# Supplementary material
Source: PubMed Central journal article supplement (PMC6955247)
Supplement: JVI.01511-19-s0001.pdf [file JVI.01511-19-s0001.pdf]

S1 Table. Differentially expressed genes of parental infected mouse corneas vs. Uninfected corneas

| Row                 | names       | baseMean | log2FoldChange | pvalue   | padj     | Parental 1 | Parental 2 | Parental 3 | Uninfected 1 | Uninfected 2 | Uninfected 3 |
|---------------------|-------------|----------|----------------|----------|----------|------------|------------|------------|--------------|--------------|--------------|
| ENSMUSG000000000001 | 4_Gnai3     | 5236.84  | -0.26595       | 0.08124  | 0.14515  | 4971.25    | 4484.4     | 4810.5     | 4571.55      | 6602.95      | 5980.39      |
| ENSMUSG000000000002 | 14_Cdc45    | 225.144  | 0.83944        | 0.00041  | 0.00168  | 310.811    | 261.575    | 292.813    | 115.416      | 167.651      | 202.596      |
| ENSMUSG000000000003 | 15_H19      | 596.214  | -0.38302       | 0.09384  | 0.16312  | 568.663    | 433.204    | 550.966    | 879.143      | 480.54       | 664.769      |
| ENSMUSG000000000037 | 16_Scm12    | 173.934  | -0.36132       | 0.09628  | 0.16665  | 152.801    | 165.205    | 138.638    | 169.517      | 231.305      | 186.135      |
| ENSMUSG000000000049 | 11_Apoh     | 6.61296  | -0.42935       | 0.64576  | 0.74074  | 5.20913    | 9.17806    | 2.39031    | 10.8202      | 4.48265      | 7.59736      |
| ENSMUSG000000000056 | 7_Narf      | 960.13   | 0.05428        | 0.71684  | 0.79821  | 1035.75    | 890.271    | 1008.71    | 1069.4       | 815.843      | 940.807      |
| ENSMUSG000000000058 | 6_Cav2      | 3250.73  | -0.17355       | 0.1273   | 0.20933  | 3015.22    | 2803.9     | 3348.82    | 3337.14      | 3569.09      | 3430.21      |
| ENSMUSG000000000078 | 6_Klf6      | 3532.78  | 0.07018        | 0.55906  | 0.6647   | 3653.34    | 3271.06    | 3932.06    | 3191.97      | 3561.02      | 3587.22      |
| ENSMUSG000000000085 | 16_Scmh1    | 1014.02  | 0.50699        | 4.39E-05 | 0.00024  | 1129.51    | 1188.56    | 1253.72    | 897.177      | 778.189      | 836.976      |
| ENSMUSG000000000088 | 6_Cox5a     | 1569.78  | -0.20873       | 0.12941  | 0.21214  | 1451.61    | 1373.04    | 1545.33    | 1469.75      | 1902.44      | 1676.48      |
| ENSMUSG000000000093 | 6_Tbx2      | 419.547  | -0.14983       | 0.56615  | 0.67134  | 365.507    | 552.519    | 274.885    | 540.11       | 398.06       | 386.199      |
| ENSMUSG000000000094 | 12_Tbx4     | 14.4204  | -0.9361        | 0.1322   | 0.21577  | 8.68188    | 13.7671    | 7.17092    | 17.132       | 23.3098      | 16.4609      |
| ENSMUSG000000000120 | 6_Ngfr      | 829.932  | 1.1391         | 1.77E-09 | 3.83E-08 | 989.735    | 1088.52    | 1345.74    | 557.242      | 407.025      | 591.328      |
| ENSMUSG000000000125 | 5_Wnt3      | 0.49975  | -0.80545       | 0.83771  | NA       | 0          | 0          | 1.19515    | 1.80337      | 0            | 0            |
| ENSMUSG000000000126 | 11_Wnt9a    | 1115.88  | 1.00796        | 4.41E-07 | 4.55E-06 | 1362.19    | 1326.23    | 1781.97    | 735.775      | 571.09       | 918.015      |
| ENSMUSG000000000127 | 14_Fer      | 894.049  | -0.17077       | 0.26553  | 0.37667  | 816.097    | 809.505    | 897.561    | 785.368      | 1008.6       | 1047.17      |
| ENSMUSG000000000131 | 15_Xpo6     | 2132.69  | 0.46402        | 9.35E-06 | 6.37E-05 | 2396.2     | 2481.75    | 2539.7     | 1825.01      | 1690.86      | 1862.62      |
| ENSMUSG000000000134 | 17_Tfe3     | 1611.54  | 0.61046        | 1.15E-06 | 1.04E-05 | 1890.05    | 1856.72    | 2095.11    | 1310.15      | 1148.46      | 1368.79      |
| ENSMUSG000000000142 | 15_Axin2    | 482.752  | -0.24513       | 0.27746  | 0.38998  | 400.235    | 553.437    | 371.693    | 666.346      | 431.231      | 473.569      |
| ENSMUSG000000000148 | 17_Brat1    | 295.623  | 0.87188        | 5.47E-06 | 4.01E-05 | 329.043    | 413.013    | 406.352    | 239.848      | 204.409      | 181.07       |
| ENSMUSG000000000149 | 10_Gna12    | 884.365  | 0.53807        | 0.0066   | 0.0178   | 982.789    | 1092.19    | 1067.27    | 911.604      | 528.057      | 724.282      |
| ENSMUSG000000000154 | 15_Slc22a18 | 416.472  | 1.09393        | 6.44E-07 | 6.29E-06 | 504.417    | 551.601    | 645.383    | 318.295      | 189.168      | 289.966      |
| ENSMUSG000000000159 | 15_Igfb5    | 0.29412  | -0.03469       | 0.99322  | NA       | 0.86819    | 0          | 0          | 0            | 0.89653      | 0            |
| ENSMUSG000000000167 | 14_Pih1d2   | 46.224   | -0.12201       | 0.72059  | 0.80119  | 42.5412    | 41.3013    | 49.0013    | 42.3792      | 50.2057      | 51.9153      |
| ENSMUSG000000000168 | 9_Dlat      | 1021.13  | -0.08638       | 0.45441  | 0.56858  | 996.68     | 967.367    | 1007.51    | 987.346      | 1092.87      | 1075.03      |
| ENSMUSG000000000171 | 4_Sdhf      | 2575.7   | -0.19098       | 0.05101  | 0.09863  | 2339.77    | 2414.75    | 2463.21    | 2828.59      | 2742.49      | 2665.41      |
| ENSMUSG000000000182 | 9_Fgf23     | 4.2782   | 3.6218         | 0.02613  | 0.05668  | 3.47275    | 3.67122    | 16.7322    | 0            | 1.79306      | 0            |
| ENSMUSG000000000183 | 6_Fgf6      | 3.55249  | -0.69132       | 0.57997  | 0.68362  | 1.73638    | 1.83561    | 4.78062    | 7.21348      | 4.48265      | 1.26623      |
| ENSMUSG000000000184 | 12_Ccnd2    | 4939.51  | 0.1515         | 0.16482  | 0.25808  | 4902.66    | 5126.86    | 5567.03    | 4883.53      | 4364.31      | 4792.67      |
| ENSMUSG000000000194 | 13_Gpr107   | 1915.73  | 0.51841        | 6.24E-05 | 0.00033  | 2127.93    | 2180.71    | 2459.63    | 1613.12      | 1404.86      | 1708.14      |
| ENSMUSG000000000197 | 7_Nalcn     | 158.496  | -1.43362       | 1.76E-08 | 2.81E-07 | 81.6097    | 104.63     | 70.5141    | 243.455      | 267.166      | 183.603      |
| ENSMUSG000000000202 | 9_Btbd17    | 1.55895  | -2.03276       | 0.28796  | NA       | 0.86819    | 0.91781    | 0          | 4.50843      | 1.79306      | 1.26623      |
| ENSMUSG000000000204 | 15_Slfn4    | 9382.53  | 1.61196        | 1.15E-09 | 2.67E-08 | 15722.9    | 10562.1    | 16133.4    | 2836.7       | 6593.09      | 4446.99      |
| ENSMUSG000000000214 | 10_Th       | 12.8278  | -0.51023       | 0.49641  | 0.60749  | 4.34094    | 15.6027    | 11.9515    | 23.4438      | 8.96531      | 12.6623      |
| ENSMUSG000000000215 | 10_Ins2     | 8.49313  | -2.78856       | 0.01192  | 0.02933  | 3.47275    | 2.75342    | 0          | 28.8539      | 4.48265      | 11.396       |
| ENSMUSG000000000216 | 8_Scnn1g    | 20.9993  | 0.09326        | 0.86338  | 0.90727  | 19.9683    | 17.4383    | 27.4885    | 12.6236      | 20.6202      | 27.857       |
| ENSMUSG000000000223 | 13_Drp2     | 134.742  | -0.4813        | 0.05474  | 0.10448  | 98.1053    | 141.342    | 98.0026    | 156.893      | 174.823      | 139.285      |
| ENSMUSG000000000244 | 16_Tspan32  | 2.83893  | 3.90315        | 0.0254   | 0.05539  | 5.20913    | 7.34244    | 3.58546    | 0            | 0.89653      | 0            |
| ENSMUSG000000000247 | 11_Lhx2     | 260.844  | -0.67311       | 0.01719  | 0.03991  | 183.188    | 275.342    | 144.614    | 387.725      | 342.475      | 231.72       |
| ENSMUSG000000000248 | 16_Clec2g   | 139.768  | -0.48234       | 0.03355  | 0.06967  | 131.965    | 112.89     | 103.978    | 144.27       | 163.169      | 182.337      |
| ENSMUSG000000000253 | 12_Gmpr     | 787.674  | 0.51686        | 0.00669  | 0.018    | 883.816    | 974.71     | 923.854    | 829.551      | 510.126      | 603.99       |
| ENSMUSG000000000263 | 15_Glra1    | 2.9893   | -3.15723       | 0.11209  | 0.18899  | 1.73638    | 0          | 0          | 10.8202      | 5.37918      | 0            |
| ENSMUSG000000000266 | 11_Mid2     | 2147.83  | -0.23752       | 0.11017  | 0.18636  | 2053.27    | 1979.71    | 1879.98    | 1886.33      | 2579.32      | 2508.4       |
| ENSMUSG000000000275 | 16_Trim25   | 6626.11  | 0.57239        | 1.21E-06 | 1.08E-05 | 7647.87    | 7614.11    | 8509.5     | 4807.79      | 5793.38      | 5384         |
| ENSMUSG000000000276 | 11_Dgke     | 406.294  | -0.35044       | 0.01872  | 0.04279  | 346.407    | 352.437    | 374.083    | 486.008      | 463.506      | 415.322      |
| ENSMUSG000000000278 | 10_Scepe1   | 1051.36  | -0.33301       | 0.0356   | 0.07318  | 922.016    | 1053.64    | 816.29     | 1291.21      | 1224.66      | 1000.32      |
| ENSMUSG000000000282 | 12_Mnt      | 570.913  | 0.83763        | 0.00015  | 0.0007   | 680.66     | 758.107    | 757.728    | 531.994      | 284.2        | 412.79       |
| ENSMUSG000000000290 | 12_Igfb2    | 186.595  | 2.29843        | 9.85E-09 | 1.68E-07 | 495.736    | 168.876    | 266.519    | 91.0702      | 55.5849      | 41.7855      |
| ENSMUSG000000000295 | 12_Hddc2    | 289.554  | -0.37549       | 0.04477  | 0.08841  | 250.906    | 217.52     | 289.227    | 314.688      | 364.888      | 300.096      |
| ENSMUSG000000000296 | 7_Tpd52l1   | 154.918  | -0.26278       | 0.28481  | 0.39811  | 114.601    | 174.383    | 133.857    | 195.666      | 157.789      | 153.213      |
| ENSMUSG000000000301 | 16_Pemt     | 44.1006  | 0.66428        | 0.06074  | 0.11411  | 45.1458    | 58.7396    | 58.5626    | 35.1657      | 34.0682      | 32.9219      |
| ENSMUSG000000000303 | 12_Cdh1     | 10484.6  | 0.78298        | 1.47E-05 | 9.50E-05 | 12563.6    | 12256.4    | 14963.3    | 6182.86      | 7086.18      | 9855.04      |
| ENSMUSG000000000305 | 12_Cdh4     | 269.395  | 0.1117         | 0.57951  | 0.6832   | 259.588    | 296.451    | 283.252    | 302.065      | 205.306      | 269.706      |
| ENSMUSG000000000308 | 14_Ckmt1    | 5144.94  | 0.76342        | 3.96E-06 | 3.02E-05 | 6332.57    | 5759.23    | 7332.27    | 3201.89      | 3606.74      | 4636.92      |
| ENSMUSG000000000317 | 11_Bcl6b    | 61.3501  | -0.50395       | 0.12329  | 0.20407  | 47.7504    | 57.8218    | 46.611     | 89.2669      | 58.2745      | 68.3763      |
| ENSMUSG000000000318 | 16_Clec10a  | 65.0176  | 0.21488        | 0.52439  | 0.63373  | 66.8505    | 77.0957    | 65.7335    | 81.1517      | 44.8265      | 54.4478      |
| ENSMUSG000000000320 | 10_Alox12   | 1650.77  | 0.65867        | 0.00011  | 0.00054  | 1800.62    | 1939.32    | 2322.18    | 1148.75      | 1135.01      | 1558.73      |
| ENSMUSG000000000325 | 15_Arvf     | 1010.03  | 0.75066        | 0.00095  | 0.00342  | 1117.36    | 1327.15    | 1356.5     | 972.919      | 494.885      | 791.392      |
| ENSMUSG000000000326 | 12_Comt     | 1105.14  | 0.49203        | 0.00411  | 0.01196  | 1228.49    | 1306.96    | 1340.96    | 1145.14      | 764.741      | 844.573      |
| ENSMUSG000000000339 | 14_Rtca     | 486.895  | -0.03056       | 0.82469  | 0.87986  | 515.704    | 456.149    | 473.281    | 484.205      | 508.333      | 483.699      |
| ENSMUSG000000000340 | 10_Dbt      | 672.138  | -0.45961       | 0.00023  | 0.00101  | 571.268    | 561.697    | 565.308    | 753.809      | 824.808      | 755.937      |
| ENSMUSG000000000346 | 8_Dazap2    | 7358.63  | 0.04497        | 0.67346  | 0.76343  | 7664.37    | 7161.64    | 7592.81    | 6618.37      | 7456.44      | 7658.14      |
| ENSMUSG000000000355 | 13_Mcts1    | 542.334  | -0.37346       | 0.03809  | 0.07736  | 516.572    | 402.917    | 498.379    | 515.764      | 710.052      | 610.321      |
| ENSMUSG000000000359 | 3_Rem1      | 29.5732  | -0.90966       | 0.05291  | 0.1015   | 24.3093    | 18.3561    | 19.1225    | 53.1994      | 35.8612      | 26.5908      |
| ENSMUSG000000000365 | 8_Rnf17     | 3.46296  | 0.60583        | 0.65483  | 0.74832  | 6.07732    | 1.83561    | 4.78062    | 2.70506      | 5.37918      | 0            |
| ENSMUSG000000000374 | 7_Trappc10  | 2017.12  | 0.4018         | 0.00082  | 0.00302  | 2213.88    | 2329.39    | 2343.7     | 1734.84      | 1568.93      | 1912         |
| ENSMUSG000000000378 | 15_Ccm2     | 525.173  | 1.00115        | 3.40E-08 | 4.89E-07 | 703.233    | 655.313    | 743.386    | 428.301      | 287.786      | 333.018      |
| ENSMUSG000000000381 | 10_Wap      | 0        | NA             | NA       | NA       | 0          |            |            |              |              |              |

|                     |             |         |          |          |          |         |         |         |         |         |         |
|---------------------|-------------|---------|----------|----------|----------|---------|---------|---------|---------|---------|---------|
| ENSMUSG000000000416 | 16_Ctnbp2   | 110.529 | -1.21495 | 0.00014  | 0.00068  | 60.7732 | 90.8628 | 47.8062 | 178.534 | 171.237 | 113.96  |
| ENSMUSG000000000420 | 15_Galnt1   | 2691.05 | -0.35955 | 0.00197  | 0.00643  | 2544.66 | 2258.72 | 2267.21 | 2788.01 | 3093.03 | 3194.69 |
| ENSMUSG000000000435 | 1_Myrf      | 1.96322 | -1.65168 | 0.40051  | NA       | 0       | 2.75342 | 0       | 0.90169 | 1.79306 | 6.33113 |
| ENSMUSG000000000439 | 9_Mkrf      | 1158.48 | 0.05778  | 0.61075  | 0.71022  | 1185.08 | 1174.79 | 1184.4  | 1168.58 | 1057.91 | 1180.12 |
| ENSMUSG000000000440 | 12_Pparg    | 20.3573 | -0.78703 | 0.18527  | 0.2835   | 22.5729 | 9.17806 | 13.1467 | 33.3624 | 28.689  | 15.1947 |
| ENSMUSG000000000441 | 17_Raf1     | 2885.85 | 0.26351  | 0.01051  | 0.02638  | 3107.25 | 3031.51 | 3306.99 | 2512.1  | 2619.66 | 2737.58 |
| ENSMUSG000000000486 | 13_Sept1    | 62.68   | 0.92484  | 0.0106   | 0.02655  | 97.2371 | 62.4108 | 87.2462 | 58.6096 | 37.6543 | 32.9219 |
| ENSMUSG000000000489 | 6_Pdgfb     | 118.594 | 0.55109  | 0.02119  | 0.04758  | 136.306 | 134.917 | 151.785 | 109.104 | 80.6878 | 98.7657 |
| ENSMUSG000000000530 | 16_Acvr1    | 348.991 | 0.15941  | 0.47996  | 0.59275  | 330.78  | 409.341 | 365.717 | 437.317 | 288.683 | 262.109 |
| ENSMUSG000000000531 | 4_Grasp     | 72.8269 | 0.13543  | 0.66898  | 0.75967  | 75.5324 | 84.4381 | 69.3189 | 87.4635 | 70.8259 | 49.3828 |
| ENSMUSG000000000532 | 10_Acvr1b   | 2048.72 | 0.62     | 2.72E-05 | 0.00016  | 2368.42 | 2366.1  | 2710.61 | 1550    | 1400.38 | 1896.81 |
| ENSMUSG000000000538 | 18_Tom1l2   | 2487.25 | 0.4472   | 0.0009   | 0.00326  | 2725.24 | 2942.48 | 2941.27 | 2364.22 | 1800.23 | 2150.05 |
| ENSMUSG000000000544 | 14_Gpa33    | 33.0438 | 1.67112  | 0.00041  | 0.00167  | 47.7504 | 38.5478 | 64.5383 | 19.8371 | 9.86184 | 17.7272 |
| ENSMUSG000000000552 | 9_Zfp385a   | 494.134 | 0.3649   | 0.1971   | 0.29758  | 526.99  | 616.765 | 525.868 | 669.051 | 299.441 | 326.687 |
| ENSMUSG000000000555 | 6_Igta5     | 327.197 | 0.54861  | 0.01202  | 0.02951  | 459.272 | 349.684 | 357.351 | 336.329 | 225.029 | 235.518 |
| ENSMUSG000000000560 | 9_Gabra2    | 15.5483 | -3.25189 | 0.0001   | 0.00052  | 0.86819 | 4.58903 | 3.58546 | 40.5758 | 32.2751 | 11.396  |
| ENSMUSG000000000561 | 14_Wdr77    | 1262.46 | -0.02942 | 0.8384   | 0.88984  | 1238.04 | 1178.46 | 1331.4  | 1085.63 | 1305.35 | 1435.9  |
| ENSMUSG000000000562 | 5_Adora3    | 5.42057 | -0.39479 | 0.6794   | 0.76786  | 6.07732 | 5.50683 | 2.39031 | 6.3118  | 7.17224 | 5.06491 |
| ENSMUSG000000000563 | 17_Atp5f1   | 4161.25 | -0.27347 | 0.0084   | 0.02183  | 3705.43 | 3648.28 | 3952.37 | 4456.13 | 4852.02 | 4353.29 |
| ENSMUSG000000000567 | 5_Sox9      | 427.717 | 0.71054  | 0.00061  | 0.00236  | 481.845 | 461.656 | 648.969 | 330.017 | 262.683 | 381.134 |
| ENSMUSG000000000568 | 15_Hnrnpd   | 2632.95 | 0.0394   | 0.79999  | 0.8618   | 2798.17 | 2357.84 | 2850.44 | 2120.76 | 2894.9  | 2775.57 |
| ENSMUSG000000000579 | 14_Dynl1c   | 662.086 | -0.17302 | 0.26449  | 0.37565  | 606.864 | 674.587 | 585.626 | 615.851 | 803.291 | 686.295 |
| ENSMUSG000000000581 | 8_C1d1      | 1007.62 | -0.5274  | 0.00017  | 0.0008   | 812.624 | 754.436 | 910.707 | 1083.83 | 1311.62 | 1172.53 |
| ENSMUSG000000000594 | 7_Gm2a      | 1413    | -0.01284 | 0.92657  | 0.95151  | 1492.42 | 1479.5  | 1247.74 | 1593.28 | 1330.45 | 1334.6  |
| ENSMUSG000000000600 | 15_Krit1    | 1089.81 | -0.30869 | 0.0232   | 0.05139  | 1000.15 | 941.669 | 978.831 | 1047.76 | 1329.55 | 1240.9  |
| ENSMUSG000000000605 | 8_Clcna4    | 1335.51 | -0.20325 | 0.07992  | 0.14324  | 1253.66 | 1316.13 | 1154.52 | 1416.55 | 1494.52 | 1377.65 |
| ENSMUSG000000000617 | 14_Grm6     | 23.493  | -2.00338 | 0.00482  | 0.01368  | 11.2864 | 11.9315 | 4.78062 | 72.1348 | 26.8959 | 13.9285 |
| ENSMUSG000000000627 | 15_Sema4f   | 16.5054 | 0.77885  | 0.22481  | 0.33004  | 32.9912 | 16.5205 | 13.1467 | 15.3287 | 13.448  | 7.59736 |
| ENSMUSG000000000628 | 10_Hk2      | 876.96  | 0.68464  | 8.27E-05 | 0.00042  | 988.867 | 953.6   | 1301.52 | 720.447 | 575.573 | 721.749 |
| ENSMUSG000000000631 | 19_Myo18a   | 5839.09 | 1.10011  | 6.80E-10 | 1.69E-08 | 7084.42 | 7676.53 | 9128.59 | 4164.89 | 2807.93 | 4172.22 |
| ENSMUSG000000000632 | 13_Seiz6    | 27.6544 | -2.78168 | 0.00026  | 0.00113  | 12.1546 | 7.34244 | 1.19515 | 72.1348 | 59.171  | 13.9285 |
| ENSMUSG000000000673 | 8_Haao      | 14.3246 | 0.86359  | 0.21018  | 0.31339  | 19.1001 | 22.0273 | 14.3418 | 17.132  | 4.48265 | 8.86359 |
| ENSMUSG000000000682 | 7_Cd52      | 141.932 | 2.19477  | 2.74E-10 | 7.77E-09 | 359.43  | 161.534 | 178.078 | 48.691  | 58.2745 | 45.5842 |
| ENSMUSG000000000686 | 11_Abhd15   | 7.58265 | 0.19585  | 0.81736  | 0.87396  | 11.2864 | 9.17806 | 3.58546 | 5.41011 | 7.17224 | 8.86359 |
| ENSMUSG000000000690 | 5_Hoxb6     | 0.43409 | 2.24584  | 0.57502  | NA       | 2.60457 | 0       | 0       | 0       | 0       | 0       |
| ENSMUSG000000000693 | 10_Loxl3    | 355.985 | 0.11843  | 0.55641  | 0.66239  | 401.971 | 390.067 | 320.301 | 412.07  | 337.992 | 273.505 |
| ENSMUSG000000000706 | 15_Btn1a1   | 0       | NA       | NA       | NA       | 0       | 0       | 0       | 0       | 0       | 0       |
| ENSMUSG000000000708 | 14_Kat2b    | 1616.2  | -0.25995 | 0.03705  | 0.07559  | 1484.6  | 1420.76 | 1509.48 | 1758.29 | 1946.37 | 1577.72 |
| ENSMUSG000000000711 | 2_Rab5b     | 4383.2  | -0.20725 | 0.03051  | 0.06437  | 4112.61 | 4165    | 3927.28 | 4559.82 | 4649.41 | 4885.1  |
| ENSMUSG000000000724 | 10_Cryba1   | 7969.57 | -2.17683 | 0.00682  | 0.01829  | 2332.82 | 5529.78 | 797.168 | 19674.8 | 7106.8  | 12376.1 |
| ENSMUSG000000000730 | 13_Dnmt3l   | 41.522  | 0.15319  | 0.70006  | 0.7855   | 45.1458 | 49.5615 | 35.8546 | 27.0506 | 42.1369 | 49.3828 |
| ENSMUSG000000000731 | 15_Aire     | 4.06253 | 1.5051   | 0.23013  | 0.33627  | 5.20913 | 5.50683 | 7.17092 | 0       | 2.68959 | 3.79868 |
| ENSMUSG000000000732 | 8_Icosl     | 1155.96 | 0.64506  | 0.00018  | 0.00082  | 1374.34 | 1349.17 | 1504.7  | 774.548 | 799.705 | 1133.27 |
| ENSMUSG000000000738 | 17_Spg7     | 1235.03 | 0.6456   | 9.93E-05 | 0.00049  | 1366.53 | 1594.23 | 1559.68 | 1123.5  | 771.016 | 995.254 |
| ENSMUSG000000000739 | 13_Sult5a1  | 220.723 | 0.40884  | 0.0527   | 0.10118  | 235.279 | 256.068 | 262.934 | 189.354 | 151.514 | 229.187 |
| ENSMUSG000000000740 | 11_Rpl13    | 19646.7 | 0.37221  | 0.00097  | 0.00349  | 21554.5 | 21550.1 | 23397.5 | 18719.9 | 15526.1 | 17132.1 |
| ENSMUSG000000000743 | 8_Chmp1a    | 2893.31 | 0.69481  | 1.35E-06 | 1.19E-05 | 3518.77 | 3442.69 | 3769.52 | 2565.3  | 1854.03 | 2209.57 |
| ENSMUSG000000000751 | 13_Rpa1     | 1961.7  | 0.07386  | 0.49607  | 0.60717  | 1979.47 | 1943.91 | 2111.84 | 1830.42 | 1877.34 | 2027.23 |
| ENSMUSG000000000753 | 15_Serpinf1 | 6145.06 | -0.08246 | 0.55078  | 0.65707  | 5779.53 | 6861.51 | 5265.85 | 6757.23 | 5696.56 | 6509.67 |
| ENSMUSG000000000759 | 14_Tubgcp3  | 1067.73 | 0.10347  | 0.3495   | 0.46624  | 1105.2  | 1136.24 | 1076.83 | 1032.43 | 1057.91 | 997.787 |
| ENSMUSG000000000766 | 18_Oprm1    | 0       | NA       | NA       | NA       | 0       | 0       | 0       | 0       | 0       | 0       |
| ENSMUSG000000000776 | 12_Polr3d   | 403.834 | 0.42776  | 0.01027  | 0.02584  | 432.358 | 441.464 | 516.307 | 373.298 | 301.234 | 358.342 |
| ENSMUSG000000000782 | 15_Tcf7     | 137.207 | -0.25021 | 0.31907  | 0.43463  | 118.942 | 148.685 | 108.759 | 169.517 | 159.582 | 117.759 |
| ENSMUSG000000000787 | 12_Ddx3x    | 14906   | -0.44818 | 0.00018  | 0.00084  | 13430.9 | 11922.3 | 12473.8 | 15358.4 | 18946.4 | 17304.3 |
| ENSMUSG000000000791 | 8_Ill2rb1   | 12.7753 | 1.02785  | 0.13492  | 0.21911  | 14.7592 | 18.3561 | 17.9273 | 4.50843 | 7.17224 | 13.9285 |
| ENSMUSG000000000792 | 2_Slc5a5    | 37.6724 | -0.05918 | 0.9001   | 0.93252  | 38.2003 | 44.9725 | 27.4885 | 59.5112 | 24.2063 | 31.6557 |
| ENSMUSG000000000794 | 9_Kcnn3     | 118.485 | -1.42326 | 5.93E-05 | 0.00032  | 77.2688 | 82.6025 | 32.2692 | 218.208 | 152.41  | 148.149 |
| ENSMUSG000000000804 | 14_Usp32    | 2518.28 | -0.16644 | 0.16371  | 0.25666  | 2366.68 | 2402.81 | 2349.67 | 2367.83 | 2915.52 | 2707.19 |
| ENSMUSG000000000805 | 18_Car4     | 16.2653 | -0.8625  | 0.13039  | 0.21344  | 12.1546 | 12.8493 | 9.56123 | 18.0337 | 25.9994 | 18.9934 |
| ENSMUSG000000000811 | 13_Txnrd3   | 542.995 | 0.01642  | 0.92747  | 0.95195  | 549.563 | 514.889 | 572.479 | 432.809 | 536.125 | 652.107 |
| ENSMUSG000000000817 | 10_FasI     | 5.57912 | 2.83306  | 0.01317  | 0.03182  | 12.1546 | 11.0137 | 5.97577 | 0.90169 | 0.89653 | 2.53245 |
| ENSMUSG000000000823 | 16_Znf512b  | 1399.88 | 0.39849  | 0.00042  | 0.00171  | 1502.83 | 1670.41 | 1602.7  | 1251.54 | 1151.15 | 1220.64 |
| ENSMUSG000000000826 | 16_Dnajc5   | 4302.2  | 0.00958  | 0.91945  | 0.94651  | 4381.75 | 4212.73 | 4355.14 | 4449.82 | 4133.9  | 4279.85 |
| ENSMUSG000000000827 | 18_Tpd52l2  | 2110.79 | -0.10237 | 0.34498  | 0.46162  | 2052.4  | 1951.25 | 2104.67 | 2314.63 | 2057.54 | 2184.24 |
| ENSMUSG000000000838 | 17_Fmr1     | 1684.82 | -0.14966 | 0.27856  | 0.39112  | 1633.93 | 1426.27 | 1732.97 | 1572.54 | 1940.09 | 1803.11 |
| ENSMUSG000000000861 | 8_Ill2rb1a  | 183.47  | 0.51554  | 0.00869  | 0.02243  | 237.015 | 192.739 | 217.518 | 146.073 | 147.928 | 159.545 |
| ENSMUSG000000000869 | 12_Ill4     | 7.64682 | -0.5651  | 0.50839  | 0.61866  | 6.94551 | 4.58903 | 7.17092 | 11.7219 | 11.6549 | 3.79868 |
| ENSMUSG000000000876 | 11_Pxmp4    | 520.634 | 0.17959  | 0.27258  | 0.38454  | 564.322 | 515.807 | 578.455 | 537.405 | 406.128 | 521.685 |
| ENSMUSG000000000881 | 12_Dlg3     | 2459.4  | 0.10952  | 0.33117  | 0.44773  | 2571.57 | 2384.46 | 2702.24 | 2202.82 | 2450.22 | 2445.08 |
| ENSMUSG000000000884 | 16_Gnb1l    | 152.055 | 0.54403  | 0.01655  | 0.03869  | 179.715 | 164.287 | 197.2   | 140.663 | 101.308 | 129.155 |
| ENSMUSG000000000889 | 8_Dbh       | 0.15028 | -0.99647 | 0.80707  | NA       | 0       | 0       | 0       | 0.90169 | 0       | 0       |
| ENSMUSG000000000901 | 15_Mmp11    | 133.666 | -0.64419 | 0.05257  | 0.10098  | 103.314 | 138.589 | 70.5141 | 222.716 | 117.446 | 149.415 |
| ENSMUSG000000000902 | 13_Smarcb1  | 1346.73 | 0.50821  | 1.94E-05 | 0.00012  | 1541.03 | 1564.86 | 1637.36 | 1110.88 | 1022.04 | 1204.18 |
| ENSMUSG000000000903 | 3_Vpreb3    | 0.85374 | 1.94753  | 0.48988  | NA       | 0       | 1.83561 | 2.39031 | 0       | 0.89653 | 0       |
| ENSMUSG000000000915 | 15_Hip1r    | 2320.33 | 1.17159  | 1.92E-12 | 9.48E-11 | 2853.74 | 3188.46 | 3598.61 | 1552.7  | 1130.53 | 1597.98 |
| ENSMUSG000000000916 | 15_Nsun5    | 266.47  | 0.63119  | 0.00043  | 0.00176  | 289.975 | 319.396 | 362.132 | 206.486 | 195.444 | 225.388 |
| ENSMUSG000000000934 | 8_Top1mt    | 285.255 | 0.47633  | 0.00366  | 0.01086  | 305.602 | 343.259 | 347.79  | 246.16  | 242.063 | 226.655 |
| ENSMUSG000000000938 | 11_Hoxa10   | 0.29767 | 1.70332  | 0.67406  | NA       | 0.86819 | 0.91781 | 0       | 0       | 0       | 0       |
| ENSMUSG000000000942 | 10_Hoxa4    | 0.29767 | 1.70332  | 0.67406  | NA       | 0.86819 | 0.91781 | 0       | 0       | 0       | 0       |

|                     |            |         |          |          |          |         |         |         |         |         |         |
|---------------------|------------|---------|----------|----------|----------|---------|---------|---------|---------|---------|---------|
| ENSMUSG000000000948 | 16_Gm38393 | 32.7075 | -1.14494 | 0.02821  | 0.0604   | 14.7592 | 27.5342 | 19.1225 | 59.5112 | 53.7918 | 21.5259 |
| ENSMUSG000000000957 | 9_Mmp14    | 3755.18 | 0.58992  | 2.05E-06 | 1.72E-05 | 4188.14 | 4358.66 | 4990.96 | 3178.44 | 2722.76 | 3092.13 |
| ENSMUSG000000000958 | 9_Slc7a7   | 109.501 | 0.16786  | 0.4899   | 0.60169  | 128.492 | 117.479 | 101.588 | 100.989 | 114.756 | 93.7008 |
| ENSMUSG000000000959 | 6_Oxa1l    | 990.177 | 0.36997  | 0.01388  | 0.03327  | 983.657 | 1110.54 | 1256.11 | 948.573 | 771.016 | 871.164 |
| ENSMUSG000000000976 | 13_Heatrf  | 620.356 | 0.3594   | 0.01378  | 0.03306  | 641.591 | 730.573 | 718.288 | 507.649 | 513.712 | 610.321 |
| ENSMUSG000000000982 | 5_Ccl3     | 8.84556 | 2.27606  | 0.00669  | 0.01799  | 13.0228 | 16.5205 | 14.3418 | 1.80337 | 3.58612 | 3.79868 |
| ENSMUSG000000000983 | 13_Wfdc18  | 488.204 | 0.63552  | 0.00159  | 0.00533  | 597.314 | 585.56  | 597.577 | 278.621 | 401.646 | 468.504 |
| ENSMUSG000000001014 | 5_Icam4    | 1.25098 | 2.50924  | 0.26203  | NA       | 1.73638 | 0.91781 | 3.58546 | 0       | 0       | 1.26623 |
| ENSMUSG000000001016 | 12_Ilf2    | 1571.19 | -0.23486 | 0.04074  | 0.08182  | 1476.79 | 1442.79 | 1410.28 | 1554.51 | 1796.65 | 1746.13 |
| ENSMUSG000000001017 | 15_Chtop   | 3033.29 | -0.01389 | 0.88466  | 0.92202  | 2981.36 | 2957.17 | 3118.16 | 2973.76 | 3110.06 | 3059.2  |
| ENSMUSG000000001018 | 15_Snapin  | 1022.4  | -0.37257 | 0.00086  | 0.00316  | 905.521 | 899.449 | 867.682 | 1110.88 | 1183.42 | 1167.46 |
| ENSMUSG000000001020 | 8_S100a4   | 542.8   | -0.14615 | 0.45174  | 0.56638  | 615.546 | 483.684 | 446.988 | 565.357 | 674.191 | 471.036 |
| ENSMUSG000000001021 | 12_S100a3  | 835.532 | 0.62794  | 0.0001   | 0.00051  | 1012.31 | 888.436 | 1143.76 | 746.596 | 573.78  | 648.308 |
| ENSMUSG000000001023 | 10_S100a5  | 0.63887 | 1.43476  | 0.64357  | NA       | 1.73638 | 0       | 1.19515 | 0.90169 | 0       | 0       |
| ENSMUSG000000001025 | 8_S100a6   | 70367.8 | 0.38551  | 0.00089  | 0.00326  | 78248.1 | 78452.2 | 82439.3 | 60550   | 54520.7 | 67996.4 |
| ENSMUSG000000001027 | 7_Scn4a    | 300.36  | 0.14349  | 0.37498  | 0.4926   | 319.493 | 298.287 | 327.472 | 278.621 | 268.063 | 310.226 |
| ENSMUSG000000001029 | 15_Icam2   | 40.4848 | -0.19246 | 0.61797  | 0.71618  | 38.2003 | 39.4656 | 35.8546 | 56.8062 | 35.8612 | 36.7206 |
| ENSMUSG000000001034 | 17_Mapk7   | 468.29  | 0.96741  | 1.08E-09 | 2.54E-08 | 566.927 | 638.793 | 652.554 | 330.919 | 276.131 | 344.414 |
| ENSMUSG000000001036 | 17_Epn2    | 1430.13 | 0.15553  | 0.16672  | 0.26054  | 1449.01 | 1526.31 | 1546.53 | 1431.88 | 1272.18 | 1354.86 |
| ENSMUSG000000001039 | 12_B9d1    | 182.665 | 0.27812  | 0.19339  | 0.29336  | 200.552 | 205.588 | 194.81  | 200.174 | 141.652 | 153.213 |
| ENSMUSG000000001052 | 15_Sec24b  | 1736.35 | 0.3861   | 0.00256  | 0.00802  | 1791.94 | 1991.64 | 2117.81 | 1377.78 | 1501.69 | 1637.23 |
| ENSMUSG000000001053 | 15_N4bp3   | 2422.13 | 1.8415   | 5.69E-15 | 5.22E-13 | 3218.37 | 3646.44 | 4497.36 | 1372.37 | 675.088 | 1123.14 |
| ENSMUSG000000001054 | 9_Rmnd5b   | 950.897 | 0.6674   | 5.74E-07 | 5.75E-06 | 1123.44 | 1159.19 | 1217.86 | 783.565 | 646.399 | 774.931 |
| ENSMUSG000000001056 | 3_Nhp2     | 834.39  | 0.61148  | 0.00059  | 0.00229  | 1063.53 | 846.217 | 1116.27 | 759.219 | 542.401 | 678.698 |
| ENSMUSG000000001062 | 17_Vps9d1  | 605.648 | 0.84006  | 4.17E-08 | 5.83E-07 | 766.61  | 810.422 | 752.947 | 459.86  | 366.681 | 477.368 |
| ENSMUSG000000001065 | 4_Zfp276   | 504.039 | 0.9479   | 5.74E-08 | 7.70E-07 | 612.073 | 641.546 | 738.605 | 398.545 | 287.786 | 345.68  |
| ENSMUSG000000001082 | 12_Mfsd10  | 483.228 | 1.64893  | 9.51E-13 | 5.16E-11 | 640.723 | 711.299 | 846.169 | 292.146 | 159.582 | 249.447 |
| ENSMUSG000000001089 | 14_Luzp1   | 3023.11 | -0.04277 | 0.6963   | 0.78269  | 2932.74 | 2927.8  | 3073.94 | 2797.03 | 3193.44 | 3213.68 |
| ENSMUSG000000001095 | 5_Slc13a2  | 429.467 | 0.38111  | 0.02884  | 0.06149  | 412.389 | 513.971 | 531.844 | 412.972 | 330.82  | 374.803 |
| ENSMUSG000000001098 | 15_Kctd10  | 2872.23 | 0.26979  | 0.0271   | 0.05846  | 3031.71 | 3249.95 | 3138.47 | 2894.41 | 2325.6  | 2593.23 |
| ENSMUSG000000001100 | 10_Poldip2 | 1209.25 | 0.01299  | 0.90801  | 0.93794  | 1239.77 | 1194.07 | 1209.5  | 1243.42 | 1127.84 | 1240.9  |
| ENSMUSG000000001103 | 7_Sebox    | 7.03124 | -1.98573 | 0.08986  | 0.15751  | 5.20913 | 0.91781 | 2.39031 | 22.5421 | 9.86184 | 1.26623 |
| ENSMUSG000000001105 | 15_lft2a   | 814.686 | -0.06465 | 0.61726  | 0.71556  | 832.593 | 758.107 | 799.558 | 905.292 | 817.636 | 774.931 |
| ENSMUSG000000001119 | 7_Col6a1   | 7938.99 | 0.25838  | 0.08527  | 0.15071  | 8240.84 | 9938    | 7762.53 | 6854.61 | 6435.3  | 8402.68 |
| ENSMUSG000000001120 | 15_Pcbp3   | 352.676 | -0.47062 | 0.0489   | 0.09532  | 289.107 | 336.835 | 261.739 | 527.486 | 415.99  | 284.901 |
| ENSMUSG000000001123 | 15_Lgals9  | 2689.29 | 1.50962  | 5.63E-14 | 4.13E-12 | 3505.74 | 3164.59 | 5271.82 | 1194.73 | 1531.27 | 1467.56 |
| ENSMUSG000000001127 | 12_Araf    | 2008.33 | 0.18018  | 0.12501  | 0.20626  | 2055    | 2194.47 | 2152.47 | 2080.19 | 1784.99 | 1782.85 |
| ENSMUSG000000001128 | 7_Cfp      | 147.796 | 1.23257  | 6.57E-07 | 6.39E-06 | 215.311 | 197.328 | 210.347 | 114.514 | 77.1016 | 72.1749 |
| ENSMUSG000000001131 | 11_Timp1   | 362.578 | 2.49624  | 3.42E-12 | 1.58E-10 | 966.294 | 324.903 | 556.942 | 147.876 | 80.6878 | 98.7657 |
| ENSMUSG000000001134 | 9_Uxt      | 320.795 | -0.00991 | 0.95218  | 0.96877  | 353.353 | 281.766 | 323.887 | 324.607 | 318.268 | 322.888 |
| ENSMUSG000000001138 | 13_Cnnm3   | 547.923 | 0.34412  | 0.01493  | 0.03545  | 575.609 | 650.724 | 611.919 | 500.435 | 441.093 | 507.757 |
| ENSMUSG000000001143 | 13_Lman2l  | 692.788 | 0.02172  | 0.86357  | 0.90742  | 738.828 | 676.423 | 678.848 | 721.348 | 677.777 | 663.503 |
| ENSMUSG000000001150 | 6_Mcm3ap   | 924.589 | 0.58312  | 1.68E-05 | 0.00011  | 1042.69 | 1139    | 1143.76 | 742.087 | 660.743 | 819.249 |
| ENSMUSG000000001151 | 9_Pcnt     | 819.094 | 0.77112  | 3.01E-07 | 3.24E-06 | 927.225 | 1038.96 | 1133.01 | 665.444 | 530.746 | 619.185 |
| ENSMUSG000000001155 | 13_Ftcd    | 2.94816 | 1.01922  | 0.42162  | 0.53711  | 3.47275 | 3.67122 | 4.78062 | 2.70506 | 1.79306 | 1.26623 |
| ENSMUSG000000001156 | 9_Mxd1     | 7013.98 | 0.6785   | 2.18E-08 | 3.34E-07 | 8230.43 | 7884.87 | 9785.92 | 5296.5  | 5259.05 | 5627.11 |
| ENSMUSG000000001157 | 13_Gmcl1   | 663.576 | -0.21882 | 0.15236  | 0.2421   | 619.887 | 565.368 | 654.944 | 613.146 | 783.568 | 744.541 |
| ENSMUSG000000001158 | 13_Snnrp27 | 717.515 | -0.27451 | 0.06089  | 0.11434  | 739.697 | 566.286 | 641.798 | 772.744 | 781.775 | 802.788 |
| ENSMUSG000000001166 | 17_Oas1c   | 408.438 | 0.21475  | 0.14094  | 0.22702  | 445.381 | 423.108 | 448.183 | 406.66  | 355.026 | 372.271 |
| ENSMUSG000000001168 | 16_Oas1h   | 15.6497 | 1.61087  | 0.02734  | 0.0589   | 31.2548 | 11.9315 | 27.4885 | 2.70506 | 11.6549 | 8.86359 |
| ENSMUSG000000001173 | 15_Ocrl    | 1316.99 | -0.49593 | 0.00028  | 0.00122  | 1150.35 | 1114.22 | 1013.49 | 1403.02 | 1748.23 | 1472.62 |
| ENSMUSG000000001175 | 13_Calm1   | 10862   | -0.31103 | 0.00069  | 0.00262  | 10110.1 | 9273.51 | 9703.46 | 12000.5 | 12166.8 | 11917.7 |
| ENSMUSG000000001211 | 14_Agpat3  | 3560.55 | 0.41124  | 0.0071   | 0.01892  | 3753.18 | 4183.36 | 4258.33 | 3676.17 | 2590.08 | 2902.19 |
| ENSMUSG000000001225 | 12_Slc26a3 | 0.651   | 0.16495  | 0.95782  | NA       | 0       | 0.91781 | 1.19515 | 0       | 1.79306 | 0       |
| ENSMUSG000000001227 | 11_Sema6b  | 28.6874 | 0.6331   | 0.23531  | 0.34212  | 43.4094 | 37.63   | 23.9031 | 35.1657 | 20.6202 | 11.396  |
| ENSMUSG000000001228 | 14_Uhrf1   | 1395.91 | 1.61532  | 2.24E-14 | 1.81E-12 | 2008.12 | 1866.82 | 2436.92 | 579.784 | 553.159 | 930.677 |
| ENSMUSG000000001229 | 7_Dpp9     | 661.723 | 1.06528  | 2.68E-08 | 3.97E-07 | 766.61  | 949.011 | 970.465 | 491.419 | 328.13  | 464.705 |
| ENSMUSG000000001240 | 13_Ramp2   | 244.584 | -0.35796 | 0.08336  | 0.14802  | 202.288 | 244.136 | 197.2   | 327.312 | 263.58  | 232.986 |
| ENSMUSG000000001247 | 16_Lsr     | 1279.79 | 1.28598  | 1.59E-10 | 4.87E-09 | 1594.86 | 1647.46 | 2202.67 | 830.452 | 554.952 | 848.372 |
| ENSMUSG000000001248 | 14_Gramd1a | 571.035 | 0.21478  | 0.19043  | 0.2897   | 570.4   | 620.437 | 651.359 | 621.261 | 505.643 | 457.108 |
| ENSMUSG000000001249 | 14_Hpn     | 36.8072 | 0.79893  | 0.07337  | 0.13362  | 35.5957 | 59.6574 | 45.4159 | 37.8708 | 23.3098 | 18.9934 |
| ENSMUSG000000001260 | 10_Gabrg1  | 6.10899 | -2.4302  | 0.01699  | 0.03955  | 1.73638 | 2.75342 | 1.19515 | 10.8202 | 12.5514 | 7.59736 |
| ENSMUSG000000001270 | 8_Ckb      | 849.397 | -0.17151 | 0.5875   | 0.69     | 740.565 | 1115.13 | 541.405 | 1365.15 | 750.396 | 583.731 |
| ENSMUSG000000001280 | 12_Sp1     | 4172.63 | -0.11433 | 0.3885   | 0.50583  | 4169.91 | 3776.77 | 4074.28 | 3683.39 | 4583.06 | 4748.35 |
| ENSMUSG000000001281 | 9_Iltgb7   | 1036.36 | 1.32974  | 2.68E-10 | 7.64E-09 | 1478.52 | 1274.83 | 1693.53 | 627.573 | 416.887 | 726.814 |
| ENSMUSG000000001285 | 12_Myg1    | 457.352 | 0.60549  | 7.15E-05 | 0.00037  | 526.122 | 524.985 | 605.943 | 396.742 | 343.371 | 346.946 |
| ENSMUSG000000001288 | 14_Rarg    | 4955.52 | 1.00092  | 4.90E-11 | 1.73E-09 | 5910.63 | 6249.34 | 7665.72 | 3430.91 | 2813.31 | 3663.19 |
| ENSMUSG000000001289 | 12_Pfdn5   | 3860.85 | -0.29443 | 0.01819  | 0.04182  | 3581.28 | 3550.99 | 3272.33 | 4820.41 | 3900.8  | 4039.26 |
| ENSMUSG000000001300 | 15_Efnb2   | 2051.79 | 0.25632  | 0.051    | 0.09863  | 2050.66 | 2290.84 | 2358.04 | 1680.74 | 1836.09 | 2094.34 |
| ENSMUSG000000001305 | 5_Rrp15    | 380.952 | -0.16367 | 0.31066  | 0.42557  | 345.539 | 332.246 | 400.377 | 378.708 | 388.198 | 440.647 |
| ENSMUSG000000001313 | 12_Rnd2    | 254.63  | -0.48473 | 0.02185  | 0.04881  | 209.233 | 234.04  | 193.615 | 368.789 | 259.994 | 262.109 |
| ENSMUSG000000001323 | 17_Srr     | 715.325 | -0.71307 | 1.68E-07 | 1.97E-06 | 558.245 | 559.861 | 507.94  | 859.306 | 977.218 | 829.379 |
| ENSMUSG000000001333 | 9_Sync     | 27.5183 | -0.14022 | 0.76779  | 0.83683  | 32.9912 | 27.5342 | 17.9273 | 36.9691 | 26.8959 | 22.7921 |
| ENSMUSG000000001334 | 9_Fndc5    | 59.2976 | -1.47159 | 0.00034  | 0.00142  | 37.3321 | 38.5478 | 17.9273 | 120.826 | 75.3086 | 65.8438 |
| ENSMUSG000000001348 | 14_Acp5    | 476.843 | 1.3176   | 6.54E-07 | 6.36E-06 | 587.764 | 635.121 | 817.485 | 275.916 | 171.237 | 373.537 |
| ENSMUSG000000001349 | 4_Cnn1     | 149.908 | -1.2579  | 0.00014  | 0.00068  | 76.4006 | 132.166 | 56.1722 | 212.798 | 257.304 | 164.609 |
| ENSMUSG000000001366 | 14_Fbxo9   | 1300.56 | -0.09508 | 0.37016  | 0.48756  | 1236.3  | 1243.63 | 1293.16 | 1335.4  | 1313.42 | 1381.45 |
| ENSMUSG000000001376 | 17_Ccdc132 | 765.862 | -0.33907 | 0.0177   | 0.04089  | 701.496 | 630.532 | 696.775 | 751.104 | 937.771 | 877.495 |
| ENSMUSG000000001380 | 6_Hars     | 1118.98 | 0.24203  | 0.03966  | 0.07992  | 1218.07 | 1132.57 | 1287.18 | 1008.08 | 1000.53 | 1067.43 |

|                     |             |         |          |          |          |         |         |         |         |         |         |
|---------------------|-------------|---------|----------|----------|----------|---------|---------|---------|---------|---------|---------|
| ENSMUSG000000001383 | 8_Zmat2     | 2530.46 | -0.47165 | 0.0006   | 0.00231  | 2166.13 | 1949.42 | 2245.69 | 2505.78 | 3160.27 | 3155.44 |
| ENSMUSG000000001403 | 13_Ube2c    | 416.974 | 0.46998  | 0.00311  | 0.00947  | 495.736 | 451.56  | 505.55  | 306.573 | 382.819 | 359.608 |
| ENSMUSG000000001415 | 10_Smg5     | 2108.87 | 0.75029  | 1.57E-07 | 1.86E-06 | 2403.15 | 2600.14 | 2932.91 | 1753.78 | 1362.73 | 1600.51 |
| ENSMUSG000000001416 | 13_Cct3     | 3914.6  | 0.20848  | 0.11413  | 0.19161  | 4340.07 | 3861.21 | 4388.61 | 3128.85 | 3809.36 | 3959.49 |
| ENSMUSG000000001418 | 13_Glmp     | 2013.65 | 0.39205  | 0.00838  | 0.02178  | 2143.56 | 2425.76 | 2287.52 | 2026.99 | 1459.55 | 1738.53 |
| ENSMUSG000000001419 | 17_Mef2d    | 2212.18 | 0.4734   | 0.00091  | 0.00329  | 2394.46 | 2540.49 | 2782.32 | 2159.54 | 1651.41 | 1744.86 |
| ENSMUSG000000001420 | 13_Tmem79   | 1289.58 | 1.21253  | 2.92E-12 | 1.38E-10 | 1633.06 | 1718.13 | 2052.08 | 751.104 | 641.019 | 942.073 |
| ENSMUSG000000001424 | 14_Snd1     | 2010.39 | 0.78376  | 2.03E-08 | 3.15E-07 | 2377.97 | 2445.95 | 2805.03 | 1458.03 | 1302.66 | 1672.69 |
| ENSMUSG000000001435 | 14_Col18a1  | 2184.49 | 0.01996  | 0.945    | 0.96426  | 1858.79 | 2989.29 | 1750.9  | 3289.35 | 1471.21 | 1747.39 |
| ENSMUSG000000001436 | 15_Slc19a1  | 285.449 | 0.08211  | 0.76164  | 0.83243  | 269.138 | 351.52  | 260.544 | 396.742 | 216.96  | 217.791 |
| ENSMUSG000000001440 | 5_Kpnb1     | 7151.87 | 0.06396  | 0.6267   | 0.72385  | 7622.69 | 6714.67 | 7592.81 | 5996.21 | 7381.14 | 7603.69 |
| ENSMUSG000000001441 | 13_Npepps   | 3846.79 | 0.14338  | 0.29396  | 0.40823  | 4075.28 | 3976.85 | 4059.94 | 3028.76 | 3941.15 | 3998.74 |
| ENSMUSG000000001444 | 2_Tbx21     | 4.64239 | 2.40875  | 0.06311  | 0.11784  | 7.8137  | 4.58903 | 10.7564 | 0       | 0.89653 | 3.79868 |
| ENSMUSG000000001445 | 10_Mrpl10   | 995.421 | 0.4069   | 0.00103  | 0.00367  | 1076.55 | 1107.79 | 1220.25 | 865.618 | 803.291 | 899.021 |
| ENSMUSG000000001467 | 5_Cyp51     | 4090.48 | 0.04513  | 0.72817  | 0.80644  | 4192.48 | 3725.37 | 4546.37 | 3622.07 | 4383.14 | 4073.45 |
| ENSMUSG000000001472 | 16_Tcf25    | 5759.56 | 0.35063  | 0.00206  | 0.00667  | 6216.23 | 6625.64 | 6526.74 | 5584.14 | 4614.44 | 4990.2  |
| ENSMUSG000000001473 | 6_Tubb6     | 772.886 | 1.14331  | 9.06E-12 | 3.85E-10 | 987.13  | 945.34  | 1260.89 | 540.11  | 436.61  | 467.238 |
| ENSMUSG000000001482 | 14_Def8     | 1580.85 | 0.29832  | 0.05014  | 0.09736  | 1676.47 | 1764.94 | 1789.15 | 1598.69 | 1143.97 | 1511.87 |
| ENSMUSG000000001493 | 9_Meox1     | 152.905 | -0.22626 | 0.33715  | 0.45368  | 123.283 | 158.78  | 141.028 | 197.469 | 139.859 | 157.012 |
| ENSMUSG000000001494 | 6_Sost      | 8.59085 | -0.52816 | 0.49776  | 0.60883  | 8.68188 | 6.42464 | 5.97577 | 14.427  | 7.17224 | 8.86359 |
| ENSMUSG000000001497 | 18_Pax9     | 5.42542 | -0.00223 | 0.99816  | 0.99852  | 5.20913 | 2.75342 | 8.36608 | 5.41011 | 4.48265 | 6.33113 |
| ENSMUSG000000001504 | 10_Irx2     | 67.6886 | 0.01698  | 0.95476  | 0.97066  | 65.9823 | 62.4108 | 76.4899 | 79.3483 | 63.6537 | 58.2464 |
| ENSMUSG000000001506 | 10_Col1a1   | 22864.8 | 0.84994  | 3.22E-06 | 2.53E-05 | 26175.9 | 35144.6 | 26912.5 | 16261.9 | 12847.3 | 19846.8 |
| ENSMUSG000000001507 | 16_Itga3    | 5014.63 | 1.42525  | 7.30E-13 | 4.09E-11 | 6503.6  | 6897.31 | 8521.45 | 2799.73 | 1969.68 | 3396.02 |
| ENSMUSG000000001508 | 15_Sgca     | 24.5433 | -0.29829 | 0.58657  | 0.68929  | 26.9138 | 25.6986 | 13.1467 | 38.7725 | 16.1376 | 26.5908 |
| ENSMUSG000000001510 | 8_Dlx3      | 96.371  | 0.74189  | 0.00826  | 0.02155  | 112.864 | 132.164 | 115.93  | 74.8399 | 53.7918 | 88.6359 |
| ENSMUSG000000001517 | 14_Foxm1    | 419.624 | 0.95184  | 1.73E-08 | 2.76E-07 | 557.377 | 473.588 | 628.651 | 280.424 | 272.545 | 305.161 |
| ENSMUSG000000001518 | 12_Irf2     | 419.182 | 0.56593  | 0.00398  | 0.01166  | 448.853 | 508.464 | 543.795 | 398.545 | 260.89  | 354.544 |
| ENSMUSG000000001520 | 12_Nrip2    | 34.5826 | -0.92754 | 0.03131  | 0.06583  | 26.9138 | 22.0273 | 22.7079 | 61.3146 | 40.3439 | 34.1881 |
| ENSMUSG000000001521 | 12_Tulp3    | 478.56  | -0.04521 | 0.80509  | 0.86503  | 484.449 | 458.903 | 470.891 | 604.129 | 440.197 | 412.79  |
| ENSMUSG000000001524 | 14_Gtf2h4   | 227.302 | 0.56767  | 0.0042   | 0.01218  | 270.007 | 232.205 | 313.13  | 200.174 | 174.823 | 173.473 |
| ENSMUSG000000001525 | 10_Tubb5    | 7866.93 | 0.82079  | 1.63E-09 | 3.58E-08 | 9717.63 | 9308.38 | 11111.3 | 5529.14 | 5045.67 | 6489.41 |
| ENSMUSG000000001542 | 6_Ell2      | 1371.73 | -0.1899  | 0.11371  | 0.19111  | 1332.67 | 1165.61 | 1346.94 | 1393.1  | 1516.93 | 1475.15 |
| ENSMUSG000000001552 | 14_Jup      | 19654.6 | 1.63061  | 2.25E-14 | 1.81E-12 | 25373.7 | 28386.8 | 35377.8 | 10316.2 | 6549.16 | 11924.1 |
| ENSMUSG000000001555 | 10_Fkbp10   | 514.447 | 0.16702  | 0.36872  | 0.48607  | 573.873 | 611.259 | 446.988 | 569.865 | 433.921 | 450.777 |
| ENSMUSG000000001558 | 5_Klh10     | 6.0667  | -0.32151 | 0.73246  | 0.81018  | 3.47275 | 4.58903 | 8.36608 | 6.3118  | 9.86184 | 3.79868 |
| ENSMUSG000000001566 | 9_Mnx1      | 0.1447  | 0.92709  | 0.02027  | NA       | 0.86819 | 0       | 0       | 0       | 0       | 0       |
| ENSMUSG000000001569 | 10_Nom1     | 799.704 | -0.13405 | 0.34916  | 0.46601  | 772.688 | 742.505 | 772.07  | 716.84  | 915.358 | 878.761 |
| ENSMUSG000000001576 | 14_Ergic1   | 2332.54 | 0.40603  | 0.00139  | 0.00476  | 2431.8  | 2656.13 | 2887.49 | 2028.79 | 1818.16 | 2172.85 |
| ENSMUSG000000001583 | 12_Tnk1     | 268.015 | 1.12016  | 6.83E-07 | 6.59E-06 | 337.725 | 369.876 | 392.011 | 156.893 | 129.997 | 221.59  |
| ENSMUSG000000001588 | 12_Acap1    | 30.3791 | 1.94559  | 4.02E-05 | 0.00023  | 58.1686 | 39.4656 | 46.611  | 9.01685 | 12.5514 | 16.4609 |
| ENSMUSG000000001604 | 14_Tcea3    | 148.606 | 0.07333  | 0.78815  | 0.85278  | 127.624 | 183.561 | 145.809 | 179.435 | 105.791 | 149.415 |
| ENSMUSG000000001622 | 15_Csn3     | 87.5476 | 0.79382  | 0.0412   | 0.08257  | 61.6414 | 166.123 | 105.174 | 71.2332 | 50.2057 | 70.9087 |
| ENSMUSG000000001627 | 11_Irfd1    | 813.3   | -0.15905 | 0.31023  | 0.42514  | 799.602 | 650.724 | 855.73  | 767.334 | 916.254 | 890.158 |
| ENSMUSG000000001630 | 13_Stk38l   | 1169.67 | -0.02846 | 0.85833  | 0.90402  | 1152.95 | 1033.45 | 1288.38 | 981.935 | 1317.9  | 1243.43 |
| ENSMUSG000000001632 | 16_Brpf1    | 883.667 | 0.64785  | 2.38E-05 | 0.00014  | 1086.97 | 1064.65 | 1084    | 771.843 | 563.918 | 730.613 |
| ENSMUSG000000001642 | 18_Akr1b3   | 6894.59 | 0.30162  | 0.0018   | 0.00594  | 7442.98 | 7346.12 | 8049.36 | 6189.17 | 6004.96 | 6334.93 |
| ENSMUSG000000001655 | 6_Hoxc13    | 0       | NA       | NA       | NA       | 0       | 0       | 0       | 0       | 0       | 0       |
| ENSMUSG000000001656 | 3_Hoxc11    | 0.19919 | 0.92709  | 0.82027  | NA       | 0       | 0       | 1.19515 | 0       | 0       | 0       |
| ENSMUSG000000001657 | 7_Hoxc8     | 0.4589  | 2.31815  | 0.56231  | NA       | 0       | 2.75342 | 0       | 0       | 0       | 0       |
| ENSMUSG000000001661 | 5_Hoxc6     | 1.17058 | 2.51932  | 0.33573  | NA       | 5.20913 | 0.91781 | 0       | 0       | 0.89653 | 0       |
| ENSMUSG000000001663 | 10_Gstt1    | 486.654 | -0.24876 | 0.31562  | 0.43066  | 465.349 | 509.382 | 359.741 | 737.579 | 424.955 | 422.92  |
| ENSMUSG000000001665 | 10_Gstt3    | 967.13  | 0.38752  | 0.00464  | 0.01326  | 1099.99 | 1075.67 | 1111.49 | 855.7   | 727.983 | 931.943 |
| ENSMUSG000000001666 | 8_Ddt       | 455.21  | 0.50742  | 0.00784  | 0.02057  | 491.395 | 559.861 | 552.161 | 452.646 | 294.062 | 381.134 |
| ENSMUSG000000001672 | 14_Marveld3 | 622.735 | 0.60215  | 9.21E-05 | 0.00046  | 673.714 | 733.327 | 846.169 | 446.334 | 531.643 | 505.225 |
| ENSMUSG000000001674 | 11_Ddx18    | 1012.78 | 0.05631  | 0.70647  | 0.78999  | 1040.09 | 948.093 | 1109.1  | 838.567 | 1063.29 | 1077.56 |
| ENSMUSG000000001687 | 15_Ubl3     | 2646.42 | 0.12089  | 0.23446  | 0.34108  | 2629.74 | 2751.58 | 2891.08 | 2586.94 | 2453.8  | 2565.38 |
| ENSMUSG000000001700 | 9_Gramd3    | 2027.46 | 0.15814  | 0.13475  | 0.21893  | 2128.8  | 2112.79 | 2172.79 | 1797.96 | 1930.23 | 2022.16 |
| ENSMUSG000000001707 | 7_Eef1e1    | 292.889 | -0.23318 | 0.21471  | 0.31855  | 266.534 | 228.534 | 314.326 | 337.23  | 324.544 | 286.167 |
| ENSMUSG000000001729 | 14_Akt1     | 3029.92 | 0.92716  | 6.68E-06 | 4.76E-05 | 3659.41 | 3897    | 4357.53 | 2644.64 | 1429.07 | 2191.84 |
| ENSMUSG000000001739 | 14_Cldn15   | 6.08999 | -0.17125 | 0.85075  | 0.89885  | 5.20913 | 3.67122 | 8.36608 | 7.21348 | 4.48265 | 7.59736 |
| ENSMUSG000000001741 | 11_Ilf16    | 103.781 | 0.46524  | 0.15197  | 0.24162  | 168.429 | 87.1915 | 105.174 | 103.694 | 70.8259 | 87.3697 |
| ENSMUSG000000001750 | 15_Tcirg1   | 978.918 | 1.72569  | 2.16E-22 | 5.16E-20 | 1429.04 | 1340    | 1741.34 | 535.601 | 372.957 | 454.575 |
| ENSMUSG000000001751 | 9_Naglu     | 471.388 | 0.67284  | 0.00204  | 0.00663  | 520.045 | 658.984 | 559.332 | 471.582 | 275.235 | 343.147 |
| ENSMUSG000000001755 | 12_Coasy    | 572.936 | 0.60504  | 0.00129  | 0.00446  | 634.646 | 713.135 | 725.459 | 509.452 | 343.371 | 511.556 |
| ENSMUSG000000001761 | 7_Smo       | 1371.37 | -0.04405 | 0.79477  | 0.85775  | 1294.47 | 1445.54 | 1312.28 | 1738.45 | 1228.25 | 1209.25 |
| ENSMUSG000000001763 | 14_Tspan33  | 200.305 | 0.52926  | 0.01353  | 0.03255  | 231.806 | 228.534 | 249.787 | 196.567 | 131.79  | 163.343 |
| ENSMUSG000000001767 | 5_Crnkl1    | 1098.15 | -0.20792 | 0.17078  | 0.26549  | 1005.36 | 999.49  | 1051.74 | 963     | 1252.45 | 1316.88 |
| ENSMUSG000000001768 | 15_Rin2     | 2950.35 | -0.10886 | 0.30506  | 0.42007  | 2884.12 | 2676.32 | 2956.81 | 2885.39 | 3135.17 | 3164.3  |
| ENSMUSG000000001773 | 13_Folh1    | 122.292 | -1.45745 | 0.00039  | 0.00162  | 64.2459 | 100.041 | 31.074  | 193.862 | 233.098 | 111.428 |
| ENSMUSG000000001774 | 7_Chordc1   | 1054.75 | -0.46669 | 0.00783  | 0.02055  | 893.366 | 794.82  | 969.27  | 972.919 | 1455.97 | 1242.17 |
| ENSMUSG000000001783 | 3_Rtcb      | 3263.12 | 0.03938  | 0.70395  | 0.78836  | 3372.91 | 3128.8  | 3420.53 | 3181.15 | 3089.44 | 3385.89 |
| ENSMUSG000000001785 | 11_Pwp1     | 838.132 | -0.11792 | 0.37418  | 0.49181  | 783.106 | 777.381 | 852.145 | 799.795 | 956.598 | 859.768 |
| ENSMUSG000000001786 | 14_Fbxo7    | 728.514 | 0.05987  | 0.64215  | 0.73755  | 772.688 | 710.382 | 746.971 | 658.23  | 730.672 | 752.139 |
| ENSMUSG000000001794 | 12_Capns1   | 12015.2 | 0.55117  | 8.30E-05 | 0.00042  | 13675.7 | 13932.3 | 15239.4 | 10526.3 | 8023.95 | 10693.3 |
| ENSMUSG000000001802 | 16_Lrp3     | 179.265 | 0.03466  | 0.89493  | 0.92909  | 175.374 | 215.684 | 152.98  | 229.93  | 134.48  | 167.142 |
| ENSMUSG000000001804 | 9_Dsg4      | 2.4596  | -0.21785 | 0.86991  | NA       | 2.60457 | 1.83561 | 2.39031 | 2.70506 | 2.68959 | 2.53245 |
| ENSMUSG000000001815 | 15_Evx2     | 0.1447  | 0.92709  | 0.82027  | NA       | 0.86819 | 0       | 0       | 0       | 0       | 0       |
| ENSMUSG000000001819 | 4_Hoxd13    | 0.2894  | 1.67273  | 0.67976  | NA       | 1.73638 | 0       | 0       | 0       | 0       | 0       |

|                     |             |         |          |          |          |         |         |         |         |         |         |
|---------------------|-------------|---------|----------|----------|----------|---------|---------|---------|---------|---------|---------|
| ENSMUSG000000001827 | 11_Folr1    | 1497.57 | -0.61091 | 0.00241  | 0.00761  | 1102.6  | 1467.57 | 984.807 | 2259.62 | 1513.34 | 1657.49 |
| ENSMUSG000000001829 | 16_Clpb     | 630.436 | 0.20155  | 0.13235  | 0.21589  | 676.319 | 636.039 | 711.117 | 618.556 | 544.194 | 596.393 |
| ENSMUSG000000001833 | 16_Sep17    | 4254.91 | -0.57681 | 2.56E-05 | 0.00015  | 3587.35 | 3201.31 | 3457.58 | 4318.17 | 5749.45 | 5215.59 |
| ENSMUSG000000001844 | 10_Zdhhc4   | 629.92  | 0.48094  | 0.00139  | 0.00476  | 696.287 | 709.464 | 797.168 | 594.211 | 473.368 | 509.023 |
| ENSMUSG000000001847 | 14_Rac1     | 8852.12 | 0.09585  | 0.39395  | 0.5117   | 9047.39 | 8686.11 | 9704.65 | 7740.97 | 8950.96 | 8982.61 |
| ENSMUSG000000001855 | 15_Nup214   | 1262.51 | 0.90145  | 3.40E-10 | 9.33E-09 | 1441.19 | 1658.47 | 1833.37 | 820.534 | 849.014 | 972.462 |
| ENSMUSG000000001864 | 13_Aif1l    | 3319.9  | -0.04394 | 0.65656  | 0.74961  | 3162.81 | 3201.31 | 3444.43 | 3318.2  | 3333.3  | 3459.33 |
| ENSMUSG000000001865 | 2_Cpa3      | 112.497 | -1.36146 | 1.88E-06 | 1.59E-05 | 78.137  | 57.8218 | 52.5868 | 199.272 | 132.687 | 154.48  |
| ENSMUSG000000001870 | 15_Ltbp1    | 2193.42 | -0.16778 | 0.13222  | 0.21579  | 2147.9  | 2150.42 | 1899.1  | 2412.91 | 2322.91 | 2227.29 |
| ENSMUSG000000001891 | 16_Ugp2     | 2145.16 | -0.74579 | 4.06E-10 | 1.09E-08 | 1595.73 | 1630.94 | 1581.19 | 2412.01 | 2938.83 | 2712.26 |
| ENSMUSG000000001901 | 15_Kcnh6    | 4.03902 | -0.3628  | 0.78077  | 0.84706  | 3.47275 | 3.67122 | 3.58546 | 9.91854 | 3.58612 | 0       |
| ENSMUSG000000001909 | 15_Trmt1    | 539.436 | 0.64826  | 1.85E-06 | 1.57E-05 | 633.778 | 636.039 | 706.336 | 428.301 | 401.646 | 430.517 |
| ENSMUSG000000001910 | 4_Nacc1     | 2703.04 | 0.8599   | 1.10E-06 | 9.97E-06 | 3137.63 | 3482.15 | 3836.44 | 2217.24 | 1447.9  | 2096.87 |
| ENSMUSG000000001911 | 16_Nfix     | 1351.32 | 0.47098  | 0.00469  | 0.01336  | 1381.29 | 1791.56 | 1536.97 | 1315.56 | 946.736 | 1135.81 |
| ENSMUSG000000001918 | 17_Slc1a5   | 440.056 | 0.5819   | 0.00145  | 0.00496  | 560.85  | 477.259 | 544.99  | 420.185 | 291.372 | 345.68  |
| ENSMUSG000000001924 | 15_Uba1     | 9700.04 | 0.76271  | 8.01E-08 | 1.04E-06 | 10952.2 | 12004.9 | 13659.4 | 6513.78 | 6757.15 | 8312.78 |
| ENSMUSG000000001930 | 17_Vwf      | 471.709 | 0.24841  | 0.27615  | 0.38854  | 506.154 | 615.848 | 414.718 | 562.652 | 358.612 | 372.271 |
| ENSMUSG000000001942 | 7_Siae      | 485.881 | -0.50668 | 0.00023  | 0.00101  | 386.344 | 417.602 | 400.377 | 541.011 | 598.882 | 571.068 |
| ENSMUSG000000001943 | 7_Vsig2     | 7.31882 | -0.49784 | 0.6073   | 0.70729  | 7.8137  | 4.58903 | 5.97577 | 10.8202 | 13.448  | 1.26623 |
| ENSMUSG000000001946 | 13_Esam     | 158.982 | -0.12943 | 0.6007   | 0.70196  | 147.592 | 144.095 | 164.931 | 214.601 | 149.721 | 132.954 |
| ENSMUSG000000001948 | 9_Spa17     | 84.9639 | -0.62319 | 0.0191   | 0.04349  | 73.796  | 68.8354 | 57.3674 | 103.694 | 95.9288 | 110.162 |
| ENSMUSG000000001962 | 8_Fam50a    | 1074.5  | 0.09684  | 0.50406  | 0.61475  | 1061.79 | 1103.2  | 1165.28 | 898.98  | 1021.15 | 1196.58 |
| ENSMUSG000000001964 | 14_Emd      | 1313.39 | 0.27061  | 0.0215   | 0.04818  | 1435.98 | 1364.78 | 1507.09 | 1120.8  | 1175.35 | 1276.36 |
| ENSMUSG000000001983 | 7_Taco1     | 214.507 | -0.07611 | 0.68648  | 0.77422  | 224.861 | 205.588 | 194.81  | 210.093 | 203.512 | 248.18  |
| ENSMUSG000000001985 | 9_Grik3     | 80.1325 | -1.00436 | 0.00319  | 0.00969  | 61.6414 | 64.2464 | 33.4643 | 133.449 | 96.8253 | 91.1683 |
| ENSMUSG000000001986 | 16_Gria3    | 266.699 | -1.28618 | 6.05E-06 | 4.38E-05 | 166.692 | 191.821 | 106.369 | 412.07  | 466.196 | 257.044 |
| ENSMUSG000000001988 | 8_Npas1     | 3.5875  | 0.80078  | 0.51265  | 0.62278  | 7.8137  | 4.58903 | 1.19515 | 2.70506 | 2.68959 | 2.53245 |
| ENSMUSG000000001995 | 8_Sipa1l2   | 794.817 | 0.74445  | 7.87E-06 | 5.50E-05 | 915.071 | 967.367 | 1103.13 | 629.376 | 484.127 | 669.834 |
| ENSMUSG000000001998 | 15_Ap4e1    | 340.385 | -0.09392 | 0.58385  | 0.68677  | 303.866 | 349.684 | 333.448 | 347.149 | 309.303 | 398.861 |
| ENSMUSG000000001999 | 15_Blvra    | 143.46  | -0.20061 | 0.35566  | 0.47244  | 147.592 | 128.493 | 124.296 | 171.32  | 143.445 | 145.616 |
| ENSMUSG000000002006 | 12_Pdzd4    | 160.427 | -0.1951  | 0.38532  | 0.50263  | 151.065 | 157.863 | 139.833 | 206.486 | 145.238 | 162.077 |
| ENSMUSG000000002007 | 5_Srpk3     | 18.1122 | -0.79943 | 0.20393  | 0.30577  | 6.94551 | 22.9451 | 9.56123 | 21.6405 | 19.7237 | 27.857  |
| ENSMUSG000000002010 | 17_Idh3g    | 1776.41 | -0.15436 | 0.2317   | 0.33788  | 1668.66 | 1657.56 | 1718.63 | 2109.04 | 1655.89 | 1848.69 |
| ENSMUSG000000002012 | 13_Pnck     | 86.6332 | -0.89424 | 0.02873  | 0.06125  | 46.8822 | 87.1915 | 47.8062 | 174.927 | 80.6878 | 82.3047 |
| ENSMUSG000000002014 | 12_Ssr4     | 1282.85 | 0.18871  | 0.1351   | 0.2192   | 1420.36 | 1259.23 | 1422.23 | 1254.24 | 1253.35 | 1087.69 |
| ENSMUSG000000002015 | 5_Bcap31    | 3301.54 | -0.16836 | 0.15381  | 0.24414  | 3246.16 | 2927.8  | 3152.82 | 3131.55 | 3714.33 | 3636.6  |
| ENSMUSG000000002017 | 9_Fam98a    | 1110.45 | -0.0791  | 0.53782  | 0.64537  | 1099.99 | 1018.76 | 1121.05 | 1020.71 | 1292.42 | 1192.79 |
| ENSMUSG000000002020 | 15_Ltbp2    | 654.801 | -0.06671 | 0.78453  | 0.85032  | 550.431 | 858.148 | 510.331 | 866.52  | 555.849 | 587.529 |
| ENSMUSG000000002028 | 12_Kmt2a    | 3117.4  | 0.06761  | 0.47374  | 0.58656  | 3129.82 | 3295.84 | 3145.65 | 3084.67 | 3028.48 | 3019.95 |
| ENSMUSG000000002031 | 11_lft46    | 799.826 | 0.0796   | 0.54585  | 0.65238  | 863.847 | 786.559 | 815.095 | 845.781 | 712.742 | 774.931 |
| ENSMUSG000000002032 | 16_Tmem25   | 116.705 | -0.04981 | 0.86735  | 0.91015  | 111.128 | 137.671 | 95.6123 | 159.598 | 107.584 | 88.6359 |
| ENSMUSG000000002033 | 13_Cd3g     | 10.2127 | 1.55758  | 0.07818  | 0.14061  | 29.5184 | 5.50683 | 10.7564 | 7.21348 | 4.48265 | 3.79868 |
| ENSMUSG000000002043 | 16_Trappc6a | 336.667 | 1.34095  | 3.35E-07 | 3.56E-06 | 389.817 | 487.355 | 571.284 | 249.767 | 125.514 | 196.265 |
| ENSMUSG000000002052 | 6_Supt6     | 4875.73 | 0.48022  | 0.00035  | 0.00147  | 5092.79 | 5635.33 | 6310.41 | 3857.41 | 3779.77 | 4578.68 |
| ENSMUSG000000002055 | 9_Spag5     | 577.565 | -0.16992 | 0.23786  | 0.34524  | 599.05  | 529.574 | 501.965 | 653.722 | 608.744 | 572.335 |
| ENSMUSG000000002057 | 4_Foxn1     | 22.7692 | 1.07765  | 0.04896  | 0.09542  | 39.9367 | 19.2739 | 33.4643 | 9.91854 | 18.8271 | 15.1947 |
| ENSMUSG000000002058 | 17_Unc119   | 575.149 | -0.63538 | 0.06542  | 0.12136  | 511.363 | 505.711 | 334.643 | 1175.8  | 539.711 | 383.667 |
| ENSMUSG000000002059 | 13_Rmb24    | 566.72  | -0.29708 | 0.06747  | 0.12463  | 504.417 | 558.026 | 463.72  | 714.135 | 616.813 | 543.211 |
| ENSMUSG000000002064 | 10_Sdf2     | 2781.86 | 0.01684  | 0.89898  | 0.93181  | 2898.01 | 2555.17 | 2941.27 | 3055.81 | 2419.74 | 2821.15 |
| ENSMUSG000000002068 | 16_Ccne1    | 249.366 | 0.77271  | 0.00044  | 0.00176  | 309.075 | 267.999 | 365.717 | 164.107 | 161.379 | 227.921 |
| ENSMUSG000000002076 | 11_Hsf2bp   | 8.04689 | -0.46764 | 0.58686  | 0.68959  | 3.47275 | 11.9315 | 4.78062 | 6.3118  | 11.6549 | 10.1298 |
| ENSMUSG000000002083 | 12_Bbc3     | 14.7794 | 1.35231  | 0.02459  | 0.05392  | 24.3093 | 20.1917 | 19.1225 | 9.01685 | 7.17224 | 8.86359 |
| ENSMUSG000000002100 | 15_Mybp3c   | 2.98708 | 1.40699  | 0.33297  | 0.4497   | 4.34094 | 2.75342 | 5.97577 | 0       | 3.58612 | 1.26623 |
| ENSMUSG000000002102 | 15_Psmc3    | 2993.33 | 0.25826  | 0.04526  | 0.08919  | 3383.33 | 3024.17 | 3373.92 | 2996.3  | 2383.87 | 2798.36 |
| ENSMUSG000000002103 | 15_Acp2     | 1092.32 | -0.38385 | 0.01753  | 0.04059  | 1050.51 | 1017.85 | 774.46  | 1351.63 | 1257.83 | 1101.62 |
| ENSMUSG000000002104 | 11_Rapsn    | 138.979 | -0.04925 | 0.90179  | 0.93347  | 96.3689 | 208.342 | 105.174 | 219.11  | 89.6531 | 115.227 |
| ENSMUSG000000002105 | 15_Slc39a13 | 504.139 | 0.16621  | 0.44726  | 0.56218  | 516.572 | 610.341 | 473.281 | 627.573 | 422.266 | 374.803 |
| ENSMUSG000000002107 | 18_Celf2    | 1007.1  | -0.5906  | 0.00026  | 0.00113  | 801.338 | 879.258 | 731.434 | 1276.79 | 1363.62 | 990.189 |
| ENSMUSG000000002108 | 10_Nr1h3    | 72.8646 | 0.38819  | 0.30523  | 0.42019  | 105.919 | 88.1093 | 53.7819 | 88.3652 | 52.8953 | 48.1166 |
| ENSMUSG000000002109 | 14_Ddb2     | 494.128 | -0.40107 | 0.0104   | 0.02613  | 409.785 | 468.999 | 399.181 | 544.618 | 629.364 | 512.822 |
| ENSMUSG000000002111 | 8_Spi1      | 79.1583 | 2.00684  | 5.96E-09 | 1.09E-07 | 167.56  | 92.6984 | 119.515 | 31.559  | 26.8959 | 36.7206 |
| ENSMUSG000000002129 | 11_SF3a1    | 1787.43 | 0.24498  | 0.08824  | 0.15511  | 1749.4  | 1960.43 | 2105.86 | 1417.45 | 1647.82 | 1843.63 |
| ENSMUSG000000002147 | 18_Stat6    | 3617.63 | 0.52509  | 3.16E-05 | 0.00018  | 4061.39 | 4171.43 | 4572.66 | 3053.11 | 2604.42 | 3242.81 |
| ENSMUSG000000002190 | 13_Clgn     | 4.93228 | -0.25979 | 0.80924  | 0.86829  | 6.94551 | 1.83561 | 4.78062 | 9.01685 | 4.48265 | 2.53245 |
| ENSMUSG000000002204 | 8_Napsa     | 42.9942 | 1.9059   | 0.00011  | 0.00055  | 107.655 | 41.3013 | 54.9771 | 22.5421 | 18.8271 | 12.6623 |
| ENSMUSG000000002205 | 15_Vrk3     | 778.649 | 0.4784   | 0.00128  | 0.00443  | 850.825 | 882.011 | 987.197 | 716.84  | 563.918 | 671.1   |
| ENSMUSG000000002210 | 11_Smg9     | 343.581 | 1.13072  | 7.35E-06 | 5.18E-05 | 426.281 | 458.903 | 529.453 | 263.292 | 135.376 | 248.18  |
| ENSMUSG000000002221 | 11_Paxip1   | 610.503 | 0.47408  | 0.00025  | 0.00109  | 696.287 | 690.19  | 744.581 | 535.601 | 510.126 | 486.231 |
| ENSMUSG000000002222 | 14_Rmnd5a   | 4043.07 | -0.38796 | 0.0004   | 0.00165  | 3616.87 | 3463.8  | 3426.51 | 4168.49 | 4882.51 | 4700.23 |
| ENSMUSG000000002227 | 15_Mov10    | 590.196 | 1.58902  | 3.31E-18 | 5.15E-16 | 762.269 | 797.573 | 1098.35 | 302.065 | 277.028 | 303.894 |
| ENSMUSG000000002228 | 7_Ppm1j     | 73.7541 | 0.94138  | 0.00082  | 0.00303  | 85.9507 | 100.041 | 105.174 | 52.2978 | 48.4127 | 50.6491 |
| ENSMUSG000000002233 | 13_Rhoc     | 1047.04 | 0.17956  | 0.26942  | 0.38091  | 1152.09 | 1121.56 | 1062.49 | 1174.9  | 805.084 | 966.131 |
| ENSMUSG000000002249 | 17_Tead3    | 1297.07 | 1.03506  | 1.02E-09 | 2.41E-08 | 1523.67 | 1735.57 | 1970.81 | 959.393 | 687.639 | 905.352 |
| ENSMUSG000000002250 | 15_Ppard    | 891.025 | 1.45931  | 1.62E-10 | 4.92E-09 | 1149.48 | 1248.22 | 1522.63 | 603.228 | 317.372 | 505.225 |
| ENSMUSG000000002257 | 7_Def6      | 404.293 | 1.23245  | 7.91E-10 | 1.94E-08 | 500.945 | 516.725 | 683.628 | 258.784 | 197.237 | 268.44  |
| ENSMUSG000000002265 | 15_Peg3     | 1257.07 | -1.09441 | 4.44E-12 | 1.99E-10 | 780.501 | 953.6   | 670.481 | 1791.65 | 1769.75 | 1576.45 |
| ENSMUSG000000002266 | 15_Zim1     | 108.291 | -1.22459 | 3.74E-05 | 0.00021  | 65.9823 | 82.6025 | 45.4159 | 182.14  | 131.79  | 141.817 |
| ENSMUSG000000002274 | 12_Metn     | 69.7069 | 0.02149  | 0.96032  | 0.97417  | 62.5096 | 86.2737 | 62.148  | 116.317 | 40.3439 | 50.6491 |
| ENSMUSG000000002279 | 18_Lmf1     | 221.291 | 0.51171  | 0.04123  | 0.08261  | 237.884 | 254.232 | 288.032 | 220.913 | 122.825 | 203.863 |

|                     |             |         |          |          |          |         |         |         |         |         |         |
|---------------------|-------------|---------|----------|----------|----------|---------|---------|---------|---------|---------|---------|
| ENSMUSG000000002280 | 10_Narfl    | 422.445 | 0.60436  | 0.00135  | 0.00465  | 461.008 | 558.026 | 510.331 | 405.758 | 277.924 | 321.622 |
| ENSMUSG000000002289 | 15_Angptl4  | 192.408 | 0.67958  | 0.00239  | 0.00755  | 250.906 | 188.15  | 271.3   | 143.368 | 133.583 | 167.142 |
| ENSMUSG000000002297 | 15_Dbf4     | 278.023 | 0.36039  | 0.16272  | 0.25554  | 333.384 | 242.301 | 362.132 | 168.615 | 302.131 | 259.577 |
| ENSMUSG000000002307 | 15_Daxx     | 1084.47 | 1.76007  | 1.56E-22 | 3.79E-20 | 1579.23 | 1363.86 | 2081.96 | 541.011 | 476.058 | 464.705 |
| ENSMUSG000000002308 | 15_Cd320    | 201.071 | 0.10522  | 0.65123  | 0.7451   | 220.52  | 196.41  | 209.152 | 250.669 | 173.927 | 155.746 |
| ENSMUSG000000002319 | 15_Ipo4     | 1045.69 | 1.02564  | 2.85E-11 | 1.08E-09 | 1225.01 | 1407    | 1575.21 | 728.562 | 598.882 | 739.477 |
| ENSMUSG000000002320 | 15_Tm9sf1   | 1532.22 | 0.37603  | 0.00379  | 0.01118  | 1655.64 | 1676.83 | 1859.66 | 1408.43 | 1177.14 | 1415.64 |
| ENSMUSG000000002324 | 7_Rec8      | 4.28437 | -0.85482 | 0.44693  | 0.56189  | 0.86819 | 3.67122 | 4.78062 | 6.3118  | 6.27571 | 3.79868 |
| ENSMUSG000000002325 | 14_Irf9     | 3648.66 | 0.73739  | 4.39E-08 | 6.08E-07 | 4304.48 | 4276.06 | 5103.31 | 2398.48 | 2885.93 | 2923.72 |
| ENSMUSG000000002326 | 5_Gmpr2     | 375.209 | -0.14387 | 0.35585  | 0.47259  | 376.794 | 320.314 | 372.888 | 376.905 | 416.887 | 387.465 |
| ENSMUSG000000002329 | 6_Mdp1      | 1085.07 | 0.01957  | 0.88335  | 0.92113  | 1108.68 | 1066.49 | 1100.74 | 941.36  | 1105.42 | 1187.72 |
| ENSMUSG000000002332 | 15_Dhrs1    | 2500.56 | -0.15617 | 0.36983  | 0.48719  | 2282.47 | 2728.64 | 2085.54 | 3214.51 | 2506.7  | 2185.51 |
| ENSMUSG000000002341 | 8_Ncan      | 49.0245 | -2.75011 | 0.02625  | 0.05692  | 15.6274 | 12.8493 | 9.56123 | 10.8202 | 225.029 | 20.2596 |
| ENSMUSG000000002342 | 17_Tmem161a | 548.076 | 0.29423  | 0.05441  | 0.10398  | 557.377 | 602.998 | 651.359 | 540.11  | 433.921 | 502.692 |
| ENSMUSG000000002343 | 11_Armc6    | 229.055 | 1.11242  | 1.54E-05 | 9.88E-05 | 246.566 | 323.985 | 369.303 | 178.534 | 103.998 | 151.947 |
| ENSMUSG000000002345 | 17_Borcs8   | 396.62  | 0.76315  | 7.14E-05 | 0.00037  | 443.644 | 486.437 | 567.698 | 340.837 | 238.477 | 302.628 |
| ENSMUSG000000002346 | 16_Slc25a42 | 406.338 | 0.24901  | 0.1599   | 0.25205  | 391.553 | 465.327 | 467.305 | 421.087 | 312.889 | 379.868 |
| ENSMUSG000000002365 | 9_Snx9      | 1358.87 | 0.11629  | 0.35852  | 0.47528  | 1358.71 | 1406.08 | 1474.82 | 1183.01 | 1282.04 | 1448.56 |
| ENSMUSG000000002372 | 8_Ranbp3    | 982.406 | 1.03069  | 3.35E-06 | 2.62E-05 | 1174.66 | 1279.42 | 1503.5  | 832.256 | 441.093 | 663.503 |
| ENSMUSG000000002379 | 6_Ndufa11   | 1054.54 | 1.11788  | 1.53E-06 | 1.33E-05 | 1284.92 | 1529.98 | 1516.65 | 893.57  | 434.817 | 667.302 |
| ENSMUSG000000002384 | 2_Bmp8b     | 4.7208  | -0.94271 | 0.37824  | 0.4957   | 2.60457 | 4.58903 | 2.39031 | 2.70506 | 7.17224 | 8.86359 |
| ENSMUSG000000002393 | 14_Nr2f6    | 545.158 | 0.84949  | 8.68E-06 | 5.98E-05 | 666.769 | 697.532 | 737.41  | 389.528 | 298.545 | 481.166 |
| ENSMUSG000000002395 | 14_Use1     | 1759.27 | 0.34598  | 0.05111  | 0.09878  | 1930.85 | 1991.64 | 1985.15 | 1917.89 | 1178.94 | 1551.13 |
| ENSMUSG000000002396 | 8_Ocl1      | 455.033 | 0.49033  | 0.00423  | 0.01226  | 495.736 | 517.642 | 580.845 | 395.84  | 314.682 | 425.452 |
| ENSMUSG000000002409 | 17_Dyrk1b   | 190.181 | 1.02625  | 1.81E-05 | 0.00011  | 219.652 | 270.753 | 276.081 | 160.5   | 110.273 | 103.831 |
| ENSMUSG000000002413 | 15_Braf     | 2499.72 | -0.22263 | 0.0931   | 0.1621   | 2420.51 | 2302.77 | 2196.69 | 2300.2  | 2867.1  | 2911.06 |
| ENSMUSG000000002416 | 13_Ndufb2   | 782.821 | -0.515   | 1.89E-05 | 0.00012  | 667.637 | 626.861 | 639.407 | 905.292 | 963.77  | 893.956 |
| ENSMUSG000000002428 | 12_Hltf     | 973.643 | -0.47282 | 0.00217  | 0.00697  | 856.034 | 792.984 | 797.168 | 945.868 | 1308.93 | 1140.87 |
| ENSMUSG000000002455 | 14_Prpf6    | 2182.02 | 0.2445   | 0.0257   | 0.05594  | 2386.65 | 2306.45 | 2404.65 | 1889.93 | 1939.2  | 2165.25 |
| ENSMUSG000000002458 | 13_Rgs19    | 181.669 | 0.19605  | 0.3107   | 0.42558  | 210.102 | 199.164 | 172.102 | 171.32  | 167.651 | 169.674 |
| ENSMUSG000000002459 | 17_Rgs20    | 153.765 | 0.17349  | 0.40702  | 0.52399  | 155.406 | 147.767 | 186.444 | 146.073 | 142.548 | 144.35  |
| ENSMUSG000000002475 | 15_Abhd3    | 65.1237 | -1.376   | 0.00028  | 0.0012   | 38.2003 | 49.5615 | 20.3176 | 112.711 | 91.4461 | 78.5061 |
| ENSMUSG000000002477 | 4_Snrpd     | 1037.01 | -0.2212  | 0.14616  | 0.23382  | 1013.18 | 857.23  | 1002.73 | 954.885 | 1256.94 | 1137.07 |
| ENSMUSG000000002486 | 15_Tchp     | 420.377 | 0.72192  | 6.62E-06 | 4.73E-05 | 477.504 | 501.122 | 591.601 | 311.081 | 300.338 | 340.615 |
| ENSMUSG000000002489 | 15_Tiam1    | 2955.96 | 0.71806  | 8.22E-07 | 7.72E-06 | 3438.03 | 3619.83 | 3970.3  | 1981    | 2076.36 | 2650.21 |
| ENSMUSG000000002496 | 9_Tsc2      | 1735.29 | 0.5203   | 7.00E-05 | 0.00036  | 1862.26 | 2138.49 | 2133.35 | 1506.72 | 1264.11 | 1506.81 |
| ENSMUSG000000002500 | 15_Rpl3l    | 64.6352 | -1.38941 | 0.00717  | 0.01908  | 22.5729 | 61.493  | 22.7079 | 130.744 | 43.93   | 106.363 |
| ENSMUSG000000002504 | 14_Slc9a3r2 | 286.648 | 0.18168  | 0.50212  | 0.6131   | 238.752 | 390.067 | 285.642 | 365.183 | 209.788 | 230.453 |
| ENSMUSG000000002524 | 15_Puf60    | 2832.64 | 0.61595  | 3.22E-05 | 0.00019  | 3195.8  | 3316.95 | 3771.91 | 2458.9  | 1847.75 | 2404.56 |
| ENSMUSG000000002546 | 16_Golga2   | 3764.53 | 0.59186  | 3.90E-06 | 2.98E-05 | 4224.6  | 4499.08 | 4853.52 | 3086.47 | 2631.32 | 3292.19 |
| ENSMUSG000000002550 | 16_Uck1     | 753.563 | 0.32272  | 0.02746  | 0.05909  | 862.111 | 783.806 | 866.487 | 743.891 | 580.055 | 685.029 |
| ENSMUSG000000002565 | 16_Scin     | 3957.1  | -0.22464 | 0.07343  | 0.13371  | 3768.81 | 3494.09 | 3684.66 | 3701.42 | 4407.34 | 4686.31 |
| ENSMUSG000000002578 | 15_lkzf4    | 156.641 | -1.14361 | 0.0006   | 0.00233  | 104.183 | 133.082 | 54.9771 | 254.273 | 237.581 | 155.746 |
| ENSMUSG000000002580 | 7_Mien1     | 1047.75 | -0.08209 | 0.49207  | 0.60379  | 937.643 | 1060.98 | 1055.32 | 1053.17 | 1065.08 | 1114.28 |
| ENSMUSG000000002588 | 12_Pon1     | 111.853 | -1.97315 | 1.29E-06 | 1.14E-05 | 57.3004 | 53.2327 | 25.0982 | 275.916 | 144.341 | 115.227 |
| ENSMUSG000000002602 | 16_Axl      | 3393.42 | 0.44447  | 0.00031  | 0.00131  | 3919    | 3939.22 | 3878.28 | 3252.38 | 2569.46 | 2802.16 |
| ENSMUSG000000002603 | 15_Tgfb1    | 406.547 | 0.83125  | 1.59E-05 | 0.0001   | 477.504 | 508.464 | 576.064 | 350.756 | 233.994 | 292.498 |
| ENSMUSG000000002608 | 8_Ccdc97    | 953.243 | 0.92968  | 8.05E-08 | 1.05E-06 | 1083.5  | 1229.86 | 1436.58 | 693.396 | 537.918 | 738.21  |
| ENSMUSG000000002617 | 14_Zfp40    | 129.787 | -0.89266 | 0.00088  | 0.00321  | 116.337 | 81.6847 | 74.0996 | 155.992 | 199.926 | 150.681 |
| ENSMUSG000000002625 | 9_Akap8l    | 883.566 | -0.04026 | 0.75917  | 0.83062  | 861.243 | 951.764 | 800.753 | 914.309 | 935.081 | 838.242 |
| ENSMUSG000000002633 | 4_Shh       | 0.50602 | -1.01212 | 0.76398  | NA       | 0.86819 | 0       | 0       | 0.90169 | 0       | 1.26623 |
| ENSMUSG000000002635 | 11_Pdcd2l   | 259.128 | 0.43885  | 0.02969  | 0.06292  | 268.27  | 300.122 | 326.277 | 247.964 | 176.617 | 235.518 |
| ENSMUSG000000002658 | 9_Gtf2f1    | 1704.47 | 0.71604  | 7.69E-06 | 5.40E-05 | 2035.9  | 1938.41 | 2381.94 | 1382.28 | 1049.84 | 1438.43 |
| ENSMUSG000000002660 | 7_Clpp      | 475.788 | 0.81401  | 0.00037  | 0.00154  | 577.345 | 581.889 | 660.92  | 459.86  | 242.96  | 331.751 |
| ENSMUSG000000002661 | 14_Alkbh7   | 206.774 | 0.30914  | 0.10586  | 0.18034  | 223.993 | 218.438 | 243.811 | 193.862 | 160.479 | 200.064 |
| ENSMUSG000000002664 | 2_Pspn      | 2.5857  | -0.20996 | 0.89319  | 0.92791  | 0.86819 | 2.75342 | 3.58546 | 4.50843 | 0       | 3.79868 |
| ENSMUSG000000002668 | 7_Dennd1c   | 87.8114 | 0.86475  | 0.00107  | 0.0038   | 118.074 | 121.15  | 100.393 | 65.823  | 55.5849 | 65.8438 |
| ENSMUSG000000002679 | 14_Med6     | 501.73  | -0.37527 | 0.01534  | 0.0363   | 474.031 | 392.821 | 443.402 | 508.551 | 607.848 | 583.731 |
| ENSMUSG000000002688 | 7_Prkd1     | 68.8834 | -1.2007  | 0.00018  | 0.00083  | 47.7504 | 44.9725 | 32.2692 | 94.677  | 113.859 | 79.7723 |
| ENSMUSG000000002699 | 12_Lcp2     | 63.1782 | 1.73378  | 9.52E-05 | 0.00048  | 138.91  | 58.7396 | 94.4172 | 42.3792 | 26.8959 | 17.7272 |
| ENSMUSG000000002718 | 14_Cse1l    | 2308.5  | -0.35482 | 0.01228  | 0.02999  | 2208.67 | 1931.06 | 1937.34 | 2197.41 | 2883.24 | 2693.26 |
| ENSMUSG000000002728 | 14_Naa20    | 1742.81 | -0.02469 | 0.87873  | 0.91817  | 1771.97 | 1490.52 | 1921.81 | 1466.14 | 2010.92 | 1795.51 |
| ENSMUSG000000002731 | 6_Prkra     | 761.919 | -0.35237 | 0.00745  | 0.0197   | 694.551 | 637.875 | 675.262 | 776.351 | 909.979 | 877.495 |
| ENSMUSG000000002732 | 14_Fkbp7    | 288.465 | -1.03443 | 3.87E-09 | 7.51E-08 | 202.288 | 195.493 | 169.712 | 402.152 | 414.197 | 346.946 |
| ENSMUSG000000002733 | 8_Plekha3   | 454.279 | -0.42874 | 0.00211  | 0.00679  | 376.794 | 412.095 | 372.888 | 540.11  | 517.298 | 506.491 |
| ENSMUSG000000002741 | 9_Ykt6      | 3527.17 | 0.06955  | 0.55119  | 0.65737  | 3585.62 | 3372.02 | 3878.28 | 3210.9  | 3380.82 | 3735.37 |
| ENSMUSG000000002748 | 7_Baz1b     | 3852.44 | 0.15685  | 0.24421  | 0.35237  | 4017.98 | 4009.89 | 4155.55 | 3057.62 | 3788.74 | 4084.85 |
| ENSMUSG000000002763 | 16_Pex6     | 588.792 | 1.14301  | 5.43E-07 | 5.46E-06 | 658.955 | 871.915 | 901.146 | 472.483 | 263.58  | 364.673 |
| ENSMUSG000000002767 | 13_Mrpl2    | 446.143 | 0.63445  | 0.00016  | 0.00076  | 503.549 | 537.834 | 588.016 | 408.464 | 317.372 | 321.622 |
| ENSMUSG000000002768 | 7_Mea1      | 1399.25 | 0.35205  | 0.01445  | 0.03446  | 1514.99 | 1524.48 | 1668.44 | 1405.73 | 1049.84 | 1232.04 |
| ENSMUSG000000002769 | 8_Gnmt      | 14.7808 | -0.21844 | 0.73878  | 0.81521  | 17.3638 | 9.17806 | 14.3418 | 20.7388 | 8.06878 | 18.9934 |
| ENSMUSG000000002771 | 10_Grin2d   | 58.6692 | 0.38231  | 0.2409   | 0.34848  | 52.9595 | 72.5066 | 74.0996 | 58.6096 | 45.7231 | 48.1166 |
| ENSMUSG000000002778 | 12_Kdelr1   | 2556.34 | 0.09155  | 0.46885  | 0.58212  | 2572.44 | 2523.97 | 2814.59 | 2305.61 | 2325.6  | 2795.83 |
| ENSMUSG000000002781 | 17_Tmem143  | 195.898 | 0.99332  | 0.00044  | 0.00176  | 210.102 | 288.191 | 284.447 | 178.534 | 88.7565 | 125.356 |
| ENSMUSG000000002797 | 9_Ggct      | 180.936 | -0.088   | 0.69863  | 0.78432  | 186.661 | 145.013 | 194.81  | 154.188 | 212.478 | 192.466 |
| ENSMUSG000000002799 | 5_Jag2      | 1419.16 | 2.0506   | 8.71E-17 | 1.09E-14 | 1885.71 | 2270.65 | 2702.24 | 691.593 | 337.992 | 626.782 |
| ENSMUSG000000002803 | 13_Btbd6    | 372.328 | 0.31372  | 0.06651  | 0.12315  | 432.358 | 425.862 | 380.059 | 385.921 | 308.407 | 301.362 |
| ENSMUSG000000002804 | 3_Nudt14    | 358.405 | 0.60111  | 0.0159   | 0.03742  | 434.094 | 419.437 | 442.207 | 370.593 | 180.203 | 303.894 |
| ENSMUSG000000002808 | 6_Epdr1     | 268.485 | -1.21393 | 4.31E-06 | 3.25E-05 | 167.56  | 204.671 | 112.344 | 471.582 | 355.923 | 298.83  |

|                     |             |         |          |          |          |         |         |         |         |         |         |
|---------------------|-------------|---------|----------|----------|----------|---------|---------|---------|---------|---------|---------|
| ENSMUSG000000002812 | 4_Flii      | 4688.04 | 0.94451  | 4.54E-10 | 1.20E-08 | 5348.04 | 6162.15 | 6998.82 | 3162.21 | 2790    | 3666.99 |
| ENSMUSG000000002814 | 15_Top3a    | 347.522 | 0.56624  | 0.00073  | 0.00275  | 401.103 | 377.218 | 466.11  | 275.916 | 260.89  | 303.894 |
| ENSMUSG000000002820 | 5_Atg4d     | 1034.18 | 1.08229  | 4.23E-07 | 4.38E-06 | 1211.12 | 1388.64 | 1614.65 | 809.714 | 461.713 | 719.217 |
| ENSMUSG000000002825 | 6_Qtrt1     | 172.325 | 1.04726  | 7.04E-05 | 0.00037  | 239.62  | 202.835 | 254.568 | 146.975 | 79.7912 | 110.162 |
| ENSMUSG000000002831 | 13_Plin4    | 391.773 | -0.43    | 0.13743  | 0.22227  | 293.448 | 448.807 | 259.348 | 642.902 | 375.646 | 330.485 |
| ENSMUSG000000002833 | 10_Hdgfrp2  | 847.675 | 0.90941  | 3.06E-07 | 3.30E-06 | 953.271 | 1201.41 | 1162.88 | 604.129 | 474.265 | 690.094 |
| ENSMUSG000000002835 | 8_Chaf1a    | 482.845 | 1.14086  | 2.77E-08 | 4.09E-07 | 711.046 | 573.628 | 706.336 | 254.275 | 261.787 | 399.898 |
| ENSMUSG000000002844 | 8_Adprh     | 658.471 | 0.42314  | 0.00442  | 0.01273  | 709.31  | 739.751 | 813.9   | 604.129 | 488.609 | 595.127 |
| ENSMUSG000000002845 | 14_Tmem39a  | 599.972 | -0.00201 | 0.98754  | 0.99122  | 619.887 | 600.245 | 577.259 | 578.882 | 591.71  | 631.847 |
| ENSMUSG000000002846 | 9_Timmdc1   | 397.938 | 0.0801   | 0.61636  | 0.71502  | 375.057 | 390.067 | 462.525 | 399.447 | 360.405 | 400.128 |
| ENSMUSG000000002847 | 6_Pla1a     | 85.8078 | 1.87405  | 2.32E-06 | 1.90E-05 | 164.088 | 84.4381 | 156.565 | 55.0028 | 26.8959 | 27.857  |
| ENSMUSG000000002870 | 8_Mcm2      | 1102.23 | 1.3626   | 2.34E-15 | 2.35E-13 | 1559.27 | 1433.61 | 1766.44 | 563.553 | 530.746 | 759.736 |
| ENSMUSG000000002871 | 14_Tpra1    | 569.458 | 0.43914  | 0.037    | 0.0755   | 657.219 | 699.368 | 609.529 | 617.655 | 350.543 | 482.432 |
| ENSMUSG000000002881 | 14_Nab1     | 3362.04 | 0.1184   | 0.41565  | 0.53162  | 3593.43 | 3021.42 | 3885.45 | 2807.85 | 3537.71 | 3326.38 |
| ENSMUSG000000002885 | 14_Adgre5   | 624.311 | 0.31116  | 0.0275   | 0.05915  | 719.728 | 695.697 | 659.725 | 609.539 | 564.814 | 496.361 |
| ENSMUSG000000002897 | 5_Ilf17ra   | 462.819 | 0.87909  | 1.02E-06 | 9.34E-06 | 619.887 | 550.683 | 626.261 | 296.655 | 283.304 | 400.128 |
| ENSMUSG000000002900 | 15_Lamb1    | 4347.93 | 0.24171  | 0.05544  | 0.10558  | 4429.5  | 5141.55 | 4560.71 | 3921.43 | 3607.64 | 4426.73 |
| ENSMUSG000000002908 | 15_Kcnn1    | 30.0008 | -0.18346 | 0.65777  | 0.75042  | 26.9138 | 32.1232 | 25.0982 | 33.3624 | 29.5855 | 32.9219 |
| ENSMUSG000000002910 | 10_Ardc2    | 149.162 | 0.72919  | 0.00083  | 0.00305  | 173.638 | 193.657 | 191.225 | 128.941 | 98.6184 | 108.896 |
| ENSMUSG000000002930 | 6_Ppp1r17   | 1.80241 | -0.98425 | 0.61041  | NA       | 0.86819 | 2.75342 | 0       | 3.60674 | 3.58612 | 0       |
| ENSMUSG000000002944 | 15_Cd36     | 114.789 | -1.29449 | 8.05E-06 | 5.60E-05 | 83.3461 | 65.1642 | 50.1965 | 200.174 | 135.376 | 154.48  |
| ENSMUSG000000002948 | 18_Map2k7   | 1584.31 | 0.28665  | 0.04272  | 0.08506  | 1752    | 1772.28 | 1699.51 | 1665.41 | 1239.01 | 1377.65 |
| ENSMUSG000000002949 | 14_Timm44   | 933.694 | 0.3669   | 0.00671  | 0.01804  | 1076.55 | 990.312 | 1087.59 | 852.093 | 718.121 | 877.495 |
| ENSMUSG000000002957 | 11_Ap2a2    | 2120.02 | 0.39396  | 0.00063  | 0.00244  | 2293.75 | 2478.08 | 2452.46 | 2004.45 | 1733.89 | 1757.52 |
| ENSMUSG000000002963 | 7_Pnkp      | 539.222 | 0.82729  | 8.17E-07 | 7.69E-06 | 713.651 | 647.971 | 706.336 | 417.48  | 315.579 | 434.316 |
| ENSMUSG000000002968 | 14_Mnd25    | 540.012 | 1.3349   | 4.88E-09 | 9.22E-08 | 629.437 | 837.956 | 853.34  | 397.643 | 224.193 | 297.563 |
| ENSMUSG000000002980 | 14_Bcam     | 2370.56 | 1.48484  | 6.78E-11 | 2.32E-09 | 3003.93 | 3533.55 | 3941.62 | 1615.82 | 807.774 | 1320.67 |
| ENSMUSG000000002981 | 9_Clptm1    | 2253.76 | 0.39461  | 0.00074  | 0.00279  | 2422.25 | 2542.32 | 2715.39 | 2016.17 | 1775.13 | 2051.29 |
| ENSMUSG000000002983 | 16_Relb     | 293.722 | 0.8565   | 0.00055  | 0.00216  | 351.616 | 324.903 | 458.939 | 257.882 | 146.134 | 222.856 |
| ENSMUSG000000002984 | 16_Tomm40   | 604.889 | 1.23275  | 4.19E-09 | 8.07E-08 | 782.238 | 748.929 | 1014.69 | 422.89  | 268.063 | 392.53  |
| ENSMUSG000000002985 | 15_Apoe     | 10064   | -0.04525 | 0.86255  | 0.90656  | 8882.44 | 12785.9 | 8050.56 | 15105   | 7413.41 | 8146.9  |
| ENSMUSG000000002992 | 16_Apoc2    | 6.72841 | 4.24123  | 0.00159  | 0.00534  | 19.1001 | 11.9315 | 7.17092 | 0.90169 | 0       | 1.26623 |
| ENSMUSG000000002996 | 17_Hbp1     | 3424.41 | -0.26938 | 0.00567  | 0.01565  | 3167.15 | 3063.63 | 3085.89 | 3578.79 | 3901.7  | 3749.3  |
| ENSMUSG000000002997 | 15_Prkar2b  | 800.536 | -0.29753 | 0.02384  | 0.05259  | 699.76  | 699.368 | 756.533 | 810.615 | 961.977 | 874.963 |
| ENSMUSG000000003031 | 14_Cdkn1b   | 2026.37 | 0.0347   | 0.73447  | 0.81175  | 2008.99 | 1992.56 | 2151.28 | 1950.35 | 2025.26 | 2029.76 |
| ENSMUSG000000003032 | 8_Klf4      | 15045   | 0.69173  | 5.05E-07 | 5.11E-06 | 17025.2 | 17245.6 | 21481.7 | 10800.4 | 10904.5 | 12813   |
| ENSMUSG000000003033 | 14_Ap1m1    | 712.087 | 0.43545  | 0.00431  | 0.01245  | 810.888 | 823.272 | 822.266 | 701.511 | 518.195 | 596.393 |
| ENSMUSG000000003037 | 16_Rab8a    | 1655.67 | 0.32929  | 0.01761  | 0.04074  | 1798.89 | 1674.08 | 2058.06 | 1473.35 | 1315.21 | 1614.44 |
| ENSMUSG000000003038 | 15_Hmgn2    | 2472.31 | -0.18244 | 0.13354  | 0.21745  | 2459.58 | 2199.98 | 2288.72 | 2378.65 | 2876.97 | 2629.95 |
| ENSMUSG000000003039 | 8_Fam32a    | 2123.14 | -0.03096 | 0.79329  | 0.85679  | 2094.94 | 2001.73 | 2205.06 | 2327.25 | 1959.82 | 2150.05 |
| ENSMUSG000000003051 | 13_Elf3     | 14941.9 | 1.03397  | 3.99E-10 | 1.08E-08 | 17858.6 | 18689.3 | 23685.6 | 9514.59 | 8279.46 | 11624   |
| ENSMUSG000000003062 | 12_Stard3nl | 399.142 | -0.21997 | 0.1694   | 0.26378  | 382.871 | 377.218 | 346.595 | 415.677 | 485.023 | 387.465 |
| ENSMUSG000000003068 | 15_Stk11    | 1508.59 | 0.81582  | 8.85E-06 | 6.08E-05 | 1854.45 | 1840.2  | 2077.18 | 1285.8  | 802.395 | 1191.52 |
| ENSMUSG000000003070 | 6_Etna2     | 16.4738 | 0.22054  | 0.73523  | 0.81234  | 13.891  | 15.6027 | 23.9031 | 24.3455 | 7.17224 | 13.9285 |
| ENSMUSG000000003072 | 15_Atp5d    | 2393.55 | 1.09113  | 2.94E-06 | 2.33E-05 | 3072.52 | 3190.29 | 3511.36 | 2146.91 | 1000.53 | 1439.7  |
| ENSMUSG000000003099 | 11_Ppp5c    | 1209.37 | 0.49828  | 0.00084  | 0.00307  | 1315.31 | 1428.11 | 1504.7  | 1100.96 | 834.67  | 1072.49 |
| ENSMUSG000000003119 | 14_Cdk12    | 1196.72 | 0.21299  | 0.09626  | 0.16663  | 1260.61 | 1195.9  | 1398.33 | 1016.2  | 1143.08 | 1166.19 |
| ENSMUSG000000003123 | 15_Lipe     | 751.632 | 1.32353  | 2.38E-08 | 3.60E-07 | 925.489 | 1072.91 | 1222.64 | 478.795 | 274.338 | 535.614 |
| ENSMUSG000000003131 | 6_Pafah1b2  | 3057.69 | -0.30052 | 0.01105  | 0.02748  | 2733.93 | 2544.16 | 2943.66 | 3082.86 | 3561.92 | 3479.59 |
| ENSMUSG000000003134 | 10_Tbc1d8   | 703.493 | 0.46919  | 0.00027  | 0.00116  | 809.152 | 764.532 | 877.243 | 594.211 | 569.297 | 606.523 |
| ENSMUSG000000003135 | 15_Cnot11   | 612.521 | -0.11517 | 0.45173  | 0.56638  | 573.873 | 559.861 | 631.041 | 551.832 | 712.742 | 645.776 |
| ENSMUSG000000003153 | 10_Slc2a3   | 84.5505 | -1.49095 | 6.60E-06 | 4.72E-05 | 50.3549 | 46.8081 | 35.8546 | 161.402 | 125.514 | 87.3697 |
| ENSMUSG000000003154 | 15_Foxj2    | 746.659 | 0.36223  | 0.01616  | 0.03792  | 768.347 | 818.683 | 933.415 | 718.643 | 577.366 | 663.503 |
| ENSMUSG000000003161 | 15_Sri      | 3567.55 | -0.23477 | 0.01781  | 0.04109  | 3430.21 | 3123.29 | 3279.5  | 3747.4  | 3873.01 | 3951.89 |
| ENSMUSG000000003166 | 19_Dgcr2    | 3583.88 | 0.5791   | 3.68E-05 | 0.00021  | 4006.69 | 4346.73 | 4527.24 | 3195.57 | 2398.22 | 3028.81 |
| ENSMUSG000000003184 | 14_Irf3     | 907.892 | 0.69501  | 1.28E-06 | 1.14E-05 | 989.735 | 1162.86 | 1214.28 | 701.511 | 629.364 | 749.606 |
| ENSMUSG000000003190 | 11_Bcl2l12  | 88.2379 | 1.74333  | 1.38E-07 | 1.66E-06 | 114.601 | 150.52  | 142.223 | 51.3961 | 25.1029 | 45.5842 |
| ENSMUSG000000003198 | 9_Zfp959    | 161.591 | -0.56102 | 0.00683  | 0.01831  | 133.701 | 139.506 | 118.32  | 183.944 | 214.271 | 179.804 |
| ENSMUSG000000003199 | 16_Mpnd     | 923.085 | 0.72252  | 0.00222  | 0.0071   | 1093.05 | 1178.46 | 1177.23 | 956.688 | 451.851 | 681.23  |
| ENSMUSG000000003200 | 9_Sh3gl1    | 1118.86 | 1.01298  | 3.96E-09 | 7.67E-08 | 1364.79 | 1548.34 | 1575.21 | 856.601 | 575.573 | 792.658 |
| ENSMUSG000000003206 | 6_Ebi3      | 13.6359 | 1.89799  | 0.00567  | 0.01564  | 19.9683 | 19.2739 | 25.0982 | 2.70506 | 7.17224 | 7.59736 |
| ENSMUSG000000003208 | 8_Ccdc94    | 142.852 | 0.76271  | 0.00401  | 0.01176  | 159.747 | 160.616 | 218.713 | 116.317 | 78.8947 | 122.824 |
| ENSMUSG000000003226 | 6_Ranbp2    | 3868.02 | -0.553   | 0.00024  | 0.00106  | 3446.71 | 2972.77 | 2986.69 | 3811.42 | 5324.5  | 4666.05 |
| ENSMUSG000000003227 | 4_Edar      | 100.868 | 0.11354  | 0.74792  | 0.82204  | 105.919 | 138.589 | 69.3189 | 122.629 | 63.6537 | 105.097 |
| ENSMUSG000000003228 | 8_Grk5      | 229.98  | -0.50988 | 0.01019  | 0.02569  | 182.32  | 223.027 | 163.736 | 280.424 | 285.993 | 244.382 |
| ENSMUSG000000003233 | 11_Dv13     | 500.961 | 1.06848  | 5.42E-10 | 1.38E-08 | 608.6   | 694.779 | 732.629 | 377.806 | 277.924 | 314.024 |
| ENSMUSG000000003234 | 15_Abcf3    | 1493.25 | 0.24289  | 0.01965  | 0.04458  | 1638.27 | 1573.12 | 1644.53 | 1394.91 | 1325.97 | 1382.72 |
| ENSMUSG000000003235 | 12_Eif2b5   | 2048.97 | 0.20132  | 0.07104  | 0.13009  | 2269.44 | 2057.72 | 2246.89 | 1903.46 | 1796.65 | 2019.63 |
| ENSMUSG000000003269 | 18_Cyth2    | 882.655 | 0.30313  | 0.01192  | 0.02933  | 939.38  | 962.778 | 1023.05 | 811.517 | 745.017 | 814.184 |
| ENSMUSG000000003271 | 15_Sult2b1  | 41.0408 | 1.81994  | 0.00012  | 0.00057  | 56.4322 | 43.1369 | 92.0269 | 18.9354 | 11.6549 | 24.0583 |
| ENSMUSG000000003273 | 13_Carl1    | 81.9593 | -0.25987 | 0.40009  | 0.51757  | 60.7732 | 96.3696 | 66.9286 | 103.694 | 90.5496 | 73.4412 |
| ENSMUSG000000003279 | 16_Dlgap1   | 80.6499 | -1.30097 | 0.00173  | 0.00577  | 59.0368 | 55.0683 | 25.0982 | 170.419 | 93.2392 | 81.0385 |
| ENSMUSG000000003282 | 9_Plag1     | 94.1121 | -0.4008  | 0.14475  | 0.232    | 84.2143 | 89.9449 | 69.3189 | 127.138 | 106.687 | 87.3697 |
| ENSMUSG000000003283 | 13_Hck      | 94.3741 | 2.30206  | 4.69E-10 | 1.23E-08 | 223.124 | 98.2052 | 149.394 | 36.9691 | 26.8959 | 31.6557 |
| ENSMUSG000000003299 | 9_Mrp14     | 553.197 | 0.92258  | 7.57E-06 | 5.32E-05 | 682.396 | 697.532 | 793.582 | 491.419 | 289.579 | 364.673 |
| ENSMUSG000000003308 | 14_Keap1    | 1829.36 | 0.93609  | 1.91E-07 | 2.20E-06 | 2161.79 | 2223.84 | 2821.76 | 1265.97 | 1002.32 | 1500.48 |
| ENSMUSG000000003309 | 13_Ap1m2    | 1663.31 | 0.7162   | 9.08E-07 | 8.42E-06 | 2022.88 | 1845.71 | 2334.14 | 1220.88 | 1136.8  | 1419.44 |
| ENSMUSG000000003316 | 14_Glg1     | 3962.92 | 0.17963  | 0.06829  | 0.12595  | 4019.71 | 4410.06 | 4197.38 | 3666.25 | 3646.19 | 3837.93 |
| ENSMUSG000000003341 | 8_Atp8b3    | 5.1126  | -0.23269 | 0.81362  | 0.87128  | 2.60457 | 5.50683 | 5.97577 | 4.50843 | 4.48265 | 7.59736 |

|                     |             |         |          |          |          |         |         |         |         |         |         |
|---------------------|-------------|---------|----------|----------|----------|---------|---------|---------|---------|---------|---------|
| ENSMUSG000000003344 | 14_Btbd2    | 746.853 | 1.49636  | 3.41E-08 | 4.89E-07 | 929.83  | 1109.63 | 1269.25 | 553.635 | 231.305 | 387.465 |
| ENSMUSG000000003345 | 15_Csnk1g2  | 1851.68 | 1.07469  | 1.45E-06 | 1.27E-05 | 2230.38 | 2475.32 | 2827.73 | 1542.78 | 785.361 | 1248.5  |
| ENSMUSG000000003346 | 14_Abhd17a  | 671.468 | 1.35293  | 3.58E-07 | 3.77E-06 | 813.493 | 924.23  | 1158.1  | 531.994 | 237.581 | 363.407 |
| ENSMUSG000000003348 | 9_Mob3a     | 468.762 | 0.59341  | 0.00022  | 0.00097  | 579.082 | 525.903 | 586.821 | 424.694 | 326.337 | 369.738 |
| ENSMUSG000000003352 | 13_Cacnb3   | 182.216 | 0.00434  | 0.98565  | 0.99015  | 177.979 | 211.095 | 158.955 | 223.618 | 181.099 | 140.551 |
| ENSMUSG000000003354 | 5_Ccdc65    | 10.3653 | -0.65618 | 0.38199  | 0.49959  | 12.1546 | 3.67122 | 8.36608 | 13.5253 | 14.3445 | 10.1298 |
| ENSMUSG000000003355 | 6_Fkbp11    | 29.3227 | 0.49559  | 0.30509  | 0.42007  | 36.4639 | 31.2054 | 34.6595 | 22.5421 | 14.3445 | 36.7206 |
| ENSMUSG000000003360 | 14_Ddx23    | 1690.45 | 0.59152  | 1.37E-06 | 1.20E-05 | 1967.31 | 2063.23 | 2065.23 | 1428.27 | 1194.18 | 1424.51 |
| ENSMUSG000000003363 | 15_Pld3     | 1673.06 | 1.11042  | 1.68E-07 | 1.98E-06 | 2015.93 | 2426.68 | 2417.8  | 1329.99 | 717.224 | 1130.74 |
| ENSMUSG000000003378 | 9_Grik5     | 318.847 | 0.25699  | 0.35033  | 0.46708  | 355.957 | 415.766 | 270.105 | 414.775 | 234.891 | 221.59  |
| ENSMUSG000000003379 | 7_Cd79a     | 7.2772  | 0.93507  | 0.29959  | 0.41431  | 12.1546 | 4.58903 | 11.9515 | 7.21348 | 2.68959 | 5.06491 |
| ENSMUSG000000003380 | 11_Rabac1   | 1345.97 | 0.63618  | 0.01586  | 0.03737  | 1439.46 | 1729.15 | 1746.12 | 1569.83 | 658.053 | 933.209 |
| ENSMUSG000000003382 | 18_Etv3     | 1491.84 | 0.31983  | 0.01058  | 0.02652  | 1613.96 | 1647.46 | 1706.68 | 1331.79 | 1186.11 | 1465.02 |
| ENSMUSG000000003402 | 13_Prkcsh   | 1437.98 | 0.96933  | 1.62E-08 | 2.62E-07 | 1679.94 | 1965.02 | 2065.23 | 1075.71 | 759.361 | 1082.62 |
| ENSMUSG000000003410 | 7_Elavl3    | 17.2435 | -1.73246 | 0.04939  | 0.09609  | 10.4183 | 6.42464 | 7.17092 | 59.5112 | 16.1376 | 3.79868 |
| ENSMUSG000000003411 | 10_Rab3b    | 51.9039 | -1.1488  | 0.02751  | 0.05917  | 23.4411 | 58.7396 | 14.3418 | 97.382  | 68.1363 | 49.3828 |
| ENSMUSG000000003418 | 11_St8sia6  | 3901.52 | -0.28392 | 0.04526  | 0.08919  | 3542.21 | 3315.11 | 3699    | 3538.21 | 4749.82 | 4564.75 |
| ENSMUSG000000003420 | 7_Fcgrt     | 794.5   | 0.04222  | 0.84966  | 0.89803  | 789.183 | 964.614 | 664.506 | 1036.94 | 620.399 | 691.36  |
| ENSMUSG000000003421 | 12_Nosip    | 762.345 | 0.99079  | 2.40E-05 | 0.00014  | 961.953 | 943.504 | 1137.79 | 687.084 | 339.785 | 503.958 |
| ENSMUSG000000003423 | 14_Pih1d1   | 622.592 | 0.87667  | 1.16E-05 | 7.73E-05 | 722.333 | 827.861 | 870.072 | 568.062 | 392.68  | 354.544 |
| ENSMUSG000000003429 | 10_Rps11    | 11430.2 | -0.24228 | 0.00873  | 0.02252  | 10607.5 | 10259.2 | 10550.8 | 11767   | 12715.5 | 12681.3 |
| ENSMUSG000000003435 | 8_Supt5     | 3600.31 | 0.79661  | 1.62E-07 | 1.92E-06 | 4254.99 | 4503.67 | 4949.13 | 2714.07 | 2143.6  | 3036.41 |
| ENSMUSG000000003436 | 11_Dil3     | 2.70188 | 0.84848  | 0.51976  | 0.6298   | 3.47275 | 4.58903 | 2.39031 | 1.80337 | 2.68959 | 1.26623 |
| ENSMUSG000000003437 | 14_Paf1     | 1535.72 | 0.06079  | 0.67656  | 0.76588  | 1557.53 | 1471.24 | 1674.41 | 1269.57 | 1532.17 | 1709.41 |
| ENSMUSG000000003438 | 17_Timm50   | 595.482 | 0.91694  | 4.70E-08 | 6.48E-07 | 747.51  | 691.108 | 897.561 | 452.646 | 358.612 | 425.452 |
| ENSMUSG000000003444 | 8_Med29     | 342.918 | 0.37958  | 0.05897  | 0.11126  | 369.848 | 383.643 | 409.938 | 360.674 | 229.512 | 303.894 |
| ENSMUSG000000003452 | 15_Bicd1    | 96.7283 | -1.0838  | 0.00041  | 0.00167  | 65.1141 | 75.2601 | 45.4159 | 149.68  | 146.134 | 98.7657 |
| ENSMUSG000000003458 | 12_Ncstn    | 2666.1  | 0.61849  | 2.38E-08 | 3.60E-07 | 3131.56 | 3104.94 | 3450.41 | 2160.44 | 1962.51 | 2186.77 |
| ENSMUSG000000003464 | 13_Pex19    | 1942.62 | -0.00088 | 0.99342  | 0.99541  | 1948.21 | 1916.38 | 1961.25 | 2041.42 | 1811.89 | 1976.58 |
| ENSMUSG000000003469 | 9_Phyhip    | 4155.8  | 1.21348  | 8.15E-11 | 2.71E-09 | 5144.88 | 5472.87 | 6802.82 | 2629.31 | 1888.99 | 2995.89 |
| ENSMUSG000000003476 | 15_Chrh2    | 33.903  | -1.36317 | 0.00492  | 0.01391  | 15.6274 | 25.6986 | 15.537  | 70.3315 | 33.1716 | 43.0517 |
| ENSMUSG000000003477 | 5_Inmt      | 256.028 | -0.51459 | 0.09448  | 0.16395  | 241.356 | 236.794 | 154.175 | 449.941 | 219.65  | 234.252 |
| ENSMUSG000000003484 | 4_Cyp4f18   | 7.39646 | 5.33689  | 0.0006   | 0.00231  | 29.5184 | 9.17806 | 4.78062 | 0.90169 | 0       | 0       |
| ENSMUSG000000003500 | 13_Impdh1   | 235.708 | -0.1155  | 0.71453  | 0.79632  | 263.061 | 223.945 | 192.42  | 373.298 | 213.374 | 148.149 |
| ENSMUSG000000003518 | 13_Dusp3    | 964.469 | -0.36844 | 0.00428  | 0.0124   | 843.879 | 896.696 | 785.216 | 1183.01 | 1049.84 | 1028.18 |
| ENSMUSG000000003526 | 11_Prodh    | 559.357 | 0.29637  | 0.1203   | 0.20018  | 563.454 | 661.738 | 625.066 | 623.966 | 400.749 | 481.166 |
| ENSMUSG000000003527 | 8_Dgcr14    | 419.455 | 0.59566  | 0.00056  | 0.00218  | 474.899 | 450.643 | 591.601 | 364.281 | 304.82  | 330.485 |
| ENSMUSG000000003528 | 14_Slc25a1  | 1636.67 | 0.60096  | 6.82E-06 | 4.85E-05 | 1826.67 | 1952.17 | 2139.33 | 1395.81 | 1144.87 | 1361.19 |
| ENSMUSG000000003531 | 14_Dgcr6    | 750.831 | 0.64997  | 0.0006   | 0.00234  | 858.638 | 898.532 | 995.563 | 747.497 | 480.54  | 524.218 |
| ENSMUSG000000003534 | 17_Ddr1     | 4410.68 | 1.32439  | 1.13E-14 | 9.62E-13 | 5354.12 | 6253.93 | 7303.59 | 2782.6  | 2008.23 | 2761.64 |
| ENSMUSG000000003541 | 6_Ier3      | 1622.65 | 0.82286  | 6.64E-11 | 2.28E-09 | 2109.7  | 2017.34 | 2093.91 | 1324.58 | 1087.49 | 1102.88 |
| ENSMUSG000000003545 | 2_Fosb      | 71.9806 | 0.99284  | 0.00647  | 0.01749  | 106.787 | 77.0957 | 103.978 | 70.3315 | 33.1716 | 40.5193 |
| ENSMUSG000000003546 | 9_Klc4      | 762.82  | 0.9663   | 3.45E-06 | 2.68E-05 | 878.607 | 1002.24 | 1147.35 | 662.739 | 390.887 | 495.095 |
| ENSMUSG000000003549 | 9_Ercc1     | 555.094 | 1.43929  | 1.31E-15 | 1.37E-13 | 721.465 | 804.915 | 907.122 | 347.149 | 244.753 | 305.161 |
| ENSMUSG000000003555 | 7_Cyp17a1   | 52.2752 | 0.31174  | 0.40136  | 0.51894  | 41.673  | 55.9861 | 76.4899 | 54.1011 | 38.5508 | 46.8504 |
| ENSMUSG000000003559 | 7_As3mt     | 638.124 | -0.42641 | 0.00174  | 0.0058   | 503.549 | 603.916 | 525.868 | 733.07  | 734.259 | 728.08  |
| ENSMUSG000000003573 | 15_Homer3   | 428.463 | 0.88527  | 1.05E-05 | 7.09E-05 | 520.913 | 560.779 | 586.821 | 382.315 | 237.581 | 282.369 |
| ENSMUSG000000003575 | 13_Crtc1    | 515.515 | 0.56873  | 0.00189  | 0.00621  | 582.554 | 706.71  | 558.137 | 493.222 | 352.337 | 400.128 |
| ENSMUSG000000003581 | 14_Rnf215   | 437.57  | 0.53554  | 0.00205  | 0.00665  | 498.34  | 524.985 | 530.648 | 423.792 | 299.441 | 348.212 |
| ENSMUSG000000003585 | 13_Sec14l2  | 66.043  | -0.65814 | 0.05341  | 0.1023   | 63.3778 | 49.5615 | 40.6352 | 103.694 | 74.412  | 61.5776 |
| ENSMUSG000000003604 | 14_Aven     | 98.3862 | -0.73172 | 0.00514  | 0.01444  | 80.7415 | 74.3423 | 66.9286 | 128.941 | 138.066 | 101.298 |
| ENSMUSG000000003617 | 16_Cp       | 2175.36 | -0.93559 | 1.34E-13 | 9.07E-12 | 1531.48 | 1620.84 | 1327.82 | 3036.88 | 2876.07 | 2659.08 |
| ENSMUSG000000003623 | 4_Crot      | 6140.1  | -0.41296 | 0.00162  | 0.00543  | 5575.51 | 4908.42 | 5317.24 | 6006.13 | 7647.41 | 7385.9  |
| ENSMUSG000000003644 | 15_Rps6ka1  | 1122.64 | 1.09553  | 8.47E-09 | 1.48E-07 | 1411.67 | 1528.15 | 1646.92 | 746.596 | 526.263 | 876.229 |
| ENSMUSG000000003657 | 8_Calb2     | 31.7977 | -1.50816 | 0.04127  | 0.08266  | 26.9138 | 11.9315 | 10.7564 | 92.8736 | 39.4473 | 8.86359 |
| ENSMUSG000000003660 | 10_Snrnp200 | 4351.12 | 0.24467  | 0.03621  | 0.07417  | 4643.07 | 4665.21 | 4847.55 | 3584.2  | 3950.11 | 4416.6  |
| ENSMUSG000000003662 | 10_Ciao1    | 789.019 | 0.14298  | 0.2294   | 0.33549  | 830.856 | 824.189 | 829.437 | 788.975 | 719.914 | 740.743 |
| ENSMUSG000000003665 | 6_Has1      | 18.4531 | 1.14153  | 0.0545   | 0.10408  | 33.8593 | 13.7671 | 28.6837 | 12.6236 | 11.6549 | 10.1298 |
| ENSMUSG000000003680 | 15_Taf6l    | 638.165 | 0.28401  | 0.0286   | 0.06105  | 723.201 | 659.902 | 719.483 | 604.129 | 548.677 | 573.601 |
| ENSMUSG000000003721 | 14_Insig2   | 2160.23 | -0.26345 | 0.01126  | 0.02792  | 1950.82 | 1932.9  | 2006.66 | 2215.44 | 2420.63 | 2434.95 |
| ENSMUSG000000003731 | 13_Kpna6    | 2305.97 | -0.12403 | 0.30083  | 0.41552  | 2216.49 | 2126.56 | 2276.77 | 2142.4  | 2475.32 | 2598.3  |
| ENSMUSG000000003746 | 15_Man1a    | 646.49  | -0.45114 | 0.00103  | 0.00367  | 549.563 | 561.697 | 528.258 | 779.958 | 793.43  | 666.035 |
| ENSMUSG000000003752 | 9_Itpkc     | 1923.98 | 0.77129  | 2.50E-06 | 2.03E-05 | 2231.24 | 2256.88 | 2790.68 | 1549.1  | 1154.73 | 1561.26 |
| ENSMUSG000000003762 | 13_Adck4    | 300.641 | 0.90501  | 2.47E-06 | 2.01E-05 | 344.671 | 373.547 | 458.939 | 237.143 | 194.547 | 194.999 |
| ENSMUSG000000003778 | 14_Brd8     | 1705.05 | -0.1087  | 0.3961   | 0.5136   | 1706.86 | 1527.23 | 1688.75 | 1589.67 | 1952.64 | 1765.12 |
| ENSMUSG000000003779 | 15_Kif20a   | 743.142 | 0.24879  | 0.14611  | 0.23376  | 850.825 | 709.464 | 860.511 | 550.028 | 754.879 | 733.145 |
| ENSMUSG000000003808 | 18_Farsa    | 963.996 | 0.72276  | 3.32E-06 | 2.60E-05 | 1134.72 | 1094.02 | 1372.04 | 701.511 | 653.571 | 828.112 |
| ENSMUSG000000003809 | 14_Gcdh     | 398.715 | -0.15332 | 0.30107  | 0.41576  | 394.158 | 353.355 | 384.84  | 391.331 | 433.024 | 435.582 |
| ENSMUSG000000003810 | 12_Mast2    | 1243.72 | 0.42413  | 0.00057  | 0.00221  | 1387.37 | 1424.43 | 1464.06 | 1154.16 | 961.081 | 1071.23 |
| ENSMUSG000000003812 | 13_Dnase2a  | 657.652 | 0.38971  | 0.00486  | 0.01377  | 735.356 | 706.71  | 795.973 | 608.638 | 515.505 | 583.731 |
| ENSMUSG000000003813 | 15_Rad23a   | 1147.87 | 0.61286  | 0.00019  | 0.00088  | 1269.29 | 1405.16 | 1489.16 | 1005.38 | 721.707 | 996.521 |
| ENSMUSG000000003814 | 8_Calr      | 15402.9 | 0.40724  | 0.00622  | 0.01692  | 16764.7 | 16428.7 | 19493   | 10967.2 | 13501.8 | 15261.8 |
| ENSMUSG000000003824 | 12_Syce2    | 153.199 | -0.16631 | 0.47635  | 0.58893  | 151.065 | 112.89  | 169.712 | 149.68  | 171.237 | 164.609 |
| ENSMUSG000000003847 | 16_Nfat5    | 6191.15 | -0.38986 | 0.00221  | 0.00708  | 5527.76 | 5503.16 | 5047.14 | 6108.02 | 7844.64 | 7116.2  |
| ENSMUSG000000003848 | 14_Nob1     | 486.375 | 0.71773  | 6.21E-06 | 4.48E-05 | 607.732 | 569.957 | 637.017 | 409.365 | 315.579 | 378.602 |
| ENSMUSG000000003849 | 8_Nqo1      | 2003.91 | -0.43269 | 0.00034  | 0.00144  | 1856.19 | 1701.61 | 1557.29 | 2154.13 | 2405.39 | 2348.85 |
| ENSMUSG000000003863 | 16_Ppfia3   | 391.201 | 1.57711  | 3.49E-14 | 2.70E-12 | 533.936 | 526.82  | 696.775 | 218.208 | 152.41  | 219.057 |
| ENSMUSG000000003865 | 14_Gys1     | 409.146 | 0.06699  | 0.74872  | 0.82264  | 371.585 | 504.793 | 378.864 | 461.663 | 313.786 | 424.186 |
| ENSMUSG000000003868 | 12_Ruvbl2   | 665.183 | 1.12923  | 3.96E-08 | 5.60E-07 | 803.942 | 847.135 | 1087.59 | 477.893 | 311.096 | 463.439 |

|                     |                 |         |          |          |          |         |         |         |         |         |         |
|---------------------|-----------------|---------|----------|----------|----------|---------|---------|---------|---------|---------|---------|
| ENSMUSG000000003872 | 7_Lin7b         | 17.2591 | 1.19862  | 0.03206  | 0.06715  | 23.4411 | 28.452  | 20.3176 | 11.7219 | 10.7584 | 8.86359 |
| ENSMUSG000000003873 | 10_Bax          | 440.9   | 0.51145  | 0.02953  | 0.06266  | 520.045 | 519.478 | 515.111 | 480.598 | 242.96  | 367.206 |
| ENSMUSG000000003882 | 4_Il7r          | 24.4267 | 1.20316  | 0.05339  | 0.10229  | 63.3778 | 18.3561 | 20.3176 | 17.132  | 13.448  | 13.9285 |
| ENSMUSG000000003923 | 14_Tfam         | 699.329 | -0.34347 | 0.00803  | 0.021    | 625.096 | 592.902 | 631.041 | 718.643 | 807.774 | 820.515 |
| ENSMUSG000000003929 | 10_Zfp81        | 336.818 | -0.88865 | 1.83E-07 | 2.12E-06 | 245.697 | 255.15  | 206.762 | 398.545 | 471.575 | 443.179 |
| ENSMUSG000000003934 | 5_Efnb3         | 56.3954 | -1.06241 | 0.00523  | 0.01461  | 28.6502 | 53.2327 | 27.4885 | 90.1685 | 71.7224 | 67.11   |
| ENSMUSG000000003948 | 16_Mmd          | 225.838 | -0.79801 | 0.00218  | 0.007    | 146.724 | 216.602 | 131.467 | 340.837 | 300.338 | 219.057 |
| ENSMUSG000000003949 | 16_Hlf          | 5835.6  | 0.09635  | 0.45596  | 0.56995  | 5929.73 | 6028.15 | 6131.14 | 4934.92 | 5493.94 | 6495.74 |
| ENSMUSG000000003955 | 7_Fam162a       | 1257.39 | -0.27217 | 0.05071  | 0.09825  | 1154.69 | 1094.94 | 1167.67 | 1175.8  | 1533.07 | 1418.17 |
| ENSMUSG000000003970 | 8_Rpl8          | 12608.3 | 0.88657  | 1.86E-05 | 0.00012  | 15328.7 | 16004.7 | 17761.2 | 11368.5 | 5954.76 | 9232.06 |
| ENSMUSG000000003974 | 6_Grm3          | 0.30056 | -1.76625 | 0.6627   | NA       | 0       | 0       | 0       | 1.80337 | 0       | 0       |
| ENSMUSG000000003992 | 14_Ssbp2        | 1148.64 | -0.42351 | 0.00015  | 0.0007   | 1024.46 | 993.066 | 925.049 | 1312.85 | 1317    | 1319.41 |
| ENSMUSG000000004018 | 9_Fanc1         | 348.237 | -0.43249 | 0.00488  | 0.0138   | 296.92  | 288.191 | 303.569 | 386.823 | 378.336 | 435.582 |
| ENSMUSG000000004031 | 13_Brip2        | 19.3125 | -1.39394 | 0.02969  | 0.06292  | 10.4183 | 16.5205 | 4.78062 | 42.3792 | 21.5167 | 20.2596 |
| ENSMUSG000000004032 | 10_Gstm5        | 565.022 | -0.89214 | 4.30E-08 | 5.98E-07 | 428.017 | 417.602 | 340.619 | 828.649 | 702.88  | 672.366 |
| ENSMUSG000000004035 | 12_Gstm7        | 71.8391 | -0.9908  | 0.00204  | 0.00661  | 45.1458 | 59.6574 | 39.4401 | 115.416 | 94.1357 | 77.2398 |
| ENSMUSG000000004040 | 16_Stat3        | 4736.83 | 0.75813  | 2.76E-09 | 5.60E-08 | 5435.73 | 5756.48 | 6667.76 | 3350.66 | 3352.13 | 3858.19 |
| ENSMUSG000000004043 | 14_Stat5a       | 332.784 | 0.57964  | 0.00464  | 0.01326  | 349.012 | 437.793 | 408.743 | 295.753 | 205.306 | 300.096 |
| ENSMUSG000000004044 | 9_Ptfr          | 5751.65 | 0.20469  | 0.11321  | 0.19044  | 5822.07 | 5938.2  | 6715.57 | 4963.78 | 4993.68 | 6076.62 |
| ENSMUSG000000004054 | 8_Map3k11       | 694.839 | 1.56476  | 1.16E-08 | 1.95E-07 | 928.093 | 1027.94 | 1160.49 | 526.584 | 216.96  | 308.959 |
| ENSMUSG000000004056 | 15_Akt2         | 3010.68 | 0.47718  | 0.00092  | 0.00332  | 3307.8  | 3461.96 | 3743.22 | 2924.17 | 2133.74 | 2493.2  |
| ENSMUSG000000004069 | 16_Dnaja3       | 1269.89 | 0.12093  | 0.35782  | 0.47458  | 1290.13 | 1258.31 | 1419.84 | 1120.8  | 1169.08 | 1361.19 |
| ENSMUSG000000004070 | 15_Hmox2        | 966.014 | -0.02586 | 0.82437  | 0.87973  | 1009.7  | 919.641 | 942.977 | 1003.58 | 978.115 | 942.073 |
| ENSMUSG000000004071 | 12_Cdip1        | 1368.87 | -0.4575  | 0.0019   | 0.00624  | 1062.66 | 1328.98 | 1069.66 | 1736.65 | 1595.82 | 1419.44 |
| ENSMUSG000000004085 | 14_Zak          | 2347.19 | -0.1099  | 0.32579  | 0.44183  | 2238.19 | 2177.95 | 2356.84 | 2243.39 | 2473.53 | 2593.23 |
| ENSMUSG000000004096 | 8_Cwc15         | 2014.83 | -0.29541 | 0.02504  | 0.05471  | 1903.07 | 1707.12 | 1816.63 | 1917.89 | 2365.05 | 2379.24 |
| ENSMUSG000000004098 | 7_Col5a3        | 285.016 | 0.23293  | 0.29548  | 0.40987  | 311.68  | 365.287 | 246.202 | 310.18  | 213.374 | 263.375 |
| ENSMUSG000000004099 | 15_Dnmt1        | 2306.03 | 1.0197   | 1.08E-10 | 3.43E-09 | 2875.44 | 2977.36 | 3410.97 | 1397.61 | 1328.66 | 1846.16 |
| ENSMUSG000000004100 | 11_Ppan         | 290.862 | 1.31719  | 1.02E-09 | 2.41E-08 | 361.166 | 393.739 | 491.208 | 201.076 | 137.169 | 160.811 |
| ENSMUSG000000004105 | 8_Angptl2       | 1647.72 | -0.40743 | 0.04322  | 0.08585  | 1310.96 | 1776.87 | 1161.69 | 2333.56 | 1655.89 | 1647.36 |
| ENSMUSG000000004110 | 14_Cacna1e      | 51.0406 | -0.81862 | 0.03243  | 0.06774  | 26.9138 | 40.3834 | 44.2207 | 82.9551 | 63.6537 | 48.1166 |
| ENSMUSG000000004113 | 18_Cacna1b      | 8.16002 | -1.74724 | 0.06587  | 0.12209  | 2.60457 | 7.34244 | 1.19515 | 18.9354 | 12.5514 | 6.33113 |
| ENSMUSG000000004127 | 12_Trmt10a      | 225.1   | -0.12144 | 0.5143   | 0.62439  | 228.334 | 193.657 | 224.689 | 210.093 | 245.649 | 248.18  |
| ENSMUSG000000004151 | 16_Etv1         | 117.673 | -0.80576 | 0.0037   | 0.01098  | 72.9278 | 96.3696 | 88.4414 | 182.14  | 155.996 | 110.162 |
| ENSMUSG000000004187 | 10_Kifc2        | 177.746 | 0.10795  | 0.6543   | 0.74786  | 171.033 | 212.931 | 169.712 | 217.306 | 152.41  | 143.084 |
| ENSMUSG000000004207 | 14_Psap         | 20329.1 | 0.41694  | 0.0007   | 0.00265  | 22480.9 | 24426.5 | 22831   | 19271.7 | 15152.3 | 17812   |
| ENSMUSG000000004221 | 16_Ikbgk        | 1505.84 | -0.19152 | 0.09378  | 0.16304  | 1449.87 | 1319.8  | 1448.53 | 1508.52 | 1677.41 | 1630.9  |
| ENSMUSG000000004231 | 15_Pax2         | 0.29498 | -0.03469 | 0.99322  | NA       | 0.86819 | 0       | 0       | 0.90169 | 0       | 0       |
| ENSMUSG000000004233 | 14_Wars2        | 225.322 | -0.17006 | 0.35237  | 0.46903  | 230.07  | 202.835 | 203.176 | 222.716 | 262.683 | 230.453 |
| ENSMUSG000000004263 | 15_Atn1         | 1219.65 | 0.77503  | 8.17E-05 | 0.00042  | 1664.32 | 1654.8  | 1299.13 | 1125.3  | 686.742 | 887.625 |
| ENSMUSG000000004264 | 17_Phb2         | 1516.67 | 0.56753  | 2.71E-05 | 0.00016  | 1719.01 | 1706.2  | 2009.05 | 1327.28 | 1093.77 | 1244.7  |
| ENSMUSG000000004266 | 15_Ptpn6        | 708.136 | 0.82973  | 7.38E-08 | 9.69E-07 | 940.248 | 830.614 | 946.562 | 513.059 | 438.403 | 579.932 |
| ENSMUSG000000004267 | 16_Eno2         | 591.315 | -0.59709 | 0.02094  | 0.04709  | 493.131 | 582.807 | 335.838 | 956.688 | 652.674 | 526.75  |
| ENSMUSG000000004268 | 11_Emg1         | 1136.8  | 0.10772  | 0.38815  | 0.5056   | 1153.82 | 1080.26 | 1305.11 | 1096.45 | 1106.32 | 1078.83 |
| ENSMUSG000000004270 | 13_Lpcat3       | 2206.08 | 0.47996  | 0.00011  | 0.00053  | 2460.45 | 2522.13 | 2724.95 | 1710.5  | 1754.51 | 2063.95 |
| ENSMUSG000000004285 | 12_Atp6v1f      | 1175.01 | 0.3598   | 0.02425  | 0.0533   | 1251.93 | 1301.45 | 1410.28 | 1245.23 | 890.255 | 950.936 |
| ENSMUSG000000004296 | 14_Il12b        | 4.58381 | 1.9097   | 0.11786  | 0.19686  | 14.7592 | 4.58903 | 2.39031 | 2.70506 | 1.79306 | 1.26623 |
| ENSMUSG000000004317 | 14_ClcN5        | 495.106 | -0.73456 | 2.34E-06 | 1.92E-05 | 372.453 | 401.081 | 341.814 | 642     | 668.812 | 544.478 |
| ENSMUSG000000004319 | 15_ClcN3        | 2441.82 | -0.21829 | 0.10225  | 0.17552  | 2338.9  | 2021.01 | 2413.02 | 2338.97 | 2885.04 | 2654.01 |
| ENSMUSG000000004328 | 16_Hif3a        | 95.8704 | -0.23926 | 0.41268  | 0.52878  | 76.4006 | 116.561 | 70.5141 | 115.416 | 95.0322 | 101.298 |
| ENSMUSG000000004347 | 16_Pde1c        | 637.713 | -1.5851  | 2.76E-11 | 1.05E-09 | 311.68  | 420.355 | 223.494 | 1107.27 | 1005.01 | 758.47  |
| ENSMUSG000000004356 | 7_Utp20         | 1287.72 | 0.1438   | 0.39722  | 0.51464  | 1400.39 | 1278.5  | 1375.62 | 937.753 | 1362.73 | 1371.32 |
| ENSMUSG000000004359 | 16_Spic         | 5.46825 | -0.03832 | 0.9732   | 0.98287  | 13.0228 | 1.83561 | 1.19515 | 6.3118  | 5.37918 | 5.06491 |
| ENSMUSG000000004360 | 8_9330159F19Rik | 59.9648 | -1.2075  | 0.00049  | 0.00195  | 32.123  | 39.4656 | 37.0498 | 97.382  | 60.0675 | 93.7008 |
| ENSMUSG000000004364 | 14_Cul3         | 2414.84 | -0.48936 | 0.00057  | 0.00223  | 2083.65 | 1863.15 | 2080.76 | 2379.55 | 3189.86 | 2892.06 |
| ENSMUSG000000004366 | 3_Sst           | 1.81618 | -0.70814 | 0.69156  | NA       | 0       | 1.83561 | 2.39031 | 4.50843 | 0.89653 | 1.26623 |
| ENSMUSG000000004371 | 14_Il11         | 8.66433 | 0.14156  | 0.85619  | 0.90263  | 6.07732 | 12.8493 | 8.36608 | 10.8202 | 6.27571 | 7.59736 |
| ENSMUSG000000004383 | 17_Large        | 438.192 | -0.21352 | 0.1226   | 0.20321  | 398.498 | 425.862 | 393.206 | 477.893 | 477.851 | 455.842 |
| ENSMUSG000000004393 | 10_Ddx56        | 762.013 | 0.56792  | 3.44E-05 | 0.0002   | 939.38  | 854.477 | 935.806 | 651.919 | 545.987 | 644.51  |
| ENSMUSG000000004394 | 12_Tmed4        | 1056.47 | -0.10176 | 0.46942  | 0.58266  | 984.526 | 1044.46 | 1029.03 | 1247.93 | 956.598 | 1076.29 |
| ENSMUSG000000004415 | 15_Col26a1      | 12.0681 | 0.13457  | 0.86161  | 0.9061   | 6.94551 | 21.1095 | 9.56123 | 5.41011 | 11.6549 | 17.7272 |
| ENSMUSG000000004446 | 12_Bid          | 243.175 | 0.53933  | 0.00363  | 0.01079  | 317.757 | 261.575 | 284.447 | 210.994 | 176.617 | 207.661 |
| ENSMUSG000000004451 | 14_Ralb         | 1290.64 | 0.3541   | 0.0169   | 0.03937  | 1492.42 | 1270.24 | 1581.19 | 1133.42 | 997.839 | 1268.76 |
| ENSMUSG000000004455 | 16_Ppp1cc       | 3872.35 | -0.4972  | 0.00028  | 0.00122  | 3362.49 | 3152.66 | 3120.55 | 4266.78 | 5316.43 | 4015.21 |
| ENSMUSG000000004460 | 16_Dnajb11      | 1491.68 | 0.02652  | 0.84281  | 0.89296  | 1524.54 | 1440.04 | 1550.11 | 1291.21 | 1482.86 | 1661.29 |
| ENSMUSG000000004462 | 6_Tbccd1        | 389.586 | -0.19343 | 0.17916  | 0.27604  | 358.562 | 381.807 | 350.18  | 431.006 | 413.301 | 402.66  |
| ENSMUSG000000004473 | 10_Clec11a      | 240.072 | -0.25313 | 0.18331  | 0.28106  | 244.829 | 215.684 | 196.005 | 290.343 | 233.994 | 259.577 |
| ENSMUSG000000004500 | 8_Zfp324        | 381.233 | 0.24303  | 0.0872   | 0.15352  | 402.839 | 416.684 | 420.694 | 358.871 | 345.164 | 343.147 |
| ENSMUSG000000004508 | 6_Gab2          | 367.462 | -0.60105 | 0.00049  | 0.00197  | 289.107 | 290.944 | 296.398 | 518.469 | 388.198 | 421.654 |
| ENSMUSG000000004530 | 12_Coro1c       | 8139.48 | 0.66681  | 3.23E-06 | 2.54E-05 | 9381.64 | 9600.25 | 10979.9 | 6356.88 | 5308.36 | 7209.9  |
| ENSMUSG000000004535 | 12_Tax1bp1      | 7314.78 | -0.29359 | 0.01849  | 0.04235  | 6766.66 | 6167.65 | 6784.89 | 7042.16 | 8891.79 | 8235.54 |
| ENSMUSG000000004540 | 7_Psg17         | 62.769  | 0.43654  | 0.20575  | 0.30801  | 73.796  | 73.4244 | 69.3189 | 36.0674 | 70.8259 | 53.1815 |
| ENSMUSG000000004542 | 15_Psg19        | 5.25618 | 0.24792  | 0.8228   | 0.87865  | 6.07732 | 3.67122 | 7.17092 | 0.90169 | 3.58612 | 10.1298 |
| ENSMUSG000000004552 | 16_Ctse         | 31.7469 | 1.41738  | 0.01652  | 0.03863  | 69.4551 | 23.8629 | 45.4159 | 28.8539 | 8.96531 | 13.9285 |
| ENSMUSG000000004558 | 15_Ndrp2        | 1264.07 | -0.53895 | 0.00395  | 0.0116   | 976.712 | 1110.54 | 1005.12 | 1925.1  | 1196.87 | 1370.06 |
| ENSMUSG000000004561 | 14_Mettl17      | 356.384 | 0.17599  | 0.34182  | 0.45826  | 337.725 | 405.67  | 390.815 | 275.014 | 378.336 | 350.745 |
| ENSMUSG000000004562 | 16_Arhgef40     | 784.843 | 0.14983  | 0.34949  | 0.46624  | 737.96  | 960.025 | 779.24  | 834.961 | 711.845 | 685.029 |
| ENSMUSG000000004565 | 14_Pnpla6       | 546.968 | 0.67432  | 0.00027  | 0.00119  | 586.895 | 763.614 | 666.896 | 490.517 | 343.371 | 430.517 |
| ENSMUSG000000004567 | 15_Mcoln1       | 518.947 | 0.32568  | 0.04798  | 0.09369  | 528.727 | 597.491 | 607.138 | 539.208 | 432.128 | 408.991 |

|                     |              |         |          |          |          |         |         |         |         |         |         |
|---------------------|--------------|---------|----------|----------|----------|---------|---------|---------|---------|---------|---------|
| ENSMUSG000000004568 | 12_Arhgef18  | 3431.02 | 0.70647  | 4.24E-08 | 5.91E-07 | 3875.59 | 4238.43 | 4649.15 | 2606.77 | 2350.7  | 2865.47 |
| ENSMUSG000000004591 | 16_Pkn2      | 2734.69 | -0.25179 | 0.08886  | 0.15602  | 2530.77 | 2332.14 | 2626.95 | 2430.04 | 3346.75 | 3141.51 |
| ENSMUSG000000004609 | 11_Cd33      | 122.458 | -0.54598 | 0.0365   | 0.07462  | 113.733 | 109.219 | 75.2947 | 165.91  | 145.238 | 125.356 |
| ENSMUSG000000004610 | 4_Etfb       | 1415.95 | 0.50632  | 0.01069  | 0.02675  | 1547.11 | 1659.39 | 1779.58 | 1502.21 | 852.601 | 1154.8  |
| ENSMUSG000000004612 | 9_Nkg7       | 19.4317 | 4.23799  | 6.52E-06 | 4.68E-05 | 73.796  | 11.9315 | 25.0982 | 2.70506 | 1.79306 | 1.26623 |
| ENSMUSG000000004613 | 7_Lim2       | 430.997 | -0.85898 | 0.38125  | 0.49918  | 224.861 | 625.943 | 68.1238 | 1058.58 | 250.132 | 358.342 |
| ENSMUSG000000004626 | 14_Stxbp2    | 1840.37 | 0.63817  | 1.77E-07 | 2.06E-06 | 2156.58 | 2178.87 | 2387.92 | 1568.03 | 1309.83 | 1440.97 |
| ENSMUSG000000004630 | 18_Pcp2      | 10.6062 | -2.14247 | 0.05598  | 0.10642  | 6.07732 | 5.50683 | 0       | 36.9691 | 12.5514 | 2.53245 |
| ENSMUSG000000004631 | 15_Sgce      | 447.653 | -0.99921 | 1.05E-05 | 7.05E-05 | 319.493 | 357.944 | 217.518 | 695.2   | 622.192 | 473.569 |
| ENSMUSG000000004633 | 17_Chn2      | 194.01  | -0.65836 | 0.00052  | 0.00206  | 144.119 | 145.013 | 162.541 | 242.553 | 217.857 | 251.979 |
| ENSMUSG000000004637 | 15_Wwox      | 257.827 | 0.05061  | 0.75769  | 0.82955  | 261.325 | 269.835 | 255.763 | 265.997 | 242.063 | 251.979 |
| ENSMUSG000000004642 | 13_Slbp      | 1200.27 | -0.03339 | 0.83809  | 0.88961  | 1176.4  | 1136.24 | 1245.35 | 963.902 | 1264.11 | 1415.64 |
| ENSMUSG000000004651 | 5_Tyr        | 2592.91 | -1.70185 | 1.08E-10 | 3.43E-09 | 1156.43 | 1740.16 | 760.118 | 4200.95 | 4664.65 | 3035.15 |
| ENSMUSG000000004654 | 6_Ghrhr      | 0.59823 | -0.02642 | 0.99339  | NA       | 0.86819 | 0.91781 | 0       | 1.80337 | 0       | 0       |
| ENSMUSG000000004655 | 5_Aqp1       | 10096.8 | -0.50486 | 0.00932  | 0.02381  | 8915.43 | 9851.72 | 6275.75 | 14503.6 | 10471.5 | 10562.9 |
| ENSMUSG000000004661 | 15_Arid3b    | 64.776  | -0.10621 | 0.82041  | 0.87649  | 85.9507 | 64.2464 | 37.0498 | 109.104 | 55.5849 | 36.7206 |
| ENSMUSG000000004665 | 10_Cnn2      | 2131.39 | 0.40245  | 0.01407  | 0.03366  | 2417.9  | 2305.53 | 2557.63 | 2253.31 | 1499    | 1754.99 |
| ENSMUSG000000004667 | 18_Polr2e    | 1070.17 | 1.10928  | 1.97E-08 | 3.06E-07 | 1327.46 | 1461.15 | 1597.92 | 784.466 | 481.437 | 768.6   |
| ENSMUSG000000004668 | 14_Abca13    | 8.07202 | -1.97855 | 0.02407  | 0.05299  | 1.73638 | 4.58903 | 3.58546 | 12.6236 | 17.0341 | 8.86359 |
| ENSMUSG000000004677 | 15_Myo9b     | 1793.15 | 0.8692   | 8.31E-11 | 2.75E-09 | 2302.44 | 2221.09 | 2427.36 | 1292.12 | 1096.46 | 1419.44 |
| ENSMUSG000000004698 | 9_Hdac9      | 40.7781 | -1.52681 | 0.00044  | 0.00177  | 21.7047 | 25.6986 | 15.537  | 79.3483 | 61.8606 | 40.5193 |
| ENSMUSG000000004707 | 14_Ly9       | 22.53   | 2.8377   | 3.54E-05 | 0.0002   | 63.3778 | 18.3561 | 37.0498 | 8.11517 | 4.48265 | 3.79868 |
| ENSMUSG000000004709 | 14_Cd244     | 6.62997 | 1.81576  | 0.08071  | 0.14434  | 19.1001 | 8.26025 | 3.58546 | 4.50843 | 1.79306 | 2.53245 |
| ENSMUSG000000004730 | 14_Adgre1    | 199.828 | 0.59046  | 0.02502  | 0.05467  | 330.78  | 201.917 | 187.639 | 172.222 | 165.858 | 140.551 |
| ENSMUSG000000004748 | 5_Mtlf1      | 104.102 | -0.21766 | 0.47244  | 0.58583  | 98.1053 | 103.712 | 87.2462 | 155.992 | 89.6531 | 89.9021 |
| ENSMUSG000000004768 | 14_Rab23     | 389.311 | -0.2696  | 0.07459  | 0.1354   | 365.507 | 333.163 | 360.937 | 462.565 | 403.439 | 410.258 |
| ENSMUSG000000004771 | 12_Rab11a    | 5849.18 | -0.15456 | 0.30532  | 0.42024  | 5730.04 | 4978.18 | 5900.48 | 5062.06 | 7069.14 | 6355.19 |
| ENSMUSG000000004788 | 11_Eif2b2    | 621.549 | 0.82751  | 1.87E-05 | 0.00012  | 762.269 | 723.231 | 899.951 | 537.405 | 344.268 | 462.173 |
| ENSMUSG000000004789 | 9_Dlst       | 2345.32 | 0.09216  | 0.35224  | 0.4689   | 2401.41 | 2358.76 | 2500.26 | 2219.05 | 2251.19 | 2341.25 |
| ENSMUSG000000004791 | 6_Pgf        | 120.432 | -0.72954 | 0.00857  | 0.02217  | 79.8733 | 107.383 | 84.8559 | 193.862 | 129.997 | 126.623 |
| ENSMUSG000000004798 | 14_Ulk2      | 909.297 | -0.48243 | 3.63E-05 | 0.00021  | 739.697 | 779.217 | 757.728 | 1112.68 | 1047.15 | 1019.31 |
| ENSMUSG000000004814 | 10_Ccl24     | 20.2654 | -1.58074 | 0.0041   | 0.01193  | 13.891  | 9.17806 | 7.17092 | 36.9691 | 27.7924 | 26.5908 |
| ENSMUSG000000004815 | 12_Grkq      | 605.024 | 0.90801  | 3.53E-11 | 1.30E-09 | 769.215 | 796.655 | 803.144 | 464.368 | 395.37  | 401.394 |
| ENSMUSG000000004837 | 2_Dgap       | 61.482  | 0.03661  | 0.91321  | 0.94185  | 67.7187 | 55.9861 | 63.3432 | 80.25   | 48.4127 | 53.1815 |
| ENSMUSG000000004842 | 18_Pou1f1    | 1.74745 | -0.84358 | 0.64734  | NA       | 0.86819 | 2.75342 | 0       | 0.90169 | 0.89653 | 5.06491 |
| ENSMUSG000000004843 | 6_Chmp2b     | 3061.31 | -0.32555 | 0.01165  | 0.02874  | 2749.55 | 2535.9  | 2867.17 | 2988.19 | 3775.29 | 3451.73 |
| ENSMUSG000000004846 | 10_Plod3     | 849.975 | 0.87165  | 5.81E-09 | 1.07E-07 | 1060.93 | 1054.56 | 1182.01 | 666.346 | 509.229 | 626.782 |
| ENSMUSG000000004849 | 14_Ap1s1     | 1116.03 | 0.66706  | 1.42E-07 | 1.70E-06 | 1349.16 | 1261.98 | 1497.53 | 871.028 | 814.946 | 901.554 |
| ENSMUSG000000004864 | 12_Mapk13    | 714.319 | 1.0777   | 5.74E-13 | 3.33E-11 | 910.73  | 956.353 | 1040.98 | 506.747 | 396.267 | 474.835 |
| ENSMUSG000000004865 | 15_Srpk1     | 1358.36 | 0.03496  | 0.79799  | 0.86046  | 1435.98 | 1326.23 | 1361.28 | 1147.85 | 1456.86 | 1421.97 |
| ENSMUSG000000004872 | 15_Pax3      | 41.7002 | -0.88465 | 0.04373  | 0.08671  | 28.6502 | 42.2191 | 16.7322 | 54.1011 | 65.4467 | 43.0517 |
| ENSMUSG000000004880 | 11_Lbr       | 1580.64 | 0.14929  | 0.22658  | 0.33213  | 1651.29 | 1555.68 | 1779.58 | 1373.27 | 1507.07 | 1616.97 |
| ENSMUSG000000004885 | 5_Crabp2     | 124.7   | 0.57039  | 0.06114  | 0.11468  | 164.956 | 93.6162 | 188.834 | 109.104 | 87.86   | 103.831 |
| ENSMUSG000000004891 | 16_Nes       | 589.183 | 0.0059   | 0.96963  | 0.98037  | 565.191 | 600.245 | 604.748 | 497.73  | 608.744 | 658.438 |
| ENSMUSG000000004892 | 13_Bcan      | 4.96911 | -2.07307 | 0.0929   | 0.16184  | 0.86819 | 3.67122 | 1.19515 | 5.41011 | 16.1376 | 2.53245 |
| ENSMUSG000000004894 | 10_Hapln2    | 0.30325 | -0.03469 | 0.99322  | NA       | 0       | 0.91781 | 0       | 0.90169 | 0       | 0       |
| ENSMUSG000000004895 | 9_Prrc       | 693.391 | 0.49853  | 0.0017   | 0.00567  | 698.023 | 866.408 | 871.267 | 596.916 | 504.747 | 622.984 |
| ENSMUSG000000004896 | 16_Rmad1     | 445.869 | 0.02004  | 0.88629  | 0.92311  | 461.008 | 447.889 | 438.622 | 456.253 | 459.92  | 411.524 |
| ENSMUSG000000004897 | 16_Hdgf      | 7377.09 | 0.48627  | 6.57E-05 | 0.00034  | 8199.17 | 8211.61 | 9414.23 | 5873.58 | 5744.07 | 6819.9  |
| ENSMUSG000000004902 | 7_Slc25a18   | 5.74382 | 0.76695  | 0.40798  | 0.52475  | 9.55007 | 7.34244 | 4.78062 | 4.50843 | 4.48265 | 3.79868 |
| ENSMUSG000000004929 | 12_Thop1     | 419.825 | 1.39824  | 4.35E-10 | 1.15E-08 | 533.068 | 595.656 | 696.775 | 268.702 | 161.376 | 263.375 |
| ENSMUSG000000004931 | 10_Apba3     | 286.046 | 1.25701  | 0.00017  | 0.00078  | 377.662 | 416.684 | 415.914 | 265.997 | 84.2739 | 155.746 |
| ENSMUSG000000004933 | 17_Matk      | 15.574  | 1.00122  | 0.14473  | 0.23199  | 24.3093 | 20.1917 | 17.9273 | 18.9354 | 4.48265 | 7.59736 |
| ENSMUSG000000004934 | 13_Pias4     | 339.087 | 1.04325  | 6.88E-07 | 6.62E-06 | 385.476 | 446.054 | 539.014 | 264.194 | 181.996 | 217.791 |
| ENSMUSG000000004936 | 8_Map2k1     | 3157.04 | 0.33604  | 0.00339  | 0.0102   | 3299.98 | 3348.15 | 3922.5  | 2777.19 | 2778.35 | 2816.09 |
| ENSMUSG000000004937 | 5_Sgta       | 1715.38 | 0.9426   | 1.42E-07 | 1.70E-06 | 2079.31 | 2269.73 | 2420.19 | 1357.04 | 873.221 | 1292.82 |
| ENSMUSG000000004939 | 6_Nmrk2      | 3.64175 | -2.27563 | 0.13255  | 0.21611  | 0       | 3.67122 | 0       | 6.3118  | 8.06878 | 3.79868 |
| ENSMUSG000000004945 | 15_Tmem242   | 819.531 | -0.22331 | 0.11271  | 0.18978  | 733.619 | 722.313 | 813.9   | 988.247 | 800.602 | 858.502 |
| ENSMUSG000000004947 | 15_Dtx2      | 666.02  | 1.15804  | 3.21E-09 | 6.38E-08 | 819.57  | 883.847 | 1056.52 | 500.435 | 319.165 | 416.589 |
| ENSMUSG000000004951 | 10_Hspb1     | 8965.41 | 1.36095  | 6.94E-09 | 1.25E-07 | 11622.4 | 12012.2 | 15082.8 | 6081.87 | 3054.48 | 5938.6  |
| ENSMUSG000000004952 | 13_Rasa4     | 236.24  | 0.7562   | 0.00433  | 0.01251  | 340.33  | 275.342 | 274.885 | 244.357 | 125.514 | 157.012 |
| ENSMUSG000000004961 | 7_Syt5       | 8.1222  | -0.16945 | 0.84228  | 0.89267  | 6.94551 | 10.0959 | 5.97577 | 5.41011 | 15.241  | 5.06491 |
| ENSMUSG000000004980 | 16_Hnrnpa2b1 | 17343.6 | -0.1679  | 0.28816  | 0.40155  | 16519   | 15321.8 | 17164.8 | 14234.9 | 19952.3 | 20868.7 |
| ENSMUSG000000004988 | 9_Fxyd4      | 280.836 | -0.50964 | 0.00188  | 0.00618  | 242.225 | 237.712 | 215.128 | 340.837 | 338.889 | 310.222 |
| ENSMUSG000000004994 | 12_Ccdc130   | 247.155 | 0.36854  | 0.03043  | 0.06421  | 276.952 | 268.917 | 289.227 | 206.486 | 207.099 | 234.256 |
| ENSMUSG000000004996 | 9_Mri1       | 192.728 | 0.72002  | 0.00041  | 0.00169  | 235.279 | 241.383 | 242.616 | 165.008 | 120.135 | 151.947 |
| ENSMUSG000000005034 | 15_Prkcab    | 1333.72 | -0.41691 | 0.0005   | 0.00199  | 1168.58 | 1188.56 | 1069.66 | 1644.67 | 1487.34 | 1443.5  |
| ENSMUSG000000005043 | 13_Sgsh      | 571.379 | 0.44186  | 0.02148  | 0.04815  | 597.314 | 669.08  | 708.726 | 597.817 | 379.232 | 476.101 |
| ENSMUSG000000005045 | 16_Chd5      | 114.703 | -0.14057 | 0.66471  | 0.75604  | 94.6325 | 142.26  | 90.8317 | 165.91  | 108.48  | 86.1034 |
| ENSMUSG000000005054 | 6_Cstb       | 3621.82 | 0.19343  | 0.06168  | 0.1155   | 3925.95 | 3610.65 | 4057.55 | 3327.22 | 3507.23 | 3302.32 |
| ENSMUSG000000005057 | 13_Sh2b2     | 22.5022 | 0.6218   | 0.21153  | 0.31482  | 26.0457 | 27.5342 | 28.6837 | 19.8371 | 21.5167 | 11.396  |
| ENSMUSG000000005069 | 12_Pex5      | 717.853 | 0.35703  | 0.02587  | 0.05623  | 678.055 | 858.148 | 883.219 | 686.183 | 568.4   | 633.113 |
| ENSMUSG000000005078 | 16_Jkmp      | 659.005 | -0.36746 | 0.01382  | 0.03316  | 618.15  | 553.437 | 555.747 | 833.157 | 741.431 | 652.107 |
| ENSMUSG000000005087 | 17_Cd44      | 15851.5 | 0.38209  | 0.06809  | 0.12565  | 17606   | 16455.3 | 19752.3 | 9293.67 | 14130.2 | 17871.5 |
| ENSMUSG000000005089 | 15_Slc1a2    | 166.945 | -1.237   | 0.00014  | 0.00068  | 115.469 | 93.6162 | 89.6366 | 316.492 | 257.304 | 129.155 |
| ENSMUSG000000005102 | 13_Eif2ak4   | 1736.54 | 0.17938  | 0.19483  | 0.29503  | 1737.25 | 1911.79 | 1882.37 | 1408.43 | 1621.82 | 1857.55 |
| ENSMUSG000000005103 | 12_Wdr1      | 10846.4 | 0.47006  | 0.00075  | 0.0028   | 12313.5 | 11574.4 | 13904.4 | 8089.02 | 8659.59 | 10537.5 |
| ENSMUSG000000005107 | 13_Slc2a9    | 190.015 | 0.72097  | 0.00026  | 0.00114  | 246.566 | 209.26  | 253.373 | 141.565 | 133.583 | 155.746 |
| ENSMUSG000000005124 | 9_Wisp1      | 383.444 | -0.61403 | 0.00158  | 0.00532  | 323.834 | 338.67  | 246.202 | 452.646 | 537.918 | 401.394 |

|                     |                 |         |          |          |          |         |         |         |         |         |         |
|---------------------|-----------------|---------|----------|----------|----------|---------|---------|---------|---------|---------|---------|
| ENSMUSG000000005125 | 12_Ndrg1        | 3309.8  | -0.16061 | 0.30612  | 0.42109  | 3180.17 | 3488.58 | 2708.22 | 4141.44 | 3149.51 | 3190.89 |
| ENSMUSG000000005131 | 3_4930550C14Rik | 53.5424 | -0.90529 | 0.00932  | 0.02382  | 36.4639 | 34.8766 | 40.6352 | 53.1994 | 85.1704 | 70.9087 |
| ENSMUSG000000005142 | 9_Man2b1        | 1441.77 | 0.58898  | 7.14E-07 | 6.83E-06 | 1658.24 | 1750.26 | 1787.95 | 1239.82 | 1057.01 | 1157.33 |
| ENSMUSG000000005148 | 7_Klf5          | 1892.2  | 0.77408  | 8.47E-07 | 7.94E-06 | 2190.44 | 2269.73 | 2702.24 | 1293.02 | 1239.01 | 1658.76 |
| ENSMUSG000000005150 | 16_Wdr83        | 334.013 | 0.48363  | 0.03059  | 0.06451  | 367.244 | 378.136 | 423.085 | 346.247 | 198.133 | 291.232 |
| ENSMUSG000000005161 | 15_Prxd2        | 3784.12 | 0.07831  | 0.52317  | 0.63253  | 3850.42 | 3997.04 | 3813.74 | 4188.33 | 3399.64 | 3455.53 |
| ENSMUSG000000005198 | 15_Polr2a       | 3279.44 | 0.36689  | 0.00039  | 0.00161  | 3500.54 | 3670.3  | 3911.74 | 2788.91 | 2823.17 | 2981.96 |
| ENSMUSG000000005202 | 2_Shbg          | 0.75302 | 1.75921  | 0.54979  | NA       | 0.86819 | 2.75342 | 0       | 0       | 0.89653 | 0       |
| ENSMUSG000000005204 | 12_Senp3        | 1350    | 0.17205  | 0.13771  | 0.22263  | 1430.77 | 1326.23 | 1534.58 | 1249.74 | 1250.66 | 1308.01 |
| ENSMUSG000000005220 | 10_Corin        | 12.38   | 0.03451  | 0.96027  | 0.97417  | 19.1001 | 10.0959 | 8.36608 | 10.8202 | 17.0341 | 8.86359 |
| ENSMUSG000000005225 | 15_Plekha8      | 893.209 | -0.26853 | 0.02852  | 0.06092  | 798.733 | 783.806 | 849.755 | 944.966 | 1046.25 | 935.742 |
| ENSMUSG000000005233 | 16_Spc25        | 204.456 | -0.28961 | 0.17559  | 0.2716   | 201.42  | 167.041 | 184.054 | 202.879 | 272.545 | 198.798 |
| ENSMUSG000000005237 | 13_Dnah2        | 30.5671 | -0.44246 | 0.35048  | 0.46722  | 26.0457 | 34.8766 | 16.7322 | 45.986  | 33.1716 | 26.5908 |
| ENSMUSG000000005251 | 14_Ripk4        | 4349.96 | 0.85785  | 1.12E-07 | 1.38E-06 | 5119.71 | 5024.99 | 6673.74 | 3008.02 | 2694.97 | 3578.36 |
| ENSMUSG000000005262 | 12_Ufd1l        | 1175.84 | -0.21094 | 0.06957  | 0.12792  | 1170.32 | 1059.15 | 1039.78 | 1224.49 | 1302.66 | 1258.63 |
| ENSMUSG000000005267 | 12_Zfp287       | 124.757 | -0.80617 | 0.00037  | 0.00154  | 89.4234 | 96.3696 | 86.0511 | 164.107 | 141.652 | 170.941 |
| ENSMUSG000000005268 | 20_Prlr         | 11.005  | 0.30661  | 0.65715  | 0.75012  | 10.4183 | 16.5205 | 9.56123 | 8.11517 | 12.5514 | 8.86359 |
| ENSMUSG000000005299 | 6_Letm1         | 1513.97 | 0.62884  | 5.78E-06 | 4.21E-05 | 1710.33 | 1770.45 | 2035.35 | 1247.03 | 1041.77 | 1278.89 |
| ENSMUSG000000005312 | 14_Ubqln1       | 2926.17 | 0.24881  | 0.05039  | 0.09779  | 2922.32 | 3105.85 | 3505.39 | 2425.53 | 2708.42 | 2889.53 |
| ENSMUSG000000005320 | 9_Fgfr4         | 8.269   | -0.61388 | 0.47576  | 0.58833  | 10.4183 | 5.50683 | 3.58546 | 16.2303 | 6.27571 | 7.59736 |
| ENSMUSG000000005338 | 13_Cadm3        | 377.618 | -0.16425 | 0.43877  | 0.55405  | 370.716 | 362.533 | 335.838 | 522.978 | 346.957 | 326.687 |
| ENSMUSG000000005339 | 10_Fcer1a       | 4.13132 | -0.65505 | 0.58317  | 0.68621  | 1.73638 | 0.91781 | 7.17092 | 6.3118  | 3.58612 | 5.06491 |
| ENSMUSG000000005354 | 15_Txn2         | 1858.61 | 0.51968  | 0.00378  | 0.01117  | 2041.11 | 2175.2  | 2353.26 | 1865.59 | 1156.52 | 1559.99 |
| ENSMUSG000000005355 | 8_Casp14        | 118.031 | 0.30299  | 0.24055  | 0.34821  | 112.864 | 156.945 | 120.711 | 88.3652 | 110.273 | 119.025 |
| ENSMUSG000000005357 | 8_Slc1a6        | 11.3906 | -0.5343  | 0.48458  | 0.5965   | 5.20913 | 15.6027 | 7.17092 | 20.7388 | 10.7584 | 8.86359 |
| ENSMUSG000000005360 | 14_Slc1a3       | 549.273 | -0.79088 | 4.79E-05 | 0.00026  | 427.149 | 453.396 | 326.277 | 715.037 | 807.774 | 566.003 |
| ENSMUSG000000005362 | 14_Crbn         | 735.235 | -0.50377 | 0.00013  | 0.00061  | 646.8   | 594.738 | 583.235 | 880.045 | 912.668 | 793.924 |
| ENSMUSG000000005364 | 11_Ilfra        | 0.59554 | -1.37459 | 0.71084  | NA       | 0.86819 | 0       | 0       | 2.70506 | 0       | 0       |
| ENSMUSG000000005370 | 3_Msh6          | 1589.08 | 0.31164  | 0.0517   | 0.09965  | 1837.95 | 1653.89 | 1786.76 | 1123.5  | 1505.27 | 1627.1  |
| ENSMUSG000000005371 | 14_Fbxo11       | 2138.18 | -0.34107 | 0.01303  | 0.03152  | 1872.68 | 1944.83 | 1841.73 | 2021.58 | 2690.49 | 2457.75 |
| ENSMUSG000000005373 | 13_Mlxip1       | 53.1486 | -0.21028 | 0.60279  | 0.70363  | 44.2776 | 43.1369 | 60.9529 | 83.8567 | 38.5508 | 48.1166 |
| ENSMUSG000000005374 | 13_Tbl2         | 662.546 | 0.12681  | 0.40086  | 0.51843  | 674.582 | 728.738 | 670.481 | 537.405 | 677.777 | 686.295 |
| ENSMUSG000000005378 | 17_Wbscr22      | 495.572 | 0.62231  | 0.00014  | 0.00066  | 528.727 | 603.916 | 670.481 | 426.497 | 348.75  | 395.063 |
| ENSMUSG000000005397 | 7_Nid1          | 3469.62 | -0.11151 | 0.48845  | 0.60031  | 3094.22 | 3650.11 | 3260.38 | 3461.57 | 2979.17 | 4372.28 |
| ENSMUSG000000005410 | 5_Mcm5          | 1449.35 | 1.46668  | 6.91E-22 | 1.59E-19 | 2144.43 | 1811.75 | 2428.55 | 762.826 | 700.19  | 848.372 |
| ENSMUSG000000005413 | 7_Hmox1         | 230.806 | 0.6991   | 0.00522  | 0.0146   | 352.484 | 257.903 | 247.397 | 220.011 | 176.617 | 130.421 |
| ENSMUSG000000005417 | 17_Mprip        | 14055.5 | 0.62862  | 6.32E-09 | 1.15E-07 | 16118.8 | 16803.2 | 18288.2 | 11379.3 | 10210.6 | 11532.8 |
| ENSMUSG000000005442 | 13_Cic          | 2861.52 | 1.36679  | 3.92E-12 | 1.79E-10 | 3668.96 | 4070.47 | 4632.42 | 1984.61 | 1147.56 | 1665.09 |
| ENSMUSG000000005447 | 12_Pafah1b3     | 895.441 | 0.69179  | 5.19E-05 | 0.00028  | 1078.29 | 1075.67 | 1164.08 | 799.795 | 534.332 | 720.483 |
| ENSMUSG000000005465 | 8_Ilf2ra        | 13.0942 | 1.13045  | 0.08984  | 0.15751  | 26.0457 | 14.6849 | 13.1467 | 9.91854 | 7.17224 | 7.59736 |
| ENSMUSG000000005469 | 9_Prkaa         | 1605.7  | 0.1557   | 0.19519  | 0.29536  | 1645.22 | 1732.82 | 1698.31 | 1632.95 | 1363.62 | 1561.26 |
| ENSMUSG000000005470 | 8_Asf1b         | 270.076 | 0.52823  | 0.01159  | 0.02863  | 335.121 | 266.164 | 354.961 | 181.239 | 225.926 | 257.044 |
| ENSMUSG000000005474 | 9_Myl10         | 13.683  | -2.24138 | 0.00251  | 0.00789  | 2.60457 | 9.17806 | 2.39031 | 26.1489 | 21.5167 | 20.2596 |
| ENSMUSG000000005481 | 17_Ddx39        | 969.697 | 0.90092  | 1.20E-09 | 2.76E-08 | 1291    | 1075.67 | 1422.23 | 641.098 | 671.501 | 716.684 |
| ENSMUSG000000005483 | 9_Dnajb1        | 3608.29 | 0.3291   | 0.00438  | 0.01262  | 3846.94 | 3837.35 | 4369.48 | 3037.78 | 3106.48 | 3451.73 |
| ENSMUSG000000005493 | 15_Msh4         | 0.7512  | 0.56081  | 0.84869  | NA       | 0.86819 | 1.83561 | 0       | 1.80337 | 0       | 0       |
| ENSMUSG000000005501 | 14_Usp40        | 1960.61 | -0.0609  | 0.65168  | 0.74547  | 1956.9  | 1838.36 | 1961.25 | 1703.28 | 2094.3  | 2209.57 |
| ENSMUSG000000005505 | 12_Kbtbd4       | 637.296 | 0.05901  | 0.64834  | 0.7427   | 656.35  | 604.834 | 690.799 | 636.59  | 624.882 | 610.321 |
| ENSMUSG000000005506 | 16_Celf1        | 2901.48 | -0.19811 | 0.03929  | 0.07933  | 2631.48 | 2741.49 | 2735.71 | 3067.53 | 3198.82 | 3033.88 |
| ENSMUSG000000005510 | 9_Ndufs3        | 1728.45 | -0.23493 | 0.02916  | 0.062    | 1554.93 | 1558.43 | 1650.51 | 1877.31 | 1770.65 | 1958.85 |
| ENSMUSG000000005514 | 14_Por          | 3389.03 | 1.38634  | 2.42E-11 | 9.31E-10 | 4216.79 | 4735.88 | 5753.47 | 1911.57 | 1338.52 | 2377.97 |
| ENSMUSG000000005533 | 9_Igf1r         | 1251.72 | 0.46485  | 0.00021  | 0.00096  | 1329.2  | 1488.68 | 1536.97 | 1084.73 | 969.15  | 1101.62 |
| ENSMUSG000000005534 | 9_Insr          | 1430.6  | -0.10034 | 0.37324  | 0.4908   | 1343.96 | 1396.9  | 1401.92 | 1378.68 | 1568.03 | 1494.15 |
| ENSMUSG000000005540 | 9_Fcer2a        | 2.26486 | 0.19945  | 0.91464  | NA       | 0.86819 | 6.42464 | 0       | 3.60674 | 2.68959 | 0       |
| ENSMUSG000000005547 | 14_Cyp2a5       | 3849.06 | 0.5594   | 0.00119  | 0.00416  | 4571.01 | 4082.4  | 5103.31 | 3142.37 | 2442.15 | 3753.1  |
| ENSMUSG000000005566 | 13_Trim28       | 3276.42 | 0.73145  | 2.05E-09 | 4.33E-08 | 3857.36 | 4192.54 | 4217.7  | 2551.77 | 2174.98 | 2664.14 |
| ENSMUSG000000005575 | 15_Ube2m        | 1257.64 | 0.32746  | 0.00591  | 0.01619  | 1433.38 | 1318.89 | 1446.14 | 1127.11 | 1036.39 | 1183.92 |
| ENSMUSG000000005580 | 11_Adcy9        | 225.427 | 0.01956  | 0.93199  | 0.95495  | 207.497 | 257.903 | 215.128 | 269.604 | 169.444 | 232.986 |
| ENSMUSG000000005583 | 16_Mef2c        | 401.115 | -1.33004 | 2.47E-10 | 7.07E-09 | 215.311 | 266.164 | 203.176 | 721.348 | 490.402 | 510.289 |
| ENSMUSG000000005609 | 15_Ctr9         | 1582.26 | 0.01086  | 0.92222  | 0.94838  | 1563.61 | 1630.94 | 1569.24 | 1459.83 | 1635.27 | 1634.7  |
| ENSMUSG000000005610 | 16_Eif4g2       | 37183.9 | -0.3201  | 0.01391  | 0.03332  | 33917.5 | 31451.4 | 33857.5 | 34927.7 | 45868.3 | 43080.8 |
| ENSMUSG000000005611 | 15_Mrvi1        | 261.556 | -1.25378 | 0.00017  | 0.00078  | 126.756 | 247.808 | 88.4414 | 395.84  | 414.197 | 296.297 |
| ENSMUSG000000005615 | 14_Pcyt1a       | 7016.59 | 0.12648  | 0.31175  | 0.42668  | 7171.24 | 6869.77 | 7929.85 | 6117.03 | 6480.12 | 7531.52 |
| ENSMUSG000000005621 | 11_Zfp592       | 942.34  | 0.33081  | 0.00751  | 0.01982  | 1021.86 | 1062.82 | 1066.08 | 912.506 | 794.326 | 796.457 |
| ENSMUSG000000005625 | 15_Psmd4        | 2478.99 | 0.64119  | 3.25E-06 | 2.54E-05 | 3036.05 | 2848.87 | 3176.72 | 2042.32 | 1632.58 | 2137.39 |
| ENSMUSG000000005628 | 12_Tmod4        | 118.545 | -0.68569 | 0.0061   | 0.01664  | 77.2688 | 99.123  | 96.8075 | 171.32  | 129.997 | 136.753 |
| ENSMUSG000000005640 | 11_Insr         | 86.9062 | -0.16432 | 0.66442  | 0.75586  | 78.137  | 104.63  | 63.3432 | 140.663 | 72.619  | 62.0451 |
| ENSMUSG000000005649 | 17_Cabp5        | 24.6429 | -2.2191  | 0.00386  | 0.01139  | 13.891  | 7.34244 | 4.78062 | 67.6264 | 46.6196 | 7.59736 |
| ENSMUSG000000005656 | 8_Snx6          | 1865.85 | -0.22795 | 0.08315  | 0.14772  | 1683.42 | 1652.97 | 1820.22 | 1750.17 | 2211.74 | 2076.61 |
| ENSMUSG000000005667 | 8_Mthfd2        | 219.195 | 0.30306  | 0.22779  | 0.33354  | 246.566 | 190.904 | 290.422 | 247.062 | 188.271 | 151.947 |
| ENSMUSG000000005672 | 12_Kit          | 4065.26 | 0.45728  | 0.00373  | 0.01105  | 4428.63 | 4555.99 | 5126.02 | 2897.12 | 3207.79 | 4176.02 |
| ENSMUSG000000005674 | 9_Tomm40l       | 602.954 | 0.19862  | 0.17988  | 0.27686  | 626.832 | 681.93  | 623.87  | 618.556 | 490.402 | 576.133 |
| ENSMUSG000000005677 | 14_Nrl1i3       | 3.67685 | -0.28026 | 0.82823  | 0.88247  | 5.20913 | 4.58903 | 0       | 4.58043 | 2.68959 | 5.06491 |
| ENSMUSG000000005682 | 8_Pan2          | 1053.22 | 0.45601  | 2.65E-05 | 0.00016  | 1207.65 | 1203.24 | 1244.16 | 879.143 | 891.151 | 893.956 |
| ENSMUSG000000005683 | 7_Cs            | 7555.56 | 0.47266  | 0.0009   | 0.00326  | 8211.33 | 8436.47 | 9697.48 | 5704.96 | 5851.66 | 7431.49 |
| ENSMUSG000000005686 | 16_Ampd3        | 255.951 | 0.18751  | 0.30895  | 0.42387  | 251.775 | 254.232 | 313.13  | 238.045 | 258.201 | 220.323 |
| ENSMUSG000000005687 | 14_Bcas2        | 1215.56 | -0.1516  | 0.17308  | 0.26845  | 1179    | 1105.04 | 1171.25 | 1222.69 | 1325.07 | 1290.29 |
| ENSMUSG000000005696 | 11_Sh2d1a       | 3.23132 | -0.7165  | 0.59967  | 0.70119  | 5.20913 | 0.91781 | 1.19515 | 7.21348 | 3.58612 | 1.26623 |
| ENSMUSG000000005698 | 15_Ctcf         | 2126.94 | -0.11008 | 0.4113   | 0.52764  | 2044.58 | 2093.51 | 1998.3  | 1869.19 | 2407.18 | 2348.85 |

|                    |                  |         |          |          |          |         |         |         |         |         |         |
|--------------------|------------------|---------|----------|----------|----------|---------|---------|---------|---------|---------|---------|
| ENSMUSG00000005699 | 15_Pard6a        | 89.713  | 0.66688  | 0.04119  | 0.08257  | 93.7643 | 93.6162 | 143.418 | 89.2669 | 51.1022 | 67.11   |
| ENSMUSG00000005705 | 10_Agrp          | 2.06408 | -0.66505 | 0.66531  | NA       | 0.86819 | 2.75342 | 1.19515 | 4.50843 | 1.79306 | 1.26623 |
| ENSMUSG00000005716 | 16_Pvalb         | 450.829 | -2.24147 | 0.00088  | 0.0032   | 113.733 | 257.903 | 100.393 | 1330.89 | 434.817 | 467.238 |
| ENSMUSG00000005718 | 7_Tfap4          | 186.603 | 0.89736  | 0.0001   | 0.00051  | 210.97  | 222.109 | 295.203 | 131.646 | 110.273 | 149.415 |
| ENSMUSG00000005732 | 14_Ranbp1        | 1322.6  | 0.16506  | 0.23198  | 0.33824  | 1416.02 | 1226.19 | 1552.51 | 1147.85 | 1268.59 | 1324.47 |
| ENSMUSG00000005763 | 15_Cd247         | 26.512  | -0.01665 | 0.98307  | 0.98878  | 31.2548 | 34.8766 | 13.1467 | 27.9522 | 49.3092 | 2.53245 |
| ENSMUSG00000005774 | 12_Rfx5          | 798.433 | 0.38157  | 0.00256  | 0.008    | 932.434 | 832.45  | 945.367 | 708.725 | 662.536 | 709.087 |
| ENSMUSG00000005779 | 12_Psmb4         | 3029    | 0.09757  | 0.35387  | 0.47074  | 3166.28 | 2969.1  | 3260.38 | 3097.29 | 2872.48 | 2808.49 |
| ENSMUSG00000005800 | 2_Mmp8           | 2.06757 | 1.62627  | 0.40643  | NA       | 6.94551 | 0       | 2.39031 | 1.80337 | 0       | 1.26623 |
| ENSMUSG00000005802 | 12_Slc30a4       | 1369.07 | -0.33531 | 0.01493  | 0.03545  | 1296.21 | 1178.46 | 1156.91 | 1348.92 | 1725.82 | 1508.08 |
| ENSMUSG00000005803 | 14_Sqrdl         | 241.441 | -0.76518 | 0.00063  | 0.00243  | 204.892 | 157.863 | 174.492 | 359.773 | 317.372 | 234.252 |
| ENSMUSG00000005804 | 14_Bloc1s6       | 990.754 | -0.03128 | 0.8091   | 0.86819  | 986.262 | 906.792 | 1048.15 | 941.36  | 1085.7  | 976.261 |
| ENSMUSG00000005813 | 12_Metap1        | 1355.89 | 0.00608  | 0.96409  | 0.97673  | 1335.27 | 1286.76 | 1454.5  | 1182.11 | 1477.48 | 1399.18 |
| ENSMUSG00000005823 | 8_Gpr108         | 1464.41 | 0.71763  | 1.21E-05 | 8.05E-05 | 1712.94 | 1765.86 | 1983.96 | 1180.31 | 875.91  | 1267.49 |
| ENSMUSG00000005824 | 6_Tnfsf14        | 3.10751 | 2.36166  | 0.13509  | 0.2192   | 8.68188 | 0.91781 | 5.97577 | 1.80337 | 0       | 1.26623 |
| ENSMUSG00000005836 | 8_Gata6          | 3.40175 | -2.00236 | 0.12857  | 0.21108  | 0.86819 | 0.91781 | 2.39031 | 7.21348 | 2.68959 | 6.33113 |
| ENSMUSG00000005846 | 11_Rsl1d1        | 1688.86 | -0.26431 | 0.07863  | 0.14131  | 1665.19 | 1378.54 | 1559.68 | 1550.9  | 2065.61 | 1913.27 |
| ENSMUSG00000005864 | 7_Cnga2          | 1.67978 | 0.28372  | 0.87303  | NA       | 3.47275 | 0.91781 | 1.19515 | 1.80337 | 2.68959 | 0       |
| ENSMUSG00000005871 | 14_Apc           | 4654.4  | -0.21279 | 0.08133  | 0.14522  | 4476.38 | 4151.23 | 4306.14 | 4372.27 | 5160.43 | 5459.97 |
| ENSMUSG00000005873 | 5_Reep5          | 6275.61 | 0.0508   | 0.62523  | 0.72262  | 6331.7  | 6147.46 | 6678.52 | 6228.84 | 5742.28 | 6524.87 |
| ENSMUSG00000005881 | 13_Ergic3        | 2933.08 | 0.59624  | 0.00016  | 0.00075  | 3363.36 | 3595.04 | 3633.27 | 2719.48 | 1839.68 | 2447.62 |
| ENSMUSG00000005882 | 18_Uqcc1         | 662.967 | -0.16943 | 0.02083  | 0.30438  | 675.451 | 580.053 | 616.7   | 735.775 | 682.26  | 687.561 |
| ENSMUSG00000005883 | 15_Spo11         | 4.57658 | 0.21529  | 0.84481  | 0.89418  | 5.20913 | 8.26025 | 1.19515 | 5.41011 | 3.58612 | 3.79868 |
| ENSMUSG00000005886 | 14_Ncoa2         | 2609.71 | 0.33444  | 0.00686  | 0.01836  | 2866.76 | 2724.96 | 3140.86 | 2444.47 | 2066.5  | 2414.69 |
| ENSMUSG00000005892 | 4_Trh            | 1.84402 | 0.05484  | 0.97786  | NA       | 1.73638 | 2.75342 | 1.19515 | 0       | 5.37918 | 0       |
| ENSMUSG00000005893 | 14_Nr2c2         | 1463.73 | -0.36687 | 0.00632  | 0.01716  | 1309.23 | 1224.35 | 1300.33 | 1489.58 | 1892.58 | 1566.32 |
| ENSMUSG00000005897 | 14_Nr2c1         | 1054.12 | 0.16422  | 0.32496  | 0.441    | 1053.98 | 1097.7  | 1189.18 | 797.992 | 1003.22 | 1182.66 |
| ENSMUSG00000005899 | 12_Smpd4         | 892.182 | 0.52128  | 9.03E-06 | 6.19E-05 | 1035.75 | 1050.89 | 1067.27 | 725.857 | 698.397 | 774.931 |
| ENSMUSG00000005907 | 14_Pex1          | 379.849 | -0.13521 | 0.40399  | 0.52126  | 355.089 | 351.52  | 378.864 | 348.952 | 398.956 | 445.712 |
| ENSMUSG00000005917 | 15_Otx1          | 1866.28 | 0.66428  | 1.15E-05 | 7.69E-05 | 1864    | 2428.51 | 2573.17 | 1433.68 | 1363.62 | 1534.67 |
| ENSMUSG00000005936 | 18_Kctd20        | 1797.05 | 0.0492   | 0.66659  | 0.75752  | 1835.35 | 1721.8  | 1925.39 | 1662.71 | 1755.41 | 1881.61 |
| ENSMUSG00000005947 | 11_Igtae         | 11.4213 | 1.67416  | 0.04499  | 0.08876  | 16.4956 | 7.34244 | 28.6837 | 4.50843 | 8.96531 | 2.53245 |
| ENSMUSG00000005949 | 9_Ctns           | 596.996 | -0.05598 | 0.66026  | 0.75239  | 592.104 | 587.396 | 576.064 | 575.275 | 623.089 | 628.049 |
| ENSMUSG00000005950 | 14_P2rx5         | 5.52611 | -1.22367 | 0.22823  | 0.33403  | 3.47275 | 1.83561 | 4.78062 | 12.6236 | 5.37918 | 5.06491 |
| ENSMUSG00000005951 | 13_ShpK          | 264.964 | 0.02212  | 0.91068  | 0.93998  | 270.875 | 281.766 | 248.592 | 319.197 | 231.305 | 238.051 |
| ENSMUSG00000005952 | 15_Trvp1         | 0.90827 | -0.41442 | 0.88263  | NA       | 0       | 0       | 2.39031 | 0       | 1.79306 | 1.26623 |
| ENSMUSG00000005958 | 14_Ephb3         | 3070.38 | 1.2483   | 5.68E-11 | 1.98E-09 | 3861.7  | 4148.48 | 4953.91 | 2090.11 | 1320.59 | 2047.49 |
| ENSMUSG00000005968 | 14_Tuft1         | 4292.88 | 0.39136  | 0.00465  | 0.01327  | 4852.31 | 4463.29 | 5298.12 | 3785.28 | 3189.86 | 4168.42 |
| ENSMUSG00000005973 | 6_Rcn1           | 4638.54 | -0.18679 | 0.10006  | 0.1722   | 4354.83 | 4254.03 | 4405.34 | 4558.02 | 4768.65 | 5490.36 |
| ENSMUSG00000005980 | 15_Dnase1        | 71.9998 | -0.33014 | 0.2513   | 0.36046  | 61.6414 | 72.5066 | 57.3674 | 87.4635 | 83.3773 | 69.6425 |
| ENSMUSG00000005981 | 11_Trap1         | 1625.3  | 0.22517  | 0.05923  | 0.11164  | 1676.47 | 1703.45 | 1875.2  | 1485.08 | 1395.9  | 1615.71 |
| ENSMUSG00000005982 | 13_Naa60         | 1636.3  | 0.43664  | 8.40E-05 | 0.00043  | 1870.95 | 1822.76 | 1952.88 | 1473.35 | 1306.25 | 1391.58 |
| ENSMUSG00000005983 | 15_1700037C18Rik | 76.1023 | 1.18768  | 3.26E-05 | 0.00019  | 107.655 | 99.123  | 109.954 | 45.986  | 39.4473 | 54.4478 |
| ENSMUSG00000005986 | 15_Ankrd13d      | 184.529 | 0.79898  | 0.00035  | 0.00146  | 231.806 | 245.972 | 224.689 | 155.992 | 103.101 | 145.616 |
| ENSMUSG00000005994 | 14_Tyrrp1        | 16291.5 | -1.62942 | 0.00014  | 0.00066  | 6952.45 | 12009.5 | 4914.47 | 27294.9 | 28469.3 | 18108.3 |
| ENSMUSG00000006005 | 17_Tpr           | 5195.3  | -0.19752 | 0.14458  | 0.23177  | 4947.81 | 4572.51 | 4999.33 | 4652.7  | 5884.83 | 6114.61 |
| ENSMUSG00000006007 | 14_Pdc           | 304.862 | -2.32531 | 0.00488  | 0.0138   | 147.592 | 111.054 | 45.4159 | 876.438 | 511.919 | 136.753 |
| ENSMUSG00000006010 | 14_BC003331      | 1098.76 | -0.6882  | 9.11E-08 | 1.16E-06 | 870.793 | 838.874 | 815.095 | 1270.47 | 1513.34 | 1283.95 |
| ENSMUSG00000006014 | 16_Prg4          | 328.6   | 2.30008  | 1.71E-13 | 1.12E-11 | 573.873 | 292.78  | 772.07  | 110.907 | 100.411 | 121.558 |
| ENSMUSG00000006019 | 15_Dhnx34        | 353.694 | 1.19715  | 1.69E-08 | 2.72E-07 | 453.194 | 479.095 | 544.99  | 252.472 | 156.893 | 235.518 |
| ENSMUSG00000006021 | 5_Kptn           | 265.439 | 0.52262  | 0.00311  | 0.00948  | 311.68  | 322.15  | 304.764 | 240.75  | 189.168 | 224.122 |
| ENSMUSG00000006024 | 12_Napa          | 2304.21 | 0.47699  | 0.00023  | 0.00101  | 2549.87 | 2626.76 | 2868.37 | 2084.7  | 1680.99 | 2014.57 |
| ENSMUSG00000006050 | 11_Sra1          | 1157.01 | -0.04369 | 0.71557  | 0.79722  | 1179    | 1134.41 | 1103.13 | 1094.65 | 1158.32 | 1272.56 |
| ENSMUSG00000006056 | 13_Calcococ2     | 0.29884 | -1.76064 | 0.66373  | NA       | 0       | 0       | 0       | 0       | 1.79306 | 0       |
| ENSMUSG00000006057 | 15_Atp5g1        | 1537.81 | 0.53006  | 0.00253  | 0.00795  | 1815.38 | 1775.95 | 1860.85 | 1588.77 | 1003.22 | 1182.66 |
| ENSMUSG00000006058 | 10_Snf8          | 983.82  | 0.04753  | 0.71538  | 0.79717  | 961.953 | 957.271 | 1080.42 | 944.065 | 901.91  | 1057.3  |
| ENSMUSG00000006095 | 12_Tbcb          | 890.444 | 0.53541  | 0.00069  | 0.00262  | 1018.39 | 1027.94 | 1113.88 | 765.531 | 592.607 | 824.314 |
| ENSMUSG00000006127 | 9_Inpp5k         | 1640.95 | -0.26077 | 0.12878  | 0.21135  | 1582.71 | 1578.63 | 1318.25 | 2192.9  | 1698.03 | 1475.15 |
| ENSMUSG00000006134 | 3_Crkl           | 1094.81 | 0.03319  | 0.76268  | 0.83303  | 1109.54 | 1067.41 | 1146.15 | 1095.55 | 1086.6  | 1063.63 |
| ENSMUSG00000006143 | 12_Upk3bl        | 34236.2 | 1.14665  | 6.37E-07 | 6.23E-06 | 42964.9 | 46218.9 | 52320.3 | 28482.4 | 13288.4 | 22142.5 |
| ENSMUSG00000006154 | 13_Eps8l1        | 7153.68 | 1.05521  | 9.54E-16 | 1.01E-13 | 8831.21 | 9478.18 | 10666.8 | 4680.65 | 4123.14 | 5142.15 |
| ENSMUSG00000006169 | 19_Clint1        | 5964.5  | 0.49522  | 0.00021  | 0.00095  | 6635.56 | 6528.35 | 7769.7  | 4598.6  | 4631.48 | 5623.31 |
| ENSMUSG00000006179 | 8_Prrs16         | 13.0484 | 0.87679  | 0.1678   | 0.2618   | 15.6274 | 13.7671 | 21.5128 | 10.8202 | 8.96531 | 7.59736 |
| ENSMUSG00000006191 | 17_Cdkal1        | 362.523 | -0.26798 | 0.14378  | 0.23068  | 329.043 | 295.533 | 362.132 | 327.312 | 420.473 | 440.647 |
| ENSMUSG00000006204 | 5_5430419D17Rik  | 8.15531 | -2.32715 | 0.03112  | 0.06547  | 6.07732 | 1.83561 | 0       | 16.2303 | 19.7237 | 5.06491 |
| ENSMUSG00000006205 | 13_Htra1         | 2185.26 | -0.3695  | 0.00132  | 0.00455  | 1853.58 | 2098.1  | 1767.63 | 2441.76 | 2426.91 | 2523.59 |
| ENSMUSG00000006215 | 12_Zbtb17        | 730.166 | 1.44107  | 4.30E-09 | 8.25E-08 | 948.062 | 982.052 | 1271.64 | 510.354 | 251.029 | 417.855 |
| ENSMUSG00000006216 | 10_Clcncb        | 0.91181 | 0.61234  | 0.80645  | NA       | 0       | 0.91781 | 2.39031 | 0       | 0.89653 | 1.26623 |
| ENSMUSG00000006218 | 4_Fam131c        | 48.5119 | 1.51623  | 2.83E-05 | 0.00017  | 63.3778 | 75.2601 | 77.685  | 29.7556 | 25.9994 | 18.9934 |
| ENSMUSG00000006219 | 12_Fblim1        | 138.767 | 0.26709  | 0.31095  | 0.42575  | 158.01  | 130.328 | 167.322 | 164.107 | 110.273 | 102.564 |
| ENSMUSG00000006221 | 7_Hspb7          | 117.402 | -0.47354 | 0.29414  | 0.40843  | 66.8505 | 134.917 | 93.222  | 225.421 | 57.378  | 126.623 |
| ENSMUSG00000006235 | 5_Epor           | 7.96713 | 0.42247  | 0.59935  | 0.70092  | 6.94551 | 11.9315 | 8.36608 | 7.21348 | 4.48265 | 8.86359 |
| ENSMUSG00000006241 | 15_Ccdc159       | 81.5801 | -0.08074 | 0.76707  | 0.83637  | 87.687  | 80.7669 | 69.3189 | 94.777  | 79.7912 | 77.2398 |
| ENSMUSG00000006262 | 15_Mob1b         | 1854.27 | -0.38859 | 0.00162  | 0.00543  | 1587.92 | 1616.26 | 1613.46 | 1849.36 | 2265.53 | 2193.11 |
| ENSMUSG00000006269 | 7_Atp6v1b1       | 1.19474 | -0.01654 | 0.99388  | NA       | 1.73638 | 1.83561 | 0       | 1.80337 | 1.79306 | 0       |
| ENSMUSG00000006273 | 14_Atp6v1b2      | 5008.11 | 0.05487  | 0.58064  | 0.68417  | 4955.62 | 4964.41 | 5390.14 | 4736.55 | 4897.75 | 5104.16 |
| ENSMUSG00000006276 | 9_Eps15l1        | 1865.55 | 0.64855  | 9.31E-06 | 6.36E-05 | 2109.7  | 2269.73 | 2452.46 | 1317.36 | 1329.55 | 1714.47 |
| ENSMUSG00000006281 | 7_Tep1           | 1446.1  | 0.82826  | 9.47E-14 | 6.53E-12 | 1776.31 | 1794.31 | 1980.37 | 1036.04 | 1031.01 | 1058.57 |
| ENSMUSG00000006288 | 7_Ttc5           | 761.527 | 0.09914  | 0.41834  | 0.53427  | 738.828 | 817.765 | 806.729 | 748.399 | 715.431 | 742.009 |

|                    |                  |         |          |          |          |         |         |         |         |         |         |
|--------------------|------------------|---------|----------|----------|----------|---------|---------|---------|---------|---------|---------|
| ENSMUSG00000006289 | 14_Osgep         | 825.517 | -0.06511 | 0.60358  | 0.70418  | 744.037 | 821.436 | 855.73  | 856.601 | 810.464 | 864.833 |
| ENSMUSG00000006299 | 13_Aamp          | 3573.49 | 0.76588  | 1.26E-05 | 8.28E-05 | 4169.91 | 4455.95 | 4875.03 | 3153.19 | 1988.5  | 2798.36 |
| ENSMUSG00000006301 | 17_Tmbim1        | 5160.11 | 0.40816  | 0.00023  | 0.00103  | 5523.41 | 5726.19 | 6406.03 | 4256.86 | 4351.76 | 4696.44 |
| ENSMUSG00000006304 | 14_Arpc2         | 11754.8 | 0.04176  | 0.74307  | 0.81829  | 12061.7 | 11203.7 | 12508.5 | 9937.48 | 12281.6 | 12535.6 |
| ENSMUSG00000006307 | 16_Kmt2b         | 1868.99 | 1.00652  | 9.42E-14 | 6.53E-12 | 2341.5  | 2441.36 | 2703.44 | 1300.23 | 1077.63 | 1349.8  |
| ENSMUSG00000006310 | 10_Zbtb32        | 30.8238 | 1.08622  | 0.0161   | 0.03782  | 48.6186 | 46.8081 | 29.8789 | 15.3287 | 21.5167 | 22.7921 |
| ENSMUSG00000006313 | 4_Upk1a          | 15.129  | 0.77602  | 0.18501  | 0.28318  | 21.7047 | 17.4383 | 17.9273 | 9.01685 | 10.7584 | 13.9285 |
| ENSMUSG00000006315 | 8_Tmem147        | 886.259 | 0.14797  | 0.27895  | 0.39161  | 965.426 | 929.737 | 899.951 | 949.475 | 763.844 | 809.119 |
| ENSMUSG00000006333 | 14_Rps9          | 11723.7 | 0.69977  | 0.00025  | 0.0011   | 13999.5 | 14282   | 15256.1 | 11478.5 | 6421.85 | 8904.11 |
| ENSMUSG00000006335 | 16_Tfpt          | 226.966 | 0.44055  | 0.04141  | 0.08285  | 236.147 | 244.136 | 303.569 | 204.683 | 154.203 | 219.057 |
| ENSMUSG00000006342 | 14_Susd2         | 145.512 | -0.37625 | 0.26027  | 0.37051  | 103.314 | 180.808 | 95.6123 | 225.421 | 121.032 | 146.882 |
| ENSMUSG00000006344 | 16_Ggt5          | 66.8036 | 0.47729  | 0.16364  | 0.25659  | 90.2916 | 76.1779 | 66.9286 | 76.6433 | 43.93   | 46.8504 |
| ENSMUSG00000006345 | 10_Ggt1          | 108.871 | -0.262   | 0.45254  | 0.56697  | 83.3461 | 127.575 | 86.0511 | 169.517 | 75.3086 | 111.428 |
| ENSMUSG00000006356 | 10_Crip2         | 513.738 | 1.11831  | 2.31E-06 | 1.90E-05 | 633.778 | 635.121 | 842.584 | 440.023 | 244.753 | 286.167 |
| ENSMUSG00000006360 | 11_Crip1         | 1914.83 | 0.65401  | 0.00124  | 0.00432  | 2397.94 | 2132.06 | 2495.48 | 1980.1  | 1110.8  | 1372.59 |
| ENSMUSG00000006362 | 15_Cbfa2t3       | 56.8269 | 0.28808  | 0.41876  | 0.53467  | 48.6186 | 78.0135 | 60.9529 | 64.0197 | 41.2404 | 48.1166 |
| ENSMUSG00000006369 | 14_Fbln1         | 3763.91 | 0.67498  | 0.00092  | 0.00335  | 3967.62 | 5047.93 | 4871.45 | 3858.31 | 2201.88 | 2636.28 |
| ENSMUSG00000006373 | 10_Pgrmc1        | 4248.21 | -0.32333 | 0.00472  | 0.01343  | 3756.65 | 3839.18 | 3726.49 | 4261.37 | 5192.71 | 4712.9  |
| ENSMUSG00000006378 | 13_Gcat          | 1340.11 | 1.03546  | 1.37E-07 | 1.65E-06 | 1727.69 | 1689.68 | 1986.35 | 1053.17 | 623.985 | 959.8   |
| ENSMUSG00000006386 | 15_Tek           | 408.909 | -0.84956 | 2.65E-06 | 2.14E-05 | 300.393 | 319.396 | 255.763 | 605.031 | 527.16  | 445.712 |
| ENSMUSG00000006389 | 12_Mpl           | 0.30056 | -1.76625 | 0.6627   | NA       | 0       | 0       | 0       | 1.80337 | 0       | 0       |
| ENSMUSG00000006390 | 15_Elov1         | 2618.77 | 0.5767   | 6.26E-05 | 0.00033  | 2996.12 | 2934.22 | 3474.31 | 2066.66 | 1825.34 | 2415.96 |
| ENSMUSG00000006392 | 16_Med8          | 920.181 | 0.19557  | 0.14291  | 0.2296   | 985.394 | 939.833 | 1020.66 | 812.419 | 797.912 | 964.865 |
| ENSMUSG00000006398 | 15_Cdc20         | 718.444 | 1.21862  | 3.06E-11 | 1.16E-09 | 1009.7  | 835.203 | 1168.86 | 402.152 | 381.922 | 512.822 |
| ENSMUSG00000006403 | 12_Adamts4       | 43.2051 | 0.8891   | 0.02361  | 0.05214  | 53.8277 | 46.8081 | 68.1238 | 39.6742 | 24.2063 | 26.5908 |
| ENSMUSG00000006411 | 12_Pvrl4         | 8972.45 | 1.01366  | 6.49E-10 | 1.63E-08 | 10803.7 | 11278.9 | 13918.8 | 5903.33 | 4904.92 | 7025.03 |
| ENSMUSG00000006412 | 10_Pfdn2         | 681.118 | 0.13848  | 0.38451  | 0.50194  | 757.928 | 682.847 | 699.165 | 689.789 | 535.229 | 721.749 |
| ENSMUSG00000006418 | 17_Rnf114        | 4946.19 | 0.74085  | 4.33E-09 | 8.28E-08 | 5807.31 | 5734.45 | 7025.12 | 3641.91 | 3506.33 | 3962.02 |
| ENSMUSG00000006423 | 15_C330007P06Rik | 1222.34 | -0.42594 | 0.00114  | 0.00401  | 1026.2  | 996.737 | 1106.71 | 1238.01 | 1481.07 | 1485.28 |
| ENSMUSG00000006435 | 15_Neur11a       | 80.8186 | -0.00434 | 0.09116  | 0.99411  | 82.4779 | 83.5203 | 76.4899 | 132.548 | 52.8953 | 56.9802 |
| ENSMUSG00000006442 | 10_Srm           | 808.644 | 0.89774  | 8.96E-07 | 8.33E-06 | 1042.69 | 930.655 | 1183.2  | 621.261 | 438.403 | 635.646 |
| ENSMUSG00000006445 | 3_Epha2          | 3273.67 | 1.64754  | 9.39E-15 | 8.21E-13 | 4672.59 | 4096.17 | 6120.38 | 1875.51 | 1128.73 | 1748.66 |
| ENSMUSG00000006456 | 10_Rbm14         | 736.752 | 0.68207  | 5.13E-06 | 3.80E-05 | 827.384 | 937.079 | 957.318 | 545.52  | 507.436 | 645.776 |
| ENSMUSG00000006457 | 3_Actn3          | 32.0316 | -1.79139 | 0.01914  | 0.04358  | 15.6274 | 20.1917 | 7.17092 | 110.907 | 26.8959 | 11.396  |
| ENSMUSG00000006462 | 6_A530013C23Rik  | 3.77461 | 0.18324  | 0.88205  | 0.92034  | 3.47275 | 7.34244 | 1.19515 | 6.3118  | 1.79306 | 2.53245 |
| ENSMUSG00000006463 | 13_Zdhhc24       | 317.771 | 0.1287   | 0.48337  | 0.59548  | 285.634 | 376.3   | 333.448 | 316.492 | 268.063 | 326.687 |
| ENSMUSG00000006464 | 8_Bbs1           | 256.749 | 0.17592  | 0.41797  | 0.53395  | 250.038 | 303.794 | 264.129 | 304.77  | 215.167 | 202.596 |
| ENSMUSG00000006469 | 13_Slc34a3       | 2.00755 | 3.31383  | 0.08192  | NA       | 2.60457 | 4.58903 | 3.58546 | 0       | 0       | 1.26623 |
| ENSMUSG00000006471 | 17_Ndor1         | 1487.5  | 0.54632  | 8.29E-06 | 5.75E-05 | 1690.36 | 1715.38 | 1891.93 | 1280.39 | 1100.94 | 1245.97 |
| ENSMUSG00000006476 | 19_Nsmf          | 470.495 | 0.15533  | 0.47283  | 0.58585  | 502.681 | 549.766 | 435.036 | 584.292 | 352.337 | 398.861 |
| ENSMUSG00000006494 | 11_Pdk1          | 1684.51 | -0.3222  | 0.00338  | 0.01016  | 1551.45 | 1518.97 | 1419.84 | 1770.01 | 1943.68 | 1903.14 |
| ENSMUSG00000006498 | 16_Ptbp1         | 5384.41 | 1.00731  | 1.85E-12 | 9.18E-11 | 6601.7  | 6911.08 | 8060.12 | 3689.7  | 3052.69 | 3991.15 |
| ENSMUSG00000006517 | 4_Mvd            | 763.296 | 1.40341  | 7.94E-10 | 1.94E-08 | 1025.33 | 1045.38 | 1252.52 | 534.699 | 276.131 | 445.712 |
| ENSMUSG00000006519 | 10_Cyba          | 293.813 | 0.86746  | 0.00093  | 0.00336  | 450.59  | 369.876 | 317.911 | 277.719 | 141.652 | 205.129 |
| ENSMUSG00000006522 | 15_Ithi3         | 5.56848 | -0.17285 | 0.85504  | 0.90167  | 5.20913 | 4.58903 | 5.97577 | 3.60674 | 8.96531 | 5.06491 |
| ENSMUSG00000006526 | 11_Tmem110       | 482.295 | 0.39464  | 0.01044  | 0.02622  | 554.772 | 547.93  | 541.405 | 478.795 | 378.336 | 392.53  |
| ENSMUSG00000006527 | 14_Sfmbt1        | 1360.33 | -0.0251  | 0.86064  | 0.90563  | 1313.57 | 1330.82 | 1400.72 | 1146.04 | 1507.07 | 1463.76 |
| ENSMUSG00000006538 | 10_Ihh           | 9.26572 | 0.14691  | 0.84413  | 0.89372  | 6.94551 | 9.17806 | 13.1467 | 9.91854 | 6.27571 | 10.1298 |
| ENSMUSG00000006542 | 13_Prkg3         | 5.85263 | -0.56446 | 0.54419  | 0.6509   | 5.20913 | 6.42464 | 2.39031 | 8.11517 | 5.37918 | 7.59736 |
| ENSMUSG00000006546 | 3_Cryba2         | 1780.42 | -1.25613 | 0.17333  | 0.2687   | 835.197 | 1998.06 | 319.106 | 4543.59 | 851.704 | 2134.86 |
| ENSMUSG00000006567 | 11_Atp7b         | 74.578  | -0.45049 | 0.22559  | 0.33094  | 48.6186 | 83.5203 | 57.3674 | 119.924 | 79.7912 | 58.2464 |
| ENSMUSG00000006570 | 3_Defb2          | 29.2027 | -1.57772 | 0.00427  | 0.01236  | 15.6274 | 22.0273 | 5.97577 | 45.0843 | 57.378  | 29.1232 |
| ENSMUSG00000006574 | 15_Slc4a1        | 0.42208 | -2.1835  | 0.58658  | NA       | 0       | 0       | 0       | 0       | 0       | 2.53245 |
| ENSMUSG00000006575 | 14_Rundc3a       | 78.3874 | -0.06061 | 0.85822  | 0.90402  | 59.0368 | 100.041 | 71.7092 | 98.2837 | 84.2739 | 56.9802 |
| ENSMUSG00000006576 | 16_Slc4a3        | 460.187 | 0.24917  | 0.30865  | 0.42353  | 460.14  | 636.957 | 402.767 | 556.34  | 369.371 | 335.55  |
| ENSMUSG00000006585 | 2_Cdt1           | 210.205 | 1.80033  | 1.69E-17 | 2.25E-15 | 317.757 | 330.41  | 329.863 | 83.8567 | 81.5843 | 117.759 |
| ENSMUSG00000006586 | 15_Runx1t1       | 64.9675 | -0.75434 | 0.04177  | 0.08345  | 44.2776 | 66.082  | 34.6595 | 102.792 | 82.4808 | 59.5127 |
| ENSMUSG00000006587 | 5_Snai3          | 5.06123 | 0.22351  | 0.83224  | 0.88529  | 3.47275 | 8.26025 | 4.78062 | 6.3118  | 6.27571 | 1.26623 |
| ENSMUSG00000006589 | 7_Aprt           | 684.882 | 1.15768  | 3.08E-08 | 4.49E-07 | 938.512 | 908.628 | 990.783 | 557.242 | 310.2   | 403.926 |
| ENSMUSG00000006599 | 13_Gtf2h1        | 1229.88 | -0.25425 | 0.05895  | 0.11125  | 1186.81 | 996.737 | 1182.01 | 1219.08 | 1424.59 | 1370.06 |
| ENSMUSG00000006611 | 14_Hfe           | 324.34  | -0.28353 | 0.13465  | 0.21885  | 293.448 | 310.218 | 274.885 | 418.382 | 360.405 | 288.7   |
| ENSMUSG00000006641 | 12_Slc5a6        | 414.1   | 0.28324  | 0.06783  | 0.12521  | 467.085 | 456.149 | 439.817 | 403.053 | 327.234 | 391.264 |
| ENSMUSG00000006642 | 3_Tcf23          | 0.44354 | -0.79887 | 0.84362  | NA       | 0.86819 | 0       | 0       | 0       | 1.79306 | 0       |
| ENSMUSG00000006649 | 16_Nphs1         | 68.1529 | -0.99268 | 0.01233  | 0.0301   | 52.0913 | 57.8218 | 26.2934 | 124.433 | 67.2398 | 81.0385 |
| ENSMUSG00000006651 | 7_Aplp1          | 143.572 | -0.63183 | 0.07415  | 0.1348   | 127.624 | 122.986 | 87.2462 | 276.817 | 120.135 | 126.623 |
| ENSMUSG00000006673 | 14_Qrich1        | 1860.06 | 0.12016  | 0.36383  | 0.48115  | 1831.01 | 1859.47 | 2121.4  | 1602.3  | 1767.06 | 1979.11 |
| ENSMUSG00000006675 | 10_P4htm         | 104.729 | -0.15078 | 0.67239  | 0.76268  | 93.7643 | 131.246 | 72.9044 | 161.402 | 90.5496 | 78.5061 |
| ENSMUSG00000006676 | 16_Usfp19        | 2800.44 | 0.79846  | 2.26E-09 | 4.75E-08 | 3174.1  | 3740.98 | 3753.98 | 2254.21 | 1821.75 | 2057.62 |
| ENSMUSG00000006678 | 6_Pola1          | 556.648 | 0.03721  | 0.81931  | 0.87576  | 595.577 | 531.409 | 564.113 | 458.958 | 621.296 | 568.536 |
| ENSMUSG00000006699 | 17_Cdc42         | 11856.6 | -0.22837 | 0.06805  | 0.1256   | 11399.3 | 10149.1 | 11211.7 | 11134.9 | 13964.4 | 13280.2 |
| ENSMUSG00000006705 | 12_Pknx1         | 640.821 | 0.02404  | 0.87208  | 0.91313  | 606.864 | 655.313 | 675.262 | 626.671 | 560.332 | 720.483 |
| ENSMUSG00000006711 | 15_D130043K22Rik | 2.27021 | -0.18727 | 0.90385  | NA       | 3.47275 | 2.75342 | 0       | 1.80337 | 1.79306 | 3.79868 |
| ENSMUSG00000006715 | 11_Gmn           | 339.607 | 0.10775  | 0.64302  | 0.73823  | 382.871 | 283.602 | 389.62  | 238.947 | 342.475 | 400.128 |
| ENSMUSG00000006717 | 6_Acot13         | 484.371 | -0.67257 | 1.86E-06 | 1.58E-05 | 388.08  | 371.711 | 360.937 | 628.475 | 608.744 | 548.276 |
| ENSMUSG00000006720 | 16_Zfp184        | 34.5293 | -0.81987 | 0.05255  | 0.10096  | 30.3866 | 28.452  | 15.537  | 44.1826 | 43.0335 | 45.5842 |
| ENSMUSG00000006724 | 12_Cyp27b1       | 2.46025 | 0.90516  | 0.51246  | NA       | 3.47275 | 3.67122 | 2.39031 | 0.90169 | 1.79306 | 2.53245 |
| ENSMUSG00000006728 | 12_Cdk4          | 2817.97 | 0.474    | 6.85E-05 | 0.00036  | 3298.25 | 3051.7  | 3480.29 | 2498.57 | 2136.43 | 2442.55 |
| ENSMUSG00000006731 | 9_B4galnt1       | 608.49  | 1.36899  | 4.58E-09 | 8.70E-08 | 856.034 | 700.286 | 1075.64 | 415.677 | 241.167 | 362.141 |
| ENSMUSG00000006732 | 14_Mettl1        | 372.155 | 0.24572  | 0.18678  | 0.28535  | 368.112 | 351.52  | 492.403 | 344.444 | 315.579 | 360.875 |

|                     |                 |         |          |          |          |         |         |         |         |         |         |
|---------------------|-----------------|---------|----------|----------|----------|---------|---------|---------|---------|---------|---------|
| ENSMUSG000000006736 | 8_Tspan31       | 1324.02 | -0.02215 | 0.83788  | 0.88945  | 1253.66 | 1333.57 | 1355.3  | 1315.56 | 1371.69 | 1314.34 |
| ENSMUSG000000006740 | 13_Kif5b        | 8425.95 | -0.17639 | 0.14397  | 0.23093  | 7888.36 | 7515.91 | 8330.22 | 7843.76 | 9631.43 | 9346.02 |
| ENSMUSG000000006763 | 12_Saal1        | 459.895 | 0.16948  | 0.21539  | 0.31922  | 487.922 | 468.081 | 504.355 | 426.497 | 420.473 | 452.043 |
| ENSMUSG000000006764 | 8_Tph2          | 1.99354 | -2.3229  | 0.24155  | NA       | 0.86819 | 0       | 1.19515 | 6.3118  | 3.58612 | 0       |
| ENSMUSG000000006777 | 7_Krt23         | 468.676 | 0.33277  | 0.05794  | 0.10962  | 564.322 | 498.368 | 505.55  | 500.435 | 377.439 | 365.94  |
| ENSMUSG000000006782 | 16_Cnp          | 481.785 | 0.4716   | 0.00448  | 0.01288  | 537.409 | 566.286 | 576.064 | 468.876 | 340.682 | 401.394 |
| ENSMUSG000000006784 | 14_Ttc25        | 13.4355 | -0.29176 | 0.64448  | 0.73953  | 13.891  | 12.8493 | 9.56123 | 19.8371 | 14.3445 | 10.1298 |
| ENSMUSG000000006800 | 13_Sulf2        | 366.99  | 0.37981  | 0.02849  | 0.06087  | 382.871 | 396.492 | 466.11  | 348.952 | 277.028 | 330.485 |
| ENSMUSG000000006818 | 4_Sod2          | 1994.79 | -0.07611 | 0.46202  | 0.5757   | 1988.15 | 1843.87 | 1994.71 | 1986.41 | 2085.33 | 2070.28 |
| ENSMUSG000000006850 | 7_Tmco6         | 214.93  | 0.5938   | 0.00744  | 0.01965  | 247.434 | 236.794 | 291.618 | 202.879 | 133.583 | 177.272 |
| ENSMUSG000000006906 | 10_Stambp       | 907.404 | 0.04756  | 0.74418  | 0.81914  | 943.721 | 840.71  | 982.417 | 770.941 | 955.702 | 950.936 |
| ENSMUSG000000006920 | 14_Ezh1         | 1942.8  | 0.27782  | 0.00647  | 0.0175   | 2044.58 | 2147.67 | 2195.5  | 1742.96 | 1720.44 | 1805.64 |
| ENSMUSG000000006930 | 15_Hap1         | 315.133 | 1.41494  | 1.65E-09 | 3.61E-08 | 410.653 | 413.93  | 552.161 | 224.52  | 151.514 | 138.019 |
| ENSMUSG000000006931 | 15_P3h4         | 714.392 | 0.26992  | 0.07879  | 0.14155  | 745.774 | 786.559 | 811.51  | 754.711 | 564.814 | 622.984 |
| ENSMUSG000000006932 | 16_Ctnnb1       | 23888.6 | -0.01328 | 0.88258  | 0.92067  | 23511.4 | 23084.6 | 24740.9 | 24591.7 | 23452.3 | 23950.7 |
| ENSMUSG000000006941 | 4_Eif1b         | 432.734 | -0.55992 | 0.00054  | 0.00212  | 367.244 | 359.78  | 322.692 | 568.964 | 530.746 | 446.978 |
| ENSMUSG000000006948 | 7_Klk4          | 0.34389 | 1.87986  | 0.64119  | NA       | 0.86819 | 0       | 1.19515 | 0       | 0       | 0       |
| ENSMUSG000000006958 | 13_Chrrd        | 94.5142 | 0.12648  | 0.64928  | 0.74342  | 92.028  | 111.972 | 92.0269 | 111.809 | 74.412  | 84.8372 |
| ENSMUSG000000006998 | 15_Psmd2        | 6325.2  | 0.34403  | 0.00192  | 0.00628  | 6869.11 | 6718.34 | 7639.43 | 5415.52 | 5311.94 | 5996.85 |
| ENSMUSG000000007021 | 4_Syngn3        | 8.26178 | -0.89099 | 0.40181  | 0.51944  | 6.94551 | 9.17806 | 1.19515 | 23.4438 | 6.27571 | 2.53245 |
| ENSMUSG000000007029 | 16_Vars         | 1224.61 | 1.37811  | 1.31E-13 | 8.91E-12 | 1583.58 | 1672.24 | 2048.49 | 651.017 | 547.78  | 844.573 |
| ENSMUSG000000007030 | 8_Vwa7          | 225.029 | 0.78219  | 0.00023  | 0.00103  | 271.743 | 264.328 | 316.716 | 165.008 | 133.583 | 198.798 |
| ENSMUSG000000007033 | 4_Hspa1l        | 52.0777 | 0.48811  | 0.26766  | 0.37899  | 94.6325 | 52.3149 | 34.6595 | 36.0674 | 40.3439 | 54.4478 |
| ENSMUSG000000007034 | 15_Slc44a4      | 733.194 | 1.01498  | 2.00E-11 | 7.89E-10 | 954.139 | 877.422 | 1111.49 | 439.121 | 509.229 | 507.757 |
| ENSMUSG000000007035 | 15_Msh5         | 113.894 | 0.62285  | 0.00682  | 0.01829  | 143.251 | 137.671 | 133.857 | 94.677  | 94.1357 | 79.7723 |
| ENSMUSG000000007036 | 15_Abhd16a      | 1136.28 | 0.86227  | 1.47E-05 | 9.51E-05 | 1398.65 | 1440.95 | 1559.68 | 1068.5  | 623.089 | 726.814 |
| ENSMUSG000000007038 | 5_Neu1          | 454.24  | 0.23488  | 0.25822  | 0.36817  | 453.194 | 561.697 | 458.939 | 534.699 | 343.371 | 373.537 |
| ENSMUSG000000007039 | 12_Ddah2        | 357.516 | 0.13713  | 0.58617  | 0.68892  | 345.539 | 437.793 | 340.619 | 476.992 | 261.787 | 282.369 |
| ENSMUSG000000007041 | 9_Clic1         | 9079.89 | 0.6646   | 1.01E-07 | 1.26E-06 | 10861   | 10396.9 | 12146.4 | 7187.33 | 6237.16 | 7650.54 |
| ENSMUSG000000007050 | 17_Lsm2         | 242.694 | 0.37079  | 0.04873  | 0.09505  | 272.611 | 242.301 | 305.959 | 207.388 | 193.651 | 234.252 |
| ENSMUSG000000007080 | 14_Pole         | 474.308 | 1.13232  | 4.24E-07 | 4.39E-06 | 651.141 | 559.861 | 742.191 | 208.289 | 320.958 | 363.407 |
| ENSMUSG000000007097 | 14_Atp1a2       | 3809.17 | -0.90677 | 0.04182  | 0.08348  | 2264.24 | 4061.29 | 1624.21 | 6325.32 | 4566.03 | 4013.94 |
| ENSMUSG000000007107 | 6_Atp1a4        | 16.0635 | -0.88942 | 0.15057  | 0.23983  | 7.8137  | 16.5205 | 9.56123 | 25.2472 | 23.3098 | 13.9285 |
| ENSMUSG000000007122 | 11_Casq1        | 323.246 | -1.92851 | 1.89E-07 | 2.18E-06 | 116.337 | 211.095 | 75.2947 | 759.219 | 340.682 | 436.848 |
| ENSMUSG000000007207 | 10_Stx1a        | 68.7632 | 0.85281  | 0.00522  | 0.0146   | 80.7415 | 89.9449 | 95.6123 | 59.5112 | 47.5161 | 39.253  |
| ENSMUSG000000007216 | 6_Zfp775        | 79.5006 | 0.11289  | 0.70747  | 0.79071  | 83.3461 | 92.6984 | 71.7092 | 96.4803 | 61.8606 | 70.9087 |
| ENSMUSG000000007279 | 14_Scbe2        | 16.6145 | -0.36273 | 0.53227  | 0.64062  | 14.7592 | 11.9315 | 16.7322 | 15.3287 | 14.3445 | 26.5908 |
| ENSMUSG000000007338 | 9_Mrpl49        | 967.653 | -0.22633 | 0.05084  | 0.09843  | 938.512 | 867.326 | 868.877 | 1053.17 | 1006.8  | 1071.23 |
| ENSMUSG000000007379 | 15_Dennd2c      | 2547.12 | 0.2588   | 0.09963  | 0.1716   | 2842.45 | 2558.84 | 2922.15 | 1862.88 | 2395.53 | 2700.86 |
| ENSMUSG000000007411 | 15_Mark3        | 2003.49 | 0.26356  | 0.01175  | 0.02894  | 2114.91 | 2157.76 | 2285.13 | 1751.07 | 1819.06 | 1893.01 |
| ENSMUSG000000007415 | 15_Gatad1       | 1356.34 | -0.43748 | 8.59E-05 | 0.00044  | 1188.55 | 1115.13 | 1152.13 | 1475.16 | 1569.83 | 1637.23 |
| ENSMUSG000000007440 | 10_Pcdha11      | 4.05544 | -5.47607 | 0.00152  | 0.00515  | 0       | 0       | 0       | 2.70506 | 8.96531 | 12.6623 |
| ENSMUSG000000007457 | 3_2310003L06Rik | 0.29412 | -0.03469 | 0.99322  | NA       | 0.86819 | 0       | 0       | 0       | 0.89653 | 0       |
| ENSMUSG000000007458 | 14_M6pr         | 4550.28 | -0.05995 | 0.5986   | 0.70031  | 4478.12 | 4142.97 | 4745.96 | 4274.89 | 4726.51 | 4933.22 |
| ENSMUSG000000007476 | 18_Lrrc8a       | 527.562 | 0.51095  | 0.00594  | 0.01627  | 566.927 | 583.724 | 709.922 | 507.649 | 351.44  | 445.712 |
| ENSMUSG000000007480 | 3_Mc5r          | 0.44912 | -2.32858 | 0.56096  | NA       | 0       | 0       | 0       | 0.90169 | 1.79306 | 0       |
| ENSMUSG000000007564 | 14_Ppp2r1a      | 5475.87 | 0.45425  | 0.00025  | 0.00109  | 5855.93 | 6362.23 | 6774.13 | 4860.08 | 4081.01 | 4921.82 |
| ENSMUSG000000007570 | 15_Fance        | 328.555 | 0.99471  | 2.22E-05 | 0.00014  | 434.962 | 414.848 | 462.525 | 276.817 | 147.928 | 234.252 |
| ENSMUSG000000007589 | 8_Tinf2         | 328.656 | 0.34354  | 0.03716  | 0.07575  | 387.212 | 320.314 | 395.596 | 286.736 | 289.579 | 292.498 |
| ENSMUSG000000007591 | 14_Tssk4        | 16.5989 | 0.5501   | 0.34912  | 0.46599  | 17.3638 | 18.3561 | 23.9031 | 17.132  | 15.241  | 7.59736 |
| ENSMUSG000000007594 | 9_Hapln4        | 3.47053 | -0.37858 | 0.77084  | 0.83907  | 4.34094 | 4.58903 | 0       | 4.50843 | 3.58612 | 3.79868 |
| ENSMUSG000000007603 | 8_Dus3l         | 372.369 | 0.98032  | 2.94E-05 | 0.00017  | 440.172 | 514.889 | 527.063 | 302.966 | 166.755 | 282.369 |
| ENSMUSG000000007610 | 15_Gtpbp3       | 232.821 | 0.63374  | 0.00087  | 0.0032   | 256.116 | 272.588 | 321.496 | 199.272 | 167.651 | 179.804 |
| ENSMUSG000000007613 | 15_Tgfb1r       | 4649.32 | -0.33413 | 0.00766  | 0.02017  | 4272.36 | 3832.76 | 4234.43 | 4525.56 | 5574.63 | 5456.17 |
| ENSMUSG000000007617 | 17_Homer1       | 261.299 | -0.48735 | 0.00844  | 0.02191  | 207.497 | 222.109 | 222.299 | 269.604 | 290.476 | 355.81  |
| ENSMUSG000000007646 | 13_Rad51c       | 79.4463 | -0.14988 | 0.58713  | 0.68967  | 72.0596 | 88.1093 | 65.7335 | 88.3652 | 85.1704 | 77.2398 |
| ENSMUSG000000007653 | 12_Gabrb2       | 51.6417 | -1.04821 | 0.00199  | 0.0065   | 33.8593 | 33.9588 | 33.4643 | 77.545  | 75.3086 | 55.714  |
| ENSMUSG000000007655 | 16_Cav1         | 2176.46 | -0.46297 | 1.22E-05 | 8.09E-05 | 1938.66 | 1797.06 | 1754.49 | 2508.49 | 2618.77 | 2441.29 |
| ENSMUSG000000007656 | 13_Arpp19       | 2250.78 | -0.26586 | 0.02811  | 0.06022  | 2097.54 | 1920.97 | 2113.03 | 2196.51 | 2590.97 | 2585.64 |
| ENSMUSG000000007659 | 18_Bcl2l1       | 2066.54 | 0.62156  | 1.79E-05 | 0.00011  | 2311.12 | 2467.06 | 2736.9  | 1820.5  | 1377.07 | 1686.61 |
| ENSMUSG000000007670 | 9_Khsrp         | 1690.65 | 0.81879  | 1.06E-07 | 1.31E-06 | 1941.27 | 2162.35 | 2368.8  | 1230.8  | 1030.11 | 1410.58 |
| ENSMUSG000000007682 | 5_Dio2          | 332.691 | 1.49232  | 2.69E-06 | 2.16E-05 | 665.032 | 252.397 | 555.747 | 159.598 | 208.892 | 154.48  |
| ENSMUSG000000007721 | 5_Ccdc124       | 414.241 | 1.30858  | 2.55E-06 | 2.07E-05 | 506.154 | 572.711 | 691.994 | 332.722 | 142.548 | 239.317 |
| ENSMUSG000000007739 | 10_Cct4         | 3818.3  | -0.27478 | 0.05484  | 0.10464  | 3632.5  | 3194.88 | 3540.05 | 3527.39 | 4816.16 | 4198.81 |
| ENSMUSG000000007777 | 9_0610009B22Rik | 461.634 | -0.43275 | 0.00186  | 0.00613  | 410.653 | 382.725 | 384.84  | 500.435 | 550.47  | 540.679 |
| ENSMUSG000000007783 | 9_Cpt1c         | 147.123 | -0.20667 | 0.50547  | 0.61596  | 150.197 | 154.191 | 105.174 | 223.618 | 110.273 | 139.285 |
| ENSMUSG000000007805 | 4_Twist2        | 56.7591 | -0.096   | 0.76497  | 0.8344   | 48.6186 | 50.4793 | 65.7335 | 60.4129 | 51.9988 | 63.3113 |
| ENSMUSG000000007812 | 16_Zfp655       | 894.196 | -0.58048 | 2.00E-05 | 0.00012  | 720.596 | 675.505 | 755.337 | 1012.59 | 1199.56 | 1001.59 |
| ENSMUSG000000007815 | 13_Rhoa         | 9669.36 | -0.16405 | 0.205    | 0.30704  | 9170.67 | 8618.19 | 9570.79 | 8745.45 | 10580.9 | 11330.2 |
| ENSMUSG000000007817 | 14_Zmiz1        | 1447.34 | 0.65579  | 1.91E-06 | 1.61E-05 | 1711.2  | 1788.8  | 1813.05 | 1297.53 | 993.356 | 1080.09 |
| ENSMUSG000000007827 | 10_Ankrd26      | 347.818 | -0.32047 | 0.03932  | 0.07936  | 301.261 | 297.369 | 329.863 | 357.067 | 408.818 | 392.53  |
| ENSMUSG000000007833 | 13_Aldh16a1     | 489.983 | 1.41641  | 3.49E-07 | 3.69E-06 | 577.345 | 720.477 | 841.388 | 383.216 | 166.755 | 250.713 |
| ENSMUSG000000007836 | 6_Hnnpa0        | 1501.25 | 0.0544   | 0.7008   | 0.78607  | 1385.63 | 1448.3  | 1755.68 | 1334.49 | 1541.14 | 1542.26 |
| ENSMUSG000000007837 | 10_Prrg2        | 276.06  | 1.36812  | 2.22E-07 | 2.49E-06 | 327.307 | 387.314 | 479.257 | 195.666 | 102.204 | 164.609 |
| ENSMUSG000000007850 | 16_Hnnp1        | 6572.34 | -0.23309 | 0.06089  | 0.11434  | 6122.46 | 5759.23 | 6245.88 | 6159.41 | 7795.33 | 7351.71 |
| ENSMUSG000000007867 | 8_Ilf43         | 203.299 | -0.09428 | 0.6261   | 0.72333  | 194.474 | 189.068 | 206.762 | 237.143 | 184.685 | 207.661 |
| ENSMUSG000000007872 | 3_Id3           | 1288.03 | 0.39028  | 0.14154  | 0.22779  | 1320.51 | 1733.73 | 1330.21 | 1693.37 | 831.084 | 819.249 |
| ENSMUSG000000007877 | 2_Tcap          | 227.952 | -0.56111 | 0.42003  | 0.53593  | 140.647 | 238.629 | 173.297 | 495.927 | 88.7565 | 230.453 |
| ENSMUSG000000007880 | 16_Arid1a       | 3189.41 | 0.62479  | 2.16E-08 | 3.31E-07 | 3575.2  | 3820.82 | 4212.92 | 2535.54 | 2421.53 | 2570.44 |

|                     |                  |         |          |          |          |         |         |         |         |         |         |
|---------------------|------------------|---------|----------|----------|----------|---------|---------|---------|---------|---------|---------|
| ENSMUSG000000007888 | 15_Crlf1         | 517.789 | 1.32886  | 1.38E-11 | 5.55E-10 | 598.182 | 761.779 | 861.706 | 313.787 | 242.063 | 329.219 |
| ENSMUSG000000007891 | 15_Ctsd          | 19688.7 | 0.30386  | 0.03635  | 0.07441  | 20978.9 | 21834.6 | 22449.8 | 20443.9 | 14320.3 | 18104.5 |
| ENSMUSG000000007892 | 7_Rplp1          | 11722.4 | 1.54149  | 1.97E-09 | 4.20E-08 | 15705.5 | 16717.8 | 19928   | 8852.75 | 3673.09 | 5457.44 |
| ENSMUSG000000007907 | 4_Cabs1          | 0.15297 | 0.92709  | 0.82027  | NA       | 0       | 0.91781 | 0       | 0       | 0       | 0       |
| ENSMUSG000000007908 | 14_Hmgcll1       | 53.9549 | 0.08972  | 0.80264  | 0.8635   | 62.5096 | 40.3834 | 64.5383 | 49.5927 | 63.6537 | 43.0517 |
| ENSMUSG000000007944 | 8_Ttc9b          | 2.61124 | -1.39881 | 0.38178  | 0.49947  | 0       | 0.91781 | 3.58546 | 6.3118  | 3.58612 | 1.26623 |
| ENSMUSG000000007946 | 10_Phox2a        | 0       | NA       | NA       | NA       | 0       | 0       | 0       | 0       | 0       | 0       |
| ENSMUSG000000007950 | 8_Abhd8          | 349.553 | 0.95129  | 0.00312  | 0.00949  | 424.544 | 511.218 | 446.988 | 377.806 | 129.1   | 207.661 |
| ENSMUSG000000007987 | 12_lftt2         | 520.6   | 0.11178  | 0.43335  | 0.54859  | 539.145 | 497.451 | 586.821 | 531.093 | 484.127 | 484.965 |
| ENSMUSG000000007989 | 6_Fzd3           | 52.9591 | -1.545   | 0.00058  | 0.00227  | 38.2003 | 20.1917 | 22.7079 | 83.8567 | 108.48  | 44.3179 |
| ENSMUSG000000008028 | 15_1700008O03Rik | 4.18168 | 1.25338  | 0.31155  | 0.42651  | 5.20913 | 5.50683 | 7.17092 | 5.41011 | 1.79306 | 0       |
| ENSMUSG000000008035 | 12_Mid1ip1       | 2627.39 | 0.84408  | 1.57E-08 | 2.55E-07 | 3089.88 | 3190.29 | 3844.81 | 2105.44 | 1609.27 | 1924.66 |
| ENSMUSG000000008036 | 11_Ap2s1         | 1278.06 | 0.88894  | 2.87E-07 | 3.13E-06 | 1460.29 | 1542.83 | 1976.78 | 1008.08 | 745.913 | 934.475 |
| ENSMUSG000000008090 | 14_Fgfr1         | 241.548 | -0.23189 | 0.34355  | 0.46008  | 205.761 | 265.246 | 196.005 | 339.935 | 238.477 | 203.863 |
| ENSMUSG000000008129 | 14_4930432K21Rik | 14.7414 | -0.16809 | 0.78485  | 0.85055  | 13.0228 | 11.0137 | 17.9273 | 21.6405 | 13.448  | 11.396  |
| ENSMUSG000000008136 | 14_Fhl2          | 113.608 | 0.24583  | 0.4043   | 0.52147  | 102.446 | 115.644 | 152.98  | 134.351 | 97.7218 | 78.5061 |
| ENSMUSG000000008140 | 17_Emc10         | 1277.39 | 0.99215  | 6.64E-06 | 4.74E-05 | 1510.65 | 1776.87 | 1813.05 | 1133.42 | 584.538 | 845.84  |
| ENSMUSG000000008153 | 11_Clstn3        | 119.953 | -0.64516 | 0.1159   | 0.1941   | 93.7643 | 137.671 | 49.0013 | 220.011 | 119.239 | 100.032 |
| ENSMUSG000000008167 | 11_Fbxw9         | 369.92  | 0.87786  | 2.67E-05 | 0.00016  | 460.14  | 435.958 | 542.6   | 332.722 | 221.443 | 226.655 |
| ENSMUSG000000008193 | 13_Spib          | 7.33818 | 2.50028  | 0.01261  | 0.03069  | 13.0228 | 9.17806 | 15.537  | 2.70506 | 3.58612 | 0       |
| ENSMUSG000000008200 | 14_Fnbp4         | 1883.03 | 0.10755  | 0.40087  | 0.51843  | 1950.82 | 1832.86 | 2075.98 | 1600.49 | 1952.64 | 1885.41 |
| ENSMUSG000000008206 | 15_Cers4         | 792.339 | -1.04034 | 1.04E-05 | 7.02E-05 | 523.518 | 665.409 | 365.717 | 1238.01 | 1148.46 | 812.918 |
| ENSMUSG000000008226 | 14_Scrn3         | 578.085 | -0.6629  | 2.55E-06 | 2.07E-05 | 482.713 | 411.177 | 448.183 | 660.034 | 724.397 | 742.009 |
| ENSMUSG000000008301 | 11_Phax          | 721.016 | -0.09181 | 0.46778  | 0.58126  | 722.333 | 705.792 | 664.506 | 706.02  | 736.052 | 791.392 |
| ENSMUSG000000008305 | 18_Tle1          | 262.227 | -0.25127 | 0.16769  | 0.26168  | 237.884 | 265.246 | 215.128 | 317.393 | 274.338 | 263.375 |
| ENSMUSG000000008307 | 11_1700109H08Rik | 46.456  | -0.29148 | 0.3884   | 0.50573  | 42.5412 | 42.2191 | 40.6352 | 57.7079 | 47.5161 | 48.1166 |
| ENSMUSG000000008318 | 9_Relt           | 17.6512 | 0.4185   | 0.53357  | 0.64176  | 29.5184 | 15.6027 | 15.537  | 27.0506 | 8.06878 | 10.1298 |
| ENSMUSG000000008333 | 12_Snrpb2        | 825.75  | -0.60967 | 8.10E-05 | 0.00041  | 671.978 | 603.916 | 686.018 | 852.093 | 1143.97 | 996.521 |
| ENSMUSG000000008348 | 9_Ubc            | 18705.7 | 1.22694  | 1.01E-12 | 5.45E-11 | 23522.7 | 26603.5 | 28510.4 | 12233.2 | 8433.66 | 12930.7 |
| ENSMUSG000000008373 | 16_Prpf31        | 850.916 | 0.33909  | 0.00864  | 0.02233  | 956.744 | 886.6   | 1007.51 | 755.612 | 697.501 | 801.522 |
| ENSMUSG000000008384 | 8_Sertad1        | 659.687 | 1.08782  | 8.31E-08 | 1.07E-06 | 859.507 | 824.189 | 1008.71 | 537.405 | 321.854 | 406.459 |
| ENSMUSG000000008393 | 8_Carhsp1        | 1688.3  | 0.3087   | 0.01197  | 0.02942  | 1923.91 | 1741.08 | 1939.74 | 1620.33 | 1366.31 | 1538.47 |
| ENSMUSG000000008398 | 14_Elk3          | 1209.71 | 0.55908  | 3.50E-06 | 2.71E-05 | 1404.73 | 1403.32 | 1515.46 | 1026.12 | 895.634 | 1012.98 |
| ENSMUSG000000008429 | 7_Herpud2        | 845.962 | -0.05505 | 0.63674  | 0.73302  | 809.152 | 839.792 | 840.193 | 825.944 | 870.531 | 890.158 |
| ENSMUSG000000008435 | 15_Rdh13         | 796.594 | 0.05388  | 0.64729  | 0.74196  | 833.461 | 784.724 | 816.29  | 805.205 | 761.154 | 778.73  |
| ENSMUSG000000008438 | 3_Adam21         | 4.33031 | -0.89321 | 0.4067   | 0.5236   | 2.60457 | 1.83561 | 4.78062 | 7.21348 | 4.48265 | 5.06491 |
| ENSMUSG000000008450 | 7_Nutl2          | 301.393 | -0.46169 | 0.00549  | 0.01523  | 239.62  | 254.232 | 266.519 | 329.034 | 322.751 | 386.199 |
| ENSMUSG000000008461 | 5_Fut1           | 13.6738 | 0.07977  | 0.90072  | 0.93293  | 16.4956 | 13.7671 | 11.9515 | 19.8371 | 9.86184 | 10.1298 |
| ENSMUSG000000008475 | 13_Arpc5         | 4495.23 | -0.16916 | 0.16975  | 0.26416  | 4239.36 | 4000.71 | 4456.73 | 4253.25 | 5302.08 | 4719.23 |
| ENSMUSG000000008482 | 8_Rnf151         | 2.90149 | 0.63322  | 0.64158  | 0.7371   | 1.73638 | 1.83561 | 7.17092 | 3.60674 | 1.79306 | 1.26623 |
| ENSMUSG000000008489 | 18_Elav12        | 13.2797 | -0.62617 | 0.41529  | 0.53132  | 19.1001 | 7.34244 | 4.78062 | 25.2472 | 14.3445 | 8.86359 |
| ENSMUSG000000008496 | 18_Pou2f2        | 40.5822 | 1.02315  | 0.0069   | 0.01845  | 61.6414 | 50.4793 | 51.3916 | 31.559  | 26.8959 | 21.5259 |
| ENSMUSG000000008540 | 11_Mgst1         | 1472.02 | -1.05889 | 4.34E-07 | 4.48E-06 | 981.921 | 1168.37 | 713.507 | 2311.02 | 2102.36 | 1554.93 |
| ENSMUSG000000008575 | 17_Nfib          | 2136.03 | -0.54738 | 2.59E-07 | 2.87E-06 | 1758.08 | 1788.8  | 1660.07 | 2586.03 | 2631.32 | 2391.9  |
| ENSMUSG000000008590 | 4_Htr3b          | 0.15028 | -0.99647 | 0.80707  | NA       | 0       | 0       | 0       | 0.90169 | 0       | 0       |
| ENSMUSG000000008601 | 12_Rab25         | 5032.27 | 0.87275  | 1.79E-09 | 3.86E-08 | 6195.39 | 5955.64 | 7377.69 | 3861.02 | 3020.41 | 3783.49 |
| ENSMUSG000000008604 | 11_Ubqln4        | 1361.38 | 0.42368  | 0.00027  | 0.00119  | 1506.31 | 1578.63 | 1593.14 | 1110.88 | 1114.39 | 1264.96 |
| ENSMUSG000000008658 | 15_Rbfox1        | 96.7714 | -0.14191 | 0.61976  | 0.17177  | 87.687  | 73.4244 | 115.93  | 119.022 | 95.9288 | 88.6359 |
| ENSMUSG000000008668 | 14_Rps18         | 3854.55 | 0.75171  | 0.0002   | 0.00091  | 4521.53 | 4852.44 | 5135.58 | 3579.69 | 1953.54 | 3084.53 |
| ENSMUSG000000008682 | 13_Rpl10         | 8236.99 | -0.11485 | 0.30111  | 0.41578  | 7739.03 | 7871.1  | 8116.29 | 7812.2  | 8458.77 | 9424.53 |
| ENSMUSG000000008683 | 16_Rps15a        | 11737.2 | -0.40643 | 5.87E-05 | 0.00031  | 10874.1 | 9745.26 | 9664.02 | 13024.8 | 13851.4 | 13263.7 |
| ENSMUSG000000008690 | 15_Ncapb2        | 4140.64 | 0.59878  | 2.58E-05 | 0.00015  | 4794.14 | 4824.9  | 5343.53 | 3580.59 | 2714.69 | 3585.95 |
| ENSMUSG000000008730 | 17_Hipk1         | 5730.09 | 0.0407   | 0.6691   | 0.75972  | 5600.68 | 5889.56 | 5942.31 | 5406.51 | 5733.31 | 5808.18 |
| ENSMUSG000000008734 | 8_Gprc5b         | 710.771 | -0.4954  | 0.02124  | 0.04769  | 559.113 | 688.354 | 522.282 | 1096.45 | 658.95  | 739.477 |
| ENSMUSG000000008763 | 16_Man1a2        | 2146.58 | -0.21939 | 0.04908  | 0.09556  | 2013.33 | 1969.61 | 1967.22 | 2103.63 | 2428.7  | 2396.97 |
| ENSMUSG000000008813 | 12_Tppp2         | 0.14942 | -0.99647 | 0.80707  | NA       | 0       | 0       | 0       | 0       | 0.89653 | 0       |
| ENSMUSG000000008822 | 15_Acyp1         | 165.039 | -0.17437 | 0.41555  | 0.53158  | 150.197 | 173.465 | 141.028 | 192.961 | 151.514 | 181.07  |
| ENSMUSG000000008845 | 9_Cd163          | 175.298 | -0.52541 | 0.02269  | 0.05042  | 142.383 | 175.301 | 112.344 | 212.798 | 187.375 | 221.59  |
| ENSMUSG000000008855 | 17_Hdac5         | 830.54  | 0.94076  | 9.35E-05 | 0.00047  | 1068.74 | 1127.98 | 1080.42 | 821.435 | 397.163 | 487.497 |
| ENSMUSG000000008859 | 7_Rala           | 2168.91 | -0.26126 | 0.06485  | 0.12056  | 2028.96 | 1808.08 | 2081.96 | 1996.33 | 2584.7  | 2513.46 |
| ENSMUSG000000008874 | 3_Clec3a         | 28.7786 | -0.02643 | 0.95875  | 0.97338  | 32.123  | 33.9588 | 19.1225 | 39.6742 | 16.1376 | 31.6557 |
| ENSMUSG000000008892 | 11_Vdac3         | 2207.56 | -0.65814 | 3.54E-07 | 3.74E-06 | 1842.3  | 1572.2  | 1723.41 | 2463.4  | 2998.89 | 2645.15 |
| ENSMUSG000000008932 | 9_Slc1a7         | 32.4571 | -1.62834 | 0.0106   | 0.02655  | 18.232  | 22.0273 | 7.17092 | 84.7584 | 44.8265 | 17.7272 |
| ENSMUSG000000008958 | 14_Vps72         | 660.035 | 0.71996  | 3.97E-05 | 0.00022  | 733.619 | 843.463 | 886.804 | 562.652 | 398.06  | 535.614 |
| ENSMUSG000000008976 | 16_Gabpa         | 1505.68 | -0.22241 | 0.07302  | 0.13313  | 1371.74 | 1295.02 | 1503.5  | 1486.88 | 1710.58 | 1666.35 |
| ENSMUSG000000008999 | 7_Bmp7           | 1470.01 | 0.33459  | 0.08443  | 0.14957  | 1530.62 | 1764.02 | 1624.21 | 1613.12 | 939.564 | 1348.53 |
| ENSMUSG000000009013 | 5_Dynl1          | 5926.89 | 0.03773  | 0.76048  | 0.83166  | 5815.99 | 5454.52 | 6744.25 | 5476.84 | 6221.03 | 5848.7  |
| ENSMUSG000000009030 | 14_Pdcl          | 1041.88 | -0.43787 | 0.00014  | 0.00066  | 843.879 | 871.915 | 940.586 | 1207.36 | 1211.21 | 1176.32 |
| ENSMUSG000000009035 | 13_Tmem184b      | 1422.42 | 1.08495  | 2.61E-09 | 5.33E-08 | 1781.52 | 1855.8  | 2163.23 | 1108.17 | 700.19  | 925.612 |
| ENSMUSG000000009070 | 14_Rsph14        | 0.19919 | 0.92709  | 0.82027  | NA       | 0       | 0       | 1.19515 | 0       | 0       | 0       |
| ENSMUSG000000009073 | 16_Nf2           | 2995.76 | 0.09973  | 0.36702  | 0.48447  | 2993.51 | 3158.17 | 3145.65 | 3050.4  | 2632.21 | 2994.63 |
| ENSMUSG000000009075 | 2_Cabp7          | 1.89165 | 1.04841  | 0.52894  | NA       | 2.60457 | 2.75342 | 2.39031 | 2.70506 | 0.89653 | 0       |
| ENSMUSG000000009076 | 10_Zmat5         | 273.298 | 0.72457  | 0.00401  | 0.01176  | 312.548 | 354.273 | 354.961 | 276.817 | 139.859 | 201.33  |
| ENSMUSG000000009079 | 16_Ewsr1         | 6050.11 | 0.43078  | 9.99E-05 | 0.0005   | 6639.9  | 6590.76 | 7609.55 | 5024.19 | 4999.05 | 5437.18 |
| ENSMUSG000000009090 | 17_Ap1b1         | 3100.36 | 0.84105  | 5.68E-08 | 7.65E-07 | 3505.74 | 4038.34 | 4393.39 | 2425.53 | 1824.44 | 2414.69 |
| ENSMUSG000000009092 | 4_Der13          | 13.756  | 0.60218  | 0.34102  | 0.45736  | 12.1546 | 17.4383 | 20.3176 | 14.427  | 8.06878 | 10.1298 |
| ENSMUSG000000009093 | 7_Gstt4          | 0.50244 | 0.94285  | 0.78015  | NA       | 0       | 0.91781 | 1.19515 | 0.90169 | 0       | 0       |
| ENSMUSG000000009097 | 9_Tbx1           | 29.1609 | -0.19736 | 0.64652  | 0.74132  | 20.8365 | 32.1232 | 28.6837 | 30.6573 | 32.2751 | 30.3894 |
| ENSMUSG000000009108 | 15_Gnat2         | 54.8274 | -1.20099 | 0.00826  | 0.02155  | 42.5412 | 32.1232 | 25.0982 | 109.104 | 83.3773 | 36.7206 |

|                     |                  |         |          |          |          |         |         |         |         |         |         |
|---------------------|------------------|---------|----------|----------|----------|---------|---------|---------|---------|---------|---------|
| ENSMUSG000000009112 | 4_Bcl2l13        | 9098.25 | 0.35891  | 0.0071   | 0.01892  | 9827.02 | 10133.5 | 10709.8 | 7080.03 | 7520.99 | 9318.16 |
| ENSMUSG000000009114 | 17_2610028H24Rik | 0.30325 | -0.03469 | 0.99322  | NA       | 0       | 0.91781 | 0       | 0.90169 | 0       | 0       |
| ENSMUSG000000009115 | 5_Spatc1l        | 3.09049 | 0.21297  | 0.86597  | 0.9091   | 3.47275 | 1.83561 | 4.78062 | 2.70506 | 4.48265 | 1.26623 |
| ENSMUSG000000009145 | 6_Dqx1           | 199.17  | 0.43484  | 0.02785  | 0.05971  | 229.202 | 225.78  | 230.665 | 157.795 | 151.514 | 200.064 |
| ENSMUSG000000009185 | 2_Ccl8           | 124.782 | 2.59979  | 8.47E-18 | 1.22E-15 | 278.688 | 189.986 | 174.492 | 34.264  | 42.1369 | 29.1232 |
| ENSMUSG000000009207 | 15_Lnp           | 416.833 | -0.43745 | 0.00329  | 0.00994  | 353.353 | 332.246 | 377.669 | 456.253 | 515.505 | 465.972 |
| ENSMUSG000000009210 | 10_Prr29         | 0.90889 | 0.01563  | 0.9955   | NA       | 0       | 2.75342 | 0       | 1.80337 | 0.89653 | 0       |
| ENSMUSG000000009214 | 9_Tmem8c         | 3.34929 | -1.08842 | 0.40475  | 0.522    | 0.86819 | 0.91781 | 4.78062 | 4.50843 | 2.68959 | 6.33113 |
| ENSMUSG000000009216 | 7_Fam163b        | 2.4002  | -4.74154 | 0.0392   | NA       | 0       | 0       | 0       | 9.91854 | 4.48265 | 0       |
| ENSMUSG000000009246 | 14_Trpm5         | 9.58435 | -1.02603 | 0.16382  | 0.2568   | 4.34094 | 6.42464 | 8.36608 | 14.427  | 12.5514 | 11.396  |
| ENSMUSG000000009248 | 5_Ascd2          | 39.2778 | 0.83842  | 0.05593  | 0.10635  | 55.5641 | 47.7259 | 47.8062 | 40.5758 | 16.1376 | 27.857  |
| ENSMUSG000000009281 | 6_Rarres2        | 1031.58 | 0.2241   | 0.25816  | 0.36815  | 1362.19 | 993.983 | 978.831 | 1180.31 | 877.703 | 796.457 |
| ENSMUSG000000009291 | 12_Pttg1ip       | 1601.93 | -0.11972 | 0.38831  | 0.50568  | 1541.03 | 1533.65 | 1533.38 | 1938.62 | 1607.48 | 1457.43 |
| ENSMUSG000000009292 | 17_Trpm2         | 19.0538 | 1.2899   | 0.02408  | 0.053    | 38.2003 | 23.8629 | 19.1225 | 11.7219 | 12.5514 | 8.86359 |
| ENSMUSG000000009293 | 17_Ube2g2        | 1757.79 | 0.35619  | 0.01551  | 0.03663  | 1921.3  | 1946.67 | 2052.08 | 1670.82 | 1257.83 | 1698.01 |
| ENSMUSG000000009350 | 13_Mpo           | 0.91893 | 0.32511  | 0.8962   | NA       | 0.86819 | 0.91781 | 1.19515 | 0       | 0       | 2.53245 |
| ENSMUSG000000009356 | 12_Lpo           | 8.39197 | 0.73736  | 0.39341  | 0.51107  | 6.07732 | 15.6027 | 9.56123 | 2.70506 | 6.27571 | 10.1298 |
| ENSMUSG000000009376 | 15_Met           | 6339.2  | -0.12708 | 0.29509  | 0.40946  | 6143.3  | 5765.65 | 6270.97 | 5775.3  | 7014.46 | 7065.55 |
| ENSMUSG000000009378 | 3_Slc16a12       | 1903.17 | -0.08856 | 0.42104  | 0.53668  | 1859.66 | 1812.67 | 1860.85 | 1813.29 | 1985.82 | 2086.74 |
| ENSMUSG000000009394 | 13_Syn2          | 39.1272 | -0.99609 | 0.02157  | 0.04832  | 31.2548 | 31.2054 | 15.537  | 66.7247 | 45.7231 | 44.3179 |
| ENSMUSG000000009406 | 13_Elk1          | 233.271 | -0.32745 | 0.08954  | 0.15703  | 231.806 | 186.315 | 203.176 | 275.014 | 277.924 | 225.388 |
| ENSMUSG000000009418 | 15_Nav1          | 1886.15 | -0.1329  | 0.82228  | 0.39531  | 1771.1  | 1978.79 | 1648.12 | 2072.97 | 2007.33 | 1838.56 |
| ENSMUSG000000009470 | 16_Tnpo1         | 4946.38 | -0.38565 | 0.00099  | 0.00354  | 4459.88 | 4062.21 | 4345.58 | 5065.67 | 6151.99 | 5592.92 |
| ENSMUSG000000009471 | 3_Myod1          | 2.51417 | -0.71724 | 0.61987  | 0.71779  | 0.86819 | 3.67122 | 1.19515 | 2.70506 | 5.37918 | 1.26623 |
| ENSMUSG000000009487 | 9_Otog           | 0.44998 | -2.33107 | 0.56049  | NA       | 0       | 0       | 0       | 1.80337 | 0.89653 | 0       |
| ENSMUSG000000009535 | 13_Rnmt          | 621.324 | -0.28563 | 0.03718  | 0.07578  | 574.741 | 557.108 | 548.576 | 644.705 | 755.775 | 647.042 |
| ENSMUSG000000009545 | 14_Kcnq1         | 17.7054 | -0.30729 | 0.64514  | 0.74008  | 7.8137  | 19.2739 | 20.3176 | 20.7388 | 8.96531 | 29.1232 |
| ENSMUSG000000009549 | 14_Srp14         | 1579.33 | -0.39124 | 0.00015  | 0.00071  | 1396.92 | 1326.23 | 1376.82 | 1839.44 | 1784.1  | 1752.46 |
| ENSMUSG000000009551 | 2_6330409D20Rik  | 0.98748 | 1.11968  | 0.64075  | NA       | 1.73638 | 0       | 2.39031 | 0.90169 | 0.89653 | 0       |
| ENSMUSG000000009555 | 16_Cdk9          | 1035.18 | 0.58479  | 8.05E-06 | 5.60E-05 | 1159.9  | 1267.49 | 1300.33 | 917.014 | 773.706 | 792.658 |
| ENSMUSG000000009563 | 16_Tor2a         | 592.023 | 0.97047  | 8.07E-07 | 7.60E-06 | 711.046 | 803.08  | 837.803 | 489.615 | 300.338 | 410.258 |
| ENSMUSG000000009566 | 12_Fpgs          | 465.177 | 1.07306  | 3.47E-09 | 6.85E-08 | 588.632 | 598.409 | 703.946 | 318.295 | 241.167 | 340.615 |
| ENSMUSG000000009569 | 14_Mkl2          | 1233.33 | 0.30056  | 0.01213  | 0.02973  | 1281.45 | 1443.71 | 1357.7  | 1045.96 | 1091.08 | 1180.12 |
| ENSMUSG000000009575 | 14_Cbx5          | 3754.16 | -0.58333 | 2.74E-07 | 3.00E-06 | 3214.9  | 2953.5  | 2846.86 | 4220.79 | 4867.26 | 4421.66 |
| ENSMUSG000000009580 | 15_Odam          | 3.69657 | 0.50375  | 0.68527  | 0.77321  | 0.86819 | 7.34244 | 4.78062 | 1.80337 | 3.58612 | 3.79868 |
| ENSMUSG000000009585 | 17_Apobec3       | 478.5   | 0.45287  | 0.00189  | 0.0062   | 569.532 | 500.204 | 589.211 | 383.216 | 409.714 | 419.121 |
| ENSMUSG000000009588 | 9_St6galnac1     | 3145.32 | 0.45973  | 0.00802  | 0.02099  | 3600.38 | 3590.46 | 3733.66 | 2045.92 | 2586.49 | 3314.98 |
| ENSMUSG000000009596 | 9_Taf7l          | 0.21104 | -0.99647 | 0.80707  | NA       | 0       | 0       | 0       | 0       | 0       | 1.26623 |
| ENSMUSG000000009614 | 16_Sardh         | 215.241 | -0.34434 | 0.23738  | 0.34463  | 191.87  | 231.287 | 145.809 | 342.64  | 187.375 | 192.466 |
| ENSMUSG000000009621 | 18_Vav2          | 1417.23 | 0.36526  | 0.00831  | 0.02163  | 1455.95 | 1569.45 | 1762.85 | 1372.37 | 1117.08 | 1225.71 |
| ENSMUSG000000009628 | 14_Tex15         | 80.0733 | -1.4641  | 1.28E-06 | 1.14E-05 | 44.2776 | 43.1369 | 40.6352 | 122.629 | 139.859 | 89.9021 |
| ENSMUSG000000009630 | 9_Ppp2cb         | 2303.07 | -0.34183 | 0.00084  | 0.00309  | 2043.72 | 1992.56 | 2058.06 | 2430.94 | 2670.76 | 2622.36 |
| ENSMUSG000000009633 | 3_G0s2           | 36.4835 | -0.34593 | 0.42059  | 0.53636  | 25.1775 | 33.041  | 38.2449 | 48.691  | 26.8959 | 46.8504 |
| ENSMUSG000000009640 | 11_Dmap1         | 407.532 | 0.6753   | 9.46E-06 | 6.44E-05 | 486.186 | 508.464 | 509.136 | 345.346 | 283.304 | 312.758 |
| ENSMUSG000000009646 | 13_Pla2g12b      | 5.53961 | -1.12442 | 0.24066  | 0.34835  | 5.20913 | 2.75342 | 2.39031 | 8.11517 | 7.17224 | 7.59736 |
| ENSMUSG000000009647 | 13_Mcu           | 1278.92 | 0.34679  | 0.02756  | 0.05924  | 1373.47 | 1351.93 | 1569.24 | 929.638 | 1147.56 | 1301.68 |
| ENSMUSG000000009654 | 4_Oit3           | 5.36665 | -1.33484 | 0.24471  | 0.35285  | 4.34094 | 4.58903 | 0       | 10.8202 | 3.58612 | 8.86359 |
| ENSMUSG000000009670 | 11_Tex11         | 14.4064 | -2.09946 | 0.00205  | 0.00664  | 6.07732 | 5.50683 | 4.78062 | 33.3624 | 21.5167 | 15.1947 |
| ENSMUSG000000009681 | 9_Bcr            | 1870.76 | 0.62382  | 2.31E-05 | 0.00014  | 2045.45 | 2328.47 | 2432.14 | 1534.67 | 1239.01 | 1644.83 |
| ENSMUSG000000009687 | 14_Fxyd5         | 373.131 | 0.17996  | 7.04E-05 | 0.00037  | 706.705 | 378.136 | 435.036 | 306.573 | 194.547 | 217.791 |
| ENSMUSG000000009731 | 4_Kcnd1          | 46.5453 | -0.56151 | 0.11296  | 0.19012  | 35.5957 | 44.9725 | 32.2692 | 60.4129 | 59.171  | 46.8504 |
| ENSMUSG000000009733 | 8_Tfcp2          | 359.08  | -0.10277 | 0.52537  | 0.63447  | 307.339 | 380.889 | 351.375 | 391.331 | 370.267 | 353.277 |
| ENSMUSG000000009734 | 17_Pou6f2        | 13.4672 | -1.12306 | 0.08895  | 0.15615  | 6.07732 | 6.42464 | 13.1467 | 15.3287 | 17.0341 | 22.7921 |
| ENSMUSG000000009739 | 16_Pou6f1        | 341.325 | -0.08671 | 0.66145  | 0.75344  | 325.571 | 355.191 | 313.13  | 439.121 | 317.372 | 297.563 |
| ENSMUSG000000009741 | 14_Ubp1          | 1586.41 | 0.11003  | 0.31572  | 0.43076  | 1666.92 | 1678.67 | 1594.34 | 1432.78 | 1604.79 | 1541    |
| ENSMUSG000000009772 | 15_Nuak2         | 1613.92 | 0.65222  | 6.83E-05 | 0.00036  | 1903.07 | 1757.6  | 2256.45 | 1296.62 | 1036.39 | 1433.37 |
| ENSMUSG000000009828 | 15_Ick           | 648.625 | -0.01764 | 0.89039  | 0.9262   | 612.941 | 636.957 | 684.823 | 672.657 | 628.468 | 655.906 |
| ENSMUSG000000009863 | 15_Sdhb          | 2254.13 | 0.11667  | 0.37174  | 0.4891   | 2399.67 | 2245.87 | 2390.31 | 2439.96 | 1892.58 | 2156.38 |
| ENSMUSG000000009876 | 13_Cox4i2        | 20.0328 | -0.62214 | 0.27821  | 0.39077  | 15.6274 | 22.0273 | 9.56123 | 34.264  | 19.7237 | 18.9934 |
| ENSMUSG000000009894 | 15_Snap47        | 1464.19 | 0.32711  | 0.00893  | 0.02297  | 1572.29 | 1600.65 | 1715.05 | 1365.15 | 1155.63 | 1376.39 |
| ENSMUSG000000009900 | 7_Wnt3a          | 365.472 | 1.15696  | 7.31E-08 | 9.61E-07 | 480.976 | 473.588 | 558.137 | 243.455 | 163.169 | 273.505 |
| ENSMUSG000000009905 | 5_Kdsr           | 1034.28 | -0.40642 | 0.00208  | 0.00671  | 893.366 | 920.559 | 855.73  | 1283.1  | 1212.11 | 1040.84 |
| ENSMUSG000000009907 | 17_Vps4b         | 4082.79 | -0.1586  | 0.27556  | 0.38781  | 3803.53 | 3627.17 | 4144.79 | 3527.39 | 4683.48 | 4710.36 |
| ENSMUSG000000009927 | 8_Rps25          | 12210.4 | -0.69577 | 5.30E-10 | 1.36E-08 | 9867.83 | 9165.21 | 8931.39 | 13780.5 | 16403.8 | 15113.7 |
| ENSMUSG000000009941 | 10_Nxf2          | 2.10289 | -0.62277 | 0.69046  | NA       | 1.73638 | 0.91781 | 2.39031 | 5.41011 | 0.89653 | 1.26623 |
| ENSMUSG000000009995 | 17_Taz           | 1765.55 | 0.07299  | 0.53762  | 0.64526  | 1773.71 | 1777.79 | 1878.78 | 1547.29 | 1810.1  | 1805.64 |
| ENSMUSG000000010021 | 13_Kif19a        | 8.0707  | -0.31533 | 0.6926   | 0.77961  | 6.07732 | 7.34244 | 8.36608 | 9.91854 | 11.6549 | 5.06491 |
| ENSMUSG000000010025 | 18_Aldh3a2       | 1101.31 | -0.22728 | 0.06051  | 0.11374  | 994.076 | 1098.61 | 951.343 | 1186.62 | 1236.32 | 1140.87 |
| ENSMUSG000000010044 | 12_Zmynd10       | 22.9959 | -0.68783 | 0.17484  | 0.27071  | 19.9683 | 17.4383 | 15.537  | 38.7725 | 25.9994 | 20.2596 |
| ENSMUSG000000010045 | 2_Tmem115        | 668.533 | 0.935    | 1.75E-06 | 1.50E-05 | 777.029 | 899.449 | 957.318 | 558.143 | 346.957 | 472.303 |
| ENSMUSG000000010047 | 12_Hyal2         | 543.892 | 1.0286   | 3.65E-06 | 2.81E-05 | 669.373 | 725.066 | 795.973 | 473.385 | 256.408 | 343.147 |
| ENSMUSG000000010048 | 10_lfrd2         | 408.947 | 1.20737  | 2.65E-07 | 2.93E-06 | 507.022 | 543.341 | 660.92  | 276.817 | 166.755 | 298.83  |
| ENSMUSG000000010051 | 15_Hyal1         | 1084.56 | 0.08998  | 0.53136  | 0.63985  | 1043.56 | 1163.78 | 1146.15 | 1003.58 | 935.978 | 1214.31 |
| ENSMUSG000000010054 | 4_Tusc2          | 517.181 | -0.17713 | 0.23395  | 0.34057  | 509.627 | 502.04  | 444.597 | 607.736 | 526.263 | 512.822 |
| ENSMUSG000000010057 | 8_Npr12          | 376.162 | 0.22135  | 0.21132  | 0.31458  | 379.398 | 412.095 | 423.085 | 385.921 | 284.2   | 372.271 |
| ENSMUSG000000010064 | 15_Slc38a3       | 486.044 | -0.60439 | 0.09418  | 0.16354  | 386.344 | 526.82  | 243.811 | 973.82  | 404.335 | 381.134 |
| ENSMUSG000000010066 | 15_Cacna2d2      | 669.394 | 0.39969  | 0.00798  | 0.02089  | 789.183 | 732.409 | 761.313 | 586.096 | 493.988 | 653.373 |
| ENSMUSG000000010067 | 13_Rassf1        | 944.166 | 0.51587  | 6.56E-05 | 0.00034  | 1092.18 | 1034.37 | 1207.11 | 797.09  | 722.604 | 811.651 |
| ENSMUSG000000010080 | 15_Epn3          | 3881.75 | 1.18386  | 2.86E-14 | 2.27E-12 | 4757.67 | 5361.82 | 6052.26 | 2637.43 | 1952.64 | 2528.66 |

|                    |                  |         |          |          |          |         |         |         |         |         |         |
|--------------------|------------------|---------|----------|----------|----------|---------|---------|---------|---------|---------|---------|
| ENSMUSG00000010086 | 17_Rnf112        | 32.9616 | -0.76861 | 0.0643   | 0.11969  | 20.8365 | 22.9451 | 29.8789 | 46.8876 | 43.0335 | 34.1881 |
| ENSMUSG00000010095 | 13_Slc3a2        | 3496.45 | 0.09488  | 0.40639  | 0.52349  | 3449.31 | 3790.54 | 3595.02 | 3714.04 | 3169.24 | 3260.53 |
| ENSMUSG00000010097 | 13_Nxf1          | 3325.9  | 0.00916  | 0.93883  | 0.95988  | 3294.78 | 3435.35 | 3278.31 | 2920.56 | 3570.88 | 3455.53 |
| ENSMUSG00000010110 | 17_Stx5a         | 1734.88 | 0.08667  | 0.39465  | 0.51232  | 1776.31 | 1758.52 | 1827.39 | 1704.19 | 1719.55 | 1623.3  |
| ENSMUSG00000010122 | 17_Slc47a1       | 237.43  | 0.03892  | 0.82487  | 0.87994  | 252.643 | 242.301 | 225.884 | 235.34  | 215.167 | 253.245 |
| ENSMUSG00000010136 | 14_Pifo          | 0.1447  | 0.92709  | 0.82027  | NA       | 0.86819 | 0       | 0       | 0       | 0       | 0       |
| ENSMUSG00000010142 | 12_Tnfrsf13b     | 21.6034 | 0.53105  | 0.27034  | 0.38196  | 27.782  | 24.7808 | 23.9031 | 16.2303 | 17.9306 | 18.9934 |
| ENSMUSG00000010154 | 6_Spire2         | 279.086 | 1.01299  | 1.63E-06 | 1.41E-05 | 374.189 | 318.479 | 427.865 | 223.618 | 156.893 | 173.473 |
| ENSMUSG00000010175 | 13_Prox1         | 148.975 | -1.51608 | 0.00065  | 0.0025   | 66.8505 | 134     | 29.8789 | 288.539 | 147.928 | 226.655 |
| ENSMUSG00000010205 | 10_Raver1        | 938.254 | 1.1265   | 2.25E-11 | 8.78E-10 | 1132.12 | 1282.17 | 1447.33 | 683.478 | 493.092 | 591.328 |
| ENSMUSG00000010277 | 7_2610507B11Rik  | 15036.9 | 0.23279  | 0.02083  | 0.04688  | 16183   | 15618.3 | 16940.1 | 13067.2 | 13670.3 | 14742.7 |
| ENSMUSG00000010290 | 7_Al597479       | 727.457 | -0.5567  | 0.00022  | 0.001    | 604.259 | 520.396 | 642.993 | 797.09  | 965.563 | 834.444 |
| ENSMUSG00000010307 | 5_Tmem86a        | 229.151 | 0.03058  | 0.90206  | 0.93359  | 262.193 | 245.972 | 186.444 | 297.556 | 186.478 | 196.265 |
| ENSMUSG00000010311 | 15_Optc          | 954.692 | -1.38023 | 1.13E-05 | 7.54E-05 | 462.744 | 789.313 | 337.033 | 1999.94 | 1012.18 | 1126.94 |
| ENSMUSG00000010342 | 16_Tex14         | 9.42737 | 0.00305  | 0.99682  | 0.99782  | 14.7592 | 7.34244 | 5.97577 | 9.91854 | 7.17224 | 11.396  |
| ENSMUSG00000010358 | 13_Iifi35        | 2967.65 | 1.01719  | 9.89E-12 | 4.15E-10 | 3593.43 | 3541.81 | 4783.01 | 1997.23 | 1837.89 | 2052.55 |
| ENSMUSG00000010362 | 9_Rdm1           | 480.243 | 0.01866  | 0.90845  | 0.93825  | 487.054 | 475.423 | 487.623 | 549.126 | 406.128 | 476.101 |
| ENSMUSG00000010376 | 14_Nedd8         | 2124.49 | -0.30608 | 0.00561  | 0.01551  | 1990.76 | 1739.24 | 1970.81 | 2368.73 | 2382.98 | 2294.4  |
| ENSMUSG00000010392 | 8_Gosr1          | 1303.63 | 0.03715  | 0.75121  | 0.82431  | 1354.37 | 1217.93 | 1388.77 | 1278.59 | 1239.9  | 1342.2  |
| ENSMUSG00000010406 | 11_Mrpl52        | 629.36  | 0.21473  | 0.11781  | 0.19679  | 680.66  | 612.176 | 736.215 | 598.719 | 562.125 | 586.263 |
| ENSMUSG00000010453 | 12_Kansl3        | 2122.39 | 0.16304  | 0.13153  | 0.21483  | 2167    | 2357.84 | 2201.47 | 2105.44 | 1894.37 | 2008.24 |
| ENSMUSG00000010461 | 14_Eya4          | 47.1495 | -0.97784 | 0.01353  | 0.03255  | 21.7047 | 44.9725 | 28.6837 | 70.3315 | 62.7571 | 54.4478 |
| ENSMUSG00000010476 | 13_Ebf3          | 53.563  | -0.46626 | 0.22121  | 0.32622  | 46.014  | 44.9725 | 44.2207 | 90.1685 | 46.6196 | 49.3828 |
| ENSMUSG00000010505 | 15_Myt1          | 14.9036 | -1.05329 | 0.23105  | 0.33728  | 16.4956 | 10.0959 | 2.39031 | 27.9522 | 28.689  | 3.79868 |
| ENSMUSG00000010517 | 7_Faf1           | 2167.6  | -0.24094 | 0.07362  | 0.13397  | 2064.55 | 1912.71 | 1982.76 | 1990.02 | 2534.49 | 2521.06 |
| ENSMUSG00000010529 | 5_Gm266          | 25.6945 | -0.80576 | 0.08613  | 0.15194  | 19.1001 | 20.1917 | 16.7322 | 25.2472 | 41.2404 | 31.6557 |
| ENSMUSG00000010538 | 14_Tsacc         | 19.4906 | -0.39817 | 0.44779  | 0.56277  | 13.891  | 22.0273 | 14.3418 | 20.7388 | 20.6202 | 25.3245 |
| ENSMUSG00000010554 | 14_Mettl16       | 755.905 | -0.35345 | 0.00609  | 0.01663  | 693.683 | 656.231 | 640.603 | 780.86  | 899.22  | 864.833 |
| ENSMUSG00000010592 | 8_Dazl           | 4.32108 | -2.48331 | 0.05248  | 0.10089  | 0       | 2.75342 | 1.19515 | 6.3118  | 8.06878 | 7.59736 |
| ENSMUSG00000010601 | 13_Apol7a        | 3268.64 | 0.56717  | 0.00023  | 0.00101  | 3755.78 | 3462.88 | 4491.39 | 2266.84 | 3002.48 | 2632.49 |
| ENSMUSG00000010607 | 8_Pigyl          | 221.435 | 0.8083   | 0.00214  | 0.00687  | 227.465 | 282.684 | 335.838 | 203.781 | 112.963 | 165.876 |
| ENSMUSG00000010608 | 15_Rbm25         | 4504.22 | -0.27024 | 0.09172  | 0.16011  | 4089.17 | 3646.44 | 4515.29 | 3926.84 | 5509.18 | 5338.41 |
| ENSMUSG00000010609 | 15_Psen2         | 370.392 | 0.3296   | 0.1549   | 0.24558  | 351.616 | 488.273 | 397.986 | 426.497 | 252.822 | 305.161 |
| ENSMUSG00000010651 | 4_Acaa1b         | 70.8616 | 1.91637  | 2.65E-07 | 2.93E-06 | 92.028  | 116.561 | 127.881 | 43.2809 | 18.8271 | 26.5908 |
| ENSMUSG00000010660 | 2_Plcd1          | 1917.48 | 1.09109  | 2.23E-11 | 8.75E-10 | 2400.54 | 2448.71 | 2979.52 | 1310.15 | 993.356 | 1372.59 |
| ENSMUSG00000010663 | 4_Fads1          | 4427.03 | -0.02634 | 0.80232  | 0.86327  | 4211.58 | 4749.64 | 4197.38 | 4337.11 | 4476.38 | 4590.07 |
| ENSMUSG00000010721 | 15_Lmbr1         | 475.57  | -0.59538 | 2.06E-05 | 0.00013  | 386.344 | 387.314 | 362.132 | 535.601 | 603.365 | 578.666 |
| ENSMUSG00000010751 | 14_Tnfrsf22      | 144.335 | 0.08142  | 0.72236  | 0.80223  | 163.219 | 127.575 | 154.175 | 152.385 | 119.239 | 149.415 |
| ENSMUSG00000010755 | 16_Cars          | 1201.79 | 0.7411   | 5.42E-08 | 7.36E-07 | 1394.31 | 1393.23 | 1724.61 | 891.767 | 872.324 | 934.475 |
| ENSMUSG00000010760 | 4_Phlda2         | 50.4139 | 1.05091  | 0.04055  | 0.0815   | 64.2459 | 55.0683 | 84.8559 | 55.0028 | 11.6549 | 31.6557 |
| ENSMUSG00000010796 | 11_Asz1          | 0.60918 | 1.35827  | 0.71243  | NA       | 0       | 2.75342 | 0       | 0.90169 | 0       | 0       |
| ENSMUSG00000010797 | 6_Wnt2           | 182.836 | -0.38676 | 0.04522  | 0.08913  | 153.669 | 158.78  | 163.736 | 227.225 | 206.202 | 187.402 |
| ENSMUSG00000010803 | 12_Gabra1        | 32.6251 | -2.16222 | 0.00048  | 0.00192  | 12.1546 | 17.4383 | 5.97577 | 75.7416 | 65.4467 | 18.9934 |
| ENSMUSG00000010825 | 17_Grid2lp       | 30.1288 | 1.46724  | 0.00266  | 0.00828  | 48.6186 | 39.4656 | 44.2207 | 8.11517 | 18.8271 | 21.5259 |
| ENSMUSG00000010830 | 7_Kdelr3         | 295.069 | -0.645   | 0.00059  | 0.00231  | 236.147 | 267.999 | 185.249 | 363.379 | 363.095 | 354.544 |
| ENSMUSG00000010841 | 13_1700006E09Rik | 0.19919 | 0.92709  | 0.82027  | NA       | 0       | 0       | 1.19515 | 0       | 0       | 0       |
| ENSMUSG00000010911 | 12_Ap1p          | 1081.38 | -0.27244 | 0.02248  | 0.05003  | 987.998 | 942.586 | 1007.51 | 1097.35 | 1194.18 | 1258.63 |
| ENSMUSG00000010914 | 10_Pdhx          | 885.285 | -0.39081 | 0.00221  | 0.00708  | 743.169 | 824.189 | 731.434 | 1027.92 | 1054.32 | 930.677 |
| ENSMUSG00000010936 | 10_Vac14         | 524.95  | 0.69444  | 6.13E-06 | 4.43E-05 | 623.359 | 606.669 | 717.092 | 433.711 | 358.612 | 410.258 |
| ENSMUSG00000011008 | 13_Mcoln2        | 34.1529 | 2.14313  | 2.38E-05 | 0.00014  | 61.6414 | 36.7122 | 69.3189 | 10.8202 | 18.8271 | 7.59736 |
| ENSMUSG00000011034 | 6_Slc5a1         | 5123.18 | 0.05085  | 0.74839  | 0.82234  | 5350.65 | 4656.03 | 5632.76 | 4029.63 | 5292.22 | 5777.79 |
| ENSMUSG00000011096 | 16_Akt1s1        | 556.685 | 0.77259  | 0.00011  | 0.00055  | 597.314 | 667.245 | 842.584 | 470.68  | 325.441 | 436.848 |
| ENSMUSG00000011114 | 17_Tbrg1         | 3292.6  | 0.45406  | 0.00022  | 0.001    | 3586.49 | 3570.26 | 4263.11 | 2595.95 | 2809.73 | 2930.05 |
| ENSMUSG00000011118 | 3_Panx3          | 0.29412 | -0.03469 | 0.99322  | NA       | 0.86819 | 0       | 0       | 0       | 0.89653 | 0       |
| ENSMUSG00000011148 | 13_Adsl1         | 174.491 | -0.86177 | 0.02191  | 0.04892  | 127.624 | 142.26  | 101.588 | 366.986 | 114.756 | 193.733 |
| ENSMUSG00000011154 | 16_1700026D08Rik | 0.14942 | -0.99647 | 0.80707  | NA       | 0       | 0       | 0       | 0       | 0.89653 | 0       |
| ENSMUSG00000011158 | 7_Brf1           | 822.995 | 0.38244  | 0.00427  | 0.01237  | 914.202 | 950.847 | 929.83  | 799.795 | 654.467 | 688.827 |
| ENSMUSG00000011171 | 11_Vipr2         | 256.028 | -1.33274 | 9.02E-07 | 8.38E-06 | 150.197 | 185.397 | 100.393 | 429.202 | 402.542 | 268.44  |
| ENSMUSG00000011179 | 7_Odc1           | 8831.24 | -0.03542 | 0.74169  | 0.81739  | 9002.25 | 8253.83 | 8911.07 | 8264.85 | 8953.65 | 9601.8  |
| ENSMUSG00000011254 | 16_Thgl1         | 262.053 | -0.23895 | 0.2331   | 0.33951  | 231.806 | 196.41  | 294.008 | 277.719 | 282.407 | 289.966 |
| ENSMUSG00000011256 | 16_Adam19        | 199.491 | -0.16071 | 0.41855  | 0.53446  | 211.838 | 183.561 | 169.712 | 233.537 | 207.099 | 191.2   |
| ENSMUSG00000011257 | 19_Pabpc4        | 766.675 | 0.42379  | 0.00495  | 0.01398  | 830.856 | 869.162 | 934.611 | 687.084 | 554.056 | 724.282 |
| ENSMUSG00000011263 | 15_Exoc3l2       | 161.332 | 0.29047  | 0.21198  | 0.31536  | 185.792 | 198.246 | 148.199 | 172.222 | 125.514 | 138.019 |
| ENSMUSG00000011267 | 7_Zfp296         | 209.443 | 1.3703   | 3.01E-06 | 2.39E-05 | 267.402 | 267.999 | 370.498 | 147.876 | 69.9294 | 132.954 |
| ENSMUSG00000011305 | 11_Plin5         | 3.04205 | -0.40179 | 0.74896  | 0.8228   | 1.73638 | 3.67122 | 2.39031 | 1.80337 | 3.58612 | 5.06491 |
| ENSMUSG00000011306 | 6_Sugp1          | 654.679 | 0.41759  | 0.00614  | 0.01675  | 681.528 | 748.012 | 817.485 | 623.065 | 495.781 | 562.205 |
| ENSMUSG00000011382 | 6_Dhdh           | 265.392 | -0.68365 | 0.00024  | 0.00107  | 207.497 | 223.027 | 180.468 | 352.559 | 345.164 | 283.635 |
| ENSMUSG00000011427 | 15_Zfp790        | 368.862 | -0.30156 | 0.0553   | 0.10537  | 322.098 | 352.437 | 315.521 | 388.626 | 383.715 | 450.777 |
| ENSMUSG00000011463 | 5_Cpb1           | 3.54381 | -0.36876 | 0.7824   | 0.8486   | 0       | 4.58903 | 4.78062 | 4.50843 | 3.58612 | 3.79868 |
| ENSMUSG00000011486 | 14_Slc25a41      | 0.60112 | -2.7448  | 0.49049  | NA       | 0       | 0       | 0       | 3.60674 | 0       | 0       |
| ENSMUSG00000011589 | 8_Fsd1           | 8.96822 | -0.83914 | 0.31823  | 0.43378  | 5.20913 | 9.17806 | 4.78062 | 16.2303 | 4.48265 | 13.9285 |
| ENSMUSG00000011632 | 7_Pinlyp         | 15.1923 | 2.82646  | 0.00153  | 0.00518  | 27.782  | 11.9315 | 40.6352 | 8.11517 | 2.68959 | 0       |
| ENSMUSG00000011658 | 14_Fuz           | 298.139 | 0.61198  | 0.00118  | 0.00415  | 317.757 | 369.876 | 394.401 | 272.309 | 205.306 | 229.187 |
| ENSMUSG00000011751 | 16_Sptbn4        | 11.0403 | -0.11966 | 0.88143  | 0.91999  | 13.0228 | 12.8493 | 5.97577 | 19.8371 | 10.7584 | 3.79868 |
| ENSMUSG00000011752 | 6_Pgam1          | 4747.53 | 0.40182  | 6.73E-05 | 0.00035  | 5349.78 | 5143.38 | 5720.01 | 4046.76 | 3970.73 | 4254.52 |
| ENSMUSG00000011831 | 16_Evi5          | 2025.22 | -0.46849 | 2.88E-05 | 0.00017  | 1775.45 | 1652.97 | 1668.44 | 2168.55 | 2469.94 | 2415.96 |
| ENSMUSG00000011832 | 15_Evi5l         | 588.939 | 0.42561  | 0.01078  | 0.02691  | 632.909 | 738.833 | 653.749 | 584.292 | 424.955 | 498.893 |
| ENSMUSG00000011837 | 3_Snapc2         | 355.674 | 0.76228  | 0.00113  | 0.00396  | 454.063 | 457.067 | 432.646 | 364.281 | 225.926 | 200.064 |
| ENSMUSG00000011877 | 13_Git1          | 1276.15 | 1.21607  | 4.84E-10 | 1.26E-08 | 1624.38 | 1732.82 | 1995.91 | 962.098 | 569.297 | 772.398 |

|                     |                  |         |          |          |          |         |         |         |         |         |         |
|---------------------|------------------|---------|----------|----------|----------|---------|---------|---------|---------|---------|---------|
| ENSMUSG000000011884 | 13_GltP          | 5048.24 | 0.73504  | 1.21E-06 | 1.08E-05 | 5749.14 | 6031.82 | 7139.85 | 4021.52 | 3143.24 | 4203.87 |
| ENSMUSG000000011958 | 17_Bnip2         | 1850.83 | -0.32248 | 0.00285  | 0.0088   | 1727.69 | 1606.16 | 1600.31 | 1978.3  | 2167.81 | 2024.7  |
| ENSMUSG000000011960 | 12_Cnt1          | 1296.58 | -0.14096 | 0.28072  | 0.3935   | 1205.05 | 1144.5  | 1351.72 | 1258.75 | 1481.07 | 1338.4  |
| ENSMUSG000000012017 | 3_Scarf2         | 364.063 | 0.6867   | 0.00741  | 0.01959  | 408.917 | 552.519 | 386.035 | 381.413 | 203.512 | 251.979 |
| ENSMUSG000000012042 | 8_4930579F01Rik  | 0.34861 | -0.03469 | 0.99322  | NA       | 0       | 0       | 1.19515 | 0       | 0.89653 | 0       |
| ENSMUSG000000012076 | 7_Brms1l         | 611.924 | -0.47885 | 0.00055  | 0.00215  | 535.672 | 521.314 | 475.671 | 651.017 | 752.189 | 735.678 |
| ENSMUSG000000012114 | 16_Med15         | 1308.98 | 1.03921  | 4.72E-12 | 2.10E-10 | 1640.88 | 1741.08 | 1900.3  | 923.326 | 710.052 | 938.274 |
| ENSMUSG000000012117 | 13_Dhdds         | 927.998 | 0.30728  | 0.0149   | 0.0354   | 1037.49 | 990.312 | 1051.74 | 898.079 | 758.465 | 831.911 |
| ENSMUSG000000012123 | 15_Aim1l         | 3905.92 | 1.27391  | 7.22E-15 | 6.45E-13 | 4828.86 | 5281.05 | 6468.17 | 2308.31 | 1914.09 | 2635.02 |
| ENSMUSG000000012126 | 16_Ubxn11        | 43.7823 | 0.17247  | 0.66152  | 0.75344  | 42.5412 | 50.4793 | 46.611  | 57.7079 | 34.9647 | 30.3894 |
| ENSMUSG000000012187 | 13_Mogat1        | 96.7782 | -1.6133  | 2.67E-08 | 3.97E-07 | 46.8822 | 58.7396 | 37.0498 | 150.581 | 165.858 | 121.558 |
| ENSMUSG000000012282 | 2_Wnt8a          | 0.68778 | 2.88297  | 0.40065  | NA       | 1.73638 | 0       | 2.39031 | 0       | 0       | 0       |
| ENSMUSG000000012296 | 15_Tjap1         | 360.164 | 1.06798  | 7.71E-06 | 5.41E-05 | 447.117 | 463.492 | 553.356 | 315.59  | 171.237 | 210.194 |
| ENSMUSG000000012350 | 15_Ehf           | 16833.7 | -0.0757  | 0.62154  | 0.71938  | 16850.7 | 15268.6 | 17056   | 13643.4 | 18555.5 | 19627.8 |
| ENSMUSG000000012396 | 12_Nanog         | 1.30615 | -0.93801 | 0.66444  | NA       | 2.60457 | 0       | 0       | 1.80337 | 0.89653 | 2.53245 |
| ENSMUSG000000012405 | 15_Rpl15         | 11373.6 | 0.30127  | 0.05581  | 0.10618  | 12617.4 | 12188.5 | 12864.6 | 12116.8 | 7991.67 | 10462.8 |
| ENSMUSG000000012422 | 14_Tmem167       | 1294.11 | -0.58052 | 5.38E-05 | 0.00029  | 1089.58 | 971.038 | 1051.74 | 1401.22 | 1803.82 | 1447.3  |
| ENSMUSG000000012428 | 9_Steap4         | 1575.01 | 0.1718   | 0.09681  | 0.1674   | 1688.63 | 1610.75 | 1706.68 | 1444.5  | 1499    | 1500.48 |
| ENSMUSG000000012429 | 8_Mplkip         | 201.08  | -0.30886 | 0.15774  | 0.2493   | 179.715 | 186.315 | 173.297 | 192.961 | 277.924 | 196.265 |
| ENSMUSG000000012443 | 3_Kif11          | 553.786 | -0.1542  | 0.43182  | 0.54709  | 581.686 | 454.314 | 536.624 | 456.253 | 703.777 | 590.062 |
| ENSMUSG000000012483 | 4_Rpa3           | 225.399 | -0.34731 | 0.07973  | 0.14298  | 221.388 | 188.15  | 185.249 | 219.11  | 287.786 | 250.713 |
| ENSMUSG000000012519 | 14_Mkl           | 316.511 | 1.83602  | 4.46E-12 | 2.00E-10 | 473.163 | 371.711 | 638.212 | 97.382  | 157.789 | 160.811 |
| ENSMUSG000000012520 | 10_PhoX2b        | 0.19919 | 0.92709  | 0.82027  | NA       | 0       | 0       | 1.19515 | 0       | 0       | 0       |
| ENSMUSG000000012535 | 14_Tnpo3         | 2585.8  | -0.18848 | 0.12623  | 0.20783  | 2470    | 2372.53 | 2408.24 | 2409.3  | 3000.69 | 2854.08 |
| ENSMUSG000000012609 | 18_Ttl5          | 417.481 | 0.01472  | 0.9237   | 0.94944  | 418.467 | 440.547 | 400.377 | 461.663 | 405.232 | 378.602 |
| ENSMUSG000000012640 | 16_Zfp715        | 555.658 | -0.57086 | 0.00041  | 0.00167  | 477.504 | 459.821 | 403.962 | 627.573 | 767.43  | 597.659 |
| ENSMUSG000000012705 | 16_Retrn         | 1.6918  | -0.74144 | 0.67942  | NA       | 1.73638 | 0.91781 | 1.19515 | 4.50843 | 1.79306 | 0       |
| ENSMUSG000000012777 | 14_Acpt          | 0.6581  | 2.82669  | 0.42105  | NA       | 0       | 2.75342 | 1.19515 | 0       | 0       | 0       |
| ENSMUSG000000012819 | 15_Cdh23         | 102.511 | 0.51018  | 0.2031   | 0.30468  | 106.787 | 168.876 | 86.0511 | 134.351 | 64.5502 | 54.4478 |
| ENSMUSG000000012848 | 14_Rps5          | 14124.8 | 0.56025  | 0.00194  | 0.00635  | 16545.1 | 16380.1 | 17575.9 | 14826.4 | 8859.52 | 10561.6 |
| ENSMUSG000000012889 | 8_Podnl1         | 3.44079 | 0.83609  | 0.53113  | 0.63966  | 2.60457 | 3.67122 | 7.17092 | 4.50843 | 2.68959 | 0       |
| ENSMUSG000000013033 | 16_Adgr1l        | 998.881 | -0.22754 | 0.3185   | 0.43399  | 970.635 | 1133.49 | 656.14  | 1366.05 | 941.357 | 925.612 |
| ENSMUSG000000013076 | 15_Amotl1        | 5086.1  | 0.0913   | 0.33759  | 0.45406  | 5119.71 | 5296.66 | 5324.41 | 5071.98 | 4687.06 | 5016.79 |
| ENSMUSG000000013089 | 15_Etv5          | 653.059 | 0.26567  | 0.07274  | 0.13269  | 734.487 | 679.176 | 724.263 | 620.36  | 509.229 | 650.841 |
| ENSMUSG000000013091 | 5_Tmem190        | 5.94824 | 0.29902  | 0.76324  | 0.83348  | 1.73638 | 7.34244 | 10.7564 | 5.41011 | 5.37918 | 5.06491 |
| ENSMUSG000000013150 | 15_Gfod2         | 421.713 | 0.5659   | 0.00519  | 0.01454  | 440.172 | 508.464 | 561.722 | 404.857 | 261.787 | 353.277 |
| ENSMUSG000000013155 | 9_Enkd1          | 79.6863 | 1.182    | 0.00037  | 0.00153  | 85.0825 | 107.383 | 139.833 | 61.3146 | 37.6543 | 46.8504 |
| ENSMUSG000000013158 | 5_4933405L10Rik  | 1.28311 | 3.79329  | 0.10443  | NA       | 3.47275 | 1.83561 | 2.39031 | 0       | 0       | 0       |
| ENSMUSG000000013160 | 7_Atp6v0d1       | 2042.46 | 0.10369  | 0.30081  | 0.41552  | 2033.3  | 2134.82 | 2179.96 | 1993.63 | 1936.51 | 1976.58 |
| ENSMUSG000000013236 | 16_Ptprs         | 3519.71 | 0.96083  | 2.52E-08 | 3.78E-07 | 4087.43 | 5041.51 | 4821.25 | 2752.85 | 1833.41 | 2581.84 |
| ENSMUSG000000013275 | 9_Slc41a1        | 3274.66 | 0.33705  | 0.01087  | 0.02711  | 3372.04 | 3714.36 | 3880.67 | 3249.67 | 2541.66 | 2889.53 |
| ENSMUSG000000013338 | 16_Fer114        | 232.6   | 1.35578  | 1.81E-11 | 7.20E-10 | 290.843 | 347.848 | 364.522 | 140.663 | 111.17  | 140.551 |
| ENSMUSG000000013353 | 10_4931406B18Rik | 0.1447  | 0.92709  | 0.82027  | NA       | 0.86819 | 0       | 0       | 0       | 0       | 0       |
| ENSMUSG000000013367 | 5_Igln5          | 41.8474 | -0.4157  | 0.43058  | 0.54591  | 26.0457 | 57.8218 | 23.9031 | 67.6264 | 52.8953 | 22.7921 |
| ENSMUSG000000013415 | 9_Igfbp1         | 103.952 | -0.66066 | 0.01677  | 0.03913  | 77.2688 | 87.1915 | 77.685  | 161.402 | 120.135 | 100.032 |
| ENSMUSG000000013418 | 8_B4galnt2       | 0.15028 | -0.99647 | 0.80707  | NA       | 0       | 0       | 0       | 0.90169 | 0       | 0       |
| ENSMUSG000000013419 | 6_Zfp651         | 559.428 | 0.12364  | 0.64885  | 0.74309  | 525.254 | 726.902 | 498.379 | 785.368 | 392.68  | 427.985 |
| ENSMUSG000000013465 | 18_Nelfb         | 1617.43 | 0.45641  | 0.00109  | 0.00385  | 1785    | 1819.09 | 2009.05 | 1476.96 | 1158.32 | 1456.16 |
| ENSMUSG000000013483 | 14_Card14        | 683.582 | 0.87612  | 6.40E-06 | 4.60E-05 | 836.934 | 788.395 | 1029.03 | 526.584 | 368.474 | 552.075 |
| ENSMUSG000000013495 | 15_Tmem175       | 650.744 | -0.20368 | 0.09417  | 0.16354  | 593.841 | 612.176 | 608.333 | 681.674 | 693.018 | 715.418 |
| ENSMUSG000000013523 | 15_Bcas1         | 1810.67 | 0.1926   | 0.08252  | 0.14692  | 1867.47 | 1948.5  | 1976.78 | 1617.62 | 1629    | 1824.63 |
| ENSMUSG000000013539 | 13_Tango2        | 228.81  | 0.27586  | 0.15179  | 0.24138  | 264.797 | 256.986 | 229.47  | 232.635 | 177.513 | 211.46  |
| ENSMUSG000000013562 | 12_4833413E03Rik | 0.99103 | 2.20972  | 0.35186  | NA       | 1.73638 | 0.91781 | 2.39031 | 0.90169 | 0       | 0       |
| ENSMUSG000000013584 | 5_Aldh1a2        | 247.637 | -0.55579 | 0.00839  | 0.02181  | 190.133 | 245.054 | 166.126 | 321.902 | 303.027 | 259.577 |
| ENSMUSG000000013593 | 12_Ndufs2        | 2674.22 | 0.00276  | 0.98047  | 0.98716  | 2669.68 | 2624.01 | 2738.1  | 2941.3  | 2552.42 | 2519.79 |
| ENSMUSG000000013611 | 14_Snx31         | 847.948 | -0.02544 | 0.84597  | 0.89513  | 796.997 | 882.929 | 840.193 | 835.862 | 793.43  | 938.274 |
| ENSMUSG000000013622 | 15_Atraid        | 1351.94 | -0.23925 | 0.05844  | 0.11045  | 1257.14 | 1270.24 | 1193.96 | 1603.2  | 1482.86 | 1304.21 |
| ENSMUSG000000013629 | 16_Cad           | 976.139 | 1.50688  | 3.33E-20 | 6.20E-18 | 1279.71 | 1372.12 | 1680.39 | 548.225 | 435.714 | 540.679 |
| ENSMUSG000000013643 | 13_Lypd8         | 198.261 | 1.59749  | 7.30E-07 | 6.96E-06 | 264.797 | 188.15  | 442.207 | 91.9719 | 120.135 | 82.3047 |
| ENSMUSG000000013646 | 17_Sh3bp5l       | 2282.17 | 1.05465  | 1.64E-12 | 8.22E-11 | 2771.26 | 2942.48 | 3530.49 | 1672.63 | 1303.56 | 1472.62 |
| ENSMUSG000000013653 | 2_1810065E05Rik  | 0.45536 | 0.77574  | 0.84797  | NA       | 0       | 1.83561 | 0       | 0       | 0.89653 | 0       |
| ENSMUSG000000013662 | 5_Atd1           | 2230.05 | -0.6485  | 7.03E-07 | 6.74E-06 | 1830.14 | 1646.54 | 1734.17 | 2369.63 | 2998.89 | 2800.89 |
| ENSMUSG000000013663 | 7_Pten           | 3717.42 | -0.39162 | 0.00238  | 0.00754  | 3330.37 | 3122.37 | 3194.65 | 3636.5  | 4710.37 | 4310.24 |
| ENSMUSG000000013698 | 12_Pea15a        | 6514.95 | -0.41764 | 7.04E-05 | 0.00037  | 5848.99 | 5721.6  | 5164.26 | 7633.67 | 7658.16 | 7063.01 |
| ENSMUSG000000013701 | 12_Timm23        | 573.607 | 0.97704  | 0.00035  | 0.00146  | 440.172 | 917.806 | 923.854 | 365.183 | 329.923 | 464.705 |
| ENSMUSG000000013707 | 3_Tnfaip8l2      | 38.9459 | 1.04549  | 0.03776  | 0.07682  | 67.7187 | 44.0547 | 45.4159 | 37.8708 | 10.7584 | 27.857  |
| ENSMUSG000000013736 | 16_Trnt1         | 646.511 | -0.4037  | 0.00684  | 0.01833  | 598.182 | 557.108 | 513.916 | 659.132 | 823.912 | 726.814 |
| ENSMUSG000000013766 | 11_Ly6g6e        | 784.684 | 0.80318  | 1.84E-05 | 0.00011  | 904.652 | 937.997 | 1149.74 | 628.475 | 440.197 | 647.042 |
| ENSMUSG000000013787 | 15_Ehmt2         | 2486.21 | 1.09233  | 1.86E-08 | 2.94E-07 | 2984.83 | 3460.13 | 3709.76 | 1971.08 | 1152.94 | 1638.5  |
| ENSMUSG000000013822 | 6_Elof1          | 1282.68 | 0.36506  | 0.00727  | 0.01928  | 1423.83 | 1412.5  | 1496.33 | 1265.97 | 978.115 | 1119.34 |
| ENSMUSG000000013833 | 15_Med16         | 818.456 | 1.21482  | 2.35E-08 | 3.56E-07 | 994.076 | 1206.91 | 1231.01 | 623.966 | 340.682 | 514.088 |
| ENSMUSG000000013846 | 9_St3gal1        | 1235.99 | -0.72012 | 5.59E-05 | 0.0003   | 958.48  | 1069.24 | 773.265 | 1821.4  | 1507.07 | 1286.49 |
| ENSMUSG000000013858 | 14_Tmem259       | 1117.09 | 0.98673  | 5.34E-06 | 3.93E-05 | 1352.64 | 1561.19 | 1540.55 | 957.59  | 502.954 | 787.593 |
| ENSMUSG000000013878 | 17_Rnf170        | 1200    | -0.51955 | 0.0001   | 0.00051  | 1078.29 | 930.655 | 948.952 | 1275.88 | 1536.65 | 1429.57 |
| ENSMUSG000000013921 | 14_Clip3         | 291.718 | -0.64574 | 0.03334  | 0.06931  | 225.729 | 304.711 | 151.785 | 496.829 | 306.613 | 264.641 |
| ENSMUSG000000013928 | 12_Thap8         | 0.30239 | -0.03469 | 0.99322  | NA       | 0       | 0.91781 | 0       | 0       | 0.89653 | 0       |
| ENSMUSG000000013936 | 12_Myl2          | 16.4445 | -4.20524 | 2.73E-06 | 2.19E-05 | 0       | 1.83561 | 3.58546 | 35.1657 | 18.8271 | 39.253  |
| ENSMUSG000000013973 | 12_Dedd          | 705.653 | 0.46849  | 0.00199  | 0.00647  | 754.456 | 785.642 | 917.878 | 631.18  | 521.781 | 622.984 |
| ENSMUSG000000013974 | 2_Mcemp1         | 15.5815 | 3.13227  | 0.0005   | 0.00199  | 57.3004 | 10.0959 | 16.7322 | 4.50843 | 3.58612 | 1.26623 |

|                    |                  |         |          |          |          |         |         |         |         |         |         |
|--------------------|------------------|---------|----------|----------|----------|---------|---------|---------|---------|---------|---------|
| ENSMUSG00000013997 | 10_Nit1          | 916.922 | -0.00773 | 0.95214  | 0.96877  | 876.87  | 877.422 | 989.588 | 847.584 | 956.598 | 953.469 |
| ENSMUSG00000014030 | 15_Pax5          | 7.10926 | 1.47217  | 0.12058  | 0.20059  | 8.68188 | 8.26025 | 14.3418 | 5.41011 | 0.89653 | 5.06491 |
| ENSMUSG00000014039 | 17_Prdrn15       | 467.509 | 0.36809  | 0.01764  | 0.04078  | 461.008 | 542.423 | 577.259 | 386.823 | 407.025 | 430.517 |
| ENSMUSG00000014074 | 17_Rnf168        | 1131.29 | -0.31465 | 0.03322  | 0.06913  | 1074.82 | 939.833 | 1009.91 | 1055.87 | 1381.55 | 1325.74 |
| ENSMUSG00000014075 | 15_Tctex1d2      | 379.045 | -0.52848 | 0.00064  | 0.00245  | 333.384 | 318.479 | 278.471 | 435.514 | 471.575 | 436.848 |
| ENSMUSG00000014077 | 13_Chpl1         | 6397.94 | -0.0924  | 0.44235  | 0.5576   | 6151.98 | 5945.54 | 6481.32 | 5783.41 | 6953.49 | 7071.88 |
| ENSMUSG00000014158 | 11_Trvp4         | 439.521 | 1.19191  | 1.03E-07 | 1.29E-06 | 523.518 | 588.313 | 721.873 | 304.77  | 190.961 | 307.693 |
| ENSMUSG00000014164 | 14_Khlh3         | 31.6297 | -0.60247 | 0.23253  | 0.33883  | 27.782  | 33.041  | 14.3418 | 55.9045 | 29.5855 | 29.1232 |
| ENSMUSG00000014177 | 10_Tvp23b        | 1008.75 | -0.50132 | 2.81E-05 | 0.00017  | 855.166 | 863.655 | 785.216 | 1116.29 | 1195.08 | 1237.1  |
| ENSMUSG00000014195 | 15_Dnajc7        | 4087.92 | -0.20079 | 0.14347  | 0.2303   | 3848.68 | 3528.96 | 4033.65 | 3682.48 | 4694.23 | 4739.49 |
| ENSMUSG00000014198 | 15_Zfp385c       | 37.8115 | -0.62999 | 0.12854  | 0.21107  | 23.4411 | 34.8766 | 31.074  | 60.4129 | 40.3439 | 36.7206 |
| ENSMUSG00000014226 | 10_Cacybp        | 1360.53 | -0.34682 | 0.02001  | 0.04528  | 1196.36 | 1118.8  | 1278.81 | 1290.31 | 1751.82 | 1527.07 |
| ENSMUSG00000014232 | 14_Cluap1        | 473.118 | -0.22465 | 0.13469  | 0.2189   | 479.24  | 389.15  | 441.012 | 504.944 | 534.332 | 490.03  |
| ENSMUSG00000014243 | 5_Zswim7         | 89.1049 | -0.68883 | 0.01523  | 0.03606  | 67.7187 | 80.7669 | 56.1722 | 121.728 | 118.342 | 89.9021 |
| ENSMUSG00000014245 | 8_Pigl           | 169     | 0.53643  | 0.02183  | 0.04879  | 173.638 | 212.931 | 212.737 | 110.907 | 135.376 | 168.408 |
| ENSMUSG00000014294 | 4_Ndufa2         | 917.285 | 0.58955  | 0.00783  | 0.02056  | 1056.59 | 1118.8  | 1131.81 | 1014.4  | 532.539 | 649.574 |
| ENSMUSG00000014301 | 12_Pam16         | 99.5015 | -0.47162 | 0.05196  | 0.10008  | 86.8188 | 77.0957 | 86.0511 | 107.301 | 115.652 | 124.09  |
| ENSMUSG00000014303 | 13_Glis2         | 588.165 | 0.0197   | 0.92723  | 0.95193  | 559.113 | 713.135 | 504.355 | 752.907 | 484.127 | 515.354 |
| ENSMUSG00000014313 | 14_Cox6c         | 2392.49 | -0.24796 | 0.04535  | 0.08934  | 2181.76 | 2283.5  | 2097.5  | 2925.07 | 2466.36 | 2400.77 |
| ENSMUSG00000014329 | 14_Bicc1         | 642.674 | -0.2411  | 0.10713  | 0.1821   | 653.746 | 566.286 | 547.381 | 770.039 | 686.742 | 631.847 |
| ENSMUSG00000014349 | 7_Ube2z          | 4288.52 | 0.0837   | 0.44237  | 0.5576   | 4329.66 | 4333.88 | 4573.85 | 3862.82 | 4101.63 | 4529.29 |
| ENSMUSG00000014351 | 12_Gip           | 7.68254 | -1.81298 | 0.05194  | 0.10006  | 5.20913 | 3.67122 | 1.19515 | 18.0337 | 11.6549 | 6.33113 |
| ENSMUSG00000014353 | 14_Tmem87b       | 1601.44 | -0.32194 | 0.01223  | 0.02989  | 1430.77 | 1372.12 | 1467.65 | 1561.72 | 1951.75 | 1824.63 |
| ENSMUSG00000014355 | 10_Anapc1        | 3403.09 | -0.01081 | 0.92006  | 0.94678  | 3332.98 | 3365.59 | 3471.92 | 3118.93 | 3558.33 | 3570.76 |
| ENSMUSG00000014361 | 5_Meritk         | 270.924 | -0.53815 | 0.00911  | 0.02335  | 188.397 | 267.081 | 207.957 | 353.461 | 332.613 | 276.037 |
| ENSMUSG00000014402 | 14_Tsg101        | 2360.52 | -0.0165  | 0.87779  | 0.91736  | 2351.92 | 2311.95 | 2375.97 | 2204.62 | 2387.46 | 2531.19 |
| ENSMUSG00000014418 | 15_Hps5          | 992.9   | -0.00835 | 0.95392  | 0.97004  | 971.503 | 985.723 | 1012.3  | 835.862 | 1088.39 | 1063.63 |
| ENSMUSG00000014426 | 8_Map3k4         | 877.222 | 0.49618  | 0.00081  | 0.003    | 1002.76 | 1021.52 | 1055.32 | 820.534 | 612.33  | 750.873 |
| ENSMUSG00000014444 | 16_Piezo1        | 3381.24 | 1.13966  | 1.04E-12 | 5.54E-11 | 4041.42 | 4816.64 | 5096.14 | 2426.44 | 1727.61 | 2179.18 |
| ENSMUSG00000014453 | 3_Blk            | 4.15737 | 1.64456  | 0.17603  | 0.27206  | 11.2864 | 2.75342 | 4.78062 | 0.90169 | 2.68959 | 2.53245 |
| ENSMUSG00000014470 | 4_Rnf166         | 483.104 | 1.16253  | 2.77E-06 | 2.22E-05 | 580.818 | 685.601 | 737.41  | 403.053 | 195.444 | 296.297 |
| ENSMUSG00000014496 | 7_Ankrd28        | 1116.75 | -0.50455 | 0.00023  | 0.00104  | 983.657 | 855.395 | 932.22  | 1259.65 | 1473    | 1196.58 |
| ENSMUSG00000014498 | 9_Ankrd52        | 1622.18 | 0.70148  | 8.95E-10 | 2.15E-08 | 1886.57 | 2050.38 | 2091.52 | 1317.36 | 1205.83 | 1181.39 |
| ENSMUSG00000014503 | 14_Pkd2l2        | 104.958 | -0.14479 | 0.59319  | 0.69529  | 82.4779 | 106.465 | 111.149 | 130.744 | 110.273 | 88.6359 |
| ENSMUSG00000014504 | 16_Srp19         | 716.9   | -0.41253 | 0.0038   | 0.01123  | 627.7   | 575.464 | 641.798 | 718.643 | 861.566 | 876.229 |
| ENSMUSG00000014542 | 3_Clec4f         | 0.19919 | 0.92709  | 0.82027  | NA       | 0       | 0       | 1.19515 | 0       | 0       | 0       |
| ENSMUSG00000014543 | 14_Klra17        | 1.94954 | 0.82769  | 0.62648  | NA       | 4.34094 | 1.83561 | 1.19515 | 0       | 1.79306 | 2.53245 |
| ENSMUSG00000014547 | 9_Wdfy2          | 282.588 | 0.27762  | 0.1192   | 0.1987   | 289.107 | 305.629 | 335.838 | 287.638 | 251.925 | 225.388 |
| ENSMUSG00000014550 | 14_Rbsn          | 1201.28 | 0.10089  | 0.37575  | 0.49339  | 1207.65 | 1205.08 | 1317.06 | 1134.32 | 1130.53 | 1213.05 |
| ENSMUSG00000014551 | 8_Mrps25         | 899.308 | -0.2288  | 0.05749  | 0.1089   | 834.329 | 859.984 | 788.802 | 914.309 | 987.977 | 1010.45 |
| ENSMUSG00000014554 | 13_Dguok         | 884.635 | -0.21812 | 0.08336  | 0.14802  | 862.111 | 784.724 | 806.729 | 890.865 | 1023.84 | 939.54  |
| ENSMUSG00000014592 | 19_Camta1        | 541.033 | 0.17598  | 0.23369  | 0.34029  | 625.096 | 534.163 | 562.918 | 559.045 | 478.747 | 486.231 |
| ENSMUSG00000014599 | 10_Csf1          | 683.738 | 0.30817  | 0.08318  | 0.14776  | 734.487 | 748.929 | 784.021 | 542.815 | 523.574 | 768.6   |
| ENSMUSG00000014601 | 13_Strip1        | 1673.13 | 0.58745  | 8.53E-08 | 1.09E-06 | 1888.31 | 2075.16 | 2064.03 | 1373.27 | 1279.35 | 1358.66 |
| ENSMUSG00000014602 | 15_Kif1a         | 1085.12 | -0.72207 | 0.01805  | 0.04156  | 790.051 | 1163.78 | 503.16  | 1895.34 | 1247.97 | 910.417 |
| ENSMUSG00000014603 | 2_Alx3           | 4.1027  | 0.76227  | 0.52208  | 0.63161  | 1.73638 | 10.0959 | 3.58546 | 3.60674 | 1.79306 | 3.79868 |
| ENSMUSG00000014606 | 14_Slc25a11      | 1875.83 | -0.00587 | 0.96153  | 0.97507  | 1789.34 | 1813.58 | 2013.83 | 2008.96 | 1709.68 | 1919.6  |
| ENSMUSG00000014609 | 16_Chme          | 0.59296 | -1.36724 | 0.17268  | NA       | 0.86819 | 0       | 0       | 0       | 2.68959 | 0       |
| ENSMUSG00000014633 | 15_Cmc2          | 182.484 | 0.10003  | 0.60486  | 0.70516  | 193.606 | 168.876 | 204.371 | 170.419 | 182.892 | 174.739 |
| ENSMUSG00000014668 | 15_Chfr          | 1144.18 | 0.11801  | 0.34846  | 0.46543  | 1129.51 | 1171.12 | 1272.84 | 1002.67 | 1170.87 | 1118.08 |
| ENSMUSG00000014686 | 7_Ceacam16       | 1.76677 | 3.17901  | 0.16579  | NA       | 6.94551 | 2.75342 | 0       | 0.90169 | 0       | 0       |
| ENSMUSG00000014704 | 10_Hoxa2         | 0.15297 | 0.92709  | 0.82027  | NA       | 0       | 0.91781 | 0       | 0       | 0       | 0       |
| ENSMUSG00000014725 | 14_Adam28        | 1958.4  | 0.02069  | 0.89492  | 0.92909  | 1982.07 | 1789.72 | 2145.3  | 1573.44 | 2142.71 | 2117.13 |
| ENSMUSG00000014747 | 6_Ankrd53        | 2.95323 | -0.61008 | 0.64636  | 0.74118  | 2.60457 | 0.91781 | 3.58546 | 1.80337 | 6.27571 | 2.53245 |
| ENSMUSG00000014748 | 13_Tex261        | 1813.35 | 0.26454  | 0.02489  | 0.05446  | 1969.05 | 1901.69 | 2066.42 | 1738.45 | 1490.03 | 1714.47 |
| ENSMUSG00000014763 | 7_Fam120b        | 990.253 | 0.02844  | 0.82363  | 0.87923  | 934.171 | 1054.56 | 1011.1  | 896.275 | 1033.7  | 1011.72 |
| ENSMUSG00000014767 | 16_Tbp           | 556.509 | -0.24666 | 0.10273  | 0.17617  | 539.145 | 499.286 | 488.818 | 551.832 | 687.639 | 572.335 |
| ENSMUSG00000014769 | 9_Psmb1          | 3906.97 | -0.09516 | 0.36858  | 0.48592  | 3946.78 | 3460.13 | 3928.47 | 4118.9  | 4012.87 | 3974.69 |
| ENSMUSG00000014771 | 12_Pdcd2         | 340.764 | -0.12549 | 0.45902  | 0.5728   | 347.275 | 288.191 | 341.814 | 323.705 | 352.337 | 391.264 |
| ENSMUSG00000014773 | 13_Dil1          | 879.414 | 1.01875  | 1.20E-08 | 2.01E-07 | 1113.02 | 1076.59 | 1342.16 | 608.638 | 459.92  | 676.165 |
| ENSMUSG00000014776 | 6_Nol3           | 185.252 | -0.45606 | 0.05991  | 0.11275  | 175.374 | 160.616 | 132.662 | 272.309 | 194.547 | 176.006 |
| ENSMUSG00000014778 | 10_Fhod1         | 272.969 | 0.63561  | 0.00203  | 0.0066   | 313.416 | 381.807 | 301.179 | 256.079 | 180.203 | 205.129 |
| ENSMUSG00000014782 | 15_Plekhg4       | 7.3106  | -0.51471 | 0.54952  | 0.65593  | 7.8137  | 5.50683 | 4.78062 | 13.5253 | 7.17224 | 5.06491 |
| ENSMUSG00000014786 | 7_Slc9a5         | 55.4722 | -0.39386 | 0.28976  | 0.40335  | 37.3321 | 62.4108 | 44.2207 | 82.0534 | 51.1022 | 55.714  |
| ENSMUSG00000014791 | 9_Elmo3          | 1248.51 | 0.86698  | 4.29E-09 | 8.23E-08 | 1490.68 | 1577.71 | 1770.02 | 981.935 | 753.982 | 916.748 |
| ENSMUSG00000014813 | 8_Stc1           | 157.016 | -0.45811 | 0.0413   | 0.0827   | 143.251 | 144.095 | 108.759 | 162.303 | 202.616 | 181.07  |
| ENSMUSG00000014837 | 14_4931428F04Rik | 138.194 | 0.34766  | 0.21915  | 0.32387  | 145.856 | 139.506 | 179.273 | 158.697 | 84.2739 | 121.558 |
| ENSMUSG00000014846 | 12_Tppp3         | 792.793 | 1.2177   | 2.87E-07 | 3.13E-06 | 950.666 | 1035.28 | 1340.96 | 625.77  | 325.441 | 478.634 |
| ENSMUSG00000014850 | 15_Msh3          | 351.883 | -0.2318  | 0.19503  | 0.29519  | 348.144 | 295.533 | 327.472 | 327.312 | 439.3   | 373.537 |
| ENSMUSG00000014852 | 16_Adamts13      | 12.3967 | -0.8234  | 0.26942  | 0.38091  | 10.4183 | 8.26025 | 8.36608 | 23.4438 | 18.8271 | 5.06491 |
| ENSMUSG00000014856 | 12_Tmem208       | 455.757 | 0.3276   | 0.06765  | 0.12492  | 524.386 | 512.136 | 485.233 | 486.008 | 331.716 | 395.063 |
| ENSMUSG00000014859 | 8_E2f4           | 1276.99 | 0.76355  | 4.08E-06 | 3.10E-05 | 1512.38 | 1554.76 | 1754.49 | 1093.74 | 751.293 | 995.254 |
| ENSMUSG00000014867 | 9_Surf4          | 3881.69 | 0.39076  | 0.00016  | 0.00076  | 4193.35 | 4375.18 | 4644.37 | 3462.47 | 3178.2  | 3436.54 |
| ENSMUSG00000014873 | 15_Surf2         | 423.35  | -0.13595 | 0.35635  | 0.47311  | 428.885 | 370.793 | 411.133 | 466.171 | 440.197 | 422.92  |
| ENSMUSG00000014905 | 3_Dnajb9         | 836.788 | -0.67032 | 4.52E-07 | 4.64E-06 | 652.009 | 664.491 | 620.285 | 925.129 | 1117.97 | 1040.84 |
| ENSMUSG00000014907 | 9_Naf1           | 268.754 | -0.09849 | 0.65717  | 0.75012  | 249.17  | 245.054 | 284.447 | 202.879 | 324.544 | 306.427 |
| ENSMUSG00000014932 | 15_Yes1          | 931.87  | -0.4335  | 0.0032   | 0.00971  | 805.679 | 703.957 | 870.072 | 959.393 | 1183.42 | 1068.7  |
| ENSMUSG00000014956 | 15_Ppp1cb        | 7042.56 | -0.19926 | 0.14229  | 0.22878  | 6647.72 | 5904.24 | 7119.53 | 6503.86 | 8296.49 | 7783.5  |
| ENSMUSG00000014959 | 12_Gorasp2       | 2092.65 | 0.32806  | 0.00564  | 0.01558  | 2145.29 | 2364.27 | 2478.75 | 1728.53 | 1861.2  | 1977.85 |

|                    |             |         |          |          |          |         |         |         |         |         |         |
|--------------------|-------------|---------|----------|----------|----------|---------|---------|---------|---------|---------|---------|
| ENSMUSG00000014980 | 14_Tsen15   | 340.26  | -0.43399 | 0.00574  | 0.01581  | 309.075 | 287.273 | 271.3   | 364.281 | 413.301 | 396.329 |
| ENSMUSG00000015001 | 17_Oc90     | 1.19967 | -3.74335 | 0.18256  | NA       | 0       | 0       | 0       | 4.50843 | 2.68959 | 0       |
| ENSMUSG00000015002 | 16_Efr3a    | 2613.32 | -0.24196 | 0.0382   | 0.07755  | 2425.72 | 2426.68 | 2331.75 | 2606.77 | 3138.75 | 2750.24 |
| ENSMUSG00000015013 | 8_Trappc2l  | 598.721 | -0.32432 | 0.01378  | 0.03306  | 552.168 | 524.985 | 517.502 | 705.118 | 623.985 | 668.568 |
| ENSMUSG00000015016 | 7_Acsf3     | 196.087 | 0.67615  | 0.00168  | 0.00561  | 210.97  | 236.794 | 277.276 | 174.927 | 146.134 | 130.421 |
| ENSMUSG00000015023 | 7_Ddx19a    | 1149.82 | 0.23793  | 0.05868  | 0.11085  | 1176.4  | 1220.68 | 1336.18 | 964.803 | 1086.6  | 1114.28 |
| ENSMUSG00000015027 | 10_Galns    | 212.097 | 0.4937   | 0.03317  | 0.06904  | 266.534 | 245.054 | 231.86  | 210.994 | 128.204 | 189.934 |
| ENSMUSG00000015053 | 14_Gata2    | 41.4897 | -0.12923 | 0.76463  | 0.83429  | 39.9367 | 37.63   | 41.8304 | 65.823  | 35.8612 | 27.857  |
| ENSMUSG00000015083 | 11_Cbg      | 51.6959 | 0.40265  | 0.2519   | 0.36107  | 52.9595 | 67.9176 | 56.1722 | 55.9045 | 43.0335 | 34.1881 |
| ENSMUSG00000015085 | 8_Entpd2    | 321.806 | 0.65176  | 0.00122  | 0.00427  | 379.398 | 384.561 | 415.914 | 301.163 | 192.754 | 257.044 |
| ENSMUSG00000015087 | 14_Rabl6    | 2047.89 | 0.51409  | 0.00024  | 0.00107  | 2309.38 | 2238.53 | 2678.34 | 1732.14 | 1467.62 | 1861.35 |
| ENSMUSG00000015090 | 13_Ptgs     | 21916.3 | -0.82039 | 0.12172  | 0.2021   | 14228.7 | 23761.1 | 9552.87 | 42271.9 | 21656.6 | 20026.6 |
| ENSMUSG00000015092 | 9_Edf1      | 1292.41 | 0.92071  | 7.05E-07 | 6.76E-06 | 1514.12 | 1632.78 | 1927.78 | 1091.04 | 694.811 | 893.956 |
| ENSMUSG00000015093 | 15_Clic3    | 2420.79 | 1.24069  | 1.73E-08 | 2.76E-07 | 3185.38 | 3239.85 | 3780.27 | 1816.9  | 929.702 | 1572.65 |
| ENSMUSG00000015094 | 16_Npdc1    | 638.101 | 0.47912  | 0.02593  | 0.05634  | 633.778 | 803.08  | 793.582 | 707.823 | 429.438 | 460.907 |
| ENSMUSG00000015095 | 12_Fbxw5    | 1443.96 | 0.76025  | 4.62E-05 | 0.00025  | 1772.84 | 1749.34 | 1925.39 | 1325.48 | 791.636 | 1099.08 |
| ENSMUSG00000015112 | 15_Slc25a13 | 1127.96 | 0.4429   | 0.007    | 0.01869  | 1260.61 | 1216.09 | 1421.04 | 794.385 | 929.702 | 1145.94 |
| ENSMUSG00000015120 | 15_Ube2i    | 3098.64 | -0.00725 | 0.94718  | 0.96537  | 3108.11 | 2979.2  | 3185.09 | 2843.01 | 3274.13 | 3202.29 |
| ENSMUSG00000015126 | 9_Tsr3      | 353.425 | 0.59547  | 0.00028  | 0.00121  | 428.017 | 420.355 | 426.67  | 295.753 | 242.063 | 307.693 |
| ENSMUSG00000015127 | 14_Unkl     | 717.338 | 0.59264  | 0.00012  | 0.00059  | 846.484 | 802.162 | 939.391 | 634.787 | 488.609 | 592.594 |
| ENSMUSG00000015133 | 16_Lrrk1    | 1789.71 | 0.84447  | 3.60E-11 | 1.32E-09 | 2213.01 | 2179.79 | 2503.85 | 1328.18 | 1148.46 | 1364.99 |
| ENSMUSG00000015134 | 14_Aldh1a3  | 6824.5  | 0.91249  | 5.02E-08 | 6.88E-07 | 8249.53 | 8074.85 | 10414.6 | 4042.26 | 4429.76 | 5736.01 |
| ENSMUSG00000015143 | 14_Actn1    | 1232.94 | -0.22176 | 0.17498  | 0.27088  | 1074.82 | 1326.23 | 1014.69 | 1435.48 | 1430.86 | 1115.55 |
| ENSMUSG00000015149 | 13_Sirt2    | 1488.13 | 0.3241   | 0.03787  | 0.07701  | 1513.25 | 1748.42 | 1701.9  | 1509.42 | 1079.42 | 1376.39 |
| ENSMUSG00000015165 | 16_Hnnp1    | 4966.6  | 0.05128  | 0.58614  | 0.68892  | 4999.03 | 4938.71 | 5227.6  | 4722.13 | 5029.54 | 4882.57 |
| ENSMUSG00000015176 | 9_Nolc1     | 1310.94 | 0.53547  | 0.00051  | 0.00201  | 1517.59 | 1486.85 | 1648.12 | 900.784 | 1043.56 | 1268.76 |
| ENSMUSG00000015189 | 12_Casd1    | 1050.54 | -0.63122 | 1.24E-07 | 1.51E-06 | 822.174 | 824.189 | 827.047 | 1206.46 | 1382.45 | 1240.9  |
| ENSMUSG00000015202 | 13_Cnksr3   | 1726.13 | 0.41951  | 0.00409  | 0.01191  | 1881.36 | 1837.45 | 2206.25 | 1301.13 | 1438.93 | 1691.68 |
| ENSMUSG00000015214 | 14_Mtmr1    | 1251.39 | -0.19881 | 0.09989  | 0.17196  | 1218.94 | 1158.27 | 1117.47 | 1220.88 | 1407.55 | 1385.25 |
| ENSMUSG00000015217 | 11_Hmgb3    | 688.998 | -0.2701  | 0.0689   | 0.1269   | 643.328 | 565.368 | 665.701 | 665.444 | 823.015 | 771.132 |
| ENSMUSG00000015222 | 17_Map2     | 665.234 | -0.73315 | 3.56E-08 | 5.08E-07 | 509.627 | 517.642 | 472.086 | 876.438 | 850.808 | 764.801 |
| ENSMUSG00000015224 | 10_Cyp2j9   | 222.693 | -0.40269 | 0.03867  | 0.07829  | 166.692 | 205.588 | 203.176 | 223.618 | 263.58  | 273.505 |
| ENSMUSG00000015243 | 4_Abca1     | 1213.39 | -0.65947 | 2.56E-05 | 0.00015  | 987.13  | 1060.98 | 773.265 | 1600.49 | 1512.45 | 1346    |
| ENSMUSG00000015247 | 10_Nsnap3b  | 350.656 | 0.01281  | 0.93589  | 0.9579   | 372.453 | 320.314 | 364.522 | 376.905 | 337.992 | 331.751 |
| ENSMUSG00000015289 | 4_Lage3     | 504.689 | -0.12131 | 0.40987  | 0.52649  | 518.308 | 466.245 | 466.11  | 581.587 | 502.057 | 493.828 |
| ENSMUSG00000015290 | 15_Ubl4a    | 1482.72 | -0.11473 | 0.2707   | 0.3823   | 1414.28 | 1383.13 | 1474.82 | 1571.64 | 1524.1  | 1528.34 |
| ENSMUSG00000015291 | 10_Gdi1     | 3326.83 | -0.1335  | 0.17586  | 0.2719   | 3096.83 | 3269.22 | 3154.01 | 3476    | 3630.95 | 3333.98 |
| ENSMUSG00000015305 | 5_Sash1     | 885.989 | -0.10899 | 0.42315  | 0.53874  | 768.347 | 917.806 | 872.462 | 998.166 | 880.393 | 878.761 |
| ENSMUSG00000015312 | 8_Gadd45b   | 290.607 | 0.84898  | 0.00044  | 0.00178  | 362.903 | 341.424 | 415.914 | 229.93  | 138.962 | 254.512 |
| ENSMUSG00000015314 | 10_Slamf6   | 12.3612 | 1.92972  | 0.02043  | 0.04612  | 35.5957 | 7.34244 | 15.537  | 4.50843 | 3.58612 | 7.59736 |
| ENSMUSG00000015316 | 11_Slamf1   | 2.87984 | 0.56424  | 0.67896  | 0.76772  | 6.94551 | 0.91781 | 2.39031 | 1.80337 | 2.68959 | 2.53245 |
| ENSMUSG00000015335 | 16_Zdhhc12  | 165.357 | 1.15588  | 2.39E-05 | 0.00014  | 177.11  | 239.547 | 268.91  | 133.449 | 80.6878 | 92.4346 |
| ENSMUSG00000015337 | 5_Endog     | 29.5437 | 0.86654  | 0.08281  | 0.14734  | 22.5729 | 43.1369 | 49.0013 | 27.0506 | 15.241  | 20.2596 |
| ENSMUSG00000015340 | 10_Cybb     | 334.628 | 0.69051  | 0.00647  | 0.01749  | 566.059 | 301.04  | 372.888 | 293.949 | 257.304 | 216.525 |
| ENSMUSG00000015341 | 16_Golga7   | 3479.38 | -0.00718 | 0.95089  | 0.96793  | 3313.88 | 3346.32 | 3752.78 | 3191.06 | 3696.4  | 3575.82 |
| ENSMUSG00000015342 | 6_Xk        | 85.5017 | -0.38241 | 0.14931  | 0.23816  | 78.137  | 74.3423 | 70.5141 | 107.301 | 100.411 | 82.3047 |
| ENSMUSG00000015354 | 8_Pcolce2   | 414.288 | -0.10042 | 0.56189  | 0.66732  | 419.335 | 433.204 | 346.595 | 490.517 | 390.887 | 405.193 |
| ENSMUSG00000015355 | 13_Cd48     | 53.9377 | 0.57597  | 0.17945  | 0.27636  | 102.446 | 47.7259 | 43.0255 | 35.1657 | 48.4127 | 46.8504 |
| ENSMUSG00000015357 | 10_ClpX     | 2062.34 | -0.1238  | 0.40315  | 0.52058  | 1969.92 | 1851.21 | 2099.89 | 1767.3  | 2279.88 | 2405.83 |
| ENSMUSG00000015363 | 13_Trabd    | 1948.33 | 1.12488  | 7.51E-08 | 9.84E-07 | 2426.59 | 2523.05 | 3065.57 | 1573.44 | 864.255 | 1237.1  |
| ENSMUSG00000015365 | 15_Mov101   | 0.8113  | -3.16904 | 0.25578  | NA       | 0       | 0       | 0       | 2.70506 | 0.89653 | 1.26623 |
| ENSMUSG00000015377 | 9_Dennd6b   | 269.196 | 0.90814  | 4.64E-07 | 4.75E-06 | 320.362 | 357.026 | 377.669 | 208.289 | 184.685 | 167.142 |
| ENSMUSG00000015396 | 3_Cd83      | 67.2131 | -0.10068 | 0.7605   | 0.83166  | 86.8188 | 52.3149 | 54.9771 | 61.3146 | 74.412  | 73.4412 |
| ENSMUSG00000015401 | 12_Tmem27   | 460.225 | -1.39632 | 3.15E-08 | 4.59E-07 | 312.548 | 278.095 | 168.517 | 797.09  | 694.811 | 510.289 |
| ENSMUSG00000015405 | 15_Ace2     | 97.9592 | -0.32755 | 0.17736  | 0.27385  | 86.8188 | 90.8628 | 82.4656 | 102.792 | 105.791 | 119.025 |
| ENSMUSG00000015437 | 4_Gzmb      | 80.5538 | 9.76409  | 1.04E-14 | 8.97E-13 | 251.775 | 76.1779 | 155.37  | 0       | 0       | 0       |
| ENSMUSG00000015441 | 3_Gzmf      | 0.1447  | 0.92709  | 0.82027  | NA       | 0.86819 | 0       | 0       | 0       | 0       | 0       |
| ENSMUSG00000015452 | 14_Ager     | 20.9138 | 0.00561  | 0.99295  | 0.99518  | 26.9138 | 23.8629 | 11.9515 | 35.1657 | 9.86184 | 17.7272 |
| ENSMUSG00000015461 | 15_Atf6b    | 645.53  | 1.11626  | 9.86E-09 | 1.68E-07 | 793.524 | 875.587 | 980.026 | 427.399 | 306.613 | 490.03  |
| ENSMUSG00000015467 | 14_Egfl8    | 30.1846 | 0.33348  | 0.46594  | 0.57944  | 33.8593 | 38.5478 | 28.6837 | 37.8708 | 20.6202 | 21.5259 |
| ENSMUSG00000015468 | 14_Notch4   | 91.2973 | 0.61378  | 0.05899  | 0.1113   | 84.2143 | 130.328 | 117.125 | 96.4803 | 53.7918 | 65.8438 |
| ENSMUSG00000015474 | 16_Ppt2     | 420.658 | 0.08546  | 0.59914  | 0.70072  | 418.467 | 446.054 | 435.036 | 467.073 | 355.923 | 401.394 |
| ENSMUSG00000015476 | 6_Prrt1     | 101.736 | -0.39574 | 0.17648  | 0.27269  | 93.7643 | 107.383 | 62.148  | 131.646 | 119.239 | 96.2332 |
| ENSMUSG00000015478 | 13_Rnf5     | 757.684 | 0.27439  | 0.10932  | 0.1853   | 764.874 | 869.162 | 854.535 | 805.205 | 549.573 | 702.756 |
| ENSMUSG00000015484 | 3_Fam163a   | 6.87905 | -1.09492 | 0.28593  | 0.3994   | 4.34094 | 6.42464 | 2.39031 | 19.8371 | 4.48265 | 3.79868 |
| ENSMUSG00000015488 | 14_Cacfd1   | 1190.64 | 0.15197  | 0.25072  | 0.35981  | 1192.89 | 1248.22 | 1319.45 | 1252.44 | 1007.7  | 1123.14 |
| ENSMUSG00000015501 | 10_Hivep2   | 1521.34 | 0.30059  | 0.02238  | 0.04985  | 1588.78 | 1658.47 | 1789.15 | 1282.2  | 1265.9  | 1543.53 |
| ENSMUSG00000015522 | 18_Arnt     | 2216.01 | 0.06875  | 0.53447  | 0.64235  | 2196.52 | 2201.82 | 2408.24 | 2018.87 | 2218.02 | 2252.62 |
| ENSMUSG00000015533 | 8_Iltga2    | 394.352 | 0.16702  | 0.40268  | 0.52026  | 381.135 | 413.013 | 456.549 | 284.933 | 387.301 | 443.179 |
| ENSMUSG00000015536 | 14_Mocs2    | 1773.74 | -0.38839 | 0.00122  | 0.00425  | 1563.61 | 1549.26 | 1496.33 | 1846.65 | 2225.19 | 1961.39 |
| ENSMUSG00000015542 | 17_Nat9     | 387.515 | 0.67196  | 0.00291  | 0.00896  | 422.808 | 466.245 | 539.014 | 347.149 | 207.995 | 341.881 |
| ENSMUSG00000015568 | 15_Lpl      | 926.348 | -1.41015 | 1.90E-08 | 2.99E-07 | 526.99  | 682.847 | 308.35  | 1442.7  | 1455.07 | 1142.14 |
| ENSMUSG00000015575 | 14_Atp6v0e  | 1851.86 | 0.02777  | 0.81565  | 0.8729   | 1904.81 | 1799.82 | 1906.27 | 2005.35 | 1829.82 | 1665.09 |
| ENSMUSG00000015597 | 16_Zfp318   | 815.644 | -0.48205 | 0.00353  | 0.01055  | 686.737 | 749.847 | 604.748 | 824.141 | 1117.97 | 910.417 |
| ENSMUSG00000015599 | 8_Ttk1      | 3.56399 | -1.16673 | 0.39593  | 0.51348  | 1.73638 | 3.67122 | 1.19515 | 11.7219 | 1.79306 | 1.26623 |
| ENSMUSG00000015605 | 5_Srf       | 870.469 | 0.72112  | 9.72E-05 | 0.00048  | 1046.17 | 998.572 | 1205.91 | 770.039 | 499.368 | 702.756 |
| ENSMUSG00000015619 | 10_Gata3    | 5.60812 | 1.03014  | 0.30447  | 0.41952  | 5.20913 | 5.50683 | 11.9515 | 1.80337 | 5.37918 | 3.79868 |
| ENSMUSG00000015627 | 5_Gata5     | 0.80569 | 0.69278  | 0.81062  | NA       | 0       | 1.83561 | 1.19515 | 1.80337 | 0       | 0       |
| ENSMUSG00000015647 | 9_Lama5     | 2686.93 | 1.31588  | 3.39E-14 | 2.64E-12 | 3336.45 | 4148.48 | 4015.72 | 1741.15 | 1184.32 | 1695.48 |

|                    |                 |         |          |          |          |         |         |         |         |         |         |
|--------------------|-----------------|---------|----------|----------|----------|---------|---------|---------|---------|---------|---------|
| ENSMUSG00000015652 | 9_Steap1        | 58.1252 | -0.61316 | 0.09683  | 0.16743  | 53.8277 | 56.9039 | 26.2934 | 65.823  | 69.9294 | 75.9736 |
| ENSMUSG00000015653 | 13_Steap2       | 588.64  | -0.78198 | 9.33E-06 | 6.36E-05 | 467.954 | 454.314 | 376.474 | 831.354 | 795.223 | 606.523 |
| ENSMUSG00000015656 | 16_Hspa8        | 7250.79 | 0.19639  | 0.09557  | 0.16562  | 8169.65 | 6992.76 | 8067.29 | 6809.53 | 6235.37 | 7230.16 |
| ENSMUSG00000015659 | 12_Serac1       | 373.904 | 0.00388  | 0.97957  | 0.98649  | 383.739 | 340.506 | 399.181 | 362.478 | 373.853 | 383.667 |
| ENSMUSG00000015668 | 13_Pdzd11       | 933.803 | -0.32792 | 0.00995  | 0.02515  | 884.684 | 813.176 | 786.411 | 1004.48 | 1125.15 | 988.923 |
| ENSMUSG00000015671 | 10_Psma2        | 3491.02 | -0.27674 | 0.02802  | 0.06006  | 3291.3  | 2880.07 | 3301.02 | 3466.08 | 4234.31 | 3773.36 |
| ENSMUSG00000015672 | 3_Mrp132        | 348.892 | -0.13913 | 0.44534  | 0.56035  | 346.407 | 279.931 | 370.498 | 324.607 | 403.439 | 368.472 |
| ENSMUSG00000015697 | 14_Setdb1       | 1334.06 | 0.04464  | 0.73372  | 0.81132  | 1319.65 | 1333.57 | 1410.28 | 1142.44 | 1387.83 | 1410.58 |
| ENSMUSG00000015702 | 13_Anxa9        | 1978.79 | 0.35413  | 0.00123  | 0.0043   | 2142.69 | 2143.08 | 2375.97 | 1658.2  | 1766.17 | 1786.65 |
| ENSMUSG00000015709 | 8_Arnt2         | 331.444 | -0.50318 | 0.02074  | 0.04671  | 286.502 | 332.246 | 203.176 | 441.826 | 379.232 | 345.68  |
| ENSMUSG00000015711 | 8_Prune         | 1228.16 | 0.26015  | 0.03928  | 0.07931  | 1351.77 | 1249.13 | 1413.87 | 1093.74 | 1037.29 | 1223.18 |
| ENSMUSG00000015714 | 11_Cers2        | 2558    | -0.08859 | 0.40233  | 0.51991  | 2505.59 | 2433.1  | 2501.46 | 2668.99 | 2790    | 2448.88 |
| ENSMUSG00000015721 | 17_Nlrp5        | 0.79387 | -0.45428 | 0.85954  | NA       | 0.86819 | 0       | 1.19515 | 1.80337 | 0.89653 | 0       |
| ENSMUSG00000015733 | 13_Capza2       | 5399.48 | -0.27653 | 0.05614  | 0.10672  | 4920.02 | 4388.03 | 5343.53 | 5025.99 | 6733.84 | 5985.45 |
| ENSMUSG00000015745 | 9_Plekho1       | 188.169 | 0.85515  | 0.00177  | 0.00587  | 293.448 | 212.931 | 221.104 | 183.944 | 104.894 | 112.694 |
| ENSMUSG00000015747 | 5_Vps45         | 476.72  | -0.17904 | 0.25442  | 0.36398  | 468.822 | 430.451 | 442.207 | 444.531 | 572.883 | 501.426 |
| ENSMUSG00000015748 | 13_Prpf3        | 774.109 | 0.02596  | 0.85672  | 0.903    | 776.16  | 782.888 | 782.826 | 658.23  | 789.843 | 854.703 |
| ENSMUSG00000015749 | 12_Annp32e      | 2817.99 | -0.35551 | 0.00057  | 0.00221  | 2478.68 | 2382.62 | 2556.43 | 3267.71 | 2980.96 | 3241.54 |
| ENSMUSG00000015750 | 15_Aph1a        | 2747.55 | 0.55118  | 2.83E-05 | 0.00017  | 3146.31 | 3130.63 | 3520.92 | 2379.55 | 1924.85 | 2383.04 |
| ENSMUSG00000015755 | 16_Tab2         | 3258.08 | -0.04667 | 0.65308  | 0.74681  | 3234.87 | 3137.98 | 3242.45 | 3068.44 | 3404.13 | 3460.6  |
| ENSMUSG00000015757 | 10_Ppil4        | 1092.28 | -0.41341 | 0.00392  | 0.01153  | 986.262 | 837.956 | 987.197 | 1136.12 | 1405.76 | 1200.38 |
| ENSMUSG00000015759 | 10_Cnih1        | 1294.45 | -0.51613 | 7.98E-06 | 5.56E-05 | 1033.14 | 1113.3  | 1049.35 | 1426.47 | 1611.07 | 1533.4  |
| ENSMUSG00000015766 | 14_Eps8         | 2719.88 | 0.40831  | 0.00472  | 0.01343  | 3061.23 | 2806.65 | 3438.46 | 1983.71 | 2481.6  | 2547.65 |
| ENSMUSG00000015776 | 12_Med22        | 1552.53 | 0.12976  | 0.29602  | 0.41037  | 1570.55 | 1630.94 | 1664.85 | 1574.34 | 1310.73 | 1563.79 |
| ENSMUSG00000015787 | 15_Abo          | 0.15028 | -0.99647 | 0.80707  | NA       | 0       | 0       | 0       | 0.90169 | 0       | 0       |
| ENSMUSG00000015790 | 16_Surf1        | 717.51  | -0.18748 | 0.22293  | 0.32792  | 675.451 | 709.464 | 628.651 | 884.553 | 739.638 | 667.302 |
| ENSMUSG00000015804 | 14_Med28        | 954.561 | 0.27663  | 0.03435  | 0.07107  | 983.657 | 1036.2  | 1119.86 | 918.818 | 887.565 | 781.262 |
| ENSMUSG00000015806 | 12_Qdpr         | 842.753 | -0.27215 | 0.0268   | 0.05792  | 764.006 | 798.491 | 726.654 | 867.421 | 935.081 | 964.865 |
| ENSMUSG00000015812 | 7_Gnrh1         | 7.64087 | 0.80437  | 0.32829  | 0.44469  | 13.0228 | 10.0959 | 5.97577 | 5.41011 | 6.27571 | 5.06491 |
| ENSMUSG00000015829 | 13_Tnr          | 97.1845 | -1.98592 | 1.58E-05 | 0.0001   | 44.2776 | 51.3971 | 21.5128 | 158.697 | 237.581 | 69.6425 |
| ENSMUSG00000015837 | 15_Sqstm1       | 5165.48 | 0.17782  | 0.16207  | 0.25463  | 5275.98 | 5715.18 | 5459.46 | 5520.12 | 4289    | 4733.16 |
| ENSMUSG00000015839 | 6_Nfe2l2        | 2890.7  | 0.07376  | 0.56189  | 0.66732  | 2874.57 | 2906.69 | 3112.18 | 2436.35 | 3031.17 | 2983.23 |
| ENSMUSG00000015843 | 10_Rxrg         | 35.9242 | -0.93677 | 0.04204  | 0.08385  | 26.9138 | 26.6164 | 20.3176 | 69.4298 | 30.482  | 41.7855 |
| ENSMUSG00000015846 | 14_Rxra         | 3557.55 | 0.9575   | 2.36E-09 | 4.91E-08 | 4317.5  | 4579.85 | 5191.75 | 2685.22 | 1913.2  | 2657.81 |
| ENSMUSG00000015850 | 11_Adamtsl4     | 1053.08 | 1.17988  | 3.34E-10 | 9.25E-09 | 1276.24 | 1485.93 | 1621.82 | 788.073 | 499.368 | 647.042 |
| ENSMUSG00000015852 | 13_Fcrls        | 77.1981 | -0.84821 | 0.00378  | 0.01117  | 54.6959 | 65.1642 | 45.4159 | 104.596 | 108.48  | 84.8372 |
| ENSMUSG00000015854 | 7_Cd5f          | 0.59264 | 1.31812  | 0.67678  | NA       | 1.73638 | 0.91781 | 0       | 0.90169 | 0       | 0       |
| ENSMUSG00000015869 | 16_Prpsap1      | 832.817 | 0.27958  | 0.03777  | 0.07683  | 832.593 | 972.874 | 935.806 | 807.91  | 751.293 | 696.425 |
| ENSMUSG00000015879 | 8_Fam184b       | 29.0086 | -1.31777 | 0.00404  | 0.01183  | 17.3638 | 20.1917 | 11.9515 | 48.691  | 34.0682 | 41.7855 |
| ENSMUSG00000015880 | 13_Ncapg        | 303.544 | -0.04933 | 0.83491  | 0.88708  | 341.198 | 227.616 | 326.277 | 235.34  | 366.681 | 324.154 |
| ENSMUSG00000015882 | 17_Lcorl        | 726.342 | -0.34421 | 0.02637  | 0.05713  | 635.514 | 656.231 | 628.651 | 696.101 | 947.633 | 793.924 |
| ENSMUSG00000015889 | 7_Lta4h         | 1890.36 | -0.01674 | 0.88225  | 0.92049  | 1872.68 | 1823.68 | 1940.93 | 1751.97 | 1916.78 | 2036.09 |
| ENSMUSG00000015890 | 2_Amdhd1        | 7.97605 | 0.22738  | 0.77371  | 0.84138  | 8.68188 | 6.42464 | 10.7564 | 9.01685 | 5.37918 | 7.59736 |
| ENSMUSG00000015932 | 8_Dstn          | 18121.2 | -0.14618 | 0.30412  | 0.41912  | 17539.1 | 15923   | 18149.6 | 15674.9 | 21376   | 20064.6 |
| ENSMUSG00000015937 | 14_H2afy        | 3193.37 | 0.64318  | 9.06E-06 | 6.21E-05 | 3830.45 | 3530.8  | 4318.09 | 2347.99 | 2233.26 | 2899.66 |
| ENSMUSG00000015942 | 9_Gtf2ird2      | 221.844 | 0.39028  | 0.0386   | 0.07818  | 242.225 | 270.753 | 242.616 | 218.208 | 183.789 | 173.473 |
| ENSMUSG00000015943 | 11_Bola1        | 94.3381 | 1.21199  | 5.36E-05 | 0.00029  | 118.074 | 152.356 | 125.491 | 75.7416 | 47.5161 | 46.8504 |
| ENSMUSG00000015944 | 9_Gatsl2        | 1164.68 | 0.24073  | 0.07442  | 0.13516  | 1155.56 | 1366.61 | 1263.28 | 1180.31 | 985.287 | 1037.04 |
| ENSMUSG00000015947 | 10_Fcgr1        | 210.568 | 2.95186  | 3.34E-18 | 5.15E-16 | 566.927 | 222.109 | 329.863 | 53.1994 | 45.7231 | 45.5842 |
| ENSMUSG00000015950 | 13_Ncf1         | 104.071 | 1.07983  | 0.00017  | 0.0008   | 182.32  | 117.479 | 124.296 | 75.7416 | 66.3433 | 58.2464 |
| ENSMUSG00000015957 | 11_Wnt11        | 278.175 | 0.22587  | 0.28839  | 0.40178  | 275.216 | 368.958 | 255.763 | 295.753 | 249.235 | 224.122 |
| ENSMUSG00000015961 | 8_Adss          | 7718.9  | -0.02329 | 0.87379  | 0.91447  | 7819.77 | 6964.31 | 8185.61 | 6384.83 | 8695.45 | 8263.4  |
| ENSMUSG00000015962 | 5_1700016C15Rik | 28.6744 | -0.02323 | 0.95872  | 0.97338  | 36.4639 | 23.8629 | 25.0982 | 30.6573 | 33.1716 | 22.7921 |
| ENSMUSG00000015966 | 16_Ill7rb       | 11.4654 | -1.09235 | 0.10848  | 0.18406  | 7.8137  | 9.17806 | 4.78062 | 13.5253 | 17.0341 | 16.4609 |
| ENSMUSG00000015968 | 16_Cacna1d      | 332.645 | -0.79139 | 0.00521  | 0.01457  | 253.511 | 320.314 | 156.565 | 539.208 | 409.714 | 316.557 |
| ENSMUSG00000015970 | 18_Chdh         | 94.1312 | -0.10542 | 0.69546  | 0.78211  | 79.8733 | 98.2052 | 94.4172 | 117.219 | 85.1704 | 89.9021 |
| ENSMUSG00000015971 | 4_Actr8         | 631.921 | -0.03951 | 0.77147  | 0.8396   | 658.955 | 580.053 | 629.846 | 638.393 | 597.986 | 686.295 |
| ENSMUSG00000015980 | 14_Lrrc27       | 101.75  | -0.34854 | 0.20134  | 0.30251  | 85.0825 | 108.301 | 75.2947 | 119.022 | 129.1   | 93.7008 |
| ENSMUSG00000015981 | 12_Stk32c       | 161.765 | 1.00886  | 1.40E-05 | 9.10E-05 | 184.056 | 203.753 | 261.739 | 118.121 | 106.687 | 96.2332 |
| ENSMUSG00000015994 | 9_Fnta          | 2109.93 | -0.53929 | 3.51E-06 | 2.72E-05 | 1745.93 | 1793.39 | 1620.63 | 2376.84 | 2724.56 | 2398.23 |
| ENSMUSG00000016018 | 3_Skiv2l2       | 1389.8  | -0.40506 | 0.00253  | 0.00795  | 1259.74 | 1119.72 | 1208.3  | 1394.91 | 1751.82 | 1604.31 |
| ENSMUSG00000016024 | 9_Lbp           | 758.557 | 0.87355  | 4.76E-06 | 3.54E-05 | 1100.86 | 745.258 | 1098.35 | 591.506 | 467.092 | 548.276 |
| ENSMUSG00000016028 | 9_Celsr1        | 3317.53 | 1.57926  | 1.57E-15 | 1.61E-13 | 4187.27 | 4862.53 | 5862.23 | 1598.69 | 1281.14 | 2113.33 |
| ENSMUSG00000016087 | 13_Fli1         | 99.7124 | -0.61972 | 0.01849  | 0.04236  | 79.8733 | 89.0271 | 66.9286 | 137.056 | 122.825 | 102.564 |
| ENSMUSG00000016128 | 14_Stard13      | 517.342 | -0.20355 | 0.26433  | 0.37546  | 447.985 | 523.149 | 472.086 | 678.969 | 471.575 | 510.289 |
| ENSMUSG00000016150 | 15_Tenm1        | 35.5456 | -2.06813 | 1.38E-05 | 9.00E-05 | 13.891  | 17.4383 | 9.56123 | 77.545  | 55.5849 | 39.253  |
| ENSMUSG00000016179 | 11_Camk1g       | 14.393  | -0.51203 | 0.4074   | 0.5244   | 12.1546 | 12.8493 | 10.7564 | 21.6405 | 18.8271 | 10.1298 |
| ENSMUSG00000016181 | 9_Dlxf          | 352.008 | 0.05944  | 0.72549  | 0.80452  | 365.507 | 342.341 | 369.303 | 292.146 | 366.681 | 376.069 |
| ENSMUSG00000016194 | 10_Hsd11b1      | 70.9631 | -0.13855 | 0.65942  | 0.75159  | 82.4779 | 52.3149 | 68.1238 | 86.5618 | 71.7224 | 64.5776 |
| ENSMUSG00000016200 | 13_Syt14        | 17.4368 | -1.98437 | 0.01882  | 0.04294  | 13.0228 | 5.50683 | 2.39031 | 46.8876 | 30.482  | 6.33113 |
| ENSMUSG00000016206 | 6_H2-M3         | 229.47  | 1.3613   | 1.32E-10 | 4.12E-09 | 367.244 | 282.684 | 340.619 | 142.466 | 105.791 | 138.019 |
| ENSMUSG00000016239 | 11_Lonrf3       | 84.5235 | -0.81047 | 0.00852  | 0.02207  | 68.5869 | 71.5888 | 43.0255 | 88.3652 | 116.549 | 119.025 |
| ENSMUSG00000016252 | 7_Atp5e         | 1937.4  | 0.05011  | 0.73818  | 0.81481  | 1859.66 | 1998.98 | 2055.67 | 2277.66 | 1655.89 | 1776.52 |
| ENSMUSG00000016253 | 12_Nelfcd       | 647.889 | 0.58642  | 0.00046  | 0.00185  | 744.037 | 774.628 | 813.9   | 571.669 | 413.301 | 569.802 |
| ENSMUSG00000016255 | 5_Tubb1         | 0.15297 | 0.92709  | 0.82027  | NA       | 0       | 0.91781 | 0       | 0       | 0       | 0       |
| ENSMUSG00000016256 | 10_Ctstz        | 1185.64 | 0.32504  | 0.10422  | 0.17833  | 1457.69 | 1322.56 | 1176.03 | 1389.5  | 852.601 | 915.482 |
| ENSMUSG00000016257 | 15_Slmo2        | 1236.31 | 0.01785  | 0.88002  | 0.91916  | 1270.16 | 1182.13 | 1278.81 | 1245.23 | 1138.59 | 1302.95 |
| ENSMUSG00000016262 | 14_Sertad4      | 988.568 | 0.14307  | 0.33596  | 0.45262  | 1003.63 | 900.367 | 1209.5  | 898.98  | 935.081 | 983.858 |
| ENSMUSG00000016283 | 13_H2-M2        | 3.88019 | -0.27804 | 0.80593  | 0.86573  | 2.60457 | 5.50683 | 2.39031 | 2.70506 | 6.27571 | 3.79868 |

|                    |             |         |          |          |          |         |         |         |         |         |         |
|--------------------|-------------|---------|----------|----------|----------|---------|---------|---------|---------|---------|---------|
| ENSMUSG00000016308 | 12_Ube2a    | 740.229 | -0.24102 | 0.09327  | 0.1623   | 677.187 | 648.889 | 709.922 | 703.315 | 892.944 | 809.119 |
| ENSMUSG00000016319 | 3_Slc25a5   | 11161.2 | 0.34755  | 0.00031  | 0.00133  | 12520.1 | 11790.1 | 13187.3 | 9796.81 | 9631.43 | 10041.2 |
| ENSMUSG00000016327 | 9_Atp1b4    | 6.78749 | -1.19075 | 0.17723  | 0.27367  | 4.34094 | 5.50683 | 2.39031 | 9.91854 | 7.17224 | 11.396  |
| ENSMUSG00000016344 | 14_Pdpf     | 822.435 | 0.45317  | 0.01919  | 0.04367  | 893.366 | 1001.33 | 957.318 | 884.553 | 530.746 | 667.302 |
| ENSMUSG00000016346 | 17_Kcnq2    | 28.3718 | -2.1224  | 0.02171  | 0.04858  | 10.4183 | 16.5205 | 4.78062 | 105.497 | 30.482  | 2.53245 |
| ENSMUSG00000016349 | 10_Eef1a2   | 153.927 | -1.09743 | 0.01257  | 0.0306   | 63.3778 | 154.191 | 76.4899 | 342.64  | 105.791 | 181.07  |
| ENSMUSG00000016356 | 17_Col20a1  | 206.039 | 0.63994  | 0.00608  | 0.0166   | 233.543 | 267.999 | 250.982 | 191.157 | 116.549 | 176.006 |
| ENSMUSG00000016382 | 15_Pls3     | 9724.79 | -0.21523 | 0.12706  | 0.20902  | 9531.84 | 8621.87 | 8847.73 | 8631.84 | 11872.8 | 10842.7 |
| ENSMUSG00000016386 | 15_Mpped2   | 232.923 | -0.15593 | 0.37424  | 0.49181  | 222.256 | 222.109 | 216.323 | 221.815 | 261.787 | 253.245 |
| ENSMUSG00000016409 | 4_Nkap      | 479.1   | -0.19023 | 0.21516  | 0.319    | 488.79  | 414.848 | 438.622 | 461.663 | 554.056 | 516.621 |
| ENSMUSG00000016427 | 7_Ndufa1    | 865.238 | -0.29041 | 0.03832  | 0.07776  | 803.942 | 794.82  | 736.215 | 1074.81 | 853.497 | 928.144 |
| ENSMUSG00000016458 | 13_Wt1      | 2.76903 | 0.22183  | 0.88509  | 0.92227  | 4.34094 | 0.91781 | 3.58546 | 2.70506 | 0       | 5.06491 |
| ENSMUSG00000016477 | 17_E2f3     | 301.671 | 0.05658  | 0.75585  | 0.82823  | 314.284 | 274.424 | 333.448 | 258.784 | 292.269 | 336.816 |
| ENSMUSG00000016481 | 15_Cr1l     | 1916.24 | -0.41955 | 0.00126  | 0.00438  | 1734.64 | 1615.34 | 1568.04 | 1941.33 | 2447.53 | 2190.57 |
| ENSMUSG00000016487 | 15_Ppfibp1  | 4826.22 | -0.12242 | 0.29858  | 0.41322  | 4547.57 | 4589.95 | 4725.64 | 4494    | 5016.09 | 5584.06 |
| ENSMUSG00000016493 | 13_Cd46     | 201.725 | -1.06552 | 4.71E-06 | 3.51E-05 | 141.515 | 147.767 | 101.588 | 296.655 | 301.234 | 221.59  |
| ENSMUSG00000016494 | 9_Cd34      | 2148.83 | -0.42049 | 0.00062  | 0.00241  | 2031.56 | 1708.95 | 1772.41 | 2624.81 | 2313.95 | 2441.29 |
| ENSMUSG00000016495 | 12_Plgrrt   | 1371.98 | -0.12514 | 0.43008  | 0.54544  | 1373.47 | 1256.48 | 1307.5  | 1166.78 | 1691.75 | 1435.9  |
| ENSMUSG00000016496 | 7_Cd274     | 5181.19 | 0.42723  | 0.0014   | 0.00479  | 6332.57 | 5376.51 | 6119.19 | 3848.39 | 4910.3  | 4500.17 |
| ENSMUSG00000016498 | 9_Pdcd1lg2  | 2.09681 | 4.5117   | 0.03584  | NA       | 9.55007 | 1.83561 | 1.19515 | 0       | 0       | 0       |
| ENSMUSG00000016503 | 16_Gtf3a    | 267.046 | 0.36859  | 0.03264  | 0.06811  | 284.766 | 315.725 | 303.569 | 247.964 | 243.856 | 206.395 |
| ENSMUSG00000016510 | 11_Mtif3    | 396.568 | 0.12395  | 0.451    | 0.56575  | 398.498 | 377.218 | 464.915 | 360.674 | 357.716 | 420.387 |
| ENSMUSG00000016520 | 7_Lnx2      | 1152.96 | 0.81046  | 2.07E-08 | 3.19E-07 | 1344.82 | 1418.01 | 1642.14 | 843.978 | 743.224 | 925.612 |
| ENSMUSG00000016524 | 12_Il19     | 1.17241 | -0.60433 | 0.76676  | NA       | 0.86819 | 1.83561 | 0       | 0.90169 | 0.89653 | 2.53245 |
| ENSMUSG00000016526 | 8_Dyrk3     | 76.5328 | 0.27292  | 0.38633  | 0.50361  | 81.6097 | 61.493  | 108.759 | 64.0197 | 76.2051 | 67.11   |
| ENSMUSG00000016528 | 10_Mapkapk2 | 3050.06 | 0.47362  | 0.0003   | 0.00129  | 3549.15 | 3378.44 | 3710.95 | 2820.47 | 2191.12 | 2650.21 |
| ENSMUSG00000016529 | 5_Il10      | 1.22035 | 3.72919  | 0.1345   | NA       | 5.20913 | 0.91781 | 1.19515 | 0       | 0       | 0       |
| ENSMUSG00000016534 | 15_Lamp2    | 11685.4 | -0.38116 | 0.00122  | 0.00425  | 10608.4 | 9253.32 | 10591.5 | 12402.7 | 14528.3 | 12728.1 |
| ENSMUSG00000016541 | 9_Atxn10    | 2490.54 | -0.17944 | 0.13029  | 0.2133   | 2319.8  | 2331.23 | 2355.65 | 2338.07 | 2790    | 2808.49 |
| ENSMUSG00000016552 | 13_Foxred2  | 109.418 | -0.36344 | 0.26495  | 0.37621  | 100.71  | 123.904 | 62.148  | 159.598 | 107.584 | 102.564 |
| ENSMUSG00000016554 | 8_Elf3d     | 2943.61 | 0.87707  | 1.11E-07 | 1.37E-06 | 3657.68 | 3586.78 | 4189.02 | 2066.66 | 1659.48 | 2502.06 |
| ENSMUSG00000016559 | 14_H3f3b    | 17581.5 | 0.15645  | 0.17747  | 0.27398  | 18373.5 | 17530.1 | 19697.3 | 14866.1 | 17145.3 | 17876.6 |
| ENSMUSG00000016619 | 9_Nup50     | 1646.04 | 0.36923  | 0.0011   | 0.00388  | 1826.67 | 1741.99 | 1998.3  | 1435.48 | 1392.31 | 1481.49 |
| ENSMUSG00000016624 | 15_Phf21b   | 25.5578 | 0.12524  | 0.83763  | 0.88936  | 22.5729 | 30.2876 | 27.4885 | 46.8876 | 13.448  | 12.6623 |
| ENSMUSG00000016637 | 6_Ilf27     | 184.227 | 0.07886  | 0.70641  | 0.78997  | 191.87  | 191.821 | 184.054 | 210.994 | 150.617 | 176.006 |
| ENSMUSG00000016664 | 14_Pacsin2  | 2767.66 | 0.22877  | 0.08254  | 0.14694  | 2821.61 | 3040.69 | 3097.84 | 2854.74 | 2205.47 | 2585.64 |
| ENSMUSG00000016756 | 16_Cmah     | 7400.33 | 0.15756  | 0.36436  | 0.48167  | 7700.83 | 7216.71 | 8493.96 | 5208.14 | 7897.54 | 7884.8  |
| ENSMUSG00000016757 | 10_Ttl12    | 798.013 | 0.93985  | 1.24E-08 | 2.06E-07 | 986.262 | 980.216 | 1180.81 | 607.736 | 451.851 | 581.198 |
| ENSMUSG00000016758 | 3_Bik       | 199.681 | 0.87502  | 0.0004   | 0.00165  | 224.861 | 267.999 | 282.056 | 165.008 | 98.6184 | 159.545 |
| ENSMUSG00000016763 | 14_Scube1   | 526.165 | -0.10109 | 0.68377  | 0.77178  | 471.426 | 606.669 | 445.792 | 761.924 | 469.782 | 401.394 |
| ENSMUSG00000016831 | 11_Tox4     | 1833.9  | 0.1998   | 0.13131  | 0.21458  | 1880.5  | 1928.31 | 2072.4  | 1477.86 | 1765.27 | 1879.08 |
| ENSMUSG00000016833 | 14_Mrps18c  | 589.889 | -0.49145 | 0.00148  | 0.00502  | 513.968 | 485.519 | 470.891 | 587.899 | 765.637 | 715.418 |
| ENSMUSG00000016918 | 15_Sulf1    | 1385.37 | -0.69707 | 1.88E-05 | 0.00012  | 1164.24 | 1134.41 | 871.267 | 1971.99 | 1569.83 | 1600.51 |
| ENSMUSG00000016921 | 15_Srsf6    | 4745.94 | -0.04834 | 0.68296  | 0.77111  | 4594.45 | 4507.34 | 4897.74 | 4283.91 | 5228.57 | 4963.61 |
| ENSMUSG00000016933 | 17_Plcg1    | 1954.56 | 0.14702  | 0.20965  | 0.31277  | 1919.56 | 2272.49 | 1969.61 | 1880.92 | 1814.58 | 1870.22 |
| ENSMUSG00000016940 | 18_Kctd2    | 778.199 | 0.2265   | 0.08832  | 0.15523  | 852.561 | 868.244 | 795.973 | 777.253 | 650.881 | 724.282 |
| ENSMUSG00000016942 | 5_Tmprss6   | 4.53943 | 0.05408  | 0.9638   | 0.97656  | 6.07732 | 6.42464 | 1.19515 | 6.3118  | 0.89653 | 6.33113 |
| ENSMUSG00000016946 | 5_Kctd5     | 2138.26 | 0.44487  | 8.63E-05 | 0.00044  | 2400.54 | 2321.13 | 2674.75 | 1834.03 | 1727.61 | 1871.48 |
| ENSMUSG00000016982 | 6_Pom121l2  | 0       | NA       | NA       | NA       | 0       | 0       | 0       | 0       | 0       | 0       |
| ENSMUSG00000016984 | 7_Etaa1     | 370.419 | -0.25594 | 0.13081  | 0.21394  | 317.757 | 344.177 | 351.375 | 348.051 | 457.231 | 403.926 |
| ENSMUSG00000016995 | 17_Matn4    | 830.959 | 0.42514  | 0.01118  | 0.02774  | 826.515 | 1111.46 | 919.074 | 779.056 | 611.434 | 738.21  |
| ENSMUSG00000017002 | 14_Slpi     | 106.508 | 0.56623  | 0.04203  | 0.08385  | 163.219 | 97.2874 | 120.711 | 85.6601 | 86.0669 | 86.1034 |
| ENSMUSG00000017007 | 9_Rbpjl     | 102.136 | -0.03803 | 0.88144  | 0.91999  | 86.8188 | 121.15  | 94.4172 | 106.399 | 103.998 | 100.032 |
| ENSMUSG00000017009 | 3_Sdc4      | 7992.71 | 0.41038  | 0.00597  | 0.01635  | 8476.12 | 8695.29 | 10193.5 | 7153.97 | 5674.14 | 7763.24 |
| ENSMUSG00000017057 | 9_Il13ra1   | 1720.52 | 0.24603  | 0.16629  | 0.25996  | 1937.8  | 1489.6  | 1273.99 | 1331.79 | 1795.75 | 1594.18 |
| ENSMUSG00000017119 | 19_Nbr1     | 4484.97 | 0.01567  | 0.87429  | 0.91476  | 4513.71 | 4455.03 | 4558.32 | 4175.71 | 4549.89 | 4657.18 |
| ENSMUSG00000017132 | 17_Cytl1    | 2149.68 | 0.66919  | 5.33E-06 | 3.93E-05 | 2526.43 | 2391.8  | 2999.84 | 1723.12 | 1433.55 | 1823.37 |
| ENSMUSG00000017144 | 8_Rnd3      | 5270.95 | -0.20535 | 0.12613  | 0.20771  | 5203.05 | 4497.25 | 4988.57 | 4826.72 | 6196.82 | 5913.28 |
| ENSMUSG00000017146 | 12_Brca1    | 674.155 | -0.55467 | 0.00078  | 0.00289  | 543.486 | 613.094 | 481.647 | 757.416 | 928.806 | 720.483 |
| ENSMUSG00000017165 | 1_Gast      | 1.53211 | 2.86774  | 0.22823  | NA       | 4.34094 | 0       | 3.58546 | 0       | 0       | 1.26623 |
| ENSMUSG00000017167 | 6_Cntnap1   | 268.581 | 0.1193   | 0.59635  | 0.69814  | 292.579 | 331.328 | 215.128 | 299.36  | 259.097 | 213.992 |
| ENSMUSG00000017176 | 17_Nt5c3b   | 415.831 | -0.03346 | 0.8189   | 0.87538  | 401.103 | 437.793 | 393.206 | 426.497 | 394.473 | 441.913 |
| ENSMUSG00000017188 | 3_Coa3      | 1253.72 | 0.19551  | 0.08854  | 0.15554  | 1278.84 | 1354.68 | 1382.79 | 1238.92 | 1107.22 | 1159.86 |
| ENSMUSG00000017195 | 15_Zpbp2    | 12.1992 | -0.44864 | 0.49547  | 0.60656  | 9.55007 | 7.34244 | 14.3418 | 14.427  | 16.1376 | 11.396  |
| ENSMUSG00000017204 | 4_Gsdma     | 22.797  | 0.77268  | 0.15915  | 0.25109  | 27.782  | 37.63   | 20.3176 | 17.132  | 9.86184 | 24.0583 |
| ENSMUSG00000017210 | 14_Med24    | 991.001 | 0.8985   | 2.27E-09 | 4.75E-08 | 1170.32 | 1334.49 | 1364.87 | 761.924 | 586.331 | 728.08  |
| ENSMUSG00000017211 | 14_Gsdma2   | 0.15028 | -0.99647 | 0.80707  | NA       | 0       | 0       | 0       | 0.90169 | 0       | 0       |
| ENSMUSG00000017221 | 14_Psmd3    | 2416.53 | 1.11461  | 9.39E-11 | 3.06E-09 | 3087.28 | 3049.87 | 3781.47 | 1776.32 | 1198.66 | 1605.58 |
| ENSMUSG00000017264 | 16_Exosc10  | 1541.36 | 0.42748  | 0.00012  | 0.0006   | 1754.61 | 1732.82 | 1815.44 | 1290.31 | 1244.38 | 1410.58 |
| ENSMUSG00000017286 | 15_Glod4    | 3085.85 | -0.38009 | 0.00085  | 0.00312  | 2732.19 | 2734.14 | 2576.75 | 3157.7  | 3557.43 | 3756.9  |
| ENSMUSG00000017288 | 15_Vps53    | 1352.76 | 0.54088  | 0.00041  | 0.00167  | 1445.53 | 1540.08 | 1823.81 | 981.034 | 1062.39 | 1263.69 |
| ENSMUSG00000017291 | 13-Taok1    | 3362.93 | -0.41625 | 0.00126  | 0.00437  | 3067.31 | 2627.68 | 2948.45 | 3415.58 | 4232.52 | 3886.05 |
| ENSMUSG00000017299 | 13_Dntt1p   | 569.722 | 0.64791  | 3.37E-05 | 0.00019  | 671.11  | 657.149 | 757.728 | 461.663 | 381.922 | 488.764 |
| ENSMUSG00000017300 | 9_Tnnc2     | 674.973 | -1.56743 | 0.01292  | 0.03131  | 216.179 | 522.231 | 283.252 | 1638.36 | 446.472 | 943.339 |
| ENSMUSG00000017307 | 15_Acot8    | 252.863 | 0.98409  | 9.68E-07 | 8.91E-06 | 291.711 | 350.602 | 365.717 | 194.764 | 143.445 | 170.941 |
| ENSMUSG00000017309 | 11_Cd300lg  | 38.4354 | -0.03601 | 0.92823  | 0.95237  | 32.123  | 42.2191 | 39.4401 | 45.986  | 27.7924 | 43.0517 |
| ENSMUSG00000017314 | 12_Mpp2     | 240.771 | 0.14031  | 0.60395  | 0.7044   | 270.875 | 288.191 | 198.396 | 318.295 | 180.203 | 188.668 |
| ENSMUSG00000017344 | 4_Vtn       | 148.316 | -1.36083 | 0.00393  | 0.01156  | 111.996 | 83.5203 | 53.7819 | 372.396 | 190.961 | 77.2398 |
| ENSMUSG00000017376 | 15_Nlk      | 909.653 | -0.34806 | 0.00348  | 0.0104   | 848.22  | 781.97  | 770.874 | 1061.28 | 1004.11 | 991.456 |

|                    |              |         |          |          |          |         |         |         |         |         |         |
|--------------------|--------------|---------|----------|----------|----------|---------|---------|---------|---------|---------|---------|
| ENSMUSG00000017386 | 10_Traf4     | 659.985 | 1.10758  | 5.70E-05 | 0.0003   | 773.556 | 828.778 | 1103.13 | 606.834 | 262.683 | 384.933 |
| ENSMUSG00000017390 | 15_Aldoc     | 2756.52 | -0.17694 | 0.40051  | 0.51804  | 2432.66 | 3168.26 | 2162.03 | 3834.87 | 2341.74 | 2599.56 |
| ENSMUSG00000017400 | 10_Stac2     | 23.9871 | -1.08382 | 0.08754  | 0.15405  | 24.3093 | 11.0137 | 10.7564 | 56.8062 | 23.3098 | 17.7272 |
| ENSMUSG00000017404 | 12_Rpl19     | 13751.6 | 0.32681  | 0.01763  | 0.04076  | 15349.6 | 14842.8 | 15716.3 | 14456.7 | 10626.6 | 11517.6 |
| ENSMUSG00000017405 | 14_Nek8      | 249.503 | 0.33685  | 0.10949  | 0.18549  | 260.457 | 299.205 | 276.081 | 271.407 | 178.41  | 211.46  |
| ENSMUSG00000017412 | 15_Cacnb4    | 268.22  | -1.05948 | 3.16E-05 | 0.00018  | 187.529 | 212.931 | 120.711 | 407.562 | 400.749 | 279.836 |
| ENSMUSG00000017417 | 14_Plxdc1    | 127.678 | 0.39098  | 0.14772  | 0.23598  | 117.205 | 167.958 | 149.394 | 130.744 | 84.2739 | 116.493 |
| ENSMUSG00000017418 | 13_Arl5b     | 1824.77 | -0.38769 | 0.0018   | 0.00594  | 1619.17 | 1500.61 | 1623.02 | 1832.22 | 2204.57 | 2169.05 |
| ENSMUSG00000017421 | 18_Zfp207    | 5119.01 | -0.08049 | 0.45926  | 0.57289  | 5034.62 | 4752.4  | 5141.55 | 4801.48 | 5546.83 | 5437.18 |
| ENSMUSG00000017428 | 16_Psmd11    | 2352.3  | 0.11266  | 0.40669  | 0.5236   | 2430.93 | 2328.47 | 2571.97 | 1917.89 | 2371.32 | 2493.2  |
| ENSMUSG00000017446 | 14_C1qtnf1   | 775.086 | -0.12033 | 0.44037  | 0.55571  | 722.333 | 765.45  | 739.8   | 891.767 | 662.536 | 868.632 |
| ENSMUSG00000017453 | 4_Pipox      | 24.0998 | -1.84194 | 0.00074  | 0.00277  | 13.0228 | 10.0959 | 8.36608 | 52.2978 | 36.7578 | 24.0583 |
| ENSMUSG00000017466 | 9_Timp2      | 8133.67 | -0.53034 | 0.0002   | 0.00093  | 6650.32 | 7607.69 | 5706.86 | 10727.4 | 9005.65 | 9104.17 |
| ENSMUSG00000017478 | 15_Zc3h18    | 991.781 | 0.85708  | 1.58E-07 | 1.87E-06 | 1133.85 | 1189.48 | 1510.67 | 731.267 | 616.813 | 768.6   |
| ENSMUSG00000017485 | 10_Top2b     | 3580.72 | -0.452   | 0.00172  | 0.00573  | 3143.71 | 2904.85 | 3023.74 | 3378.62 | 4633.27 | 4400.14 |
| ENSMUSG00000017491 | 8_Rarb       | 284.7   | -0.97304 | 2.64E-08 | 3.93E-07 | 197.079 | 211.095 | 167.322 | 399.447 | 355.923 | 377.336 |
| ENSMUSG00000017493 | 12_Igfbp4    | 2990.11 | 0.05169  | 0.78974  | 0.85401  | 3416.32 | 2915.87 | 2799.05 | 3867.33 | 2333.67 | 2608.43 |
| ENSMUSG00000017499 | 15_Cdc6      | 173.518 | 0.87918  | 0.00023  | 0.00103  | 252.643 | 185.397 | 235.445 | 98.2837 | 123.721 | 145.616 |
| ENSMUSG00000017548 | 15_Suz12     | 1377.76 | -0.23946 | 0.07597  | 0.13739  | 1351.77 | 1134.41 | 1305.11 | 1351.63 | 1630.79 | 1492.88 |
| ENSMUSG00000017550 | 14_Atad5     | 317.542 | -0.00638 | 0.97393  | 0.98302  | 344.671 | 289.109 | 315.521 | 256.079 | 326.337 | 373.537 |
| ENSMUSG00000017561 | 16_Crlf3     | 484.796 | 0.05078  | 0.7044   | 0.7884   | 510.495 | 484.601 | 484.037 | 468.876 | 464.403 | 496.361 |
| ENSMUSG00000017588 | 2_Krt27      | 1.2401  | 0.05701  | 0.97703  | NA       | 1.73638 | 0.91781 | 1.19515 | 0.90169 | 2.68959 | 0       |
| ENSMUSG00000017607 | 9_Tns4       | 9020.39 | 1.041    | 2.60E-08 | 3.88E-07 | 10773.3 | 11764.4 | 13881.7 | 4683.35 | 5434.77 | 7584.7  |
| ENSMUSG00000017615 | 12_Tnfaip1   | 3135.55 | 0.18251  | 0.09768  | 0.16874  | 3262.65 | 3221.5  | 3516.14 | 2719.48 | 2962.14 | 3131.38 |
| ENSMUSG00000017631 | 18_Abr       | 2000.07 | 0.172    | 0.12351  | 0.20438  | 2085.39 | 2200.9  | 2071.2  | 2027.89 | 1762.58 | 1852.49 |
| ENSMUSG00000017639 | 13_Rab11fip4 | 891.161 | 0.07259  | 0.66102  | 0.75306  | 910.73  | 855.395 | 975.246 | 1036.94 | 179.018 | 849.638 |
| ENSMUSG00000017652 | 16_Cd40      | 130.84  | 0.37279  | 0.12947  | 0.2122   | 182.32  | 123.904 | 136.248 | 118.121 | 106.687 | 117.759 |
| ENSMUSG00000017664 | 16_Slc35c2   | 859.227 | 0.88858  | 9.03E-05 | 0.00046  | 1058.32 | 1064.65 | 1225.03 | 825.042 | 421.369 | 560.939 |
| ENSMUSG00000017667 | 9_Zfp334     | 197.084 | -0.32743 | 0.16324  | 0.25606  | 170.165 | 202.835 | 151.785 | 269.604 | 213.374 | 174.739 |
| ENSMUSG00000017670 | 16_Elmo2     | 1520.19 | 0.45383  | 0.0019   | 0.00623  | 1667.79 | 1820.93 | 1784.37 | 1516.63 | 1132.32 | 1199.12 |
| ENSMUSG00000017677 | 11_Wsb1      | 2206    | -0.2246  | 0.09903  | 0.17078  | 2111.43 | 1778.71 | 2214.62 | 2155.93 | 2584.7  | 2390.64 |
| ENSMUSG00000017679 | 16_Ttpal     | 1533.16 | 0.0087   | 0.94541  | 0.96445  | 1521.07 | 1465.74 | 1626.6  | 1355.23 | 1636.17 | 1594.18 |
| ENSMUSG00000017686 | 16_Rhot1     | 891.582 | -0.44879 | 0.00043  | 0.00176  | 777.029 | 747.094 | 737.41  | 935.95  | 1109.9  | 1042.1  |
| ENSMUSG00000017688 | 14_Hnf4g     | 6.04352 | -0.12098 | 0.89263  | 0.92761  | 5.20913 | 7.34244 | 4.78062 | 8.11517 | 4.48265 | 6.33113 |
| ENSMUSG00000017692 | 8_Rhbdl3     | 366.148 | 0.63044  | 0.00037  | 0.00153  | 421.94  | 394.656 | 518.697 | 306.573 | 259.994 | 295.031 |
| ENSMUSG00000017697 | 3_Ada        | 49.177  | 0.88071  | 0.01075  | 0.02687  | 69.4551 | 55.0683 | 66.9286 | 40.5758 | 31.3786 | 31.6557 |
| ENSMUSG00000017707 | 9_Serinc3    | 6956.1  | -0.27975 | 0.00264  | 0.00825  | 6437.62 | 6337.45 | 6076.16 | 7570.55 | 7907.4  | 7407.43 |
| ENSMUSG00000017713 | 9_Tha1       | 101.936 | 0.6526   | 0.0062   | 0.01689  | 125.019 | 131.246 | 117.125 | 78.4466 | 76.2051 | 83.571  |
| ENSMUSG00000017715 | 11_Pgs1      | 1031.87 | 1.18843  | 4.11E-14 | 3.12E-12 | 1342.22 | 1287.68 | 1674.41 | 702.413 | 572.883 | 611.588 |
| ENSMUSG00000017716 | 15_Birc5     | 479.431 | 0.5065   | 0.0082   | 0.02142  | 628.568 | 478.177 | 580.845 | 315.59  | 442.886 | 430.517 |
| ENSMUSG00000017718 | 15_Afmid     | 217.499 | -0.00121 | 0.99467  | 0.99637  | 220.52  | 204.671 | 227.079 | 231.733 | 198.133 | 222.856 |
| ENSMUSG00000017720 | 2_Trp53tg5   | 1.61882 | -0.56328 | 0.75524  | NA       | 0       | 2.75342 | 1.19515 | 2.70506 | 1.79306 | 1.26623 |
| ENSMUSG00000017721 | 15_Pigt      | 2417.3  | 1.02839  | 1.43E-09 | 3.20E-08 | 2955.31 | 3208.65 | 3567.53 | 1769.11 | 1222.87 | 1780.32 |
| ENSMUSG00000017723 | 11_Wfdc2     | 1780.74 | 1.12807  | 1.89E-08 | 2.97E-07 | 2153.98 | 2448.71 | 2727.34 | 1333.59 | 786.257 | 1234.57 |
| ENSMUSG00000017724 | 14_Etv4      | 205.394 | 0.72866  | 0.00036  | 0.0015   | 275.216 | 225.78  | 266.519 | 147.876 | 137.169 | 179.804 |
| ENSMUSG00000017734 | 15_Dbndd2    | 1448.51 | 0.38862  | 0.01001  | 0.02528  | 1591.39 | 1648.38 | 1687.56 | 1456.22 | 1033.7  | 1273.82 |
| ENSMUSG00000017737 | 2_Mmp9       | 21.0432 | 0.25981  | 0.66239  | 0.75421  | 25.1775 | 17.4383 | 26.2934 | 30.6573 | 8.96531 | 17.7272 |
| ENSMUSG00000017740 | 16_Slc12a5   | 182.201 | -0.89934 | 0.21665  | 0.32076  | 152.801 | 148.685 | 80.0753 | 456.253 | 166.755 | 88.6359 |
| ENSMUSG00000017747 | 13_Ghdc      | 318.226 | 0.75304  | 4.64E-05 | 0.00026  | 400.235 | 379.972 | 418.304 | 277.719 | 196.34  | 236.784 |
| ENSMUSG00000017754 | 13_Pltp      | 854.568 | 0.19292  | 0.4446   | 0.5595   | 808.283 | 1141.75 | 785.216 | 1132.52 | 602.469 | 657.172 |
| ENSMUSG00000017756 | 8_Slc12a7    | 624.536 | 0.33088  | 0.03509  | 0.07235  | 671.978 | 699.368 | 717.092 | 651.017 | 488.609 | 519.153 |
| ENSMUSG00000017760 | 15_Ctsa      | 2789.27 | 0.45715  | 0.0002   | 0.0009   | 3148.05 | 3237.1  | 3297.43 | 2598.66 | 2070.09 | 2384.31 |
| ENSMUSG00000017764 | 2_Zswim1     | 158.05  | 0.54702  | 0.02581  | 0.05613  | 151.065 | 192.739 | 219.908 | 152.385 | 109.377 | 122.824 |
| ENSMUSG00000017765 | 16_Slc12a4   | 863.28  | 0.52606  | 0.00079  | 0.00293  | 968.03  | 1061.9  | 1027.83 | 843.978 | 619.503 | 658.438 |
| ENSMUSG00000017767 | 3_Spata25    | 1.29492 | -1.24422 | 0.67248  | NA       | 0       | 0       | 2.39031 | 0       | 5.37918 | 0       |
| ENSMUSG00000017774 | 19_Myo1c     | 4044.15 | 0.92633  | 3.10E-11 | 1.17E-09 | 5085.85 | 4965.33 | 5847.89 | 3097.29 | 2380.29 | 2888.26 |
| ENSMUSG00000017776 | 15_Crk       | 4879.74 | -0.19316 | 0.12434  | 0.20545  | 4508.5  | 4384.36 | 4768.66 | 4607.61 | 5878.55 | 5130.75 |
| ENSMUSG00000017778 | 14_Cox7c     | 1505.77 | -0.008   | 0.95433  | 0.97034  | 1514.12 | 1440.95 | 1551.31 | 1760.09 | 1412.04 | 1356.13 |
| ENSMUSG00000017781 | 17_Pitpna    | 4431.97 | -0.06709 | 0.51884  | 0.62891  | 4333.13 | 4229.25 | 4424.46 | 4192.84 | 4801.82 | 4610.33 |
| ENSMUSG00000017801 | 15_Mlx       | 841.445 | -0.08104 | 0.57212  | 0.67668  | 873.398 | 719.56  | 860.511 | 784.466 | 918.047 | 892.69  |
| ENSMUSG00000017802 | 14_Fam134c   | 4700.38 | 0.2789   | 0.00941  | 0.02398  | 4999.03 | 4954.31 | 5506.07 | 4145.95 | 4061.28 | 4535.62 |
| ENSMUSG00000017817 | 11_Jph2      | 196.684 | -0.93148 | 0.00539  | 0.015    | 117.205 | 184.479 | 103.978 | 379.61  | 169.444 | 225.388 |
| ENSMUSG00000017830 | 15_Dhx58     | 1920.06 | 1.86514  | 6.82E-28 | 2.89E-25 | 2701.8  | 2557.01 | 3780.27 | 791.68  | 809.567 | 880.028 |
| ENSMUSG00000017831 | 7_Rab5a      | 1752.87 | -0.33031 | 0.01718  | 0.03989  | 1594.86 | 1454.72 | 1609.87 | 1678.94 | 2200.98 | 1977.85 |
| ENSMUSG00000017832 | 2_Hspb9      | 3.22154 | 1.20644  | 0.43384  | 0.54903  | 5.20913 | 0       | 8.36608 | 0.90169 | 3.58612 | 1.26623 |
| ENSMUSG00000017837 | 12_Nkiras2   | 2374.79 | 0.66083  | 5.88E-06 | 4.28E-05 | 2682.7  | 2895.68 | 3150.43 | 2118.96 | 1566.24 | 1834.76 |
| ENSMUSG00000017843 | 13_Ppp2r5c   | 3193.63 | 0.05797  | 0.6037   | 0.70425  | 3174.1  | 3171.94 | 3426.51 | 2895.31 | 3111.86 | 3382.09 |
| ENSMUSG00000017858 | 12_Ifft52    | 1165.04 | -0.12897 | 0.31905  | 0.43463  | 1183.34 | 1065.57 | 1089.98 | 1111.78 | 1343    | 1196.58 |
| ENSMUSG00000017861 | 11_Mybl2     | 175.459 | 1.17758  | 2.92E-06 | 2.33E-05 | 271.743 | 175.301 | 283.252 | 97.382  | 117.446 | 107.629 |
| ENSMUSG00000017868 | 16_Sgk2      | 0.30056 | -1.76625 | 0.6627   | NA       | 0       | 0       | 0       | 1.80337 | 0       | 0       |
| ENSMUSG00000017897 | 18_Eya2      | 904.495 | 0.66725  | 4.23E-05 | 0.00024  | 1018.39 | 1077.5  | 1233.4  | 736.677 | 574.676 | 786.327 |
| ENSMUSG00000017929 | 13_B4galt5   | 281.455 | 0.49449  | 0.06862  | 0.1265   | 361.166 | 296.451 | 331.058 | 341.739 | 187.375 | 170.941 |
| ENSMUSG00000017943 | 15_Gdap111   | 9.08317 | -1.32901 | 0.12568  | 0.20715  | 4.34094 | 6.42464 | 4.78062 | 23.4438 | 5.37918 | 10.1298 |
| ENSMUSG00000017950 | 16_Hnf4a     | 23.9311 | -1.06788 | 0.08346  | 0.14816  | 19.1001 | 21.1095 | 5.97577 | 44.1826 | 36.7578 | 16.4609 |
| ENSMUSG00000017969 | 13_Ptgis     | 419.698 | 0.1233   | 0.60897  | 0.70869  | 421.94  | 528.656 | 362.132 | 534.699 | 304.82  | 365.94  |
| ENSMUSG00000017978 | 18_Cadps2    | 438.136 | -0.02002 | 0.90744  | 0.93755  | 400.235 | 422.191 | 482.842 | 370.593 | 467.989 | 484.965 |
| ENSMUSG00000017999 | 16_Ddx27     | 958.587 | 0.55581  | 6.10E-05 | 0.00032  | 1080.03 | 1142.67 | 1198.74 | 756.514 | 694.811 | 878.761 |
| ENSMUSG00000018001 | 18_Cyth3     | 4121.8  | 0.34073  | 0.00124  | 0.00433  | 4451.2  | 4576.18 | 4790.18 | 3485.01 | 3505.43 | 3922.77 |
| ENSMUSG00000018008 | 7_Cyth4      | 220.07  | 1.30459  | 1.03E-06 | 9.39E-06 | 395.026 | 277.177 | 267.715 | 166.812 | 95.9288 | 117.759 |

|                    |                  |         |          |          |          |         |         |         |         |         |         |
|--------------------|------------------|---------|----------|----------|----------|---------|---------|---------|---------|---------|---------|
| ENSMUSG00000018012 | 11_Rac3          | 368.692 | 0.89676  | 1.13E-05 | 7.53E-05 | 476.635 | 439.629 | 522.282 | 293.048 | 191.858 | 288.7   |
| ENSMUSG00000018040 | 9_Rrp7a          | 1148.33 | 0.54402  | 0.00045  | 0.00181  | 1335.27 | 1333.57 | 1417.45 | 1046.86 | 753.982 | 1002.85 |
| ENSMUSG00000018042 | 17_Cyb5r3        | 3620.67 | 0.5022   | 0.00066  | 0.00253  | 3984.12 | 4419.23 | 4330.04 | 3438.13 | 2450.22 | 3102.26 |
| ENSMUSG00000018068 | 13_Ints2         | 649.213 | -0.21136 | 0.20711  | 0.3096   | 625.964 | 558.026 | 620.285 | 564.455 | 735.155 | 791.392 |
| ENSMUSG00000018076 | 12_Med13l        | 1904.12 | 0.67479  | 2.08E-07 | 2.37E-06 | 2123.59 | 2320.21 | 2580.34 | 1485.08 | 1340.31 | 1575.19 |
| ENSMUSG00000018102 | 4_Hist1h2bc      | 410.618 | 0.08815  | 0.56283  | 0.6681   | 406.312 | 450.643 | 413.523 | 416.579 | 419.576 | 357.076 |
| ENSMUSG00000018126 | 15_Baiap2l2      | 7.76989 | -0.26421 | 0.76736  | 0.83661  | 11.2864 | 7.34244 | 2.39031 | 12.6236 | 5.37918 | 7.59736 |
| ENSMUSG00000018143 | 10_Mafk          | 1175.05 | 1.01772  | 1.23E-09 | 2.83E-08 | 1445.53 | 1439.12 | 1835.76 | 901.685 | 663.433 | 764.801 |
| ENSMUSG00000018160 | 15_Med1          | 1426    | -0.01891 | 0.87622  | 0.91628  | 1433.38 | 1403.32 | 1412.67 | 1284    | 1541.14 | 1481.49 |
| ENSMUSG00000018166 | 8_ErbB3          | 5209.98 | 0.72631  | 3.57E-06 | 2.76E-05 | 5863.74 | 6387.01 | 7230.68 | 3394.85 | 3654.26 | 4729.36 |
| ENSMUSG00000018167 | 10_Stard3        | 603.371 | 0.78778  | 3.24E-07 | 3.46E-06 | 762.269 | 705.792 | 824.656 | 494.124 | 386.405 | 446.978 |
| ENSMUSG00000018168 | 8_Ikzf3          | 178.168 | 0.31951  | 0.13601  | 0.22026  | 210.102 | 178.054 | 204.371 | 134.351 | 155.996 | 186.135 |
| ENSMUSG00000018169 | 12_Mfng          | 42.6796 | 0.44543  | 0.28372  | 0.39686  | 47.7504 | 60.5752 | 39.4401 | 51.3961 | 27.7924 | 29.1232 |
| ENSMUSG00000018171 | 9_Vmp1           | 2545.94 | -0.08664 | 0.54552  | 0.65208  | 2571.57 | 2237.61 | 2599.46 | 2221.75 | 2946.9  | 2698.33 |
| ENSMUSG00000018189 | 12_Uchl5         | 531.487 | -0.22233 | 0.23907  | 0.34666  | 545.222 | 451.56  | 474.476 | 447.236 | 671.501 | 598.925 |
| ENSMUSG00000018196 | 18_Glrx2         | 630.345 | -0.49114 | 0.0007   | 0.00267  | 536.54  | 537.834 | 497.184 | 651.919 | 814.05  | 744.541 |
| ENSMUSG00000018199 | 8_Trove2         | 914.545 | -0.85014 | 5.82E-10 | 1.47E-08 | 689.342 | 698.45  | 568.893 | 1226.29 | 1195.08 | 1109.21 |
| ENSMUSG00000018209 | 15_Stk4          | 1533.77 | 0.01828  | 0.88075  | 0.91954  | 1664.32 | 1481.34 | 1483.19 | 1398.51 | 1567.14 | 1608.11 |
| ENSMUSG00000018211 | 13_Wfdc15b       | 0.70432 | 2.91493  | 0.39205  | NA       | 0       | 1.83561 | 2.39031 | 0       | 0       | 0       |
| ENSMUSG00000018217 | 12_Pmp22         | 1838.52 | -0.51528 | 0.00056  | 0.00217  | 1489.81 | 1686.01 | 1364.87 | 2516.6  | 1979.54 | 1994.31 |
| ENSMUSG00000018238 | 6_Gdf9           | 7.68903 | -0.54754 | 0.5451   | 0.65175  | 2.60457 | 9.17806 | 7.17092 | 12.6236 | 10.7584 | 3.79868 |
| ENSMUSG00000018239 | 9_Zcchc10        | 175.744 | -0.16152 | 0.4289   | 0.54425  | 171.901 | 154.191 | 170.907 | 174.927 | 168.548 | 213.992 |
| ENSMUSG00000018263 | 11_Tbx5          | 37.7765 | -0.69278 | 0.16957  | 0.264    | 29.5184 | 40.3834 | 16.7322 | 55.0028 | 60.9641 | 24.0583 |
| ENSMUSG00000018286 | 6_Psmb6          | 2686.72 | 0.51511  | 0.00101  | 0.00361  | 3238.34 | 2849.79 | 3396.63 | 2635.63 | 1854.92 | 2144.99 |
| ENSMUSG00000018287 | 12_Spag7         | 1227.43 | 0.13477  | 0.39731  | 0.51472  | 1284.05 | 1267.49 | 1302.72 | 1390.4  | 951.219 | 1168.73 |
| ENSMUSG00000018293 | 4_Pfn1           | 6192.7  | 0.36616  | 0.00317  | 0.00965  | 6757.11 | 6380.58 | 7785.23 | 5336.17 | 5042.09 | 5855.03 |
| ENSMUSG00000018322 | 10_Tomm34        | 645.708 | 0.30628  | 0.01763  | 0.04075  | 692.814 | 713.135 | 736.215 | 609.539 | 538.815 | 583.731 |
| ENSMUSG00000018326 | 9_Ywhab          | 7635.13 | -0.16136 | 0.1329   | 0.2166   | 7409.12 | 6815.62 | 7400.39 | 7396.53 | 8311.73 | 8477.39 |
| ENSMUSG00000018334 | 16_Ksr1          | 612.892 | 0.61066  | 4.00E-05 | 0.00023  | 688.473 | 741.587 | 792.387 | 533.798 | 428.542 | 492.562 |
| ENSMUSG00000018339 | 11_Gpx3          | 4478.18 | -0.8258  | 0.00107  | 0.00381  | 3126.35 | 4288.91 | 2275.57 | 7731.95 | 5198.08 | 4248.19 |
| ENSMUSG00000018340 | 13_Anxa6         | 2572.93 | 0.09629  | 0.44422  | 0.55935  | 2680.97 | 2795.64 | 2497.87 | 2632.02 | 2182.16 | 2648.95 |
| ENSMUSG00000018341 | 12_I12rb2        | 5.80197 | 2.68045  | 0.02427  | 0.05331  | 17.3638 | 4.58903 | 8.36608 | 1.80337 | 2.68959 | 0       |
| ENSMUSG00000018347 | 16_Zkscan6       | 379.906 | 0.3036   | 0.076    | 0.13743  | 381.135 | 387.314 | 491.208 | 333.624 | 322.751 | 363.407 |
| ENSMUSG00000018362 | 14_Kpna2         | 258.189 | -0.34669 | 0.12127  | 0.2015   | 218.783 | 228.534 | 235.445 | 240.75  | 377.439 | 248.18  |
| ENSMUSG00000018363 | 16_Smurf2        | 1723.68 | -0.32906 | 0.00657  | 0.01773  | 1517.59 | 1458.39 | 1608.68 | 1751.07 | 2088.02 | 1918.33 |
| ENSMUSG00000018372 | 13_Cep95         | 310.76  | -0.23168 | 0.21943  | 0.32416  | 288.239 | 287.273 | 282.056 | 275.916 | 398.06  | 333.018 |
| ENSMUSG00000018377 | 10_Vezf1         | 2315.37 | -0.05361 | 0.61987  | 0.71779  | 2186.97 | 2289.01 | 2341.31 | 2192.9  | 2476.22 | 2405.83 |
| ENSMUSG00000018378 | 13_Cuedc1        | 1124.12 | 0.67352  | 2.85E-05 | 0.00017  | 1260.61 | 1414.34 | 1471.23 | 1023.41 | 721.707 | 853.437 |
| ENSMUSG00000018379 | 17_Srsf1         | 5561.07 | -0.27872 | 0.03407  | 0.07058  | 5246.46 | 4791.86 | 5037.57 | 5168.46 | 6699.77 | 6422.3  |
| ENSMUSG00000018381 | 15_Abi3          | 61.0179 | 1.36795  | 0.00024  | 0.00104  | 116.337 | 67.9176 | 80.0753 | 43.2809 | 33.1716 | 25.3245 |
| ENSMUSG00000018387 | 12_Shroom1       | 26.9158 | -0.20017 | 0.67862  | 0.76749  | 24.3093 | 33.9588 | 16.7322 | 36.0674 | 25.1029 | 25.3245 |
| ENSMUSG00000018395 | 19_Kif3a         | 597.159 | -0.40816 | 0.00198  | 0.00645  | 555.641 | 486.437 | 497.184 | 682.576 | 684.949 | 676.165 |
| ENSMUSG00000018398 | 18_Sept8         | 2468.44 | 0.12308  | 0.28775  | 0.40118  | 2410.96 | 2585.46 | 2724.95 | 2487.75 | 2167.81 | 2433.69 |
| ENSMUSG00000018401 | 17_Mtmr4         | 2426.49 | 0.29124  | 0.01893  | 0.04317  | 2537.71 | 2698.35 | 2773.95 | 1999.94 | 2092.5  | 2456.48 |
| ENSMUSG00000018405 | 7_Mrm1           | 212.781 | 0.24467  | 0.17985  | 0.27683  | 244.829 | 223.027 | 223.494 | 188.452 | 182.892 | 213.992 |
| ENSMUSG00000018411 | 17_Mapt          | 181.69  | -0.41633 | 0.10519  | 0.17949  | 136.306 | 180.808 | 150.589 | 270.506 | 193.651 | 158.278 |
| ENSMUSG00000018412 | 16_Kansl1        | 1955.23 | 0.24505  | 0.02728  | 0.05879  | 1999.44 | 2100.86 | 2262.43 | 1780.83 | 1715.06 | 1872.75 |
| ENSMUSG00000018415 | 14_Gid4          | 1178.37 | -0.29458 | 0.01078  | 0.02691  | 1069.61 | 1085.76 | 1018.27 | 1240.72 | 1266.8  | 1389.05 |
| ENSMUSG00000018417 | 14_Myo1b         | 396.655 | -0.43809 | 0.00509  | 0.0143   | 351.616 | 318.479 | 340.619 | 502.239 | 412.404 | 454.575 |
| ENSMUSG00000018425 | 18_Dhx40         | 693.979 | -0.38711 | 0.03567  | 0.07332  | 637.25  | 519.478 | 648.969 | 723.152 | 966.46  | 668.568 |
| ENSMUSG00000018427 | 7_Ypel2          | 1398.47 | 0.02346  | 0.85955  | 0.90493  | 1358.71 | 1284.93 | 1587.16 | 1293.92 | 1463.14 | 1402.98 |
| ENSMUSG00000018428 | 15_Akap1         | 551.626 | 0.14821  | 0.27499  | 0.38714  | 565.191 | 620.437 | 554.552 | 547.323 | 527.16  | 495.095 |
| ENSMUSG00000018433 | 14_Nol11         | 831.51  | -0.16864 | 0.29717  | 0.41162  | 777.897 | 743.423 | 827.047 | 709.626 | 954.805 | 976.261 |
| ENSMUSG00000018442 | 13_Derl2         | 1095.17 | -0.2322  | 0.06878  | 0.12673  | 1032.28 | 918.723 | 1070.86 | 1093.74 | 1224.66 | 1230.77 |
| ENSMUSG00000018446 | 8_C1qbp          | 945.362 | -0.23377 | 0.08313  | 0.14771  | 884.684 | 811.34  | 910.707 | 906.194 | 1089.28 | 1069.96 |
| ENSMUSG00000018449 | 12_Rpain         | 207.033 | -0.31015 | 0.1101   | 0.18631  | 193.606 | 203.753 | 156.565 | 242.553 | 224.133 | 221.59  |
| ENSMUSG00000018451 | 6_6330403K07Rik  | 70.6022 | -0.95403 | 0.00913  | 0.02339  | 47.7504 | 55.9861 | 40.6352 | 133.449 | 82.4808 | 63.3113 |
| ENSMUSG00000018459 | 15_Slc13a3       | 78.4413 | -0.75291 | 0.0469   | 0.09194  | 66.8505 | 69.7532 | 38.2449 | 140.663 | 69.0329 | 86.1034 |
| ENSMUSG00000018470 | 8_Kcnab3         | 25.3668 | -0.32314 | 0.54373  | 0.65049  | 18.232  | 24.7808 | 25.0982 | 40.5758 | 29.5855 | 13.9285 |
| ENSMUSG00000018474 | 17_Chd3          | 5615.05 | 0.19571  | 0.0997   | 0.1717   | 5718.76 | 6431.06 | 5834.74 | 5490.36 | 4671.82 | 5543.54 |
| ENSMUSG00000018476 | 7_Kdm6b          | 782.594 | 1.25837  | 9.70E-10 | 2.32E-08 | 997.548 | 1047.22 | 1266.86 | 575.275 | 338.889 | 469.77  |
| ENSMUSG00000018479 | 12_1700125H20Rik | 1.32624 | -0.20262 | 0.92519  | NA       | 0.86819 | 2.75342 | 0       | 1.80337 | 0       | 2.53245 |
| ENSMUSG00000018481 | 9_Appbp2         | 2321.82 | -0.14676 | 0.1996   | 0.30052  | 2256.42 | 2124.72 | 2230.16 | 2218.15 | 2619.66 | 2481.8  |
| ENSMUSG00000018486 | 2_Wnt9b          | 1.968   | -0.54942 | 0.74686  | NA       | 1.73638 | 1.83561 | 1.19515 | 4.50843 | 0       | 2.53245 |
| ENSMUSG00000018500 | 2_Adora2b        | 314.25  | 0.33542  | 0.0395   | 0.07965  | 322.966 | 355.191 | 374.083 | 294.851 | 257.304 | 281.102 |
| ENSMUSG00000018501 | 17_Ncor1         | 4469.14 | 0.08812  | 0.4699   | 0.58303  | 4517.18 | 4613.81 | 4683.81 | 3851.1  | 4270.18 | 4878.77 |
| ENSMUSG00000018507 | 16_Trpv2         | 74.3185 | 0.41918  | 0.25032  | 0.35945  | 112.864 | 73.4244 | 69.3189 | 75.7416 | 75.3086 | 39.253  |
| ENSMUSG00000018509 | 8_Cenpv          | 68.7012 | -0.18406 | 0.61053  | 0.71007  | 61.6414 | 78.0135 | 53.7819 | 91.9719 | 82.4808 | 44.3179 |
| ENSMUSG00000018537 | 16_Pcgf2         | 535.734 | 0.47747  | 0.00158  | 0.00532  | 595.577 | 658.984 | 615.504 | 484.205 | 389.094 | 471.036 |
| ENSMUSG00000018541 | 10_Cwc25         | 612.409 | 0.20025  | 0.15904  | 0.25094  | 668.505 | 609.423 | 686.018 | 587.899 | 511.022 | 611.588 |
| ENSMUSG00000018543 | 8_1700001P01Rik  | 3.40136 | -0.75311 | 0.54707  | 0.65355  | 3.47275 | 2.75342 | 1.19515 | 1.80337 | 3.58612 | 7.59736 |
| ENSMUSG00000018547 | 8_Pip4k2b        | 1823.34 | 0.23959  | 0.03408  | 0.07058  | 1935.19 | 2011.83 | 1974.39 | 1648.28 | 1554.58 | 1815.77 |
| ENSMUSG00000018548 | 15_Trim37        | 1315.69 | -0.40265 | 0.00122  | 0.00426  | 1218.07 | 1101.37 | 1079.22 | 1370.56 | 1594.03 | 1530.87 |
| ENSMUSG00000018554 | 13_Ybx2          | 28.4182 | 1.01177  | 0.03009  | 0.06363  | 28.6502 | 42.2191 | 43.0255 | 21.6405 | 13.448  | 21.5259 |
| ENSMUSG00000018559 | 16_Ctdnep1       | 1113.9  | 0.62548  | 3.21E-05 | 0.00019  | 1269.29 | 1329.9  | 1456.89 | 1023.41 | 765.637 | 838.242 |
| ENSMUSG00000018565 | 17_Elp5          | 727.632 | -0.01118 | 0.93077  | 0.95416  | 710.178 | 721.395 | 743.386 | 790.778 | 679.57  | 720.483 |
| ENSMUSG00000018566 | 14_Slc2a4        | 154.959 | -0.87466 | 0.00713  | 0.01897  | 100.71  | 146.849 | 80.0753 | 275.014 | 137.169 | 189.934 |
| ENSMUSG00000018567 | 14_Gabarap       | 5871.51 | -0.32575 | 0.00047  | 0.00187  | 5257.75 | 5261.78 | 5115.26 | 6485.82 | 6806.46 | 6302.01 |
| ENSMUSG00000018569 | 12_Cldn7         | 4954.02 | 1.22219  | 3.46E-12 | 1.59E-10 | 5954.9  | 6588.01 | 8262.1  | 3095.49 | 2388.36 | 3435.27 |

|                    |                  |         |          |          |          |         |         |         |         |         |         |
|--------------------|------------------|---------|----------|----------|----------|---------|---------|---------|---------|---------|---------|
| ENSMUSG00000018570 | 17_2810408A11Rik | 55.9514 | 0.39798  | 0.22133  | 0.32633  | 59.0368 | 73.4244 | 58.5626 | 56.8062 | 44.8265 | 43.0517 |
| ENSMUSG00000018572 | 10_Phf23         | 1162.84 | 0.18179  | 0.16529  | 0.25864  | 1205.05 | 1197.74 | 1306.3  | 1217.28 | 993.356 | 1057.3  |
| ENSMUSG00000018574 | 14_Acadvl        | 1881.56 | 0.09664  | 0.3802   | 0.49792  | 1916.09 | 1939.32 | 1977.98 | 1915.18 | 1675.62 | 1865.15 |
| ENSMUSG00000018581 | 15_Dnah11        | 8.88046 | -0.69648 | 0.39246  | 0.51     | 10.4183 | 7.34244 | 2.39031 | 10.8202 | 13.448  | 8.86359 |
| ENSMUSG00000018583 | 5_G3bp1          | 7351.76 | 0.28261  | 0.03736  | 0.07612  | 7915.27 | 7615.95 | 8675.62 | 5995.31 | 6165.44 | 7742.98 |
| ENSMUSG00000018585 | 9_Atox1          | 1906.44 | 0.55984  | 0.00406  | 0.01185  | 2285.94 | 2138.49 | 2391.5  | 2015.27 | 1153.83 | 1453.63 |
| ENSMUSG00000018589 | 8_Glra2          | 2.73405 | -0.98087 | 0.49438  | 0.60557  | 1.73638 | 3.67122 | 0       | 4.50843 | 2.68959 | 3.79868 |
| ENSMUSG00000018593 | 12_Sparc         | 30162.5 | -0.35885 | 0.00493  | 0.01391  | 25095   | 30283   | 23911.4 | 33822.2 | 31763.2 | 36100.1 |
| ENSMUSG00000018595 | 6_Glra4          | 1.51988 | -0.58016 | 0.75941  | NA       | 2.60457 | 0.91781 | 0       | 0.90169 | 0.89653 | 3.79868 |
| ENSMUSG00000018599 | 5_Mier2          | 248.02  | 0.59041  | 0.00523  | 0.01462  | 282.161 | 314.807 | 296.398 | 220.913 | 149.721 | 224.122 |
| ENSMUSG00000018604 | 18_Tbx3          | 35.3826 | -1.28073 | 0.00789  | 0.02068  | 16.4956 | 32.1232 | 13.1467 | 55.9045 | 59.171  | 35.4544 |
| ENSMUSG00000018620 | 2_Mmp20          | 0.79473 | -0.44155 | 0.88027  | NA       | 0.86819 | 0       | 1.19515 | 2.70506 | 0       | 0       |
| ENSMUSG00000018623 | 9_Mmp7           | 0.51343 | -1.00887 | 0.76364  | NA       | 0       | 0.91781 | 0       | 0       | 0.89653 | 1.26623 |
| ENSMUSG00000018634 | 10_Chrh1         | 1.65137 | -4.20262 | 0.10589  | NA       | 0       | 0       | 0       | 8.11517 | 1.79306 | 0       |
| ENSMUSG00000018648 | 15_Dusp14        | 365.795 | 0.65362  | 2.43E-05 | 0.00015  | 411.521 | 449.725 | 480.452 | 281.326 | 271.649 | 300.096 |
| ENSMUSG00000018651 | 14_Tada2a        | 389.134 | -0.28922 | 0.0914   | 0.15967  | 321.23  | 381.807 | 347.79  | 371.494 | 483.23  | 429.251 |
| ENSMUSG00000018654 | 17_Ikzf1         | 79.4638 | 1.45577  | 2.39E-05 | 0.00014  | 162.351 | 81.6847 | 105.174 | 43.2809 | 41.2404 | 43.0517 |
| ENSMUSG00000018656 | 5_Tcaf3          | 0.30239 | -0.03469 | 0.99322  | NA       | 0       | 0.91781 | 0       | 0       | 0.89653 | 0       |
| ENSMUSG00000018659 | 12_Pnpo          | 528.067 | 0.26552  | 0.07734  | 0.13941  | 549.563 | 567.204 | 611.919 | 475.188 | 427.645 | 536.88  |
| ENSMUSG00000018661 | 17_Cog1          | 866.531 | 0.78554  | 1.06E-06 | 9.61E-06 | 1028.8  | 1077.5  | 1183.2  | 687.986 | 516.402 | 705.288 |
| ENSMUSG00000018666 | 13_Cbx1          | 1185.9  | -0.31418 | 0.0229   | 0.05085  | 1048.77 | 989.394 | 1134.2  | 1150.55 | 1445.21 | 1347.27 |
| ENSMUSG00000018669 | 14_Cdk5rap3      | 944.843 | 0.43745  | 0.0071   | 0.01892  | 1090.44 | 1057.31 | 1113.88 | 971.115 | 671.501 | 764.801 |
| ENSMUSG00000018672 | 15_Copz2         | 286.155 | -0.43689 | 0.0172   | 0.03992  | 258.72  | 267.999 | 201.981 | 353.461 | 324.544 | 310.226 |
| ENSMUSG00000018677 | 9_Slc25a39       | 1659.26 | 0.92673  | 5.48E-06 | 4.01E-05 | 2028.96 | 2151.34 | 2343.7  | 1476.96 | 808.671 | 1145.94 |
| ENSMUSG00000018678 | 12_Sp2           | 337.672 | 0.97972  | 3.36E-07 | 3.57E-06 | 410.653 | 467.163 | 466.11  | 259.685 | 179.306 | 243.116 |
| ENSMUSG00000018697 | 14_Aatf          | 433.11  | 0.15195  | 0.39403  | 0.5117   | 447.985 | 392.821 | 527.063 | 356.166 | 427.645 | 446.978 |
| ENSMUSG00000018698 | 15_Lhx1          | 0.54308 | 2.53494  | 0.50107  | NA       | 0.86819 | 0       | 2.39031 | 0       | 0       | 0       |
| ENSMUSG00000018707 | 13_Dync1h1       | 11514.3 | 0.9811   | 4.47E-13 | 2.67E-11 | 13522   | 15330.1 | 17002.3 | 7604.82 | 6973.21 | 8653.39 |
| ENSMUSG00000018727 | 19_Cpsf4l        | 12.7133 | -0.17414 | 0.80494  | 0.86493  | 10.4183 | 13.7671 | 11.9515 | 19.8371 | 15.241  | 5.06491 |
| ENSMUSG00000018733 | 10_Pex12         | 346.02  | -0.15668 | 0.33979  | 0.45637  | 320.362 | 326.739 | 334.643 | 318.295 | 402.542 | 373.537 |
| ENSMUSG00000018736 | 14_Ndel1         | 1604.93 | 0.02462  | 0.83877  | 0.89006  | 1660.84 | 1496.94 | 1698.31 | 1463.44 | 1685.48 | 1624.57 |
| ENSMUSG00000018740 | 14_Slc25a35      | 496.53  | 0.06914  | 0.62603  | 0.7233   | 475.767 | 513.053 | 536.624 | 504.042 | 448.265 | 501.426 |
| ENSMUSG00000018750 | 14_Zbtb4         | 2023.97 | -0.18283 | 0.16499  | 0.25826  | 1862.26 | 2030.19 | 1795.12 | 2435.45 | 1945.47 | 2075.35 |
| ENSMUSG00000018752 | 19_Tnfrsfm13     | 114.503 | -0.71604 | 0.01641  | 0.03844  | 108.524 | 84.4381 | 66.9286 | 160.5   | 164.065 | 102.564 |
| ENSMUSG00000018761 | 14_Mpdu1         | 1272.93 | 0.45478  | 0.00139  | 0.00477  | 1413.41 | 1372.12 | 1630.19 | 1145.14 | 933.288 | 1143.4  |
| ENSMUSG00000018765 | 5_Fxr2           | 1506.85 | 0.38235  | 0.00089  | 0.00324  | 1661.71 | 1643.79 | 1811.85 | 1394.01 | 1247.07 | 1282.69 |
| ENSMUSG00000018770 | 9_Atp5g3         | 3770.19 | -0.19756 | 0.04466  | 0.08823  | 3523.98 | 3488.58 | 3525.7  | 3921.43 | 4272.86 | 3888.58 |
| ENSMUSG00000018774 | 13_Cd68          | 544.078 | 1.10291  | 5.24E-09 | 9.79E-08 | 742.301 | 714.053 | 770.874 | 417.48  | 262.683 | 357.076 |
| ENSMUSG00000018776 | 9_Slc35g3        | 2.00497 | 0.14154  | 0.933    | NA       | 2.60457 | 3.67122 | 0       | 0.90169 | 3.58612 | 1.26623 |
| ENSMUSG00000018796 | 12_Acs1          | 8016.34 | 0.49499  | 0.00126  | 0.00439  | 8791.28 | 8988.07 | 10353.6 | 5583.24 | 6429.92 | 7951.91 |
| ENSMUSG00000018800 | 12_Abca5         | 394.655 | -1.23909 | 6.29E-10 | 1.58E-08 | 243.093 | 284.52  | 175.688 | 586.096 | 565.711 | 512.822 |
| ENSMUSG00000018809 | 2_Smyd4          | 335.992 | 0.21923  | 0.17023  | 0.26475  | 340.33  | 386.396 | 357.351 | 328.214 | 283.304 | 320.355 |
| ENSMUSG00000018819 | 10_Lsp1          | 1491.63 | 0.13249  | 0.31786  | 0.43333  | 1692.1  | 1503.37 | 1484.38 | 1586.97 | 1290.11 | 1392.85 |
| ENSMUSG00000018820 | 13_Zfyve27       | 935.221 | 0.38789  | 0.01292  | 0.03131  | 1018.39 | 1118.8  | 1043.37 | 946.77  | 678.674 | 805.32  |
| ENSMUSG00000018821 | 3_Avpi1          | 1161.73 | 1.09653  | 1.64E-11 | 6.56E-10 | 1421.22 | 1488.68 | 1839.34 | 799.795 | 624.882 | 796.457 |
| ENSMUSG00000018822 | 7_Sfrp5          | 13.0771 | -0.2299  | 0.74937  | 0.82303  | 5.20913 | 16.5205 | 14.3418 | 15.3287 | 8.06878 | 18.9934 |
| ENSMUSG00000018830 | 8_Myh11          | 4746.49 | -1.15726 | 0.03221  | 0.0674   | 2086.26 | 5063.53 | 1666.04 | 7216.19 | 7056.59 | 5390.33 |
| ENSMUSG00000018841 | 17_Rad51d        | 457.476 | 0.33875  | 0.03066  | 0.06462  | 541.75  | 481.848 | 509.136 | 451.744 | 357.716 | 402.66  |
| ENSMUSG00000018844 | 6_Fndc8          | 2.45245 | -1.06211 | 0.50905  | NA       | 0.86819 | 2.75342 | 1.19515 | 6.3118  | 3.58612 | 0       |
| ENSMUSG00000018845 | 14_Unc45b        | 62.5462 | -0.77218 | 0.07049  | 0.12922  | 48.6186 | 55.0683 | 34.6595 | 120.826 | 43.93   | 72.1749 |
| ENSMUSG00000018846 | 8_Pank3          | 3188.76 | -0.47653 | 3.11E-05 | 0.00018  | 2787.75 | 2435.86 | 2777.54 | 3489.52 | 3926.8  | 3715.11 |
| ENSMUSG00000018848 | 4_Rars           | 1802.31 | -0.1533  | 0.28073  | 0.3935   | 1754.61 | 1519.89 | 1845.32 | 1640.17 | 2012.71 | 2041.16 |
| ENSMUSG00000018849 | 6_Wwc1           | 3347.77 | 0.79471  | 5.06E-07 | 5.12E-06 | 3834.79 | 4099.84 | 4806.91 | 2734.81 | 1992.99 | 2617.29 |
| ENSMUSG00000018858 | 15_Ict1          | 543.398 | -0.18652 | 0.21163  | 0.31494  | 480.108 | 525.903 | 519.892 | 654.624 | 537.918 | 541.945 |
| ENSMUSG00000018861 | 8_Fdxr           | 127.978 | 1.02092  | 5.51E-05 | 0.0003   | 188.397 | 166.123 | 160.151 | 106.399 | 70.8259 | 75.9736 |
| ENSMUSG00000018862 | 11_Otop3         | 5.83756 | 0.32902  | 0.77123  | 0.83939  | 5.20913 | 7.34244 | 7.17092 | 10.8202 | 4.48265 | 0       |
| ENSMUSG00000018865 | 8_Sult4a1        | 21.9954 | -0.74925 | 0.32401  | 0.44009  | 16.4956 | 17.4383 | 15.537  | 58.6096 | 18.8271 | 5.06491 |
| ENSMUSG00000018882 | 12_Mrpl45        | 513.397 | -0.00991 | 0.94302  | 0.96285  | 529.595 | 474.505 | 531.844 | 522.978 | 535.229 | 486.231 |
| ENSMUSG00000018893 | 14_Mb            | 1202.81 | -1.2666  | 0.01624  | 0.03809  | 553.036 | 1012.34 | 553.356 | 2571.61 | 837.36  | 1689.15 |
| ENSMUSG00000018899 | 16_Irf1          | 8022.29 | 0.79565  | 5.63E-09 | 1.04E-07 | 10005   | 9319.4  | 11214.1 | 5151.33 | 5783.52 | 6660.35 |
| ENSMUSG00000018900 | 7_Slc22a5        | 1288.89 | -0.07561 | 0.50495  | 0.61559  | 1235.43 | 1271.16 | 1259.69 | 1277.69 | 1421.9  | 1267.49 |
| ENSMUSG00000018906 | 14_P4ha2         | 624.369 | 0.11961  | 0.44254  | 0.55774  | 654.614 | 693.861 | 601.163 | 660.935 | 510.126 | 625.516 |
| ENSMUSG00000018907 | 10_Alox12e       | 6302.29 | 1.49272  | 1.82E-16 | 2.11E-14 | 7384.81 | 9772.79 | 10740.8 | 3391.24 | 2673.45 | 3850.6  |
| ENSMUSG00000018909 | 15_Arrb1         | 986.406 | -0.27004 | 0.05524  | 0.10528  | 904.652 | 919.641 | 859.316 | 1243.42 | 1005.01 | 986.391 |
| ENSMUSG00000018914 | 5_Ii3            | 0.44236 | 2.27028  | 0.57071  | NA       | 1.73638 | 0.91781 | 0       | 0       | 0       | 0       |
| ENSMUSG00000018916 | 5_Csf2           | 2.08396 | 1.233    | 0.51887  | NA       | 1.73638 | 0       | 7.17092 | 1.80337 | 1.79306 | 0       |
| ENSMUSG00000018919 | 10_Tm4sf5        | 1.84365 | 0.67728  | 0.7043   | NA       | 4.34094 | 0       | 2.39031 | 0.90169 | 0.89653 | 2.53245 |
| ENSMUSG00000018920 | 11_Cxcl16        | 845.9   | 0.76524  | 2.38E-06 | 1.95E-05 | 1185.95 | 854.477 | 1155.71 | 633.885 | 640.123 | 605.256 |
| ENSMUSG00000018921 | 11_Pelp1         | 501.579 | 0.83615  | 6.18E-05 | 0.00033  | 588.632 | 602.08  | 738.605 | 442.728 | 268.959 | 368.472 |
| ENSMUSG00000018923 | 13_Med11         | 299.868 | 0.52842  | 0.00856  | 0.02215  | 372.453 | 292.78  | 397.986 | 284.933 | 214.271 | 236.784 |
| ENSMUSG00000018924 | 6_Alox15         | 2305.37 | 2.69688  | 8.09E-35 | 7.08E-32 | 3402.43 | 3143.48 | 5436.76 | 536.503 | 577.366 | 735.678 |
| ENSMUSG00000018925 | 3_Heatr9         | 1.41954 | 3.9415   | 0.09202  | NA       | 5.20913 | 0.91781 | 2.39031 | 0       | 0       | 0       |
| ENSMUSG00000018927 | 3_Ccl6           | 302.743 | 0.79275  | 0.00058  | 0.00227  | 482.713 | 283.602 | 386.035 | 233.537 | 239.374 | 191.2   |
| ENSMUSG00000018930 | 3_Ccl4           | 27.1251 | 4.28141  | 1.30E-10 | 4.05E-09 | 56.4322 | 42.2191 | 56.1722 | 2.70506 | 2.68959 | 2.53245 |
| ENSMUSG00000018931 | 3_Natd1          | 779.253 | 0.36153  | 0.02921  | 0.06209  | 793.524 | 916.888 | 919.074 | 796.188 | 564.814 | 685.029 |
| ENSMUSG00000018932 | 9_Map2k3         | 2230.89 | 0.33493  | 0.00763  | 0.0201   | 2558.55 | 2389.97 | 2516.99 | 2153.22 | 1726.72 | 2039.89 |
| ENSMUSG00000018965 | 11_Ywhah         | 2877.98 | 0.0934   | 0.46994  | 0.58305  | 2870.23 | 2711.2  | 3333.28 | 2560.79 | 2995.31 | 2797.1  |
| ENSMUSG00000018974 | 7_Sart3          | 839.238 | 0.93059  | 1.07E-11 | 4.46E-10 | 1015.78 | 1097.7  | 1189.18 | 608.638 | 522.677 | 601.458 |
| ENSMUSG00000018983 | 9_E2f2           | 80.5594 | 1.01575  | 0.00058  | 0.00226  | 119.81  | 89.9449 | 113.54  | 61.3146 | 43.0335 | 55.714  |

|                    |                 |         |          |          |          |         |         |         |         |         |         |
|--------------------|-----------------|---------|----------|----------|----------|---------|---------|---------|---------|---------|---------|
| ENSMUSG00000018986 | 9_Slfn3         | 309.692 | 0.4457   | 0.01563  | 0.03687  | 342.934 | 315.725 | 413.523 | 234.438 | 286.89  | 264.641 |
| ENSMUSG00000018995 | 12_Nars2        | 238.958 | -0.38824 | 0.02725  | 0.05875  | 198.815 | 210.177 | 211.542 | 247.062 | 269.856 | 296.297 |
| ENSMUSG00000018999 | 14_Slc35b4      | 1140.54 | -0.17834 | 0.16157  | 0.25405  | 1085.24 | 1037.12 | 1088.79 | 1115.38 | 1349.28 | 1167.46 |
| ENSMUSG00000019027 | 7_Dnah1         | 57.4678 | -1.01577 | 0.01848  | 0.04234  | 34.7275 | 58.7396 | 20.3176 | 84.7584 | 90.5496 | 55.714  |
| ENSMUSG00000019039 | 13_Dalrd3       | 859.762 | 0.79125  | 6.22E-07 | 6.11E-06 | 966.294 | 1036.2  | 1268.06 | 697.003 | 569.297 | 621.717 |
| ENSMUSG00000019054 | 13_Fis1         | 1812.39 | 0.34522  | 0.02975  | 0.06303  | 2001.17 | 2076.99 | 2006.66 | 1931.41 | 1304.45 | 1553.66 |
| ENSMUSG00000019055 | 15_Plod1        | 1497.02 | 0.0306   | 0.8605   | 0.90562  | 1489.81 | 1777.79 | 1269.25 | 1601.39 | 1219.28 | 1624.57 |
| ENSMUSG00000019066 | 13_Rab3d        | 10673.2 | 0.60254  | 5.53E-06 | 4.05E-05 | 12271.8 | 12093.9 | 14243.8 | 8703.97 | 7379.34 | 9346.02 |
| ENSMUSG00000019080 | 7_Mfsd3         | 92.604  | 0.98257  | 0.00017  | 0.00079  | 129.36  | 123.904 | 114.735 | 56.8062 | 57.378  | 73.4412 |
| ENSMUSG00000019082 | 17_Slc25a22     | 414.199 | 1.07065  | 6.76E-06 | 4.81E-05 | 507.022 | 575.464 | 602.358 | 373.298 | 207.995 | 219.057 |
| ENSMUSG00000019087 | 13_Atp6ap1      | 6306.93 | 0.00466  | 0.96522  | 0.97761  | 6148.51 | 6183.26 | 6619.96 | 5785.21 | 6668.39 | 6436.23 |
| ENSMUSG00000019088 | 2_Dnase11l      | 616.132 | -0.2677  | 0.04255  | 0.08478  | 592.104 | 571.793 | 512.721 | 675.362 | 687.639 | 657.172 |
| ENSMUSG00000019102 | 10_Aldh3a1      | 372662  | 0.65105  | 7.37E-06 | 5.19E-05 | 432984  | 442705  | 490357  | 290364  | 240420  | 339142  |
| ENSMUSG00000019122 | 8_Ccl9          | 183.565 | 1.12341  | 1.60E-05 | 0.0001   | 329.912 | 180.808 | 243.811 | 111.809 | 114.756 | 120.292 |
| ENSMUSG00000019124 | 10_Scrn1        | 1076.15 | -0.72596 | 0.00012  | 0.00056  | 769.215 | 981.134 | 682.433 | 1599.59 | 1302.66 | 1121.88 |
| ENSMUSG00000019132 | 10_BC005537     | 3999.81 | -0.13242 | 0.28908  | 0.40267  | 4005.82 | 3567.51 | 3875.88 | 3716.75 | 4640.44 | 4192.48 |
| ENSMUSG00000019139 | 9_Isyna1        | 516.446 | 1.12014  | 1.80E-06 | 1.53E-05 | 599.05  | 815.929 | 707.531 | 429.202 | 230.408 | 316.557 |
| ENSMUSG00000019143 | 15_Hars2        | 690.31  | -0.15846 | 0.22581  | 0.33118  | 619.887 | 642.464 | 695.58  | 679.871 | 762.051 | 742.009 |
| ENSMUSG00000019146 | 2_Cacng2        | 2.58823 | -2.12751 | 0.23511  | 0.34185  | 1.73638 | 0       | 1.19515 | 8.11517 | 4.48265 | 0       |
| ENSMUSG00000019158 | 8_Tmem160       | 116.115 | 0.83307  | 0.01763  | 0.04075  | 129.36  | 158.78  | 158.955 | 132.548 | 60.0675 | 56.9802 |
| ENSMUSG00000019173 | 11_Rab5c        | 5297.03 | 0.72261  | 1.12E-06 | 1.01E-05 | 6085.13 | 6130.02 | 7574.89 | 4410.14 | 3399.64 | 4182.35 |
| ENSMUSG00000019178 | 17_Styxl1       | 15.3984 | -0.75986 | 0.21922  | 0.32394  | 12.1546 | 10.0959 | 11.9515 | 10.8202 | 23.3098 | 24.0583 |
| ENSMUSG00000019179 | 10_Mdh2         | 2753.18 | 0.53646  | 0.0005   | 0.00199  | 3029.98 | 3246.28 | 3501.8  | 2622.1  | 1833.41 | 2285.54 |
| ENSMUSG00000019188 | 16_H13          | 1497.74 | 0.25163  | 0.03512  | 0.07242  | 1561    | 1608    | 1715.05 | 1436.38 | 1245.28 | 1420.71 |
| ENSMUSG00000019189 | 13_Rnf145       | 3822.74 | 0.24671  | 0.03531  | 0.07271  | 4070.94 | 3947.48 | 4426.85 | 3383.12 | 3256.2  | 3851.86 |
| ENSMUSG00000019194 | 14_Scn1b        | 149.463 | -0.29271 | 0.32343  | 0.4394   | 117.205 | 156.027 | 130.272 | 234.438 | 124.618 | 134.22  |
| ENSMUSG00000019210 | 10_Atp6v1e1     | 7088.06 | -0.00739 | 0.93784  | 0.95923  | 7047.95 | 6899.14 | 7261.76 | 6910.52 | 6938.25 | 7470.74 |
| ENSMUSG00000019214 | 13_Chtf18       | 115.206 | 2.06125  | 2.06E-08 | 3.18E-07 | 192.738 | 150.52  | 215.128 | 72.1348 | 27.7924 | 32.9219 |
| ENSMUSG00000019230 | 14_Lhx9         | 1.04263 | -0.4354  | 0.85124  | NA       | 1.73638 | 0.91781 | 0       | 2.70506 | 0.89653 | 0       |
| ENSMUSG00000019232 | 14_Etnppl       | 69.7888 | -1.63059 | 1.08E-05 | 7.27E-05 | 29.5184 | 49.5615 | 22.7079 | 130.744 | 95.0322 | 91.1683 |
| ENSMUSG00000019235 | 8_Rps6kl1       | 7.54798 | 0.08692  | 0.91371  | 0.9423   | 6.94551 | 9.17806 | 7.17092 | 9.01685 | 5.37918 | 7.59736 |
| ENSMUSG00000019254 | 16_Ppp1r12c     | 943.09  | 0.57346  | 2.87E-05 | 0.00017  | 1123.44 | 1138.08 | 1123.44 | 865.618 | 684.949 | 723.016 |
| ENSMUSG00000019256 | 17_Ahr          | 647.586 | -0.13404 | 0.29165  | 0.40542  | 658.955 | 608.505 | 584.43  | 684.379 | 676.881 | 672.366 |
| ENSMUSG00000019261 | 2_Map1s         | 128.339 | 1.8537   | 9.98E-08 | 1.25E-06 | 169.297 | 195.493 | 239.031 | 86.5618 | 34.0682 | 45.5842 |
| ENSMUSG00000019278 | 4_Dpep1         | 675.625 | 0.038    | 0.81001  | 0.86895  | 638.987 | 761.779 | 652.554 | 754.711 | 580.952 | 664.769 |
| ENSMUSG00000019295 | 8_Tmem129       | 612.698 | 0.08668  | 0.57717  | 0.68111  | 550.431 | 659.902 | 684.823 | 651.017 | 594.4   | 535.614 |
| ENSMUSG00000019297 | 8_Nop9          | 594.285 | 0.42696  | 0.00198  | 0.00645  | 689.342 | 651.642 | 702.751 | 509.452 | 461.713 | 550.809 |
| ENSMUSG00000019301 | 5_Hsd17b1       | 4.71407 | 0.65967  | 0.52267  | 0.63219  | 6.07732 | 6.42464 | 4.78062 | 5.41011 | 1.79306 | 3.79868 |
| ENSMUSG00000019302 | 16_Atp6v0a1     | 4288.29 | 0.39861  | 0.00019  | 0.00088  | 4689.09 | 4875.38 | 5065.06 | 3614.86 | 3486.61 | 3998.74 |
| ENSMUSG00000019303 | 14_Psmc3ip      | 158.362 | 0.58411  | 0.0052   | 0.01457  | 189.265 | 172.547 | 209.152 | 134.351 | 130.893 | 113.96  |
| ENSMUSG00000019312 | 10_Mdm3         | 2111.13 | 1.1265   | 3.70E-13 | 2.28E-11 | 2566.36 | 2901.18 | 3219.75 | 1463.44 | 1099.15 | 1416.91 |
| ENSMUSG00000019320 | 13_Noxo1        | 114.106 | -0.02287 | 0.92523  | 0.95066  | 113.733 | 125.739 | 100.393 | 127.138 | 120.135 | 97.4995 |
| ENSMUSG00000019326 | 14_Aoc3         | 107.612 | -0.64676 | 0.03482  | 0.07187  | 77.2688 | 98.2052 | 76.4899 | 181.239 | 111.17  | 101.298 |
| ENSMUSG00000019338 | 13_Zfp687       | 931.236 | 0.585    | 0.0003   | 0.00127  | 1034.88 | 1137.16 | 1180.81 | 873.733 | 615.02  | 745.808 |
| ENSMUSG00000019359 | 14_Gdpd2        | 1213.31 | 0.89852  | 1.68E-07 | 1.97E-06 | 1559.27 | 1321.64 | 1857.27 | 715.037 | 916.254 | 910.417 |
| ENSMUSG00000019362 | 7_D8ErtD738e    | 702.912 | 0.64965  | 0.00237  | 0.00752  | 809.152 | 870.08  | 896.366 | 697.905 | 379.232 | 564.737 |
| ENSMUSG00000019368 | 13_Sec14l4      | 118.672 | 0.38763  | 0.1475   | 0.23565  | 125.019 | 120.233 | 157.76  | 97.382  | 82.408  | 129.155 |
| ENSMUSG00000019370 | 10_Grb7         | 3028.76 | 0.13496  | 0.46143  | 0.57516  | 2993.51 | 3332.55 | 3185.09 | 3649.12 | 2169.6  | 2842.68 |
| ENSMUSG00000019373 | 11_Cops3        | 1743.46 | -0.31997 | 0.01139  | 0.02821  | 1567.08 | 1475.83 | 1611.07 | 1795.26 | 2176.78 | 1834.76 |
| ENSMUSG00000019428 | 16_Fkbp8        | 3229.2  | 1.1808   | 7.40E-09 | 1.32E-07 | 4104.79 | 4326.54 | 5013.67 | 2557.18 | 1397.69 | 1975.31 |
| ENSMUSG00000019432 | 15_Ddx39b       | 3432.65 | 0.59435  | 6.23E-07 | 6.11E-06 | 4003.22 | 4051.19 | 4334.82 | 2918.76 | 2422.43 | 2865.47 |
| ENSMUSG00000019433 | 8_Gipc1         | 3896.95 | 1.11473  | 9.70E-08 | 1.22E-06 | 4776.77 | 5135.12 | 6083.33 | 3065.73 | 1675.62 | 2645.15 |
| ENSMUSG00000019437 | 17_Tlcl1        | 407.33  | -0.19824 | 0.21395  | 0.31756  | 365.507 | 429.533 | 343.009 | 449.941 | 448.265 | 407.725 |
| ENSMUSG00000019461 | 12_Plsr3        | 1925.33 | 0.83575  | 8.94E-08 | 1.14E-06 | 2241.66 | 2298.19 | 2863.59 | 1458.03 | 1173.56 | 1516.94 |
| ENSMUSG00000019464 | 5_Ptger1        | 441.167 | 0.66942  | 0.00014  | 0.00067  | 502.681 | 548.848 | 573.674 | 392.233 | 278.821 | 350.745 |
| ENSMUSG00000019467 | 13_Arhgef25     | 522.76  | -0.50246 | 0.00856  | 0.02215  | 415.862 | 526.82  | 354.961 | 685.281 | 623.089 | 530.549 |
| ENSMUSG00000019470 | 12_Xab2         | 1198.13 | 0.85006  | 1.42E-07 | 1.70E-06 | 1392.57 | 1519.89 | 1711.46 | 974.722 | 703.777 | 886.359 |
| ENSMUSG00000019471 | 9_Cdc37         | 2817.66 | 0.71544  | 1.27E-05 | 8.34E-05 | 3140.24 | 3389.46 | 3977.47 | 2431.85 | 1716.86 | 2250.09 |
| ENSMUSG00000019478 | 15_Rab4a        | 111.158 | -0.34735 | 0.2835   | 0.39665  | 86.8188 | 134.917 | 71.7092 | 161.402 | 112.066 | 100.032 |
| ENSMUSG00000019487 | 10_Trip10       | 2195.25 | 0.88789  | 7.84E-10 | 1.92E-08 | 2625.4  | 2840.61 | 3083.5  | 1610.41 | 1294.59 | 1717    |
| ENSMUSG00000019494 | 14_Cops6        | 2491.82 | 0.03543  | 0.74965  | 0.82314  | 2551.61 | 2400.06 | 2616.19 | 2637.43 | 2294.22 | 2451.42 |
| ENSMUSG00000019505 | 7_Ubb           | 22167.1 | 0.51877  | 0.00405  | 0.01185  | 25540.4 | 25714.2 | 27076.2 | 23066   | 13527.7 | 18077.9 |
| ENSMUSG00000019518 | 10_Ap4m1        | 622.911 | 0.57972  | 4.13E-05 | 0.00023  | 711.914 | 726.902 | 799.558 | 492.32  | 457.231 | 549.542 |
| ENSMUSG00000019528 | 18_Gyg          | 11501.8 | -0.36808 | 0.00228  | 0.00726  | 10289.8 | 10015.1 | 9820.58 | 11244.9 | 13490.1 | 14150.1 |
| ENSMUSG00000019539 | 10_Rcn3         | 892.776 | 0.42393  | 0.09417  | 0.16354  | 972.371 | 1189.48 | 907.122 | 1073.01 | 490.402 | 724.282 |
| ENSMUSG00000019558 | 14_Slc6a8       | 3259.87 | 0.5772   | 4.01E-06 | 3.05E-05 | 3730.61 | 3827.25 | 4150.77 | 2574.31 | 2346.22 | 2930.05 |
| ENSMUSG00000019564 | 12_Arid3a       | 411.55  | 0.49099  | 0.00686  | 0.01837  | 408.049 | 476.341 | 559.332 | 380.511 | 305.717 | 339.349 |
| ENSMUSG00000019577 | 6_Pdk4          | 95.6619 | -1.59964 | 2.02E-08 | 3.13E-07 | 39.0685 | 62.4108 | 40.6352 | 145.171 | 146.134 | 140.551 |
| ENSMUSG00000019578 | 11_Ubxn6        | 1424.55 | 0.63283  | 2.34E-05 | 0.00014  | 1609.62 | 1702.53 | 1884.76 | 1284.9  | 951.219 | 1114.28 |
| ENSMUSG00000019579 | 13_Mydgf        | 1099.96 | 0.4174   | 0.00194  | 0.00634  | 1223.28 | 1185.8  | 1366.06 | 1044.15 | 862.462 | 918.015 |
| ENSMUSG00000019590 | 16_Cyb561       | 553.283 | 0.60306  | 0.00016  | 0.00074  | 655.482 | 648.889 | 695.58  | 404.857 | 394.473 | 520.419 |
| ENSMUSG00000019647 | 16_Sema6a       | 184.011 | -0.86565 | 0.00118  | 0.00412  | 144.119 | 152.356 | 94.4172 | 274.112 | 261.787 | 177.272 |
| ENSMUSG00000019659 | 8_Ccdc12        | 1467.68 | 0.79546  | 7.07E-07 | 6.77E-06 | 1741.59 | 1740.16 | 2105.86 | 1236.21 | 892.048 | 1090.22 |
| ENSMUSG00000019689 | 4_1110001J03Rik | 162.563 | -0.26685 | 0.32174  | 0.43746  | 145.856 | 160.616 | 136.248 | 238.947 | 129.1   | 164.609 |
| ENSMUSG00000019699 | 15_Akt3         | 1013.66 | -0.14096 | 0.29013  | 0.40368  | 981.053 | 921.477 | 991.978 | 1137.03 | 1119.77 | 930.677 |
| ENSMUSG00000019710 | 13_Mrpl24       | 1569.54 | -0.28763 | 0.00959  | 0.02438  | 1468.11 | 1341.83 | 1430.6  | 1629.35 | 1788.58 | 1758.79 |
| ENSMUSG00000019715 | 14_Gle1         | 911.864 | 0.05993  | 0.62307  | 0.72061  | 893.366 | 922.395 | 977.636 | 951.278 | 849.014 | 877.495 |
| ENSMUSG00000019718 | 8_L3hypdh       | 129.775 | -0.46301 | 0.0795   | 0.14265  | 118.074 | 106.465 | 102.783 | 192.961 | 116.549 | 141.817 |
| ENSMUSG00000019726 | 10_Lyst         | 969.599 | -0.59239 | 5.69E-06 | 4.15E-05 | 831.724 | 781.053 | 706.336 | 1256.95 | 1132.32 | 1109.21 |

|                    |                  |         |          |          |          |         |         |         |         |         |         |
|--------------------|------------------|---------|----------|----------|----------|---------|---------|---------|---------|---------|---------|
| ENSMUSG00000019731 | 13_Slc35e1       | 1709.59 | 0.16527  | 0.172    | 0.26699  | 1895.26 | 1719.05 | 1805.88 | 1541.88 | 1515.14 | 1780.32 |
| ENSMUSG00000019732 | 14_Calr3         | 30.7601 | -0.80866 | 0.06798  | 0.12547  | 26.9138 | 22.0273 | 17.9273 | 49.5927 | 31.3786 | 36.7206 |
| ENSMUSG00000019734 | 16_Tmc4          | 3852.76 | 0.82195  | 5.62E-09 | 1.04E-07 | 4498.08 | 4812.97 | 5452.29 | 2408.4  | 2800.76 | 3144.04 |
| ENSMUSG00000019737 | 14_Syne4         | 40.6892 | 0.7128   | 0.10574  | 0.18017  | 37.3321 | 63.3286 | 51.3916 | 45.0843 | 24.2063 | 22.7921 |
| ENSMUSG00000019738 | 15_Polr2i        | 431.806 | 0.8087   | 0.00018  | 0.00083  | 494.867 | 542.423 | 611.919 | 382.315 | 225.029 | 334.284 |
| ENSMUSG00000019761 | 9_Krt10          | 146.711 | 0.39625  | 0.13919  | 0.22464  | 154.538 | 122.986 | 223.494 | 122.629 | 129.997 | 126.623 |
| ENSMUSG00000019762 | 4_lyd            | 24.465  | -1.25875 | 0.00869  | 0.02242  | 13.891  | 18.3561 | 10.7564 | 34.264  | 34.0682 | 35.4544 |
| ENSMUSG00000019763 | 11_Rmnd1         | 446.014 | -0.29365 | 0.05352  | 0.10245  | 371.585 | 431.369 | 400.377 | 495.927 | 529.85  | 446.978 |
| ENSMUSG00000019767 | 12_Ccdc170       | 4.38811 | -0.53144 | 0.62772  | 0.7247   | 1.73638 | 5.50683 | 3.58546 | 8.11517 | 3.58612 | 3.79868 |
| ENSMUSG00000019768 | 16_Esr1          | 167.582 | -0.23704 | 0.27861  | 0.39117  | 152.801 | 166.123 | 142.223 | 150.581 | 208.892 | 184.869 |
| ENSMUSG00000019772 | 4_Vip            | 1.38635 | -2.79204 | 0.19815  | NA       | 0       | 0.91781 | 0       | 2.70506 | 0.89653 | 3.79868 |
| ENSMUSG00000019773 | 7_Fbxo5          | 184.088 | 0.10691  | 0.66623  | 0.75726  | 197.079 | 146.849 | 229.47  | 146.975 | 210.685 | 173.473 |
| ENSMUSG00000019774 | 8_Mtrf1l         | 162.626 | -0.51453 | 0.01651  | 0.03861  | 144.119 | 119.315 | 138.638 | 172.222 | 217.857 | 183.603 |
| ENSMUSG00000019775 | 17_Rgs17         | 10.3741 | -1.29774 | 0.0884   | 0.15534  | 6.07732 | 8.26025 | 3.58546 | 21.6405 | 12.5514 | 10.1298 |
| ENSMUSG00000019777 | 16_Hdac2         | 1528.86 | -0.48719 | 0.00042  | 0.00173  | 1288.39 | 1228.02 | 1302.72 | 1512.13 | 1967.88 | 1874.02 |
| ENSMUSG00000019779 | 14_Frk           | 1211.49 | -0.34432 | 0.02294  | 0.05091  | 1111.28 | 1011.42 | 1080.42 | 1155.06 | 1591.34 | 1319.41 |
| ENSMUSG00000019782 | 9_Rwdd1          | 1030.22 | -0.43903 | 0.00037  | 0.00154  | 935.907 | 817.765 | 870.072 | 1122.6  | 1249.76 | 1185.19 |
| ENSMUSG00000019785 | 13_Clvs2         | 0.57504 | -1.21646 | 0.74749  | NA       | 0       | 0.91781 | 0       | 0       | 0       | 2.53245 |
| ENSMUSG00000019787 | 8_Trdn           | 192.026 | -2.07126 | 2.45E-10 | 7.03E-09 | 52.9595 | 98.2052 | 70.5141 | 449.941 | 234.891 | 245.648 |
| ENSMUSG00000019789 | 8_Hey2           | 21.8904 | -0.71048 | 0.18994  | 0.28926  | 10.4183 | 18.3561 | 21.5128 | 35.1657 | 26.8959 | 18.9934 |
| ENSMUSG00000019790 | 16_Stxbp5        | 2078.76 | 0.08018  | 0.46256  | 0.57612  | 2123.59 | 2092.6  | 2193.11 | 1864.69 | 2113.12 | 2085.48 |
| ENSMUSG00000019791 | 11_Hint3         | 398.711 | -0.10153 | 0.5219   | 0.63149  | 374.189 | 385.478 | 395.596 | 396.742 | 467.989 | 372.271 |
| ENSMUSG00000019792 | 7_Trmt11         | 234.369 | -0.45781 | 0.01454  | 0.03464  | 210.97  | 185.397 | 196.005 | 238.947 | 303.924 | 270.973 |
| ENSMUSG00000019794 | 13_Katna1        | 1506.37 | 0.22346  | 0.14011  | 0.22591  | 1657.37 | 1506.12 | 1704.29 | 1136.12 | 1525    | 1509.34 |
| ENSMUSG00000019795 | 17_Pcmt1         | 1250.4  | -0.3036  | 0.0047   | 0.01338  | 1122.57 | 1118.8  | 1116.27 | 1323.67 | 1421.9  | 1399.18 |
| ENSMUSG00000019796 | 12_Lrp11         | 85.5004 | -0.90061 | 0.00202  | 0.00658  | 48.6186 | 64.2464 | 66.9286 | 125.334 | 119.239 | 88.6359 |
| ENSMUSG00000019797 | 10_1700021F05Rik | 331.88  | -0.10733 | 0.49951  | 0.6105   | 348.144 | 301.04  | 309.545 | 365.183 | 340.682 | 326.687 |
| ENSMUSG00000019802 | 13_Sec63         | 2601.45 | -0.34857 | 0.00725  | 0.01925  | 2247.74 | 2233.94 | 2384.33 | 2501.28 | 3174.61 | 3066.8  |
| ENSMUSG00000019803 | 11_Nr2e1         | 24.171  | -1.46407 | 0.01744  | 0.04042  | 10.4183 | 22.0273 | 5.97577 | 48.691  | 37.6543 | 20.2596 |
| ENSMUSG00000019804 | 12_Snx3          | 1720.5  | -0.00096 | 0.99267  | 0.99513  | 1668.66 | 1686.93 | 1804.68 | 1668.12 | 1738.37 | 1756.26 |
| ENSMUSG00000019806 | 13_Aig1          | 752.705 | -0.13936 | 0.28782  | 0.40124  | 747.51  | 750.765 | 648.969 | 765.531 | 772.809 | 830.645 |
| ENSMUSG00000019808 | 8_Adat2          | 90.4602 | 0.3934   | 0.14289  | 0.22958  | 82.4779 | 114.726 | 111.149 | 75.7416 | 78.8947 | 79.7723 |
| ENSMUSG00000019809 | 16_Pex3          | 501.103 | -0.42253 | 0.00433  | 0.01251  | 426.281 | 432.286 | 425.475 | 503.14  | 607.848 | 611.588 |
| ENSMUSG00000019810 | 15_Fuca2         | 1665.82 | -0.29934 | 0.02542  | 0.05544  | 1565.34 | 1452.89 | 1461.67 | 1578.85 | 2006.44 | 1929.73 |
| ENSMUSG00000019813 | 15_Cep571l       | 268.246 | 0.1019   | 0.56715  | 0.67216  | 281.293 | 253.314 | 298.789 | 229.93  | 281.511 | 264.641 |
| ENSMUSG00000019814 | 4_Ltv1           | 810.736 | 0.03664  | 0.82805  | 0.88238  | 829.12  | 742.505 | 890.39  | 661.837 | 793.43  | 947.138 |
| ENSMUSG00000019817 | 18_Plagl1        | 412.725 | -0.66746 | 0.00019  | 0.00087  | 302.998 | 351.52  | 302.374 | 601.424 | 448.265 | 469.77  |
| ENSMUSG00000019818 | 15_Cd164         | 12841.9 | -0.21436 | 0.111    | 0.18746  | 12052.2 | 11479.9 | 12135.6 | 11459.5 | 14651.1 | 15273.2 |
| ENSMUSG00000019820 | 9_Utrn           | 5766.38 | -0.19859 | 0.03391  | 0.07029  | 5585.92 | 5321.44 | 5201.31 | 6081.87 | 6067.72 | 6340    |
| ENSMUSG00000019822 | 12_Smpd2         | 464.955 | 0.0219   | 0.8807   | 0.91954  | 456.667 | 516.725 | 431.451 | 475.188 | 450.058 | 459.64  |
| ENSMUSG00000019823 | 17_Mical1        | 399.629 | 0.36028  | 0.09645  | 0.16684  | 441.908 | 501.122 | 405.157 | 458.958 | 284.2   | 306.427 |
| ENSMUSG00000019826 | 10_Zbtb24        | 393.519 | 0.24175  | 0.10742  | 0.18253  | 428.017 | 392.821 | 458.939 | 344.444 | 374.75  | 362.141 |
| ENSMUSG00000019828 | 13_Grm1          | 9.63414 | -2.27857 | 0.01089  | 0.02714  | 3.47275 | 1.83561 | 4.78062 | 25.2472 | 16.1376 | 6.33113 |
| ENSMUSG00000019831 | 14_Wasf1         | 23.8742 | -1.13824 | 0.03148  | 0.06614  | 15.6274 | 18.3561 | 10.7564 | 43.2809 | 34.9647 | 20.2596 |
| ENSMUSG00000019832 | 3_Rab32          | 468.042 | -0.15374 | 0.28431  | 0.39756  | 477.504 | 422.191 | 429.06  | 462.565 | 515.505 | 501.426 |
| ENSMUSG00000019834 | 15_Slc22a16      | 0.42208 | -2.1835  | 0.58658  | NA       | 0       | 0       | 0       | 0       | 0       | 2.53245 |
| ENSMUSG00000019837 | 7_Gtf3c6         | 753.47  | -0.40338 | 0.01646  | 0.03852  | 670.241 | 586.478 | 689.604 | 693.396 | 959.288 | 921.813 |
| ENSMUSG00000019838 | 10_Slc16a10      | 163.158 | -0.7252  | 0.00585  | 0.01606  | 123.283 | 157.863 | 87.2462 | 201.978 | 231.305 | 177.272 |
| ENSMUSG00000019841 | 15_Rev3l         | 1240.23 | -0.75496 | 1.96E-07 | 2.25E-06 | 993.208 | 985.723 | 787.607 | 1404.83 | 1629    | 1641.03 |
| ENSMUSG00000019842 | 6_Traf3ip2       | 612.124 | 0.82744  | 4.65E-08 | 6.43E-07 | 717.124 | 748.012 | 885.609 | 428.301 | 479.644 | 414.056 |
| ENSMUSG00000019843 | 14_Fyn           | 319.347 | -0.13574 | 0.54522  | 0.6518   | 374.189 | 284.52  | 254.568 | 379.61  | 364.888 | 258.31  |
| ENSMUSG00000019845 | 7_Tube1          | 59.2075 | -0.06867 | 0.8268   | 0.88139  | 63.3778 | 50.4793 | 59.7577 | 70.3315 | 55.5849 | 55.714  |
| ENSMUSG00000019846 | 11_Lama4         | 538.261 | -0.00891 | 0.95227  | 0.96877  | 583.423 | 516.725 | 510.331 | 574.374 | 564.814 | 479.9   |
| ENSMUSG00000019848 | 10_Popdc3        | 235.336 | 0.15816  | 0.38997  | 0.50742  | 238.752 | 243.218 | 264.129 | 235.34  | 239.374 | 191.2   |
| ENSMUSG00000019849 | 14_Prep          | 1795.86 | 0.58707  | 0.00022  | 0.00099  | 1978.6  | 2032.94 | 2456.04 | 1265.06 | 1339.42 | 1703.08 |
| ENSMUSG00000019850 | 11_Tnfaip3       | 559.044 | 0.33153  | 0.05924  | 0.11166  | 685.869 | 510.3   | 672.872 | 541.011 | 433.921 | 510.289 |
| ENSMUSG00000019851 | 7_Perp           | 50140   | 0.1139   | 0.39034  | 0.50778  | 52140.8 | 47618.5 | 56594.1 | 42105.1 | 48079.1 | 54302.1 |
| ENSMUSG00000019852 | 6_Arfgef3        | 60.5177 | -1.32592 | 0.0064   | 0.01734  | 38.2003 | 50.4793 | 14.3418 | 130.744 | 60.9641 | 68.3763 |
| ENSMUSG00000019853 | 5_Hebp2          | 3333.79 | -0.06343 | 0.53295  | 0.64124  | 3220.11 | 3184.79 | 3376.31 | 3209.1  | 3454.33 | 3558.1  |
| ENSMUSG00000019854 | 16_Reps1         | 1393.84 | 0.33921  | 0.00373  | 0.01105  | 1508.04 | 1501.53 | 1661.26 | 1149.65 | 1256.04 | 1286.49 |
| ENSMUSG00000019856 | 13_Fam184a       | 421.605 | -0.84963 | 9.51E-07 | 8.76E-06 | 309.943 | 331.328 | 260.544 | 482.402 | 612.33  | 533.082 |
| ENSMUSG00000019857 | 6_Asf1a          | 469.138 | -0.43954 | 0.00644  | 0.01743  | 427.149 | 384.561 | 382.449 | 467.975 | 606.951 | 545.744 |
| ENSMUSG00000019861 | 14_Gopc          | 1071.76 | -0.09784 | 0.4739   | 0.58667  | 1031.41 | 987.559 | 1087.59 | 968.41  | 1221.07 | 1134.54 |
| ENSMUSG00000019863 | 6_Qrs1           | 383.335 | 0.11377  | 0.46856  | 0.58201  | 423.676 | 385.478 | 384.84  | 331.82  | 370.267 | 403.926 |
| ENSMUSG00000019864 | 13_Rtn4ip1       | 487.451 | -0.11716 | 0.42134  | 0.53692  | 480.108 | 422.191 | 500.77  | 479.697 | 510.126 | 531.815 |
| ENSMUSG00000019865 | 9_Nmbr           | 1.01117 | -1.23005 | 0.60652  | NA       | 1.73638 | 0       | 0       | 0.90169 | 0.89653 | 2.53245 |
| ENSMUSG00000019866 | 13_Aim1          | 8788.65 | 0.42727  | 0.00388  | 0.01143  | 9764.52 | 9681.01 | 10794.6 | 6205.4  | 7443    | 8843.33 |
| ENSMUSG00000019867 | 4_Gje1           | 1.40595 | -0.87702 | 0.68604  | NA       | 0       | 1.83561 | 1.19515 | 4.50843 | 0.89653 | 0       |
| ENSMUSG00000019868 | 16_Vta1          | 777.55  | 0.15811  | 0.25635  | 0.36612  | 834.329 | 739.751 | 887.999 | 792.582 | 730.672 | 679.964 |
| ENSMUSG00000019872 | 13_Smpdl3a       | 2593.74 | -0.47203 | 0.00012  | 0.00056  | 2167.87 | 2081.58 | 2270.79 | 2706.86 | 3336.89 | 2998.43 |
| ENSMUSG00000019873 | 7_Reep3          | 4299.68 | -0.0773  | 0.48745  | 0.59938  | 4184.67 | 4151.23 | 4216.5  | 3958.4  | 4585.75 | 4701.5  |
| ENSMUSG00000019874 | 11_Fabp7         | 54.8233 | -2.38757 | 0.00011  | 0.00056  | 18.232  | 20.1917 | 14.3418 | 41.4775 | 195.444 | 39.253  |
| ENSMUSG00000019876 | 15_Pkib          | 28.4881 | -0.22472 | 0.62841  | 0.7252   | 29.5184 | 25.6986 | 23.9031 | 34.264  | 38.5508 | 18.9934 |
| ENSMUSG00000019877 | 10_Serinc1       | 4146.14 | -0.70722 | 7.27E-08 | 9.57E-07 | 3426.74 | 3200.39 | 2821.76 | 5186.49 | 5646.35 | 4595.14 |
| ENSMUSG00000019878 | 7_Hsf2           | 158.712 | -0.76398 | 0.00034  | 0.00143  | 126.756 | 122.068 | 103.978 | 210.093 | 213.374 | 176.006 |
| ENSMUSG00000019880 | 9_Rspo3          | 17.798  | -0.9613  | 0.07961  | 0.14282  | 12.1546 | 11.0137 | 13.1467 | 28.8539 | 18.8271 | 22.7921 |
| ENSMUSG00000019883 | 10_Echdc1        | 1604.78 | -0.29074 | 0.04815  | 0.09399  | 1487.21 | 1368.45 | 1474.82 | 1458.03 | 1981.33 | 1858.82 |
| ENSMUSG00000019888 | 15_Mgat4c        | 2.84989 | -0.03281 | 0.98145  | 0.98774  | 1.73638 | 0.91781 | 5.97577 | 5.41011 | 1.79306 | 1.26623 |
| ENSMUSG00000019889 | 9_Ptpk           | 1351.72 | -0.38894 | 0.00119  | 0.00418  | 1130.38 | 1207.83 | 1174.84 | 1496.8  | 1674.72 | 1425.77 |

|                    |                 |         |          |          |          |         |         |         |         |         |         |
|--------------------|-----------------|---------|----------|----------|----------|---------|---------|---------|---------|---------|---------|
| ENSMUSG00000019890 | 3_Nts           | 2.6974  | -0.57487 | 0.67527  | 0.76478  | 4.34094 | 0.91781 | 1.19515 | 4.50843 | 2.68959 | 2.53245 |
| ENSMUSG00000019891 | 13_Dcbld1       | 186.267 | 0.16713  | 0.39108  | 0.50852  | 189.265 | 179.89  | 222.299 | 169.517 | 173.03  | 183.603 |
| ENSMUSG00000019892 | 12_Lrriq1       | 10.7081 | -1.84918 | 0.02045  | 0.04616  | 6.94551 | 5.50683 | 1.19515 | 12.6236 | 21.5167 | 16.4609 |
| ENSMUSG00000019893 | 11_Ros1         | 1.27198 | -0.63594 | 0.7771   | NA       | 1.73638 | 0       | 1.19515 | 0.90169 | 0       | 3.79868 |
| ENSMUSG00000019894 | 13_Slc6a15      | 611.558 | -1.55153 | 1.08E-07 | 1.34E-06 | 326.439 | 431.369 | 174.492 | 990.952 | 1068.66 | 677.431 |
| ENSMUSG00000019897 | 8_Ccdc59        | 714.327 | -0.12493 | 0.31295  | 0.42791  | 674.582 | 690.19  | 684.823 | 697.905 | 758.465 | 779.996 |
| ENSMUSG00000019899 | 15_Lama2        | 1300.78 | -0.81259 | 1.45E-06 | 1.27E-05 | 875.134 | 1142.67 | 812.705 | 1470.65 | 1854.92 | 1648.63 |
| ENSMUSG00000019906 | 14_Lin7a        | 44.0991 | -1.8738  | 0.00062  | 0.00239  | 32.123  | 10.0959 | 14.3418 | 105.497 | 64.5502 | 37.9868 |
| ENSMUSG00000019907 | 9_Ppp1r12a      | 2510.73 | -0.08135 | 0.52107  | 0.63085  | 2549.87 | 2337.65 | 2430.94 | 2247    | 2696.76 | 2802.16 |
| ENSMUSG00000019909 | 3_Fam162b       | 0.42208 | -2.1835  | 0.58658  | NA       | 0       | 0       | 0       | 0       | 0       | 2.53245 |
| ENSMUSG00000019913 | 3_Sim1          | 2.10168 | -2.50244 | 0.15451  | NA       | 0.86819 | 0.91781 | 0       | 1.80337 | 2.68959 | 6.33113 |
| ENSMUSG00000019916 | 14_P4ha1        | 1180.95 | -0.33487 | 0.00602  | 0.01647  | 1083.5  | 1032.53 | 1015.88 | 1201.95 | 1334.93 | 1416.91 |
| ENSMUSG00000019917 | 9_Sept10        | 693.28  | -0.35127 | 0.01939  | 0.04406  | 649.405 | 561.697 | 616.7   | 679.871 | 866.945 | 785.061 |
| ENSMUSG00000019920 | 17_Lims1        | 3152.57 | -0.09111 | 0.45425  | 0.56848  | 3207.96 | 2918.62 | 3032.11 | 2889.9  | 3555.64 | 3311.18 |
| ENSMUSG00000019923 | 13_Zwint        | 2054.38 | -0.32727 | 0.00449  | 0.01291  | 1927.38 | 1825.52 | 1713.85 | 2467.01 | 2210.84 | 2181.71 |
| ENSMUSG00000019927 | 6_Ube2d1        | 542.302 | -0.17468 | 0.27855  | 0.39112  | 513.099 | 530.492 | 484.037 | 479.697 | 637.433 | 609.055 |
| ENSMUSG00000019929 | 15_Dcn          | 51487.1 | -0.92853 | 3.36E-12 | 1.55E-10 | 37301.7 | 38948   | 30151.3 | 70744.4 | 70138.3 | 61638.7 |
| ENSMUSG00000019932 | 7_Kera          | 10646.9 | -1.24539 | 1.11E-15 | 1.17E-13 | 6858.69 | 7092.8  | 4996.94 | 13639.8 | 15406   | 15887.3 |
| ENSMUSG00000019935 | 16_Slc17a8      | 6.46    | -0.08256 | 0.94066  | 0.96128  | 8.68188 | 5.50683 | 4.78062 | 11.7219 | 8.06878 | 0       |
| ENSMUSG00000019936 | 10_Epyc         | 150.518 | -0.63011 | 0.00813  | 0.02124  | 119.81  | 129.411 | 105.174 | 224.52  | 159.582 | 164.609 |
| ENSMUSG00000019942 | 12_Cdk1         | 700.663 | 0.19701  | 0.19958  | 0.30052  | 799.602 | 645.217 | 800.753 | 589.702 | 706.466 | 662.237 |
| ENSMUSG00000019943 | 9_Atp2b1        | 7380.38 | 0.26493  | 0.05958  | 0.11219  | 8233.03 | 7470.94 | 8462.89 | 5609.39 | 6865.63 | 7640.41 |
| ENSMUSG00000019944 | 14_Rhobtb1      | 364.451 | 0.27892  | 0.15532  | 0.24617  | 419.335 | 333.163 | 446.988 | 388.626 | 283.304 | 315.291 |
| ENSMUSG00000019945 | 9_1700040L02Rik | 34.4803 | -1.1012  | 0.01566  | 0.03694  | 31.2548 | 16.5205 | 17.9273 | 53.1994 | 53.7918 | 34.1881 |
| ENSMUSG00000019947 | 9_Arid5b        | 1453.3  | 0.75933  | 1.56E-10 | 4.80E-09 | 1712.07 | 1791.56 | 1977.98 | 1093.74 | 1023.84 | 1120.61 |
| ENSMUSG00000019948 | 3_Actr6         | 183.35  | -0.74857 | 0.00017  | 0.00079  | 137.174 | 138.589 | 135.052 | 217.306 | 261.787 | 210.194 |
| ENSMUSG00000019951 | 9_Uhrf1bp1l     | 831.063 | 0.22471  | 0.06593  | 0.12219  | 886.42  | 893.025 | 908.317 | 732.169 | 825.705 | 740.743 |
| ENSMUSG00000019952 | 14_Poc1b        | 854.316 | 0.10399  | 0.41678  | 0.53275  | 849.956 | 889.354 | 915.488 | 746.596 | 850.808 | 873.697 |
| ENSMUSG00000019960 | 7_Dusp6         | 1580.42 | 0.41223  | 0.00176  | 0.00583  | 1715.54 | 1687.84 | 2010.25 | 1307.44 | 1274.87 | 1486.55 |
| ENSMUSG00000019961 | 16_Tmpo         | 4054.03 | -0.06619 | 0.60407  | 0.7045   | 3968.49 | 3633.59 | 4281.04 | 3657.24 | 4363.41 | 4420.4  |
| ENSMUSG00000019966 | 17_Kitl         | 1156.46 | -0.68765 | 8.30E-08 | 1.07E-06 | 931.566 | 887.518 | 838.998 | 1420.15 | 1562.65 | 1297.88 |
| ENSMUSG00000019969 | 13_Psen1        | 3772.73 | 0.47253  | 0.00039  | 0.0016   | 4227.21 | 4100.76 | 4826.03 | 2983.68 | 2903.86 | 3594.82 |
| ENSMUSG00000019970 | 15_Sgk1         | 7374.63 | -0.02574 | 0.8038   | 0.86431  | 7270.21 | 7490.21 | 7167.34 | 8031.31 | 7349.76 | 6938.92 |
| ENSMUSG00000019971 | 9_Cep290        | 617.271 | -0.61225 | 5.04E-05 | 0.00027  | 517.44  | 460.738 | 486.428 | 658.23  | 840.049 | 740.743 |
| ENSMUSG00000019975 | 11_Ikbp1        | 537.621 | -1.09156 | 6.88E-12 | 2.98E-10 | 360.298 | 367.122 | 302.374 | 766.433 | 786.257 | 643.243 |
| ENSMUSG00000019977 | 15_Hbs1l        | 774.226 | -0.26667 | 0.03559  | 0.07318  | 682.396 | 739.751 | 686.018 | 786.27  | 891.151 | 859.768 |
| ENSMUSG00000019978 | 15_Epb41l2      | 2934.29 | -0.51398 | 0.00024  | 0.00105  | 2462.18 | 2592.8  | 2195.5  | 3971.92 | 3060.76 | 3322.58 |
| ENSMUSG00000019979 | 12_Apaf1        | 773.834 | 0.2429   | 0.0635   | 0.11843  | 819.57  | 800.326 | 897.561 | 663.641 | 762.948 | 698.957 |
| ENSMUSG00000019982 | 14_Myb          | 100.672 | 0.60705  | 0.01775  | 0.04097  | 118.942 | 114.726 | 130.272 | 73.0365 | 70.8259 | 96.2332 |
| ENSMUSG00000019984 | 16_Med23        | 1276.1  | 0.39041  | 0.00572  | 0.01576  | 1430.77 | 1369.37 | 1541.75 | 953.082 | 1114.39 | 1247.23 |
| ENSMUSG00000019986 | 16_Ahi1         | 345.469 | -1.12349 | 1.15E-08 | 1.94E-07 | 204.024 | 244.136 | 204.371 | 564.455 | 467.092 | 388.732 |
| ENSMUSG00000019987 | 8_Arg1          | 5740.84 | 0.32628  | 0.00991  | 0.02506  | 6885.6  | 5726.19 | 6548.25 | 4731.14 | 4910.3  | 5643.57 |
| ENSMUSG00000019988 | 6_Nedd1         | 426.267 | -0.14247 | 0.4058   | 0.52294  | 433.226 | 352.437 | 430.255 | 390.43  | 496.678 | 454.575 |
| ENSMUSG00000019989 | 7_Enpp3         | 5307.34 | 0.20426  | 0.13229  | 0.21586  | 5618.92 | 5562.82 | 5864.62 | 4093.65 | 5335.25 | 5368.8  |
| ENSMUSG00000019990 | 14_Pde7b        | 352.711 | -0.46809 | 0.00755  | 0.01991  | 305.602 | 293.698 | 289.227 | 483.303 | 381.025 | 363.407 |
| ENSMUSG00000019992 | 7_Mtfr2         | 58.9024 | 0.21635  | 0.48248  | 0.59469  | 54.6959 | 65.1642 | 70.5141 | 56.8062 | 55.5849 | 50.6491 |
| ENSMUSG00000019996 | 16_Map7         | 2065.23 | 0.20397  | 0.11561  | 0.1937   | 2008.99 | 2196.31 | 2427.36 | 1895.34 | 1765.27 | 2098.14 |
| ENSMUSG00000019997 | 11_Ctcf         | 3033.33 | -0.58048 | 0.00046  | 0.00187  | 2455.24 | 2386.29 | 2453.65 | 4470.56 | 3563.71 | 2870.54 |
| ENSMUSG00000019998 | 5_Stx7          | 3014.86 | -0.12616 | 0.18808  | 0.28698  | 2965.73 | 2811.24 | 2871.96 | 3059.42 | 3205.1  | 3175.7  |
| ENSMUSG00000020000 | 7_Moxd1         | 133.759 | 0.15408  | 0.5486   | 0.65506  | 109.392 | 140.424 | 173.297 | 109.104 | 133.583 | 136.753 |
| ENSMUSG00000020003 | 15_Pex7         | 691.785 | -0.37078 | 0.01472  | 0.03502  | 625.096 | 600.245 | 584.43  | 669.051 | 889.358 | 782.528 |
| ENSMUSG00000020007 | 3_Il20ra        | 187.026 | 0.80279  | 0.00029  | 0.00123  | 257.852 | 189.986 | 265.324 | 121.728 | 141.652 | 145.616 |
| ENSMUSG00000020009 | 12_Iffng1       | 2564.2  | 0.65535  | 5.75E-05 | 0.00031  | 2937.95 | 2723.13 | 3749.2  | 1712.3  | 2053.06 | 2209.57 |
| ENSMUSG00000020010 | 7_Vnn3          | 4.59501 | 2.27953  | 0.11513  | 0.19306  | 9.55007 | 4.58903 | 8.36608 | 0       | 0       | 5.06491 |
| ENSMUSG00000020014 | 15_Cfap54       | 602.286 | -1.69797 | 0.00112  | 0.00395  | 228.334 | 474.505 | 148.199 | 944.065 | 1132.32 | 686.295 |
| ENSMUSG00000020015 | 9_Cdk17         | 540.334 | -0.29772 | 0.05337  | 0.10226  | 483.581 | 493.779 | 476.866 | 516.666 | 675.984 | 595.127 |
| ENSMUSG00000020017 | 14_Hal          | 144.337 | 0.70853  | 0.00188  | 0.00619  | 189.265 | 163.369 | 184.054 | 118.121 | 89.6531 | 121.558 |
| ENSMUSG00000020018 | 6_Snrp1         | 830.609 | -0.05984 | 0.71915  | 0.80009  | 856.034 | 701.203 | 882.024 | 726.758 | 833.773 | 983.858 |
| ENSMUSG00000020019 | 4_Ntn4          | 2025.01 | -0.07321 | 0.48299  | 0.5951   | 1891.78 | 2025.6  | 2003.08 | 2088.3  | 1984.92 | 2156.38 |
| ENSMUSG00000020020 | 7_Usp44         | 1.3244  | 2.71976  | 0.27253  | NA       | 5.20913 | 1.83561 | 0       | 0.90169 | 0       | 0       |
| ENSMUSG00000020021 | 4_Fgd6          | 1484.76 | 0.20849  | 0.10599  | 0.18045  | 1618.3  | 1578.63 | 1576.41 | 1234.41 | 1342.11 | 1558.73 |
| ENSMUSG00000020022 | 16_Ndufa12      | 1130.22 | -0.07349 | 0.61697  | 0.71545  | 1059.19 | 1038.96 | 1207.11 | 1312.85 | 1005.91 | 1157.33 |
| ENSMUSG00000020023 | 17_Tmcc3        | 2005.37 | 0.20434  | 0.09952  | 0.17146  | 2200.86 | 2127.47 | 2110.64 | 1698.78 | 1791.27 | 2103.2  |
| ENSMUSG00000020024 | 6_Cep83         | 406.126 | -0.18597 | 0.35535  | 0.47215  | 395.894 | 309.3   | 435.036 | 349.854 | 483.23  | 463.439 |
| ENSMUSG00000020027 | 18_Socs2        | 161.887 | -0.43805 | 0.06079  | 0.11418  | 141.515 | 148.685 | 121.906 | 151.483 | 224.133 | 183.603 |
| ENSMUSG00000020029 | 5_Nudt4         | 13497.3 | -0.25356 | 0.0347   | 0.07168  | 12288.3 | 12081.1 | 12573   | 12759.8 | 16098.1 | 15183.3 |
| ENSMUSG00000020032 | 14_Nuak1        | 397.637 | -0.13232 | 0.43103  | 0.54635  | 394.158 | 401.999 | 341.814 | 476.09  | 379.232 | 392.53  |
| ENSMUSG00000020033 | 2_4930463O16Rik | 0.1447  | 0.92709  | 0.82027  | NA       | 0.86819 | 0       | 0       | 0       | 0       | 0       |
| ENSMUSG00000020034 | 7_Tcp11l2       | 1356.57 | -0.00956 | 0.93004  | 0.9537   | 1328.33 | 1320.72 | 1407.89 | 1308.35 | 1412.93 | 1361.19 |
| ENSMUSG00000020037 | 15_Rfx4         | 3.13313 | -4.09249 | 0.09441  | 0.16387  | 0.86819 | 0       | 0       | 0       | 17.9306 | 0       |
| ENSMUSG00000020038 | 9_Cry1          | 276.862 | -0.09355 | 0.57077  | 0.67546  | 247.434 | 267.999 | 289.227 | 294.851 | 286.89  | 274.771 |
| ENSMUSG00000020042 | 15_Btbd11       | 461.276 | 0.36103  | 0.01064  | 0.02665  | 511.363 | 511.218 | 533.039 | 370.593 | 415.99  | 425.452 |
| ENSMUSG00000020044 | 13_Timp3        | 12834.7 | -1.02935 | 3.07E-09 | 6.16E-08 | 8498.7  | 10217   | 6605.62 | 18936.3 | 17841.9 | 14908.6 |
| ENSMUSG00000020048 | 13_Hsp90b1      | 14584.5 | -0.17678 | 0.23873  | 0.34632  | 13891.9 | 12628.1 | 14555.8 | 12402.7 | 17165   | 16863.6 |
| ENSMUSG00000020051 | 15_Pah          | 0.1447  | 0.92709  | 0.82027  | NA       | 0.86819 | 0       | 0       | 0       | 0       | 0       |
| ENSMUSG00000020052 | 7_Asc1          | 1.71546 | -0.8582  | 0.63829  | NA       | 0.86819 | 2.75342 | 0       | 4.50843 | 0.89653 | 1.26623 |
| ENSMUSG00000020053 | 18_Igf1         | 1171.76 | -1.52414 | 7.43E-11 | 2.51E-09 | 586.027 | 771.874 | 455.354 | 1894.44 | 2078.16 | 1244.7  |
| ENSMUSG00000020056 | 16_Ccdc53       | 785.075 | -0.30582 | 0.01051  | 0.02638  | 722.333 | 674.587 | 709.922 | 901.685 | 847.221 | 854.703 |
| ENSMUSG00000020057 | 2_Dram1         | 132.237 | 1.16183  | 6.96E-06 | 4.93E-05 | 214.443 | 136.753 | 197.2   | 78.4466 | 84.2739 | 82.3047 |

|                     |                  |         |          |          |          |         |         |         |         |         |         |
|---------------------|------------------|---------|----------|----------|----------|---------|---------|---------|---------|---------|---------|
| ENSMUSG000000020059 | 9_Sycp3          | 2.54545 | -0.17212 | 0.92152  | 0.94771  | 2.60457 | 4.58903 | 0       | 1.80337 | 6.27571 | 0       |
| ENSMUSG000000020061 | 17_Mybp1         | 878.546 | -1.64543 | 6.53E-08 | 8.66E-07 | 315.152 | 644.3   | 316.716 | 1765.5  | 884.876 | 1344.73 |
| ENSMUSG000000020062 | 6_Slc5a8         | 1053.69 | -0.17863 | 0.33968  | 0.45629  | 1019.25 | 867.326 | 1079.22 | 850.289 | 1332.24 | 1173.79 |
| ENSMUSG000000020063 | 16_Sirt1         | 573.292 | -0.41373 | 0.00741  | 0.0196   | 526.99  | 424.944 | 523.477 | 604.129 | 705.57  | 654.639 |
| ENSMUSG000000020064 | 8_Herc4          | 1452.83 | -0.1902  | 0.28823  | 0.40161  | 1414.28 | 1201.41 | 1455.7  | 1177.6  | 1781.41 | 1686.61 |
| ENSMUSG000000020067 | 7_Mypn           | 68.629  | -1.35358 | 0.0032   | 0.00971  | 28.6502 | 60.5752 | 26.2934 | 146.073 | 56.4814 | 93.7008 |
| ENSMUSG000000020069 | 16_Hnrnp3        | 1177.18 | -0.31379 | 0.01705  | 0.03968  | 1155.56 | 986.641 | 1005.12 | 1197.44 | 1317.9  | 1400.45 |
| ENSMUSG000000020070 | 18_Rufy2         | 435.402 | -0.54012 | 0.00075  | 0.00283  | 349.88  | 401.081 | 313.13  | 520.273 | 546.884 | 481.166 |
| ENSMUSG000000020072 | 14_Pbld2         | 32.3341 | 0.10694  | 0.82408  | 0.87959  | 23.4411 | 32.1232 | 45.4159 | 43.2809 | 20.6202 | 29.1232 |
| ENSMUSG000000020074 | 6_Ccar1          | 2205.92 | -0.18805 | 0.17828  | 0.27496  | 2088.86 | 2069.65 | 2028.18 | 1974.69 | 2679.73 | 2394.44 |
| ENSMUSG000000020075 | 7_Ddx21          | 2699.34 | 0.10769  | 0.51551  | 0.62562  | 2819.01 | 2563.43 | 3016.57 | 2032.4  | 2721.87 | 3042.74 |
| ENSMUSG000000020076 | 6_Ddx50          | 1806.37 | -0.50308 | 7.56E-05 | 0.00039  | 1574.03 | 1415.26 | 1493.94 | 1874.6  | 2298.7  | 2181.71 |
| ENSMUSG000000020077 | 14_Srgn          | 228.555 | 1.2632   | 0.00057  | 0.00222  | 499.208 | 171.63  | 297.593 | 183.944 | 113.859 | 105.097 |
| ENSMUSG000000020078 | 15_Vps26a        | 2289.52 | -0.21484 | 0.0789   | 0.14169  | 2090.6  | 2071.49 | 2195.5  | 2164.05 | 2591.87 | 2623.62 |
| ENSMUSG000000020079 | 15_Supv31        | 333.582 | 0.1019   | 0.50294  | 0.6138   | 361.166 | 325.821 | 348.985 | 309.278 | 330.82  | 325.42  |
| ENSMUSG000000020080 | 8_Hkdc1          | 63.5311 | -0.49326 | 0.27203  | 0.38383  | 64.2459 | 69.7532 | 23.9031 | 105.497 | 58.2745 | 59.5127 |
| ENSMUSG000000020081 | 5_Tacr2          | 1.01501 | -0.01604 | 0.9946   | NA       | 0       | 1.83561 | 1.19515 | 0       | 1.79306 | 1.26623 |
| ENSMUSG000000020083 | 13_2010107G23Rik | 362.702 | 0.20419  | 0.22238  | 0.32737  | 373.321 | 367.122 | 424.28  | 348.952 | 294.062 | 368.472 |
| ENSMUSG000000020085 | 15_Aifm2         | 531.866 | 0.59967  | 8.23E-05 | 0.00042  | 621.623 | 672.751 | 627.456 | 462.565 | 364.888 | 441.913 |
| ENSMUSG000000020086 | 6_H2afy2         | 369.42  | 0.22642  | 0.18429  | 0.28228  | 384.607 | 424.944 | 384.84  | 376.003 | 287.786 | 358.342 |
| ENSMUSG000000020087 | 4_Tysnd1         | 316.409 | 0.63953  | 0.00024  | 0.00104  | 358.562 | 377.218 | 420.694 | 271.407 | 216.064 | 254.512 |
| ENSMUSG000000020088 | 9_Sar1a          | 4471.86 | -0.1919  | 0.0418   | 0.08347  | 4314.03 | 4022.74 | 4187.82 | 4659.91 | 4871.75 | 4774.94 |
| ENSMUSG000000020089 | 8_Ppa1           | 3186.01 | 0.34427  | 0.01043  | 0.02621  | 3578.67 | 3141.65 | 3972.69 | 2535.54 | 2875.17 | 3012.35 |
| ENSMUSG000000020090 | 7_Npffr1         | 2.9576  | -1.09338 | 0.41268  | 0.52878  | 1.73638 | 2.75342 | 1.19515 | 6.3118  | 4.48265 | 1.26623 |
| ENSMUSG000000020091 | 14_Eif4ebp2      | 708.183 | 0.3524   | 0.01084  | 0.02703  | 743.169 | 815.929 | 824.656 | 689.789 | 579.159 | 596.393 |
| ENSMUSG000000020092 | 8_Pald1          | 189.158 | 0.1821   | 0.40502  | 0.52216  | 195.342 | 214.767 | 193.615 | 219.11  | 155.1   | 157.012 |
| ENSMUSG000000020097 | 14_Sgpl1         | 3215.64 | -0.01726 | 0.85684  | 0.90302  | 3245.29 | 3195.8  | 3146.84 | 3115.32 | 3249.03 | 3341.57 |
| ENSMUSG000000020098 | 6_Pcbd1          | 41.4257 | -1.12326 | 0.01267  | 0.03081  | 19.9683 | 41.3013 | 16.7322 | 61.3146 | 63.6537 | 45.5842 |
| ENSMUSG000000020099 | 7_Unc5b          | 732.618 | 1.09234  | 1.38E-07 | 1.66E-06 | 826.515 | 1027.94 | 1137.79 | 557.242 | 346.061 | 500.16  |
| ENSMUSG000000020100 | 15_Slc29a3       | 1073.91 | 0.69288  | 2.56E-06 | 2.07E-05 | 1330.93 | 1217.01 | 1431.79 | 703.315 | 843.635 | 916.748 |
| ENSMUSG000000020101 | 14_4632428N05Rik | 296.969 | 0.54891  | 0.03787  | 0.07701  | 458.403 | 293.698 | 305.959 | 312.885 | 176.617 | 234.252 |
| ENSMUSG000000020102 | 14_Slc16a7       | 54.0498 | -1.06166 | 0.00249  | 0.00784  | 33.8593 | 43.1369 | 27.4885 | 59.5112 | 77.9982 | 82.3047 |
| ENSMUSG000000020105 | 8_Lrig3          | 953.575 | 0.38815  | 0.00344  | 0.01031  | 1053.98 | 1157.35 | 1030.22 | 843.978 | 743.224 | 892.69  |
| ENSMUSG000000020107 | 10_Anapc16       | 682.807 | -0.16783 | 0.21733  | 0.32165  | 671.978 | 629.615 | 628.651 | 790.778 | 719.914 | 655.906 |
| ENSMUSG000000020108 | 3_Ddit4          | 373.354 | 0.25155  | 0.12497  | 0.20626  | 398.498 | 398.328 | 421.889 | 391.331 | 323.648 | 306.427 |
| ENSMUSG000000020109 | 13_Dnajb12       | 776.492 | 0.57955  | 0.00048  | 0.00193  | 857.77  | 1016.01 | 916.683 | 700.61  | 505.643 | 662.237 |
| ENSMUSG000000020111 | 15_Micu1         | 2943.83 | 0.29198  | 0.02394  | 0.05278  | 3219.24 | 3269.22 | 3232.89 | 2916.95 | 2259.26 | 2765.44 |
| ENSMUSG000000020114 | 12_Cand1         | 2544.78 | -0.11692 | 0.36397  | 0.4813   | 2413.56 | 2417.5  | 2493.09 | 2268.64 | 2792.69 | 2883.2  |
| ENSMUSG000000020115 | 2_Tbk1           | 1355.81 | 0.27215  | 0.06243  | 0.11673  | 1481.13 | 1368.45 | 1600.31 | 1037.84 | 1349.28 | 1297.88 |
| ENSMUSG000000020116 | 7_Pno1           | 575.653 | -0.18155 | 0.24901  | 0.35802  | 572.136 | 479.095 | 567.698 | 546.421 | 685.846 | 602.724 |
| ENSMUSG000000020120 | 15_Plek          | 202.736 | 0.35734  | 0.26511  | 0.37634  | 326.439 | 127.575 | 229.47  | 186.649 | 198.133 | 148.149 |
| ENSMUSG000000020121 | 15_Srgap1        | 77.2145 | -0.25498 | 0.41083  | 0.52721  | 70.3233 | 65.1642 | 76.4899 | 109.104 | 78.8947 | 63.3113 |
| ENSMUSG000000020122 | 16_Egfr          | 6291.45 | 0.36362  | 0.05134  | 0.09914  | 6818.75 | 6828.47 | 7591.62 | 3960.2  | 5744.97 | 6804.7  |
| ENSMUSG000000020123 | 5_Avpr1a         | 4.5705  | -0.9243  | 0.42633  | 0.5418   | 6.07732 | 0.91781 | 2.39031 | 9.01685 | 2.68959 | 6.33113 |
| ENSMUSG000000020124 | 9_Uspl5          | 2537.61 | -0.24276 | 0.08351  | 0.14821  | 2415.3  | 2156.84 | 2401.06 | 2305.61 | 2980.07 | 2966.77 |
| ENSMUSG000000020128 | 15_Vps54         | 2135.12 | -0.13263 | 0.33633  | 0.45295  | 2044.58 | 1908.12 | 2158.45 | 1897.15 | 2457.39 | 2345.05 |
| ENSMUSG000000020130 | 8_Tbc1d15        | 1399.6  | -0.25856 | 0.03184  | 0.06676  | 1367.4  | 1192.23 | 1263.28 | 1420.15 | 1595.82 | 1558.73 |
| ENSMUSG000000020131 | 14_Pcsk4         | 23.3341 | 0.75444  | 0.19318  | 0.29323  | 26.9138 | 39.4656 | 21.5128 | 27.9522 | 8.96531 | 15.1947 |
| ENSMUSG000000020132 | 9_Rab21          | 1301.7  | -0.02017 | 0.86713  | 0.91012  | 1243.25 | 1230.78 | 1405.5  | 1266.87 | 1388.73 | 1275.09 |
| ENSMUSG000000020133 | 8_2310011J03Rik  | 643.309 | 0.82929  | 5.90E-05 | 0.00031  | 780.501 | 821.436 | 868.877 | 614.949 | 361.302 | 412.79  |
| ENSMUSG000000020134 | 13_Peli1         | 742.984 | 0.13258  | 0.40327  | 0.52069  | 801.338 | 710.382 | 821.071 | 657.329 | 834.67  | 633.113 |
| ENSMUSG000000020135 | 13_Apc2          | 84.0326 | 0.32569  | 0.4043   | 0.52147  | 82.4779 | 118.397 | 80.0753 | 118.121 | 58.2745 | 46.8504 |
| ENSMUSG000000020137 | 4_Thap2          | 343.179 | -0.39708 | 0.01881  | 0.04292  | 287.37  | 299.205 | 302.374 | 339.034 | 441.093 | 389.998 |
| ENSMUSG000000020140 | 15_Lgr5          | 76.4037 | -1.03721 | 0.00288  | 0.00886  | 59.905  | 58.7396 | 31.074  | 119.924 | 110.273 | 78.5061 |
| ENSMUSG000000020142 | 12_Slc1a4        | 513.287 | 0.35217  | 0.0368   | 0.07516  | 507.89  | 613.094 | 604.748 | 397.643 | 432.128 | 524.218 |
| ENSMUSG000000020143 | 15_Dock2         | 110.667 | 1.63362  | 1.98E-06 | 1.66E-05 | 247.434 | 114.726 | 139.833 | 61.3146 | 47.5161 | 53.1815 |
| ENSMUSG000000020149 | 17_Rab1a         | 6195.23 | -0.11215 | 0.36371  | 0.48104  | 6061.69 | 5573.83 | 6227.95 | 5626.52 | 6924.8  | 6756.59 |
| ENSMUSG000000020150 | 13_Gamt          | 95.3169 | 0.29332  | 0.40712  | 0.52408  | 113.733 | 102.794 | 98.0026 | 115.416 | 45.7231 | 96.2332 |
| ENSMUSG000000020151 | 16_Ptprr         | 10.8656 | -0.78145 | 0.34188  | 0.45827  | 8.68188 | 8.26025 | 7.17092 | 27.0506 | 8.96531 | 5.06491 |
| ENSMUSG000000020152 | 7_Actr2          | 7907.48 | -0.16985 | 0.22184  | 0.32674  | 7757.26 | 6767.9  | 7801.97 | 7021.42 | 9099.79 | 8996.54 |
| ENSMUSG000000020153 | 14_Ndufs7        | 644.603 | 1.06781  | 0.00055  | 0.00215  | 751.851 | 873.751 | 993.173 | 630.278 | 213.374 | 405.193 |
| ENSMUSG000000020154 | 9_Ptpnb          | 528.139 | -0.88904 | 2.80E-08 | 4.13E-07 | 344.671 | 425.862 | 340.619 | 735.775 | 700.19  | 621.717 |
| ENSMUSG000000020155 | 2_Kcnmb1         | 23.7313 | -1.54063 | 0.00187  | 0.00614  | 13.0228 | 14.6849 | 8.36608 | 33.3624 | 34.9647 | 37.9868 |
| ENSMUSG000000020156 | 16_Mum1          | 885.234 | 0.47986  | 0.0002   | 0.00089  | 960.216 | 1057.31 | 1076.83 | 800.697 | 698.397 | 717.951 |
| ENSMUSG000000020159 | 8_Gabrp          | 335.466 | 0.1079   | 0.62214  | 0.71988  | 387.212 | 263.41  | 393.206 | 264.194 | 345.164 | 359.608 |
| ENSMUSG000000020160 | 18_Meis1         | 1308.29 | 0.0644   | 0.54776  | 0.65419  | 1328.33 | 1352.85 | 1330.21 | 1235.31 | 1265.9  | 1337.14 |
| ENSMUSG000000020163 | 12_Uqcr11        | 921.02  | 0.9663   | 0.00077  | 0.00288  | 1135.59 | 1227.11 | 1293.16 | 964.803 | 355.923 | 549.542 |
| ENSMUSG000000020166 | 14_Cnot2         | 1961.7  | -0.2569  | 0.06498  | 0.12077  | 1892.65 | 1725.47 | 1743.73 | 1815.09 | 2402.7  | 2190.57 |
| ENSMUSG000000020167 | 14_Tcf3          | 737.408 | 1.2761   | 2.70E-10 | 7.66E-09 | 959.348 | 1067.41 | 1104.32 | 527.486 | 307.51  | 458.374 |
| ENSMUSG000000020169 | 4_Best3          | 25.1274 | -0.37175 | 0.46002  | 0.57372  | 20.8365 | 29.3698 | 15.537  | 36.9691 | 27.7924 | 20.2596 |
| ENSMUSG000000020170 | 3_Frs2           | 1469.75 | -0.00229 | 0.98348  | 0.98896  | 1498.49 | 1441.87 | 1465.26 | 1379.58 | 1558.17 | 1475.15 |
| ENSMUSG000000020171 | 7_Yeats4         | 644.507 | -0.2812  | 0.03092  | 0.06509  | 608.6   | 568.122 | 567.698 | 664.542 | 704.673 | 753.405 |
| ENSMUSG000000020173 | 17_Cobl          | 2346.78 | 0.09859  | 0.44327  | 0.55844  | 2332.82 | 2454.31 | 2491.9  | 2048.63 | 2162.43 | 2590.7  |
| ENSMUSG000000020175 | 13_Rab36         | 131.166 | -0.60523 | 0.04402  | 0.08717  | 108.524 | 129.411 | 74.0996 | 196.567 | 163.169 | 115.227 |
| ENSMUSG000000020176 | 17_Grb10         | 934.091 | -0.84693 | 8.37E-08 | 1.08E-06 | 665.901 | 759.025 | 577.259 | 1323.67 | 1226.45 | 1052.23 |
| ENSMUSG000000020178 | 5_Adora2a        | 15.4453 | 1.07885  | 0.08465  | 0.1499   | 21.7047 | 16.5205 | 25.0982 | 13.5253 | 10.7584 | 5.06491 |
| ENSMUSG000000020180 | 9_Snrpd3         | 1496.28 | -0.18971 | 0.12879  | 0.21135  | 1434.25 | 1299.61 | 1459.28 | 1473.35 | 1559.96 | 1751.19 |
| ENSMUSG000000020181 | 15_Nav3          | 339.955 | 0.03858  | 0.80131  | 0.8625   | 364.639 | 347.848 | 320.301 | 321.902 | 346.957 | 338.083 |
| ENSMUSG000000020182 | 16_Ddc           | 24.3704 | -1.50867 | 0.02665  | 0.05763  | 12.1546 | 22.0273 | 3.58546 | 58.6096 | 29.5855 | 20.2596 |

|                     |                  |         |          |          |          |         |         |         |         |         |         |
|---------------------|------------------|---------|----------|----------|----------|---------|---------|---------|---------|---------|---------|
| ENSMUSG000000020183 | 11_Cpm           | 3131.16 | 0.19652  | 0.12145  | 0.20173  | 3318.22 | 3337.14 | 3375.12 | 2524.72 | 2973.79 | 3258    |
| ENSMUSG000000020184 | 14_Mdm2          | 1465.89 | 0.02287  | 0.84106  | 0.89188  | 1418.62 | 1411.58 | 1603.9  | 1435.48 | 1487.34 | 1438.43 |
| ENSMUSG000000020185 | 16_E2f7          | 629.076 | 1.09682  | 6.42E-11 | 2.22E-09 | 874.266 | 823.272 | 872.462 | 323.705 | 409.714 | 471.036 |
| ENSMUSG000000020186 | 6_Csrp2          | 380.261 | -0.37387 | 0.03138  | 0.06596  | 342.066 | 358.862 | 291.618 | 467.975 | 370.267 | 450.777 |
| ENSMUSG000000020189 | 13_Osbpl8        | 1883.62 | -0.24958 | 0.07129  | 0.13046  | 1743.32 | 1594.23 | 1826.2  | 1766.4  | 2292.43 | 2079.14 |
| ENSMUSG000000020190 | 13_Mknk2         | 9495.14 | 1.24117  | 1.34E-10 | 4.17E-09 | 11883.8 | 12803.4 | 15347   | 6530.91 | 4022.73 | 6383.05 |
| ENSMUSG000000020191 | 11_4930415F15Rik | 4.41084 | -0.19341 | 0.87627  | 0.91628  | 4.34094 | 0.91781 | 7.17092 | 0.90169 | 8.06878 | 5.06491 |
| ENSMUSG000000020193 | 3_Zbp            | 21.3757 | -0.89031 | 0.11069  | 0.18711  | 18.232  | 19.2739 | 7.17092 | 33.3624 | 28.689  | 21.5259 |
| ENSMUSG000000020196 | 9_Cabin1         | 1201.42 | 1.01744  | 4.82E-10 | 1.25E-08 | 1525.41 | 1678.67 | 1620.63 | 934.146 | 632.951 | 816.716 |
| ENSMUSG000000020198 | 7_Ap3d1          | 3216.26 | 0.51301  | 6.66E-05 | 0.00035  | 3560.44 | 3850.19 | 3935.64 | 2908.84 | 2296.01 | 2746.45 |
| ENSMUSG000000020205 | 8_Phlda1         | 2156.67 | 0.80753  | 3.47E-09 | 6.85E-08 | 2748.68 | 2675.4  | 2811    | 1795.26 | 1342.11 | 1567.59 |
| ENSMUSG000000020211 | 15_Sf3a2         | 461.451 | 1.33771  | 1.19E-10 | 3.72E-09 | 593.841 | 634.204 | 755.337 | 303.868 | 192.754 | 288.7   |
| ENSMUSG000000020212 | 13_Mdm1          | 143.837 | -0.44654 | 0.06201  | 0.11605  | 128.492 | 134     | 102.783 | 194.764 | 164.962 | 138.019 |
| ENSMUSG000000020214 | 10_Glpr112       | 0       | NA       | NA       | NA       | 0       | 0       | 0       | 0       | 0       | 0       |
| ENSMUSG000000020216 | 13_Jsrp1         | 17.1728 | -0.36492 | 0.6449   | 0.73991  | 11.2864 | 19.2739 | 14.3418 | 28.8539 | 2.68959 | 26.5908 |
| ENSMUSG000000020218 | 11_Wif1          | 348.725 | -1.31422 | 9.35E-06 | 6.37E-05 | 205.761 | 267.081 | 126.686 | 536.503 | 619.503 | 336.816 |
| ENSMUSG000000020219 | 6_Timm13         | 641.03  | 1.45082  | 3.57E-09 | 7.02E-08 | 855.166 | 917.806 | 1043.37 | 471.582 | 221.443 | 336.816 |
| ENSMUSG000000020220 | 16_Vps13d        | 2281.5  | -0.1475  | 0.16876  | 0.26314  | 2273.79 | 2088.01 | 2132.15 | 2255.12 | 2477.11 | 2462.81 |
| ENSMUSG000000020224 | 14_Llph          | 1937.76 | -0.0026  | 0.9858   | 0.99023  | 1938.66 | 1712.63 | 2156.06 | 1841.24 | 1760.79 | 2217.16 |
| ENSMUSG000000020225 | 10_Tmbim4        | 1301.99 | -0.16257 | 0.18861  | 0.28765  | 1291.86 | 1140.83 | 1253.72 | 1277.69 | 1482.86 | 1364.99 |
| ENSMUSG000000020226 | 9_Slc5a4b        | 9.01598 | -1.17127 | 0.17332  | 0.2687   | 6.07732 | 9.17806 | 1.19515 | 16.2303 | 12.5514 | 8.86359 |
| ENSMUSG000000020227 | 10_Irak3         | 185.272 | 0.30799  | 0.12584  | 0.20727  | 209.233 | 185.397 | 219.908 | 169.517 | 145.238 | 182.337 |
| ENSMUSG000000020228 | 11_Helb          | 450.7   | 0.39915  | 0.00728  | 0.0193   | 526.99  | 495.615 | 513.916 | 378.708 | 355.923 | 433.05  |
| ENSMUSG000000020229 | 4_Slc5a4a        | 0.63887 | 1.43476  | 0.64357  | NA       | 1.73638 | 0       | 1.19515 | 0.90169 | 0       | 0       |
| ENSMUSG000000020230 | 14_Prm12         | 596.783 | 0.18469  | 0.29262  | 0.40657  | 565.191 | 701.203 | 638.212 | 640.197 | 457.231 | 578.666 |
| ENSMUSG000000020231 | 15_Dip2a         | 1039.03 | 0.73229  | 7.34E-06 | 5.18E-05 | 1179.87 | 1264.74 | 1448.53 | 930.539 | 684.949 | 725.548 |
| ENSMUSG000000020232 | 17_Hmg20b        | 646.272 | 0.78845  | 2.54E-06 | 2.06E-05 | 729.278 | 826.025 | 899.951 | 506.747 | 392.68  | 522.952 |
| ENSMUSG000000020234 | 10_4930404N11Rik | 11.7391 | 0.93424  | 0.16509  | 0.2584   | 11.2864 | 14.6849 | 20.3176 | 7.21348 | 8.06878 | 8.86359 |
| ENSMUSG000000020235 | 16_Fzr1          | 1152.86 | 1.26324  | 4.17E-10 | 1.11E-08 | 1490.68 | 1549.26 | 1842.93 | 836.764 | 485.92  | 711.62  |
| ENSMUSG000000020238 | 14_Ncln          | 971.046 | 1.53523  | 7.49E-10 | 1.85E-08 | 1209.39 | 1392.31 | 1729.39 | 609.539 | 305.717 | 579.932 |
| ENSMUSG000000020241 | 13_Col6a2        | 5861.66 | 0.3594   | 0.02656  | 0.05745  | 6083.4  | 7709.57 | 5968.6  | 4918.69 | 4411.83 | 6077.89 |
| ENSMUSG000000020246 | 12_Hcfc2         | 721.335 | -0.23297 | 0.12381  | 0.2048   | 690.21  | 639.71  | 659.725 | 671.756 | 892.944 | 773.665 |
| ENSMUSG000000020248 | 18_Nfyb          | 859.106 | -0.36879 | 0.00781  | 0.02052  | 789.183 | 689.272 | 770.874 | 860.208 | 1028.32 | 1016.78 |
| ENSMUSG000000020250 | 9_Txnrd1         | 1622.49 | 0.10309  | 0.33622  | 0.45286  | 1729.43 | 1634.61 | 1678    | 1535.57 | 1650.51 | 1506.81 |
| ENSMUSG000000020251 | 13_Glt8d2        | 209.381 | -0.89101 | 4.32E-06 | 3.26E-05 | 127.624 | 145.931 | 167.322 | 272.309 | 258.201 | 284.901 |
| ENSMUSG000000020253 | 14_Ppm1m         | 224.627 | 0.13693  | 0.56243  | 0.66784  | 237.015 | 270.753 | 198.396 | 273.211 | 193.651 | 174.739 |
| ENSMUSG000000020255 | 7_D10Wsu102e     | 742.957 | -0.15653 | 0.26892  | 0.38036  | 767.479 | 654.395 | 684.823 | 706.921 | 797.016 | 847.106 |
| ENSMUSG000000020256 | 14_Aldh1l2       | 95.432  | -0.45219 | 0.08374  | 0.14853  | 71.1914 | 96.3696 | 74.0996 | 103.694 | 118.342 | 108.896 |
| ENSMUSG000000020257 | 12_Wdr82         | 2035.7  | -0.38568 | 0.00098  | 0.00351  | 1803.23 | 1704.36 | 1789.15 | 2201.92 | 2545.25 | 2170.31 |
| ENSMUSG000000020258 | 5_Glyctk         | 55.7624 | 0.81525  | 0.01877  | 0.04285  | 67.7187 | 68.8354 | 76.4899 | 46.8876 | 27.7924 | 46.8504 |
| ENSMUSG000000020260 | 8_Pofut2         | 531.61  | 0.45945  | 0.03691  | 0.07535  | 586.027 | 658.067 | 603.553 | 611.343 | 362.198 | 368.472 |
| ENSMUSG000000020261 | 15_Slc36a1       | 449.192 | 0.23766  | 0.11295  | 0.19012  | 526.99  | 463.492 | 468.5   | 435.514 | 425.852 | 374.803 |
| ENSMUSG000000020262 | 15_Adarb1        | 1122.99 | 0.22317  | 0.11707  | 0.19575  | 1167.71 | 1332.65 | 1128.23 | 1158.67 | 922.53  | 1028.18 |
| ENSMUSG000000020263 | 14_Appl2         | 3491.37 | -0.78941 | 2.69E-05 | 0.00016  | 2446.55 | 3240.77 | 1989.93 | 4658.11 | 4833.2  | 3779.69 |
| ENSMUSG000000020264 | 5_Slc36a2        | 23.3302 | -0.55178 | 0.3431   | 0.45954  | 17.3638 | 27.5342 | 11.9515 | 29.7556 | 39.4473 | 13.9285 |
| ENSMUSG000000020265 | 15_Sumo3         | 3378.46 | -0.16852 | 0.10935  | 0.18531  | 3241.82 | 3059.96 | 3242.45 | 3789.78 | 3336.89 | 3599.88 |
| ENSMUSG000000020267 | 6_Hint1          | 2157.99 | -0.21472 | 0.04476  | 0.0884   | 2107.09 | 1902.61 | 1983.96 | 2414.71 | 2321.12 | 2218.43 |
| ENSMUSG000000020268 | 13_Lymr7         | 88.7568 | -0.60667 | 0.02397  | 0.05281  | 81.6097 | 66.082  | 63.3432 | 107.301 | 119.239 | 94.967  |
| ENSMUSG000000020271 | 17_Fbxw11        | 2699.19 | 0.17247  | 0.09871  | 0.17027  | 2726.11 | 2824.09 | 3030.91 | 2470.62 | 2499.53 | 2643.88 |
| ENSMUSG000000020272 | 8_Stk10          | 219.281 | 0.82909  | 1.94E-05 | 0.00012  | 266.534 | 258.821 | 316.716 | 169.517 | 140.755 | 163.343 |
| ENSMUSG000000020273 | 13_Papolg        | 662.759 | -0.34346 | 0.02884  | 0.06148  | 616.414 | 528.656 | 608.333 | 660.935 | 854.394 | 707.821 |
| ENSMUSG000000020275 | 9_Rel            | 975.714 | 0.101    | 0.53933  | 0.64683  | 1047.9  | 859.984 | 1121.05 | 807.009 | 945.84  | 1072.49 |
| ENSMUSG000000020277 | 9_Pfkl           | 1948.34 | 1.10375  | 9.28E-08 | 1.18E-06 | 2513.41 | 2638.69 | 2825.34 | 1544.59 | 834.67  | 1333.34 |
| ENSMUSG000000020279 | 10_Il9r          | 2.54472 | -0.6931  | 0.61784  | 0.71607  | 2.60457 | 0.91781 | 2.39031 | 3.60674 | 4.48265 | 1.26623 |
| ENSMUSG000000020280 | 12_Pus10         | 777.642 | -0.25628 | 0.1289   | 0.21151  | 757.928 | 633.286 | 735.02  | 693.396 | 976.322 | 869.898 |
| ENSMUSG000000020282 | 18_Rhbd1         | 1674.3  | 1.49223  | 3.71E-13 | 2.28E-11 | 2213.01 | 2439.53 | 2758.42 | 1080.22 | 608.744 | 945.872 |
| ENSMUSG000000020283 | 5_Pex13          | 760.16  | -0.52465 | 0.00294  | 0.00902  | 645.064 | 580.053 | 645.383 | 712.332 | 1074.04 | 904.086 |
| ENSMUSG000000020284 | 16_1810043G02Rik | 248.455 | 0.25654  | 0.23729  | 0.34458  | 263.061 | 297.369 | 250.982 | 281.326 | 180.203 | 217.791 |
| ENSMUSG000000020286 | 12_1700093K21Rik | 3.66517 | -0.67906 | 0.58891  | 0.69151  | 0.86819 | 1.83561 | 5.97577 | 3.60674 | 7.17224 | 2.53245 |
| ENSMUSG000000020287 | 15_Mpg           | 259.169 | 0.4488   | 0.02592  | 0.05631  | 281.293 | 321.232 | 295.203 | 265.096 | 181.996 | 210.194 |
| ENSMUSG000000020288 | 13_Ahsa2         | 644.308 | -0.44991 | 0.00403  | 0.0118   | 501.813 | 624.108 | 507.94  | 693.396 | 825.705 | 712.886 |
| ENSMUSG000000020289 | 15_Nprl3         | 585.928 | 0.43412  | 0.00271  | 0.00844  | 663.296 | 705.792 | 651.359 | 559.045 | 453.644 | 482.432 |
| ENSMUSG000000020290 | 14_Xpo1          | 3426.86 | -0.30256 | 0.03535  | 0.07278  | 3367.7  | 2772.69 | 3065.57 | 3215.41 | 4227.14 | 3912.64 |
| ENSMUSG000000020297 | 10_Nsg2          | 76.9358 | -1.25986 | 0.00207  | 0.0067   | 50.3549 | 53.2327 | 32.2692 | 170.419 | 86.9635 | 68.3763 |
| ENSMUSG000000020299 | 6_4930524B15Rik  | 0.42208 | -2.1835  | 0.58658  | NA       | 0       | 0       | 0       | 0       | 0       | 2.53245 |
| ENSMUSG000000020300 | 14_Cpeb4         | 3353.18 | -0.12604 | 0.30771  | 0.42272  | 3183.65 | 3227    | 3210.18 | 3122.54 | 3958.18 | 3417.55 |
| ENSMUSG000000020303 | 2_Stc2           | 85.4136 | -0.56493 | 0.04089  | 0.08206  | 68.5869 | 82.6025 | 54.9771 | 106.399 | 98.6184 | 101.298 |
| ENSMUSG000000020305 | 13_Asb3          | 255.336 | -0.55214 | 0.00434  | 0.01252  | 202.288 | 188.15  | 231.86  | 275.014 | 352.337 | 282.369 |
| ENSMUSG000000020307 | 14_Cdc34         | 768.649 | 0.81281  | 9.86E-05 | 0.00049  | 1020.99 | 871.915 | 1045.76 | 692.494 | 394.473 | 586.263 |
| ENSMUSG000000020308 | 5_Tpgs1          | 88.1613 | 1.67752  | 7.42E-05 | 0.00038  | 105.051 | 133.082 | 164.931 | 64.9214 | 17.9306 | 43.0517 |
| ENSMUSG000000020309 | 6_Chac2          | 135.938 | -0.33774 | 0.13023  | 0.21324  | 129.36  | 101.876 | 129.077 | 142.466 | 153.307 | 159.545 |
| ENSMUSG000000020310 | 8_Madcam1        | 3.84226 | 0.2611   | 0.84827  | 0.89695  | 1.73638 | 3.67122 | 7.17092 | 5.41011 | 0       | 5.06491 |
| ENSMUSG000000020311 | 17_Erlec1        | 778.231 | -0.52829 | 0.00012  | 0.00056  | 638.118 | 675.505 | 597.577 | 833.157 | 1003.22 | 921.813 |
| ENSMUSG000000020312 | 11_Shc2          | 139.508 | -0.43225 | 0.1442   | 0.23124  | 94.6325 | 157.863 | 103.978 | 208.289 | 138.066 | 134.22  |
| ENSMUSG000000020315 | 18_Sptbn1        | 14854.9 | -0.42802 | 0.00038  | 0.00159  | 12427.2 | 13516.5 | 12059.1 | 19055.3 | 16651.3 | 15420.1 |
| ENSMUSG000000020319 | 9_Wdpcp          | 466.055 | -0.40357 | 0.00733  | 0.01942  | 413.258 | 380.889 | 409.938 | 478.795 | 585.434 | 528.017 |
| ENSMUSG000000020321 | 15_Mdh1          | 8538.86 | -0.36553 | 0.00036  | 0.00152  | 7959.55 | 7213.95 | 7215.15 | 10125.9 | 9528.33 | 9190.27 |
| ENSMUSG000000020323 | 14_Prss57        | 2.92739 | 0.40396  | 0.79465  | 0.85768  | 1.73638 | 8.26025 | 0       | 4.50843 | 1.79306 | 1.26623 |
| ENSMUSG000000020325 | 10_Fstl3         | 208.879 | 0.32676  | 0.16908  | 0.26347  | 211.838 | 234.04  | 250.982 | 211.896 | 131.79  | 212.726 |

|                     |                  |         |          |          |          |         |         |         |         |         |         |
|---------------------|------------------|---------|----------|----------|----------|---------|---------|---------|---------|---------|---------|
| ENSMUSG000000020326 | 7_Ccng1          | 3396.51 | -0.59729 | 2.40E-07 | 2.68E-06 | 2766.92 | 2645.12 | 2697.46 | 3664.45 | 4440.52 | 4164.62 |
| ENSMUSG000000020327 | 3_Fgf22          | 0.29884 | -1.76064 | 0.66373  | NA       | 0       | 0       | 0       | 0       | 1.79306 | 0       |
| ENSMUSG000000020328 | 10_Nudcd2        | 468.968 | -0.28556 | 0.1295   | 0.21222  | 460.14  | 373.547 | 433.841 | 405.758 | 571.987 | 568.536 |
| ENSMUSG000000020329 | 12_Polrmt        | 335.724 | 1.45984  | 1.58E-09 | 3.48E-08 | 416.73  | 500.204 | 560.527 | 229.93  | 124.618 | 182.337 |
| ENSMUSG000000020330 | 16_Hmmr          | 497.657 | 0.08419  | 0.66713  | 0.75793  | 547.827 | 422.191 | 566.503 | 385.02  | 547.78  | 516.621 |
| ENSMUSG000000020331 | 9_Hcn2           | 66.3561 | 0.49333  | 0.16521  | 0.25857  | 71.1914 | 78.9313 | 82.4656 | 70.3315 | 33.1716 | 62.0451 |
| ENSMUSG000000020332 | 7_Meikin         | 0.94147 | 3.32614  | 0.29039  | NA       | 0.86819 | 0       | 4.78062 | 0       | 0       | 0       |
| ENSMUSG000000020333 | 17_Acsl6         | 573.208 | -1.19455 | 0.00012  | 0.00059  | 451.458 | 397.41  | 196.005 | 1110.88 | 707.363 | 576.133 |
| ENSMUSG000000020334 | 6_Slc22a4        | 190.411 | 0.75256  | 0.00216  | 0.00692  | 217.047 | 256.986 | 241.421 | 106.399 | 134.48  | 186.135 |
| ENSMUSG000000020335 | 13_Zfp354b       | 34.2758 | -0.54773 | 0.20225  | 0.30366  | 28.6502 | 31.2054 | 23.9031 | 47.7893 | 47.5161 | 26.5908 |
| ENSMUSG000000020340 | 16_Cyfp2         | 2976.26 | 0.47011  | 0.00058  | 0.00226  | 3281.75 | 3461.96 | 3624.9  | 2345.28 | 2228.78 | 2914.85 |
| ENSMUSG000000020346 | 16_Mgat1         | 1404.75 | 0.68383  | 0.00012  | 0.00057  | 1654.77 | 1644.71 | 1896.71 | 1363.35 | 902.806 | 966.131 |
| ENSMUSG000000020349 | 4_Ppp2ca         | 10837.1 | -0.12159 | 0.31055  | 0.42545  | 10778.6 | 9701.2  | 10662   | 9970.84 | 12197.3 | 11712.6 |
| ENSMUSG000000020354 | 15_Sgcd          | 101.045 | -1.25234 | 0.00016  | 0.00075  | 65.9823 | 78.9313 | 33.4643 | 163.205 | 138.066 | 126.623 |
| ENSMUSG000000020357 | 3_Flt4           | 168.458 | 0.42804  | 0.05041  | 0.0978   | 166.692 | 190.904 | 223.494 | 158.697 | 144.341 | 126.623 |
| ENSMUSG000000020358 | 17_Hnrrnpab      | 6456.66 | 0.00043  | 0.9976   | 0.99825  | 6463.66 | 5982.26 | 6925.92 | 5397.49 | 6637.91 | 7332.72 |
| ENSMUSG000000020359 | 13_Phykpl        | 416.03  | -0.04356 | 0.78816  | 0.85278  | 406.312 | 437.793 | 386.035 | 440.023 | 462.61  | 363.407 |
| ENSMUSG000000020361 | 13_Hspa4         | 6020.84 | -0.16167 | 0.23242  | 0.33875  | 5539.91 | 5400.37 | 6110.82 | 5372.24 | 6694.39 | 7007.3  |
| ENSMUSG000000020362 | 13_Cnot6         | 3812.52 | -0.28927 | 0.05916  | 0.11152  | 3420.66 | 3267.39 | 3606.98 | 3380.42 | 4914.78 | 4284.91 |
| ENSMUSG000000020363 | 6_Gfp2           | 363.944 | -0.33392 | 0.06924  | 0.12744  | 315.152 | 325.821 | 326.277 | 487.812 | 391.784 | 336.816 |
| ENSMUSG000000020364 | 14_Zfp354a       | 205.114 | -0.40196 | 0.10291  | 0.17638  | 195.342 | 190.904 | 143.418 | 183.944 | 296.752 | 220.323 |
| ENSMUSG000000020366 | 18_Mapk9         | 1154.99 | -0.40934 | 0.00021  | 0.00094  | 1027.07 | 997.655 | 951.343 | 1296.62 | 1355.55 | 1301.68 |
| ENSMUSG000000020368 | 15_Canx          | 9044.79 | -0.27049 | 0.03488  | 0.07196  | 8227.82 | 7846.32 | 8523.84 | 8446.09 | 10918.8 | 10305.8 |
| ENSMUSG000000020372 | 15_Gnb2l1        | 23006.5 | 0.26485  | 0.03117  | 0.06557  | 25189.6 | 24130   | 26017.3 | 23225.6 | 18161.9 | 21314.4 |
| ENSMUSG000000020374 | 16_Rasgef1c      | 14.2928 | -0.277   | 0.64858  | 0.74292  | 12.1546 | 15.6027 | 10.7564 | 15.3287 | 11.6549 | 20.2596 |
| ENSMUSG000000020375 | 9_Rufy1          | 1015.16 | 0.12317  | 0.29265  | 0.40657  | 1014.04 | 1055.48 | 1105.52 | 947.671 | 941.357 | 1026.91 |
| ENSMUSG000000020376 | 16_Rnf130        | 753.246 | -0.50259 | 8.21E-05 | 0.00042  | 632.041 | 639.71  | 598.772 | 930.539 | 905.496 | 812.918 |
| ENSMUSG000000020377 | 14_Ltc4s         | 8.4725  | 0.7255   | 0.4539   | 0.56821  | 13.891  | 12.8493 | 4.78062 | 10.8202 | 0.89653 | 7.59736 |
| ENSMUSG000000020380 | 16_Rad50         | 1337.33 | -0.01885 | 0.91049  | 0.93984  | 1382.16 | 1183.05 | 1419.84 | 1065.79 | 1452.38 | 1520.74 |
| ENSMUSG000000020381 | 10_3010026O09Rik | 86.3187 | 0.60813  | 0.02477  | 0.05423  | 102.446 | 102.794 | 107.564 | 80.25   | 56.4814 | 68.3763 |
| ENSMUSG000000020383 | 1_Ill3           | 0       | NA       | NA       | NA       | 0       | 0       | 0       | 0       | 0       | 0       |
| ENSMUSG000000020385 | 16_Clk4          | 1575.18 | -0.55102 | 0.00013  | 0.00061  | 1297.94 | 1215.17 | 1321.84 | 1669.92 | 2200.09 | 1746.13 |
| ENSMUSG000000020386 | 5_Sar1b          | 1158.54 | -0.27424 | 0.02547  | 0.05552  | 1060.06 | 960.942 | 1127.03 | 1313.76 | 1286.52 | 1202.92 |
| ENSMUSG000000020387 | 15_Jade2         | 973.688 | 0.36071  | 0.01778  | 0.04104  | 1000.15 | 1172.04 | 1112.69 | 985.542 | 742.327 | 829.379 |
| ENSMUSG000000020388 | 12_Pdlim4        | 172.116 | 0.2768   | 0.30268  | 0.4175   | 192.738 | 224.862 | 148.199 | 204.683 | 131.79  | 130.421 |
| ENSMUSG000000020389 | 18_Cdkl3         | 175.13  | -0.41153 | 0.04067  | 0.08169  | 145.856 | 145.013 | 160.151 | 174.927 | 213.374 | 211.46  |
| ENSMUSG000000020390 | 12_Ube2b         | 3158.02 | -0.31929 | 0.00681  | 0.01826  | 2828.56 | 2618.5  | 2984.3  | 3278.53 | 3837.15 | 3041.09 |
| ENSMUSG000000020392 | 8_Cdkn2aipnl     | 1034.62 | -0.10721 | 0.37081  | 0.48822  | 1027.07 | 943.504 | 1017.08 | 1018.9  | 1055.22 | 1145.94 |
| ENSMUSG000000020393 | 16_Kremen1       | 3444.88 | 0.71807  | 1.10E-07 | 1.36E-06 | 3857.36 | 4343.97 | 4652.73 | 2719.48 | 2268.22 | 2827.48 |
| ENSMUSG000000020395 | 13_Itk           | 13.1507 | 1.48967  | 0.03238  | 0.06766  | 29.5184 | 11.9315 | 16.7322 | 8.11517 | 6.27571 | 6.33113 |
| ENSMUSG000000020396 | 8_Nefh           | 21.0385 | 0.48046  | 0.44946  | 0.5643   | 30.3866 | 13.7671 | 29.8789 | 25.2472 | 20.6202 | 6.33113 |
| ENSMUSG000000020397 | 15_Med7          | 449.761 | -0.27531 | 0.08757  | 0.15409  | 428.885 | 384.561 | 407.548 | 431.907 | 559.435 | 486.231 |
| ENSMUSG000000020399 | 14_Havcr2        | 38.4668 | 1.50821  | 0.00111  | 0.00393  | 80.7415 | 34.8766 | 54.9771 | 22.5421 | 16.1376 | 21.5259 |
| ENSMUSG000000020400 | 17_Trip1         | 751.993 | 1.06631  | 5.76E-07 | 5.74E-06 | 912.466 | 1010.5  | 1130.62 | 604.129 | 338.889 | 515.354 |
| ENSMUSG000000020401 | 6_Fam71b         | 0.89535 | -0.99566 | 0.72519  | NA       | 0.86819 | 0.91781 | 0       | 0       | 3.58612 | 0       |
| ENSMUSG000000020402 | 11_Vdac1         | 8983.27 | 0.01614  | 0.88324  | 0.92107  | 9105.56 | 8480.52 | 9513.43 | 8535.35 | 8543.94 | 9720.82 |
| ENSMUSG000000020405 | 4_Fabp6          | 392.286 | -0.16726 | 0.33643  | 0.45304  | 366.376 | 346.931 | 394.401 | 376.905 | 376.543 | 492.562 |
| ENSMUSG000000020407 | 13_Upp1          | 1517.47 | 1.45651  | 5.15E-15 | 4.75E-13 | 2245.14 | 1687.84 | 2740.49 | 858.405 | 727.086 | 845.84  |
| ENSMUSG000000020409 | 10_Slu7          | 1761.93 | -0.09301 | 0.46431  | 0.57791  | 1821.46 | 1598.82 | 1693.53 | 1634.76 | 1832.51 | 1990.51 |
| ENSMUSG000000020411 | 2_Nipal4         | 7.13727 | 1.56992  | 0.07412  | 0.13476  | 8.68188 | 9.17806 | 14.3418 | 3.60674 | 4.48265 | 2.53245 |
| ENSMUSG000000020412 | 16_Asc2          | 1318.82 | 0.53994  | 0.00043  | 0.00175  | 1386.5  | 1567.61 | 1732.97 | 985.542 | 987.977 | 1252.3  |
| ENSMUSG000000020413 | 11_Hus1          | 502.783 | -0.12077 | 0.40425  | 0.52147  | 506.154 | 448.807 | 490.013 | 476.992 | 554.056 | 540.679 |
| ENSMUSG000000020415 | 16_Pttg1         | 457.646 | 0.37475  | 0.03397  | 0.0704   | 575.609 | 423.108 | 552.161 | 373.298 | 439.3   | 382.401 |
| ENSMUSG000000020419 | 11_Hormad2       | 0.2997  | -1.76345 | 0.66322  | NA       | 0       | 0       | 0       | 0.90169 | 0.89653 | 0       |
| ENSMUSG000000020420 | 8_Zfp607         | 193.886 | -0.29992 | 0.16345  | 0.25634  | 206.629 | 160.616 | 152.98  | 187.551 | 218.753 | 236.784 |
| ENSMUSG000000020422 | 13_Tns3          | 3464.61 | -0.10112 | 0.48391  | 0.59597  | 3168.02 | 3739.14 | 3122.94 | 4175.71 | 3279.51 | 3302.32 |
| ENSMUSG000000020423 | 6_Btg2           | 938.045 | 0.23412  | 0.21759  | 0.32192  | 1141.67 | 874.669 | 1024.25 | 917.916 | 658.053 | 1011.72 |
| ENSMUSG000000020424 | 3_Gatsl3         | 355.085 | 0.95565  | 6.31E-05 | 0.00033  | 387.212 | 497.451 | 521.087 | 302.966 | 168.548 | 253.245 |
| ENSMUSG000000020427 | 11_Igfbp3        | 521.334 | 0.01472  | 0.91963  | 0.94653  | 546.959 | 471.752 | 554.552 | 545.52  | 528.057 | 481.166 |
| ENSMUSG000000020428 | 13_Gabra6        | 2.03735 | -1.61418 | 0.32913  | NA       | 0       | 1.83561 | 1.19515 | 2.70506 | 2.68959 | 3.79868 |
| ENSMUSG000000020430 | 12_Pes1          | 1671.4  | 0.17494  | 0.16315  | 0.25595  | 1773.71 | 1679.58 | 1863.25 | 1538.28 | 1429.97 | 1743.59 |
| ENSMUSG000000020431 | 5_Adcy1          | 368.806 | -1.19701 | 0.00012  | 0.00057  | 189.265 | 312.972 | 169.712 | 751.104 | 427.645 | 362.141 |
| ENSMUSG000000020432 | 12_Tcn2          | 2140.03 | 0.30772  | 0.03321  | 0.06912  | 2205.2  | 2506.53 | 2390.31 | 2174.87 | 1605.69 | 1957.59 |
| ENSMUSG000000020434 | 4_4921536K21Rik  | 4.85762 | 1.67464  | 0.13142  | 0.21467  | 13.0228 | 5.50683 | 3.58546 | 2.70506 | 1.79306 | 2.53245 |
| ENSMUSG000000020435 | 17_Osbp2         | 188.597 | -1.1507  | 0.00549  | 0.01523  | 143.251 | 146.849 | 60.9529 | 417.48  | 225.029 | 138.019 |
| ENSMUSG000000020436 | 17_Gabrg2        | 23.8167 | -2.71864 | 0.00014  | 0.00065  | 8.68188 | 6.42464 | 3.58546 | 65.823  | 45.7231 | 12.6623 |
| ENSMUSG000000020437 | 12_Myo1g         | 76.324  | 2.42105  | 3.58E-10 | 9.76E-09 | 164.088 | 86.2737 | 136.248 | 32.4607 | 22.4133 | 16.4609 |
| ENSMUSG000000020439 | 17_Smtn          | 792.715 | -0.07378 | 0.80379  | 0.86431  | 569.532 | 1172.96 | 574.869 | 1103.66 | 661.64  | 673.633 |
| ENSMUSG000000020440 | 13_Arf5          | 1852.54 | 0.94731  | 2.88E-09 | 5.80E-08 | 2113.17 | 2370.69 | 2836.1  | 1407.53 | 1084.8  | 1302.95 |
| ENSMUSG000000020441 | 6_2310033P09Rik  | 259.141 | 0.6561   | 0.00437  | 0.01259  | 289.107 | 334.081 | 327.472 | 237.143 | 141.652 | 225.388 |
| ENSMUSG000000020444 | 19_Guk1          | 605.125 | -0.01137 | 0.94873  | 0.96633  | 546.959 | 632.368 | 629.846 | 740.284 | 519.091 | 562.205 |
| ENSMUSG000000020447 | 5_Npc111         | 3.05038 | 0.47802  | 0.71598  | 0.79762  | 3.47275 | 3.67122 | 3.58546 | 5.41011 | 0.89653 | 1.26623 |
| ENSMUSG000000020448 | 16_Rnf185        | 1171.47 | 0.03764  | 0.73255  | 0.8102   | 1236.3  | 1139.91 | 1184.4  | 1167.68 | 1173.56 | 1126.94 |
| ENSMUSG000000020451 | 17_Limk2         | 9030.91 | 0.60805  | 7.39E-06 | 5.21E-05 | 10331.4 | 10194.1 | 12193   | 7378.49 | 6213.85 | 7874.67 |
| ENSMUSG000000020453 | 17_Patz1         | 330.864 | -0.0334  | 0.8445   | 0.8939   | 295.184 | 348.766 | 338.229 | 374.199 | 323.648 | 305.161 |
| ENSMUSG000000020454 | 17_Eif4enif1     | 1360.23 | 0.12663  | 0.31433  | 0.42939  | 1370.87 | 1364.78 | 1523.82 | 1174.9  | 1336.73 | 1390.32 |
| ENSMUSG000000020455 | 16_Trim11        | 850.631 | 0.6329   | 2.17E-07 | 2.46E-06 | 979.317 | 1015.09 | 1109.1  | 652.82  | 675.088 | 672.366 |
| ENSMUSG000000020456 | 17_Ogdh          | 5395.06 | 0.35822  | 0.00486  | 0.01376  | 5417.5  | 6504.49 | 6261.41 | 4823.12 | 4249.55 | 5114.29 |
| ENSMUSG000000020457 | 13_Drg1          | 1534.4  | -0.17845 | 0.14908  | 0.23784  | 1473.32 | 1342.75 | 1502.31 | 1472.45 | 1678.31 | 1737.26 |

|                     |                  |         |          |          |          |         |         |         |         |         |         |
|---------------------|------------------|---------|----------|----------|----------|---------|---------|---------|---------|---------|---------|
| ENSMUSG000000020458 | 16_Rtn4          | 2667.81 | -0.71163 | 1.86E-07 | 2.15E-06 | 2082.78 | 2009.08 | 1977.98 | 3358.78 | 3767.22 | 2811.02 |
| ENSMUSG000000020459 | 14_Mtif2         | 498.785 | -0.53485 | 0.00185  | 0.00611  | 408.917 | 413.93  | 399.181 | 488.714 | 695.708 | 586.263 |
| ENSMUSG000000020460 | 15_Rps27a        | 14821.7 | -0.66934 | 8.79E-09 | 1.53E-07 | 12177.2 | 10743.8 | 11410.1 | 16515.3 | 19918.2 | 18165.3 |
| ENSMUSG000000020461 | 9_Clh1           | 3.31047 | -1.10236 | 0.40988  | 0.52649  | 4.34094 | 1.83561 | 0       | 4.50843 | 5.37918 | 3.79868 |
| ENSMUSG000000020462 | 14_Cfap36        | 454.747 | -0.74351 | 1.95E-05 | 0.00012  | 352.484 | 368.958 | 298.789 | 570.767 | 649.985 | 487.497 |
| ENSMUSG000000020463 | 15_Smek2         | 2411.38 | -0.3921  | 0.00222  | 0.00709  | 2179.15 | 1912.71 | 2165.62 | 2451.68 | 3017.72 | 2741.38 |
| ENSMUSG000000020464 | 15_Pnpt1         | 710.727 | 0.11035  | 0.59395  | 0.69594  | 713.651 | 616.765 | 884.414 | 543.716 | 849.911 | 655.906 |
| ENSMUSG000000020467 | 15_Efemp1        | 6979.39 | 0.06763  | 0.6383   | 0.73436  | 6797.92 | 6617.38 | 8013.51 | 5745.54 | 7207.21 | 7494.8  |
| ENSMUSG000000020469 | 8_Myl7           | 34.6634 | 0.05116  | 0.90601  | 0.93665  | 34.7275 | 32.1232 | 39.4401 | 27.9522 | 48.4127 | 25.3245 |
| ENSMUSG000000020471 | 11_Pold2         | 462.229 | 0.95649  | 2.06E-05 | 0.00013  | 586.027 | 529.574 | 714.702 | 385.921 | 224.133 | 333.018 |
| ENSMUSG000000020472 | 14_Zkscan17      | 580.939 | 0.4853   | 0.00183  | 0.00605  | 595.577 | 703.039 | 735.02  | 523.879 | 433.024 | 495.095 |
| ENSMUSG000000020473 | 13_Aebp1         | 2055.94 | 0.41466  | 0.00577  | 0.01589  | 2211.28 | 2737.81 | 2098.69 | 1974.69 | 1601.2  | 1711.94 |
| ENSMUSG000000020474 | 11_Polm          | 371.008 | 0.62841  | 0.00042  | 0.00172  | 434.962 | 407.506 | 510.331 | 334.525 | 262.683 | 276.037 |
| ENSMUSG000000020475 | 3_Pgam2          | 238.143 | -0.94336 | 0.01901  | 0.04332  | 126.756 | 209.26  | 152.98  | 541.011 | 144.341 | 254.512 |
| ENSMUSG000000020476 | 14_Dbnl          | 4963.09 | 0.96676  | 1.85E-09 | 3.99E-08 | 6037.38 | 6264.02 | 7396.81 | 3576.08 | 2681.52 | 3822.74 |
| ENSMUSG000000020477 | 10_Mrps24        | 477.473 | 0.09956  | 0.51098  | 0.62124  | 479.24  | 494.697 | 509.136 | 522.076 | 439.3   | 420.387 |
| ENSMUSG000000020481 | 15_Ankrd36       | 0.45267 | -0.80756 | 0.8164   | NA       | 0       | 0.91781 | 0       | 0.90169 | 0.89653 | 0       |
| ENSMUSG000000020482 | 4_Ccdc117        | 760.723 | -0.33958 | 0.00628  | 0.01708  | 682.396 | 653.478 | 678.848 | 792.582 | 894.738 | 862.301 |
| ENSMUSG000000020483 | 14_Dynl12        | 5517.77 | -0.43923 | 8.48E-06 | 5.86E-05 | 4687.35 | 4835    | 4528.44 | 6080.97 | 6267.65 | 6707.2  |
| ENSMUSG000000020484 | 18_Xbp1          | 3074.55 | -0.08528 | 0.47987  | 0.59268  | 2925.79 | 2975.53 | 3048.84 | 2774.49 | 3312.68 | 3409.95 |
| ENSMUSG000000020485 | 14_Supt4a        | 751.354 | -0.06719 | 0.61537  | 0.71443  | 746.642 | 681.93  | 774.46  | 834.059 | 753.086 | 717.951 |
| ENSMUSG000000020486 | 18_Sept4         | 258.352 | -0.91308 | 0.00089  | 0.00324  | 172.769 | 215.684 | 149.394 | 467.073 | 308.407 | 236.784 |
| ENSMUSG000000020490 | 16_Btnl10        | 1.01289 | 3.45998  | 0.34087  | NA       | 6.07732 | 0       | 0       | 0       | 0       | 0       |
| ENSMUSG000000020491 | 15_2810021J22Rik | 240.885 | -0.49467 | 0.00975  | 0.02472  | 193.606 | 229.451 | 176.883 | 293.949 | 299.441 | 251.979 |
| ENSMUSG000000020492 | 11_Ska2          | 499.054 | -0.53277 | 0.00062  | 0.00239  | 447.117 | 361.615 | 415.914 | 611.343 | 623.985 | 534.348 |
| ENSMUSG000000020493 | 8_Prr11          | 260.65  | 0.0778   | 0.7526   | 0.82547  | 300.393 | 209.26  | 292.813 | 183.042 | 277.028 | 301.362 |
| ENSMUSG000000020495 | 13_Smg8          | 462.637 | 0.19553  | 0.17499  | 0.27088  | 460.14  | 480.012 | 542.6   | 421.087 | 440.197 | 431.783 |
| ENSMUSG000000020496 | 8_Rnf187         | 1866.81 | 0.19884  | 0.13842  | 0.22354  | 1903.07 | 2117.38 | 1964.83 | 1929.61 | 1504.38 | 1781.58 |
| ENSMUSG000000020513 | 15_Tubd1         | 260.88  | -0.36612 | 0.05222  | 0.10047  | 237.015 | 209.26  | 237.836 | 252.472 | 336.199 | 292.498 |
| ENSMUSG000000020514 | 8_Mrpl22         | 299.95  | -0.03096 | 0.86414  | 0.9077   | 311.68  | 248.725 | 329.863 | 285.834 | 299.441 | 324.154 |
| ENSMUSG000000020515 | 13_Cnot8         | 1068.7  | -0.08181 | 0.47371  | 0.58656  | 1047.9  | 1025.19 | 1043.37 | 1139.73 | 1127.84 | 1028.18 |
| ENSMUSG000000020516 | 15_Rps6kb1       | 1480.26 | -0.32304 | 0.01601  | 0.03765  | 1291    | 1272.08 | 1382.79 | 1422.86 | 1804.72 | 1708.14 |
| ENSMUSG000000020519 | 5_Sap30l         | 328.504 | 0.35959  | 0.07316  | 0.13333  | 355.957 | 354.273 | 397.986 | 353.461 | 229.512 | 279.836 |
| ENSMUSG000000020520 | 14_Galnt10       | 1161.59 | 0.00073  | 0.99757  | 0.99825  | 1128.64 | 1359.27 | 997.954 | 1655.49 | 848.118 | 980.06  |
| ENSMUSG000000020521 | 7_Rnf1           | 613.48  | -0.50979 | 0.00017  | 0.00078  | 548.695 | 503.875 | 464.915 | 696.101 | 746.81  | 720.483 |
| ENSMUSG000000020522 | 13_Mfap3         | 714.682 | -0.16624 | 0.22149  | 0.32643  | 709.31  | 636.039 | 675.262 | 690.691 | 822.119 | 754.671 |
| ENSMUSG000000020523 | 14_Fam114a2      | 1145.47 | -0.25411 | 0.0197   | 0.04468  | 1057.45 | 1030.7  | 1046.95 | 1231.7  | 1295.49 | 1210.51 |
| ENSMUSG000000020524 | 16_Gria1         | 168.149 | -0.97319 | 8.46E-05 | 0.00043  | 100.71  | 149.602 | 89.6366 | 238.045 | 223.236 | 207.661 |
| ENSMUSG000000020525 | 17_Ppm1d         | 551.066 | 0.06318  | 0.64961  | 0.7437   | 605.127 | 522.231 | 561.722 | 508.551 | 563.021 | 545.744 |
| ENSMUSG000000020526 | 12_Znhit3        | 167.819 | -0.29215 | 0.13633  | 0.22072  | 159.747 | 150.52  | 142.223 | 198.371 | 177.513 | 178.538 |
| ENSMUSG000000020527 | 14_Myo19         | 443.664 | 0.75811  | 2.30E-06 | 1.89E-05 | 543.486 | 582.807 | 544.99  | 283.129 | 335.302 | 372.271 |
| ENSMUSG000000020528 | 14_Prpsap2       | 798.228 | -0.11416 | 0.38908  | 0.50638  | 842.143 | 689.272 | 768.484 | 835.862 | 829.291 | 824.314 |
| ENSMUSG000000020530 | 14_Ggnbp2        | 2444.55 | -0.39919 | 0.0034   | 0.01021  | 2241.66 | 1929.23 | 2154.86 | 2448.08 | 3143.24 | 2750.24 |
| ENSMUSG000000020532 | 18_Acaca         | 3188.94 | 0.14787  | 0.18873  | 0.2878   | 3283.49 | 3234.35 | 3538.85 | 2758.26 | 3168.34 | 3150.37 |
| ENSMUSG000000020534 | 14_Shmt1         | 740.328 | 0.46067  | 0.00054  | 0.00212  | 883.816 | 818.683 | 870.072 | 566.258 | 675.088 | 628.049 |
| ENSMUSG000000020536 | 12_Ligl1         | 1341.63 | 1.14957  | 6.46E-11 | 2.22E-09 | 1642.61 | 1808.08 | 2097.5  | 937.753 | 650.881 | 912.95  |
| ENSMUSG000000020537 | 9_Drg2           | 848.529 | 0.46169  | 0.00249  | 0.00784  | 941.116 | 963.696 | 1044.56 | 799.795 | 596.193 | 745.808 |
| ENSMUSG000000020538 | 15_Sreb1         | 2585.56 | 1.25765  | 2.03E-09 | 4.30E-08 | 3172.36 | 3805.22 | 3960.74 | 1914.28 | 1039.98 | 1620.77 |
| ENSMUSG000000020541 | 12_Tom11         | 423.569 | -0.57011 | 0.00069  | 0.00262  | 368.98  | 353.355 | 299.984 | 473.385 | 574.676 | 471.036 |
| ENSMUSG000000020542 | 18_Myocd         | 18.7649 | -0.88095 | 0.14455  | 0.23174  | 7.8137  | 22.0273 | 9.56123 | 23.4438 | 20.6202 | 29.1232 |
| ENSMUSG000000020544 | 14_Cox11         | 137.182 | 0.12362  | 0.60269  | 0.70356  | 133.701 | 138.589 | 156.565 | 104.596 | 138.962 | 150.681 |
| ENSMUSG000000020545 | 11_Lrrc72        | 0.19919 | 0.92709  | 0.82027  | NA       | 0       | 0       | 1.19515 | 0       | 0       | 0       |
| ENSMUSG000000020546 | 14_Stxbp4        | 304.187 | -0.86537 | 9.30E-05 | 0.00047  | 204.024 | 277.177 | 164.931 | 416.579 | 414.197 | 348.212 |
| ENSMUSG000000020547 | 4_Bzw2           | 755.613 | -0.00081 | 0.99522  | 0.99668  | 821.306 | 674.587 | 770.874 | 759.219 | 780.878 | 726.814 |
| ENSMUSG000000020549 | 4_Elac2          | 567.565 | 0.46734  | 0.00777  | 0.0204   | 645.064 | 611.259 | 718.288 | 449.941 | 403.439 | 577.399 |
| ENSMUSG000000020553 | 8_Pctp           | 77.1372 | -0.31166 | 0.2526   | 0.36183  | 72.0596 | 66.082  | 68.1238 | 74.8399 | 90.5496 | 91.1683 |
| ENSMUSG000000020561 | 7_Twistnb        | 407.257 | -0.49745 | 0.0074   | 0.01959  | 358.562 | 309.3   | 345.4   | 388.626 | 563.021 | 478.634 |
| ENSMUSG000000020564 | 16_Atnx711       | 688.661 | 0.54827  | 0.00029  | 0.00125  | 822.174 | 715.888 | 915.488 | 527.486 | 540.608 | 610.321 |
| ENSMUSG000000020566 | 18_Atp6v1c2      | 6.94224 | -0.0135  | 0.98747  | 0.99122  | 7.8137  | 9.17806 | 3.58546 | 5.41011 | 8.06878 | 7.59736 |
| ENSMUSG000000020570 | 14_Sypl          | 9068.16 | -0.15868 | 0.21854  | 0.32314  | 8335.48 | 8246.48 | 9127.39 | 8191.81 | 10019.6 | 10488.2 |
| ENSMUSG000000020571 | 12_Pdia6         | 5021.56 | 0.33349  | 0.00436  | 0.01256  | 5597.21 | 5062.62 | 6138.31 | 4344.32 | 4285.42 | 4701.5  |
| ENSMUSG000000020572 | 7_Nampt          | 2585.79 | -0.14151 | 0.36937  | 0.48673  | 2538.58 | 2300.02 | 2539.7  | 2335.37 | 3324.34 | 2476.74 |
| ENSMUSG000000020573 | 16_Pik3cg        | 98.8073 | -0.12925 | 0.64132  | 0.73694  | 112.864 | 98.2052 | 71.7092 | 117.219 | 100.411 | 92.4346 |
| ENSMUSG000000020576 | 9_Nbas           | 1051.69 | 0.3687   | 0.00672  | 0.01807  | 1113.89 | 1134.41 | 1307.5  | 834.059 | 922.53  | 997.787 |
| ENSMUSG000000020577 | 15_Tspan13       | 270.963 | -0.84782 | 0.00045  | 0.00183  | 217.047 | 226.698 | 136.248 | 395.84  | 367.578 | 282.369 |
| ENSMUSG000000020580 | 9_Rock2          | 5343.66 | -0.33458 | 0.01235  | 0.03014  | 4816.71 | 4354.99 | 5008.89 | 5108.05 | 6596.67 | 6176.65 |
| ENSMUSG000000020581 | 11_Agr2          | 222.472 | 0.08527  | 0.64241  | 0.7378   | 241.356 | 223.945 | 221.104 | 190.256 | 227.719 | 230.453 |
| ENSMUSG000000020583 | 4_Matn3          | 84.8067 | -2.03868 | 4.19E-05 | 0.00023  | 17.3638 | 65.1642 | 16.7322 | 172.222 | 139.859 | 97.4995 |
| ENSMUSG000000020585 | 4_Laptm4a        | 25510.6 | -0.35065 | 0.00113  | 0.00396  | 21892.2 | 22217.3 | 23168.1 | 26241.8 | 31254   | 28290   |
| ENSMUSG000000020589 | 16_Fam49a        | 443.083 | -1.2289  | 5.70E-11 | 1.98E-09 | 256.984 | 294.616 | 243.811 | 672.657 | 696.604 | 493.828 |
| ENSMUSG000000020590 | 15_Snx13         | 1347.02 | -0.46041 | 0.00058  | 0.00225  | 1190.29 | 1150.93 | 1058.91 | 1363.35 | 1673.82 | 1644.83 |
| ENSMUSG000000020591 | 10_Ntsr2         | 1.01976 | -3.49093 | 0.24409  | NA       | 0       | 0       | 0       | 0       | 3.58612 | 2.53245 |
| ENSMUSG000000020592 | 14_Sdc1          | 39877.9 | 0.82452  | 1.05E-06 | 9.52E-06 | 46599.1 | 47576.3 | 58741.8 | 28474.3 | 23163.7 | 34712.3 |
| ENSMUSG000000020593 | 14_Lpin1         | 400.119 | 0.29458  | 0.12189  | 0.20233  | 388.948 | 406.588 | 528.258 | 412.972 | 318.268 | 345.68  |
| ENSMUSG000000020594 | 14_Pum2          | 5164.28 | -0.34056 | 0.00517  | 0.01451  | 4648.28 | 4438.51 | 4585.81 | 5070.18 | 6418.26 | 5824.64 |
| ENSMUSG000000020598 | 15_Nrcam         | 334.28  | -1.75246 | 3.34E-09 | 6.63E-08 | 154.538 | 210.177 | 93.222  | 678.969 | 414.197 | 454.575 |
| ENSMUSG000000020599 | 13_Rgs9          | 328.066 | -1.31301 | 0.0003   | 0.00127  | 221.388 | 233.123 | 109.954 | 721.348 | 420.473 | 262.109 |
| ENSMUSG000000020600 | 13_Slc7a15       | 0.14942 | -0.99647 | 0.80707  | NA       | 0       | 0       | 0       | 0       | 0.89653 | 0       |
| ENSMUSG000000020601 | 7_Trib2          | 629.633 | -0.07975 | 0.58697  | 0.68962  | 603.391 | 692.943 | 539.014 | 649.214 | 628.468 | 664.769 |

|                     |                 |         |          |          |          |         |         |         |         |         |         |
|---------------------|-----------------|---------|----------|----------|----------|---------|---------|---------|---------|---------|---------|
| ENSMUSG000000020604 | 13_Arsg         | 129.752 | -0.94758 | 0.00258  | 0.00808  | 93.7643 | 111.972 | 59.7577 | 220.011 | 167.651 | 125.356 |
| ENSMUSG000000020605 | 8_Hs1bp3        | 648.872 | 0.40821  | 0.00884  | 0.02277  | 663.296 | 750.765 | 806.729 | 620.36  | 488.609 | 563.471 |
| ENSMUSG000000020607 | 6_Fam84a        | 2677.59 | 0.68158  | 4.20E-07 | 4.35E-06 | 2996.12 | 3327.05 | 3573.51 | 1826.81 | 2299.6  | 2042.42 |
| ENSMUSG000000020608 | 6_Smc6          | 1561.86 | -0.48251 | 0.00053  | 0.00208  | 1367.4  | 1227.11 | 1314.67 | 1570.74 | 2053.95 | 1837.3  |
| ENSMUSG000000020609 | 14_Apob         | 0.21104 | -0.99647 | 0.80707  | NA       | 0       | 0       | 0       | 0       | 0       | 1.26623 |
| ENSMUSG000000020610 | 16_Amz2         | 992.375 | -0.27415 | 0.01459  | 0.03473  | 887.289 | 904.038 | 904.732 | 1110.88 | 1109.01 | 1038.31 |
| ENSMUSG000000020611 | 14_Gna13        | 2438.43 | -0.01306 | 0.90869  | 0.93834  | 2423.98 | 2316.54 | 2542.09 | 2247    | 2617.87 | 2483.07 |
| ENSMUSG000000020612 | 16_Prkar1a      | 5366.89 | -0.15645 | 0.12063  | 0.20064  | 4754.2  | 5115.85 | 5359.07 | 5529.14 | 5609.59 | 5833.51 |
| ENSMUSG000000020614 | 13_Fam20a       | 112.321 | -0.00501 | 0.98717  | 0.9912   | 98.1053 | 147.767 | 90.8317 | 145.171 | 108.48  | 83.571  |
| ENSMUSG000000020620 | 14_Abca8b       | 433.526 | -0.95928 | 2.99E-07 | 3.23E-06 | 277.82  | 365.287 | 239.031 | 584.292 | 552.263 | 582.464 |
| ENSMUSG000000020621 | 5_Rdh14         | 303.04  | -0.50305 | 0.00319  | 0.00969  | 255.247 | 235.876 | 260.544 | 315.59  | 355.923 | 395.063 |
| ENSMUSG000000020622 | 15_Nt5c1b       | 0.15028 | -0.99647 | 0.80707  | NA       | 0       | 0       | 0       | 0.90169 | 0       | 0       |
| ENSMUSG000000020623 | 11_Map2k6       | 171.318 | -0.26066 | 0.21256  | 0.31601  | 173.638 | 135.835 | 157.76  | 192.961 | 167.651 | 200.064 |
| ENSMUSG000000020627 | 9_Kihl29        | 242.75  | 0.21692  | 0.27427  | 0.38641  | 229.202 | 251.479 | 303.569 | 254.275 | 211.581 | 206.395 |
| ENSMUSG000000020628 | 15_Trappc12     | 1152.38 | 0.44311  | 0.0013   | 0.00449  | 1266.69 | 1284.01 | 1432.99 | 1042.35 | 849.911 | 1038.31 |
| ENSMUSG000000020629 | 12_Adi1         | 558.968 | -0.62646 | 2.10E-06 | 1.75E-05 | 424.544 | 468.081 | 425.475 | 660.034 | 695.708 | 679.964 |
| ENSMUSG000000020630 | 8_Rnaseh1       | 200.564 | 0.41722  | 0.0263   | 0.05701  | 223.993 | 221.191 | 243.811 | 189.354 | 166.755 | 158.278 |
| ENSMUSG000000020633 | 13_Dcdc2c       | 0.2997  | -1.76345 | 0.66322  | NA       | 0       | 0       | 0       | 0.90169 | 0.89653 | 0       |
| ENSMUSG000000020634 | 12_Ubxn2a       | 1142.39 | -0.51963 | 0.00022  | 0.00098  | 914.202 | 970.12  | 932.22  | 1164.98 | 1526.79 | 1346    |
| ENSMUSG000000020635 | 7_Fkbp1b        | 41.06   | -0.0641  | 0.86506  | 0.90834  | 46.8822 | 41.3013 | 32.2692 | 47.7893 | 43.93   | 34.1881 |
| ENSMUSG000000020638 | 7_Cmpk2         | 2401.48 | 0.94666  | 0.08355  | 0.14827  | 2942.29 | 2566.18 | 3978.67 | 808.812 | 2763.11 | 1349.8  |
| ENSMUSG000000020639 | 13_Pfn4         | 19.9391 | -0.51239 | 0.35858  | 0.47532  | 19.9683 | 19.2739 | 9.56123 | 17.132  | 23.3098 | 30.3894 |
| ENSMUSG000000020640 | 9_Itns2         | 2360.12 | -0.01626 | 0.89216  | 0.9272   | 2356.26 | 2189.88 | 2494.29 | 2148.72 | 2477.11 | 2494.47 |
| ENSMUSG000000020641 | 15_Rsad2        | 5028.93 | 1.114    | 0.06197  | 0.116    | 6629.49 | 5008.46 | 9000.71 | 1355.23 | 5444.63 | 2735.05 |
| ENSMUSG000000020642 | 12_Rnf144a      | 144.241 | -0.51354 | 0.02046  | 0.04616  | 128.492 | 125.739 | 101.588 | 185.747 | 154.203 | 169.674 |
| ENSMUSG000000020644 | 8_Id2           | 2502.6  | 0.14566  | 0.23916  | 0.34674  | 2621.06 | 2542.32 | 2722.56 | 2542.75 | 2077.26 | 2509.66 |
| ENSMUSG000000020646 | 16_Mboat2       | 716.842 | -0.51085 | 0.00013  | 0.00064  | 642.459 | 570.875 | 559.332 | 787.171 | 883.979 | 857.236 |
| ENSMUSG000000020647 | 9_Ncoa1         | 1357.62 | -0.01511 | 0.88516  | 0.92227  | 1324.86 | 1328.98 | 1398.33 | 1356.13 | 1369.9  | 1367.53 |
| ENSMUSG000000020648 | 2_Dus4l         | 109.278 | -0.52798 | 0.02433  | 0.05343  | 87.687  | 89.0271 | 92.0269 | 119.022 | 142.548 | 125.356 |
| ENSMUSG000000020649 | 11_Rrm2         | 913.303 | 0.64874  | 0.00138  | 0.00475  | 1146.01 | 916.888 | 1282.4  | 528.388 | 797.016 | 809.119 |
| ENSMUSG000000020650 | 14_Bcap29       | 621.937 | -0.81269 | 3.54E-09 | 6.96E-08 | 483.581 | 435.958 | 433.841 | 747.497 | 857.083 | 773.665 |
| ENSMUSG000000020651 | 7_Slc26a4       | 502.746 | -1.11754 | 1.03E-06 | 9.39E-06 | 331.648 | 390.985 | 228.274 | 765.531 | 759.361 | 540.679 |
| ENSMUSG000000020652 | 17_Cenpo        | 254.276 | 0.06107  | 0.72433  | 0.80366  | 245.697 | 266.164 | 266.519 | 227.225 | 246.546 | 273.505 |
| ENSMUSG000000020653 | 11_Kif11        | 422.115 | 0.15836  | 0.41423  | 0.53041  | 380.267 | 493.779 | 461.329 | 441.826 | 317.372 | 438.115 |
| ENSMUSG000000020654 | 15_Adcy3        | 191.926 | -0.06491 | 0.74813  | 0.82216  | 189.265 | 204.671 | 168.517 | 221.815 | 174.823 | 192.466 |
| ENSMUSG000000020656 | 15_Grh1         | 3134.12 | 0.35078  | 0.01648  | 0.03855  | 3372.91 | 3457.37 | 3707.37 | 2460.7  | 2497.73 | 3308.65 |
| ENSMUSG000000020657 | 15_Dnajc27      | 413.785 | -0.40111 | 0.02714  | 0.05853  | 401.971 | 334.999 | 333.448 | 541.913 | 477.851 | 392.53  |
| ENSMUSG000000020658 | 9_Efr3b         | 234.155 | -1.00009 | 0.0009   | 0.00328  | 123.283 | 223.027 | 121.906 | 415.677 | 277.924 | 243.116 |
| ENSMUSG000000020659 | 15_Cbl1         | 397.893 | -0.14574 | 0.39845  | 0.51593  | 352.484 | 353.355 | 427.865 | 360.674 | 438.403 | 454.575 |
| ENSMUSG000000020660 | 5_Pomc          | 2.39615 | 1.36913  | 0.34984  | NA       | 2.60457 | 1.83561 | 5.97577 | 0.90169 | 1.79306 | 1.26623 |
| ENSMUSG000000020661 | 15_Dnmt3a       | 1515.65 | -0.09559 | 0.46793  | 0.58135  | 1435.98 | 1575.87 | 1383.99 | 1736.65 | 1403.97 | 1557.46 |
| ENSMUSG000000020664 | 9_Dld           | 2040.75 | -0.55732 | 2.63E-05 | 0.00016  | 1717.28 | 1612.58 | 1624.21 | 2129.78 | 2758.62 | 2402.03 |
| ENSMUSG000000020668 | 9_Kif3c         | 447.663 | -0.73808 | 0.00046  | 0.00186  | 337.725 | 397.41  | 271.3   | 688.888 | 520.884 | 469.77  |
| ENSMUSG000000020669 | 15_Sh3yl1       | 495.084 | -0.07877 | 0.61424  | 0.71343  | 483.581 | 425.862 | 535.429 | 467.073 | 512.815 | 545.744 |
| ENSMUSG000000020671 | 8_Rab10         | 6304.41 | 0.05968  | 0.65554  | 0.74882  | 6184.97 | 6074.96 | 7044.24 | 5298.3  | 6486.4  | 6737.59 |
| ENSMUSG000000020672 | 13_Sntg2        | 18.4482 | -1.0848  | 0.10554  | 0.17989  | 13.891  | 11.0137 | 10.7564 | 33.3624 | 34.0682 | 7.59736 |
| ENSMUSG000000020673 | 14_Tpo          | 1.8213  | -1.0132  | 0.60548  | NA       | 2.60457 | 0.91781 | 0       | 3.60674 | 0       | 3.79868 |
| ENSMUSG000000020674 | 16_Pxdn         | 873.082 | -0.84372 | 0.00014  | 0.00068  | 569.532 | 839.792 | 463.72  | 1236.21 | 944.047 | 1185.19 |
| ENSMUSG000000020676 | 2_Ccl11         | 145.014 | -0.06501 | 0.76854  | 0.83726  | 158.878 | 131.246 | 135.052 | 167.713 | 135.376 | 141.817 |
| ENSMUSG000000020677 | 7_Ddx52         | 847.458 | -0.34355 | 0.01506  | 0.03573  | 790.051 | 741.587 | 708.726 | 834.961 | 1053.42 | 956.001 |
| ENSMUSG000000020679 | 11_Hnf1b        | 0.14942 | -0.99647 | 0.80707  | NA       | 0       | 0       | 0       | 0       | 0.89653 | 0       |
| ENSMUSG000000020680 | 15_Taf15        | 2045.84 | 0.15232  | 0.34983  | 0.46649  | 2112.3  | 2061.39 | 2286.33 | 1517.54 | 2036.02 | 2261.48 |
| ENSMUSG000000020681 | 14_Ace          | 641.613 | -0.3228  | 0.12718  | 0.20919  | 526.99  | 706.71  | 476.866 | 886.357 | 665.226 | 587.529 |
| ENSMUSG000000020682 | 17_Mmp28        | 669.886 | 0.89078  | 4.88E-06 | 3.62E-05 | 796.997 | 788.395 | 1024.25 | 411.169 | 409.714 | 588.796 |
| ENSMUSG000000020684 | 14_Ras10b       | 28.1242 | -0.90802 | 0.1158   | 0.19398  | 26.9138 | 22.0273 | 9.56123 | 57.7079 | 32.2751 | 20.2596 |
| ENSMUSG000000020686 | 12_Gas2l2       | 0.15028 | -0.99647 | 0.80707  | NA       | 0       | 0       | 0       | 0.90169 | 0       | 0       |
| ENSMUSG000000020687 | 13_Cdc27        | 1607.87 | -0.29428 | 0.04224  | 0.08422  | 1502.83 | 1315.22 | 1515.46 | 1508.52 | 1989.4  | 1815.77 |
| ENSMUSG000000020689 | 4_Irgb3         | 104.522 | 0.04111  | 0.87953  | 0.91889  | 120.678 | 98.2052 | 98.0026 | 91.0702 | 88.7565 | 130.421 |
| ENSMUSG000000020690 | 12_Efcab3       | 0.95157 | -0.84081 | 0.72669  | NA       | 0       | 0.91781 | 1.19515 | 1.80337 | 1.79306 | 0       |
| ENSMUSG000000020691 | 13_Mettl2       | 404.744 | -0.10816 | 0.48434  | 0.59624  | 394.158 | 371.711 | 402.767 | 372.396 | 451.851 | 435.582 |
| ENSMUSG000000020692 | 14_Nle1         | 178.905 | 1.24454  | 2.67E-06 | 2.15E-05 | 243.093 | 235.876 | 276.081 | 140.663 | 72.619  | 105.097 |
| ENSMUSG000000020694 | 16_Tlk2         | 1397.19 | -0.01079 | 0.93821  | 0.95936  | 1523.67 | 1191.31 | 1460.48 | 1314.66 | 1410.24 | 1482.75 |
| ENSMUSG000000020695 | 14_Mrc2         | 1915.42 | 0.30206  | 0.07016  | 0.12879  | 2050.66 | 2484.5  | 1809.46 | 1953.95 | 1454.17 | 1739.8  |
| ENSMUSG000000020696 | 18_Rfl1         | 1063.17 | 0.2161   | 0.07785  | 0.14012  | 1177.26 | 1083.01 | 1166.47 | 913.407 | 979.011 | 1059.83 |
| ENSMUSG000000020697 | 16_Lig3         | 1801.37 | 0.13769  | 0.33145  | 0.44804  | 1774.58 | 1849.38 | 2036.54 | 1531.06 | 1623.62 | 1993.04 |
| ENSMUSG000000020698 | 11_Cct6b        | 18.0963 | -0.4843  | 0.37163  | 0.48904  | 13.0228 | 20.1917 | 11.9515 | 20.7388 | 22.4133 | 20.2596 |
| ENSMUSG000000020700 | 11_Map3k3       | 1345.3  | 0.38083  | 0.00099  | 0.00354  | 1500.23 | 1510.71 | 1553.7  | 1203.75 | 1071.35 | 1232.04 |
| ENSMUSG000000020701 | 12_Tmem132e     | 46.6649 | 0.63528  | 0.12056  | 0.20057  | 56.4322 | 69.7532 | 44.2207 | 52.2978 | 26.8959 | 30.3894 |
| ENSMUSG000000020702 | 13_Ccl1         | 0.35216 | 1.91112  | 0.63543  | NA       | 0       | 0.91781 | 1.19515 | 0       | 0       | 0       |
| ENSMUSG000000020703 | 3_5530401A14Rik | 0.72092 | -2.98196 | 0.3773   | NA       | 0       | 0       | 0       | 0       | 1.79306 | 2.53245 |
| ENSMUSG000000020704 | 13_Asic2        | 16.4776 | -1.11818 | 0.06113  | 0.11466  | 13.0228 | 11.9315 | 5.97577 | 27.9522 | 19.7237 | 20.2596 |
| ENSMUSG000000020705 | 6_Ddx42         | 2345.28 | -0.1361  | 0.30555  | 0.42046  | 2277.26 | 2154.09 | 2271.99 | 2084.7  | 2638.49 | 2645.15 |
| ENSMUSG000000020706 | 13_Ftsj3        | 1462.62 | 0.12167  | 0.43718  | 0.55245  | 1595.73 | 1336.32 | 1639.75 | 1176.7  | 1431.76 | 1595.45 |
| ENSMUSG000000020707 | 6_Rnf135        | 197.78  | 0.49409  | 0.01497  | 0.03551  | 217.915 | 235.876 | 239.031 | 146.975 | 150.617 | 196.265 |
| ENSMUSG000000020708 | 12_Psmc5        | 3388.91 | 0.38777  | 0.00313  | 0.00953  | 3719.32 | 3671.22 | 4132.84 | 2861.95 | 2611.59 | 3336.51 |
| ENSMUSG000000020709 | 15_Adap2        | 54.2556 | 1.00439  | 0.00553  | 0.01534  | 88.5552 | 63.3286 | 65.7335 | 46.8876 | 33.1716 | 27.857  |
| ENSMUSG000000020712 | 11_Tcam1        | 3.16463 | -1.4516  | 0.26545  | 0.37661  | 0.86819 | 1.83561 | 2.39031 | 3.60674 | 2.68959 | 7.59736 |
| ENSMUSG000000020713 | 6_Gh            | 0.30594 | 1.73752  | 0.66765  | NA       | 0       | 1.83561 | 0       | 0       | 0       | 0       |
| ENSMUSG000000020715 | 9_Ern1          | 833.888 | 0.19177  | 0.10917  | 0.18511  | 874.266 | 855.395 | 938.196 | 781.761 | 752.189 | 801.522 |

|                     |                  |         |          |          |          |         |         |         |         |         |         |
|---------------------|------------------|---------|----------|----------|----------|---------|---------|---------|---------|---------|---------|
| ENSMUSG000000020716 | 15_Nf1           | 1253.6  | -0.41333 | 0.0007   | 0.00266  | 1126.04 | 1118.8  | 980.026 | 1401.22 | 1517.83 | 1377.65 |
| ENSMUSG000000020717 | 19_Pecam1        | 446.616 | -0.05065 | 0.794    | 0.85725  | 532.199 | 379.972 | 403.962 | 530.191 | 407.921 | 425.452 |
| ENSMUSG000000020718 | 12_Polg2         | 162.234 | -0.48996 | 0.0246   | 0.05393  | 134.569 | 134.917 | 136.248 | 201.978 | 212.478 | 153.213 |
| ENSMUSG000000020719 | 14_Ddx5          | 30524.4 | -0.33303 | 0.01545  | 0.03652  | 27430.4 | 27007.3 | 26612.5 | 28212.8 | 39110.2 | 34773.1 |
| ENSMUSG000000020720 | 13_Psmid12       | 1848.72 | -0.09373 | 0.49249  | 0.60418  | 1804.1  | 1651.13 | 1911.05 | 1650.99 | 2093.4  | 1981.65 |
| ENSMUSG000000020721 | 16_Helz          | 1233.53 | 0.00914  | 0.94513  | 0.96429  | 1083.5  | 1317.97 | 1311.08 | 1157.76 | 1244.38 | 1286.49 |
| ENSMUSG000000020722 | 5_Cacng1         | 20.1089 | -0.47526 | 0.4592   | 0.57286  | 14.7592 | 20.1917 | 15.537  | 39.6742 | 8.96531 | 21.5259 |
| ENSMUSG000000020723 | 13_Cacng4        | 348.09  | -0.56442 | 0.02934  | 0.06231  | 281.293 | 362.533 | 198.396 | 526.584 | 391.784 | 327.953 |
| ENSMUSG000000020728 | 17_Cep112        | 108.667 | -0.63682 | 0.00947  | 0.0241   | 85.9507 | 87.1915 | 82.4656 | 134.351 | 150.617 | 111.428 |
| ENSMUSG000000020732 | 13_Rab37         | 19.8425 | -0.62244 | 0.28118  | 0.39399  | 18.232  | 11.0137 | 17.9273 | 36.0674 | 20.6202 | 15.1947 |
| ENSMUSG000000020733 | 3_Slc9a3r1       | 1978.58 | 1.2114   | 8.30E-13 | 4.61E-11 | 2449.16 | 2526.72 | 3314.16 | 1182.11 | 1022.94 | 1376.39 |
| ENSMUSG000000020734 | 13_Grin2c        | 14.8882 | -0.5423  | 0.4941   | 0.60529  | 2.60457 | 22.9451 | 10.7564 | 20.7388 | 10.7584 | 21.5259 |
| ENSMUSG000000020736 | 12_Nt5c          | 362.501 | 0.53697  | 0.00696  | 0.01861  | 441.908 | 426.78  | 418.304 | 350.756 | 223.236 | 314.024 |
| ENSMUSG000000020737 | 12_Hn1           | 2075.04 | 0.68609  | 1.35E-08 | 2.22E-07 | 2421.38 | 2452.38 | 2803.83 | 1569.83 | 1497.21 | 1705.61 |
| ENSMUSG000000020738 | 16_Sumo2         | 5621.23 | -0.39117 | 0.00149  | 0.00507  | 5069.35 | 4532.12 | 4989.77 | 5618.4  | 6940.94 | 6576.78 |
| ENSMUSG000000020739 | 11_Nup85         | 818.993 | 0.36214  | 0.00697  | 0.01862  | 949.798 | 889.354 | 922.659 | 669.051 | 677.777 | 805.32  |
| ENSMUSG000000020740 | 13_Gga3          | 803.559 | 0.47437  | 0.00034  | 0.00144  | 884.684 | 952.682 | 968.075 | 727.66  | 680.467 | 607.789 |
| ENSMUSG000000020741 | 17_Cluh          | 1511.82 | 0.56094  | 4.91E-06 | 3.64E-05 | 1639.14 | 1859.47 | 1908.66 | 1302.94 | 1156.52 | 1204.18 |
| ENSMUSG000000020743 | 15_Mif4gd        | 982.193 | 0.16384  | 0.21496  | 0.31882  | 947.194 | 1051.81 | 1116.27 | 1006.28 | 883.979 | 887.625 |
| ENSMUSG000000020744 | 13_Slc25a19      | 258.399 | 0.12989  | 0.61603  | 0.71492  | 283.029 | 276.259 | 250.982 | 345.346 | 175.72  | 219.057 |
| ENSMUSG000000020745 | 15_Pafah1b1      | 5648.5  | -0.45063 | 8.62E-05 | 0.00044  | 4858.38 | 4738.63 | 4723.25 | 5888.01 | 7222.45 | 6460.29 |
| ENSMUSG000000020747 | 17_2310067B10Rik | 1281.79 | 1.42542  | 1.28E-11 | 5.24E-10 | 1585.31 | 1959.51 | 2059.25 | 867.421 | 488.609 | 730.613 |
| ENSMUSG000000020752 | 11_Reclq5        | 453.362 | 0.71038  | 9.66E-07 | 8.89E-06 | 534.804 | 558.944 | 593.992 | 341.739 | 320.958 | 369.738 |
| ENSMUSG000000020755 | 9_Sap30bp        | 854.86  | 0.19378  | 0.12964  | 0.21241  | 926.357 | 847.135 | 963.294 | 835.862 | 742.327 | 814.184 |
| ENSMUSG000000020758 | 15_Igfb4         | 8346.42 | 1.89919  | 1.32E-19 | 2.27E-17 | 11352.4 | 12629   | 15507.1 | 3296.56 | 2607.11 | 4686.31 |
| ENSMUSG000000020766 | 4_Galk1          | 144.193 | 0.46953  | 0.13514  | 0.21923  | 147.592 | 198.246 | 156.565 | 171.32  | 76.2051 | 115.227 |
| ENSMUSG000000020770 | 13_Unk           | 478.087 | 0.81202  | 6.94E-05 | 0.00036  | 521.781 | 645.217 | 660.92  | 425.596 | 268.063 | 346.946 |
| ENSMUSG000000020773 | 11_Trim47        | 136.442 | 0.88834  | 0.00068  | 0.0026   | 168.429 | 159.698 | 204.371 | 123.531 | 81.5843 | 81.0385 |
| ENSMUSG000000020774 | 9_Aspa           | 153.721 | -1.05054 | 1.87E-05 | 0.00012  | 103.314 | 116.561 | 80.0753 | 203.781 | 243.856 | 174.739 |
| ENSMUSG000000020775 | 13_Mrpl38        | 454.311 | 0.768    | 0.00039  | 0.00163  | 495.736 | 562.615 | 659.725 | 425.596 | 255.511 | 326.687 |
| ENSMUSG000000020776 | 18_Fbf1          | 825.841 | 0.56847  | 0.00081  | 0.00299  | 936.775 | 1043.54 | 977.636 | 716.84  | 521.781 | 758.47  |
| ENSMUSG000000020777 | 16_Acox1         | 2315.55 | 0.06715  | 0.52046  | 0.63042  | 2290.28 | 2423.92 | 2393.89 | 2350.69 | 2127.47 | 2307.07 |
| ENSMUSG000000020778 | 12_Ten1          | 492.36  | 0.3341   | 0.03816  | 0.07748  | 550.431 | 549.766 | 547.381 | 506.747 | 375.646 | 424.186 |
| ENSMUSG000000020780 | 15_Spr68         | 2392.26 | 0.617    | 3.59E-06 | 2.77E-05 | 2833.77 | 2745.16 | 3108.6  | 1976.49 | 1628.1  | 2061.42 |
| ENSMUSG000000020781 | 14_Tsen54        | 259.108 | 0.80383  | 7.42E-05 | 0.00038  | 300.393 | 335.917 | 351.375 | 202.879 | 148.824 | 215.259 |
| ENSMUSG000000020782 | 18_Llgl2         | 1352.52 | 1.75531  | 2.80E-13 | 1.79E-11 | 1721.62 | 2054.97 | 2483.53 | 766.433 | 390.887 | 697.691 |
| ENSMUSG000000020783 | 14_1200014J11Rik | 1236.66 | -0.19271 | 0.12528  | 0.20661  | 1188.55 | 1099.53 | 1173.64 | 1180.31 | 1369.9  | 1408.04 |
| ENSMUSG000000020785 | 17_Camkk1        | 204.959 | 0.41542  | 0.06933  | 0.12756  | 204.024 | 231.287 | 267.715 | 205.584 | 136.273 | 184.869 |
| ENSMUSG000000020787 | 14_P2rx1         | 4.16139 | -0.42697 | 0.70412  | 0.78839  | 3.47275 | 3.67122 | 3.58546 | 9.01685 | 2.68959 | 2.53245 |
| ENSMUSG000000020788 | 15_Atp2a3        | 91.9558 | 0.41142  | 0.20475  | 0.30678  | 117.205 | 113.808 | 83.6608 | 106.399 | 54.6884 | 75.9736 |
| ENSMUSG000000020790 | 14_Ankyf1        | 3787.75 | 0.55271  | 4.27E-05 | 0.00024  | 4510.24 | 4013.56 | 4989.77 | 2711.37 | 3234.68 | 3266.87 |
| ENSMUSG000000020792 | 15_Exoc7         | 1223.21 | 0.59741  | 0.00041  | 0.00169  | 1383.89 | 1436.37 | 1597.92 | 1091.94 | 756.672 | 1072.49 |
| ENSMUSG000000020793 | 5_Gair2          | 13.1181 | -0.21502 | 0.76345  | 0.83355  | 14.7592 | 11.0137 | 10.7564 | 25.2472 | 8.06878 | 8.86359 |
| ENSMUSG000000020794 | 13_Ube2g1        | 1133.88 | -0.18821 | 0.19472  | 0.29491  | 1087.84 | 1029.78 | 1062.49 | 1031.53 | 1388.73 | 1202.92 |
| ENSMUSG000000020798 | 14_Spns3         | 22.7189 | 0.74193  | 0.13344  | 0.21729  | 27.782  | 23.8629 | 33.4643 | 16.2303 | 13.448  | 21.5259 |
| ENSMUSG000000020799 | 16_Tekt1         | 2.38653 | -1.41963 | 0.34452  | NA       | 1.73638 | 0.91781 | 1.19515 | 4.50843 | 0.89653 | 5.06491 |
| ENSMUSG000000020801 | 8_Med31          | 219.511 | 0.10779  | 0.58497  | 0.68789  | 242.225 | 198.246 | 243.811 | 224.52  | 225.926 | 182.337 |
| ENSMUSG000000020802 | 8_Ube2o          | 662.604 | 0.68636  | 9.04E-05 | 0.00046  | 792.656 | 824.189 | 834.218 | 574.374 | 391.784 | 558.406 |
| ENSMUSG000000020803 | 3_Txndc17        | 6099.7  | -0.11241 | 0.25881  | 0.36892  | 5914.1  | 5500.41 | 6172.97 | 6154.91 | 6491.78 | 6364.06 |
| ENSMUSG000000020804 | 12_Aanat         | 10.9564 | -0.00454 | 0.99498  | 0.9965   | 16.4956 | 5.50683 | 10.7564 | 11.7219 | 9.86184 | 11.396  |
| ENSMUSG000000020805 | 13_Slc13a5       | 7.21407 | -1.63804 | 0.06835  | 0.12605  | 2.60457 | 5.50683 | 2.39031 | 14.427  | 10.7584 | 7.59736 |
| ENSMUSG000000020806 | 15_Rhbf2         | 788.384 | 1.59115  | 5.42E-13 | 3.16E-11 | 1045.3  | 1061.9  | 1443.75 | 455.351 | 277.028 | 446.978 |
| ENSMUSG000000020807 | 14_4933427D14Rik | 598.354 | 0.30869  | 0.03598  | 0.07382  | 632.909 | 650.724 | 702.751 | 467.073 | 578.262 | 558.406 |
| ENSMUSG000000020808 | 3_Fam64a         | 131.744 | 0.80403  | 0.00031  | 0.00134  | 172.769 | 151.438 | 178.078 | 97.382  | 86.9635 | 103.831 |
| ENSMUSG000000020810 | 5_Cybb           | 676.169 | 0.27406  | 0.30727  | 0.42232  | 683.264 | 803.08  | 735.02  | 928.736 | 416.887 | 490.03  |
| ENSMUSG000000020811 | 16_Wscd1         | 394.409 | -0.21949 | 0.45041  | 0.56526  | 386.344 | 465.327 | 241.421 | 596.916 | 337.095 | 339.349 |
| ENSMUSG000000020812 | 17_1810032O08Rik | 202.35  | 0.43144  | 0.04063  | 0.08165  | 230.07  | 200.082 | 267.715 | 152.385 | 195.444 | 168.408 |
| ENSMUSG000000020814 | 13_Mxra7         | 4584.19 | -0.13093 | 0.31358  | 0.42863  | 4195.09 | 4303.59 | 4628.83 | 4525.56 | 4333.83 | 5518.22 |
| ENSMUSG000000020817 | 16_Rabep1        | 1124    | -0.73147 | 1.76E-06 | 1.50E-05 | 879.475 | 896.696 | 757.728 | 1199.24 | 1600.31 | 1410.58 |
| ENSMUSG000000020818 | 16_Mfsd11        | 552.763 | 0.05287  | 0.71042  | 0.79299  | 563.454 | 562.615 | 564.113 | 570.767 | 578.262 | 477.368 |
| ENSMUSG000000020821 | 17_Kif1c         | 12252.9 | 0.644    | 3.39E-05 | 0.00019  | 13496   | 15117.2 | 16215.9 | 10870.7 | 7648.3  | 10169.1 |
| ENSMUSG000000020823 | 16_Sec14l1       | 1777.19 | 0.12082  | 0.35818  | 0.47498  | 1732.9  | 2045.79 | 1776    | 1876.41 | 1564.45 | 1667.62 |
| ENSMUSG000000020826 | 6_Nos2           | 35.897  | 2.2685   | 6.18E-07 | 6.08E-06 | 60.7732 | 47.7259 | 70.5141 | 14.427  | 14.3445 | 7.59736 |
| ENSMUSG000000020827 | 18_Mink1         | 5496.57 | 0.71631  | 4.78E-07 | 4.88E-06 | 6332.57 | 6733.02 | 7433.86 | 4046.76 | 3592.4  | 4840.79 |
| ENSMUSG000000020828 | 13_Pld2          | 1042.48 | 0.71122  | 6.58E-09 | 1.20E-07 | 1255.4  | 1237.2  | 1389.96 | 770.941 | 759.361 | 842.041 |
| ENSMUSG000000020829 | 9_Slc46a1        | 134.11  | 0.19587  | 0.48077  | 0.59336  | 123.283 | 174.383 | 132.662 | 159.598 | 121.032 | 93.7008 |
| ENSMUSG000000020830 | 3_Vmo1           | 0.65186 | 0.14793  | 0.95721  | NA       | 0       | 0.91781 | 1.19515 | 0.90169 | 0.89653 | 0       |
| ENSMUSG000000020831 | 18_0610010K14Rik | 490.281 | 0.69261  | 5.62E-05 | 0.0003   | 569.532 | 627.779 | 620.285 | 442.728 | 312.889 | 368.472 |
| ENSMUSG000000020832 | 14_Eral1         | 449.595 | 0.39391  | 0.01587  | 0.03737  | 511.363 | 474.505 | 546.185 | 436.416 | 335.302 | 393.797 |
| ENSMUSG000000020834 | 17_Dhrs13        | 84.7157 | 0.50609  | 0.06144  | 0.11515  | 86.8188 | 109.219 | 102.783 | 69.4298 | 77.9982 | 62.0451 |
| ENSMUSG000000020836 | 15_Cor6          | 65.4827 | -0.78888 | 0.09083  | 0.15889  | 29.5184 | 84.4381 | 29.8789 | 111.809 | 66.3433 | 70.9087 |
| ENSMUSG000000020838 | 12_Slc6a4        | 94.8919 | 0.01488  | 0.95329  | 0.96963  | 94.6325 | 84.4381 | 107.564 | 102.792 | 88.7565 | 91.1683 |
| ENSMUSG000000020839 | 16_Tmigd1        | 537.621 | -0.16617 | 0.30988  | 0.42478  | 493.999 | 457.067 | 570.089 | 503.14  | 639.226 | 562.205 |
| ENSMUSG000000020840 | 10_Blmh          | 2272.31 | 0.08646  | 0.56843  | 0.6732   | 2430.93 | 2081.58 | 2507.43 | 1857.47 | 2218.91 | 2537.52 |
| ENSMUSG000000020841 | 5_Cpd            | 14680.4 | -0.0309  | 0.84932  | 0.89785  | 14670.6 | 13854.3 | 15043.4 | 11346.8 | 15783.4 | 17384   |
| ENSMUSG000000020843 | 15_Timm22        | 717.182 | -0.05208 | 0.68179  | 0.76995  | 681.528 | 696.614 | 736.215 | 768.236 | 740.534 | 679.964 |
| ENSMUSG000000020844 | 6_Nxn            | 3170.29 | 0.27451  | 0.03798  | 0.07719  | 3334.71 | 3450.03 | 3627.29 | 3037.78 | 2436.77 | 3135.18 |
| ENSMUSG000000020846 | 6_Fam101b        | 1164.65 | 0.18786  | 0.14542  | 0.23284  | 1180.74 | 1239.96 | 1299.13 | 1028.82 | 1021.15 | 1218.11 |
| ENSMUSG000000020847 | 15_Rph3al        | 72.3444 | 0.31474  | 0.26971  | 0.38119  | 73.796  | 89.0271 | 77.685  | 71.2332 | 56.4814 | 65.8438 |

</

|                     |                  |         |          |          |          |         |         |         |         |         |         |
|---------------------|------------------|---------|----------|----------|----------|---------|---------|---------|---------|---------|---------|
| ENSMUSG000000020848 | 7_Doc2b          | 24.421  | -1.56433 | 0.01127  | 0.02793  | 13.0228 | 15.6027 | 8.36608 | 63.118  | 28.689  | 17.7272 |
| ENSMUSG000000020849 | 13_Ywhae         | 11929.6 | -0.00445 | 0.9677   | 0.9793   | 11643.3 | 11501   | 12588.6 | 10912.2 | 12057.4 | 12875   |
| ENSMUSG000000020850 | 14_PrpF8         | 8329.93 | 0.35072  | 0.00292  | 0.00898  | 8823.4  | 9446.97 | 9740.51 | 6610.26 | 7245.76 | 8112.72 |
| ENSMUSG000000020857 | 11_Nme2          | 2528.06 | 0.15837  | 0.10606  | 0.18049  | 2724.38 | 2549.66 | 2726.15 | 2379.55 | 2380.29 | 2408.36 |
| ENSMUSG000000020859 | 16_Spag9         | 3549.25 | -0.38883 | 0.00053  | 0.0021   | 3217.51 | 3100.35 | 2903.03 | 3779.87 | 4373.28 | 3921.5  |
| ENSMUSG000000020863 | 15_Luc7l3        | 3162.28 | -0.55542 | 2.78E-05 | 0.00016  | 2562.89 | 2458.8  | 2661.61 | 3238.85 | 4247.76 | 3803.75 |
| ENSMUSG000000020864 | 13_Ankrd40       | 1494.66 | -0.34737 | 0.0071   | 0.01891  | 1272.76 | 1345.5  | 1329.01 | 1883.62 | 1506.17 | 1630.9  |
| ENSMUSG000000020865 | 16_Abcc3         | 63.9961 | 0.72669  | 0.01709  | 0.03974  | 82.4779 | 88.1093 | 68.1238 | 46.8876 | 43.93   | 54.4478 |
| ENSMUSG000000020866 | 17_Cacna1g       | 543.165 | -0.01873 | 0.94311  | 0.96286  | 441.04  | 716.806 | 461.329 | 751.104 | 430.335 | 458.374 |
| ENSMUSG000000020867 | 13_Spata20       | 7.34836 | 1.51549  | 0.09918  | 0.171    | 6.94551 | 12.8493 | 13.1467 | 3.60674 | 6.27571 | 1.26623 |
| ENSMUSG000000020868 | 15_Xylt2         | 276.923 | 0.89676  | 0.0011   | 0.0039   | 317.757 | 422.191 | 341.814 | 281.326 | 145.238 | 153.213 |
| ENSMUSG000000020869 | 8_Lrrc59         | 2362.11 | 0.60329  | 2.85E-05 | 0.00017  | 2787.75 | 2538.65 | 3219.75 | 1652.79 | 1890.78 | 2082.94 |
| ENSMUSG000000020870 | 7_Cdc34-ps       | 2.81601 | -0.01356 | 0.9922   | 0.99484  | 5.20913 | 1.83561 | 1.19515 | 0.90169 | 2.68959 | 5.06491 |
| ENSMUSG000000020871 | 8_Dlx4           | 22.6199 | 0.06941  | 0.88931  | 0.92542  | 18.232  | 19.2739 | 32.2692 | 20.7388 | 22.4133 | 22.7921 |
| ENSMUSG000000020872 | 4_Tac4           | 0.74121 | 0.544    | 0.85364  | NA       | 1.73638 | 0.91781 | 0       | 0       | 1.79306 | 0       |
| ENSMUSG000000020873 | 13_Slc35b1       | 1097.94 | 0.13705  | 0.24823  | 0.35717  | 1159.03 | 1091.27 | 1199.93 | 976.525 | 1088.39 | 1072.49 |
| ENSMUSG000000020875 | 9_Hoxb9          | 1.32355 | 2.71975  | 0.27262  | NA       | 5.20913 | 1.83561 | 0       | 0       | 0.89653 | 0       |
| ENSMUSG000000020876 | 14_Snx11         | 551.755 | 0.58499  | 5.05E-05 | 0.00028  | 623.359 | 674.587 | 687.214 | 431.006 | 404.335 | 490.03  |
| ENSMUSG000000020877 | 11_Scrn2         | 216.782 | 1.27944  | 5.43E-07 | 5.46E-06 | 295.184 | 325.821 | 299.984 | 165.008 | 84.2739 | 130.421 |
| ENSMUSG000000020878 | 6_Lrrc46         | 10.7483 | -0.05561 | 0.93644  | 0.9583   | 13.891  | 8.26025 | 9.56123 | 13.5253 | 11.6549 | 7.59736 |
| ENSMUSG000000020882 | 17_Cacnb1        | 134.854 | -0.05899 | 0.82828  | 0.88247  | 115.469 | 154.191 | 126.686 | 175.829 | 103.998 | 132.954 |
| ENSMUSG000000020883 | 18_Fbxl20        | 1550.52 | -0.11756 | 0.27401  | 0.38615  | 1479.39 | 1470.32 | 1513.07 | 1707.79 | 1544.72 | 1587.85 |
| ENSMUSG000000020884 | 15_Asgr1         | 1.86137 | -0.28595 | 0.85484  | NA       | 1.73638 | 0.91781 | 2.39031 | 0.90169 | 2.68959 | 2.53245 |
| ENSMUSG000000020886 | 16_Dlg4          | 306.273 | -0.66412 | 0.0385   | 0.07805  | 274.348 | 271.67  | 164.931 | 566.258 | 323.648 | 236.784 |
| ENSMUSG000000020888 | 16_Dvl2          | 435.921 | 0.79752  | 0.00015  | 0.00071  | 512.231 | 573.628 | 574.869 | 409.365 | 240.27  | 305.161 |
| ENSMUSG000000020889 | 11_Nr1d1         | 5219.37 | 1.13792  | 3.61E-09 | 7.06E-08 | 6591.29 | 7561.8  | 7377.69 | 3852    | 2266.43 | 3666.99 |
| ENSMUSG000000020890 | 11_Gucy2e        | 247.375 | -1.49099 | 0.0002   | 0.00092  | 158.01  | 144.095 | 87.2462 | 565.357 | 380.129 | 149.415 |
| ENSMUSG000000020891 | 11_Alox8         | 2.83348 | -1.61779 | 0.29145  | 0.40521  | 0.86819 | 0.91781 | 2.39031 | 0.90169 | 1.79306 | 10.1298 |
| ENSMUSG000000020892 | 10_Aloxe3        | 26.3652 | -0.34246 | 0.49944  | 0.61046  | 20.8365 | 26.6164 | 22.7079 | 37.8708 | 34.9647 | 15.1947 |
| ENSMUSG000000020893 | 17_Per1          | 939.984 | 1.04861  | 1.35E-05 | 8.82E-05 | 1103.47 | 1252.8  | 1446.14 | 837.666 | 403.439 | 596.393 |
| ENSMUSG000000020894 | 16_Vamp2         | 2031.71 | -0.4894  | 0.00077  | 0.00287  | 1777.18 | 1763.1  | 1530.99 | 2754.65 | 2291.53 | 2072.81 |
| ENSMUSG000000020895 | 14_Tmem107       | 101.522 | 0.18874  | 0.5119   | 0.62219  | 92.028  | 113.808 | 119.515 | 123.531 | 84.2739 | 75.9736 |
| ENSMUSG000000020897 | 12_Aurkb         | 240.435 | 1.00592  | 2.97E-07 | 3.21E-06 | 332.516 | 284.52  | 345.4   | 135.253 | 167.651 | 177.272 |
| ENSMUSG000000020898 | 18_Ctcf1         | 580.047 | 0.68115  | 1.15E-06 | 1.03E-05 | 688.473 | 679.176 | 775.655 | 451.744 | 414.197 | 471.036 |
| ENSMUSG000000020899 | 15_Pfas          | 579.828 | 0.49651  | 0.00024  | 0.00104  | 669.373 | 654.395 | 712.312 | 508.551 | 445.576 | 488.764 |
| ENSMUSG000000020900 | 15_Myh10         | 1699.37 | -0.18737 | 0.13595  | 0.2202   | 1562.74 | 1738.32 | 1466.45 | 1958.46 | 1776.03 | 1694.21 |
| ENSMUSG000000020901 | 13_Pik3r5        | 71.1475 | 2.02025  | 6.68E-07 | 6.47E-06 | 172.769 | 71.5888 | 98.0026 | 32.4607 | 24.2063 | 27.857  |
| ENSMUSG000000020902 | 12_Ntn1          | 2021.02 | 0.61049  | 0.00099  | 0.00353  | 2369.29 | 2417.5  | 2539.7  | 1912.47 | 1151.15 | 1736    |
| ENSMUSG000000020903 | 13_Stx8          | 690.661 | -0.28027 | 0.02638  | 0.05714  | 664.164 | 623.19  | 583.235 | 762.826 | 764.741 | 745.808 |
| ENSMUSG000000020904 | 11_Cfap52        | 3.26472 | -1.2834  | 0.33996  | 0.45649  | 0.86819 | 3.67122 | 1.19515 | 6.3118  | 6.27571 | 1.26623 |
| ENSMUSG000000020905 | 11_Usp43         | 546.93  | 1.00312  | 2.66E-09 | 5.42E-08 | 728.41  | 658.984 | 800.753 | 371.494 | 306.613 | 415.322 |
| ENSMUSG000000020907 | 1_Rcvrn          | 115.502 | -1.51427 | 0.07776  | 0.14002  | 86.8188 | 68.8354 | 23.9031 | 338.132 | 118.342 | 56.9802 |
| ENSMUSG000000020908 | 14_Myh3          | 947.775 | -1.29526 | 0.02655  | 0.05745  | 419.335 | 924.23  | 302.374 | 1773.62 | 818.532 | 1448.56 |
| ENSMUSG000000020910 | 16_Adprm         | 279.251 | -0.37592 | 0.021    | 0.04721  | 261.325 | 228.534 | 239.031 | 305.671 | 321.854 | 319.089 |
| ENSMUSG000000020911 | 14_Krt19         | 4908.87 | 1.37051  | 1.01E-10 | 3.25E-09 | 5715.28 | 6367.74 | 9154.88 | 2743.83 | 2118.5  | 3352.97 |
| ENSMUSG000000020912 | 4_Krt12          | 609540  | 0.63592  | 2.24E-05 | 0.00014  | 696260  | 716218  | 812757  | 422531  | 431952  | 577522  |
| ENSMUSG000000020913 | 3_Krt24          | 0.45353 | -0.80448 | 0.84252  | NA       | 0       | 0.91781 | 0       | 1.80337 | 0       | 0       |
| ENSMUSG000000020914 | 17_Top2a         | 2726.62 | 0.12361  | 0.56429  | 0.66965  | 3174.1  | 2305.53 | 3050.03 | 1792.55 | 3137.86 | 2899.66 |
| ENSMUSG000000020916 | 8_Krt36          | 18.3902 | 0.14908  | 0.80594  | 0.86573  | 15.6274 | 16.5205 | 26.2934 | 27.9522 | 12.5514 | 11.396  |
| ENSMUSG000000020917 | 17_Acly          | 10942   | 0.69304  | 9.74E-07 | 8.95E-06 | 12882.2 | 13038.3 | 14639.4 | 7702.2  | 7475.27 | 9914.56 |
| ENSMUSG000000020918 | 14_Kat2a         | 1273.45 | 0.94196  | 1.98E-10 | 5.81E-09 | 1504.57 | 1592.39 | 1927.78 | 880.947 | 785.361 | 949.67  |
| ENSMUSG000000020919 | 11_Stat5b        | 875.346 | 0.36925  | 0.01956  | 0.0444   | 957.612 | 970.12  | 1033.81 | 917.916 | 672.398 | 700.223 |
| ENSMUSG000000020921 | 6_Tmem101        | 317.648 | 0.56289  | 0.00492  | 0.01391  | 345.539 | 355.191 | 436.231 | 297.556 | 207.995 | 263.375 |
| ENSMUSG000000020922 | 11_Lsm12         | 827.161 | 0.05742  | 0.70032  | 0.78569  | 923.752 | 725.066 | 882.024 | 740.284 | 862.462 | 829.379 |
| ENSMUSG000000020923 | 17_Ubf           | 2919.64 | 0.37877  | 0.00106  | 0.00376  | 3150.66 | 3372.02 | 3378.7  | 2658.17 | 2278.98 | 2679.34 |
| ENSMUSG000000020925 | 16_Ccdc43        | 433.155 | -0.14549 | 0.34294  | 0.45939  | 397.63  | 382.725 | 454.159 | 417.48  | 473.368 | 473.569 |
| ENSMUSG000000020926 | 16_Adam11        | 96.3089 | -0.00256 | 0.9949   | 0.99649  | 85.0825 | 145.013 | 58.5626 | 139.761 | 79.7912 | 69.6425 |
| ENSMUSG000000020928 | 14_Higd1b        | 9.93446 | -1.08303 | 0.19439  | 0.29451  | 3.47275 | 6.42464 | 9.56123 | 20.7388 | 14.3445 | 5.06491 |
| ENSMUSG000000020929 | 14_Eftud2        | 1862.04 | 0.63846  | 4.31E-06 | 3.25E-05 | 2215.62 | 2157.76 | 2427.36 | 1443.6  | 1264.11 | 1663.82 |
| ENSMUSG000000020930 | 9_Ccdc103        | 10.3211 | 0.41491  | 0.58318  | 0.68621  | 9.55007 | 13.7671 | 11.9515 | 3.60674 | 11.6549 | 11.396  |
| ENSMUSG000000020932 | 14_Gfap          | 88.4138 | -2.1209  | 1.60E-05 | 0.0001   | 34.7275 | 35.7944 | 28.6837 | 85.6601 | 273.442 | 72.1749 |
| ENSMUSG000000020935 | 8_Dcakd          | 512.865 | 0.96583  | 5.72E-07 | 5.70E-06 | 619.887 | 693.861 | 720.678 | 394.037 | 259.994 | 388.732 |
| ENSMUSG000000020936 | 8_Nmt1           | 2317.4  | 0.17776  | 0.09048  | 0.15841  | 2449.16 | 2364.27 | 2566    | 2081.99 | 2156.16 | 2286.81 |
| ENSMUSG000000020937 | 14_Plcd3         | 695.773 | 1.08936  | 4.38E-07 | 4.52E-06 | 897.707 | 859.984 | 1082.81 | 576.177 | 323.648 | 434.316 |
| ENSMUSG000000020940 | 13_1700023F06Rik | 4.32216 | 0.81249  | 0.46434  | 0.57791  | 6.07732 | 5.50683 | 4.78062 | 3.60674 | 0.89653 | 5.06491 |
| ENSMUSG000000020941 | 7_Map3k14        | 249.507 | 0.80101  | 0.00025  | 0.0011   | 288.239 | 317.561 | 345.4   | 219.11  | 138.066 | 188.668 |
| ENSMUSG000000020946 | 13_Gosr2         | 3584.98 | -0.02397 | 0.81285  | 0.87068  | 3562.18 | 3485.83 | 3616.54 | 3633.79 | 3395.16 | 3816.41 |
| ENSMUSG000000020948 | 8_Klhl28         | 226.888 | -0.50759 | 0.00302  | 0.00925  | 182.32  | 195.493 | 184.054 | 259.685 | 266.27  | 273.505 |
| ENSMUSG000000020949 | 8_Fkbp3          | 936.841 | -0.7038  | 5.33E-07 | 5.37E-06 | 777.029 | 692.943 | 668.091 | 1103.66 | 1301.76 | 1077.56 |
| ENSMUSG000000020950 | 10_Foxg1         | 18.4758 | -2.0791  | 0.02319  | 0.05137  | 10.4183 | 8.26025 | 2.39031 | 13.5253 | 69.9294 | 6.33113 |
| ENSMUSG000000020952 | 9_Scfd1          | 1440.99 | -0.29624 | 0.02322  | 0.05141  | 1307.49 | 1196.82 | 1376.82 | 1417.45 | 1717.75 | 1629.63 |
| ENSMUSG000000020953 | 16_Coch          | 94.7244 | -0.45491 | 0.08845  | 0.15542  | 88.5552 | 71.5888 | 80.0753 | 112.711 | 125.514 | 89.9021 |
| ENSMUSG000000020954 | 15_Strn3         | 3032.18 | -0.29682 | 0.02586  | 0.05622  | 2788.62 | 2474.4  | 2901.83 | 2960.23 | 3740.33 | 3327.64 |
| ENSMUSG000000020955 | 8_Ap4s1          | 348.041 | -0.51301 | 0.00069  | 0.00264  | 295.184 | 288.191 | 277.276 | 429.202 | 415.99  | 382.401 |
| ENSMUSG000000020956 | 14_Dtd2          | 190.752 | -0.015   | 0.94318  | 0.96287  | 203.156 | 200.999 | 163.736 | 194.764 | 164.065 | 217.791 |
| ENSMUSG000000020961 | 14_Ston2         | 676.373 | 0.64952  | 1.08E-06 | 9.82E-06 | 811.756 | 804.915 | 860.511 | 519.371 | 486.816 | 574.867 |
| ENSMUSG000000020962 | 13_Gtf2a1        | 742.698 | -0.41102 | 0.00148  | 0.00501  | 677.187 | 628.697 | 607.138 | 877.34  | 879.496 | 786.327 |
| ENSMUSG000000020963 | 14_Tshr          | 118.884 | -1.47441 | 0.0005   | 0.00198  | 83.3461 | 76.1779 | 28.6837 | 240.75  | 185.582 | 98.7657 |
| ENSMUSG000000020964 | 14_Sel1l         | 3493.03 | 0.0482   | 0.68944  | 0.77674  | 3573.46 | 3567.51 | 3511.36 | 3009.83 | 3540.4  | 3755.63 |

|                     |                  |         |          |          |          |         |         |         |         |         |         |
|---------------------|------------------|---------|----------|----------|----------|---------|---------|---------|---------|---------|---------|
| ENSMUSG000000020973 | 7_Dnaaf2         | 161.9   | 0.1561   | 0.47412  | 0.58682  | 194.474 | 159.698 | 157.76  | 140.663 | 175.72  | 143.084 |
| ENSMUSG000000020974 | 5_Pole2          | 160.007 | 0.46785  | 0.06303  | 0.11772  | 215.311 | 144.095 | 197.2   | 108.202 | 140.755 | 154.48  |
| ENSMUSG000000020978 | 10_Klhdc2        | 768.764 | -0.49825 | 0.00102  | 0.00364  | 704.969 | 637.875 | 568.893 | 894.472 | 1002.32 | 804.054 |
| ENSMUSG000000020982 | 8_Nemf           | 1312.44 | -0.473   | 0.00203  | 0.0066   | 1119.96 | 1068.33 | 1109.1  | 1246.13 | 1757.2  | 1573.92 |
| ENSMUSG000000020986 | 13_Sec23a        | 1621.72 | -0.3657  | 0.00095  | 0.00344  | 1410.81 | 1364.78 | 1477.21 | 1737.55 | 1935.61 | 1804.37 |
| ENSMUSG000000020988 | 8_L2hgdh         | 413.031 | -0.33031 | 0.02693  | 0.05816  | 373.321 | 390.985 | 332.253 | 438.219 | 463.506 | 479.9   |
| ENSMUSG000000020990 | 4_Cdk1           | 5.01179 | -2.69947 | 0.02448  | 0.05371  | 1.73638 | 0       | 2.39031 | 8.11517 | 8.96531 | 8.86359 |
| ENSMUSG000000020993 | 8_Trappc6b       | 976.892 | -0.36009 | 0.00595  | 0.0163   | 870.793 | 795.737 | 901.146 | 1014.4  | 1200.45 | 1078.83 |
| ENSMUSG000000020994 | 4_Pnn            | 2890.11 | -0.04337 | 0.76208  | 0.83279  | 2738.27 | 2664.39 | 3137.28 | 2467.91 | 3128    | 3204.82 |
| ENSMUSG000000021000 | 15_Ctage5        | 2472.15 | 0.15422  | 0.22019  | 0.32495  | 2684.44 | 2408.32 | 2718.98 | 2071.17 | 2446.63 | 2503.33 |
| ENSMUSG000000021003 | 9_Galc           | 634.888 | -0.50499 | 0.00013  | 0.00061  | 509.627 | 571.793 | 492.403 | 742.989 | 737.845 | 754.671 |
| ENSMUSG000000021007 | 13_Spata7        | 135.905 | -0.2879  | 0.27789  | 0.39041  | 142.383 | 125.739 | 99.1978 | 176.73  | 158.686 | 112.694 |
| ENSMUSG000000021009 | 14_Ptpn21        | 1086.6  | 0.17223  | 0.28774  | 0.40118  | 1047.9  | 1234.45 | 1172.45 | 1219.08 | 866.945 | 978.793 |
| ENSMUSG000000021010 | 7_Npas3          | 32.0681 | -1.15648 | 0.03029  | 0.06397  | 24.3093 | 27.5342 | 7.17092 | 55.9045 | 33.1716 | 44.3179 |
| ENSMUSG000000021012 | 15_Zc3h14        | 2733.42 | -0.28768 | 0.01715  | 0.03984  | 2601.09 | 2380.79 | 2402.26 | 2670.79 | 3195.23 | 3150.37 |
| ENSMUSG000000021013 | 15_Ttc8          | 513.869 | -0.58631 | 1.14E-05 | 7.60E-05 | 408.049 | 422.191 | 402.767 | 635.688 | 632.054 | 582.464 |
| ENSMUSG000000021018 | 7_Polr2h         | 457.877 | 0.01993  | 0.88526  | 0.92227  | 478.372 | 430.451 | 474.476 | 458.958 | 449.162 | 455.842 |
| ENSMUSG000000021022 | 8_Ppp2r3c        | 415.369 | -0.65525 | 0.00018  | 0.00085  | 338.593 | 311.136 | 317.911 | 421.989 | 587.228 | 515.354 |
| ENSMUSG000000021023 | 14_1110008L16Rik | 275.284 | -0.19079 | 0.33617  | 0.45283  | 272.611 | 255.15  | 242.616 | 231.733 | 325.441 | 324.154 |
| ENSMUSG000000021024 | 14_Psma6         | 2922.21 | -0.35662 | 0.00631  | 0.01714  | 2714.83 | 2440.45 | 2533.73 | 2974.66 | 3754.67 | 3114.92 |
| ENSMUSG000000021025 | 7_Nfkbia         | 934.461 | 0.7957   | 0.00043  | 0.00175  | 1077.42 | 1141.75 | 1336.18 | 536.503 | 557.642 | 957.268 |
| ENSMUSG000000021027 | 15_Ralgapa1      | 1903.41 | -0.22185 | 0.08285  | 0.14737  | 1780.65 | 1632.78 | 1858.46 | 1811.49 | 2164.22 | 2172.85 |
| ENSMUSG000000021028 | 7_Mbp            | 318.447 | -0.22278 | 0.15227  | 0.24202  | 289.107 | 285.438 | 307.155 | 320.098 | 350.543 | 358.342 |
| ENSMUSG000000021032 | 13_Ngb           | 2.93185 | 0.83237  | 0.54251  | 0.64943  | 3.47275 | 6.42464 | 1.19515 | 1.80337 | 0.89653 | 3.79868 |
| ENSMUSG000000021033 | 10_Gstz1         | 909.705 | -0.32834 | 0.00468  | 0.01334  | 798.733 | 776.464 | 844.974 | 989.149 | 1006.8  | 1042.1  |
| ENSMUSG000000021036 | 10_Sptlc2        | 2434.42 | -0.0896  | 0.47583  | 0.58838  | 2451.76 | 2216.5  | 2408.24 | 2222.65 | 2755.93 | 2551.45 |
| ENSMUSG000000021037 | 6_Ahsa1          | 1838.23 | 0.24621  | 0.01706  | 0.03969  | 1997.7  | 1906.28 | 2080.76 | 1654.59 | 1703.41 | 1686.61 |
| ENSMUSG000000021038 | 16_Vipas39       | 954.711 | 0.01751  | 0.87408  | 0.91466  | 979.317 | 943.504 | 958.514 | 939.556 | 953.909 | 953.469 |
| ENSMUSG000000021039 | 8_Snw1           | 2895.85 | -0.30404 | 0.01253  | 0.03049  | 2760.84 | 2411.08 | 2603.05 | 2877.28 | 3431.92 | 3290.92 |
| ENSMUSG000000021040 | 15_Slirp         | 593.708 | -0.32114 | 0.03411  | 0.07063  | 538.277 | 491.944 | 554.552 | 607.736 | 753.086 | 616.653 |
| ENSMUSG000000021044 | 14_Adck1         | 388.117 | 0.45381  | 0.00607  | 0.01659  | 410.653 | 477.259 | 458.939 | 372.396 | 303.027 | 306.427 |
| ENSMUSG000000021047 | 6_Nova1          | 104.067 | -0.88689 | 0.00201  | 0.00654  | 77.2688 | 75.2601 | 66.9286 | 173.124 | 131.79  | 100.032 |
| ENSMUSG000000021048 | 6_Mthfd1         | 1767.23 | 0.523    | 0.00011  | 0.00052  | 1966.45 | 2049.46 | 2234.94 | 1290.31 | 1417.41 | 1644.83 |
| ENSMUSG000000021051 | 9_Ppp2r5e        | 1919.72 | -0.18015 | 0.2494   | 0.35844  | 1838.82 | 1804.41 | 1755.68 | 1608.61 | 2277.19 | 2233.62 |
| ENSMUSG000000021054 | 5_Sgpp1          | 2154.9  | -0.265   | 0.02098  | 0.04717  | 1933.46 | 1899.86 | 2038.93 | 2137.9  | 2419.74 | 2499.53 |
| ENSMUSG000000021055 | 13_Esr2          | 14.6261 | -0.16753 | 0.78891  | 0.85326  | 13.891  | 11.0137 | 16.7322 | 22.5421 | 13.448  | 10.1298 |
| ENSMUSG000000021057 | 15_Akap5         | 22.4552 | -0.96649 | 0.08067  | 0.14429  | 7.8137  | 16.5205 | 21.5128 | 28.8539 | 23.3098 | 36.7206 |
| ENSMUSG000000021061 | 15_Sptb          | 923.723 | -0.5606  | 0.07274  | 0.13269  | 579.082 | 1108.71 | 550.966 | 1467.04 | 658.95  | 1177.59 |
| ENSMUSG000000021062 | 15_Rab15         | 1609.25 | 0.37004  | 0.00371  | 0.011    | 1836.22 | 1654.8  | 1951.69 | 1384.99 | 1298.18 | 1529.6  |
| ENSMUSG000000021065 | 15_Fut8          | 630.077 | -0.47956 | 0.00044  | 0.00179  | 506.154 | 516.725 | 556.942 | 679.871 | 795.223 | 725.548 |
| ENSMUSG000000021066 | 8_Atl1           | 104.269 | -0.61635 | 0.05153  | 0.09941  | 67.7187 | 91.7806 | 88.4414 | 136.155 | 160.479 | 81.0385 |
| ENSMUSG000000021067 | 7_Sav1           | 1020.05 | -0.20769 | 0.1068   | 0.18159  | 996.68  | 865.491 | 978.831 | 1038.74 | 1180.73 | 1059.83 |
| ENSMUSG000000021068 | 15_Nin           | 601.095 | -0.10857 | 0.44447  | 0.55948  | 557.377 | 602.08  | 577.259 | 687.986 | 922.192 | 559.672 |
| ENSMUSG000000021069 | 16_Pygl          | 2559.46 | 0.23517  | 0.10601  | 0.18048  | 2710.48 | 2671.73 | 2918.57 | 2083.8  | 2162.43 | 2809.76 |
| ENSMUSG000000021070 | 5_Bdkrb2         | 9.2737  | 1.12692  | 0.21462  | 0.31848  | 13.891  | 2.75342 | 21.5128 | 4.50843 | 5.37918 | 7.59736 |
| ENSMUSG000000021071 | 15_Trim9         | 240.206 | -0.76608 | 0.00277  | 0.0086   | 207.497 | 209.26  | 115.93  | 348.051 | 295.855 | 264.641 |
| ENSMUSG000000021072 | 12_Tmx1          | 1620.6  | -0.37861 | 0.00198  | 0.00646  | 1384.76 | 1329.9  | 1514.26 | 1709.6  | 1992.09 | 1792.98 |
| ENSMUSG000000021076 | 5_Actr10         | 2023.8  | -0.31697 | 0.00589  | 0.01615  | 1838.82 | 1770.45 | 1797.51 | 2039.61 | 2419.74 | 2276.68 |
| ENSMUSG000000021078 | 4_Tomm20l        | 0.15028 | -0.99647 | 0.80707  | NA       | 0       | 0       | 0       | 0.90169 | 0       | 0       |
| ENSMUSG000000021079 | 15_Timm9         | 236.891 | -0.2699  | 0.11342  | 0.19074  | 226.597 | 217.52  | 199.591 | 253.374 | 260.89  | 263.375 |
| ENSMUSG000000021087 | 17_Rtn1          | 110.357 | -1.0625  | 0.0173   | 0.04012  | 79.8733 | 97.2874 | 37.0498 | 213.699 | 165.858 | 68.3763 |
| ENSMUSG000000021090 | 15_Lrrc9         | 2.28305 | -0.94583 | 0.56531  | NA       | 2.60457 | 0.91781 | 1.19515 | 2.70506 | 6.27571 | 0       |
| ENSMUSG000000021091 | 8_Serpina3n      | 2819.55 | 1.17065  | 1.80E-06 | 1.53E-05 | 5298.55 | 2407.4  | 4008.55 | 1693.37 | 2006.44 | 1503.01 |
| ENSMUSG000000021094 | 9_Dhrs7          | 487.302 | -0.08516 | 0.53767  | 0.64527  | 501.813 | 437.793 | 479.257 | 495.927 | 510.126 | 498.893 |
| ENSMUSG000000021095 | 5_Gsc            | 0.91893 | 0.32511  | 0.8962   | NA       | 0.86819 | 0.91781 | 1.19515 | 0       | 0       | 2.53245 |
| ENSMUSG000000021096 | 10_Ppm1a         | 2792.26 | -0.09001 | 0.35553  | 0.47235  | 2725.24 | 2631.35 | 2758.42 | 2793.42 | 2864.42 | 2980.7  |
| ENSMUSG000000021097 | 14_Clmm          | 872.44  | -0.25483 | 0.05746  | 0.10885  | 804.811 | 843.463 | 738.605 | 1043.25 | 927.013 | 877.495 |
| ENSMUSG000000021098 | 14_930447C04Rik  | 68.2559 | -1.79204 | 1.09E-05 | 7.31E-05 | 28.6502 | 45.8903 | 16.7322 | 131.646 | 109.377 | 77.2398 |
| ENSMUSG000000021099 | 6_Six6           | 58.1594 | -1.24033 | 0.00391  | 0.01151  | 33.8593 | 50.4793 | 19.1225 | 107.301 | 82.4808 | 55.714  |
| ENSMUSG000000021102 | 3_Glrx5          | 392.824 | 0.04243  | 0.77192  | 0.83993  | 410.653 | 370.793 | 414.718 | 374.199 | 401.646 | 384.933 |
| ENSMUSG000000021103 | 12_Mnat1         | 445.111 | -0.33595 | 0.01384  | 0.03319  | 410.653 | 379.972 | 389.62  | 491.419 | 497.574 | 501.426 |
| ENSMUSG000000021108 | 17_Prkc          | 1972.53 | 0.15275  | 0.18312  | 0.28089  | 2143.56 | 1917.3  | 2169.2  | 1760.99 | 1876.44 | 1967.72 |
| ENSMUSG000000021109 | 13_Hif1a         | 4988.66 | -0.71297 | 8.44E-13 | 4.65E-11 | 3807.01 | 3736.39 | 3799.39 | 6270.32 | 6525.85 | 5792.99 |
| ENSMUSG000000021111 | 15_Papola        | 5266.5  | -0.14672 | 0.3228   | 0.43869  | 5128.39 | 4771.67 | 5096.14 | 4437.19 | 6243.44 | 5922.14 |
| ENSMUSG000000021112 | 8_Mpp5           | 1849.73 | -0.42089 | 0.00253  | 0.00793  | 1619.17 | 1553.84 | 1571.63 | 1770.91 | 2339.05 | 2243.75 |
| ENSMUSG000000021113 | 4_Snapc1         | 390.202 | -0.60452 | 3.22E-05 | 0.00019  | 308.207 | 309.3   | 310.74  | 457.155 | 451.851 | 503.958 |
| ENSMUSG000000021114 | 8_Atp6v1d        | 2785.45 | -0.23483 | 0.07093  | 0.12994  | 2689.65 | 2370.69 | 2617.39 | 2643.74 | 3333.3  | 3057.94 |
| ENSMUSG000000021115 | 14_Vrk1          | 428.758 | 0.26057  | 0.09605  | 0.16636  | 506.154 | 432.286 | 462.525 | 351.657 | 394.473 | 425.452 |
| ENSMUSG000000021116 | 9_Elf2s1         | 2202.01 | -0.31639 | 0.03516  | 0.07245  | 2074.97 | 1706.2  | 2103.47 | 2070.27 | 2690.49 | 2566.64 |
| ENSMUSG000000021118 | 7_Plek2          | 709.19  | 0.2998   | 0.09618  | 0.16651  | 809.152 | 632.368 | 905.927 | 560.848 | 621.296 | 725.548 |
| ENSMUSG000000021120 | 10_Pigh          | 1211.18 | -0.21043 | 0.19072  | 0.29009  | 1117.36 | 1072.91 | 1178.42 | 1031.53 | 1461.34 | 1405.51 |
| ENSMUSG000000021123 | 12_Rdh12         | 145.117 | -0.20552 | 0.01307  | 0.0316   | 80.7415 | 71.5888 | 19.1225 | 373.298 | 247.442 | 78.5061 |
| ENSMUSG000000021124 | 13_Vti1b         | 1492.79 | -0.38179 | 0.00029  | 0.00124  | 1320.51 | 1241.79 | 1327.82 | 1705.09 | 1714.17 | 1467.36 |
| ENSMUSG000000021125 | 6_Arg2           | 27.0287 | 0.2798   | 0.62945  | 0.72625  | 51.2231 | 13.7671 | 23.9031 | 21.6405 | 31.3786 | 20.2596 |
| ENSMUSG000000021127 | 6_Zfp36l1        | 3753.24 | 0.60098  | 8.79E-06 | 6.04E-05 | 4391.3  | 4093.41 | 5086.58 | 3063.93 | 2652.83 | 3231.41 |
| ENSMUSG000000021130 | 7_Galnt16        | 98.8507 | -0.3164  | 0.30413  | 0.41912  | 93.7643 | 100.959 | 69.3189 | 146.975 | 89.6531 | 92.4346 |
| ENSMUSG000000021131 | 13_Erh           | 2115.06 | -0.20611 | 0.08183  | 0.14593  | 2059.34 | 1808.08 | 2025.79 | 2118.06 | 2434.08 | 2245.02 |
| ENSMUSG000000021133 | 8_Susd6          | 1847.11 | 0.3438   | 0.0045   | 0.01293  | 2006.38 | 1961.35 | 2230.16 | 1616.72 | 1507.96 | 1760.06 |
| ENSMUSG000000021134 | 17_Srsf5         | 11383.4 | -0.05403 | 0.67585  | 0.76517  | 11071.1 | 10651.1 | 11787.8 | 9871.65 | 12262.7 | 12655.9 |

|                     |                  |         |          |          |          |         |         |         |         |         |         |
|---------------------|------------------|---------|----------|----------|----------|---------|---------|---------|---------|---------|---------|
| ENSMUSG000000021135 | 7_Slc10a1        | 3.52949 | -0.01434 | 0.99047  | 0.99369  | 5.20913 | 2.75342 | 2.39031 | 1.80337 | 2.68959 | 6.33113 |
| ENSMUSG000000021136 | 13_Smoc1         | 923.27  | -0.74329 | 0.00141  | 0.00483  | 757.928 | 779.217 | 534.234 | 1564.42 | 1008.6  | 895.222 |
| ENSMUSG000000021139 | 17_Gm20498       | 116.021 | 0.06938  | 0.79088  | 0.85502  | 111.128 | 122.986 | 123.101 | 144.27  | 102.204 | 92.4346 |
| ENSMUSG000000021140 | 8_Pcnx           | 2112.99 | 0.04326  | 0.72181  | 0.80192  | 1973.39 | 2262.39 | 2197.89 | 2172.16 | 1891.68 | 2180.44 |
| ENSMUSG000000021143 | 9_Pacs2          | 1359.4  | 0.163    | 0.30005  | 0.41473  | 1424.7  | 1539.16 | 1344.55 | 1536.47 | 1094.66 | 1216.84 |
| ENSMUSG000000021144 | 14_Mta1          | 827.468 | 0.57861  | 9.72E-05 | 0.00048  | 881.211 | 1052.72 | 1039.78 | 724.053 | 584.538 | 682.496 |
| ENSMUSG000000021147 | 16_Wdr37         | 761.736 | -0.30135 | 0.01872  | 0.0428   | 716.255 | 658.984 | 672.872 | 844.879 | 897.427 | 779.996 |
| ENSMUSG000000021149 | 7_Gtpbp4         | 1661.62 | -0.40108 | 0.00989  | 0.02503  | 1473.32 | 1369.37 | 1453.31 | 1516.63 | 2161.54 | 1995.57 |
| ENSMUSG000000021156 | 16_Zmynd11       | 4230.37 | 0.03035  | 0.77311  | 0.84095  | 4071.8  | 4351.32 | 4400.56 | 3936.76 | 4154.52 | 4467.25 |
| ENSMUSG000000021171 | 7_Esyt2          | 3101.45 | -0.13596 | 0.29918  | 0.41384  | 3032.58 | 2838.77 | 2995.06 | 2819.57 | 3681.15 | 3241.54 |
| ENSMUSG000000021175 | 15_Cdca7l        | 294.022 | 0.46046  | 0.03125  | 0.06571  | 308.207 | 284.52  | 429.06  | 231.733 | 229.512 | 281.102 |
| ENSMUSG000000021176 | 5_Efcab11        | 50.0945 | -0.3457  | 0.32454  | 0.44073  | 50.3549 | 32.1232 | 50.1965 | 56.8062 | 59.171  | 51.9153 |
| ENSMUSG000000021177 | 15_Tdp1          | 266.64  | 0.41021  | 0.01767  | 0.04082  | 283.898 | 321.232 | 307.155 | 234.438 | 206.202 | 246.914 |
| ENSMUSG000000021178 | 8_Psmc1          | 2864.94 | -0.02039 | 0.86401  | 0.90767  | 3030.85 | 2644.2  | 2857.61 | 2633.82 | 2920.9  | 3102.26 |
| ENSMUSG000000021179 | 7_Nrde2          | 386.953 | 0.62599  | 8.49E-05 | 0.00043  | 469.69  | 476.341 | 461.329 | 307.475 | 266.27  | 340.615 |
| ENSMUSG000000021180 | 8_Rps6ka5        | 209.594 | -0.38779 | 0.04175  | 0.08344  | 197.947 | 167.958 | 179.273 | 235.34  | 261.787 | 215.259 |
| ENSMUSG000000021182 | 14_Ccdc88c       | 251.318 | 1.09306  | 3.61E-05 | 0.00021  | 301.261 | 363.451 | 360.937 | 183.944 | 99.5149 | 198.798 |
| ENSMUSG000000021185 | 15_9030617O03Rik | 555.825 | 0.03344  | 0.80292  | 0.86362  | 576.477 | 549.766 | 559.332 | 522.978 | 532.539 | 593.86  |
| ENSMUSG000000021186 | 8_Fbln5          | 2229.14 | -0.7264  | 6.47E-06 | 4.64E-05 | 1797.15 | 1931.98 | 1307.5  | 2927.77 | 2720.97 | 2689.47 |
| ENSMUSG000000021187 | 14_Tc2n          | 147.502 | -0.75202 | 0.00138  | 0.00474  | 92.028  | 122.068 | 115.93  | 157.795 | 209.788 | 187.402 |
| ENSMUSG000000021188 | 14_Trip11        | 2239.54 | -0.23796 | 0.05081  | 0.09837  | 2090.6  | 1918.21 | 2157.25 | 2181.18 | 2604.42 | 2485.6  |
| ENSMUSG000000021189 | 11_Atnx3         | 1767.72 | -0.20016 | 0.13401  | 0.21801  | 1635.67 | 1536.41 | 1764.05 | 1646.48 | 2045.88 | 1977.85 |
| ENSMUSG000000021190 | 14_Lgmn          | 3813.86 | 0.53005  | 4.84E-05 | 0.00026  | 4936.52 | 4098    | 4484.22 | 3286.64 | 2757.73 | 3320.05 |
| ENSMUSG000000021192 | 15_Golga5        | 929.814 | -0.06614 | 0.60047  | 0.70193  | 943.721 | 853.559 | 928.635 | 889.062 | 1025.63 | 938.274 |
| ENSMUSG000000021193 | 9_Pitrm1         | 1072.38 | -0.24171 | 0.03037  | 0.06409  | 1010.57 | 977.463 | 959.709 | 1118.09 | 1202.25 | 1166.19 |
| ENSMUSG000000021194 | 5_Chga           | 15.3441 | -1.82045 | 0.07724  | 0.13926  | 4.34094 | 14.6849 | 1.19515 | 48.691  | 20.6202 | 2.53245 |
| ENSMUSG000000021196 | 13_Pfkp          | 1522.71 | -0.4097  | 0.01163  | 0.0287   | 1284.92 | 1482.26 | 1156.91 | 2040.51 | 1686.37 | 1485.28 |
| ENSMUSG000000021198 | 16_Unc97         | 150.599 | 0.32979  | 0.11641  | 0.19482  | 155.406 | 165.205 | 182.859 | 120.826 | 142.548 | 136.753 |
| ENSMUSG000000021200 | 14_Asb2          | 117.203 | -0.21451 | 0.55513  | 0.66123  | 97.2371 | 146.849 | 81.2705 | 185.747 | 80.6878 | 111.428 |
| ENSMUSG000000021203 | 15_Otub2         | 363.255 | 0.33046  | 0.03006  | 0.06359  | 388.08  | 420.355 | 405.157 | 335.427 | 294.959 | 335.55  |
| ENSMUSG000000021207 | 8_Akr1c21        | 0.15028 | -0.99647 | 0.80707  | NA       | 0       | 0       | 0       | 0.90169 | 0       | 0       |
| ENSMUSG000000021208 | 9_lfi27l2b       | 11.1825 | 0.52124  | 0.43694  | 0.55236  | 10.4183 | 13.7671 | 15.537  | 9.01685 | 10.7584 | 7.59736 |
| ENSMUSG000000021209 | 12_Ppp4r4        | 54.7567 | -0.52571 | 0.18442  | 0.2824   | 40.8049 | 55.9861 | 38.2449 | 73.0365 | 82.4808 | 37.9868 |
| ENSMUSG000000021211 | 3_Akr1c12        | 7.52536 | -0.98331 | 0.2835   | 0.39665  | 6.94551 | 5.50683 | 2.39031 | 5.41011 | 7.17224 | 7.17272 |
| ENSMUSG000000021213 | 11_Akr1c13       | 802.902 | -0.49689 | 0.00079  | 0.00293  | 716.255 | 607.587 | 674.067 | 827.747 | 1047.15 | 944.605 |
| ENSMUSG000000021214 | 13_Akr1c18       | 174.228 | -0.31126 | 0.13408  | 0.21804  | 143.251 | 149.602 | 174.492 | 174.927 | 216.96  | 186.135 |
| ENSMUSG000000021215 | 14_Net1          | 12958   | 0.13037  | 0.3259   | 0.44191  | 13357.9 | 12685.9 | 14584.5 | 10653.4 | 12538   | 13928.5 |
| ENSMUSG000000021217 | 7_Tshz3          | 51.912  | -0.76338 | 0.02736  | 0.05893  | 32.123  | 48.6437 | 34.6595 | 73.0365 | 60.9641 | 62.0451 |
| ENSMUSG000000021218 | 9_Gdi2           | 7214.95 | -0.44389 | 0.00073  | 0.00274  | 6348.19 | 5844.59 | 6147.87 | 7074.62 | 9318.54 | 8555.9  |
| ENSMUSG000000021219 | 16_Rgs6          | 187.298 | -1.366   | 8.23E-09 | 1.45E-07 | 109.392 | 113.808 | 90.8317 | 330.919 | 263.58  | 215.259 |
| ENSMUSG000000021221 | 15_Dpf3          | 37.4047 | -1.51122 | 0.04763  | 0.09308  | 37.3321 | 10.0959 | 10.7564 | 112.711 | 42.1369 | 11.396  |
| ENSMUSG000000021222 | 8_Dcaf4          | 919.573 | 0.70463  | 1.02E-05 | 6.88E-05 | 1112.15 | 1055.48 | 1251.33 | 769.138 | 574.676 | 754.671 |
| ENSMUSG000000021223 | 13_Papln         | 167.625 | 1.90412  | 8.41E-12 | 3.59E-10 | 220.52  | 297.369 | 274.885 | 81.1517 | 45.7231 | 86.1034 |
| ENSMUSG000000021224 | 14_Numb          | 1567.9  | 0.3484   | 0.00421  | 0.01221  | 1640.01 | 1850.3  | 1777.19 | 1285.8  | 1351.07 | 1503.01 |
| ENSMUSG000000021226 | 7_Acot2          | 102.528 | -0.24162 | 0.45748  | 0.57134  | 104.183 | 112.89  | 64.5383 | 148.778 | 92.3426 | 92.4346 |
| ENSMUSG000000021228 | 14_Acot3         | 0.44827 | -2.3261  | 0.56139  | NA       | 0       | 0       | 0       | 0       | 2.68959 | 0       |
| ENSMUSG000000021234 | 9_Fam161b        | 108.193 | -0.36998 | 0.13666  | 0.22116  | 78.137  | 100.041 | 105.174 | 113.612 | 119.239 | 132.954 |
| ENSMUSG000000021235 | 13_Coq6          | 353.38  | 0.45239  | 0.00278  | 0.00862  | 427.149 | 395.574 | 401.572 | 305.671 | 278.821 | 311.492 |
| ENSMUSG000000021236 | 16_Entpd5        | 1022.1  | -0.36298 | 0.00648  | 0.0175   | 924.621 | 964.614 | 791.192 | 1086.53 | 1147.56 | 1218.11 |
| ENSMUSG000000021238 | 10_Aldh6a1       | 1644.76 | -0.53927 | 8.81E-07 | 8.22E-06 | 1310.96 | 1400.57 | 1311.08 | 1865.59 | 2062.02 | 1918.33 |
| ENSMUSG000000021239 | 12_Vsx2          | 144.074 | -1.07049 | 0.01105  | 0.02748  | 68.5869 | 146.849 | 63.3432 | 316.492 | 142.548 | 126.623 |
| ENSMUSG000000021240 | 5_Abcd4          | 471.945 | 0.58848  | 1.24E-05 | 8.18E-05 | 551.3   | 580.053 | 568.893 | 377.806 | 364.888 | 388.732 |
| ENSMUSG000000021241 | 6_Isca2          | 414.42  | -0.18957 | 0.19043  | 0.2897   | 405.444 | 362.533 | 394.401 | 451.744 | 454.541 | 417.855 |
| ENSMUSG000000021242 | 8_Npc2           | 5046.92 | 0.19801  | 0.09705  | 0.16775  | 5907.15 | 5124.11 | 5146.33 | 5105.34 | 4355.35 | 4643.25 |
| ENSMUSG000000021243 | 14_Fcf1          | 708.846 | -0.37168 | 0.00447  | 0.01286  | 665.032 | 574.546 | 614.309 | 765.531 | 834.67  | 798.989 |
| ENSMUSG000000021244 | 15_Ylpm1         | 1437.52 | -0.09228 | 0.48158  | 0.59388  | 1358.71 | 1452.89 | 1361.28 | 1305.64 | 1495.41 | 1651.16 |
| ENSMUSG000000021245 | 14_Mlh3          | 556.162 | -0.52781 | 9.38E-05 | 0.00047  | 479.24  | 446.054 | 441.012 | 623.065 | 699.294 | 648.308 |
| ENSMUSG000000021248 | 8_Tmed10         | 5721.02 | 0.00655  | 0.95382  | 0.96999  | 5643.22 | 5493.07 | 6065.41 | 5160.35 | 5893.79 | 6070.29 |
| ENSMUSG000000021250 | 13_Fos           | 885.327 | 1.44209  | 1.10E-09 | 2.57E-08 | 1431.64 | 946.258 | 1504.7  | 575.275 | 336.199 | 517.887 |
| ENSMUSG000000021252 | 11_0610007P14Rik | 1065.78 | 0.10372  | 0.42352  | 0.53906  | 1124.3  | 980.216 | 1208.3  | 1008.08 | 1020.25 | 1053.5  |
| ENSMUSG000000021253 | 6_Tgfb3          | 1227.29 | -0.32731 | 0.09399  | 0.16336  | 1080.89 | 1200.49 | 984.807 | 1788.04 | 1117.97 | 1191.52 |
| ENSMUSG000000021254 | 8_Gpach2l        | 604.146 | 0.18227  | 0.21293  | 0.31636  | 652.878 | 678.258 | 593.992 | 586.997 | 501.161 | 611.588 |
| ENSMUSG000000021255 | 17_Esrrb         | 53.9764 | -2.0237  | 0.00242  | 0.00764  | 27.782  | 27.5342 | 8.36608 | 159.598 | 81.5843 | 18.9934 |
| ENSMUSG000000021256 | 5_Vash1          | 21.4139 | -0.13891 | 0.80817  | 0.86746  | 18.232  | 18.3561 | 25.0982 | 32.4607 | 24.2063 | 10.1298 |
| ENSMUSG000000021257 | 18_Angel1        | 186.053 | 0.51829  | 0.00578  | 0.0159   | 217.047 | 221.191 | 218.713 | 158.697 | 139.859 | 160.811 |
| ENSMUSG000000021258 | 9_Ccnk           | 619.653 | 0.44768  | 0.00103  | 0.00368  | 678.923 | 680.094 | 786.411 | 508.551 | 518.195 | 545.744 |
| ENSMUSG000000021259 | 4_Cyp46a1        | 27.047  | -0.07101 | 0.89332  | 0.92799  | 33.8593 | 33.041  | 11.9515 | 35.1657 | 24.2063 | 24.0583 |
| ENSMUSG000000021260 | 7_Hhip1          | 6.22844 | -0.31324 | 0.75226  | 0.8253   | 2.60457 | 8.26025 | 5.97577 | 11.7219 | 6.27571 | 2.53245 |
| ENSMUSG000000021262 | 14_Evl           | 238.063 | -0.05998 | 0.82288  | 0.87865  | 250.038 | 278.095 | 170.907 | 322.803 | 196.34  | 210.194 |
| ENSMUSG000000021263 | 10_Degs2         | 35.6396 | 0.13221  | 0.73647  | 0.81334  | 34.7275 | 45.8903 | 31.074  | 33.3624 | 35.8612 | 32.9219 |
| ENSMUSG000000021264 | 11_Yy1           | 1068.74 | -0.01819 | 0.89065  | 0.92635  | 1067    | 1026.11 | 1093.57 | 970.214 | 1205.83 | 1049.7  |
| ENSMUSG000000021265 | 3_Slc25a29       | 79.7014 | 0.31259  | 0.34246  | 0.4589   | 86.8188 | 100.041 | 77.685  | 91.0702 | 46.6196 | 75.9736 |
| ENSMUSG000000021266 | 16_Wars          | 1383.15 | 1.20798  | 1.49E-17 | 2.02E-15 | 1737.25 | 1901.69 | 2152.47 | 875.537 | 740.534 | 891.424 |
| ENSMUSG000000021268 | 17_Meg3          | 1652.54 | -0.3984  | 0.06101  | 0.11449  | 1376.08 | 1661.23 | 1240.57 | 2523.82 | 1652.31 | 1461.23 |
| ENSMUSG000000021270 | 13_Hsp90aa1      | 10107.5 | -0.50171 | 1.89E-05 | 0.00012  | 8756.55 | 7880.28 | 8466.47 | 11023.1 | 13230.1 | 11288.4 |
| ENSMUSG000000021271 | 4_Zfp839         | 421.983 | 0.18346  | 0.19555  | 0.29565  | 425.412 | 452.478 | 468.5   | 399.447 | 378.336 | 407.725 |
| ENSMUSG000000021273 | 9_Fdft1          | 5121.75 | 0.132    | 0.29578  | 0.41013  | 5435.73 | 4815.73 | 5815.62 | 4466.05 | 4841.27 | 5356.14 |
| ENSMUSG000000021275 | 15_Tecpr2        | 546.467 | 0.27749  | 0.07197  | 0.13146  | 571.268 | 650.724 | 574.869 | 560.848 | 450.058 | 471.036 |
| ENSMUSG000000021276 | 9_Cinp           | 492.163 | -0.08885 | 0.59497  | 0.69683  | 499.208 | 399.245 | 533.039 | 462.565 | 533.436 | 525.484 |

|                     |                 |         |          |          |          |         |         |         |         |         |         |
|---------------------|-----------------|---------|----------|----------|----------|---------|---------|---------|---------|---------|---------|
| ENSMUSG000000021277 | 16_Traf3        | 1067.65 | 0.33797  | 0.01851  | 0.04239  | 1086.1  | 1196.82 | 1294.35 | 1053.17 | 834.67  | 940.807 |
| ENSMUSG000000021279 | 4_Cdc42bbp      | 2494.35 | 0.8559   | 3.17E-08 | 4.60E-07 | 2835.5  | 3260.05 | 3544.83 | 2036.91 | 1488.24 | 1800.57 |
| ENSMUSG000000021280 | 8_Exoc3l4       | 52.9123 | 0.58638  | 0.13892  | 0.22424  | 68.5869 | 57.8218 | 64.5383 | 64.0197 | 29.5855 | 32.9219 |
| ENSMUSG000000021281 | 15_Tnfrsf2      | 339.956 | 0.68305  | 0.00246  | 0.00777  | 474.899 | 297.369 | 485.233 | 293.048 | 238.477 | 250.713 |
| ENSMUSG000000021282 | 16_Eif5         | 4746.22 | -0.32593 | 0.02767  | 0.05943  | 4355.7  | 3946.56 | 4334.82 | 4317.27 | 6109.86 | 5413.12 |
| ENSMUSG000000021285 | 14_Ppp1r13b     | 989.975 | 0.43961  | 7.74E-05 | 0.0004   | 1139.06 | 1122.48 | 1156.91 | 837.666 | 817.636 | 866.099 |
| ENSMUSG000000021286 | 7_Zfyve21       | 392.543 | -0.28599 | 0.19273  | 0.29264  | 344.671 | 398.328 | 319.106 | 546.421 | 427.645 | 319.089 |
| ENSMUSG000000021287 | 12_Xrcc3        | 421.398 | 0.62607  | 4.91E-05 | 0.00027  | 485.317 | 518.56  | 529.453 | 335.427 | 294.959 | 364.673 |
| ENSMUSG000000021288 | 18_Klc1         | 2818.97 | 0.5518   | 8.11E-05 | 0.00042  | 3081.2  | 3379.36 | 3593.83 | 2484.14 | 1930.23 | 2445.08 |
| ENSMUSG000000021290 | 5_2010107E04Rik | 1252.75 | -0.82134 | 4.40E-09 | 8.40E-08 | 980.185 | 871.915 | 864.096 | 1458.93 | 1824.44 | 1516.94 |
| ENSMUSG000000021294 | 7_Klf26a        | 977.895 | 1.37148  | 2.79E-12 | 1.32E-10 | 1246.72 | 1339.08 | 1645.73 | 637.492 | 407.025 | 591.328 |
| ENSMUSG000000021298 | 7_Gpr132        | 41.4739 | 2.7639   | 6.69E-07 | 6.48E-06 | 112.864 | 33.9588 | 70.5141 | 12.6236 | 12.5514 | 6.33113 |
| ENSMUSG000000021301 | 8_Hecw1         | 11.7669 | -2.7136  | 0.00238  | 0.00752  | 5.20913 | 2.75342 | 1.19515 | 36.9691 | 14.3445 | 10.1298 |
| ENSMUSG000000021302 | 9_Ggpi1         | 529.553 | -0.55325 | 0.00057  | 0.00222  | 465.349 | 380.889 | 442.207 | 591.506 | 713.638 | 583.731 |
| ENSMUSG000000021303 | 13_Gng4         | 27.5771 | -0.59448 | 0.22693  | 0.33262  | 15.6274 | 26.6164 | 23.9031 | 45.986  | 24.2063 | 29.1232 |
| ENSMUSG000000021306 | 10_Ggpi137b     | 818.728 | -0.17136 | 0.20034  | 0.3014   | 776.16  | 780.135 | 755.337 | 958.492 | 866.049 | 776.197 |
| ENSMUSG000000021311 | 8_Mtr           | 415.45  | -0.11294 | 0.46564  | 0.57915  | 374.189 | 413.93  | 409.938 | 392.233 | 476.954 | 425.452 |
| ENSMUSG000000021313 | 15_Ryr2         | 54.5369 | -1.65977 | 3.02E-05 | 0.00018  | 28.6502 | 28.452  | 21.5128 | 116.317 | 75.3086 | 56.9802 |
| ENSMUSG000000021314 | 11_Amph         | 346.516 | -1.40727 | 2.47E-05 | 0.00015  | 184.924 | 280.849 | 102.783 | 619.458 | 550.47  | 340.615 |
| ENSMUSG000000021318 | 15_Gli3         | 441.949 | -0.35129 | 0.03646  | 0.07456  | 359.43  | 459.821 | 345.4   | 520.273 | 480.54  | 486.231 |
| ENSMUSG000000021319 | 6_Sfrp4         | 156.114 | -0.34671 | 0.15036  | 0.23956  | 151.065 | 138.589 | 121.906 | 201.978 | 134.48  | 188.668 |
| ENSMUSG000000021322 | 7_Aoah          | 20.9548 | 1.5761   | 0.00855  | 0.02214  | 49.4867 | 26.6164 | 17.9273 | 9.01685 | 12.5514 | 10.1298 |
| ENSMUSG000000021326 | 11_Trim27       | 760.324 | 0.06533  | 0.62436  | 0.72195  | 749.247 | 746.176 | 837.803 | 681.674 | 789.843 | 757.204 |
| ENSMUSG000000021327 | 18_Zkscan3      | 1617.86 | -0.37852 | 0.00636  | 0.01725  | 1332.67 | 1460.23 | 1428.21 | 1605.9  | 2102.36 | 1777.78 |
| ENSMUSG000000021335 | 13_Slc17a1      | 1.25785 | -3.8068  | 0.12357  | NA       | 0       | 0       | 0       | 0.90169 | 5.37918 | 1.26623 |
| ENSMUSG000000021336 | 16_Slc17a4      | 0.66102 | -2.86976 | 0.33535  | NA       | 0       | 0       | 0       | 1.80337 | 0.89653 | 1.26623 |
| ENSMUSG000000021337 | 7_Scgn          | 12.6148 | -1.70767 | 0.08528  | 0.15071  | 9.55007 | 4.58903 | 3.58546 | 37.8708 | 18.8271 | 1.26623 |
| ENSMUSG000000021338 | 17_Lrrc16a      | 823.002 | 0.70131  | 4.16E-05 | 0.00023  | 900.311 | 975.627 | 1180.81 | 540.11  | 610.537 | 730.613 |
| ENSMUSG000000021339 | 3_Mrs2          | 385.151 | 0.04838  | 0.73594  | 0.81297  | 381.135 | 399.245 | 394.401 | 360.674 | 391.784 | 383.667 |
| ENSMUSG000000021340 | 12_Gpld1        | 524.561 | 0.02131  | 0.88248  | 0.92066  | 523.518 | 548.848 | 511.526 | 625.683 | 467.989 | 569.802 |
| ENSMUSG000000021342 | 13_Prl          | 1.26215 | -3.81124 | 0.12289  | NA       | 0       | 0       | 0       | 5.41011 | 0.89653 | 1.26623 |
| ENSMUSG000000021345 | 15_Prl8a6       | 0       | NA       | NA       | NA       | 0       | 0       | 0       | 0       | 0       | 0       |
| ENSMUSG000000021356 | 9_Irf4          | 60.5414 | -0.41823 | 0.21076  | 0.31404  | 47.7504 | 66.9998 | 40.6352 | 73.9382 | 74.412  | 59.5127 |
| ENSMUSG000000021357 | 13_Exoc2        | 1587.24 | -0.04924 | 0.66179  | 0.75362  | 1597.47 | 1482.26 | 1600.31 | 1505.81 | 1658.58 | 1679.02 |
| ENSMUSG000000021359 | 15_Tfap2a       | 929.847 | 0.84001  | 3.16E-07 | 3.39E-06 | 1052.24 | 1127.07 | 1399.53 | 642     | 599.779 | 758.47  |
| ENSMUSG000000021360 | 15_Gcnt2        | 236.333 | -0.21309 | 0.27517  | 0.38733  | 228.334 | 191.821 | 237.836 | 281.326 | 260.89  | 217.791 |
| ENSMUSG000000021361 | 6_Tmem14c       | 1289.56 | 0.33458  | 0.00938  | 0.02393  | 1378.68 | 1386.8  | 1548.92 | 1116.29 | 1048.04 | 1258.63 |
| ENSMUSG000000021363 | 13_Mak          | 54.102  | -1.95728 | 0.00234  | 0.00744  | 32.9912 | 20.1917 | 13.1467 | 169.517 | 67.2398 | 21.5259 |
| ENSMUSG000000021364 | 15_Elovl2       | 31.2714 | -1.92441 | 0.00082  | 0.00303  | 15.6274 | 18.3561 | 4.78062 | 60.4129 | 61.8606 | 26.5908 |
| ENSMUSG000000021365 | 14_Nedd9        | 825.603 | -0.43447 | 0.00284  | 0.00878  | 693.683 | 771.874 | 640.603 | 1062.19 | 872.324 | 912.95  |
| ENSMUSG000000021366 | 7_Hivep1        | 2514.61 | 0.38742  | 0.00056  | 0.0022   | 2624.53 | 2905.77 | 3020.15 | 2142.4  | 2097.88 | 2296.94 |
| ENSMUSG000000021367 | 7_Edn1          | 231.684 | 0.01124  | 0.95812  | 0.97286  | 241.356 | 255.15  | 199.591 | 189.354 | 228.615 | 276.037 |
| ENSMUSG000000021368 | 14_Tbc1d7       | 393.129 | 0.07061  | 0.64783  | 0.74231  | 397.63  | 401.081 | 408.743 | 395.84  | 338.889 | 416.589 |
| ENSMUSG000000021371 | 4_Mcur1         | 733.411 | -0.13014 | 0.32788  | 0.4442   | 733.619 | 627.779 | 739.8   | 741.185 | 769.223 | 788.859 |
| ENSMUSG000000021373 | 15_Cap2         | 186.52  | -1.25548 | 6.84E-06 | 4.86E-05 | 104.183 | 147.767 | 77.685  | 325.508 | 225.926 | 238.051 |
| ENSMUSG000000021374 | 9_Nup153        | 2234.49 | -0.08209 | 0.57059  | 0.67532  | 2209.54 | 1986.13 | 2317.4  | 1936.82 | 2589.18 | 2367.84 |
| ENSMUSG000000021375 | 9_Kif13a        | 1872.49 | 0.20436  | 0.14359  | 0.23044  | 1922.17 | 2165.1  | 1925.39 | 1774.52 | 1492.72 | 1955.05 |
| ENSMUSG000000021376 | 10_Tpmt         | 149.861 | -0.69636 | 0.00078  | 0.00291  | 116.337 | 116.561 | 109.954 | 168.615 | 199.03  | 188.668 |
| ENSMUSG000000021377 | 14_Dek          | 2710.67 | -0.32072 | 0.03223  | 0.06741  | 2518.61 | 2132.98 | 2580.34 | 2515.7  | 3358.4  | 3157.97 |
| ENSMUSG000000021379 | 1_Id4           | 201.308 | -0.62364 | 0.00054  | 0.00211  | 158.878 | 153.274 | 163.736 | 245.258 | 253.718 | 232.986 |
| ENSMUSG000000021381 | 4_Bax1          | 0.34389 | 1.87986  | 0.64119  | NA       | 0.86819 | 0       | 1.19515 | 0       | 0       | 0       |
| ENSMUSG000000021384 | 14_Susd3        | 35.3695 | -0.24727 | 0.65918  | 0.75142  | 38.2003 | 33.9588 | 25.0982 | 71.2332 | 25.9994 | 17.7272 |
| ENSMUSG000000021385 | 9_Ippk          | 323.226 | -0.00942 | 0.95968  | 0.97386  | 309.075 | 290.027 | 369.303 | 331.82  | 363.095 | 276.037 |
| ENSMUSG000000021388 | 13_Aspn         | 730.946 | -0.8275  | 2.01E-08 | 3.12E-07 | 578.213 | 524.067 | 478.062 | 1023.41 | 944.943 | 836.976 |
| ENSMUSG000000021390 | 5_Ogn           | 3338.12 | -1.23399 | 4.28E-14 | 3.23E-12 | 2086.26 | 2255.05 | 1632.58 | 5112.56 | 4995.47 | 3946.83 |
| ENSMUSG000000021391 | 9_Cenpp         | 74.7394 | -0.05816 | 0.85175  | 0.89967  | 80.7415 | 61.493  | 77.685  | 60.4129 | 95.9288 | 72.1749 |
| ENSMUSG000000021392 | 7_Nol8          | 505.263 | -0.51379 | 0.00452  | 0.01297  | 408.917 | 384.561 | 455.354 | 472.483 | 667.019 | 643.243 |
| ENSMUSG000000021395 | 10_Spin1        | 3346.96 | -0.05369 | 0.60709  | 0.70709  | 3297.38 | 3139.81 | 3416.95 | 3194.67 | 3530.54 | 3502.38 |
| ENSMUSG000000021396 | 4_Nxn12         | 9.48305 | -2.09063 | 0.07161  | 0.13092  | 6.07732 | 4.58903 | 0       | 24.3455 | 20.6202 | 1.26623 |
| ENSMUSG000000021400 | 6_Wrnip1        | 786.274 | 0.17123  | 0.18543  | 0.28366  | 802.206 | 864.573 | 831.827 | 797.09  | 678.674 | 743.275 |
| ENSMUSG000000021403 | 2_Serpinb9b     | 4.5365  | 2.18434  | 0.07715  | 0.13913  | 12.1546 | 1.83561 | 8.36608 | 1.80337 | 1.79306 | 1.26623 |
| ENSMUSG000000021404 | 12_Serpinb9c    | 3.89196 | -0.21035 | 0.84834  | 0.89697  | 3.47275 | 3.67122 | 3.58546 | 2.70506 | 3.58612 | 6.33113 |
| ENSMUSG000000021408 | 14_Ripk1        | 1169.08 | -0.06861 | 0.63348  | 0.72991  | 1164.24 | 1045.38 | 1214.28 | 1027.02 | 1312.52 | 1251.03 |
| ENSMUSG000000021411 | 15_Pxdc1        | 708.787 | 0.76969  | 1.37E-06 | 1.21E-05 | 843.879 | 804.915 | 1031.42 | 528.388 | 467.989 | 576.133 |
| ENSMUSG000000021413 | 8_Prfp4b        | 2282.66 | -0.36983 | 0.01283  | 0.03115  | 2030.69 | 1946.67 | 1997.1  | 2083.8  | 2919.1  | 2718.59 |
| ENSMUSG000000021414 | 7_Fam217a       | 4.99712 | -0.24166 | 0.82435  | 0.87973  | 6.94551 | 1.83561 | 4.78062 | 2.70506 | 3.58612 | 10.1298 |
| ENSMUSG000000021416 | 11_Eci3         | 17.1608 | -0.88304 | 0.18164  | 0.27904  | 6.94551 | 22.0273 | 7.17092 | 27.0506 | 23.3098 | 16.4609 |
| ENSMUSG000000021417 | 15_Eci2         | 1386.26 | -0.45225 | 0.00018  | 0.00084  | 1258.87 | 1140.83 | 1112.69 | 1673.53 | 1651.41 | 1480.22 |
| ENSMUSG000000021418 | 15_Rpp40        | 206.37  | -0.2381  | 0.19773  | 0.29832  | 193.606 | 178.054 | 197.2   | 219.11  | 243.856 | 206.395 |
| ENSMUSG000000021420 | 12_Fars2        | 315.457 | 0.24163  | 0.13171  | 0.21506  | 349.88  | 331.328 | 344.204 | 313.787 | 263.58  | 289.966 |
| ENSMUSG000000021423 | 5_Ly86          | 120.874 | 0.35168  | 0.16225  | 0.25486  | 161.483 | 121.15  | 124.296 | 120.826 | 107.584 | 89.9021 |
| ENSMUSG000000021427 | 9_Ssr1          | 4778.69 | -0.23979 | 0.04178  | 0.08347  | 4439.92 | 4197.12 | 4509.32 | 4593.19 | 5309.25 | 5623.31 |
| ENSMUSG000000021428 | 8_Riok1         | 586.734 | -0.22596 | 0.13558  | 0.21981  | 550.431 | 543.341 | 528.258 | 541.011 | 700.19  | 657.172 |
| ENSMUSG000000021431 | 14_Snmp48       | 348.789 | -0.26664 | 0.12303  | 0.20378  | 328.175 | 287.273 | 334.643 | 329.115 | 422.266 | 391.264 |
| ENSMUSG000000021432 | 14_Slc35b3      | 412.738 | -0.27354 | 0.11913  | 0.19861  | 424.544 | 312.054 | 384.84  | 421.989 | 494.885 | 438.115 |
| ENSMUSG000000021441 | 4_Cts6          | 0       | NA       | NA       | NA       | 0       | 0       | 0       | 0       | 0       | 0       |
| ENSMUSG000000021448 | 6_Shc3          | 2.96911 | -1.60923 | 0.40964  | 0.52632  | 4.34094 | 0       | 0       | 4.50843 | 8.96531 | 0       |
| ENSMUSG000000021451 | 15_Sema4d       | 2911.96 | 1.01768  | 4.63E-09 | 8.78E-08 | 3649.86 | 3442.69 | 4601.34 | 1871    | 1598.51 | 2308.33 |
| ENSMUSG000000021453 | 2_Gadd45g       | 70.1904 | 2.0792   | 5.12E-09 | 9.60E-08 | 92.8962 | 92.6984 | 155.37  | 28.8539 | 25.9994 | 25.3245 |

|                     |                  |         |          |          |          |         |         |         |         |         |         |
|---------------------|------------------|---------|----------|----------|----------|---------|---------|---------|---------|---------|---------|
| ENSMUSG000000021456 | 7_Fbp2           | 89.4688 | -0.0932  | 0.71445  | 0.79632  | 91.1598 | 84.4381 | 83.6608 | 93.7753 | 82.4808 | 101.298 |
| ENSMUSG000000021457 | 14_Syk           | 1632.71 | 0.6266   | 0.00014  | 0.00066  | 1948.21 | 1758.52 | 2237.33 | 1085.63 | 1240.8  | 1525.8  |
| ENSMUSG000000021458 | 16_2010111101Rik | 814.776 | 0.28933  | 0.03052  | 0.06437  | 951.534 | 889.354 | 847.364 | 804.303 | 676.881 | 719.217 |
| ENSMUSG000000021460 | 16_Auh           | 426.596 | -0.20742 | 0.32211  | 0.43789  | 434.094 | 419.437 | 334.643 | 577.079 | 425.852 | 368.472 |
| ENSMUSG000000021461 | 15_Fancc         | 151.64  | 0.09779  | 0.62673  | 0.72385  | 146.724 | 161.534 | 162.541 | 146.975 | 151.514 | 140.551 |
| ENSMUSG000000021464 | 14_Ror2          | 70.7372 | 0.71474  | 0.03951  | 0.07965  | 79.0051 | 114.726 | 69.3189 | 59.5112 | 38.5508 | 63.3113 |
| ENSMUSG000000021466 | 11_Ptch1         | 708.503 | -0.02172 | 0.8967   | 0.93037  | 698.023 | 728.738 | 683.628 | 871.93  | 641.916 | 626.782 |
| ENSMUSG000000021468 | 7_Sptlc1         | 1734.34 | 0.10977  | 0.40385  | 0.5212   | 1742.45 | 1686.93 | 1970.81 | 1537.37 | 1608.38 | 1860.09 |
| ENSMUSG000000021469 | 9_Msx2           | 64.3886 | 0.60524  | 0.07757  | 0.13974  | 65.9823 | 75.2601 | 92.0269 | 64.0197 | 35.8612 | 53.1815 |
| ENSMUSG000000021470 | 17_Ercc6l2       | 704.9   | -0.37653 | 0.00541  | 0.01505  | 614.677 | 593.82  | 632.237 | 724.053 | 873.221 | 791.392 |
| ENSMUSG000000021474 | 8_Sfxn1          | 912.412 | -0.04422 | 0.70929  | 0.79204  | 910.73  | 902.203 | 880.829 | 902.587 | 886.669 | 991.456 |
| ENSMUSG000000021476 | 8_Habp4          | 477.564 | -0.58087 | 0.00085  | 0.00311  | 399.367 | 379.972 | 369.303 | 690.691 | 527.16  | 498.893 |
| ENSMUSG000000021477 | 8_Ctst           | 38721.7 | -0.09991 | 0.35371  | 0.47055  | 37079.5 | 36279.9 | 38783.9 | 36905.1 | 39440.2 | 43841.8 |
| ENSMUSG000000021478 | 5_Drd1           | 78.5541 | -0.87676 | 0.00314  | 0.00956  | 62.5096 | 62.4108 | 40.6352 | 112.711 | 96.8253 | 96.2332 |
| ENSMUSG000000021481 | 11_Zfp346        | 608.816 | -0.04708 | 0.72603  | 0.8049   | 592.104 | 629.615 | 574.869 | 668.149 | 585.434 | 602.724 |
| ENSMUSG000000021482 | 9_Aaed1          | 770.848 | -0.3991  | 0.00078  | 0.0029   | 685.001 | 641.546 | 668.091 | 852.994 | 897.427 | 880.028 |
| ENSMUSG000000021483 | 7_Cdk20          | 206.232 | 0.45228  | 0.03929  | 0.07933  | 226.597 | 224.862 | 262.934 | 188.452 | 134.48  | 200.064 |
| ENSMUSG000000021484 | 7_Lman2          | 3810.31 | 0.57489  | 7.57E-05 | 0.00039  | 4290.59 | 4376.1  | 5012.48 | 3472.39 | 2564.97 | 3145.31 |
| ENSMUSG000000021485 | 13_Mxd3          | 55.4042 | 1.14321  | 0.00462  | 0.01319  | 86.8188 | 55.0683 | 87.2462 | 49.5927 | 23.3098 | 30.3894 |
| ENSMUSG000000021486 | 6_Prelid1        | 3815.28 | 0.71306  | 4.15E-08 | 5.81E-07 | 4467.7  | 4655.11 | 5096.14 | 3238.85 | 2544.35 | 2889.53 |
| ENSMUSG000000021488 | 7_Nsd1           | 4475.38 | -0.17118 | 0.14283  | 0.22952  | 4363.51 | 4036.51 | 4229.65 | 4208.17 | 5033.12 | 4981.34 |
| ENSMUSG000000021490 | 10_Slc34a1       | 0.64359 | 0.12079  | 0.96515  | NA       | 0.86819 | 0       | 1.19515 | 0.90169 | 0.89653 | 0       |
| ENSMUSG000000021492 | 15_F12           | 0.44998 | -2.33107 | 0.56049  | NA       | 0       | 0       | 0       | 1.80337 | 0.89653 | 0       |
| ENSMUSG000000021493 | 15_Pdlm7         | 485.312 | 0.61113  | 0.00148  | 0.00502  | 517.44  | 625.026 | 617.895 | 470.68  | 311.096 | 369.738 |
| ENSMUSG000000021494 | 8_Ddx41          | 731.269 | 0.70491  | 3.27E-05 | 0.00019  | 928.962 | 837.039 | 953.733 | 663.641 | 457.231 | 547.01  |
| ENSMUSG000000021495 | 8_Fam193b        | 1063.58 | 0.94549  | 1.89E-09 | 4.06E-08 | 1415.15 | 1394.15 | 1391.16 | 862.913 | 598.882 | 719.217 |
| ENSMUSG000000021496 | 12_Pcbd2         | 298.392 | -0.11437 | 0.47934  | 0.59206  | 298.657 | 293.698 | 266.519 | 323.705 | 288.683 | 319.089 |
| ENSMUSG000000021497 | 9_Txndc15        | 731.047 | -0.27611 | 0.02861  | 0.06107  | 657.219 | 706.71  | 619.09  | 776.351 | 820.325 | 806.587 |
| ENSMUSG000000021499 | 12_Catsper3      | 10.8606 | -0.3021  | 0.66675  | 0.7576   | 7.8137  | 11.9315 | 9.56123 | 17.132  | 9.86184 | 8.86359 |
| ENSMUSG000000021500 | 15_Ddx46         | 2450.36 | -0.0681  | 0.5914   | 0.69353  | 2430.93 | 2298.19 | 2447.68 | 2171.26 | 2667.18 | 2686.93 |
| ENSMUSG000000021501 | 4_Caml           | 415.87  | 0.01773  | 0.90985  | 0.93941  | 374.189 | 445.136 | 436.231 | 379.61  | 438.403 | 421.654 |
| ENSMUSG000000021504 | 14_B4galt7       | 296.724 | 0.52895  | 0.00154  | 0.00521  | 339.462 | 344.177 | 368.107 | 265.096 | 217.857 | 245.648 |
| ENSMUSG000000021506 | 7_Pitx1          | 28.932  | 2.17234  | 0.00019  | 0.00087  | 30.3866 | 33.9588 | 77.685  | 12.6236 | 6.27571 | 12.6623 |
| ENSMUSG000000021508 | 10_Xcxl14        | 349.169 | 0.73107  | 0.03383  | 0.07016  | 712.783 | 229.451 | 364.522 | 282.228 | 216.064 | 289.966 |
| ENSMUSG000000021509 | 5_Slc25a48       | 634.914 | 1.29835  | 6.53E-14 | 4.72E-12 | 818.702 | 830.614 | 1058.91 | 395.84  | 312.889 | 392.53  |
| ENSMUSG000000021510 | 10_Zfp729a       | 476.726 | -0.54015 | 0.00241  | 0.00761  | 434.962 | 372.629 | 357.351 | 478.795 | 660.743 | 555.874 |
| ENSMUSG000000021514 | 17_Zfp369        | 311.492 | -0.49983 | 0.00568  | 0.01567  | 287.37  | 275.342 | 210.347 | 364.281 | 378.336 | 353.277 |
| ENSMUSG000000021518 | 3_Ptdss1         | 1874.27 | -0.1648  | 0.15889  | 0.25073  | 1741.59 | 1719.97 | 1839.34 | 1901.65 | 1863.89 | 2179.18 |
| ENSMUSG000000021519 | 10_Mterf3        | 406.349 | -0.53786 | 0.00052  | 0.00207  | 321.23  | 350.602 | 322.692 | 444.531 | 534.332 | 464.705 |
| ENSMUSG000000021520 | 4_Uqcrb          | 2116.2  | -0.67014 | 3.92E-06 | 2.99E-05 | 1679.94 | 1588.72 | 1631.39 | 2180.28 | 3024.89 | 2591.97 |
| ENSMUSG000000021532 | 10_Fastcd3       | 150.666 | -0.08987 | 0.65764  | 0.75041  | 144.119 | 139.506 | 154.175 | 153.287 | 147.031 | 165.876 |
| ENSMUSG000000021534 | 7_1700001L19Rik  | 13.3481 | -1.00235 | 0.12014  | 0.2      | 8.68188 | 11.9315 | 5.97577 | 21.6405 | 17.9306 | 13.9285 |
| ENSMUSG000000021536 | 7_Adcy2          | 305.382 | -0.55611 | 0.00319  | 0.00969  | 250.906 | 275.342 | 213.933 | 372.396 | 311.993 | 407.725 |
| ENSMUSG000000021537 | 8_Cetn3          | 1434.94 | -0.61371 | 1.21E-05 | 8.04E-05 | 1219.8  | 1016.93 | 1166.47 | 1565.33 | 1948.16 | 1692.95 |
| ENSMUSG000000021538 | 3_Ilg            | 0.29884 | -1.76064 | 0.66373  | NA       | 0       | 0       | 0       | 0       | 1.79306 | 0       |
| ENSMUSG000000021539 | 8_Lect2          | 0.79688 | -1.78096 | 0.59759  | NA       | 0       | 0       | 1.19515 | 0       | 3.58612 | 0       |
| ENSMUSG000000021540 | 16_Smad5         | 2437.43 | -0.28996 | 0.01193  | 0.02934  | 2226.9  | 2303.69 | 2048.49 | 2508.49 | 2893.1  | 2643.88 |
| ENSMUSG000000021541 | 13_Trpc7         | 1.55452 | -1.09899 | 0.58978  | NA       | 0       | 1.83561 | 1.19515 | 3.60674 | 2.68959 | 0       |
| ENSMUSG000000021546 | 17_Hnmpk         | 14725   | -0.104   | 0.45177  | 0.56638  | 14433.6 | 13456.9 | 14692   | 12565.9 | 16419.1 | 16782.6 |
| ENSMUSG000000021548 | 10_Ccnh          | 429.357 | -0.40052 | 0.01082  | 0.027    | 387.212 | 379.054 | 343.009 | 430.104 | 522.677 | 514.088 |
| ENSMUSG000000021549 | 13_Rasa1         | 1656    | -0.4313  | 0.0077   | 0.02024  | 1435.12 | 1351.01 | 1444.94 | 1525.65 | 2273.6  | 1905.67 |
| ENSMUSG000000021550 | 5_2210016F16Rik  | 1051.94 | 0.05535  | 0.66971  | 0.7603   | 1061.79 | 981.134 | 1173.64 | 1040.55 | 965.563 | 1088.96 |
| ENSMUSG000000021552 | 6_Gkap1          | 261.803 | -1.05353 | 3.30E-07 | 3.53E-06 | 164.956 | 207.424 | 137.443 | 330.919 | 388.198 | 341.881 |
| ENSMUSG000000021553 | 13_Slc28a3       | 2891.44 | 0.13104  | 0.37551  | 0.49314  | 2982.23 | 2855.29 | 3230.5  | 2259.62 | 3122.62 | 2898.39 |
| ENSMUSG000000021555 | 14_Naa35         | 1851.88 | -0.20217 | 0.12774  | 0.20992  | 1717.28 | 1606.16 | 1842.93 | 1746.56 | 2000.16 | 2198.17 |
| ENSMUSG000000021556 | 11_Golm1         | 722.09  | -0.18073 | 0.17142  | 0.26634  | 656.35  | 736.998 | 637.017 | 735.775 | 810.464 | 755.937 |
| ENSMUSG000000021557 | 14_Agtpbp1       | 429.801 | -0.83472 | 1.32E-07 | 1.60E-06 | 323.834 | 319.396 | 283.252 | 576.177 | 589.917 | 486.231 |
| ENSMUSG000000021559 | 13_Dapk1         | 3705.74 | 0.24297  | 0.04881  | 0.09517  | 3710.64 | 4207.22 | 4131.65 | 3180.24 | 3205.99 | 3798.68 |
| ENSMUSG000000021565 | 16_Slc6a19       | 9.44476 | -0.1931  | 0.79231  | 0.85613  | 10.4183 | 6.42464 | 9.56123 | 7.21348 | 11.6549 | 11.396  |
| ENSMUSG000000021567 | 14_Nkd2          | 661.123 | -0.64267 | 0.0077   | 0.02026  | 476.635 | 671.834 | 400.377 | 999.068 | 827.498 | 591.328 |
| ENSMUSG000000021569 | 9_Trip13         | 203.837 | 0.32083  | 0.15599  | 0.24712  | 219.652 | 199.164 | 260.544 | 141.565 | 207.099 | 194.999 |
| ENSMUSG000000021572 | 8_Cep72          | 158.475 | 0.08772  | 0.68621  | 0.77401  | 174.506 | 134.917 | 180.468 | 150.581 | 147.031 | 163.343 |
| ENSMUSG000000021573 | 14_Tppp          | 1598.81 | -0.18333 | 0.10614  | 0.18061  | 1503.7  | 1448.3  | 1539.36 | 1573.44 | 1718.65 | 1809.44 |
| ENSMUSG000000021575 | 15_Ahrr          | 53.7141 | -0.70435 | 0.088    | 0.15474  | 40.8049 | 40.3834 | 41.8304 | 102.792 | 54.6884 | 41.7855 |
| ENSMUSG000000021576 | 15_Pdcd6         | 1739.83 | 0.02352  | 0.84683  | 0.89588  | 1749.4  | 1606.16 | 1907.47 | 1618.53 | 1816.37 | 1741.06 |
| ENSMUSG000000021577 | 13_Sdha          | 5099.46 | -0.30972 | 0.00153  | 0.00518  | 4658.7  | 4549.56 | 4454.34 | 5981.78 | 5460.77 | 5491.63 |
| ENSMUSG000000021578 | 16_Ccdc127       | 1129.71 | -0.43808 | 0.00021  | 0.00095  | 980.185 | 910.463 | 988.392 | 1229    | 1382.45 | 1287.75 |
| ENSMUSG000000021579 | 4_Lrrc14b        | 2.10458 | -4.52913 | 0.02345  | NA       | 0       | 0       | 0       | 3.60674 | 2.68959 | 6.33113 |
| ENSMUSG000000021583 | 6_Erap1          | 1850.69 | 0.17832  | 0.24192  | 0.34963  | 2016.8  | 1732.82 | 2145.3  | 1458.03 | 1932.92 | 1818.3  |
| ENSMUSG000000021585 | 8_Cast           | 11887.2 | 0.18581  | 0.23888  | 0.34645  | 12765   | 11733.2 | 13455   | 8844.63 | 11341.1 | 13184   |
| ENSMUSG000000021587 | 4_Pcsk1          | 6.09434 | -0.74882 | 0.49945  | 0.61046  | 4.34094 | 9.17806 | 0       | 9.01685 | 8.96531 | 5.06491 |
| ENSMUSG000000021589 | 12_Rhobtb3       | 282.489 | -1.14495 | 5.57E-07 | 5.58E-06 | 199.683 | 193.657 | 133.857 | 425.596 | 435.714 | 306.427 |
| ENSMUSG000000021590 | 6_Spata9         | 9.42852 | -1.56664 | 0.05894  | 0.11124  | 5.20913 | 5.50683 | 3.58546 | 13.523  | 22.4133 | 6.33113 |
| ENSMUSG000000021591 | 7_Glrx           | 897.038 | 0.05875  | 0.67469  | 0.76442  | 1032.28 | 818.683 | 895.17  | 876.438 | 925.22  | 834.444 |
| ENSMUSG000000021592 | 15_Arsk          | 509.945 | -0.67343 | 5.50E-05 | 0.0003   | 427.149 | 428.615 | 321.496 | 580.685 | 650.881 | 650.841 |
| ENSMUSG000000021594 | 10_Srd5a1        | 833.251 | 0.39551  | 0.00272  | 0.00845  | 886.42  | 909.545 | 1044.56 | 714.135 | 687.639 | 757.204 |
| ENSMUSG000000021595 | 18_Nsun2         | 2598.56 | 0.21356  | 0.09404  | 0.16339  | 2850.26 | 2566.18 | 2954.42 | 2129.78 | 2486.08 | 2604.63 |
| ENSMUSG000000021596 | 16_Mctp1         | 51.5077 | -0.7801  | 0.02562  | 0.05578  | 46.014  | 38.5478 | 28.6837 | 57.7079 | 73.5155 | 64.5776 |
| ENSMUSG000000021597 | 16_Sif1          | 284.888 | -0.28755 | 0.11161  | 0.18834  | 288.239 | 232.205 | 248.592 | 277.719 | 330.82  | 331.751 |

|                     |             |         |          |          |          |         |         |         |         |         |         |
|---------------------|-------------|---------|----------|----------|----------|---------|---------|---------|---------|---------|---------|
| ENSMUSG000000021598 | 8_Med10     | 503.693 | 0.14653  | 0.28298  | 0.39613  | 540.013 | 492.862 | 555.747 | 479.697 | 490.402 | 463.439 |
| ENSMUSG000000021604 | 15_Irx4     | 0.30056 | -1.76625 | 0.6627   | NA       | 0       | 0       | 0       | 1.80337 | 0       | 0       |
| ENSMUSG000000021606 | 7_Ndufs6    | 1037.15 | 0.1046   | 0.46704  | 0.58064  | 1040.09 | 1030.7  | 1154.52 | 1145.14 | 887.565 | 964.865 |
| ENSMUSG000000021607 | 8_Mrpl36    | 400.77  | -0.1085  | 0.48165  | 0.59388  | 397.63  | 347.848 | 412.328 | 394.037 | 443.783 | 408.991 |
| ENSMUSG000000021608 | 14_Lpcat1   | 576.577 | -0.05855 | 0.69751  | 0.78353  | 546.091 | 579.135 | 570.089 | 675.362 | 531.643 | 557.14  |
| ENSMUSG000000021609 | 6_Slc6a3    | 17.4734 | -1.38118 | 0.05595  | 0.10638  | 15.6274 | 7.34244 | 5.97577 | 45.986  | 13.448  | 16.4609 |
| ENSMUSG000000021610 | 7_Clptm1l   | 2861.08 | 0.12823  | 0.22127  | 0.3263   | 2967.47 | 2845.2  | 3151.62 | 2617.59 | 2725.45 | 2859.14 |
| ENSMUSG000000021611 | 8_Tert      | 77.0127 | 0.15338  | 0.58134  | 0.6847   | 79.8733 | 91.7806 | 71.7092 | 80.25   | 72.619  | 65.8438 |
| ENSMUSG000000021612 | 14_Slc6a18  | 0       | NA       | NA       | NA       | 0       | 0       | 0       | 0       | 0       | 0       |
| ENSMUSG000000021613 | 8_Hapln1    | 4.5859  | -0.78959 | 0.4759   | 0.58841  | 0.86819 | 4.58903 | 4.78062 | 5.41011 | 8.06878 | 3.79868 |
| ENSMUSG000000021614 | 16_Vcan     | 620.851 | -0.75726 | 3.27E-05 | 0.00019  | 539.145 | 467.163 | 377.669 | 877.34  | 795.223 | 668.568 |
| ENSMUSG000000021615 | 13_Xrcc4    | 295.112 | -0.67656 | 0.00024  | 0.00107  | 244.829 | 212.013 | 224.689 | 318.295 | 421.369 | 349.479 |
| ENSMUSG000000021619 | 5_Atg10     | 185.11  | -0.80252 | 0.00161  | 0.00541  | 144.987 | 157.863 | 101.588 | 238.947 | 282.407 | 184.869 |
| ENSMUSG000000021620 | 4_Acot12    | 1.25481 | -0.61733 | 0.77648  | NA       | 0       | 1.83561 | 1.19515 | 2.70506 | 1.79306 | 0       |
| ENSMUSG000000021621 | 15_Zcchc9   | 705.972 | -0.19335 | 0.17056  | 0.26521  | 676.319 | 625.943 | 674.067 | 669.051 | 831.98  | 758.47  |
| ENSMUSG000000021622 | 3_Ckmt2     | 362.331 | -2.08443 | 4.10E-08 | 5.75E-07 | 103.314 | 183.561 | 127.881 | 931.441 | 261.787 | 566.003 |
| ENSMUSG000000021624 | 9_Cd180     | 53.0695 | 1.67088  | 0.00054  | 0.00213  | 131.096 | 66.082  | 45.4159 | 33.3624 | 25.9994 | 16.4609 |
| ENSMUSG000000021629 | 9_Slc30a5   | 1193.7  | -0.43272 | 0.00037  | 0.00153  | 1056.59 | 993.066 | 997.954 | 1257.85 | 1476.59 | 1380.19 |
| ENSMUSG000000021635 | 13_Rad17    | 445.054 | -0.47227 | 0.00211  | 0.0068   | 354.221 | 362.533 | 402.767 | 472.483 | 569.297 | 509.023 |
| ENSMUSG000000021636 | 14_Marveld2 | 652.691 | 0.53885  | 0.00068  | 0.00259  | 724.069 | 709.464 | 885.609 | 485.107 | 515.505 | 596.393 |
| ENSMUSG000000021638 | 12_Ocln     | 1452.6  | 0.00062  | 0.99679  | 0.99782  | 1449.87 | 1370.28 | 1536.97 | 1242.52 | 1376.17 | 1739.8  |
| ENSMUSG000000021639 | 16_Gtf2h2   | 351.542 | -0.38715 | 0.01844  | 0.04227  | 304.734 | 312.054 | 297.593 | 370.593 | 454.541 | 369.738 |
| ENSMUSG000000021640 | 5_Naip1     | 623.463 | 0.27089  | 0.12316  | 0.20395  | 723.201 | 591.067 | 732.629 | 520.273 | 675.984 | 497.627 |
| ENSMUSG000000021643 | 14_Serf1    | 102.256 | -0.68268 | 0.00853  | 0.0221   | 75.5324 | 65.1642 | 95.6123 | 119.924 | 134.48  | 122.824 |
| ENSMUSG000000021645 | 16_Smn1     | 381.276 | 0.21598  | 0.13651  | 0.22097  | 403.708 | 404.752 | 420.694 | 363.379 | 331.716 | 363.407 |
| ENSMUSG000000021646 | 8_Mccc2     | 459.014 | 0.0699   | 0.63696  | 0.73317  | 434.962 | 482.766 | 493.599 | 487.812 | 423.162 | 431.783 |
| ENSMUSG000000021647 | 6_Cartpt    | 9.6516  | -2.58152 | 0.03342  | 0.06943  | 1.73638 | 6.42464 | 0       | 39.6742 | 6.27571 | 3.79868 |
| ENSMUSG000000021650 | 6_Ptcd2     | 464.119 | 0.02345  | 0.87035  | 0.91205  | 457.535 | 488.273 | 456.549 | 435.514 | 442.886 | 503.958 |
| ENSMUSG000000021660 | 14_Btf3     | 7013.88 | -0.07219 | 0.52905  | 0.63782  | 7124.35 | 6272.28 | 7118.34 | 6566.98 | 7476.17 | 7525.19 |
| ENSMUSG000000021661 | 15_Ankra2   | 561.359 | -0.35958 | 0.00866  | 0.02237  | 503.549 | 507.546 | 463.72  | 594.211 | 678.674 | 620.451 |
| ENSMUSG000000021662 | 9_Arhgef28  | 1146.85 | 0.35307  | 0.0119   | 0.02928  | 1173.79 | 1284.01 | 1400.72 | 955.787 | 929.702 | 1137.07 |
| ENSMUSG000000021665 | 7_Hexb      | 3469.47 | -0.13007 | 0.24467  | 0.35284  | 3252.23 | 3233.43 | 3454    | 3288.45 | 3847.01 | 3741.7  |
| ENSMUSG000000021666 | 16_Gfm2     | 823.485 | 0.06592  | 0.60931  | 0.70898  | 809.152 | 877.422 | 838.998 | 742.989 | 796.119 | 876.229 |
| ENSMUSG000000021668 | 14_Polk     | 462.557 | -0.14745 | 0.35404  | 0.47087  | 433.226 | 413.93  | 470.891 | 448.138 | 555.849 | 453.309 |
| ENSMUSG000000021669 | 14_Col4a3bp | 2319.96 | -0.25617 | 0.03231  | 0.06755  | 2108.83 | 2009.99 | 2225.38 | 2283.97 | 2738.9  | 2552.71 |
| ENSMUSG000000021670 | 14_Hmgcr    | 6613.58 | 0.33514  | 0.02926  | 0.06217  | 7241.56 | 6355.8  | 8536.99 | 5183.79 | 5640.97 | 6722.4  |
| ENSMUSG000000021671 | 8_Poc5      | 394.633 | 0.01013  | 0.94563  | 0.96456  | 368.112 | 392.821 | 427.865 | 378.708 | 405.232 | 395.063 |
| ENSMUSG000000021675 | 4_F2rl2     | 0.99729 | 2.13143  | 0.37315  | NA       | 2.60457 | 0.91781 | 1.19515 | 0       | 0       | 1.26623 |
| ENSMUSG000000021676 | 9_Iqgap2    | 1784.77 | -1.05211 | 6.40E-07 | 6.26E-06 | 1156.43 | 1394.15 | 933.415 | 2930.48 | 2535.39 | 1758.79 |
| ENSMUSG000000021678 | 8_F2rl1     | 733.392 | 0.71982  | 0.00066  | 0.00252  | 918.543 | 840.71  | 976.441 | 444.531 | 467.989 | 752.139 |
| ENSMUSG000000021680 | 7_Crhhp     | 335.125 | -1.54587 | 1.68E-06 | 1.45E-05 | 141.515 | 264.328 | 106.369 | 661.837 | 399.853 | 436.848 |
| ENSMUSG000000021681 | 8_Aggf1     | 1219.38 | -0.17848 | 0.0912   | 0.15941  | 1126.91 | 1135.33 | 1170.06 | 1289.41 | 1280.25 | 1314.34 |
| ENSMUSG000000021684 | 16_Pde8b    | 58.8117 | -0.86874 | 0.0286   | 0.06105  | 36.4639 | 55.0683 | 33.4643 | 106.399 | 70.8259 | 50.6491 |
| ENSMUSG000000021686 | 4_Ap3b1     | 3119.34 | 0.1251   | 0.34099  | 0.45736  | 3185.38 | 3101.27 | 3475.51 | 2649.15 | 2907.45 | 3397.29 |
| ENSMUSG000000021687 | 14_Scamp1   | 3152.74 | -0.28101 | 0.01829  | 0.042    | 2878.04 | 2735.06 | 2925.74 | 3089.17 | 3497.37 | 3791.08 |
| ENSMUSG000000021690 | 9_Jmy       | 1037.73 | -0.49357 | 3.53E-05 | 0.0002   | 902.916 | 807.669 | 876.048 | 1218.18 | 1266.8  | 1154.8  |
| ENSMUSG000000021692 | 8_Dimt1     | 241.205 | -0.12573 | 0.5808   | 0.68431  | 243.961 | 232.205 | 216.323 | 209.191 | 329.027 | 216.525 |
| ENSMUSG000000021693 | 19_Kif2a    | 685.268 | -0.40672 | 0.00924  | 0.02365  | 619.887 | 548.848 | 598.772 | 656.427 | 663.359 | 824.314 |
| ENSMUSG000000021694 | 18_Ercc8    | 239.007 | 0.17735  | 0.29578  | 0.41013  | 244.829 | 249.643 | 266.519 | 225.421 | 213.374 | 234.252 |
| ENSMUSG000000021696 | 8_Elov17    | 389.986 | -1.09981 | 5.65E-07 | 5.64E-06 | 254.379 | 293.698 | 196.005 | 561.75  | 621.296 | 412.79  |
| ENSMUSG000000021697 | 12_Depcd1b  | 44.7646 | 0.07941  | 0.8359   | 0.8879   | 47.7504 | 33.041  | 57.3674 | 35.1657 | 48.4127 | 46.8504 |
| ENSMUSG000000021699 | 17_Pde4d    | 329.496 | -0.5311  | 0.00329  | 0.00995  | 285.634 | 301.04  | 221.104 | 410.267 | 398.06  | 360.875 |
| ENSMUSG000000021700 | 9_Rab3c     | 67.9678 | -2.21275 | 5.46E-06 | 4.00E-05 | 21.7047 | 39.4656 | 10.7564 | 133.449 | 141.652 | 60.7789 |
| ENSMUSG000000021701 | 7_Plk2      | 3884.02 | 0.31926  | 0.00694  | 0.01856  | 4496.35 | 3957.58 | 4481.83 | 3136.96 | 3647.98 | 3583.42 |
| ENSMUSG000000021702 | 7_Thbs4     | 4077.76 | 0.28321  | 0.03864  | 0.07823  | 4380.01 | 4903.84 | 4143.6  | 3615.76 | 3234.68 | 4188.68 |
| ENSMUSG000000021703 | 8_Serinc5   | 1492.94 | 0.00678  | 0.95285  | 0.9693   | 1503.7  | 1430.86 | 1556.09 | 1431.88 | 1603    | 1432.1  |
| ENSMUSG000000021704 | 7_Mtx3      | 734.683 | -0.81741 | 3.24E-08 | 4.71E-07 | 559.113 | 576.382 | 458.939 | 879.143 | 1013.98 | 920.547 |
| ENSMUSG000000021706 | 14_Zfyve16  | 687.185 | -0.77507 | 4.00E-07 | 4.16E-06 | 533.068 | 469.916 | 518.697 | 820.534 | 999.632 | 781.262 |
| ENSMUSG000000021707 | 4_Dhfr      | 445.356 | 0.13198  | 0.4572   | 0.57106  | 523.518 | 390.985 | 482.842 | 379.61  | 476.058 | 419.121 |
| ENSMUSG000000021708 | 16_Rasgrf2  | 93.5721 | -1.68043 | 8.85E-05 | 0.00045  | 52.9595 | 50.4793 | 29.8789 | 224.52  | 132.687 | 70.9087 |
| ENSMUSG000000021709 | 14_Erbb2ip  | 6281.52 | -0.27681 | 0.02835  | 0.06065  | 5765.64 | 5323.27 | 5953.06 | 5954.73 | 7390.1  | 7302.33 |
| ENSMUSG000000021710 | 10_Nln      | 467.576 | 0.04034  | 0.75954  | 0.83087  | 473.163 | 473.588 | 475.671 | 465.27  | 458.127 | 459.64  |
| ENSMUSG000000021711 | 16_Trappc13 | 1272.5  | -0.21463 | 0.13784  | 0.22277  | 1185.95 | 1090.35 | 1258.5  | 1184.81 | 1555.48 | 1359.93 |
| ENSMUSG000000021712 | 14_Trim23   | 649.778 | -0.55739 | 1.71E-05 | 0.00011  | 526.122 | 512.136 | 540.21  | 763.728 | 828.394 | 728.08  |
| ENSMUSG000000021713 | 8_Ppwd1     | 393.654 | -0.361   | 0.04081  | 0.08194  | 365.507 | 299.205 | 369.303 | 378.708 | 483.23  | 465.972 |
| ENSMUSG000000021714 | 14_Cenpk    | 84.7091 | -0.15841 | 0.57724  | 0.68111  | 97.2371 | 66.082  | 76.4899 | 78.4466 | 95.0322 | 94.967  |
| ENSMUSG000000021715 | 12_Cwc27    | 476.205 | -0.31847 | 0.03533  | 0.07275  | 415.862 | 387.314 | 469.696 | 502.239 | 569.297 | 512.822 |
| ENSMUSG000000021716 | 14_Srek1ip1 | 494.861 | -0.41163 | 0.01604  | 0.03772  | 444.512 | 386.396 | 443.402 | 471.582 | 644.605 | 578.666 |
| ENSMUSG000000021719 | 8_Rgs7bp    | 190.687 | -1.16336 | 3.70E-06 | 2.84E-05 | 101.578 | 147.767 | 103.978 | 317.393 | 264.477 | 208.927 |
| ENSMUSG000000021720 | 10_Rnf180   | 25.0306 | -0.73727 | 0.18379  | 0.28161  | 11.2864 | 23.8629 | 21.5128 | 47.7893 | 24.2063 | 21.5259 |
| ENSMUSG000000021721 | 4_Htr1a     | 0.7441  | -1.79146 | 0.53825  | NA       | 0.86819 | 0       | 0       | 1.80337 | 1.79306 | 0       |
| ENSMUSG000000021725 | 8_Parp8     | 585.029 | -0.18917 | 0.22769  | 0.33352  | 532.199 | 482.766 | 626.261 | 570.767 | 662.536 | 635.646 |
| ENSMUSG000000021728 | 7_Emb       | 848.082 | -0.55112 | 0.00034  | 0.00143  | 757.06  | 714.971 | 591.601 | 1044.15 | 1089.28 | 891.424 |
| ENSMUSG000000021730 | 7_Hcn1      | 42.8694 | -2.26297 | 7.26E-05 | 0.00038  | 16.4956 | 19.2739 | 8.36608 | 121.728 | 60.9641 | 30.3894 |
| ENSMUSG000000021731 | 9_Mrps30    | 329.743 | -0.14433 | 0.39974  | 0.5172   | 321.23  | 304.711 | 313.13  | 293.048 | 370.267 | 376.069 |
| ENSMUSG000000021732 | 14_Fgf10    | 398.479 | -1.48885 | 1.30E-11 | 5.29E-10 | 248.302 | 231.287 | 147.004 | 665.444 | 580.952 | 517.887 |
| ENSMUSG000000021733 | 9_Slc4a7    | 340.275 | -0.56986 | 0.00046  | 0.00185  | 298.657 | 248.725 | 274.885 | 413.874 | 429.438 | 376.069 |
| ENSMUSG000000021737 | 3_Psm6d     | 1886.83 | -0.36526 | 0.00444  | 0.01277  | 1667.79 | 1531.82 | 1748.51 | 1885.42 | 2303.19 | 2184.24 |
| ENSMUSG000000021738 | 4_Atxn7     | 1105.47 | 0.1075   | 0.3911   | 0.50852  | 1177.26 | 1090.35 | 1172.45 | 970.214 | 1153.83 | 1068.7  |

|                     |                  |         |          |          |          |         |         |         |         |         |         |
|---------------------|------------------|---------|----------|----------|----------|---------|---------|---------|---------|---------|---------|
| ENSMUSG000000021743 | 5_Fezf2          | 7.01686 | -2.16169 | 0.03019  | 0.0638   | 2.60457 | 2.75342 | 2.39031 | 12.6236 | 17.9306 | 3.79868 |
| ENSMUSG000000021745 | 13_Ptprg         | 1682.66 | 0.00215  | 0.98521  | 0.99     | 1561    | 1736.49 | 1754.49 | 1573.44 | 1738.37 | 1732.2  |
| ENSMUSG000000021747 | 11_4930452B06Rik | 320.523 | 0.125    | 0.4972   | 0.6082   | 316.889 | 300.122 | 386.035 | 294.851 | 277.028 | 348.212 |
| ENSMUSG000000021748 | 8_Pdhb           | 1802.46 | -0.32569 | 0.00201  | 0.00655  | 1656.5  | 1528.15 | 1615.85 | 2040.51 | 2050.37 | 1923.4  |
| ENSMUSG000000021749 | 5_Oit1           | 1202.2  | 0.41255  | 0.00149  | 0.00506  | 1387.37 | 1227.11 | 1504.7  | 1055.87 | 974.529 | 1063.63 |
| ENSMUSG000000021750 | 15_Fam107a       | 448.151 | -1.215   | 4.00E-07 | 4.16E-06 | 266.534 | 345.095 | 197.2   | 782.663 | 578.262 | 519.153 |
| ENSMUSG000000021751 | 13_Acox2         | 11.9921 | -0.85185 | 0.23174  | 0.33791  | 8.68188 | 7.34244 | 9.56123 | 18.9354 | 7.17224 | 20.2596 |
| ENSMUSG000000021752 | 12_Kctd6         | 414.556 | -0.46577 | 0.00299  | 0.00917  | 378.53  | 356.109 | 308.35  | 448.138 | 485.92  | 510.289 |
| ENSMUSG000000021754 | 17_Map3k1        | 2219.54 | 0.31641  | 0.01799  | 0.04146  | 2383.18 | 2439.53 | 2561.22 | 1759.19 | 1889.89 | 2284.27 |
| ENSMUSG000000021756 | 12_Ilf6st        | 4900.07 | -0.0401  | 0.67273  | 0.76287  | 5060.67 | 4723.03 | 4711.3  | 5048.54 | 4850.23 | 5006.66 |
| ENSMUSG000000021758 | 13_Ddx4          | 2.814   | 1.82659  | 0.29579  | 0.41013  | 5.20913 | 0.91781 | 7.17092 | 0       | 3.58612 | 0       |
| ENSMUSG000000021759 | 13_Ppap2a        | 973.498 | -0.44169 | 0.0003   | 0.00128  | 775.292 | 850.806 | 852.145 | 1104.56 | 1193.28 | 1064.9  |
| ENSMUSG000000021760 | 3_Gpx8           | 823.795 | -0.84335 | 9.72E-10 | 2.32E-08 | 600.786 | 602.998 | 565.308 | 999.068 | 1193.28 | 981.326 |
| ENSMUSG000000021763 | 16_BC067074      | 578.789 | -1.1152  | 5.90E-06 | 4.29E-05 | 332.516 | 506.629 | 256.958 | 880.045 | 850.808 | 645.776 |
| ENSMUSG000000021764 | 6_Ndufs4         | 1860.07 | -0.4008  | 0.0004   | 0.00163  | 1620.91 | 1512.54 | 1678    | 2046.83 | 2267.33 | 2034.83 |
| ENSMUSG000000021765 | 7_Fst            | 225.027 | -0.95758 | 0.00034  | 0.00144  | 172.769 | 164.287 | 121.906 | 362.478 | 329.923 | 198.798 |
| ENSMUSG000000021767 | 16_Kat6b         | 1464.77 | -0.13754 | 0.22984  | 0.33598  | 1398.65 | 1496.94 | 1288.38 | 1567.13 | 1514.24 | 1523.27 |
| ENSMUSG000000021768 | 15_Dusp13        | 14.5601 | -0.27827 | 0.67807  | 0.76712  | 13.0228 | 15.6027 | 10.7564 | 24.3455 | 7.17224 | 16.4609 |
| ENSMUSG000000021770 | 10_Samd8         | 987.507 | -0.48759 | 0.00061  | 0.00235  | 874.266 | 790.231 | 803.144 | 1173.09 | 1286.52 | 997.787 |
| ENSMUSG000000021771 | 13_Vdac2         | 4711.04 | -0.18794 | 0.15445  | 0.24497  | 4496.35 | 4339.38 | 4377.85 | 4275.79 | 5692.97 | 5083.9  |
| ENSMUSG000000021772 | 14_Nkiras1       | 324.313 | -0.33819 | 0.02643  | 0.05721  | 297.789 | 282.684 | 278.471 | 373.298 | 345.164 | 368.472 |
| ENSMUSG000000021773 | 10_Comtd1        | 43.8926 | 0.97359  | 0.03359  | 0.06973  | 63.3778 | 44.9725 | 66.9286 | 45.986  | 26.8959 | 15.1947 |
| ENSMUSG000000021774 | 12_Ube2e1        | 1471.79 | -0.32963 | 0.01102  | 0.02743  | 1379.55 | 1152.76 | 1381.6  | 1548.19 | 1749.13 | 1619.5  |
| ENSMUSG000000021775 | 10_Nr1d2         | 4437.39 | -0.25966 | 0.02181  | 0.04874  | 4144.73 | 3952.07 | 4019.3  | 4321.78 | 5036.71 | 5149.74 |
| ENSMUSG000000021779 | 16_Thrb          | 610.379 | -0.90005 | 1.19E-05 | 7.93E-05 | 373.321 | 551.601 | 352.57  | 799.795 | 897.427 | 687.561 |
| ENSMUSG000000021782 | 14_Dlg5          | 1361.59 | 0.58995  | 0.00013  | 0.00064  | 1462.9  | 1658.47 | 1786.76 | 1177.6  | 903.703 | 1180.12 |
| ENSMUSG000000021785 | 7_Ngly1          | 865.176 | -0.37801 | 0.00954  | 0.02427  | 764.874 | 715.888 | 778.045 | 924.228 | 1130.53 | 877.495 |
| ENSMUSG000000021786 | 12_Oxsm          | 327.542 | -0.3004  | 0.07042  | 0.12915  | 285.634 | 287.273 | 307.155 | 323.705 | 355.026 | 406.459 |
| ENSMUSG000000021791 | 6_Dydc2          | 0.21104 | -0.99647 | 0.80707  | NA       | 0       | 0       | 0       | 0       | 0       | 1.26623 |
| ENSMUSG000000021792 | 15_Fam213a       | 1048.11 | -0.90948 | 1.95E-05 | 0.00012  | 745.774 | 895.778 | 542.6   | 1643.77 | 1359.14 | 1101.62 |
| ENSMUSG000000021794 | 15_Glud1         | 3429.4  | -0.046   | 0.69011  | 0.77728  | 3474.49 | 3251.79 | 3396.63 | 3118.93 | 3600.47 | 3734.1  |
| ENSMUSG000000021795 | 9_Sftpd          | 87.702  | 0.03663  | 0.8977   | 0.93106  | 81.6097 | 86.2737 | 98.0026 | 77.545  | 72.619  | 110.162 |
| ENSMUSG000000021796 | 14_Bmpr1a        | 3367.15 | -0.52962 | 3.54E-05 | 0.0002   | 2928.4  | 2821.33 | 2516.99 | 3593.22 | 4431.55 | 3911.37 |
| ENSMUSG000000021797 | 1_9230112D13Rik  | 0.1447  | 0.92709  | 0.82027  | NA       | 0.86819 | 0       | 0       | 0       | 0       | 0       |
| ENSMUSG000000021798 | 13_Ldb3          | 309.304 | -0.94686 | 0.00644  | 0.01743  | 158.01  | 300.122 | 175.688 | 624.868 | 243.856 | 353.277 |
| ENSMUSG000000021799 | 8_Opn4           | 63.9267 | -0.60439 | 0.21861  | 0.32316  | 43.4094 | 83.5203 | 25.0982 | 119.022 | 61.8606 | 50.6491 |
| ENSMUSG000000021803 | 9_Cdhr1          | 614.76  | -0.70083 | 0.00139  | 0.00477  | 460.14  | 513.971 | 431.451 | 691.821 | 692.122 | 571.068 |
| ENSMUSG000000021804 | 5_Rgr            | 3194.6  | -1.65889 | 0.00082  | 0.00303  | 1782.39 | 2014.58 | 812.705 | 7181.92 | 4172.45 | 3203.55 |
| ENSMUSG000000021806 | 3_Nid2           | 625.118 | -0.50242 | 0.04265  | 0.08496  | 501.813 | 686.519 | 363.327 | 918.818 | 687.639 | 592.594 |
| ENSMUSG000000021807 | 5_2700060E02Rik  | 2300.18 | -0.46244 | 0.00093  | 0.00335  | 1968.18 | 1846.62 | 1989.93 | 2331.76 | 3111.86 | 2552.71 |
| ENSMUSG000000021809 | 9_Nudt13         | 351.467 | 0.26905  | 0.09217  | 0.16074  | 395.894 | 350.602 | 406.352 | 343.542 | 295.855 | 316.557 |
| ENSMUSG000000021810 | 2_Ecd            | 994.865 | 0.30634  | 0.0348   | 0.07183  | 1105.2  | 1072    | 1121.05 | 856.601 | 777.292 | 1037.04 |
| ENSMUSG000000021811 | 6_Dnajc9         | 755.77  | -0.29185 | 0.03737  | 0.07612  | 676.319 | 628.697 | 733.825 | 745.694 | 862.462 | 887.625 |
| ENSMUSG000000021814 | 16_Anxa7         | 9372.11 | 0.43771  | 0.00048  | 0.00193  | 10367.9 | 10351.9 | 11627.7 | 7452.43 | 7391.89 | 9040.86 |
| ENSMUSG000000021815 | 3_Mss51          | 21.3724 | 0.17342  | 0.74008  | 0.81622  | 20.8365 | 30.2876 | 16.7322 | 25.2472 | 16.1376 | 18.9934 |
| ENSMUSG000000021816 | 10_Ppp3cb        | 1423.82 | -0.37248 | 0.00255  | 0.00799  | 1277.11 | 1194.07 | 1252.52 | 1490.49 | 1781.41 | 1547.33 |
| ENSMUSG000000021819 | 10_Zswim8        | 2147.25 | 1.0187   | 2.58E-09 | 5.29E-08 | 2663.6  | 2959.01 | 3003.42 | 1713.2  | 1098.25 | 1446.03 |
| ENSMUSG000000021820 | 16_Camk2g        | 994.539 | 0.00882  | 0.94305  | 0.96285  | 974.107 | 1060.07 | 958.514 | 1065.79 | 941.357 | 967.397 |
| ENSMUSG000000021822 | 2_Plau           | 1416.19 | 0.2418   | 0.11751  | 0.19637  | 1498.49 | 1353.76 | 1750.9  | 1166.78 | 1238.11 | 1489.08 |
| ENSMUSG000000021823 | 9_Vcl            | 4920.28 | 0.45715  | 0.00151  | 0.00512  | 5335.02 | 5389.35 | 6354.63 | 3586.9  | 4078.32 | 4777.47 |
| ENSMUSG000000021824 | 12_Ap3m1         | 2712.22 | -0.45769 | 0.00171  | 0.00569  | 2454.37 | 2101.77 | 2300.67 | 2682.51 | 3644.4  | 3089.59 |
| ENSMUSG000000021830 | 13_Txndc16       | 848.935 | -0.97815 | 2.44E-09 | 5.05E-08 | 589.5   | 652.56  | 472.086 | 1183.91 | 1197.76 | 997.787 |
| ENSMUSG000000021831 | 8_Ero1l          | 973.949 | -0.49779 | 0.00038  | 0.00156  | 871.661 | 748.929 | 801.948 | 1021.61 | 1265    | 1134.54 |
| ENSMUSG000000021832 | 7_Psmc6          | 2110.99 | -0.44933 | 0.00326  | 0.00985  | 1952.56 | 1608    | 1793.93 | 2046.83 | 2804.35 | 2460.28 |
| ENSMUSG000000021835 | 16_Bmp4          | 434.44  | -0.6461  | 0.02754  | 0.05922  | 328.175 | 435.958 | 252.178 | 773.646 | 454.541 | 362.141 |
| ENSMUSG000000021838 | 16_Samd4         | 199.149 | -0.80342 | 0.00016  | 0.00076  | 138.042 | 167.041 | 130.272 | 292.146 | 248.339 | 219.057 |
| ENSMUSG000000021840 | 16_Mapk1ip1l     | 2045.17 | 0.12967  | 0.31198  | 0.42692  | 2140.95 | 1992.56 | 2276.77 | 1733.94 | 1989.4  | 2137.39 |
| ENSMUSG000000021843 | 16_Ktn1          | 5316.64 | -0.24924 | 0.09846  | 0.1699   | 4967.77 | 4499.08 | 5108.09 | 4629.25 | 6299.92 | 6395.71 |
| ENSMUSG000000021846 | 8_Peli2          | 1297.34 | 0.17085  | 0.15642  | 0.24764  | 1341.35 | 1362.02 | 1417.45 | 1175.8  | 1143.97 | 1343.47 |
| ENSMUSG000000021848 | 15_Otx2          | 518.232 | -1.27446 | 8.82E-07 | 8.22E-06 | 348.144 | 343.259 | 217.518 | 934.146 | 767.43  | 498.893 |
| ENSMUSG000000021850 | 13_1700011H14Rik | 0.36046 | -1.978   | 0.62369  | NA       | 0       | 0       | 0       | 0       | 0.89653 | 1.26623 |
| ENSMUSG000000021852 | 13_Slc35f4       | 0.75409 | -1.78763 | 0.60306  | NA       | 0       | 0.91781 | 0       | 3.60674 | 0       | 0       |
| ENSMUSG000000021866 | 15_Anxa11        | 3180.33 | 0.65734  | 4.42E-07 | 4.55E-06 | 3548.29 | 3874.06 | 4254.75 | 2518.41 | 2198.29 | 2688.2  |
| ENSMUSG000000021867 | 16_Tmem254b      | 161.185 | -0.25848 | 0.23029  | 0.3364   | 128.492 | 155.109 | 157.76  | 174.927 | 196.34  | 154.48  |
| ENSMUSG000000021868 | 6_Ppif           | 375.852 | 0.70224  | 0.00062  | 0.0024   | 482.713 | 379.054 | 535.429 | 336.329 | 236.684 | 284.901 |
| ENSMUSG000000021870 | 17_Slimap        | 3272.88 | -0.25784 | 0.02029  | 0.04584  | 3020.43 | 2957.17 | 2965.18 | 3216.31 | 3783.36 | 3694.85 |
| ENSMUSG000000021871 | 17_Pnp           | 1525.93 | 0.35583  | 0.01586  | 0.03736  | 1880.5  | 1479.5  | 1780.78 | 1285.8  | 1507.07 | 1221.91 |
| ENSMUSG000000021872 | 7_Rnase10        | 5.65739 | -1.09948 | 0.28395  | 0.39715  | 5.20913 | 0.91781 | 4.78062 | 7.21348 | 10.7584 | 5.06491 |
| ENSMUSG000000021874 | 12_4933413J09Rik | 10.0489 | -0.45355 | 0.52278  | 0.63228  | 8.68188 | 8.26025 | 8.36608 | 11.7219 | 8.06878 | 15.1947 |
| ENSMUSG000000021876 | 14_Rnase4        | 1342.45 | -0.37493 | 0.01801  | 0.0415   | 1310.96 | 1116.05 | 1080.42 | 1770.91 | 1487.34 | 1289.02 |
| ENSMUSG000000021877 | 11_Arf4          | 4334.48 | 0.05106  | 0.71114  | 0.79356  | 4224.6  | 4269.63 | 4739.98 | 3625.68 | 4843.06 | 4303.91 |
| ENSMUSG000000021879 | 12_Dnah12        | 5.79958 | 0.15405  | 0.89101  | 0.92653  | 10.4183 | 1.83561 | 5.97577 | 0.90169 | 8.06878 | 7.59736 |
| ENSMUSG000000021880 | 6_Rnase6         | 18.8717 | 2.04318  | 0.00136  | 0.00469  | 43.4094 | 24.7808 | 22.7079 | 3.60674 | 9.86184 | 8.86359 |
| ENSMUSG000000021884 | 17_Hacl1         | 338.554 | -0.43632 | 0.00724  | 0.01923  | 308.207 | 301.04  | 253.373 | 405.758 | 394.473 | 368.472 |
| ENSMUSG000000021886 | 6_Gpr65          | 49.5123 | 0.90648  | 0.02755  | 0.05923  | 92.028  | 39.4656 | 62.148  | 36.9691 | 32.2751 | 34.1881 |
| ENSMUSG000000021890 | 5_Eaf1           | 1546.17 | -0.06755 | 0.55149  | 0.65768  | 1472.45 | 1432.69 | 1625.41 | 1520.24 | 1594.03 | 1632.17 |
| ENSMUSG000000021891 | 7_Mettl6         | 458.209 | -0.15341 | 0.32497  | 0.441    | 417.599 | 411.177 | 474.476 | 466.171 | 537.918 | 441.913 |
| ENSMUSG000000021892 | 14_Sh3bp5        | 372.097 | -0.31558 | 0.06687  | 0.1237   | 347.275 | 349.684 | 297.593 | 475.188 | 385.508 | 377.336 |
| ENSMUSG000000021893 | 13_Capn7         | 2152.72 | -0.44738 | 0.00355  | 0.01059  | 1926.51 | 1703.45 | 1834.56 | 2025.19 | 2875.17 | 2551.45 |

|                     |                 |         |          |          |          |         |         |         |         |         |         |
|---------------------|-----------------|---------|----------|----------|----------|---------|---------|---------|---------|---------|---------|
| ENSMUSG000000021895 | 9_Arhgef3       | 3381.52 | 0.21265  | 0.10095  | 0.17345  | 3590.83 | 3514.28 | 3783.86 | 2784.4  | 3022.2  | 3593.55 |
| ENSMUSG000000021898 | 14_Asb14        | 13.7519 | -1.76331 | 0.01781  | 0.04108  | 5.20913 | 11.0137 | 2.39031 | 23.4438 | 27.7924 | 12.6623 |
| ENSMUSG000000021900 | 10_Btd          | 415.712 | -0.0216  | 0.91187  | 0.94083  | 397.63  | 435.958 | 405.157 | 530.191 | 372.06  | 353.277 |
| ENSMUSG000000021901 | 10_Bap1         | 1121.15 | 0.34809  | 0.02059  | 0.0464   | 1185.95 | 1239.04 | 1343.35 | 1155.06 | 858.876 | 944.605 |
| ENSMUSG000000021902 | 6_Phf7          | 183.315 | -0.31621 | 0.17085  | 0.26554  | 202.288 | 145.931 | 141.028 | 178.534 | 229.512 | 202.596 |
| ENSMUSG000000021903 | 11_Galnt15      | 161.78  | -0.05649 | 0.79013  | 0.85437  | 168.429 | 154.191 | 152.98  | 187.551 | 141.652 | 165.876 |
| ENSMUSG000000021904 | 5_Sema3g        | 155.57  | -0.18392 | 0.51151  | 0.6218   | 123.283 | 186.315 | 127.881 | 211.896 | 158.686 | 125.356 |
| ENSMUSG000000021905 | 13_Dph3         | 939.478 | -0.20846 | 0.0848   | 0.15008  | 902.916 | 808.587 | 904.732 | 1036.94 | 1017.56 | 966.131 |
| ENSMUSG000000021906 | 13_Oxnad1       | 574.474 | -0.17284 | 0.19509  | 0.29526  | 527.859 | 535.998 | 555.747 | 579.784 | 589.021 | 658.438 |
| ENSMUSG000000021907 | 12_Msmb         | 0.21104 | -0.99647 | 0.80707  | NA       | 0       | 0       | 0       | 0       | 0       | 1.26623 |
| ENSMUSG000000021908 | 9_Gm6768        | 119.247 | -0.36672 | 0.1336   | 0.21749  | 94.6325 | 97.2874 | 120.711 | 135.253 | 115.652 | 151.947 |
| ENSMUSG000000021910 | 15_Nisch        | 5297.33 | 0.40438  | 0.00043  | 0.00175  | 5570.3  | 6510.91 | 6023.58 | 4857.38 | 4240.59 | 4581.21 |
| ENSMUSG000000021911 | 15_Parg         | 969.522 | -0.20098 | 0.15043  | 0.23966  | 909.861 | 859.066 | 937.001 | 892.669 | 1114.39 | 1104.15 |
| ENSMUSG000000021913 | 7_Ogdhl         | 221.894 | -0.61932 | 0.0667   | 0.12343  | 162.351 | 252.397 | 109.954 | 381.413 | 227.719 | 197.531 |
| ENSMUSG000000021916 | 15_Glt8d1       | 641.436 | -0.74945 | 5.61E-06 | 4.11E-05 | 476.635 | 517.642 | 441.012 | 714.135 | 952.115 | 747.074 |
| ENSMUSG000000021917 | 14_Spcs1        | 2045.59 | -0.45626 | 0.00038  | 0.00157  | 1860.53 | 1708.95 | 1603.9  | 2140.6  | 2610.7  | 2348.85 |
| ENSMUSG000000021918 | 9_Nek4          | 305.634 | -0.06963 | 0.67259  | 0.76282  | 270.007 | 307.465 | 317.911 | 293.949 | 331.716 | 312.758 |
| ENSMUSG000000021919 | 7_Chat          | 2.44879 | -2.0084  | 0.25298  | NA       | 0.86819 | 0.91781 | 1.19515 | 9.91854 | 1.79306 | 0       |
| ENSMUSG000000021922 | 15_Ilih4        | 9.29182 | -1.42308 | 0.08574  | 0.15138  | 3.47275 | 9.17806 | 2.39031 | 17.132  | 13.448  | 10.1298 |
| ENSMUSG000000021928 | 8_Ebpl          | 225.906 | -0.72979 | 0.00072  | 0.00272  | 163.219 | 197.328 | 149.394 | 335.427 | 270.752 | 239.317 |
| ENSMUSG000000021929 | 8_Kpna3         | 1502.49 | -0.31778 | 0.02601  | 0.05648  | 1420.36 | 1201.41 | 1391.16 | 1439.99 | 1829.82 | 1732.2  |
| ENSMUSG000000021930 | 14_Spryd7       | 531.11  | -0.12749 | 0.45601  | 0.56995  | 517.44  | 445.136 | 561.722 | 503.14  | 646.399 | 512.822 |
| ENSMUSG000000021932 | 13_Rnaseh2b     | 460.812 | -0.21106 | 0.17346  | 0.26887  | 462.744 | 399.245 | 419.499 | 452.646 | 549.573 | 481.166 |
| ENSMUSG000000021933 | 11_Gucy1b2      | 0.59264 | 1.31812  | 0.67678  | NA       | 1.73638 | 0.91781 | 0       | 0.90169 | 0       | 0       |
| ENSMUSG000000021936 | 11_Mapk8        | 712.129 | -0.36342 | 0.01805  | 0.04156  | 680.66  | 634.204 | 553.356 | 748.399 | 909.082 | 747.074 |
| ENSMUSG000000021938 | 11_Pspc1        | 875.909 | -0.09914 | 0.49412  | 0.60529  | 897.707 | 782.888 | 855.73  | 784.466 | 936.874 | 997.787 |
| ENSMUSG000000021939 | 7_Ctsb          | 17540.6 | 0.29868  | 0.0035   | 0.01047  | 20263.5 | 18078   | 19708.1 | 16517.1 | 14923.6 | 15753.1 |
| ENSMUSG000000021940 | 9_Ptpn20        | 1.1007  | -1.42795 | 0.53728  | NA       | 1.73638 | 0       | 0       | 2.70506 | 0.89653 | 1.26623 |
| ENSMUSG000000021943 | 6_Gdf10         | 148.173 | 0.0441   | 0.886    | 0.92293  | 125.019 | 207.424 | 118.32  | 177.632 | 104.894 | 155.746 |
| ENSMUSG000000021944 | 15_Gata4        | 0.1447  | 0.92709  | 0.82027  | NA       | 0.86819 | 0       | 0       | 0       | 0       | 0       |
| ENSMUSG000000021945 | 8_Zmym2         | 2054.35 | -0.46393 | 0.0015   | 0.00508  | 1798.02 | 1711.71 | 1670.83 | 2038.71 | 2812.42 | 2294.4  |
| ENSMUSG000000021947 | 10_Cryl1        | 394.169 | 0.19433  | 0.29796  | 0.41246  | 421.94  | 428.615 | 411.133 | 435.514 | 290.476 | 377.336 |
| ENSMUSG000000021948 | 15_Prkcδ        | 2814.72 | 0.4286   | 0.00062  | 0.00238  | 3110.72 | 3176.53 | 3400.21 | 2247    | 2231.46 | 2722.39 |
| ENSMUSG000000021950 | 15_Anxa8        | 27708.9 | 0.22978  | 0.0741   | 0.13475  | 30753.8 | 27666.3 | 31310.6 | 22974.9 | 24303.2 | 29244.8 |
| ENSMUSG000000021951 | 5_N6amt2        | 330.792 | -0.09178 | 0.57741  | 0.68118  | 359.43  | 284.52  | 316.716 | 341.739 | 344.268 | 338.083 |
| ENSMUSG000000021952 | 15_Xpo4         | 498.182 | -0.21456 | 0.20762  | 0.31029  | 509.627 | 403.834 | 470.891 | 499.534 | 617.71  | 487.497 |
| ENSMUSG000000021953 | 14_Tdh          | 2.81147 | 0.07318  | 0.95613  | 0.9714   | 4.34094 | 1.83561 | 2.39031 | 3.60674 | 0.89653 | 3.79868 |
| ENSMUSG000000021957 | 6_Tkt           | 115845  | 1.1674   | 1.91E-10 | 5.66E-09 | 144909  | 161034  | 174999  | 76076.1 | 51875.9 | 86176.9 |
| ENSMUSG000000021958 | 4_Pinx1         | 400.102 | 0.13056  | 0.45485  | 0.56886  | 429.753 | 404.752 | 418.304 | 340.837 | 346.061 | 460.907 |
| ENSMUSG000000021959 | 15_Lats2        | 1018.55 | -0.13482 | 0.31049  | 0.42539  | 995.812 | 977.463 | 940.586 | 1198.34 | 1035.49 | 963.599 |
| ENSMUSG000000021961 | 5_4930578106Rik | 0.99844 | 2.22191  | 0.34867  | NA       | 0.86819 | 1.83561 | 2.39031 | 0       | 0.89653 | 0       |
| ENSMUSG000000021962 | 8_Dcp1a         | 1472.41 | 0.37666  | 0.00078  | 0.00291  | 1670.39 | 1603.41 | 1716.24 | 1194.73 | 1312.52 | 1337.14 |
| ENSMUSG000000021963 | 16_Sap18        | 1277.71 | -0.44972 | 0.00119  | 0.00418  | 1065.27 | 1116.05 | 1058.91 | 1273.18 | 1667.55 | 1485.28 |
| ENSMUSG000000021965 | 2_Ska3          | 104.764 | 0.37876  | 0.12929  | 0.21202  | 117.205 | 109.219 | 129.077 | 77.545  | 103.101 | 92.4346 |
| ENSMUSG000000021966 | 7_Prrs52        | 1.50295 | -0.89183 | 0.63204  | NA       | 0.86819 | 0       | 2.39031 | 1.80337 | 2.68959 | 1.26623 |
| ENSMUSG000000021967 | 3_Mrp157        | 181.024 | 0.72683  | 0.00081  | 0.00298  | 223.993 | 190.904 | 262.934 | 151.483 | 126.411 | 130.421 |
| ENSMUSG000000021969 | 7_Zdhhc20       | 2153.45 | -0.32164 | 0.00639  | 0.01732  | 2009.86 | 1758.52 | 1975.59 | 2269.54 | 2574.84 | 2332.39 |
| ENSMUSG000000021972 | 14_Hmbx1        | 1273.74 | 0.2154   | 0.05346  | 0.10237  | 1340.48 | 1347.34 | 1417.45 | 1132.52 | 1157.42 | 1247.23 |
| ENSMUSG000000021973 | 8_Micu2         | 2896.45 | -0.20503 | 0.14526  | 0.23266  | 2736.53 | 2463.39 | 2871.96 | 2675.3  | 3082.27 | 3549.23 |
| ENSMUSG000000021974 | 14_Fgf9         | 24.7813 | -0.68613 | 0.14564  | 0.23312  | 23.4411 | 15.6027 | 17.9273 | 36.0674 | 27.7924 | 27.857  |
| ENSMUSG000000021975 | 7_Ints9         | 644.02  | 0.62957  | 2.18E-05 | 0.00013  | 727.542 | 815.929 | 801.948 | 460.761 | 480.54  | 577.399 |
| ENSMUSG000000021978 | 8_Extl3         | 1812.75 | 0.45793  | 0.00061  | 0.00236  | 2048.06 | 2083.42 | 2163.23 | 1742.06 | 1336.73 | 1503.01 |
| ENSMUSG000000021981 | 9_Cab39l        | 3481.93 | -0.25052 | 0.04582  | 0.09017  | 3282.62 | 3064.55 | 3193.45 | 3284.84 | 4150.94 | 3915.17 |
| ENSMUSG000000021982 | 13_Cdadcl       | 549.678 | -0.47617 | 0.00046  | 0.00185  | 438.435 | 454.314 | 487.623 | 611.343 | 679.57  | 626.782 |
| ENSMUSG000000021983 | 15_Atp8a2       | 48.0194 | -0.80604 | 0.02478  | 0.05424  | 31.2548 | 40.3834 | 33.4643 | 73.0365 | 61.8606 | 48.1166 |
| ENSMUSG000000021986 | 7_Amer2         | 22.4839 | -1.23348 | 0.04414  | 0.08738  | 11.2864 | 18.3561 | 10.7564 | 45.0843 | 36.7578 | 12.6623 |
| ENSMUSG000000021987 | 8_Mtmr6         | 2195.85 | -0.26017 | 0.04399  | 0.08712  | 2074.97 | 1942.99 | 1976.78 | 2085.6  | 2663.59 | 2431.16 |
| ENSMUSG000000021990 | 15_Spata13      | 565.127 | -0.43719 | 0.06664  | 0.12334  | 523.518 | 571.793 | 344.204 | 826.846 | 512.815 | 611.588 |
| ENSMUSG000000021991 | 8_Cacna2d3      | 114.829 | -0.72863 | 0.0026   | 0.00814  | 72.0596 | 99.123  | 88.4414 | 149.68  | 141.652 | 138.019 |
| ENSMUSG000000021993 | 9_Mipep         | 434.775 | -0.24371 | 0.08778  | 0.15443  | 382.871 | 384.561 | 427.865 | 454.449 | 490.402 | 468.504 |
| ENSMUSG000000021994 | 14_Wnt5a        | 1631.14 | -0.57776 | 7.52E-05 | 0.00039  | 1361.32 | 1488.68 | 1074.44 | 1950.35 | 1948.16 | 1963.92 |
| ENSMUSG000000021996 | 16_Esd          | 2459.95 | -0.27113 | 0.02817  | 0.06034  | 2396.2  | 2022.84 | 2269.6  | 2495.87 | 2911.03 | 2664.14 |
| ENSMUSG000000021997 | 4_Lrrc63        | 0.1447  | 0.92709  | 0.82027  | NA       | 0.86819 | 0       | 0       | 0       | 0       | 0       |
| ENSMUSG000000021998 | 16_Lcp1         | 546.18  | 0.78492  | 0.00264  | 0.00824  | 1007.1  | 484.601 | 582.04  | 414.775 | 442.886 | 345.68  |
| ENSMUSG000000021999 | 8_Cpb2          | 0.61187 | 2.73082  | 0.49238  | NA       | 0       | 3.67122 | 0       | 0       | 0       | 0       |
| ENSMUSG000000022000 | 10_Zc3h13       | 1311.11 | 0.10998  | 0.44789  | 0.56284  | 1281.45 | 1335.41 | 1465.26 | 1091.94 | 1245.28 | 1447.3  |
| ENSMUSG000000022003 | 6_Slc25a30      | 116.79  | 0.01188  | 0.95951  | 0.97374  | 100.71  | 128.493 | 123.101 | 121.728 | 116.549 | 110.162 |
| ENSMUSG000000022008 | 3_Gpalpp1       | 1384.95 | -0.32354 | 0.01786  | 0.04118  | 1350.03 | 1177.54 | 1161.69 | 1354.33 | 1620.03 | 1646.09 |
| ENSMUSG000000022009 | 1_Nufip1        | 291.827 | -0.15359 | 0.42277  | 0.53833  | 283.898 | 283.602 | 260.544 | 246.16  | 342.475 | 334.284 |
| ENSMUSG000000022010 | 19_Tsc22d1      | 4485.67 | -0.8529  | 1.65E-08 | 2.66E-07 | 3013.48 | 3836.43 | 2740.49 | 6054.82 | 5992.41 | 5276.37 |
| ENSMUSG000000022012 | 8_Enox1         | 19.3217 | -0.27553 | 0.6165   | 0.71506  | 17.3638 | 22.0273 | 13.1467 | 27.0506 | 22.4133 | 13.9285 |
| ENSMUSG000000022013 | 3_Dnajc15       | 402.789 | -0.16575 | 0.30308  | 0.41795  | 395.894 | 334.081 | 409.938 | 403.955 | 462.61  | 410.258 |
| ENSMUSG000000022014 | 14_Epsti1       | 263.935 | 1.28743  | 2.19E-08 | 3.35E-07 | 383.739 | 278.095 | 461.329 | 144.27  | 145.238 | 170.941 |
| ENSMUSG000000022015 | 8_Tnfsf11       | 1.08037 | 2.3776   | 0.31141  | NA       | 3.47275 | 0.91781 | 1.19515 | 0       | 0.89653 | 0       |
| ENSMUSG000000022016 | 15_Akap11       | 1530.17 | -0.68359 | 2.01E-09 | 4.28E-08 | 1228.49 | 1197.74 | 1095.96 | 1868.29 | 1984.92 | 1805.64 |
| ENSMUSG000000022018 | 7_Rgcc          | 61.3263 | -0.00916 | 0.97629  | 0.98434  | 64.2459 | 62.4108 | 56.1722 | 63.118  | 51.1022 | 70.9087 |
| ENSMUSG000000022019 | 15_Tdrd3        | 748.301 | -0.4163  | 0.00209  | 0.00676  | 648.537 | 605.752 | 669.286 | 773.646 | 925.22  | 867.365 |
| ENSMUSG000000022020 | 14_Naa16        | 223.648 | -0.24431 | 0.25771  | 0.36763  | 213.574 | 198.246 | 203.176 | 218.208 | 304.82  | 203.863 |
| ENSMUSG000000022021 | 13_Diap3        | 451.175 | 0.24866  | 0.20663  | 0.30906  | 550.431 | 424.944 | 493.599 | 320.098 | 454.541 | 463.439 |

|                    |             |         |          |          |          |         |         |         |         |         |         |
|--------------------|-------------|---------|----------|----------|----------|---------|---------|---------|---------|---------|---------|
| ENSMUSG00000022022 | 2_Mtrf1     | 128.421 | -0.70637 | 0.00372  | 0.01102  | 106.787 | 75.2601 | 111.149 | 164.107 | 152.41  | 160.811 |
| ENSMUSG00000022023 | 5_Wbp4      | 1064.09 | -0.35102 | 0.00866  | 0.02236  | 964.557 | 866.408 | 974.051 | 1072.1  | 1196.87 | 1310.54 |
| ENSMUSG00000022024 | 9_Sugt1     | 1030.13 | -0.43535 | 0.00037  | 0.00155  | 913.334 | 847.135 | 867.682 | 1146.04 | 1284.73 | 1121.88 |
| ENSMUSG00000022025 | 13_Lect1    | 64.2681 | -1.12247 | 0.00847  | 0.02198  | 45.1458 | 54.1505 | 21.5128 | 124.433 | 61.8606 | 78.5061 |
| ENSMUSG00000022026 | 6_Olfm4     | 188.445 | -1.09106 | 3.02E-06 | 2.39E-05 | 115.469 | 136.753 | 108.759 | 210.994 | 315.579 | 243.116 |
| ENSMUSG00000022031 | 5_Elp3      | 1216.41 | 0.00611  | 0.96007  | 0.97414  | 1268.42 | 1143.59 | 1244.16 | 1245.23 | 1114.39 | 1282.69 |
| ENSMUSG00000022032 | 14_Scara5   | 807.572 | -0.09262 | 0.5801   | 0.68368  | 804.811 | 746.176 | 794.777 | 1019.81 | 716.328 | 763.535 |
| ENSMUSG00000022033 | 9_Pbk       | 303.417 | -0.12651 | 0.52141  | 0.63103  | 321.23  | 259.739 | 289.227 | 259.685 | 370.267 | 320.355 |
| ENSMUSG00000022034 | 9_Esco2     | 180.318 | 0.1052   | 0.67892  | 0.76772  | 229.202 | 158.78  | 172.102 | 131.646 | 205.306 | 184.869 |
| ENSMUSG00000022035 | 5_Ccdc25    | 1353.76 | -0.15534 | 0.25475  | 0.36426  | 1304.02 | 1180.3  | 1358.89 | 1253.34 | 1569.83 | 1456.16 |
| ENSMUSG00000022037 | 14_Clu      | 15811.8 | 0.03041  | 0.87432  | 0.91476  | 13849.3 | 17810.9 | 16275.6 | 20252.8 | 11966   | 14716.1 |
| ENSMUSG00000022039 | 5_Adam2     | 0.1447  | 0.92709  | 0.82027  | NA       | 0.86819 | 0       | 0       | 0       | 0       | 0       |
| ENSMUSG00000022040 | 7_Ephx2     | 1574.91 | -0.10878 | 0.32906  | 0.44556  | 1484.6  | 1525.39 | 1535.77 | 1517.54 | 1651.41 | 1734.73 |
| ENSMUSG00000022041 | 10_Chrna2   | 13.1974 | -0.35048 | 0.61062  | 0.71013  | 13.0228 | 10.0959 | 11.9515 | 22.5421 | 15.241  | 6.33113 |
| ENSMUSG00000022043 | 18_Trim35   | 933.546 | -0.57271 | 0.00644  | 0.01744  | 728.41  | 926.984 | 596.382 | 1383.19 | 1059.7  | 906.618 |
| ENSMUSG00000022044 | 14_Stmn4    | 7.05862 | -2.63588 | 0.00782  | 0.02054  | 1.73638 | 1.83561 | 2.39031 | 18.0337 | 10.7584 | 7.59736 |
| ENSMUSG00000022048 | 8_Dpysl2    | 296.859 | -0.70968 | 0.00088  | 0.00321  | 246.566 | 240.465 | 188.834 | 379.61  | 435.714 | 289.966 |
| ENSMUSG00000022051 | 15_Bnip3l   | 5735.39 | -0.3946  | 0.00032  | 0.00136  | 5262.09 | 4689.07 | 4915.67 | 6002.52 | 6845.91 | 6697.07 |
| ENSMUSG00000022052 | 8_Ppp2r2a   | 2036.81 | -0.10133 | 0.4747   | 0.58722  | 1936.06 | 1829.19 | 2130.96 | 1787.14 | 2322.91 | 2214.63 |
| ENSMUSG00000022053 | 13_Ebf2     | 55.6396 | -0.81548 | 0.01508  | 0.03575  | 40.8049 | 33.9588 | 46.611  | 84.7584 | 61.8606 | 65.8438 |
| ENSMUSG00000022054 | 11_Nefm     | 54.8457 | -0.27083 | 0.45211  | 0.5666   | 65.9823 | 45.8903 | 37.0498 | 70.3315 | 59.171  | 50.6491 |
| ENSMUSG00000022055 | 7_Nefl      | 48.317  | -1.39504 | 0.00765  | 0.02015  | 28.6502 | 32.1232 | 19.1225 | 119.022 | 61.8606 | 29.1232 |
| ENSMUSG00000022056 | 8_Adam7     | 17.6117 | -1.94383 | 0.00186  | 0.00613  | 7.8137  | 10.0959 | 3.58546 | 36.0674 | 21.5167 | 26.5908 |
| ENSMUSG00000022057 | 7_Adamdec1  | 229.067 | 0.15407  | 0.47755  | 0.59015  | 274.348 | 223.945 | 224.689 | 169.517 | 243.856 | 238.051 |
| ENSMUSG00000022061 | 8_Nkx3-1    | 2.68725 | -0.92957 | 0.59013  | 0.69242  | 0       | 5.50683 | 0       | 2.70506 | 5.37918 | 2.53245 |
| ENSMUSG00000022064 | 9_Pibf1     | 209.478 | -0.56046 | 0.00286  | 0.00883  | 177.979 | 148.685 | 181.663 | 238.947 | 262.683 | 246.914 |
| ENSMUSG00000022066 | 16_Gm21685  | 480.949 | -0.07412 | 0.61169  | 0.71113  | 454.063 | 495.615 | 456.549 | 543.716 | 469.782 | 465.972 |
| ENSMUSG00000022070 | 6_Bora      | 151.589 | 0.34785  | 0.14852  | 0.23706  | 187.529 | 142.26  | 179.273 | 106.399 | 149.721 | 144.35  |
| ENSMUSG00000022074 | 5_Tnfrsf10b | 253.75  | 0.04172  | 0.80294  | 0.86362  | 250.038 | 262.492 | 259.348 | 231.733 | 255.511 | 263.375 |
| ENSMUSG00000022075 | 6_Rhobtb2   | 515.313 | -0.39865 | 0.02185  | 0.04881  | 441.04  | 496.533 | 395.596 | 683.478 | 509.229 | 566.003 |
| ENSMUSG00000022076 | 9_Klhl1     | 6.36932 | -1.09388 | 0.29202  | 0.40585  | 1.73638 | 9.17806 | 1.19515 | 9.01685 | 10.7584 | 6.33113 |
| ENSMUSG00000022085 | 3_Pebp4     | 6.57438 | -1.21262 | 0.25224  | 0.36141  | 4.34094 | 7.34244 | 0       | 12.6236 | 6.27571 | 8.86359 |
| ENSMUSG00000022089 | 8_Bin3      | 468.566 | 0.35232  | 0.03327  | 0.06919  | 567.795 | 471.752 | 535.429 | 388.626 | 372.957 | 474.835 |
| ENSMUSG00000022090 | 10_Pdlim2   | 1218.61 | 1.12244  | 1.30E-07 | 1.58E-06 | 1551.45 | 1422.6  | 2036.54 | 940.458 | 560.332 | 800.255 |
| ENSMUSG00000022091 | 5_Sorbs3    | 780.576 | 0.08308  | 0.70817  | 0.79126  | 729.278 | 946.258 | 733.825 | 1013.49 | 575.573 | 685.029 |
| ENSMUSG00000022092 | 10_Ppp3cc   | 161.233 | -1.01103 | 5.41E-06 | 3.97E-05 | 107.655 | 98.2052 | 115.93  | 245.258 | 220.547 | 179.804 |
| ENSMUSG00000022094 | 15_Slc39a14 | 404.723 | -0.05323 | 0.74474  | 0.8195   | 450.59  | 368.04  | 372.888 | 390.43  | 450.058 | 396.329 |
| ENSMUSG00000022095 | 9_Fam160b2  | 1136.92 | 0.9432   | 1.98E-08 | 3.08E-07 | 1372.61 | 1484.09 | 1630.19 | 863.815 | 612.33  | 858.502 |
| ENSMUSG00000022096 | 14_Hr       | 3762.36 | 1.28627  | 5.18E-08 | 7.07E-07 | 4522.39 | 4747.81 | 6738.28 | 2222.65 | 1471.21 | 2871.8  |
| ENSMUSG00000022097 | 3_Sftpc     | 0.30056 | -1.76625 | 0.6627   | NA       | 0       | 0       | 0       | 1.80337 | 0       | 0       |
| ENSMUSG00000022098 | 9_Bmp1      | 1191.63 | 0.4308   | 0.00407  | 0.01187  | 1337.88 | 1402.41 | 1364.87 | 1199.24 | 867.842 | 977.527 |
| ENSMUSG00000022099 | 16_Dmtn     | 103.479 | 0.0537   | 0.84547  | 0.89466  | 104.183 | 98.2052 | 114.735 | 129.843 | 94.1357 | 79.7723 |
| ENSMUSG00000022100 | 13_Xpo7     | 2065.73 | -0.1648  | 0.14224  | 0.22877  | 1926.51 | 1877.83 | 2040.13 | 2035.1  | 2338.15 | 2176.64 |
| ENSMUSG00000022101 | 5_Fgf17     | 1.41587 | 0.22001  | 0.91843  | NA       | 0.86819 | 3.67122 | 0       | 0       | 2.68959 | 1.26623 |
| ENSMUSG00000022102 | 13_Dok2     | 44.1234 | 1.32616  | 0.00084  | 0.00309  | 72.0596 | 53.2327 | 63.3432 | 26.1489 | 17.0341 | 32.9219 |
| ENSMUSG00000022103 | 9_Gfra2     | 134.998 | -0.53399 | 0.0666   | 0.12327  | 87.687  | 148.685 | 94.4172 | 197.469 | 133.583 | 148.149 |
| ENSMUSG00000022105 | 6_Rb1       | 1089.6  | -0.18458 | 0.23126  | 0.33741  | 1026.2  | 954.518 | 1079.22 | 953.983 | 1301.76 | 1221.91 |
| ENSMUSG00000022106 | 14_Rcbtb2   | 1522.33 | -0.4221  | 0.0001   | 0.00051  | 1329.2  | 1280.34 | 1294.35 | 1674.43 | 1851.34 | 1704.34 |
| ENSMUSG00000022108 | 7_Itn2b     | 24062.5 | 0.14524  | 0.14052  | 0.22642  | 24746.8 | 24499.9 | 26570.7 | 21871.3 | 22473.3 | 24212.8 |
| ENSMUSG00000022109 | 5_Med4      | 562.912 | -0.00887 | 0.95067  | 0.96778  | 550.431 | 576.382 | 555.747 | 498.632 | 587.228 | 609.055 |
| ENSMUSG00000022110 | 13_Suc1a2   | 1576.53 | -0.61623 | 1.81E-07 | 2.10E-06 | 1256.27 | 1214.26 | 1264.47 | 1757.38 | 2082.64 | 1884.15 |
| ENSMUSG00000022111 | 8_Uchl3     | 739.824 | -0.25231 | 0.12037  | 0.20028  | 739.697 | 571.793 | 714.702 | 711.43  | 894.738 | 806.587 |
| ENSMUSG00000022112 | 14_Gpc5     | 0.90416 | 0.97586  | 0.72554  | NA       | 0.86819 | 2.75342 | 0       | 1.80337 | 0       | 0       |
| ENSMUSG00000022113 | 6_Trim52    | 0       | NA       | NA       | NA       | 0       | 0       | 0       | 0       | 0       | 0       |
| ENSMUSG00000022114 | 4_Spry2     | 545.108 | 0.24968  | 0.0872   | 0.15352  | 621.623 | 559.861 | 593.992 | 517.567 | 441.99  | 535.614 |
| ENSMUSG00000022119 | 15_Rbm26    | 1544.62 | -0.1717  | 0.24756  | 0.35645  | 1556.66 | 1366.61 | 1434.18 | 1354.33 | 1804.72 | 1751.19 |
| ENSMUSG00000022120 | 3_Rnf219    | 296.333 | -0.20274 | 0.24412  | 0.35235  | 299.525 | 243.218 | 283.252 | 295.753 | 309.303 | 346.946 |
| ENSMUSG00000022122 | 14_Ednrb    | 2423.19 | -1.79943 | 1.02E-11 | 4.25E-10 | 1052.24 | 1541    | 650.164 | 4447.11 | 3836.25 | 3012.35 |
| ENSMUSG00000022123 | 8_Scel      | 11971.7 | -0.07732 | 0.57612  | 0.68016  | 11795.2 | 11111   | 12046   | 10109.7 | 13316.2 | 13452.4 |
| ENSMUSG00000022124 | 14_Fbxl3    | 2105.42 | -0.4444  | 1.01E-05 | 6.82E-05 | 1863.13 | 1761.27 | 1725.8  | 2393.97 | 2460.98 | 2427.36 |
| ENSMUSG00000022125 | 6_Cln5      | 795.054 | -0.54751 | 4.59E-05 | 0.00025  | 698.892 | 602.08  | 637.017 | 898.079 | 1023.84 | 910.417 |
| ENSMUSG00000022126 | 6_Irg1      | 83.3181 | 6.94384  | 8.81E-17 | 1.10E-14 | 237.015 | 81.6847 | 176.883 | 0       | 1.79306 | 2.53245 |
| ENSMUSG00000022129 | 3_Dct       | 30730   | -1.31433 | 1.32E-07 | 1.60E-06 | 16211.7 | 25076.3 | 11589.4 | 51507   | 45712.3 | 34283.1 |
| ENSMUSG00000022130 | 9_Tgds      | 436.833 | -0.45246 | 0.00131  | 0.00453  | 395.026 | 360.698 | 350.18  | 499.534 | 506.54  | 509.023 |
| ENSMUSG00000022131 | 2_Gpr180    | 1239.7  | -0.37228 | 0.04333  | 0.08605  | 1058.32 | 1219.76 | 964.489 | 1726.73 | 1360.93 | 1107.95 |
| ENSMUSG00000022132 | 15_Cldn10   | 380.801 | -1.67881 | 2.52E-08 | 3.78E-07 | 212.706 | 229.451 | 100.393 | 763.728 | 501.161 | 477.368 |
| ENSMUSG00000022136 | 7_Dnajc3    | 3965.05 | -0.29049 | 0.00437  | 0.01259  | 3603.85 | 3467.47 | 3629.68 | 4066.6  | 4471.89 | 4550.82 |
| ENSMUSG00000022139 | 16_Mbnl2    | 6176.42 | 0.02929  | 0.7998   | 0.86165  | 6244.01 | 5890.48 | 6582.91 | 5487.66 | 6494.47 | 6358.99 |
| ENSMUSG00000022141 | 6_Nipbl     | 2859.19 | -0.25928 | 0.07195  | 0.13143  | 2665.34 | 2594.64 | 2548.07 | 2549.06 | 3519.78 | 3278.26 |
| ENSMUSG00000022142 | 7_Nup155    | 961.032 | -0.08411 | 0.58706  | 0.68963  | 906.389 | 880.176 | 1012.3  | 818.73  | 1065.97 | 1082.62 |
| ENSMUSG00000022144 | 3_Gdnf      | 69.6804 | 0.23138  | 0.45822  | 0.57201  | 59.905  | 91.7806 | 74.0996 | 72.1348 | 55.5849 | 64.5776 |
| ENSMUSG00000022146 | 12_Osmr     | 3557.63 | 0.29975  | 0.07322  | 0.13338  | 3851.28 | 3588.62 | 4337.21 | 2465.21 | 3509.92 | 3593.55 |
| ENSMUSG00000022148 | 15_Fyb      | 95.3796 | 1.15385  | 0.00075  | 0.0028   | 164.088 | 95.4518 | 136.248 | 76.6433 | 61.8606 | 37.9868 |
| ENSMUSG00000022149 | 17_C9       | 0.19919 | 0.92709  | 0.82027  | NA       | 0       | 0       | 1.19515 | 0       | 0       | 0       |
| ENSMUSG00000022150 | 16_Dab2     | 837.861 | -0.57328 | 0.0004   | 0.00166  | 747.51  | 700.286 | 572.479 | 1048.66 | 1094.66 | 863.567 |
| ENSMUSG00000022151 | 16_Ttc33    | 482.925 | -0.53556 | 0.00022  | 0.00099  | 390.685 | 407.506 | 384.84  | 630.278 | 533.436 | 550.809 |
| ENSMUSG00000022156 | 7_Gzme      | 0       | NA       | NA       | NA       | 0       | 0       | 0       | 0       | 0       | 0       |
| ENSMUSG00000022157 | 7_Mcpt8     | 0       | NA       | NA       | NA       | 0       | 0       | 0       | 0       | 0       | 0       |
| ENSMUSG00000022159 | 16_Rab2b    | 512.807 | -0.55527 | 3.56E-05 | 0.0002   | 423.676 | 418.519 | 403.962 | 643.803 | 606.951 | 579.932 |

|                     |                 |         |          |          |          |         |         |         |         |         |         |
|---------------------|-----------------|---------|----------|----------|----------|---------|---------|---------|---------|---------|---------|
| ENSMUSG000000022160 | 17_Mettl3       | 441.396 | -0.035   | 0.81817  | 0.87471  | 409.785 | 448.807 | 449.378 | 396.742 | 475.161 | 468.504 |
| ENSMUSG000000022174 | 8_Dad1          | 1513.61 | 0.34774  | 0.04609  | 0.09059  | 1693.84 | 1666.73 | 1724.61 | 1605    | 1011.29 | 1380.19 |
| ENSMUSG000000022175 | 8_Lrp10         | 2655.79 | 1.05729  | 1.03E-09 | 2.41E-08 | 3151.52 | 3564.76 | 4046.79 | 2032.4  | 1356.45 | 1782.85 |
| ENSMUSG000000022176 | 11_Rem2         | 3.07911 | 0.24589  | 0.85424  | 0.90106  | 6.07732 | 2.75342 | 1.19515 | 1.80337 | 5.37918 | 1.26623 |
| ENSMUSG000000022177 | 8_Haus4         | 230.498 | 0.57562  | 0.0036   | 0.01071  | 283.029 | 287.273 | 258.153 | 219.11  | 178.41  | 157.012 |
| ENSMUSG000000022178 | 10_Ajuba        | 1862.49 | 0.55693  | 0.00019  | 0.00088  | 2033.3  | 1952.17 | 2668.78 | 1547.29 | 1464.03 | 1509.34 |
| ENSMUSG000000022179 | 4_4931414P19Rik | 179.373 | 0.56809  | 0.01201  | 0.0295   | 218.783 | 207.424 | 216.323 | 173.124 | 111.17  | 149.415 |
| ENSMUSG000000022180 | 6_Slc7a8        | 1897.27 | -0.78267 | 0.00031  | 0.00134  | 1357.85 | 1801.65 | 1024.25 | 2957.53 | 2096.09 | 2146.25 |
| ENSMUSG000000022181 | 15_C6           | 6.38877 | 1.02912  | 0.25055  | 0.35963  | 7.8137  | 7.34244 | 10.7564 | 4.50843 | 5.37918 | 2.53245 |
| ENSMUSG000000022184 | 8_Fbxo4         | 410.438 | -0.23928 | 0.13508  | 0.2192   | 401.103 | 362.533 | 364.522 | 389.528 | 453.644 | 491.296 |
| ENSMUSG000000022185 | 18_Acin1        | 3746.06 | 0.45311  | 9.37E-05 | 0.00047  | 4045.76 | 4209.97 | 4732.81 | 3176.64 | 2959.45 | 3351.7  |
| ENSMUSG000000022186 | 14_Oxct1        | 7666.66 | -0.54689 | 5.55E-08 | 7.50E-07 | 6435.01 | 6348.46 | 5907.65 | 8725.61 | 9638.6  | 8944.63 |
| ENSMUSG000000022187 | 2_Gm5546        | 1.56167 | 0.24523  | 0.89297  | NA       | 1.73638 | 0.91781 | 2.39031 | 0       | 1.79306 | 2.53245 |
| ENSMUSG000000022191 | 15_Drosha       | 1646.06 | 0.02098  | 0.85747  | 0.90348  | 1565.34 | 1675    | 1732.97 | 1575.24 | 1556.38 | 1771.45 |
| ENSMUSG000000022193 | 6_Psmb5         | 1589.71 | 0.69413  | 0.00025  | 0.00111  | 2013.33 | 1788.8  | 2092.71 | 1508.52 | 896.531 | 1238.37 |
| ENSMUSG000000022194 | 15_Pabpn1       | 1776.5  | 0.0739   | 0.46108  | 0.57487  | 1822.33 | 1835.61 | 1807.07 | 1721.32 | 1687.27 | 1785.38 |
| ENSMUSG000000022195 | 6_6030458C11Rik | 1493.97 | 0.01434  | 0.90088  | 0.93293  | 1392.57 | 1531.82 | 1579.99 | 1413.84 | 1500.79 | 1544.8  |
| ENSMUSG000000022197 | 15_Pdzd2        | 3828.22 | 0.59263  | 1.02E-05 | 6.88E-05 | 4256.73 | 4408.22 | 5145.14 | 3029.66 | 2733.52 | 3396.02 |
| ENSMUSG000000022199 | 10_Slc22a17     | 803.678 | -0.14196 | 0.62484  | 0.72232  | 643.328 | 1104.12 | 544.99  | 1183.91 | 667.019 | 678.698 |
| ENSMUSG000000022200 | 7_Golph3        | 5040.31 | -0.08509 | 0.50986  | 0.6201   | 4925.23 | 4649.6  | 5099.72 | 4429.98 | 5555.8  | 5581.53 |
| ENSMUSG000000022201 | 15_Zfr          | 3156.48 | -0.34349 | 0.00156  | 0.00525  | 2848.53 | 2771.77 | 2726.15 | 3225.33 | 3724.19 | 3642.93 |
| ENSMUSG000000022203 | 6_Efs           | 593.363 | 0.91379  | 2.04E-05 | 0.00013  | 716.255 | 763.614 | 846.169 | 530.191 | 294.959 | 408.991 |
| ENSMUSG000000022204 | 8_Ngdn          | 593.727 | 0.01585  | 0.9111   | 0.94025  | 599.05  | 563.533 | 628.651 | 639.295 | 531.643 | 600.192 |
| ENSMUSG000000022205 | 15_Sub1         | 3996.91 | -0.52478 | 1.82E-05 | 0.00011  | 3401.56 | 2982.87 | 3449.21 | 4237.02 | 4956.02 | 4954.75 |
| ENSMUSG000000022206 | 6_Npr3          | 1385.49 | -1.39845 | 1.97E-11 | 7.77E-10 | 828.252 | 902.203 | 554.552 | 2047.73 | 2363.25 | 1616.97 |
| ENSMUSG000000022208 | 11_Jph4         | 189.338 | -0.35033 | 0.15937  | 0.25136  | 160.615 | 215.684 | 121.906 | 217.306 | 190.064 | 230.453 |
| ENSMUSG000000022209 | 12_Dhrs2        | 3.86591 | 0.16364  | 0.89104  | 0.92653  | 5.20913 | 4.58903 | 2.39031 | 6.3118  | 0.89653 | 3.79868 |
| ENSMUSG000000022210 | 6_Dhrs4         | 482.459 | 0.33721  | 0.03314  | 0.069    | 485.317 | 531.409 | 598.772 | 391.331 | 416.887 | 471.036 |
| ENSMUSG000000022211 | 8_Lrrc16b       | 52.8783 | -0.14431 | 0.72004  | 0.80078  | 49.4867 | 64.2464 | 37.0498 | 79.3483 | 46.6196 | 40.5193 |
| ENSMUSG000000022212 | 15_Cpne6        | 6.42192 | -1.29508 | 0.28653  | 0.4      | 2.60457 | 7.34244 | 1.19515 | 21.6405 | 4.48265 | 1.26623 |
| ENSMUSG000000022214 | 14_Dcaf11       | 3127.21 | 0.10676  | 0.34032  | 0.45669  | 3286.09 | 3242.61 | 3199.43 | 3261.4  | 2733.52 | 3040.21 |
| ENSMUSG000000022215 | 5_Fitm1         | 24.3579 | -0.79365 | 0.30803  | 0.42303  | 6.94551 | 27.5342 | 19.1225 | 61.3146 | 7.17224 | 24.0583 |
| ENSMUSG000000022216 | 16_Psme1        | 4296.78 | 0.72163  | 5.90E-07 | 5.86E-06 | 5095.4  | 4772.59 | 6180.14 | 2891.71 | 3240.96 | 3599.88 |
| ENSMUSG000000022217 | 14_Emc9         | 236.112 | 0.5469   | 0.00801  | 0.02095  | 264.797 | 289.109 | 286.837 | 222.716 | 150.617 | 202.596 |
| ENSMUSG000000022218 | 15_Tgm1         | 918.589 | 0.8235   | 4.03E-08 | 5.68E-07 | 1132.99 | 1217.93 | 1171.25 | 777.253 | 576.469 | 635.646 |
| ENSMUSG000000022219 | 9_Cideb         | 14.2903 | -0.90392 | 0.16393  | 0.25694  | 13.0228 | 8.26025 | 8.36608 | 22.5421 | 10.7584 | 22.7921 |
| ENSMUSG000000022220 | 13_Adcy4        | 101.17  | 0.60514  | 0.03427  | 0.07093  | 129.36  | 107.383 | 130.272 | 105.497 | 69.9294 | 64.5776 |
| ENSMUSG000000022221 | 13_Ripk3        | 396.091 | 1.48355  | 2.58E-13 | 1.65E-11 | 605.127 | 479.095 | 665.701 | 167.713 | 225.926 | 232.986 |
| ENSMUSG000000022223 | 8_Sdr39u1       | 1111.31 | 0.54232  | 1.76E-05 | 0.00011  | 1300.55 | 1275.75 | 1378.01 | 999.068 | 838.256 | 876.229 |
| ENSMUSG000000022225 | 6_Cma1          | 100.957 | -0.95054 | 0.00206  | 0.00666  | 79.8733 | 63.3286 | 63.3432 | 181.239 | 103.998 | 113.96  |
| ENSMUSG000000022226 | 5_Mcpt2         | 4.17512 | -0.42276 | 0.69745  | 0.78352  | 5.20913 | 1.83561 | 3.58546 | 3.60674 | 4.48265 | 6.33113 |
| ENSMUSG000000022227 | 4_Mcpt1         | 4.43908 | 0.77994  | 0.47116  | 0.58431  | 6.07732 | 3.67122 | 7.17092 | 1.80337 | 5.37918 | 2.53245 |
| ENSMUSG000000022228 | 13_Zscan26      | 1678.7  | -0.3697  | 0.00236  | 0.00748  | 1527.14 | 1441.87 | 1425.82 | 1807.88 | 2100.57 | 1768.92 |
| ENSMUSG000000022229 | 2_Atp12a        | 5.64404 | 1.42612  | 0.17669  | 0.27293  | 6.94551 | 4.58903 | 13.1467 | 0.90169 | 4.48265 | 3.79868 |
| ENSMUSG000000022231 | 9_Sema5a        | 2068.9  | -0.06749 | 0.60651  | 0.70671  | 2000.31 | 2232.1  | 1827.39 | 1911.57 | 2219.81 | 2222.23 |
| ENSMUSG000000022234 | 14_Cct5         | 5334.96 | 0.08946  | 0.42063  | 0.53637  | 5837.7  | 5024.99 | 5637.54 | 5235.19 | 4872.64 | 5401.72 |
| ENSMUSG000000022235 | 14_Cmb1         | 337.777 | -0.7438  | 1.58E-05 | 0.0001   | 268.27  | 263.41  | 225.884 | 420.185 | 471.575 | 377.336 |
| ENSMUSG000000022236 | 9_Ropn1l        | 29.1031 | 0.27411  | 0.54367  | 0.65048  | 24.3093 | 41.3013 | 29.8789 | 29.7556 | 21.5167 | 27.857  |
| ENSMUSG000000022237 | 16_Ankrd33b     | 143.935 | -1.87686 | 1.22E-05 | 8.09E-05 | 79.0051 | 66.082  | 39.4401 | 359.773 | 220.547 | 98.7657 |
| ENSMUSG000000022240 | 9_Ctnnd2        | 92.1445 | -0.87536 | 0.02022  | 0.04569  | 56.4322 | 100.041 | 38.2449 | 124.433 | 142.548 | 91.1683 |
| ENSMUSG000000022241 | 5_Tars          | 1746.37 | 0.30313  | 0.01667  | 0.03891  | 1869.21 | 1742.91 | 2176.38 | 1554.51 | 1532.17 | 1603.04 |
| ENSMUSG000000022243 | 10_Slc45a2      | 600.006 | -1.18917 | 4.27E-05 | 0.00024  | 311.68  | 558.026 | 227.079 | 953.082 | 886.669 | 663.503 |
| ENSMUSG000000022244 | 6_Amacr         | 130.58  | -0.20913 | 0.39832  | 0.5158   | 125.019 | 132.164 | 105.174 | 147.876 | 111.17  | 162.077 |
| ENSMUSG000000022245 | 15_Skor1        | 0.64983 | 2.80989  | 0.34835  | NA       | 0.86819 | 1.83561 | 1.19515 | 0       | 0       | 0       |
| ENSMUSG000000022246 | 13_Rai14        | 1492.51 | -0.09267 | 0.41317  | 0.52933  | 1428.17 | 1419.85 | 1485.58 | 1420.15 | 1608.38 | 1592.91 |
| ENSMUSG000000022247 | 12_Brix1        | 889.825 | -0.41648 | 0.00842  | 0.02187  | 764.874 | 693.861 | 828.242 | 845.781 | 1119.77 | 1086.42 |
| ENSMUSG000000022248 | 14_Rad1         | 221.601 | -0.2887  | 0.11208  | 0.18899  | 194.474 | 189.986 | 213.933 | 222.716 | 243.856 | 264.641 |
| ENSMUSG000000022249 | 13_Ttc23l       | 2.51234 | -1.10608 | 0.44043  | 0.55571  | 0.86819 | 2.75342 | 1.19515 | 4.50843 | 4.48265 | 1.26623 |
| ENSMUSG000000022253 | 14_Nadk2        | 441.657 | -0.62953 | 0.00016  | 0.00075  | 383.739 | 330.41  | 326.277 | 614.949 | 508.333 | 486.231 |
| ENSMUSG000000022255 | 15_Mtdh         | 2163.08 | -0.36719 | 0.00336  | 0.01012  | 1924.77 | 1800.73 | 1942.13 | 2139.7  | 2634.9  | 2536.25 |
| ENSMUSG000000022257 | 3_Laptn4b       | 1997.04 | -0.28244 | 0.03445  | 0.07127  | 1792.81 | 1965.94 | 1648.12 | 2424.63 | 2189.33 | 1961.39 |
| ENSMUSG000000022261 | 5_Sdc2          | 1744.02 | -0.95448 | 1.74E-08 | 2.78E-07 | 1164.24 | 1447.38 | 948.952 | 2460.7  | 2334.57 | 2108.27 |
| ENSMUSG000000022262 | 7_Dnah5         | 6.17743 | -3.04312 | 0.01227  | 0.02998  | 0.86819 | 0.91781 | 2.39031 | 5.41011 | 22.4133 | 5.06491 |
| ENSMUSG000000022263 | 9_Trio          | 1399.52 | 0.20757  | 0.11086  | 0.18732  | 1394.31 | 1573.12 | 1533.38 | 1444.5  | 1184.32 | 1267.49 |
| ENSMUSG000000022265 | 6_Ank           | 2503.17 | 0.27392  | 0.03025  | 0.0639   | 2639.29 | 2827.76 | 2751.24 | 2260.53 | 2000.16 | 2540.05 |
| ENSMUSG000000022269 | 13_March11      | 0.75237 | -1.79164 | 0.53681  | NA       | 0       | 0.91781 | 0       | 1.80337 | 1.79306 | 0       |
| ENSMUSG000000022270 | 15_Fam134b      | 673.734 | -0.74204 | 2.40E-08 | 3.62E-07 | 505.286 | 539.67  | 467.305 | 877.34  | 858.876 | 793.924 |
| ENSMUSG000000022272 | 17_Myo10        | 2060.4  | 0.5198   | 9.29E-05 | 0.00047  | 2195.65 | 2443.2  | 2643.68 | 1754.68 | 1504.38 | 1820.83 |
| ENSMUSG000000022280 | 8_Rnf19a        | 1130.51 | -0.21197 | 0.07024  | 0.1289   | 1042.69 | 989.394 | 1111.49 | 1156.86 | 1256.94 | 1225.71 |
| ENSMUSG000000022283 | 14_Pabpc1       | 11788   | 0.14754  | 0.27703  | 0.38953  | 12211.9 | 11647.9 | 13310.4 | 9402.78 | 11866.5 | 12288.7 |
| ENSMUSG000000022285 | 16_Ywhaz        | 16335.3 | 0.14835  | 0.30085  | 0.41552  | 16497.3 | 15747.7 | 19277.8 | 13129.4 | 16005.8 | 17353.6 |
| ENSMUSG000000022286 | 15_Grh12        | 2536.17 | 0.41758  | 0.01289  | 0.03127  | 2719.17 | 2633.18 | 3348.82 | 1770.91 | 2188.43 | 2556.51 |
| ENSMUSG000000022292 | 15_Rrm2b        | 531.786 | -0.77798 | 1.72E-08 | 2.75E-07 | 405.444 | 408.423 | 360.937 | 678.067 | 698.397 | 639.445 |
| ENSMUSG000000022295 | 7_Atp6v1c1      | 1148.52 | -0.33872 | 0.0105   | 0.02636  | 1057.45 | 946.258 | 1039.78 | 1172.19 | 1428.17 | 1247.23 |
| ENSMUSG000000022296 | 8_Baalc         | 5.38782 | -0.73076 | 0.55875  | 0.6644   | 0       | 2.75342 | 9.56123 | 3.60674 | 6.27571 | 10.1298 |
| ENSMUSG000000022297 | 14_Fzd6         | 4159.46 | 0.20019  | 0.11339  | 0.19071  | 4298.4  | 4365.08 | 4677.83 | 3404.76 | 3858.67 | 4352.02 |
| ENSMUSG000000022299 | 8_Slc25a32      | 269.355 | -0.48513 | 0.00968  | 0.02457  | 226.597 | 242.301 | 203.176 | 270.506 | 316.475 | 357.076 |
| ENSMUSG000000022300 | 9_Dcaf13        | 1011.52 | -0.32947 | 0.03327  | 0.06919  | 897.707 | 800.326 | 991.978 | 957.59  | 1236.32 | 1185.19 |
| ENSMUSG000000022303 | 8_Dcstamp       | 12.2959 | -1.58819 | 0.01823  | 0.04191  | 6.07732 | 6.42464 | 5.97577 | 22.5421 | 18.8271 | 13.9285 |

|                    |                 |         |          |          |          |         |         |         |         |         |         |
|--------------------|-----------------|---------|----------|----------|----------|---------|---------|---------|---------|---------|---------|
| ENSMUSG00000022304 | 12_Dpys         | 0.8961  | -2.10793 | 0.51859  | NA       | 0.86819 | 0       | 0       | 4.50843 | 0       | 0       |
| ENSMUSG00000022305 | 12_Lrp12        | 1308.3  | 0.01116  | 0.92562  | 0.95095  | 1348.3  | 1281.26 | 1308.69 | 1257.85 | 1222.87 | 1430.84 |
| ENSMUSG00000022306 | 8_Zfpm2         | 22.0657 | -0.87118 | 0.07934  | 0.14241  | 15.6274 | 14.6849 | 16.7322 | 29.7556 | 34.0682 | 21.5259 |
| ENSMUSG00000022307 | 15_Oxr1         | 12618.1 | -0.2527  | 0.07094  | 0.12994  | 11844.7 | 11045.8 | 11655.1 | 11410.8 | 13883.7 | 15868.4 |
| ENSMUSG00000022309 | 8_Angpt1        | 248.199 | -1.32508 | 5.17E-07 | 5.22E-06 | 166.692 | 143.178 | 114.735 | 467.975 | 343.371 | 253.245 |
| ENSMUSG00000022311 | 15_Csmd3        | 44.0461 | -2.0093  | 3.33E-05 | 0.00019  | 19.1001 | 25.6986 | 7.17092 | 94.677  | 55.5849 | 62.0451 |
| ENSMUSG00000022312 | 10_Eif3h        | 5766.23 | -0.09623 | 0.31325  | 0.42827  | 5545.99 | 5439.83 | 5735.54 | 5893.42 | 5741.38 | 6241.23 |
| ENSMUSG00000022313 | 10_Utp23        | 276.595 | -0.17992 | 0.31504  | 0.43003  | 265.666 | 260.657 | 250.982 | 248.865 | 315.579 | 317.823 |
| ENSMUSG00000022314 | 9_Rad21         | 4595.87 | -0.03226 | 0.77733  | 0.84451  | 4551.04 | 4452.27 | 4628.83 | 4152.26 | 4752.51 | 5038.32 |
| ENSMUSG00000022321 | 15_Cdh10        | 6.75871 | -1.36609 | 0.2208   | 0.32566  | 3.47275 | 5.50683 | 2.39031 | 21.6405 | 6.27571 | 1.26623 |
| ENSMUSG00000022322 | 7_Shcbp1        | 188.607 | -0.10902 | 0.70425  | 0.7884   | 223.993 | 126.657 | 193.615 | 139.761 | 234.891 | 212.726 |
| ENSMUSG00000022323 | 11_Hrsp12       | 368.032 | -1.0367  | 4.23E-12 | 1.92E-10 | 243.961 | 254.232 | 224.689 | 483.303 | 505.643 | 496.361 |
| ENSMUSG00000022324 | 14_Matn2        | 441.234 | -0.58061 | 0.00433  | 0.01251  | 316.021 | 434.122 | 310.74  | 634.787 | 483.23  | 468.504 |
| ENSMUSG00000022325 | 14_Pop1         | 202.444 | 0.26959  | 0.18959  | 0.28883  | 207.497 | 223.945 | 231.86  | 149.68  | 192.754 | 208.927 |
| ENSMUSG00000022329 | 14_Str3         | 774.186 | -0.41427 | 0.00348  | 0.0104   | 680.66  | 597.491 | 713.507 | 797.09  | 933.288 | 923.079 |
| ENSMUSG00000022330 | 4_Osr2          | 511.877 | 1.3504   | 8.98E-14 | 6.24E-12 | 638.118 | 681.93  | 885.609 | 276.817 | 267.166 | 321.622 |
| ENSMUSG00000022332 | 7_Khdrbs3       | 228.996 | -0.68285 | 0.00407  | 0.01187  | 150.197 | 204.671 | 173.297 | 355.264 | 268.959 | 221.59  |
| ENSMUSG00000022335 | 16_Zfat         | 129.154 | 0.59039  | 0.03384  | 0.07016  | 133.701 | 145.013 | 187.639 | 132.548 | 79.7912 | 96.2332 |
| ENSMUSG00000022336 | 2_Elf3e         | 4823.41 | -0.6329  | 5.68E-06 | 4.14E-05 | 4061.39 | 3595.96 | 3688.25 | 4962.88 | 6684.53 | 5947.47 |
| ENSMUSG00000022337 | 6_Emc2          | 1108.03 | -0.69567 | 1.90E-06 | 1.60E-05 | 934.171 | 807.669 | 794.777 | 1185.72 | 1502.59 | 1423.24 |
| ENSMUSG00000022338 | 6_Eny2          | 705.342 | -0.4818  | 0.00262  | 0.00819  | 599.918 | 564.45  | 602.358 | 723.152 | 979.908 | 762.269 |
| ENSMUSG00000022339 | 8_Ebag9         | 435.268 | -0.31862 | 0.04101  | 0.08227  | 403.708 | 356.109 | 402.767 | 438.219 | 533.436 | 477.368 |
| ENSMUSG00000022340 | 14_Sybu         | 86.1604 | -1.00728 | 0.00257  | 0.00805  | 57.3004 | 72.5066 | 41.8304 | 123.531 | 140.755 | 81.0385 |
| ENSMUSG00000022342 | 5_Kcnv1         | 335.431 | 0.33832  | 0.11396  | 0.19139  | 339.462 | 332.246 | 451.768 | 235.34  | 303.027 | 350.745 |
| ENSMUSG00000022346 | 14_Myc          | 357.981 | 1.4053   | 5.41E-11 | 1.89E-09 | 471.426 | 424.944 | 663.311 | 174.025 | 211.581 | 202.596 |
| ENSMUSG00000022350 | 6_E430025E21Rik | 1645.22 | 0.00256  | 0.98231  | 0.98825  | 1656.5  | 1572.2  | 1711.46 | 1513.03 | 1736.58 | 1681.55 |
| ENSMUSG00000022351 | 14_Sqle         | 5722.27 | 0.28783  | 0.07129  | 0.13046  | 6132.01 | 5746.38 | 6994.04 | 4183.82 | 5185.53 | 6091.82 |
| ENSMUSG00000022353 | 9_Mtss1         | 1391.21 | 0.07942  | 0.56256  | 0.66793  | 1333.54 | 1429.02 | 1527.41 | 1540.98 | 1233.63 | 1282.69 |
| ENSMUSG00000022354 | 3_Ndufb9        | 2004.58 | -0.29009 | 0.00959  | 0.02438  | 1733.77 | 1886.09 | 1792.73 | 2300.2  | 2279.88 | 2034.83 |
| ENSMUSG00000022357 | 2_Klhl38        | 13.6911 | -1.02213 | 0.1399   | 0.22561  | 12.1546 | 6.42464 | 8.36608 | 23.4438 | 8.96531 | 22.7921 |
| ENSMUSG00000022358 | 6_Fbxo32        | 1941.83 | -0.28219 | 0.01479  | 0.03518  | 1663.45 | 1934.73 | 1658.87 | 2112.65 | 2170.5  | 2110.8  |
| ENSMUSG00000022359 | 9_Wdyhvf1       | 364.526 | -0.17253 | 0.32173  | 0.43746  | 329.912 | 328.574 | 370.498 | 333.624 | 444.679 | 379.868 |
| ENSMUSG00000022360 | 7_Atd2          | 784.612 | 0.21155  | 0.25433  | 0.36389  | 895.102 | 725.984 | 904.732 | 562.652 | 832.877 | 786.327 |
| ENSMUSG00000022361 | 14_Zhx1         | 1651.1  | -0.6057  | 1.61E-06 | 1.39E-05 | 1367.4  | 1351.01 | 1209.5  | 1869.19 | 2206.36 | 1903.14 |
| ENSMUSG00000022362 | 13_Gm29394      | 27.1525 | 0.77546  | 0.14078  | 0.2268   | 31.2548 | 19.2739 | 52.5868 | 16.2303 | 23.3098 | 20.2596 |
| ENSMUSG00000022364 | 14_Tbcd1d31     | 438.079 | -0.10352 | 0.48486  | 0.59667  | 426.281 | 414.848 | 425.475 | 404.857 | 479.644 | 477.368 |
| ENSMUSG00000022365 | 5_Der1          | 3123.25 | 0.0986   | 0.30001  | 0.41473  | 3220.11 | 3138.9  | 3330.89 | 3011.63 | 2964.83 | 3073.13 |
| ENSMUSG00000022366 | 12_Slc22a22     | 0       | NA       | NA       | NA       | 0       | 0       | 0       | 0       | 0       | 0       |
| ENSMUSG00000022367 | 7_Has2          | 342.788 | 0.17989  | 0.41698  | 0.53291  | 426.281 | 271.67  | 395.596 | 339.034 | 359.509 | 264.641 |
| ENSMUSG00000022369 | 13_Mtbp         | 234.207 | 0.24765  | 0.24071  | 0.34837  | 303.866 | 200.999 | 258.153 | 213.699 | 225.926 | 202.596 |
| ENSMUSG00000022370 | 13_Mrpl13       | 730.937 | -0.47484 | 0.00087  | 0.0032   | 688.473 | 559.861 | 586.821 | 852.994 | 901.013 | 796.457 |
| ENSMUSG00000022371 | 15_Col14a1      | 1924.36 | -0.11801 | 0.25495  | 0.36445  | 1766.76 | 1870.49 | 1900.3  | 2055.84 | 1929.33 | 2023.43 |
| ENSMUSG00000022372 | 14_Sla          | 83.5963 | 0.96249  | 0.00287  | 0.00884  | 148.46  | 79.8491 | 102.783 | 57.7079 | 51.9988 | 60.7789 |
| ENSMUSG00000022375 | 6_Lrrc6         | 0.59855 | -2.74206 | 0.44803  | NA       | 0       | 0       | 0       | 0.90169 | 2.68959 | 0       |
| ENSMUSG00000022376 | 7_Adcy8         | 10.6635 | -0.86377 | 0.29562  | 0.41     | 2.60457 | 7.34244 | 13.1467 | 20.7388 | 12.5514 | 7.59736 |
| ENSMUSG00000022377 | 16_Asap1        | 1040.82 | -0.20208 | 0.08144  | 0.14537  | 1007.97 | 928.819 | 968.075 | 1163.17 | 1117.08 | 1059.83 |
| ENSMUSG00000022378 | 13_Fam49b       | 1153.43 | 0.01367  | 0.93151  | 0.95466  | 1247.59 | 950.847 | 1278.81 | 1033.33 | 1248.87 | 1161.13 |
| ENSMUSG00000022382 | 14_Wnt7b        | 1604.7  | 0.82936  | 5.46E-05 | 0.00029  | 1793.68 | 1981.54 | 2385.53 | 1377.78 | 815.843 | 1273.82 |
| ENSMUSG00000022383 | 13_Ppara        | 101.388 | 0.0085   | 0.9754   | 0.9838   | 96.3689 | 100.959 | 108.759 | 124.433 | 103.101 | 74.7074 |
| ENSMUSG00000022385 | 10_Gtse1        | 173.468 | 1.51827  | 6.94E-10 | 1.73E-08 | 259.588 | 237.712 | 272.495 | 82.9551 | 69.0329 | 119.025 |
| ENSMUSG00000022386 | 12_Trmu         | 259.272 | 0.3593   | 0.04897  | 0.09542  | 250.906 | 312.054 | 311.935 | 243.455 | 216.96  | 220.323 |
| ENSMUSG00000022387 | 16_Brd1         | 1749.08 | 0.55126  | 2.36E-05 | 0.00014  | 1929.98 | 2066.9  | 2240.91 | 1522.05 | 1256.94 | 1477.69 |
| ENSMUSG00000022388 | 14_Tll8         | 0.44827 | -2.3261  | 0.56139  | NA       | 0       | 0       | 0       | 0       | 2.68959 | 0       |
| ENSMUSG00000022389 | 14_Tef          | 6127.51 | 0.2682   | 0.02151  | 0.04821  | 6938.56 | 6636.65 | 6508.81 | 5694.14 | 4931.81 | 6055.1  |
| ENSMUSG00000022390 | 10_Zc3h7b       | 3260.84 | 0.48006  | 0.00014  | 0.00065  | 3572.6  | 3822.66 | 4000.18 | 2986.38 | 2393.74 | 2789.5  |
| ENSMUSG00000022391 | 15_Rangap1      | 2655.29 | 0.85894  | 1.20E-07 | 1.47E-06 | 3187.99 | 3184.79 | 3895.01 | 1760.99 | 1626.31 | 2276.68 |
| ENSMUSG00000022394 | 14_L3mbtl2      | 481.36  | 0.46597  | 0.00484  | 0.01371  | 554.772 | 536.916 | 583.235 | 450.843 | 334.406 | 427.985 |
| ENSMUSG00000022400 | 8_Rbx1          | 2291.48 | -0.26907 | 0.01274  | 0.03096  | 2113.17 | 1928.31 | 2194.3  | 2422.83 | 2536.28 | 2553.98 |
| ENSMUSG00000022401 | 11_Xpnpep3      | 410.307 | -0.22408 | 0.12879  | 0.21135  | 379.398 | 357.944 | 397.986 | 411.169 | 445.576 | 469.77  |
| ENSMUSG00000022403 | 14_St13         | 3355.54 | -0.20286 | 0.06349  | 0.11842  | 3089.01 | 3002.14 | 3268.75 | 3301.97 | 3695.5  | 3775.89 |
| ENSMUSG00000022404 | 7_Slc25a17      | 2221.03 | 0.09077  | 0.50644  | 0.61679  | 2370.15 | 2057.72 | 2444.09 | 1877.31 | 2230.57 | 2346.32 |
| ENSMUSG00000022407 | 8_Ads1          | 987.129 | 0.51183  | 1.47E-05 | 9.52E-05 | 1128.64 | 1133.49 | 1220.25 | 859.306 | 787.154 | 793.924 |
| ENSMUSG00000022408 | 6_Fam83f        | 1006.58 | 0.68191  | 9.48E-06 | 6.46E-05 | 1172.92 | 1169.28 | 1376.82 | 733.972 | 684.949 | 901.554 |
| ENSMUSG00000022412 | 12_Mief1        | 676.229 | 0.14231  | 0.32443  | 0.44062  | 672.846 | 671.834 | 784.021 | 580.685 | 655.364 | 692.626 |
| ENSMUSG00000022414 | 7_Tab1          | 654.989 | 1.02744  | 1.32E-07 | 1.60E-06 | 810.888 | 905.874 | 919.074 | 505.84  | 314.682 | 473.569 |
| ENSMUSG00000022415 | 12_Syng1        | 747.463 | -0.82064 | 0.00701  | 0.01872  | 512.231 | 772.792 | 335.838 | 1337.2  | 839.153 | 687.561 |
| ENSMUSG00000022416 | 15_Cacna1i      | 237.045 | 1.57599  | 2.82E-13 | 1.79E-11 | 317.757 | 306.547 | 441.012 | 116.317 | 116.549 | 124.09  |
| ENSMUSG00000022419 | 15_Deptor       | 487.765 | -1.0992  | 2.41E-06 | 1.97E-05 | 319.493 | 399.245 | 211.542 | 686.183 | 744.12  | 566.003 |
| ENSMUSG00000022420 | 15_Dnal4        | 500.227 | 0.7814   | 0.00025  | 0.00109  | 607.732 | 634.204 | 656.14  | 486.91  | 277.028 | 339.349 |
| ENSMUSG00000022421 | 18_Nptxr        | 160.53  | -0.0758  | 0.77581  | 0.84329  | 140.647 | 198.246 | 130.272 | 206.486 | 153.307 | 134.22  |
| ENSMUSG00000022422 | 13_Dscc1        | 72.198  | 0.2564   | 0.40312  | 0.52058  | 97.2371 | 68.8354 | 69.3189 | 55.9045 | 73.5155 | 68.3763 |
| ENSMUSG00000022425 | 15_Enpp2        | 2454.32 | -1.81162 | 7.86E-05 | 0.0004   | 936.775 | 1706.2  | 621.48  | 4361.45 | 4166.18 | 2933.85 |
| ENSMUSG00000022426 | 5_Josd1         | 1175.44 | 0.08363  | 0.48428  | 0.59622  | 1175.53 | 1195.9  | 1256.11 | 1118.09 | 1068.66 | 1238.37 |
| ENSMUSG00000022427 | 3_Tomm22        | 1279.82 | 0.03094  | 0.78583  | 0.85141  | 1253.66 | 1249.13 | 1378.01 | 1250.64 | 1225.56 | 1321.94 |
| ENSMUSG00000022428 | 7_Cby1          | 280.075 | -0.09734 | 0.65839  | 0.75082  | 283.898 | 290.027 | 237.836 | 368.789 | 233.994 | 265.908 |
| ENSMUSG00000022429 | 10_Dmc1         | 6.1357  | -0.81033 | 0.38964  | 0.50703  | 3.47275 | 7.34244 | 2.39031 | 5.41011 | 8.06878 | 10.1298 |
| ENSMUSG00000022431 | 2_Ribc2         | 5.26335 | 1.70948  | 0.14284  | 0.22952  | 10.4183 | 9.17806 | 4.78062 | 5.41011 | 1.79306 | 0       |
| ENSMUSG00000022432 | 6_Smc1b         | 74.9524 | -0.07655 | 0.802    | 0.86308  | 86.8188 | 70.671  | 60.9529 | 62.2163 | 90.5496 | 78.5061 |
| ENSMUSG00000022433 | 18_Csnk1e       | 1695.31 | 0.62318  | 3.57E-06 | 2.76E-05 | 1976    | 2095.35 | 2096.3  | 1503.11 | 1153.83 | 1347.27 |

|                     |                  |         |          |          |          |         |         |         |         |         |         |
|---------------------|------------------|---------|----------|----------|----------|---------|---------|---------|---------|---------|---------|
| ENSMUSG000000022434 | 7_Fam118a        | 232.977 | -0.39046 | 0.02684  | 0.05799  | 216.179 | 202.835 | 185.249 | 249.767 | 277.924 | 265.908 |
| ENSMUSG000000022435 | 5_Upk3a          | 4.87995 | 0.80899  | 0.45215  | 0.56661  | 9.55007 | 5.50683 | 3.58546 | 6.3118  | 1.79306 | 2.53245 |
| ENSMUSG000000022436 | 15_Sh3bp1        | 2029.06 | 1.45891  | 5.65E-14 | 4.13E-12 | 2635.82 | 2827.76 | 3462.36 | 1203.75 | 789.843 | 1254.83 |
| ENSMUSG000000022437 | 6_Samm50         | 1512.99 | 0.35888  | 0.00209  | 0.00676  | 1635.67 | 1661.23 | 1804.68 | 1415.65 | 1242.59 | 1318.14 |
| ENSMUSG000000022438 | 6_Parvb          | 176.715 | -0.46512 | 0.12462  | 0.20576  | 158.878 | 170.712 | 115.93  | 295.753 | 172.134 | 146.882 |
| ENSMUSG000000022439 | 9_Parvg          | 26.0257 | 0.48032  | 0.30004  | 0.41473  | 38.2003 | 23.8629 | 28.6837 | 18.9354 | 22.4133 | 24.0583 |
| ENSMUSG000000022440 | 8_C1qtnf6        | 192.093 | -0.12088 | 0.60832  | 0.70819  | 203.156 | 199.164 | 149.394 | 246.16  | 168.548 | 186.135 |
| ENSMUSG000000022441 | 17_Efcab6        | 1221.87 | 0.61155  | 0.00046  | 0.00185  | 1389.97 | 1453.8  | 1587.16 | 1137.03 | 741.431 | 1021.85 |
| ENSMUSG000000022442 | 15_Tll1          | 324.282 | 0.1708   | 0.32729  | 0.44365  | 342.066 | 341.424 | 346.595 | 342.64  | 256.408 | 316.557 |
| ENSMUSG000000022443 | 16_Myh9          | 12273.5 | 1.47712  | 1.23E-16 | 1.50E-14 | 15756.8 | 17308   | 21112.4 | 6204.5  | 5252.77 | 8006.35 |
| ENSMUSG000000022445 | 6_Cyp2d26        | 1.47276 | 0.73748  | 0.72544  | NA       | 1.73638 | 3.67122 | 0       | 0       | 0.89653 | 2.53245 |
| ENSMUSG000000022449 | 14_Adamts20      | 17.8838 | -1.12918 | 0.12247  | 0.20307  | 17.3638 | 14.6849 | 1.19515 | 28.8539 | 22.4133 | 22.7921 |
| ENSMUSG000000022450 | 5_Ndufa6         | 1021.97 | -0.34386 | 0.00231  | 0.00735  | 893.366 | 869.162 | 940.586 | 1118.99 | 1172.66 | 1137.07 |
| ENSMUSG000000022451 | 12_Twf1          | 2912.56 | -0.05593 | 0.63972  | 0.73556  | 2765.18 | 2771.77 | 3030.91 | 2662.68 | 3037.45 | 3207.35 |
| ENSMUSG000000022452 | 14_Smdt1         | 1275.57 | 0.40859  | 0.01054  | 0.02644  | 1338.75 | 1476.75 | 1550.11 | 1295.72 | 908.185 | 1083.89 |
| ENSMUSG000000022453 | 7_Naga           | 1055.56 | 0.65668  | 4.84E-07 | 4.93E-06 | 1218.07 | 1298.69 | 1358.89 | 895.374 | 740.534 | 821.781 |
| ENSMUSG000000022454 | 16_Nell2         | 93.1877 | -0.48465 | 0.12327  | 0.20404  | 67.7187 | 84.4381 | 81.2705 | 148.778 | 80.6878 | 96.2332 |
| ENSMUSG000000022455 | 3_Wbp2nl         | 0.85259 | 1.83284  | 0.46343  | NA       | 1.73638 | 0.91781 | 1.19515 | 0       | 0       | 1.26623 |
| ENSMUSG000000022456 | 15_Sept3         | 49.3202 | -1.11578 | 0.03966  | 0.07992  | 25.1775 | 42.2191 | 26.2934 | 115.416 | 62.7571 | 24.0583 |
| ENSMUSG000000022462 | 6_Slc38a2        | 7926.49 | 0.40231  | 0.00158  | 0.00532  | 8673.2  | 8333.67 | 10066.8 | 6132.36 | 6997.42 | 7355.51 |
| ENSMUSG000000022463 | 7_Sreb2          | 6491.5  | 1.13165  | 2.25E-10 | 6.53E-09 | 7860.58 | 8832.96 | 10048.9 | 4479.57 | 3057.17 | 4669.84 |
| ENSMUSG000000022464 | 13_Slc38a4       | 95.9755 | -1.67646 | 1.42E-05 | 9.18E-05 | 31.2548 | 70.671  | 34.6595 | 127.138 | 112.066 | 200.064 |
| ENSMUSG000000022466 | 5_Rp3p3          | 486.403 | 0.05068  | 0.75517  | 0.82759  | 495.736 | 450.643 | 537.819 | 418.382 | 475.161 | 540.679 |
| ENSMUSG000000022468 | 11_Endou         | 28.0372 | -1.18131 | 0.00649  | 0.01754  | 18.232  | 16.5205 | 16.7322 | 39.6742 | 40.3439 | 36.7206 |
| ENSMUSG000000022469 | 16_Rapgef3       | 728.957 | 0.58679  | 0.00272  | 0.00845  | 856.902 | 930.655 | 837.803 | 729.464 | 433.921 | 584.997 |
| ENSMUSG000000022471 | 13_Xrcc6         | 640.422 | -0.03056 | 0.82887  | 0.88292  | 669.373 | 591.985 | 638.212 | 596.014 | 630.261 | 716.684 |
| ENSMUSG000000022472 | 16_Des1          | 2317.1  | 0.19762  | 0.04255  | 0.08479  | 2420.51 | 2456.97 | 2549.26 | 2126.17 | 2148.98 | 2200.7  |
| ENSMUSG000000022474 | 14_Pmm1          | 1472.53 | 0.4785   | 0.01577  | 0.03718  | 1728.56 | 1679.58 | 1735.36 | 1574.34 | 877.703 | 1239.64 |
| ENSMUSG000000022475 | 18_Hdac7         | 3857.56 | 1.08253  | 2.82E-12 | 1.34E-10 | 4701.24 | 5296.66 | 5722.4  | 2618.49 | 2008.23 | 2798.36 |
| ENSMUSG000000022476 | 7_Polr3h         | 325.795 | 0.18834  | 0.37598  | 0.49361  | 361.166 | 335.917 | 344.204 | 388.626 | 234.891 | 289.966 |
| ENSMUSG000000022477 | 12_Aco2          | 5077.39 | 0.26398  | 0.0507   | 0.09825  | 5195.24 | 5623.39 | 5803.67 | 5252.32 | 3952.8  | 4636.92 |
| ENSMUSG000000022479 | 15_Vdr           | 464.574 | 0.66915  | 0.00022  | 0.00099  | 554.772 | 540.587 | 614.309 | 297.556 | 343.371 | 436.848 |
| ENSMUSG000000022483 | 16_Col2a1        | 61.5587 | -0.43631 | 0.394    | 0.5117   | 44.2776 | 82.6025 | 29.8789 | 117.219 | 35.8612 | 59.5127 |
| ENSMUSG000000022484 | 7_Hoxc10         | 2.16315 | 3.44987  | 0.08467  | NA       | 8.68188 | 1.83561 | 1.19515 | 0       | 0       | 1.26623 |
| ENSMUSG000000022485 | 3_Hoxc5          | 0.29767 | 1.70332  | 0.67406  | NA       | 0.86819 | 0.91781 | 0       | 0       | 0       | 0       |
| ENSMUSG000000022487 | 14_Gtsf1         | 0.15028 | -0.99647 | 0.80707  | NA       | 0       | 0       | 0       | 0.90169 | 0       | 0       |
| ENSMUSG000000022488 | 8_Nckap1l        | 254.193 | 0.72907  | 0.0085   | 0.02204  | 457.535 | 218.438 | 274.885 | 205.584 | 177.513 | 191.2   |
| ENSMUSG000000022489 | 5_Pde1b          | 249.954 | -0.715   | 0.01108  | 0.02754  | 201.42  | 236.794 | 129.077 | 412.972 | 272.545 | 246.914 |
| ENSMUSG000000022490 | 6_Ppp1r1a        | 112.674 | -0.91637 | 0.01829  | 0.042    | 67.7187 | 122.986 | 43.0255 | 195.666 | 132.687 | 113.96  |
| ENSMUSG000000022491 | 4_Glycam1        | 12.9449 | -0.9587  | 0.1997   | 0.30065  | 13.891  | 6.42464 | 5.97577 | 28.8539 | 9.86184 | 12.6623 |
| ENSMUSG000000022494 | 13_Shisa9        | 38.8569 | -1.57454 | 0.00132  | 0.00457  | 17.3638 | 31.2054 | 9.56123 | 74.8399 | 45.7231 | 54.4478 |
| ENSMUSG000000022496 | 5_Tnfrsf17       | 2.1186  | 0.41815  | 0.80418  | NA       | 5.20913 | 0.91781 | 1.19515 | 1.80337 | 3.58612 | 0       |
| ENSMUSG000000022498 | 16_Txndc11       | 793.526 | 0.18555  | 0.14553  | 0.23299  | 806.547 | 820.518 | 907.122 | 698.806 | 777.292 | 750.873 |
| ENSMUSG000000022500 | 14_L1laf         | 968.313 | 0.5884   | 3.49E-05 | 0.0002   | 1164.24 | 1056.39 | 1268.06 | 797.992 | 684.949 | 838.242 |
| ENSMUSG000000022501 | 5_Prm1           | 0.34389 | 1.87986  | 0.64119  | NA       | 0.86819 | 0       | 1.19515 | 0       | 0       | 0       |
| ENSMUSG000000022503 | 10_Nubp1         | 691.324 | 0.53477  | 0.0001   | 0.00051  | 861.243 | 759.025 | 834.218 | 617.655 | 526.263 | 549.542 |
| ENSMUSG000000022504 | 9_Ciita          | 72.6142 | 2.76284  | 1.31E-16 | 1.59E-14 | 138.91  | 118.397 | 123.101 | 18.9354 | 22.4133 | 13.9285 |
| ENSMUSG000000022505 | 8_Emp2           | 11841.2 | 0.40676  | 0.00073  | 0.00274  | 13146.1 | 12691.4 | 14659.8 | 9722.87 | 9506.81 | 11320.1 |
| ENSMUSG000000022507 | 5_1810013L24Rik  | 1382.42 | -0.16642 | 0.16065  | 0.25296  | 1325.72 | 1214.26 | 1369.65 | 1410.24 | 1565.34 | 1409.31 |
| ENSMUSG000000022508 | 5_Bcl6           | 1049.81 | 0.46252  | 0.00087  | 0.00317  | 1131.25 | 1309.71 | 1207.11 | 837.666 | 814.05  | 999.053 |
| ENSMUSG000000022510 | 14_Trp63         | 7679.66 | 0.46118  | 0.00409  | 0.01192  | 8418.82 | 8473.18 | 9796.68 | 5255.92 | 6316.95 | 7816.42 |
| ENSMUSG000000022512 | 2_Cldn1          | 809.274 | -0.01744 | 0.90372  | 0.93513  | 898.575 | 690.19  | 824.656 | 829.551 | 814.946 | 797.723 |
| ENSMUSG000000022514 | 14_I1trap        | 407.585 | -0.03076 | 0.84308  | 0.89319  | 396.762 | 368.958 | 444.597 | 381.413 | 432.128 | 421.654 |
| ENSMUSG000000022515 | 5_Anks3          | 541.387 | 0.34992  | 0.0514   | 0.09922  | 554.772 | 661.738 | 603.553 | 559.947 | 384.612 | 483.699 |
| ENSMUSG000000022516 | 9_Nudt16l1       | 870.624 | 0.2756   | 0.09088  | 0.15895  | 960.216 | 927.901 | 971.66  | 881.848 | 624.882 | 857.236 |
| ENSMUSG000000022517 | 16_Mgrn1         | 1321.31 | 0.37193  | 0.0238   | 0.05252  | 1396.92 | 1639.2  | 1436.58 | 1402.12 | 990.666 | 1062.36 |
| ENSMUSG000000022518 | 15_4930562C15Rik | 5.76085 | 0.33926  | 0.71693  | 0.79821  | 5.20913 | 8.26025 | 5.97577 | 6.3118  | 6.27571 | 2.53245 |
| ENSMUSG000000022519 | 13_Srl           | 444.27  | -1.74544 | 1.40E-07 | 1.68E-06 | 186.661 | 274.424 | 150.589 | 979.23  | 363.095 | 711.62  |
| ENSMUSG000000022521 | 10_Crebbp        | 1512.14 | 0.43332  | 0.00054  | 0.00213  | 1590.52 | 1730.06 | 1891.93 | 1201.05 | 1289.21 | 1370.06 |
| ENSMUSG000000022523 | 9_Fgf12          | 56.3273 | -1.8348  | 0.00011  | 0.00055  | 22.5729 | 41.3013 | 9.56123 | 96.4803 | 102.204 | 65.8438 |
| ENSMUSG000000022525 | 13_Hrasls        | 24.7405 | -1.94    | 0.00152  | 0.00515  | 9.55007 | 12.8493 | 8.36608 | 48.691  | 53.7918 | 15.1947 |
| ENSMUSG000000022526 | 7_Zfp251         | 248.55  | -0.00714 | 0.96822  | 0.97945  | 217.047 | 263.41  | 264.129 | 242.553 | 263.58  | 240.583 |
| ENSMUSG000000022528 | 7_Hes1           | 1812.95 | 0.58914  | 0.00021  | 0.00096  | 2040.24 | 1976.04 | 2516.99 | 1415.65 | 1249.76 | 1679.02 |
| ENSMUSG000000022529 | 11_Zfp263        | 759.317 | -0.1661  | 0.25033  | 0.35945  | 712.783 | 669.998 | 764.899 | 712.332 | 895.634 | 800.255 |
| ENSMUSG000000022533 | 13_Atp13a3       | 1620.88 | -0.46567 | 4.85E-05 | 0.00027  | 1410.81 | 1324.39 | 1349.33 | 1752.88 | 2025.26 | 1862.62 |
| ENSMUSG000000022534 | 13_Mefv          | 25.7173 | 4.3676   | 1.21E-07 | 1.48E-06 | 80.7415 | 138.561 | 47.8062 | 2.70506 | 0.89653 | 3.79868 |
| ENSMUSG000000022536 | 13_Glyr1         | 3364.46 | 0.05869  | 0.53961  | 0.64705  | 3438.03 | 3386.7  | 3473.12 | 3168.52 | 3302.82 | 3417.55 |
| ENSMUSG000000022537 | 17_Tmem44        | 62.6386 | -0.59591 | 0.07878  | 0.14155  | 38.2003 | 66.082  | 45.4159 | 86.5618 | 69.9294 | 69.6425 |
| ENSMUSG000000022538 | 19_Lsg1          | 785.142 | 0.16169  | 0.30006  | 0.41473  | 823.911 | 772.792 | 889.195 | 660.034 | 691.225 | 873.697 |
| ENSMUSG000000022540 | 16_Rogdi         | 300.145 | 0.34127  | 0.1715   | 0.26644  | 340.33  | 362.533 | 303.569 | 360.674 | 185.582 | 248.18  |
| ENSMUSG000000022542 | 6_Sept12         | 0.30325 | -0.03469 | 0.99322  | NA       | 0       | 0.91781 | 0       | 0.90169 | 0       | 0       |
| ENSMUSG000000022543 | 8_4930451G09Rik  | 21.1685 | 0.03651  | 0.9436   | 0.96314  | 19.1001 | 19.2739 | 26.2934 | 27.9522 | 17.9306 | 16.4609 |
| ENSMUSG000000022544 | 13_Eef2kmt       | 475.118 | 0.52799  | 0.00055  | 0.00215  | 563.454 | 568.122 | 552.161 | 443.629 | 352.337 | 371.004 |
| ENSMUSG000000022545 | 13_Ercc4         | 363.31  | 0.46415  | 0.00386  | 0.01138  | 387.212 | 433.204 | 443.402 | 326.41  | 274.338 | 315.291 |
| ENSMUSG000000022546 | 4_Gpt            | 974.075 | 0.96758  | 9.62E-08 | 1.22E-06 | 1263.21 | 1264.74 | 1337.38 | 708.725 | 490.402 | 779.996 |
| ENSMUSG000000022548 | 14_Apod          | 11199.6 | 0.05812  | 0.62534  | 0.72264  | 12493.2 | 10830.1 | 10952.4 | 10296.1 | 10415   | 10410.9 |
| ENSMUSG000000022550 | 17_Adck5         | 218.173 | 1.02812  | 1.20E-06 | 1.07E-05 | 276.952 | 336.835 | 264.129 | 164.107 | 120.135 | 146.882 |
| ENSMUSG000000022551 | 7_Cyc1           | 1853.79 | 0.32726  | 0.05162  | 0.09954  | 1936.93 | 2044.87 | 2208.64 | 2030.6  | 1343    | 1558.73 |
| ENSMUSG000000022552 | 15_Sharpin       | 601.784 | 0.6708   | 3.51E-06 | 2.72E-05 | 667.637 | 800.326 | 749.362 | 483.303 | 427.645 | 482.432 |

|                    |            |         |          |          |          |         |         |         |         |         |         |
|--------------------|------------|---------|----------|----------|----------|---------|---------|---------|---------|---------|---------|
| ENSMUSG00000022553 | 15_Maf1    | 1041.8  | 0.19624  | 0.17199  | 0.26699  | 1114.75 | 1110.54 | 1112.69 | 1125.3  | 845.428 | 942.073 |
| ENSMUSG00000022554 | 6_Hgh1     | 194.527 | 0.56402  | 0.00635  | 0.01724  | 246.566 | 223.027 | 227.079 | 187.551 | 139.859 | 143.084 |
| ENSMUSG00000022555 | 11_Dgat1   | 389.136 | 0.06817  | 0.65813  | 0.75069  | 412.389 | 381.807 | 400.377 | 406.66  | 339.785 | 393.797 |
| ENSMUSG00000022556 | 9_Hsf1     | 613.665 | 0.79119  | 2.41E-07 | 2.69E-06 | 727.542 | 761.779 | 843.779 | 477.893 | 387.301 | 483.699 |
| ENSMUSG00000022557 | 10_Bop1    | 901.817 | 1.14656  | 1.57E-10 | 4.80E-09 | 1120.83 | 1188.56 | 1417.45 | 628.475 | 440.197 | 615.386 |
| ENSMUSG00000022558 | 15_Mroh1   | 1075.04 | 0.84276  | 2.88E-05 | 0.00017  | 1212.86 | 1562.11 | 1367.26 | 1008.99 | 626.675 | 672.366 |
| ENSMUSG00000022559 | 7_Fbxl6    | 315.283 | 1.25638  | 3.80E-06 | 2.91E-05 | 403.708 | 433.204 | 497.184 | 266.899 | 121.032 | 169.674 |
| ENSMUSG00000022560 | 8_Slc52a2  | 112.341 | 0.41499  | 0.15471  | 0.24529  | 135.437 | 123.904 | 125.491 | 121.728 | 63.6537 | 103.831 |
| ENSMUSG00000022561 | 12_Gpaa1   | 634.238 | 1.27831  | 1.20E-09 | 2.76E-08 | 799.602 | 946.258 | 948.952 | 475.188 | 270.752 | 364.673 |
| ENSMUSG00000022562 | 13_Oplah   | 509.803 | 0.77382  | 0.00333  | 0.01004  | 545.222 | 762.696 | 622.675 | 541.913 | 260.89  | 325.42  |
| ENSMUSG00000022564 | 6_Grina    | 1848.77 | 0.51247  | 0.00752  | 0.01985  | 2156.58 | 2442.28 | 1923    | 1983.71 | 1295.49 | 1291.55 |
| ENSMUSG00000022565 | 15_Plec    | 10455.7 | 1.78657  | 1.39E-17 | 1.91E-15 | 13752.1 | 15273.2 | 19610.1 | 5420.03 | 3270.54 | 5408.06 |
| ENSMUSG00000022568 | 16_Scrib   | 2533.74 | 1.68477  | 8.50E-13 | 4.65E-11 | 3330.37 | 3754.74 | 4509.32 | 1411.14 | 743.224 | 1453.63 |
| ENSMUSG00000022570 | 5_Tsta3    | 667.328 | 0.54592  | 0.00089  | 0.00325  | 799.602 | 779.217 | 797.168 | 629.376 | 440.197 | 558.406 |
| ENSMUSG00000022571 | 8_Pyclr    | 318.409 | 0.61131  | 0.01352  | 0.03253  | 345.539 | 379.054 | 430.255 | 329.115 | 169.444 | 257.044 |
| ENSMUSG00000022574 | 6_Naprt    | 793.148 | 1.25033  | 1.24E-07 | 1.51E-06 | 982.789 | 1107.79 | 1259.69 | 600.523 | 300.338 | 507.757 |
| ENSMUSG00000022575 | 4_Gsdmd    | 680.025 | 1.12273  | 2.32E-13 | 1.50E-11 | 936.775 | 826.943 | 1031.42 | 420.185 | 389.991 | 474.835 |
| ENSMUSG00000022577 | 16_Ly6h    | 1.30884 | -0.21866 | 0.91145  | NA       | 2.60457 | 0.91781 | 0       | 0.90169 | 0.89653 | 2.53245 |
| ENSMUSG00000022579 | 12_Gpihbp1 | 19.8181 | -0.40035 | 0.47789  | 0.59052  | 16.4956 | 19.2739 | 15.537  | 34.264  | 14.3445 | 18.9934 |
| ENSMUSG00000022580 | 12_Rhpn1   | 25.1891 | 0.59143  | 0.30722  | 0.42231  | 27.782  | 34.8766 | 28.6837 | 34.264  | 17.9306 | 7.59736 |
| ENSMUSG00000022582 | 4_Ly6g     | 1.70007 | 2.12389  | 0.26004  | NA       | 0.86819 | 2.75342 | 4.78062 | 0.90169 | 0.89653 | 0       |
| ENSMUSG00000022583 | 12_Ly6f    | 0       | NA       | NA       | NA       | 0       | 0       | 0       | 0       | 0       | 0       |
| ENSMUSG00000022584 | 14_Ly6c2   | 477.055 | 4.07477  | 6.79E-10 | 1.69E-08 | 1582.71 | 400.163 | 719.483 | 47.7893 | 77.9982 | 34.1881 |
| ENSMUSG00000022586 | 11_Ly6i    | 16.4492 | 2.77336  | 0.00028  | 0.00122  | 50.3549 | 15.6027 | 20.3176 | 4.50843 | 5.37918 | 2.53245 |
| ENSMUSG00000022587 | 14_Ly6e    | 17484.6 | 1.67487  | 3.70E-21 | 7.85E-19 | 23659   | 21629.9 | 34598.5 | 7966.39 | 8244.5  | 8809.14 |
| ENSMUSG00000022591 | 5_Gm9747   | 95.5412 | -1.48551 | 7.96E-05 | 0.00041  | 69.4551 | 68.7396 | 21.5128 | 138.86  | 147.928 | 136.753 |
| ENSMUSG00000022594 | 14_Lynx1   | 7632.96 | 0.62293  | 1.59E-05 | 0.0001   | 8566.42 | 8803.59 | 10396.6 | 6376.72 | 5057.33 | 6597.04 |
| ENSMUSG00000022595 | 7_Lypd2    | 43357.2 | 0.85891  | 2.38E-06 | 1.95E-05 | 52421.2 | 54118.4 | 61146.5 | 38102.5 | 22675.9 | 31678.5 |
| ENSMUSG00000022596 | 3_Slurp1   | 13597.9 | 1.10203  | 1.47E-09 | 3.26E-08 | 17827.4 | 18181.7 | 19648.3 | 10164.7 | 6167.23 | 9598    |
| ENSMUSG00000022598 | 6_Psca     | 18364.6 | 0.65903  | 6.64E-07 | 6.45E-06 | 22087.6 | 22572.5 | 22803.5 | 16641.5 | 12376.6 | 13705.6 |
| ENSMUSG00000022601 | 11_Zbtb11  | 645.154 | -0.31285 | 0.04652  | 0.0913   | 554.772 | 556.19  | 616.7   | 637.492 | 834.67  | 671.1   |
| ENSMUSG00000022602 | 14_Arc     | 83.5388 | 2.23143  | 6.62E-09 | 1.20E-07 | 127.624 | 108.301 | 178.078 | 45.0843 | 20.6202 | 21.5259 |
| ENSMUSG00000022603 | 9_Mroh4    | 3.75051 | 0.99586  | 0.42799  | 0.54331  | 8.68188 | 3.67122 | 2.39031 | 0.90169 | 1.79306 | 5.06491 |
| ENSMUSG00000022604 | 18_Cep97   | 216.478 | -0.70925 | 8.11E-05 | 0.00042  | 157.142 | 178.054 | 157.76  | 282.228 | 265.373 | 258.31  |
| ENSMUSG00000022607 | 14_Ptk2    | 1142.42 | 0.16575  | 0.16158  | 0.25405  | 1231.96 | 1132.57 | 1259.69 | 1015.3  | 1126.04 | 1088.96 |
| ENSMUSG00000022610 | 9_Mapk12   | 409.491 | 0.01321  | 0.93758  | 0.95917  | 447.985 | 363.451 | 421.889 | 421.087 | 356.819 | 445.712 |
| ENSMUSG00000022614 | 7_Lmf2     | 607.202 | 1.20083  | 1.56E-08 | 2.54E-07 | 743.169 | 880.176 | 915.488 | 462.565 | 264.477 | 377.336 |
| ENSMUSG00000022615 | 7_Tymp     | 7.12631 | 2.23654  | 0.03368  | 0.0699   | 13.891  | 7.34244 | 14.3418 | 1.80337 | 5.37918 | 0       |
| ENSMUSG00000022617 | 14_Chkb    | 562.164 | 0.17991  | 0.1797   | 0.27666  | 553.904 | 618.601 | 619.09  | 533.798 | 505.643 | 541.945 |
| ENSMUSG00000022619 | 5_Mapk8ip2 | 37.048  | -1.26478 | 0.04008  | 0.08067  | 26.9138 | 27.5342 | 10.7564 | 96.4803 | 40.3439 | 20.2596 |
| ENSMUSG00000022620 | 14_Arsa    | 689.567 | 0.74694  | 1.04E-06 | 9.50E-06 | 762.269 | 907.71  | 921.464 | 486.91  | 477.851 | 581.198 |
| ENSMUSG00000022621 | 16_Rabl2   | 347.514 | 0.09475  | 0.52026  | 0.63026  | 375.057 | 357.026 | 344.204 | 332.722 | 337.992 | 338.083 |
| ENSMUSG00000022622 | 4_Acr      | 1.29374 | 0.15901  | 0.94281  | NA       | 0.86819 | 0.91781 | 2.39031 | 0       | 3.58612 | 0       |
| ENSMUSG00000022623 | 15_Shank3  | 111.135 | 0.73836  | 0.01645  | 0.03852  | 112.864 | 129.411 | 175.688 | 111.809 | 69.9294 | 67.11   |
| ENSMUSG00000022629 | 16_Kif21a  | 9213.86 | 0.14552  | 0.31228  | 0.42716  | 9458.04 | 9368.04 | 10206.6 | 7314.47 | 8632.69 | 10303.3 |
| ENSMUSG00000022634 | 9_Yaf2     | 306.105 | -0.24812 | 0.12274  | 0.2034   | 256.984 | 283.602 | 299.984 | 330.017 | 346.957 | 319.089 |
| ENSMUSG00000022635 | 9_Zcbr1    | 862.604 | -0.5292  | 6.94E-05 | 0.00036  | 706.705 | 713.135 | 697.97  | 900.784 | 1094.66 | 1062.36 |
| ENSMUSG00000022636 | 13_Alcam   | 4382.67 | -0.14247 | 0.33908  | 0.45572  | 4079.62 | 3921.78 | 4497.36 | 3732.98 | 4903.13 | 5161.14 |
| ENSMUSG00000022637 | 10_Cblb    | 601.622 | 0.09618  | 0.48021  | 0.59293  | 651.141 | 632.368 | 579.65  | 567.16  | 551.366 | 628.049 |
| ENSMUSG00000022639 | 14_Dubr    | 144.338 | -0.62591 | 0.00545  | 0.01514  | 111.128 | 121.15  | 108.759 | 181.239 | 198.133 | 145.616 |
| ENSMUSG00000022641 | 15_Bbx     | 1185.74 | -0.32525 | 0.016    | 0.03763  | 1130.38 | 943.504 | 1084    | 1197.44 | 1415.62 | 1343.47 |
| ENSMUSG00000022651 | 5_Retnlg   | 0.81044 | -3.16783 | 0.24943  | NA       | 0       | 0       | 0       | 1.80337 | 1.79306 | 1.26623 |
| ENSMUSG00000022652 | 6_Morc1    | 2.77855 | 0.59301  | 0.7075   | 0.79071  | 6.07732 | 2.75342 | 1.19515 | 0       | 5.37918 | 1.26623 |
| ENSMUSG00000022656 | 15_Pvrl3   | 1123.79 | -1.61973 | 1.07E-10 | 3.42E-09 | 511.363 | 781.97  | 360.937 | 1880.01 | 1818.16 | 1390.32 |
| ENSMUSG00000022657 | 9_Cd96     | 3.55843 | -1.01215 | 0.54991  | 0.65629  | 6.94551 | 0       | 0       | 0.90169 | 7.17224 | 6.33113 |
| ENSMUSG00000022658 | 10_Tagln3  | 23.1167 | -1.93469 | 0.0026   | 0.00814  | 12.1546 | 8.26025 | 8.36608 | 65.823  | 25.1029 | 18.9934 |
| ENSMUSG00000022659 | 13_Gcsam   | 3.54866 | 0.21098  | 0.86515  | 0.90834  | 3.47275 | 0.91781 | 7.17092 | 4.50843 | 2.68959 | 2.53245 |
| ENSMUSG00000022661 | 14_Cd200   | 590.355 | -0.47465 | 0.00334  | 0.01006  | 541.75  | 489.19  | 451.768 | 756.514 | 721.707 | 581.198 |
| ENSMUSG00000022663 | 3_Atg3     | 1313.7  | -0.23232 | 0.13387  | 0.21783  | 1225.88 | 1107.79 | 1290.77 | 1164.08 | 1586.86 | 1506.81 |
| ENSMUSG00000022664 | 11_Slc35a5 | 600.265 | -0.39666 | 0.00204  | 0.00663  | 510.495 | 503.875 | 541.405 | 668.149 | 715.431 | 662.237 |
| ENSMUSG00000022665 | 14_Ccdc80  | 871.263 | -0.45669 | 0.00127  | 0.00442  | 717.992 | 818.683 | 666.896 | 1050.46 | 1060.6  | 912.95  |
| ENSMUSG00000022667 | 17_Cd200r1 | 19.6191 | 0.17551  | 0.76126  | 0.8322   | 28.6502 | 19.2739 | 14.3418 | 11.7219 | 25.9994 | 17.7272 |
| ENSMUSG00000022668 | 10_Gtpbp8  | 458.365 | -0.23196 | 0.12947  | 0.2122   | 457.535 | 376.3   | 431.451 | 478.795 | 532.539 | 473.569 |
| ENSMUSG00000022671 | 12_Mzt2    | 262.176 | 0.49968  | 0.00356  | 0.01062  | 309.943 | 292.78  | 319.106 | 238.947 | 200.823 | 211.46  |
| ENSMUSG00000022672 | 8_Prkd3    | 1023.01 | -0.38124 | 0.02886  | 0.06151  | 973.239 | 775.546 | 916.683 | 918.818 | 1311.62 | 1242.17 |
| ENSMUSG00000022673 | 4_Mcm4     | 1475.34 | 0.73006  | 6.31E-06 | 4.54E-05 | 1810.17 | 1619.93 | 2091.52 | 934.146 | 1122.46 | 1273.82 |
| ENSMUSG00000022674 | 14_Ube2v2  | 1151.38 | -0.60583 | 0.00016  | 0.00074  | 1034.88 | 802.162 | 902.341 | 1226.29 | 1609.27 | 1333.34 |
| ENSMUSG00000022676 | 6_Snai2    | 471.607 | 0.31028  | 0.085    | 0.15036  | 524.386 | 447.889 | 593.992 | 354.362 | 445.576 | 463.439 |
| ENSMUSG00000022677 | 14_Fopnl   | 967.995 | -0.349   | 0.0044   | 0.01266  | 919.412 | 806.751 | 828.242 | 1076.61 | 1132.32 | 1044.64 |
| ENSMUSG00000022678 | 16_Nde1    | 755.012 | 0.20555  | 0.16067  | 0.25296  | 819.57  | 724.149 | 882.024 | 711.43  | 629.364 | 763.535 |
| ENSMUSG00000022679 | 13_Mpv17l  | 109.22  | -0.99588 | 3.16E-05 | 0.00018  | 65.1141 | 74.3423 | 80.0753 | 150.581 | 149.721 | 135.486 |
| ENSMUSG00000022680 | 13_Pdxdc1  | 4415.28 | -0.06778 | 0.53378  | 0.64197  | 4345.28 | 4316.44 | 4271.48 | 4086.44 | 4656.58 | 4815.46 |
| ENSMUSG00000022681 | 14_Ntan1   | 596.377 | -0.2323  | 0.10626  | 0.1808   | 536.54  | 540.587 | 570.089 | 691.593 | 675.984 | 563.471 |
| ENSMUSG00000022682 | 7_Rrn3     | 1070.02 | 0.07057  | 0.56074  | 0.66637  | 1145.14 | 1044.46 | 1098.35 | 963     | 1092.87 | 1076.29 |
| ENSMUSG00000022683 | 13_Pla2g10 | 0.1447  | 0.92709  | 0.82027  | NA       | 0.86819 | 0       | 0       | 0       | 0       | 0       |
| ENSMUSG00000022684 | 14_Bfar    | 778.043 | -0.38172 | 0.00162  | 0.00544  | 688.473 | 665.409 | 674.067 | 902.587 | 910.875 | 826.846 |
| ENSMUSG00000022685 | 8_Parn     | 791.974 | -0.23998 | 0.04296  | 0.08544  | 756.192 | 701.203 | 720.678 | 845.781 | 845.428 | 882.56  |
| ENSMUSG00000022686 | 14_B3gnt5  | 75.6617 | -1.36929 | 4.24E-05 | 0.00024  | 43.4094 | 41.3013 | 41.8304 | 136.155 | 73.5155 | 117.759 |
| ENSMUSG00000022687 | 11_Boc     | 1262.31 | 0.57726  | 1.68E-05 | 0.00011  | 1443.8  | 1541.91 | 1548.92 | 1126.21 | 884.876 | 1028.18 |

|                     |                  |         |          |          |          |         |         |         |         |         |         |
|---------------------|------------------|---------|----------|----------|----------|---------|---------|---------|---------|---------|---------|
| ENSMUSG000000022696 | 17_Sidt1         | 72.5102 | 1.20566  | 0.00023  | 0.00101  | 84.2143 | 84.4381 | 135.052 | 40.5758 | 43.93   | 46.8504 |
| ENSMUSG000000022698 | 17_Naa50         | 3145.95 | -0.21197 | 0.13937  | 0.22484  | 2981.36 | 2605.65 | 3158.79 | 2859.24 | 3669.5  | 3601.15 |
| ENSMUSG000000022701 | 17_2610015P09Rik | 359.505 | -0.16511 | 0.33347  | 0.45009  | 341.198 | 326.739 | 347.79  | 330.919 | 368.474 | 441.913 |
| ENSMUSG000000022702 | 15_Hira          | 757.931 | 0.36204  | 0.00951  | 0.0242   | 861.243 | 766.368 | 931.025 | 712.332 | 625.778 | 650.841 |
| ENSMUSG000000022704 | 15_Qtrtd1        | 378.577 | 0.00064  | 0.99657  | 0.99775  | 352.484 | 390.985 | 393.206 | 366.986 | 398.06  | 369.738 |
| ENSMUSG000000022705 | 4_Drd3           | 0.45267 | -0.80756 | 0.8164   | NA       | 0       | 0.91781 | 0       | 0.90169 | 0.89653 | 0       |
| ENSMUSG000000022706 | 15_Mrpl40        | 596.677 | -0.14498 | 0.3275   | 0.44381  | 599.918 | 495.615 | 605.943 | 646.508 | 650.881 | 581.198 |
| ENSMUSG000000022707 | 16_Gbe1          | 437.517 | -0.42349 | 0.0085   | 0.02204  | 386.344 | 380.889 | 352.57  | 432.809 | 512.815 | 559.672 |
| ENSMUSG000000022708 | 16_Zbtb20        | 2549.78 | -1.03864 | 4.39E-14 | 3.30E-12 | 1689.49 | 1839.28 | 1479.6  | 3526.49 | 3728.67 | 3035.15 |
| ENSMUSG000000022710 | 17_Usp7          | 5083.89 | -0.09296 | 0.54337  | 0.65028  | 4955.62 | 4836.84 | 4967.06 | 4117.1  | 5855.24 | 5771.46 |
| ENSMUSG000000022711 | 15_Pmm2          | 1441.12 | 0.37087  | 0.0009   | 0.00327  | 1657.37 | 1527.23 | 1691.14 | 1205.55 | 1265    | 1300.42 |
| ENSMUSG000000022715 | 2_Tmem114        | 4.58075 | -0.3922  | 0.72538  | 0.80451  | 2.60457 | 4.58903 | 4.78062 | 9.91854 | 1.79306 | 3.79868 |
| ENSMUSG000000022718 | 11_Dgcr8         | 920.098 | -0.01103 | 0.92752  | 0.95195  | 915.071 | 859.066 | 976.441 | 889.964 | 955.702 | 924.346 |
| ENSMUSG000000022721 | 18_Trmt2a        | 728.315 | 0.42499  | 0.00097  | 0.00348  | 870.793 | 831.532 | 800.753 | 638.393 | 573.78  | 654.639 |
| ENSMUSG000000022722 | 18_Arl6          | 286.978 | -0.35942 | 0.03852  | 0.07808  | 276.084 | 254.232 | 223.494 | 349.854 | 315.579 | 302.628 |
| ENSMUSG000000022723 | 16_Crybg3        | 2383.46 | 0.00414  | 0.97443  | 0.98336  | 2451.76 | 2239.45 | 2467.99 | 2097.32 | 2383.87 | 2660.34 |
| ENSMUSG000000022724 | 15_Mina          | 1522.01 | -0.10604 | 0.52452  | 0.63381  | 1436.85 | 1362.94 | 1597.92 | 1238.92 | 1687.27 | 1808.17 |
| ENSMUSG000000022738 | 6_Gsc2           | 0.1447  | 0.92709  | 0.82027  | NA       | 0.86819 | 0       | 0       | 0       | 0       | 0       |
| ENSMUSG000000022742 | 5_Cpox           | 632.285 | 0.47501  | 0.00107  | 0.00381  | 672.846 | 701.203 | 833.022 | 539.208 | 502.954 | 544.478 |
| ENSMUSG000000022744 | 12_Cldnd1        | 2635.35 | 0.15693  | 0.17352  | 0.26892  | 2748.68 | 2566.18 | 3021.35 | 2351.6  | 2555.11 | 2569.17 |
| ENSMUSG000000022747 | 16_St3gal6       | 452.136 | -1.37325 | 1.64E-10 | 4.97E-09 | 254.379 | 319.396 | 180.468 | 670.854 | 700.19  | 587.529 |
| ENSMUSG000000022748 | 7_Cmss1          | 116.136 | -0.15835 | 0.50516  | 0.61567  | 119.81  | 104.63  | 103.978 | 114.514 | 112.066 | 141.817 |
| ENSMUSG000000022749 | 6_Tbc1d23        | 1261.51 | -0.28438 | 0.02293  | 0.05091  | 1152.95 | 1074.75 | 1185.59 | 1265.06 | 1507.96 | 1382.72 |
| ENSMUSG000000022750 | 17_Khlh22        | 624.352 | 0.09031  | 0.65057  | 0.74455  | 615.546 | 710.382 | 605.943 | 775.45  | 477.851 | 560.939 |
| ENSMUSG000000022751 | 8_Nit2           | 438.97  | -0.28231 | 0.06515  | 0.12099  | 424.544 | 369.876 | 394.401 | 455.351 | 532.539 | 457.108 |
| ENSMUSG000000022752 | 8_Tomm70a        | 1901.29 | -0.38602 | 0.00926  | 0.0237   | 1796.28 | 1500.61 | 1648.12 | 1827.72 | 2452.01 | 2182.98 |
| ENSMUSG000000022753 | 15_Tmem30c       | 1.35887 | -0.97045 | 0.6877   | NA       | 0       | 2.75342 | 0       | 3.60674 | 1.79306 | 0       |
| ENSMUSG000000022754 | 5_Tmem45a        | 191.37  | -0.32329 | 0.11116  | 0.18768  | 191.87  | 165.205 | 152.98  | 215.503 | 233.994 | 188.668 |
| ENSMUSG000000022755 | 4_Adgrg7         | 4.12857 | -1.69253 | 0.17828  | 0.27496  | 3.47275 | 0       | 2.39031 | 4.50843 | 8.06878 | 6.33113 |
| ENSMUSG000000022756 | 15_Slc7a4        | 227.82  | -0.003   | 0.99128  | 0.99415  | 213.574 | 298.287 | 170.907 | 298.458 | 200.823 | 184.869 |
| ENSMUSG000000022757 | 18_Tfg           | 1761.42 | 0.22148  | 0.08937  | 0.15677  | 1865.74 | 1786.05 | 2036.54 | 1441.8  | 1650.51 | 1787.91 |
| ENSMUSG000000022758 | 12_P2rx6         | 124.922 | -0.82902 | 0.02109  | 0.04739  | 79.0051 | 136.753 | 53.7819 | 208.289 | 142.548 | 129.155 |
| ENSMUSG000000022759 | 15_Lrrc74b       | 4.93809 | -2.0646  | 0.05845  | 0.11046  | 1.73638 | 2.75342 | 1.19515 | 9.01685 | 9.86184 | 5.06491 |
| ENSMUSG000000022760 | 15_Thap7         | 241.449 | 1.03049  | 2.67E-07 | 2.94E-06 | 315.152 | 329.492 | 328.667 | 193.862 | 137.169 | 144.35  |
| ENSMUSG000000022761 | 10_Lztr1         | 1285.89 | 0.28739  | 0.03905  | 0.07891  | 1330.06 | 1428.11 | 1483.19 | 1316.46 | 1016.67 | 1140.87 |
| ENSMUSG000000022762 | 17_Ncam2         | 13.4087 | -3.05331 | 7.49E-05 | 0.00039  | 3.47275 | 2.75342 | 2.39031 | 27.9522 | 28.689  | 15.1947 |
| ENSMUSG000000022763 | 16_Aifm3         | 77.8834 | -0.30722 | 0.42828  | 0.54355  | 65.9823 | 97.2874 | 45.4159 | 122.629 | 66.3433 | 69.6425 |
| ENSMUSG000000022765 | 8_Snap29         | 1859.09 | -0.20506 | 0.15918  | 0.25111  | 1801.49 | 1649.3  | 1729.39 | 1642.87 | 2097.88 | 2233.62 |
| ENSMUSG000000022766 | 12_Serpind1      | 10.4587 | -2.42516 | 0.00451  | 0.01295  | 1.73638 | 4.58903 | 3.58546 | 26.1489 | 8.96531 | 17.7272 |
| ENSMUSG000000022768 | 15_Ccdc116       | 47.2    | 0.93277  | 0.01117  | 0.02774  | 74.6642 | 64.2464 | 46.611  | 36.0674 | 28.689  | 32.9219 |
| ENSMUSG000000022769 | 7_Sdf2l1         | 201.757 | 0.65769  | 0.00041  | 0.00167  | 239.62  | 236.794 | 265.324 | 168.615 | 153.307 | 146.882 |
| ENSMUSG000000022770 | 16_Dlg1          | 3253.61 | -0.24562 | 0.03718  | 0.07578  | 3004.8  | 2836.02 | 3090.67 | 3145.98 | 3699.98 | 3744.23 |
| ENSMUSG000000022771 | 15_Ppil2         | 1764.91 | 0.24282  | 0.0396   | 0.07982  | 1794.55 | 1838.36 | 2107.06 | 1605    | 1568.03 | 1676.48 |
| ENSMUSG000000022772 | 11_Senp5         | 588.857 | -0.14419 | 0.35016  | 0.4669   | 582.554 | 535.081 | 561.722 | 580.685 | 717.224 | 555.874 |
| ENSMUSG000000022773 | 16_Ypel1         | 49.7747 | -0.49797 | 0.21937  | 0.32414  | 45.1458 | 43.1369 | 35.8546 | 81.1517 | 59.171  | 34.1881 |
| ENSMUSG000000022774 | 12_Ncbp2         | 1506.78 | -0.32937 | 0.00739  | 0.01955  | 1359.58 | 1236.28 | 1411.48 | 1550    | 1805.61 | 1677.75 |
| ENSMUSG000000022779 | 14_Top3b         | 1304.03 | 0.30333  | 0.00994  | 0.02512  | 1402.12 | 1448.3  | 1470.04 | 1086.53 | 1148.46 | 1268.76 |
| ENSMUSG000000022780 | 5_Mif2           | 24.2852 | 1.33932  | 0.00893  | 0.02296  | 33.8593 | 27.5342 | 43.0255 | 17.132  | 8.96531 | 15.1947 |
| ENSMUSG000000022781 | 8_Pak2           | 3892.67 | -0.06036 | 0.64691  | 0.74161  | 3778.36 | 3683.15 | 3971.5  | 3364.19 | 4233.42 | 4325.43 |
| ENSMUSG000000022783 | 11_Spag6         | 1.63881 | -0.32867 | 0.89067  | NA       | 0.86819 | 0       | 3.58546 | 0       | 5.37918 | 0       |
| ENSMUSG000000022787 | 10_Wdr53         | 273.715 | 0.17939  | 0.39443  | 0.51212  | 302.998 | 312.054 | 255.763 | 197.469 | 281.511 | 292.498 |
| ENSMUSG000000022788 | 16_Fgd4          | 609.975 | -0.77647 | 1.86E-07 | 2.16E-06 | 478.372 | 475.423 | 394.401 | 753.809 | 837.36  | 720.483 |
| ENSMUSG000000022789 | 14_Dnm1l         | 2907    | -0.31145 | 0.0293   | 0.06225  | 2667.94 | 2568.02 | 2546.87 | 2669.89 | 3700.88 | 3288.39 |
| ENSMUSG000000022790 | 13_lgsf11        | 73.1984 | -1.38697 | 0.00075  | 0.00281  | 30.3866 | 57.8218 | 33.4643 | 122.629 | 135.376 | 59.5127 |
| ENSMUSG000000022791 | 16_Tnk2          | 1713.93 | 1.35914  | 2.30E-10 | 6.64E-09 | 2140.95 | 2354.17 | 2904.22 | 1208.26 | 670.605 | 1005.38 |
| ENSMUSG000000022792 | 16_Yars2         | 192.337 | -0.15041 | 0.42607  | 0.54161  | 184.924 | 179.89  | 181.663 | 180.337 | 210.685 | 216.525 |
| ENSMUSG000000022793 | 16_B4galt4       | 128.743 | -0.79359 | 0.00252  | 0.00791  | 93.7643 | 115.644 | 72.9044 | 184.846 | 168.544 | 136.753 |
| ENSMUSG000000022797 | 15_Tfrc          | 982.46  | -0.21752 | 0.2105   | 0.31376  | 1001.02 | 728.738 | 996.759 | 951.278 | 1210.32 | 1006.65 |
| ENSMUSG000000022799 | 4_Arhgap31       | 594.769 | -0.46228 | 0.01233  | 0.0301   | 520.045 | 550.683 | 430.255 | 827.747 | 668.812 | 571.068 |
| ENSMUSG000000022800 | 13_Fyttd1        | 2290.97 | -0.48305 | 0.00036  | 0.00152  | 1958.63 | 1924.64 | 1848.9  | 2270.44 | 2998    | 2745.18 |
| ENSMUSG000000022801 | 13_Lrch3         | 1142.97 | -0.07501 | 0.52202  | 0.63158  | 1067    | 1150.93 | 1122.25 | 1106.37 | 1248.87 | 1162.4  |
| ENSMUSG000000022802 | 2_Lmin           | 106.928 | -0.25855 | 0.3664   | 0.48385  | 107.655 | 115.644 | 68.1238 | 134.351 | 103.101 | 112.694 |
| ENSMUSG000000022803 | 12_Popdc2        | 18.0076 | -0.35253 | 0.51511  | 0.62524  | 13.0228 | 16.5205 | 17.9273 | 22.5421 | 15.241  | 22.7921 |
| ENSMUSG000000022805 | 16_Maats1        | 3.03993 | -0.59831 | 0.6951   | 0.78186  | 1.73638 | 0.91781 | 4.78062 | 8.11517 | 2.68959 | 0       |
| ENSMUSG000000022807 | 8_Osbpl11        | 664.642 | 0.13667  | 0.30216  | 0.41698  | 686.737 | 648.889 | 754.142 | 660.034 | 630.261 | 607.789 |
| ENSMUSG000000022808 | 4_Snx4           | 1863.91 | -0.191   | 0.09746  | 0.16841  | 1790.2  | 1662.15 | 1770.02 | 1836.73 | 2142.71 | 1981.65 |
| ENSMUSG000000022809 | 4_Nr1i2          | 3.64474 | -1.27906 | 0.32883  | 0.44531  | 4.34094 | 1.83561 | 0       | 4.50843 | 3.58612 | 7.59736 |
| ENSMUSG000000022811 | 16_Zfp148        | 1874.23 | -0.36851 | 0.0046   | 0.01316  | 1730.3  | 1645.63 | 1530.99 | 1850.26 | 2273.6  | 2214.63 |
| ENSMUSG000000022812 | 13_Gsk3b         | 3867.05 | 0.05884  | 0.58196  | 0.68521  | 3911.19 | 3858.45 | 4067.11 | 3485.92 | 3841.63 | 4038    |
| ENSMUSG000000022814 | 6_Umps           | 562.571 | 0.31043  | 0.0263   | 0.05701  | 647.669 | 591.067 | 628.651 | 461.663 | 499.368 | 547.01  |
| ENSMUSG000000022816 | 11_Fstl1         | 6664.54 | -0.70438 | 1.01E-09 | 2.38E-08 | 5468.72 | 5224.15 | 4512.9  | 8612    | 8202.36 | 7967.1  |
| ENSMUSG000000022817 | 14_Iltgb5        | 3086.04 | 0.47737  | 0.00483  | 0.01369  | 3319.08 | 3789.62 | 3666.73 | 3008.92 | 1965.2  | 2766.71 |
| ENSMUSG000000022818 | 12_Cyp2ab1       | 2.85219 | -0.07115 | 0.95579  | 0.97132  | 4.34094 | 2.75342 | 1.19515 | 2.70506 | 3.58612 | 2.53245 |
| ENSMUSG000000022820 | 3_Ndufb4         | 998.713 | -0.20575 | 0.14389  | 0.23082  | 889.025 | 979.299 | 915.488 | 1227.19 | 1005.01 | 976.261 |
| ENSMUSG000000022821 | 13_Hgd           | 2.62376 | -0.17583 | 0.8986   | 0.93165  | 1.73638 | 1.83561 | 4.78062 | 0.90169 | 2.68959 | 3.79868 |
| ENSMUSG000000022822 | 15_Abcc5         | 1048.65 | -0.4888  | 0.00537  | 0.01496  | 888.157 | 1049.97 | 678.848 | 1291.21 | 1254.25 | 1129.47 |
| ENSMUSG000000022824 | 12_Muc13         | 137.563 | 0.18004  | 0.48399  | 0.59603  | 136.306 | 175.301 | 125.491 | 112.711 | 114.756 | 160.811 |
| ENSMUSG000000022827 | 14_Rab13         | 279.921 | -0.188   | 0.35109  | 0.46774  | 264.797 | 244.136 | 277.276 | 267.801 | 368.474 | 257.044 |
| ENSMUSG000000022828 | 10_Gtf2e1        | 691.987 | -0.64042 | 1.75E-06 | 1.49E-05 | 569.532 | 524.067 | 529.453 | 831.354 | 916.254 | 781.262 |

|                     |                 |         |          |          |          |         |         |         |         |         |         |
|---------------------|-----------------|---------|----------|----------|----------|---------|---------|---------|---------|---------|---------|
| ENSMUSG000000022829 | 14_Stxbp5l      | 117.931 | -1.54955 | 5.59E-08 | 7.55E-07 | 65.9823 | 66.082  | 47.8062 | 170.419 | 220.547 | 136.753 |
| ENSMUSG000000022831 | 14_Hcls1        | 214.853 | 1.20501  | 7.01E-05 | 0.00037  | 413.258 | 209.26  | 277.276 | 171.32  | 119.239 | 98.7657 |
| ENSMUSG000000022833 | 6_Ccdc14        | 188.775 | -0.09231 | 0.64041  | 0.73615  | 197.079 | 165.205 | 185.249 | 177.632 | 190.961 | 216.525 |
| ENSMUSG000000022836 | 10_Mylk         | 6120.01 | -0.61394 | 0.00281  | 0.00869  | 4221.13 | 6575.16 | 3714.54 | 7636.37 | 8066.98 | 6505.87 |
| ENSMUSG000000022837 | 13_Iqcb1        | 358.016 | -0.49529 | 0.0022   | 0.00705  | 327.307 | 275.342 | 288.032 | 383.216 | 434.817 | 439.381 |
| ENSMUSG000000022838 | 13_Eaf2         | 59.312  | 0.15497  | 0.66277  | 0.75449  | 76.4006 | 43.1369 | 68.1238 | 47.7893 | 67.2398 | 53.1815 |
| ENSMUSG000000022840 | 8_Adcy5         | 207.898 | -0.32999 | 0.25304  | 0.3623   | 213.574 | 212.931 | 125.491 | 306.573 | 174.823 | 213.992 |
| ENSMUSG000000022841 | 14_Ap2m1        | 5239.65 | 0.3262   | 0.00886  | 0.02281  | 5906.29 | 5516.01 | 6066.6  | 5204.53 | 4108.8  | 4635.66 |
| ENSMUSG000000022842 | 16_Ece2         | 243.238 | 0.49097  | 0.04107  | 0.08237  | 260.457 | 248.725 | 345.4   | 247.964 | 206.202 | 150.681 |
| ENSMUSG000000022843 | 16_ClcN2        | 220.621 | 0.40936  | 0.10454  | 0.17869  | 255.247 | 290.944 | 209.152 | 252.472 | 155.1   | 160.811 |
| ENSMUSG000000022844 | 7_Pdia5         | 173.507 | -0.29764 | 0.26621  | 0.37744  | 171.033 | 179.89  | 115.93  | 244.357 | 176.617 | 153.213 |
| ENSMUSG000000022847 | 14_Thpo         | 17.1215 | 0.12467  | 0.83068  | 0.88408  | 16.4956 | 19.2739 | 17.9273 | 24.3455 | 10.7584 | 13.9285 |
| ENSMUSG000000022848 | 8_Dirc2         | 1271.99 | 0.06816  | 0.55272  | 0.65882  | 1338.75 | 1303.28 | 1262.08 | 1195.63 | 1195.08 | 1337.14 |
| ENSMUSG000000022849 | 4_Hspbap1       | 207.753 | 0.53025  | 0.00905  | 0.02323  | 250.906 | 238.629 | 246.202 | 137.056 | 183.789 | 189.934 |
| ENSMUSG000000022853 | 6_Ehhadh        | 359.371 | -0.02519 | 0.86866  | 0.91091  | 355.957 | 334.081 | 378.864 | 339.935 | 373.853 | 373.537 |
| ENSMUSG000000022855 | 8_Senp2         | 2947.66 | -0.21132 | 0.13705  | 0.22169  | 2751.29 | 2613.91 | 2831.32 | 2628.41 | 3600.47 | 3260.53 |
| ENSMUSG000000022856 | 8_Tmem41a       | 777.786 | 0.47727  | 0.00105  | 0.00373  | 848.22  | 918.723 | 947.757 | 564.455 | 660.743 | 726.814 |
| ENSMUSG000000022858 | 15_Tra2b        | 3865.63 | -0.17799 | 0.16728  | 0.2612   | 3759.26 | 3337.14 | 3786.25 | 3601.33 | 4527.48 | 4182.35 |
| ENSMUSG000000022860 | 13_Chodl        | 56.3928 | -0.85969 | 0.03078  | 0.06485  | 35.5957 | 51.3971 | 33.4643 | 96.4803 | 77.1016 | 44.3179 |
| ENSMUSG000000022861 | 16_Dgkg         | 15.3283 | -0.83568 | 0.25237  | 0.36157  | 14.7592 | 15.6027 | 2.39031 | 16.2303 | 27.7924 | 15.1947 |
| ENSMUSG000000022863 | 14_Btg3         | 99.8848 | 0.29308  | 0.48418  | 0.59614  | 151.933 | 98.2052 | 78.8802 | 103.694 | 41.2404 | 125.356 |
| ENSMUSG000000022864 | 13_D16Ert472e   | 449.211 | 0.04194  | 0.80345  | 0.86409  | 507.022 | 391.903 | 467.305 | 407.562 | 427.645 | 493.828 |
| ENSMUSG000000022865 | 13_Cxadr        | 3232.01 | -0.13788 | 0.17184  | 0.26687  | 3159.34 | 3050.79 | 3021.35 | 3195.57 | 3415.78 | 3549.23 |
| ENSMUSG000000022867 | 9_Usp25         | 3008.19 | 0.36145  | 0.01044  | 0.02621  | 3328.63 | 3137.98 | 3682.27 | 2217.24 | 2849.17 | 2833.82 |
| ENSMUSG000000022868 | 5_Ahsg          | 0.45267 | -0.80756 | 0.8164   | NA       | 0       | 0.91781 | 0       | 0.90169 | 0.89653 | 0       |
| ENSMUSG000000022871 | 12_Fetub        | 207.434 | 0.38266  | 0.05813  | 0.10995  | 209.233 | 249.643 | 245.007 | 152.385 | 188.271 | 200.064 |
| ENSMUSG000000022876 | 17_Samsn1       | 26.2598 | 0.51454  | 0.34544  | 0.46213  | 47.7504 | 17.4383 | 27.4885 | 28.8539 | 17.0341 | 18.9934 |
| ENSMUSG000000022877 | 8_Hrg           | 0.14942 | -0.99647 | 0.80707  | NA       | 0       | 0       | 0       | 0       | 0.89653 | 0       |
| ENSMUSG000000022878 | 5_Adipoq        | 1.53766 | 0.04121  | 0.9844   | NA       | 2.60457 | 0.91781 | 1.19515 | 4.50843 | 0       | 0       |
| ENSMUSG000000022881 | 14_Rfc4         | 311.061 | -0.16777 | 0.38468  | 0.50207  | 333.384 | 237.712 | 308.35  | 308.376 | 365.784 | 312.758 |
| ENSMUSG000000022883 | 10_Robo1        | 439.03  | -0.92469 | 2.76E-05 | 0.00016  | 301.261 | 384.561 | 222.299 | 614.048 | 625.778 | 486.231 |
| ENSMUSG000000022884 | 14_Eif4a2       | 8012.99 | -0.64101 | 3.10E-06 | 2.45E-05 | 6493.18 | 6185.09 | 6106.04 | 8237.8  | 11294.5 | 9761.34 |
| ENSMUSG000000022885 | 15_St6gal1      | 1121.65 | -0.35581 | 0.00545  | 0.01513  | 906.389 | 1016.93 | 1030.22 | 1202.85 | 1374.38 | 1199.12 |
| ENSMUSG000000022887 | 8_Masp1         | 158.561 | -0.02096 | 0.92755  | 0.95195  | 162.351 | 156.027 | 152.98  | 123.531 | 170.341 | 186.135 |
| ENSMUSG000000022889 | 7_Mrpl39        | 507.533 | -0.35742 | 0.0097   | 0.0246   | 444.512 | 417.602 | 473.281 | 540.11  | 587.228 | 582.464 |
| ENSMUSG000000022890 | 13_Atp5j        | 2574.02 | -0.58019 | 1.11E-06 | 1.00E-05 | 2137.48 | 2037.53 | 2015.03 | 2852.93 | 3438.19 | 2962.97 |
| ENSMUSG000000022892 | 10_App          | 20104.6 | 0.14746  | 0.24685  | 0.35561  | 19549   | 22601   | 21243.9 | 21430.4 | 16874.5 | 18928.8 |
| ENSMUSG000000022893 | 14_Adamts1      | 1868.17 | -0.90793 | 5.33E-09 | 9.93E-08 | 1421.22 | 1351.93 | 1123.44 | 2667.19 | 2605.32 | 2039.89 |
| ENSMUSG000000022894 | 5_Adamts5       | 703.02  | -0.97031 | 2.18E-07 | 2.46E-06 | 500.945 | 486.437 | 438.622 | 1082.92 | 1007.7  | 701.49  |
| ENSMUSG000000022895 | 14_Ets2         | 2183.1  | 0.73715  | 1.63E-05 | 0.0001   | 2521.22 | 2437.69 | 3226.92 | 1500.4  | 1443.41 | 1968.98 |
| ENSMUSG000000022897 | 14_Dyrk1a       | 1656.68 | 0.00259  | 0.9845   | 0.98955  | 1653.9  | 1564.86 | 1755.68 | 1432.78 | 1793.06 | 1739.8  |
| ENSMUSG000000022898 | 12_Dscr3        | 1639.67 | -0.05737 | 0.61879  | 0.71693  | 1617.44 | 1502.45 | 1703.09 | 1771.81 | 1654.1  | 1589.11 |
| ENSMUSG000000022899 | 8_Slc15a2       | 1079.9  | -0.51012 | 0.00262  | 0.00819  | 908.125 | 929.737 | 833.022 | 1008.99 | 1283.83 | 1515.67 |
| ENSMUSG000000022900 | 14_Ildr1        | 1661.21 | 0.82873  | 3.78E-06 | 2.89E-05 | 1864    | 1900.78 | 2611.41 | 1085.63 | 1091.08 | 1414.38 |
| ENSMUSG000000022901 | 13_Cd86         | 60.7976 | 0.51491  | 0.13216  | 0.21574  | 93.7643 | 55.0683 | 65.7335 | 46.8876 | 56.4814 | 46.8504 |
| ENSMUSG000000022902 | 7_Stfa2         | 2.60349 | 0.20698  | 0.8949   | 0.92909  | 1.73638 | 5.50683 | 1.19515 | 1.80337 | 5.37918 | 0       |
| ENSMUSG000000022905 | 12_Kpna1        | 1911.53 | -0.35975 | 0.0057   | 0.01572  | 1700.78 | 1620.84 | 1701.9  | 1888.13 | 2418.84 | 2138.66 |
| ENSMUSG000000022906 | 15_Parp9        | 5056.59 | 0.65405  | 0.00077  | 0.00287  | 6011.34 | 5410.46 | 7129.09 | 2858.34 | 4797.34 | 4132.96 |
| ENSMUSG000000022911 | 10_Arl13b       | 331.277 | -0.13139 | 0.4015   | 0.51908  | 292.579 | 321.232 | 335.838 | 342.64  | 364.888 | 330.485 |
| ENSMUSG000000022912 | 8_Pros1         | 788.77  | -0.93137 | 1.00E-07 | 1.26E-06 | 592.973 | 601.163 | 432.646 | 999.969 | 1172.66 | 933.209 |
| ENSMUSG000000022913 | 14_Psmg1        | 414.356 | -0.1892  | 0.1875   | 0.28627  | 382.003 | 387.314 | 392.011 | 408.464 | 455.438 | 460.907 |
| ENSMUSG000000022914 | 15_Brwd1        | 2833.11 | -0.38946 | 0.00158  | 0.00531  | 2552.47 | 2392.72 | 2413.02 | 2818.67 | 3492.88 | 3328.91 |
| ENSMUSG000000022935 | 14_Grik1        | 29.9386 | -1.20936 | 0.0256   | 0.05575  | 24.3093 | 15.6027 | 14.3418 | 66.7247 | 35.8612 | 22.7921 |
| ENSMUSG000000022938 | 7_Fam3b         | 21.4251 | -0.00479 | 0.99292  | 0.99518  | 19.1001 | 19.2739 | 26.2934 | 20.7388 | 30.482  | 12.6623 |
| ENSMUSG000000022940 | 16_Piip         | 917.873 | -0.75735 | 5.35E-08 | 7.28E-07 | 717.124 | 694.779 | 634.627 | 1061.28 | 1299.07 | 1100.35 |
| ENSMUSG000000022941 | 8_Ripply3       | 697.744 | 0.31707  | 0.04699  | 0.09208  | 660.691 | 806.751 | 856.925 | 623.065 | 683.156 | 555.874 |
| ENSMUSG000000022945 | 11_Chaf1b       | 264.57  | 1.16485  | 3.49E-07 | 3.69E-06 | 352.484 | 310.218 | 433.841 | 141.565 | 141.652 | 207.661 |
| ENSMUSG000000022946 | 10_Dopey2       | 1075.67 | 0.86504  | 6.32E-08 | 8.43E-07 | 1256.27 | 1317.97 | 1591.95 | 808.812 | 644.605 | 834.444 |
| ENSMUSG000000022947 | 7_Cbr3          | 272.71  | 0.49205  | 0.00245  | 0.00773  | 302.998 | 317.561 | 335.838 | 288.126 | 218.753 | 232.986 |
| ENSMUSG000000022948 | 14_Setd4        | 117.81  | 0.46585  | 0.04139  | 0.08282  | 127.624 | 149.602 | 132.662 | 104.596 | 92.3426 | 100.032 |
| ENSMUSG000000022949 | 9_Clic6         | 499.114 | -1.04618 | 7.88E-05 | 0.0004   | 323.834 | 418.519 | 234.25  | 910.702 | 597.089 | 510.289 |
| ENSMUSG000000022951 | 15_Rcan1        | 1944.01 | 0.13277  | 0.39523  | 0.51288  | 2028.96 | 1862.23 | 2208.64 | 2041.42 | 1498.1  | 2024.7  |
| ENSMUSG000000022952 | 16_Runx1        | 601.111 | 0.69487  | 1.87E-07 | 2.16E-06 | 766.61  | 712.217 | 749.362 | 431.006 | 453.644 | 493.828 |
| ENSMUSG000000022956 | 10_Atp5o        | 3195.15 | 0.00338  | 0.97574  | 0.98396  | 3208.82 | 3111.36 | 3278.31 | 3487.72 | 3121.72 | 2962.97 |
| ENSMUSG000000022957 | 19_Itns1        | 1317.4  | -0.33488 | 0.01287  | 0.03122  | 1117.36 | 1310.63 | 1067.27 | 1591.47 | 1421    | 1396.65 |
| ENSMUSG000000022960 | 12_Donson       | 224.612 | -0.14987 | 0.47066  | 0.58376  | 242.225 | 189.986 | 206.762 | 208.289 | 278.821 | 221.59  |
| ENSMUSG000000022961 | 17_Son          | 10321   | -0.24371 | 0.04491  | 0.08862  | 9695.93 | 9512.14 | 9145.32 | 9822.96 | 12496.7 | 11253   |
| ENSMUSG000000022962 | 14_Gart         | 1509.96 | 0.48564  | 3.87E-05 | 0.00022  | 1625.25 | 1783.3  | 1876.39 | 1240.72 | 1205.83 | 1328.27 |
| ENSMUSG000000022964 | 12_Tmem50b      | 4160.67 | 0.23866  | 0.04641  | 0.09112  | 4420.82 | 4283.4  | 4806.91 | 3446.24 | 3819.22 | 4187.41 |
| ENSMUSG000000022965 | 7_IlfngR2       | 1620.1  | 0.01902  | 0.87048  | 0.91212  | 1640.88 | 1485.01 | 1767.63 | 1611.31 | 1610.17 | 1605.58 |
| ENSMUSG000000022967 | 12_Ilfnar1      | 1211.15 | -0.05439 | 0.63659  | 0.7329   | 1252.8  | 1172.96 | 1138.98 | 1303.84 | 1200.45 | 1197.85 |
| ENSMUSG000000022969 | 13_Ill10rb      | 903.289 | -0.29141 | 0.02231  | 0.0497   | 786.579 | 863.655 | 786.411 | 1063.09 | 917.151 | 1002.85 |
| ENSMUSG000000022971 | 18_Ilfnar2      | 472.931 | 0.125    | 0.46265  | 0.57619  | 511.363 | 482.766 | 487.623 | 520.273 | 467.092 | 368.472 |
| ENSMUSG000000022972 | 9_1110004E09Rik | 370.103 | 0.01557  | 0.91663  | 0.9448   | 367.244 | 357.944 | 390.815 | 355.264 | 356.819 | 392.53  |
| ENSMUSG000000022973 | 17_Synj1        | 1086.55 | 0.0807   | 0.51413  | 0.62427  | 1112.15 | 1130.74 | 1109.1  | 1025.22 | 1164.59 | 977.527 |
| ENSMUSG000000022974 | 12_Paxbp1       | 938.254 | -0.2742  | 0.03488  | 0.07196  | 875.134 | 810.422 | 862.901 | 941.36  | 1130.53 | 1009.18 |
| ENSMUSG000000022978 | 11_Mis18a       | 198.861 | 0.43057  | 0.02304  | 0.05111  | 250.038 | 218.438 | 216.323 | 159.598 | 182.892 | 165.876 |
| ENSMUSG000000022982 | 9_Sod1          | 2076.1  | -0.36674 | 0.00324  | 0.00982  | 1823.2  | 1913.62 | 1704.29 | 2607.67 | 2241.33 | 2166.51 |
| ENSMUSG000000022983 | 15_Scaf4        | 776.823 | 0.49005  | 0.00076  | 0.00283  | 828.252 | 855.395 | 1039.78 | 605.933 | 670.605 | 660.97  |

|                    |                 |         |          |          |          |         |         |         |         |         |         |
|--------------------|-----------------|---------|----------|----------|----------|---------|---------|---------|---------|---------|---------|
| ENSMUSG00000022986 | 5_Krt75         | 367.021 | 1.10981  | 4.29E-06 | 3.24E-05 | 430.621 | 513.053 | 561.722 | 310.18  | 164.962 | 221.59  |
| ENSMUSG00000022987 | 11_Zfp641       | 71.4451 | -1.01754 | 0.00914  | 0.02342  | 38.2003 | 68.8354 | 34.6595 | 129.843 | 88.7565 | 68.3763 |
| ENSMUSG00000022991 | 4_Lalba         | 2.76024 | -1.0258  | 0.49039  | 0.60212  | 1.73638 | 3.67122 | 0       | 4.50843 | 5.37918 | 1.26623 |
| ENSMUSG00000022992 | 16_Kansl2       | 1015.75 | -0.00058 | 0.99602  | 0.99738  | 981.053 | 1016.01 | 1050.54 | 1071.2  | 981.701 | 993.988 |
| ENSMUSG00000022993 | 6_4930415O20Rik | 14.8596 | -0.89404 | 0.14941  | 0.23831  | 12.1546 | 8.26025 | 10.7564 | 12.6236 | 25.1029 | 20.2596 |
| ENSMUSG00000022994 | 8_Adcy6         | 1478.89 | 0.27474  | 0.05884  | 0.11108  | 1516.73 | 1737.41 | 1603.9  | 1542.78 | 1155.63 | 1316.88 |
| ENSMUSG00000022995 | 16_Enah         | 848.484 | -0.71508 | 9.10E-08 | 1.16E-06 | 656.35  | 674.587 | 596.382 | 1100.06 | 1112.59 | 950.936 |
| ENSMUSG00000022996 | 14_Wnt10b       | 23.9159 | -0.3791  | 0.49446  | 0.60563  | 19.9683 | 30.2876 | 11.9515 | 38.7725 | 19.7237 | 22.7921 |
| ENSMUSG00000022997 | 9_Wnt1          | 0.45084 | -2.33355 | 0.56009  | NA       | 0       | 0       | 0       | 2.70506 | 0       | 0       |
| ENSMUSG00000022999 | 14_Lmbr1l       | 1318.08 | 0.92233  | 4.46E-10 | 1.18E-08 | 1664.32 | 1708.95 | 1804.68 | 1075.71 | 792.533 | 862.301 |
| ENSMUSG00000023000 | 4_Dhh           | 9.97644 | -0.00553 | 0.99459  | 0.99635  | 13.891  | 10.0959 | 5.97577 | 17.132  | 8.96531 | 3.79868 |
| ENSMUSG00000023004 | 8_Tuba1b        | 21038.6 | 0.38027  | 0.0003   | 0.00128  | 24133   | 22661.5 | 24591.5 | 19359.2 | 16767.8 | 18718.6 |
| ENSMUSG00000023007 | 15_Prpf40b      | 626.994 | 0.42352  | 0.00998  | 0.02522  | 669.373 | 781.053 | 705.141 | 631.18  | 466.196 | 509.023 |
| ENSMUSG00000023008 | 18_Fmn13        | 714.802 | 0.28819  | 0.09228  | 0.16089  | 786.579 | 827.861 | 744.581 | 787.171 | 600.675 | 541.945 |
| ENSMUSG00000023009 | 14_Nckap5l      | 150.62  | 1.21145  | 0.0001   | 0.00051  | 164.088 | 242.301 | 224.689 | 120.826 | 55.5849 | 96.2332 |
| ENSMUSG00000023010 | 14_Tmbim6       | 13623.5 | 0.88919  | 8.34E-10 | 2.02E-08 | 15311.4 | 17642.1 | 20127.6 | 9827.47 | 8330.56 | 10502.1 |
| ENSMUSG00000023011 | 7_Faim2         | 53.4217 | -0.4758  | 0.3904   | 0.50783  | 35.5957 | 60.5752 | 38.2449 | 119.022 | 43.0335 | 24.0583 |
| ENSMUSG00000023013 | 4_Aqp2          | 65.3282 | 1.22022  | 0.00045  | 0.00182  | 61.6414 | 106.465 | 106.369 | 42.3792 | 35.8612 | 39.253  |
| ENSMUSG00000023015 | 13_Racgap1      | 1629.38 | 0.64994  | 3.71E-05 | 0.00021  | 1976    | 1789.72 | 2203.86 | 1064.89 | 1264.11 | 1477.69 |
| ENSMUSG00000023017 | 9_Asic1         | 185.166 | 0.39168  | 0.08233  | 0.14663  | 211.838 | 190.904 | 227.079 | 171.32  | 123.721 | 186.135 |
| ENSMUSG00000023018 | 4_Smarcd1       | 469.281 | 0.3531   | 0.04124  | 0.08263  | 493.131 | 560.779 | 525.868 | 490.517 | 354.13  | 391.264 |
| ENSMUSG00000023019 | 12_Gpd1         | 126.363 | -0.89557 | 0.01666  | 0.03889  | 76.4006 | 132.164 | 56.1722 | 236.242 | 125.514 | 131.688 |
| ENSMUSG00000023020 | 2_Cox14         | 710.965 | 0.29766  | 0.10546  | 0.17986  | 738.828 | 815.011 | 798.363 | 777.253 | 493.092 | 643.243 |
| ENSMUSG00000023021 | 15_Cers5        | 1270.26 | -0.33242 | 0.00362  | 0.01078  | 1179.87 | 1139.91 | 1052.93 | 1372.37 | 1474.79 | 1401.71 |
| ENSMUSG00000023022 | 13_Lima1        | 5212.52 | 0.40813  | 0.00098  | 0.00353  | 5545.12 | 5865.7  | 6422.76 | 4130.62 | 4304.24 | 5006.66 |
| ENSMUSG00000023025 | 15_Larp4        | 1818.05 | -0.31214 | 0.01369  | 0.03287  | 1704.25 | 1467.57 | 1694.73 | 1832.22 | 2148.09 | 2061.42 |
| ENSMUSG00000023026 | 15_Dip2b        | 2730.58 | 0.65954  | 3.60E-06 | 2.77E-05 | 3213.17 | 3219.66 | 3597.41 | 1852.06 | 2018.09 | 2483.07 |
| ENSMUSG00000023027 | 12_Atf1         | 1029.47 | -0.15289 | 0.23785  | 0.34524  | 1049.64 | 875.587 | 999.149 | 1090.14 | 1026.53 | 1135.81 |
| ENSMUSG00000023030 | 16_Slc11a2      | 1576.66 | 0.12358  | 0.2467   | 0.35543  | 1613.96 | 1612.58 | 1705.48 | 1454.42 | 1494.52 | 1578.98 |
| ENSMUSG00000023031 | 7_Cela1         | 36.6345 | -0.18208 | 0.63713  | 0.73328  | 30.3866 | 31.2054 | 41.8304 | 42.3792 | 38.5508 | 35.4544 |
| ENSMUSG00000023032 | 12_Slc4a8       | 195.3   | -1.21467 | 0.0005   | 0.00198  | 123.283 | 150.52  | 78.8802 | 394.938 | 267.166 | 157.012 |
| ENSMUSG00000023033 | 14_Scn8a        | 326.117 | -1.10508 | 3.75E-05 | 0.00021  | 168.429 | 281.766 | 170.907 | 535.601 | 479.644 | 320.355 |
| ENSMUSG00000023034 | 6_Nr4a1         | 120.708 | -0.06152 | 0.88915  | 0.92542  | 124.151 | 86.2737 | 144.614 | 223.618 | 64.5502 | 81.0385 |
| ENSMUSG00000023036 | 14_Pcdhga8      | 453.429 | -0.27328 | 0.27099  | 0.38258  | 430.621 | 403.834 | 396.791 | 628.475 | 307.51  | 553.341 |
| ENSMUSG00000023039 | 16_Krt7         | 2997.37 | 1.53216  | 3.36E-14 | 2.63E-12 | 4085.69 | 3728.13 | 5549.1  | 1698.78 | 1157.42 | 1765.12 |
| ENSMUSG00000023041 | 6_Krt6b         | 99336.6 | 0.99981  | 1.30E-11 | 5.29E-10 | 125735  | 117873  | 153721  | 68991.6 | 56889.3 | 72810.6 |
| ENSMUSG00000023043 | 6_Krt18         | 660.796 | -0.37659 | 0.12256  | 0.20317  | 580.818 | 675.505 | 468.5   | 1029.72 | 544.194 | 666.035 |
| ENSMUSG00000023044 | 1_Csad          | 817.701 | 0.11102  | 0.55595  | 0.66202  | 747.51  | 970.12  | 830.632 | 983.739 | 677.777 | 696.425 |
| ENSMUSG00000023045 | 12_Soat2        | 4.43143 | 0.85277  | 0.42526  | 0.54086  | 6.94551 | 5.50683 | 4.78062 | 3.60674 | 4.48265 | 1.26623 |
| ENSMUSG00000023046 | 6_Igfbp6        | 611.931 | 0.65815  | 0.02563  | 0.0558   | 685.001 | 848.052 | 714.702 | 731.267 | 273.442 | 419.121 |
| ENSMUSG00000023047 | 10_Amhr2        | 2.10741 | 0.233    | 0.87186  | NA       | 1.73638 | 2.75342 | 2.39031 | 2.70506 | 1.79306 | 1.26623 |
| ENSMUSG00000023048 | 13_Prr13        | 2385.19 | 0.61003  | 4.65E-05 | 0.00026  | 2741.74 | 2504.69 | 3400.21 | 1945.84 | 1707.89 | 2010.77 |
| ENSMUSG00000023050 | 8_Map3k12       | 208.393 | -0.45173 | 0.05713  | 0.1083   | 168.429 | 212.931 | 147.004 | 266.899 | 268.959 | 186.135 |
| ENSMUSG00000023051 | 10_Tarbp2       | 599.129 | 0.86609  | 7.76E-07 | 7.36E-06 | 737.092 | 796.655 | 787.607 | 508.551 | 340.682 | 424.186 |
| ENSMUSG00000023052 | 7_Npff          | 43.9282 | 0.29377  | 0.41181  | 0.52814  | 43.4094 | 54.1505 | 47.8062 | 46.8876 | 35.8612 | 35.4544 |
| ENSMUSG00000023055 | 9_Calcoco1      | 1411.54 | 0.31835  | 0.05363  | 0.10262  | 1434.25 | 1731.9  | 1533.38 | 1457.12 | 1012.18 | 1300.42 |
| ENSMUSG00000023057 | 5_Fabp2         | 1.794   | -2.06247 | 0.31696  | NA       | 0       | 0.91781 | 1.19515 | 0       | 3.58612 | 5.06491 |
| ENSMUSG00000023064 | 4_Sncg          | 38.9174 | 0.12102  | 0.79959  | 0.86154  | 46.014  | 41.3013 | 34.6595 | 61.3146 | 28.689  | 21.5259 |
| ENSMUSG00000023066 | 9_Rttm          | 288.774 | -0.08858 | 0.62791  | 0.72478  | 317.757 | 243.218 | 278.471 | 270.506 | 320.061 | 302.628 |
| ENSMUSG00000023067 | 13_Cdkn1a       | 3048.7  | 0.51116  | 0.00088  | 0.00321  | 3415.45 | 3193.96 | 4140.01 | 2634.72 | 2133.74 | 2774.3  |
| ENSMUSG00000023068 | 14_Nus1         | 1482.72 | -0.37848 | 0.00834  | 0.02171  | 1335.27 | 1241.79 | 1290.77 | 1416.55 | 1911.4  | 1700.54 |
| ENSMUSG00000023070 | 6_Rgn           | 9.75669 | -1.16988 | 0.16099  | 0.25337  | 4.34094 | 10.0959 | 3.58546 | 20.7388 | 13.448  | 6.33113 |
| ENSMUSG00000023072 | 14_Cep89        | 404.692 | 0.26292  | 0.07314  | 0.13331  | 443.644 | 451.56  | 429.06  | 396.742 | 342.475 | 364.673 |
| ENSMUSG00000023074 | 11_Mospd1       | 326.175 | -0.64977 | 0.00027  | 0.00118  | 277.82  | 256.068 | 227.079 | 349.854 | 447.369 | 398.861 |
| ENSMUSG00000023075 | 9_Akirin1       | 2694.24 | -0.23405 | 0.09114  | 0.15936  | 2514.27 | 2349.58 | 2463.4  | 2463.4  | 3302.82 | 2970.57 |
| ENSMUSG00000023078 | 6_Cxcl13        | 28.6383 | 0.10373  | 0.84945  | 0.89792  | 40.8049 | 18.3561 | 29.8789 | 15.3287 | 42.1369 | 25.3245 |
| ENSMUSG00000023079 | 14_Gtf2ird1     | 1079.8  | 0.4211   | 0.00333  | 0.01004  | 1156.43 | 1228.94 | 1324.23 | 1045.96 | 807.774 | 915.482 |
| ENSMUSG00000023083 | 7_H2-M10        | 0.14942 | -0.99647 | 0.80707  | NA       | 0       | 0       | 0       | 0       | 0.89653 | 0       |
| ENSMUSG00000023084 | 11_Lrrc71       | 73.8948 | 0.26572  | 0.33432  | 0.45098  | 78.137  | 86.2737 | 77.685  | 73.9382 | 62.7571 | 64.5776 |
| ENSMUSG00000023087 | 15_Noct         | 354.529 | 0.45023  | 0.01662  | 0.03883  | 411.521 | 334.999 | 482.842 | 285.834 | 324.544 | 287.434 |
| ENSMUSG00000023088 | 16_Abcc1        | 847.389 | 0.11037  | 0.39679  | 0.51428  | 845.616 | 899.449 | 895.17  | 900.784 | 762.051 | 781.262 |
| ENSMUSG00000023089 | 12_Ndufa5       | 785.11  | -0.6375  | 8.67E-06 | 5.97E-05 | 644.196 | 556.19  | 644.188 | 938.655 | 1058.8  | 868.632 |
| ENSMUSG00000023092 | 16_Fhl1         | 1975.9  | -0.99444 | 8.14E-07 | 7.66E-06 | 1332.67 | 1580.46 | 1048.15 | 3336.24 | 2310.36 | 2247.55 |
| ENSMUSG00000023093 | 7_Gm7257        | 0.14942 | -0.99647 | 0.80707  | NA       | 0       | 0       | 0       | 0       | 0.89653 | 0       |
| ENSMUSG00000023094 | 14_Msrb2        | 169.681 | -0.66004 | 0.0087   | 0.02245  | 158.878 | 135.835 | 99.1978 | 249.767 | 188.271 | 186.135 |
| ENSMUSG00000023104 | 9_Rfc2          | 953.683 | 0.50604  | 0.00083  | 0.00307  | 1113.89 | 1039.87 | 1203.52 | 856.601 | 659.847 | 848.372 |
| ENSMUSG00000023106 | 15_Denr         | 1669.3  | -0.22074 | 0.08924  | 0.15659  | 1606.15 | 1458.39 | 1560.87 | 1584.26 | 1984.02 | 1822.1  |
| ENSMUSG00000023110 | 12_Prrt5        | 793.228 | 0.26902  | 0.07857  | 0.14125  | 848.22  | 813.176 | 938.196 | 663.641 | 655.364 | 840.775 |
| ENSMUSG00000023118 | 5_Sympk         | 1973.5  | 1.01965  | 1.69E-09 | 3.68E-08 | 2368.42 | 2573.53 | 2987.89 | 1508.52 | 1036.39 | 1366.26 |
| ENSMUSG00000023120 | 9_Gm853         | 2.01945 | -0.31467 | 0.87161  | NA       | 4.34094 | 0.91781 | 0       | 0       | 1.79306 | 5.06491 |
| ENSMUSG00000023122 | 6_Sult1c2       | 1.71621 | -4.22318 | 0.06214  | NA       | 0       | 0       | 0       | 1.80337 | 0.89653 | 7.59736 |
| ENSMUSG00000023132 | 7_Gzma          | 78.1168 | 3.63095  | 3.00E-13 | 1.88E-11 | 242.225 | 80.7669 | 111.149 | 11.7219 | 15.241  | 7.59736 |
| ENSMUSG00000023143 | 10_Nagpa        | 195.285 | 0.93097  | 6.30E-05 | 0.00033  | 237.884 | 256.068 | 274.885 | 167.713 | 102.204 | 132.954 |
| ENSMUSG00000023147 | 15_Wrb          | 242.622 | -0.60041 | 0.00914  | 0.02342  | 204.892 | 228.534 | 144.614 | 339.034 | 290.476 | 248.18  |
| ENSMUSG00000023150 | 14_Ivns1abp     | 7851.97 | -0.42083 | 0.00098  | 0.00352  | 6866.5  | 6649.5  | 6627.13 | 7619.24 | 9619.77 | 9729.69 |
| ENSMUSG00000023151 | 9_Lrrc69        | 7.18576 | -0.35643 | 0.69592  | 0.78242  | 7.8137  | 6.42464 | 4.78062 | 8.11517 | 13.448  | 2.53245 |
| ENSMUSG00000023153 | 9_Tmem52        | 15.2629 | 0.24394  | 0.71893  | 0.79995  | 10.4183 | 20.1917 | 19.1225 | 21.6405 | 6.27571 | 13.9285 |
| ENSMUSG00000023156 | 4_Rpp14         | 670.345 | -0.38722 | 0.00321  | 0.00975  | 571.268 | 589.231 | 582.04  | 693.396 | 808.671 | 777.463 |
| ENSMUSG00000023165 | 13_Ssxb2        | 0.14942 | -0.99647 | 0.80707  | NA       | 0       | 0       | 0       | 0       | 0.89653 | 0       |

|                     |                  |         |          |          |          |         |         |         |         |         |         |
|---------------------|------------------|---------|----------|----------|----------|---------|---------|---------|---------|---------|---------|
| ENSMUSG000000023169 | 14_Slc38a1       | 961.917 | -1.12983 | 5.34E-06 | 3.93E-05 | 636.382 | 790.231 | 382.449 | 1586.06 | 1287.42 | 1088.96 |
| ENSMUSG000000023170 | 14_Gps2          | 865.351 | 0.76003  | 8.93E-06 | 6.13E-05 | 976.712 | 1114.22 | 1172.45 | 679.871 | 511.919 | 736.944 |
| ENSMUSG000000023175 | 15_Bsg           | 10929.9 | -0.1171  | 0.45984  | 0.57357  | 10607.5 | 11288.1 | 9563.62 | 13786.8 | 9365.16 | 10968.1 |
| ENSMUSG000000023176 | 8_Cpn2           | 0.15297 | 0.92709  | 0.82027  | NA       | 0       | 0.91781 | 0       | 0       | 0       | 0       |
| ENSMUSG000000023186 | 14_Vvwa5a        | 4018.77 | -0.07576 | 0.53348  | 0.64172  | 3947.65 | 3697.84 | 4094.6  | 3653.63 | 4502.38 | 4216.54 |
| ENSMUSG000000023191 | 9_P3h3           | 770.858 | 0.06286  | 0.77318  | 0.84097  | 759.665 | 932.49  | 670.481 | 977.427 | 568.4   | 716.684 |
| ENSMUSG000000023192 | 12_Grm2          | 0.75678 | -0.56237 | 0.86956  | NA       | 0       | 1.83561 | 0       | 2.70506 | 0       | 0       |
| ENSMUSG000000023206 | 16_Il15ra        | 236.612 | 0.72868  | 0.00069  | 0.00264  | 316.889 | 232.205 | 337.033 | 200.174 | 164.962 | 168.408 |
| ENSMUSG000000023216 | 13_Epb42         | 2.71254 | -1.27083 | 0.36096  | 0.47807  | 1.73638 | 1.83561 | 1.19515 | 1.80337 | 7.17224 | 2.53245 |
| ENSMUSG000000023224 | 12_Serping1      | 6468.49 | 0.64662  | 5.04E-09 | 9.48E-08 | 8440.53 | 7429.64 | 7812.72 | 5419.13 | 4730.1  | 4978.8  |
| ENSMUSG000000023232 | 17_Serinc2       | 1272.16 | 1.3688   | 6.75E-13 | 3.83E-11 | 1583.58 | 1806.24 | 2111.84 | 798.893 | 533.436 | 798.989 |
| ENSMUSG000000023235 | 13_Ccl25         | 29.2966 | -0.61486 | 0.15234  | 0.24208  | 20.8365 | 25.6986 | 22.7079 | 35.1657 | 29.5855 | 41.7855 |
| ENSMUSG000000023236 | 7_Scg5           | 125.779 | -1.89526 | 1.08E-05 | 7.24E-05 | 64.2459 | 73.4244 | 21.5128 | 265.096 | 215.167 | 115.227 |
| ENSMUSG000000023243 | 8_Kcnk5          | 618.429 | 0.62499  | 0.00301  | 0.00921  | 759.665 | 663.573 | 827.047 | 558.143 | 342.475 | 559.672 |
| ENSMUSG000000023247 | 2_Guca2a         | 0.42208 | -2.1835  | 0.58658  | NA       | 0       | 0       | 0       | 0       | 0       | 2.53245 |
| ENSMUSG000000023249 | 14_Parp3         | 449.936 | 0.35586  | 0.029    | 0.06174  | 494.867 | 550.683 | 470.891 | 439.121 | 403.439 | 340.615 |
| ENSMUSG000000023259 | 16_Slc26a6       | 109.866 | 0.51853  | 0.07611  | 0.13758  | 147.592 | 139.506 | 101.588 | 110.006 | 95.9288 | 64.5776 |
| ENSMUSG000000023262 | 12_Acy1          | 196.329 | 0.48866  | 0.04837  | 0.09439  | 225.729 | 223.027 | 239.031 | 208.289 | 114.756 | 167.142 |
| ENSMUSG000000023266 | 11_Frs3          | 50.7572 | 0.5917   | 0.12757  | 0.20972  | 49.4867 | 76.1779 | 57.3674 | 53.1994 | 27.7924 | 40.5193 |
| ENSMUSG000000023267 | 10_Gabrr2        | 16.976  | -1.39605 | 0.05152  | 0.09941  | 6.07732 | 13.7671 | 8.36608 | 40.5758 | 24.2063 | 8.86359 |
| ENSMUSG000000023272 | 3_Crelid2        | 767.284 | 0.51348  | 0.00322  | 0.00975  | 818.702 | 839.792 | 1048.15 | 638.393 | 528.057 | 730.613 |
| ENSMUSG000000023274 | 14_Cd4           | 27.6838 | 1.22897  | 0.01783  | 0.04112  | 57.3004 | 22.0273 | 37.0498 | 16.2303 | 17.0341 | 16.4609 |
| ENSMUSG000000023277 | 11_Twf2          | 177.138 | 0.57285  | 0.07088  | 0.12984  | 273.479 | 183.561 | 178.078 | 193.862 | 86.9635 | 146.882 |
| ENSMUSG000000023279 | 7_Bmp15          | 31.4737 | -1.88308 | 0.00032  | 0.00136  | 14.7592 | 20.1917 | 4.78062 | 46.8876 | 59.171  | 43.0517 |
| ENSMUSG000000023284 | 15_Zfp605        | 255.745 | -0.59266 | 0.00094  | 0.00339  | 204.892 | 214.767 | 191.225 | 270.506 | 320.061 | 333.018 |
| ENSMUSG000000023286 | 16_Ube2j2        | 699.211 | 0.19912  | 0.16194  | 0.25449  | 786.579 | 676.423 | 779.24  | 589.702 | 701.087 | 662.237 |
| ENSMUSG000000023307 | 13_March5        | 1286.26 | -0.08758 | 0.54349  | 0.65034  | 1287.52 | 1206.91 | 1246.55 | 1106.37 | 1468.52 | 1401.71 |
| ENSMUSG000000023328 | 14_Ache          | 48.8849 | -0.31248 | 0.46787  | 0.58132  | 44.2776 | 57.8218 | 28.6837 | 78.4466 | 44.8265 | 39.253  |
| ENSMUSG000000023330 | 12_Dtwd1         | 145.825 | -0.16191 | 0.50799  | 0.61832  | 125.887 | 124.822 | 163.736 | 166.812 | 172.134 | 121.558 |
| ENSMUSG000000023333 | 7_Gcm1           | 0.92723 | -2.11787 | 0.44983  | NA       | 0.86819 | 0       | 0       | 0       | 0.89653 | 3.79868 |
| ENSMUSG000000023336 | 5_Wfdc1          | 159.494 | -0.67181 | 0.02655  | 0.05744  | 121.546 | 150.52  | 96.8075 | 276.817 | 147.928 | 163.343 |
| ENSMUSG000000023345 | 15_Poc1a         | 100.817 | 1.34025  | 1.94E-07 | 2.23E-06 | 151.933 | 134     | 147.004 | 57.7079 | 48.4127 | 65.8438 |
| ENSMUSG000000023348 | 11_Trip6         | 700.401 | 1.03989  | 4.54E-07 | 4.65E-06 | 895.97  | 913.217 | 1018.27 | 581.587 | 329.923 | 463.439 |
| ENSMUSG000000023349 | 14_Clec4n        | 42.7073 | -0.2658  | 0.51151  | 0.6218   | 41.673  | 35.7944 | 39.4401 | 54.1011 | 57.378  | 27.857  |
| ENSMUSG000000023353 | 13_Agap3         | 1453.92 | 1.17439  | 2.08E-07 | 2.37E-06 | 1828.4  | 1959.51 | 2256.45 | 1084.73 | 567.504 | 1026.91 |
| ENSMUSG000000023367 | 14_Tmem176a      | 2703.19 | 0.35091  | 0.00367  | 0.0109   | 2728.72 | 3052.62 | 3310.58 | 2472.42 | 2235.05 | 2419.76 |
| ENSMUSG000000023391 | 8_Dlx2           | 0.74293 | 0.53888  | 0.85492  | NA       | 1.73638 | 0.91781 | 0       | 1.80337 | 0       | 0       |
| ENSMUSG000000023393 | 15_Slc17a9       | 269.433 | 0.59797  | 0.00529  | 0.01476  | 298.657 | 283.602 | 392.011 | 250.669 | 180.203 | 211.46  |
| ENSMUSG000000023403 | 14_Stk31         | 0.30056 | -1.76625 | 0.6627   | NA       | 0       | 0       | 0       | 1.80337 | 0       | 0       |
| ENSMUSG000000023411 | 11_Nfatc4        | 448.538 | 0.18443  | 0.43597  | 0.55147  | 439.303 | 607.587 | 384.84  | 541.913 | 369.371 | 348.212 |
| ENSMUSG000000023439 | 11_Gnb3          | 69.9553 | -1.60149 | 0.01352  | 0.03254  | 55.5641 | 38.5478 | 9.56123 | 210.093 | 65.4467 | 40.5193 |
| ENSMUSG000000023443 | 13_Esx1          | 0.81106 | 3.13024  | 0.33955  | NA       | 0       | 3.67122 | 1.19515 | 0       | 0       | 0       |
| ENSMUSG000000023452 | 18_Pisd          | 1189.89 | 0.24231  | 0.07657  | 0.13831  | 1309.23 | 1317.05 | 1241.77 | 1216.37 | 943.15  | 1111.75 |
| ENSMUSG000000023456 | 14_Trip1         | 6985.37 | 0.32269  | 0.03514  | 0.07243  | 8007.3  | 7519.58 | 7763.72 | 7578.67 | 5182.84 | 5860.1  |
| ENSMUSG000000023460 | 12_Rab12         | 1197.59 | -0.49963 | 3.65E-05 | 0.00021  | 981.921 | 1027.94 | 966.88  | 1305.64 | 1526.79 | 1376.39 |
| ENSMUSG000000023467 | 16_Tulp2         | 3.49425 | -0.21776 | 0.85428  | 0.90106  | 3.47275 | 2.75342 | 3.58546 | 4.50843 | 5.37918 | 1.26623 |
| ENSMUSG000000023473 | 11_Celsr3        | 35.7278 | -1.17505 | 0.10255  | 0.17595  | 33.8593 | 21.1095 | 10.7564 | 105.497 | 30.482  | 12.6623 |
| ENSMUSG000000023484 | 13_Prrh          | 9.04226 | 0.26241  | 0.74647  | 0.82087  | 14.7592 | 6.42464 | 8.36608 | 12.6236 | 4.48265 | 7.59736 |
| ENSMUSG000000023495 | 12_Pcbp4         | 504.129 | -0.2643  | 0.43276  | 0.54813  | 449.722 | 598.409 | 326.277 | 898.079 | 392.68  | 359.608 |
| ENSMUSG000000023505 | 13_Cdca3         | 421.641 | 0.35495  | 0.03445  | 0.08623  | 510.495 | 393.739 | 515.111 | 332.722 | 373.853 | 403.926 |
| ENSMUSG000000023571 | 4_Fam132a        | 97.6557 | 0.20704  | 0.54375  | 0.63395  | 95.5007 | 127.575 | 90.8317 | 124.433 | 62.7571 | 84.8372 |
| ENSMUSG000000023572 | 16_Ccndbp1       | 1045.55 | 0.0058   | 0.9625   | 0.97587  | 1013.18 | 1032.53 | 1098.35 | 978.329 | 1134.11 | 1016.78 |
| ENSMUSG000000023707 | 13_Ogfod2        | 274.654 | 0.76829  | 7.79E-05 | 0.0004   | 308.207 | 345.095 | 384.84  | 220.913 | 168.548 | 220.323 |
| ENSMUSG000000023723 | 17_Mrps23        | 696.954 | 0.11976  | 0.3622   | 0.47945  | 685.001 | 702.121 | 791.192 | 683.478 | 637.433 | 682.496 |
| ENSMUSG000000023755 | 9_Rheb1          | 71.0709 | 0.12941  | 0.68731  | 0.77489  | 80.7415 | 51.3971 | 90.8317 | 67.6264 | 63.6537 | 72.1749 |
| ENSMUSG000000023764 | 18_Sfi1          | 1491.86 | 0.57069  | 9.93E-08 | 1.25E-06 | 1787.6  | 1738.32 | 1822.61 | 1148.75 | 1197.76 | 1256.1  |
| ENSMUSG000000023781 | 2_Hes7           | 2.9521  | 0.21966  | 0.88195  | 0.92029  | 1.73638 | 5.50683 | 2.39031 | 1.80337 | 6.27571 | 0       |
| ENSMUSG000000023791 | 14_Pigx          | 415.859 | -0.41306 | 0.00894  | 0.02297  | 349.012 | 331.328 | 390.815 | 434.612 | 520.884 | 468.504 |
| ENSMUSG000000023800 | 14_Tiam2         | 196.293 | 0.01811  | 0.94009  | 0.96098  | 177.979 | 246.89  | 167.322 | 230.831 | 162.272 | 192.466 |
| ENSMUSG000000023805 | 16_Synj2         | 1466.03 | 0.66762  | 1.46E-07 | 1.74E-06 | 1766.76 | 1729.15 | 1900.3  | 1058.58 | 1071.35 | 1270.03 |
| ENSMUSG000000023806 | 9_Rsph3b         | 564.998 | 0.20268  | 0.25432  | 0.36389  | 548.695 | 645.217 | 620.285 | 626.671 | 431.231 | 517.887 |
| ENSMUSG000000023809 | 9_Rps6ka2        | 646.091 | -0.02069 | 0.90449  | 0.93573  | 627.7   | 681.93  | 614.309 | 765.531 | 523.574 | 663.503 |
| ENSMUSG000000023826 | 14_Park2         | 75.7195 | -0.17416 | 0.55377  | 0.65994  | 55.5641 | 77.0957 | 81.2705 | 88.3652 | 73.5155 | 78.5061 |
| ENSMUSG000000023827 | 8_Agpat4         | 184.575 | -0.17072 | 0.47255  | 0.58565  | 176.242 | 204.671 | 139.833 | 237.143 | 174.823 | 174.739 |
| ENSMUSG000000023828 | 2_Slc22a3        | 1.98189 | 0.18825  | 0.91237  | NA       | 0.86819 | 1.83561 | 3.58546 | 1.80337 | 0       | 3.79868 |
| ENSMUSG000000023830 | 13_Igf2r         | 2310.5  | 0.58046  | 9.52E-06 | 6.47E-05 | 2567.23 | 2810.32 | 2928.13 | 1688.86 | 1765.27 | 2103.2  |
| ENSMUSG000000023832 | 13_Acat2         | 2054.96 | 0.40197  | 0.00097  | 0.0035   | 2439.61 | 2110.03 | 2467.99 | 1650.08 | 1786.79 | 1875.28 |
| ENSMUSG000000023845 | 6_Lnpep          | 779.162 | -0.66984 | 1.39E-06 | 1.22E-05 | 678.923 | 563.533 | 560.527 | 910.702 | 973.632 | 987.657 |
| ENSMUSG000000023852 | 13_Chd1          | 3088.43 | -0.14793 | 0.25451  | 0.36405  | 2941.42 | 2776.36 | 3072.74 | 2793.42 | 3527.85 | 3418.81 |
| ENSMUSG000000023861 | 17_Mpc1          | 1498.32 | -0.43181 | 8.69E-05 | 0.00044  | 1330.06 | 1280.34 | 1216.67 | 1792.55 | 1726.72 | 1643.56 |
| ENSMUSG000000023868 | 15_Pdei10a       | 93.9539 | -1.1217  | 0.00011  | 0.00053  | 56.4322 | 60.5752 | 60.9529 | 165.91  | 114.756 | 105.097 |
| ENSMUSG000000023873 | 12_1700010114Rik | 64.7326 | 0.4504   | 0.12313  | 0.20393  | 69.4551 | 81.6847 | 72.9044 | 55.0028 | 51.1022 | 58.2464 |
| ENSMUSG000000023882 | 15_Zfp54         | 264.28  | -0.55221 | 0.00554  | 0.01535  | 216.179 | 203.753 | 223.494 | 264.194 | 329.232 | 298.83  |
| ENSMUSG000000023883 | 13_Phfi10        | 1585.93 | -0.29657 | 0.0108   | 0.02696  | 1478.52 | 1410.67 | 1380.4  | 1602.3  | 1862.09 | 1781.58 |
| ENSMUSG000000023885 | 8_Thbs2          | 5109.93 | 0.19637  | 0.09934  | 0.17119  | 5628.47 | 5774.83 | 4965.87 | 4328.99 | 4912.99 | 5048.45 |
| ENSMUSG000000023886 | 1_Smoc2          | 1260.11 | -0.24166 | 0.11885  | 0.19823  | 1196.36 | 1314.3  | 951.343 | 1308.35 | 1299.97 | 1490.35 |
| ENSMUSG000000023892 | 7_Zfp51          | 410.407 | -0.43335 | 0.02     | 0.04527  | 375.057 | 364.369 | 307.155 | 383.216 | 538.815 | 493.828 |
| ENSMUSG000000023902 | 18_Zscan10       | 1.05208 | -2.37346 | 0.36309  | NA       | 0       | 0.91781 | 0       | 2.70506 | 2.68959 | 0       |
| ENSMUSG000000023903 | 7_Mmp25          | 8.90215 | 3.30796  | 0.00097  | 0.00349  | 24.3093 | 14.6849 | 9.56123 | 0.90169 | 2.68959 | 1.26623 |

|                     |              |         |          |          |          |         |         |         |         |         |         |
|---------------------|--------------|---------|----------|----------|----------|---------|---------|---------|---------|---------|---------|
| ENSMUSG000000023904 | 10_Hcfc1r1   | 1623.7  | 0.65934  | 0.00015  | 0.00072  | 1900.46 | 2031.1  | 2032.96 | 1471.55 | 944.943 | 1361.19 |
| ENSMUSG000000023905 | 14_Tnfrsf12a | 488.112 | 0.94287  | 1.57E-07 | 1.86E-06 | 628.568 | 530.492 | 768.484 | 357.067 | 317.372 | 326.687 |
| ENSMUSG000000023906 | 2_Cldn6      | 0.21104 | -0.99647 | 0.80707  | NA       | 0       | 0       | 0       | 0       | 0       | 1.26623 |
| ENSMUSG000000023908 | 7_Pkmyt1     | 122.674 | 2.58179  | 3.83E-18 | 5.80E-16 | 184.924 | 176.219 | 268.91  | 31.559  | 31.3786 | 43.0517 |
| ENSMUSG000000023909 | 3_Pagr4      | 291.516 | 0.39526  | 0.06442  | 0.11985  | 325.571 | 319.396 | 350.18  | 321     | 236.684 | 196.265 |
| ENSMUSG000000023911 | 12_Flywch2   | 53.4988 | 0.34297  | 0.42109  | 0.53668  | 57.3004 | 64.2464 | 58.5626 | 75.7416 | 38.5508 | 26.5908 |
| ENSMUSG000000023912 | 9_Slc25a27   | 248.644 | -0.03606 | 0.00524  | 0.89448  | 252.643 | 246.89  | 236.641 | 214.601 | 281.511 | 259.577 |
| ENSMUSG000000023913 | 17_Pla2g7    | 1132.39 | -0.47993 | 0.04041  | 0.00167  | 1070.48 | 893.943 | 871.267 | 1230.8  | 1365.42 | 1362.46 |
| ENSMUSG000000023914 | 16_Mep1a     | 0.39838 | 2.07058  | 0.60634  | NA       | 0       | 0       | 2.39031 | 0       | 0       | 0       |
| ENSMUSG000000023915 | 4_Tnfrsf21   | 1703.34 | 0.67193  | 1.30E-05 | 8.54E-05 | 1936.93 | 2073.32 | 2267.21 | 1332.69 | 1086.6  | 1523.27 |
| ENSMUSG000000023918 | 12_Adgrf4    | 497.257 | 0.29524  | 0.07668  | 0.1385   | 608.6   | 517.642 | 516.307 | 377.806 | 476.954 | 486.231 |
| ENSMUSG000000023919 | 7_Cenpq      | 328.477 | -0.33886 | 0.03916  | 0.0791   | 309.943 | 261.575 | 298.789 | 339.034 | 391.784 | 369.738 |
| ENSMUSG000000023921 | 8_Mut        | 1326.1  | -0.66656 | 5.90E-08 | 7.90E-07 | 1086.1  | 1016.01 | 972.855 | 1552.7  | 1777.82 | 1551.13 |
| ENSMUSG000000023923 | 9_Tbc1d5     | 888.579 | 0.22458  | 0.10261  | 0.17601  | 920.28  | 916.888 | 1035    | 737.579 | 817.636 | 904.086 |
| ENSMUSG000000023926 | 7_Rhag       | 2.99245 | 0.44688  | 0.72635  | 0.80505  | 4.34094 | 3.67122 | 2.39031 | 1.80337 | 4.48265 | 1.26623 |
| ENSMUSG000000023927 | 15_Satb1     | 532.89  | 0.12484  | 0.36848  | 0.48587  | 553.036 | 533.245 | 580.845 | 474.287 | 503.85  | 552.075 |
| ENSMUSG000000023930 | 13_Crisp2    | 8.07459 | -0.68338 | 0.39556  | 0.51317  | 6.07732 | 5.50683 | 7.17092 | 9.01685 | 14.3445 | 6.33113 |
| ENSMUSG000000023931 | 4_Efhb       | 8.47291 | 0.46616  | 0.60522  | 0.70544  | 8.68188 | 9.17806 | 11.9515 | 6.3118  | 13.448  | 1.26623 |
| ENSMUSG000000023932 | 8_Cdc5l      | 1884.69 | -0.09475 | 0.49148  | 0.60329  | 1767.63 | 1803.49 | 1896.71 | 1637.46 | 2084.43 | 2118.4  |
| ENSMUSG000000023935 | 9_Spats1     | 3.22854 | -1.25562 | 0.30825  | 0.42316  | 1.73638 | 2.75342 | 1.19515 | 4.50843 | 5.37918 | 3.79868 |
| ENSMUSG000000023938 | 7_Aars2      | 177.824 | 1.07326  | 1.26E-06 | 1.12E-05 | 223.124 | 230.369 | 270.105 | 134.351 | 95.0322 | 113.96  |
| ENSMUSG000000023939 | 7_Mrpl14     | 670.462 | 0.82422  | 6.31E-05 | 0.00033  | 757.928 | 845.299 | 968.075 | 607.736 | 361.302 | 482.432 |
| ENSMUSG000000023940 | 14_Sgol1     | 195.778 | 0.00542  | 0.98173  | 0.98784  | 217.915 | 171.63  | 198.396 | 145.171 | 225.029 | 216.525 |
| ENSMUSG000000023942 | 15_Slc29a1   | 944.997 | 0.5255   | 0.00281  | 0.00869  | 1055.72 | 1165.61 | 1123.44 | 882.75  | 589.021 | 853.437 |
| ENSMUSG000000023943 | 7_Sult1c1    | 46.7723 | -2.16873 | 5.08E-07 | 5.14E-06 | 26.0457 | 14.6849 | 9.56123 | 83.8567 | 65.4467 | 81.0385 |
| ENSMUSG000000023944 | 14_Hsp90ab1  | 26562.2 | 0.40645  | 0.00342  | 0.01028  | 28410.6 | 29610.2 | 32815.3 | 20492.6 | 21153.6 | 26890.9 |
| ENSMUSG000000023945 | 6_Slc5a7     | 2.73937 | -2.22617 | 0.21655  | 0.32064  | 1.73638 | 0       | 1.19515 | 9.91854 | 3.58612 | 0       |
| ENSMUSG000000023947 | 7_Nfkbie     | 147.496 | 0.7808   | 0.00052  | 0.00205  | 209.233 | 178.054 | 170.907 | 105.497 | 95.9288 | 125.356 |
| ENSMUSG000000023949 | 6_Tcte1      | 0       | NA       | NA       | NA       | 0       | 0       | 0       | 0       | 0       | 0       |
| ENSMUSG000000023951 | 16_Vegfa     | 1207.77 | 0.18537  | 0.30239  | 0.4172   | 1210.25 | 1372.12 | 1275.23 | 1402.12 | 1108.11 | 878.761 |
| ENSMUSG000000023952 | 13_Gtpbp2    | 4585.84 | 1.14835  | 1.56E-22 | 3.79E-20 | 5963.59 | 6108    | 6888.87 | 2936.79 | 2608.01 | 3009.82 |
| ENSMUSG000000023953 | 8_Polh       | 436.09  | 0.12121  | 0.4005   | 0.51804  | 433.226 | 467.163 | 462.525 | 385.02  | 433.024 | 435.582 |
| ENSMUSG000000023959 | 8_Clic5      | 2943.37 | 0.33816  | 0.00861  | 0.02225  | 3221.85 | 3227.92 | 3410.97 | 2269.54 | 2931.65 | 2598.3  |
| ENSMUSG000000023960 | 13_Enpp5     | 3270.98 | -0.6162  | 3.41E-09 | 6.74E-08 | 2638.42 | 2669.9  | 2439.31 | 3807.82 | 4174.25 | 3896.18 |
| ENSMUSG000000023961 | 16_Enpp4     | 970.41  | -0.01378 | 0.9146   | 0.94311  | 951.534 | 921.477 | 1025.44 | 907.096 | 1065.97 | 950.936 |
| ENSMUSG000000023963 | 9_Cyp39a1    | 1555.73 | -0.46633 | 0.00049  | 0.00194  | 1318.78 | 1307.87 | 1291.96 | 1543.69 | 1971.47 | 1900.61 |
| ENSMUSG000000023964 | 15_Calcr     | 1.6297  | -2.07867 | 0.37533  | NA       | 0       | 1.83561 | 0       | 5.41011 | 0       | 2.53245 |
| ENSMUSG000000023965 | 13_Fbxl17    | 569.359 | -0.3518  | 0.00662  | 0.01783  | 498.34  | 512.136 | 490.013 | 605.933 | 665.226 | 644.51  |
| ENSMUSG000000023966 | 8_Rsph9      | 61.4976 | -0.28037 | 0.45188  | 0.56641  | 64.2459 | 60.5752 | 41.8304 | 94.677  | 58.2745 | 49.3828 |
| ENSMUSG000000023967 | 9_Mrps18a    | 586.615 | 0.27351  | 0.06499  | 0.12077  | 646.8   | 652.56  | 627.456 | 609.539 | 489.506 | 493.828 |
| ENSMUSG000000023968 | 15_Crip3     | 9.2191  | -0.3825  | 0.62111  | 0.719    | 7.8137  | 9.17806 | 7.17092 | 15.3287 | 10.7584 | 5.06491 |
| ENSMUSG000000023971 | 8_Rrp36      | 354.62  | 0.76332  | 1.29E-06 | 1.14E-05 | 434.094 | 447.889 | 456.549 | 280.424 | 233.994 | 274.771 |
| ENSMUSG000000023972 | 9_Ptk7       | 1513.08 | 1.45474  | 8.48E-15 | 7.50E-13 | 1885.71 | 2274.32 | 2490.7  | 896.275 | 609.641 | 921.813 |
| ENSMUSG000000023973 | 13_Cnpy3     | 785.578 | 0.53918  | 0.00674  | 0.0181   | 804.811 | 907.71  | 1080.42 | 793.483 | 500.264 | 626.782 |
| ENSMUSG000000023977 | 14_Ubr2      | 3814.17 | 0.32174  | 0.00285  | 0.0088   | 3988.46 | 4276.97 | 4447.17 | 3186.56 | 3389.78 | 3596.08 |
| ENSMUSG000000023978 | 5_Prph2      | 742.427 | -1.77783 | 0.05058  | 0.09805  | 474.899 | 411.177 | 119.515 | 2248.8  | 884.876 | 315.291 |
| ENSMUSG000000023979 | 14_Guca1b    | 457.173 | -0.49753 | 0.09953  | 0.17146  | 397.63  | 401.999 | 338.229 | 853.896 | 404.335 | 346.946 |
| ENSMUSG000000023980 | 6_Taf8       | 625.793 | 0.3601   | 0.01344  | 0.03238  | 693.683 | 670.916 | 745.776 | 592.407 | 479.644 | 572.335 |
| ENSMUSG000000023982 | 7_Guca1a     | 1147.35 | 0.35275  | 0.03646  | 0.07456  | 1350.03 | 1144.5  | 1367.26 | 1226.29 | 861.566 | 934.475 |
| ENSMUSG000000023984 | 17_Gm20517   | 63.2087 | 1.12023  | 0.00038  | 0.00156  | 89.4234 | 78.9313 | 90.8317 | 39.6742 | 32.2751 | 48.1166 |
| ENSMUSG000000023987 | 14_Pgc       | 0.59382 | -1.37748 | 0.06284  | NA       | 0.86819 | 0       | 0       | 0.90169 | 1.79306 | 0       |
| ENSMUSG000000023988 | 8_Bysl       | 521.286 | 0.60899  | 0.00053  | 0.0021   | 534.804 | 631.45  | 723.068 | 441.826 | 355.923 | 440.647 |
| ENSMUSG000000023990 | 18_Tfeb      | 317.492 | 1.02426  | 3.48E-05 | 0.0002   | 347.275 | 478.177 | 451.768 | 270.506 | 147.031 | 210.194 |
| ENSMUSG000000023991 | 16_Foxp4     | 667.908 | 1.44369  | 2.23E-10 | 6.47E-09 | 855.166 | 978.381 | 1095.96 | 431.006 | 236.684 | 410.258 |
| ENSMUSG000000023992 | 14_Trem2     | 47.0943 | 0.19803  | 0.67152  | 0.76198  | 63.3778 | 58.7396 | 28.6837 | 66.7247 | 29.5855 | 35.4544 |
| ENSMUSG000000023993 | 6_Trem1      | 0.7514  | -3.06435 | 0.43974  | NA       | 0       | 0       | 0       | 4.50843 | 0       | 0       |
| ENSMUSG000000023994 | 13_Nfyf      | 1331.78 | 0.17737  | 0.12937  | 0.21214  | 1399.52 | 1308.79 | 1533.38 | 1256.95 | 1237.21 | 1254.83 |
| ENSMUSG000000023999 | 14_Kif6      | 36.3639 | -0.11039 | 0.77332  | 0.84107  | 39.9367 | 34.8766 | 29.8789 | 34.264  | 41.2404 | 37.9868 |
| ENSMUSG000000024002 | 16_Brd4      | 1763.97 | 0.729    | 5.89E-09 | 1.08E-07 | 2035.03 | 2175.2  | 2390.31 | 1224.49 | 1324.18 | 1434.64 |
| ENSMUSG000000024006 | 16_Stk38     | 3851.73 | 0.10383  | 0.44838  | 0.56326  | 3937.23 | 3853.87 | 4179.45 | 3101.8  | 4117.76 | 3920.24 |
| ENSMUSG000000024007 | 14_Ppil1     | 670.961 | 0.69548  | 3.71E-05 | 0.00021  | 803.074 | 787.477 | 897.561 | 557.242 | 410.611 | 569.802 |
| ENSMUSG000000024008 | 15_Cpne5     | 242.716 | 0.92107  | 2.11E-07 | 2.40E-06 | 302.13  | 305.629 | 345.4   | 175.829 | 155.1   | 172.207 |
| ENSMUSG000000024011 | 16_Pi16      | 2935.74 | 0.44308  | 0.05879  | 0.11101  | 3482.3  | 3209.57 | 3457.58 | 3506.65 | 1605.69 | 2352.65 |
| ENSMUSG000000024012 | 17_Mtch1     | 5128.14 | 0.50661  | 0.00554  | 0.01534  | 5839.44 | 6195.19 | 6023.58 | 5350.6  | 3133.37 | 4226.67 |
| ENSMUSG000000024013 | 14_Fgd2      | 245.606 | 0.94212  | 3.20E-06 | 2.52E-05 | 331.648 | 305.629 | 331.058 | 184.846 | 131.79  | 188.668 |
| ENSMUSG000000024014 | 7_Pim1       | 2435.75 | 0.95449  | 9.50E-12 | 4.01E-10 | 3074.26 | 3048.03 | 3516.14 | 1660.9  | 1433.55 | 1881.61 |
| ENSMUSG000000024018 | 17_Ccdc167   | 292.479 | -0.20468 | 0.24363  | 0.3518   | 269.138 | 307.465 | 237.836 | 294.851 | 329.027 | 316.557 |
| ENSMUSG000000024019 | 17_Cmtr1     | 2529.41 | 0.79745  | 3.44E-11 | 1.28E-09 | 3085.54 | 2991.13 | 3556.78 | 1828.62 | 1758.1  | 1956.32 |
| ENSMUSG000000024026 | 12_Glo1      | 2246.14 | -0.35932 | 0.0005   | 0.002    | 2056.74 | 1965.02 | 1879.98 | 2473.32 | 2480.7  | 2621.09 |
| ENSMUSG000000024028 | 7_Tff2       | 0.21104 | -0.99647 | 0.80707  | NA       | 0       | 0       | 0       | 0       | 0       | 1.26623 |
| ENSMUSG000000024030 | 6_Abcg1      | 1270.19 | 1.27455  | 1.60E-14 | 1.33E-12 | 1595.73 | 1820.93 | 1974.39 | 793.483 | 597.089 | 839.508 |
| ENSMUSG000000024032 | 6_Tff1       | 5.48048 | 0.04588  | 0.96584  | 0.97794  | 2.60457 | 8.26025 | 5.97577 | 10.8202 | 2.68959 | 2.53245 |
| ENSMUSG000000024033 | 9_Rsph1      | 70.646  | 0.47096  | 0.10255  | 0.17595  | 94.6325 | 77.0957 | 74.0996 | 61.3146 | 54.6884 | 62.0451 |
| ENSMUSG000000024034 | 12_Tmprss3   | 90.6023 | 0.67141  | 0.02779  | 0.05963  | 82.4779 | 103.712 | 148.199 | 71.2332 | 64.5502 | 73.4412 |
| ENSMUSG000000024036 | 15_Slc37a1   | 1140.33 | 1.13323  | 1.56E-11 | 6.26E-10 | 1423.83 | 1521.72 | 1753.29 | 785.368 | 570.193 | 787.593 |
| ENSMUSG000000024037 | 12_Wdr4      | 558.57  | 0.67336  | 8.35E-05 | 0.00043  | 612.941 | 704.875 | 742.191 | 490.517 | 357.716 | 443.179 |
| ENSMUSG000000024038 | 16_Ndufv3    | 1412.93 | 0.15198  | 0.29426  | 0.40847  | 1474.18 | 1481.34 | 1505.89 | 1511.22 | 1110.8  | 1394.12 |
| ENSMUSG000000024039 | 14_Cbs       | 30.653  | 0.46451  | 0.31733  | 0.43268  | 32.9912 | 36.7122 | 37.0498 | 36.9691 | 16.1376 | 24.0583 |
| ENSMUSG000000024041 | 8_Cryaa      | 15663.5 | -1.15299 | 0.17936  | 0.2763   | 7105.25 | 18378.1 | 3669.12 | 36076.4 | 7551.48 | 21200.4 |

|                    |                  |         |          |          |          |         |         |         |         |         |         |
|--------------------|------------------|---------|----------|----------|----------|---------|---------|---------|---------|---------|---------|
| ENSMUSG00000024042 | 6_Sik1           | 1640.1  | 1.0344   | 1.73E-07 | 2.03E-06 | 1960.37 | 2287.17 | 2362.82 | 1094.65 | 778.189 | 1357.4  |
| ENSMUSG00000024043 | 13_Arhgap28      | 198.252 | -1.10844 | 2.09E-05 | 0.00013  | 131.096 | 163.369 | 81.2705 | 284.031 | 275.235 | 254.512 |
| ENSMUSG00000024044 | 15_Epb4113       | 336.804 | -0.81235 | 0.00028  | 0.0012   | 250.038 | 288.191 | 194.81  | 518.469 | 431.231 | 338.083 |
| ENSMUSG00000024045 | 5_Akap8          | 2371.08 | 0.0173   | 0.87057  | 0.91212  | 2356.26 | 2335.82 | 2463.21 | 2201.92 | 2387.46 | 2481.8  |
| ENSMUSG00000024048 | 14_Myl12a        | 7361.11 | 0.41151  | 0.0012   | 0.00419  | 8196.57 | 8019.79 | 8994.73 | 6708.54 | 5456.29 | 6790.77 |
| ENSMUSG00000024049 | 14_Myom1         | 335.5   | -1.40228 | 3.35E-06 | 2.62E-05 | 142.383 | 287.273 | 121.906 | 541.011 | 402.542 | 517.887 |
| ENSMUSG00000024050 | 15_Wiz           | 1017.2  | 1.11262  | 3.00E-10 | 8.39E-09 | 1217.2  | 1496.02 | 1459.28 | 725.857 | 502.057 | 702.756 |
| ENSMUSG00000024052 | 17_Lpin2         | 5592.57 | 0.43589  | 3.08E-05 | 0.00018  | 6389.87 | 6712.83 | 6188.51 | 4410.14 | 4844.85 | 5009.19 |
| ENSMUSG00000024053 | 10_Emilin2       | 442.463 | 0.26697  | 0.20784  | 0.31056  | 544.354 | 475.423 | 430.255 | 521.174 | 329.027 | 354.544 |
| ENSMUSG00000024054 | 13_Smchd1        | 1736.9  | -0.13055 | 0.42555  | 0.5411   | 1760.69 | 1518.05 | 1695.92 | 1433.68 | 2087.12 | 1925.93 |
| ENSMUSG00000024055 | 14_Cyp4f13       | 534.308 | 0.312    | 0.05936  | 0.11182  | 533.936 | 601.163 | 641.798 | 555.438 | 430.335 | 443.179 |
| ENSMUSG00000024056 | 9_Ndc80          | 265.122 | 0.1114   | 0.6036   | 0.70418  | 302.998 | 250.561 | 272.495 | 201.076 | 312.889 | 250.713 |
| ENSMUSG00000024059 | 9_Clip4          | 3602.79 | 0.53776  | 0.0001   | 0.0005   | 4148.2  | 3944.73 | 4705.32 | 2753.75 | 2678.83 | 3385.89 |
| ENSMUSG00000024063 | 12_Lbh           | 1219.18 | -0.52787 | 0.0061   | 0.01664  | 952.403 | 1204.16 | 838.998 | 1780.83 | 1283.83 | 1254.83 |
| ENSMUSG00000024064 | 13_Galnt14       | 20.9872 | -1.19751 | 0.04898  | 0.09543  | 17.3638 | 14.6849 | 5.97577 | 42.3792 | 27.7924 | 17.7272 |
| ENSMUSG00000024065 | 7_Ehd3           | 465.492 | -0.68534 | 0.00048  | 0.0019   | 350.748 | 421.273 | 298.789 | 668.149 | 579.159 | 474.835 |
| ENSMUSG00000024066 | 8_Xdh            | 3968.68 | 1.62828  | 8.11E-18 | 1.18E-15 | 5449.62 | 4998.37 | 7543.81 | 1562.62 | 2126.57 | 2131.06 |
| ENSMUSG00000024067 | 13_Dpy30         | 1000.83 | -0.25899 | 0.04918  | 0.09575  | 936.775 | 849.888 | 947.757 | 1001.77 | 1201.35 | 1067.43 |
| ENSMUSG00000024068 | 6_Spast          | 984.877 | -0.25061 | 0.0762   | 0.13772  | 886.42  | 848.052 | 964.489 | 928.736 | 1167.28 | 1114.28 |
| ENSMUSG00000024069 | 12_Slc30a6       | 325.387 | -0.0142  | 0.93475  | 0.95697  | 319.493 | 308.383 | 343.009 | 342.64  | 277.924 | 360.875 |
| ENSMUSG00000024070 | 15_Prkd3         | 1496.39 | -0.48235 | 0.00016  | 0.00075  | 1280.58 | 1243.63 | 1221.45 | 1576.15 | 1959.82 | 1696.74 |
| ENSMUSG00000024072 | 8_Yipf4          | 968.389 | -0.55253 | 3.46E-05 | 0.0002   | 828.252 | 748.012 | 779.24  | 1045.05 | 1273.97 | 1135.81 |
| ENSMUSG00000024073 | 14_Birc6         | 3389.83 | -0.21312 | 0.04041  | 0.08122  | 3286.09 | 3009.48 | 3122.94 | 3431.81 | 3687.43 | 3801.21 |
| ENSMUSG00000024074 | 7_Crim1          | 5354.22 | 0.3086   | 0.02748  | 0.05911  | 5244.73 | 6079.54 | 6449.05 | 4842.95 | 4155.42 | 5353.61 |
| ENSMUSG00000024076 | 9_Vit            | 494.832 | -0.49097 | 0.06878  | 0.12673  | 341.198 | 523.149 | 369.303 | 712.332 | 359.509 | 663.503 |
| ENSMUSG00000024077 | 15_Strn          | 2378.65 | -0.04048 | 0.78684  | 0.85201  | 2338.9  | 2260.56 | 2435.72 | 1940.43 | 2660.01 | 2636.28 |
| ENSMUSG00000024078 | 6_Ttc27          | 414.388 | 0.09278  | 0.53887  | 0.64649  | 429.753 | 413.93  | 438.622 | 360.674 | 405.232 | 438.115 |
| ENSMUSG00000024079 | 4_Elf2ak2        | 3224.43 | 0.32119  | 0.07422  | 0.13489  | 3666.36 | 3145.32 | 3934.45 | 2208.23 | 3509.02 | 2883.2  |
| ENSMUSG00000024081 | 8_Cebpz          | 912.638 | -0.30168 | 0.04128  | 0.08267  | 812.624 | 795.737 | 843.779 | 842.174 | 1087.49 | 1094.02 |
| ENSMUSG00000024082 | 4_Ndufa7         | 450.082 | -0.30995 | 0.02383  | 0.05258  | 399.367 | 404.752 | 401.572 | 473.385 | 519.988 | 501.426 |
| ENSMUSG00000024083 | 15_Pja2          | 2843.78 | -0.57436 | 7.42E-09 | 1.32E-07 | 2324.14 | 2343.16 | 2187.13 | 3327.22 | 3524.26 | 3356.77 |
| ENSMUSG00000024084 | 7_Qpct           | 319.448 | -1.24989 | 1.78E-06 | 1.52E-05 | 203.156 | 228.534 | 135.052 | 588.801 | 414.197 | 346.946 |
| ENSMUSG00000024085 | 13_Man2a1        | 871.79  | -0.03534 | 0.78272  | 0.84879  | 896.839 | 822.354 | 864.096 | 810.615 | 953.012 | 883.826 |
| ENSMUSG00000024087 | 3_Cyp1b1         | 232.324 | -0.52803 | 0.02643  | 0.05721  | 214.443 | 187.232 | 169.712 | 311.081 | 316.475 | 194.999 |
| ENSMUSG00000024091 | 8_Vapa           | 2214.63 | -0.30567 | 0.02255  | 0.05014  | 1972.52 | 1854.89 | 2115.42 | 2109.94 | 2658.21 | 2576.77 |
| ENSMUSG00000024095 | 15_Hnrnp11       | 1038.68 | -0.30394 | 0.03612  | 0.07402  | 944.589 | 931.573 | 913.098 | 1005.38 | 1335.83 | 1101.62 |
| ENSMUSG00000024096 | 16_Ralbp1        | 5489.02 | 0.66809  | 3.37E-05 | 0.00019  | 6095.55 | 6151.13 | 7965.7  | 4148.65 | 3646.19 | 4926.89 |
| ENSMUSG00000024097 | 10_Srsf7         | 2274.27 | -0.14033 | 0.3137   | 0.42877  | 2259.03 | 1968.69 | 2263.62 | 2050.43 | 2660.01 | 2443.82 |
| ENSMUSG00000024098 | 5_Twsg1          | 4632.97 | -0.0087  | 0.92616  | 0.95127  | 4567.54 | 4652.36 | 4636    | 4486.79 | 4605.48 | 4849.65 |
| ENSMUSG00000024099 | 14_Ndufv2        | 1731.41 | -0.48674 | 1.33E-05 | 8.71E-05 | 1512.38 | 1364.78 | 1449.72 | 1983.71 | 2141.81 | 1936.06 |
| ENSMUSG00000024101 | 14_Wash1         | 597.235 | 0.72559  | 8.59E-05 | 0.00044  | 694.551 | 746.176 | 792.387 | 541.011 | 349.647 | 459.64  |
| ENSMUSG00000024104 | 11_Fam21         | 1647.83 | -0.05839 | 0.63008  | 0.72678  | 1693.84 | 1485.93 | 1663.65 | 1549.1  | 1778.72 | 1715.74 |
| ENSMUSG00000024105 | 2_Themis3        | 2.16384 | -0.87963 | 0.61357  | NA       | 0.86819 | 3.67122 | 0       | 0.90169 | 6.27571 | 1.26623 |
| ENSMUSG00000024109 | 10_Nrxn1         | 150.012 | -0.81746 | 0.00351  | 0.01048  | 111.128 | 127.575 | 87.2462 | 197.469 | 241.167 | 135.486 |
| ENSMUSG00000024112 | 16_Cacna1h       | 28.0848 | -1.30756 | 0.03066  | 0.06462  | 18.232  | 18.3561 | 11.9515 | 71.2332 | 32.2751 | 16.4609 |
| ENSMUSG00000024114 | 14_Prss41        | 31.5677 | 0.06707  | 0.8678   | 0.91023  | 28.6502 | 34.8766 | 33.4643 | 28.8539 | 33.1716 | 30.3894 |
| ENSMUSG00000024118 | 13_1600002H07Rik | 128.278 | 0.64755  | 0.00866  | 0.02237  | 150.197 | 137.671 | 181.663 | 103.694 | 82.4808 | 113.96  |
| ENSMUSG00000024120 | 12_Lrpprc        | 1077.29 | -0.13588 | 0.2216   | 0.3265   | 1071.34 | 1016.93 | 990.783 | 1107.27 | 1146.66 | 1130.74 |
| ENSMUSG00000024121 | 13_Atp6v0c       | 3136.2  | 0.66726  | 5.43E-06 | 3.99E-05 | 3765.33 | 3838.26 | 3944.01 | 2918.76 | 2103.26 | 2247.55 |
| ENSMUSG00000024122 | 16_Pdpk1         | 2543.74 | -0.12567 | 0.26026  | 0.37051  | 2393.6  | 2401.9  | 2503.85 | 2425.53 | 2845.59 | 2692    |
| ENSMUSG00000024124 | 9_Prss30         | 6.92978 | 1.91937  | 0.03858  | 0.07816  | 8.68188 | 10.0959 | 14.3418 | 3.60674 | 3.58612 | 1.26623 |
| ENSMUSG00000024127 | 14_Prepl         | 846.963 | -0.39123 | 0.00079  | 0.00292  | 757.928 | 709.464 | 731.434 | 968.41  | 982.598 | 931.943 |
| ENSMUSG00000024128 | 13_Sbp           | 0.34861 | -0.03469 | 0.99322  | NA       | 0       | 0       | 1.19515 | 0       | 0.89653 | 0       |
| ENSMUSG00000024130 | 15_Abca3         | 3022.86 | 0.71753  | 6.10E-07 | 6.03E-06 | 3372.91 | 3949.32 | 3954.76 | 2357.91 | 1935.61 | 2566.64 |
| ENSMUSG00000024131 | 7_Slc3a1         | 4.59369 | -2.54354 | 0.04131  | 0.08272  | 0.86819 | 0.91781 | 2.39031 | 3.60674 | 13.448  | 6.33113 |
| ENSMUSG00000024132 | 5_Eci1           | 821.607 | -0.11963 | 0.41821  | 0.53417  | 799.602 | 795.737 | 767.289 | 986.444 | 742.327 | 838.242 |
| ENSMUSG00000024134 | 11_Six2          | 105.121 | 0.73518  | 0.02967  | 0.06289  | 105.919 | 121.15  | 166.126 | 65.823  | 56.4814 | 115.227 |
| ENSMUSG00000024135 | 9_Srbd1          | 537.786 | -0.00356 | 0.98174  | 0.98784  | 559.113 | 487.355 | 564.113 | 473.385 | 545.091 | 597.659 |
| ENSMUSG00000024136 | 14_Dnase1l2      | 97.5896 | 0.56073  | 0.03346  | 0.06951  | 114.601 | 116.561 | 117.125 | 82.9551 | 61.8606 | 92.4346 |
| ENSMUSG00000024137 | 8_E4f1           | 393.393 | 1.16576  | 2.04E-08 | 3.16E-07 | 507.89  | 553.437 | 571.284 | 300.261 | 179.306 | 248.18  |
| ENSMUSG00000024140 | 9_Epas1          | 12877   | 0.60306  | 2.93E-05 | 0.00017  | 13832.8 | 15897.3 | 16857.6 | 9547.95 | 9127.58 | 11998.8 |
| ENSMUSG00000024142 | 14_Mlst8         | 670.211 | 0.30173  | 0.04978  | 0.09676  | 691.946 | 736.08  | 792.387 | 671.756 | 513.712 | 615.386 |
| ENSMUSG00000024143 | 14_Rhoq          | 1893.1  | -0.46705 | 0.00054  | 0.00211  | 1581.84 | 1731.9  | 1454.5  | 2207.33 | 2430.49 | 1952.52 |
| ENSMUSG00000024145 | 6_Pigf           | 439.719 | -0.39284 | 0.01321  | 0.03192  | 404.576 | 346.013 | 389.62  | 440.924 | 525.367 | 531.815 |
| ENSMUSG00000024146 | 9_Cript          | 1045.52 | -0.50747 | 0.00017  | 0.00078  | 869.057 | 865.491 | 856.925 | 1165.88 | 1397.69 | 1118.08 |
| ENSMUSG00000024150 | 11_Mcfd2         | 1285.85 | -0.16138 | 0.16692  | 0.2608   | 1214.6  | 1234.45 | 1193.96 | 1467.04 | 1343.9  | 1261.16 |
| ENSMUSG00000024151 | 13_Msh2          | 1495.32 | -0.13054 | 0.37102  | 0.48842  | 1442.93 | 1325.31 | 1514.26 | 1308.35 | 1651.41 | 1729.67 |
| ENSMUSG00000024154 | 10_Gtf2a1l       | 0.14942 | -0.99647 | 0.80707  | NA       | 0       | 0       | 0       | 0       | 0.89653 | 0       |
| ENSMUSG00000024155 | 7_MeioB          | 8.41298 | -0.15958 | 0.8346   | 0.88686  | 7.8137  | 6.42464 | 9.56123 | 7.21348 | 8.06878 | 11.396  |
| ENSMUSG00000024158 | 17_Hagh          | 540.082 | 0.26012  | 0.12278  | 0.20344  | 658.955 | 513.053 | 593.992 | 557.242 | 434.817 | 482.432 |
| ENSMUSG00000024160 | 16_Spsb3         | 498.559 | 0.10571  | 4.84E-05 | 0.00027  | 600.786 | 742.505 | 658.53  | 461.663 | 221.443 | 306.427 |
| ENSMUSG00000024163 | 17_Mapk8ip3      | 1391.4  | 0.35845  | 0.01496  | 0.03551  | 1503.7  | 1730.98 | 1455.7  | 1411.14 | 1100.94 | 1145.94 |
| ENSMUSG00000024164 | 5_C3             | 1714.42 | 1.34468  | 9.76E-13 | 5.26E-11 | 2646.24 | 1839.28 | 2894.66 | 830.452 | 1027.42 | 1048.44 |
| ENSMUSG00000024165 | 8_Hn1l           | 1522.72 | 0.26801  | 0.08947  | 0.15691  | 1703.39 | 1489.6  | 1797.51 | 1128.01 | 1473    | 1544.8  |
| ENSMUSG00000024168 | 7_Tmem204        | 409.252 | -0.04576 | 0.84014  | 0.89119  | 371.585 | 480.012 | 357.351 | 541.913 | 379.232 | 325.42  |
| ENSMUSG00000024169 | 15_lft140        | 609.136 | 0.31777  | 0.01226  | 0.02996  | 665.901 | 697.532 | 664.506 | 568.062 | 524.47  | 534.348 |
| ENSMUSG00000024170 | 15_Telo2         | 432.091 | 0.55883  | 0.00134  | 0.00462  | 511.363 | 549.766 | 482.842 | 408.464 | 293.165 | 346.946 |
| ENSMUSG00000024172 | 10_St6gal2       | 4.28943 | -1.02576 | 0.37549  | 0.49314  | 1.73638 | 5.50683 | 1.19515 | 9.01685 | 4.48265 | 3.79868 |
| ENSMUSG00000024173 | 10_Tpsab1        | 75.8814 | -0.30165 | 0.47525  | 0.58774  | 78.137  | 62.4108 | 63.3432 | 132.548 | 40.3439 | 78.5061 |

|                     |                 |         |          |          |          |         |         |         |         |         |         |
|---------------------|-----------------|---------|----------|----------|----------|---------|---------|---------|---------|---------|---------|
| ENSMUSG000000024174 | 8_Pot1b         | 156.964 | -0.63553 | 0.01087  | 0.02709  | 121.546 | 140.424 | 106.369 | 148.778 | 232.201 | 192.466 |
| ENSMUSG000000024175 | 1_Tekt4         | 0.94512 | 0.09843  | 0.96781  | NA       | 0.86819 | 0.91781 | 1.19515 | 0       | 2.68959 | 0       |
| ENSMUSG000000024176 | 10_Sox8         | 15.8874 | -1.2663  | 0.07149  | 0.13078  | 7.8137  | 11.9315 | 8.36608 | 40.5758 | 15.241  | 11.396  |
| ENSMUSG000000024177 | 8_Nme4          | 37.24   | -0.04109 | 0.92139  | 0.94769  | 46.8822 | 35.7944 | 27.4885 | 43.2809 | 42.1369 | 27.857  |
| ENSMUSG000000024180 | 13_Tmem8        | 91.8237 | -0.22725 | 0.53812  | 0.64568  | 83.3461 | 99.123  | 71.7092 | 154.188 | 77.9982 | 64.5776 |
| ENSMUSG000000024181 | 8_Mrpl28        | 624.324 | 0.69005  | 1.84E-05 | 0.00011  | 755.324 | 724.149 | 833.022 | 535.601 | 398.956 | 498.893 |
| ENSMUSG000000024182 | 16_Axin1        | 1350.62 | 0.42621  | 0.00035  | 0.00146  | 1508.91 | 1543.75 | 1593.14 | 1223.59 | 1045.35 | 1188.99 |
| ENSMUSG000000024184 | 15_Pdia2        | 0.2997  | -1.76345 | 0.66322  | NA       | 0       | 0       | 0       | 0.90169 | 0.89653 | 0       |
| ENSMUSG000000024186 | 15_Rgs11        | 314.484 | -0.26069 | 0.26366  | 0.37464  | 243.093 | 385.478 | 229.47  | 384.118 | 321.854 | 322.888 |
| ENSMUSG000000024187 | 14_Fam234a      | 1583.81 | 0.70488  | 8.63E-05 | 0.00044  | 1791.07 | 2009.08 | 2089.13 | 1419.25 | 902.806 | 1291.55 |
| ENSMUSG000000024188 | 15_Luc7l        | 1520.2  | -0.1749  | 0.19945  | 0.30039  | 1471.58 | 1363.86 | 1448.53 | 1376.87 | 1766.17 | 1694.21 |
| ENSMUSG000000024190 | 6_Dusp1         | 1225.49 | 0.49942  | 0.01838  | 0.04216  | 1857.92 | 1184.89 | 1263.28 | 1231.7  | 827.498 | 987.657 |
| ENSMUSG000000024191 | 14_Bnip1        | 503.107 | 0.35961  | 0.0169   | 0.03937  | 526.99  | 553.437 | 615.504 | 408.464 | 426.749 | 487.497 |
| ENSMUSG000000024193 | 7_Phf1          | 756.604 | 0.60298  | 0.00146  | 0.00498  | 876.002 | 974.71  | 886.804 | 755.612 | 465.299 | 581.198 |
| ENSMUSG000000024194 | 15_Cuta         | 626.986 | 0.65132  | 0.00013  | 0.00064  | 727.542 | 777.381 | 793.582 | 573.472 | 393.577 | 496.361 |
| ENSMUSG000000024197 | 9_Plin3         | 1748.75 | 0.67968  | 1.12E-05 | 7.48E-05 | 1934.32 | 2173.36 | 2352.06 | 1513.93 | 1110.8  | 1408.04 |
| ENSMUSG000000024201 | 12_Kdm4b        | 719.235 | 0.93814  | 1.00E-05 | 6.80E-05 | 872.529 | 964.614 | 999.149 | 658.23  | 367.578 | 453.309 |
| ENSMUSG000000024206 | 14_Rfx2         | 290.434 | 1.37277  | 5.18E-12 | 2.28E-10 | 352.484 | 423.108 | 481.647 | 175.829 | 139.859 | 169.674 |
| ENSMUSG000000024207 | 8_Acsbg2        | 2.12959 | -2.54334 | 0.13457  | NA       | 0.86819 | 0.91781 | 0       | 3.60674 | 3.58612 | 3.79868 |
| ENSMUSG000000024208 | 15_Uqcc2        | 824.017 | 0.36466  | 0.01348  | 0.03245  | 876.002 | 935.244 | 972.855 | 834.961 | 652.674 | 672.366 |
| ENSMUSG000000024209 | 9_1700061G19Rik | 8.08962 | -0.57097 | 0.47379  | 0.58657  | 8.68188 | 3.67122 | 7.17092 | 9.91854 | 8.96531 | 10.1298 |
| ENSMUSG000000024210 | 2_Ip6k3         | 51.0638 | -1.1272  | 0.03731  | 0.07603  | 28.6502 | 54.1505 | 13.1467 | 110.006 | 57.378  | 43.0517 |
| ENSMUSG000000024211 | 15_Grm8         | 38.594  | -1.51321 | 0.00458  | 0.0131   | 26.9138 | 26.6164 | 5.97577 | 75.7416 | 51.9988 | 44.3179 |
| ENSMUSG000000024212 | 8_Mllt1         | 1206.39 | 1.09425  | 3.60E-08 | 5.14E-07 | 1442.93 | 1641.95 | 1844.12 | 905.292 | 553.159 | 850.904 |
| ENSMUSG000000024213 | 13_Nudt3        | 1924.04 | 0.39033  | 0.02495  | 0.05455  | 2051.53 | 2081.58 | 2415.41 | 1984.61 | 1286.52 | 1724.6  |
| ENSMUSG000000024215 | 12_0986         | 0.86251 | 0.28065  | 0.39345  | 17.3638  | 25.6986 | 3.58546 | 8.11517 | 8.96531 | 8.86359 |         |
| ENSMUSG000000024217 | 9_Snrpc         | 569.259 | 0.2471   | 0.10495  | 0.17918  | 566.927 | 571.793 | 715.897 | 508.551 | 515.505 | 536.88  |
| ENSMUSG000000024218 | 12_Taf11        | 489.234 | 0.06356  | 0.68689  | 0.77457  | 460.14  | 502.957 | 536.624 | 416.579 | 494.885 | 524.218 |
| ENSMUSG000000024219 | 15_Anks1        | 845.611 | 1.04193  | 1.85E-07 | 2.14E-06 | 980.185 | 1145.42 | 1289.57 | 669.952 | 412.404 | 576.133 |
| ENSMUSG000000024220 | 13_Zfp523       | 536.887 | 0.9981   | 6.47E-05 | 0.00034  | 629.437 | 755.354 | 762.508 | 507.649 | 244.753 | 321.622 |
| ENSMUSG000000024222 | 16_Fkbp5        | 841.357 | 0.89927  | 6.56E-06 | 4.70E-05 | 916.807 | 1183.05 | 1184.4  | 513.961 | 493.988 | 755.937 |
| ENSMUSG000000024225 | 4_Clps          | 0.19919 | 0.92709  | 0.82027  | NA       | 0       | 0       | 1.19515 | 0       | 0       | 0       |
| ENSMUSG000000024227 | 14_Pdzph1       | 74.2782 | -2.29346 | 2.20E-05 | 0.00013  | 35.5957 | 32.1232 | 7.17092 | 186.649 | 124.618 | 59.5127 |
| ENSMUSG000000024228 | 12_Nudt12       | 262.547 | -0.65044 | 0.00021  | 0.00094  | 209.233 | 191.821 | 212.737 | 308.376 | 356.819 | 296.297 |
| ENSMUSG000000024231 | 14_Cul2         | 840.787 | -0.31798 | 0.02394  | 0.05278  | 778.765 | 703.039 | 763.703 | 821.435 | 1031.91 | 945.872 |
| ENSMUSG000000024232 | 1_Bambi         | 371.22  | -0.41047 | 0.04378  | 0.0868   | 349.012 | 301.04  | 307.155 | 519.371 | 424.059 | 326.687 |
| ENSMUSG000000024233 | 10_Lyzl1        | 8.19242 | -0.68136 | 0.38449  | 0.50194  | 5.20913 | 5.50683 | 8.36608 | 10.8202 | 11.6549 | 7.59736 |
| ENSMUSG000000024234 | 6_Mtpap         | 511.582 | -0.18222 | 0.29734  | 0.4117   | 487.922 | 451.56  | 498.379 | 437.317 | 625.778 | 568.536 |
| ENSMUSG000000024235 | 10_Map3k8       | 437.131 | 0.17433  | 0.25221  | 0.3614   | 433.226 | 471.752 | 486.428 | 380.511 | 454.541 | 396.329 |
| ENSMUSG000000024236 | 17_Svil         | 2005.99 | -0.01474 | 0.89045  | 0.9262   | 1878.76 | 2098.1  | 2010.25 | 2053.14 | 1941.89 | 2053.82 |
| ENSMUSG000000024238 | 13_Zeb1         | 650.422 | -0.78554 | 1.03E-05 | 6.99E-05 | 508.758 | 523.149 | 400.377 | 969.312 | 788.05  | 712.886 |
| ENSMUSG000000024240 | 13_Epc1         | 1017.67 | -0.08852 | 0.43016  | 0.54549  | 1011.44 | 959.107 | 988.392 | 1008.99 | 1066.87 | 1071.23 |
| ENSMUSG000000024241 | 6_Sos1          | 991.337 | -0.1671  | 0.20228  | 0.30366  | 953.271 | 875.587 | 974.051 | 972.919 | 1159.21 | 1012.98 |
| ENSMUSG000000024242 | 14_Map4k3       | 1999.81 | -0.28971 | 0.01095  | 0.02725  | 1848.37 | 1837.45 | 1711.46 | 2017.97 | 2266.43 | 2317.2  |
| ENSMUSG000000024245 | 4_Tmem178       | 79.2322 | -1.51791 | 0.0002   | 0.0009   | 44.2776 | 57.8218 | 20.3176 | 160.5   | 101.308 | 91.1683 |
| ENSMUSG000000024246 | 8_Thumpd2       | 99.2734 | -0.22173 | 0.4049   | 0.52209  | 96.3689 | 98.2052 | 80.0753 | 127.138 | 88.7565 | 105.097 |
| ENSMUSG000000024247 | 14_Pkdcc        | 360.853 | 0.28971  | 0.38523  | 0.50261  | 390.685 | 514.889 | 285.642 | 519.371 | 230.408 | 224.122 |
| ENSMUSG000000024248 | 13_Cox7a2l      | 5234.99 | -0.28915 | 0.01105  | 0.02748  | 4870.54 | 4818.48 | 4447.17 | 6349.67 | 5431.18 | 5492.89 |
| ENSMUSG000000024251 | 9_Thada         | 709.291 | 0.14659  | 0.28046  | 0.39325  | 736.224 | 704.875 | 794.777 | 609.539 | 703.777 | 706.555 |
| ENSMUSG000000024253 | 8_Dync2l1       | 362.39  | -0.44252 | 0.00419  | 0.01217  | 281.293 | 321.232 | 319.106 | 399.447 | 408.818 | 444.446 |
| ENSMUSG000000024254 | 15_Abcg8        | 25.4006 | -0.29838 | 0.60047  | 0.70193  | 24.3093 | 33.9588 | 9.56123 | 31.559  | 18.8271 | 34.1881 |
| ENSMUSG000000024256 | 6_Adcyap1       | 0.96169 | -2.2033  | 0.4236   | NA       | 0       | 0.91781 | 0       | 0       | 3.58612 | 1.26623 |
| ENSMUSG000000024258 | 3_Polr2d        | 524.311 | -0.01172 | 0.94044  | 0.96117  | 535.672 | 498.368 | 533.039 | 607.736 | 467.092 | 503.958 |
| ENSMUSG000000024259 | 8_Slc25a46      | 853.453 | -0.4645  | 0.00081  | 0.00299  | 738.828 | 686.519 | 726.654 | 885.455 | 1110.8  | 972.462 |
| ENSMUSG000000024260 | 13_Sap130       | 1351.22 | 0.50183  | 7.96E-05 | 0.00041  | 1488.07 | 1562.11 | 1700.7  | 1117.19 | 1021.15 | 1218.11 |
| ENSMUSG000000024261 | 5_Syt4          | 775.666 | -1.62839 | 2.23E-09 | 4.68E-08 | 343.803 | 535.998 | 256.958 | 1292.12 | 1393.21 | 831.911 |
| ENSMUSG000000024268 | 15_Celf4        | 66.8176 | -0.49314 | 0.18183  | 0.27925  | 49.4867 | 56.9039 | 60.9529 | 105.497 | 82.4808 | 45.5842 |
| ENSMUSG000000024269 | 11_Tpgs2        | 236.351 | -0.67645 | 0.00076  | 0.00286  | 216.179 | 163.369 | 166.126 | 312.885 | 301.234 | 258.31  |
| ENSMUSG000000024270 | 11_Slc39a6      | 1686.15 | 0.35538  | 0.01493  | 0.03545  | 1915.22 | 1673.16 | 2089.13 | 1301.13 | 1475.69 | 1662.56 |
| ENSMUSG000000024271 | 7_Elp2          | 1892.33 | -0.20225 | 0.10247  | 0.17584  | 1913.49 | 1667.65 | 1697.12 | 1837.64 | 2109.54 | 2128.53 |
| ENSMUSG000000024273 | 7_2700062C07Rik | 251.596 | -0.03918 | 0.81218  | 0.87048  | 237.884 | 251.479 | 255.763 | 263.292 | 255.511 | 245.648 |
| ENSMUSG000000024274 | 8_Zscan30       | 24.6992 | -0.14973 | 0.74293  | 0.81824  | 25.1775 | 25.6986 | 19.1225 | 23.4438 | 26.8959 | 27.857  |
| ENSMUSG000000024276 | 6_Zfp397        | 1097.09 | -0.68298 | 5.09E-05 | 0.00028  | 915.939 | 784.724 | 825.851 | 1128.01 | 1641.55 | 1286.49 |
| ENSMUSG000000024277 | 14_Mapre2       | 1868.86 | -0.02852 | 0.8011   | 0.86239  | 1810.17 | 1850.3  | 1889.54 | 1890.83 | 1737.48 | 2034.83 |
| ENSMUSG000000024283 | 14_Wac          | 2900.92 | -0.26016 | 0.05231  | 0.10061  | 2581.99 | 2578.12 | 2760.81 | 2738.42 | 3614.81 | 3131.38 |
| ENSMUSG000000024286 | 7_Ccny          | 1947.82 | -0.40443 | 0.00064  | 0.00245  | 1713.8  | 1669.49 | 1645.73 | 1990.92 | 2392.84 | 2274.14 |
| ENSMUSG000000024287 | 7_Thoc1         | 866.715 | -0.52923 | 0.00105  | 0.00373  | 718.86  | 677.341 | 732.629 | 846.683 | 1206.73 | 1018.05 |
| ENSMUSG000000024290 | 8_Rock1         | 1797.78 | -0.38665 | 0.00931  | 0.02378  | 1649.56 | 1441.87 | 1583.58 | 1718.61 | 2356.98 | 2036.09 |
| ENSMUSG000000024292 | 14_Cyp4f14      | 3.35793 | -1.75804 | 0.22959  | 0.33567  | 2.60457 | 1.83561 | 0       | 7.21348 | 0.89653 | 7.59736 |
| ENSMUSG000000024293 | 15_Esco1        | 935.579 | -0.49447 | 0.00165  | 0.00551  | 789.183 | 735.162 | 806.729 | 935.048 | 1296.38 | 1050.97 |
| ENSMUSG000000024294 | 13_Mib1         | 2627.88 | -0.52095 | 3.35E-07 | 3.57E-06 | 2248.61 | 2081.58 | 2145.3  | 2994.5  | 3235.58 | 3061.74 |
| ENSMUSG000000024298 | 14_Zfp871       | 800.232 | -0.76163 | 1.15E-06 | 1.03E-05 | 698.892 | 543.341 | 537.819 | 926.933 | 1077.63 | 1016.78 |
| ENSMUSG000000024299 | 16_Adamts10     | 716.514 | 0.08531  | 0.70339  | 0.78793  | 678.923 | 882.011 | 652.554 | 935.048 | 563.021 | 587.529 |
| ENSMUSG000000024300 | 16_Myo1f        | 137.5   | 1.6864   | 3.18E-05 | 0.00019  | 325.571 | 155.109 | 149.394 | 100.087 | 55.5849 | 39.253  |
| ENSMUSG000000024301 | 9_Klf5b         | 92.7453 | 1.55798  | 2.96E-07 | 3.21E-06 | 141.515 | 103.712 | 170.907 | 53.1994 | 64.6196 | 40.5193 |
| ENSMUSG000000024302 | 15_Dtna         | 554.154 | -1.26782 | 9.47E-07 | 8.73E-06 | 308.207 | 443.3   | 223.494 | 908.899 | 853.497 | 587.529 |
| ENSMUSG000000024304 | 14_Cdh2         | 497.221 | -1.82612 | 2.94E-12 | 1.38E-10 | 218.783 | 279.013 | 157.76  | 724.053 | 1030.11 | 573.601 |
| ENSMUSG000000024306 | 12_Ccdc178      | 0.51429 | -1.01187 | 0.76286  | NA       | 0       | 0.91781 | 0       | 0.90169 | 0       | 1.26623 |
| ENSMUSG000000024308 | 14_Tapbp        | 6072.28 | 1.51344  | 1.42E-20 | 2.81E-18 | 7736.43 | 8266.67 | 10978.7 | 3166.72 | 2789.11 | 3496.05 |

|                     |                 |         |          |          |          |         |         |         |         |         |         |
|---------------------|-----------------|---------|----------|----------|----------|---------|---------|---------|---------|---------|---------|
| ENSMUSG000000024309 | 14_Pfdn6        | 633.743 | 0.43931  | 0.00384  | 0.01132  | 731.883 | 676.423 | 780.436 | 598.719 | 467.989 | 547.01  |
| ENSMUSG000000024312 | 9_Wdr46         | 622.928 | 0.99958  | 6.97E-08 | 9.19E-07 | 764.874 | 777.381 | 948.952 | 468.876 | 325.441 | 452.043 |
| ENSMUSG000000024317 | 14_Rnf138       | 365.373 | -0.22671 | 0.2252   | 0.33048  | 383.739 | 281.766 | 345.4   | 384.118 | 446.472 | 350.745 |
| ENSMUSG000000024319 | 17_Vps52        | 1421.16 | 0.78429  | 1.32E-09 | 2.99E-08 | 1705.99 | 1743.83 | 1944.52 | 1097.35 | 932.392 | 1102.88 |
| ENSMUSG000000024325 | 8_Ring1         | 417.896 | 0.80027  | 6.87E-05 | 0.00036  | 520.913 | 554.355 | 517.502 | 381.413 | 233.098 | 300.096 |
| ENSMUSG000000024327 | 15_Slc39a7      | 2081.43 | 0.64254  | 0.00043  | 0.00174  | 2371.02 | 2576.28 | 2665.19 | 2026.09 | 1222.87 | 1627.1  |
| ENSMUSG000000024330 | 16_Col11a2      | 176.621 | 0.96897  | 0.0002   | 0.00089  | 236.147 | 190.904 | 274.885 | 152.385 | 91.4461 | 113.96  |
| ENSMUSG000000024331 | 11_Dsc2         | 30541.8 | 0.38616  | 0.03765  | 0.0766   | 33263.8 | 31790   | 38760   | 19362.8 | 27542.3 | 32531.9 |
| ENSMUSG000000024334 | 8_H2-Oa         | 2.37669 | 1.05916  | 0.48485  | NA       | 4.34094 | 1.83561 | 3.58546 | 2.70506 | 1.79306 | 0       |
| ENSMUSG000000024335 | 19_Brd2         | 5024.52 | 0.35422  | 0.00133  | 0.00458  | 5673.61 | 5252.6  | 5988.92 | 4628.35 | 4097.14 | 4506.5  |
| ENSMUSG000000024338 | 14_Psmb8        | 3638.96 | 1.73557  | 3.38E-26 | 1.15E-23 | 5453.09 | 4664.29 | 6673.74 | 1804.27 | 1447.9  | 1790.44 |
| ENSMUSG000000024339 | 12_Tap2         | 1947.3  | 2.29918  | 3.27E-27 | 1.26E-24 | 2687.91 | 2806.65 | 4215.31 | 711.43  | 506.54  | 755.937 |
| ENSMUSG000000024340 | 14_Btnl2        | 0.29767 | 1.70332  | 0.67406  | NA       | 0.86819 | 0.91781 | 0       | 0       | 0       | 0       |
| ENSMUSG000000024346 | 5_Pfdn1         | 1856.4  | 0.01528  | 0.89427  | 0.92865  | 1837.09 | 1745.67 | 2016.22 | 1763.7  | 1839.68 | 1936.06 |
| ENSMUSG000000024347 | 16_Psd2         | 25.8715 | -0.1268  | 0.78104  | 0.84729  | 31.2548 | 20.1917 | 22.7079 | 28.8539 | 26.8959 | 25.3245 |
| ENSMUSG000000024349 | 9_Tmem173       | 278.506 | 0.94601  | 2.60E-05 | 0.00016  | 430.621 | 268.917 | 400.377 | 202.879 | 169.444 | 198.798 |
| ENSMUSG000000024350 | 5_Dnajc18       | 567.322 | -0.86327 | 3.96E-05 | 0.00022  | 364.639 | 518.56  | 323.887 | 835.862 | 740.534 | 620.451 |
| ENSMUSG000000024352 | 11_Spata24      | 57.0469 | -0.44983 | 0.18713  | 0.25853  | 46.8822 | 61.493  | 35.8546 | 73.0365 | 59.171  | 65.8438 |
| ENSMUSG000000024353 | 4_Mzb1          | 1.23334 | 2.5979   | 0.24287  | NA       | 3.47275 | 1.83561 | 1.19515 | 0       | 0.89653 | 0       |
| ENSMUSG000000024354 | 11_Slc23a1      | 41.4285 | 0.16691  | 0.65649  | 0.74961  | 43.4094 | 37.63   | 50.1965 | 32.4607 | 36.7578 | 48.1166 |
| ENSMUSG000000024357 | 9_Sil1          | 671.538 | 0.59833  | 0.00077  | 0.00289  | 723.201 | 782.888 | 920.269 | 589.702 | 429.438 | 583.731 |
| ENSMUSG000000024359 | 8_Hspa9         | 5127.14 | -0.3517  | 0.00215  | 0.00692  | 4572.75 | 4295.33 | 4647.95 | 5172.97 | 6226.4  | 5847.44 |
| ENSMUSG000000024360 | 7_Etf1          | 4057.24 | -0.24848 | 0.05098  | 0.09862  | 3854.76 | 3449.11 | 3822.1  | 3845.69 | 4826.02 | 4545.75 |
| ENSMUSG000000024365 | 9_Cyp21a1       | 1.78514 | 0.60549  | 0.76449  | NA       | 0.86819 | 5.50683 | 0       | 1.80337 | 0       | 2.53245 |
| ENSMUSG000000024366 | 7_Gfra3         | 34.9904 | -0.41271 | 0.34473  | 0.4614   | 24.3093 | 38.5478 | 27.4885 | 51.3961 | 40.3439 | 27.857  |
| ENSMUSG000000024369 | 16_Nelfe        | 863.824 | 0.69397  | 1.09E-06 | 9.88E-06 | 1010.57 | 1025.19 | 1167.67 | 721.348 | 584.538 | 673.633 |
| ENSMUSG000000024370 | 16_Cdc23        | 1112.17 | -0.29543 | 0.01226  | 0.02995  | 996.68  | 960.942 | 1039.78 | 1188.42 | 1313.42 | 1173.79 |
| ENSMUSG000000024371 | 14_C2           | 1422.71 | -0.2452  | 0.1539   | 0.24427  | 1179.87 | 1509.79 | 1217.86 | 1735.74 | 1655.89 | 1237.1  |
| ENSMUSG000000024376 | 6_Epb41l4a      | 1434.54 | 0.14583  | 0.35167  | 0.46825  | 1463.77 | 1440.04 | 1615.85 | 1120.8  | 1366.31 | 1600.51 |
| ENSMUSG000000024378 | 9_Stard4        | 2686.89 | -0.16363 | 0.16721  | 0.26112  | 2700.07 | 2397.31 | 2505.04 | 2580.62 | 2884.14 | 3054.14 |
| ENSMUSG000000024379 | 3_Tslp          | 79.4051 | -0.33666 | 0.24835  | 0.35729  | 68.5869 | 64.2464 | 77.685  | 68.5281 | 98.6184 | 98.7657 |
| ENSMUSG000000024381 | 15_Bin1         | 334.622 | -0.52021 | 0.03905  | 0.07891  | 269.138 | 303.794 | 252.178 | 556.34  | 302.131 | 324.154 |
| ENSMUSG000000024382 | 13_Ercc3        | 1143.96 | 0.38494  | 0.00129  | 0.00446  | 1226.75 | 1295.94 | 1363.67 | 944.065 | 970.943 | 1062.36 |
| ENSMUSG000000024383 | 8_Marp3k2       | 1162.43 | -0.58545 | 4.25E-06 | 3.22E-05 | 982.789 | 914.134 | 892.78  | 1387.69 | 1525.9  | 1271.29 |
| ENSMUSG000000024384 | 3_lws1          | 1305.83 | -0.24679 | 0.07008  | 0.12869  | 1188.55 | 1113.3  | 1281.21 | 1238.01 | 1479.28 | 1534.67 |
| ENSMUSG000000024386 | 8_Proc          | 0.36046 | -1.978   | 0.62369  | NA       | 0       | 0       | 0       | 0       | 0.89653 | 1.26623 |
| ENSMUSG000000024387 | 13_Csnk2b       | 1888.21 | 0.56329  | 7.21E-05 | 0.00037  | 2146.16 | 2115.54 | 2494.29 | 1578.85 | 1311.62 | 1682.82 |
| ENSMUSG000000024388 | 10_Myo7b        | 6.15656 | -1.06666 | 0.30314  | 0.41797  | 0.86819 | 6.42464 | 4.78062 | 13.5253 | 6.27571 | 5.06491 |
| ENSMUSG000000024391 | 7_Apom          | 3.64787 | -0.50863 | 0.70233  | 0.78712  | 0       | 5.50683 | 3.58546 | 5.41011 | 3.58612 | 3.79868 |
| ENSMUSG000000024392 | 17_Bag6         | 2827.46 | 1.1095   | 1.04E-12 | 5.52E-11 | 3371.18 | 3897.92 | 4322.87 | 1969.28 | 1486.45 | 1917.07 |
| ENSMUSG000000024393 | 14_Prrc2a       | 5518.95 | 1.25753  | 3.71E-12 | 1.70E-10 | 6806.6  | 7955.54 | 8585.99 | 3940.37 | 2458.29 | 3366.9  |
| ENSMUSG000000024395 | 7_Lims2         | 80.0198 | -0.06169 | 0.85218  | 0.89985  | 65.9823 | 97.2874 | 71.7092 | 108.202 | 60.9641 | 75.9736 |
| ENSMUSG000000024397 | 14_Aif1         | 224.141 | 0.88365  | 0.00014  | 0.00067  | 363.771 | 253.314 | 254.568 | 132.548 | 181.099 | 159.545 |
| ENSMUSG000000024399 | 5_Ltb           | 68.492  | 1.53052  | 3.45E-05 | 0.0002   | 124.151 | 76.1779 | 105.174 | 48.691  | 25.1029 | 31.6557 |
| ENSMUSG000000024400 | 15_Wdr33        | 1135.07 | 0.38722  | 0.00059  | 0.00228  | 1246.72 | 1270.24 | 1342.16 | 953.983 | 969.15  | 1028.18 |
| ENSMUSG000000024401 | 14_Tnf          | 223.921 | 0.63077  | 0.00626  | 0.01702  | 323.834 | 221.191 | 270.105 | 145.171 | 173.03  | 210.194 |
| ENSMUSG000000024402 | 5_Lta           | 12.2091 | 0.23197  | 0.73167  | 0.80963  | 15.6274 | 15.6027 | 8.36608 | 10.8202 | 15.241  | 7.59736 |
| ENSMUSG000000024403 | 16_Atp6v1g2     | 55.6679 | -0.67928 | 0.04584  | 0.09019  | 48.6186 | 44.9725 | 34.6595 | 83.8567 | 63.6537 | 58.2464 |
| ENSMUSG000000024404 | 6_Riok3         | 2919.42 | -0.00764 | 0.94752  | 0.96556  | 2921.45 | 2754.33 | 3059.59 | 2656.37 | 3128.89 | 2995.89 |
| ENSMUSG000000024409 | 8_Psors1c2      | 5.91708 | 1.34015  | 0.14956  | 0.23844  | 6.94551 | 10.0959 | 8.36608 | 3.60674 | 2.68959 | 3.79868 |
| ENSMUSG000000024410 | 14_311002H16Rik | 792.628 | 0.40234  | 0.00629  | 0.01709  | 869.925 | 867.326 | 969.27  | 587.899 | 702.88  | 758.47  |
| ENSMUSG000000024411 | 9_Aqp4          | 217.837 | -1.8337  | 1.39E-10 | 4.28E-09 | 94.6325 | 122.986 | 68.1238 | 446.334 | 319.165 | 255.778 |
| ENSMUSG000000024413 | 13_Npc1         | 1513.93 | 0.37713  | 0.01135  | 0.02811  | 1561    | 1768.61 | 1801.1  | 1113.58 | 1328.66 | 1510.61 |
| ENSMUSG000000024414 | 13_Mrp127       | 734.706 | 0.09422  | 0.53442  | 0.64234  | 778.765 | 696.614 | 801.948 | 820.534 | 654.467 | 655.906 |
| ENSMUSG000000024420 | 8_Zfp521        | 374.733 | -0.27096 | 0.17859  | 0.27534  | 331.648 | 394.656 | 292.813 | 496.829 | 385.508 | 346.946 |
| ENSMUSG000000024421 | 16_Lama3        | 11758   | 0.75249  | 1.38E-05 | 8.97E-05 | 14128   | 13745.1 | 16395.1 | 7021.42 | 8258.84 | 10999.7 |
| ENSMUSG000000024422 | 14_Dhx16        | 1238.86 | 0.87606  | 2.50E-08 | 3.76E-07 | 1402.12 | 1563.02 | 1846.51 | 935.95  | 754.879 | 930.677 |
| ENSMUSG000000024423 | 5_Impact        | 1043.89 | -0.84042 | 9.38E-08 | 1.19E-06 | 790.051 | 821.436 | 632.237 | 1336.3  | 1498.1  | 1185.19 |
| ENSMUSG000000024424 | 14_Ttc39c       | 87.758  | -0.19948 | 0.4423   | 0.5576   | 85.9507 | 77.0957 | 82.4656 | 104.596 | 94.1357 | 82.3047 |
| ENSMUSG000000024425 | 3_Ndfip1        | 2287.95 | -0.56229 | 4.84E-07 | 4.93E-06 | 1895.26 | 1865.9  | 1780.78 | 2506.69 | 2904.76 | 2774.3  |
| ENSMUSG000000024426 | 17_Atad1        | 406.257 | 0.23704  | 0.1246   | 0.20575  | 399.367 | 458.903 | 461.329 | 355.264 | 404.335 | 358.342 |
| ENSMUSG000000024427 | 6_Spry4         | 126.726 | -0.18772 | 0.41769  | 0.53368  | 128.492 | 111.972 | 114.735 | 151.483 | 115.652 | 138.019 |
| ENSMUSG000000024429 | 9_Gnl1          | 1073.87 | 0.78857  | 1.09E-05 | 7.33E-05 | 1205.91 | 1460.23 | 1413.87 | 890.865 | 602.469 | 869.898 |
| ENSMUSG000000024430 | 13_Cabyr        | 14.7778 | 0.10172  | 0.88801  | 0.92448  | 18.232  | 14.6849 | 13.1467 | 7.21348 | 27.7924 | 7.59736 |
| ENSMUSG000000024431 | 14_Nr3c1        | 2540.38 | -0.42193 | 0.00038  | 0.00155  | 2341.5  | 2040.28 | 2133.35 | 2861.05 | 3151.3  | 2714.79 |
| ENSMUSG000000024436 | 16_Mrps18b      | 751.243 | 0.36788  | 0.01267  | 0.0308   | 853.429 | 792.984 | 891.585 | 625.77  | 598.021 | 754.671 |
| ENSMUSG000000024440 | 12_Pcdh12       | 33.5061 | -1.10499 | 0.01612  | 0.03786  | 17.3638 | 27.5342 | 19.1225 | 54.1011 | 53.7918 | 29.1232 |
| ENSMUSG000000024442 | 5_0610009O20Rik | 899.515 | 0.32355  | 0.01043  | 0.02621  | 917.675 | 1058.23 | 1024.25 | 832.256 | 759.361 | 805.32  |
| ENSMUSG000000024446 | 13_Rpp21        | 234.693 | 0.78461  | 0.00088  | 0.00322  | 263.061 | 301.04  | 327.472 | 222.716 | 131.79  | 162.077 |
| ENSMUSG000000024451 | 8_Arap3         | 162.846 | -0.00516 | 0.9812   | 0.98754  | 158.01  | 168.876 | 161.346 | 196.567 | 147.928 | 144.35  |
| ENSMUSG000000024454 | 15_Hdac3        | 1518.8  | 0.0712   | 0.50129  | 0.61231  | 1587.05 | 1521.72 | 1559.68 | 1412.04 | 1526.79 | 1505.54 |
| ENSMUSG000000024456 | 16_Diap1        | 5294.87 | 0.55095  | 1.75E-05 | 0.00011  | 6012.2  | 6045.59 | 6821.94 | 3978.24 | 4023.63 | 4887.64 |
| ENSMUSG000000024457 | 16_Trim26       | 2529.68 | 0.49428  | 0.00025  | 0.00111  | 2808.59 | 2825.92 | 3241.26 | 1827.72 | 2156.16 | 2318.46 |
| ENSMUSG000000024459 | 18_H2-M5        | 38.7688 | 0.92671  | 0.02188  | 0.04887  | 52.9595 | 57.8218 | 41.8304 | 35.1657 | 23.3098 | 21.5259 |
| ENSMUSG000000024462 | 17_Gabbr1       | 742.574 | -0.57155 | 0.00157  | 0.00529  | 561.718 | 730.573 | 499.574 | 908.899 | 977.218 | 777.463 |
| ENSMUSG000000024471 | 12_Myot         | 219.164 | -1.65049 | 9.82E-08 | 1.24E-06 | 101.578 | 128.493 | 87.2462 | 482.402 | 215.167 | 300.096 |
| ENSMUSG000000024472 | 9_Dcp2          | 1517.44 | -0.12526 | 0.36904  | 0.48637  | 1571.42 | 1304.2  | 1479.6  | 1431.88 | 1777.82 | 1539.73 |
| ENSMUSG000000024474 | 5_Ik            | 3558.87 | -0.25454 | 0.03235  | 0.06761  | 3293.91 | 3059.05 | 3383.48 | 3469.69 | 3948.32 | 4198.81 |
| ENSMUSG000000024477 | 3_Pggt1b        | 628.88  | -0.2247  | 0.0924   | 0.16107  | 612.073 | 570.875 | 555.747 | 627.573 | 690.329 | 716.684 |

|                     |                  |         |          |          |          |         |         |         |         |         |         |
|---------------------|------------------|---------|----------|----------|----------|---------|---------|---------|---------|---------|---------|
| ENSMUSG000000024479 | 2_Mal2           | 25659.7 | -0.21795 | 0.11163  | 0.18836  | 24262.4 | 21894.3 | 25018.2 | 23039.9 | 29661.7 | 30081.8 |
| ENSMUSG000000024480 | 7_Ap3s1          | 873.303 | -0.47194 | 0.0021   | 0.00678  | 756.192 | 702.121 | 737.41  | 889.062 | 1197.76 | 957.268 |
| ENSMUSG000000024481 | 4_Lvrn           | 88.1028 | -0.47918 | 0.08499  | 0.15036  | 84.2143 | 69.7532 | 66.9286 | 122.629 | 97.7218 | 87.3697 |
| ENSMUSG000000024483 | 18_Ankhd1        | 4168.42 | -0.08484 | 0.57451  | 0.67884  | 4152.55 | 3767.59 | 4216.5  | 3444.44 | 4584.86 | 4844.58 |
| ENSMUSG000000024485 | 15_Slc4a9        | 7.16567 | 0.63501  | 0.5321   | 0.6405   | 4.34094 | 11.9315 | 9.56123 | 2.70506 | 1.79306 | 12.6623 |
| ENSMUSG000000024486 | 5_Hbegf          | 2710.36 | 0.28889  | 0.02619  | 0.05681  | 3229.66 | 2618.5  | 3095.45 | 2651.86 | 2365.94 | 2300.73 |
| ENSMUSG000000024487 | 4_Yipf5          | 1152.48 | -0.13215 | 0.23807  | 0.34548  | 1086.1  | 1098.61 | 1115.08 | 1155.06 | 1274.87 | 1185.19 |
| ENSMUSG000000024491 | 15_Rbm27         | 1147.21 | -0.11161 | 0.48238  | 0.59463  | 1073.08 | 1022.44 | 1213.08 | 972.919 | 1308.93 | 1292.82 |
| ENSMUSG000000024493 | 8_Lars           | 2296.35 | -0.00236 | 0.98435  | 0.98955  | 2298.96 | 2205.49 | 2379.55 | 2074.78 | 2530.01 | 2289.34 |
| ENSMUSG000000024498 | 15_Tcerg1        | 1417.11 | 0.12729  | 0.45085  | 0.56567  | 1391.71 | 1418.93 | 1627.8  | 1055.87 | 1499    | 1509.34 |
| ENSMUSG000000024500 | 18_Ppp2r2b       | 122.961 | -1.25824 | 0.00029  | 0.00123  | 71.1914 | 93.6162 | 52.5868 | 243.455 | 166.755 | 110.162 |
| ENSMUSG000000024501 | 19_Dpysl3        | 1934.6  | -0.81546 | 6.77E-07 | 6.54E-06 | 1376.95 | 1642.87 | 1185.59 | 2815.06 | 2442.15 | 2144.99 |
| ENSMUSG000000024502 | 9_Jakmp2         | 39.697  | -1.83554 | 3.25E-05 | 0.00019  | 20.8365 | 20.1917 | 10.7564 | 74.8399 | 67.2398 | 44.3179 |
| ENSMUSG000000024505 | 15_Dtw2          | 61.7637 | -0.54554 | 0.07205  | 0.13156  | 52.0913 | 54.1505 | 44.2207 | 67.6264 | 81.5843 | 70.9087 |
| ENSMUSG000000024507 | 6_Hsd17b4        | 1520.66 | -0.17824 | 0.09435  | 0.16378  | 1387.37 | 1479.5  | 1412.67 | 1575.24 | 1585.07 | 1684.08 |
| ENSMUSG000000024511 | 15_Rab27b        | 3869.99 | -0.46995 | 0.00067  | 0.00256  | 3433.69 | 3015.91 | 3285.48 | 3787.98 | 4986.5  | 4710.36 |
| ENSMUSG000000024512 | 3_Dynap          | 97.1195 | 1.18532  | 0.00404  | 0.01182  | 131.096 | 106.465 | 166.126 | 55.0028 | 27.7924 | 96.2332 |
| ENSMUSG000000024513 | 16_Mbd2          | 3292.3  | -0.1236  | 0.26937  | 0.3809   | 3139.37 | 2932.39 | 3382.29 | 3269.51 | 3383.51 | 3646.73 |
| ENSMUSG000000024515 | 13_Smad4         | 1829.95 | 0.2827   | 0.01     | 0.02525  | 1963.84 | 1903.53 | 2159.64 | 1609.51 | 1681.89 | 1661.29 |
| ENSMUSG000000024516 | 12_Sec11c        | 783.933 | -0.22805 | 0.08699  | 0.15325  | 728.41  | 692.943 | 744.581 | 755.612 | 889.358 | 892.69  |
| ENSMUSG000000024517 | 16_Grp           | 1.21981 | -2.52687 | 0.25983  | NA       | 0       | 0       | 1.19515 | 0.90169 | 2.68959 | 2.53245 |
| ENSMUSG000000024518 | 3_Rax            | 73.9349 | 0.17966  | 0.63399  | 0.7303   | 64.2459 | 104.63  | 66.9286 | 100.989 | 51.1022 | 55.714  |
| ENSMUSG000000024519 | 5_Cplx4          | 94.2423 | -2.17581 | 5.58E-05 | 0.0003   | 47.7504 | 37.63   | 16.7322 | 244.357 | 172.134 | 46.8504 |
| ENSMUSG000000024521 | 7_Pmaip1         | 38.8339 | 1.53508  | 0.00036  | 0.00151  | 65.1141 | 38.5478 | 69.3189 | 18.0337 | 17.9306 | 24.0583 |
| ENSMUSG000000024524 | 16_Gnal          | 214.506 | -0.32694 | 0.07308  | 0.13323  | 200.552 | 175.301 | 194.81  | 220.011 | 245.649 | 250.713 |
| ENSMUSG000000024525 | 6_Impa2          | 213.322 | 0.30787  | 0.18122  | 0.27851  | 210.97  | 227.616 | 268.91  | 200.174 | 144.341 | 227.921 |
| ENSMUSG000000024526 | 8_Cidea          | 188.22  | 0.2223   | 0.26727  | 0.37857  | 227.465 | 175.301 | 205.567 | 171.32  | 183.789 | 165.876 |
| ENSMUSG000000024527 | 9_Afg3l2         | 1320.75 | 0.14621  | 0.24074  | 0.34837  | 1365.66 | 1338.16 | 1458.09 | 1137.93 | 1253.35 | 1371.32 |
| ENSMUSG000000024528 | 7_Srfbp1         | 220.8   | -0.13422 | 0.46725  | 0.5808   | 206.629 | 191.821 | 234.25  | 229.028 | 246.546 | 216.525 |
| ENSMUSG000000024529 | 13_Lox           | 693.511 | -0.19755 | 0.14217  | 0.22868  | 640.723 | 669.998 | 628.651 | 788.073 | 770.12  | 663.503 |
| ENSMUSG000000024530 | 7_Slmo1          | 27.6338 | -1.22437 | 0.01394  | 0.03337  | 10.4183 | 24.7808 | 14.3418 | 38.7725 | 33.1716 | 44.3179 |
| ENSMUSG000000024533 | 15_Spire1        | 488.841 | -0.4217  | 0.00649  | 0.01754  | 421.071 | 446.971 | 386.035 | 614.048 | 571.09  | 493.828 |
| ENSMUSG000000024534 | 15_Sncaip        | 138.279 | -0.95574 | 0.00132  | 0.00456  | 98.1053 | 124.822 | 58.5626 | 206.486 | 184.685 | 157.012 |
| ENSMUSG000000024535 | 15_Snx24         | 202.296 | -0.61961 | 0.00284  | 0.00876  | 177.979 | 156.027 | 144.614 | 242.553 | 282.407 | 210.194 |
| ENSMUSG000000024537 | 4_Psmg2          | 430.406 | 0.10128  | 0.46553  | 0.57905  | 447.117 | 443.3   | 445.792 | 392.233 | 428.542 | 425.452 |
| ENSMUSG000000024538 | 7_Ppic           | 748.322 | -0.60567 | 6.27E-05 | 0.00033  | 645.064 | 639.71  | 493.599 | 867.421 | 904.599 | 939.54  |
| ENSMUSG000000024539 | 17_Ptpn2         | 649.522 | -0.37032 | 0.03514  | 0.07243  | 591.236 | 495.615 | 613.114 | 594.211 | 829.291 | 773.665 |
| ENSMUSG000000024542 | 8_Cep192         | 761.171 | -0.09096 | 0.5697   | 0.67442  | 761.401 | 691.108 | 758.923 | 647.41  | 896.531 | 811.651 |
| ENSMUSG000000024544 | 8_Ldlrad4        | 201.037 | -0.28722 | 0.19778  | 0.29837  | 169.297 | 213.849 | 160.151 | 265.096 | 199.03  | 198.798 |
| ENSMUSG000000024548 | 11_Setbp1        | 841.88  | -0.09984 | 0.42585  | 0.54144  | 782.238 | 882.929 | 772.07  | 869.225 | 844.532 | 900.287 |
| ENSMUSG000000024552 | 15_Slc14a2       | 1.70179 | -0.72044 | 0.73073  | NA       | 0.86819 | 1.83561 | 1.19515 | 6.3118  | 0       | 0       |
| ENSMUSG000000024553 | 7_Gair1          | 0.21104 | -0.99647 | 0.80707  | NA       | 0       | 0       | 0       | 0       | 0       | 1.26623 |
| ENSMUSG000000024556 | 3_Me2            | 455.932 | -0.05208 | 0.70827  | 0.79127  | 452.326 | 427.697 | 463.72  | 448.138 | 490.402 | 453.309 |
| ENSMUSG000000024558 | 12_Mapk4         | 214.198 | -0.67406 | 0.03331  | 0.06925  | 191.87  | 208.342 | 94.4172 | 332.722 | 265.373 | 192.466 |
| ENSMUSG000000024560 | 6_Cxxc1          | 832.333 | 0.85749  | 1.48E-05 | 9.56E-05 | 982.789 | 1139.91 | 1094.76 | 715.037 | 425.852 | 635.646 |
| ENSMUSG000000024561 | 8_Mbd1           | 1015.94 | 0.47423  | 0.00031  | 0.00132  | 1073.95 | 1174.79 | 1295.55 | 842.174 | 805.084 | 904.086 |
| ENSMUSG000000024563 | 15_Smad2         | 1515.5  | -0.18135 | 0.20014  | 0.30116  | 1447.27 | 1322.56 | 1491.55 | 1378.68 | 1811.89 | 1641.03 |
| ENSMUSG000000024565 | 8_Sall3          | 2.70208 | -0.84476 | 0.65824  | 0.75075  | 0       | 0       | 5.97577 | 0.90169 | 8.06878 | 1.26623 |
| ENSMUSG000000024566 | 8_Atp9b          | 1604.93 | 0.38658  | 0.00119  | 0.00418  | 1811.91 | 1736.49 | 1906.27 | 1323.67 | 1324.18 | 1527.07 |
| ENSMUSG000000024570 | 6_Rbfa           | 278.813 | 0.71759  | 0.00018  | 0.00081  | 350.748 | 319.396 | 370.498 | 247.062 | 177.513 | 207.661 |
| ENSMUSG000000024571 | 14_Gm16286       | 1377.45 | 0.51536  | 0.00018  | 0.00084  | 1535.83 | 1585.97 | 1740.14 | 1187.52 | 978.115 | 1237.1  |
| ENSMUSG000000024575 | 15_Pde6a         | 458.736 | -2.23514 | 0.01137  | 0.02816  | 237.015 | 189.986 | 54.9771 | 1349.82 | 709.156 | 211.46  |
| ENSMUSG000000024576 | 14_Csnk1a1       | 8954.67 | -0.17552 | 0.14781  | 0.23607  | 8311.17 | 8039.06 | 8881.19 | 8313.54 | 9922.8  | 10260.2 |
| ENSMUSG000000024579 | 17_Pcyox1l       | 55.6049 | 0.45368  | 0.14306  | 0.22975  | 61.6414 | 63.3286 | 68.1238 | 50.4944 | 45.7231 | 44.3179 |
| ENSMUSG000000024580 | 7_Grpel2         | 1595.13 | -0.17384 | 0.1981   | 0.29877  | 1550.58 | 1438.2  | 1508.28 | 1454.42 | 1878.23 | 1741.06 |
| ENSMUSG000000024581 | 12_Napg          | 909.276 | 0.00234  | 0.98675  | 0.99089  | 928.962 | 798.491 | 1002.73 | 844.879 | 914.461 | 966.131 |
| ENSMUSG000000024583 | 2_Txn1l          | 1674.11 | -0.31652 | 0.04021  | 0.0809   | 1547.11 | 1451.97 | 1473.63 | 1485.98 | 2085.33 | 2000.64 |
| ENSMUSG000000024587 | 9_Nars           | 3618.9  | 0.13829  | 0.24094  | 0.34852  | 3725.4  | 3455.54 | 4196.19 | 3334.43 | 3381.71 | 3620.14 |
| ENSMUSG000000024588 | 8_Fech           | 1974.73 | -0.16278 | 0.12205  | 0.20255  | 1845.77 | 1870.49 | 1872.81 | 2045.92 | 1991.19 | 2222.23 |
| ENSMUSG000000024589 | 15_Nedd4l        | 1126.39 | 0.28385  | 0.0493   | 0.09595  | 1169.45 | 1189.48 | 1350.52 | 906.194 | 979.011 | 1163.66 |
| ENSMUSG000000024590 | 8_Lmnb1          | 3349.43 | 0.54932  | 0.00077  | 0.00286  | 3910.32 | 3628.09 | 4398.17 | 2315.53 | 2506.7  | 3337.77 |
| ENSMUSG000000024592 | 15_C330018D20Rik | 475.922 | -0.46224 | 0.00492  | 0.01391  | 418.467 | 372.629 | 409.938 | 471.582 | 625.778 | 557.14  |
| ENSMUSG000000024593 | 15_Megf10        | 110.937 | -1.43228 | 0.00025  | 0.00109  | 65.9823 | 78.9313 | 34.6595 | 153.287 | 233.994 | 98.7657 |
| ENSMUSG000000024594 | 8_Prrc1          | 1353.29 | 0.4091   | 0.00334  | 0.01006  | 1376.08 | 1514.38 | 1741.34 | 1171.29 | 1066.87 | 1249.77 |
| ENSMUSG000000024597 | 10_Slc12a2       | 10868.1 | -0.19867 | 0.14225  | 0.22877  | 10223.8 | 9962.78 | 10175.5 | 9585.82 | 12731.6 | 12529.3 |
| ENSMUSG000000024598 | 8_Fbn2           | 283.825 | -0.54695 | 0.02538  | 0.05535  | 213.574 | 288.191 | 190.03  | 434.612 | 281.511 | 295.031 |
| ENSMUSG000000024600 | 8_Slc27a6        | 111.23  | -0.99428 | 0.00042  | 0.00171  | 76.4006 | 89.0271 | 57.3674 | 177.632 | 147.928 | 119.025 |
| ENSMUSG000000024601 | 8_Isoc1          | 1941.52 | -0.058   | 0.61582  | 0.7148   | 1861.4  | 1845.71 | 2000.69 | 1808.78 | 2095.19 | 2037.36 |
| ENSMUSG000000024603 | 7_Dctn4          | 1781.85 | -0.09065 | 0.45087  | 0.56567  | 1681.68 | 1670.41 | 1826.2  | 1668.12 | 1979.54 | 1865.15 |
| ENSMUSG000000024604 | 7_Rbm22          | 962.107 | 0.20628  | 0.10315  | 0.17671  | 1056.59 | 1015.09 | 1019.47 | 801.598 | 931.495 | 948.404 |
| ENSMUSG000000024608 | 10_Rps14         | 12234.3 | 0.23189  | 0.14956  | 0.23844  | 13117.5 | 12971.3 | 13557.8 | 13854.4 | 8976.96 | 10927.5 |
| ENSMUSG000000024610 | 14_Cd74          | 2652.24 | 1.78597  | 5.54E-20 | 1.00E-17 | 4689.95 | 3862.13 | 3785.05 | 1569.83 | 959.288 | 1047.17 |
| ENSMUSG000000024613 | 16_Tcof1         | 746.534 | 1.24823  | 2.88E-09 | 5.80E-08 | 942.853 | 973.792 | 1234.59 | 485.107 | 317.372 | 525.484 |
| ENSMUSG000000024614 | 6_Tmx3           | 1928.54 | -0.48365 | 0.00127  | 0.00441  | 1728.56 | 1476.75 | 1619.43 | 1893.54 | 2599.04 | 2253.88 |
| ENSMUSG000000024617 | 16_Camk2a        | 42.2315 | -1.10686 | 0.02986  | 0.06323  | 24.3093 | 35.7944 | 20.3176 | 97.382  | 43.93   | 31.6557 |
| ENSMUSG000000024620 | 11_Pdgfrb        | 1159.06 | 0.09224  | 0.59737  | 0.69918  | 1137.33 | 1369.37 | 1081.61 | 1364.25 | 952.15  | 1049.7  |
| ENSMUSG000000024621 | 15_Csf1r         | 812.323 | 0.17361  | 0.41127  | 0.52764  | 1019.25 | 856.313 | 707.531 | 981.034 | 615.917 | 693.892 |
| ENSMUSG000000024622 | 7_Hmgxb3         | 815.24  | 0.49935  | 0.00078  | 0.00289  | 880.343 | 958.189 | 1026.64 | 752.006 | 585.434 | 688.827 |
| ENSMUSG000000024639 | 5_Gnaq           | 2188.25 | -0.09092 | 0.45553  | 0.56954  | 2165.26 | 1916.38 | 2277.96 | 2180.28 | 2426.91 | 2162.72 |

|                     |                 |         |          |          |          |         |         |         |         |         |         |
|---------------------|-----------------|---------|----------|----------|----------|---------|---------|---------|---------|---------|---------|
| ENSMUSG000000024640 | 9_Psat1         | 2759.91 | 0.32173  | 0.00756  | 0.01994  | 3085.54 | 2799.31 | 3314.16 | 2262.33 | 2504.91 | 2593.23 |
| ENSMUSG000000024642 | 16_Tle4         | 1473.39 | 0.23663  | 0.03497  | 0.07212  | 1504.57 | 1644.71 | 1632.58 | 1278.59 | 1395.9  | 1383.99 |
| ENSMUSG000000024644 | 16_Cndp2        | 1875.27 | 0.63196  | 2.28E-06 | 1.89E-05 | 2242.53 | 2075.16 | 2520.58 | 1514.83 | 1317    | 1581.52 |
| ENSMUSG000000024645 | 4_Timm21        | 336.366 | -0.62795 | 9.06E-05 | 0.00046  | 276.952 | 265.246 | 249.787 | 368.789 | 429.438 | 427.985 |
| ENSMUSG000000024646 | 13_Cyb5a        | 3044.37 | -0.54043 | 2.83E-08 | 4.16E-07 | 2563.76 | 2482.66 | 2395.09 | 3538.21 | 3717.02 | 3569.49 |
| ENSMUSG000000024647 | 14_Cbln2        | 54.6269 | -2.38744 | 6.82E-06 | 4.85E-05 | 12.1546 | 33.9588 | 5.97577 | 99.1854 | 109.377 | 67.11   |
| ENSMUSG000000024650 | 4_Slc22a6       | 1.20183 | 1.54699  | 0.53916  | NA       | 1.73638 | 3.67122 | 0       | 1.80337 | 0       | 0       |
| ENSMUSG000000024653 | 2_Scgb1a1       | 0.36401 | -0.03469 | 0.99322  | NA       | 0       | 0.91781 | 0       | 0       | 0       | 1.26623 |
| ENSMUSG000000024654 | 8_Asrgl1        | 271.997 | -0.75418 | 4.80E-05 | 0.00026  | 202.288 | 208.342 | 197.2   | 401.25  | 316.475 | 306.427 |
| ENSMUSG000000024659 | 14_Anxa1        | 29613.4 | -0.14311 | 0.25896  | 0.36907  | 28548.6 | 25632.5 | 30256.5 | 27212   | 33458.5 | 32572.4 |
| ENSMUSG000000024660 | 8_Incenp        | 722.48  | 0.69577  | 4.83E-06 | 3.59E-05 | 818.702 | 841.628 | 1019.47 | 523.879 | 520.884 | 610.321 |
| ENSMUSG000000024661 | 6_Fth1          | 20206   | -0.42121 | 0.00118  | 0.00415  | 17632.9 | 17820.1 | 16379.6 | 23894.7 | 25829   | 19679.7 |
| ENSMUSG000000024663 | 17_Rab3il1      | 342.038 | 0.26617  | 0.23974  | 0.34733  | 401.103 | 403.834 | 315.521 | 405.758 | 247.442 | 278.57  |
| ENSMUSG000000024664 | 4_Fads3         | 485.451 | -0.3169  | 0.11818  | 0.19734  | 397.63  | 513.053 | 386.035 | 656.427 | 436.61  | 522.952 |
| ENSMUSG000000024665 | 7_Fads2         | 1988.44 | 0.47004  | 4.42E-05 | 0.00025  | 2306.78 | 2302.77 | 2317.4  | 1703.28 | 1506.17 | 1794.24 |
| ENSMUSG000000024666 | 5_Tmem138       | 213.687 | -0.09548 | 0.63239  | 0.72895  | 227.465 | 194.575 | 198.396 | 252.472 | 220.547 | 188.668 |
| ENSMUSG000000024667 | 11_Tmem216      | 220.828 | -0.34872 | 0.04229  | 0.0843   | 191.001 | 199.164 | 192.42  | 249.767 | 239.374 | 253.245 |
| ENSMUSG000000024668 | 7_Sdha2         | 966.26  | -0.10969 | 0.34798  | 0.46494  | 915.939 | 904.038 | 969.27  | 954.885 | 1048.04 | 1005.38 |
| ENSMUSG000000024669 | 7_Cd5           | 32.0043 | 0.69367  | 0.09594  | 0.16619  | 39.9367 | 32.1232 | 46.611  | 25.2472 | 21.5167 | 26.5908 |
| ENSMUSG000000024670 | 16_Cd6          | 7.11475 | 4.31454  | 0.00125  | 0.00436  | 17.3638 | 6.42464 | 16.7322 | 0.90169 | 0       | 1.26623 |
| ENSMUSG000000024672 | 11_Ms4a7        | 114.729 | 0.63616  | 0.04148  | 0.08294  | 191.87  | 95.4518 | 131.467 | 103.694 | 79.7912 | 86.1034 |
| ENSMUSG000000024673 | 9_Ms4a1         | 4.75706 | 0.07711  | 0.94638  | 0.96509  | 9.55007 | 2.75342 | 2.39031 | 5.41011 | 7.17224 | 1.26623 |
| ENSMUSG000000024675 | 19_Ms4a4c       | 225.053 | 4.64362  | 2.47E-08 | 3.71E-07 | 672.846 | 214.767 | 411.133 | 8.11517 | 35.8612 | 7.59736 |
| ENSMUSG000000024677 | 13_Ms4a6b       | 232.352 | 1.61707  | 3.81E-07 | 3.99E-06 | 535.672 | 234.04  | 282.056 | 117.219 | 132.687 | 92.4346 |
| ENSMUSG000000024678 | 6_Ms4a4d        | 46.8303 | 0.54441  | 0.12015  | 0.2      | 58.1686 | 46.8081 | 62.148  | 43.2809 | 37.6543 | 32.9219 |
| ENSMUSG000000024679 | 10_Ms4a6d       | 265.124 | 2.81853  | 9.94E-15 | 8.61E-13 | 754.456 | 256.986 | 382.449 | 76.6433 | 70.8259 | 49.3828 |
| ENSMUSG000000024680 | 12_Ms4a2        | 5.85581 | -0.10267 | 0.91154  | 0.94064  | 6.94551 | 6.42464 | 3.58546 | 6.3118  | 8.06878 | 3.79868 |
| ENSMUSG000000024681 | 11_Ms4a3        | 0.21104 | -0.99647 | 0.80707  | NA       | 0       | 0       | 0       | 0       | 0       | 1.26623 |
| ENSMUSG000000024682 | 3_Gif           | 0       | NA       | NA       | NA       | 0       | 0       | 0       | 0       | 0       | 0       |
| ENSMUSG000000024683 | 5_Mrpl16        | 508.927 | 0.10496  | 0.44012  | 0.55551  | 500.945 | 538.752 | 542.6   | 461.663 | 505.643 | 503.958 |
| ENSMUSG000000024687 | 10_Osbp         | 2124.15 | 0.16292  | 0.16089  | 0.25323  | 2124.46 | 2210.99 | 2396.28 | 1850.26 | 2036.92 | 2125.99 |
| ENSMUSG000000024691 | 13_Fam111a      | 3048.39 | -0.16852 | 0.33712  | 0.45368  | 2977.02 | 2577.2  | 3057.2  | 2430.04 | 3759.15 | 3489.72 |
| ENSMUSG000000024695 | 15_Zfp91        | 4552.47 | -0.29226 | 0.01119  | 0.02776  | 4248.05 | 3883.24 | 4147.18 | 4508.43 | 5390.84 | 5137.08 |
| ENSMUSG000000024696 | 8_Lpxn          | 61.5014 | 0.88574  | 0.0149   | 0.03541  | 109.392 | 74.3423 | 54.9771 | 39.6742 | 41.2404 | 49.3828 |
| ENSMUSG000000024697 | 3_Gna14         | 787.998 | -0.09607 | 0.50175  | 0.61279  | 822.174 | 656.231 | 806.729 | 788.975 | 797.912 | 855.969 |
| ENSMUSG000000024712 | 9_Rfk           | 1037.52 | -0.56669 | 1.48E-06 | 1.29E-05 | 843.011 | 870.08  | 795.973 | 1274.98 | 1274.87 | 1166.19 |
| ENSMUSG000000024713 | 15_Pcsk5        | 183.104 | -0.42229 | 0.04756  | 0.09299  | 151.065 | 182.643 | 135.052 | 228.126 | 186.478 | 215.259 |
| ENSMUSG000000024725 | 12_Ostf1        | 4797.34 | 0.31376  | 0.00202  | 0.00656  | 5235.18 | 5045.18 | 5671.01 | 4316.37 | 4133.9  | 4382.41 |
| ENSMUSG000000024726 | 9_Carmnt1       | 822.904 | -0.35926 | 0.0114   | 0.02823  | 783.106 | 648.889 | 730.239 | 832.256 | 962.874 | 980.06  |
| ENSMUSG000000024727 | 8_Trpm6         | 1639.07 | 0.35917  | 0.01983  | 0.04493  | 1878.76 | 1686.93 | 1958.86 | 1198.34 | 1429.97 | 1681.55 |
| ENSMUSG000000024729 | 7_1700017D01Rik | 0       | NA       | NA       | NA       | 0       | 0       | 0       | 0       | 0       | 0       |
| ENSMUSG000000024730 | 7_Ms4a8a        | 55.9598 | 0.17379  | 0.61333  | 0.71269  | 72.9278 | 51.3971 | 53.7819 | 64.9214 | 48.4127 | 44.3179 |
| ENSMUSG000000024731 | 15_Ms4a10       | 38.8228 | 0.10358  | 0.00863  | 0.02231  | 46.014  | 53.2327 | 56.1722 | 24.3455 | 21.5167 | 31.6557 |
| ENSMUSG000000024732 | 7_Ccdc86        | 231.836 | 0.73564  | 6.38E-05 | 0.00034  | 289.975 | 286.355 | 291.618 | 173.124 | 152.41  | 197.531 |
| ENSMUSG000000024734 | 8_Zp1           | 0.30325 | -0.03469 | 0.99322  | NA       | 0       | 0.91781 | 0       | 0.90169 | 0       | 0       |
| ENSMUSG000000024735 | 13_Prp19        | 3886.23 | 0.30877  | 0.00492  | 0.0139   | 4312.29 | 4145.73 | 4442.39 | 3535.51 | 3170.13 | 3711.31 |
| ENSMUSG000000024736 | 14_Tmem132a     | 568.11  | 1.44712  | 1.21E-08 | 2.02E-07 | 696.287 | 917.806 | 879.633 | 400.348 | 189.168 | 325.42  |
| ENSMUSG000000024737 | 2_Slc15a3       | 110.819 | 2.37806  | 8.58E-09 | 1.50E-07 | 250.038 | 101.876 | 206.762 | 48.691  | 38.5508 | 18.9934 |
| ENSMUSG000000024738 | 5_Pga5          | 0.1447  | 0.92709  | 0.82027  | NA       | 0.86819 | 0       | 0       | 0       | 0       | 0       |
| ENSMUSG000000024740 | 9_Ddb1          | 11690.2 | 0.27351  | 0.02783  | 0.05968  | 12444.6 | 12573   | 13365.4 | 9434.34 | 10259   | 12064.6 |
| ENSMUSG000000024742 | 15_Fen1         | 626.431 | 0.96369  | 1.92E-07 | 2.21E-06 | 792.656 | 746.176 | 944.172 | 991.331 | 361.302 | 522.952 |
| ENSMUSG000000024743 | 14_Syt7         | 360.9   | 0.21847  | 0.22485  | 0.33006  | 375.057 | 439.629 | 348.985 | 368.789 | 285.993 | 346.946 |
| ENSMUSG000000024747 | 3_Aldh1a7       | 277.83  | -1.17783 | 6.55E-10 | 1.64E-08 | 167.56  | 198.246 | 144.614 | 413.874 | 394.473 | 348.212 |
| ENSMUSG000000024749 | 8_Tmc1          | 2.51206 | 0.55166  | 0.6785   | 0.76749  | 2.60457 | 2.75342 | 3.58546 | 1.80337 | 1.79306 | 2.53245 |
| ENSMUSG000000024750 | 10_Zfand5       | 5151.33 | -0.09559 | 0.50845  | 0.61866  | 4903.53 | 5032.33 | 5006.5  | 4406.54 | 6258.68 | 5300.43 |
| ENSMUSG000000024754 | 12_Tmem2        | 1880.84 | 0.33761  | 0.01865  | 0.04267  | 1980.34 | 2031.1  | 2287.52 | 1406.63 | 1723.13 | 1856.29 |
| ENSMUSG000000024757 | 7_Slc22a19      | 0       | NA       | NA       | NA       | 0       | 0       | 0       | 0       | 0       | 0       |
| ENSMUSG000000024758 | 14_Rtn3         | 5438.08 | -0.4171  | 4.07E-05 | 0.00023  | 4691.69 | 4742.3  | 4538    | 5867.27 | 6659.43 | 6129.8  |
| ENSMUSG000000024759 | 13_Atl3         | 4273.79 | -0.33593 | 0.00763  | 0.02011  | 3925.95 | 3690.5  | 3718.12 | 4122.51 | 5247.39 | 4938.28 |
| ENSMUSG000000024764 | 9_Naa40         | 1037.86 | 0.35009  | 0.00476  | 0.01353  | 1069.61 | 1194.98 | 1225.03 | 857.503 | 934.185 | 945.872 |
| ENSMUSG000000024766 | 14_Lipo1        | 721.187 | -0.45017 | 0.00404  | 0.01182  | 592.104 | 613.094 | 623.87  | 705.118 | 967.356 | 825.58  |
| ENSMUSG000000024767 | 11_Otub1        | 1471.51 | 0.62715  | 4.46E-05 | 0.00025  | 1709.46 | 1737.41 | 1912.25 | 1319.17 | 944.047 | 1206.71 |
| ENSMUSG000000024768 | 5_Lipf          | 0.30056 | -1.76625 | 0.6627   | NA       | 0       | 0       | 0       | 1.80337 | 0       | 0       |
| ENSMUSG000000024769 | 7_Cdc42bpg      | 2186.31 | 1.36336  | 4.46E-14 | 3.33E-12 | 2771.26 | 3119.62 | 3554.39 | 1357.04 | 925.22  | 1390.32 |
| ENSMUSG000000024770 | 14_Lipn         | 2.59053 | -0.19888 | 0.89824  | 0.93139  | 0       | 3.67122 | 3.58546 | 0.90169 | 3.58612 | 3.79868 |
| ENSMUSG000000024771 | 6_Lipk          | 162.894 | -0.24077 | 0.26521  | 0.37637  | 162.351 | 142.26  | 143.418 | 155.992 | 206.202 | 167.142 |
| ENSMUSG000000024772 | 9_Ehd1          | 2412.42 | 0.90394  | 1.69E-09 | 3.68E-08 | 2899.75 | 2974.61 | 3559.17 | 1880.01 | 1423.69 | 1737.26 |
| ENSMUSG000000024773 | 14_Atg2a        | 1103.85 | 1.48181  | 4.70E-15 | 4.41E-13 | 1405.6  | 1641.95 | 1829.78 | 711.43  | 451.851 | 582.464 |
| ENSMUSG000000024774 | 15_Ankr22       | 1236.63 | -0.16861 | 0.3103   | 0.42521  | 1233.7  | 1058.23 | 1201.13 | 1041.45 | 1508.86 | 1376.39 |
| ENSMUSG000000024776 | 17_Stambpl1     | 241.582 | 0.00724  | 0.971    | 0.98129  | 238.752 | 229.451 | 258.153 | 193.862 | 267.166 | 262.109 |
| ENSMUSG000000024777 | 9_Ppp2r5b       | 3613.85 | 0.85748  | 5.40E-10 | 1.38E-08 | 4266.28 | 4376.1  | 5329.19 | 2628.41 | 2298.7  | 2784.43 |
| ENSMUSG000000024778 | 12_Fas          | 101.956 | -0.05161 | 0.83104  | 0.88436  | 97.2371 | 105.548 | 98.0026 | 114.514 | 103.998 | 92.4346 |
| ENSMUSG000000024780 | 6_Cdc3711       | 906.453 | -0.45945 | 0.00112  | 0.00393  | 792.656 | 738.833 | 757.728 | 902.587 | 1137.7  | 1109.21 |
| ENSMUSG000000024781 | 15_Lipa         | 1591.48 | -0.69087 | 1.03E-07 | 1.29E-06 | 1234.56 | 1326.23 | 1091.18 | 1949.44 | 2120.29 | 1827.17 |
| ENSMUSG000000024782 | 7_Ak3           | 3400.58 | -0.30648 | 0.00682  | 0.01829  | 3155.86 | 2999.39 | 2966.37 | 3422.8  | 4081.9  | 3777.15 |
| ENSMUSG000000024784 | 13_Gpha2        | 908.872 | 1.5032   | 6.96E-09 | 1.25E-07 | 1402.12 | 1085.76 | 1544.14 | 687.084 | 320.061 | 414.056 |
| ENSMUSG000000024785 | 6_Rcl1          | 368.412 | 0.405    | 0.02499  | 0.05462  | 409.785 | 386.396 | 462.525 | 327.312 | 263.58  | 360.875 |
| ENSMUSG000000024786 | 9_1700123101Rik | 40.1153 | 1.14483  | 0.00488  | 0.0138   | 51.2231 | 47.7259 | 66.9286 | 31.559  | 17.9306 | 25.3245 |
| ENSMUSG000000024787 | 13_Snx15        | 433.268 | 0.72507  | 0.00019  | 0.00088  | 474.899 | 569.957 | 574.869 | 385.02  | 255.511 | 339.349 |

|                     |             |         |          |          |          |         |         |         |         |         |         |
|---------------------|-------------|---------|----------|----------|----------|---------|---------|---------|---------|---------|---------|
| ENSMUSG000000024789 | 12_Jak2     | 2270.02 | 0.11341  | 0.40997  | 0.52649  | 2438.74 | 2125.64 | 2513.41 | 1896.24 | 2403.6  | 2242.49 |
| ENSMUSG000000024790 | 7_Sac3d1    | 210.93  | 0.8518   | 0.00046  | 0.00187  | 228.334 | 271.67  | 314.326 | 177.632 | 110.273 | 163.343 |
| ENSMUSG000000024791 | 10_Cdca5    | 136.242 | 0.54468  | 0.02754  | 0.05921  | 162.351 | 140.424 | 181.663 | 88.3652 | 112.963 | 131.688 |
| ENSMUSG000000024792 | 8_Zfp1      | 472.5   | 1.10109  | 8.50E-08 | 1.09E-06 | 592.973 | 620.437 | 720.678 | 376.003 | 228.615 | 296.297 |
| ENSMUSG000000024793 | 14_Tnfrsf25 | 39.2863 | 0.44693  | 0.29074  | 0.40445  | 39.0685 | 44.9725 | 51.3916 | 29.7556 | 22.4133 | 48.1166 |
| ENSMUSG000000024795 | 10_Kir20b   | 496.758 | -0.20627 | 0.30922  | 0.4241   | 522.649 | 406.588 | 454.159 | 403.053 | 629.364 | 564.737 |
| ENSMUSG000000024797 | 12_Vps51    | 835.491 | 1.03624  | 1.29E-08 | 2.14E-07 | 991.471 | 1160.11 | 1217.86 | 631.18  | 422.266 | 590.062 |
| ENSMUSG000000024798 | 15_Htr7     | 12.9779 | 1.54254  | 0.09506  | 0.16487  | 21.7047 | 5.50683 | 31.074  | 2.70506 | 14.3445 | 2.53245 |
| ENSMUSG000000024799 | 14_Tm7sf2   | 871.342 | 0.77923  | 3.36E-07 | 3.57E-06 | 1110.41 | 1034.37 | 1158.1  | 715.938 | 534.332 | 674.899 |
| ENSMUSG000000024800 | 7_Rpp30     | 207.309 | -0.34623 | 0.1112   | 0.1877   | 186.661 | 156.027 | 205.567 | 194.764 | 271.649 | 229.187 |
| ENSMUSG000000024803 | 8_Ankrd1    | 11.8665 | 0.37421  | 0.56889  | 0.67365  | 13.0228 | 17.4383 | 9.56123 | 9.91854 | 9.86184 | 11.396  |
| ENSMUSG000000024805 | 15_Pcgf5    | 340.652 | 0.31049  | 0.09774  | 0.1688   | 383.739 | 313.89  | 435.036 | 284.031 | 339.785 | 287.434 |
| ENSMUSG000000024806 | 3_Mlana     | 1420.19 | -1.28365 | 8.05E-06 | 5.60E-05 | 720.596 | 1236.28 | 523.477 | 2576.12 | 1976.85 | 1487.82 |
| ENSMUSG000000024807 | 17_Syvn1    | 1009.16 | 1.1135   | 1.70E-10 | 5.12E-09 | 1222.41 | 1373.04 | 1545.33 | 722.25  | 505.643 | 686.295 |
| ENSMUSG000000024810 | 16_Ii33     | 961.254 | -0.44731 | 7.25E-05 | 0.00038  | 841.275 | 800.326 | 798.363 | 1137.93 | 1089.28 | 1100.35 |
| ENSMUSG000000024811 | 11_Tnks2    | 5995.95 | -0.23188 | 0.0485   | 0.09461  | 5511.26 | 5272.79 | 5761.84 | 5788.82 | 7093.35 | 6547.66 |
| ENSMUSG000000024812 | 9_Tjp2      | 6432.31 | 0.78044  | 5.51E-09 | 1.02E-07 | 7407.38 | 8082.2  | 8901.51 | 4307.35 | 4498.79 | 5396.66 |
| ENSMUSG000000024816 | 12_Frmd8    | 1010.66 | 1.02477  | 4.93E-11 | 1.74E-09 | 1179.87 | 1332.65 | 1553.7  | 724.053 | 589.917 | 683.763 |
| ENSMUSG000000024817 | 13_Uhrf2    | 1021.62 | -0.1919  | 0.20491  | 0.30699  | 974.107 | 903.121 | 984.807 | 944.065 | 1280.25 | 1043.37 |
| ENSMUSG000000024818 | 14_Slc25a45 | 260.211 | 0.44948  | 0.01646  | 0.03852  | 283.898 | 312.054 | 305.959 | 258.784 | 195.444 | 205.129 |
| ENSMUSG000000024824 | 6_Rad9a     | 310.908 | 0.69947  | 0.00027  | 0.00118  | 377.662 | 380.889 | 395.596 | 274.112 | 186.478 | 250.713 |
| ENSMUSG000000024826 | 14_Dpf2     | 1918.04 | 0.46103  | 2.21E-05 | 0.00013  | 2160.05 | 2246.79 | 2258.84 | 1701.48 | 1502.59 | 1638.5  |
| ENSMUSG000000024827 | 9_Gldc      | 2698.78 | 0.40046  | 0.01319  | 0.03187  | 2855.47 | 3332.55 | 3022.54 | 2283.07 | 1894.37 | 2804.69 |
| ENSMUSG000000024829 | 12_Mrpl21   | 546.467 | 0.2766   | 0.043    | 0.0855   | 594.709 | 574.546 | 627.456 | 530.191 | 464.403 | 487.497 |
| ENSMUSG000000024830 | 16_Rps6kb2  | 433.625 | 0.82928  | 2.10E-05 | 0.00013  | 490.526 | 548.848 | 626.261 | 379.61  | 256.408 | 300.096 |
| ENSMUSG000000024831 | 12_Ighmbp2  | 157.02  | 1.06257  | 1.70E-06 | 1.46E-05 | 199.683 | 207.424 | 229.47  | 108.202 | 83.3773 | 113.96  |
| ENSMUSG000000024833 | 14_Pola2    | 303.992 | 0.92087  | 7.52E-08 | 9.84E-07 | 402.839 | 368.958 | 420.694 | 192.059 | 202.616 | 236.784 |
| ENSMUSG000000024835 | 14_Coro1b   | 4590.81 | 0.82291  | 1.50E-08 | 2.45E-07 | 5524.28 | 5538.04 | 6535.1  | 3723.96 | 2788.21 | 3435.27 |
| ENSMUSG000000024841 | 7_Elflad    | 783.324 | 0.19769  | 0.17958  | 0.27649  | 859.507 | 756.272 | 893.975 | 652.82  | 718.121 | 819.249 |
| ENSMUSG000000024842 | 3_Cabp4     | 39.5865 | -1.46027 | 0.02846  | 0.06084  | 26.0457 | 22.9451 | 14.3418 | 118.121 | 42.1369 | 13.9285 |
| ENSMUSG000000024843 | 15_Chka     | 614.145 | -0.49458 | 0.00531  | 0.01481  | 526.99  | 596.574 | 405.157 | 706.02  | 785.361 | 664.769 |
| ENSMUSG000000024844 | 14_Banf1    | 1449.82 | 0.48654  | 0.00202  | 0.00656  | 1662.58 | 1536.41 | 1876.39 | 1288.51 | 991.563 | 1343.47 |
| ENSMUSG000000024846 | 5_Cst6      | 266.554 | 0.33943  | 0.10843  | 0.18398  | 278.688 | 282.684 | 332.253 | 281.326 | 183.789 | 240.583 |
| ENSMUSG000000024847 | 14_Aip      | 681.506 | 0.76071  | 0.00035  | 0.00146  | 783.106 | 843.463 | 945.367 | 657.329 | 368.474 | 491.296 |
| ENSMUSG000000024851 | 13_Pitpnm1  | 684.71  | 0.80283  | 0.00107  | 0.00378  | 740.565 | 871.915 | 1000.34 | 712.332 | 385.508 | 397.595 |
| ENSMUSG000000024853 | 9_Sf3b2     | 4831.36 | 0.53473  | 9.54E-06 | 6.48E-05 | 5333.28 | 5505.92 | 6310.41 | 3978.24 | 3633.64 | 4226.67 |
| ENSMUSG000000024854 | 3_Pold4     | 393.748 | 0.65377  | 0.00227  | 0.00722  | 488.79  | 448.807 | 506.745 | 381.413 | 221.443 | 315.291 |
| ENSMUSG000000024855 | 9_Pacs1     | 923.29  | 0.54029  | 0.00015  | 0.00069  | 1037.49 | 1126.15 | 1117.47 | 770.941 | 648.192 | 839.508 |
| ENSMUSG000000024856 | 10_Cdk2ap2  | 807.786 | 1.13039  | 1.78E-07 | 2.08E-06 | 972.371 | 1087.6  | 1266.86 | 623.966 | 351.44  | 544.478 |
| ENSMUSG000000024857 | 16_Cabp2    | 0.74496 | -1.79256 | 0.54299  | NA       | 0.86819 | 0       | 0       | 2.70506 | 0.89653 | 0       |
| ENSMUSG000000024858 | 13_Adrbk1   | 2765.6  | 0.90239  | 8.49E-10 | 2.06E-08 | 3411.11 | 3425.25 | 3973.89 | 2171.26 | 1610.17 | 2001.9  |
| ENSMUSG000000024862 | 16_Klc2     | 555.514 | 0.76879  | 0.00039  | 0.00161  | 579.95  | 757.19  | 763.703 | 521.174 | 308.407 | 402.66  |
| ENSMUSG000000024866 | 9_Acy3      | 152.307 | 0.57929  | 0.0057   | 0.01572  | 177.979 | 178.054 | 191.225 | 130.744 | 106.687 | 129.155 |
| ENSMUSG000000024867 | 14_Pip5k1b  | 446.549 | -1.28469 | 3.36E-07 | 3.57E-06 | 273.479 | 324.903 | 180.468 | 812.419 | 576.469 | 511.556 |
| ENSMUSG000000024868 | 8_Dkk1      | 25.4012 | -1.65926 | 0.00265  | 0.00827  | 13.0228 | 18.3561 | 4.78062 | 45.986  | 32.2751 | 37.9868 |
| ENSMUSG000000024869 | 9_Nudt8     | 315.756 | 0.65529  | 7.28E-05 | 0.00038  | 369.848 | 361.615 | 427.865 | 257.882 | 230.408 | 246.914 |
| ENSMUSG000000024870 | 5_Rab1b     | 2880.78 | 0.72659  | 1.19E-05 | 7.90E-05 | 3446.71 | 3524.37 | 3802.98 | 2629.31 | 1703.41 | 2177.91 |
| ENSMUSG000000024871 | 10_Doc2g    | 43.8109 | 0.883    | 0.0242   | 0.05322  | 53.8277 | 65.1642 | 51.3916 | 40.5758 | 21.5167 | 30.3894 |
| ENSMUSG000000024873 | 6_Cnih2     | 17.8908 | -0.61216 | 0.31327  | 0.42827  | 10.4183 | 15.6027 | 16.7322 | 15.3287 | 34.0682 | 15.1947 |
| ENSMUSG000000024875 | 4_Yif1a     | 983.338 | 0.71573  | 4.56E-06 | 3.42E-05 | 1140.8  | 1183.05 | 1343.35 | 834.961 | 620.399 | 777.463 |
| ENSMUSG000000024878 | 8_Cbwd1     | 268.169 | -0.32893 | 0.09094  | 0.15903  | 254.379 | 223.027 | 235.445 | 244.357 | 341.578 | 310.226 |
| ENSMUSG000000024883 | 6_Rin1      | 1199.13 | 1.15778  | 1.62E-10 | 4.92E-09 | 1528.01 | 1429.94 | 2009.05 | 643.803 | 706.466 | 877.495 |
| ENSMUSG000000024885 | 8_Aldh3b1   | 346.919 | 0.73684  | 5.64E-05 | 0.0003   | 445.381 | 421.273 | 433.841 | 300.261 | 209.788 | 270.973 |
| ENSMUSG000000024887 | 9_Ash2      | 431.581 | -0.08602 | 0.59012  | 0.69242  | 402.839 | 392.821 | 461.329 | 398.545 | 489.506 | 444.446 |
| ENSMUSG000000024889 | 3_Rce1      | 414.144 | 0.57334  | 0.00136  | 0.00466  | 474.031 | 505.711 | 505.55  | 367.888 | 264.777 | 367.206 |
| ENSMUSG000000024891 | 5_Slc29a2   | 96.4984 | 1.03276  | 0.00212  | 0.00682  | 119.81  | 111.972 | 157.76  | 91.0702 | 43.93   | 54.4478 |
| ENSMUSG000000024892 | 15_Pcx      | 1809    | 1.12538  | 3.10E-09 | 6.18E-08 | 2247.74 | 2389.05 | 2805.03 | 1307.44 | 828.394 | 1276.36 |
| ENSMUSG000000024896 | 8_Minpp1    | 517.599 | 0.13495  | 0.32267  | 0.43855  | 560.85  | 538.752 | 524.673 | 504.042 | 458.127 | 519.153 |
| ENSMUSG000000024897 | 8_Apba1     | 108.078 | -0.56859 | 0.03449  | 0.07132  | 93.7643 | 100.041 | 66.9286 | 150.581 | 121.928 | 115.227 |
| ENSMUSG000000024899 | 6_Papss2    | 2036.2  | -0.45123 | 0.00072  | 0.00272  | 1753.74 | 1843.87 | 1562.07 | 2084.7  | 2584.7  | 2388.1  |
| ENSMUSG000000024900 | 4_Cpt1a     | 2824.5  | 0.0064   | 0.95899  | 0.97351  | 2502.99 | 3003.06 | 2987.89 | 3026.06 | 2729.94 | 2697.06 |
| ENSMUSG000000024901 | 14_Peli3    | 120.597 | -0.19038 | 0.57584  | 0.68003  | 100.71  | 147.767 | 89.6366 | 188.452 | 99.5149 | 97.4995 |
| ENSMUSG000000024902 | 4_Mrpl11    | 486.167 | -0.10343 | 0.49892  | 0.61     | 480.976 | 472.67  | 451.768 | 548.225 | 436.61  | 526.75  |
| ENSMUSG000000024903 | 10_Lao1     | 0.89728 | 0.90031  | 0.75269  | NA       | 0       | 0       | 3.58546 | 0.90169 | 0.89653 | 0       |
| ENSMUSG000000024905 | 15_Mitf     | 3.98824 | 0.13631  | 0.90647  | 0.93694  | 1.73638 | 3.67122 | 7.17092 | 1.80337 | 4.48265 | 5.06491 |
| ENSMUSG000000024906 | 9_Mus81     | 321.556 | 0.71756  | 0.00032  | 0.00136  | 352.484 | 423.108 | 424.28  | 286.736 | 194.547 | 248.18  |
| ENSMUSG000000024907 | 6_Gal       | 0.79656 | 0.65655  | 0.77834  | NA       | 0.86819 | 0.91781 | 1.19515 | 0.90169 | 0.89653 | 0       |
| ENSMUSG000000024908 | 14_Ppp6r3   | 3476.72 | -0.01475 | 0.89963  | 0.93225  | 3420.66 | 3307.77 | 3647.61 | 3161.31 | 3524.26 | 3798.68 |
| ENSMUSG000000024909 | 14_Efemp2   | 508.685 | 0.17149  | 0.41325  | 0.52939  | 540.013 | 604.834 | 472.086 | 622.163 | 398.956 | 414.056 |
| ENSMUSG000000024910 | 4_Ctsw      | 15.5116 | 3.45271  | 1.65E-05 | 0.0001   | 38.2003 | 17.4383 | 29.8789 | 1.80337 | 4.48265 | 1.26623 |
| ENSMUSG000000024911 | 5_Fibp      | 644.245 | 0.42171  | 0.00149  | 0.00507  | 781.37  | 716.806 | 713.507 | 547.323 | 516.402 | 590.062 |
| ENSMUSG000000024912 | 5_Fosl1     | 45.7174 | 1.67811  | 4.60E-05 | 0.00025  | 63.3778 | 50.4793 | 95.6123 | 20.7388 | 25.1029 | 18.9934 |
| ENSMUSG000000024913 | 16_Lrp5     | 1456.84 | 1.22105  | 1.33E-11 | 5.39E-10 | 1807.57 | 2043.04 | 2266.01 | 1016.2  | 666.122 | 942.073 |
| ENSMUSG000000024914 | 16_Drap1    | 1761.67 | 0.49766  | 0.013    | 0.03147  | 1926.51 | 2023.76 | 2237.33 | 1821.4  | 1023.84 | 1537.2  |
| ENSMUSG000000024921 | 16_Smarca2  | 2965.58 | -0.30919 | 0.00174  | 0.00579  | 2707.88 | 2529.47 | 2709.41 | 3196.48 | 3273.23 | 3377.03 |
| ENSMUSG000000024922 | 1_Ovol1     | 872.83  | 1.05144  | 1.35E-07 | 1.63E-06 | 1204.18 | 978.381 | 1350.52 | 698.806 | 442.886 | 562.205 |
| ENSMUSG000000024924 | 14_Vldlr    | 776.612 | -0.62704 | 7.87E-05 | 0.0004   | 698.892 | 623.19  | 507.94  | 1019.81 | 917.151 | 892.69  |
| ENSMUSG000000024925 | 10_Rnaseh2c | 105.688 | 1.6271   | 6.93E-08 | 9.15E-07 | 125.887 | 158.78  | 194.81  | 64.9214 | 40.3439 | 49.3828 |
| ENSMUSG000000024926 | 9_Kat5      | 797.434 | 0.15421  | 0.21987  | 0.3246   | 824.779 | 839.792 | 854.535 | 763.728 | 693.915 | 807.853 |

|                     |                 |         |          |          |          |         |         |         |         |         |         |
|---------------------|-----------------|---------|----------|----------|----------|---------|---------|---------|---------|---------|---------|
| ENSMUSG000000024927 | 7_Rela          | 1271.6  | 0.95703  | 8.93E-10 | 2.15E-08 | 1562.74 | 1703.45 | 1768.83 | 968.41  | 699.294 | 926.878 |
| ENSMUSG000000024935 | 10_Slc1a1       | 3597.33 | 0.1549   | 0.27378  | 0.38589  | 4023.19 | 3346.32 | 4001.38 | 2936.79 | 3787.84 | 3488.46 |
| ENSMUSG000000024936 | 7_Kcnk7         | 53.3834 | 1.77871  | 1.53E-05 | 9.84E-05 | 85.0825 | 63.3286 | 99.1978 | 28.8539 | 13.448  | 30.3894 |
| ENSMUSG000000024937 | 14_Ehbp111      | 1025.3  | 0.85526  | 9.99E-09 | 1.70E-07 | 1192.02 | 1302.37 | 1467.65 | 796.188 | 633.847 | 759.736 |
| ENSMUSG000000024939 | 6_Fam89b        | 249.315 | 0.71117  | 0.00168  | 0.0056   | 259.588 | 334.999 | 334.643 | 235.34  | 151.514 | 179.804 |
| ENSMUSG000000024940 | 10_Ltbp3        | 2131.01 | 0.32489  | 0.10351  | 0.17726  | 2085.39 | 2882.83 | 2141.72 | 2394.88 | 1503.48 | 1777.78 |
| ENSMUSG000000024941 | 8_Scy1          | 1252.05 | 0.71279  | 0.00042  | 0.0017   | 1467.24 | 1600.65 | 1597.92 | 1228.1  | 681.363 | 937.008 |
| ENSMUSG000000024942 | 16_Capn1        | 10122   | 1.08447  | 7.18E-10 | 1.78E-08 | 12478.5 | 13087.9 | 15701.9 | 6528.2  | 5040.29 | 7894.92 |
| ENSMUSG000000024943 | 8_Smc5          | 906.2   | -0.28151 | 0.04455  | 0.08808  | 820.438 | 798.491 | 835.413 | 865.618 | 1114.39 | 1002.85 |
| ENSMUSG000000024944 | 5_Arl2          | 661.167 | 0.19408  | 0.30843  | 0.42336  | 687.605 | 763.614 | 665.701 | 779.958 | 493.988 | 576.133 |
| ENSMUSG000000024947 | 16_Men1         | 673.972 | 0.76167  | 8.01E-05 | 0.00041  | 777.029 | 859.984 | 905.927 | 576.177 | 367.578 | 557.14  |
| ENSMUSG000000024948 | 14_Map4k2       | 908.802 | 0.43307  | 0.00122  | 0.00425  | 1022.73 | 1103.2  | 1006.32 | 851.191 | 695.708 | 773.665 |
| ENSMUSG000000024949 | 17_Sf1          | 3039.61 | 0.34846  | 0.00143  | 0.00489  | 3206.22 | 3414.24 | 3593.83 | 2520.21 | 2668.07 | 2835.08 |
| ENSMUSG000000024952 | 12_Rps6ka4      | 1999.45 | 1.2455   | 2.35E-12 | 1.15E-10 | 2545.53 | 2621.25 | 3269.94 | 1250.64 | 927.909 | 1381.45 |
| ENSMUSG000000024953 | 16_Prdx5        | 9383.47 | 0.7444   | 4.08E-05 | 0.00023  | 11357.6 | 11133   | 12765.4 | 8639.05 | 5166.71 | 7239.02 |
| ENSMUSG000000024955 | 13_Srra         | 995.399 | 1.48996  | 7.34E-10 | 1.81E-08 | 1257.14 | 1453.8  | 1693.53 | 697.003 | 335.302 | 535.614 |
| ENSMUSG000000024957 | 8_Kcnk4         | 30.0926 | 1.69196  | 0.00158  | 0.00531  | 29.5184 | 61.493  | 46.611  | 18.0337 | 7.17224 | 17.7272 |
| ENSMUSG000000024958 | 12_Gpr137       | 562.103 | 0.86181  | 5.09E-05 | 0.00028  | 634.646 | 758.107 | 782.826 | 497.73  | 287.786 | 411.524 |
| ENSMUSG000000024959 | 13_Bad          | 573.51  | 0.95325  | 3.66E-07 | 3.85E-06 | 692.814 | 800.326 | 775.655 | 462.565 | 299.441 | 410.258 |
| ENSMUSG000000024960 | 8_Plcb3         | 3444.88 | 1.17524  | 8.97E-11 | 2.94E-09 | 4219.4  | 4601.88 | 5502.49 | 2050.43 | 1676.51 | 2618.56 |
| ENSMUSG000000024962 | 13_Vegfb        | 427.83  | -0.13337 | 0.56804  | 0.67292  | 368.112 | 509.382 | 346.595 | 577.98  | 355.923 | 408.991 |
| ENSMUSG000000024963 | 11_Dnajc4       | 422.721 | 0.75627  | 8.51E-06 | 5.88E-05 | 503.549 | 509.382 | 580.845 | 360.674 | 271.649 | 310.226 |
| ENSMUSG000000024965 | 8_Fermt3        | 1721.69 | 1.47082  | 3.39E-15 | 3.28E-13 | 2282.47 | 2505.61 | 2801.44 | 963     | 675.984 | 1101.62 |
| ENSMUSG000000024966 | 8_Stip1         | 2841.97 | 0.10633  | 0.37398  | 0.49163  | 2849.39 | 2833.27 | 3156.4  | 2554.47 | 2635.8  | 3022.48 |
| ENSMUSG000000024968 | 12_Rcor2        | 118.717 | 0.27717  | 0.21458  | 0.31845  | 131.965 | 133.082 | 125.491 | 115.416 | 107.584 | 98.7657 |
| ENSMUSG000000024969 | 15_Mark2        | 4072.5  | 1.03578  | 1.09E-11 | 4.53E-10 | 4965.17 | 5290.23 | 6167    | 2614.89 | 2278.98 | 3118.72 |
| ENSMUSG000000024970 | 4_Al846148      | 328.444 | 0.70596  | 0.00045  | 0.00183  | 368.112 | 408.423 | 445.792 | 304.77  | 201.719 | 241.849 |
| ENSMUSG000000024972 | 16_Lgals12      | 77.2477 | 0.58948  | 0.07139  | 0.13061  | 101.578 | 65.1642 | 112.344 | 56.8062 | 74.412  | 53.1815 |
| ENSMUSG000000024973 | 10_Hrasls5      | 0.81313 | -1.90676 | 0.45144  | NA       | 0       | 0.91781 | 0       | 0.90169 | 1.79306 | 1.26623 |
| ENSMUSG000000024974 | 16_Smc3         | 2702.2  | -0.31838 | 0.0407   | 0.08176  | 2445.69 | 2327.55 | 2441.7  | 2357.91 | 3349.44 | 3290.92 |
| ENSMUSG000000024975 | 12_Pdcd4        | 3238.25 | -0.2732  | 0.01939  | 0.04406  | 2994.38 | 2949.83 | 2851.64 | 3154.1  | 3654.26 | 3825.27 |
| ENSMUSG000000024976 | 13_Shoc2        | 2389.32 | -0.29342 | 0.02066  | 0.04655  | 2192.18 | 2009.99 | 2239.72 | 2331.76 | 2899.38 | 2662.88 |
| ENSMUSG000000024978 | 10_Gpam         | 698.277 | -0.31551 | 0.07455  | 0.13536  | 694.551 | 638.793 | 533.039 | 926.933 | 710.052 | 686.295 |
| ENSMUSG000000024979 | 13_Tectb        | 0.36132 | -1.98116 | 0.62311  | NA       | 0       | 0       | 0       | 0.90169 | 0       | 1.26623 |
| ENSMUSG000000024981 | 5_Acsf5         | 4249.81 | 0.06149  | 0.70127  | 0.7865   | 4315.76 | 3809.81 | 4895.35 | 3370.5  | 4484.45 | 4622.99 |
| ENSMUSG000000024982 | 9_Zdhhc6        | 930.061 | -0.00473 | 0.97419  | 0.98319  | 985.394 | 807.669 | 991.978 | 846.683 | 930.599 | 1018.05 |
| ENSMUSG000000024983 | 9_Vti1a         | 974.665 | 0.06571  | 0.62447  | 0.72203  | 968.03  | 950.847 | 1070.86 | 900.784 | 893.841 | 1063.63 |
| ENSMUSG000000024985 | 18_Tcf7l2       | 372.374 | 0.26917  | 0.10022  | 0.17245  | 410.653 | 380.889 | 429.06  | 357.067 | 293.165 | 363.407 |
| ENSMUSG000000024986 | 11_Hhex         | 22.5288 | 0.4069   | 0.49201  | 0.60375  | 37.3321 | 13.7671 | 26.2934 | 23.4438 | 24.2063 | 10.1298 |
| ENSMUSG000000024987 | 5_Cyp26a1       | 94.8617 | -0.78322 | 0.00558  | 0.01543  | 83.3461 | 65.1642 | 59.7577 | 122.629 | 97.7218 | 140.551 |
| ENSMUSG000000024989 | 14_Cep55        | 266.439 | 0.18334  | 0.41339  | 0.52953  | 311.68  | 223.945 | 314.326 | 197.469 | 281.511 | 269.706 |
| ENSMUSG000000024990 | 12_Rbp4         | 28.2898 | -0.55455 | 0.25143  | 0.36053  | 23.4411 | 28.452  | 16.7322 | 46.8876 | 25.1029 | 29.1232 |
| ENSMUSG000000024991 | 7_Eif3a         | 8641.29 | -0.05851 | 0.68     | 0.76833  | 8540.37 | 7881.2  | 8975.61 | 7318.08 | 9120.41 | 10012.1 |
| ENSMUSG000000024992 | 12_Pde6c        | 16.3126 | -1.64173 | 0.0577   | 0.10924  | 6.94551 | 16.5205 | 0       | 35.1657 | 21.5167 | 17.7272 |
| ENSMUSG000000024993 | 15_Fam45a       | 749.111 | -0.54051 | 6.75E-05 | 0.00035  | 602.523 | 638.793 | 590.406 | 859.306 | 984.391 | 819.249 |
| ENSMUSG000000024997 | 7_Prdx3         | 1744.08 | -0.22491 | 0.06923  | 0.12743  | 1700.78 | 1430.86 | 1694.73 | 1841.24 | 1984.92 | 1811.97 |
| ENSMUSG000000024998 | 17_Plce1        | 1430.69 | -0.25551 | 0.0547   | 0.10442  | 1304.89 | 1450.13 | 1155.71 | 1521.14 | 1484.65 | 1667.62 |
| ENSMUSG000000024999 | 7_Noc3l         | 621.033 | -0.12069 | 0.46222  | 0.57591  | 559.982 | 602.08  | 622.675 | 527.486 | 701.087 | 712.886 |
| ENSMUSG000000025001 | 11_Hells        | 579.707 | 0.25933  | 0.25132  | 0.36046  | 680.66  | 508.464 | 705.141 | 371.494 | 575.573 | 636.912 |
| ENSMUSG000000025002 | 5_Cyp2c55       | 0.7542  | -0.55519 | 0.87133  | NA       | 0       | 1.83561 | 0       | 0       | 2.68959 | 0       |
| ENSMUSG000000025003 | 6_Cyp2c39       | 0.21104 | -0.99647 | 0.80707  | NA       | 0       | 0       | 0       | 0       | 0       | 1.26623 |
| ENSMUSG000000025006 | 15_Sorbs1       | 1516.22 | 0.02046  | 0.86291  | 0.90689  | 1424.7  | 1510.71 | 1646.92 | 1591.47 | 1434.45 | 1489.08 |
| ENSMUSG000000025007 | 13_Aldh18a1     | 513.006 | 0.59843  | 9.43E-05 | 0.00047  | 574.741 | 602.08  | 678.848 | 448.138 | 407.025 | 367.206 |
| ENSMUSG000000025008 | 15_Tctn3        | 295.722 | -0.06038 | 0.71537  | 0.79717  | 285.634 | 273.506 | 310.74  | 303.868 | 324.544 | 276.037 |
| ENSMUSG000000025010 | 13_Ccnj         | 176.675 | -0.04185 | 0.83242  | 0.88538  | 191.87  | 174.383 | 155.37  | 186.649 | 169.444 | 182.337 |
| ENSMUSG000000025013 | 14_Tll2         | 23.2656 | -0.02065 | 0.96924  | 0.98021  | 19.1001 | 28.452  | 21.5128 | 28.8539 | 12.5514 | 29.1232 |
| ENSMUSG000000025014 | 12_Dntt         | 0.39838 | 2.07058  | 0.60634  | NA       | 0       | 0       | 2.39031 | 0       | 0       | 0       |
| ENSMUSG000000025016 | 10_Tm9sf3       | 6675.36 | -0.4978  | 2.42E-05 | 0.00015  | 5666.67 | 5412.3  | 5525.2  | 6849.2  | 8398.7  | 8200.09 |
| ENSMUSG000000025017 | 9_Pik3ap1       | 108.206 | 2.51026  | 6.92E-13 | 3.90E-11 | 241.356 | 138.589 | 172.102 | 42.3792 | 20.6202 | 34.1881 |
| ENSMUSG000000025019 | 15_Lcor         | 378.963 | -0.14694 | 0.41111  | 0.52752  | 397.63  | 323.985 | 356.156 | 340.837 | 398.06  | 457.108 |
| ENSMUSG000000025020 | 11_Slit1        | 14.6996 | 0.65411  | 0.37605  | 0.49362  | 13.891  | 16.5205 | 23.9031 | 22.5421 | 6.27571 | 5.06491 |
| ENSMUSG000000025024 | 6_Smndc1        | 856.045 | -0.31223 | 0.03251  | 0.06788  | 751.851 | 705.792 | 834.218 | 827.747 | 1032.8  | 983.858 |
| ENSMUSG000000025025 | 13_Mxi1         | 1162.67 | 0.12691  | 0.33606  | 0.45272  | 1132.12 | 1178.46 | 1332.6  | 1217.28 | 1057.01 | 1058.57 |
| ENSMUSG000000025026 | 14_Add3         | 3035.18 | 0.09783  | 0.38405  | 0.50161  | 3041.26 | 3108.61 | 3263.97 | 3070.24 | 2656.42 | 3070.6  |
| ENSMUSG000000025027 | 17_Xpnpep1      | 2415.33 | 0.72209  | 3.03E-08 | 4.43E-07 | 2866.76 | 2923.21 | 3231.7  | 1918.79 | 1585.07 | 1966.45 |
| ENSMUSG000000025034 | 8_Trim8         | 1150.08 | 1.10946  | 9.77E-08 | 1.23E-06 | 1415.15 | 1470.32 | 1829.78 | 901.685 | 519.988 | 763.535 |
| ENSMUSG000000025035 | 8_Arl3          | 519.959 | -0.30804 | 0.05347  | 0.10237  | 460.14  | 483.684 | 450.573 | 672.657 | 520.884 | 531.815 |
| ENSMUSG000000025036 | 6_Sfxn2         | 323.646 | 0.26328  | 0.0969   | 0.16752  | 343.803 | 327.657 | 388.425 | 294.851 | 289.579 | 297.563 |
| ENSMUSG000000025037 | 6_Maoa          | 694.766 | -0.81637 | 3.89E-07 | 4.07E-06 | 520.913 | 524.985 | 463.72  | 792.582 | 1047.15 | 819.249 |
| ENSMUSG000000025038 | 7_Efhc2         | 23.6503 | -1.57469 | 0.00706  | 0.01883  | 15.6274 | 13.7671 | 5.97577 | 26.1489 | 53.7918 | 26.5908 |
| ENSMUSG000000025040 | 13_Fundc1       | 1041.49 | -0.58519 | 4.83E-06 | 3.59E-05 | 869.925 | 820.518 | 809.119 | 1186.62 | 1385.14 | 1177.59 |
| ENSMUSG000000025041 | 16_Nt5c2        | 3405.35 | 0.04172  | 0.72253  | 0.80223  | 3494.46 | 3274.73 | 3593.83 | 3002.61 | 3476.75 | 3589.75 |
| ENSMUSG000000025044 | 15_Msr1         | 112.081 | 1.96855  | 1.65E-05 | 0.0001   | 309.943 | 93.6162 | 132.662 | 52.2978 | 57.378  | 26.5908 |
| ENSMUSG000000025047 | 8_Pdcd11        | 947.328 | 0.55057  | 0.00017  | 0.00078  | 1017.52 | 1122.48 | 1236.98 | 758.317 | 687.639 | 861.034 |
| ENSMUSG000000025049 | 5_Taf5          | 133.482 | -0.21853 | 0.32932  | 0.44584  | 119.81  | 117.479 | 133.857 | 146.073 | 159.582 | 124.09  |
| ENSMUSG000000025050 | 17_Pcgf6        | 243.037 | -0.31242 | 0.15108  | 0.23931  | 178.847 | 212.013 | 260.544 | 227.225 | 304.82  | 274.771 |
| ENSMUSG000000025056 | 4_Nr0b1         | 0.14942 | -0.99647 | 0.80707  | NA       | 0       | 0       | 0       | 0       | 0.89653 | 0       |
| ENSMUSG000000025058 | 4_5430427O19Rik | 15.3594 | 2.31329  | 0.00065  | 0.0025   | 33.8593 | 19.2739 | 23.9031 | 6.3118  | 6.27571 | 2.53245 |
| ENSMUSG000000025059 | 16_Gk           | 4892.91 | 0.12419  | 0.49497  | 0.60612  | 5143.15 | 4458.7  | 5708.06 | 3481.41 | 5365.74 | 5200.39 |

|                     |                  |         |          |          |          |         |         |         |         |         |         |
|---------------------|------------------|---------|----------|----------|----------|---------|---------|---------|---------|---------|---------|
| ENSMUSG000000025060 | 14_Slk           | 10851.6 | 0.08962  | 0.52705  | 0.636    | 11226.5 | 10421.7 | 11916.9 | 8650.77 | 11428.1 | 11465.7 |
| ENSMUSG000000025064 | 14_Col17a1       | 52908.4 | 1.36722  | 1.31E-12 | 6.78E-11 | 66173.3 | 75288.5 | 87306   | 25856.7 | 24001.9 | 38823.8 |
| ENSMUSG000000025066 | 9_Sfr1           | 3696.45 | 0.18444  | 0.23641  | 0.3434   | 3921.61 | 3629    | 4245.19 | 2827.69 | 3461.5  | 4093.71 |
| ENSMUSG000000025068 | 7_Gsto1          | 123473  | 0.0169   | 0.87806  | 0.91759  | 124377  | 118457  | 129757  | 111233  | 132895  | 124122  |
| ENSMUSG000000025069 | 14_Gsto2         | 28.9155 | -0.63373 | 0.17279  | 0.26803  | 14.7592 | 23.8629 | 29.8789 | 33.3624 | 41.2404 | 30.3894 |
| ENSMUSG000000025075 | 14_Habp2         | 0.66102 | -2.86976 | 0.33535  | NA       | 0       | 0       | 0       | 1.80337 | 0.89653 | 1.26623 |
| ENSMUSG000000025076 | 9_Casp7          | 994.116 | 0.50023  | 0.00068  | 0.00259  | 1110.41 | 1041.71 | 1342.16 | 781.761 | 793.43  | 895.222 |
| ENSMUSG000000025077 | 13_Dclre1a       | 608.982 | -0.00502 | 0.97388  | 0.98302  | 632.909 | 543.341 | 646.578 | 572.57  | 568.4   | 690.094 |
| ENSMUSG000000025078 | 8_Nhlrc2         | 884.671 | 0.33136  | 0.01023  | 0.02577  | 1013.18 | 929.737 | 1013.49 | 715.938 | 789.843 | 845.84  |
| ENSMUSG000000025081 | 13_Tdrd1         | 2.44507 | -0.1318  | 0.9251   | NA       | 2.60457 | 0.91781 | 3.58546 | 3.60674 | 2.68959 | 1.26623 |
| ENSMUSG000000025082 | 8_Vwa2           | 11.9006 | 0.93548  | 0.17818  | 0.27488  | 10.4183 | 13.7671 | 22.7079 | 6.3118  | 8.06878 | 10.1298 |
| ENSMUSG000000025083 | 17_Afap1l2       | 1245.41 | 0.74414  | 2.97E-05 | 0.00017  | 1365.66 | 1566.69 | 1744.92 | 862.913 | 779.982 | 1152.27 |
| ENSMUSG000000025085 | 16_Ablim1        | 13956.1 | 0.19012  | 0.10878  | 0.18447  | 14378.1 | 14538   | 15705.5 | 11776   | 12771.1 | 14567.9 |
| ENSMUSG000000025086 | 12_Trub1         | 313.207 | -0.00596 | 0.9711   | 0.98133  | 292.579 | 320.314 | 325.082 | 284.031 | 340.682 | 316.557 |
| ENSMUSG000000025089 | 15_Gfra1         | 865.81  | -0.7938  | 1.19E-05 | 7.89E-05 | 757.06  | 637.875 | 504.355 | 1233.51 | 1094.66 | 967.397 |
| ENSMUSG000000025090 | 8_Ccdc172        | 0.21104 | -0.99647 | 0.80707  | NA       | 0       | 0       | 0       | 0       | 0       | 1.26623 |
| ENSMUSG000000025091 | 3_Pnlipr2        | 14.8608 | -0.54181 | 0.34554  | 0.46219  | 11.2864 | 11.9315 | 13.1467 | 18.9354 | 16.1376 | 17.7272 |
| ENSMUSG000000025092 | 6_Hspa12a        | 176.424 | -1.18426 | 0.00016  | 0.00076  | 107.655 | 132.164 | 83.6608 | 341.739 | 237.581 | 155.746 |
| ENSMUSG000000025094 | 7_Slc18a2        | 116.211 | -1.15544 | 0.00011  | 0.00055  | 66.8505 | 91.7806 | 57.3674 | 164.107 | 198.133 | 119.025 |
| ENSMUSG000000025102 | 14_3110040N11Rik | 191.546 | 0.32388  | 0.14133  | 0.2275   | 240.488 | 220.273 | 178.078 | 200.174 | 159.582 | 150.681 |
| ENSMUSG000000025103 | 7_Btdb1          | 2880.06 | -0.55894 | 8.22E-07 | 7.72E-06 | 2428.32 | 2268.82 | 2289.92 | 3193.77 | 3752.88 | 3346.64 |
| ENSMUSG000000025104 | 13_Hdgfrp3       | 1660.66 | -0.44496 | 0.00126  | 0.00437  | 1509.78 | 1251.89 | 1458.09 | 1697.87 | 2086.23 | 1960.12 |
| ENSMUSG000000025105 | 8_Bnc1           | 2800.09 | 0.42954  | 0.00503  | 0.01417  | 3151.52 | 2950.74 | 3537.66 | 2118.06 | 2182.16 | 2860.41 |
| ENSMUSG000000025127 | 15_Gcgr          | 0.30594 | 1.73752  | 0.66765  | NA       | 0       | 1.83561 | 0       | 0       | 0       | 0       |
| ENSMUSG000000025128 | 7_Bhlhe22        | 16.9152 | -0.13645 | 0.81579  | 0.87299  | 12.1546 | 17.4383 | 19.1225 | 24.3455 | 17.0341 | 11.396  |
| ENSMUSG000000025129 | 2_Ppp1r27        | 0.45353 | -0.80448 | 0.84252  | NA       | 0       | 0.91781 | 0       | 1.80337 | 0       | 0       |
| ENSMUSG000000025130 | 11_P4hb          | 10858.1 | 0.34875  | 0.00274  | 0.0085   | 12079.1 | 11438.6 | 12973.4 | 9006.03 | 9062.13 | 10589.5 |
| ENSMUSG000000025132 | 13_Arhgdia       | 5104.36 | 0.87256  | 5.35E-08 | 7.28E-07 | 6092.95 | 6401.69 | 7313.15 | 4201.85 | 2876.07 | 3740.43 |
| ENSMUSG000000025133 | 9_Ints4          | 1256.05 | -0.15664 | 0.16146  | 0.25401  | 1175.53 | 1169.28 | 1219.06 | 1243.42 | 1377.97 | 1351.06 |
| ENSMUSG000000025134 | 2_Alyref         | 910.012 | 0.29314  | 0.0389   | 0.07868  | 1001.89 | 884.765 | 1119.86 | 815.124 | 764.741 | 873.697 |
| ENSMUSG000000025135 | 12_Anapc11       | 675.825 | 0.49384  | 0.01072  | 0.02679  | 734.487 | 823.272 | 813.9   | 712.332 | 436.61  | 534.348 |
| ENSMUSG000000025137 | 15_Pcyt2         | 1437.58 | 0.87765  | 4.04E-08 | 5.69E-07 | 1748.53 | 1766.78 | 2070.01 | 1137.93 | 822.119 | 1080.09 |
| ENSMUSG000000025138 | 14_Sirt7         | 796.178 | 0.90948  | 8.55E-08 | 1.10E-06 | 911.598 | 1008.67 | 1197.54 | 619.458 | 466.196 | 573.601 |
| ENSMUSG000000025139 | 13_Tollip        | 2339.66 | 0.01375  | 0.89713  | 0.93064  | 2270.31 | 2364.27 | 2417.8  | 2420.12 | 2172.29 | 2393.17 |
| ENSMUSG000000025140 | 15_Pycr1         | 70.3586 | 0.11147  | 0.69321  | 0.78014  | 73.796  | 80.7669 | 64.5383 | 71.2332 | 67.2398 | 64.5776 |
| ENSMUSG000000025141 | 2_Myadml2        | 4.4865  | -1.13574 | 0.33735  | 0.45388  | 3.47275 | 3.67122 | 1.19515 | 11.7219 | 1.79306 | 5.06491 |
| ENSMUSG000000025142 | 17_Aspscr1       | 850.303 | 0.8608   | 3.85E-05 | 0.00022  | 984.526 | 1106.87 | 1198.74 | 756.514 | 425.852 | 629.315 |
| ENSMUSG000000025144 | 17_Stra13        | 394.417 | 0.30753  | 0.12571  | 0.20718  | 399.367 | 423.108 | 487.623 | 442.728 | 295.855 | 317.823 |
| ENSMUSG000000025145 | 13_Lrrc45        | 720.356 | 1.19186  | 8.22E-10 | 2.00E-08 | 922.884 | 993.066 | 1089.98 | 526.584 | 323.648 | 465.972 |
| ENSMUSG000000025147 | 6_Mob2           | 793.95  | 0.26212  | 0.08307  | 0.14766  | 787.447 | 859.066 | 951.343 | 780.86  | 623.985 | 761.002 |
| ENSMUSG000000025150 | 10_Cbr2          | 22939.2 | 0.8822   | 3.45E-08 | 4.94E-07 | 27296.7 | 29104.5 | 32823.7 | 17201.5 | 12694   | 18514.8 |
| ENSMUSG000000025151 | 16_Maged1        | 3538.38 | -0.30066 | 0.07862  | 0.1413   | 2987.44 | 3780.44 | 2745.27 | 4656.3  | 3668.6  | 3392.22 |
| ENSMUSG000000025153 | 9_Fasn           | 6442.01 | 1.67545  | 1.65E-19 | 2.80E-17 | 8253    | 9806.75 | 11375.5 | 3365.99 | 2319.32 | 3531.51 |
| ENSMUSG000000025154 | 14_Arhgap19      | 453.151 | 0.11643  | 0.44092  | 0.55623  | 475.767 | 418.519 | 521.087 | 444.531 | 434.817 | 424.186 |
| ENSMUSG000000025155 | 15_Dus1l         | 614.821 | 0.73423  | 1.61E-07 | 1.90E-06 | 775.292 | 708.546 | 821.071 | 499.534 | 437.507 | 446.978 |
| ENSMUSG000000025156 | 16_Gps1          | 2227.43 | 0.34575  | 0.00936  | 0.02388  | 2476.07 | 2419.34 | 2583.92 | 2208.23 | 1689.06 | 1987.98 |
| ENSMUSG000000025157 | 7_Zdhhc16        | 554.011 | 0.19311  | 0.20434  | 0.30633  | 539.145 | 555.272 | 680.043 | 539.208 | 497.574 | 512.822 |
| ENSMUSG000000025158 | 7_Rfng           | 619.163 | 1.01677  | 5.59E-08 | 7.55E-07 | 771.819 | 802.162 | 911.903 | 475.188 | 311.993 | 441.913 |
| ENSMUSG000000025159 | 8_Mms19          | 1403.73 | 0.43151  | 3.95E-05 | 0.00022  | 1599.2  | 1600.65 | 1637.36 | 1180.31 | 1239.9  | 1164.93 |
| ENSMUSG000000025161 | 16_Slc16a3       | 141.668 | 0.80548  | 0.06152  | 0.11526  | 180.583 | 176.219 | 184.054 | 179.435 | 38.5508 | 91.1683 |
| ENSMUSG000000025162 | 17_Csnk1d        | 3914.24 | 0.47317  | 4.08E-05 | 0.00023  | 4281.04 | 4540.38 | 4829.62 | 3417.39 | 2972.9  | 3444.14 |
| ENSMUSG000000025163 | 6_Cd7            | 8.82096 | 2.70588  | 0.00652  | 0.0176   | 16.4956 | 5.50683 | 23.9031 | 0.90169 | 3.58612 | 2.53245 |
| ENSMUSG000000025165 | 12_Sectm1a       | 32.5644 | 5.28745  | 8.15E-11 | 2.71E-09 | 71.1914 | 46.8081 | 72.9044 | 0       | 4.48265 | 0       |
| ENSMUSG000000025169 | 6_Ogfd3          | 203.076 | 0.1119   | 0.55992  | 0.66558  | 191.001 | 229.451 | 212.737 | 214.601 | 181.996 | 188.668 |
| ENSMUSG000000025170 | 13_Rab40b        | 63.6806 | -0.17538 | 0.59906  | 0.70067  | 69.4551 | 66.082  | 43.0255 | 69.4298 | 55.5849 | 78.5061 |
| ENSMUSG000000025171 | 1_Ubtd1          | 546.971 | 1.51806  | 1.87E-09 | 4.01E-08 | 650.273 | 815.929 | 966.88  | 384.118 | 193.651 | 270.973 |
| ENSMUSG000000025172 | 2_Ankrd2         | 2.32509 | 2.65574  | 0.11869  | NA       | 4.34094 | 1.83561 | 5.97577 | 0.90169 | 0.89653 | 0       |
| ENSMUSG000000025173 | 13_Wdr45b        | 1278.22 | -0.01229 | 0.9087   | 0.93834  | 1301.41 | 1221.6  | 1295.55 | 1261.46 | 1305.35 | 1283.95 |
| ENSMUSG000000025175 | 12_Fn3k          | 108.431 | -1.00115 | 0.00056  | 0.00219  | 72.9278 | 86.2737 | 57.3674 | 183.042 | 134.48  | 116.493 |
| ENSMUSG000000025176 | 14_Hoga1         | 23.9563 | 0.28894  | 0.5255   | 0.63458  | 24.3093 | 28.452  | 26.2934 | 21.6405 | 21.5167 | 21.5259 |
| ENSMUSG000000025178 | 8_Pi4k2a         | 1601.68 | 0.69617  | 2.38E-07 | 2.65E-06 | 1837.95 | 2033.86 | 2070.01 | 1313.76 | 1057.91 | 1296.62 |
| ENSMUSG000000025184 | 10_R3hcc1l       | 697.777 | -0.22268 | 0.09197  | 0.16046  | 664.164 | 603.916 | 663.311 | 700.61  | 746.81  | 807.853 |
| ENSMUSG000000025185 | 14_Loxl4         | 94.1838 | 0.25645  | 0.37054  | 0.48793  | 116.337 | 96.3696 | 94.4172 | 101.89  | 63.6537 | 92.4346 |
| ENSMUSG000000025188 | 15_Hps1          | 269.642 | 1.02649  | 2.38E-06 | 1.95E-05 | 322.098 | 365.287 | 397.986 | 216.405 | 136.273 | 179.804 |
| ENSMUSG000000025189 | 8_Cnnm1          | 64.9554 | 0.29595  | 0.3754   | 0.49308  | 73.796  | 81.6847 | 59.7577 | 68.5281 | 65.4467 | 40.5193 |
| ENSMUSG000000025190 | 13_Got1          | 716.201 | -0.5867  | 0.0097   | 0.02461  | 579.95  | 703.039 | 433.841 | 1094.65 | 686.742 | 798.989 |
| ENSMUSG000000025192 | 13_Entpd7        | 156.72  | 0.33416  | 0.09371  | 0.16295  | 178.847 | 165.205 | 180.468 | 131.646 | 146.134 | 138.019 |
| ENSMUSG000000025193 | 14_Cutc          | 420.779 | -0.03349 | 0.83877  | 0.89006  | 414.994 | 379.972 | 452.963 | 369.691 | 462.61  | 444.446 |
| ENSMUSG000000025194 | 5_Abcc2          | 8.16313 | -0.5416  | 0.54249  | 0.64943  | 6.07732 | 9.17806 | 4.78062 | 7.21348 | 17.9306 | 3.79868 |
| ENSMUSG000000025195 | 8_Dnmbp          | 911.999 | 0.73996  | 1.18E-06 | 1.06E-05 | 1007.1  | 1206    | 1208.3  | 675.362 | 601.572 | 773.665 |
| ENSMUSG000000025196 | 4_Cpn1           | 44.6195 | 1.68877  | 9.61E-06 | 6.53E-05 | 53.8277 | 74.3423 | 76.4899 | 23.4438 | 20.6202 | 18.9934 |
| ENSMUSG000000025197 | 8_Cyp2c44        | 4.10586 | -0.30051 | 0.78814  | 0.85278  | 6.07732 | 3.67122 | 1.19515 | 5.41011 | 4.48265 | 3.79868 |
| ENSMUSG000000025198 | 16_Erlin1        | 2521.03 | -0.02965 | 0.83093  | 0.88429  | 2465.66 | 2322.05 | 2697.46 | 2161.34 | 2728.14 | 2751.51 |
| ENSMUSG000000025199 | 16_Chuk          | 1545.71 | -0.31452 | 0.03835  | 0.07782  | 1416.02 | 1320.72 | 1397.14 | 1427.37 | 2016.3  | 1696.74 |
| ENSMUSG000000025200 | 6_Cwf19l1        | 249.016 | 0.1444   | 0.43386  | 0.54903  | 256.984 | 267.081 | 260.544 | 206.486 | 272.545 | 230.453 |
| ENSMUSG000000025202 | 7_Scd3           | 32.2097 | -0.0958  | 0.83404  | 0.88649  | 31.2548 | 35.7944 | 26.2934 | 21.6405 | 46.6196 | 31.6557 |
| ENSMUSG000000025203 | 5_Scd2           | 41729.1 | 0.32331  | 0.0222   | 0.04948  | 45339.4 | 45337.8 | 48476.6 | 32516.6 | 34243   | 44461   |
| ENSMUSG000000025204 | 10_Ndufb8        | 1826.17 | -0.01917 | 0.88654  | 0.92332  | 1864.87 | 1791.56 | 1785.56 | 2092.81 | 1597.62 | 1824.63 |
| ENSMUSG000000025207 | 15_Sema4g        | 117.004 | -0.40882 | 0.26854  | 0.38003  | 74.6642 | 145.931 | 81.2705 | 193.862 | 113.859 | 92.4346 |

|                     |                 |         |          |          |          |         |         |         |         |         |         |
|---------------------|-----------------|---------|----------|----------|----------|---------|---------|---------|---------|---------|---------|
| ENSMUSG000000025208 | 8_Mrpl43        | 587.846 | 0.4005   | 0.00653  | 0.01762  | 603.391 | 698.45  | 705.141 | 542.815 | 458.127 | 519.153 |
| ENSMUSG000000025209 | 4_Peo1          | 379.456 | 0.03706  | 0.81949  | 0.87591  | 343.803 | 407.506 | 401.572 | 390.43  | 337.095 | 396.329 |
| ENSMUSG000000025212 | 16_Sfnx3        | 1383.11 | 0.24932  | 0.0256   | 0.05575  | 1458.56 | 1539.16 | 1509.48 | 1339.9  | 1194.18 | 1257.36 |
| ENSMUSG000000025213 | 11_Kazald1      | 99.1056 | -0.2905  | 0.33992  | 0.45647  | 87.687  | 110.137 | 69.3189 | 138.86  | 86.0669 | 102.564 |
| ENSMUSG000000025216 | 9_Lbx1          | 0.39838 | 2.07058  | 0.60634  | NA       | 0       | 0       | 2.39031 | 0       | 0       | 0       |
| ENSMUSG000000025217 | 14_Btrc         | 574.68  | -0.40231 | 0.01226  | 0.02995  | 498.34  | 518.56  | 468.5   | 770.039 | 589.917 | 602.724 |
| ENSMUSG000000025218 | 6_Poll          | 222.248 | 0.93985  | 4.85E-05 | 0.00027  | 256.116 | 309.3   | 311.935 | 195.666 | 123.721 | 136.753 |
| ENSMUSG000000025219 | 13_Fgf8         | 0.15297 | 0.92709  | 0.82027  | NA       | 0       | 0.91781 | 0       | 0       | 0       | 0       |
| ENSMUSG000000025220 | 7_Mgea5         | 5822.13 | -0.22501 | 0.06276  | 0.11726  | 5406.21 | 5207.63 | 5491.73 | 5542.66 | 6287.37 | 6997.17 |
| ENSMUSG000000025221 | 15_Kcnp2        | 36.4471 | 0.21476  | 0.56792  | 0.67288  | 42.5412 | 37.63   | 37.0498 | 33.3624 | 31.3786 | 36.7206 |
| ENSMUSG000000025223 | 14_Ldb1         | 2295.51 | 0.61578  | 1.00E-05 | 6.79E-05 | 2662.73 | 2936.98 | 2734.51 | 2078.39 | 1551    | 1809.44 |
| ENSMUSG000000025224 | 14_Gbf1         | 2571.24 | 0.55804  | 4.85E-05 | 0.00027  | 2705.28 | 3157.25 | 3323.72 | 1880.92 | 2034.23 | 2326.06 |
| ENSMUSG000000025225 | 14_Nfkb2        | 718.188 | 1.14283  | 5.72E-07 | 5.70E-06 | 878.607 | 861.819 | 1225.03 | 511.256 | 311.993 | 520.419 |
| ENSMUSG000000025226 | 11_Fbxl15       | 18.3518 | 1.03615  | 0.0831   | 0.14769  | 23.4411 | 25.6986 | 25.0982 | 19.8371 | 7.17224 | 8.86359 |
| ENSMUSG000000025227 | 14_Tmem180      | 227.945 | 1.11769  | 5.24E-05 | 0.00028  | 270.007 | 310.218 | 356.156 | 192.961 | 91.4461 | 146.882 |
| ENSMUSG000000025228 | 4_Actr1a        | 6186.21 | 0.60034  | 3.77E-07 | 3.95E-06 | 7426.48 | 7162.55 | 7774.48 | 4969.19 | 4377.76 | 5406.79 |
| ENSMUSG000000025229 | 15_Pitx3        | 1.8933  | -0.38546 | 0.82672  | NA       | 0       | 3.67122 | 1.19515 | 0.90169 | 1.79306 | 3.79868 |
| ENSMUSG000000025231 | 16_Sufu         | 770.908 | 0.528    | 4.85E-05 | 0.00027  | 843.011 | 923.312 | 964.489 | 614.949 | 606.055 | 673.633 |
| ENSMUSG000000025232 | 7_Hexa          | 1670.82 | -0.45053 | 0.00081  | 0.00298  | 1378.68 | 1608.91 | 1247.74 | 2016.17 | 1937.4  | 1836.03 |
| ENSMUSG000000025234 | 11_Arh1         | 2835.39 | -0.22682 | 0.08878  | 0.1559   | 2627.14 | 2572.61 | 2638.9  | 2598.66 | 3437.3  | 3137.71 |
| ENSMUSG000000025235 | 7_Bbs4          | 393.331 | -0.63493 | 0.00031  | 0.00133  | 317.757 | 328.574 | 278.471 | 522.978 | 514.609 | 397.595 |
| ENSMUSG000000025236 | 10_Adpkg        | 411.578 | 0.22456  | 0.10807  | 0.18347  | 458.403 | 429.533 | 442.207 | 376.003 | 372.06  | 391.264 |
| ENSMUSG000000025237 | 15_Parp6        | 581.807 | -0.14568 | 0.25743  | 0.36736  | 539.145 | 532.327 | 586.821 | 616.753 | 610.537 | 605.256 |
| ENSMUSG000000025239 | 2_Limd1         | 1858.5  | 0.41212  | 0.00337  | 0.01015  | 2034.17 | 2013.67 | 2318.6  | 1736.65 | 1360.04 | 1687.88 |
| ENSMUSG000000025240 | 8_Sacm1l        | 2319.75 | -0.41958 | 0.00206  | 0.00666  | 2069.76 | 1942.99 | 1940.93 | 2256.02 | 2980.07 | 2728.72 |
| ENSMUSG000000025241 | 15_Fycy1        | 3109.68 | -0.02362 | 0.82403  | 0.87959  | 2989.17 | 3213.24 | 3050.03 | 3324.51 | 2930.76 | 3150.37 |
| ENSMUSG000000025243 | 14_Slc6a20b     | 20.6622 | 0.56033  | 0.29588  | 0.41022  | 27.782  | 20.1917 | 26.2934 | 22.5421 | 17.0341 | 10.1298 |
| ENSMUSG000000025245 | 13_Lztlf1       | 715.619 | -0.64709 | 6.52E-06 | 4.67E-05 | 548.695 | 556.19  | 568.893 | 777.253 | 987.977 | 854.703 |
| ENSMUSG000000025246 | 13_Tbl1x        | 3462.52 | 0.04184  | 0.74281  | 0.81822  | 3452.79 | 3402.31 | 3682.27 | 2942.2  | 3575.36 | 3720.17 |
| ENSMUSG000000025255 | 18_Zfhx4        | 977.673 | -1.12186 | 1.89E-11 | 7.49E-10 | 663.296 | 687.436 | 494.794 | 1477.86 | 1344.8  | 1197.85 |
| ENSMUSG000000025257 | 5_Ribc1         | 53.0181 | -0.15468 | 0.66945  | 0.76005  | 55.5641 | 50.4793 | 44.2207 | 38.7725 | 70.8259 | 58.2464 |
| ENSMUSG000000025260 | 10_Hsd17b10     | 1003.59 | 0.02101  | 0.87204  | 0.91313  | 1046.17 | 1050.89 | 935.806 | 1091.94 | 973.632 | 923.079 |
| ENSMUSG000000025261 | 17_Huwe1        | 13835.1 | 0.0871   | 0.45312  | 0.56752  | 14643.7 | 13638.6 | 14474.5 | 11822.9 | 14154.4 | 14276.7 |
| ENSMUSG000000025262 | 8_Fam120c       | 430.361 | -0.40472 | 0.01247  | 0.03038  | 349.88  | 400.163 | 360.937 | 430.104 | 545.987 | 495.095 |
| ENSMUSG000000025264 | 12_Tsr2         | 556.774 | -0.55352 | 2.52E-05 | 0.00015  | 434.962 | 474.505 | 444.597 | 658.23  | 687.639 | 640.711 |
| ENSMUSG000000025265 | 14_Fgd1         | 150.471 | -0.16463 | 0.58339  | 0.68642  | 119.81  | 176.219 | 130.272 | 220.913 | 141.652 | 113.96  |
| ENSMUSG000000025266 | 11_Gnl3l        | 1233.92 | -0.53604 | 4.62E-06 | 3.45E-05 | 1047.04 | 1029.78 | 944.172 | 1397.61 | 1546.52 | 1438.43 |
| ENSMUSG000000025268 | 15_Maged2       | 772.01  | -0.45336 | 0.02121  | 0.04762  | 663.296 | 770.039 | 521.087 | 1086.53 | 778.189 | 812.918 |
| ENSMUSG000000025269 | 16_Apex2        | 149.992 | 0.16549  | 0.47293  | 0.58585  | 181.451 | 145.013 | 148.199 | 119.924 | 140.755 | 164.609 |
| ENSMUSG000000025270 | 13_Alas2        | 150.283 | 0.11669  | 0.59179  | 0.69394  | 151.933 | 162.452 | 154.175 | 155.992 | 120.135 | 157.012 |
| ENSMUSG000000025271 | 13_Pfkfb1       | 47.3198 | -0.41197 | 0.29419  | 0.40843  | 41.673  | 25.6986 | 54.9771 | 48.691  | 60.9641 | 51.9153 |
| ENSMUSG000000025272 | 16_Tro          | 150.3   | -1.10138 | 0.00108  | 0.00383  | 98.9735 | 127.575 | 59.7577 | 275.014 | 199.926 | 140.551 |
| ENSMUSG000000025277 | 13_Abhd6        | 313.747 | -0.16364 | 0.34982  | 0.46649  | 296.92  | 287.273 | 303.569 | 369.691 | 280.614 | 344.414 |
| ENSMUSG000000025278 | 8_Flnb          | 5687.58 | 0.92751  | 3.22E-10 | 8.93E-09 | 6779.68 | 6975.32 | 8609.89 | 3616.66 | 3633.64 | 4510.3  |
| ENSMUSG000000025279 | 7_Dnase1l3      | 33.5287 | 1.23557  | 0.00558  | 0.01543  | 63.3778 | 43.1369 | 34.6595 | 23.4438 | 18.8271 | 17.7272 |
| ENSMUSG000000025280 | 7_Polr3a        | 539.02  | 0.29482  | 0.03121  | 0.06564  | 613.809 | 609.423 | 556.942 | 457.155 | 481.437 | 515.354 |
| ENSMUSG000000025283 | 15_Sat1         | 6247.09 | -0.07585 | 0.60539  | 0.70554  | 6445.43 | 5579.34 | 6224.36 | 5423.64 | 7546.99 | 6262.76 |
| ENSMUSG000000025287 | 15_Acot9        | 1756.4  | -0.08954 | 0.53567  | 0.64342  | 1771.1  | 1496.94 | 1838.15 | 1578.85 | 2004.64 | 1848.69 |
| ENSMUSG000000025288 | 1_4933436l01Rik | 0.1447  | 0.92709  | 0.82027  | NA       | 0.86819 | 0       | 0       | 0       | 0       | 0       |
| ENSMUSG000000025289 | 15_Prdx4        | 498.705 | -0.51639 | 0.00394  | 0.01159  | 472.294 | 403.834 | 354.961 | 652.82  | 613.227 | 495.095 |
| ENSMUSG000000025290 | 16_Rps24        | 23085.6 | -0.6527  | 3.65E-07 | 3.84E-06 | 19228.6 | 17030.8 | 17592.7 | 25014.6 | 32167.5 | 27479.7 |
| ENSMUSG000000025314 | 16_Ptprj        | 2532.08 | 0.16662  | 0.15262  | 0.24245  | 2702.67 | 2596.47 | 2733.32 | 2265.03 | 2242.22 | 2652.75 |
| ENSMUSG000000025316 | 16_Banp         | 385.157 | 0.56992  | 0.00023  | 0.00103  | 441.908 | 464.41  | 473.281 | 288.539 | 295.855 | 346.946 |
| ENSMUSG000000025317 | 7_Car5a         | 1.94035 | 0.65012  | 0.72421  | NA       | 3.47275 | 3.67122 | 0       | 2.70506 | 1.79306 | 0       |
| ENSMUSG000000025318 | 13_Jph3         | 2.00536 | -1.61064 | 0.40311  | NA       | 0       | 1.83561 | 1.19515 | 6.3118  | 2.68959 | 0       |
| ENSMUSG000000025321 | 14_Iltgb8       | 802.397 | -1.81878 | 3.14E-10 | 8.77E-09 | 410.653 | 450.643 | 200.786 | 1513.03 | 1368.11 | 871.164 |
| ENSMUSG000000025323 | 9_Sp4           | 245.439 | -0.99316 | 9.06E-05 | 0.00046  | 200.552 | 162.452 | 129.077 | 417.48  | 311.096 | 251.979 |
| ENSMUSG000000025324 | 7_Atp10a        | 183.596 | 1.83267  | 1.01E-11 | 4.24E-10 | 290.843 | 201.917 | 368.107 | 89.2669 | 77.9982 | 73.4412 |
| ENSMUSG000000025326 | 11_Ube3a        | 2088.79 | -0.62939 | 2.00E-07 | 2.28E-06 | 1740.72 | 1563.02 | 1617.04 | 2353.4  | 2794.49 | 2464.08 |
| ENSMUSG000000025328 | 9_Padi3         | 6.04261 | 1.27518  | 0.2151   | 0.31897  | 11.2864 | 4.58903 | 9.56123 | 0.90169 | 3.58612 | 6.33113 |
| ENSMUSG000000025329 | 3_Padi1         | 355.905 | 1.93854  | 3.17E-15 | 3.09E-13 | 443.644 | 537.834 | 711.117 | 152.385 | 109.377 | 181.07  |
| ENSMUSG000000025330 | 6_Padi4         | 1710.41 | 0.99052  | 9.59E-09 | 1.64E-07 | 1967.31 | 2231.19 | 2626.95 | 1152.35 | 938.668 | 1346    |
| ENSMUSG000000025332 | 14_Kdm5c        | 3361.63 | 0.70119  | 9.93E-09 | 1.69E-07 | 3787.04 | 4108.1  | 4592.98 | 2491.36 | 2434.98 | 2755.31 |
| ENSMUSG000000025333 | 10_Gpr143       | 111.849 | -1.31336 | 3.41E-05 | 0.0002   | 52.0913 | 89.0271 | 51.3916 | 192.961 | 164.065 | 121.558 |
| ENSMUSG000000025337 | 10_Sbds         | 1952.07 | 0.03562  | 0.75132  | 0.82439  | 1996.83 | 1845.71 | 2085.54 | 1877.31 | 1862.09 | 2044.96 |
| ENSMUSG000000025340 | 14_Rabgef1      | 1673.86 | 0.14995  | 0.18891  | 0.28805  | 1754.61 | 1683.26 | 1846.51 | 1687.96 | 1593.13 | 1477.69 |
| ENSMUSG000000025347 | 3_Mettl7b       | 0.30594 | 1.73752  | 0.66765  | NA       | 0       | 1.83561 | 0       | 0       | 0       | 0       |
| ENSMUSG000000025348 | 8_Iltga7        | 276.045 | -0.25863 | 0.32161  | 0.43735  | 230.07  | 326.739 | 197.2   | 393.135 | 254.615 | 254.512 |
| ENSMUSG000000025350 | 15_Rdh5         | 776.671 | -0.69041 | 0.02862  | 0.06108  | 655.482 | 747.094 | 380.059 | 1475.16 | 760.258 | 641.977 |
| ENSMUSG000000025351 | 13_Cd63         | 3628.89 | -0.89729 | 9.79E-07 | 8.99E-06 | 2634.95 | 2990.21 | 1980.37 | 5312.73 | 4998.16 | 3856.93 |
| ENSMUSG000000025352 | 6_Gdf11         | 165.691 | -1.35479 | 0.00019  | 0.00086  | 95.5007 | 142.26  | 40.6352 | 251.57  | 243.856 | 220.323 |
| ENSMUSG000000025353 | 4_Ormdl2        | 1067.37 | -0.12675 | 0.33053  | 0.44722  | 1080.89 | 919.641 | 1061.3  | 1038.74 | 1184.32 | 1119.34 |
| ENSMUSG000000025354 | 2_Dnajc14       | 2239.22 | 0.11288  | 0.30349  | 0.41834  | 2290.28 | 2331.23 | 2358.04 | 2234.38 | 1968.78 | 2252.62 |
| ENSMUSG000000025355 | 6_Mmp19         | 229.526 | 0.51401  | 0.01931  | 0.04391  | 305.602 | 210.177 | 295.203 | 207.388 | 195.444 | 163.343 |
| ENSMUSG000000025357 | 7_Dgka          | 6206.1  | 0.46421  | 0.00208  | 0.00673  | 7053.16 | 6583.42 | 7950.17 | 4347.93 | 5230.36 | 6071.56 |
| ENSMUSG000000025358 | 15_Cdk2         | 1178.01 | -0.09053 | 0.42788  | 0.54322  | 1147.75 | 1152.76 | 1123.44 | 1197.44 | 1298.18 | 1148.47 |
| ENSMUSG000000025359 | 9_Pmel          | 13049.9 | -1.01809 | 0.04381  | 0.08683  | 6978.5  | 14025.9 | 4877.42 | 22177   | 16334.8 | 13905.7 |
| ENSMUSG000000025362 | 5_Rps26         | 6603.7  | 0.70788  | 0.00063  | 0.00243  | 8145.34 | 7825.21 | 8606.3  | 6826.66 | 3590.6  | 4628.06 |
| ENSMUSG000000025364 | 12_Pa2g4        | 3430.07 | 0.195    | 0.20493  | 0.307    | 3657.68 | 3336.22 | 3989.42 | 2650.05 | 3195.23 | 3751.83 |

|                     |             |         |          |          |          |         |         |         |         |         |         |
|---------------------|-------------|---------|----------|----------|----------|---------|---------|---------|---------|---------|---------|
| ENSMUSG000000025366 | 7_Esy1      | 1021.89 | 0.90562  | 1.03E-10 | 3.29E-09 | 1215.46 | 1300.53 | 1481.99 | 762.826 | 643.709 | 726.814 |
| ENSMUSG000000025369 | 14_Smarcc2  | 3084.53 | 0.2755   | 0.01339  | 0.03229  | 3168.89 | 3645.52 | 3318.94 | 2820.47 | 2638.49 | 2914.85 |
| ENSMUSG000000025370 | 6_Cdh9      | 8.46999 | -1.62743 | 0.04652  | 0.0913   | 4.34094 | 5.50683 | 2.39031 | 13.5253 | 9.86184 | 15.1947 |
| ENSMUSG000000025371 | 12_Chmp6    | 697.613 | 0.62769  | 0.00082  | 0.00302  | 810.02  | 828.778 | 902.341 | 666.346 | 415.99  | 562.205 |
| ENSMUSG000000025372 | 16_Baiap2   | 2509.72 | 1.44914  | 7.08E-14 | 5.00E-12 | 3267.86 | 3502.35 | 4249.97 | 1436.38 | 983.494 | 1618.24 |
| ENSMUSG000000025373 | 13_Rnf41    | 513.089 | 0.44159  | 0.01587  | 0.03738  | 596.445 | 550.683 | 627.456 | 539.208 | 396.267 | 368.472 |
| ENSMUSG000000025374 | 13_Nabp2    | 799.374 | 0.39451  | 0.01222  | 0.02988  | 826.515 | 910.463 | 986.002 | 690.691 | 589.917 | 792.658 |
| ENSMUSG000000025375 | 15_Aatk     | 232.294 | 0.28793  | 0.28916  | 0.40275  | 236.147 | 293.698 | 236.641 | 294.851 | 148.824 | 183.603 |
| ENSMUSG000000025377 | 14_Enthd2   | 313.674 | 0.79496  | 0.00017  | 0.00079  | 344.671 | 393.739 | 455.354 | 259.685 | 176.617 | 251.979 |
| ENSMUSG000000025380 | 2_Fscn2     | 35.2957 | 0.27755  | 0.64905  | 0.74327  | 40.8049 | 42.2191 | 33.4643 | 62.2163 | 24.2063 | 8.86359 |
| ENSMUSG000000025381 | 2_Cnpy2     | 1133.55 | -0.20522 | 0.12332  | 0.20409  | 1048.77 | 1092.19 | 1018.27 | 1369.66 | 1097.35 | 1175.06 |
| ENSMUSG000000025383 | 1_IL23a     | 3.20894 | 0.32097  | 0.8074   | 0.86695  | 2.60457 | 4.58903 | 3.58546 | 6.3118  | 0.89653 | 1.26623 |
| ENSMUSG000000025384 | 15_Faap100  | 621.856 | 1.47005  | 4.11E-10 | 1.10E-08 | 728.41  | 927.901 | 1085.2  | 410.267 | 228.615 | 350.745 |
| ENSMUSG000000025386 | 2_Pde6g     | 325.322 | -1.39893 | 0.10943  | 0.18542  | 286.502 | 177.136 | 72.9044 | 934.146 | 319.165 | 162.077 |
| ENSMUSG000000025389 | 7_Mip       | 1439.45 | -1.38576 | 0.02886  | 0.06151  | 671.11  | 1355.6  | 363.327 | 2928.67 | 1193.28 | 2124.73 |
| ENSMUSG000000025393 | 12_Atp5b    | 17481.9 | -0.00652 | 0.94052  | 0.96119  | 17475.8 | 17099.6 | 17752.8 | 18035.5 | 17290.5 | 17237.1 |
| ENSMUSG000000025395 | 14_Prim1    | 661.481 | -0.09374 | 0.57255  | 0.67707  | 656.35  | 592.902 | 670.481 | 554.537 | 766.534 | 728.08  |
| ENSMUSG000000025400 | 10_Tac2     | 1.05025 | -3.55157 | 0.22891  | NA       | 0       | 0       | 0       | 4.50843 | 1.79306 | 0       |
| ENSMUSG000000025401 | 8_Myo1a     | 3.18639 | 3.05642  | 0.04789  | 0.09354  | 6.94551 | 6.42464 | 3.58546 | 0       | 0.89653 | 1.26623 |
| ENSMUSG000000025402 | 12_Nab2     | 756.664 | 0.76539  | 0.00013  | 0.00063  | 909.861 | 923.312 | 1025.44 | 706.02  | 410.611 | 564.737 |
| ENSMUSG000000025403 | 4_Shmt2     | 869.162 | 1.29351  | 9.85E-14 | 6.74E-12 | 1111.28 | 1159.19 | 1434.18 | 586.997 | 423.162 | 500.16  |
| ENSMUSG000000025404 | 15_R3hdm2   | 1938.22 | 0.33228  | 0.00898  | 0.02307  | 2012.46 | 2114.62 | 2354.45 | 1806.08 | 1541.14 | 1800.57 |
| ENSMUSG000000025407 | 6_Gli1      | 131.34  | 0.07408  | 0.7983   | 0.86071  | 136.306 | 131.246 | 137.443 | 180.337 | 110.273 | 92.4346 |
| ENSMUSG000000025408 | 15_Ddit3    | 257.699 | 0.29538  | 0.09945  | 0.17135  | 274.348 | 292.78  | 284.447 | 252.472 | 199.03  | 243.116 |
| ENSMUSG000000025409 | 14_Bmd6     | 1119.09 | 1.10896  | 1.18E-10 | 3.70E-09 | 1329.2  | 1658.47 | 1601.51 | 864.716 | 633.487 | 626.782 |
| ENSMUSG000000025410 | 9_Dctn2     | 3098.93 | 0.53464  | 0.00053  | 0.0021   | 3414.59 | 3752.91 | 3832.86 | 2997.2  | 2067.4  | 2528.66 |
| ENSMUSG000000025413 | 13_Ttc4     | 787.317 | -0.04448 | 0.70606  | 0.78968  | 759.665 | 792.066 | 773.265 | 769.138 | 804.188 | 825.58  |
| ENSMUSG000000025417 | 7_Pip4k2c   | 2234.71 | 0.14894  | 0.25633  | 0.36612  | 2273.79 | 2445.95 | 2329.36 | 2320.04 | 1818.16 | 2220.96 |
| ENSMUSG000000025418 | 7_Bsnd      | 1.90149 | -2.3339  | 0.29587  | NA       | 0       | 1.83561 | 0       | 4.50843 | 0       | 5.06491 |
| ENSMUSG000000025420 | 13_Katnal2  | 29.4722 | -1.21613 | 0.01302  | 0.03152  | 18.232  | 22.9451 | 11.9515 | 50.4944 | 46.6196 | 26.5908 |
| ENSMUSG000000025421 | 14_Hdhd2    | 791.649 | -0.25622 | 0.05581  | 0.10618  | 756.192 | 750.765 | 657.335 | 928.736 | 849.014 | 807.853 |
| ENSMUSG000000025422 | 8_Agap2     | 30.7799 | -0.07451 | 0.90528  | 0.93611  | 40.8049 | 22.0273 | 27.4885 | 56.8062 | 28.689  | 8.86359 |
| ENSMUSG000000025423 | 15_Pias2    | 946.555 | -0.46633 | 0.00022  | 0.001    | 813.493 | 837.039 | 733.825 | 1088.33 | 1170.87 | 1035.77 |
| ENSMUSG000000025425 | 17_St8sia5  | 7.382   | -1.40422 | 0.16153  | 0.25405  | 3.47275 | 7.34244 | 1.19515 | 18.9354 | 4.48265 | 8.86359 |
| ENSMUSG000000025427 | 14_Rnf165   | 23.77   | -1.28781 | 0.03101  | 0.06527  | 13.0228 | 16.5205 | 11.9515 | 58.6096 | 19.7237 | 22.7921 |
| ENSMUSG000000025428 | 15_Atp5a1   | 14240.8 | 0.06081  | 0.54994  | 0.65629  | 14247.8 | 14598.6 | 14775.7 | 14707.4 | 12795.3 | 14319.8 |
| ENSMUSG000000025429 | 8_Pstpip2   | 285.676 | 0.14447  | 0.48892  | 0.60075  | 274.348 | 290.027 | 334.643 | 221.815 | 256.408 | 336.816 |
| ENSMUSG000000025431 | 4_Crisp1    | 75.958  | 0.69006  | 0.06332  | 0.11817  | 85.0825 | 80.7669 | 114.735 | 53.1994 | 35.8612 | 86.1034 |
| ENSMUSG000000025432 | 11_Avil     | 29.8404 | 0.28851  | 0.50643  | 0.61679  | 33.8593 | 40.3834 | 23.9031 | 25.2472 | 27.7924 | 27.857  |
| ENSMUSG000000025433 | 7_Crisp3    | 0.39838 | 2.07058  | 0.60634  | NA       | 0       | 0       | 2.39031 | 0       | 0       | 0       |
| ENSMUSG000000025436 | 11_Xrcc6bp1 | 79.517  | 0.19058  | 0.5286   | 0.63737  | 92.028  | 70.671  | 92.0269 | 93.7753 | 62.7571 | 65.8438 |
| ENSMUSG000000025437 | 15_Usp33    | 1248.66 | -0.38511 | 0.00228  | 0.00726  | 1123.44 | 1052.72 | 1073.25 | 1319.17 | 1576.1  | 1347.27 |
| ENSMUSG000000025439 | 5_Clns1a    | 1066.55 | -0.19832 | 0.14794  | 0.23622  | 1019.25 | 879.258 | 1081.61 | 1051.37 | 1148.46 | 1219.38 |
| ENSMUSG000000025451 | 15_Paip1    | 1248.7  | -0.43348 | 0.00196  | 0.0064   | 1076.55 | 1047.22 | 1063.69 | 1232.6  | 1629.89 | 1442.23 |
| ENSMUSG000000025453 | 16_Nnt      | 858.173 | -0.48247 | 0.00033  | 0.00138  | 671.11  | 804.915 | 671.677 | 1037.84 | 989.77  | 973.728 |
| ENSMUSG000000025461 | 10_Cd16311  | 4.0253  | 0.62913  | 0.59378  | 0.69584  | 6.07732 | 2.75342 | 5.97577 | 1.80337 | 6.27571 | 1.26623 |
| ENSMUSG000000025464 | 14_Paox     | 244.97  | 0.44101  | 0.01687  | 0.03931  | 284.766 | 269.835 | 291.618 | 230.831 | 177.513 | 215.259 |
| ENSMUSG000000025465 | 12_Echs1    | 2084.6  | -0.01046 | 0.92398  | 0.94955  | 2125.33 | 2056.8  | 2048.49 | 2228.06 | 1935.61 | 2113.33 |
| ENSMUSG000000025466 | 18_Fuom     | 393.855 | 0.11161  | 0.57661  | 0.6806   | 405.444 | 429.533 | 393.206 | 483.303 | 338.889 | 312.758 |
| ENSMUSG000000025467 | 8_Prap1     | 13.9701 | 1.21306  | 0.09116  | 0.15936  | 14.7592 | 11.9315 | 32.2692 | 12.6236 | 7.17224 | 5.06491 |
| ENSMUSG000000025468 | 14_Caly     | 3.16026 | -1.58947 | 0.25464  | 0.36417  | 2.60457 | 0.91781 | 1.19515 | 9.91854 | 1.79306 | 2.53245 |
| ENSMUSG000000025470 | 10_Zfp511   | 209.877 | 0.52873  | 0.01327  | 0.03206  | 197.947 | 256.068 | 290.422 | 182.14  | 160.479 | 172.207 |
| ENSMUSG000000025473 | 16_Adam8    | 253.019 | 2.96366  | 7.52E-22 | 1.70E-19 | 542.618 | 277.177 | 524.673 | 55.9045 | 43.0335 | 74.7074 |
| ENSMUSG000000025474 | 8_Tubgcp2   | 781.763 | 0.52191  | 0.00017  | 0.00079  | 931.566 | 902.203 | 932.22  | 730.365 | 595.296 | 598.925 |
| ENSMUSG000000025475 | 17_Adgra1   | 6.94874 | -2.17697 | 0.02584  | 0.05618  | 2.60457 | 3.67122 | 1.19515 | 17.132  | 10.7584 | 6.33113 |
| ENSMUSG000000025477 | 13_Inpp5a   | 1070.58 | 0.26668  | 0.02457  | 0.05388  | 1096.52 | 1174.79 | 1236.98 | 1002.67 | 926.116 | 986.391 |
| ENSMUSG000000025478 | 15_Dpysl4   | 40.1993 | -0.68224 | 0.19577  | 0.29587  | 27.782  | 42.2191 | 22.7079 | 86.5618 | 34.0682 | 27.857  |
| ENSMUSG000000025479 | 8_Cyp2e1    | 8.97734 | -0.742   | 0.37005  | 0.48745  | 3.47275 | 11.9315 | 4.78062 | 14.427  | 11.6549 | 7.59736 |
| ENSMUSG000000025480 | 4_Syce1     | 9.48654 | -2.27368 | 0.03917  | 0.0791   | 1.73638 | 0       | 8.36608 | 5.41011 | 22.4133 | 18.9934 |
| ENSMUSG000000025481 | 11_Urah     | 3677.65 | 0.9404   | 3.41E-09 | 6.74E-08 | 4320.11 | 4253.11 | 5933.94 | 2292.99 | 2592.77 | 2673.01 |
| ENSMUSG000000025482 | 11_Odf3     | 7.926   | -0.46927 | 0.58304  | 0.68614  | 6.07732 | 5.50683 | 8.36608 | 12.6236 | 3.58612 | 11.396  |
| ENSMUSG000000025484 | 8_Bet1l     | 525.297 | 0.20968  | 0.27947  | 0.39211  | 607.732 | 534.163 | 548.576 | 614.949 | 391.784 | 454.575 |
| ENSMUSG000000025485 | 12_Ric8     | 1229.52 | 0.72718  | 7.91E-07 | 7.47E-06 | 1385.63 | 1567.61 | 1646.92 | 1065.79 | 824.808 | 886.359 |
| ENSMUSG000000025486 | 16_Sirt3    | 224.723 | -0.20551 | 0.36641  | 0.48385  | 207.497 | 240.465 | 178.078 | 299.36  | 202.616 | 220.323 |
| ENSMUSG000000025487 | 15_Psmd13   | 2013.31 | 0.24284  | 0.03459  | 0.07148  | 2246    | 2035.69 | 2264.82 | 1895.34 | 1706.99 | 1931    |
| ENSMUSG000000025488 | 8_Cox8b     | 226.561 | -0.58413 | 0.12326  | 0.20404  | 164.956 | 248.725 | 130.272 | 455.351 | 173.927 | 186.135 |
| ENSMUSG000000025489 | 4_Ifftm5    | 11.5764 | 0.82414  | 0.2363   | 0.3433   | 13.891  | 13.7671 | 16.7322 | 11.7219 | 4.48265 | 8.86359 |
| ENSMUSG000000025491 | 14_Ifftm1   | 17493.5 | 0.47752  | 5.85E-05 | 0.00031  | 19933.6 | 18316.6 | 22839.4 | 14715.5 | 15176.5 | 13979.1 |
| ENSMUSG000000025492 | 6_Ifftm3    | 7798.92 | 2.09778  | 3.24E-30 | 1.83E-27 | 12144.2 | 9593.82 | 16194.3 | 3119.83 | 2741.59 | 2999.69 |
| ENSMUSG000000025494 | 7_Sigirr    | 126.035 | 0.68474  | 0.00516  | 0.01447  | 166.692 | 138.589 | 160.151 | 100.087 | 77.9982 | 112.694 |
| ENSMUSG000000025495 | 14_Ptdss2   | 1018.35 | 0.33866  | 0.0059   | 0.01617  | 1045.3  | 1139.91 | 1227.42 | 907.997 | 871.428 | 918.015 |
| ENSMUSG000000025496 | 4_Drd4      | 6.69839 | -1.50854 | 0.2129   | 0.31634  | 2.60457 | 5.50683 | 2.39031 | 18.0337 | 11.6549 | 0       |
| ENSMUSG000000025497 | 14_Cdhr5    | 1.48789 | 2.88191  | 0.16509  | NA       | 2.60457 | 1.83561 | 3.58546 | 0.90169 | 0       | 0       |
| ENSMUSG000000025498 | 14_Irf7     | 8406.74 | 2.13926  | 5.60E-30 | 2.97E-27 | 12098.2 | 10808.1 | 18203.4 | 3237.95 | 3000.69 | 3092.13 |
| ENSMUSG000000025499 | 17_Hras     | 2179.31 | 0.64098  | 5.24E-06 | 3.86E-05 | 2470.86 | 2510.2  | 2986.69 | 1889.03 | 1500.79 | 1718.27 |
| ENSMUSG000000025500 | 11_Lmntd2   | 93.3188 | 1.03513  | 3.06E-05 | 0.00018  | 122.415 | 129.411 | 124.296 | 60.4129 | 60.0675 | 63.3113 |
| ENSMUSG000000025503 | 4_Taldo1    | 5561.49 | 0.85531  | 3.52E-07 | 3.72E-06 | 6734.54 | 6596.27 | 8159.32 | 4544.49 | 3097.51 | 4236.8  |
| ENSMUSG000000025504 | 12_Eps8l2   | 9017.07 | 1.31103  | 3.64E-15 | 3.47E-13 | 11149.3 | 12673.1 | 14737.4 | 5442.57 | 4150.04 | 5950    |
| ENSMUSG000000025505 | 16_Tmem80   | 375.11  | -0.04983 | 0.74941  | 0.82303  | 347.275 | 397.41  | 360.937 | 406.66  | 349.647 | 388.732 |

|                    |                  |         |          |          |          |         |         |         |         |         |         |
|--------------------|------------------|---------|----------|----------|----------|---------|---------|---------|---------|---------|---------|
| ENSMUSG00000025507 | 13_Pidd1         | 98.1997 | 1.36997  | 2.50E-07 | 2.78E-06 | 144.119 | 124.822 | 155.37  | 46.8876 | 54.6884 | 63.3113 |
| ENSMUSG00000025508 | 13_Rplp2         | 5702.81 | 0.91046  | 3.64E-07 | 3.83E-06 | 6726.72 | 7149.71 | 8458.11 | 4702.29 | 2992.62 | 4187.41 |
| ENSMUSG00000025509 | 15_Pnplp1        | 738.423 | 0.78159  | 0.00024  | 0.00107  | 857.77  | 1022.44 | 921.464 | 724.955 | 408.818 | 495.095 |
| ENSMUSG00000025510 | 13_Cd151         | 3935.55 | 0.23241  | 0.12433  | 0.20545  | 4215.05 | 4147.56 | 4393.39 | 4321.78 | 2971.1  | 3564.43 |
| ENSMUSG00000025511 | 14_Tspan4        | 549.11  | 0.29679  | 0.19213  | 0.292    | 600.786 | 625.943 | 590.406 | 687.986 | 394.473 | 395.063 |
| ENSMUSG00000025512 | 14_Chid1         | 955.757 | 0.14838  | 0.19995  | 0.30095  | 1027.07 | 980.216 | 1007.51 | 954.885 | 869.635 | 895.222 |
| ENSMUSG00000025515 | 15_Muc2          | 6.33407 | -0.61844 | 0.50857  | 0.61876  | 5.20913 | 7.34244 | 2.39031 | 11.7219 | 6.27571 | 5.06491 |
| ENSMUSG00000025521 | 14_Tmem192       | 459.962 | 0.2767   | 0.05793  | 0.10962  | 531.331 | 516.725 | 462.525 | 430.104 | 387.301 | 431.783 |
| ENSMUSG00000025525 | 12_Apool         | 442.916 | -0.45885 | 0.00906  | 0.02326  | 384.607 | 357.944 | 376.474 | 417.48  | 591.71  | 529.283 |
| ENSMUSG00000025527 | 9_Satl1          | 0.60026 | -2.74584 | 0.447    | NA       | 0       | 0       | 0       | 2.70506 | 0.89653 | 0       |
| ENSMUSG00000025529 | 14_Zfp711        | 34.7537 | -0.81408 | 0.05057  | 0.09805  | 25.1775 | 27.5342 | 22.7079 | 32.4607 | 53.7918 | 46.8504 |
| ENSMUSG00000025531 | 14_Chm           | 635.184 | -0.55334 | 7.61E-05 | 0.00039  | 540.013 | 479.095 | 525.868 | 704.216 | 827.498 | 734.412 |
| ENSMUSG00000025532 | 13_Crcp          | 692.467 | 0.05824  | 0.65648  | 0.74961  | 698.892 | 667.245 | 754.142 | 721.348 | 644.605 | 668.568 |
| ENSMUSG00000025533 | 15_Asl           | 557.441 | 0.45466  | 0.00324  | 0.00981  | 629.437 | 656.231 | 647.774 | 529.289 | 400.749 | 481.166 |
| ENSMUSG00000025534 | 17_Gusb          | 516.809 | 0.00896  | 0.95024  | 0.96746  | 547.827 | 535.998 | 470.891 | 551.832 | 496.678 | 497.627 |
| ENSMUSG00000025537 | 12_Phkg1         | 33.4017 | -1.15127 | 0.0268   | 0.05792  | 14.7592 | 28.452  | 19.1225 | 73.0365 | 29.5855 | 35.4544 |
| ENSMUSG00000025538 | 15_Sumf2         | 200.269 | 0.31869  | 0.08125  | 0.14515  | 214.443 | 240.465 | 211.542 | 177.632 | 173.927 | 183.603 |
| ENSMUSG00000025544 | 13_Tm9sf2        | 5070.82 | -0.2695  | 0.03381  | 0.07013  | 4575.35 | 4488.99 | 4731.62 | 4798.77 | 6224.61 | 5605.59 |
| ENSMUSG00000025545 | 9_Clybl          | 175.319 | -1.03601 | 1.64E-06 | 1.42E-05 | 118.074 | 128.493 | 98.0026 | 248.865 | 254.615 | 203.863 |
| ENSMUSG00000025551 | 13_Fgf14         | 58.3702 | -1.10769 | 0.00105  | 0.00373  | 31.2548 | 38.5478 | 41.8304 | 79.3483 | 95.9288 | 63.3113 |
| ENSMUSG00000025555 | 14_Farp1         | 430.653 | -0.13155 | 0.44215  | 0.55751  | 356.825 | 456.149 | 420.694 | 506.747 | 407.921 | 435.582 |
| ENSMUSG00000025557 | 9_Slc15a1        | 68.0172 | 0.26301  | 0.41234  | 0.52861  | 59.905  | 71.5888 | 92.0269 | 61.3146 | 72.619  | 50.6491 |
| ENSMUSG00000025558 | 15_Dock9         | 4822.22 | 0.43542  | 0.00014  | 0.00066  | 5552.06 | 5390.27 | 5688.93 | 3746.5  | 4011.08 | 4544.49 |
| ENSMUSG00000025571 | 13_Tnrc6c        | 1103.07 | 0.10623  | 0.44118  | 0.55648  | 1061.79 | 1195.9  | 1174.84 | 1204.65 | 1011.29 | 969.93  |
| ENSMUSG00000025572 | 17_Tmc6          | 1076.62 | 1.27207  | 2.36E-09 | 4.91E-08 | 1314.44 | 1535.49 | 1717.44 | 732.169 | 432.128 | 728.08  |
| ENSMUSG00000025573 | 4_6030468B19Rik  | 0.64156 | 2.79342  | 0.35281  | NA       | 1.73638 | 0.91781 | 1.19515 | 0       | 0       | 0       |
| ENSMUSG00000025574 | 13_Tk1           | 604.777 | 1.28522  | 2.82E-15 | 2.80E-13 | 894.234 | 778.299 | 898.756 | 357.067 | 297.648 | 402.66  |
| ENSMUSG00000025575 | 14_Cant1         | 1651.64 | 0.73533  | 0.00019  | 0.00087  | 1745.06 | 2005.41 | 2440.5  | 1436.38 | 922.53  | 1359.93 |
| ENSMUSG00000025576 | 17_Rbfox3        | 14.4933 | -1.49683 | 0.052    | 0.10014  | 3.47275 | 15.6027 | 3.58546 | 28.8539 | 21.5167 | 13.9285 |
| ENSMUSG00000025577 | 7_Cbx2           | 196.293 | 0.77255  | 0.00035  | 0.00147  | 224.861 | 240.465 | 277.276 | 157.795 | 116.549 | 160.811 |
| ENSMUSG00000025578 | 9_Cbx8           | 142.11  | 0.83081  | 0.00223  | 0.00712  | 140.647 | 188.15  | 216.323 | 88.3652 | 88.7565 | 130.421 |
| ENSMUSG00000025579 | 14_Gaa           | 1436.12 | 0.71573  | 0.0019   | 0.00622  | 1559.27 | 2115.54 | 1680.39 | 1395.81 | 717.224 | 1148.47 |
| ENSMUSG00000025580 | 15_Eif4a3        | 1802.4  | 0.46385  | 0.00076  | 0.00286  | 1995.97 | 1984.3  | 2287.52 | 1458.93 | 1361.83 | 1725.87 |
| ENSMUSG00000025582 | 4_Nptx1          | 18.1994 | -1.14515 | 0.15832  | 0.24997  | 16.4956 | 9.17806 | 8.36608 | 55.9045 | 11.6549 | 7.59736 |
| ENSMUSG00000025583 | 15_Rptor         | 950.776 | 0.73169  | 2.60E-05 | 0.00016  | 1119.96 | 1179.38 | 1260.89 | 834.961 | 552.263 | 757.204 |
| ENSMUSG00000025584 | 17_Pde8a         | 363.664 | 0.04242  | 0.78297  | 0.849    | 366.376 | 341.424 | 400.377 | 376.003 | 355.923 | 341.881 |
| ENSMUSG00000025586 | 16_Cpeb1         | 517.18  | -0.36854 | 0.04271  | 0.08506  | 406.312 | 562.615 | 384.84  | 570.767 | 608.744 | 569.802 |
| ENSMUSG00000025588 | 3_Nat1           | 8.64783 | -1.12955 | 0.17265  | 0.26789  | 4.34094 | 8.26025 | 3.58546 | 17.132  | 7.17224 | 11.396  |
| ENSMUSG00000025591 | 5_Tma16          | 274.508 | -0.19542 | 0.22772  | 0.33352  | 250.038 | 260.657 | 256.958 | 273.211 | 304.82  | 301.362 |
| ENSMUSG00000025592 | 17_Dach2         | 34.6465 | -1.30179 | 0.00443  | 0.01275  | 18.232  | 29.3698 | 11.9515 | 56.8062 | 42.1369 | 49.3828 |
| ENSMUSG00000025597 | 13_Kihl4         | 43.0478 | -1.42296 | 0.00105  | 0.00372  | 32.123  | 21.1095 | 16.7322 | 70.3315 | 76.2051 | 41.7855 |
| ENSMUSG00000025602 | 13_Zfp202        | 182.012 | -0.0342  | 0.86737  | 0.91015  | 180.583 | 186.315 | 172.102 | 154.188 | 202.616 | 196.265 |
| ENSMUSG00000025607 | 15_Copg2         | 5165.16 | -0.22668 | 0.0887   | 0.15577  | 4783.72 | 4473.38 | 5023.23 | 4718.52 | 6019.31 | 5972.79 |
| ENSMUSG00000025608 | 9_Podxl          | 1033.42 | -0.5941  | 0.00237  | 0.0075   | 707.574 | 1059.15 | 703.946 | 1433.68 | 1193.28 | 1102.88 |
| ENSMUSG00000025609 | 15_Mkln1         | 2620.02 | -0.42482 | 0.00166  | 0.00555  | 2298.96 | 2113.71 | 2298.28 | 2557.18 | 3339.58 | 3112.39 |
| ENSMUSG00000025610 | 7_Map3k7cl       | 12.7627 | -0.96499 | 0.15435  | 0.24485  | 7.8137  | 11.9315 | 5.97577 | 19.8371 | 10.7584 | 20.2596 |
| ENSMUSG00000025612 | 5_Bach1          | 1403.38 | 0.41355  | 0.00089  | 0.00324  | 1589.65 | 1505.2  | 1713.85 | 1105.47 | 1203.14 | 1302.95 |
| ENSMUSG00000025613 | 13_Cct8          | 4647.38 | -0.26242 | 0.07624  | 0.13779  | 4472.04 | 3874.06 | 4331.24 | 4162.18 | 5777.24 | 5267.5  |
| ENSMUSG00000025616 | 14_Uspl6         | 1042.34 | -0.38458 | 0.00384  | 0.01132  | 903.784 | 874.669 | 934.611 | 1048.66 | 1307.14 | 1185.19 |
| ENSMUSG00000025626 | 16_Phf6          | 775.619 | -0.28363 | 0.09556  | 0.16562  | 716.255 | 675.505 | 707.531 | 704.216 | 1037.29 | 812.918 |
| ENSMUSG00000025630 | 8_Hprt           | 1477.66 | -0.38691 | 0.00519  | 0.01455  | 1375.21 | 1179.38 | 1287.18 | 1462.53 | 1852.23 | 1709.41 |
| ENSMUSG00000025645 | 8_Ccdc51         | 1405.16 | 0.41364  | 0.00774  | 0.02034  | 1541.03 | 1411.58 | 1864.44 | 1354.33 | 1079.42 | 1180.12 |
| ENSMUSG00000025646 | 8_Atrip          | 175.06  | 0.76498  | 0.00019  | 0.00088  | 225.729 | 232.205 | 203.176 | 146.975 | 115.652 | 126.623 |
| ENSMUSG00000025647 | 16_Shisa5        | 5093.1  | 1.19807  | 3.99E-17 | 5.13E-15 | 6563.5  | 6301.65 | 8417.47 | 3105.4  | 2901.17 | 3269.4  |
| ENSMUSG00000025648 | 17_Pfkfb4        | 1382.6  | 0.89443  | 3.51E-09 | 6.91E-08 | 1703.39 | 1714.46 | 1975.59 | 1057.68 | 802.395 | 1042.1  |
| ENSMUSG00000025650 | 12_Col7a1        | 1743.59 | 1.82025  | 2.58E-21 | 5.62E-19 | 2271.18 | 2675.4  | 3204.21 | 733.07  | 620.399 | 957.268 |
| ENSMUSG00000025651 | 14_Uqrcr1        | 4321.97 | 0.70616  | 3.02E-06 | 2.39E-05 | 4801.08 | 5310.42 | 5966.21 | 3738.39 | 2742.49 | 3373.23 |
| ENSMUSG00000025656 | 17_Arhgef9       | 432.801 | -0.77261 | 4.68E-06 | 3.49E-05 | 319.493 | 334.081 | 305.959 | 620.36  | 558.539 | 458.374 |
| ENSMUSG00000025658 | 16_Cnksr2        | 36.6955 | -1.37342 | 0.00088  | 0.00321  | 20.8365 | 24.7808 | 15.537  | 55.0028 | 60.9641 | 43.0517 |
| ENSMUSG00000025665 | 16_Rps6ka6       | 166.697 | -0.57602 | 0.00505  | 0.0142   | 132.833 | 139.506 | 129.077 | 176.73  | 223.236 | 198.798 |
| ENSMUSG00000025666 | 16_Tmem47        | 523.12  | -1.41011 | 6.61E-10 | 1.66E-08 | 301.261 | 346.931 | 209.152 | 873.733 | 823.912 | 583.731 |
| ENSMUSG00000025701 | 12_Alox5         | 45.4267 | -0.22078 | 0.58086  | 0.68433  | 52.0913 | 41.3013 | 32.2692 | 65.823  | 36.7578 | 44.3179 |
| ENSMUSG00000025702 | 15_March8        | 2735.24 | -0.167   | 0.08937  | 0.15677  | 2690.52 | 2539.57 | 2500.26 | 2937.69 | 2828.55 | 2914.85 |
| ENSMUSG00000025716 | 14_Myo3a         | 0.15297 | 0.92709  | 0.82027  | NA       | 0       | 0.91781 | 0       | 0       | 0       | 0       |
| ENSMUSG00000025722 | 16_Wdr73         | 479.312 | 0.36664  | 0.01248  | 0.0304   | 509.627 | 519.478 | 590.406 | 401.25  | 404.335 | 450.777 |
| ENSMUSG00000025723 | 12_Nmb           | 19.6837 | -0.43829 | 0.43311  | 0.54842  | 20.8365 | 13.7671 | 15.537  | 32.4607 | 15.241  | 20.2596 |
| ENSMUSG00000025724 | 12_Sec11a        | 1365.75 | -0.20572 | 0.1174   | 0.19623  | 1297.07 | 1209.67 | 1297.94 | 1276.79 | 1521.41 | 1591.65 |
| ENSMUSG00000025726 | 11_Slc28a1       | 1.30612 | 0.65818  | 0.73386  | NA       | 1.73638 | 1.83561 | 1.19515 | 1.80337 | 0       | 1.26623 |
| ENSMUSG00000025727 | 8_A930017K11Rik  | 3.25164 | 0.80943  | 0.51746  | 0.62746  | 3.47275 | 1.83561 | 7.17092 | 2.70506 | 1.79306 | 2.53245 |
| ENSMUSG00000025728 | 14_Pigq          | 2378.35 | 0.69594  | 2.68E-09 | 5.46E-08 | 2788.62 | 2871.81 | 3163.57 | 1932.31 | 1676.51 | 1837.3  |
| ENSMUSG00000025730 | 14_Rab40c        | 1093.84 | 0.77952  | 1.45E-07 | 1.74E-06 | 1300.55 | 1384.05 | 1462.87 | 921.523 | 684.949 | 809.119 |
| ENSMUSG00000025731 | 15_0610011F06Rik | 361.841 | 0.24415  | 0.23216  | 0.33844  | 369.848 | 416.684 | 390.815 | 413.874 | 258.201 | 321.622 |
| ENSMUSG00000025732 | 5_Fam195a        | 77.5702 | 0.5604   | 0.13575  | 0.21999  | 91.1598 | 82.6025 | 103.978 | 95.5787 | 37.6543 | 54.4478 |
| ENSMUSG00000025733 | 17_Rhot2         | 951.579 | 0.55473  | 9.23E-05 | 0.00046  | 1088.71 | 1177.54 | 1130.62 | 870.126 | 668.812 | 773.665 |
| ENSMUSG00000025735 | 12_Rhbd1         | 16.2407 | 0.33696  | 0.66517  | 0.75643  | 6.94551 | 28.452  | 19.1225 | 26.1489 | 5.37918 | 11.396  |
| ENSMUSG00000025736 | 14_Mjmd8         | 1271.98 | 0.39546  | 0.0121   | 0.02967  | 1409.07 | 1512.54 | 1413.87 | 1294.82 | 897.427 | 1104.15 |
| ENSMUSG00000025737 | 5_Wdr24          | 493.542 | 0.79206  | 2.94E-06 | 2.34E-05 | 560.85  | 647.971 | 668.091 | 398.545 | 302.131 | 383.667 |
| ENSMUSG00000025738 | 7_Fbxl16         | 59.0539 | -0.23821 | 0.59454  | 0.69649  | 46.014  | 76.1779 | 40.6352 | 100.087 | 54.6884 | 36.7206 |
| ENSMUSG00000025739 | 13_Gng13         | 21.592  | -1.05373 | 0.08931  | 0.15671  | 21.7047 | 11.9315 | 8.36608 | 45.986  | 25.1029 | 16.4609 |

|                     |                  |         |          |          |          |         |         |         |         |         |         |
|---------------------|------------------|---------|----------|----------|----------|---------|---------|---------|---------|---------|---------|
| ENSMUSG000000025742 | 5_Prps2          | 1152.49 | -0.46435 | 0.00041  | 0.00168  | 1008.83 | 937.079 | 959.709 | 1192.03 | 1480.17 | 1337.14 |
| ENSMUSG000000025743 | 14_Sdc3          | 1923.89 | 0.04575  | 0.81014  | 0.86898  | 2027.22 | 2244.03 | 1591.95 | 2374.14 | 1695.34 | 1610.64 |
| ENSMUSG000000025745 | 11_Hadha         | 3641.7  | 0.13921  | 0.13869  | 0.22393  | 3733.21 | 3775.85 | 3942.81 | 3416.49 | 3436.4  | 3545.44 |
| ENSMUSG000000025746 | 11_Il6           | 17.6588 | 3.6985   | 8.78E-05 | 0.00044  | 38.2003 | 9.17806 | 51.3916 | 1.80337 | 5.37918 | 0       |
| ENSMUSG000000025747 | 12_Tyms          | 424.934 | 0.04884  | 0.77037  | 0.83872  | 469.69  | 381.807 | 444.597 | 365.183 | 452.748 | 435.582 |
| ENSMUSG000000025754 | 11_Agbl1         | 3.32454 | -2.63265 | 0.06633  | 0.12282  | 1.73638 | 0.91781 | 0       | 8.11517 | 5.37918 | 3.79868 |
| ENSMUSG000000025757 | 12_Hspa4l        | 890.897 | -0.35858 | 0.01973  | 0.04475  | 761.401 | 866.408 | 714.702 | 951.278 | 1153.83 | 897.755 |
| ENSMUSG000000025758 | 10_Plk4          | 276.23  | 0.01402  | 0.94172  | 0.96205  | 308.207 | 244.136 | 279.666 | 232.635 | 291.372 | 301.362 |
| ENSMUSG000000025759 | 11_Mfsd8         | 430.29  | -0.37831 | 0.00684  | 0.01833  | 359.43  | 381.807 | 381.254 | 463.466 | 493.092 | 502.692 |
| ENSMUSG000000025762 | 14_Larp1b        | 474.214 | -0.00205 | 0.99107  | 0.99411  | 459.272 | 416.684 | 546.185 | 393.135 | 529.85  | 500.16  |
| ENSMUSG000000025764 | 14_Jade1         | 1147.28 | -0.07913 | 0.47141  | 0.58449  | 1112.15 | 1115.13 | 1119.86 | 1214.57 | 1121.56 | 1200.38 |
| ENSMUSG000000025766 | 14_D3ErtD751e    | 269.939 | -0.90533 | 1.84E-07 | 2.13E-06 | 178.847 | 197.328 | 187.639 | 319.197 | 384.612 | 352.011 |
| ENSMUSG000000025776 | 13_Crispld1      | 118.12  | -1.08942 | 0.00018  | 0.00082  | 85.9507 | 90.8628 | 49.0013 | 173.124 | 173.03  | 136.753 |
| ENSMUSG000000025777 | 8_Gdap1          | 16.4858 | -1.44149 | 0.05665  | 0.10753  | 10.4183 | 14.6849 | 1.19515 | 35.1657 | 19.7237 | 17.7272 |
| ENSMUSG000000025779 | 10_Ly96          | 114.935 | -0.45229 | 0.09329  | 0.16233  | 102.446 | 97.2874 | 90.8317 | 96.4803 | 150.617 | 151.947 |
| ENSMUSG000000025780 | 7_Ilih5          | 1573.77 | -0.72868 | 5.78E-09 | 1.07E-07 | 1245.85 | 1264.74 | 1040.98 | 1892.64 | 2002.85 | 1995.57 |
| ENSMUSG000000025781 | 14_Atp5c1        | 4387.74 | -0.43622 | 5.65E-05 | 0.0003   | 3978.04 | 3601.47 | 3608.17 | 4779.83 | 5395.32 | 4963.61 |
| ENSMUSG000000025782 | 12_Taf3          | 250.847 | 0.02603  | 0.8816   | 0.92004  | 233.543 | 253.314 | 272.495 | 252.472 | 228.615 | 264.641 |
| ENSMUSG000000025784 | 4_Clec3b         | 499.518 | 0.25608  | 0.33068  | 0.44736  | 537.409 | 552.519 | 541.405 | 648.312 | 280.614 | 436.848 |
| ENSMUSG000000025785 | 4_Exosc7         | 739.666 | 0.13169  | 0.36248  | 0.47963  | 774.424 | 708.546 | 836.608 | 702.413 | 634.744 | 781.262 |
| ENSMUSG000000025786 | 15_Zdhhc3        | 3095.23 | 0.14072  | 0.24515  | 0.35346  | 3282.62 | 3143.48 | 3310.58 | 2598.66 | 3003.38 | 3232.68 |
| ENSMUSG000000025787 | 5_Tgm4           | 11.8826 | -0.918   | 0.22771  | 0.33352  | 5.20913 | 14.6849 | 4.78062 | 18.0337 | 19.7237 | 8.86359 |
| ENSMUSG000000025789 | 9_St8sia2        | 18.9039 | -1.2326  | 0.05145  | 0.09928  | 5.20913 | 20.1917 | 8.36608 | 29.7556 | 23.3098 | 26.5908 |
| ENSMUSG000000025790 | 14_Slco3a1       | 2518.73 | 0.414    | 0.002    | 0.0065   | 2727.85 | 2777.28 | 3126.52 | 2083.8  | 1939.2  | 2457.75 |
| ENSMUSG000000025791 | 18_Pgm2          | 895.122 | -0.14087 | 0.33565  | 0.45231  | 783.974 | 918.723 | 852.145 | 1065.79 | 840.946 | 909.151 |
| ENSMUSG000000025792 | 9_Slct5a10       | 659.419 | 1.4618   | 8.31E-13 | 4.61E-11 | 847.352 | 987.559 | 1067.27 | 415.677 | 253.718 | 384.933 |
| ENSMUSG000000025793 | 15_Hgs           | 1523.69 | 1.27746  | 1.73E-13 | 1.13E-11 | 1823.2  | 2136.65 | 2512.21 | 987.346 | 727.983 | 954.735 |
| ENSMUSG000000025794 | 8_Rpl14          | 13013.1 | 0.14468  | 0.14688  | 0.23479  | 13654.9 | 13277.9 | 14061   | 11929.3 | 11869.2 | 13286.5 |
| ENSMUSG000000025795 | 7_Rassf3         | 1695.22 | -0.15943 | 0.10923  | 0.18517  | 1628.72 | 1604.32 | 1571.63 | 1797.96 | 1792.16 | 1776.52 |
| ENSMUSG000000025804 | 4_Ccr1           | 82.8255 | 1.60201  | 0.00011  | 0.00055  | 192.738 | 66.082  | 114.735 | 32.4607 | 46.6196 | 44.3179 |
| ENSMUSG000000025809 | 15_Iltgb1        | 8035.54 | -0.47573 | 3.34E-06 | 2.61E-05 | 6914.25 | 6490.72 | 6763.38 | 8933.9  | 10075.2 | 9035.8  |
| ENSMUSG000000025810 | 8_Nrp1           | 1336.37 | -0.97997 | 1.98E-08 | 3.08E-07 | 884.684 | 1070.16 | 742.191 | 1907.06 | 1921.27 | 1492.88 |
| ENSMUSG000000025812 | 17_Pard3         | 4192    | 0.4008   | 0.00504  | 0.0142   | 4590.11 | 4549.56 | 5170.24 | 3215.41 | 3355.71 | 4270.98 |
| ENSMUSG000000025813 | 13_Homer2        | 4820.55 | 0.01647  | 0.89876  | 0.9317   | 4853.17 | 4567    | 5122.43 | 4321.78 | 4566.03 | 5492.89 |
| ENSMUSG000000025815 | 13_Dhtkd1        | 122.55  | -0.55086 | 0.03174  | 0.06659  | 78.137  | 120.233 | 100.393 | 162.303 | 142.548 | 131.688 |
| ENSMUSG000000025816 | 15_Sec61a2       | 519.417 | -0.22236 | 0.14706  | 0.23504  | 500.945 | 479.095 | 458.939 | 536.503 | 638.33  | 502.692 |
| ENSMUSG000000025817 | 12_Nudt5         | 872.964 | -0.14266 | 0.26714  | 0.37842  | 858.638 | 835.203 | 794.777 | 831.354 | 980.804 | 937.008 |
| ENSMUSG000000025821 | 9_Zfp282         | 1348.94 | 0.94949  | 5.24E-10 | 1.35E-08 | 1624.38 | 1684.17 | 2023.4  | 966.607 | 787.154 | 1007.92 |
| ENSMUSG000000025823 | 9_Pdia4          | 3232.03 | 0.36997  | 0.01594  | 0.0375   | 3563.05 | 3428.92 | 3939.23 | 2292.99 | 2885.93 | 3282.06 |
| ENSMUSG000000025825 | 12_Iscu          | 878.751 | -0.03615 | 0.77818  | 0.84494  | 869.057 | 880.176 | 854.535 | 985.542 | 837.36  | 845.84  |
| ENSMUSG000000025854 | 15_Fam20c        | 83.9087 | 0.09735  | 0.73856  | 0.81507  | 91.1598 | 86.2737 | 82.4656 | 97.382  | 60.0675 | 86.1034 |
| ENSMUSG000000025855 | 13_Prkar1b       | 183.693 | -0.66826 | 0.01125  | 0.02789  | 142.383 | 169.794 | 113.54  | 288.539 | 216.96  | 170.941 |
| ENSMUSG000000025856 | 15_Pdgfra        | 573.756 | 0.01345  | 0.94185  | 0.96209  | 509.627 | 627.779 | 592.796 | 701.511 | 490.402 | 520.419 |
| ENSMUSG000000025857 | 10_Dnaaf5        | 404.968 | 1.11513  | 4.76E-13 | 2.82E-11 | 526.122 | 521.314 | 615.504 | 260.587 | 249.235 | 257.044 |
| ENSMUSG000000025858 | 12_Get4          | 1154.3  | 0.59829  | 0.00027  | 0.00117  | 1345.69 | 1284.01 | 1541.75 | 1078.42 | 756.672 | 919.281 |
| ENSMUSG000000025860 | 14_Xiap          | 2955.85 | -0.49268 | 0.00024  | 0.00104  | 2488.23 | 2394.55 | 2485.92 | 3068.44 | 4020.94 | 3277    |
| ENSMUSG000000025862 | 14_Stag2         | 3445.58 | -0.60254 | 6.87E-06 | 4.87E-05 | 2936.21 | 2712.12 | 2560.02 | 3677.07 | 4739.96 | 4048.13 |
| ENSMUSG000000025867 | 8_Cplx2          | 344.792 | -0.54596 | 0.03232  | 0.06757  | 290.843 | 301.958 | 248.592 | 578.882 | 349.647 | 298.83  |
| ENSMUSG000000025868 | 6_Higd2a         | 881.576 | 0.22087  | 0.11868  | 0.19803  | 913.334 | 1020.6  | 913.098 | 921.523 | 739.638 | 781.262 |
| ENSMUSG000000025869 | 11_Nop16         | 481.516 | 0.17521  | 0.22728  | 0.33295  | 498.34  | 487.355 | 546.185 | 457.155 | 415.094 | 484.965 |
| ENSMUSG000000025870 | 10_Arl10         | 151.479 | 0.46945  | 0.04904  | 0.09552  | 171.901 | 182.643 | 173.297 | 157.795 | 100.411 | 122.824 |
| ENSMUSG000000025871 | 18_4833439L19Rik | 2226.87 | -0.08989 | 0.38228  | 0.49986  | 2060.21 | 2250.46 | 2162.03 | 2364.22 | 2226.09 | 2298.2  |
| ENSMUSG000000025872 | 5_Thoc3          | 740.68  | 0.15631  | 0.23634  | 0.34332  | 777.897 | 726.902 | 838.998 | 748.399 | 685.846 | 666.035 |
| ENSMUSG000000025873 | 15_Faf2          | 2254.92 | 0.15366  | 0.18807  | 0.28698  | 2306.78 | 2304.61 | 2512.21 | 2030.6  | 2031.54 | 2343.79 |
| ENSMUSG000000025875 | 14_Tspan17       | 640.178 | 0.51959  | 0.00432  | 0.01248  | 673.714 | 740.669 | 848.559 | 608.638 | 418.68  | 550.809 |
| ENSMUSG000000025876 | 15_Unc5a         | 1496.46 | 2.01032  | 1.47E-15 | 1.53E-13 | 1937.8  | 2311.03 | 2943.66 | 726.758 | 363.095 | 696.425 |
| ENSMUSG000000025877 | 14_HK3           | 62.054  | 3.25542  | 8.49E-11 | 2.79E-09 | 158.878 | 67.9176 | 111.149 | 17.132  | 13.448  | 3.79868 |
| ENSMUSG000000025878 | 16_Uimc1         | 1817.4  | 0.41605  | 0.00076  | 0.00285  | 1979.47 | 2083.42 | 2172.79 | 1641.97 | 1647.82 | 1378.92 |
| ENSMUSG000000025880 | 11_Smad7         | 235.215 | 0.35663  | 0.1265   | 0.20817  | 236.147 | 264.328 | 292.813 | 267.801 | 164.065 | 186.135 |
| ENSMUSG000000025885 | 18_Myo5b         | 2966.54 | 0.52415  | 0.0003   | 0.00129  | 3300.85 | 3437.18 | 3758.76 | 2311.92 | 2114.92 | 2875.6  |
| ENSMUSG000000025887 | 10_Casp12        | 289.606 | 0.53551  | 0.00364  | 0.01081  | 355.957 | 297.369 | 375.278 | 210.093 | 260.89  | 238.051 |
| ENSMUSG000000025888 | 5_Casp1          | 249.756 | 1.03619  | 5.21E-05 | 0.00028  | 358.562 | 256.068 | 393.206 | 123.531 | 208.892 | 158.278 |
| ENSMUSG000000025889 | 13_Snca          | 109.218 | -1.65834 | 3.68E-07 | 3.87E-06 | 50.3549 | 64.2464 | 43.0255 | 222.716 | 162.272 | 112.694 |
| ENSMUSG000000025892 | 15_Gria4         | 62.676  | -2.06782 | 6.81E-08 | 9.01E-07 | 26.9138 | 28.452  | 16.7322 | 120.826 | 114.756 | 68.3763 |
| ENSMUSG000000025893 | 7_Kbtbd3         | 104.573 | -0.90759 | 0.0008   | 0.00295  | 88.5552 | 67.9176 | 60.9529 | 115.416 | 151.514 | 143.084 |
| ENSMUSG000000025894 | 10_Aasdhppt      | 467.735 | -0.54461 | 0.00058  | 0.00226  | 391.553 | 368.958 | 381.254 | 495.025 | 636.537 | 533.082 |
| ENSMUSG000000025898 | 5_Cwf19l2        | 645.264 | -0.46176 | 0.00048  | 0.00193  | 532.199 | 542.423 | 554.552 | 697.905 | 811.36  | 733.145 |
| ENSMUSG000000025899 | 12_Alkbh8        | 271.927 | -0.57278 | 0.00132  | 0.00457  | 223.993 | 206.506 | 225.884 | 293.048 | 369.371 | 312.758 |
| ENSMUSG000000025900 | 10_Rp1           | 317.864 | -2.56613 | 0.00497  | 0.01401  | 144.987 | 102.794 | 27.4885 | 860.208 | 631.158 | 104.551 |
| ENSMUSG000000025902 | 13_Sox17         | 28.6276 | -0.06146 | 0.89079  | 0.92638  | 23.4411 | 36.7122 | 23.9031 | 27.0506 | 34.0682 | 26.5908 |
| ENSMUSG000000025903 | 14_Lypla1        | 1946.36 | -0.21057 | 0.07049  | 0.12922  | 1771.97 | 1670.41 | 1973.2  | 2045.92 | 2176.78 | 2039.89 |
| ENSMUSG000000025905 | 13_Oprk1         | 5.75142 | -1.65295 | 0.12122  | 0.20144  | 5.20913 | 1.83561 | 1.19515 | 9.91854 | 12.5514 | 3.79868 |
| ENSMUSG000000025907 | 14_Rb1ccc1       | 1983.57 | -0.47606 | 0.00026  | 0.00115  | 1608.75 | 1558.43 | 1811.85 | 2078.39 | 2547.04 | 2296.94 |
| ENSMUSG000000025909 | 16_Sntg1         | 31.0912 | -1.61219 | 0.00249  | 0.00785  | 10.4183 | 24.7808 | 10.7564 | 52.2978 | 59.171  | 29.1232 |
| ENSMUSG000000025911 | 12_Adhfe1        | 152.452 | -1.01306 | 0.00014  | 0.00068  | 105.051 | 116.561 | 81.2705 | 260.587 | 189.168 | 162.077 |
| ENSMUSG000000025912 | 16_Mybl1         | 129.996 | -0.63715 | 0.07674  | 0.13857  | 87.687  | 97.2874 | 120.711 | 85.6601 | 236.684 | 151.947 |
| ENSMUSG000000025915 | 14_Sgk3          | 2922.63 | -0.41272 | 0.00322  | 0.00977  | 2733.93 | 2299.1  | 2488.31 | 2841.21 | 3641.71 | 3531.51 |
| ENSMUSG000000025916 | 10_Ppp1r42       | 4.67091 | -2.64627 | 0.03529  | 0.07269  | 0.86819 | 1.83561 | 1.19515 | 13.5253 | 8.06878 | 2.53245 |
| ENSMUSG000000025917 | 9_Cops5          | 1863.39 | -0.22329 | 0.0568   | 0.10777  | 1772.84 | 1625.43 | 1760.46 | 1850.26 | 2166.91 | 2004.44 |

|                     |                 |         |          |          |          |         |         |         |         |         |         |
|---------------------|-----------------|---------|----------|----------|----------|---------|---------|---------|---------|---------|---------|
| ENSMUSG000000025920 | 19_Stau2        | 702.865 | -0.5251  | 1.76E-05 | 0.00011  | 557.377 | 596.574 | 574.869 | 798.893 | 843.635 | 845.84  |
| ENSMUSG000000025921 | 7_Rdh10         | 1542.7  | -1.00611 | 3.87E-08 | 5.48E-07 | 1126.91 | 1111.46 | 837.803 | 2434.55 | 2094.3  | 1651.16 |
| ENSMUSG000000025925 | 14_Terf1        | 483.274 | -0.07305 | 0.6927   | 0.77962  | 494.867 | 414.848 | 503.16  | 394.037 | 555.849 | 536.88  |
| ENSMUSG000000025927 | 13_Tfap2b       | 1783.51 | -0.43034 | 0.00085  | 0.00313  | 1542.77 | 1675    | 1339.77 | 2051.33 | 2156.16 | 1936.06 |
| ENSMUSG000000025930 | 6_Msc           | 8.23543 | -0.7578  | 0.33245  | 0.44911  | 6.94551 | 5.50683 | 5.97577 | 13.5253 | 9.86184 | 7.59736 |
| ENSMUSG000000025931 | 15_Paqr8        | 1333.3  | 0.22524  | 0.08728  | 0.15363  | 1360.45 | 1369.37 | 1581.19 | 1169.49 | 1161.9  | 1357.4  |
| ENSMUSG000000025932 | 14_Eya1         | 317.706 | -1.22791 | 4.61E-05 | 0.00025  | 171.901 | 277.177 | 120.711 | 544.618 | 462.61  | 329.219 |
| ENSMUSG000000025933 | 15_Tmem14a      | 118.566 | -0.957   | 0.00015  | 0.0007   | 86.8188 | 89.9449 | 64.5383 | 145.171 | 179.306 | 145.616 |
| ENSMUSG000000025934 | 15_Gsta3        | 5789.48 | -0.57891 | 6.01E-08 | 8.04E-07 | 4762.01 | 4554.15 | 4613.29 | 6370.41 | 7475.27 | 6961.72 |
| ENSMUSG000000025935 | 10_Tram1        | 2475.93 | -0.27905 | 0.01058  | 0.02652  | 2325.88 | 2142.16 | 2243.3  | 2524.72 | 2868    | 2751.51 |
| ENSMUSG000000025937 | 6_Lactb2        | 646.385 | -0.3603  | 0.0138   | 0.03311  | 593.841 | 555.272 | 548.576 | 635.688 | 804.188 | 740.743 |
| ENSMUSG000000025938 | 16_Slco5a1      | 31.5745 | -1.20377 | 0.00945  | 0.02406  | 18.232  | 20.1917 | 19.1225 | 63.118  | 35.8612 | 32.9219 |
| ENSMUSG000000025939 | 17_Ube2w        | 683.851 | -0.73216 | 4.93E-08 | 6.77E-07 | 533.068 | 507.546 | 500.77  | 779.056 | 921.633 | 861.034 |
| ENSMUSG000000025940 | 6_Tmem70        | 416.637 | -0.25861 | 0.08118  | 0.14505  | 367.244 | 372.629 | 399.181 | 427.399 | 493.988 | 439.381 |
| ENSMUSG000000025945 | 11_Crygf        | 361.425 | -0.35919 | 0.82091  | 0.87676  | 142.383 | 792.066 | 15.537  | 1038.74 | 79.7912 | 100.032 |
| ENSMUSG000000025946 | 13_Pth2r        | 0.65544 | -1.52662 | 0.57491  | NA       | 0.86819 | 0       | 0       | 0.90169 | 0.89653 | 1.26623 |
| ENSMUSG000000025949 | 15_Pikfyve      | 1045.95 | -0.33908 | 0.01584  | 0.03733  | 957.612 | 922.395 | 890.39  | 1018    | 1322.38 | 1164.93 |
| ENSMUSG000000025950 | 16_Idh1         | 2645.19 | -0.31834 | 0.0052   | 0.01457  | 2457.84 | 2266.98 | 2338.92 | 2729.4  | 3202.41 | 2875.6  |
| ENSMUSG000000025952 | 15_Crycg        | 2269.07 | -0.52316 | 0.7132   | 0.79526  | 1044.43 | 4361.41 | 180.468 | 6557.06 | 507.436 | 963.599 |
| ENSMUSG000000025955 | 13_Akr1cl       | 4.68258 | -0.39468 | 0.70145  | 0.78662  | 2.60457 | 3.67122 | 5.97577 | 3.60674 | 7.17224 | 5.06491 |
| ENSMUSG000000025956 | 10_Mettl21a     | 432.525 | -0.18478 | 0.19722  | 0.29768  | 421.071 | 403.834 | 389.62  | 440.924 | 493.988 | 445.712 |
| ENSMUSG000000025958 | 14_Creb1        | 1596.04 | -0.38394 | 0.00248  | 0.00781  | 1389.1  | 1326.23 | 1440.16 | 1630.25 | 2012.71 | 1777.78 |
| ENSMUSG000000025959 | 13_Klf7         | 774.35  | 0.12157  | 0.32488  | 0.44096  | 853.429 | 775.546 | 792.387 | 754.711 | 764.741 | 705.288 |
| ENSMUSG000000025961 | 1_4933402D24Rik | 3.65652 | -2.66887 | 0.05515  | 0.10514  | 0       | 1.83561 | 1.19515 | 4.50843 | 8.06878 | 6.33113 |
| ENSMUSG000000025962 | 15_Fastkd2      | 387.286 | -0.50069 | 0.00468  | 0.01334  | 335.121 | 324.903 | 302.374 | 405.758 | 541.504 | 414.056 |
| ENSMUSG000000025963 | 5_Mdh1b         | 0       | NA       | NA       | NA       | 0       | 0       | 0       | 0       | 0       | 0       |
| ENSMUSG000000025964 | 15_Adam23       | 73.3562 | -1.21387 | 0.00505  | 0.0142   | 39.9367 | 70.671  | 21.5128 | 91.9719 | 136.273 | 79.7723 |
| ENSMUSG000000025967 | 16_Eef1b2       | 10112.2 | -0.24249 | 0.01705  | 0.03966  | 9458.04 | 8784.32 | 9550.48 | 10234.1 | 11273   | 11373.3 |
| ENSMUSG000000025968 | 15_Ndufs1       | 2100.06 | -0.54204 | 3.24E-06 | 2.54E-05 | 1700.78 | 1753.01 | 1676.8  | 2313.72 | 2745.18 | 2410.9  |
| ENSMUSG000000025969 | 15_Nrp2         | 1367.87 | -0.64856 | 4.09E-05 | 0.00023  | 1060.93 | 1173.87 | 962.099 | 1917.89 | 1703.41 | 1389.05 |
| ENSMUSG000000025971 | 6_9430016H08Rik | 282.499 | -0.15841 | 0.41485  | 0.531    | 278.688 | 250.561 | 271.3   | 238.045 | 333.509 | 322.888 |
| ENSMUSG000000025977 | 15_Boll         | 0       | NA       | NA       | NA       | 0       | 0       | 0       | 0       | 0       | 0       |
| ENSMUSG000000025978 | 14_Rfn2         | 167.314 | -0.68912 | 0.00196  | 0.0064   | 137.174 | 140.424 | 106.369 | 234.438 | 204.409 | 181.07  |
| ENSMUSG000000025979 | 13_Mob4         | 1558.64 | -0.436   | 0.00282  | 0.00873  | 1412.54 | 1218.85 | 1343.35 | 1535.57 | 2048.57 | 1792.98 |
| ENSMUSG000000025980 | 14_Hspd1        | 3625.6  | -0.19015 | 0.21095  | 0.31427  | 3406.77 | 3143.48 | 3610.56 | 3106.31 | 4316.79 | 4169.69 |
| ENSMUSG000000025981 | 13_Coq10b       | 1413.22 | -0.04773 | 0.73825  | 0.81483  | 1414.28 | 1308.79 | 1446.14 | 1208.26 | 1582.38 | 1519.47 |
| ENSMUSG000000025982 | 13_Sf3b1        | 10176.8 | -0.17003 | 0.26118  | 0.37165  | 9962.46 | 9209.26 | 9561.23 | 8565.11 | 12442.9 | 11320.1 |
| ENSMUSG000000025983 | 11_Ccdc150      | 8.30521 | -0.33348 | 0.69946  | 0.78499  | 11.2864 | 8.26025 | 2.39031 | 8.11517 | 13.448  | 6.33113 |
| ENSMUSG000000025986 | 6_Slc39a10      | 1269.71 | -0.40129 | 0.00098  | 0.00352  | 1067.87 | 1087.6  | 1127.03 | 1302.03 | 1514.24 | 1519.47 |
| ENSMUSG000000025991 | 8_Cps1          | 99.6015 | -0.15204 | 0.5773   | 0.68114  | 111.996 | 100.041 | 70.5141 | 104.596 | 112.963 | 97.4995 |
| ENSMUSG000000025993 | 15_Slc40a1      | 121.682 | -1.32017 | 1.66E-07 | 1.96E-06 | 85.0825 | 67.9176 | 54.9771 | 184.846 | 173.927 | 163.343 |
| ENSMUSG000000025995 | 16_Wdr75        | 745.925 | -0.29285 | 0.09589  | 0.16615  | 665.901 | 594.738 | 751.752 | 681.674 | 973.632 | 807.853 |
| ENSMUSG000000025997 | 15_Ikzf2        | 4943.62 | 0.02864  | 0.85846  | 0.90406  | 5221.29 | 4519.27 | 5235.97 | 3913.31 | 4964.99 | 5806.92 |
| ENSMUSG000000026000 | 16_Lanc1        | 3142.09 | 0.23815  | 0.00991  | 0.02506  | 3442.37 | 3366.51 | 3393.04 | 2854.74 | 2867.1  | 2928.78 |
| ENSMUSG000000026003 | 5_Acadl         | 2722.72 | 0.12117  | 0.31909  | 0.43463  | 2733.06 | 2648.79 | 3130.11 | 2408.4  | 2750.56 | 2665.41 |
| ENSMUSG000000026004 | 15_Kans1l1      | 1047.57 | -0.3578  | 0.02442  | 0.05361  | 974.976 | 854.477 | 925.049 | 958.492 | 1334.04 | 1238.37 |
| ENSMUSG000000026005 | 15_Rpe          | 847.446 | -0.26958 | 0.08185  | 0.14593  | 753.588 | 736.998 | 815.095 | 770.039 | 1045.35 | 963.599 |
| ENSMUSG000000026009 | 14_Icos         | 9.51288 | 1.66024  | 0.0498   | 0.09678  | 23.4411 | 9.17806 | 10.7564 | 7.21348 | 2.68959 | 3.79868 |
| ENSMUSG000000026011 | 13_Ctla4        | 6.80813 | 3.2241   | 0.00833  | 0.02168  | 26.0457 | 3.67122 | 7.17092 | 0.90169 | 1.79306 | 1.26623 |
| ENSMUSG000000026012 | 2_Cd28          | 10.0623 | 0.59213  | 0.41906  | 0.53489  | 16.4956 | 9.17806 | 10.7564 | 9.01685 | 9.86184 | 5.06491 |
| ENSMUSG000000026014 | 15_Raph1        | 913.886 | 0.05732  | 0.66479  | 0.75608  | 922.884 | 871.915 | 1001.54 | 811.517 | 942.254 | 933.209 |
| ENSMUSG000000026017 | 13_Carf         | 273.338 | -0.67514 | 0.00013  | 0.00065  | 213.574 | 214.767 | 203.176 | 302.065 | 381.025 | 325.42  |
| ENSMUSG000000026018 | 12_Ica1l        | 13.5515 | -0.70772 | 0.31091  | 0.42573  | 8.68188 | 4.58903 | 17.9273 | 18.9354 | 13.448  | 17.7272 |
| ENSMUSG000000026019 | 15_Wdr12        | 508.32  | -0.33332 | 0.04476  | 0.0884   | 487.922 | 390.985 | 470.891 | 499.534 | 632.054 | 568.536 |
| ENSMUSG000000026020 | 9_Nop58         | 1812.66 | -0.29495 | 0.08024  | 0.14372  | 1700.78 | 1429.94 | 1753.29 | 1577.95 | 2281.67 | 2132.33 |
| ENSMUSG000000026021 | 15_Sumo1        | 2973.22 | -0.49711 | 5.93E-05 | 0.00031  | 2602.83 | 2262.39 | 2532.53 | 3117.13 | 3723.29 | 3601.15 |
| ENSMUSG000000026023 | 16_Cdk15        | 64.081  | -1.5773  | 0.00065  | 0.00249  | 19.1001 | 56.9039 | 20.3176 | 116.317 | 102.204 | 69.6425 |
| ENSMUSG000000026024 | 14_Als2         | 636.69  | -0.03559 | 0.79932  | 0.86145  | 689.342 | 605.752 | 591.601 | 684.379 | 652.674 | 596.393 |
| ENSMUSG000000026027 | 13_Stradb       | 406.682 | -0.46704 | 0.00445  | 0.0128   | 365.507 | 349.684 | 308.35  | 423.792 | 528.057 | 464.705 |
| ENSMUSG000000026028 | 12_Trak2        | 1318.08 | -0.41604 | 0.00072  | 0.00271  | 1155.56 | 1173.87 | 1058.91 | 1602.3  | 1546.52 | 1371.32 |
| ENSMUSG000000026029 | 14_Casp8        | 1119.94 | 0.13011  | 0.40229  | 0.51991  | 1249.32 | 1014.18 | 1247.74 | 916.112 | 1184.32 | 1107.95 |
| ENSMUSG000000026031 | 15_Cflar        | 2674.48 | -0.05461 | 0.06677  | 0.70687  | 2568.1  | 2487.25 | 2818.17 | 2722.19 | 2797.18 | 2654.01 |
| ENSMUSG000000026032 | 8_Ndufb3        | 1153.42 | -0.40324 | 0.00038  | 0.00158  | 1048.77 | 937.997 | 993.173 | 1342.61 | 1308.93 | 1289.02 |
| ENSMUSG000000026034 | 17_Clk1         | 4133.79 | -0.55795 | 0.0002   | 0.00091  | 3388.54 | 3169.18 | 3476.7  | 4574.25 | 5954.76 | 4239.33 |
| ENSMUSG000000026035 | 15_Ppil3        | 346.852 | -0.38592 | 0.0316   | 0.06634  | 299.525 | 274.424 | 329.863 | 389.528 | 450.955 | 336.816 |
| ENSMUSG000000026036 | 17_Nif3l1       | 651.06  | -0.16018 | 0.2526   | 0.36183  | 598.182 | 628.697 | 617.895 | 610.441 | 752.189 | 698.957 |
| ENSMUSG000000026037 | 14_Orc2         | 966.109 | -0.55058 | 0.00067  | 0.00256  | 796.997 | 731.491 | 823.461 | 929.638 | 1313.42 | 1201.65 |
| ENSMUSG000000026039 | 9_Sgol2a        | 263.44  | -0.16302 | 0.48735  | 0.59935  | 271.743 | 193.657 | 279.666 | 224.52  | 265.373 | 345.68  |
| ENSMUSG000000026042 | 16_Col5a2       | 5951.27 | -0.00375 | 0.9782   | 0.98564  | 5911.49 | 6752.3  | 5164.26 | 5479.54 | 5892.9  | 6507.14 |
| ENSMUSG000000026043 | 18_Col3a1       | 11057   | 0.67458  | 3.09E-07 | 3.32E-06 | 15087.4 | 11939.7 | 13759.8 | 8969.07 | 7633.96 | 8952.22 |
| ENSMUSG000000026047 | 13_Kdelc1       | 355.769 | -0.4309  | 0.00555  | 0.01538  | 318.625 | 300.122 | 290.422 | 394.938 | 445.576 | 384.933 |
| ENSMUSG000000026048 | 16_Ercc5        | 994.604 | -0.11813 | 0.41524  | 0.5313   | 965.426 | 959.107 | 935.806 | 868.323 | 1095.56 | 1143.4  |
| ENSMUSG000000026049 | 11_Tex30        | 104.882 | -0.20904 | 0.41991  | 0.53582  | 90.2916 | 101.876 | 100.393 | 104.596 | 137.169 | 94.967  |
| ENSMUSG000000026051 | 8_1500015O10Rik | 334.486 | -0.75978 | 0.00389  | 0.01145  | 233.543 | 315.725 | 196.005 | 551.832 | 409.714 | 300.096 |
| ENSMUSG000000026058 | 11_Khdrbs2      | 10.7369 | -1.15282 | 0.18639  | 0.28483  | 13.0228 | 5.50683 | 1.19515 | 22.5421 | 10.7584 | 11.396  |
| ENSMUSG000000026062 | 12_Slc9a2       | 15.9849 | -0.18222 | 0.75105  | 0.82419  | 11.2864 | 19.2739 | 14.3418 | 18.9354 | 14.3445 | 17.7272 |
| ENSMUSG000000026064 | 15_Ptp4a1       | 1898.91 | -0.42645 | 0.00436  | 0.01258  | 1767.63 | 1595.15 | 1497.53 | 1883.62 | 2548.84 | 2100.67 |
| ENSMUSG000000026065 | 8_Slc9a4        | 7.12165 | 0.25005  | 0.78237  | 0.8486   | 12.1546 | 2.75342 | 8.36608 | 8.11517 | 6.27571 | 5.06491 |
| ENSMUSG000000026068 | 11_Il18rap      | 34.8884 | 1.92786  | 0.00158  | 0.00532  | 101.578 | 21.1095 | 43.0255 | 18.0337 | 11.6549 | 13.9285 |

|                    |                  |         |          |          |          |         |         |         |         |         |         |
|--------------------|------------------|---------|----------|----------|----------|---------|---------|---------|---------|---------|---------|
| ENSMUSG00000026069 | 15_Il1r1r        | 47.7428 | -0.12283 | 0.75515  | 0.82759  | 49.4867 | 45.8903 | 41.8304 | 71.2332 | 34.9647 | 43.0517 |
| ENSMUSG00000026070 | 15_Il18r1        | 263.152 | 0.31759  | 0.15143  | 0.24097  | 302.13  | 227.616 | 346.595 | 195.666 | 259.994 | 246.914 |
| ENSMUSG00000026072 | 12_Il1r1         | 634.204 | -0.41526 | 0.00457  | 0.0131   | 564.322 | 505.711 | 561.722 | 690.691 | 816.739 | 666.035 |
| ENSMUSG00000026073 | 13_Il1r2         | 179.383 | -0.34831 | 0.08275  | 0.14727  | 159.747 | 142.26  | 172.102 | 185.747 | 221.443 | 194.999 |
| ENSMUSG00000026074 | 14_Map4k4        | 4545.25 | 0.37359  | 0.00427  | 0.01237  | 4902.66 | 4852.44 | 5635.15 | 3732.98 | 3656.95 | 4491.31 |
| ENSMUSG00000026077 | 15_Npas2         | 275.925 | 0.41481  | 0.05057  | 0.09805  | 258.72  | 310.218 | 378.864 | 265.096 | 243.856 | 198.798 |
| ENSMUSG00000026078 | 10_Pdcl3         | 1331.59 | -0.19506 | 0.10999  | 0.18616  | 1244.11 | 1181.22 | 1299.13 | 1428.27 | 1300.87 | 1535.93 |
| ENSMUSG00000026080 | 13_Chst10        | 459.493 | -0.17639 | 0.26747  | 0.37881  | 383.739 | 470.834 | 441.012 | 525.683 | 497.574 | 438.115 |
| ENSMUSG00000026082 | 11_Rev1          | 522.178 | -0.48051 | 0.00057  | 0.00221  | 445.381 | 461.656 | 400.377 | 593.309 | 641.019 | 591.328 |
| ENSMUSG00000026083 | 12_Eif5b         | 4543.89 | -0.17636 | 0.20058  | 0.30156  | 4189.01 | 4077.81 | 4532.02 | 4033.24 | 5072.57 | 5358.67 |
| ENSMUSG00000026085 | 11_Lyg1          | 0.15297 | 0.92709  | 0.82027  | NA       | 0       | 0.91781 | 0       | 0       | 0       | 0       |
| ENSMUSG00000026087 | 11_Mrpl30        | 1252.69 | 0.02953  | 0.81217  | 0.87048  | 1293.6  | 1179.38 | 1325.43 | 1331.79 | 1248.87 | 1137.07 |
| ENSMUSG00000026088 | 15_Mitd1         | 1110.3  | 0.30685  | 0.07632  | 0.13792  | 1198.1  | 1070.16 | 1416.26 | 816.025 | 1145.77 | 1015.51 |
| ENSMUSG00000026090 | 16_2010300C02Rik | 581.753 | 1.02931  | 1.08E-08 | 1.83E-07 | 704.101 | 774.628 | 862.901 | 402.152 | 304.82  | 441.913 |
| ENSMUSG00000026094 | 14_Stk17b        | 572.469 | -0.42853 | 0.00834  | 0.02171  | 539.145 | 433.204 | 492.403 | 612.244 | 751.293 | 606.523 |
| ENSMUSG00000026095 | 15_Asn5d1        | 1199.67 | -0.54249 | 1.10E-05 | 7.40E-05 | 988.867 | 957.271 | 984.807 | 1335.4  | 1574.31 | 1357.4  |
| ENSMUSG00000026096 | 14_Osgepl1       | 212.113 | -0.94417 | 6.59E-07 | 6.40E-06 | 161.483 | 139.506 | 133.857 | 302.966 | 268.959 | 265.908 |
| ENSMUSG00000026097 | 9_Ormdl1         | 469.021 | -0.4746  | 0.00545  | 0.01514  | 427.149 | 357.944 | 393.206 | 503.14  | 640.123 | 492.562 |
| ENSMUSG00000026098 | 13_Pms1          | 112.678 | -0.65649 | 0.00872  | 0.02249  | 93.7643 | 85.3559 | 83.6608 | 137.056 | 162.272 | 113.96  |
| ENSMUSG00000026100 | 6_Mstn           | 5.59428 | -2.29062 | 0.0322   | 0.06739  | 2.60457 | 1.83561 | 1.19515 | 14.427  | 7.17224 | 6.33113 |
| ENSMUSG00000026102 | 9_Innp1          | 824.429 | 0.14752  | 0.27504  | 0.38718  | 862.979 | 788.395 | 948.952 | 729.464 | 820.325 | 796.457 |
| ENSMUSG00000026103 | 14_Gls           | 5496.07 | -0.43203 | 0.00228  | 0.00725  | 4854.91 | 4663.37 | 4518.88 | 5251.42 | 7302.24 | 6385.58 |
| ENSMUSG00000026104 | 14_Stat1         | 7410.44 | 1.54064  | 5.62E-17 | 7.18E-15 | 10056.2 | 9405.67 | 13627.1 | 3033.27 | 4336.52 | 4003.81 |
| ENSMUSG00000026107 | 11_Nabp1         | 2068.56 | -0.15417 | 0.27362  | 0.3857   | 2102.75 | 1882.42 | 1888.34 | 1843.95 | 2434.98 | 2258.95 |
| ENSMUSG00000026109 | 14_Tneff2        | 27.2531 | -0.48754 | 0.28937  | 0.40297  | 21.7047 | 28.452  | 17.9273 | 31.559  | 38.5508 | 25.3245 |
| ENSMUSG00000026110 | 15_Mgat4a        | 3092.82 | 0.082    | 0.50721  | 0.6175   | 3271.33 | 2913.11 | 3357.19 | 2688.83 | 3128    | 3198.49 |
| ENSMUSG00000026111 | 15_Unc50         | 1006.17 | -0.27548 | 0.0212   | 0.04761  | 920.28  | 892.107 | 919.074 | 1030.63 | 1183.42 | 1091.49 |
| ENSMUSG00000026112 | 7_Coa5           | 2403.16 | -0.19236 | 0.07161  | 0.13092  | 2217.35 | 2188.05 | 2323.38 | 2435.45 | 2512.08 | 2742.65 |
| ENSMUSG00000026113 | 17_Innp4a        | 504.848 | 0.3499   | 0.01102  | 0.02743  | 526.99  | 602.998 | 567.698 | 438.219 | 456.334 | 436.848 |
| ENSMUSG00000026114 | 14_Cnga3         | 3.47381 | 2.17274  | 0.10822  | 0.18368  | 5.20913 | 3.67122 | 8.36608 | 1.80337 | 1.79306 | 0       |
| ENSMUSG00000026116 | 11_Tmem131       | 2300.19 | 0.49715  | 0.00116  | 0.00409  | 2554.21 | 2724.96 | 2796.66 | 1577.95 | 1871.96 | 2275.41 |
| ENSMUSG00000026117 | 10_Zap70         | 10.5968 | 1.72449  | 0.01922  | 0.04371  | 12.1546 | 16.5205 | 20.3176 | 5.41011 | 5.37918 | 3.79868 |
| ENSMUSG00000026121 | 13_Sema4c        | 673.021 | 1.03852  | 1.68E-07 | 1.97E-06 | 857.77  | 783.806 | 1073.25 | 444.531 | 346.957 | 531.815 |
| ENSMUSG00000026123 | 11_Plekhh2       | 4593.16 | 0.16467  | 0.08534  | 0.15077  | 4773.3  | 4731.29 | 5060.28 | 4260.46 | 4248.66 | 4484.98 |
| ENSMUSG00000026124 | 4_Cfc1           | 4.76296 | 0.40757  | 0.76491  | 0.83439  | 0.86819 | 8.26025 | 7.17092 | 7.21348 | 0       | 5.06491 |
| ENSMUSG00000026125 | 9_Prss39         | 0       | NA       | NA       | NA       | 0       | 0       | 0       | 0       | 0       | 0       |
| ENSMUSG00000026126 | 15_Ptpn18        | 191.744 | 0.78626  | 0.0005   | 0.00199  | 221.388 | 204.671 | 302.374 | 131.646 | 137.169 | 153.213 |
| ENSMUSG00000026127 | 13_Imp4          | 1055.08 | 0.24882  | 0.02915  | 0.06198  | 1159.9  | 1083.01 | 1195.15 | 943.163 | 984.391 | 964.865 |
| ENSMUSG00000026131 | 17_Dst           | 15151.8 | 0.41989  | 0.00278  | 0.00861  | 17089.4 | 16582.9 | 18349.2 | 11403.6 | 12065.5 | 15420.1 |
| ENSMUSG00000026134 | 11_Prim2         | 315.882 | 0.49133  | 0.0144   | 0.03436  | 401.103 | 301.958 | 403.962 | 219.11  | 277.924 | 291.232 |
| ENSMUSG00000026135 | 17_Zfp142        | 450.255 | 0.30036  | 0.03753  | 0.07641  | 470.558 | 520.396 | 499.574 | 421.087 | 372.06  | 417.855 |
| ENSMUSG00000026141 | 13_Col19a1       | 2.59681 | -3.78231 | 0.06752  | 0.1247   | 0       | 0       | 1.19515 | 7.21348 | 7.17224 | 0       |
| ENSMUSG00000026142 | 15_Rhbdd1        | 1335.8  | 0.15782  | 0.21569  | 0.31961  | 1394.31 | 1325.31 | 1505.89 | 1164.08 | 1233.63 | 1391.58 |
| ENSMUSG00000026147 | 16_Col9a1        | 131.223 | -0.92752 | 0.02703  | 0.05832  | 72.9278 | 147.767 | 50.1965 | 255.177 | 115.652 | 145.616 |
| ENSMUSG00000026149 | 2_Tm4sf20        | 0.30056 | -1.76625 | 0.6627   | NA       | 0       | 0       | 0       | 1.80337 | 0       | 0       |
| ENSMUSG00000026150 | 14_Mff           | 2024.73 | -0.57048 | 2.25E-06 | 1.86E-05 | 1678.21 | 1594.23 | 1617.04 | 2311.02 | 2700.35 | 2247.55 |
| ENSMUSG00000026153 | 15_Fam135a       | 2591.48 | -0.28675 | 0.01534  | 0.03629  | 2412.7  | 2218.34 | 2373.58 | 2591.44 | 3119.03 | 2833.82 |
| ENSMUSG00000026154 | 4_Sdhaf4         | 364.452 | -0.63903 | 6.31E-05 | 0.00033  | 256.116 | 287.273 | 313.13  | 440.023 | 469.782 | 420.387 |
| ENSMUSG00000026155 | 13_Smap1         | 1483.89 | 0.15525  | 0.22991  | 0.33599  | 1511.52 | 1516.21 | 1662.46 | 1245.23 | 1428.17 | 1539.73 |
| ENSMUSG00000026156 | 8_B3gat2         | 74.2233 | 0.02257  | 0.93725  | 0.95895  | 67.7187 | 75.2601 | 81.2705 | 61.3146 | 76.2051 | 83.571  |
| ENSMUSG00000026158 | 11_Ogfrl1        | 1023.62 | -0.68843 | 4.61E-05 | 0.00025  | 716.255 | 863.655 | 773.265 | 1340.81 | 1439.83 | 1007.92 |
| ENSMUSG00000026159 | 13_Agfg1         | 2367.07 | 0.10102  | 0.44415  | 0.55931  | 2522.09 | 2253.21 | 2574.36 | 1990.92 | 2491.46 | 2370.38 |
| ENSMUSG00000026162 | 7_Nhej1          | 70.5355 | 0.09329  | 0.756    | 0.82829  | 76.4006 | 61.493  | 81.2705 | 71.2332 | 77.1016 | 55.714  |
| ENSMUSG00000026163 | 17_Sphkap        | 1800.27 | -0.21297 | 0.12015  | 0.2      | 1693.84 | 1705.28 | 1601.51 | 1672.63 | 1914.99 | 2213.36 |
| ENSMUSG00000026166 | 14_Col20         | 0.651   | 0.16495  | 0.95782  | NA       | 0       | 0.91781 | 1.19515 | 0       | 1.79306 | 0       |
| ENSMUSG00000026167 | 14_Wnt10a        | 253.552 | 0.90567  | 7.71E-06 | 5.41E-05 | 285.634 | 308.383 | 397.986 | 176.73  | 161.376 | 191.2   |
| ENSMUSG00000026170 | 6_Cyp27a1        | 350.645 | 0.30203  | 0.05332  | 0.1022   | 388.948 | 372.629 | 400.377 | 342.64  | 287.786 | 311.492 |
| ENSMUSG00000026171 | 12_Rnf25         | 579.549 | 0.20878  | 0.129    | 0.21165  | 618.15  | 617.683 | 628.651 | 588.801 | 492.195 | 531.815 |
| ENSMUSG00000026172 | 12_Bcs1l         | 312.361 | 0.05847  | 0.73081  | 0.80888  | 281.293 | 346.931 | 327.472 | 289.441 | 298.545 | 330.485 |
| ENSMUSG00000026173 | 15_Plcd4         | 25.0563 | -1.08313 | 0.10426  | 0.17834  | 26.9138 | 12.8493 | 8.36608 | 45.986  | 44.8265 | 11.396  |
| ENSMUSG00000026174 | 9_Rqcd1          | 1169.05 | 0.18825  | 0.21941  | 0.32416  | 1247.59 | 1151.85 | 1334.99 | 919.719 | 1096.46 | 1263.69 |
| ENSMUSG00000026175 | 12_Vil1          | 6.68991 | -1.18767 | 0.23492  | 0.34167  | 5.20913 | 4.58903 | 2.39031 | 18.0337 | 3.58612 | 6.33113 |
| ENSMUSG00000026176 | 13_Ctdsp1        | 2836.28 | 0.4937   | 0.00062  | 0.00238  | 3026.5  | 3314.2  | 3610.56 | 2671.69 | 2002.85 | 2391.9  |
| ENSMUSG00000026177 | 11_Slc11a1       | 104.366 | 0.60438  | 0.07024  | 0.1289   | 141.515 | 139.506 | 96.8075 | 119.924 | 60.0675 | 68.3763 |
| ENSMUSG00000026179 | 14_Pnk4          | 527.215 | 0.31705  | 0.12579  | 0.20721  | 550.431 | 623.19  | 582.04  | 620.36  | 384.612 | 402.66  |
| ENSMUSG00000026180 | 8_Cxcr2          | 21.6917 | 2.42196  | 0.00097  | 0.0035   | 69.4551 | 12.8493 | 27.4885 | 9.01685 | 6.27571 | 5.06491 |
| ENSMUSG00000026181 | 11_Ppm1f         | 950.79  | -0.11081 | 0.5028   | 0.61377  | 901.18  | 942.586 | 899.951 | 1215.47 | 864.255 | 881.294 |
| ENSMUSG00000026182 | 6_Tnp1           | 0.1447  | 0.92709  | 0.82027  | NA       | 0.86819 | 0       | 0       | 0       | 0       | 0       |
| ENSMUSG00000026185 | 8_Igfbp5         | 32251.7 | -0.22269 | 0.04925  | 0.09586  | 32377.4 | 29300.9 | 27622.4 | 36794.2 | 32075.2 | 35340.4 |
| ENSMUSG00000026187 | 8_Xrcc5          | 969.962 | -0.34222 | 0.01815  | 0.04177  | 920.28  | 799.409 | 846.169 | 938.655 | 1202.25 | 1113.01 |
| ENSMUSG00000026188 | 11_Tmem169       | 18.616  | -0.8649  | 0.11628  | 0.19469  | 13.0228 | 10.0959 | 16.7322 | 19.8371 | 30.482  | 21.5259 |
| ENSMUSG00000026189 | 13_Pecr          | 133.539 | -0.07423 | 0.75796  | 0.8298   | 105.919 | 131.246 | 154.175 | 151.483 | 131.79  | 126.623 |
| ENSMUSG00000026192 | 13_Atic          | 1211.8  | 0.41236  | 0.00588  | 0.01613  | 1381.29 | 1320.72 | 1447.33 | 944.065 | 937.771 | 1239.64 |
| ENSMUSG00000026193 | 15_Fn1           | 7406.67 | 0.20167  | 0.21316  | 0.31664  | 7825.85 | 8894.45 | 7049.02 | 5519.22 | 7950.43 | 7201.03 |
| ENSMUSG00000026196 | 7_Bard1          | 107.483 | 0.55814  | 0.03692  | 0.07537  | 139.778 | 102.794 | 141.028 | 73.0365 | 86.9635 | 101.298 |
| ENSMUSG00000026197 | 12_Zfand2b       | 481.993 | 0.81626  | 5.94E-05 | 0.00032  | 577.345 | 608.505 | 658.53  | 426.497 | 256.408 | 364.673 |
| ENSMUSG00000026198 | 15_Abcb6         | 240.789 | 0.24279  | 0.20381  | 0.30565  | 228.334 | 260.657 | 295.203 | 244.357 | 209.788 | 206.395 |
| ENSMUSG00000026199 | 17_Ankzf1        | 581.447 | 0.3341   | 0.00927  | 0.0237   | 619.018 | 665.409 | 660.92  | 521.174 | 496.678 | 525.484 |
| ENSMUSG00000026200 | 13_Glb1l         | 368.464 | -0.73844 | 0.00134  | 0.00463  | 275.216 | 346.013 | 206.762 | 437.317 | 556.745 | 388.732 |

|                    |                  |         |          |          |          |         |         |         |         |         |         |
|--------------------|------------------|---------|----------|----------|----------|---------|---------|---------|---------|---------|---------|
| ENSMUSG00000026201 | 12_Stk16         | 853.519 | 0.26862  | 0.06303  | 0.11771  | 828.252 | 935.244 | 1036.2  | 845.781 | 723.5   | 752.139 |
| ENSMUSG00000026202 | 13_Tuba4a        | 2292.76 | 0.74391  | 1.45E-05 | 9.38E-05 | 2743.48 | 2530.39 | 3339.26 | 1891.74 | 1366.31 | 1885.41 |
| ENSMUSG00000026203 | 16_Dnajb2        | 1426.82 | 0.38361  | 0.02178  | 0.04869  | 1457.69 | 1700.69 | 1687.56 | 1425.56 | 976.322 | 1313.08 |
| ENSMUSG00000026204 | 15_Ptprn         | 79.4726 | -2.2254  | 0.00011  | 0.00054  | 26.9138 | 32.1232 | 25.0982 | 111.809 | 249.235 | 31.6557 |
| ENSMUSG00000026205 | 8_Slc23a3        | 72.5394 | 0.63262  | 0.03131  | 0.06583  | 79.8733 | 89.9449 | 94.4172 | 45.986  | 59.171  | 65.8438 |
| ENSMUSG00000026207 | 16_Speg          | 275.511 | -0.45801 | 0.09445  | 0.16392  | 204.892 | 315.725 | 175.688 | 414.775 | 282.407 | 259.577 |
| ENSMUSG00000026208 | 9_Des            | 528.289 | -0.3697  | 0.48799  | 0.59984  | 333.384 | 608.505 | 441.012 | 914.309 | 276.131 | 596.393 |
| ENSMUSG00000026209 | 15_Dnpep         | 1682.39 | 0.92885  | 8.52E-08 | 1.09E-06 | 2014.2  | 2184.38 | 2420.19 | 1418.35 | 925.22  | 1132.01 |
| ENSMUSG00000026211 | 17_Obsl1         | 256.535 | 0.4895   | 0.09127  | 0.15951  | 266.534 | 390.985 | 241.421 | 297.556 | 151.514 | 191.2   |
| ENSMUSG00000026213 | 15_Stk11ip       | 560.133 | 0.84576  | 2.56E-07 | 2.84E-06 | 706.705 | 730.573 | 721.873 | 464.368 | 330.82  | 406.459 |
| ENSMUSG00000026219 | 14_Trip12        | 7888.81 | -0.04326 | 0.76016  | 0.8315   | 7878.81 | 7318.58 | 8113.9  | 6571.48 | 8947.38 | 8502.71 |
| ENSMUSG00000026220 | 6_Slc16a14       | 4.72724 | 0.33307  | 0.76482  | 0.83434  | 2.60457 | 7.34244 | 5.97577 | 8.11517 | 1.79306 | 2.53245 |
| ENSMUSG00000026222 | 16_Sp100         | 5338.18 | 0.71152  | 0.00066  | 0.00253  | 6160.66 | 5675.71 | 8049.36 | 2866.46 | 4921.06 | 4355.82 |
| ENSMUSG00000026223 | 15_Itn2c         | 3930.19 | 0.05079  | 0.77272  | 0.84069  | 3901.64 | 4411.89 | 3684.66 | 4873.61 | 3114.55 | 3594.82 |
| ENSMUSG00000026224 | 11_4933407L21Rik | 0.29884 | -1.76064 | 0.66373  | NA       | 0       | 0       | 0       | 0       | 1.79306 | 0       |
| ENSMUSG00000026227 | 11_2810459M11Rik | 2.54566 | -1.25156 | 0.46635  | 0.57982  | 1.73638 | 2.75342 | 0       | 4.50843 | 6.27571 | 0       |
| ENSMUSG00000026228 | 6_Htr2b          | 9.4515  | -0.2418  | 0.78883  | 0.85324  | 8.68188 | 10.0959 | 7.17092 | 1.80337 | 18.8271 | 10.1298 |
| ENSMUSG00000026229 | 17_Psmd1         | 3695    | -0.18749 | 0.14145  | 0.22768  | 3633.37 | 3282.07 | 3449.21 | 3398.45 | 4211.9  | 4195.01 |
| ENSMUSG00000026234 | 12_Ncl           | 10502.5 | -0.12998 | 0.37825  | 0.4957   | 10668.3 | 8839.39 | 10580.7 | 9123.25 | 11561.7 | 12241.9 |
| ENSMUSG00000026235 | 14_Epha4         | 2340.66 | 0.08001  | 0.46252  | 0.57612  | 2408.35 | 2352.34 | 2454.85 | 2101.83 | 2300.5  | 2426.09 |
| ENSMUSG00000026237 | 3_Nmur1          | 0.14942 | -0.99647 | 0.80707  | NA       | 0       | 0       | 0       | 0       | 0.89653 | 0       |
| ENSMUSG00000026238 | 14_Ptma          | 12847.4 | 0.11572  | 0.40888  | 0.52554  | 13193   | 11577.2 | 15317.1 | 11978.9 | 11363.5 | 13655   |
| ENSMUSG00000026239 | 14_Pde6d         | 303.273 | -0.40198 | 0.02227  | 0.04963  | 258.72  | 290.944 | 234.25  | 348.952 | 376.543 | 310.226 |
| ENSMUSG00000026240 | 12_Cops7b        | 357.519 | 0.20851  | 0.15673  | 0.24804  | 376.794 | 378.136 | 395.596 | 348.952 | 322.751 | 322.888 |
| ENSMUSG00000026241 | 5_Nppc           | 5.11742 | 1.60915  | 0.15554  | 0.24647  | 5.20913 | 4.58903 | 13.1467 | 0.90169 | 1.79306 | 5.06491 |
| ENSMUSG00000026245 | 16_Farsb         | 987.44  | -0.2591  | 0.0749   | 0.1358   | 903.784 | 819.6   | 974.051 | 934.146 | 1176.25 | 1116.81 |
| ENSMUSG00000026246 | 12_Alpl2         | 0.14942 | -0.99647 | 0.80707  | NA       | 0       | 0       | 0       | 0       | 0.89653 | 0       |
| ENSMUSG00000026247 | 13_Ecel1         | 0.44709 | 0.74829  | 0.83033  | NA       | 0.86819 | 0.91781 | 0       | 0       | 0.89653 | 0       |
| ENSMUSG00000026248 | 9_Mrpl44         | 407.829 | 0.3742   | 0.0087   | 0.02245  | 440.172 | 483.684 | 457.744 | 367.888 | 350.543 | 346.946 |
| ENSMUSG00000026249 | 10_Serpine2      | 1614.12 | -0.51794 | 0.02606  | 0.05656  | 1679.94 | 1284.01 | 1018.27 | 2437.26 | 1886.3  | 1378.92 |
| ENSMUSG00000026251 | 13_Chnd          | 0.15028 | -0.99647 | 0.80707  | NA       | 0       | 0       | 0       | 0.90169 | 0       | 0       |
| ENSMUSG00000026253 | 14_Chng          | 2.32757 | -0.02343 | 0.9872   | NA       | 0.86819 | 3.67122 | 2.39031 | 3.60674 | 0.89653 | 2.53245 |
| ENSMUSG00000026254 | 17_Eif4e2        | 1617    | -0.03579 | 0.74589  | 0.82039  | 1637.4  | 1489.6  | 1663.65 | 1598.69 | 1614.65 | 1698.01 |
| ENSMUSG00000026255 | 15_Efh1          | 105.922 | -0.84642 | 0.00168  | 0.00561  | 81.6097 | 86.2737 | 58.5626 | 156.893 | 119.239 | 132.954 |
| ENSMUSG00000026258 | 5_3110079O15Rik  | 0.45622 | 0.77574  | 0.84797  | NA       | 0       | 1.83561 | 0       | 0.90169 | 0       | 0       |
| ENSMUSG00000026259 | 14_Ngef          | 962.534 | 0.97817  | 1.29E-07 | 1.57E-06 | 1232.83 | 1221.6  | 1374.43 | 667.247 | 487.713 | 791.392 |
| ENSMUSG00000026260 | 12_Ndufa10       | 1525.12 | 0.0406   | 0.74222  | 0.81773  | 1434.25 | 1580.46 | 1624.21 | 1415.65 | 1448.79 | 1647.36 |
| ENSMUSG00000026269 | 14_Rnpepl1       | 1610.25 | 1.20692  | 3.96E-11 | 1.44E-09 | 2126.19 | 2090.76 | 2524.17 | 1160.47 | 734.259 | 1025.64 |
| ENSMUSG00000026270 | 11_Capn10        | 327.225 | 0.80148  | 0.00011  | 0.00054  | 376.794 | 426.78  | 444.597 | 298.458 | 190.064 | 226.655 |
| ENSMUSG00000026271 | 15_Gpr35         | 43.2897 | 2.25973  | 2.82E-05 | 0.00017  | 118.074 | 34.8766 | 62.148  | 12.6236 | 20.6202 | 11.396  |
| ENSMUSG00000026272 | 6_Agxt           | 3.23283 | 1.56393  | 0.22141  | 0.32636  | 6.07732 | 3.67122 | 4.78062 | 2.70506 | 0.89653 | 1.26623 |
| ENSMUSG00000026273 | 13_Mterf4        | 1135.64 | -0.74398 | 9.73E-06 | 6.61E-05 | 901.18  | 958.189 | 686.018 | 1232.6  | 1536.65 | 1499.21 |
| ENSMUSG00000026274 | 11_Pask          | 327.869 | 0.65822  | 0.00011  | 0.00053  | 384.607 | 373.547 | 445.792 | 229.028 | 258.201 | 276.037 |
| ENSMUSG00000026275 | 13_Ppp1r7        | 1213.31 | -0.04834 | 0.67485  | 0.7645   | 1193.76 | 1128.9  | 1256.11 | 1191.13 | 1212.11 | 1297.88 |
| ENSMUSG00000026276 | 17_Sept2         | 4967.76 | -0.42131 | 0.00028  | 0.0012   | 4368.72 | 4026.41 | 4347.97 | 5199.12 | 6273.92 | 5590.39 |
| ENSMUSG00000026277 | 13_Stk25         | 4362.75 | 0.46694  | 1.69E-05 | 0.00011  | 4827.13 | 5042.42 | 5317.24 | 3472.39 | 3556.54 | 3960.76 |
| ENSMUSG00000026278 | 14_Bok           | 989.794 | 0.6982   | 3.40E-05 | 0.0002   | 1083.5  | 1149.09 | 1442.55 | 854.798 | 649.088 | 759.736 |
| ENSMUSG00000026279 | 14_Thap4         | 790.867 | 0.53832  | 0.00095  | 0.00342  | 844.747 | 910.463 | 1055.32 | 717.742 | 543.298 | 673.633 |
| ENSMUSG00000026280 | 17_Atg4b         | 1182.99 | 0.11474  | 0.29254  | 0.40652  | 1211.99 | 1266.57 | 1210.69 | 1147.85 | 1094.66 | 1166.19 |
| ENSMUSG00000026281 | 15_Dtymk         | 668.469 | -0.12881 | 0.30863  | 0.42353  | 633.778 | 667.245 | 614.309 | 662.739 | 726.19  | 706.555 |
| ENSMUSG00000026283 | 13_Ing5          | 575.806 | -0.16947 | 0.18006  | 0.277    | 557.377 | 538.752 | 529.453 | 621.261 | 592.607 | 615.386 |
| ENSMUSG00000026285 | 7_Pdcd1          | 3.79201 | 1.29294  | 0.31992  | 0.43551  | 9.55007 | 2.75342 | 3.58546 | 0.90169 | 0.89653 | 5.06491 |
| ENSMUSG00000026288 | 14_Inpp5d        | 161.159 | 1.26796  | 2.40E-06 | 1.96E-05 | 307.339 | 189.986 | 185.249 | 98.2837 | 86.0669 | 100.032 |
| ENSMUSG00000026289 | 15_Atg16l1       | 963.892 | 0.14292  | 0.2388   | 0.34639  | 1001.02 | 971.956 | 1061.3  | 914.309 | 859.773 | 974.995 |
| ENSMUSG00000026295 | 12_Spp2          | 0.42208 | -2.1835  | 0.58658  | NA       | 0       | 0       | 0       | 0       | 0       | 2.53245 |
| ENSMUSG00000026301 | 15_Iqca          | 4.16203 | -3.00505 | 0.03206  | 0.06715  | 1.73638 | 0.91781 | 0       | 10.8202 | 8.96531 | 2.53245 |
| ENSMUSG00000026303 | 6_Mlph           | 2137.79 | -0.39276 | 0.05156  | 0.09945  | 1610.49 | 2346.83 | 1588.36 | 3019.74 | 2096.09 | 2165.25 |
| ENSMUSG00000026304 | 13_Rab17         | 188.213 | 0.10905  | 0.61357  | 0.71283  | 191.87  | 192.739 | 200.786 | 198.371 | 141.652 | 203.863 |
| ENSMUSG00000026305 | 15_Lrrfp1        | 4331.57 | 0.25833  | 0.04134  | 0.08276  | 4623.97 | 4341.22 | 5189.36 | 3573.38 | 3941.15 | 4320.37 |
| ENSMUSG00000026307 | 12_Scly          | 619.089 | 0.59186  | 0.00426  | 0.01234  | 699.76  | 734.244 | 799.558 | 640.197 | 368.474 | 472.303 |
| ENSMUSG00000026308 | 8_Klhl30         | 51.8003 | -1.04945 | 0.03215  | 0.06731  | 28.6502 | 53.2327 | 19.1225 | 108.202 | 48.4127 | 53.1815 |
| ENSMUSG00000026309 | 14_Ilkap         | 1212.2  | -0.00775 | 0.9457   | 0.96456  | 1191.15 | 1176.63 | 1258.5  | 1193.83 | 1162.8  | 1290.29 |
| ENSMUSG00000026311 | 16_Asb1          | 320.136 | -0.46911 | 0.01683  | 0.03926  | 302.13  | 285.438 | 217.518 | 422.89  | 364.888 | 327.953 |
| ENSMUSG00000026312 | 17_Cdh7          | 3.70369 | -0.75037 | 0.57092  | 0.67558  | 1.73638 | 6.42464 | 0       | 5.41011 | 3.58612 | 5.06491 |
| ENSMUSG00000026313 | 15_Hdac4         | 997.92  | 0.64424  | 0.00015  | 0.00072  | 1152.95 | 1218.85 | 1280.01 | 945.868 | 627.571 | 762.269 |
| ENSMUSG00000026315 | 13_Serpnb8       | 2851.17 | 0.08971  | 0.52974  | 0.63838  | 2956.18 | 2780.95 | 3082.3  | 2300.2  | 3139.65 | 2847.74 |
| ENSMUSG00000026317 | 7_Cln8           | 558.978 | 0.27267  | 0.09617  | 0.16651  | 610.336 | 624.108 | 599.967 | 577.98  | 415.99  | 525.484 |
| ENSMUSG00000026319 | 13_2310035C23Rik | 2520.52 | -0.14862 | 0.35088  | 0.4676   | 2382.31 | 2186.21 | 2604.24 | 2130.68 | 3064.34 | 2755.31 |
| ENSMUSG00000026321 | 7_Tnfrsf11a      | 185.238 | 0.39497  | 0.06017  | 0.11318  | 202.288 | 190.904 | 237.836 | 137.958 | 161.376 | 181.07  |
| ENSMUSG00000026322 | 8_Htr4           | 4.1353  | -1.92841 | 0.11095  | 0.18743  | 0.86819 | 0.91781 | 3.58546 | 5.41011 | 8.96531 | 5.06491 |
| ENSMUSG00000026327 | 8_Serpnb11       | 3748.79 | -0.11917 | 0.40783  | 0.52462  | 3671.57 | 3407.81 | 3702.59 | 3210    | 4438.72 | 4062.06 |
| ENSMUSG00000026333 | 14_Gin1          | 170.948 | -0.57312 | 0.00354  | 0.01056  | 131.965 | 136.753 | 143.418 | 188.452 | 203.512 | 221.59  |
| ENSMUSG00000026335 | 16_Pam           | 4531.26 | -0.60519 | 6.58E-07 | 6.40E-06 | 3603.85 | 3985.11 | 3193.45 | 5758.16 | 5363.05 | 5283.96 |
| ENSMUSG00000026339 | 18_Ccdc93        | 1006.38 | 0.02079  | 0.87084  | 0.91234  | 1042.69 | 999.49  | 996.759 | 919.719 | 969.15  | 1110.48 |
| ENSMUSG00000026341 | 16_Actr3         | 10147   | -0.05357 | 0.70456  | 0.78852  | 10183.9 | 8976.14 | 10715.8 | 8655.28 | 11214.7 | 11136.5 |
| ENSMUSG00000026342 | 10_Slc35f5       | 1904.2  | -0.34495 | 0.00831  | 0.02165  | 1640.01 | 1647.46 | 1744.92 | 1834.93 | 2252.08 | 2305.8  |
| ENSMUSG00000026343 | 6_Gpr39          | 210.058 | 0.70214  | 0.00038  | 0.00156  | 272.611 | 221.191 | 286.837 | 165.008 | 148.824 | 165.876 |
| ENSMUSG00000026344 | 9_Lypd1          | 111.178 | -0.65522 | 0.04319  | 0.08583  | 63.3778 | 118.397 | 77.685  | 168.615 | 138.962 | 100.032 |
| ENSMUSG00000026347 | 13_Tmem163       | 12.5578 | -1.56752 | 0.02769  | 0.05946  | 8.68188 | 5.50683 | 4.78062 | 27.0506 | 17.9306 | 11.396  |

|                    |                  |         |          |          |          |         |         |         |         |          |         |
|--------------------|------------------|---------|----------|----------|----------|---------|---------|---------|---------|----------|---------|
| ENSMUSG00000026348 | 7_Acmsd          | 0.21104 | -0.99647 | 0.80707  | NA       | 0       | 0       | 0       | 0       | 0        | 1.26623 |
| ENSMUSG00000026349 | 14_Ccnt2         | 1770.9  | -0.15424 | 0.18481  | 0.28292  | 1679.08 | 1686.01 | 1663.65 | 1695.17 | 2019.88  | 1881.61 |
| ENSMUSG00000026353 | 9_Ubxn4          | 2356.54 | -0.22649 | 0.05189  | 0.09999  | 2124.46 | 2135.73 | 2255.26 | 2281.26 | 2649.25  | 2693.26 |
| ENSMUSG00000026354 | 8_Lct            | 1.82889 | -1.40595 | 0.48337  | NA       | 0       | 1.83561 | 1.19515 | 5.41011 | 0        | 2.53245 |
| ENSMUSG00000026355 | 11_Mcm6          | 1571.53 | 0.93178  | 2.87E-07 | 3.13E-06 | 2171.34 | 1736.49 | 2276.77 | 862.011 | 1075.84  | 1306.75 |
| ENSMUSG00000026356 | 15_Dars          | 1499.78 | -0.15202 | 0.30174  | 0.41654  | 1447.27 | 1336.32 | 1478.41 | 1303.84 | 1728.51  | 1704.34 |
| ENSMUSG00000026357 | 3_Rgs18          | 10.4411 | -0.73529 | 0.32041  | 0.43603  | 12.1546 | 6.42464 | 4.78062 | 17.132  | 10.7584  | 11.396  |
| ENSMUSG00000026358 | 13_Rgs1          | 11.7376 | 1.72892  | 0.02761  | 0.05932  | 23.4411 | 8.26025 | 22.7079 | 6.3118  | 7.17224  | 2.53245 |
| ENSMUSG00000026360 | 9_Rgs2           | 300.458 | -0.63211 | 0.00967  | 0.02455  | 316.021 | 211.095 | 179.273 | 421.087 | 367.578  | 307.693 |
| ENSMUSG00000026361 | 8_Cdc73          | 1080.67 | -0.42481 | 0.00095  | 0.00342  | 940.248 | 906.792 | 921.464 | 1136.12 | 1381.55  | 1197.85 |
| ENSMUSG00000026365 | 15_Cfh           | 1937.42 | -1.14226 | 2.36E-11 | 9.12E-10 | 1327.46 | 1214.26 | 1082.81 | 3117.13 | 2793.59  | 2089.27 |
| ENSMUSG00000026374 | 14_Tsn           | 1665.73 | -0.35794 | 0.00363  | 0.01079  | 1462.03 | 1509.79 | 1407.89 | 1675.33 | 2038.71  | 1900.61 |
| ENSMUSG00000026377 | 12_Nifk          | 968.074 | -0.38064 | 0.01954  | 0.04435  | 877.738 | 747.094 | 898.756 | 907.096 | 1253.35  | 1124.41 |
| ENSMUSG00000026380 | 10_Tfcp2l1       | 753.454 | 0.38386  | 0.22156  | 0.32649  | 829.988 | 813.176 | 914.293 | 458.056 | 406.128  | 1099.08 |
| ENSMUSG00000026383 | 14_Epb41l5       | 1695.25 | -0.06529 | 0.59393  | 0.69594  | 1691.23 | 1662.15 | 1615.85 | 1534.67 | 1816.37  | 1851.22 |
| ENSMUSG00000026384 | 13_Ptpn4         | 739.208 | -0.60766 | 1.19E-05 | 7.89E-05 | 644.196 | 535.998 | 577.259 | 862.011 | 1961.081 | 854.703 |
| ENSMUSG00000026385 | 16_Dbi           | 3630.34 | -0.30651 | 0.00089  | 0.00326  | 3306.93 | 3163.68 | 3267.55 | 3977.33 | 3999.42  | 4067.12 |
| ENSMUSG00000026387 | 15_Sctr          | 1.83461 | -3.25074 | 0.09485  | NA       | 0       | 0.91781 | 0       | 2.70506 | 3.58612  | 3.79868 |
| ENSMUSG00000026388 | 15_3110009E18Rik | 59.4089 | -0.45558 | 0.15153  | 0.24109  | 51.2231 | 46.8081 | 52.5868 | 60.4129 | 83.3773  | 62.0451 |
| ENSMUSG00000026389 | 16_Steap3        | 1399.86 | 0.80058  | 6.88E-09 | 1.24E-07 | 1769.37 | 1759.43 | 1805.88 | 1108.17 | 859.773  | 1096.55 |
| ENSMUSG00000026393 | 10_Nek7          | 1842.54 | -0.59714 | 1.96E-08 | 3.06E-07 | 1456.82 | 1471.24 | 1472.43 | 2152.32 | 2365.05  | 2137.39 |
| ENSMUSG00000026395 | 16_Ptprc         | 359.377 | 1.88476  | 7.69E-08 | 1.00E-06 | 918.543 | 313.89  | 464.915 | 147.876 | 194.547  | 116.493 |
| ENSMUSG00000026398 | 14_Nr5a2         | 7.1632  | -0.39088 | 0.66148  | 0.75344  | 2.60457 | 10.0959 | 5.97577 | 7.21348 | 10.7584  | 6.33113 |
| ENSMUSG00000026399 | 12_Cd55          | 429.43  | -0.38973 | 0.02046  | 0.04616  | 384.607 | 361.615 | 369.303 | 421.989 | 569.297  | 469.77  |
| ENSMUSG00000026401 | 15_Cd55b         | 0       | NA       | NA       | NA       | 0       | 0       | 0       | 0       | 0        | 0       |
| ENSMUSG00000026404 | 12_Ddx59         | 257.819 | -0.23344 | 0.18998  | 0.28927  | 215.311 | 243.218 | 252.178 | 264.194 | 261.787  | 310.226 |
| ENSMUSG00000026405 | 14_C4bp          | 1.08864 | 2.38902  | 0.29806  | NA       | 2.60457 | 1.83561 | 1.19515 | 0       | 0.89653  | 0       |
| ENSMUSG00000026407 | 17_Cacna1s       | 124.154 | -1.33604 | 0.00117  | 0.00409  | 67.7187 | 100.041 | 43.0255 | 266.899 | 95.0322  | 172.207 |
| ENSMUSG00000026409 | 14_Pfkfb2        | 2065.42 | -0.16298 | 0.15772  | 0.2493   | 1921.3  | 1836.53 | 2089.13 | 2027.89 | 2235.95  | 2281.74 |
| ENSMUSG00000026411 | 17_Tmem9         | 802.323 | 0.03511  | 0.85185  | 0.89967  | 789.183 | 900.367 | 746.971 | 1003.58 | 657.157  | 716.684 |
| ENSMUSG00000026413 | 12_Pkp1          | 24308   | 0.90278  | 5.31E-07 | 5.34E-06 | 28880.3 | 29479   | 36662.5 | 14326   | 14911.1  | 21589.2 |
| ENSMUSG00000026414 | 13_Tnnt2         | 113.962 | 0.00176  | 0.99422  | 0.9961   | 113.733 | 103.712 | 124.296 | 97.382  | 112.963  | 131.688 |
| ENSMUSG00000026415 | 11_Fcamr         | 81.2161 | 0.58551  | 0.05217  | 0.10042  | 85.9507 | 92.6984 | 114.735 | 60.4129 | 81.5843  | 51.9153 |
| ENSMUSG00000026417 | 13_Pigr          | 780.264 | 0.19483  | 0.24953  | 0.35858  | 755.324 | 918.723 | 823.461 | 588.801 | 777.292  | 817.983 |
| ENSMUSG00000026418 | 16_Tnni1         | 24.0306 | -0.5324  | 0.36948  | 0.48684  | 14.7592 | 29.3698 | 14.3418 | 27.0506 | 14.3445  | 44.3179 |
| ENSMUSG00000026420 | 16_Ii24          | 14.0037 | 7.23686  | 1.38E-07 | 1.66E-06 | 35.5957 | 13.7671 | 34.6595 | 0       | 0        | 0       |
| ENSMUSG00000026421 | 14_Csrp1         | 4022.79 | 0.13496  | 0.23488  | 0.34165  | 4103.93 | 4003.47 | 4527.24 | 4156.77 | 3712.53  | 3632.81 |
| ENSMUSG00000026424 | 8_Gpr37l1        | 21.1607 | 0.01479  | 0.98224  | 0.98824  | 25.1775 | 30.2876 | 8.36608 | 18.9354 | 34.0682  | 10.1298 |
| ENSMUSG00000026425 | 15_Srgap2        | 2370.44 | 0.2501   | 0.01365  | 0.0328   | 2654.92 | 2440.45 | 2630.53 | 2123.47 | 2162.43  | 2210.83 |
| ENSMUSG00000026426 | 10_Arl8a         | 734.488 | 0.24708  | 0.11095  | 0.18743  | 816.965 | 780.135 | 794.777 | 785.368 | 573.78   | 655.906 |
| ENSMUSG00000026427 | 16_Eif2d         | 925.781 | 0.45471  | 0.00013  | 0.00061  | 1062.66 | 1017.85 | 1131.81 | 808.812 | 761.154  | 772.398 |
| ENSMUSG00000026429 | 8_Ube2t          | 72.5086 | 0.20498  | 0.55947  | 0.6651   | 81.6097 | 61.493  | 89.6366 | 42.3792 | 78.8947  | 81.0385 |
| ENSMUSG00000026430 | 15_Rassf5        | 1329.32 | 0.37785  | 0.00519  | 0.01455  | 1494.15 | 1344.59 | 1668.44 | 1065.79 | 1164.59  | 1238.37 |
| ENSMUSG00000026433 | 13_Rab29         | 326.752 | 0.01442  | 0.93153  | 0.95466  | 316.021 | 307.465 | 363.327 | 349.854 | 332.613  | 291.232 |
| ENSMUSG00000026434 | 12_Nucks1        | 3122.37 | -0.41649 | 0.00088  | 0.00322  | 2759.1  | 2442.28 | 2822.95 | 3179.34 | 3776.19  | 3754.36 |
| ENSMUSG00000026435 | 15_Slc45a3       | 71.6712 | 0.69255  | 0.02233  | 0.04974  | 81.6097 | 84.4381 | 99.1978 | 55.9045 | 43.0335  | 65.8438 |
| ENSMUSG00000026436 | 15_Elk4          | 1206.77 | 0.07318  | 0.59017  | 0.69243  | 1260.61 | 1160.11 | 1290.77 | 1020.71 | 1243.49  | 1264.96 |
| ENSMUSG00000026437 | 11_Cdk18         | 171     | 0.9512   | 1.58E-05 | 0.0001   | 210.102 | 218.438 | 247.397 | 128.039 | 94.1357  | 127.889 |
| ENSMUSG00000026439 | 14_Rbbp5         | 849.344 | -0.15001 | 0.31164  | 0.4266   | 786.579 | 782.888 | 846.169 | 753.809 | 987.08   | 939.54  |
| ENSMUSG00000026442 | 14_Nfasc         | 262.079 | -0.65767 | 0.08515  | 0.15057  | 244.829 | 234.958 | 130.272 | 533.798 | 256.408  | 172.207 |
| ENSMUSG00000026443 | 3_Lrrn2          | 54.3372 | -0.46077 | 0.21064  | 0.31391  | 40.8049 | 60.5752 | 35.8546 | 77.545  | 61.8606  | 49.3828 |
| ENSMUSG00000026447 | 16_Pik3c2b       | 554.931 | 0.49014  | 0.00107  | 0.00379  | 630.305 | 590.149 | 724.263 | 441.826 | 442.886  | 500.16  |
| ENSMUSG00000026450 | 14_Chit1         | 1310.34 | 0.75792  | 2.03E-07 | 2.31E-06 | 1580.97 | 1591.47 | 1766.44 | 977.427 | 830.187  | 1115.55 |
| ENSMUSG00000026452 | 15_Syt2          | 11.6102 | 0.01231  | 0.98689  | 0.99098  | 13.891  | 8.26025 | 13.1467 | 14.427  | 16.1376  | 3.79868 |
| ENSMUSG00000026455 | 14_Kihl12        | 824.881 | -0.40353 | 0.00206  | 0.00667  | 750.115 | 672.751 | 707.531 | 858.405 | 1003.22  | 957.268 |
| ENSMUSG00000026456 | 18_Cyb5r1        | 986.148 | 0.18179  | 0.1593   | 0.25126  | 1008.83 | 972.874 | 1164.08 | 886.357 | 956.598  | 928.144 |
| ENSMUSG00000026457 | 18_Adipor1       | 7506.57 | 0.3397   | 0.00807  | 0.0211   | 7951.74 | 8225.37 | 8981.58 | 7194.55 | 5711.8   | 6974.38 |
| ENSMUSG00000026458 | 13_Ppfia4        | 251.878 | 0.77689  | 0.00103  | 0.00367  | 292.579 | 290.027 | 372.888 | 242.553 | 152.41   | 160.811 |
| ENSMUSG00000026459 | 5_Myog           | 7.97662 | -1.89549 | 0.03998  | 0.08049  | 3.47275 | 0.91781 | 5.97577 | 17.132  | 8.96531  | 11.396  |
| ENSMUSG00000026463 | 17_Atp2b4        | 758.339 | -0.7225  | 5.85E-05 | 0.00031  | 592.104 | 670.916 | 452.963 | 1063.99 | 915.358  | 854.703 |
| ENSMUSG00000026466 | 16_Tor1aip1      | 2541.64 | 0.39336  | 0.00035  | 0.00147  | 2769.52 | 2787.38 | 3101.42 | 2076.58 | 2239.53  | 2275.41 |
| ENSMUSG00000026468 | 14_Lhx4          | 7.03898 | -0.51516 | 0.61023  | 0.70987  | 6.07732 | 5.50683 | 5.97577 | 17.132  | 6.27571  | 1.26623 |
| ENSMUSG00000026469 | 14_Xpr1          | 2503.98 | -0.27472 | 0.0095   | 0.02417  | 2244.27 | 2257.8  | 2297.09 | 2559.89 | 2920.9   | 2743.91 |
| ENSMUSG00000026470 | 14_Stx6          | 1823.93 | 0.3155   | 0.01159  | 0.02863  | 1856.19 | 1985.21 | 2226.57 | 1651.89 | 1507.96  | 1715.74 |
| ENSMUSG00000026471 | 14_Mr1           | 4283.58 | -0.28694 | 0.01795  | 0.04139  | 3984.12 | 3622.58 | 3970.3  | 4179.31 | 5133.53  | 4811.66 |
| ENSMUSG00000026473 | 15_Giul          | 23383.2 | 0.17027  | 0.1704   | 0.26498  | 22764.8 | 26587   | 24930.9 | 21266.3 | 20065.3  | 24685.1 |
| ENSMUSG00000026475 | 7_Rgs16          | 60.768  | 0.59606  | 0.11013  | 0.18633  | 96.3689 | 62.4108 | 59.7577 | 48.691  | 34.0682  | 63.3113 |
| ENSMUSG00000026478 | 14_Lamc1         | 2681.36 | 0.35073  | 0.00427  | 0.01236  | 2864.15 | 3130.63 | 3020.15 | 2278.56 | 2150.78  | 2643.88 |
| ENSMUSG00000026479 | 13_Lamc2         | 2682.9  | 1.20505  | 5.65E-09 | 1.04E-07 | 3403.3  | 3271.06 | 4551.15 | 1437.29 | 1303.56  | 2131.06 |
| ENSMUSG00000026480 | 12_Ncf2          | 218.056 | 0.2762   | 0.21057  | 0.31383  | 296.92  | 205.588 | 213.933 | 221.815 | 186.478  | 183.603 |
| ENSMUSG00000026482 | 13_Rgl1          | 774.067 | -0.47014 | 0.00136  | 0.00468  | 711.046 | 661.738 | 573.674 | 992.756 | 866.945  | 838.242 |
| ENSMUSG00000026483 | 13_Fam129a       | 6504.62 | -0.75735 | 4.61E-06 | 3.45E-05 | 4665.64 | 5916.17 | 3923.69 | 8830.21 | 8352.98  | 7339.05 |
| ENSMUSG00000026484 | 13_Rnf2          | 1099.99 | -0.5151  | 1.95E-05 | 0.00012  | 879.475 | 897.614 | 940.586 | 1198.34 | 1386.04  | 1297.88 |
| ENSMUSG00000026489 | 13_Adck3         | 399.573 | -0.36303 | 0.20822  | 0.31102  | 302.998 | 411.177 | 334.643 | 656.427 | 274.338  | 417.855 |
| ENSMUSG00000026490 | 17_Cdc42bpa      | 2008.09 | -0.74102 | 4.22E-11 | 1.52E-09 | 1522.8  | 1593.31 | 1393.55 | 2586.94 | 2567.66  | 2384.31 |
| ENSMUSG00000026491 | 13_Ahctf1        | 2233.16 | -0.22525 | 0.09639  | 0.16676  | 2132.27 | 2008.16 | 2036.54 | 2045.92 | 2696.76  | 2479.27 |
| ENSMUSG00000026492 | 11_Tfb2m         | 472.556 | -0.63281 | 7.34E-05 | 0.00038  | 403.708 | 338.67  | 369.303 | 520.273 | 643.709  | 559.672 |
| ENSMUSG00000026494 | 12_Kif26b        | 135.068 | -0.98597 | 0.00072  | 0.00271  | 82.4779 | 122.068 | 66.9286 | 220.913 | 162.272  | 155.746 |
| ENSMUSG00000026495 | 8_Efcab2         | 136.684 | -0.88568 | 0.00031  | 0.00134  | 111.996 | 80.7669 | 95.6123 | 197.469 | 187.375  | 146.882 |

|                    |             |         |          |          |          |         |         |         |         |         |         |
|--------------------|-------------|---------|----------|----------|----------|---------|---------|---------|---------|---------|---------|
| ENSMUSG00000026496 | 11_Parp1    | 1531.45 | 0.43904  | 0.00027  | 0.00116  | 1736.38 | 1718.13 | 1832.17 | 1293.92 | 1186.11 | 1421.97 |
| ENSMUSG00000026497 | 7_Mixl1     | 0       | NA       | NA       | NA       | 0       | 0       | 0       | 0       | 0       | 0       |
| ENSMUSG00000026499 | 5_Acbd3     | 1667.53 | -0.17274 | 0.16778  | 0.26179  | 1573.16 | 1499.69 | 1630.19 | 1560.82 | 1864.78 | 1876.55 |
| ENSMUSG00000026500 | 6_Cox20     | 656.769 | -0.77315 | 3.95E-07 | 4.12E-06 | 523.518 | 486.437 | 444.597 | 809.714 | 936.874 | 739.477 |
| ENSMUSG00000026502 | 13_Desl2    | 746.995 | -0.33692 | 0.01358  | 0.03264  | 695.419 | 641.546 | 644.188 | 815.124 | 923.426 | 762.269 |
| ENSMUSG00000026504 | 17_Sdccag8  | 244.302 | -0.09553 | 0.61306  | 0.71248  | 263.929 | 204.671 | 240.226 | 276.817 | 235.788 | 244.382 |
| ENSMUSG00000026509 | 15_Capn2    | 8279.59 | 0.24226  | 0.0791   | 0.14203  | 8687.96 | 8545.69 | 9684.33 | 6506.56 | 7508.44 | 8744.56 |
| ENSMUSG00000026510 | 10_Trp53bp2 | 1555.93 | 0.40006  | 0.00263  | 0.00822  | 1653.03 | 1757.6  | 1899.1  | 1320.07 | 1204.04 | 1501.75 |
| ENSMUSG00000026511 | 7_Srp9      | 1372.75 | -0.41755 | 0.0013   | 0.00451  | 1260.61 | 1103.2  | 1162.88 | 1462.53 | 1745.55 | 1501.75 |
| ENSMUSG00000026514 | 13_Cnih3    | 0.74883 | -3.06485 | 0.35312  | NA       | 0       | 0       | 0       | 1.80337 | 2.68959 | 0       |
| ENSMUSG00000026516 | 8_Nvl       | 1251.45 | 0.04986  | 0.71023  | 0.79283  | 1306.62 | 1186.72 | 1325.43 | 1074.81 | 1313.42 | 1301.68 |
| ENSMUSG00000026519 | 16_Tmem63a  | 1583.86 | 0.71551  | 1.69E-07 | 1.98E-06 | 1800.62 | 1951.25 | 2153.67 | 1222.69 | 1060.6  | 1314.34 |
| ENSMUSG00000026520 | 8_Pycr2     | 435.577 | 0.74722  | 0.00021  | 0.00094  | 526.122 | 525.903 | 586.821 | 418.382 | 266.27  | 289.966 |
| ENSMUSG00000026525 | 9_Opn3      | 13.6127 | -0.07595 | 0.9248   | 0.95034  | 3.47275 | 17.4383 | 19.1225 | 23.4438 | 8.06878 | 10.1298 |
| ENSMUSG00000026526 | 14_Fh1      | 1169.25 | -0.43158 | 0.00054  | 0.00212  | 1042.69 | 1010.5  | 933.415 | 1467.04 | 1282.94 | 1278.89 |
| ENSMUSG00000026527 | 13_Rgs7     | 10.4622 | -1.80815 | 0.03807  | 0.07735  | 4.34094 | 8.26025 | 1.19515 | 24.3455 | 17.0341 | 7.59736 |
| ENSMUSG00000026532 | 7_Spta1     | 26.3628 | -1.64913 | 0.00352  | 0.01051  | 13.0228 | 15.6027 | 9.56123 | 27.9522 | 65.4467 | 26.5908 |
| ENSMUSG00000026535 | 9_Ilf202b   | 9750.58 | 0.23809  | 0.22288  | 0.3279   | 10645.7 | 9224.86 | 11789   | 6285.65 | 10406.9 | 10151.3 |
| ENSMUSG00000026536 | 9_Mnda      | 488.867 | 1.45825  | 3.33E-08 | 4.81E-07 | 767.479 | 522.231 | 860.511 | 170.419 | 320.061 | 292.498 |
| ENSMUSG00000026544 | 6_Dusp23    | 31.6668 | 0.05498  | 0.90261  | 0.9341   | 30.3866 | 35.7944 | 31.074  | 41.4775 | 32.2751 | 18.9934 |
| ENSMUSG00000026546 | 16_Cfap45   | 36.8757 | -0.02392 | 0.95587  | 0.97132  | 26.9138 | 41.3013 | 41.8304 | 50.4944 | 27.7924 | 32.9219 |
| ENSMUSG00000026547 | 15_Tagln2   | 4489.67 | 1.0275   | 4.75E-10 | 1.24E-08 | 5975.74 | 5107.59 | 6988.07 | 3036.88 | 2456.49 | 3373.23 |
| ENSMUSG00000026548 | 4_Slamf9    | 82.9867 | 0.96055  | 0.00461  | 0.01317  | 151.065 | 91.7806 | 86.0511 | 70.3315 | 49.3092 | 49.3828 |
| ENSMUSG00000026553 | 17_Copa     | 6689.73 | 0.16053  | 0.20865  | 0.31152  | 6845.67 | 6871.61 | 7466.13 | 5470.53 | 6429.02 | 7055.42 |
| ENSMUSG00000026554 | 15_Dcaf8    | 3188.29 | 0.04229  | 0.67326  | 0.76331  | 3108.11 | 3250.87 | 3346.43 | 3239.76 | 2996.21 | 3188.36 |
| ENSMUSG00000026556 | 15_Vangl2   | 469.171 | 0.43635  | 0.00685  | 0.01835  | 473.163 | 530.492 | 615.504 | 402.152 | 372.06  | 421.654 |
| ENSMUSG00000026558 | 13_Uck2     | 964.913 | 0.41846  | 0.00214  | 0.00688  | 1144.27 | 983.888 | 1183.2  | 848.486 | 758.465 | 871.164 |
| ENSMUSG00000026563 | 13_Tada1    | 499.123 | 0.20137  | 0.16585  | 0.25937  | 553.904 | 474.505 | 573.674 | 467.975 | 453.644 | 471.036 |
| ENSMUSG00000026564 | 9_Dusp27    | 20.5014 | -1.83399 | 0.00223  | 0.00711  | 6.07732 | 14.6849 | 5.97577 | 38.7725 | 23.3098 | 34.1881 |
| ENSMUSG00000026565 | 18_Pouzf1   | 1027.77 | -0.14622 | 0.24375  | 0.35189  | 994.076 | 912.299 | 1021.86 | 1022.51 | 1169.97 | 1045.9  |
| ENSMUSG00000026566 | 15_Mpz1     | 751.324 | -0.4614  | 0.00056  | 0.00218  | 627.7   | 676.423 | 591.601 | 930.539 | 804.188 | 877.495 |
| ENSMUSG00000026567 | 16_Adcy10   | 3.02783 | -0.95008 | 0.54043  | 0.64759  | 5.20913 | 0.91781 | 0       | 2.70506 | 8.06878 | 1.26623 |
| ENSMUSG00000026568 | 6_Mpc2      | 1310.02 | -0.45132 | 0.00037  | 0.00154  | 1101.73 | 1104.12 | 1115.08 | 1385.89 | 1697.13 | 1456.16 |
| ENSMUSG00000026571 | 12_Dcaf6    | 913.315 | -0.4681  | 0.00022  | 0.00099  | 788.315 | 808.587 | 701.555 | 1024.31 | 1125.15 | 1031.97 |
| ENSMUSG00000026572 | 11_Tbx19    | 0.5715  | -2.63875 | 0.47614  | NA       | 0       | 0       | 0       | 0       | 0.89653 | 2.53245 |
| ENSMUSG00000026573 | 7_Xcl1      | 3.91201 | 1.91521  | 0.19381  | 0.29389  | 6.94551 | 0.91781 | 10.7564 | 0       | 3.58612 | 1.26623 |
| ENSMUSG00000026574 | 5_Dpt       | 3098.4  | -0.64577 | 2.45E-06 | 2.00E-05 | 2579.39 | 2653.38 | 2013.83 | 3901.59 | 3621.98 | 3820.21 |
| ENSMUSG00000026575 | 15_Nme7     | 406.914 | -0.42785 | 0.01514  | 0.03588  | 381.135 | 297.369 | 362.132 | 403.955 | 490.402 | 506.491 |
| ENSMUSG00000026576 | 12_Atp1b1   | 2210.74 | -1.14897 | 1.70E-09 | 3.70E-08 | 1486.34 | 1615.34 | 1019.47 | 3519.28 | 2995.31 | 2628.69 |
| ENSMUSG00000026577 | 13_Blzf1    | 1071.55 | -0.26792 | 0.1023   | 0.17558  | 1018.39 | 870.997 | 1027.83 | 959.393 | 1357.35 | 1195.32 |
| ENSMUSG00000026578 | 6_Ccdc181   | 436.351 | -0.23066 | 0.13514  | 0.21923  | 384.607 | 425.862 | 393.206 | 417.48  | 484.127 | 512.822 |
| ENSMUSG00000026579 | 8_F5        | 374.04  | -1.08447 | 6.22E-07 | 6.11E-06 | 217.047 | 301.04  | 200.786 | 613.146 | 471.575 | 440.647 |
| ENSMUSG00000026580 | 16_Selp     | 83.1425 | 2.04979  | 2.41E-05 | 0.00015  | 208.365 | 49.5615 | 143.418 | 24.3455 | 31.3786 | 41.7855 |
| ENSMUSG00000026581 | 14_Sell     | 100.946 | 3.65038  | 2.16E-12 | 1.06E-10 | 336.857 | 83.5203 | 141.028 | 12.6236 | 21.5167 | 10.1298 |
| ENSMUSG00000026582 | 6_Seie      | 27.5638 | 1.74231  | 0.00825  | 0.02153  | 63.3778 | 15.6027 | 47.8062 | 6.3118  | 10.7584 | 21.5259 |
| ENSMUSG00000026584 | 14_Scyl3    | 803.193 | 0.05212  | 0.69697  | 0.78317  | 790.92  | 771.874 | 890.39  | 726.758 | 799.705 | 839.508 |
| ENSMUSG00000026585 | 13_Kifap3   | 994.954 | -0.43263 | 0.00106  | 0.00377  | 829.988 | 918.723 | 791.192 | 1051.37 | 1236.32 | 1142.14 |
| ENSMUSG00000026586 | 16_Prrx1    | 1212.49 | -0.79176 | 1.74E-08 | 2.78E-07 | 977.58  | 901.285 | 784.021 | 1676.23 | 1536.65 | 1399.18 |
| ENSMUSG00000026587 | 15_Astn1    | 307.378 | -1.6409  | 1.14E-08 | 1.91E-07 | 159.747 | 188.15  | 99.1978 | 605.031 | 467.989 | 324.154 |
| ENSMUSG00000026589 | 14_Sec16b   | 171.898 | -0.086   | 0.6976   | 0.78358  | 144.987 | 204.671 | 150.589 | 185.747 | 175.72  | 169.674 |
| ENSMUSG00000026592 | 13_Tex35    | 2.10133 | 2.15291  | 0.25897  | NA       | 5.20913 | 3.67122 | 1.19515 | 0       | 0       | 2.53245 |
| ENSMUSG00000026594 | 14_Ralgs2   | 2366.92 | 0.00876  | 0.95053  | 0.9677   | 2321.54 | 2240.36 | 2560.02 | 1981.9  | 2512.08 | 2585.64 |
| ENSMUSG00000026596 | 13_Abl2     | 1379.25 | 0.36232  | 0.00414  | 0.01203  | 1571.42 | 1490.52 | 1590.75 | 1143.34 | 1123.35 | 1356.13 |
| ENSMUSG00000026600 | 12_Soat1    | 451.646 | -0.65567 | 0.00039  | 0.0016   | 414.994 | 354.273 | 282.056 | 585.194 | 578.262 | 495.095 |
| ENSMUSG00000026601 | 17_Axdnd1   | 17.5382 | -0.5499  | 0.33687  | 0.45352  | 16.4956 | 16.5205 | 9.56123 | 17.132  | 27.7924 | 17.7272 |
| ENSMUSG00000026602 | 9_Nphs2     | 3.04612 | -0.18111 | 0.8916   | 0.92683  | 4.34094 | 1.83561 | 2.39031 | 0.90169 | 6.27571 | 2.53245 |
| ENSMUSG00000026603 | 13_Smyd2    | 589.656 | -0.18448 | 0.22636  | 0.33187  | 579.082 | 576.382 | 499.574 | 695.2   | 555.849 | 631.847 |
| ENSMUSG00000026604 | 17_Ptpn14   | 1628.3  | 0.1045   | 0.37303  | 0.4906   | 1650.43 | 1633.69 | 1779.58 | 1702.38 | 1534.86 | 1468.82 |
| ENSMUSG00000026605 | 14_Cenpf    | 1029.02 | -0.23468 | 0.18022  | 0.27723  | 1055.72 | 780.135 | 1000.34 | 917.014 | 1219.28 | 1201.65 |
| ENSMUSG00000026608 | 12_Kctd3    | 967.158 | 0.41     | 0.0013   | 0.0045   | 1091.31 | 1066.49 | 1152.13 | 833.157 | 755.775 | 904.086 |
| ENSMUSG00000026609 | 15_Ush2a    | 215.245 | 0.06124  | 0.82294  | 0.87865  | 210.102 | 218.438 | 231.86  | 304.77  | 166.755 | 159.545 |
| ENSMUSG00000026610 | 13_Esrrg    | 68.1599 | -1.1206  | 0.00776  | 0.02038  | 43.4094 | 57.8218 | 27.4885 | 133.449 | 92.3426 | 54.4478 |
| ENSMUSG00000026611 | 17_Spata17  | 4.83737 | -1.0188  | 0.32027  | 0.43591  | 2.60457 | 4.58903 | 2.39031 | 5.41011 | 8.96531 | 5.06491 |
| ENSMUSG00000026614 | 6_Slc30a10  | 5.51668 | -1.53731 | 0.22562  | 0.33094  | 0.86819 | 6.42464 | 1.19515 | 6.3118  | 17.0341 | 1.26623 |
| ENSMUSG00000026615 | 14_Eprs     | 4119.88 | -0.11761 | 0.39166  | 0.50908  | 4110.87 | 3623.5  | 4120.89 | 3628.38 | 4532.86 | 4702.77 |
| ENSMUSG00000026616 | 14_Cr2      | 15.8231 | -0.78662 | 0.26644  | 0.37769  | 18.232  | 13.7671 | 2.39031 | 18.0337 | 19.7237 | 22.7921 |
| ENSMUSG00000026617 | 15_Bpnt1    | 573.825 | -0.07952 | 0.595    | 0.69683  | 560.85  | 547.012 | 565.308 | 622.163 | 505.643 | 641.977 |
| ENSMUSG00000026618 | 11_lars2    | 2177.39 | -0.04296 | 0.67136  | 0.76186  | 2208.67 | 2132.06 | 2092.71 | 2128.88 | 2206.36 | 2295.67 |
| ENSMUSG00000026620 | 11_Mark1    | 77.6443 | -0.42882 | 0.15826  | 0.24992  | 69.4551 | 69.7532 | 59.7577 | 105.497 | 96.8253 | 64.5776 |
| ENSMUSG00000026621 | 13_Marc1    | 2.14109 | -0.8337  | 0.65876  | NA       | 0.86819 | 3.67122 | 0       | 4.50843 | 0       | 3.79868 |
| ENSMUSG00000026622 | 15_Nek2     | 291.051 | 0.55645  | 0.00129  | 0.00446  | 356.825 | 312.972 | 369.303 | 211.896 | 242.063 | 253.245 |
| ENSMUSG00000026623 | 16_Lpgat1   | 1610.46 | -0.39185 | 0.0009   | 0.00326  | 1465.5  | 1351.01 | 1363.67 | 1890.83 | 1926.64 | 1665.09 |
| ENSMUSG00000026626 | 11_Ppp2r5a  | 2201.35 | 0.15392  | 0.21723  | 0.32153  | 2288.54 | 2132.98 | 2536.12 | 1956.66 | 2269.12 | 2024.7  |
| ENSMUSG00000026627 | 7_Tmem206   | 166.696 | -0.45628 | 0.09368  | 0.16293  | 129.36  | 188.15  | 103.978 | 210.093 | 211.581 | 157.012 |
| ENSMUSG00000026628 | 13_Atf3     | 200.519 | 1.4775   | 9.41E-08 | 1.19E-06 | 340.33  | 185.397 | 359.741 | 104.596 | 106.687 | 106.363 |
| ENSMUSG00000026630 | 9_Batf3     | 6.02778 | 1.30165  | 0.18333  | 0.28106  | 9.55007 | 9.17806 | 7.17092 | 6.3118  | 2.68959 | 1.26623 |
| ENSMUSG00000026632 | 17_Tatdn3   | 180.585 | -0.40858 | 0.03104  | 0.06533  | 153.669 | 152.356 | 160.151 | 206.486 | 219.65  | 191.2   |
| ENSMUSG00000026634 | 16_Angel2   | 1146.31 | -0.28633 | 0.01042  | 0.02618  | 1040.96 | 1060.07 | 997.954 | 1259.65 | 1312.52 | 1206.71 |
| ENSMUSG00000026637 | 13_Traf5    | 997.909 | 0.63163  | 0.00012  | 0.00057  | 1135.59 | 1105.04 | 1397.14 | 705.118 | 725.293 | 919.281 |

|                    |                  |         |          |          |          |         |         |         |         |         |         |
|--------------------|------------------|---------|----------|----------|----------|---------|---------|---------|---------|---------|---------|
| ENSMUSG00000026638 | 15_Irf6          | 18407.5 | 0.14481  | 0.30966  | 0.42453  | 19069.8 | 18230.4 | 20690.5 | 14465.7 | 17973.6 | 20015.2 |
| ENSMUSG00000026639 | 18_Lamb3         | 2252.65 | 1.91977  | 8.58E-18 | 1.22E-15 | 2938.82 | 3352.74 | 4396.97 | 938.655 | 670.605 | 1218.11 |
| ENSMUSG00000026640 | 12_Plxna2        | 1516.99 | -0.33851 | 0.00515  | 0.01445  | 1294.47 | 1475.83 | 1248.94 | 1764.6  | 1693.55 | 1624.57 |
| ENSMUSG00000026641 | 13_Usf1          | 1225.32 | 0.81116  | 1.07E-06 | 9.69E-06 | 1424.7  | 1471.24 | 1786.76 | 971.115 | 724.397 | 973.728 |
| ENSMUSG00000026643 | 16_Nmt2          | 729.355 | -0.55939 | 0.00011  | 0.00053  | 598.182 | 614.93  | 555.747 | 787.171 | 984.391 | 835.71  |
| ENSMUSG00000026644 | 6_Acbd7          | 1.75374 | -2.09664 | 0.25298  | NA       | 0.86819 | 0       | 1.19515 | 3.60674 | 3.58612 | 1.26623 |
| ENSMUSG00000026646 | 16_Suv39h2       | 112.579 | -0.32661 | 0.22011  | 0.32488  | 102.446 | 77.0957 | 120.711 | 110.006 | 139.859 | 125.356 |
| ENSMUSG00000026648 | 18_Dclre1c       | 237.641 | -0.08506 | 0.65661  | 0.74961  | 250.038 | 206.506 | 235.445 | 215.503 | 275.235 | 243.116 |
| ENSMUSG00000026649 | 14_Cfap126       | 25.7568 | 0.12753  | 0.78744  | 0.85239  | 29.5184 | 33.041  | 17.9273 | 27.9522 | 23.3098 | 22.7921 |
| ENSMUSG00000026650 | 15_Meig1         | 1.52209 | 0.59454  | 0.77427  | NA       | 4.34094 | 0       | 1.19515 | 1.80337 | 1.79306 | 0       |
| ENSMUSG00000026655 | 14_Fam107b       | 2597.91 | -0.13124 | 0.28124  | 0.39404  | 2575.92 | 2268.82 | 2594.68 | 2458.9  | 2868    | 2821.15 |
| ENSMUSG00000026656 | 15_Fcgr2b        | 406.884 | 0.3317   | 0.16932  | 0.26373  | 614.677 | 355.191 | 390.815 | 390.43  | 398.956 | 291.232 |
| ENSMUSG00000026657 | 16_Frmd4a        | 1078.91 | -0.05219 | 0.68165  | 0.76984  | 1066.14 | 1076.59 | 1033.81 | 1119.89 | 981.701 | 1195.32 |
| ENSMUSG00000026659 | 13_Dusp12        | 358.246 | -0.30315 | 0.07569  | 0.13698  | 318.625 | 327.657 | 316.716 | 370.593 | 462.61  | 353.277 |
| ENSMUSG00000026662 | 13_Sephs1        | 1261.8  | -0.22075 | 0.0626   | 0.117    | 1257.14 | 1097.7  | 1140.18 | 1328.18 | 1320.59 | 1427.04 |
| ENSMUSG00000026663 | 6_Atf6           | 1887.02 | 0.0228   | 0.84525  | 0.89448  | 1876.16 | 1757.6  | 2073.59 | 1813.29 | 1955.33 | 1846.16 |
| ENSMUSG00000026664 | 7_Phyh           | 2440.45 | -0.29286 | 0.0161   | 0.03782  | 2187.83 | 2097.19 | 2295.89 | 2384.96 | 2888.62 | 2788.23 |
| ENSMUSG00000026667 | 14_Uhmk1         | 5181.23 | -0.35855 | 0.00047  | 0.00187  | 4663.91 | 4482.56 | 4474.66 | 5390.28 | 6110.75 | 5965.2  |
| ENSMUSG00000026668 | 10_Ucma          | 0.54867 | 1.10538  | 0.77323  | NA       | 0       | 0       | 2.39031 | 0.90169 | 0       | 0       |
| ENSMUSG00000026669 | 14_Mcm10         | 240.689 | 1.16902  | 1.48E-06 | 1.29E-05 | 335.121 | 285.438 | 378.864 | 104.596 | 179.306 | 160.811 |
| ENSMUSG00000026670 | 15_Uap1          | 1979.8  | -0.04718 | 0.73037  | 0.8085   | 1965.58 | 1765.86 | 2110.64 | 1753.78 | 2105.05 | 2177.91 |
| ENSMUSG00000026672 | 11_Optn          | 925.345 | -0.46099 | 0.00109  | 0.00387  | 784.842 | 828.778 | 723.068 | 1193.83 | 1073.15 | 948.404 |
| ENSMUSG00000026674 | 9_Ddr2           | 3699.82 | -0.70048 | 6.02E-09 | 1.10E-07 | 2884.99 | 3015.91 | 2555.24 | 4726.64 | 4828.71 | 4187.41 |
| ENSMUSG00000026675 | 12_Hsd17b7       | 950.388 | 0.18794  | 0.21963  | 0.32439  | 1093.05 | 847.135 | 1095.96 | 825.042 | 875.014 | 966.131 |
| ENSMUSG00000026676 | 7_Ccdc3          | 970.227 | 0.36811  | 0.03486  | 0.07193  | 1090.44 | 993.983 | 1193.96 | 797.992 | 702.88  | 1042.1  |
| ENSMUSG00000026678 | 10_Rgs5          | 2881.93 | -1.26825 | 1.02E-12 | 5.45E-11 | 1653.9  | 1907.2  | 1511.87 | 4932.22 | 4119.56 | 3166.83 |
| ENSMUSG00000026679 | 3_Enkur          | 16.9227 | -1.37612 | 0.02114  | 0.04748  | 6.94551 | 12.8493 | 8.36608 | 28.8539 | 17.9306 | 26.5908 |
| ENSMUSG00000026683 | 14_Nuf2          | 310.06  | -0.17334 | 0.43187  | 0.54709  | 334.253 | 254.232 | 285.642 | 251.57  | 401.646 | 333.018 |
| ENSMUSG00000026686 | 14_Lmx1a         | 21.0298 | -0.68553 | 0.24563  | 0.35406  | 14.7592 | 24.7808 | 8.36608 | 27.0506 | 17.0341 | 34.1881 |
| ENSMUSG00000026687 | 14_Aldh9a1       | 951.46  | -0.20163 | 0.12524  | 0.20657  | 892.498 | 932.49  | 829.437 | 1107.27 | 925.22  | 1021.85 |
| ENSMUSG00000026688 | 5_Mgst3          | 2105.05 | 0.55229  | 0.00086  | 0.00314  | 2413.56 | 2490.01 | 2605.44 | 2000.84 | 1316.11 | 1804.37 |
| ENSMUSG00000026691 | 10_Fmo3          | 8.45718 | -1.06948 | 0.21741  | 0.32174  | 6.07732 | 6.42464 | 3.58546 | 9.01685 | 5.37918 | 20.2596 |
| ENSMUSG00000026692 | 12_Fmo4          | 3.77565 | 0.02422  | 0.98724  | 0.99121  | 1.73638 | 7.34244 | 2.39031 | 9.91854 | 0       | 1.26623 |
| ENSMUSG00000026694 | 19_Mtll13        | 308.766 | 0.43622  | 0.00965  | 0.02451  | 319.493 | 383.643 | 362.132 | 277.719 | 241.167 | 268.44  |
| ENSMUSG00000026696 | 15_Vamp4         | 930.753 | -0.54075 | 1.60E-05 | 0.0001   | 752.719 | 781.97  | 740.996 | 1086.53 | 1200.45 | 1021.85 |
| ENSMUSG00000026697 | 10_Myoc          | 5831.64 | 0.03848  | 0.82791  | 0.88235  | 5732.65 | 6863.35 | 5131.99 | 7117    | 4772.23 | 5372.6  |
| ENSMUSG00000026698 | 8_Pigc           | 2250.13 | -0.06286 | 0.71631  | 0.79778  | 2140.95 | 2179.79 | 2281.55 | 1716.81 | 2511.18 | 2670.47 |
| ENSMUSG00000026700 | 4_Tnfsf4         | 2.26714 | 1.26464  | 0.49983  | NA       | 0       | 3.67122 | 5.97577 | 0       | 2.68959 | 1.26623 |
| ENSMUSG00000026701 | 15_Prx6          | 19115.4 | 0.39913  | 0.00101  | 0.00361  | 21027.5 | 21769.4 | 22429.5 | 14615.4 | 16237.1 | 18613.5 |
| ENSMUSG00000026705 | 16_Khl20         | 590.629 | -0.06697 | 0.61705  | 0.71551  | 572.136 | 591.067 | 566.503 | 554.537 | 615.02  | 644.51  |
| ENSMUSG00000026707 | 15_Nsun6         | 368.839 | -0.25088 | 0.20792  | 0.31059  | 372.453 | 346.013 | 290.422 | 316.492 | 426.749 | 460.907 |
| ENSMUSG00000026708 | 16_Cenpl         | 206.605 | 0.0547   | 0.79881  | 0.86098  | 232.674 | 185.397 | 213.933 | 177.632 | 243.856 | 186.135 |
| ENSMUSG00000026709 | 10_Dars2         | 524.904 | -0.30574 | 0.05121  | 0.09893  | 504.417 | 413.93  | 490.013 | 517.567 | 619.503 | 603.99  |
| ENSMUSG00000026712 | 3_Mrc1           | 500.518 | -0.71453 | 0.00027  | 0.00118  | 407.18  | 429.533 | 299.984 | 661.837 | 693.018 | 511.556 |
| ENSMUSG00000026715 | 12_Serpinc1      | 79.3101 | 0.22535  | 0.47519  | 0.58771  | 79.8733 | 106.465 | 70.5141 | 86.5618 | 77.9982 | 54.4478 |
| ENSMUSG00000026718 | 17_Stam          | 687.345 | -0.32489 | 0.01217  | 0.02978  | 632.909 | 566.286 | 632.237 | 737.579 | 804.188 | 750.873 |
| ENSMUSG00000026721 | 15_Rabgap1l      | 1965.31 | -0.35976 | 0.00975  | 0.02473  | 1671.26 | 1724.56 | 1768.83 | 1861.98 | 2492.35 | 2272.88 |
| ENSMUSG00000026723 | 10_Trdmt1        | 267.033 | -0.54023 | 0.00249  | 0.00784  | 238.752 | 221.191 | 192.42  | 308.376 | 345.164 | 296.297 |
| ENSMUSG00000026725 | 17_Tnn           | 271.724 | 0.2833   | 0.46866  | 0.58201  | 262.193 | 329.492 | 303.569 | 101.89  | 420.473 | 212.726 |
| ENSMUSG00000026726 | 10_Cubn          | 98.7427 | -1.19359 | 0.00186  | 0.00613  | 53.8277 | 90.8628 | 34.6595 | 156.893 | 94.1357 | 162.077 |
| ENSMUSG00000026727 | 10_Rsu1          | 1098.73 | -0.41091 | 0.00076  | 0.00283  | 1017.52 | 926.066 | 885.609 | 1212.77 | 1325.97 | 1224.44 |
| ENSMUSG00000026728 | 9_Vim            | 5622.59 | -0.45209 | 0.04847  | 0.09456  | 4834.94 | 5263.61 | 4148.38 | 5540.86 | 9272.82 | 4674.91 |
| ENSMUSG00000026729 | 9_4930562F07Rik  | 11.1557 | -0.70148 | 0.5045   | 0.61521  | 7.8137  | 17.4383 | 0       | 20.7388 | 4.48265 | 16.4609 |
| ENSMUSG00000026730 | 12_Pter          | 252.644 | -0.41693 | 0.01738  | 0.04028  | 211.838 | 223.027 | 215.128 | 301.163 | 310.2   | 254.512 |
| ENSMUSG00000026735 | 2_Ptf1a          | 0       | NA       | NA       | NA       | 0       | 0       | 0       | 0       | 0       | 0       |
| ENSMUSG00000026736 | 1_4930426L09Rik  | 4.64282 | -1.09214 | 0.28482  | 0.39811  | 2.60457 | 2.75342 | 3.58546 | 5.41011 | 7.17224 | 6.33113 |
| ENSMUSG00000026737 | 12_Pip4k2a       | 342.537 | -0.41087 | 0.01198  | 0.02945  | 306.471 | 304.711 | 271.3   | 421.087 | 403.439 | 348.212 |
| ENSMUSG00000026739 | 13_Bmi1          | 1001.36 | -0.56587 | 7.66E-06 | 5.38E-05 | 843.879 | 843.463 | 733.825 | 1139.73 | 1265.9  | 1181.39 |
| ENSMUSG00000026740 | 12_Dnajc1        | 952.588 | -0.32009 | 0.00652  | 0.0176   | 869.925 | 852.641 | 818.681 | 997.264 | 1104.53 | 1072.49 |
| ENSMUSG00000026743 | 16_Mlt10         | 1173.44 | 0.08938  | 0.46161  | 0.57532  | 1192.02 | 1196.82 | 1239.37 | 1037.84 | 1141.28 | 1233.31 |
| ENSMUSG00000026748 | 13_Plxdc2        | 2526.46 | -0.15557 | 0.15051  | 0.23975  | 2395.33 | 2284.42 | 2490.7  | 2522.01 | 2622.35 | 2843.95 |
| ENSMUSG00000026749 | 11_Nek6          | 367.866 | -0.89663 | 2.72E-05 | 0.00016  | 281.293 | 290.944 | 198.396 | 570.767 | 464.403 | 401.394 |
| ENSMUSG00000026750 | 6_Psmb7          | 3160.71 | -0.24278 | 0.0401   | 0.0807   | 3057.76 | 2721.29 | 2907.81 | 3228.94 | 3781.57 | 3266.87 |
| ENSMUSG00000026751 | 14_Nr5a1         | 0       | NA       | NA       | NA       | 0       | 0       | 0       | 0       | 0       | 0       |
| ENSMUSG00000026753 | 5_Ppp6c          | 1599.2  | -0.46839 | 0.00055  | 0.00217  | 1397.78 | 1249.13 | 1379.21 | 1654.59 | 2105.05 | 1809.44 |
| ENSMUSG00000026754 | 16_Golga1        | 1335.02 | -0.24656 | 0.07557  | 0.13678  | 1225.88 | 1159.19 | 1278.81 | 1247.03 | 1616.44 | 1482.75 |
| ENSMUSG00000026755 | 14_Arpc5l        | 1929.27 | -0.30909 | 0.01732  | 0.04016  | 1745.93 | 1624.52 | 1799.9  | 1868.29 | 2342.63 | 2194.37 |
| ENSMUSG00000026761 | 12_Orc4          | 854.322 | -0.44263 | 0.00429  | 0.0124   | 685.869 | 703.039 | 785.216 | 862.913 | 1149.35 | 939.54  |
| ENSMUSG00000026764 | 15_Kif5c         | 201.004 | -2.28012 | 2.88E-08 | 4.23E-07 | 85.9507 | 61.6847 | 37.0498 | 295.753 | 171.237 | 534.348 |
| ENSMUSG00000026765 | 12_Lypd6b        | 271.179 | 0.00707  | 0.96807  | 0.97945  | 251.775 | 261.575 | 302.374 | 244.357 | 277.028 | 289.966 |
| ENSMUSG00000026766 | 16_Mmadhc        | 2094.35 | -0.31028 | 0.01813  | 0.04172  | 1925.64 | 1767.69 | 1915.83 | 1998.14 | 2452.91 | 2505.86 |
| ENSMUSG00000026767 | 12_Fam188a       | 2144.45 | -0.00169 | 0.99044  | 0.99369  | 2170.47 | 2003.57 | 2255.26 | 1800.67 | 2358.77 | 2277.94 |
| ENSMUSG00000026768 | 10_Igfa8         | 236.741 | -1.04035 | 4.14E-05 | 0.00023  | 152.801 | 190.904 | 120.711 | 296.655 | 406.128 | 253.245 |
| ENSMUSG00000026770 | 5_Il2ra          | 30.2648 | 1.0714   | 0.01123  | 0.02786  | 46.8822 | 36.7122 | 39.4401 | 19.8371 | 19.7237 | 18.9934 |
| ENSMUSG00000026771 | 14_Spopl         | 428.98  | -0.43297 | 0.013    | 0.03148  | 395.026 | 373.547 | 326.277 | 439.121 | 576.469 | 463.439 |
| ENSMUSG00000026773 | 19_Pfkfb3        | 1982.9  | 0.70302  | 5.35E-09 | 9.96E-08 | 2471.73 | 2401.9  | 2494.29 | 1365.15 | 1489.14 | 1675.22 |
| ENSMUSG00000026774 | 11_4931423N10Rik | 0.90685 | 2.08306  | 0.4559   | NA       | 0.86819 | 3.67122 | 0       | 0.90169 | 0       | 0       |
| ENSMUSG00000026775 | 9_Yme1l1         | 2747.59 | -0.49114 | 0.00083  | 0.00307  | 2371.89 | 2116.46 | 2365.21 | 2712.27 | 3752.88 | 3166.83 |
| ENSMUSG00000026778 | 13_Prkcq         | 496.326 | -1.02686 | 1.23E-06 | 1.10E-05 | 322.098 | 401.999 | 255.763 | 779.056 | 673.294 | 545.744 |

|                    |                  |         |          |          |          |         |         |         |         |         |         |
|--------------------|------------------|---------|----------|----------|----------|---------|---------|---------|---------|---------|---------|
| ENSMUSG00000026779 | 6_Mastl          | 280.692 | 0.0685   | 0.74813  | 0.82216  | 308.207 | 260.657 | 292.813 | 206.486 | 320.958 | 295.031 |
| ENSMUSG00000026781 | 15_Acbd5         | 1157.04 | -0.45522 | 5.55E-05 | 0.0003   | 960.216 | 983.888 | 983.612 | 1255.15 | 1384.24 | 1375.12 |
| ENSMUSG00000026782 | 15_Abi2          | 382.262 | -0.77797 | 3.12E-05 | 0.00018  | 302.13  | 307.465 | 234.25  | 511.256 | 530.746 | 407.725 |
| ENSMUSG00000026784 | 14_Pdss1         | 129.605 | -0.17773 | 0.49224  | 0.60396  | 138.91  | 98.2052 | 127.881 | 112.711 | 163.169 | 136.753 |
| ENSMUSG00000026785 | 14_Pkn3          | 197.109 | 1.24342  | 1.49E-08 | 2.43E-07 | 251.775 | 281.766 | 297.593 | 133.449 | 91.4461 | 126.623 |
| ENSMUSG00000026786 | 14_Apbb1ip       | 88.6488 | 0.75891  | 0.01806  | 0.04158  | 149.328 | 100.041 | 84.8559 | 80.25   | 59.171  | 58.2464 |
| ENSMUSG00000026787 | 3_Gad2           | 12.2307 | -2.79716 | 0.01213  | 0.02971  | 6.07732 | 1.83561 | 1.19515 | 44.1826 | 18.8271 | 1.26623 |
| ENSMUSG00000026788 | 13_Zbtb43        | 793.343 | 0.11107  | 0.40933  | 0.52604  | 836.065 | 791.148 | 842.584 | 728.562 | 708.259 | 853.437 |
| ENSMUSG00000026790 | 19_Odf2          | 1363.95 | 0.46005  | 0.00052  | 0.00206  | 1547.98 | 1508.87 | 1680.39 | 1053.17 | 1092.87 | 1300.42 |
| ENSMUSG00000026791 | 14_Slc2a8        | 169.877 | 0.87858  | 0.00139  | 0.00477  | 197.079 | 241.383 | 222.299 | 166.812 | 87.86   | 103.831 |
| ENSMUSG00000026792 | 16_Lrsam1        | 433.545 | 0.38684  | 0.01554  | 0.0367   | 458.403 | 522.231 | 493.599 | 422.89  | 334.406 | 369.738 |
| ENSMUSG00000026796 | 16_Fam129b       | 15334.7 | 1.24539  | 1.14E-11 | 4.70E-10 | 19178.3 | 20544.2 | 24989.5 | 10073.6 | 6756.25 | 10466.6 |
| ENSMUSG00000026797 | 15_Stxbp1        | 422.55  | -0.66927 | 0.0219   | 0.04891  | 337.725 | 368.958 | 272.495 | 779.958 | 454.541 | 321.622 |
| ENSMUSG00000026798 | 10_Coq4          | 259.259 | 0.47241  | 0.00883  | 0.02274  | 287.37  | 290.027 | 327.472 | 245.258 | 199.03  | 206.395 |
| ENSMUSG00000026799 | 15_Med27         | 293.838 | 0.54784  | 0.0047   | 0.01339  | 336.857 | 358.862 | 350.18  | 258.784 | 187.375 | 270.973 |
| ENSMUSG00000026803 | 17_Ttf1          | 598.725 | -0.13812 | 0.33689  | 0.45352  | 586.027 | 516.725 | 607.138 | 578.882 | 624.882 | 678.698 |
| ENSMUSG00000026805 | 14_Barhl1        | 2.15266 | -0.13501 | 0.93729  | NA       | 1.73638 | 0.91781 | 3.58546 | 5.41011 | 0       | 1.26623 |
| ENSMUSG00000026806 | 15_Ddx31         | 318.152 | 0.26321  | 0.18114  | 0.27846  | 326.439 | 330.41  | 383.644 | 232.635 | 291.372 | 344.414 |
| ENSMUSG00000026807 | 8_Ak8            | 1.79028 | -0.50057 | 0.79348  | NA       | 2.60457 | 1.83561 | 0       | 4.50843 | 1.79306 | 0       |
| ENSMUSG00000026809 | 15_1700026L06Rik | 1.35511 | 0.32136  | 0.88183  | NA       | 0.86819 | 3.67122 | 0       | 0.90169 | 2.68959 | 0       |
| ENSMUSG00000026810 | 12_Dpm2          | 713.605 | 0.27103  | 0.06383  | 0.11889  | 783.106 | 710.382 | 848.559 | 712.332 | 582.745 | 644.51  |
| ENSMUSG00000026811 | 18_St6galnac6    | 381.68  | -0.60319 | 0.01093  | 0.02722  | 291.711 | 374.465 | 242.616 | 596.916 | 385.508 | 398.861 |
| ENSMUSG00000026812 | 16_Tsc1          | 1141.51 | 0.07598  | 0.55855  | 0.66423  | 1179    | 1197.74 | 1138.98 | 1247.93 | 1074.94 | 1010.45 |
| ENSMUSG00000026814 | 16_Eng           | 718.45  | 0.80784  | 0.00028  | 0.0012   | 869.057 | 1038.96 | 835.413 | 687.986 | 370.267 | 509.023 |
| ENSMUSG00000026815 | 14_Gli1b         | 0.15297 | 0.92709  | 0.82027  | NA       | 0       | 0.91781 | 0       | 0       | 0       | 0       |
| ENSMUSG00000026816 | 14_Gtf3c5        | 585.935 | 0.45535  | 0.00554  | 0.01534  | 624.227 | 648.889 | 758.923 | 468.876 | 441.093 | 573.601 |
| ENSMUSG00000026817 | 14_Ak1           | 679.851 | -0.10915 | 0.64067  | 0.73635  | 656.35  | 677.341 | 628.651 | 953.983 | 468.885 | 693.892 |
| ENSMUSG00000026818 | 5_Cel            | 0.54308 | 2.53494  | 0.50107  | NA       | 0.86819 | 0       | 2.39031 | 0       | 0       | 0       |
| ENSMUSG00000026819 | 15_Slc25a25      | 527.869 | 0.35917  | 0.10285  | 0.17632  | 573.004 | 569.957 | 637.017 | 599.621 | 325.441 | 462.173 |
| ENSMUSG00000026820 | 5_Ptges2         | 413.56  | 0.60082  | 0.00255  | 0.008    | 470.558 | 480.93  | 543.795 | 389.528 | 248.339 | 348.212 |
| ENSMUSG00000026821 | 15_Ralgds        | 1304.39 | 0.96378  | 5.85E-07 | 5.81E-06 | 1508.91 | 1764.02 | 1900.3  | 1035.13 | 645.502 | 972.462 |
| ENSMUSG00000026822 | 14_Lcn2          | 363.3   | 2.4446   | 1.91E-11 | 7.54E-10 | 825.647 | 294.616 | 721.873 | 82.9551 | 162.272 | 92.4346 |
| ENSMUSG00000026824 | 11_Kcni3         | 71.4416 | -1.82879 | 1.80E-05 | 0.00011  | 22.5729 | 53.2327 | 17.9273 | 137.958 | 105.791 | 91.1683 |
| ENSMUSG00000026825 | 17_Dnm1          | 687.412 | 0.04544  | 0.82655  | 0.88118  | 657.219 | 812.258 | 625.066 | 861.11  | 521.781 | 647.042 |
| ENSMUSG00000026826 | 13_Nr4a2         | 467.413 | 0.15008  | 0.30224  | 0.41706  | 497.472 | 503.875 | 472.086 | 418.382 | 421.369 | 491.296 |
| ENSMUSG00000026827 | 12_Gpd2          | 3798.48 | 0.28693  | 0.08038  | 0.14394  | 4112.61 | 3770.35 | 4640.78 | 2745.63 | 3469.57 | 4051.93 |
| ENSMUSG00000026828 | 11_Galnt5        | 66.0773 | -0.80217 | 0.02275  | 0.05055  | 60.7732 | 50.4793 | 32.2692 | 87.4635 | 65.4467 | 100.032 |
| ENSMUSG00000026829 | 9_Gbgt1          | 65.5687 | -0.58123 | 0.09294  | 0.16188  | 47.7504 | 57.8218 | 52.5868 | 105.497 | 75.3086 | 54.4478 |
| ENSMUSG00000026830 | 9_Ermn           | 148.492 | -2.05001 | 2.87E-10 | 8.08E-09 | 65.9823 | 70.671  | 35.8546 | 320.098 | 222.34  | 176.006 |
| ENSMUSG00000026831 | 16_1700007K13Rik | 27.1684 | -0.01572 | 0.97286  | 0.98265  | 28.6502 | 19.2739 | 33.4643 | 32.4607 | 25.1029 | 24.0583 |
| ENSMUSG00000026832 | 12_Cytip         | 44.4875 | 1.38527  | 0.00212  | 0.00683  | 89.4234 | 39.4656 | 64.5383 | 32.4607 | 23.3098 | 17.7272 |
| ENSMUSG00000026833 | 18_Olfm1         | 545.455 | -0.60756 | 0.00187  | 0.00615  | 443.644 | 503.875 | 348.985 | 772.744 | 652.674 | 550.809 |
| ENSMUSG00000026834 | 13_Acvr1c        | 1.6527  | 1.90285  | 0.29825  | NA       | 2.60457 | 2.75342 | 2.39031 | 0.90169 | 0       | 1.26623 |
| ENSMUSG00000026836 | 15_Acvr1         | 626.425 | -0.06864 | 0.631    | 0.72775  | 663.296 | 629.615 | 540.21  | 605.933 | 666.122 | 653.373 |
| ENSMUSG00000026837 | 15_Col5a1        | 2820.82 | 0.25115  | 0.13586  | 0.22013  | 2879.78 | 3780.44 | 2534.92 | 2507.59 | 2366.84 | 2855.34 |
| ENSMUSG00000026839 | 16_Upp2          | 73.7116 | -0.40234 | 0.15414  | 0.2446   | 56.4322 | 69.7532 | 64.5383 | 93.7753 | 77.9982 | 79.7723 |
| ENSMUSG00000026840 | 12_Lamc3         | 123.492 | -0.12003 | 0.74307  | 0.81829  | 96.3689 | 167.041 | 92.0269 | 189.354 | 113.859 | 82.3047 |
| ENSMUSG00000026841 | 7_Fibcd1         | 8.90975 | -0.76448 | 0.3567   | 0.47331  | 6.07732 | 10.0959 | 3.58546 | 18.0337 | 8.06878 | 7.59736 |
| ENSMUSG00000026842 | 16_Abl1          | 2191.61 | 0.72622  | 2.17E-07 | 2.45E-06 | 2555.95 | 2762.59 | 2876.74 | 1835.83 | 1391.42 | 1727.13 |
| ENSMUSG00000026843 | 15_Fubp3         | 1395.53 | 0.36947  | 0.00482  | 0.01367  | 1495.89 | 1532.74 | 1689.95 | 1164.08 | 1124.25 | 1366.26 |
| ENSMUSG00000026848 | 14_Tor1b         | 1347.28 | 0.0329   | 0.76998  | 0.83836  | 1293.6  | 1337.24 | 1458.09 | 1297.53 | 1353.76 | 1343.47 |
| ENSMUSG00000026849 | 18_Tor1a         | 568.049 | 0.31036  | 0.02952  | 0.06265  | 646.8   | 598.409 | 641.798 | 559.045 | 460.817 | 501.426 |
| ENSMUSG00000026851 | 9_BC005624       | 1158.9  | -0.0736  | 0.57916  | 0.68291  | 1065.27 | 1072.91 | 1250.13 | 1202.85 | 1088.39 | 1273.82 |
| ENSMUSG00000026853 | 15_Crat          | 880.34  | 0.15829  | 0.31257  | 0.42752  | 890.761 | 1005.91 | 889.195 | 976.525 | 718.121 | 801.522 |
| ENSMUSG00000026854 | 16_Usp20         | 750.883 | 0.90098  | 7.90E-09 | 1.40E-07 | 887.289 | 882.052 | 1064.88 | 584.292 | 447.369 | 539.413 |
| ENSMUSG00000026856 | 14_Dolpp1        | 578.069 | 1.10988  | 4.76E-09 | 9.01E-08 | 769.215 | 700.286 | 899.951 | 398.545 | 285.097 | 415.322 |
| ENSMUSG00000026857 | 9_Ntmt1          | 250.665 | 0.95129  | 8.16E-05 | 0.00042  | 294.316 | 360.698 | 335.838 | 208.289 | 117.446 | 187.402 |
| ENSMUSG00000026858 | 18_Fam73b        | 670.744 | 0.50202  | 0.01059  | 0.02653  | 744.906 | 858.148 | 755.337 | 677.166 | 411.508 | 577.399 |
| ENSMUSG00000026860 | 16_Sh3glb2       | 1240.38 | 0.96376  | 3.16E-07 | 3.39E-06 | 1475.92 | 1652.97 | 1791.54 | 1054.97 | 646.399 | 820.515 |
| ENSMUSG00000026864 | 13_Hspa5         | 12027.3 | -0.00579 | 0.97046  | 0.98086  | 11704.9 | 11431.3 | 12873   | 9419.91 | 13477.5 | 13257.4 |
| ENSMUSG00000026866 | 16_Kynu          | 18.5573 | -1.85293 | 0.0037   | 0.01098  | 9.55007 | 7.34244 | 7.17092 | 44.1826 | 15.241  | 27.857  |
| ENSMUSG00000026867 | 18_Gapvd1        | 3150.94 | 0.10087  | 0.41227  | 0.52861  | 3257.44 | 3171.94 | 3352.41 | 2664.48 | 3112.75 | 3346.64 |
| ENSMUSG00000026869 | 12_Psmd5         | 1288.84 | -0.25502 | 0.04608  | 0.09058  | 1190.29 | 1133.49 | 1201.13 | 1236.21 | 1467.62 | 1504.28 |
| ENSMUSG00000026870 | 19_Cutal         | 78.4533 | -0.20609 | 0.53284  | 0.64121  | 75.5324 | 90.8628 | 51.3916 | 95.5787 | 63.6537 | 93.7008 |
| ENSMUSG00000026872 | 16_Zeb2          | 839.507 | -0.80903 | 3.43E-06 | 2.67E-05 | 645.064 | 661.738 | 523.477 | 1195.63 | 1147.56 | 863.567 |
| ENSMUSG00000026873 | 9_Phf19          | 179.135 | 0.9067   | 6.98E-05 | 0.00036  | 246.566 | 200.082 | 253.373 | 125.334 | 101.308 | 148.149 |
| ENSMUSG00000026874 | 10_Hc            | 23.4441 | -0.39415 | 0.45775  | 0.57163  | 20.8365 | 22.9451 | 16.7322 | 14.427  | 34.0682 | 31.6557 |
| ENSMUSG00000026875 | 14_Traf1         | 82.1152 | 1.47255  | 3.93E-05 | 0.00022  | 168.429 | 89.0271 | 105.174 | 55.0028 | 42.1369 | 32.9219 |
| ENSMUSG00000026878 | 16_Rab14         | 4571.04 | -0.25546 | 0.05872  | 0.1109   | 4104.79 | 3948.4  | 4449.56 | 4249.64 | 5605.11 | 5068.71 |
| ENSMUSG00000026879 | 14_Gsn           | 25453.7 | 1.02325  | 3.85E-08 | 5.46E-07 | 30489   | 33242.9 | 38627.4 | 19112.1 | 12147.1 | 19103.6 |
| ENSMUSG00000026880 | 11_Stom          | 7018.45 | 0.62118  | 4.12E-05 | 0.00023  | 8021.19 | 7566.39 | 9931.73 | 4747.37 | 5745.86 | 6098.15 |
| ENSMUSG00000026883 | 17_Dab2ip        | 1574.13 | 0.83884  | 9.63E-05 | 0.00048  | 1772.84 | 2065.98 | 2219.4  | 1476.06 | 783.568 | 1126.94 |
| ENSMUSG00000026885 | 13_Tll11         | 16.7295 | -0.4964  | 0.41035  | 0.52682  | 12.1546 | 16.5205 | 13.1467 | 29.7556 | 16.1376 | 12.6623 |
| ENSMUSG00000026887 | 9_Mrrf           | 492.208 | -0.25608 | 0.08294  | 0.14748  | 455.799 | 418.519 | 470.891 | 505.846 | 508.333 | 593.86  |
| ENSMUSG00000026888 | 14_Grb14         | 79.8633 | -1.52525 | 3.28E-05 | 0.00019  | 36.4639 | 61.493  | 25.0982 | 138.86  | 121.032 | 96.2332 |
| ENSMUSG00000026889 | 12_Rbm18         | 884.718 | -0.22285 | 0.09178  | 0.16019  | 868.188 | 767.285 | 813.9   | 871.028 | 1031.91 | 956.001 |
| ENSMUSG00000026890 | 19_Lhx6          | 12.2378 | 0.68687  | 0.33279  | 0.4495   | 15.6274 | 9.17806 | 20.3176 | 5.41011 | 8.96531 | 13.9285 |
| ENSMUSG00000026893 | 4_Gca            | 151.576 | -0.30345 | 0.18046  | 0.27754  | 128.492 | 138.589 | 141.028 | 170.419 | 195.444 | 135.486 |
| ENSMUSG00000026894 | 4_Morn5          | 2.41924 | -0.51255 | 0.74443  | NA       | 0       | 3.67122 | 2.39031 | 2.70506 | 4.48265 | 1.26623 |

|                    |                  |         |          |          |          |         |         |         |         |         |         |
|--------------------|------------------|---------|----------|----------|----------|---------|---------|---------|---------|---------|---------|
| ENSMUSG00000026895 | 7_Ndufa8         | 1447.81 | 0.77276  | 1.81E-05 | 0.00011  | 1743.32 | 1801.65 | 1934.95 | 1323.67 | 815.843 | 1067.43 |
| ENSMUSG00000026896 | 14_Ilfih1        | 3574.59 | 0.87118  | 1.91E-05 | 0.00012  | 4538.02 | 3833.67 | 5495.32 | 1849.36 | 3110.06 | 2621.09 |
| ENSMUSG00000026904 | 17_Slc4a10       | 48.784  | -1.84843 | 0.00043  | 0.00174  | 27.782  | 24.7808 | 10.7564 | 113.612 | 81.5843 | 34.1881 |
| ENSMUSG00000026914 | 15_Psmd14        | 1674.52 | -0.07314 | 0.60091  | 0.70202  | 1682.55 | 1547.42 | 1666.04 | 1455.32 | 1923.06 | 1772.72 |
| ENSMUSG00000026915 | 16_Strbp         | 1096.37 | -0.55818 | 4.97E-05 | 0.00027  | 922.016 | 899.449 | 838.998 | 1186.62 | 1486.45 | 1244.7  |
| ENSMUSG00000026917 | 15_Wdr5          | 1213.52 | 0.14989  | 0.22988  | 0.33598  | 1279.71 | 1220.68 | 1327.82 | 1063.99 | 1118.87 | 1270.03 |
| ENSMUSG00000026918 | 16_Brd3          | 1727.56 | 0.53959  | 0.00107  | 0.00381  | 1835.35 | 1996.23 | 2309.04 | 1566.23 | 1131.42 | 1527.07 |
| ENSMUSG00000026921 | 18_Egfl7         | 349.008 | 0.24097  | 0.32456  | 0.44073  | 355.957 | 414.848 | 364.522 | 446.334 | 274.338 | 238.051 |
| ENSMUSG00000026922 | 13_Agpat2        | 598.305 | 0.78904  | 1.40E-05 | 9.11E-05 | 737.96  | 681.012 | 855.73  | 525.683 | 363.991 | 425.452 |
| ENSMUSG00000026923 | 15_Notch1        | 2724.15 | 1.37804  | 1.22E-18 | 1.97E-16 | 3543.95 | 3737.3  | 4521.27 | 1578.85 | 1266.8  | 1696.74 |
| ENSMUSG00000026924 | 17_Sec16a        | 3339.11 | 0.64197  | 1.10E-07 | 1.36E-06 | 3718.45 | 4072.3  | 4418.48 | 2489.55 | 2499.53 | 2836.35 |
| ENSMUSG00000026925 | 16_Inpp5e        | 683.713 | 0.2577   | 0.0831   | 0.14769  | 674.582 | 758.107 | 800.753 | 639.295 | 549.573 | 679.964 |
| ENSMUSG00000026926 | 14_Pmpca         | 2028.52 | 0.01988  | 0.84638  | 0.89545  | 2022.01 | 1989.8  | 2115.42 | 1943.13 | 2006.44 | 2094.34 |
| ENSMUSG00000026927 | 17_Sdcag3        | 1380.87 | 0.20649  | 0.07356  | 0.1339   | 1408.2  | 1528.15 | 1502.31 | 1355.23 | 1195.97 | 1295.35 |
| ENSMUSG00000026928 | 14_Card9         | 21.8474 | 1.8471   | 0.00098  | 0.00352  | 38.2003 | 27.5342 | 37.0498 | 14.427  | 6.27571 | 7.59736 |
| ENSMUSG00000026930 | 15_Gpsm1         | 627.084 | 0.60455  | 0.00218  | 0.00699  | 748.378 | 742.505 | 780.436 | 651.017 | 437.507 | 402.66  |
| ENSMUSG00000026931 | 10_1700019N19Rik | 0.30239 | -0.03469 | 0.99322  | NA       | 0       | 0.91781 | 0       | 0       | 0.89653 | 0       |
| ENSMUSG00000026932 | 14_Nacc2         | 964.378 | -0.31761 | 0.07966  | 0.14289  | 728.41  | 1047.22 | 800.753 | 1246.13 | 1001.42 | 962.332 |
| ENSMUSG00000026933 | 17_Camsap1       | 1325.88 | 0.28382  | 0.01931  | 0.04391  | 1389.97 | 1383.13 | 1596.73 | 1222.69 | 1228.25 | 1134.54 |
| ENSMUSG00000026934 | 15_Lhx3          | 1.33492 | -1.03357 | 0.677    | NA       | 2.60457 | 0       | 0       | 4.50843 | 0.89653 | 0       |
| ENSMUSG00000026937 | 12_Lcn5          | 0.30056 | -1.76625 | 0.6627   | NA       | 0       | 0       | 0       | 1.80337 | 0       | 0       |
| ENSMUSG00000026938 | 10_Fcna          | 48.6989 | -0.00956 | 0.98076  | 0.9874   | 39.0685 | 58.7396 | 47.8062 | 64.9214 | 32.2751 | 49.3828 |
| ENSMUSG00000026939 | 12_Tmem141       | 341.317 | -0.12592 | 0.48709  | 0.59915  | 299.525 | 334.999 | 345.4   | 416.579 | 305.717 | 345.68  |
| ENSMUSG00000026940 | 3_Ccdc183        | 8.15952 | -0.78002 | 0.34093  | 0.45732  | 5.20913 | 9.17806 | 3.58546 | 13.5253 | 9.86184 | 7.59736 |
| ENSMUSG00000026941 | 16_Mamdc4        | 65.2836 | 0.73592  | 0.10456  | 0.17869  | 45.1458 | 125.739 | 74.0996 | 71.2332 | 34.9647 | 40.5193 |
| ENSMUSG00000026942 | 13_Traf2         | 713.255 | 0.707    | 9.70E-06 | 6.59E-05 | 862.111 | 845.299 | 946.562 | 621.261 | 450.955 | 553.341 |
| ENSMUSG00000026943 | 12_Lcn12         | 1.24451 | 0.76993  | 0.69301  | NA       | 1.73638 | 1.83561 | 1.19515 | 1.80337 | 0.89653 | 0       |
| ENSMUSG00000026944 | 18_Abca2         | 1643.41 | 0.61417  | 0.00151  | 0.00511  | 1801.49 | 2281.66 | 1881.17 | 1655.49 | 1008.6  | 1232.04 |
| ENSMUSG00000026946 | 9_Nmi            | 1771.37 | 0.48105  | 0.00605  | 0.01654  | 2007.25 | 1766.78 | 2418.99 | 1226.29 | 1746.44 | 1462.49 |
| ENSMUSG00000026950 | 16_Neb           | 840.841 | -1.89033 | 1.95E-10 | 5.75E-09 | 343.803 | 493.779 | 233.055 | 1809.68 | 857.98  | 1306.75 |
| ENSMUSG00000026955 | 13_Sapcd2        | 75.4454 | 0.77982  | 0.00949  | 0.02414  | 92.028  | 78.0135 | 115.93  | 50.4944 | 52.8953 | 63.3113 |
| ENSMUSG00000026956 | 15_Uap111        | 731.684 | 0.29195  | 0.13394  | 0.21792  | 730.146 | 843.463 | 843.779 | 847.584 | 532.539 | 592.594 |
| ENSMUSG00000026958 | 13_Dpp7          | 686.705 | -0.05984 | 0.67083  | 0.76131  | 679.792 | 705.792 | 632.237 | 781.761 | 678.674 | 641.977 |
| ENSMUSG00000026959 | 13_Grin1         | 112.711 | 0.5942   | 0.02251  | 0.05008  | 126.756 | 126.657 | 154.175 | 110.907 | 77.9982 | 79.7723 |
| ENSMUSG00000026960 | 6_Arl6ip6        | 360.81  | 0.06128  | 0.71098  | 0.79352  | 365.507 | 344.177 | 396.791 | 326.41  | 398.956 | 333.018 |
| ENSMUSG00000026961 | 6_Lrrc26         | 414.942 | 1.53609  | 1.73E-08 | 2.76E-07 | 521.781 | 604.834 | 724.263 | 272.309 | 124.618 | 241.849 |
| ENSMUSG00000026963 | 4_Tmem210        | 0.51697 | 0.77694  | 0.84161  | NA       | 0       | 1.83561 | 0       | 0       | 0       | 1.26623 |
| ENSMUSG00000026965 | 12_Anapc2        | 2656.91 | 0.66793  | 7.13E-06 | 5.05E-05 | 3049.95 | 3251.79 | 3480.29 | 2111.75 | 1689.96 | 2357.71 |
| ENSMUSG00000026966 | 6_Ssna1          | 754.94  | 0.41753  | 0.0059   | 0.01617  | 833.461 | 825.107 | 932.22  | 731.267 | 556.745 | 650.841 |
| ENSMUSG00000026969 | 3_Fam166a        | 1.27484 | 3.78472  | 0.11545  | NA       | 4.34094 | 0.91781 | 2.39031 | 0       | 0       | 0       |
| ENSMUSG00000026970 | 16_Rbms1         | 5349.98 | 0.07127  | 0.53294  | 0.64124  | 5410.55 | 5036.92 | 5999.67 | 4906.07 | 5385.46 | 5361.2  |
| ENSMUSG00000026971 | 15_Iltgb6        | 523.63  | 0.49332  | 0.01336  | 0.03223  | 599.918 | 487.355 | 749.362 | 415.677 | 385.508 | 503.958 |
| ENSMUSG00000026972 | 15_Arrdc1        | 1175.8  | 1.12396  | 1.03E-17 | 1.46E-15 | 1463.77 | 1648.38 | 1724.61 | 799.795 | 687.639 | 730.613 |
| ENSMUSG00000026974 | 11_Zmynd19       | 576.247 | 0.20348  | 0.1072   | 0.18218  | 611.205 | 614.93  | 625.066 | 536.503 | 553.159 | 516.621 |
| ENSMUSG00000026975 | 10_Dph7          | 297.722 | -0.14738 | 0.36799  | 0.48537  | 291.711 | 279.931 | 276.081 | 345.346 | 293.165 | 300.096 |
| ENSMUSG00000026976 | 15_Pax8          | 1.01117 | -1.23005 | 0.60652  | NA       | 1.73638 | 0       | 0       | 0.90169 | 0.89653 | 2.53245 |
| ENSMUSG00000026977 | 17_March7        | 2825.35 | -0.20163 | 0.13001  | 0.21292  | 2700.93 | 2479.91 | 2703.44 | 2575.21 | 3305.51 | 3187.09 |
| ENSMUSG00000026979 | 16_Psd4          | 1526.83 | 0.68979  | 4.48E-08 | 6.20E-07 | 1830.14 | 1772.28 | 2052.08 | 1073.01 | 1173.56 | 1259.9  |
| ENSMUSG00000026980 | 15_Ly75          | 250.616 | 0.92151  | 5.24E-06 | 3.87E-05 | 303.866 | 299.205 | 381.254 | 146.073 | 190.961 | 182.337 |
| ENSMUSG00000026981 | 15_I1rn          | 484.967 | 0.27242  | 0.23937  | 0.34692  | 638.118 | 358.862 | 595.187 | 382.315 | 498.471 | 436.848 |
| ENSMUSG00000026983 | 10_I1lf5         | 91.2409 | -0.65016 | 0.04146  | 0.08293  | 72.9278 | 81.6847 | 58.5626 | 99.1854 | 151.514 | 83.571  |
| ENSMUSG00000026984 | 4_I1lf6          | 89.3364 | -0.61839 | 0.10868  | 0.18431  | 86.8188 | 50.4793 | 74.0996 | 60.4129 | 151.514 | 112.694 |
| ENSMUSG00000026985 | 1_I1lf8          | 57.2639 | -0.61913 | 0.10005  | 0.1722   | 46.8822 | 44.0547 | 44.2207 | 41.4775 | 83.3773 | 83.571  |
| ENSMUSG00000026986 | 14_Hnmt          | 153.976 | -1.40277 | 4.00E-09 | 7.73E-08 | 89.4234 | 89.9449 | 74.0996 | 253.374 | 238.477 | 178.538 |
| ENSMUSG00000026987 | 16_Baz2b         | 1729.81 | -0.01557 | 0.87964  | 0.91896  | 1727.69 | 1677.75 | 1755.68 | 1672.63 | 1757.2  | 1787.91 |
| ENSMUSG00000026988 | 15_Wdsub1        | 716.571 | 0.19756  | 0.10285  | 0.17632  | 754.456 | 779.217 | 762.508 | 682.576 | 635.64  | 685.029 |
| ENSMUSG00000026989 | 5_Dapl1          | 13161.3 | -0.27379 | 0.01875  | 0.04284  | 12650.4 | 11620.3 | 11477.1 | 15781.3 | 12940.5 | 14498.3 |
| ENSMUSG00000026991 | 20_Pkp4          | 5387.11 | -0.27447 | 0.01864  | 0.04265  | 4747.25 | 5104.83 | 4777.03 | 6585.91 | 5474.22 | 5633.44 |
| ENSMUSG00000026994 | 9_Gaint3         | 2002.4  | 0.08802  | 0.52528  | 0.63445  | 2017.67 | 2008.16 | 2164.42 | 1633.85 | 2151.67 | 2038.63 |
| ENSMUSG00000026999 | 14_Nup35         | 421.604 | -0.37771 | 0.03141  | 0.06601  | 377.662 | 330.41  | 392.011 | 394.938 | 521.781 | 512.822 |
| ENSMUSG00000027001 | 10_Dusp19        | 233.444 | -0.578   | 0.00121  | 0.00424  | 176.242 | 181.726 | 204.371 | 257.882 | 290.476 | 289.966 |
| ENSMUSG00000027002 | 13_Nckap1        | 10096.1 | -0.13769 | 0.29133  | 0.40511  | 9659.46 | 9356.11 | 9827.75 | 8880.7  | 11441.5 | 11411.2 |
| ENSMUSG00000027004 | 3_Frzb           | 29.3529 | -0.89691 | 0.04907  | 0.09556  | 23.4411 | 21.1095 | 16.7322 | 47.7893 | 27.7924 | 39.253  |
| ENSMUSG00000027006 | 13_Dnajc10       | 2412.58 | -0.46384 | 2.01E-05 | 0.00012  | 2058.47 | 2074.24 | 1951.69 | 2737.52 | 3009.65 | 2643.88 |
| ENSMUSG00000027007 | 16_Ssfa2         | 3422.4  | 0.12929  | 0.18537  | 0.2836   | 3485.78 | 3508.77 | 3732.47 | 3253.28 | 3180.89 | 3373.23 |
| ENSMUSG00000027009 | 18_I1tga4        | 216.221 | -0.49219 | 0.08136  | 0.14526  | 236.147 | 156.027 | 147.004 | 328.214 | 250.132 | 179.804 |
| ENSMUSG00000027010 | 16_Slc25a12      | 1094.9  | -0.20577 | 0.18368  | 0.2815   | 1000.15 | 1085.76 | 965.685 | 1398.51 | 1084.8  | 1034.51 |
| ENSMUSG00000027011 | 14_Ube2e3        | 834.659 | -0.49135 | 0.00022  | 0.00098  | 751.851 | 673.669 | 656.14  | 969.312 | 1051.63 | 905.352 |
| ENSMUSG00000027012 | 15_Dync1i2       | 3976.68 | -0.10732 | 0.43135  | 0.54668  | 3898.17 | 3520.7  | 4067.11 | 3502.15 | 4376.86 | 4495.11 |
| ENSMUSG00000027014 | 14_Cwc22         | 1036.19 | -0.14157 | 0.34277  | 0.45924  | 994.944 | 961.86  | 997.954 | 906.194 | 1115.28 | 1240.9  |
| ENSMUSG00000027015 | 4_Cybrd1         | 194.661 | -0.71704 | 0.00242  | 0.00765  | 117.205 | 185.397 | 138.638 | 239.848 | 213.374 | 273.505 |
| ENSMUSG00000027016 | 17_Zfp385b       | 57.2122 | -1.65047 | 0.00026  | 0.00113  | 35.5957 | 30.2876 | 16.7322 | 130.744 | 77.9982 | 51.9153 |
| ENSMUSG00000027018 | 11_Hat1          | 981.825 | -0.16059 | 0.3653   | 0.48269  | 1007.97 | 786.559 | 987.197 | 834.059 | 1195.08 | 1080.09 |
| ENSMUSG00000027022 | 13_Xirp2         | 393.505 | -1.72522 | 1.52E-09 | 3.37E-08 | 151.933 | 235.876 | 160.151 | 826.846 | 387.301 | 598.925 |
| ENSMUSG00000027030 | 15_Stk39         | 442.971 | -0.18284 | 0.25641  | 0.36615  | 434.962 | 376.3   | 435.036 | 507.649 | 494.885 | 408.991 |
| ENSMUSG00000027035 | 10_Cers6         | 773.259 | -0.20578 | 0.13598  | 0.22024  | 739.697 | 649.806 | 766.094 | 777.253 | 900.117 | 806.587 |
| ENSMUSG00000027048 | 15_Abcb11        | 0.87271 | 0.19389  | 0.94543  | NA       | 0.86819 | 1.83561 | 0       | 0       | 0       | 2.53245 |
| ENSMUSG00000027067 | 16_Ssrp1         | 3776.78 | 0.13654  | 0.33272  | 0.44943  | 4084.83 | 3532.63 | 4247.58 | 3104.5  | 3635.43 | 4055.72 |
| ENSMUSG00000027068 | 6_Dhrs9          | 3.34193 | 0.42941  | 0.71961  | 0.80046  | 4.34094 | 3.67122 | 3.58546 | 2.70506 | 4.48265 | 1.26623 |

|                     |                  |         |          |          |          |         |         |         |         |         |         |
|---------------------|------------------|---------|----------|----------|----------|---------|---------|---------|---------|---------|---------|
| ENSMUSG000000027070 | 14_Lrp2          | 307.228 | -1.6439  | 4.22E-08 | 5.88E-07 | 151.933 | 205.588 | 88.4414 | 578.882 | 471.575 | 346.946 |
| ENSMUSG000000027071 | 14_P2rx3         | 9.00833 | 0.30738  | 0.78741  | 0.85239  | 5.20913 | 5.50683 | 19.1225 | 9.01685 | 0       | 15.1947 |
| ENSMUSG000000027072 | 13_Prg3          | 0       | NA       | NA       | NA       | 0       | 0       | 0       | 0       | 0       | 0       |
| ENSMUSG000000027073 | 5_Prg2           | 0.34389 | 1.87986  | 0.64119  | NA       | 0.86819 | 0       | 1.19515 | 0       | 0       | 0       |
| ENSMUSG000000027074 | 14_Slc43a3       | 297.706 | -0.02185 | 0.89121  | 0.92665  | 303.866 | 282.684 | 299.984 | 321     | 282.407 | 296.297 |
| ENSMUSG000000027075 | 16_Slc43a1       | 79.7963 | -0.55772 | 0.11191  | 0.18879  | 59.905  | 93.6162 | 39.4401 | 100.087 | 86.9635 | 98.7657 |
| ENSMUSG000000027076 | 10_Timm10        | 166.058 | 0.37647  | 0.08548  | 0.15098  | 191.87  | 161.534 | 210.347 | 165.008 | 137.169 | 130.421 |
| ENSMUSG000000027077 | 7_Smtnl1         | 36.6728 | -1.3547  | 0.01353  | 0.03255  | 17.3638 | 27.5342 | 16.7322 | 75.7416 | 20.6202 | 62.0451 |
| ENSMUSG000000027078 | 14_Ube2l6        | 2205.91 | 1.29395  | 4.10E-13 | 2.49E-11 | 2935.35 | 2501.02 | 3965.52 | 1173.99 | 1337.62 | 1321.94 |
| ENSMUSG000000027079 | 15_Clp1          | 456.505 | -0.08243 | 0.57953  | 0.6832   | 438.435 | 413.93  | 479.257 | 449.039 | 510.126 | 448.244 |
| ENSMUSG000000027080 | 6_Med19          | 874.843 | -0.13423 | 0.372    | 0.48934  | 841.275 | 744.34  | 916.683 | 801.598 | 935.978 | 1009.18 |
| ENSMUSG000000027082 | 15_Tfpi          | 407.849 | -1.20181 | 8.59E-09 | 1.50E-07 | 273.479 | 272.588 | 194.81  | 614.048 | 640.123 | 452.043 |
| ENSMUSG000000027086 | 16_Fastkd1       | 266.834 | -0.42136 | 0.06254  | 0.11691  | 190.133 | 273.506 | 221.104 | 256.98  | 375.646 | 283.635 |
| ENSMUSG000000027087 | 11_Itgav         | 3907.77 | -0.26073 | 0.01543  | 0.03648  | 3483.17 | 3664.8  | 3518.53 | 3914.22 | 4554.38 | 4311.5  |
| ENSMUSG000000027088 | 10_Phospho2      | 431.62  | -0.47847 | 0.00168  | 0.00561  | 379.398 | 352.437 | 350.18  | 462.565 | 557.642 | 487.497 |
| ENSMUSG000000027091 | 14_Zc3h15        | 2072.47 | -0.34632 | 0.0291   | 0.0619   | 1909.15 | 1677.75 | 1887.15 | 1841.24 | 2560.49 | 2559.04 |
| ENSMUSG000000027099 | 9_Mtx2           | 962.808 | -0.4512  | 0.00129  | 0.00446  | 877.738 | 758.107 | 804.339 | 994.559 | 1235.42 | 1106.68 |
| ENSMUSG000000027102 | 4_Hoxd8          | 17.7501 | -0.24925 | 0.66328  | 0.75497  | 22.5729 | 13.7671 | 11.9515 | 14.427  | 19.7237 | 24.0583 |
| ENSMUSG000000027104 | 18_Atf2          | 1205.7  | -0.31641 | 0.01001  | 0.02526  | 1103.47 | 1014.18 | 1105.52 | 1283.1  | 1460.45 | 1267.49 |
| ENSMUSG000000027107 | 3_Chрна1         | 32.4185 | -0.5807  | 0.1523   | 0.24205  | 23.4411 | 29.3698 | 25.0982 | 43.2809 | 34.0682 | 39.253  |
| ENSMUSG000000027108 | 15_Ola1          | 1573.96 | -0.13496 | 0.39599  | 0.51353  | 1535.83 | 1369.37 | 1595.53 | 1320.97 | 1810.1  | 1811.97 |
| ENSMUSG000000027109 | 16_Sp3           | 2549.05 | -0.37075 | 0.00846  | 0.02195  | 2300.7  | 2035.69 | 2334.14 | 2484.14 | 3289.37 | 2850.28 |
| ENSMUSG000000027111 | 15_Itg6          | 7233.12 | 0.60212  | 0.00055  | 0.00217  | 8443.13 | 7706.81 | 10011.8 | 4517.44 | 5827.45 | 6892.07 |
| ENSMUSG000000027115 | 14_Kif18a        | 133.486 | -0.3015  | 0.22136  | 0.32633  | 128.492 | 118.397 | 112.344 | 140.663 | 181.996 | 119.025 |
| ENSMUSG000000027122 | 15_Arl14ep       | 703.226 | -0.30867 | 0.01456  | 0.03467  | 599.05  | 652.56  | 633.432 | 737.579 | 816.739 | 779.996 |
| ENSMUSG000000027130 | 15_Slc12a6       | 2766.88 | 0.01042  | 0.91756  | 0.94513  | 2845.92 | 2698.35 | 2785.9  | 2615.79 | 2851.86 | 2803.43 |
| ENSMUSG000000027131 | 3_Emc4           | 1166.31 | -0.06997 | 0.58701  | 0.68962  | 1109.54 | 1074.75 | 1232.2  | 1272.28 | 1226.45 | 1082.62 |
| ENSMUSG000000027132 | 3_Katnb1         | 716.877 | -0.52878 | 0.00021  | 0.00096  | 629.437 | 525.903 | 605.943 | 788.073 | 922.53  | 829.379 |
| ENSMUSG000000027133 | 3_Nop10          | 677.397 | -0.41919 | 0.00287  | 0.00883  | 603.391 | 613.094 | 522.282 | 825.944 | 788.05  | 711.62  |
| ENSMUSG000000027134 | 4_Lpcat4         | 3162.26 | 1.38268  | 9.46E-17 | 1.16E-14 | 4063.12 | 4394.45 | 5256.29 | 1982.81 | 1406.66 | 1870.22 |
| ENSMUSG000000027157 | 10_4930430A15Rik | 0.21104 | -0.99647 | 0.80707  | NA       | 0       | 0       | 0       | 0       | 0       | 1.26623 |
| ENSMUSG000000027160 | 16_Ccdc34        | 208.723 | -0.0052  | 0.97793  | 0.98554  | 203.156 | 189.068 | 233.055 | 198.371 | 207.099 | 221.59  |
| ENSMUSG000000027162 | 7_Lin7c          | 2796.54 | -0.53039 | 3.77E-06 | 2.89E-05 | 2376.23 | 2193.56 | 2294.7  | 3017.04 | 3578.95 | 3318.78 |
| ENSMUSG000000027163 | 13_Cmdmd9        | 540.67  | 0.78694  | 9.30E-06 | 6.35E-05 | 667.637 | 662.656 | 724.263 | 485.107 | 330.82  | 373.537 |
| ENSMUSG000000027164 | 8_Traf6          | 1178.33 | 0.01991  | 0.86687  | 0.90992  | 1204.18 | 1121.56 | 1233.4  | 1086.53 | 1204.94 | 1219.38 |
| ENSMUSG000000027165 | 16_B230118H07Rik | 533.692 | -0.87926 | 9.48E-11 | 3.08E-09 | 395.894 | 385.478 | 345.4   | 699.708 | 695.708 | 679.964 |
| ENSMUSG000000027166 | 14_Dnajc24       | 579.561 | 0.07046  | 0.62787  | 0.72477  | 574.741 | 611.259 | 595.187 | 501.337 | 627.571 | 567.27  |
| ENSMUSG000000027167 | 11_Elp4          | 388.092 | -0.46893 | 0.00255  | 0.00799  | 335.989 | 297.369 | 344.204 | 488.714 | 433.024 | 429.251 |
| ENSMUSG000000027168 | 21_Pax6          | 15107.6 | 0.17652  | 0.11808  | 0.19719  | 15853.1 | 16273.6 | 15963.7 | 12563.2 | 14649.3 | 15342.9 |
| ENSMUSG000000027170 | 12_Eif3m         | 3007.51 | -0.4819  | 7.19E-05 | 0.00037  | 2674.02 | 2350.5  | 2505.04 | 3211.8  | 3859.56 | 3444.14 |
| ENSMUSG000000027171 | 10_Prrg4         | 313.896 | 0.42639  | 0.03761  | 0.07654  | 365.507 | 299.205 | 415.914 | 227.225 | 314.682 | 260.843 |
| ENSMUSG000000027173 | 7_Depdc7         | 106.758 | -0.39131 | 0.12247  | 0.20307  | 96.3689 | 95.4518 | 84.8559 | 99.1854 | 138.066 | 126.623 |
| ENSMUSG000000027175 | 10_Tcp111i       | 222.648 | -0.47339 | 0.01833  | 0.04208  | 201.42  | 203.753 | 152.98  | 233.537 | 277.028 | 267.174 |
| ENSMUSG000000027176 | 8_Cstf3          | 625.696 | -0.13811 | 0.41594  | 0.53187  | 580.818 | 556.19  | 651.359 | 559.045 | 779.982 | 626.782 |
| ENSMUSG000000027177 | 14_Hipk3         | 4882.65 | -0.2095  | 0.02731  | 0.05885  | 4469.43 | 4500.92 | 4615.69 | 4982.71 | 5340.63 | 5386.53 |
| ENSMUSG000000027180 | 12_Fbxo3         | 2443.67 | -0.2826  | 0.01401  | 0.03352  | 2155.71 | 2118.3  | 2341.31 | 2454.39 | 2749.66 | 2842.68 |
| ENSMUSG000000027184 | 14_Caprin1       | 7282.82 | -0.11691 | 0.38962  | 0.50703  | 7145.19 | 6467.78 | 7350.2  | 6372.21 | 8181.74 | 8179.83 |
| ENSMUSG000000027185 | 14_Nat10         | 630.084 | 0.36003  | 0.01241  | 0.03026  | 693.683 | 714.053 | 717.092 | 483.303 | 611.434 | 560.939 |
| ENSMUSG000000027186 | 14_Eif5          | 361.071 | 0.22238  | 0.28572  | 0.39913  | 397.63  | 370.793 | 396.791 | 246.16  | 346.061 | 408.991 |
| ENSMUSG000000027187 | 10_Cat           | 1248.09 | 0.02168  | 0.86006  | 0.9053   | 1132.12 | 1340    | 1300.33 | 1229.9  | 1202.25 | 1283.95 |
| ENSMUSG000000027188 | 8_Pamr1          | 152.455 | -0.76933 | 0.002    | 0.00652  | 119.81  | 133.082 | 84.8559 | 215.503 | 198.133 | 163.343 |
| ENSMUSG000000027189 | 16_Trim44        | 3519.87 | -0.51045 | 6.00E-06 | 4.35E-05 | 2941.42 | 2960.84 | 2807.42 | 3731.17 | 4422.59 | 4255.79 |
| ENSMUSG000000027193 | 12_Api5          | 3183.38 | -0.27583 | 0.04505  | 0.08883  | 2908.43 | 2725.88 | 3005.81 | 2945.81 | 3932.18 | 3582.16 |
| ENSMUSG000000027194 | 16_Ttc17         | 1050.43 | 0.17031  | 0.21519  | 0.319    | 1100.86 | 1081.17 | 1153.32 | 905.292 | 926.116 | 1135.81 |
| ENSMUSG000000027195 | 10_Hsd17b12      | 4196.69 | -0.38749 | 0.00279  | 0.00863  | 3736.68 | 3434.43 | 3738.44 | 4121.6  | 5327.18 | 4821.79 |
| ENSMUSG000000027198 | 16_Ext2          | 1614.86 | 0.47787  | 0.00116  | 0.00408  | 1750.27 | 1885.17 | 2004.27 | 1521.14 | 1127.84 | 1400.45 |
| ENSMUSG000000027199 | 14_Gatm          | 222.812 | 0.02515  | 0.91585  | 0.94409  | 288.239 | 193.657 | 192.42  | 220.011 | 256.408 | 186.135 |
| ENSMUSG000000027200 | 17_Sema6d        | 944.333 | -0.28458 | 0.06736  | 0.12448  | 770.951 | 965.531 | 818.681 | 977.427 | 1188.8  | 944.605 |
| ENSMUSG000000027201 | 16_Myef2         | 897.358 | -0.85397 | 7.99E-08 | 1.04E-06 | 605.127 | 708.546 | 604.748 | 1135.22 | 1340.31 | 990.189 |
| ENSMUSG000000027202 | 12_Slc12a1       | 1.25213 | -1.42493 | 0.52334  | NA       | 0       | 0.91781 | 1.19515 | 3.60674 | 1.79306 | 0       |
| ENSMUSG000000027203 | 15_Dut           | 533.565 | -0.05092 | 0.71449  | 0.79632  | 519.177 | 498.368 | 554.552 | 506.747 | 538.815 | 583.731 |
| ENSMUSG000000027204 | 13_Fbn1          | 2901.83 | -0.33748 | 0.01557  | 0.03677  | 2669.68 | 2831.43 | 2189.52 | 3563.46 | 3035.65 | 3121.25 |
| ENSMUSG000000027206 | 13_Cops2         | 2268.34 | -0.54658 | 2.96E-05 | 0.00017  | 1927.38 | 1744.75 | 1859.66 | 2451.68 | 3075.1  | 2551.45 |
| ENSMUSG000000027207 | 15_Galk2         | 563.251 | -0.09701 | 0.45051  | 0.56535  | 538.277 | 538.752 | 556.942 | 593.309 | 598.882 | 553.341 |
| ENSMUSG000000027208 | 14_Fgf7          | 86.8757 | -0.49931 | 0.11673  | 0.19528  | 94.6325 | 61.493  | 59.7577 | 127.138 | 95.9288 | 82.3047 |
| ENSMUSG000000027209 | 17_Fam227b       | 0.44827 | -2.3261  | 0.56139  | NA       | 0       | 0       | 0       | 0       | 2.68959 | 0       |
| ENSMUSG000000027210 | 20_Meis2         | 1942.5  | 0.13395  | 0.34165  | 0.45807  | 1961.24 | 1863.15 | 2273.18 | 1629.35 | 1875.54 | 2052.55 |
| ENSMUSG000000027215 | 13_Cd82          | 5575.66 | 0.67924  | 1.36E-06 | 1.20E-05 | 6370.77 | 6733.02 | 7488.84 | 4550.81 | 3595.09 | 4715.43 |
| ENSMUSG000000027217 | 13_Tspan18       | 326.488 | -0.58486 | 0.01631  | 0.03824  | 230.07  | 344.177 | 209.152 | 486.008 | 351.44  | 338.083 |
| ENSMUSG000000027219 | 13_Slc28a2       | 52.4491 | 2.80219  | 1.90E-08 | 2.98E-07 | 139.778 | 51.3971 | 83.6608 | 15.3287 | 8.06878 | 16.4609 |
| ENSMUSG000000027220 | 2_Syt13          | 32.9965 | -1.15591 | 0.04351  | 0.0863   | 25.1775 | 27.5342 | 8.36608 | 71.2332 | 40.3439 | 25.3245 |
| ENSMUSG000000027221 | 5_Chst1          | 50.8939 | -0.70247 | 0.09502  | 0.16481  | 43.4094 | 44.9725 | 27.4885 | 89.2669 | 39.4473 | 60.7789 |
| ENSMUSG000000027222 | 14_Pex16         | 399.802 | 0.91433  | 9.07E-05 | 0.00046  | 500.945 | 480.012 | 586.821 | 367.888 | 197.237 | 265.908 |
| ENSMUSG000000027223 | 15_Mapk8ip1      | 319.215 | -0.06022 | 0.81283  | 0.87068  | 289.975 | 378.136 | 270.105 | 445.433 | 285.993 | 245.648 |
| ENSMUSG000000027224 | 14_Duoxa1        | 753.154 | 1.0263   | 1.50E-08 | 2.46E-07 | 904.652 | 917.806 | 1208.3  | 536.503 | 409.714 | 541.945 |
| ENSMUSG000000027225 | 7_Duoxa2         | 13.4809 | 3.31501  | 0.00019  | 0.00088  | 20.8365 | 12.8493 | 39.4401 | 0.90169 | 1.79306 | 5.06491 |
| ENSMUSG000000027227 | 7_Sord           | 1349.11 | -0.1567  | 0.20474  | 0.30678  | 1173.79 | 1410.67 | 1242.96 | 1458.93 | 1369.9  | 1438.43 |
| ENSMUSG000000027229 | 5_4933406J08Rik  | 0.29412 | -0.03469 | 0.99322  | NA       | 0.86819 | 0       | 0       | 0       | 0.89653 | 0       |
| ENSMUSG000000027230 | 9_Creb3l1        | 155.826 | 0.08325  | 0.77302  | 0.84091  | 133.701 | 217.52  | 129.077 | 174.025 | 114.756 | 165.876 |

|                     |                  |         |          |          |          |         |         |         |         |         |         |
|---------------------|------------------|---------|----------|----------|----------|---------|---------|---------|---------|---------|---------|
| ENSMUSG000000027233 | 4_Pati2          | 2.70904 | 0.04176  | 0.97741  | 0.98531  | 0.86819 | 3.67122 | 3.58546 | 0.90169 | 0.89653 | 6.33113 |
| ENSMUSG000000027236 | 8_Eif3j1         | 442.491 | -0.38451 | 0.01902  | 0.04334  | 432.358 | 380.889 | 337.033 | 454.449 | 536.125 | 514.088 |
| ENSMUSG000000027238 | 16_FrmD5         | 26.7185 | -1.81842 | 0.00899  | 0.02309  | 12.1546 | 13.7671 | 9.56123 | 82.0534 | 31.3786 | 11.396  |
| ENSMUSG000000027239 | 14_Mdk           | 691.984 | -0.20367 | 0.45096  | 0.56574  | 549.563 | 789.313 | 591.601 | 1092.84 | 613.227 | 515.354 |
| ENSMUSG000000027242 | 14_Wdr76         | 363.065 | -0.0376  | 0.81613  | 0.87308  | 365.507 | 323.985 | 386.035 | 337.23  | 397.163 | 368.472 |
| ENSMUSG000000027243 | 8_Harbi1         | 295.245 | -0.25989 | 0.12229  | 0.20287  | 284.766 | 267.999 | 252.178 | 290.343 | 325.441 | 350.745 |
| ENSMUSG000000027244 | 14_Atg13         | 1285.92 | 0.29174  | 0.02296  | 0.05096  | 1385.63 | 1391.39 | 1470.04 | 1284    | 1037.29 | 1147.2  |
| ENSMUSG000000027245 | 11_Hypk          | 413.805 | -0.74805 | 0.00033  | 0.0014   | 359.43  | 223.027 | 344.204 | 512.157 | 480.54  | 563.471 |
| ENSMUSG000000027246 | 12_Eli3          | 97.4192 | 0.15407  | 0.60378  | 0.70425  | 105.919 | 94.534  | 106.369 | 79.3483 | 71.7224 | 126.623 |
| ENSMUSG000000027247 | 16_Arhgap1       | 4030.67 | 0.41879  | 0.00063  | 0.00241  | 4178.59 | 4695.49 | 4959.89 | 3326.32 | 3242.75 | 3780.95 |
| ENSMUSG000000027248 | 13_Pdia3         | 11835.1 | -0.11592 | 0.46919  | 0.58241  | 11418.4 | 10494.2 | 12166.7 | 9552.46 | 13884.6 | 13494.2 |
| ENSMUSG000000027249 | 15_F2            | 0.9033  | 0.97591  | 0.69322  | NA       | 0.86819 | 2.75342 | 0       | 0.90169 | 0.89653 | 0       |
| ENSMUSG000000027253 | 15_Lrp4          | 1643.26 | 0.51095  | 8.26E-06 | 5.74E-05 | 1834.48 | 2019.17 | 1938.54 | 1310.15 | 1297.28 | 1459.96 |
| ENSMUSG000000027254 | 13_Map1a         | 533.654 | -0.5855  | 0.01161  | 0.02867  | 420.203 | 543.341 | 316.716 | 752.907 | 672.398 | 496.361 |
| ENSMUSG000000027255 | 14_Arfgap2       | 2691.39 | 0.25092  | 0.04692  | 0.09196  | 2882.39 | 2802.06 | 3089.47 | 2594.15 | 2142.71 | 2637.55 |
| ENSMUSG000000027257 | 13_Paccin3       | 675.121 | 0.96244  | 0.00033  | 0.0014   | 795.261 | 962.778 | 919.074 | 653.722 | 271.649 | 448.244 |
| ENSMUSG000000027259 | 15_Adal          | 489.332 | -0.65057 | 8.53E-05 | 0.00043  | 417.599 | 378.136 | 346.595 | 563.553 | 689.432 | 540.679 |
| ENSMUSG000000027261 | 2_Hao1           | 0.83248 | 3.16299  | 0.32343  | NA       | 2.60457 | 0       | 2.39031 | 0       | 0       | 0       |
| ENSMUSG000000027263 | 12_Tubgcp4       | 835.035 | -0.05551 | 0.69965  | 0.7851   | 782.238 | 803.998 | 871.267 | 742.989 | 951.219 | 858.502 |
| ENSMUSG000000027270 | 14_Lamp5         | 11.128  | -3.00918 | 0.00452  | 0.01296  | 2.60457 | 4.58903 | 0       | 33.3624 | 22.4133 | 3.79868 |
| ENSMUSG000000027272 | 5_Ubr1           | 1264.53 | -0.46515 | 0.00234  | 0.00742  | 1133.85 | 1080.26 | 972.855 | 1293.92 | 1731.2  | 1375.12 |
| ENSMUSG000000027273 | 13_Snap25        | 203.062 | -2.26193 | 0.02905  | 0.06182  | 105.919 | 82.6025 | 21.5128 | 651.017 | 300.338 | 56.9802 |
| ENSMUSG000000027274 | 16_Mkks          | 617.607 | -0.65022 | 2.80E-06 | 2.24E-05 | 495.736 | 457.067 | 490.013 | 708.725 | 831.084 | 723.016 |
| ENSMUSG000000027276 | 7_Jag1           | 3882.54 | 0.54589  | 0.00048  | 0.00193  | 4458.15 | 4206.3  | 5159.48 | 2639.23 | 3105.58 | 3726.51 |
| ENSMUSG000000027281 | 16_Slx4ip        | 467.056 | -0.28939 | 0.07449  | 0.13528  | 444.512 | 405.67  | 409.938 | 433.711 | 551.366 | 557.14  |
| ENSMUSG000000027282 | 17_Mtch2         | 2741.07 | -0.298   | 0.02408  | 0.05299  | 2533.37 | 2367.02 | 2476.36 | 2597.76 | 3392.47 | 3079.46 |
| ENSMUSG000000027284 | 16_Cdan1         | 505.722 | -0.00527 | 0.97261  | 0.98262  | 530.463 | 520.396 | 463.72  | 569.865 | 487.713 | 462.173 |
| ENSMUSG000000027285 | 13_Haus2         | 480.492 | -0.50204 | 0.00162  | 0.00542  | 434.094 | 354.273 | 405.157 | 522.076 | 626.675 | 540.679 |
| ENSMUSG000000027286 | 16_Lrrc57        | 321.199 | -0.41382 | 0.01309  | 0.03166  | 309.943 | 263.41  | 252.178 | 348.051 | 386.405 | 367.206 |
| ENSMUSG000000027287 | 14_Snap23        | 1251.81 | -0.27247 | 0.04679  | 0.09176  | 1118.23 | 1120.64 | 1162.88 | 1173.99 | 1516.93 | 1418.17 |
| ENSMUSG000000027288 | 16_Zfp106        | 4935.21 | -0.38036 | 5.38E-05 | 0.00029  | 4369.59 | 4378.85 | 4116.11 | 5744.64 | 5530.7  | 5471.37 |
| ENSMUSG000000027291 | 15_Vps39         | 1081.3  | -0.03574 | 0.77159  | 0.83967  | 1149.48 | 1036.2  | 1018.27 | 1158.67 | 1098.25 | 1026.91 |
| ENSMUSG000000027293 | 13_Ehd4          | 2105.75 | 0.61159  | 4.23E-08 | 5.90E-07 | 2450.9  | 2423.01 | 2763.2  | 1609.51 | 1680.99 | 1706.87 |
| ENSMUSG000000027296 | 7_Itpka          | 13.5341 | 1.50299  | 0.03296  | 0.06869  | 18.232  | 22.9451 | 19.1225 | 12.6236 | 4.48265 | 3.79868 |
| ENSMUSG000000027297 | 14_Ltk           | 45.1119 | 1.34929  | 0.00057  | 0.00221  | 60.7732 | 53.2327 | 80.0753 | 18.9354 | 25.9994 | 31.6557 |
| ENSMUSG000000027298 | 17_Tyro3         | 1303.08 | 0.92236  | 1.35E-09 | 3.05E-08 | 1559.27 | 1624.52 | 1934.95 | 1012.59 | 781.775 | 905.352 |
| ENSMUSG000000027300 | 9_Ubox5          | 209.439 | 0.28538  | 0.12406  | 0.20513  | 213.574 | 257.903 | 218.713 | 188.452 | 191.858 | 186.135 |
| ENSMUSG000000027301 | 7_Oxt            | 0.34861 | -0.03469 | 0.99322  | NA       | 0       | 0       | 1.19515 | 0       | 0.89653 | 0       |
| ENSMUSG000000027303 | 17_Ptpa          | 2341.76 | -0.03031 | 0.75724  | 0.82933  | 2272.92 | 2311.03 | 2368.8  | 2436.35 | 2363.25 | 2298.2  |
| ENSMUSG000000027304 | 9_Rtf1           | 1694.77 | 0.06901  | 0.60434  | 0.70471  | 1652.16 | 1750.26 | 1802.29 | 1437.29 | 1679.2  | 1847.43 |
| ENSMUSG000000027305 | 9_Ndufa1         | 321.893 | -0.41469 | 0.03156  | 0.06625  | 284.766 | 232.205 | 311.935 | 330.919 | 425.852 | 345.68  |
| ENSMUSG000000027306 | 15_Nusap1        | 697.941 | -0.30512 | 0.09056  | 0.15851  | 686.737 | 519.478 | 666.896 | 632.983 | 859.773 | 821.781 |
| ENSMUSG000000027309 | 18_4930402H24Rik | 707.649 | -0.56308 | 0.0004   | 0.00166  | 585.159 | 618.601 | 510.331 | 878.242 | 936.874 | 716.684 |
| ENSMUSG000000027312 | 14_Atrn          | 2250.35 | -0.0914  | 0.38201  | 0.49959  | 2135.74 | 2264.23 | 2135.74 | 2232.57 | 2279.88 | 2453.95 |
| ENSMUSG000000027313 | 3_Chac1          | 1141.06 | 1.40762  | 3.30E-14 | 2.60E-12 | 1511.52 | 1571.28 | 1890.73 | 786.27  | 515.505 | 571.068 |
| ENSMUSG000000027314 | 6_Dil4           | 55.4299 | 0.29985  | 0.45662  | 0.57053  | 42.5412 | 62.4108 | 78.8802 | 65.823  | 32.2751 | 50.6491 |
| ENSMUSG000000027315 | 13_Spint1        | 4844.41 | 0.77688  | 5.45E-07 | 5.47E-06 | 5614.57 | 5905.16 | 6832.7  | 3257.79 | 3154.89 | 4301.37 |
| ENSMUSG000000027316 | 15_Gfra4         | 5.5912  | -0.74592 | 0.41935  | 0.53514  | 5.20913 | 3.67122 | 3.58546 | 6.3118  | 7.17224 | 7.59736 |
| ENSMUSG000000027317 | 8_Ppp1r14d       | 12.1518 | 0.24244  | 0.72546  | 0.80452  | 15.6274 | 15.6027 | 8.36608 | 15.3287 | 11.6549 | 6.33113 |
| ENSMUSG000000027318 | 17_Adam33        | 79.8251 | 0.15628  | 0.58925  | 0.69165  | 74.6642 | 93.6162 | 84.8559 | 77.545  | 88.7565 | 59.5127 |
| ENSMUSG000000027322 | 11_Siglec1       | 231.983 | 3.02058  | 2.98E-26 | 1.03E-23 | 448.853 | 405.67  | 384.84  | 73.9382 | 30.482  | 48.1166 |
| ENSMUSG000000027323 | 10_Rad51         | 310.286 | 0.56434  | 0.00321  | 0.00974  | 380.267 | 341.424 | 388.425 | 199.272 | 278.821 | 273.505 |
| ENSMUSG000000027324 | 1_Rpusd2         | 72.585  | 0.64632  | 0.03397  | 0.0704   | 83.3461 | 87.1915 | 94.4172 | 50.4944 | 46.6196 | 73.4412 |
| ENSMUSG000000027326 | 13_Casc5         | 308.191 | -0.2571  | 0.26703  | 0.37834  | 305.602 | 232.205 | 304.764 | 247.964 | 414.197 | 344.414 |
| ENSMUSG000000027327 | 16_1700037H04Rik | 394.482 | 0.77284  | 3.58E-05 | 0.0002   | 467.954 | 481.848 | 542.6   | 318.295 | 229.512 | 326.687 |
| ENSMUSG000000027329 | 9_Spef1          | 100.152 | 0.14445  | 0.58137  | 0.6847   | 110.26  | 83.5203 | 121.906 | 89.2669 | 95.9288 | 100.032 |
| ENSMUSG000000027330 | 16_Cdc25b        | 632.712 | 0.65733  | 2.96E-05 | 0.00017  | 798.733 | 679.176 | 844.974 | 517.567 | 430.335 | 525.484 |
| ENSMUSG000000027331 | 15_Knstrn        | 492.773 | -0.03278 | 0.85874  | 0.90419  | 537.409 | 390.985 | 533.039 | 431.907 | 528.953 | 534.348 |
| ENSMUSG000000027332 | 11_Ivd           | 1158.85 | 0.10899  | 0.46466  | 0.57819  | 1185.95 | 1199.57 | 1222.64 | 1304.74 | 944.943 | 1095.29 |
| ENSMUSG000000027333 | 18_Smox          | 2560.13 | 1.37902  | 1.33E-14 | 1.12E-12 | 3354.68 | 3406.89 | 4333.63 | 1679.84 | 1114.39 | 1471.36 |
| ENSMUSG000000027335 | 9_Adra1d         | 1.79028 | -0.50057 | 0.79348  | NA       | 2.60457 | 1.83561 | 0       | 4.50843 | 1.79306 | 0       |
| ENSMUSG000000027338 | 16_Prnd          | 9.82241 | 0.15511  | 0.88071  | 0.91954  | 11.2864 | 10.0959 | 9.56123 | 15.3287 | 0       | 12.6623 |
| ENSMUSG000000027339 | 15_Rassf2        | 419.288 | -0.26551 | 0.16301  | 0.25582  | 420.203 | 420.355 | 301.179 | 519.371 | 439.3   | 415.322 |
| ENSMUSG000000027340 | 15_Slc23a2       | 1025.27 | -0.37303 | 0.01624  | 0.03809  | 900.311 | 969.203 | 811.51  | 1201.05 | 1300.87 | 968.664 |
| ENSMUSG000000027341 | 10_Tmem230       | 648.049 | -0.30098 | 0.02545  | 0.05547  | 568.663 | 581.889 | 591.601 | 648.312 | 771.016 | 726.814 |
| ENSMUSG000000027342 | 14_Pcna          | 2660.93 | 0.2861   | 0.03642  | 0.0745   | 2946.63 | 2718.54 | 3106.21 | 2036.91 | 2607.11 | 2550.18 |
| ENSMUSG000000027344 | 13_Fsip1         | 2.2262  | 0.64664  | 0.66374  | NA       | 0.86819 | 3.67122 | 3.58546 | 1.80337 | 0.89653 | 2.53245 |
| ENSMUSG000000027345 | 6_4921508D12Rik  | 0.55493 | 0.9119   | 0.78046  | NA       | 0.86819 | 0       | 1.19515 | 0       | 0       | 1.26623 |
| ENSMUSG000000027346 | 15_Gpcpd1        | 4019.2  | -0.33632 | 0.02419  | 0.05321  | 3751.44 | 3386.7  | 3519.73 | 3628.38 | 5123.67 | 4705.3  |
| ENSMUSG000000027347 | 18_Rasgrp1       | 304.768 | -0.04781 | 0.8551   | 0.90167  | 296.052 | 229.451 | 374.083 | 215.503 | 379.232 | 334.284 |
| ENSMUSG000000027349 | 5_Fam98b         | 917.884 | -0.0906  | 0.56615  | 0.67134  | 848.22  | 828.778 | 989.588 | 818.73  | 921.633 | 1100.35 |
| ENSMUSG000000027350 | 8_Chgb           | 56.82   | -2.15283 | 7.10E-05 | 0.00037  | 25.1775 | 22.9451 | 14.3418 | 164.107 | 78.8947 | 35.4544 |
| ENSMUSG000000027351 | 14_Spred1        | 2457.49 | -0.26982 | 0.03456  | 0.07144  | 2108.83 | 2157.76 | 2418.99 | 2375.94 | 2863.52 | 2819.89 |
| ENSMUSG000000027353 | 14_Mcm8          | 183.626 | -0.00554 | 0.97832  | 0.98569  | 204.024 | 167.958 | 178.078 | 174.025 | 207.995 | 169.674 |
| ENSMUSG000000027356 | 8_Fermt1         | 2245.06 | 0.18924  | 0.20482  | 0.3484   | 2292.89 | 2160.51 | 2722.56 | 1711.4  | 2212.64 | 2370.38 |
| ENSMUSG000000027357 | 6_Crls1          | 429.776 | -0.49186 | 0.00045  | 0.00183  | 368.98  | 360.698 | 341.814 | 497.73  | 524.47  | 484.965 |
| ENSMUSG000000027358 | 6_Bmp2           | 224.18  | -1.26338 | 8.66E-07 | 8.08E-06 | 126.756 | 163.369 | 105.174 | 403.955 | 297.648 | 248.18  |
| ENSMUSG000000027359 | 16_Slc27a2       | 0.55135 | 2.55533  | 0.49555  | NA       | 0       | 0.91781 | 2.39031 | 0       | 0       | 0       |
| ENSMUSG000000027360 | 5_Hdc            | 57.4698 | 2.35785  | 3.19E-07 | 3.41E-06 | 125.019 | 51.3971 | 112.344 | 26.1489 | 13.448  | 16.4609 |

|                     |                 |         |          |          |          |         |         |         |         |         |         |
|---------------------|-----------------|---------|----------|----------|----------|---------|---------|---------|---------|---------|---------|
| ENSMUSG000000027361 | 15_Gabpb1       | 457.563 | -0.03413 | 0.85931  | 0.90474  | 450.59  | 362.533 | 543.795 | 404.857 | 479.644 | 503.958 |
| ENSMUSG000000027363 | 15_Usp8         | 2423.95 | 0.08555  | 0.47335  | 0.58621  | 2451.76 | 2405.57 | 2629.34 | 2113.55 | 2400.91 | 2542.58 |
| ENSMUSG000000027364 | 12_Usp50        | 304.391 | 0.84921  | 0.0005   | 0.00197  | 348.144 | 375.382 | 451.768 | 292.146 | 161.376 | 197.531 |
| ENSMUSG000000027365 | 14_Trpm7        | 1976.04 | -0.61912 | 1.45E-06 | 1.27E-05 | 1636.54 | 1530.9  | 1507.09 | 2104.53 | 2644.77 | 2432.42 |
| ENSMUSG000000027366 | 12_Sppl2a       | 3512.09 | 0.077    | 0.60375  | 0.70425  | 3658.55 | 3137.98 | 4021.69 | 2951.22 | 3842.53 | 3460.6  |
| ENSMUSG000000027367 | 16_Stard7       | 1776.34 | -0.51504 | 1.03E-05 | 6.94E-05 | 1567.95 | 1439.12 | 1380.4  | 2059.45 | 2233.26 | 1977.85 |
| ENSMUSG000000027368 | 6_Dusp2         | 31.7589 | 1.00259  | 0.0289   | 0.06157  | 39.9367 | 33.9588 | 53.7819 | 28.8539 | 18.8271 | 15.1947 |
| ENSMUSG000000027371 | 10_Fahd2a       | 298.793 | 0.00874  | 0.95906  | 0.97351  | 296.052 | 299.205 | 303.569 | 325.508 | 258.201 | 310.226 |
| ENSMUSG000000027374 | 12_Mrps5        | 653.981 | 0.20832  | 0.17188  | 0.26688  | 669.373 | 704.875 | 727.849 | 610.441 | 519.988 | 691.36  |
| ENSMUSG000000027375 | 14_Mal          | 86421.9 | -0.03339 | 0.80811  | 0.86746  | 84904.5 | 82731.9 | 88627.8 | 71795.8 | 93221.2 | 97250   |
| ENSMUSG000000027376 | 15_Prom2        | 1901.27 | 0.80786  | 9.88E-08 | 1.24E-06 | 2370.15 | 2351.42 | 2536.12 | 1242.52 | 1230.94 | 1676.48 |
| ENSMUSG000000027377 | 2_Mall          | 7520.35 | 0.64017  | 5.67E-06 | 4.14E-05 | 8457.02 | 8254.74 | 10774.3 | 5511.1  | 5706.42 | 6418.5  |
| ENSMUSG000000027378 | 16_Nphp1        | 486.196 | -0.36343 | 0.0129   | 0.03127  | 439.303 | 424.944 | 412.328 | 591.506 | 560.332 | 488.764 |
| ENSMUSG000000027379 | 13_Bub1         | 272.813 | 0.20111  | 0.42691  | 0.54222  | 320.362 | 219.356 | 335.838 | 184.846 | 309.303 | 267.174 |
| ENSMUSG000000027380 | 10_Acox1        | 0.45267 | -0.80756 | 0.8164   | NA       | 0       | 0.91781 | 0       | 0.90169 | 0.89653 | 0       |
| ENSMUSG000000027381 | 16_Bcl2l11      | 549.245 | 0.45533  | 0.00212  | 0.00683  | 621.623 | 589.231 | 694.385 | 466.171 | 421.369 | 502.692 |
| ENSMUSG000000027384 | 6_Ndufaf5       | 149.634 | -0.48168 | 0.03598  | 0.07382  | 128.492 | 120.233 | 126.686 | 170.419 | 208.892 | 143.084 |
| ENSMUSG000000027386 | 9_Fbln7         | 176.68  | -0.4155  | 0.10602  | 0.18048  | 144.987 | 182.643 | 126.686 | 259.685 | 180.203 | 165.876 |
| ENSMUSG000000027387 | 11_Zc3h8        | 63.4949 | -0.19624 | 0.54002  | 0.64732  | 53.8277 | 73.4244 | 50.1965 | 61.3146 | 78.8947 | 63.3113 |
| ENSMUSG000000027394 | 13_Ttl          | 635.395 | -0.1955  | 0.22342  | 0.32849  | 591.236 | 604.834 | 582.04  | 809.714 | 623.089 | 601.458 |
| ENSMUSG000000027395 | 15_Polr1b       | 363.552 | 0.59641  | 0.00049  | 0.00197  | 426.281 | 413.93  | 472.086 | 246.16  | 301.234 | 321.622 |
| ENSMUSG000000027397 | 14_Slc20a1      | 1326.27 | 0.13855  | 0.40958  | 0.52631  | 1547.98 | 1255.56 | 1366.06 | 1036.94 | 1502.59 | 1248.5  |
| ENSMUSG000000027398 | 13_Ill1b        | 144.765 | 2.13077  | 7.03E-07 | 6.74E-06 | 338.593 | 89.0271 | 279.666 | 66.7247 | 43.93   | 50.6491 |
| ENSMUSG000000027399 | 1_Ill1a         | 912.861 | -0.00695 | 0.97461  | 0.98348  | 985.394 | 773.71  | 972.855 | 634.787 | 1149.35 | 961.066 |
| ENSMUSG000000027400 | 11_Pdyn         | 74.1116 | -0.81544 | 0.03679  | 0.07514  | 46.8822 | 74.3423 | 39.4401 | 124.433 | 58.2745 | 101.298 |
| ENSMUSG000000027401 | 9_Tgm3          | 14.0104 | 0.15918  | 0.83715  | 0.88896  | 10.4183 | 21.1095 | 13.1467 | 17.132  | 19.7237 | 2.53245 |
| ENSMUSG000000027403 | 12_Tgm6         | 0.30056 | -1.76625 | 0.6627   | NA       | 0       | 0       | 0       | 1.80337 | 0       | 0       |
| ENSMUSG000000027404 | 15_Snrpb        | 2840.62 | 1.01926  | 2.22E-09 | 4.67E-08 | 3385.93 | 3670.3  | 4356.34 | 2110.85 | 1476.59 | 2043.69 |
| ENSMUSG000000027405 | 16_Nop56        | 1847.09 | 0.1601   | 0.27663  | 0.38909  | 2102.75 | 1807.16 | 1937.34 | 1449.01 | 1897.06 | 1889.21 |
| ENSMUSG000000027406 | 12_Ihh3b        | 2109.5  | 0.01588  | 0.88442  | 0.92185  | 2024.62 | 2138.49 | 2201.47 | 2240.69 | 2005.54 | 2046.22 |
| ENSMUSG000000027408 | 7_Cpxm1         | 746.189 | 0.08381  | 0.6871   | 0.77475  | 743.169 | 927.901 | 632.237 | 910.702 | 597.089 | 666.035 |
| ENSMUSG000000027409 | 5_1700020A23Rik | 0.14942 | -0.99647 | 0.80707  | NA       | 0       | 0       | 0       | 0       | 0.89653 | 0       |
| ENSMUSG000000027411 | 17_Vps16        | 1317.7  | 0.37237  | 0.00471  | 0.0134   | 1483.73 | 1432.69 | 1542.94 | 1197.44 | 999.632 | 1249.77 |
| ENSMUSG000000027412 | 12_Lpin3        | 580.649 | 0.95482  | 8.30E-09 | 1.46E-07 | 721.465 | 753.518 | 822.266 | 421.087 | 323.648 | 441.913 |
| ENSMUSG000000027416 | 2_Otor          | 18.7192 | -2.16728 | 0.00243  | 0.00768  | 6.07732 | 12.8493 | 1.19515 | 36.9691 | 34.9647 | 20.2596 |
| ENSMUSG000000027419 | 9_Pcsk2         | 80.4155 | 0.12376  | 0.67945  | 0.76786  | 79.0051 | 100.959 | 71.7092 | 94.677  | 69.0329 | 67.11   |
| ENSMUSG000000027420 | 13_Bfsp1        | 909.656 | -0.47885 | 0.58991  | 0.69226  | 513.968 | 1408.83 | 357.351 | 2072.07 | 416.887 | 688.827 |
| ENSMUSG000000027422 | 15_Rrbp1        | 7746.66 | 0.6648   | 1.93E-05 | 0.00012  | 9026.55 | 9313.89 | 10158.8 | 5291.99 | 5300.29 | 7388.43 |
| ENSMUSG000000027423 | 15_Snx5         | 3088.26 | -0.2781  | 0.04181  | 0.08348  | 3037.79 | 2555.17 | 2781.12 | 2936.79 | 3755.57 | 3463.13 |
| ENSMUSG000000027424 | 11_Mgme1        | 240.533 | -0.17286 | 0.30965  | 0.42453  | 217.915 | 221.191 | 240.226 | 262.39  | 260.89  | 240.583 |
| ENSMUSG000000027425 | 18_Csrp2bp      | 1079.66 | 0.1856   | 0.17681  | 0.27307  | 1061.79 | 1097.7  | 1288.38 | 1067.6  | 921.633 | 1040.84 |
| ENSMUSG000000027427 | 13_Polr3f       | 620.234 | -0.47436 | 0.00031  | 0.00131  | 528.727 | 503.875 | 524.673 | 666.346 | 755.775 | 742.009 |
| ENSMUSG000000027428 | 9_Rbbp9         | 622.961 | -0.64628 | 3.53E-06 | 2.73E-05 | 503.549 | 507.546 | 445.792 | 759.219 | 817.636 | 704.022 |
| ENSMUSG000000027429 | 16_Sec23b       | 2294.75 | 0.28706  | 0.03482  | 0.07186  | 2388.39 | 2360.6  | 2818.17 | 1817.8  | 2186.64 | 2196.9  |
| ENSMUSG000000027430 | 12_Dtd1         | 342.371 | 0.10327  | 0.53657  | 0.64419  | 355.957 | 355.191 | 352.57  | 371.494 | 285.993 | 333.018 |
| ENSMUSG000000027433 | 5_Xrn2          | 2758.03 | -0.02353 | 0.87697  | 0.91673  | 2876.31 | 2523.05 | 2806.22 | 2242.49 | 3016.83 | 3083.26 |
| ENSMUSG000000027435 | 8_Cd93          | 255.886 | -0.4309  | 0.0107   | 0.02676  | 237.884 | 211.095 | 204.371 | 299.36  | 291.372 | 291.232 |
| ENSMUSG000000027438 | 14_Napb         | 226.474 | -1.37475 | 2.86E-06 | 2.28E-05 | 144.119 | 148.685 | 84.8559 | 391.331 | 372.06  | 217.791 |
| ENSMUSG000000027439 | 9_Gzf1          | 694.742 | -0.48758 | 0.00033  | 0.0014   | 637.25  | 574.546 | 522.282 | 794.385 | 834.67  | 805.32  |
| ENSMUSG000000027447 | 6_Cst3          | 8620.14 | -0.30709 | 0.13057  | 0.21367  | 7721.67 | 8363.96 | 7033.48 | 13062.7 | 7959.4  | 7579.63 |
| ENSMUSG000000027452 | 11_Acss1        | 435.74  | 0.06491  | 0.67758  | 0.76678  | 407.18  | 470.834 | 457.744 | 410.267 | 393.577 | 474.835 |
| ENSMUSG000000027454 | 10_Gins1        | 114.422 | 0.40546  | 0.09291  | 0.16184  | 141.515 | 114.726 | 135.052 | 87.4635 | 110.273 | 97.4995 |
| ENSMUSG000000027455 | 16_Nsfl1c       | 1976.91 | 0.13021  | 0.27638  | 0.38881  | 2089.73 | 1954.93 | 2153.67 | 2030.6  | 1707.89 | 1924.66 |
| ENSMUSG000000027456 | 8_Sdcbp2        | 590.771 | 0.92709  | 2.69E-09 | 5.48E-08 | 803.942 | 671.834 | 848.559 | 443.629 | 398.06  | 378.602 |
| ENSMUSG000000027457 | 15_Snph         | 39.7479 | -0.84744 | 0.13309  | 0.21685  | 21.7047 | 46.8081 | 16.7322 | 79.3483 | 51.1022 | 22.7921 |
| ENSMUSG000000027459 | 16_Fam110a      | 408.844 | 1.11738  | 5.73E-08 | 7.70E-07 | 493.999 | 524.067 | 660.92  | 293.048 | 199.926 | 281.102 |
| ENSMUSG000000027460 | 7_Angpt4        | 36.3563 | -0.29083 | 0.53267  | 0.64105  | 23.4411 | 44.9725 | 29.8789 | 57.7079 | 30.482  | 31.6557 |
| ENSMUSG000000027463 | 14_Slc52a3      | 579.816 | 1.31607  | 1.13E-14 | 9.60E-13 | 749.247 | 771.874 | 960.904 | 357.969 | 286.89  | 352.011 |
| ENSMUSG000000027465 | 13_Tbc1d20      | 2014.16 | 0.33609  | 0.00406  | 0.01186  | 2129.67 | 2300.02 | 2313.82 | 1921.49 | 1630.79 | 1789.18 |
| ENSMUSG000000027466 | 15_Rbck1        | 1656.27 | 1.18141  | 2.29E-07 | 2.56E-06 | 2117.51 | 2199.06 | 2580.34 | 1352.53 | 662.536 | 1025.64 |
| ENSMUSG000000027469 | 16_Tpx2         | 755.221 | 0.23931  | 0.2215   | 0.32643  | 891.629 | 668.162 | 892.78  | 534.699 | 760.258 | 783.794 |
| ENSMUSG000000027470 | 9_Mylk2         | 50.1796 | -0.95146 | 0.02826  | 0.06049  | 23.4411 | 45.8903 | 33.4643 | 95.5787 | 45.7231 | 56.9802 |
| ENSMUSG000000027472 | 14_Pdrg1        | 1018.42 | -0.16187 | 0.18372  | 0.28153  | 916.807 | 992.148 | 975.246 | 1144.24 | 996.942 | 1085.16 |
| ENSMUSG000000027474 | 12_Ccm2l        | 32.9193 | -0.13916 | 0.74168  | 0.81739  | 26.9138 | 25.6986 | 41.8304 | 38.7725 | 31.3786 | 32.9219 |
| ENSMUSG000000027475 | 9_Kif3b         | 1392.67 | -0.21466 | 0.04177  | 0.08345  | 1269.29 | 1258.31 | 1340.96 | 1471.55 | 1520.52 | 1495.41 |
| ENSMUSG000000027478 | 15_Dnmt3b       | 71.3551 | 0.0043   | 0.98879  | 0.99241  | 76.4006 | 63.3286 | 75.2947 | 87.4635 | 69.9294 | 55.714  |
| ENSMUSG000000027479 | 14_Mapre1       | 5383.37 | -0.41357 | 5.88E-05 | 0.00031  | 4742.91 | 4600.04 | 4506.93 | 5684.23 | 6451.43 | 6314.67 |
| ENSMUSG000000027480 | 12_Sun5         | 0.29884 | -1.76064 | 0.66373  | NA       | 0       | 0       | 0       | 0       | 1.79306 | 0       |
| ENSMUSG000000027481 | 2_Bpifb2        | 1.43812 | 1.84547  | 0.33359  | NA       | 2.60457 | 1.83561 | 2.39031 | 0.90169 | 0.89653 | 0       |
| ENSMUSG000000027484 | 2_Bpifa5        | 0.77781 | -1.80873 | 0.59824  | NA       | 0.86819 | 0       | 0       | 0       | 0       | 3.79868 |
| ENSMUSG000000027485 | 15_Bpifb1       | 147.663 | 2.73335  | 6.54E-13 | 3.73E-11 | 422.808 | 171.63  | 175.688 | 41.4775 | 37.6543 | 36.7206 |
| ENSMUSG000000027487 | 11_Cdk5rap1     | 222.983 | 0.076    | 0.6758   | 0.76516  | 238.752 | 216.602 | 230.665 | 193.862 | 225.029 | 232.986 |
| ENSMUSG000000027488 | 12_Snta1        | 138.212 | -0.05093 | 0.88932  | 0.92542  | 131.965 | 171.63  | 103.978 | 225.421 | 101.308 | 94.967  |
| ENSMUSG000000027489 | 15_Necab3       | 7.40885 | -1.0785  | 0.23167  | 0.33787  | 7.8137  | 2.75342 | 3.58546 | 13.5253 | 5.37918 | 11.396  |
| ENSMUSG000000027490 | 17_E2f1         | 201.613 | 1.22882  | 8.26E-09 | 1.45E-07 | 311.68  | 230.369 | 305.959 | 128.941 | 111.17  | 121.558 |
| ENSMUSG000000027495 | 4_Fam210b       | 1136.88 | -0.12055 | 0.31086  | 0.42573  | 1068.74 | 1090.35 | 1107.91 | 1146.04 | 1117.97 | 1290.29 |
| ENSMUSG000000027496 | 15_Aurka        | 273.257 | 0.8369   | 8.74E-05 | 0.00044  | 347.275 | 308.383 | 394.401 | 155.09  | 196.34  | 238.051 |
| ENSMUSG000000027498 | 14_Cstf1        | 836.55  | 0.59253  | 3.31E-05 | 0.00019  | 951.534 | 947.175 | 1118.66 | 660.034 | 608.744 | 733.145 |
| ENSMUSG000000027499 | 12_Pkia         | 444.94  | -1.58673 | 2.58E-11 | 9.87E-10 | 246.566 | 257.903 | 161.346 | 850.289 | 614.123 | 539.413 |

|                     |                |         |          |          |          |         |         |         |         |         |         |
|---------------------|----------------|---------|----------|----------|----------|---------|---------|---------|---------|---------|---------|
| ENSMUSG000000027500 | 10_Stmn2       | 60.4901 | -1.76003 | 0.00267  | 0.00832  | 41.673  | 18.3561 | 22.7079 | 64.0197 | 181.996 | 34.1881 |
| ENSMUSG000000027502 | 11_Rtfdc1      | 4983.1  | 0.5492   | 7.69E-05 | 0.0004   | 5723.1  | 5649.09 | 6388.1  | 4397.52 | 3379.92 | 4360.89 |
| ENSMUSG000000027505 | 2_Fam209       | 2.99551 | 0.15619  | 0.90774  | 0.9378   | 2.60457 | 5.50683 | 1.19515 | 2.70506 | 0.89653 | 5.06491 |
| ENSMUSG000000027506 | 15_Tpd52       | 6795.61 | -0.02157 | 0.85337  | 0.90073  | 6793.57 | 6350.3  | 7089.65 | 6156.71 | 6941.84 | 7441.62 |
| ENSMUSG000000027508 | 15_Pag1        | 596.872 | -0.4092  | 0.00673  | 0.01808  | 484.449 | 572.711 | 481.647 | 742.087 | 684.949 | 615.386 |
| ENSMUSG000000027509 | 11_Rae1        | 818.667 | 0.3187   | 0.00595  | 0.0163   | 889.893 | 913.217 | 922.659 | 722.25  | 711.845 | 752.139 |
| ENSMUSG000000027510 | 17_Rbm38       | 58.6353 | 1.27322  | 0.00512  | 0.01439  | 80.7415 | 70.671  | 98.0026 | 59.5112 | 18.8271 | 24.0583 |
| ENSMUSG000000027513 | 11_Pck1        | 0.21104 | -0.99647 | 0.80707  | NA       | 0       | 0       | 0       | 0       | 0       | 1.26623 |
| ENSMUSG000000027514 | 14_Zbp1        | 3045.1  | 2.36222  | 4.64E-35 | 4.38E-32 | 4781.98 | 3978.69 | 6535.1  | 858.405 | 1085.7  | 1030.71 |
| ENSMUSG000000027519 | 10_Rab22a      | 1859.76 | 0.04853  | 0.65637  | 0.74957  | 1859.66 | 1803.49 | 2011.44 | 1781.73 | 1910.51 | 1791.71 |
| ENSMUSG000000027520 | 15_Zdbf2       | 42.5835 | -0.915   | 0.02219  | 0.04946  | 39.0685 | 26.6164 | 22.7079 | 58.6096 | 65.4467 | 43.0517 |
| ENSMUSG000000027522 | 15_Stx16       | 1320.59 | 0.02714  | 0.7938   | 0.85724  | 1350.9  | 1340    | 1307.5  | 1290.31 | 1311.62 | 1323.21 |
| ENSMUSG000000027523 | 19_Gnas        | 12395.7 | 0.07696  | 0.58015  | 0.68369  | 12456.8 | 13444.9 | 12277.8 | 14326   | 10713.5 | 11155.5 |
| ENSMUSG000000027524 | 9_Edn3         | 1728.21 | -0.94696 | 0.00011  | 0.00053  | 1053.98 | 1681.42 | 805.534 | 2544.56 | 2422.43 | 1861.35 |
| ENSMUSG000000027525 | 17_Phactr3     | 13.1931 | -0.11273 | 0.88348  | 0.92116  | 20.8365 | 10.0959 | 7.17092 | 22.5421 | 13.448  | 5.06491 |
| ENSMUSG000000027528 | 12_Fabp9       | 0.15297 | 0.92709  | 0.82027  | NA       | 0       | 0.91781 | 0       | 0       | 0       | 0       |
| ENSMUSG000000027530 | 15_Fabp12      | 18.485  | -1.66167 | 0.01211  | 0.02969  | 12.1546 | 7.34244 | 7.17092 | 39.6742 | 33.1716 | 11.396  |
| ENSMUSG000000027531 | 16_Impa1       | 1027.19 | -0.18817 | 0.10335  | 0.17702  | 948.062 | 913.217 | 1020.66 | 1074.81 | 1116.18 | 1090.22 |
| ENSMUSG000000027533 | 10_Fabp5       | 7118.73 | 1.1108   | 2.23E-08 | 3.40E-07 | 11086.8 | 7927.09 | 10180.3 | 5571.51 | 3335.09 | 4611.6  |
| ENSMUSG000000027534 | 16_Snx16       | 253.243 | -0.38518 | 0.05995  | 0.1128   | 223.993 | 201.917 | 234.25  | 277.719 | 346.061 | 235.518 |
| ENSMUSG000000027536 | 6_Chmp4c       | 5005.01 | 0.13502  | 0.29643  | 0.41085  | 5160.51 | 4807.47 | 5748.69 | 4249.64 | 4815.27 | 5248.51 |
| ENSMUSG000000027540 | 13_Ptpn1       | 3869.14 | 1.05918  | 8.60E-10 | 2.08E-08 | 4832.34 | 4949.73 | 5902.87 | 2543.65 | 1962.51 | 3023.75 |
| ENSMUSG000000027544 | 10_Nfatc2      | 1079.87 | 0.72937  | 6.96E-06 | 4.93E-05 | 1270.16 | 1364.78 | 1404.31 | 769.138 | 683.156 | 987.657 |
| ENSMUSG000000027546 | 15_Atp9a       | 2179.22 | 0.67977  | 0.00016  | 0.00074  | 2378.84 | 2759.84 | 2911.4  | 2010.76 | 1272.18 | 1742.33 |
| ENSMUSG000000027547 | 17_Sall4       | 1.16432 | -1.25067 | 0.59204  | NA       | 0       | 0.91781 | 1.19515 | 3.60674 | 0       | 1.26623 |
| ENSMUSG000000027550 | 14_Lrrcc1      | 621.038 | -0.6688  | 1.96E-05 | 0.00012  | 483.581 | 475.423 | 479.257 | 634.787 | 836.463 | 816.716 |
| ENSMUSG000000027551 | 15_Zfp64       | 329.735 | 1.30617  | 4.85E-07 | 4.94E-06 | 420.203 | 441.464 | 547.381 | 256.079 | 124.618 | 188.668 |
| ENSMUSG000000027552 | 14_E2f5        | 161.222 | -0.64945 | 0.00255  | 0.008    | 122.415 | 124.822 | 130.272 | 201.978 | 223.236 | 164.609 |
| ENSMUSG000000027555 | 8_Car13        | 851.972 | 0.28628  | 0.14695  | 0.23488  | 1017.52 | 694.779 | 1097.15 | 670.854 | 870.531 | 761.002 |
| ENSMUSG000000027556 | 15_Car1        | 0.14942 | -0.99647 | 0.80707  | NA       | 0       | 0       | 0       | 0       | 0.89653 | 0       |
| ENSMUSG000000027559 | 5_Car3         | 2125.63 | -1.33519 | 0.00342  | 0.01026  | 1429.04 | 1586.89 | 603.553 | 3949.38 | 2696.76 | 2488.14 |
| ENSMUSG000000027560 | 4_Dok5         | 13.8927 | -0.6924  | 0.25333  | 0.36264  | 12.1546 | 10.0959 | 9.56123 | 20.7388 | 14.3445 | 16.4609 |
| ENSMUSG000000027562 | 12_Car2        | 190.663 | -1.3639  | 0.00014  | 0.00068  | 118.074 | 135.835 | 65.7335 | 420.185 | 220.547 | 183.603 |
| ENSMUSG000000027566 | 14_Psma7       | 3062.57 | 0.16479  | 0.13984  | 0.22553  | 3330.37 | 2988.37 | 3393.04 | 2978.27 | 2702.14 | 2983.23 |
| ENSMUSG000000027568 | 9_Ntsr1        | 2.44689 | -1.62231 | 0.30685  | NA       | 2.60457 | 0.91781 | 0       | 5.41011 | 4.48265 | 1.26623 |
| ENSMUSG000000027569 | 15_Mrgbp       | 629.908 | 0.37419  | 0.00357  | 0.01062  | 678.055 | 738.833 | 715.897 | 547.323 | 524.47  | 574.867 |
| ENSMUSG000000027570 | 15_Col9a3      | 359.926 | -0.14805 | 0.63919  | 0.73511  | 354.221 | 440.547 | 229.47  | 567.16  | 268.063 | 300.096 |
| ENSMUSG000000027573 | 11_Gid8        | 2089.9  | 0.04091  | 0.72805  | 0.8064   | 2135.74 | 1923.72 | 2299.48 | 2038.71 | 1992.99 | 2148.79 |
| ENSMUSG000000027574 | 15_Nkain4      | 11.9716 | -0.51931 | 0.48277  | 0.59492  | 5.20913 | 13.7671 | 10.7564 | 10.8202 | 22.4133 | 8.86359 |
| ENSMUSG000000027575 | 19_Arfgap1     | 1095.92 | 0.35647  | 0.00724  | 0.01923  | 1271.9  | 1253.72 | 1165.28 | 1050.46 | 849.014 | 985.125 |
| ENSMUSG000000027577 | 14_ChRNA4      | 30.9069 | -0.47462 | 0.45129  | 0.56602  | 20.8365 | 41.3013 | 15.537  | 67.6264 | 22.4133 | 17.7272 |
| ENSMUSG000000027579 | 6_Srms         | 10.3127 | -0.20165 | 0.81469  | 0.87199  | 5.20913 | 16.5205 | 7.17092 | 20.7388 | 7.17224 | 5.06491 |
| ENSMUSG000000027580 | 17_Helz2       | 2632.99 | 2.20685  | 3.75E-37 | 4.54E-34 | 3938.1  | 3610.65 | 5436.76 | 849.388 | 996.942 | 966.131 |
| ENSMUSG000000027581 | 12_Stmn3       | 72.8017 | -1.71545 | 8.19E-05 | 0.00042  | 39.9367 | 45.8903 | 15.537  | 157.795 | 100.411 | 77.2398 |
| ENSMUSG000000027582 | 16_Zgpat       | 899.681 | 0.29965  | 0.03544  | 0.07292  | 869.925 | 1066.49 | 1042.17 | 855.7   | 736.948 | 826.846 |
| ENSMUSG000000027583 | 13_Zbtb46      | 71.1812 | -0.62742 | 0.04952  | 0.09631  | 47.7504 | 68.8354 | 51.3916 | 107.301 | 77.1016 | 74.7074 |
| ENSMUSG000000027584 | 16_Oprl1       | 6.17626 | -1.93733 | 0.0536   | 0.10258  | 3.47275 | 1.83561 | 2.39031 | 15.3287 | 8.96531 | 5.06491 |
| ENSMUSG000000027589 | 14_Pcmt2d      | 1142.07 | -0.41471 | 0.00553  | 0.01533  | 907.257 | 1098.61 | 932.22  | 1448.11 | 1336.73 | 1129.47 |
| ENSMUSG000000027593 | 15_Raly        | 3476.37 | 0.39285  | 0.00158  | 0.00532  | 3830.45 | 3820.82 | 4189.02 | 3260.49 | 2634.9  | 3122.52 |
| ENSMUSG000000027596 | 10_a           | 1.71085 | 0.17554  | 0.92112  | NA       | 1.73638 | 3.67122 | 0       | 0.90169 | 2.68959 | 1.26623 |
| ENSMUSG000000027597 | 15_Ahcy        | 51.3607 | -0.9924  | 0.07531  | 0.13638  | 8.68188 | 54.1505 | 40.6352 | 64.9214 | 87.86   | 51.9153 |
| ENSMUSG000000027598 | 16_Itch        | 2442.75 | -0.14756 | 0.30271  | 0.4175   | 2365.81 | 2197.23 | 2390.31 | 2119.86 | 2854.55 | 2728.72 |
| ENSMUSG000000027599 | 9_Armc1        | 859.765 | -0.46504 | 0.00045  | 0.00181  | 731.015 | 670.916 | 766.094 | 923.326 | 1082.11 | 985.125 |
| ENSMUSG000000027601 | 13_Mtfr1       | 1537.76 | -0.1027  | 0.36972  | 0.48713  | 1516.73 | 1414.34 | 1519.04 | 1522.05 | 1715.96 | 1538.47 |
| ENSMUSG000000027602 | 9_Map1lc3a     | 1190.38 | 0.41127  | 0.05218  | 0.10042  | 1262.35 | 1458.39 | 1356.5  | 1374.17 | 745.017 | 945.872 |
| ENSMUSG000000027603 | 15_Ggt7        | 50.2306 | 0.08115  | 0.85339  | 0.90073  | 42.5412 | 65.1642 | 47.8062 | 72.1348 | 48.4127 | 25.3245 |
| ENSMUSG000000027605 | 18_Acss2       | 1997.2  | 0.26984  | 0.02658  | 0.05749  | 2223.43 | 2037.53 | 2288.72 | 1631.15 | 1876.44 | 1925.93 |
| ENSMUSG000000027606 | 12_Dnajc5b     | 0.50602 | -1.01212 | 0.76398  | NA       | 0.86819 | 0       | 0       | 0.90169 | 0       | 1.26623 |
| ENSMUSG000000027610 | 17_Gss         | 975.831 | 0.36733  | 0.00501  | 0.0141   | 1034.01 | 1067.41 | 1196.35 | 834.961 | 797.912 | 924.346 |
| ENSMUSG000000027611 | 12_Procr       | 462.75  | 0.55319  | 0.00097  | 0.00349  | 497.472 | 514.889 | 639.407 | 396.742 | 337.992 | 389.998 |
| ENSMUSG000000027612 | 7_Mmp24        | 5.65801 | -1.98162 | 0.05718  | 0.10838  | 0.86819 | 3.67122 | 2.39031 | 11.7219 | 8.96531 | 6.33113 |
| ENSMUSG000000027613 | 15_Eif6        | 2724.23 | 1.04421  | 5.08E-09 | 9.53E-08 | 3437.16 | 3199.47 | 4370.68 | 1963.87 | 1403.97 | 1970.25 |
| ENSMUSG000000027615 | 14_Hps3        | 904.161 | -0.40698 | 0.00128  | 0.00444  | 792.656 | 813.176 | 725.459 | 957.59  | 1090.18 | 1045.9  |
| ENSMUSG000000027618 | 17_Nfs1        | 1096.84 | 0.09914  | 0.46864  | 0.58201  | 1054.85 | 1141.75 | 1208.3  | 1192.93 | 972.736 | 1010.45 |
| ENSMUSG000000027620 | 16_Rbm39       | 5581.24 | -0.46512 | 0.00033  | 0.0014   | 4815.84 | 4575.26 | 4676.64 | 5593.16 | 7365    | 6461.56 |
| ENSMUSG000000027624 | 17_Epb4111     | 7569.62 | 0.72707  | 2.46E-07 | 2.74E-06 | 8624.58 | 8995.41 | 10691.8 | 5476.84 | 5121.88 | 6507.14 |
| ENSMUSG000000027628 | 10_Aar2        | 685.721 | 0.32375  | 0.04588  | 0.09024  | 722.333 | 750.765 | 813.9   | 688.888 | 500.264 | 638.178 |
| ENSMUSG000000027630 | 13_Tbl1xr1     | 1603.7  | -0.15569 | 0.21243  | 0.31586  | 1587.05 | 1371.2  | 1593.14 | 1561.72 | 1718.65 | 1790.44 |
| ENSMUSG000000027634 | 14_Ndrp3       | 1449.29 | -0.58882 | 1.64E-06 | 1.41E-05 | 1157.3  | 1262.9  | 1051.74 | 1823.21 | 1732.99 | 1667.62 |
| ENSMUSG000000027635 | 15_Dsn1        | 145.503 | 0.18926  | 0.43109  | 0.54639  | 168.429 | 120.233 | 176.883 | 124.433 | 148.824 | 134.22  |
| ENSMUSG000000027636 | 11_Sla2        | 14.1629 | 0.88609  | 0.21708  | 0.32134  | 31.2548 | 8.26025 | 15.537  | 12.6236 | 7.17224 | 10.1298 |
| ENSMUSG000000027637 | 3_111008F13Rik | 838.195 | -0.21722 | 0.1314   | 0.21467  | 800.47  | 720.477 | 805.534 | 816.025 | 1025.63 | 861.034 |
| ENSMUSG000000027639 | 16_Samhd1      | 6035.83 | 1.91332  | 9.69E-24 | 2.69E-21 | 9333.03 | 7548.03 | 11736.4 | 2026.09 | 2883.24 | 2688.2  |
| ENSMUSG000000027641 | 13_Rbl1        | 1247.96 | 0.4087   | 0.03541  | 0.07287  | 1343.96 | 1250.97 | 1675.61 | 801.598 | 1207.63 | 1207.98 |
| ENSMUSG000000027642 | 15_Rpn2        | 4970.77 | 0.5551   | 2.15E-06 | 1.79E-05 | 5391.45 | 5863.86 | 6490.88 | 3853.8  | 3938.46 | 4286.18 |
| ENSMUSG000000027643 | 9_Ghrh         | 0.45536 | 0.77574  | 0.84797  | NA       | 0       | 1.83561 | 0       | 0       | 0.89653 | 0       |
| ENSMUSG000000027646 | 15_Src         | 2728.39 | 1.0624   | 6.99E-08 | 9.22E-07 | 3362.49 | 3440.85 | 4265.5  | 1988.22 | 1256.94 | 2056.35 |
| ENSMUSG000000027649 | 15_Ctnnb1      | 721.412 | 0.3753   | 0.05534  | 0.10543  | 756.192 | 846.217 | 841.388 | 753.809 | 457.231 | 673.633 |
| ENSMUSG000000027650 | 12_Tti1        | 779.839 | 0.25546  | 0.0809   | 0.14461  | 789.183 | 812.258 | 944.172 | 669.051 | 667.915 | 796.457 |

|                     |                 |         |          |          |          |         |         |         |         |         |         |
|---------------------|-----------------|---------|----------|----------|----------|---------|---------|---------|---------|---------|---------|
| ENSMUSG000000027651 | 16_Rprd1b       | 1271.97 | 0.1114   | 0.38382  | 0.50145  | 1286.66 | 1303.28 | 1372.04 | 1093.74 | 1223.76 | 1352.33 |
| ENSMUSG000000027652 | 15_Ralgapb      | 2747.9  | -0.00151 | 0.99099  | 0.99411  | 2685.31 | 2693.76 | 2860    | 2328.15 | 3007.86 | 2912.32 |
| ENSMUSG000000027654 | 2_Fam83d        | 105.487 | 1.17483  | 1.54E-06 | 1.33E-05 | 138.91  | 145.013 | 154.175 | 61.3146 | 60.0675 | 73.4412 |
| ENSMUSG000000027655 | 14_Dhx35        | 404.158 | 0.38263  | 0.01663  | 0.03884  | 428.885 | 446.054 | 498.379 | 390.43  | 321.854 | 339.349 |
| ENSMUSG000000027656 | 7_Wisp2         | 300.565 | 1.02961  | 2.27E-06 | 1.87E-05 | 405.444 | 368.958 | 437.426 | 256.98  | 171.237 | 163.343 |
| ENSMUSG000000027660 | 16_Skil         | 1307.28 | -0.30762 | 0.02178  | 0.04869  | 1235.43 | 1053.64 | 1217.86 | 1466.14 | 1568.93 | 1301.68 |
| ENSMUSG000000027661 | 4_Slc2a10       | 175.606 | -0.45191 | 0.04904  | 0.09552  | 143.251 | 180.808 | 120.711 | 220.011 | 211.581 | 177.272 |
| ENSMUSG000000027663 | 12_Zmat3        | 565.959 | -0.24079 | 0.06598  | 0.12226  | 535.672 | 521.314 | 499.574 | 646.508 | 605.158 | 587.529 |
| ENSMUSG000000027665 | 13_Pik3ca       | 2124.06 | -0.37065 | 0.00137  | 0.00471  | 1884.84 | 1763.1  | 1911.05 | 2236.18 | 2614.28 | 2334.92 |
| ENSMUSG000000027667 | 13_Zfp639       | 425.61  | -0.48714 | 0.00557  | 0.01542  | 367.244 | 381.807 | 314.326 | 482.402 | 577.366 | 430.517 |
| ENSMUSG000000027668 | 13_Mfn1         | 1555.47 | -0.27044 | 0.03442  | 0.0712   | 1442.93 | 1365.69 | 1421.04 | 1485.98 | 1828.03 | 1789.18 |
| ENSMUSG000000027669 | 14_Gnb4         | 504.768 | -0.74385 | 9.35E-05 | 0.00047  | 375.926 | 439.629 | 316.716 | 712.332 | 666.122 | 517.887 |
| ENSMUSG000000027670 | 4_Ocstamp       | 1.70383 | 0.81908  | 0.7225   | NA       | 0       | 1.83561 | 4.78062 | 3.60674 | 0       | 0       |
| ENSMUSG000000027671 | 14_Actl6a       | 1116.28 | 0.11035  | 0.44792  | 0.56284  | 1181.6  | 1024.27 | 1270.45 | 961.197 | 1068.66 | 1191.52 |
| ENSMUSG000000027673 | 12_Ndufb5       | 1297.39 | -0.40352 | 0.00097  | 0.00349  | 1149.48 | 1139.91 | 1062.49 | 1483.27 | 1599.41 | 1349.8  |
| ENSMUSG000000027674 | 16_Pex5l        | 197.779 | -1.86945 | 4.67E-07 | 4.77E-06 | 92.8962 | 110.137 | 51.3916 | 486.008 | 247.442 | 198.798 |
| ENSMUSG000000027676 | 11_Cdc39        | 103.42  | -1.49322 | 8.08E-08 | 1.05E-06 | 60.7732 | 60.5752 | 40.6352 | 144.27  | 177.513 | 136.753 |
| ENSMUSG000000027677 | 17_Ttc14        | 1987.99 | -0.64072 | 7.56E-05 | 0.00039  | 1620.04 | 1609.83 | 1430.6  | 1992.72 | 2927.17 | 2347.58 |
| ENSMUSG000000027678 | 17_Ncoa3        | 2803.64 | 0.62331  | 3.01E-07 | 3.24E-06 | 3241.82 | 3338.98 | 3617.73 | 2118.06 | 2044.99 | 2460.28 |
| ENSMUSG000000027679 | 13_Dnajc19      | 516.678 | -0.52944 | 0.00068  | 0.0026   | 428.885 | 414.848 | 425.475 | 544.618 | 703.777 | 582.464 |
| ENSMUSG000000027680 | 15_Fxr1         | 1671.99 | -0.48916 | 4.15E-05 | 0.00023  | 1457.69 | 1359.27 | 1356.5  | 1808.78 | 2136.43 | 1913.27 |
| ENSMUSG000000027684 | 16_Mecom        | 265.269 | -0.61051 | 0.00193  | 0.0063   | 236.147 | 222.109 | 170.907 | 356.166 | 313.786 | 292.498 |
| ENSMUSG000000027690 | 13_Slc2a2       | 32.4892 | -0.40002 | 0.33075  | 0.44741  | 34.7275 | 22.9451 | 26.2934 | 36.0674 | 39.4473 | 35.4544 |
| ENSMUSG000000027692 | 16_Tnik         | 420.44  | 0.04793  | 0.77763  | 0.84452  | 421.071 | 372.629 | 490.013 | 455.351 | 393.577 | 389.998 |
| ENSMUSG000000027695 | 16_Pid1         | 629.719 | -0.0337  | 0.79256  | 0.85629  | 638.987 | 587.396 | 640.603 | 649.214 | 608.744 | 653.373 |
| ENSMUSG000000027698 | 14_Nceh1        | 429.227 | -0.99048 | 7.21E-07 | 6.89E-06 | 315.152 | 319.396 | 227.079 | 618.556 | 626.675 | 468.504 |
| ENSMUSG000000027699 | 19_Ect2         | 480.417 | 0.29628  | 0.17555  | 0.27159  | 616.414 | 399.245 | 572.479 | 339.034 | 465.299 | 490.03  |
| ENSMUSG000000027702 | 7_Lrrc34        | 1.96918 | 0.67543  | 0.69449  | NA       | 5.20913 | 0.91781 | 1.19515 | 1.80337 | 2.68959 | 0       |
| ENSMUSG000000027706 | 8_Sec62         | 3988.66 | -0.46837 | 6.15E-07 | 6.06E-06 | 3337.32 | 3329.8  | 3373.92 | 4503.02 | 4820.64 | 4567.28 |
| ENSMUSG000000027708 | 14_Dcun1d1      | 1299.31 | -0.52404 | 0.00019  | 0.00089  | 1118.23 | 1005    | 1074.44 | 1329.99 | 1734.79 | 1533.4  |
| ENSMUSG000000027709 | 9_Mccc1         | 876.867 | -0.28052 | 0.01658  | 0.03876  | 809.152 | 771.874 | 794.777 | 924.228 | 1007.7  | 953.469 |
| ENSMUSG000000027710 | 14_Acad9        | 1303.96 | 0.04964  | 0.68604  | 0.77387  | 1338.75 | 1293.19 | 1345.74 | 1164.08 | 1273.97 | 1408.04 |
| ENSMUSG000000027712 | 13_Anxa5        | 5552.68 | -0.02871 | 0.7591   | 0.83062  | 5607.63 | 5400.37 | 5483.37 | 5360.52 | 5696.56 | 5767.66 |
| ENSMUSG000000027713 | 6_1810062G17Rik | 7.82702 | -0.12801 | 0.88133  | 0.91999  | 11.2864 | 6.42464 | 4.78062 | 9.01685 | 11.6549 | 3.79868 |
| ENSMUSG000000027714 | 11_Exosc9       | 819.743 | -0.35379 | 0.02903  | 0.0618   | 754.456 | 639.71  | 764.899 | 762.826 | 1013.98 | 982.592 |
| ENSMUSG000000027715 | 9_Ccna2         | 980.744 | 0.05588  | 0.77656  | 0.84379  | 1086.97 | 838.874 | 1073.25 | 720.447 | 1143.08 | 1021.85 |
| ENSMUSG000000027716 | 13_Trpc3        | 31.3399 | -0.96354 | 0.05419  | 0.10361  | 17.3638 | 27.5342 | 19.1225 | 50.4944 | 51.9988 | 21.5259 |
| ENSMUSG000000027718 | 8_Ii21          | 0       | NA       | NA       | NA       | 0       | 0       | 0       | 0       | 0       | 0       |
| ENSMUSG000000027719 | 15_Adad1        | 1.23097 | 0.05857  | 0.98161  | NA       | 2.60457 | 0       | 1.19515 | 0       | 3.58612 | 0       |
| ENSMUSG000000027720 | 7_Ii2           | 0.59296 | -1.36724 | 0.71268  | NA       | 0.86819 | 0       | 0       | 0       | 2.68959 | 0       |
| ENSMUSG000000027722 | 14_Spata5       | 320.692 | -0.38668 | 0.03826  | 0.07767  | 282.161 | 277.177 | 273.69  | 291.244 | 390.887 | 408.991 |
| ENSMUSG000000027737 | 10_Slc7a11      | 452.842 | -1.41748 | 6.21E-07 | 6.11E-06 | 214.443 | 367.122 | 157.76  | 695.2   | 755.775 | 526.75  |
| ENSMUSG000000027739 | 9_Rab33b        | 548.961 | -0.30018 | 0.02309  | 0.0512   | 464.481 | 524.067 | 487.623 | 603.228 | 607.848 | 606.523 |
| ENSMUSG000000027742 | 13_Cog6         | 1109.87 | -0.16073 | 0.21963  | 0.32439  | 1007.97 | 997.655 | 1138.98 | 1057.68 | 1214.8  | 1242.17 |
| ENSMUSG000000027744 | 4_Stoml3        | 0.5087  | 0.75055  | 0.82276  | NA       | 0.86819 | 0.91781 | 0       | 0       | 0       | 1.26623 |
| ENSMUSG000000027746 | 13_Ufm1         | 1611.46 | -0.40235 | 0.0031   | 0.00946  | 1469.84 | 1277.59 | 1417.45 | 1631.15 | 2062.02 | 1810.7  |
| ENSMUSG000000027748 | 11_Trpc4        | 10.7111 | -0.10144 | 0.18637  | 0.28483  | 11.2864 | 7.34244 | 2.39031 | 18.0337 | 12.5514 | 12.6623 |
| ENSMUSG000000027750 | 16_Postn        | 6093.63 | -0.84412 | 1.13E-10 | 3.58E-09 | 4804.55 | 4541.3  | 3732.47 | 7482.19 | 8379.87 | 7621.42 |
| ENSMUSG000000027751 | 13_Supt20       | 1871.25 | 0.09863  | 0.44544  | 0.56039  | 2064.55 | 1807.16 | 1932.56 | 1593.28 | 1886.3  | 1943.66 |
| ENSMUSG000000027752 | 15_Exosc8       | 431.655 | 0.02978  | 0.85413  | 0.90105  | 434.094 | 385.478 | 488.818 | 394.938 | 423.162 | 463.439 |
| ENSMUSG000000027761 | 4_Aadac         | 67.7016 | 0.06894  | 0.86497  | 0.90833  | 81.6097 | 54.1505 | 72.9044 | 60.4129 | 100.411 | 36.7206 |
| ENSMUSG000000027762 | 6_Sucnr1        | 0.30056 | -1.76625 | 0.6627   | NA       | 0       | 0       | 0       | 1.80337 | 0       | 0       |
| ENSMUSG000000027763 | 13_Mbnl1        | 3202.85 | -0.21246 | 0.08202  | 0.14613  | 3179.31 | 2663.47 | 3060.79 | 3381.32 | 3707.15 | 3225.08 |
| ENSMUSG000000027765 | 6_P2ry1         | 442.418 | -0.03245 | 0.82941  | 0.88311  | 411.521 | 444.218 | 456.549 | 400.348 | 473.368 | 468.504 |
| ENSMUSG000000027770 | 5_Dhx36         | 1425.72 | -0.47058 | 0.0002   | 0.00092  | 1217.2  | 1125.23 | 1244.16 | 1520.24 | 1834.3  | 1613.17 |
| ENSMUSG000000027774 | 16_Gfm1         | 820.436 | -0.15231 | 0.29768  | 0.41215  | 762.269 | 719.56  | 849.755 | 752.907 | 909.979 | 928.144 |
| ENSMUSG000000027775 | 9_Mfsd1         | 1692.43 | -0.06702 | 0.62838  | 0.7252   | 1758.95 | 1515.3  | 1683.97 | 1494.09 | 1802.92 | 1899.34 |
| ENSMUSG000000027776 | 12_Ii12a        | 1.9192  | -0.60096 | 0.71246  | NA       | 1.73638 | 2.75342 | 0       | 1.80337 | 2.68959 | 2.53245 |
| ENSMUSG000000027777 | 15_Schlp1       | 231.768 | -0.9358  | 7.27E-06 | 5.13E-05 | 145.856 | 173.465 | 158.955 | 319.197 | 348.75  | 244.382 |
| ENSMUSG000000027778 | 15_Ift80        | 614.98  | -0.77878 | 1.04E-08 | 1.77E-07 | 466.217 | 458.903 | 433.841 | 776.351 | 839.153 | 715.418 |
| ENSMUSG000000027782 | 10_Kpna4        | 2423.98 | -0.2136  | 0.10974  | 0.18581  | 2330.22 | 2098.1  | 2306.65 | 2279.46 | 2945.1  | 2584.37 |
| ENSMUSG000000027784 | 10_Ppm1l        | 1137.94 | -0.45495 | 0.00054  | 0.00214  | 898.575 | 1077.5  | 903.536 | 1263.26 | 1393.21 | 1291.55 |
| ENSMUSG000000027787 | 14_Nmd3         | 909.777 | -0.38649 | 0.02254  | 0.05013  | 843.011 | 713.135 | 810.314 | 871.028 | 1246.18 | 974.995 |
| ENSMUSG000000027788 | 6_Otol1         | 0       | NA       | NA       | NA       | 0       | 0       | 0       | 0       | 0       | 0       |
| ENSMUSG000000027790 | 14_Sis          | 0.4989  | -0.80902 | 0.81036  | NA       | 0       | 0       | 1.19515 | 0.90169 | 0.89653 | 0       |
| ENSMUSG000000027792 | 11_Bche         | 118.686 | -1.56045 | 2.50E-06 | 2.03E-05 | 57.3004 | 85.3559 | 37.0498 | 207.388 | 188.271 | 136.753 |
| ENSMUSG000000027793 | 6_Ccna1         | 10.7206 | 0.2802   | 0.69159  | 0.77874  | 10.4183 | 11.9315 | 13.1467 | 14.427  | 8.06878 | 6.33113 |
| ENSMUSG000000027796 | 2_Smad9         | 142.086 | -0.94716 | 0.00093  | 0.00336  | 96.3689 | 123.904 | 70.5141 | 233.537 | 177.513 | 150.681 |
| ENSMUSG000000027797 | 5_Ddk1          | 364.79  | -1.25841 | 1.10E-08 | 1.85E-07 | 215.311 | 255.15  | 174.492 | 582.489 | 567.504 | 393.797 |
| ENSMUSG000000027799 | 12_Nbea         | 1596.97 | -0.29244 | 0.0068   | 0.01824  | 1389.97 | 1473.08 | 1444.94 | 1725.83 | 1857.61 | 1690.41 |
| ENSMUSG000000027800 | 14_Tm4sf1       | 495.637 | -0.15408 | 0.35142  | 0.46807  | 521.781 | 412.095 | 474.476 | 586.997 | 507.436 | 471.036 |
| ENSMUSG000000027801 | 7_Tm4sf4        | 0.1447  | 0.92709  | 0.82027  | NA       | 0.86819 | 0       | 0       | 0       | 0       | 0       |
| ENSMUSG000000027803 | 14_Wwtr1        | 1730.89 | -0.0717  | 0.49691  | 0.60797  | 1723.35 | 1663.98 | 1676.8  | 1875.51 | 1724.92 | 1720.8  |
| ENSMUSG000000027804 | 13_Ppid         | 1091.09 | -0.33634 | 0.06072  | 0.11408  | 941.984 | 971.956 | 978.831 | 906.194 | 1391.42 | 1356.13 |
| ENSMUSG000000027805 | 16_Pfn2         | 1120.32 | -1.33497 | 3.15E-13 | 1.97E-11 | 690.21  | 727.82  | 488.818 | 1696.07 | 1752.72 | 1366.26 |
| ENSMUSG000000027806 | 9_Tsc22d2       | 779.009 | -0.03272 | 0.82709  | 0.88159  | 788.315 | 679.176 | 844.974 | 790.778 | 864.255 | 706.555 |
| ENSMUSG000000027808 | 8_Serp1         | 3615.62 | -0.28472 | 0.03003  | 0.06354  | 3312.14 | 2952.58 | 3516.14 | 3527.39 | 4386.72 | 3998.74 |
| ENSMUSG000000027809 | 14_Etfdh        | 1060.72 | -0.40619 | 0.00179  | 0.00593  | 956.744 | 898.532 | 882.024 | 1134.32 | 1349.28 | 1143.4  |
| ENSMUSG000000027810 | 14_Eif2a        | 1129.96 | -0.42978 | 0.00927  | 0.02371  | 1057.45 | 852.641 | 978.831 | 1100.96 | 1537.55 | 1252.3  |

|                     |                  |         |          |          |          |         |         |         |         |         |         |
|---------------------|------------------|---------|----------|----------|----------|---------|---------|---------|---------|---------|---------|
| ENSMUSG000000027811 | 9_4930579G24Rik  | 77.3764 | -0.16281 | 0.56598  | 0.6713   | 74.6642 | 59.6574 | 84.8559 | 78.4466 | 77.9982 | 88.6359 |
| ENSMUSG000000027820 | 12_Mme           | 621.89  | -1.2139  | 2.61E-12 | 1.25E-10 | 380.267 | 440.547 | 301.179 | 885.455 | 797.016 | 926.878 |
| ENSMUSG000000027822 | 16_Slc33a1       | 896.348 | -0.42333 | 0.00182  | 0.00601  | 750.115 | 760.861 | 786.411 | 901.685 | 1124.25 | 1054.77 |
| ENSMUSG000000027823 | 9_Gmps           | 1480.74 | -0.39952 | 0.01082  | 0.027    | 1357.85 | 1150.01 | 1323.04 | 1384.09 | 1913.2  | 1756.26 |
| ENSMUSG000000027824 | 4_Vmn2r1         | 0.1447  | 0.92709  | 0.82027  | NA       | 0.86819 | 0       | 0       | 0       | 0       | 0       |
| ENSMUSG000000027827 | 16_Kcnab1        | 185.464 | -1.16286 | 7.68E-05 | 0.0004   | 118.074 | 135.835 | 89.6366 | 340.837 | 259.994 | 168.408 |
| ENSMUSG000000027828 | 12_Ssr3          | 5134.84 | -0.3229  | 0.01344  | 0.03238  | 4676.06 | 4310.93 | 4700.54 | 4868.2  | 6285.58 | 5967.73 |
| ENSMUSG000000027829 | 15_Ccn1          | 2065.14 | -0.12103 | 0.38313  | 0.50068  | 2088.86 | 1819.09 | 2028.18 | 1889.93 | 2456.49 | 2108.27 |
| ENSMUSG000000027831 | 9_Veph1          | 161.466 | -1.56459 | 6.93E-07 | 6.66E-06 | 83.3461 | 108.301 | 52.5868 | 275.014 | 282.407 | 167.142 |
| ENSMUSG000000027832 | 5_Ptx3           | 47.1982 | 1.02592  | 0.05559  | 0.10583  | 43.4094 | 28.452  | 118.32  | 30.6573 | 26.8959 | 35.4544 |
| ENSMUSG000000027833 | 16_Shox2         | 35.944  | -0.90713 | 0.0182   | 0.04184  | 26.9138 | 22.9451 | 25.0982 | 43.2809 | 49.3092 | 48.1166 |
| ENSMUSG000000027834 | 15_Serpini1      | 140.288 | -0.84894 | 0.00123  | 0.0043   | 104.183 | 90.8628 | 106.369 | 188.452 | 221.443 | 130.421 |
| ENSMUSG000000027835 | 11_Pdcd10        | 1574.49 | -0.38998 | 0.02199  | 0.04908  | 1432.51 | 1214.26 | 1442.55 | 1431.88 | 2139.12 | 1786.65 |
| ENSMUSG000000027840 | 5_Wnt2b          | 345.93  | -0.64001 | 0.00641  | 0.01737  | 283.029 | 324.903 | 203.176 | 482.402 | 461.713 | 320.355 |
| ENSMUSG000000027843 | 13_Ptpn22        | 110.573 | 0.20566  | 0.40568  | 0.52285  | 134.569 | 106.465 | 113.54  | 90.1685 | 102.204 | 116.493 |
| ENSMUSG000000027845 | 15_Dclre1b       | 346.927 | 0.05878  | 0.72277  | 0.8024   | 364.639 | 331.328 | 365.717 | 295.753 | 365.784 | 358.342 |
| ENSMUSG000000027848 | 12_Olfml3        | 2655.06 | -0.23729 | 0.13356  | 0.21745  | 2514.27 | 2746.07 | 2048.49 | 2810.55 | 2511.18 | 3299.79 |
| ENSMUSG000000027849 | 18_Syt6          | 26.1062 | -1.17871 | 0.00941  | 0.02398  | 16.4956 | 13.7671 | 17.9273 | 37.8708 | 37.6543 | 32.9219 |
| ENSMUSG000000027852 | 14_Nras          | 2706.99 | -0.08889 | 0.41776  | 0.53371  | 2691.38 | 2479.91 | 2698.66 | 2604.97 | 2798.97 | 2968.04 |
| ENSMUSG000000027854 | 12_Sike1         | 1473.12 | -0.45242 | 0.00017  | 0.00078  | 1339.61 | 1194.98 | 1196.35 | 1577.95 | 1791.27 | 1738.53 |
| ENSMUSG000000027855 | 13_Sycp1         | 23.8346 | 0.15026  | 0.74919  | 0.82295  | 27.782  | 20.1917 | 27.4885 | 24.3455 | 24.2063 | 18.9934 |
| ENSMUSG000000027857 | 10_Tshb          | 0.86734 | -2.01721 | 0.47244  | NA       | 0.86819 | 0       | 0       | 1.80337 | 0       | 2.53245 |
| ENSMUSG000000027858 | 13_Tspan2        | 65.481  | -1.08339 | 0.00167  | 0.00558  | 39.0685 | 52.3149 | 34.6595 | 95.5787 | 106.687 | 64.5776 |
| ENSMUSG000000027859 | 10_Ngf           | 79.774  | 0.90772  | 0.01099  | 0.02735  | 105.919 | 77.0957 | 130.272 | 75.7416 | 52.8953 | 36.7206 |
| ENSMUSG000000027860 | 15_Vangl1        | 1021.75 | 0.6188   | 4.03E-05 | 0.00023  | 1222.41 | 1150.01 | 1338.57 | 738.48  | 735.155 | 945.872 |
| ENSMUSG000000027861 | 13_Casq2         | 50.6547 | -0.64333 | 0.06347  | 0.11839  | 50.3549 | 32.1232 | 35.8546 | 62.2163 | 60.0675 | 63.3113 |
| ENSMUSG000000027863 | 8_Cd2            | 10.677  | 2.51631  | 0.00687  | 0.01838  | 31.2548 | 7.34244 | 15.537  | 1.80337 | 1.79306 | 6.33113 |
| ENSMUSG000000027864 | 9_Ptgrfn         | 6084.83 | 0.47425  | 0.00018  | 0.00081  | 6459.32 | 6937.69 | 7830.65 | 5102.64 | 4628.79 | 5549.87 |
| ENSMUSG000000027865 | 10_Gdap2         | 551.678 | -0.00406 | 0.97773  | 0.98545  | 546.959 | 528.656 | 577.259 | 490.517 | 600.675 | 566.003 |
| ENSMUSG000000027867 | 10_Spag17        | 2.70277 | 0.08753  | 0.94676  | 0.96535  | 4.34094 | 2.75342 | 1.19515 | 2.70506 | 2.68959 | 2.53245 |
| ENSMUSG000000027868 | 11_Tbx15         | 115.828 | -1.12344 | 0.001    | 0.00358  | 64.2459 | 86.2737 | 68.1238 | 229.93  | 99.5149 | 146.882 |
| ENSMUSG000000027869 | 14_Hsd3b6        | 0.21104 | -0.99647 | 0.80707  | NA       | 0       | 0       | 0       | 0       | 0       | 1.26623 |
| ENSMUSG000000027870 | 8_Hao2           | 0.15028 | -0.99647 | 0.80707  | NA       | 0       | 0       | 0       | 0.90169 | 0       | 0       |
| ENSMUSG000000027871 | 16_Hsd3b1        | 0.1447  | 0.92709  | 0.82027  | NA       | 0.86819 | 0       | 0       | 0       | 0       | 0       |
| ENSMUSG000000027875 | 12_Hmgcs2        | 420.824 | -1.35997 | 7.37E-06 | 5.19E-05 | 211.838 | 346.931 | 148.199 | 792.582 | 458.127 | 567.27  |
| ENSMUSG000000027876 | 4_Reg4           | 0.99443 | -3.43548 | 0.26715  | NA       | 0       | 0       | 0       | 0.90169 | 0       | 5.06491 |
| ENSMUSG000000027878 | 11_Notch2        | 3760.29 | -0.4682  | 3.96E-05 | 0.00022  | 4110    | 4512.85 | 4472.27 | 3344.35 | 2861.73 | 3260.53 |
| ENSMUSG000000027879 | 9_Sec22b         | 1364.01 | -0.37098 | 0.00593  | 0.01624  | 1228.49 | 1136.24 | 1204.72 | 1389.5  | 1756.3  | 1468.82 |
| ENSMUSG000000027880 | 6_Slc25a54       | 0.15028 | -0.99647 | 0.80707  | NA       | 0       | 0       | 0       | 0.90169 | 0       | 0       |
| ENSMUSG000000027881 | 14_Prp38b        | 2774.36 | -0.23416 | 0.12754  | 0.20968  | 2516.01 | 2337.65 | 2795.47 | 2434.55 | 3295.65 | 3266.87 |
| ENSMUSG000000027882 | 18_Stxbp3        | 1903.64 | -0.11357 | 0.45815  | 0.57197  | 1911.75 | 1638.28 | 1936.15 | 1633.85 | 2225.19 | 2076.61 |
| ENSMUSG000000027883 | 15_Gpsm2         | 1191.26 | 0.14228  | 0.31872  | 0.43426  | 1277.97 | 1152.76 | 1319.45 | 981.034 | 1270.38 | 1145.94 |
| ENSMUSG000000027884 | 16_Clccl         | 1163.78 | 0.03054  | 0.81012  | 0.86898  | 1166.85 | 1083.93 | 1277.62 | 1071.2  | 1163.7  | 1219.38 |
| ENSMUSG000000027886 | 7_1700013F07Rik  | 0.44526 | -0.80448 | 0.84252  | NA       | 0.86819 | 0       | 0       | 1.80337 | 0       | 0       |
| ENSMUSG000000027887 | 11_Sypl2         | 48.6347 | -1.62272 | 0.00045  | 0.00182  | 25.1775 | 24.7808 | 21.5128 | 115.416 | 40.3439 | 64.5776 |
| ENSMUSG000000027889 | 17_Ampd2         | 571.659 | 0.55684  | 0.00087  | 0.00318  | 602.523 | 746.176 | 694.385 | 539.208 | 428.542 | 419.121 |
| ENSMUSG000000027890 | 17_Gstm4         | 272.518 | -0.1302  | 0.47122  | 0.58433  | 248.302 | 277.177 | 254.568 | 305.671 | 242.96  | 306.427 |
| ENSMUSG000000027893 | 14_Ahcy1         | 3222.45 | -0.37535 | 0.00037  | 0.00154  | 2908.43 | 2792.88 | 2715.39 | 3485.92 | 3904.39 | 3527.71 |
| ENSMUSG000000027894 | 14_Slc6a17       | 1078.07 | -0.72178 | 0.01038  | 0.0261   | 726.674 | 1212.42 | 501.965 | 1634.76 | 1334.04 | 1058.57 |
| ENSMUSG000000027895 | 9_Kcnc4          | 46.2643 | -0.60626 | 0.22064  | 0.32553  | 30.3866 | 56.9039 | 22.7079 | 87.4635 | 42.1369 | 37.9868 |
| ENSMUSG000000027896 | 15_Slc16a4       | 166.361 | -1.69281 | 2.34E-09 | 4.88E-08 | 72.0596 | 99.123  | 64.5383 | 257.882 | 320.958 | 183.603 |
| ENSMUSG000000027900 | 15_Dram2         | 1377.09 | -0.43651 | 0.00319  | 0.00968  | 1197.23 | 1091.27 | 1223.84 | 1439.99 | 1869.27 | 1440.97 |
| ENSMUSG000000027901 | 12_Dennd2d       | 1296.44 | 0.09421  | 0.61628  | 0.71502  | 1342.22 | 1193.15 | 1480.8  | 929.638 | 1464.03 | 1368.79 |
| ENSMUSG000000027902 | 8_Chil6          | 1.36693 | 1.00601  | 0.68728  | NA       | 0       | 5.50683 | 0       | 0.90169 | 1.79306 | 0       |
| ENSMUSG000000027905 | 15_Ddx20         | 463.256 | -0.38729 | 0.02465  | 0.05403  | 414.994 | 382.725 | 406.352 | 429.202 | 597.986 | 548.276 |
| ENSMUSG000000027907 | 4_S100a11        | 27089.4 | 0.21199  | 0.07041  | 0.12915  | 29135.5 | 25999.6 | 32093.5 | 23891.1 | 25058.9 | 26357.8 |
| ENSMUSG000000027908 | 2_Tchhl1         | 3.0551  | -2.47497 | 0.1026   | 0.17601  | 1.73638 | 0.91781 | 0       | 1.80337 | 6.27571 | 7.59736 |
| ENSMUSG000000027912 | 8_Lce1m          | 0       | NA       | NA       | NA       | 0       | 0       | 0       | 0       | 0       | 0       |
| ENSMUSG000000027913 | 5_Crcr1          | 30.5206 | -0.39711 | 0.34824  | 0.46518  | 27.782  | 23.8629 | 27.4885 | 42.3792 | 28.689  | 32.9219 |
| ENSMUSG000000027925 | 2_Spr2j-ps       | 0.34389 | 1.87986  | 0.64119  | NA       | 0.86819 | 0       | 1.19515 | 0       | 0       | 0       |
| ENSMUSG000000027927 | 5_Lelp1          | 0.21104 | -0.99647 | 0.80707  | NA       | 0       | 0       | 0       | 0       | 0       | 1.26623 |
| ENSMUSG000000027931 | 12_Npr1          | 240.157 | -0.19447 | 0.46336  | 0.57694  | 233.543 | 240.465 | 198.396 | 363.379 | 208.892 | 196.265 |
| ENSMUSG000000027932 | 14_Slc27a3       | 133.715 | 1.10197  | 2.42E-06 | 1.98E-05 | 171.033 | 164.287 | 212.737 | 92.8736 | 81.5843 | 79.7723 |
| ENSMUSG000000027933 | 11_Ints3         | 1610.29 | 0.53023  | 0.00012  | 0.00057  | 1799.75 | 1889.76 | 2017.42 | 1189.32 | 1243.49 | 1522    |
| ENSMUSG000000027935 | 14_Rab13         | 280.127 | -0.23664 | 0.19663  | 0.29696  | 250.038 | 272.588 | 249.787 | 350.756 | 296.752 | 260.843 |
| ENSMUSG000000027936 | 18_Crtc2         | 801.612 | 0.52605  | 0.00048  | 0.00193  | 978.448 | 915.97  | 944.172 | 760.121 | 563.918 | 647.042 |
| ENSMUSG000000027937 | 15_Jtb           | 557.763 | -0.32883 | 0.01598  | 0.03759  | 498.34  | 475.423 | 510.331 | 586.096 | 672.398 | 603.99  |
| ENSMUSG000000027938 | 11_Creb3l4       | 12.3719 | -0.31791 | 0.67478  | 0.76447  | 15.6274 | 9.17806 | 8.36608 | 23.4438 | 12.5514 | 5.06491 |
| ENSMUSG000000027939 | 11_Nup210l       | 38.5664 | 0.31196  | 0.39744  | 0.51485  | 46.8822 | 44.0547 | 37.0498 | 33.3624 | 35.8612 | 34.1881 |
| ENSMUSG000000027940 | 18_Tpm3          | 2287.57 | 0.44122  | 0.00108  | 0.00383  | 2572.44 | 2415.66 | 2914.98 | 1764.6  | 1883.61 | 2174.11 |
| ENSMUSG000000027942 | 16_4933434E20Rik | 1237.27 | -0.36002 | 0.00186  | 0.00613  | 1099.99 | 1045.38 | 1106.71 | 1346.22 | 1494.52 | 1330.8  |
| ENSMUSG000000027944 | 13_Hax1          | 905.408 | -0.19707 | 0.10271  | 0.17615  | 825.647 | 795.737 | 910.707 | 974.722 | 955.702 | 969.93  |
| ENSMUSG000000027947 | 11_Ilfra         | 172.117 | 0.95948  | 0.00016  | 0.00076  | 292.579 | 179.89  | 209.152 | 130.744 | 101.308 | 119.025 |
| ENSMUSG000000027950 | 7_Chmb2          | 96.8675 | 0.16132  | 0.53025  | 0.6389   | 109.392 | 94.534  | 102.783 | 103.694 | 77.1016 | 93.7008 |
| ENSMUSG000000027951 | 16_Adar          | 3994.24 | 1.17148  | 4.97E-15 | 4.61E-13 | 4996.42 | 4924.03 | 6677.33 | 2285.77 | 2565.87 | 2515.99 |
| ENSMUSG000000027952 | 16_Pmvk          | 1461.67 | 0.75352  | 1.62E-06 | 1.40E-05 | 1869.21 | 1707.12 | 1927.78 | 1222.69 | 873.221 | 1169.99 |
| ENSMUSG000000027953 | 13_Slc50a1       | 782.761 | 0.42165  | 0.00312  | 0.0095   | 858.638 | 872.833 | 957.318 | 716.84  | 581.848 | 709.087 |
| ENSMUSG000000027954 | 9_Efnal          | 1001.76 | 0.57314  | 0.00021  | 0.00093  | 1172.05 | 1136.24 | 1284.79 | 816.927 | 672.398 | 928.144 |
| ENSMUSG000000027955 | 16_Fam198b       | 1465.13 | -0.40151 | 0.00155  | 0.00523  | 1376.95 | 1239.04 | 1170.06 | 1525.65 | 1754.51 | 1724.6  |

|                     |                  |         |          |          |          |         |         |         |         |         |         |
|---------------------|------------------|---------|----------|----------|----------|---------|---------|---------|---------|---------|---------|
| ENSMUSG000000027956 | 11_Tmem144       | 188.824 | 0.37598  | 0.07017  | 0.12879  | 231.806 | 186.315 | 221.104 | 142.466 | 167.651 | 183.603 |
| ENSMUSG000000027957 | 13_Slc35a3       | 1738.71 | -0.15745 | 0.24438  | 0.35256  | 1757.21 | 1528.15 | 1645.73 | 1590.57 | 1994.78 | 1915.8  |
| ENSMUSG000000027959 | 13_Sass6         | 163.516 | 0.24714  | 0.27759  | 0.39013  | 186.661 | 161.534 | 185.249 | 141.565 | 181.996 | 124.09  |
| ENSMUSG000000027961 | 7_Lrrc39         | 42.0622 | -1.5122  | 0.00051  | 0.00201  | 18.232  | 30.2876 | 16.7322 | 80.25   | 44.8265 | 62.0451 |
| ENSMUSG000000027962 | 14_Vcam1         | 1276.16 | -0.40273 | 0.00684  | 0.01833  | 1262.35 | 927.901 | 1106.71 | 1352.53 | 1491.83 | 1515.67 |
| ENSMUSG000000027963 | 14_Extl2         | 557.897 | -0.51072 | 0.00018  | 0.00084  | 478.372 | 481.848 | 419.499 | 679.871 | 650.881 | 636.912 |
| ENSMUSG000000027965 | 15_Olfm3         | 22.5635 | -2.31834 | 9.08E-05 | 0.00046  | 9.55007 | 9.17806 | 3.58546 | 44.1826 | 44.8265 | 24.0583 |
| ENSMUSG000000027966 | 19_Col11a1       | 508.423 | -0.35115 | 0.05812  | 0.10993  | 411.521 | 548.848 | 380.059 | 580.685 | 620.399 | 509.023 |
| ENSMUSG000000027967 | 8_Neurog2        | 0.21104 | -0.99647 | 0.80707  | NA       | 0       | 0       | 0       | 0       | 0       | 1.26623 |
| ENSMUSG000000027968 | 11_Larp7         | 637.167 | -0.26943 | 0.05975  | 0.11249  | 581.686 | 544.259 | 607.138 | 617.655 | 716.328 | 755.937 |
| ENSMUSG000000027971 | 16_Ndst4         | 1.85425 | -3.2936  | 0.09854  | NA       | 0.86819 | 0       | 0       | 4.50843 | 4.48265 | 1.26623 |
| ENSMUSG000000027977 | 15_Ndst3         | 37.9467 | -0.97576 | 0.03598  | 0.07382  | 23.4411 | 37.63   | 15.537  | 58.6096 | 58.2745 | 34.1881 |
| ENSMUSG000000027978 | 9_Prss12         | 82.7591 | -0.52537 | 0.06524  | 0.12111  | 59.0368 | 74.3423 | 70.5141 | 117.219 | 84.2739 | 91.1683 |
| ENSMUSG000000027981 | 14_Rnpc3         | 436.204 | -0.78949 | 1.24E-06 | 1.11E-05 | 316.889 | 346.013 | 296.398 | 530.191 | 627.571 | 500.16  |
| ENSMUSG000000027983 | 13_Cyp2u1        | 62.0926 | -0.86849 | 0.032    | 0.06706  | 43.4094 | 59.6574 | 28.6837 | 108.202 | 80.6878 | 51.9153 |
| ENSMUSG000000027984 | 8_Hadh           | 1811.26 | 0.05326  | 0.67197  | 0.76235  | 1771.1  | 1888.84 | 1874    | 1947.64 | 1568.93 | 1817.04 |
| ENSMUSG000000027985 | 14_Lef1          | 45.2149 | -0.63481 | 0.14009  | 0.2259   | 34.7275 | 49.5615 | 21.5128 | 69.4298 | 40.3439 | 55.714  |
| ENSMUSG000000027993 | 16_Trim2         | 5831.09 | -0.07778 | 0.54921  | 0.65561  | 5837.7  | 5115.85 | 6067.8  | 5266.74 | 6182.47 | 6516    |
| ENSMUSG000000027994 | 14_Ccdc109b      | 191.13  | 0.48099  | 0.01523  | 0.03606  | 225.729 | 199.164 | 243.811 | 147.876 | 175.72  | 154.48  |
| ENSMUSG000000027995 | 10_Tlr2          | 517.769 | 0.37286  | 0.10211  | 0.1753   | 628.568 | 480.93  | 641.798 | 374.199 | 372.06  | 609.055 |
| ENSMUSG000000027996 | 13_Sfrp2         | 684.333 | 0.08747  | 0.64815  | 0.74258  | 626.832 | 790.231 | 697.97  | 795.287 | 511.919 | 683.763 |
| ENSMUSG000000027997 | 9_Casp6          | 510.222 | 0.20101  | 0.125    | 0.20626  | 527.859 | 564.45  | 544.99  | 467.975 | 485.023 | 471.036 |
| ENSMUSG000000027998 | 11_Plrp1         | 1230.63 | -0.15781 | 0.2055   | 0.30769  | 1251.93 | 1037.12 | 1201.13 | 1270.47 | 1306.25 | 1316.88 |
| ENSMUSG000000027999 | 15_Pla2g12a      | 339.308 | -0.21938 | 0.16935  | 0.26373  | 319.493 | 331.328 | 289.227 | 393.135 | 337.992 | 364.673 |
| ENSMUSG000000028003 | 6_Lrat           | 673.057 | -1.77177 | 1.03E-08 | 1.75E-07 | 395.894 | 359.78  | 157.76  | 1358.84 | 998.735 | 767.334 |
| ENSMUSG000000028004 | 12_Npy2r         | 0.44526 | -0.80448 | 0.84252  | NA       | 0.86819 | 0       | 0       | 1.80337 | 0       | 0       |
| ENSMUSG000000028005 | 13_Gucy1b3       | 141.017 | -1.35606 | 6.50E-07 | 6.34E-06 | 76.4006 | 95.4518 | 65.7335 | 253.374 | 198.133 | 157.012 |
| ENSMUSG000000028007 | 13_Snx7          | 330.365 | -0.41986 | 0.01123  | 0.02786  | 308.207 | 261.575 | 277.276 | 342.64  | 387.301 | 405.193 |
| ENSMUSG000000028008 | 10_Asic5         | 0.14942 | -0.99647 | 0.80707  | NA       | 0       | 0       | 0       | 0       | 0.89653 | 0       |
| ENSMUSG000000028009 | 7_1700061117Rik  | 0.19919 | 0.92709  | 0.82027  | NA       | 0       | 0       | 1.19515 | 0       | 0       | 0       |
| ENSMUSG000000028010 | 16_Gar1          | 359.161 | 0.51048  | 0.00461  | 0.01317  | 428.017 | 364.369 | 473.281 | 296.655 | 260.89  | 331.751 |
| ENSMUSG000000028011 | 16_Tdo2          | 29.4301 | -0.88146 | 0.05019  | 0.09744  | 20.8365 | 21.1095 | 20.3176 | 31.559  | 51.1022 | 31.6557 |
| ENSMUSG000000028012 | 15_Rrh           | 170.067 | -1.3732  | 5.58E-05 | 0.0003   | 90.2916 | 134.917 | 58.5626 | 320.098 | 251.925 | 164.609 |
| ENSMUSG000000028013 | 16_Ppa2          | 684.16  | -0.40866 | 0.00436  | 0.01257  | 612.941 | 547.93  | 603.553 | 721.348 | 875.91  | 743.275 |
| ENSMUSG000000028015 | 3_Ctso           | 1930.96 | -0.4615  | 7.15E-06 | 5.05E-05 | 1607.88 | 1579.54 | 1687.56 | 2164.05 | 2306.77 | 2239.96 |
| ENSMUSG000000028016 | 9_Ints12         | 507.528 | -0.16435 | 0.25288  | 0.36214  | 483.581 | 459.821 | 492.403 | 481.5   | 571.987 | 555.874 |
| ENSMUSG000000028017 | 7_Egf            | 114.289 | -0.13266 | 0.59702  | 0.69882  | 100.71  | 119.315 | 106.369 | 98.2837 | 119.239 | 141.817 |
| ENSMUSG000000028018 | 15_Gstcd         | 248.29  | 0.1663   | 0.31288  | 0.42785  | 261.325 | 261.575 | 265.324 | 233.537 | 243.856 | 224.122 |
| ENSMUSG000000028019 | 9_Pdgfc          | 190.251 | -0.65391 | 0.00143  | 0.00489  | 145.856 | 170.712 | 126.686 | 244.357 | 241.167 | 212.726 |
| ENSMUSG000000028020 | 16_Glrb          | 261.37  | -1.43806 | 2.09E-08 | 3.23E-07 | 118.074 | 195.493 | 108.759 | 413.874 | 414.197 | 317.823 |
| ENSMUSG000000028023 | 16_Pitx2         | 467.252 | -0.12821 | 0.58254  | 0.68584  | 443.644 | 518.56  | 377.669 | 659.132 | 419.576 | 384.933 |
| ENSMUSG000000028024 | 14_Enpep         | 1249.56 | -0.25237 | 0.11309  | 0.1903   | 1171.19 | 1073.83 | 1174.84 | 1182.11 | 1241.69 | 1653.69 |
| ENSMUSG000000028028 | 11_Alpk1         | 1824.01 | 0.14239  | 0.36064  | 0.47771  | 1997.7  | 1785.13 | 1958.86 | 1406.63 | 2015.4  | 1780.32 |
| ENSMUSG000000028029 | 11_Lamtor1       | 1290.16 | -0.31967 | 0.01138  | 0.02819  | 1208.52 | 1074.75 | 1159.3  | 1291.21 | 1486.45 | 1520.74 |
| ENSMUSG000000028030 | 12_Tbck          | 616.724 | 0.01184  | 0.93702  | 0.95878  | 602.523 | 625.026 | 629.846 | 523.879 | 673.294 | 645.776 |
| ENSMUSG000000028031 | 6_Dkk2           | 2114.53 | -0.69326 | 6.21E-07 | 6.11E-06 | 1763.29 | 1729.15 | 1354.11 | 2682.51 | 2700.35 | 2457.75 |
| ENSMUSG000000028032 | 13_Papss1        | 3242.19 | 0.41911  | 0.00219  | 0.00703  | 3569.12 | 3628.09 | 3930.86 | 2824.08 | 2356.98 | 3144.04 |
| ENSMUSG000000028033 | 16_Kcnq5         | 135.059 | -0.89676 | 0.00924  | 0.02365  | 101.578 | 123.904 | 57.3674 | 227.225 | 183.789 | 116.493 |
| ENSMUSG000000028034 | 15_Fubp1         | 3346.18 | -0.08235 | 0.53029  | 0.63891  | 3171.49 | 3167.35 | 3413.36 | 2942.2  | 3803.08 | 3579.62 |
| ENSMUSG000000028035 | 16_Dnajb4        | 1168.58 | -0.46583 | 0.00035  | 0.00146  | 1005.36 | 968.285 | 970.465 | 1194.73 | 1481.07 | 1391.58 |
| ENSMUSG000000028036 | 6_Ptgrf          | 196.672 | -0.76108 | 0.00012  | 0.00059  | 167.56  | 135.835 | 133.857 | 263.292 | 231.305 | 248.18  |
| ENSMUSG000000028037 | 13_Iffi44        | 8286.01 | 1.15981  | 3.74E-07 | 3.93E-06 | 10507.7 | 9222.11 | 14615.5 | 3687.89 | 6707.84 | 4975.01 |
| ENSMUSG000000028039 | 11_Efn3          | 578.236 | 0.69205  | 0.00074  | 0.00278  | 698.023 | 687.436 | 756.533 | 502.239 | 311.096 | 514.088 |
| ENSMUSG000000028040 | 7_Efn4           | 347.039 | 0.77123  | 0.00022  | 0.00099  | 421.071 | 425.862 | 466.11  | 316.492 | 191.858 | 260.843 |
| ENSMUSG000000028041 | 17_Adam15        | 2415.97 | 1.27355  | 2.96E-14 | 2.34E-12 | 2994.38 | 3515.2  | 3744.42 | 1632.05 | 1120.66 | 1489.08 |
| ENSMUSG000000028042 | 15_Zbtb7b        | 2125.11 | 1.07997  | 6.25E-09 | 1.14E-07 | 2543.79 | 2636.86 | 3475.51 | 1576.15 | 1065.97 | 1452.36 |
| ENSMUSG000000028044 | 6_Cks1b          | 318.19  | 0.49247  | 0.00508  | 0.01428  | 410.653 | 335.917 | 368.107 | 260.587 | 237.581 | 296.297 |
| ENSMUSG000000028047 | 11_Thbs3         | 258.548 | 0.4574   | 0.02702  | 0.05832  | 286.502 | 323.985 | 288.032 | 270.506 | 199.926 | 182.337 |
| ENSMUSG000000028048 | 11_Gba           | 1700.16 | 0.69498  | 4.01E-08 | 5.65E-07 | 2075.84 | 2018.25 | 2209.84 | 1182.11 | 1258.73 | 1456.16 |
| ENSMUSG000000028049 | 15_Scamp3        | 781.62  | 1.07041  | 1.99E-10 | 5.85E-09 | 935.907 | 1079.34 | 1162.88 | 598.719 | 439.3   | 473.569 |
| ENSMUSG000000028051 | 10_Hcn3          | 11.9129 | -0.71087 | 0.42009  | 0.53593  | 14.7592 | 6.42464 | 5.97577 | 30.6573 | 9.86184 | 3.79868 |
| ENSMUSG000000028053 | 13_Ash1l         | 3124.79 | -0.25116 | 0.01956  | 0.0444   | 2868.49 | 2888.33 | 2802.64 | 3107.21 | 3577.16 | 3504.92 |
| ENSMUSG000000028057 | 14_Rit1          | 1490.73 | 0.10083  | 0.40304  | 0.52055  | 1449.01 | 1539.16 | 1639.75 | 1421.96 | 1342.11 | 1552.39 |
| ENSMUSG000000028059 | 14_Arhgef2       | 931.227 | 0.25099  | 0.10115  | 0.17374  | 977.58  | 1089.44 | 969.27  | 995.461 | 741.431 | 814.184 |
| ENSMUSG000000028060 | 14_2810403A07Rik | 1761.51 | -0.04339 | 0.75836  | 0.83003  | 1728.56 | 1703.45 | 1773.61 | 1538.28 | 2079.05 | 1746.13 |
| ENSMUSG000000028062 | 15_Lamtor2       | 1185.88 | 0.49926  | 0.00737  | 0.01953  | 1355.24 | 1381.3  | 1429.4  | 1100.96 | 710.052 | 1138.34 |
| ENSMUSG000000028063 | 15_Lmna          | 2560.27 | 1.57477  | 8.61E-15 | 7.57E-13 | 3332.98 | 3445.44 | 4722.05 | 1493.19 | 948.529 | 1419.44 |
| ENSMUSG000000028064 | 17_Sema4a        | 3041.66 | 1.14981  | 7.05E-14 | 5.00E-12 | 3932.03 | 4015.4  | 4631.22 | 1956.66 | 1545.62 | 2169.05 |
| ENSMUSG000000028066 | 15_Pmf1          | 398.531 | 0.99307  | 1.40E-08 | 2.30E-07 | 500.945 | 522.231 | 568.893 | 311.081 | 225.926 | 262.109 |
| ENSMUSG000000028068 | 14_Iqgap3        | 555.178 | 1.50066  | 2.05E-15 | 2.09E-13 | 731.883 | 734.244 | 994.368 | 249.767 | 287.786 | 333.018 |
| ENSMUSG000000028069 | 16_Gpatch4       | 444.523 | 0.22215  | 0.20916  | 0.3122   | 473.163 | 448.807 | 512.721 | 384.118 | 353.233 | 495.095 |
| ENSMUSG000000028070 | 17_Apoa1bp       | 1515.49 | 0.1963   | 0.10548  | 0.17987  | 1583.58 | 1669.49 | 1601.51 | 1512.13 | 1265    | 1461.23 |
| ENSMUSG000000028071 | 12_Sn2d2a        | 15.8313 | 2.56691  | 0.00154  | 0.00519  | 53.8277 | 11.9315 | 15.537  | 5.41011 | 4.48265 | 3.79868 |
| ENSMUSG000000028072 | 6_Ntrk1          | 2.33046 | 1.02711  | 0.49805  | NA       | 4.34094 | 2.75342 | 2.39031 | 2.70506 | 1.79306 | 0       |
| ENSMUSG000000028073 | 15_Pear1         | 253.582 | 0.37419  | 0.2039   | 0.30575  | 283.898 | 337.752 | 237.836 | 329.115 | 178.41  | 154.48  |
| ENSMUSG000000028076 | 12_Cd1d1         | 44.7914 | -0.77361 | 0.06822  | 0.12585  | 36.4639 | 33.041  | 29.8789 | 84.7584 | 46.6196 | 37.9868 |
| ENSMUSG000000028078 | 14_Dclk2         | 119.762 | -0.98886 | 0.00064  | 0.00246  | 84.2143 | 95.4518 | 60.9529 | 184.846 | 176.617 | 116.493 |
| ENSMUSG000000028080 | 15_Lrba          | 2672.32 | 0.05069  | 0.67179  | 0.76221  | 2635.82 | 2704.77 | 2816.98 | 2325.45 | 2813.31 | 2737.58 |
| ENSMUSG000000028081 | 6_Rps3a1         | 20899.5 | -0.53228 | 9.17E-07 | 8.50E-06 | 18110.4 | 16527.8 | 16623.4 | 23568.3 | 26993.6 | 23573.3 |

|                     |             |         |          |          |          |         |         |         |         |         |         |
|---------------------|-------------|---------|----------|----------|----------|---------|---------|---------|---------|---------|---------|
| ENSMUSG000000028082 | 13_Sh3d19   | 4556.69 | 0.22716  | 0.04712  | 0.09231  | 4748.12 | 4830.41 | 5164.26 | 3852    | 4131.21 | 4614.13 |
| ENSMUSG000000028085 | 12_Gatb     | 310.796 | 0.03638  | 0.81092  | 0.86965  | 316.021 | 323.068 | 304.764 | 313.787 | 299.441 | 307.693 |
| ENSMUSG000000028086 | 14_Fbxw7    | 714.42  | -0.167   | 0.19435  | 0.29449  | 691.946 | 682.847 | 642.993 | 703.315 | 757.568 | 807.853 |
| ENSMUSG000000028088 | 14_Fmo5     | 784.172 | -0.29739 | 0.01274  | 0.03096  | 683.264 | 726.902 | 700.36  | 828.649 | 879.496 | 886.359 |
| ENSMUSG000000028089 | 5_Chd1l     | 532.857 | 0.12453  | 0.43297  | 0.54829  | 601.655 | 472.67  | 592.796 | 477.893 | 503.85  | 548.276 |
| ENSMUSG000000028093 | 15_Acp6     | 525.678 | 0.10321  | 0.43575  | 0.55123  | 511.363 | 564.45  | 558.137 | 511.256 | 507.436 | 501.426 |
| ENSMUSG000000028096 | 13_Gpr89    | 729.13  | -0.09284 | 0.47342  | 0.58625  | 737.092 | 681.93  | 696.775 | 695.2   | 758.465 | 805.32  |
| ENSMUSG000000028098 | 13_Rnf115   | 1304.25 | -0.13151 | 0.39501  | 0.51265  | 1203.31 | 1159.19 | 1372.04 | 1125.3  | 1476.59 | 1489.08 |
| ENSMUSG000000028099 | 8_Polr3c    | 693.519 | 0.30449  | 0.03083  | 0.06493  | 810.888 | 705.792 | 781.631 | 636.59  | 557.642 | 668.568 |
| ENSMUSG000000028100 | 11_Nudt17   | 97.3758 | 0.28362  | 0.32461  | 0.44077  | 118.074 | 115.644 | 86.0511 | 95.5787 | 66.3433 | 102.564 |
| ENSMUSG000000028101 | 18_Pias3    | 1029.77 | 0.52176  | 9.10E-06 | 6.23E-05 | 1152.95 | 1273.91 | 1215.47 | 886.357 | 816.739 | 833.177 |
| ENSMUSG000000028102 | 15_Pex11b   | 580.654 | -0.17376 | 0.17645  | 0.27266  | 547.827 | 541.505 | 548.576 | 649.214 | 610.537 | 586.263 |
| ENSMUSG000000028104 | 14_Polr3gl  | 296.337 | -0.28709 | 0.09404  | 0.16339  | 264.797 | 291.862 | 243.811 | 357.969 | 303.027 | 316.557 |
| ENSMUSG000000028106 | 13_Rprd2    | 1296.95 | 0.1586   | 0.20037  | 0.3014   | 1284.05 | 1416.17 | 1405.5  | 1158.67 | 1344.8  | 1172.53 |
| ENSMUSG000000028107 | 18_Tars2    | 554.237 | 0.40923  | 0.00153  | 0.00518  | 628.568 | 606.669 | 662.115 | 472.483 | 476.954 | 478.634 |
| ENSMUSG000000028108 | 15_Ecm1     | 2549    | 1.455    | 8.16E-21 | 1.67E-18 | 3405.03 | 3531.72 | 4271.48 | 1605    | 1224.66 | 1256.1  |
| ENSMUSG000000028111 | 4_Ctsk      | 1464.01 | -0.76383 | 2.52E-07 | 2.79E-06 | 1156.43 | 1215.17 | 882.024 | 1868.29 | 1817.27 | 1844.89 |
| ENSMUSG000000028114 | 16_Mettl14  | 533.555 | 0.00305  | 0.98326  | 0.98881  | 546.091 | 522.231 | 533.039 | 469.778 | 554.056 | 576.133 |
| ENSMUSG000000028115 | 16_Bnrl     | 2175.81 | 0.77738  | 1.53E-06 | 1.33E-05 | 2618.46 | 2537.73 | 3087.08 | 1614.02 | 1313.42 | 1884.15 |
| ENSMUSG000000028116 | 13_Myoz2    | 55.2296 | -1.33018 | 0.00334  | 0.01006  | 24.3093 | 45.8903 | 23.9031 | 116.317 | 47.5161 | 73.4412 |
| ENSMUSG000000028121 | 8_Bcar3     | 575.799 | 0.75518  | 1.03E-06 | 9.42E-06 | 684.132 | 681.93  | 803.144 | 448.138 | 376.543 | 460.907 |
| ENSMUSG000000028124 | 15_Gclm     | 1697.9  | -0.01547 | 0.88315  | 0.92103  | 1682.55 | 1704.36 | 1680.39 | 1800.67 | 1687.27 | 1632.17 |
| ENSMUSG000000028125 | 14_Abca4    | 1780.1  | -1.05202 | 0.00034  | 0.00143  | 1266.69 | 1481.34 | 726.654 | 3359.68 | 2338.15 | 1508.08 |
| ENSMUSG000000028126 | 16_Pip5k1a  | 1270.98 | 0.44814  | 3.42E-05 | 0.0002   | 1419.49 | 1451.97 | 1529.8  | 1058.58 | 1097.35 | 1068.7  |
| ENSMUSG000000028127 | 10_Abcd3    | 5242.15 | -0.26129 | 0.07472  | 0.13556  | 4766.35 | 4745.97 | 4792.57 | 4581.46 | 6127.79 | 6438.76 |
| ENSMUSG000000028128 | 13_F3       | 3699.07 | 0.2849   | 0.08855  | 0.15555  | 3997.14 | 3705.18 | 4485.41 | 2758.26 | 3130.68 | 4117.77 |
| ENSMUSG000000028132 | 15_Tmem56   | 468.769 | -1.6389  | 3.10E-08 | 4.52E-07 | 239.62  | 313.89  | 129.077 | 843.076 | 766.534 | 520.419 |
| ENSMUSG000000028133 | 17_Rwdc3    | 164.536 | -0.32603 | 0.10686  | 0.18164  | 147.592 | 145.931 | 144.614 | 204.683 | 165.858 | 178.538 |
| ENSMUSG000000028134 | 11_Ptbp2    | 532.229 | -0.65642 | 0.00025  | 0.00111  | 433.226 | 447.889 | 357.351 | 540.11  | 751.293 | 663.503 |
| ENSMUSG000000028136 | 15_Snx27    | 1747.06 | -0.00249 | 0.98474  | 0.98964  | 1741.59 | 1710.79 | 1784.37 | 1523.85 | 1949.06 | 1772.72 |
| ENSMUSG000000028137 | 9_Celf3     | 47.4902 | 0.11008  | 0.82587  | 0.88063  | 55.5641 | 48.6437 | 44.2207 | 77.545  | 41.2404 | 17.7272 |
| ENSMUSG000000028138 | 8_Adh5      | 1710.77 | -0.39188 | 0.00029  | 0.00125  | 1549.72 | 1460.23 | 1429.4  | 2042.32 | 1905.13 | 1877.81 |
| ENSMUSG000000028139 | 5_Riia1     | 4.17831 | -0.81048 | 0.45512  | 0.56915  | 2.60457 | 1.83561 | 4.78062 | 4.50843 | 6.27571 | 5.06491 |
| ENSMUSG000000028140 | 13_Mrpl9    | 1731.82 | 0.26045  | 0.01748  | 0.04049  | 1811.91 | 1826.43 | 2025.79 | 1531.96 | 1605.69 | 1589.11 |
| ENSMUSG000000028141 | 10_Oaz3     | 9.94453 | 1.65484  | 0.03842  | 0.07794  | 19.1001 | 15.6027 | 10.7564 | 3.60674 | 8.06878 | 2.53245 |
| ENSMUSG000000028145 | 9_Them4     | 101.616 | -0.81568 | 0.00096  | 0.00347  | 69.4551 | 69.7532 | 82.4656 | 136.155 | 135.376 | 116.493 |
| ENSMUSG000000028148 | 11_Them5    | 2.62083 | -0.02529 | 0.98453  | 0.98955  | 1.73638 | 3.67122 | 2.39031 | 2.70506 | 2.68959 | 2.53245 |
| ENSMUSG000000028149 | 12_Rap1gds1 | 1096.66 | -0.23866 | 0.0381   | 0.07739  | 980.185 | 1023.35 | 1014.69 | 1109.97 | 1233.63 | 1218.11 |
| ENSMUSG000000028150 | 14_Rorc     | 354.956 | -0.00913 | 0.95664  | 0.97173  | 363.771 | 361.615 | 337.033 | 396.742 | 366.681 | 303.894 |
| ENSMUSG000000028152 | 10_Tspan5   | 1656.85 | -0.04673 | 0.66728  | 0.75805  | 1606.15 | 1638.28 | 1644.53 | 1687.96 | 1578.79 | 1785.38 |
| ENSMUSG000000028156 | 12_Eif4e    | 1902.84 | -0.4759  | 0.00029  | 0.00125  | 1717.28 | 1464.82 | 1593.14 | 1982.81 | 2436.77 | 2222.23 |
| ENSMUSG000000028158 | 14_Mtbp     | 538.707 | -0.16296 | 0.2865   | 0.39999  | 505.286 | 485.519 | 533.039 | 529.289 | 524.47  | 654.639 |
| ENSMUSG000000028159 | 14_Dapp1    | 888.447 | 0.10143  | 0.49385  | 0.60519  | 915.071 | 883.847 | 959.709 | 718.643 | 940.461 | 912.95  |
| ENSMUSG000000028161 | 17_Ppp3ca   | 3936.96 | -0.0289  | 0.79724  | 0.85998  | 3937.23 | 3669.39 | 4085.04 | 3691.5  | 3932.18 | 4306.44 |
| ENSMUSG000000028163 | 17_Nfkb1    | 2306.19 | 0.61864  | 2.91E-06 | 2.32E-05 | 2627.14 | 2611.16 | 3140.86 | 1797.06 | 1672.93 | 1987.98 |
| ENSMUSG000000028164 | 15_Manba    | 498.277 | -0.44623 | 0.00247  | 0.0078   | 438.435 | 454.314 | 371.693 | 600.523 | 561.228 | 563.471 |
| ENSMUSG000000028165 | 9_Cisd2     | 931.826 | -0.48452 | 0.00017  | 0.00077  | 724.937 | 811.34  | 794.777 | 1010.79 | 1175.35 | 1073.76 |
| ENSMUSG000000028167 | 15_Bdh2     | 364.948 | -1.23384 | 6.70E-07 | 6.49E-06 | 217.047 | 283.602 | 151.785 | 617.655 | 496.678 | 422.92  |
| ENSMUSG000000028172 | 5_Tacr3     | 388.079 | -1.57275 | 4.01E-09 | 7.74E-08 | 182.32  | 278.095 | 124.296 | 573.472 | 662.536 | 507.757 |
| ENSMUSG000000028173 | 10_Wls      | 5803.5  | -0.53247 | 1.83E-05 | 0.00011  | 4839.28 | 4764.33 | 4630.03 | 6138.67 | 7827.61 | 6621.1  |
| ENSMUSG000000028174 | 12_Rpe65    | 1079.76 | -2.3083  | 1.49E-14 | 1.24E-12 | 416.73  | 471.752 | 198.396 | 2452.58 | 1614.65 | 1324.47 |
| ENSMUSG000000028175 | 15_Depdc1a  | 130.432 | 0.06387  | 0.77748  | 0.84452  | 139.778 | 132.164 | 127.881 | 110.907 | 145.238 | 126.623 |
| ENSMUSG000000028176 | 11_Lrrc7    | 47.8622 | -0.83541 | 0.04586  | 0.09021  | 40.8049 | 44.9725 | 16.7322 | 65.823  | 61.8606 | 56.9802 |
| ENSMUSG000000028179 | 12_Cth      | 262.765 | -0.04217 | 0.7944   | 0.85762  | 267.402 | 256.986 | 252.178 | 275.916 | 258.201 | 265.908 |
| ENSMUSG000000028180 | 18_Zranb2   | 2035.89 | -0.54125 | 4.13E-05 | 0.00023  | 1748.53 | 1591.47 | 1634.97 | 2119.86 | 2714.69 | 2405.83 |
| ENSMUSG000000028182 | 14_Lrriq3   | 35.3935 | -0.58888 | 0.15777  | 0.24931  | 25.1775 | 23.8629 | 35.8546 | 42.3792 | 33.1716 | 51.9153 |
| ENSMUSG000000028184 | 12_Adgrl2   | 2105.72 | 0.45491  | 5.96E-05 | 0.00032  | 2476.94 | 2401.9  | 2423.77 | 1689.76 | 1688.17 | 1953.79 |
| ENSMUSG000000028185 | 12_Dnase2b  | 19.3133 | -1.21464 | 0.2218   | 0.32671  | 6.07732 | 27.5342 | 1.19515 | 57.7079 | 17.0341 | 6.33113 |
| ENSMUSG000000028186 | 14_Uox      | 0.51429 | -1.01187 | 0.76286  | NA       | 0       | 0.91781 | 0       | 0.90169 | 0       | 1.26623 |
| ENSMUSG000000028187 | 10_Rpf1     | 635.072 | -0.3264  | 0.05656  | 0.10738  | 609.468 | 493.779 | 586.821 | 581.587 | 763.844 | 774.931 |
| ENSMUSG000000028188 | 13_Spata1   | 116.523 | -1.20843 | 4.33E-05 | 0.00024  | 69.4551 | 66.082  | 76.4899 | 200.174 | 179.306 | 107.629 |
| ENSMUSG000000028189 | 12_Ctbs     | 256.044 | -0.37701 | 0.04828  | 0.09422  | 248.302 | 210.177 | 210.347 | 307.475 | 315.579 | 244.382 |
| ENSMUSG000000028191 | 11_Bcl10    | 1165.49 | 0.30104  | 0.05167  | 0.09961  | 1224.15 | 1174.79 | 1460.48 | 906.194 | 1040.87 | 1186.45 |
| ENSMUSG000000028194 | 15_Ddah1    | 1237.13 | -0.22225 | 0.10475  | 0.17895  | 1138.2  | 1169.28 | 1117.47 | 1136.12 | 1430.86 | 1430.84 |
| ENSMUSG000000028195 | 4_Cyr61     | 1621.85 | 0.23135  | 0.25205  | 0.36119  | 1835.35 | 1533.65 | 1887.15 | 1992.72 | 1221.07 | 1261.16 |
| ENSMUSG000000028197 | 4_Col24a1   | 138.967 | -0.5023  | 0.09113  | 0.15935  | 118.942 | 153.274 | 71.7092 | 172.222 | 141.652 | 176.006 |
| ENSMUSG000000028199 | 18_Cryz     | 427.367 | -0.65711 | 0.00121  | 0.00422  | 382.871 | 344.177 | 267.715 | 602.326 | 544.194 | 422.92  |
| ENSMUSG000000028207 | 18_Asph     | 7192.4  | -0.23232 | 0.05566  | 0.10593  | 6681.58 | 6476.04 | 6684.5  | 6768.05 | 7956.71 | 8587.55 |
| ENSMUSG000000028211 | 11_Trp5inp1 | 715.184 | -0.38999 | 0.00724  | 0.01923  | 652.878 | 636.957 | 566.503 | 724.053 | 896.531 | 814.184 |
| ENSMUSG000000028212 | 16_Ccne2    | 177.098 | -0.21315 | 0.34231  | 0.45881  | 182.32  | 130.328 | 179.273 | 168.615 | 191.858 | 210.194 |
| ENSMUSG000000028214 | 13_Gem      | 137.659 | -0.45736 | 0.04111  | 0.08243  | 125.887 | 105.548 | 117.125 | 177.632 | 160.479 | 139.285 |
| ENSMUSG000000028217 | 11_Cdh17    | 8.6988  | -1.51304 | 0.11957  | 0.1992   | 8.68188 | 4.58903 | 0       | 18.0337 | 10.7584 | 10.1298 |
| ENSMUSG000000028218 | 19_Fam92a   | 541.411 | -0.64775 | 2.13E-05 | 0.00013  | 438.435 | 427.697 | 399.181 | 594.211 | 749.5   | 639.445 |
| ENSMUSG000000028221 | 3_Tmem55a   | 656.653 | -0.47447 | 0.00019  | 0.00088  | 560.85  | 538.752 | 549.771 | 741.185 | 814.946 | 734.412 |
| ENSMUSG000000028222 | 2_Calb1     | 24.9966 | -3.12804 | 0.0007   | 0.00267  | 9.55007 | 5.50683 | 0       | 30.6573 | 94.1357 | 10.1298 |
| ENSMUSG000000028223 | 8_Decr1     | 877.206 | -0.85409 | 4.67E-09 | 8.84E-08 | 692.814 | 650.724 | 529.453 | 1106.37 | 1192.39 | 1091.49 |
| ENSMUSG000000028224 | 14_Nbn      | 682.305 | -0.44247 | 0.00691  | 0.01848  | 619.887 | 558.026 | 556.942 | 649.214 | 901.91  | 807.853 |
| ENSMUSG000000028226 | 15_Mmp16    | 71.1105 | -1.15024 | 0.00017  | 0.0008   | 44.2776 | 53.2327 | 34.6595 | 96.4803 | 109.377 | 88.6359 |
| ENSMUSG000000028228 | 5_Cpne3     | 6177.06 | -0.18081 | 0.16878  | 0.26315  | 5855.06 | 5404.04 | 6112.02 | 5596.76 | 7053.01 | 7041.49 |

|                    |                  |         |          |          |          |         |         |         |         |         |         |
|--------------------|------------------|---------|----------|----------|----------|---------|---------|---------|---------|---------|---------|
| ENSMUSG00000028229 | 11_Rmdn1         | 278.95  | -0.5208  | 0.00766  | 0.02017  | 235.279 | 239.547 | 212.737 | 293.048 | 398.06  | 295.031 |
| ENSMUSG00000028232 | 13_Tmem68        | 668.304 | -0.25017 | 0.1209   | 0.20103  | 606.864 | 583.724 | 641.798 | 627.573 | 859.773 | 690.094 |
| ENSMUSG00000028233 | 6_Tgs1           | 1063.02 | -0.297   | 0.05138  | 0.09919  | 996.68  | 932.49  | 932.22  | 970.214 | 1338.52 | 1207.98 |
| ENSMUSG00000028234 | 6_Rps20          | 12722.5 | 0.01888  | 0.85288  | 0.90039  | 12736.3 | 12484.9 | 13198.1 | 13637.1 | 12364.9 | 11913.9 |
| ENSMUSG00000028238 | 6_Atp6v0d2       | 11.4847 | -1.7199  | 0.06711  | 0.12408  | 2.60457 | 1.83561 | 11.9515 | 24.3455 | 5.37918 | 22.7921 |
| ENSMUSG00000028243 | 5_Ubxn2b         | 308.442 | -0.71974 | 9.55E-05 | 0.00048  | 208.365 | 269.835 | 221.104 | 358.871 | 430.335 | 362.141 |
| ENSMUSG00000028245 | 15_Nsmaf         | 1035.58 | -0.23949 | 0.04938  | 0.09609  | 996.68  | 921.477 | 931.025 | 1046.86 | 1203.14 | 1114.28 |
| ENSMUSG00000028246 | 13_Faxc          | 79.3473 | -1.54684 | 3.87E-05 | 0.00022  | 46.014  | 53.2327 | 21.5128 | 137.958 | 129.997 | 87.3697 |
| ENSMUSG00000028247 | 2_Coq3           | 241.689 | -0.27249 | 0.11466  | 0.19233  | 236.147 | 213.849 | 206.762 | 267.801 | 276.131 | 249.447 |
| ENSMUSG00000028248 | 15_Pnlsr         | 3353.06 | -0.42407 | 0.00035  | 0.00146  | 2867.63 | 2935.14 | 2788.29 | 3457.06 | 4257.62 | 3812.61 |
| ENSMUSG00000028249 | 15_Sdcbp         | 6215.35 | -0.40883 | 0.0002   | 0.00092  | 5661.46 | 5110.34 | 5250.31 | 6840.19 | 7713.75 | 6716.07 |
| ENSMUSG00000028251 | 5_Tstd3          | 594.37  | -0.30185 | 0.05072  | 0.09826  | 564.322 | 470.834 | 561.722 | 580.685 | 679.57  | 709.087 |
| ENSMUSG00000028252 | 20_Ccnc          | 539.564 | -0.37763 | 0.02168  | 0.04852  | 498.34  | 417.602 | 492.403 | 528.388 | 690.329 | 610.321 |
| ENSMUSG00000028255 | 6_Clca1          | 4.56872 | -0.00881 | 0.9932   | 0.99531  | 4.34094 | 4.58903 | 4.78062 | 7.21348 | 2.68959 | 3.79868 |
| ENSMUSG00000028256 | 16_Odf2l         | 494.23  | -0.17816 | 0.3371   | 0.45368  | 466.217 | 448.807 | 475.671 | 401.25  | 593.503 | 579.932 |
| ENSMUSG00000028259 | 13_Fhl5          | 3.57024 | -0.52284 | 0.71141  | 0.79368  | 0       | 1.83561 | 7.17092 | 3.60674 | 6.27571 | 2.53245 |
| ENSMUSG00000028261 | 13_Ndufaf4       | 332.542 | -0.39493 | 0.06143  | 0.11513  | 308.207 | 239.547 | 314.326 | 295.753 | 441.093 | 396.329 |
| ENSMUSG00000028262 | 13_Clca3a2       | 22.3717 | 0.03941  | 0.94018  | 0.96102  | 26.0457 | 20.1917 | 21.5128 | 12.6236 | 25.9994 | 27.857  |
| ENSMUSG00000028264 | 16_Spaca1        | 157.355 | -0.16124 | 0.42531  | 0.54088  | 146.724 | 135.835 | 163.736 | 171.32  | 163.169 | 163.343 |
| ENSMUSG00000028266 | 17_Lmo4          | 2861.6  | 0.07643  | 0.45453  | 0.56863  | 2891.07 | 2864.47 | 3056.01 | 2687.92 | 2729.94 | 2940.18 |
| ENSMUSG00000028268 | 14_Gbp3          | 2177.61 | 1.72306  | 6.88E-13 | 3.89E-11 | 3366.83 | 2456.97 | 4204.55 | 708.725 | 1292.8  | 1035.77 |
| ENSMUSG00000028270 | 12_Gbp2          | 5069.92 | 1.35138  | 5.27E-14 | 3.89E-12 | 7316.22 | 5985.93 | 8552.52 | 2288.48 | 3332.4  | 2943.98 |
| ENSMUSG00000028271 | 9_Gtf2b          | 882.232 | -0.18544 | 0.1385   | 0.22365  | 855.166 | 815.011 | 806.729 | 883.652 | 1021.15 | 911.683 |
| ENSMUSG00000028273 | 15_Pdlm5         | 8729.83 | 0.09526  | 0.44127  | 0.55651  | 8819.93 | 8594.33 | 9638.92 | 7390.21 | 8725.04 | 9210.53 |
| ENSMUSG00000028274 | 17_Rngtt         | 449.779 | -0.20835 | 0.2312   | 0.33741  | 421.071 | 363.451 | 467.305 | 421.087 | 478.747 | 547.01  |
| ENSMUSG00000028277 | 13_Ube2j1        | 1964.71 | -0.15181 | 0.16493  | 0.2582   | 1858.79 | 1842.95 | 1882.37 | 1908.87 | 2185.74 | 2109.53 |
| ENSMUSG00000028278 | 14_Rragd         | 1070.68 | -1.61088 | 4.14E-10 | 1.10E-08 | 498.34  | 731.491 | 353.766 | 1910.67 | 1729.41 | 1200.38 |
| ENSMUSG00000028280 | 9_Gabrr1         | 16.0644 | -2.71206 | 0.00253  | 0.00794  | 6.94551 | 5.50683 | 0       | 50.4944 | 23.3098 | 10.1298 |
| ENSMUSG00000028282 | 12_Casp8ap2      | 572.241 | -0.16212 | 0.28718  | 0.4006   | 577.345 | 543.341 | 498.379 | 526.584 | 650.881 | 636.912 |
| ENSMUSG00000028284 | 13_Map3k7        | 2419.85 | -0.20042 | 0.06422  | 0.11954  | 2304.17 | 2227.51 | 2222.99 | 2384.06 | 2646.56 | 2733.78 |
| ENSMUSG00000028287 | 4_1700009N14Rik  | 0.74711 | -3.05659 | 0.44093  | NA       | 0       | 0       | 0       | 0       | 4.48265 | 0       |
| ENSMUSG00000028289 | 12_Epha7         | 66.0887 | -0.54156 | 0.07472  | 0.13556  | 61.6414 | 48.6437 | 51.3916 | 81.1517 | 87.86   | 65.8438 |
| ENSMUSG00000028291 | 7_Akirin2        | 907.72  | -0.29041 | 0.09347  | 0.16261  | 812.624 | 803.998 | 833.022 | 769.138 | 1160.11 | 1067.43 |
| ENSMUSG00000028292 | 14_Rars2         | 954.309 | -0.26836 | 0.11465  | 0.19233  | 957.612 | 757.19  | 882.024 | 844.879 | 1161.01 | 1123.14 |
| ENSMUSG00000028293 | 14_Slc35a1       | 3158.49 | -0.31777 | 0.01685  | 0.03928  | 2835.5  | 2813.99 | 2785.9  | 2955.72 | 3880.18 | 3679.66 |
| ENSMUSG00000028294 | 15_1700003M02Rik | 28.6892 | -0.30556 | 0.48097  | 0.59352  | 22.5729 | 29.3698 | 25.0982 | 27.0506 | 37.6543 | 30.3894 |
| ENSMUSG00000028295 | 14_Smim8         | 430.399 | -0.67954 | 2.79E-05 | 0.00017  | 347.275 | 320.314 | 325.082 | 472.483 | 606.951 | 510.289 |
| ENSMUSG00000028300 | 14_3110043O21Rik | 276.554 | -0.36893 | 0.062    | 0.11605  | 292.579 | 212.013 | 218.713 | 333.624 | 283.304 | 319.089 |
| ENSMUSG00000028307 | 9_Aldob          | 0.30056 | -1.76625 | 0.6627   | NA       | 0       | 0       | 0       | 1.80337 | 0       | 0       |
| ENSMUSG00000028309 | 12_Rnf20         | 1936.27 | -0.13904 | 0.33475  | 0.45128  | 1815.38 | 1848.46 | 1864.44 | 1662.71 | 2223.4  | 2203.23 |
| ENSMUSG00000028310 | 2_Ppp3r2         | 0.48859 | 2.39711  | 0.53861  | NA       | 1.73638 | 0       | 1.19515 | 0       | 0       | 0       |
| ENSMUSG00000028312 | 19_Smc2          | 636.364 | -0.08093 | 0.72183  | 0.80192  | 704.101 | 500.204 | 651.359 | 470.68  | 834.67  | 657.172 |
| ENSMUSG00000028318 | 14_Polr1e        | 216.886 | -0.10698 | 0.58923  | 0.69165  | 209.233 | 181.726 | 235.445 | 209.191 | 212.478 | 253.245 |
| ENSMUSG00000028322 | 11_Exosc3        | 319.493 | -0.04672 | 0.79191  | 0.85584  | 303.866 | 294.616 | 344.204 | 278.621 | 333.509 | 362.141 |
| ENSMUSG00000028327 | 14_Stra6l        | 18.9814 | 0.1434   | 0.79719  | 0.85997  | 29.5184 | 15.6027 | 14.3418 | 17.132  | 17.0341 | 20.2596 |
| ENSMUSG00000028328 | 13_Tmod1         | 248.579 | -1.0956  | 0.00016  | 0.00076  | 170.165 | 206.506 | 98.0026 | 428.301 | 320.061 | 268.44  |
| ENSMUSG00000028329 | 13_Xpa           | 334.35  | -0.50344 | 0.0009   | 0.00327  | 276.952 | 269.835 | 283.252 | 372.396 | 412.404 | 391.264 |
| ENSMUSG00000028330 | 8_Ncbp1          | 1425.24 | -0.06305 | 0.6222   | 0.71989  | 1442.06 | 1270.24 | 1470.04 | 1320.07 | 1538.45 | 1510.61 |
| ENSMUSG00000028331 | 12_5830415F09Rik | 64.6514 | 0.24248  | 0.52629  | 0.63531  | 79.8733 | 78.9313 | 51.3916 | 86.5618 | 43.0335 | 48.1166 |
| ENSMUSG00000028332 | 13_Hemgn         | 6.44034 | -0.80116 | 0.39261  | 0.51015  | 1.73638 | 6.42464 | 5.97577 | 5.41011 | 8.96531 | 10.1298 |
| ENSMUSG00000028333 | 10_An3p2b        | 3564.65 | -0.08412 | 0.60335  | 0.704    | 3352.08 | 3257.29 | 3771.91 | 2910.64 | 3759.15 | 4336.83 |
| ENSMUSG00000028334 | 10_Nans          | 1515.63 | 0.70837  | 1.95E-07 | 2.23E-06 | 1798.02 | 1824.6  | 2017.42 | 1172.19 | 1001.42 | 1280.16 |
| ENSMUSG00000028337 | 14_Coro2a        | 2415.59 | 0.60133  | 5.19E-05 | 0.00028  | 2648.84 | 2792.88 | 3292.65 | 1741.15 | 1789.48 | 2228.56 |
| ENSMUSG00000028339 | 17_Col15a1       | 277.596 | 0.13947  | 0.51404  | 0.62427  | 232.674 | 368.958 | 271.3   | 276.817 | 253.718 | 262.109 |
| ENSMUSG00000028341 | 9_Nr4a3          | 165.382 | -1.01005 | 0.00058  | 0.00225  | 100.71  | 150.52  | 77.685  | 263.292 | 230.408 | 169.674 |
| ENSMUSG00000028343 | 10_Erp44         | 1563.39 | -0.11991 | 0.42072  | 0.53637  | 1517.59 | 1408.83 | 1568.04 | 1339.9  | 1721.34 | 1824.63 |
| ENSMUSG00000028344 | 12_Invs          | 266.841 | -0.49293 | 0.00325  | 0.00983  | 211.838 | 239.547 | 213.933 | 321.902 | 320.061 | 293.765 |
| ENSMUSG00000028345 | 15_Tex10         | 788.968 | -0.1816  | 0.27175  | 0.3835   | 739.697 | 724.149 | 754.142 | 672.657 | 974.529 | 868.632 |
| ENSMUSG00000028347 | 14_Tmeff1        | 625.852 | -0.38704 | 0.00288  | 0.00886  | 545.222 | 552.519 | 528.258 | 665.444 | 706.466 | 757.204 |
| ENSMUSG00000028348 | 7_Murc           | 47.5268 | -0.62929 | 0.08186  | 0.14594  | 34.7275 | 40.3834 | 37.0498 | 73.9382 | 48.4127 | 50.6491 |
| ENSMUSG00000028351 | 5_Brlnp1         | 41.6747 | -0.73915 | 0.08185  | 0.14593  | 27.782  | 38.5478 | 27.4885 | 74.8399 | 42.1369 | 39.253  |
| ENSMUSG00000028354 | 13_Fmn2          | 127.723 | -1.50064 | 5.27E-06 | 3.88E-05 | 65.1141 | 88.1093 | 46.611  | 230.831 | 211.581 | 124.09  |
| ENSMUSG00000028356 | 4_Ambp           | 0.19919 | 0.92709  | 0.82027  | NA       | 0       | 0       | 1.19515 | 0       | 0       | 0       |
| ENSMUSG00000028358 | 15_Zfp618        | 953.111 | -0.22449 | 0.09371  | 0.16295  | 871.661 | 971.038 | 793.582 | 1087.43 | 971.839 | 1023.11 |
| ENSMUSG00000028360 | 9_Slc44a5        | 11.6958 | -1.1731  | 0.0783   | 0.1408   | 6.07732 | 8.26025 | 7.17092 | 15.3287 | 14.3445 | 18.9934 |
| ENSMUSG00000028362 | 2_Tnfsf8         | 19.9997 | 1.26295  | 0.02258  | 0.0502   | 26.9138 | 21.1095 | 37.0498 | 10.8202 | 15.241  | 8.86359 |
| ENSMUSG00000028364 | 15_Tnc           | 1524.82 | 1.27099  | 3.16E-07 | 3.39E-06 | 2221.69 | 1824.6  | 2422.58 | 560.848 | 1241.69 | 877.495 |
| ENSMUSG00000028367 | 5_Txn1           | 6440.62 | 0.41309  | 0.00095  | 0.00343  | 7680.86 | 6376    | 8012.31 | 5434.46 | 5306.56 | 5833.51 |
| ENSMUSG00000028369 | 15_Svep1         | 1124.99 | -0.67704 | 3.70E-05 | 0.00021  | 882.079 | 1006.83 | 707.531 | 1500.4  | 1414.73 | 1238.37 |
| ENSMUSG00000028370 | 7_Pappa          | 92.5266 | -1.46186 | 0.00209  | 0.00673  | 47.7504 | 81.6847 | 17.9273 | 165.91  | 159.582 | 82.3047 |
| ENSMUSG00000028373 | 16_Astn2         | 144.11  | -0.59564 | 0.04741  | 0.09279  | 114.601 | 141.342 | 88.4414 | 234.438 | 160.479 | 125.356 |
| ENSMUSG00000028378 | 6_Ptgr1          | 12474   | -0.02742 | 0.79946  | 0.86149  | 12608.7 | 11444.1 | 13012.8 | 12361.2 | 11938.2 | 13479   |
| ENSMUSG00000028381 | 8_Ucg9           | 915.93  | -0.72588 | 7.14E-05 | 0.00037  | 796.129 | 636.957 | 638.212 | 1255.15 | 1280.25 | 888.891 |
| ENSMUSG00000028382 | 15_Ptbp3         | 7614.2  | -0.04647 | 0.72724  | 0.80578  | 7742.5  | 6773.41 | 7958.53 | 6656.24 | 8312.63 | 8241.87 |
| ENSMUSG00000028383 | 17_Hsdl2         | 2337.76 | -0.31587 | 0.00315  | 0.00958  | 2090.6  | 1989.8  | 2168.01 | 2439.96 | 2625.94 | 2712.26 |
| ENSMUSG00000028385 | 14_Snx30         | 427.539 | -0.48569 | 0.00462  | 0.01319  | 369.848 | 369.876 | 328.667 | 583.391 | 434.817 | 478.634 |
| ENSMUSG00000028386 | 1_Slc46a2        | 230.686 | 0.50146  | 0.00717  | 0.01906  | 277.82  | 241.383 | 291.618 | 194.764 | 172.134 | 206.395 |
| ENSMUSG00000028389 | 10_Zfp37         | 184.574 | -1.07885 | 2.21E-07 | 2.49E-06 | 109.392 | 133.082 | 113.54  | 238.045 | 284.2   | 229.187 |
| ENSMUSG00000028391 | 16_Wdr31         | 121.267 | -0.33778 | 0.15373  | 0.24404  | 123.283 | 95.4518 | 102.783 | 148.778 | 134.48  | 122.824 |

|                    |                  |         |          |          |          |         |         |         |         |         |         |
|--------------------|------------------|---------|----------|----------|----------|---------|---------|---------|---------|---------|---------|
| ENSMUSG00000028392 | 15_Bspry         | 2436.37 | 0.86403  | 9.50E-09 | 1.63E-07 | 2763.44 | 2963.59 | 3707.37 | 1703.28 | 1576.1  | 1904.41 |
| ENSMUSG00000028393 | 10_Alad          | 2621.64 | 0.8829   | 6.51E-05 | 0.00034  | 3079.46 | 3536.3  | 3583.07 | 2373.24 | 1188.8  | 1968.98 |
| ENSMUSG00000028394 | 9_Pole3          | 1241.12 | -0.24661 | 0.04742  | 0.09279  | 1112.15 | 1047.22 | 1247.74 | 1279.49 | 1397.69 | 1362.46 |
| ENSMUSG00000028396 | 5_2310002L09Rik  | 27.9075 | -1.74109 | 0.00472  | 0.01344  | 9.55007 | 23.8629 | 4.78062 | 60.4129 | 29.5855 | 39.253  |
| ENSMUSG00000028397 | 13_Kdm4c         | 814.85  | -0.40221 | 0.00155  | 0.00522  | 734.487 | 648.889 | 723.068 | 888.16  | 979.011 | 915.482 |
| ENSMUSG00000028398 | 8_Tmem261        | 346.626 | 0.13768  | 0.36319  | 0.48039  | 353.353 | 367.122 | 369.303 | 353.461 | 311.096 | 325.42  |
| ENSMUSG00000028399 | 17_Ptprd         | 694.303 | -1.11725 | 5.69E-08 | 7.65E-07 | 452.326 | 518.56  | 343.009 | 997.264 | 1106.32 | 748.34  |
| ENSMUSG00000028402 | 17_Mpdz          | 848.296 | -0.90879 | 6.16E-07 | 6.06E-06 | 574.741 | 717.724 | 475.671 | 1219.08 | 1137.7  | 964.865 |
| ENSMUSG00000028403 | 15_Zdhhc21       | 1280.35 | -0.2292  | 0.12744  | 0.20953  | 1271.03 | 1128.9  | 1136.59 | 1196.54 | 1618.24 | 1330.8  |
| ENSMUSG00000028405 | 9_Aco1           | 1925.54 | 0.26972  | 0.02038  | 0.046    | 2093.2  | 2129.31 | 2090.32 | 1689.76 | 1620.93 | 1929.73 |
| ENSMUSG00000028409 | 11_Smu1          | 2226.87 | -0.241   | 0.04654  | 0.09133  | 2120.12 | 1954.93 | 2048.49 | 2154.13 | 2616.97 | 2466.61 |
| ENSMUSG00000028410 | 13_Dnaja1        | 2925.07 | -0.40378 | 0.00576  | 0.01585  | 2570.71 | 2467.06 | 2516.99 | 2719.48 | 3821.91 | 3454.27 |
| ENSMUSG00000028411 | 15_Aptx          | 773.636 | -0.16934 | 0.18331  | 0.28106  | 744.037 | 663.573 | 778.045 | 821.435 | 816.739 | 817.983 |
| ENSMUSG00000028412 | 17_Slc44a1       | 2569.7  | -0.27734 | 0.02724  | 0.05872  | 2430.93 | 2288.09 | 2250.48 | 2467.01 | 3085.86 | 2895.86 |
| ENSMUSG00000028413 | 13_B4galt1       | 3349.36 | 0.27623  | 0.02773  | 0.05953  | 3500.54 | 3466.55 | 4039.62 | 2755.55 | 3024    | 3309.92 |
| ENSMUSG00000028414 | 16_Fktn          | 805.746 | -0.57247 | 6.93E-06 | 4.91E-05 | 684.132 | 642.464 | 616.7   | 912.506 | 1032.8  | 945.872 |
| ENSMUSG00000028416 | 11_Bag1          | 2441.43 | -0.17886 | 0.08662  | 0.15273  | 2318.06 | 2175.2  | 2377.16 | 2517.51 | 2540.77 | 2719.86 |
| ENSMUSG00000028417 | 3_Tal2           | 3.5987  | -1.54194 | 0.23983  | 0.34744  | 2.60457 | 2.75342 | 0       | 7.21348 | 2.68959 | 6.33113 |
| ENSMUSG00000028419 | 5_Chmp5          | 2662.28 | -0.26361 | 0.01686  | 0.0393   | 2437.87 | 2247.71 | 2574.36 | 2754.65 | 3008.76 | 2950.31 |
| ENSMUSG00000028420 | 13_Tmem38b       | 200.04  | -0.38276 | 0.08614  | 0.15194  | 161.483 | 208.342 | 150.589 | 258.784 | 191.858 | 229.187 |
| ENSMUSG00000028423 | 15_Nfx1          | 2037.65 | -0.07241 | 0.50874  | 0.61887  | 1976    | 1976.04 | 2006.66 | 1918.79 | 2148.98 | 2199.44 |
| ENSMUSG00000028426 | 10_Rad23b        | 3478.98 | 0.04864  | 0.7088   | 0.79159  | 3532.66 | 3315.11 | 3764.74 | 2950.31 | 3639.02 | 3672.06 |
| ENSMUSG00000028427 | 13_Aqp7          | 3.73878 | -0.79512 | 0.52949  | 0.63827  | 4.34094 | 3.67122 | 0       | 3.60674 | 4.48265 | 6.33113 |
| ENSMUSG00000028430 | 14_Nol6          | 998.223 | 1.01853  | 1.28E-09 | 2.92E-08 | 1144.27 | 1323.48 | 1541.75 | 690.691 | 558.539 | 730.613 |
| ENSMUSG00000028431 | 11_Ikbpap        | 847.675 | 0.03677  | 0.77565  | 0.84318  | 880.343 | 891.189 | 801.948 | 775.45  | 835.566 | 901.554 |
| ENSMUSG00000028433 | 14_Ubpap2        | 1698.64 | 0.83381  | 2.75E-08 | 4.05E-07 | 1960.37 | 2089.84 | 2477.55 | 1175.8  | 1092.87 | 1395.38 |
| ENSMUSG00000028434 | 12_Epb41I4b      | 2053.21 | 0.08049  | 0.48732  | 0.59935  | 2106.23 | 2032.02 | 2191.91 | 1849.36 | 1958.02 | 2181.71 |
| ENSMUSG00000028435 | 8_Aqp3           | 29796.5 | 1.03561  | 6.64E-10 | 1.66E-08 | 36686.2 | 37528.2 | 45946.5 | 18324.1 | 16285.5 | 24008.9 |
| ENSMUSG00000028436 | 8_Dcaf12         | 2291.58 | 0.1233   | 0.3142   | 0.42933  | 2339.77 | 2243.12 | 2585.12 | 1996.33 | 2219.81 | 2365.31 |
| ENSMUSG00000028437 | 14_Ubpap1        | 1284.39 | 0.15308  | 0.19278  | 0.2927   | 1266.69 | 1328.98 | 1462.87 | 1173.99 | 1250.66 | 1223.18 |
| ENSMUSG00000028438 | 16_Kir24         | 193.707 | 0.71893  | 0.00012  | 0.00057  | 233.543 | 235.876 | 253.373 | 135.253 | 149.721 | 154.48  |
| ENSMUSG00000028439 | 12_Fam219a       | 221.033 | -0.12492 | 0.58391  | 0.68678  | 206.629 | 224.862 | 203.176 | 296.655 | 184.685 | 210.194 |
| ENSMUSG00000028441 | 12_1110017D15Rik | 2.6302  | -0.17152 | 0.90106  | 0.93295  | 0.86819 | 1.83561 | 4.78062 | 2.70506 | 1.79306 | 3.79868 |
| ENSMUSG00000028443 | 6_Nudt1          | 665.555 | -0.25341 | 0.06943  | 0.12771  | 605.996 | 561.697 | 653.749 | 691.593 | 687.639 | 792.658 |
| ENSMUSG00000028444 | 17_Cntfr         | 122.975 | 0.38567  | 0.25122  | 0.3604   | 103.314 | 179.89  | 135.052 | 151.483 | 74.412  | 93.7008 |
| ENSMUSG00000028445 | 7_Enho           | 80.6542 | 0.13496  | 0.74893  | 0.8228   | 66.8505 | 113.808 | 72.9044 | 126.236 | 48.4127 | 55.714  |
| ENSMUSG00000028447 | 11_Dctn3         | 726.504 | 0.55236  | 0.00163  | 0.00546  | 826.515 | 844.381 | 921.464 | 717.742 | 477.851 | 571.068 |
| ENSMUSG00000028451 | 12_170002211Rik  | 5.03357 | -0.58904 | 0.68138  | 0.76963  | 1.73638 | 0.91781 | 9.56123 | 0       | 11.6549 | 6.33113 |
| ENSMUSG00000028452 | 7_Vcp            | 10271   | 0.0437   | 0.73781  | 0.81456  | 10337.5 | 10130.7 | 10810.2 | 8532.65 | 10630.2 | 11184.6 |
| ENSMUSG00000028453 | 10_Fancg         | 222.267 | 0.53726  | 0.00405  | 0.01185  | 263.929 | 283.602 | 242.616 | 191.157 | 192.754 | 159.545 |
| ENSMUSG00000028454 | 16_Pigo          | 493.164 | 1.03536  | 3.65E-08 | 5.19E-07 | 586.895 | 707.628 | 694.385 | 386.823 | 259.097 | 324.154 |
| ENSMUSG00000028455 | 15_Stoml2        | 1076.37 | 0.30268  | 0.01479  | 0.03518  | 1162.5  | 1159.19 | 1244.16 | 981.034 | 876.807 | 1034.51 |
| ENSMUSG00000028456 | 17_Unc13b        | 1091.1  | -0.48527 | 0.00034  | 0.00144  | 864.716 | 969.203 | 895.17  | 1412.94 | 1271.28 | 1133.27 |
| ENSMUSG00000028457 | 18_Atp8b5        | 48.0968 | -0.81057 | 0.02493  | 0.05451  | 45.1458 | 28.452  | 31.074  | 63.118  | 66.3433 | 54.4478 |
| ENSMUSG00000028458 | 12_Tesk1         | 695.55  | 0.90877  | 0.00031  | 0.00133  | 826.515 | 944.422 | 952.538 | 691.593 | 313.786 | 444.446 |
| ENSMUSG00000028459 | 11_Cd72          | 270.254 | 0.75061  | 2.69E-05 | 0.00016  | 376.794 | 294.616 | 345.4   | 201.978 | 196.34  | 206.395 |
| ENSMUSG00000028460 | 6_Sit1           | 0.92827 | 2.11538  | 0.44657  | NA       | 3.47275 | 0       | 1.19515 | 0.90169 | 0       | 0       |
| ENSMUSG00000028461 | 12_Ccdc107       | 264.973 | -0.20118 | 0.32467  | 0.44081  | 255.247 | 275.342 | 209.152 | 329.115 | 284.2   | 236.784 |
| ENSMUSG00000028463 | 14_Car9          | 147.802 | -0.82291 | 0.01429  | 0.03412  | 113.733 | 141.342 | 64.5383 | 256.98  | 144.341 | 165.876 |
| ENSMUSG00000028464 | 16_Tpm2          | 3873.66 | 0.50538  | 0.00288  | 0.00888  | 4030.13 | 4617.48 | 4988.57 | 3801.51 | 2512.08 | 3292.19 |
| ENSMUSG00000028465 | 16_Tln1          | 4544.59 | 0.80432  | 5.24E-09 | 9.79E-08 | 5111.89 | 6199.78 | 6027.16 | 3653.63 | 2884.14 | 3390.96 |
| ENSMUSG00000028466 | 15_Creb3         | 1610.83 | 0.16705  | 0.14511  | 0.23247  | 1744.19 | 1573.12 | 1795.12 | 1571.64 | 1448.79 | 1532.13 |
| ENSMUSG00000028467 | 15_Gba2          | 355.22  | 0.11131  | 0.59898  | 0.70063  | 368.98  | 368.958 | 369.303 | 443.629 | 268.959 | 311.492 |
| ENSMUSG00000028468 | 15_Rgp1          | 2274.76 | 0.5827   | 1.07E-05 | 7.21E-05 | 2533.37 | 2713.03 | 2937.69 | 1981.9  | 1589.55 | 1893.01 |
| ENSMUSG00000028469 | 15_Npr2          | 815.447 | -0.44104 | 0.03236  | 0.06762  | 674.582 | 855.395 | 544.99  | 1144.24 | 873.221 | 800.255 |
| ENSMUSG00000028470 | 10_Hint2         | 479.352 | 0.07031  | 0.67558  | 0.76507  | 507.89  | 477.259 | 487.623 | 537.405 | 387.301 | 478.634 |
| ENSMUSG00000028475 | 8_5430416O09Rik  | 18.3313 | -0.98689 | 0.08478  | 0.15007  | 8.68188 | 17.4383 | 10.7564 | 19.8371 | 30.482  | 22.7921 |
| ENSMUSG00000028476 | 13_Reck          | 763.907 | -0.46377 | 0.01077  | 0.0269   | 649.405 | 707.628 | 570.089 | 1046.86 | 911.772 | 697.691 |
| ENSMUSG00000028478 | 18_Cita          | 4613.15 | 0.12372  | 0.32059  | 0.43621  | 4801.95 | 4400.88 | 5229.99 | 4695.08 | 3954.6  | 4596.4  |
| ENSMUSG00000028479 | 18_Gne           | 2440.44 | 0.81715  | 9.02E-09 | 1.56E-07 | 2779.07 | 3002.14 | 3559.17 | 1726.73 | 1612.86 | 1962.65 |
| ENSMUSG00000028480 | 14_Glipr2        | 118.406 | 0.71114  | 0.02286  | 0.05076  | 179.715 | 105.548 | 156.565 | 118.121 | 83.3773 | 67.11   |
| ENSMUSG00000028483 | 13_Snapc3        | 434.071 | -0.28169 | 0.09072  | 0.15876  | 391.553 | 405.67  | 378.864 | 440.023 | 560.332 | 427.985 |
| ENSMUSG00000028484 | 16_Psip1         | 1117.52 | -0.55614 | 3.71E-06 | 2.85E-05 | 916.807 | 915.97  | 880.829 | 1220.88 | 1418.31 | 1352.33 |
| ENSMUSG00000028487 | 18_Bnc2          | 134.636 | -0.74438 | 0.0008   | 0.00297  | 99.8417 | 110.137 | 92.0269 | 174.927 | 180.203 | 150.681 |
| ENSMUSG00000028488 | 15_Sh3gl2        | 1912.75 | -0.0363  | 0.71693  | 0.79821  | 1892.65 | 1920.97 | 1851.29 | 1884.52 | 1930.23 | 1996.84 |
| ENSMUSG00000028492 | 13_Saxo1         | 0.21104 | -0.99647 | 0.80707  | NA       | 0       | 0       | 0       | 0       | 0       | 1.26623 |
| ENSMUSG00000028494 | 12_Plin2         | 729.59  | 0.19558  | 0.21146  | 0.31474  | 816.965 | 693.861 | 827.047 | 783.565 | 614.123 | 641.977 |
| ENSMUSG00000028495 | 14_Rps6          | 16883.6 | -0.19708 | 0.03461  | 0.0715   | 16381.8 | 15075.9 | 15737.8 | 15753.8 | 17842.8 | 18689.5 |
| ENSMUSG00000028496 | 17_Mlit3         | 722.596 | -0.16448 | 0.21107  | 0.31439  | 686.737 | 647.053 | 709.922 | 706.921 | 759.361 | 825.58  |
| ENSMUSG00000028497 | 12_Hacd4         | 1519.8  | -0.36436 | 0.00765  | 0.02014  | 1347.43 | 1250.97 | 1388.77 | 1492.29 | 1924.85 | 1714.47 |
| ENSMUSG00000028514 | 15_Usp24         | 4412.19 | 0.07406  | 0.58545  | 0.68831  | 4507.63 | 4407.3  | 4659.91 | 3597.73 | 4467.41 | 4833.19 |
| ENSMUSG00000028517 | 8_Ppap2b         | 2665.32 | -0.23496 | 0.0695   | 0.1278   | 2542.92 | 2610.24 | 2191.91 | 3173.03 | 2634.9  | 2838.88 |
| ENSMUSG00000028518 | 8_Prkaa2         | 748.381 | -0.39016 | 0.00528  | 0.01474  | 678.923 | 681.012 | 582.04  | 775.45  | 905.496 | 867.365 |
| ENSMUSG00000028519 | 16_Dab1          | 200.309 | -1.2767  | 2.17E-07 | 2.46E-06 | 124.151 | 146.849 | 78.8802 | 294.851 | 288.683 | 268.44  |
| ENSMUSG00000028520 | 12_4921539E11Rik | 0.14942 | -0.99647 | 0.80707  | NA       | 0       | 0       | 0       | 0       | 0.89653 | 0       |
| ENSMUSG00000028521 | 17_Slc35d1       | 420.898 | -0.07986 | 0.60083  | 0.70202  | 398.498 | 396.492 | 433.841 | 405.758 | 480.54  | 410.258 |
| ENSMUSG00000028522 | 16_Mier1         | 1671.27 | -0.40327 | 0.00043  | 0.00176  | 1502.83 | 1352.85 | 1462.87 | 1862.88 | 2034.23 | 1811.97 |
| ENSMUSG00000028523 | 13_Tctex1d1      | 0.72349 | 2.97602  | 0.45311  | NA       | 4.34094 | 0       | 0       | 0       | 0       | 0       |
| ENSMUSG00000028524 | 21_Sgip1         | 333.518 | -1.22603 | 5.83E-10 | 1.47E-08 | 188.397 | 234.04  | 176.883 | 503.14  | 513.712 | 384.933 |

|                    |                  |         |          |          |          |         |         |         |         |         |         |
|--------------------|------------------|---------|----------|----------|----------|---------|---------|---------|---------|---------|---------|
| ENSMUSG00000028525 | 16_Pde4b         | 806.133 | -0.31977 | 0.01081  | 0.02698  | 728.41  | 695.697 | 727.849 | 967.509 | 843.635 | 873.697 |
| ENSMUSG00000028527 | 18_Ak4           | 244.831 | -0.55262 | 0.00197  | 0.00644  | 212.706 | 201.917 | 180.468 | 318.295 | 277.028 | 278.57  |
| ENSMUSG00000028528 | 16_Dnajc6        | 393.2   | -0.42524 | 0.03009  | 0.06362  | 349.012 | 328.574 | 329.863 | 568.964 | 380.129 | 402.66  |
| ENSMUSG00000028530 | 14_Jak1          | 7263.39 | 0.06124  | 0.64874  | 0.74305  | 7595.78 | 7043.24 | 7611.94 | 5999.82 | 7300.45 | 8029.14 |
| ENSMUSG00000028532 | 14_Cachd1        | 865.822 | -0.10089 | 0.42595  | 0.54149  | 819.57  | 867.326 | 819.876 | 975.624 | 833.773 | 878.761 |
| ENSMUSG00000028536 | 12_2610528J11Rik | 372.431 | 0.70784  | 3.28E-05 | 0.00019  | 447.117 | 402.917 | 536.624 | 277.719 | 281.511 | 288.7   |
| ENSMUSG00000028538 | 12_St3gal3       | 171.662 | -0.13004 | 0.65917  | 0.75142  | 134.569 | 200.999 | 156.565 | 251.57  | 131.79  | 154.48  |
| ENSMUSG00000028539 | 14_Artn          | 270.635 | 0.99118  | 8.47E-08 | 1.09E-06 | 355.089 | 341.424 | 382.449 | 163.205 | 167.651 | 213.992 |
| ENSMUSG00000028540 | 6_Dph2           | 206.259 | 0.82622  | 6.34E-05 | 0.00033  | 265.666 | 233.123 | 291.618 | 133.449 | 138.962 | 174.739 |
| ENSMUSG00000028541 | 14_B4galt2       | 158.895 | -0.14217 | 0.60706  | 0.70709  | 151.933 | 168.876 | 132.662 | 230.831 | 133.583 | 135.486 |
| ENSMUSG00000028542 | 17_Slc6a9        | 1191.97 | 0.71461  | 0.00101  | 0.00362  | 1337.88 | 1636.45 | 1470.04 | 1219.98 | 651.778 | 835.71  |
| ENSMUSG00000028544 | 14_Slc5a9        | 167.621 | 0.72936  | 0.00225  | 0.00719  | 240.488 | 161.534 | 224.689 | 117.219 | 117.446 | 144.35  |
| ENSMUSG00000028545 | 13_Bend5         | 89.7223 | -0.1093  | 0.70814  | 0.79126  | 86.8188 | 88.1093 | 84.8559 | 104.596 | 109.377 | 64.5776 |
| ENSMUSG00000028546 | 17_Elav4         | 5.04199 | -1.87298 | 0.17904  | 0.2759   | 4.34094 | 0.91781 | 1.19515 | 20.7388 | 1.79306 | 1.26623 |
| ENSMUSG00000028549 | 17_Iltg3bp       | 232.515 | -0.89705 | 1.91E-05 | 0.00012  | 174.506 | 167.958 | 144.614 | 262.39  | 365.784 | 279.836 |
| ENSMUSG00000028550 | 15_Atg4c         | 500.703 | -0.33301 | 0.02204  | 0.04917  | 433.226 | 441.464 | 455.354 | 509.452 | 617.71  | 547.01  |
| ENSMUSG00000028551 | 14_Cdkn2c        | 316.486 | 0.22646  | 0.16005  | 0.25225  | 346.407 | 310.218 | 368.107 | 304.77  | 289.579 | 279.836 |
| ENSMUSG00000028552 | 12_Eps15         | 2344.42 | -0.31061 | 0.01804  | 0.04155  | 2149.63 | 2063.23 | 2066.42 | 2300.2  | 2977.38 | 2509.66 |
| ENSMUSG00000028553 | 13_Angptl3       | 0.72349 | 2.97602  | 0.45311  | NA       | 4.34094 | 0       | 0       | 0       | 0       | 0       |
| ENSMUSG00000028555 | 15_Ttc39a        | 147.735 | 0.95324  | 0.00015  | 0.00071  | 198.815 | 162.452 | 222.299 | 87.4635 | 88.7565 | 126.623 |
| ENSMUSG00000028556 | 15_Dock7         | 2942.17 | -0.21565 | 0.08043  | 0.14401  | 2710.48 | 2792.88 | 2664    | 2765.47 | 3465.99 | 3254.2  |
| ENSMUSG00000028557 | 10_Rnf11         | 2133.32 | -0.40985 | 8.62E-05 | 0.00044  | 1832.75 | 1863.15 | 1801.1  | 2328.15 | 2582.9  | 2391.9  |
| ENSMUSG00000028558 | 14_Cair4         | 15.8957 | 0.03786  | 0.94758  | 0.96556  | 14.7592 | 14.6849 | 19.1225 | 13.5253 | 20.6202 | 12.6623 |
| ENSMUSG00000028559 | 17_Osbp19        | 4167.02 | -0.06999 | 0.55091  | 0.65713  | 4155.15 | 3864.88 | 4178.26 | 3854.71 | 4693.34 | 4255.79 |
| ENSMUSG00000028560 | 11_Usp1          | 1574.23 | -0.23063 | 0.10309  | 0.17664  | 1518.46 | 1329.9  | 1497.53 | 1454.42 | 1886.3  | 1758.79 |
| ENSMUSG00000028563 | 16_Tm2d1         | 320.389 | -0.71431 | 2.08E-05 | 0.00013  | 237.884 | 243.218 | 247.397 | 364.281 | 450.955 | 378.602 |
| ENSMUSG00000028565 | 18_Nfia          | 804.713 | -0.36315 | 0.00344  | 0.01031  | 730.146 | 701.203 | 680.043 | 851.191 | 962.874 | 902.82  |
| ENSMUSG00000028567 | 8_Txndc12        | 2048.56 | -0.00377 | 0.97369  | 0.98302  | 2014.2  | 1992.56 | 2129.76 | 1929.61 | 1984.02 | 2241.22 |
| ENSMUSG00000028568 | 16_Btf3l4        | 2399.85 | -0.44119 | 0.00021  | 0.00095  | 2132.27 | 1961.35 | 2012.64 | 2472.42 | 2939.72 | 2880.67 |
| ENSMUSG00000028571 | 15_Cyp2j13       | 13.7245 | -1.95389 | 0.01072  | 0.02679  | 4.34094 | 11.0137 | 1.19515 | 22.5421 | 17.9306 | 25.3245 |
| ENSMUSG00000028572 | 13_Hook1         | 1755.41 | -0.35262 | 0.0083   | 0.02162  | 1612.23 | 1474.91 | 1538.16 | 1698.78 | 2172.29 | 2036.09 |
| ENSMUSG00000028573 | 18_Fggy          | 139.737 | -0.02127 | 0.93232  | 0.95523  | 111.128 | 177.136 | 127.881 | 138.86  | 147.928 | 135.486 |
| ENSMUSG00000028575 | 11_Eqtn          | 1.09444 | 3.54201  | 0.17073  | NA       | 0.86819 | 0.91781 | 4.78062 | 0       | 0       | 0       |
| ENSMUSG00000028576 | 12_Ifft4         | 300.204 | -0.72078 | 0.00032  | 0.00134  | 203.156 | 242.301 | 235.445 | 320.098 | 454.541 | 345.68  |
| ENSMUSG00000028577 | 13_Plaa          | 1191.26 | -0.285   | 0.06158  | 0.11534  | 1106.94 | 970.12  | 1144.96 | 1096.45 | 1457.76 | 1371.32 |
| ENSMUSG00000028578 | 8_Caap1          | 191.441 | -0.16417 | 0.37495  | 0.4926   | 175.374 | 180.808 | 185.249 | 187.551 | 204.409 | 215.259 |
| ENSMUSG00000028580 | 15_Pum1          | 2074.68 | 0.38508  | 0.00343  | 0.01029  | 2118.38 | 2322.05 | 2609.02 | 1699.68 | 1724.92 | 1974.05 |
| ENSMUSG00000028581 | 17_Laptn5        | 384.138 | 1.77223  | 2.75E-07 | 3.01E-06 | 858.638 | 432.286 | 492.403 | 272.309 | 111.17  | 138.019 |
| ENSMUSG00000028582 | 14_Cc2d1b        | 1290.38 | 0.82971  | 7.33E-09 | 1.31E-07 | 1611.36 | 1589.64 | 1752.1  | 954.885 | 787.154 | 1047.17 |
| ENSMUSG00000028583 | 14_Pdpn          | 3881.41 | -0.13623 | 0.22037  | 0.32516  | 3857.36 | 3395.88 | 3841.23 | 3817.74 | 4120.45 | 4255.79 |
| ENSMUSG00000028584 | 3_Lrrc38         | 23.9666 | -1.53624 | 0.00413  | 0.01202  | 13.0228 | 11.9315 | 11.9515 | 52.2978 | 24.2063 | 30.3894 |
| ENSMUSG00000028587 | 18_Orc1          | 105.286 | 0.82467  | 0.00198  | 0.00645  | 136.306 | 108.301 | 158.955 | 69.4298 | 72.619  | 86.1034 |
| ENSMUSG00000028591 | 11_Pramef12      | 25.0106 | -0.30922 | 0.52658  | 0.63557  | 17.3638 | 24.7808 | 25.0982 | 20.7388 | 36.7578 | 25.3245 |
| ENSMUSG00000028597 | 11_Gpx7          | 127.697 | -0.18602 | 0.42397  | 0.53954  | 124.151 | 106.465 | 127.881 | 150.581 | 116.549 | 140.551 |
| ENSMUSG00000028599 | 10_Tnfrsf1b      | 275.036 | 0.81033  | 0.00205  | 0.00664  | 461.008 | 274.424 | 315.521 | 256.079 | 159.582 | 183.603 |
| ENSMUSG00000028600 | 15_Podn          | 313.725 | 0.0201   | 0.94217  | 0.96231  | 272.611 | 393.739 | 280.861 | 400.348 | 195.444 | 339.349 |
| ENSMUSG00000028601 | 18_Echdc2        | 202.443 | -0.20989 | 0.31522  | 0.43014  | 188.397 | 209.26  | 164.931 | 247.062 | 184.685 | 220.323 |
| ENSMUSG00000028602 | 12_Tnfrsf8       | 6.6401  | 0.96494  | 0.29385  | 0.4081   | 8.68188 | 8.26025 | 9.56123 | 8.11517 | 2.68959 | 2.53245 |
| ENSMUSG00000028603 | 15_Scp2          | 5615.87 | -0.21141 | 0.01725  | 0.04003  | 5245.59 | 5117.68 | 5252.7  | 6010.64 | 6122.41 | 5946.2  |
| ENSMUSG00000028607 | 16_Cpt2          | 462.965 | 0.09519  | 0.50339  | 0.61421  | 437.567 | 499.286 | 498.379 | 460.761 | 446.978 | 446.978 |
| ENSMUSG00000028608 | 15_0610037L13Rik | 894.343 | -0.19663 | 0.10398  | 0.178    | 864.716 | 777.381 | 859.316 | 986.444 | 960.184 | 918.015 |
| ENSMUSG00000028609 | 6_Magoh          | 988.741 | -0.34952 | 0.01206  | 0.02961  | 927.225 | 792.066 | 889.195 | 984.641 | 1202.25 | 1137.07 |
| ENSMUSG00000028610 | 16_Dmrtb1        | 2.82552 | 0.30068  | 0.82926  | 0.88307  | 6.07732 | 0.91781 | 2.39031 | 4.50843 | 1.79306 | 1.26623 |
| ENSMUSG00000028613 | 14_Lrp8          | 347.462 | -0.4755  | 0.02472  | 0.05415  | 289.107 | 310.218 | 273.69  | 505.846 | 400.749 | 305.161 |
| ENSMUSG00000028614 | 14_Ndc1          | 442.02  | 0.00553  | 0.97281  | 0.98265  | 445.381 | 428.615 | 454.159 | 371.494 | 481.437 | 471.036 |
| ENSMUSG00000028617 | 10_Lrrc42        | 918.897 | -0.12391 | 0.27113  | 0.38276  | 854.297 | 894.86  | 889.195 | 963.902 | 938.668 | 972.462 |
| ENSMUSG00000028618 | 11_Tmem59        | 7063.14 | -0.35845 | 0.00023  | 0.00103  | 6096.42 | 6236.49 | 6237.51 | 7434.4  | 8308.15 | 8065.87 |
| ENSMUSG00000028619 | 15_Tceanc2       | 592.612 | 0.09238  | 0.48131  | 0.59379  | 577.345 | 621.354 | 635.822 | 549.126 | 569.297 | 602.724 |
| ENSMUSG00000028621 | 17_Cyb5l1        | 290.04  | 0.37761  | 0.04708  | 0.09224  | 318.625 | 312.972 | 351.375 | 277.719 | 203.512 | 276.037 |
| ENSMUSG00000028622 | 11_Mrpl37        | 729.621 | 0.26513  | 0.03073  | 0.06476  | 764.874 | 822.354 | 801.948 | 631.18  | 678.674 | 678.698 |
| ENSMUSG00000028626 | 5_Col9a2         | 130.642 | -0.11414 | 0.77751  | 0.84452  | 100.71  | 191.821 | 83.6608 | 203.781 | 79.7912 | 124.09  |
| ENSMUSG00000028629 | 9_Exo5           | 294.349 | -0.05438 | 0.72455  | 0.80379  | 278.688 | 292.78  | 295.203 | 299.36  | 301.234 | 298.83  |
| ENSMUSG00000028630 | 8_Dyrk2          | 494.25  | 0.52953  | 0.0081   | 0.02117  | 511.363 | 610.341 | 631.041 | 509.452 | 327.234 | 376.069 |
| ENSMUSG00000028631 | 7_Kcnq4          | 488.745 | -0.04917 | 0.83207  | 0.88517  | 439.303 | 606.669 | 395.596 | 638.393 | 453.644 | 398.861 |
| ENSMUSG00000028633 | 7_Ctps           | 783.763 | 0.21484  | 0.18221  | 0.27975  | 879.475 | 798.491 | 847.364 | 587.899 | 813.153 | 776.197 |
| ENSMUSG00000028634 | 16_Hivep3        | 284.798 | 0.49729  | 0.00509  | 0.01432  | 342.934 | 334.081 | 321.496 | 212.798 | 221.443 | 276.037 |
| ENSMUSG00000028635 | 7_Edn2           | 13.7347 | 1.74418  | 0.02721  | 0.05866  | 20.8365 | 21.1095 | 21.5128 | 11.7219 | 0.89653 | 6.33113 |
| ENSMUSG00000028636 | 14_Ppcs          | 296.793 | 0.08546  | 0.62715  | 0.72415  | 268.27  | 334.081 | 314.326 | 260.587 | 302.131 | 301.362 |
| ENSMUSG00000028637 | 15_Ccdc30        | 12.5383 | -0.64061 | 0.3331   | 0.44977  | 9.55007 | 13.7671 | 5.97577 | 18.0337 | 15.241  | 12.6623 |
| ENSMUSG00000028639 | 14_Ybx1          | 7535.75 | 0.04042  | 0.70966  | 0.79235  | 7989.94 | 7193.76 | 7738.62 | 7362.26 | 6924.8  | 8005.09 |
| ENSMUSG00000028640 | 11_Tfap2c        | 781.051 | 0.55703  | 0.00107  | 0.00381  | 885.552 | 872.833 | 1030.22 | 618.556 | 524.47  | 754.671 |
| ENSMUSG00000028641 | 16_P3h1          | 404.37  | -0.13897 | 0.44659  | 0.56155  | 402.839 | 446.971 | 303.569 | 434.612 | 411.508 | 426.718 |
| ENSMUSG00000028642 | 6_4930538K18Rik  | 2.59676 | -1.23007 | 0.46807  | 0.58148  | 0       | 4.58903 | 0       | 3.60674 | 3.58612 | 3.79868 |
| ENSMUSG00000028643 | 10_Ccdc23        | 429.168 | 0.00043  | 0.99809  | 0.9985   | 421.94  | 469.916 | 396.791 | 499.534 | 434.817 | 352.011 |
| ENSMUSG00000028644 | 16_Ermap         | 57.9324 | -1.59538 | 0.00119  | 0.00417  | 32.123  | 38.5478 | 15.537  | 120.826 | 101.308 | 39.253  |
| ENSMUSG00000028645 | 10_Slc2a1        | 5656.09 | 0.12683  | 0.54369  | 0.65048  | 5368.88 | 6823.88 | 5521.61 | 7381.2  | 4280.04 | 4560.95 |
| ENSMUSG00000028646 | 16_Rragc         | 1744.9  | -0.12206 | 0.26687  | 0.37815  | 1629.59 | 1607.08 | 1778.39 | 1778.12 | 1906.02 | 1770.19 |
| ENSMUSG00000028647 | 13_Mycbp         | 524.545 | -0.29879 | 0.05605  | 0.10655  | 468.822 | 430.451 | 512.721 | 513.059 | 641.019 | 581.198 |
| ENSMUSG00000028648 | 13_Ndufs5        | 968.355 | -0.12725 | 0.32685  | 0.44312  | 928.093 | 879.258 | 969.27  | 1048.66 | 907.289 | 1077.56 |

|                     |             |         |          |          |          |         |         |         |         |         |         |
|---------------------|-------------|---------|----------|----------|----------|---------|---------|---------|---------|---------|---------|
| ENSMUSG000000028649 | 17_Macf1    | 6972.52 | -0.45498 | 8.10E-06 | 5.63E-05 | 6176.29 | 5744.55 | 5725.98 | 8417.23 | 8231.94 | 7539.12 |
| ENSMUSG000000028651 | 12_Ppie     | 755.153 | 0.30666  | 0.04179  | 0.08347  | 794.392 | 781.97  | 929.83  | 750.202 | 597.089 | 677.431 |
| ENSMUSG000000028653 | 16_Trit1    | 409.368 | 0.17596  | 0.28612  | 0.3996   | 428.017 | 437.793 | 436.231 | 321.902 | 410.611 | 421.654 |
| ENSMUSG000000028654 | 13_Mycl     | 1455.23 | 0.47178  | 0.00168  | 0.0056   | 1628.72 | 1562.11 | 1881.17 | 1176.7  | 1069.56 | 1413.11 |
| ENSMUSG000000028655 | 11_Mfsd2a   | 145.601 | 0.67788  | 0.01089  | 0.02714  | 168.429 | 154.191 | 215.128 | 134.351 | 82.4808 | 119.025 |
| ENSMUSG000000028656 | 14_Cap1     | 10388.4 | 0.22813  | 0.05242  | 0.10077  | 11392.4 | 10582.3 | 11648   | 8566.91 | 9607.22 | 10533.7 |
| ENSMUSG000000028657 | 14_Ppt1     | 2501.37 | -0.51871 | 1.52E-05 | 9.79E-05 | 2036.77 | 2119.21 | 2013.83 | 2725.8  | 3296.54 | 2816.09 |
| ENSMUSG000000028661 | 8_Epha8     | 5.64339 | -0.73126 | 0.51823  | 0.6283   | 4.34094 | 8.26025 | 0       | 9.91854 | 6.27571 | 5.06491 |
| ENSMUSG000000028664 | 14_Ephb2    | 308.883 | 0.45975  | 0.00581  | 0.01596  | 335.989 | 351.52  | 386.035 | 282.228 | 236.684 | 260.843 |
| ENSMUSG000000028668 | 5_Tceb3     | 2810.56 | 0.14282  | 0.27049  | 0.38207  | 2852.87 | 2838.77 | 3156.4  | 2321.84 | 2768.49 | 2924.98 |
| ENSMUSG000000028669 | 15_Pithd1   | 637.508 | -0.17668 | 0.15608  | 0.24722  | 577.345 | 610.341 | 608.333 | 701.511 | 658.95  | 668.568 |
| ENSMUSG000000028670 | 14_Lypla2   | 1078.87 | 1.39769  | 4.24E-13 | 2.56E-11 | 1335.27 | 1518.05 | 1839.34 | 711.43  | 462.61  | 606.523 |
| ENSMUSG000000028671 | 16_Gale     | 942.925 | 1.49368  | 3.96E-13 | 2.41E-11 | 1285.79 | 1260.15 | 1629    | 602.326 | 358.612 | 521.685 |
| ENSMUSG000000028672 | 13_Hmgcl    | 647.821 | 0.3546   | 0.0262   | 0.05682  | 691.946 | 740.669 | 749.362 | 672.657 | 496.678 | 535.614 |
| ENSMUSG000000028673 | 10_Fuca1    | 1883.44 | 0.08604  | 0.53087  | 0.63947  | 1850.11 | 2117.38 | 1851.29 | 2075.68 | 1633.48 | 1772.72 |
| ENSMUSG000000028675 | 12_Pncr2    | 2263.16 | -0.38862 | 0.00142  | 0.00486  | 2008.12 | 1832.86 | 2040.13 | 2330.86 | 2807.93 | 2559.04 |
| ENSMUSG000000028676 | 17_Srsf10   | 2238.79 | -0.38993 | 0.01222  | 0.02988  | 2067.16 | 1867.73 | 1878.78 | 2057.65 | 2972    | 2589.43 |
| ENSMUSG000000028677 | 18_Rnf220   | 1282.62 | 0.66789  | 0.00021  | 0.00096  | 1466.37 | 1538.24 | 1718.63 | 1205.55 | 760.258 | 1006.65 |
| ENSMUSG000000028678 | 13_Kif2c    | 337.239 | 0.40276  | 0.06432  | 0.11971  | 407.18  | 336.835 | 407.548 | 210.994 | 337.992 | 322.888 |
| ENSMUSG000000028680 | 14_Pik3     | 174.781 | 1.66696  | 1.68E-08 | 2.70E-07 | 289.975 | 205.588 | 301.179 | 97.382  | 51.9988 | 102.564 |
| ENSMUSG000000028681 | 11_Ptch2    | 34.7168 | 0.14658  | 0.78731  | 0.85239  | 42.5412 | 39.4656 | 27.4885 | 58.6096 | 16.1376 | 24.0583 |
| ENSMUSG000000028683 | 14_Eif2b3   | 453.766 | -0.19481 | 0.17814  | 0.27485  | 416.73  | 402.917 | 450.573 | 452.646 | 517.298 | 482.432 |
| ENSMUSG000000028684 | 14_Urod     | 901.043 | 0.24339  | 0.14132  | 0.2275   | 952.403 | 998.572 | 980.026 | 999.969 | 681.363 | 793.924 |
| ENSMUSG000000028687 | 17_Mutyh    | 40.11   | 0.80741  | 0.03862  | 0.07821  | 43.4094 | 64.2464 | 45.4159 | 33.3624 | 25.1029 | 29.1232 |
| ENSMUSG000000028688 | 13_Toe1     | 414.026 | 0.19081  | 0.2433   | 0.35139  | 485.317 | 408.423 | 430.255 | 432.809 | 348.75  | 378.602 |
| ENSMUSG000000028689 | 14_Ccdc163  | 127.616 | -0.01987 | 0.93173  | 0.95479  | 109.392 | 122.068 | 149.394 | 122.629 | 131.79  | 130.421 |
| ENSMUSG000000028690 | 4_Mmachc    | 275.083 | -0.18437 | 0.28039  | 0.39321  | 255.247 | 249.643 | 267.715 | 259.685 | 315.579 | 302.628 |
| ENSMUSG000000028691 | 12_Prdx1    | 9201.76 | -0.6023  | 2.28E-06 | 1.89E-05 | 7829.32 | 6915.66 | 7180.49 | 10124.1 | 12671.6 | 10489.4 |
| ENSMUSG000000028692 | 15_Akr1a1   | 8603.63 | 0.29271  | 0.00325  | 0.00984  | 9392.06 | 9332.25 | 9697.48 | 8308.13 | 7443.89 | 7447.95 |
| ENSMUSG000000028693 | 15_Nasp     | 1601.1  | -0.07732 | 0.6329   | 0.72944  | 1646.09 | 1399.65 | 1627.8  | 1320.07 | 1733.89 | 1879.08 |
| ENSMUSG000000028696 | 12_Ipp      | 390.99  | -0.38383 | 0.05154  | 0.09943  | 357.694 | 346.013 | 313.13  | 337.23  | 505.643 | 486.231 |
| ENSMUSG000000028698 | 13_Pik3r3   | 2164.4  | -0.44371 | 0.0006   | 0.00231  | 1787.6  | 1975.12 | 1740.14 | 2369.63 | 2810.62 | 2303.27 |
| ENSMUSG000000028699 | 9_Tspan1    | 1030.58 | -0.21108 | 0.10531  | 0.17964  | 945.457 | 890.271 | 1030.22 | 1010.79 | 1121.56 | 1185.19 |
| ENSMUSG000000028700 | 14_Pomgnt1  | 961.367 | 0.09948  | 0.51662  | 0.6266   | 969.766 | 1035.28 | 978.831 | 1098.25 | 799.705 | 886.359 |
| ENSMUSG000000028701 | 4_Lurap1    | 235.691 | -1.29147 | 3.91E-07 | 4.08E-06 | 123.283 | 183.561 | 102.783 | 391.331 | 330.82  | 282.369 |
| ENSMUSG000000028702 | 15_Rad54l   | 161.304 | 0.63075  | 0.01065  | 0.02665  | 200.552 | 164.287 | 222.299 | 104.596 | 116.549 | 159.545 |
| ENSMUSG000000028703 | 14_Lrrc41   | 1407.87 | 0.66063  | 1.20E-05 | 7.95E-05 | 1583.58 | 1673.16 | 1917.03 | 1174.9  | 917.151 | 1181.39 |
| ENSMUSG000000028706 | 14_Nsun4    | 268.097 | -0.01668 | 0.9193   | 0.94641  | 266.534 | 267.081 | 266.519 | 292.146 | 261.787 | 254.512 |
| ENSMUSG000000028707 | 15_Dmbx1    | 2.55804 | 0.7202   | 0.59343  | 0.69553  | 2.60457 | 4.58903 | 2.39031 | 2.70506 | 1.79306 | 1.26623 |
| ENSMUSG000000028708 | 16_Mknk1    | 520.257 | 0.42339  | 0.00157  | 0.00528  | 602.523 | 591.067 | 595.187 | 475.188 | 432.128 | 425.452 |
| ENSMUSG000000028709 | 3_Mob3c     | 294.304 | -0.02114 | 0.90185  | 0.93348  | 309.943 | 256.068 | 310.74  | 278.621 | 312.889 | 297.563 |
| ENSMUSG000000028710 | 16_Atpaf1   | 634.961 | -0.42073 | 0.00671  | 0.01805  | 576.477 | 558.944 | 492.403 | 626.671 | 800.602 | 754.671 |
| ENSMUSG000000028713 | 17_Cyp4b1   | 164.304 | 0.061    | 0.78067  | 0.847    | 151.065 | 179.89  | 173.297 | 188.452 | 155.1   | 138.019 |
| ENSMUSG000000028716 | 15_Edka1ip1 | 4912.88 | 0.64342  | 6.04E-05 | 0.00032  | 5679.69 | 5624.31 | 6667.76 | 4388.5  | 3041.03 | 4075.98 |
| ENSMUSG000000028717 | 12_Tal1     | 25.124  | -1.10904 | 0.0206   | 0.04643  | 12.1546 | 20.1917 | 15.537  | 38.7725 | 34.9647 | 29.1232 |
| ENSMUSG000000028718 | 16_Stil     | 180.259 | 0.17395  | 0.41349  | 0.52961  | 207.497 | 176.219 | 188.834 | 139.761 | 179.306 | 189.934 |
| ENSMUSG000000028719 | 8_Cmpk1     | 3560.74 | -0.15781 | 0.29631  | 0.41071  | 3432.82 | 3045.28 | 3620.12 | 3059.42 | 4095.35 | 4111.44 |
| ENSMUSG000000028729 | 15_Ebna1bp2 | 1375.86 | -0.02921 | 0.83051  | 0.88401  | 1382.16 | 1239.96 | 1462.87 | 1369.66 | 1250.66 | 1549.86 |
| ENSMUSG000000028730 | 14_Cfap57   | 3.27807 | -0.7574  | 0.58367  | 0.68665  | 1.73638 | 5.50683 | 0       | 5.41011 | 4.48265 | 2.53245 |
| ENSMUSG000000028736 | 13_Pax7     | 2.39849 | -0.37064 | 0.86077  | NA       | 2.60457 | 3.67122 | 0       | 8.11517 | 0       | 0       |
| ENSMUSG000000028737 | 15_Aldh4a1  | 377.613 | 0.37552  | 0.06693  | 0.12379  | 402.839 | 443.3   | 433.841 | 418.382 | 260.89  | 306.427 |
| ENSMUSG000000028741 | 13_Mrt04    | 488.065 | 0.2675   | 0.11827  | 0.19746  | 579.95  | 444.218 | 574.869 | 445.433 | 398.956 | 484.965 |
| ENSMUSG000000028743 | 7_Akr7a5    | 195.008 | 0.70643  | 0.01113  | 0.02763  | 197.079 | 294.616 | 234.25  | 202.879 | 112.066 | 129.155 |
| ENSMUSG000000028744 | 15_Pqlc2    | 128.173 | 0.38915  | 0.11729  | 0.19608  | 149.328 | 149.602 | 137.443 | 139.761 | 94.1357 | 98.7657 |
| ENSMUSG000000028745 | 18_Capzb    | 6517.77 | 0.18253  | 0.11294  | 0.19012  | 6673.76 | 6837.65 | 7276.1  | 6173.84 | 5491.25 | 6654.02 |
| ENSMUSG000000028747 | 10_Htr6     | 0.66371 | -1.52656 | 0.57363  | NA       | 0       | 0.91781 | 0       | 0.90169 | 0.89653 | 1.26623 |
| ENSMUSG000000028749 | 7_Pla2g2f   | 176.851 | 0.75456  | 0.00204  | 0.00663  | 217.915 | 231.287 | 216.323 | 155.09  | 92.3426 | 148.149 |
| ENSMUSG000000028750 | 12_Pla2g2c  | 1.49648 | -1.97914 | 0.34861  | NA       | 0.86819 | 0.91781 | 0       | 3.60674 | 3.58612 | 0       |
| ENSMUSG000000028751 | 13_Pla2g2e  | 51.9995 | -0.24364 | 0.60529  | 0.70548  | 43.4094 | 66.082  | 33.4643 | 92.8736 | 39.4473 | 36.7206 |
| ENSMUSG000000028753 | 12_Vwa5b1   | 4.08575 | -1.11324 | 0.31413  | 0.42928  | 2.60457 | 2.75342 | 2.39031 | 8.11517 | 3.58612 | 5.06491 |
| ENSMUSG000000028755 | 3_Cda       | 476.85  | 1.28405  | 1.93E-10 | 5.71E-09 | 588.632 | 635.121 | 804.339 | 313.787 | 217.857 | 301.362 |
| ENSMUSG000000028756 | 12_Pink1    | 2137.05 | 0.15561  | 0.45716  | 0.57106  | 2127.06 | 2456.05 | 2173.99 | 2754.65 | 1506.17 | 1804.37 |
| ENSMUSG000000028757 | 4_Ddost     | 3682.83 | 0.52016  | 3.41E-05 | 0.0002   | 4268.01 | 4167.76 | 4582.22 | 3176.64 | 2630.42 | 3271.93 |
| ENSMUSG000000028758 | 12_Kif17    | 15.5745 | 0.87377  | 0.16541  | 0.25876  | 20.8365 | 18.3561 | 21.5128 | 7.21348 | 17.9306 | 7.59736 |
| ENSMUSG000000028759 | 13_Hp1bp3   | 4488.81 | 0.16497  | 0.11386  | 0.19131  | 4503.29 | 4739.55 | 4992.16 | 4083.73 | 4117.76 | 4496.37 |
| ENSMUSG000000028760 | 16_Eif4g3   | 2521.69 | 0.41371  | 0.00024  | 0.00107  | 2660.13 | 2939.73 | 3042.86 | 2241.59 | 2032.43 | 2213.36 |
| ENSMUSG000000028763 | 17_Hspg2    | 2506.24 | 0.97279  | 5.63E-05 | 0.0003   | 2820.74 | 3977.77 | 3162.38 | 2117.16 | 1043.56 | 1915.8  |
| ENSMUSG000000028766 | 10_Alpl     | 6884.88 | 0.78764  | 4.98E-09 | 9.38E-08 | 7907.46 | 8593.41 | 9655.65 | 5358.72 | 4388.52 | 5405.52 |
| ENSMUSG000000028771 | 13_Ptpn12   | 622.283 | -0.00489 | 0.97548  | 0.9838   | 658.955 | 524.985 | 680.043 | 656.357 | 659.847 | 644.51  |
| ENSMUSG000000028772 | 19_Zcchc17  | 720.694 | -0.13313 | 0.30533  | 0.42024  | 671.11  | 695.697 | 695.58  | 808.812 | 689.432 | 763.535 |
| ENSMUSG000000028773 | 8_Fabp3     | 353.208 | -1.4105  | 1.15E-05 | 7.66E-05 | 177.11  | 293.698 | 107.564 | 660.034 | 440.197 | 440.647 |
| ENSMUSG000000028776 | 14_Tinagl1  | 676.836 | 0.79553  | 0.00044  | 0.00177  | 737.96  | 882.011 | 957.318 | 660.935 | 356.819 | 465.972 |
| ENSMUSG000000028777 | 8_Gnat3     | 0       | NA       | NA       | NA       | 0       | 0       | 0       | 0       | 0       | 0       |
| ENSMUSG000000028778 | 15_Hcrrt1   | 1.12746 | 2.43507  | 0.34771  | NA       | 3.47275 | 0       | 2.39031 | 0.90169 | 0       | 0       |
| ENSMUSG000000028779 | 16_Pef1     | 1440.18 | 0.62847  | 0.00018  | 0.00083  | 1673    | 1741.99 | 1832.17 | 1360.64 | 891.151 | 1142.14 |
| ENSMUSG000000028780 | 13_Sema3c   | 1947.15 | -1.00295 | 3.83E-12 | 1.75E-10 | 1429.04 | 1384.97 | 1073.25 | 2652.76 | 2721.87 | 2421.03 |
| ENSMUSG000000028782 | 14_Adgrb2   | 75.2824 | 0.35678  | 0.23381  | 0.34041  | 82.4779 | 97.2874 | 74.0996 | 81.1517 | 60.9641 | 55.714  |
| ENSMUSG000000028784 | 13_Spodc1   | 0.93095 | 3.33642  | 0.21268  | NA       | 3.47275 | 0.91781 | 1.19515 | 0       | 0       | 0       |
| ENSMUSG000000028785 | 12_Hpca     | 12.5794 | -1.63639 | 0.06158  | 0.11534  | 13.0228 | 2.75342 | 2.39031 | 33.3624 | 12.5514 | 11.396  |

|                     |             |         |          |          |          |         |         |         |         |         |         |
|---------------------|-------------|---------|----------|----------|----------|---------|---------|---------|---------|---------|---------|
| ENSMUSG000000028786 | 15_Tmem54   | 109.275 | 1.34122  | 1.12E-05 | 7.52E-05 | 149.328 | 167.041 | 152.98  | 73.9382 | 37.6543 | 74.7074 |
| ENSMUSG000000028788 | 14_Ptp4a2   | 7891.1  | -0.43963 | 0.0003   | 0.00129  | 6728.46 | 6297.98 | 7068.14 | 8034.92 | 9962.25 | 9254.85 |
| ENSMUSG000000028789 | 16_Azin2    | 228.565 | 0.19354  | 0.57015  | 0.67491  | 233.543 | 291.862 | 206.762 | 348.952 | 149.721 | 140.551 |
| ENSMUSG000000028790 | 13_Khdrbs1  | 2527.39 | -0.0067  | 0.96346  | 0.97652  | 2620.19 | 2361.51 | 2581.53 | 2081.99 | 2666.28 | 2852.81 |
| ENSMUSG000000028792 | 14_AK2      | 1900.48 | 0.54992  | 3.87E-06 | 2.95E-05 | 2126.19 | 2225.68 | 2422.58 | 1539.18 | 1431.76 | 1657.49 |
| ENSMUSG000000028793 | 15_Rnf19b   | 1330.81 | 0.8989   | 4.48E-09 | 8.53E-08 | 1730.3  | 1455.64 | 2011.44 | 917.014 | 871.428 | 999.053 |
| ENSMUSG000000028794 | 13_A3galt2  | 13.7475 | 0.13272  | 0.84164  | 0.89222  | 7.8137  | 12.8493 | 22.7079 | 14.427  | 10.7584 | 13.9285 |
| ENSMUSG000000028795 | 15_Ccdc28b  | 138.737 | 0.11869  | 0.6596   | 0.75174  | 138.91  | 131.246 | 163.736 | 174.025 | 100.411 | 124.09  |
| ENSMUSG000000028796 | 17_Phc2     | 1759.02 | 0.9109   | 4.84E-07 | 4.93E-06 | 2052.4  | 2181.62 | 2656.83 | 1503.11 | 988.873 | 1171.26 |
| ENSMUSG000000028797 | 20_Tmem234  | 2344.83 | 0.1232   | 0.25632  | 0.36612  | 2321.54 | 2514.79 | 2499.07 | 2388.56 | 2126.57 | 2218.43 |
| ENSMUSG000000028798 | 16_Eif3i    | 3136.84 | 0.24127  | 0.10753  | 0.18268  | 3620.35 | 3234.35 | 3340.46 | 3347.96 | 2360.57 | 2917.39 |
| ENSMUSG000000028799 | 15_Zfp362   | 765.271 | 0.78449  | 4.39E-06 | 3.31E-05 | 829.12  | 996.737 | 1079.22 | 622.163 | 467.989 | 596.393 |
| ENSMUSG000000028800 | 15_Hdac1    | 1573.46 | 0.08925  | 0.44709  | 0.56206  | 1653.03 | 1497.86 | 1715.05 | 1507.62 | 1451.48 | 1615.71 |
| ENSMUSG000000028801 | 14_Stpg1    | 10.1363 | -0.75248 | 0.31215  | 0.42706  | 8.68188 | 9.17806 | 4.78062 | 17.132  | 13.448  | 7.59736 |
| ENSMUSG000000028803 | 18_Nipal3   | 1799.74 | 0.18237  | 0.18206  | 0.27957  | 1765.03 | 1994.39 | 1981.57 | 1923.3  | 1507.07 | 1627.1  |
| ENSMUSG000000028804 | 18_Csmd2    | 34.099  | -1.24072 | 0.00572  | 0.01577  | 24.3093 | 22.0273 | 14.3418 | 61.3146 | 48.4127 | 34.1881 |
| ENSMUSG000000028807 | 2_Zbtb8a    | 514.173 | 0.41116  | 0.00742  | 0.01962  | 586.895 | 544.259 | 628.651 | 424.694 | 401.646 | 498.893 |
| ENSMUSG000000028809 | 16_Srrm1    | 4075.9  | 0.29806  | 0.0242   | 0.05321  | 4176.85 | 4479.81 | 4828.42 | 3228.94 | 3599.57 | 4141.83 |
| ENSMUSG000000028811 | 11_Yars     | 1046.49 | 0.33204  | 0.01397  | 0.03345  | 1162.5  | 1043.54 | 1294.35 | 985.542 | 881.29  | 911.683 |
| ENSMUSG000000028813 | 2_CK137956  | 0.44827 | -2.3261  | 0.56139  | NA       | 0       | 0       | 0       | 0       | 2.68959 | 0       |
| ENSMUSG000000028820 | 13_Sfpq     | 4816.33 | -0.18877 | 0.23563  | 0.34247  | 4540.63 | 4494.49 | 4468.68 | 3946.68 | 5663.38 | 5784.12 |
| ENSMUSG000000028821 | 8_Syf2      | 1776.23 | -0.04389 | 0.70095  | 0.78619  | 1783.26 | 1640.12 | 1823.81 | 1826.81 | 1682.79 | 1900.61 |
| ENSMUSG000000028822 | 11_Tmem50a  | 2163.97 | -0.08152 | 0.46386  | 0.57753  | 2157.45 | 2088.93 | 2061.64 | 2386.76 | 2050.37 | 2238.69 |
| ENSMUSG000000028825 | 7_Rhd       | 1.78632 | -0.38635 | 0.8437   | NA       | 0       | 4.58903 | 0       | 1.80337 | 1.79306 | 2.53245 |
| ENSMUSG000000028826 | 14_Tmem57   | 1317.67 | -0.0899  | 0.38836  | 0.50572  | 1305.76 | 1246.38 | 1277.62 | 1351.63 | 1360.93 | 1363.73 |
| ENSMUSG000000028830 | 14_AU040320 | 1185.8  | 0.76417  | 1.77E-06 | 1.51E-05 | 1441.19 | 1413.42 | 1623.02 | 980.132 | 707.363 | 949.67  |
| ENSMUSG000000028832 | 11_Stmn1    | 1207.71 | 0.0793   | 0.58181  | 0.68508  | 1249.32 | 1168.37 | 1303.91 | 998.166 | 1205.83 | 1320.67 |
| ENSMUSG000000028833 | 13_Nodn     | 531.619 | 0.95639  | 2.03E-05 | 0.00012  | 620.755 | 743.423 | 740.996 | 471.582 | 254.615 | 358.342 |
| ENSMUSG000000028834 | 13_Trim63   | 115.427 | -1.11381 | 0.00569  | 0.0157   | 66.8505 | 115.644 | 35.8546 | 212.798 | 139.859 | 121.558 |
| ENSMUSG000000028836 | 14_Slc30a2  | 5.93052 | -0.88809 | 0.34911  | 0.46599  | 4.34094 | 4.58903 | 3.58546 | 12.6236 | 5.37918 | 5.06491 |
| ENSMUSG000000028837 | 8_Psmb2     | 2388.6  | 0.50401  | 0.00015  | 0.0007   | 2755.63 | 2578.12 | 3070.35 | 1995.43 | 1755.41 | 2176.64 |
| ENSMUSG000000028838 | 11_Extl1    | 30.163  | -0.88657 | 0.12855  | 0.21107  | 13.891  | 33.9588 | 15.537  | 59.5112 | 18.8271 | 39.253  |
| ENSMUSG000000028840 | 10_Zfp593   | 162.23  | 0.74083  | 0.00016  | 0.00077  | 203.156 | 201.917 | 204.371 | 128.941 | 121.032 | 113.96  |
| ENSMUSG000000028841 | 14_Cnksr1   | 1687.09 | 1.23282  | 6.45E-16 | 7.20E-14 | 2167.87 | 2242.2  | 2690.29 | 1059.48 | 853.497 | 1109.21 |
| ENSMUSG000000028842 | 15_Ago3     | 755.798 | -0.581   | 1.41E-05 | 9.15E-05 | 641.591 | 583.724 | 591.601 | 851.191 | 994.252 | 872.43  |
| ENSMUSG000000028843 | 8_Sh3bgrl3  | 4555.63 | 0.84378  | 1.88E-06 | 1.59E-05 | 5429.65 | 5439.83 | 6683.3  | 3674.37 | 2463.67 | 3642.93 |
| ENSMUSG000000028845 | 15_Tekt2    | 82.7812 | -0.35154 | 0.19248  | 0.29234  | 65.1141 | 81.6847 | 71.7092 | 102.792 | 90.5496 | 84.8372 |
| ENSMUSG000000028847 | 8_Trappc3   | 1469.6  | -0.04294 | 0.6919   | 0.77895  | 1466.37 | 1411.58 | 1466.45 | 1568.03 | 1488.24 | 1416.91 |
| ENSMUSG000000028848 | 13_Gpn2     | 228.246 | 0.69638  | 0.00309  | 0.00941  | 289.975 | 253.314 | 303.569 | 216.405 | 126.411 | 179.804 |
| ENSMUSG000000028849 | 17_Map7d1   | 1136.05 | 0.69862  | 1.66E-05 | 0.00011  | 1313.57 | 1323.48 | 1581.19 | 1002.67 | 721.707 | 873.697 |
| ENSMUSG000000028850 | 2_Gpatch3   | 60.9613 | 1.09804  | 0.00032  | 0.00136  | 78.137  | 87.1915 | 83.6608 | 36.9691 | 36.7578 | 43.0517 |
| ENSMUSG000000028851 | 6_Nudc      | 1489.53 | 0.46316  | 0.00095  | 0.00343  | 1642.61 | 1578.63 | 1958.86 | 1309.25 | 1123.35 | 1324.47 |
| ENSMUSG000000028854 | 9_Slc9a1    | 1244.95 | 1.26589  | 2.59E-12 | 1.24E-10 | 1549.72 | 1709.87 | 2015.03 | 772.744 | 570.193 | 852.171 |
| ENSMUSG000000028857 | 16_Tmem222  | 1042.06 | 0.40067  | 0.0186   | 0.04257  | 1181.6  | 1129.82 | 1246.55 | 1091.04 | 120.811 | 882.56  |
| ENSMUSG000000028859 | 14_Csf3r    | 121.311 | 2.56193  | 1.66E-09 | 3.63E-08 | 362.035 | 115.644 | 144.614 | 33.3624 | 36.7578 | 35.4544 |
| ENSMUSG000000028860 | 13_Sytl1    | 4120.72 | 1.31592  | 5.09E-10 | 1.32E-08 | 5166.59 | 5768.41 | 6703.62 | 2863.75 | 1580.58 | 2641.35 |
| ENSMUSG000000028861 | 13_Mrps15   | 363.912 | -0.17108 | 0.3594   | 0.47629  | 336.857 | 328.574 | 362.132 | 316.492 | 460.817 | 378.602 |
| ENSMUSG000000028862 | 6_Map3k6    | 929.293 | 1.27814  | 9.37E-11 | 3.06E-09 | 1239.77 | 1188.56 | 1517.85 | 541.011 | 412.404 | 676.165 |
| ENSMUSG000000028863 | 13_Meaf6    | 470.621 | -0.11172 | 0.41246  | 0.52866  | 453.194 | 456.149 | 446.988 | 485.107 | 464.403 | 517.887 |
| ENSMUSG000000028864 | 7_Hgf       | 73.7602 | -1.72694 | 1.94E-05 | 0.00012  | 39.9367 | 43.1369 | 19.1225 | 114.514 | 152.41  | 73.4412 |
| ENSMUSG000000028865 | 13_Cd164l2  | 18.7115 | 0.91454  | 0.15944  | 0.25144  | 34.7275 | 23.8629 | 14.3418 | 16.2303 | 5.37918 | 17.7272 |
| ENSMUSG000000028868 | 13_Wasf2    | 4171.27 | 0.70043  | 2.87E-09 | 5.80E-08 | 4773.3  | 5036.92 | 5682.96 | 3201.89 | 2972    | 3360.57 |
| ENSMUSG000000028869 | 13_Gnl2     | 1332.98 | -0.08556 | 0.5416   | 0.64858  | 1295.34 | 1230.78 | 1352.91 | 1198.34 | 1346.59 | 1573.92 |
| ENSMUSG000000028871 | 7_Rspo1     | 50.4117 | -0.34112 | 0.43675  | 0.55222  | 43.4094 | 59.6574 | 29.8789 | 73.9382 | 32.2751 | 63.3113 |
| ENSMUSG000000028873 | 16_Cdca8    | 378.328 | 0.76278  | 0.00025  | 0.00109  | 468.822 | 407.506 | 550.966 | 221.815 | 281.511 | 339.349 |
| ENSMUSG000000028874 | 14_Fgr      | 59.6484 | 3.8182   | 0.00099  | 0.00354  | 198.815 | 53.2327 | 82.4656 | 11.7219 | 11.6549 | 0       |
| ENSMUSG000000028876 | 7_Epha10    | 6.38588 | -1.50092 | 0.17276  | 0.26801  | 4.34094 | 5.50683 | 0       | 16.2303 | 7.17224 | 5.06491 |
| ENSMUSG000000028878 | 11_Fam76a   | 1401.4  | -0.00275 | 0.97963  | 0.98649  | 1385.63 | 1409.75 | 1404.31 | 1442.7  | 1325.07 | 1440.97 |
| ENSMUSG000000028879 | 4_Stx12     | 2710.84 | -0.21673 | 0.06782  | 0.12521  | 2565.5  | 2403.73 | 2552.85 | 2589.64 | 3075.1  | 3078.2  |
| ENSMUSG000000028882 | 13_Ppp1r8   | 734.609 | 0.08778  | 0.45381  | 0.56815  | 745.774 | 754.436 | 770.874 | 718.643 | 703.777 | 714.152 |
| ENSMUSG000000028883 | 17_Sema3a   | 308.554 | -0.68235 | 0.00012  | 0.00057  | 258.72  | 252.397 | 198.396 | 359.773 | 403.439 | 378.602 |
| ENSMUSG000000028884 | 14_Rpa2     | 479.425 | 0.45051  | 0.00234  | 0.00744  | 595.577 | 509.382 | 555.747 | 429.202 | 373.853 | 412.79  |
| ENSMUSG000000028885 | 8_Smpdl3b   | 271.335 | 0.73018  | 0.00022  | 0.001    | 354.221 | 301.04  | 362.132 | 232.635 | 213.374 | 164.609 |
| ENSMUSG000000028886 | 15_Eya3     | 1375.18 | 0.28279  | 0.02988  | 0.06326  | 1484.6  | 1410.67 | 1632.58 | 1229.9  | 1129.63 | 1363.73 |
| ENSMUSG000000028889 | 17_Yrdc     | 484.078 | 0.17544  | 0.24668  | 0.35543  | 480.976 | 490.108 | 571.284 | 477.893 | 468.885 | 415.322 |
| ENSMUSG000000028890 | 13_Mtf1     | 574.329 | 0.24815  | 0.06115  | 0.11468  | 645.064 | 608.505 | 617.895 | 561.75  | 516.402 | 496.361 |
| ENSMUSG000000028893 | 8_Sesn2     | 388.435 | 1.01248  | 1.43E-09 | 3.20E-08 | 512.231 | 501.122 | 544.99  | 292.146 | 220.547 | 259.577 |
| ENSMUSG000000028894 | 18_Inpp5b   | 650.47  | -0.05462 | 0.67498  | 0.76455  | 646.8   | 651.642 | 616.7   | 705.118 | 669.708 | 612.854 |
| ENSMUSG000000028896 | 13_Rcc1     | 528.744 | 0.65136  | 0.00031  | 0.00133  | 616.414 | 545.177 | 776.85  | 414.775 | 368.474 | 450.777 |
| ENSMUSG000000028898 | 15_Trnau1ap | 743.782 | -0.17499 | 0.19494  | 0.2951   | 734.487 | 633.286 | 729.044 | 843.978 | 749.5   | 772.398 |
| ENSMUSG000000028899 | 11_Taf12    | 512.639 | -0.07272 | 0.58288  | 0.68605  | 500.945 | 481.848 | 516.307 | 504.042 | 530.746 | 541.945 |
| ENSMUSG000000028901 | 13_Gmeb1    | 529.784 | 0.22996  | 0.1015   | 0.17428  | 560.85  | 537.834 | 617.895 | 460.761 | 516.402 | 484.965 |
| ENSMUSG000000028902 | 4_Sf3a3     | 1518.03 | -0.00833 | 0.94932  | 0.96681  | 1527.14 | 1389.56 | 1624.21 | 1355.23 | 1603.89 | 1608.11 |
| ENSMUSG000000028906 | 15_Epb41    | 4245.38 | 0.07472  | 0.44896  | 0.56386  | 4276.7  | 4392.62 | 4396.97 | 4372.27 | 3928.6  | 4105.11 |
| ENSMUSG000000028907 | 7_Utp11l    | 894.104 | -0.13036 | 0.36839  | 0.48579  | 843.011 | 777.381 | 941.781 | 834.961 | 1029.22 | 938.274 |
| ENSMUSG000000028909 | 17_Ptprru   | 325.687 | 0.5698   | 0.05633  | 0.107    | 345.539 | 467.163 | 354.961 | 386.823 | 157.789 | 241.849 |
| ENSMUSG000000028910 | 12_Mecr     | 337.67  | 0.37967  | 0.02245  | 0.04997  | 376.794 | 377.218 | 390.815 | 310.18  | 251.925 | 319.089 |
| ENSMUSG000000028911 | 16_Srsf4    | 1052.96 | 0.79181  | 1.81E-08 | 2.88E-07 | 1185.08 | 1370.28 | 1449.72 | 831.354 | 697.501 | 783.794 |
| ENSMUSG000000028914 | 13_Casp9    | 1030.97 | 0.50483  | 0.00085  | 0.00312  | 1117.36 | 1253.72 | 1257.3  | 955.787 | 712.742 | 888.891 |

|                    |             |         |          |          |          |         |         |         |         |         |         |
|--------------------|-------------|---------|----------|----------|----------|---------|---------|---------|---------|---------|---------|
| ENSMUSG00000028917 | 14_Plekhm2  | 887.382 | 0.80843  | 2.19E-05 | 0.00013  | 1026.2  | 1227.11 | 1135.4  | 776.351 | 480.54  | 678.698 |
| ENSMUSG00000028919 | 11_Arhgef19 | 633.918 | 1.25269  | 3.34E-09 | 6.63E-08 | 745.774 | 948.093 | 984.807 | 440.924 | 269.856 | 414.056 |
| ENSMUSG00000028920 | 9_Fbxo42    | 946.619 | 0.48696  | 0.00065  | 0.00248  | 1013.18 | 1110.54 | 1191.57 | 874.635 | 698.397 | 791.392 |
| ENSMUSG00000028923 | 14_Necap2   | 2933.45 | 0.84404  | 1.71E-07 | 2.00E-06 | 3530.05 | 3617.07 | 4156.75 | 2457.99 | 1677.41 | 2161.45 |
| ENSMUSG00000028926 | 15_Cdk14    | 303.856 | -1.26715 | 3.69E-09 | 7.20E-08 | 199.683 | 202.835 | 131.467 | 477.893 | 433.921 | 377.336 |
| ENSMUSG00000028927 | 6_Padi2     | 78.2852 | -1.00207 | 0.00417  | 0.01209  | 59.905  | 61.493  | 34.6595 | 137.056 | 96.8253 | 79.7723 |
| ENSMUSG00000028931 | 11_Kcnab2   | 85.8943 | -0.05267 | 0.92247  | 0.94857  | 103.314 | 80.7669 | 69.3189 | 176.73  | 57.378  | 27.857  |
| ENSMUSG00000028932 | 7_Psmc2     | 3070.65 | 0.08485  | 0.50103  | 0.61204  | 3161.94 | 2959.92 | 3360.77 | 2614.89 | 3183.58 | 3142.78 |
| ENSMUSG00000028933 | 11_Xrcc2    | 148.886 | -0.056   | 0.7996   | 0.86154  | 125.887 | 167.958 | 144.614 | 155.09  | 160.479 | 139.285 |
| ENSMUSG00000028936 | 15_Rpl22    | 8280.01 | -0.43468 | 2.86E-06 | 2.28E-05 | 7258.06 | 6850.5  | 7016.75 | 9132.27 | 9749.77 | 9672.71 |
| ENSMUSG00000028937 | 14_Acot7    | 236.616 | 0.32284  | 0.15403  | 0.24445  | 243.093 | 266.164 | 280.861 | 273.211 | 182.892 | 173.473 |
| ENSMUSG00000028940 | 2_Hes2      | 12.2701 | -0.55581 | 0.38769  | 0.50513  | 8.68188 | 9.17806 | 11.9515 | 14.427  | 11.6549 | 17.7272 |
| ENSMUSG00000028943 | 17_Espn     | 57.9897 | 0.55672  | 0.16022  | 0.25245  | 52.0913 | 78.9313 | 76.4899 | 68.5281 | 31.3786 | 40.5193 |
| ENSMUSG00000028944 | 14_Prkg2    | 594.223 | -0.38306 | 0.00346  | 0.01035  | 505.286 | 516.725 | 524.673 | 653.722 | 641.916 | 723.016 |
| ENSMUSG00000028945 | 9_Rheb      | 1964.68 | -0.25921 | 0.03538  | 0.07283  | 1812.78 | 1733.73 | 1820.22 | 1955.76 | 2399.12 | 2066.48 |
| ENSMUSG00000028946 | 6_Hes3      | 0.15028 | -0.99647 | 0.80707  | NA       | 0       | 0       | 0       | 0.90169 | 0       | 0       |
| ENSMUSG00000028948 | 16_Nol9     | 625.106 | 0.44123  | 0.01165  | 0.02873  | 710.178 | 653.478 | 794.777 | 481.5   | 466.196 | 644.51  |
| ENSMUSG00000028949 | 13_Smarcd3  | 168.456 | -0.62161 | 0.07883  | 0.1416   | 140.647 | 172.547 | 84.8559 | 302.065 | 180.203 | 130.421 |
| ENSMUSG00000028950 | 3_Tas1r1    | 8.34508 | 0.35509  | 0.67266  | 0.76283  | 8.68188 | 11.0137 | 8.36608 | 11.7219 | 2.68959 | 7.59736 |
| ENSMUSG00000028952 | 12_Zbtb48   | 348.12  | 1.11333  | 3.34E-06 | 2.61E-05 | 426.281 | 492.862 | 509.136 | 280.424 | 147.031 | 232.986 |
| ENSMUSG00000028953 | 10_Abcf2    | 1666.49 | 0.3478   | 0.00408  | 0.01191  | 1847.5  | 1779.62 | 1970.81 | 1375.07 | 1410.24 | 1615.71 |
| ENSMUSG00000028954 | 11_Nub1     | 3216.66 | 0.35801  | 0.00307  | 0.00938  | 3418.93 | 3419.74 | 4002.57 | 2813.26 | 2633.11 | 3012.35 |
| ENSMUSG00000028955 | 3_Vamp3     | 5293.26 | -0.00657 | 0.95918  | 0.97358  | 5256.88 | 4841.42 | 5745.11 | 4676.14 | 5500.22 | 5739.81 |
| ENSMUSG00000028957 | 12_Per3     | 2853.81 | 0.54378  | 3.23E-06 | 2.54E-05 | 3409.38 | 3305.94 | 3438.46 | 2250.61 | 2132.85 | 2585.64 |
| ENSMUSG00000028958 | 14_Tmub1    | 172.791 | 1.07535  | 0.0001   | 0.00052  | 193.606 | 232.205 | 278.471 | 152.385 | 91.4461 | 88.6359 |
| ENSMUSG00000028959 | 14_Fstk     | 870.539 | 0.77712  | 0.00027  | 0.00118  | 979.317 | 1105.96 | 1214.28 | 860.208 | 488.609 | 574.867 |
| ENSMUSG00000028960 | 18_Ube4b    | 1660.21 | 0.26501  | 0.02014  | 0.04555  | 1707.73 | 1841.12 | 1887.15 | 1467.04 | 1442.52 | 1615.71 |
| ENSMUSG00000028961 | 15_Pgd      | 4275.65 | 0.84978  | 1.22E-09 | 2.80E-08 | 5211.74 | 5114.01 | 6171.78 | 2839.41 | 2813.31 | 3503.65 |
| ENSMUSG00000028962 | 14_Slc4a2   | 2001.38 | 0.95812  | 3.15E-08 | 4.59E-07 | 2401.41 | 2714.87 | 2812.2  | 1687.05 | 1091.08 | 1301.68 |
| ENSMUSG00000028963 | 1_Uts2      | 1.10604 | 2.41015  | 0.30305  | NA       | 0.86819 | 3.67122 | 1.19515 | 0.90169 | 0       | 0       |
| ENSMUSG00000028964 | 14_Park7    | 2680.64 | 0.25891  | 0.04858  | 0.09477  | 2837.24 | 2907.61 | 3016.57 | 2709.56 | 2088.02 | 2524.86 |
| ENSMUSG00000028965 | 13_Tnfrsf9  | 16.9205 | 2.12394  | 0.00105  | 0.00374  | 34.7275 | 15.6027 | 32.2692 | 7.21348 | 5.37918 | 6.33113 |
| ENSMUSG00000028967 | 10_Errf1    | 2139.01 | 0.22736  | 0.04242  | 0.08454  | 2376.23 | 2213.75 | 2331.75 | 1826.81 | 2114.02 | 1971.52 |
| ENSMUSG00000028969 | 10_Cdk5     | 695.628 | 0.14605  | 0.26759  | 0.37893  | 707.574 | 764.532 | 719.483 | 687.084 | 602.469 | 692.626 |
| ENSMUSG00000028970 | 9_Abccl1b   | 67.6951 | -0.25406 | 0.45845  | 0.57226  | 72.0596 | 68.8354 | 44.2207 | 93.7753 | 69.0329 | 58.2464 |
| ENSMUSG00000028971 | 4_Cort      | 16.5559 | 0.18695  | 0.7738   | 0.84143  | 13.0228 | 30.2876 | 9.56123 | 18.0337 | 17.0341 | 11.396  |
| ENSMUSG00000028972 | 11_Car6     | 486.083 | -1.06242 | 2.55E-05 | 0.00015  | 337.725 | 354.273 | 252.178 | 915.211 | 574.676 | 482.432 |
| ENSMUSG00000028973 | 18_Abccl8   | 764.98  | 0.92908  | 3.52E-07 | 3.72E-06 | 895.97  | 1066.49 | 1046.95 | 631.18  | 412.404 | 536.88  |
| ENSMUSG00000028974 | 13_Dffa     | 1013.06 | 0.40525  | 0.00705  | 0.01882  | 1076.55 | 1040.79 | 1346.94 | 926.031 | 797.912 | 890.158 |
| ENSMUSG00000028975 | 16_Pex14    | 680.154 | 1.25546  | 4.21E-09 | 8.09E-08 | 832.593 | 933.408 | 1110.3  | 495.927 | 289.579 | 419.121 |
| ENSMUSG00000028976 | 10_Slc2a5   | 1.5337  | 0.1975   | 0.92476  | NA       | 0       | 3.67122 | 1.19515 | 1.80337 | 0       | 2.53245 |
| ENSMUSG00000028977 | 16_Casz1    | 918.181 | 1.21342  | 2.02E-09 | 4.28E-08 | 1139.93 | 1203.24 | 1505.89 | 659.132 | 407.025 | 593.86  |
| ENSMUSG00000028978 | 12_Nos3     | 82.1078 | 0.82106  | 0.01346  | 0.03242  | 92.028  | 102.794 | 120.711 | 83.8567 | 50.2057 | 43.0517 |
| ENSMUSG00000028979 | 17_Masp2    | 54.3045 | 0.50255  | 0.1495   | 0.2384   | 67.7187 | 60.5752 | 63.3432 | 57.7079 | 44.8265 | 31.6557 |
| ENSMUSG00000028980 | 14_H6pd     | 830.356 | 0.5422   | 0.00051  | 0.00203  | 940.248 | 1025.19 | 988.392 | 787.171 | 567.504 | 673.633 |
| ENSMUSG00000028982 | 9_Slc25a33  | 108.442 | -0.73564 | 0.02133  | 0.04788  | 107.655 | 84.4381 | 51.3916 | 164.107 | 129.1   | 113.96  |
| ENSMUSG00000028986 | 12_Klhl7    | 719.287 | -0.56886 | 1.13E-05 | 7.56E-05 | 599.918 | 596.574 | 540.21  | 805.205 | 900.117 | 873.697 |
| ENSMUSG00000028988 | 13_Cttnbip1 | 769.487 | 0.36439  | 0.02458  | 0.0539   | 777.897 | 941.669 | 878.438 | 746.596 | 559.435 | 712.886 |
| ENSMUSG00000028989 | 3_Angptl7   | 6724.24 | 0.01917  | 0.89319  | 0.92791  | 6558.3  | 7576.48 | 6169.39 | 6634.6  | 5791.59 | 7615.09 |
| ENSMUSG00000028990 | 13_Lzic     | 570.333 | 0.07     | 0.61845  | 0.71658  | 613.809 | 536.916 | 601.163 | 514.862 | 563.918 | 591.328 |
| ENSMUSG00000028991 | 15_Mtor     | 2083.23 | 0.58235  | 4.65E-05 | 0.00026  | 2420.51 | 2512.95 | 2558.82 | 1713.2  | 1386.93 | 1906.94 |
| ENSMUSG00000028992 | 13_Nmnat1   | 135.078 | 0.07183  | 0.73927  | 0.81559  | 129.36  | 148.685 | 137.443 | 143.368 | 123.721 | 127.889 |
| ENSMUSG00000028995 | 14_Fam126a  | 1008.96 | 0.37718  | 0.02056  | 0.04637  | 1118.23 | 1012.34 | 1290.77 | 752.006 | 1013.08 | 867.365 |
| ENSMUSG00000028996 | 9_Rbp7      | 5.49571 | -0.72257 | 0.52123  | 0.63092  | 4.34094 | 5.50683 | 2.39031 | 0.90169 | 17.7224 | 12.6623 |
| ENSMUSG00000028998 | 6_Tomm7     | 1523.09 | -0.21599 | 0.0394   | 0.07951  | 1439.46 | 1351.93 | 1436.58 | 1595.08 | 1663.06 | 1652.43 |
| ENSMUSG00000028999 | 15_Rint1    | 470.319 | 0.06378  | 0.64385  | 0.73901  | 496.604 | 466.245 | 479.257 | 435.514 | 485.92  | 458.374 |
| ENSMUSG00000029001 | 15_Fbxo42   | 191.193 | -0.2744  | 0.33924  | 0.45581  | 156.274 | 222.109 | 141.028 | 286.736 | 180.203 | 160.811 |
| ENSMUSG00000029003 | 11_Mad2l2   | 194.792 | 0.34106  | 0.08293  | 0.14747  | 208.365 | 220.273 | 224.689 | 194.764 | 149.721 | 170.941 |
| ENSMUSG00000029004 | 15_Kmt2e    | 3657.47 | 0.03152  | 0.76062  | 0.83174  | 3619.48 | 3763.92 | 3707.37 | 3387.63 | 3603.16 | 3863.26 |
| ENSMUSG00000029005 | 4_Draxin    | 5.27592 | -0.3612  | 0.74319  | 0.81832  | 3.47275 | 9.17806 | 1.19515 | 6.3118  | 8.96531 | 2.53245 |
| ENSMUSG00000029007 | 8_Agtrp     | 969.659 | -0.15032 | 0.23772  | 0.34509  | 915.939 | 931.573 | 910.707 | 1133.42 | 960.184 | 966.131 |
| ENSMUSG00000029009 | 17_Mthfr    | 1302.99 | 0.85964  | 9.18E-07 | 8.51E-06 | 1613.96 | 1569.45 | 1858.46 | 1158.67 | 788.05  | 829.379 |
| ENSMUSG00000029012 | 11_Orc5     | 487.465 | -0.50821 | 0.00177  | 0.00587  | 447.985 | 382.725 | 376.474 | 524.781 | 650.881 | 541.945 |
| ENSMUSG00000029014 | 14_Dnajc2   | 949.291 | -0.32616 | 0.04492  | 0.08863  | 855.166 | 729.655 | 942.977 | 891.767 | 1161.9  | 1114.28 |
| ENSMUSG00000029015 | 9_Slc26a5   | 0.59382 | -1.37748 | 0.66284  | NA       | 0.86819 | 0       | 0       | 0.90169 | 1.79306 | 0       |
| ENSMUSG00000029016 | 13_Clcnc6   | 478.17  | -0.20355 | 0.27724  | 0.38975  | 450.59  | 460.738 | 423.085 | 634.787 | 483.23  | 416.589 |
| ENSMUSG00000029017 | 13_Pmpcb    | 1111.31 | -0.26781 | 0.01716  | 0.03986  | 989.735 | 1033.45 | 1002.73 | 1187.52 | 1279.35 | 1175.06 |
| ENSMUSG00000029019 | 8_Nppb      | 23.3629 | 3.17085  | 1.65E-07 | 1.94E-06 | 47.7504 | 29.3698 | 49.0013 | 4.50843 | 4.48265 | 5.06491 |
| ENSMUSG00000029020 | 13_Mfn2     | 2777.6  | 0.19405  | 0.0908   | 0.15888  | 2695.73 | 3056.29 | 3140.86 | 2673.5  | 2443.94 | 2655.28 |
| ENSMUSG00000029022 | 18_Miip     | 349.354 | 0.82944  | 4.54E-05 | 0.00025  | 418.467 | 423.108 | 499.574 | 292.146 | 191.858 | 270.973 |
| ENSMUSG00000029026 | 16_Trp73    | 75.5262 | 0.91734  | 0.00431  | 0.01245  | 108.524 | 81.6847 | 105.174 | 47.7893 | 40.3439 | 69.6425 |
| ENSMUSG00000029027 | 8_Dffb      | 113.076 | 0.10534  | 0.66434  | 0.75583  | 131.096 | 116.561 | 103.978 | 123.531 | 105.791 | 97.4995 |
| ENSMUSG00000029028 | 14_Lrrc47   | 1117.6  | 0.62833  | 1.45E-05 | 9.37E-05 | 1261.48 | 1311.54 | 1497.53 | 861.11  | 779.982 | 993.988 |
| ENSMUSG00000029029 | 14_Wrap73   | 229.31  | 0.54462  | 0.00469  | 0.01337  | 283.029 | 275.342 | 258.153 | 219.11  | 166.755 | 173.473 |
| ENSMUSG00000029030 | 14_Tprgl    | 2380.56 | -0.0364  | 0.75867  | 0.8303   | 2386.65 | 2422.09 | 2243.3  | 2674.4  | 2300.5  | 2256.42 |
| ENSMUSG00000029032 | 12_Arhgef16 | 945.171 | 1.377    | 2.27E-11 | 8.79E-10 | 1238.04 | 1340    | 1515.46 | 602.326 | 634.888 | 610.321 |
| ENSMUSG00000029033 | 16_Acap3    | 851.962 | 0.96411  | 3.58E-09 | 7.02E-08 | 995.812 | 1127.07 | 1257.3  | 662.739 | 493.988 | 574.867 |
| ENSMUSG00000029034 | 9_Cpsf3l    | 990.314 | 0.50585  | 0.00078  | 0.00289  | 1188.55 | 1037.12 | 1259.69 | 812.419 | 717.224 | 926.878 |
| ENSMUSG00000029036 | 18_Atad3a   | 786.436 | 0.68827  | 2.93E-06 | 2.33E-05 | 976.712 | 915.052 | 1018.27 | 597.817 | 524.47  | 686.295 |

|                    |                 |         |          |          |          |         |         |         |         |         |         |
|--------------------|-----------------|---------|----------|----------|----------|---------|---------|---------|---------|---------|---------|
| ENSMUSG00000029038 | 9_Ssu72         | 1814.6  | 0.02087  | 0.86596  | 0.9091   | 1738.98 | 1697.94 | 2048.49 | 1871.9  | 1799.34 | 1730.93 |
| ENSMUSG00000029044 | 9_4930584F24Rik | 0.15028 | -0.99647 | 0.80707  | NA       | 0       | 0       | 0       | 0.90169 | 0       | 0       |
| ENSMUSG00000029047 | 13_Pex10        | 251.64  | 0.42104  | 0.05165  | 0.09959  | 270.007 | 252.397 | 343.009 | 258.784 | 185.582 | 200.064 |
| ENSMUSG00000029048 | 3_Rer1          | 3257.98 | -0.12161 | 0.3112   | 0.42606  | 3116.8  | 2907.61 | 3338.07 | 3057.62 | 3579.85 | 3547.97 |
| ENSMUSG00000029049 | 14_Morn1        | 45.7337 | 0.34005  | 0.40398  | 0.52126  | 32.123  | 60.5752 | 60.9529 | 49.5927 | 33.1716 | 37.9868 |
| ENSMUSG00000029050 | 15_Ski          | 2006.22 | 0.40614  | 0.003    | 0.00918  | 2127.06 | 2275.24 | 2458.43 | 1922.39 | 1495.41 | 1758.79 |
| ENSMUSG00000029053 | 16_Prkc2        | 553.174 | 0.15753  | 0.3716   | 0.48903  | 575.609 | 602.998 | 572.479 | 645.607 | 471.575 | 450.777 |
| ENSMUSG00000029054 | 8_Gabrd         | 7.6384  | -0.79502 | 0.36899  | 0.48636  | 7.8137  | 6.42464 | 2.39031 | 15.3287 | 6.27571 | 7.59736 |
| ENSMUSG00000029055 | 17_Plch2        | 2155.64 | 1.26559  | 3.44E-17 | 4.45E-15 | 2806.85 | 2937.9  | 3388.26 | 1293.02 | 1066.87 | 1440.97 |
| ENSMUSG00000029056 | 13_Pank4        | 540.082 | 0.42725  | 0.00221  | 0.00708  | 611.205 | 578.218 | 670.481 | 481.5   | 463.506 | 435.582 |
| ENSMUSG00000029059 | 9_Fam213b       | 209.553 | -0.05671 | 0.80585  | 0.86573  | 186.661 | 230.369 | 199.591 | 270.506 | 173.927 | 196.265 |
| ENSMUSG00000029060 | 17_Mib2         | 599.298 | 1.37096  | 9.82E-08 | 1.24E-06 | 735.356 | 893.943 | 964.489 | 474.287 | 218.753 | 308.959 |
| ENSMUSG00000029061 | 2_Mmp23         | 141.893 | 0.45879  | 0.06497  | 0.12076  | 175.374 | 169.794 | 148.199 | 151.483 | 110.273 | 96.2332 |
| ENSMUSG00000029062 | 14_Cdk11b       | 2119.4  | 0.08053  | 0.55683  | 0.66272  | 2089.73 | 2156.84 | 2287.52 | 1793.45 | 2017.19 | 2371.64 |
| ENSMUSG00000029063 | 16_Nadk         | 2475.61 | 0.38097  | 0.00227  | 0.00724  | 2758.23 | 2518.46 | 3125.33 | 2110.85 | 2069.19 | 2271.61 |
| ENSMUSG00000029064 | 15_Gnb1         | 12054.9 | -0.0996  | 0.35076  | 0.46747  | 11867.3 | 11264.2 | 11786.6 | 13686.7 | 11943.6 | 11781   |
| ENSMUSG00000029066 | 12_Mrpl20       | 679.889 | 0.01464  | 0.92145  | 0.9477   | 727.542 | 598.409 | 725.459 | 678.067 | 730.672 | 619.185 |
| ENSMUSG00000029068 | 16_Cncl2        | 2909.99 | 0.27925  | 0.01747  | 0.04046  | 3194.07 | 3206.81 | 3171.94 | 2403.89 | 2934.34 | 2548.91 |
| ENSMUSG00000029070 | 9_Mxra8         | 1411.89 | 0.18678  | 0.24036  | 0.34803  | 1447.27 | 1729.15 | 1332.6  | 1522.95 | 1159.21 | 1280.16 |
| ENSMUSG00000029071 | 16_Dvl1         | 1217.86 | 0.81386  | 8.93E-09 | 1.55E-07 | 1479.39 | 1555.68 | 1623.02 | 1008.08 | 764.741 | 876.229 |
| ENSMUSG00000029072 | 3_Tas1r3        | 40.5566 | 0.58788  | 0.13082  | 0.21394  | 42.5412 | 45.8903 | 57.3674 | 29.7556 | 25.9994 | 41.7855 |
| ENSMUSG00000029073 | 9_Cptp          | 520.871 | 0.46072  | 0.00144  | 0.00492  | 633.778 | 554.355 | 622.675 | 476.09  | 420.473 | 417.855 |
| ENSMUSG00000029074 | 14_Tll10        | 165.423 | 1.15671  | 1.07E-05 | 7.23E-05 | 205.761 | 242.301 | 235.445 | 80.25   | 86.9635 | 141.817 |
| ENSMUSG00000029075 | 6_Tnfrsf4       | 21.6239 | 1.32688  | 0.00854  | 0.0221   | 31.2548 | 25.6986 | 35.8546 | 11.7219 | 12.5514 | 12.6623 |
| ENSMUSG00000029076 | 14_Sdf4         | 5510.48 | -0.13659 | 0.17905  | 0.2759   | 5267.3  | 5449.93 | 5031.6  | 6117.03 | 5472.42 | 5724.61 |
| ENSMUSG00000029082 | 17_Bst1         | 136.613 | 0.01606  | 0.96357  | 0.97656  | 171.033 | 114.726 | 125.491 | 157.795 | 70.8259 | 179.804 |
| ENSMUSG00000029084 | 5_Cd38          | 108.758 | -0.47341 | 0.07127  | 0.13045  | 74.6642 | 102.794 | 95.6123 | 105.497 | 130.893 | 143.084 |
| ENSMUSG00000029086 | 15_Prom1        | 5998.22 | -0.26854 | 0.087    | 0.15326  | 5406.21 | 5099.33 | 5819.21 | 5166.66 | 7520.99 | 6976.91 |
| ENSMUSG00000029088 | 16_Kcnip4       | 96.5538 | -1.11135 | 0.00358  | 0.01066  | 62.5096 | 83.5203 | 37.0498 | 155.992 | 160.479 | 79.7723 |
| ENSMUSG00000029089 | 8_Pacrgl        | 211.585 | -0.65349 | 0.00045  | 0.00181  | 167.56  | 154.191 | 172.102 | 239.848 | 285.097 | 250.713 |
| ENSMUSG00000029090 | 12_Adgra3       | 720.882 | -0.72838 | 0.00028  | 0.00121  | 511.363 | 697.532 | 418.304 | 992.756 | 891.151 | 814.184 |
| ENSMUSG00000029092 | 9_D5Ert615e     | 0.64832 | -1.37909 | 0.65362  | NA       | 0       | 0       | 1.19515 | 0.90169 | 1.79306 | 0       |
| ENSMUSG00000029093 | 14_Sorcs2       | 206.766 | 0.5008   | 0.02626  | 0.05694  | 239.62  | 265.246 | 222.299 | 216.405 | 142.548 | 154.48  |
| ENSMUSG00000029094 | 11_Afap1        | 1479.42 | 0.34787  | 0.00491  | 0.01388  | 1488.94 | 1730.98 | 1750.9  | 1320.07 | 1228.25 | 1357.4  |
| ENSMUSG00000029095 | 17_Ablim2       | 93.4688 | 0.17537  | 0.57686  | 0.68085  | 76.4006 | 117.479 | 103.978 | 115.416 | 69.0329 | 78.5061 |
| ENSMUSG00000029096 | 15_Htra3        | 710.22  | 0.45985  | 0.06743  | 0.12458  | 729.278 | 907.71  | 829.437 | 709.626 | 355.923 | 729.347 |
| ENSMUSG00000029097 | 10_Tmt44        | 164.071 | 0.65806  | 0.00177  | 0.00588  | 175.374 | 203.753 | 223.494 | 117.219 | 129.1   | 135.486 |
| ENSMUSG00000029098 | 16_Acox3        | 1107.89 | 0.48907  | 4.08E-05 | 0.00023  | 1230.22 | 1290.43 | 1361.28 | 963     | 861.566 | 940.807 |
| ENSMUSG00000029101 | 14_Rgs12        | 3622.67 | 0.96795  | 4.04E-10 | 1.09E-08 | 4423.42 | 4656.03 | 5301.7  | 2433.65 | 2034.23 | 2887    |
| ENSMUSG00000029102 | 9_Hgfac         | 50.4803 | 2.32365  | 1.34E-08 | 2.21E-07 | 78.137  | 90.8628 | 82.4656 | 16.2303 | 9.86184 | 25.3245 |
| ENSMUSG00000029103 | 16_Lrpap1       | 2013.31 | -0.00458 | 0.97627  | 0.98434  | 1972.52 | 2198.14 | 1859.66 | 2400.29 | 1741.06 | 1908.2  |
| ENSMUSG00000029104 | 15_Htt          | 2748.09 | 0.45476  | 8.82E-05 | 0.00045  | 2988.3  | 3147.16 | 3396.63 | 2182.98 | 2257.46 | 2515.99 |
| ENSMUSG00000029106 | 14_Add1         | 9235.9  | 0.50689  | 4.04E-05 | 0.00023  | 9958.12 | 10921.9 | 11644.4 | 7162.99 | 7184.8  | 8543.23 |
| ENSMUSG00000029108 | 14_Pcdh7        | 1707.96 | 0.13264  | 0.20172  | 0.30304  | 1746.8  | 1826.43 | 1785.56 | 1556.31 | 1667.55 | 1665.09 |
| ENSMUSG00000029110 | 13_Rnf4         | 2727.28 | 0.00821  | 0.94574  | 0.96456  | 2818.14 | 2511.12 | 2875.54 | 2463.4  | 2824.97 | 2870.54 |
| ENSMUSG00000029111 | 7_Nelfa         | 558.336 | 0.67698  | 1.57E-05 | 0.0001   | 645.064 | 672.751 | 742.191 | 436.416 | 371.164 | 482.432 |
| ENSMUSG00000029119 | 9_Man2b2        | 1274.57 | 1.01693  | 4.01E-07 | 4.16E-06 | 1562.74 | 1777.79 | 1777.19 | 1036.04 | 590.814 | 902.82  |
| ENSMUSG00000029120 | 10_Ppp2r2c      | 105.067 | 0.10917  | 0.6886   | 0.07598  | 100.71  | 102.794 | 123.101 | 97.382  | 79.7912 | 126.623 |
| ENSMUSG00000029121 | 15_Crmp1        | 19.1552 | -1.32013 | 0.07643  | 0.13809  | 17.3638 | 12.8493 | 2.39031 | 45.986  | 22.4133 | 13.9285 |
| ENSMUSG00000029122 | 11_Evc          | 391.71  | -0.26945 | 0.26181  | 0.37239  | 357.694 | 425.862 | 282.056 | 568.062 | 359.509 | 357.076 |
| ENSMUSG00000029123 | 8_Stk32b        | 4.85304 | -1.05619 | 0.3317   | 0.44823  | 4.34094 | 2.75342 | 2.39031 | 11.7219 | 5.37918 | 2.53245 |
| ENSMUSG00000029125 | 14_Stx18        | 450.697 | 0.09735  | 0.57628  | 0.68031  | 405.444 | 443.3   | 549.771 | 391.331 | 457.231 | 457.108 |
| ENSMUSG00000029126 | 7_Nsg1          | 157.756 | -0.3426  | 0.19916  | 0.30013  | 138.042 | 145.931 | 133.857 | 241.652 | 145.238 | 141.817 |
| ENSMUSG00000029127 | 15_Zbtb49       | 165.665 | 0.42438  | 0.03875  | 0.07842  | 177.979 | 179.89  | 211.542 | 134.351 | 134.48  | 155.746 |
| ENSMUSG00000029128 | 12_Rab28        | 1063.33 | -0.43239 | 0.00028  | 0.00122  | 890.761 | 905.874 | 920.269 | 1219.98 | 1309.83 | 1133.27 |
| ENSMUSG00000029130 | 12_Rnf32        | 43.326  | -0.63957 | 0.07412  | 0.13476  | 35.5957 | 33.9588 | 32.2692 | 56.8062 | 58.2745 | 43.0517 |
| ENSMUSG00000029131 | 14_Dnajb6       | 3835.82 | -0.1716  | 0.20445  | 0.30643  | 3584.75 | 3378.44 | 3860.35 | 3449.85 | 4318.59 | 4422.93 |
| ENSMUSG00000029134 | 14_Plb1         | 19.1802 | 0.026    | 0.96424  | 0.97673  | 29.5184 | 16.5205 | 11.9515 | 22.5421 | 20.6202 | 13.9285 |
| ENSMUSG00000029135 | 10_Fosl2        | 9674.56 | 0.63895  | 2.10E-07 | 2.39E-06 | 11056.4 | 11079.7 | 13211.2 | 7436.2  | 7070.04 | 8193.75 |
| ENSMUSG00000029136 | 9_Rbks          | 102.221 | -0.05719 | 0.8114   | 0.87005  | 105.919 | 96.3696 | 98.0026 | 110.006 | 94.1357 | 108.896 |
| ENSMUSG00000029138 | 4_4930548H24Rik | 0.51429 | -1.01187 | 0.76286  | NA       | 0       | 0.91781 | 0       | 0.90169 | 0       | 1.26623 |
| ENSMUSG00000029141 | 16_Slc4a1ap     | 583.864 | -0.06263 | 0.64276  | 0.73805  | 546.959 | 547.012 | 620.285 | 568.964 | 609.641 | 610.321 |
| ENSMUSG00000029145 | 12_Eif2b4       | 620.069 | 0.5467   | 0.00067  | 0.00256  | 665.901 | 692.943 | 850.95  | 557.242 | 460.817 | 492.562 |
| ENSMUSG00000029146 | 14_Snx17        | 1666.7  | 0.27917  | 0.01973  | 0.04475  | 1806.7  | 1731.9  | 1945.71 | 1637.46 | 1464.03 | 1414.38 |
| ENSMUSG00000029147 | 10_Ppm1g        | 1917.49 | 0.38291  | 0.00719  | 0.01911  | 2168.73 | 2032.94 | 2307.84 | 1488.68 | 1555.48 | 1951.26 |
| ENSMUSG00000029148 | 15_Nrbp1        | 3078.84 | 0.2133   | 0.03828  | 0.07769  | 3363.36 | 3227    | 3326.11 | 2830.39 | 2692.28 | 3033.88 |
| ENSMUSG00000029149 | 14_Krtcap3      | 206.608 | 1.13578  | 2.22E-07 | 2.50E-06 | 268.27  | 258.821 | 323.887 | 126.236 | 106.687 | 155.746 |
| ENSMUSG00000029151 | 14_Slc30a3      | 3.5261  | 0.12433  | 0.91484  | 0.94329  | 2.60457 | 3.67122 | 4.78062 | 4.50843 | 1.79306 | 3.79868 |
| ENSMUSG00000029152 | 13_Ociad1       | 3699.05 | -0.3752  | 0.00113  | 0.00397  | 3232.27 | 3164.59 | 3265.16 | 3724.86 | 4514.93 | 4292.51 |
| ENSMUSG00000029153 | 11_Ociad2       | 2158.32 | -0.97209 | 1.45E-09 | 3.23E-08 | 1443.8  | 1717.21 | 1210.69 | 3073.85 | 2999.79 | 2504.6  |
| ENSMUSG00000029154 | 13_Cwh43        | 4722.43 | 0.40439  | 0.00855  | 0.02213  | 5335.02 | 4779.01 | 6024.77 | 3436.32 | 4026.32 | 4733.16 |
| ENSMUSG00000029155 | 16_Spata18      | 2.51913 | -1.31588 | 0.41175  | 0.52811  | 0       | 0.91781 | 3.58546 | 1.80337 | 6.27571 | 2.53245 |
| ENSMUSG00000029156 | 11_Sgcb         | 866.755 | -0.11931 | 0.34968  | 0.46645  | 839.538 | 781.97  | 871.267 | 828.649 | 939.564 | 939.54  |
| ENSMUSG00000029158 | 9_Yipf7         | 14.9149 | -1.79089 | 0.00836  | 0.02175  | 8.68188 | 6.42464 | 4.78062 | 33.3624 | 13.448  | 22.7921 |
| ENSMUSG00000029161 | 7_Cgref1        | 57.7255 | -0.29919 | 0.34818  | 0.46514  | 53.8277 | 56.9039 | 44.2207 | 72.1348 | 54.6884 | 64.5776 |
| ENSMUSG00000029162 | 15_Khk          | 246.653 | 0.48647  | 0.05767  | 0.10921  | 286.502 | 276.259 | 301.179 | 282.228 | 142.548 | 191.2   |
| ENSMUSG00000029163 | 9_Emilin1       | 400.145 | 0.62446  | 0.00888  | 0.02285  | 458.403 | 578.218 | 419.499 | 413.874 | 259.512 | 301.362 |
| ENSMUSG00000029165 | 16_Agbl5        | 322.206 | 0.49038  | 0.00654  | 0.01766  | 375.926 | 348.766 | 406.352 | 307.475 | 268.063 | 226.655 |
| ENSMUSG00000029166 | 14_Mapre3       | 480.378 | -0.03525 | 0.83298  | 0.88575  | 450.59  | 535.998 | 437.426 | 552.733 | 472.472 | 433.05  |

|                    |                  |         |          |          |          |         |         |         |         |         |         |
|--------------------|------------------|---------|----------|----------|----------|---------|---------|---------|---------|---------|---------|
| ENSMUSG00000029167 | 13_Pparg1a       | 355.43  | -1.5569  | 1.41E-12 | 7.20E-11 | 172.769 | 218.438 | 149.394 | 522.076 | 641.916 | 427.985 |
| ENSMUSG00000029168 | 14_Dpysl5        | 47.0449 | -0.32998 | 0.40751  | 0.52447  | 39.0685 | 45.8903 | 40.6352 | 70.3315 | 54.6884 | 31.6557 |
| ENSMUSG00000029169 | 11_Dhx15         | 4452.45 | -0.24588 | 0.07441  | 0.13516  | 4196.82 | 3791.45 | 4233.24 | 4047.67 | 5317.32 | 5128.22 |
| ENSMUSG00000029171 | 12_Pgm1          | 633.24  | 0.32808  | 0.0418   | 0.08347  | 664.164 | 622.272 | 829.437 | 518.469 | 595.296 | 569.802 |
| ENSMUSG00000029173 | 12_Sepsecs       | 649.495 | -0.22032 | 0.10425  | 0.17834  | 596.445 | 589.231 | 614.309 | 629.376 | 752.189 | 715.418 |
| ENSMUSG00000029174 | 18_Tbc1d1        | 814.838 | -0.2625  | 0.045    | 0.08876  | 744.037 | 742.505 | 737.41  | 974.722 | 887.565 | 802.788 |
| ENSMUSG00000029175 | 17_Slc35f6       | 1271.6  | 0.74656  | 2.88E-09 | 5.80E-08 | 1560.13 | 1507.04 | 1712.66 | 972.017 | 866.049 | 1011.72 |
| ENSMUSG00000029176 | 13_Anapc4        | 1247.37 | -0.44547 | 0.00132  | 0.00455  | 1131.25 | 989.394 | 1048.15 | 1273.18 | 1616.44 | 1425.77 |
| ENSMUSG00000029177 | 9_Cenpa          | 422.197 | 0.54888  | 0.00167  | 0.00558  | 535.672 | 429.533 | 539.014 | 296.655 | 361.302 | 371.004 |
| ENSMUSG00000029178 | 14_Klf3          | 9833.83 | 0.36682  | 0.00187  | 0.00616  | 11342   | 10127.1 | 11761.5 | 8088.12 | 8238.22 | 9446.05 |
| ENSMUSG00000029179 | 14_Zcchc4        | 334.794 | -0.09632 | 0.52504  | 0.6342   | 309.943 | 324.903 | 335.838 | 332.722 | 340.682 | 364.673 |
| ENSMUSG00000029182 | 10_1700001C02Rik | 1.71407 | -2.17319 | 0.28481  | NA       | 0       | 1.83561 | 0       | 1.80337 | 5.37918 | 1.26623 |
| ENSMUSG00000029185 | 14_Fam114a1      | 751.493 | -0.62262 | 6.83E-06 | 4.85E-05 | 608.6   | 647.971 | 517.502 | 937.753 | 901.91  | 895.222 |
| ENSMUSG00000029186 | 12_Pik42b        | 474.004 | -0.19833 | 0.16963  | 0.26404  | 451.458 | 443.3   | 430.255 | 495.025 | 556.745 | 467.238 |
| ENSMUSG00000029188 | 10_Slc34a2       | 6981.77 | 0.43768  | 0.00111  | 0.00392  | 7483.78 | 7916.99 | 8695.94 | 5319.94 | 5633.8  | 6840.16 |
| ENSMUSG00000029189 | 10_Sel1i3        | 908.599 | 0.34523  | 0.01883  | 0.04296  | 982.789 | 1018.76 | 1048.15 | 669.952 | 869.635 | 862.301 |
| ENSMUSG00000029190 | 19_D5Ertcd579e   | 2289.05 | -0.25566 | 0.01525  | 0.03611  | 2106.23 | 2064.14 | 2090.32 | 2366.92 | 2665.39 | 2441.29 |
| ENSMUSG00000029191 | 16_Rfc1          | 2272.26 | -0.03439 | 0.79281  | 0.85645  | 2221.69 | 2107.28 | 2405.85 | 2019.78 | 2336.36 | 2542.58 |
| ENSMUSG00000029192 | 17_Tbc1d14       | 2987.11 | 0.08176  | 0.39925  | 0.51672  | 3091.62 | 3016.83 | 3106.21 | 2776.29 | 2952.28 | 2979.43 |
| ENSMUSG00000029193 | 7_Cckar          | 7.6792  | -0.4488  | 0.61027  | 0.70987  | 6.94551 | 10.0959 | 2.39031 | 10.8202 | 10.7584 | 5.06491 |
| ENSMUSG00000029195 | 10_Klb           | 5.41434 | 0.09311  | 0.92932  | 0.95319  | 1.73638 | 5.50683 | 9.56123 | 2.70506 | 5.37918 | 7.59736 |
| ENSMUSG00000029196 | 9_Tada2b         | 572.004 | 0.06614  | 0.65529  | 0.74859  | 570.4   | 553.437 | 632.237 | 616.753 | 502.057 | 557.14  |
| ENSMUSG00000029198 | 3_Grpel1         | 1556.47 | -0.006   | 0.95539  | 0.97101  | 1585.31 | 1502.45 | 1572.82 | 1640.17 | 1531.27 | 1506.81 |
| ENSMUSG00000029199 | 11_Lias          | 522.262 | -0.19505 | 0.13483  | 0.21899  | 476.635 | 477.259 | 507.94  | 554.537 | 570.193 | 547.01  |
| ENSMUSG00000029201 | 14_Ugdh          | 2149.46 | -0.09945 | 0.3491   | 0.46599  | 2085.39 | 2024.68 | 2115.42 | 2076.58 | 2261.05 | 2333.66 |
| ENSMUSG00000029202 | 12_Pds5a         | 3579.11 | -0.25042 | 0.07578  | 0.13709  | 3325.16 | 3166.43 | 3315.36 | 3189.26 | 4265.69 | 4212.74 |
| ENSMUSG00000029203 | 16_Ube2k         | 1847.68 | -0.26982 | 0.04267  | 0.085    | 1659.98 | 1660.31 | 1705.48 | 1721.32 | 2211.74 | 2127.26 |
| ENSMUSG00000029204 | 7_Rhoh           | 31.468  | 0.27966  | 0.53349  | 0.64172  | 46.8822 | 26.6164 | 29.8789 | 34.264  | 23.3098 | 27.857  |
| ENSMUSG00000029205 | 12_Chra9         | 0.60942 | 1.10242  | 0.76561  | NA       | 0       | 0       | 2.39031 | 0       | 0       | 1.26623 |
| ENSMUSG00000029206 | 13_Nsun7         | 5.07718 | -1.12974 | 0.26834  | 0.37983  | 2.60457 | 4.58903 | 2.39031 | 8.11517 | 8.96531 | 3.79868 |
| ENSMUSG00000029207 | 16_Apbb2         | 336.954 | -0.26785 | 0.13769  | 0.22262  | 302.13  | 293.698 | 322.692 | 437.317 | 344.268 | 321.622 |
| ENSMUSG00000029208 | 16_Gul1          | 828.696 | -0.79713 | 1.06E-05 | 7.14E-05 | 625.964 | 662.656 | 527.063 | 890.865 | 1291.9  | 973.728 |
| ENSMUSG00000029209 | 15_Gnpda2        | 401.768 | -0.68173 | 2.67E-05 | 0.00016  | 330.78  | 313.89  | 280.861 | 483.303 | 552.263 | 449.511 |
| ENSMUSG00000029211 | 11_Gabra4        | 22.9809 | -1.39779 | 0.00643  | 0.0174   | 14.7592 | 15.6027 | 7.17092 | 33.3624 | 34.0682 | 32.9219 |
| ENSMUSG00000029212 | 11_Gabrb1        | 56.3733 | -1.35845 | 0.0004   | 0.00163  | 26.9138 | 29.3698 | 39.4401 | 93.7753 | 96.8253 | 51.9153 |
| ENSMUSG00000029213 | 11_Commd8        | 954.367 | -0.33432 | 0.00876  | 0.02256  | 864.716 | 845.299 | 823.461 | 1028.82 | 1176.25 | 987.657 |
| ENSMUSG00000029217 | 16_Tec           | 166.985 | -0.4845  | 0.03527  | 0.07267  | 128.492 | 160.616 | 129.077 | 215.503 | 212.478 | 155.746 |
| ENSMUSG00000029219 | 10_Slc10a4       | 0.6563  | -1.5307  | 0.61899  | NA       | 0.86819 | 0       | 0       | 1.80337 | 0       | 1.26623 |
| ENSMUSG00000029221 | 15_Slc30a9       | 1501.1  | -0.44071 | 0.00023  | 0.00102  | 1291    | 1264.74 | 1265.67 | 1629.35 | 1912.3  | 1643.56 |
| ENSMUSG00000029223 | 12_Uchl1         | 66.3452 | -1.42552 | 0.00103  | 0.00368  | 28.6502 | 55.0683 | 23.9031 | 136.155 | 61.8606 | 92.4346 |
| ENSMUSG00000029227 | 15_Fip11         | 1619.3  | -0.07438 | 0.55802  | 0.6637   | 1579.23 | 1500.61 | 1652.9  | 1467.94 | 1793.06 | 1722.07 |
| ENSMUSG00000029228 | 15_Lnx1          | 433.632 | 0.87481  | 6.23E-07 | 6.11E-06 | 561.718 | 515.807 | 604.748 | 304.77  | 256.408 | 358.342 |
| ENSMUSG00000029229 | 8_Chic2          | 943.056 | -0.18291 | 0.16337  | 0.25625  | 859.507 | 837.956 | 953.733 | 926.031 | 1088.39 | 992.722 |
| ENSMUSG00000029231 | 15_Pdgfra        | 1814.36 | -0.40647 | 0.00189  | 0.00619  | 1703.39 | 1627.27 | 1349.33 | 2157.73 | 2071.88 | 1976.58 |
| ENSMUSG00000029233 | 15_Srd5a3        | 560.587 | -0.11972 | 0.40526  | 0.52243  | 576.477 | 491.026 | 543.795 | 596.014 | 537.022 | 619.185 |
| ENSMUSG00000029234 | 13_Tmem165       | 1288.53 | -0.37234 | 0.00157  | 0.00529  | 1177.26 | 1080.26 | 1111.49 | 1348.92 | 1539.34 | 1473.89 |
| ENSMUSG00000029235 | 14_Pdcl2         | 0.44354 | -0.79887 | 0.84362  | NA       | 0.86819 | 0       | 0       | 0       | 1.79306 | 0       |
| ENSMUSG00000029236 | 4_Nmu            | 8.53355 | -1.0891  | 0.19011  | 0.2894   | 8.68188 | 2.75342 | 4.78062 | 11.7219 | 8.06878 | 15.1947 |
| ENSMUSG00000029238 | 11_Clock         | 5207.59 | -0.42766 | 0.0004   | 0.00163  | 4485.93 | 4222.82 | 4615.69 | 5296.5  | 6579.64 | 6044.97 |
| ENSMUSG00000029245 | 16_Epha5         | 154.17  | -1.64394 | 2.09E-09 | 4.42E-08 | 70.3233 | 97.2874 | 56.1722 | 243.455 | 271.649 | 186.135 |
| ENSMUSG00000029246 | 14_Ppat          | 364.306 | 0.08536  | 0.59553  | 0.69741  | 395.894 | 359.78  | 369.303 | 314.688 | 389.094 | 357.076 |
| ENSMUSG00000029247 | 17_Paics         | 3674.04 | -0.46702 | 3.55E-05 | 0.0002   | 3272.2  | 2967.27 | 3014.18 | 4047.67 | 4652.99 | 4089.91 |
| ENSMUSG00000029249 | 15_Rest          | 1250.61 | 0.00208  | 0.98552  | 0.99013  | 1244.98 | 1209.67 | 1299.13 | 1189.32 | 1224.66 | 1335.87 |
| ENSMUSG00000029250 | 5_Polr2b         | 2388.58 | -0.35202 | 0.0084   | 0.02182  | 2204.33 | 1990.72 | 2099.89 | 2286.67 | 2895.79 | 2854.08 |
| ENSMUSG00000029253 | 12_Cenpc1        | 437.178 | -0.43957 | 0.0159   | 0.03742  | 383.739 | 363.451 | 365.717 | 400.348 | 588.124 | 521.685 |
| ENSMUSG00000029254 | 16_Stap1         | 18.2751 | 0.41036  | 0.46465  | 0.57819  | 28.6502 | 19.2739 | 14.3418 | 12.6236 | 17.0341 | 17.7272 |
| ENSMUSG00000029255 | 8_Gnhr           | 2.81831 | 0.17173  | 0.89733  | 0.93075  | 1.73638 | 3.67122 | 3.58546 | 0.90169 | 4.48265 | 2.53245 |
| ENSMUSG00000029263 | 15_Pigg          | 823.426 | 0.06958  | 0.59843  | 0.70018  | 876.87  | 848.052 | 803.144 | 724.955 | 817.636 | 869.898 |
| ENSMUSG00000029265 | 4_Dr1            | 815.46  | -0.10707 | 0.41589  | 0.53184  | 800.47  | 718.642 | 836.608 | 786.27  | 866.945 | 883.826 |
| ENSMUSG00000029267 | 17_Mtf2          | 804.085 | -0.36784 | 0.01023  | 0.02577  | 749.247 | 680.094 | 677.652 | 875.537 | 1026.53 | 815.45  |
| ENSMUSG00000029269 | 11_Sult1b1       | 8.29234 | -1.19159 | 0.15082  | 0.24012  | 4.34094 | 8.26025 | 2.39031 | 9.91854 | 13.448  | 11.396  |
| ENSMUSG00000029270 | 10_Fam69a        | 337.999 | -0.76408 | 2.07E-06 | 1.73E-05 | 255.247 | 255.15  | 241.421 | 412.07  | 471.575 | 392.53  |
| ENSMUSG00000029275 | 17_Gfi1          | 3.12186 | 0.9189   | 0.53459  | 0.64244  | 4.34094 | 0.91781 | 7.17092 | 4.50843 | 1.79306 | 0       |
| ENSMUSG00000029276 | 13_Glimn         | 247.442 | -0.66423 | 0.00032  | 0.00136  | 210.102 | 181.726 | 182.859 | 310.18  | 332.613 | 267.174 |
| ENSMUSG00000029279 | 15_Brdt          | 38.3083 | -0.09679 | 0.80578  | 0.86572  | 44.2776 | 31.2054 | 35.8546 | 45.986  | 42.1369 | 30.3894 |
| ENSMUSG00000029280 | 13_Smr3a         | 0.30056 | -1.76625 | 0.6627   | NA       | 0       | 0       | 0       | 1.80337 | 0       | 0       |
| ENSMUSG00000029282 | 3_Amtn           | 0.29884 | -1.76064 | 0.66373  | NA       | 0       | 0       | 0       | 0       | 1.79306 | 0       |
| ENSMUSG00000029283 | 17_Cdc7          | 237.231 | 0.04071  | 0.8529   | 0.90039  | 254.379 | 219.356 | 247.397 | 174.927 | 262.683 | 264.641 |
| ENSMUSG00000029286 | 12_Enam          | 0.15028 | -0.99647 | 0.80707  | NA       | 0       | 0       | 0       | 0.90169 | 0       | 0       |
| ENSMUSG00000029287 | 14_Tgfb3         | 2478.51 | -0.28339 | 0.01754  | 0.0406   | 2198.25 | 2452.38 | 2056.86 | 2799.73 | 2818.69 | 2545.12 |
| ENSMUSG00000029290 | 12_Zfp326        | 1349.99 | -0.11427 | 0.45721  | 0.57106  | 1268.42 | 1250.97 | 1369.65 | 1136.12 | 1516.03 | 1558.73 |
| ENSMUSG00000029291 | 11_Rufy3         | 791.85  | -0.27507 | 0.05068  | 0.09822  | 737.092 | 755.354 | 657.335 | 966.607 | 838.256 | 796.457 |
| ENSMUSG00000029298 | 15_Gbp9          | 1431.34 | 1.64184  | 1.07E-14 | 9.15E-13 | 2217.35 | 1717.21 | 2569.58 | 516.666 | 860.669 | 706.555 |
| ENSMUSG00000029299 | 14_Abcg3         | 5.3247  | -0.04076 | 0.96549  | 0.97776  | 6.07732 | 3.67122 | 5.97577 | 5.41011 | 4.48265 | 6.33113 |
| ENSMUSG00000029304 | 14_Spp1          | 1566.09 | -1.24187 | 5.49E-09 | 1.02E-07 | 869.057 | 1170.2  | 752.947 | 2506.69 | 2465.46 | 1632.17 |
| ENSMUSG00000029306 | 8_Ibsp           | 2.0464  | -4.49604 | 0.06367  | NA       | 0       | 0       | 0       | 7.21348 | 0       | 5.06491 |
| ENSMUSG00000029307 | 7_Dmp1           | 0.57236 | -2.64079 | 0.47559  | NA       | 0       | 0       | 0       | 0.90169 | 0       | 2.53245 |
| ENSMUSG00000029309 | 7_Sparcl1        | 5663.74 | -1.03177 | 5.58E-08 | 7.55E-07 | 3596.04 | 4784.52 | 2779.93 | 8192.71 | 7789.06 | 6840.16 |
| ENSMUSG00000029310 | 13_Nudt9         | 775.872 | 0.23954  | 0.07571  | 0.13698  | 795.261 | 836.121 | 889.195 | 760.121 | 640.123 | 734.412 |

|                    |                  |         |          |          |          |         |         |         |         |         |         |
|--------------------|------------------|---------|----------|----------|----------|---------|---------|---------|---------|---------|---------|
| ENSMUSG00000029311 | 16_Hsd17b11      | 1709.73 | -0.73929 | 3.39E-07 | 3.60E-06 | 1250.19 | 1450.13 | 1142.57 | 2356.1  | 2165.12 | 1894.28 |
| ENSMUSG00000029312 | 12_Kihl8         | 408.463 | 0.04819  | 0.77633  | 0.8437   | 421.071 | 431.369 | 393.206 | 466.171 | 345.164 | 393.797 |
| ENSMUSG00000029313 | 18_Aff1          | 3192.08 | 0.25937  | 0.01204  | 0.02955  | 3292.17 | 3564.76 | 3577.1  | 2821.37 | 2836.62 | 3060.47 |
| ENSMUSG00000029314 | 14_Agpat9        | 171.237 | 0.66368  | 0.00362  | 0.01078  | 225.729 | 163.369 | 241.421 | 138.86  | 132.687 | 125.356 |
| ENSMUSG00000029319 | 8_Coq2           | 962.338 | 0.20308  | 0.10099  | 0.17351  | 1031.41 | 994.901 | 1062.49 | 889.964 | 826.601 | 968.664 |
| ENSMUSG00000029320 | 11_1700016H13Rik | 2.80464 | 0.24632  | 0.85057  | 0.89876  | 1.73638 | 2.75342 | 4.78062 | 2.70506 | 3.58612 | 1.26623 |
| ENSMUSG00000029321 | 1_Slc10a6        | 42.1407 | 1.61161  | 0.00025  | 0.00109  | 59.0368 | 44.9725 | 87.2462 | 25.2472 | 22.4133 | 13.9285 |
| ENSMUSG00000029322 | 12_Plac8         | 10785   | 0.24673  | 0.12324  | 0.20403  | 12792.8 | 9496.53 | 12826.4 | 8606.59 | 11250.6 | 9737.28 |
| ENSMUSG00000029326 | 13_Enoph1        | 455.286 | 0.68541  | 1.73E-05 | 0.00011  | 557.377 | 502.04  | 625.066 | 366.084 | 316.475 | 364.673 |
| ENSMUSG00000029328 | 15_Hnmpdl        | 3429.98 | -0.1846  | 0.17577  | 0.27179  | 3283.49 | 2990.21 | 3359.58 | 3183.85 | 4195.76 | 3566.96 |
| ENSMUSG00000029330 | 8_Cds1           | 1789.59 | 0.36087  | 0.00142  | 0.00485  | 1956.03 | 1920.97 | 2159.64 | 1558.11 | 1495.41 | 1647.36 |
| ENSMUSG00000029333 | 14_Rasgef1b      | 1040.2  | 0.41647  | 0.00153  | 0.00518  | 1170.32 | 1199.57 | 1196.35 | 788.073 | 899.22  | 987.657 |
| ENSMUSG00000029334 | 14_Prkg2         | 21.9159 | -0.53558 | 0.31966  | 0.43523  | 26.9138 | 15.6027 | 10.7564 | 27.9522 | 22.4133 | 27.857  |
| ENSMUSG00000029335 | 5_Bmp3           | 628.081 | -0.59976 | 0.00023  | 0.00102  | 534.804 | 559.861 | 401.572 | 748.399 | 753.982 | 769.866 |
| ENSMUSG00000029337 | 2_Fgf5           | 0.59758 | 2.66585  | 0.50308  | NA       | 0       | 0       | 3.58546 | 0       | 0       | 0       |
| ENSMUSG00000029338 | 13_Antxr2        | 423.471 | -0.69775 | 2.42E-06 | 1.98E-05 | 335.989 | 312.972 | 320.301 | 571.669 | 498.471 | 501.426 |
| ENSMUSG00000029343 | 17_Crybb1        | 717.685 | -0.72349 | 0.47923  | 0.59198  | 409.785 | 1051.81 | 162.541 | 1802.47 | 222.34  | 657.172 |
| ENSMUSG00000029344 | 14_Tpst2         | 268.437 | 0.85414  | 0.00013  | 0.00062  | 310.811 | 321.232 | 405.157 | 227.225 | 146.134 | 200.064 |
| ENSMUSG00000029345 | 13_Tfip11        | 869.923 | 1.04213  | 1.65E-09 | 3.61E-08 | 1115.62 | 1136.24 | 1260.89 | 646.508 | 441.093 | 619.185 |
| ENSMUSG00000029346 | 12_Srrd          | 144.126 | 0.35966  | 0.19538  | 0.29552  | 142.383 | 159.698 | 184.054 | 159.598 | 86.0669 | 132.954 |
| ENSMUSG00000029348 | 11_Asphd2        | 44.0607 | -0.53184 | 0.19409  | 0.2942   | 42.5412 | 41.3013 | 23.9031 | 68.5281 | 41.2404 | 46.8504 |
| ENSMUSG00000029352 | 14_Crybb3        | 647.305 | -0.56372 | 0.60841  | 0.70819  | 335.989 | 1083.01 | 148.199 | 1590.57 | 167.651 | 558.406 |
| ENSMUSG00000029359 | 13_Tesc          | 5.2941  | 0.76902  | 0.4688   | 0.58212  | 4.34094 | 2.75342 | 13.1467 | 4.50843 | 4.48265 | 2.53245 |
| ENSMUSG00000029361 | 18_Nos1          | 129.149 | -1.08826 | 0.01485  | 0.03531  | 57.3004 | 154.191 | 35.8546 | 213.699 | 163.169 | 150.681 |
| ENSMUSG00000029363 | 14_Rfc5          | 722.394 | 0.34336  | 0.02174  | 0.04862  | 854.297 | 713.135 | 856.925 | 576.177 | 701.983 | 631.847 |
| ENSMUSG00000029364 | 15_Wsb2          | 2487.67 | 0.4139   | 0.0069   | 0.01846  | 2685.31 | 2702.02 | 3139.67 | 2481.44 | 1775.13 | 2142.46 |
| ENSMUSG00000029366 | 10_Dck           | 710.319 | 0.4058   | 0.03002  | 0.06352  | 869.057 | 695.697 | 862.901 | 475.188 | 649.985 | 709.087 |
| ENSMUSG00000029368 | 10_Alb           | 1.80327 | 1.51343  | 0.39228  | NA       | 0.86819 | 3.67122 | 3.58546 | 0.90169 | 1.79306 | 0       |
| ENSMUSG00000029370 | 10_Rassf6        | 173.168 | -0.26316 | 0.23125  | 0.33741  | 162.351 | 148.685 | 161.346 | 155.09  | 224.133 | 187.402 |
| ENSMUSG00000029371 | 7_Cxcl5          | 53.9517 | 1.9361   | 0.00075  | 0.00282  | 135.437 | 30.2876 | 90.8317 | 10.8202 | 32.2751 | 24.0583 |
| ENSMUSG00000029372 | 7_Pbbp           | 40.415  | 3.27741  | 4.45E-06 | 3.34E-05 | 90.2916 | 49.5615 | 80.0753 | 16.2303 | 0       | 6.33113 |
| ENSMUSG00000029373 | 7_Pf4            | 44.6509 | -0.63723 | 0.13973  | 0.22538  | 41.673  | 26.6164 | 37.0498 | 67.6264 | 64.5502 | 30.3894 |
| ENSMUSG00000029375 | 6_Cxcl15         | 0.1447  | 0.92709  | 0.82027  | NA       | 0.86819 | 0       | 0       | 0       | 0       | 0       |
| ENSMUSG00000029376 | 8_Mthfd2l        | 265.586 | -0.57455 | 0.00321  | 0.00974  | 203.156 | 188.15  | 249.787 | 278.621 | 349.647 | 324.154 |
| ENSMUSG00000029377 | 5_Ereg           | 568.134 | 0.16748  | 0.34028  | 0.45669  | 685.869 | 483.684 | 634.627 | 543.716 | 574.676 | 486.231 |
| ENSMUSG00000029378 | 5_Areg           | 135.231 | 1.39163  | 1.52E-05 | 9.79E-05 | 231.806 | 111.972 | 243.811 | 73.9382 | 72.619  | 77.2398 |
| ENSMUSG00000029379 | 14_Cxcl3         | 3.87843 | 3.46183  | 0.02017  | 0.0456   | 5.20913 | 10.7564 | 0.90169 | 0.89653 | 0       | 0       |
| ENSMUSG00000029380 | 11_Cxcl1         | 97.8371 | 1.29172  | 0.01815  | 0.04177  | 129.36  | 67.9176 | 218.713 | 20.7388 | 43.93   | 106.363 |
| ENSMUSG00000029381 | 15_Shroom3       | 591.092 | 1.19695  | 3.18E-10 | 8.86E-09 | 783.106 | 732.409 | 954.928 | 437.317 | 299.441 | 339.349 |
| ENSMUSG00000029384 | 5_2010109A12Rik  | 1.65202 | -1.40021 | 0.50412  | NA       | 0.86819 | 1.83561 | 0       | 6.3118  | 0.89653 | 0       |
| ENSMUSG00000029385 | 10_Cng2          | 1025.09 | 0.04891  | 0.72422  | 0.80366  | 1050.51 | 1023.35 | 1054.13 | 896.275 | 1153.83 | 972.462 |
| ENSMUSG00000029387 | 10_Gtf2h3        | 584.11  | 0.16665  | 0.23629  | 0.3433   | 619.018 | 609.423 | 623.87  | 562.652 | 489.506 | 600.192 |
| ENSMUSG00000029388 | 14_Eif2b1        | 709.863 | 0.14371  | 0.27049  | 0.38207  | 744.906 | 709.464 | 780.436 | 639.295 | 654.467 | 730.613 |
| ENSMUSG00000029389 | 17_Ddx55         | 342.688 | 0.08894  | 0.58924  | 0.69165  | 337.725 | 343.259 | 378.864 | 292.146 | 355.923 | 348.212 |
| ENSMUSG00000029390 | 13_Tmed2         | 6321.3  | -0.29536 | 0.02684  | 0.058    | 5760.43 | 5310.42 | 5957.84 | 5900.63 | 7332.72 | 7665.74 |
| ENSMUSG00000029392 | 12_Rilpl1        | 277.356 | -0.36931 | 0.1185   | 0.19779  | 208.365 | 269.835 | 248.592 | 412.07  | 249.235 | 276.037 |
| ENSMUSG00000029394 | 11_Cdk2ap1       | 1992.1  | 0.37488  | 0.00156  | 0.00525  | 2167    | 2240.36 | 2341.31 | 1874.6  | 1568.03 | 1761.32 |
| ENSMUSG00000029397 | 15_Cong2         | 1296.06 | -0.25205 | 0.0278   | 0.05963  | 1180.74 | 1140.83 | 1228.62 | 1331.79 | 1499    | 1395.38 |
| ENSMUSG00000029401 | 8_Rilpl2         | 156.01  | 0.43674  | 0.07703  | 0.13897  | 188.397 | 180.808 | 169.712 | 173.124 | 113.859 | 110.162 |
| ENSMUSG00000029402 | 8_Snmp35         | 200.804 | 0.37077  | 0.09305  | 0.16204  | 202.288 | 217.52  | 259.348 | 185.747 | 139.859 | 200.064 |
| ENSMUSG00000029403 | 14_Cdk12         | 390.17  | -0.35316 | 0.02739  | 0.05898  | 325.571 | 353.355 | 348.985 | 383.216 | 477.851 | 452.043 |
| ENSMUSG00000029404 | 15_Arl6ip4       | 578.429 | 0.61083  | 0.00166  | 0.00557  | 648.537 | 709.464 | 738.605 | 526.584 | 337.095 | 510.289 |
| ENSMUSG00000029405 | 16_G3bp2         | 3665.61 | -0.19742 | 0.08528  | 0.15071  | 3456.26 | 3220.58 | 3568.73 | 3542.72 | 4135.7  | 4069.65 |
| ENSMUSG00000029406 | 15_Pitpnm2       | 642.557 | 0.6454   | 0.00045  | 0.00181  | 705.837 | 892.107 | 754.142 | 607.736 | 416.887 | 478.634 |
| ENSMUSG00000029407 | 10_Uso1          | 3477.5  | -0.05536 | 0.64933  | 0.74343  | 3452.79 | 3234.35 | 3544.83 | 3118.03 | 3777.08 | 3737.9  |
| ENSMUSG00000029408 | 13_Abcb9         | 398.93  | 1.20419  | 3.83E-07 | 4.01E-06 | 472.294 | 574.546 | 621.48  | 277.719 | 161.376 | 286.167 |
| ENSMUSG00000029410 | 11_Ppef2         | 54.4574 | -1.2981  | 0.01068  | 0.02672  | 40.8049 | 32.1232 | 21.5128 | 126.236 | 74.412  | 31.6557 |
| ENSMUSG00000029413 | 14_Naa1          | 908.063 | 0.56951  | 0.00049  | 0.00195  | 1140.8  | 991.23  | 1121.05 | 721.348 | 607.848 | 866.099 |
| ENSMUSG00000029414 | 11_Kntc1         | 335.155 | 0.65033  | 0.00222  | 0.0071   | 440.172 | 342.341 | 445.792 | 201.978 | 308.407 | 272.239 |
| ENSMUSG00000029415 | 4_Sdad1          | 969.123 | 0.00313  | 0.98301  | 0.98878  | 943.721 | 972.874 | 993.173 | 807.009 | 1044.46 | 1053.5  |
| ENSMUSG00000029416 | 17_Slc15a4       | 549.662 | 0.21604  | 0.13082  | 0.21394  | 562.586 | 622.272 | 588.016 | 562.652 | 478.747 | 483.699 |
| ENSMUSG00000029417 | 9_Cxcl9          | 318.638 | 5.07982  | 4.33E-08 | 6.01E-07 | 846.484 | 278.095 | 732.629 | 5.41011 | 40.3439 | 8.86359 |
| ENSMUSG00000029419 | 8_Gm996          | 15.5377 | -1.11256 | 0.38187  | 0.49948  | 15.6274 | 13.7671 | 0       | 58.6096 | 2.68959 | 2.53245 |
| ENSMUSG00000029420 | 12_Rimbp2        | 354.807 | 0.77394  | 7.34E-05 | 0.00038  | 384.607 | 468.081 | 490.013 | 280.424 | 210.685 | 295.031 |
| ENSMUSG00000029422 | 14_Rsrc2         | 2344.37 | -0.38104 | 0.00272  | 0.00845  | 2058.47 | 1882.42 | 2169.2  | 2355.2  | 2860.83 | 2740.12 |
| ENSMUSG00000029423 | 10_Piwil1        | 0.45267 | -0.80756 | 0.8164   | NA       | 0       | 0.91781 | 0       | 0.90169 | 0.89653 | 0       |
| ENSMUSG00000029426 | 8_Scarb2         | 4861.35 | -0.16811 | 0.1418   | 0.22815  | 4636.13 | 4357.74 | 4741.18 | 4610.32 | 5452.7  | 5370.07 |
| ENSMUSG00000029427 | 11_Zcchc8        | 677.233 | 0.31542  | 0.02227  | 0.04963  | 704.101 | 761.779 | 787.607 | 550.028 | 657.157 | 602.724 |
| ENSMUSG00000029428 | 13_Stx2          | 324.698 | 0.11799  | 0.43006  | 0.54544  | 330.78  | 346.013 | 337.033 | 302.966 | 317.372 | 314.024 |
| ENSMUSG00000029430 | 13_Ran           | 4440.48 | 0.19946  | 0.10799  | 0.18337  | 4746.39 | 4212.73 | 5282.58 | 3880.85 | 4274.66 | 4245.66 |
| ENSMUSG00000029431 | 5_B3gnt4         | 4.71342 | 2.31986  | 0.11963  | 0.19927  | 3.47275 | 13.7671 | 5.97577 | 0       | 0       | 5.06491 |
| ENSMUSG00000029432 | 12_Gbas          | 1312.3  | -0.37776 | 0.00702  | 0.01874  | 1120.83 | 1228.94 | 1074.44 | 1693.37 | 1330.45 | 1425.77 |
| ENSMUSG00000029433 | 14_Diablo        | 909.005 | -0.12177 | 0.38054  | 0.42344  | 882.079 | 866.408 | 862.901 | 879.143 | 989.77  | 973.728 |
| ENSMUSG00000029434 | 12_Vps33a        | 1375.75 | 0.18672  | 0.12216  | 0.20268  | 1440.32 | 1484.09 | 1467.65 | 1238.92 | 1197.76 | 1425.77 |
| ENSMUSG00000029436 | 9_Mmp17          | 14.9406 | 0.14116  | 0.8133   | 0.87099  | 15.6274 | 18.3561 | 13.1467 | 18.9354 | 13.448  | 10.1298 |
| ENSMUSG00000029437 | 12_Ii31          | 0.1447  | 0.92709  | 0.82027  | NA       | 0.86819 | 0       | 0       | 0       | 0       | 0       |
| ENSMUSG00000029438 | 9_Bcl7a          | 1174.85 | 0.54287  | 9.29E-05 | 0.00047  | 1301.41 | 1345.5  | 1532.19 | 942.261 | 861.566 | 1066.16 |
| ENSMUSG00000029439 | 14_Sfswap        | 1474.07 | 0.50844  | 1.47E-05 | 9.51E-05 | 1619.17 | 1714.46 | 1859.66 | 1186.62 | 1178.04 | 1286.49 |
| ENSMUSG00000029440 | 15_Psmd9         | 465.746 | 0.64109  | 0.00073  | 0.00274  | 509.627 | 626.861 | 566.503 | 441.826 | 297.648 | 352.011 |

|                     |                  |         |          |          |          |         |         |         |         |         |         |
|---------------------|------------------|---------|----------|----------|----------|---------|---------|---------|---------|---------|---------|
| ENSMUSG000000029442 | 18_Wdr66         | 87.2172 | -0.50665 | 0.06361  | 0.11856  | 73.796  | 78.0135 | 64.5383 | 118.121 | 103.998 | 84.8372 |
| ENSMUSG000000029446 | 14_Psph          | 339.345 | 0.35333  | 0.01867  | 0.0427   | 387.212 | 390.067 | 364.522 | 311.081 | 286.89  | 296.297 |
| ENSMUSG000000029449 | 11_Rhof          | 38.9863 | 0.27954  | 0.56074  | 0.66637  | 44.2776 | 48.6437 | 35.8546 | 51.3961 | 38.5508 | 15.1947 |
| ENSMUSG000000029451 | 14_Gm13103       | 0.15028 | -0.99647 | 0.80707  | NA       | 0       | 0       | 0       | 0.90169 | 0       | 0       |
| ENSMUSG000000029452 | 18_Tmem116       | 166.335 | 0.22546  | 0.28047  | 0.39325  | 188.397 | 184.479 | 163.736 | 144.27  | 139.859 | 177.272 |
| ENSMUSG000000029454 | 15_Mapkapk5      | 832.885 | -0.02702 | 0.85748  | 0.90348  | 914.202 | 777.381 | 782.826 | 731.267 | 930.599 | 861.034 |
| ENSMUSG000000029455 | 14_Aldh2         | 3842.92 | 0.37137  | 0.03271  | 0.06823  | 3915.53 | 4711.1  | 4377.85 | 4072.91 | 2589.18 | 3390.96 |
| ENSMUSG000000029456 | 12_Acad10        | 437.448 | 0.5836   | 0.0004   | 0.00165  | 446.249 | 592.902 | 535.429 | 362.478 | 340.682 | 346.946 |
| ENSMUSG000000029458 | 14_Brap          | 1636.76 | 0.50431  | 5.48E-05 | 0.0003   | 1737.25 | 1910.87 | 2111.84 | 1323.67 | 1303.56 | 1433.37 |
| ENSMUSG000000029461 | 15_Fam168a       | 1641.72 | -0.26008 | 0.03527  | 0.07266  | 1560.13 | 1537.32 | 1385.18 | 1789.85 | 1941.89 | 1635.97 |
| ENSMUSG000000029462 | 18_Vps29         | 1319.06 | -0.3725  | 0.00551  | 0.01527  | 1210.25 | 1094.02 | 1146.15 | 1487.78 | 1663.06 | 1313.08 |
| ENSMUSG000000029463 | 5_Fam216a        | 171.379 | -0.28293 | 0.20594  | 0.30819  | 139.778 | 156.945 | 168.517 | 212.798 | 200.823 | 149.415 |
| ENSMUSG000000029464 | 10_Gpn3          | 337.263 | 0.17979  | 0.34878  | 0.46571  | 367.244 | 321.232 | 386.035 | 354.362 | 252.822 | 341.881 |
| ENSMUSG000000029465 | 14_Arpc3         | 4110.39 | 0.43717  | 0.00033  | 0.0014   | 4696.9  | 4392.62 | 5094.94 | 3524.69 | 3155.79 | 3797.41 |
| ENSMUSG000000029466 | 11_Anapc7        | 1340.68 | 0.48308  | 8.87E-05 | 0.00045  | 1478.52 | 1566.69 | 1643.34 | 1148.75 | 1013.98 | 1192.79 |
| ENSMUSG000000029467 | 15_Atp2a2        | 8920.85 | 0.33724  | 0.00977  | 0.02475  | 9469.33 | 9343.26 | 11063.5 | 6930.35 | 8144.98 | 8573.62 |
| ENSMUSG000000029468 | 17_P2rx7         | 494.28  | 0.25924  | 0.11294  | 0.19012  | 578.213 | 487.355 | 548.576 | 411.169 | 418.68  | 521.685 |
| ENSMUSG000000029469 | 14_Ifft81        | 464.563 | -0.56007 | 8.96E-05 | 0.00045  | 374.189 | 365.287 | 387.23  | 508.551 | 589.917 | 562.205 |
| ENSMUSG000000029470 | 15_P2rx4         | 623.791 | 0.12894  | 0.44436  | 0.55941  | 750.983 | 602.08  | 601.163 | 674.461 | 516.402 | 597.659 |
| ENSMUSG000000029471 | 13_Camkk2        | 696.886 | 0.05508  | 0.64774  | 0.74231  | 690.21  | 738.833 | 701.555 | 684.379 | 687.639 | 678.698 |
| ENSMUSG000000029472 | 13_Anapc5        | 6133.17 | 0.18963  | 0.03176  | 0.06662  | 6428.07 | 6684.38 | 6494.47 | 5714.88 | 5738.69 | 5738.54 |
| ENSMUSG000000029474 | 7_Rnf34          | 959.986 | -0.21681 | 0.06893  | 0.12693  | 888.157 | 870.08  | 904.732 | 990.051 | 995.149 | 1111.75 |
| ENSMUSG000000029475 | 17_Kdm2b         | 868.42  | 0.55082  | 2.12E-05 | 0.00013  | 1025.33 | 951.764 | 1119.86 | 724.955 | 664.329 | 724.282 |
| ENSMUSG000000029477 | 14_Morn3         | 2.45578 | 0.39309  | 0.80082  | NA       | 1.73638 | 5.50683 | 1.19515 | 3.60674 | 2.68959 | 0       |
| ENSMUSG000000029478 | 16_Ncor2         | 1672.77 | 1.37895  | 1.76E-13 | 1.15E-11 | 2081.92 | 2531.31 | 2635.31 | 1072.1  | 690.329 | 1025.64 |
| ENSMUSG000000029480 | 13_Dhx37         | 360.112 | 0.88732  | 8.15E-08 | 1.05E-06 | 415.862 | 492.862 | 493.599 | 264.194 | 229.512 | 264.641 |
| ENSMUSG000000029482 | 4_Aacs           | 2640.54 | 1.34229  | 2.54E-12 | 1.22E-10 | 3389.41 | 3484.91 | 4486.61 | 1605    | 1113.49 | 1763.85 |
| ENSMUSG000000029484 | 12_Anxa3         | 1099.24 | -0.15793 | 0.22507  | 0.33034  | 1079.16 | 926.984 | 1112.69 | 1143.34 | 1229.14 | 1104.15 |
| ENSMUSG000000029486 | 18_Mrp11         | 308.6   | -0.4755  | 0.00754  | 0.01988  | 287.37  | 261.575 | 224.689 | 327.312 | 393.577 | 357.076 |
| ENSMUSG000000029490 | 3_Mfsd7a         | 264.181 | 0.50874  | 0.00752  | 0.01984  | 286.502 | 292.78  | 351.375 | 187.551 | 225.029 | 241.849 |
| ENSMUSG000000029491 | 7_Pde6b          | 549.829 | -2.20092 | 0.01378  | 0.03306  | 307.339 | 218.438 | 63.3432 | 1533.77 | 927.909 | 248.18  |
| ENSMUSG000000029499 | 11_Pxmp2         | 48.5336 | -0.91947 | 0.03283  | 0.06847  | 30.3866 | 44.0547 | 26.2934 | 94.677  | 50.2057 | 45.5842 |
| ENSMUSG000000029500 | 16_Pgam5         | 489.541 | 0.16268  | 0.41628  | 0.53222  | 539.145 | 448.807 | 562.918 | 519.371 | 347.854 | 519.153 |
| ENSMUSG000000029501 | 14_Ankle2        | 1284.39 | -0.04636 | 0.70826  | 0.79127  | 1253.66 | 1220.68 | 1317.06 | 1173.99 | 1401.28 | 1339.67 |
| ENSMUSG000000029502 | 14_Golga3        | 2238.44 | 0.10913  | 0.35147  | 0.46807  | 2244.27 | 2271.57 | 2452.46 | 1981.9  | 2132.85 | 2347.58 |
| ENSMUSG000000029503 | 16_P2rx2         | 2.84968 | -0.61431 | 0.64295  | 0.73821  | 2.60457 | 1.83561 | 2.39031 | 6.3118  | 2.68959 | 1.26623 |
| ENSMUSG000000029504 | 5_Ddx51          | 547.306 | 0.36116  | 0.01767  | 0.04082  | 604.259 | 575.464 | 665.701 | 458.958 | 437.507 | 541.945 |
| ENSMUSG000000029505 | 17_Ep400         | 2621.07 | 0.60447  | 4.08E-06 | 3.10E-05 | 2892.8  | 3257.29 | 3335.68 | 1824.11 | 2137.33 | 2279.21 |
| ENSMUSG000000029507 | 16_Pus1          | 351.02  | 1.10089  | 7.36E-11 | 2.50E-09 | 451.458 | 466.245 | 518.697 | 243.455 | 194.547 | 231.72  |
| ENSMUSG000000029510 | 15_Gpc2          | 514.075 | 0.75505  | 0.00014  | 0.00069  | 619.018 | 627.779 | 688.409 | 286.736 | 386.405 | 476.101 |
| ENSMUSG000000029512 | 11_Ulk1          | 1129.77 | 0.60914  | 0.00016  | 0.00074  | 1244.11 | 1345.5  | 1505.89 | 1059.48 | 763.844 | 859.768 |
| ENSMUSG000000029513 | 14_Prkab1        | 2398.11 | 0.54266  | 1.48E-05 | 9.56E-05 | 2628.87 | 2748.83 | 3154.01 | 1989.12 | 1797.54 | 2070.28 |
| ENSMUSG000000029516 | 19_Cit           | 421.36  | 0.23782  | 0.19244  | 0.29231  | 413.258 | 477.259 | 478.062 | 460.761 | 322.751 | 376.069 |
| ENSMUSG000000029517 | 13_Ankrd7        | 0.4589  | 2.31815  | 0.56231  | NA       | 0       | 2.75342 | 0       | 0       | 0       | 0       |
| ENSMUSG000000029518 | 15_Rab35         | 1653.56 | 0.27304  | 0.02864  | 0.0611   | 1677.34 | 1784.21 | 1967.22 | 1535.57 | 1371.69 | 1585.32 |
| ENSMUSG000000029521 | 7_Chek2          | 250.418 | 0.13729  | 0.56842  | 0.6732   | 277.82  | 252.397 | 255.763 | 161.402 | 268.959 | 286.167 |
| ENSMUSG000000029522 | 12_Pla2g1b       | 0.59769 | -2.73717 | 0.49174  | NA       | 0       | 0       | 0       | 0       | 3.58612 | 0       |
| ENSMUSG000000029524 | 16_Sirt4         | 151.462 | 0.05374  | 0.83456  | 0.88686  | 158.01  | 186.315 | 118.32  | 179.435 | 136.273 | 130.421 |
| ENSMUSG000000029526 | 5_1700123K08Rik  | 1.24386 | -1.44953 | 0.51675  | NA       | 0.86819 | 0       | 1.19515 | 3.60674 | 1.79306 | 0       |
| ENSMUSG000000029528 | 17_Pxn           | 1837.59 | 0.66662  | 1.33E-06 | 1.18E-05 | 2131.4  | 2378.95 | 2252.87 | 1546.39 | 1204.04 | 1511.87 |
| ENSMUSG000000029530 | 15_Ccr9          | 96.8787 | 0.29345  | 0.25624  | 0.36606  | 109.392 | 95.4518 | 114.735 | 77.545  | 81.5843 | 102.564 |
| ENSMUSG000000029534 | 17_St7           | 362.855 | -0.24754 | 0.16423  | 0.25734  | 374.189 | 290.944 | 329.863 | 344.444 | 431.231 | 406.459 |
| ENSMUSG000000029535 | 4_Trip1          | 825.789 | -0.04421 | 0.71896  | 0.79995  | 838.67  | 755.354 | 846.169 | 868.323 | 825.705 | 820.515 |
| ENSMUSG000000029536 | 8_Gatc           | 536.618 | -0.3498  | 0.00933  | 0.02383  | 484.449 | 455.232 | 476.866 | 627.573 | 615.917 | 559.672 |
| ENSMUSG000000029538 | 13_Srsf9         | 955.541 | 0.43176  | 0.00464  | 0.01326  | 1094.79 | 1054.56 | 1141.37 | 817.829 | 681.363 | 943.339 |
| ENSMUSG000000029541 | 12_Cyp2w1        | 3.14442 | 3.13956  | 0.04382  | 0.08684  | 3.47275 | 6.42464 | 7.17092 | 0.90169 | 0.89653 | 0       |
| ENSMUSG000000029544 | 16_Cabp1         | 44.3646 | -0.78877 | 0.0941   | 0.16346  | 34.7275 | 41.3013 | 21.5128 | 88.3652 | 44.8265 | 35.4544 |
| ENSMUSG000000029545 | 13_Acads         | 320.147 | 0.94875  | 1.91E-05 | 0.00012  | 370.716 | 461.656 | 432.646 | 264.194 | 158.686 | 232.986 |
| ENSMUSG000000029547 | 10_Ints1         | 742.498 | 1.67782  | 4.25E-13 | 2.56E-11 | 914.202 | 1167.45 | 1312.28 | 440.023 | 241.167 | 379.868 |
| ENSMUSG000000029550 | 11_Sppl3         | 2622.95 | 0.67873  | 8.61E-07 | 8.05E-06 | 2887.59 | 3218.74 | 3579.49 | 2053.14 | 1784.1  | 2214.63 |
| ENSMUSG000000029551 | 13_Psmg3         | 247.409 | 0.88173  | 0.00016  | 0.00075  | 316.021 | 303.794 | 343.009 | 229.028 | 131.79  | 160.811 |
| ENSMUSG000000029552 | 19_Tes           | 516.08  | 0.21598  | 0.21314  | 0.31664  | 579.082 | 521.314 | 564.113 | 576.177 | 408.818 | 446.978 |
| ENSMUSG000000029553 | 10_Tfec          | 30.4095 | -1.13083 | 0.02829  | 0.06054  | 21.7047 | 25.6986 | 9.56123 | 49.5927 | 49.3092 | 26.5908 |
| ENSMUSG000000029554 | 15_Mad111        | 758.487 | 1.03547  | 2.73E-09 | 5.54E-08 | 936.775 | 980.216 | 1141.37 | 558.143 | 396.267 | 538.146 |
| ENSMUSG000000029556 | 12_Hnf1a         | 0.44236 | 2.27028  | 0.57071  | NA       | 1.73638 | 0.91781 | 0       | 0       | 0       | 0       |
| ENSMUSG000000029557 | 7_Ftsj2          | 113.764 | 0.41011  | 0.13229  | 0.21586  | 114.601 | 157.863 | 115.93  | 87.4635 | 85.1704 | 121.558 |
| ENSMUSG000000029559 | 15_2210016L21Rik | 439.203 | 0.24552  | 0.12204  | 0.20254  | 447.117 | 492.862 | 490.013 | 455.351 | 358.612 | 391.264 |
| ENSMUSG000000029560 | 12_Snx8          | 1747.35 | 1.00016  | 1.16E-07 | 1.43E-06 | 2106.23 | 2275.24 | 2607.83 | 1375.07 | 853.497 | 1266.23 |
| ENSMUSG000000029561 | 17_Oasl2         | 9995.34 | 1.39211  | 6.53E-12 | 2.84E-10 | 13006.3 | 12497.8 | 17922.5 | 4090.05 | 6710.53 | 5744.87 |
| ENSMUSG000000029563 | 16_Foxp2         | 348.355 | -1.05793 | 4.59E-05 | 0.00025  | 285.634 | 242.301 | 149.394 | 522.076 | 529.85  | 360.875 |
| ENSMUSG000000029564 | 12_4930519G04Rik | 0.29767 | 1.70332  | 0.67406  | NA       | 0.86819 | 0.91781 | 0       | 0       | 0       | 0       |
| ENSMUSG000000029569 | 9_Tmem168        | 1051.63 | -0.25155 | 0.08291  | 0.14745  | 971.503 | 841.628 | 1068.47 | 1038.74 | 1243.49 | 1145.94 |
| ENSMUSG000000029570 | 5_Lfng           | 381.502 | 1.09654  | 2.50E-05 | 0.00015  | 503.549 | 459.821 | 595.187 | 271.407 | 148.824 | 310.226 |
| ENSMUSG000000029571 | 14_Tmem106b      | 2338.19 | -0.57464 | 2.51E-07 | 2.79E-06 | 1928.25 | 1875.08 | 1833.37 | 2907.03 | 2935.24 | 2550.18 |
| ENSMUSG000000029575 | 17_Mmab          | 448.351 | 0.34678  | 0.03549  | 0.07299  | 450.59  | 518.56  | 536.624 | 422.89  | 339.785 | 421.654 |
| ENSMUSG000000029576 | 17_Radil         | 58.7261 | 0.37751  | 0.37913  | 0.49664  | 46.8822 | 88.1093 | 64.5383 | 79.3483 | 36.7578 | 36.7206 |
| ENSMUSG000000029577 | 13_Ube3b         | 1828.15 | 0.8702   | 7.38E-07 | 7.01E-06 | 2131.4  | 2318.38 | 2640.1  | 1494.99 | 992.459 | 1391.58 |
| ENSMUSG000000029578 | 15_Wipi2         | 1921.2  | 0.28656  | 0.0101   | 0.02547  | 2074.1  | 2113.71 | 2146.5  | 1857.47 | 1599.41 | 1736    |
| ENSMUSG000000029580 | 14_Actb          | 38346.2 | 0.92051  | 1.81E-10 | 5.39E-09 | 45577.3 | 46506.1 | 58458.6 | 27549.2 | 23141.2 | 28844.6 |

|                     |             |         |          |          |          |         |         |         |         |         |         |
|---------------------|-------------|---------|----------|----------|----------|---------|---------|---------|---------|---------|---------|
| ENSMUSG000000029581 | 14_Fscn1    | 526.622 | 1.40052  | 3.50E-11 | 1.30E-09 | 724.069 | 702.121 | 865.292 | 352.559 | 207.995 | 307.693 |
| ENSMUSG000000029586 | 9_Spdye4b   | 0.2894  | 1.67273  | 0.67976  | NA       | 1.73638 | 0       | 0       | 0       | 0       | 0       |
| ENSMUSG000000029587 | 16_Zfp12    | 636.06  | -0.01484 | 0.9087   | 0.93834  | 616.414 | 666.327 | 615.504 | 675.362 | 609.641 | 633.113 |
| ENSMUSG000000029591 | 14_Ung      | 178.455 | 1.19503  | 5.36E-08 | 7.29E-07 | 214.443 | 255.15  | 274.885 | 104.596 | 95.0322 | 126.623 |
| ENSMUSG000000029592 | 11_Usp30    | 608.902 | 0.53456  | 0.00277  | 0.00858  | 654.614 | 737.916 | 768.484 | 567.16  | 390.887 | 534.348 |
| ENSMUSG000000029594 | 12_Rbm19    | 415.239 | 0.98328  | 8.05E-07 | 7.59E-06 | 529.595 | 549.766 | 573.674 | 295.753 | 207.099 | 335.55  |
| ENSMUSG000000029595 | 9_Lhx5      | 1.25367 | -0.8303  | 0.67501  | NA       | 1.73638 | 0.91781 | 0       | 2.70506 | 0.89653 | 1.26623 |
| ENSMUSG000000029596 | 13_Sdsi     | 19.2797 | 0.67733  | 0.22827  | 0.33405  | 26.0457 | 24.7808 | 20.3176 | 21.6405 | 8.96531 | 13.9285 |
| ENSMUSG000000029597 | 14_Sds      | 1.5637  | -0.95847 | 0.60549  | NA       | 0.86819 | 0       | 2.39031 | 0.90169 | 2.68959 | 2.53245 |
| ENSMUSG000000029598 | 12_Pibd2    | 853.193 | 0.69154  | 0.00017  | 0.00081  | 1010.57 | 1121.56 | 1030.22 | 832.256 | 537.022 | 587.529 |
| ENSMUSG000000029599 | 13_Ddx54    | 1062.89 | 1.34554  | 9.72E-11 | 3.15E-09 | 1252.8  | 1497.86 | 1825    | 657.329 | 442.886 | 701.49  |
| ENSMUSG000000029600 | 10_Rita1    | 124.63  | 0.88378  | 0.00848  | 0.02199  | 151.933 | 151.438 | 181.663 | 124.433 | 48.4127 | 89.9021 |
| ENSMUSG000000029601 | 13_Iqcd     | 24.787  | 0.93499  | 0.07788  | 0.14016  | 46.014  | 31.2054 | 20.3176 | 22.5421 | 13.448  | 15.1947 |
| ENSMUSG000000029602 | 11_Rasal1   | 110.973 | 2.07573  | 3.65E-10 | 9.91E-09 | 156.274 | 172.547 | 209.152 | 56.8062 | 24.2063 | 46.8504 |
| ENSMUSG000000029603 | 15_Dtx1     | 85.5648 | 0.04034  | 0.91832  | 0.94576  | 66.8505 | 113.808 | 80.0753 | 132.548 | 61.8606 | 58.2464 |
| ENSMUSG000000029607 | 12_Ankrd61  | 12.0646 | -0.24097 | 0.72454  | 0.80379  | 10.4183 | 16.5205 | 5.97577 | 12.6236 | 11.6549 | 15.1947 |
| ENSMUSG000000029608 | 10_Rph3a    | 29.3954 | -1.93061 | 0.02291  | 0.05086  | 14.7592 | 14.6849 | 7.17092 | 101.89  | 34.0682 | 3.79868 |
| ENSMUSG000000029610 | 13_Aimp2    | 342.285 | 0.86026  | 1.34E-06 | 1.18E-05 | 386.344 | 451.56  | 486.428 | 262.39  | 212.478 | 254.512 |
| ENSMUSG000000029613 | 15_Eif2ak1  | 1128.31 | 0.12097  | 0.35455  | 0.47131  | 1112.15 | 1178.46 | 1235.79 | 958.492 | 1131.42 | 1153.53 |
| ENSMUSG000000029614 | 13_Rpl6     | 20746.4 | 0.00852  | 0.92975  | 0.95352  | 21129.1 | 19894.4 | 21399.2 | 21260.8 | 19508.5 | 21286.5 |
| ENSMUSG000000029616 | 9_Erp29     | 2042.28 | 0.36697  | 0.00612  | 0.01668  | 2238.19 | 2177.03 | 2485.92 | 1844.85 | 1550.1  | 1957.59 |
| ENSMUSG000000029617 | 10_Ccz1     | 917.896 | -0.13409 | 0.32506  | 0.44109  | 942.853 | 797.573 | 885.609 | 889.062 | 1048.94 | 943.339 |
| ENSMUSG000000029618 | 13_Ocm      | 176.023 | -0.06177 | 0.75837  | 0.83003  | 172.769 | 156.945 | 187.639 | 165.91  | 198.133 | 174.739 |
| ENSMUSG000000029621 | 14_Arpc1a   | 3108.41 | 0.30637  | 0.01294  | 0.03134  | 3257.44 | 3370.18 | 3684.66 | 3031.47 | 2484.29 | 2822.42 |
| ENSMUSG000000029622 | 16_Arpc1b   | 3206.62 | 1.22055  | 2.99E-11 | 1.13E-09 | 4156.02 | 4292.58 | 5013.67 | 2288.48 | 1417.41 | 2071.55 |
| ENSMUSG000000029623 | 14_Pdap1    | 1522.23 | 0.28096  | 0.04908  | 0.09556  | 1596.6  | 1551.09 | 1862.05 | 1426.47 | 1194.18 | 1503.01 |
| ENSMUSG000000029624 | 10_Ptcd1    | 465.27  | 0.81131  | 0.00011  | 0.00054  | 529.595 | 612.176 | 637.017 | 431.006 | 256.408 | 325.42  |
| ENSMUSG000000029625 | 16_Cpsf4    | 503.234 | 0.57981  | 0.00041  | 0.00167  | 552.168 | 576.382 | 681.238 | 447.236 | 355.923 | 406.459 |
| ENSMUSG000000029627 | 12_Zkscan14 | 236.633 | 0.23158  | 0.17415  | 0.2698   | 273.479 | 243.218 | 249.787 | 215.503 | 218.753 | 219.057 |
| ENSMUSG000000029629 | 16_Phf14    | 2874.76 | -0.29938 | 0.01919  | 0.04367  | 2649.71 | 2447.79 | 2634.12 | 2746.53 | 3307.3  | 3463.13 |
| ENSMUSG000000029632 | 7_Ndufa4    | 9288.87 | -0.26575 | 0.04363  | 0.08653  | 8532.56 | 7616.87 | 9159.66 | 9342.36 | 11514.1 | 9567.61 |
| ENSMUSG000000029634 | 15_Rnf6     | 2030.88 | 0.04335  | 0.67901  | 0.76772  | 2027.22 | 2054.05 | 2102.28 | 1880.92 | 2031.54 | 2089.27 |
| ENSMUSG000000029635 | 15_Cdk8     | 1106.12 | -0.0054  | 0.96948  | 0.98034  | 1132.99 | 1038.04 | 1141.37 | 962.098 | 1247.97 | 1114.28 |
| ENSMUSG000000029636 | 10_Wasf3    | 345.966 | -0.88304 | 3.52E-06 | 2.73E-05 | 253.511 | 254.232 | 222.299 | 536.503 | 435.714 | 373.537 |
| ENSMUSG000000029638 | 17_Glcc1    | 49.5067 | -0.6795  | 0.07201  | 0.13152  | 50.3549 | 36.7122 | 26.2934 | 58.6096 | 52.8953 | 72.1749 |
| ENSMUSG000000029640 | 17_Usp12    | 1871.42 | -0.0989  | 0.38436  | 0.50189  | 1955.16 | 1671.32 | 1795.12 | 1887.23 | 1984.92 | 1934.79 |
| ENSMUSG000000029641 | 8_Rasl11a   | 10.8062 | -1.12652 | 0.18561  | 0.2839   | 5.20913 | 13.7671 | 1.19515 | 17.132  | 16.1376 | 11.396  |
| ENSMUSG000000029642 | 11_Polr1d   | 3107.41 | 0.11072  | 0.31517  | 0.43011  | 3208.82 | 3037.02 | 3433.68 | 2810.55 | 2992.62 | 3161.77 |
| ENSMUSG000000029647 | 15_Pan3     | 1761.6  | -0.11344 | 0.45422  | 0.56848  | 1692.97 | 1672.24 | 1711.46 | 1476.06 | 2087.12 | 1929.73 |
| ENSMUSG000000029648 | 13_Fit1     | 536.846 | -0.38126 | 0.03181  | 0.0667   | 423.676 | 544.259 | 431.451 | 706.02  | 580.055 | 535.614 |
| ENSMUSG000000029649 | 10_Pomp     | 2781.17 | -0.14213 | 0.17439  | 0.27011  | 2756.5  | 2477.16 | 2698.66 | 2820.47 | 2909.24 | 3025.02 |
| ENSMUSG000000029650 | 10_Slc46a3  | 199.926 | 0.11955  | 0.56938  | 0.67413  | 199.683 | 208.342 | 216.323 | 216.405 | 152.41  | 206.395 |
| ENSMUSG000000029651 | 16_Mtus2    | 458.647 | 0.35813  | 0.00979  | 0.02481  | 539.145 | 495.615 | 510.331 | 403.955 | 383.715 | 419.121 |
| ENSMUSG000000029655 | 17_NAbp2l2  | 1532.65 | -0.41341 | 0.00319  | 0.00969  | 1368.26 | 1228.94 | 1346.94 | 1538.28 | 2009.13 | 1704.34 |
| ENSMUSG000000029656 | 13_C8b      | 0       | NA       | NA       | NA       | 0       | 0       | 0       | 0       | 0       | 0       |
| ENSMUSG000000029657 | 15_Hsph1    | 1225.9  | -0.48727 | 7.18E-05 | 0.00037  | 1010.57 | 1073.83 | 977.636 | 1324.58 | 1551.89 | 1416.91 |
| ENSMUSG000000029658 | 17_Wdr95    | 2.34943 | 0.4194   | 0.7917   | NA       | 5.20913 | 2.75342 | 0       | 2.70506 | 0.89653 | 2.53245 |
| ENSMUSG000000029659 | 16_Medag    | 540.391 | -0.62604 | 1.40E-05 | 9.08E-05 | 450.59  | 447.889 | 375.278 | 684.379 | 647.295 | 636.912 |
| ENSMUSG000000029660 | 10_Tex26    | 5.39039 | -0.74725 | 0.44543  | 0.56039  | 4.34094 | 1.83561 | 5.97577 | 7.21348 | 5.37918 | 7.59736 |
| ENSMUSG000000029661 | 16_Col1a2   | 34624.1 | 0.31786  | 0.0361   | 0.07401  | 35208.5 | 45386.4 | 34671.4 | 27982.9 | 29140.8 | 35354.3 |
| ENSMUSG000000029663 | 10_Gngt1    | 249.958 | -2.4749  | 0.00146  | 0.00497  | 119.81  | 79.8491 | 28.6837 | 637.492 | 483.23  | 150.681 |
| ENSMUSG000000029664 | 10_Tfpi2    | 10.8039 | -0.74011 | 0.28317  | 0.39633  | 10.4183 | 5.50683 | 8.36608 | 13.5253 | 14.3445 | 12.6623 |
| ENSMUSG000000029669 | 14_Tspan12  | 281.62  | -0.85768 | 2.64E-05 | 0.00016  | 175.374 | 217.52  | 209.152 | 360.674 | 429.438 | 297.563 |
| ENSMUSG000000029670 | 12_Ing3     | 292.071 | -0.29434 | 0.10606  | 0.18049  | 243.961 | 279.013 | 265.324 | 365.183 | 325.441 | 273.505 |
| ENSMUSG000000029671 | 15_Wnt16    | 379.7   | -1.07893 | 6.77E-05 | 0.00035  | 228.334 | 311.136 | 192.42  | 711.43  | 462.61  | 372.271 |
| ENSMUSG000000029672 | 16_Fam3c    | 663.277 | -0.91951 | 7.23E-07 | 6.90E-06 | 487.054 | 524.067 | 364.522 | 945.868 | 928.806 | 729.347 |
| ENSMUSG000000029673 | 17_Auts2    | 1596.25 | 0.86621  | 1.24E-08 | 2.06E-07 | 1898.73 | 1998.06 | 2286.33 | 1109.07 | 970.943 | 1314.34 |
| ENSMUSG000000029674 | 13_Limk1    | 243.047 | 0.49523  | 0.01284  | 0.03115  | 255.247 | 280.849 | 316.716 | 213.699 | 167.651 | 224.122 |
| ENSMUSG000000029675 | 12_Eln      | 1304.61 | 0.08294  | 0.71073  | 0.79328  | 1267.56 | 1500.61 | 1257.3  | 1566.23 | 820.325 | 1415.64 |
| ENSMUSG000000029676 | 15_Pot1a    | 990.604 | -0.25521 | 0.0749   | 0.1358   | 979.317 | 912.299 | 816.29  | 945.868 | 1150.25 | 1139.6  |
| ENSMUSG000000029679 | 7_Hyal6     | 0       | NA       | NA       | NA       | 0       | 0       | 0       | 0       | 0       | 0       |
| ENSMUSG000000029681 | 12_Bcl7b    | 545.582 | 0.38203  | 0.02491  | 0.0545   | 597.314 | 589.231 | 665.701 | 541.011 | 386.405 | 493.828 |
| ENSMUSG000000029683 | 7_Lmod2     | 66.5077 | -1.30645 | 0.00428  | 0.01239  | 19.9683 | 62.4108 | 32.2692 | 109.104 | 60.0675 | 115.227 |
| ENSMUSG000000029684 | 14_Wasl     | 1686.13 | -0.08331 | 0.52293  | 0.63237  | 1638.27 | 1567.61 | 1705.48 | 1514.83 | 1776.03 | 1914.54 |
| ENSMUSG000000029685 | 15_Asb15    | 5.34321 | -3.90344 | 0.00674  | 0.0181   | 0       | 0.91781 | 1.19515 | 16.2303 | 3.58612 | 10.1298 |
| ENSMUSG000000029686 | 15_Cul1     | 5093.53 | -0.26675 | 0.0624   | 0.11671  | 4750.73 | 4523.86 | 4596.56 | 4526.46 | 6266.75 | 5896.82 |
| ENSMUSG000000029687 | 16_Ezh2     | 783.689 | -0.02986 | 0.88159  | 0.92004  | 865.584 | 692.025 | 768.484 | 577.079 | 940.461 | 858.502 |
| ENSMUSG000000029695 | 13_Aass     | 274.608 | -1.40074 | 5.24E-10 | 1.35E-08 | 144.119 | 191.821 | 115.93  | 411.169 | 440.197 | 344.414 |
| ENSMUSG000000029697 | 6_Fezf1     | 0.35216 | 1.91112  | 0.63543  | NA       | 0       | 0.91781 | 1.19515 | 0       | 0       | 0       |
| ENSMUSG000000029699 | 13_Ssc4d    | 57.6962 | 0.3156   | 0.33745  | 0.45391  | 57.3004 | 68.8354 | 65.7335 | 60.4129 | 39.4473 | 54.4478 |
| ENSMUSG000000029700 | 11_Slc13a1  | 6.05286 | 0.86975  | 0.33127  | 0.44783  | 7.8137  | 7.34244 | 8.36608 | 5.41011 | 3.58612 | 3.79868 |
| ENSMUSG000000029701 | 15_Rbm28    | 1077.26 | 0.17466  | 0.12444  | 0.20556  | 1164.24 | 1128.9  | 1133.01 | 953.082 | 1028.32 | 1056.03 |
| ENSMUSG000000029703 | 10_Lrwd1    | 352.124 | 1.03096  | 1.52E-07 | 1.81E-06 | 408.917 | 481.848 | 528.258 | 272.309 | 190.961 | 230.453 |
| ENSMUSG000000029705 | 17_Cux1     | 4735.39 | 0.40692  | 0.00135  | 0.00464  | 5194.37 | 5294.82 | 5705.67 | 3588.71 | 4036.18 | 4592.61 |
| ENSMUSG000000029706 | 15_Pax4     | 0       | NA       | NA       | NA       | 0       | 0       | 0       | 0       | 0       | 0       |
| ENSMUSG000000029707 | 6_Fscn3     | 0.7597  | 0.11011  | 0.97071  | NA       | 0       | 0       | 2.39031 | 0.90169 | 0       | 1.26623 |
| ENSMUSG000000029708 | 9_Gcc1      | 764.375 | 0.36301  | 0.00768  | 0.02019  | 825.647 | 815.929 | 939.391 | 717.742 | 617.71  | 669.834 |
| ENSMUSG000000029710 | 15_Ephb4    | 1110.77 | 0.6059   | 0.00018  | 0.00085  | 1244.98 | 1405.16 | 1372.04 | 1043.25 | 721.707 | 877.495 |
| ENSMUSG000000029712 | 14_Actl6b   | 2.41376 | -1.84304 | 0.27832  | NA       | 0       | 0.91781 | 2.39031 | 8.11517 | 1.79306 | 1.26623 |

|                     |                  |         |          |          |          |         |         |         |         |         |         |
|---------------------|------------------|---------|----------|----------|----------|---------|---------|---------|---------|---------|---------|
| ENSMUSG000000029713 | 15_Gnb2          | 5212.52 | 1.30194  | 1.34E-10 | 4.18E-09 | 6781.42 | 7268.1  | 8201.15 | 3830.36 | 2088.02 | 3106.05 |
| ENSMUSG000000029714 | 11_Gigyf1        | 962.085 | 0.91189  | 3.65E-06 | 2.81E-05 | 1147.75 | 1287.68 | 1334.99 | 876.438 | 534.332 | 591.328 |
| ENSMUSG000000029715 | 5_Pop7           | 169.19  | 1.1793   | 1.94E-06 | 1.63E-05 | 210.102 | 237.712 | 256.958 | 133.449 | 80.6878 | 96.2332 |
| ENSMUSG000000029716 | 13_Tfr2          | 10.3068 | -0.91143 | 0.27455  | 0.38662  | 6.94551 | 11.9315 | 2.39031 | 20.7388 | 7.17224 | 12.6623 |
| ENSMUSG000000029718 | 14_Pcolce        | 4460    | 0.5641   | 0.00051  | 0.002    | 4729.02 | 5923.52 | 5310.07 | 4160.38 | 2887.72 | 3749.3  |
| ENSMUSG000000029720 | 9_Gm20605        | 414.859 | 0.9722   | 1.10E-07 | 1.36E-06 | 484.449 | 671.834 | 492.403 | 284.031 | 284.2   | 272.239 |
| ENSMUSG000000029722 | 15_Agfg2         | 1996.06 | 0.70212  | 1.94E-05 | 0.00012  | 2279.86 | 2323.88 | 2812.2  | 1508.52 | 1255.14 | 1796.78 |
| ENSMUSG000000029723 | 16_Tsc22d4       | 2340.68 | 1.26247  | 1.54E-10 | 4.73E-09 | 2867.63 | 3280.24 | 3763.54 | 1562.62 | 983.494 | 1586.58 |
| ENSMUSG000000029725 | 10_Ppp1r35       | 64.5425 | 0.84975  | 0.02043  | 0.04612  | 68.5869 | 80.7669 | 100.393 | 65.823  | 34.9647 | 36.7206 |
| ENSMUSG000000029726 | 16_Mepce         | 1059.89 | 0.48997  | 0.00405  | 0.01185  | 1209.39 | 1177.54 | 1327.82 | 1052.27 | 698.397 | 893.956 |
| ENSMUSG000000029727 | 7_Cyp3a13        | 599.9   | -0.24256 | 0.22275  | 0.32778  | 555.641 | 489.19  | 603.553 | 480.598 | 720.811 | 749.606 |
| ENSMUSG000000029729 | 12_Zkscan1       | 1486.27 | -0.35948 | 0.0033   | 0.00996  | 1370    | 1279.42 | 1254.91 | 1513.03 | 1697.13 | 1803.11 |
| ENSMUSG000000029730 | 16_Mcm7          | 1315.04 | 0.99315  | 3.79E-09 | 7.36E-08 | 1789.34 | 1597.9  | 1862.05 | 766.433 | 781.775 | 1092.75 |
| ENSMUSG000000029735 | 17_Tpk1          | 167.673 | -0.45742 | 0.0291   | 0.06189  | 130.228 | 128.493 | 166.126 | 183.944 | 203.512 | 193.733 |
| ENSMUSG000000029736 | 15_Nobox         | 1.32376 | -3.87119 | 0.16218  | NA       | 0       | 0       | 0       | 5.41011 | 0       | 2.53245 |
| ENSMUSG000000029752 | 12_Asns          | 279.525 | 0.48911  | 0.03735  | 0.0761   | 311.68  | 303.794 | 365.717 | 225.421 | 302.131 | 168.408 |
| ENSMUSG000000029754 | 13_Dlx6          | 0       | NA       | NA       | NA       | 0       | 0       | 0       | 0       | 0       | 0       |
| ENSMUSG000000029755 | 10_Dlx5          | 9.17037 | 1.35273  | 0.09543  | 0.16544  | 12.1546 | 12.8493 | 14.3418 | 1.80337 | 6.27571 | 7.59736 |
| ENSMUSG000000029757 | 16_Dync1i1       | 139.605 | -1.23463 | 0.00028  | 0.00122  | 72.0596 | 126.657 | 50.1965 | 227.225 | 155.1   | 206.395 |
| ENSMUSG000000029759 | 9_Pon3           | 1415.81 | -0.42649 | 0.0019   | 0.00623  | 1324.86 | 1129.82 | 1170.06 | 1586.06 | 1819.06 | 1465.02 |
| ENSMUSG000000029761 | 16_Cald1         | 2387.28 | -1.26917 | 1.25E-12 | 6.50E-11 | 1454.22 | 1638.28 | 1106.71 | 3621.17 | 3712.53 | 2790.76 |
| ENSMUSG000000029762 | 6_Akr1b8         | 417.903 | 1.2927   | 2.40E-14 | 1.93E-12 | 607.732 | 515.807 | 657.335 | 219.11  | 261.787 | 245.648 |
| ENSMUSG000000029763 | 17_Exoc4         | 1636.69 | 0.04146  | 0.69568  | 0.78224  | 1626.99 | 1599.74 | 1754.49 | 1594.18 | 1601.2  | 1643.56 |
| ENSMUSG000000029765 | 12_Plxna4        | 450.555 | -1.01039 | 1.01E-06 | 9.30E-06 | 279.557 | 375.382 | 241.421 | 678.969 | 617.71  | 510.289 |
| ENSMUSG000000029767 | 16_Calu          | 6487.9  | -0.53549 | 5.61E-07 | 5.61E-06 | 5681.42 | 5188.35 | 5022.04 | 7475.87 | 8176.36 | 7383.37 |
| ENSMUSG000000029769 | 16_Ccdc136       | 276.965 | -0.71114 | 0.00518  | 0.01451  | 216.179 | 252.397 | 161.346 | 452.646 | 305.717 | 273.505 |
| ENSMUSG000000029771 | 12_Irf5          | 570.863 | 1.29701  | 1.06E-12 | 5.60E-11 | 694.551 | 748.929 | 990.783 | 302.966 | 324.544 | 363.407 |
| ENSMUSG000000029772 | 17_Ahcyl2        | 1899.4  | -0.87736 | 4.53E-07 | 4.65E-06 | 1359.58 | 1565.78 | 1091.18 | 2647.35 | 2691.38 | 2041.16 |
| ENSMUSG000000029775 | 14_Klhdc10       | 1961.85 | -0.17285 | 0.07795  | 0.14027  | 1824.06 | 1865.9  | 1842.93 | 2073.88 | 2039.61 | 2124.73 |
| ENSMUSG000000029776 | 11_Hibadh        | 2202.94 | -0.33767 | 0.00114  | 0.00402  | 1927.38 | 1954.93 | 1956.47 | 2310.12 | 2573.04 | 2495.73 |
| ENSMUSG000000029777 | 10_Gars          | 2057.09 | 0.20017  | 0.09347  | 0.16261  | 2114.04 | 2088.01 | 2397.48 | 1773.62 | 2011.81 | 1957.59 |
| ENSMUSG000000029778 | 12_Adcyap1r1     | 148.164 | -0.13688 | 0.59599  | 0.69781  | 144.119 | 167.958 | 109.954 | 127.138 | 152.41  | 187.402 |
| ENSMUSG000000029780 | 14_Nt5c3         | 868.701 | 0.12486  | 0.5456   | 0.65212  | 992.339 | 765.45  | 962.099 | 687.986 | 1090.18 | 714.152 |
| ENSMUSG000000029781 | 7_Fkbp9          | 4480.64 | -0.59256 | 1.44E-05 | 9.31E-05 | 3660.28 | 4049.36 | 3008.2  | 5667.99 | 5233.05 | 5264.97 |
| ENSMUSG000000029782 | 18_Tmem209       | 899.046 | -0.18384 | 0.22721  | 0.33291  | 905.521 | 759.943 | 859.316 | 812.419 | 1023.84 | 1033.24 |
| ENSMUSG000000029784 | 13_Ssmem1        | 1.84749 | -1.06478 | 0.53428  | NA       | 2.60457 | 0.91781 | 0       | 3.60674 | 2.68959 | 1.26623 |
| ENSMUSG000000029787 | 10_Avl9          | 1079.66 | -0.36672 | 0.00164  | 0.00549  | 937.643 | 946.258 | 946.562 | 1191.13 | 1305.35 | 1151    |
| ENSMUSG000000029788 | 13_Cpa5          | 0.2894  | 1.67273  | 0.67976  | NA       | 1.73638 | 0       | 0       | 0       | 0       | 0       |
| ENSMUSG000000029790 | 16_Cep41         | 285.569 | 0.03113  | 0.86202  | 0.90635  | 281.293 | 289.109 | 295.203 | 237.143 | 309.303 | 301.362 |
| ENSMUSG000000029797 | 12_Sspo          | 39.7468 | 1.239    | 0.0014   | 0.00481  | 46.8822 | 62.4108 | 58.5626 | 27.9522 | 22.4133 | 20.2596 |
| ENSMUSG000000029798 | 11_Herc6         | 2129.69 | 1.02514  | 8.37E-06 | 5.80E-05 | 2801.64 | 2284.42 | 3482.68 | 981.935 | 1839.68 | 1387.78 |
| ENSMUSG000000029802 | 13_Abcg2         | 549.151 | -0.9267  | 1.39E-08 | 2.29E-07 | 448.853 | 352.437 | 333.448 | 715.037 | 757.568 | 687.561 |
| ENSMUSG000000029804 | 16_Herc3         | 1106.8  | -0.27055 | 0.04634  | 0.09102  | 1030.54 | 994.901 | 986.002 | 1327.28 | 1258.73 | 1043.37 |
| ENSMUSG000000029810 | 15_Tmem176b      | 4015.46 | 0.28603  | 0.01451  | 0.03459  | 4241.1  | 4291.66 | 4705.32 | 3982.74 | 3346.75 | 3525.18 |
| ENSMUSG000000029811 | 14_Aoc1          | 39.3382 | 1.50549  | 0.00092  | 0.00334  | 50.3549 | 54.1505 | 69.3189 | 11.7219 | 18.8271 | 31.6557 |
| ENSMUSG000000029814 | 10_Igf2bp3       | 16.4622 | 0.0351   | 0.96384  | 0.97656  | 36.4639 | 7.34244 | 5.97577 | 17.132  | 17.9306 | 13.9285 |
| ENSMUSG000000029815 | 12_Malsu1        | 291.195 | -0.24393 | 0.15748  | 0.24899  | 276.952 | 255.15  | 267.715 | 277.719 | 350.543 | 319.089 |
| ENSMUSG000000029816 | 10_Gpnmb         | 9876.25 | -0.81322 | 0.00104  | 0.00372  | 6486.24 | 10162.9 | 4842.76 | 15096.9 | 12885.8 | 1287.87 |
| ENSMUSG000000029817 | 11_Tra2a         | 2290.16 | -0.28378 | 0.05209  | 0.1003   | 2113.17 | 1960.43 | 2122.59 | 2054.04 | 2744.28 | 2746.45 |
| ENSMUSG000000029819 | 6_Npy            | 2653.94 | 0.40899  | 0.00325  | 0.00984  | 2934.48 | 3185.7  | 2961.59 | 2517.51 | 1903.33 | 2421.03 |
| ENSMUSG000000029821 | 15_Dfna5         | 234.675 | -0.90208 | 0.00041  | 0.00167  | 147.592 | 217.52  | 125.491 | 338.132 | 336.199 | 243.116 |
| ENSMUSG000000029822 | 15_Osblp3        | 2606.85 | 0.39182  | 0.00289  | 0.00891  | 2871.1  | 2708.44 | 3296.24 | 2036.01 | 2281.67 | 2447.62 |
| ENSMUSG000000029823 | 16_Luc7l2        | 5312.64 | -0.24151 | 0.09398  | 0.16335  | 4933.05 | 4745.97 | 4927.62 | 4686.06 | 6585.02 | 5998.12 |
| ENSMUSG000000029826 | 14_Zc3hav1       | 3392.16 | 0.61859  | 4.15E-05 | 0.00023  | 4000.61 | 3588.62 | 4736.4  | 2302.9  | 2886.83 | 2837.61 |
| ENSMUSG000000029828 | 4_4921507P07Rik  | 9.6232  | -0.95898 | 0.28034  | 0.3932   | 5.20913 | 11.9315 | 2.39031 | 22.5421 | 8.06878 | 7.59736 |
| ENSMUSG000000029829 | 4_Tmem213        | 3.60035 | 0.87784  | 0.53649  | 0.64418  | 5.20913 | 6.42464 | 2.39031 | 6.3118  | 0       | 1.26623 |
| ENSMUSG000000029830 | 15_Svopl         | 11.5914 | -1.48647 | 0.03946  | 0.0796   | 6.94551 | 6.42464 | 4.78062 | 22.5421 | 9.86184 | 18.9934 |
| ENSMUSG000000029831 | 7_Npvf           | 45.7046 | -1.37274 | 0.00339  | 0.01018  | 18.232  | 41.3013 | 16.7322 | 86.5618 | 64.5502 | 46.8504 |
| ENSMUSG000000029832 | 16_Nfe2l3        | 1596.31 | -0.10747 | 0.53102  | 0.6396   | 1564.48 | 1416.17 | 1629    | 1274.08 | 1758.1  | 1936.06 |
| ENSMUSG000000029833 | 17_Trim24        | 877.906 | 0.10051  | 0.47472  | 0.58722  | 948.062 | 804.915 | 972.855 | 774.548 | 907.289 | 859.768 |
| ENSMUSG000000029836 | 15_Cbx3          | 2858.22 | -0.39076 | 0.00078  | 0.0029   | 2511.67 | 2333.98 | 2575.56 | 2979.17 | 3531.43 | 3217.48 |
| ENSMUSG000000029838 | 11_Ptn           | 2022.96 | -1.31609 | 2.87E-08 | 4.21E-07 | 972.371 | 1637.37 | 867.682 | 3075.65 | 3290.27 | 2294.4  |
| ENSMUSG000000029840 | 8_Mtpn           | 3885.98 | -0.36811 | 0.00528  | 0.01474  | 3503.14 | 3165.51 | 3510.17 | 3782.57 | 4898.64 | 4455.85 |
| ENSMUSG000000029843 | 4_Slc13a4        | 469.505 | -0.7962  | 0.00734  | 0.01945  | 301.261 | 511.218 | 216.323 | 768.236 | 517.298 | 502.692 |
| ENSMUSG000000029844 | 9_Hoxa1          | 0.29884 | -1.76064 | 0.66373  | NA       | 0       | 0       | 0       | 0       | 1.79306 | 0       |
| ENSMUSG000000029847 | 13_2010107G12Rik | 557.423 | 0.99384  | 1.88E-08 | 2.96E-07 | 692.814 | 682.847 | 849.755 | 316.492 | 365.784 | 436.848 |
| ENSMUSG000000029851 | 5_Tcaf2          | 1075.9  | 0.28598  | 0.07005  | 0.12863  | 1225.01 | 1074.75 | 1245.35 | 808.812 | 974.529 | 1126.94 |
| ENSMUSG000000029859 | 6_Epha1          | 3546.79 | 0.99734  | 4.44E-09 | 8.47E-08 | 4418.21 | 4486.23 | 5271.82 | 2269.54 | 1914.99 | 2919.92 |
| ENSMUSG000000029860 | 16_Zyx           | 1716.51 | 1.29119  | 9.51E-14 | 6.53E-12 | 2164.39 | 2411.08 | 2735.71 | 1146.04 | 778.189 | 1063.63 |
| ENSMUSG000000029861 | 17_Fam131b       | 11.3993 | -1.4609  | 0.08598  | 0.15171  | 8.68188 | 3.67122 | 5.97577 | 30.6573 | 14.3445 | 5.06491 |
| ENSMUSG000000029862 | 15_Clcnc1        | 26.717  | -1.62682 | 0.00539  | 0.01499  | 7.8137  | 18.3561 | 13.1467 | 63.118  | 22.4133 | 35.4544 |
| ENSMUSG000000029863 | 13_Casp2         | 1728.45 | 0.25439  | 0.04206  | 0.08389  | 1764.16 | 1830.1  | 2047.3  | 1430.97 | 1640.65 | 1657.49 |
| ENSMUSG000000029864 | 7_Gstk1          | 499.92  | -0.38129 | 0.00398  | 0.01167  | 428.017 | 446.054 | 429.06  | 577.079 | 577.366 | 541.945 |
| ENSMUSG000000029866 | 13_Kel           | 0.14942 | -0.99647 | 0.80707  | NA       | 0       | 0       | 0       | 0       | 0.89653 | 0       |
| ENSMUSG000000029868 | 12_Trvp6         | 79.9785 | -0.29421 | 0.2649   | 0.37617  | 69.4551 | 78.0135 | 68.1238 | 88.3652 | 92.3426 | 83.571  |
| ENSMUSG000000029869 | 7_Ephb6          | 677.736 | 1.01376  | 5.31E-08 | 7.24E-07 | 788.315 | 942.586 | 988.392 | 518.469 | 348.75  | 479.9   |
| ENSMUSG000000029875 | 4_Ccdc184        | 2.5132  | -1.10651 | 0.44205  | 0.55745  | 0.86819 | 2.75342 | 1.19515 | 5.41011 | 3.58612 | 1.26623 |
| ENSMUSG000000029878 | 5_Dbph2          | 13.9652 | -2.99236 | 0.00057  | 0.00223  | 1.73638 | 7.34244 | 0       | 23.4438 | 32.2751 | 18.9934 |
| ENSMUSG000000029910 | 14_Mad2l1        | 444.862 | -0.19814 | 0.3004   | 0.4151   | 474.899 | 360.698 | 407.548 | 403.053 | 568.4   | 454.575 |

|                    |                  |         |          |          |          |         |         |         |         |         |         |
|--------------------|------------------|---------|----------|----------|----------|---------|---------|---------|---------|---------|---------|
| ENSMUSG00000029911 | 14_Ssbp1         | 650.983 | -0.5001  | 0.0021   | 0.00677  | 547.827 | 546.094 | 523.477 | 629.376 | 880.393 | 778.73  |
| ENSMUSG00000029913 | 14_Prdm5         | 115.632 | -0.70041 | 0.02425  | 0.0533   | 87.687  | 116.561 | 59.7577 | 172.222 | 146.134 | 111.428 |
| ENSMUSG00000029915 | 14_Clec5a        | 42.771  | 0.35823  | 0.41438  | 0.53052  | 72.0596 | 33.9588 | 38.2449 | 40.5758 | 43.93   | 27.857  |
| ENSMUSG00000029916 | 11_Agk           | 310.38  | -0.315   | 0.05942  | 0.11191  | 271.743 | 257.903 | 301.179 | 321     | 377.439 | 333.018 |
| ENSMUSG00000029917 | 15_C130060K24Rik | 0.35574 | -0.03469 | 0.99322  | NA       | 0.86819 | 0       | 0       | 0       | 0       | 1.26623 |
| ENSMUSG00000029918 | 9_Mrps33         | 894.473 | -0.60473 | 3.33E-07 | 3.55E-06 | 733.619 | 721.395 | 672.872 | 1034.23 | 1101.84 | 1102.88 |
| ENSMUSG00000029919 | 5_Hpgds          | 2628.18 | -0.37519 | 0.0083   | 0.02162  | 2331.95 | 2277.08 | 2255.26 | 2443.57 | 3332.4  | 3128.85 |
| ENSMUSG00000029920 | 9_Smarcad1       | 784.133 | -0.3376  | 0.02654  | 0.05742  | 707.574 | 606.669 | 764.899 | 779.056 | 953.909 | 892.69  |
| ENSMUSG00000029922 | 15_Mkrm1         | 4992.87 | 0.16222  | 0.12725  | 0.20927  | 5115.37 | 5103    | 5601.69 | 4384.9  | 4858.3  | 4893.97 |
| ENSMUSG00000029923 | 4_Rab19          | 260.147 | 0.5516   | 0.00257  | 0.00803  | 328.175 | 277.177 | 321.496 | 199.272 | 195.444 | 239.317 |
| ENSMUSG00000029924 | 12_Slc37a3       | 1470.92 | 0.1726   | 0.14492  | 0.23223  | 1534.96 | 1507.95 | 1632.58 | 1279.49 | 1372.59 | 1497.95 |
| ENSMUSG00000029925 | 13_Tbxas1        | 86.8354 | -0.6145  | 0.10643  | 0.18103  | 83.3461 | 81.6847 | 40.6352 | 138.86  | 109.377 | 67.11   |
| ENSMUSG00000029992 | 14_Gfpt1         | 5535.56 | 0.09724  | 0.4691   | 0.58239  | 5658.85 | 5382.93 | 6123.97 | 4527.36 | 5744.97 | 5775.26 |
| ENSMUSG00000029993 | 16_Nfu1          | 671.04  | -0.04252 | 0.74319  | 0.81832  | 678.055 | 607.587 | 697.97  | 678.969 | 663.433 | 700.223 |
| ENSMUSG00000029994 | 17_Anxa4         | 2490.54 | 0.13995  | 0.26518  | 0.37636  | 2653.18 | 2355.09 | 2825.34 | 2160.44 | 2433.18 | 2515.99 |
| ENSMUSG00000029998 | 14_Pcyox1        | 2859.86 | -0.06746 | 0.52438  | 0.63373  | 2787.75 | 2780.95 | 2808.61 | 2793.42 | 2817.8  | 3170.63 |
| ENSMUSG00000029999 | 14_Tgfa          | 833.283 | 0.80646  | 2.19E-06 | 1.82E-05 | 928.962 | 971.038 | 1281.21 | 627.573 | 538.815 | 652.107 |
| ENSMUSG00000030000 | 10_Add2          | 166.929 | -1.70363 | 5.85E-05 | 0.00031  | 73.796  | 133.082 | 27.4885 | 313.787 | 233.098 | 220.323 |
| ENSMUSG00000030001 | 4_Figla          | 0.50988 | -2.49048 | 0.5167   | NA       | 0       | 0       | 0       | 0       | 1.79306 | 1.26623 |
| ENSMUSG00000030002 | 15_Dusp11        | 3465.11 | -0.11368 | 0.40763  | 0.52452  | 3311.27 | 3159.09 | 3516.14 | 3066.63 | 4097.14 | 3640.4  |
| ENSMUSG00000030004 | 6_Nat8           | 8.04779 | -0.41235 | 0.63983  | 0.73563  | 5.20913 | 11.9315 | 3.58546 | 14.427  | 8.06878 | 5.06491 |
| ENSMUSG00000030007 | 8_Cct7           | 4495.84 | 0.22271  | 0.04092  | 0.08211  | 5000.77 | 4488.99 | 5036.38 | 4268.58 | 3873.91 | 4306.44 |
| ENSMUSG00000030008 | 9_Pradc1         | 162.835 | -0.00283 | 0.98938  | 0.99283  | 159.747 | 142.26  | 186.444 | 172.222 | 147.928 | 168.408 |
| ENSMUSG00000030016 | 14_Zfp638        | 2504.94 | -0.62571 | 2.50E-05 | 0.00015  | 2024.62 | 1906.28 | 1979.18 | 2488.65 | 3519.78 | 3111.12 |
| ENSMUSG00000030017 | 2_Reg3g          | 48.551  | 0.23042  | 0.55183  | 0.65799  | 55.5641 | 67.9176 | 33.4643 | 40.5758 | 51.9988 | 41.7855 |
| ENSMUSG00000030019 | 6_Fbxl14         | 609.578 | 0.30955  | 0.05654  | 0.10736  | 610.336 | 618.601 | 795.973 | 561.75  | 498.471 | 572.335 |
| ENSMUSG00000030020 | 13_Prickle2      | 1709.41 | -0.01126 | 0.91995  | 0.94673  | 1781.52 | 1616.26 | 1709.07 | 1642.87 | 1678.31 | 1828.43 |
| ENSMUSG00000030022 | 14_Adams9        | 209.578 | -0.29684 | 0.15573  | 0.24673  | 191.87  | 188.15  | 185.249 | 267.801 | 242.063 | 182.337 |
| ENSMUSG00000030029 | 5_Lrig1          | 5848.51 | 0.5418   | 0.00024  | 0.00105  | 6842.19 | 6938.61 | 7019.14 | 4984.52 | 3826.39 | 5480.23 |
| ENSMUSG00000030030 | 15_1700003E16Rik | 33.3275 | 0.66009  | 0.1518   | 0.24138  | 28.6502 | 40.3834 | 53.7819 | 34.264  | 18.8271 | 24.0583 |
| ENSMUSG00000030031 | 14_Kbtbd8        | 72.197  | -0.60845 | 0.05515  | 0.10514  | 65.9823 | 41.3013 | 64.5383 | 75.7416 | 99.5149 | 86.1034 |
| ENSMUSG00000030032 | 12_Wdr54         | 188.592 | 0.34172  | 0.12865  | 0.2112   | 223.124 | 228.534 | 179.273 | 167.713 | 135.376 | 197.531 |
| ENSMUSG00000030034 | 11_Ino80b        | 194.928 | 0.59494  | 0.03469  | 0.07166  | 218.783 | 203.753 | 280.861 | 184.846 | 97.7218 | 183.603 |
| ENSMUSG00000030035 | 14_Wbp1          | 812.788 | 0.38984  | 0.04126  | 0.08264  | 892.498 | 940.751 | 933.415 | 912.506 | 565.711 | 631.847 |
| ENSMUSG00000030036 | 8_Mogs           | 853.428 | 0.99328  | 7.74E-08 | 1.01E-06 | 1006.23 | 1070.16 | 1331.4  | 612.244 | 450.955 | 649.574 |
| ENSMUSG00000030037 | 9_Mrpl53         | 276.089 | 0.55959  | 0.00078  | 0.0029   | 327.307 | 302.876 | 357.351 | 229.028 | 219.65  | 220.323 |
| ENSMUSG00000030041 | 9_M1ap           | 6.87086 | 1.22021  | 0.16757  | 0.26151  | 10.4183 | 11.0137 | 7.17092 | 2.70506 | 3.58612 | 6.33113 |
| ENSMUSG00000030042 | 15_Pole4         | 1678.4  | -0.48247 | 1.66E-05 | 0.00011  | 1389.97 | 1422.6  | 1388.77 | 1847.55 | 2115.81 | 1905.67 |
| ENSMUSG00000030043 | 11_Tacr1         | 507.495 | -1.15797 | 1.14E-05 | 7.60E-05 | 291.711 | 448.807 | 200.786 | 800.697 | 693.915 | 609.055 |
| ENSMUSG00000030045 | 10_Mrpl19        | 594.686 | -0.09028 | 0.50715  | 0.61748  | 592.973 | 572.711 | 562.918 | 582.489 | 673.294 | 583.731 |
| ENSMUSG00000030046 | 6_Bmp10          | 0.78625 | 0.37145  | 0.27218  | NA       | 2.60457 | 0.91781 | 1.19515 | 0       | 0       | 0       |
| ENSMUSG00000030047 | 14_Arhgap25      | 235.492 | 0.69639  | 0.00029  | 0.00126  | 289.975 | 284.52  | 298.789 | 199.272 | 147.928 | 192.466 |
| ENSMUSG00000030048 | 5_Gkn3           | 7.55315 | -1.74148 | 0.05435  | 0.10389  | 5.20913 | 2.75342 | 2.39031 | 18.0337 | 8.06878 | 8.86359 |
| ENSMUSG00000030050 | 4_Gkn1           | 406.675 | 0.04244  | 0.84184  | 0.89237  | 451.458 | 344.177 | 441.012 | 330.017 | 363.095 | 510.289 |
| ENSMUSG00000030051 | 10_Aplf          | 203.107 | 0.10607  | 0.55667  | 0.66264  | 205.761 | 204.671 | 221.104 | 193.862 | 185.582 | 207.661 |
| ENSMUSG00000030054 | 4_Gp9            | 0.30325 | -0.03469 | 0.99322  | NA       | 0       | 0.91781 | 0       | 0.90169 | 0       | 0       |
| ENSMUSG00000030055 | 16_Rab43         | 98.6437 | 1.6617   | 0.00074  | 0.00278  | 160.615 | 186.315 | 102.783 | 83.8567 | 15.241  | 43.0517 |
| ENSMUSG00000030056 | 8_Isl1           | 821.873 | -0.18096 | 0.16961  | 0.26403  | 754.456 | 757.19  | 799.558 | 781.761 | 934.185 | 904.086 |
| ENSMUSG00000030057 | 15_Cnbp          | 8181.73 | -0.26091 | 0.01212  | 0.02969  | 7939.58 | 6944.12 | 7448.2  | 8654.38 | 9348.12 | 8755.96 |
| ENSMUSG00000030058 | 17_Copg1         | 3596.9  | 0.47145  | 5.52E-06 | 4.05E-05 | 3951.99 | 4222.82 | 4363.51 | 3091.88 | 2852.76 | 3098.46 |
| ENSMUSG00000030059 | 15_Tmff1         | 1737.39 | -0.29184 | 0.02141  | 0.04802  | 1514.99 | 1472.16 | 1700.7  | 1733.94 | 2066.5  | 1936.06 |
| ENSMUSG00000030060 | 14_Hmces         | 314.82  | -0.04479 | 0.81091  | 0.86965  | 307.339 | 279.013 | 343.009 | 269.604 | 322.751 | 367.206 |
| ENSMUSG00000030061 | 16_Uba3          | 2016.12 | -0.31071 | 0.03656  | 0.07471  | 1788.47 | 1668.57 | 1943.32 | 1885.42 | 2581.11 | 2229.83 |
| ENSMUSG00000030062 | 7_Rpn1           | 5240.76 | 0.29656  | 0.01488  | 0.03537  | 5875.9  | 5256.27 | 6199.26 | 4436.29 | 4491.62 | 5185.2  |
| ENSMUSG00000030064 | 16_Frmd4b        | 2686.45 | 0.17697  | 0.14515  | 0.23251  | 2905.83 | 2769.02 | 2876.74 | 2216.34 | 2616.97 | 2733.78 |
| ENSMUSG00000030067 | 17_Foxp1         | 2854.19 | 0.38102  | 0.0043   | 0.01244  | 3196.67 | 3017.74 | 3470.73 | 2341.68 | 2255.67 | 2842.68 |
| ENSMUSG00000030068 | 4_Gm20696        | 0.80872 | -3.16341 | 0.33424  | NA       | 0       | 0       | 0       | 0       | 3.58612 | 1.26623 |
| ENSMUSG00000030069 | 15_Prok2         | 1.3921  | 3.89618  | 0.09064  | NA       | 1.73638 | 1.83561 | 4.78062 | 0       | 0       | 0       |
| ENSMUSG00000030074 | 9_Gxylt2         | 315.677 | -1.05075 | 7.79E-09 | 1.38E-07 | 193.606 | 227.616 | 194.81  | 363.379 | 462.61  | 452.043 |
| ENSMUSG00000030075 | 10_Cntn3         | 35.7936 | -1.64985 | 0.00038  | 0.00158  | 16.4956 | 21.1095 | 14.3418 | 73.9382 | 54.6884 | 34.1881 |
| ENSMUSG00000030077 | 11_Chil1         | 4499.24 | -0.10435 | 0.55233  | 0.6584   | 4766.35 | 3891.5  | 4350.36 | 3538.21 | 4906.71 | 5542.28 |
| ENSMUSG00000030079 | 15_Ruvbl1        | 943.02  | 0.31582  | 0.03294  | 0.06865  | 1057.45 | 950.847 | 1128.23 | 847.584 | 730.672 | 943.339 |
| ENSMUSG00000030082 | 14_Sec61a1       | 4688.8  | 0.77618  | 1.27E-09 | 2.90E-08 | 5511.26 | 5689.48 | 6560.2  | 3505.75 | 3102.89 | 3763.23 |
| ENSMUSG00000030083 | 11_Abtb1         | 630.351 | 0.98016  | 1.54E-07 | 1.84E-06 | 718.86  | 843.463 | 947.757 | 494.124 | 339.785 | 438.115 |
| ENSMUSG00000030084 | 11_Plxna1        | 2528.27 | 0.95856  | 1.64E-09 | 3.60E-08 | 2931    | 3505.1  | 3579.49 | 1950.35 | 1396.79 | 1806.91 |
| ENSMUSG00000030086 | 16_Chchd6        | 224.44  | 0.8396   | 0.00013  | 0.00065  | 270.007 | 274.424 | 320.301 | 201.076 | 132.687 | 148.149 |
| ENSMUSG00000030087 | 11_Klf15         | 130.521 | 0.05     | 0.87006  | 0.91195  | 119.81  | 160.616 | 118.32  | 182.14  | 102.204 | 100.032 |
| ENSMUSG00000030088 | 15_Aldh11        | 656.836 | 0.71047  | 0.00016  | 0.00073  | 774.424 | 753.518 | 917.878 | 567.16  | 381.025 | 547.01  |
| ENSMUSG00000030089 | 15_Slc41a3       | 134.835 | -0.24334 | 0.37767  | 0.49518  | 119.81  | 138.589 | 112.344 | 197.469 | 119.239 | 121.558 |
| ENSMUSG00000030091 | 17_Nup210        | 175.855 | 0.68011  | 0.0009   | 0.00328  | 211.838 | 211.095 | 227.079 | 155.09  | 118.342 | 131.688 |
| ENSMUSG00000030092 | 14_Cntn6         | 17.341  | -1.82632 | 0.00564  | 0.01559  | 5.20913 | 13.7671 | 3.58546 | 26.1489 | 22.4133 | 32.9219 |
| ENSMUSG00000030093 | 7_Wnt7a          | 14.5297 | -1.0182  | 0.15258  | 0.24243  | 10.4183 | 15.6027 | 2.39031 | 19.8371 | 16.1376 | 22.7921 |
| ENSMUSG00000030094 | 8_Xpc            | 987.113 | 0.18539  | 0.18174  | 0.27913  | 1049.64 | 1026.11 | 1074.44 | 965.705 | 792.533 | 1014.25 |
| ENSMUSG00000030095 | 10_Tmem43        | 2947.69 | 0.62964  | 1.34E-05 | 8.76E-05 | 3348.6  | 3479.4  | 3912.93 | 2201.01 | 2030.64 | 2713.52 |
| ENSMUSG00000030096 | 8_Slc6a6         | 16126   | 0.23122  | 0.15423  | 0.24472  | 16474.7 | 19806.2 | 15964.9 | 17615.3 | 12052.1 | 14842.7 |
| ENSMUSG00000030098 | 15_Grip2         | 32.8713 | -0.44216 | 0.36731  | 0.48471  | 19.9683 | 33.041  | 31.074  | 57.7079 | 31.3786 | 24.0583 |
| ENSMUSG00000030101 | 15_Sumf1         | 1082.96 | -0.1687  | 0.14476  | 0.232    | 1008.83 | 979.299 | 1070.86 | 1104.56 | 1128.73 | 1205.45 |
| ENSMUSG00000030102 | 10_Itp1          | 1728.05 | -0.92296 | 1.40E-06 | 1.23E-05 | 1221.54 | 1428.11 | 929.83  | 2681.61 | 2218.02 | 1889.21 |
| ENSMUSG00000030103 | 11_Bhlhe40       | 4504.65 | 0.671    | 7.46E-06 | 5.25E-05 | 5032.89 | 5406.79 | 6159.82 | 3262.3  | 3057.17 | 4108.91 |

|                    |             |         |          |          |          |         |         |         |         |         |         |
|--------------------|-------------|---------|----------|----------|----------|---------|---------|---------|---------|---------|---------|
| ENSMUSG00000030104 | 9_Edem1     | 1665.32 | 0.09481  | 0.48132  | 0.59379  | 1755.48 | 1601.57 | 1802.29 | 1391.3  | 1698.93 | 1742.33 |
| ENSMUSG00000030105 | 8_Arl8b     | 3089.02 | -0.19686 | 0.20298  | 0.30453  | 2949.24 | 2702.94 | 2983.1  | 2618.49 | 3719.71 | 3560.63 |
| ENSMUSG00000030107 | 10_Usp18    | 2421.63 | 1.56416  | 7.63E-14 | 5.36E-12 | 3369.44 | 2836.94 | 4652.73 | 1015.3  | 1504.38 | 1151    |
| ENSMUSG00000030108 | 14_Slc6a13  | 624.79  | -1.1399  | 5.65E-05 | 0.0003   | 367.244 | 536.916 | 265.324 | 1191.13 | 677.777 | 710.353 |
| ENSMUSG00000030109 | 15_Slc6a12  | 74.9679 | -0.88523 | 0.06242  | 0.11672  | 36.4639 | 89.0271 | 32.2692 | 148.778 | 60.9641 | 82.3047 |
| ENSMUSG00000030110 | 13_Ret      | 331.104 | 0.49983  | 0.02312  | 0.05126  | 351.616 | 403.834 | 407.548 | 313.787 | 194.547 | 315.291 |
| ENSMUSG00000030111 | 9_A2m       | 32273.2 | -0.61571 | 0.00173  | 0.00575  | 27154.3 | 30765.8 | 18545.2 | 31835.8 | 42900.8 | 42437.6 |
| ENSMUSG00000030114 | 8_Klrp1     | 5.3986  | 2.26988  | 0.09607  | 0.16638  | 13.0228 | 9.17806 | 4.78062 | 5.41011 | 0       | 0       |
| ENSMUSG00000030116 | 14_Mfap5    | 588.782 | -0.45452 | 0.00562  | 0.01554  | 480.108 | 493.779 | 517.502 | 812.419 | 603.365 | 625.516 |
| ENSMUSG00000030117 | 5_Gdf3      | 1.85103 | 2.10671  | 0.23423  | NA       | 2.60457 | 2.75342 | 3.58546 | 0       | 0.89653 | 1.26623 |
| ENSMUSG00000030120 | 14_Mlf2     | 2223.01 | 0.63166  | 0.00043  | 0.00173  | 2581.12 | 2738.73 | 2785.9  | 2109.94 | 1290.11 | 1832.23 |
| ENSMUSG00000030122 | 12_Ptms     | 2598.64 | 0.38954  | 0.02864  | 0.0611   | 2804.25 | 2936.98 | 3101.42 | 2835.8  | 1739.27 | 2174.11 |
| ENSMUSG00000030123 | 15_Plxnd1   | 529.238 | 0.26657  | 0.30506  | 0.42007  | 603.391 | 615.848 | 515.111 | 706.02  | 336.199 | 398.861 |
| ENSMUSG00000030124 | 2_Lag3      | 27.0013 | 0.47074  | 0.33796  | 0.45442  | 35.5957 | 20.1917 | 38.2449 | 25.2472 | 16.1376 | 26.5908 |
| ENSMUSG00000030125 | 11_Lrrc23   | 18.5121 | -1.18792 | 0.09315  | 0.16215  | 9.55007 | 18.3561 | 5.97577 | 33.3624 | 34.9647 | 8.86359 |
| ENSMUSG00000030126 | 17_Tmcc1    | 1030.29 | 0.02501  | 0.84121  | 0.89199  | 981.053 | 999.49  | 1137.79 | 971.115 | 1033.7  | 1058.57 |
| ENSMUSG00000030127 | 15_Cops7a   | 2429.66 | 0.73357  | 3.99E-07 | 4.16E-06 | 2961.39 | 2842.44 | 3299.82 | 2088.3  | 1547.41 | 1838.56 |
| ENSMUSG00000030131 | 8_Mug2      | 0.99103 | 2.20972  | 0.35186  | NA       | 1.73638 | 0.91781 | 2.39031 | 0.90169 | 0       | 0       |
| ENSMUSG00000030134 | 11_Rasgef1a | 22.776  | -0.6813  | 0.15289  | 0.24282  | 16.4956 | 19.2739 | 16.7322 | 32.4607 | 25.1029 | 26.5908 |
| ENSMUSG00000030137 | 8_Tuba8     | 51.2239 | 0.32019  | 0.41703  | 0.53291  | 49.4867 | 57.8218 | 63.3432 | 60.4129 | 26.8959 | 49.3828 |
| ENSMUSG00000030138 | 8_Bms1      | 1436.41 | 0.18082  | 0.15608  | 0.24722  | 1505.44 | 1414.34 | 1658.87 | 1234.41 | 1355.55 | 1449.83 |
| ENSMUSG00000030142 | 10_Clec4e   | 29.4783 | 5.12134  | 7.94E-10 | 1.94E-08 | 91.1598 | 33.041  | 47.8062 | 1.80337 | 1.79306 | 1.26623 |
| ENSMUSG00000030143 | 7_Gm8882    | 76.9404 | -0.10624 | 0.83363  | 0.88618  | 47.7504 | 134     | 40.6352 | 123.531 | 66.3433 | 49.3828 |
| ENSMUSG00000030144 | 4_Clec4d    | 28.1952 | 2.06001  | 0.00031  | 0.00131  | 67.7187 | 31.2054 | 37.0498 | 12.6236 | 5.37918 | 15.1947 |
| ENSMUSG00000030145 | 14_Zfp248   | 124.159 | -0.48744 | 0.05593  | 0.10635  | 116.337 | 116.561 | 76.4899 | 138.86  | 158.686 | 138.019 |
| ENSMUSG00000030147 | 12_Clec4b1  | 5.75221 | -0.6521  | 0.52532  | 0.63445  | 7.8137  | 1.83561 | 3.58546 | 3.60674 | 6.27571 | 11.396  |
| ENSMUSG00000030148 | 15_Clec4a2  | 46.6456 | 0.48279  | 0.27446  | 0.38655  | 68.5869 | 44.9725 | 50.1965 | 52.2978 | 44.8265 | 18.9934 |
| ENSMUSG00000030149 | 15_Klrk1    | 50.7697 | 3.40272  | 0.00629  | 0.01709  | 160.615 | 48.6437 | 69.3189 | 7.21348 | 18.8271 | 0       |
| ENSMUSG00000030154 | 10_Klrk1f   | 3.53513 | 5.25456  | 0.00301  | 0.00921  | 11.2864 | 2.75342 | 7.17092 | 0       | 0       | 0       |
| ENSMUSG00000030155 | 7_Clec2e    | 1.50889 | 0.17051  | 0.92703  | NA       | 2.60457 | 0.91781 | 1.19515 | 1.80337 | 0       | 2.53245 |
| ENSMUSG00000030156 | 5_Cd69      | 19.695  | 2.30825  | 0.00012  | 0.0006   | 41.673  | 22.0273 | 34.6595 | 5.41011 | 8.06878 | 6.33113 |
| ENSMUSG00000030157 | 5_Clec2d    | 881.602 | 0.21745  | 0.28344  | 0.39663  | 947.194 | 870.08  | 1026.64 | 586.096 | 1017.56 | 842.041 |
| ENSMUSG00000030158 | 12_Clec12b  | 0.15297 | 0.92709  | 0.82027  | NA       | 0       | 0.91781 | 0       | 0       | 0       | 0       |
| ENSMUSG00000030159 | 15_Clec1b   | 3.81971 | -0.91798 | 0.43882  | 0.55405  | 3.47275 | 0.91781 | 3.58546 | 2.70506 | 7.17224 | 5.06491 |
| ENSMUSG00000030161 | 8_Gabarapl1 | 1397.54 | -0.77876 | 2.99E-06 | 2.37E-05 | 1025.33 | 1202.33 | 859.316 | 2034.2  | 1671.13 | 1592.91 |
| ENSMUSG00000030162 | 14_Olr1     | 3.27678 | 2.57997  | 0.09887  | 0.17053  | 6.94551 | 6.42464 | 3.58546 | 2.70506 | 0       | 0       |
| ENSMUSG00000030165 | 16_Klr1d    | 7.43435 | 2.31893  | 0.02776  | 0.05957  | 21.7047 | 7.34244 | 8.36608 | 3.60674 | 3.58612 | 0       |
| ENSMUSG00000030166 | 14_Rad52    | 243.399 | -0.09979 | 0.62234  | 0.72001  | 231.806 | 212.931 | 260.544 | 206.486 | 287.786 | 260.843 |
| ENSMUSG00000030167 | 15_Klrk1    | 4.79452 | 1.6419   | 0.20133  | 0.30251  | 13.0228 | 2.75342 | 5.97577 | 0       | 4.48265 | 2.53245 |
| ENSMUSG00000030168 | 13_Adipor2  | 2490.24 | -0.15091 | 0.11357  | 0.19095  | 2361.47 | 2403.73 | 2315.01 | 2666.28 | 2601.73 | 2593.23 |
| ENSMUSG00000030170 | 14_Wnt5b    | 172.976 | -0.28616 | 0.27746  | 0.38998  | 138.042 | 172.547 | 156.565 | 220.011 | 129.1   | 221.59  |
| ENSMUSG00000030172 | 15_Erc1     | 1504.15 | 0.219    | 0.08795  | 0.15466  | 1551.45 | 1592.39 | 1709.07 | 1283.1  | 1325.07 | 1563.79 |
| ENSMUSG00000030173 | 15_Klra5    | 0.99489 | 1.13664  | 0.63529  | NA       | 0.86819 | 0.91781 | 2.39031 | 0       | 1.79306 | 0       |
| ENSMUSG00000030177 | 14_Cdc77    | 336.568 | -0.06474 | 0.70064  | 0.78595  | 326.439 | 292.78  | 368.107 | 317.393 | 348.75  | 365.94  |
| ENSMUSG00000030180 | 15_Kdm5a    | 2512.05 | -0.31447 | 0.00974  | 0.0247   | 2331.95 | 2148.58 | 2237.33 | 2492.26 | 3062.55 | 2799.63 |
| ENSMUSG00000030187 | 15_Klra2    | 25.333  | 2.75182  | 0.00018  | 0.00083  | 68.5869 | 15.6027 | 47.8062 | 1.80337 | 8.06878 | 10.1298 |
| ENSMUSG00000030188 | 12_Magohb   | 249.161 | -0.3708  | 0.0573   | 0.10857  | 217.915 | 198.246 | 236.641 | 248.865 | 329.923 | 263.375 |
| ENSMUSG00000030189 | 15_Ybx3     | 7932.68 | 0.50724  | 6.84E-05 | 0.00036  | 8865.07 | 8837.55 | 10235.3 | 6368.6  | 5946.69 | 7342.85 |
| ENSMUSG00000030199 | 16_Etv6     | 1651.71 | 0.3534   | 0.01398  | 0.03347  | 1851.85 | 1721.8  | 1983.96 | 1246.13 | 1445.21 | 1661.29 |
| ENSMUSG00000030200 | 13_Bcl2l14  | 50.9565 | 0.30547  | 0.45635  | 0.57027  | 51.2231 | 42.2191 | 75.2947 | 30.6573 | 43.0335 | 63.3113 |
| ENSMUSG00000030201 | 15_Lrp6     | 2928.03 | -0.38521 | 5.90E-05 | 0.00031  | 2594.15 | 2587.29 | 2435.72 | 3318.2  | 3300.13 | 3332.71 |
| ENSMUSG00000030203 | 17_Dusp16   | 1657.65 | 0.19685  | 0.17702  | 0.27336  | 1755.48 | 1691.52 | 1863.25 | 1297.53 | 1559.07 | 1779.05 |
| ENSMUSG00000030204 | 10_Ddx47    | 1322.28 | 0.36532  | 0.00111  | 0.00392  | 1456.82 | 1423.52 | 1587.16 | 1131.62 | 1186.11 | 1148.47 |
| ENSMUSG00000030205 | 15_Gprc5d   | 1.01383 | 2.15675  | 0.36623  | NA       | 0.86819 | 2.75342 | 1.19515 | 0       | 0       | 1.26623 |
| ENSMUSG00000030206 | 13_Gsg1     | 12.648  | 0.25555  | 0.70213  | 0.78702  | 16.4956 | 17.4383 | 7.17092 | 13.5253 | 9.86184 | 11.396  |
| ENSMUSG00000030207 | 15_Fam234b  | 617.276 | 0.56103  | 0.00178  | 0.0059   | 706.705 | 720.477 | 779.24  | 543.716 | 383.715 | 569.802 |
| ENSMUSG00000030208 | 15_Emp1     | 135885  | 0.15921  | 0.23248  | 0.33879  | 146741  | 136603  | 146779  | 107200  | 135117  | 142868  |
| ENSMUSG00000030209 | 14_Grin2b   | 31.9906 | -1.79966 | 0.00177  | 0.00587  | 15.6274 | 22.0273 | 4.78062 | 71.2332 | 46.6196 | 31.6557 |
| ENSMUSG00000030213 | 12_Atf7ip   | 2247.43 | 0.23413  | 0.01942  | 0.04412  | 2360.6  | 2442.28 | 2484.73 | 2008.96 | 2040.5  | 2147.52 |
| ENSMUSG00000030214 | 6_Plbd1     | 1035.14 | 0.12815  | 0.40637  | 0.52349  | 1116.49 | 1016.01 | 1109.1  | 827.747 | 987.977 | 1153.53 |
| ENSMUSG00000030216 | 12_Wbp11    | 1335.16 | 0.44867  | 0.00082  | 0.00303  | 1432.51 | 1468.49 | 1722.22 | 1128.01 | 1039.08 | 1220.64 |
| ENSMUSG00000030217 | 2_Art4      | 1067.44 | 0.07858  | 0.60489  | 0.70516  | 1143.4  | 1056.39 | 1087.59 | 884.553 | 1009.49 | 1223.18 |
| ENSMUSG00000030218 | 2_Mgp       | 2496.98 | 0.39474  | 0.02373  | 0.05237  | 3157.6  | 2430.35 | 2922.15 | 2658.17 | 1815.47 | 1998.11 |
| ENSMUSG00000030219 | 13_Erp27    | 15.8569 | -0.7021  | 0.30044  | 0.41512  | 13.891  | 18.3561 | 3.58546 | 22.5421 | 15.241  | 21.5259 |
| ENSMUSG00000030220 | 13_Arhgdlb  | 5564.43 | 0.10614  | 0.43716  | 0.55245  | 6086    | 5270.96 | 5948.28 | 4669.83 | 5271.6  | 6139.93 |
| ENSMUSG00000030222 | 13_Rerg     | 680.248 | 0.20191  | 0.1552   | 0.24602  | 741.433 | 694.779 | 745.776 | 632.983 | 561.228 | 705.288 |
| ENSMUSG00000030223 | 14_Ptpro    | 65.442  | 0.38852  | 0.2814   | 0.39424  | 88.5552 | 78.0135 | 56.1722 | 78.4466 | 48.4127 | 43.0517 |
| ENSMUSG00000030224 | 10_Strap    | 2437.1  | -0.29094 | 0.0241   | 0.05304  | 2325.01 | 2053.13 | 2197.89 | 2349.79 | 2926.28 | 2770.5  |
| ENSMUSG00000030225 | 11_Dera     | 662.627 | 0.5143   | 0.00039  | 0.0016   | 808.283 | 703.957 | 825.851 | 570.767 | 489.506 | 577.399 |
| ENSMUSG00000030226 | 12_Lmo3     | 1.80756 | -3.20753 | 0.1126   | NA       | 0       | 0.91781 | 0       | 1.80337 | 1.79306 | 6.33113 |
| ENSMUSG00000030228 | 15_Pik3c2g  | 1.34995 | -3.91318 | 0.14882  | NA       | 0       | 0       | 0       | 5.41011 | 2.68959 | 0       |
| ENSMUSG00000030231 | 10_Plekha5  | 1669.42 | -0.00591 | 0.95747  | 0.97237  | 1637.4  | 1585.97 | 1774.8  | 1610.41 | 1663.06 | 1744.86 |
| ENSMUSG00000030232 | 17_Aebp2    | 2378.75 | -0.04585 | 0.70972  | 0.79237  | 2321.54 | 2168.77 | 2532.53 | 2192    | 2477.11 | 2580.57 |
| ENSMUSG00000030235 | 17_Slco1c1  | 78.4603 | -1.63684 | 0.00027  | 0.00118  | 52.0913 | 49.5615 | 11.9515 | 143.368 | 104.894 | 108.896 |
| ENSMUSG00000030236 | 10_Slco1b2  | 1.91025 | -0.97599 | 0.53189  | NA       | 0.86819 | 1.83561 | 1.19515 | 3.60674 | 2.68959 | 1.26623 |
| ENSMUSG00000030237 | 14_Slco1a4  | 343.348 | -1.66688 | 2.15E-07 | 2.44E-06 | 189.265 | 214.767 | 88.4414 | 584.292 | 633.847 | 349.479 |
| ENSMUSG00000030243 | 16_Recql    | 835.613 | -0.17048 | 0.29732  | 0.4117   | 887.289 | 730.573 | 739.8   | 735.775 | 971.839 | 948.404 |
| ENSMUSG00000030244 | 7_Gys2      | 2.69719 | 0.41156  | 0.75831  | 0.83003  | 5.20913 | 2.75342 | 1.19515 | 1.80337 | 2.68959 | 2.53245 |
| ENSMUSG00000030245 | 10_Golt1b   | 1019.99 | 0.03642  | 0.79065  | 0.85488  | 1062.66 | 911.381 | 1124.64 | 931.441 | 1027.42 | 1062.36 |

|                    |             |         |          |          |          |         |         |         |         |         |         |
|--------------------|-------------|---------|----------|----------|----------|---------|---------|---------|---------|---------|---------|
| ENSMUSG00000030246 | 11_Ldhd     | 1732    | -0.7291  | 0.00096  | 0.00347  | 1335.27 | 1537.32 | 1037.39 | 2907.03 | 1819.96 | 1754.99 |
| ENSMUSG00000030247 | 9_Kcnj8     | 82.7191 | -0.64234 | 0.042    | 0.08382  | 66.8505 | 70.671  | 56.1722 | 134.351 | 77.1016 | 91.1683 |
| ENSMUSG00000030249 | 15_Abcb9    | 376.878 | -0.62481 | 0.00021  | 0.00096  | 271.743 | 310.218 | 308.35  | 522.076 | 413.301 | 435.582 |
| ENSMUSG00000030254 | 16_Rad18    | 281.34  | 0.27266  | 0.15619  | 0.24735  | 335.989 | 256.986 | 329.863 | 234.438 | 242.063 | 288.7   |
| ENSMUSG00000030255 | 13_Sspn     | 827.653 | -1.02915 | 2.44E-08 | 3.67E-07 | 533.936 | 638.793 | 460.134 | 1292.12 | 1130.53 | 910.417 |
| ENSMUSG00000030256 | 11_Bhlhe41  | 906.023 | -0.59157 | 0.00081  | 0.003    | 722.333 | 883.847 | 560.527 | 1078.42 | 1076.73 | 1114.28 |
| ENSMUSG00000030257 | 16_Srgap3   | 1354.92 | -0.32913 | 0.00177  | 0.00587  | 1194.63 | 1237.2  | 1171.25 | 1510.32 | 1538.45 | 1477.69 |
| ENSMUSG00000030259 | 12_Rassf8   | 714.966 | -0.67337 | 0.00146  | 0.00497  | 558.245 | 660.82  | 433.841 | 1096.45 | 821.222 | 719.217 |
| ENSMUSG00000030263 | 13_Lrmp     | 66.3698 | 0.70259  | 0.0508   | 0.09837  | 97.2371 | 80.7669 | 69.3189 | 64.9214 | 55.5849 | 30.3894 |
| ENSMUSG00000030264 | 14_Thumpd3  | 998.627 | -0.43734 | 0.00458  | 0.01311  | 858.638 | 851.724 | 834.218 | 937.753 | 1296.38 | 1213.05 |
| ENSMUSG00000030265 | 14_Kras     | 1571.86 | -0.31743 | 0.01309  | 0.03166  | 1457.69 | 1274.83 | 1466.45 | 1575.24 | 1857.61 | 1799.31 |
| ENSMUSG00000030268 | 17_Bcat1    | 184.392 | -1.64629 | 4.68E-07 | 4.78E-06 | 116.337 | 89.9449 | 60.9529 | 403.053 | 232.201 | 203.863 |
| ENSMUSG00000030269 | 14_Mttr14   | 687.978 | 0.39126  | 0.01323  | 0.03195  | 723.201 | 769.121 | 850.95  | 690.691 | 525.367 | 568.536 |
| ENSMUSG00000030270 | 11_Cpne9    | 3.06524 | -0.17099 | 0.88752  | 0.92423  | 2.60457 | 3.67122 | 2.39031 | 3.60674 | 3.58612 | 2.53245 |
| ENSMUSG00000030271 | 14_Ogg1     | 165.617 | 0.65918  | 0.00429  | 0.01241  | 220.52  | 170.712 | 217.518 | 151.483 | 109.377 | 124.09  |
| ENSMUSG00000030272 | 15_Camk1    | 575.311 | -0.4326  | 0.00579  | 0.01593  | 481.845 | 558.944 | 427.865 | 707.823 | 662.536 | 612.854 |
| ENSMUSG00000030275 | 6_Etnk1     | 5614.53 | -0.35075 | 0.00242  | 0.00764  | 5006.84 | 4781.77 | 5018.45 | 5816.77 | 7038.66 | 6024.71 |
| ENSMUSG00000030276 | 19_Ttl13    | 77.3721 | 0.19584  | 0.51023  | 0.62046  | 87.687  | 87.1915 | 72.9044 | 90.1685 | 59.171  | 67.11   |
| ENSMUSG00000030278 | 11_Cidec    | 0.15028 | -0.99647 | 0.80707  | NA       | 0       | 0       | 0       | 0.90169 | 0       | 0       |
| ENSMUSG00000030279 | 15_C2cd5    | 1161.56 | -0.1258  | 0.25951  | 0.36967  | 1075.69 | 1141.75 | 1116.27 | 1197.44 | 1269.49 | 1168.73 |
| ENSMUSG00000030281 | 16_I17rc    | 967.048 | 1.43492  | 5.46E-12 | 2.40E-10 | 1207.65 | 1355.6  | 1673.22 | 664.542 | 399.853 | 501.426 |
| ENSMUSG00000030282 | 14_Cmas     | 4254.07 | 0.02643  | 0.83411  | 0.88651  | 4275.83 | 3964.92 | 4638.39 | 3722.16 | 4464.72 | 4458.38 |
| ENSMUSG00000030283 | 7_St8sia1   | 152.469 | -1.58074 | 4.12E-05 | 0.00023  | 73.796  | 116.561 | 38.2449 | 302.065 | 232.201 | 151.947 |
| ENSMUSG00000030284 | 11_Crel1    | 294.393 | 0.41952  | 0.03579  | 0.07353  | 302.998 | 366.204 | 341.814 | 302.966 | 207.995 | 244.382 |
| ENSMUSG00000030286 | 6_Emc3      | 1588.92 | -0.26222 | 0.02864  | 0.0611   | 1488.07 | 1410.67 | 1436.58 | 1624.84 | 1915.89 | 1657.49 |
| ENSMUSG00000030287 | 15_Itp2     | 3201.54 | 0.63763  | 0.00028  | 0.0012   | 3535.26 | 3696    | 4460.32 | 2075.68 | 2322.01 | 3119.98 |
| ENSMUSG00000030291 | 12_Med21    | 789.994 | -0.3691  | 0.00362  | 0.01078  | 698.892 | 652.56  | 718.288 | 876.438 | 953.012 | 840.775 |
| ENSMUSG00000030298 | 10_Sec13    | 1896.91 | 0.40551  | 0.0018   | 0.00594  | 2134.01 | 2024.68 | 2326.97 | 1780.83 | 1446.1  | 1668.89 |
| ENSMUSG00000030301 | 17_Ccdc91   | 1196.32 | 0.112    | 0.38889  | 0.50625  | 1235.43 | 1132.57 | 1361.28 | 1229    | 1074.94 | 1144.67 |
| ENSMUSG00000030302 | 16_Atp2b2   | 106.177 | -0.90968 | 0.0144   | 0.03435  | 91.1598 | 76.1779 | 53.7819 | 214.601 | 101.308 | 100.032 |
| ENSMUSG00000030303 | 15_Far2     | 71.2613 | -0.08483 | 0.76217  | 0.83284  | 65.9823 | 67.9176 | 74.0996 | 73.0365 | 80.6878 | 65.8438 |
| ENSMUSG00000030304 | 11_Ergic2   | 1759.53 | -0.39567 | 0.00801  | 0.02095  | 1555.79 | 1410.67 | 1593.14 | 1671.72 | 2304.98 | 2020.9  |
| ENSMUSG00000030306 | 14_Tmtc1    | 509.798 | -0.69519 | 0.00053  | 0.00209  | 407.18  | 412.095 | 348.985 | 795.287 | 598.882 | 496.361 |
| ENSMUSG00000030307 | 8_Slc6a11   | 39.4689 | -2.43014 | 0.00044  | 0.00176  | 18.232  | 13.7671 | 4.78062 | 119.022 | 64.5502 | 16.4609 |
| ENSMUSG00000030309 | 16_Caprin2  | 274.189 | -0.61907 | 0.00749  | 0.01979  | 233.543 | 262.492 | 151.785 | 329.115 | 369.371 | 298.83  |
| ENSMUSG00000030310 | 10_Slc6a1   | 67.9768 | -2.10889 | 0.00154  | 0.00519  | 34.7275 | 27.5342 | 14.3418 | 231.733 | 77.9982 | 21.5259 |
| ENSMUSG00000030313 | 15_Denn15b  | 186.7   | -1.20713 | 7.92E-06 | 5.53E-05 | 102.446 | 144.095 | 92.0269 | 311.081 | 280.614 | 189.934 |
| ENSMUSG00000030314 | 16_Atg7     | 878.404 | 0.52545  | 1.64E-05 | 0.0001   | 1027.94 | 982.052 | 1100.74 | 752.006 | 694.811 | 712.886 |
| ENSMUSG00000030315 | 15_Vgll4    | 1382.21 | 0.71591  | 3.37E-05 | 0.00019  | 1580.97 | 1704.36 | 1870.42 | 1284.9  | 847.221 | 1005.38 |
| ENSMUSG00000030316 | 13_Tamm41   | 234.958 | 0.21178  | 0.25453  | 0.36405  | 219.652 | 264.328 | 272.495 | 216.405 | 202.616 | 234.252 |
| ENSMUSG00000030317 | 8_Timp4     | 3.95844 | -0.13781 | 0.90101  | 0.93295  | 4.34094 | 4.58903 | 2.39031 | 6.3118  | 3.58612 | 2.53245 |
| ENSMUSG00000030319 | 8_Cand2     | 415.777 | 0.1571   | 0.33977  | 0.45637  | 414.126 | 500.204 | 400.377 | 425.596 | 363.095 | 391.264 |
| ENSMUSG00000030321 | 15_Efcab12  | 53.693  | -0.57825 | 0.08833  | 0.15524  | 45.1458 | 51.3971 | 32.2692 | 71.2332 | 60.0675 | 62.0451 |
| ENSMUSG00000030322 | 12_Mbd4     | 216.878 | 0.0082   | 0.96628  | 0.97811  | 208.365 | 224.862 | 218.713 | 181.239 | 231.305 | 236.784 |
| ENSMUSG00000030323 | 13_Ift122   | 626.082 | 0.2496   | 0.08989  | 0.15754  | 636.382 | 709.464 | 694.385 | 627.573 | 501.161 | 587.529 |
| ENSMUSG00000030324 | 8_Rho       | 5642.09 | -2.04711 | 0.01136  | 0.02815  | 3232.27 | 2583.62 | 779.24  | 16751.5 | 7737.96 | 2767.97 |
| ENSMUSG00000030325 | 16_Klrb1c   | 4.81478 | 3.21628  | 0.03845  | 0.07797  | 12.1546 | 12.8493 | 1.19515 | 0       | 2.68959 | 0       |
| ENSMUSG00000030327 | 8_Necap1    | 567.445 | -0.38541 | 0.00969  | 0.02459  | 543.486 | 435.04  | 498.379 | 659.132 | 669.708 | 598.925 |
| ENSMUSG00000030329 | 11_Pianp    | 656.509 | -0.2125  | 0.41856  | 0.53446  | 567.795 | 780.135 | 476.866 | 996.362 | 553.159 | 564.737 |
| ENSMUSG00000030330 | 15_Ing4     | 1182.7  | 0.19558  | 0.06898  | 0.12701  | 1284.05 | 1230.78 | 1272.84 | 1086.53 | 1087.49 | 1134.54 |
| ENSMUSG00000030335 | 6_Mrp151    | 990.596 | 0.21918  | 0.07014  | 0.12876  | 1045.3  | 1023.35 | 1128.23 | 859.306 | 922.53  | 964.865 |
| ENSMUSG00000030336 | 14_Cd27     | 31.4971 | 0.26189  | 0.56824  | 0.67307  | 41.673  | 32.1232 | 28.6837 | 18.0337 | 30.482  | 37.9868 |
| ENSMUSG00000030337 | 16_Vamp1    | 698.173 | -0.17297 | 0.19088  | 0.29031  | 689.342 | 685.601 | 592.796 | 712.332 | 759.361 | 749.606 |
| ENSMUSG00000030339 | 7_Ltbr      | 1280.48 | 1.02444  | 9.77E-06 | 6.63E-05 | 1560.13 | 1665.82 | 1924.2  | 1036.04 | 528.057 | 968.664 |
| ENSMUSG00000030340 | 16_Scnn1a   | 277.478 | 1.05469  | 1.84E-07 | 2.13E-06 | 368.112 | 363.451 | 390.815 | 183.944 | 140.755 | 217.791 |
| ENSMUSG00000030341 | 17_Tnfrsf1a | 2616.49 | 0.9136   | 3.28E-12 | 1.53E-10 | 3272.2  | 3270.14 | 3712.15 | 1935.02 | 1579.69 | 1929.73 |
| ENSMUSG00000030342 | 8_Cd9       | 8770.43 | 0.23252  | 0.04754  | 0.09298  | 9517.95 | 8886.19 | 10021.4 | 7536.29 | 7689.54 | 8971.22 |
| ENSMUSG00000030344 | 11_Akap3    | 0.30239 | -0.03469 | 0.99322  | NA       | 0       | 0.91781 | 0       | 0       | 0.89653 | 0       |
| ENSMUSG00000030345 | 16_Dyrk4    | 2.02973 | -0.14044 | 0.92628  | NA       | 1.73638 | 2.75342 | 1.19515 | 0.90169 | 1.79306 | 3.79868 |
| ENSMUSG00000030346 | 16_Rad51ap1 | 137.659 | 0.75467  | 0.00427  | 0.01238  | 179.715 | 147.767 | 191.225 | 75.7416 | 126.411 | 105.097 |
| ENSMUSG00000030347 | 6_D6Wsu163e | 465.636 | -0.20641 | 0.24031  | 0.34803  | 446.249 | 378.136 | 473.281 | 423.792 | 568.4   | 503.958 |
| ENSMUSG00000030350 | 8_Prrt8     | 3.25311 | -3.14916 | 0.05261  | 0.10104  | 0.86819 | 0       | 1.19515 | 0.91685 | 7.17224 | 1.26623 |
| ENSMUSG00000030351 | 5_Tspan11   | 185.888 | 0.13846  | 0.6393   | 0.73516  | 222.256 | 160.616 | 201.981 | 255.177 | 124.618 | 150.681 |
| ENSMUSG00000030352 | 14_Tspan9   | 1629.93 | 0.55387  | 0.00015  | 0.0007   | 1735.51 | 2019.17 | 2062.84 | 1491.39 | 1138.59 | 1332.07 |
| ENSMUSG00000030353 | 15_Tead4    | 69.45   | 1.11148  | 0.00055  | 0.00216  | 76.4006 | 89.0271 | 119.515 | 45.986  | 37.6543 | 48.1166 |
| ENSMUSG00000030357 | 10_Fkbp4    | 2978.01 | 0.43631  | 0.00223  | 0.00711  | 3380.73 | 3275.65 | 3617.73 | 2780.8  | 2084.43 | 2728.72 |
| ENSMUSG00000030359 | 14_Pzp      | 0.95039 | 1.05414  | 0.66254  | NA       | 0.86819 | 1.83561 | 1.19515 | 1.80337 | 0       | 0       |
| ENSMUSG00000030361 | 16_Klrb1a   | 2.42678 | -1.09185 | 0.54277  | NA       | 3.47275 | 0       | 1.19515 | 5.41011 | 4.48265 | 0       |
| ENSMUSG00000030364 | 6_Clec2h    | 1.07394 | -1.0501  | 0.62495  | NA       | 0       | 0.91781 | 1.19515 | 0.90169 | 0.89653 | 2.53245 |
| ENSMUSG00000030365 | 11_Clec2i   | 5.84652 | -0.23935 | 0.84142  | 0.89204  | 8.68188 | 2.75342 | 4.78062 | 6.3118  | 12.5514 | 0       |
| ENSMUSG00000030366 | 10_Ceacam12 | 1.80097 | 1.19453  | 0.50369  | NA       | 4.34094 | 1.83561 | 1.19515 | 0.90169 | 0       | 2.53245 |
| ENSMUSG00000030374 | 15_Strn4    | 2238.79 | 0.79702  | 2.43E-06 | 1.98E-05 | 2602.83 | 2776.36 | 3145.65 | 1776.32 | 1267.69 | 1863.89 |
| ENSMUSG00000030376 | 7_Slc8a2    | 22.6737 | -0.33284 | 0.57164  | 0.67624  | 23.4411 | 24.7808 | 11.9515 | 41.4775 | 17.9306 | 16.4609 |
| ENSMUSG00000030378 | 14_Sult2a8  | 0.15028 | -0.99647 | 0.80707  | NA       | 0       | 0       | 0       | 0.90169 | 0       | 0       |
| ENSMUSG00000030380 | 16_Mzf1     | 29.4192 | -0.47231 | 0.33921  | 0.45581  | 31.2548 | 30.2876 | 11.9515 | 29.7556 | 40.3439 | 32.9219 |
| ENSMUSG00000030382 | 14_Slc27a5  | 2.03838 | 0.29133  | 0.85548  | NA       | 2.60457 | 1.83561 | 2.39031 | 3.60674 | 1.79306 | 0       |
| ENSMUSG00000030386 | 17_Zfp606   | 328.643 | -0.6878  | 2.80E-05 | 0.00017  | 270.875 | 256.986 | 225.884 | 381.413 | 399.853 | 436.848 |
| ENSMUSG00000030393 | 8_Zik1      | 96.0281 | -0.74685 | 0.00345  | 0.01033  | 73.796  | 79.8491 | 60.9529 | 111.809 | 128.204 | 121.558 |
| ENSMUSG00000030397 | 9_Mark4     | 342.938 | 1.11388  | 1.79E-09 | 3.86E-08 | 428.885 | 436.875 | 542.6   | 247.062 | 194.547 | 207.661 |

|                    |              |         |          |          |          |         |         |         |         |         |         |
|--------------------|--------------|---------|----------|----------|----------|---------|---------|---------|---------|---------|---------|
| ENSMUSG00000030399 | 1_Ckm        | 832.043 | -1.05143 | 0.17328  | 0.26869  | 361.166 | 869.162 | 394.401 | 2063.06 | 380.129 | 924.346 |
| ENSMUSG00000030400 | 17_Ercc2     | 597.12  | 1.03216  | 1.65E-09 | 3.60E-08 | 762.269 | 790.231 | 853.34  | 449.039 | 313.786 | 414.056 |
| ENSMUSG00000030401 | 15_Rtn2      | 99.0032 | -0.68593 | 0.13632  | 0.22072  | 50.3549 | 121.15  | 56.1722 | 201.076 | 69.0329 | 96.2332 |
| ENSMUSG00000030402 | 5_Ppm1n      | 16.7358 | -1.99986 | 0.02648  | 0.05731  | 10.4183 | 8.26025 | 1.19515 | 56.8062 | 16.1376 | 7.59736 |
| ENSMUSG00000030403 | 9_Vasp       | 3124.42 | 0.81943  | 1.28E-08 | 2.13E-07 | 3764.46 | 3727.21 | 4473.46 | 2364.22 | 1923.95 | 2493.2  |
| ENSMUSG00000030406 | 7_Gipr       | 3.6815  | 1.91413  | 0.152    | 0.24163  | 6.94551 | 8.26025 | 2.39031 | 1.80337 | 2.68959 | 0       |
| ENSMUSG00000030407 | 2_Qpctl      | 243.07  | 0.45312  | 0.01433  | 0.03421  | 253.511 | 316.643 | 272.495 | 189.354 | 218.753 | 207.661 |
| ENSMUSG00000030409 | 15_Dmpk      | 478.372 | 0.19788  | 0.37567  | 0.49332  | 450.59  | 636.039 | 446.988 | 568.964 | 373.853 | 393.797 |
| ENSMUSG00000030410 | 16_Dmwd      | 211.153 | 0.42733  | 0.16305  | 0.25586  | 193.606 | 301.958 | 231.86  | 265.997 | 144.341 | 129.155 |
| ENSMUSG00000030411 | 15_Nova2     | 27.4854 | -0.90799 | 0.08047  | 0.14403  | 26.0457 | 14.6849 | 16.7322 | 39.6742 | 47.5161 | 20.2596 |
| ENSMUSG00000030413 | 7_Pglyrp1    | 9205.11 | 0.4758   | 0.00022  | 0.00097  | 9497.11 | 10210.6 | 12422.4 | 7791.46 | 7657.27 | 7651.81 |
| ENSMUSG00000030417 | 15_Pdcd5     | 995.194 | -0.33765 | 0.00449  | 0.01289  | 920.28  | 840.71  | 876.048 | 1045.96 | 1135.9  | 1152.27 |
| ENSMUSG00000030421 | 9_Uri1       | 1130.64 | -0.24102 | 0.05636  | 0.10704  | 1058.32 | 955.436 | 1095.96 | 1129.81 | 1300.87 | 1243.43 |
| ENSMUSG00000030423 | 7_Pop4       | 338.886 | 0.04648  | 0.7698   | 0.83827  | 375.926 | 331.328 | 325.082 | 311.983 | 349.647 | 339.349 |
| ENSMUSG00000030427 | 17_Lilra6    | 43.542  | 1.55105  | 0.00149  | 0.00506  | 102.446 | 33.9588 | 58.5626 | 25.2472 | 23.3098 | 17.7272 |
| ENSMUSG00000030428 | 16_Ttyh1     | 199.152 | -0.80975 | 0.00674  | 0.0181   | 131.965 | 173.465 | 129.077 | 364.281 | 227.719 | 168.408 |
| ENSMUSG00000030431 | 8_Tmem238    | 90.9542 | 0.70922  | 0.00536  | 0.01493  | 107.655 | 105.548 | 125.491 | 65.823  | 69.0329 | 72.1749 |
| ENSMUSG00000030432 | 12_Rpl28     | 10085.7 | 0.5269   | 0.0005   | 0.002    | 11256.9 | 11596.5 | 12868.2 | 9392.86 | 6619.98 | 8780.02 |
| ENSMUSG00000030433 | 15_Sbk2      | 7.51571 | -1.5424  | 0.07785  | 0.14012  | 3.47275 | 5.50683 | 2.39031 | 12.6236 | 7.17224 | 13.9285 |
| ENSMUSG00000030435 | 15_U2af2     | 3516.97 | 0.74764  | 9.75E-09 | 1.67E-07 | 4241.1  | 4119.11 | 4864.28 | 2696.04 | 2324.7  | 2856.61 |
| ENSMUSG00000030443 | 16_Zfp583    | 42.73   | -0.47488 | 0.20135  | 0.30251  | 34.7275 | 42.2191 | 29.8789 | 40.5758 | 51.9988 | 56.9802 |
| ENSMUSG00000030446 | 17_Zfp273    | 57.9864 | -0.92202 | 0.00616  | 0.0168   | 50.3549 | 39.4656 | 29.8789 | 73.0365 | 84.2739 | 70.9087 |
| ENSMUSG00000030447 | 15_Cyfp1     | 5475.05 | 0.42095  | 0.00089  | 0.00323  | 6189.32 | 5856.52 | 6757.4  | 419.13  | 4619.82 | 5237.11 |
| ENSMUSG00000030450 | 11_Oca2      | 791.772 | -1.21706 | 2.98E-05 | 0.00017  | 453.194 | 689.272 | 285.642 | 1420.15 | 1070.46 | 831.911 |
| ENSMUSG00000030451 | 15_Herc2     | 3127.31 | 0.12015  | 0.20988  | 0.313    | 3275.67 | 3275.65 | 3219.75 | 3000.81 | 2885.93 | 3106.05 |
| ENSMUSG00000030452 | 16_Nipa2     | 771.656 | -0.308   | 0.06516  | 0.12099  | 727.542 | 660.82  | 680.043 | 688.888 | 995.149 | 877.495 |
| ENSMUSG00000030465 | 18_Psd3      | 673.243 | -0.73525 | 2.68E-08 | 3.97E-07 | 506.154 | 516.725 | 493.599 | 908.899 | 839.153 | 774.931 |
| ENSMUSG00000030468 | 12_Siglecg   | 62.7096 | 0.62134  | 0.04285  | 0.08528  | 86.8188 | 66.082  | 75.2947 | 47.7893 | 54.6884 | 45.5842 |
| ENSMUSG00000030469 | 10_Zfp719    | 361.929 | -0.71462 | 1.26E-05 | 8.27E-05 | 294.316 | 269.835 | 258.153 | 439.121 | 501.161 | 408.991 |
| ENSMUSG00000030470 | 14_Csrp3     | 41.0334 | -0.55722 | 0.19659  | 0.29694  | 26.0457 | 41.3013 | 32.2692 | 65.823  | 31.3786 | 49.3828 |
| ENSMUSG00000030471 | 17_Zdhhc13   | 884.512 | -0.17973 | 0.22723  | 0.33292  | 845.616 | 759.943 | 883.219 | 808.812 | 1047.15 | 962.332 |
| ENSMUSG00000030472 | 9_Ceacam18   | 0.30325 | -0.03469 | 0.99322  | NA       | 0       | 0.91781 | 0       | 0.90169 | 0       | 0       |
| ENSMUSG00000030474 | 9_Siglece    | 23.4312 | 0.76228  | 0.17123  | 0.2661   | 41.673  | 15.6027 | 31.074  | 12.6236 | 20.6202 | 18.9934 |
| ENSMUSG00000030483 | 14_Cyp2b10   | 2.54067 | -0.09005 | 0.94957  | 0.96695  | 5.20913 | 0.91781 | 1.19515 | 1.80337 | 3.58612 | 2.53245 |
| ENSMUSG00000030484 | 5_Lypd5      | 4.97779 | 4.71519  | 0.00371  | 0.01099  | 2.60457 | 12.8493 | 13.1467 | 0       | 0       | 1.26623 |
| ENSMUSG00000030486 | 9_Zfp108     | 95.9634 | -0.72833 | 0.00396  | 0.01163  | 64.2459 | 77.0957 | 75.2947 | 110.907 | 116.549 | 131.688 |
| ENSMUSG00000030491 | 16_Tdrd12    | 3.18306 | -0.17228 | 0.89305  | 0.92788  | 1.73638 | 3.67122 | 3.58546 | 5.41011 | 0.89653 | 3.79868 |
| ENSMUSG00000030492 | 16_Slc7a9    | 0.50988 | -2.49048 | 0.5167   | NA       | 0       | 0       | 0       | 0       | 1.79306 | 1.26623 |
| ENSMUSG00000030493 | 13_Faap24    | 94.641  | 0.43842  | 0.08678  | 0.15295  | 125.019 | 100.959 | 100.393 | 84.7584 | 74.412  | 82.3047 |
| ENSMUSG00000030494 | 13_Rhpn2     | 3005.6  | 0.41978  | 2.83E-05 | 0.00017  | 3305.19 | 3543.65 | 3470.73 | 2463.4  | 2666.28 | 2584.37 |
| ENSMUSG00000030495 | 12_Slc7a10   | 59.2873 | -0.87003 | 0.09615  | 0.16649  | 59.0368 | 44.9725 | 21.5128 | 135.253 | 43.0335 | 51.9153 |
| ENSMUSG00000030498 | 14_Gas2      | 175.98  | -0.056   | 0.77693  | 0.84413  | 185.792 | 154.191 | 178.078 | 191.157 | 175.72  | 170.941 |
| ENSMUSG00000030499 | 9_Kctd15     | 888.391 | 0.47552  | 0.01454  | 0.03463  | 1067.87 | 1007.75 | 1024.25 | 903.489 | 534.332 | 792.658 |
| ENSMUSG00000030500 | 5_Slc17a6    | 6.58026 | -2.66514 | 0.07974  | 0.14299  | 4.34094 | 0.91781 | 0       | 27.0506 | 7.17224 | 0       |
| ENSMUSG00000030505 | 16_Prmt3     | 490.209 | -0.12165 | 0.4525   | 0.56697  | 488.79  | 399.245 | 521.087 | 470.68  | 533.436 | 528.017 |
| ENSMUSG00000030507 | 6_Dbx1       | 0.64156 | 2.79342  | 0.35281  | NA       | 1.73638 | 0.91781 | 1.19515 | 0       | 0       | 0       |
| ENSMUSG00000030509 | 16_Asb7      | 476.122 | -0.06921 | 0.65906  | 0.75142  | 434.962 | 440.547 | 518.697 | 490.517 | 440.197 | 531.815 |
| ENSMUSG00000030510 | 10_Cers3     | 1479.81 | 0.42612  | 0.00521  | 0.01459  | 1631.33 | 1471.24 | 1988.74 | 1139.73 | 1353.76 | 1294.08 |
| ENSMUSG00000030512 | 13_Snrpa1    | 538.402 | 0.24181  | 0.17496  | 0.27088  | 638.118 | 525.903 | 585.626 | 396.742 | 558.539 | 525.484 |
| ENSMUSG00000030513 | 14_Pcsk6     | 1153.46 | 0.65519  | 0.00057  | 0.00223  | 1343.96 | 1325.31 | 1563.26 | 1048.66 | 654.467 | 985.125 |
| ENSMUSG00000030515 | 9_Tarsl2     | 281.482 | -0.53311 | 0.0008   | 0.00295  | 219.652 | 237.712 | 233.055 | 326.41  | 341.578 | 330.485 |
| ENSMUSG00000030516 | 14_Tjp1      | 8423.36 | 0.19387  | 0.17312  | 0.26847  | 8438.79 | 9132.17 | 9393.91 | 6424.51 | 8650.62 | 8500.18 |
| ENSMUSG00000030518 | 17_Fam189a1  | 8.90002 | -0.09156 | 0.91195  | 0.94083  | 10.4183 | 12.8493 | 2.39031 | 9.01685 | 9.86184 | 8.86359 |
| ENSMUSG00000030519 | 14_Apba2     | 38.4236 | 0.08282  | 0.86306  | 0.90699  | 48.6186 | 40.3834 | 29.8789 | 56.8062 | 35.8612 | 18.9934 |
| ENSMUSG00000030521 | 11_Mphosph10 | 547.929 | -0.50108 | 0.00199  | 0.00648  | 474.899 | 403.834 | 482.842 | 559.045 | 719.914 | 647.042 |
| ENSMUSG00000030522 | 14_Mttr10    | 1504.3  | 0.01072  | 0.91887  | 0.94614  | 1487.21 | 1542.83 | 1499.92 | 1456.22 | 1564.45 | 1475.15 |
| ENSMUSG00000030523 | 18_Trpm1     | 7345.11 | -1.17634 | 0.00787  | 0.02063  | 4112.61 | 6728.43 | 2677.15 | 13186.2 | 9678.94 | 7687.26 |
| ENSMUSG00000030525 | 7_Chna7      | 24.3659 | -1.53986 | 0.01413  | 0.03379  | 9.55007 | 23.8629 | 3.58546 | 39.6742 | 34.0682 | 35.4544 |
| ENSMUSG00000030527 | 15_Crtc3     | 509.458 | 0.55061  | 0.00588  | 0.01613  | 547.827 | 669.08  | 599.967 | 519.371 | 325.441 | 395.063 |
| ENSMUSG00000030528 | 12_Blm       | 228.581 | 0.06933  | 0.76402  | 0.83392  | 258.72  | 191.821 | 250.982 | 172.222 | 233.098 | 264.641 |
| ENSMUSG00000030530 | 15_Furin     | 1606.78 | 1.46614  | 4.51E-11 | 1.61E-09 | 2106.23 | 2237.61 | 2734.51 | 1075.71 | 564.814 | 921.813 |
| ENSMUSG00000030532 | 6_Hddc3      | 687.584 | -0.32057 | 0.02956  | 0.06272  | 658.955 | 595.656 | 579.65  | 863.815 | 693.018 | 734.412 |
| ENSMUSG00000030533 | 15_Unc45a    | 1285.16 | 1.34564  | 2.50E-11 | 9.59E-10 | 1567.95 | 1836.53 | 2128.57 | 842.174 | 525.367 | 810.385 |
| ENSMUSG00000030534 | 13_Vps33b    | 560.333 | 0.16437  | 0.26957  | 0.3811   | 567.795 | 574.546 | 633.432 | 481.5   | 508.333 | 596.393 |
| ENSMUSG00000030536 | 10_Iqgap1    | 16444.1 | 0.57817  | 0.00078  | 0.0029   | 18936.9 | 18641.5 | 21506.8 | 10263.9 | 12928   | 16387.5 |
| ENSMUSG00000030538 | 15_Cib1      | 752.362 | 0.59088  | 1.53E-05 | 9.81E-05 | 900.311 | 873.751 | 938.196 | 633.885 | 529.85  | 638.178 |
| ENSMUSG00000030539 | 13_Sema4b    | 1924.79 | 1.37445  | 1.14E-12 | 5.99E-11 | 2405.75 | 2613.91 | 3312.97 | 1070.3  | 830.187 | 1315.61 |
| ENSMUSG00000030541 | 16_Idh2      | 1242.04 | 0.09571  | 0.56604  | 0.6713   | 1219.8  | 1337.24 | 1293.16 | 1471.55 | 987.08  | 1143.4  |
| ENSMUSG00000030543 | 10_Mesp2     | 55.055  | 1.03177  | 0.0017   | 0.00566  | 67.7187 | 78.0135 | 76.4899 | 43.2809 | 33.1716 | 31.6557 |
| ENSMUSG00000030544 | 5_Mesp1      | 9.38693 | 1.08879  | 0.14294  | 0.22961  | 9.55007 | 15.6027 | 13.1467 | 6.3118  | 5.37918 | 6.33113 |
| ENSMUSG00000030545 | 9_Pex11a     | 572.693 | 0.07334  | 0.57168  | 0.67624  | 592.104 | 580.053 | 589.211 | 578.882 | 523.574 | 572.335 |
| ENSMUSG00000030546 | 14_Plin1     | 0.4444  | -0.80729 | 0.81753  | NA       | 0.86819 | 0       | 0       | 0.90169 | 0.89653 | 0       |
| ENSMUSG00000030549 | 6_Rhcg       | 1.3921  | 3.89618  | 0.09064  | 0.173638 | 1.83561 | 1.83561 | 4.78062 | 0       | 0       | 0       |
| ENSMUSG00000030551 | 13_Nr2f2     | 1145.53 | 0.20509  | 0.08035  | 0.1439   | 1146.88 | 1229.86 | 1303.91 | 1033.33 | 1052.53 | 1106.68 |
| ENSMUSG00000030553 | 2_Pgpep1l    | 2.01679 | 0.59047  | 0.731016 | NA       | 1.73638 | 5.50683 | 0       | 0.90169 | 2.68959 | 1.26623 |
| ENSMUSG00000030554 | 15_Synn      | 507.965 | -0.78521 | 8.98E-05 | 0.00045  | 346.407 | 467.163 | 304.764 | 741.185 | 572.883 | 615.386 |
| ENSMUSG00000030555 | 15_Ttc23     | 376.041 | -0.16078 | 0.27716  | 0.38968  | 375.057 | 341.424 | 348.985 | 419.284 | 389.094 | 382.401 |
| ENSMUSG00000030556 | 12_Lrrc28    | 483.973 | 0.01393  | 0.91845  | 0.94576  | 482.713 | 467.163 | 509.136 | 458.958 | 489.506 | 496.361 |
| ENSMUSG00000030557 | 16_Mef2a     | 2715.15 | 0.0272   | 0.80469  | 0.86483  | 2836.37 | 2524.88 | 2861.2  | 2558.08 | 2770.28 | 2740.12 |

|                    |                  |         |          |          |          |         |         |         |         |         |         |
|--------------------|------------------|---------|----------|----------|----------|---------|---------|---------|---------|---------|---------|
| ENSMUSG00000030559 | 7_Rab38          | 860.274 | -0.65165 | 4.24E-05 | 0.00024  | 635.514 | 792.066 | 579.65  | 1082.02 | 1112.59 | 959.8   |
| ENSMUSG00000030560 | 16_Ctsc          | 1715.76 | 0.24053  | 0.11391  | 0.19137  | 2047.19 | 1627.27 | 1901.49 | 1394.91 | 1818.16 | 1505.54 |
| ENSMUSG00000030562 | 16_NoX4          | 95.3637 | -0.80019 | 0.00538  | 0.01499  | 68.5869 | 77.0957 | 63.3432 | 151.483 | 119.239 | 92.4346 |
| ENSMUSG00000030577 | 13_Cd22          | 9.0878  | 1.11013  | 0.20062  | 0.30157  | 23.4411 | 6.42464 | 7.17092 | 5.41011 | 4.48265 | 7.59736 |
| ENSMUSG00000030579 | 9_Tyrobp         | 246.268 | 1.1303   | 0.00057  | 0.00221  | 502.681 | 227.616 | 284.447 | 210.994 | 135.376 | 116.493 |
| ENSMUSG00000030583 | 16_Sipa1l3       | 2085.6  | 0.86788  | 8.75E-06 | 6.02E-05 | 2333.69 | 2867.22 | 2882.71 | 1777.22 | 1062.39 | 1590.38 |
| ENSMUSG00000030584 | 13_Dpf1          | 10.2304 | 1.04871  | 0.21578  | 0.31972  | 23.4411 | 9.17806 | 8.36608 | 6.3118  | 2.68959 | 11.396  |
| ENSMUSG00000030587 | 4_2200002D01Rik  | 875.868 | 1.28742  | 2.05E-08 | 3.18E-07 | 1022.73 | 1200.49 | 1504.7  | 628.475 | 350.543 | 548.276 |
| ENSMUSG00000030588 | 11_Yif1b         | 386.918 | 0.68446  | 0.00217  | 0.00695  | 416.73  | 536.916 | 478.062 | 389.528 | 233.098 | 267.174 |
| ENSMUSG00000030589 | 15_Rasgrp4       | 48.8276 | 1.36947  | 0.00108  | 0.00382  | 99.8417 | 49.5615 | 62.148  | 33.3624 | 27.7924 | 20.2596 |
| ENSMUSG00000030590 | 14_Fam98c        | 161.474 | 0.90807  | 3.71E-05 | 0.00021  | 203.156 | 206.506 | 222.299 | 128.941 | 91.4461 | 116.493 |
| ENSMUSG00000030591 | 16_Psm8          | 2467.8  | 0.00184  | 0.98566  | 0.99015  | 2574.18 | 2417.5  | 2416.6  | 2415.62 | 2584.7  | 2398.23 |
| ENSMUSG00000030592 | 16_Ryr1          | 295.121 | -0.92751 | 0.0127   | 0.03086  | 148.46  | 304.711 | 156.565 | 546.421 | 195.444 | 419.121 |
| ENSMUSG00000030595 | 15_Nfkib1        | 343.159 | 1.10307  | 2.65E-07 | 2.93E-06 | 390.685 | 468.081 | 546.185 | 251.57  | 169.444 | 232.986 |
| ENSMUSG00000030598 | 15_Fbxo17        | 50.5177 | -0.06047 | 0.85071  | 0.89885  | 46.014  | 52.3149 | 50.1965 | 53.1994 | 51.9988 | 49.3828 |
| ENSMUSG00000030600 | 15_Lrn1          | 57.0363 | 0.74689  | 0.03156  | 0.06625  | 64.2459 | 70.671  | 80.0753 | 56.8062 | 34.9647 | 35.4544 |
| ENSMUSG00000030602 | 12_Pak4          | 3117.69 | 1.11512  | 9.41E-12 | 3.98E-10 | 3662.89 | 4111.77 | 5023.23 | 2142.4  | 1648.72 | 2117.13 |
| ENSMUSG00000030603 | 15_Psmc4         | 2119.38 | 0.40533  | 0.00195  | 0.00638  | 2374.5  | 2246.79 | 2623.36 | 1837.64 | 1624.51 | 2009.5  |
| ENSMUSG00000030604 | 9_Zfp626         | 391.248 | -0.47094 | 0.00517  | 0.0145   | 347.275 | 298.287 | 338.229 | 393.135 | 502.057 | 468.504 |
| ENSMUSG00000030605 | 15_Mfge8         | 2082.74 | 0.9838   | 6.31E-07 | 6.18E-06 | 2463.92 | 2986.54 | 2848.05 | 1604.1  | 978.115 | 1615.71 |
| ENSMUSG00000030606 | 8_Hapln3         | 44.178  | -0.02429 | 0.9482   | 0.9659   | 41.673  | 46.8081 | 43.0255 | 57.7079 | 34.0682 | 41.7855 |
| ENSMUSG00000030607 | 7_Acan           | 5.81632 | -0.1733  | 0.87588  | 0.91604  | 1.73638 | 1.83561 | 13.1467 | 6.3118  | 8.06878 | 3.79868 |
| ENSMUSG00000030609 | 18_Aen           | 647.27  | 0.42602  | 0.0064   | 0.01735  | 679.792 | 700.286 | 846.169 | 545.52  | 500.264 | 611.588 |
| ENSMUSG00000030610 | 13_Det1          | 321.536 | 0.50285  | 0.00533  | 0.01487  | 382.003 | 348.766 | 400.377 | 302.966 | 224.133 | 270.973 |
| ENSMUSG00000030611 | 10_Mrps11        | 217.712 | 0.47446  | 0.07297  | 0.13306  | 274.348 | 226.698 | 258.153 | 230.831 | 117.446 | 198.798 |
| ENSMUSG00000030612 | 6_Mrpl46         | 458.852 | 0.07095  | 0.6346   | 0.73081  | 445.381 | 442.382 | 523.477 | 422.89  | 464.403 | 454.575 |
| ENSMUSG00000030613 | 13_Ccdc90b       | 1065.48 | -0.41124 | 0.00138  | 0.00473  | 937.643 | 915.052 | 891.585 | 1139.73 | 1359.14 | 1149.73 |
| ENSMUSG00000030614 | 7_Tmem126b       | 453.184 | -0.56906 | 0.00021  | 0.00096  | 397.63  | 334.999 | 362.132 | 502.239 | 589.021 | 533.082 |
| ENSMUSG00000030615 | 11_Tmem126a      | 371.835 | -0.25196 | 0.09977  | 0.1718   | 364.639 | 323.985 | 329.863 | 394.938 | 433.921 | 383.667 |
| ENSMUSG00000030616 | 14_Sytl2         | 639.023 | -1.64016 | 2.51E-07 | 2.78E-06 | 278.688 | 485.519 | 166.126 | 1060.38 | 1109.01 | 734.412 |
| ENSMUSG00000030617 | 12_Ccdc83        | 0.44795 | 0.74833  | 0.83022  | NA       | 0.86819 | 0.91781 | 0       | 0.90169 | 0       | 0       |
| ENSMUSG00000030619 | 8_Eed            | 854.56  | -0.254   | 0.08286  | 0.14737  | 786.579 | 770.039 | 781.631 | 787.171 | 1040.87 | 961.066 |
| ENSMUSG00000030621 | 17_Me3           | 540.787 | -0.17864 | 0.22484  | 0.33006  | 540.881 | 507.546 | 472.086 | 595.112 | 513.712 | 615.386 |
| ENSMUSG00000030629 | 14_Zfand6        | 2301.13 | -0.32796 | 0.00853  | 0.0221   | 2041.98 | 1959.51 | 2121.4  | 2300.2  | 2862.62 | 2521.06 |
| ENSMUSG00000030630 | 15_Fah           | 1109.47 | 0.2355   | 0.04322  | 0.08585  | 1128.64 | 1228.02 | 1242.96 | 1046.86 | 968.253 | 1042.1  |
| ENSMUSG00000030636 | 15_1700010L04Rik | 0.29498 | -0.03469 | 0.99322  | NA       | 0.86819 | 0       | 0       | 0.90169 | 0       | 0       |
| ENSMUSG00000030638 | 13_Sh3gl3        | 37.465  | -0.60112 | 0.14801  | 0.23626  | 22.5729 | 39.4656 | 27.4885 | 51.3961 | 48.4127 | 35.4544 |
| ENSMUSG00000030641 | 9_Ddias          | 126.676 | -0.02165 | 0.94722  | 0.96537  | 122.415 | 107.383 | 147.004 | 73.0365 | 144.341 | 165.876 |
| ENSMUSG00000030643 | 13_Rab30         | 177.06  | -0.54198 | 0.01632  | 0.03825  | 161.483 | 156.945 | 113.54  | 202.879 | 237.581 | 189.934 |
| ENSMUSG00000030647 | 8_Ndufc2         | 520.89  | 0.07665  | 0.65139  | 0.74519  | 528.727 | 520.396 | 556.942 | 591.506 | 513.712 | 414.056 |
| ENSMUSG00000030649 | 17_Anapc15       | 519.699 | 0.16501  | 0.28353  | 0.39665  | 581.686 | 486.437 | 579.65  | 506.747 | 441.99  | 521.685 |
| ENSMUSG00000030650 | 17_Tmc5          | 2.69601 | -0.50259 | 0.74496  | 0.81969  | 1.73638 | 3.67122 | 1.19515 | 4.50843 | 0       | 5.06491 |
| ENSMUSG00000030651 | 4_Art2b          | 1.30641 | 0.86838  | 0.68833  | NA       | 0       | 2.75342 | 2.39031 | 0.90169 | 1.79306 | 0       |
| ENSMUSG00000030652 | 10_Coq7          | 304.851 | 0.17741  | 0.30063  | 0.41531  | 309.943 | 345.095 | 315.521 | 318.295 | 252.822 | 287.434 |
| ENSMUSG00000030653 | 16_Pde2a         | 206.082 | -0.0008  | 0.99726  | 0.99802  | 191.001 | 225.78  | 200.786 | 241.652 | 150.617 | 226.655 |
| ENSMUSG00000030654 | 9_Arl6ip1        | 6198.91 | -0.51341 | 1.92E-06 | 1.62E-05 | 5227.36 | 5024.07 | 5072.23 | 7464.15 | 7790.85 | 6614.77 |
| ENSMUSG00000030655 | 14_Smg1          | 4620.3  | -0.32574 | 0.01174  | 0.02893  | 4549.31 | 3722.62 | 4030.06 | 4622.94 | 5558.49 | 5238.38 |
| ENSMUSG00000030657 | 11_Xytl1         | 304.327 | -0.20984 | 0.2901   | 0.40368  | 257.852 | 298.287 | 291.618 | 401.25  | 295.855 | 281.102 |
| ENSMUSG00000030659 | 14_Nucb2         | 564.807 | -0.31311 | 0.06324  | 0.11805  | 552.168 | 428.615 | 530.648 | 547.323 | 695.708 | 634.38  |
| ENSMUSG00000030660 | 9_Pik3c2a        | 1029.55 | -0.60872 | 1.61E-05 | 0.0001   | 901.18  | 759.025 | 786.411 | 1178.5  | 1392.31 | 1159.86 |
| ENSMUSG00000030662 | 9_Ipo5           | 5474.85 | 0.071    | 0.6209   | 0.71884  | 5826.41 | 5127.78 | 5872.99 | 4465.15 | 5459.87 | 6096.88 |
| ENSMUSG00000030663 | 12_1110004F10Rik | 2348.34 | -0.09856 | 0.3145   | 0.42957  | 2320.67 | 2227.51 | 2255.26 | 2394.88 | 2382.08 | 2509.66 |
| ENSMUSG00000030666 | 11_Calcb         | 2.625   | 2.71929  | 0.10584  | 0.18033  | 1.73638 | 8.26025 | 3.58546 | 0.90169 | 0       | 1.26623 |
| ENSMUSG00000030669 | 13_Calca         | 1.04091 | -0.43215 | 0.85238  | NA       | 1.73638 | 0.91781 | 0       | 0.90169 | 2.68959 | 0       |
| ENSMUSG00000030670 | 15_Cyp2r1        | 27.1145 | 0.08983  | 0.8476   | 0.89641  | 27.782  | 22.9451 | 33.4643 | 20.7388 | 34.9647 | 22.7921 |
| ENSMUSG00000030671 | 8_Pde3b          | 85.8254 | -0.68126 | 0.0131   | 0.03167  | 76.4006 | 62.4108 | 58.5626 | 92.8736 | 118.342 | 106.363 |
| ENSMUSG00000030672 | 12_Mylpf         | 1117.35 | -1.94935 | 0.00082  | 0.00304  | 358.562 | 693.861 | 326.277 | 2911.54 | 910.875 | 1503.01 |
| ENSMUSG00000030674 | 5_Qprt           | 6.67267 | -0.26857 | 0.76158  | 0.83243  | 5.20913 | 8.26025 | 4.78062 | 9.91854 | 8.06878 | 3.79868 |
| ENSMUSG00000030677 | 8_Klf22          | 342.686 | 0.95599  | 2.07E-05 | 0.00013  | 481.845 | 361.615 | 512.721 | 174.927 | 259.097 | 265.908 |
| ENSMUSG00000030678 | 7_Maz            | 1682.65 | 0.35238  | 0.00307  | 0.00936  | 1844.9  | 1869.57 | 1946.91 | 1593.28 | 1333.14 | 1508.08 |
| ENSMUSG00000030680 | 5_Pagr1a         | 83.4831 | -0.59657 | 0.27333  | 0.38538  | 69.4551 | 55.0683 | 75.2947 | 209.191 | 41.2404 | 50.6491 |
| ENSMUSG00000030681 | 18_Mvp           | 3991.74 | 1.61711  | 6.13E-15 | 5.50E-13 | 5177.01 | 5543.55 | 7340.64 | 2158.64 | 1399.48 | 2331.12 |
| ENSMUSG00000030682 | 4_Cdipt          | 1495.4  | 0.84554  | 4.85E-08 | 6.66E-07 | 1799.75 | 1852.13 | 2113.03 | 1236.21 | 891.151 | 1080.09 |
| ENSMUSG00000030683 | 11_Seiz6l2       | 35.322  | -0.30901 | 0.49958  | 0.61053  | 32.123  | 33.9588 | 28.6837 | 59.5112 | 25.9994 | 31.6557 |
| ENSMUSG00000030685 | 5_Kctd13         | 162.426 | 0.38219  | 0.1246   | 0.20575  | 202.288 | 175.301 | 173.297 | 169.517 | 102.204 | 151.947 |
| ENSMUSG00000030688 | 14_Stard10       | 1897.58 | 0.98515  | 9.34E-09 | 1.61E-07 | 2282.47 | 2488.17 | 2794.27 | 1544.59 | 1021.15 | 1254.83 |
| ENSMUSG00000030689 | 15_Ino80e        | 578.594 | 0.565    | 0.00051  | 0.00202  | 669.373 | 658.067 | 743.386 | 504.042 | 386.405 | 510.289 |
| ENSMUSG00000030691 | 14_Fchsd2        | 719.329 | -0.15438 | 0.22928  | 0.33536  | 685.001 | 638.793 | 719.483 | 717.742 | 795.223 | 759.736 |
| ENSMUSG00000030693 | 10_Klk10         | 126.233 | 1.23913  | 4.38E-05 | 0.00024  | 167.56  | 127.575 | 236.641 | 60.4129 | 75.3086 | 89.9021 |
| ENSMUSG00000030695 | 13_Aldoa         | 13925.4 | 0.46322  | 0.01082  | 0.02699  | 14853   | 17207   | 16366.4 | 15014   | 8986.82 | 11125.1 |
| ENSMUSG00000030697 | 7_Ppp4c          | 1566.38 | 0.46615  | 9.30E-06 | 6.35E-05 | 1798.02 | 1752.09 | 1902.69 | 1309.25 | 1335.83 | 1300.42 |
| ENSMUSG00000030699 | 16_Tbx6          | 18.4763 | 0.45478  | 0.41892  | 0.53475  | 21.7047 | 18.3561 | 23.9031 | 18.9354 | 8.96531 | 18.9934 |
| ENSMUSG00000030701 | 16_Plekhh1       | 471.802 | -1.39691 | 1.68E-05 | 0.00011  | 311.68  | 318.479 | 148.199 | 986.444 | 611.434 | 454.575 |
| ENSMUSG00000030703 | 8_Gdpd3          | 137.299 | 0.65114  | 0.00569  | 0.01569  | 187.529 | 177.136 | 137.443 | 100.087 | 101.308 | 120.292 |
| ENSMUSG00000030704 | 14_Rab6a         | 2949.29 | -0.27695 | 0.01636  | 0.03833  | 2733.93 | 2544.16 | 2722.56 | 2906.13 | 3400.54 | 3388.42 |
| ENSMUSG00000030706 | 16_Mrpl48        | 735.54  | -0.49812 | 3.08E-05 | 0.00018  | 617.282 | 606.669 | 605.943 | 882.75  | 875.014 | 825.58  |
| ENSMUSG00000030707 | 15_Coro1a        | 237.772 | 2.30696  | 2.47E-15 | 2.47E-13 | 531.331 | 282.684 | 372.888 | 102.792 | 60.9641 | 75.9736 |
| ENSMUSG00000030708 | 13_Dnajb13       | 11.1225 | 1.08901  | 0.12824  | 0.21063  | 9.55007 | 20.1917 | 15.537  | 7.21348 | 5.37918 | 8.86359 |
| ENSMUSG00000030711 | 15_Sult1a1       | 256.879 | -0.84965 | 8.67E-05 | 0.00044  | 187.529 | 219.356 | 142.223 | 377.806 | 300.338 | 314.024 |

|                    |                 |         |          |          |          |         |         |         |         |         |         |
|--------------------|-----------------|---------|----------|----------|----------|---------|---------|---------|---------|---------|---------|
| ENSMUSG00000030713 | 6_Klk7          | 1.20121 | 1.26227  | 0.53788  | NA       | 1.73638 | 0.91781 | 2.39031 | 0       | 0.89653 | 1.26623 |
| ENSMUSG00000030714 | 14_Ccdc101      | 188.566 | 0.74518  | 0.00012  | 0.0006   | 218.783 | 231.287 | 259.348 | 151.483 | 136.273 | 134.22  |
| ENSMUSG00000030717 | 9_Nupr1         | 1635.72 | -0.28776 | 0.07977  | 0.14301  | 1501.1  | 1530.9  | 1386.38 | 2085.6  | 1408.45 | 1901.87 |
| ENSMUSG00000030718 | 8_Ppme1         | 897.527 | 0.28227  | 0.0185   | 0.04237  | 943.721 | 974.71  | 1037.39 | 843.978 | 773.706 | 811.651 |
| ENSMUSG00000030720 | 16_Cln3         | 411.688 | 0.69173  | 0.00036  | 0.00149  | 522.649 | 519.478 | 484.037 | 397.643 | 262.683 | 283.635 |
| ENSMUSG00000030722 | 7_Nfatc2ip      | 192.869 | 0.23964  | 0.24429  | 0.35246  | 240.488 | 178.054 | 207.957 | 165.91  | 190.064 | 174.739 |
| ENSMUSG00000030724 | 7_Cd19          | 2.75986 | 0.91066  | 0.53888  | 0.64649  | 8.68188 | 0.91781 | 1.19515 | 2.70506 | 1.79306 | 1.26623 |
| ENSMUSG00000030725 | 3_Lipt2         | 68.5218 | -0.46673 | 0.12422  | 0.20536  | 68.5869 | 57.8218 | 45.4159 | 73.9382 | 77.9982 | 87.3697 |
| ENSMUSG00000030726 | 15_Pold3        | 811.455 | 0.15711  | 0.22632  | 0.33186  | 876.002 | 810.422 | 879.633 | 697.905 | 788.05  | 816.716 |
| ENSMUSG00000030727 | 12_Rabep2       | 457.44  | 1.25418  | 7.62E-08 | 9.96E-07 | 585.159 | 650.724 | 697.97  | 349.854 | 181.099 | 279.836 |
| ENSMUSG00000030729 | 16_Pgm211       | 122.561 | -0.61336 | 0.01105  | 0.02748  | 94.6325 | 110.137 | 86.0511 | 161.402 | 157.789 | 125.356 |
| ENSMUSG00000030730 | 12_Atp2a1       | 2098.91 | -1.27731 | 0.05628  | 0.10696  | 810.888 | 1969.61 | 897.561 | 4937.63 | 1389.62 | 2588.17 |
| ENSMUSG00000030731 | 13_Syt3         | 59.0052 | 0.09895  | 0.79318  | 0.85676  | 65.1141 | 64.2464 | 53.7819 | 82.9551 | 38.5508 | 49.3828 |
| ENSMUSG00000030732 | 12_Chrdl2       | 1.08578 | -2.37422 | 0.31624  | NA       | 0       | 0.91781 | 0       | 0.90169 | 0.89653 | 3.79868 |
| ENSMUSG00000030733 | 10_Sh2b1        | 1047.91 | 0.68045  | 3.11E-05 | 0.00018  | 1188.55 | 1326.23 | 1357.7  | 967.509 | 675.088 | 772.398 |
| ENSMUSG00000030735 | 5_Gm9755        | 30.118  | -0.14961 | 0.81618  | 0.87308  | 8.68188 | 41.3013 | 35.8546 | 15.3287 | 46.6196 | 32.9219 |
| ENSMUSG00000030737 | 16_Slco2b1      | 154.241 | -0.07645 | 0.74122  | 0.81716  | 145.856 | 156.945 | 148.199 | 196.567 | 139.859 | 138.019 |
| ENSMUSG00000030738 | 11_Eif3c        | 7313.87 | 0.18706  | 0.11843  | 0.19769  | 7719.93 | 7363.55 | 8277.64 | 6100.8  | 6939.15 | 7482.13 |
| ENSMUSG00000030739 | 17_Myh14        | 7510.42 | 1.70129  | 4.11E-14 | 3.12E-12 | 9326.08 | 11088.9 | 14047.8 | 3768.14 | 2388.36 | 4443.19 |
| ENSMUSG00000030741 | 15_Spns1        | 477.285 | 0.94375  | 4.91E-07 | 4.98E-06 | 577.345 | 617.683 | 689.604 | 393.135 | 261.787 | 324.154 |
| ENSMUSG00000030742 | 7_Lat           | 13.7922 | 0.84933  | 0.21679  | 0.32094  | 26.9138 | 11.9315 | 14.3418 | 14.427  | 6.27571 | 8.86359 |
| ENSMUSG00000030744 | 12_Rps3         | 18299.8 | -0.08234 | 0.4146   | 0.53076  | 18111.3 | 17484.2 | 17737.3 | 19972.3 | 17337.1 | 19156.7 |
| ENSMUSG00000030745 | 9_Il21r         | 26.5181 | 1.80461  | 0.00608  | 0.01661  | 62.5096 | 33.041  | 28.6837 | 11.7219 | 20.6202 | 2.53245 |
| ENSMUSG00000030747 | 4_Dgat2         | 1180.65 | 0.85154  | 2.13E-06 | 1.77E-05 | 1381.29 | 1362.94 | 1813.05 | 867.421 | 686.742 | 972.462 |
| ENSMUSG00000030748 | 9_Il4ra         | 487.85  | 1.28039  | 1.62E-09 | 3.56E-08 | 738.828 | 616.765 | 715.897 | 287.638 | 207.099 | 360.875 |
| ENSMUSG00000030750 | 13_Nsmce1       | 673.144 | -0.00726 | 0.95647  | 0.97164  | 706.705 | 636.957 | 671.677 | 719.545 | 682.266 | 621.717 |
| ENSMUSG00000030751 | 17_Psma1        | 2735.01 | -0.2636  | 0.06101  | 0.11449  | 2660.13 | 2249.54 | 2548.07 | 2591.44 | 3391.58 | 2969.3  |
| ENSMUSG00000030752 | 8_Kdm8          | 76.5394 | 0.3273   | 0.25469  | 0.3642   | 77.2688 | 77.0957 | 101.588 | 74.8399 | 60.0675 | 68.3763 |
| ENSMUSG00000030753 | 15_Prkrir       | 2495.22 | -0.48808 | 4.89E-05 | 0.00027  | 2227.77 | 1987.05 | 2016.22 | 2696.94 | 3194.34 | 2849.01 |
| ENSMUSG00000030754 | 8_Copb1         | 4112.39 | -0.28735 | 0.04896  | 0.09542  | 3879.07 | 3463.8  | 3769.52 | 3723.96 | 5184.64 | 4653.38 |
| ENSMUSG00000030757 | 13_Zkscan2      | 177.49  | -1.18087 | 1.09E-05 | 7.31E-05 | 125.887 | 118.397 | 81.2705 | 302.065 | 253.718 | 183.603 |
| ENSMUSG00000030759 | 16_Far1         | 3564.05 | -0.43316 | 0.00666  | 0.01794  | 3065.57 | 2823.17 | 3210.18 | 3216.31 | 4715.75 | 4353.29 |
| ENSMUSG00000030760 | 14_Acer3        | 4443.87 | -0.15826 | 0.24606  | 0.35465  | 4294.93 | 3745.56 | 4560.71 | 4062.99 | 5021.47 | 4977.54 |
| ENSMUSG00000030761 | 15_Myo7a        | 793.376 | -0.33911 | 0.18107  | 0.2784   | 677.187 | 942.586 | 481.647 | 1118.09 | 848.118 | 692.626 |
| ENSMUSG00000030762 | 11_Aqp8         | 2.44775 | 0.23255  | 0.86414  | NA       | 2.60457 | 1.83561 | 3.58546 | 2.70506 | 2.68959 | 1.26623 |
| ENSMUSG00000030763 | 7_Lcmt1         | 543.465 | -0.16192 | 0.23422  | 0.34083  | 553.904 | 502.957 | 481.647 | 594.211 | 568.4   | 559.672 |
| ENSMUSG00000030766 | 15_Arhgap17     | 1212.61 | 0.29127  | 0.01535  | 0.0363   | 1290.13 | 1330.82 | 1382.79 | 994.559 | 1152.94 | 1124.41 |
| ENSMUSG00000030768 | 12_Displ        | 395.204 | 0.45871  | 0.01446  | 0.03446  | 434.962 | 495.615 | 442.207 | 404.857 | 277.028 | 316.557 |
| ENSMUSG00000030769 | 15_Slc5a11      | 0.30325 | -0.03469 | 0.99322  | NA       | 0       | 0.91781 | 0       | 0.90169 | 0       | 0       |
| ENSMUSG00000030770 | 14_Parva        | 4919.67 | -0.1531  | 0.17571  | 0.27172  | 4636.99 | 4823.99 | 4514.1  | 4639.17 | 5415.94 | 5487.83 |
| ENSMUSG00000030771 | 15_Micalcl      | 22.2861 | 0.52087  | 0.3094   | 0.42425  | 25.1775 | 25.6986 | 27.4885 | 12.6236 | 16.1376 | 26.5908 |
| ENSMUSG00000030772 | 5_Dkk3          | 17500.3 | -0.31384 | 0.03639  | 0.07447  | 14497   | 18103.7 | 14211.6 | 22295.1 | 16982.1 | 18912.4 |
| ENSMUSG00000030774 | 13_Pak1         | 2382.47 | -0.05178 | 0.78253  | 0.84869  | 2316.33 | 2174.28 | 2527.75 | 1742.06 | 2675.25 | 2859.14 |
| ENSMUSG00000030775 | 9_Trat1         | 0.45084 | -2.33355 | 0.56009  | NA       | 0       | 0       | 0       | 2.70506 | 0       | 0       |
| ENSMUSG00000030779 | 15_Rbbp6        | 2299.06 | -0.13548 | 0.2235   | 0.32855  | 2211.28 | 2108.2  | 2254.06 | 2209.13 | 2542.56 | 2469.14 |
| ENSMUSG00000030780 | 15_BC017158     | 586.403 | 0.35509  | 0.02156  | 0.04831  | 599.05  | 708.546 | 668.091 | 585.194 | 481.437 | 476.101 |
| ENSMUSG00000030781 | 13_Slc5a2       | 1.30276 | -0.50568 | 0.84224  | NA       | 0       | 0.91781 | 2.39031 | 4.50843 | 0       | 0       |
| ENSMUSG00000030782 | 15_Tgfb111      | 341.626 | -0.21702 | 0.38399  | 0.5016   | 292.579 | 423.108 | 231.86  | 447.236 | 330.82  | 324.154 |
| ENSMUSG00000030785 | 8_Cox6a2        | 74.9531 | -0.67757 | 0.1894   | 0.28859  | 39.9367 | 81.6847 | 51.3916 | 158.697 | 33.1716 | 84.8372 |
| ENSMUSG00000030786 | 18_Iltgam       | 6306.23 | 0.57026  | 2.53E-05 | 0.00015  | 7460.34 | 6907.4  | 8241.78 | 4350.63 | 5474.22 | 5402.99 |
| ENSMUSG00000030787 | 3_Lyve1         | 101.142 | -0.04053 | 0.87972  | 0.91898  | 118.074 | 85.3559 | 95.6123 | 119.022 | 88.7565 | 100.032 |
| ENSMUSG00000030788 | 15_Rnf141       | 1148.53 | -0.41095 | 0.00048  | 0.00193  | 1053.11 | 949.929 | 954.928 | 1280.39 | 1381.55 | 1271.29 |
| ENSMUSG00000030789 | 9_Iltgax        | 83.5734 | 0.93582  | 0.00557  | 0.01542  | 138.042 | 74.3423 | 117.125 | 71.2332 | 47.5161 | 53.1815 |
| ENSMUSG00000030790 | 14_Adm          | 117.289 | 1.3601   | 4.57E-05 | 0.00025  | 212.706 | 100.041 | 193.615 | 73.9382 | 53.7918 | 69.6425 |
| ENSMUSG00000030792 | 7_Dkk11         | 88.3359 | 0.59313  | 0.0428   | 0.0852   | 106.787 | 86.2737 | 125.491 | 74.8399 | 55.5849 | 81.0385 |
| ENSMUSG00000030793 | 4_Pycard        | 1456.77 | 0.5461   | 0.00088  | 0.00322  | 1702.52 | 1555.68 | 1930.17 | 1389.5  | 976.322 | 1186.45 |
| ENSMUSG00000030795 | 18_Fus          | 9555.08 | 0.09528  | 0.46226  | 0.57592  | 9800.11 | 9317.56 | 10493.5 | 7888.85 | 9942.52 | 9887.97 |
| ENSMUSG00000030796 | 15_Tead2        | 145.174 | -0.54265 | 0.08865  | 0.1557   | 125.887 | 149.602 | 78.8802 | 231.733 | 159.882 | 125.356 |
| ENSMUSG00000030798 | 13_Cd37         | 58.1294 | 1.31206  | 0.00118  | 0.00414  | 98.1053 | 60.5752 | 89.6366 | 42.3792 | 18.8271 | 39.253  |
| ENSMUSG00000030800 | 10_Prss8        | 1783.1  | 1.13068  | 3.91E-13 | 2.40E-11 | 2357.13 | 2483.58 | 2502.65 | 1261.46 | 885.772 | 1207.98 |
| ENSMUSG00000030801 | 10_Kat8         | 392.097 | -0.07431 | 0.63619  | 0.73254  | 393.289 | 353.355 | 399.181 | 425.596 | 359.509 | 421.654 |
| ENSMUSG00000030802 | 14_Bckdk        | 1311.68 | 0.58696  | 8.54E-05 | 0.00043  | 1507.18 | 1601.57 | 1615.85 | 1204.65 | 869.635 | 1071.23 |
| ENSMUSG00000030805 | 14_Stx4a        | 1393.49 | 0.44427  | 0.00185  | 0.00609  | 1569.68 | 1611.67 | 1637.36 | 1327.28 | 987.977 | 1226.97 |
| ENSMUSG00000030806 | 6_Stx1b         | 189.769 | -0.86121 | 0.01867  | 0.0427   | 141.515 | 178.972 | 83.6608 | 357.969 | 238.477 | 138.019 |
| ENSMUSG00000030811 | 14_Fbxl19       | 893.116 | 0.91468  | 9.27E-09 | 1.60E-07 | 1071.34 | 1101.37 | 1327.82 | 626.671 | 532.539 | 698.957 |
| ENSMUSG00000030814 | 17_Bcl7c        | 671.914 | 0.29459  | 0.11708  | 0.19575  | 731.015 | 696.614 | 793.582 | 742.989 | 467.092 | 600.192 |
| ENSMUSG00000030815 | 11_Phkg2        | 579.752 | 0.44595  | 0.00087  | 0.0032   | 638.987 | 700.286 | 666.896 | 522.978 | 464.403 | 484.965 |
| ENSMUSG00000030816 | 8_Rnf40         | 1621.33 | 0.87529  | 5.30E-10 | 1.36E-08 | 1921.3  | 2056.8  | 2318.6  | 1279.49 | 1012.18 | 1139.6  |
| ENSMUSG00000030822 | 15_Prr14        | 670.583 | 0.44801  | 0.00733  | 0.01942  | 727.542 | 775.546 | 819.876 | 686.183 | 500.264 | 514.088 |
| ENSMUSG00000030823 | 6_9130019O22Rik | 136.254 | 0.28347  | 0.19498  | 0.29515  | 155.406 | 146.849 | 147.004 | 139.761 | 118.342 | 110.162 |
| ENSMUSG00000030824 | 15_Nucb1        | 4035.44 | 0.78981  | 4.12E-06 | 3.13E-05 | 4663.04 | 5324.19 | 5351.9  | 3430.91 | 2231.46 | 3211.15 |
| ENSMUSG00000030825 | 17_Hsd17b14     | 1.64089 | 1.16423  | 0.49288  | NA       | 3.47275 | 0.91781 | 2.39031 | 0.90169 | 0.89653 | 1.26623 |
| ENSMUSG00000030826 | 17_Bcat2        | 615.812 | 0.72396  | 0.00015  | 0.00072  | 684.132 | 801.244 | 816.29  | 563.553 | 568.612 | 471.036 |
| ENSMUSG00000030827 | 4_Fgf21         | 7.9334  | 0.14125  | 0.88276  | 0.9208   | 1.73638 | 13.7671 | 9.56123 | 11.7219 | 4.48265 | 6.33113 |
| ENSMUSG00000030830 | 18_Iltgal       | 76.3087 | 2.83745  | 3.50E-11 | 1.30E-09 | 204.024 | 77.0957 | 120.711 | 19.8371 | 19.7237 | 16.4609 |
| ENSMUSG00000030834 | 5_Abcc6         | 35.9223 | 0.19174  | 0.96689  | 0.78317  | 31.2548 | 51.3971 | 32.2692 | 51.3971 | 18.8271 | 30.3894 |
| ENSMUSG00000030835 | 6_Nomo1         | 1500.27 | 0.49072  | 0.00377  | 0.01114  | 1620.04 | 1841.12 | 1797.51 | 1466.14 | 970.046 | 1306.75 |
| ENSMUSG00000030838 | 17_Ush1c        | 5.62255 | -0.02337 | 0.98317  | 0.98881  | 3.47275 | 11.9315 | 1.19515 | 8.11517 | 2.68959 | 6.33113 |
| ENSMUSG00000030839 | 10_Sergef       | 385.059 | 0.70018  | 0.00079  | 0.00295  | 472.294 | 435.958 | 522.282 | 366.986 | 224.133 | 288.7   |

|                    |                  |         |          |          |          |         |         |         |         |         |         |
|--------------------|------------------|---------|----------|----------|----------|---------|---------|---------|---------|---------|---------|
| ENSMUSG00000030842 | 11_Lamtor1       | 1754.1  | 0.4761   | 0.00489  | 0.01382  | 1982.94 | 1969.61 | 2170.4  | 1761.89 | 1143.08 | 1496.68 |
| ENSMUSG00000030844 | 11_Rgs10         | 1485.48 | -0.38113 | 0.0017   | 0.00566  | 1326.59 | 1271.16 | 1272.84 | 1510.32 | 1813.68 | 1718.27 |
| ENSMUSG00000030846 | 15_Tial1         | 1526.31 | -0.31755 | 0.02598  | 0.05644  | 1370    | 1358.35 | 1348.13 | 1412.94 | 1903.33 | 1765.12 |
| ENSMUSG00000030847 | 8_Bag3           | 1458.6  | 0.66035  | 1.27E-05 | 8.36E-05 | 1562.74 | 1744.75 | 2052.08 | 1051.37 | 1066.87 | 1273.82 |
| ENSMUSG00000030849 | 17_Fgfr2         | 3465.87 | -0.04704 | 0.62799  | 0.72482  | 3377.25 | 3432.59 | 3416.95 | 3435.42 | 3422.95 | 3710.04 |
| ENSMUSG00000030850 | 15_Ate1          | 1405.93 | -0.44834 | 0.00037  | 0.00154  | 1210.25 | 1179.38 | 1178.42 | 1491.39 | 1819.96 | 1556.19 |
| ENSMUSG00000030852 | 15_Tacc2         | 1190.87 | 0.13827  | 0.40232  | 0.51991  | 1112.15 | 1400.57 | 1231.01 | 1322.77 | 946.736 | 1132.01 |
| ENSMUSG00000030854 | 15_Ptpn5         | 1.46759 | 0.52718  | 0.82609  | NA       | 5.20913 | 0       | 0       | 1.80337 | 1.79306 | 0       |
| ENSMUSG00000030858 | 10_1700007K09Rik | 0.15028 | -0.99647 | 0.80707  | NA       | 0       | 0       | 0       | 0.90169 | 0       | 0       |
| ENSMUSG00000030859 | 7_Fam24a         | 0.19919 | 0.92709  | 0.82027  | NA       | 0       | 0       | 1.19515 | 0       | 0       | 0       |
| ENSMUSG00000030861 | 14_Acadsb        | 1702.5  | -0.60514 | 6.52E-07 | 6.35E-06 | 1449.01 | 1308.79 | 1294.35 | 2174.87 | 2120.29 | 1867.68 |
| ENSMUSG00000030862 | 12_Cpxm2         | 3586.82 | -0.27769 | 0.01661  | 0.03882  | 3156.73 | 3603.3  | 2966.37 | 3834.87 | 3939.36 | 4020.27 |
| ENSMUSG00000030865 | 4_Chp2           | 37.2888 | -0.98898 | 0.02401  | 0.05289  | 33.8593 | 22.9451 | 17.9273 | 64.9214 | 44.8265 | 39.253  |
| ENSMUSG00000030866 | 8_Ern2           | 4.86718 | -0.37585 | 0.7112   | 0.79356  | 2.60457 | 6.42464 | 3.58546 | 4.50843 | 4.48265 | 7.59736 |
| ENSMUSG00000030867 | 7_Plk1           | 310.663 | 1.25727  | 2.75E-09 | 5.58E-08 | 434.094 | 347.848 | 531.844 | 166.812 | 175.72  | 207.661 |
| ENSMUSG00000030868 | 6_Dctn5          | 1333.12 | -0.19785 | 0.10597  | 0.18044  | 1258.87 | 1173.87 | 1291.96 | 1310.15 | 1416.52 | 1547.33 |
| ENSMUSG00000030869 | 11_Ndufab1       | 862.877 | -0.32178 | 0.02966  | 0.06289  | 752.719 | 775.546 | 773.265 | 831.354 | 1109.9  | 934.475 |
| ENSMUSG00000030870 | 12_Ubifd1        | 1020.05 | -0.15124 | 0.19175  | 0.29152  | 978.448 | 991.23  | 929.83  | 1027.02 | 1131.42 | 1062.36 |
| ENSMUSG00000030871 | 11_Ears2         | 222.976 | 0.44092  | 0.02573  | 0.056    | 251.775 | 245.054 | 272.495 | 182.14  | 162.272 | 224.122 |
| ENSMUSG00000030872 | 14_Gga2          | 1385.81 | -0.08381 | 0.52077  | 0.63071  | 1297.07 | 1518.05 | 1220.25 | 1461.63 | 1359.14 | 1458.69 |
| ENSMUSG00000030873 | 9_Scnn1b         | 38.3095 | 0.11051  | 0.80747  | 0.86695  | 50.3549 | 44.9725 | 23.9031 | 50.4944 | 32.2751 | 27.857  |
| ENSMUSG00000030876 | 6_Mettl9         | 1244.26 | -0.46895 | 0.00048  | 0.00193  | 1068.74 | 1001.33 | 1061.3  | 1262.36 | 1603    | 1468.82 |
| ENSMUSG00000030877 | 10_4933427G17Rik | 9.79271 | -1.13599 | 0.20602  | 0.30828  | 6.94551 | 0.91781 | 10.7564 | 9.01685 | 19.7237 | 11.396  |
| ENSMUSG00000030878 | 10_Cdr2          | 696.284 | -0.64528 | 0.00058  | 0.00226  | 607.732 | 550.683 | 470.891 | 1043.25 | 802.395 | 702.756 |
| ENSMUSG00000030879 | 9_Mrp17          | 977.462 | 0.2327   | 0.09165  | 0.16007  | 1037.49 | 1036.2  | 1094.76 | 999.068 | 781.775 | 915.482 |
| ENSMUSG00000030880 | 13_Polr3e        | 617.216 | 0.41567  | 0.0029   | 0.00891  | 707.574 | 705.792 | 701.555 | 525.683 | 475.161 | 587.529 |
| ENSMUSG00000030881 | 14_Arfip2        | 1008.28 | 0.18464  | 0.18711  | 0.28583  | 1031.41 | 1123.39 | 1064.88 | 1074.81 | 920.737 | 834.444 |
| ENSMUSG00000030882 | 17_Dnhd1         | 172.774 | -0.01591 | 0.93797  | 0.95923  | 154.538 | 187.232 | 174.492 | 177.632 | 188.271 | 154.48  |
| ENSMUSG00000030884 | 11_Uqcrcc2       | 4244.23 | -0.41278 | 0.00016  | 0.00076  | 3784.43 | 3509.69 | 3629.68 | 4543.59 | 5278.77 | 4719.23 |
| ENSMUSG00000030887 | 3_Pdzd9          | 7.37021 | -0.45647 | 0.59897  | 0.70063  | 4.34094 | 7.34244 | 7.17092 | 9.01685 | 12.5514 | 3.79868 |
| ENSMUSG00000030888 | 13_Rrp8          | 475.189 | -0.00487 | 0.97196  | 0.98209  | 449.722 | 477.259 | 497.184 | 465.27  | 502.057 | 459.64  |
| ENSMUSG00000030889 | 13_Vwa3a         | 3.82408 | -0.12115 | 0.91191  | 0.94083  | 2.60457 | 3.67122 | 4.78062 | 3.60674 | 4.48265 | 3.79868 |
| ENSMUSG00000030890 | 15_Ilk           | 1661.77 | -0.20514 | 0.10066  | 0.17306  | 1435.12 | 1666.73 | 1530.99 | 1907.97 | 1806.51 | 1623.3  |
| ENSMUSG00000030894 | 4_Tpp1           | 2650.35 | -0.07282 | 0.44299  | 0.55814  | 2588.94 | 2626.76 | 2533.73 | 2682.51 | 2695.87 | 2774.3  |
| ENSMUSG00000030895 | 8_Hpx            | 14.6597 | -0.36989 | 0.53619  | 0.64395  | 13.891  | 13.7671 | 10.7564 | 21.6405 | 15.241  | 12.6623 |
| ENSMUSG00000030897 | 4_Cnga4          | 2.00217 | -0.74406 | 0.66461  | NA       | 2.60457 | 1.83561 | 0       | 5.41011 | 0.89653 | 1.26623 |
| ENSMUSG00000030898 | 14_Cckbr         | 1.93318 | -2.03602 | 0.36293  | NA       | 0       | 0       | 2.39031 | 5.41011 | 0       | 3.79868 |
| ENSMUSG00000030905 | 5_Crym           | 27.1453 | -0.27682 | 0.62462  | 0.72215  | 28.6502 | 28.452  | 16.7322 | 29.7556 | 46.6196 | 12.6623 |
| ENSMUSG00000030909 | 5_Anks4b         | 0.29767 | 1.70332  | 0.67406  | NA       | 0.86819 | 0.91781 | 0       | 0       | 0       | 0       |
| ENSMUSG00000030911 | 6_Zp2            | 0.15028 | -0.99647 | 0.80707  | NA       | 0       | 0       | 0       | 0.90169 | 0       | 0       |
| ENSMUSG00000030917 | 12_Tmem159       | 816.172 | 0.25566  | 0.06389  | 0.11897  | 904.652 | 800.326 | 960.904 | 804.303 | 697.501 | 729.347 |
| ENSMUSG00000030921 | 16_Trim30a       | 3554.76 | 1.05147  | 7.87E-06 | 5.50E-05 | 4635.26 | 3714.36 | 6037.92 | 1584.26 | 2958.55 | 2398.23 |
| ENSMUSG00000030922 | 11_Lymr1         | 88.2632 | -0.41593 | 0.13775  | 0.22267  | 88.5552 | 66.082  | 71.7092 | 82.9551 | 107.584 | 112.694 |
| ENSMUSG00000030924 | 15_2610020H08Rik | 102.61  | 0.1169   | 0.6513   | 0.74514  | 105.919 | 91.7806 | 123.101 | 86.5618 | 110.066 | 96.2332 |
| ENSMUSG00000030929 | 16_Eri2          | 196.323 | -0.33017 | 0.16283  | 0.25563  | 203.156 | 146.849 | 172.102 | 186.649 | 271.649 | 197.531 |
| ENSMUSG00000030930 | 13_Chst15        | 1940.08 | 0.5315   | 0.00017  | 0.0008   | 2314.59 | 2262.39 | 2300.67 | 1467.04 | 1412.93 | 1882.88 |
| ENSMUSG00000030934 | 8_Oat            | 12709.5 | -0.00681 | 0.94897  | 0.96652  | 12534.9 | 12112.3 | 13390.5 | 12143.9 | 12276.2 | 13799.3 |
| ENSMUSG00000030935 | 15_Acsm3         | 12.849  | -0.26509 | 0.6723   | 0.76262  | 10.4183 | 13.7671 | 10.7564 | 10.8202 | 16.1376 | 15.1947 |
| ENSMUSG00000030942 | 7_Thumpd1        | 1086.37 | -0.14443 | 0.30911  | 0.42399  | 1036.62 | 997.655 | 1061.3  | 963.902 | 1238.11 | 1220.64 |
| ENSMUSG00000030945 | 16_Acsm2         | 29.0947 | -0.21784 | 0.61337  | 0.71269  | 25.1775 | 26.6164 | 28.6837 | 26.1489 | 28.689  | 39.253  |
| ENSMUSG00000030946 | 12_Lhpp          | 290.613 | 0.55063  | 0.00645  | 0.01745  | 352.484 | 301.04  | 382.449 | 262.39  | 188.271 | 257.044 |
| ENSMUSG00000030954 | 9_Gp2            | 705.268 | -0.68206 | 0.00936  | 0.02388  | 552.168 | 724.149 | 346.595 | 881.848 | 667.019 | 1059.83 |
| ENSMUSG00000030956 | 15_Fam53b        | 1585.88 | 0.79026  | 6.80E-07 | 6.57E-06 | 1778.92 | 2050.38 | 2200.28 | 1345.31 | 969.15  | 1171.26 |
| ENSMUSG00000030960 | 16_Mettl10       | 353.687 | -0.55596 | 0.0034   | 0.01022  | 329.912 | 284.52  | 243.811 | 372.396 | 485.023 | 406.459 |
| ENSMUSG00000030963 | 5_Umod           | 0.15297 | 0.92709  | 0.82027  | NA       | 0       | 0.91781 | 0       | 0       | 0       | 0       |
| ENSMUSG00000030965 | 18_Fam175b       | 891.638 | -0.18122 | 0.21374  | 0.31731  | 800.47  | 824.189 | 882.024 | 805.205 | 999.632 | 1038.31 |
| ENSMUSG00000030966 | 12_Trim21        | 1005.64 | 0.81285  | 4.38E-06 | 3.30E-05 | 1305.76 | 1089.44 | 1449.72 | 586.997 | 819.429 | 782.528 |
| ENSMUSG00000030967 | 13_Zranb1        | 1547.71 | -0.50715 | 1.26E-05 | 8.28E-05 | 1350.9  | 1215.17 | 1269.25 | 1721.32 | 1945.47 | 1784.11 |
| ENSMUSG00000030968 | 2_Pdilt          | 18.9601 | -0.58606 | 0.25971  | 0.3699   | 15.6274 | 16.5205 | 13.1467 | 18.9354 | 24.2063 | 25.3245 |
| ENSMUSG00000030970 | 16_Ctbp2         | 1104.07 | 0.33047  | 0.01703  | 0.03964  | 1205.91 | 1213.34 | 1270.45 | 1083.83 | 839.153 | 1011.72 |
| ENSMUSG00000030972 | 5_Acsm5          | 18.7363 | -0.46482 | 0.43228  | 0.54757  | 13.0228 | 13.7671 | 20.3176 | 19.8371 | 12.5514 | 32.9219 |
| ENSMUSG00000030976 | 2_Tex36          | 0.21104 | -0.99647 | 0.80707  | NA       | 0       | 0       | 0       | 0       | 0       | 1.26623 |
| ENSMUSG00000030978 | 9_Rrm1           | 2260.54 | 0.07061  | 0.69192  | 0.77895  | 2499.51 | 2091.68 | 2355.65 | 1650.99 | 2559.59 | 2405.83 |
| ENSMUSG00000030979 | 12_Uros          | 402.81  | -0.23374 | 0.10513  | 0.1794   | 379.398 | 377.218 | 353.766 | 414.775 | 459.92  | 431.783 |
| ENSMUSG00000030980 | 16_Knop1         | 1902.16 | 0.04384  | 0.74454  | 0.81939  | 1949.95 | 1832.86 | 2009.05 | 1617.62 | 1901.54 | 2101.94 |
| ENSMUSG00000030981 | 9_Mmp21          | 0.15028 | -0.99647 | 0.80707  | NA       | 0       | 0       | 0       | 0.90169 | 0       | 0       |
| ENSMUSG00000030982 | 17_9030624J02Rik | 1442.98 | 0.40981  | 0.00021  | 0.00094  | 1583.58 | 1608.91 | 1747.32 | 1232.6  | 1204.04 | 1281.42 |
| ENSMUSG00000030983 | 4_Bccip          | 1023.8  | -0.20112 | 0.13652  | 0.22097  | 967.162 | 849.888 | 1040.98 | 1012.59 | 1122.46 | 1149.73 |
| ENSMUSG00000030986 | 12_Dhx32         | 1834.58 | 0.14111  | 0.1924   | 0.2923   | 1861.4  | 1932.9  | 1979.18 | 1853.87 | 1656.79 | 1723.33 |
| ENSMUSG00000030987 | 4_Stim1          | 2375.71 | 0.03891  | 0.76344  | 0.83355  | 2309.38 | 2561.6  | 2350.87 | 2472.42 | 2035.12 | 2524.86 |
| ENSMUSG00000030990 | 17_Pgap2         | 1753.16 | 0.51212  | 0.00013  | 0.00061  | 2033.3  | 1920.05 | 2228.96 | 1275.88 | 1464.03 | 1596.71 |
| ENSMUSG00000030994 | 15_D7Ertd443e    | 175.791 | 0.10978  | 0.56184  | 0.66732  | 187.529 | 183.561 | 175.688 | 162.303 | 165.858 | 179.804 |
| ENSMUSG00000030996 | 7_Art1           | 56.3976 | -1.7287  | 0.00074  | 0.00278  | 13.0228 | 35.7944 | 29.8789 | 134.351 | 43.0335 | 82.3047 |
| ENSMUSG00000031004 | 7_Mki67          | 3977.95 | 0.0376   | 0.8549   | 0.90165  | 4336.6  | 3495.92 | 4255.94 | 2665.38 | 4478.17 | 4635.66 |
| ENSMUSG00000031007 | 2_Atp6ap2        | 6175.65 | -0.17503 | 0.1679   | 0.26192  | 5633.67 | 5560.07 | 6211.22 | 5692.34 | 7184.8  | 6771.78 |
| ENSMUSG00000031010 | 17_Usp9x         | 5257.08 | -0.52747 | 0.00021  | 0.00093  | 4639.6  | 4257.7  | 4021.69 | 5268.55 | 7166.87 | 6188.05 |
| ENSMUSG00000031012 | 17_Cask          | 1374.81 | -0.29802 | 0.01175  | 0.02896  | 1278.84 | 1184.89 | 1235.79 | 1389.5  | 1607.48 | 1552.39 |
| ENSMUSG00000031015 | 7_Swap70         | 599.002 | -0.04778 | 0.74217  | 0.81773  | 599.05  | 605.752 | 562.918 | 688.888 | 576.469 | 560.939 |
| ENSMUSG00000031016 | 8_Wee1           | 326.617 | 0.22411  | 0.22072  | 0.32563  | 355.957 | 369.876 | 328.667 | 246.16  | 320.958 | 338.083 |

|                     |                 |         |          |          |          |         |         |         |         |         |         |
|---------------------|-----------------|---------|----------|----------|----------|---------|---------|---------|---------|---------|---------|
| ENSMUSG000000031021 | 13_Tmem9b       | 1359.88 | -0.07166 | 0.52828  | 0.63707  | 1360.45 | 1302.37 | 1315.86 | 1325.48 | 1499    | 1356.13 |
| ENSMUSG000000031022 | 14_BC051019     | 2.28581 | 0.4511   | 0.78184  | NA       | 2.60457 | 2.75342 | 2.39031 | 0.90169 | 0       | 5.06491 |
| ENSMUSG000000031023 | 5_Akip1         | 482.507 | 0.04671  | 0.74239  | 0.81787  | 482.713 | 463.492 | 525.868 | 458.056 | 506.54  | 458.374 |
| ENSMUSG000000031024 | 12_St5          | 950.555 | -0.30128 | 0.04282  | 0.08523  | 806.547 | 964.614 | 784.021 | 1175.8  | 1011.29 | 961.066 |
| ENSMUSG000000031026 | 18_Trim66       | 18.302  | 0.61216  | 0.27094  | 0.38254  | 20.8365 | 22.0273 | 23.9031 | 19.8371 | 14.3445 | 8.86359 |
| ENSMUSG000000031027 | 15_Stk33        | 16.1833 | -1.82909 | 0.00354  | 0.01056  | 6.94551 | 8.26025 | 5.97577 | 30.6573 | 16.1376 | 29.1232 |
| ENSMUSG000000031028 | 13_Tub          | 133.844 | -2.03144 | 6.24E-05 | 0.00033  | 64.2459 | 71.5888 | 21.5128 | 372.396 | 184.685 | 88.6359 |
| ENSMUSG000000031029 | 6_Elf3f         | 3806.79 | -0.04086 | 0.65596  | 0.74915  | 3658.55 | 3797.88 | 3802.98 | 3864.62 | 3899.01 | 3817.67 |
| ENSMUSG000000031059 | 9_Ndufb11       | 2056.15 | -0.15602 | 0.24297  | 0.35106  | 1955.16 | 2005.41 | 1875.2  | 2508.49 | 1983.13 | 2009.5  |
| ENSMUSG000000031060 | 16_Rbm10        | 1357.59 | 0.67259  | 6.40E-06 | 4.60E-05 | 1593.99 | 1603.41 | 1807.07 | 1115.38 | 869.635 | 1156.07 |
| ENSMUSG000000031065 | 14_Cdk16        | 2486.03 | 0.2805   | 0.00998  | 0.02522  | 2654.92 | 2713.95 | 2812.2  | 2386.76 | 2075.47 | 2272.88 |
| ENSMUSG000000031066 | 10_Usp11        | 640.165 | -0.71066 | 0.00016  | 0.00075  | 449.722 | 599.327 | 407.548 | 888.16  | 808.671 | 687.561 |
| ENSMUSG000000031068 | 7_Glrx3         | 3401.15 | -0.38889 | 0.00304  | 0.0093   | 3188.86 | 2724.05 | 2923.35 | 3416.49 | 4299.76 | 3854.39 |
| ENSMUSG000000031070 | 15_Mrgprf       | 123.643 | 0.32205  | 0.29866  | 0.41326  | 125.019 | 165.205 | 121.906 | 151.483 | 74.412  | 103.831 |
| ENSMUSG000000031072 | 13_Oraov1       | 576.306 | 0.3503   | 0.01466  | 0.03489  | 619.887 | 636.957 | 680.043 | 504.944 | 456.334 | 559.672 |
| ENSMUSG000000031073 | 5_Fgf15         | 0.36132 | -1.98116 | 0.62311  | NA       | 0       | 0       | 0       | 0.90169 | 0       | 1.26623 |
| ENSMUSG000000031074 | 14_Fgf3         | 0.1447  | 0.92709  | 0.82027  | NA       | 0.86819 | 0       | 0       | 0       | 0       | 0       |
| ENSMUSG000000031075 | 17_Ano1         | 372.763 | -0.51783 | 0.0101   | 0.02547  | 275.216 | 379.972 | 264.129 | 503.14  | 396.267 | 417.855 |
| ENSMUSG000000031077 | 7_Fadd          | 482.398 | 0.1247   | 0.40768  | 0.52452  | 488.79  | 475.423 | 544.99  | 449.941 | 424.955 | 510.289 |
| ENSMUSG000000031078 | 15_Cttn         | 6726.76 | 0.47369  | 0.00028  | 0.00119  | 7558.45 | 7456.25 | 8447.35 | 5359.62 | 5088.71 | 6450.16 |
| ENSMUSG000000031079 | 12_Zfp300       | 48.6528 | -0.93755 | 0.01647  | 0.03854  | 39.9367 | 39.4656 | 20.3176 | 73.9382 | 66.3433 | 51.9153 |
| ENSMUSG000000031085 | 15_Gm498        | 0.19919 | 0.92709  | 0.82027  | NA       | 0       | 0       | 1.19515 | 0       | 0       | 0       |
| ENSMUSG000000031089 | 7_Slc6a14       | 9641.76 | -0.01438 | 0.93632  | 0.95823  | 10356.6 | 8293.29 | 10131.3 | 7366.77 | 11780.4 | 9922.15 |
| ENSMUSG000000031090 | 14_Nadsyn1      | 161.724 | 0.2039   | 0.36534  | 0.4827   | 147.592 | 210.177 | 161.346 | 155.992 | 140.755 | 154.48  |
| ENSMUSG000000031093 | 14_Dock11       | 979.423 | -0.52428 | 0.01543  | 0.03647  | 863.847 | 720.477 | 825.851 | 798.893 | 1487.34 | 1180.12 |
| ENSMUSG000000031095 | 15_Cul4b        | 1031.04 | -0.34616 | 0.02161  | 0.04839  | 921.148 | 893.025 | 909.512 | 963.902 | 1328.66 | 1169.99 |
| ENSMUSG000000031097 | 14_Tnni2        | 1115.13 | -0.75443 | 0.01639  | 0.03838  | 707.574 | 962.778 | 819.876 | 2186.59 | 704.673 | 1309.28 |
| ENSMUSG000000031098 | 17_Syt8         | 2890.48 | 1.19797  | 5.97E-13 | 3.45E-11 | 3559.57 | 3755.66 | 4761.49 | 1675.33 | 1520.52 | 2070.28 |
| ENSMUSG000000031099 | 16_Smarca1      | 165.67  | -1.20737 | 0.00022  | 0.00097  | 132.833 | 108.301 | 58.5626 | 262.39  | 269.856 | 162.077 |
| ENSMUSG000000031101 | 6_Sash3         | 52.8807 | 1.36035  | 0.00364  | 0.01081  | 121.546 | 44.9725 | 62.148  | 38.7725 | 29.5855 | 20.2596 |
| ENSMUSG000000031103 | 12_Elf4         | 372.505 | 0.52143  | 0.00072  | 0.00272  | 454.063 | 413.013 | 449.378 | 307.475 | 280.614 | 330.485 |
| ENSMUSG000000031104 | 2_Rab33a        | 2.87251 | 0.12051  | 0.92345  | 0.94924  | 2.60457 | 2.75342 | 3.58546 | 1.80337 | 2.68959 | 3.79868 |
| ENSMUSG000000031105 | 16_Slc25a14     | 112.926 | -0.5051  | 0.04026  | 0.08098  | 82.4779 | 103.712 | 94.4172 | 128.941 | 151.514 | 116.493 |
| ENSMUSG000000031107 | 6_RbmX2         | 155.423 | -0.12714 | 0.54505  | 0.65175  | 154.538 | 129.411 | 162.541 | 168.615 | 166.755 | 150.681 |
| ENSMUSG000000031109 | 16_Enox2        | 455.667 | -0.46824 | 0.00424  | 0.0123   | 369.848 | 357.026 | 420.694 | 456.253 | 575.573 | 554.607 |
| ENSMUSG000000031111 | 16_Igslf1       | 14.5346 | -1.11303 | 0.07501  | 0.13595  | 6.07732 | 11.9315 | 9.56123 | 15.3287 | 21.5167 | 22.7921 |
| ENSMUSG000000031112 | 10_Stk26        | 940.681 | -0.29312 | 0.03676  | 0.0751   | 829.12  | 870.08  | 836.608 | 889.964 | 1139.49 | 1078.83 |
| ENSMUSG000000031119 | 4_Gpc4          | 748.447 | -0.6016  | 3.77E-05 | 0.00021  | 612.941 | 643.382 | 527.063 | 886.357 | 991.563 | 829.379 |
| ENSMUSG000000031125 | 2_3830403N18Rik | 5.94749 | -1.04079 | 0.28686  | 0.40023  | 1.73638 | 6.42464 | 3.58546 | 8.11517 | 10.7584 | 5.06491 |
| ENSMUSG000000031129 | 9_Slc9a9        | 215.624 | -0.03861 | 0.83365  | 0.88618  | 219.652 | 214.767 | 203.176 | 193.862 | 233.098 | 229.187 |
| ENSMUSG000000031131 | 11_Vgll1        | 18.343  | -0.49153 | 0.42059  | 0.53636  | 22.5729 | 10.0959 | 13.1467 | 18.9354 | 31.3786 | 13.9285 |
| ENSMUSG000000031132 | 1_Cd40lg        | 0.80841 | -0.71506 | 0.75829  | NA       | 0.86819 | 0.91781 | 0       | 0.90169 | 0.89653 | 1.26623 |
| ENSMUSG000000031133 | 12_Arhgef6      | 443.828 | -0.7395  | 4.41E-06 | 3.32E-05 | 350.748 | 339.588 | 307.155 | 532.896 | 631.158 | 501.426 |
| ENSMUSG000000031134 | 16_RbmX         | 986.265 | -0.47387 | 0.00163  | 0.00546  | 917.675 | 797.573 | 761.313 | 1022.51 | 1308.04 | 1110.48 |
| ENSMUSG000000031137 | 17_Fgf13        | 37.6646 | -1.49685 | 0.00802  | 0.02099  | 28.6502 | 22.9451 | 7.17092 | 70.3315 | 69.0329 | 27.857  |
| ENSMUSG000000031138 | 4_F9            | 0.21104 | -0.99647 | 0.80707  | NA       | 0       | 0       | 0       | 0       | 0       | 1.26623 |
| ENSMUSG000000031139 | 17_Mcf2         | 2.24842 | -3.56433 | 0.05544  | NA       | 0.86819 | 0       | 0       | 2.70506 | 3.58612 | 6.33113 |
| ENSMUSG000000031142 | 17_Cacna1f      | 111.428 | -1.69904 | 0.04789  | 0.09354  | 79.0051 | 61.493  | 16.7322 | 309.278 | 142.548 | 59.5127 |
| ENSMUSG000000031143 | 4_Ccdc22        | 399.309 | 0.48738  | 0.00195  | 0.00639  | 477.504 | 466.245 | 455.354 | 377.806 | 313.786 | 305.161 |
| ENSMUSG000000031144 | 15_Syp          | 223.286 | -1.63986 | 0.02471  | 0.05414  | 142.383 | 130.328 | 52.5868 | 603.228 | 283.304 | 127.889 |
| ENSMUSG000000031145 | 15_Prickle3     | 373.153 | 1.07036  | 6.85E-09 | 1.23E-07 | 454.931 | 484.601 | 576.064 | 224.52  | 215.167 | 283.635 |
| ENSMUSG000000031146 | 6_Plp2          | 5844.84 | 0.37117  | 0.00022  | 0.00099  | 6678.97 | 6288.8  | 6808.79 | 4960.17 | 4925.54 | 5406.79 |
| ENSMUSG000000031147 | 8_Magix         | 19.9236 | -0.84739 | 0.12163  | 0.20197  | 13.891  | 20.1917 | 8.36608 | 24.3455 | 28.689  | 24.0583 |
| ENSMUSG000000031148 | 14_Gpkow        | 1397.83 | 0.11399  | 0.28096  | 0.39377  | 1439.46 | 1448.3  | 1471.23 | 1284.9  | 1380.66 | 1362.46 |
| ENSMUSG000000031149 | 7_Praf2         | 247.646 | -0.32397 | 0.0614   | 0.11509  | 223.124 | 231.287 | 204.371 | 257.882 | 271.649 | 297.563 |
| ENSMUSG000000031150 | 12_Ccdc120      | 976.526 | 0.77167  | 1.88E-06 | 1.59E-05 | 1129.51 | 1152.76 | 1411.48 | 669.051 | 651.778 | 844.573 |
| ENSMUSG000000031153 | 16_Gripap1      | 810.322 | 0.43151  | 0.00087  | 0.00319  | 924.621 | 938.915 | 928.635 | 760.121 | 634.744 | 674.899 |
| ENSMUSG000000031154 | 15_Otud5        | 1922.21 | 0.54619  | 3.62E-06 | 2.79E-05 | 2136.61 | 2202.73 | 2506.24 | 1522.05 | 1525.9  | 1639.76 |
| ENSMUSG000000031155 | 14_Pim2         | 89.1789 | 0.04405  | 0.86839  | 0.91079  | 89.4234 | 82.6025 | 100.393 | 100.087 | 87.86   | 74.7074 |
| ENSMUSG000000031156 | 17_Slc35a2      | 565.442 | 0.54616  | 0.00018  | 0.00082  | 602.523 | 677.341 | 733.825 | 433.711 | 459.024 | 486.231 |
| ENSMUSG000000031157 | 10_Pqbp1        | 701.773 | 0.17502  | 0.19987  | 0.30088  | 742.301 | 722.313 | 767.289 | 672.657 | 588.124 | 717.951 |
| ENSMUSG000000031158 | 11_Timm17b      | 611.486 | 0.47198  | 0.00295  | 0.00905  | 710.178 | 693.861 | 727.849 | 589.702 | 429.438 | 517.887 |
| ENSMUSG000000031161 | 15_Hdac6        | 543.219 | 0.35606  | 0.01713  | 0.0398   | 561.718 | 655.313 | 613.114 | 526.584 | 436.61  | 465.972 |
| ENSMUSG000000031162 | 14_Gata1        | 0.70521 | -0.06078 | 0.98208  | NA       | 0.86819 | 0       | 1.19515 | 0.90169 | 0       | 1.26623 |
| ENSMUSG000000031165 | 6_Was           | 39.2434 | 1.31278  | 0.01303  | 0.03153  | 93.7643 | 34.8766 | 39.4401 | 32.4607 | 19.7237 | 15.1947 |
| ENSMUSG000000031166 | 13_Wdr13        | 1808.75 | 0.05472  | 0.6278   | 0.72474  | 1750.27 | 1931.98 | 1847.71 | 1701.48 | 1901.54 | 1719.54 |
| ENSMUSG000000031167 | 16_Rbm3         | 8741.08 | -0.11496 | 0.29676  | 0.41117  | 9128.13 | 7660.01 | 8389.98 | 8704.87 | 9213.64 | 9349.82 |
| ENSMUSG000000031168 | 14_Ebp          | 1053.54 | 0.41323  | 0.0029   | 0.00891  | 1194.63 | 1105.04 | 1309.89 | 807.009 | 914.461 | 990.189 |
| ENSMUSG000000031169 | 13_PorcN        | 517.186 | 0.73367  | 8.06E-07 | 7.59E-06 | 598.182 | 702.121 | 637.017 | 411.169 | 353.233 | 401.394 |
| ENSMUSG000000031170 | 14_Slc38a5      | 0.45267 | -0.80756 | 0.8164   | NA       | 0       | 0.91781 | 0       | 0.90169 | 0.89653 | 0       |
| ENSMUSG000000031171 | 11_Ftsj1        | 441.5   | 0.09684  | 0.49318  | 0.60475  | 441.04  | 445.136 | 484.037 | 443.629 | 431.231 | 403.926 |
| ENSMUSG000000031173 | 13_Otc          | 0       | NA       | NA       | NA       | 0       | 0       | 0       | 0       | 0       | 0       |
| ENSMUSG000000031174 | 17_Rpgr         | 209.061 | -0.49413 | 0.01077  | 0.02689  | 179.715 | 149.602 | 192.42  | 242.553 | 260.89  | 229.187 |
| ENSMUSG000000031176 | 8_Dynlt3        | 4847.8  | -0.5752  | 3.65E-06 | 2.81E-05 | 4005.82 | 3647.36 | 4028.86 | 5087.31 | 6335.78 | 5981.66 |
| ENSMUSG000000031189 | 12_Aff2         | 29.0581 | -0.85724 | 0.0703   | 0.12896  | 19.9683 | 28.452  | 13.1467 | 29.7556 | 41.2404 | 41.7855 |
| ENSMUSG000000031196 | 13_F8           | 88.4011 | -0.75358 | 0.00472  | 0.01344  | 65.1141 | 72.5066 | 59.7577 | 101.89  | 127.307 | 103.831 |
| ENSMUSG000000031197 | 11_Vbp1         | 1191.33 | -0.60174 | 2.39E-06 | 1.96E-05 | 987.998 | 943.504 | 907.122 | 1301.13 | 1576.1  | 1432.1  |
| ENSMUSG000000031198 | 4_Fundc2        | 1551.5  | -0.64187 | 9.61E-08 | 1.22E-06 | 1280.58 | 1173.87 | 1180.81 | 1737.55 | 2043.19 | 1893.01 |
| ENSMUSG000000031200 | 16_Mtcp1        | 138.463 | -0.55078 | 0.03813  | 0.07743  | 135.437 | 104.63  | 96.8075 | 140.663 | 208.892 | 144.35  |

|                     |                 |         |          |          |          |         |         |         |         |         |         |
|---------------------|-----------------|---------|----------|----------|----------|---------|---------|---------|---------|---------|---------|
| ENSMUSG000000031201 | 17_Brcc3        | 693.723 | -0.50076 | 0.00146  | 0.00496  | 611.205 | 524.067 | 589.211 | 752.907 | 946.736 | 738.21  |
| ENSMUSG000000031202 | 5_Rab39b        | 25.1873 | -1.59749 | 0.00478  | 0.01358  | 15.6274 | 10.0959 | 11.9515 | 55.9045 | 38.5508 | 18.9934 |
| ENSMUSG000000031204 | 2_Asb12         | 7.12601 | -3.36347 | 0.00336  | 0.01011  | 0.86819 | 2.75342 | 0       | 18.0337 | 7.17224 | 13.9285 |
| ENSMUSG000000031207 | 16_Msn          | 2022.93 | -0.05516 | 0.73424  | 0.81167  | 2232.11 | 1846.62 | 1875.2  | 2071.17 | 2423.32 | 1689.15 |
| ENSMUSG000000031209 | 14_Heph         | 638.144 | -1.18344 | 3.21E-07 | 3.44E-06 | 375.057 | 527.738 | 266.519 | 940.458 | 931.495 | 787.593 |
| ENSMUSG000000031210 | 10_Gpr165       | 208.738 | -1.19133 | 2.31E-05 | 0.00014  | 125.019 | 156.027 | 100.393 | 351.657 | 328.13  | 191.2   |
| ENSMUSG000000031214 | 13_Ophn1        | 806.241 | -0.19653 | 0.19556  | 0.29565  | 789.183 | 707.628 | 756.533 | 721.348 | 927.013 | 935.742 |
| ENSMUSG000000031216 | 13_Stard8       | 617.845 | -0.04297 | 0.80254  | 0.86345  | 554.772 | 713.135 | 558.137 | 722.25  | 573.78  | 584.997 |
| ENSMUSG000000031217 | 8_Efnb1         | 1415.69 | 0.97637  | 1.22E-06 | 1.09E-05 | 1604.41 | 1807.16 | 2219.4  | 1043.25 | 699.294 | 1120.61 |
| ENSMUSG000000031220 | 14_Awat2        | 12.7741 | -0.32462 | 0.63133  | 0.728    | 7.8137  | 15.6027 | 10.7564 | 11.7219 | 20.6202 | 10.1298 |
| ENSMUSG000000031221 | 7_Igfbp1        | 1630.26 | -0.20619 | 0.05317  | 0.10193  | 1598.33 | 1461.15 | 1481.99 | 1713.2  | 1792.16 | 1734.73 |
| ENSMUSG000000031224 | 6_Magee2        | 114.827 | 0.20568  | 0.44243  | 0.55763  | 115.469 | 121.15  | 131.467 | 85.6601 | 95.9288 | 139.285 |
| ENSMUSG000000031226 | 13_Pbdc1        | 573.301 | -0.23317 | 0.18977  | 0.28904  | 545.222 | 489.19  | 547.381 | 514.862 | 753.086 | 590.062 |
| ENSMUSG000000031227 | 8_Magee1        | 169.567 | -0.98976 | 0.00035  | 0.00147  | 123.283 | 135.835 | 81.2705 | 269.604 | 240.27  | 167.142 |
| ENSMUSG000000031229 | 16_Atrx         | 3263.09 | -0.67914 | 4.32E-08 | 6.00E-07 | 2619.32 | 2506.53 | 2399.87 | 3534.61 | 4411.83 | 4106.37 |
| ENSMUSG000000031230 | 3_Fgf16         | 14.5536 | 0.79257  | 0.24866  | 0.35757  | 19.1001 | 20.1917 | 15.537  | 9.01685 | 4.48265 | 18.9934 |
| ENSMUSG000000031231 | 4_Cox7b         | 2904.11 | -0.35258 | 0.00128  | 0.00445  | 2628.01 | 2522.13 | 2503.85 | 3507.56 | 3257.1  | 3006.02 |
| ENSMUSG000000031232 | 16_Magt1        | 2811.33 | -0.27269 | 0.04234  | 0.0844   | 2633.22 | 2367.94 | 2637.71 | 2624.81 | 3332.4  | 3271.93 |
| ENSMUSG000000031239 | 5_Itn2a         | 1068.98 | -0.85964 | 3.96E-07 | 4.12E-06 | 828.252 | 856.313 | 592.796 | 1477.86 | 1401.28 | 1257.36 |
| ENSMUSG000000031241 | 17_Tbx22        | 50.2973 | -1.75689 | 0.00072  | 0.00271  | 15.6274 | 42.2191 | 10.7564 | 93.7753 | 88.7565 | 50.6491 |
| ENSMUSG000000031242 | 7_2610002M06Rik | 924.664 | -0.35891 | 0.01089  | 0.02714  | 829.12  | 791.148 | 810.314 | 901.685 | 1167.28 | 1048.44 |
| ENSMUSG000000031245 | 8_Hmgn5         | 1769.04 | -0.63325 | 1.10E-06 | 9.96E-06 | 1455.08 | 1234.45 | 1471.23 | 1958.46 | 2223.4  | 2271.61 |
| ENSMUSG000000031246 | 14_Sh3bgrl      | 1038.59 | -1.04202 | 8.45E-09 | 1.48E-07 | 769.215 | 685.601 | 582.04  | 1548.19 | 1547.41 | 1099.08 |
| ENSMUSG000000031250 | 8_Tnmd          | 947.624 | -1.06203 | 4.26E-15 | 4.01E-13 | 625.096 | 646.135 | 570.089 | 1344.41 | 1359.14 | 1140.87 |
| ENSMUSG000000031253 | 15_Srxp2        | 568.989 | -0.88743 | 7.55E-05 | 0.00039  | 427.149 | 485.519 | 284.447 | 871.028 | 740.534 | 605.256 |
| ENSMUSG000000031255 | 14_Sytl4        | 163.1   | -0.65532 | 0.00118  | 0.00413  | 133.701 | 119.315 | 126.686 | 181.239 | 206.202 | 211.46  |
| ENSMUSG000000031256 | 11_Cstf2        | 1019.78 | 0.01831  | 0.89649  | 0.93021  | 998.417 | 954.518 | 1125.84 | 891.767 | 1057.91 | 1090.22 |
| ENSMUSG000000031257 | 14_NoX1         | 4.08589 | -0.29061 | 0.80411  | 0.86457  | 3.47275 | 2.75342 | 4.78062 | 0.90169 | 6.27571 | 6.33113 |
| ENSMUSG000000031258 | 4_Xkrx          | 28.5264 | -0.07898 | 0.85833  | 0.90402  | 29.5184 | 33.041  | 20.3176 | 25.2472 | 31.3786 | 31.6557 |
| ENSMUSG000000031262 | 12_Cenpi        | 119.577 | 0.23172  | 0.40551  | 0.52269  | 133.701 | 105.548 | 148.199 | 80.25   | 128.204 | 121.558 |
| ENSMUSG000000031264 | 13_Btk          | 30.0223 | 0.73111  | 0.14783  | 0.23608  | 53.8277 | 36.7122 | 21.5128 | 16.2303 | 27.7924 | 24.0583 |
| ENSMUSG000000031266 | 6_Gla           | 202.806 | -0.31715 | 0.11114  | 0.18766  | 197.947 | 192.739 | 150.589 | 233.537 | 233.098 | 208.927 |
| ENSMUSG000000031273 | 16_Col4a6       | 122.07  | -0.52796 | 0.104    | 0.17802  | 89.4234 | 142.26  | 68.1238 | 169.517 | 154.203 | 108.896 |
| ENSMUSG000000031274 | 16_Col4a5       | 2227.01 | -0.46508 | 0.00942  | 0.024    | 1734.64 | 2339.49 | 1538.16 | 2916.05 | 2277.19 | 2556.51 |
| ENSMUSG000000031278 | 12_Acsl4        | 1181.91 | -0.39973 | 0.01849  | 0.04236  | 1066.14 | 968.285 | 1023.05 | 1059.48 | 1605.69 | 1368.79 |
| ENSMUSG000000031283 | 15_Chrdl1       | 380.511 | -1.67041 | 2.37E-08 | 3.59E-07 | 165.824 | 272.588 | 106.369 | 567.16  | 691.225 | 479.9   |
| ENSMUSG000000031284 | 16_Pak3         | 112.024 | -1.68    | 1.15E-07 | 1.41E-06 | 45.1458 | 71.5888 | 43.0255 | 164.107 | 217.857 | 130.421 |
| ENSMUSG000000031285 | 14_Dcx          | 2.10493 | -1.60337 | 0.35527  | NA       | 0.86819 | 0       | 2.39031 | 6.3118  | 1.79306 | 1.26623 |
| ENSMUSG000000031286 | 6_Glt28d2       | 449.756 | -0.1098  | 0.53944  | 0.6469   | 441.908 | 461.656 | 394.401 | 406.66  | 562.125 | 431.783 |
| ENSMUSG000000031289 | 10_Ill13ra2     | 14.447  | -0.96955 | 0.12319  | 0.20398  | 13.891  | 9.17806 | 5.97577 | 16.2303 | 22.4133 | 18.9934 |
| ENSMUSG000000031290 | 14_Lrch2        | 180.526 | -0.72665 | 0.00267  | 0.00833  | 155.406 | 132.164 | 120.711 | 236.242 | 268.959 | 169.674 |
| ENSMUSG000000031292 | 14_Cdkl5        | 295.004 | -0.56133 | 0.00033  | 0.00141  | 250.038 | 229.451 | 235.445 | 357.969 | 351.44  | 345.68  |
| ENSMUSG000000031293 | 13_Rs1          | 418.936 | -2.4452  | 0.00457  | 0.0131   | 176.242 | 171.63  | 41.8304 | 1134.32 | 784.464 | 205.129 |
| ENSMUSG000000031294 | 9_D630029K05Rik | 0.59264 | 1.31812  | 0.67678  | NA       | 1.73638 | 0.91781 | 0       | 0.90169 | 0       | 0       |
| ENSMUSG000000031295 | 13_Phka2        | 460.066 | 0.02075  | 0.88005  | 0.91916  | 487.054 | 463.492 | 438.622 | 456.253 | 446.472 | 468.504 |
| ENSMUSG000000031297 | 14_Slc7a3       | 82.9875 | -1.07746 | 0.00124  | 0.00432  | 59.0368 | 61.493  | 39.4401 | 126.236 | 134.48  | 77.2398 |
| ENSMUSG000000031298 | 15_Adgrg2       | 94.3411 | -0.07652 | 0.79853  | 0.86087  | 92.8962 | 71.5888 | 111.149 | 73.0365 | 108.48  | 108.896 |
| ENSMUSG000000031299 | 10_Pdha1        | 3495.64 | -0.40872 | 2.52E-05 | 0.00015  | 3090.75 | 2904.85 | 3016.57 | 4072.01 | 4056.8  | 3832.87 |
| ENSMUSG000000031302 | 16_Nlgn3        | 128.716 | -0.61026 | 0.03169  | 0.06651  | 102.446 | 122.068 | 81.2705 | 193.862 | 158.686 | 113.96  |
| ENSMUSG000000031303 | 8_Map3k15       | 29.6044 | -0.61876 | 0.23124  | 0.33741  | 21.7047 | 33.9588 | 14.3418 | 32.4607 | 51.1022 | 24.0583 |
| ENSMUSG000000031304 | 18_Ilg2rg       | 128.192 | 1.68702  | 8.80E-06 | 6.05E-05 | 307.339 | 129.411 | 150.589 | 56.8062 | 80.6878 | 44.3179 |
| ENSMUSG000000031309 | 15_Rps6ka3      | 4348.24 | -0.21697 | 0.13051  | 0.2136   | 4162.96 | 3824.5  | 4077.87 | 3846.59 | 5331.67 | 4845.85 |
| ENSMUSG000000031310 | 16_Zmym3        | 1335.37 | -0.07409 | 0.53492  | 0.64271  | 1278.84 | 1369.37 | 1256.11 | 1440.89 | 1414.73 | 1252.3  |
| ENSMUSG000000031311 | 17_Nono         | 6045.88 | 0.01383  | 0.9053   | 0.93611  | 6230.99 | 5635.33 | 6357.02 | 5547.17 | 5915.31 | 6589.44 |
| ENSMUSG000000031312 | 5_Igfb1bp2      | 57.6439 | -1.80684 | 0.00012  | 0.00057  | 21.7047 | 35.7944 | 19.1225 | 135.253 | 46.6196 | 87.3697 |
| ENSMUSG000000031314 | 17_Taf1         | 2322.17 | -0.32595 | 0.02332  | 0.05161  | 2164.39 | 2022.84 | 1994.71 | 2138.8  | 2910.14 | 2702.13 |
| ENSMUSG000000031320 | 9_Rps4x         | 28715.4 | -0.59061 | 2.72E-07 | 2.98E-06 | 24333.6 | 22449.5 | 21971.7 | 32013.4 | 38352.7 | 33171.3 |
| ENSMUSG000000031323 | 8_Dmrtc1a       | 24.8648 | -0.89642 | 0.07407  | 0.13471  | 20.8365 | 14.6849 | 16.7322 | 45.0843 | 27.7924 | 24.0583 |
| ENSMUSG000000031326 | 2_Cdx4          | 0       | NA       | NA       | NA       | 0       | 0       | 0       | 0       | 0       | 0       |
| ENSMUSG000000031327 | 10_Chic1        | 164.382 | -1.15497 | 1.49E-07 | 1.78E-06 | 105.919 | 116.561 | 82.4656 | 239.848 | 231.305 | 210.194 |
| ENSMUSG000000031328 | 15_Flna         | 13176.8 | 0.11581  | 0.35178  | 0.46835  | 12689.4 | 15043.8 | 13384.5 | 12409.9 | 14005.6 | 11527.7 |
| ENSMUSG000000031329 | 4_Tsx           | 2.3359  | -2.01498 | 0.20256  | NA       | 1.73638 | 0.91781 | 0       | 3.60674 | 2.68959 | 5.06491 |
| ENSMUSG000000031330 | 8_Zcchc13       | 0.49804 | -0.79984 | 0.839    | NA       | 0       | 0       | 1.19515 | 0       | 1.79306 | 0       |
| ENSMUSG000000031333 | 7_Abc7          | 1044.45 | -0.39641 | 0.00069  | 0.00262  | 916.807 | 878.34  | 910.707 | 1122.6  | 1263.21 | 1175.06 |
| ENSMUSG000000031337 | 16_Mtm1         | 246.841 | -0.60616 | 0.00073  | 0.00275  | 203.156 | 178.054 | 206.762 | 288.539 | 327.234 | 277.304 |
| ENSMUSG000000031340 | 8_Gabre         | 151.906 | -0.20934 | 0.33961  | 0.45624  | 133.701 | 163.369 | 125.491 | 155.09  | 179.306 | 154.48  |
| ENSMUSG000000031342 | 17_Gpm6b        | 1839.62 | -0.81955 | 1.60E-07 | 1.90E-06 | 1454.22 | 1380.38 | 1156.91 | 2179.37 | 2764.9  | 2101.94 |
| ENSMUSG000000031343 | 13_Gabra3       | 103.358 | -1.60891 | 7.66E-08 | 1.00E-06 | 52.0913 | 62.4108 | 38.2449 | 183.042 | 164.065 | 120.292 |
| ENSMUSG000000031344 | 11_Gabrq        | 40.0295 | -1.98474 | 1.52E-05 | 9.79E-05 | 13.891  | 25.6986 | 8.36608 | 68.5281 | 65.4467 | 58.2464 |
| ENSMUSG000000031347 | 12_Cetn2        | 1115.16 | -0.63989 | 2.50E-06 | 2.03E-05 | 935.907 | 831.532 | 847.364 | 1203.75 | 1490.93 | 1381.45 |
| ENSMUSG000000031349 | 4_Nsdhl         | 2913.01 | 0.15483  | 0.32564  | 0.4417   | 3044.74 | 2850.7  | 3311.77 | 2186.59 | 3085.86 | 2998.43 |
| ENSMUSG000000031351 | 15_Zfp185       | 10811.6 | 0.1042   | 0.46067  | 0.57448  | 10935.7 | 10671.3 | 11998.2 | 8565.11 | 11309.7 | 11389.7 |
| ENSMUSG000000031352 | 10_Hccs         | 297.725 | -0.22184 | 0.21645  | 0.32055  | 302.998 | 275.342 | 246.202 | 308.376 | 362.198 | 291.232 |
| ENSMUSG000000031353 | 13_Rbbp7        | 3855.95 | -0.31766 | 0.01408  | 0.03367  | 3670.7  | 3195.8  | 3432.48 | 3741.09 | 4715.75 | 4379.88 |
| ENSMUSG000000031354 | 16_Amelx        | 0.36132 | -1.98116 | 0.62311  | NA       | 0       | 0       | 0       | 0.90169 | 0       | 1.26623 |
| ENSMUSG000000031355 | 16_Arhgap6      | 115.107 | -1.30155 | 2.09E-05 | 0.00013  | 65.1141 | 87.1915 | 46.611  | 194.764 | 170.341 | 126.623 |
| ENSMUSG000000031357 | 3_Syap1         | 1282.8  | -0.37174 | 0.00568  | 0.01568  | 1139.06 | 1098.61 | 1117.47 | 1259.65 | 1618.24 | 1463.76 |
| ENSMUSG000000031358 | 17_Msl3         | 773.991 | -0.34608 | 0.00942  | 0.024    | 682.396 | 698.45  | 663.311 | 775.45  | 934.185 | 890.158 |
| ENSMUSG000000031360 | 14_Ctsp2        | 438.297 | -0.77942 | 1.42E-06 | 1.25E-05 | 340.33  | 335.917 | 291.618 | 537.405 | 623.089 | 501.426 |

|                     |                  |         |          |          |          |         |         |         |         |         |         |
|---------------------|------------------|---------|----------|----------|----------|---------|---------|---------|---------|---------|---------|
| ENSMUSG000000031362 | 17_Xlr4c         | 1020.08 | -0.83438 | 2.18E-06 | 1.81E-05 | 812.624 | 710.382 | 675.262 | 1034.23 | 1548.31 | 1339.67 |
| ENSMUSG000000031364 | 2_Grpr           | 0.74582 | -1.7875  | 0.60443  | NA       | 0.86819 | 0       | 0       | 3.60674 | 0       | 0       |
| ENSMUSG000000031365 | 13_Zfp275        | 480.479 | -0.40582 | 0.0096   | 0.0244   | 433.226 | 418.519 | 388.425 | 625.77  | 515.505 | 501.426 |
| ENSMUSG000000031367 | 15_Ap1s2         | 303.9   | -1.21361 | 5.39E-08 | 7.33E-07 | 190.133 | 222.109 | 136.248 | 423.792 | 487.713 | 363.407 |
| ENSMUSG000000031370 | 12_Zrsr2         | 953.55  | -0.27639 | 0.04417  | 0.08743  | 848.22  | 863.655 | 874.853 | 900.784 | 1108.11 | 1125.68 |
| ENSMUSG000000031371 | 14_Haus7         | 743.717 | 0.02755  | 0.82826  | 0.88247  | 721.465 | 743.423 | 787.607 | 684.379 | 759.361 | 766.067 |
| ENSMUSG000000031372 | 7_Trex2          | 704.465 | 1.08499  | 1.44E-10 | 4.45E-09 | 884.684 | 952.682 | 1035    | 513.961 | 363.095 | 477.368 |
| ENSMUSG000000031373 | 4_Car5b          | 1774.22 | -0.16522 | 0.24643  | 0.35513  | 1799.75 | 1559.35 | 1657.68 | 1586.97 | 1968.78 | 2072.81 |
| ENSMUSG000000031374 | 13_Zfp92         | 59.2962 | -0.09138 | 0.76819  | 0.83699  | 67.7187 | 50.4793 | 53.7819 | 61.3146 | 59.171  | 63.3113 |
| ENSMUSG000000031375 | 17_Bgn           | 11777   | -0.0958  | 0.36646  | 0.48385  | 11372.4 | 12305.9 | 10477.9 | 11765.2 | 12200.9 | 12539.4 |
| ENSMUSG000000031376 | 15_Atp2b3        | 23.0951 | -1.198   | 0.01916  | 0.04361  | 14.7592 | 16.5205 | 10.7564 | 39.6742 | 34.0682 | 22.7921 |
| ENSMUSG000000031377 | 11_Bmx           | 43.3719 | -0.25101 | 0.48369  | 0.59579  | 32.9912 | 43.1369 | 43.0255 | 53.1994 | 44.8265 | 43.0517 |
| ENSMUSG000000031378 | 14_Abcd1         | 340.85  | 0.39222  | 0.04186  | 0.08355  | 380.267 | 422.191 | 358.546 | 360.674 | 253.718 | 269.706 |
| ENSMUSG000000031379 | 13_Pir           | 1400.12 | -0.14991 | 0.31434  | 0.42939  | 1317.91 | 1276.67 | 1387.57 | 1210.96 | 1651.41 | 1556.19 |
| ENSMUSG000000031380 | 10_Figf          | 153.874 | -0.29233 | 0.19925  | 0.30022  | 160.615 | 122.068 | 132.662 | 171.32  | 190.961 | 145.616 |
| ENSMUSG000000031381 | 15_Piga          | 7204.81 | 0.11896  | 0.47923  | 0.59198  | 7579.28 | 6927.6  | 7997.97 | 5258.63 | 8107.33 | 7358.04 |
| ENSMUSG000000031382 | 14_Asb11         | 627.379 | 0.24921  | 0.083    | 0.14757  | 684.132 | 682.847 | 678.848 | 572.57  | 641.916 | 503.958 |
| ENSMUSG000000031383 | 8_Dusp9          | 9.74504 | 1.32692  | 0.13503  | 0.2192   | 14.7592 | 11.0137 | 15.537  | 2.70506 | 1.79306 | 12.6623 |
| ENSMUSG000000031385 | 17_Plxnb3        | 17.0773 | -0.0128  | 0.98104  | 0.98754  | 18.232  | 18.3561 | 14.3418 | 18.9354 | 16.1376 | 16.4609 |
| ENSMUSG000000031386 | 14_Hcfc1         | 2987.14 | 0.62539  | 8.08E-08 | 1.05E-06 | 3326.03 | 3646.44 | 3900.98 | 2340.78 | 2209.05 | 2499.53 |
| ENSMUSG000000031387 | 14_Renbp         | 343.705 | -0.64019 | 0.01805  | 0.04156  | 240.488 | 367.122 | 198.396 | 507.649 | 444.679 | 303.894 |
| ENSMUSG000000031388 | 17_Naa10         | 609.119 | 0.84151  | 1.81E-08 | 2.88E-07 | 758.797 | 736.998 | 849.755 | 467.975 | 382.819 | 458.374 |
| ENSMUSG000000031389 | 14_Arhgap4       | 187.724 | 1.08751  | 5.65E-06 | 4.13E-05 | 271.743 | 212.013 | 282.056 | 141.565 | 92.3426 | 126.623 |
| ENSMUSG000000031390 | 8_Avpr2          | 9.63985 | 0.45417  | 0.52968  | 0.63838  | 11.2864 | 10.0959 | 11.9515 | 5.41011 | 8.96531 | 10.1298 |
| ENSMUSG000000031391 | 18_L1cam         | 2728.29 | 1.16498  | 8.04E-12 | 3.45E-10 | 3293.04 | 3628.09 | 4398.17 | 1435.48 | 1587.76 | 2027.23 |
| ENSMUSG000000031392 | 16_Irak1         | 2087.08 | 0.18424  | 0.07875  | 0.14151  | 2128.8  | 2244.95 | 2286.33 | 1962.97 | 1862.09 | 2037.36 |
| ENSMUSG000000031393 | 16_Mecp2         | 1510.15 | -0.45505 | 0.00019  | 0.00088  | 1313.57 | 1267.49 | 1241.77 | 1894.44 | 1776.03 | 1567.59 |
| ENSMUSG000000031394 | 11_Opn1mw        | 8.86887 | -1.90757 | 0.09168  | 0.16007  | 0.86819 | 4.58903 | 5.97577 | 29.7556 | 10.7584 | 1.26623 |
| ENSMUSG000000031397 | 11_Tktl1         | 1.37987 | -0.10312 | 0.95791  | NA       | 0       | 2.75342 | 1.19515 | 0.90169 | 0.89653 | 2.53245 |
| ENSMUSG000000031398 | 13_Plxna3        | 657.73  | 0.8867   | 1.38E-10 | 4.28E-09 | 795.261 | 879.258 | 885.609 | 461.663 | 423.162 | 501.426 |
| ENSMUSG000000031399 | 15_Fam3a         | 636.29  | 0.29799  | 0.06153  | 0.11528  | 648.537 | 755.354 | 701.555 | 654.624 | 490.402 | 567.27  |
| ENSMUSG000000031400 | 10_G6pdx         | 7435.32 | 0.33374  | 0.02085  | 0.04692  | 8387.57 | 7742.61 | 8742.55 | 5499.38 | 6556.33 | 7683.46 |
| ENSMUSG000000031402 | 12_Mpp1          | 780.275 | -0.01572 | 0.91724  | 0.94503  | 866.452 | 676.423 | 785.216 | 718.643 | 856.187 | 778.73  |
| ENSMUSG000000031403 | 14_Dkc1          | 1036.2  | -0.19336 | 0.16143  | 0.25399  | 1003.63 | 864.573 | 1032.61 | 994.559 | 1177.14 | 1144.67 |
| ENSMUSG000000031409 | 1_Tceal6         | 128.731 | -1.33234 | 2.20E-05 | 0.00013  | 64.2459 | 96.3696 | 58.5626 | 244.357 | 135.376 | 173.473 |
| ENSMUSG000000031410 | 14_Nxf7          | 1.11724 | -1.37659 | 0.55036  | NA       | 0       | 1.83561 | 0       | 2.70506 | 0.89653 | 1.26623 |
| ENSMUSG000000031422 | 16_Morf4l2       | 5567.82 | -0.09954 | 0.38534  | 0.50263  | 5525.15 | 4942.38 | 5660.25 | 5287.48 | 6112.55 | 5879.09 |
| ENSMUSG000000031424 | 16_Kir3dl1       | 0       | NA       | NA       | NA       | 0       | 0       | 0       | 0       | 0       | 0       |
| ENSMUSG000000031425 | 15_Plp1          | 559.369 | -1.28489 | 1.68E-08 | 2.70E-07 | 329.043 | 401.999 | 245.007 | 911.604 | 869.635 | 598.925 |
| ENSMUSG000000031428 | 11_Zcchc18       | 148.162 | -1.49825 | 6.72E-05 | 0.00035  | 67.7187 | 111.972 | 52.5868 | 297.556 | 237.581 | 121.558 |
| ENSMUSG000000031429 | 14_Psmad10       | 645.667 | -0.32298 | 0.03806  | 0.07734  | 566.059 | 568.122 | 586.821 | 601.424 | 809.567 | 742.009 |
| ENSMUSG000000031430 | 8_Vsig1          | 0.79301 | -0.45215 | 0.86022  | NA       | 0.86819 | 0       | 1.19515 | 0.90169 | 1.79306 | 0       |
| ENSMUSG000000031431 | 13_Tsc22d3       | 1630.53 | 0.08825  | 0.50737  | 0.61765  | 1645.22 | 1637.37 | 1756.88 | 1477.86 | 1448.79 | 1817.04 |
| ENSMUSG000000031432 | 3_Prps1          | 399.409 | -0.44345 | 0.00334  | 0.01007  | 355.957 | 350.602 | 308.35  | 445.433 | 490.402 | 445.712 |
| ENSMUSG000000031433 | 15_Rbm41         | 168.396 | -0.42952 | 0.07609  | 0.13756  | 150.197 | 145.931 | 135.052 | 189.354 | 242.96  | 146.882 |
| ENSMUSG000000031434 | 15_Mora4         | 140.372 | -0.38528 | 0.10088  | 0.17335  | 136.306 | 108.301 | 120.711 | 138.86  | 187.375 | 150.681 |
| ENSMUSG000000031438 | 11_Rnf128        | 92.8594 | -0.56797 | 0.03426  | 0.0709   | 75.5324 | 73.4244 | 75.2947 | 88.3652 | 125.514 | 119.025 |
| ENSMUSG000000031441 | 15_Atp11a        | 3284.24 | 0.05114  | 0.72156  | 0.80192  | 3140.24 | 3704.26 | 3182.7  | 3709.53 | 2798.07 | 3170.63 |
| ENSMUSG000000031442 | 20_Mcf2l         | 192.536 | -0.26652 | 0.38774  | 0.50514  | 180.583 | 210.177 | 133.857 | 306.573 | 178.41  | 145.616 |
| ENSMUSG000000031443 | 7_F7             | 1.15316 | 0.34486  | 0.86581  | NA       | 1.73638 | 0.91781 | 1.19515 | 1.80337 | 0       | 1.26623 |
| ENSMUSG000000031444 | 16_F10           | 8.55136 | 4.68609  | 0.00145  | 0.00493  | 36.4639 | 8.26025 | 4.78062 | 1.80337 | 0       | 0       |
| ENSMUSG000000031445 | 4_Proz           | 5.95598 | -0.40837 | 0.68106  | 0.76938  | 2.60457 | 9.17806 | 3.58546 | 10.8202 | 4.48265 | 5.06491 |
| ENSMUSG000000031446 | 14_Cul4a         | 2141.43 | 0.09878  | 0.33484  | 0.45134  | 2252.95 | 2145.83 | 2244.5  | 1978.3  | 2071.88 | 2155.12 |
| ENSMUSG000000031447 | 6_Lamp1          | 10759   | 0.12798  | 0.15832  | 0.24997  | 11384.6 | 11018.3 | 11303.8 | 10215.2 | 9935.35 | 10697.1 |
| ENSMUSG000000031448 | 12_Adprhl1       | 10.6812 | -1.30291 | 0.12797  | 0.21024  | 6.94551 | 5.50683 | 5.97577 | 24.3455 | 3.58612 | 17.7272 |
| ENSMUSG000000031450 | 7_Grk1           | 471.815 | -2.43831 | 0.00958  | 0.02436  | 230.938 | 156.027 | 53.7819 | 1434.58 | 787.154 | 168.408 |
| ENSMUSG000000031451 | 5_Gas6           | 5770.15 | 0.54282  | 0.00276  | 0.00857  | 6165.87 | 7364.47 | 6998.82 | 5817.67 | 3526.95 | 4747.08 |
| ENSMUSG000000031452 | 14_1700029H14Rik | 0.15297 | 0.92709  | 0.82027  | NA       | 0       | 0.91781 | 0       | 0       | 0       | 0       |
| ENSMUSG000000031453 | 15_Rasa3         | 724.114 | 0.76412  | 4.28E-08 | 5.96E-07 | 946.325 | 863.655 | 923.854 | 575.275 | 473.368 | 562.205 |
| ENSMUSG000000031458 | 7_Coprs          | 112.034 | -0.44697 | 0.0775   | 0.13963  | 93.7643 | 109.219 | 81.2705 | 150.581 | 118.342 | 119.025 |
| ENSMUSG000000031461 | 4_Myom2          | 29.4987 | -0.81666 | 0.06744  | 0.12458  | 18.232  | 26.6164 | 19.1225 | 44.1826 | 29.5855 | 39.253  |
| ENSMUSG000000031465 | 6_Angpt2         | 227.574 | -0.92273 | 0.00029  | 0.00125  | 174.506 | 172.547 | 124.296 | 386.823 | 280.614 | 226.655 |
| ENSMUSG000000031467 | 10_Agpat5        | 476.962 | -0.71182 | 2.19E-06 | 1.82E-05 | 375.057 | 357.944 | 352.57  | 609.539 | 643.709 | 522.952 |
| ENSMUSG000000031478 | 16_Nek3          | 134.037 | -0.01827 | 0.93518  | 0.9573   | 130.228 | 115.644 | 154.175 | 137.056 | 129.1   | 138.019 |
| ENSMUSG000000031479 | 8_Vps36          | 1576.44 | -0.14457 | 0.18646  | 0.28491  | 1542.77 | 1399.65 | 1550.11 | 1612.21 | 1655.89 | 1698.01 |
| ENSMUSG000000031480 | 15_Thsd1         | 93.2206 | -0.21358 | 0.41829  | 0.53423  | 93.7643 | 81.6847 | 83.6608 | 119.022 | 88.7565 | 92.4346 |
| ENSMUSG000000031481 | 7_Tpte           | 0.43968 | 0.71095  | 0.86073  | NA       | 1.73638 | 0       | 0       | 0.90169 | 0       | 0       |
| ENSMUSG000000031482 | 8_Slc25a15       | 395.094 | -0.11024 | 0.44429  | 0.5594   | 371.585 | 381.807 | 386.035 | 399.447 | 393.577 | 438.115 |
| ENSMUSG000000031483 | 7_Erlin2         | 4346.05 | 0.07596  | 0.47684  | 0.58943  | 4380.01 | 4314.6  | 4686.2  | 3928.64 | 4275.55 | 4491.31 |
| ENSMUSG000000031485 | 14_Prosc         | 925.628 | -0.09279 | 0.42807  | 0.54337  | 900.311 | 902.203 | 884.414 | 895.374 | 988.873 | 982.592 |
| ENSMUSG000000031486 | 14_Adgra2        | 894.829 | -0.08385 | 0.65855  | 0.7509   | 757.06  | 1061.9  | 787.607 | 1105.47 | 799.705 | 857.236 |
| ENSMUSG000000031487 | 4_Brf2           | 120.877 | 0.51938  | 0.03569  | 0.07334  | 132.833 | 144.095 | 150.589 | 119.924 | 81.5843 | 96.2332 |
| ENSMUSG000000031488 | 13_Rab11fip1     | 4869.73 | 0.53001  | 0.00027  | 0.00116  | 5308.97 | 5880.38 | 6071.38 | 3688.8  | 3517.99 | 4750.88 |
| ENSMUSG000000031489 | 14_Adrb3         | 2.6741  | 2.57239  | 0.16086  | 0.25321  | 7.8137  | 0.91781 | 4.78062 | 0       | 0       | 2.53245 |
| ENSMUSG000000031490 | 5_Elf4ebp1       | 511.363 | 0.97668  | 2.62E-06 | 2.11E-05 | 639.855 | 626.861 | 768.484 | 440.023 | 266.27  | 326.687 |
| ENSMUSG000000031491 | 9_Chna6          | 39.1399 | -1.88898 | 0.00078  | 0.0029   | 19.1001 | 21.1095 | 9.56123 | 92.8736 | 68.1363 | 24.0583 |
| ENSMUSG000000031492 | 12_Chrrnb3       | 316.242 | -2.00243 | 2.80E-07 | 3.06E-06 | 103.314 | 217.52  | 57.3674 | 601.424 | 574.676 | 343.147 |
| ENSMUSG000000031493 | 9_Ggn            | 6.32394 | 0.92578  | 0.37587  | 0.4935   | 3.47275 | 16.5205 | 4.78062 | 6.3118  | 1.79306 | 5.06491 |
| ENSMUSG000000031494 | 6_Cd209a         | 22.1537 | -0.20943 | 0.70816  | 0.79126  | 20.8365 | 26.6164 | 14.3418 | 33.3624 | 25.1029 | 12.6623 |

|                     |                  |         |          |          |          |         |         |         |         |         |         |
|---------------------|------------------|---------|----------|----------|----------|---------|---------|---------|---------|---------|---------|
| ENSMUSG000000031495 | 7_Cd209d         | 11.8314 | -0.94254 | 0.18059  | 0.27771  | 10.4183 | 5.50683 | 8.36608 | 21.6405 | 9.86184 | 15.1947 |
| ENSMUSG000000031497 | 8_Tnfsf13b       | 4.84659 | 0.0334   | 0.97347  | 0.98291  | 5.20913 | 3.67122 | 5.97577 | 6.3118  | 5.37918 | 2.53245 |
| ENSMUSG000000031502 | 9_Col4a1         | 3182.21 | -0.25399 | 0.64428  | 0.73934  | 2202.59 | 4092.5  | 2413.02 | 4214.48 | 1494.52 | 4676.18 |
| ENSMUSG000000031503 | 13_Col4a2        | 2022.65 | -0.08612 | 0.85985  | 0.90519  | 1566.21 | 2713.95 | 1606.29 | 2501.28 | 1028.32 | 2719.86 |
| ENSMUSG000000031504 | 5_Rab20          | 68.3256 | 0.30848  | 0.37879  | 0.49626  | 69.4551 | 51.3971 | 106.369 | 59.5112 | 57.378  | 65.8438 |
| ENSMUSG000000031505 | 10_Carkd         | 848.599 | 0.44464  | 0.01151  | 0.02846  | 922.016 | 944.422 | 1068.47 | 829.551 | 558.539 | 768.6   |
| ENSMUSG000000031506 | 11_Ptpn7         | 26.7237 | 1.23192  | 0.02199  | 0.04908  | 53.8277 | 30.2876 | 28.6837 | 22.5421 | 16.1376 | 8.86359 |
| ENSMUSG000000031508 | 13_Ankrd10       | 765.949 | -0.09149 | 0.52398  | 0.63341  | 699.76  | 818.683 | 707.531 | 838.567 | 828.394 | 702.756 |
| ENSMUSG000000031510 | 5_1700128E19Rik  | 0.14942 | -0.99647 | 0.80707  | NA       | 0       | 0       | 0       | 0       | 0.89653 | 0       |
| ENSMUSG000000031511 | 14_Arhgef7       | 1548.37 | 0.41703  | 0.00028  | 0.0012   | 1677.34 | 1743.83 | 1890.73 | 1344.41 | 1252.45 | 1381.45 |
| ENSMUSG000000031512 | 14_Tex29         | 0.2894  | 1.67273  | 0.67976  | NA       | 1.73638 | 0       | 0       | 0       | 0       | 0       |
| ENSMUSG000000031513 | 8_Leprotl1       | 796.842 | 0.0781   | 0.50062  | 0.61162  | 812.624 | 801.244 | 841.388 | 769.138 | 766.534 | 790.126 |
| ENSMUSG000000031516 | 11_Dctn6         | 1191.93 | 0.01523  | 0.89545  | 0.92937  | 1196.36 | 1136.24 | 1262.08 | 1122.6  | 1202.25 | 1232.04 |
| ENSMUSG000000031517 | 7_Gpm6a          | 903.986 | -1.6599  | 8.83E-10 | 2.13E-08 | 446.249 | 578.218 | 278.471 | 1671.72 | 1494.52 | 954.735 |
| ENSMUSG000000031518 | 6_Spata4         | 0.5715  | -2.63875 | 0.47614  | NA       | 0       | 0       | 0       | 0       | 0.89653 | 2.53245 |
| ENSMUSG000000031519 | 2_Asb5           | 34.113  | -1.91413 | 0.00036  | 0.0015   | 7.8137  | 22.0273 | 13.1467 | 79.3483 | 36.7578 | 45.5842 |
| ENSMUSG000000031520 | 5_Vegfc          | 87.4728 | -0.82537 | 0.0066   | 0.01779  | 59.0368 | 78.9313 | 51.3916 | 116.317 | 131.79  | 87.3697 |
| ENSMUSG000000031521 | 4_Aga            | 502.226 | -0.31083 | 0.04119  | 0.08257  | 425.412 | 512.136 | 406.352 | 549.126 | 544.194 | 576.133 |
| ENSMUSG000000031523 | 16_Dlc1          | 628.243 | -0.5427  | 0.00329  | 0.00995  | 553.904 | 574.546 | 405.157 | 856.601 | 720.811 | 658.438 |
| ENSMUSG000000031527 | 6_Eri1           | 646.698 | -0.0908  | 0.59125  | 0.69344  | 659.823 | 588.313 | 631.041 | 551.832 | 790.74  | 658.438 |
| ENSMUSG000000031529 | 4_Tnks           | 1061.21 | 0.01487  | 0.89072  | 0.92637  | 1067    | 1064.65 | 1068.47 | 1034.23 | 1079.42 | 1053.5  |
| ENSMUSG000000031530 | 6_Dusp4          | 102.592 | -0.78348 | 0.01239  | 0.03022  | 78.137  | 91.7806 | 56.1722 | 167.713 | 125.514 | 96.2332 |
| ENSMUSG000000031532 | 5_Saraf          | 1848.46 | -0.06696 | 0.53114  | 0.63966  | 1770.24 | 1854.89 | 1791.54 | 1997.23 | 1787.68 | 1889.21 |
| ENSMUSG000000031533 | 3_Mrps31         | 290.898 | -0.46369 | 0.00807  | 0.0211   | 263.929 | 240.465 | 229.47  | 332.722 | 377.439 | 301.362 |
| ENSMUSG000000031534 | 14_Smim19        | 593.014 | -0.54935 | 0.00028  | 0.00121  | 503.549 | 469.916 | 470.891 | 626.671 | 803.291 | 683.763 |
| ENSMUSG000000031535 | 6_Dkk4           | 0       | NA       | NA       | NA       | 0       | 0       | 0       | 0       | 0       | 0       |
| ENSMUSG000000031536 | 5_Polb           | 1714.72 | -0.40153 | 0.00306  | 0.00934  | 1443.8  | 1406.08 | 1583.58 | 1690.66 | 2153.47 | 2010.77 |
| ENSMUSG000000031537 | 15_Ikbbk         | 1959.01 | 0.52356  | 4.57E-06 | 3.42E-05 | 2230.38 | 2278.91 | 2421.38 | 1579.75 | 1502.59 | 1741.06 |
| ENSMUSG000000031538 | 5_Plat           | 3087.89 | 0.55524  | 8.59E-05 | 0.00044  | 3357.28 | 3350.91 | 4316.9  | 2516.6  | 2320.22 | 2665.41 |
| ENSMUSG000000031539 | 5_Ap3m2          | 426.254 | -0.64157 | 0.00053  | 0.00209  | 305.602 | 393.739 | 299.984 | 581.587 | 533.436 | 443.179 |
| ENSMUSG000000031540 | 13_Kat6a         | 4400.69 | 0.29158  | 0.02708  | 0.05844  | 4615.29 | 4605.55 | 5310.07 | 3472.39 | 3999.42 | 4401.4  |
| ENSMUSG000000031543 | 18_Ank1          | 56.1518 | -0.94508 | 0.0573   | 0.10857  | 32.9912 | 39.4656 | 43.0255 | 131.646 | 34.0682 | 55.714  |
| ENSMUSG000000031545 | 5_Gpat4          | 1730.55 | 0.20697  | 0.04904  | 0.09552  | 1810.17 | 1912.71 | 1839.34 | 1544.59 | 1594.93 | 1681.55 |
| ENSMUSG000000031546 | 5_Gins4          | 527.602 | -0.17541 | 0.24103  | 0.34858  | 534.804 | 492.862 | 457.744 | 500.435 | 593.503 | 586.263 |
| ENSMUSG000000031548 | 7_Sfrp1          | 9230.79 | -0.05119 | 0.66338  | 0.75503  | 8952.76 | 9048.65 | 9197.91 | 8361.33 | 9334.68 | 10489.4 |
| ENSMUSG000000031549 | 15_Ido2          | 0.94953 | 1.04875  | 0.63343  | NA       | 0.86819 | 1.83561 | 1.19515 | 0.90169 | 0.89653 | 0       |
| ENSMUSG000000031551 | 12_Ido1          | 13.2019 | 3.64026  | 0.00012  | 0.00059  | 35.5957 | 9.17806 | 28.6837 | 0.90169 | 3.58612 | 1.26623 |
| ENSMUSG000000031553 | 15_Adam3         | 0.72178 | -2.97888 | 0.30629  | NA       | 0       | 0       | 0       | 0.90169 | 0.89653 | 2.53245 |
| ENSMUSG000000031554 | 17_Adam5         | 6.91538 | -0.5721  | 0.5579   | 0.66365  | 2.60457 | 3.67122 | 10.7564 | 7.21348 | 13.448  | 3.79868 |
| ENSMUSG000000031555 | 13_Adam9         | 1740.01 | -0.05463 | 0.60837  | 0.70819  | 1666.92 | 1739.24 | 1713.85 | 1706.89 | 1730.3  | 1882.88 |
| ENSMUSG000000031556 | 5_Tm2d2          | 881.209 | 0.04245  | 0.76282  | 0.83311  | 896.839 | 842.546 | 944.172 | 983.739 | 788.05  | 831.911 |
| ENSMUSG000000031557 | 15_Plekha2       | 2927.75 | 0.27687  | 0.03626  | 0.07425  | 3109.85 | 2954.42 | 3559.17 | 2347.09 | 2746.97 | 2849.01 |
| ENSMUSG000000031558 | 15_Slit2         | 1034.03 | -1.44911 | 2.62E-09 | 5.36E-08 | 599.918 | 714.053 | 347.79  | 1721.32 | 1581.48 | 1239.64 |
| ENSMUSG000000031561 | 15_Tenm3         | 948.209 | -0.93643 | 1.55E-05 | 9.90E-05 | 593.841 | 882.011 | 475.671 | 1352.53 | 1250.66 | 1134.54 |
| ENSMUSG000000031562 | 15_Dctd          | 291.567 | 0.1514   | 0.4627   | 0.57621  | 281.293 | 272.588 | 366.912 | 227.225 | 294.959 | 306.427 |
| ENSMUSG000000031563 | 7_Wwc2           | 1690.99 | 0.27143  | 0.01252  | 0.03049  | 1799.75 | 1865.9  | 1883.56 | 1624.84 | 1446.1  | 1525.8  |
| ENSMUSG000000031565 | 17_Fgfr1         | 1806.26 | -0.16551 | 0.3977   | 0.51515  | 1582.71 | 2149.5  | 1375.62 | 2296.59 | 1675.62 | 1757.52 |
| ENSMUSG000000031568 | 16_Rwdd4a        | 614.372 | -0.19411 | 0.17179  | 0.26684  | 554.772 | 579.135 | 584.43  | 584.292 | 658.053 | 725.548 |
| ENSMUSG000000031570 | 16_Ppapdc1b      | 362.919 | 0.09612  | 0.53934  | 0.64683  | 356.825 | 398.328 | 370.498 | 385.02  | 338.889 | 327.953 |
| ENSMUSG000000031574 | 7_Star           | 68.2627 | -0.46896 | 0.13369  | 0.21761  | 58.1686 | 63.3286 | 50.1965 | 65.823  | 96.6184 | 73.4412 |
| ENSMUSG000000031575 | 17_Ash2l         | 1389.66 | 0.09323  | 0.4251   | 0.54069  | 1414.28 | 1382.22 | 1507.09 | 1239.82 | 1394.11 | 1400.45 |
| ENSMUSG000000031576 | 15_Kcnu1         | 32.3192 | -0.27443 | 0.51561  | 0.62567  | 23.4411 | 33.041  | 31.074  | 31.559  | 30.482  | 44.3179 |
| ENSMUSG000000031577 | 9_Ti2            | 286.593 | 0.25603  | 0.16656  | 0.26034  | 302.13  | 324.903 | 308.35  | 214.601 | 292.269 | 277.304 |
| ENSMUSG000000031578 | 4_Mak16          | 562.677 | -0.32785 | 0.06343  | 0.11834  | 516.572 | 432.286 | 548.576 | 519.371 | 710.949 | 648.308 |
| ENSMUSG000000031583 | 12_Wrm           | 440.075 | -0.17777 | 0.21358  | 0.31713  | 431.49  | 388.232 | 419.499 | 446.334 | 493.988 | 460.907 |
| ENSMUSG000000031584 | 16_Gsr           | 850.504 | 0.01307  | 0.91965  | 0.94653  | 871.661 | 833.367 | 856.925 | 760.121 | 870.531 | 910.417 |
| ENSMUSG000000031585 | 13_Gtf2e2        | 840.064 | -0.41854 | 0.01514  | 0.03588  | 729.278 | 652.56  | 775.655 | 769.138 | 1119.77 | 993.988 |
| ENSMUSG000000031586 | 16_Rbpms         | 661.591 | -0.19733 | 0.27145  | 0.38318  | 517.44  | 730.573 | 602.358 | 764.629 | 753.086 | 601.458 |
| ENSMUSG000000031590 | 7_Frg1           | 1194.94 | -0.22702 | 0.10946  | 0.18546  | 1140.8  | 1014.18 | 1147.35 | 1118.99 | 1303.56 | 1444.76 |
| ENSMUSG000000031591 | 14_Ash1          | 1547    | -0.37745 | 0.00167  | 0.00558  | 1416.02 | 1324.39 | 1296.74 | 1637.46 | 1913.2  | 1694.21 |
| ENSMUSG000000031592 | 9_Pcm1           | 3112.77 | -0.56819 | 1.22E-05 | 8.07E-05 | 2505.59 | 2463.39 | 2554.04 | 3213.61 | 4195.76 | 3744.23 |
| ENSMUSG000000031594 | 9_Fgl1           | 0.78608 | -1.80845 | 0.59702  | NA       | 0       | 0.91781 | 0       | 0       | 0       | 3.79868 |
| ENSMUSG000000031595 | 9_Pdgfrl         | 526.383 | -0.16013 | 0.40873  | 0.52548  | 506.154 | 562.615 | 421.889 | 657.329 | 445.576 | 564.737 |
| ENSMUSG000000031596 | 15_Slc7a2        | 1852.17 | -0.94615 | 4.61E-06 | 3.45E-05 | 1268.42 | 1601.57 | 926.244 | 2680.71 | 2636.7  | 1999.37 |
| ENSMUSG000000031600 | 10_Vps37a        | 1128.81 | -0.3938  | 0.00576  | 0.01584  | 981.921 | 997.655 | 947.757 | 1137.03 | 1489.14 | 1219.38 |
| ENSMUSG000000031601 | 16_Cnot7         | 1052.02 | -0.41487 | 0.00268  | 0.00835  | 889.893 | 865.491 | 951.343 | 1105.47 | 1371.69 | 1128.21 |
| ENSMUSG000000031603 | 14_Fgf20         | 0.15028 | -0.99647 | 0.80707  | NA       | 0       | 0       | 0       | 0.90169 | 0       | 0       |
| ENSMUSG000000031604 | 10_Msmo1         | 4946.66 | -0.28308 | 0.02871  | 0.06124  | 4584.9  | 4050.28 | 4754.32 | 4833.03 | 6035.44 | 5421.98 |
| ENSMUSG000000031605 | 7_Klhl2          | 1162.95 | 0.06752  | 0.56413  | 0.6695   | 1149.48 | 1217.93 | 1202.33 | 1163.17 | 1050.73 | 1194.05 |
| ENSMUSG000000031608 | 13_Galnt7        | 3950.09 | 0.11434  | 0.4554   | 0.56941  | 4104.79 | 3846.52 | 4367.09 | 3047.7  | 3960.87 | 4373.55 |
| ENSMUSG000000031609 | 3_Sap30          | 188.202 | 0.13557  | 0.5549   | 0.66106  | 204.892 | 176.219 | 210.347 | 142.466 | 220.547 | 174.739 |
| ENSMUSG000000031610 | 3_Scrg1          | 15.3977 | -0.93464 | 0.23101  | 0.33725  | 19.9683 | 4.58903 | 7.17092 | 28.8539 | 24.2063 | 7.59736 |
| ENSMUSG000000031613 | 8_Hpgd           | 209.305 | -0.96163 | 7.98E-06 | 5.56E-05 | 156.274 | 147.767 | 121.906 | 289.441 | 131.786 | 226.655 |
| ENSMUSG000000031616 | 7_Ednra          | 326.953 | -0.52271 | 0.00152  | 0.00516  | 262.193 | 295.533 | 247.397 | 410.267 | 391.784 | 354.544 |
| ENSMUSG000000031617 | 16_Tmem184c      | 481.346 | -0.95987 | 1.18E-10 | 3.71E-09 | 331.648 | 345.095 | 303.569 | 610.441 | 698.397 | 598.925 |
| ENSMUSG000000031618 | 13_Nr3c2         | 204.071 | -1.07577 | 1.27E-05 | 8.37E-05 | 130.228 | 170.712 | 92.0269 | 295.753 | 276.131 | 259.577 |
| ENSMUSG000000031620 | 15_1700007B14Rik | 0.21104 | -0.99647 | 0.80707  | NA       | 0       | 0       | 0       | 0       | 0       | 1.26623 |
| ENSMUSG000000031622 | 15_Sin3b         | 2861.23 | 0.52546  | 0.00028  | 0.00122  | 3442.37 | 3152.66 | 3535.27 | 2735.71 | 1986.71 | 2314.66 |
| ENSMUSG000000031626 | 16_Sorbs2        | 2443.5  | -0.05041 | 0.67403  | 0.76398  | 2485.62 | 2186.21 | 2530.14 | 2298.4  | 2512.98 | 2647.68 |

|                     |                 |         |          |          |          |         |         |         |         |         |         |
|---------------------|-----------------|---------|----------|----------|----------|---------|---------|---------|---------|---------|---------|
| ENSMUSG000000031627 | 7_Irf2          | 1369.63 | 0.61407  | 9.32E-06 | 6.36E-05 | 1691.23 | 1513.46 | 1764.05 | 1038.74 | 980.804 | 1229.51 |
| ENSMUSG000000031628 | 8_Casp3         | 341.539 | -0.12911 | 0.45699  | 0.57094  | 336.857 | 299.205 | 343.009 | 309.278 | 402.542 | 358.342 |
| ENSMUSG000000031629 | 13_Cenpu        | 98.0399 | 0.28721  | 0.2995   | 0.41422  | 129.36  | 85.3559 | 108.759 | 81.1517 | 101.308 | 82.3047 |
| ENSMUSG000000031631 | 15_Cfap97       | 905.43  | -0.34226 | 0.02171  | 0.04857  | 869.925 | 743.423 | 782.826 | 949.475 | 1166.39 | 920.547 |
| ENSMUSG000000031633 | 4_Slc25a4       | 6518.69 | -0.40605 | 0.00349  | 0.01043  | 5544.25 | 5902.41 | 5375.8  | 8799.55 | 6620.88 | 6869.28 |
| ENSMUSG000000031634 | 12_Ufsp2        | 755.326 | -0.34442 | 0.01362  | 0.03274  | 715.387 | 640.628 | 640.603 | 779.056 | 939.564 | 816.716 |
| ENSMUSG000000031635 | 13_Anxa10       | 0.99372 | 3.41853  | 0.17914  | NA       | 1.73638 | 1.83561 | 2.39031 | 0       | 0       | 0       |
| ENSMUSG000000031636 | 6_Pdlim3        | 118.96  | -1.15856 | 0.00026  | 0.00115  | 59.0368 | 102.794 | 58.5626 | 201.978 | 125.514 | 165.876 |
| ENSMUSG000000031637 | 13_Lrp2bp       | 8.45836 | -2.18771 | 0.03845  | 0.07797  | 4.34094 | 4.58903 | 0       | 27.0506 | 7.17224 | 7.59736 |
| ENSMUSG000000031639 | 11_Tlr3         | 1280.35 | 0.6591   | 0.00042  | 0.00172  | 1561.87 | 1326.23 | 1815.44 | 769.138 | 1139.49 | 1069.96 |
| ENSMUSG000000031640 | 9_Klkb1         | 0.43409 | 2.24584  | 0.57502  | NA       | 2.60457 | 0       | 0       | 0       | 0       | 0       |
| ENSMUSG000000031641 | 13_Cbr4         | 497.352 | -0.2105  | 0.1508   | 0.24011  | 458.403 | 432.286 | 493.599 | 495.025 | 581.848 | 522.952 |
| ENSMUSG000000031642 | 8_Sh3rf1        | 1231.17 | 0.32791  | 0.02743  | 0.05904  | 1206.78 | 1417.09 | 1486.77 | 1079.32 | 963.77  | 1233.31 |
| ENSMUSG000000031644 | 18_Nek1         | 734.502 | -0.44194 | 0.00127  | 0.00442  | 668.505 | 615.848 | 583.235 | 770.941 | 909.979 | 858.502 |
| ENSMUSG000000031647 | 10_Mfap3l       | 7227.15 | -0.21888 | 0.0731   | 0.13326  | 6910.78 | 6386.09 | 6741.86 | 6756.33 | 8172.77 | 8395.08 |
| ENSMUSG000000031652 | 10_N4bp1        | 2362.91 | 0.63778  | 6.06E-06 | 4.38E-05 | 2594.15 | 2677.24 | 3359.58 | 1718.61 | 1857.61 | 1970.25 |
| ENSMUSG000000031654 | 15_Cbln1        | 804.653 | 0.74214  | 1.28E-06 | 1.14E-05 | 934.171 | 948.093 | 1138.98 | 625.77  | 526.263 | 654.639 |
| ENSMUSG000000031657 | 12_Heatr3       | 1001.27 | -0.25413 | 0.09926  | 0.1711   | 956.744 | 909.545 | 872.462 | 891.767 | 1205.83 | 1171.26 |
| ENSMUSG000000031659 | 16_Adcy7        | 841.765 | 0.04188  | 0.77841  | 0.84499  | 965.426 | 876.504 | 718.288 | 808.812 | 838.256 | 843.307 |
| ENSMUSG000000031660 | 13_Brd7         | 1442.5  | -0.10851 | 0.3808   | 0.49867  | 1392.57 | 1360.19 | 1411.48 | 1325.48 | 1591.34 | 1573.92 |
| ENSMUSG000000031661 | 11_Nkd1         | 261.558 | -0.64693 | 0.02854  | 0.06097  | 148.46  | 306.547 | 156.565 | 371.494 | 325.441 | 260.843 |
| ENSMUSG000000031662 | 7_Snx20         | 21.1259 | 1.61301  | 0.0187   | 0.04275  | 58.1686 | 16.5205 | 20.3176 | 8.11517 | 7.17224 | 16.4609 |
| ENSMUSG000000031665 | 6_Sall1         | 26.4285 | -2.01917 | 0.00356  | 0.01061  | 6.94551 | 18.3561 | 5.97577 | 23.4438 | 79.7912 | 24.0583 |
| ENSMUSG000000031666 | 14_Rbl2         | 1176.06 | -0.31331 | 0.00331  | 0.00999  | 1074.82 | 1023.35 | 1048.15 | 1299.33 | 1296.38 | 1314.34 |
| ENSMUSG000000031667 | 15_Aktip        | 2780.04 | -0.37434 | 0.00184  | 0.00608  | 2483.89 | 2388.13 | 2391.5  | 2777.19 | 3422.06 | 3217.48 |
| ENSMUSG000000031668 | 14_Eif2ak3      | 815.023 | -0.0036  | 0.9774   | 0.98531  | 803.074 | 822.354 | 815.095 | 778.155 | 773.706 | 897.755 |
| ENSMUSG000000031669 | 9_Gins3         | 139.362 | 0.08077  | 0.73446  | 0.81175  | 142.383 | 159.698 | 126.686 | 110.006 | 141.652 | 155.746 |
| ENSMUSG000000031671 | 10_Setd6        | 273.949 | -0.0367  | 0.83425  | 0.8866   | 254.379 | 256.068 | 301.179 | 251.57  | 284.2   | 296.297 |
| ENSMUSG000000031672 | 7_Got2          | 3602.87 | 0.42735  | 0.00068  | 0.0026   | 3832.18 | 4055.78 | 4510.51 | 3319.1  | 2750.56 | 3149.11 |
| ENSMUSG000000031673 | 5_Cdh11         | 1522.95 | -0.75002 | 3.90E-06 | 2.98E-05 | 1144.27 | 1338.16 | 923.854 | 1944.94 | 2059.33 | 1727.13 |
| ENSMUSG000000031681 | 14_Smad1        | 562.929 | 0.32016  | 0.05003  | 0.09717  | 541.75  | 592.902 | 742.191 | 515.764 | 488.609 | 496.361 |
| ENSMUSG000000031682 | 4_1700011L22Rik | 0.34947 | -0.03469 | 0.99322  | NA       | 0       | 0       | 1.19515 | 0.90169 | 0       | 0       |
| ENSMUSG000000031683 | 16_Lsm6         | 954.084 | -0.3851  | 0.00585  | 0.01605  | 814.361 | 786.559 | 882.024 | 944.966 | 1186.11 | 1110.48 |
| ENSMUSG000000031684 | 10_Slc10a7      | 935.431 | -0.05064 | 0.71266  | 0.79471  | 909.861 | 858.148 | 988.392 | 862.011 | 936.874 | 1057.3  |
| ENSMUSG000000031688 | 4_Pou4f2        | 1.38469 | -0.2661  | 0.91429  | NA       | 2.60457 | 0       | 1.19515 | 4.50843 | 0       | 0       |
| ENSMUSG000000031691 | 13_Tnpo2        | 2615.44 | 0.5535   | 2.16E-06 | 1.79E-05 | 3017.82 | 2992.05 | 3322.53 | 2128.88 | 1944.57 | 2286.81 |
| ENSMUSG000000031696 | 8_Vps35         | 5054.97 | -0.47673 | 0.00081  | 0.003    | 4476.38 | 3981.44 | 4223.67 | 4895.25 | 6719.5  | 6033.57 |
| ENSMUSG000000031697 | 11_Orc6         | 429.943 | -0.12505 | 0.40275  | 0.5203   | 428.017 | 390.985 | 414.718 | 405.758 | 480.54  | 459.64  |
| ENSMUSG000000031698 | 14_Mylk3        | 5.99646 | -1.13112 | 0.29203  | 0.40585  | 4.34094 | 4.58903 | 2.39031 | 14.427  | 8.96531 | 1.26623 |
| ENSMUSG000000031700 | 15_Gpt2         | 399.113 | 0.07464  | 0.62214  | 0.71988  | 414.126 | 384.561 | 429.06  | 358.871 | 386.405 | 421.654 |
| ENSMUSG000000031701 | 5_Dnaja2        | 3822.99 | -0.17525 | 0.16048  | 0.25279  | 3601.25 | 3318.78 | 3853.18 | 3593.22 | 4254.93 | 4316.57 |
| ENSMUSG000000031703 | 7_Iltfg1        | 2568.05 | -0.61545 | 1.25E-06 | 1.12E-05 | 2124.46 | 2041.2  | 1919.42 | 2845.72 | 3517.09 | 2960.44 |
| ENSMUSG000000031706 | 6_Rfx1          | 324.51  | 1.54018  | 4.75E-16 | 5.41E-14 | 410.653 | 497.451 | 541.405 | 186.649 | 148.824 | 162.077 |
| ENSMUSG000000031708 | 15_Tecr         | 4372.29 | 0.81631  | 7.29E-08 | 9.58E-07 | 5264.69 | 5564.66 | 5900.48 | 3223.53 | 2059.35 | 3710.04 |
| ENSMUSG000000031709 | 15_Tbc1d9       | 164.169 | -0.14318 | 0.57578  | 0.68001  | 179.715 | 164.287 | 124.296 | 201.978 | 185.582 | 129.155 |
| ENSMUSG000000031710 | 3_Ucp1          | 0.50244 | 0.94285  | 0.78015  | NA       | 0       | 0.91781 | 1.19515 | 0.90169 | 0       | 0       |
| ENSMUSG000000031711 | 6_Zfp330        | 716.33  | -0.1085  | 0.37658  | 0.49409  | 671.978 | 665.409 | 731.434 | 730.365 | 744.12  | 754.671 |
| ENSMUSG000000031712 | 8_Ilf5          | 83.7678 | 0.32347  | 0.23731  | 0.34459  | 99.8417 | 77.0957 | 102.783 | 81.1517 | 70.8259 | 70.9087 |
| ENSMUSG000000031714 | 8_Gab1          | 1624.24 | 0.28209  | 0.02348  | 0.05192  | 1662.58 | 1846.62 | 1836.95 | 1404.83 | 1369.9  | 1624.57 |
| ENSMUSG000000031715 | 14_Smarca5      | 2780.27 | -0.32827 | 0.03655  | 0.0747   | 2554.21 | 2343.16 | 2497.87 | 2433.65 | 3494.68 | 3358.03 |
| ENSMUSG000000031722 | 9_Hp            | 40.9785 | 3.97377  | 6.54E-08 | 8.67E-07 | 152.801 | 21.1095 | 57.3674 | 6.3118  | 4.48265 | 3.79868 |
| ENSMUSG000000031723 | 8_Txn14b        | 203.334 | -0.01983 | 0.91279  | 0.94153  | 203.156 | 196.41  | 206.762 | 220.913 | 199.03  | 193.733 |
| ENSMUSG000000031725 | 8_Ces1f         | 0.14942 | -0.99647 | 0.80707  | NA       | 0       | 0       | 0       | 0       | 0.89653 | 0       |
| ENSMUSG000000031727 | 7_Pmfbp1        | 3.58466 | -0.8737  | 0.49255  | 0.60421  | 4.34094 | 0.91781 | 2.39031 | 7.21348 | 5.37918 | 1.26623 |
| ENSMUSG000000031728 | 9_Zfp821        | 254.669 | -0.50501 | 0.00457  | 0.01309  | 289.975 | 299.205 | 307.155 | 232.635 | 183.789 | 215.259 |
| ENSMUSG000000031729 | 5_Ist1          | 4002.2  | 0.04148  | 0.74183  | 0.81746  | 4218.53 | 3809.81 | 4149.58 | 3439.93 | 4086.39 | 4308.97 |
| ENSMUSG000000031730 | 17_Dhodh        | 181.838 | 0.58574  | 0.0031   | 0.00944  | 213.574 | 215.684 | 224.689 | 144.27  | 128.204 | 164.609 |
| ENSMUSG000000031731 | 16_Ap1g1        | 4156.21 | -0.03307 | 0.8254   | 0.88033  | 4116.95 | 4072.3  | 4135.23 | 3337.14 | 4567.82 | 4707.83 |
| ENSMUSG000000031732 | 12_Phlpp2       | 947.665 | 0.01974  | 0.87438  | 0.91476  | 938.512 | 927.901 | 997.954 | 946.77  | 1011.29 | 863.567 |
| ENSMUSG000000031734 | 12_Irx3         | 86.3842 | 0.30898  | 0.29998  | 0.41473  | 79.8733 | 104.63  | 101.588 | 68.5281 | 63.6537 | 100.032 |
| ENSMUSG000000031736 | 10_Crnde        | 76.1561 | 0.15943  | 0.59951  | 0.70105  | 70.3233 | 82.6025 | 88.4414 | 55.9045 | 88.7565 | 70.9087 |
| ENSMUSG000000031737 | 10_Irx5         | 157.75  | 1.21282  | 2.13E-08 | 3.29E-07 | 196.211 | 221.191 | 243.811 | 100.087 | 85.1704 | 100.032 |
| ENSMUSG000000031738 | 14_Irx6         | 20.9747 | 0.15938  | 0.77181  | 0.83986  | 23.4411 | 24.7808 | 17.9273 | 26.1489 | 10.7584 | 22.7921 |
| ENSMUSG000000031740 | 7_Mmp2          | 4455.53 | 0.18571  | 0.13828  | 0.22335  | 4773.3  | 5114.93 | 4334.82 | 4183.82 | 3756.46 | 4569.81 |
| ENSMUSG000000031748 | 15_Gnao1        | 646.411 | -1.06275 | 0.00028  | 0.00122  | 412.389 | 580.971 | 261.739 | 1138.83 | 883.083 | 601.458 |
| ENSMUSG000000031749 | 9_Zfp3gal2      | 924.274 | 0.45563  | 0.01047  | 0.02627  | 968.898 | 1131.65 | 1106.71 | 940.458 | 614.123 | 783.794 |
| ENSMUSG000000031750 | 15_Ii34         | 131.153 | 0.0404   | 0.88304  | 0.92103  | 120.678 | 131.246 | 148.199 | 171.32  | 119.239 | 96.2332 |
| ENSMUSG000000031751 | 13_Amfr         | 4443.23 | 0.05825  | 0.60153  | 0.70255  | 4361.78 | 4595.45 | 4641.98 | 4732.95 | 3975.22 | 4352.02 |
| ENSMUSG000000031753 | 16_Cog4         | 1745.47 | 0.02629  | 0.81474  | 0.87199  | 1800.62 | 1648.38 | 1834.56 | 1715.01 | 1649.62 | 1824.63 |
| ENSMUSG000000031754 | 9_Nudt21        | 983.125 | -0.39893 | 0.00317  | 0.00965  | 863.847 | 792.066 | 889.195 | 1024.31 | 1247.97 | 1081.36 |
| ENSMUSG000000031755 | 5_Bbs2          | 480.947 | -0.42927 | 0.00279  | 0.00864  | 392.421 | 431.369 | 406.352 | 600.523 | 524.47  | 530.549 |
| ENSMUSG000000031756 | 4_Cenpn         | 101.832 | 0.15581  | 0.60159  | 0.70257  | 111.128 | 92.6984 | 118.32  | 67.6264 | 123.721 | 97.4995 |
| ENSMUSG000000031757 | 6_Mt4           | 1.47587 | 0.68626  | 0.74701  | NA       | 0       | 1.83561 | 3.58546 | 0.90169 | 0       | 2.53245 |
| ENSMUSG000000031758 | 9_Cdy12         | 149.08  | 0.31705  | 0.11701  | 0.19568  | 169.297 | 155.109 | 172.102 | 131.646 | 137.169 | 129.155 |
| ENSMUSG000000031760 | 8_Mt3           | 68.7252 | -0.91669 | 0.08483  | 0.15011  | 51.2231 | 73.4244 | 17.9273 | 139.761 | 86.9635 | 43.0517 |
| ENSMUSG000000031762 | 6_Mt2           | 4348.4  | 1.31105  | 2.60E-08 | 3.88E-07 | 5484.35 | 5270.96 | 7841.41 | 3387.63 | 1757.2  | 2348.85 |
| ENSMUSG000000031765 | 7_Mt1           | 1629.9  | 0.76817  | 0.0012   | 0.00419  | 1808.44 | 1985.21 | 2368.8  | 1690.66 | 822.119 | 1104.15 |
| ENSMUSG000000031766 | 3_Slc12a3       | 0.74003 | 3.01088  | 0.364    | NA       | 2.60457 | 1.83561 | 0       | 0       | 0       | 0       |
| ENSMUSG000000031767 | 13_Nudt7        | 530.914 | -0.38253 | 0.00669  | 0.01799  | 465.349 | 471.752 | 445.792 | 563.553 | 661.64  | 577.399 |

|                     |                     |         |          |          |          |         |         |         |         |         |         |
|---------------------|---------------------|---------|----------|----------|----------|---------|---------|---------|---------|---------|---------|
| ENSMUSG000000031770 | 15_Herpud1          | 1483.1  | 0.3045   | 0.02436  | 0.0535   | 1496.76 | 1790.64 | 1629    | 1408.43 | 1177.14 | 1396.65 |
| ENSMUSG000000031772 | 17_Cntnap4          | 139.114 | -1.24274 | 0.00096  | 0.00347  | 85.0825 | 123.904 | 38.2449 | 221.815 | 218.753 | 146.882 |
| ENSMUSG000000031774 | 7_Fam192a           | 878.275 | 0.16972  | 0.21132  | 0.31458  | 929.83  | 837.956 | 1021.86 | 818.73  | 779.982 | 881.294 |
| ENSMUSG000000031775 | 4_Plp               | 1459    | 0.64036  | 1.76E-06 | 1.50E-05 | 1695.57 | 1755.76 | 1881.17 | 1240.72 | 987.977 | 1192.79 |
| ENSMUSG000000031776 | 16_Arl2bp           | 2198.26 | 0.00157  | 0.98752  | 0.99122  | 2217.35 | 2126.56 | 2255.26 | 2270.44 | 2153.47 | 2166.51 |
| ENSMUSG000000031778 | 12_Cx3cl1           | 894.964 | 0.70951  | 0.00076  | 0.00283  | 1060.06 | 1172.04 | 1098.35 | 740.284 | 460.817 | 838.242 |
| ENSMUSG000000031779 | 3_Ccl22             | 7.23489 | 1.60057  | 0.06859  | 0.12646  | 9.55007 | 10.0959 | 13.1467 | 2.70506 | 5.37918 | 2.53245 |
| ENSMUSG000000031780 | 1_Ccl17             | 3.8877  | -1.26089 | 0.2872   | 0.4006   | 0.86819 | 3.67122 | 2.39031 | 8.11517 | 4.48265 | 3.79868 |
| ENSMUSG000000031781 | 13_Ciapi1           | 1136.06 | 0.43569  | 0.00061  | 0.00236  | 1289.26 | 1259.23 | 1370.84 | 1052.27 | 872.324 | 972.462 |
| ENSMUSG000000031782 | 14_Coq9             | 768.099 | 0.01419  | 0.92773  | 0.95202  | 765.742 | 784.724 | 766.094 | 913.407 | 688.535 | 690.094 |
| ENSMUSG000000031783 | 9_Polr2c            | 892.591 | 0.18869  | 0.19484  | 0.29503  | 897.707 | 972.874 | 982.417 | 946.77  | 722.604 | 833.177 |
| ENSMUSG000000031785 | 15_Adgrg1           | 614.173 | 1.05403  | 1.20E-07 | 1.47E-06 | 752.719 | 832.45  | 899.951 | 376.003 | 311.096 | 512.822 |
| ENSMUSG000000031786 | 6_Drc7              | 0.74239 | -1.78004 | 0.60641  | NA       | 0.86819 | 0       | 0       | 0       | 3.58612 | 0       |
| ENSMUSG000000031787 | 7_Katnb1            | 323.069 | 1.12408  | 1.86E-07 | 2.15E-06 | 388.948 | 444.218 | 495.989 | 250.669 | 155.996 | 202.596 |
| ENSMUSG000000031788 | 13_Kifc3            | 1800.16 | 1.37871  | 1.13E-09 | 2.62E-08 | 2226.9  | 2571.69 | 3002.23 | 1271.38 | 656.26  | 1072.49 |
| ENSMUSG000000031789 | 16_Cngb1            | 156.581 | -1.81937 | 0.02486  | 0.0544   | 98.9735 | 80.7669 | 27.4885 | 455.351 | 188.271 | 88.6359 |
| ENSMUSG000000031790 | 7_Mmp15             | 698.639 | 1.28352  | 3.17E-12 | 1.48E-10 | 892.498 | 959.107 | 1118.66 | 439.121 | 316.475 | 465.972 |
| ENSMUSG000000031791 | 7_Tmem38a           | 489.163 | -0.69173 | 0.00664  | 0.01788  | 358.562 | 427.697 | 335.838 | 841.273 | 404.335 | 567.27  |
| ENSMUSG000000031792 | 14_Usb1             | 488.963 | 0.59769  | 0.00151  | 0.00512  | 626.832 | 510.3   | 629.846 | 468.876 | 321.854 | 376.069 |
| ENSMUSG000000031796 | 6_Cfap20            | 694.647 | -0.16654 | 0.17419  | 0.26983  | 659.823 | 627.779 | 676.457 | 709.626 | 752.189 | 742.009 |
| ENSMUSG000000031799 | 9_Tpm4              | 6691.29 | -0.08408 | 0.5727   | 0.67717  | 6895.15 | 5817.05 | 6776.52 | 5649.06 | 7710.16 | 7299.8  |
| ENSMUSG000000031802 | 8_Phrx4             | 0.15028 | -0.99647 | 0.80707  | NA       | 0       | 0       | 0       | 0.90169 | 0       | 0       |
| ENSMUSG000000031803 | 7_B3gnt3            | 69.3127 | 1.12355  | 0.00456  | 0.01307  | 90.2916 | 77.0957 | 117.125 | 22.5421 | 49.3092 | 59.5127 |
| ENSMUSG000000031805 | 17_Jak3             | 509.787 | 1.60519  | 2.88E-15 | 2.84E-13 | 695.419 | 738.833 | 866.487 | 271.407 | 186.478 | 300.096 |
| ENSMUSG000000031807 | 10_Pgls             | 707.879 | 1.31527  | 2.99E-07 | 3.23E-06 | 870.793 | 1006.83 | 1152.13 | 545.52  | 246.546 | 425.452 |
| ENSMUSG000000031808 | 6_Slc27a1           | 541.939 | 1.04101  | 0.00015  | 0.00072  | 632.041 | 787.477 | 768.484 | 484.205 | 200.823 | 378.602 |
| ENSMUSG000000031809 | 10_1700018B08Rik    | 0.1447  | 0.92709  | 0.82027  | NA       | 0.86819 | 0       | 0       | 0       | 0       | 0       |
| ENSMUSG000000031812 | 16_Map1lc3b         | 3555.33 | 0.29635  | 0.01393  | 0.03337  | 3760.12 | 4019.07 | 3978.67 | 3534.61 | 2847.38 | 3192.16 |
| ENSMUSG000000031813 | 7_Mvb12a            | 770.574 | 1.04708  | 1.89E-06 | 1.59E-05 | 945.457 | 1027.02 | 1143.76 | 669.952 | 358.612 | 478.634 |
| ENSMUSG000000031816 | 14_Mthfsd           | 756.696 | 0.5909   | 5.59E-05 | 0.0003   | 870.793 | 911.381 | 946.562 | 678.969 | 520.884 | 611.588 |
| ENSMUSG000000031818 | 12_Cox4i1           | 4605.34 | 0.34301  | 0.05157  | 0.09946  | 4882.69 | 5359.07 | 5209.68 | 5178.38 | 3193.44 | 3808.81 |
| ENSMUSG000000031819 | 13_Emc8             | 1068.59 | -0.11769 | 0.33107  | 0.44763  | 1027.07 | 1055.48 | 991.978 | 1192.03 | 1025.63 | 1119.34 |
| ENSMUSG000000031820 | 8_Babam1            | 1019.62 | 0.80508  | 1.03E-07 | 1.29E-06 | 1247.59 | 1232.61 | 1411.48 | 856.601 | 640.123 | 729.347 |
| ENSMUSG000000031821 | 11_Gins2            | 700.26  | 0.95077  | 1.47E-06 | 1.28E-05 | 894.234 | 827.861 | 1048.15 | 609.539 | 389.991 | 431.783 |
| ENSMUSG000000031822 | 18_Gse1             | 398.88  | 1.19885  | 1.81E-06 | 1.54E-05 | 495.736 | 492.862 | 678.848 | 316.492 | 164.962 | 244.382 |
| ENSMUSG000000031823 | 13_Zdhhc7           | 500.174 | 0.71418  | 0.00019  | 0.00089  | 565.191 | 635.121 | 665.701 | 477.893 | 331.716 | 325.42  |
| ENSMUSG000000031824 | 14_6430548M08Rik    | 1812.81 | 0.51072  | 9.61E-05 | 0.00048  | 1984.68 | 2155.01 | 2251.67 | 1641.07 | 1316.11 | 1528.34 |
| ENSMUSG000000031825 | 16_Crispld2         | 1441.51 | -0.2505  | 0.1467   | 0.23461  | 1199.84 | 1646.54 | 1103.13 | 1698.78 | 1535.76 | 1465.02 |
| ENSMUSG000000031826 | 19_Uspl10           | 1919.13 | 0.62591  | 1.06E-05 | 7.16E-05 | 2107.96 | 2400.98 | 2476.36 | 1374.17 | 1406.66 | 1748.66 |
| ENSMUSG000000031827 | 12_Cotl1            | 3432.34 | 1.17298  | 8.61E-10 | 2.08E-08 | 4400.85 | 4451.36 | 5414.05 | 2494.06 | 1517.83 | 2315.93 |
| ENSMUSG000000031828 | 8_Klhl36            | 142.377 | 1.1857   | 0.00014  | 0.00068  | 184.924 | 202.835 | 205.567 | 120.826 | 50.2057 | 89.9021 |
| ENSMUSG000000031831 | 6_Dnaaf1            | 3.53156 | 0.82447  | 0.56086  | 0.66647  | 6.07732 | 2.75342 | 4.78062 | 6.3118  | 0       | 1.26623 |
| ENSMUSG000000031832 | 14_Taf1c            | 289.312 | 1.56316  | 5.44E-09 | 1.01E-07 | 355.089 | 433.204 | 509.136 | 199.272 | 98.6184 | 140.551 |
| ENSMUSG000000031833 | 9_Mast3             | 329.517 | 1.05818  | 5.14E-09 | 9.62E-08 | 464.481 | 431.369 | 439.817 | 250.669 | 179.306 | 211.46  |
| ENSMUSG000000031834 | 15_Pik3r2           | 1246.19 | 1.05385  | 8.59E-07 | 8.03E-06 | 1521.07 | 1686.93 | 1838.15 | 1018    | 546.884 | 866.099 |
| ENSMUSG000000031835 | 15_Mbtsp1           | 4137.59 | 0.26964  | 0.02808  | 0.06016  | 4241.97 | 4662.45 | 4664.69 | 4051.27 | 3300.13 | 3905.04 |
| ENSMUSG000000031837 | 13_Necab2           | 218.673 | -0.73308 | 0.06514  | 0.12099  | 114.601 | 275.342 | 102.783 | 408.464 | 219.65  | 191.2   |
| ENSMUSG000000031838 | ENSMUSG000000031838 | 697.445 | 0.64752  | 3.05E-05 | 0.00018  | 874.266 | 830.614 | 847.364 | 553.635 | 454.541 | 624.25  |
| ENSMUSG000000031839 | 6_Hsbp1             | 2382.68 | -0.28794 | 0.00241  | 0.00762  | 2138.35 | 2176.12 | 2122.59 | 2646.45 | 2614.28 | 2598.3  |
| ENSMUSG000000031840 | 12_Rab3a            | 213.68  | -0.26463 | 0.36288  | 0.48006  | 186.661 | 240.465 | 155.37  | 332.722 | 181.996 | 184.869 |
| ENSMUSG000000031841 | 18_Cdh13            | 344.25  | 0.11697  | 0.52135  | 0.63101  | 332.516 | 332.246 | 409.938 | 347.149 | 281.511 | 362.141 |
| ENSMUSG000000031842 | 13_Pde4c            | 13.4235 | 0.49112  | 0.48637  | 0.59832  | 10.4183 | 12.8493 | 23.9031 | 15.3287 | 5.37918 | 12.6623 |
| ENSMUSG000000031843 | 1_Mphosph6          | 704.393 | -0.23074 | 0.18925  | 0.28845  | 679.792 | 593.82  | 670.481 | 596.014 | 860.669 | 825.58  |
| ENSMUSG000000031844 | 7_Hsd17b2           | 2442.35 | 0.36419  | 0.00699  | 0.01869  | 2796.43 | 2546.91 | 2901.83 | 2051.33 | 1908.71 | 2448.88 |
| ENSMUSG000000031845 | 15_Bco1             | 151.732 | -0.13979 | 0.49533  | 0.60644  | 137.174 | 143.178 | 152.98  | 145.171 | 168.548 | 163.343 |
| ENSMUSG000000031847 | 7_1700030J22Rik     | 38.7395 | -0.21222 | 0.57386  | 0.67826  | 41.673  | 31.2054 | 34.6595 | 45.986  | 35.8612 | 43.0517 |
| ENSMUSG000000031848 | 14_Lsm4             | 378.974 | 1.04619  | 5.23E-06 | 3.86E-05 | 460.14  | 475.423 | 596.382 | 302.065 | 173.927 | 265.908 |
| ENSMUSG000000031849 | 8_Comp              | 86.1837 | 0.46313  | 0.15128  | 0.24077  | 73.796  | 114.726 | 111.149 | 85.6601 | 51.9988 | 79.7723 |
| ENSMUSG000000031851 | 14_Ntpcr            | 392.949 | 0.24143  | 0.12576  | 0.20718  | 421.94  | 403.834 | 450.573 | 334.542 | 332.613 | 405.193 |
| ENSMUSG000000031853 | 4_BC021891          | 211.325 | 0.20454  | 0.26801  | 0.37944  | 221.388 | 225.78  | 231.86  | 217.306 | 176.617 | 194.999 |
| ENSMUSG000000031858 | 15_Mau2             | 2451.41 | 0.34054  | 0.00248  | 0.0078   | 2682.7  | 2721.29 | 2814.59 | 2343.48 | 1984.92 | 2161.45 |
| ENSMUSG000000031860 | 17_Pbx4             | 10.1884 | -0.46532 | 0.56124  | 0.66678  | 5.20913 | 11.0137 | 9.56123 | 19.8371 | 5.37918 | 10.1298 |
| ENSMUSG000000031861 | 15_Lpar2            | 421.603 | 0.63541  | 0.00026  | 0.00114  | 530.463 | 467.163 | 540.21  | 342.64  | 274.338 | 374.803 |
| ENSMUSG000000031862 | 10_Atp13a1          | 1053.24 | 1.26078  | 2.07E-17 | 2.74E-15 | 1369.13 | 1453.8  | 1634.97 | 654.624 | 530.746 | 676.165 |
| ENSMUSG000000031864 | 15_Ints10           | 1529.85 | 0.07818  | 0.54752  | 0.65396  | 1475.05 | 1596.98 | 1640.95 | 1317.36 | 1511.55 | 1637.23 |
| ENSMUSG000000031865 | 15_Dctn1            | 2885.58 | 1.22901  | 4.33E-10 | 1.15E-08 | 3425.87 | 4168.67 | 4541.59 | 2122.57 | 1260.52 | 1794.24 |
| ENSMUSG000000031870 | 16_Pgr              | 8.45906 | -0.53636 | 0.52222  | 0.63174  | 11.2864 | 4.58903 | 4.78062 | 15.3287 | 7.17224 | 7.59736 |
| ENSMUSG000000031871 | 8_Cdh5              | 337.049 | -0.10229 | 0.62716  | 0.72415  | 340.33  | 353.355 | 282.056 | 437.317 | 328.13  | 281.102 |
| ENSMUSG000000031872 | 13_Bean1            | 7.86491 | -1.07069 | 0.24774  | 0.35661  | 2.60457 | 10.0959 | 2.39031 | 14.427  | 6.27571 | 11.396  |
| ENSMUSG000000031875 | 6_Cmtm3             | 485.554 | -0.24882 | 0.23605  | 0.34299  | 483.581 | 480.93  | 366.912 | 669.051 | 482.333 | 430.517 |
| ENSMUSG000000031876 | 16_Cmtm1            | 0.60918 | 1.35827  | 0.71243  | NA       | 0       | 2.75342 | 0       | 0.90169 | 0       | 0       |
| ENSMUSG000000031877 | 8_Ces2g             | 4367.83 | 0.42157  | 0.0121   | 0.02967  | 5006.84 | 4716.6  | 5279    | 2923.26 | 3693.71 | 4587.54 |
| ENSMUSG000000031878 | 17_Nae1             | 1364.78 | -0.4462  | 0.00318  | 0.00966  | 1141.67 | 1144.5  | 1179.62 | 1278.59 | 1765.27 | 1679.02 |
| ENSMUSG000000031879 | 13_Fam96b           | 333.939 | 0.65959  | 0.00272  | 0.00844  | 407.18  | 379.054 | 441.012 | 330.017 | 191.858 | 254.512 |
| ENSMUSG000000031880 | 6_Rrad              | 22.4398 | -0.20877 | 0.71789  | 0.79901  | 20.8365 | 11.0137 | 31.074  | 34.264  | 19.7237 | 17.7272 |
| ENSMUSG000000031881 | 5_Cdh16             | 0.48859 | 2.39711  | 0.53861  | NA       | 1.73638 | 0       | 1.19515 | 0       | 0       | 0       |
| ENSMUSG000000031883 | 12_Car7             | 21.0922 | 0.26734  | 0.62065  | 0.71864  | 27.782  | 24.7808 | 16.7322 | 24.3455 | 21.5167 | 11.396  |
| ENSMUSG000000031884 | 9_Ces2d-ps          | 8.01513 | -0.06363 | 0.95356  | 0.96979  | 10.4183 | 0       | 13.1467 | 9.01685 | 5.37918 | 10.1298 |
| ENSMUSG000000031885 | 13_Cbfb             | 1575.56 | -0.11812 | 0.40334  | 0.52073  | 1515.86 | 1358.35 | 1658.87 | 1436.38 | 1684.58 | 1799.31 |

|                     |                  |         |          |          |          |         |         |         |         |         |         |
|---------------------|------------------|---------|----------|----------|----------|---------|---------|---------|---------|---------|---------|
| ENSMUSG000000031886 | 13_Ces2e         | 390.712 | 0.22564  | 0.20097  | 0.30205  | 451.458 | 412.095 | 397.986 | 325.508 | 325.441 | 431.783 |
| ENSMUSG000000031887 | 13_Tradd         | 459.455 | 0.93057  | 2.77E-05 | 0.00016  | 547.827 | 517.642 | 742.191 | 343.542 | 235.788 | 369.738 |
| ENSMUSG000000031889 | 9_D230025D16Rik  | 553.951 | 0.11466  | 0.3966   | 0.51412  | 619.887 | 565.368 | 541.405 | 532.896 | 514.609 | 549.542 |
| ENSMUSG000000031891 | 5_Hsd11b2        | 3.0808  | 0.91249  | 0.50385  | 0.6146   | 5.20913 | 4.58903 | 2.39031 | 3.60674 | 2.68959 | 0       |
| ENSMUSG000000031893 | 6_Tsnaxip1       | 1.40309 | -1.07474 | 0.56741  | NA       | 1.73638 | 0.91781 | 0       | 2.70506 | 1.79306 | 1.26623 |
| ENSMUSG000000031896 | 6_Ctrl           | 6.59476 | 2.4063   | 0.01707  | 0.0397   | 9.55007 | 9.17806 | 14.3418 | 1.80337 | 0.89653 | 3.79868 |
| ENSMUSG000000031897 | 8_Psmb10         | 1191.39 | 2.35983  | 2.54E-20 | 4.84E-18 | 1831.88 | 1591.47 | 2560.02 | 532.896 | 263.58  | 368.472 |
| ENSMUSG000000031898 | 8_Dpep3          | 0.4989  | -0.80902 | 0.81036  | NA       | 0       | 0       | 1.19515 | 0.90169 | 0.89653 | 0       |
| ENSMUSG000000031901 | 12_Dus2          | 302.141 | 0.0926   | 0.591    | 0.69323  | 287.37  | 334.081 | 313.13  | 285.834 | 264.477 | 327.953 |
| ENSMUSG000000031902 | 9_Nfatc3         | 2130.98 | 0.01999  | 0.87376  | 0.91447  | 2172.21 | 2088.93 | 2175.18 | 1837.64 | 2252.98 | 2258.95 |
| ENSMUSG000000031903 | 6_Pla2g15        | 383.46  | 0.19586  | 0.30737  | 0.42239  | 434.962 | 452.478 | 340.619 | 422.89  | 321.854 | 327.953 |
| ENSMUSG000000031904 | 4_Slc7a6         | 271.716 | -0.67385 | 0.00435  | 0.01253  | 218.783 | 256.986 | 151.785 | 329.115 | 389.991 | 283.635 |
| ENSMUSG000000031906 | 8_Smpd3          | 22.5192 | -0.69847 | 0.22078  | 0.32566  | 19.9683 | 18.3561 | 13.1467 | 45.0843 | 17.0341 | 21.5259 |
| ENSMUSG000000031907 | 8_Zfp90          | 268.31  | -0.29195 | 0.0698   | 0.12824  | 253.511 | 236.794 | 233.055 | 298.458 | 290.476 | 297.563 |
| ENSMUSG000000031910 | 14_Has3          | 109.683 | -0.06105 | 0.84096  | 0.89188  | 120.678 | 94.534  | 107.564 | 99.1854 | 155.1   | 81.0385 |
| ENSMUSG000000031913 | 9_Vps4a          | 1251.14 | -0.06838 | 0.57949  | 0.6832   | 1139.93 | 1217.93 | 1307.5  | 1186.62 | 1358.24 | 1296.62 |
| ENSMUSG000000031916 | 17_Cog8          | 806.787 | 0.12542  | 0.32321  | 0.43918  | 768.347 | 858.148 | 899.951 | 756.514 | 785.361 | 772.398 |
| ENSMUSG000000031917 | 11_Nip7          | 607.467 | -0.26771 | 0.06355  | 0.11849  | 612.073 | 484.601 | 556.942 | 668.149 | 654.467 | 668.568 |
| ENSMUSG000000031918 | 16_Mtmmr2        | 1399.86 | -0.18824 | 0.14734  | 0.23542  | 1331.8  | 1310.63 | 1283.6  | 1332.69 | 1679.2  | 1461.23 |
| ENSMUSG000000031921 | 17_Terf2         | 596.681 | 0.13315  | 0.30525  | 0.42019  | 614.677 | 623.19  | 634.627 | 596.916 | 530.746 | 579.932 |
| ENSMUSG000000031922 | 12_Cep57         | 822.794 | -0.37882 | 0.02586  | 0.05622  | 765.742 | 604.834 | 775.655 | 776.351 | 1026.53 | 987.657 |
| ENSMUSG000000031924 | 3_Cyb5b          | 4835.1  | -0.01868 | 0.85616  | 0.90263  | 4779.38 | 4573.43 | 5059.09 | 4588.68 | 5043.88 | 4966.14 |
| ENSMUSG000000031925 | 16_Maml2         | 1030.94 | -0.25647 | 0.07219  | 0.13177  | 946.325 | 856.313 | 1015.88 | 980.132 | 1172.66 | 1214.31 |
| ENSMUSG000000031927 | 9_1700012B09Rik  | 0       | NA       | NA       | NA       | 0       | 0       | 0       | 0       | 0       | 0       |
| ENSMUSG000000031928 | 14_Mre11a        | 821.951 | -0.01064 | 0.94689  | 0.96537  | 842.143 | 770.957 | 842.584 | 671.756 | 872.324 | 931.943 |
| ENSMUSG000000031930 | 10_Wwp2          | 1991.41 | -0.71973 | 2.98E-06 | 2.37E-05 | 2279.86 | 2447.79 | 2705.83 | 1623.94 | 1624.66 | 1666.35 |
| ENSMUSG000000031931 | 3_Ankrd49        | 466.696 | -0.3069  | 0.07128  | 0.13045  | 432.358 | 404.752 | 413.523 | 421.989 | 545.091 | 582.464 |
| ENSMUSG000000031932 | 14_Gpr83         | 8.0172  | -0.47176 | 0.56098  | 0.66652  | 7.8137  | 6.42464 | 5.97577 | 7.21348 | 14.3445 | 6.33113 |
| ENSMUSG000000031933 | 17_Izumo1r       | 0.6534  | 1.31976  | 0.66692  | NA       | 1.73638 | 0.91781 | 0       | 0       | 0       | 1.26623 |
| ENSMUSG000000031934 | 13_Panx1         | 324.702 | 0.27834  | 0.19039  | 0.2897   | 332.516 | 291.862 | 443.402 | 267.801 | 270.752 | 341.881 |
| ENSMUSG000000031935 | 8_Med17          | 801.388 | -0.12206 | 0.36481  | 0.48212  | 775.292 | 741.587 | 785.216 | 738.48  | 890.255 | 877.495 |
| ENSMUSG000000031936 | 9_Heph11         | 263.811 | 0.06234  | 0.76641  | 0.83586  | 291.711 | 247.808 | 267.715 | 202.879 | 259.994 | 312.758 |
| ENSMUSG000000031937 | 6_Vstm5          | 182.919 | 0.2695   | 0.15156  | 0.24111  | 203.156 | 186.315 | 210.347 | 165.008 | 160.479 | 172.207 |
| ENSMUSG000000031938 | 14_4931406C07Rik | 1111.58 | -0.4915  | 0.00027  | 0.00117  | 908.125 | 969.203 | 893.975 | 1133.42 | 1411.14 | 1353.6  |
| ENSMUSG000000031939 | 15_Taf1d         | 372.49  | -0.28449 | 0.16693  | 0.2608   | 341.198 | 313.89  | 352.57  | 306.573 | 493.988 | 426.718 |
| ENSMUSG000000031948 | 13_Kars          | 2115.27 | 0.5356   | 6.12E-05 | 0.00032  | 2383.18 | 2307.36 | 2819.37 | 1623.94 | 1655.89 | 1901.87 |
| ENSMUSG000000031949 | 17_Adat1         | 178.066 | -0.1079  | 0.56639  | 0.67154  | 182.32  | 163.369 | 168.517 | 184.846 | 188.271 | 181.07  |
| ENSMUSG000000031950 | 7_Gabarapl2      | 2496.7  | -0.33106 | 0.00104  | 0.0037   | 2239.06 | 2196.31 | 2197.89 | 2640.14 | 2794.49 | 2912.32 |
| ENSMUSG000000031951 | 7_Tmem231        | 162.309 | -0.28276 | 0.21267  | 0.31613  | 115.469 | 167.958 | 156.565 | 191.157 | 173.03  | 169.674 |
| ENSMUSG000000031952 | 4_Chst5          | 403.271 | -0.78731 | 0.00534  | 0.01487  | 316.021 | 401.999 | 168.517 | 605.933 | 459.92  | 467.238 |
| ENSMUSG000000031953 | 1_Tmem170        | 191.689 | -0.14228 | 0.44951  | 0.5643   | 176.242 | 174.383 | 196.005 | 192.961 | 192.754 | 217.791 |
| ENSMUSG000000031954 | 5_Cfdp1          | 2149.93 | -0.33812 | 0.00517  | 0.0145   | 1900.46 | 1790.64 | 2006.66 | 2161.34 | 2564.97 | 2475.47 |
| ENSMUSG000000031955 | 9_Bcar1          | 884.216 | 1.03648  | 5.18E-06 | 3.83E-05 | 1080.89 | 1160.11 | 1325.43 | 742.087 | 380.129 | 616.653 |
| ENSMUSG000000031958 | 16_Ldhd          | 183.15  | -0.09818 | 0.7206   | 0.80119  | 162.351 | 198.246 | 170.907 | 265.997 | 159.582 | 141.817 |
| ENSMUSG000000031959 | 14_Wdr59         | 613.718 | 0.22881  | 0.08765  | 0.15422  | 680.66  | 610.341 | 695.58  | 540.11  | 563.021 | 592.594 |
| ENSMUSG000000031960 | 14_Aars          | 2427.88 | 0.65131  | 2.10E-06 | 1.75E-05 | 2753.89 | 2794.72 | 3352.41 | 2040.51 | 1678.31 | 1947.46 |
| ENSMUSG000000031962 | 5_Cdh15          | 4.26683 | -0.58126 | 0.61305  | 0.71248  | 1.73638 | 2.75342 | 5.97577 | 9.01685 | 3.58612 | 2.53245 |
| ENSMUSG000000031963 | 7_Bmper          | 277.718 | -0.42739 | 0.01831  | 0.04204  | 224.861 | 277.177 | 207.957 | 313.787 | 327.234 | 315.291 |
| ENSMUSG000000031965 | 14_Tbx20         | 302.084 | -1.99183 | 7.17E-10 | 1.78E-08 | 115.469 | 180.808 | 66.9286 | 523.879 | 574.676 | 350.745 |
| ENSMUSG000000031966 | 6_Glb1l3         | 1.56185 | -4.12047 | 0.07081  | NA       | 0       | 0       | 0       | 6.3118  | 1.79306 | 1.26623 |
| ENSMUSG000000031967 | 15_Afg3l1        | 1322.03 | 0.59648  | 1.93E-05 | 0.00012  | 1530.62 | 1546.5  | 1695.92 | 1054.07 | 913.565 | 1161.52 |
| ENSMUSG000000031969 | 15_Acad8         | 895.451 | -0.22441 | 0.05673  | 0.10766  | 843.011 | 833.367 | 801.948 | 995.461 | 989.77  | 909.151 |
| ENSMUSG000000031970 | 16_Dbndd1        | 50.6765 | -0.05386 | 0.87571  | 0.91592  | 59.905  | 40.3834 | 49.0013 | 58.6096 | 49.3092 | 46.8504 |
| ENSMUSG000000031971 | 15_Ccsap         | 43.654  | -0.04925 | 0.90641  | 0.93694  | 48.6186 | 29.3698 | 51.3916 | 55.9045 | 47.5161 | 29.1232 |
| ENSMUSG000000031972 | 4_Acta1          | 991.168 | -0.79996 | 0.25375  | 0.36315  | 494.867 | 1114.22 | 560.527 | 2298.4  | 506.54  | 972.462 |
| ENSMUSG000000031974 | 8_Abcb10         | 302.096 | 0.04157  | 0.79072  | 0.8549   | 325.571 | 302.876 | 290.422 | 304.77  | 291.372 | 297.563 |
| ENSMUSG000000031976 | 14_Urb2          | 637.453 | 0.49046  | 0.0018   | 0.00595  | 688.473 | 712.217 | 833.022 | 468.876 | 524.47  | 597.659 |
| ENSMUSG000000031979 | 17_Cog2          | 921.245 | 0.37912  | 0.00818  | 0.02137  | 1011.44 | 1021.52 | 1091.18 | 859.306 | 680.467 | 863.567 |
| ENSMUSG000000031980 | 9_Agt            | 4.35317 | -0.28593 | 0.8042   | 0.86457  | 4.34094 | 2.75342 | 4.78062 | 9.91854 | 1.79306 | 2.53245 |
| ENSMUSG000000031981 | 7_Capn9          | 1.92854 | 0.27052  | 0.87448  | NA       | 0       | 2.75342 | 3.58546 | 1.80337 | 0.89653 | 2.53245 |
| ENSMUSG000000031982 | 4_Arv1           | 58.9302 | -0.06543 | 0.83337  | 0.886    | 52.0913 | 66.9998 | 53.7819 | 65.823  | 59.171  | 55.714  |
| ENSMUSG000000031983 | 6_2310022B05Rik  | 2842.5  | 0.75781  | 1.26E-07 | 1.53E-06 | 3273.07 | 3437.18 | 4006.16 | 2201.92 | 1811.89 | 2324.79 |
| ENSMUSG000000031984 | 7_2810004N23Rik  | 393.313 | 0.15451  | 0.37643  | 0.49393  | 382.003 | 372.629 | 488.818 | 364.281 | 346.957 | 405.193 |
| ENSMUSG000000031985 | 9_Gnpat          | 1031.87 | 0.00993  | 0.93246  | 0.95531  | 1046.17 | 1039.87 | 1020.66 | 1105.47 | 988.873 | 990.189 |
| ENSMUSG000000031986 | 5_Sprtn          | 344.161 | 0.49189  | 0.00939  | 0.02395  | 387.212 | 363.451 | 456.549 | 326.41  | 237.581 | 293.765 |
| ENSMUSG000000031987 | 5_Eglm1          | 1460.07 | 0.1446   | 0.24038  | 0.34803  | 1471.58 | 1583.21 | 1542.94 | 1320.97 | 1298.18 | 1543.53 |
| ENSMUSG000000031988 | 9_Vps26b         | 1714.8  | -0.10914 | 0.30933  | 0.42422  | 1638.27 | 1649.3  | 1661.26 | 1674.43 | 1781.41 | 1884.15 |
| ENSMUSG000000031990 | 14_Jam3          | 378.057 | -1.09826 | 1.14E-05 | 7.63E-05 | 209.233 | 320.314 | 192.42  | 654.624 | 475.161 | 416.589 |
| ENSMUSG000000031993 | 6_Snx19          | 1281.86 | -0.0566  | 0.60764  | 0.70754  | 1205.05 | 1245.46 | 1320.65 | 1272.28 | 1344.8  | 1302.95 |
| ENSMUSG000000031994 | 13_Adamts8       | 12.8094 | 0.22229  | 0.75428  | 0.82693  | 19.1001 | 5.50683 | 16.7322 | 12.6236 | 8.96531 | 13.9285 |
| ENSMUSG000000031995 | 8_St14           | 3537.45 | 1.34628  | 5.50E-10 | 1.40E-08 | 4452.07 | 4763.41 | 6016.41 | 2139.7  | 1351.07 | 2502.06 |
| ENSMUSG000000031996 | 16_Aplp2         | 17376.5 | -0.06063 | 0.54392  | 0.65066  | 16289.8 | 17730.2 | 17013   | 17864.2 | 16664.7 | 18697.1 |
| ENSMUSG000000031997 | 8_Tpcc6          | 5.10007 | -1.01618 | 0.35068  | 0.46742  | 5.20913 | 3.67122 | 1.19515 | 10.8202 | 7.17224 | 2.53245 |
| ENSMUSG000000032000 | 17_Birc3         | 956.415 | 0.2406   | 0.13755  | 0.22244  | 1074.82 | 865.491 | 1167.67 | 767.334 | 919.84  | 943.339 |
| ENSMUSG000000032002 | 9_Dcun1d5        | 1033.92 | -0.37236 | 0.00984  | 0.02491  | 983.657 | 870.08  | 848.559 | 1007.18 | 1256.94 | 1237.1  |
| ENSMUSG000000032006 | 14_Pdgfd         | 231.008 | -1.3266  | 2.95E-07 | 3.20E-06 | 132.833 | 152.356 | 109.954 | 412.07  | 349.647 | 229.187 |
| ENSMUSG000000032009 | 7_Sesn3          | 926.371 | -0.64765 | 6.10E-06 | 4.41E-05 | 730.146 | 804.915 | 629.846 | 1186.62 | 1164.59 | 1042.1  |
| ENSMUSG000000032010 | 14_Usp2          | 469.168 | 0.02209  | 0.88627  | 0.92311  | 453.194 | 456.149 | 510.331 | 523.879 | 438.403 | 433.05  |
| ENSMUSG000000032011 | 4_Thy1           | 639.262 | 0.73877  | 0.00099  | 0.00353  | 962.821 | 648.889 | 786.411 | 599.621 | 354.13  | 483.699 |

|                    |                 |         |          |          |          |         |         |         |         |         |         |
|--------------------|-----------------|---------|----------|----------|----------|---------|---------|---------|---------|---------|---------|
| ENSMUSG00000032012 | 7_Pvrl1         | 3053.93 | 0.98141  | 4.10E-08 | 5.75E-07 | 3577.8  | 3933.71 | 4650.34 | 2145.11 | 1584.17 | 2432.42 |
| ENSMUSG00000032013 | 5_Trim29        | 21320.9 | 1.01682  | 5.48E-09 | 1.02E-07 | 25721.8 | 27528.7 | 32362.4 | 14649.7 | 10822   | 16840.8 |
| ENSMUSG00000032014 | 5_Oaf           | 334.709 | 0.10925  | 0.64597  | 0.74094  | 335.121 | 425.862 | 280.861 | 412.07  | 255.511 | 298.83  |
| ENSMUSG00000032015 | 15_Pou2f3       | 154.418 | 0.0123   | 0.95609  | 0.9714   | 132.833 | 161.534 | 170.907 | 162.303 | 131.79  | 167.142 |
| ENSMUSG00000032017 | 14_Grik4        | 10.6092 | 0.002    | 0.99797  | 0.99846  | 15.6274 | 9.17806 | 7.17092 | 15.3287 | 12.5514 | 3.79868 |
| ENSMUSG00000032018 | 13_Sc5d         | 3912.13 | 0.00296  | 0.98385  | 0.98922  | 4075.28 | 3514.28 | 4157.94 | 3260.49 | 4089.97 | 4374.81 |
| ENSMUSG00000032020 | 15_Ubash3b      | 79.7726 | -0.12139 | 0.68779  | 0.77517  | 86.8188 | 60.5752 | 82.4656 | 99.1854 | 82.4808 | 67.11   |
| ENSMUSG00000032021 | 13_Crtam        | 2.83852 | 0.00103  | 0.99937  | 0.99938  | 4.34094 | 1.83561 | 2.39031 | 4.50843 | 2.68959 | 1.26623 |
| ENSMUSG00000032023 | 7_4931429111Rik | 4.30998 | 0.01157  | 0.99116  | 0.99411  | 4.34094 | 2.75342 | 5.97577 | 4.50843 | 4.48265 | 3.79868 |
| ENSMUSG00000032024 | 10_Clmp         | 753.938 | -0.93386 | 8.88E-06 | 6.10E-05 | 500.077 | 675.505 | 377.669 | 1025.22 | 1058.8  | 886.359 |
| ENSMUSG00000032026 | 6_Rexo2         | 835.358 | -0.22285 | 0.05216  | 0.10042  | 784.842 | 758.107 | 769.679 | 875.537 | 913.565 | 910.417 |
| ENSMUSG00000032028 | 15_Nxpe2        | 4.42224 | -1.90314 | 0.13238  | 0.21592  | 0.86819 | 4.58903 | 0       | 5.41011 | 8.06878 | 7.59736 |
| ENSMUSG00000032030 | 16_Cul5         | 985.963 | -0.45943 | 0.00048  | 0.00192  | 865.584 | 756.272 | 870.072 | 1091.04 | 1242.59 | 1090.22 |
| ENSMUSG00000032033 | 11_Barx2        | 515.056 | 1.35599  | 4.54E-11 | 1.62E-09 | 729.278 | 667.245 | 823.461 | 235.34  | 256.408 | 378.602 |
| ENSMUSG00000032034 | 5_Kcnj5         | 5.74145 | -2.08688 | 0.11101  | 0.18746  | 2.60457 | 2.75342 | 1.19515 | 18.0337 | 9.86184 | 0       |
| ENSMUSG00000032035 | 15_Ets1         | 520.458 | -0.06041 | 0.704    | 0.78836  | 518.308 | 456.149 | 555.747 | 598.719 | 510.126 | 483.699 |
| ENSMUSG00000032036 | 15_Kirrel3      | 41.1981 | -1.0632  | 0.09128  | 0.15951  | 12.1546 | 56.9039 | 10.7564 | 77.545  | 49.3092 | 40.5193 |
| ENSMUSG00000032038 | 6_St3ga14       | 727.22  | 0.05843  | 0.67769  | 0.76678  | 805.679 | 712.217 | 708.726 | 764.629 | 735.155 | 636.912 |
| ENSMUSG00000032040 | 15_Dcps         | 815.766 | 0.18027  | 0.13682  | 0.22137  | 912.466 | 827.861 | 859.316 | 734.874 | 788.947 | 771.132 |
| ENSMUSG00000032041 | 15_Tirap        | 1367.61 | 0.35887  | 0.00887  | 0.02282  | 1438.59 | 1451.97 | 1719.83 | 1082.02 | 1210.32 | 1302.95 |
| ENSMUSG00000032042 | 11_Srpr         | 4791.89 | -0.01595 | 0.87053  | 0.91212  | 4698.64 | 4633.08 | 4964.67 | 4587.78 | 4917.47 | 4949.68 |
| ENSMUSG00000032044 | 4_Rpusd4        | 307.157 | 0.31418  | 0.04434  | 0.08771  | 325.571 | 349.684 | 346.595 | 289.441 | 264.477 | 267.174 |
| ENSMUSG00000032046 | 15_Abhd12       | 3011.51 | 0.33984  | 0.00159  | 0.00533  | 3271.33 | 3247.2  | 3574.71 | 2633.82 | 2524.63 | 2817.35 |
| ENSMUSG00000032047 | 5_Acat1         | 2018.18 | -0.60587 | 6.81E-08 | 9.01E-07 | 1679.94 | 1610.75 | 1510.67 | 2433.65 | 2584.7  | 2289.34 |
| ENSMUSG00000032050 | 16_Rdx          | 4359.17 | -0.25372 | 0.01336  | 0.03223  | 3905.98 | 3903.43 | 4120.89 | 4417.36 | 4847.54 | 4959.81 |
| ENSMUSG00000032051 | 8_Fdx1          | 421.403 | -0.36155 | 0.01009  | 0.02546  | 366.376 | 364.369 | 376.474 | 461.663 | 501.161 | 458.374 |
| ENSMUSG00000032053 | 7_Pou2af1       | 4.00467 | 1.00773  | 0.35833  | 0.47511  | 4.34094 | 4.58903 | 7.17092 | 2.70506 | 2.68959 | 2.53245 |
| ENSMUSG00000032056 | 9_Btg4          | 0.15297 | 0.92709  | 0.82027  | NA       | 0       | 0.91781 | 0       | 0       | 0       | 0       |
| ENSMUSG00000032057 | 8_4833427G06Rik | 0.2997  | -1.76345 | 0.66322  | NA       | 0       | 0       | 0       | 0.90169 | 0.89653 | 0       |
| ENSMUSG00000032058 | 14_Ppp2r1b      | 2007.68 | 0.29877  | 0.02363  | 0.05217  | 2198.25 | 2102.69 | 2342.5  | 1560.82 | 1857.61 | 1984.18 |
| ENSMUSG00000032059 | 13_Alg9         | 670.936 | 0.30029  | 0.03121  | 0.06564  | 756.192 | 708.546 | 755.337 | 592.407 | 543.298 | 669.834 |
| ENSMUSG00000032060 | 9_Cryab         | 7844.4  | -0.92824 | 0.09818  | 0.16951  | 4345.28 | 8266.67 | 3601    | 14393.6 | 4676.3  | 11783.5 |
| ENSMUSG00000032062 | 1_2310030G06Rik | 361.505 | -0.26712 | 0.07525  | 0.13632  | 350.748 | 323.068 | 309.545 | 390.43  | 383.715 | 411.524 |
| ENSMUSG00000032064 | 17_Dixdc1       | 225.877 | -0.95385 | 5.42E-05 | 0.00029  | 131.096 | 181.726 | 149.394 | 333.624 | 335.302 | 224.122 |
| ENSMUSG00000032065 | 5_Tex12         | 0.50602 | -1.01212 | 0.76398  | NA       | 0.86819 | 0       | 0       | 0.90169 | 0       | 1.26623 |
| ENSMUSG00000032066 | 9_Bco2          | 67.1983 | -0.19259 | 0.52438  | 0.63373  | 72.9278 | 63.3286 | 51.3916 | 78.4466 | 63.6537 | 73.4412 |
| ENSMUSG00000032067 | 5_Pts           | 1071.07 | -0.84508 | 2.10E-09 | 4.44E-08 | 806.547 | 781.053 | 709.922 | 1242.52 | 1564.45 | 1321.94 |
| ENSMUSG00000032068 | 14_Plet1        | 32390.7 | 0.27574  | 0.05055  | 0.09805  | 35423   | 33319.1 | 37686.8 | 24268   | 30579.8 | 33067.5 |
| ENSMUSG00000032076 | 18_Cadm1        | 4385.99 | -0.67993 | 1.90E-12 | 9.41E-11 | 3455.39 | 3427.09 | 3230.5  | 5590.45 | 5379.18 | 5233.32 |
| ENSMUSG00000032077 | 4_Bud13         | 264.791 | 0.49081  | 0.00934  | 0.02385  | 302.998 | 295.533 | 328.667 | 185.747 | 218.753 | 257.044 |
| ENSMUSG00000032078 | 16_Zpr1         | 728.433 | 0.27967  | 0.05764  | 0.10918  | 831.724 | 714.971 | 849.755 | 583.391 | 708.259 | 682.496 |
| ENSMUSG00000032081 | 9_Apoc3         | 0.2894  | 1.67273  | 0.67976  | NA       | 1.73638 | 0       | 0       | 0       | 0       | 0       |
| ENSMUSG00000032083 | 8_Apoa1         | 1.27484 | 3.78472  | 0.11545  | NA       | 4.34094 | 0.91781 | 2.39031 | 0       | 0       | 0       |
| ENSMUSG00000032085 | 4_Tgln          | 1980.02 | -1.09631 | 9.98E-07 | 9.15E-06 | 1071.34 | 1753.01 | 960.904 | 2922.36 | 2932.55 | 2239.96 |
| ENSMUSG00000032086 | 12_Bace1        | 1171.64 | -0.49214 | 0.0008   | 0.00297  | 909.861 | 1118.8  | 892.78  | 1467.94 | 1414.73 | 1225.71 |
| ENSMUSG00000032087 | 9_Dscam11       | 17.4805 | -1.72289 | 0.0757   | 0.13698  | 10.4183 | 9.17806 | 4.78062 | 60.4129 | 18.8271 | 1.26623 |
| ENSMUSG00000032089 | 16_Il10ra       | 186.316 | 1.92166  | 1.03E-09 | 2.41E-08 | 430.621 | 200.999 | 253.373 | 90.1685 | 80.6878 | 62.0451 |
| ENSMUSG00000032091 | 16_Tmprss4      | 4134.94 | 0.92865  | 3.95E-13 | 2.41E-11 | 5245.59 | 4855.19 | 6164.6  | 2927.77 | 2678.83 | 2937.65 |
| ENSMUSG00000032092 | 4_Mpzl2         | 6592.63 | 0.41258  | 0.01778  | 0.04104  | 7129.56 | 6889.05 | 8566.86 | 4467.85 | 5580.01 | 6922.46 |
| ENSMUSG00000032093 | 6_Cd3e          | 5.77326 | 1.75672  | 0.07345  | 0.13373  | 11.2864 | 8.26025 | 7.17092 | 1.80337 | 3.58612 | 2.53245 |
| ENSMUSG00000032094 | 7_Cd3d          | 5.57771 | 4.0309   | 0.00476  | 0.01352  | 14.7592 | 7.34244 | 9.56123 | 1.80337 | 0       | 0       |
| ENSMUSG00000032096 | 15_Arcn1        | 5836.49 | -0.21052 | 0.07996  | 0.14329  | 5571.17 | 5071.79 | 5590.93 | 5529.14 | 6700.67 | 6555.26 |
| ENSMUSG00000032097 | 9_Ddx6          | 5900.99 | -0.20141 | 0.05253  | 0.10095  | 5526.02 | 5324.19 | 5618.42 | 5807.76 | 6509.71 | 6619.83 |
| ENSMUSG00000032101 | 6_Ddx25         | 12.5822 | -2.65892 | 0.00104  | 0.0037   | 4.34094 | 4.58903 | 1.19515 | 31.559  | 22.4133 | 11.396  |
| ENSMUSG00000032103 | 10_Pus3         | 201.461 | -0.61288 | 0.0056   | 0.01549  | 175.374 | 135.835 | 167.322 | 220.913 | 294.062 | 215.259 |
| ENSMUSG00000032105 | 4_Pdzd3         | 5.47894 | 0.60479  | 0.53473  | 0.64252  | 6.94551 | 9.17806 | 3.58546 | 5.41011 | 2.68959 | 5.06491 |
| ENSMUSG00000032109 | 14_Nlr1x1       | 649.441 | 1.41376  | 2.95E-12 | 1.38E-10 | 770.951 | 884.765 | 1177.23 | 376.003 | 291.372 | 396.329 |
| ENSMUSG00000032110 | 4_Acrv1         | 0.15297 | 0.92709  | 0.82027  | NA       | 0       | 0.91781 | 0       | 0       | 0       | 0       |
| ENSMUSG00000032112 | 9_Trappc4       | 1042.14 | 0.06036  | 0.62348  | 0.72103  | 1001.89 | 1033.45 | 1158.1  | 995.461 | 1068.66 | 995.254 |
| ENSMUSG00000032113 | 15_Chek1        | 210.485 | 0.13538  | 0.6208   | 0.71877  | 257.852 | 191.821 | 210.347 | 128.941 | 223.236 | 250.713 |
| ENSMUSG00000032114 | 8_Slc37a4       | 243.129 | -0.02103 | 0.90293  | 0.93437  | 240.488 | 245.054 | 239.031 | 268.702 | 237.581 | 227.921 |
| ENSMUSG00000032115 | 13_Hyou1        | 2646.62 | 0.59032  | 1.75E-05 | 0.00011  | 2865.02 | 3213.24 | 3462.36 | 1944.94 | 1985.82 | 2408.36 |
| ENSMUSG00000032116 | 17_Stt3a        | 4089.83 | -0.29823 | 0.04556  | 0.08971  | 3821.77 | 3394.96 | 3788.64 | 3650.92 | 5039.4  | 4843.32 |
| ENSMUSG00000032118 | 15_Fez1         | 235.618 | -1.23858 | 3.61E-06 | 2.78E-05 | 143.251 | 174.383 | 102.783 | 403.955 | 348.75  | 240.583 |
| ENSMUSG00000032119 | 4_Hinfp         | 292.408 | 0.34049  | 0.03023  | 0.06386  | 325.571 | 312.972 | 341.814 | 260.587 | 250.132 | 263.375 |
| ENSMUSG00000032120 | 10_C2cd2l       | 310.839 | 0.1854   | 0.53406  | 0.64212  | 320.362 | 356.109 | 316.716 | 455.351 | 215.167 | 201.33  |
| ENSMUSG00000032121 | 8_Tmem218       | 341.302 | -0.44474 | 0.00478  | 0.01357  | 270.875 | 292.78  | 303.569 | 395.84  | 363.095 | 421.654 |
| ENSMUSG00000032122 | 14_Slc37a2      | 181.846 | -0.12088 | 0.60064  | 0.70196  | 211.838 | 161.534 | 149.394 | 212.798 | 197.237 | 158.278 |
| ENSMUSG00000032123 | 4_Dpagt1        | 645.432 | 0.5069   | 0.00058  | 0.00226  | 714.519 | 717.724 | 840.193 | 511.256 | 497.574 | 591.328 |
| ENSMUSG00000032125 | 19_Robo4        | 119.529 | 0.32823  | 0.16935  | 0.26373  | 115.469 | 138.589 | 145.809 | 119.924 | 98.6184 | 98.7657 |
| ENSMUSG00000032126 | 15_Hmbs         | 621.016 | 0.30534  | 0.02915  | 0.06199  | 696.287 | 639.71  | 723.068 | 576.177 | 502.057 | 588.796 |
| ENSMUSG00000032127 | 8_Vps11         | 1385.44 | 0.41033  | 0.00068  | 0.00259  | 1540.17 | 1635.53 | 1566.85 | 1257.85 | 1071.35 | 1240.9  |
| ENSMUSG00000032128 | 14_Robo3        | 20.01   | 0.35554  | 0.55762  | 0.6635   | 20.8365 | 14.6849 | 32.2692 | 27.9522 | 11.6549 | 12.6623 |
| ENSMUSG00000032131 | 15_Abcg4        | 116.345 | -0.17604 | 0.60857  | 0.70828  | 124.151 | 120.233 | 83.6608 | 182.14  | 109.377 | 78.5061 |
| ENSMUSG00000032134 | 6_Muc16         | 6.68285 | -0.51791 | 0.59096  | 0.69323  | 7.8137  | 3.67122 | 4.78062 | 7.21348 | 2.68959 | 13.9285 |
| ENSMUSG00000032135 | 14_Mcam         | 336.265 | -0.25311 | 0.19759  | 0.29813  | 287.37  | 350.602 | 283.252 | 432.809 | 362.198 | 301.362 |
| ENSMUSG00000032171 | 6_Pin1          | 747.005 | 0.45108  | 0.02193  | 0.04895  | 806.547 | 835.203 | 946.562 | 748.399 | 459.024 | 686.295 |
| ENSMUSG00000032172 | 7_Olfm2         | 53.5382 | 0.44243  | 0.16819  | 0.26233  | 60.7732 | 59.6574 | 64.5383 | 49.5927 | 38.5508 | 48.1166 |
| ENSMUSG00000032174 | 4_Icam5         | 4.50123 | 2.53994  | 0.03606  | 0.07395  | 11.2864 | 4.58903 | 7.17092 | 0.90169 | 1.79306 | 1.26623 |

|                    |                 |         |          |          |          |         |         |         |         |         |         |
|--------------------|-----------------|---------|----------|----------|----------|---------|---------|---------|---------|---------|---------|
| ENSMUSG00000032175 | 10_Tyk2         | 975.514 | 0.98897  | 9.86E-11 | 3.19E-09 | 1165.11 | 1340.91 | 1386.38 | 739.382 | 560.332 | 660.97  |
| ENSMUSG00000032177 | 16_Pde4a        | 302.537 | 0.32759  | 0.07394  | 0.13451  | 295.184 | 367.122 | 348.985 | 305.671 | 256.408 | 241.849 |
| ENSMUSG00000032178 | 13_Ilf3         | 1882.63 | 0.44036  | 0.00013  | 0.00062  | 2034.17 | 2155.93 | 2312.62 | 1531.06 | 1556.38 | 1705.61 |
| ENSMUSG00000032179 | 7_Bmp5          | 12.1282 | -2.46759 | 0.00284  | 0.00878  | 4.34094 | 6.42464 | 0       | 23.4438 | 17.0341 | 21.5259 |
| ENSMUSG00000032180 | 10_Tmed1        | 420.16  | 0.10698  | 0.58377  | 0.68672  | 414.126 | 458.903 | 433.841 | 481.5   | 308.407 | 424.186 |
| ENSMUSG00000032181 | 6_Scg3          | 21.6325 | -1.71689 | 0.02603  | 0.05651  | 18.232  | 8.26025 | 3.58546 | 53.1994 | 37.6543 | 8.86359 |
| ENSMUSG00000032182 | 14_Yipf2        | 829.271 | 0.31918  | 0.01174  | 0.02894  | 919.412 | 912.299 | 929.83  | 787.171 | 669.708 | 757.204 |
| ENSMUSG00000032184 | 4_Lysmd2        | 133.458 | -0.2543  | 0.25526  | 0.36484  | 128.492 | 108.301 | 129.077 | 157.795 | 147.928 | 129.155 |
| ENSMUSG00000032185 | 14_Carm1        | 756.774 | 0.41166  | 0.00104  | 0.00369  | 845.616 | 891.189 | 854.535 | 676.264 | 600.675 | 672.366 |
| ENSMUSG00000032186 | 14_Tmod2        | 163.1   | -1.28359 | 0.00053  | 0.00208  | 101.578 | 130.328 | 52.5868 | 318.295 | 233.994 | 141.817 |
| ENSMUSG00000032187 | 16_Smarca4      | 3311.08 | 1.08339  | 4.04E-10 | 1.09E-08 | 3934.63 | 4374.26 | 5186.97 | 2226.26 | 1676.51 | 2467.88 |
| ENSMUSG00000032191 | 5_Bcl2l10       | 1.00964 | -2.20816 | 0.34768  | NA       | 0       | 0       | 1.19515 | 1.80337 | 1.79306 | 1.26623 |
| ENSMUSG00000032192 | 8_Gnb5          | 341.555 | -0.14717 | 0.5801   | 0.68368  | 330.78  | 367.122 | 274.885 | 518.469 | 283.304 | 274.771 |
| ENSMUSG00000032193 | 8_Ldlr          | 8706.98 | 0.9804   | 2.68E-08 | 3.97E-07 | 10056.2 | 10366.6 | 14246.2 | 5788.82 | 4942.57 | 6841.42 |
| ENSMUSG00000032194 | 8_Kank2         | 863.913 | -0.37324 | 0.05851  | 0.11056  | 707.574 | 914.134 | 637.017 | 1152.35 | 998.735 | 773.665 |
| ENSMUSG00000032198 | 8_Dock6         | 1014.24 | 1.05692  | 2.56E-11 | 9.80E-10 | 1220.67 | 1458.39 | 1431.79 | 772.744 | 573.78  | 628.049 |
| ENSMUSG00000032199 | 12_Polr2m       | 4031.49 | -0.32234 | 0.00064  | 0.00247  | 3662.89 | 3526.21 | 3559.17 | 4585.97 | 4305.14 | 4549.55 |
| ENSMUSG00000032202 | 11_Rab27a       | 1931.89 | -0.41099 | 0.00072  | 0.00273  | 1627.85 | 1735.57 | 1613.46 | 2249.71 | 2391.94 | 1972.78 |
| ENSMUSG00000032204 | 13_Aqp9         | 4.4539  | -1.19679 | 0.33162  | 0.44816  | 4.34094 | 3.67122 | 0       | 7.21348 | 8.96531 | 2.53245 |
| ENSMUSG00000032207 | 9_Lipc          | 15.9341 | -0.99115 | 0.10673  | 0.18149  | 13.0228 | 12.8493 | 5.97577 | 26.1489 | 22.4133 | 15.1947 |
| ENSMUSG00000032212 | 9_Sltm          | 2101.13 | -0.07516 | 0.62662  | 0.72383  | 2060.21 | 1985.21 | 2092.71 | 1709.6  | 2335.46 | 2423.56 |
| ENSMUSG00000032215 | 15_Rsl24d1      | 863.439 | -0.13427 | 0.31979  | 0.43537  | 869.925 | 725.984 | 874.853 | 880.947 | 947.633 | 881.294 |
| ENSMUSG00000032216 | 14_Nedd4        | 17609   | -0.36287 | 0.00015  | 0.00071  | 15396.5 | 15998.3 | 14822.3 | 18802.8 | 20587   | 20046.9 |
| ENSMUSG00000032217 | 12_Rnf111       | 1217.71 | 0.19694  | 0.09463  | 0.16419  | 1262.35 | 1320.72 | 1318.25 | 1039.64 | 1169.97 | 1195.32 |
| ENSMUSG00000032218 | 6_Ccnb2         | 394.218 | 0.58084  | 0.00093  | 0.00337  | 450.59  | 436.875 | 529.453 | 271.407 | 317.372 | 359.608 |
| ENSMUSG00000032220 | 9_Myo1e         | 3176.57 | 0.64191  | 0.00021  | 0.00094  | 3484.04 | 3859.37 | 4270.29 | 1974.69 | 2414.36 | 3056.67 |
| ENSMUSG00000032221 | 14_Mns1         | 40.3833 | -0.42496 | 0.31506  | 0.43003  | 26.9138 | 34.8766 | 41.8304 | 29.7556 | 58.2745 | 50.6491 |
| ENSMUSG00000032224 | 14_Fam81a       | 55.1966 | -0.28144 | 0.38518  | 0.50258  | 49.4867 | 43.1369 | 57.3674 | 57.7079 | 69.0329 | 54.4478 |
| ENSMUSG00000032226 | 5_Gcnt3         | 5.13839 | 0.32343  | 0.74465  | 0.81945  | 8.68188 | 3.67122 | 4.78062 | 6.3118  | 3.58612 | 3.79868 |
| ENSMUSG00000032228 | 16_Tcf12        | 2958.12 | -0.2576  | 0.02353  | 0.05202  | 2735.66 | 2645.12 | 2703.44 | 2928.67 | 3517.09 | 3218.75 |
| ENSMUSG00000032231 | 14_Anxa2        | 69772.5 | 0.40574  | 0.00069  | 0.00262  | 81021.1 | 72226.7 | 85310.1 | 59083.8 | 55194.9 | 65798.2 |
| ENSMUSG00000032232 | 14_Cgnt1        | 5561.73 | -0.06271 | 0.58159  | 0.68487  | 5328.94 | 5750.05 | 5244.34 | 6265.81 | 5464.35 | 5316.89 |
| ENSMUSG00000032235 | 15_Ice2         | 421.265 | -0.53486 | 0.0021   | 0.00677  | 368.112 | 313.89  | 350.18  | 422.89  | 571.09  | 501.426 |
| ENSMUSG00000032238 | 17_Rora         | 2619.61 | -0.52721 | 1.35E-07 | 1.63E-06 | 2264.24 | 2071.49 | 2102.28 | 3118.93 | 3072.41 | 3088.33 |
| ENSMUSG00000032239 | 9_Rp9           | 703.117 | -0.01424 | 0.92045  | 0.94712  | 690.21  | 638.793 | 770.874 | 761.023 | 649.985 | 707.821 |
| ENSMUSG00000032243 | 8_Iltga11       | 415.997 | 0.38836  | 0.09135  | 0.1596   | 432.358 | 579.135 | 401.572 | 346.247 | 277.028 | 459.64  |
| ENSMUSG00000032244 | 8_Fem1b         | 2356.17 | -0.33985 | 0.00423  | 0.01226  | 2134.88 | 2053.13 | 2050.88 | 2338.97 | 2817.8  | 2741.38 |
| ENSMUSG00000032245 | 12_Cln6         | 870.51  | 0.31122  | 0.01683  | 0.03926  | 994.076 | 962.778 | 934.611 | 842.174 | 699.294 | 790.126 |
| ENSMUSG00000032246 | 13_Calm14       | 172.078 | -1.22894 | 3.87E-05 | 0.00022  | 111.128 | 112.89  | 84.8559 | 319.197 | 253.718 | 150.681 |
| ENSMUSG00000032249 | 14_Anpr32a      | 8513.72 | -0.27915 | 0.01877  | 0.04285  | 7775.5  | 7302.98 | 7997.97 | 8511.91 | 9029.86 | 10464.1 |
| ENSMUSG00000032251 | 12_Irak1bp1     | 90.9769 | -0.96802 | 0.00017  | 0.00078  | 62.5096 | 66.9998 | 54.9771 | 124.433 | 125.514 | 111.428 |
| ENSMUSG00000032252 | 14_Glce         | 1331.63 | -0.27964 | 0.03644  | 0.07452  | 1288.39 | 1194.07 | 1124.64 | 1284.9  | 1527.69 | 1570.12 |
| ENSMUSG00000032253 | 13_Phip         | 2582.51 | -0.39334 | 0.00465  | 0.01326  | 2364.08 | 2068.73 | 2264.82 | 2497.67 | 3284.89 | 3014.89 |
| ENSMUSG00000032254 | 9_Klf23         | 1134.77 | 0.11274  | 0.57799  | 0.68171  | 1238.9  | 1022.44 | 1275.23 | 771.843 | 1232.73 | 1267.49 |
| ENSMUSG00000032257 | 5_Ankk1         | 1131.19 | 0.75924  | 3.50E-11 | 1.30E-09 | 1459.42 | 1329.9  | 1477.21 | 844.879 | 824.808 | 850.904 |
| ENSMUSG00000032258 | 15_Lca5         | 178.432 | -0.64341 | 0.00081  | 0.003    | 146.724 | 144.095 | 126.686 | 222.716 | 221.443 | 208.927 |
| ENSMUSG00000032259 | 7_Drd2          | 10.7343 | -1.31785 | 0.11841  | 0.19768  | 1.73638 | 11.9315 | 4.78062 | 21.6405 | 11.6549 | 12.6623 |
| ENSMUSG00000032261 | 16_Sh3bgrl2     | 2448.89 | -0.40438 | 0.00037  | 0.00153  | 2132.27 | 2101.77 | 2089.13 | 2522.92 | 2994.41 | 2522.81 |
| ENSMUSG00000032262 | 13_Elovl4       | 245.193 | -1.55404 | 4.20E-06 | 3.18E-05 | 130.228 | 168.876 | 74.0996 | 458.056 | 419.576 | 220.323 |
| ENSMUSG00000032263 | 14_Bckdhd       | 482.541 | -0.24152 | 0.09411  | 0.16346  | 452.326 | 465.327 | 408.743 | 502.239 | 563.918 | 502.692 |
| ENSMUSG00000032264 | 8_Zw10          | 687.171 | 0.13769  | 0.36411  | 0.48145  | 716.255 | 678.258 | 766.094 | 574.374 | 748.603 | 639.445 |
| ENSMUSG00000032265 | 14_Fam46a       | 2350.19 | 0.21531  | 0.11936  | 0.19891  | 2391.86 | 2507.44 | 2677.15 | 1874.6  | 2486.08 | 2163.98 |
| ENSMUSG00000032267 | 7_Usp28         | 607.027 | -0.09179 | 0.50364  | 0.61443  | 615.546 | 599.327 | 547.381 | 578.882 | 667.915 | 633.113 |
| ENSMUSG00000032268 | 13_Tmprss5      | 5.98749 | -0.98557 | 0.32652  | 0.44272  | 4.34094 | 6.42464 | 1.19515 | 12.6236 | 6.27571 | 5.06491 |
| ENSMUSG00000032269 | 7_Htr3a         | 66.0067 | -1.45873 | 0.00072  | 0.00271  | 37.3321 | 48.6437 | 19.1225 | 139.761 | 66.3433 | 84.8372 |
| ENSMUSG00000032271 | 13_Nnmt         | 32.179  | 0.21521  | 0.6602   | 0.75237  | 49.4867 | 31.2054 | 22.7079 | 19.8371 | 39.4473 | 30.3894 |
| ENSMUSG00000032274 | 8_Cyp19a1       | 0       | NA       | NA       | NA       | 0       | 0       | 0       | 0       | 0       | 0       |
| ENSMUSG00000032278 | 11_Paqr5        | 3764.95 | 0.45454  | 0.00507  | 0.01425  | 4133.45 | 4153.07 | 4771.06 | 2824.98 | 2772.97 | 3934.17 |
| ENSMUSG00000032279 | 10_Idh3a        | 1715.59 | -0.24325 | 0.01936  | 0.044    | 1561    | 1508.87 | 1644.53 | 1840.34 | 1843.27 | 1895.54 |
| ENSMUSG00000032280 | 16_Tle3         | 2183.89 | 0.81082  | 1.86E-08 | 2.94E-07 | 2500.38 | 2759.84 | 3084.69 | 1630.25 | 1368.11 | 1760.06 |
| ENSMUSG00000032281 | 11_Acsbg1       | 428.965 | 0.99882  | 1.89E-08 | 2.97E-07 | 514.836 | 571.793 | 628.651 | 319.197 | 236.684 | 302.628 |
| ENSMUSG00000032285 | 15_Dnaja4       | 1267.29 | -0.09003 | 0.52124  | 0.63092  | 1172.05 | 1226.19 | 1283.6  | 1182.11 | 1222.87 | 1516.94 |
| ENSMUSG00000032288 | 9_Imp3          | 555.123 | -0.0391  | 0.77888  | 0.84538  | 528.727 | 569.039 | 544.99  | 608.638 | 514.609 | 564.737 |
| ENSMUSG00000032289 | 15_Thsd4        | 721.921 | -0.13991 | 0.3915   | 0.50891  | 673.714 | 730.573 | 657.335 | 908.899 | 697.501 | 663.503 |
| ENSMUSG00000032290 | 6_Ptpn9         | 1850.86 | 0.0308   | 0.82554  | 0.88037  | 1880.5  | 1758.52 | 1972    | 1548.19 | 1921.27 | 2024.7  |
| ENSMUSG00000032291 | 8_Crapb1        | 39.7557 | 0.40286  | 0.32345  | 0.4394   | 48.6186 | 47.7259 | 39.4401 | 46.8876 | 24.2063 | 31.6557 |
| ENSMUSG00000032292 | 8_Nr2e3         | 170.013 | -2.03889 | 0.02389  | 0.05269  | 102.446 | 82.6025 | 14.3418 | 478.795 | 224.133 | 117.759 |
| ENSMUSG00000032293 | 7_Ireb2         | 1872.07 | -0.42351 | 0.00155  | 0.00523  | 1693.84 | 1540.08 | 1563.26 | 1862.88 | 2391.94 | 2180.44 |
| ENSMUSG00000032294 | 16_Pkm          | 19323.4 | 0.97104  | 1.66E-08 | 2.67E-07 | 24901.4 | 24836.7 | 27036.8 | 16015.8 | 9860.94 | 13289.1 |
| ENSMUSG00000032295 | 15_Man2c1       | 1441.27 | 0.97178  | 9.90E-11 | 3.19E-09 | 1738.98 | 1966.86 | 2022.2  | 1129.81 | 833.773 | 956.001 |
| ENSMUSG00000032297 | 11_Celf6        | 7.60505 | -0.46813 | 0.60011  | 0.70161  | 6.07732 | 8.26025 | 4.78062 | 15.3287 | 3.58612 | 7.59736 |
| ENSMUSG00000032298 | 13_Neil1        | 183.209 | 0.42237  | 0.0234   | 0.05178  | 197.079 | 217.52  | 215.128 | 155.992 | 157.789 | 155.746 |
| ENSMUSG00000032299 | 9_Commnd4       | 493.662 | 0.579    | 0.0018   | 0.00595  | 547.827 | 616.765 | 493.222 | 493.222 | 338.889 | 354.544 |
| ENSMUSG00000032300 | 6_1700017B05Rik | 376.199 | 1.24909  | 2.52E-09 | 5.19E-08 | 504.417 | 520.396 | 562.918 | 251.57  | 159.582 | 258.31  |
| ENSMUSG00000032301 | 13_Psma4        | 3038.51 | -0.39036 | 0.00575  | 0.01582  | 2807.72 | 2379.87 | 2702.24 | 2955.72 | 3894.53 | 3490.99 |
| ENSMUSG00000032303 | 6_Chrra3        | 2.42571 | 0.01811  | 0.99087  | NA       | 4.34094 | 1.83561 | 1.19515 | 1.80337 | 5.37918 | 0       |
| ENSMUSG00000032305 | 14_Fam219b      | 895.748 | 0.02756  | 0.82323  | 0.87886  | 889.893 | 887.518 | 934.611 | 875.537 | 828.394 | 958.534 |
| ENSMUSG00000032306 | 14_Mpi          | 434.856 | -0.02295 | 0.86974  | 0.91176  | 438.435 | 408.423 | 448.183 | 447.236 | 446.472 | 420.387 |
| ENSMUSG00000032307 | 16_Ube2q2       | 2275.71 | -0.32536 | 0.03327  | 0.06919  | 2025.48 | 1927.39 | 2107.06 | 2022.48 | 2774.76 | 2797.1  |

|                    |                 |         |          |          |          |         |         |         |         |         |         |
|--------------------|-----------------|---------|----------|----------|----------|---------|---------|---------|---------|---------|---------|
| ENSMUSG00000032308 | 8_Ulk3          | 775.756 | 0.68273  | 3.35E-06 | 2.62E-05 | 910.73  | 885.682 | 1070.86 | 579.784 | 547.78  | 659.704 |
| ENSMUSG00000032309 | 15_Fbxo22       | 635.509 | -0.12894 | 0.35995  | 0.47688  | 653.746 | 552.519 | 614.309 | 614.949 | 669.708 | 707.821 |
| ENSMUSG00000032311 | 17_Nrg4         | 40.5397 | -0.0537  | 0.88927  | 0.92542  | 42.5412 | 33.9588 | 43.0255 | 32.4607 | 51.9988 | 39.253  |
| ENSMUSG00000032312 | 6_Csk           | 3254.16 | 1.16563  | 2.39E-10 | 6.88E-09 | 4085.69 | 4326.54 | 5091.36 | 2182.08 | 1482.86 | 2356.45 |
| ENSMUSG00000032313 | 11_Ali118078    | 10.0997 | -0.17849 | 0.84197  | 0.89246  | 12.1546 | 9.17806 | 7.17092 | 23.4438 | 3.58612 | 5.06491 |
| ENSMUSG00000032314 | 14_Etfa         | 2589.43 | -0.26319 | 0.03605  | 0.07393  | 2318.93 | 2246.79 | 2496.68 | 2507.59 | 3116.34 | 2850.28 |
| ENSMUSG00000032315 | 5_Cyp1a1        | 2.69013 | -2.96156 | 0.12999  | 0.21291  | 0.86819 | 0.91781 | 0       | 1.80337 | 12.5514 | 0       |
| ENSMUSG00000032316 | 7_Clk3          | 942.442 | 0.55652  | 1.73E-05 | 0.00011  | 1060.06 | 1060.98 | 1245.35 | 752.907 | 741.431 | 793.924 |
| ENSMUSG00000032318 | 12_Isi2         | 0.34389 | 1.87986  | 0.64119  | NA       | 0.86819 | 0       | 1.19515 | 0       | 0       | 0       |
| ENSMUSG00000032320 | 7_Rcn2          | 1306.9  | -0.7076  | 1.90E-09 | 4.07E-08 | 968.03  | 1022.44 | 988.392 | 1574.34 | 1759.89 | 1528.34 |
| ENSMUSG00000032322 | 14_Pstpip1      | 135.54  | 1.57457  | 3.64E-09 | 7.11E-08 | 248.302 | 163.369 | 197.2   | 80.25   | 58.2745 | 65.8438 |
| ENSMUSG00000032323 | 13_Cyp11a1      | 6.32349 | 0.06071  | 0.95164  | 0.96848  | 7.8137  | 4.58903 | 7.17092 | 11.7219 | 5.37918 | 1.26623 |
| ENSMUSG00000032324 | 10_Tspan3       | 1725.4  | -0.89864 | 7.85E-07 | 7.43E-06 | 1201.57 | 1434.53 | 977.636 | 2634.72 | 2219.81 | 1884.15 |
| ENSMUSG00000032327 | 14_Stra6        | 447.775 | -0.5238  | 0.09764  | 0.1687   | 418.467 | 427.697 | 255.763 | 825.042 | 374.75  | 384.933 |
| ENSMUSG00000032328 | 12_Tmem30a      | 3776.7  | -0.51724 | 4.56E-06 | 3.42E-05 | 3082.94 | 3084.74 | 3154.01 | 4189.23 | 4932.71 | 4216.54 |
| ENSMUSG00000032329 | 3_Hmg20a        | 1227.5  | -0.10504 | 0.32757  | 0.44383  | 1192.89 | 1213.34 | 1141.37 | 1282.2  | 1246.18 | 1289.02 |
| ENSMUSG00000032330 | 6_Cox7a2        | 2586.72 | -0.34967 | 0.00198  | 0.00646  | 2469.13 | 2220.17 | 2134.55 | 3037.78 | 2895.79 | 2762.91 |
| ENSMUSG00000032332 | 17_Col12a1      | 12673.9 | -0.40521 | 0.01974  | 0.04476  | 11209.2 | 12512.4 | 8993.53 | 11525.3 | 16525.7 | 15277   |
| ENSMUSG00000032333 | 5_Stom1         | 378.175 | 0.78033  | 0.00072  | 0.00274  | 470.558 | 434.122 | 529.453 | 353.461 | 192.754 | 288.7   |
| ENSMUSG00000032334 | 9_Loxl1         | 799.05  | 0.20911  | 0.26514  | 0.37634  | 835.197 | 961.86  | 773.265 | 915.211 | 590.814 | 717.951 |
| ENSMUSG00000032336 | 17_Nptn         | 4171.37 | -0.14309 | 0.19702  | 0.29748  | 4129.1  | 3774.02 | 3990.62 | 4009.8  | 4685.27 | 4439.39 |
| ENSMUSG00000032338 | 8_Hcn4          | 7.5381  | -0.86854 | 0.3566   | 0.47329  | 1.73638 | 7.34244 | 7.17092 | 13.5253 | 11.6549 | 3.79868 |
| ENSMUSG00000032340 | 7_Neo1          | 2211.92 | -0.20293 | 0.06044  | 0.11363  | 1995.1  | 2190.8  | 1982.76 | 2252.41 | 2405.39 | 2445.08 |
| ENSMUSG00000032342 | 13_Mto1         | 303.537 | -0.12507 | 0.49029  | 0.60205  | 304.734 | 274.424 | 291.618 | 264.194 | 353.233 | 333.018 |
| ENSMUSG00000032343 | 15_Impg1        | 71.4406 | -2.67602 | 9.18E-05 | 0.00046  | 27.782  | 23.8629 | 5.97577 | 222.716 | 125.514 | 22.7921 |
| ENSMUSG00000032344 | 17_Mb21d1       | 224.342 | 0.46092  | 0.02995  | 0.06399  | 247.434 | 242.301 | 289.227 | 150.581 | 193.651 | 222.856 |
| ENSMUSG00000032346 | 7_Ooep          | 38.2247 | -0.69949 | 0.07104  | 0.13009  | 27.782  | 33.041  | 26.2934 | 51.3961 | 37.6543 | 53.1815 |
| ENSMUSG00000032348 | 5_Gsta4         | 99769.3 | -0.16214 | 0.24318  | 0.35128  | 97105.1 | 87703.7 | 97696.7 | 87531.1 | 109279  | 119300  |
| ENSMUSG00000032349 | 13_Elov15       | 2059.73 | -0.01642 | 0.90838  | 0.93823  | 2035.9  | 2004.49 | 2102.28 | 1717.71 | 2151.67 | 2346.32 |
| ENSMUSG00000032350 | 8_Gclc          | 1705.83 | -0.04035 | 0.76793  | 0.83687  | 1736.38 | 1652.05 | 1656.48 | 1461.63 | 1889.89 | 1838.56 |
| ENSMUSG00000032352 | 15_Lrrc1        | 945.277 | 0.20314  | 0.1174   | 0.19623  | 976.712 | 960.942 | 1097.15 | 861.11  | 824.808 | 950.936 |
| ENSMUSG00000032353 | 8_Tmed3         | 2241.84 | 0.11681  | 0.24932  | 0.35835  | 2252.08 | 2293.6  | 2452.46 | 2132.49 | 2124.78 | 2195.64 |
| ENSMUSG00000032355 | 16_Mlip         | 22.9869 | -1.7655  | 0.00053  | 0.00209  | 7.8137  | 12.8493 | 10.7564 | 38.7725 | 32.2751 | 35.4544 |
| ENSMUSG00000032356 | 12_Rasgrf1      | 5054.18 | 0.33351  | 0.00926  | 0.02369  | 5385.37 | 5674.79 | 5845.5  | 3882.66 | 4499.69 | 5037.05 |
| ENSMUSG00000032357 | 12_Tinag        | 8.5706  | -0.24561 | 0.7531   | 0.82591  | 9.55007 | 9.17806 | 4.78062 | 11.7219 | 9.86184 | 6.33113 |
| ENSMUSG00000032358 | 12_Fam83b       | 1106.7  | -0.12242 | 0.45443  | 0.56858  | 1090.44 | 987.559 | 1100.74 | 913.407 | 1285.62 | 1262.43 |
| ENSMUSG00000032359 | 14_Ctsh         | 3109.93 | -0.07375 | 0.44044  | 0.55571  | 3122.87 | 3047.11 | 2920.96 | 3225.33 | 3206.89 | 3136.44 |
| ENSMUSG00000032360 | 16_Hcrt2        | 0.14942 | -0.99647 | 0.80707  | NA       | 0       | 0       | 0       | 0       | 0.89653 | 0       |
| ENSMUSG00000032363 | 15_Adamts7      | 42.0364 | 0.98801  | 0.01074  | 0.02685  | 60.7732 | 63.3286 | 43.0255 | 29.7556 | 22.4133 | 32.9219 |
| ENSMUSG00000032366 | 15_Tpm1         | 3679.52 | -0.95681 | 1.55E-09 | 3.42E-08 | 2472.6  | 2921.38 | 2111.84 | 5557.99 | 4678.99 | 4334.29 |
| ENSMUSG00000032368 | 14_Zic1         | 483.728 | -1.19239 | 0.00021  | 0.00095  | 250.906 | 459.821 | 172.102 | 862.011 | 653.571 | 503.958 |
| ENSMUSG00000032369 | 13_Plscr1       | 1180.2  | 0.18562  | 0.34745  | 0.4643   | 1205.05 | 1067.41 | 1496.33 | 847.584 | 1327.76 | 1137.07 |
| ENSMUSG00000032370 | 7_Lactb         | 285.235 | -0.13822 | 0.42657  | 0.54192  | 275.216 | 291.862 | 246.202 | 274.112 | 292.269 | 331.751 |
| ENSMUSG00000032372 | 14_Plscr2       | 84.8649 | -0.25688 | 0.389    | 0.50633  | 85.0825 | 76.1779 | 70.5141 | 116.317 | 69.9294 | 91.1683 |
| ENSMUSG00000032373 | 14_Carl2        | 941.8   | -0.24291 | 0.11954  | 0.19918  | 890.761 | 820.518 | 877.243 | 1208.26 | 871.428 | 982.592 |
| ENSMUSG00000032374 | 14_Plod2        | 255.258 | -1.10426 | 3.17E-08 | 4.60E-07 | 168.429 | 187.232 | 129.077 | 320.098 | 359.509 | 367.206 |
| ENSMUSG00000032375 | 15_Aph1b        | 356.337 | -0.68592 | 1.40E-05 | 9.07E-05 | 265.666 | 293.698 | 260.544 | 459.86  | 458.127 | 400.128 |
| ENSMUSG00000032376 | 12_Usp3         | 1134.42 | -0.07403 | 0.56461  | 0.6699   | 1116.49 | 1062.82 | 1136.59 | 1035.13 | 1261.42 | 1194.05 |
| ENSMUSG00000032377 | 8_Plscr4        | 1599.93 | 0.048    | 0.73355  | 0.81118  | 1565.34 | 1560.27 | 1754.49 | 1345.31 | 1757.2  | 1616.97 |
| ENSMUSG00000032380 | 8_Dapk2         | 119.449 | 0.56192  | 0.05113  | 0.0988   | 151.933 | 102.794 | 172.102 | 87.4635 | 83.3773 | 119.025 |
| ENSMUSG00000032381 | 5_Fam96a        | 874.597 | -0.23051 | 0.07554  | 0.13673  | 845.616 | 729.655 | 840.193 | 915.211 | 1001.42 | 915.482 |
| ENSMUSG00000032382 | 14_Snx1         | 3484.87 | -0.15961 | 0.1112   | 0.1877   | 3400.69 | 3155.42 | 3320.14 | 3499.44 | 3747.5  | 3786.02 |
| ENSMUSG00000032383 | 6_Ppib          | 4160.69 | 0.17455  | 0.12433  | 0.20545  | 4498.95 | 4287.07 | 4449.56 | 4191.03 | 3498.26 | 4039.26 |
| ENSMUSG00000032384 | 15_Csnk1g1      | 1090.85 | 0.11337  | 0.35707  | 0.47377  | 1135.59 | 1070.16 | 1195.15 | 963.902 | 1081.22 | 1099.08 |
| ENSMUSG00000032386 | 15_Trip4        | 1002.57 | -0.26193 | 0.03428  | 0.07093  | 937.643 | 884.765 | 913.098 | 1009.89 | 1186.11 | 1083.89 |
| ENSMUSG00000032387 | 14_Rbpm5        | 167.251 | -0.45439 | 0.10589  | 0.18036  | 155.406 | 167.041 | 100.393 | 250.669 | 157.789 | 172.207 |
| ENSMUSG00000032388 | 6_Spg21         | 3454.55 | -0.08361 | 0.43185  | 0.54709  | 3304.33 | 3237.1  | 3522.12 | 3303.78 | 3673.98 | 3685.99 |
| ENSMUSG00000032392 | 10_Parp16       | 300.562 | -0.00752 | 0.96807  | 0.97945  | 276.952 | 325.821 | 295.203 | 278.621 | 267.166 | 359.608 |
| ENSMUSG00000032393 | 14_Dpp8         | 3217.11 | -0.39965 | 0.00537  | 0.01495  | 2859.81 | 2719.46 | 2742.88 | 2988.19 | 4087.28 | 3905.04 |
| ENSMUSG00000032394 | 5_Igdc3         | 3.22021 | -1.32892 | 0.37627  | 0.49377  | 0.86819 | 4.58903 | 0       | 8.11517 | 4.48265 | 1.26623 |
| ENSMUSG00000032396 | 17_Dis3l        | 604.018 | 0.36135  | 0.0248   | 0.05428  | 632.041 | 610.341 | 795.973 | 484.205 | 540.608 | 560.939 |
| ENSMUSG00000032397 | 6_Tipin         | 586.369 | -0.12462 | 0.4774   | 0.59001  | 575.609 | 503.875 | 603.553 | 491.419 | 684.053 | 659.704 |
| ENSMUSG00000032398 | 6_Snapc5        | 583.628 | -0.73706 | 5.93E-07 | 5.87E-06 | 446.249 | 453.396 | 413.523 | 689.789 | 823.912 | 674.899 |
| ENSMUSG00000032399 | 7_Rpl4          | 36137.5 | -0.21809 | 0.02161  | 0.04839  | 34308.2 | 32441.7 | 33482.2 | 37239.6 | 38161.7 | 41191.6 |
| ENSMUSG00000032400 | 17_Zwilch       | 255.528 | 0.48581  | 0.01834  | 0.04209  | 313.416 | 259.739 | 321.496 | 174.025 | 249.235 | 215.259 |
| ENSMUSG00000032401 | 15_Lcll         | 232.768 | -0.88915 | 0.39466  | 0.51232  | 103.314 | 355.191 | 31.074  | 568.964 | 165.858 | 172.207 |
| ENSMUSG00000032402 | 12_Smad3        | 2344.92 | 0.23991  | 0.06949  | 0.1278   | 2370.15 | 2461.55 | 2785.9  | 2118.96 | 1934.71 | 2398.23 |
| ENSMUSG00000032403 | 8_2300009A05Rik | 97.3917 | -0.55294 | 0.03082  | 0.06491  | 74.6642 | 93.6162 | 68.1238 | 118.121 | 112.066 | 117.759 |
| ENSMUSG00000032405 | 9_Pias1         | 1346.69 | -0.00796 | 0.94175  | 0.96205  | 1366.53 | 1304.2  | 1357.7  | 1280.39 | 1379.76 | 1391.58 |
| ENSMUSG00000032407 | 13_U2surp       | 1964.01 | -0.28494 | 0.10123  | 0.17386  | 1922.17 | 1584.13 | 1804.68 | 1653.69 | 2342.63 | 2476.74 |
| ENSMUSG00000032409 | 14_Atr          | 829.821 | -0.53563 | 0.0001   | 0.0005   | 703.233 | 650.724 | 677.652 | 862.011 | 1022.94 | 1062.36 |
| ENSMUSG00000032410 | 13_Xrn1         | 1730.19 | -0.15816 | 0.22713  | 0.33281  | 1734.64 | 1433.61 | 1738.95 | 1721.32 | 1957.13 | 1795.51 |
| ENSMUSG00000032411 | 15_Tfpd2        | 810.191 | -0.40057 | 0.00133  | 0.00458  | 685.001 | 700.286 | 711.117 | 996.362 | 901.013 | 867.365 |
| ENSMUSG00000032412 | 8_Atp1b3        | 10873.3 | -0.30197 | 0.00692  | 0.01849  | 9739.34 | 9574.55 | 9904.24 | 10701.2 | 12959.3 | 12360.9 |
| ENSMUSG00000032413 | 12_Rasa2        | 1023.79 | -0.25043 | 0.06515  | 0.12099  | 941.116 | 893.943 | 970.465 | 972.919 | 1218.39 | 1145.94 |
| ENSMUSG00000032415 | 14_Ube2cbp      | 38.823  | 0.33684  | 0.39896  | 0.51643  | 39.9367 | 43.1369 | 46.611  | 23.4438 | 36.7578 | 43.0517 |
| ENSMUSG00000032417 | 10_Rwdd2a       | 9.59124 | -1.48469 | 0.06147  | 0.11519  | 7.8137  | 3.67122 | 3.58546 | 12.6236 | 19.7237 | 10.1298 |
| ENSMUSG00000032418 | 15_Me1          | 705.135 | -0.63112 | 8.64E-05 | 0.00044  | 559.982 | 611.259 | 488.818 | 928.736 | 912.668 | 729.347 |
| ENSMUSG00000032419 | 8_Tbx18         | 18.7303 | -0.19759 | 0.71606  | 0.79762  | 19.9683 | 14.6849 | 17.9273 | 26.1489 | 19.7237 | 13.9285 |

|                    |                 |         |          |          |          |         |         |         |         |         |         |
|--------------------|-----------------|---------|----------|----------|----------|---------|---------|---------|---------|---------|---------|
| ENSMUSG00000032420 | 7_Nt5e          | 1267.7  | 0.53883  | 0.00077  | 0.00288  | 1522.8  | 1255.56 | 1727    | 907.096 | 1094.66 | 1099.08 |
| ENSMUSG00000032422 | 17_Snx14        | 1133.71 | -0.42696 | 0.00191  | 0.00627  | 1000.15 | 948.093 | 952.538 | 1118.09 | 1427.28 | 1356.13 |
| ENSMUSG00000032423 | 12_Syncrip      | 3419.14 | -0.27526 | 0.07418  | 0.13484  | 3322.56 | 2780.95 | 3177.91 | 3041.39 | 4232.52 | 3959.49 |
| ENSMUSG00000032425 | 15_Zfp949       | 523.92  | -0.03768 | 0.80484  | 0.86488  | 543.486 | 473.588 | 533.039 | 483.303 | 513.712 | 596.393 |
| ENSMUSG00000032431 | 6_Crtap         | 1133.62 | -0.12636 | 0.26316  | 0.37403  | 1068.74 | 1147.26 | 1035    | 1184.81 | 1159.21 | 1206.71 |
| ENSMUSG00000032434 | 8_Cmtm6         | 2946.55 | 0.39354  | 0.00026  | 0.00113  | 3238.34 | 3165.51 | 3635.66 | 2594.15 | 2530.91 | 2514.73 |
| ENSMUSG00000032435 | 8_Dync1li1      | 1109.08 | 0.12411  | 0.3045   | 0.41953  | 1099.13 | 1125.23 | 1246.55 | 1000.87 | 1093.77 | 1088.96 |
| ENSMUSG00000032436 | 16_Cmtm7        | 207.937 | 0.60559  | 0.00975  | 0.02471  | 256.984 | 229.451 | 267.715 | 213.699 | 150.617 | 129.155 |
| ENSMUSG00000032437 | 9_Stt3b         | 2711.01 | -0.11882 | 0.29536  | 0.40977  | 2698.33 | 2507.44 | 2591.09 | 2563.49 | 2889.52 | 3016.15 |
| ENSMUSG00000032440 | 12_Tgfb2        | 2463.02 | 0.18024  | 0.08989  | 0.15754  | 2612.38 | 2609.32 | 2629.34 | 2493.16 | 2218.02 | 2215.9  |
| ENSMUSG00000032446 | 14_Eomes        | 10.5883 | 2.86146  | 0.00402  | 0.01178  | 39.0685 | 7.34244 | 9.56123 | 2.70506 | 3.58612 | 1.26623 |
| ENSMUSG00000032449 | 13_Slc25a36     | 1716.04 | -0.65119 | 7.21E-09 | 1.29E-07 | 1350.9  | 1330.82 | 1323.04 | 1920.59 | 2186.64 | 2184.24 |
| ENSMUSG00000032452 | 12_Clstn2       | 187.966 | -0.69135 | 0.01118  | 0.02774  | 143.251 | 188.15  | 99.1978 | 281.326 | 204.409 | 211.46  |
| ENSMUSG00000032454 | 9_Rbp2          | 4064.12 | 0.34056  | 0.00414  | 0.01204  | 4459.88 | 4191.62 | 4973.04 | 3342.55 | 3577.16 | 3840.47 |
| ENSMUSG00000032456 | 13_Nmnat3       | 233.14  | 0.41504  | 0.02071  | 0.04665  | 268.27  | 238.629 | 292.813 | 202.879 | 193.651 | 202.596 |
| ENSMUSG00000032458 | 6_Copb2         | 5732.92 | -0.1356  | 0.32126  | 0.43702  | 5602.42 | 5008.46 | 5779.77 | 5069.28 | 6474.74 | 6462.82 |
| ENSMUSG00000032459 | 9_Mrps22        | 276.552 | -0.23494 | 0.17951  | 0.27643  | 270.875 | 222.109 | 270.105 | 303.868 | 313.786 | 278.57  |
| ENSMUSG00000032462 | 14_Pik3cb       | 1624.08 | 0.08761  | 0.44455  | 0.5595   | 1594.86 | 1664.9  | 1760.46 | 1459.83 | 1627.2  | 1637.23 |
| ENSMUSG00000032463 | 10_Faim         | 361.492 | -0.28699 | 0.05143  | 0.09926  | 321.23  | 315.725 | 340.619 | 385.02  | 415.094 | 391.264 |
| ENSMUSG00000032468 | 11_Armc8        | 1431.92 | -0.22756 | 0.06674  | 0.1235   | 1323.12 | 1273    | 1361.28 | 1374.17 | 1644.24 | 1615.71 |
| ENSMUSG00000032469 | 12_Dbr1         | 353.702 | 0.08842  | 0.57422  | 0.67854  | 355.089 | 355.191 | 383.644 | 310.18  | 371.164 | 346.946 |
| ENSMUSG00000032470 | 16_Mras         | 497.947 | -0.54755 | 0.01093  | 0.02723  | 373.321 | 485.519 | 354.961 | 758.317 | 506.54  | 509.023 |
| ENSMUSG00000032475 | 15_Nck1         | 1332.95 | -0.38152 | 0.0116   | 0.02863  | 1192.89 | 1124.31 | 1155.71 | 1245.23 | 1741.06 | 1538.47 |
| ENSMUSG00000032477 | 13_Cdc25a       | 368.859 | 0.24821  | 0.10031  | 0.17256  | 399.367 | 379.972 | 421.889 | 315.59  | 337.992 | 358.342 |
| ENSMUSG00000032478 | 14_Nme6         | 233.863 | 0.1207   | 0.48162  | 0.59388  | 257.852 | 234.04  | 239.031 | 235.34  | 217.857 | 219.057 |
| ENSMUSG00000032479 | 15_Map4         | 7951.92 | 0.25195  | 0.01054  | 0.02644  | 8133.19 | 8944.93 | 8854.9  | 7183.73 | 7040.45 | 7554.31 |
| ENSMUSG00000032480 | 17_Dhx30        | 1225.98 | 0.60691  | 6.59E-06 | 4.72E-05 | 1346.56 | 1534.57 | 1559.68 | 1063.09 | 873.221 | 978.793 |
| ENSMUSG00000032481 | 16_Smarcc1      | 2041.77 | 0.13117  | 0.38275  | 0.5003   | 2055    | 2130.23 | 2217.01 | 1583.36 | 2028.85 | 2236.16 |
| ENSMUSG00000032482 | 9_Cspg5         | 371.611 | -1.31174 | 0.0001   | 0.00051  | 236.147 | 278.095 | 125.491 | 780.86  | 476.058 | 333.018 |
| ENSMUSG00000032484 | 8_Ngp           | 0.14942 | -0.99647 | 0.80707  | NA       | 0       | 0       | 0       | 0       | 0.89653 | 0       |
| ENSMUSG00000032485 | 14_Scap         | 1535.99 | 1.00077  | 2.27E-09 | 4.75E-08 | 1956.9  | 1961.35 | 2226.57 | 1192.93 | 800.602 | 1077.56 |
| ENSMUSG00000032487 | 8_Ptgs2         | 211.61  | 0.80047  | 0.01145  | 0.02833  | 361.166 | 153.274 | 292.813 | 185.747 | 155.1   | 121.558 |
| ENSMUSG00000032489 | 17_Kif9         | 76.0889 | 0.17416  | 0.54332  | 0.65027  | 85.0825 | 65.1642 | 92.0269 | 75.7416 | 66.3433 | 72.1749 |
| ENSMUSG00000032491 | 14_Nradd        | 248.066 | 0.70978  | 0.00041  | 0.00169  | 283.898 | 301.958 | 338.229 | 220.913 | 155.996 | 187.402 |
| ENSMUSG00000032492 | 14_Pth1r        | 167.069 | 0.02067  | 0.94132  | 0.9619   | 156.274 | 167.041 | 181.663 | 221.815 | 108.48  | 167.142 |
| ENSMUSG00000032493 | 8_Prss44        | 0.34389 | 1.87986  | 0.64119  | NA       | 0.86819 | 0       | 1.19515 | 0       | 0       | 0       |
| ENSMUSG00000032494 | 12_Tdgf1        | 1.69739 | 1.38042  | 0.44877  | NA       | 0.86819 | 1.83561 | 4.78062 | 1.80337 | 0.89653 | 0       |
| ENSMUSG00000032495 | 8_Lrrc2         | 12.7337 | -1.98126 | 0.01843  | 0.04225  | 4.34094 | 6.42464 | 4.78062 | 36.0674 | 19.7237 | 5.06491 |
| ENSMUSG00000032496 | 7_Ltf           | 626.83  | 0.75377  | 0.00279  | 0.00865  | 775.292 | 537.834 | 1049.35 | 427.399 | 583.641 | 387.465 |
| ENSMUSG00000032497 | 15_Lrrfp2       | 1638.47 | -0.04035 | 0.80042  | 0.86197  | 1513.25 | 1548.34 | 1784.37 | 1359.74 | 1689.06 | 1936.06 |
| ENSMUSG00000032498 | 9_Mlh1          | 586.42  | 0.06956  | 0.5999   | 0.70142  | 631.173 | 583.724 | 586.821 | 549.126 | 610.537 | 557.14  |
| ENSMUSG00000032500 | 10_Dclk3        | 34.5708 | 1.03247  | 0.01711  | 0.03976  | 46.8822 | 34.8766 | 57.3674 | 17.132  | 23.3098 | 27.857  |
| ENSMUSG00000032501 | 8_Trib1         | 3013.97 | 0.49984  | 0.00027  | 0.00117  | 3313.01 | 3255.46 | 4024.08 | 2504.88 | 2253.88 | 2732.52 |
| ENSMUSG00000032502 | 8_Stac          | 220.737 | -1.02749 | 0.00113  | 0.00397  | 126.756 | 216.602 | 92.0269 | 369.691 | 285.097 | 234.252 |
| ENSMUSG00000032503 | 17_Arpp21       | 11.4557 | -1.9167  | 0.03642  | 0.0745   | 0.86819 | 11.0137 | 2.39031 | 23.4438 | 10.7584 | 20.2596 |
| ENSMUSG00000032504 | 15_Pdc6dip      | 6868.99 | 0.44086  | 0.00262  | 0.00819  | 7523.72 | 7624.21 | 8582.4  | 4755.49 | 6205.78 | 6522.33 |
| ENSMUSG00000032507 | 15_Fbxl2        | 67.9133 | -0.34736 | 0.41056  | 0.52694  | 72.0596 | 77.0957 | 29.8789 | 104.596 | 68.1363 | 55.714  |
| ENSMUSG00000032508 | 8_Myd88         | 1051.41 | 0.77945  | 4.01E-08 | 5.65E-07 | 1312.7  | 1184.89 | 1487.97 | 739.382 | 735.155 | 848.372 |
| ENSMUSG00000032511 | 17_Scn5a        | 5.65491 | -0.18339 | 0.84977  | 0.89809  | 2.60457 | 7.34244 | 5.97577 | 3.60674 | 8.06878 | 6.33113 |
| ENSMUSG00000032512 | 6_Wdr48         | 1371.22 | -0.23739 | 0.04304  | 0.08557  | 1240.64 | 1194.07 | 1343.35 | 1499.5  | 1558.17 | 1391.58 |
| ENSMUSG00000032513 | 7_Gorasp1       | 1042.19 | 0.83711  | 8.92E-07 | 8.30E-06 | 1168.58 | 1362.94 | 1477.21 | 834.961 | 601.572 | 807.853 |
| ENSMUSG00000032514 | 11_Ttc21a       | 11.6331 | -0.10632 | 0.88184  | 0.92023  | 7.8137  | 17.4383 | 8.36608 | 9.01685 | 17.0341 | 10.1298 |
| ENSMUSG00000032515 | 7_Csrnp1        | 487.747 | 1.49059  | 5.99E-10 | 1.51E-08 | 752.719 | 601.163 | 804.339 | 328.214 | 170.341 | 269.706 |
| ENSMUSG00000032517 | 15_Mobp         | 29.8384 | -0.48928 | 0.26974  | 0.3812   | 24.3093 | 18.3561 | 32.2692 | 33.3624 | 40.3439 | 30.3894 |
| ENSMUSG00000032518 | 5_Rpsa          | 24945.6 | 0.43513  | 0.0006   | 0.00232  | 28461   | 27270.8 | 30306.7 | 24107.5 | 18670.2 | 20857.3 |
| ENSMUSG00000032519 | 11_Slc25a38     | 303.88  | 0.69008  | 0.00155  | 0.00523  | 361.166 | 371.711 | 393.206 | 299.36  | 177.513 | 220.323 |
| ENSMUSG00000032523 | 10_Hhat1        | 35.4346 | -0.57409 | 0.33775  | 0.45421  | 20.8365 | 47.7259 | 16.7322 | 72.1348 | 19.7237 | 35.4544 |
| ENSMUSG00000032525 | 14_Nktr         | 4190.27 | -0.10986 | 0.37811  | 0.49564  | 4103.06 | 3926.37 | 4062.33 | 3753.72 | 4745.34 | 4550.82 |
| ENSMUSG00000032526 | 10_Deb1         | 230.184 | -0.7715  | 7.47E-05 | 0.00039  | 189.265 | 178.054 | 142.223 | 308.376 | 298.545 | 264.641 |
| ENSMUSG00000032527 | 13_Pccb         | 897.93  | -0.19727 | 0.20052  | 0.30152  | 843.879 | 887.518 | 778.045 | 1112.68 | 822.119 | 943.339 |
| ENSMUSG00000032528 | 4_Vipr1         | 94.5092 | 0.22803  | 0.49301  | 0.60468  | 121.546 | 84.4381 | 99.1978 | 99.1854 | 53.7918 | 108.896 |
| ENSMUSG00000032530 | 13_Lyzl4        | 0.45063 | 2.29438  | 0.56648  | NA       | 0.86819 | 1.83561 | 0       | 0       | 0       | 0       |
| ENSMUSG00000032531 | 15_Armt12       | 2853.97 | 0.62018  | 0.00028  | 0.00122  | 3053.42 | 3271.98 | 4050.38 | 2696.94 | 1893.47 | 2157.65 |
| ENSMUSG00000032532 | 6_Cck           | 20.3888 | -0.93765 | 0.14316  | 0.22988  | 14.7592 | 21.1095 | 5.97577 | 37.8708 | 28.689  | 13.9285 |
| ENSMUSG00000032534 | 16_Cep63        | 769.717 | -0.44444 | 0.00082  | 0.00303  | 691.946 | 632.368 | 631.041 | 806.107 | 941.357 | 915.482 |
| ENSMUSG00000032536 | 9_Trak1         | 1417.64 | 0.66771  | 4.40E-07 | 4.53E-06 | 1622.64 | 1751.17 | 1846.51 | 1206.46 | 973.632 | 1105.42 |
| ENSMUSG00000032537 | 14_Ephb1        | 96.7532 | -0.66756 | 0.01829  | 0.042    | 75.5324 | 91.7806 | 56.1722 | 129.843 | 103.101 | 124.09  |
| ENSMUSG00000032540 | 15_Abhd5        | 1659.77 | -0.20687 | 0.04988  | 0.09691  | 1528.88 | 1528.15 | 1565.65 | 1680.74 | 1828.03 | 1827.17 |
| ENSMUSG00000032547 | 12_Ryk          | 1804.5  | -0.08391 | 0.41819  | 0.53417  | 1771.1  | 1687.84 | 1797.51 | 1790.75 | 1915.89 | 1863.89 |
| ENSMUSG00000032548 | 14_Slco2a1      | 726.682 | 1.23671  | 8.47E-11 | 2.79E-09 | 1053.11 | 770.039 | 1238.18 | 409.365 | 434.817 | 454.575 |
| ENSMUSG00000032549 | 7_Rab6b         | 55.3362 | -1.29441 | 0.00739  | 0.01955  | 37.3321 | 34.8766 | 23.9031 | 137.056 | 51.9988 | 46.8504 |
| ENSMUSG00000032551 | 6_1110059G10Rik | 303.916 | -0.40948 | 0.02178  | 0.04869  | 264.797 | 266.164 | 252.178 | 300.261 | 400.749 | 339.349 |
| ENSMUSG00000032553 | 14_Srpb         | 809.53  | 0.30895  | 0.03807  | 0.07735  | 860.375 | 906.792 | 921.464 | 843.978 | 644.605 | 679.964 |
| ENSMUSG00000032554 | 15_Trif         | 4333.93 | -1.29318 | 0.00273  | 0.00847  | 3046.47 | 3137.06 | 1351.72 | 8464.12 | 5334.36 | 4669.84 |
| ENSMUSG00000032555 | 9_Topbp1        | 1537.22 | 0.35171  | 0.0337   | 0.06993  | 1831.01 | 1568.53 | 1770.02 | 1064.89 | 1432.66 | 1556.19 |
| ENSMUSG00000032556 | 10_Bfsp2        | 465.248 | -0.85235 | 0.30938  | 0.42425  | 250.906 | 626.861 | 117.125 | 1075.71 | 303.027 | 417.855 |
| ENSMUSG00000032557 | 11_Uba5         | 1061.21 | -0.26961 | 0.02405  | 0.05295  | 1016.65 | 897.614 | 972.855 | 1114.48 | 1212.11 | 1153.53 |
| ENSMUSG00000032558 | 18_Nphp3        | 243.972 | -0.36017 | 0.04617  | 0.09073  | 226.597 | 204.671 | 210.347 | 303.868 | 275.235 | 243.116 |
| ENSMUSG00000032560 | 13_Dnajc13      | 2488.18 | -0.027   | 0.83059  | 0.88404  | 2459.58 | 2377.12 | 2557.63 | 2181.18 | 2708.42 | 2645.15 |

|                    |                  |         |          |          |          |         |         |         |         |         |         |
|--------------------|------------------|---------|----------|----------|----------|---------|---------|---------|---------|---------|---------|
| ENSMUSG00000032561 | 14_Acpp          | 1844.99 | 0.0175   | 0.91574  | 0.94405  | 1905.67 | 1722.72 | 1939.74 | 1424.66 | 2100.57 | 1976.58 |
| ENSMUSG00000032562 | 13_Gnai2         | 6964.1  | 0.58535  | 6.08E-05 | 0.00032  | 8092.38 | 8336.43 | 8644.55 | 6477.71 | 4541.82 | 5691.69 |
| ENSMUSG00000032563 | 15_Mrpl3         | 756.65  | -0.22304 | 0.09954  | 0.17146  | 688.473 | 694.779 | 712.312 | 748.399 | 910.875 | 785.061 |
| ENSMUSG00000032564 | 15_Cpne4         | 7.25745 | -1.94861 | 0.05477  | 0.10453  | 3.47275 | 0.91781 | 4.78062 | 16.2303 | 14.3445 | 3.79868 |
| ENSMUSG00000032565 | 8_Nudt16         | 149.318 | -0.14644 | 0.49623  | 0.60731  | 148.46  | 142.26  | 135.052 | 172.222 | 164.962 | 132.954 |
| ENSMUSG00000032567 | 14_Aste1         | 104.004 | -0.21746 | 0.41354  | 0.52961  | 106.787 | 73.4244 | 108.759 | 105.497 | 121.928 | 107.629 |
| ENSMUSG00000032570 | 16_Atp2c1        | 2552.89 | -0.31265 | 0.0152   | 0.03599  | 2343.24 | 2178.87 | 2309.04 | 2435.45 | 3010.55 | 3040.21 |
| ENSMUSG00000032571 | 13_Pik3r4        | 758.716 | 0.51043  | 4.42E-05 | 0.00025  | 863.847 | 921.477 | 887.999 | 605.933 | 600.675 | 672.366 |
| ENSMUSG00000032572 | 7_Col6a4         | 33.7475 | 0.69771  | 0.0855   | 0.15098  | 37.3321 | 42.2191 | 45.4159 | 24.3455 | 21.5167 | 31.6557 |
| ENSMUSG00000032575 | 16_Manf          | 1700.93 | -0.12865 | 0.3658   | 0.48316  | 1724.22 | 1418.93 | 1731.78 | 1566.23 | 1833.41 | 1931    |
| ENSMUSG00000032577 | 16_Mapkapk3      | 3412.13 | 0.59247  | 2.98E-05 | 0.00017  | 3863.44 | 3918.11 | 4526.05 | 2534.64 | 2457.39 | 3173.16 |
| ENSMUSG00000032578 | 7_Cish           | 600.285 | 0.82948  | 1.97E-05 | 0.00012  | 802.206 | 628.697 | 873.658 | 486.91  | 344.268 | 465.972 |
| ENSMUSG00000032579 | 14_Hemk1         | 347.169 | 0.07989  | 0.65663  | 0.74961  | 384.607 | 357.944 | 327.472 | 394.037 | 292.269 | 326.687 |
| ENSMUSG00000032580 | 12_Rbm5          | 4435.81 | -0.1391  | 0.24988  | 0.35896  | 4238.5  | 4131.96 | 4295.38 | 4049.47 | 5016.99 | 4882.57 |
| ENSMUSG00000032582 | 14_Rbm6          | 2060.75 | -0.27072 | 0.08556  | 0.15107  | 1914.36 | 1737.41 | 1951.69 | 1789.85 | 2521.04 | 2450.15 |
| ENSMUSG00000032583 | 7_Mon1a          | 280.439 | 1.15392  | 2.14E-07 | 2.43E-06 | 355.957 | 364.369 | 441.012 | 216.405 | 132.687 | 172.207 |
| ENSMUSG00000032584 | 12_Mst1r         | 2068.91 | 1.45954  | 1.66E-17 | 2.23E-15 | 2627.14 | 2897.51 | 3577.1  | 1053.17 | 946.736 | 1311.81 |
| ENSMUSG00000032586 | 9_Traip          | 119.723 | 0.60731  | 0.00897  | 0.02306  | 159.747 | 125.739 | 148.199 | 91.0702 | 98.6184 | 94.967  |
| ENSMUSG00000032589 | 14_Bsn           | 77.0778 | 0.50663  | 0.27943  | 0.39209  | 96.3689 | 83.5203 | 92.0269 | 119.022 | 32.2751 | 39.253  |
| ENSMUSG00000032590 | 14_Apeh          | 1436    | 0.77402  | 3.25E-08 | 4.72E-07 | 1696.44 | 1732.82 | 2006.66 | 1081.12 | 931.495 | 1167.46 |
| ENSMUSG00000032591 | 15_Mst1          | 290.045 | 1.40696  | 7.39E-12 | 3.18E-10 | 391.553 | 396.492 | 474.476 | 161.402 | 126.411 | 189.934 |
| ENSMUSG00000032593 | 5_Amigo3         | 162.155 | 1.3384   | 1.01E-08 | 1.71E-07 | 217.915 | 196.41  | 283.252 | 96.4803 | 85.1704 | 93.7008 |
| ENSMUSG00000032594 | 11_Ip6k1         | 3728.32 | 0.57952  | 1.48E-05 | 9.53E-05 | 4268.01 | 4504.59 | 4630.03 | 3457.96 | 2622.35 | 2887    |
| ENSMUSG00000032595 | 10_Cdhr4         | 23.0149 | 0.02666  | 0.95742  | 0.97237  | 27.782  | 22.9451 | 19.1225 | 26.1489 | 26.8959 | 15.1947 |
| ENSMUSG00000032596 | 14_Uba7          | 3845.23 | 1.7593   | 6.84E-27 | 2.52E-24 | 5247.33 | 5393.03 | 7168.53 | 1641.97 | 1595.82 | 2024.7  |
| ENSMUSG00000032598 | 8_Nckipsd        | 317.192 | 0.9483   | 4.95E-07 | 5.02E-06 | 391.553 | 396.492 | 464.915 | 230.831 | 177.513 | 241.849 |
| ENSMUSG00000032599 | 12_Ip6k2         | 733.277 | 0.12562  | 0.3441   | 0.46066  | 755.324 | 802.162 | 738.605 | 770.941 | 674.191 | 658.438 |
| ENSMUSG00000032601 | 13_Prkar2a       | 1865.05 | -0.02392 | 0.83583  | 0.88789  | 1841.43 | 1741.08 | 1966.03 | 1758.29 | 1885.4  | 1998.11 |
| ENSMUSG00000032602 | 6_Slc25a20       | 456.107 | -0.04991 | 0.72174  | 0.80192  | 457.535 | 460.738 | 425.475 | 435.514 | 478.747 | 478.634 |
| ENSMUSG00000032604 | 14_Qars          | 4729.5  | 0.30287  | 0.00486  | 0.01376  | 5165.72 | 5026.82 | 5478.59 | 4025.12 | 4094.46 | 4586.27 |
| ENSMUSG00000032606 | 7_Nicn1          | 531.517 | -0.33726 | 0.02161  | 0.04839  | 461.876 | 511.218 | 436.231 | 615.851 | 625.778 | 538.146 |
| ENSMUSG00000032607 | 12_Amt           | 461.977 | -0.36083 | 0.0169   | 0.03937  | 430.621 | 392.821 | 389.62  | 569.865 | 469.782 | 519.153 |
| ENSMUSG00000032609 | 12_Klhdcb8b      | 443.237 | -0.13268 | 0.58349  | 0.68648  | 388.08  | 525.903 | 354.961 | 620.36  | 401.646 | 368.472 |
| ENSMUSG00000032611 | 9_1700102P08Rik  | 7.91651 | -0.79565 | 0.34264  | 0.45911  | 4.34094 | 3.67122 | 9.56123 | 12.6236 | 7.17224 | 10.1298 |
| ENSMUSG00000032612 | 14_Usp4          | 3520.9  | 0.22597  | 0.04616  | 0.09071  | 3757.52 | 3640.02 | 3989.42 | 3026.06 | 3159.37 | 3553.03 |
| ENSMUSG00000032615 | 14_Nt5m          | 227.506 | 0.41183  | 0.04025  | 0.08096  | 241.356 | 236.794 | 302.374 | 221.815 | 182.892 | 179.804 |
| ENSMUSG00000032621 | 7_Srek1          | 1549.98 | -0.42858 | 0.00051  | 0.00204  | 1369.13 | 1295.02 | 1299.13 | 1580.65 | 1890.78 | 1865.15 |
| ENSMUSG00000032623 | 9_Oas1d          | 0.29767 | 1.70332  | 0.67406  | NA       | 0.86819 | 0.91781 | 0       | 0       | 0       | 0       |
| ENSMUSG00000032624 | 15_Eml4          | 875.751 | -0.28221 | 0.02926  | 0.06217  | 809.152 | 831.532 | 729.044 | 887.259 | 1008.6  | 988.923 |
| ENSMUSG00000032625 | 14_Thsd7a        | 163.113 | -1.38816 | 8.36E-08 | 1.08E-06 | 88.5552 | 111.054 | 70.5141 | 286.736 | 226.822 | 194.999 |
| ENSMUSG00000032633 | 12_Fln           | 968.346 | 0.21676  | 0.19241  | 0.2923   | 1041.83 | 1124.31 | 957.318 | 1091.04 | 804.188 | 791.392 |
| ENSMUSG00000032637 | 15_Atxn2l        | 2004.31 | 0.76606  | 1.08E-10 | 3.43E-09 | 2290.28 | 2528.55 | 2754.83 | 1431.88 | 1516.03 | 1504.28 |
| ENSMUSG00000032640 | 10_Chcy1         | 636.986 | -0.05843 | 0.64137  | 0.73695  | 648.537 | 600.245 | 623.87  | 671.756 | 648.192 | 629.315 |
| ENSMUSG00000032641 | 17_Gpr19         | 103.676 | -0.19241 | 0.48284  | 0.59496  | 98.9735 | 91.7806 | 100.393 | 138.86  | 108.48  | 83.571  |
| ENSMUSG00000032643 | 12_Fhl3          | 111.332 | 0.59353  | 0.04339  | 0.08613  | 140.647 | 120.233 | 141.028 | 118.121 | 61.8606 | 86.1034 |
| ENSMUSG00000032648 | 14_Pygm          | 847.006 | -0.80693 | 0.01093  | 0.02723  | 540.881 | 903.121 | 403.962 | 1601.39 | 781.775 | 850.904 |
| ENSMUSG00000032649 | 14_Colgal2       | 764.227 | -1.02044 | 1.35E-06 | 1.19E-05 | 526.122 | 640.628 | 345.4   | 984.641 | 1042.67 | 1045.9  |
| ENSMUSG00000032652 | 13_Cesb12        | 785.038 | -0.72028 | 1.11E-06 | 1.00E-05 | 625.964 | 623.19  | 529.453 | 1099.15 | 935.978 | 896.489 |
| ENSMUSG00000032656 | 14_March3        | 325.952 | 0.88901  | 1.81E-06 | 1.54E-05 | 382.003 | 426.78  | 460.134 | 229.028 | 191.858 | 265.908 |
| ENSMUSG00000032657 | 15_Fam189b       | 201.751 | 0.68815  | 0.00205  | 0.00665  | 228.334 | 267.999 | 250.982 | 192.059 | 152.514 | 145.616 |
| ENSMUSG00000032661 | 9_Oas3           | 4154.73 | 1.93877  | 2.09E-20 | 4.02E-18 | 5198.71 | 5765.65 | 8805.9  | 1459.83 | 1665.17 | 2036.09 |
| ENSMUSG00000032666 | 16_1700025G04Rik | 1329.52 | -0.38282 | 0.001    | 0.00357  | 1144.27 | 1201.41 | 1115.08 | 1414.74 | 1484.65 | 1616.97 |
| ENSMUSG00000032667 | 17_Pon2          | 3701.76 | -0.32179 | 0.00218  | 0.00698  | 3403.3  | 3242.61 | 3224.53 | 3804.21 | 4230.73 | 4305.17 |
| ENSMUSG00000032673 | 5_Prorsd1        | 220.766 | -0.57041 | 0.00193  | 0.00633  | 188.397 | 176.219 | 168.517 | 256.079 | 292.269 | 243.116 |
| ENSMUSG00000032679 | 12_Cd59a         | 543.557 | -1.42389 | 1.18E-09 | 2.72E-08 | 283.898 | 384.561 | 216.323 | 880.045 | 878.6   | 617.919 |
| ENSMUSG00000032680 | 11_6820408C15Rik | 6.24204 | 0.46244  | 0.62521  | 0.72262  | 9.55007 | 8.26025 | 3.58546 | 3.60674 | 3.58612 | 8.86359 |
| ENSMUSG00000032688 | 7_Malt1          | 848.643 | -0.17179 | 0.35651  | 0.47324  | 856.034 | 729.655 | 807.924 | 671.756 | 1005.91 | 1020.58 |
| ENSMUSG00000032690 | 16_Oas2          | 6048.04 | 1.71544  | 6.26E-14 | 4.54E-12 | 7763.34 | 7459.92 | 12594.5 | 2109.94 | 3370.95 | 2989.56 |
| ENSMUSG00000032691 | 12_Nlrp3         | 24.7003 | 1.75251  | 0.0011   | 0.00389  | 46.8822 | 22.0273 | 45.4159 | 11.7219 | 10.7584 | 11.396  |
| ENSMUSG00000032698 | 15_Lmo2          | 346.124 | -0.27528 | 0.13559  | 0.21982  | 309.943 | 337.752 | 292.813 | 403.955 | 425.852 | 306.427 |
| ENSMUSG00000032702 | 16_Kank1         | 1840.04 | 0.67123  | 1.46E-06 | 1.27E-05 | 2036.77 | 2240.36 | 2505.04 | 1552.7  | 1254.25 | 1451.1  |
| ENSMUSG00000032705 | 8_Ext2           | 491.62  | -0.15831 | 0.23928  | 0.34685  | 477.504 | 446.054 | 470.891 | 507.649 | 542.401 | 505.225 |
| ENSMUSG00000032712 | 16_2810474O19Rik | 1500.54 | 0.24242  | 0.1735   | 0.26892  | 1639.14 | 1446.46 | 1792.73 | 1048.66 | 1512.45 | 1563.79 |
| ENSMUSG00000032714 | 6_Syde1          | 424.677 | -0.09383 | 0.67563  | 0.76507  | 404.576 | 502.957 | 325.082 | 549.126 | 401.646 | 364.673 |
| ENSMUSG00000032715 | 9_Trib3          | 87.3501 | 0.04463  | 0.86375  | 0.90755  | 85.9507 | 95.4518 | 84.8559 | 97.382  | 80.6878 | 79.7723 |
| ENSMUSG00000032717 | 14_Mdf1          | 332.569 | 1.53628  | 1.99E-07 | 2.27E-06 | 436.699 | 444.218 | 603.553 | 251.57  | 104.894 | 154.48  |
| ENSMUSG00000032718 | 4_Mansc1         | 72.2082 | -0.42499 | 0.1939   | 0.29395  | 51.2231 | 74.3423 | 59.7577 | 107.301 | 73.5155 | 67.11   |
| ENSMUSG00000032719 | 4_Sbspon         | 132.723 | -1.49204 | 1.12E-06 | 1.01E-05 | 74.6642 | 93.6162 | 39.4401 | 210.994 | 192.754 | 184.869 |
| ENSMUSG00000032724 | 5_Abtb2          | 566.912 | 1.18891  | 1.49E-07 | 1.78E-06 | 712.783 | 739.751 | 911.903 | 436.416 | 238.477 | 362.141 |
| ENSMUSG00000032725 | 9_Folr2          | 177.84  | -0.02366 | 0.90533  | 0.93611  | 193.606 | 170.712 | 164.931 | 196.567 | 176.617 | 164.609 |
| ENSMUSG00000032726 | 12_Bmp8a         | 2.77239 | -0.57845 | 0.7375   | 0.81427  | 4.34094 | 0       | 2.39031 | 7.21348 | 2.68959 | 0       |
| ENSMUSG00000032727 | 13_Mier3         | 788.968 | -0.25498 | 0.04665  | 0.0915   | 764.874 | 701.203 | 690.799 | 797.992 | 872.324 | 906.618 |
| ENSMUSG00000032733 | 5_Snx33          | 1482.97 | 0.44175  | 0.00245  | 0.00773  | 1653.9  | 1590.56 | 1879.98 | 1346.22 | 1065.97 | 1361.19 |
| ENSMUSG00000032735 | 14_Ablim3        | 134.886 | -0.73106 | 0.04424  | 0.08755  | 68.5869 | 152.356 | 83.6608 | 207.388 | 190.961 | 106.363 |
| ENSMUSG00000032737 | 12_Innpl1        | 1330.48 | 0.46036  | 0.00074  | 0.0028   | 1468.11 | 1575.87 | 1579.99 | 1285.8  | 1009.49 | 1063.63 |
| ENSMUSG00000032739 | 16_Pram1         | 30.6523 | 0.22662  | 0.63455  | 0.7308   | 31.2548 | 34.8766 | 33.4643 | 43.2809 | 23.3098 | 17.7272 |
| ENSMUSG00000032740 | 16_Ccdc88a       | 266.571 | -1.22605 | 8.92E-07 | 8.30E-06 | 192.738 | 170.712 | 114.735 | 365.183 | 457.231 | 298.83  |
| ENSMUSG00000032741 | 9_Tpcn1          | 2648.64 | 0.59273  | 1.30E-05 | 8.52E-05 | 2943.16 | 3259.13 | 3352.41 | 2235.28 | 1801.13 | 2300.73 |
| ENSMUSG00000032743 | 15_D430042O09Rik | 635.081 | 0.28745  | 0.05359  | 0.10258  | 628.568 | 749.847 | 717.092 | 637.492 | 540.608 | 536.88  |

|                    |                  |         |          |          |          |         |         |         |         |         |         |
|--------------------|------------------|---------|----------|----------|----------|---------|---------|---------|---------|---------|---------|
| ENSMUSG00000032744 | 4_Heyl           | 152.766 | -0.83115 | 0.00124  | 0.00433  | 100.71  | 135.835 | 93.222  | 240.75  | 180.203 | 165.876 |
| ENSMUSG00000032745 | 17_Gbbp1         | 2325.59 | -0.54113 | 0.00015  | 0.00071  | 1957.76 | 1774.12 | 1951.69 | 2320.04 | 3141.44 | 2808.49 |
| ENSMUSG00000032750 | 13_Gab3          | 16.493  | -0.70338 | 0.25052  | 0.35963  | 13.0228 | 18.3561 | 5.97577 | 18.0337 | 23.3098 | 20.2596 |
| ENSMUSG00000032754 | 14_Slc8b1        | 2608.28 | 1.0893   | 3.44E-10 | 9.44E-09 | 3211.43 | 3458.29 | 3975.08 | 1780.83 | 1282.94 | 1941.13 |
| ENSMUSG00000032757 | 6_Bet1           | 508.112 | -0.40294 | 0.002    | 0.00652  | 424.544 | 436.875 | 451.768 | 577.079 | 574.676 | 583.731 |
| ENSMUSG00000032763 | 10_Illvl         | 378.933 | 0.19882  | 0.2668   | 0.37808  | 380.267 | 441.464 | 393.206 | 410.267 | 297.648 | 350.745 |
| ENSMUSG00000032766 | 9_Gng11          | 383.356 | -1.32723 | 2.45E-09 | 5.07E-08 | 215.311 | 279.013 | 160.151 | 555.438 | 614.123 | 476.101 |
| ENSMUSG00000032769 | 4_Trap1          | 2.31336 | -3.63159 | 0.05714  | NA       | 0       | 0.91781 | 0       | 7.21348 | 4.48265 | 1.26623 |
| ENSMUSG00000032773 | 9_Chrm1          | 38.9113 | -0.55486 | 0.26849  | 0.38     | 23.4411 | 49.5615 | 21.5128 | 69.4298 | 34.0682 | 35.4544 |
| ENSMUSG00000032776 | 9_Mctp2          | 1568.52 | 0.18342  | 0.3224   | 0.43822  | 1718.14 | 1612.58 | 1672.02 | 1063.99 | 1586.86 | 1757.52 |
| ENSMUSG00000032777 | 9_Gtf3c1         | 2712.49 | 0.59162  | 2.45E-05 | 0.00015  | 2790.36 | 3403.22 | 3589.05 | 2173.96 | 1966.99 | 2351.38 |
| ENSMUSG00000032782 | 19_Cntrob        | 302.202 | 0.85391  | 1.43E-05 | 9.26E-05 | 329.912 | 417.602 | 419.499 | 233.537 | 178.41  | 234.252 |
| ENSMUSG00000032783 | 8_Troap          | 80.0811 | 1.23412  | 0.00019  | 0.00085  | 117.205 | 83.5203 | 136.248 | 54.1011 | 34.9647 | 54.4478 |
| ENSMUSG00000032786 | 14_Alas1         | 913.314 | 0.37835  | 0.00236  | 0.00749  | 982.789 | 1063.74 | 1051.74 | 860.208 | 762.948 | 758.47  |
| ENSMUSG00000032788 | 14_Pdxk          | 6541.55 | 0.73213  | 1.33E-06 | 1.18E-05 | 7053.16 | 8374.06 | 9071.22 | 4585.07 | 4408.24 | 5757.53 |
| ENSMUSG00000032796 | 7_Lama1          | 108.628 | -0.40434 | 0.18002  | 0.27699  | 81.6097 | 119.315 | 78.8802 | 137.958 | 89.6531 | 144.35  |
| ENSMUSG00000032802 | 8_Srxn1          | 886.341 | 0.07188  | 0.55594  | 0.66202  | 950.666 | 936.162 | 837.803 | 862.913 | 888.462 | 842.041 |
| ENSMUSG00000032803 | 14_Cdv3          | 4860.34 | -0.28098 | 0.02214  | 0.04937  | 4495.48 | 4198.04 | 4471.07 | 4636.47 | 5606.01 | 5755    |
| ENSMUSG00000032806 | 13_Slc10a3       | 645.489 | 0.19066  | 0.18624  | 0.28479  | 684.132 | 613.094 | 767.289 | 581.587 | 589.917 | 636.912 |
| ENSMUSG00000032807 | 5_Alox12b        | 35.6715 | 2.20181  | 1.97E-07 | 2.26E-06 | 59.905  | 60.5752 | 54.9771 | 11.7219 | 11.6549 | 15.1947 |
| ENSMUSG00000032812 | 16_Arap1         | 3562.96 | 0.97474  | 3.46E-10 | 9.46E-09 | 4388.69 | 4486.23 | 5293.34 | 2701.45 | 1955.33 | 2552.71 |
| ENSMUSG00000032815 | 15_Fanca         | 537.795 | 1.20059  | 2.83E-13 | 1.79E-11 | 671.11  | 698.45  | 879.633 | 342.64  | 305.717 | 329.219 |
| ENSMUSG00000032816 | 14_Igdc4         | 380.411 | -0.72296 | 0.00409  | 0.01191  | 266.534 | 395.574 | 198.396 | 525.683 | 494.885 | 401.394 |
| ENSMUSG00000032818 | 15_Loxhd1        | 1.07751 | -2.37436 | 0.31714  | NA       | 0.86819 | 0       | 0       | 0.90169 | 0.89653 | 3.79868 |
| ENSMUSG00000032826 | 16_Ank2          | 1475.25 | -0.66258 | 4.53E-06 | 3.40E-05 | 1205.05 | 1194.07 | 1027.83 | 2045.92 | 1804.72 | 1573.92 |
| ENSMUSG00000032827 | 15_Ppp1r9a       | 725.205 | -1.36126 | 3.75E-07 | 3.93E-06 | 435.831 | 523.149 | 259.348 | 1210.06 | 1189.7  | 733.145 |
| ENSMUSG00000032834 | 10_Pwp2          | 633.277 | 0.71941  | 5.73E-06 | 4.18E-05 | 745.774 | 708.546 | 909.512 | 479.697 | 435.714 | 520.419 |
| ENSMUSG00000032839 | 13_Trpc1         | 104.109 | -1.23313 | 0.00046  | 0.00184  | 67.7187 | 74.3423 | 44.2207 | 200.174 | 147.031 | 91.1683 |
| ENSMUSG00000032840 | 7_2410131K14Rik  | 547.288 | -0.27373 | 0.14043  | 0.22633  | 475.767 | 539.67  | 470.891 | 724.053 | 476.954 | 596.393 |
| ENSMUSG00000032841 | 15_Prr5l         | 136.247 | -0.21767 | 0.37729  | 0.4948   | 145.856 | 135.835 | 95.6123 | 162.303 | 139.859 | 138.019 |
| ENSMUSG00000032842 | 13_Abcc10        | 211.463 | 0.87931  | 0.00047  | 0.00187  | 243.961 | 290.944 | 288.032 | 202.879 | 120.135 | 122.824 |
| ENSMUSG00000032845 | 15_Alpk2         | 27.0479 | -0.35177 | 0.47241  | 0.58551  | 25.1775 | 24.7808 | 21.5128 | 45.0843 | 24.2063 | 21.5259 |
| ENSMUSG00000032846 | 9_Zswim6         | 615.419 | 0.27407  | 0.04454  | 0.08806  | 664.164 | 653.478 | 702.751 | 506.747 | 563.918 | 601.458 |
| ENSMUSG00000032849 | 13_Abcc4         | 2731.92 | 0.311    | 0.02743  | 0.05904  | 3007.4  | 2908.53 | 3157.6  | 2160.44 | 2271.81 | 2885.73 |
| ENSMUSG00000032850 | 16_Rnft2         | 141.328 | -0.4457  | 0.13332  | 0.21715  | 131.096 | 120.233 | 107.564 | 227.225 | 111.17  | 150.681 |
| ENSMUSG00000032852 | 3_Rspo4          | 1.32473 | -2.73062 | 0.20333  | NA       | 0       | 0.91781 | 0       | 2.70506 | 1.79306 | 2.53245 |
| ENSMUSG00000032854 | 12_Ugt8a         | 6.7083  | -1.71265 | 0.08606  | 0.15182  | 2.60457 | 5.50683 | 1.19515 | 6.3118  | 17.0341 | 7.59736 |
| ENSMUSG00000032855 | 5_Pkd1           | 2234.88 | 0.20375  | 0.28665  | 0.40007  | 2304.17 | 2710.28 | 2163.23 | 2701.45 | 1689.06 | 1841.09 |
| ENSMUSG00000032860 | 4_P2ry2          | 2721.79 | 0.97     | 1.60E-10 | 4.87E-09 | 3224.45 | 3302.26 | 4284.63 | 1863.78 | 1655    | 2000.64 |
| ENSMUSG00000032864 | 4_Rag2           | 0.21104 | -0.99647 | 0.80707  | NA       | 0       | 0       | 0       | 0       | 0       | 1.26623 |
| ENSMUSG00000032867 | 8_Fbxw8          | 2107.1  | 0.71798  | 1.64E-05 | 0.0001   | 2432.66 | 2614.83 | 2814.59 | 1824.11 | 1231.83 | 1724.6  |
| ENSMUSG00000032869 | 15_Psmf1         | 929.846 | 0.26182  | 0.02785  | 0.05971  | 963.689 | 1030.7  | 1048.15 | 886.357 | 806.878 | 843.307 |
| ENSMUSG00000032870 | 8_Smap2          | 713.985 | 0.23777  | 0.09375  | 0.163    | 790.92  | 683.765 | 843.779 | 612.244 | 679.57  | 673.633 |
| ENSMUSG00000032872 | 16_Cyb5r4        | 999.907 | -0.2811  | 0.07481  | 0.13566  | 974.107 | 840.71  | 892.78  | 899.882 | 1221.97 | 1169.99 |
| ENSMUSG00000032875 | 7_Arhgef17       | 3474.46 | 1.11583  | 2.89E-09 | 5.81E-08 | 4048.36 | 4749.64 | 5466.63 | 2597.76 | 1646.93 | 2337.45 |
| ENSMUSG00000032878 | 16_Ccdc85a       | 28.9257 | -0.83883 | 0.15446  | 0.24497  | 24.3093 | 29.3698 | 8.36608 | 57.7079 | 32.2751 | 21.5259 |
| ENSMUSG00000032883 | 15_Acsl3         | 1847.54 | -0.614   | 1.34E-07 | 1.62E-06 | 1514.12 | 1453.8  | 1412.67 | 2109.94 | 2448.43 | 2146.25 |
| ENSMUSG00000032889 | 6_Gm6685         | 47.05   | 0.11612  | 0.7932   | 0.85676  | 31.2548 | 38.5478 | 77.685  | 55.0028 | 36.7578 | 43.0517 |
| ENSMUSG00000032890 | 17_Rims3         | 55.5049 | -0.29338 | 0.45346  | 0.56774  | 63.3778 | 37.63   | 49.0013 | 83.8567 | 57.378  | 41.7855 |
| ENSMUSG00000032892 | 14_Rangrf        | 271.639 | 0.11457  | 0.52795  | 0.63672  | 288.239 | 250.561 | 308.35  | 230.831 | 270.752 | 281.102 |
| ENSMUSG00000032897 | 17_Nfyc          | 1011.7  | 0.29615  | 0.02396  | 0.0528   | 1139.93 | 1046.3  | 1159.3  | 982.837 | 814.946 | 926.878 |
| ENSMUSG00000032898 | 9_Fbxo21         | 550.713 | 0.07056  | 0.69361  | 0.78049  | 544.354 | 662.656 | 485.233 | 621.261 | 486.816 | 503.958 |
| ENSMUSG00000032899 | 14_Styk1         | 106.33  | 0.4061   | 0.1313   | 0.21457  | 114.601 | 124.822 | 123.101 | 75.7416 | 80.6878 | 119.025 |
| ENSMUSG00000032902 | 1_Slc16a1        | 955.37  | -1.04998 | 2.71E-06 | 2.18E-05 | 758.797 | 650.724 | 456.549 | 1576.15 | 1297.28 | 992.722 |
| ENSMUSG00000032905 | 4_Atg12          | 1563.58 | -0.35261 | 0.00226  | 0.00721  | 1418.62 | 1294.11 | 1406.7  | 1660    | 1720.44 | 1881.61 |
| ENSMUSG00000032908 | 9_Sgpp2          | 7.7187  | -0.92265 | 0.27651  | 0.38895  | 5.20913 | 8.26025 | 2.39031 | 12.6236 | 8.96531 | 8.86359 |
| ENSMUSG00000032911 | 5_Cspg4          | 141.857 | 0.55712  | 0.04584  | 0.09019  | 132.833 | 197.328 | 176.883 | 146.975 | 86.9635 | 110.162 |
| ENSMUSG00000032913 | 13_Lrig2         | 865.774 | -0.23317 | 0.06191  | 0.11591  | 819.57  | 759.943 | 807.924 | 861.11  | 973.632 | 972.462 |
| ENSMUSG00000032915 | 6_Adgre4         | 6.25328 | 0.64966  | 0.51964  | 0.6297   | 13.0228 | 2.75342 | 7.17092 | 2.70506 | 8.06878 | 3.79868 |
| ENSMUSG00000032925 | 16_Iltgbl1       | 1877.6  | -0.65265 | 6.82E-09 | 1.23E-07 | 1397.78 | 1572.2  | 1410.28 | 2387.66 | 2312.15 | 2185.51 |
| ENSMUSG00000032932 | 14_Hspa13        | 1084.09 | -0.64605 | 3.67E-06 | 2.82E-05 | 881.211 | 835.203 | 818.681 | 1136.12 | 1450.59 | 1382.72 |
| ENSMUSG00000032936 | 13_Camkv         | 17.4742 | -1.08691 | 0.27322  | 0.38526  | 18.232  | 12.8493 | 2.39031 | 58.6096 | 8.96531 | 3.79868 |
| ENSMUSG00000032939 | 13_Nup93         | 1097.97 | 0.50015  | 0.00144  | 0.00492  | 1266.69 | 1200.49 | 1391.16 | 743.891 | 963.77  | 1021.85 |
| ENSMUSG00000032940 | 16_Rbm11         | 45.5007 | -2.00942 | 1.22E-05 | 8.09E-05 | 13.891  | 29.3698 | 10.7564 | 82.9551 | 81.5843 | 54.4478 |
| ENSMUSG00000032942 | 14_Ucp3          | 96.709  | 0.02999  | 0.92055  | 0.94717  | 92.8962 | 120.233 | 80.0753 | 123.531 | 82.4808 | 81.0385 |
| ENSMUSG00000032946 | 16_Rasgrp2       | 53.5896 | 0.09379  | 0.78868  | 0.85313  | 50.3549 | 72.5066 | 43.0255 | 55.9045 | 52.8953 | 46.8504 |
| ENSMUSG00000032952 | 11_Ap4b1         | 722.073 | 0.04878  | 0.71211  | 0.79425  | 721.465 | 685.601 | 795.973 | 669.952 | 713.638 | 745.808 |
| ENSMUSG00000032959 | 12_Pebp1         | 5276.44 | 0.16715  | 0.11579  | 0.19397  | 5489.56 | 5474.71 | 5780.96 | 5248.71 | 4551.69 | 5113.02 |
| ENSMUSG00000032965 | 10_Ift57         | 293.929 | -0.72046 | 0.0001   | 0.00051  | 223.124 | 252.397 | 190.03  | 350.756 | 407.921 | 339.349 |
| ENSMUSG00000032966 | 14_Fkbp1a        | 1071.53 | -0.77474 | 6.83E-07 | 6.59E-06 | 826.515 | 859.984 | 684.823 | 1508.52 | 1386.93 | 1162.4  |
| ENSMUSG00000032968 | 4_Inha           | 59.6317 | 0.41893  | 0.34654  | 0.46339  | 69.4551 | 86.2737 | 49.0013 | 82.9551 | 29.5855 | 40.5193 |
| ENSMUSG00000032977 | 8_Fam207a        | 681.755 | 0.68055  | 0.00075  | 0.0028   | 786.579 | 811.34  | 921.464 | 663.641 | 390.887 | 516.621 |
| ENSMUSG00000032985 | 15_5730522E02Rik | 1.44527 | -3.98678 | 0.13663  | NA       | 0       | 0       | 0       | 3.60674 | 0       | 5.06491 |
| ENSMUSG00000032988 | 3_Slc16a8        | 143.148 | -0.26061 | 0.58598  | 0.68888  | 137.174 | 165.205 | 88.4414 | 301.163 | 68.1363 | 98.7657 |
| ENSMUSG00000032997 | 16_Chpf          | 402.181 | 1.16212  | 1.03E-05 | 6.98E-05 | 461.008 | 656.231 | 550.966 | 347.149 | 168.548 | 229.187 |
| ENSMUSG00000032998 | 16_Foxj3         | 1292.46 | -0.07398 | 0.54856  | 0.65506  | 1280.58 | 1220.68 | 1276.42 | 1188.42 | 1423.69 | 1364.99 |
| ENSMUSG00000032999 | 9_Nlrp4f         | 1.4777  | -1.89166 | 0.35759  | NA       | 0       | 1.83561 | 0       | 2.70506 | 1.79306 | 2.53245 |
| ENSMUSG00000033004 | 14_Mycbp2        | 6854.95 | -0.08131 | 0.50285  | 0.61378  | 7168.63 | 6012.54 | 6802.82 | 6614.76 | 6814.53 | 7716.39 |
| ENSMUSG00000033006 | 9_Sox10          | 202.573 | -0.09404 | 0.78964  | 0.85395  | 180.583 | 261.575 | 145.809 | 330.017 | 135.376 | 162.077 |

|                    |                  |         |          |          |          |         |         |         |         |         |         |
|--------------------|------------------|---------|----------|----------|----------|---------|---------|---------|---------|---------|---------|
| ENSMUSG00000033007 | 15_Asic4         | 7.64069 | -0.72621 | 0.47299  | 0.58585  | 8.68188 | 7.34244 | 1.19515 | 16.2303 | 9.86184 | 2.53245 |
| ENSMUSG00000033009 | 15_Ogfod1        | 883.346 | 0.00488  | 0.96897  | 0.98006  | 851.693 | 901.285 | 901.146 | 803.402 | 920.737 | 921.813 |
| ENSMUSG00000033014 | 12_Trim33        | 1694.82 | -0.21297 | 0.12909  | 0.21174  | 1607.88 | 1491.43 | 1609.87 | 1526.55 | 1976.85 | 1956.32 |
| ENSMUSG00000033016 | 15_Nfatc1        | 221.931 | 0.47406  | 0.01127  | 0.02793  | 271.743 | 230.369 | 272.495 | 202.879 | 173.03  | 181.07  |
| ENSMUSG00000033020 | 6_Polr2f         | 718.358 | 0.91553  | 0.00087  | 0.00317  | 791.788 | 896.696 | 1128.23 | 656.427 | 282.407 | 554.607 |
| ENSMUSG00000033021 | 16_Gmppa         | 798.592 | 0.83305  | 1.77E-07 | 2.06E-06 | 924.621 | 1039.87 | 1104.32 | 642.902 | 479.644 | 600.192 |
| ENSMUSG00000033022 | 7_Cdo1           | 5318.43 | -0.46903 | 2.88E-07 | 3.13E-06 | 4597.06 | 4396.29 | 4389.8  | 6061.13 | 6152.89 | 6313.41 |
| ENSMUSG00000033024 | 16_Klra9         | 1.0721  | 2.36316  | 0.37757  | NA       | 4.34094 | 0       | 1.19515 | 0       | 0.89653 | 0       |
| ENSMUSG00000033027 | 15_Klrc3         | 1.17176 | 0.6815   | 0.81987  | NA       | 4.34094 | 0       | 0       | 0       | 2.68959 | 0       |
| ENSMUSG00000033029 | 12_1700088E04Rik | 117.983 | 0.93797  | 9.09E-05 | 0.00046  | 140.647 | 177.136 | 147.004 | 84.7584 | 73.5155 | 84.8372 |
| ENSMUSG00000033031 | 13_C330027C09Rik | 371.733 | 0.1432   | 0.54647  | 0.65297  | 395.894 | 314.807 | 460.134 | 253.374 | 433.921 | 372.271 |
| ENSMUSG00000033032 | 7_Afap11i        | 239.052 | 0.2253   | 0.2688   | 0.38025  | 243.961 | 242.301 | 288.032 | 265.096 | 199.926 | 194.999 |
| ENSMUSG00000033033 | 10_Calhm2        | 157.324 | 0.62679  | 0.00913  | 0.02339  | 191.001 | 189.986 | 192.42  | 158.697 | 100.411 | 111.428 |
| ENSMUSG00000033036 | 9_Gm7879         | 273.98  | -0.40009 | 0.02574  | 0.056    | 237.015 | 209.26  | 262.934 | 282.228 | 330.82  | 321.622 |
| ENSMUSG00000033039 | 9_Micall1        | 3633.92 | 0.96041  | 4.38E-10 | 1.16E-08 | 4288.85 | 4684.48 | 5427.19 | 2375.04 | 2134.64 | 2893.33 |
| ENSMUSG00000033044 | 12_Dhrs7c        | 19.9832 | -1.51401 | 0.07507  | 0.13604  | 7.8137  | 18.3561 | 4.78062 | 59.5112 | 5.37918 | 24.0583 |
| ENSMUSG00000033047 | 4_Elf3l          | 3340.67 | 0.27618  | 0.02321  | 0.0514   | 3780.96 | 3365.59 | 3830.47 | 2762.76 | 2985.45 | 3318.78 |
| ENSMUSG00000033053 | 3_1700028P14Rik  | 0.15297 | 0.92709  | 0.82027  | NA       | 0       | 0.91781 | 0       | 0       | 0       | 0       |
| ENSMUSG00000033054 | 7_Npat           | 627.376 | -0.19146 | 0.19336  | 0.29334  | 626.832 | 540.587 | 590.406 | 615.851 | 748.603 | 641.977 |
| ENSMUSG00000033055 | 10_Ankrd54       | 389.211 | 0.81896  | 1.75E-05 | 0.00011  | 427.149 | 536.916 | 527.063 | 335.427 | 240.27  | 268.44  |
| ENSMUSG00000033059 | 7_Pygb           | 2703.53 | 0.1449   | 0.1599   | 0.25205  | 2741.74 | 2871.81 | 2904.22 | 2685.22 | 2422.43 | 2595.77 |
| ENSMUSG00000033060 | 15_Lmo7          | 11549.3 | 0.39385  | 0.00462  | 0.01319  | 12921.2 | 12617.1 | 13807.6 | 8680.53 | 9465.57 | 11803.8 |
| ENSMUSG00000033061 | 15_Resp18        | 2.54555 | -1.68921 | 0.33585  | 0.45254  | 1.73638 | 1.83561 | 0       | 8.11517 | 3.58612 | 0       |
| ENSMUSG00000033063 | 7_Cntnap3        | 7.87619 | -1.19555 | 0.15983  | 0.25198  | 2.60457 | 3.67122 | 8.36608 | 12.6236 | 9.86184 | 10.1298 |
| ENSMUSG00000033065 | 13_Pfkm          | 1882.23 | -0.10691 | 0.59775  | 0.69947  | 1584.44 | 2176.12 | 1676.8  | 2452.58 | 1477.48 | 1925.93 |
| ENSMUSG00000033066 | 15_Gas7          | 723.592 | -0.73113 | 0.00021  | 0.00093  | 614.677 | 591.067 | 425.475 | 1095.55 | 800.602 | 814.184 |
| ENSMUSG00000033068 | 16_Entpd6        | 286.791 | 0.47388  | 0.00467  | 0.01333  | 313.416 | 336.835 | 350.18  | 255.177 | 216.96  | 248.18  |
| ENSMUSG00000033075 | 17_Senp1         | 1542.54 | 0.19274  | 0.19729  | 0.29776  | 1731.17 | 1555.68 | 1648.12 | 1178.5  | 1550.1  | 1591.65 |
| ENSMUSG00000033080 | 9_Vsx1           | 5.76328 | -2.40061 | 0.0685   | 0.1263   | 1.73638 | 3.67122 | 0       | 19.8371 | 8.06878 | 1.26623 |
| ENSMUSG00000033082 | 10_Clec1a        | 57.3923 | -0.92931 | 0.00466  | 0.01329  | 33.8593 | 48.6437 | 35.8546 | 80.25   | 67.2398 | 78.5061 |
| ENSMUSG00000033083 | 16_Tbc1d4        | 317.815 | -0.33935 | 0.02727  | 0.05877  | 281.293 | 290.944 | 268.91  | 338.132 | 360.405 | 367.206 |
| ENSMUSG00000033088 | 18_Triobp        | 1823.96 | 1.23222  | 5.02E-10 | 1.30E-08 | 2264.24 | 2452.38 | 2959.2  | 1278.59 | 782.671 | 1206.71 |
| ENSMUSG00000033096 | 7_Apmap          | 1051.68 | -0.47989 | 6.76E-05 | 0.00035  | 907.257 | 879.258 | 847.364 | 1128.01 | 1273.07 | 1275.09 |
| ENSMUSG00000033099 | 9_Nol12          | 550.794 | 0.6603   | 0.00043  | 0.00176  | 644.196 | 632.368 | 746.971 | 477.893 | 327.234 | 476.101 |
| ENSMUSG00000033102 | 14_Cdc14b        | 630.287 | -0.33812 | 0.02421  | 0.05323  | 557.377 | 526.82  | 586.821 | 623.966 | 797.912 | 688.827 |
| ENSMUSG00000033105 | 12_Lss           | 4087.73 | 0.67797  | 1.94E-08 | 3.04E-07 | 5024.21 | 4589.03 | 5478.59 | 2987.28 | 3028.48 | 3418.81 |
| ENSMUSG00000033106 | 5_Slc7a6os       | 288.082 | -0.0763  | 0.65793  | 0.75054  | 276.952 | 267.081 | 297.593 | 260.587 | 323.648 | 302.628 |
| ENSMUSG00000033107 | 5_Rnf125         | 14.4947 | -1.04293 | 0.0828   | 0.14734  | 8.68188 | 9.17806 | 10.7564 | 21.6405 | 21.5167 | 15.1947 |
| ENSMUSG00000033111 | 15_3830406C13Rik | 1238.44 | -0.59219 | 3.45E-06 | 2.68E-05 | 998.417 | 988.477 | 976.441 | 1342.61 | 1655.89 | 1468.82 |
| ENSMUSG00000033114 | 10_Slc35d2       | 151.028 | -0.12552 | 0.589    | 0.69157  | 171.901 | 122.068 | 138.638 | 140.663 | 156.893 | 176.006 |
| ENSMUSG00000033124 | 15_Atg9a         | 894.23  | 1.06151  | 7.44E-11 | 2.51E-09 | 1035.75 | 1281.26 | 1311.08 | 662.739 | 504.747 | 569.802 |
| ENSMUSG00000033126 | 4_Ybey           | 145.319 | 0.24014  | 0.26607  | 0.37733  | 146.724 | 149.602 | 175.688 | 126.236 | 125.514 | 148.149 |
| ENSMUSG00000033128 | 8_Gga1           | 1351.85 | 1.23732  | 2.53E-10 | 7.22E-09 | 1679.08 | 1868.65 | 2147.69 | 986.444 | 593.503 | 835.71  |
| ENSMUSG00000033147 | 16_Slc22a15      | 478.677 | 0.25009  | 0.06959  | 0.12793  | 551.3   | 491.944 | 516.307 | 435.514 | 424.955 | 452.043 |
| ENSMUSG00000033149 | 16_Phldb2        | 1106.88 | -0.35311 | 0.00283  | 0.00874  | 969.766 | 969.203 | 977.636 | 1159.57 | 1339.42 | 1225.71 |
| ENSMUSG00000033152 | 13_Podxl2        | 743.645 | -0.42721 | 0.19229  | 0.29218  | 561.718 | 925.148 | 415.914 | 1301.13 | 588.124 | 669.834 |
| ENSMUSG00000033157 | 16_Abhd10        | 176.666 | -0.46392 | 0.01436  | 0.03427  | 138.91  | 150.52  | 156.565 | 203.781 | 208.892 | 201.33  |
| ENSMUSG00000033159 | 14_Cnppd1        | 1094.06 | 0.41859  | 0.00092  | 0.00333  | 1166.85 | 1237.2  | 1351.72 | 990.952 | 870.531 | 947.138 |
| ENSMUSG00000033161 | 10_Atp1a1        | 17176.5 | 0.4109   | 0.00034  | 0.00143  | 18467.2 | 19976   | 20373.8 | 14917.5 | 13262.4 | 16062.1 |
| ENSMUSG00000033166 | 10_Dis3          | 574.203 | -0.17636 | 0.32976  | 0.44634  | 584.291 | 487.355 | 546.185 | 509.452 | 740.534 | 577.399 |
| ENSMUSG00000033170 | 14_Card10        | 434.057 | 1.43188  | 3.52E-07 | 3.72E-06 | 545.222 | 620.437 | 733.825 | 297.556 | 129.997 | 277.304 |
| ENSMUSG00000033174 | 17_Mgll          | 7188.85 | -0.45271 | 0.0638   | 0.11886  | 5374.95 | 8010.61 | 4824.84 | 11529   | 6949.91 | 6443.83 |
| ENSMUSG00000033177 | 13_Tmprss7       | 4.67806 | -1.92462 | 0.08371  | 0.14848  | 2.60457 | 0.91781 | 2.39031 | 9.91854 | 7.17224 | 5.06491 |
| ENSMUSG00000033182 | 12_Kbtbd12       | 5.56666 | -2.2128  | 0.03531  | 0.07272  | 0.86819 | 2.75342 | 2.39031 | 11.7219 | 8.06878 | 7.59736 |
| ENSMUSG00000033184 | 14_Tmed7         | 2864.71 | -0.35011 | 0.00162  | 0.00543  | 2556.81 | 2404.65 | 2595.87 | 3015.24 | 3483.02 | 3132.65 |
| ENSMUSG00000033186 | 8_Mzt1           | 773.7   | -0.27817 | 0.03975  | 0.08008  | 717.124 | 641.546 | 740.996 | 906.194 | 858.876 | 777.463 |
| ENSMUSG00000033187 | 7_BC016579       | 142.931 | 0.48479  | 0.0508   | 0.09837  | 170.165 | 145.013 | 184.054 | 100.087 | 107.584 | 150.681 |
| ENSMUSG00000033191 | 14_Tie1          | 241.747 | 0.18313  | 0.51413  | 0.62427  | 258.72  | 308.383 | 204.371 | 321.902 | 181.099 | 176.006 |
| ENSMUSG00000033192 | 4_Lpcat2         | 232.965 | -0.10227 | 0.57715  | 0.68111  | 221.388 | 216.602 | 235.445 | 230.831 | 218.753 | 274.771 |
| ENSMUSG00000033196 | 17_Myh2          | 1544.97 | -0.93954 | 0.07173  | 0.13109  | 752.719 | 1629.1  | 794.777 | 2727.6  | 1083.91 | 2281.74 |
| ENSMUSG00000033200 | 16_Tpsg1         | 1.52006 | -1.04349 | 0.58469  | NA       | 0.86819 | 0.91781 | 1.19515 | 3.60674 | 0       | 2.53245 |
| ENSMUSG00000033207 | 6_Mamdc2         | 464.17  | -0.88716 | 6.83E-05 | 0.00036  | 329.043 | 413.93  | 233.055 | 528.388 | 686.742 | 593.86  |
| ENSMUSG00000033208 | 7_S100b          | 942.776 | -1.60856 | 4.70E-10 | 1.23E-08 | 452.326 | 622.272 | 321.496 | 1829.52 | 1385.14 | 1045.9  |
| ENSMUSG00000033209 | 17_Ttc28         | 700.238 | 0.27048  | 0.24788  | 0.35676  | 656.35  | 968.285 | 672.872 | 846.683 | 519.091 | 538.146 |
| ENSMUSG00000033213 | 16_AA467197      | 419.555 | -0.26087 | 0.31169  | 0.42663  | 454.063 | 318.479 | 372.888 | 330.017 | 639.226 | 402.66  |
| ENSMUSG00000033214 | 9_Slitrk5        | 15.7089 | -0.14391 | 0.81275  | 0.87068  | 15.6274 | 14.6849 | 14.3418 | 21.6405 | 8.96531 | 18.9934 |
| ENSMUSG00000033216 | 9_Eefsec         | 415.082 | 0.7163   | 5.44E-05 | 0.00029  | 526.122 | 472.67  | 548.576 | 338.132 | 255.511 | 349.479 |
| ENSMUSG00000033219 | 8_Gm9758         | 0.99357 | -3.43429 | 0.26742  | NA       | 0       | 0       | 0       | 0       | 0.89653 | 5.06491 |
| ENSMUSG00000033220 | 6_Rac2           | 127.013 | 2.43315  | 1.65E-13 | 1.09E-11 | 298.657 | 160.616 | 184.054 | 50.4944 | 34.0682 | 34.1881 |
| ENSMUSG00000033222 | 16_Ttf2          | 305.668 | 0.32523  | 0.08086  | 0.14457  | 323.834 | 338.67  | 356.156 | 230.831 | 259.097 | 325.42  |
| ENSMUSG00000033227 | 7_Wnt6           | 72.7911 | 0.11171  | 0.70208  | 0.78702  | 60.7732 | 82.6025 | 83.6608 | 64.0197 | 73.5155 | 72.1749 |
| ENSMUSG00000033228 | 7_Scaf11         | 3160.33 | 0.01335  | 0.91288  | 0.94157  | 3215.77 | 3094.84 | 3213.77 | 2751.04 | 3424.75 | 3261.8  |
| ENSMUSG00000033233 | 17_Trim45        | 170.309 | 0.59713  | 0.00499  | 0.01406  | 222.256 | 198.246 | 193.615 | 140.663 | 113.859 | 153.213 |
| ENSMUSG00000033237 | 18_Arid2         | 1848.79 | -0.02335 | 0.84059  | 0.89155  | 1848.37 | 1818.17 | 1833.37 | 1691.56 | 1879.13 | 2022.16 |
| ENSMUSG00000033249 | 10_Hsf4          | 59.2411 | 0.07417  | 0.85386  | 0.90096  | 58.1686 | 70.671  | 53.7819 | 90.1685 | 42.1369 | 40.5193 |
| ENSMUSG00000033253 | 18_Szt2          | 955.041 | 0.94568  | 2.55E-09 | 5.23E-08 | 1119.09 | 1296.86 | 1356.5  | 751.104 | 555.849 | 650.841 |
| ENSMUSG00000033255 | 8_Gm5134         | 0.60564 | 0.00735  | 0.99816  | NA       | 0       | 1.83561 | 0       | 0.90169 | 0.89653 | 0       |
| ENSMUSG00000033256 | 14_Shf           | 80.0354 | 0.8754   | 0.00306  | 0.00935  | 97.2371 | 93.6162 | 120.711 | 69.4298 | 51.1022 | 48.1166 |
| ENSMUSG00000033257 | 14_Ttll4         | 1183.62 | 0.1081   | 0.5107   | 0.62095  | 1208.52 | 1150.93 | 1324.23 | 903.489 | 1290.11 | 1224.44 |

|                    |             |         |          |          |          |         |         |         |         |         |         |
|--------------------|-------------|---------|----------|----------|----------|---------|---------|---------|---------|---------|---------|
| ENSMUSG00000033268 | 8_Duox1     | 499.045 | 1.44312  | 7.65E-14 | 5.36E-12 | 659.823 | 679.176 | 848.559 | 250.669 | 226.822 | 329.219 |
| ENSMUSG00000033272 | 12_Slc35a4  | 1852.51 | 0.58107  | 1.77E-05 | 0.00011  | 2212.14 | 2054.05 | 2395.09 | 1573.44 | 1287.42 | 1592.91 |
| ENSMUSG00000033276 | 18_Stk36    | 75.676  | 0.37663  | 0.26502  | 0.37628  | 61.6414 | 108.301 | 87.2462 | 79.3483 | 68.1363 | 49.3828 |
| ENSMUSG00000033278 | 9_Ptpm      | 635.192 | -0.7081  | 0.00076  | 0.00286  | 455.799 | 612.176 | 378.864 | 866.52  | 857.083 | 640.711 |
| ENSMUSG00000033282 | 13_Prgrip11 | 511.089 | -0.54044 | 0.00184  | 0.00606  | 384.607 | 406.588 | 458.939 | 504.042 | 695.708 | 616.653 |
| ENSMUSG00000033285 | 15_Wdr3     | 862.838 | -0.08172 | 0.5827   | 0.68598  | 826.515 | 815.929 | 872.462 | 742.989 | 974.529 | 944.605 |
| ENSMUSG00000033287 | 15_Kctd17   | 657.819 | 0.86465  | 2.90E-06 | 2.32E-05 | 791.788 | 835.203 | 920.269 | 536.503 | 354.13  | 509.023 |
| ENSMUSG00000033294 | 11_Noc4l    | 459.008 | 1.14129  | 2.29E-09 | 4.79E-08 | 638.987 | 534.163 | 720.678 | 284.031 | 239.374 | 336.816 |
| ENSMUSG00000033295 | 13_Ptpf     | 10597.7 | 1.2889   | 1.03E-12 | 5.51E-11 | 13293.7 | 14510.5 | 17314.2 | 6183.76 | 4748.92 | 7535.32 |
| ENSMUSG00000033306 | 14_Lpp      | 3184.28 | -0.34463 | 0.01824  | 0.04192  | 2965.73 | 2705.69 | 2745.27 | 2939.49 | 4098.94 | 3650.53 |
| ENSMUSG00000033307 | 6_Mlf       | 1651.86 | 1.66067  | 4.72E-11 | 1.68E-09 | 2262.5  | 2463.39 | 2803.83 | 1107.27 | 475.161 | 798.989 |
| ENSMUSG00000033308 | 16_Dpyd     | 301.025 | -0.11089 | 0.48804  | 0.59984  | 269.138 | 289.109 | 310.74  | 322.803 | 300.338 | 314.024 |
| ENSMUSG00000033313 | 11_Fbxl8    | 70.5356 | 1.14377  | 0.00079  | 0.00292  | 73.796  | 94.534  | 123.101 | 50.4944 | 33.1716 | 48.1166 |
| ENSMUSG00000033316 | 14_Galn9    | 3.06669 | 0.49685  | 0.73012  | 0.80828  | 5.20913 | 1.83561 | 3.58546 | 2.70506 | 0       | 5.06491 |
| ENSMUSG00000033318 | 6_Gst2      | 369.306 | 0.40939  | 0.1132   | 0.19044  | 408.049 | 430.451 | 425.475 | 429.202 | 197.237 | 325.42  |
| ENSMUSG00000033319 | 5_Fem1c     | 2079.25 | -0.01788 | 0.9014   | 0.93313  | 2075.84 | 1919.13 | 2203.86 | 1742.96 | 2286.15 | 2247.55 |
| ENSMUSG00000033323 | 13_Ctdp1    | 404.843 | 0.55327  | 0.00265  | 0.00826  | 449.722 | 429.533 | 565.308 | 341.739 | 280.614 | 362.141 |
| ENSMUSG00000033326 | 15_Kdm4a    | 1767.72 | 0.55879  | 0.00014  | 0.00066  | 1854.45 | 2111.87 | 2350.87 | 1479.67 | 1244.38 | 1565.06 |
| ENSMUSG00000033327 | 16_Tnxb     | 1148.92 | 0.96125  | 0.00021  | 0.00095  | 1419.49 | 1550.17 | 1584.77 | 1103.66 | 455.438 | 779.996 |
| ENSMUSG00000033335 | 17_Dnm2     | 3567.01 | 0.95462  | 1.80E-10 | 5.37E-09 | 4322.71 | 4565.16 | 5228.8  | 2565.3  | 2009.13 | 2710.99 |
| ENSMUSG00000033342 | 13_Lppr5    | 5.73021 | -2.51208 | 0.03579  | 0.07352  | 0.86819 | 0.91781 | 3.58546 | 18.9354 | 6.27571 | 3.79868 |
| ENSMUSG00000033350 | 7_Chst2     | 198.256 | -0.99815 | 0.00125  | 0.00435  | 131.965 | 185.397 | 78.8802 | 293.949 | 296.752 | 202.596 |
| ENSMUSG00000033352 | 11_Tmap2k4  | 2246.35 | -0.10944 | 0.4265   | 0.54187  | 2199.99 | 2088.93 | 2194.3  | 1961.17 | 2608.9  | 2424.82 |
| ENSMUSG00000033355 | 5_Rtp4      | 2607.62 | 0.80302  | 3.08E-06 | 2.43E-05 | 3102.04 | 2994.8  | 3849.59 | 1546.39 | 2270.02 | 1882.88 |
| ENSMUSG00000033356 | 3_Pus7l     | 106.397 | 0.30242  | 0.20468  | 0.30674  | 115.469 | 108.301 | 129.077 | 88.3652 | 102.204 | 94.967  |
| ENSMUSG00000033361 | 13_Prrg3    | 414.412 | -1.29039 | 0.1018   | 1.72E-07 | 218.783 | 311.136 | 191.225 | 685.281 | 598.882 | 481.166 |
| ENSMUSG00000033364 | 13_Usp37    | 809.968 | -0.16242 | 0.26863  | 0.38011  | 808.283 | 700.286 | 784.021 | 739.382 | 907.289 | 920.547 |
| ENSMUSG00000033365 | 14_Ipo13    | 1028.54 | 0.68904  | 0.00026  | 0.00115  | 1193.76 | 1281.26 | 1333.79 | 972.919 | 585.434 | 804.054 |
| ENSMUSG00000033368 | 8_Trim69    | 2.40693 | 0.10508  | 0.94082  | NA       | 3.47275 | 2.75342 | 1.19515 | 0.90169 | 3.58612 | 2.53245 |
| ENSMUSG00000033373 | 16_Fntb     | 367.794 | 0.57489  | 0.00081  | 0.00298  | 454.063 | 406.588 | 458.939 | 313.787 | 249.235 | 324.154 |
| ENSMUSG00000033377 | 14_Palmd    | 900.708 | -0.43859 | 0.00553  | 0.01533  | 688.473 | 853.559 | 752.947 | 922.424 | 1200.45 | 986.391 |
| ENSMUSG00000033379 | 13_Atp6v0b  | 2393.31 | 0.32721  | 0.00848  | 0.02199  | 2657.52 | 2576.28 | 2758.42 | 2403.89 | 1979.54 | 1984.18 |
| ENSMUSG00000033382 | 13_Trappc8  | 1707.25 | -0.29409 | 0.03963  | 0.07988  | 1561    | 1477.67 | 1563.26 | 1611.31 | 2186.64 | 1843.63 |
| ENSMUSG00000033383 | 6_Rtp1      | 0.15028 | -0.99647 | 0.80707  | NA       | 0       | 0       | 0       | 0.90169 | 0       | 0       |
| ENSMUSG00000033386 | 10_Frs1     | 330.64  | -0.2501  | 0.1166   | 0.19509  | 309.075 | 282.684 | 315.521 | 378.708 | 371.164 | 326.687 |
| ENSMUSG00000033389 | 16_Arhgap44 | 132.432 | -0.5046  | 0.03848  | 0.07801  | 105.919 | 126.657 | 95.6123 | 182.14  | 133.583 | 150.681 |
| ENSMUSG00000033392 | 15_Clasp2   | 1192.54 | -0.40645 | 0.00134  | 0.0046   | 1040.09 | 1051.81 | 986.002 | 1394.01 | 1470.31 | 1213.05 |
| ENSMUSG00000033396 | 13_Spg11    | 1215.65 | 0.2177   | 0.07437  | 0.13511  | 1230.22 | 1360.19 | 1330.21 | 1037.84 | 1128.73 | 1206.71 |
| ENSMUSG00000033400 | 14_Agl      | 1010.02 | -0.73262 | 2.08E-06 | 1.73E-05 | 746.642 | 852.641 | 677.652 | 1384.09 | 1315.21 | 1083.89 |
| ENSMUSG00000033405 | 3_Nudt15    | 107.202 | 0.10091  | 0.6726   | 0.76282  | 101.578 | 111.972 | 119.515 | 111.809 | 93.2392 | 105.097 |
| ENSMUSG00000033409 | 13_Syce1l   | 4.43135 | 1.22846  | 0.2577   | 0.36763  | 7.8137  | 3.67122 | 7.17092 | 3.60674 | 1.79306 | 2.53245 |
| ENSMUSG00000033411 | 16_Ctdspl2  | 848.969 | -0.40351 | 0.00147  | 0.00501  | 719.728 | 703.957 | 769.679 | 888.16  | 1015.77 | 996.521 |
| ENSMUSG00000033416 | 14_Gucd1    | 1015.1  | 0.25018  | 0.09428  | 0.16368  | 1137.33 | 1072    | 1099.54 | 1082.92 | 793.43  | 905.352 |
| ENSMUSG00000033417 | 15_Caul1    | 1176.31 | -0.26743 | 0.0509   | 0.0985   | 1062.66 | 1080.26 | 1058.91 | 1096.45 | 1380.66 | 1378.92 |
| ENSMUSG00000033419 | 15_Snap91   | 96.916  | -1.68387 | 0.0003   | 0.00128  | 52.0913 | 65.1642 | 20.3176 | 221.815 | 146.134 | 75.9736 |
| ENSMUSG00000033420 | 12_Antxr1   | 9295.05 | -0.10622 | 0.34518  | 0.46186  | 8794.75 | 8880.69 | 9182.37 | 8642.66 | 9739.91 | 10529.9 |
| ENSMUSG00000033423 | 16_Eri3     | 684.594 | 0.25612  | 0.09605  | 0.16636  | 736.224 | 789.313 | 709.922 | 718.643 | 540.608 | 612.854 |
| ENSMUSG00000033427 | 13_Upb1     | 141.821 | 0.13861  | 0.56093  | 0.6665   | 151.065 | 133.082 | 161.346 | 144.27  | 106.687 | 154.48  |
| ENSMUSG00000033429 | 10_Mcee     | 397.662 | -0.56685 | 0.00106  | 0.00376  | 335.121 | 312.054 | 313.13  | 480.598 | 398.06  | 547.01  |
| ENSMUSG00000033430 | 9_Terf2ip   | 513.116 | -0.27419 | 0.0386   | 0.07818  | 469.69  | 444.218 | 480.452 | 572.57  | 571.09  | 540.679 |
| ENSMUSG00000033434 | 15_Gtpbp6   | 200.994 | 1.73482  | 2.20E-08 | 3.36E-07 | 275.216 | 280.849 | 371.693 | 135.253 | 55.5849 | 87.3697 |
| ENSMUSG00000033436 | 13_Armcx2   | 738.964 | -0.93868 | 0.00023  | 0.00104  | 533.936 | 675.505 | 309.545 | 1122.6  | 969.15  | 823.047 |
| ENSMUSG00000033439 | 12_Tmt13    | 173.373 | -0.17792 | 0.43019  | 0.54549  | 177.11  | 155.109 | 155.37  | 145.171 | 212.478 | 194.999 |
| ENSMUSG00000033444 | 13_Specc1l  | 2187.63 | -0.23673 | 0.01873  | 0.0428   | 2002.04 | 2073.32 | 1949.3  | 2412.01 | 2280.77 | 2408.36 |
| ENSMUSG00000033446 | 7_Lpar6     | 1042.94 | -0.20791 | 0.24717  | 0.35595  | 1048.77 | 973.792 | 879.633 | 850.289 | 1245.28 | 1259.9  |
| ENSMUSG00000033450 | 7_Tagap     | 107.021 | 0.63199  | 0.01329  | 0.03209  | 148.46  | 135.835 | 105.174 | 84.7584 | 77.9982 | 89.9021 |
| ENSMUSG00000033453 | 7_Adamts15  | 155.125 | 0.03709  | 0.87652  | 0.91643  | 171.033 | 146.849 | 154.175 | 191.157 | 143.445 | 124.09  |
| ENSMUSG00000033454 | 6_Btb1      | 832.373 | -0.32565 | 0.01245  | 0.03033  | 765.742 | 699.368 | 750.557 | 842.174 | 944.943 | 991.456 |
| ENSMUSG00000033458 | 17_Fan1     | 213.728 | 0.16344  | 0.35666  | 0.47331  | 232.674 | 233.123 | 211.542 | 211.896 | 198.133 | 194.999 |
| ENSMUSG00000033460 | 14_Armcx1   | 275.423 | -1.23332 | 1.03E-06 | 9.44E-06 | 160.615 | 214.767 | 117.125 | 424.694 | 427.645 | 307.693 |
| ENSMUSG00000033467 | 12_Crlf2    | 86.0528 | 1.3003   | 1.61E-05 | 0.0001   | 106.787 | 108.301 | 151.785 | 48.691  | 41.2404 | 59.5127 |
| ENSMUSG00000033470 | 11_Cysltr2  | 2.98475 | 1.95127  | 0.22795  | 0.33365  | 11.2864 | 1.83561 | 1.19515 | 0.90169 | 2.68959 | 0       |
| ENSMUSG00000033475 | 15_Tomm6    | 875.139 | 0.40116  | 0.01388  | 0.03327  | 952.403 | 980.216 | 1056.52 | 909.801 | 642.812 | 709.087 |
| ENSMUSG00000033478 | 4_Fam160b1  | 743.82  | 0.14554  | 0.23094  | 0.33721  | 758.797 | 805.833 | 779.24  | 734.874 | 675.088 | 709.087 |
| ENSMUSG00000033486 | 14_Catsper2 | 90.7921 | -0.33894 | 0.19485  | 0.29503  | 94.6325 | 72.5066 | 72.9044 | 101.89  | 97.7218 | 105.097 |
| ENSMUSG00000033487 | 14_Fndc3a   | 6169.76 | 0.25645  | 0.12772  | 0.2099   | 6483.63 | 6154.8  | 7511.54 | 4332.6  | 6413.78 | 6122.21 |
| ENSMUSG00000033488 | 11_BC026585 | 113.998 | 0.50881  | 0.04239  | 0.08449  | 144.119 | 136.753 | 120.711 | 112.711 | 79.7912 | 89.9021 |
| ENSMUSG00000033491 | 13_Prss35   | 29.6507 | -0.30799 | 0.51664  | 0.6266   | 18.232  | 33.041  | 28.6837 | 37.8708 | 38.5508 | 21.5259 |
| ENSMUSG00000033498 | 14_Strc     | 0.30325 | -0.03469 | 0.99322  | NA       | 0       | 0.91781 | 0       | 0.90169 | 0       | 0       |
| ENSMUSG00000033499 | 13_Larp4b   | 4316.02 | 0.11115  | 0.40752  | 0.52447  | 4281.91 | 4387.11 | 4777.03 | 3510.26 | 4418.1  | 4521.7  |
| ENSMUSG00000033501 | 4_Crygs     | 3749.35 | -1.69685 | 0.07819  | 0.14061  | 1325.72 | 3563.84 | 413.523 | 10171   | 2267.33 | 4754.68 |
| ENSMUSG00000033502 | 14_Cdc14a   | 446.774 | -0.56317 | 0.00023  | 0.00102  | 363.771 | 379.054 | 339.424 | 524.781 | 589.917 | 483.699 |
| ENSMUSG00000033508 | 7_Asprv1    | 72276.8 | 0.80242  | 1.01E-10 | 3.25E-09 | 89459.9 | 92398.2 | 93764.6 | 58880.1 | 45362.7 | 53795.7 |
| ENSMUSG00000033510 | 14_Otud7a   | 1.26483 | -2.66832 | 0.23953  | NA       | 0       | 0.91781 | 0       | 4.50843 | 0.89653 | 1.26623 |
| ENSMUSG00000033520 | 2_Idl2      | 0       | NA       | NA       | NA       | 0       | 0       | 0       | 0       | 0       | 0       |
| ENSMUSG00000033526 | 16_Ppip5k1  | 2351.14 | 0.30437  | 0.00526  | 0.0147   | 2426.59 | 2652.46 | 2715.39 | 2104.53 | 2004.64 | 2203.23 |
| ENSMUSG00000033530 | 7_Ttc7b     | 539.678 | -0.03596 | 0.79639  | 0.85922  | 513.968 | 554.355 | 530.648 | 592.407 | 504.747 | 541.945 |
| ENSMUSG00000033533 | 13_Acsm1    | 2302.51 | 0.22547  | 0.07535  | 0.13643  | 2492.57 | 2427.6  | 2524.17 | 1865.59 | 2122.09 | 2383.04 |
| ENSMUSG00000033538 | 13_Casp4    | 149.558 | 1.17186  | 2.93E-05 | 0.00017  | 255.247 | 140.424 | 225.884 | 81.1517 | 102.204 | 92.4346 |

|                    |                  |         |          |          |          |         |         |         |         |         |         |
|--------------------|------------------|---------|----------|----------|----------|---------|---------|---------|---------|---------|---------|
| ENSMUSG00000033540 | 18_Idua          | 285.684 | -0.14414 | 0.44384  | 0.55904  | 256.116 | 320.314 | 237.836 | 318.295 | 309.303 | 272.239 |
| ENSMUSG00000033542 | 13_Arhgef5       | 4812.33 | 0.18601  | 0.19554  | 0.29565  | 4932.18 | 4926.78 | 5506.07 | 3787.98 | 4488.93 | 5232.05 |
| ENSMUSG00000033543 | 17_Gtf2a2        | 763.03  | -0.47407 | 0.00443  | 0.01273  | 705.837 | 612.176 | 597.577 | 735.775 | 1026.53 | 900.287 |
| ENSMUSG00000033544 | 6_Angptl1        | 370.271 | -0.54404 | 0.00316  | 0.00962  | 318.625 | 343.259 | 240.226 | 450.843 | 405.232 | 463.439 |
| ENSMUSG00000033545 | 14_Znrf1         | 790.882 | 0.55801  | 1.87E-05 | 0.00012  | 867.32  | 928.819 | 1030.22 | 622.163 | 638.33  | 658.438 |
| ENSMUSG00000033554 | 17_Dph5          | 203.881 | -0.0823  | 0.66363  | 0.75526  | 220.52  | 186.315 | 186.444 | 206.486 | 198.133 | 225.388 |
| ENSMUSG00000033557 | 17_Fam20b        | 3440.8  | 0.01835  | 0.85836  | 0.90402  | 3452.79 | 3390.37 | 3543.63 | 3255.08 | 3342.27 | 3660.66 |
| ENSMUSG00000033565 | 16_Rbfox2        | 2310.01 | 0.13994  | 0.19385  | 0.2939   | 2351.92 | 2360.6  | 2552.85 | 2130.68 | 2126.57 | 2337.45 |
| ENSMUSG00000033569 | 17_Adgrb3        | 13.6022 | -2.92956 | 0.00103  | 0.00368  | 6.07732 | 0.91781 | 2.39031 | 41.4775 | 20.6202 | 10.1298 |
| ENSMUSG00000033576 | 11_Apol6         | 80.6281 | 2.42928  | 3.28E-10 | 9.09E-09 | 111.996 | 104.63  | 191.225 | 30.6573 | 16.1376 | 29.1232 |
| ENSMUSG00000033577 | 18_Myo6          | 6313.2  | -0.08861 | 0.49341  | 0.60486  | 6043.46 | 6168.57 | 6144.29 | 5558.89 | 6611.02 | 7352.98 |
| ENSMUSG00000033578 | 7_Tmem35         | 70.747  | -1.24876 | 0.00033  | 0.0014   | 49.4867 | 44.9725 | 31.074  | 120.826 | 108.48  | 69.6425 |
| ENSMUSG00000033579 | 16_Fa2h          | 9.72106 | -1.01818 | 0.19324  | 0.29324  | 9.55007 | 3.67122 | 5.97577 | 17.132  | 8.06878 | 13.9285 |
| ENSMUSG00000033581 | 16_Igf2bp2       | 59.6773 | -0.18115 | 0.60305  | 0.70383  | 53.8277 | 61.493  | 52.5868 | 85.6601 | 47.5161 | 56.9802 |
| ENSMUSG00000033585 | 4_Ndn            | 1060.19 | 0.07545  | 0.53141  | 0.63985  | 1025.33 | 1087.6  | 1152.13 | 1097.35 | 993.356 | 1005.38 |
| ENSMUSG00000033589 | 3_Reep4          | 1875.27 | 1.22162  | 4.49E-12 | 2.01E-10 | 2425.72 | 2350.5  | 3097.84 | 1206.46 | 894.738 | 1276.36 |
| ENSMUSG00000033590 | 7_Myo5c          | 107.358 | -0.33628 | 0.23737  | 0.34463  | 72.0596 | 123.904 | 88.4414 | 123.531 | 105.791 | 130.421 |
| ENSMUSG00000033594 | 10_Spata2l       | 161.942 | 0.68888  | 0.00106  | 0.00376  | 197.947 | 200.999 | 199.591 | 118.121 | 109.377 | 145.616 |
| ENSMUSG00000033595 | 6_Lgi3           | 26.9823 | -0.47617 | 0.37819  | 0.4957   | 19.1001 | 33.9588 | 14.3418 | 41.4775 | 18.8271 | 34.1881 |
| ENSMUSG00000033596 | 4_Rfwd3          | 1976.38 | -0.03456 | 0.81694  | 0.87378  | 2035.03 | 1819.09 | 2003.08 | 1632.05 | 2169.6  | 2199.44 |
| ENSMUSG00000033597 | 8_Caskin1        | 64.0335 | -0.41697 | 0.3215   | 0.43723  | 37.3321 | 80.7669 | 46.611  | 106.399 | 57.378  | 55.714  |
| ENSMUSG00000033610 | 15_Pank1         | 666.213 | -0.11717 | 0.3842   | 0.50173  | 611.205 | 607.587 | 699.165 | 656.427 | 694.811 | 728.08  |
| ENSMUSG00000033615 | 9_Cplx1          | 18.8574 | -0.78354 | 0.36833  | 0.48574  | 22.5729 | 16.5205 | 2.39031 | 44.1826 | 22.4133 | 5.06491 |
| ENSMUSG00000033618 | 6_Map3k13        | 109.242 | 0.34635  | 0.14249  | 0.22904  | 137.174 | 119.315 | 109.954 | 95.5787 | 95.9288 | 97.4995 |
| ENSMUSG00000033623 | 13_Pcgf3         | 1685.04 | 0.15587  | 0.23447  | 0.34108  | 1769.37 | 1610.75 | 1948.1  | 1439.99 | 1669.34 | 1672.69 |
| ENSMUSG00000033624 | 10_Pdpr          | 665.07  | -0.29962 | 0.03286  | 0.06852  | 594.709 | 625.943 | 568.893 | 799.795 | 747.706 | 653.373 |
| ENSMUSG00000033628 | 15_Pik3c3        | 978.348 | 0.02871  | 0.80425  | 0.86457  | 955.007 | 993.983 | 1014.69 | 951.278 | 933.288 | 1021.85 |
| ENSMUSG00000033629 | 5_Hacd3          | 1398.36 | -0.7228  | 1.08E-10 | 3.43E-09 | 1113.89 | 1070.16 | 980.026 | 1718.61 | 1756.3  | 1751.19 |
| ENSMUSG00000033632 | 15_AW554918      | 388.966 | -0.41545 | 0.01062  | 0.02659  | 352.484 | 317.561 | 329.863 | 393.135 | 497.574 | 443.179 |
| ENSMUSG00000033633 | 13_Clec18a       | 123.867 | -0.53689 | 0.21082  | 0.3141   | 88.5552 | 156.027 | 58.5626 | 236.242 | 107.584 | 96.2332 |
| ENSMUSG00000033634 | 7_Cml2           | 0.80958 | -3.1663  | 0.25644  | NA       | 0       | 0       | 0       | 0.90169 | 2.68959 | 1.26623 |
| ENSMUSG00000033644 | 4_Piwi2          | 15.6031 | -0.21103 | 0.71617  | 0.79768  | 13.891  | 16.5205 | 13.1467 | 19.8371 | 18.8271 | 11.396  |
| ENSMUSG00000033653 | 17_Vps8          | 982.219 | 0.12197  | 0.2913   | 0.4051   | 1081.76 | 1009.59 | 978.831 | 918.818 | 952.115 | 952.203 |
| ENSMUSG00000033658 | 16_Ddx19b        | 932.365 | 0.02408  | 0.86072  | 0.90564  | 961.953 | 878.34  | 978.831 | 843.076 | 891.151 | 1040.84 |
| ENSMUSG00000033669 | 7_Zfp7           | 839.504 | 0.26786  | 0.05824  | 0.1101   | 928.962 | 828.778 | 993.173 | 742.087 | 701.983 | 842.041 |
| ENSMUSG00000033671 | 17_Cep350        | 2629.78 | -0.18559 | 0.16295  | 0.25575  | 2627.14 | 2286.25 | 2467.99 | 2416.52 | 2946.9  | 3033.88 |
| ENSMUSG00000033676 | 13_Gabrb3        | 190.734 | -1.55539 | 8.65E-06 | 5.96E-05 | 117.205 | 116.561 | 56.1722 | 377.806 | 305.717 | 170.941 |
| ENSMUSG00000033684 | 14_Qsox1         | 1387.31 | 0.49697  | 6.80E-05 | 0.00036  | 1729.43 | 1563.02 | 1578.8  | 1249.74 | 1048.04 | 1154.8  |
| ENSMUSG00000033685 | 12_Ucp2          | 11002.1 | 0.93703  | 3.74E-09 | 7.28E-08 | 13123.5 | 14173.7 | 16066.5 | 8708.48 | 6031.86 | 7908.85 |
| ENSMUSG00000033688 | 9_1300017J02Rik  | 0.80927 | -0.72724 | 0.77643  | NA       | 0.86819 | 0.91781 | 0       | 1.80337 | 0       | 1.26623 |
| ENSMUSG00000033697 | 15_Arhgap39      | 362.292 | 0.73609  | 9.81E-05 | 0.00049  | 423.676 | 479.095 | 455.354 | 320.098 | 216.96  | 278.57  |
| ENSMUSG00000033701 | 13_Acbd6         | 332.975 | 0.17217  | 0.2592   | 0.36935  | 355.089 | 345.095 | 358.546 | 295.753 | 334.406 | 308.959 |
| ENSMUSG00000033703 | 8_Fuk            | 431.017 | 1.01788  | 2.11E-10 | 6.16E-09 | 535.672 | 583.724 | 611.919 | 314.688 | 250.132 | 289.966 |
| ENSMUSG00000033705 | 16_Stard9        | 383.827 | -0.63208 | 0.00401  | 0.01176  | 323.834 | 315.725 | 264.129 | 574.374 | 486.816 | 338.083 |
| ENSMUSG00000033706 | 13_Smyd5         | 393.297 | 0.45331  | 0.00657  | 0.01771  | 413.258 | 455.232 | 495.989 | 371.494 | 295.855 | 327.953 |
| ENSMUSG00000033707 | 8_Lrrc24         | 120.805 | 0.37415  | 0.19283  | 0.29275  | 123.283 | 159.698 | 126.686 | 142.466 | 87.86   | 84.8372 |
| ENSMUSG00000033712 | 5_Ccar2          | 1231.5  | 0.60011  | 1.75E-06 | 1.49E-05 | 1396.92 | 1474.91 | 1579.99 | 1024.31 | 888.462 | 1024.38 |
| ENSMUSG00000033713 | 11_Foxn3         | 498.87  | 0.26041  | 0.07132  | 0.1305   | 553.904 | 502.04  | 574.869 | 452.646 | 422.266 | 487.497 |
| ENSMUSG00000033715 | 14_Akr1c14       | 92.1641 | -0.93057 | 0.0004   | 0.00163  | 71.1914 | 57.8218 | 60.9529 | 106.399 | 129.997 | 126.623 |
| ENSMUSG00000033717 | 5_Adra2a         | 87.7497 | 0.86041  | 0.0012   | 0.0042   | 128.492 | 100.041 | 111.149 | 64.0197 | 64.5502 | 58.2464 |
| ENSMUSG00000033720 | 12_Sfxn5         | 153.089 | -0.47397 | 0.07747  | 0.1396   | 146.724 | 143.178 | 94.4172 | 209.191 | 188.771 | 136.753 |
| ENSMUSG00000033721 | 16_Vav3          | 577.835 | -0.19258 | 0.21861  | 0.32316  | 565.191 | 502.957 | 549.771 | 529.289 | 693.018 | 626.782 |
| ENSMUSG00000033722 | 9_BC034090       | 518.816 | -0.2832  | 0.3381   | 0.45453  | 407.18  | 655.313 | 341.814 | 811.517 | 486.816 | 410.258 |
| ENSMUSG00000033726 | 8_Emx1           | 0       | NA       | NA       | NA       | 0       | 0       | 0       | 0       | 0       | 0       |
| ENSMUSG00000033728 | 14_Lrrc14        | 441.433 | 0.63938  | 0.0005   | 0.00199  | 518.308 | 510.3   | 584.43  | 400.348 | 274.338 | 360.875 |
| ENSMUSG00000033730 | 3_Egr3           | 2.4007  | -0.64222 | 0.65428  | NA       | 3.47275 | 0.91781 | 1.19515 | 1.80337 | 4.48265 | 2.53245 |
| ENSMUSG00000033732 | 9_Sf3b3          | 3637.46 | 0.40343  | 0.01058  | 0.02652  | 3984.12 | 3946.56 | 4496.17 | 2508.49 | 3212.27 | 3677.12 |
| ENSMUSG00000033735 | 14_Spr           | 439.266 | 0.27743  | 0.18633  | 0.28483  | 435.831 | 512.136 | 495.989 | 484.205 | 289.579 | 417.855 |
| ENSMUSG00000033737 | 14_Fndc3c1       | 9.76288 | -1.11734 | 0.16896  | 0.26336  | 3.47275 | 10.0959 | 4.78062 | 15.3287 | 7.17224 | 17.7272 |
| ENSMUSG00000033739 | 8_Fkbp1          | 132.135 | 0.06767  | 0.75066  | 0.82387  | 140.647 | 139.506 | 125.491 | 133.449 | 130.893 | 122.824 |
| ENSMUSG00000033740 | 17_St18          | 6.8454  | -1.06683 | 0.28518  | 0.39851  | 6.07732 | 3.67122 | 3.58546 | 18.0337 | 7.17224 | 2.53245 |
| ENSMUSG00000033751 | 5_Gadd45gip1     | 190.93  | 0.23957  | 0.18914  | 0.2883   | 210.97  | 202.835 | 206.762 | 183.944 | 173.927 | 167.142 |
| ENSMUSG00000033752 | 7_Mnd1           | 126.787 | -0.0346  | 0.88023  | 0.91929  | 131.096 | 108.301 | 136.248 | 117.219 | 127.307 | 140.551 |
| ENSMUSG00000033760 | 16_Rbm4b         | 793.959 | -0.37946 | 0.01     | 0.02525  | 681.528 | 681.93  | 707.531 | 785.368 | 1033.7  | 873.697 |
| ENSMUSG00000033762 | 7_Recql4         | 98.7183 | 1.31911  | 6.31E-07 | 6.18E-06 | 139.778 | 148.685 | 133.857 | 63.118  | 44.8265 | 62.0451 |
| ENSMUSG00000033763 | 14_Mtssn1l       | 392.748 | -0.61545 | 0.0224   | 0.04988  | 272.611 | 417.602 | 240.226 | 641.098 | 381.025 | 403.926 |
| ENSMUSG00000033765 | 4_Calm4          | 15.2557 | 1.1472   | 0.08192  | 0.14599  | 18.232  | 13.7671 | 31.074  | 5.41011 | 11.6549 | 11.396  |
| ENSMUSG00000033767 | 14_D930015E06Rik | 1707.78 | 0.79382  | 0.0001   | 0.0005   | 1993.36 | 2177.03 | 2325.77 | 908.899 | 1187.9  | 1653.69 |
| ENSMUSG00000033768 | 16_Nrxn2         | 61.0682 | -0.54113 | 0.21972  | 0.32444  | 52.9595 | 55.9861 | 40.6352 | 112.711 | 69.9294 | 34.1881 |
| ENSMUSG00000033769 | 16_Exoc6b        | 992.273 | 0.01655  | 0.8993   | 0.93204  | 1020.12 | 923.312 | 1050.54 | 893.57  | 1048.04 | 1018.05 |
| ENSMUSG00000033770 | 13_Clcna         | 16.1368 | -0.33509 | 0.70961  | 0.79234  | 31.2548 | 10.0959 | 1.19515 | 27.9522 | 9.86184 | 16.4609 |
| ENSMUSG00000033773 | 14_Rpap2         | 248.262 | -0.23392 | 0.16236  | 0.255    | 243.961 | 219.356 | 221.104 | 269.604 | 273.442 | 262.109 |
| ENSMUSG00000033774 | 4_Npbwr1         | 1.00674 | -0.0347  | 0.98715  | NA       | 0.86819 | 0.91781 | 1.19515 | 0       | 1.79306 | 1.26623 |
| ENSMUSG00000033777 | 3_Tlr13          | 97.9139 | 1.38721  | 0.00035  | 0.00145  | 225.729 | 98.2052 | 100.393 | 57.7079 | 42.1369 | 63.3113 |
| ENSMUSG00000033781 | 6_Asb13          | 1028.28 | 0.25635  | 0.10064  | 0.17304  | 974.107 | 1070.16 | 1315.86 | 886.357 | 1029.22 | 893.956 |
| ENSMUSG00000033788 | 15_Dysf          | 211.463 | -0.0975  | 0.67866  | 0.76749  | 202.288 | 209.26  | 201.981 | 288.539 | 179.306 | 187.402 |
| ENSMUSG00000033790 | 11_Tubgcp5       | 697.198 | -0.2925  | 0.03547  | 0.07296  | 638.118 | 594.738 | 647.774 | 690.691 | 844.532 | 767.334 |
| ENSMUSG00000033792 | 12_Atp7a         | 403.109 | -0.60157 | 0.00309  | 0.00941  | 381.135 | 326.739 | 252.178 | 466.171 | 565.711 | 426.718 |
| ENSMUSG00000033793 | 12_Atp6v1h       | 1816.47 | -0.28627 | 0.02395  | 0.0528   | 1734.64 | 1538.24 | 1637.36 | 1786.24 | 2183.95 | 2018.37 |

|                    |                 |         |          |          |          |         |         |         |         |         |         |
|--------------------|-----------------|---------|----------|----------|----------|---------|---------|---------|---------|---------|---------|
| ENSMUSG00000033794 | 6_Lpcat2b       | 0.21104 | -0.99647 | 0.80707  | NA       | 0       | 0       | 0       | 0       | 0       | 1.26623 |
| ENSMUSG00000033799 | 9_Fam208b       | 1412.1  | -0.30137 | 0.05347  | 0.10237  | 1307.49 | 1159.19 | 1329.01 | 1287.61 | 1806.51 | 1582.78 |
| ENSMUSG00000033805 | 12_Ephx4        | 13.421  | -0.22735 | 0.74694  | 0.82122  | 13.891  | 5.50683 | 17.9273 | 9.91854 | 20.6202 | 12.6623 |
| ENSMUSG00000033808 | 16_Tmem87a      | 3186.71 | -0.25096 | 0.05486  | 0.10468  | 3003.93 | 2639.61 | 3087.08 | 3034.17 | 3691.02 | 3664.46 |
| ENSMUSG00000033809 | 14_Alg3         | 311.507 | 0.90403  | 2.29E-06 | 1.89E-05 | 377.662 | 398.328 | 441.012 | 220.913 | 176.617 | 254.512 |
| ENSMUSG00000033813 | 15_Tcea1        | 2406.14 | -0.41018 | 0.00098  | 0.00352  | 2078.44 | 1972.36 | 2148.89 | 2448.98 | 3045.51 | 2742.65 |
| ENSMUSG00000033819 | 15_Ppp1r16a     | 606.785 | 1.35119  | 3.73E-09 | 7.26E-08 | 700.628 | 884.765 | 1030.22 | 423.792 | 242.96  | 358.342 |
| ENSMUSG00000033825 | 9_Tpsb2         | 75.2793 | -0.48552 | 0.25483  | 0.36435  | 65.9823 | 66.082  | 56.1722 | 145.171 | 44.8265 | 73.4412 |
| ENSMUSG00000033826 | 9_Dnah8         | 76.1091 | -0.69705 | 0.03186  | 0.0668   | 72.9278 | 56.9039 | 44.2207 | 111.809 | 98.6184 | 72.1749 |
| ENSMUSG00000033831 | 5_Fgb           | 0.30056 | -1.76625 | 0.6627   | NA       | 0       | 0       | 0       | 1.80337 | 0       | 0       |
| ENSMUSG00000033845 | 13_Mrpl15       | 576.582 | -0.33937 | 0.00984  | 0.02491  | 503.549 | 524.067 | 499.574 | 610.441 | 684.949 | 636.912 |
| ENSMUSG00000033847 | 15_Pla2g4c      | 37.8068 | 1.29616  | 0.00556  | 0.01538  | 49.4867 | 45.8903 | 65.7335 | 10.8202 | 29.5855 | 25.3245 |
| ENSMUSG00000033849 | 3_B3galt2       | 166.609 | -1.04525 | 9.77E-07 | 8.97E-06 | 113.733 | 121.15  | 90.8317 | 236.242 | 231.305 | 206.395 |
| ENSMUSG00000033852 | 16_Gm28042      | 202.867 | 0.66766  | 0.00341  | 0.01026  | 244.829 | 256.068 | 247.397 | 198.371 | 151.514 | 119.025 |
| ENSMUSG00000033854 | 9_Kcnk10        | 5.76205 | -3.42608 | 0.03249  | 0.06785  | 0.86819 | 0.91781 | 1.19515 | 0       | 27.7924 | 3.79868 |
| ENSMUSG00000033855 | 15_Ston1        | 382.655 | -0.84159 | 0.00013  | 0.00064  | 248.302 | 352.437 | 221.104 | 581.587 | 451.851 | 440.647 |
| ENSMUSG00000033857 | 12_Engase       | 442.253 | 1.58134  | 5.90E-15 | 5.35E-13 | 586.895 | 625.943 | 775.655 | 250.669 | 171.237 | 243.116 |
| ENSMUSG00000033860 | 13_Fgg          | 0.45084 | -2.33355 | 0.56009  | NA       | 0       | 0       | 0       | 2.70506 | 0       | 0       |
| ENSMUSG00000033862 | 6_Cdk10         | 655.39  | 0.4902   | 0.00049  | 0.00195  | 699.76  | 782.888 | 815.095 | 588.801 | 503.85  | 541.945 |
| ENSMUSG00000033863 | 1_Klf9          | 673.91  | -0.43128 | 0.00473  | 0.01346  | 566.059 | 587.396 | 568.893 | 905.292 | 696.604 | 719.217 |
| ENSMUSG00000033871 | 14_Ppargc1b     | 107.492 | 0.43969  | 0.14327  | 0.23003  | 105.051 | 149.602 | 117.125 | 122.629 | 77.1016 | 73.4412 |
| ENSMUSG00000033880 | 11_Lgals3bp     | 4784.56 | 2.1801   | 3.84E-31 | 2.33E-28 | 6802.26 | 6762.39 | 9954.44 | 2050.43 | 1498.1  | 1639.76 |
| ENSMUSG00000033882 | 15_Rbm46        | 34.7658 | -0.62043 | 0.15528  | 0.24613  | 39.0685 | 24.7808 | 17.9273 | 40.5758 | 45.7231 | 40.5193 |
| ENSMUSG00000033883 | 11_D3Ert254e    | 477.742 | -0.68151 | 1.27E-06 | 1.13E-05 | 366.376 | 368.958 | 365.717 | 552.733 | 636.537 | 576.133 |
| ENSMUSG00000033885 | 14_Pxk          | 1383.46 | 0.59247  | 0.00013  | 0.00064  | 1553.19 | 1487.76 | 1950.49 | 970.214 | 1184.32 | 1154.8  |
| ENSMUSG00000033898 | 16_Ctfr2        | 1.14721 | -1.01222 | 0.69275  | NA       | 0       | 0       | 2.39031 | 1.80337 | 2.68959 | 0       |
| ENSMUSG00000033900 | 13_Map9         | 287.722 | -0.59282 | 0.00029  | 0.00125  | 243.093 | 218.438 | 227.079 | 366.084 | 348.75  | 322.888 |
| ENSMUSG00000033902 | 11_Mapkbp1      | 781.317 | 0.21203  | 0.10771  | 0.18295  | 796.129 | 895.778 | 824.656 | 787.171 | 696.604 | 687.561 |
| ENSMUSG00000033904 | 5_Ccp110        | 433.643 | -0.51764 | 0.00025  | 0.0011   | 371.585 | 354.273 | 344.204 | 507.649 | 537.918 | 486.231 |
| ENSMUSG00000033906 | 5_Zdhhc15       | 300.893 | -0.50775 | 0.00413  | 0.01202  | 276.952 | 212.013 | 256.958 | 353.461 | 372.957 | 333.018 |
| ENSMUSG00000033909 | 17_Usp36        | 722.197 | 0.51755  | 0.00098  | 0.00352  | 811.756 | 777.381 | 963.294 | 672.657 | 537.022 | 571.068 |
| ENSMUSG00000033910 | 13_Gucy1a3      | 254.21  | -1.30254 | 4.68E-06 | 3.49E-05 | 147.592 | 179.89  | 112.344 | 488.714 | 352.337 | 244.382 |
| ENSMUSG00000033916 | 4_Chmp2a        | 5871.23 | 0.23458  | 0.04061  | 0.08162  | 6438.49 | 5945.54 | 6657.01 | 5224.37 | 5032.23 | 5929.74 |
| ENSMUSG00000033917 | 14_Gde1         | 901.105 | -0.38278 | 0.00707  | 0.01885  | 813.493 | 857.23  | 675.262 | 1063.09 | 1045.35 | 952.203 |
| ENSMUSG00000033918 | 15_Parl         | 1080.84 | -0.09772 | 0.46715  | 0.58073  | 1097.39 | 997.655 | 1037.39 | 988.247 | 1233.63 | 1130.74 |
| ENSMUSG00000033931 | 8_Rbm34         | 448.216 | -0.28303 | 0.07678  | 0.13861  | 417.599 | 387.314 | 407.548 | 419.284 | 524.47  | 533.082 |
| ENSMUSG00000033933 | 13_Vhl          | 712.125 | -0.31746 | 0.01567  | 0.03696  | 657.219 | 615.848 | 628.651 | 839.469 | 719.914 | 811.651 |
| ENSMUSG00000033938 | 5_Ndufb7        | 914.844 | 1.25769  | 7.37E-07 | 7.01E-06 | 1154.69 | 1239.04 | 1477.21 | 763.728 | 341.578 | 512.822 |
| ENSMUSG00000033940 | 8_Brk1          | 3048.52 | -0.09768 | 0.37693  | 0.4944   | 3006.54 | 2799.31 | 3029.72 | 3272.22 | 2888.62 | 3294.72 |
| ENSMUSG00000033943 | 15_Mga          | 2192.76 | -0.8249  | 1.53E-10 | 4.70E-09 | 1774.58 | 1518.05 | 1453.31 | 2633.82 | 3024    | 2752.78 |
| ENSMUSG00000033948 | 3_Zswim5        | 65.9261 | -0.71609 | 0.03911  | 0.07901  | 52.0913 | 61.493  | 35.8546 | 104.596 | 74.412  | 67.11   |
| ENSMUSG00000033949 | 11_Trim36       | 97.3804 | -0.38327 | 0.15727  | 0.24876  | 98.9735 | 68.8354 | 86.0511 | 126.236 | 106.687 | 97.4995 |
| ENSMUSG00000033952 | 14_Aspm         | 519.127 | 0.00316  | 0.98746  | 0.99122  | 617.282 | 421.273 | 519.892 | 418.382 | 578.262 | 559.672 |
| ENSMUSG00000033953 | 10_Ppp3r1       | 2240.94 | -0.40115 | 0.00169  | 0.00565  | 2010.72 | 1811.75 | 1972    | 2278.56 | 2846.48 | 2526.12 |
| ENSMUSG00000033955 | 12_Tnks1bp1     | 5786.15 | 1.12192  | 8.17E-10 | 1.99E-08 | 7197.28 | 7376.4  | 9212.25 | 3900.69 | 2741.59 | 4288.71 |
| ENSMUSG00000033960 | 5_9430020K01Rik | 1398.21 | -0.99782 | 5.20E-07 | 5.25E-06 | 878.607 | 1155.52 | 764.899 | 2212.74 | 1893.47 | 1484.02 |
| ENSMUSG00000033961 | 15_Zfp446       | 229.382 | 0.00318  | 0.98632  | 0.99058  | 218.783 | 258.821 | 210.347 | 214.601 | 226.822 | 246.914 |
| ENSMUSG00000033964 | 12_Zbtb41       | 849.922 | -0.64492 | 2.37E-07 | 2.65E-06 | 678.055 | 647.971 | 663.311 | 971.115 | 1119.77 | 1019.31 |
| ENSMUSG00000033965 | 10_Slc16a2      | 1391.35 | 0.00571  | 0.96033  | 0.97417  | 1292.73 | 1428.11 | 1461.67 | 1394.91 | 1332.24 | 1438.43 |
| ENSMUSG00000033966 | 7_Cdkl4         | 2.55178 | -0.86741 | 0.61912  | 0.71727  | 1.73638 | 3.67122 | 0       | 7.21348 | 2.68959 | 0       |
| ENSMUSG00000033967 | 4_Rnf225        | 296.581 | 0.81152  | 0.00052  | 0.00206  | 386.344 | 271.67  | 475.671 | 191.157 | 217.857 | 236.784 |
| ENSMUSG00000033970 | 15_Rfc3         | 444.003 | 0.41057  | 0.00837  | 0.02178  | 495.736 | 477.259 | 547.381 | 337.23  | 408.818 | 397.595 |
| ENSMUSG00000033972 | 9_Zfp944        | 193.099 | -0.47798 | 0.01628  | 0.03817  | 165.824 | 153.274 | 164.931 | 196.567 | 256.408 | 221.59  |
| ENSMUSG00000033981 | 14_Gria2        | 72.2505 | -2.30501 | 7.28E-07 | 6.94E-06 | 33.8593 | 26.6164 | 11.9515 | 149.68  | 150.617 | 60.7789 |
| ENSMUSG00000033983 | 13_Coil         | 161.806 | -0.06807 | 0.7276   | 0.80613  | 162.351 | 154.191 | 157.76  | 174.927 | 165.858 | 155.746 |
| ENSMUSG00000033985 | 17_Tesk2        | 109.177 | -0.50332 | 0.04404  | 0.0872   | 90.2916 | 101.876 | 78.8802 | 136.155 | 138.962 | 108.896 |
| ENSMUSG00000033987 | 15_Dnah17       | 44.7532 | 0.8471   | 0.01908  | 0.04346  | 64.2459 | 57.8218 | 50.1965 | 36.0674 | 25.9994 | 34.1881 |
| ENSMUSG00000033991 | 8_Ttc37         | 1357.04 | -0.16452 | 0.27785  | 0.39041  | 1350.03 | 1144.5  | 1344.55 | 1203.75 | 1591.34 | 1508.08 |
| ENSMUSG00000033998 | 8_Kcnk1         | 838.712 | 0.34691  | 0.01057  | 0.02651  | 902.048 | 885.682 | 1029.03 | 710.528 | 698.397 | 806.587 |
| ENSMUSG00000034000 | 15_Neu4         | 0       | NA       | NA       | NA       | 0       | 0       | 0       | 0       | 0       | 0       |
| ENSMUSG00000034006 | 16_Pqlc1        | 2074.66 | 0.89415  | 9.20E-08 | 1.17E-06 | 2479.55 | 2473.49 | 3140.86 | 1683.45 | 1194.18 | 1476.42 |
| ENSMUSG00000034007 | 9_Scaper        | 966.28  | -0.26762 | 0.06346  | 0.11839  | 933.303 | 829.696 | 866.487 | 903.489 | 1109.9  | 1154.8  |
| ENSMUSG00000034009 | 14_Rxfp1        | 53.6282 | 0.51353  | 0.23116  | 0.33741  | 56.4322 | 49.5615 | 83.6608 | 26.1489 | 65.4467 | 40.5193 |
| ENSMUSG00000034021 | 15_Pds5b        | 1097.01 | -0.65992 | 6.46E-08 | 8.59E-07 | 874.266 | 840.71  | 835.413 | 1221.78 | 1418.31 | 1391.58 |
| ENSMUSG00000034022 | 7_Cpsf1         | 1243.14 | 0.99047  | 2.26E-11 | 8.78E-10 | 1477.66 | 1687.84 | 1796.32 | 924.228 | 718.121 | 854.703 |
| ENSMUSG00000034023 | 16_Fancd2       | 258.177 | 0.22178  | 0.32021  | 0.43587  | 322.966 | 218.438 | 292.813 | 202.879 | 281.511 | 230.453 |
| ENSMUSG00000034024 | 7_Cct2          | 4455.14 | 0.15256  | 0.18419  | 0.28216  | 4682.14 | 4524.78 | 4863.08 | 3826.75 | 4198.45 | 4635.66 |
| ENSMUSG00000034028 | 15_Cd226        | 4.63245 | 1.16348  | 0.28414  | 0.39735  | 6.94551 | 6.42464 | 5.97577 | 1.80337 | 5.37918 | 1.26623 |
| ENSMUSG00000034031 | 5_Ccdc182       | 0.6925  | 1.56391  | 0.60682  | NA       | 0.86819 | 0       | 2.39031 | 0       | 0.89653 | 0       |
| ENSMUSG00000034032 | 15_Rpap1        | 632.032 | 0.93567  | 6.42E-09 | 1.17E-07 | 711.046 | 822.354 | 957.318 | 450.843 | 399.853 | 450.777 |
| ENSMUSG00000034035 | 18_Ccdc17       | 240.435 | 0.39985  | 0.0411   | 0.08241  | 281.293 | 275.342 | 262.934 | 167.713 | 222.34  | 232.986 |
| ENSMUSG00000034037 | 14_Fgd5         | 144.824 | -0.02751 | 0.89841  | 0.93151  | 138.91  | 149.602 | 142.223 | 167.713 | 136.273 | 134.22  |
| ENSMUSG00000034040 | 16_Wbscr17      | 43.4655 | -1.02477 | 0.01212  | 0.02969  | 27.782  | 32.1232 | 26.2934 | 58.6096 | 77.9982 | 37.9868 |
| ENSMUSG00000034041 | 4_Lyl1          | 38.5703 | 1.48714  | 0.0041   | 0.01194  | 58.1686 | 56.9039 | 56.1722 | 36.9691 | 14.3445 | 8.86359 |
| ENSMUSG00000034042 | 16_Gbbp111      | 2317.18 | 0.02997  | 0.8001   | 0.86183  | 2456.97 | 2108.2  | 2458.43 | 2163.14 | 2334.57 | 2381.77 |
| ENSMUSG00000034055 | 16_Phka1        | 416.554 | -0.84884 | 1.01E-05 | 6.82E-05 | 317.757 | 345.095 | 228.274 | 531.994 | 583.641 | 492.562 |
| ENSMUSG00000034057 | 7_Myrf1         | 5.09953 | -0.50442 | 0.61954  | 0.71755  | 4.34094 | 3.67122 | 4.78062 | 5.41011 | 9.86184 | 2.53245 |
| ENSMUSG00000034059 | 13_Ypel4        | 48.5378 | -0.12261 | 0.71636  | 0.79779  | 46.014  | 41.3013 | 52.5868 | 55.9045 | 51.1022 | 44.3179 |
| ENSMUSG00000034063 | 8_493059J08Rik  | 19.4165 | -1.04929 | 0.05505  | 0.10498  | 14.7592 | 14.6849 | 8.36608 | 27.0506 | 31.3786 | 20.2596 |

|                    |                  |         |          |          |          |         |         |         |         |         |         |
|--------------------|------------------|---------|----------|----------|----------|---------|---------|---------|---------|---------|---------|
| ENSMUSG00000034064 | 14_Poglut1       | 809.412 | -0.51392 | 5.23E-05 | 0.00028  | 676.319 | 668.162 | 656.14  | 907.096 | 1040.87 | 907.885 |
| ENSMUSG00000034066 | 13_Farp2         | 309.279 | -0.39076 | 0.05674  | 0.10766  | 289.107 | 250.561 | 261.739 | 317.393 | 294.959 | 441.913 |
| ENSMUSG00000034071 | 14_Zfp551        | 88.0929 | -0.64362 | 0.02079  | 0.04681  | 68.5869 | 72.5066 | 64.5383 | 85.6601 | 109.377 | 127.889 |
| ENSMUSG00000034075 | 10_Zdhhc5        | 10061.8 | 0.45653  | 0.00166  | 0.00556  | 11197.9 | 10818.2 | 12904.1 | 7474.07 | 7978.23 | 9998.13 |
| ENSMUSG00000034083 | 16_Ccdc174       | 552.468 | -0.28073 | 0.04121  | 0.08258  | 464.481 | 494.697 | 537.819 | 592.407 | 587.228 | 638.178 |
| ENSMUSG00000034087 | 13_Nlrp4b        | 0.15297 | 0.92709  | 0.82027  | NA       | 0       | 0.91781 | 0       | 0       | 0       | 0       |
| ENSMUSG00000034088 | 15_Hdlbp         | 13778.7 | 0.20935  | 0.11081  | 0.18726  | 14677.6 | 14117.7 | 15533.4 | 10854.5 | 13178.1 | 14310.9 |
| ENSMUSG00000034098 | 14_Fstl5         | 9.82158 | -1.83002 | 0.05894  | 0.11124  | 5.20913 | 6.42464 | 1.19515 | 28.8539 | 13.448  | 3.79868 |
| ENSMUSG00000034101 | 14_Ctnnd1        | 17693.2 | 0.20361  | 0.15088  | 0.24019  | 18623.5 | 17844   | 20349.9 | 14013.1 | 16050.6 | 19278.3 |
| ENSMUSG00000034105 | 8_Tlhc1          | 405.796 | 0.52825  | 0.00491  | 0.01388  | 393.289 | 499.286 | 546.185 | 376.003 | 295.855 | 324.154 |
| ENSMUSG00000034107 | 10_Ano7          | 2.42046 | 0.48337  | 0.73399  | NA       | 2.60457 | 4.58903 | 1.19515 | 2.70506 | 0.89653 | 2.53245 |
| ENSMUSG00000034108 | 5_Ccs            | 601.466 | 0.495    | 0.00637  | 0.01727  | 649.405 | 721.395 | 739.8   | 576.177 | 386.405 | 535.614 |
| ENSMUSG00000034109 | 15_Golim4        | 2579.97 | -0.15809 | 0.12234  | 0.20292  | 2517.75 | 2348.66 | 2448.87 | 2594.15 | 2735.31 | 2835.08 |
| ENSMUSG00000034110 | 8_Kctd7          | 204.881 | -0.02197 | 0.9071   | 0.93742  | 218.783 | 180.808 | 210.347 | 215.503 | 193.651 | 210.194 |
| ENSMUSG00000034111 | 5_Tmed8          | 575.692 | -0.5709  | 0.00025  | 0.00109  | 447.117 | 518.56  | 424.28  | 694.298 | 755.775 | 614.12  |
| ENSMUSG00000034112 | 8_Atp2c2         | 264.105 | 1.50736  | 3.62E-10 | 9.84E-09 | 336.857 | 378.136 | 456.549 | 154.188 | 96.8253 | 162.077 |
| ENSMUSG00000034115 | 9_Scn11a         | 0.1447  | 0.92709  | 0.82027  | NA       | 0.86819 | 0       | 0       | 0       | 0       | 0       |
| ENSMUSG00000034116 | 17_Vav1          | 94.1362 | 1.65918  | 3.62E-06 | 2.79E-05 | 208.365 | 99.123  | 120.711 | 37.8708 | 43.0335 | 55.714  |
| ENSMUSG00000034117 | 3_Ptgr2          | 0.57504 | -1.21646 | 0.74749  | NA       | 0       | 0.91781 | 0       | 0       | 0       | 2.53245 |
| ENSMUSG00000034118 | 15_Tpst1         | 524.186 | 0.17125  | 0.18356  | 0.28136  | 545.222 | 550.683 | 570.089 | 498.632 | 484.127 | 496.361 |
| ENSMUSG00000034120 | 18_Srsf2         | 5372.3  | 0.1055   | 0.48061  | 0.59325  | 5364.54 | 5284.72 | 6057.04 | 4226.2  | 5935.03 | 5366.27 |
| ENSMUSG00000034121 | 12_Mks1          | 273.981 | 0.51208  | 0.00572  | 0.01576  | 293.448 | 340.506 | 332.253 | 251.57  | 191.858 | 234.252 |
| ENSMUSG00000034126 | 4_Pont2          | 456.778 | -0.29044 | 0.03904  | 0.07891  | 421.94  | 425.862 | 384.84  | 528.388 | 498.471 | 481.166 |
| ENSMUSG00000034127 | 14_Tspan8        | 43.9475 | -0.27764 | 0.49407  | 0.60529  | 47.7504 | 32.1232 | 39.4401 | 66.7247 | 35.8612 | 41.7855 |
| ENSMUSG00000034135 | 14_Sik3          | 1571.28 | 0.81769  | 1.62E-08 | 2.62E-07 | 1849.24 | 2013.67 | 2151.28 | 1210.06 | 957.495 | 1245.97 |
| ENSMUSG00000034145 | 14_Tmem63c       | 13.4981 | -2.19074 | 0.02712  | 0.05849  | 6.07732 | 8.26025 | 0       | 44.1826 | 16.1376 | 6.33113 |
| ENSMUSG00000034152 | 5_Exoc3          | 1954.83 | -0.15914 | 0.13142  | 0.21467  | 1896.99 | 1775.04 | 1869.22 | 1957.56 | 2140.92 | 2089.27 |
| ENSMUSG00000034154 | 15_Ino80         | 1173.76 | 0.21739  | 0.13508  | 0.2192   | 1276.24 | 1114.22 | 1395.94 | 957.59  | 1162.8  | 1135.81 |
| ENSMUSG00000034156 | 16_Bzap1         | 318.219 | -0.19166 | 0.40388  | 0.52121  | 313.416 | 341.424 | 236.641 | 424.694 | 327.234 | 265.908 |
| ENSMUSG00000034157 | 12_Cipc          | 1671.42 | 0.23108  | 0.07798  | 0.1403   | 1790.2  | 1692.43 | 1931.37 | 1545.49 | 1367.21 | 1701.81 |
| ENSMUSG00000034158 | 9_Lrrc58         | 1868.5  | -0.70571 | 1.20E-07 | 1.47E-06 | 1435.98 | 1527.23 | 1297.94 | 2285.77 | 2581.11 | 2082.94 |
| ENSMUSG00000034159 | 12_Z310007B03Rik | 6718.45 | 0.98226  | 2.35E-18 | 3.76E-16 | 8157.5  | 8810.93 | 9795.48 | 4583.27 | 4332.93 | 4630.59 |
| ENSMUSG00000034160 | 13_Ogt           | 6846.13 | -0.68763 | 2.40E-06 | 1.96E-05 | 5354.99 | 5666.53 | 4712.49 | 7602.11 | 9983.76 | 7756.91 |
| ENSMUSG00000034161 | 7_Scx            | 53.8645 | -0.47405 | 0.27153  | 0.38326  | 46.014  | 56.9039 | 32.2692 | 96.4803 | 42.1369 | 49.3828 |
| ENSMUSG00000034163 | 10_Zfc3h1        | 1837.31 | -0.3852  | 0.01997  | 0.04521  | 1600.94 | 1692.43 | 1486.77 | 1688.86 | 2532.7  | 2022.16 |
| ENSMUSG00000034164 | 17_Emid1         | 14.7144 | 0.63779  | 0.31004  | 0.42493  | 10.4183 | 22.9451 | 20.3176 | 9.91854 | 10.7584 | 13.9285 |
| ENSMUSG00000034165 | 16_Ccnd3         | 1072.08 | 0.65765  | 0.00147  | 0.005    | 1239.77 | 1384.97 | 1312.28 | 1085.63 | 594.4   | 815.45  |
| ENSMUSG00000034168 | 6_Irf2bpl        | 1144.12 | 0.70919  | 4.04E-06 | 3.07E-05 | 1239.77 | 1374.87 | 1644.53 | 861.11  | 787.154 | 957.268 |
| ENSMUSG00000034171 | 13_Faah          | 112.849 | 0.21552  | 0.44847  | 0.56333  | 111.128 | 116.561 | 136.248 | 130.744 | 73.5155 | 108.896 |
| ENSMUSG00000034173 | 13_Zbed5         | 32.1114 | -0.34462 | 0.4259   | 0.54146  | 24.3093 | 36.7122 | 23.9031 | 44.1826 | 33.1716 | 30.3894 |
| ENSMUSG00000034175 | 13_Rhbdd3        | 207.889 | 1.13734  | 9.20E-06 | 6.29E-05 | 252.643 | 306.547 | 298.789 | 174.927 | 94.1357 | 120.292 |
| ENSMUSG00000034177 | 15_Rnf43         | 582.131 | 0.71581  | 5.44E-06 | 3.99E-05 | 677.187 | 700.286 | 792.387 | 389.528 | 429.438 | 503.958 |
| ENSMUSG00000034187 | 18_Nsf           | 1293.04 | 0.13258  | 0.27455  | 0.38662  | 1317.91 | 1295.02 | 1446.14 | 1333.59 | 1196.87 | 1168.73 |
| ENSMUSG00000034189 | 4_Hsd1l          | 1069.33 | 0.50142  | 0.00017  | 0.0008   | 1194.63 | 1237.2  | 1327.82 | 944.065 | 779.085 | 933.209 |
| ENSMUSG00000034190 | 8_Chmp7          | 915.13  | -0.06881 | 0.56245  | 0.66784  | 838.67  | 923.312 | 919.074 | 965.705 | 938.668 | 905.352 |
| ENSMUSG00000034192 | 5_Lsm3           | 546.039 | -0.36792 | 0.0083   | 0.02162  | 491.395 | 434.122 | 505.55  | 591.506 | 644.605 | 609.055 |
| ENSMUSG00000034194 | 16_R3hcc1        | 429.075 | 0.3      | 0.0837   | 0.14848  | 447.985 | 477.259 | 495.989 | 455.351 | 328.13  | 369.738 |
| ENSMUSG00000034201 | 13_Gas2l1        | 505.723 | 1.18052  | 8.43E-08 | 1.09E-06 | 648.537 | 673.669 | 784.021 | 410.267 | 230.408 | 287.434 |
| ENSMUSG00000034203 | 8_Chchd4         | 432.215 | -0.1047  | 0.48799  | 0.59984  | 423.676 | 379.972 | 445.792 | 417.48  | 446.472 | 479.9   |
| ENSMUSG00000034205 | 16_Loxl2         | 917.695 | -0.58146 | 0.00024  | 0.00104  | 775.292 | 823.272 | 604.748 | 1099.15 | 1012.18 | 1191.52 |
| ENSMUSG00000034206 | 15_Polq          | 107.338 | 0.19979  | 0.44944  | 0.5643   | 142.383 | 92.6984 | 108.759 | 94.677  | 100.411 | 105.097 |
| ENSMUSG00000034209 | 4_Ras10a         | 3.29899 | 0.19994  | 0.89218  | 0.9272   | 0.86819 | 2.75342 | 7.17092 | 6.3118  | 2.68959 | 0       |
| ENSMUSG00000034210 | 13_Efcab14       | 1824.85 | -0.14142 | 0.17934  | 0.2763   | 1736.38 | 1712.63 | 1756.88 | 1799.76 | 1958.02 | 1985.44 |
| ENSMUSG00000034211 | 14_Mrps17        | 701.376 | -0.02159 | 0.86134  | 0.90605  | 713.651 | 701.203 | 672.872 | 670.854 | 734.259 | 715.418 |
| ENSMUSG00000034212 | 13_Ankmy1        | 15.121  | 0.83894  | 0.16536  | 0.25872  | 14.7592 | 17.4383 | 26.2934 | 10.8202 | 12.5514 | 8.86359 |
| ENSMUSG00000034216 | 12_Vps18         | 303.817 | 1.1737   | 8.61E-06 | 5.94E-05 | 362.035 | 455.232 | 445.792 | 250.669 | 119.239 | 189.934 |
| ENSMUSG00000034218 | 15_Atm           | 755.775 | -0.54362 | 0.00071  | 0.0027   | 714.519 | 505.711 | 625.066 | 890.865 | 932.392 | 866.099 |
| ENSMUSG00000034219 | 15_Sept14        | 0.14942 | -0.99647 | 0.80707  | NA       | 0       | 0       | 0       | 0       | 0.89653 | 0       |
| ENSMUSG00000034220 | 7_Gpc1           | 900.018 | 0.66543  | 0.00043  | 0.00173  | 996.68  | 1223.43 | 1092.37 | 878.242 | 558.539 | 650.841 |
| ENSMUSG00000034224 | 14_Slc38a8       | 286.475 | -0.07291 | 0.78009  | 0.84643  | 269.138 | 332.246 | 236.641 | 409.365 | 238.477 | 232.986 |
| ENSMUSG00000034226 | 17_Rhov          | 734.388 | 0.94099  | 4.43E-06 | 3.33E-05 | 842.143 | 895.778 | 1159.3  | 583.391 | 377.439 | 548.276 |
| ENSMUSG00000034227 | 7_Foxj1          | 9.62578 | -1.66551 | 0.06512  | 0.12098  | 6.07732 | 6.42464 | 1.19515 | 12.6236 | 25.1029 | 6.33113 |
| ENSMUSG00000034235 | 16_Usp54         | 2752.33 | 0.22345  | 0.06     | 0.11287  | 3035.19 | 2866.31 | 2991.47 | 2333.56 | 2451.11 | 2836.35 |
| ENSMUSG00000034243 | 16_Golgb1        | 5302.29 | -0.02307 | 0.83254  | 0.88545  | 5377.56 | 5146.14 | 5253.9  | 4941.24 | 5241.12 | 5853.77 |
| ENSMUSG00000034245 | 10_Hdac11        | 642.087 | -0.08056 | 0.68314  | 0.77116  | 563.454 | 734.244 | 574.869 | 819.632 | 542.401 | 617.919 |
| ENSMUSG00000034247 | 9_Plekhm1        | 1405.98 | 0.77868  | 6.12E-08 | 8.18E-07 | 1640.88 | 1792.47 | 1895.51 | 1124.4  | 875.91  | 1106.68 |
| ENSMUSG00000034248 | 7_Slc25a37       | 972.903 | 0.04073  | 0.74075  | 0.81674  | 987.998 | 979.299 | 991.978 | 869.225 | 1008.6  | 1000.32 |
| ENSMUSG00000034252 | 14_Senp6         | 2080.57 | -0.40956 | 0.00215  | 0.0069   | 1773.71 | 1787.89 | 1799.9  | 2030.6  | 2662.7  | 2428.62 |
| ENSMUSG00000034254 | 17_Agpat1        | 923.955 | 0.92424  | 5.74E-06 | 4.19E-05 | 1071.34 | 1220.68 | 1338.57 | 788.073 | 459.024 | 666.035 |
| ENSMUSG00000034255 | 17_Arhgap27      | 3737.07 | 1.32006  | 2.52E-12 | 1.22E-10 | 4809.76 | 4997.45 | 6201.65 | 2336.27 | 1575.2  | 2502.06 |
| ENSMUSG00000034258 | 3_Mfsd7c         | 173.657 | -1.28117 | 4.69E-06 | 3.50E-05 | 112.864 | 122.068 | 68.1238 | 296.655 | 251.029 | 191.2   |
| ENSMUSG00000034259 | 17_Exosc4        | 238.502 | 0.77335  | 0.0052   | 0.01456  | 238.752 | 279.013 | 386.035 | 237.143 | 131.79  | 158.278 |
| ENSMUSG00000034263 | 12_Vvwa9         | 693.236 | 0.14803  | 0.23067  | 0.33688  | 738.828 | 707.628 | 739.8   | 623.966 | 683.156 | 666.035 |
| ENSMUSG00000034265 | 7_Zdhhc14        | 78.2502 | -0.11296 | 0.68305  | 0.77115  | 66.8505 | 87.1915 | 71.7092 | 86.5618 | 82.4808 | 74.7074 |
| ENSMUSG00000034266 | 5_Batf           | 18.1527 | 1.05646  | 0.05418  | 0.10361  | 26.9138 | 20.1917 | 26.2934 | 12.6236 | 8.96531 | 13.9285 |
| ENSMUSG00000034269 | 12_Setd5         | 3723.27 | 0.02428  | 0.82958  | 0.88318  | 3699.35 | 3643.69 | 3920.11 | 3338.94 | 3793.22 | 3944.3  |
| ENSMUSG00000034271 | 15_Jdp2          | 2880.97 | 0.83466  | 4.51E-07 | 4.63E-06 | 3339.92 | 3679.48 | 4056.35 | 2434.55 | 1640.65 | 2134.86 |
| ENSMUSG00000034274 | 11_Thoc5         | 1081.77 | 0.41856  | 0.00497  | 0.01401  | 1188.55 | 1166.53 | 1356.5  | 897.177 | 813.153 | 1068.7  |
| ENSMUSG00000034275 | 17_lgsf9b        | 24.1489 | 0.32316  | 0.5141   | 0.62427  | 27.782  | 25.6986 | 27.4885 | 27.9522 | 23.3098 | 12.6623 |

|                     |             |         |          |          |          |         |         |         |         |         |         |
|---------------------|-------------|---------|----------|----------|----------|---------|---------|---------|---------|---------|---------|
| ENSMUSG000000034278 | 3_Dnajc17   | 326.163 | 0.34886  | 0.03387  | 0.07022  | 375.926 | 340.506 | 380.059 | 315.59  | 259.994 | 284.901 |
| ENSMUSG000000034282 | 3_Evpl      | 23883.2 | 1.90078  | 6.11E-15 | 5.50E-13 | 30686.1 | 35986.2 | 46356.4 | 11514.5 | 6195.03 | 12561   |
| ENSMUSG000000034285 | 15_Nipsnap1 | 210.861 | -0.67354 | 0.00584  | 0.01603  | 159.747 | 191.821 | 136.248 | 282.228 | 303.924 | 191.2   |
| ENSMUSG000000034290 | 9_Nek9      | 3709.16 | -0.10621 | 0.25056  | 0.35963  | 3536.13 | 3600.55 | 3580.68 | 3756.42 | 3825.5  | 3955.69 |
| ENSMUSG000000034292 | 13_Traf3ip1 | 291.559 | 0.28249  | 0.0852   | 0.15062  | 347.275 | 301.958 | 310.74  | 278.621 | 253.718 | 257.044 |
| ENSMUSG000000034295 | 9_Fhod3     | 160.558 | -1.21167 | 3.94E-05 | 0.00022  | 92.8962 | 116.561 | 81.2705 | 258.784 | 270.752 | 143.084 |
| ENSMUSG000000034297 | 14_Med13    | 2687.8  | -0.29909 | 0.02398  | 0.05282  | 2475.21 | 2277.99 | 2477.55 | 2570.71 | 3339.58 | 2985.76 |
| ENSMUSG000000034300 | 16_Fam53c   | 1095.23 | 0.25704  | 0.03191  | 0.06689  | 1157.3  | 1170.2  | 1251.33 | 1074.81 | 950.322 | 967.397 |
| ENSMUSG000000034303 | 6_Ccdc15    | 44.996  | -0.29676 | 0.48025  | 0.59293  | 38.2003 | 44.0547 | 39.4401 | 50.4944 | 69.9294 | 27.857  |
| ENSMUSG000000034308 | 13_Sdr42e1  | 2683.94 | 0.3029   | 0.05101  | 0.09863  | 2887.59 | 2868.14 | 3136.08 | 2132.49 | 2132.85 | 2946.51 |
| ENSMUSG000000034310 | 8_Tmem132d  | 319.274 | -0.89704 | 0.00059  | 0.00229  | 222.256 | 272.588 | 174.492 | 527.486 | 433.921 | 284.901 |
| ENSMUSG000000034311 | 3_Kif4      | 427.909 | 0.25823  | 0.22161  | 0.3265   | 534.804 | 408.423 | 454.159 | 288.539 | 444.679 | 436.848 |
| ENSMUSG000000034312 | 13_Iqsec1   | 1163.57 | 0.02191  | 0.89281  | 0.92775  | 1090.44 | 1340.91 | 1086.4  | 1365.15 | 1061.49 | 1037.04 |
| ENSMUSG000000034317 | 14_Trim59   | 299.667 | -0.01351 | 0.95592  | 0.97132  | 281.293 | 258.821 | 354.961 | 209.191 | 365.784 | 327.953 |
| ENSMUSG000000034320 | 14_Slc26a2  | 726.276 | -0.22633 | 0.08581  | 0.15148  | 737.96  | 624.108 | 645.383 | 767.334 | 788.947 | 793.924 |
| ENSMUSG000000034321 | 13_Exosc1   | 277.962 | 0.20253  | 0.23133  | 0.33748  | 293.448 | 301.958 | 296.398 | 228.126 | 274.338 | 273.505 |
| ENSMUSG000000034324 | 16_Tmem132c | 564.618 | -0.49785 | 0.0148   | 0.03518  | 410.653 | 604.834 | 388.425 | 752.907 | 601.572 | 629.315 |
| ENSMUSG000000034327 | 17_Kctd9    | 1196.7  | -0.08868 | 0.60658  | 0.70674  | 1202.44 | 977.463 | 1300.33 | 1012.59 | 1402.17 | 1285.22 |
| ENSMUSG000000034329 | 16_Brip1    | 183.475 | 0.24367  | 0.38183  | 0.49947  | 209.233 | 166.123 | 221.104 | 107.301 | 200.823 | 196.265 |
| ENSMUSG000000034330 | 9_Plcg2     | 488.93  | 1.09674  | 6.82E-08 | 9.01E-07 | 614.677 | 625.943 | 756.533 | 251.57  | 285.993 | 398.861 |
| ENSMUSG000000034333 | 15_Zbed4    | 687.702 | -0.02868 | 0.83771  | 0.88938  | 657.219 | 622.272 | 764.899 | 720.447 | 696.604 | 664.769 |
| ENSMUSG000000034334 | 7_Fam151b   | 85.3781 | 0.27896  | 0.27571  | 0.38799  | 91.1598 | 100.959 | 88.4414 | 73.9382 | 77.9982 | 79.7723 |
| ENSMUSG000000034336 | 3_Ina       | 13.5008 | -1.23686 | 0.15467  | 0.24525  | 10.4183 | 10.0959 | 3.58546 | 36.9691 | 16.1376 | 3.79868 |
| ENSMUSG000000034339 | 8_Gm5689    | 0.29412 | -0.03469 | 0.99322  | NA       | 0.86819 | 0       | 0       | 0       | 0.89653 | 0       |
| ENSMUSG000000034341 | 17_Wbp2     | 3030.13 | 0.61958  | 9.32E-05 | 0.00047  | 3326.9  | 3686.82 | 3998.99 | 2708.66 | 1910.51 | 2548.91 |
| ENSMUSG000000034342 | 9_Cbl       | 3324.9  | 0.12215  | 0.40778  | 0.5246   | 3466.68 | 3275.65 | 3653.59 | 2580.62 | 3448.95 | 3523.91 |
| ENSMUSG000000034343 | 14_Ube2f    | 1907.29 | -0.07833 | 0.52464  | 0.63387  | 1787.6  | 1815.42 | 1963.64 | 1743.86 | 2078.16 | 2055.09 |
| ENSMUSG000000034345 | 14_Gtf2h5   | 963.851 | -0.3337  | 0.00389  | 0.01145  | 824.779 | 874.669 | 859.316 | 1118.99 | 1026.53 | 1078.83 |
| ENSMUSG000000034349 | 14_Smc4     | 1622.47 | -0.19974 | 0.27923  | 0.39187  | 1620.04 | 1339.08 | 1571.63 | 1296.62 | 2063.81 | 1843.63 |
| ENSMUSG000000034353 | 14_Ramp1    | 87.1541 | -0.40464 | 0.32751  | 0.44381  | 72.9278 | 98.2052 | 53.7819 | 158.697 | 58.2745 | 81.0385 |
| ENSMUSG000000034354 | 17_Mttr3    | 3105.72 | 0.24154  | 0.02803  | 0.06007  | 3205.35 | 3410.57 | 3479.09 | 2971.05 | 2611.59 | 2956.64 |
| ENSMUSG000000034359 | 16_Skint2   | 2.01691 | 2.44317  | 0.1698   | NA       | 6.07732 | 1.83561 | 2.39031 | 0.90169 | 0.89653 | 0       |
| ENSMUSG000000034361 | 9_Cpne2     | 178.16  | 0.1612   | 0.44624  | 0.56123  | 199.683 | 175.301 | 190.03  | 199.272 | 157.789 | 146.882 |
| ENSMUSG000000034362 | 7_Csta1     | 3880.18 | -0.27    | 0.05365  | 0.10266  | 3715.85 | 3545.48 | 3292.65 | 3659.94 | 4929.13 | 4138.03 |
| ENSMUSG000000034371 | 8_Tkfc      | 243.31  | 0.63294  | 0.00104  | 0.00369  | 281.293 | 301.958 | 303.569 | 205.584 | 155.996 | 211.46  |
| ENSMUSG000000034377 | 10_Tulp4    | 4764.39 | 0.23523  | 0.02088  | 0.04698  | 5135.33 | 5050.68 | 5268.24 | 4162.18 | 4268.38 | 4701.5  |
| ENSMUSG000000034379 | 8_Wdr5b     | 167.486 | -0.31585 | 0.20613  | 0.30841  | 161.483 | 172.547 | 112.344 | 150.581 | 199.03  | 208.927 |
| ENSMUSG000000034382 | 14_Al661453 | 20221.7 | 1.22047  | 4.83E-12 | 2.14E-10 | 25821.7 | 27298.3 | 31775.6 | 12970.7 | 9106.06 | 14357.7 |
| ENSMUSG000000034384 | 11_Barlh2   | 1.10714 | -2.45583 | 0.35544  | NA       | 0.86819 | 0       | 0       | 4.50843 | 0       | 1.26623 |
| ENSMUSG000000034387 | 12_Ssu2     | 3.39213 | -1.05752 | 0.4207   | 0.53637  | 4.34094 | 0.91781 | 1.19515 | 4.50843 | 1.79306 | 7.59736 |
| ENSMUSG000000034390 | 15_Cmip     | 1512.81 | 0.78289  | 1.29E-09 | 2.93E-08 | 1728.56 | 1911.79 | 2099.89 | 1117.19 | 1035.49 | 1183.92 |
| ENSMUSG000000034391 | 10_Fbxo15   | 1.60872 | -1.1904  | 0.49579  | NA       | 0.86819 | 0.91781 | 1.19515 | 4.50843 | 0.89653 | 1.26623 |
| ENSMUSG000000034394 | 14_Lif      | 150.699 | 1.16304  | 4.70E-05 | 0.00026  | 183.188 | 180.808 | 260.544 | 64.0197 | 100.411 | 115.227 |
| ENSMUSG000000034401 | 16_Spata6   | 412.664 | -0.50297 | 0.00116  | 0.00409  | 339.462 | 327.657 | 357.351 | 429.202 | 520.884 | 501.426 |
| ENSMUSG000000034402 | 2_Kcnh5     | 10.9327 | -1.14836 | 0.12866  | 0.2112   | 6.07732 | 7.34244 | 7.17092 | 21.6405 | 17.0341 | 6.33113 |
| ENSMUSG000000034403 | 16_Pja1     | 2976.92 | 0.41575  | 0.00177  | 0.00587  | 3269.6  | 3405.06 | 3532.88 | 2691.53 | 2161.54 | 2800.89 |
| ENSMUSG000000034412 | 13_Tbc1d10a | 1618.65 | 1.04154  | 9.35E-09 | 1.61E-07 | 1898.73 | 2066.9  | 2570.78 | 1200.14 | 831.98  | 1143.4  |
| ENSMUSG000000034413 | 18_Neur11b  | 57.0234 | 0.454    | 0.18315  | 0.28089  | 63.3778 | 68.8354 | 65.7335 | 63.118  | 36.7578 | 44.3179 |
| ENSMUSG000000034416 | 18_Pkd1l2   | 4.65989 | 1.18913  | 0.29281  | 0.40676  | 10.4183 | 5.50683 | 3.58546 | 1.80337 | 5.37918 | 1.26623 |
| ENSMUSG000000034422 | 14_Parp14   | 5809.1  | 0.98547  | 5.09E-08 | 6.97E-07 | 7643.53 | 6701.82 | 8813.07 | 2975.56 | 4654.79 | 4065.85 |
| ENSMUSG000000034424 | 5_Gcsh      | 1868.23 | -0.28769 | 0.05903  | 0.11136  | 1679.94 | 1591.47 | 1776    | 1658.2  | 2278.98 | 2224.76 |
| ENSMUSG000000034427 | 16_Myo15b   | 12.2738 | 1.10836  | 0.10592  | 0.1804   | 16.4956 | 13.7671 | 20.3176 | 11.7219 | 6.27571 | 5.06491 |
| ENSMUSG000000034429 | 14_Zfp707   | 279.154 | 0.8292   | 4.69E-07 | 4.80E-06 | 347.275 | 372.629 | 352.57  | 213.699 | 202.616 | 186.135 |
| ENSMUSG000000034430 | 16_Zxdc     | 787.9   | 0.22907  | 0.05222  | 0.10047  | 825.647 | 860.902 | 865.292 | 750.202 | 722.604 | 702.756 |
| ENSMUSG000000034432 | 11_Cops8    | 1135.15 | 0.10477  | 0.38578  | 0.50309  | 1150.35 | 1225.27 | 1153.32 | 1180.31 | 1013.98 | 1087.69 |
| ENSMUSG000000034435 | 5_Tmem30b   | 877.2   | 0.40469  | 0.01157  | 0.02857  | 968.03  | 960.025 | 1068.47 | 658.23  | 699.294 | 909.151 |
| ENSMUSG000000034438 | 16_Gbp8     | 385.078 | 1.30955  | 3.84E-06 | 2.94E-05 | 586.895 | 378.136 | 681.238 | 144.27  | 280.614 | 239.317 |
| ENSMUSG000000034442 | 10_Trmt5    | 298.28  | -0.3147  | 0.10245  | 0.17582  | 263.929 | 276.259 | 256.958 | 264.194 | 380.129 | 348.212 |
| ENSMUSG000000034445 | 7_Cyb561a3  | 319.389 | 0.62214  | 0.00037  | 0.00154  | 400.235 | 374.465 | 386.035 | 271.407 | 210.685 | 273.505 |
| ENSMUSG000000034449 | 7_Dhrs11    | 151.66  | 0.31311  | 0.12697  | 0.20889  | 169.297 | 170.712 | 163.736 | 143.368 | 121.032 | 141.817 |
| ENSMUSG000000034450 | 7_Gulo      | 25.7255 | -1.37897 | 0.01104  | 0.02745  | 16.4956 | 15.6027 | 10.7564 | 55.9045 | 34.0682 | 21.5259 |
| ENSMUSG000000034452 | 7_Slc24a1   | 552.62  | -1.97846 | 0.00313  | 0.00953  | 315.152 | 258.821 | 96.8075 | 1437.29 | 774.602 | 433.05  |
| ENSMUSG000000034453 | 7_Polr3b    | 1024.02 | 0.13763  | 0.31422  | 0.42933  | 1130.38 | 1009.59 | 1076.83 | 867.421 | 970.943 | 1088.96 |
| ENSMUSG000000034456 | 15_Uroc1    | 4.88963 | 1.35969  | 0.19923  | 0.30021  | 7.8137  | 3.67122 | 9.56123 | 1.80337 | 2.68959 | 3.79868 |
| ENSMUSG000000034457 | 10_Eda2r    | 39.7995 | -0.87399 | 0.01867  | 0.0427   | 27.782  | 25.6986 | 31.074  | 58.6096 | 47.5161 | 48.1166 |
| ENSMUSG000000034459 | 8_Iift1     | 7199.71 | 1.13384  | 1.13E-06 | 1.02E-05 | 9418.98 | 8073.94 | 12183.4 | 3190.16 | 6173.51 | 4158.29 |
| ENSMUSG000000034460 | 9_Six4      | 51.1532 | -0.85561 | 0.01164  | 0.02871  | 40.8049 | 39.4656 | 28.6837 | 67.6264 | 70.8259 | 59.5127 |
| ENSMUSG000000034462 | 9_Pkd2      | 1764.21 | -0.60803 | 3.72E-06 | 2.86E-05 | 1347.43 | 1595.15 | 1250.13 | 2184.78 | 2161.54 | 2046.22 |
| ENSMUSG000000034463 | 3_Scara3    | 1103.53 | -0.09554 | 0.54646  | 0.65297  | 1104.34 | 1024.27 | 1073.25 | 1382.28 | 998.735 | 1038.31 |
| ENSMUSG000000034467 | 6_Dynlrb2   | 3.65419 | -1.59024 | 0.29337  | 0.40751  | 1.73638 | 3.67122 | 0       | 1.80337 | 13.448  | 1.26623 |
| ENSMUSG000000034471 | 12_Caskin2  | 623.605 | 1.00696  | 5.78E-06 | 4.21E-05 | 698.023 | 897.614 | 903.536 | 547.323 | 310.2   | 384.933 |
| ENSMUSG000000034472 | 13_Rasd2    | 14.3642 | 0.85134  | 0.21356  | 0.31713  | 19.1001 | 25.6986 | 10.7564 | 16.2303 | 8.06878 | 6.33113 |
| ENSMUSG000000034473 | 13_Sec22a   | 696.308 | -0.48786 | 0.00041  | 0.00168  | 573.873 | 555.272 | 610.724 | 742.087 | 895.634 | 800.255 |
| ENSMUSG000000034480 | 18_Diap2    | 314.25  | -0.46891 | 0.01056  | 0.02647  | 280.425 | 261.575 | 248.592 | 311.983 | 425.852 | 357.076 |
| ENSMUSG000000034484 | 7_Snx2      | 3051.33 | -0.02435 | 0.86935  | 0.91146  | 3118.53 | 2712.12 | 3246.04 | 2558.08 | 3420.26 | 3252.94 |
| ENSMUSG000000034485 | 9_Uaca      | 12172.7 | 0.54522  | 6.04E-05 | 0.00032  | 13696.5 | 13949.7 | 15690   | 10044.8 | 8454.28 | 11201   |
| ENSMUSG000000034486 | 8_Gbx2      | 2.10691 | 1.52125  | 0.36864  | NA       | 4.34094 | 3.67122 | 1.19515 | 0.90169 | 0       | 2.53245 |
| ENSMUSG000000034487 | 3_Kdelc2    | 693.257 | -0.52012 | 3.94E-05 | 0.00022  | 592.104 | 554.355 | 562.918 | 819.632 | 860.669 | 769.866 |
| ENSMUSG000000034488 | 14_Edil3    | 122.806 | -1.37974 | 3.01E-06 | 2.39E-05 | 80.7415 | 74.3423 | 49.0013 | 211.896 | 189.168 | 131.688 |

|                    |                  |         |          |          |          |         |         |         |         |         |         |
|--------------------|------------------|---------|----------|----------|----------|---------|---------|---------|---------|---------|---------|
| ENSMUSG00000034493 | 1_4930556J24Rik  | 2.85334 | 0.0142   | 0.99118  | 0.99411  | 2.60457 | 3.67122 | 2.39031 | 2.70506 | 4.48265 | 1.26623 |
| ENSMUSG00000034501 | 6_Pcnxl4         | 370.254 | -0.39899 | 0.01163  | 0.0287   | 337.725 | 305.629 | 315.521 | 455.351 | 431.231 | 376.069 |
| ENSMUSG00000034509 | 8_Mad211bp       | 473.225 | 0.72405  | 2.89E-06 | 2.31E-05 | 558.245 | 552.519 | 658.53  | 382.315 | 328.13  | 359.608 |
| ENSMUSG00000034518 | 13_Hmgxb4        | 635.471 | -0.11662 | 0.38828  | 0.50568  | 652.009 | 597.491 | 578.455 | 613.146 | 671.501 | 700.223 |
| ENSMUSG00000034520 | 14_Gjc1          | 103.343 | -1.00439 | 5.71E-05 | 0.00031  | 72.0596 | 69.7532 | 64.5383 | 136.155 | 155.996 | 121.558 |
| ENSMUSG00000034522 | 9_Zfp395         | 754.074 | 0.45848  | 0.00334  | 0.01008  | 806.547 | 947.175 | 864.096 | 690.691 | 533.436 | 682.496 |
| ENSMUSG00000034525 | 6_Ice1           | 1661.83 | -0.04027 | 0.69894  | 0.78461  | 1604.41 | 1670.41 | 1642.14 | 1750.17 | 1688.17 | 1615.71 |
| ENSMUSG00000034528 | 15_Hsd17b13      | 2.86338 | 0.06039  | 0.9701   | 0.98062  | 7.8137  | 0.91781 | 0       | 1.80337 | 5.37918 | 1.26623 |
| ENSMUSG00000034532 | 8_Fbxo16         | 13.3744 | -0.79105 | 0.25523  | 0.36482  | 11.2864 | 11.0137 | 7.17092 | 25.2472 | 17.9306 | 7.59736 |
| ENSMUSG00000034533 | 9_Scn10a         | 0.15297 | 0.92709  | 0.82027  | NA       | 0       | 0.91781 | 0       | 0       | 0       | 0       |
| ENSMUSG00000034538 | 7_Zfp418         | 91.6187 | -0.28318 | 0.33425  | 0.45095  | 85.9507 | 74.3423 | 87.2462 | 72.1348 | 108.48  | 121.558 |
| ENSMUSG00000034543 | 14_Morc2a        | 1031.7  | -0.0392  | 0.7369   | 0.81367  | 1019.25 | 1039.87 | 993.173 | 975.624 | 1091.08 | 1071.23 |
| ENSMUSG00000034544 | 17_Rsrc1         | 771.368 | -0.1831  | 0.14384  | 0.23076  | 700.628 | 703.039 | 763.703 | 778.155 | 814.05  | 868.632 |
| ENSMUSG00000034551 | 12_Hdx           | 17.4358 | -2.03692 | 0.00236  | 0.00748  | 2.60457 | 11.9315 | 5.97577 | 23.4438 | 34.0682 | 26.5908 |
| ENSMUSG00000034552 | 8_Zswim2         | 0.19919 | 0.92709  | 0.82027  | NA       | 0       | 0       | 1.19515 | 0       | 0       | 0       |
| ENSMUSG00000034557 | 14_Zfyve9        | 1446.81 | -0.23236 | 0.03593  | 0.07376  | 1389.1  | 1270.24 | 1331.4  | 1489.58 | 1573.41 | 1627.1  |
| ENSMUSG00000034560 | 5_A230046K03Rik  | 989.38  | -0.31523 | 0.01709  | 0.03974  | 901.18  | 813.176 | 932.22  | 1052.27 | 1206.73 | 1030.71 |
| ENSMUSG00000034563 | 16_Ccp1          | 2002.11 | -0.50803 | 3.32E-07 | 3.54E-06 | 1647.82 | 1706.2  | 1605.09 | 2388.56 | 2330.08 | 2334.92 |
| ENSMUSG00000034566 | 10_Atp5h         | 4227.47 | -0.4453  | 2.93E-06 | 2.33E-05 | 3675.04 | 3443.61 | 3622.51 | 4806.89 | 5030.43 | 4786.34 |
| ENSMUSG00000034570 | 12_Inpp5j        | 21.4587 | 0.43944  | 0.37405  | 0.49168  | 25.1775 | 23.8629 | 25.0982 | 22.5421 | 14.3445 | 17.7272 |
| ENSMUSG00000034573 | 14_Ptpn13        | 10989.5 | 0.56343  | 2.57E-05 | 0.00015  | 12723.3 | 12379.4 | 14221.1 | 8147.63 | 8176.36 | 10289.4 |
| ENSMUSG00000034574 | 9_Daam1          | 3255.42 | -0.0448  | 0.70754  | 0.79071  | 3092.49 | 3227    | 3293.84 | 2948.51 | 3331.51 | 3639.14 |
| ENSMUSG00000034575 | 11_Atpd7         | 914.459 | 0.65436  | 3.35E-05 | 0.00019  | 1058.32 | 964.614 | 1333.79 | 747.497 | 697.501 | 685.029 |
| ENSMUSG00000034579 | 17_Pla2g3        | 14.8081 | -0.35232 | 0.55011  | 0.65644  | 15.6274 | 13.7671 | 9.56123 | 18.0337 | 17.9306 | 13.9285 |
| ENSMUSG00000034584 | 3_Exp5h          | 2115.52 | -0.17384 | 0.28609  | 0.39958  | 2140.95 | 1987.97 | 1833.37 | 1797.96 | 2270.02 | 2662.88 |
| ENSMUSG00000034586 | 14_Hid1          | 135.299 | -0.55915 | 0.11654  | 0.19501  | 99.8417 | 142.26  | 86.0511 | 247.062 | 104.894 | 131.688 |
| ENSMUSG00000034591 | 5_Slc41a2        | 86.2433 | -0.48865 | 0.07685  | 0.13871  | 83.3461 | 69.7532 | 62.148  | 100.087 | 114.756 | 87.3697 |
| ENSMUSG00000034593 | 16_Myo5a         | 1931.72 | -1.20602 | 2.36E-08 | 3.58E-07 | 1153.82 | 1464.82 | 885.609 | 3155    | 2903.86 | 2027.23 |
| ENSMUSG00000034595 | 17_Ppp1r18       | 526.299 | 0.91031  | 6.59E-09 | 1.20E-07 | 674.582 | 614.93  | 772.07  | 390.43  | 333.509 | 372.271 |
| ENSMUSG00000034601 | 16_2700049A03Rik | 347.239 | 0.12458  | 0.43612  | 0.55161  | 355.089 | 353.355 | 378.864 | 303.868 | 369.371 | 322.888 |
| ENSMUSG00000034602 | 13_Mon2          | 2167.71 | 0.29138  | 0.0037   | 0.01098  | 2365.81 | 2395.47 | 2395.09 | 1888.13 | 1916.78 | 2044.96 |
| ENSMUSG00000034607 | 6_Pof1b          | 3869.31 | -0.15742 | 0.29871  | 0.4133   | 3797.46 | 3287.58 | 3890.23 | 3339.84 | 4617.13 | 4283.65 |
| ENSMUSG00000034610 | 14_Zcchc11       | 1380.78 | 0.23213  | 0.06903  | 0.1271   | 1495.89 | 1372.12 | 1606.29 | 1171.29 | 1261.42 | 1377.65 |
| ENSMUSG00000034612 | 7_Chts11         | 482.917 | -0.82243 | 2.73E-05 | 0.00016  | 350.748 | 424.944 | 270.105 | 669.952 | 634.744 | 547.01  |
| ENSMUSG00000034613 | 12_Ppm1h         | 839.496 | -0.62643 | 0.00022  | 0.00098  | 627.7   | 781.053 | 571.284 | 1138.83 | 1029.22 | 888.891 |
| ENSMUSG00000034614 | 14_Pik3ip1       | 439.506 | 0.20243  | 0.27267  | 0.38461  | 514.836 | 456.149 | 439.817 | 495.025 | 342.475 | 388.732 |
| ENSMUSG00000034616 | 16_Ssh3          | 1557.1  | 1.28778  | 1.17E-12 | 6.12E-11 | 1870.08 | 2142.16 | 2615    | 967.509 | 723.5   | 1024.38 |
| ENSMUSG00000034617 | 6_Mtrr           | 330.99  | 0.0316   | 0.83482  | 0.88704  | 330.78  | 336.835 | 337.033 | 339.935 | 336.199 | 305.161 |
| ENSMUSG00000034620 | 17_Tmem5         | 660.608 | -0.45294 | 0.00059  | 0.0023   | 563.454 | 549.766 | 560.527 | 720.447 | 833.773 | 735.678 |
| ENSMUSG00000034621 | 14_Gpatch8       | 1875.67 | 0.16643  | 0.09932  | 0.17118  | 1923.91 | 2032.94 | 1994.71 | 1730.33 | 1814.58 | 1757.52 |
| ENSMUSG00000034623 | 14_Prss55        | 0.15297 | 0.92709  | 0.82027  | NA       | 0       | 0.91781 | 0       | 0       | 0       | 0       |
| ENSMUSG00000034634 | 7_Ly6d           | 61.7994 | 3.60743  | 4.49E-09 | 8.55E-08 | 109.392 | 34.8766 | 198.396 | 12.6236 | 5.37918 | 10.1298 |
| ENSMUSG00000034636 | 9_Zyg11b         | 1999.05 | -0.55794 | 1.57E-06 | 1.36E-05 | 1711.2  | 1621.76 | 1517.85 | 2237.08 | 2561.39 | 2345.05 |
| ENSMUSG00000034639 | 7_Tetmar         | 109.162 | -0.59229 | 0.01012  | 0.02551  | 85.0825 | 89.0271 | 87.2462 | 127.138 | 139.859 | 126.623 |
| ENSMUSG00000034640 | 9_Tiparp         | 1791.52 | -0.18481 | 0.26243  | 0.37308  | 1788.47 | 1550.17 | 1692.34 | 1550    | 2306.77 | 1861.35 |
| ENSMUSG00000034641 | 2_Cd300ld        | 40.8686 | 0.6669   | 0.16978  | 0.26418  | 81.6097 | 31.2054 | 37.0498 | 24.3455 | 30.482  | 40.5193 |
| ENSMUSG00000034645 | 13_Zyg11a        | 0.77424 | -0.21793 | 0.9418   | NA       | 0       | 0.91781 | 1.19515 | 0       | 0       | 2.53245 |
| ENSMUSG00000034647 | 14_Ankrd12       | 1190.97 | -0.46449 | 0.00021  | 0.00096  | 1105.2  | 947.175 | 948.952 | 1308.35 | 1419.21 | 1416.91 |
| ENSMUSG00000034648 | 9_Lrn1           | 160.786 | -1.75211 | 2.93E-12 | 1.38E-10 | 77.2688 | 84.4381 | 58.5626 | 300.261 | 233.994 | 210.194 |
| ENSMUSG00000034652 | 12_Cd300a        | 50.9878 | 0.80353  | 0.02772  | 0.05952  | 84.2143 | 57.8218 | 52.5868 | 39.6742 | 41.2404 | 30.3894 |
| ENSMUSG00000034653 | 11_Thtdc2        | 438.434 | -0.14368 | 0.38623  | 0.50351  | 433.226 | 383.643 | 432.646 | 389.528 | 500.264 | 491.296 |
| ENSMUSG00000034656 | 16_Cacna1a       | 100.261 | -0.17545 | 0.53723  | 0.64484  | 99.8417 | 108.301 | 74.0996 | 131.646 | 91.4461 | 96.2332 |
| ENSMUSG00000034659 | 14_Tmem109       | 1880.34 | 0.80695  | 1.30E-05 | 8.52E-05 | 2125.33 | 2503.77 | 2549.26 | 1619.43 | 1010.39 | 1473.89 |
| ENSMUSG00000034663 | 13_Bmp2k         | 986.553 | 0.15494  | 0.27339  | 0.38543  | 1019.25 | 984.805 | 1113.88 | 807.009 | 976.322 | 1018.05 |
| ENSMUSG00000034664 | 13_Igta2b        | 130.296 | 0.54166  | 0.02199  | 0.04908  | 137.174 | 158.78  | 167.322 | 115.416 | 87.86   | 115.227 |
| ENSMUSG00000034667 | 7_Xpot           | 2300.83 | 0.03225  | 0.79547  | 0.85845  | 2179.15 | 2323.88 | 2476.36 | 2025.19 | 2364.15 | 2436.22 |
| ENSMUSG00000034673 | 14_Pbx2          | 836.954 | 0.14777  | 0.23499  | 0.34174  | 877.738 | 889.354 | 872.462 | 861.11  | 742.327 | 778.73  |
| ENSMUSG00000034674 | 18_Tdg           | 1148.79 | 0.26128  | 0.05076  | 0.09831  | 1211.99 | 1226.19 | 1318.25 | 925.129 | 1046.25 | 1164.93 |
| ENSMUSG00000034675 | 17_Dbn1          | 222.789 | -0.28226 | 0.24714  | 0.35593  | 171.033 | 254.232 | 178.078 | 302.966 | 215.167 | 215.259 |
| ENSMUSG00000034677 | 9_Gpr142         | 0.15028 | -0.99647 | 0.80707  | NA       | 0       | 0       | 0       | 0.90169 | 0       | 0       |
| ENSMUSG00000034681 | 16_Rnps1         | 1444.06 | 0.4272   | 0.00072  | 0.00273  | 1532.35 | 1599.74 | 1836.95 | 1190.22 | 1193.28 | 1311.81 |
| ENSMUSG00000034683 | 12_Ppp1r1c       | 0.75237 | -1.79164 | 0.53681  | NA       | 0       | 0.91781 | 0       | 1.80337 | 1.79306 | 0       |
| ENSMUSG00000034684 | 12_Sema3f        | 2509.2  | 1.25308  | 2.46E-12 | 1.19E-10 | 3023.9  | 3451.87 | 4129.26 | 1640.17 | 1160.11 | 1649.89 |
| ENSMUSG00000034685 | 4_Fam171a2       | 318.633 | 1.48197  | 4.02E-07 | 4.18E-06 | 420.203 | 503.875 | 482.842 | 210.994 | 88.7565 | 205.129 |
| ENSMUSG00000034686 | 7_Prr7           | 2.5918  | 0.10186  | 0.50533  | 0.61583  | 0.86819 | 8.26025 | 1.19515 | 0.90169 | 1.79306 | 2.53245 |
| ENSMUSG00000034687 | 8_Fras1          | 1047.95 | -0.42732 | 0.00169  | 0.00565  | 841.275 | 1017.85 | 822.266 | 1215.47 | 1246.18 | 1144.67 |
| ENSMUSG00000034690 | 12_Nlrp4c        | 0.14942 | -0.99647 | 0.80707  | NA       | 0       | 0       | 0       | 0       | 0.89653 | 0       |
| ENSMUSG00000034701 | 9_Neurod1        | 43.3231 | -2.02489 | 0.008    | 0.02094  | 26.0457 | 20.1917 | 4.78062 | 142.466 | 53.7918 | 12.6623 |
| ENSMUSG00000034706 | 16_Dnaic2        | 11.8451 | 0.17162  | 0.81283  | 0.87068  | 14.7592 | 15.6027 | 7.17092 | 17.132  | 6.27571 | 10.1298 |
| ENSMUSG00000034707 | 6_Gns            | 9871.82 | 0.01509  | 0.87179  | 0.91295  | 9524.03 | 10480.4 | 9765.6  | 9796.81 | 9802.67 | 9861.38 |
| ENSMUSG00000034708 | 11_Grn           | 4088.28 | 1.12169  | 6.40E-13 | 3.67E-11 | 5582.45 | 5266.37 | 5956.65 | 2919.66 | 2031.54 | 2773.04 |
| ENSMUSG00000034709 | 8_Ppp1r21        | 866.929 | 0.09217  | 0.50584  | 0.61631  | 886.42  | 925.148 | 871.267 | 905.292 | 727.086 | 886.359 |
| ENSMUSG00000034714 | 9_Ttyh2          | 132.255 | -0.0992  | 0.74535  | 0.82001  | 113.733 | 181.726 | 87.2462 | 157.795 | 126.623 | 126.623 |
| ENSMUSG00000034723 | 11_Tmx4          | 1316.93 | -1.15184 | 5.03E-08 | 6.88E-07 | 902.048 | 971.956 | 577.259 | 1976.49 | 2003.75 | 1470.09 |
| ENSMUSG00000034724 | 17_Cnot6l        | 1541.95 | -0.16769 | 0.24224  | 0.35007  | 1516.73 | 1332.65 | 1508.28 | 1409.33 | 1857.61 | 1627.1  |
| ENSMUSG00000034729 | 16_Mrps10        | 934.059 | 0.10933  | 0.43283  | 0.54903  | 952.403 | 884.765 | 1070.86 | 828.649 | 881.29  | 986.391 |
| ENSMUSG00000034730 | 16_Adgrb1        | 29.6573 | 0.0485   | 0.93364  | 0.95623  | 28.6502 | 31.2054 | 31.074  | 54.1011 | 21.5167 | 11.396  |
| ENSMUSG00000034731 | 9_Dgkh           | 188.182 | -0.22918 | 0.25054  | 0.35963  | 177.979 | 159.698 | 181.663 | 205.584 | 177.513 | 226.655 |
| ENSMUSG00000034732 | 4_Pabpc5         | 3.56652 | -2.11498 | 0.12186  | 0.20231  | 1.73638 | 0       | 2.39031 | 4.50843 | 8.96531 | 3.79868 |

|                    |             |         |          |          |          |         |         |         |         |         |         |
|--------------------|-------------|---------|----------|----------|----------|---------|---------|---------|---------|---------|---------|
| ENSMUSG00000034738 | 8_Nostrin   | 85.3637 | -0.73673 | 0.00542  | 0.01507  | 62.5096 | 64.2464 | 65.7335 | 103.694 | 121.032 | 94.967  |
| ENSMUSG00000034739 | 17_Mfrp     | 3657.29 | -0.48991 | 0.05098  | 0.09862  | 2867.63 | 4165.92 | 2092.71 | 5607.58 | 3807.57 | 3402.35 |
| ENSMUSG00000034744 | 13_Nagk     | 1518.96 | 0.33311  | 0.01068  | 0.02672  | 1686.89 | 1610.75 | 1783.17 | 1476.96 | 1183.42 | 1372.59 |
| ENSMUSG00000034748 | 16_Sirt6    | 282.418 | 1.28352  | 1.27E-08 | 2.12E-07 | 369.848 | 347.848 | 484.037 | 200.174 | 131.79  | 160.811 |
| ENSMUSG00000034751 | 15_Mast4    | 6058.34 | 0.77252  | 4.66E-05 | 0.00026  | 6786.63 | 7542.53 | 8596.74 | 3596.82 | 3982.39 | 5844.9  |
| ENSMUSG00000034755 | 18_Pcdh11x  | 17.2995 | -1.76942 | 0.00546  | 0.01515  | 13.0228 | 5.50683 | 4.78062 | 27.9522 | 32.2751 | 20.2596 |
| ENSMUSG00000034757 | 15_Tmub2    | 918.597 | 0.59108  | 0.00028  | 0.00119  | 1036.62 | 1124.31 | 1150.93 | 817.829 | 585.434 | 796.457 |
| ENSMUSG00000034758 | 12_Tle6     | 77.8312 | 0.44984  | 0.12025  | 0.20013  | 80.7415 | 88.1093 | 101.588 | 78.4466 | 63.6537 | 54.4478 |
| ENSMUSG00000034761 | 15_Map4k5   | 3087.52 | -0.13804 | 0.30423  | 0.41923  | 3021.3  | 2813.07 | 2984.3  | 2725.8  | 3445.37 | 3535.31 |
| ENSMUSG00000034762 | 9_Glis1     | 27.0951 | 0.47869  | 0.48035  | 0.59301  | 26.0457 | 53.2327 | 15.537  | 43.2809 | 14.3445 | 10.1298 |
| ENSMUSG00000034765 | 6_Dusp5     | 1763.94 | 0.56889  | 1.92E-06 | 1.62E-05 | 2238.19 | 1891.6  | 2193.11 | 1456.22 | 1434.45 | 1370.06 |
| ENSMUSG00000034768 | 4_Asb16     | 29.7083 | -0.31679 | 0.50867  | 0.61884  | 31.2548 | 32.1232 | 15.537  | 39.6742 | 24.2063 | 35.4544 |
| ENSMUSG00000034771 | 15_Tle2     | 203.651 | 0.66896  | 0.0263   | 0.05701  | 243.093 | 305.629 | 201.981 | 230.831 | 126.411 | 113.96  |
| ENSMUSG00000034773 | 16_BC030867 | 89.9517 | 1.16088  | 0.00018  | 0.00082  | 131.965 | 116.561 | 123.101 | 51.3961 | 39.4473 | 77.2398 |
| ENSMUSG00000034774 | 6_Dsg1c     | 7.79853 | -0.99495 | 0.25061  | 0.35968  | 7.8137  | 1.83561 | 5.97577 | 8.11517 | 11.6549 | 11.396  |
| ENSMUSG00000034777 | 2_Vax2      | 6.51594 | -0.73299 | 0.45602  | 0.56995  | 6.07732 | 7.34244 | 1.19515 | 10.8202 | 9.86184 | 3.79868 |
| ENSMUSG00000034780 | 6_B3galt1   | 32.5387 | -1.23136 | 0.0161   | 0.03782  | 16.4956 | 27.5342 | 14.3418 | 64.0197 | 47.5161 | 25.3245 |
| ENSMUSG00000034781 | 5_Gna11     | 1550.12 | 0.50503  | 0.00208  | 0.00673  | 1712.94 | 1874.16 | 1869.22 | 1537.37 | 1025.63 | 1281.42 |
| ENSMUSG00000034783 | 7_Cd207     | 4.05104 | -0.34815 | 0.77602  | 0.84346  | 0.86819 | 2.75342 | 7.17092 | 1.80337 | 5.37918 | 6.33113 |
| ENSMUSG00000034785 | 14_Dio1     | 1.87693 | 1.60481  | 0.34741  | NA       | 4.34094 | 1.83561 | 2.39031 | 0.90169 | 1.79306 | 0       |
| ENSMUSG00000034786 | 17_Gpsm3    | 73.1505 | 0.16811  | 0.59192  | 0.69396  | 85.0825 | 87.1915 | 59.7577 | 84.7584 | 60.0675 | 62.0451 |
| ENSMUSG00000034789 | 7_Rab24     | 695.897 | 0.46435  | 0.00011  | 0.00054  | 801.338 | 792.984 | 827.047 | 598.719 | 579.159 | 576.133 |
| ENSMUSG00000034792 | 8_Gna15     | 992.369 | 0.9656   | 3.12E-09 | 6.21E-08 | 1217.2  | 1235.37 | 1484.38 | 703.315 | 556.745 | 757.204 |
| ENSMUSG00000034793 | 15_G6pc3    | 670.595 | 0.56983  | 0.00071  | 0.0027   | 746.642 | 824.189 | 833.022 | 623.065 | 435.714 | 560.939 |
| ENSMUSG00000034795 | 14_Ccdc122  | 56.0178 | -0.17979 | 0.57309  | 0.67749  | 51.2231 | 58.7396 | 47.8062 | 66.7247 | 60.9641 | 50.6491 |
| ENSMUSG00000034796 | 14_Cpne7    | 422.068 | -0.19262 | 0.36771  | 0.48511  | 400.235 | 495.615 | 284.447 | 460.761 | 417.783 | 473.569 |
| ENSMUSG00000034799 | 16_Unc13a   | 175.975 | -0.33502 | 0.11872  | 0.19809  | 138.91  | 184.479 | 143.418 | 183.042 | 216.064 | 189.934 |
| ENSMUSG00000034800 | 15_Zfp661   | 177.402 | -0.27761 | 0.16191  | 0.25446  | 154.538 | 149.602 | 178.078 | 194.764 | 208.892 | 178.538 |
| ENSMUSG00000034801 | 13_Sos2     | 1365.48 | -0.04716 | 0.69264  | 0.77961  | 1349.16 | 1375.79 | 1303.91 | 1264.16 | 1491.83 | 1408.04 |
| ENSMUSG00000034807 | 8_Colgal1   | 1654.73 | 0.25795  | 0.02942  | 0.06249  | 1786.73 | 1751.17 | 1868.03 | 1550    | 1361.83 | 1610.64 |
| ENSMUSG00000034810 | 7_Scn7a     | 425.314 | -1.07388 | 6.29E-06 | 4.53E-05 | 270.007 | 316.643 | 235.445 | 571.669 | 750.396 | 407.725 |
| ENSMUSG00000034813 | 16_Grip1    | 167.786 | 0.32105  | 0.12275  | 0.2034   | 182.32  | 162.452 | 215.128 | 151.483 | 149.721 | 145.616 |
| ENSMUSG00000034818 | 16_Celf5    | 37.723  | -0.11895 | 0.79764  | 0.86019  | 39.9367 | 36.7122 | 32.2692 | 58.6096 | 38.5508 | 20.2596 |
| ENSMUSG00000034820 | 3_Cpsf7     | 1741.43 | 0.00894  | 0.93509  | 0.95725  | 1726.83 | 1737.41 | 1776    | 1606.8  | 1819.96 | 1781.58 |
| ENSMUSG00000034825 | 13_Nrip3    | 12.1705 | -1.7153  | 0.02687  | 0.05805  | 2.60457 | 6.42464 | 8.36608 | 25.2472 | 21.5167 | 8.86359 |
| ENSMUSG00000034826 | 14_Nup54    | 692.122 | -0.01054 | 0.93806  | 0.95925  | 712.783 | 653.478 | 701.555 | 628.475 | 705.57  | 750.873 |
| ENSMUSG00000034829 | 7_Nxn11     | 50.5225 | -1.92242 | 0.00383  | 0.01129  | 35.5957 | 20.1917 | 7.17092 | 138.86  | 79.7912 | 21.5259 |
| ENSMUSG00000034832 | 15_Tet3     | 4478.63 | 0.71989  | 4.06E-07 | 4.21E-06 | 5412.29 | 5438.92 | 5867.01 | 3437.23 | 2815.11 | 3901.25 |
| ENSMUSG00000034833 | 9_Tespa1    | 3.17951 | 0.8792   | 0.47795  | 0.59052  | 6.07732 | 2.75342 | 3.58546 | 2.70506 | 2.68959 | 1.26623 |
| ENSMUSG00000034837 | 12_Gnat1    | 2056.18 | -1.80994 | 0.03632  | 0.07437  | 1351.77 | 1049.97 | 335.838 | 5885.3  | 2765.8  | 948.404 |
| ENSMUSG00000034839 | 5_Larp6     | 55.1749 | 0.00808  | 0.98271  | 0.98853  | 59.0368 | 61.493  | 45.4159 | 76.6433 | 40.3439 | 48.1166 |
| ENSMUSG00000034842 | 16_Art3     | 335.36  | -0.29911 | 0.10288  | 0.17636  | 279.557 | 330.41  | 292.813 | 437.317 | 341.578 | 330.485 |
| ENSMUSG00000034845 | 5_Plvap     | 314.173 | 0.59642  | 0.00641  | 0.01736  | 372.453 | 370.793 | 392.011 | 327.312 | 194.547 | 227.921 |
| ENSMUSG00000034848 | 7_Ttc21b    | 278.011 | -0.58046 | 0.00028  | 0.0012   | 232.674 | 219.356 | 216.323 | 331.82  | 342.475 | 325.42  |
| ENSMUSG00000034850 | 15_Tmem127  | 3984.49 | 0.08775  | 0.33203  | 0.44861  | 4114.34 | 4098.92 | 4102.96 | 3812.33 | 3835.36 | 3943.03 |
| ENSMUSG00000034853 | 16_Acot11   | 631.26  | 0.51364  | 0.00187  | 0.00615  | 650.273 | 721.395 | 856.925 | 580.685 | 467.989 | 510.289 |
| ENSMUSG00000034854 | 8_Mfsd12    | 330.087 | 0.93973  | 2.78E-05 | 0.00016  | 414.994 | 474.505 | 412.328 | 291.244 | 165.858 | 221.59  |
| ENSMUSG00000034855 | 13_Cxcl10   | 605.045 | 5.87911  | 1.27E-24 | 3.86E-22 | 1209.39 | 582.807 | 1777.19 | 11.7219 | 25.1029 | 24.0583 |
| ENSMUSG00000034858 | 15_Fam214a  | 797.938 | -0.04563 | 0.72249  | 0.80223  | 823.043 | 803.08  | 727.849 | 793.483 | 772.809 | 867.365 |
| ENSMUSG00000034863 | 7_Anol8     | 200.83  | 0.73994  | 0.0003   | 0.00127  | 218.783 | 254.232 | 280.861 | 162.303 | 131.79  | 157.012 |
| ENSMUSG00000034867 | 16_Ankrd27  | 668.48  | 0.24392  | 0.05831  | 0.11022  | 674.582 | 766.368 | 733.825 | 629.376 | 592.607 | 614.12  |
| ENSMUSG00000034868 | 8_Myl12b    | 8066.88 | 0.4075   | 0.00484  | 0.01371  | 8852.05 | 8727.41 | 10015.4 | 7261.27 | 5719.87 | 7825.28 |
| ENSMUSG00000034871 | 2_Fam151a   | 1.07077 | 3.53604  | 0.32226  | NA       | 0       | 6.42464 | 0       | 0       | 0       | 0       |
| ENSMUSG00000034872 | 5_Gipc3     | 1.21749 | -0.77574 | 0.76274  | NA       | 2.60457 | 0       | 0       | 0.90169 | 0       | 3.79868 |
| ENSMUSG00000034875 | 5_Nudt19    | 622.259 | -0.49878 | 0.00027  | 0.00118  | 541.75  | 481.848 | 524.673 | 746.596 | 770.12  | 668.568 |
| ENSMUSG00000034880 | 6_Mrpl34    | 113.653 | 0.75005  | 0.00897  | 0.02305  | 139.778 | 132.164 | 155.37  | 101.89  | 56.4814 | 96.2332 |
| ENSMUSG00000034881 | 7_Tbx2r     | 14.9196 | 0.83761  | 0.21506  | 0.31894  | 18.232  | 19.2739 | 20.3176 | 18.0337 | 9.86184 | 3.79868 |
| ENSMUSG00000034883 | 8_Lrr1      | 26.35   | 0.66559  | 0.14587  | 0.23342  | 31.2548 | 27.5342 | 38.2449 | 16.2303 | 23.3098 | 21.5259 |
| ENSMUSG00000034889 | 7_Cactin    | 450.841 | 1.4079   | 6.57E-10 | 1.65E-08 | 579.95  | 657.149 | 726.654 | 286.736 | 165.858 | 288.7   |
| ENSMUSG00000034891 | 13_Sncb     | 27.5415 | -1.53146 | 0.10822  | 0.18368  | 20.8365 | 15.6027 | 5.97577 | 93.7753 | 27.7924 | 1.26623 |
| ENSMUSG00000034892 | 8_Rps29     | 8231.37 | 0.74204  | 0.00042  | 0.00171  | 9925.13 | 10203.2 | 10780.3 | 8274.77 | 4209.21 | 5995.58 |
| ENSMUSG00000034893 | 7_Cog3      | 1280.54 | -0.05519 | 0.60197  | 0.70296  | 1289.26 | 1214.26 | 1264.47 | 1296.62 | 1301.76 | 1316.88 |
| ENSMUSG00000034898 | 15_Filip1   | 206.252 | -1.10923 | 3.01E-06 | 2.39E-05 | 114.601 | 171.63  | 105.174 | 311.081 | 271.649 | 263.375 |
| ENSMUSG00000034902 | 17_Pip5k1c  | 967.401 | 0.88778  | 2.51E-06 | 2.04E-05 | 1251.06 | 1306.04 | 1210.69 | 846.683 | 507.436 | 682.496 |
| ENSMUSG00000034903 | 18_Cobl1    | 1636.61 | 0.12787  | 0.31836  | 0.43387  | 1664.32 | 1688.76 | 1773.61 | 1362.45 | 1660.37 | 1670.15 |
| ENSMUSG00000034906 | 15_Ncaph    | 323.153 | 0.69695  | 0.00166  | 0.00557  | 355.957 | 384.561 | 457.744 | 183.042 | 253.718 | 303.894 |
| ENSMUSG00000034908 | 15_Sidt2    | 5501.68 | 1.068    | 9.19E-19 | 1.53E-16 | 7113.94 | 6871.61 | 8364.88 | 3697.81 | 3346.75 | 3615.08 |
| ENSMUSG00000034910 | 5_Pygo1     | 276.364 | -1.2739  | 1.77E-07 | 2.06E-06 | 162.351 | 208.342 | 113.54  | 440.924 | 402.542 | 330.485 |
| ENSMUSG00000034911 | 7_Ushbp1    | 104.59  | 0.41267  | 0.09733  | 0.16821  | 111.128 | 112.89  | 135.052 | 101.89  | 84.2739 | 82.3047 |
| ENSMUSG00000034912 | 16_Mdga2    | 6.12673 | -2.25226 | 0.04501  | 0.08878  | 4.34094 | 1.83561 | 0       | 8.11517 | 16.1376 | 6.33113 |
| ENSMUSG00000034917 | 7_Tjp3      | 3488.23 | 1.22183  | 1.10E-09 | 2.57E-08 | 4024.05 | 4499.08 | 6125.16 | 2258.72 | 1603.89 | 2418.49 |
| ENSMUSG00000034918 | 8_Cdhr2     | 0.2894  | 1.67273  | 0.67976  | NA       | 1.73638 | 0       | 0       | 0       | 0       | 0       |
| ENSMUSG00000034919 | 2_Ttc22     | 1729.16 | 1.00198  | 6.83E-09 | 1.23E-07 | 2031.56 | 2093.51 | 2794.27 | 1180.31 | 973.632 | 1301.68 |
| ENSMUSG00000034923 | 9_Ly6g6f    | 5.03031 | -0.41393 | 0.70507  | 0.78884  | 4.34094 | 7.34244 | 1.19515 | 9.91854 | 3.58612 | 3.79868 |
| ENSMUSG00000034926 | 3_Dhcr24    | 18897.3 | 1.03921  | 2.53E-09 | 5.19E-08 | 23116.4 | 24383.3 | 28769.7 | 13192.6 | 9392.95 | 14528.7 |
| ENSMUSG00000034928 | 16_Rnf44    | 2396.72 | 1.0098   | 6.27E-09 | 1.15E-07 | 2884.99 | 3115.03 | 3608.17 | 1823.21 | 1225.56 | 1723.33 |
| ENSMUSG00000034930 | 15_Rtkn     | 1108.4  | 1.17515  | 2.90E-08 | 4.26E-07 | 1323.99 | 1503.37 | 1780.78 | 745.694 | 476.058 | 820.515 |
| ENSMUSG00000034931 | 15_Dhxx8    | 1542.28 | 0.5331   | 9.06E-05 | 0.00046  | 1766.76 | 1690.6  | 2013.83 | 1144.24 | 1232.73 | 1405.51 |
| ENSMUSG00000034932 | 4_Mrpl54    | 454.696 | 0.49173  | 0.00192  | 0.00627  | 520.913 | 516.725 | 556.942 | 425.596 | 328.13  | 379.868 |

|                    |                 |         |          |          |          |         |         |         |         |         |         |
|--------------------|-----------------|---------|----------|----------|----------|---------|---------|---------|---------|---------|---------|
| ENSMUSG00000034936 | 2_Arl4d         | 190.863 | 0.54597  | 0.05697  | 0.10805  | 190.133 | 193.657 | 297.593 | 199.272 | 156.893 | 107.629 |
| ENSMUSG00000034940 | 15_Synrg        | 1629.18 | 0.15516  | 0.16043  | 0.25274  | 1606.15 | 1811.75 | 1731.78 | 1514.83 | 1515.14 | 1595.45 |
| ENSMUSG00000034947 | 13_Tmem106a     | 453.437 | 1.04163  | 5.69E-08 | 7.65E-07 | 653.746 | 505.711 | 670.481 | 298.458 | 246.546 | 345.68  |
| ENSMUSG00000034949 | 18_Zfr2         | 151.926 | 0.43821  | 0.05912  | 0.11147  | 157.142 | 189.068 | 179.273 | 155.09  | 124.618 | 106.363 |
| ENSMUSG00000034951 | 10_Cog7         | 1001.63 | 0.55253  | 1.57E-05 | 0.0001   | 1174.66 | 1152.76 | 1246.55 | 889.062 | 741.431 | 805.32  |
| ENSMUSG00000034957 | 10_Cebpa        | 447.047 | 0.33735  | 0.0819   | 0.14597  | 518.308 | 460.738 | 516.307 | 345.346 | 338.889 | 502.692 |
| ENSMUSG00000034958 | 11_Atcay        | 17.3992 | -1.63959 | 0.03648  | 0.07458  | 14.7592 | 4.58903 | 5.97577 | 48.691  | 21.5167 | 8.86359 |
| ENSMUSG00000034959 | 7_5031414D18Rik | 16.582  | 1.22729  | 0.09216  | 0.16074  | 43.4094 | 15.6027 | 10.7564 | 14.427  | 8.96531 | 6.33113 |
| ENSMUSG00000034968 | 3_Lbx2          | 2.10118 | -0.62512 | 0.67378  | NA       | 1.73638 | 0.91781 | 2.39031 | 3.60674 | 2.68959 | 1.26623 |
| ENSMUSG00000034973 | 16_Dopey1       | 1363.18 | -0.30594 | 0.01544  | 0.0365   | 1240.64 | 1235.37 | 1180.81 | 1339.9  | 1645.13 | 1537.2  |
| ENSMUSG00000034974 | 12_Dapk3        | 445.487 | 1.20473  | 3.75E-07 | 3.93E-06 | 585.159 | 625.943 | 652.554 | 339.935 | 173.03  | 296.297 |
| ENSMUSG00000034981 | 9_Parm1         | 4023.8  | 0.26097  | 0.01387  | 0.03326  | 4123.03 | 4428.41 | 4608.51 | 3681.58 | 3457.02 | 3844.26 |
| ENSMUSG00000034987 | 3_Hrh2          | 5.77714 | 2.0425   | 0.07041  | 0.12915  | 14.7592 | 3.67122 | 9.56123 | 4.50843 | 0.89653 | 1.26623 |
| ENSMUSG00000034990 | 14_Otoa         | 3.31285 | -0.24192 | 0.85507  | 0.90167  | 0.86819 | 4.58903 | 3.58546 | 3.60674 | 0.89653 | 6.33113 |
| ENSMUSG00000034993 | 7_Vat1          | 5477.91 | 0.44042  | 0.00144  | 0.0049   | 5914.97 | 6567.82 | 6439.49 | 5167.56 | 3874.81 | 4902.83 |
| ENSMUSG00000034994 | 9_Eef2          | 43460.9 | 1.02521  | 6.40E-09 | 1.17E-07 | 52321.4 | 59154.4 | 63376.6 | 32902.5 | 21157.2 | 31853.2 |
| ENSMUSG00000034997 | 4_Htr2a         | 20.8342 | -0.38953 | 0.49371  | 0.60513  | 22.5729 | 22.9451 | 8.36608 | 22.5421 | 29.5855 | 18.9934 |
| ENSMUSG00000034998 | 18_Foxn2        | 779.313 | -0.23394 | 0.0834   | 0.14808  | 738.828 | 653.478 | 756.533 | 771.843 | 877.703 | 877.495 |
| ENSMUSG00000035000 | 8_Dpp4          | 816.085 | -1.11411 | 5.08E-11 | 1.79E-09 | 540.013 | 563.533 | 443.402 | 1180.31 | 1246.18 | 923.079 |
| ENSMUSG00000035004 | 2_Igfb6         | 74.4664 | 0.91456  | 0.03062  | 0.06457  | 162.351 | 57.8218 | 71.7092 | 56.8062 | 53.7918 | 44.3179 |
| ENSMUSG00000035007 | 5_Rundc1        | 489.418 | 0.39815  | 0.00886  | 0.02281  | 487.922 | 590.149 | 592.796 | 441.826 | 424.955 | 398.861 |
| ENSMUSG00000035011 | 15_Zbtb7a       | 3104.18 | 1.09208  | 1.03E-08 | 1.75E-07 | 3734.08 | 3817.15 | 5126.02 | 2126.17 | 1513.34 | 2308.33 |
| ENSMUSG00000035020 | 11_Epgn         | 670.921 | -0.16725 | 0.28734  | 0.40077  | 717.124 | 523.149 | 656.14  | 715.938 | 709.156 | 704.022 |
| ENSMUSG00000035021 | 13_Baz1a        | 2229.45 | 0.14262  | 0.392    | 0.50944  | 2302.44 | 2223.84 | 2491.9  | 1624.84 | 2400.01 | 2333.66 |
| ENSMUSG00000035024 | 15_Ncapd3       | 769.278 | 0.0443   | 0.76427  | 0.83411  | 817.833 | 700.286 | 824.656 | 664.542 | 791.636 | 816.716 |
| ENSMUSG00000035027 | 17_Map2k2       | 1409.94 | 1.39465  | 8.37E-11 | 2.76E-09 | 1764.16 | 2025.6  | 2338.92 | 980.132 | 537.918 | 812.918 |
| ENSMUSG00000035031 | 15_C8a          | 1.53751 | -0.87112 | 0.68714  | NA       | 0.86819 | 0       | 2.39031 | 0.90169 | 0       | 5.06491 |
| ENSMUSG00000035032 | 11_Nek11        | 1.35157 | -0.31491 | 0.88418  | NA       | 0.86819 | 2.75342 | 0       | 0.90169 | 3.58612 | 0       |
| ENSMUSG00000035033 | 15_Tbr1         | 0.2997  | -1.76345 | 0.66322  | NA       | 0       | 0       | 0       | 0.90169 | 0.89653 | 0       |
| ENSMUSG00000035041 | 8_Creb3l3       | 11.0511 | 0.23231  | 0.72811  | 0.80642  | 10.4183 | 14.6849 | 10.7564 | 11.7219 | 9.86184 | 8.86359 |
| ENSMUSG00000035042 | 2_Ccl5          | 75.9347 | 5.81562  | 6.04E-19 | 1.01E-16 | 221.388 | 81.6847 | 144.614 | 1.80337 | 3.58612 | 2.53245 |
| ENSMUSG00000035045 | 17_Zc3h12b      | 103.851 | -0.88849 | 0.00037  | 0.00154  | 72.9278 | 62.4108 | 83.6608 | 125.334 | 140.755 | 138.019 |
| ENSMUSG00000035047 | 9_Kri1          | 555.648 | 0.71527  | 6.28E-06 | 4.53E-05 | 637.25  | 705.792 | 727.849 | 434.612 | 358.612 | 469.77  |
| ENSMUSG00000035048 | 13_Anapc13      | 832.961 | -0.05993 | 0.70026  | 0.78568  | 834.329 | 795.737 | 816.29  | 955.787 | 696.604 | 899.021 |
| ENSMUSG00000035049 | 3_Rp12          | 494.218 | 1.32938  | 4.70E-11 | 1.67E-09 | 624.227 | 663.573 | 831.827 | 257.882 | 235.788 | 352.011 |
| ENSMUSG00000035051 | 14_Dhx57        | 608.83  | 0.0409   | 0.75254  | 0.82547  | 577.345 | 641.546 | 633.432 | 599.621 | 581.848 | 619.185 |
| ENSMUSG00000035062 | 13_Zc4h2        | 98.8085 | -0.98202 | 0.0008   | 0.00296  | 79.0051 | 69.7532 | 50.1965 | 149.68  | 141.652 | 102.564 |
| ENSMUSG00000035064 | 16_Eef2k        | 2031.23 | 0.64227  | 2.31E-06 | 1.90E-05 | 2388.39 | 2343.16 | 2695.07 | 1530.16 | 1423.69 | 1806.91 |
| ENSMUSG00000035067 | 9_Xkr6          | 218.652 | -0.09823 | 0.65173  | 0.74548  | 236.147 | 214.767 | 181.663 | 180.337 | 254.615 | 244.382 |
| ENSMUSG00000035069 | 3_Oma1          | 435.942 | 0.11369  | 0.50197  | 0.61296  | 430.621 | 455.232 | 472.086 | 376.003 | 382.819 | 498.893 |
| ENSMUSG00000035078 | 5_Mtmr9         | 996.77  | 0.2231   | 0.05442  | 0.10399  | 1046.17 | 1104.12 | 1069.66 | 876.438 | 911.772 | 972.462 |
| ENSMUSG00000035085 | 5_1700020L24Rik | 31.254  | 2.50199  | 4.14E-06 | 3.14E-05 | 52.0913 | 38.5478 | 69.3189 | 15.3287 | 7.17224 | 5.06491 |
| ENSMUSG00000035086 | 13_Becn1        | 2306.27 | -0.06999 | 0.48025  | 0.59293  | 2245.14 | 2207.32 | 2298.28 | 2271.35 | 2385.67 | 2429.89 |
| ENSMUSG00000035093 | 16_Secisbp2l    | 1986.14 | -0.09535 | 0.33392  | 0.45063  | 1898.73 | 1952.17 | 1911.05 | 2026.09 | 2110.43 | 2018.37 |
| ENSMUSG00000035095 | 11_Fam167a      | 70.361  | 1.55275  | 8.49E-06 | 5.87E-05 | 105.919 | 71.5888 | 137.443 | 34.264  | 34.9647 | 37.9868 |
| ENSMUSG00000035104 | 14_Eva1a        | 565.594 | 0.27466  | 0.05989  | 0.11271  | 566.927 | 630.532 | 660.92  | 553.635 | 466.196 | 515.354 |
| ENSMUSG00000035105 | 5_Egln3         | 12559.6 | -0.1234  | 0.36833  | 0.48574  | 12132.9 | 11541.4 | 12392.6 | 10938.3 | 13365.5 | 14987.1 |
| ENSMUSG00000035107 | 13_Dcblid2      | 533.301 | -0.99831 | 7.52E-08 | 9.84E-07 | 340.33  | 435.958 | 290.422 | 761.924 | 734.259 | 636.912 |
| ENSMUSG00000035109 | 14_Shc4         | 40.4289 | -0.5841  | 0.15332  | 0.24343  | 45.1458 | 27.5342 | 23.9031 | 54.1011 | 41.2404 | 50.6491 |
| ENSMUSG00000035112 | 17_Wnk4         | 1591.84 | 1.18525  | 4.94E-13 | 2.92E-11 | 1951.69 | 2385.38 | 2294.7  | 972.017 | 798.809 | 1148.47 |
| ENSMUSG00000035121 | 5_Neil2         | 32.3943 | -1.11289 | 0.03263  | 0.06811  | 25.1775 | 27.5342 | 8.36608 | 56.8062 | 44.8265 | 31.6557 |
| ENSMUSG00000035125 | 10_Gcfc2        | 153.231 | -0.37501 | 0.09943  | 0.17133  | 144.987 | 139.506 | 114.735 | 144.27  | 184.685 | 191.2   |
| ENSMUSG00000035126 | 19_Wdr78        | 165.4   | -0.46959 | 0.0243   | 0.05339  | 138.91  | 135.835 | 142.223 | 193.862 | 216.96  | 164.609 |
| ENSMUSG00000035131 | 14_Brinp3       | 2.43337 | 0.6283   | 0.69803  | NA       | 6.07732 | 2.75342 | 0       | 3.60674 | 0.89653 | 1.26623 |
| ENSMUSG00000035133 | 8_Arhgap5       | 2186.61 | -0.69476 | 3.41E-06 | 2.66E-05 | 1754.61 | 1661.23 | 1594.34 | 2344.38 | 3236.48 | 2528.66 |
| ENSMUSG00000035139 | 14_Secisbp2     | 623.394 | 0.59999  | 8.31E-05 | 0.00042  | 679.792 | 763.614 | 809.119 | 450.843 | 476.058 | 560.939 |
| ENSMUSG00000035142 | 18_Nubpl        | 265.743 | -0.38097 | 0.02604  | 0.05653  | 229.202 | 216.602 | 247.397 | 279.522 | 325.441 | 296.297 |
| ENSMUSG00000035148 | 4_Gpr33         | 0.69605 | 2.89528  | 0.32523  | NA       | 0.86819 | 0.91781 | 2.39031 | 0       | 0       | 0       |
| ENSMUSG00000035150 | 15_Eif2s3x      | 6179.68 | -0.26967 | 0.02112  | 0.04745  | 6009.6  | 5168.16 | 5632.76 | 6141.38 | 7068.25 | 7057.95 |
| ENSMUSG00000035151 | 12_Elmod2       | 545.998 | -0.46101 | 0.00181  | 0.00597  | 489.658 | 452.478 | 436.231 | 588.801 | 707.363 | 601.458 |
| ENSMUSG00000035152 | 14_Ap2b1        | 7711.31 | 0.3331   | 0.02377  | 0.05246  | 8142.74 | 8746.69 | 8901.51 | 5584.14 | 6904.18 | 7988.63 |
| ENSMUSG00000035158 | 15_Mitf         | 1306.52 | -1.87743 | 6.36E-13 | 3.66E-11 | 550.431 | 706.71  | 419.499 | 2420.12 | 2467.25 | 1275.09 |
| ENSMUSG00000035161 | 6_Ints6         | 611.366 | -0.25995 | 0.09834  | 0.16978  | 553.904 | 507.546 | 609.529 | 630.278 | 762.948 | 603.99  |
| ENSMUSG00000035164 | 7_Zc3h12c       | 964.139 | -0.32022 | 0.02832  | 0.0606   | 922.016 | 784.724 | 865.292 | 922.424 | 1152.04 | 1138.34 |
| ENSMUSG00000035165 | 13_Kcne3        | 12.0477 | -0.3453  | 0.63831  | 0.73436  | 13.891  | 12.8493 | 4.78062 | 17.132  | 7.17224 | 16.4609 |
| ENSMUSG00000035168 | 16_Tanc1        | 3100.5  | 0.36805  | 0.00354  | 0.01055  | 3370.31 | 3309.61 | 3800.59 | 2609.48 | 2490.56 | 3022.48 |
| ENSMUSG00000035171 | 9_1110059E24Rik | 1130.18 | -0.35615 | 0.01897  | 0.04324  | 1008.83 | 933.408 | 1032.61 | 1089.24 | 1490.03 | 1226.97 |
| ENSMUSG00000035172 | 15_Plekhh3      | 982.091 | 1.63233  | 2.50E-09 | 5.15E-08 | 1305.76 | 1454.72 | 1694.73 | 660.935 | 263.58  | 512.822 |
| ENSMUSG00000035173 | 14_Cdc4186      | 1574.52 | -0.35631 | 0.00051  | 0.00203  | 1409.07 | 1346.42 | 1387.57 | 1724.02 | 1798.44 | 1781.58 |
| ENSMUSG00000035177 | 7_Nlrp2         | 0.21104 | -0.99647 | 0.80707  | NA       | 0       | 0       | 0       | 0       | 0       | 1.26623 |
| ENSMUSG00000035179 | 3_Ppp1r32       | 6.43607 | -0.04223 | 0.96313  | 0.9763   | 3.47275 | 7.34244 | 8.36608 | 4.50843 | 9.86184 | 5.06491 |
| ENSMUSG00000035181 | 5_Heat5a        | 1036.24 | 0.10697  | 0.35865  | 0.47537  | 1061.79 | 1081.17 | 1081.61 | 1070.3  | 953.909 | 968.664 |
| ENSMUSG00000035183 | 14_Slc24a5      | 1852.43 | -1.55794 | 2.70E-10 | 7.66E-09 | 889.025 | 1313.38 | 614.309 | 3056.71 | 3024    | 2217.16 |
| ENSMUSG00000035184 | 15_Fam124a      | 467.145 | 0.33769  | 0.03029  | 0.06397  | 478.372 | 563.533 | 522.282 | 437.317 | 365.784 | 435.582 |
| ENSMUSG00000035186 | 6_Ubd           | 18.0154 | 7.59958  | 4.74E-08 | 6.53E-07 | 46.8822 | 11.0137 | 50.1965 | 0       | 0       | 0       |
| ENSMUSG00000035187 | 10_Nkx6-1       | 0.19919 | 0.92709  | 0.82027  | NA       | 0       | 0       | 1.19515 | 0       | 0       | 0       |
| ENSMUSG00000035189 | 16_Ano4         | 257.658 | -0.17605 | 0.40991  | 0.52649  | 260.457 | 243.218 | 221.104 | 207.388 | 304.82  | 308.959 |
| ENSMUSG00000035198 | 9_Tubg1         | 759.632 | 0.94961  | 8.20E-07 | 7.71E-06 | 922.016 | 1007.75 | 1072.05 | 576.177 | 378.336 | 601.458 |
| ENSMUSG00000035199 | 6_Arl6ip5       | 2424.8  | 0.00786  | 0.94697  | 0.96537  | 2446.55 | 2387.21 | 2459.63 | 2144.21 | 2562.28 | 2548.91 |

|                    |                 |         |          |          |          |         |         |         |         |         |         |
|--------------------|-----------------|---------|----------|----------|----------|---------|---------|---------|---------|---------|---------|
| ENSMUSG00000035200 | 6_Chrrnb4       | 122.969 | -0.82863 | 0.02599  | 0.05644  | 89.4234 | 130.328 | 45.4159 | 205.584 | 135.376 | 131.688 |
| ENSMUSG00000035202 | 7_Lars2         | 12900.7 | 0.03336  | 0.77528  | 0.84288  | 14623.8 | 12829.1 | 11694.6 | 12541.5 | 12788.1 | 12926.9 |
| ENSMUSG00000035203 | 15_Epn1         | 1914.62 | 1.01293  | 5.33E-08 | 7.26E-07 | 2343.24 | 2549.66 | 2788.29 | 1541.88 | 935.081 | 1329.54 |
| ENSMUSG00000035206 | 9_Sppl2b        | 483.572 | 1.48476  | 1.12E-12 | 5.89E-11 | 679.792 | 686.519 | 770.874 | 308.376 | 181.099 | 274.771 |
| ENSMUSG00000035208 | 15_Slfn8        | 684.983 | 1.72507  | 2.52E-12 | 1.22E-10 | 1130.38 | 719.56  | 1306.3  | 256.079 | 402.542 | 295.031 |
| ENSMUSG00000035211 | 8_Xrra1         | 7.30028 | 0.29099  | 0.75383  | 0.8266   | 13.891  | 5.50683 | 4.78062 | 9.91854 | 7.17224 | 2.53245 |
| ENSMUSG00000035212 | 14_Leprot       | 2062.16 | -0.10118 | 0.33912  | 0.45572  | 2048.06 | 1949.42 | 1970.81 | 2159.54 | 2006.44 | 2238.69 |
| ENSMUSG00000035215 | 8_Lsm7          | 37.0142 | 2.0532   | 0.13505  | 0.2192   | 48.6186 | 35.7944 | 94.4172 | 0       | 17.9306 | 25.3245 |
| ENSMUSG00000035226 | 5_Rims4         | 11.7553 | -1.8574  | 0.01839  | 0.04218  | 4.34094 | 7.34244 | 3.58546 | 26.1489 | 21.5167 | 7.59736 |
| ENSMUSG00000035227 | 6_Spcs2         | 2648.26 | -0.24676 | 0.0299   | 0.0633   | 2409.22 | 2315.62 | 2543.29 | 2676.2  | 3119.03 | 2826.22 |
| ENSMUSG00000035228 | 14_Ccdc106      | 16.1194 | 0.23347  | 0.75064  | 0.82387  | 19.1001 | 25.6986 | 7.17092 | 21.6405 | 5.37918 | 17.7272 |
| ENSMUSG00000035232 | 8_Pdk3          | 238.022 | -0.23993 | 0.25143  | 0.36053  | 247.434 | 208.342 | 199.591 | 272.309 | 294.062 | 206.395 |
| ENSMUSG00000035234 | 18_Fam175a      | 196.147 | -0.22248 | 0.28214  | 0.39515  | 192.738 | 181.726 | 167.322 | 181.239 | 204.409 | 249.447 |
| ENSMUSG00000035235 | 12_Trim13       | 497.208 | -0.46297 | 0.0022   | 0.00704  | 436.699 | 407.506 | 409.938 | 513.961 | 642.812 | 572.335 |
| ENSMUSG00000035236 | 17_Scai         | 558.149 | -0.84726 | 1.12E-09 | 2.60E-08 | 408.917 | 407.506 | 380.059 | 706.921 | 778.189 | 667.302 |
| ENSMUSG00000035237 | 7_Lcat          | 26.6751 | 0.30726  | 0.54424  | 0.65091  | 30.3866 | 19.2739 | 39.4401 | 29.7556 | 25.9994 | 15.1947 |
| ENSMUSG00000035239 | 6_Neu3          | 298.838 | 0.37529  | 0.04716  | 0.09237  | 309.075 | 324.903 | 378.864 | 218.208 | 292.269 | 269.706 |
| ENSMUSG00000035242 | 15_Oaz1         | 6362.23 | 0.68788  | 3.83E-05 | 0.00022  | 7268.47 | 7872.94 | 8411.49 | 5885.3  | 3790.53 | 4944.62 |
| ENSMUSG00000035245 | 12_Eogt         | 1945.89 | -0.37878 | 0.00126  | 0.00439  | 1655.64 | 1673.16 | 1747.32 | 1993.63 | 2382.08 | 2223.49 |
| ENSMUSG00000035246 | 16_Pcyt1b       | 96.0071 | -0.91002 | 0.00451  | 0.01295  | 79.0051 | 77.0957 | 43.0255 | 147.876 | 98.6184 | 130.421 |
| ENSMUSG00000035247 | 15_Hectd1       | 7384.95 | -0.06961 | 0.6192   | 0.71731  | 7409.12 | 7001.94 | 7207.97 | 6186.46 | 8087.6  | 8416.61 |
| ENSMUSG00000035248 | 8_Zcchc6        | 2755.88 | 0.11485  | 0.35741  | 0.47413  | 2841.58 | 2684.58 | 3070.35 | 2345.28 | 2805.24 | 2788.23 |
| ENSMUSG00000035258 | 14_Abi3bp       | 2288.51 | -0.2768  | 0.00889  | 0.02287  | 1925.64 | 2126.56 | 2157.25 | 2483.24 | 2471.73 | 2566.64 |
| ENSMUSG00000035262 | 4_Amh           | 2.06601 | -2.34013 | 0.26407  | NA       | 0       | 0.91781 | 1.19515 | 9.01685 | 0       | 1.26623 |
| ENSMUSG00000035266 | 16_Helq         | 230.157 | 0.05825  | 0.73419  | 0.81167  | 244.829 | 234.958 | 224.689 | 225.421 | 235.788 | 215.259 |
| ENSMUSG00000035268 | 14_Pklg         | 307.64  | 0.52737  | 0.01034  | 0.02601  | 368.98  | 366.204 | 354.961 | 319.197 | 203.512 | 232.986 |
| ENSMUSG00000035270 | 15_Impg2        | 95.4297 | -2.36859 | 6.89E-06 | 4.88E-05 | 42.5412 | 36.7122 | 13.1467 | 255.177 | 166.755 | 58.2464 |
| ENSMUSG00000035273 | 14_Hpse         | 820.128 | -0.34197 | 0.01268  | 0.03083  | 732.751 | 746.176 | 691.994 | 913.407 | 1018.46 | 817.983 |
| ENSMUSG00000035274 | 13_Tpbg         | 213.87  | 0.74676  | 0.00032  | 0.00135  | 250.038 | 241.383 | 313.13  | 177.632 | 138.962 | 162.077 |
| ENSMUSG00000035275 | 14_Raver2       | 1952.22 | 0.07761  | 0.43069  | 0.54596  | 1965.58 | 2054.97 | 1993.52 | 1921.49 | 1874.65 | 1903.14 |
| ENSMUSG00000035277 | 15_Arx          | 3.34589 | -4.19601 | 0.02747  | 0.0591   | 0.86819 | 0       | 0       | 1.80337 | 16.1376 | 1.26623 |
| ENSMUSG00000035278 | 8_Plekhj1       | 371.652 | 0.48309  | 0.00789  | 0.02068  | 416.73  | 420.355 | 462.525 | 348.051 | 249.235 | 333.018 |
| ENSMUSG00000035279 | 7_Ssc5d         | 309.481 | 0.32346  | 0.18151  | 0.27888  | 255.247 | 429.533 | 347.79  | 337.23  | 231.305 | 255.778 |
| ENSMUSG00000035283 | 4_Adrb1         | 223.236 | 0.93038  | 5.42E-05 | 0.00029  | 262.193 | 278.095 | 337.033 | 144.27  | 122.825 | 194.999 |
| ENSMUSG00000035284 | 9_Vps13c        | 2191.26 | -0.24834 | 0.06525  | 0.12111  | 2057.61 | 1976.04 | 1974.39 | 2008.05 | 2540.77 | 2590.7  |
| ENSMUSG00000035285 | 5_Nat14         | 68.5456 | -0.71172 | 0.022    | 0.0491   | 50.3549 | 62.4108 | 43.0255 | 100.087 | 80.6878 | 74.7074 |
| ENSMUSG00000035293 | 13_G2e3         | 465.589 | -0.29974 | 0.11444  | 0.19202  | 443.644 | 356.109 | 452.963 | 422.89  | 611.434 | 506.491 |
| ENSMUSG00000035295 | 10_Wdr38        | 11.7682 | -1.04485 | 0.12103  | 0.20119  | 6.94551 | 5.50683 | 10.7564 | 15.3287 | 14.3445 | 17.7272 |
| ENSMUSG00000035296 | 13_Sgcg         | 75.1643 | -1.10266 | 0.00525  | 0.01467  | 37.3321 | 73.4244 | 32.2692 | 137.056 | 86.0669 | 84.8372 |
| ENSMUSG00000035297 | 14_Cops4        | 2061.67 | -0.19806 | 0.14364  | 0.23051  | 1965.58 | 1826.43 | 1968.42 | 1867.39 | 2379.39 | 2362.78 |
| ENSMUSG00000035298 | 8_Klhl35        | 6.33983 | -0.17472 | 0.85754  | 0.90348  | 2.60457 | 8.26025 | 7.17092 | 11.7219 | 4.48265 | 3.79868 |
| ENSMUSG00000035299 | 16_Mid1         | 227.078 | -0.55614 | 0.0208   | 0.04683  | 184.056 | 202.835 | 164.931 | 357.067 | 235.788 | 217.791 |
| ENSMUSG00000035305 | 5_Ror1          | 193.43  | -0.75254 | 0.00103  | 0.00369  | 137.174 | 160.616 | 135.052 | 293.949 | 243.856 | 189.934 |
| ENSMUSG00000035310 | 15_Lin54        | 570.414 | 0.15014  | 0.30203  | 0.41687  | 605.996 | 580.971 | 613.114 | 475.188 | 592.607 | 554.607 |
| ENSMUSG00000035311 | 16_Gnptab       | 2975.99 | 0.06856  | 0.63233  | 0.72893  | 3178.44 | 2911.28 | 3048.84 | 2386.76 | 3090.34 | 3240.27 |
| ENSMUSG00000035314 | 8_Gdpd5         | 486.496 | 1.17482  | 3.39E-07 | 3.59E-06 | 617.282 | 649.806 | 756.533 | 401.25  | 214.271 | 279.836 |
| ENSMUSG00000035325 | 16_Sec31a       | 3200.72 | 0.55442  | 2.13E-06 | 1.77E-05 | 3592.56 | 3735.47 | 4095.79 | 2519.31 | 2434.98 | 2826.22 |
| ENSMUSG00000035329 | 7_Fbxo33        | 441.005 | -0.56213 | 9.89E-05 | 0.00049  | 334.253 | 363.451 | 371.693 | 507.649 | 561.228 | 507.757 |
| ENSMUSG00000035337 | 3_Uchl4         | 7.23855 | 0.53358  | 0.52565  | 0.63466  | 5.20913 | 11.0137 | 9.56123 | 5.41011 | 7.17224 | 5.06491 |
| ENSMUSG00000035342 | 13_Lzts2        | 997.342 | 1.20984  | 1.97E-07 | 2.26E-06 | 1218.94 | 1366.61 | 1593.14 | 827.747 | 420.473 | 557.14  |
| ENSMUSG00000035349 | 5_Mia2          | 14.9173 | -0.29569 | 0.6797   | 0.76809  | 4.34094 | 14.6849 | 21.5128 | 12.6236 | 22.4133 | 13.9285 |
| ENSMUSG00000035351 | 15_Nup37        | 273.066 | -0.17569 | 0.30178  | 0.41656  | 254.379 | 245.972 | 268.91  | 258.784 | 303.924 | 306.427 |
| ENSMUSG00000035352 | 3_Ccl12         | 60.2147 | 1.28621  | 0.00012  | 0.0006   | 103.314 | 72.5066 | 80.0753 | 28.8539 | 38.5508 | 37.9868 |
| ENSMUSG00000035354 | 8_Uvrag         | 975.603 | 0.0104   | 0.92999  | 0.9537   | 958.48  | 980.216 | 997.954 | 906.194 | 982.598 | 1028.18 |
| ENSMUSG00000035355 | 15_Kcnh4        | 4.57808 | 2.11526  | 0.07062  | 0.12943  | 7.8137  | 3.67122 | 10.7564 | 0.90169 | 1.79306 | 2.53245 |
| ENSMUSG00000035356 | 16_Nfkbiz       | 2581.45 | 0.44227  | 0.00062  | 0.0024   | 2986.57 | 2724.96 | 3210.18 | 1936.82 | 2282.57 | 2347.58 |
| ENSMUSG00000035357 | 16_Pdzrn3       | 471.888 | -0.63177 | 0.00233  | 0.0074   | 352.484 | 462.574 | 295.203 | 654.624 | 582.745 | 483.699 |
| ENSMUSG00000035364 | 1_4930524J08Rik | 4.86001 | 0.41539  | 0.69506  | 0.78186  | 7.8137  | 2.75342 | 5.97577 | 1.80337 | 4.48265 | 6.33113 |
| ENSMUSG00000035365 | 15_Parbp        | 99.4917 | 0.0698   | 0.80018  | 0.86183  | 115.469 | 86.2737 | 103.978 | 78.4466 | 116.549 | 96.2332 |
| ENSMUSG00000035367 | 8_Rmi1          | 545.079 | -0.46454 | 0.00704  | 0.0188   | 529.595 | 399.245 | 444.597 | 546.421 | 685.846 | 664.769 |
| ENSMUSG00000035370 | 7_Adat3         | 90.5382 | 0.86058  | 0.00265  | 0.00826  | 114.601 | 120.233 | 115.93  | 83.8567 | 52.8953 | 55.714  |
| ENSMUSG00000035372 | 1_1810055G02Rik | 321.042 | 0.40774  | 0.0364   | 0.07449  | 349.012 | 392.821 | 356.156 | 324.607 | 218.753 | 284.901 |
| ENSMUSG00000035373 | 2_Ccl7          | 254.536 | 4.31349  | 7.67E-25 | 2.41E-22 | 510.495 | 263.41  | 680.043 | 9.91854 | 36.7578 | 26.5908 |
| ENSMUSG00000035376 | 9_Hacd2         | 2707.59 | -0.09918 | 0.41909  | 0.5349   | 2548.13 | 2474.4  | 2820.56 | 2571.61 | 2742.49 | 3088.33 |
| ENSMUSG00000035378 | 17_Shq1         | 208.392 | 0.34162  | 0.13099  | 0.21413  | 223.124 | 203.753 | 271.3   | 170.419 | 155.1   | 226.655 |
| ENSMUSG00000035382 | 8_Pcsk7         | 1029.07 | 0.59223  | 5.49E-05 | 0.0003   | 1165.98 | 1244.54 | 1301.52 | 918.818 | 693.915 | 849.638 |
| ENSMUSG00000035383 | 7_Pmch          | 0.93905 | -0.98794 | 0.75996  | NA       | 0       | 1.83561 | 0       | 0       | 0       | 3.79868 |
| ENSMUSG00000035385 | 5_Ccl2          | 319.6   | 3.20618  | 0.00203  | 0.0066   | 569.532 | 325.821 | 834.218 | 11.7219 | 26.8959 | 149.415 |
| ENSMUSG00000035390 | 16_Brsk1        | 67.2296 | -0.41045 | 0.32576  | 0.44183  | 49.4867 | 76.1779 | 47.8062 | 120.826 | 60.9641 | 48.1166 |
| ENSMUSG00000035392 | 17_Dennd1a      | 535.448 | 0.1465   | 0.44394  | 0.55912  | 511.363 | 614.93  | 562.918 | 634.787 | 473.368 | 415.322 |
| ENSMUSG00000035394 | 11_Cfap53       | 2.13228 | -1.83812 | 0.25637  | NA       | 0.86819 | 1.83561 | 0       | 2.70506 | 3.58612 | 3.79868 |
| ENSMUSG00000035397 | 8_Klf16         | 536.449 | 0.50813  | 0.00406  | 0.01186  | 581.686 | 625.026 | 683.628 | 522.978 | 362.198 | 443.179 |
| ENSMUSG00000035399 | 12_Oser1        | 1642.33 | -0.19289 | 0.10035  | 0.17261  | 1553.19 | 1452.89 | 1591.95 | 1601.39 | 1838.78 | 1815.77 |
| ENSMUSG00000035401 | 9_2210018M11Rik | 1081.56 | -0.20856 | 0.11443  | 0.19202  | 996.68  | 956.353 | 1057.71 | 1027.02 | 1252.45 | 1199.12 |
| ENSMUSG00000035403 | 10_Crb2         | 258.604 | -1.05108 | 0.00296  | 0.00909  | 184.056 | 233.123 | 87.2462 | 497.73  | 294.959 | 254.512 |
| ENSMUSG00000035407 | 8_Kank4         | 150.39  | -1.00285 | 9.22E-05 | 0.00046  | 92.8962 | 129.411 | 77.685  | 215.503 | 213.374 | 173.473 |
| ENSMUSG00000035413 | 8_Tmem98        | 762.177 | -0.50046 | 0.07455  | 0.13536  | 671.11  | 799.409 | 423.085 | 1269.57 | 753.982 | 655.906 |
| ENSMUSG00000035429 | 13_Ptprh        | 379.492 | 0.6522   | 0.0004   | 0.00165  | 454.931 | 446.054 | 488.818 | 250.669 | 274.338 | 362.141 |
| ENSMUSG00000035431 | 4_Sstr1         | 1.84703 | -0.85173 | 0.64655  | NA       | 1.73638 | 0.91781 | 1.19515 | 0.90169 | 0       | 6.33113 |

|                    |                  |         |          |          |          |         |         |         |         |         |         |
|--------------------|------------------|---------|----------|----------|----------|---------|---------|---------|---------|---------|---------|
| ENSMUSG00000035435 | 15_Abca17        | 0.29498 | -0.03469 | 0.99322  | NA       | 0.86819 | 0       | 0       | 0.90169 | 0       | 0       |
| ENSMUSG00000035437 | 15_Rabgap1       | 2924.84 | -0.28389 | 0.02267  | 0.05038  | 2695.73 | 2552.42 | 2665.19 | 2789.81 | 3471.37 | 3374.49 |
| ENSMUSG00000035439 | 13_Haus8         | 167.712 | 0.32939  | 0.14353  | 0.23037  | 172.769 | 171.63  | 216.323 | 168.615 | 123.721 | 153.213 |
| ENSMUSG00000035441 | 14_Myo1d         | 2495.59 | 0.44012  | 0.00033  | 0.00141  | 2707.01 | 2938.81 | 2972.35 | 1958.46 | 2025.26 | 2371.64 |
| ENSMUSG00000035443 | 9_Thyn1          | 240.547 | -0.4718  | 0.01283  | 0.03115  | 211.838 | 205.588 | 187.639 | 316.492 | 282.407 | 239.317 |
| ENSMUSG00000035448 | 8_Ccr3           | 0.2997  | -1.76345 | 0.66322  | NA       | 0       | 0       | 0       | 0.90169 | 0.89653 | 0       |
| ENSMUSG00000035451 | 6_Foxa1          | 45.1945 | 0.88352  | 0.03285  | 0.0685   | 62.5096 | 62.4108 | 50.1965 | 18.0337 | 34.9647 | 43.0517 |
| ENSMUSG00000035454 | 1_Samt3          | 1.26755 | 0.32121  | 0.87333  | NA       | 0.86819 | 0.91781 | 2.39031 | 0       | 0.89653 | 2.53245 |
| ENSMUSG00000035455 | 12_Fignl1        | 298.516 | 0.2243   | 0.34857  | 0.46554  | 336.857 | 286.355 | 341.814 | 190.256 | 349.647 | 286.167 |
| ENSMUSG00000035456 | 8_Prdm8          | 32.1042 | -1.22551 | 0.01744  | 0.04042  | 17.3638 | 19.2739 | 21.5128 | 62.2163 | 51.9988 | 20.2596 |
| ENSMUSG00000035458 | 14_Tnni3         | 16.5996 | -0.30971 | 0.58907  | 0.69161  | 15.6274 | 14.6849 | 14.3418 | 25.2472 | 17.0341 | 12.6623 |
| ENSMUSG00000035459 | 15_Stab2         | 15.645  | -0.07674 | 0.8936   | 0.92817  | 12.1546 | 19.2739 | 14.3418 | 18.0337 | 16.1376 | 13.9285 |
| ENSMUSG00000035469 | 17_Rcbtb1        | 704.428 | -0.34704 | 0.00888  | 0.02285  | 632.909 | 588.313 | 640.603 | 825.042 | 823.015 | 716.684 |
| ENSMUSG00000035472 | 13_Slc25a21      | 31.7723 | -1.47902 | 0.01615  | 0.03791  | 12.1546 | 33.041  | 4.78062 | 54.1011 | 51.1022 | 35.4544 |
| ENSMUSG00000035473 | 10_Galm          | 769.674 | -0.34675 | 0.0068   | 0.01824  | 725.806 | 689.272 | 616.7   | 857.503 | 880.393 | 848.372 |
| ENSMUSG00000035476 | 9_Tab3           | 584.253 | -0.29043 | 0.10487  | 0.17913  | 585.159 | 497.451 | 493.599 | 518.469 | 748.603 | 662.237 |
| ENSMUSG00000035478 | 14_Mbd3          | 1120.81 | 1.13777  | 1.10E-06 | 9.93E-06 | 1378.68 | 1552.93 | 1692.34 | 951.278 | 460.817 | 688.827 |
| ENSMUSG00000035486 | 14_Plk5          | 207.031 | 0.07481  | 0.84213  | 0.89257  | 184.056 | 307.465 | 145.809 | 323.705 | 138.066 | 143.084 |
| ENSMUSG00000035493 | 9_Tgfb1          | 29040.1 | 0.92106  | 5.65E-07 | 5.64E-06 | 34263.1 | 35194.2 | 44563.7 | 16224.9 | 18525.9 | 25468.9 |
| ENSMUSG00000035495 | 15_Tstd2         | 875.681 | 0.0927   | 0.42946  | 0.54482  | 890.761 | 899.449 | 921.464 | 805.205 | 887.565 | 849.638 |
| ENSMUSG00000035498 | 9_Cdcp1          | 4278.66 | 0.60563  | 0.00037  | 0.00155  | 4944.33 | 4775.34 | 5770.2  | 2650.05 | 3468.68 | 4063.32 |
| ENSMUSG00000035504 | 16_Reep6         | 283.816 | -0.08355 | 0.82058  | 0.87657  | 268.27  | 280.849 | 278.471 | 518.469 | 190.961 | 165.876 |
| ENSMUSG00000035505 | 14_Cox18         | 288.215 | 0.74021  | 3.20E-05 | 0.00019  | 329.043 | 341.424 | 412.328 | 231.733 | 207.099 | 207.661 |
| ENSMUSG00000035506 | 16_Slc12a8       | 9.17616 | -0.47426 | 0.58281  | 0.68602  | 4.34094 | 8.26025 | 10.7564 | 18.9354 | 8.96531 | 3.79868 |
| ENSMUSG00000035509 | 17_Fbxl21        | 35.1419 | -1.07573 | 0.01152  | 0.02848  | 23.4411 | 27.5342 | 16.7322 | 45.986  | 59.171  | 37.9868 |
| ENSMUSG00000035513 | 19_Ntng2         | 113.021 | -0.09571 | 0.77286  | 0.84078  | 118.942 | 131.246 | 77.685  | 164.107 | 101.308 | 84.8372 |
| ENSMUSG00000035517 | 17_Tdrd7         | 3289.65 | 0.34309  | 0.00277  | 0.0086   | 3500.54 | 3501.43 | 4036.04 | 3026.96 | 2735.31 | 2937.65 |
| ENSMUSG00000035521 | 13_Gnptg         | 798.016 | 0.22625  | 0.10295  | 0.17641  | 818.702 | 875.587 | 887.999 | 828.649 | 670.605 | 706.555 |
| ENSMUSG00000035528 | 4_Npffr2         | 0.1447  | 0.92709  | 0.82027  | NA       | 0.86819 | 0       | 0       | 0       | 0       | 0       |
| ENSMUSG00000035529 | 9_Prdm4          | 785.742 | 0.037    | 0.77358  | 0.8413   | 826.515 | 745.258 | 816.29  | 736.677 | 833.773 | 755.937 |
| ENSMUSG00000035530 | 13_Eif1          | 7544.21 | -0.36066 | 0.00098  | 0.00353  | 6728.46 | 6464.1  | 6627.13 | 8232.39 | 9349.92 | 7863.27 |
| ENSMUSG00000035539 | 13_Ccdc180       | 4.92526 | -0.97457 | 0.47299  | 0.58585  | 3.47275 | 6.42464 | 0       | 15.3287 | 1.79306 | 2.53245 |
| ENSMUSG00000035540 | 12_Gc            | 0.74883 | -3.06485 | 0.35312  | NA       | 0       | 0       | 0       | 1.80337 | 2.68959 | 0       |
| ENSMUSG00000035545 | 13_Leng8         | 3934.84 | 0.60512  | 3.08E-07 | 3.31E-06 | 4368.72 | 5231.49 | 4645.56 | 3282.14 | 3154.89 | 2926.25 |
| ENSMUSG00000035547 | 14_Capn5         | 10867.1 | 0.97931  | 6.94E-12 | 3.00E-10 | 13089.7 | 14255.4 | 15913.5 | 7440.71 | 6209.37 | 8293.79 |
| ENSMUSG00000035551 | 6_Igfbp1         | 0.30594 | 1.73752  | 0.66765  | NA       | 0       | 1.83561 | 0       | 0       | 0       | 0       |
| ENSMUSG00000035557 | 9_Krt17          | 3081.55 | 3.94889  | 6.01E-14 | 4.37E-12 | 6030.44 | 3019.58 | 8314.69 | 491.419 | 217.857 | 415.322 |
| ENSMUSG00000035559 | 8_Mpv17l2        | 268.167 | 0.53027  | 0.01921  | 0.04371  | 304.734 | 320.314 | 326.277 | 288.539 | 170.341 | 198.798 |
| ENSMUSG00000035560 | 4_Wdr20rt        | 0.29884 | -1.76064 | 0.66373  | NA       | 0       | 0       | 0       | 0       | 1.79306 | 0       |
| ENSMUSG00000035561 | 5_Aldh1b1        | 36.0091 | 0.71075  | 0.11087  | 0.18732  | 55.5641 | 39.4656 | 38.2449 | 21.6405 | 20.6202 | 40.5193 |
| ENSMUSG00000035566 | 6_Pcdh17         | 18.1747 | -1.39688 | 0.04216  | 0.08407  | 14.7592 | 4.58903 | 10.7564 | 44.1826 | 17.0341 | 17.7272 |
| ENSMUSG00000035569 | 16_Ankrd11       | 4374.46 | 0.65396  | 3.34E-07 | 3.56E-06 | 4978.19 | 5315.01 | 5753.47 | 3455.26 | 2991.72 | 3753.1  |
| ENSMUSG00000035572 | 16_Dcaf10        | 800.272 | -0.18051 | 0.17511  | 0.27101  | 755.324 | 754.436 | 739.8   | 755.612 | 875.91  | 920.547 |
| ENSMUSG00000035575 | 11_Utp6          | 1411.16 | -0.32155 | 0.01911  | 0.0435   | 1332.67 | 1166.53 | 1263.28 | 1359.74 | 1629    | 1715.74 |
| ENSMUSG00000035576 | 13_L3mbtl1       | 2.28313 | 0.0432   | 0.97844  | NA       | 2.60457 | 1.83561 | 2.39031 | 1.80337 | 0       | 5.06491 |
| ENSMUSG00000035578 | 15_Iqcg          | 9.95397 | -1.41398 | 0.12645  | 0.20814  | 10.4183 | 5.50683 | 0       | 12.6236 | 13.448  | 17.7272 |
| ENSMUSG00000035580 | 10_Kcnh8         | 1.98468 | -1.14051 | 0.5039   | NA       | 0.86819 | 2.75342 | 0       | 0.90169 | 3.58612 | 3.79868 |
| ENSMUSG00000035582 | 13_Gdpd4         | 0.78743 | 0.65682  | 0.82121  | NA       | 1.73638 | 0       | 1.19515 | 0       | 1.79306 | 0       |
| ENSMUSG00000035585 | 16_Tsen34        | 1453.62 | 0.83508  | 0.00016  | 0.00075  | 1709.46 | 1782.38 | 2097.5  | 1387.69 | 712.742 | 1031.97 |
| ENSMUSG00000035592 | 2_Krt33a         | 4.222   | 0.24687  | 0.8232   | 0.87886  | 6.07732 | 2.75342 | 4.78062 | 1.80337 | 3.58612 | 6.33113 |
| ENSMUSG00000035594 | 6_Chna5          | 5.26317 | -2.21827 | 0.06578  | 0.12196  | 0.86819 | 4.58903 | 0       | 11.7219 | 0.06878 | 6.33113 |
| ENSMUSG00000035595 | _1600002K03Rik   | 130.315 | 0.36572  | 0.10355  | 0.1773   | 128.492 | 145.013 | 167.322 | 113.612 | 114.756 | 112.694 |
| ENSMUSG00000035596 | 14_Mboat7        | 1028.37 | 0.31452  | 0.00524  | 0.01465  | 1103.47 | 1141.75 | 1174.84 | 881.848 | 928.806 | 939.54  |
| ENSMUSG00000035597 | 18_Prfp39        | 1299.95 | -0.52413 | 0.00022  | 0.00099  | 1108.68 | 1030.7  | 1060.1  | 1354.33 | 1779.61 | 1466.29 |
| ENSMUSG00000035601 | 9_Trmt10b        | 234.631 | -0.33754 | 0.05097  | 0.09862  | 199.683 | 201.917 | 221.104 | 255.177 | 277.924 | 251.979 |
| ENSMUSG00000035606 | 8_Ky             | 51.7335 | -1.20877 | 0.01424  | 0.03402  | 20.8365 | 38.5478 | 34.6595 | 120.826 | 38.5508 | 56.9802 |
| ENSMUSG00000035614 | 10_Fam179b       | 770.379 | -0.24925 | 0.06877  | 0.12673  | 680.66  | 720.477 | 711.117 | 750.202 | 927.909 | 831.911 |
| ENSMUSG00000035615 | 12_Frmpd1        | 330.05  | 0.49022  | 0.03291  | 0.0686   | 346.407 | 388.232 | 423.085 | 366.084 | 213.374 | 243.116 |
| ENSMUSG00000035620 | 9_Krt8b          | 467.693 | -0.54902 | 0.00043  | 0.00175  | 394.158 | 392.821 | 352.57  | 555.438 | 618.606 | 492.562 |
| ENSMUSG00000035621 | 13_Midn          | 2595.06 | 1.21946  | 2.29E-08 | 3.48E-07 | 3425    | 2904.85 | 4563.1  | 1920.59 | 1138.59 | 1618.24 |
| ENSMUSG00000035623 | 14_Rsf1          | 1453.05 | -0.40886 | 0.00088  | 0.00321  | 1337.01 | 1179.38 | 1228.62 | 1522.95 | 1775.13 | 1675.22 |
| ENSMUSG00000035629 | 17_1700021K19Rik | 1366.68 | 0.39489  | 0.00267  | 0.00831  | 1440.32 | 1518.05 | 1699.51 | 1238.92 | 1062.39 | 1240.9  |
| ENSMUSG00000035632 | 16_Cnot3         | 1070.51 | 0.75869  | 9.06E-07 | 8.41E-06 | 1228.49 | 1258.31 | 1550.11 | 829.551 | 693.018 | 863.567 |
| ENSMUSG00000035637 | 14_Grhp1         | 251.959 | 1.09265  | 3.22E-05 | 0.00019  | 315.152 | 346.013 | 368.107 | 216.405 | 103.998 | 162.077 |
| ENSMUSG00000035638 | 14_Muc20         | 4334.97 | 0.79531  | 1.65E-07 | 1.95E-06 | 5307.24 | 5084.64 | 6108.43 | 2597.76 | 3320.75 | 3591.02 |
| ENSMUSG00000035640 | 18_Cbap          | 450.712 | 1.34699  | 4.32E-09 | 8.27E-08 | 542.618 | 626.861 | 772.07  | 320.098 | 185.582 | 257.044 |
| ENSMUSG00000035642 | 16_Aamdc         | 260.167 | -0.60181 | 0.00411  | 0.01196  | 213.574 | 223.945 | 182.859 | 369.691 | 322.751 | 248.18  |
| ENSMUSG00000035649 | 17_Zcchc7        | 1433.46 | -0.32949 | 0.02711  | 0.05847  | 1309.23 | 1211.5  | 1290.77 | 1335.4  | 1849.54 | 1604.31 |
| ENSMUSG00000035653 | 16_Lrnf5         | 6.65012 | -1.69886 | 0.08081  | 0.14449  | 2.60457 | 5.50683 | 1.19515 | 9.91854 | 14.3445 | 6.33113 |
| ENSMUSG00000035666 | 14_Gtf3c4        | 1298.73 | -0.22153 | 0.03897  | 0.07879  | 1189.42 | 1217.93 | 1190.37 | 1351.63 | 1457.76 | 1385.25 |
| ENSMUSG00000035671 | 5_Zswim4         | 1281.71 | 1.49359  | 4.74E-16 | 5.41E-14 | 1684.29 | 1801.65 | 2189.52 | 813.32  | 531.643 | 669.834 |
| ENSMUSG00000035673 | 9_Sbno2          | 1823.66 | 1.76776  | 1.28E-17 | 1.77E-15 | 2490.83 | 2369.77 | 3597.41 | 957.59  | 637.433 | 888.891 |
| ENSMUSG00000035674 | 13_Ndufa3        | 1039.53 | -0.13644 | 0.24878  | 0.35772  | 1031.41 | 971.038 | 968.075 | 1143.34 | 1016.67 | 1106.68 |
| ENSMUSG00000035678 | 7_Tnfsf9         | 15.3649 | -0.06686 | 0.91017  | 0.93963  | 11.2864 | 13.7671 | 20.3176 | 15.3287 | 18.8271 | 12.6623 |
| ENSMUSG00000035681 | 6_Kcnc2          | 138.983 | 0.16356  | 0.46763  | 0.58115  | 144.987 | 146.849 | 148.199 | 140.663 | 107.584 | 145.616 |
| ENSMUSG00000035683 | 13_Melk          | 626.145 | 0.34894  | 0.04655  | 0.09133  | 729.278 | 591.985 | 782.826 | 462.565 | 577.366 | 612.856 |
| ENSMUSG00000035686 | 8_Thrsp          | 67.4796 | -0.70484 | 0.15167  | 0.24124  | 33.8593 | 89.0271 | 31.074  | 124.433 | 77.1016 | 49.3828 |
| ENSMUSG00000035692 | 6_Isg15          | 6515.09 | 2.03916  | 8.35E-35 | 7.08E-32 | 9379.04 | 8787.99 | 13274.6 | 2509.39 | 2585.59 | 2553.98 |
| ENSMUSG00000035694 | 15_Caps2         | 10.318  | -1.02473 | 0.19385  | 0.2939   | 6.07732 | 8.26025 | 5.97577 | 5.41011 | 19.7237 | 16.4609 |

|                    |                 |         |          |          |          |         |         |         |         |         |         |
|--------------------|-----------------|---------|----------|----------|----------|---------|---------|---------|---------|---------|---------|
| ENSMUSG00000035696 | 15_Rnf38        | 1856.26 | 0.12116  | 0.35483  | 0.47161  | 1912.62 | 1802.57 | 2086.74 | 1575.24 | 1815.47 | 1944.92 |
| ENSMUSG00000035697 | 14_Hmha1        | 217.986 | 1.86746  | 3.97E-10 | 1.07E-08 | 441.04  | 256.986 | 328.667 | 128.039 | 64.5502 | 88.6359 |
| ENSMUSG00000035699 | 7_Slc51a        | 4.71386 | 1.30257  | 0.21357  | 0.31713  | 6.94551 | 8.26025 | 4.78062 | 2.70506 | 1.79306 | 3.79868 |
| ENSMUSG00000035704 | 17_Alg8         | 270.3   | 0.18394  | 0.43663  | 0.55213  | 262.193 | 272.588 | 327.472 | 176.73  | 287.786 | 295.031 |
| ENSMUSG00000035711 | 4_Dok3          | 35.3055 | 1.908    | 0.00052  | 0.00204  | 71.1914 | 45.8903 | 50.1965 | 25.2472 | 5.37918 | 13.9285 |
| ENSMUSG00000035713 | 15_Usp35        | 85.7342 | 0.01209  | 0.9682   | 0.97945  | 89.4234 | 106.465 | 62.148  | 98.2837 | 83.3773 | 74.7074 |
| ENSMUSG00000035722 | 15_Abca7        | 1086.81 | 1.60639  | 2.23E-17 | 2.90E-15 | 1443.8  | 1648.38 | 1815.44 | 602.326 | 398.06  | 612.854 |
| ENSMUSG00000035725 | 13_Prkx         | 1246.96 | 0.37296  | 0.01313  | 0.03172  | 1353.51 | 1288.6  | 1579.99 | 929.638 | 1187.9  | 1142.14 |
| ENSMUSG00000035726 | 7_Supt16        | 2121.22 | -0.20944 | 0.14531  | 0.2327   | 2048.92 | 1784.21 | 2068.81 | 1915.18 | 2423.32 | 2486.87 |
| ENSMUSG00000035735 | 10_Dagla        | 359.196 | 1.12238  | 1.76E-07 | 2.06E-06 | 452.326 | 448.807 | 574.869 | 242.553 | 169.444 | 267.174 |
| ENSMUSG00000035745 | 8_Grin3b        | 10.8369 | 0.88004  | 0.22947  | 0.33555  | 8.68188 | 16.5205 | 16.7322 | 6.3118  | 5.37918 | 11.396  |
| ENSMUSG00000035754 | 7_Wdr18         | 610.608 | 0.98772  | 6.71E-07 | 6.49E-06 | 748.378 | 779.217 | 908.317 | 507.649 | 311.096 | 408.991 |
| ENSMUSG00000035757 | 16_Selo         | 656.1   | 0.25859  | 0.06682  | 0.12362  | 667.637 | 728.738 | 746.971 | 594.211 | 540.608 | 658.438 |
| ENSMUSG00000035759 | 3_Bbs10         | 92.3794 | -1.14875 | 1.82E-05 | 0.00011  | 56.4322 | 64.2464 | 51.3916 | 114.514 | 146.134 | 121.558 |
| ENSMUSG00000035762 | 10_Tmem161b     | 340.001 | -0.48734 | 0.0081   | 0.02117  | 287.37  | 254.232 | 308.35  | 338.132 | 458.127 | 393.797 |
| ENSMUSG00000035764 | 5_Fbxo45        | 825.211 | -0.2318  | 0.10421  | 0.17832  | 810.888 | 698.45  | 767.289 | 783.565 | 956.598 | 934.475 |
| ENSMUSG00000035765 | 9_Dym           | 514.093 | 0.18108  | 0.20769  | 0.31037  | 487.922 | 568.122 | 583.235 | 473.385 | 474.265 | 497.627 |
| ENSMUSG00000035769 | 8_Xylb          | 57.7575 | 0.00157  | 0.99616  | 0.99745  | 56.4322 | 57.8218 | 59.7577 | 66.7247 | 62.7571 | 43.0517 |
| ENSMUSG00000035770 | 7_Dync1li2      | 3570.48 | -0.1901  | 0.06085  | 0.11428  | 3463.2  | 3232.51 | 3309.38 | 3668.06 | 3720.6  | 4029.13 |
| ENSMUSG00000035772 | 11_Mrps2        | 509.024 | 0.1399   | 0.34027  | 0.45669  | 507.022 | 539.67  | 554.552 | 432.809 | 526.263 | 493.828 |
| ENSMUSG00000035773 | 5_Kiss1r        | 33.7479 | 0.79064  | 0.0728   | 0.13278  | 38.2003 | 49.5615 | 40.6352 | 34.264  | 17.0341 | 22.7921 |
| ENSMUSG00000035775 | 2_Krt20         | 29.5117 | -0.86392 | 0.07733  | 0.13941  | 19.1001 | 31.2054 | 11.9515 | 34.264  | 34.9647 | 45.5842 |
| ENSMUSG00000035776 | 14_Cd9912       | 2789.66 | -0.24274 | 0.01108  | 0.02754  | 2535.11 | 2582.7  | 2548.07 | 3044.09 | 2924.48 | 3103.52 |
| ENSMUSG00000035778 | 17_Ggta1        | 3656.56 | 0.26953  | 0.08853  | 0.15553  | 3921.61 | 3445.44 | 4624.05 | 2817.77 | 3379.92 | 3750.56 |
| ENSMUSG00000035781 | 13_R3hdm4       | 3207.09 | 0.59031  | 0.00011  | 0.00053  | 3332.11 | 3765.76 | 4465.1  | 2736.62 | 2211.74 | 2731.25 |
| ENSMUSG00000035783 | 8_Acta2         | 3994.23 | -1.20051 | 1.85E-06 | 1.57E-05 | 2086.26 | 3550.07 | 1629    | 6499.35 | 5591.66 | 4609.07 |
| ENSMUSG00000035785 | 5_Cmtm2b        | 0.45084 | -2.33355 | 0.56009  | NA       | 0       | 0       | 0       | 2.70506 | 0       | 0       |
| ENSMUSG00000035790 | 15_Cep19        | 349.816 | -0.11295 | 0.45916  | 0.57286  | 330.78  | 320.314 | 357.351 | 341.739 | 367.578 | 381.134 |
| ENSMUSG00000035798 | 13_Zdhhc17      | 463.973 | -0.84912 | 1.49E-06 | 1.30E-05 | 375.926 | 329.492 | 288.032 | 638.393 | 645.502 | 506.491 |
| ENSMUSG00000035799 | 5_Twist1        | 215.298 | -0.41308 | 0.02258  | 0.05021  | 193.606 | 185.397 | 174.492 | 225.421 | 260.89  | 251.979 |
| ENSMUSG00000035805 | 13_Mlc1         | 121.543 | -1.93286 | 5.94E-06 | 4.32E-05 | 43.4094 | 78.9313 | 28.6837 | 218.208 | 259.994 | 100.032 |
| ENSMUSG00000035818 | 13_Plekhs1      | 4465.52 | -0.06563 | 0.66102  | 0.75306  | 4472.91 | 4239.34 | 4380.24 | 3856.51 | 5519.94 | 4324.16 |
| ENSMUSG00000035824 | 6_Tk2           | 768.155 | -0.16922 | 0.1789   | 0.27573  | 699.76  | 753.518 | 715.897 | 857.503 | 756.672 | 825.58  |
| ENSMUSG00000035828 | 10_Pim3         | 576.521 | 0.63314  | 0.00411  | 0.01196  | 698.023 | 665.409 | 739.8   | 588.801 | 313.786 | 453.309 |
| ENSMUSG00000035829 | 13_Ppp1r26      | 268.416 | 0.10808  | 0.575    | 0.67932  | 285.634 | 296.451 | 253.373 | 307.475 | 229.512 | 238.051 |
| ENSMUSG00000035831 | 2_Krt25         | 8.70097 | -1.24832 | 0.21531  | 0.31913  | 5.20913 | 10.0959 | 0       | 15.3287 | 15.241  | 6.33113 |
| ENSMUSG00000035834 | 11_Polr3g       | 1064.18 | -0.57311 | 0.00012  | 0.00057  | 935.039 | 876.504 | 752.947 | 1109.97 | 1330.45 | 1380.19 |
| ENSMUSG00000035835 | 14_Lppr3        | 121.864 | 1.10481  | 0.0003   | 0.00128  | 151.933 | 175.301 | 172.102 | 108.202 | 50.2057 | 73.4412 |
| ENSMUSG00000035836 | 2_Ugt2b1        | 0       | NA       | NA       | NA       | 0       | 0       | 0       | 0       | 0       | 0       |
| ENSMUSG00000035840 | 6_Lysmd3        | 519.168 | -0.32591 | 0.02607  | 0.05658  | 480.108 | 459.821 | 442.207 | 527.486 | 641.916 | 563.471 |
| ENSMUSG00000035842 | 9_Ddx11         | 168.898 | 0.80372  | 0.00054  | 0.00212  | 220.52  | 218.438 | 204.371 | 91.9719 | 136.273 | 141.817 |
| ENSMUSG00000035845 | 17_Alg12        | 344.803 | 0.3784   | 0.02102  | 0.04725  | 377.662 | 363.451 | 427.865 | 296.655 | 275.235 | 327.953 |
| ENSMUSG00000035847 | 15_Id3          | 3104    | -0.29924 | 0.00928  | 0.02372  | 2746.08 | 2856.21 | 2746.46 | 3058.52 | 3628.26 | 3588.49 |
| ENSMUSG00000035849 | 14_Krt222       | 39.4818 | -0.95678 | 0.03981  | 0.08019  | 31.2548 | 35.7944 | 13.1467 | 64.0197 | 54.6884 | 37.9868 |
| ENSMUSG00000035851 | 14_Ythdc1       | 2497.57 | -0.25913 | 0.05499  | 0.10489  | 2283.34 | 2164.19 | 2373.58 | 2302.9  | 2920    | 2941.45 |
| ENSMUSG00000035852 | 10_Misp         | 464.481 | 1.99019  | 8.01E-16 | 8.65E-14 | 677.187 | 559.861 | 989.588 | 220.011 | 145.238 | 194.999 |
| ENSMUSG00000035860 | 8_Cdhr3         | 2.36141 | -2.59388 | 0.13114  | NA       | 0       | 0.91781 | 1.19515 | 5.41011 | 5.37918 | 1.26623 |
| ENSMUSG00000035861 | 6_Tmprss11b     | 9646.81 | -0.09536 | 0.55377  | 0.65994  | 9411.16 | 8607.18 | 9965.19 | 7716.62 | 10897.3 | 11283.3 |
| ENSMUSG00000035863 | 13_Palm         | 713.581 | 0.82668  | 0.00024  | 0.00104  | 836.934 | 974.71  | 926.244 | 678.969 | 350.543 | 514.088 |
| ENSMUSG00000035864 | 14_Syt1         | 249.946 | -2.32373 | 0.00146  | 0.00497  | 112.864 | 101.876 | 34.6595 | 686.183 | 400.749 | 163.343 |
| ENSMUSG00000035868 | 8_3110052M02Rik | 170.734 | -0.61365 | 0.01614  | 0.03788  | 137.174 | 111.972 | 156.565 | 167.713 | 263.58  | 187.402 |
| ENSMUSG00000035873 | 7_Pawr          | 829.564 | 0.02942  | 0.84315  | 0.8932   | 847.352 | 750.765 | 915.488 | 727.66  | 825.705 | 910.417 |
| ENSMUSG00000035875 | 14_Al182371     | 9.57445 | 0.41026  | 0.56954  | 0.67428  | 11.2864 | 11.9315 | 9.56123 | 6.3118  | 10.7584 | 7.59736 |
| ENSMUSG00000035877 | 17_Zhx3         | 1228.86 | -0.26041 | 0.05723  | 0.10847  | 1088.71 | 1239.04 | 1025.44 | 1201.05 | 1399.48 | 1419.44 |
| ENSMUSG00000035878 | 13_Hyck         | 106.256 | -0.91937 | 0.00015  | 0.0007   | 72.0596 | 72.5066 | 76.4899 | 150.581 | 144.341 | 121.558 |
| ENSMUSG00000035885 | 4_Cox8a         | 2642.96 | -0.1673  | 0.24628  | 0.35494  | 2527.3  | 2467.98 | 2475.16 | 3346.15 | 2461.87 | 2579.3  |
| ENSMUSG00000035890 | 8_Rnf126        | 690.382 | 1.50153  | 6.85E-09 | 1.23E-07 | 862.111 | 987.559 | 1210.69 | 434.612 | 214.271 | 433.05  |
| ENSMUSG00000035891 | 16_Cerk         | 1306.99 | 0.37694  | 0.00222  | 0.0071   | 1356.98 | 1539.16 | 1534.58 | 1207.36 | 1057.91 | 1145.94 |
| ENSMUSG00000035896 | 4_Rnase1        | 14.6965 | -1.6884  | 0.00752  | 0.01985  | 6.07732 | 5.50683 | 9.56123 | 27.0506 | 19.7237 | 20.2596 |
| ENSMUSG00000035898 | 13_Uba6         | 1247.82 | -0.3729  | 0.02486  | 0.0544   | 1099.13 | 990.312 | 1173.64 | 1154.16 | 1681.89 | 1387.78 |
| ENSMUSG00000035900 | 18_Gramd4       | 1899.69 | 0.80189  | 5.78E-07 | 5.75E-06 | 2235.59 | 2199.98 | 2807.42 | 1464.34 | 1157.42 | 1533.4  |
| ENSMUSG00000035901 | 14_Dennd5a      | 1656.11 | -0.56182 | 0.00067  | 0.00256  | 1349.16 | 1498.78 | 1165.28 | 2285.77 | 2011.81 | 1625.84 |
| ENSMUSG00000035910 | 15_Dcdc2a       | 128.419 | -1.566   | 3.31E-05 | 0.00019  | 58.1686 | 105.548 | 29.8789 | 203.781 | 188.271 | 184.869 |
| ENSMUSG00000035914 | 10_Cd276        | 836.805 | 0.92106  | 1.36E-09 | 3.07E-08 | 1004.49 | 1073.83 | 1205.91 | 552.733 | 519.091 | 664.769 |
| ENSMUSG00000035916 | 7_Ptprq         | 2.88947 | -1.95191 | 0.25453  | 0.36405  | 3.47275 | 0       | 0       | 8.11517 | 4.48265 | 1.26623 |
| ENSMUSG00000035919 | 16_Bbs9         | 283.606 | -0.47016 | 0.01301  | 0.03149  | 266.534 | 242.301 | 204.371 | 362.478 | 339.785 | 286.167 |
| ENSMUSG00000035923 | 3_Myf6          | 31.7319 | -1.19737 | 0.07375  | 0.13417  | 13.891  | 37.63   | 5.97577 | 70.3315 | 23.3098 | 39.253  |
| ENSMUSG00000035929 | 11_H2-Q4        | 2346.91 | 2.87165  | 3.81E-54 | 1.62E-50 | 3876.46 | 3307.77 | 5203.7  | 584.292 | 491.299 | 617.919 |
| ENSMUSG00000035930 | 8_Chst4         | 0.57879 | 2.65671  | 0.50459  | NA       | 3.47275 | 0       | 0       | 0       | 0       | 0       |
| ENSMUSG00000035932 | 5_Olfr750       | 0.14942 | -0.99647 | 0.80707  | NA       | 0       | 0       | 0       | 0       | 0.89653 | 0       |
| ENSMUSG00000035933 | 4_Cog5          | 797.949 | -0.38753 | 0.00179  | 0.00593  | 681.528 | 707.628 | 684.823 | 839.469 | 957.495 | 916.748 |
| ENSMUSG00000035934 | 15_Pknox2       | 97.1132 | -0.99913 | 0.00309  | 0.00942  | 79.0051 | 75.2601 | 39.4401 | 165.008 | 120.135 | 103.831 |
| ENSMUSG00000035936 | 6_Aldh5a1       | 414.556 | -0.38653 | 0.00582  | 0.016    | 367.244 | 370.793 | 339.424 | 472.483 | 468.885 | 468.504 |
| ENSMUSG00000035941 | 15_Ibtk         | 1285.02 | -0.18997 | 0.11259  | 0.18965  | 1238.04 | 1151.85 | 1210.69 | 1252.44 | 1395.9  | 1461.23 |
| ENSMUSG00000035944 | 17_Ttc38        | 499.203 | 0.28627  | 0.06056  | 0.11381  | 538.277 | 515.807 | 591.601 | 479.697 | 396.267 | 473.569 |
| ENSMUSG00000035946 | 7_Gsx2          | 66.5492 | -1.21378 | 0.00255  | 0.008    | 42.5412 | 56.9039 | 20.3176 | 110.006 | 98.6184 | 70.9087 |
| ENSMUSG00000035948 | 12_Acss3        | 34.0179 | -1.2409  | 0.01558  | 0.03679  | 17.3638 | 31.2054 | 11.9515 | 68.5281 | 42.1369 | 32.9219 |
| ENSMUSG00000035949 | 15_Fbxw2        | 1536.41 | -0.22706 | 0.03739  | 0.07616  | 1429.91 | 1369.37 | 1448.53 | 1577.95 | 1749.13 | 1643.56 |
| ENSMUSG00000035951 | 1_Asc13         | 1.18529 | 1.52388  | 0.54629  | NA       | 3.47275 | 1.83561 | 0       | 1.80337 | 0       | 0       |

|                    |                  |         |          |          |          |         |         |         |         |         |         |
|--------------------|------------------|---------|----------|----------|----------|---------|---------|---------|---------|---------|---------|
| ENSMUSG00000035953 | 13_Tmem55b       | 948.838 | -0.00303 | 0.97918  | 0.98621  | 999.285 | 925.148 | 919.074 | 970.214 | 957.495 | 921.813 |
| ENSMUSG00000035954 | 9_Dock4          | 194.322 | -0.77153 | 0.00027  | 0.00119  | 140.647 | 135.835 | 155.37  | 285.834 | 245.649 | 202.596 |
| ENSMUSG00000035958 | 2_Tdp2           | 301.589 | -0.22035 | 0.30348  | 0.41834  | 301.261 | 250.561 | 284.447 | 264.194 | 411.508 | 297.563 |
| ENSMUSG00000035960 | 13_Apex1         | 775.046 | 0.18199  | 0.18169  | 0.27909  | 886.42  | 758.107 | 825.851 | 727.66  | 669.708 | 782.528 |
| ENSMUSG00000035963 | 8_Odf3l2         | 0.30325 | -0.03469 | 0.99322  | NA       | 0       | 0.91781 | 0       | 0.90169 | 0       | 0       |
| ENSMUSG00000035964 | 7_Tmem59l        | 16.1475 | -0.58952 | 0.37763  | 0.49517  | 15.6274 | 14.6849 | 8.36608 | 33.3624 | 13.448  | 11.396  |
| ENSMUSG00000035967 | 15_Ddx26b        | 694.5   | -0.5444  | 0.00237  | 0.00752  | 642.459 | 550.683 | 500.77  | 672.657 | 958.391 | 842.041 |
| ENSMUSG00000035969 | 15_Rusc2         | 378.13  | 0.63301  | 0.02579  | 0.0561   | 405.444 | 547.93  | 426.67  | 446.334 | 210.685 | 231.72  |
| ENSMUSG00000035983 | 4_Gm7008         | 9.89857 | 0.92195  | 0.25931  | 0.36948  | 13.891  | 11.0137 | 14.3418 | 9.01685 | 9.86184 | 1.26623 |
| ENSMUSG00000035984 | 14_Nme5          | 24.6095 | -0.52242 | 0.25188  | 0.36107  | 21.7047 | 22.0273 | 16.7322 | 28.8539 | 30.482  | 27.857  |
| ENSMUSG00000035992 | 15_Fnip1         | 903.286 | -0.67666 | 7.85E-07 | 7.43E-06 | 750.983 | 655.313 | 680.043 | 1110.88 | 1218.39 | 1004.12 |
| ENSMUSG00000036002 | 12_Fam214b       | 2422.7  | 0.87985  | 6.97E-11 | 2.38E-09 | 2805.98 | 3119.62 | 3492.24 | 1759.19 | 1529.48 | 1829.7  |
| ENSMUSG00000036006 | 19_Fam65b        | 97.3838 | -0.64761 | 0.02692  | 0.05815  | 96.3689 | 59.6574 | 71.7092 | 114.514 | 140.755 | 101.298 |
| ENSMUSG00000036009 | 16_Mettl25       | 130.236 | -0.35008 | 0.1299   | 0.2128   | 102.446 | 116.561 | 124.296 | 130.744 | 138.962 | 168.408 |
| ENSMUSG00000036019 | 8_Tmtc2          | 662.305 | -0.20573 | 0.11309  | 0.1903   | 597.314 | 602.08  | 647.774 | 733.07  | 735.155 | 658.438 |
| ENSMUSG00000036022 | 15_Fam122b       | 331.516 | -0.31546 | 0.07861  | 0.1413   | 298.657 | 278.095 | 309.545 | 306.573 | 415.094 | 381.134 |
| ENSMUSG00000036023 | 5_Parp2          | 578.384 | -0.04864 | 0.72782  | 0.80626  | 579.082 | 534.163 | 592.796 | 535.601 | 628.468 | 600.192 |
| ENSMUSG00000036026 | 15_Tmem63b       | 1285.65 | 0.82649  | 1.23E-07 | 1.50E-06 | 1511.52 | 1704.36 | 1716.24 | 1052.27 | 755.775 | 973.728 |
| ENSMUSG00000036027 | 11_1810046K07Rik | 0.15028 | -0.99647 | 0.80707  | NA       | 0       | 0       | 0       | 0.90169 | 0       | 0       |
| ENSMUSG00000036030 | 9_Prtg           | 68.1857 | -1.3666  | 0.00016  | 0.00075  | 35.5957 | 47.7259 | 31.074  | 110.006 | 120.135 | 64.5776 |
| ENSMUSG00000036036 | 15_Zfp57         | 53.5471 | -1.05797 | 0.00193  | 0.00631  | 27.782  | 43.1369 | 33.4643 | 76.6433 | 74.412  | 65.8438 |
| ENSMUSG00000036040 | 12_Adamtsl2      | 52.4758 | -0.41432 | 0.27969  | 0.39238  | 40.8049 | 56.9039 | 37.0498 | 78.4466 | 42.1369 | 59.5127 |
| ENSMUSG00000036046 | 14_5031439G07Rik | 1964.81 | 0.0724   | 0.56542  | 0.67075  | 1906.54 | 2124.72 | 2011.44 | 2133.39 | 1737.48 | 1875.28 |
| ENSMUSG00000036052 | 14_Dnajb5        | 210.177 | -0.01185 | 0.95501  | 0.97074  | 205.761 | 239.547 | 182.859 | 244.357 | 206.202 | 182.337 |
| ENSMUSG00000036053 | 16_Fmnl2         | 695.066 | -0.64257 | 2.87E-07 | 3.13E-06 | 527.859 | 579.135 | 521.087 | 844.879 | 864.255 | 833.177 |
| ENSMUSG00000036054 | 15_Sugp2         | 828.962 | 0.36461  | 0.00235  | 0.00747  | 908.993 | 963.696 | 927.44  | 765.531 | 709.156 | 698.952 |
| ENSMUSG00000036057 | 11_Ptpn23        | 1342.02 | 1.05162  | 4.80E-10 | 1.25E-08 | 1613.09 | 1867.73 | 1950.49 | 998.166 | 689.432 | 933.209 |
| ENSMUSG00000036061 | 9_Smug1          | 571.479 | -0.10327 | 0.46447  | 0.57803  | 555.641 | 516.725 | 582.04  | 571.669 | 648.192 | 554.607 |
| ENSMUSG00000036062 | 13_Phf24         | 88.9445 | -0.13011 | 0.65815  | 0.75069  | 106.787 | 63.3286 | 84.8559 | 100.989 | 94.1357 | 83.571  |
| ENSMUSG00000036067 | 12_Slc2a6        | 30.294  | 3.47776  | 8.86E-09 | 1.54E-07 | 62.5096 | 38.5478 | 65.7335 | 8.11517 | 1.79306 | 5.06491 |
| ENSMUSG00000036073 | 17_Galt          | 323.083 | 0.71566  | 0.0023   | 0.00733  | 359.43  | 415.766 | 429.06  | 289.441 | 164.962 | 279.836 |
| ENSMUSG00000036078 | 16_Sigmar1       | 1117.88 | 0.60192  | 0.00063  | 0.00242  | 1251.06 | 1272.08 | 1519.04 | 915.211 | 700.19  | 1049.7  |
| ENSMUSG00000036083 | 14_Slc17a3       | 1.17176 | -3.693   | 0.12466  | NA       | 0       | 0       | 0       | 2.70506 | 1.79306 | 2.53245 |
| ENSMUSG00000036086 | 16_Zranb3        | 403.63  | -0.10124 | 0.53228  | 0.64062  | 399.367 | 344.177 | 425.475 | 382.315 | 450.058 | 420.387 |
| ENSMUSG00000036087 | 18_Slain2        | 1852.51 | -0.13161 | 0.22932  | 0.33539  | 1752    | 1700.69 | 1851.29 | 1825.01 | 1949.95 | 2036.09 |
| ENSMUSG00000036091 | 8_Hyal3          | 32.36   | 0.34639  | 0.4166   | 0.5326   | 43.4094 | 36.7122 | 28.6837 | 30.6573 | 33.1716 | 21.5259 |
| ENSMUSG00000036093 | 7_Arl5a          | 1689.24 | -0.53265 | 2.64E-05 | 0.00016  | 1508.91 | 1304.2  | 1329.01 | 1846.65 | 2177.67 | 1968.98 |
| ENSMUSG00000036095 | 10_Dgkb          | 17.9976 | -2.17862 | 0.00051  | 0.00202  | 5.20913 | 7.34244 | 7.17092 | 41.4775 | 27.7924 | 18.9934 |
| ENSMUSG00000036097 | 7_Fam178a        | 1303.09 | -0.16199 | 0.18801  | 0.28692  | 1285.79 | 1211.5  | 1192.76 | 1281.3  | 1515.14 | 1332.07 |
| ENSMUSG00000036098 | 15_Myrf          | 234.555 | -0.50293 | 0.15794  | 0.24949  | 232.674 | 253.314 | 95.6123 | 384.118 | 218.753 | 222.856 |
| ENSMUSG00000036099 | 16_Vezt          | 994.289 | -0.00849 | 0.94273  | 0.96274  | 1032.28 | 996.737 | 945.367 | 1037.84 | 1013.98 | 939.54  |
| ENSMUSG00000036103 | 8_Colec12        | 1406.51 | -0.92177 | 1.20E-06 | 1.07E-05 | 1044.43 | 1139.91 | 730.239 | 2025.19 | 1948.16 | 1551.13 |
| ENSMUSG00000036104 | 11_Rab3gap1      | 2347.96 | 0.00607  | 0.95224  | 0.96877  | 2386.65 | 2311.95 | 2359.23 | 2218.15 | 2385.67 | 2426.09 |
| ENSMUSG00000036106 | 15_Prr5          | 53.8254 | 8.1603   | 0.01677  | 0.03913  | 63.3778 | 63.3286 | 78.8802 | 37.8708 | 31.3786 | 48.1166 |
| ENSMUSG00000036109 | 17_Mbnl3         | 581.5   | -0.10792 | 0.49807  | 0.60913  | 555.641 | 554.355 | 568.893 | 499.534 | 672.398 | 638.178 |
| ENSMUSG00000036110 | 14_Slc17a2       | 0.80572 | -1.90834 | 0.4522   | NA       | 0.86819 | 0       | 0       | 1.80337 | 0.89653 | 1.26623 |
| ENSMUSG00000036111 | 7_Lmo1           | 94.1808 | -0.3485  | 0.39467  | 0.51232  | 89.4234 | 110.137 | 49.0013 | 160.5   | 91.4461 | 64.5776 |
| ENSMUSG00000036112 | 14_Metap2        | 4238.11 | -0.22615 | 0.05449  | 0.10408  | 3995.4  | 3630.84 | 4093.4  | 4112.59 | 4784.78 | 4811.66 |
| ENSMUSG00000036114 | 3_Rpp25l         | 238.627 | 0.86319  | 5.67E-06 | 4.14E-05 | 299.525 | 314.807 | 309.545 | 194.764 | 143.445 | 169.674 |
| ENSMUSG00000036117 | 2_Il5            | 3.02321 | 1.00378  | 0.44934  | 0.56425  | 3.47275 | 7.34244 | 1.19515 | 1.80337 | 1.79306 | 2.53245 |
| ENSMUSG00000036120 | 9_Rfxank         | 237.075 | 0.21739  | 0.23289  | 0.33927  | 255.247 | 267.081 | 242.616 | 248.865 | 203.512 | 205.129 |
| ENSMUSG00000036123 | 6_Slc9a3         | 1.23892 | 1.58567  | 0.43098  | NA       | 2.60457 | 1.83561 | 1.19515 | 0.90169 | 0.89653 | 0       |
| ENSMUSG00000036131 | 12_Frmd7         | 7.89214 | -0.65686 | 0.42261  | 0.53817  | 8.68188 | 3.67122 | 5.97577 | 11.7219 | 7.17224 | 10.1298 |
| ENSMUSG00000036136 | 8_Fam110c        | 711.125 | 0.52416  | 0.0015   | 0.0051   | 803.074 | 737.916 | 975.246 | 543.716 | 543.298 | 663.503 |
| ENSMUSG00000036138 | 16_Acaa1a        | 1268.07 | 0.94418  | 6.86E-09 | 1.23E-07 | 1535.83 | 1665.82 | 1804.68 | 997.264 | 695.708 | 909.151 |
| ENSMUSG00000036144 | 6_Meox2          | 58.7271 | -0.44013 | 0.20882  | 0.31173  | 39.0685 | 46.8081 | 64.5383 | 82.0534 | 65.4467 | 54.4478 |
| ENSMUSG00000036151 | 15_Tn6sf2        | 11.4471 | -0.35061 | 0.61729  | 0.71556  | 10.4183 | 13.7671 | 5.97577 | 12.6236 | 17.0341 | 8.86359 |
| ENSMUSG00000036155 | 13_Mgat5         | 1433.16 | 0.03847  | 0.72178  | 0.80192  | 1435.12 | 1451.97 | 1468.84 | 1417.45 | 1340.31 | 1485.28 |
| ENSMUSG00000036158 | 12_Prickle1      | 470.041 | 0.28332  | 0.09056  | 0.15851  | 507.022 | 558.026 | 482.842 | 489.615 | 364.888 | 417.855 |
| ENSMUSG00000036160 | 13_Surf6         | 643.73  | 0.32369  | 0.01875  | 0.04284  | 711.914 | 670.916 | 763.703 | 580.685 | 523.574 | 611.588 |
| ENSMUSG00000036167 | 15_Pphl1         | 1493.89 | -0.13638 | 0.30801  | 0.42303  | 1417.75 | 1335.41 | 1516.65 | 1362.45 | 1655.89 | 1675.52 |
| ENSMUSG00000036168 | 15_Cdc38         | 16.0539 | -0.31382 | 0.57814  | 0.68179  | 12.1546 | 16.5205 | 14.3418 | 15.3287 | 21.5167 | 16.4609 |
| ENSMUSG00000036169 | 5_Sostdc1        | 147.164 | -0.72587 | 0.00434  | 0.01253  | 100.71  | 119.315 | 113.54  | 229.93  | 180.203 | 139.285 |
| ENSMUSG00000036172 | 17_Cd200r3       | 2.73609 | -1.77367 | 0.22973  | 0.33585  | 0.86819 | 2.75342 | 0       | 5.41011 | 3.58612 | 3.79868 |
| ENSMUSG00000036180 | 14_Gatad2a       | 1845.5  | 1.08024  | 9.53E-10 | 2.28E-08 | 2120.12 | 2467.98 | 2929.32 | 1320.07 | 950.322 | 1285.22 |
| ENSMUSG00000036181 | 2_Hist1h1c       | 744.358 | 0.27012  | 0.18783  | 0.28669  | 766.61  | 934.326 | 740.996 | 880.045 | 547.78  | 596.393 |
| ENSMUSG00000036185 | 9_Sapcd1         | 33.4278 | -0.15103 | 0.75744  | 0.82944  | 34.7275 | 39.4656 | 20.3176 | 43.2809 | 19.7237 | 43.0517 |
| ENSMUSG00000036186 | 5_Fam69b         | 93.6297 | 0.1978   | 0.62489  | 0.72233  | 82.4779 | 133.082 | 84.8559 | 142.466 | 55.5849 | 63.3113 |
| ENSMUSG00000036188 | 3_Ankmy2         | 843.918 | -0.25893 | 0.03798  | 0.07719  | 823.043 | 744.34  | 736.215 | 899.882 | 887.565 | 972.462 |
| ENSMUSG00000036192 | 15_Rorb          | 57.6086 | -2.39934 | 5.54E-05 | 0.0003   | 28.6502 | 21.1095 | 4.78062 | 145.171 | 106.687 | 39.253  |
| ENSMUSG00000036196 | 15_Slc26a8       | 24.1674 | -0.33144 | 0.53427  | 0.64225  | 13.0228 | 32.1232 | 19.1225 | 34.264  | 22.4133 | 24.0583 |
| ENSMUSG00000036197 | 15_Gxylt1        | 847.714 | -0.18696 | 0.13231  | 0.21586  | 856.034 | 736.08  | 786.411 | 907.096 | 911.772 | 888.891 |
| ENSMUSG00000036198 | 12_Arhgap36      | 2.38475 | 0.33732  | 0.84473  | NA       | 4.34094 | 3.67122 | 0       | 3.60674 | 2.68959 | 0       |
| ENSMUSG00000036199 | 8_Ndufa13        | 1064.89 | 0.59048  | 0.03947  | 0.07962  | 1237.17 | 1350.09 | 1252.52 | 1308.35 | 475.161 | 766.067 |
| ENSMUSG00000036202 | 15_Rif1          | 1404.44 | -0.36698 | 0.01844  | 0.04227  | 1270.16 | 1169.28 | 1240.57 | 1281.3  | 1821.75 | 1643.56 |
| ENSMUSG00000036206 | 12_Sb3bp4        | 928.019 | 0.88004  | 1.96E-08 | 3.06E-07 | 1087.84 | 1181.22 | 1338.57 | 711.43  | 551.366 | 697.691 |
| ENSMUSG00000036208 | 13_BC027231      | 314.547 | -0.34451 | 0.10507  | 0.17934  | 322.966 | 257.903 | 249.787 | 274.112 | 411.508 | 371.004 |
| ENSMUSG00000036211 | 3_Hist1h1t       | 0.49686 | 2.41829  | 0.46418  | NA       | 0.86819 | 0.91781 | 1.19515 | 0       | 0       | 0       |
| ENSMUSG00000036214 | 13_Znrd1as       | 173.357 | -0.48465 | 0.05445  | 0.10403  | 162.351 | 129.411 | 141.028 | 145.171 | 224.133 | 238.051 |

|                    |                  |         |          |          |          |         |         |         |         |         |         |
|--------------------|------------------|---------|----------|----------|----------|---------|---------|---------|---------|---------|---------|
| ENSMUSG00000036216 | 5_Leap2          | 0.1447  | 0.92709  | 0.82027  | NA       | 0.86819 | 0       | 0       | 0       | 0       | 0       |
| ENSMUSG00000036218 | 15_Pdzm4         | 37.2806 | -0.51354 | 0.24841  | 0.35731  | 35.5957 | 35.7944 | 20.3176 | 56.8062 | 29.5855 | 45.5842 |
| ENSMUSG00000036223 | 15_Ska1          | 47.6246 | 0.4994   | 0.18441  | 0.2824   | 54.6959 | 43.1369 | 69.3189 | 31.559  | 37.6543 | 49.3828 |
| ENSMUSG00000036225 | 14_Kctd1         | 497.486 | 0.04379  | 0.76449  | 0.83425  | 453.194 | 527.738 | 535.429 | 516.666 | 485.92  | 465.972 |
| ENSMUSG00000036231 | 5_Agr3           | 2.1135  | -1.79052 | 0.33799  | NA       | 0       | 2.75342 | 0       | 1.80337 | 1.79306 | 6.33113 |
| ENSMUSG00000036241 | 3_Ube2r2         | 3588.81 | -0.06711 | 0.51375  | 0.62399  | 3431.95 | 3528.04 | 3556.78 | 3468.78 | 3925.91 | 3621.41 |
| ENSMUSG00000036242 | 14_3632451O06Rik | 241.79  | -1.20059 | 5.45E-07 | 5.47E-06 | 148.46  | 180.808 | 109.954 | 397.643 | 335.302 | 278.57  |
| ENSMUSG00000036246 | 14_Gmip          | 320.753 | 0.79941  | 2.84E-06 | 2.27E-05 | 393.289 | 378.136 | 450.573 | 240.75  | 209.788 | 251.979 |
| ENSMUSG00000036249 | 16_Rbm43         | 696.187 | 0.24097  | 0.22012  | 0.32488  | 761.401 | 625.026 | 877.243 | 525.683 | 779.982 | 607.789 |
| ENSMUSG00000036251 | 16_Trpm8         | 0.15297 | 0.92709  | 0.82027  | NA       | 0       | 0.91781 | 0       | 0       | 0       | 0       |
| ENSMUSG00000036256 | 13_Igfbp7        | 3416.15 | -0.95057 | 3.20E-06 | 2.52E-05 | 2074.97 | 3069.14 | 1844.12 | 5321.75 | 3848.81 | 4338.09 |
| ENSMUSG00000036257 | 14_Pnpla8        | 1718.4  | -0.52366 | 3.90E-05 | 0.00022  | 1495.89 | 1314.3  | 1419.84 | 1858.37 | 2246.71 | 1975.31 |
| ENSMUSG00000036264 | 9_Fstl4          | 134.196 | -0.79881 | 0.04515  | 0.08901  | 66.8505 | 171.63  | 54.9771 | 202.879 | 156.893 | 151.947 |
| ENSMUSG00000036270 | 16_Edc4          | 1046.72 | 0.88844  | 6.14E-11 | 2.13E-09 | 1283.18 | 1413.42 | 1381.6  | 825.944 | 660.743 | 715.418 |
| ENSMUSG00000036273 | 15_Lrrk2         | 212.489 | -1.07169 | 2.73E-07 | 2.99E-06 | 144.119 | 145.013 | 121.906 | 325.508 | 300.338 | 238.051 |
| ENSMUSG00000036275 | 13_9530068E07Rik | 4473    | 0.03013  | 0.76477  | 0.83434  | 4307.08 | 4475.22 | 4777.03 | 4297.43 | 4375.97 | 4605.27 |
| ENSMUSG00000036278 | 6_Macrod1        | 174.695 | 0.20634  | 0.42147  | 0.537    | 149.328 | 207.424 | 205.567 | 208.289 | 134.48  | 143.084 |
| ENSMUSG00000036281 | 13_Snapc4        | 536.126 | 0.55938  | 2.02E-05 | 0.00012  | 629.437 | 647.053 | 639.407 | 445.433 | 409.714 | 445.712 |
| ENSMUSG00000036282 | 14_Naa30         | 659.436 | -0.33157 | 0.01603  | 0.03768  | 625.964 | 555.272 | 570.089 | 670.854 | 783.568 | 750.873 |
| ENSMUSG00000036285 | 10_Noar1         | 194.792 | 0.03337  | 0.87682  | 0.91669  | 177.979 | 189.986 | 224.689 | 191.157 | 224.133 | 160.811 |
| ENSMUSG00000036291 | 5_Ap5m1          | 397.099 | -0.3759  | 0.0276   | 0.0593   | 400.235 | 309.3   | 327.472 | 449.039 | 485.023 | 411.524 |
| ENSMUSG00000036292 | 13_Gramd1c       | 257.846 | -0.16197 | 0.44043  | 0.55571  | 268.27  | 194.575 | 267.715 | 236.242 | 309.303 | 270.973 |
| ENSMUSG00000036295 | 4_Lrrn3          | 33.5613 | -1.77649 | 0.00024  | 0.00106  | 17.3638 | 18.3561 | 9.56123 | 59.5112 | 63.6537 | 32.9219 |
| ENSMUSG00000036298 | 10_Slc2a13       | 91.4847 | -1.57798 | 4.72E-07 | 4.82E-06 | 45.1458 | 58.7396 | 33.4643 | 157.795 | 146.134 | 107.629 |
| ENSMUSG00000036299 | 4_BC031181       | 979.31  | -0.28816 | 0.00936  | 0.02388  | 882.079 | 884.765 | 878.438 | 1101.86 | 1043.56 | 1085.16 |
| ENSMUSG00000036304 | 13_Zdhhc23       | 25.5169 | 0.57705  | 0.24443  | 0.35258  | 22.5729 | 33.041  | 35.8546 | 13.5253 | 21.5167 | 26.5908 |
| ENSMUSG00000036306 | 11_Lzts1         | 51.948  | 0.43234  | 0.24072  | 0.34837  | 59.905  | 54.1505 | 64.5383 | 48.691  | 28.689  | 55.714  |
| ENSMUSG00000036309 | 14_Skpl1a        | 5065.46 | -0.50622 | 0.00013  | 0.00065  | 4250.65 | 4020.91 | 4285.82 | 5062.06 | 6719.5  | 6053.83 |
| ENSMUSG00000036315 | 13_Znrd1         | 594.725 | -0.06006 | 0.68762  | 0.77509  | 599.918 | 520.396 | 627.456 | 663.641 | 556.745 | 600.192 |
| ENSMUSG00000036323 | 14_Srp72         | 3916.76 | 0.00088  | 0.99488  | 0.99649  | 4017.98 | 3780.44 | 3953.57 | 3303.78 | 3978.8  | 4465.98 |
| ENSMUSG00000036327 | 18_Qsox2         | 1336.77 | 0.43739  | 0.0011   | 0.00389  | 1439.46 | 1482.26 | 1691.14 | 1091.04 | 1054.32 | 1262.43 |
| ENSMUSG00000036330 | 12_Slc18a1       | 42.7618 | 0.56385  | 0.1265   | 0.20817  | 44.2776 | 52.3149 | 56.1722 | 27.9522 | 34.0682 | 41.7855 |
| ENSMUSG00000036333 | 10_Kidins220     | 4492.72 | -0.18775 | 0.06221  | 0.11641  | 4300.14 | 4147.56 | 4153.16 | 4473.26 | 4850.23 | 5031.99 |
| ENSMUSG00000036334 | 12_Igslf10       | 686.606 | 0.05748  | 0.67858  | 0.76749  | 744.037 | 689.272 | 666.896 | 608.638 | 733.362 | 677.431 |
| ENSMUSG00000036339 | 17_Tmem260       | 868.993 | -0.18914 | 0.1244   | 0.20552  | 835.197 | 801.244 | 799.558 | 859.306 | 987.977 | 930.677 |
| ENSMUSG00000036352 | 16_Ubac1         | 692.83  | 0.14359  | 0.2594   | 0.36954  | 691.078 | 714.971 | 776.85  | 685.281 | 639.226 | 649.574 |
| ENSMUSG00000036353 | 13_P2ry12        | 22.9239 | -0.46574 | 0.39916  | 0.51665  | 30.3866 | 17.4383 | 9.56123 | 25.2472 | 29.5855 | 25.3245 |
| ENSMUSG00000036356 | 14_Csgalnact1    | 411.016 | 0.01693  | 0.90723  | 0.93746  | 444.512 | 410.259 | 384.84  | 418.382 | 401.646 | 406.459 |
| ENSMUSG00000036357 | 5_Gpr101         | 0       | NA       | NA       | NA       | 0       | 0       | 0       | 0       | 0       | 0       |
| ENSMUSG00000036362 | 2_P2ry13         | 34.9533 | -0.05206 | 0.91023  | 0.93963  | 51.2231 | 27.5342 | 23.9031 | 44.1826 | 28.689  | 34.1881 |
| ENSMUSG00000036368 | 7_Rmdn2          | 78.8115 | -1.1693  | 0.00062  | 0.0024   | 57.3004 | 58.7396 | 28.6837 | 96.4803 | 129.1   | 102.564 |
| ENSMUSG00000036371 | 6_Serbp1         | 6995.94 | -0.01684 | 0.89033  | 0.9262   | 7203.36 | 6253.93 | 7407.57 | 6386.64 | 7181.21 | 7542.91 |
| ENSMUSG00000036372 | 14_Tmem258       | 979.668 | -0.28171 | 0.04009  | 0.08069  | 968.898 | 848.97  | 834.218 | 1173.09 | 972.736 | 1080.09 |
| ENSMUSG00000036376 | 2_Abt1           | 235.694 | 0.3696   | 0.05252  | 0.10094  | 273.479 | 227.616 | 296.398 | 217.306 | 189.168 | 210.194 |
| ENSMUSG00000036377 | 18_C530008M17Rik | 24.7463 | -0.46582 | 0.32588  | 0.44191  | 19.1001 | 27.5342 | 15.537  | 30.6573 | 27.7924 | 27.857  |
| ENSMUSG00000036381 | 13_P2ry14        | 162.733 | 0.06728  | 0.79754  | 0.86017  | 207.497 | 122.986 | 169.712 | 172.222 | 174.823 | 129.155 |
| ENSMUSG00000036390 | 8_Gadd45a        | 542.361 | 0.07339  | 0.60845  | 0.70819  | 579.082 | 560.779 | 527.063 | 541.011 | 475.161 | 571.068 |
| ENSMUSG00000036391 | 16_Sec24a        | 673.727 | -0.05928 | 0.70484  | 0.78877  | 610.336 | 683.765 | 684.823 | 578.882 | 717.224 | 767.334 |
| ENSMUSG00000036395 | 14_Glb1l2        | 434.136 | -0.2359  | 0.10036  | 0.17261  | 422.808 | 386.396 | 387.23  | 471.582 | 494.885 | 441.913 |
| ENSMUSG00000036398 | 13_Ppp1r11       | 1414.13 | 0.12748  | 0.37332  | 0.49088  | 1433.38 | 1313.38 | 1683.97 | 1452.62 | 1223.76 | 1377.65 |
| ENSMUSG00000036402 | 13_Gng12         | 4129.6  | -0.15825 | 0.16525  | 0.25861  | 3995.4  | 3699.67 | 4014.52 | 3923.23 | 4602.79 | 4541.96 |
| ENSMUSG00000036403 | 15_Cep135        | 286.938 | -0.2771  | 0.10486  | 0.17913  | 276.084 | 258.821 | 243.811 | 343.542 | 318.268 | 281.102 |
| ENSMUSG00000036411 | 9_9530077C05Rik  | 37.4432 | -1.05165 | 0.01386  | 0.03324  | 17.3638 | 32.1232 | 23.9031 | 55.9045 | 57.378  | 37.9868 |
| ENSMUSG00000036412 | 5_Arsi           | 91.3719 | -0.03608 | 0.90488  | 0.93598  | 69.4551 | 110.137 | 90.8317 | 100.989 | 71.7224 | 105.097 |
| ENSMUSG00000036422 | 10_Pcdh8         | 17.8259 | 0.02916  | 0.63711  | 0.73328  | 13.0228 | 16.5205 | 29.8789 | 20.7388 | 17.9306 | 8.86359 |
| ENSMUSG00000036427 | 5_Gpi1           | 6912.82 | 0.52743  | 9.56E-05 | 0.00048  | 7765.95 | 8379.56 | 8342.18 | 6457.87 | 4792.85 | 5738.54 |
| ENSMUSG00000036430 | 7_Tbcc           | 231.834 | 0.75117  | 0.0002   | 0.00093  | 265.666 | 270.753 | 335.838 | 174.927 | 148.824 | 194.999 |
| ENSMUSG00000036432 | 8_Siah2          | 128.553 | 0.06196  | 0.81281  | 0.87068  | 125.019 | 113.808 | 155.37  | 146.073 | 96.8253 | 134.22  |
| ENSMUSG00000036435 | 13_Exoc1         | 1207.4  | 0.03893  | 0.79389  | 0.85725  | 1287.52 | 1106.87 | 1276.42 | 1007.18 | 1317.9  | 1248.5  |
| ENSMUSG00000036437 | 5_Npy1r          | 61.5189 | -0.79349 | 0.01178  | 0.029    | 38.2003 | 55.0683 | 41.8304 | 81.1517 | 80.6878 | 72.1749 |
| ENSMUSG00000036438 | 12_Calm2         | 6336.18 | -0.62612 | 1.09E-09 | 2.54E-08 | 5257.75 | 4830.41 | 4859.5  | 7759    | 8077.74 | 7232.69 |
| ENSMUSG00000036442 | 7_Thap11         | 471.782 | 0.06003  | 0.69833  | 0.78407  | 430.621 | 506.629 | 509.136 | 468.876 | 497.574 | 417.855 |
| ENSMUSG00000036446 | 4_Lum            | 13274.1 | -1.02539 | 6.94E-12 | 3.00E-10 | 9429.39 | 9776.46 | 7029.9  | 17663.1 | 19173.2 | 16572.4 |
| ENSMUSG00000036449 | 6_Lcn8           | 0.92097 | -2.00926 | 0.41498  | NA       | 0       | 0       | 1.19515 | 0.90169 | 0.89653 | 2.53245 |
| ENSMUSG00000036450 | 4_Hif1an         | 2266.23 | -0.05484 | 0.57555  | 0.67979  | 2214.75 | 2169.69 | 2285.13 | 2316.43 | 2257.46 | 2353.92 |
| ENSMUSG00000036452 | 17_Arhgap26      | 639.665 | 0.17686  | 0.26123  | 0.37168  | 645.932 | 613.094 | 778.045 | 534.699 | 635.64  | 630.581 |
| ENSMUSG00000036459 | 15_Wtip          | 364.17  | 0.15876  | 0.48322  | 0.59535  | 428.017 | 373.547 | 351.375 | 460.761 | 278.821 | 292.498 |
| ENSMUSG00000036461 | 15_Elfl          | 3470.44 | 0.17203  | 0.26676  | 0.37806  | 3592.56 | 3451.87 | 3985.84 | 2627.51 | 3397.85 | 3767.03 |
| ENSMUSG00000036466 | 17_Megf11        | 190.143 | -0.53013 | 0.05707  | 0.1082   | 138.042 | 209.26  | 119.515 | 275.014 | 226.822 | 172.207 |
| ENSMUSG00000036469 | 16_March1        | 70.9771 | 0.50871  | 0.24468  | 0.35284  | 120.678 | 52.3149 | 77.685  | 79.3483 | 65.4467 | 30.3894 |
| ENSMUSG00000036473 | 15_Tbc1d24       | 350.751 | -0.78161 | 0.00386  | 0.01137  | 262.193 | 323.985 | 187.639 | 589.702 | 423.162 | 317.823 |
| ENSMUSG00000036478 | 7_Btg1           | 1609.62 | 0.02184  | 0.84415  | 0.89372  | 1712.07 | 1519.89 | 1632.58 | 1559.92 | 1570.72 | 1662.56 |
| ENSMUSG00000036480 | 9_Prs56          | 0.60918 | 1.35827  | 0.71243  | NA       | 0       | 2.75342 | 0       | 0.90169 | 0       | 0       |
| ENSMUSG00000036492 | 12_Rnf39         | 1378.53 | 0.75513  | 3.15E-11 | 1.19E-09 | 1737.25 | 1610.75 | 1846.51 | 1018.9  | 1028.32 | 1029.44 |
| ENSMUSG00000036499 | 8_Eea1           | 1945.71 | -0.25564 | 0.02776  | 0.05956  | 1819.72 | 1697.02 | 1803.49 | 1931.41 | 2147.19 | 2275.41 |
| ENSMUSG00000036501 | 6_Fam13b         | 1420.4  | -0.38263 | 0.00741  | 0.0196   | 1210.25 | 1263.82 | 1225.03 | 1352.53 | 1820.85 | 1649.89 |
| ENSMUSG00000036502 | 14_Tmem255a      | 45.8847 | -1.5889  | 0.0007   | 0.00267  | 21.7047 | 35.7944 | 10.7564 | 71.2332 | 85.1704 | 50.6491 |
| ENSMUSG00000036503 | 13_Rnf13         | 3344.64 | -0.68076 | 8.20E-11 | 2.72E-09 | 2673.15 | 2595.55 | 2440.5  | 4088.24 | 4352.66 | 3917.71 |
| ENSMUSG00000036504 | 6_Phtp1          | 688.799 | -0.30658 | 0.0758   | 0.1371   | 657.219 | 627.779 | 561.722 | 887.259 | 615.02  | 783.794 |

|                    |                  |         |          |          |          |         |         |         |         |         |         |
|--------------------|------------------|---------|----------|----------|----------|---------|---------|---------|---------|---------|---------|
| ENSMUSG00000036510 | 17_Cdh8          | 8.03488 | -1.97425 | 0.03881  | 0.07853  | 1.73638 | 4.58903 | 3.58546 | 10.8202 | 22.4133 | 5.06491 |
| ENSMUSG00000036513 | 15_Commd2        | 647.128 | -0.00438 | 0.97336  | 0.98291  | 635.514 | 614.93  | 689.604 | 654.624 | 677.777 | 610.321 |
| ENSMUSG00000036521 | 5_Scgb2b2        | 39.4208 | -1.08374 | 0.0075   | 0.01982  | 30.3866 | 29.3698 | 15.537  | 54.1011 | 56.4814 | 50.6491 |
| ENSMUSG00000036523 | 16_Greb1         | 138.175 | -0.83593 | 0.01734  | 0.0402   | 91.1598 | 148.685 | 57.3674 | 226.323 | 164.962 | 140.551 |
| ENSMUSG00000036526 | 8_Card11         | 12.8814 | 1.806    | 0.02508  | 0.05478  | 28.6502 | 13.7671 | 17.9273 | 11.7219 | 2.68959 | 2.53245 |
| ENSMUSG00000036528 | 14_Ppfibp2       | 3039.33 | 0.22734  | 0.09024  | 0.15804  | 3361.63 | 3103.1  | 3367.94 | 2561.69 | 2581.11 | 3260.53 |
| ENSMUSG00000036529 | 17_Sbf1          | 2915.17 | 1.15367  | 1.39E-16 | 1.67E-14 | 3759.26 | 3990.62 | 4316.9  | 2006.25 | 1525    | 1893.01 |
| ENSMUSG00000036533 | 8_Cdc42ep3       | 607.642 | 0.17647  | 0.2241   | 0.32927  | 649.405 | 570.875 | 714.702 | 542.815 | 588.124 | 579.932 |
| ENSMUSG00000036534 | 5_Slc38a7        | 363.484 | 0.46872  | 0.00359  | 0.0107   | 420.203 | 414.848 | 430.255 | 321.902 | 264.477 | 329.219 |
| ENSMUSG00000036537 | 6_Rnf113a1       | 92.9801 | 0.26177  | 0.3082   | 0.42313  | 107.655 | 101.876 | 94.4172 | 95.5787 | 73.5155 | 84.8372 |
| ENSMUSG00000036545 | 8_Adamts2        | 844.802 | 0.38695  | 0.00872  | 0.02249  | 961.953 | 983.888 | 925.049 | 789.876 | 614.123 | 793.924 |
| ENSMUSG00000036550 | 15_Cnot1         | 5593.33 | 0.0702   | 0.6051   | 0.70535  | 5972.27 | 5574.75 | 5639.93 | 4540.89 | 5983.45 | 5848.7  |
| ENSMUSG00000036551 | 6_Akap14         | 0.19919 | 0.92709  | 0.82027  | NA       | 0       | 0       | 1.19515 | 0       | 0       | 0       |
| ENSMUSG00000036552 | 16_Ermard        | 657.057 | -0.14832 | 0.38771  | 0.50513  | 652.878 | 633.286 | 584.43  | 632.983 | 843.635 | 595.127 |
| ENSMUSG00000036553 | 16_Sh3tc1        | 201.323 | 1.1573   | 1.20E-07 | 1.47E-06 | 244.829 | 279.931 | 309.545 | 146.073 | 102.204 | 125.356 |
| ENSMUSG00000036555 | 14_Iqce          | 315.438 | 0.03026  | 0.88342  | 0.92115  | 306.471 | 339.588 | 310.74  | 396.742 | 261.787 | 277.304 |
| ENSMUSG00000036557 | 8_1700011E24Rik  | 2.51266 | -2.03139 | 0.21217  | 0.3155   | 0       | 1.83561 | 1.19515 | 3.60674 | 7.17224 | 1.26623 |
| ENSMUSG00000036560 | 14_Lgl4          | 342.657 | -0.0524  | 0.85818  | 0.90402  | 324.702 | 390.067 | 295.203 | 532.896 | 278.821 | 234.252 |
| ENSMUSG00000036561 | 7_Ppp6r2         | 738.805 | 0.60058  | 0.00023  | 0.00104  | 882.079 | 903.121 | 884.414 | 624.868 | 469.782 | 668.568 |
| ENSMUSG00000036564 | 16_Ndr4          | 399.054 | 0.01877  | 0.93683  | 0.95863  | 403.708 | 455.232 | 346.595 | 538.306 | 347.854 | 302.628 |
| ENSMUSG00000036565 | 7_Ttyh3          | 602.2   | 0.39463  | 0.07941  | 0.14253  | 645.064 | 781.97  | 625.066 | 687.084 | 373.853 | 500.16  |
| ENSMUSG00000036568 | 6_Gltscr11       | 732.807 | 0.15707  | 0.24967  | 0.35873  | 727.542 | 793.902 | 795.973 | 720.447 | 619.503 | 739.477 |
| ENSMUSG00000036570 | 14_Fxyd1         | 440.987 | -0.43816 | 0.11386  | 0.19131  | 365.507 | 445.136 | 313.13  | 754.711 | 377.439 | 389.998 |
| ENSMUSG00000036572 | 16_Upf3b         | 862.712 | -0.41867 | 0.00386  | 0.01138  | 768.347 | 704.875 | 742.191 | 867.421 | 1126.04 | 967.397 |
| ENSMUSG00000036578 | 7_Fxyd7          | 8.60874 | 0.18597  | 0.80822  | 0.86746  | 8.68188 | 8.26025 | 10.7564 | 10.8202 | 8.06878 | 5.06491 |
| ENSMUSG00000036580 | 15_Spg20         | 759.729 | -0.44915 | 0.00133  | 0.00367  | 636.382 | 702.121 | 588.016 | 943.163 | 830.187 | 858.502 |
| ENSMUSG00000036585 | 15_Fgf1          | 712.044 | -1.57502 | 3.90E-09 | 7.56E-08 | 411.521 | 443.3   | 217.518 | 1357.94 | 1005.01 | 836.976 |
| ENSMUSG00000036586 | 6_Grfin          | 169.953 | -1.09684 | 0.24176  | 0.34946  | 78.137  | 196.41  | 50.1965 | 437.317 | 53.7918 | 203.863 |
| ENSMUSG00000036587 | 13_Fut7          | 2.12386 | 4.51682  | 0.02256  | NA       | 5.20913 | 2.75342 | 4.78062 | 0       | 0       | 0       |
| ENSMUSG00000036591 | 15_Arhgap21      | 1800.19 | -0.02748 | 0.81402  | 0.87154  | 1712.94 | 1807.16 | 1828.59 | 1644.67 | 1897.06 | 1910.74 |
| ENSMUSG00000036594 | 14_H2-Aa         | 1044.02 | 1.20586  | 2.62E-09 | 5.36E-08 | 1776.31 | 1289.52 | 1305.11 | 794.385 | 587.228 | 511.556 |
| ENSMUSG00000036596 | 6_Cpz            | 335.288 | 0.3158   | 0.13286  | 0.21656  | 303.866 | 472.67  | 338.229 | 300.261 | 272.545 | 324.154 |
| ENSMUSG00000036598 | 3_Ccdc113        | 44.8405 | -1.41593 | 0.00026  | 0.00115  | 28.6502 | 22.9451 | 21.5128 | 81.1517 | 50.2057 | 64.5776 |
| ENSMUSG00000036599 | 10_Chst12        | 209.351 | 0.67767  | 0.00673  | 0.01808  | 252.643 | 273.506 | 246.202 | 199.272 | 108.48  | 176.006 |
| ENSMUSG00000036602 | 13_Alx1          | 24.2934 | -1.07915 | 0.03851  | 0.07806  | 19.9683 | 9.17806 | 17.9273 | 37.8708 | 36.7578 | 24.0583 |
| ENSMUSG00000036606 | 16_Plxbn2        | 20150   | 1.25583  | 8.46E-13 | 4.65E-11 | 24861.4 | 27689.3 | 32663.6 | 12757   | 9132.96 | 13795.5 |
| ENSMUSG00000036611 | 5_Eepd1          | 82.3609 | -0.62935 | 0.04937  | 0.09607  | 47.7504 | 76.1779 | 70.5141 | 125.334 | 80.6878 | 93.7008 |
| ENSMUSG00000036613 | 7_Tssc1          | 450.699 | 0.69975  | 2.94E-05 | 0.00017  | 542.618 | 534.163 | 596.382 | 372.396 | 285.097 | 373.537 |
| ENSMUSG00000036615 | 5_Rfxap          | 242.915 | 0.06136  | 0.74455  | 0.81939  | 215.311 | 267.999 | 261.739 | 263.292 | 225.029 | 224.122 |
| ENSMUSG00000036617 | 16_Etl4          | 3288.9  | 0.00354  | 0.97186  | 0.98205  | 3174.97 | 3215.99 | 3488.65 | 3197.38 | 3313.58 | 3342.84 |
| ENSMUSG00000036620 | 14_Mgat4b        | 803.885 | 0.15576  | 0.31631  | 0.4315   | 805.679 | 910.463 | 825.851 | 889.062 | 661.64  | 730.613 |
| ENSMUSG00000036622 | 15_Atp13a2       | 940.113 | 1.45647  | 8.02E-10 | 1.95E-08 | 1179.87 | 1433.61 | 1520.24 | 632.082 | 316.475 | 558.406 |
| ENSMUSG00000036632 | 9_Alg5           | 558.439 | -0.37877 | 0.01472  | 0.03502  | 536.54  | 450.643 | 469.696 | 596.916 | 711.845 | 584.997 |
| ENSMUSG00000036634 | 15_Mag           | 13.7693 | -0.57594 | 0.35305  | 0.46975  | 13.0228 | 8.26025 | 11.9515 | 20.7388 | 13.448  | 15.1947 |
| ENSMUSG00000036636 | 9_Clcu7          | 1209.98 | 0.61703  | 1.39E-06 | 1.22E-05 | 1461.16 | 1483.17 | 1449.72 | 1045.05 | 844.532 | 976.261 |
| ENSMUSG00000036639 | 12_Nudt1         | 293.874 | 0.14736  | 0.40484  | 0.52209  | 311.68  | 282.684 | 332.253 | 302.065 | 242.063 | 292.498 |
| ENSMUSG00000036641 | 8_Ccdc148        | 79.8719 | -1.25087 | 0.00045  | 0.00182  | 49.4867 | 64.2464 | 27.4885 | 116.317 | 131.79  | 89.9021 |
| ENSMUSG00000036644 | 15_Tbcl1d9b      | 1454.12 | 0.37018  | 0.01217  | 0.02978  | 1590.52 | 1732.82 | 1595.53 | 1472.45 | 1072.25 | 1261.16 |
| ENSMUSG00000036646 | 13_Man1b1        | 2776.34 | 0.2052   | 0.05468  | 0.1044   | 2898.01 | 2868.14 | 3154.01 | 2581.53 | 2446.63 | 2709.73 |
| ENSMUSG00000036655 | 7_Colec11        | 5.26415 | 0.30033  | 0.76346  | 0.83355  | 5.20913 | 2.75342 | 9.56123 | 5.41011 | 3.58612 | 5.06491 |
| ENSMUSG00000036661 | 13_Denn3         | 189.285 | 0.01611  | 0.94796  | 0.96589  | 177.979 | 225.78  | 167.322 | 240.75  | 154.203 | 169.674 |
| ENSMUSG00000036667 | 14_Tcaf1         | 850.07  | -0.89079 | 1.44E-06 | 1.26E-05 | 528.727 | 753.518 | 504.355 | 1195.63 | 1130.53 | 987.657 |
| ENSMUSG00000036672 | 4_Cenpt          | 288.902 | 0.75576  | 1.53E-05 | 9.84E-05 | 340.33  | 361.615 | 386.035 | 219.11  | 188.271 | 238.051 |
| ENSMUSG00000036676 | 14_Tmtc3         | 1457.6  | -0.18356 | 0.2693   | 0.38084  | 1417.75 | 1271.16 | 1405.5  | 1206.46 | 1758.1  | 1686.61 |
| ENSMUSG00000036678 | 7_Aaas           | 369.085 | 0.61409  | 4.65E-05 | 0.00026  | 437.567 | 424.026 | 478.062 | 300.261 | 277.028 | 297.563 |
| ENSMUSG00000036686 | 16_Cc2d1a        | 1074.14 | 1.44069  | 5.42E-13 | 3.16E-11 | 1353.51 | 1553.84 | 1802.29 | 695.2   | 425.852 | 614.12  |
| ENSMUSG00000036687 | 13_Tmem184a      | 1746.39 | 1.04125  | 3.30E-12 | 1.53E-10 | 2193.91 | 2306.45 | 2550.46 | 1225.39 | 942.254 | 1259.9  |
| ENSMUSG00000036693 | 12_Nop14         | 638.361 | 0.12311  | 0.44448  | 0.55948  | 603.391 | 632.368 | 761.313 | 532.896 | 639.226 | 660.97  |
| ENSMUSG00000036698 | 10_Ago2          | 2564.94 | 0.23711  | 0.02963  | 0.06283  | 2602.83 | 2823.17 | 2900.64 | 2231.67 | 2482.49 | 2348.85 |
| ENSMUSG00000036699 | 12_Zcchc12       | 14.7838 | -1.85562 | 0.00552  | 0.01531  | 9.55007 | 3.67122 | 5.97577 | 26.1489 | 26.8959 | 16.4609 |
| ENSMUSG00000036707 | 16_Cab39         | 7304.26 | 0.10374  | 0.3583   | 0.4751   | 7511.57 | 7124.01 | 8064.9  | 6403.77 | 7393.69 | 7327.66 |
| ENSMUSG00000036712 | 14_Cyld          | 2201.11 | -0.21343 | 0.1096   | 0.18562  | 2118.38 | 1868.65 | 2128.57 | 2054.04 | 2564.08 | 2472.94 |
| ENSMUSG00000036718 | 17_Micall2       | 280.401 | 0.68105  | 0.00093  | 0.00336  | 316.021 | 342.341 | 376.474 | 203.781 | 176.617 | 267.174 |
| ENSMUSG00000036721 | 13_Zscan12       | 169.697 | -0.42136 | 0.05101  | 0.09863  | 129.36  | 156.945 | 149.394 | 171.32  | 225.029 | 186.135 |
| ENSMUSG00000036731 | 7_Cysrt1         | 1110.48 | 0.85869  | 7.26E-06 | 5.13E-05 | 1417.75 | 1425.35 | 1452.11 | 1024.31 | 605.158 | 738.21  |
| ENSMUSG00000036733 | 15_Rbm42         | 678.037 | 1.35369  | 8.96E-12 | 3.81E-10 | 882.948 | 933.408 | 1107.91 | 466.171 | 287.786 | 389.998 |
| ENSMUSG00000036737 | 12_Oxsr1         | 1849.92 | -0.10447 | 0.43953  | 0.55481  | 1844.9  | 1691.52 | 1811.85 | 1634.76 | 2088.02 | 2028.5  |
| ENSMUSG00000036743 | 3_Psma8          | 3.69323 | -0.47651 | 0.7165   | 0.79789  | 0       | 4.58903 | 4.78062 | 4.50843 | 4.48265 | 3.79868 |
| ENSMUSG00000036744 | 11_Olf701        | 0.66102 | -2.86976 | 0.35535  | NA       | 0       | 0       | 0       | 1.80337 | 0.89653 | 1.26623 |
| ENSMUSG00000036745 | 15_Ttll7         | 215.119 | -0.67731 | 0.00038  | 0.00159  | 168.429 | 179.89  | 148.199 | 273.211 | 284.2   | 236.784 |
| ENSMUSG00000036748 | 15_Cuedc2        | 756.243 | 0.2624   | 0.14854  | 0.23707  | 807.415 | 853.559 | 813.9   | 862.011 | 552.263 | 648.308 |
| ENSMUSG00000036751 | 6_Cox6b1         | 3440.04 | -0.07145 | 0.49312  | 0.60475  | 3404.17 | 3262.8  | 3397.82 | 3754.62 | 3295.65 | 3525.18 |
| ENSMUSG00000036752 | 4_Tubb4b         | 13318.9 | 0.83235  | 8.81E-09 | 1.53E-07 | 16085.8 | 15968.9 | 19117.7 | 9865.34 | 8066.98 | 10808.5 |
| ENSMUSG00000036764 | 11_Dnajc12       | 76.2696 | -1.08034 | 0.00361  | 0.01073  | 39.9367 | 69.7532 | 37.0498 | 139.761 | 82.4808 | 88.6359 |
| ENSMUSG00000036766 | 12_Dner          | 63.4985 | -0.80517 | 0.02845  | 0.06082  | 41.673  | 57.8218 | 39.4401 | 105.497 | 83.3773 | 53.1815 |
| ENSMUSG00000036768 | 5_Klf15          | 413.648 | 0.12425  | 0.53559  | 0.64338  | 447.985 | 396.492 | 449.378 | 294.851 | 456.334 | 436.848 |
| ENSMUSG00000036769 | 14_Wdr44         | 730.119 | -0.02087 | 0.89968  | 0.93225  | 727.542 | 692.025 | 755.337 | 605.933 | 870.531 | 729.347 |
| ENSMUSG00000036770 | 11_4933433C11Rik | 4.36235 | 5.54711  | 0.00158  | 0.00531  | 1.73638 | 10.0959 | 14.3418 | 0       | 0       | 0       |
| ENSMUSG00000036775 | 12_Decr2         | 453.911 | -0.11388 | 0.41243  | 0.52865  | 440.172 | 433.204 | 433.841 | 441.826 | 474.265 | 500.16  |

|                    |                 |         |          |          |          |         |         |         |         |         |         |
|--------------------|-----------------|---------|----------|----------|----------|---------|---------|---------|---------|---------|---------|
| ENSMUSG00000036777 | 7_Anln          | 1403.31 | 0.30133  | 0.12382  | 0.2048   | 1640.01 | 1270.24 | 1737.75 | 946.77  | 1482.86 | 1342.2  |
| ENSMUSG00000036779 | 12_Papd5        | 1153.35 | 0.01627  | 0.88762  | 0.92427  | 1182.47 | 1134.41 | 1162.88 | 1082.02 | 1223.76 | 1134.54 |
| ENSMUSG00000036781 | 13_Rps27l       | 1636.92 | -0.32647 | 0.00843  | 0.0219   | 1556.66 | 1381.3  | 1419.84 | 1733.94 | 2006.44 | 1723.33 |
| ENSMUSG00000036782 | 13_Klhl13       | 221.639 | -1.40461 | 7.32E-09 | 1.31E-07 | 116.337 | 157.863 | 89.6366 | 341.739 | 346.957 | 277.304 |
| ENSMUSG00000036790 | 5_Slitrk2       | 60.2559 | -1.47503 | 0.00033  | 0.0014   | 26.0457 | 46.8081 | 22.7079 | 110.006 | 97.7218 | 58.2464 |
| ENSMUSG00000036792 | 12_Mbd5         | 620.193 | -0.33099 | 0.00796  | 0.02086  | 560.85  | 537.834 | 549.771 | 684.379 | 717.224 | 671.1   |
| ENSMUSG00000036800 | 7_Fam135b       | 6.30243 | -2.22181 | 0.04213  | 0.08402  | 0.86819 | 4.58903 | 1.19515 | 17.132  | 8.96531 | 5.06491 |
| ENSMUSG00000036805 | 13_Noxa1        | 0.63801 | 1.43476  | 0.6437   | NA       | 1.73638 | 0       | 1.19515 | 0       | 0.89653 | 0       |
| ENSMUSG00000036810 | 16_Cnep1r1      | 735.039 | -0.37131 | 0.01408  | 0.03367  | 725.806 | 574.546 | 622.675 | 794.385 | 915.358 | 777.463 |
| ENSMUSG00000036813 | 11_Entpd8       | 0.35216 | 1.91112  | 0.63543  | NA       | 0       | 0.91781 | 1.19515 | 0       | 0       | 0       |
| ENSMUSG00000036814 | 12_Slc6a20a     | 481.702 | 0.05792  | 0.72431  | 0.80366  | 491.395 | 483.684 | 499.574 | 555.438 | 410.611 | 449.511 |
| ENSMUSG00000036815 | 16_Dpp10        | 3.36405 | -1.11554 | 0.43322  | 0.54851  | 1.73638 | 4.58903 | 0       | 7.21348 | 5.37918 | 1.26623 |
| ENSMUSG00000036817 | 14_Sun1         | 3805.48 | 0.423    | 0.00088  | 0.0032   | 4159.49 | 4178.77 | 4738.79 | 3172.13 | 2943.31 | 3640.4  |
| ENSMUSG00000036819 | 14_Jmjd4        | 537.551 | 0.21868  | 0.12636  | 0.208    | 562.586 | 540.587 | 632.237 | 464.368 | 525.367 | 500.16  |
| ENSMUSG00000036820 | 11_Amdhd2       | 206.015 | 0.91782  | 0.00016  | 0.00075  | 232.674 | 276.259 | 299.984 | 183.944 | 110.273 | 132.954 |
| ENSMUSG00000036822 | 6_Topors        | 1188.25 | -0.24221 | 0.05881  | 0.11103  | 1172.92 | 993.066 | 1099.54 | 1187.52 | 1330.45 | 1346    |
| ENSMUSG00000036825 | 12_Ssx2ip       | 999.65  | -0.09075 | 0.52116  | 0.63091  | 954.139 | 872.833 | 1078.03 | 928.736 | 1065.08 | 1099.08 |
| ENSMUSG00000036826 | 14_Igflr1       | 11.6797 | 2.56235  | 0.02949  | 0.0626   | 25.1775 | 26.6164 | 8.36608 | 9.91854 | 0       | 0       |
| ENSMUSG00000036832 | 5_Lpar3         | 8.4904  | 1.62463  | 0.10108  | 0.17364  | 9.55007 | 15.6027 | 13.1467 | 6.3118  | 0       | 6.33113 |
| ENSMUSG00000036833 | 16_Pnpla7       | 326.541 | 0.51492  | 0.00377  | 0.01115  | 407.18  | 359.78  | 386.035 | 313.787 | 236.684 | 255.778 |
| ENSMUSG00000036834 | 16_Plch1        | 225.711 | -1.68618 | 1.87E-08 | 2.94E-07 | 119.81  | 135.835 | 64.5383 | 408.464 | 377.439 | 248.18  |
| ENSMUSG00000036835 | 6_Psenen        | 1831.52 | 0.21695  | 0.12102  | 0.20119  | 1967.31 | 1844.79 | 2095.11 | 1907.97 | 1450.59 | 1723.33 |
| ENSMUSG00000036840 | 4_Siah1a        | 794.64  | -0.1107  | 0.34627  | 0.46309  | 762.269 | 749.847 | 780.436 | 845.781 | 792.533 | 836.976 |
| ENSMUSG00000036845 | 12_Lin37        | 226.324 | 0.64451  | 0.00359  | 0.0107   | 270.875 | 260.657 | 296.398 | 208.289 | 131.79  | 189.934 |
| ENSMUSG00000036850 | 4_Mrpl41        | 501.161 | -0.07701 | 0.61546  | 0.71449  | 536.54  | 488.273 | 437.426 | 552.733 | 471.575 | 520.419 |
| ENSMUSG00000036853 | 5_Mcoln3        | 74.6402 | -1.59142 | 2.06E-05 | 0.00013  | 39.0685 | 50.4793 | 21.5128 | 132.548 | 121.928 | 82.3047 |
| ENSMUSG00000036854 | 14_Hspb6        | 334.28  | -0.83909 | 0.00605  | 0.01654  | 199.683 | 306.547 | 212.737 | 610.441 | 254.615 | 421.654 |
| ENSMUSG00000036855 | 3_Gjd4          | 0.44998 | -2.33107 | 0.56049  | NA       | 0       | 0       | 0       | 1.80337 | 0.89653 | 0       |
| ENSMUSG00000036856 | 4_Wnt4          | 3593.39 | 1.02271  | 4.07E-08 | 5.72E-07 | 4186.4  | 4464.21 | 5797.69 | 2613.08 | 1820.85 | 2678.07 |
| ENSMUSG00000036858 | 8_Ptcr4         | 0.88945 | 2.05594  | 0.45545  | NA       | 2.60457 | 1.83561 | 0       | 0       | 0.89653 | 0       |
| ENSMUSG00000036860 | 14_Mrpl55       | 240.208 | 0.55567  | 0.00759  | 0.02001  | 276.952 | 276.259 | 304.764 | 234.438 | 155.1   | 193.733 |
| ENSMUSG00000036862 | 14_Dchs1        | 478.774 | 0.05114  | 0.8204   | 0.87649  | 494.867 | 605.752 | 360.937 | 570.767 | 440.197 | 400.128 |
| ENSMUSG00000036863 | 11_Syde2        | 220.832 | -0.55185 | 0.00335  | 0.01009  | 194.474 | 185.397 | 156.565 | 281.326 | 243.856 | 263.375 |
| ENSMUSG00000036864 | 14_Proser3      | 210.366 | 0.96335  | 5.51E-07 | 5.52E-06 | 302.13  | 266.164 | 265.324 | 152.385 | 125.514 | 150.681 |
| ENSMUSG00000036867 | 7_Smad6         | 178.829 | 0.65464  | 0.01211  | 0.02969  | 197.947 | 202.835 | 255.763 | 177.632 | 99.5149 | 139.285 |
| ENSMUSG00000036872 | 16_Abcc12       | 20.5089 | -0.24915 | 0.63016  | 0.72683  | 19.9683 | 19.2739 | 16.7322 | 25.2472 | 15.241  | 26.5908 |
| ENSMUSG00000036873 | 13_241004B18Rik | 354.451 | -0.33964 | 0.03472  | 0.07171  | 334.253 | 283.602 | 320.301 | 366.986 | 393.577 | 427.985 |
| ENSMUSG00000036875 | 15_Dna2         | 129.196 | 0.98978  | 0.00017  | 0.00079  | 184.924 | 134     | 196.005 | 73.9382 | 82.4808 | 103.831 |
| ENSMUSG00000036879 | 15_Phkb         | 2259.31 | -0.49637 | 3.65E-06 | 2.81E-05 | 1938.66 | 1849.38 | 1834.56 | 2472.42 | 2789.11 | 2671.74 |
| ENSMUSG00000036880 | 9_Acaa2         | 2392.12 | 0.27535  | 0.07716  | 0.13913  | 2687.04 | 2479.91 | 2692.68 | 2609.48 | 1793.06 | 2090.54 |
| ENSMUSG00000036882 | 6_Arhgap33      | 103.123 | 1.23778  | 2.13E-06 | 1.77E-05 | 140.647 | 162.452 | 131.467 | 72.1348 | 53.7918 | 58.2464 |
| ENSMUSG00000036885 | 14_Arhgef26     | 161.465 | -0.29165 | 0.20443  | 0.30643  | 141.515 | 155.109 | 139.833 | 193.862 | 201.719 | 136.753 |
| ENSMUSG00000036887 | 5_C1qa          | 462.107 | 1.32414  | 4.38E-09 | 8.36E-08 | 661.56  | 682.847 | 637.017 | 350.756 | 184.685 | 255.778 |
| ENSMUSG00000036890 | 13_Gldc1        | 364.464 | -0.40998 | 0.00535  | 0.01491  | 298.657 | 319.396 | 321.496 | 403.053 | 433.921 | 410.258 |
| ENSMUSG00000036893 | 16_Ehmt1        | 1400.53 | 0.54699  | 0.00014  | 0.00065  | 1461.16 | 1786.05 | 1740.14 | 1083.83 | 1048.04 | 1283.95 |
| ENSMUSG00000036894 | 3_Rap2b         | 1206.18 | 0.24221  | 0.09322  | 0.16223  | 1208.52 | 1196.82 | 1516.65 | 1067.6  | 1053.42 | 1194.05 |
| ENSMUSG00000036896 | 5_C1qc          | 414.371 | 1.30391  | 1.72E-06 | 1.48E-05 | 660.691 | 561.697 | 547.381 | 348.051 | 150.617 | 217.791 |
| ENSMUSG00000036898 | 16_Zfp157       | 322.152 | -0.67234 | 2.01E-05 | 0.00012  | 268.27  | 234.04  | 242.616 | 381.413 | 411.508 | 395.063 |
| ENSMUSG00000036899 | 10_Trpv5        | 2.50719 | -1.49592 | 0.31502  | 0.43003  | 1.73638 | 0.91781 | 1.19515 | 1.80337 | 1.79306 | 7.59736 |
| ENSMUSG00000036902 | 9_Neto2         | 105.042 | -0.90627 | 0.00016  | 0.00077  | 81.6097 | 66.9998 | 70.5141 | 136.155 | 140.755 | 134.22  |
| ENSMUSG00000036904 | 5_Fzd8          | 151.718 | 0.10514  | 0.66048  | 0.7526   | 144.987 | 161.534 | 166.126 | 183.944 | 130.893 | 122.824 |
| ENSMUSG00000036905 | 8_C1qb          | 478.911 | 1.38674  | 2.23E-10 | 6.47E-09 | 755.324 | 683.765 | 640.603 | 357.969 | 220.547 | 215.259 |
| ENSMUSG00000036907 | 9_C1ql2         | 5.23576 | 0.44593  | 0.68028  | 0.76855  | 9.55007 | 7.34244 | 1.19515 | 6.3118  | 4.48265 | 2.53245 |
| ENSMUSG00000036908 | 16_Unc93b1      | 1439.36 | 1.29923  | 6.62E-16 | 7.33E-14 | 1947.35 | 1960.43 | 2232.55 | 941.36  | 664.329 | 890.158 |
| ENSMUSG00000036912 | 17_Piwil4       | 13.8716 | 1.76144  | 0.00665  | 0.01791  | 15.6274 | 24.7808 | 23.9031 | 6.3118  | 6.27571 | 6.33113 |
| ENSMUSG00000036913 | 14_Trim67       | 17.7155 | -1.85178 | 0.02206  | 0.0492   | 11.2864 | 9.17806 | 2.39031 | 55.9045 | 16.1376 | 11.396  |
| ENSMUSG00000036915 | 16_Kirrel2      | 11.9668 | -0.76947 | 0.25012  | 0.35922  | 12.1546 | 8.26025 | 5.97577 | 18.0337 | 13.448  | 13.9285 |
| ENSMUSG00000036916 | 13_Zfp280c      | 384.615 | -0.28772 | 0.09549  | 0.16553  | 348.144 | 298.287 | 393.206 | 380.511 | 439.3   | 448.244 |
| ENSMUSG00000036918 | 15_Ttc7         | 2629.77 | 1.12785  | 3.09E-09 | 6.17E-08 | 3303.46 | 3349.07 | 4172.28 | 1945.84 | 1121.21 | 1796.78 |
| ENSMUSG00000036923 | 12_Stox1        | 16.3953 | -1.68608 | 0.0038   | 0.01123  | 7.8137  | 8.26025 | 7.17092 | 21.6405 | 26.8959 | 26.5908 |
| ENSMUSG00000036925 | 7_Muc12         | 2.1239  | -0.05269 | 0.97472  | NA       | 1.73638 | 0.91781 | 3.58546 | 2.70506 | 0       | 3.79868 |
| ENSMUSG00000036928 | 14_Stag3        | 410.923 | 0.35292  | 0.10412  | 0.1782   | 438.435 | 451.56  | 492.403 | 251.57  | 427.645 | 403.926 |
| ENSMUSG00000036931 | 14_Nfkbid       | 23.3754 | 1.77575  | 0.00311  | 0.00948  | 48.6186 | 31.2054 | 28.6837 | 17.132  | 4.48265 | 10.1298 |
| ENSMUSG00000036932 | 14_Aifm1        | 1031.17 | -0.17917 | 0.18218  | 0.27973  | 928.093 | 956.353 | 1017.08 | 959.393 | 1163.7  | 1162.4  |
| ENSMUSG00000036934 | 8_4921524J17Rik | 291.265 | -0.19533 | 0.20974  | 0.31284  | 265.666 | 271.67  | 277.276 | 300.261 | 311.096 | 321.622 |
| ENSMUSG00000036940 | 15_Kdm1a        | 1891.58 | 0.19931  | 0.11249  | 0.18954  | 2002.04 | 1930.15 | 2133.35 | 1554.51 | 1841.47 | 1887.94 |
| ENSMUSG00000036941 | 2_Elac1         | 576.887 | -0.127   | 0.33711  | 0.45368  | 568.663 | 558.026 | 527.063 | 564.455 | 630.261 | 612.854 |
| ENSMUSG00000036943 | 8_Rab8b         | 873.595 | -0.30528 | 0.03839  | 0.07789  | 864.716 | 675.505 | 804.339 | 888.16  | 1036.39 | 972.462 |
| ENSMUSG00000036944 | 5_Tmem71        | 34.2949 | 0.39621  | 0.4066   | 0.5236   | 39.0685 | 28.452  | 49.0013 | 18.0337 | 26.8959 | 44.3179 |
| ENSMUSG00000036948 | 17_BC037034     | 579.66  | 0.96491  | 3.86E-11 | 1.41E-09 | 698.023 | 776.464 | 825.851 | 422.89  | 362.198 | 392.53  |
| ENSMUSG00000036949 | 16_Slc39a12     | 316.202 | -1.61344 | 9.57E-09 | 1.64E-07 | 155.406 | 199.164 | 112.344 | 551.832 | 565.711 | 312.758 |
| ENSMUSG00000036951 | 2_C130079G13Rik | 1.41042 | -0.0627  | 0.97622  | NA       | 1.73638 | 0       | 2.39031 | 1.80337 | 0       | 2.53245 |
| ENSMUSG00000036955 | 15_Kif1bp       | 829.987 | -0.16339 | 0.17753  | 0.27402  | 796.129 | 824.189 | 727.849 | 869.225 | 887.565 | 874.963 |
| ENSMUSG00000036957 | 7_Lrnf3         | 32.5399 | 0.25122  | 0.61837  | 0.71654  | 22.5729 | 37.63   | 46.611  | 42.3792 | 29.5855 | 16.4609 |
| ENSMUSG00000036959 | 15_Bcorl1       | 422.803 | 0.31617  | 0.08454  | 0.14975  | 446.249 | 471.752 | 488.818 | 441.826 | 299.441 | 388.732 |
| ENSMUSG00000036960 | 15_Clca2        | 1136.27 | 1.45226  | 1.79E-10 | 5.36E-09 | 1487.21 | 1407    | 2097.5  | 434.612 | 623.985 | 767.334 |
| ENSMUSG00000036962 | 12_Cfap221      | 2.3751  | 0.43195  | 0.80884  | NA       | 2.60457 | 5.50683 | 0       | 3.60674 | 0       | 2.53245 |
| ENSMUSG00000036964 | 14_Trim17       | 11.9861 | -0.40657 | 0.65482  | 0.74832  | 15.6274 | 8.26025 | 7.17092 | 25.2472 | 14.3445 | 1.26623 |
| ENSMUSG00000036966 | 15_Spryd3       | 1606.44 | 0.59743  | 0.0002   | 0.00091  | 1812.78 | 1913.62 | 2075.98 | 1409.33 | 1011.29 | 1415.64 |

|                    |                  |         |          |          |          |         |         |         |         |         |         |
|--------------------|------------------|---------|----------|----------|----------|---------|---------|---------|---------|---------|---------|
| ENSMUSG00000036968 | 15_Cnpy4         | 595.555 | -0.48053 | 0.00022  | 0.00098  | 518.308 | 510.3   | 462.525 | 702.413 | 701.087 | 678.698 |
| ENSMUSG00000036972 | 14_Zic4          | 233.714 | -1.25672 | 0.00116  | 0.00408  | 118.942 | 233.123 | 60.9529 | 373.298 | 363.991 | 251.979 |
| ENSMUSG00000036975 | 5_Tmem177        | 178.504 | -0.18881 | 0.33419  | 0.45092  | 150.197 | 184.479 | 166.126 | 193.862 | 192.754 | 183.603 |
| ENSMUSG00000036977 | 7_Anapc10        | 277.289 | -0.6694  | 0.00114  | 0.004    | 221.388 | 207.424 | 213.933 | 291.244 | 425.852 | 303.894 |
| ENSMUSG00000036980 | 13_Taf6          | 886.385 | 0.48055  | 0.00035  | 0.00146  | 988.867 | 997.655 | 1111.49 | 784.466 | 663.433 | 772.398 |
| ENSMUSG00000036983 | 6_Tfb1m          | 238.99  | -0.43397 | 0.01689  | 0.03936  | 203.156 | 191.821 | 215.128 | 242.553 | 297.648 | 283.635 |
| ENSMUSG00000036985 | 12_Zdhhc9        | 3329.24 | 0.37391  | 0.00303  | 0.00926  | 3588.22 | 3527.13 | 4159.14 | 2635.63 | 2920    | 3145.31 |
| ENSMUSG00000036986 | 16_Pml           | 1565.97 | 1.52063  | 1.40E-24 | 4.16E-22 | 2130.53 | 2065.98 | 2771.56 | 798.893 | 803.291 | 825.58  |
| ENSMUSG00000036989 | 15_Trim3         | 410.768 | -0.08152 | 0.73048  | 0.80858  | 392.421 | 500.204 | 304.764 | 536.503 | 377.439 | 353.277 |
| ENSMUSG00000036990 | 13_Otud4         | 3039.97 | -0.1232  | 0.37864  | 0.49611  | 2901.49 | 2702.94 | 3126.52 | 2675.3  | 3513.5  | 3320.05 |
| ENSMUSG00000036992 | 10_Nxt1          | 329.371 | 0.15729  | 0.33094  | 0.44753  | 343.803 | 358.862 | 338.229 | 276.817 | 319.165 | 339.349 |
| ENSMUSG00000036995 | 7_Asap3          | 421.278 | 1.21141  | 7.55E-09 | 1.34E-07 | 528.727 | 513.971 | 723.068 | 295.753 | 205.306 | 260.843 |
| ENSMUSG00000037001 | 10_Zfp39         | 173.65  | -0.17563 | 0.35105  | 0.46771  | 168.429 | 156.945 | 163.736 | 179.435 | 184.685 | 188.668 |
| ENSMUSG00000037003 | 15_Tns2          | 1511.03 | 0.60978  | 0.00212  | 0.00683  | 1653.9  | 2006.32 | 1816.63 | 1494.09 | 860.669 | 1234.57 |
| ENSMUSG00000037005 | 16_Xpnpep2       | 127.209 | -0.19802 | 0.42553  | 0.5411   | 143.251 | 115.644 | 95.6123 | 143.368 | 121.032 | 144.35  |
| ENSMUSG00000037007 | 17_Zfp113        | 500.474 | -0.31001 | 0.05696  | 0.10805  | 454.063 | 464.41  | 420.694 | 467.073 | 571.09  | 625.516 |
| ENSMUSG00000037010 | 7_Apln           | 53.4618 | -0.25351 | 0.49324  | 0.60475  | 54.6959 | 34.8766 | 57.3674 | 72.1348 | 57.378  | 44.3179 |
| ENSMUSG00000037012 | 18_Hk1           | 1851.91 | 0.4284   | 0.00313  | 0.00954  | 1986.42 | 2209.16 | 2179.96 | 1855.67 | 1379.76 | 1500.48 |
| ENSMUSG00000037013 | 15_Ss18          | 1863.58 | 0.02201  | 0.8391   | 0.89027  | 1922.17 | 1825.52 | 1884.76 | 1722.22 | 1897.06 | 1929.73 |
| ENSMUSG00000037014 | 4_Sstr4          | 38.3996 | -0.83875 | 0.17958  | 0.27649  | 29.5184 | 46.8081 | 5.97577 | 73.0365 | 42.1369 | 32.9219 |
| ENSMUSG00000037016 | 11_Frem2         | 1590.95 | 0.56305  | 0.00376  | 0.01113  | 1869.21 | 1930.15 | 1890.73 | 960.295 | 1211.21 | 1684.08 |
| ENSMUSG00000037017 | 15_Zscan21       | 611.544 | -0.40654 | 0.00533  | 0.01487  | 487.054 | 504.793 | 588.016 | 691.593 | 749.5   | 648.308 |
| ENSMUSG00000037020 | 16_Wdr62         | 96.2033 | 1.29589  | 2.77E-07 | 3.03E-06 | 125.887 | 142.26  | 142.223 | 58.6096 | 53.7918 | 54.4478 |
| ENSMUSG00000037022 | 2_Mmaa           | 476.456 | -0.10873 | 0.44909  | 0.56397  | 454.063 | 435.958 | 485.233 | 457.155 | 495.781 | 530.549 |
| ENSMUSG00000037025 | 11_Foxa2         | 0.19919 | 0.92709  | 0.82027  | NA       | 0       | 0       | 1.19515 | 0       | 0       | 0       |
| ENSMUSG00000037029 | 7_Zfp146         | 732.878 | -0.33591 | 0.00746  | 0.01971  | 674.582 | 652.56  | 616.7   | 817.829 | 860.669 | 774.931 |
| ENSMUSG00000037031 | 9_Tspan15        | 537.198 | 0.17013  | 0.27468  | 0.38673  | 584.291 | 540.587 | 580.845 | 541.913 | 428.542 | 547.01  |
| ENSMUSG00000037032 | 15_Apbb1         | 371.693 | -0.17951 | 0.55206  | 0.65817  | 341.198 | 452.478 | 252.178 | 585.194 | 306.613 | 292.498 |
| ENSMUSG00000037033 | 9_Clca3b         | 442.13  | -0.21202 | 0.27977  | 0.39247  | 428.017 | 330.41  | 470.891 | 392.233 | 514.609 | 516.621 |
| ENSMUSG00000037034 | 15_Pax1          | 0.19919 | 0.92709  | 0.82027  | NA       | 0       | 0       | 1.19515 | 0       | 0       | 0       |
| ENSMUSG00000037035 | 5_Inhbb          | 126.953 | 0.54197  | 0.05121  | 0.09893  | 138.042 | 146.849 | 166.126 | 115.416 | 69.9294 | 125.356 |
| ENSMUSG00000037049 | 8_Smpd1          | 1628.86 | -0.03843 | 0.84444  | 0.8939   | 1507.18 | 1924.64 | 1389.96 | 2102.73 | 1431.76 | 1416.91 |
| ENSMUSG00000037053 | 6_Azgp1          | 0.35216 | 1.91112  | 0.63543  | NA       | 0       | 0.91781 | 1.19515 | 0       | 0       | 0       |
| ENSMUSG00000037058 | 14_Paip2         | 3356.16 | -0.36365 | 0.00102  | 0.00365  | 3029.11 | 2874.57 | 2903.03 | 3572.48 | 4140.18 | 3617.61 |
| ENSMUSG00000037060 | 2_Prkcdbp        | 1240.93 | 0.55675  | 0.00023  | 0.00101  | 1412.54 | 1496.94 | 1522.63 | 1146.04 | 826.601 | 1040.84 |
| ENSMUSG00000037062 | 13_Sh3glb1       | 5170.46 | -0.24282 | 0.05873  | 0.1109   | 4861.86 | 4478.89 | 4867.86 | 4800.57 | 6083.86 | 5929.74 |
| ENSMUSG00000037070 | 8_Rbmxl1         | 1513.93 | 0.1542   | 0.22782  | 0.33354  | 1525.41 | 1508.87 | 1749.71 | 1406.63 | 1330.45 | 1562.52 |
| ENSMUSG00000037071 | 2_Scd1           | 2600.88 | 0.2445   | 0.00911  | 0.02336  | 2802.51 | 2801.14 | 2858.81 | 2395.78 | 2361.46 | 2385.57 |
| ENSMUSG00000037072 | 15_Sep15         | 4596.83 | -0.62355 | 8.86E-08 | 1.14E-06 | 3837.39 | 3464.72 | 3554.39 | 5431.75 | 6149.3  | 5143.41 |
| ENSMUSG00000037075 | 6_Rnf139         | 1351.44 | -0.34375 | 0.00997  | 0.0252   | 1201.57 | 1092.19 | 1281.21 | 1398.51 | 1682.79 | 1452.36 |
| ENSMUSG00000037085 | 7_Trmt12         | 177.832 | 0.01368  | 0.94681  | 0.96535  | 171.033 | 160.616 | 205.567 | 178.534 | 189.168 | 162.077 |
| ENSMUSG00000037086 | 3_Prr32          | 26.9342 | -0.67769 | 0.16968  | 0.26408  | 26.0457 | 24.7808 | 10.7564 | 30.6573 | 31.3786 | 37.9868 |
| ENSMUSG00000037089 | 9_Slc35b2        | 908.771 | 0.28279  | 0.10815  | 0.18358  | 968.898 | 1050.89 | 972.855 | 1002.67 | 648.192 | 809.119 |
| ENSMUSG00000037095 | 7_Lrg1           | 48.6341 | 1.94017  | 6.31E-05 | 0.00033  | 98.1053 | 39.4656 | 94.4172 | 28.8539 | 17.0341 | 13.9285 |
| ENSMUSG00000037098 | 17_Rab11fip3     | 680.898 | 0.4329   | 0.01605  | 0.03772  | 696.287 | 863.655 | 787.607 | 706.02  | 488.609 | 543.211 |
| ENSMUSG00000037101 | 16_Ttc29         | 0       | NA       | NA       | NA       | 0       | 0       | 0       | 0       | 0       | 0       |
| ENSMUSG00000037103 | 7_Dcaf15         | 466.07  | 1.26261  | 7.31E-13 | 4.09E-11 | 619.018 | 658.984 | 695.58  | 316.492 | 221.443 | 284.901 |
| ENSMUSG00000037104 | 8_Socs5          | 741.45  | -0.02297 | 0.84703  | 0.89588  | 725.806 | 746.176 | 735.02  | 730.365 | 778.189 | 733.145 |
| ENSMUSG00000037106 | 8_Fer1l6         | 4.8639  | -1.13069 | 0.38161  | 0.49947  | 7.8137  | 0       | 1.19515 | 4.50843 | 8.06878 | 7.59736 |
| ENSMUSG00000037108 | 13_Zcwpw1        | 439.392 | -0.30787 | 0.10335  | 0.17702  | 394.158 | 363.451 | 420.694 | 383.216 | 574.676 | 500.16  |
| ENSMUSG00000037110 | 19_Ralgapa2      | 259.139 | -0.34914 | 0.03853  | 0.07808  | 207.497 | 234.04  | 242.616 | 289.441 | 282.407 | 298.83  |
| ENSMUSG00000037111 | 9_Setd7          | 6174.51 | -0.19265 | 0.06871  | 0.12665  | 5711.81 | 6073.12 | 5501.29 | 6319.91 | 6356.4  | 7084.54 |
| ENSMUSG00000037112 | 16_Slk2          | 802.808 | 0.30641  | 0.01208  | 0.02964  | 866.452 | 856.313 | 940.586 | 687.986 | 723.5   | 742.009 |
| ENSMUSG00000037119 | 3_D15Ert621e     | 3625.34 | -0.25445 | 0.05142  | 0.09924  | 3491.85 | 3013.16 | 3414.56 | 3479.6  | 4370.59 | 3982.28 |
| ENSMUSG00000037124 | 6_Trim58         | 2.42377 | 4.69787  | 0.01681  | NA       | 4.34094 | 1.83561 | 8.36608 | 0       | 0       | 0       |
| ENSMUSG00000037126 | 15_Psd           | 64.3081 | -0.02783 | 0.96084  | 0.97451  | 62.5096 | 79.8491 | 49.0013 | 135.253 | 31.3786 | 27.857  |
| ENSMUSG00000037129 | 7_Tmprss13       | 1914.05 | 0.77572  | 9.28E-08 | 1.18E-06 | 2356.26 | 2230.27 | 2661.61 | 1371.46 | 1236.32 | 1628.37 |
| ENSMUSG00000037134 | 16_Prmt10        | 466.429 | -0.51518 | 0.00066  | 0.00252  | 409.785 | 379.054 | 362.132 | 490.517 | 580.952 | 576.133 |
| ENSMUSG00000037138 | 16_Aff3          | 451.981 | 0.0224   | 0.89371  | 0.92823  | 474.899 | 483.684 | 406.352 | 478.795 | 381.922 | 486.231 |
| ENSMUSG00000037139 | 15_Myom3         | 72.2137 | -0.72286 | 0.07124  | 0.13042  | 50.3549 | 73.4244 | 39.4401 | 131.646 | 57.378  | 81.0385 |
| ENSMUSG00000037140 | 6_Tas2r108       | 0.15028 | -0.99647 | 0.80707  | NA       | 0       | 0       | 0       | 0.90169 | 0       | 0       |
| ENSMUSG00000037143 | 17_Cfap61        | 7.94453 | -2.00272 | 0.02387  | 0.05265  | 4.34094 | 2.75342 | 2.39031 | 18.0337 | 12.5514 | 7.59736 |
| ENSMUSG00000037145 | 14_2210407C18Rik | 3.14463 | 5.07262  | 0.00543  | 0.01508  | 2.60457 | 5.50683 | 10.7564 | 0       | 0       | 0       |
| ENSMUSG00000037148 | 7_Arhgap10       | 1580.91 | 0.29199  | 0.04729  | 0.09259  | 1646.95 | 1667.65 | 1905.08 | 1325.48 | 1273.97 | 1666.35 |
| ENSMUSG00000037149 | 9_Ddx1           | 2887.52 | -0.37414 | 0.00449  | 0.01289  | 2697.46 | 2409.24 | 2438.11 | 2837.6  | 3626.47 | 3316.25 |
| ENSMUSG00000037151 | 7_Lrrc20         | 389.426 | 0.54928  | 0.00144  | 0.00492  | 445.381 | 423.108 | 519.892 | 347.149 | 274.338 | 326.687 |
| ENSMUSG00000037152 | 11_Ndufc1        | 537.97  | -0.33314 | 0.01934  | 0.04396  | 461.008 | 492.862 | 475.671 | 651.017 | 607.848 | 539.413 |
| ENSMUSG00000037157 | 8_Il22ra1        | 163.911 | 1.18211  | 3.56E-05 | 0.0002   | 177.979 | 210.177 | 294.008 | 104.596 | 72.619  | 124.09  |
| ENSMUSG00000037159 | 11_Wee2          | 0       | NA       | NA       | NA       | 0       | 0       | 0       | 0       | 0       | 0       |
| ENSMUSG00000037161 | 14_Mgarp         | 38434.5 | 0.54537  | 6.61E-05 | 0.00035  | 42412.7 | 43754.5 | 50673.3 | 32542.7 | 26735.4 | 34488.2 |
| ENSMUSG00000037166 | 4_Ppp1r14a       | 7.658   | 0.58391  | 0.48555  | 0.59743  | 7.8137  | 9.17806 | 10.7564 | 9.91854 | 4.48265 | 3.79868 |
| ENSMUSG00000037167 | 5_Spaca5         | 0.34389 | 1.87986  | 0.64119  | NA       | 0.86819 | 0       | 1.19515 | 0       | 0       | 0       |
| ENSMUSG00000037169 | 12_Mycn          | 14.2551 | -1.0894  | 0.11537  | 0.19338  | 8.68188 | 14.6849 | 3.58546 | 14.427  | 18.8271 | 25.3245 |
| ENSMUSG00000037171 | 6_Nodal          | 0       | NA       | NA       | NA       | 0       | 0       | 0       | 0       | 0       | 0       |
| ENSMUSG00000037172 | 14_E330009J07Rik | 506.701 | -0.75292 | 2.26E-06 | 1.87E-05 | 382.003 | 400.163 | 350.18  | 611.343 | 727.983 | 568.536 |
| ENSMUSG00000037174 | 18_Elf2          | 1826.06 | 0.05392  | 0.61824  | 0.71644  | 1849.24 | 1806.24 | 1924.2  | 1721.32 | 1744.65 | 1910.74 |
| ENSMUSG00000037185 | 8_Krt80          | 5762.92 | 1.16788  | 1.54E-13 | 1.03E-11 | 7080.08 | 7926.17 | 8920.63 | 3833.06 | 2864.42 | 3953.16 |
| ENSMUSG00000037188 | 7_Grh13          | 2185.95 | 0.77043  | 4.99E-06 | 3.70E-05 | 2549.87 | 2468.9  | 3248.43 | 1508.52 | 1410.24 | 1929.73 |
| ENSMUSG00000037190 | 12_Cyb561d2      | 220.01  | 0.5827   | 0.01217  | 0.02979  | 247.434 | 261.575 | 282.056 | 204.683 | 125.514 | 198.798 |

|                     |                  |         |          |          |          |         |         |         |         |         |         |
|---------------------|------------------|---------|----------|----------|----------|---------|---------|---------|---------|---------|---------|
| ENSMUSG000000037196 | 6_Pacrg          | 13.5207 | -0.80412 | 0.22361  | 0.32869  | 9.55007 | 8.26025 | 11.9515 | 26.1489 | 12.5514 | 12.6623 |
| ENSMUSG000000037197 | 11_Rbm17         | 1365.34 | 0.05405  | 0.72898  | 0.80712  | 1333.54 | 1287.68 | 1551.31 | 1109.07 | 1420.1  | 1490.35 |
| ENSMUSG000000037202 | 5_Prr1           | 16.034  | 6.46277  | 1.11E-06 | 1.01E-05 | 45.1458 | 23.8629 | 26.2934 | 0.90169 | 0       | 0       |
| ENSMUSG000000037204 | 6_Atg101         | 393.114 | 0.99671  | 6.84E-06 | 4.86E-05 | 504.417 | 497.451 | 568.893 | 315.59  | 181.099 | 291.232 |
| ENSMUSG000000037206 | 14_Islr          | 2063.64 | -0.2001  | 0.39813  | 0.51563  | 1718.14 | 2479.91 | 1564.46 | 3009.83 | 1862.09 | 1747.39 |
| ENSMUSG000000037210 | 16_Fam193a       | 1115.1  | 0.51162  | 9.94E-05 | 0.00049  | 1211.12 | 1328.06 | 1392.35 | 834.059 | 923.426 | 1001.59 |
| ENSMUSG000000037211 | 12_Spry1         | 954.519 | 0.56141  | 0.00161  | 0.00542  | 1135.59 | 1131.65 | 1146.15 | 924.228 | 585.434 | 804.054 |
| ENSMUSG000000037214 | 11_Thap1         | 106.335 | 0.06027  | 0.81249  | 0.87061  | 87.687  | 111.972 | 126.686 | 100.989 | 109.377 | 101.298 |
| ENSMUSG000000037216 | 5_Lipt1          | 109.845 | -0.20884 | 0.38658  | 0.50382  | 95.5007 | 103.712 | 106.369 | 100.087 | 125.514 | 127.889 |
| ENSMUSG000000037217 | 15_Syn1          | 15.958  | -2.03611 | 0.00726  | 0.01927  | 9.55007 | 5.50683 | 3.58546 | 45.986  | 19.7237 | 11.396  |
| ENSMUSG000000037221 | 13_Mospd3        | 410.343 | 1.29069  | 5.74E-08 | 7.70E-07 | 495.736 | 560.779 | 690.799 | 284.031 | 162.272 | 268.44  |
| ENSMUSG000000037224 | 15_Zfyve28       | 23.8831 | -1.70781 | 0.02896  | 0.06168  | 11.2864 | 17.4383 | 4.78062 | 63.118  | 40.3439 | 6.33113 |
| ENSMUSG000000037225 | 13_Fgf2          | 350.864 | -0.75708 | 7.96E-06 | 5.56E-05 | 257.852 | 283.602 | 241.421 | 466.171 | 472.472 | 383.667 |
| ENSMUSG000000037234 | 16_Hook3         | 3721.16 | -0.41931 | 0.00077  | 0.00287  | 3404.17 | 2969.1  | 3177.91 | 3770.85 | 4398.38 | 4606.53 |
| ENSMUSG000000037235 | 13_Mxd4          | 2075.78 | -0.01113 | 0.94562  | 0.96456  | 2003.78 | 2229.35 | 1970.81 | 2576.12 | 1799.34 | 1875.28 |
| ENSMUSG000000037236 | 14_Matr3         | 4886.11 | -0.60535 | 3.25E-06 | 2.55E-05 | 4189.88 | 3663.88 | 3773.1  | 5192.81 | 6612.81 | 5884.16 |
| ENSMUSG000000037239 | 7_Spred3         | 82.6757 | -0.47208 | 0.09837  | 0.1698   | 71.1914 | 59.6574 | 77.685  | 113.612 | 94.1357 | 79.7723 |
| ENSMUSG000000037242 | 8_Clic4          | 3606.63 | 0.47666  | 0.00081  | 0.00299  | 4073.54 | 3635.43 | 4884.59 | 2972.86 | 3259.79 | 2813.56 |
| ENSMUSG000000037243 | 17_Zfp692        | 544.829 | 0.75651  | 9.37E-07 | 8.66E-06 | 623.359 | 645.217 | 785.216 | 385.921 | 402.542 | 426.718 |
| ENSMUSG000000037247 | 3_Pldi           | 0.19919 | 0.92709  | 0.82027  | NA       | 0       | 0       | 1.19515 | 0       | 0       | 0       |
| ENSMUSG000000037251 | 4_Pomk           | 380.97  | -0.34536 | 0.04746  | 0.09286  | 300.393 | 374.465 | 332.253 | 485.107 | 384.612 | 408.991 |
| ENSMUSG000000037253 | 8_Mex3c          | 1976.78 | -0.28931 | 0.03012  | 0.06368  | 1898.73 | 1536.41 | 1903.88 | 2119.86 | 2332.77 | 2069.01 |
| ENSMUSG000000037254 | 18_Ithi2         | 129.318 | -0.82641 | 0.00067  | 0.00257  | 98.1053 | 109.219 | 71.7092 | 170.419 | 169.444 | 157.012 |
| ENSMUSG000000037257 | 7_Aagab          | 2499.97 | 0.10901  | 0.41251  | 0.52868  | 2544.66 | 2641.44 | 2594.68 | 2281.26 | 2144.5  | 2793.3  |
| ENSMUSG000000037259 | 15_Zdank1        | 172.523 | -1.27721 | 8.28E-06 | 5.75E-05 | 115.469 | 114.726 | 71.7092 | 305.671 | 252.822 | 174.739 |
| ENSMUSG000000037260 | 7_Hgsnat         | 672.693 | -0.43096 | 0.01013  | 0.02553  | 574.741 | 657.149 | 486.428 | 877.34  | 728.879 | 711.62  |
| ENSMUSG000000037262 | 7_Kin            | 289.676 | -0.12478 | 0.44436  | 0.55941  | 293.448 | 271.67  | 265.324 | 282.228 | 301.234 | 324.154 |
| ENSMUSG000000037263 | 13_Aldh3b3       | 5.03731 | 0.727    | 0.48895  | 0.60075  | 2.60457 | 5.50683 | 10.7564 | 2.70506 | 3.58612 | 5.06491 |
| ENSMUSG000000037266 | 18_Rsrp1         | 5831.83 | -0.05201 | 0.66849  | 0.75922  | 5816.86 | 5571.08 | 5792.91 | 5334.37 | 6719.5  | 5756.27 |
| ENSMUSG000000037270 | 17_4932438A13Rik | 2373.63 | -0.60744 | 5.45E-07 | 5.47E-06 | 2024.62 | 1866.82 | 1750.9  | 2641.04 | 3105.58 | 2852.81 |
| ENSMUSG000000037275 | 14_Gemin5        | 780.999 | 0.51012  | 0.00042  | 0.00173  | 862.111 | 908.628 | 981.222 | 566.258 | 647.295 | 720.483 |
| ENSMUSG000000037278 | 9_Tmem97         | 466.536 | 0.11522  | 0.39526  | 0.51288  | 501.813 | 464.41  | 488.818 | 438.219 | 443.783 | 462.173 |
| ENSMUSG000000037279 | 13_Ovol2         | 163.411 | 0.38282  | 0.06566  | 0.12177  | 182.32  | 167.958 | 204.371 | 129.843 | 138.962 | 157.012 |
| ENSMUSG000000037280 | 12_Galnt6        | 20.891  | 0.80941  | 0.17548  | 0.27154  | 43.4094 | 22.0273 | 14.3418 | 18.0337 | 16.1376 | 11.396  |
| ENSMUSG000000037286 | 15_Stag1         | 1466.96 | -0.39395 | 0.00067  | 0.00257  | 1341.35 | 1226.19 | 1235.79 | 1570.74 | 1777.82 | 1649.89 |
| ENSMUSG000000037287 | 14_Tbcel         | 807.352 | -0.51037 | 4.19E-05 | 0.00023  | 651.141 | 676.423 | 671.677 | 1008.99 | 958.391 | 877.495 |
| ENSMUSG000000037295 | 7_Ldlrap1        | 3158.13 | 0.83754  | 3.24E-08 | 4.71E-07 | 3754.91 | 3965.84 | 4428.05 | 2431.85 | 1843.27 | 2524.86 |
| ENSMUSG000000037296 | 6_Lsm1           | 342.657 | -0.30859 | 0.05564  | 0.10591  | 306.471 | 280.849 | 331.058 | 352.559 | 374.75  | 410.258 |
| ENSMUSG000000037300 | 17_Ttc13         | 890.276 | 0.26235  | 0.06107  | 0.11458  | 955.875 | 943.504 | 1012.3  | 709.626 | 808.671 | 911.683 |
| ENSMUSG000000037306 | 13_Man1c1        | 698.572 | -0.62247 | 0.01508  | 0.03575  | 480.976 | 782.888 | 386.035 | 1038.74 | 762.051 | 740.743 |
| ENSMUSG000000037313 | 16_Tacc3         | 583.919 | 0.45289  | 0.01903  | 0.04335  | 678.055 | 586.478 | 758.923 | 387.725 | 498.471 | 593.86  |
| ENSMUSG000000037315 | 14_Jade3         | 408.082 | -0.44899 | 0.00475  | 0.01349  | 339.462 | 334.081 | 362.132 | 415.677 | 523.574 | 473.569 |
| ENSMUSG000000037316 | 8_Bag4           | 503.392 | -0.22908 | 0.09225  | 0.16086  | 474.031 | 438.711 | 478.062 | 517.567 | 567.504 | 544.478 |
| ENSMUSG000000037318 | 10_Traf3ip3      | 25.1714 | 0.37576  | 0.46884  | 0.58212  | 39.9367 | 19.2739 | 26.2934 | 21.6405 | 28.689  | 15.1947 |
| ENSMUSG000000037321 | 17_Tap1          | 3262.07 | 2.45249  | 2.02E-45 | 4.29E-42 | 5013.79 | 4611.06 | 6923.53 | 906.194 | 1023.84 | 1094.02 |
| ENSMUSG000000037325 | 10_Bbs7          | 352.094 | -0.55024 | 0.00075  | 0.0028   | 297.789 | 290.944 | 268.91  | 431.907 | 454.541 | 368.472 |
| ENSMUSG000000037326 | 9_Capn15         | 1230.08 | 1.73797  | 6.97E-16 | 7.63E-14 | 1603.54 | 1862.23 | 2212.23 | 699.708 | 396.267 | 606.523 |
| ENSMUSG000000037331 | 15_Larp1         | 5081.05 | 0.6266   | 8.58E-07 | 8.03E-06 | 5816.86 | 5920.76 | 6763.38 | 3689.7  | 3809.36 | 4486.24 |
| ENSMUSG000000037336 | 14_Mfsd2b        | 55.0381 | 0.20859  | 0.53644  | 0.64417  | 50.3549 | 65.1642 | 62.148  | 60.4129 | 52.8953 | 39.253  |
| ENSMUSG000000037337 | 10_Map4k1        | 41.2935 | 1.15763  | 0.00763  | 0.0201   | 84.2143 | 44.9725 | 41.8304 | 27.9522 | 25.9994 | 22.7921 |
| ENSMUSG000000037339 | 17_Fam53a        | 588.322 | 0.61864  | 1.20E-05 | 7.98E-05 | 667.637 | 697.532 | 773.265 | 496.829 | 431.231 | 463.439 |
| ENSMUSG000000037341 | 13_Slc9a7        | 64.443  | -0.94672 | 0.00457  | 0.0131   | 51.2231 | 50.4793 | 29.8789 | 93.7753 | 87.86   | 73.4412 |
| ENSMUSG000000037343 | 7_Taf2           | 797.543 | -0.13446 | 0.30708  | 0.42217  | 754.456 | 768.203 | 758.923 | 766.433 | 924.323 | 812.918 |
| ENSMUSG000000037344 | 13_Slc12a9       | 307.725 | 1.11499  | 4.50E-07 | 4.63E-06 | 409.785 | 440.547 | 413.523 | 256.98  | 153.307 | 172.207 |
| ENSMUSG000000037346 | 4_Hrh4           | 0.14942 | -0.99647 | 0.80707  | NA       | 0       | 0       | 0       | 0       | 0.89653 | 0       |
| ENSMUSG000000037347 | 7_Chst7          | 15.2432 | 0.12339  | 0.83384  | 0.88633  | 11.2864 | 17.4383 | 19.1225 | 17.132  | 12.5514 | 13.9285 |
| ENSMUSG000000037348 | 15_Paqr7         | 150.278 | -0.08349 | 0.75256  | 0.82547  | 133.701 | 177.136 | 126.686 | 192.961 | 119.239 | 151.947 |
| ENSMUSG000000037349 | 9_Nudt22         | 427.683 | 0.95926  | 1.07E-05 | 7.20E-05 | 525.254 | 592.902 | 576.064 | 360.674 | 203.512 | 307.693 |
| ENSMUSG000000037351 | 8_Actr1b         | 1951.32 | 0.41319  | 0.00247  | 0.00778  | 2100.15 | 2263.31 | 2323.38 | 1888.13 | 1442.52 | 1690.41 |
| ENSMUSG000000037353 | 8_Letmd1         | 370.716 | 0.10107  | 0.55461  | 0.66076  | 358.562 | 410.259 | 383.644 | 402.152 | 365.784 | 303.894 |
| ENSMUSG000000037355 | 14_Uvssa         | 890.889 | -0.21696 | 0.09979  | 0.17183  | 843.879 | 848.97  | 778.045 | 858.405 | 1022.04 | 993.988 |
| ENSMUSG000000037358 | 6_4930578C19Rik  | 27.6423 | -0.52256 | 0.25547  | 0.36511  | 17.3638 | 29.3698 | 21.5128 | 33.3624 | 37.6543 | 26.5908 |
| ENSMUSG000000037361 | 7_Sf3b6          | 2952.15 | -0.45863 | 0.00016  | 0.00073  | 2599.36 | 2398.23 | 2463.21 | 3140.57 | 3828.19 | 3283.33 |
| ENSMUSG000000037362 | 8_Nov            | 289.684 | -0.66189 | 0.00027  | 0.00119  | 225.729 | 227.616 | 219.908 | 414.775 | 311.993 | 338.083 |
| ENSMUSG000000037363 | 8_Letm2          | 100.091 | -0.19814 | 0.42865  | 0.54398  | 89.4234 | 106.465 | 83.6608 | 100.989 | 117.446 | 102.564 |
| ENSMUSG000000037364 | 11_Srt           | 2508.92 | 0.63824  | 2.13E-06 | 1.77E-05 | 2851.13 | 3023.25 | 3289.06 | 1919.69 | 1739.27 | 2231.09 |
| ENSMUSG000000037366 | 14_Pafah2        | 327.896 | 0.23373  | 0.20497  | 0.30703  | 326.439 | 380.889 | 354.961 | 318.295 | 247.442 | 339.349 |
| ENSMUSG000000037369 | 16_Kdm6a         | 1789.88 | -0.16652 | 0.19322  | 0.29324  | 1797.15 | 1601.57 | 1661.26 | 1708.69 | 2104.16 | 1866.42 |
| ENSMUSG000000037370 | 13_Enpp1         | 295.554 | -0.39589 | 0.02348  | 0.05192  | 283.029 | 237.712 | 243.811 | 307.475 | 329.027 | 372.271 |
| ENSMUSG000000037373 | 12_Ctbp1         | 2157.59 | 0.74014  | 2.59E-06 | 2.09E-05 | 2471.73 | 2681.83 | 2944.86 | 1913.38 | 1342.11 | 1591.65 |
| ENSMUSG000000037375 | 16_Hhat          | 94.1293 | 0.26506  | 0.35276  | 0.46948  | 101.578 | 77.0957 | 130.272 | 86.5618 | 86.9635 | 82.3047 |
| ENSMUSG000000037376 | 14_Trmt6         | 689.624 | -0.04066 | 0.80748  | 0.86695  | 717.992 | 577.3   | 744.581 | 598.719 | 764.741 | 734.412 |
| ENSMUSG000000037379 | 7_Spon2          | 1750.54 | 0.60398  | 0.00132  | 0.00455  | 2153.98 | 2043.04 | 2136.94 | 1604.1  | 986.184 | 1578.98 |
| ENSMUSG000000037386 | 15_Rims2         | 52.6581 | -1.97097 | 7.80E-05 | 0.0004   | 30.3866 | 19.2739 | 14.3418 | 129.843 | 81.5843 | 40.5193 |
| ENSMUSG000000037390 | 12_Muc3          | 0.94619 | 2.11489  | 0.51389  | NA       | 0       | 0       | 4.78062 | 0       | 0.89653 | 0       |
| ENSMUSG000000037393 | 2_Nmur2          | 3.20997 | -2.44192 | 0.09121  | 0.15943  | 0       | 1.83561 | 1.19515 | 6.3118  | 3.58612 | 6.33113 |
| ENSMUSG000000037395 | 15_Rcor3         | 845.727 | -0.01331 | 0.91748  | 0.94513  | 855.166 | 795.737 | 873.658 | 792.582 | 832.877 | 924.346 |
| ENSMUSG000000037400 | 16_Atp11b        | 4141.86 | -0.2386  | 0.08347  | 0.14817  | 4004.08 | 3508.77 | 3886.64 | 3772.65 | 4796.44 | 4882.57 |
| ENSMUSG000000037405 | 7_Icam1          | 413.843 | 0.83635  | 0.00021  | 0.00095  | 548.695 | 416.684 | 625.066 | 274.112 | 241.167 | 377.336 |

|                     |                  |         |          |          |          |         |         |         |         |         |         |
|---------------------|------------------|---------|----------|----------|----------|---------|---------|---------|---------|---------|---------|
| ENSMUSG000000037406 | 6_Htra4          | 9.85206 | 1.43066  | 0.1188   | 0.19817  | 17.3638 | 4.58903 | 21.5128 | 6.3118  | 8.06878 | 1.26623 |
| ENSMUSG000000037408 | 10_Cnnm4         | 350.785 | 0.72428  | 0.00113  | 0.00398  | 429.753 | 427.697 | 454.159 | 348.952 | 197.237 | 246.914 |
| ENSMUSG000000037410 | 13_Tbc1d2b       | 1967.05 | 0.49816  | 4.66E-06 | 3.49E-05 | 2252.08 | 2178.87 | 2479.94 | 1642.87 | 1607.48 | 1641.03 |
| ENSMUSG000000037411 | 10_Serpine1      | 618.424 | -0.13989 | 0.43745  | 0.55267  | 573.873 | 549.766 | 642.993 | 799.795 | 554.056 | 590.062 |
| ENSMUSG000000037415 | 5_Ranbp10        | 1620.5  | 0.58414  | 1.04E-06 | 9.45E-06 | 1852.71 | 1949.42 | 2029.37 | 1320.97 | 1178.94 | 1391.58 |
| ENSMUSG000000037416 | 12_Dmxl1         | 1393.8  | -0.71011 | 3.40E-08 | 4.89E-07 | 1106.07 | 1028.86 | 1037.39 | 1552.7  | 1919.47 | 1718.27 |
| ENSMUSG000000037418 | 5_Best1          | 0       | NA       | NA       | NA       | 0       | 0       | 0       | 0       | 0       | 0       |
| ENSMUSG000000037419 | 8_Endod1         | 3983.18 | 0.29904  | 0.0197   | 0.04468  | 4252.39 | 4035.59 | 4895.35 | 3248.77 | 3583.43 | 3883.52 |
| ENSMUSG000000037426 | 17_Depdc5        | 545.398 | 0.18581  | 0.16171  | 0.25419  | 572.136 | 584.642 | 584.43  | 535.601 | 475.161 | 520.419 |
| ENSMUSG000000037428 | 14_Vgf           | 8.5724  | -0.47855 | 0.69819  | 0.78398  | 2.60457 | 3.67122 | 15.537  | 6.3118  | 23.3098 | 0       |
| ENSMUSG000000037432 | 15_Fer1l5        | 40.4442 | -0.16385 | 0.66665  | 0.75754  | 37.3321 | 46.8081 | 29.8789 | 36.9691 | 44.8265 | 46.8504 |
| ENSMUSG000000037434 | 7_Slc30a1        | 762.859 | -0.25398 | 0.08076  | 0.14442  | 771.819 | 592.902 | 723.068 | 835.862 | 820.325 | 833.177 |
| ENSMUSG000000037437 | 18_Adam32        | 2.21063 | -0.9454  | 0.53923  | NA       | 2.60457 | 1.83561 | 0       | 2.70506 | 3.58612 | 2.53245 |
| ENSMUSG000000037440 | 7_Vnn1           | 684.523 | 0.3998   | 0.00286  | 0.00882  | 769.215 | 725.066 | 842.584 | 554.537 | 616.813 | 598.925 |
| ENSMUSG000000037443 | 13_Cep85         | 350.158 | 0.04717  | 0.75512  | 0.82759  | 369.848 | 370.793 | 326.277 | 345.346 | 344.268 | 344.414 |
| ENSMUSG000000037446 | 13_Tulp1         | 141.121 | -1.48007 | 0.11635  | 0.19475  | 119.81  | 80.7669 | 22.7079 | 407.562 | 155.1   | 60.7789 |
| ENSMUSG000000037447 | 16_Arid5a        | 242.015 | 1.17939  | 6.62E-06 | 4.73E-05 | 347.275 | 262.492 | 399.181 | 193.862 | 141.652 | 107.629 |
| ENSMUSG000000037451 | 7_Slc22a20       | 0       | NA       | NA       | NA       | 0       | 0       | 0       | 0       | 0       | 0       |
| ENSMUSG000000037455 | 16_Slc18b1       | 426.736 | -0.24537 | 0.08014  | 0.14356  | 392.421 | 402.917 | 375.278 | 447.236 | 456.334 | 486.231 |
| ENSMUSG000000037458 | 14_Azin1         | 3142.32 | -0.27019 | 0.06506  | 0.12088  | 2917.11 | 2575.36 | 3054.81 | 2893.51 | 3919.63 | 3493.52 |
| ENSMUSG000000037461 | 10_Ints7         | 851.113 | 0.40587  | 0.00479  | 0.01359  | 890.761 | 900.367 | 1119.86 | 733.972 | 701.983 | 759.736 |
| ENSMUSG000000037463 | 14_Fbxo27        | 219.302 | -0.7028  | 0.0052   | 0.01455  | 138.91  | 222.109 | 139.833 | 290.343 | 303.027 | 221.59  |
| ENSMUSG000000037465 | 9_Klf10          | 814.841 | 0.90334  | 1.78E-06 | 1.52E-05 | 1026.2  | 825.107 | 1334.99 | 569.865 | 535.229 | 597.659 |
| ENSMUSG000000037466 | 13_4930427A07Rik | 203.337 | 1.19154  | 8.20E-09 | 1.45E-07 | 268.27  | 261.575 | 319.106 | 140.663 | 107.584 | 122.824 |
| ENSMUSG000000037469 | 9_Pap1           | 0.14942 | -0.99647 | 0.80707  | NA       | 0       | 0       | 0       | 0       | 0.89653 | 0       |
| ENSMUSG000000037470 | 14_Uggt1         | 2786.08 | 0.18834  | 0.20958  | 0.3127   | 2844.19 | 2908.53 | 3149.23 | 2109.94 | 2735.31 | 2969.3  |
| ENSMUSG000000037474 | 13_Dtl           | 509.482 | 0.44075  | 0.03356  | 0.06967  | 630.305 | 517.642 | 610.724 | 319.197 | 444.679 | 534.348 |
| ENSMUSG000000037475 | 15_Thoc2         | 2314.11 | -0.51163 | 0.00083  | 0.00307  | 2064.55 | 1765.86 | 1893.12 | 2225.36 | 3108.27 | 2827.48 |
| ENSMUSG000000037482 | 2_Erv3           | 0.49331 | 0.9132   | 0.78796  | NA       | 0.86819 | 0       | 1.19515 | 0       | 0.89653 | 0       |
| ENSMUSG000000037486 | 17_Asxl2         | 1448.27 | -0.17002 | 0.22474  | 0.32997  | 1389.97 | 1275.75 | 1423.43 | 1311.95 | 1706.99 | 1581.52 |
| ENSMUSG000000037487 | 6_Ubr5           | 6298.75 | 0.00756  | 0.95012  | 0.96739  | 6211.02 | 6205.28 | 6529.13 | 5465.12 | 6791.22 | 6590.71 |
| ENSMUSG000000037490 | 5_Slc2a12        | 413.287 | -0.14796 | 0.32517  | 0.44117  | 392.421 | 406.588 | 377.669 | 479.697 | 416.887 | 406.459 |
| ENSMUSG000000037492 | 15_Zmat4         | 12.6384 | -1.38083 | 0.12431  | 0.20545  | 8.68188 | 11.0137 | 1.19515 | 34.264  | 14.3445 | 6.33113 |
| ENSMUSG000000037493 | 6_Cib2           | 510.768 | 0.17072  | 0.28808  | 0.40148  | 533.068 | 518.56  | 571.284 | 539.208 | 406.128 | 496.361 |
| ENSMUSG000000037499 | 9_Nenf           | 571.775 | 0.07525  | 0.72826  | 0.80649  | 603.391 | 654.395 | 501.965 | 723.152 | 422.266 | 525.484 |
| ENSMUSG000000037503 | 12_Fam168b       | 4567.16 | 0.09383  | 0.38704  | 0.50438  | 4465.96 | 4790.95 | 4889.38 | 4501.21 | 4072.94 | 4682.51 |
| ENSMUSG000000037509 | 18_Arhgef4       | 4527.09 | 0.96726  | 3.50E-08 | 5.01E-07 | 5502.58 | 5604.12 | 6862.57 | 3090.08 | 2398.22 | 3704.98 |
| ENSMUSG000000037514 | 17_Pank2         | 1207.42 | -0.11685 | 0.34535  | 0.46204  | 1201.57 | 1120.64 | 1153.32 | 1145.14 | 1369    | 1254.83 |
| ENSMUSG000000037519 | 16_Ppfia1        | 2270.23 | 0.43924  | 0.00044  | 0.00176  | 2410.96 | 2600.14 | 2827.73 | 1907.06 | 1769.75 | 2105.74 |
| ENSMUSG000000037523 | 13_Mavs          | 1886.33 | 0.54986  | 1.03E-05 | 6.94E-05 | 2067.16 | 2184.38 | 2472.77 | 1504.01 | 1446.1  | 1643.56 |
| ENSMUSG000000037525 | 4_Bcdin3d        | 130.513 | 0.6172   | 0.01894  | 0.04319  | 132.833 | 139.506 | 201.981 | 108.202 | 87.86   | 112.694 |
| ENSMUSG000000037526 | 6_Atg14          | 560.758 | 0.18086  | 0.19559  | 0.29566  | 572.136 | 564.45  | 651.359 | 535.601 | 493.988 | 547.01  |
| ENSMUSG000000037529 | 13_Prss40        | 1.46975 | -4.02476 | 0.07355  | NA       | 0       | 0       | 0       | 1.80337 | 4.48265 | 2.53245 |
| ENSMUSG000000037531 | 8_Mrpl47         | 337.39  | -0.42284 | 0.02469  | 0.05411  | 302.998 | 273.506 | 289.227 | 357.969 | 468.885 | 331.751 |
| ENSMUSG000000037533 | 17_Rapgef6       | 1483.15 | -0.09    | 0.44084  | 0.55618  | 1507.18 | 1408.83 | 1393.55 | 1404.83 | 1603    | 1581.52 |
| ENSMUSG000000037535 | 5_1700021A07Rik  | 0.44236 | 2.27028  | 0.57071  | NA       | 1.73638 | 0.91781 | 0       | 0       | 0       | 0       |
| ENSMUSG000000037536 | 13_Fbxo34        | 1252.36 | 0.52653  | 2.45E-05 | 0.00015  | 1365.66 | 1444.63 | 1625.41 | 973.82  | 1043.56 | 1061.1  |
| ENSMUSG000000037541 | 19_Shank2        | 57.7559 | -0.47905 | 0.2539   | 0.36332  | 45.1458 | 61.493  | 38.2449 | 104.596 | 50.2057 | 46.8504 |
| ENSMUSG000000037542 | 13_Aldh8a1       | 0.81216 | -3.16909 | 0.33278  | NA       | 0       | 0       | 0       | 3.60674 | 0       | 1.26623 |
| ENSMUSG000000037544 | 13_Dlgap5        | 407.952 | 0.43683  | 0.01299  | 0.03146  | 478.372 | 427.697 | 501.965 | 291.244 | 398.956 | 349.479 |
| ENSMUSG000000037548 | 14_H2-DMb2       | 79.72   | 1.71336  | 1.74E-07 | 2.04E-06 | 158.878 | 100.959 | 106.369 | 42.3792 | 30.482  | 39.253  |
| ENSMUSG000000037552 | 17_Plekkg2       | 754.102 | 0.8702   | 5.88E-08 | 7.89E-07 | 877.738 | 1038.04 | 1009.91 | 626.671 | 473.368 | 498.893 |
| ENSMUSG000000037553 | 14_Zdhhc18       | 1205.19 | 0.91692  | 1.58E-08 | 2.56E-07 | 1384.76 | 1563.02 | 1779.58 | 925.129 | 694.811 | 883.826 |
| ENSMUSG000000037563 | 14_Rps16         | 9907.29 | 0.2857   | 0.05194  | 0.10006  | 10737.8 | 10464.8 | 11454.4 | 10825.6 | 7924.43 | 8036.74 |
| ENSMUSG000000037568 | 12_Vash2         | 16.0511 | -0.85643 | 0.18032  | 0.27735  | 10.4183 | 16.5205 | 7.17092 | 29.7556 | 13.448  | 18.9934 |
| ENSMUSG000000037570 | 15_Mcrl1         | 1064.24 | 0.99547  | 1.66E-06 | 1.43E-05 | 1317.04 | 1362.02 | 1574.02 | 928.736 | 517.298 | 686.295 |
| ENSMUSG000000037572 | 16_Wdhd1         | 442.977 | 0.38307  | 0.05539  | 0.10551  | 500.945 | 443.3   | 559.332 | 293.949 | 407.025 | 453.309 |
| ENSMUSG000000037573 | 5_Tob1           | 494.998 | -0.15074 | 0.4171   | 0.53296  | 461.876 | 480.93  | 464.915 | 642.902 | 420.473 | 498.893 |
| ENSMUSG000000037577 | 12_Ephx3         | 1011.07 | 0.6515   | 0.0003   | 0.00129  | 1113.89 | 1137.16 | 1454.5  | 721.348 | 682.26  | 957.268 |
| ENSMUSG000000037578 | 4_Pkd2l1         | 0.15028 | -0.99647 | 0.80707  | NA       | 0       | 0       | 0       | 0.90169 | 0       | 0       |
| ENSMUSG000000037579 | 6_Kcnh3          | 20.0437 | 1.32795  | 0.01425  | 0.03402  | 21.7047 | 28.452  | 35.8546 | 12.6236 | 8.96531 | 12.6623 |
| ENSMUSG000000037580 | 9_Gch1           | 298.187 | 0.98582  | 3.38E-06 | 2.64E-05 | 359.43  | 335.917 | 493.599 | 173.124 | 207.995 | 219.057 |
| ENSMUSG000000037593 | 11_BC030499      | 41.2584 | -1.39751 | 0.01299  | 0.03146  | 22.5729 | 31.2054 | 14.3418 | 84.7584 | 74.412  | 20.2596 |
| ENSMUSG000000037594 | 10_BC022687      | 265.044 | 0.31528  | 0.10434  | 0.17841  | 275.216 | 311.136 | 295.203 | 273.211 | 193.651 | 241.849 |
| ENSMUSG000000037600 | 16_Kdf1          | 336.464 | 1.49694  | 3.76E-10 | 1.02E-08 | 418.467 | 502.957 | 568.893 | 213.699 | 121.032 | 193.733 |
| ENSMUSG000000037601 | 11_Nme1          | 1043.83 | 0.00388  | 0.97578  | 0.98396  | 1081.76 | 934.326 | 1119.86 | 1002.67 | 1048.04 | 1076.29 |
| ENSMUSG000000037605 | 16_Adgrl3        | 171.544 | -0.99664 | 0.00071  | 0.00268  | 99.8417 | 158.78  | 84.8559 | 262.39  | 253.718 | 169.674 |
| ENSMUSG000000037606 | 17_Osbpl5        | 3577.01 | 0.80556  | 4.81E-07 | 4.90E-06 | 4143    | 4438.51 | 5069.84 | 2952.12 | 2081.74 | 2776.84 |
| ENSMUSG000000037608 | 15_Bclaf1        | 3337.89 | -0.39878 | 0.0037   | 0.01098  | 2893.67 | 2746.07 | 2998.64 | 3182.05 | 4227.14 | 3979.75 |
| ENSMUSG000000037610 | 15_Kcnmb2        | 2.4586  | -1.61475 | 0.34024  | NA       | 1.73638 | 1.83561 | 0       | 9.01685 | 0.89653 | 1.26623 |
| ENSMUSG000000037613 | 15_Tnfrsf23      | 184.192 | 1.3154   | 8.77E-09 | 1.53E-07 | 256.116 | 217.52  | 314.326 | 97.382  | 99.5149 | 120.292 |
| ENSMUSG000000037617 | 11_Spag1         | 212.276 | -0.05203 | 0.77394  | 0.84153  | 205.761 | 197.328 | 222.399 | 199.272 | 222.34  | 226.655 |
| ENSMUSG000000037621 | 8_Atoh8          | 58.2527 | 0.16854  | 0.64822  | 0.74261  | 57.3004 | 78.9313 | 49.0013 | 72.1348 | 52.8953 | 39.253  |
| ENSMUSG000000037622 | 14_Wdtd1         | 2789.73 | 1.09549  | 2.88E-09 | 5.80E-08 | 3428.48 | 3870.39 | 4102.96 | 2109.04 | 1299.07 | 1928.46 |
| ENSMUSG000000037624 | 15_Kcnk2         | 36.5997 | -0.6124  | 0.10266  | 0.17607  | 26.9138 | 31.2054 | 28.6837 | 43.2809 | 43.93   | 45.5842 |
| ENSMUSG000000037625 | 7_Cldn11         | 34.3686 | -0.81125 | 0.07047  | 0.1292   | 33.8593 | 22.9451 | 17.9273 | 54.1011 | 45.7231 | 31.6557 |
| ENSMUSG000000037627 | 15_Rgs22         | 6.29866 | -2.25339 | 0.04142  | 0.08286  | 3.47275 | 1.83561 | 1.19515 | 11.7219 | 17.0341 | 2.53245 |
| ENSMUSG000000037628 | 9_Cdkn3          | 153.785 | -0.08874 | 0.69523  | 0.78195  | 162.351 | 124.822 | 160.151 | 137.958 | 176.617 | 160.811 |
| ENSMUSG000000037636 | 6_Slc25a43       | 107.21  | 0.17486  | 0.49648  | 0.60754  | 111.128 | 94.534  | 136.248 | 96.4803 | 111.17  | 93.7008 |

|                    |                  |         |          |          |          |         |         |         |         |         |         |
|--------------------|------------------|---------|----------|----------|----------|---------|---------|---------|---------|---------|---------|
| ENSMUSG00000037638 | 5_Zbtb42         | 557.258 | 1.05808  | 1.25E-06 | 1.12E-05 | 675.451 | 733.327 | 849.755 | 441.826 | 251.925 | 391.264 |
| ENSMUSG00000037640 | 15_Zfp60         | 494.867 | -0.77971 | 8.40E-08 | 1.08E-06 | 397.63  | 348.766 | 345.4   | 582.489 | 642.812 | 652.107 |
| ENSMUSG00000037643 | 14_Prkc1         | 7131.39 | -0.01804 | 0.88823  | 0.92463  | 7049.69 | 6908.32 | 7301.2  | 6101.71 | 7508.44 | 7918.98 |
| ENSMUSG00000037646 | 9_Vps13b         | 1728.3  | -0.2731  | 0.0563   | 0.10698  | 1731.17 | 1403.32 | 1559.68 | 1659.1  | 1915.89 | 2100.67 |
| ENSMUSG00000037649 | 9_H2-DMa         | 173.243 | 1.21136  | 2.49E-06 | 2.03E-05 | 261.325 | 218.438 | 246.202 | 135.253 | 74.412  | 103.831 |
| ENSMUSG00000037652 | 15_Phc3          | 1865.67 | -0.33269 | 0.00139  | 0.00476  | 1685.15 | 1684.17 | 1584.77 | 2036.01 | 2167.81 | 2036.09 |
| ENSMUSG00000037653 | 7_Kctd8          | 14.7556 | -0.94313 | 0.13557  | 0.21981  | 10.4183 | 13.7671 | 5.97577 | 25.2472 | 17.9306 | 15.1947 |
| ENSMUSG00000037656 | 8_Slc20a2        | 1531.62 | -0.13174 | 0.45792  | 0.57175  | 1383.89 | 1659.39 | 1342.16 | 1996.33 | 1355.55 | 1452.36 |
| ENSMUSG00000037660 | 4_Gdf7           | 1.39747 | 1.02338  | 0.5868   | NA       | 1.73638 | 2.75342 | 1.19515 | 1.80337 | 0.89653 | 0       |
| ENSMUSG00000037661 | 14_Gpr160        | 654.85  | 0.39176  | 0.01188  | 0.02925  | 757.06  | 716.806 | 754.142 | 477.893 | 571.09  | 652.107 |
| ENSMUSG00000037664 | 12_Cdkn1c        | 329.355 | -0.18761 | 0.29256  | 0.40652  | 269.138 | 349.684 | 305.959 | 379.61  | 357.716 | 314.024 |
| ENSMUSG00000037669 | 14_Ldah          | 786.857 | -0.16384 | 0.17037  | 0.26495  | 745.774 | 744.34  | 736.215 | 865.618 | 787.154 | 842.041 |
| ENSMUSG00000037674 | 15_Rfx7          | 1361.25 | -0.17658 | 0.17654  | 0.27275  | 1225.01 | 1215.17 | 1394.74 | 1298.43 | 1550.1  | 1484.02 |
| ENSMUSG00000037679 | 8_Inf2           | 472.746 | 1.10745  | 1.95E-10 | 5.74E-09 | 618.15  | 658.067 | 662.115 | 363.379 | 259.994 | 274.771 |
| ENSMUSG00000037681 | 13_Esyf3         | 869.623 | 0.64686  | 1.52E-06 | 1.32E-05 | 1004.49 | 1002.24 | 1177.23 | 660.034 | 648.192 | 725.548 |
| ENSMUSG00000037683 | 14_Armc3         | 6.07261 | 0.26469  | 0.76926  | 0.83784  | 4.34094 | 7.34244 | 8.36608 | 6.3118  | 6.27571 | 3.79868 |
| ENSMUSG00000037685 | 15_Atp8a1        | 2202    | -0.35519 | 0.00573  | 0.0158   | 1944.74 | 1939.32 | 1912.25 | 2135.19 | 2729.04 | 2551.45 |
| ENSMUSG00000037686 | 5_Aspg           | 15.0296 | 1.21504  | 0.03972  | 0.08003  | 18.232  | 22.0273 | 22.7079 | 8.11517 | 8.96531 | 10.1298 |
| ENSMUSG00000037692 | 14_Ahdc1         | 793.304 | 1.3392   | 9.91E-10 | 2.35E-08 | 913.334 | 1160.11 | 1338.57 | 568.062 | 335.302 | 444.446 |
| ENSMUSG00000037697 | 18_Ddhd1         | 1152.73 | -0.39465 | 0.00216  | 0.00693  | 1081.76 | 941.669 | 963.294 | 1195.63 | 1347.49 | 1386.52 |
| ENSMUSG00000037703 | 14_Lzts3         | 418.6   | 0.01533  | 0.94167  | 0.96205  | 373.321 | 489.19  | 400.377 | 526.584 | 346.061 | 376.069 |
| ENSMUSG00000037705 | 13_Tecta         | 1.54324 | -0.51571 | 0.08076  | NA       | 1.73638 | 0.91781 | 1.19515 | 5.41011 | 0       | 0       |
| ENSMUSG00000037706 | 16_Cd81          | 3271.47 | -0.14956 | 0.33018  | 0.44683  | 3078.6  | 3329.8  | 2898.25 | 4178.41 | 3070.62 | 3073.13 |
| ENSMUSG00000037708 | 16_Spag6l        | 7.40758 | -0.79897 | 0.35298  | 0.4697   | 4.34094 | 8.26025 | 3.58546 | 7.21348 | 13.448  | 7.59736 |
| ENSMUSG00000037709 | 13_Fam13a        | 734.934 | -1.09909 | 1.37E-05 | 8.91E-05 | 466.217 | 639.71  | 296.398 | 1109.97 | 1070.46 | 826.846 |
| ENSMUSG00000037710 | 8_Cisid1         | 652.289 | -0.08479 | 0.51823  | 0.6283   | 645.064 | 602.998 | 651.359 | 709.626 | 622.192 | 682.496 |
| ENSMUSG00000037712 | 15_Fermt2        | 901.715 | -1.25447 | 1.26E-09 | 2.90E-08 | 552.168 | 656.231 | 388.425 | 1387.69 | 1367.21 | 1058.57 |
| ENSMUSG00000037716 | 14_Ccdc33        | 24.952  | -1.10975 | 0.0267   | 0.05772  | 11.2864 | 22.9451 | 13.1467 | 38.7725 | 33.1716 | 30.3894 |
| ENSMUSG00000037720 | 16_Tmem33        | 1493.48 | -0.4105  | 0.00031  | 0.00132  | 1308.36 | 1220.68 | 1318.25 | 1586.97 | 1780.51 | 1746.13 |
| ENSMUSG00000037722 | 7_Gnpat1         | 359.824 | -0.58537 | 0.00053  | 0.0021   | 294.316 | 267.999 | 302.374 | 430.104 | 486.816 | 377.336 |
| ENSMUSG00000037725 | 7_Ckap2          | 392.398 | 0.09653  | 0.63329  | 0.72979  | 461.876 | 352.437 | 401.572 | 294.851 | 432.128 | 411.524 |
| ENSMUSG00000037727 | 6_Avp            | 0.2997  | -1.76345 | 0.66322  | NA       | 0       | 0       | 0       | 0.90169 | 0.89653 | 0       |
| ENSMUSG00000037730 | 13_Mynn          | 676.69  | -0.2925  | 0.02105  | 0.0473   | 639.855 | 577.3   | 608.333 | 753.809 | 769.223 | 711.62  |
| ENSMUSG00000037731 | 5_Themis2        | 183.24  | 2.56252  | 9.80E-20 | 1.70E-17 | 417.599 | 234.958 | 286.837 | 48.691  | 49.3092 | 62.0451 |
| ENSMUSG00000037735 | 7_2810032G03Rik  | 69.0749 | -0.15479 | 0.61341  | 0.71269  | 78.137  | 66.9998 | 50.1965 | 66.7247 | 72.619  | 79.7723 |
| ENSMUSG00000037736 | 18_Limch1        | 437.898 | -1.28088 | 3.40E-10 | 9.33E-09 | 256.116 | 304.711 | 204.371 | 741.185 | 570.193 | 550.809 |
| ENSMUSG00000037737 | 6_Acrt3          | 0.65813 | -0.20128 | 0.94165  | NA       | 0.86819 | 0.91781 | 0       | 0       | 0.89653 | 1.26623 |
| ENSMUSG00000037738 | 9_Nek5           | 25.8463 | -0.34197 | 0.47512  | 0.58767  | 21.7047 | 20.1917 | 26.2934 | 20.7388 | 26.8959 | 39.253  |
| ENSMUSG00000037740 | 8_Mrps26         | 561.797 | 0.24188  | 0.10358  | 0.17733  | 596.445 | 591.067 | 639.407 | 577.98  | 458.127 | 507.757 |
| ENSMUSG00000037742 | 14_Eef1a1        | 156293  | -0.24779 | 0.00726  | 0.01926  | 148188  | 139337  | 141185  | 162694  | 169235  | 177117  |
| ENSMUSG00000037747 | 9_Phyhl1         | 154.897 | -0.4033  | 0.06043  | 0.11363  | 128.492 | 131.246 | 141.028 | 159.598 | 204.409 | 164.609 |
| ENSMUSG00000037750 | 16_Fam222b       | 316.673 | 0.4887   | 0.00405  | 0.01183  | 340.33  | 349.684 | 420.694 | 278.621 | 259.994 | 250.713 |
| ENSMUSG00000037752 | 4_Xkr8           | 122.085 | 0.16432  | 0.49328  | 0.60475  | 117.205 | 134.917 | 135.052 | 131.646 | 95.9288 | 117.759 |
| ENSMUSG00000037754 | 13_Ppp1r16b      | 104.244 | -0.45645 | 0.08284  | 0.14737  | 96.3689 | 91.7806 | 75.2947 | 145.171 | 106.687 | 110.162 |
| ENSMUSG00000037759 | 5_Ptger2         | 25.6479 | -0.33063 | 0.46949  | 0.58271  | 26.0457 | 18.3561 | 23.9031 | 33.3624 | 26.8959 | 25.3245 |
| ENSMUSG00000037761 | 16_Acrt5         | 210.446 | 0.92221  | 4.23E-05 | 0.00024  | 238.752 | 251.479 | 337.033 | 166.812 | 125.514 | 143.084 |
| ENSMUSG00000037762 | 6_Slc16a9        | 620.055 | -0.81621 | 1.80E-06 | 1.53E-05 | 493.131 | 434.122 | 420.694 | 929.638 | 781.775 | 660.97  |
| ENSMUSG00000037771 | 11_Slc32a1       | 7.01159 | -1.22675 | 0.33767  | 0.45414  | 6.07732 | 6.42464 | 0       | 24.3455 | 2.68959 | 2.53245 |
| ENSMUSG00000037772 | 12_Mrpl23        | 847.948 | 0.02473  | 0.85204  | 0.89976  | 889.025 | 832.45  | 843.779 | 917.916 | 754.879 | 849.638 |
| ENSMUSG00000037773 | 14_Pced1a        | 258.703 | 0.11875  | 0.49315  | 0.60475  | 266.534 | 284.52  | 256.958 | 274.112 | 229.512 | 240.583 |
| ENSMUSG00000037784 | 14_Dzip1         | 151.023 | -0.16291 | 0.54433  | 0.65097  | 146.724 | 170.712 | 109.954 | 202.879 | 141.652 | 134.282 |
| ENSMUSG00000037787 | 13_Apopt1        | 409.689 | -0.17978 | 0.22251  | 0.32748  | 368.112 | 402.917 | 382.449 | 458.056 | 446.472 | 400.128 |
| ENSMUSG00000037788 | 14_Vopp1         | 2146.1  | -0.18122 | 0.12453  | 0.2057   | 2044.58 | 1906.28 | 2084.35 | 2101.83 | 2493.25 | 2246.29 |
| ENSMUSG00000037791 | 15_Phf12         | 1094.2  | 0.48131  | 7.28E-05 | 0.00038  | 1284.05 | 1229.86 | 1312.28 | 995.461 | 866.049 | 877.495 |
| ENSMUSG00000037795 | 14_Nabp2         | 762.466 | -0.43078 | 0.00049  | 0.00194  | 661.56  | 644.3   | 642.993 | 852.093 | 936.874 | 836.976 |
| ENSMUSG00000037797 | 14_Adh4          | 0.14942 | -0.99647 | 0.80707  | NA       | 0       | 0       | 0       | 0       | 0.89653 | 0       |
| ENSMUSG00000037801 | 13_Iqch          | 3.30522 | -4.1607  | 0.01274  | 0.03096  | 0       | 0.91781 | 0       | 5.41011 | 7.17224 | 6.33113 |
| ENSMUSG00000037805 | 14_Rpl10a        | 10893.1 | 0.18469  | 0.1302   | 0.2132   | 11461.8 | 11087.1 | 12221.6 | 11560.5 | 9705.84 | 9321.96 |
| ENSMUSG00000037808 | 12_Fam76b        | 819.785 | -0.21793 | 0.12316  | 0.20395  | 788.315 | 685.601 | 800.753 | 805.205 | 972.736 | 866.099 |
| ENSMUSG00000037813 | 13_D630003M21Rik | 112.83  | -0.08424 | 0.82039  | 0.87649  | 83.3461 | 165.205 | 80.0753 | 163.205 | 91.4461 | 93.7008 |
| ENSMUSG00000037815 | 6_Ctnna1         | 17158.6 | 0.41032  | 0.00103  | 0.00367  | 18715.5 | 19175.7 | 20854.2 | 12992.4 | 14650.2 | 16563.5 |
| ENSMUSG00000037816 | 10_Fbxw17        | 264.933 | 1.03987  | 4.31E-07 | 4.45E-06 | 355.089 | 287.273 | 427.865 | 165.91  | 183.789 | 169.674 |
| ENSMUSG00000037818 | 16_3110057O12Rik | 195.058 | -0.55495 | 0.01725  | 0.04003  | 172.769 | 179.89  | 120.711 | 215.503 | 272.545 | 208.927 |
| ENSMUSG00000037820 | 15_Tgm2          | 24677   | 0.84535  | 1.87E-08 | 2.94E-07 | 29138.1 | 29703.9 | 36276.5 | 16405.3 | 15752.9 | 20785.1 |
| ENSMUSG00000037822 | 15_Smim14        | 2471.15 | -0.39552 | 0.00037  | 0.00154  | 2166.13 | 2215.58 | 2022.2  | 2965.64 | 2859.04 | 2598.3  |
| ENSMUSG00000037824 | 5_Tspan14        | 2514.75 | 0.32672  | 0.01149  | 0.02842  | 2665.34 | 2755.25 | 2973.54 | 2338.07 | 1936.51 | 2419.76 |
| ENSMUSG00000037826 | 5_Ppm1k          | 313.917 | -0.29941 | 0.09167  | 0.16007  | 306.471 | 266.164 | 271.3   | 299.36  | 388.198 | 352.011 |
| ENSMUSG00000037833 | 13_Sh2d4b        | 9.21419 | -0.57449 | 0.48154  | 0.59388  | 10.4183 | 5.50683 | 5.97577 | 8.11517 | 6.27571 | 18.9934 |
| ENSMUSG00000037843 | 6_Vstm2l         | 2.36281 | -1.41675 | 0.37406  | NA       | 0.86819 | 1.83561 | 1.19515 | 8.11517 | 0.89653 | 1.26623 |
| ENSMUSG00000037845 | 14_Fdxacb1       | 223.54  | 0.00781  | 0.9701   | 0.98062  | 250.038 | 185.397 | 236.641 | 191.157 | 234.891 | 243.116 |
| ENSMUSG00000037846 | 18_Rtkn2         | 54.6114 | 0.08385  | 0.83642  | 0.88823  | 52.0913 | 38.5478 | 78.8802 | 69.4298 | 51.9988 | 36.7206 |
| ENSMUSG00000037847 | 13_Nmrk1         | 190.967 | -0.29267 | 0.11258  | 0.18964  | 170.165 | 176.219 | 168.517 | 197.469 | 223.236 | 210.194 |
| ENSMUSG00000037849 | 7_Gm4955         | 31.9362 | 5.58638  | 5.37E-10 | 1.37E-08 | 78.137  | 35.7944 | 74.0996 | 0       | 3.58612 | 0       |
| ENSMUSG00000037851 | 13_lars          | 1876.7  | 0.34746  | 0.0116   | 0.02864  | 2062.82 | 1876.91 | 2365.21 | 1489.58 | 1698.03 | 1767.65 |
| ENSMUSG00000037852 | 7_Cpe            | 5347.9  | -0.21456 | 0.03222  | 0.0674   | 4882.69 | 5058.03 | 4910.89 | 5354.21 | 5854.34 | 6027.24 |
| ENSMUSG00000037855 | 5_Zfp365         | 250.364 | -0.97765 | 0.00047  | 0.00189  | 144.987 | 195.493 | 166.126 | 472.483 | 291.372 | 231.72  |
| ENSMUSG00000037857 | 16_Nufip2        | 1510.45 | -0.24359 | 0.11062  | 0.18703  | 1441.19 | 1241.79 | 1467.65 | 1423.76 | 1919.47 | 1568.86 |
| ENSMUSG00000037860 | 15_Aim2          | 54.1448 | 1.31619  | 0.00012  | 0.00056  | 91.1598 | 64.2464 | 76.4899 | 34.264  | 29.5855 | 29.1232 |
| ENSMUSG00000037868 | 15_Egr2          | 27.324  | 0.75999  | 0.12112  | 0.2013   | 38.2003 | 24.7808 | 40.6352 | 26.1489 | 21.5167 | 12.6623 |

|                    |                  |         |          |          |          |         |         |         |         |         |         |
|--------------------|------------------|---------|----------|----------|----------|---------|---------|---------|---------|---------|---------|
| ENSMUSG00000037872 | 5_Ackr1          | 92.1189 | 0.74536  | 0.01606  | 0.03774  | 119.81  | 90.8628 | 136.248 | 90.1685 | 57.378  | 58.2464 |
| ENSMUSG00000037876 | 16_Jmjd1c        | 3496.18 | -0.28846 | 0.01507  | 0.03574  | 3322.56 | 3038.85 | 3081.11 | 3432.72 | 4141.07 | 3960.76 |
| ENSMUSG00000037884 | 6_1700017G19Rik  | 7.32235 | -0.76641 | 0.36066  | 0.47771  | 4.34094 | 8.26025 | 3.58546 | 9.91854 | 8.96531 | 8.86359 |
| ENSMUSG00000037885 | 18_Stk35         | 21633.7 | 0.48851  | 4.77E-05 | 0.00026  | 24378.7 | 24477.9 | 26926.8 | 17328.6 | 16440.6 | 20249.5 |
| ENSMUSG00000037887 | 11_Dusp8         | 122.967 | -0.64116 | 0.01816  | 0.04177  | 112.864 | 101.876 | 72.9044 | 182.14  | 129.997 | 138.019 |
| ENSMUSG00000037890 | 13_Wdr19         | 315.46  | -0.37532 | 0.02014  | 0.04555  | 277.82  | 290.027 | 255.763 | 335.427 | 385.508 | 348.212 |
| ENSMUSG00000037892 | 13_Pcdh18        | 496.536 | -0.49487 | 0.00616  | 0.0168   | 447.985 | 457.985 | 329.863 | 643.803 | 579.159 | 520.419 |
| ENSMUSG00000037894 | 13_H2afz         | 4429.29 | 0.05303  | 0.66911  | 0.75972  | 4620.5  | 4169.59 | 4743.57 | 4066.6  | 4884.3  | 4091.18 |
| ENSMUSG00000037896 | 17_Rcor1         | 1739.35 | 0.232    | 0.06235  | 0.11662  | 1828.4  | 1811.75 | 1995.91 | 1429.17 | 1642.44 | 1728.4  |
| ENSMUSG00000037902 | 18_Sirpa         | 1671.47 | 0.37978  | 0.00138  | 0.00473  | 1991.62 | 1892.52 | 1785.56 | 1558.11 | 1338.52 | 1462.49 |
| ENSMUSG00000037904 | 14_Ankrd9        | 129.981 | 1.23053  | 5.44E-05 | 0.00029  | 159.747 | 170.712 | 217.518 | 110.907 | 62.7571 | 58.2464 |
| ENSMUSG00000037905 | 13_Bri3bp        | 252.852 | -0.19383 | 0.30475  | 0.41978  | 242.225 | 226.698 | 239.031 | 315.59  | 233.994 | 259.577 |
| ENSMUSG00000037907 | 16_Ankrd13b      | 171.341 | 1.07994  | 1.32E-05 | 8.64E-05 | 197.947 | 223.945 | 276.081 | 128.039 | 84.2739 | 117.759 |
| ENSMUSG00000037913 | 11_Tmem156       | 2.06024 | 0.92342  | 0.56987  | NA       | 2.60457 | 1.83561 | 3.58546 | 1.80337 | 0       | 2.53245 |
| ENSMUSG00000037916 | 13_Ndufv1        | 2335.39 | 0.52258  | 0.0034   | 0.01021  | 2665.34 | 2605.65 | 2990.28 | 2291.18 | 1432.66 | 2027.23 |
| ENSMUSG00000037921 | 14_Ddx60         | 6209.19 | 0.49419  | 0.01963  | 0.04455  | 7179.92 | 6076.79 | 8531.01 | 3647.32 | 6608.33 | 5211.79 |
| ENSMUSG00000037922 | 13_Bank1         | 17.307  | -0.49808 | 0.38089  | 0.49874  | 19.1001 | 11.9315 | 11.9515 | 17.132  | 25.9994 | 17.7272 |
| ENSMUSG00000037926 | 15_Ssh2          | 1152.08 | 0.20235  | 0.11268  | 0.18977  | 1223.28 | 1288.6  | 1184.4  | 965.705 | 1076.73 | 1173.79 |
| ENSMUSG00000037933 | 15_Bicd2         | 1950.81 | 0.45274  | 0.00014  | 0.00065  | 2178.28 | 2184.38 | 2399.87 | 1669.02 | 1504.38 | 1768.92 |
| ENSMUSG00000037935 | 16_Smarce1       | 2080.05 | -0.09435 | 0.35991  | 0.47686  | 2042.85 | 1972.36 | 2019.81 | 2052.24 | 2132.85 | 2260.22 |
| ENSMUSG00000037936 | 15_Scarb1        | 1010.13 | 0.52361  | 0.00136  | 0.00469  | 1148.61 | 1161.94 | 1264.47 | 995.461 | 684.949 | 805.32  |
| ENSMUSG00000037938 | 4_Chchd5         | 237.59  | 0.75305  | 0.00083  | 0.00307  | 270.875 | 289.109 | 334.643 | 209.191 | 131.79  | 189.934 |
| ENSMUSG00000037940 | 15_Inpp4b        | 139.597 | -0.49994 | 0.02652  | 0.05739  | 133.701 | 101.876 | 111.149 | 177.632 | 152.41  | 160.811 |
| ENSMUSG00000037942 | 5_Crp            | 0.1447  | 0.92709  | 0.82027  | NA       | 0.86819 | 0       | 0       | 0       | 0       | 0       |
| ENSMUSG00000037944 | 8_Ccr7           | 13.7753 | 4.72338  | 1.45E-05 | 9.38E-05 | 32.9912 | 11.9315 | 34.6595 | 1.80337 | 0       | 1.26623 |
| ENSMUSG00000037946 | 11_Fgd3          | 3052.85 | 0.74119  | 3.17E-09 | 6.31E-08 | 3468.41 | 3765.97 | 4226.06 | 2238.89 | 2146.29 | 2471.67 |
| ENSMUSG00000037949 | 7_Ano10          | 1761.53 | 0.2416   | 0.02736  | 0.05893  | 1882.23 | 1819.09 | 2024.59 | 1586.97 | 1567.14 | 1689.15 |
| ENSMUSG00000037953 | 7_A4gnt          | 0.51697 | 0.77694  | 0.84161  | NA       | 0       | 1.83561 | 0       | 0       | 0       | 1.26623 |
| ENSMUSG00000037957 | 14_Wdr20         | 796.901 | 0.13175  | 0.33218  | 0.44877  | 827.384 | 785.642 | 886.804 | 680.773 | 806.878 | 793.924 |
| ENSMUSG00000037958 | 13_Ccdc55        | 885.673 | -0.28113 | 0.07265  | 0.13257  | 795.261 | 716.806 | 886.804 | 827.747 | 1008.6  | 1078.83 |
| ENSMUSG00000037960 | 10_1110007C09Rik | 585.768 | 1.05859  | 6.89E-06 | 4.88E-05 | 695.419 | 802.162 | 877.243 | 503.14  | 255.511 | 381.134 |
| ENSMUSG00000037962 | 7_Fam101a        | 35.8498 | -0.49276 | 0.24973  | 0.35878  | 21.7047 | 40.3834 | 27.4885 | 45.0843 | 47.5161 | 32.9219 |
| ENSMUSG00000037965 | 14_Zc3h7a        | 3864.51 | 0.05139  | 0.75407  | 0.82682  | 3994.53 | 3695.09 | 4110.13 | 2928.67 | 4439.62 | 4019    |
| ENSMUSG00000037966 | 15_Ninj1         | 373.247 | 0.65553  | 0.00597  | 0.01634  | 447.117 | 424.944 | 498.379 | 393.135 | 206.202 | 269.706 |
| ENSMUSG00000037971 | 10_1110032A03Rik | 513.199 | -0.5223  | 0.00037  | 0.00155  | 460.14  | 410.259 | 393.206 | 586.997 | 656.26  | 572.335 |
| ENSMUSG00000037972 | 6_Snn            | 1213.7  | -0.12936 | 0.28758  | 0.401    | 1141.67 | 1213.34 | 1123.44 | 1386.79 | 1216.59 | 1200.38 |
| ENSMUSG00000037973 | 6_Ccdc129        | 12.8879 | -0.25247 | 0.70215  | 0.78702  | 6.94551 | 12.8493 | 15.537  | 10.8202 | 13.448  | 17.7272 |
| ENSMUSG00000037974 | 15_Muc5ac        | 1015.74 | 0.36679  | 0.50383  | 0.6146   | 779.633 | 1929.23 | 723.068 | 742.087 | 642.812 | 1277.62 |
| ENSMUSG00000037977 | 6_6430571L13Rik  | 69.6767 | -0.45619 | 0.13933  | 0.22483  | 46.014  | 66.9998 | 63.3432 | 87.4635 | 68.1363 | 86.1034 |
| ENSMUSG00000037979 | 13_Ccdc92        | 61.2571 | 0.30495  | 0.49169  | 0.6035   | 65.1141 | 64.2464 | 74.0996 | 91.9719 | 27.7924 | 44.3179 |
| ENSMUSG00000037982 | 15_Gm9725        | 0.1447  | 0.92709  | 0.82027  | NA       | 0.86819 | 0       | 0       | 0       | 0       | 0       |
| ENSMUSG00000037984 | 9_Neurod6        | 0.49417 | 0.91318  | 0.78785  | NA       | 0.86819 | 0       | 1.19515 | 0.90169 | 0       | 0       |
| ENSMUSG00000037989 | 15_Wnk2          | 1251.2  | 1.57083  | 2.57E-14 | 2.06E-12 | 1592.26 | 1847.54 | 2175.18 | 660.935 | 456.334 | 774.931 |
| ENSMUSG00000037990 | 18_Sh3f3         | 124.009 | -0.61296 | 0.01009  | 0.02545  | 108.524 | 88.1093 | 98.0026 | 165.008 | 157.789 | 126.623 |
| ENSMUSG00000037991 | 9_Rmi2           | 63.5573 | 1.08721  | 0.00767  | 0.02017  | 66.8505 | 85.3559 | 106.369 | 22.5421 | 39.4473 | 60.7789 |
| ENSMUSG00000037992 | 16_Rara          | 289.816 | 0.99778  | 3.53E-06 | 2.73E-05 | 367.244 | 376.3   | 415.914 | 247.964 | 154.203 | 177.272 |
| ENSMUSG00000037993 | 7_Dhx38          | 972.15  | 1.18291  | 8.97E-11 | 2.94E-09 | 1291    | 1305.12 | 1452.11 | 669.051 | 441.99  | 673.633 |
| ENSMUSG00000037994 | 14_Slc9b2        | 53.8829 | -0.91433 | 0.0059   | 0.01617  | 40.8049 | 36.7122 | 34.6595 | 81.1517 | 71.7224 | 58.2464 |
| ENSMUSG00000037995 | 15_Igfbp3        | 400.729 | 1.17203  | 7.01E-07 | 6.73E-06 | 474.899 | 576.382 | 614.309 | 321     | 172.134 | 245.648 |
| ENSMUSG00000037996 | 17_Slc24a2       | 26.1361 | -1.85925 | 0.00026  | 0.00113  | 10.4183 | 12.8493 | 10.7564 | 47.7893 | 48.4127 | 26.5908 |
| ENSMUSG00000037997 | 12_Parp11        | 684.664 | 0.40549  | 0.01493  | 0.03545  | 734.487 | 670.916 | 937.001 | 566.258 | 632.054 | 567.27  |
| ENSMUSG00000037999 | 13_Arap2         | 3130.22 | -0.24191 | 0.05334  | 0.10222  | 2966.6  | 2638.69 | 2999.84 | 3007.12 | 3642.6  | 3526.44 |
| ENSMUSG00000038000 | 9_Acd            | 360.504 | 0.76951  | 0.00047  | 0.00188  | 458.403 | 446.971 | 457.744 | 337.23  | 189.168 | 273.505 |
| ENSMUSG00000038002 | 8_Cramp1l        | 1056.29 | 0.24995  | 0.07375  | 0.13417  | 1139.93 | 1122.48 | 1179.62 | 820.534 | 1044.46 | 1030.71 |
| ENSMUSG00000038005 | 14_2700029M09Rik | 626.901 | -0.26111 | 0.10432  | 0.17838  | 614.677 | 515.807 | 580.845 | 601.424 | 788.947 | 659.704 |
| ENSMUSG00000038007 | 14_Acer2         | 290.277 | -0.38891 | 0.01368  | 0.03287  | 239.62  | 261.575 | 253.373 | 329.115 | 338.889 | 319.089 |
| ENSMUSG00000038009 | 7_Dnajc22        | 0.45536 | 0.77574  | 0.84797  | NA       | 0       | 1.83561 | 0       | 0       | 0.89653 | 0       |
| ENSMUSG00000038010 | 8_Ccdc138        | 92.9778 | -0.57212 | 0.03988  | 0.08031  | 78.137  | 59.6574 | 87.2462 | 103.694 | 129.1   | 100.032 |
| ENSMUSG00000038011 | 15_Dnah10        | 12.2033 | -0.41748 | 0.5723   | 0.67684  | 8.68188 | 11.9315 | 10.7564 | 22.5421 | 5.37918 | 13.9285 |
| ENSMUSG00000038013 | 14_Wipf2         | 1095.24 | 0.34291  | 0.0027   | 0.00841  | 1221.54 | 1203.24 | 1248.94 | 986.444 | 904.599 | 1006.65 |
| ENSMUSG00000038014 | 7_Fam120a        | 8277.05 | 0.52224  | 3.01E-06 | 2.39E-05 | 9157.65 | 9511.22 | 10608.2 | 6319.01 | 6937.35 | 7128.86 |
| ENSMUSG00000038020 | 5_Rapgef1l       | 3959.87 | 1.15149  | 8.18E-13 | 4.57E-11 | 4978.19 | 5210.38 | 6193.29 | 2349.79 | 2077.26 | 2950.31 |
| ENSMUSG00000038022 | 11_Fam188b       | 165.054 | -0.30002 | 0.19563  | 0.29568  | 148.46  | 155.109 | 139.833 | 213.699 | 140.755 | 192.466 |
| ENSMUSG00000038023 | 12_Atp6v0a2      | 1370.27 | 0.02353  | 0.83207  | 0.88517  | 1338.75 | 1393.23 | 1411.48 | 1301.13 | 1332.24 | 1444.76 |
| ENSMUSG00000038024 | 17_Dennd4c       | 3079.78 | -0.05887 | 0.70875  | 0.79159  | 2998.72 | 2973.69 | 3077.52 | 2443.57 | 3486.61 | 3498.58 |
| ENSMUSG00000038025 | 7_Phf2           | 1328.41 | 0.6329   | 0.00012  | 0.00059  | 1435.12 | 1683.26 | 1727    | 1180.31 | 835.566 | 1109.21 |
| ENSMUSG00000038026 | 12_Kcnj9         | 17.2887 | -1.68719 | 0.13507  | 0.2192   | 14.7592 | 7.34244 | 2.39031 | 60.4129 | 18.8271 | 0       |
| ENSMUSG00000038028 | 9_Tigar          | 282.235 | 0.09257  | 0.59207  | 0.69407  | 295.184 | 293.698 | 285.642 | 311.081 | 260.89  | 246.914 |
| ENSMUSG00000038034 | 15_Igfbp8        | 828.348 | 1.21183  | 1.41E-06 | 1.24E-05 | 942.853 | 1169.28 | 1360.09 | 699.708 | 339.785 | 458.374 |
| ENSMUSG00000038037 | 4_Socs1          | 91.7717 | 2.97795  | 4.70E-14 | 3.50E-12 | 175.374 | 94.534  | 218.713 | 24.3455 | 16.1376 | 21.5259 |
| ENSMUSG00000038039 | 13_Gcc2          | 1281.44 | -0.19459 | 0.18292  | 0.28069  | 1290.13 | 1069.24 | 1226.23 | 1198.34 | 1538.45 | 1366.26 |
| ENSMUSG00000038042 | 9_Ptpdc1         | 252.56  | -0.23564 | 0.2071   | 0.3096   | 245.697 | 237.712 | 212.737 | 313.787 | 263.58  | 241.849 |
| ENSMUSG00000038044 | 8_Cct8l1         | 1.7048  | 1.4063   | 0.48654  | NA       | 0       | 2.75342 | 4.78062 | 0.90169 | 1.79306 | 0       |
| ENSMUSG00000038045 | 14_Sult6b1       | 12.8071 | 0.10372  | 0.88075  | 0.91954  | 19.1001 | 10.0959 | 10.7564 | 13.5253 | 17.0341 | 6.33113 |
| ENSMUSG00000038046 | 4_Rnmt1l         | 155.12  | 0.1381   | 0.48719  | 0.59924  | 168.429 | 155.109 | 163.736 | 141.565 | 146.134 | 155.746 |
| ENSMUSG00000038047 | 18_Haus6         | 375.498 | -0.25953 | 0.15977  | 0.25194  | 382.871 | 312.054 | 329.863 | 338.132 | 460.817 | 429.251 |
| ENSMUSG00000038055 | 12_Dexi          | 243.384 | 0.55399  | 0.00475  | 0.01349  | 256.116 | 288.191 | 325.082 | 224.52  | 173.927 | 192.466 |
| ENSMUSG00000038056 | 15_Kmt2c         | 3232.14 | -0.32363 | 0.0024   | 0.0076   | 3049.08 | 2746.07 | 2816.98 | 3383.12 | 3674.88 | 3722.71 |
| ENSMUSG00000038057 | 4_Dbil5          | 8.9166  | 0.39727  | 0.60438  | 0.70471  | 13.891  | 9.17806 | 7.17092 | 9.01685 | 5.37918 | 8.86359 |

|                    |                  |         |          |          |          |         |         |         |         |         |         |
|--------------------|------------------|---------|----------|----------|----------|---------|---------|---------|---------|---------|---------|
| ENSMUSG00000038058 | 14_Nod1          | 984.851 | 0.90307  | 3.31E-08 | 4.79E-07 | 1239.77 | 1216.09 | 1393.55 | 753.809 | 548.677 | 757.204 |
| ENSMUSG00000038059 | 6_Smim3          | 203.211 | 0.58829  | 0.03886  | 0.07861  | 317.757 | 200.082 | 213.933 | 207.388 | 112.963 | 167.142 |
| ENSMUSG00000038060 | 15_Dlec1         | 41.806  | 0.29569  | 0.42025  | 0.53602  | 43.4094 | 49.5615 | 45.4159 | 45.986  | 32.2751 | 34.1881 |
| ENSMUSG00000038064 | 6_Cldn22         | 18.3274 | -0.50833 | 0.36757  | 0.48497  | 12.1546 | 16.5205 | 16.7322 | 27.0506 | 13.448  | 24.0583 |
| ENSMUSG00000038065 | 13_Mturm         | 700.35  | -0.92306 | 7.62E-06 | 5.35E-05 | 474.031 | 568.122 | 408.743 | 1156.86 | 862.462 | 731.879 |
| ENSMUSG00000038067 | 2_Csf3           | 10.1079 | 2.83079  | 0.0039   | 0.01149  | 8.68188 | 11.9315 | 32.2692 | 1.80337 | 0.89653 | 5.06491 |
| ENSMUSG00000038068 | 14_Rnf144b       | 2100.65 | 0.2332   | 0.05309  | 0.10179  | 2213.01 | 2212.83 | 2383.14 | 1750.17 | 1921.27 | 2123.46 |
| ENSMUSG00000038069 | 5_Cdkn2aip       | 578.563 | -0.13669 | 0.31918  | 0.4347   | 540.013 | 528.656 | 584.43  | 579.784 | 580.055 | 658.438 |
| ENSMUSG00000038070 | 15_Cntln         | 608.619 | -0.6088  | 4.74E-06 | 3.52E-05 | 480.108 | 511.218 | 454.159 | 697.003 | 771.016 | 738.21  |
| ENSMUSG00000038071 | 3_Npy6r          | 0       | NA       | NA       | NA       | 0       | 0       | 0       | 0       | 0       | 0       |
| ENSMUSG00000038072 | 14_Galnt11       | 832.169 | -0.24789 | 0.03381  | 0.07013  | 770.083 | 781.97  | 730.239 | 899.882 | 927.013 | 883.826 |
| ENSMUSG00000038074 | 16_Fkbp14        | 532.158 | -0.78972 | 7.45E-08 | 9.78E-07 | 401.971 | 423.108 | 344.204 | 687.986 | 697.501 | 638.178 |
| ENSMUSG00000038077 | 7_Kcna6          | 81.0995 | -0.7218  | 0.0259   | 0.05628  | 59.905  | 77.0957 | 46.611  | 125.334 | 100.411 | 77.2398 |
| ENSMUSG00000038079 | 14_Tmem237       | 329.945 | -0.69697 | 7.93E-05 | 0.00041  | 243.093 | 235.876 | 277.276 | 465.27  | 363.095 | 395.063 |
| ENSMUSG00000038080 | 16_Kdm1b         | 1245.16 | 0.23884  | 0.11374  | 0.19115  | 1347.43 | 1284.93 | 1410.28 | 944.065 | 1176.25 | 1308.01 |
| ENSMUSG00000038084 | 16_Opa1          | 1595.28 | -0.22289 | 0.05274  | 0.10122  | 1467.24 | 1428.11 | 1521.43 | 1572.54 | 1802.03 | 1780.32 |
| ENSMUSG00000038085 | 13_Cnbd2         | 53.7411 | -0.57337 | 0.14944  | 0.23833  | 40.8049 | 54.1505 | 34.6595 | 92.8736 | 49.3092 | 50.6491 |
| ENSMUSG00000038086 | 3_Hspb2          | 58.5156 | -0.30677 | 0.49573  | 0.60679  | 42.5412 | 80.7669 | 33.4643 | 94.677  | 43.93   | 55.714  |
| ENSMUSG00000038092 | 6_Hsd3b5         | 0       | NA       | NA       | NA       | 0       | 0       | 0       | 0       | 0       | 0       |
| ENSMUSG00000038094 | 15_Atp13a4       | 489.004 | 0.16517  | 0.30689  | 0.422    | 537.409 | 501.122 | 511.526 | 385.02  | 503.85  | 495.095 |
| ENSMUSG00000038095 | 15_Sbno1         | 3445.04 | -0.24701 | 0.05769  | 0.10923  | 3292.17 | 2915.87 | 3244.84 | 3302.87 | 4199.35 | 3715.11 |
| ENSMUSG00000038102 | 15_Trappc11      | 1424.57 | 0.1529   | 0.22784  | 0.33354  | 1458.56 | 1445.54 | 1595.53 | 1201.95 | 1404.86 | 1440.97 |
| ENSMUSG00000038112 | 15_AW551984      | 179.345 | -0.06412 | 0.75754  | 0.82949  | 197.079 | 145.013 | 184.054 | 185.747 | 179.306 | 184.869 |
| ENSMUSG00000038115 | 16_Ano2          | 30.9245 | -1.24763 | 0.04975  | 0.09673  | 26.0457 | 23.8629 | 4.78062 | 56.8062 | 53.7918 | 20.2596 |
| ENSMUSG00000038116 | 16_Phf20         | 916.107 | -0.40693 | 0.00251  | 0.00788  | 810.02  | 856.313 | 695.58  | 999.068 | 1097.35 | 1038.31 |
| ENSMUSG00000038119 | 14_Cdon          | 2352.69 | -0.72204 | 3.31E-08 | 4.78E-07 | 1765.03 | 1983.38 | 1578.8  | 3094.58 | 2993.52 | 2700.86 |
| ENSMUSG00000038121 | 6_Fam210a        | 963.113 | -0.65082 | 2.50E-07 | 2.78E-06 | 791.788 | 752.601 | 703.946 | 1176.7  | 1259.63 | 1094.02 |
| ENSMUSG00000038122 | 8_Tbc1d32        | 470.05  | -0.5546  | 0.00043  | 0.00175  | 366.376 | 387.314 | 388.425 | 478.795 | 604.262 | 595.127 |
| ENSMUSG00000038126 | 17_Mphosph9      | 391.83  | -0.44701 | 0.00244  | 0.00771  | 350.748 | 323.985 | 319.106 | 426.497 | 454.541 | 476.101 |
| ENSMUSG00000038127 | 14_Ccdc50        | 2678.51 | -0.53309 | 6.11E-05 | 0.00032  | 2342.37 | 2115.54 | 2109.45 | 2820.47 | 3613.91 | 3069.33 |
| ENSMUSG00000038128 | 6_Camk4          | 271.047 | -1.30643 | 1.12E-07 | 1.39E-06 | 172.769 | 183.561 | 111.149 | 440.924 | 417.783 | 300.096 |
| ENSMUSG00000038132 | 5_Rbm24          | 173.241 | -1.41768 | 9.40E-06 | 6.41E-05 | 74.6642 | 147.767 | 59.7577 | 257.882 | 232.201 | 267.174 |
| ENSMUSG00000038135 | 4_Crygn          | 38.374  | -0.06035 | 0.89957  | 0.93225  | 37.3321 | 44.0547 | 31.074  | 55.9045 | 18.8271 | 43.0517 |
| ENSMUSG00000038141 | 9_Tmem181a       | 2994.03 | -0.01497 | 0.89632  | 0.93014  | 2794.7  | 2972.77 | 3168.35 | 2756.45 | 3140.55 | 331.38  |
| ENSMUSG00000038143 | 14_Stox2         | 551.561 | -0.69316 | 3.21E-05 | 0.00019  | 436.699 | 468.999 | 358.546 | 707.823 | 739.638 | 597.659 |
| ENSMUSG00000038145 | 16_Snrk          | 2988.09 | 0.74221  | 2.09E-10 | 6.11E-09 | 3440.63 | 3740.06 | 4039.62 | 2258.72 | 2088.02 | 2361.51 |
| ENSMUSG00000038146 | 7_Notch3         | 6256.55 | 1.51231  | 6.27E-12 | 2.74E-10 | 7873.6  | 9059.66 | 10860.4 | 3321.81 | 2200.98 | 4222.87 |
| ENSMUSG00000038147 | 13_Cd84          | 62.0388 | 0.62532  | 0.12809  | 0.2104   | 114.601 | 46.8081 | 64.5383 | 60.4129 | 46.6196 | 39.253  |
| ENSMUSG00000038150 | 7_Ormdl3         | 1588.33 | 0.26641  | 0.11029  | 0.18653  | 1637.4  | 1850.3  | 1716.24 | 1758.29 | 1167.28 | 1400.45 |
| ENSMUSG00000038151 | 12_Prdm1         | 1481.3  | 0.34336  | 0.00337  | 0.01014  | 1658.24 | 1592.39 | 1721.02 | 1247.93 | 1421    | 1247.23 |
| ENSMUSG00000038152 | 4_5033430115Rik  | 20.9586 | 0.02236  | 0.96421  | 0.97673  | 26.0457 | 19.2739 | 17.9273 | 18.9354 | 23.3098 | 20.2596 |
| ENSMUSG00000038155 | 10_Gstp2         | 179.793 | 0.11981  | 0.67567  | 0.76507  | 195.342 | 179.89  | 187.639 | 242.553 | 163.169 | 110.162 |
| ENSMUSG00000038156 | 15_Spon1         | 6449.79 | -0.53189 | 0.0044   | 0.01266  | 5174.4  | 6686.21 | 3960.74 | 8349.61 | 7685.06 | 6842.69 |
| ENSMUSG00000038160 | 6_Atg5           | 1106.29 | -0.17722 | 0.13821  | 0.22329  | 1072.21 | 981.134 | 1062.49 | 1114.48 | 1255.14 | 1152.27 |
| ENSMUSG00000038167 | 6_Plekhg6        | 1483.8  | 1.2689   | 5.85E-13 | 3.39E-11 | 1906.54 | 2042.12 | 2342.5  | 987.346 | 667.019 | 957.268 |
| ENSMUSG00000038168 | 5_P3h2           | 1794.6  | 0.32936  | 0.0358   | 0.07353  | 1921.3  | 1930.15 | 2142.91 | 1287.61 | 1628.1  | 1857.55 |
| ENSMUSG00000038170 | 15_Pde4dip       | 1605.42 | -0.75898 | 0.00033  | 0.0014   | 1059.19 | 1450.13 | 1068.47 | 2649.15 | 1601.2  | 1804.37 |
| ENSMUSG00000038172 | 14_Ttc39b        | 2807.35 | 0.06418  | 0.65007  | 0.74408  | 2878.04 | 2693.76 | 3036.89 | 2282.17 | 2952.28 | 3000.96 |
| ENSMUSG00000038173 | 14_Enpp6         | 6.51201 | -1.07661 | 0.25128  | 0.36046  | 3.47275 | 5.50683 | 3.58546 | 14.427  | 4.48265 | 7.59736 |
| ENSMUSG00000038174 | 14_Fam126b       | 839.242 | -0.603   | 2.03E-05 | 0.00012  | 744.906 | 616.765 | 637.017 | 952.18  | 1104.53 | 980.06  |
| ENSMUSG00000038175 | 9_Mylip          | 1827.61 | -0.03582 | 0.73424  | 0.81167  | 1734.64 | 1820.01 | 1859.66 | 1798.86 | 1810.1  | 1942.39 |
| ENSMUSG00000038178 | 16_Slc43a2       | 653.176 | 0.51574  | 0.00784  | 0.02056  | 811.756 | 735.162 | 757.728 | 593.309 | 391.784 | 629.315 |
| ENSMUSG00000038179 | 13_Slamf7        | 28.2962 | 3.29791  | 9.39E-08 | 1.19E-06 | 76.4006 | 34.8766 | 43.0255 | 3.60674 | 8.06878 | 3.79868 |
| ENSMUSG00000038180 | 11_Spag4         | 13.1025 | 0.43709  | 0.50625  | 0.61668  | 15.6274 | 21.1095 | 8.36608 | 12.6236 | 10.7584 | 10.1298 |
| ENSMUSG00000038181 | 16_Chp2          | 700.933 | 0.9221   | 2.62E-07 | 2.90E-06 | 823.911 | 1014.18 | 914.293 | 561.75  | 383.715 | 507.757 |
| ENSMUSG00000038187 | 14_Btbd10        | 842.502 | -0.34902 | 0.01906  | 0.04342  | 738.828 | 674.587 | 810.314 | 819.632 | 1026.53 | 985.125 |
| ENSMUSG00000038188 | 17_Scarf1        | 60.3969 | 0.97938  | 0.02396  | 0.0528   | 85.0825 | 95.4518 | 59.7577 | 62.2163 | 20.6202 | 39.253  |
| ENSMUSG00000038192 | 5_Cer1           | 0.75946 | 0.58488  | 0.86435  | NA       | 0       | 2.75342 | 0       | 1.80337 | 0       | 0       |
| ENSMUSG00000038193 | 3_Hand2          | 0.58352 | 1.28689  | 0.73023  | NA       | 2.60457 | 0       | 0       | 0       | 0.89653 | 0       |
| ENSMUSG00000038195 | 6_Rilp           | 47.9558 | 0.22771  | 0.54048  | 0.6476   | 41.673  | 51.3971 | 62.148  | 49.5927 | 32.2751 | 50.6491 |
| ENSMUSG00000038199 | 12_4931409K22Rik | 0.804   | -1.9047  | 0.51039  | NA       | 0.86819 | 0       | 0       | 0       | 2.68959 | 1.26623 |
| ENSMUSG00000038201 | 9_Kcna7          | 32.1468 | -1.25997 | 0.04975  | 0.09673  | 7.8137  | 35.7944 | 13.1467 | 73.0365 | 25.1029 | 37.9868 |
| ENSMUSG00000038204 | 13_Asb10         | 37.3136 | -1.24714 | 0.02945  | 0.06254  | 15.6274 | 38.5478 | 11.9515 | 82.9551 | 30.482  | 44.3179 |
| ENSMUSG00000038205 | 12_Prkab2        | 643.75  | -0.62433 | 2.96E-06 | 2.35E-05 | 520.045 | 512.136 | 487.623 | 851.191 | 749.5   | 742.009 |
| ENSMUSG00000038206 | 12_Fbxo8         | 472.408 | -0.3795  | 0.01243  | 0.0303   | 434.094 | 393.739 | 403.962 | 482.402 | 593.503 | 526.75  |
| ENSMUSG00000038208 | 13_Pgap3         | 259.427 | 0.8582   | 0.00047  | 0.00187  | 320.362 | 308.383 | 374.083 | 223.618 | 123.721 | 206.395 |
| ENSMUSG00000038209 | 12_Itnl1         | 2.88722 | -0.21869 | 0.88082  | 0.91956  | 5.20913 | 2.75342 | 0       | 4.50843 | 3.58612 | 1.26623 |
| ENSMUSG00000038210 | 10_Hoxa11        | 0.1447  | 0.92709  | 0.82027  | NA       | 0.86819 | 0       | 0       | 0       | 0       | 0       |
| ENSMUSG00000038212 | 15_Hiatt1        | 2029.32 | -0.06303 | 0.60692  | 0.70699  | 2001.17 | 1871.41 | 2081.96 | 1851.16 | 2160.64 | 2209.57 |
| ENSMUSG00000038213 | 7_Tapbp1         | 886.741 | 1.39119  | 3.13E-15 | 3.07E-13 | 1188.55 | 1136.24 | 1526.21 | 498.632 | 412.404 | 558.406 |
| ENSMUSG00000038214 | 14_Bend3         | 271.276 | 0.36373  | 0.04458  | 0.08811  | 274.348 | 320.314 | 321.496 | 262.39  | 209.788 | 239.317 |
| ENSMUSG00000038215 | 14_Cep44         | 169.966 | -0.30128 | 0.15628  | 0.24746  | 159.747 | 136.753 | 161.346 | 197.469 | 206.202 | 158.278 |
| ENSMUSG00000038217 | 13_Tlcd2         | 265.536 | 0.02491  | 0.90081  | 0.93293  | 253.511 | 311.136 | 239.031 | 307.475 | 246.546 | 235.518 |
| ENSMUSG00000038224 | 12_Serpinf2      | 8.77848 | 0.16463  | 0.84387  | 0.89369  | 9.55007 | 14.6849 | 3.58546 | 10.8202 | 8.96531 | 5.06491 |
| ENSMUSG00000038225 | 14_Prmpol        | 302.435 | -0.14778 | 0.40925  | 0.52597  | 301.261 | 262.492 | 296.398 | 272.309 | 326.337 | 355.81  |
| ENSMUSG00000038227 | 15_Hoxa9         | 0.55135 | 2.55533  | 0.49555  | NA       | 0       | 0.91781 | 2.39031 | 0       | 0       | 0       |
| ENSMUSG00000038233 | 8_Fam198a        | 177.932 | -0.70269 | 0.00445  | 0.0128   | 138.91  | 143.178 | 124.296 | 288.539 | 180.203 | 192.466 |
| ENSMUSG00000038235 | 4_F11r           | 8910.15 | 0.48734  | 0.0003   | 0.00127  | 9810.53 | 9804    | 11587   | 6827.56 | 6954.39 | 8477.39 |
| ENSMUSG00000038236 | 8_Hoxa7          | 0.54308 | 2.53494  | 0.50107  | NA       | 0.86819 | 0       | 2.39031 | 0       | 0       | 0       |

|                    |                  |         |          |          |          |         |         |         |         |         |         |
|--------------------|------------------|---------|----------|----------|----------|---------|---------|---------|---------|---------|---------|
| ENSMUSG00000038239 | 10_Hrc           | 206.946 | -1.35046 | 5.83E-05 | 0.00031  | 103.314 | 134     | 112.344 | 423.792 | 154.203 | 314.024 |
| ENSMUSG00000038240 | 13_Pdss2         | 102.915 | -0.10568 | 0.70407  | 0.78839  | 84.2143 | 105.548 | 108.759 | 126.236 | 112.963 | 79.7723 |
| ENSMUSG00000038241 | 16_Cep250        | 684.359 | 0.57786  | 0.00169  | 0.00564  | 836.934 | 808.587 | 813.9   | 694.298 | 444.679 | 507.757 |
| ENSMUSG00000038242 | 12_Aox4          | 12.868  | 0.07517  | 0.91717  | 0.94501  | 17.3638 | 11.0137 | 10.7564 | 7.21348 | 8.06878 | 22.7921 |
| ENSMUSG00000038244 | 13_Mical2        | 490.494 | 0.01418  | 0.93766  | 0.95918  | 501.813 | 457.985 | 519.892 | 599.621 | 420.473 | 443.179 |
| ENSMUSG00000038246 | 6_Fam50b         | 0.15028 | -0.99647 | 0.80707  | NA       | 0       | 0       | 0       | 0.90169 | 0       | 0       |
| ENSMUSG00000038248 | 8_Sobp           | 92.0515 | -1.07165 | 0.00127  | 0.0044   | 54.6959 | 83.5203 | 39.4401 | 141.565 | 131.79  | 101.298 |
| ENSMUSG00000038250 | 8_Usp38          | 941.034 | -0.14158 | 0.28546  | 0.39883  | 928.093 | 833.367 | 923.854 | 909.801 | 1087.49 | 963.599 |
| ENSMUSG00000038252 | 13_Ncapd2        | 849.813 | 0.92572  | 3.33E-08 | 4.80E-07 | 1089.58 | 1038.04 | 1210.69 | 527.486 | 516.402 | 716.684 |
| ENSMUSG00000038253 | 6_Hoxa5          | 0.64156 | 2.79342  | 0.35281  | NA       | 1.73638 | 0.91781 | 1.19515 | 0       | 0       | 0       |
| ENSMUSG00000038255 | 6_Neurod2        | 0.75055 | -3.06738 | 0.3596   | NA       | 0       | 0       | 0       | 3.60674 | 0.89653 | 0       |
| ENSMUSG00000038256 | 15_Bcl9          | 840.47  | 0.61953  | 1.54E-05 | 9.87E-05 | 928.093 | 1023.35 | 1103.13 | 705.118 | 585.434 | 697.691 |
| ENSMUSG00000038257 | 8_Glra3          | 0.64832 | -1.37909 | 0.65362  | NA       | 0       | 0       | 1.19515 | 0.90169 | 1.79306 | 0       |
| ENSMUSG00000038259 | 4_Gdf5           | 1.38159 | 3.90814  | 0.09212  | NA       | 4.34094 | 2.75342 | 1.19515 | 0       | 0       | 0       |
| ENSMUSG00000038260 | 9_Trpm4          | 872.206 | 1.17693  | 1.73E-10 | 5.20E-09 | 1089.58 | 1200.49 | 1337.38 | 591.506 | 405.232 | 609.055 |
| ENSMUSG00000038264 | 7_Sema7a         | 181.1   | -0.17049 | 0.44987  | 0.56466  | 168.429 | 170.712 | 173.297 | 221.815 | 207.995 | 144.35  |
| ENSMUSG00000038267 | 14_Slc22a23      | 945.773 | 0.23834  | 0.1118   | 0.18862  | 974.107 | 1043.54 | 1051.74 | 752.006 | 836.463 | 1016.78 |
| ENSMUSG00000038268 | 4_Ovca2          | 371.48  | -0.42802 | 0.00594  | 0.01627  | 281.293 | 334.999 | 334.643 | 414.775 | 433.921 | 429.251 |
| ENSMUSG00000038271 | 17_Iffo1         | 215.622 | -0.24817 | 0.29461  | 0.40889  | 175.374 | 244.136 | 172.102 | 285.834 | 218.753 | 197.531 |
| ENSMUSG00000038274 | 11_Fau           | 3413.6  | 0.81653  | 4.26E-06 | 3.22E-05 | 4081.35 | 4608.3  | 4375.46 | 3191.06 | 2044.99 | 2180.44 |
| ENSMUSG00000038276 | 12_Asic3         | 12.7933 | -0.67664 | 0.37043  | 0.48784  | 14.7592 | 11.0137 | 3.58546 | 25.2472 | 10.7584 | 11.396  |
| ENSMUSG00000038279 | 10_Nop2          | 752.892 | 0.87457  | 3.73E-10 | 1.01E-08 | 932.434 | 933.408 | 1056.52 | 540.11  | 478.747 | 576.133 |
| ENSMUSG00000038280 | 12_Ostm1         | 858.404 | -0.41578 | 0.0004   | 0.00164  | 744.037 | 756.272 | 706.336 | 990.051 | 1010.39 | 943.339 |
| ENSMUSG00000038286 | 10_Bphl          | 578.334 | -0.21294 | 0.09592  | 0.16618  | 525.254 | 558.944 | 522.282 | 617.655 | 605.158 | 640.711 |
| ENSMUSG00000038290 | 15_Smg6          | 1234.71 | 0.19339  | 0.07516  | 0.13616  | 1268.42 | 1351.93 | 1331.4  | 1116.29 | 1160.11 | 1180.12 |
| ENSMUSG00000038291 | 16_Snx25         | 1379.44 | -0.17567 | 0.1954   | 0.29552  | 1369.13 | 1304.2  | 1210.69 | 1358.84 | 1363.62 | 1670.15 |
| ENSMUSG00000038292 | 12_Ccdc155       | 12.2357 | 1.13819  | 0.1003   | 0.17256  | 21.7047 | 14.6849 | 14.3418 | 9.91854 | 8.96531 | 3.79868 |
| ENSMUSG00000038295 | 14_Atg9b         | 439.351 | 1.07194  | 1.57E-12 | 7.98E-11 | 575.609 | 587.396 | 622.675 | 251.57  | 294.959 | 303.894 |
| ENSMUSG00000038296 | 14_Gaint18       | 4548.95 | 1.18407  | 1.50E-11 | 6.01E-10 | 5730.04 | 5846.42 | 7375.3  | 3063.03 | 2152.57 | 3126.31 |
| ENSMUSG00000038298 | 14_Pdzk1         | 6.39589 | 0.98969  | 0.25704  | 0.36683  | 8.68188 | 7.34244 | 9.56123 | 4.50843 | 4.48265 | 3.79868 |
| ENSMUSG00000038299 | 15_Wdr36         | 1591.69 | -0.00923 | 0.95583  | 0.97132  | 1681.68 | 1406.08 | 1670.83 | 1279.49 | 1646.93 | 1865.15 |
| ENSMUSG00000038301 | 15_Snx10         | 532.447 | -0.26437 | 0.12568  | 0.20715  | 507.022 | 428.615 | 517.502 | 602.326 | 658.053 | 481.166 |
| ENSMUSG00000038302 | 14_Lace1         | 340.14  | 0.02755  | 0.8574   | 0.90348  | 340.33  | 345.095 | 345.4   | 326.41  | 365.784 | 317.823 |
| ENSMUSG00000038304 | 14_Cd160         | 8.19275 | -0.12679 | 0.8676   | 0.91022  | 6.94551 | 8.26025 | 8.36608 | 9.91854 | 8.06878 | 7.59736 |
| ENSMUSG00000038305 | 14_Spats2l       | 596.6   | 0.82569  | 5.96E-08 | 7.98E-07 | 788.315 | 656.231 | 844.974 | 425.596 | 449.162 | 415.322 |
| ENSMUSG00000038311 | 13_241001717Rik  | 1.18765 | -1.6008  | 0.52564  | NA       | 1.73638 | 0       | 0       | 1.80337 | 3.58612 | 0       |
| ENSMUSG00000038312 | 10_Edem2         | 746.599 | 0.49647  | 0.00052  | 0.00206  | 791.788 | 915.052 | 914.293 | 653.722 | 551.366 | 653.373 |
| ENSMUSG00000038319 | 14_Kcnh2         | 68.2006 | 0.03721  | 0.93451  | 0.95678  | 50.3549 | 110.137 | 46.611  | 99.1854 | 42.1369 | 60.7789 |
| ENSMUSG00000038323 | 3_1700066M21Rik  | 124.891 | -0.58172 | 0.03522  | 0.07258  | 103.314 | 80.7669 | 117.125 | 144.27  | 187.375 | 116.493 |
| ENSMUSG00000038324 | 13_Trpc4ap       | 3129.35 | 0.48464  | 7.55E-06 | 5.31E-05 | 3474.49 | 3619.83 | 3855.57 | 2650.96 | 2437.67 | 2737.58 |
| ENSMUSG00000038327 | 8_Serpinb9f      | 0.94147 | 3.32614  | 0.29039  | NA       | 0.86819 | 0       | 4.78062 | 0       | 0       | 0       |
| ENSMUSG00000038331 | 15_Satb2         | 18.698  | 0.33381  | 0.56873  | 0.67351  | 29.5184 | 12.8493 | 20.3176 | 14.427  | 22.4133 | 12.6623 |
| ENSMUSG00000038332 | 12_Sesn1         | 1922.62 | -0.32955 | 0.00619  | 0.01686  | 1734.64 | 1711.71 | 1663.65 | 1927.8  | 2142.71 | 2355.18 |
| ENSMUSG00000038335 | 13_Tsr1          | 905.318 | -0.02768 | 0.85004  | 0.89827  | 963.689 | 786.559 | 939.391 | 813.32  | 969.15  | 959.8   |
| ENSMUSG00000038342 | 15_Mlxi          | 1670.76 | 0.48646  | 1.67E-05 | 0.00011  | 1856.19 | 1947.58 | 2044.91 | 1314.66 | 1379.76 | 1481.49 |
| ENSMUSG00000038344 | 14_Txln          | 398.057 | -0.42578 | 0.02414  | 0.05312  | 334.253 | 322.15  | 363.327 | 368.789 | 547.78  | 452.043 |
| ENSMUSG00000038346 | 18_Zfp384        | 1356.73 | 0.38832  | 0.00022  | 0.00098  | 1536.69 | 1510.71 | 1566.85 | 1145.14 | 1171.77 | 1209.25 |
| ENSMUSG00000038347 | 12_Tcte2         | 153.563 | 0.29309  | 0.18118  | 0.27847  | 175.374 | 182.643 | 148.199 | 119.924 | 140.755 | 154.48  |
| ENSMUSG00000038349 | 10_Plcl1         | 78.9308 | -1.58902 | 3.56E-06 | 2.75E-05 | 35.5957 | 51.3971 | 31.074  | 144.27  | 126.411 | 84.8372 |
| ENSMUSG00000038351 | 14_Sgsm2         | 778.564 | 0.48493  | 0.00249  | 0.00784  | 883.816 | 973.792 | 866.487 | 748.399 | 537.918 | 660.97  |
| ENSMUSG00000038352 | 15_Arl5c         | 119.816 | -0.18848 | 0.54825  | 0.65473  | 142.383 | 66.9998 | 126.686 | 111.809 | 138.066 | 132.954 |
| ENSMUSG00000038354 | 13_Ankrd35       | 1885.93 | 0.85641  | 2.62E-08 | 3.91E-07 | 2297.23 | 2318.38 | 2672.36 | 1367.86 | 1109.9  | 1549.86 |
| ENSMUSG00000038357 | 10_Camp          | 14.2349 | 1.82543  | 0.01673  | 0.03904  | 18.232  | 9.17806 | 39.4401 | 8.11517 | 5.37918 | 5.06491 |
| ENSMUSG00000038365 | 7_Fbxo25         | 397.105 | 0.00114  | 0.99439  | 0.99621  | 393.289 | 412.095 | 387.23  | 454.449 | 381.025 | 354.544 |
| ENSMUSG00000038366 | 15_Lasp1         | 4248.53 | 0.67711  | 4.31E-07 | 4.46E-06 | 4782.85 | 5078.22 | 5821.6  | 3437.23 | 2868.9  | 3502.38 |
| ENSMUSG00000038368 | 16_Focad         | 850.818 | 0.17029  | 0.14993  | 0.23895  | 869.925 | 884.765 | 948.952 | 778.155 | 820.325 | 802.788 |
| ENSMUSG00000038369 | 14_Ncoa6         | 1935.32 | 0.32231  | 0.01658  | 0.03876  | 2022.88 | 2156.84 | 2270.79 | 1499.5  | 1725.82 | 1936.06 |
| ENSMUSG00000038370 | 6_Pcp41l         | 140.427 | -1.24764 | 0.00014  | 0.00065  | 78.137  | 119.315 | 51.3916 | 244.357 | 156.893 | 192.466 |
| ENSMUSG00000038371 | 14_Sbf2          | 1791.36 | -0.03506 | 0.72507  | 0.80422  | 1754.61 | 1740.16 | 1814.24 | 1782.63 | 1821.75 | 1834.76 |
| ENSMUSG00000038372 | 13_Gmds          | 669.769 | 0.24426  | 0.08597  | 0.15171  | 658.955 | 711.299 | 810.314 | 592.407 | 651.778 | 593.86  |
| ENSMUSG00000038374 | 10_Rbm8a         | 1313.27 | 0.01395  | 0.91902  | 0.94623  | 1331.8  | 1199.57 | 1427.01 | 1161.37 | 1327.76 | 1432.1  |
| ENSMUSG00000038375 | 15_Trp53inp2     | 6034.33 | 0.11777  | 0.25099  | 0.36011  | 5975.74 | 6174.08 | 6692.86 | 5529.14 | 6024.69 | 5809.45 |
| ENSMUSG00000038379 | 15_Ttk           | 233.734 | -0.00505 | 0.98327  | 0.98881  | 259.588 | 186.315 | 254.568 | 186.649 | 294.959 | 220.323 |
| ENSMUSG00000038383 | 16_Pigu          | 831.666 | 0.0811   | 0.58292  | 0.68605  | 862.111 | 762.696 | 940.586 | 715.037 | 862.462 | 847.106 |
| ENSMUSG00000038384 | 16_Setd1b        | 1034.66 | 1.09699  | 7.56E-15 | 6.72E-13 | 1295.34 | 1404.24 | 1530.99 | 722.25  | 582.745 | 672.366 |
| ENSMUSG00000038387 | 8_Rras           | 599.643 | 0.18469  | 0.28471  | 0.39804  | 672.846 | 612.176 | 628.651 | 663.641 | 454.541 | 566.003 |
| ENSMUSG00000038388 | 14_Mpp6          | 773.594 | -0.53916 | 0.00013  | 0.00062  | 661.56  | 641.546 | 588.016 | 815.124 | 1005.91 | 929.411 |
| ENSMUSG00000038390 | 11_Gpr162        | 174.294 | -0.2275  | 0.473    | 0.58585  | 154.538 | 201.917 | 125.491 | 276.817 | 151.514 | 135.486 |
| ENSMUSG00000038393 | 14_Txnip         | 15758.1 | 0.06417  | 0.60124  | 0.7023   | 14705.4 | 16068   | 17552   | 13832.8 | 15810.3 | 16580   |
| ENSMUSG00000038398 | 7_Upf3a          | 475.591 | 0.00305  | 0.98246  | 0.98835  | 441.908 | 501.122 | 485.233 | 473.385 | 464.403 | 487.497 |
| ENSMUSG00000038400 | 15_Pmepa1        | 698.959 | 0.33461  | 0.05743  | 0.1088   | 695.419 | 843.463 | 800.753 | 747.497 | 519.091 | 587.529 |
| ENSMUSG00000038402 | 2_Foxf2          | 69.1396 | -0.83846 | 0.00919  | 0.02353  | 51.2231 | 57.8218 | 39.4401 | 110.006 | 75.3086 | 81.0385 |
| ENSMUSG00000038403 | 10_Hfe2          | 51.6166 | -1.57129 | 0.00015  | 0.0007   | 20.8365 | 32.1232 | 25.0982 | 109.104 | 52.8953 | 69.6425 |
| ENSMUSG00000038406 | 15_Scaf1         | 1385.52 | 1.15572  | 4.63E-10 | 1.21E-08 | 1613.09 | 1936.57 | 2188.33 | 1013.49 | 671.501 | 890.158 |
| ENSMUSG00000038408 | 13_1700018A04Rik | 3.74233 | -1.91773 | 0.2132   | 0.31667  | 0       | 4.58903 | 0       | 6.3118  | 2.68959 | 8.86359 |
| ENSMUSG00000038412 | 7_Higd1a         | 1006.32 | -0.35136 | 0.00516  | 0.01447  | 928.093 | 864.573 | 860.511 | 1061.28 | 1234.52 | 1088.96 |
| ENSMUSG00000038415 | 9_Foxq1          | 795.214 | 0.61977  | 0.00633  | 0.01718  | 816.097 | 944.422 | 1128.23 | 505.846 | 518.195 | 858.502 |
| ENSMUSG00000038416 | 14_Cdc16         | 1106.39 | -0.34867 | 0.00562  | 0.01553  | 986.262 | 938.915 | 995.563 | 1146.94 | 1369    | 1201.65 |
| ENSMUSG00000038417 | 3_Fig4           | 379.379 | -0.33201 | 0.02315  | 0.0513   | 351.616 | 341.424 | 314.326 | 431.006 | 427.645 | 410.258 |

|                    |                  |         |          |          |          |         |         |         |         |         |         |
|--------------------|------------------|---------|----------|----------|----------|---------|---------|---------|---------|---------|---------|
| ENSMUSG00000038418 | 7_Egr1           | 824.739 | 1.29654  | 0.01106  | 0.0275   | 1501.1  | 825.107 | 1190.37 | 678.969 | 222.34  | 530.549 |
| ENSMUSG00000038421 | 13_Fcrla         | 3.41324 | 1.68322  | 0.20284  | 0.30438  | 9.55007 | 3.67122 | 2.39031 | 2.70506 | 0.89653 | 1.26623 |
| ENSMUSG00000038422 | 2_Hdh3           | 351.029 | 0.68227  | 0.00281  | 0.00869  | 414.126 | 450.643 | 432.646 | 345.346 | 187.375 | 276.037 |
| ENSMUSG00000038425 | 17_Poli          | 132.509 | -0.19721 | 0.39545  | 0.5131   | 113.733 | 128.493 | 129.077 | 140.663 | 164.065 | 119.025 |
| ENSMUSG00000038429 | 10_Usp5          | 2486.89 | 0.72553  | 7.46E-09 | 1.32E-07 | 2879.78 | 3043.48 | 3373.92 | 1859.28 | 1712.37 | 2052.55 |
| ENSMUSG00000038437 | 11_Mllt6         | 1571.03 | 0.28569  | 0.06316  | 0.11791  | 1636.54 | 1820.01 | 1722.22 | 1691.56 | 1202.25 | 1353.6  |
| ENSMUSG00000038446 | 7_Cdc40          | 868.783 | -0.11925 | 0.34714  | 0.46398  | 856.902 | 759.943 | 883.219 | 922.424 | 927.909 | 862.301 |
| ENSMUSG00000038451 | 13_Spsb2         | 205.598 | 0.74013  | 0.00131  | 0.00453  | 230.07  | 263.41  | 277.276 | 163.205 | 114.756 | 184.869 |
| ENSMUSG00000038453 | 15_Srcin1        | 1018.34 | 0.92059  | 3.36E-10 | 9.26E-09 | 1242.38 | 1236.28 | 1520.24 | 768.236 | 640.123 | 702.756 |
| ENSMUSG00000038456 | 9_Dennd2a        | 359.261 | -0.66975 | 0.00839  | 0.02181  | 258.72  | 362.533 | 210.347 | 571.669 | 371.164 | 381.134 |
| ENSMUSG00000038457 | 16_Tmem255b      | 30.7126 | 0.82238  | 0.10961  | 0.18562  | 39.9367 | 38.5478 | 39.4401 | 36.9691 | 11.6549 | 17.7272 |
| ENSMUSG00000038459 | 9_Abhd17c        | 1245.65 | 0.26771  | 0.03813  | 0.07743  | 1260.61 | 1353.76 | 1467.65 | 1066.69 | 1083.01 | 1242.17 |
| ENSMUSG00000038462 | 3_Uqcrfs1        | 1452.42 | -0.18818 | 0.07501  | 0.13595  | 1319.65 | 1392.31 | 1362.48 | 1575.24 | 1577    | 1487.82 |
| ENSMUSG00000038463 | 8_Olfml2b        | 325.537 | -0.18921 | 0.39266  | 0.51018  | 317.757 | 306.547 | 288.032 | 437.317 | 252.822 | 350.745 |
| ENSMUSG00000038467 | 15_Chmp4b        | 4540.01 | 0.481    | 4.22E-05 | 0.00024  | 5035.49 | 4909.34 | 5925.57 | 3671.66 | 3766.32 | 3931.63 |
| ENSMUSG00000038473 | 14_Nos1ap        | 142.869 | 0.33694  | 0.17792  | 0.27457  | 139.778 | 194.575 | 143.418 | 137.056 | 103.101 | 139.285 |
| ENSMUSG00000038481 | 12_Cdk19         | 1256.14 | -0.26686 | 0.04354  | 0.08635  | 1210.25 | 983.888 | 1227.42 | 1366.96 | 1368.11 | 1380.19 |
| ENSMUSG00000038482 | 10_Tfdp1         | 1651.56 | 0.44336  | 0.00134  | 0.00461  | 1949.95 | 1679.58 | 2079.57 | 1318.26 | 1323.28 | 1558.73 |
| ENSMUSG00000038485 | 5_Socs7          | 1626.54 | -0.14019 | 0.2218   | 0.32671  | 1601.81 | 1508.87 | 1532.19 | 1848.46 | 1600.31 | 1667.62 |
| ENSMUSG00000038486 | 9_Sv2a           | 502.839 | -0.81156 | 0.01678  | 0.03914  | 364.639 | 518.56  | 211.542 | 951.278 | 553.159 | 417.855 |
| ENSMUSG00000038489 | 8_Polr2l         | 172.463 | 0.31976  | 0.09232  | 0.16096  | 191.87  | 186.315 | 196.005 | 150.581 | 147.928 | 162.077 |
| ENSMUSG00000038495 | 14_Otud7b        | 2913.82 | 0.21978  | 0.0577   | 0.10924  | 3023.9  | 2999.39 | 3382.29 | 2673.5  | 2506.7  | 2897.13 |
| ENSMUSG00000038496 | 16_Slc19a3       | 23.7684 | -0.94661 | 0.05072  | 0.09826  | 14.7592 | 12.8493 | 21.5128 | 32.4607 | 33.1716 | 27.857  |
| ENSMUSG00000038497 | 6_Tmco3          | 595.152 | -0.00832 | 0.95891  | 0.97348  | 574.741 | 634.204 | 571.284 | 693.396 | 511.022 | 586.263 |
| ENSMUSG00000038500 | 15_Prr3          | 229.262 | 0.10296  | 0.64041  | 0.73615  | 230.07  | 274.424 | 207.957 | 272.309 | 194.547 | 196.265 |
| ENSMUSG00000038502 | 15_Ptov1         | 1040.51 | 1.00983  | 1.87E-05 | 0.00012  | 1191.15 | 1577.71 | 1403.11 | 953.082 | 476.058 | 641.977 |
| ENSMUSG00000038503 | 14_Mesdc2        | 1437.19 | -0.22958 | 0.05586  | 0.10625  | 1383.89 | 1278.5  | 1307.5  | 1699.68 | 1493.62 | 1459.96 |
| ENSMUSG00000038506 | 13_Dcun1d2       | 605.637 | -0.09817 | 0.45427  | 0.56848  | 548.695 | 595.656 | 610.724 | 623.065 | 599.779 | 655.906 |
| ENSMUSG00000038507 | 6_Parp12         | 4906.86 | 0.92564  | 4.07E-08 | 5.72E-07 | 6087.74 | 5589.44 | 7610.74 | 2777.19 | 3877.49 | 3498.58 |
| ENSMUSG00000038508 | 7_Gdf15          | 3.0977  | 1.89336  | 0.21211  | 0.31549  | 6.07732 | 7.34244 | 1.19515 | 2.70506 | 0       | 1.26623 |
| ENSMUSG00000038510 | 12_Rpf2          | 350.245 | -0.34429 | 0.1049   | 0.17916  | 365.507 | 249.643 | 310.74  | 324.607 | 463.506 | 387.465 |
| ENSMUSG00000038515 | 9_Grtp1          | 64.5165 | -0.42246 | 0.27696  | 0.38946  | 52.9595 | 62.4108 | 50.1965 | 112.711 | 49.3092 | 59.5127 |
| ENSMUSG00000038517 | 15_Tbkbp1        | 115.719 | 0.23109  | 0.37942  | 0.49697  | 131.965 | 123.904 | 119.515 | 137.056 | 93.2392 | 88.6359 |
| ENSMUSG00000038518 | 15_Jarid2        | 2423.15 | 0.51578  | 0.0002   | 0.00089  | 2799.91 | 2657.05 | 3096.64 | 1880.92 | 1801.13 | 2303.27 |
| ENSMUSG00000038520 | 14_Tbc1d17       | 760.918 | 0.79587  | 1.59E-05 | 0.0001   | 860.375 | 1004.08 | 1032.61 | 668.149 | 433.024 | 567.27  |
| ENSMUSG00000038521 | 17_C1s1          | 3285.08 | -0.13915 | 0.30144  | 0.41619  | 3605.59 | 2981.03 | 2793.08 | 3441.73 | 3661.43 | 3227.61 |
| ENSMUSG00000038522 | 6_Al317395       | 9.08707 | -1.12211 | 0.14276  | 0.22943  | 5.20913 | 8.26025 | 3.58546 | 12.6236 | 13.448  | 11.396  |
| ENSMUSG00000038523 | 10_1700003F12Rik | 1.47921 | 0.11964  | 0.95458  | NA       | 0.86819 | 3.67122 | 0       | 1.80337 | 0       | 2.53245 |
| ENSMUSG00000038524 | 13_Fchsd1        | 421.741 | 1.18614  | 1.26E-08 | 2.09E-07 | 548.695 | 570.875 | 638.212 | 314.688 | 188.271 | 269.706 |
| ENSMUSG00000038525 | 16_Armc10        | 589.536 | -0.27166 | 0.0777   | 0.13993  | 575.609 | 474.505 | 552.161 | 570.767 | 686.742 | 677.431 |
| ENSMUSG00000038526 | 14_Carl4         | 973.832 | -1.20943 | 5.78E-05 | 0.00031  | 575.609 | 851.724 | 335.838 | 1749.27 | 1355.55 | 974.995 |
| ENSMUSG00000038527 | 9_C1rl           | 175.404 | -0.13267 | 0.55434  | 0.66053  | 184.924 | 161.534 | 155.37  | 220.913 | 152.41  | 177.272 |
| ENSMUSG00000038528 | 14_BC021785      | 3.2577  | 0.19901  | 0.86767  | 0.91022  | 5.20913 | 2.75342 | 2.39031 | 2.70506 | 2.68959 | 3.79868 |
| ENSMUSG00000038530 | 11_Rgs4          | 60.3768 | -1.57268 | 2.54E-05 | 0.00015  | 26.9138 | 41.3013 | 22.7079 | 115.416 | 82.4808 | 73.4412 |
| ENSMUSG00000038533 | 15_Cbfa2t2       | 902.628 | -0.03433 | 0.77049  | 0.83874  | 930.698 | 893.025 | 850.95  | 877.34  | 936.874 | 926.878 |
| ENSMUSG00000038534 | 17_Osbpl7        | 486.139 | 1.08397  | 1.62E-06 | 1.40E-05 | 594.709 | 629.615 | 757.728 | 394.037 | 217.857 | 322.888 |
| ENSMUSG00000038535 | 17_Zfp280d       | 789.391 | -0.44002 | 0.00236  | 0.00748  | 671.978 | 666.327 | 671.677 | 794.385 | 1035.49 | 896.489 |
| ENSMUSG00000038537 | 1_Mc3r           | 0.30594 | 1.73752  | 0.66765  | NA       | 0       | 1.83561 | 0       | 0       | 0       | 0       |
| ENSMUSG00000038538 | 17_Ubn2          | 1666.66 | -0.42039 | 0.00718  | 0.01908  | 1497.63 | 1373.95 | 1404.31 | 1526.55 | 2174.09 | 2023.43 |
| ENSMUSG00000038539 | 14_Atf5          | 973.027 | 0.40983  | 0.02057  | 0.04638  | 962.821 | 1133.49 | 1234.59 | 944.065 | 661.64  | 901.554 |
| ENSMUSG00000038540 | 14_Tmc3          | 159.467 | -0.76624 | 0.00255  | 0.00798  | 117.205 | 152.356 | 83.6608 | 197.469 | 203.512 | 202.596 |
| ENSMUSG00000038541 | 7_Srd5a2         | 17.4218 | -1.09084 | 0.30811  | 0.42307  | 0.86819 | 27.5342 | 4.78062 | 23.4438 | 3.58612 | 44.3179 |
| ENSMUSG00000038542 | 14_Pcid2         | 475.768 | 0.40985  | 0.00231  | 0.00736  | 560.85  | 538.752 | 528.258 | 407.562 | 396.267 | 422.92  |
| ENSMUSG00000038543 | 13_BC028528      | 49.2841 | -0.51856 | 0.11236  | 0.18935  | 41.673  | 40.3834 | 39.4401 | 54.1011 | 61.8606 | 58.2464 |
| ENSMUSG00000038544 | 14_Inip          | 604.689 | 0.10787  | 0.39949  | 0.51695  | 619.018 | 602.998 | 660.92  | 579.784 | 600.675 | 564.737 |
| ENSMUSG00000038545 | 13_Cul7          | 687.64  | 0.52595  | 0.02405  | 0.05295  | 735.356 | 920.559 | 779.24  | 770.941 | 398.06  | 521.685 |
| ENSMUSG00000038546 | 8_Ranbp9         | 1239.56 | -0.1721  | 0.21967  | 0.32441  | 1225.01 | 1142.67 | 1129.42 | 1156.86 | 1507.07 | 1276.36 |
| ENSMUSG00000038550 | 10_Ciart         | 161.129 | 1.01466  | 1.71E-06 | 1.47E-05 | 225.729 | 223.027 | 197.2   | 114.514 | 92.3426 | 113.96  |
| ENSMUSG00000038552 | 14_Fndc4         | 271.51  | -0.67281 | 0.00574  | 0.0158   | 181.451 | 274.424 | 172.102 | 399.447 | 328.13  | 273.505 |
| ENSMUSG00000038555 | 7_Reep2          | 72.1288 | -0.41285 | 0.32211  | 0.43789  | 55.5641 | 75.2601 | 54.9771 | 134.351 | 49.3092 | 63.3113 |
| ENSMUSG00000038560 | 7_Sp6            | 419.162 | 0.44715  | 0.00751  | 0.01983  | 515.704 | 455.232 | 478.062 | 338.132 | 313.786 | 414.056 |
| ENSMUSG00000038563 | 13_Eftud1        | 645.637 | 0.27388  | 0.13609  | 0.22036  | 738.828 | 655.313 | 724.263 | 464.368 | 569.297 | 721.749 |
| ENSMUSG00000038564 | 10_lft172        | 928.6   | 0.15932  | 0.26031  | 0.37053  | 950.666 | 1086.68 | 901.146 | 947.671 | 788.947 | 896.489 |
| ENSMUSG00000038567 | 5_Cyp24a1        | 1685.94 | 0.3568   | 0.04621  | 0.09078  | 1920.43 | 2010.91 | 1746.12 | 1153.26 | 1436.24 | 1848.69 |
| ENSMUSG00000038569 | 13_Rad9b         | 236.938 | 0.14357  | 0.45011  | 0.56493  | 260.457 | 230.369 | 254.568 | 191.157 | 233.098 | 251.979 |
| ENSMUSG00000038570 | 14_Saxo2         | 23.6167 | -0.5536  | 0.28665  | 0.40007  | 21.7047 | 24.7808 | 10.7564 | 30.6573 | 32.2751 | 21.5259 |
| ENSMUSG00000038572 | 7_Bpifb5         | 21.0618 | -0.73688 | 0.18892  | 0.28805  | 19.9683 | 16.5205 | 10.7564 | 38.7725 | 18.8271 | 21.5259 |
| ENSMUSG00000038576 | 15_Susd4         | 1353.59 | 0.84862  | 1.87E-06 | 1.58E-05 | 1458.56 | 1611.67 | 2151.28 | 901.685 | 892.944 | 1105.42 |
| ENSMUSG00000038578 | 15_Susd1         | 263.388 | 0.30693  | 0.11152  | 0.18821  | 303.866 | 278.095 | 290.422 | 201.076 | 223.236 | 283.635 |
| ENSMUSG00000038580 | 12_Sct           | 4.22516 | 5.50516  | 0.00258  | 0.00808  | 11.2864 | 0.91781 | 13.1467 | 0       | 0       | 0       |
| ENSMUSG00000038582 | 15_Pptc7         | 1187.88 | -0.00231 | 0.98417  | 0.98948  | 1132.99 | 1146.34 | 1282.4  | 1202.85 | 1154.73 | 1207.98 |
| ENSMUSG00000038583 | 12_Pln           | 33.9848 | -2.5934  | 4.02E-06 | 3.06E-05 | 10.4183 | 15.6027 | 2.39031 | 77.545  | 51.1022 | 46.8504 |
| ENSMUSG00000038587 | 8_Akap12         | 1126.24 | -0.77471 | 3.01E-05 | 0.00018  | 702.364 | 1024.27 | 766.094 | 1675.33 | 1256.04 | 1333.34 |
| ENSMUSG00000038591 | 3_Colec10        | 2.83359 | -0.22744 | 0.86431  | 0.9078   | 1.73638 | 3.67122 | 2.39031 | 4.50843 | 0.89653 | 3.79868 |
| ENSMUSG00000038593 | 18_Tctn1         | 547.144 | 0.5815   | 0.00063  | 0.00241  | 608.6   | 668.162 | 691.994 | 523.879 | 377.439 | 412.79  |
| ENSMUSG00000038594 | 8_Cep85l         | 44.8605 | -1.02937 | 0.00411  | 0.01196  | 26.0457 | 33.9588 | 28.6837 | 62.2163 | 66.3433 | 51.9153 |
| ENSMUSG00000038598 | 9_Al481877       | 0.74797 | -3.06283 | 0.36079  | NA       | 0       | 0       | 0       | 0.90169 | 3.58612 | 0       |
| ENSMUSG00000038599 | 14_Capn8         | 0.79387 | -0.45428 | 0.85954  | NA       | 0.86819 | 0       | 1.19515 | 1.80337 | 0.89653 | 0       |
| ENSMUSG00000038600 | 12_Atp6v0a4      | 12.6264 | -0.21752 | 0.77094  | 0.83913  | 15.6274 | 11.0137 | 8.36608 | 24.3455 | 6.27571 | 10.1298 |

|                    |                 |         |          |          |          |         |         |         |         |         |         |
|--------------------|-----------------|---------|----------|----------|----------|---------|---------|---------|---------|---------|---------|
| ENSMUSG00000038602 | 7_Slc35f1       | 78.0167 | -1.53783 | 4.95E-06 | 3.66E-05 | 32.123  | 53.2327 | 34.6595 | 126.236 | 134.48  | 87.3697 |
| ENSMUSG00000038604 | 8_Fam65a        | 327.077 | 0.23359  | 0.32535  | 0.44138  | 314.284 | 408.423 | 338.229 | 402.152 | 232.201 | 267.174 |
| ENSMUSG00000038605 | 11_Samd10       | 826.968 | 0.39629  | 0.00066  | 0.00252  | 939.38  | 907.71  | 972.855 | 703.315 | 724.397 | 714.152 |
| ENSMUSG00000038607 | 12_Gng10        | 415.939 | -0.52506 | 0.00106  | 0.00377  | 364.639 | 312.972 | 346.595 | 504.944 | 533.436 | 433.05  |
| ENSMUSG00000038608 | 15_Dock10       | 192.814 | -0.21279 | 0.32286  | 0.43873  | 205.761 | 177.136 | 152.98  | 213.699 | 231.305 | 176.006 |
| ENSMUSG00000038611 | 16_Phrf1        | 1462.97 | 0.6524   | 1.20E-06 | 1.08E-05 | 1653.9  | 1806.24 | 1903.88 | 1192.93 | 995.149 | 1225.71 |
| ENSMUSG00000038612 | 17_Mcl1         | 5714.86 | -0.04274 | 0.7467   | 0.82106  | 5673.61 | 5085.56 | 6132.34 | 5126.98 | 6430.81 | 5839.84 |
| ENSMUSG00000038615 | 17_Nfe2l1       | 5803.82 | 0.26027  | 0.0545   | 0.10408  | 5908.89 | 6375.08 | 6694.06 | 5933.99 | 4488.93 | 5421.98 |
| ENSMUSG00000038618 | 11_Rassf7       | 3202.24 | 1.08166  | 1.02E-09 | 2.41E-08 | 3940.71 | 3941.06 | 5166.65 | 2359.71 | 1623.62 | 2181.71 |
| ENSMUSG00000038619 | 12_Ensa         | 2668.98 | -0.29608 | 0.00265  | 0.00825  | 2493.44 | 2340.4  | 2354.45 | 2951.22 | 3011.45 | 2862.94 |
| ENSMUSG00000038622 | 7_Med30         | 312.548 | -0.46076 | 0.00364  | 0.01081  | 271.743 | 264.328 | 252.178 | 335.427 | 366.681 | 384.933 |
| ENSMUSG00000038623 | 9_Tm6sf1        | 82.0772 | -0.1975  | 0.53397  | 0.64211  | 94.6325 | 80.7669 | 53.7819 | 90.1685 | 102.204 | 70.9087 |
| ENSMUSG00000038624 | 11_Nepn         | 0.35574 | -0.03469 | 0.99322  | NA       | 0.86819 | 0       | 0       | 0       | 0       | 1.26623 |
| ENSMUSG00000038628 | 8_Polr3k        | 756.665 | -0.46137 | 0.00031  | 0.00132  | 626.832 | 636.957 | 646.578 | 809.714 | 944.943 | 874.963 |
| ENSMUSG00000038630 | 8_Zkscan16      | 54.8622 | -1.90453 | 1.74E-05 | 0.00011  | 24.3093 | 29.3698 | 15.537  | 110.006 | 103.101 | 46.8504 |
| ENSMUSG00000038633 | 5_Degs1         | 2738.57 | -0.5517  | 9.13E-06 | 6.25E-05 | 2297.23 | 2414.75 | 1950.49 | 3246.97 | 3418.47 | 3103.52 |
| ENSMUSG00000038637 | 14_Lrrc56       | 97.647  | 0.88291  | 0.00035  | 0.00148  | 130.228 | 122.068 | 127.881 | 64.9214 | 76.2051 | 64.5776 |
| ENSMUSG00000038642 | 10_Ctss         | 1561.94 | 1.35503  | 7.64E-10 | 1.88E-08 | 3010.88 | 1525.39 | 2201.47 | 936.851 | 849.911 | 847.106 |
| ENSMUSG00000038644 | 14_Pold1        | 367.016 | 1.94149  | 7.85E-14 | 5.48E-12 | 534.804 | 515.807 | 696.775 | 202.879 | 98.6184 | 153.213 |
| ENSMUSG00000038646 | 13_Fam103a1     | 749.207 | -0.55639 | 2.32E-05 | 0.00014  | 630.305 | 580.053 | 608.333 | 812.419 | 914.461 | 949.67  |
| ENSMUSG00000038648 | 5_Creb3l2       | 1577.73 | -0.35401 | 0.01635  | 0.03832  | 1257.14 | 1642.87 | 1254.91 | 1704.19 | 1888.99 | 1718.27 |
| ENSMUSG00000038650 | 14_Rnh1         | 7882.63 | 1.08293  | 1.42E-09 | 3.19E-08 | 9969.41 | 10078.4 | 12080.6 | 5933.99 | 3764.53 | 5468.83 |
| ENSMUSG00000038656 | 5_Cyp3a16       | 0.19919 | 0.92709  | 0.82027  | NA       | 0       | 0       | 1.19515 | 0       | 0       | 0       |
| ENSMUSG00000038658 | 15_Ric1         | 1086.27 | -0.14425 | 0.20787  | 0.31058  | 1033.14 | 1063.74 | 997.954 | 1076.61 | 1161.01 | 1185.19 |
| ENSMUSG00000038663 | 7_Fsd2          | 59.8306 | -2.14724 | 3.52E-06 | 2.73E-05 | 12.1546 | 30.2876 | 23.9031 | 140.663 | 58.2745 | 93.7008 |
| ENSMUSG00000038664 | 16_Herc1        | 2710.81 | -0.30517 | 0.00337  | 0.01014  | 2529.03 | 2334.9  | 2410.63 | 2828.59 | 3067.03 | 3094.66 |
| ENSMUSG00000038665 | 15_Dgki         | 33.7864 | -0.53075 | 0.20669  | 0.30912  | 27.782  | 30.2876 | 25.0982 | 43.2809 | 48.4127 | 27.857  |
| ENSMUSG00000038668 | 14_Lpar1        | 824.424 | -0.23886 | 0.08232  | 0.14662  | 829.988 | 758.107 | 680.043 | 959.393 | 857.98  | 861.034 |
| ENSMUSG00000038670 | 10_Mybp2        | 110.202 | -1.37806 | 0.00141  | 0.00483  | 46.014  | 94.534  | 43.0255 | 258.784 | 104.894 | 113.96  |
| ENSMUSG00000038671 | 15_Arfp1        | 1010.97 | -0.05267 | 0.65911  | 0.75142  | 1005.36 | 991.23  | 980.026 | 945.868 | 1069.56 | 1073.76 |
| ENSMUSG00000038677 | 13_Scub3        | 56.7473 | -1.3687  | 0.02633  | 0.05706  | 18.232  | 67.9176 | 8.36608 | 94.677  | 53.7918 | 97.4995 |
| ENSMUSG00000038679 | 16_Trps1        | 793.567 | -0.18832 | 0.17555  | 0.27159  | 819.57  | 686.519 | 718.288 | 773.646 | 873.221 | 890.158 |
| ENSMUSG00000038683 | 15_Pak1ip1      | 1184.41 | -0.09509 | 0.50685  | 0.6172   | 1171.19 | 1027.94 | 1236.98 | 1064.89 | 1299.97 | 1305.48 |
| ENSMUSG00000038685 | 18_Rtel1        | 713.34  | 0.35349  | 0.00375  | 0.01111  | 804.811 | 787.477 | 809.119 | 605.933 | 659.847 | 612.854 |
| ENSMUSG00000038690 | 15_Atp5j2       | 2550.92 | -0.15216 | 0.14673  | 0.23462  | 2423.11 | 2434.02 | 2392.7  | 2879.08 | 2547.94 | 2628.69 |
| ENSMUSG00000038692 | 8_Hoxb4         | 0.94974 | 3.33811  | 0.28754  | NA       | 0       | 0.91781 | 4.78062 | 0       | 0       | 0       |
| ENSMUSG00000038695 | 12_Josd2        | 366.26  | 1.16993  | 1.75E-09 | 3.79E-08 | 464.481 | 525.903 | 530.648 | 262.39  | 174.823 | 239.317 |
| ENSMUSG00000038696 | 14_Mapkap1      | 3622.98 | 0.4313   | 0.00011  | 0.00055  | 3978.04 | 3966.76 | 4536.8  | 3003.51 | 2993.52 | 3259.27 |
| ENSMUSG00000038697 | 14_Taf5l        | 1073.73 | 0.52852  | 9.71E-05 | 0.00048  | 1257.14 | 1181.22 | 1366.06 | 927.834 | 778.189 | 931.943 |
| ENSMUSG00000038702 | 6_Dsel          | 395.026 | -0.71646 | 1.73E-06 | 1.48E-05 | 299.525 | 314.807 | 282.056 | 467.975 | 527.16  | 478.634 |
| ENSMUSG00000038704 | 10_Aspdh        | 1.25385 | -1.4081  | 0.59111  | NA       | 0       | 0.91781 | 1.19515 | 5.41011 | 0       | 0       |
| ENSMUSG00000038705 | 13_Gmeb2        | 746.379 | 0.38031  | 0.0054   | 0.01502  | 805.679 | 791.148 | 935.806 | 633.885 | 620.399 | 691.36  |
| ENSMUSG00000038708 | 9_Golga4        | 9577.66 | 0.13752  | 0.25567  | 0.36534  | 9879.12 | 9742.51 | 10477.9 | 8355.02 | 8652.42 | 10359   |
| ENSMUSG00000038709 | 14_Txndc8       | 0       | NA       | NA       | NA       | 0       | 0       | 0       | 0       | 0       | 0       |
| ENSMUSG00000038712 | 16_Fam63a       | 1993.04 | 0.41629  | 0.00175  | 0.00581  | 2196.52 | 2148.58 | 2490.7  | 1821.4  | 1495.41 | 1805.64 |
| ENSMUSG00000038717 | 7_Atp5l         | 3045.38 | -0.16957 | 0.16655  | 0.26034  | 2916.24 | 2948.91 | 2735.71 | 3587.81 | 3204.2  | 2879.4  |
| ENSMUSG00000038718 | 15_Pbx3         | 952.243 | -0.1571  | 0.1631   | 0.25593  | 927.225 | 868.244 | 905.927 | 1020.71 | 989.77  | 1001.59 |
| ENSMUSG00000038721 | 8_Hoxb7         | 0.44236 | 2.27028  | 0.50771  | NA       | 1.73638 | 0.91781 | 0       | 0       | 0       | 0       |
| ENSMUSG00000038722 | 17_Bud31        | 1185.54 | -0.35318 | 0.00915  | 0.02344  | 1100.86 | 965.531 | 1056.52 | 1167.68 | 1427.28 | 1395.38 |
| ENSMUSG00000038725 | 11_Pkhd11       | 33.9907 | -1.4971  | 0.0004   | 0.00163  | 13.891  | 19.2739 | 20.3176 | 42.3792 | 51.1022 | 56.9802 |
| ENSMUSG00000038729 | 20_Akap2        | 701.29  | -0.77225 | 0.0014   | 0.0048   | 467.085 | 731.491 | 353.766 | 884.553 | 805.981 | 964.865 |
| ENSMUSG00000038732 | 12_Mboat1       | 1839.13 | 0.20914  | 0.13591  | 0.22016  | 1910.01 | 1799.82 | 2206.25 | 1534.67 | 1672.03 | 1912    |
| ENSMUSG00000038733 | 13_Wdr26        | 8590.31 | 0.01854  | 0.88489  | 0.92217  | 8756.55 | 8324.5  | 8854.9  | 7251.35 | 9336.47 | 9018.07 |
| ENSMUSG00000038736 | 9_Nudcd1        | 556.825 | -0.31463 | 0.04173  | 0.08341  | 513.099 | 473.588 | 501.965 | 526.584 | 678.674 | 647.042 |
| ENSMUSG00000038738 | 15_Shank1       | 355.743 | 1.25704  | 1.59E-10 | 4.87E-09 | 430.621 | 533.245 | 541.405 | 248.865 | 173.927 | 206.395 |
| ENSMUSG00000038740 | 9_Mvb12b        | 478.746 | -0.21968 | 0.34866  | 0.46563  | 416.73  | 538.752 | 371.693 | 687.084 | 421.369 | 436.848 |
| ENSMUSG00000038742 | 6_Angptl6       | 20.87   | 0.76461  | 0.16754  | 0.26149  | 27.782  | 22.0273 | 28.6837 | 17.132  | 8.06878 | 21.5259 |
| ENSMUSG00000038745 | 15_Nlrp6        | 23.9867 | 0.44648  | 0.4648   | 0.57831  | 22.5729 | 13.7671 | 46.611  | 17.132  | 13.448  | 30.3894 |
| ENSMUSG00000038751 | 5_Ptk6          | 8.59412 | 1.48576  | 0.0805   | 0.14408  | 13.891  | 6.42464 | 17.9273 | 5.41011 | 5.37918 | 2.53245 |
| ENSMUSG00000038754 | 4_Elov13        | 0.2997  | -1.76345 | 0.66322  | NA       | 0       | 0       | 0       | 0.90169 | 0.89653 | 0       |
| ENSMUSG00000038756 | 13_Tlll6        | 0.29884 | -1.76064 | 0.66373  | NA       | 0       | 0       | 0       | 0       | 1.79306 | 0       |
| ENSMUSG00000038759 | 15_Nup205       | 2169.55 | 0.09536  | 0.4814   | 0.59383  | 2275.52 | 2083.42 | 2364.01 | 1797.06 | 2211.74 | 2285.54 |
| ENSMUSG00000038760 | 13_Trhr         | 0.49804 | -0.79984 | 0.839    | NA       | 0       | 0       | 1.19515 | 0       | 1.79306 | 0       |
| ENSMUSG00000038762 | 15_Abcf1        | 2312.91 | 0.71728  | 2.62E-06 | 2.11E-05 | 2628.87 | 2768.1  | 3230.5  | 1667.22 | 1527.69 | 2055.09 |
| ENSMUSG00000038763 | 11_Alpk3        | 49.5809 | -0.44505 | 0.39795  | 0.51544  | 45.1458 | 50.4793 | 29.8789 | 78.4466 | 18.8271 | 74.7074 |
| ENSMUSG00000038764 | 14_Ptpn3        | 2242.91 | 0.05143  | 0.69765  | 0.78358  | 2245.14 | 2175.2  | 2427.36 | 1916.08 | 2235.95 | 2457.75 |
| ENSMUSG00000038765 | 13_Lmx1b        | 508.76  | -0.06996 | 0.74975  | 0.82319  | 482.713 | 606.669 | 399.181 | 639.295 | 410.611 | 514.088 |
| ENSMUSG00000038766 | 16_Gabpb2       | 3891.35 | -0.16563 | 0.13892  | 0.22424  | 3754.91 | 3461.04 | 3788.64 | 3754.62 | 4357.14 | 4231.73 |
| ENSMUSG00000038768 | 8_9130409123Rik | 0.36132 | -1.98116 | 0.62311  | NA       | 0       | 0       | 0       | 0.90169 | 0       | 1.26623 |
| ENSMUSG00000038773 | 10_Kdm3b        | 3153.47 | 0.40847  | 0.00013  | 0.00061  | 3487.51 | 3403.22 | 3900.98 | 2697.84 | 2679.73 | 2751.51 |
| ENSMUSG00000038774 | 8_Asc3          | 1538.76 | 0.31261  | 0.065    | 0.12077  | 1720.75 | 1469.41 | 1924.2  | 1106.37 | 1515.14 | 1496.68 |
| ENSMUSG00000038775 | 14_Vill         | 87.9611 | 0.19955  | 0.45132  | 0.56602  | 93.7643 | 105.548 | 82.4656 | 90.1685 | 73.5155 | 82.3047 |
| ENSMUSG00000038776 | 13_Ephx1        | 4716.33 | 0.16221  | 0.15866  | 0.25043  | 4855.78 | 4987.36 | 5098.53 | 4329.89 | 4072.94 | 4953.48 |
| ENSMUSG00000038777 | 19_Sema6c       | 91.0872 | -0.27303 | 0.49187  | 0.60368  | 77.2688 | 122.068 | 47.8062 | 139.761 | 73.5155 | 86.1034 |
| ENSMUSG00000038780 | 14_Smurf1       | 1993.88 | 0.75077  | 1.94E-07 | 2.23E-06 | 2314.59 | 2459.72 | 2728.54 | 1547.29 | 1256.94 | 1656.22 |
| ENSMUSG00000038781 | 6_Stap2         | 2166.4  | 0.59728  | 4.79E-08 | 6.60E-07 | 2518.61 | 2526.72 | 2779.93 | 1705.99 | 1651.41 | 1815.77 |
| ENSMUSG00000038782 | 5_1700028J19Rik | 6.38517 | 0.05572  | 0.95217  | 0.96877  | 7.8137  | 9.17806 | 2.39031 | 8.11517 | 4.48265 | 6.33113 |
| ENSMUSG00000038784 | 13_Cnot4        | 660.485 | -0.04166 | 0.78301  | 0.849    | 642.459 | 642.464 | 668.091 | 573.472 | 760.258 | 676.165 |
| ENSMUSG00000038791 | 14_Scgb3a2      | 0.2894  | 1.67273  | 0.67976  | NA       | 1.73638 | 0       | 0       | 0       | 0       | 0       |

|                    |                  |         |          |          |          |         |         |         |         |         |         |
|--------------------|------------------|---------|----------|----------|----------|---------|---------|---------|---------|---------|---------|
| ENSMUSG00000038792 | 3_4931403M11Rik  | 0       | NA       | NA       | NA       | 0       | 0       | 0       | 0       | 0       | 0       |
| ENSMUSG00000038793 | 8_Lefty1         | 68.3246 | 0.58438  | 0.0524   | 0.10077  | 83.3461 | 88.1093 | 74.0996 | 62.2163 | 43.93   | 58.2464 |
| ENSMUSG00000038797 | 13_Zscan2        | 34.0603 | 0.14029  | 0.7561   | 0.82834  | 32.123  | 23.8629 | 51.3916 | 34.264  | 25.9994 | 36.7206 |
| ENSMUSG00000038801 | 6_Scgb1c1        | 17.7438 | -1.33863 | 0.04164  | 0.08325  | 12.1546 | 11.9315 | 5.97577 | 42.3792 | 18.8271 | 15.1947 |
| ENSMUSG00000038803 | 7_Ost4           | 1807.39 | -0.05064 | 0.69592  | 0.78242  | 1829.27 | 1699.78 | 1798.71 | 2090.11 | 1670.24 | 1756.26 |
| ENSMUSG00000038805 | 10_Six3          | 206.409 | -1.05565 | 4.34E-05 | 0.00024  | 123.283 | 178.054 | 100.393 | 331.82  | 261.787 | 243.116 |
| ENSMUSG00000038806 | 7_Sde2           | 1162.11 | 0.21772  | 0.14497  | 0.23227  | 1180.74 | 1170.2  | 1397.14 | 1013.49 | 972.736 | 1238.37 |
| ENSMUSG00000038807 | 17_Rap1gap2      | 344.67  | 0.25199  | 0.20045  | 0.30145  | 387.212 | 369.876 | 368.107 | 394.037 | 290.476 | 258.31  |
| ENSMUSG00000038811 | 13_Gngt2         | 55.8022 | 0.23661  | 0.52792  | 0.63672  | 73.796  | 43.1369 | 64.5383 | 67.6264 | 43.93   | 41.7855 |
| ENSMUSG00000038812 | 16_Trmt112       | 531.433 | 0.42131  | 0.00378  | 0.01117  | 599.918 | 580.053 | 646.578 | 504.042 | 424.955 | 433.05  |
| ENSMUSG00000038816 | 14_Ctnnal1       | 1921.82 | -0.46064 | 2.54E-05 | 0.00015  | 1579.23 | 1715.38 | 1558.48 | 2243.39 | 2321.12 | 2113.33 |
| ENSMUSG00000038822 | 15_Hace1         | 1655.15 | -0.25516 | 0.06059  | 0.11385  | 1565.34 | 1444.63 | 1516.65 | 1532.87 | 1945.47 | 1925.93 |
| ENSMUSG00000038827 | 11_Fam206a       | 520.54  | -0.1696  | 0.24398  | 0.3522   | 495.736 | 468.999 | 505.55  | 497.73  | 606.951 | 548.276 |
| ENSMUSG00000038828 | 13_Tmem214       | 1523.65 | 0.82648  | 2.74E-08 | 4.04E-07 | 1893.52 | 1926.47 | 2025.79 | 1279.49 | 916.254 | 1100.35 |
| ENSMUSG00000038831 | 16_Ralgs1        | 368.617 | -0.25128 | 0.15885  | 0.2507   | 332.516 | 364.369 | 313.13  | 474.287 | 363.991 | 363.407 |
| ENSMUSG00000038836 | 15_Agbl3         | 184.986 | -0.54012 | 0.01848  | 0.04233  | 138.91  | 173.465 | 139.833 | 182.14  | 265.373 | 210.194 |
| ENSMUSG00000038838 | 15_Vars2         | 460.597 | 0.99142  | 4.08E-06 | 3.10E-05 | 571.268 | 608.505 | 658.53  | 373.298 | 215.167 | 336.816 |
| ENSMUSG00000038840 | 7_Birc7          | 25.5017 | -0.28266 | 0.77913  | 0.84561  | 18.232  | 49.5615 | 1.19515 | 65.823  | 8.06878 | 10.1298 |
| ENSMUSG00000038843 | 17_Gcnt1         | 46.2431 | 0.54681  | 0.17509  | 0.271    | 76.4006 | 36.7122 | 51.3916 | 32.4607 | 41.2404 | 39.253  |
| ENSMUSG00000038844 | 8_Kif16b         | 1367.9  | -0.01292 | 0.91217  | 0.94101  | 1382.16 | 1284.93 | 1417.45 | 1302.94 | 1344.8  | 1475.15 |
| ENSMUSG00000038845 | 11_Phb           | 2323.44 | 0.3093   | 0.03048  | 0.06432  | 2531.64 | 2437.69 | 2745.27 | 2323.64 | 1732.1  | 2170.31 |
| ENSMUSG00000038848 | 14_Ythdf1        | 1177.99 | -0.02385 | 0.85871  | 0.90419  | 1105.2  | 1110.54 | 1289.57 | 1069.4  | 1249.76 | 1243.43 |
| ENSMUSG00000038855 | 10_ltpkb         | 1115.31 | -0.11673 | 0.50329  | 0.61414  | 1110.41 | 1227.11 | 872.462 | 1357.94 | 1048.94 | 1075.03 |
| ENSMUSG00000038859 | 7_Baiap211       | 926.677 | 0.41195  | 0.00714  | 0.01899  | 1003.63 | 1020.6  | 1148.54 | 731.267 | 719.018 | 937.008 |
| ENSMUSG00000038860 | 15_Garnl3        | 157.438 | -0.25469 | 0.27062  | 0.38223  | 145.856 | 155.109 | 130.272 | 174.025 | 202.616 | 136.753 |
| ENSMUSG00000038861 | 14_Pik4b         | 1475.04 | 0.29798  | 0.00411  | 0.01196  | 1580.97 | 1626.35 | 1673.22 | 1301.13 | 1318.8  | 1349.8  |
| ENSMUSG00000038866 | 15_Zcchc2        | 1311.07 | 0.53306  | 0.00158  | 0.00532  | 1448.14 | 1400.57 | 1803.49 | 880.947 | 1213.9  | 1119.34 |
| ENSMUSG00000038871 | 5_Bpgm           | 564.39  | -0.37013 | 0.01447  | 0.03449  | 513.968 | 532.327 | 430.255 | 688.888 | 625.778 | 595.127 |
| ENSMUSG00000038872 | 9_Zfhx3          | 852.854 | 0.08755  | 0.51925  | 0.62926  | 877.738 | 906.792 | 850.95  | 904.391 | 728.879 | 848.372 |
| ENSMUSG00000038876 | 11_Rnf146        | 1090.04 | -0.39855 | 0.00116  | 0.00406  | 905.521 | 924.23  | 993.173 | 1198.34 | 1343.9  | 1175.06 |
| ENSMUSG00000038879 | 7_Nipal2         | 1653.9  | 0.04338  | 0.76999  | 0.83836  | 1659.98 | 1522.64 | 1853.68 | 1375.07 | 1754.51 | 1757.52 |
| ENSMUSG00000038880 | 13_Mrps34        | 367.805 | 0.72373  | 5.80E-05 | 0.00031  | 398.498 | 481.848 | 494.794 | 316.492 | 242.96  | 272.239 |
| ENSMUSG00000038884 | 14_A230050P20Rik | 524.28  | 0.77875  | 6.63E-06 | 4.73E-05 | 598.182 | 703.957 | 687.214 | 449.039 | 388.198 | 319.089 |
| ENSMUSG00000038886 | 10_Man2a2        | 2264.01 | -0.17117 | 0.37471  | 0.49232  | 2014.2  | 2499.18 | 1876.39 | 3085.57 | 2005.54 | 2103.2  |
| ENSMUSG00000038888 | 8_Ctu1           | 281.333 | 0.46481  | 0.02422  | 0.05324  | 289.107 | 287.273 | 402.767 | 241.652 | 208.892 | 258.31  |
| ENSMUSG00000038893 | 12_Fam117a       | 238.679 | 0.27764  | 0.27308  | 0.38513  | 243.961 | 343.259 | 197.2   | 260.587 | 188.271 | 198.798 |
| ENSMUSG00000038894 | 6_Irs2           | 397.693 | 1.3775   | 1.01E-07 | 1.26E-06 | 475.767 | 591.067 | 656.14  | 289.441 | 140.755 | 232.986 |
| ENSMUSG00000038895 | 15_Zfp653        | 116.294 | 0.67597  | 0.01887  | 0.04302  | 154.538 | 117.479 | 157.76  | 119.022 | 71.7224 | 77.2398 |
| ENSMUSG00000038900 | 17_Rpl12         | 14346   | 0.02516  | 0.78762  | 0.85247  | 14675   | 13867.1 | 14871.3 | 14655.1 | 13647   | 14360.3 |
| ENSMUSG00000038902 | 14_Pogz          | 1255.01 | 0.09672  | 0.38528  | 0.50263  | 1223.28 | 1351.01 | 1317.06 | 1234.41 | 1179.83 | 1224.44 |
| ENSMUSG00000038903 | 13_Ccdc68        | 238.755 | -0.59551 | 0.0039   | 0.01147  | 216.179 | 198.246 | 155.37  | 267.801 | 329.027 | 265.908 |
| ENSMUSG00000038909 | 16_Kat7          | 1577.35 | 0.17144  | 0.1656   | 0.25901  | 1620.91 | 1672.24 | 1718.63 | 1320.07 | 1517.83 | 1614.44 |
| ENSMUSG00000038910 | 6_Plcl2          | 62.2798 | -0.32767 | 0.49377  | 0.60513  | 99.8417 | 32.1232 | 33.4643 | 86.5618 | 67.2398 | 54.4478 |
| ENSMUSG00000038914 | 15_Dido1         | 2123.19 | 0.12392  | 0.24844  | 0.35732  | 2089.73 | 2177.03 | 2377.16 | 2025.19 | 2007.33 | 2062.68 |
| ENSMUSG00000038916 | 6_Soga3          | 9.0885  | -1.65173 | 0.05573  | 0.10607  | 5.20913 | 5.50683 | 2.39031 | 22.5421 | 12.5514 | 6.33113 |
| ENSMUSG00000038917 | 3_3930402G23Rik  | 5.72364 | -0.2644  | 0.79229  | 0.85613  | 7.8137  | 6.42464 | 1.19515 | 4.50843 | 8.06878 | 6.33113 |
| ENSMUSG00000038925 | 12_E330034G19Rik | 4.00932 | -2.73781 | 0.06226  | 0.11649  | 0       | 0.91781 | 2.39031 | 12.6236 | 1.79306 | 6.33113 |
| ENSMUSG00000038930 | 11_Rccd1         | 161.617 | 0.58622  | 0.00684  | 0.01833  | 184.056 | 219.356 | 178.078 | 140.663 | 112.066 | 135.486 |
| ENSMUSG00000038932 | 13_Tcfl5         | 5.48225 | -1.22028 | 0.21128  | 0.31458  | 3.47275 | 2.75342 | 3.58546 | 5.41011 | 6.27571 | 11.396  |
| ENSMUSG00000038936 | 13_Sccpdh        | 462.314 | -1.15312 | 2.58E-08 | 3.86E-07 | 286.502 | 349.684 | 223.494 | 633.885 | 739.638 | 540.679 |
| ENSMUSG00000038943 | 16_Prc1          | 1157.22 | 0.26199  | 0.16056  | 0.25289  | 1316.17 | 1106.87 | 1362.48 | 786.27  | 1204.04 | 1167.46 |
| ENSMUSG00000038949 | 8_Cnst           | 1246.64 | 0.10423  | 0.39093  | 0.50843  | 1285.79 | 1233.53 | 1355.3  | 1243.42 | 1095.56 | 1266.23 |
| ENSMUSG00000038954 | 14_Supt3         | 237.604 | -0.08561 | 0.64171  | 0.7372   | 211.838 | 229.451 | 250.982 | 220.011 | 268.959 | 244.382 |
| ENSMUSG00000038957 | 13_Edc3          | 919.121 | 0.27167  | 0.02023  | 0.0457   | 981.921 | 1007.75 | 1026.64 | 869.225 | 787.154 | 842.041 |
| ENSMUSG00000038963 | 15_Slco4a1       | 721.949 | 1.0258   | 3.52E-11 | 1.30E-09 | 863.847 | 965.531 | 1075.64 | 513.059 | 415.99  | 497.627 |
| ENSMUSG00000038965 | 15_Ube2l3        | 3304.48 | 0.07346  | 0.54603  | 0.65254  | 3342.53 | 3138.9  | 3684.66 | 2916.95 | 3365.58 | 3378.29 |
| ENSMUSG00000038967 | 13_Pdk2          | 1816.44 | 0.0684   | 0.7069   | 0.79036  | 1744.19 | 2110.95 | 1723.41 | 2222.65 | 1427.28 | 1670.15 |
| ENSMUSG00000038970 | 7_Lmtk2          | 1672.68 | 0.67495  | 6.07E-07 | 6.00E-06 | 1784.13 | 2064.14 | 2323.38 | 1299.33 | 1238.11 | 1327.01 |
| ENSMUSG00000038973 | 2_Cldnd2         | 0.2894  | 1.67273  | 0.67976  | NA       | 1.73638 | 0       | 0       | 0       | 0       | 0       |
| ENSMUSG00000038975 | 14_Rabgg1b       | 1042.51 | -0.26729 | 0.02513  | 0.05488  | 1010.57 | 893.943 | 933.415 | 1086.53 | 1168.18 | 1162.4  |
| ENSMUSG00000038976 | 12_Ppp1r9b       | 2025.96 | 0.78923  | 1.48E-06 | 1.29E-05 | 2475.21 | 2504.69 | 2720.17 | 1760.99 | 1166.39 | 1528.34 |
| ENSMUSG00000038980 | 1_Rbbp8nl        | 117.591 | 1.35219  | 7.23E-06 | 5.11E-05 | 171.033 | 140.424 | 194.81  | 73.9382 | 43.0335 | 82.3047 |
| ENSMUSG00000038982 | 9_Bloc1s5        | 420.629 | -0.16634 | 0.25895  | 0.36907  | 395.894 | 384.561 | 409.938 | 482.402 | 441.99  | 408.991 |
| ENSMUSG00000038984 | 3_Tspsyl5        | 42.5396 | -1.2473  | 0.00127  | 0.00443  | 26.0457 | 30.2876 | 19.1225 | 70.3315 | 60.0675 | 49.3828 |
| ENSMUSG00000038987 | 8_1700019L03Rik  | 15.7647 | 0.9409   | 0.10559  | 0.17997  | 24.3093 | 16.5205 | 21.5128 | 12.6236 | 10.7584 | 8.86359 |
| ENSMUSG00000038990 | 14_Cables2       | 591.52  | 0.34261  | 0.01355  | 0.03259  | 596.445 | 712.217 | 676.457 | 530.191 | 529.85  | 503.958 |
| ENSMUSG00000038991 | 16_Txndc5        | 3206.99 | 0.19783  | 0.05792  | 0.10962  | 3328.63 | 3509.69 | 3440.85 | 3132.46 | 2777.45 | 3052.87 |
| ENSMUSG00000038994 | 6_Hils1          | 1.30996 | 1.67965  | 0.45141  | NA       | 0       | 3.67122 | 2.39031 | 0.90169 | 0.89653 | 0       |
| ENSMUSG00000038997 | 4_Asb17          | 2.35439 | -0.11036 | 0.94415  | NA       | 4.34094 | 0       | 2.39031 | 1.80337 | 1.79306 | 3.79868 |
| ENSMUSG00000039000 | 8_Ube3c          | 2314.32 | -0.06793 | 0.55612  | 0.66218  | 2298.09 | 2208.24 | 2271.99 | 2128.88 | 2447.53 | 2531.19 |
| ENSMUSG00000039001 | 12_Rps21         | 4155.71 | 0.49863  | 0.00074  | 0.00278  | 4630.05 | 4877.22 | 5093.75 | 4081.03 | 2875.17 | 3377.03 |
| ENSMUSG00000039004 | 5_Bmp6           | 73.9216 | -0.48488 | 0.13404  | 0.21802  | 62.5096 | 55.0683 | 68.1238 | 96.4803 | 103.101 | 58.2464 |
| ENSMUSG00000039005 | 13_Tlr4          | 538.37  | -0.15911 | 0.35778  | 0.47456  | 562.586 | 428.615 | 535.429 | 507.649 | 646.399 | 549.542 |
| ENSMUSG00000039007 | 9_Cpq            | 1821.99 | -0.84664 | 3.59E-11 | 1.32E-09 | 1279.71 | 1440.95 | 1185.59 | 2399.39 | 2469.94 | 2156.38 |
| ENSMUSG00000039013 | 16_Siglec1       | 3.83761 | -1.03277 | 0.3971   | 0.51457  | 1.73638 | 4.58903 | 1.19515 | 0.91685 | 2.68959 | 3.79868 |
| ENSMUSG00000039016 | 4_Timm8b         | 771.631 | -0.42073 | 0.0032   | 0.00972  | 691.078 | 683.765 | 604.748 | 990.952 | 846.325 | 812.918 |
| ENSMUSG00000039018 | 14_Mtg1          | 267.94  | 0.1244   | 0.44725  | 0.56218  | 287.37  | 262.492 | 289.227 | 260.587 | 263.58  | 244.382 |
| ENSMUSG00000039021 | 15_Ttc16         | 5.30757 | 0.70546  | 0.55106  | 0.65726  | 12.1546 | 6.42464 | 1.19515 | 8.11517 | 2.68959 | 1.26623 |
| ENSMUSG00000039031 | 15_Arhgap18      | 975.361 | -0.55011 | 0.00019  | 0.00087  | 818.702 | 748.012 | 809.119 | 1057.68 | 1353.76 | 1064.9  |

|                    |                 |         |          |          |          |         |         |         |         |         |         |
|--------------------|-----------------|---------|----------|----------|----------|---------|---------|---------|---------|---------|---------|
| ENSMUSG00000039032 | 2_Tsga13        | 0.60026 | -2.74584 | 0.447    | NA       | 0       | 0       | 0       | 2.70506 | 0.89653 | 0       |
| ENSMUSG00000039033 | 11_Tasp1        | 261.801 | -0.5163  | 0.00605  | 0.01653  | 248.302 | 201.917 | 196.005 | 310.18  | 337.095 | 277.304 |
| ENSMUSG00000039037 | 5_St6galnac5    | 11.1504 | -1.13845 | 0.23951  | 0.34707  | 10.4183 | 9.17806 | 1.19515 | 30.6573 | 11.6549 | 3.79868 |
| ENSMUSG00000039041 | 15_Adrn1        | 1203.44 | 1.09062  | 1.49E-06 | 1.30E-05 | 1490.68 | 1571.28 | 1850.1  | 838.567 | 497.574 | 972.462 |
| ENSMUSG00000039043 | 5_Arpin         | 586.305 | -0.08827 | 0.47882  | 0.59155  | 559.982 | 567.204 | 578.455 | 617.655 | 600.675 | 593.86  |
| ENSMUSG00000039046 | 15_Usp6nl       | 2323.17 | 0.16264  | 0.14027  | 0.22612  | 2411.83 | 2442.28 | 2506.24 | 2067.56 | 2122.98 | 2388.1  |
| ENSMUSG00000039047 | 17_Pigk         | 1459.15 | -0.14417 | 0.18157  | 0.27894  | 1422.96 | 1381.3  | 1354.11 | 1601.39 | 1460.45 | 1534.67 |
| ENSMUSG00000039048 | 14_Foxred1      | 802.586 | 0.13464  | 0.27342  | 0.38544  | 863.847 | 784.724 | 872.462 | 765.531 | 790.74  | 738.21  |
| ENSMUSG00000039050 | 8_Osbp12        | 2222.38 | 0.10556  | 0.31843  | 0.43393  | 2229.51 | 2244.03 | 2438.11 | 2206.42 | 2045.88 | 2170.31 |
| ENSMUSG00000039055 | 4_Eme1          | 64.9292 | 0.83758  | 0.00991  | 0.02506  | 95.5007 | 68.8354 | 86.0511 | 45.986  | 56.4814 | 36.7206 |
| ENSMUSG00000039057 | 9_Myo16         | 35.2061 | -1.17441 | 0.05271  | 0.10118  | 19.1001 | 39.4656 | 5.97577 | 49.5927 | 65.4467 | 31.6557 |
| ENSMUSG00000039058 | 11_Ak5          | 57.236  | -1.47792 | 0.00014  | 0.00067  | 28.6502 | 40.3834 | 21.5128 | 105.497 | 87.86   | 59.5127 |
| ENSMUSG00000039059 | 11_Hrh3         | 3.18241 | 0.30402  | 0.80844  | 0.8676   | 5.20913 | 1.83561 | 3.58546 | 4.50843 | 2.68959 | 1.26623 |
| ENSMUSG00000039062 | 15_Anep         | 1594.25 | 0.68337  | 2.23E-05 | 0.00014  | 1793.68 | 1982.46 | 2116.62 | 1146.94 | 1041.77 | 1484.02 |
| ENSMUSG00000039063 | 5_Echdc3        | 823.535 | 0.27764  | 0.08639  | 0.15235  | 842.143 | 842.546 | 1024.25 | 862.913 | 652.674 | 716.684 |
| ENSMUSG00000039065 | 10_Fam173b      | 371.249 | -0.02381 | 0.87235  | 0.9133   | 395.026 | 362.533 | 346.595 | 376.905 | 379.232 | 367.206 |
| ENSMUSG00000039067 | 4_Psmc7         | 2258.19 | 0.15121  | 0.25619  | 0.36601  | 2397.94 | 2164.19 | 2566    | 2015.27 | 1988.5  | 2417.23 |
| ENSMUSG00000039068 | 16_Zzz3         | 1802.06 | -0.5038  | 6.34E-06 | 4.56E-05 | 1551.45 | 1463.9  | 1455.7  | 1969.28 | 2242.22 | 2129.79 |
| ENSMUSG00000039069 | 19_Mtg2         | 346.265 | 0.34094  | 0.0716   | 0.13092  | 381.135 | 394.656 | 384.84  | 357.969 | 241.167 | 317.823 |
| ENSMUSG00000039070 | 5_Cpa4          | 2.00754 | -4.48441 | 0.03281  | NA       | 0       | 0       | 0       | 3.60674 | 7.17224 | 1.26623 |
| ENSMUSG00000039079 | 1_Thr2          | 0.19919 | 0.92709  | 0.82027  | NA       | 0       | 0       | 1.19515 | 0       | 0       | 0       |
| ENSMUSG00000039081 | 9_Zfp503        | 199.135 | 0.08564  | 0.65399  | 0.74766  | 193.606 | 217.52  | 204.371 | 216.405 | 179.306 | 183.603 |
| ENSMUSG00000039084 | 8_Chad          | 320.998 | 0.25441  | 0.25639  | 0.36615  | 296.052 | 435.958 | 315.521 | 350.756 | 240.27  | 287.434 |
| ENSMUSG00000039086 | 9_Ss18l1        | 224.931 | 0.08697  | 0.63838  | 0.73436  | 218.783 | 212.931 | 264.129 | 225.421 | 207.995 | 220.323 |
| ENSMUSG00000039087 | 16_Rreb1        | 2668.46 | 0.95717  | 7.30E-10 | 1.81E-08 | 3281.75 | 3334.39 | 3949.98 | 1812.39 | 1515.14 | 2117.13 |
| ENSMUSG00000039089 | 14_L3mbt13      | 424.569 | -0.33558 | 0.04258  | 0.08483  | 385.476 | 406.588 | 332.253 | 428.301 | 461.713 | 533.082 |
| ENSMUSG00000039092 | 9_Sptlc3        | 1.40509 | -0.87827 | 0.67739  | NA       | 0       | 1.83561 | 1.19515 | 3.60674 | 1.79306 | 0       |
| ENSMUSG00000039095 | 8_En2           | 0.90008 | -2.10051 | 0.51934  | NA       | 0       | 0.91781 | 0       | 0       | 4.48265 | 0       |
| ENSMUSG00000039096 | 10_Rsad1        | 232.714 | 0.26436  | 0.12467  | 0.20582  | 249.17  | 260.657 | 252.178 | 226.323 | 199.03  | 208.927 |
| ENSMUSG00000039097 | 5_Rln1          | 0.9404  | 1.04355  | 0.66632  | NA       | 1.73638 | 0.91781 | 1.19515 | 0       | 1.79306 | 0       |
| ENSMUSG00000039099 | 7_Wdr93         | 17.0965 | 0.01958  | 0.97285  | 0.98265  | 14.7592 | 21.1095 | 15.537  | 10.8202 | 18.8271 | 21.5259 |
| ENSMUSG00000039100 | 9_March6        | 3478.92 | -0.14322 | 0.19912  | 0.3001   | 3198.41 | 3441.77 | 3278.31 | 3315.5  | 3864.94 | 3774.62 |
| ENSMUSG00000039103 | 12_Nexn         | 218.968 | -1.65378 | 1.27E-11 | 5.21E-10 | 119.81  | 122.986 | 72.9044 | 367.888 | 347.854 | 282.369 |
| ENSMUSG00000039105 | 6_Atp6v1g1      | 2187.47 | -0.15573 | 0.14037  | 0.22626  | 2072.37 | 1942.99 | 2194.3  | 2345.28 | 2269.12 | 2300.73 |
| ENSMUSG00000039106 | 6_Htr5a         | 0.60112 | -2.7448  | 0.49049  | NA       | 0       | 0       | 0       | 3.60674 | 0       | 0       |
| ENSMUSG00000039108 | 14_Lsm14b       | 791.786 | 0.29065  | 0.03116  | 0.06556  | 787.447 | 867.326 | 959.709 | 722.25  | 679.57  | 734.412 |
| ENSMUSG00000039109 | 15_F13a1        | 281.816 | -0.65968 | 0.00347  | 0.0104   | 236.147 | 217.52  | 201.981 | 452.646 | 291.372 | 291.232 |
| ENSMUSG00000039110 | 14_Mycbpap      | 237.629 | 0.56397  | 0.00133  | 0.00458  | 270.875 | 269.835 | 310.74  | 192.961 | 199.03  | 182.337 |
| ENSMUSG00000039114 | 15_Nm1          | 31.6856 | -0.79125 | 0.10494  | 0.17918  | 30.3866 | 24.7808 | 14.3418 | 43.2809 | 51.9988 | 25.3245 |
| ENSMUSG00000039115 | 13_Irga9        | 524.863 | -0.59641 | 0.00288  | 0.00886  | 404.576 | 518.56  | 329.863 | 726.758 | 597.089 | 572.335 |
| ENSMUSG00000039116 | 4_Adgrg6        | 460.771 | -0.5916  | 0.00054  | 0.00211  | 380.267 | 415.766 | 304.764 | 522.076 | 535.229 | 606.523 |
| ENSMUSG00000039117 | 15_Taf4a        | 751.96  | 0.44395  | 0.0016   | 0.00538  | 848.22  | 812.258 | 939.391 | 569.865 | 654.467 | 687.561 |
| ENSMUSG00000039126 | 9_Prune2        | 446.469 | -1.57489 | 4.89E-09 | 9.22E-08 | 200.552 | 316.643 | 155.37  | 733.07  | 769.223 | 503.958 |
| ENSMUSG00000039128 | 13_F13a1        | 1674.06 | -0.25485 | 0.02792  | 0.05984  | 1580.1  | 1408.83 | 1590.75 | 1712.3  | 1865.68 | 1886.68 |
| ENSMUSG00000039130 | 18_Zc3hc1       | 366.454 | 0.2672   | 0.09304  | 0.16204  | 376.794 | 409.341 | 414.718 | 358.871 | 295.855 | 343.147 |
| ENSMUSG00000039131 | 15_Gipc2        | 61.9258 | 0.62902  | 0.0697   | 0.1281   | 86.8188 | 61.493  | 76.4899 | 38.7725 | 42.1369 | 65.8438 |
| ENSMUSG00000039137 | 18_Whrn         | 205.165 | 0.22005  | 0.38653  | 0.50382  | 202.288 | 237.712 | 223.494 | 256.079 | 172.134 | 139.285 |
| ENSMUSG00000039145 | 16_Camk1d       | 4947.93 | 0.28652  | 0.01807  | 0.0416   | 5548.59 | 5213.14 | 5549.1  | 4376.86 | 4376.86 | 5005.4  |
| ENSMUSG00000039146 | 5_Irf4i         | 1862.63 | 1.5548   | 1.94E-09 | 4.14E-08 | 2546.4  | 2145.83 | 3646.42 | 643.803 | 1304.45 | 888.891 |
| ENSMUSG00000039148 | 4_Sart1         | 1241.23 | 0.82007  | 4.86E-07 | 4.94E-06 | 1468.11 | 1577.71 | 1707.88 | 994.559 | 712.742 | 986.591 |
| ENSMUSG00000039153 | 16_Runx2        | 271.562 | 0.83339  | 9.24E-06 | 6.32E-05 | 354.221 | 325.821 | 362.132 | 171.32  | 182.892 | 232.986 |
| ENSMUSG00000039154 | 6_Shd           | 16.0887 | -0.06571 | 0.91412  | 0.94268  | 15.6274 | 18.3561 | 13.1467 | 24.3455 | 9.86184 | 15.1947 |
| ENSMUSG00000039155 | 15_Cdh26        | 32.4468 | -0.75848 | 0.0855   | 0.15098  | 25.1775 | 30.2876 | 16.7322 | 48.691  | 42.1369 | 31.6557 |
| ENSMUSG00000039156 | 19_Stim2        | 722.46  | 0.07854  | 0.55632  | 0.66232  | 770.951 | 697.532 | 757.728 | 641.098 | 749.5   | 717.951 |
| ENSMUSG00000039157 | 12_Fam102a      | 2235.24 | 0.81855  | 1.53E-08 | 2.50E-07 | 2585.47 | 2818.58 | 3154.01 | 1716.81 | 1375.28 | 1761.32 |
| ENSMUSG00000039158 | 11_Akna         | 165.432 | 0.75064  | 0.00982  | 0.02489  | 250.038 | 193.657 | 179.273 | 174.927 | 95.9288 | 98.7657 |
| ENSMUSG00000039159 | 16_Ube2h        | 3407.93 | 0.19219  | 0.06716  | 0.12417  | 3544.81 | 3478.48 | 3880.67 | 3192.87 | 3044.62 | 3306.12 |
| ENSMUSG00000039163 | 9_Cmc1          | 510.767 | -0.41581 | 0.00639  | 0.01733  | 454.931 | 396.492 | 462.525 | 548.225 | 649.088 | 553.341 |
| ENSMUSG00000039164 | 2_Naif1         | 159.27  | 0.50772  | 0.03553  | 0.07308  | 190.133 | 158.78  | 212.737 | 160.5   | 109.377 | 124.09  |
| ENSMUSG00000039166 | 15_Akap7        | 359.008 | -0.65142 | 6.41E-05 | 0.00034  | 291.711 | 288.191 | 258.153 | 449.039 | 476.954 | 389.998 |
| ENSMUSG00000039167 | 11_Adgrl4       | 128.407 | -0.8045  | 0.00046  | 0.00185  | 96.3689 | 98.2052 | 86.0511 | 182.14  | 165.858 | 141.817 |
| ENSMUSG00000039168 | 15_Dap          | 3596.64 | 0.428    | 8.18E-05 | 0.00042  | 3806.14 | 4289.82 | 4282.24 | 2960.23 | 3008.76 | 3232.68 |
| ENSMUSG00000039176 | 17_Polg         | 967.934 | 0.43961  | 0.00013  | 0.00064  | 1118.23 | 1061.9  | 1162.88 | 828.649 | 801.498 | 834.444 |
| ENSMUSG00000039178 | 9_Tbc1d19       | 464.711 | -0.57539 | 4.64E-05 | 0.00026  | 380.267 | 351.52  | 388.425 | 527.486 | 587.228 | 553.341 |
| ENSMUSG00000039179 | 13_Tekt5        | 43.674  | 0.95119  | 0.00955  | 0.02428  | 54.6959 | 51.3971 | 66.9286 | 35.1657 | 25.9994 | 27.857  |
| ENSMUSG00000039182 | 5_AW209491      | 347.052 | -0.29683 | 0.05305  | 0.10171  | 316.889 | 330.41  | 286.837 | 394.037 | 388.198 | 365.94  |
| ENSMUSG00000039183 | 5_Nubp2         | 538.348 | 0.64273  | 0.00046  | 0.00185  | 643.328 | 616.765 | 709.922 | 520.273 | 352.337 | 387.465 |
| ENSMUSG00000039187 | 16_Fanci        | 282.578 | 0.41344  | 0.04978  | 0.09676  | 345.539 | 268.917 | 353.766 | 192.961 | 273.442 | 260.843 |
| ENSMUSG00000039191 | 12_Rbpj         | 1356.45 | -0.07747 | 0.52005  | 0.63006  | 1275.37 | 1250.97 | 1435.38 | 1335.4  | 1476.59 | 1364.99 |
| ENSMUSG00000039193 | 7_Nlrc4         | 11.6692 | 0.26739  | 0.72263  | 0.80229  | 11.2864 | 14.6849 | 11.9515 | 3.60674 | 10.7584 | 17.7272 |
| ENSMUSG00000039194 | 15_Rlbp1        | 1258.4  | -1.58139 | 0.00189  | 0.00622  | 753.588 | 837.039 | 299.984 | 2623    | 1660.37 | 1376.39 |
| ENSMUSG00000039195 | 4_1110008P14Rik | 353.937 | 0.64211  | 0.00013  | 0.00062  | 390.685 | 435.04  | 468.5   | 292.146 | 244.753 | 292.948 |
| ENSMUSG00000039196 | 2_Orm1          | 0.44795 | 0.74833  | 0.83022  | NA       | 0.86819 | 0.91781 | 0       | 0.90169 | 0       | 0       |
| ENSMUSG00000039197 | 9_Adk           | 879.113 | -0.66327 | 6.35E-06 | 4.56E-05 | 745.774 | 701.203 | 593.992 | 1141.53 | 1126.04 | 966.131 |
| ENSMUSG00000039199 | 5_Zdhc1         | 233.655 | 0.5478   | 0.04729  | 0.09259  | 257.852 | 295.533 | 279.666 | 275.014 | 131.79  | 162.077 |
| ENSMUSG00000039200 | 5_Atf7ip2       | 4.14402 | 1.25827  | 0.29981  | 0.41458  | 6.07732 | 1.83561 | 9.56123 | 0.90169 | 2.68959 | 3.79868 |
| ENSMUSG00000039201 | 9_Tbc1d25       | 248.381 | 0.79206  | 0.00016  | 0.00074  | 275.216 | 313.89  | 356.156 | 214.601 | 150.617 | 179.804 |
| ENSMUSG00000039202 | 12_Abhd2        | 3109.75 | -0.06483 | 0.59757  | 0.69936  | 2980.49 | 3096.68 | 3044.06 | 3603.14 | 3044.62 | 2889.53 |
| ENSMUSG00000039205 | 16_Ciz1         | 1366.83 | 0.9805   | 2.05E-12 | 1.01E-10 | 1604.41 | 1865.9  | 1972    | 961.197 | 821.222 | 976.261 |

|                    |                  |         |          |          |          |         |         |         |         |         |         |
|--------------------|------------------|---------|----------|----------|----------|---------|---------|---------|---------|---------|---------|
| ENSMUSG00000039206 | 13_Daglb         | 391.124 | 0.18879  | 0.37674  | 0.49422  | 408.049 | 399.245 | 443.402 | 475.188 | 281.511 | 339.349 |
| ENSMUSG00000039208 | 15_Metrnl        | 928.687 | 0.72285  | 9.78E-05 | 0.00049  | 1112.15 | 1113.3  | 1244.16 | 839.469 | 523.574 | 739.477 |
| ENSMUSG00000039209 | 12_Rpl39l        | 109.535 | -0.71431 | 0.0142   | 0.03392  | 94.6325 | 87.1915 | 66.9286 | 177.632 | 121.928 | 108.896 |
| ENSMUSG00000039210 | 16_Gpatch2       | 692.181 | 0.18307  | 0.16315  | 0.25595  | 676.319 | 765.45  | 766.094 | 634.787 | 626.675 | 683.763 |
| ENSMUSG00000039217 | 12_Il18          | 979.086 | -0.51792 | 0.00278  | 0.00861  | 899.443 | 766.368 | 749.362 | 950.376 | 1389.62 | 1119.34 |
| ENSMUSG00000039218 | 16_Srrm2         | 11752   | 0.40132  | 0.00102  | 0.00364  | 12712   | 14198.5 | 13217.2 | 8885.21 | 11073   | 10426.1 |
| ENSMUSG00000039219 | 17_Arid4b        | 1701.28 | -0.46357 | 0.00115  | 0.00403  | 1517.59 | 1365.69 | 1406.7  | 1655.49 | 2183.05 | 2079.14 |
| ENSMUSG00000039220 | 16_Ppp1r10       | 1245.18 | 0.5604   | 9.52E-05 | 0.00048  | 1370    | 1360.19 | 1723.41 | 1075.71 | 950.322 | 991.456 |
| ENSMUSG00000039221 | 10_Rpl22l1       | 1329.45 | -0.6964  | 4.95E-05 | 0.00027  | 1134.72 | 955.436 | 953.733 | 1393.1  | 2018.99 | 1520.74 |
| ENSMUSG00000039224 | 1_D1Pas1         | 3.1345  | 5.09159  | 0.0083   | 0.02162  | 13.0228 | 4.58903 | 1.19515 | 0       | 0       | 0       |
| ENSMUSG00000039230 | 14_Tbcd          | 2497.69 | 0.51175  | 4.15E-05 | 0.00023  | 2949.24 | 2780.95 | 3076.33 | 2029.69 | 1850.44 | 2299.47 |
| ENSMUSG00000039231 | 18_Suv39h1       | 435.596 | 0.24748  | 0.0852   | 0.15062  | 488.79  | 467.163 | 462.525 | 371.494 | 428.542 | 395.063 |
| ENSMUSG00000039232 | 11_Stx11         | 134.388 | 0.73378  | 0.00303  | 0.00928  | 188.397 | 164.287 | 149.394 | 84.7584 | 94.1357 | 125.356 |
| ENSMUSG00000039233 | 12_Tbce          | 764.114 | -0.40702 | 0.00835  | 0.02172  | 657.219 | 644.3   | 670.481 | 776.351 | 1031.01 | 805.32  |
| ENSMUSG00000039234 | 11_Sec24d        | 656.763 | 0.18811  | 0.13069  | 0.21383  | 670.241 | 734.244 | 694.385 | 623.966 | 615.02  | 602.724 |
| ENSMUSG00000039236 | 18_Isq20         | 194.274 | 2.44554  | 6.55E-17 | 8.29E-15 | 333.384 | 225.78  | 426.67  | 74.8399 | 55.5849 | 49.3828 |
| ENSMUSG00000039238 | 6_Zfp750         | 5468.85 | 0.76248  | 8.05E-06 | 5.60E-05 | 6133.75 | 6630.23 | 7878.46 | 3282.14 | 3974.32 | 4914.23 |
| ENSMUSG00000039239 | 14_Tgfb2         | 1080.96 | -1.12926 | 3.12E-07 | 3.35E-06 | 657.219 | 903.121 | 473.281 | 1623.03 | 1537.55 | 1291.55 |
| ENSMUSG00000039242 | 9_B3galnt2       | 1103.34 | -0.21434 | 0.10429  | 0.17835  | 1061.79 | 980.216 | 1021.86 | 1041.45 | 1271.28 | 1243.43 |
| ENSMUSG00000039244 | 10_E130309D02Rik | 397.798 | 0.96344  | 5.83E-07 | 5.79E-06 | 502.681 | 480.93  | 593.992 | 308.376 | 213.374 | 287.434 |
| ENSMUSG00000039246 | 8_Lyp1al1        | 147.314 | -0.55734 | 0.01033  | 0.02599  | 126.756 | 117.479 | 113.54  | 201.076 | 166.755 | 158.278 |
| ENSMUSG00000039252 | 11_Lgi2          | 1725.84 | -0.654   | 8.91E-08 | 1.14E-06 | 1304.02 | 1451.97 | 1268.06 | 2226.26 | 2174.98 | 1929.73 |
| ENSMUSG00000039253 | 7_Fn3krp         | 556.404 | 0.02861  | 0.85416  | 0.90105  | 582.554 | 522.231 | 579.65  | 486.91  | 535.229 | 631.847 |
| ENSMUSG00000039254 | 16_Pomt1         | 356.79  | 0.522    | 0.00103  | 0.00368  | 401.103 | 450.643 | 409.938 | 316.492 | 266.27  | 296.297 |
| ENSMUSG00000039257 | 11_Vstm2b        | 21.6097 | -1.32942 | 0.01215  | 0.02976  | 9.55007 | 16.5205 | 10.7564 | 36.9691 | 24.2063 | 31.6557 |
| ENSMUSG00000039262 | 16_Prrc2b        | 4863.9  | 0.41221  | 0.00061  | 0.00236  | 5287.27 | 5768.41 | 5606.47 | 4591.38 | 3704.46 | 4225.4  |
| ENSMUSG00000039263 | 16_Npepl1        | 727.786 | 0.50944  | 0.00255  | 0.008    | 783.974 | 891.189 | 890.39  | 719.545 | 502.954 | 578.666 |
| ENSMUSG00000039264 | 9_Gimap3         | 29.4355 | 2.43273  | 8.45E-05 | 0.00043  | 82.4779 | 39.4656 | 27.4885 | 12.6236 | 10.7584 | 3.79868 |
| ENSMUSG00000039269 | 5_230002M23Rik   | 1.5402  | -0.23467 | 0.91367  | NA       | 0.86819 | 0.91781 | 2.39031 | 0       | 0       | 5.06491 |
| ENSMUSG00000039270 | 9_Megf9          | 3258.72 | -0.38497 | 0.00342  | 0.01026  | 2775.6  | 2903.02 | 2800.25 | 3134.26 | 4081.01 | 3858.19 |
| ENSMUSG00000039275 | 9_Foxk2          | 1614.24 | 0.28257  | 0.01952  | 0.04432  | 1689.49 | 1693.35 | 1932.56 | 1449.91 | 1369    | 1551.13 |
| ENSMUSG00000039278 | 10_Pcsk1n        | 2.24874 | 1.9056   | 0.26447  | NA       | 0.86819 | 2.75342 | 7.17092 | 1.80337 | 0.89653 | 0       |
| ENSMUSG00000039285 | 12_Azi2          | 2250.03 | 0.04499  | 0.76111  | 0.83211  | 2210.41 | 2094.43 | 2551.65 | 1908.87 | 2535.39 | 2199.44 |
| ENSMUSG00000039286 | 12_Fndc3b        | 1634.35 | -0.35385 | 0.00215  | 0.00691  | 1498.49 | 1500.61 | 1303.91 | 1871    | 1779.61 | 1852.49 |
| ENSMUSG00000039294 | 14_BC017643      | 732.17  | 0.34971  | 0.0067   | 0.01802  | 853.429 | 750.765 | 858.121 | 663.641 | 642.812 | 624.25  |
| ENSMUSG00000039298 | 16_Cdk5rap2      | 769.146 | 0.02586  | 0.83911  | 0.89027  | 774.424 | 792.066 | 760.118 | 705.118 | 757.568 | 825.58  |
| ENSMUSG00000039304 | 11_Tnfrsf10      | 1764.2  | 0.99784  | 1.51E-07 | 1.80E-06 | 2114.04 | 2041.2  | 2899.44 | 986.444 | 1427.28 | 1116.81 |
| ENSMUSG00000039307 | 16_Hexdc         | 503.392 | 0.382    | 0.01789  | 0.04126  | 537.409 | 602.998 | 568.893 | 504.944 | 381.922 | 424.186 |
| ENSMUSG00000039308 | 5_Ndst2          | 972.519 | 0.60914  | 2.13E-06 | 1.78E-05 | 1122.57 | 1184.89 | 1215.47 | 735.775 | 721.707 | 854.703 |
| ENSMUSG00000039313 | 14_AF529169      | 64.0001 | -1.06151 | 0.00179  | 0.00592  | 40.8049 | 54.1505 | 28.6837 | 75.7416 | 89.6531 | 94.967  |
| ENSMUSG00000039315 | 15_Clnk          | 4.30769 | -1.1674  | 0.43937  | 0.55469  | 7.8137  | 0       | 0       | 8.11517 | 3.58612 | 6.33113 |
| ENSMUSG00000039316 | 14_Rftn1         | 130.336 | -0.05198 | 0.82547  | 0.88036  | 141.515 | 114.726 | 127.881 | 155.09  | 117.446 | 125.356 |
| ENSMUSG00000039318 | 12_Rab3gap2      | 1202.31 | 0.39858  | 0.00089  | 0.00325  | 1391.71 | 1363.86 | 1344.55 | 952.18  | 1034.6  | 1126.94 |
| ENSMUSG00000039321 | 1_Uts2r          | 11.2902 | 0.80484  | 0.2408   | 0.3484   | 13.0228 | 19.2739 | 10.7564 | 9.91854 | 7.17224 | 7.59736 |
| ENSMUSG00000039323 | 18_Igfbp2        | 9494.97 | 0.24117  | 0.23121  | 0.33741  | 9891.27 | 11593.7 | 9374.79 | 11119.6 | 6126.89 | 8863.59 |
| ENSMUSG00000039328 | 9_Rnf122         | 100.887 | 0.81938  | 0.00776  | 0.02039  | 135.437 | 144.095 | 106.369 | 92.8736 | 49.3092 | 77.2398 |
| ENSMUSG00000039330 | 4_Tsga10ip       | 0.29498 | -0.03469 | 0.99322  | NA       | 0.86819 | 0       | 0       | 0.90169 | 0       | 0       |
| ENSMUSG00000039339 | 3_2010001E11Rik  | 0.74969 | -3.06636 | 0.35271  | NA       | 0       | 0       | 0       | 2.70506 | 1.79306 | 0       |
| ENSMUSG00000039345 | 15_Mettl22       | 111.925 | 0.56657  | 0.06961  | 0.12796  | 156.274 | 136.753 | 107.564 | 121.728 | 61.8606 | 87.3697 |
| ENSMUSG00000039347 | 7_Atp6v0e2       | 569.216 | -0.82696 | 0.00056  | 0.00218  | 427.149 | 496.533 | 307.155 | 951.278 | 669.708 | 563.471 |
| ENSMUSG00000039349 | 5_C130074G19Rik  | 291.762 | -0.82988 | 8.36E-05 | 0.00043  | 178.847 | 253.314 | 198.396 | 442.728 | 344.268 | 333.018 |
| ENSMUSG00000039354 | 16_Smarcal1      | 749.73  | 0.59303  | 3.92E-05 | 0.00022  | 823.043 | 897.614 | 983.612 | 577.079 | 552.263 | 664.769 |
| ENSMUSG00000039356 | 15_Exosc2        | 591.3   | 0.10828  | 0.42162  | 0.53711  | 630.305 | 577.3   | 632.237 | 530.191 | 573.78  | 603.99  |
| ENSMUSG00000039357 | 1_Fut11          | 562.532 | -0.38048 | 0.00561  | 0.01551  | 517.44  | 490.108 | 457.744 | 593.309 | 667.019 | 649.574 |
| ENSMUSG00000039358 | 3_Drd5           | 0.15297 | 0.92709  | 0.82027  | NA       | 0       | 0       | 0       | 0       | 0       | 0       |
| ENSMUSG00000039361 | 9_Picalm         | 3690.24 | -0.1892  | 0.18565  | 0.28393  | 3627.29 | 3216.91 | 3501.8  | 3328.12 | 4559.75 | 3907.58 |
| ENSMUSG00000039364 | 13_Sectm1b       | 259.613 | 1.53864  | 2.42E-09 | 5.02E-08 | 320.362 | 333.163 | 504.355 | 107.301 | 122.825 | 169.674 |
| ENSMUSG00000039367 | 9_Sec24c         | 4297.8  | 0.41553  | 0.00073  | 0.00274  | 4587.51 | 4801.96 | 5347.12 | 3393.04 | 3588.81 | 4068.39 |
| ENSMUSG00000039372 | 5_March4         | 21.128  | 0.48125  | 0.36546  | 0.48282  | 29.5184 | 27.5342 | 16.7322 | 23.4438 | 14.3445 | 15.1947 |
| ENSMUSG00000039375 | 16_Wdr17         | 80.7118 | -2.07041 | 0.00039  | 0.00159  | 44.2776 | 33.041  | 15.537  | 228.126 | 129.1   | 34.1881 |
| ENSMUSG00000039376 | 13_Synpo2l       | 56.3704 | -0.77093 | 0.02774  | 0.05955  | 39.9367 | 42.2191 | 43.0255 | 93.7753 | 54.6884 | 64.5776 |
| ENSMUSG00000039377 | 7_Hix            | 12.0814 | 0.81635  | 0.23142  | 0.33753  | 13.0228 | 20.1917 | 13.1467 | 12.6236 | 7.17224 | 6.33113 |
| ENSMUSG00000039382 | 11_Wdr45         | 430.354 | 0.30686  | 0.13573  | 0.21998  | 458.403 | 479.095 | 491.208 | 501.337 | 310.2   | 341.881 |
| ENSMUSG00000039384 | 8_Dusp10         | 156.736 | 0.22232  | 0.37453  | 0.49213  | 165.824 | 183.561 | 156.565 | 176.73  | 105.791 | 151.947 |
| ENSMUSG00000039385 | 4_Cdh6           | 61.7048 | -1.24284 | 0.00394  | 0.01158  | 32.9912 | 49.5615 | 27.4885 | 85.6601 | 126.411 | 48.1166 |
| ENSMUSG00000039391 | 11_Ccdc81        | 3.42248 | 0.59657  | 0.61484  | 0.71391  | 4.34094 | 5.50683 | 2.39031 | 2.70506 | 1.79306 | 3.79868 |
| ENSMUSG00000039395 | 8_Mreg           | 3062.65 | 0.13914  | 0.28172  | 0.39464  | 3111.59 | 3118.7  | 3399.02 | 2576.12 | 2870.69 | 3299.79 |
| ENSMUSG00000039396 | 10_Neil3         | 85.3958 | -0.15456 | 0.62726  | 0.72422  | 96.3689 | 63.3286 | 82.4656 | 64.0197 | 104.894 | 101.298 |
| ENSMUSG00000039405 | 6_Prss23         | 5231.79 | 0.11335  | 0.29544  | 0.40984  | 5492.16 | 5194.78 | 5623.2  | 4827.62 | 4774.03 | 5478.96 |
| ENSMUSG00000039410 | 16_Prdr16        | 205.166 | -0.42122 | 0.11357  | 0.19095  | 172.769 | 213.849 | 139.833 | 305.671 | 224.133 | 174.739 |
| ENSMUSG00000039414 | 9_Heat5b         | 1140.48 | 0.28064  | 0.01824  | 0.04192  | 1207.65 | 1265.65 | 1278.81 | 955.787 | 1028.32 | 1106.68 |
| ENSMUSG00000039419 | 16_Cntnap2       | 133.157 | -1.5458  | 9.51E-06 | 6.47E-05 | 77.2688 | 85.3559 | 40.6352 | 269.604 | 191.858 | 134.22  |
| ENSMUSG00000039427 | 14_Alg1          | 387.651 | 0.51279  | 0.00378  | 0.01117  | 421.071 | 455.232 | 492.403 | 738.708 | 285.993 | 292.498 |
| ENSMUSG00000039428 | 10_Tmem135       | 1161.88 | -0.13052 | 0.31836  | 0.43387  | 1078.29 | 1078.42 | 1171.25 | 1071.2  | 1285.62 | 1286.49 |
| ENSMUSG00000039431 | 16_Mtmr7         | 175.991 | -0.9252  | 0.00063  | 0.00244  | 113.733 | 146.849 | 103.978 | 284.031 | 246.546 | 160.811 |
| ENSMUSG00000039438 | 6_Ttc36          | 500.301 | -0.02498 | 0.87033  | 0.91205  | 484.449 | 508.464 | 493.599 | 501.337 | 442.886 | 571.068 |
| ENSMUSG00000039449 | 14_Prpf18        | 1564.84 | -0.26385 | 0.02612  | 0.05667  | 1442.93 | 1341.83 | 1480.8  | 1605    | 1662.17 | 1856.29 |
| ENSMUSG00000039450 | 11_Dcxr          | 737.578 | 0.78197  | 3.02E-05 | 0.00018  | 849.956 | 923.312 | 1024.25 | 612.244 | 407.921 | 607.789 |
| ENSMUSG00000039452 | 5_Snx22          | 105.03  | -0.39968 | 0.18448  | 0.28247  | 98.9735 | 104.63  | 68.1238 | 149.68  | 120.135 | 88.6359 |

|                    |                  |         |          |          |          |         |         |         |         |         |         |
|--------------------|------------------|---------|----------|----------|----------|---------|---------|---------|---------|---------|---------|
| ENSMUSG00000039456 | 9_Morc3          | 1545.29 | 0.13014  | 0.40801  | 0.52475  | 1680.81 | 1434.53 | 1729.39 | 1212.77 | 1656.79 | 1557.46 |
| ENSMUSG00000039457 | 3_Ppl            | 43781.1 | 0.8487   | 2.68E-08 | 3.97E-07 | 52165.1 | 52616.9 | 64115.2 | 28685.3 | 27833.7 | 37270.1 |
| ENSMUSG00000039458 | 14_Mtmr12        | 1099.37 | 0.12824  | 0.27797  | 0.3905   | 1133.85 | 1088.52 | 1222.64 | 996.362 | 1078.53 | 1076.29 |
| ENSMUSG00000039461 | 12_Tcta          | 980.183 | -0.30187 | 0.00646  | 0.01746  | 856.034 | 897.614 | 880.829 | 1087.43 | 1095.56 | 1063.63 |
| ENSMUSG00000039462 | 4_Col10a1        | 100.49  | -0.90182 | 0.00352  | 0.0105   | 73.796  | 74.3423 | 62.148  | 181.239 | 107.584 | 103.831 |
| ENSMUSG00000039463 | 14_Slc9a8        | 1075.27 | 0.57363  | 2.68E-05 | 0.00016  | 1213.73 | 1296.86 | 1348.13 | 944.966 | 753.982 | 893.956 |
| ENSMUSG00000039470 | 15_Zdhhc2        | 322.766 | -1.447   | 1.03E-08 | 1.75E-07 | 178.847 | 219.356 | 120.711 | 554.537 | 498.471 | 364.673 |
| ENSMUSG00000039473 | 7_Ubn1           | 2416.03 | 0.10943  | 0.27693  | 0.38945  | 2476.07 | 2434.02 | 2612.61 | 2284.87 | 2278.98 | 2409.63 |
| ENSMUSG00000039474 | 13_Wfs1          | 3085.22 | 1.27649  | 9.73E-12 | 4.10E-10 | 3705.43 | 4244.85 | 5151.11 | 1898.95 | 1382.45 | 2128.53 |
| ENSMUSG00000039476 | 13_Prrx2         | 90.9695 | 0.84873  | 0.04546  | 0.08955  | 112.864 | 140.424 | 98.0026 | 112.711 | 34.9647 | 46.8504 |
| ENSMUSG00000039477 | 16_Tnrc18        | 2514.66 | 1.33604  | 7.41E-11 | 2.51E-09 | 3205.35 | 3487.66 | 4113.72 | 1730.33 | 987.08  | 1563.79 |
| ENSMUSG00000039478 | 15_Micu3         | 128.563 | -0.68872 | 0.00727  | 0.01928  | 86.8188 | 124.822 | 83.6608 | 168.615 | 169.444 | 138.019 |
| ENSMUSG00000039480 | 13_Nt5dc1        | 788.171 | -0.18843 | 0.20105  | 0.30215  | 722.333 | 699.368 | 788.802 | 720.447 | 918.047 | 880.028 |
| ENSMUSG00000039481 | 5_Nrtn           | 2.03924 | 3.37456  | 0.07772  | NA       | 2.60457 | 2.75342 | 5.97577 | 0.90169 | 0       | 0       |
| ENSMUSG00000039483 | 10_Asb6          | 410.091 | 1.20431  | 2.38E-08 | 3.60E-07 | 537.409 | 545.177 | 633.432 | 311.081 | 180.203 | 253.245 |
| ENSMUSG00000039485 | 7_Tsply4         | 510.623 | -1.23702 | 7.77E-07 | 7.36E-06 | 303.866 | 383.643 | 224.689 | 907.096 | 725.293 | 519.153 |
| ENSMUSG00000039488 | 15_Cntrn5        | 6.37291 | -0.24643 | 0.77746  | 0.84452  | 6.94551 | 4.58903 | 5.97577 | 9.01685 | 5.37918 | 6.33113 |
| ENSMUSG00000039492 | 7_Ccdc27         | 4.18628 | -0.73372 | 0.61605  | 0.71492  | 0       | 8.26025 | 1.19515 | 9.01685 | 5.37918 | 1.26623 |
| ENSMUSG00000039496 | 8_Cdnf           | 137.245 | -0.79098 | 0.00021  | 0.00093  | 102.446 | 99.123  | 100.393 | 180.337 | 182.892 | 158.278 |
| ENSMUSG00000039497 | 7_Dse            | 641.625 | -0.78907 | 2.37E-05 | 0.00014  | 474.899 | 523.149 | 413.523 | 937.753 | 866.049 | 634.38  |
| ENSMUSG00000039501 | 14_Znfx1         | 2925.89 | 1.52203  | 4.78E-22 | 1.11E-19 | 4116.08 | 3624.41 | 5281.39 | 1560.82 | 1422.79 | 1549.86 |
| ENSMUSG00000039508 | 5_Fam26d         | 0.2997  | -1.76345 | 0.66322  | NA       | 0       | 0       | 0       | 0.90169 | 0.89653 | 0       |
| ENSMUSG00000039509 | 7_Nup133         | 658.514 | 0.36927  | 0.00994  | 0.02513  | 689.342 | 718.642 | 818.681 | 547.323 | 547.78  | 629.315 |
| ENSMUSG00000039512 | 11_Uhrf1bp1      | 820.947 | 0.58498  | 1.72E-05 | 0.00011  | 931.566 | 939.833 | 1084    | 671.756 | 603.365 | 695.159 |
| ENSMUSG00000039515 | 11_Ppp2r4        | 3310.08 | 0.47675  | 0.00028  | 0.00121  | 3719.32 | 3838.26 | 3998.99 | 3134.26 | 2392.84 | 2776.84 |
| ENSMUSG00000039518 | 7_Cdsn           | 29.0207 | 2.42817  | 1.23E-05 | 8.11E-05 | 39.0685 | 61.493  | 45.4159 | 5.41011 | 6.27571 | 16.4609 |
| ENSMUSG00000039519 | 6_Cyp7b1         | 97.3633 | -0.27673 | 0.34087  | 0.45731  | 102.446 | 72.5066 | 89.6366 | 95.5787 | 135.376 | 88.6359 |
| ENSMUSG00000039521 | 12_Foxp3         | 8.93385 | 2.33619  | 0.00682  | 0.01828  | 19.9683 | 12.8493 | 11.9515 | 4.50843 | 1.79306 | 2.53245 |
| ENSMUSG00000039523 | 16_Cep104        | 731.193 | 0.37794  | 0.01537  | 0.03634  | 784.842 | 817.765 | 876.048 | 686.183 | 527.16  | 695.159 |
| ENSMUSG00000039529 | 8_Atp8b1         | 680.141 | 0.27436  | 0.10076  | 0.17316  | 762.269 | 653.478 | 817.485 | 515.764 | 639.226 | 692.626 |
| ENSMUSG00000039530 | 16_Tusc3         | 1139.24 | -0.57901 | 3.41E-06 | 2.65E-05 | 934.171 | 949.929 | 856.925 | 1359.74 | 1474.79 | 1259.9  |
| ENSMUSG00000039531 | 7_Zufsp          | 329.867 | 0.06512  | 0.72647  | 0.80513  | 337.725 | 286.355 | 388.425 | 284.031 | 349.647 | 333.018 |
| ENSMUSG00000039533 | 8_Mmd2           | 21.3978 | -1.76361 | 0.00945  | 0.02407  | 13.0228 | 10.0959 | 5.97577 | 61.3146 | 21.5167 | 16.4609 |
| ENSMUSG00000039536 | 16_Stau1         | 1880.55 | 0.11262  | 0.3667   | 0.48408  | 1834.48 | 1948.5  | 2078.37 | 1617.62 | 1859.4  | 1944.92 |
| ENSMUSG00000039539 | 13_Sgcx          | 0.14942 | -0.99647 | 0.80707  | NA       | 0       | 0       | 0       | 0       | 0.89653 | 0       |
| ENSMUSG00000039542 | 15_Ncam1         | 888.065 | -1.17141 | 7.88E-06 | 5.51E-05 | 526.122 | 776.464 | 334.643 | 1405.73 | 1240.8  | 1044.64 |
| ENSMUSG00000039543 | 15_Cfap70        | 9.04718 | -0.8259  | 0.33402  | 0.45072  | 6.07732 | 1.83561 | 11.9515 | 14.427  | 9.86184 | 10.1298 |
| ENSMUSG00000039546 | 9_Ajap1          | 20.9571 | -0.5674  | 0.34434  | 0.46095  | 13.891  | 25.6986 | 10.7564 | 31.559  | 13.448  | 30.3894 |
| ENSMUSG00000039552 | 13_Rsph4a        | 1.00792 | -2.20347 | 0.41723  | NA       | 0       | 0       | 1.19515 | 0       | 3.58612 | 1.26623 |
| ENSMUSG00000039556 | 16_Ppp1r3f       | 108.187 | 0.20911  | 0.44368  | 0.55889  | 105.051 | 122.986 | 120.711 | 129.843 | 86.9635 | 83.571  |
| ENSMUSG00000039563 | 6_2210406O10Rik  | 3.03281 | -0.72087 | 0.56672  | 0.67183  | 2.60457 | 1.83561 | 2.39031 | 4.50843 | 1.79306 | 5.06491 |
| ENSMUSG00000039568 | 6_Ubald1         | 973.674 | 0.94601  | 1.95E-08 | 3.05E-07 | 1159.9  | 1245.46 | 1440.16 | 740.284 | 537.022 | 719.217 |
| ENSMUSG00000039577 | 17_Nphp4         | 84.4789 | 0.5212   | 0.12792  | 0.21019  | 98.1053 | 105.548 | 95.6123 | 103.694 | 51.9988 | 51.9153 |
| ENSMUSG00000039578 | 17_Ccser1        | 120.435 | -0.149   | 0.53183  | 0.64026  | 131.965 | 114.726 | 95.6123 | 133.449 | 129.1   | 117.759 |
| ENSMUSG00000039579 | 15_Grin3a        | 69.4261 | -0.61184 | 0.05635  | 0.10703  | 41.673  | 70.671  | 52.5868 | 80.25   | 94.1357 | 77.2398 |
| ENSMUSG00000039585 | 15_Myo9a         | 1271.36 | -0.8576  | 2.83E-09 | 5.72E-08 | 983.657 | 945.34  | 782.826 | 1644.67 | 1793.96 | 1477.69 |
| ENSMUSG00000039599 | 15_Fam149b       | 697.265 | -0.04475 | 0.71879  | 0.79986  | 674.582 | 719.56  | 664.506 | 676.264 | 724.397 | 724.282 |
| ENSMUSG00000039601 | 15_Rcan2         | 213.811 | -1.53477 | 2.94E-07 | 3.20E-06 | 142.383 | 121.15  | 64.5383 | 394.037 | 307.51  | 253.245 |
| ENSMUSG00000039607 | 15_Rbms3         | 330.819 | -0.73175 | 1.37E-05 | 8.91E-05 | 243.961 | 272.588 | 229.47  | 404.857 | 455.438 | 378.602 |
| ENSMUSG00000039611 | 2_Tmem246        | 502.407 | 0.10537  | 0.52449  | 0.63381  | 513.099 | 533.245 | 516.307 | 573.472 | 418.68  | 459.64  |
| ENSMUSG00000039615 | 8_Stub1          | 1221.41 | 0.70206  | 2.08E-06 | 1.74E-05 | 1343.96 | 1532.74 | 1662.46 | 1032.43 | 812.257 | 944.605 |
| ENSMUSG00000039616 | 9_Mocos          | 489.568 | 0.45517  | 0.01471  | 0.03502  | 515.704 | 494.697 | 688.409 | 430.104 | 357.716 | 450.777 |
| ENSMUSG00000039620 | 16_6430573F11Rik | 107.329 | -0.02623 | 0.91179  | 0.94083  | 97.2371 | 114.726 | 107.564 | 113.612 | 112.066 | 98.7657 |
| ENSMUSG00000039621 | 13_Prex1         | 316.722 | 0.76111  | 0.00051  | 0.00201  | 442.776 | 383.643 | 369.303 | 306.573 | 195.444 | 202.596 |
| ENSMUSG00000039623 | 13_Ap5z1         | 317.592 | 1.24043  | 2.35E-10 | 6.79E-09 | 399.367 | 438.711 | 500.77  | 214.601 | 153.307 | 198.798 |
| ENSMUSG00000039628 | 8_Hs3st6         | 3.75896 | 0.81067  | 0.4892   | 0.60097  | 6.07732 | 4.58903 | 3.58546 | 3.60674 | 0.89653 | 3.79868 |
| ENSMUSG00000039629 | 14_Strip2        | 29.6884 | -1.71757 | 0.01535  | 0.0363   | 25.1775 | 14.6849 | 1.19515 | 64.0197 | 43.93   | 29.1232 |
| ENSMUSG00000039630 | 9_Hnrmpu         | 5171.05 | -0.38351 | 0.01068  | 0.02672  | 4679.54 | 4153.07 | 4630.03 | 4703.19 | 6477.43 | 6383.05 |
| ENSMUSG00000039632 | 12_Ccdc151       | 2.28799 | 0.21194  | 0.89714  | NA       | 3.47275 | 2.75342 | 1.19515 | 5.41011 | 0.89653 | 0       |
| ENSMUSG00000039633 | 6_Lonrf1         | 510.803 | 0.01896  | 0.89157  | 0.92683  | 534.804 | 491.944 | 515.111 | 526.584 | 467.092 | 529.283 |
| ENSMUSG00000039634 | 12_Zfp189        | 76.5277 | -1.22683 | 9.54E-05 | 0.00048  | 36.4639 | 55.9861 | 45.4159 | 118.121 | 118.342 | 84.8372 |
| ENSMUSG00000039637 | 14_Coro7         | 971.866 | 1.08596  | 1.35E-11 | 5.47E-10 | 1216.33 | 1256.48 | 1491.55 | 708.725 | 526.263 | 631.847 |
| ENSMUSG00000039639 | 6_Kcne1          | 21.5884 | 0.22953  | 0.69368  | 0.78052  | 28.6502 | 19.2739 | 21.5128 | 20.7388 | 8.96531 | 30.3894 |
| ENSMUSG00000039640 | 7_Mrpl12         | 714.677 | 0.65159  | 0.00144  | 0.00492  | 867.32  | 837.956 | 915.488 | 729.464 | 418.68  | 519.153 |
| ENSMUSG00000039646 | 5_Vasn           | 1412.95 | 1.11727  | 7.23E-07 | 6.90E-06 | 1730.3  | 2005.41 | 2067.62 | 1217.28 | 608.744 | 848.372 |
| ENSMUSG00000039648 | 14_Ccbl1         | 604.118 | 0.61453  | 0.00101  | 0.00362  | 720.596 | 767.285 | 702.751 | 491.419 | 363.991 | 578.666 |
| ENSMUSG00000039652 | 16_Cpeb3         | 346.073 | -0.12168 | 0.45428  | 0.56848  | 345.539 | 300.122 | 348.985 | 386.823 | 329.027 | 365.94  |
| ENSMUSG00000039653 | 9_Baat           | 1.16443 | -0.39896 | 0.86095  | NA       | 0       | 1.83561 | 1.19515 | 0       | 2.68959 | 1.26623 |
| ENSMUSG00000039656 | 16_Rxbp          | 781.206 | 0.85974  | 2.63E-05 | 0.00016  | 903.784 | 1013.26 | 1105.52 | 712.332 | 414.197 | 538.146 |
| ENSMUSG00000039660 | 16_D2Wsu81e      | 504.775 | 0.72822  | 9.07E-05 | 0.00046  | 556.509 | 638.793 | 694.385 | 462.565 | 321.854 | 354.544 |
| ENSMUSG00000039661 | 14_Dusp26        | 15.2118 | -1.33248 | 0.08742  | 0.15387  | 6.94551 | 11.9315 | 7.17092 | 43.2809 | 14.3445 | 7.59736 |
| ENSMUSG00000039662 | 16_Lcmt          | 1945.94 | 0.27446  | 0.08279  | 0.14733  | 2047.19 | 2209.16 | 2135.74 | 2146.01 | 1471.21 | 1666.35 |
| ENSMUSG00000039670 | 2_Oxld1          | 60.1793 | 0.34196  | 0.37806  | 0.49561  | 59.0368 | 62.4108 | 81.2705 | 78.4466 | 45.7231 | 34.1881 |
| ENSMUSG00000039671 | 18_Zmynd8        | 1493.66 | 0.2595   | 0.02317  | 0.05134  | 1558.4  | 1637.37 | 1687.56 | 1441.8  | 1266.8  | 1370.06 |
| ENSMUSG00000039672 | 12_Kcne2         | 22.4692 | -1.43842 | 0.00767  | 0.02019  | 13.0228 | 13.7671 | 9.56123 | 36.0674 | 42.1369 | 20.2596 |
| ENSMUSG00000039676 | 3_Capsl          | 90.2444 | -0.60541 | 0.02517  | 0.05496  | 73.796  | 75.2601 | 65.7335 | 98.2837 | 130.893 | 97.4995 |
| ENSMUSG00000039678 | 12_Tbc1d13       | 772.412 | 0.2995   | 0.04563  | 0.08982  | 905.521 | 750.765 | 901.146 | 769.138 | 626.675 | 681.23  |
| ENSMUSG00000039680 | 9_Mrps6          | 451.257 | -0.45126 | 0.00414  | 0.01203  | 355.089 | 430.451 | 358.546 | 538.306 | 547.78  | 477.368 |
| ENSMUSG00000039682 | 12_Lap3          | 673.97  | 0.55577  | 0.00022  | 0.00097  | 833.461 | 695.697 | 877.243 | 554.537 | 502.954 | 579.932 |

|                    |                  |         |          |          |          |         |         |         |         |         |         |
|--------------------|------------------|---------|----------|----------|----------|---------|---------|---------|---------|---------|---------|
| ENSMUSG00000039683 | 16_Sdk1          | 221.764 | -0.61321 | 0.08386  | 0.1487   | 140.647 | 280.849 | 103.978 | 355.264 | 207.995 | 241.849 |
| ENSMUSG00000039684 | 8_Gm5422         | 14.1943 | -0.15458 | 0.82926  | 0.88307  | 16.4956 | 16.5205 | 7.17092 | 7.21348 | 25.1029 | 12.6623 |
| ENSMUSG00000039686 | 14_Zer1          | 877.824 | 0.67318  | 0.00019  | 0.00088  | 964.557 | 1176.63 | 1097.15 | 845.781 | 595.296 | 587.529 |
| ENSMUSG00000039691 | 10_Tspan10       | 1227.68 | -0.59893 | 0.22459  | 0.32978  | 856.902 | 1467.57 | 604.748 | 2119.86 | 1253.35 | 1063.63 |
| ENSMUSG00000039693 | 11_Msantd3       | 200.992 | 0.309    | 0.14343  | 0.23025  | 206.629 | 211.095 | 250.982 | 211.896 | 172.134 | 153.213 |
| ENSMUSG00000039697 | 15_Ncoa7         | 213.479 | -0.14282 | 0.49344  | 0.60486  | 214.443 | 178.054 | 217.518 | 233.537 | 253.718 | 183.603 |
| ENSMUSG00000039699 | 13_Batf2         | 365.1   | 2.52119  | 6.79E-29 | 3.29E-26 | 572.136 | 499.286 | 794.777 | 96.4803 | 122.825 | 105.097 |
| ENSMUSG00000039701 | 11_Usp53         | 1781.2  | -0.05928 | 0.64376  | 0.73895  | 1844.03 | 1601.57 | 1787.95 | 1624.84 | 1953.54 | 1875.28 |
| ENSMUSG00000039703 | 15_Nploc4        | 1733.26 | 0.42847  | 0.00017  | 0.00079  | 1877.89 | 1995.31 | 2092.71 | 1495.9  | 1381.55 | 1556.19 |
| ENSMUSG00000039704 | 6_Lmbrd2         | 520.626 | -0.54134 | 0.00169  | 0.00563  | 461.876 | 377.218 | 432.646 | 512.157 | 675.088 | 664.769 |
| ENSMUSG00000039706 | 11_Ldb2          | 154.895 | -1.05187 | 0.00034  | 0.00144  | 105.919 | 131.246 | 64.5383 | 252.472 | 201.719 | 173.473 |
| ENSMUSG00000039713 | 16_PlekHg5       | 586.409 | 1.01523  | 7.73E-06 | 5.42E-05 | 685.869 | 815.011 | 852.145 | 453.548 | 257.304 | 454.575 |
| ENSMUSG00000039714 | 8_Cplx3          | 54.6789 | -1.90823 | 0.11444  | 0.19202  | 39.0685 | 23.8629 | 5.97577 | 186.649 | 63.6537 | 8.86359 |
| ENSMUSG00000039715 | 8_Wdr34          | 307.553 | 0.87918  | 2.32E-05 | 0.00014  | 391.553 | 388.232 | 415.914 | 270.506 | 167.651 | 211.46  |
| ENSMUSG00000039716 | 12_Dock3         | 74.888  | -1.5689  | 8.03E-05 | 0.00041  | 38.2003 | 48.6437 | 26.2934 | 150.581 | 121.032 | 64.5776 |
| ENSMUSG00000039717 | 15_Raly1         | 3.56957 | -1.45904 | 0.30726  | 0.42232  | 0.86819 | 3.67122 | 1.19515 | 12.6236 | 1.79306 | 1.26623 |
| ENSMUSG00000039720 | 6_Got111         | 0.15028 | -0.99647 | 0.80707  | NA       | 0       | 0       | 0       | 0.90169 | 0       | 0       |
| ENSMUSG00000039725 | 6_Trp53rka       | 339.412 | 0.23467  | 0.17249  | 0.26766  | 320.362 | 397.41  | 383.644 | 341.739 | 286.89  | 306.427 |
| ENSMUSG00000039728 | 14_Slc6a5        | 5.36492 | -2.2837  | 0.06468  | 0.1203   | 2.60457 | 2.75342 | 0       | 16.2303 | 8.06878 | 2.53245 |
| ENSMUSG00000039735 | 15_Fnbp11        | 2764.15 | -0.32488 | 0.01283  | 0.03115  | 2613.25 | 2289.01 | 2459.63 | 2668.09 | 3310.89 | 3244.07 |
| ENSMUSG00000039737 | 11_Prkrp1        | 295.053 | 0.09921  | 0.61631  | 0.71502  | 298.657 | 293.698 | 323.887 | 348.952 | 236.684 | 268.44  |
| ENSMUSG00000039738 | 16_Slx4          | 508.619 | 0.36066  | 0.02534  | 0.05529  | 568.663 | 534.163 | 614.309 | 516.666 | 417.783 | 400.128 |
| ENSMUSG00000039740 | 6_Alg2           | 844.318 | -0.41789 | 0.00142  | 0.00486  | 653.746 | 772.792 | 743.386 | 989.149 | 995.149 | 911.683 |
| ENSMUSG00000039741 | 15_Bahcc1        | 327.96  | 0.84049  | 0.00021  | 0.00096  | 389.817 | 420.355 | 452.963 | 307.475 | 173.03  | 224.122 |
| ENSMUSG00000039742 | 15_Fam71f1       | 0.14942 | -0.99647 | 0.80707  | NA       | 0       | 0       | 0       | 0       | 0.89653 | 0       |
| ENSMUSG00000039745 | 7_Htatip2        | 318.033 | 0.3253   | 0.03886  | 0.07861  | 357.694 | 365.287 | 337.033 | 265.997 | 277.028 | 305.161 |
| ENSMUSG00000039747 | 11_Orai2         | 283.257 | 0.48067  | 0.01003  | 0.02531  | 346.407 | 291.862 | 352.57  | 273.211 | 215.167 | 220.323 |
| ENSMUSG00000039748 | 11_Exo1          | 140.413 | 1.04951  | 1.32E-05 | 8.66E-05 | 181.451 | 177.136 | 209.152 | 71.2332 | 102.204 | 101.298 |
| ENSMUSG00000039753 | 16_Fbxl5         | 1592.04 | -0.48439 | 1.73E-05 | 0.00011  | 1377.82 | 1306.96 | 1296.74 | 1751.97 | 1990.3  | 1828.43 |
| ENSMUSG00000039754 | 10_Alkhh4        | 152.387 | 0.61072  | 0.01839  | 0.04218  | 171.033 | 166.123 | 215.128 | 137.056 | 86.9635 | 138.019 |
| ENSMUSG00000039756 | 12_Dnttip2       | 1146.62 | -0.37559 | 0.01033  | 0.026    | 1014.91 | 955.436 | 1024.25 | 1090.14 | 1466.72 | 1328.27 |
| ENSMUSG00000039759 | 10_Thap3         | 252.558 | 0.83624  | 0.00073  | 0.00274  | 289.975 | 338.67  | 343.009 | 240.75  | 128.204 | 174.739 |
| ENSMUSG00000039760 | 8_Il22ra2        | 0.69605 | 2.89528  | 0.32523  | NA       | 0.86819 | 0.91781 | 2.39031 | 0       | 0       | 0       |
| ENSMUSG00000039763 | 9_Dnajc28        | 131.766 | -0.45288 | 0.0387   | 0.07833  | 112.864 | 105.548 | 115.93  | 150.581 | 167.651 | 138.019 |
| ENSMUSG00000039765 | 15_Cc2d2a        | 820.156 | -0.48691 | 0.00018  | 0.00082  | 712.783 | 703.957 | 632.237 | 958.492 | 1022.04 | 891.424 |
| ENSMUSG00000039768 | 16_Dnajc11       | 1679.3  | 0.51094  | 0.00022  | 0.00099  | 1955.16 | 1774.12 | 2190.72 | 1350.72 | 1264.11 | 1541    |
| ENSMUSG00000039770 | 5_Ypel5          | 1731.16 | -0.29264 | 0.02966  | 0.06288  | 1554.93 | 1411.58 | 1703.09 | 1711.4  | 2088.92 | 1917.07 |
| ENSMUSG00000039771 | 13_Polr2j        | 618.222 | 0.29241  | 0.08424  | 0.14927  | 726.674 | 647.971 | 666.896 | 646.508 | 452.748 | 568.536 |
| ENSMUSG00000039774 | 12_Galnt12       | 317.069 | 0.60115  | 0.00053  | 0.00208  | 357.694 | 349.684 | 439.817 | 261.489 | 236.684 | 257.044 |
| ENSMUSG00000039781 | 14_Cep131        | 164.248 | 1.24713  | 4.73E-06 | 3.52E-05 | 182.32  | 259.739 | 250.982 | 115.416 | 68.1363 | 108.896 |
| ENSMUSG00000039782 | 14_Cpeb2         | 2559.86 | 0.012    | 0.9196   | 0.94653  | 2696.59 | 2431.27 | 2582.73 | 2287.58 | 2684.21 | 2676.8  |
| ENSMUSG00000039783 | 15_Kmo           | 19.6281 | 0.7689   | 0.21482  | 0.31869  | 39.0685 | 13.7671 | 21.5128 | 20.7388 | 12.5514 | 10.1298 |
| ENSMUSG00000039787 | 13_Cercam        | 333.612 | 0.32173  | 0.07497  | 0.13591  | 357.694 | 403.834 | 350.18  | 341.739 | 251.925 | 296.297 |
| ENSMUSG00000039789 | 7_Zfp597         | 317.92  | -0.558   | 0.00083  | 0.00307  | 262.193 | 267.081 | 241.421 | 334.525 | 403.439 | 398.861 |
| ENSMUSG00000039795 | 14_Zfand1        | 666.456 | -0.33148 | 0.01419  | 0.03391  | 610.336 | 575.464 | 584.43  | 670.854 | 797.912 | 759.736 |
| ENSMUSG00000039801 | 6_2410089E03Rik  | 413.711 | -0.43577 | 0.01132  | 0.02806  | 326.439 | 355.191 | 375.278 | 502.239 | 528.057 | 395.063 |
| ENSMUSG00000039804 | 15_Ncoa5         | 980.296 | 0.09831  | 0.48862  | 0.60046  | 940.248 | 1008.67 | 1091.18 | 897.177 | 866.945 | 1077.56 |
| ENSMUSG00000039809 | 10_Gabbr2        | 11.0116 | -1.26285 | 0.20737  | 0.30997  | 12.1546 | 3.67122 | 3.58546 | 34.264  | 9.86184 | 2.53245 |
| ENSMUSG00000039810 | 11_Zc3h10        | 289.456 | 0.5281   | 0.00608  | 0.0166   | 291.711 | 341.424 | 393.206 | 264.194 | 210.685 | 235.518 |
| ENSMUSG00000039813 | 14_Tbc1d2        | 1156.7  | 1.31616  | 4.10E-11 | 1.48E-09 | 1398.65 | 1538.24 | 2013.83 | 699.708 | 511.022 | 778.73  |
| ENSMUSG00000039814 | 15_Xkr5          | 17.5088 | 0.42803  | 0.43843  | 0.5537   | 19.1001 | 22.9451 | 17.9273 | 15.3287 | 10.7584 | 18.9934 |
| ENSMUSG00000039824 | 3_Myl6b          | 62.0506 | 0.05009  | 0.90465  | 0.93581  | 53.8277 | 72.5066 | 63.3432 | 97.382  | 35.8612 | 49.3828 |
| ENSMUSG00000039826 | 13_Trub2         | 529.449 | 0.17114  | 0.22987  | 0.33598  | 582.554 | 566.286 | 533.039 | 541.011 | 453.644 | 500.16  |
| ENSMUSG00000039828 | 6_Wdr70          | 260.596 | 0.46839  | 0.01152  | 0.02849  | 273.479 | 299.205 | 334.643 | 192.059 | 222.34  | 241.849 |
| ENSMUSG00000039830 | 8_Olig2          | 0.49804 | -0.79984 | 0.839    | NA       | 0       | 0       | 1.19515 | 0       | 1.79306 | 0       |
| ENSMUSG00000039831 | 16_Arhgap29      | 992.145 | -1.05506 | 7.43E-11 | 2.51E-09 | 643.328 | 711.299 | 579.65  | 1407.53 | 1504.38 | 1106.68 |
| ENSMUSG00000039834 | 17_Zfp335        | 548.41  | 1.18671  | 2.93E-11 | 1.11E-09 | 631.173 | 807.669 | 847.364 | 366.986 | 287.786 | 349.479 |
| ENSMUSG00000039835 | 15_Nhs1          | 2295.84 | 0.45071  | 0.00046  | 0.00185  | 2466.52 | 2601.06 | 2886.3  | 1924.2  | 1754.51 | 2142.46 |
| ENSMUSG00000039838 | 11_Slc45a1       | 1.34351 | -2.78642 | 0.25192  | NA       | 0.86819 | 0       | 0       | 3.60674 | 3.58612 | 0       |
| ENSMUSG00000039840 | 7_Epg5           | 890.264 | 0.20052  | 0.09366  | 0.16292  | 940.248 | 922.395 | 994.368 | 875.537 | 796.119 | 812.918 |
| ENSMUSG00000039841 | 14_Zfp800        | 556.2   | -0.23114 | 0.21386  | 0.31746  | 525.254 | 476.341 | 534.234 | 488.714 | 744.12  | 568.536 |
| ENSMUSG00000039842 | 15_Mcph1         | 196.067 | 0.44821  | 0.03677  | 0.0751   | 207.497 | 238.629 | 231.86  | 132.548 | 172.134 | 193.733 |
| ENSMUSG00000039844 | 19_Rapgef1       | 1937.17 | 0.45119  | 0.00178  | 0.00588  | 2075.84 | 2347.75 | 2289.92 | 1901.65 | 1411.14 | 1596.71 |
| ENSMUSG00000039849 | 5_Pcif1          | 1443.14 | 0.67711  | 7.39E-05 | 0.00038  | 1666.92 | 1747.5  | 1913.44 | 1359.74 | 891.151 | 1080.09 |
| ENSMUSG00000039850 | 16_Endov         | 713.081 | 0.52801  | 0.00342  | 0.01026  | 793.524 | 839.792 | 892.78  | 680.773 | 447.369 | 624.25  |
| ENSMUSG00000039851 | 11_4932438H23Rik | 83.7953 | -1.59808 | 1.32E-05 | 8.67E-05 | 39.9367 | 55.9861 | 28.6837 | 157.795 | 138.066 | 82.3047 |
| ENSMUSG00000039852 | 16_Rere          | 3199.57 | 0.61265  | 3.91E-07 | 4.08E-06 | 3661.15 | 3996.13 | 3948.79 | 2711.37 | 2238.64 | 2641.35 |
| ENSMUSG00000039853 | 18_Trim14        | 292.736 | 0.99734  | 7.46E-08 | 9.78E-07 | 355.089 | 368.04  | 446.988 | 172.222 | 202.616 | 211.46  |
| ENSMUSG00000039860 | 19_Srrm3         | 17.2966 | -1.49049 | 0.0835   | 0.1482   | 13.891  | 11.9315 | 1.19515 | 50.4944 | 16.1376 | 10.1298 |
| ENSMUSG00000039865 | 8_Slc44a3        | 31.5313 | -0.17079 | 0.68742  | 0.77492  | 24.3093 | 26.6164 | 38.2449 | 29.7556 | 32.2751 | 37.9868 |
| ENSMUSG00000039873 | 4_Neur12         | 13.2102 | 0.08959  | 0.90884  | 0.93843  | 14.7592 | 11.9315 | 14.3418 | 26.1489 | 4.48265 | 7.59736 |
| ENSMUSG00000039878 | 12_Slc39a5       | 0.15028 | -0.99647 | 0.80707  | NA       | 0       | 0       | 0       | 0.90169 | 0       | 0       |
| ENSMUSG00000039879 | 8_Heca           | 1430.43 | 0.14178  | 0.24657  | 0.35529  | 1436.85 | 1393.23 | 1673.22 | 1358.84 | 1346.59 | 1373.86 |
| ENSMUSG00000039883 | 5_Lrrc17         | 191.174 | -0.52091 | 0.0098   | 0.02482  | 178.847 | 158.78  | 132.662 | 238.045 | 219.65  | 219.057 |
| ENSMUSG00000039886 | 8_Tmem120a       | 409.253 | 0.47292  | 0.00235  | 0.00746  | 496.604 | 446.971 | 482.842 | 357.969 | 303.924 | 367.206 |
| ENSMUSG00000039887 | 11_Alg14         | 499.046 | -0.44137 | 0.00271  | 0.00844  | 410.653 | 394.656 | 466.11  | 557.242 | 618.606 | 547.01  |
| ENSMUSG00000039891 | 6_Txlnb          | 149.785 | -1.57316 | 2.98E-07 | 3.22E-06 | 62.5096 | 95.4518 | 68.1238 | 311.081 | 170.341 | 191.2   |
| ENSMUSG00000039899 | 5_Fgl2           | 741.399 | -0.04856 | 0.82905  | 0.883    | 962.821 | 600.245 | 623.87  | 736.677 | 914.461 | 610.321 |
| ENSMUSG00000039901 | 9_9130011E15Rik  | 634.37  | 0.25711  | 0.05909  | 0.11146  | 703.233 | 680.094 | 687.214 | 551.832 | 540.608 | 643.243 |

|                    |              |         |          |          |          |         |         |         |         |         |         |
|--------------------|--------------|---------|----------|----------|----------|---------|---------|---------|---------|---------|---------|
| ENSMUSG00000039903 | 16_Eva1c     | 78.7566 | 0.35221  | 0.23398  | 0.34057  | 80.7415 | 101.876 | 82.4656 | 57.7079 | 85.1704 | 64.5776 |
| ENSMUSG00000039904 | 9_Gpr37      | 77.134  | -1.41146 | 0.00228  | 0.00726  | 45.1458 | 60.5752 | 20.3176 | 176.73  | 87.86   | 72.1749 |
| ENSMUSG00000039908 | 14_Slc26a11  | 127.087 | 0.17623  | 0.51854  | 0.62864  | 123.283 | 149.602 | 132.662 | 149.68  | 123.721 | 83.571  |
| ENSMUSG00000039910 | 9_Cited2     | 971.075 | -0.05503 | 0.64203  | 0.73746  | 948.93  | 1016.01 | 891.585 | 982.837 | 981.701 | 1005.38 |
| ENSMUSG00000039911 | 13_Spsb1     | 249.733 | -0.03033 | 0.89217  | 0.9272   | 221.388 | 287.273 | 233.055 | 317.393 | 215.167 | 224.122 |
| ENSMUSG00000039913 | 12_Pak7      | 32.7695 | -1.8681  | 0.00023  | 0.00102  | 13.891  | 16.5205 | 11.9515 | 62.2163 | 65.4467 | 26.5908 |
| ENSMUSG00000039914 | 5_Coq10a     | 390.202 | -0.63327 | 7.74E-05 | 0.0004   | 292.579 | 323.068 | 302.374 | 533.798 | 434.817 | 454.575 |
| ENSMUSG00000039917 | 10_Rhbdd2    | 585.77  | 0.28933  | 0.02571  | 0.05596  | 632.909 | 634.204 | 665.701 | 542.815 | 495.781 | 543.211 |
| ENSMUSG00000039929 | 14_Urb1      | 374.785 | 0.57522  | 0.00084  | 0.0031   | 430.621 | 432.286 | 481.647 | 302.065 | 256.408 | 345.68  |
| ENSMUSG00000039934 | 12_Gsap      | 153.796 | 0.34965  | 0.12513  | 0.20641  | 204.024 | 139.506 | 173.297 | 133.449 | 134.48  | 138.019 |
| ENSMUSG00000039936 | 18_Pik3cd    | 135.505 | 1.47866  | 4.19E-06 | 3.17E-05 | 264.797 | 153.274 | 180.468 | 98.2837 | 52.8953 | 63.3113 |
| ENSMUSG00000039942 | 15_Ptger4    | 82.5723 | 1.18534  | 3.32E-05 | 0.00019  | 109.392 | 100.041 | 135.052 | 45.0843 | 56.4814 | 49.3828 |
| ENSMUSG00000039943 | 16_Plcb4     | 1629.66 | -1.38914 | 2.39E-10 | 6.88E-09 | 860.375 | 1174.79 | 665.701 | 2499.47 | 2720.07 | 1857.55 |
| ENSMUSG00000039952 | 15_Dag1      | 5217.18 | 0.41173  | 0.0011   | 0.00389  | 5368.01 | 6316.34 | 6184.92 | 4686.96 | 3983.29 | 4763.55 |
| ENSMUSG00000039953 | 13_Clstn1    | 4915.23 | 0.43941  | 0.01291  | 0.0313   | 5111.89 | 6267.69 | 5594.52 | 5136.9  | 3228.41 | 4151.96 |
| ENSMUSG00000039954 | 8_Stk32a     | 13.4465 | -1.16164 | 0.09523  | 0.16514  | 8.68188 | 9.17806 | 7.17092 | 28.8539 | 17.9306 | 8.86359 |
| ENSMUSG00000039956 | 8_Mrap       | 6.52683 | -0.46041 | 0.63921  | 0.73511  | 3.47275 | 9.17806 | 3.58546 | 5.41011 | 3.58612 | 13.9285 |
| ENSMUSG00000039958 | 17_Mettl20   | 108.545 | -0.75276 | 0.00227  | 0.00722  | 81.6097 | 83.5203 | 77.685  | 130.744 | 158.686 | 119.025 |
| ENSMUSG00000039959 | 12_Hip1      | 511.123 | -0.47581 | 0.01303  | 0.03153  | 413.258 | 510.3   | 358.546 | 697.905 | 518.195 | 568.536 |
| ENSMUSG00000039960 | 5_Rhou       | 624.247 | 0.14874  | 0.3195   | 0.43504  | 687.605 | 581.889 | 699.165 | 598.719 | 536.125 | 641.977 |
| ENSMUSG00000039963 | 18_Ccdc40    | 7.16863 | 0.85099  | 0.3378   | 0.45424  | 5.20913 | 11.9315 | 10.7564 | 5.41011 | 7.17224 | 2.53245 |
| ENSMUSG00000039967 | 14_Zfp292    | 1283.95 | -0.39743 | 0.00064  | 0.00245  | 1174.66 | 1081.17 | 1068.47 | 1402.12 | 1552.79 | 1424.51 |
| ENSMUSG00000039968 | 9_Rsbn1l     | 881.119 | -0.10374 | 0.4841   | 0.59608  | 836.934 | 800.326 | 911.903 | 794.385 | 1039.08 | 904.086 |
| ENSMUSG00000039976 | 3_Tbc1d16    | 630.746 | -0.49905 | 0.04695  | 0.092    | 491.395 | 701.203 | 375.278 | 944.065 | 678.674 | 593.86  |
| ENSMUSG00000039977 | 16_Ccdc67    | 5.1854  | -1.92306 | 0.12207  | 0.20255  | 4.34094 | 0.91781 | 1.19515 | 14.427  | 8.96531 | 1.26623 |
| ENSMUSG00000039981 | 5_Zc3h12d    | 18.3919 | 2.17226  | 0.00056  | 0.00217  | 43.4094 | 19.2739 | 27.4885 | 5.41011 | 7.17224 | 7.59736 |
| ENSMUSG00000039982 | 7_Dtx4       | 703.514 | -0.71821 | 2.73E-06 | 2.19E-05 | 535.672 | 594.738 | 464.915 | 952.18  | 882.186 | 791.392 |
| ENSMUSG00000039983 | 13_Ccdc32    | 526.791 | 0.31842  | 0.05226  | 0.10053  | 550.431 | 510.3   | 694.385 | 467.975 | 459.024 | 478.634 |
| ENSMUSG00000039985 | 14_Fam60a    | 398.172 | -0.11851 | 0.45522  | 0.56923  | 391.553 | 342.341 | 412.328 | 385.921 | 449.162 | 407.725 |
| ENSMUSG00000039987 | 15_Phtf2     | 379.841 | -0.6356  | 6.60E-05 | 0.00035  | 326.439 | 298.287 | 266.519 | 430.104 | 484.127 | 473.569 |
| ENSMUSG00000039988 | 14_Ankrd13c  | 1620.67 | -0.28676 | 0.03788  | 0.07701  | 1534.96 | 1368.45 | 1477.21 | 1561.72 | 2027.95 | 1753.72 |
| ENSMUSG00000039989 | 7_Cbx4       | 954.619 | 1.25438  | 1.19E-08 | 1.99E-07 | 1152.09 | 1234.45 | 1649.31 | 675.362 | 399.853 | 616.653 |
| ENSMUSG00000039990 | 15_Edrf1     | 892.7   | 0.02899  | 0.82466  | 0.87986  | 937.643 | 824.189 | 942.977 | 814.222 | 915.358 | 921.813 |
| ENSMUSG00000039994 | 15_Timeless  | 333.588 | 1.49623  | 4.69E-12 | 2.09E-10 | 504.417 | 402.917 | 568.893 | 156.893 | 150.617 | 217.791 |
| ENSMUSG00000039997 | 16_Ilf203    | 4954.82 | 0.95491  | 0.00011  | 0.00056  | 5930.6  | 5186.52 | 8495.16 | 2214.54 | 4407.34 | 3494.79 |
| ENSMUSG00000040003 | 17_Magi2     | 182.816 | -1.05899 | 0.00045  | 0.0018   | 132.833 | 150.52  | 71.7092 | 287.638 | 268.063 | 186.135 |
| ENSMUSG00000040006 | 13_Gsnm1     | 1207.29 | -0.46288 | 0.00033  | 0.00138  | 1091.31 | 996.737 | 957.318 | 1313.76 | 1541.14 | 1343.47 |
| ENSMUSG00000040007 | 8_Bahd1      | 466.641 | 0.90637  | 4.25E-10 | 1.13E-08 | 588.632 | 581.889 | 654.944 | 327.312 | 303.924 | 343.147 |
| ENSMUSG00000040009 | 5_Gnaz       | 59.4258 | -0.59263 | 0.18928  | 0.28845  | 38.2003 | 71.5888 | 32.2692 | 109.104 | 48.4127 | 56.9802 |
| ENSMUSG00000040010 | 10_Slc7a5    | 1884.74 | 0.61654  | 0.00014  | 0.00068  | 1937.8  | 2377.12 | 2530.14 | 1711.4  | 1257.83 | 1494.15 |
| ENSMUSG00000040016 | 16_Ptger3    | 34.6379 | -1.13495 | 0.0182   | 0.04184  | 15.6274 | 34.8766 | 14.3418 | 45.0843 | 57.378  | 40.5193 |
| ENSMUSG00000040017 | 7_Saa4       | 0.92268 | 3.32202  | 0.29066  | NA       | 4.34094 | 0       | 1.19515 | 0       | 0       | 0       |
| ENSMUSG00000040018 | 9_Cox15      | 906.728 | 0.47209  | 0.00036  | 0.00152  | 994.076 | 998.572 | 1168.86 | 758.317 | 719.018 | 801.522 |
| ENSMUSG00000040021 | 12_Lats1     | 1692.96 | -0.23294 | 0.05489  | 0.10472  | 1546.24 | 1487.76 | 1637.36 | 1739.35 | 2019.88 | 1727.13 |
| ENSMUSG00000040022 | 14_Rab11fip2 | 619.878 | -0.38907 | 0.00226  | 0.0072   | 540.013 | 555.272 | 515.111 | 700.61  | 733.362 | 674.899 |
| ENSMUSG00000040025 | 17_Ythdf2    | 1491.99 | 0.08644  | 0.5861   | 0.68892  | 1558.4  | 1461.15 | 1589.55 | 1145.14 | 1583.27 | 1614.44 |
| ENSMUSG00000040026 | 7_Saa3       | 1149.82 | 4.20579  | 0.00014  | 0.00067  | 2911.04 | 1684.17 | 1949.3  | 293.949 | 16.1376 | 44.3179 |
| ENSMUSG00000040028 | 9_Elav1      | 1452.19 | 0.03229  | 0.8069   | 0.8666   | 1436.85 | 1454.72 | 1513.07 | 1237.11 | 1530.38 | 1541    |
| ENSMUSG00000040029 | 14_Ipo8      | 1891.88 | -0.01813 | 0.88803  | 0.92448  | 1837.95 | 1767.69 | 2034.15 | 1691.56 | 1966.09 | 2053.82 |
| ENSMUSG00000040033 | 15_Stat2     | 3717.07 | 1.78406  | 3.71E-26 | 1.23E-23 | 5242.99 | 5040.59 | 7000.02 | 1409.33 | 1819.06 | 1790.44 |
| ENSMUSG00000040034 | 15_Nup43     | 302.166 | -0.24197 | 0.21829  | 0.32282  | 292.579 | 245.972 | 291.618 | 262.39  | 353.233 | 367.206 |
| ENSMUSG00000040035 | 14_Dis2      | 19.3758 | -1.92346 | 0.00513  | 0.01441  | 11.2864 | 9.17806 | 3.58546 | 48.691  | 29.5855 | 13.9285 |
| ENSMUSG00000040037 | 13_Negr1     | 93.0337 | -1.70481 | 2.93E-05 | 0.00017  | 52.9595 | 55.9861 | 21.5128 | 167.713 | 173.927 | 86.1034 |
| ENSMUSG00000040040 | 16_Ift88     | 435.986 | -0.29168 | 0.0869   | 0.15312  | 386.344 | 383.643 | 406.352 | 399.447 | 551.366 | 488.764 |
| ENSMUSG00000040043 | 15_Rbms2     | 1824.36 | -0.07697 | 0.51199  | 0.62225  | 1890.05 | 1748.42 | 1688.75 | 2028.79 | 1819.96 | 1770.19 |
| ENSMUSG00000040044 | 11_Orc3      | 1085.89 | -0.48162 | 0.001    | 0.00358  | 973.239 | 863.655 | 882.024 | 1119.89 | 1462.24 | 1214.31 |
| ENSMUSG00000040046 | 12_Tph1      | 6.08341 | 0.16517  | 0.86677  | 0.90988  | 5.20913 | 4.58903 | 9.56123 | 9.01685 | 1.79306 | 6.33113 |
| ENSMUSG00000040048 | 14_Ndufb10   | 1445.22 | 0.0387   | 0.73631  | 0.81322  | 1382.16 | 1473.08 | 1538.16 | 1380.48 | 1377.97 | 1519.47 |
| ENSMUSG00000040054 | 15_Baz2a     | 5296.28 | 0.63461  | 8.77E-07 | 8.18E-06 | 6076.45 | 6219.05 | 7031.09 | 3908.81 | 3834.46 | 4707.83 |
| ENSMUSG00000040055 | 8_Gjb6       | 270.905 | -0.47487 | 0.01088  | 0.02712  | 234.411 | 231.287 | 215.128 | 355.264 | 327.234 | 262.109 |
| ENSMUSG00000040061 | 17_Plcb2     | 48.9506 | 0.99158  | 0.00672  | 0.01805  | 77.2688 | 55.0683 | 63.3432 | 41.4775 | 28.689  | 27.857  |
| ENSMUSG00000040084 | 9_Bub1b      | 589.899 | 0.35454  | 0.0331   | 0.06892  | 662.428 | 588.313 | 735.02  | 437.317 | 547.78  | 568.536 |
| ENSMUSG00000040086 | 13_Tnni3k    | 0.15028 | -0.99647 | 0.80707  | NA       | 0       | 0       | 0       | 0.90169 | 0       | 0       |
| ENSMUSG00000040093 | 15_Bmf       | 277.492 | 0.08409  | 0.65184  | 0.7455   | 294.316 | 273.506 | 289.227 | 317.393 | 232.201 | 258.31  |
| ENSMUSG00000040097 | 15_Flywch1   | 433.522 | 0.1985   | 0.38473  | 0.50211  | 461.876 | 524.067 | 403.962 | 537.405 | 306.613 | 367.206 |
| ENSMUSG00000040102 | 10_Kihl42    | 470.379 | -0.29085 | 0.03692  | 0.07537  | 421.071 | 445.136 | 402.767 | 494.124 | 545.091 | 514.088 |
| ENSMUSG00000040105 | 3_Ppapdc2    | 440.446 | -0.08293 | 0.61577  | 0.71479  | 391.553 | 428.615 | 462.525 | 412.972 | 424.059 | 522.952 |
| ENSMUSG00000040111 | 14_Gramd1b   | 747.96  | -0.95778 | 5.50E-05 | 0.0003   | 521.781 | 636.039 | 366.912 | 1234.41 | 979.011 | 749.606 |
| ENSMUSG00000040112 | 9_Mrps35     | 553.114 | -0.13089 | 0.41495  | 0.53109  | 500.077 | 524.067 | 559.332 | 486.91  | 596.193 | 652.107 |
| ENSMUSG00000040113 | 14_Mettl11b  | 0.87561 | -2.0171  | 0.47121  | NA       | 0       | 0.91781 | 0       | 1.80337 | 0       | 2.53245 |
| ENSMUSG00000040118 | 15_Cacna2d1  | 552.838 | -1.54439 | 4.84E-11 | 1.71E-09 | 248.302 | 373.547 | 224.689 | 889.062 | 952.115 | 629.315 |
| ENSMUSG00000040121 | 5_Rep15      | 15.4472 | -0.45773 | 0.4876   | 0.59948  | 14.7592 | 19.2739 | 4.78062 | 21.6405 | 17.0341 | 15.1947 |
| ENSMUSG00000040123 | 16_Zmym5     | 1812.15 | -0.40527 | 0.00545  | 0.01515  | 1586.18 | 1527.23 | 1564.46 | 1728.53 | 2400.01 | 2066.48 |
| ENSMUSG00000040124 | 5_Gorab      | 382.393 | -0.19958 | 0.18508  | 0.28327  | 367.244 | 357.026 | 343.009 | 373.298 | 432.128 | 421.654 |
| ENSMUSG00000040125 | 4_Gpr26      | 6.11804 | -1.46141 | 0.31485  | 0.42995  | 6.94551 | 2.75342 | 0       | 19.8371 | 7.17224 | 0       |
| ENSMUSG00000040127 | 13_Sdr9c7    | 740.562 | 0.55975  | 0.00028  | 0.00122  | 920.28  | 779.217 | 946.562 | 545.52  | 569.297 | 682.496 |
| ENSMUSG00000040128 | 9_Pnrc1      | 519.808 | -0.13396 | 0.30018  | 0.41485  | 491.395 | 496.533 | 499.574 | 537.405 | 562.125 | 531.815 |
| ENSMUSG00000040132 | 6_Svs2       | 0       | NA       | NA       | NA       | 0       | 0       | 0       | 0       | 0       | 0       |
| ENSMUSG00000040133 | 2_Gpr176     | 21.2364 | 0.01268  | 0.98014  | 0.98689  | 24.3093 | 18.3561 | 21.5128 | 27.9522 | 18.8271 | 16.4609 |

|                     |                  |         |          |          |          |         |         |         |         |         |         |
|---------------------|------------------|---------|----------|----------|----------|---------|---------|---------|---------|---------|---------|
| ENSMUSG000000040134 | 8_Rdh7           | 11.4503 | 0.63171  | 0.36653  | 0.48389  | 10.4183 | 14.6849 | 16.7322 | 12.6236 | 5.37918 | 8.86359 |
| ENSMUSG000000040136 | 9_Abcc8          | 25.4434 | -0.93628 | 0.08724  | 0.15358  | 13.0228 | 23.8629 | 15.537  | 50.4944 | 20.6202 | 29.1232 |
| ENSMUSG000000040138 | 7_Ndp            | 12.6758 | -1.66751 | 0.05092  | 0.09854  | 4.34094 | 9.17806 | 4.78062 | 28.8539 | 25.1029 | 3.79868 |
| ENSMUSG000000040139 | 14_9430038I01Rik | 222.305 | 0.06329  | 0.7145   | 0.79632  | 229.202 | 214.767 | 237.836 | 211.896 | 222.34  | 217.791 |
| ENSMUSG000000040140 | 14_Tdrd6         | 6.67864 | -0.34291 | 0.70266  | 0.78739  | 7.8137  | 7.34244 | 2.39031 | 9.91854 | 6.27571 | 6.33113 |
| ENSMUSG000000040146 | 8_Rgl3           | 107.686 | 0.33446  | 0.23021  | 0.33634  | 137.174 | 132.164 | 90.8317 | 114.514 | 87.86   | 83.571  |
| ENSMUSG000000040147 | 14_Maob          | 154.919 | -1.0892  | 5.98E-06 | 4.34E-05 | 93.7643 | 103.712 | 100.393 | 201.978 | 259.994 | 169.674 |
| ENSMUSG000000040151 | 9_Hs2st1         | 882.754 | -0.55851 | 4.62E-05 | 0.00025  | 755.324 | 761.779 | 623.87  | 1074.81 | 1089.28 | 991.456 |
| ENSMUSG000000040152 | 8_Thbs1          | 4079.37 | -0.25793 | 0.13471  | 0.2189   | 3958.94 | 3863.04 | 3326.11 | 4804.18 | 5153.26 | 3370.7  |
| ENSMUSG000000040154 | 11_Wfdc5         | 44.4734 | 0.76656  | 0.02887  | 0.06152  | 63.3778 | 49.5615 | 54.9771 | 32.4607 | 32.2751 | 34.1881 |
| ENSMUSG000000040158 | 12_Tax1bp3       | 2634.27 | 0.25021  | 0.03709  | 0.07565  | 2714.83 | 2730.47 | 3142.06 | 2545.46 | 2225.19 | 2447.62 |
| ENSMUSG000000040163 | 14_1700034J05Rik | 0.2894  | 1.67273  | 0.67976  | NA       | 1.73638 | 0       | 0       | 0       | 0       | 0       |
| ENSMUSG000000040164 | 3_Kcns1          | 80.5164 | 0.14201  | 0.64756  | 0.74215  | 74.6642 | 113.808 | 64.5383 | 76.6433 | 76.2051 | 77.2398 |
| ENSMUSG000000040165 | 13_Cd209c        | 8.60644 | -0.0764  | 0.9276   | 0.95195  | 5.20913 | 4.58903 | 15.537  | 6.3118  | 9.86184 | 10.1298 |
| ENSMUSG000000040167 | 15_Ikzf5         | 573.586 | -0.00953 | 0.94246  | 0.96254  | 588.632 | 547.012 | 579.65  | 609.539 | 546.884 | 569.802 |
| ENSMUSG000000040170 | 13_Fmo2          | 841.494 | -0.14451 | 0.38572  | 0.50305  | 783.974 | 818.683 | 793.582 | 842.174 | 734.259 | 1076.29 |
| ENSMUSG000000040174 | 14_Alkbh3        | 513.643 | 0.11129  | 0.42729  | 0.54263  | 541.75  | 484.601 | 574.869 | 497.73  | 496.678 | 486.231 |
| ENSMUSG000000040177 | 9_2310057M21Rik  | 212.628 | 0.0253   | 0.89041  | 0.9262   | 218.783 | 226.698 | 197.2   | 220.011 | 192.754 | 220.323 |
| ENSMUSG000000040181 | 14_Fmo1          | 692.533 | -0.27581 | 0.03608  | 0.07397  | 638.118 | 673.669 | 566.503 | 752.006 | 757.568 | 767.334 |
| ENSMUSG000000040183 | 13_Ankrd6        | 163.773 | -0.27266 | 0.20703  | 0.30954  | 140.647 | 177.136 | 126.686 | 178.534 | 181.099 | 178.538 |
| ENSMUSG000000040187 | 15_Arntl2        | 303.897 | 0.70715  | 0.00189  | 0.00619  | 384.607 | 292.78  | 452.963 | 184.846 | 238.477 | 269.706 |
| ENSMUSG000000040188 | 9_Scamp2         | 3075.5  | 0.6691   | 3.15E-06 | 2.48E-05 | 3572.6  | 3554.66 | 4199.77 | 2283.97 | 2094.3  | 2747.71 |
| ENSMUSG000000040189 | 15_Ccdc114       | 50.5402 | -0.36034 | 0.28796  | 0.40136  | 46.8822 | 38.5478 | 47.8062 | 57.7079 | 65.4467 | 46.8504 |
| ENSMUSG000000040195 | 11_Tmem194       | 516.191 | 0.1486   | 0.39404  | 0.5117   | 553.036 | 460.738 | 614.309 | 423.792 | 502.057 | 543.211 |
| ENSMUSG000000040197 | 4_Cd209e         | 2.50292 | 0.46647  | 0.80101  | 0.86235  | 7.8137  | 0.91781 | 0       | 1.80337 | 4.48265 | 0       |
| ENSMUSG000000040204 | 6_2810417H13Rik  | 439.706 | -0.04302 | 0.83813  | 0.88961  | 441.908 | 359.78  | 498.379 | 348.051 | 540.608 | 449.511 |
| ENSMUSG000000040205 | 8_Cuzd1          | 0.48859 | 2.39711  | 0.53861  | NA       | 1.73638 | 0       | 1.19515 | 0       | 0       | 0       |
| ENSMUSG000000040209 | 12_Zfp704        | 1768.9  | -0.65907 | 1.07E-05 | 7.21E-05 | 1519.33 | 1485.93 | 1107.91 | 2104.53 | 2264.64 | 2131.06 |
| ENSMUSG000000040212 | 11_Emp3          | 511.315 | -0.01424 | 0.94658  | 0.96524  | 542.618 | 540.587 | 443.402 | 676.264 | 429.438 | 435.582 |
| ENSMUSG000000040213 | 13_Ccbl2         | 503.142 | -0.34474 | 0.00989  | 0.02503  | 465.349 | 435.958 | 427.865 | 544.618 | 570.193 | 574.867 |
| ENSMUSG000000040219 | 4_Ttc12          | 308.211 | -0.44151 | 0.00581  | 0.01597  | 258.72  | 284.52  | 240.226 | 357.969 | 346.957 | 360.875 |
| ENSMUSG000000040220 | 9_Gas8           | 327.058 | 0.4799   | 0.02004  | 0.04533  | 357.694 | 370.793 | 413.523 | 292.146 | 205.306 | 322.888 |
| ENSMUSG000000040225 | 15_Prrc2c        | 5955.02 | 0.16356  | 0.24778  | 0.35664  | 5982.69 | 6099.74 | 6793.26 | 4687.86 | 5805.04 | 6361.52 |
| ENSMUSG000000040229 | 11_Gpr34         | 36.059  | -1.28004 | 0.0124   | 0.03025  | 22.5729 | 28.452  | 11.9515 | 65.823  | 60.9641 | 26.5908 |
| ENSMUSG000000040231 | 14_Syngr4        | 3.86703 | 0.76978  | 0.54006  | 0.64732  | 2.60457 | 7.34244 | 4.78062 | 6.3118  | 0.89653 | 1.26623 |
| ENSMUSG000000040234 | 16_Tm7sf3        | 1578.24 | -0.06855 | 0.58135  | 0.6847   | 1521.93 | 1576.79 | 1523.82 | 1805.17 | 1470.31 | 1571.39 |
| ENSMUSG000000040236 | 3_Trappc5        | 503.85  | 0.10894  | 0.44411  | 0.5593   | 478.372 | 533.245 | 556.942 | 468.876 | 471.575 | 514.088 |
| ENSMUSG000000040242 | 14_Fgfr1op2      | 2328.61 | -0.33268 | 0.00493  | 0.01391  | 2144.43 | 1975.12 | 2064.03 | 2339.87 | 2804.35 | 2643.88 |
| ENSMUSG000000040247 | 5_Tbc1d10c       | 25.9866 | 1.31877  | 0.03305  | 0.06884  | 52.9595 | 15.6027 | 43.0255 | 23.4438 | 10.7584 | 10.1298 |
| ENSMUSG000000040249 | 15_Lrp1          | 9387.93 | 0.101943 | 6.65E-09 | 1.20E-07 | 11598.1 | 13971.8 | 12149.9 | 7656.21 | 4781.2  | 6170.32 |
| ENSMUSG000000040250 | 14_Asun          | 1251.35 | -0.28749 | 0.04962  | 0.0965   | 1077.42 | 1099.53 | 1204.72 | 1160.47 | 1546.52 | 1419.44 |
| ENSMUSG000000040253 | 15_Gbp7          | 2711.35 | 1.40079  | 1.20E-13 | 8.15E-12 | 3852.15 | 3153.58 | 4794.96 | 1269.57 | 1794.85 | 1402.98 |
| ENSMUSG000000040254 | 11_Sema3d        | 1132.81 | -0.49305 | 0.00012  | 0.00059  | 974.976 | 913.217 | 933.415 | 1219.98 | 1277.56 | 1477.69 |
| ENSMUSG000000040258 | 6_Nxph3          | 59.9807 | -0.40988 | 0.33081  | 0.44742  | 55.5641 | 61.493  | 37.0498 | 95.5787 | 36.7578 | 73.4412 |
| ENSMUSG000000040260 | 7_Daam2          | 436.183 | -0.50226 | 0.0125   | 0.03044  | 332.516 | 453.396 | 296.398 | 577.98  | 461.713 | 495.095 |
| ENSMUSG000000040263 | 16_Klhdcc4       | 523.815 | 0.76986  | 2.24E-05 | 0.00014  | 630.305 | 590.149 | 760.118 | 409.365 | 317.372 | 435.582 |
| ENSMUSG000000040264 | 10_Gbp2b         | 4705.04 | 1.52395  | 1.41E-12 | 7.20E-11 | 6951.58 | 5667.45 | 8327.83 | 1732.14 | 3101.1  | 2450.15 |
| ENSMUSG000000040265 | 16_Dnm3          | 95.7329 | -0.59926 | 0.06328  | 0.11811  | 72.9278 | 89.0271 | 66.9286 | 138.86  | 134.48  | 72.1749 |
| ENSMUSG000000040268 | 16_Plekha1       | 2469.11 | -0.40389 | 0.00064  | 0.00245  | 2153.11 | 2181.62 | 2042.52 | 2623.9  | 3125.31 | 2688.2  |
| ENSMUSG000000040269 | 5_Mrps28         | 288.292 | 0.3347   | 0.06433  | 0.11972  | 295.184 | 296.451 | 374.083 | 272.309 | 238.477 | 253.245 |
| ENSMUSG000000040270 | 16_Bach2         | 134.637 | 0.26254  | 0.26214  | 0.37278  | 125.887 | 170.712 | 143.418 | 112.711 | 118.442 | 136.753 |
| ENSMUSG000000040272 | 14_Accs          | 221.547 | -0.15711 | 0.42648  | 0.54187  | 219.652 | 235.876 | 172.102 | 247.964 | 223.236 | 230.453 |
| ENSMUSG000000040274 | 11_Cdk6          | 1229.6  | 0.33668  | 0.02426  | 0.0533   | 1356.11 | 1298.69 | 1461.67 | 899.882 | 1158.32 | 1202.92 |
| ENSMUSG000000040276 | 14_Pacsin1       | 135.027 | -1.08172 | 0.0245   | 0.05375  | 95.5007 | 108.301 | 56.1722 | 341.739 | 136.273 | 72.1749 |
| ENSMUSG000000040280 | 9_Ndufa4l2       | 96.7376 | 1.04881  | 0.00262  | 0.00817  | 108.524 | 144.095 | 138.638 | 87.4635 | 35.8612 | 65.8438 |
| ENSMUSG000000040282 | 13_BC052040      | 387.532 | 0.20554  | 0.27419  | 0.38634  | 385.476 | 396.492 | 463.72  | 291.244 | 415.99  | 372.271 |
| ENSMUSG000000040283 | 14_Btnl9         | 24.182  | -1.47167 | 0.00301  | 0.00921  | 8.68188 | 15.6027 | 14.3418 | 32.4607 | 38.5508 | 35.4544 |
| ENSMUSG000000040287 | 9_Stac3          | 69.9533 | -0.17985 | 0.58413  | 0.687    | 67.7187 | 68.8354 | 59.7577 | 88.3652 | 50.2057 | 84.8372 |
| ENSMUSG000000040289 | 8_Hey1           | 102.124 | -1.0017  | 0.00074  | 0.0028   | 52.9595 | 88.1093 | 63.3432 | 155.992 | 143.445 | 108.896 |
| ENSMUSG000000040296 | 15_Ddx58         | 4445.14 | 0.89851  | 4.24E-07 | 4.39E-06 | 5568.56 | 5023.15 | 6766.96 | 2408.4  | 3509.02 | 3394.75 |
| ENSMUSG000000040297 | 12_Suco          | 4299.26 | -0.40302 | 0.00267  | 0.00831  | 3833.05 | 3644.61 | 3628.49 | 4121.6  | 5091.4  | 5476.43 |
| ENSMUSG000000040298 | 5_Btbd16         | 0.78254 | -3.0902  | 0.35367  | NA       | 0       | 0       | 0       | 0       | 0.89653 | 3.79868 |
| ENSMUSG000000040302 | 17_Rbm48         | 158.432 | -0.47137 | 0.01689  | 0.03937  | 139.778 | 125.739 | 132.662 | 178.534 | 186.478 | 187.402 |
| ENSMUSG000000040310 | 12_Alx4          | 321.18  | -0.29294 | 0.18331  | 0.28106  | 284.766 | 306.547 | 274.885 | 459.86  | 274.338 | 326.687 |
| ENSMUSG000000040312 | 14_Ctchcr1       | 325.432 | 1.06898  | 2.65E-07 | 2.93E-06 | 414.994 | 386.396 | 519.892 | 201.076 | 175.72  | 254.512 |
| ENSMUSG000000040314 | 1_Ctsg           | 0.19919 | 0.92709  | 0.82027  | NA       | 0       | 0       | 1.19515 | 0       | 0       | 0       |
| ENSMUSG000000040321 | 3_Zfp770         | 270.442 | -0.61658 | 0.00035  | 0.00147  | 227.465 | 197.328 | 216.323 | 327.312 | 354.13  | 300.096 |
| ENSMUSG000000040322 | 10_Slc25a24      | 2569.54 | 0.06221  | 0.65066  | 0.74455  | 2632.35 | 2374.36 | 2868.37 | 2182.98 | 2725.45 | 2633.75 |
| ENSMUSG000000040325 | 16_Prrbp         | 1196.38 | -0.09087 | 0.45778  | 0.57163  | 1128.64 | 1129.82 | 1217.86 | 1121.7  | 1302.66 | 1277.62 |
| ENSMUSG000000040327 | 16_Cul9          | 343.934 | 0.51003  | 0.07893  | 0.14174  | 369.848 | 477.259 | 365.717 | 430.104 | 192.754 | 227.921 |
| ENSMUSG000000040328 | 14_Olfir56       | 146.709 | 1.99236  | 1.34E-07 | 1.62E-06 | 257.852 | 152.356 | 292.813 | 28.8539 | 76.2051 | 72.1749 |
| ENSMUSG000000040329 | 14_Ii7           | 13.6288 | 1.32254  | 0.05049  | 0.09794  | 17.3638 | 17.4383 | 23.9031 | 12.6236 | 5.37918 | 5.06491 |
| ENSMUSG000000040331 | 15_Nsmce4a       | 1262.46 | -0.18739 | 0.13448  | 0.21863  | 1184.21 | 1115.13 | 1242.96 | 1222.69 | 1452.38 | 1357.4  |
| ENSMUSG000000040339 | 10_Fam102b       | 2974.21 | 0.03088  | 0.80043  | 0.86197  | 3027.37 | 2896.59 | 3094.25 | 2600.46 | 3238.27 | 2988.3  |
| ENSMUSG000000040340 | 13_1700019B03Rik | 3.9476  | -0.14111 | 0.89912  | 0.9319   | 5.20913 | 3.67122 | 2.39031 | 3.60674 | 6.27571 | 2.53245 |
| ENSMUSG000000040345 | 9_Arhgap9        | 35.1303 | 1.32901  | 0.00481  | 0.01366  | 72.9278 | 42.2191 | 35.8546 | 22.5421 | 23.3098 | 13.9285 |
| ENSMUSG000000040350 | 15_Trim7         | 688.97  | 0.29984  | 0.05126  | 0.09901  | 733.619 | 743.423 | 803.144 | 517.567 | 653.571 | 682.496 |
| ENSMUSG000000040351 | 11_Ankib1        | 1334.45 | 0.00111  | 0.99323  | 0.99531  | 1234.56 | 1340    | 1431.79 | 1231.7  | 1478.38 | 1290.29 |
| ENSMUSG000000040354 | 14_Mars          | 1468.71 | 0.61256  | 4.01E-06 | 3.06E-05 | 1713.8  | 1635.53 | 1979.18 | 1242.52 | 1062.39 | 1178.86 |

|                     |                  |         |          |          |          |         |         |         |         |         |         |
|---------------------|------------------|---------|----------|----------|----------|---------|---------|---------|---------|---------|---------|
| ENSMUSG000000040356 | 16_Skiv2l        | 1355.91 | 1.21515  | 1.88E-13 | 1.22E-11 | 1603.54 | 1982.46 | 2099.89 | 897.177 | 678.674 | 873.697 |
| ENSMUSG000000040359 | 14_Uffl1         | 1384.03 | -0.22589 | 0.08496  | 0.15033  | 1291    | 1246.38 | 1289.57 | 1291.21 | 1599.41 | 1586.58 |
| ENSMUSG000000040363 | 14_Bcor          | 1188.62 | 0.40346  | 0.00189  | 0.0062   | 1253.66 | 1337.24 | 1471.23 | 1100.96 | 940.461 | 1028.18 |
| ENSMUSG000000040364 | 6_Sec1           | 7.94325 | 0.30236  | 0.7383   | 0.81483  | 6.94551 | 10.0959 | 9.56123 | 11.7219 | 8.06878 | 1.26623 |
| ENSMUSG000000040365 | 14_Trim41        | 1350.55 | 0.62288  | 3.31E-06 | 2.59E-05 | 1528.01 | 1681.42 | 1703.09 | 1146.94 | 927.013 | 1116.81 |
| ENSMUSG000000040367 | 2_Lrrd1          | 2.11184 | -0.29805 | 0.84118  | NA       | 2.60457 | 1.83561 | 1.19515 | 3.60674 | 0.89653 | 2.53245 |
| ENSMUSG000000040370 | 13_Lyrm5         | 544.875 | -0.91852 | 2.34E-08 | 3.56E-07 | 397.63  | 375.382 | 358.546 | 690.691 | 832.877 | 614.12  |
| ENSMUSG000000040372 | 2_Gpr63          | 9.29927 | -0.4216  | 0.58746  | 0.69     | 6.07732 | 12.8493 | 4.78062 | 12.6236 | 8.06878 | 11.396  |
| ENSMUSG000000040373 | 12_Cacng5        | 24.4119 | -1.19362 | 0.04078  | 0.08188  | 13.891  | 21.1095 | 9.56123 | 48.691  | 36.7578 | 16.4609 |
| ENSMUSG000000040374 | 13_Pex2          | 908.261 | -0.47903 | 0.00076  | 0.00283  | 777.029 | 715.888 | 784.021 | 930.539 | 1192.39 | 1049.7  |
| ENSMUSG000000040380 | 13_Cbln3         | 95.5284 | 0.06723  | 0.78345  | 0.84937  | 94.6325 | 105.548 | 93.222  | 94.677  | 97.7218 | 87.3697 |
| ENSMUSG000000040383 | 16_Aqr           | 1634.92 | 0.2995   | 0.04454  | 0.08806  | 1808.44 | 1700.69 | 1901.49 | 1216.37 | 1497.21 | 1685.35 |
| ENSMUSG000000040385 | 6_Ppp1ca         | 5776.85 | 0.36043  | 0.00079  | 0.00294  | 6431.54 | 6152.05 | 6900.82 | 5264.04 | 4699.61 | 5213.06 |
| ENSMUSG000000040387 | 16_Khlh32        | 14.1793 | -1.10804 | 0.11003  | 0.18621  | 8.68188 | 10.0959 | 8.36608 | 22.5421 | 27.7924 | 7.59736 |
| ENSMUSG000000040389 | 15_Wdr47         | 966.026 | -0.2875  | 0.01201  | 0.0295   | 859.507 | 864.573 | 885.609 | 1021.61 | 1048.04 | 1116.81 |
| ENSMUSG000000040390 | 13_Map3k10       | 223.135 | 0.94017  | 0.00151  | 0.00512  | 251.775 | 296.451 | 332.253 | 218.208 | 93.2392 | 146.882 |
| ENSMUSG000000040396 | 12_Abhd13        | 1216.64 | -0.2745  | 0.0388   | 0.07852  | 1112.15 | 1029.78 | 1161.69 | 1173.09 | 1413.83 | 1409.31 |
| ENSMUSG000000040405 | 13_Havcr1        | 0.58438 | 1.28692  | 0.7301   | NA       | 2.60457 | 0       | 0       | 0.90169 | 0       | 0       |
| ENSMUSG000000040407 | 17_Akap9         | 3679.42 | -0.2573  | 0.05377  | 0.10285  | 3569.99 | 3012.24 | 3473.12 | 3543.62 | 4019.15 | 4458.38 |
| ENSMUSG000000040410 | 14_Fbxl4         | 490.931 | -0.51264 | 0.00036  | 0.00151  | 442.776 | 375.382 | 395.596 | 604.129 | 569.297 | 558.406 |
| ENSMUSG000000040412 | 16_5330417C22Rik | 8.78846 | -0.6067  | 0.54005  | 0.64732  | 7.8137  | 12.8493 | 0       | 9.01685 | 11.6549 | 11.396  |
| ENSMUSG000000040413 | 5_Timd2          | 66.8401 | -0.04059 | 0.91094  | 0.9402   | 73.796  | 49.5615 | 74.0996 | 43.2809 | 77.9982 | 82.3047 |
| ENSMUSG000000040414 | 7_Slc25a28       | 353.664 | 0.6403   | 0.00267  | 0.00833  | 384.607 | 445.136 | 463.72  | 354.362 | 219.65  | 254.512 |
| ENSMUSG000000040415 | 15_Dtx3          | 1232.63 | 0.04332  | 0.81221  | 0.87048  | 1123.44 | 1503.37 | 1127.03 | 1471.55 | 1099.15 | 1071.23 |
| ENSMUSG000000040420 | 14_Cdh18         | 3.70325 | -1.06164 | 0.14469  | 0.53083  | 4.34094 | 2.75342 | 0       | 7.21348 | 5.37918 | 2.53245 |
| ENSMUSG000000040423 | 10_Rc3h1         | 1401.63 | -0.29591 | 0.01493  | 0.03545  | 1250.19 | 1241.79 | 1282.4  | 1383.19 | 1598.51 | 1653.69 |
| ENSMUSG000000040424 | 15_Hipk4         | 34.035  | 0.24269  | 0.56377  | 0.66912  | 39.0685 | 26.6164 | 45.4159 | 30.6573 | 35.8612 | 26.5908 |
| ENSMUSG000000040428 | 17_Plekha4       | 139.634 | 1.54524  | 2.57E-05 | 0.00015  | 165.824 | 161.534 | 297.593 | 108.202 | 50.2057 | 54.4478 |
| ENSMUSG000000040429 | 6_Mterf1a        | 94.0374 | -0.71768 | 0.00773  | 0.02032  | 69.4551 | 69.7532 | 74.0996 | 92.8736 | 132.687 | 125.356 |
| ENSMUSG000000040430 | 18_Pitpnc1       | 1660.5  | 0.23973  | 0.03264  | 0.06811  | 1774.58 | 1743.83 | 1875.2  | 1516.63 | 1428.17 | 1624.57 |
| ENSMUSG000000040432 | 4_Ltb4r2         | 167.041 | 1.05463  | 0.0001   | 0.0005   | 174.506 | 234.04  | 267.715 | 122.629 | 77.9982 | 125.356 |
| ENSMUSG000000040433 | 16_Zbtb38        | 1957.93 | 0.10513  | 0.4192   | 0.535    | 1986.42 | 2011.83 | 2087.93 | 1645.58 | 1896.16 | 2119.66 |
| ENSMUSG000000040434 | 16_Gytl1b        | 293.639 | 0.99171  | 4.19E-08 | 5.86E-07 | 382.003 | 353.355 | 436.231 | 188.452 | 180.203 | 221.59  |
| ENSMUSG000000040435 | 10_Ppp1r15a      | 879.478 | 0.85051  | 1.10E-08 | 1.86E-07 | 1102.6  | 1140.83 | 1150.93 | 718.643 | 530.746 | 633.113 |
| ENSMUSG000000040441 | 8_Slc26a10       | 3.46652 | -0.35547 | 0.76402  | 0.83392  | 1.73638 | 2.75342 | 4.78062 | 5.41011 | 3.58612 | 2.53245 |
| ENSMUSG000000040446 | 3_Rprd1a         | 896.361 | -0.43443 | 0.00137  | 0.0047   | 771.819 | 719.56  | 797.168 | 973.82  | 1154.73 | 961.066 |
| ENSMUSG000000040447 | 15_Spns2         | 4188.82 | 0.69235  | 1.38E-07 | 1.66E-06 | 4922.63 | 5153.48 | 5449.9  | 3656.33 | 2805.24 | 3145.31 |
| ENSMUSG000000040451 | 17_Sgms1         | 1769.21 | 0.07632  | 0.5399   | 0.64727  | 1832.75 | 1721.8  | 1891.93 | 1615.82 | 1624.51 | 1928.46 |
| ENSMUSG000000040452 | 8_Cdh12          | 4.15699 | -1.84566 | 0.15979  | 0.25195  | 3.47275 | 1.83561 | 0       | 11.7219 | 5.37918 | 2.53245 |
| ENSMUSG000000040455 | 17_Usp45         | 1319.13 | -0.23494 | 0.13209  | 0.21563  | 1231.09 | 1103.2  | 1302.72 | 1237.11 | 1690.86 | 1349.8  |
| ENSMUSG000000040459 | 10_Arglu1        | 1838.77 | -0.49434 | 0.00013  | 0.00062  | 1533.22 | 1526.31 | 1520.24 | 1858.37 | 2350.7  | 2243.75 |
| ENSMUSG000000040462 | 12_Os9           | 3147.94 | 0.76269  | 1.06E-06 | 9.60E-06 | 3726.26 | 3944.73 | 4211.72 | 2607.67 | 1843.27 | 2553.98 |
| ENSMUSG000000040463 | 16_Mybbp1a       | 2232.23 | 0.78984  | 2.55E-07 | 2.83E-06 | 2679.23 | 2619.42 | 3185.09 | 1539.18 | 1440.72 | 1929.73 |
| ENSMUSG000000040464 | 15_Gtpbp10       | 421.487 | -0.52742 | 0.00039  | 0.00159  | 372.453 | 315.725 | 347.79  | 483.303 | 520.884 | 488.764 |
| ENSMUSG000000040466 | 15_Blvr1b        | 543.161 | 1.05985  | 1.16E-06 | 1.04E-05 | 623.359 | 713.135 | 866.487 | 440.023 | 262.683 | 353.277 |
| ENSMUSG000000040467 | 1_4921522P10Rik  | 2.0824  | -0.53637 | 0.72353  | NA       | 0.86819 | 1.83561 | 2.39031 | 2.70506 | 0.89653 | 3.79868 |
| ENSMUSG000000040471 | 17_Ggt6          | 92.9843 | 1.18547  | 9.00E-06 | 6.17E-05 | 131.096 | 112.89  | 143.418 | 60.4129 | 49.3092 | 60.7789 |
| ENSMUSG000000040472 | 14_Rabggta       | 733.345 | 0.62463  | 2.98E-05 | 0.00017  | 806.547 | 928.819 | 933.415 | 625.77  | 500.264 | 605.256 |
| ENSMUSG000000040473 | 15_Cfap69        | 89.9401 | -1.06183 | 8.82E-05 | 0.00045  | 65.9823 | 52.3149 | 56.1722 | 104.596 | 132.687 | 127.889 |
| ENSMUSG000000040478 | 14_Prdm13        | 2.39676 | -4.73988 | 0.03776  | NA       | 0       | 0       | 0       | 6.3118  | 8.06878 | 0       |
| ENSMUSG000000040479 | 11_Dgkz          | 1719.44 | 0.90155  | 5.43E-08 | 7.37E-07 | 2042.85 | 2292.68 | 2384.33 | 1429.17 | 958.391 | 1209.25 |
| ENSMUSG000000040481 | 16_Ptpf          | 2779.56 | -0.0512  | 0.65523  | 0.74857  | 2666.21 | 2849.79 | 2674.75 | 2600.46 | 3090.34 | 2795.83 |
| ENSMUSG000000040482 | 15_Dxo           | 255.189 | 0.96129  | 3.24E-05 | 0.00019  | 337.725 | 336.835 | 337.033 | 222.716 | 124.618 | 172.207 |
| ENSMUSG000000040483 | 15_Xaf1          | 2073.85 | 1.03359  | 9.28E-10 | 2.22E-08 | 2693.12 | 2377.12 | 3290.26 | 1162.27 | 1574.31 | 1346    |
| ENSMUSG000000040485 | 5_Lrrc52         | 1.67778 | -3.11417 | 0.12183  | NA       | 0.86819 | 0       | 0       | 3.60674 | 1.79306 | 3.79868 |
| ENSMUSG000000040488 | 16_Ltbp4         | 2037.55 | 1.51732  | 7.24E-10 | 1.79E-08 | 2514.27 | 3148.07 | 3397.82 | 1412.04 | 646.399 | 1106.68 |
| ENSMUSG000000040489 | 5_Sox30          | 5.74105 | -0.5383  | 0.63391  | 0.73026  | 4.34094 | 2.75342 | 7.17092 | 15.3287 | 3.58612 | 1.26623 |
| ENSMUSG000000040490 | 4_Lrnf2          | 2.06207 | -0.79033 | 0.61984  | NA       | 2.60457 | 1.83561 | 0       | 3.60674 | 1.79306 | 2.53245 |
| ENSMUSG000000040495 | 4_Chrm4          | 42.899  | -0.51154 | 0.42815  | 0.54343  | 26.9138 | 70.671  | 8.36608 | 68.5281 | 53.7918 | 29.1232 |
| ENSMUSG000000040498 | 6_Igsf23         | 0.50602 | -1.01212 | 0.76398  | NA       | 0.86819 | 0       | 0       | 0.90169 | 0       | 1.26623 |
| ENSMUSG000000040502 | 5_March9         | 290.208 | 0.57769  | 0.00153  | 0.00517  | 329.912 | 359.78  | 352.57  | 259.685 | 193.651 | 245.648 |
| ENSMUSG000000040505 | 13_Abcg5         | 53.7751 | -1.00165 | 0.03892  | 0.07872  | 34.7275 | 56.9039 | 15.537  | 79.3483 | 90.5496 | 45.5842 |
| ENSMUSG000000040506 | 16_Ambra1        | 1210.18 | 0.37948  | 0.00306  | 0.00935  | 1272.76 | 1410.67 | 1421.04 | 1074.81 | 948.529 | 1133.27 |
| ENSMUSG000000040511 | 13_Pvr           | 254.129 | 0.08392  | 0.69946  | 0.78499  | 279.557 | 196.41  | 309.545 | 267.801 | 238.477 | 232.986 |
| ENSMUSG000000040520 | 7_Manea          | 575.841 | -0.31937 | 0.02896  | 0.06168  | 491.395 | 503.875 | 542.6   | 575.275 | 710.052 | 631.847 |
| ENSMUSG000000040521 | 11_Tsfm          | 256.7   | 0.67802  | 0.00021  | 0.00096  | 281.293 | 338.67  | 327.472 | 205.584 | 175.72  | 211.46  |
| ENSMUSG000000040522 | 5_Tlr8           | 26.7472 | 0.57703  | 0.23277  | 0.33912  | 39.9367 | 22.9451 | 33.4643 | 27.9522 | 19.7237 | 16.4609 |
| ENSMUSG000000040524 | 9_Zfp609         | 1073.18 | 0.15605  | 0.1638   | 0.25678  | 1119.96 | 1138.08 | 1135.4  | 1059.48 | 965.563 | 1020.58 |
| ENSMUSG000000040525 | 13_Cblc          | 1366.24 | 1.38843  | 5.17E-12 | 2.28E-10 | 1724.22 | 1881.5  | 2325.77 | 901.685 | 551.366 | 812.918 |
| ENSMUSG000000040528 | 15_Milr1         | 119.949 | -0.28738 | 0.29731  | 0.4117   | 124.151 | 112.89  | 87.2462 | 137.958 | 158.686 | 98.7657 |
| ENSMUSG000000040532 | 14_Abhd11        | 748.497 | 0.86188  | 1.46E-09 | 3.25E-08 | 941.984 | 896.696 | 1058.91 | 577.98  | 482.333 | 533.082 |
| ENSMUSG000000040536 | 15_Necab1        | 114.665 | -1.6647  | 1.77E-06 | 1.51E-05 | 50.3549 | 82.6025 | 31.074  | 201.978 | 143.445 | 178.538 |
| ENSMUSG000000040537 | 17_Adam22        | 226.046 | -1.35142 | 9.33E-07 | 8.63E-06 | 129.36  | 167.958 | 83.6608 | 399.447 | 298.545 | 277.304 |
| ENSMUSG000000040543 | 16_Pitpnm3       | 905.122 | 0.57914  | 2.49E-05 | 0.00015  | 1068.74 | 1011.42 | 1173.64 | 793.483 | 655.364 | 728.08  |
| ENSMUSG000000040548 | 15_Tex2          | 2682.94 | 0.0851   | 0.43187  | 0.54709  | 2615.85 | 2734.14 | 2936.49 | 2654.56 | 2458.29 | 2698.33 |
| ENSMUSG000000040549 | 16_Ckap5         | 2416.98 | -0.31034 | 0.02474  | 0.05419  | 2232.98 | 2088.93 | 2151.28 | 2235.28 | 2940.62 | 2852.81 |
| ENSMUSG000000040550 | 16_Otud6b        | 1016.39 | -0.64968 | 2.19E-07 | 2.47E-06 | 799.602 | 770.957 | 804.339 | 1180.31 | 1368.11 | 1175.06 |
| ENSMUSG000000040552 | 8_C3ar1          | 165.782 | 1.27384  | 0.00014  | 0.00065  | 355.957 | 156.027 | 191.225 | 112.711 | 76.2051 | 102.564 |
| ENSMUSG000000040554 | 10_Aip1          | 86.5908 | -1.22326 | 0.03949  | 0.07965  | 81.6097 | 55.9861 | 17.9273 | 223.618 | 98.6184 | 41.7855 |

|                    |                  |         |          |          |          |         |         |         |         |         |         |
|--------------------|------------------|---------|----------|----------|----------|---------|---------|---------|---------|---------|---------|
| ENSMUSG00000040557 | 14_Wbscr27       | 548.372 | 0.24855  | 0.07605  | 0.1375   | 585.159 | 602.998 | 597.577 | 525.683 | 448.265 | 530.549 |
| ENSMUSG00000040560 | 9_Wdr7           | 607.416 | -0.01193 | 0.93069  | 0.95416  | 559.982 | 624.108 | 632.237 | 638.393 | 627.571 | 562.205 |
| ENSMUSG00000040562 | 12_Gstm2         | 2167.12 | -0.28384 | 0.01221  | 0.02985  | 2012.46 | 1995.31 | 1853.68 | 2237.08 | 2327.39 | 2576.77 |
| ENSMUSG00000040563 | 13_Lppr2         | 152.948 | 0.58658  | 0.01508  | 0.03575  | 167.56  | 203.753 | 180.468 | 152.385 | 114.756 | 98.7657 |
| ENSMUSG00000040564 | 13_Apoc1         | 1202.7  | -0.07162 | 0.70659  | 0.79006  | 1111.28 | 926.984 | 1480.8  | 1140.63 | 1148.46 | 1408.04 |
| ENSMUSG00000040565 | 7_Btaf1          | 1824.57 | -0.19309 | 0.14677  | 0.23466  | 1693.84 | 1687.84 | 1725.8  | 1659.1  | 2134.64 | 2046.22 |
| ENSMUSG00000040569 | 13_Slc26a7       | 1441.71 | -1.09178 | 7.19E-09 | 1.29E-07 | 993.208 | 1078.42 | 689.604 | 2101.83 | 2122.09 | 1665.09 |
| ENSMUSG00000040570 | 14_Rundc3b       | 16.0189 | -1.28315 | 0.04379  | 0.08681  | 12.1546 | 11.9315 | 3.58546 | 24.3455 | 25.1029 | 18.9934 |
| ENSMUSG00000040583 | 8_Cyp2b13        | 0.1447  | 0.92709  | 0.82027  | NA       | 0.86819 | 0       | 0       | 0       | 0       | 0       |
| ENSMUSG00000040584 | 8_Abc1a          | 278.447 | -0.72476 | 0.00349  | 0.01043  | 189.265 | 274.424 | 166.126 | 403.053 | 369.371 | 268.44  |
| ENSMUSG00000040586 | 8_Ofd1           | 548.898 | -0.36855 | 0.01238  | 0.03022  | 526.99  | 461.656 | 448.183 | 573.472 | 671.501 | 611.588 |
| ENSMUSG00000040591 | 18_1110051M20Rik | 340.326 | -0.41646 | 0.00966  | 0.02452  | 302.13  | 265.246 | 308.35  | 398.545 | 410.611 | 357.076 |
| ENSMUSG00000040592 | 11_Cd79b         | 43.0313 | 0.27488  | 0.47463  | 0.58722  | 49.4867 | 36.7122 | 54.9771 | 40.5758 | 29.5855 | 46.8504 |
| ENSMUSG00000040594 | 18_Ranbp17       | 161.628 | -0.37851 | 0.06096  | 0.11443  | 138.91  | 142.26  | 141.028 | 181.239 | 201.719 | 164.609 |
| ENSMUSG00000040596 | 15_Pogk          | 1185.99 | -0.48009 | 9.43E-05 | 0.00047  | 1004.49 | 1072.91 | 892.78  | 1410.24 | 1380.66 | 1354.86 |
| ENSMUSG00000040599 | 13_Mis12         | 805.728 | -0.25521 | 0.11098  | 0.18745  | 742.301 | 703.957 | 757.728 | 719.545 | 1013.08 | 897.755 |
| ENSMUSG00000040600 | 9_Eps8l3         | 20.6709 | -0.74285 | 0.17201  | 0.26699  | 16.4956 | 20.1917 | 9.56123 | 24.3455 | 33.1716 | 20.2596 |
| ENSMUSG00000040605 | 6_Bace2          | 2137.01 | -0.38834 | 0.00297  | 0.00911  | 1738.98 | 2080.67 | 1734.17 | 2491.36 | 2568.56 | 2208.3  |
| ENSMUSG00000040606 | 13_Kazn          | 1801.25 | 0.57888  | 8.36E-07 | 7.85E-06 | 2015.93 | 2132.06 | 2325.77 | 1486.88 | 1350.18 | 1496.68 |
| ENSMUSG00000040610 | 7_Tlx3           | 0.15297 | 0.92709  | 0.82027  | NA       | 0       | 0.91781 | 0       | 0       | 0       | 0       |
| ENSMUSG00000040612 | 13_Ildr2         | 691.625 | -1.63718 | 5.24E-10 | 1.35E-08 | 303.866 | 488.273 | 216.323 | 1154.16 | 1119.77 | 867.365 |
| ENSMUSG00000040613 | 14_Apobec1       | 989.039 | 0.76323  | 0.00015  | 0.0007   | 1498.49 | 933.408 | 1302.72 | 641.098 | 863.359 | 695.159 |
| ENSMUSG00000040614 | 14_Nlrp9c        | 0       | NA       | NA       | NA       | 0       | 0       | 0       | 0       | 0       | 0       |
| ENSMUSG00000040616 | 3_Tmem51         | 1252.91 | 0.69689  | 0.00043  | 0.00176  | 1484.6  | 1474.91 | 1689.95 | 1201.05 | 689.432 | 977.527 |
| ENSMUSG00000040618 | 6_Pck2           | 498.493 | 0.51268  | 0.01035  | 0.02603  | 511.363 | 638.793 | 609.529 | 522.076 | 355.923 | 353.277 |
| ENSMUSG00000040620 | 15_Dhx33         | 757.001 | -0.06597 | 0.64671  | 0.74148  | 749.247 | 743.423 | 725.459 | 661.837 | 836.463 | 825.58  |
| ENSMUSG00000040621 | 14_Gemin8        | 147.737 | -0.09936 | 0.69067  | 0.77785  | 126.756 | 125.739 | 176.883 | 179.435 | 149.721 | 127.889 |
| ENSMUSG00000040624 | 17_Plekhhg1      | 4670.63 | 0.24097  | 0.15188  | 0.24149  | 4788.06 | 5025.9  | 5363.85 | 3296.56 | 4376.86 | 5172.54 |
| ENSMUSG00000040627 | 14_Aicda         | 0.48859 | 2.39711  | 0.53861  | NA       | 1.73638 | 0       | 1.19515 | 0       | 0       | 0       |
| ENSMUSG00000040629 | 8_Mael           | 1.48262 | -1.24833 | 0.5924   | NA       | 2.60457 | 0       | 0       | 2.70506 | 3.58612 | 0       |
| ENSMUSG00000040631 | 7_Dok4           | 694.595 | 0.91379  | 7.58E-07 | 7.19E-06 | 810.02  | 867.326 | 1045.76 | 571.669 | 389.094 | 483.699 |
| ENSMUSG00000040632 | 15_Nrl           | 286.142 | -1.83072 | 0.04331  | 0.08601  | 202.288 | 131.246 | 43.0255 | 789.876 | 433.921 | 116.493 |
| ENSMUSG00000040640 | 9_Erc2           | 50.846  | -1.09777 | 0.00626  | 0.01702  | 26.9138 | 44.0547 | 26.2934 | 84.7584 | 76.2051 | 46.8504 |
| ENSMUSG00000040648 | 14_Ppip5k2       | 915.177 | -0.11724 | 0.49533  | 0.60644  | 933.303 | 769.121 | 931.025 | 761.023 | 1035.49 | 1061.1  |
| ENSMUSG00000040649 | 15_Rimkb         | 370.681 | -0.63964 | 4.28E-05 | 0.00024  | 302.13  | 307.465 | 259.348 | 468.876 | 460.817 | 425.452 |
| ENSMUSG00000040651 | 8_Fam208a        | 1499.12 | -0.51027 | 0.00034  | 0.00142  | 1230.22 | 1172.96 | 1307.5  | 1500.4  | 1989.4  | 1794.24 |
| ENSMUSG00000040652 | 15_Oaz2          | 1335.94 | -0.39117 | 0.00469  | 0.01336  | 1160.77 | 1227.11 | 1080.42 | 1722.22 | 1476.59 | 1348.53 |
| ENSMUSG00000040653 | 5_Ppp1r14c       | 1031.39 | -0.02687 | 0.85187  | 0.89967  | 1031.41 | 989.394 | 1043.37 | 879.143 | 1083.91 | 1161.13 |
| ENSMUSG00000040658 | 6_Dnph1          | 188.053 | 0.76381  | 0.00061  | 0.00235  | 213.574 | 205.588 | 291.618 | 149.68  | 127.307 | 140.551 |
| ENSMUSG00000040659 | 3_Efhf2          | 3481.22 | 0.88858  | 9.16E-09 | 1.58E-07 | 4255.86 | 4333.88 | 4971.84 | 2753.75 | 1966.09 | 2605.89 |
| ENSMUSG00000040660 | 6_Cyp2b9         | 0.39838 | 2.07058  | 0.60634  | NA       | 0       | 0       | 2.39031 | 0       | 0       | 0       |
| ENSMUSG00000040661 | 6_Rad54l2        | 1029.35 | 0.11721  | 0.30905  | 0.42396  | 1043.56 | 1112.38 | 1057.71 | 951.278 | 1039.98 | 971.196 |
| ENSMUSG00000040663 | 8_Clc1f          | 360.132 | 1.07841  | 1.28E-11 | 5.24E-10 | 462.744 | 467.163 | 537.819 | 241.652 | 234.891 | 216.525 |
| ENSMUSG00000040666 | 17_Sh3bgr        | 124.293 | -1.62585 | 5.68E-08 | 7.65E-07 | 46.8822 | 81.6847 | 53.7819 | 229.93  | 152.41  | 181.07  |
| ENSMUSG00000040667 | 11_Nup88         | 1304.19 | -0.07182 | 0.63368  | 0.7301   | 1198.97 | 1237.2  | 1379.21 | 1109.97 | 1482.86 | 1416.91 |
| ENSMUSG00000040669 | 14_Phc1          | 974.526 | 0.55669  | 8.42E-06 | 5.83E-05 | 1060.93 | 1239.96 | 1180.81 | 818.73  | 784.464 | 762.269 |
| ENSMUSG00000040675 | 17_Mthfd1l       | 256.008 | 0.95891  | 2.99E-08 | 4.38E-07 | 357.694 | 308.383 | 347.79  | 167.713 | 172.134 | 182.337 |
| ENSMUSG00000040680 | 8_Kremen2        | 3.42201 | -0.38387 | 0.75616  | 0.82836  | 1.73638 | 3.67122 | 3.58546 | 7.21348 | 1.79306 | 2.53245 |
| ENSMUSG00000040681 | 14_Hmgn1         | 6827.54 | -0.40284 | 0.00132  | 0.00456  | 5997.45 | 5588.52 | 6054.65 | 6697.72 | 8201.46 | 8425.47 |
| ENSMUSG00000040687 | 16_Madd          | 1426.24 | 0.60936  | 8.47E-06 | 5.86E-05 | 1624.38 | 1645.63 | 1900.3  | 1256.95 | 1018.46 | 1111.75 |
| ENSMUSG00000040688 | 16_Tbl3          | 652.513 | 1.06871  | 5.09E-12 | 2.25E-10 | 860.375 | 847.135 | 942.977 | 457.155 | 354.13  | 453.309 |
| ENSMUSG00000040690 | 15_Col16a1       | 1902.27 | 0.9047   | 1.76E-06 | 1.51E-05 | 2139.22 | 2779.12 | 2520.58 | 1531.96 | 979.011 | 1463.76 |
| ENSMUSG00000040693 | 7_Slco4c1        | 127.389 | 0.1019   | 0.68586  | 0.77372  | 140.647 | 130.328 | 124.296 | 93.7753 | 146.134 | 129.155 |
| ENSMUSG00000040694 | 3_Apobec2        | 314.375 | -0.09233 | 0.66518  | 0.75643  | 280.425 | 269.835 | 363.327 | 376.905 | 256.408 | 339.349 |
| ENSMUSG00000040697 | 10_Dnajc16       | 948.635 | 0.4729   | 0.00026  | 0.00113  | 1062.66 | 1045.38 | 1199.93 | 797.09  | 739.638 | 847.106 |
| ENSMUSG00000040699 | 13_Limd2         | 251.371 | 0.37844  | 0.05811  | 0.10992  | 316.021 | 268.917 | 267.715 | 261.489 | 192.754 | 201.33  |
| ENSMUSG00000040701 | 15_Ap1q2         | 812.684 | 1.00748  | 1.31E-08 | 2.17E-07 | 993.208 | 1035.28 | 1226.23 | 520.273 | 446.472 | 654.639 |
| ENSMUSG00000040703 | 11_Cyp2s1        | 998.138 | 1.30045  | 2.20E-10 | 6.42E-09 | 1383.89 | 1196.82 | 1676.8  | 509.452 | 476.058 | 745.808 |
| ENSMUSG00000040705 | 1_A930016O22Rik  | 1.78373 | -0.51707 | 0.82392  | NA       | 3.47275 | 0.91781 | 0       | 6.3118  | 0       | 0       |
| ENSMUSG00000040706 | 4_Agmat          | 1.1123  | 2.33701  | 0.36631  | NA       | 1.73638 | 3.67122 | 0       | 0       | 0       | 1.26623 |
| ENSMUSG00000040710 | 10_St8sia4       | 182.826 | -0.60301 | 0.01493  | 0.03545  | 168.429 | 148.685 | 118.32  | 215.503 | 272.545 | 173.473 |
| ENSMUSG00000040711 | 7_Sh3pxd2b       | 682.874 | -0.10824 | 0.49557  | 0.60664  | 652.009 | 725.066 | 595.187 | 810.615 | 693.915 | 620.451 |
| ENSMUSG00000040712 | 16_Camta2        | 627.209 | 0.75155  | 0.00012  | 0.0006   | 809.152 | 794.82  | 757.728 | 608.638 | 380.129 | 412.79  |
| ENSMUSG00000040713 | 12_Creg1         | 919.967 | -0.49848 | 0.00011  | 0.00056  | 790.051 | 813.176 | 683.628 | 1123.5  | 1074.94 | 1034.51 |
| ENSMUSG00000040714 | 12_Klc3          | 678.031 | 1.95827  | 1.02E-09 | 2.41E-08 | 882.948 | 1078.42 | 1274.03 | 403.955 | 129.997 | 298.83  |
| ENSMUSG00000040715 | 13_Rsc1a1        | 452.678 | 0.36615  | 0.0419   | 0.08363  | 408.049 | 589.231 | 533.039 | 397.643 | 413.301 | 374.803 |
| ENSMUSG00000040717 | 5_Ill17rd        | 345.497 | -0.88562 | 7.88E-07 | 7.45E-06 | 243.961 | 274.424 | 209.152 | 498.632 | 442.886 | 403.926 |
| ENSMUSG00000040720 | 15_1110037F02Rik | 1553.33 | -0.17325 | 0.16102  | 0.25338  | 1484.6  | 1387.72 | 1508.28 | 1476.96 | 1779.61 | 1682.82 |
| ENSMUSG00000040721 | 9_Zfhx2          | 292.138 | 0.95798  | 4.04E-06 | 3.08E-05 | 346.407 | 379.054 | 432.646 | 245.258 | 165.858 | 183.603 |
| ENSMUSG00000040722 | 6_Scamp5         | 353.674 | -0.84887 | 0.00508  | 0.01428  | 276.952 | 288.191 | 192.42  | 690.691 | 371.164 | 302.628 |
| ENSMUSG00000040723 | 14_Rcsd1         | 164.233 | -0.56725 | 0.01344  | 0.03238  | 138.042 | 130.328 | 129.077 | 243.455 | 174.823 | 169.674 |
| ENSMUSG00000040724 | 5_Kcna2          | 442.529 | -1.58826 | 1.19E-08 | 2.00E-07 | 217.915 | 302.876 | 141.028 | 793.483 | 713.638 | 486.231 |
| ENSMUSG00000040725 | 13_Hnrnpul1      | 4446.51 | 0.54964  | 5.74E-05 | 0.00031  | 5042.44 | 5107.59 | 5698.49 | 3520.18 | 3149.51 | 4160.82 |
| ENSMUSG00000040726 | 9_Hesx1          | 0.15297 | 0.92709  | 0.82027  | NA       | 0       | 0.91781 | 0       | 0       | 0       | 0       |
| ENSMUSG00000040728 | 15_Esrp1         | 6533.33 | 0.42092  | 0.00659  | 0.01778  | 7177.31 | 7137.77 | 8122.27 | 4604.91 | 5451.8  | 6705.94 |
| ENSMUSG00000040729 | 6_Cep126         | 103.931 | -0.42729 | 0.11325  | 0.19048  | 82.4779 | 82.6025 | 101.588 | 100.989 | 147.031 | 108.896 |
| ENSMUSG00000040731 | 13_Eif4h         | 7870.26 | 0.49734  | 5.64E-05 | 0.0003   | 8931.92 | 8732.92 | 9975.95 | 7056.59 | 5763.8  | 6760.39 |
| ENSMUSG00000040732 | 18_Erg           | 868.002 | -0.46621 | 0.00631  | 0.01713  | 762.269 | 841.628 | 582.04  | 1108.17 | 993.356 | 920.547 |
| ENSMUSG00000040734 | 14_Ppp1r13l      | 1791.92 | 1.82521  | 2.52E-18 | 4.00E-16 | 2331.09 | 2630.43 | 3422.92 | 893.57  | 571.987 | 901.554 |

|                     |                  |         |          |          |          |         |         |         |         |         |         |
|---------------------|------------------|---------|----------|----------|----------|---------|---------|---------|---------|---------|---------|
| ENSMUSG000000040738 | 10_Ints8         | 1021.47 | -0.29195 | 0.06128  | 0.11491  | 1000.15 | 846.217 | 908.317 | 935.048 | 1255.14 | 1183.92 |
| ENSMUSG000000040740 | 7_Slc25a34       | 52.3689 | -0.59257 | 0.13459  | 0.21878  | 34.7275 | 55.9861 | 34.6595 | 86.5618 | 52.8953 | 49.3828 |
| ENSMUSG000000040746 | 15_Rnf167        | 1363    | 0.23825  | 0.03007  | 0.06359  | 1414.28 | 1505.2  | 1507.09 | 1310.15 | 1206.73 | 1234.57 |
| ENSMUSG000000040747 | 9_Cd53           | 175.91  | 1.23029  | 0.00217  | 0.00695  | 415.862 | 132.164 | 192.42  | 135.253 | 107.584 | 72.1749 |
| ENSMUSG000000040749 | 11_Siah1b        | 121.512 | 0.06069  | 0.78809  | 0.85278  | 128.492 | 116.561 | 126.686 | 107.301 | 118.342 | 131.688 |
| ENSMUSG000000040751 | 12_Lat2          | 51.5346 | 1.23784  | 0.01789  | 0.04124  | 129.36  | 44.9725 | 43.0255 | 41.4775 | 31.3786 | 18.9934 |
| ENSMUSG000000040752 | 15_Myh6          | 5.78498 | -1.11588 | 0.31476  | 0.42986  | 0.86819 | 6.42464 | 3.58546 | 7.21348 | 2.68959 | 13.9285 |
| ENSMUSG000000040759 | 8_Cmtm5          | 23.768  | -0.24653 | 0.67322  | 0.76331  | 21.7047 | 34.8766 | 8.36608 | 31.559  | 23.3098 | 22.7921 |
| ENSMUSG000000040760 | 10_Appl1         | 1636.46 | -0.49163 | 3.91E-05 | 0.00022  | 1447.27 | 1316.13 | 1317.06 | 1781.73 | 2073.68 | 1882.88 |
| ENSMUSG000000040761 | 16_Spen          | 2488.92 | 0.98052  | 5.34E-11 | 1.87E-09 | 2941.42 | 3294    | 3675.1  | 1829.52 | 1409.35 | 1784.11 |
| ENSMUSG000000040767 | 10_Snrnp25       | 204.882 | 0.57957  | 0.01609  | 0.0378   | 240.488 | 213.849 | 282.056 | 192.961 | 120.135 | 179.804 |
| ENSMUSG000000040770 | 5_Il25           | 4.10238 | -0.91136 | 0.46193  | 0.57564  | 4.34094 | 1.83561 | 2.39031 | 11.7219 | 1.79306 | 2.53245 |
| ENSMUSG000000040771 | 13_Oard1         | 682.724 | -0.3761  | 0.00842  | 0.02187  | 625.096 | 568.122 | 589.211 | 684.379 | 850.808 | 778.73  |
| ENSMUSG000000040774 | 15_Cept1         | 1466.93 | -0.28146 | 0.08665  | 0.15276  | 1389.1  | 1156.44 | 1428.21 | 1364.25 | 1914.99 | 1548.6  |
| ENSMUSG000000040775 | 5_Gm9772         | 0.58706 | 2.67811  | 0.46198  | NA       | 2.60457 | 0.91781 | 0       | 0       | 0       | 0       |
| ENSMUSG000000040782 | 12_Rfwd2         | 2242.15 | -0.34364 | 0.01214  | 0.02973  | 1951.69 | 1901.69 | 2075.98 | 2130.68 | 2809.73 | 2583.1  |
| ENSMUSG000000040785 | 17_Ttc3          | 3904.44 | -0.58889 | 1.43E-09 | 3.20E-08 | 3207.96 | 3183.87 | 2962.79 | 4719.42 | 4786.58 | 4566.01 |
| ENSMUSG000000040794 | 5_C1qtnf4        | 5.75504 | 1.86504  | 0.11241  | 0.18941  | 10.4183 | 7.34244 | 9.56123 | 6.3118  | 0.89653 | 0       |
| ENSMUSG000000040795 | 12_Iqcc          | 215.404 | -0.31619 | 0.06759  | 0.12483  | 197.947 | 186.315 | 191.225 | 236.242 | 237.581 | 243.116 |
| ENSMUSG000000040797 | 16_Iqsec3        | 54.0682 | -1.89499 | 0.00798  | 0.02089  | 39.9367 | 20.1917 | 8.36608 | 143.368 | 98.6184 | 13.9285 |
| ENSMUSG000000040808 | 4_S100g          | 0.29884 | -1.76064 | 0.66373  | NA       | 0       | 0       | 0       | 0       | 1.79306 | 0       |
| ENSMUSG000000040809 | 10_Chil3         | 6.90903 | 6.22095  | 8.84E-05 | 0.00045  | 23.4411 | 3.67122 | 14.3418 | 0       | 0       | 0       |
| ENSMUSG000000040811 | 15_Eml2          | 1213.61 | 0.90746  | 5.37E-06 | 3.95E-05 | 1335.27 | 1698.86 | 1715.05 | 999.068 | 614.123 | 919.281 |
| ENSMUSG000000040812 | 14_Agbl2         | 55.2155 | -1.06822 | 0.00391  | 0.0115   | 32.123  | 44.9725 | 29.8789 | 64.9214 | 98.6184 | 60.7789 |
| ENSMUSG000000040813 | 15_Tex264        | 999.189 | 0.69391  | 0.00032  | 0.00136  | 1170.32 | 1286.76 | 1247.74 | 955.787 | 562.125 | 772.398 |
| ENSMUSG000000040818 | 9_Dennd6a        | 1271.73 | -0.32438 | 0.0061   | 0.01664  | 1198.97 | 1051.81 | 1136.59 | 1338.1  | 1433.55 | 1471.36 |
| ENSMUSG000000040820 | 15_Hlcs          | 427.988 | -0.03349 | 0.84008  | 0.89118  | 414.126 | 394.656 | 461.329 | 496.829 | 388.198 | 412.79  |
| ENSMUSG000000040822 | 6_1700123O20Rik  | 789.11  | -0.00667 | 0.95935  | 0.97364  | 780.501 | 726.902 | 855.73  | 761.924 | 834.67  | 774.931 |
| ENSMUSG000000040824 | 3_Snrpd2         | 1251.6  | 0.24903  | 0.1219   | 0.20234  | 1389.1  | 1231.7  | 1456.89 | 1278.59 | 922.53  | 1230.77 |
| ENSMUSG000000040828 | 9_Catsperd       | 17.3138 | -1.28915 | 0.02322  | 0.05142  | 7.8137  | 12.8493 | 9.56123 | 23.4438 | 28.689  | 21.5259 |
| ENSMUSG000000040829 | 14_Zmynd15       | 62.2555 | 1.24491  | 4.63E-05 | 0.00026  | 94.6325 | 79.8491 | 88.4414 | 37.8708 | 38.5508 | 34.1881 |
| ENSMUSG000000040836 | 15_Gpr161        | 202.885 | -0.21409 | 0.23825  | 0.34572  | 199.683 | 184.479 | 179.273 | 230.831 | 211.581 | 211.46  |
| ENSMUSG000000040838 | 9_Gm11639        | 0.15297 | 0.92709  | 0.82027  | NA       | 0       | 0.91781 | 0       | 0       | 0       | 0       |
| ENSMUSG000000040841 | 5_Six5           | 261.152 | 0.42927  | 0.05912  | 0.11147  | 270.875 | 353.355 | 274.885 | 276.817 | 175.72  | 215.259 |
| ENSMUSG000000040842 | 17_Szrd1         | 2080.48 | 0.61485  | 0.00013  | 0.00062  | 2325.88 | 2526.72 | 2699.85 | 1978.3  | 1352.86 | 1599.24 |
| ENSMUSG000000040843 | 10_Tipr1         | 868.29  | -0.23963 | 0.07854  | 0.1412   | 818.702 | 737.916 | 831.827 | 841.273 | 961.977 | 1018.05 |
| ENSMUSG000000040848 | 11_Sf2d2         | 5028.73 | -0.07571 | 0.40995  | 0.52649  | 4980.8  | 4791.86 | 4916.86 | 5099.03 | 5055.54 | 5328.28 |
| ENSMUSG000000040850 | 17_Psme4         | 3215.02 | -0.14632 | 0.33311  | 0.44977  | 3230.53 | 2862.64 | 3063.18 | 2783.5  | 3970.73 | 3379.56 |
| ENSMUSG000000040852 | 5_Plekhh2        | 408.759 | -1.03763 | 2.57E-05 | 0.00015  | 280.425 | 340.506 | 181.663 | 618.556 | 597.089 | 434.316 |
| ENSMUSG000000040855 | 15_Reps2         | 1750.87 | -0.23117 | 0.07125  | 0.13043  | 1670.39 | 1483.17 | 1679.19 | 1687.05 | 2040.5  | 1944.92 |
| ENSMUSG000000040856 | 17_Dlk1          | 30.2736 | 0.53489  | 0.23371  | 0.34029  | 28.6502 | 44.0547 | 34.6595 | 29.7556 | 17.9306 | 26.5908 |
| ENSMUSG000000040857 | 15_Erf           | 1312.28 | 1.28861  | 9.96E-10 | 2.36E-08 | 1696.44 | 1754.84 | 2135.74 | 973.82  | 537.918 | 774.931 |
| ENSMUSG000000040859 | 14_Bsdc1         | 1216.35 | 0.303    | 0.04125  | 0.08264  | 1277.11 | 1301.45 | 1453.31 | 1262.36 | 944.407 | 1059.83 |
| ENSMUSG000000040860 | 16_Crocc         | 368.452 | 0.8797   | 0.00827  | 0.02157  | 427.149 | 587.396 | 418.304 | 426.497 | 155.1   | 196.265 |
| ENSMUSG000000040865 | 15_Ino80d        | 1725.2  | 0.1218   | 0.3494   | 0.46618  | 1861.4  | 1661.23 | 1870.42 | 1458.03 | 1709.68 | 1790.44 |
| ENSMUSG000000040867 | 11_Begain        | 33.7222 | 0.41977  | 0.32888  | 0.44535  | 38.2003 | 42.2191 | 35.8546 | 34.264  | 34.0682 | 17.7272 |
| ENSMUSG000000040875 | 12_Osbpl10       | 313.247 | 0.84947  | 6.44E-05 | 0.00034  | 378.53  | 393.739 | 435.036 | 227.225 | 167.651 | 277.304 |
| ENSMUSG000000040877 | 15_Wdr25         | 123.246 | 0.43273  | 0.06398  | 0.11913  | 132.833 | 147.767 | 144.614 | 122.629 | 94.1357 | 97.4995 |
| ENSMUSG000000040883 | 15_Tmem205       | 867.226 | 0.64474  | 0.00397  | 0.01166  | 1007.1  | 1012.34 | 1154.52 | 905.292 | 464.403 | 659.704 |
| ENSMUSG000000040888 | 9_Gfer           | 306.287 | 0.33502  | 0.04953  | 0.09632  | 313.416 | 368.958 | 343.009 | 299.36  | 248.339 | 264.641 |
| ENSMUSG000000040891 | 6_Foxa3          | 3.41288 | 0.91956  | 0.44647  | 0.56148  | 2.60457 | 3.67122 | 7.17092 | 2.70506 | 1.79306 | 2.53245 |
| ENSMUSG000000040896 | 16_Kcnd3         | 76.2723 | -1.40226 | 5.52E-05 | 0.0003   | 38.2003 | 55.0683 | 32.2692 | 134.351 | 119.239 | 78.5061 |
| ENSMUSG000000040899 | 13_Ccr6          | 3.71799 | 0.51345  | 0.65081  | 0.74467  | 3.47275 | 3.67122 | 5.97577 | 1.80337 | 3.58612 | 3.79868 |
| ENSMUSG000000040904 | 10_Gm21988       | 40.7006 | 1.21768  | 0.05553  | 0.10575  | 43.4094 | 55.0683 | 72.9044 | 53.1994 | 10.7584 | 8.86359 |
| ENSMUSG000000040907 | 15_Atp1a3        | 537.702 | -0.65455 | 0.33371  | 0.45038  | 473.163 | 502.957 | 277.276 | 123.982 | 467.092 | 265.908 |
| ENSMUSG000000040913 | 10_Fbxw4         | 585.983 | 0.88067  | 3.77E-06 | 2.89E-05 | 698.892 | 710.382 | 868.877 | 466.171 | 318.268 | 453.309 |
| ENSMUSG000000040918 | 12_Slc19a2       | 3043.03 | 0.17176  | 0.21129  | 0.31458  | 3145.45 | 3093.92 | 3431.29 | 2435.45 | 2909.24 | 3242.81 |
| ENSMUSG000000040919 | 13_4930505A04Rik | 0.42208 | -2.1835  | 0.58658  | NA       | 0       | 0       | 0       | 0       | 0       | 2.53245 |
| ENSMUSG000000040928 | 15_S100pbp       | 797.578 | -0.54724 | 0.00063  | 0.00244  | 640.723 | 722.313 | 580.845 | 848.486 | 1099.15 | 893.956 |
| ENSMUSG000000040929 | 16_Rfx3          | 197.916 | -0.35024 | 0.06354  | 0.11848  | 159.747 | 192.739 | 169.712 | 218.208 | 233.098 | 213.992 |
| ENSMUSG000000040935 | 12_Padi6         | 0.72801 | -0.39528 | 0.90997  | NA       | 0       | 1.83561 | 0       | 0       | 0       | 2.53245 |
| ENSMUSG000000040936 | 14_Ulk4          | 45.5136 | 0.51441  | 0.16866  | 0.26302  | 60.7732 | 53.2327 | 46.611  | 48.691  | 29.5855 | 34.1881 |
| ENSMUSG000000040938 | 16_Slc16a11      | 841.508 | 1.6995   | 1.58E-13 | 1.05E-11 | 1126.91 | 1234.45 | 1498.72 | 495.025 | 260.89  | 433.05  |
| ENSMUSG000000040940 | 18_Arhgef1       | 1970.53 | 1.36295  | 7.22E-18 | 1.06E-15 | 2628.01 | 2780.95 | 3103.82 | 1247.03 | 885.772 | 1177.59 |
| ENSMUSG000000040943 | 12_Tet2          | 1645.25 | -0.06184 | 0.63184  | 0.72845  | 1752.87 | 1526.31 | 1548.92 | 1512.13 | 1707.89 | 1823.37 |
| ENSMUSG000000040945 | 13_Rcc2          | 2371.7  | 1.2863   | 5.49E-11 | 1.92E-09 | 3019.56 | 3178.36 | 3893.81 | 1607.71 | 989.77  | 1541    |
| ENSMUSG000000040950 | 13_Mgl2          | 85.7531 | -1.2615  | 2.82E-05 | 0.00017  | 54.6959 | 51.3971 | 45.4159 | 153.287 | 114.756 | 94.967  |
| ENSMUSG000000040952 | 16_Rps19         | 9722.92 | 0.2495   | 0.03932  | 0.07936  | 10553.7 | 10211.5 | 10920.1 | 9987.97 | 7893.06 | 8771.15 |
| ENSMUSG000000040957 | 14_Cables1       | 161.559 | 0.50568  | 0.018    | 0.04147  | 186.661 | 166.123 | 216.323 | 141.565 | 121.928 | 136.753 |
| ENSMUSG000000040963 | 15_Asgr2         | 2.24037 | -0.58977 | 0.73894  | NA       | 2.60457 | 2.75342 | 0       | 2.70506 | 5.37918 | 0       |
| ENSMUSG000000040964 | 16_Arhgef10l     | 696.809 | 1.34709  | 1.96E-09 | 4.18E-08 | 843.011 | 983.888 | 1174.84 | 510.354 | 285.097 | 383.667 |
| ENSMUSG000000040966 | 9_Slc22a2        | 2.61275 | -2.22478 | 0.17528  | 0.27124  | 0.86819 | 1.83561 | 0       | 9.01685 | 2.68959 | 1.26623 |
| ENSMUSG000000040969 | 14_Arhgef38      | 1.25481 | -0.61733 | 0.77648  | NA       | 0       | 1.83561 | 1.19515 | 2.70506 | 1.79306 | 0       |
| ENSMUSG000000040972 | 8_Igsf21         | 3.22146 | 0.17118  | 0.89467  | 0.929    | 4.34094 | 4.58903 | 1.19515 | 4.50843 | 0.89653 | 3.79868 |
| ENSMUSG000000040978 | 4_Gm11992        | 125.63  | 0.27985  | 0.20586  | 0.30809  | 130.228 | 136.753 | 147.004 | 123.531 | 111.17  | 105.097 |
| ENSMUSG000000040985 | 13_Sun3          | 13.1417 | -0.10651 | 0.8624   | 0.90652  | 12.1546 | 12.8493 | 13.1467 | 15.3287 | 15.241  | 10.1298 |
| ENSMUSG000000040987 | 14_Mlll2         | 339.099 | -0.07241 | 0.64686  | 0.7416   | 325.571 | 319.396 | 346.595 | 313.787 | 359.509 | 369.738 |
| ENSMUSG000000040990 | 17_Sh3kbp1       | 340.54  | -0.98075 | 3.17E-06 | 2.50E-05 | 266.534 | 244.136 | 175.688 | 499.534 | 478.747 | 378.602 |
| ENSMUSG000000040997 | 13_Abhd4         | 3693.52 | 0.17981  | 0.08382  | 0.14866  | 3748.84 | 4032.84 | 3988.23 | 3595.92 | 3234.68 | 3560.63 |

|                    |                 |         |          |          |          |         |         |         |         |         |         |
|--------------------|-----------------|---------|----------|----------|----------|---------|---------|---------|---------|---------|---------|
| ENSMUSG00000040998 | 18_Npnt         | 2354.51 | -1.68148 | 1.99E-09 | 4.24E-08 | 1258.87 | 1504.28 | 592.796 | 4410.14 | 3320.75 | 3040.21 |
| ENSMUSG00000041000 | 8_Trim62        | 139.806 | 0.74009  | 0.00105  | 0.00372  | 158.878 | 188.15  | 178.078 | 120.826 | 94.1357 | 98.7657 |
| ENSMUSG00000041009 | 8_Iqcf4         | 0.36046 | -1.978   | 0.62369  | NA       | 0       | 0       | 0       | 0       | 0.89653 | 1.26623 |
| ENSMUSG00000041012 | 3_Cmtm8         | 36.4411 | -0.13134 | 0.74823  | 0.82221  | 39.0685 | 33.041  | 32.2692 | 50.4944 | 29.5855 | 34.1881 |
| ENSMUSG00000041014 | 17_Nrg3         | 0.84923 | -0.24879 | 0.94024  | NA       | 0       | 0       | 2.39031 | 2.70506 | 0       | 0       |
| ENSMUSG00000041020 | 14_Map7d2       | 23.113  | -1.5828  | 0.00498  | 0.01404  | 17.3638 | 11.0137 | 5.97577 | 45.986  | 30.482  | 27.857  |
| ENSMUSG00000041025 | 15_Iffo2        | 2706.64 | 0.5989   | 8.94E-06 | 6.13E-05 | 3093.36 | 2921.38 | 3767.13 | 2063.96 | 2105.95 | 2288.07 |
| ENSMUSG00000041028 | 15_Ghitm        | 6025.29 | -0.45782 | 8.47E-07 | 7.94E-06 | 5084.11 | 4996.53 | 5152.31 | 6955.6  | 7254.73 | 6708.47 |
| ENSMUSG00000041035 | 8_Dpcd          | 759.916 | 0.25678  | 0.141    | 0.22708  | 806.547 | 741.587 | 933.415 | 724.955 | 560.332 | 792.658 |
| ENSMUSG00000041037 | 8_Irgq          | 750.697 | 0.33567  | 0.01714  | 0.03983  | 744.906 | 882.011 | 885.609 | 618.556 | 658.95  | 714.152 |
| ENSMUSG00000041040 | 12_Fam117b      | 397.182 | -0.2041  | 0.24191  | 0.34963  | 420.203 | 373.547 | 311.935 | 438.219 | 384.612 | 454.575 |
| ENSMUSG00000041044 | 9_Lrit1         | 68.4662 | -2.51084 | 4.19E-05 | 0.00023  | 22.5729 | 26.6164 | 11.9515 | 211.896 | 111.17  | 26.5908 |
| ENSMUSG00000041046 | 7_Ramp3         | 36.8716 | 0.37683  | 0.44347  | 0.55866  | 48.6186 | 44.0547 | 32.2692 | 51.3961 | 17.0341 | 27.857  |
| ENSMUSG00000041057 | 9_Wdr43         | 1414.82 | -0.02799 | 0.84104  | 0.89188  | 1462.03 | 1292.27 | 1448.53 | 1225.39 | 1550.1  | 1510.61 |
| ENSMUSG00000041058 | 15_Wwp1         | 1209.86 | -0.5844  | 1.26E-05 | 8.32E-05 | 1080.03 | 922.395 | 901.146 | 1370.56 | 1577    | 1408.04 |
| ENSMUSG00000041062 | 6_Mslnl         | 0.30325 | -0.03469 | 0.99322  | NA       | 0       | 0.91781 | 0       | 0.90169 | 0       | 0       |
| ENSMUSG00000041064 | 13_Pif1         | 82.132  | 0.89336  | 0.00327  | 0.0099   | 127.624 | 80.7669 | 112.344 | 65.823  | 55.5849 | 50.6491 |
| ENSMUSG00000041068 | 6_4930596D02Rik | 0.96244 | -3.41564 | 0.27109  | NA       | 0       | 0       | 0       | 4.50843 | 0       | 1.26623 |
| ENSMUSG00000041073 | 10_Nacad        | 28.3609 | -0.68767 | 0.21852  | 0.32313  | 22.5729 | 29.3698 | 13.1467 | 57.7079 | 23.3098 | 24.0583 |
| ENSMUSG00000041075 | 8_Fzd7          | 890.105 | -0.15446 | 0.21876  | 0.32334  | 814.361 | 866.408 | 846.169 | 980.132 | 853.497 | 980.06  |
| ENSMUSG00000041078 | 6_Grid1         | 139.064 | -1.01671 | 0.00066  | 0.00252  | 82.4779 | 128.493 | 64.5383 | 222.716 | 176.617 | 159.545 |
| ENSMUSG00000041079 | 11_Rwdd2b       | 110.141 | -0.38014 | 0.12365  | 0.20456  | 106.787 | 100.041 | 80.0753 | 127.138 | 135.376 | 111.428 |
| ENSMUSG00000041084 | 8_Ostc          | 1676.09 | -0.3201  | 0.0142   | 0.03392  | 1554.93 | 1295.94 | 1623.02 | 1788.94 | 1952.64 | 1841.09 |
| ENSMUSG00000041096 | 13_Tspsy12      | 589.038 | -0.53555 | 0.00031  | 0.00132  | 474.899 | 546.094 | 420.694 | 702.413 | 697.501 | 692.626 |
| ENSMUSG00000041112 | 15_Elmo1        | 154.657 | -0.40122 | 0.18634  | 0.28483  | 155.406 | 156.945 | 87.2462 | 225.421 | 171.237 | 131.688 |
| ENSMUSG00000041115 | 16_lqsec2       | 666.355 | 0.72033  | 6.22E-06 | 4.48E-05 | 790.92  | 903.121 | 793.582 | 573.472 | 426.749 | 510.289 |
| ENSMUSG00000041117 | 8_Ccdc8         | 258.032 | -0.30731 | 0.28506  | 0.39838  | 210.102 | 308.383 | 173.297 | 390.43  | 224.133 | 241.849 |
| ENSMUSG00000041119 | 11_Pde9a        | 899.27  | 0.41617  | 0.00662  | 0.01783  | 1030.54 | 998.572 | 1052.93 | 687.986 | 703.777 | 921.813 |
| ENSMUSG00000041120 | 6_Nbl1          | 2305.19 | -0.22787 | 0.34031  | 0.45669  | 2061.95 | 2514.79 | 1793.93 | 3556.25 | 1835.2  | 2069.01 |
| ENSMUSG00000041124 | 10_Msantd4      | 815.684 | -0.47636 | 0.00015  | 0.00069  | 728.41  | 692.025 | 625.066 | 937.753 | 970.046 | 940.807 |
| ENSMUSG00000041126 | 16_H2afv        | 1069.58 | 0.17272  | 0.22695  | 0.33262  | 1164.24 | 1142.67 | 1093.57 | 1156.86 | 875.014 | 985.125 |
| ENSMUSG00000041130 | 9_Zfp598        | 1248.91 | 1.13575  | 1.16E-12 | 6.05E-11 | 1570.55 | 1678.67 | 1900.3  | 873.733 | 638.33  | 831.911 |
| ENSMUSG00000041132 | 11_N4bp21l      | 440.685 | -0.35341 | 0.03492  | 0.07203  | 379.398 | 415.766 | 365.717 | 434.612 | 573.78  | 474.835 |
| ENSMUSG00000041133 | 11_Smc1a        | 3769.52 | -0.0532  | 0.73355  | 0.81118  | 3865.17 | 3332.55 | 3900.98 | 3122.54 | 3907.08 | 4488.77 |
| ENSMUSG00000041134 | 15_Cyrr1        | 159.497 | -0.64243 | 0.0034   | 0.01022  | 123.283 | 130.328 | 120.711 | 213.699 | 210.685 | 158.278 |
| ENSMUSG00000041135 | 15_Ripk2        | 527.769 | -0.15903 | 0.32075  | 0.43639  | 531.331 | 454.314 | 510.331 | 479.697 | 618.606 | 572.335 |
| ENSMUSG00000041141 | 7_Pnnal1        | 7.99691 | -1.70895 | 0.11206  | 0.18897  | 6.07732 | 2.75342 | 2.39031 | 27.9522 | 6.27571 | 2.53245 |
| ENSMUSG00000041143 | 16_Tmco4        | 593.469 | 0.97498  | 1.53E-08 | 2.49E-07 | 741.433 | 777.381 | 841.388 | 467.975 | 323.648 | 408.991 |
| ENSMUSG00000041144 | 10_Dnah7b       | 166.508 | -1.19571 | 5.64E-05 | 0.0003   | 111.128 | 123.904 | 68.1238 | 250.669 | 280.614 | 164.609 |
| ENSMUSG00000041147 | 10_Brca2        | 285.035 | 0.03801  | 0.83331  | 0.886    | 300.393 | 259.739 | 307.155 | 262.39  | 320.958 | 259.577 |
| ENSMUSG00000041153 | 9_Osgin2        | 482.573 | -0.60572 | 0.00027  | 0.00118  | 373.321 | 392.821 | 381.254 | 480.598 | 620.399 | 647.042 |
| ENSMUSG00000041161 | 8_Otud3         | 172.602 | 0.88103  | 0.0004   | 0.00163  | 191.87  | 245.972 | 233.055 | 144.27  | 88.7565 | 131.688 |
| ENSMUSG00000041164 | 15_Zmniz2       | 1750.2  | 1.4066   | 4.85E-10 | 1.26E-08 | 2210.41 | 2502.86 | 2911.4  | 1199.24 | 621.296 | 1056.03 |
| ENSMUSG00000041165 | 6_Spem1         | 0.44709 | 0.74829  | 0.83033  | NA       | 0.86819 | 0.91781 | 0       | 0       | 0.89653 | 0       |
| ENSMUSG00000041168 | 9_Lonp1         | 1338.99 | 0.58275  | 0.00151  | 0.00512  | 1442.06 | 1611.67 | 1764.05 | 1305.64 | 820.325 | 1090.22 |
| ENSMUSG00000041180 | 13_Hectd2       | 350.906 | -0.44109 | 0.01997  | 0.0452   | 297.789 | 274.424 | 321.496 | 337.23  | 483.23  | 391.264 |
| ENSMUSG00000041187 | 16_Prkd2        | 896.454 | 1.04766  | 1.49E-09 | 3.32E-08 | 1109.54 | 1167.45 | 1346.94 | 617.655 | 463.506 | 673.633 |
| ENSMUSG00000041189 | 9_Chrrb1        | 236.873 | -0.9147  | 2.05E-06 | 1.72E-05 | 177.979 | 176.219 | 137.443 | 338.132 | 291.372 | 300.096 |
| ENSMUSG00000041193 | 15_Pla2g5       | 1157.99 | -1.18624 | 1.00E-05 | 6.80E-05 | 669.373 | 988.477 | 462.525 | 2093.71 | 1489.14 | 1244.7  |
| ENSMUSG00000041199 | 2_Rpusd1        | 165.797 | 1.19552  | 6.69E-06 | 4.77E-05 | 220.52  | 246.89  | 225.884 | 139.761 | 80.6878 | 81.0385 |
| ENSMUSG00000041202 | 12_Pla2g2d      | 30.6918 | -0.25811 | 0.64884  | 0.74309  | 41.673  | 18.3561 | 23.9031 | 56.8062 | 20.6202 | 22.7921 |
| ENSMUSG00000041203 | 8_2310036O22Rik | 975.181 | 0.12786  | 0.34891  | 0.46582  | 974.107 | 1041.71 | 1038.59 | 992.756 | 808.671 | 995.254 |
| ENSMUSG00000041205 | 7_Map6d1        | 15.4506 | -1.32918 | 0.11584  | 0.19402  | 9.55007 | 16.5205 | 0       | 21.6405 | 25.9994 | 18.9934 |
| ENSMUSG00000041215 | 15_Yeats2       | 905.542 | 0.16034  | 0.18408  | 0.28202  | 937.643 | 930.655 | 999.149 | 798.893 | 883.083 | 883.826 |
| ENSMUSG00000041216 | 15_Clvs1        | 44.6817 | -1.72239 | 0.00017  | 0.00079  | 20.8365 | 31.2054 | 9.56123 | 53.1994 | 73.5155 | 79.7723 |
| ENSMUSG00000041219 | 14_Arhgap11a    | 344.096 | 0.41384  | 0.02578  | 0.05609  | 407.18  | 361.615 | 409.938 | 237.143 | 324.544 | 324.154 |
| ENSMUSG00000041220 | 10_Elov16       | 5373.65 | -0.08628 | 0.49048  | 0.60219  | 5333.28 | 4895.57 | 5409.27 | 4812.3  | 5778.14 | 6013.31 |
| ENSMUSG00000041225 | 16_Arhgap12     | 1766.66 | -0.36581 | 0.01521  | 0.03604  | 1528.01 | 1418.93 | 1685.17 | 1656.4  | 2238.64 | 2072.81 |
| ENSMUSG00000041229 | 15_Phf8         | 1067.06 | 0.2459   | 0.12432  | 0.20545  | 1140.8  | 1134.41 | 1196.35 | 799.795 | 697.356 | 1163.66 |
| ENSMUSG00000041231 | 15_Ublcp1       | 969.9   | -0.3316  | 0.0087   | 0.02245  | 925.489 | 828.778 | 821.071 | 1002.67 | 1108.11 | 1133.27 |
| ENSMUSG00000041235 | 11_Chd7         | 506.155 | -0.05632 | 0.73666  | 0.81351  | 525.254 | 521.314 | 442.207 | 602.326 | 476.058 | 469.77  |
| ENSMUSG00000041236 | 7_Vps41         | 2467.81 | -0.34009 | 0.00491  | 0.01389  | 2227.77 | 2140.32 | 2166.81 | 2479.64 | 3066.13 | 2726.19 |
| ENSMUSG00000041238 | 15_Rbbp8        | 634.12  | -0.16439 | 0.31691  | 0.43223  | 635.514 | 545.177 | 613.114 | 556.34  | 753.086 | 701.49  |
| ENSMUSG00000041241 | 12_Mul1         | 643.12  | 0.55115  | 0.00271  | 0.00842  | 708.442 | 764.532 | 821.071 | 639.295 | 415.094 | 510.289 |
| ENSMUSG00000041245 | 13_Wnk3         | 30.8532 | -1.57393 | 0.00212  | 0.00683  | 17.3638 | 18.3561 | 10.7564 | 62.2163 | 51.1022 | 25.3245 |
| ENSMUSG00000041247 | 7_Lamp3         | 5.32277 | -2.14355 | 0.0634   | 0.1183   | 0.86819 | 2.75342 | 2.39031 | 14.427  | 8.96531 | 2.53245 |
| ENSMUSG00000041248 | 8_Kcnj1         | 8.00851 | -0.91678 | 0.29866  | 0.41326  | 9.55007 | 4.58903 | 2.39031 | 15.3287 | 9.86184 | 6.33113 |
| ENSMUSG00000041258 | 16_Zfp236       | 988.307 | 0.56453  | 1.24E-05 | 8.18E-05 | 1129.51 | 1147.26 | 1260.89 | 838.567 | 721.707 | 831.911 |
| ENSMUSG00000041261 | 9_Car8          | 80.0989 | -1.90058 | 3.26E-08 | 4.72E-07 | 46.014  | 27.5342 | 27.4885 | 158.697 | 103.101 | 117.759 |
| ENSMUSG00000041263 | 14_Rusc1        | 370.376 | 0.63904  | 0.00078  | 0.00291  | 410.653 | 440.547 | 503.16  | 349.854 | 248.339 | 269.706 |
| ENSMUSG00000041264 | 16_Usp11        | 836.265 | -0.32459 | 0.01263  | 0.03072  | 766.61  | 782.888 | 677.652 | 904.391 | 993.356 | 892.69  |
| ENSMUSG00000041268 | 16_Dmxl2        | 959.312 | -1.75126 | 1.26E-12 | 6.54E-11 | 447.117 | 565.368 | 304.764 | 1766.4  | 1604.79 | 1067.43 |
| ENSMUSG00000041272 | 11_Tox          | 600.688 | 0.16807  | 0.7559   | 0.82823  | 797.865 | 576.382 | 531.844 | 398.545 | 309.303 | 990.189 |
| ENSMUSG00000041278 | 10_Ttc1         | 899.23  | -0.33348 | 0.00737  | 0.01953  | 811.756 | 775.546 | 799.558 | 915.211 | 1058.8  | 1034.51 |
| ENSMUSG00000041287 | 5_Sox15         | 913.968 | 1.07526  | 1.58E-08 | 2.56E-07 | 1132.12 | 1183.05 | 1403.11 | 669.952 | 438.403 | 657.172 |
| ENSMUSG00000041293 | 5_Adgrf1        | 3559.04 | 0.23191  | 0.0525   | 0.1009   | 3857.36 | 3754.74 | 3920.11 | 2872.77 | 3420.26 | 3528.97 |
| ENSMUSG00000041297 | 7_Cdk13         | 1459.2  | -0.16783 | 0.21995  | 0.32469  | 1432.51 | 1330.82 | 1358.89 | 1314.66 | 1668.44 | 1649.89 |
| ENSMUSG00000041298 | 15_Katnal1      | 214.503 | -0.41665 | 0.0359   | 0.0737   | 168.429 | 197.328 | 186.444 | 247.964 | 277.924 | 208.927 |
| ENSMUSG00000041301 | 15_Cftr         | 66.6397 | -0.41938 | 0.21877  | 0.32334  | 59.0368 | 55.9861 | 56.1722 | 55.0028 | 103.998 | 69.6425 |

|                     |              |         |          |          |          |         |         |         |         |         |         |
|---------------------|--------------|---------|----------|----------|----------|---------|---------|---------|---------|---------|---------|
| ENSMUSG000000041303 | 7_Gtf3c3     | 844.991 | -0.26345 | 0.08142  | 0.14536  | 866.452 | 700.286 | 736.215 | 809.714 | 977.218 | 980.06  |
| ENSMUSG000000041308 | 5_Sntb2      | 883.749 | -0.02972 | 0.79594  | 0.85884  | 863.847 | 863.655 | 897.561 | 917.916 | 901.013 | 858.502 |
| ENSMUSG000000041309 | 17_Nkx6-2    | 0.59758 | 2.66585  | 0.50308  | NA       | 0       | 0       | 3.58546 | 0       | 0       | 0       |
| ENSMUSG000000041313 | 14_Slc7a1    | 3982.18 | 0.759    | 1.23E-07 | 1.50E-06 | 4672.59 | 4689.07 | 5655.47 | 2723.09 | 2735.31 | 3417.55 |
| ENSMUSG000000041319 | 13_Thoc6     | 320.791 | 0.95728  | 2.60E-06 | 2.10E-05 | 389.817 | 367.122 | 513.916 | 241.652 | 185.582 | 226.655 |
| ENSMUSG000000041323 | 5_Ak7        | 81.1919 | 0.71532  | 0.00757  | 0.01996  | 90.2916 | 107.383 | 105.174 | 57.7079 | 64.5502 | 62.0451 |
| ENSMUSG000000041324 | 13_Inhba     | 25.3766 | -0.25954 | 0.60232  | 0.70325  | 18.232  | 24.7808 | 26.2934 | 34.264  | 17.0341 | 31.6557 |
| ENSMUSG000000041328 | 15_Pcf11     | 1614.8  | -0.51046 | 0.00055  | 0.00217  | 1385.63 | 1177.54 | 1434.18 | 1696.07 | 2182.16 | 1813.24 |
| ENSMUSG000000041329 | 13_Atp1b2    | 934.333 | -1.45275 | 0.00391  | 0.01152  | 547.827 | 686.519 | 265.324 | 1938.62 | 1299.07 | 868.632 |
| ENSMUSG000000041341 | 9_Atg2b      | 1271.85 | 0.17759  | 0.10527  | 0.17962  | 1314.44 | 1359.27 | 1375.62 | 1178.5  | 1148.46 | 1254.83 |
| ENSMUSG000000041343 | 18_Ankrd42   | 110.37  | -0.165   | 0.55224  | 0.65834  | 96.3689 | 102.794 | 112.344 | 110.006 | 88.7565 | 151.947 |
| ENSMUSG000000041346 | 11_Wrap53    | 191.479 | 0.73457  | 0.00138  | 0.00474  | 219.652 | 233.123 | 265.324 | 177.632 | 113.859 | 139.285 |
| ENSMUSG000000041347 | 5_Bdkrb1     | 4.23966 | 2.9893   | 0.04637  | 0.09105  | 10.4183 | 2.75342 | 9.56123 | 2.70506 | 0       | 0       |
| ENSMUSG000000041351 | 16_Rap1gap   | 1773.29 | 1.01667  | 2.04E-07 | 2.33E-06 | 2095.81 | 2487.25 | 2537.31 | 1453.52 | 849.014 | 1216.84 |
| ENSMUSG000000041353 | 12_Tmem29    | 437.099 | -0.51515 | 0.00233  | 0.0074   | 388.948 | 316.643 | 374.083 | 448.138 | 569.297 | 525.484 |
| ENSMUSG000000041354 | 15_Rgl2      | 1152.92 | 1.17604  | 1.73E-10 | 5.20E-09 | 1460.29 | 1591.47 | 1743.73 | 865.618 | 539.711 | 716.684 |
| ENSMUSG000000041355 | 13_Ssr2      | 2216.47 | 0.25492  | 0.02888  | 0.06153  | 2447.42 | 2278.91 | 2508.63 | 2123.47 | 1833.41 | 2107    |
| ENSMUSG000000041358 | 1_Nutm1      | 4.63748 | 1.43628  | 0.21346  | 0.31704  | 10.4183 | 3.67122 | 5.97577 | 0.90169 | 1.79306 | 5.06491 |
| ENSMUSG000000041360 | 7_Pum3       | 1314.19 | 0.08955  | 0.50657  | 0.61689  | 1351.77 | 1288.6  | 1423.43 | 1114.48 | 1287.42 | 1419.44 |
| ENSMUSG000000041361 | 13_Myzap     | 315.237 | -0.02603 | 0.87547  | 0.91572  | 314.284 | 309.3   | 314.326 | 360.674 | 300.338 | 292.498 |
| ENSMUSG000000041362 | 16_Shtn1     | 1037.47 | -0.03402 | 0.82625  | 0.88091  | 998.417 | 942.586 | 1134.2  | 889.964 | 1066.87 | 1192.79 |
| ENSMUSG000000041372 | 9_B4galnt3   | 5.47578 | 1.48899  | 0.13572  | 0.21998  | 8.68188 | 7.34244 | 8.36608 | 4.50843 | 2.68959 | 1.26623 |
| ENSMUSG000000041375 | 18_Ccdc9     | 1005.77 | 0.62258  | 6.65E-05 | 0.00035  | 1117.36 | 1240.87 | 1299.13 | 831.354 | 654.467 | 891.424 |
| ENSMUSG000000041377 | 12_Ninj2     | 1.54486 | 1.98888  | 0.29498  | NA       | 2.60457 | 3.67122 | 1.19515 | 0.90169 | 0.89653 | 0       |
| ENSMUSG000000041378 | 1_Cldn5      | 197.344 | -0.28885 | 0.30611  | 0.42109  | 151.933 | 237.712 | 143.418 | 284.933 | 190.064 | 176.006 |
| ENSMUSG000000041380 | 13_Htr2c     | 0.60112 | -2.7448  | 0.49049  | NA       | 0       | 0       | 0       | 3.60674 | 0       | 0       |
| ENSMUSG000000041390 | 18_Mdfic     | 1006.68 | -0.69063 | 7.69E-08 | 1.00E-06 | 806.547 | 771.874 | 732.629 | 1328.18 | 1280.25 | 1120.61 |
| ENSMUSG000000041396 | 13_Mettl18   | 128.05  | -0.44824 | 0.04558  | 0.08975  | 113.733 | 112.89  | 98.0026 | 136.155 | 163.169 | 144.35  |
| ENSMUSG000000041406 | 14_BC055324  | 190.469 | -0.09124 | 0.68446  | 0.77244  | 191.001 | 146.849 | 216.323 | 177.632 | 222.34  | 188.668 |
| ENSMUSG000000041408 | 16_Wapl      | 3206.13 | -0.3105  | 0.04761  | 0.09306  | 3010.88 | 2815.83 | 2759.61 | 2795.22 | 4060.39 | 3794.88 |
| ENSMUSG000000041415 | 9_Dicer1     | 2115.3  | -0.00116 | 0.99145  | 0.99426  | 2238.19 | 2055.88 | 2048.49 | 2012.56 | 2208.15 | 2128.53 |
| ENSMUSG000000041417 | 15_Pik3r1    | 3008.26 | -0.41203 | 2.22E-05 | 0.00014  | 2555.08 | 2650.62 | 2538.51 | 3304.68 | 3535.02 | 3465.66 |
| ENSMUSG000000041420 | 18_Meis3     | 145.163 | 0.3295   | 0.11852  | 0.19781  | 159.747 | 164.287 | 161.346 | 145.171 | 120.135 | 120.292 |
| ENSMUSG000000041423 | 16_Paqr6     | 148.047 | -0.27767 | 0.35582  | 0.47259  | 123.283 | 174.383 | 103.978 | 218.208 | 144.341 | 124.09  |
| ENSMUSG000000041426 | 12_Hibch     | 419.159 | -0.7572  | 8.63E-07 | 8.06E-06 | 309.075 | 288.191 | 338.229 | 482.402 | 557.642 | 539.413 |
| ENSMUSG000000041429 | 2_Nthl1      | 128.708 | 0.74502  | 0.00065  | 0.00251  | 161.483 | 161.534 | 160.151 | 98.2837 | 86.9635 | 103.831 |
| ENSMUSG000000041431 | 16_Ccnb1     | 769.566 | 0.14541  | 0.46919  | 0.58241  | 889.025 | 652.56  | 883.219 | 559.045 | 847.221 | 786.327 |
| ENSMUSG000000041438 | 7_Cirh1a     | 692.799 | 0.03105  | 0.83142  | 0.88464  | 693.683 | 662.656 | 744.581 | 596.916 | 748.603 | 710.353 |
| ENSMUSG000000041439 | 15_Mfsd6     | 3157.19 | 0.31427  | 0.04169  | 0.08333  | 3201.01 | 3334.39 | 3963.13 | 2348.89 | 2876.97 | 3218.75 |
| ENSMUSG000000041440 | 18_Gk5       | 637.803 | 0.01649  | 0.90578  | 0.93652  | 663.296 | 602.08  | 658.53  | 568.964 | 667.915 | 666.035 |
| ENSMUSG000000041444 | 14_Arhgap32  | 5354.88 | 0.42018  | 0.00067  | 0.00254  | 5895.87 | 5984.09 | 6506.42 | 4036.85 | 4644.92 | 5061.11 |
| ENSMUSG000000041445 | 8_Mmrn2      | 189.321 | 0.12197  | 0.6006   | 0.70196  | 214.443 | 220.273 | 156.565 | 213.699 | 152.41  | 178.538 |
| ENSMUSG000000041453 | 12_Rpl21     | 13067.3 | -0.4915  | 1.95E-05 | 0.00012  | 11374.1 | 10615.3 | 10597.4 | 13567.7 | 16499.7 | 15749.3 |
| ENSMUSG000000041459 | 15_Tardbp    | 5797.1  | -0.21361 | 0.07958  | 0.14276  | 5464.38 | 5088.31 | 5553.88 | 5525.53 | 6919.42 | 6231.1  |
| ENSMUSG000000041460 | 14_Cacna2d4  | 138.926 | -2.06366 | 7.28E-05 | 0.00038  | 70.3233 | 56.9039 | 33.4643 | 417.48  | 188.271 | 67.11   |
| ENSMUSG000000041468 | 7_Gpr12      | 0.89353 | -2.11082 | 0.44256  | NA       | 0.86819 | 0       | 0       | 1.80337 | 2.68959 | 0       |
| ENSMUSG000000041471 | 8_Fam35a     | 169.892 | -0.499   | 0.01335  | 0.03222  | 158.878 | 125.739 | 137.443 | 195.666 | 199.03  | 202.596 |
| ENSMUSG000000041476 | 12_Smpx      | 142.514 | -2.16956 | 3.39E-08 | 4.88E-07 | 37.3321 | 85.3559 | 32.2692 | 323.705 | 164.962 | 211.46  |
| ENSMUSG000000041477 | 14_Dcp1b     | 328.303 | 0.39126  | 0.01665  | 0.03888  | 353.353 | 366.204 | 397.986 | 298.458 | 253.718 | 300.096 |
| ENSMUSG000000041479 | 13_Syt15     | 64.4483 | -0.14776 | 0.64787  | 0.74231  | 75.5324 | 58.7396 | 49.0013 | 80.25   | 63.6537 | 59.5127 |
| ENSMUSG000000041481 | 16_Serpina3g | 243.272 | 2.88316  | 1.71E-20 | 3.34E-18 | 496.604 | 272.588 | 516.307 | 40.5758 | 75.3086 | 58.2464 |
| ENSMUSG000000041482 | 16_Piezo2    | 418.313 | -0.53621 | 0.00293  | 0.00899  | 390.685 | 360.698 | 271.3   | 517.567 | 464.403 | 505.225 |
| ENSMUSG000000041483 | 14_Zfp281    | 480.499 | -0.2493  | 0.1497   | 0.2386   | 444.512 | 396.492 | 478.062 | 522.076 | 602.469 | 439.381 |
| ENSMUSG000000041488 | 15_Stx3      | 1282.69 | -0.24998 | 0.03176  | 0.06662  | 1131.25 | 1129.82 | 1256.11 | 1354.33 | 1468.52 | 1356.13 |
| ENSMUSG000000041491 | 7_Cep78      | 190.489 | -0.09814 | 0.62117  | 0.719    | 205.761 | 162.452 | 184.054 | 191.157 | 213.374 | 186.135 |
| ENSMUSG000000041498 | 13_Kif14     | 225.173 | 0.4324   | 0.08415  | 0.14913  | 268.27  | 218.438 | 289.227 | 133.449 | 233.994 | 207.661 |
| ENSMUSG000000041505 | 15_Gm3402    | 0.21104 | -0.99647 | 0.80707  | NA       | 0       | 0       | 0       | 0       | 0       | 1.26623 |
| ENSMUSG000000041506 | 14_Rrp9      | 293.222 | 1.29637  | 4.79E-09 | 9.06E-08 | 365.507 | 424.026 | 461.329 | 214.601 | 131.79  | 162.077 |
| ENSMUSG000000041515 | 9_Irf8       | 226.513 | 1.7623   | 1.23E-11 | 5.06E-10 | 445.381 | 251.479 | 352.57  | 117.219 | 86.0669 | 106.363 |
| ENSMUSG000000041523 | 2_Upk2       | 8.03561 | 1.6866   | 0.05067  | 0.09821  | 10.4183 | 14.6849 | 11.9515 | 5.41011 | 4.48265 | 1.26623 |
| ENSMUSG000000041528 | 15_Rnf123    | 1147.2  | 0.75613  | 3.23E-07 | 3.45E-06 | 1331.8  | 1466.65 | 1526.21 | 995.461 | 760.258 | 802.788 |
| ENSMUSG000000041530 | 16_Ago1      | 1825.76 | -0.16886 | 0.12762  | 0.20978  | 1671.26 | 1858.56 | 1626.6  | 1902.56 | 1975.95 | 1919.6  |
| ENSMUSG000000041534 | 8_Rbp3       | 632.693 | -1.84432 | 0.01883  | 0.04296  | 344.671 | 362.533 | 119.515 | 1814.19 | 809.567 | 345.68  |
| ENSMUSG000000041538 | 15_H2-Ob     | 6.00648 | 0.61439  | 0.51176  | 0.62206  | 10.4183 | 6.42464 | 4.78062 | 2.70506 | 5.37918 | 6.33113 |
| ENSMUSG000000041540 | 16_Sox5      | 49.2983 | -1.701   | 7.82E-05 | 0.0004   | 21.7047 | 32.1232 | 15.537  | 101.89  | 72.619  | 51.9153 |
| ENSMUSG000000041544 | 11_Ptchd2    | 2.35165 | -0.59203 | 0.69459  | NA       | 2.60457 | 1.83561 | 1.19515 | 6.3118  | 0.89653 | 1.26623 |
| ENSMUSG000000041548 | 4_Hspb8      | 859.775 | -0.45679 | 0.01391  | 0.03332  | 742.301 | 817.765 | 614.309 | 1218.18 | 934.185 | 831.911 |
| ENSMUSG000000041552 | 7_Ptchd1     | 12.7413 | -0.8198  | 0.37378  | 0.4914   | 7.8137  | 18.3561 | 1.19515 | 23.4438 | 5.37918 | 20.2596 |
| ENSMUSG000000041556 | 8_Fbxo2      | 22.0686 | -0.38601 | 0.50923  | 0.61939  | 21.7047 | 24.7808 | 10.7564 | 38.7725 | 16.1376 | 20.2596 |
| ENSMUSG000000041559 | 7_Fmod       | 6817.04 | -0.11255 | 0.42341  | 0.53899  | 5921.91 | 7408.53 | 6322.37 | 7584.98 | 6115.24 | 7549.24 |
| ENSMUSG000000041560 | 12_Gltscr2   | 2228.5  | 0.82838  | 2.19E-10 | 6.40E-09 | 2678.36 | 2752.5  | 3122.94 | 1716.81 | 1420.1  | 1680.28 |
| ENSMUSG000000041565 | 16_L3mbt14   | 0.36132 | -1.98116 | 0.62311  | NA       | 0       | 0       | 0       | 0.90169 | 0       | 1.26623 |
| ENSMUSG000000041566 | 3_Tssk1      | 7.50203 | -0.84285 | 0.32475  | 0.44088  | 3.47275 | 5.50683 | 7.17092 | 10.8202 | 5.37918 | 12.6623 |
| ENSMUSG000000041570 | 14_Camsap2   | 2298.59 | -0.21391 | 0.04142  | 0.08286  | 2167    | 2098.1  | 2120.2  | 2320.04 | 2610.7  | 2475.47 |
| ENSMUSG000000041571 | 9_Sepw1      | 2383.52 | 0.40231  | 0.034    | 0.07045  | 2555.95 | 2781.87 | 2803.83 | 2650.05 | 1536.65 | 1972.78 |
| ENSMUSG000000041577 | 5_Prelp      | 2937.84 | -0.09646 | 0.49325  | 0.60475  | 2537.71 | 3196.72 | 2784.71 | 3394.85 | 2720.97 | 2992.09 |
| ENSMUSG000000041578 | 15_Crx       | 178.763 | -2.2312  | 0.00359  | 0.01068  | 101.578 | 57.8218 | 28.6837 | 469.778 | 314.682 | 100.032 |
| ENSMUSG000000041583 | 8_Obox6      | 0.45084 | -2.33355 | 0.56009  | NA       | 0       | 0       | 0       | 2.70506 | 0       | 0       |
| ENSMUSG000000041592 | 16_Sdk2      | 131.393 | -0.57749 | 0.12688  | 0.20876  | 91.1598 | 161.534 | 63.3432 | 222.716 | 125.514 | 124.09  |

|                     |                  |         |          |          |          |         |         |         |         |         |         |
|---------------------|------------------|---------|----------|----------|----------|---------|---------|---------|---------|---------|---------|
| ENSMUSG000000041594 | 17_Tmtc4         | 351.061 | -0.26918 | 0.12398  | 0.20505  | 289.107 | 370.793 | 295.203 | 362.478 | 417.783 | 371.004 |
| ENSMUSG000000041598 | 7_Cdc42ep4       | 3247.05 | 0.83606  | 3.84E-06 | 2.94E-05 | 3793.12 | 4053.95 | 4639.59 | 2670.79 | 1724.03 | 2600.83 |
| ENSMUSG000000041605 | 16_5730559C18Rik | 921.298 | 1.19184  | 8.51E-12 | 3.63E-10 | 1088.71 | 1212.42 | 1542.94 | 529.289 | 513.712 | 640.711 |
| ENSMUSG000000041607 | 16_Mbp           | 3947.33 | 0.58121  | 1.44E-06 | 1.26E-05 | 4308.82 | 4714.77 | 5171.43 | 3049.5  | 3016.83 | 3422.61 |
| ENSMUSG000000041608 | 7_Entpd3         | 201.953 | 0.71461  | 0.00196  | 0.00639  | 237.015 | 234.958 | 279.666 | 133.449 | 129.1   | 197.531 |
| ENSMUSG000000041609 | 16_Ccdc64        | 952.945 | 0.57439  | 0.018    | 0.04148  | 1040.09 | 1249.13 | 1131.81 | 1090.14 | 516.402 | 690.094 |
| ENSMUSG000000041616 | 9_Nppa           | 1.27112 | -0.63452 | 0.77761  | NA       | 1.73638 | 0       | 1.19515 | 0       | 0.89653 | 3.79868 |
| ENSMUSG000000041617 | 10_Ccdc74a       | 60.5629 | -0.49651 | 0.17751  | 0.27402  | 53.8277 | 54.1505 | 43.0255 | 98.2837 | 67.2398 | 46.8504 |
| ENSMUSG000000041620 | 8_Mmp1b          | 2.12386 | 4.51682  | 0.02256  | NA       | 5.20913 | 2.75342 | 4.78062 | 0       | 0       | 0       |
| ENSMUSG000000041623 | 17_D11Wsu47e     | 236.575 | 0.14761  | 0.42353  | 0.53906  | 233.543 | 250.561 | 262.934 | 255.177 | 213.374 | 203.863 |
| ENSMUSG000000041624 | 9_Gucy1a2        | 15.9613 | -1.75822 | 0.01712  | 0.03978  | 3.47275 | 14.6849 | 3.58546 | 32.4607 | 25.1029 | 16.4609 |
| ENSMUSG000000041625 | 14_Ggact         | 333.983 | -0.34702 | 0.1167   | 0.19525  | 289.107 | 357.026 | 235.445 | 458.056 | 323.648 | 340.615 |
| ENSMUSG000000041629 | 7_Fam104a        | 502.111 | 0.26473  | 0.04663  | 0.09145  | 526.122 | 545.177 | 573.674 | 467.073 | 453.644 | 446.978 |
| ENSMUSG000000041632 | 5_Mrps27         | 327.74  | 0.51714  | 0.00359  | 0.01069  | 340.33  | 386.396 | 431.451 | 295.753 | 240.27  | 272.239 |
| ENSMUSG000000041633 | 14_Kctd12b       | 261.926 | -1.29379 | 8.91E-09 | 1.55E-07 | 173.638 | 166.123 | 114.735 | 408.464 | 403.439 | 305.161 |
| ENSMUSG000000041638 | 18_Gn1l1         | 2215.75 | 1.30622  | 4.11E-14 | 3.12E-12 | 2835.5  | 3343.57 | 3286.67 | 1478.76 | 973.632 | 1376.39 |
| ENSMUSG000000041642 | 18_Klf21b        | 261.286 | -0.43284 | 0.19232  | 0.2922   | 255.247 | 237.712 | 174.492 | 474.287 | 247.442 | 178.538 |
| ENSMUSG000000041644 | 14_Slc5a12       | 1.20948 | 1.27389  | 0.53383  | NA       | 0.86819 | 1.83561 | 2.39031 | 0       | 0.89653 | 1.26623 |
| ENSMUSG000000041645 | 13_Ddx24         | 2421.28 | 0.54161  | 2.04E-05 | 0.00013  | 2700.93 | 2838.77 | 3070.35 | 1908.87 | 1796.65 | 2212.1  |
| ENSMUSG000000041649 | 13_Klf8          | 23.5933 | -0.29707 | 0.55935  | 0.66499  | 22.5729 | 14.6849 | 26.2934 | 18.0337 | 29.5855 | 30.3894 |
| ENSMUSG000000041650 | 15_Pcca          | 597.948 | -0.70402 | 1.82E-05 | 0.00011  | 487.054 | 491.026 | 386.035 | 757.416 | 814.05  | 652.107 |
| ENSMUSG000000041653 | 4_Pnpla3         | 76.7387 | -1.29182 | 0.00051  | 0.00203  | 49.4867 | 55.0683 | 28.6837 | 135.253 | 121.032 | 70.9087 |
| ENSMUSG000000041654 | 15_Slc39a11      | 423.134 | 0.66702  | 3.06E-05 | 0.00018  | 486.186 | 489.19  | 582.04  | 305.671 | 317.372 | 358.342 |
| ENSMUSG000000041658 | 12_Rragb         | 83.7857 | -1.54892 | 6.13E-06 | 4.43E-05 | 45.1458 | 50.4793 | 32.2692 | 135.253 | 155.996 | 83.571  |
| ENSMUSG000000041660 | 8_Bbox1          | 19.2893 | -0.90977 | 0.12248  | 0.20307  | 13.891  | 6.42464 | 20.3176 | 27.0506 | 27.7924 | 20.2596 |
| ENSMUSG000000041669 | 15_Prma1         | 15.6472 | 0.70271  | 0.27264  | 0.3846   | 14.7592 | 25.6986 | 17.9273 | 18.9354 | 8.96531 | 7.59736 |
| ENSMUSG000000041670 | 15_Rims1         | 21.8104 | -1.22346 | 0.07956  | 0.14275  | 13.0228 | 11.0137 | 15.537  | 55.0028 | 28.689  | 7.59736 |
| ENSMUSG000000041671 | 13_Pyrox1        | 1249.32 | 0.09156  | 0.52286  | 0.63234  | 1240.64 | 1174.79 | 1452.11 | 1071.2  | 1297.28 | 1259.9  |
| ENSMUSG000000041673 | 11_Lrrc18        | 16.1535 | -2.21697 | 0.00237  | 0.00751  | 2.60457 | 11.9315 | 2.39031 | 24.3455 | 27.7924 | 27.857  |
| ENSMUSG000000041679 | 8_Lrrc29         | 34.1889 | 1.06573  | 0.00969  | 0.02458  | 42.5412 | 48.6437 | 47.8062 | 27.9522 | 17.9306 | 20.2596 |
| ENSMUSG000000041681 | 2_lapp           | 0.69963 | 1.43467  | 0.63415  | NA       | 1.73638 | 0       | 1.19515 | 0       | 0       | 1.26623 |
| ENSMUSG000000041684 | 11_Bivm          | 424.636 | -0.45229 | 0.00343  | 0.01029  | 380.267 | 371.711 | 322.692 | 449.941 | 521.781 | 501.426 |
| ENSMUSG000000041685 | 15_Fcho2         | 3399.24 | -0.14429 | 0.28097  | 0.39377  | 3271.33 | 3039.77 | 3377.51 | 3077.45 | 4037.08 | 3592.29 |
| ENSMUSG000000041688 | 16_Amot          | 240.332 | -1.03953 | 8.58E-06 | 5.92E-05 | 151.933 | 191.821 | 127.881 | 394.037 | 306.613 | 269.706 |
| ENSMUSG000000041695 | 2_Kcnj2          | 195.736 | -0.705   | 0.00099  | 0.00357  | 139.778 | 167.041 | 138.638 | 232.635 | 208.892 | 287.434 |
| ENSMUSG000000041696 | 13_Rasl12        | 113.108 | -0.57198 | 0.04459  | 0.08812  | 85.0825 | 119.315 | 68.1238 | 156.893 | 126.411 | 122.824 |
| ENSMUSG000000041697 | 8_Cox6a1         | 1661.02 | 0.36515  | 0.02018  | 0.04561  | 1817.12 | 1744.75 | 2049.69 | 1734.84 | 1240.8  | 1378.92 |
| ENSMUSG000000041700 | 9_Lhfp1          | 47.495  | -0.08391 | 0.82027  | 0.87649  | 35.5957 | 41.3013 | 62.148  | 52.2978 | 49.3092 | 44.3179 |
| ENSMUSG000000041702 | 6_Btbd7          | 1339.81 | 0.04443  | 0.67765  | 0.76678  | 1355.24 | 1358.35 | 1367.26 | 1256.05 | 1348.38 | 1353.6  |
| ENSMUSG000000041703 | 7_Zic5           | 66.6376 | -1.3369  | 0.00784  | 0.02056  | 24.3093 | 69.7532 | 19.1225 | 118.121 | 110.273 | 58.2464 |
| ENSMUSG000000041707 | 7_1810011H11Rik  | 5.64705 | -0.4095  | 0.72116  | 0.80166  | 4.34094 | 10.0959 | 0       | 6.3118  | 8.06878 | 5.06491 |
| ENSMUSG000000041708 | 12_Mpped1        | 12.2389 | 0.09467  | 0.88393  | 0.9214   | 9.55007 | 12.8493 | 15.537  | 9.01685 | 12.5514 | 13.9285 |
| ENSMUSG000000041710 | 4_Trpc5          | 0.2997  | -1.76345 | 0.66322  | NA       | 0       | 0       | 0       | 0.90169 | 0.89653 | 0       |
| ENSMUSG000000041712 | 6_Ubr7           | 1118.51 | -0.10928 | 0.3498   | 0.46649  | 1084.37 | 1012.34 | 1131.81 | 1108.17 | 1166.39 | 1207.98 |
| ENSMUSG000000041716 | 7_Gm20604        | 239.497 | -0.39382 | 0.04274  | 0.0851   | 173.638 | 240.465 | 206.762 | 266.899 | 261.787 | 287.434 |
| ENSMUSG000000041718 | 15_Alg13         | 153.132 | -0.53103 | 0.02033  | 0.04591  | 139.778 | 122.068 | 113.54  | 153.287 | 211.581 | 178.538 |
| ENSMUSG000000041720 | 12_Pi4ka         | 1972.75 | 0.11007  | 0.34877  | 0.46571  | 1879.63 | 2191.72 | 2072.4  | 1965.67 | 1779.61 | 1947.46 |
| ENSMUSG000000041722 | 7_Khdc1c         | 7.42929 | 0.11174  | 0.90495  | 0.936    | 9.55007 | 1.83561 | 11.9515 | 6.3118  | 9.86184 | 5.06491 |
| ENSMUSG000000041729 | 15_Coro2b        | 377.605 | -0.54167 | 0.07479  | 0.13564  | 316.889 | 417.602 | 187.639 | 614.949 | 376.543 | 352.011 |
| ENSMUSG000000041730 | 13_Prrx1         | 0.51697 | 0.77694  | 0.84161  | NA       | 0       | 1.83561 | 0       | 0       | 0       | 1.26623 |
| ENSMUSG000000041731 | 13_Pgm5          | 229.708 | -1.0529  | 6.33E-05 | 0.00033  | 151.065 | 189.986 | 106.369 | 387.725 | 258.201 | 284.901 |
| ENSMUSG000000041733 | 10_Coq5          | 543.441 | 0.09065  | 0.5154   | 0.62554  | 555.641 | 557.108 | 567.698 | 526.584 | 478.747 | 574.867 |
| ENSMUSG000000041734 | 15_Kirrel        | 1043.39 | -0.68185 | 0.00025  | 0.00109  | 816.965 | 948.093 | 638.212 | 1516.63 | 1221.07 | 1119.34 |
| ENSMUSG000000041735 | 7_Gm13178        | 0       | NA       | NA       | NA       | 0       | 0       | 0       | 0       | 0       | 0       |
| ENSMUSG000000041736 | 6_Tspo           | 3056.68 | 1.36407  | 5.97E-12 | 2.61E-10 | 4022.32 | 4062.21 | 5124.82 | 2181.18 | 1273.07 | 1676.48 |
| ENSMUSG000000041737 | 7_Tmem45b        | 576.195 | 0.22419  | 0.11861  | 0.19793  | 597.314 | 604.834 | 659.725 | 482.402 | 525.367 | 587.529 |
| ENSMUSG000000041740 | 16_Rnf10         | 7290.7  | 0.45306  | 0.00018  | 0.00082  | 7922.22 | 8225.37 | 9130.98 | 6525.5  | 5491.25 | 6448.89 |
| ENSMUSG000000041741 | 10_Pde3a         | 264.134 | -1.1862  | 2.72E-07 | 2.98E-06 | 191.87  | 167.041 | 124.296 | 388.626 | 420.173 | 292.498 |
| ENSMUSG000000041747 | 2_Utp15          | 592.931 | 0.13287  | 0.33472  | 0.45128  | 654.614 | 567.204 | 638.212 | 536.503 | 562.125 | 598.925 |
| ENSMUSG000000041750 | 13_Cd1d2         | 2.22114 | -1.03284 | 0.622    | NA       | 4.34094 | 0       | 0       | 3.60674 | 5.37918 | 0       |
| ENSMUSG000000041754 | 5_Trem3          | 2.92778 | 2.40868  | 0.18524  | 0.28349  | 11.2864 | 0       | 3.58546 | 0.90169 | 1.79306 | 0       |
| ENSMUSG000000041757 | 15_Plekha6       | 6359.45 | 0.71526  | 3.85E-08 | 5.46E-07 | 7409.12 | 7685.7  | 8617.06 | 4864.59 | 4225.35 | 5354.87 |
| ENSMUSG000000041762 | 16_Gpr155        | 187.597 | -0.44893 | 0.02499  | 0.05462  | 162.351 | 137.671 | 176.883 | 218.208 | 230.408 | 200.064 |
| ENSMUSG000000041763 | 14_Tpp2          | 1574.49 | -0.14274 | 0.36424  | 0.48155  | 1541.03 | 1386.8  | 1562.07 | 1334.49 | 1897.96 | 1724.6  |
| ENSMUSG000000041765 | 5_Ubac2          | 730.259 | 0.47187  | 0.00177  | 0.00587  | 840.406 | 818.683 | 886.804 | 689.789 | 519.091 | 626.782 |
| ENSMUSG000000041769 | 13_Ppp2r2d       | 672.543 | -0.19583 | 0.12854  | 0.21107  | 658.955 | 585.56  | 637.017 | 714.135 | 749.5   | 690.094 |
| ENSMUSG000000041771 | 13_Slc24a4       | 90.4582 | -0.86338 | 0.01709  | 0.03974  | 51.2231 | 99.123  | 41.8304 | 136.155 | 115.652 | 98.7657 |
| ENSMUSG000000041773 | 7_Enc1           | 1151.41 | 0.19635  | 0.0736   | 0.13396  | 1205.91 | 1220.68 | 1262.08 | 1031.53 | 1080.32 | 1107.95 |
| ENSMUSG000000041774 | 14_Ydjc          | 80.2154 | 0.66637  | 0.0285   | 0.0609   | 88.5552 | 82.6025 | 124.296 | 67.6264 | 51.1022 | 67.11   |
| ENSMUSG000000041775 | 7_Mapk1ip1       | 305.091 | -0.13693 | 0.45463  | 0.5687   | 278.688 | 334.081 | 259.348 | 327.312 | 348.75  | 282.369 |
| ENSMUSG000000041777 | 11_Cir1          | 1039.62 | -0.19867 | 0.11523  | 0.19319  | 984.526 | 874.669 | 1045.76 | 1068.5  | 1117.08 | 1147.2  |
| ENSMUSG000000041779 | 5_Tram2          | 411.717 | -0.2939  | 0.07672  | 0.13855  | 360.298 | 424.944 | 323.887 | 433.711 | 486.816 | 440.647 |
| ENSMUSG000000041781 | 8_Cpsf2          | 1375.38 | -0.02393 | 0.68155  | 0.9061   | 1409.94 | 1295.94 | 1385.18 | 1183.91 | 1488.24 | 1489.08 |
| ENSMUSG000000041782 | 14_Lad1          | 5482.91 | 1.01386  | 8.57E-09 | 1.50E-07 | 6686.79 | 6499.9  | 8814.26 | 3785.28 | 2913.72 | 4197.54 |
| ENSMUSG000000041789 | 7_2700046A07Rik  | 12.2429 | -2.10921 | 0.01101  | 0.02741  | 5.20913 | 8.26025 | 0       | 21.6405 | 20.6202 | 17.7272 |
| ENSMUSG000000041794 | 12_Myrip         | 156.934 | -1.11805 | 0.0018   | 0.00594  | 112.864 | 123.904 | 59.7577 | 32.0098 | 173.03  | 151.947 |
| ENSMUSG000000041797 | 7_Abca9          | 507.663 | -0.99656 | 1.67E-08 | 2.69E-07 | 345.539 | 391.903 | 278.471 | 756.514 | 645.502 | 628.049 |
| ENSMUSG000000041798 | 15_Gck           | 8.77133 | -0.92592 | 0.2608   | 0.37116  | 5.20913 | 4.58903 | 8.36608 | 12.6236 | 5.37918 | 16.4609 |
| ENSMUSG000000041801 | 5_Phlda3         | 1818.57 | 0.78389  | 2.03E-05 | 0.00013  | 2104.49 | 1993.47 | 2805.03 | 1532.87 | 1077.63 | 1397.91 |

|                     |                 |         |          |          |          |         |         |         |         |         |         |
|---------------------|-----------------|---------|----------|----------|----------|---------|---------|---------|---------|---------|---------|
| ENSMUSG000000041805 | 3_Pramel1       | 1.17971 | 2.53073  | 0.32092  | NA       | 4.34094 | 1.83561 | 0       | 0.90169 | 0       | 0       |
| ENSMUSG000000041809 | 5_Efhc1         | 72.3222 | -0.45444 | 0.12951  | 0.21222  | 54.6959 | 74.3423 | 53.7819 | 73.0365 | 93.2392 | 84.8372 |
| ENSMUSG000000041815 | 13_Poldip3      | 2913.21 | 0.58765  | 2.03E-07 | 2.31E-06 | 3385.93 | 3386.7  | 3721.71 | 2308.31 | 2166.91 | 2509.66 |
| ENSMUSG000000041817 | 13_Fam169a      | 6475.18 | -0.41893 | 0.00034  | 0.00142  | 5848.99 | 5308.59 | 5465.44 | 6645.42 | 7506.65 | 8076    |
| ENSMUSG000000041827 | 15_Oasl1        | 7451.04 | 1.57101  | 3.24E-31 | 2.04E-28 | 10205.6 | 10157.4 | 13085.7 | 3550.84 | 3815.63 | 3891.12 |
| ENSMUSG000000041828 | 15_Abca8a       | 1014.39 | -1.08416 | 1.27E-09 | 2.91E-08 | 678.055 | 777.381 | 493.599 | 1453.52 | 1398.59 | 1285.22 |
| ENSMUSG000000041831 | 15_Sytl3        | 171.851 | 0.08903  | 0.67419  | 0.76405  | 179.715 | 175.301 | 175.688 | 176.73  | 136.273 | 187.402 |
| ENSMUSG000000041836 | 9_Ptpre         | 620.597 | 0.61125  | 0.00029  | 0.00125  | 743.169 | 700.286 | 805.534 | 494.124 | 404.335 | 576.133 |
| ENSMUSG000000041837 | 3_Pdcd7         | 560.333 | 0.07459  | 0.60092  | 0.70202  | 588.632 | 548.848 | 585.626 | 513.961 | 514.609 | 610.321 |
| ENSMUSG000000041840 | 7_Haus1         | 301.794 | -0.40746 | 0.01418  | 0.03388  | 274.348 | 239.547 | 264.129 | 312.885 | 357.716 | 362.141 |
| ENSMUSG000000041841 | 7_Rpl37         | 7562.16 | 0.30844  | 0.07124  | 0.13042  | 8456.16 | 8019.79 | 8626.62 | 8359.53 | 5178.36 | 6732.53 |
| ENSMUSG000000041842 | 15_Fhdc1        | 2510    | 0.48987  | 5.40E-05 | 0.00029  | 2772.13 | 2884.66 | 3138.47 | 2079.29 | 1902.44 | 2283.01 |
| ENSMUSG000000041845 | 10_Rhod         | 2198.86 | 0.3481   | 0.00902  | 0.02317  | 2253.82 | 2291.76 | 2844.47 | 2009.86 | 1843.27 | 1949.99 |
| ENSMUSG000000041846 | 14_Smek1        | 1505.32 | -0.10413 | 0.46392  | 0.57755  | 1408.2  | 1386.8  | 1558.48 | 1328.18 | 1744.65 | 1605.58 |
| ENSMUSG000000041849 | 7_Card6         | 306.477 | -0.00515 | 0.97535  | 0.9838   | 286.502 | 313.89  | 316.716 | 281.326 | 298.545 | 341.881 |
| ENSMUSG000000041852 | 14_Tcf20        | 6720.59 | 0.24465  | 0.03018  | 0.06378  | 7233.75 | 6979.91 | 7652.57 | 5564.3  | 6254.2  | 6638.83 |
| ENSMUSG000000041859 | 10_Mcm3         | 1134.69 | 1.25701  | 2.51E-10 | 7.19E-09 | 1635.67 | 1341.83 | 1820.22 | 542.815 | 607.848 | 859.768 |
| ENSMUSG000000041870 | 16_Ankrd13a     | 3902.92 | 0.64454  | 1.04E-06 | 9.51E-06 | 4558.86 | 4552.32 | 5169.04 | 3048.6  | 2669.87 | 3418.81 |
| ENSMUSG000000041872 | 9_Ilf17f        | 0.43409 | 2.24584  | 0.57502  | NA       | 2.60457 | 0       | 0       | 0       | 0       | 0       |
| ENSMUSG000000041879 | 13_Ipo9         | 1930.69 | 0.09617  | 0.32757  | 0.44383  | 1948.21 | 2009.08 | 2028.18 | 1849.36 | 1885.4  | 1863.89 |
| ENSMUSG000000041881 | 12_Ndufa7       | 736.988 | 0.51862  | 0.04295  | 0.08544  | 846.484 | 860.902 | 897.561 | 899.882 | 410.611 | 506.491 |
| ENSMUSG000000041886 | 6_Macc1         | 899.841 | -0.22148 | 0.19535  | 0.29552  | 880.343 | 724.149 | 887.999 | 780.86  | 1078.53 | 1047.17 |
| ENSMUSG000000041889 | 7_Shisa4        | 110.618 | -0.63856 | 0.05707  | 0.1082   | 88.5552 | 111.054 | 59.7577 | 186.649 | 113.859 | 103.831 |
| ENSMUSG000000041890 | 17_Git2         | 1389.87 | 0.51856  | 4.21E-05 | 0.00023  | 1550.58 | 1588.72 | 1771.22 | 1160.47 | 1039.98 | 1228.24 |
| ENSMUSG000000041891 | 15_Lman1        | 2750.12 | -0.2154  | 0.02502  | 0.05467  | 2601.96 | 2491.84 | 2540.9  | 2907.94 | 2912.83 | 3045.28 |
| ENSMUSG000000041895 | 15_Wip1         | 1074.75 | 0.01132  | 0.93531  | 0.95737  | 1071.34 | 1127.98 | 1037.39 | 1216.37 | 943.15  | 1052.23 |
| ENSMUSG000000041907 | 9_Gpr45         | 7.32689 | -0.80007 | 0.35481  | 0.47161  | 5.20913 | 8.26025 | 2.39031 | 7.21348 | 10.7584 | 10.1298 |
| ENSMUSG000000041911 | 3_Dlx1          | 1.08037 | 2.3776   | 0.31141  | NA       | 3.47275 | 0.91781 | 1.19515 | 0       | 0.89653 | 0       |
| ENSMUSG000000041912 | 12_Tdrkh        | 96.8592 | -1.60062 | 1.01E-07 | 1.26E-06 | 46.014  | 59.6574 | 38.2449 | 156.893 | 167.651 | 112.694 |
| ENSMUSG000000041915 | 8_Ammecr1l      | 1677.66 | -0.04695 | 0.67044  | 0.76102  | 1641.74 | 1599.74 | 1710.27 | 1605    | 1807.41 | 1701.81 |
| ENSMUSG000000041920 | 14_Slc16a6      | 333.67  | -0.03924 | 0.85268  | 0.90032  | 392.421 | 289.109 | 305.959 | 415.677 | 294.959 | 303.894 |
| ENSMUSG000000041921 | 16_Metap1d      | 666.425 | -0.43839 | 0.00217  | 0.00697  | 589.5   | 602.08  | 505.55  | 733.972 | 835.566 | 731.879 |
| ENSMUSG000000041923 | 15_Nol4         | 30.4954 | -0.94282 | 0.05106  | 0.0987   | 16.4956 | 23.8629 | 22.7079 | 50.4944 | 46.6196 | 22.7921 |
| ENSMUSG000000041926 | 15_Nrpep        | 3386.84 | 0.81323  | 2.43E-08 | 3.66E-07 | 3876.46 | 4048.44 | 5025.62 | 2184.78 | 2501.32 | 2684.4  |
| ENSMUSG000000041930 | 7_Fam222a       | 21.9729 | -0.39499 | 0.53497  | 0.64272  | 13.0228 | 28.452  | 15.537  | 43.2809 | 12.5514 | 18.9934 |
| ENSMUSG000000041935 | 9_AW549877      | 2145.74 | -0.60375 | 6.87E-07 | 6.62E-06 | 1760.69 | 1644.71 | 1704.29 | 2341.68 | 2865.31 | 2557.78 |
| ENSMUSG000000041936 | 18_Agrn         | 4702.27 | 1.18504  | 3.65E-21 | 7.83E-19 | 5884.58 | 6562.31 | 7148.22 | 3013.43 | 2599.04 | 3006.02 |
| ENSMUSG000000041939 | 14_Mvk          | 1024.54 | 1.38475  | 9.76E-11 | 3.16E-09 | 1340.48 | 1409.75 | 1694.73 | 712.332 | 393.577 | 596.393 |
| ENSMUSG000000041945 | 12_Mfsd9        | 112.116 | 0.30594  | 0.22706  | 0.33275  | 119.81  | 112.89  | 138.638 | 86.5618 | 93.2392 | 121.558 |
| ENSMUSG000000041949 | 5_Tango6        | 143.423 | 0.47859  | 0.02174  | 0.04862  | 173.638 | 155.109 | 172.102 | 123.531 | 112.066 | 124.09  |
| ENSMUSG000000041954 | 18_Tnfrsf18     | 128.502 | 0.88109  | 0.0009   | 0.00326  | 188.397 | 145.013 | 166.126 | 110.907 | 68.1363 | 92.4346 |
| ENSMUSG000000041957 | 15_Pkp2         | 150.807 | -0.77402 | 0.00061  | 0.00234  | 94.6325 | 122.986 | 117.125 | 201.978 | 203.512 | 164.609 |
| ENSMUSG000000041958 | 10_Pigs         | 1073.51 | 0.72124  | 3.57E-05 | 0.0002   | 1223.28 | 1356.52 | 1429.4  | 960.295 | 632.054 | 839.508 |
| ENSMUSG000000041959 | 14_S100a10      | 18250.1 | -0.12187 | 0.2704   | 0.38201  | 18139.1 | 16049.7 | 18251.2 | 17757.8 | 20353.9 | 18949.1 |
| ENSMUSG000000041961 | 14_Znrf3        | 493.626 | 0.19938  | 0.13762  | 0.22253  | 528.727 | 535.081 | 518.697 | 475.188 | 433.024 | 471.036 |
| ENSMUSG000000041966 | 18_Dcaf17       | 539.652 | -0.41615 | 0.01153  | 0.0285   | 461.876 | 424.944 | 500.77  | 523.879 | 698.397 | 628.049 |
| ENSMUSG000000041974 | 9_Spidr         | 283.336 | -0.10704 | 0.57482  | 0.67915  | 285.634 | 229.451 | 303.569 | 256.98  | 312.889 | 311.492 |
| ENSMUSG000000041975 | 17_Mettl8       | 201.478 | -0.50507 | 0.00965  | 0.02451  | 175.374 | 160.616 | 163.736 | 210.994 | 268.959 | 229.187 |
| ENSMUSG000000041977 | 17_Arhgef11     | 1817.67 | 0.38538  | 0.01034  | 0.02601  | 1859.66 | 2124.72 | 2193.11 | 1807.88 | 1327.76 | 1592.91 |
| ENSMUSG000000041984 | 2_Rptn          | 0.35216 | 1.91112  | 0.63543  | NA       | 0       | 0.91781 | 1.19515 | 0       | 0       | 0       |
| ENSMUSG000000041986 | 15_Elmod1       | 62.4858 | -2.44082 | 5.65E-07 | 5.64E-06 | 17.3638 | 33.041  | 7.17092 | 133.449 | 69.9294 | 113.96  |
| ENSMUSG000000041991 | 18_Hmr          | 0.94619 | 2.11489  | 0.51389  | NA       | 0       | 0       | 4.78062 | 0       | 0.89653 | 0       |
| ENSMUSG000000041992 | 8_Rapgef5       | 1152.63 | -0.09242 | 0.52695  | 0.63592  | 1216.33 | 938.915 | 1191.57 | 1132.52 | 1160.11 | 1276.36 |
| ENSMUSG000000041995 | 7_Zbed3         | 246.958 | 0.04814  | 0.78338  | 0.84934  | 250.906 | 260.657 | 241.421 | 265.997 | 219.65  | 243.116 |
| ENSMUSG000000041997 | 16_Tlk1         | 1456.06 | -0.38042 | 0.0019   | 0.00623  | 1297.07 | 1205.08 | 1293.16 | 1480.57 | 1753.61 | 1706.87 |
| ENSMUSG000000042002 | 11_Foxn4        | 0.19919 | 0.92709  | 0.82027  | NA       | 0       | 0       | 1.19515 | 0       | 0       | 0       |
| ENSMUSG000000042010 | 16_Acacb        | 330.673 | 0.01169  | 0.96557  | 0.97778  | 326.439 | 410.259 | 259.348 | 461.663 | 252.822 | 273.505 |
| ENSMUSG000000042015 | 6_Wdr41         | 870.119 | -0.13836 | 0.2698   | 0.38126  | 774.424 | 819.6   | 891.585 | 879.143 | 897.427 | 958.534 |
| ENSMUSG000000042029 | 16_Ncapg2       | 558.847 | 0.06629  | 0.69417  | 0.78102  | 647.669 | 503.875 | 562.918 | 469.778 | 601.572 | 567.27  |
| ENSMUSG000000042031 | 4_Lce3b         | 13.5546 | -0.05734 | 0.93103  | 0.95431  | 15.6274 | 10.0959 | 14.3418 | 21.6405 | 10.7584 | 8.86359 |
| ENSMUSG000000042032 | 13_Mat2b        | 1917.96 | -0.20836 | 0.07548  | 0.13664  | 1798.89 | 1655.72 | 1884.76 | 1898.95 | 2140.92 | 2128.53 |
| ENSMUSG000000042035 | 11_Igsf3        | 4113.76 | 0.8593   | 1.92E-07 | 2.21E-06 | 4691.69 | 4980.01 | 6238.7  | 2681.61 | 2600.84 | 3489.72 |
| ENSMUSG000000042041 | 6_2010003K11Rik | 1.89941 | -0.98428 | 0.54829  | NA       | 1.73638 | 0.91781 | 1.19515 | 0.90169 | 5.37918 | 1.26623 |
| ENSMUSG000000042042 | 14_Csgalnact2   | 599.456 | -0.63571 | 1.05E-06 | 9.56E-06 | 488.79  | 456.149 | 463.72  | 716.84  | 771.016 | 700.223 |
| ENSMUSG000000042043 | 5_Tbca          | 1698.47 | -0.72544 | 4.54E-06 | 3.40E-05 | 1268.42 | 1194.98 | 1376.82 | 1709.6  | 2200.98 | 2440.02 |
| ENSMUSG000000042045 | 5_Sln           | 38.4417 | -2.16394 | 8.74E-06 | 6.02E-05 | 16.4956 | 15.6027 | 9.56123 | 83.8567 | 36.7578 | 68.3763 |
| ENSMUSG000000042046 | 15_Dsty1        | 1918.96 | -0.17729 | 0.08998  | 0.15766  | 1862.26 | 1810.83 | 1729.39 | 1948.54 | 2098.78 | 2063.95 |
| ENSMUSG000000042050 | 7_Wdr60         | 389.365 | -0.14011 | 0.31738  | 0.43272  | 365.507 | 375.382 | 370.498 | 400.348 | 414.197 | 410.258 |
| ENSMUSG000000042055 | 1614.3          | 0.2779  | 0.02905  | 0.06182  | 1735.51  | 1770.45 | 1799.9  | 1327.28 | 1397.69 | 1654.96 |         |
| ENSMUSG000000042063 | 11_Zfp386       | 639.199 | -0.73183 | 2.46E-06 | 2.00E-05 | 539.145 | 474.505 | 426.67  | 731.267 | 884.876 | 778.73  |
| ENSMUSG000000042064 | 13_Myo3b        | 0.93857 | 0.07366  | 0.97558  | NA       | 1.73638 | 0       | 1.19515 | 1.80337 | 0.89653 | 0       |
| ENSMUSG000000042066 | 15_Tmcc2        | 173.329 | -0.28853 | 0.33909  | 0.45572  | 158.878 | 200.082 | 108.759 | 256.079 | 145.238 | 170.941 |
| ENSMUSG000000042073 | 15_Abhd14b      | 507.147 | -0.67578 | 0.00501  | 0.01411  | 375.057 | 513.971 | 282.056 | 746.596 | 627.571 | 497.627 |
| ENSMUSG000000042078 | 14_Svop         | 12.985  | -2.03751 | 0.04458  | 0.08811  | 10.4183 | 4.58903 | 0       | 43.2809 | 10.7584 | 8.86359 |
| ENSMUSG000000042079 | 13_Hnmpf        | 12388.4 | 0.17482  | 0.1904   | 0.2897   | 13030.6 | 12353.7 | 14028.7 | 9889.69 | 12023.4 | 13004.2 |
| ENSMUSG000000042082 | 6_Arsb          | 1287.13 | -0.01669 | 0.8998   | 0.93227  | 1327.46 | 1304.2  | 1205.91 | 1391.3  | 1131.42 | 1362.46 |
| ENSMUSG000000042092 | 5_Lce1c         | 0.19919 | 0.92709  | 0.82027  | NA       | 0       | 0       | 1.19515 | 0       | 0       | 0       |
| ENSMUSG000000042096 | 15_Dao          | 0.29498 | -0.03469 | 0.99322  | NA       | 0.86819 | 0       | 0       | 0.90169 | 0       | 0       |
| ENSMUSG000000042097 | 17_Zfp239       | 69.6103 | -0.23315 | 0.44663  | 0.56156  | 54.6959 | 69.7532 | 68.1238 | 70.3315 | 91.4461 | 63.3113 |

|                     |                  |         |          |          |          |         |         |         |         |         |         |
|---------------------|------------------|---------|----------|----------|----------|---------|---------|---------|---------|---------|---------|
| ENSMUSG000000042099 | 15_Kank3         | 192.697 | 0.24476  | 0.28983  | 0.40342  | 205.761 | 217.52  | 204.371 | 228.126 | 149.721 | 150.681 |
| ENSMUSG000000042102 | 6_Dmgdh          | 78.5137 | -0.85532 | 0.00989  | 0.02503  | 51.2231 | 73.4244 | 43.0255 | 107.301 | 120.135 | 75.9736 |
| ENSMUSG000000042104 | 18_Uggt2         | 309.11  | -1.26789 | 9.99E-08 | 1.25E-06 | 150.197 | 238.629 | 155.37  | 444.531 | 510.126 | 355.81  |
| ENSMUSG000000042105 | 18_Inpp5f        | 1117.53 | -0.13207 | 0.30263  | 0.41746  | 1119.96 | 1014.18 | 1063.69 | 1055.87 | 1178.94 | 1272.56 |
| ENSMUSG000000042106 | 5_Fam212a        | 130.699 | 0.85537  | 0.00091  | 0.0033   | 175.374 | 145.931 | 184.054 | 115.416 | 73.5155 | 89.9021 |
| ENSMUSG000000042109 | 7_Csdc2          | 146.75  | -0.48412 | 0.16481  | 0.25808  | 99.8417 | 175.301 | 92.0269 | 247.062 | 143.445 | 122.824 |
| ENSMUSG000000042111 | 9_Ccdct115       | 573.493 | -0.08114 | 0.64393  | 0.73904  | 585.159 | 457.985 | 628.651 | 567.16  | 533.436 | 668.568 |
| ENSMUSG000000042115 | 4_Klhdc8a        | 562.97  | 0.3795   | 0.03382  | 0.07015  | 642.459 | 615.848 | 651.359 | 582.489 | 385.508 | 500.16  |
| ENSMUSG000000042116 | 3_Vwa1           | 205.925 | 0.96938  | 2.16E-05 | 0.00013  | 238.752 | 302.876 | 276.081 | 165.91  | 107.584 | 144.35  |
| ENSMUSG000000042118 | 7_Bhmt2          | 15.6967 | -1.83877 | 0.01244  | 0.03033  | 6.07732 | 11.9315 | 2.39031 | 27.0506 | 34.0682 | 12.6623 |
| ENSMUSG000000042121 | 16_Ssh1          | 719.928 | 0.27947  | 0.03152  | 0.0662   | 790.92  | 792.066 | 786.411 | 712.332 | 633.847 | 603.99  |
| ENSMUSG000000042129 | 8_Rassf4         | 226.187 | -0.04454 | 0.8715   | 0.9127   | 298.657 | 184.479 | 185.249 | 281.326 | 240.27  | 167.142 |
| ENSMUSG000000042133 | 16_Ppig          | 2318.88 | -0.32016 | 0.01964  | 0.04456  | 2132.27 | 1846.62 | 2208.64 | 2247    | 2668.97 | 2809.76 |
| ENSMUSG000000042138 | 6_Msantd2        | 348.852 | -0.28865 | 0.12488  | 0.20615  | 342.066 | 292.78  | 307.155 | 316.492 | 450.955 | 383.667 |
| ENSMUSG000000042148 | 8_Cox10          | 273.65  | 0.60898  | 0.00122  | 0.00425  | 311.68  | 322.15  | 357.351 | 230.831 | 179.306 | 240.583 |
| ENSMUSG000000042155 | 3_Klhl23         | 236.629 | -1.05271 | 5.39E-07 | 5.42E-06 | 179.715 | 146.849 | 135.052 | 336.329 | 355.923 | 265.908 |
| ENSMUSG000000042156 | 15_Dzip1         | 522.033 | -0.7627  | 8.39E-06 | 5.81E-05 | 408.917 | 430.451 | 321.496 | 689.789 | 702.88  | 578.666 |
| ENSMUSG000000042157 | 2_Spr2i          | 0.2894  | 1.67273  | 0.67976  | NA       | 1.73638 | 0       | 0       | 0       | 0       | 0       |
| ENSMUSG000000042165 | 8_Gm9774         | 108.591 | -0.9406  | 0.60448  | 0.70478  | 71.1914 | 38.5478 | 113.54  | 109.104 | 319.165 | 0       |
| ENSMUSG000000042167 | 5_Papd4          | 558.751 | -0.26638 | 0.14159  | 0.22784  | 536.54  | 474.505 | 510.331 | 475.188 | 697.501 | 658.438 |
| ENSMUSG000000042178 | 6_Armc5          | 329.419 | 1.4263   | 5.17E-13 | 3.05E-11 | 421.071 | 499.286 | 519.892 | 203.781 | 142.548 | 189.934 |
| ENSMUSG000000042179 | 5_Pnliprp1       | 3.41446 | -0.81173 | 0.54658  | 0.65306  | 0.86819 | 1.83561 | 4.78062 | 4.50843 | 0.89653 | 7.59736 |
| ENSMUSG000000042182 | 16_Bend6         | 20.2977 | -1.67867 | 0.00277  | 0.00859  | 8.68188 | 11.9315 | 8.36608 | 42.3792 | 25.1029 | 25.3245 |
| ENSMUSG000000042184 | 11_170069L16Rik  | 0.57504 | -1.21646 | 0.74749  | NA       | 0       | 0.91781 | 0       | 0       | 0       | 2.53245 |
| ENSMUSG000000042185 | 13_Nfrkb         | 811.617 | 0.54506  | 2.03E-05 | 0.00013  | 911.598 | 938.915 | 1039.78 | 693.396 | 627.571 | 658.438 |
| ENSMUSG000000042189 | 5_Tekt3          | 0.34947 | -0.03469 | 0.99322  | NA       | 0       | 0       | 1.19515 | 0.90169 | 0       | 0       |
| ENSMUSG000000042190 | 12_Cmklr1        | 165.512 | 0.35449  | 0.08404  | 0.14898  | 189.265 | 202.835 | 164.931 | 157.795 | 138.962 | 139.285 |
| ENSMUSG000000042195 | 8_Slc35f2        | 748.408 | 0.02549  | 0.8893   | 0.92542  | 768.347 | 694.779 | 800.753 | 571.669 | 764.741 | 890.158 |
| ENSMUSG000000042197 | 13_Zfp451        | 819.505 | -0.46033 | 0.00141  | 0.00481  | 695.419 | 675.505 | 699.165 | 842.174 | 1089.28 | 915.482 |
| ENSMUSG000000042198 | 12_Chchd7        | 442.021 | -0.4158  | 0.00674  | 0.0181   | 404.576 | 390.067 | 340.619 | 467.073 | 543.298 | 506.491 |
| ENSMUSG000000042200 | 3_Cdrt4          | 2.33802 | -1.35325 | 0.41262  | NA       | 0       | 2.75342 | 1.19515 | 0.90169 | 5.37918 | 3.79868 |
| ENSMUSG000000042202 | 15_Slc35e2       | 653.006 | -0.42913 | 0.00284  | 0.00876  | 589.5   | 558.944 | 521.087 | 695.2   | 839.153 | 714.152 |
| ENSMUSG000000042203 | 7_Tbc1d22b       | 731.702 | 0.7915   | 1.74E-05 | 0.00011  | 812.624 | 938.915 | 1030.22 | 576.177 | 416.887 | 615.386 |
| ENSMUSG000000042207 | 17_Kdm5b         | 4005.91 | 0.18865  | 0.19345  | 0.29342  | 4116.95 | 4102.59 | 4582.22 | 3063.93 | 4046.94 | 4122.83 |
| ENSMUSG000000042208 | 15_0610010F05Rik | 216.882 | -0.82621 | 0.00019  | 0.00085  | 173.638 | 175.301 | 119.515 | 269.604 | 313.786 | 249.447 |
| ENSMUSG000000042210 | 16_Abhd14a       | 127.496 | -0.01136 | 0.9686   | 0.97975  | 146.724 | 122.986 | 111.149 | 172.222 | 94.1357 | 117.759 |
| ENSMUSG000000042211 | 6_Fbxo38         | 1865.23 | 0.15388  | 0.18003  | 0.27699  | 1963.84 | 1866.82 | 2062.84 | 1626.64 | 1813.68 | 1857.55 |
| ENSMUSG000000042212 | 3_Spr2d          | 0.68778 | 2.88297  | 0.40065  | NA       | 1.73638 | 0       | 2.39031 | 0       | 0       | 0       |
| ENSMUSG000000042213 | 15_Zfand4        | 37.3491 | -0.34309 | 0.43495  | 0.55025  | 46.8822 | 32.1232 | 19.1225 | 38.7725 | 40.3439 | 46.8504 |
| ENSMUSG000000042215 | 8_Bag2           | 1117.77 | 0.19298  | 0.17082  | 0.26551  | 1226.75 | 1155.52 | 1192.76 | 937.753 | 980.804 | 1213.05 |
| ENSMUSG000000042216 | 13_Sgsm1         | 491.754 | 0.98197  | 7.71E-08 | 1.01E-06 | 573.004 | 590.149 | 795.973 | 341.739 | 297.648 | 352.011 |
| ENSMUSG000000042225 | 3_Ammecr1        | 312.657 | -0.14112 | 0.42761  | 0.54295  | 327.307 | 259.739 | 305.959 | 332.722 | 357.716 | 292.498 |
| ENSMUSG000000042228 | 14_Lyn           | 1179.19 | 0.37333  | 0.00739  | 0.01957  | 1401.26 | 1178.46 | 1413.87 | 945.868 | 1134.11 | 1001.59 |
| ENSMUSG000000042229 | 9_Rabif          | 888.465 | -0.12485 | 0.29471  | 0.40899  | 868.188 | 824.189 | 856.925 | 873.733 | 931.495 | 976.261 |
| ENSMUSG000000042240 | 14_Crybb2        | 8512.81 | -0.8641  | 0.39377  | 0.51151  | 4246.31 | 12087.5 | 1777.19 | 21254.5 | 3092.13 | 8619.21 |
| ENSMUSG000000042244 | 4_Pglyrp3        | 0.4444  | -0.80729 | 0.81753  | NA       | 0.86819 | 0       | 0       | 0.90169 | 0.89653 | 0       |
| ENSMUSG000000042246 | 4_Tmc7           | 74.039  | 0.09706  | 0.74372  | 0.81874  | 66.8505 | 79.8491 | 82.4656 | 68.5281 | 59.171  | 87.3697 |
| ENSMUSG000000042249 | 11_Adrbk2        | 172.273 | -0.49447 | 0.04137  | 0.08279  | 168.429 | 143.178 | 117.125 | 247.062 | 179.306 | 178.538 |
| ENSMUSG000000042250 | 13_Pglyrp4       | 16.863  | 0.15974  | 0.81088  | 0.86965  | 30.3866 | 7.34244 | 15.537  | 12.6236 | 18.8271 | 16.4609 |
| ENSMUSG000000042251 | 12_Pm20d1        | 684.689 | 0.05287  | 0.69783  | 0.78369  | 639.855 | 746.176 | 705.141 | 625.77  | 679.57  | 711.62  |
| ENSMUSG000000042254 | 14_Clip          | 257.651 | -0.35302 | 0.21944  | 0.32416  | 166.692 | 279.013 | 233.055 | 361.576 | 186.478 | 319.089 |
| ENSMUSG000000042256 | 4_Ptchd4         | 10.8822 | -2.39547 | 0.00487  | 0.01379  | 3.47275 | 5.50683 | 1.19515 | 9.01685 | 23.3098 | 22.7921 |
| ENSMUSG000000042258 | 13_Isl1          | 7.63212 | -2.62265 | 0.01373  | 0.03297  | 4.34094 | 1.83561 | 0       | 19.8371 | 13.448  | 6.33113 |
| ENSMUSG000000042262 | 4_Ccr8           | 0.58352 | 1.28689  | 0.73023  | NA       | 2.60457 | 0       | 0       | 0       | 0.89653 | 0       |
| ENSMUSG000000042265 | 13_Trem1         | 8.3099  | 2.40827  | 0.01717  | 0.03988  | 27.782  | 4.58903 | 9.56123 | 2.70506 | 2.68959 | 2.53245 |
| ENSMUSG000000042268 | 10_Slc26a9       | 17.3433 | 0.77388  | 0.19873  | 0.29955  | 29.5184 | 14.6849 | 21.5128 | 9.01685 | 17.9306 | 11.396  |
| ENSMUSG000000042269 | 15_Fam92b        | 1.24808 | -0.12742 | 0.94863  | NA       | 2.60457 | 0.91781 | 0       | 1.80337 | 0.89653 | 1.26623 |
| ENSMUSG000000042271 | 13_Nxt2          | 546.13  | -0.57985 | 5.22E-05 | 0.00028  | 459.272 | 417.602 | 437.426 | 652.82  | 714.535 | 595.127 |
| ENSMUSG000000042272 | 17_Sestd1        | 471.73  | -0.43411 | 0.00516  | 0.01448  | 436.699 | 396.492 | 370.498 | 518.469 | 604.262 | 503.958 |
| ENSMUSG000000042275 | 8_Pelo           | 201.927 | 0.70948  | 0.00098  | 0.00351  | 207.497 | 256.068 | 288.032 | 152.385 | 135.376 | 172.207 |
| ENSMUSG000000042279 | 13_H1foo         | 0.44912 | -2.32858 | 0.56096  | NA       | 0       | 0       | 0       | 0.90169 | 1.79306 | 0       |
| ENSMUSG000000042282 | 8_Gucy2f         | 258.519 | -2.02526 | 2.52E-08 | 3.77E-07 | 105.051 | 153.274 | 46.611  | 504.944 | 456.334 | 284.901 |
| ENSMUSG000000042284 | 9_Iltga1         | 252.938 | -0.78401 | 0.00038  | 0.00156  | 224.861 | 191.821 | 139.833 | 306.573 | 359.509 | 295.031 |
| ENSMUSG000000042286 | 13_Stab1         | 574.317 | 0.51281  | 0.02341  | 0.05179  | 606.864 | 724.149 | 695.58  | 641.098 | 345.164 | 433.05  |
| ENSMUSG000000042289 | 11_Hsd3b7        | 391.657 | 0.17647  | 0.32223  | 0.43802  | 428.017 | 428.615 | 390.815 | 441.826 | 341.578 | 319.089 |
| ENSMUSG000000042292 | 16_MK11          | 563.81  | 1.44598  | 2.12E-17 | 2.78E-15 | 764.874 | 838.874 | 870.072 | 337.23  | 243.856 | 327.953 |
| ENSMUSG000000042293 | 7_Gm5617         | 72.522  | 0.84729  | 0.03706  | 0.07561  | 71.1914 | 103.712 | 105.174 | 81.1517 | 29.5855 | 44.3179 |
| ENSMUSG000000042298 | 18_Ttc19         | 503.508 | -0.42435 | 0.0054   | 0.01503  | 474.031 | 424.944 | 389.62  | 524.781 | 608.744 | 598.925 |
| ENSMUSG000000042302 | 14_Ehbp1         | 1064.72 | -0.41173 | 0.00202  | 0.00656  | 856.034 | 1006.83 | 878.438 | 1130.71 | 1319.69 | 1196.58 |
| ENSMUSG000000042303 | 16_Sgsm3         | 317.156 | 0.73805  | 0.00017  | 0.0008   | 355.089 | 386.396 | 448.183 | 266.899 | 191.858 | 254.512 |
| ENSMUSG000000042305 | 12_Tmem183a      | 1475.94 | 0.09393  | 0.45469  | 0.5687   | 1547.98 | 1460.23 | 1564.46 | 1303.84 | 1591.34 | 1387.78 |
| ENSMUSG000000042306 | 11_S100a14       | 13934.6 | 0.07375  | 0.50643  | 0.61679  | 14285.2 | 13245.8 | 15341   | 12595.6 | 13758.2 | 14381.8 |
| ENSMUSG000000042308 | 14_Sestd1a       | 1223    | 0.8431   | 6.44E-07 | 6.29E-06 | 1434.25 | 1633.69 | 1643.34 | 1020.71 | 686.742 | 919.281 |
| ENSMUSG000000042312 | 9_S100a13        | 289.472 | -0.82646 | 9.26E-06 | 6.33E-05 | 226.597 | 216.602 | 182.859 | 413.874 | 376.543 | 320.355 |
| ENSMUSG000000042320 | 16_Prox2         | 66.9849 | -0.05676 | 0.85142  | 0.89949  | 79.8733 | 59.6574 | 57.3674 | 73.0365 | 69.9294 | 62.0451 |
| ENSMUSG000000042323 | 16_Phmr1         | 2523.09 | -0.18074 | 0.14586  | 0.23342  | 2397.94 | 2291.76 | 2405.85 | 2347.99 | 2939.72 | 2755.31 |
| ENSMUSG000000042328 | 13_Hps4          | 400.986 | 0.7303   | 7.14E-06 | 5.05E-05 | 451.458 | 529.574 | 521.087 | 337.23  | 284.2   | 282.369 |
| ENSMUSG000000042331 | 13_Specc1        | 2668.19 | 0.36278  | 0.00286  | 0.00882  | 2919.72 | 2837.85 | 3247.23 | 2168.55 | 2269.12 | 2566.64 |
| ENSMUSG000000042333 | 14_Tnfrsf14      | 106.524 | 1.04837  | 5.02E-05 | 0.00027  | 137.174 | 135.835 | 157.76  | 79.3483 | 55.5849 | 73.4412 |

|                    |                  |         |          |          |          |         |         |         |         |         |         |
|--------------------|------------------|---------|----------|----------|----------|---------|---------|---------|---------|---------|---------|
| ENSMUSG00000042340 | 6_Ctf1           | 178.236 | -0.48912 | 0.0134   | 0.0323   | 134.569 | 167.958 | 142.223 | 204.683 | 209.788 | 210.194 |
| ENSMUSG00000042345 | 14_Ubash3a       | 1.48768 | 1.17789  | 0.56622  | NA       | 3.47275 | 2.75342 | 0       | 1.80337 | 0.89653 | 0       |
| ENSMUSG00000042348 | 9_Arl15          | 697.088 | -0.33299 | 0.00706  | 0.01883  | 602.523 | 640.628 | 607.138 | 742.087 | 783.568 | 806.587 |
| ENSMUSG00000042349 | 13_Ikbke         | 548.765 | 0.54762  | 0.00091  | 0.0033   | 654.614 | 561.697 | 738.605 | 397.643 | 456.334 | 483.699 |
| ENSMUSG00000042350 | 13_Arel1         | 1767.5  | 0.31703  | 0.00469  | 0.01336  | 1890.91 | 1858.56 | 2134.55 | 1571.64 | 1571.62 | 1577.72 |
| ENSMUSG00000042351 | 8_Grap2          | 152.309 | 0.85914  | 0.0005   | 0.00198  | 228.334 | 145.931 | 215.128 | 107.301 | 112.066 | 105.097 |
| ENSMUSG00000042353 | 9_Frem3          | 139.219 | -1.51025 | 1.14E-05 | 7.63E-05 | 103.314 | 74.3423 | 38.2449 | 256.079 | 172.134 | 191.2   |
| ENSMUSG00000042354 | 6_Gnl3           | 739.036 | -0.05596 | 0.74718  | 0.82133  | 723.201 | 689.272 | 761.313 | 586.997 | 857.98  | 815.45  |
| ENSMUSG00000042357 | 2_Gjb5           | 533.619 | 0.71161  | 0.00034  | 0.00142  | 649.405 | 585.56  | 751.752 | 412.972 | 311.993 | 490.03  |
| ENSMUSG00000042359 | 18_Osbp16        | 1235.57 | -0.0471  | 0.69784  | 0.78369  | 1152.09 | 1260.15 | 1233.4  | 1146.94 | 1296.38 | 1324.47 |
| ENSMUSG00000042360 | 12_4930433N12Rik | 1.77826 | 0.56199  | 0.75433  | NA       | 0       | 2.75342 | 3.58546 | 0.90169 | 0.89653 | 2.53245 |
| ENSMUSG00000042363 | 14_Lgalsl        | 2251.08 | -0.06654 | 0.56057  | 0.66627  | 2312.85 | 2052.21 | 2232.55 | 2152.32 | 2452.01 | 2304.53 |
| ENSMUSG00000042364 | 10_Snx18         | 591.355 | -0.20277 | 0.18639  | 0.28483  | 550.431 | 562.615 | 537.819 | 715.938 | 641.916 | 539.413 |
| ENSMUSG00000042367 | 12_Gjb3          | 1215.67 | 0.97604  | 1.40E-07 | 1.68E-06 | 1446.4  | 1424.43 | 1964.83 | 899.882 | 660.743 | 897.755 |
| ENSMUSG00000042369 | 8_Rbm45          | 553.636 | -0.0087  | 0.95349  | 0.96978  | 569.532 | 546.094 | 539.014 | 480.598 | 580.055 | 606.523 |
| ENSMUSG00000042371 | 12_Slc5a10       | 14.4906 | 0.69708  | 0.31945  | 0.435    | 15.6274 | 8.26025 | 29.8789 | 9.01685 | 8.96531 | 15.1947 |
| ENSMUSG00000042377 | 8_Fam83g         | 2799.05 | 1.28094  | 1.89E-10 | 5.61E-09 | 3611.66 | 3486.74 | 4798.54 | 1773.62 | 1191.49 | 1932.26 |
| ENSMUSG00000042379 | 8_Esm1           | 53.1962 | -0.35066 | 0.3563   | 0.47307  | 57.3004 | 41.3013 | 41.8304 | 82.9551 | 50.2057 | 45.5842 |
| ENSMUSG00000042380 | 8_Smim12         | 213.295 | 0.29821  | 0.1814   | 0.27876  | 217.047 | 242.301 | 247.397 | 243.455 | 164.962 | 164.609 |
| ENSMUSG00000042385 | 14_Gzmk          | 1.47179 | 4.00156  | 0.13067  | NA       | 6.07732 | 2.75342 | 0       | 0       | 0       | 0       |
| ENSMUSG00000042386 | 7_Tex13          | 0.36132 | -1.98116 | 0.62311  | NA       | 0       | 0       | 0       | 0.90169 | 0       | 1.26623 |
| ENSMUSG00000042388 | 14_Dlgap3        | 6.49519 | 0.63804  | 0.49076  | 0.60244  | 8.68188 | 9.17806 | 5.97577 | 9.01685 | 3.58612 | 2.53245 |
| ENSMUSG00000042389 | 13_Tsen2         | 194.734 | 0.04652  | 0.80695  | 0.8666   | 187.529 | 186.315 | 219.908 | 183.944 | 185.582 | 205.129 |
| ENSMUSG00000042390 | 9_Gatad2b        | 1551.64 | -0.03927 | 0.74938  | 0.82303  | 1416.88 | 1523.56 | 1651.7  | 1448.11 | 1636.17 | 1633.43 |
| ENSMUSG00000042396 | 9_Rbm7           | 1284.76 | -0.29859 | 0.01049  | 0.02634  | 1185.95 | 1083.93 | 1187.98 | 1375.07 | 1510.65 | 1364.99 |
| ENSMUSG00000042401 | 6_Crtac1         | 14.2431 | 0.17008  | 0.79333  | 0.85679  | 11.2864 | 22.0273 | 11.9515 | 18.9354 | 9.86184 | 11.396  |
| ENSMUSG00000042404 | 16_Dennd4b       | 297.727 | 0.52863  | 0.02156  | 0.04831  | 340.33  | 360.698 | 354.961 | 330.017 | 199.03  | 201.33  |
| ENSMUSG00000042406 | 7_Atf4           | 4184.14 | 0.11752  | 0.32553  | 0.44158  | 4189.01 | 4038.34 | 4837.98 | 4289.32 | 3836.25 | 3913.91 |
| ENSMUSG00000042408 | 13_Zmym6         | 682.683 | -0.54799 | 0.00045  | 0.00183  | 561.718 | 537.834 | 565.308 | 760.121 | 955.702 | 715.418 |
| ENSMUSG00000042410 | 15_Agps          | 2433.07 | -0.23869 | 0.08117  | 0.14505  | 2325.88 | 2008.16 | 2362.82 | 2286.67 | 2876.07 | 2738.85 |
| ENSMUSG00000042414 | 7_Prdm14         | 0.29498 | -0.03469 | 0.99322  | NA       | 0.86819 | 0       | 0       | 0.90169 | 0       | 0       |
| ENSMUSG00000042417 | 4_Ccno           | 2.18877 | 0.48004  | 0.76522  | NA       | 2.60457 | 2.75342 | 2.39031 | 0.90169 | 4.48265 | 0       |
| ENSMUSG00000042419 | 8_Nfkbil1        | 127.365 | 1.00539  | 0.00075  | 0.00281  | 142.383 | 181.726 | 185.249 | 94.677  | 53.7918 | 106.363 |
| ENSMUSG00000042423 | 8_Fbrs           | 1386.83 | 1.15985  | 2.16E-14 | 1.76E-12 | 1712.07 | 1832.86 | 2202.67 | 869.225 | 755.775 | 948.404 |
| ENSMUSG00000042425 | 17_Frmpd3        | 4.63082 | -1.23376 | 0.33474  | 0.45128  | 2.60457 | 5.50683 | 0       | 9.01685 | 1.79306 | 8.86359 |
| ENSMUSG00000042426 | 5_Dhx29          | 1007.89 | -0.04163 | 0.78824  | 0.85278  | 994.944 | 921.477 | 1062.49 | 867.421 | 1009.49 | 1191.52 |
| ENSMUSG00000042428 | 6_Mgat3          | 2881.95 | 0.44786  | 0.00104  | 0.00369  | 3033.45 | 3165.51 | 3777.88 | 2378.65 | 2240.43 | 2695.8  |
| ENSMUSG00000042429 | 8_Adora1         | 267.021 | -0.79756 | 0.00458  | 0.0131   | 204.024 | 247.808 | 132.662 | 452.646 | 278.821 | 286.167 |
| ENSMUSG00000042433 | 2_Pih1h3b        | 0.15297 | 0.92709  | 0.82027  | NA       | 0       | 0.91781 | 0       | 0       | 0       | 0       |
| ENSMUSG00000042436 | 12_Mfap4         | 3864.85 | -0.18144 | 0.2992   | 0.41384  | 3356.42 | 4299    | 3210.18 | 4833.03 | 3320.75 | 4169.69 |
| ENSMUSG00000042439 | 12_Zfp532        | 579.906 | 0.45525  | 0.0134   | 0.0323   | 638.118 | 622.272 | 751.752 | 568.964 | 385.508 | 512.822 |
| ENSMUSG00000042444 | 9_Fam63b         | 2319.09 | -0.4893  | 3.36E-05 | 0.00019  | 2022.88 | 1901.69 | 1864.44 | 2609.48 | 2989.93 | 2526.12 |
| ENSMUSG00000042446 | 16_Zmym4         | 1529.42 | -0.40398 | 0.00158  | 0.00531  | 1422.09 | 1280.34 | 1246.55 | 1573.44 | 1888.99 | 1765.12 |
| ENSMUSG00000042447 | 13_Mios          | 546.648 | -0.40514 | 0.00279  | 0.00863  | 496.604 | 456.149 | 457.744 | 583.391 | 649.088 | 636.912 |
| ENSMUSG00000042448 | 5_Hoxd1          | 0.19919 | 0.92709  | 0.82027  | NA       | 0       | 0       | 1.19515 | 0       | 0       | 0       |
| ENSMUSG00000042451 | 12_Mybp1         | 5.28335 | 0.89649  | 0.38478  | 0.50213  | 2.60457 | 7.34244 | 10.7564 | 4.50843 | 2.68959 | 3.79868 |
| ENSMUSG00000042453 | 14_Reln          | 4212.29 | -0.90171 | 0.00039  | 0.00162  | 2834.64 | 4060.37 | 1915.83 | 6628.29 | 5754.83 | 4079.78 |
| ENSMUSG00000042459 | 8_Bpifa2         | 0.96513 | -2.20876 | 0.42211  | NA       | 0       | 0.91781 | 0       | 3.60674 | 0       | 1.26623 |
| ENSMUSG00000042460 | 5_C1gal1         | 263.622 | -0.55678 | 0.00795  | 0.02082  | 251.775 | 197.328 | 191.225 | 339.935 | 346.957 | 254.512 |
| ENSMUSG00000042462 | 4_Dctpp1         | 261.852 | 0.81959  | 0.00104  | 0.00369  | 314.284 | 310.218 | 377.669 | 216.405 | 124.618 | 227.921 |
| ENSMUSG00000042472 | 10_Zfp410        | 820.563 | 0.02951  | 0.83918  | 0.89027  | 826.515 | 773.71  | 886.804 | 703.315 | 888.462 | 844.573 |
| ENSMUSG00000042473 | 8_Tbc1d8b        | 474.124 | -0.6514  | 1.68E-05 | 0.00011  | 391.553 | 346.931 | 368.107 | 527.486 | 638.33  | 572.335 |
| ENSMUSG00000042474 | 6_Fcml           | 2.30985 | 3.59115  | 0.05659  | NA       | 7.8137  | 2.75342 | 2.39031 | 0.90169 | 0       | 0       |
| ENSMUSG00000042476 | 12_Abcb4         | 32.9887 | -1.14747 | 0.00847  | 0.02198  | 17.3638 | 28.452  | 15.537  | 50.944  | 43.0335 | 43.0517 |
| ENSMUSG00000042477 | 7_Tfap2e         | 20.4375 | 1.02246  | 0.074    | 0.13459  | 26.0457 | 29.3698 | 26.2934 | 6.3118  | 14.3445 | 20.2596 |
| ENSMUSG00000042485 | 6_Mustn1         | 115.558 | -0.51381 | 0.10458  | 0.1787   | 94.6325 | 99.123  | 92.0269 | 196.567 | 93.2392 | 117.759 |
| ENSMUSG00000042487 | 5_Leo1           | 615.272 | 0.02893  | 0.83626  | 0.88818  | 599.05  | 585.56  | 680.043 | 562.652 | 624.882 | 639.445 |
| ENSMUSG00000042489 | 15_Clsn          | 231.011 | 0.85213  | 0.00122  | 0.00425  | 349.012 | 240.465 | 301.179 | 113.612 | 170.341 | 211.46  |
| ENSMUSG00000042492 | 12_Tbc1d10b      | 1143.43 | 0.77799  | 1.03E-06 | 9.45E-06 | 1394.31 | 1394.15 | 1544.14 | 926.933 | 674.191 | 926.878 |
| ENSMUSG00000042496 | 17_Prdm10        | 247.038 | 0.437    | 0.0122   | 0.02985  | 264.797 | 287.273 | 299.984 | 198.371 | 202.616 | 229.187 |
| ENSMUSG00000042498 | 16_D330045A20Rik | 4.25288 | -0.54498 | 0.61426  | 0.71343  | 4.34094 | 3.67122 | 2.39031 | 5.41011 | 7.17224 | 2.53245 |
| ENSMUSG00000042499 | 13_Hoxd11        | 1.09219 | 3.56658  | 0.15154  | NA       | 2.60457 | 2.75342 | 1.19515 | 0       | 0       | 0       |
| ENSMUSG00000042500 | 11_Ago4          | 348.389 | -0.28696 | 0.05254  | 0.10096  | 324.702 | 318.479 | 297.593 | 376.003 | 381.025 | 392.53  |
| ENSMUSG00000042501 | 12_Cpa6          | 8.61379 | -1.16177 | 0.16009  | 0.2523   | 2.60457 | 6.42464 | 7.17092 | 16.2303 | 11.6549 | 7.59736 |
| ENSMUSG00000042502 | 10_Cd2bp2        | 1970.16 | 0.28141  | 0.01189  | 0.02926  | 2044.58 | 2130.23 | 2310.23 | 1766.4  | 1698.03 | 1871.48 |
| ENSMUSG00000042505 | 6_Sdhaf3         | 146.249 | -0.42269 | 0.03951  | 0.07965  | 135.437 | 117.479 | 121.906 | 169.517 | 168.548 | 164.609 |
| ENSMUSG00000042506 | 15_Usp22         | 2882.45 | 0.33841  | 0.00446  | 0.01283  | 3168.89 | 3200.39 | 3285.48 | 2438.16 | 2342.63 | 2859.14 |
| ENSMUSG00000042507 | 14_Elmsan1       | 1489.6  | 0.85604  | 9.49E-10 | 2.27E-08 | 1747.66 | 1874.16 | 2134.55 | 1076.61 | 942.254 | 1162.4  |
| ENSMUSG00000042508 | 16_Dmtf1         | 1258.53 | -0.35785 | 0.00907  | 0.02326  | 1088.71 | 1129.82 | 1091.18 | 1231.7  | 1603    | 1406.78 |
| ENSMUSG00000042510 | 7_AA986860       | 5199.77 | 0.82172  | 5.82E-09 | 1.07E-07 | 6143.3  | 6501.73 | 7278.49 | 3575.18 | 3322.54 | 4377.35 |
| ENSMUSG00000042514 | 11_Kihl14        | 106.828 | -1.02913 | 0.00176  | 0.00583  | 62.5096 | 94.534  | 53.7819 | 162.303 | 170.341 | 97.4995 |
| ENSMUSG00000042515 | 13_Mum11         | 80.1125 | -1.42692 | 4.88E-05 | 0.00027  | 44.2776 | 51.3971 | 34.6595 | 134.351 | 142.548 | 73.4412 |
| ENSMUSG00000042520 | 16_Ubap2l        | 4748.69 | 0.39174  | 0.00218  | 0.00699  | 5134.47 | 5410.46 | 5622    | 3560.76 | 4176.94 | 4587.54 |
| ENSMUSG00000042523 | 12_Dnal1         | 434.199 | -0.68056 | 2.03E-05 | 0.00013  | 321.23  | 368.04  | 311.935 | 534.699 | 588.124 | 481.166 |
| ENSMUSG00000042524 | 13_Sun2          | 1930.3  | 0.71087  | 0.00041  | 0.00167  | 2274.65 | 2508.36 | 2405.85 | 1815.99 | 1006.8  | 1570.12 |
| ENSMUSG00000042529 | 14_Kcnj12        | 28.0112 | -1.37648 | 0.08595  | 0.15169  | 10.4183 | 31.2054 | 4.78062 | 60.4129 | 8.06878 | 53.1815 |
| ENSMUSG00000042532 | 14_Golga7b       | 3.30914 | -2.54779 | 0.08185  | 0.14593  | 1.73638 | 0       | 1.19515 | 8.11517 | 6.27571 | 2.53245 |
| ENSMUSG00000042535 | 8_Gtpbp1         | 1919.81 | 0.82633  | 3.08E-07 | 3.32E-06 | 2303.3  | 2441.36 | 2619.78 | 1558.11 | 1085.7  | 1510.61 |
| ENSMUSG00000042540 | 12_Acot5         | 0.30056 | -1.76625 | 0.6627   | NA       | 0       | 0       | 0       | 1.80337 | 0       | 0       |

|                    |                 |         |          |          |          |         |         |         |         |         |         |
|--------------------|-----------------|---------|----------|----------|----------|---------|---------|---------|---------|---------|---------|
| ENSMUSG00000042541 | 10_Shfm1        | 2467.69 | 0.07739  | 0.53653  | 0.64418  | 2504.72 | 2356.92 | 2739.29 | 2384.06 | 2184.85 | 2636.28 |
| ENSMUSG00000042548 | 13_Asxl1        | 1838.03 | 0.04644  | 0.66593  | 0.75703  | 1847.5  | 1807.16 | 1948.1  | 1706.89 | 1843.27 | 1875.28 |
| ENSMUSG00000042557 | 14_Sin3a        | 1664.05 | 0.04193  | 0.71923  | 0.80009  | 1722.49 | 1597.9  | 1743.73 | 1503.11 | 1689.96 | 1727.13 |
| ENSMUSG00000042558 | 16_Adprhl2      | 643.064 | 0.91514  | 7.15E-06 | 5.05E-05 | 787.447 | 809.505 | 925.049 | 572.57  | 337.095 | 426.718 |
| ENSMUSG00000042564 | 12_Fam227a      | 50.5397 | -1.01608 | 0.00293  | 0.009    | 29.5184 | 37.63   | 33.4643 | 71.2332 | 74.412  | 56.9802 |
| ENSMUSG00000042567 | 19_Nek10        | 1.32848 | -0.36553 | 0.8804   | NA       | 3.47275 | 0       | 0       | 2.70506 | 1.79306 | 0       |
| ENSMUSG00000042569 | 13_Dhrs7b       | 393.704 | 0.18198  | 0.27075  | 0.38231  | 396.762 | 433.204 | 425.475 | 412.972 | 316.475 | 377.336 |
| ENSMUSG00000042570 | 14_Mier2        | 551.977 | 1.21346  | 1.75E-10 | 5.24E-09 | 668.505 | 739.751 | 905.927 | 379.61  | 269.856 | 348.212 |
| ENSMUSG00000042572 | 12_Ube2q1       | 2072.61 | -0.03514 | 0.74954  | 0.82307  | 1969.05 | 1969.61 | 2203.86 | 2045.92 | 2056.64 | 2190.57 |
| ENSMUSG00000042579 | 2_4632404H12Rik | 250.379 | -0.42457 | 0.01835  | 0.04212  | 214.443 | 209.26  | 218.713 | 291.244 | 319.165 | 249.447 |
| ENSMUSG00000042581 | 14_Thsd7b       | 10.0597 | -1.72834 | 0.02932  | 0.06228  | 6.07732 | 6.42464 | 1.19515 | 15.3287 | 16.1376 | 15.1947 |
| ENSMUSG00000042589 | 18_Cux2         | 215.294 | 0.56062  | 0.05236  | 0.1007   | 289.107 | 250.561 | 229.47  | 225.421 | 102.204 | 194.999 |
| ENSMUSG00000042590 | 16_Ipo11        | 794.957 | -0.38458 | 0.00286  | 0.00882  | 708.442 | 673.669 | 686.018 | 815.124 | 943.15  | 943.339 |
| ENSMUSG00000042594 | 16_Sh2b3        | 817.916 | 0.53215  | 0.00042  | 0.0017   | 963.689 | 900.367 | 1036.2  | 694.298 | 568.4   | 744.541 |
| ENSMUSG00000042595 | 7_Fam199x       | 346.268 | -0.46268 | 0.00446  | 0.01281  | 287.37  | 274.424 | 313.13  | 390.43  | 443.783 | 368.472 |
| ENSMUSG00000042599 | 8_Kdm7a         | 2138.17 | -0.11764 | 0.37322  | 0.4908   | 2182.63 | 1864.06 | 2105.86 | 1956.66 | 2372.22 | 2347.58 |
| ENSMUSG00000042604 | 5_Kcna4         | 3.98446 | -1.11308 | 0.33505  | 0.45157  | 1.73638 | 4.58903 | 1.19515 | 6.3118  | 6.27571 | 3.79868 |
| ENSMUSG00000042605 | 15_Atnx2        | 1147.4  | 0.31497  | 0.00598  | 0.01635  | 1187.68 | 1333.57 | 1295.55 | 1037.84 | 1004.11 | 1025.64 |
| ENSMUSG00000042606 | 9_Hirip3        | 478.569 | 0.35385  | 0.0252   | 0.05502  | 581.686 | 512.136 | 515.111 | 389.528 | 391.784 | 481.166 |
| ENSMUSG00000042607 | 15_Asb4         | 3.23627 | -2.45443 | 0.10026  | 0.17251  | 0.86819 | 0.91781 | 1.19515 | 5.41011 | 0.89653 | 10.1298 |
| ENSMUSG00000042608 | 15_Stk40        | 908.86  | 0.99147  | 5.50E-08 | 7.46E-07 | 1143.4  | 1059.15 | 1427.01 | 732.169 | 519.091 | 572.335 |
| ENSMUSG00000042613 | 9_Pbxip1        | 3464.88 | 0.08372  | 0.57367  | 0.67808  | 3352.94 | 3952.07 | 3391.85 | 3990.86 | 3034.76 | 3066.8  |
| ENSMUSG00000042616 | 7_Oscp1         | 118.28  | -0.19684 | 0.46164  | 0.57532  | 136.306 | 89.0271 | 105.174 | 146.975 | 109.377 | 122.824 |
| ENSMUSG00000042622 | 13_Maff         | 420.668 | 0.28868  | 0.11014  | 0.18633  | 435.831 | 473.588 | 478.062 | 430.104 | 301.234 | 405.193 |
| ENSMUSG00000042625 | 16_Safb2        | 1569.59 | 0.56797  | 1.18E-06 | 1.06E-05 | 1757.21 | 1898.94 | 1968.42 | 1345.31 | 1185.21 | 1262.43 |
| ENSMUSG00000042626 | 13_Shc1         | 2144.5  | 0.14818  | 0.16285  | 0.25563  | 2277.26 | 2207.32 | 2279.16 | 2159.54 | 1911.4  | 2032.29 |
| ENSMUSG00000042628 | 7_Zfyve1        | 846.122 | 0.36715  | 0.00848  | 0.02199  | 870.793 | 951.764 | 1038.59 | 814.222 | 694.811 | 706.555 |
| ENSMUSG00000042631 | 7_Xkr7          | 1.33117 | 0.28091  | 0.89511  | NA       | 3.47275 | 0.91781 | 0       | 1.80337 | 1.79306 | 0       |
| ENSMUSG00000042632 | 16_Pla2g6       | 263.205 | 0.97006  | 0.00042  | 0.00171  | 302.998 | 376.3   | 366.912 | 256.98  | 122.825 | 153.213 |
| ENSMUSG00000042638 | 14_Gucy2c       | 4.66837 | -0.31402 | 0.75503  | 0.82759  | 4.34094 | 4.58903 | 3.58546 | 7.21348 | 4.48265 | 3.79868 |
| ENSMUSG00000042641 | 18_Rgs1         | 4.8992  | -0.68924 | 0.50238  | 0.61338  | 1.73638 | 3.67122 | 5.97577 | 4.50843 | 7.17224 | 6.33113 |
| ENSMUSG00000042642 | 13_Flad1        | 703.005 | 0.60123  | 0.0121   | 0.02967  | 803.074 | 993.066 | 746.971 | 787.171 | 457.231 | 430.517 |
| ENSMUSG00000042644 | 8_Itp3          | 7784.44 | 1.43181  | 4.00E-12 | 1.82E-10 | 9750.62 | 11345.9 | 12977   | 3987.25 | 3085.86 | 5560    |
| ENSMUSG00000042647 | 13_Acad12       | 162.066 | -0.1924  | 0.41354  | 0.52961  | 132.833 | 176.219 | 144.614 | 201.076 | 141.652 | 176.006 |
| ENSMUSG00000042650 | 3_Alkhh5        | 1999.65 | -0.04022 | 0.72166  | 0.80192  | 1927.38 | 1924.64 | 2065.23 | 2192    | 1980.44 | 1908.2  |
| ENSMUSG00000042655 | 4_Fam159b       | 0.59264 | 1.31812  | 0.67678  | NA       | 1.73638 | 0.91781 | 0       | 0.90169 | 0       | 0       |
| ENSMUSG00000042659 | 14_Arrdc4       | 3371.37 | 0.09267  | 0.55776  | 0.66357  | 3320.82 | 3257.29 | 3861.54 | 2666.28 | 3838.94 | 3283.33 |
| ENSMUSG00000042660 | 7_Wdr55         | 324.569 | 0.85714  | 6.51E-07 | 6.34E-06 | 395.894 | 404.752 | 454.159 | 252.472 | 200.823 | 239.317 |
| ENSMUSG00000042662 | 16_Dusp15       | 30.7301 | -1.22242 | 0.07706  | 0.13899  | 13.0228 | 35.7944 | 5.97577 | 43.2809 | 17.9306 | 68.3763 |
| ENSMUSG00000042670 | 5_Immp1l        | 887.743 | -0.61556 | 2.51E-05 | 0.00015  | 749.247 | 687.436 | 666.896 | 988.247 | 1238.11 | 996.521 |
| ENSMUSG00000042671 | 12_Rgs8         | 41.725  | -2.17413 | 0.00065  | 0.00251  | 21.7047 | 12.8493 | 10.7564 | 136.155 | 44.8265 | 24.0583 |
| ENSMUSG00000042672 | 15_Dcst1        | 45.6068 | -0.01477 | 0.97026  | 0.98072  | 44.2776 | 61.493  | 29.8789 | 38.7725 | 51.1022 | 48.1166 |
| ENSMUSG00000042675 | 15_Ypel3        | 919.165 | 0.61588  | 0.00062  | 0.00238  | 980.185 | 1162.86 | 1195.15 | 892.669 | 595.296 | 688.827 |
| ENSMUSG00000042677 | 7_Zc3h12a       | 567.938 | 1.06535  | 1.33E-06 | 1.17E-05 | 706.705 | 617.683 | 981.222 | 397.643 | 287.786 | 416.589 |
| ENSMUSG00000042678 | 16_Myo15        | 4.30245 | -0.68138 | 0.54233  | 0.64931  | 0.86819 | 5.50683 | 3.58546 | 5.41011 | 5.37918 | 5.06491 |
| ENSMUSG00000042680 | 7_Garem         | 626.533 | 0.45192  | 0.0033   | 0.00998  | 680.66  | 738.833 | 750.557 | 465.27  | 511.022 | 612.854 |
| ENSMUSG00000042682 | 8_Selk          | 1865.51 | -0.35753 | 0.00369  | 0.01096  | 1662.58 | 1519.89 | 1723.41 | 2063.96 | 1927.54 | 2295.67 |
| ENSMUSG00000042684 | 8_Npl           | 58.7741 | -0.51601 | 0.16484  | 0.25808  | 50.3549 | 43.1369 | 51.3916 | 82.0534 | 42.1369 | 83.571  |
| ENSMUSG00000042686 | 5_Jph1          | 68.6049 | -1.11352 | 0.003    | 0.00919  | 45.1458 | 56.9039 | 27.4885 | 122.629 | 70.8259 | 88.6359 |
| ENSMUSG00000042688 | 16_Mapk6        | 3177.39 | 0.29829  | 0.00627  | 0.01705  | 3508.35 | 3250.87 | 3755.17 | 2725.8  | 2881.45 | 2942.71 |
| ENSMUSG00000042694 | 17_Obfc1        | 513.414 | 0.15894  | 0.30552  | 0.42046  | 517.44  | 522.231 | 584.43  | 446.334 | 455.438 | 554.607 |
| ENSMUSG00000042699 | 11_Dhx9         | 4546.29 | -0.21749 | 0.1291   | 0.21174  | 4229.81 | 4043.85 | 4338.41 | 3975.53 | 5378.29 | 5311.82 |
| ENSMUSG00000042700 | 15_Sipa11l      | 2728.68 | 0.49994  | 4.59E-05 | 0.00025  | 3101.17 | 3103.1  | 3384.68 | 2247    | 2031.54 | 2504.6  |
| ENSMUSG00000042705 | 8_Commd10       | 414.953 | -0.15483 | 0.35607  | 0.47285  | 401.103 | 374.465 | 403.962 | 431.907 | 504.747 | 373.537 |
| ENSMUSG00000042707 | 6_Dnal1         | 7.11605 | -2.16759 | 0.05835  | 0.11029  | 0.86819 | 4.58903 | 2.39031 | 7.21348 | 25.1029 | 2.53245 |
| ENSMUSG00000042708 | 12_Shcbp1l      | 1.14904 | -0.17923 | 0.94532  | NA       | 0       | 0.91781 | 2.39031 | 0       | 3.58612 | 0       |
| ENSMUSG00000042709 | 14_Atpaf2       | 368.526 | 0.37343  | 0.02172  | 0.04859  | 422.808 | 433.204 | 392.011 | 364.281 | 294.959 | 303.894 |
| ENSMUSG00000042712 | 10_Wbp5         | 1074.62 | -0.78516 | 1.35E-09 | 3.06E-08 | 848.22  | 773.71  | 745.776 | 1449.01 | 1397.69 | 1233.31 |
| ENSMUSG00000042717 | 5_Ppp1r3a       | 65.1856 | -2.19575 | 7.68E-10 | 1.89E-08 | 21.7047 | 25.6986 | 22.7079 | 138.86  | 83.3773 | 98.7657 |
| ENSMUSG00000042719 | 17_Naa25        | 1529.78 | 0.48912  | 0.00194  | 0.00636  | 1778.92 | 1570.37 | 2010.25 | 1064.89 | 1347.49 | 1406.78 |
| ENSMUSG00000042724 | 7_Map3k9        | 1409.18 | 0.89662  | 1.30E-09 | 2.94E-08 | 1854.45 | 1771.36 | 1872.81 | 1027.92 | 810.464 | 1118.08 |
| ENSMUSG00000042726 | 14_Traf4        | 4815.56 | 1.37107  | 9.33E-19 | 1.54E-16 | 6257.03 | 6219.97 | 8360.1  | 2731.21 | 2393.74 | 2931.32 |
| ENSMUSG00000042729 | 9_Wdr74         | 468.695 | 0.42027  | 0.00303  | 0.00928  | 538.277 | 505.711 | 565.308 | 410.267 | 374.75  | 417.855 |
| ENSMUSG00000042734 | 5_Ttc9          | 1633.11 | 0.24622  | 0.01951  | 0.04431  | 1725.96 | 1730.06 | 1860.85 | 1510.32 | 1453.28 | 1518.21 |
| ENSMUSG00000042737 | 9_Dpm3          | 145.877 | 1.77629  | 1.09E-05 | 7.31E-05 | 148.46  | 254.232 | 274.885 | 100.989 | 29.5855 | 67.11   |
| ENSMUSG00000042742 | 7_B630005N14Rik | 502.865 | -0.3275  | 0.0187   | 0.04276  | 477.504 | 449.725 | 409.938 | 545.52  | 577.366 | 557.14  |
| ENSMUSG00000042743 | 13_Sgtb         | 100.399 | -1.01414 | 0.00144  | 0.00492  | 65.1141 | 86.2737 | 47.8062 | 171.32  | 125.514 | 106.363 |
| ENSMUSG00000042744 | 16_Gm15800      | 1292.92 | 0.71213  | 2.33E-06 | 1.91E-05 | 1484.6  | 1660.31 | 1673.22 | 1155.96 | 855.29  | 928.144 |
| ENSMUSG00000042745 | 9_Id1           | 734.873 | 0.94352  | 6.72E-06 | 4.79E-05 | 942.853 | 827.861 | 1130.62 | 625.77  | 375.646 | 506.491 |
| ENSMUSG00000042747 | 12_Krtcap2      | 652.833 | 0.27208  | 0.03337  | 0.06936  | 691.078 | 683.765 | 768.484 | 586.096 | 589.917 | 597.659 |
| ENSMUSG00000042750 | 7_Bex2          | 39.2063 | -1.04187 | 0.01838  | 0.04216  | 24.3093 | 27.5342 | 25.0982 | 75.7416 | 33.1716 | 49.3828 |
| ENSMUSG00000042751 | 14_Nmnat2       | 131.015 | -0.57411 | 0.07977  | 0.14301  | 132.833 | 93.6162 | 89.6366 | 224.52  | 141.652 | 103.831 |
| ENSMUSG00000042757 | 15_Tmem108      | 89.3873 | -0.84179 | 0.03543  | 0.07292  | 59.0368 | 94.534  | 38.2449 | 165.008 | 95.9288 | 83.571  |
| ENSMUSG00000042759 | 12_Apobr        | 71.1344 | 1.65123  | 3.71E-05 | 0.00021  | 157.142 | 69.7532 | 96.8075 | 44.1826 | 25.9994 | 32.9219 |
| ENSMUSG00000042761 | 14_Mrap2        | 2.11116 | 1.63819  | 0.3429   | NA       | 0.86819 | 2.75342 | 5.97577 | 1.80337 | 0       | 1.26623 |
| ENSMUSG00000042763 | 9_Maneal        | 35.5151 | -0.73247 | 0.07987  | 0.14315  | 32.123  | 27.5342 | 20.3176 | 54.1011 | 44.8265 | 34.1881 |
| ENSMUSG00000042766 | 17_Trim46       | 58.3345 | 0.38595  | 0.22906  | 0.33509  | 76.4006 | 63.3286 | 58.5626 | 59.5112 | 46.6196 | 45.5842 |
| ENSMUSG00000042770 | 8_Hebp1         | 345.656 | -0.15195 | 0.43677  | 0.55222  | 354.221 | 346.931 | 279.666 | 391.331 | 294.062 | 407.725 |
| ENSMUSG00000042772 | 15_Smg7         | 2111.8  | 0.25508  | 0.04808  | 0.09387  | 2294.62 | 2162.35 | 2436.92 | 1683.45 | 2076.36 | 2017.1  |

|                    |                 |         |          |          |          |         |         |         |         |         |         |
|--------------------|-----------------|---------|----------|----------|----------|---------|---------|---------|---------|---------|---------|
| ENSMUSG00000042784 | 9_Muc1          | 2066.73 | 0.9808   | 9.26E-08 | 1.18E-06 | 2200.86 | 2713.03 | 3315.36 | 1220.88 | 1299.07 | 1651.16 |
| ENSMUSG00000042787 | 13_Exog         | 212.821 | 0.34628  | 0.06892  | 0.12693  | 245.697 | 223.027 | 245.007 | 171.32  | 176.617 | 215.259 |
| ENSMUSG00000042788 | 12_Fam166b      | 4.02158 | -1.70776 | 0.15062  | 0.23989  | 3.47275 | 0.91781 | 1.19515 | 5.41011 | 8.06878 | 5.06491 |
| ENSMUSG00000042790 | 15_Rnf214       | 734.447 | -0.15133 | 0.3275   | 0.44381  | 678.055 | 706.71  | 702.751 | 641.098 | 865.152 | 812.918 |
| ENSMUSG00000042793 | 13_Lgr6         | 25.6486 | -0.8278  | 0.11502  | 0.1929   | 10.4183 | 20.1917 | 25.0982 | 22.5421 | 37.6543 | 37.9868 |
| ENSMUSG00000042797 | 9_Aqp11         | 58.044  | -0.85992 | 0.02402  | 0.0529   | 30.3866 | 58.7396 | 34.6595 | 92.8736 | 70.8259 | 60.7789 |
| ENSMUSG00000042800 | 5_1700015E13Rik | 6.28119 | -0.07656 | 0.9379   | 0.95923  | 6.94551 | 10.0959 | 1.19515 | 7.21348 | 7.17224 | 5.06491 |
| ENSMUSG00000042804 | 13_Gpr153       | 452.816 | 0.25552  | 0.13091  | 0.21403  | 507.022 | 537.834 | 432.646 | 460.761 | 359.509 | 419.121 |
| ENSMUSG00000042807 | 15_Hecw5        | 106.516 | -1.16973 | 0.00019  | 0.00088  | 59.0368 | 91.7806 | 45.4159 | 153.287 | 166.755 | 122.824 |
| ENSMUSG00000042808 | 7_Gpx2          | 84.8512 | 1.3717   | 3.06E-06 | 2.42E-05 | 125.019 | 101.876 | 141.028 | 44.1826 | 56.4814 | 40.5193 |
| ENSMUSG00000042810 | 14_Krba1        | 1412.02 | 0.50652  | 0.0001   | 0.0005   | 1518.46 | 1707.12 | 1747.32 | 1280.39 | 1061.49 | 1157.33 |
| ENSMUSG00000042812 | 5_Foxf1         | 5.70181 | 0.36582  | 0.71724  | 0.7985   | 5.20913 | 8.26025 | 5.97577 | 9.01685 | 4.48265 | 1.26623 |
| ENSMUSG00000042814 | 7_Mcts2         | 145.461 | -0.41356 | 0.07605  | 0.1375   | 137.174 | 102.794 | 135.052 | 185.747 | 167.651 | 144.35  |
| ENSMUSG00000042816 | 3_Gpr151        | 1.1942  | -1.57158 | 0.55137  | NA       | 0.86819 | 0.91781 | 0       | 0       | 5.37918 | 0       |
| ENSMUSG00000042817 | 15_Fit3         | 12.4026 | 2.65039  | 0.00462  | 0.01319  | 32.123  | 19.2739 | 13.1467 | 1.80337 | 8.06878 | 0       |
| ENSMUSG00000042821 | 7_Snai1         | 39.2466 | 0.56095  | 0.02915  | 0.33521  | 54.6959 | 51.3971 | 34.6595 | 46.8876 | 31.3786 | 16.4609 |
| ENSMUSG00000042826 | 13_Fgf11        | 111     | -1.05209 | 0.00059  | 0.0023   | 76.4006 | 90.8628 | 49.0013 | 174.927 | 159.582 | 115.227 |
| ENSMUSG00000042828 | 12_Trim72       | 98.1431 | 0.85384  | 0.0178   | 0.04108  | 88.5552 | 152.356 | 137.443 | 72.1348 | 42.1369 | 96.2332 |
| ENSMUSG00000042831 | 12_Alkbh6       | 252.098 | 0.32502  | 0.13085  | 0.21395  | 270.875 | 267.081 | 303.569 | 275.916 | 174.823 | 220.323 |
| ENSMUSG00000042834 | 14_Nrep         | 1178.47 | -1.58441 | 1.16E-10 | 3.65E-09 | 551.3   | 838.874 | 376.474 | 1953.05 | 1644.24 | 1706.87 |
| ENSMUSG00000042842 | 10_Serpinb6b    | 212.626 | 0.28337  | 0.21164  | 0.31494  | 255.247 | 174.383 | 271.3   | 178.534 | 208.892 | 187.402 |
| ENSMUSG00000042845 | 7_Wfdc12        | 3.81345 | 0.83593  | 0.46966  | 0.58287  | 5.20913 | 4.58903 | 4.78062 | 3.60674 | 0.89653 | 3.79868 |
| ENSMUSG00000042846 | 8_Lrrtm3        | 11.6948 | -0.32675 | 0.65843  | 0.75082  | 11.2864 | 9.17806 | 10.7564 | 22.5421 | 6.27571 | 10.1298 |
| ENSMUSG00000042849 | 10_Olfrl414     | 0.15297 | 0.92709  | 0.82027  | NA       | 0       | 0.91781 | 0       | 0       | 0       | 0       |
| ENSMUSG00000042851 | 17_Zc3h6        | 416.29  | -0.24328 | 0.10502  | 0.17927  | 410.653 | 351.52  | 381.254 | 421.989 | 468.885 | 463.439 |
| ENSMUSG00000042854 | 9_Ttp53rkb      | 58.8686 | 0.13329  | 0.67155  | 0.76198  | 52.0913 | 61.493  | 71.7092 | 61.3146 | 54.6884 | 51.9153 |
| ENSMUSG00000042857 | 2_Gm9776        | 124.553 | 0.14186  | 0.5344   | 0.64234  | 112.864 | 134.917 | 144.614 | 111.809 | 122.825 | 120.292 |
| ENSMUSG00000042870 | 14_Tom1         | 1000.51 | 0.45567  | 0.00904  | 0.02322  | 1085.24 | 1217.01 | 1170.06 | 1047.76 | 690.329 | 792.658 |
| ENSMUSG00000042873 | 11_Lhfp4        | 43.1249 | -1.16378 | 0.01417  | 0.03388  | 29.5184 | 26.6164 | 23.9031 | 96.4803 | 49.3092 | 32.9219 |
| ENSMUSG00000042895 | 5_Abra          | 21.8195 | -1.14814 | 0.0821   | 0.14626  | 7.8137  | 26.6164 | 5.97577 | 36.9691 | 20.6202 | 32.9219 |
| ENSMUSG00000042901 | 10_Aida         | 2388.64 | 0.22738  | 0.12279  | 0.20344  | 2528.16 | 2316.54 | 2885.1  | 1871    | 2412.56 | 2318.46 |
| ENSMUSG00000042903 | 8_Foxo4         | 1190.12 | 0.28711  | 0.03208  | 0.06719  | 1314.44 | 1269.33 | 1339.77 | 1139.73 | 925.22  | 1152.27 |
| ENSMUSG00000042918 | 15_Mamstr       | 42.9831 | 0.02961  | 0.94174  | 0.96205  | 48.6186 | 46.8081 | 34.6595 | 57.7079 | 29.5855 | 40.5193 |
| ENSMUSG00000042942 | 15_Greb1l       | 51.369  | -1.30414 | 0.00023  | 0.00104  | 32.9912 | 33.9588 | 21.5128 | 77.545  | 78.8947 | 63.3113 |
| ENSMUSG00000042961 | 13_Egflam       | 296.677 | -0.75071 | 0.00256  | 0.008    | 222.256 | 286.355 | 154.175 | 444.531 | 346.061 | 326.687 |
| ENSMUSG00000042976 | 5_9930038B18Rik | 21.1268 | -0.10711 | 0.83296  | 0.88575  | 16.4956 | 22.9451 | 21.5128 | 24.3455 | 16.1376 | 25.3245 |
| ENSMUSG00000042978 | 10_Sbk1         | 270.748 | 0.58616  | 0.00916  | 0.02345  | 292.579 | 312.972 | 370.498 | 277.719 | 175.72  | 194.999 |
| ENSMUSG00000042985 | 7_Upk3b         | 179.921 | -0.22563 | 0.37077  | 0.4882   | 171.033 | 168.876 | 157.76  | 255.177 | 144.341 | 182.337 |
| ENSMUSG00000042988 | 10_Notum        | 83.5545 | -0.29363 | 0.48928  | 0.60102  | 80.7415 | 108.301 | 35.8546 | 129.843 | 74.412  | 72.1749 |
| ENSMUSG00000042992 | 15_Borcs5       | 291.685 | 0.60403  | 0.00176  | 0.00584  | 329.043 | 349.684 | 376.474 | 256.98  | 184.685 | 253.245 |
| ENSMUSG00000042993 | 6_lfnk          | 0.14942 | -0.99647 | 0.80707  | NA       | 0       | 0       | 0       | 0       | 0.89653 | 0       |
| ENSMUSG00000042997 | 13_Nhlrc3       | 1035.65 | 0.14497  | 0.23296  | 0.33935  | 1055.72 | 1060.98 | 1146.15 | 907.997 | 1014.87 | 1028.18 |
| ENSMUSG00000043003 | 13_Rasef        | 1121.57 | -0.38618 | 0.01168  | 0.02879  | 1055.72 | 889.354 | 971.66  | 1074.81 | 1442.52 | 1295.35 |
| ENSMUSG00000043004 | 13_Gng2         | 227.626 | -0.80948 | 0.00037  | 0.00153  | 167.56  | 199.164 | 129.077 | 314.688 | 314.682 | 240.583 |
| ENSMUSG00000043008 | 8_Klh6          | 43.5865 | -0.02515 | 0.94844  | 0.96609  | 54.6959 | 45.8903 | 28.6837 | 49.5927 | 42.1369 | 40.5193 |
| ENSMUSG00000043013 | 10_Onecut1      | 1.01847 | 2.28163  | 0.46871  | NA       | 5.20913 | 0       | 0       | 0.90169 | 0       | 0       |
| ENSMUSG00000043015 | 15_Tmem194b     | 514.312 | 0.14785  | 0.36145  | 0.47854  | 581.686 | 462.574 | 577.259 | 440.924 | 496.678 | 526.75  |
| ENSMUSG00000043017 | 9_Ptgir         | 109.844 | 0.43716  | 0.07746  | 0.1396   | 126.756 | 134.917 | 117.125 | 107.301 | 77.9982 | 94.967  |
| ENSMUSG00000043019 | 12_Edem3        | 1651.81 | -0.32395 | 0.0173   | 0.04012  | 1395.18 | 1467.57 | 1538.16 | 1570.74 | 1928.44 | 2010.77 |
| ENSMUSG00000043020 | 13_Wdr63        | 3.1088  | -1.13178 | 0.4112   | 0.5276   | 3.47275 | 0       | 2.39031 | 4.50843 | 4.48265 | 3.79868 |
| ENSMUSG00000043029 | 2_Ttp3          | 47.4915 | 0.74518  | 0.03661  | 0.07482  | 71.1914 | 47.7259 | 59.7577 | 36.0674 | 38.5508 | 31.6557 |
| ENSMUSG00000043036 | 13_Ccdc63       | 10.2065 | 0.28475  | 0.71005  | 0.79268  | 13.0228 | 14.6849 | 5.97577 | 13.5253 | 8.96531 | 5.06491 |
| ENSMUSG00000043050 | 7_Tnp2          | 0.1447  | 0.92709  | 0.82027  | NA       | 0.86819 | 0       | 0       | 0       | 0       | 0       |
| ENSMUSG00000043051 | 17_Disc1        | 6.23515 | 1.61128  | 0.15295  | 0.24289  | 13.891  | 7.34244 | 7.17092 | 7.21348 | 1.79306 | 0       |
| ENSMUSG00000043059 | 16_Zfp513       | 436.942 | 1.21689  | 3.41E-08 | 4.89E-07 | 588.632 | 577.3   | 668.091 | 351.657 | 201.719 | 234.252 |
| ENSMUSG00000043061 | 9_Tmem18        | 761.495 | -0.32431 | 0.00783  | 0.02055  | 665.032 | 680.094 | 684.823 | 862.011 | 883.083 | 793.924 |
| ENSMUSG00000043065 | 12_Spice1       | 592.703 | 0.34316  | 0.05282  | 0.10136  | 594.709 | 680.094 | 712.312 | 462.565 | 467.092 | 639.445 |
| ENSMUSG00000043067 | 15_Dpy19l       | 1154.76 | -0.52213 | 1.34E-05 | 8.77E-05 | 989.735 | 949.929 | 904.732 | 1377.78 | 1445.21 | 1261.16 |
| ENSMUSG00000043068 | 5_Fam89a        | 33.4549 | 0.29874  | 0.48756  | 0.59947  | 46.014  | 27.5342 | 37.0498 | 35.1657 | 23.3098 | 31.6557 |
| ENSMUSG00000043073 | 9_Usp17le       | 1.19849 | 2.51981  | 0.26548  | NA       | 0.86819 | 1.83561 | 3.58546 | 0.90169 | 0       | 0       |
| ENSMUSG00000043079 | 17_Synpo        | 835.865 | 0.24051  | 0.08473  | 0.15     | 799.602 | 979.299 | 937.001 | 779.958 | 712.742 | 806.587 |
| ENSMUSG00000043085 | 14_Tmem82       | 10.0687 | -0.56355 | 0.48023  | 0.59293  | 10.4183 | 9.17806 | 4.78062 | 20.7388 | 8.96531 | 6.33113 |
| ENSMUSG00000043088 | 16_Ill17re      | 1053.69 | 0.80079  | 1.63E-08 | 2.63E-07 | 1251.93 | 1280.34 | 1483.19 | 736.677 | 706.466 | 863.567 |
| ENSMUSG00000043090 | 18_Zfp866       | 693.993 | -0.52122 | 0.00022  | 0.00099  | 618.15  | 554.355 | 536.624 | 745.694 | 891.151 | 817.983 |
| ENSMUSG00000043091 | 8_Tuba1c        | 4683.51 | 0.84168  | 2.76E-10 | 7.81E-09 | 6097.29 | 5129.62 | 6809.99 | 3296.56 | 3258.89 | 3508.71 |
| ENSMUSG00000043099 | 4_Hic1          | 56.1315 | 0.58425  | 0.11693  | 0.19555  | 62.5096 | 86.2737 | 52.5868 | 49.5927 | 31.3786 | 54.4478 |
| ENSMUSG00000043102 | 2_Qrfp          | 6.90258 | 0.26455  | 0.75834  | 0.83003  | 11.2864 | 6.42464 | 4.78062 | 7.21348 | 5.37918 | 6.33113 |
| ENSMUSG00000043122 | 6_A530016L24Rik | 0.45063 | 2.29438  | 0.56648  | NA       | 0.86819 | 1.83561 | 0       | 0       | 0       | 0       |
| ENSMUSG00000043126 | 4_D830039M14Rik | 2.0214  | -0.27701 | 0.87503  | NA       | 0.86819 | 4.58903 | 0       | 4.50843 | 0.89653 | 1.26623 |
| ENSMUSG00000043131 | 14_Mob1a        | 6497.34 | -0.27967 | 0.01816  | 0.04178  | 6105.97 | 5544.46 | 5957.84 | 6326.23 | 7715.54 | 7333.99 |
| ENSMUSG00000043140 | 9_Tmem186       | 434.931 | 0.09601  | 0.52465  | 0.63387  | 483.581 | 397.41  | 467.305 | 425.596 | 411.508 | 424.186 |
| ENSMUSG00000043144 | 5_Aqp6          | 0.30239 | -0.03469 | 0.99322  | NA       | 0       | 0.91781 | 0       | 0       | 0.89653 | 0       |
| ENSMUSG00000043153 | 5_Ispd          | 89.8827 | -0.71092 | 0.02345  | 0.05188  | 79.8733 | 69.7532 | 54.9771 | 118.121 | 138.066 | 78.5061 |
| ENSMUSG00000043154 | 15_Ppp2r3a      | 1260.14 | -0.50921 | 0.00021  | 0.00095  | 1083.5  | 978.381 | 1057.71 | 1275.88 | 1600.31 | 1565.06 |
| ENSMUSG00000043155 | 4_Hpd1          | 2.90586 | -0.73925 | 0.58627  | 0.68899  | 4.34094 | 0.91781 | 1.19515 | 1.80337 | 5.37918 | 3.79868 |
| ENSMUSG00000043157 | 7_Arl11         | 30.5145 | -0.08717 | 0.84365  | 0.89351  | 39.0685 | 25.6986 | 23.9031 | 37.8708 | 28.689  | 27.857  |
| ENSMUSG00000043162 | 7_Pyurf         | 424.764 | -0.91376 | 4.53E-08 | 6.26E-07 | 305.602 | 323.985 | 253.373 | 538.306 | 613.227 | 514.088 |
| ENSMUSG00000043164 | 3_Tmem212       | 0       | NA       | NA       | NA       | 0       | 0       | 0       | 0       | 0       | 0       |
| ENSMUSG00000043165 | 7_Lor           | 2.77658 | 2.95034  | 0.0809   | 0.14461  | 5.20913 | 3.67122 | 5.97577 | 1.80337 | 0       | 0       |

|                     |                 |         |          |          |          |         |         |         |         |         |         |
|---------------------|-----------------|---------|----------|----------|----------|---------|---------|---------|---------|---------|---------|
| ENSMUSG000000043183 | 18_Simc1        | 199.091 | -0.14396 | 0.46431  | 0.57791  | 182.32  | 197.328 | 187.639 | 178.534 | 232.201 | 216.525 |
| ENSMUSG000000043190 | 13_Rfescd       | 254.856 | -0.37779 | 0.02223  | 0.04954  | 215.311 | 226.698 | 223.494 | 285.834 | 303.027 | 274.771 |
| ENSMUSG000000043192 | 3_Gm1840        | 196.25  | 0.81392  | 0.00074  | 0.00278  | 237.015 | 267.999 | 245.007 | 171.32  | 100.411 | 155.746 |
| ENSMUSG000000043207 | 10_Zmpste24     | 1822.41 | -0.26684 | 0.02844  | 0.06081  | 1705.99 | 1584.13 | 1672.02 | 1772.71 | 2079.95 | 2119.66 |
| ENSMUSG000000043219 | 9_Hoxa6         | 0.1447  | 0.92709  | 0.82027  | NA       | 0.86819 | 0       | 0       | 0       | 0       | 0       |
| ENSMUSG000000043230 | 2_Fam124b       | 3.40526 | -1.79782 | 0.23244  | 0.33875  | 3.47275 | 0.91781 | 0       | 0.90169 | 6.27571 | 8.86359 |
| ENSMUSG000000043241 | 14_Upf2         | 1508.34 | -0.32596 | 0.01993  | 0.04512  | 1416.88 | 1313.38 | 1284.79 | 1428.27 | 1865.68 | 1741.06 |
| ENSMUSG000000043243 | 15_Fam129c      | 88.214  | 0.83179  | 0.00222  | 0.00709  | 98.1053 | 109.219 | 131.467 | 60.4129 | 59.171  | 70.9087 |
| ENSMUSG000000043251 | 5_Exoc3l        | 26.1406 | 0.66653  | 0.15742  | 0.24894  | 31.2548 | 38.5478 | 26.2934 | 25.2472 | 15.241  | 20.2596 |
| ENSMUSG000000043252 | 8_Tmem64        | 1733.3  | -0.51165 | 2.33E-06 | 1.92E-05 | 1441.19 | 1438.2  | 1407.89 | 1927.8  | 2171.4  | 2013.3  |
| ENSMUSG000000043257 | 15_Pigv         | 583.717 | 0.56761  | 0.00012  | 0.00057  | 662.428 | 739.751 | 688.409 | 506.747 | 412.404 | 492.562 |
| ENSMUSG000000043259 | 14_Fam13c       | 87.5397 | -0.8665  | 0.0326   | 0.06805  | 45.1458 | 86.2737 | 54.9771 | 171.32  | 100.411 | 67.11   |
| ENSMUSG000000043262 | 14_Uevld        | 949.578 | -0.26211 | 0.06651  | 0.12315  | 903.784 | 814.094 | 872.462 | 892.669 | 1145.77 | 1068.7  |
| ENSMUSG000000043263 | 13_Pyhin1       | 769.6   | 0.41018  | 0.05623  | 0.10687  | 978.448 | 730.573 | 926.244 | 497.73  | 855.29  | 629.315 |
| ENSMUSG000000043279 | 9_Trim56        | 3107.23 | 0.39626  | 0.0008   | 0.00297  | 3353.81 | 3383.03 | 3856.76 | 2494.06 | 2678.83 | 2876.87 |
| ENSMUSG000000043282 | 3_Teddml1b      | 3.14921 | 0.7567   | 0.54699  | 0.65351  | 4.34094 | 2.75342 | 4.78062 | 0.90169 | 3.58612 | 2.53245 |
| ENSMUSG000000043284 | 12_Tmem11       | 485.568 | 0.49429  | 0.00202  | 0.00658  | 539.145 | 551.601 | 613.114 | 442.728 | 345.164 | 421.654 |
| ENSMUSG000000043286 | 11_Pnpla1       | 16.3654 | 0.14862  | 0.81704  | 0.87383  | 19.9683 | 11.0137 | 20.3176 | 9.01685 | 12.5514 | 25.3245 |
| ENSMUSG000000043289 | 12_Mei4         | 5.50566 | -2.03269 | 0.09666  | 0.16717  | 0.86819 | 5.50683 | 0       | 13.5253 | 8.06878 | 5.06491 |
| ENSMUSG000000043290 | 6_Zfp784        | 181.475 | -0.04128 | 0.82962  | 0.88318  | 184.056 | 178.972 | 173.297 | 198.371 | 166.755 | 187.402 |
| ENSMUSG000000043298 | 8_Smco3         | 46.8632 | -1.3789  | 0.04169  | 0.08333  | 20.8365 | 53.2327 | 3.58546 | 99.1854 | 44.8265 | 59.5127 |
| ENSMUSG000000043300 | 2_B3galnt1      | 107.99  | -0.82075 | 0.00252  | 0.00792  | 84.2143 | 86.2737 | 63.3432 | 168.615 | 120.135 | 125.356 |
| ENSMUSG000000043301 | 15_Kcnj6        | 1.05025 | -3.55157 | 0.22891  | NA       | 0       | 0       | 0       | 4.50843 | 1.79306 | 0       |
| ENSMUSG000000043311 | 7_D17H6S53E     | 242.503 | 0.33817  | 0.06909  | 0.12719  | 243.093 | 280.849 | 289.227 | 240.75  | 197.237 | 203.863 |
| ENSMUSG000000043313 | 6_Pcdhb19       | 88.5266 | -0.80599 | 0.01142  | 0.02825  | 77.2688 | 72.5066 | 43.0255 | 112.711 | 134.48  | 91.1683 |
| ENSMUSG000000043323 | 16_Fhrs1        | 935.089 | 1.07207  | 3.36E-10 | 9.27E-09 | 1153.82 | 1282.17 | 1366.06 | 703.315 | 479.644 | 625.516 |
| ENSMUSG000000043333 | 12_Rhbd12       | 305.295 | 0.19924  | 0.24273  | 0.35075  | 316.889 | 319.396 | 341.814 | 255.177 | 274.338 | 324.154 |
| ENSMUSG000000043336 | 14_Filip1l      | 938.124 | -0.20914 | 0.18314  | 0.28089  | 837.802 | 849.888 | 923.854 | 850.289 | 1184.32 | 982.592 |
| ENSMUSG000000043342 | 9_Hoxd9         | 1.48552 | 0.49932  | 0.81074  | NA       | 1.73638 | 0       | 3.58546 | 0.90169 | 2.68959 | 0       |
| ENSMUSG000000043346 | 8_Gm6741        | 406.478 | -0.16388 | 0.35126  | 0.46789  | 370.716 | 414.848 | 363.327 | 356.166 | 443.783 | 490.03  |
| ENSMUSG000000043366 | 13_Olfr78       | 1.19881 | -3.7425  | 0.1814   | NA       | 0       | 0       | 0       | 3.60674 | 3.58612 | 0       |
| ENSMUSG000000043372 | 12_Hexim2       | 60.6199 | 0.38316  | 0.24308  | 0.35118  | 52.0913 | 70.671  | 83.6608 | 57.7079 | 50.2057 | 49.3828 |
| ENSMUSG000000043383 | 4_Olfr1342      | 0.2997  | -1.76345 | 0.66322  | NA       | 0       | 0       | 0       | 0.90169 | 0.89653 | 0       |
| ENSMUSG000000043384 | 15_Gprasp1      | 1832.02 | -1.08307 | 5.59E-10 | 1.42E-08 | 1211.99 | 1358.35 | 953.733 | 2645.55 | 2764.9  | 2057.62 |
| ENSMUSG000000043385 | 3_Olfr267       | 0.43968 | 0.71095  | 0.86073  | NA       | 1.73638 | 0       | 0       | 0.90169 | 0       | 0       |
| ENSMUSG000000043388 | 8_Tmem130       | 13.0566 | -2.17004 | 0.0143   | 0.03415  | 6.07732 | 4.58903 | 3.58546 | 38.7725 | 21.5167 | 3.79868 |
| ENSMUSG000000043391 | 9_2510009E07Rik | 3871.44 | -0.00917 | 0.93178  | 0.95479  | 3816.56 | 3734.55 | 4025.28 | 3773.55 | 3681.15 | 4197.54 |
| ENSMUSG000000043398 | 4_Gpr135        | 4.69826 | 0.93081  | 0.38178  | 0.49947  | 7.8137  | 8.26025 | 2.39031 | 3.60674 | 3.58612 | 2.53245 |
| ENSMUSG000000043410 | 16_Hfm1         | 3.28846 | -1.85583 | 0.27441  | 0.38652  | 0.86819 | 0       | 3.58546 | 6.3118  | 8.96531 | 0       |
| ENSMUSG000000043411 | 15_Usp48        | 2258.63 | -0.24012 | 0.01358  | 0.03266  | 2055    | 2108.2  | 2049.69 | 2377.74 | 2493.25 | 2467.88 |
| ENSMUSG000000043415 | 5_Otud1         | 409.228 | 0.07929  | 0.59636  | 0.69814  | 404.576 | 407.506 | 449.378 | 411.169 | 364.888 | 417.855 |
| ENSMUSG000000043418 | 3_Lrit2         | 70.4776 | -2.7835  | 3.19E-06 | 2.51E-05 | 26.0457 | 21.1095 | 5.97577 | 217.306 | 109.377 | 43.0517 |
| ENSMUSG000000043421 | 8_Hilpda        | 93.836  | -0.35673 | 0.19992  | 0.30092  | 92.8962 | 89.9449 | 63.3432 | 119.022 | 91.4461 | 106.363 |
| ENSMUSG000000043424 | 10_Elfr3j2      | 1258.34 | -0.48742 | 0.00103  | 0.00368  | 1086.1  | 977.463 | 1079.22 | 1219.98 | 1599.41 | 1587.85 |
| ENSMUSG000000043430 | 5_Psap1         | 1937.73 | 1.13234  | 2.36E-09 | 4.91E-08 | 2435.27 | 2490.01 | 3057.2  | 1226.29 | 917.151 | 1500.48 |
| ENSMUSG000000043432 | 7_Leng9         | 226.383 | 0.30951  | 0.11742  | 0.19624  | 240.488 | 279.931 | 230.665 | 223.618 | 172.134 | 211.46  |
| ENSMUSG000000043439 | 5_E130012A19Rik | 815.324 | 0.78883  | 2.27E-07 | 2.54E-06 | 1022.73 | 950.847 | 1124.64 | 651.017 | 508.333 | 634.38  |
| ENSMUSG000000043441 | 5_Gpr149        | 2.71532 | -2.84929 | 0.07999  | 0.1433   | 0.86819 | 0       | 1.19515 | 7.21348 | 4.48265 | 2.53245 |
| ENSMUSG000000043445 | 6_Pgp           | 82.0275 | 0.67652  | 0.01875  | 0.04284  | 87.687  | 106.465 | 108.759 | 74.8399 | 51.1022 | 63.3113 |
| ENSMUSG000000043448 | 13_Gjc2         | 8.78995 | 1.19362  | 0.13305  | 0.21682  | 16.4956 | 12.8493 | 7.17092 | 5.41011 | 4.48265 | 6.33113 |
| ENSMUSG000000043456 | 16_Zfp536       | 99.7003 | -0.49552 | 0.16481  | 0.25808  | 78.137  | 113.808 | 56.1722 | 162.303 | 100.411 | 87.3697 |
| ENSMUSG000000043458 | 5_Pcdhb12       | 51.2863 | -0.7291  | 0.0582   | 0.11004  | 35.5957 | 36.7122 | 44.2207 | 73.9382 | 77.9982 | 39.253  |
| ENSMUSG000000043460 | 6_Elfrn2        | 6.75401 | -0.85353 | 0.50515  | 0.61567  | 9.55007 | 3.67122 | 1.19515 | 18.9354 | 7.17224 | 0       |
| ENSMUSG000000043461 | 13_Pstssb       | 215.17  | -0.07549 | 0.75622  | 0.82836  | 204.892 | 155.109 | 270.105 | 237.143 | 231.305 | 192.466 |
| ENSMUSG000000043463 | 6_Rab9b         | 8.6853  | -1.84691 | 0.03171  | 0.06655  | 5.20913 | 3.67122 | 2.39031 | 12.6236 | 20.6202 | 7.59736 |
| ENSMUSG000000043467 | 19_Zbtb37       | 536.906 | -0.76306 | 3.64E-07 | 3.84E-06 | 454.063 | 372.629 | 366.912 | 668.149 | 703.777 | 655.906 |
| ENSMUSG000000043468 | 4_Adam30        | 0.50513 | 2.44144  | 0.52662  | NA       | 0       | 1.83561 | 1.19515 | 0       | 0       | 0       |
| ENSMUSG000000043485 | 2_Krt34         | 3.10431 | 0.60829  | 0.67451  | 0.76432  | 0.86819 | 4.58903 | 5.97577 | 3.60674 | 3.58612 | 0       |
| ENSMUSG000000043487 | 3_Acot6         | 98.4808 | -1.09974 | 5.34E-05 | 0.00029  | 71.1914 | 66.9998 | 49.0013 | 117.219 | 149.721 | 136.753 |
| ENSMUSG000000043496 | 7_Tril          | 77.8485 | -0.43522 | 0.1405   | 0.22641  | 59.0368 | 78.9313 | 60.9529 | 96.4803 | 99.5149 | 72.1749 |
| ENSMUSG000000043501 | 4_Lgals2        | 1.39145 | 0.98049  | 0.65521  | NA       | 0.86819 | 0       | 4.78062 | 1.80337 | 0.89653 | 0       |
| ENSMUSG000000043505 | 8_Gimap5        | 21.1083 | 0.77261  | 0.16165  | 0.25411  | 39.9367 | 22.9451 | 16.7322 | 16.2303 | 14.3445 | 16.4609 |
| ENSMUSG000000043510 | 12_Hscb         | 191.629 | -0.17384 | 0.36118  | 0.47832  | 191.001 | 188.15  | 160.151 | 193.862 | 202.616 | 213.992 |
| ENSMUSG000000043518 | 7_Rai2          | 65.5726 | 0.12302  | 0.7053   | 0.7889   | 79.8733 | 72.5066 | 52.5868 | 76.6433 | 57.378  | 54.4478 |
| ENSMUSG000000043531 | 15_Sorcs1       | 300.373 | -1.5135  | 2.62E-07 | 2.90E-06 | 123.283 | 234.958 | 108.759 | 515.764 | 466.196 | 353.277 |
| ENSMUSG000000043535 | 13_Setx         | 1913.17 | -0.28659 | 0.02354  | 0.05202  | 1888.31 | 1581.38 | 1700.7  | 1917.89 | 2209.05 | 2181.71 |
| ENSMUSG000000043541 | 16_Casc1        | 13.5828 | -0.40682 | 0.53424  | 0.64225  | 15.6274 | 11.0137 | 8.36608 | 22.5421 | 12.5514 | 11.396  |
| ENSMUSG000000043542 | 12_Zc2hc1a      | 367.99  | -0.52127 | 0.00317  | 0.00965  | 314.284 | 281.766 | 311.935 | 450.843 | 489.506 | 359.608 |
| ENSMUSG000000043549 | 13_Fam90a1b     | 0       | NA       | NA       | NA       | 0       | 0       | 0       | 0       | 0       | 0       |
| ENSMUSG000000043556 | 9_Fbxl7         | 16.799  | -0.07845 | 0.88847  | 0.92482  | 21.7047 | 12.8493 | 14.3418 | 18.0337 | 16.1376 | 17.7272 |
| ENSMUSG000000043557 | 15_Mdga1        | 70.4342 | -0.45209 | 0.20525  | 0.30734  | 54.6959 | 67.9176 | 56.1722 | 118.121 | 63.6537 | 62.0451 |
| ENSMUSG000000043572 | 7_Pars2         | 134.375 | 0.44521  | 0.05045  | 0.09786  | 131.965 | 155.109 | 178.078 | 110.006 | 112.066 | 119.025 |
| ENSMUSG000000043583 | 1_4930470P17Rik | 0.21104 | -0.99647 | 0.80707  | NA       | 0       | 0       | 0       | 0       | 0       | 1.26623 |
| ENSMUSG000000043587 | 15_Pxylp1       | 587.953 | 0.41589  | 0.00676  | 0.01815  | 694.551 | 635.121 | 684.823 | 461.663 | 465.299 | 586.263 |
| ENSMUSG000000043592 | 15_Unc5cl       | 14.4621 | 0.92191  | 0.18267  | 0.28036  | 9.55007 | 22.0273 | 25.0982 | 5.41011 | 10.7584 | 13.9285 |
| ENSMUSG000000043602 | 5_Zfp3          | 137.021 | -0.4954  | 0.02136  | 0.04794  | 118.074 | 122.068 | 100.393 | 153.287 | 164.962 | 163.343 |
| ENSMUSG000000043613 | 7_Mmp3          | 4621.8  | 0.73164  | 0.00031  | 0.00132  | 7596.65 | 4265.96 | 5445.12 | 3142.37 | 3964.46 | 3316.25 |
| ENSMUSG000000043614 | 13_Vps37d       | 33.8355 | 0.87384  | 0.03481  | 0.07185  | 35.5957 | 55.0683 | 40.6352 | 24.3455 | 23.3098 | 24.0583 |
| ENSMUSG000000043621 | 13_Ubxn10       | 3.83793 | -1.58965 | 0.19326  | 0.29325  | 0.86819 | 3.67122 | 1.19515 | 8.11517 | 5.37918 | 3.79868 |

|                     |                  |         |          |          |          |         |         |         |         |         |         |
|---------------------|------------------|---------|----------|----------|----------|---------|---------|---------|---------|---------|---------|
| ENSMUSG000000043629 | 12_1700019D03Rik | 195.347 | -1.11166 | 3.27E-06 | 2.56E-05 | 106.787 | 149.602 | 114.735 | 322.803 | 259.097 | 219.057 |
| ENSMUSG000000043631 | 7_Ecm2           | 431.779 | -0.84523 | 2.34E-07 | 2.62E-06 | 298.657 | 342.341 | 285.642 | 586.096 | 591.71  | 486.231 |
| ENSMUSG000000043633 | 6_Fam221b        | 53.1067 | 0.47672  | 0.16663  | 0.26043  | 68.5869 | 58.7396 | 58.5626 | 55.0028 | 44.8265 | 32.9219 |
| ENSMUSG000000043635 | 12_Adamts3       | 33.1306 | -1.77335 | 0.00081  | 0.00298  | 18.232  | 19.2739 | 7.17092 | 64.0197 | 60.9641 | 29.1232 |
| ENSMUSG000000043639 | 14_Rbm20         | 854.72  | -0.77424 | 0.00062  | 0.00239  | 669.373 | 789.313 | 432.646 | 1223.59 | 1135.9  | 877.495 |
| ENSMUSG000000043644 | 4_0610009L18Rik  | 15.4167 | -0.46439 | 0.48903  | 0.6008   | 18.232  | 15.6027 | 4.78062 | 24.3455 | 14.3445 | 15.1947 |
| ENSMUSG000000043648 | 7_Pld6           | 5.95855 | 0.31777  | 0.77227  | 0.84025  | 2.60457 | 10.0959 | 7.17092 | 9.91854 | 0.89653 | 5.06491 |
| ENSMUSG000000043659 | 11_Npsr1         | 222.259 | -1.5852  | 2.90E-07 | 3.15E-06 | 93.7643 | 161.534 | 77.685  | 367.888 | 397.163 | 235.518 |
| ENSMUSG000000043664 | 6_Tmem221        | 14.3614 | 1.09035  | 0.06927  | 0.12749  | 17.3638 | 21.1095 | 20.3176 | 9.91854 | 9.86184 | 7.59736 |
| ENSMUSG000000043668 | 13_Tox3          | 34.525  | -0.88511 | 0.06133  | 0.11499  | 24.3093 | 34.8766 | 13.1467 | 55.9045 | 35.8612 | 43.0517 |
| ENSMUSG000000043670 | 4_Diras1         | 14.5704 | -0.77937 | 0.38354  | 0.50115  | 10.4183 | 14.6849 | 7.17092 | 43.2809 | 8.06878 | 3.79868 |
| ENSMUSG000000043671 | 14_Dpy19I3       | 512.195 | -0.38646 | 0.01463  | 0.03483  | 428.017 | 500.204 | 403.962 | 631.18  | 588.124 | 521.685 |
| ENSMUSG000000043673 | 10_Kcns3         | 17.0454 | -0.98331 | 0.10315  | 0.17671  | 10.4183 | 15.6027 | 8.36608 | 28.8539 | 25.1029 | 13.9285 |
| ENSMUSG000000043681 | 5_Fam25c         | 352.909 | 0.93463  | 0.00064  | 0.00245  | 425.412 | 467.163 | 497.184 | 316.492 | 138.962 | 272.239 |
| ENSMUSG000000043683 | 3_Fem1a          | 1065.3  | 0.47138  | 0.00218  | 0.007    | 1179.87 | 1261.06 | 1272.84 | 1046.86 | 748.603 | 882.56  |
| ENSMUSG000000043687 | 15_1190005I06Rik | 25.4964 | 0.00303  | 0.99578  | 0.99719  | 18.232  | 40.3834 | 17.9273 | 38.7725 | 16.1376 | 21.5259 |
| ENSMUSG000000043702 | 9_Pde12          | 558.409 | 0.02748  | 0.86752  | 0.91021  | 546.091 | 507.546 | 638.212 | 478.795 | 608.744 | 571.068 |
| ENSMUSG000000043705 | 6_Capn13         | 365.171 | 0.56181  | 0.0004   | 0.00165  | 418.467 | 464.41  | 421.889 | 273.211 | 285.097 | 327.953 |
| ENSMUSG000000043716 | 13_Rpl7          | 28129.2 | -0.57176 | 9.69E-08 | 1.22E-06 | 23997.6 | 21920   | 21963.3 | 31856.5 | 36582.9 | 32454.7 |
| ENSMUSG000000043719 | 14_Col6a6        | 139.917 | 0.15204  | 0.51003  | 0.62027  | 150.197 | 159.698 | 131.467 | 151.483 | 111.17  | 135.486 |
| ENSMUSG000000043727 | 5_F830045P16Rik  | 0.29412 | -0.03469 | 0.99322  | NA       | 0.86819 | 0       | 0       | 0       | 0.89653 | 0       |
| ENSMUSG000000043733 | 14_Ptpn11        | 5110.62 | 0.12358  | 0.2155   | 0.31936  | 5155.3  | 5321.44 | 5510.86 | 4939.43 | 4613.55 | 5123.15 |
| ENSMUSG000000043740 | 14_B430306N03Rik | 33.061  | 3.80862  | 2.29E-07 | 2.56E-06 | 90.2916 | 32.1232 | 63.3432 | 9.91854 | 2.68959 | 0       |
| ENSMUSG000000043747 | 12_1520401A03Rik | 0.15297 | 0.92709  | 0.82027  | NA       | 0       | 0.91781 | 0       | 0       | 0       | 0       |
| ENSMUSG000000043753 | 2_Dmrt1a         | 6.43892 | -1.15678 | 0.29193  | 0.40577  | 2.60457 | 9.17806 | 0       | 9.91854 | 8.06878 | 8.86359 |
| ENSMUSG000000043760 | 16_Pkhd1         | 18.4462 | -1.15225 | 0.03858  | 0.07816  | 7.8137  | 14.6849 | 11.9515 | 29.7556 | 22.4133 | 24.0583 |
| ENSMUSG000000043773 | 4_1700048O20Rik  | 71.796  | -1.48851 | 4.89E-06 | 3.62E-05 | 39.0685 | 29.3698 | 45.4159 | 99.1854 | 129.1   | 88.6359 |
| ENSMUSG000000043782 | 8_Ccdc64b        | 786.962 | 1.28071  | 3.30E-11 | 1.23E-09 | 1012.31 | 1085.76 | 1246.55 | 540.11  | 340.682 | 496.361 |
| ENSMUSG000000043789 | 7_Vwce           | 2.01582 | 0.14696  | 0.93139  | NA       | 1.73638 | 4.58903 | 0       | 3.60674 | 0.89653 | 1.26623 |
| ENSMUSG000000043795 | 8_Prr33          | 194.943 | -0.22215 | 0.27669  | 0.38915  | 183.188 | 197.328 | 158.955 | 238.947 | 187.375 | 203.863 |
| ENSMUSG000000043807 | 6_Ly6g5b         | 12.8704 | 0.867    | 0.18827  | 0.28721  | 22.5729 | 16.5205 | 10.7564 | 9.01685 | 10.7584 | 7.59736 |
| ENSMUSG000000043811 | 5_Rtn4r          | 20.9841 | 1.06259  | 0.09155  | 0.15992  | 28.6502 | 17.4383 | 39.4401 | 23.4438 | 8.06878 | 8.86359 |
| ENSMUSG000000043822 | 18_AdamtsI5      | 652.287 | 0.79669  | 1.37E-05 | 8.95E-05 | 711.914 | 878.34  | 893.975 | 564.455 | 386.405 | 478.634 |
| ENSMUSG000000043831 | 11_Lysmd4        | 349.896 | 0.1125   | 0.45193  | 0.56641  | 374.189 | 356.109 | 360.937 | 348.952 | 345.164 | 314.024 |
| ENSMUSG000000043832 | 13_Clec4a3       | 73.5575 | 1.93699  | 3.55E-05 | 0.0002   | 202.288 | 56.9039 | 90.8317 | 31.559  | 33.1716 | 26.5908 |
| ENSMUSG000000043843 | 16_Tmem145       | 9.04469 | -1.19842 | 0.18962  | 0.28885  | 6.07732 | 4.58903 | 5.97577 | 22.5421 | 12.5514 | 2.53245 |
| ENSMUSG000000043850 | 15_Clrn1         | 12.7244 | -1.90961 | 0.01656  | 0.03871  | 7.8137  | 5.50683 | 2.39031 | 23.4438 | 8.06878 | 29.1232 |
| ENSMUSG000000043857 | 16_Mgat5b        | 22.8792 | 0.89678  | 0.12904  | 0.21169  | 28.6502 | 29.3698 | 31.074  | 22.5421 | 5.37918 | 20.2596 |
| ENSMUSG000000043865 | 3_Tas2r118       | 0.29498 | -0.03469 | 0.99322  | NA       | 0.86819 | 0       | 0       | 0.90169 | 0       | 0       |
| ENSMUSG000000043866 | 10_Taf10         | 1211.91 | 0.08296  | 0.49928  | 0.61039  | 1291    | 1133.49 | 1317.06 | 1238.01 | 1163.7  | 1128.21 |
| ENSMUSG000000043872 | 14_Znymy1        | 341.525 | -0.13761 | 0.42017  | 0.53599  | 355.957 | 307.465 | 311.935 | 316.492 | 398.956 | 358.342 |
| ENSMUSG000000043873 | 11_Chil5         | 1.62443 | 0.22336  | 0.91393  | NA       | 4.34094 | 0.91781 | 0       | 0.90169 | 3.58612 | 0       |
| ENSMUSG000000043881 | 8_Kbtbd7         | 382.059 | -0.54499 | 0.0002   | 0.00092  | 296.92  | 331.328 | 303.569 | 440.023 | 454.541 | 465.972 |
| ENSMUSG000000043885 | 13_Slc36a4       | 990.492 | -0.57007 | 4.80E-05 | 0.00026  | 832.593 | 866.408 | 691.994 | 1265.97 | 1178.04 | 1107.95 |
| ENSMUSG000000043895 | 5_S1pr2          | 267.031 | 0.37587  | 0.05557  | 0.10581  | 320.362 | 274.424 | 310.74  | 279.522 | 204.409 | 212.726 |
| ENSMUSG000000043897 | 12_Vmn2r2        | 2.4129  | 0.17081  | 0.91628  | NA       | 0       | 1.83561 | 5.97577 | 3.60674 | 1.79306 | 1.26623 |
| ENSMUSG000000043903 | 3_Gm22           | 54.4541 | 0.26852  | 0.4028   | 0.52033  | 56.4322 | 66.9998 | 54.9771 | 55.0028 | 43.93   | 49.3828 |
| ENSMUSG000000043909 | 16_Trp53bp1      | 2017.98 | -0.01744 | 0.87624  | 0.91628  | 1916.09 | 2065.06 | 2035.35 | 1877.31 | 2060.23 | 2153.85 |
| ENSMUSG000000043911 | 4_Olf922         | 0.6065  | 0.00563  | 0.99878  | NA       | 0       | 1.83561 | 0       | 1.80337 | 0       | 0       |
| ENSMUSG000000043913 | 14_Ccdc60        | 41.9348 | -0.99325 | 0.05862  | 0.11073  | 29.5184 | 41.3013 | 13.1467 | 79.3483 | 59.171  | 29.1232 |
| ENSMUSG000000043923 | 7_Ccdc84         | 93.6649 | -0.05839 | 0.16165  | 0.87308  | 88.5552 | 98.2052 | 88.4414 | 85.6601 | 104.894 | 96.2332 |
| ENSMUSG000000043924 | 16_Ncmap         | 42.8474 | 0.15715  | 0.72607  | 0.8049   | 42.5412 | 55.9861 | 37.0498 | 62.2163 | 25.1029 | 34.1881 |
| ENSMUSG000000043929 | 16_Klhl15        | 238.75  | -0.62114 | 0.00027  | 0.00118  | 191.87  | 193.657 | 178.078 | 281.326 | 282.407 | 305.161 |
| ENSMUSG000000043931 | 10_Gimap7        | 7.93095 | 3.06589  | 0.00396  | 0.01163  | 25.1775 | 6.42464 | 10.7564 | 0.90169 | 1.79306 | 2.53245 |
| ENSMUSG000000043932 | 5_Klri2          | 3.24349 | 5.13734  | 0.0043   | 0.01244  | 11.2864 | 4.58903 | 3.58546 | 0       | 0       | 0       |
| ENSMUSG000000043939 | 14_A530064D06Rik | 10.8207 | 3.66713  | 0.00077  | 0.00287  | 39.9367 | 7.34244 | 13.1467 | 2.70506 | 1.79306 | 0       |
| ENSMUSG000000043940 | 14_Wdfy3         | 3265.89 | 0.45198  | 8.78E-05 | 0.00044  | 3517.9  | 3822.66 | 3979.86 | 2943.1  | 2530.91 | 2800.89 |
| ENSMUSG000000043943 | 14_Naalad2       | 167.334 | -1.44476 | 6.80E-09 | 1.23E-07 | 88.5552 | 115.644 | 64.5383 | 260.587 | 242.96  | 231.72  |
| ENSMUSG000000043945 | 4_Adam6a         | 0.2894  | 1.67273  | 0.67976  | NA       | 1.73638 | 0       | 0       | 0       | 0       | 0       |
| ENSMUSG000000043953 | 12_Ccrl2         | 300.207 | 1.20599  | 3.83E-09 | 7.44E-08 | 441.908 | 351.52  | 463.72  | 154.188 | 215.167 | 174.739 |
| ENSMUSG000000043962 | 16_Thrap3        | 4859.18 | 0.1952   | 0.10087  | 0.17334  | 4981.67 | 5043.34 | 5535.95 | 4253.25 | 4289.9  | 5050.98 |
| ENSMUSG000000043964 | 14_Orai3         | 784.458 | 0.20282  | 0.17276  | 0.26801  | 777.897 | 818.683 | 922.659 | 807.91  | 640.123 | 739.477 |
| ENSMUSG000000043969 | 4_Emx2           | 783.966 | -0.15066 | 0.33306  | 0.44977  | 743.169 | 657.149 | 829.437 | 717.742 | 896.531 | 859.768 |
| ENSMUSG000000043972 | 7_Opn5           | 0.7338  | 0.51912  | 0.86226  | NA       | 2.60457 | 0       | 0       | 0.90169 | 0.89653 | 0       |
| ENSMUSG000000043986 | 5_Spata31d1d     | 0.21104 | -0.99647 | 0.80707  | NA       | 0       | 0       | 0       | 0       | 0       | 1.26623 |
| ENSMUSG000000043987 | 17_Cep164        | 1013.1  | 0.69278  | 2.39E-06 | 1.96E-05 | 1202.44 | 1192.23 | 1360.09 | 825.042 | 658.053 | 840.775 |
| ENSMUSG000000043991 | 3_Pura           | 2018.58 | -0.63053 | 4.39E-08 | 6.08E-07 | 1666.05 | 1541    | 1546.53 | 2422.83 | 2654.63 | 2280.47 |
| ENSMUSG000000043998 | 10_Mgat2         | 899.863 | -0.28151 | 0.03174  | 0.06659  | 801.338 | 779.217 | 856.925 | 890.865 | 1064.18 | 1006.65 |
| ENSMUSG000000043999 | 6_Gpr75          | 8.07721 | -0.69491 | 0.42441  | 0.5399   | 9.55007 | 6.42464 | 2.39031 | 5.13287 | 7.17224 | 7.59736 |
| ENSMUSG000000044005 | 13_Gls2          | 21.1216 | 0.16453  | 0.76472  | 0.83434  | 27.782  | 15.6027 | 23.9031 | 27.9522 | 18.8271 | 12.6623 |
| ENSMUSG000000044006 | 8_Cilp2          | 96.5044 | 0.47532  | 0.10421  | 0.17832  | 97.2371 | 143.178 | 95.6123 | 82.9551 | 66.3433 | 93.7008 |
| ENSMUSG000000044014 | 8_Npy5r          | 0       | NA       | NA       | NA       | 0       | 0       | 0       | 0       | 0       | 0       |
| ENSMUSG000000044017 | 16_Adgrd1        | 169.424 | 0.4487   | 0.08941  | 0.15683  | 191.87  | 173.465 | 222.299 | 193.862 | 114.756 | 120.292 |
| ENSMUSG000000044018 | 3_Mrpl50         | 614.427 | -0.60868 | 4.54E-05 | 0.00025  | 489.658 | 451.56  | 519.892 | 675.362 | 834.67  | 715.418 |
| ENSMUSG000000044022 | 5_Pcdhb21        | 42.1267 | -0.64666 | 0.08508  | 0.15046  | 33.8593 | 27.5342 | 37.0498 | 52.2978 | 41.2404 | 60.7789 |
| ENSMUSG000000044024 | 15_Rell2         | 14.4764 | 0.28764  | 0.67922  | 0.76781  | 26.0457 | 11.0137 | 10.7564 | 11.7219 | 19.7237 | 7.59736 |
| ENSMUSG000000044026 | 2_Slc35g1        | 703.308 | -1.10473 | 3.06E-08 | 4.47E-07 | 413.258 | 563.533 | 362.132 | 992.756 | 1080.32 | 807.853 |
| ENSMUSG000000044030 | 4_Irf2bp1        | 436.235 | 0.80295  | 1.39E-05 | 9.06E-05 | 501.813 | 563.533 | 598.772 | 376.003 | 258.201 | 319.089 |
| ENSMUSG000000044033 | 16_Ccdc141       | 895.728 | -0.82497 | 2.57E-06 | 2.08E-05 | 648.537 | 714.971 | 576.064 | 1284.9  | 1247.07 | 902.82  |

|                    |                  |         |          |          |          |         |         |         |         |         |         |
|--------------------|------------------|---------|----------|----------|----------|---------|---------|---------|---------|---------|---------|
| ENSMUSG00000044034 | 11_Npb           | 1.46825 | -0.50006 | 0.80723  | NA       | 1.73638 | 1.83561 | 0       | 2.70506 | 0       | 2.53245 |
| ENSMUSG00000044037 | 15_Als2cl        | 3333.22 | 1.1631   | 5.08E-16 | 5.74E-14 | 4161.23 | 4341.22 | 5322.02 | 1972.89 | 1896.16 | 2305.8  |
| ENSMUSG00000044041 | 4_Krt13          | 17811   | 1.4344   | 2.33E-15 | 2.35E-13 | 23868.2 | 20642.4 | 33494.2 | 10210.7 | 8615.66 | 10034.8 |
| ENSMUSG00000044042 | 18_Fmn1          | 855.733 | -0.5382  | 0.00015  | 0.00069  | 669.373 | 779.217 | 645.383 | 1015.3  | 1098.25 | 926.878 |
| ENSMUSG00000044043 | 4_Pcdhb14        | 127.626 | -1.12729 | 4.53E-06 | 3.40E-05 | 70.3233 | 97.2874 | 72.9044 | 178.534 | 190.961 | 155.746 |
| ENSMUSG00000044052 | 3_Ccr10          | 10.5891 | 0.91024  | 0.30312  | 0.41796  | 13.0228 | 9.17806 | 19.1225 | 9.91854 | 0.89653 | 11.396  |
| ENSMUSG00000044055 | 5_Otos           | 1.25635 | -0.11166 | 0.95415  | NA       | 1.73638 | 1.83561 | 0       | 1.80337 | 0.89653 | 1.26623 |
| ENSMUSG00000044056 | 3_Efcab9         | 1.9968  | 0.52144  | 0.76078  | NA       | 2.60457 | 0.91781 | 3.58546 | 3.60674 | 0       | 1.26623 |
| ENSMUSG00000044060 | 17_A830010M20Rik | 143.712 | -0.78079 | 0.00045  | 0.00181  | 125.019 | 97.2874 | 94.4172 | 186.649 | 182.892 | 176.006 |
| ENSMUSG00000044066 | 14_Cep68         | 550.96  | -0.16325 | 0.23428  | 0.34085  | 525.254 | 547.93  | 486.428 | 591.506 | 611.434 | 543.211 |
| ENSMUSG00000044067 | 6_Gpr22          | 3.19966 | -4.10385 | 0.04093  | 0.08212  | 0       | 0       | 1.19515 | 12.6236 | 5.37918 | 0       |
| ENSMUSG00000044068 | 6_Zrsr1          | 467.084 | -0.82711 | 1.92E-07 | 2.21E-06 | 372.453 | 344.177 | 292.813 | 632.983 | 610.537 | 549.542 |
| ENSMUSG00000044071 | 7_Fam19a2        | 3.17465 | -1.95351 | 0.19355  | 0.29353  | 0       | 2.75342 | 1.19515 | 2.70506 | 9.86184 | 2.53245 |
| ENSMUSG00000044072 | 14_Eml6          | 74.8138 | -0.8627  | 0.00858  | 0.02218  | 49.4867 | 67.9176 | 41.8304 | 117.219 | 97.7218 | 74.7074 |
| ENSMUSG00000044080 | 9_S100a1         | 1165.76 | -0.93535 | 4.03E-05 | 0.00023  | 770.951 | 1032.53 | 597.577 | 1949.44 | 1375.28 | 1268.76 |
| ENSMUSG00000044083 | 11_Efcab8        | 2.14899 | 0.04074  | 0.97969  | NA       | 1.73638 | 3.67122 | 1.19515 | 2.70506 | 3.58612 | 0       |
| ENSMUSG00000044084 | 2_4933402P03Rik  | 0.15028 | -0.99647 | 0.80707  | NA       | 0       | 0       | 0       | 0.90169 | 0       | 0       |
| ENSMUSG00000044086 | 8_Lmod3          | 33.5472 | -1.81461 | 0.00035  | 0.00146  | 9.55007 | 22.9451 | 11.9515 | 69.4298 | 36.7578 | 50.6491 |
| ENSMUSG00000044087 | 8_C130050O18Rik  | 12.2888 | 1.19595  | 0.08815  | 0.15499  | 19.9683 | 10.0959 | 21.5128 | 9.91854 | 7.17224 | 5.06491 |
| ENSMUSG00000044098 | 14_Rsbn1         | 726.004 | -0.41786 | 0.00381  | 0.01125  | 644.196 | 581.889 | 639.407 | 757.416 | 940.461 | 792.658 |
| ENSMUSG00000044103 | 4_Il1f9          | 524.201 | 0.18895  | 0.43694  | 0.55236  | 587.764 | 431.369 | 657.335 | 375.101 | 658.053 | 435.582 |
| ENSMUSG00000044117 | 12_2900011O08Rik | 20.8234 | -1.86384 | 0.03747  | 0.0763   | 15.6274 | 11.0137 | 0       | 54.1011 | 34.0682 | 10.1298 |
| ENSMUSG00000044120 | 3_Olfr683        | 2.31469 | 0.75906  | 0.62296  | NA       | 2.60457 | 3.67122 | 2.39031 | 0       | 2.68959 | 2.53245 |
| ENSMUSG00000044122 | 14_Proca1        | 163.711 | -0.1179  | 0.55877  | 0.6644   | 171.033 | 144.095 | 155.37  | 162.303 | 165.858 | 183.603 |
| ENSMUSG00000044134 | 9_Fam109a        | 217.517 | 0.83096  | 3.38E-05 | 0.00019  | 285.634 | 247.808 | 302.374 | 178.534 | 136.273 | 154.48  |
| ENSMUSG00000044139 | 12_Prss53        | 22.9663 | 0.97767  | 0.04738  | 0.09273  | 25.1775 | 37.63   | 28.6837 | 18.0337 | 14.3445 | 13.9285 |
| ENSMUSG00000044145 | 2_1810024B03Rik  | 5.98561 | 0.19336  | 0.84258  | 0.89277  | 10.4183 | 2.75342 | 5.97577 | 8.11517 | 3.58612 | 5.06491 |
| ENSMUSG00000044147 | 7_Arf6           | 3975.08 | 0.2703   | 0.06442  | 0.11985  | 4229.81 | 3885.99 | 4922.84 | 3118.03 | 3644.4  | 4049.39 |
| ENSMUSG00000044148 | 6_1810030O07Rik  | 1162.71 | -0.20923 | 0.06541  | 0.12136  | 1111.28 | 1076.59 | 1046.95 | 1174.9  | 1299.07 | 1267.49 |
| ENSMUSG00000044149 | 6_Nkrf           | 189.52  | -0.11958 | 0.61687  | 0.71539  | 205.761 | 159.698 | 179.273 | 149.68  | 237.581 | 205.129 |
| ENSMUSG00000044150 | 12_A830080D01Rik | 182.406 | -0.49686 | 0.01936  | 0.04401  | 169.297 | 137.671 | 147.004 | 192.059 | 248.339 | 200.064 |
| ENSMUSG00000044155 | 11_Lsm8          | 758.856 | -0.17    | 0.26405  | 0.37517  | 717.992 | 632.368 | 792.387 | 708.725 | 835.566 | 866.099 |
| ENSMUSG00000044156 | 14_Hepacam2      | 7.31775 | -0.23672 | 0.77648  | 0.84375  | 9.55007 | 4.58903 | 5.97577 | 9.91854 | 6.27571 | 7.59736 |
| ENSMUSG00000044162 | 11_Trip3         | 24.6666 | 0.4077   | 0.41037  | 0.52682  | 21.7047 | 28.452  | 34.6595 | 18.0337 | 28.689  | 16.4609 |
| ENSMUSG00000044164 | 2_Rnf182         | 23.0122 | -0.7863  | 0.13378  | 0.21771  | 21.7047 | 15.6027 | 13.1467 | 38.7725 | 19.7237 | 29.1232 |
| ENSMUSG00000044165 | 12_Bcl2l15       | 158.031 | -0.32905 | 0.19285  | 0.29276  | 137.174 | 158.78  | 124.296 | 142.466 | 225.926 | 159.545 |
| ENSMUSG00000044167 | 6_Foxo1          | 1731.9  | 0.18665  | 0.19518  | 0.29536  | 1769.37 | 1793.39 | 1967.22 | 1381.38 | 1611.07 | 1868.95 |
| ENSMUSG00000044170 | 4_Olfr1384       | 1.04352 | 2.19914  | 0.40618  | NA       | 2.60457 | 0       | 2.39031 | 0       | 0       | 1.26623 |
| ENSMUSG00000044172 | 6_Ptx4           | 25.744  | 0.22031  | 0.63253  | 0.72906  | 30.3866 | 26.6164 | 26.2934 | 30.6573 | 21.5167 | 18.9934 |
| ENSMUSG00000044176 | 11_Spink10       | 1.0365  | -1.34535 | 0.66597  | NA       | 1.73638 | 0       | 0       | 0       | 4.48265 | 0       |
| ENSMUSG00000044177 | 4_Wfikkn2        | 299.946 | -0.4766  | 0.12798  | 0.21024  | 283.898 | 330.41  | 137.443 | 455.351 | 288.683 | 303.894 |
| ENSMUSG00000044186 | 10_Nkx2-6        | 0.73734 | 1.72465  | 0.55961  | NA       | 2.60457 | 0.91781 | 0       | 0.90169 | 0       | 0       |
| ENSMUSG00000044197 | 8_Gpr146         | 555.847 | -0.65285 | 0.003    | 0.00919  | 449.722 | 509.382 | 337.033 | 865.618 | 606.055 | 567.27  |
| ENSMUSG00000044199 | 5_S1pr4          | 33.5064 | 1.26901  | 0.00219  | 0.007    | 50.3549 | 47.7259 | 44.2207 | 24.3455 | 17.9306 | 16.4609 |
| ENSMUSG00000044201 | 9_Cdc25c         | 166.206 | 0.05226  | 0.81787  | 0.87445  | 198.815 | 151.438 | 156.565 | 137.056 | 174.823 | 178.538 |
| ENSMUSG00000044206 | 3_Vsig4          | 2.78377 | -0.5641  | 0.71114  | 0.79356  | 2.60457 | 1.83561 | 2.39031 | 1.80337 | 0.86878 | 0       |
| ENSMUSG00000044216 | 6_Kcnj4          | 0.50158 | 0.94287  | 0.78026  | NA       | 0       | 0.91781 | 1.19515 | 0       | 0.89653 | 0       |
| ENSMUSG00000044217 | 16_Aqp5          | 77738.6 | 1.36838  | 2.85E-10 | 8.05E-09 | 96495.7 | 109773  | 129940  | 50950.6 | 28356.4 | 50916.3 |
| ENSMUSG00000044221 | 14_Grsf1         | 1360.99 | -0.33979 | 0.00779  | 0.02046  | 1269.29 | 1172.96 | 1161.69 | 1375.97 | 1679.2  | 1506.81 |
| ENSMUSG00000044222 | 3_Defb13         | 0.1447  | 0.92709  | 0.82027  | NA       | 0.86819 | 0       | 0       | 0       | 0       | 0       |
| ENSMUSG00000044224 | 16_Dnajc21       | 1067.74 | -0.33189 | 0.01183  | 0.02914  | 958.48  | 882.929 | 994.368 | 1072.1  | 1196.87 | 1301.68 |
| ENSMUSG00000044229 | 8_Nxpe4          | 53.0413 | -0.66106 | 0.04286  | 0.0853   | 42.5412 | 40.3834 | 40.6352 | 66.7247 | 73.5155 | 54.4478 |
| ENSMUSG00000044231 | 2_Nhlrc1         | 72.3995 | -0.5351  | 0.13588  | 0.22014  | 38.2003 | 79.8491 | 59.7577 | 82.0534 | 104.894 | 69.6425 |
| ENSMUSG00000044244 | 18_Il20rb        | 1845.83 | 0.39293  | 0.00197  | 0.00642  | 2120.98 | 1952.17 | 2212.23 | 1489.58 | 1513.34 | 1786.65 |
| ENSMUSG00000044248 | 3_Vmn1r45        | 0.29498 | -0.03469 | 0.99322  | NA       | 0.86819 | 0       | 0       | 0.90169 | 0       | 0       |
| ENSMUSG00000044250 | 7_Pced1b         | 135.266 | 0.83611  | 0.00016  | 0.00076  | 167.56  | 167.958 | 185.249 | 110.006 | 89.6531 | 91.1683 |
| ENSMUSG00000044252 | 17_Osbpl1a       | 973.813 | -0.33537 | 0.00502  | 0.01413  | 849.956 | 835.203 | 899.951 | 1102.76 | 1139.49 | 1015.51 |
| ENSMUSG00000044254 | 6_Pcsk9          | 29.3043 | -0.55168 | 0.27191  | 0.3837   | 18.232  | 30.2876 | 22.7079 | 46.8876 | 19.7237 | 37.9868 |
| ENSMUSG00000044258 | 9_Ctla2a         | 136.771 | -0.49895 | 0.07695  | 0.13887  | 133.701 | 98.2052 | 108.759 | 166.812 | 201.719 | 111.428 |
| ENSMUSG00000044279 | 15_Crb3          | 667.708 | 1.23435  | 6.10E-08 | 8.15E-07 | 799.602 | 865.491 | 1146.15 | 480.598 | 278.821 | 435.582 |
| ENSMUSG00000044287 | 6_Nrn1l          | 1.89519 | 1.62342  | 0.38414  | NA       | 2.60457 | 3.67122 | 2.39031 | 2.70506 | 0       | 0       |
| ENSMUSG00000044288 | 6_Cnr1           | 22.9229 | -1.72213 | 0.00234  | 0.00742  | 10.4183 | 11.0137 | 10.7564 | 50.4944 | 35.8612 | 18.9934 |
| ENSMUSG00000044294 | 7_Krt84          | 4.20042 | 0.02103  | 0.98459  | 0.98955  | 4.34094 | 3.67122 | 4.78062 | 2.70506 | 7.17224 | 2.53245 |
| ENSMUSG00000044296 | 10_Zfp879        | 50.0505 | -0.69    | 0.05118  | 0.09889  | 49.4867 | 33.9588 | 31.074  | 67.6264 | 57.378  | 60.7789 |
| ENSMUSG00000044303 | 6_Cdkn2a         | 2.22534 | 0.55008  | 0.75837  | NA       | 5.20913 | 2.75342 | 0       | 1.80337 | 3.58612 | 0       |
| ENSMUSG00000044308 | 17_Ubr3          | 2719.07 | -0.2615  | 0.01586  | 0.03736  | 2522.09 | 2419.34 | 2477.55 | 2716.78 | 3068.82 | 3109.85 |
| ENSMUSG00000044309 | 7_Apol7c         | 8.74053 | 0.18776  | 0.8062   | 0.86596  | 6.07732 | 10.0959 | 11.9515 | 9.91854 | 8.06878 | 6.33113 |
| ENSMUSG00000044313 | 13_Mab21l3       | 64.5761 | 0.32214  | 0.3818   | 0.49947  | 65.1141 | 57.8218 | 92.0269 | 38.7725 | 56.4814 | 77.2398 |
| ENSMUSG00000044317 | 7_Gpr4           | 40.1763 | -0.45772 | 0.32367  | 0.43966  | 33.8593 | 49.5615 | 17.9273 | 45.0843 | 59.171  | 35.4544 |
| ENSMUSG00000044320 | 14_1700001O22Rik | 18.1239 | 0.65035  | 0.24316  | 0.35127  | 24.3093 | 20.1917 | 21.5128 | 9.91854 | 12.5514 | 20.2596 |
| ENSMUSG00000044322 | 6_Dsc1           | 30.8916 | -0.04541 | 0.92869  | 0.95266  | 48.6186 | 26.6164 | 15.537  | 28.8539 | 34.0682 | 31.6557 |
| ENSMUSG00000044328 | 13_Trp53i13      | 77.8713 | 0.74232  | 0.07813  | 0.14055  | 104.183 | 109.219 | 78.8802 | 91.0702 | 26.8959 | 56.9802 |
| ENSMUSG00000044337 | 5_Ackr3          | 1170.16 | -0.1706  | 0.30821  | 0.42313  | 1148.61 | 1090.35 | 1064.88 | 1540.98 | 1082.11 | 1094.02 |
| ENSMUSG00000044338 | 9_Aplnr          | 41.0406 | -0.53656 | 0.22188  | 0.32677  | 47.7504 | 29.3698 | 22.7079 | 54.1011 | 34.0682 | 58.2464 |
| ENSMUSG00000044339 | 12_Alkbh2        | 37.8957 | 0.78762  | 0.04084  | 0.08197  | 49.4867 | 39.4656 | 54.9771 | 27.9522 | 25.1029 | 30.3894 |
| ENSMUSG00000044340 | 7_Phlpd1         | 1531.05 | 0.4385   | 6.71E-05 | 0.00035  | 1670.39 | 1786.97 | 1828.59 | 1332.69 | 1238.11 | 1329.54 |
| ENSMUSG00000044345 | 9_Marveld1       | 1028.23 | 0.03051  | 0.82289  | 0.87865  | 1017.52 | 1175.71 | 922.659 | 1025.22 | 986.184 | 1042.1  |
| ENSMUSG00000044348 | 14_Slc25a53      | 101.899 | -0.52815 | 0.02987  | 0.06325  | 82.4779 | 81.6847 | 86.0511 | 126.236 | 105.791 | 129.155 |
| ENSMUSG00000044349 | 15_Snhg11        | 166.064 | -2.36971 | 0.00514  | 0.01444  | 63.3778 | 75.2601 | 22.7079 | 510.354 | 247.442 | 77.2398 |

|                     |                  |         |          |          |          |         |         |         |         |         |         |
|---------------------|------------------|---------|----------|----------|----------|---------|---------|---------|---------|---------|---------|
| ENSMUSG000000044350 | 14_Lacc1         | 118.382 | 0.08007  | 0.73085  | 0.80888  | 131.096 | 103.712 | 130.272 | 110.006 | 117.446 | 117.759 |
| ENSMUSG000000044352 | 6_Sowaha         | 40.6967 | -0.93707 | 0.01333  | 0.03219  | 32.9912 | 27.5342 | 22.7079 | 49.5927 | 49.3092 | 62.0451 |
| ENSMUSG000000044359 | 1_P2ry4          | 18.0747 | 0.59195  | 0.2806   | 0.3934   | 28.6502 | 17.4383 | 19.1225 | 16.2303 | 14.3445 | 12.6623 |
| ENSMUSG000000044361 | 15_BC024139      | 3.37956 | 1.00414  | 0.4123   | 0.52861  | 6.07732 | 2.75342 | 4.78062 | 3.60674 | 1.79306 | 1.26623 |
| ENSMUSG000000044362 | 7_Ccdc89         | 43.9478 | -0.17268 | 0.65305  | 0.74681  | 37.3321 | 33.041  | 53.7819 | 49.5927 | 36.7578 | 53.1815 |
| ENSMUSG000000044364 | 5_Tmem74b        | 6.68289 | -0.32808 | 0.70706  | 0.79046  | 4.34094 | 6.42464 | 7.17092 | 10.8202 | 6.27571 | 5.06491 |
| ENSMUSG000000044365 | 15_Cxxc4         | 97.7399 | -1.46973 | 0.00014  | 0.00069  | 47.7504 | 75.2601 | 32.2692 | 192.961 | 147.031 | 91.1683 |
| ENSMUSG000000044367 | 7_Slc16a13       | 555.091 | 0.84793  | 6.93E-07 | 6.66E-06 | 670.241 | 666.327 | 803.144 | 357.969 | 363.095 | 469.77  |
| ENSMUSG000000044375 | 7_BC027072       | 108.532 | -1.86254 | 0.0007   | 0.00265  | 65.1141 | 52.3149 | 22.7079 | 324.607 | 128.204 | 58.2464 |
| ENSMUSG000000044378 | 12_Slc15a5       | 1.26225 | -2.66617 | 0.22802  | NA       | 0       | 0.91781 | 0       | 1.80337 | 3.58612 | 1.26623 |
| ENSMUSG000000044387 | 5_2410080102Rik  | 0.60564 | 0.00735  | 0.99816  | NA       | 0       | 1.83561 | 0       | 0.90169 | 0.89653 | 0       |
| ENSMUSG000000044390 | 4_Tigd3          | 16.5258 | 0.49592  | 0.42381  | 0.53937  | 13.0228 | 16.5205 | 28.6837 | 18.0337 | 8.96531 | 13.9285 |
| ENSMUSG000000044393 | 15_Dsg2          | 1665.52 | 0.24654  | 0.10044  | 0.17273  | 1650.43 | 1831.02 | 1939.74 | 1299.33 | 1499.9  | 1772.72 |
| ENSMUSG000000044405 | 4_Adig           | 2.26747 | 1.28089  | 0.43042  | NA       | 1.73638 | 5.50683 | 2.39031 | 2.70506 | 0       | 1.26623 |
| ENSMUSG000000044408 | 6_Sptssa         | 1190.13 | -0.6083  | 1.06E-08 | 1.79E-07 | 942.853 | 958.189 | 927.44  | 1424.66 | 1463.14 | 1424.51 |
| ENSMUSG000000044424 | 3_Gm9493         | 1241.13 | -2.10223 | 7.93E-24 | 2.24E-21 | 516.572 | 473.588 | 415.914 | 1568.03 | 2686.01 | 1786.65 |
| ENSMUSG000000044429 | 8_Cryga          | 261.227 | -0.66621 | 0.65741  | 0.75028  | 109.392 | 480.93  | 15.537  | 814.222 | 57.378  | 89.9021 |
| ENSMUSG000000044430 | 11_Klk12         | 2.06937 | 4.4841   | 0.02538  | NA       | 6.07732 | 2.75342 | 3.58546 | 0       | 0       | 0       |
| ENSMUSG000000044433 | 5_Camsap3        | 1118.78 | 1.13538  | 8.25E-11 | 2.73E-09 | 1380.42 | 1504.28 | 1728.19 | 815.124 | 554.056 | 730.613 |
| ENSMUSG000000044441 | 2_Olfr1442       | 0.44912 | -2.32858 | 0.56096  | NA       | 0       | 0       | 0       | 0.90169 | 1.79306 | 0       |
| ENSMUSG000000044442 | 11_N6amt1        | 475.826 | -0.48719 | 0.0018   | 0.00594  | 442.776 | 398.328 | 346.595 | 536.503 | 592.607 | 538.146 |
| ENSMUSG000000044447 | 4_Dock5          | 1077.4  | -0.61029 | 3.88E-05 | 0.00022  | 847.352 | 990.312 | 719.483 | 1336.3  | 1294.59 | 1276.36 |
| ENSMUSG000000044452 | 10_Zfp507        | 884.197 | 0.01083  | 0.93403  | 0.95651  | 858.638 | 896.696 | 905.927 | 803.402 | 864.255 | 976.261 |
| ENSMUSG000000044453 | 5_Ffar1          | 0.21104 | -0.99647 | 0.80707  | NA       | 0       | 0       | 0       | 0       | 0       | 1.26623 |
| ENSMUSG000000044456 | 16_Rin3          | 78.6049 | 0.4565   | 0.13027  | 0.21328  | 100.71  | 86.2737 | 86.0511 | 85.6601 | 54.6884 | 58.2464 |
| ENSMUSG000000044461 | 5_Shisa2         | 705.315 | -0.48743 | 0.01286  | 0.0312   | 561.718 | 703.957 | 495.989 | 1010.79 | 735.155 | 724.282 |
| ENSMUSG000000044465 | 18_Fam160a2      | 1577.83 | 0.80662  | 3.96E-11 | 1.44E-09 | 1918.7  | 1893.43 | 2211.04 | 1132.52 | 1098.25 | 1213.05 |
| ENSMUSG000000044468 | 14_Fam46c        | 308.342 | -0.74447 | 0.00025  | 0.00108  | 227.465 | 249.643 | 213.933 | 460.761 | 305.717 | 392.53  |
| ENSMUSG000000044469 | 7_Tnfaip8l1      | 34.2648 | 0.51715  | 0.19834  | 0.29905  | 38.2003 | 42.2191 | 40.6352 | 34.264  | 22.4133 | 27.857  |
| ENSMUSG000000044471 | 11_Lincpnt       | 3.4584  | -0.13957 | 0.91838  | 0.94576  | 6.07732 | 3.67122 | 0       | 5.41011 | 1.79306 | 3.79868 |
| ENSMUSG000000044475 | 13_Asccl1        | 788.118 | 0.23634  | 0.08158  | 0.14558  | 799.602 | 870.08  | 886.804 | 703.315 | 666.122 | 802.788 |
| ENSMUSG000000044477 | 10_Zfand3        | 1319.62 | 0.43664  | 0.00593  | 0.01625  | 1437.72 | 1577.71 | 1538.16 | 1330.89 | 918.944 | 1114.28 |
| ENSMUSG000000044496 | 6_2510039O18Rik  | 1143.15 | 1.22511  | 1.24E-08 | 2.06E-07 | 1374.34 | 1579.54 | 1850.1  | 855.7   | 478.747 | 720.483 |
| ENSMUSG000000044499 | 11_Hs3st5        | 17.9343 | -1.58044 | 0.01363  | 0.03275  | 11.2864 | 12.8493 | 2.39031 | 29.7556 | 25.9994 | 25.3245 |
| ENSMUSG000000044501 | 17_Zfp758        | 174.001 | -0.71631 | 0.00062  | 0.00238  | 133.701 | 150.52  | 109.954 | 206.486 | 226.822 | 216.525 |
| ENSMUSG000000044502 | 16_Bod1          | 1055    | -0.16706 | 0.16213  | 0.25468  | 950.666 | 994.901 | 1037.39 | 1192.93 | 1058.8  | 1095.29 |
| ENSMUSG000000044505 | 5_Lingo4         | 4.24802 | -0.07502 | 0.94815  | 0.9659   | 4.34094 | 4.58903 | 3.58546 | 9.01685 | 2.68959 | 1.26623 |
| ENSMUSG000000044518 | 3_Foxe3          | 0.96782 | -1.08575 | 0.69132  | NA       | 0       | 1.83561 | 0       | 2.70506 | 0       | 1.26623 |
| ENSMUSG000000044519 | 8_Zfp488         | 2.38087 | -2.12556 | 0.29914  | NA       | 2.60457 | 0       | 0       | 4.50843 | 7.17224 | 0       |
| ENSMUSG000000044522 | 8_A730020M07Rik  | 13.005  | -0.53456 | 0.42664  | 0.54197  | 13.891  | 12.8493 | 4.78062 | 16.2303 | 12.5514 | 17.7272 |
| ENSMUSG000000044528 | 5_Tram1l1        | 33.0975 | -1.50747 | 0.00326  | 0.00986  | 16.4956 | 27.5342 | 7.17092 | 58.6096 | 45.7231 | 43.0517 |
| ENSMUSG000000044533 | 15_Rps2          | 8571.05 | 0.59508  | 3.07E-06 | 2.42E-05 | 9709.82 | 9913.22 | 11320.5 | 7620.14 | 6131.37 | 6731.26 |
| ENSMUSG000000044534 | 7_Ackr2          | 10.9622 | 0.6511   | 0.34009  | 0.45658  | 12.1546 | 14.6849 | 13.1467 | 8.11517 | 6.27571 | 11.396  |
| ENSMUSG000000044542 | 3_Propr1         | 0.36401 | -0.03469 | 0.99322  | NA       | 0       | 0.91781 | 0       | 0       | 0       | 1.26623 |
| ENSMUSG000000044544 | 3_4921513103Rik  | 0.50516 | -1.00911 | 0.76476  | NA       | 0.86819 | 0       | 0       | 0       | 0.89653 | 1.26623 |
| ENSMUSG000000044548 | 11_Dact1         | 175.53  | -0.65175 | 0.00221  | 0.00707  | 140.647 | 150.52  | 118.32  | 241.652 | 213.374 | 188.668 |
| ENSMUSG000000044550 | 11_Tceal3        | 228.345 | -1.14678 | 0.00018  | 0.00083  | 131.096 | 203.753 | 90.8317 | 401.25  | 294.959 | 248.18  |
| ENSMUSG000000044551 | 13_9930012K11Rik | 50.8829 | -0.13501 | 0.71169  | 0.79388  | 51.2231 | 42.2191 | 52.5868 | 71.2332 | 47.5161 | 40.5193 |
| ENSMUSG000000044556 | 3_Tex38          | 4.06323 | 0.10752  | 0.92592  | 0.95114  | 1.73638 | 2.75342 | 8.36608 | 4.50843 | 4.48265 | 2.53245 |
| ENSMUSG000000044562 | 10_Rasip1        | 76.3791 | 0.44139  | 0.22301  | 0.32799  | 72.9278 | 89.0271 | 102.783 | 96.4803 | 50.2057 | 46.8504 |
| ENSMUSG000000044566 | 15_Cage1         | 119.608 | -0.39426 | 0.08924  | 0.15659  | 109.392 | 101.876 | 98.0026 | 123.531 | 129.1   | 155.746 |
| ENSMUSG000000044573 | 14_Acp1          | 1273.81 | -0.15906 | 0.14787  | 0.23614  | 1204.18 | 1150.93 | 1256.11 | 1301.13 | 1352.86 | 1377.65 |
| ENSMUSG000000044576 | 6_Gareml         | 0.65272 | 0.15968  | 0.95914  | NA       | 0       | 0.91781 | 1.19515 | 1.80337 | 0       | 0       |
| ENSMUSG000000044581 | 7_4932415D10Rik  | 0.15028 | -0.99647 | 0.80707  | NA       | 0       | 0       | 0       | 0.90169 | 0       | 0       |
| ENSMUSG000000044583 | 13_Tlir7         | 59.6392 | 0.66415  | 0.09029  | 0.1581   | 102.446 | 48.6437 | 68.1238 | 56.8062 | 34.9647 | 46.8504 |
| ENSMUSG000000044594 | 14_Serpinb3a     | 666.924 | 0.64257  | 0.04748  | 0.09288  | 762.269 | 458.903 | 1219.06 | 386.823 | 719.914 | 454.575 |
| ENSMUSG000000044595 | 10_Dnd1          | 18.6587 | 0.90853  | 0.09634  | 0.16672  | 17.3638 | 24.7808 | 31.074  | 12.6236 | 13.448  | 12.6623 |
| ENSMUSG000000044600 | 14_Smim7         | 2768.68 | -0.31302 | 0.003    | 0.00918  | 2575.05 | 2417.5  | 2414.21 | 2891.71 | 3067.03 | 3246.61 |
| ENSMUSG000000044617 | 7_Zbtb39         | 538.344 | 0.38682  | 0.00307  | 0.00937  | 605.996 | 600.245 | 623.87  | 479.697 | 442.886 | 477.368 |
| ENSMUSG000000044626 | 12_Liph          | 1459.21 | 0.10756  | 0.41436  | 0.53052  | 1451.61 | 1468.49 | 1620.63 | 1230.8  | 1497.21 | 1486.55 |
| ENSMUSG000000044627 | 11_Swi5          | 3223.6  | -0.14289 | 0.14096  | 0.22705  | 3113.32 | 2994.8  | 3083.5  | 3233.44 | 3438.19 | 3478.33 |
| ENSMUSG000000044628 | 4_Rnf208         | 219.353 | 1.34735  | 5.39E-06 | 3.96E-05 | 270.875 | 326.739 | 346.595 | 155.992 | 69.0329 | 146.882 |
| ENSMUSG000000044629 | 5_Cnrip1         | 138.652 | -0.94884 | 4.65E-05 | 0.00026  | 95.5007 | 100.041 | 88.4414 | 217.306 | 168.548 | 162.077 |
| ENSMUSG000000044633 | 3_B530045E10Rik  | 0.34861 | -0.03469 | 0.99322  | NA       | 0       | 0       | 1.19515 | 0       | 0.89653 | 0       |
| ENSMUSG000000044636 | 5_Csmp2          | 158.999 | 0.31713  | 0.14295  | 0.22961  | 189.265 | 172.547 | 166.126 | 124.433 | 134.48  | 167.142 |
| ENSMUSG000000044641 | 7_Pard6b         | 1279.8  | 0.68485  | 5.97E-06 | 4.33E-05 | 1486.34 | 1478.58 | 1771.22 | 1137.03 | 924.323 | 881.294 |
| ENSMUSG000000044645 | 7_Gm7334         | 302.101 | -0.75068 | 0.00014  | 0.00067  | 203.156 | 240.465 | 233.055 | 348.952 | 459.024 | 327.953 |
| ENSMUSG000000044646 | 14_Zbtb7c        | 680.282 | 0.81047  | 8.56E-07 | 8.01E-06 | 810.888 | 871.915 | 915.488 | 522.978 | 400.749 | 559.672 |
| ENSMUSG000000044647 | 16_Csmp3         | 57.0607 | -1.56917 | 0.00177  | 0.00587  | 31.2548 | 40.3834 | 14.3418 | 139.761 | 67.2398 | 49.3828 |
| ENSMUSG000000044664 | 7_Prss42         | 0.36046 | -1.978   | 0.62369  | NA       | 0       | 0       | 0       | 0       | 0.89653 | 1.26623 |
| ENSMUSG000000044667 | 12_Lppr4         | 107.26  | -1.23066 | 0.00049  | 0.00194  | 47.7504 | 100.041 | 44.2207 | 168.615 | 161.376 | 121.558 |
| ENSMUSG000000044674 | 6_Fzd1           | 887.257 | 0.16802  | 0.2988   | 0.41337  | 934.171 | 919.641 | 964.489 | 1011.69 | 784.464 | 709.087 |
| ENSMUSG000000044676 | 9_Zfp612         | 198.762 | -0.45127 | 0.01603  | 0.03768  | 171.033 | 177.136 | 155.37  | 218.208 | 249.235 | 221.59  |
| ENSMUSG000000044678 | 11_Ly6k          | 5.67772 | 0.13787  | 0.88116  | 0.91986  | 6.07732 | 4.58903 | 7.17092 | 6.3118  | 3.58612 | 6.33113 |
| ENSMUSG000000044681 | 18_Cnpy1         | 3.86516 | 0.40074  | 0.7232   | 0.80276  | 5.20913 | 5.50683 | 2.39031 | 1.80337 | 4.48265 | 3.79868 |
| ENSMUSG000000044689 | 5_Gm13749        | 1.95021 | -0.75487 | 0.69576  | NA       | 0       | 0.91781 | 3.58546 | 4.50843 | 2.68959 | 0       |
| ENSMUSG000000044700 | 15_Tmem201       | 481.26  | 0.43074  | 0.03622  | 0.07418  | 544.354 | 589.231 | 524.673 | 535.601 | 329.027 | 364.673 |
| ENSMUSG000000044701 | 5_Il27           | 7.49532 | 6.32693  | 2.91E-05 | 0.00017  | 10.4183 | 8.26025 | 26.2934 | 0       | 0       | 0       |
| ENSMUSG000000044702 | 13_Palb2         | 107.688 | 0.38282  | 0.11758  | 0.19647  | 142.383 | 108.301 | 114.735 | 92.8736 | 94.1357 | 93.7008 |

|                    |                  |         |          |          |          |         |         |         |         |         |         |
|--------------------|------------------|---------|----------|----------|----------|---------|---------|---------|---------|---------|---------|
| ENSMUSG00000044703 | 5_Ph11a          | 216.358 | 2.00406  | 1.75E-06 | 1.49E-05 | 311.68  | 195.493 | 533.039 | 60.4129 | 144.341 | 53.1815 |
| ENSMUSG00000044707 | 7_Ccnj1          | 188.202 | 0.33552  | 0.15065  | 0.23992  | 185.792 | 192.739 | 250.982 | 153.287 | 142.548 | 203.863 |
| ENSMUSG00000044708 | 5_Kcnj10         | 37.3888 | -1.34827 | 0.00285  | 0.00879  | 28.6502 | 21.1095 | 13.1467 | 70.3315 | 49.3092 | 41.7855 |
| ENSMUSG00000044709 | 5_Gemin7         | 573.935 | 0.15363  | 0.22957  | 0.33567  | 607.732 | 600.245 | 605.943 | 571.669 | 532.539 | 525.484 |
| ENSMUSG00000044712 | 15_Slc38a6       | 234.514 | -0.19355 | 0.28685  | 0.40023  | 235.279 | 198.246 | 223.494 | 271.649 | 230.453 |         |
| ENSMUSG00000044715 | 6_Gskip          | 712.44  | -0.30536 | 0.03326  | 0.06919  | 645.932 | 629.615 | 635.822 | 678.969 | 856.187 | 828.112 |
| ENSMUSG00000044716 | 12_Dok7          | 11.9658 | 0.43866  | 0.55766  | 0.6635   | 11.2864 | 19.2739 | 10.7564 | 17.132  | 4.48265 | 8.86359 |
| ENSMUSG00000044719 | 4_E23025N22Rik   | 3.29928 | 0.06737  | 0.95617  | 0.9714   | 5.20913 | 3.67122 | 1.19515 | 2.70506 | 4.48265 | 2.53245 |
| ENSMUSG00000044724 | 8_Gpr152         | 22.5059 | -1.86599 | 0.01895  | 0.04321  | 19.9683 | 6.42464 | 2.39031 | 61.3146 | 32.2751 | 12.6623 |
| ENSMUSG00000044726 | 7_Erich5         | 6514.13 | -0.05343 | 0.7225   | 0.80223  | 6294.37 | 6215.38 | 6668.96 | 5503.89 | 6417.37 | 7984.83 |
| ENSMUSG00000044734 | 15_Serp1b1a      | 3245.3  | -0.12378 | 0.50756  | 0.61784  | 3057.76 | 2521.21 | 3740.83 | 2766.37 | 4047.84 | 3337.77 |
| ENSMUSG00000044737 | 6_Klk14          | 1.59935 | 2.03543  | 0.27439  | NA       | 1.73638 | 3.67122 | 2.39031 | 0.90169 | 0.89653 | 0       |
| ENSMUSG00000044743 | 3_Defb10         | 1.71321 | -2.17336 | 0.30024  | NA       | 0       | 1.83561 | 0       | 0.90169 | 6.27571 | 1.26623 |
| ENSMUSG00000044748 | 8_Defb1          | 1376.27 | -0.52736 | 0.00247  | 0.00779  | 1158.16 | 1040.79 | 1184.4  | 1338.1  | 2030.64 | 1505.54 |
| ENSMUSG00000044749 | 13_Abca6         | 53.6649 | -0.94825 | 0.01186  | 0.02919  | 39.9367 | 32.1232 | 38.2449 | 97.382  | 63.6537 | 50.6491 |
| ENSMUSG00000044763 | 8_Tmrt10c        | 369.905 | -0.49455 | 0.00237  | 0.00752  | 323.834 | 279.013 | 317.911 | 392.233 | 430.335 | 476.101 |
| ENSMUSG00000044768 | 16_D1Ert622e     | 286.65  | -0.08163 | 0.664    | 0.75554  | 283.898 | 261.575 | 291.618 | 302.966 | 337.992 | 241.849 |
| ENSMUSG00000044770 | 14_Scm1d         | 23.2527 | -0.87923 | 0.12657  | 0.20827  | 23.4411 | 19.2739 | 5.97577 | 36.9691 | 25.9994 | 27.857  |
| ENSMUSG00000044783 | 16_Hjup          | 2483.07 | 0.29091  | 0.01103  | 0.02743  | 2748.68 | 2590.05 | 2858.81 | 2036.91 | 2348.01 | 2315.93 |
| ENSMUSG00000044786 | 5_Zfp36          | 2218.01 | 1.24803  | 5.41E-18 | 8.06E-16 | 3382.46 | 2691.92 | 3289.06 | 1314.66 | 1169.97 | 1459.96 |
| ENSMUSG00000044787 | 7_Spata32        | 0.78743 | 0.65682  | 0.82121  | NA       | 1.73638 | 0       | 1.19515 | 0       | 1.79306 | 0       |
| ENSMUSG00000044788 | 10_Fads6         | 193.109 | -0.85376 | 0.00666  | 0.01792  | 125.887 | 199.164 | 87.2462 | 311.983 | 239.374 | 194.999 |
| ENSMUSG00000044791 | 16_Setd2         | 2704.75 | -0.1599  | 0.22439  | 0.32962  | 2587.2  | 2405.57 | 2672.36 | 2462.5  | 3153.1  | 2947.78 |
| ENSMUSG00000044792 | 6_Isca1          | 1316.88 | -0.33423 | 0.00395  | 0.0116   | 1183.34 | 1197.74 | 1113.88 | 1580.65 | 1413.83 | 1411.84 |
| ENSMUSG00000044795 | 12_Cyb5d1        | 217.125 | -0.40754 | 0.04592  | 0.09031  | 206.629 | 200.999 | 151.785 | 270.506 | 247.442 | 225.388 |
| ENSMUSG00000044798 | 5_Olfr923        | 0       | NA       | NA       | NA       | 0       | 0       | 0       | 0       | 0       | 0       |
| ENSMUSG00000044807 | 13_Zfp354c       | 300.749 | -1.29059 | 7.70E-07 | 7.30E-06 | 164.956 | 234.958 | 123.101 | 458.056 | 490.402 | 333.018 |
| ENSMUSG00000044811 | 13_AF251705      | 62.9321 | 1.28949  | 0.00122  | 0.00426  | 136.306 | 59.6574 | 71.7092 | 36.9691 | 34.9647 | 37.9868 |
| ENSMUSG00000044813 | 15_Shb           | 704.804 | 0.71822  | 4.06E-05 | 0.00023  | 810.888 | 864.573 | 954.928 | 628.475 | 426.749 | 543.211 |
| ENSMUSG00000044814 | 5_Olfr543        | 1.25387 | 0.50911  | 0.82118  | NA       | 0.86819 | 0       | 3.58546 | 1.80337 | 0       | 1.26623 |
| ENSMUSG00000044816 | 10_D630023F18Rik | 7.61736 | -0.42317 | 0.64343  | 0.73862  | 1.73638 | 8.26025 | 9.56123 | 6.3118  | 7.17224 | 12.6623 |
| ENSMUSG00000044820 | 6_AY074887       | 1.0719  | 0.72847  | 0.75696  | NA       | 0.86819 | 1.83561 | 1.19515 | 0       | 0       | 2.53245 |
| ENSMUSG00000044824 | 5_Olfr545        | 1.0306  | 1.26067  | 0.63782  | NA       | 3.47275 | 0.91781 | 0       | 0       | 1.79306 | 0       |
| ENSMUSG00000044827 | 10_Tlr1          | 290.399 | 0.32452  | 0.1294   | 0.21214  | 392.421 | 261.575 | 314.326 | 219.11  | 287.786 | 267.174 |
| ENSMUSG00000044835 | 15_Ankrd45       | 35.1798 | -1.98251 | 8.10E-05 | 0.00042  | 14.7592 | 19.2739 | 8.36608 | 66.7247 | 69.0329 | 32.9219 |
| ENSMUSG00000044847 | 13_Lsm11         | 240.869 | 0.04303  | 0.80139  | 0.86253  | 256.984 | 247.808 | 228.274 | 229.028 | 250.132 | 232.986 |
| ENSMUSG00000044854 | 7_1700056E22Rik  | 5.06277 | 0.34626  | 0.72895  | 0.80712  | 5.20913 | 8.26025 | 3.58546 | 5.41011 | 5.37918 | 2.53245 |
| ENSMUSG00000044857 | 7_Lem2           | 1030.82 | 0.93893  | 3.43E-07 | 3.63E-06 | 1188.55 | 1404.24 | 1472.43 | 866.52  | 556.745 | 696.425 |
| ENSMUSG00000044860 | 9_Gm1123         | 0.81399 | -1.90834 | 0.45098  | NA       | 0       | 0.91781 | 0       | 1.80337 | 0.89653 | 1.26623 |
| ENSMUSG00000044864 | 16_Ankrd50       | 2317.98 | 0.41017  | 0.0011   | 0.00388  | 2434.4  | 2485.42 | 3017.76 | 2006.25 | 1984.92 | 1979.11 |
| ENSMUSG00000044876 | 14_Zfp444        | 182.677 | 0.38213  | 0.10283  | 0.17632  | 187.529 | 212.931 | 221.104 | 198.371 | 153.307 | 122.824 |
| ENSMUSG00000044881 | 6_Coa4           | 262.047 | 0.10892  | 0.52763  | 0.63648  | 254.379 | 272.588 | 289.227 | 229.93  | 271.649 | 254.512 |
| ENSMUSG00000044894 | 14_Uqcrq         | 693.759 | 1.00561  | 1.34E-05 | 8.77E-05 | 788.315 | 911.381 | 1080.42 | 633.885 | 364.888 | 383.667 |
| ENSMUSG00000044903 | 14_Psq22         | 0.1447  | 0.92709  | 0.82027  | NA       | 0.86819 | 0       | 0       | 0       | 0       | 0       |
| ENSMUSG00000044906 | 4_4930503L19Rik  | 33.7985 | -0.92728 | 0.01931  | 0.04391  | 21.7047 | 26.6164 | 21.5128 | 44.1826 | 45.7231 | 43.0517 |
| ENSMUSG00000044912 | 9_Syt16          | 232.707 | 0.62853  | 0.00147  | 0.00501  | 267.402 | 248.725 | 332.253 | 166.812 | 193.651 | 187.402 |
| ENSMUSG00000044916 | 10_1700029I15Rik | 32.4614 | 0.18301  | 0.66773  | 0.75846  | 26.0457 | 34.8766 | 43.0255 | 36.0674 | 26.8959 | 27.857  |
| ENSMUSG00000044921 | 4_Rassf9         | 330.683 | -0.28346 | 0.13884  | 0.22416  | 335.989 | 257.903 | 299.984 | 308.376 | 363.991 | 417.855 |
| ENSMUSG00000044927 | 6_H1fx           | 14.9715 | 1.8598   | 0.00533  | 0.01487  | 20.8365 | 26.6164 | 22.7079 | 8.11517 | 2.68959 | 8.86359 |
| ENSMUSG00000044933 | 2_Sstr3          | 0.41023 | -0.03469 | 0.99322  | NA       | 0       | 0       | 1.19515 | 0       | 0       | 1.26623 |
| ENSMUSG00000044934 | 12_Zfp367        | 559.35  | -0.21807 | 0.11067  | 0.18709  | 511.363 | 502.957 | 537.819 | 561.75  | 650.881 | 591.328 |
| ENSMUSG00000044937 | 14_Ttc41         | 72.5383 | -0.45193 | 0.10664  | 0.18136  | 54.6959 | 66.082  | 63.3432 | 82.0534 | 90.5496 | 78.5061 |
| ENSMUSG00000044938 | 8_Klhl31         | 37.5761 | -2.00598 | 1.67E-05 | 0.00011  | 16.4956 | 17.4383 | 10.7564 | 85.6601 | 45.7231 | 49.3828 |
| ENSMUSG00000044948 | 16_Cfap43        | 825.558 | 0.88059  | 9.60E-09 | 1.64E-07 | 1044.43 | 985.723 | 1178.42 | 571.669 | 508.333 | 664.769 |
| ENSMUSG00000044949 | 4_Ubtd2          | 134.696 | 0.03503  | 0.8771   | 0.91681  | 130.228 | 143.178 | 136.248 | 155.09  | 128.204 | 115.227 |
| ENSMUSG00000044950 | 7_Pwmp2a         | 727.809 | -0.03385 | 0.82045  | 0.87649  | 714.519 | 711.299 | 731.434 | 619.458 | 805.084 | 785.061 |
| ENSMUSG00000044951 | 13_Mylk4         | 395.284 | -1.90888 | 7.33E-11 | 2.49E-09 | 133.701 | 233.123 | 131.467 | 858.405 | 446.472 | 568.536 |
| ENSMUSG00000044952 | 5_Kctd21         | 160.937 | 0.18047  | 0.36578  | 0.48316  | 164.956 | 167.041 | 181.663 | 146.975 | 163.169 | 141.817 |
| ENSMUSG00000044957 | 3_Pp2d1          | 13.9073 | -1.18069 | 0.07167  | 0.13101  | 6.94551 | 10.0959 | 8.36608 | 11.7219 | 19.7237 | 26.5908 |
| ENSMUSG00000044966 | 4_Fbxo48         | 18.736  | 0.38013  | 0.49452  | 0.60566  | 24.3093 | 15.6027 | 23.9031 | 13.5253 | 22.4133 | 12.6623 |
| ENSMUSG00000044968 | 16_Napepld       | 204.92  | -0.90728 | 0.00038  | 0.00156  | 120.678 | 196.41  | 109.954 | 291.244 | 261.787 | 249.447 |
| ENSMUSG00000044976 | 16_Wdr72         | 50.8816 | -0.89148 | 0.00944  | 0.02404  | 34.7275 | 37.63   | 34.6595 | 56.8062 | 80.6878 | 60.7789 |
| ENSMUSG00000044982 | 6_Sft2d3         | 122.401 | -0.34862 | 0.15647  | 0.24769  | 111.128 | 127.575 | 83.6608 | 138.86  | 138.962 | 134.22  |
| ENSMUSG00000044986 | 8_Tst            | 627.948 | 0.28185  | 0.17594  | 0.27198  | 624.227 | 777.381 | 665.701 | 720.447 | 424.059 | 555.874 |
| ENSMUSG00000044991 | 10_1110034G24Rik | 159.262 | -0.42362 | 0.03078  | 0.06485  | 144.119 | 131.246 | 132.662 | 184.846 | 182.892 | 179.804 |
| ENSMUSG00000044994 | 7_Olfr1426       | 0       | NA       | NA       | NA       | 0       | 0       | 0       | 0       | 0       | 0       |
| ENSMUSG00000045004 | 3_Spata21        | 0.70435 | -0.05801 | 0.9829   | NA       | 0.86819 | 0       | 1.19515 | 0       | 0.89653 | 1.26623 |
| ENSMUSG00000045005 | 9_Fzd5           | 977.698 | 0.23477  | 0.07359  | 0.13395  | 1061.79 | 1090.35 | 1017.08 | 902.587 | 804.188 | 990.189 |
| ENSMUSG00000045007 | 9_Tubg2          | 67.4151 | -0.15359 | 0.63152  | 0.72815  | 71.1914 | 74.3423 | 45.4159 | 79.3483 | 64.5502 | 69.6425 |
| ENSMUSG00000045008 | 1_9030612E09Rik  | 3.85264 | 0.52151  | 0.64476  | 0.7398   | 3.47275 | 5.50683 | 4.78062 | 3.60674 | 4.48265 | 1.26623 |
| ENSMUSG00000045009 | 9_Prrt3          | 9.26097 | -0.00698 | 0.99273  | 0.99513  | 6.94551 | 10.0959 | 10.7564 | 13.5253 | 5.37918 | 8.86359 |
| ENSMUSG00000045019 | 4_Acer1          | 4.50523 | -0.36866 | 0.80902  | 0.86816  | 4.34094 | 7.34244 | 0       | 9.01685 | 0       | 6.33113 |
| ENSMUSG00000045027 | 6_Prss22         | 3004.69 | 1.38011  | 8.82E-16 | 9.48E-14 | 4113.48 | 4287.99 | 4622.86 | 2026.09 | 1278.45 | 1699.28 |
| ENSMUSG00000045031 | 18_Cetn4         | 71.6511 | -0.53212 | 0.05981  | 0.11258  | 59.905  | 55.0683 | 60.9529 | 76.6433 | 95.0322 | 82.3047 |
| ENSMUSG00000045034 | 12_Ankrd34b      | 1.02405 | 1.24282  | 0.6911   | NA       | 4.34094 | 0       | 0       | 1.80337 | 0       | 0       |
| ENSMUSG00000045036 | 14_Tmem232       | 4.47475 | -2.50936 | 0.04064  | 0.08165  | 0.86819 | 0.91781 | 2.39031 | 8.11517 | 10.7584 | 3.79868 |
| ENSMUSG00000045038 | 14_Prkc          | 460.425 | 0.17587  | 0.27322  | 0.38526  | 442.776 | 468.999 | 554.552 | 465.27  | 395.37  | 435.582 |
| ENSMUSG00000045039 | 9_Megf8          | 1484.48 | 0.75683  | 0.00012  | 0.0006   | 1672.13 | 2027.43 | 1896.71 | 1444.5  | 854.394 | 1011.72 |
| ENSMUSG00000045045 | 7_Lfn4           | 126.051 | 1.57052  | 4.08E-06 | 3.10E-05 | 175.374 | 188.15  | 203.176 | 100.989 | 43.0335 | 45.5842 |

|                    |                  |         |          |          |          |         |         |         |         |         |         |
|--------------------|------------------|---------|----------|----------|----------|---------|---------|---------|---------|---------|---------|
| ENSMUSG00000045052 | 2_Pr1hr          | 0       | NA       | NA       | NA       | 0       | 0       | 0       | 0       | 0       | 0       |
| ENSMUSG00000045053 | 1_Kcng3          | 90.8252 | -0.30901 | 0.34666  | 0.46351  | 92.028  | 70.671  | 80.0753 | 63.118  | 111.17  | 127.889 |
| ENSMUSG00000045062 | 4_Pcdhb7         | 46.691  | -0.71563 | 0.14716  | 0.23515  | 36.4639 | 55.9861 | 13.1467 | 68.5281 | 59.171  | 46.8504 |
| ENSMUSG00000045064 | 4_Zc2hc1c        | 127.718 | -0.55555 | 0.04594  | 0.09033  | 84.2143 | 106.465 | 120.711 | 195.666 | 138.962 | 120.292 |
| ENSMUSG00000045065 | 7_9930022D16Rik  | 0       | NA       | NA       | NA       | 0       | 0       | 0       | 0       | 0       | 0       |
| ENSMUSG00000045071 | 13_E130308A19Rik | 734.217 | -0.01832 | 0.88522  | 0.92227  | 750.983 | 757.19  | 678.848 | 708.725 | 733.362 | 776.197 |
| ENSMUSG00000045075 | 3_Gm9796         | 1.99842 | 0.13184  | 0.9357   | NA       | 3.47275 | 2.75342 | 0       | 2.70506 | 1.79306 | 1.26623 |
| ENSMUSG00000045078 | 12_Rnf216        | 1203.19 | 0.32847  | 0.00375  | 0.0111   | 1265.82 | 1346.42 | 1406.7  | 1074.81 | 1030.11 | 1095.29 |
| ENSMUSG00000045083 | 14_Lingo2        | 3.85621 | 0.22678  | 0.83515  | 0.88728  | 4.34094 | 4.58903 | 3.58546 | 3.60674 | 4.48265 | 2.53245 |
| ENSMUSG00000045087 | 8_S1pr5          | 414.349 | 0.43502  | 0.02988  | 0.06326  | 463.613 | 424.026 | 540.21  | 293.949 | 323.648 | 440.647 |
| ENSMUSG00000045091 | 4_Aqp12          | 0.1447  | 0.92709  | 0.82027  | NA       | 0.86819 | 0       | 0       | 0       | 0       | 0       |
| ENSMUSG00000045092 | 8_S1pr1          | 153.71  | -0.64145 | 0.01791  | 0.04128  | 121.546 | 129.411 | 109.954 | 205.584 | 230.408 | 125.356 |
| ENSMUSG00000045094 | 7_Arhgef37       | 1464    | 0.24094  | 0.06079  | 0.11418  | 1620.91 | 1596.06 | 1539.36 | 1419.25 | 1169.97 | 1438.43 |
| ENSMUSG00000045095 | 16_Magi1         | 439.884 | -0.00502 | 0.97236  | 0.98244  | 410.653 | 437.793 | 469.696 | 464.368 | 418.68  | 438.115 |
| ENSMUSG00000045098 | 18_Suv420h1      | 1783.59 | -0.14896 | 0.13371  | 0.21761  | 1691.23 | 1654.8  | 1729.39 | 1890.83 | 1876.44 | 1858.82 |
| ENSMUSG00000045100 | 11_Slc25a26      | 104.562 | 0.24705  | 0.3566   | 0.47329  | 104.183 | 105.548 | 131.467 | 117.219 | 81.5843 | 87.3697 |
| ENSMUSG00000045102 | 11_Poln          | 5.27494 | -2.1685  | 0.04406  | 0.08723  | 1.73638 | 2.75342 | 1.19515 | 11.7219 | 5.37918 | 8.86359 |
| ENSMUSG00000045103 | 17_Dmd           | 467.816 | -1.04708 | 5.20E-08 | 7.11E-07 | 340.33  | 316.643 | 258.153 | 716.84  | 669.708 | 505.225 |
| ENSMUSG00000045106 | 12_Ccdc73        | 38.4891 | -0.67569 | 0.08714  | 0.15347  | 23.4411 | 26.6164 | 39.4401 | 51.3961 | 45.7231 | 44.3179 |
| ENSMUSG00000045107 | 4_Saysd1         | 131.163 | 0.38527  | 0.0956   | 0.16567  | 136.306 | 156.945 | 152.98  | 133.449 | 102.204 | 105.097 |
| ENSMUSG00000045111 | 5_Taar6          | 0       | NA       | NA       | NA       | 0       | 0       | 0       | 0       | 0       | 0       |
| ENSMUSG00000045114 | 10_Prrt2         | 109.907 | -0.0696  | 0.8602   | 0.90539  | 68.5869 | 154.191 | 99.1978 | 168.615 | 72.619  | 96.2332 |
| ENSMUSG00000045128 | 8_Rpl18a         | 14824   | 0.4974   | 0.00704  | 0.01879  | 17207.5 | 16469.1 | 18387.4 | 15820.1 | 9208.27 | 11851.9 |
| ENSMUSG00000045136 | 5_Tubb2b         | 1264.08 | 0.67725  | 7.19E-07 | 6.87E-06 | 1451.61 | 1420.76 | 1795.12 | 980.132 | 953.012 | 983.858 |
| ENSMUSG00000045140 | 8_Plgw           | 133.023 | -0.30194 | 0.16403  | 0.25705  | 119.81  | 127.575 | 109.954 | 140.663 | 159.582 | 140.551 |
| ENSMUSG00000045160 | 14_Bola3         | 386.736 | -0.40016 | 0.01406  | 0.03365  | 349.012 | 357.026 | 294.008 | 476.09  | 442.886 | 401.394 |
| ENSMUSG00000045165 | 6_Al467606       | 333.632 | 0.42304  | 0.00822  | 0.02145  | 362.903 | 374.465 | 409.938 | 309.278 | 265.373 | 279.836 |
| ENSMUSG00000045174 | 10_Amer3         | 0.75055 | -3.06738 | 0.3596   | NA       | 0       | 0       | 0       | 3.60674 | 0.89653 | 0       |
| ENSMUSG00000045176 | 3_Borcs6         | 173.055 | 0.36028  | 0.08469  | 0.14995  | 181.451 | 199.164 | 203.176 | 172.222 | 129.1   | 153.213 |
| ENSMUSG00000045179 | 9_Sox3           | 1.73602 | 1.96934  | 0.34208  | NA       | 3.47275 | 0       | 4.78062 | 0       | 0.89653 | 1.26623 |
| ENSMUSG00000045180 | 13_Shroom2       | 870.488 | 0.01362  | 0.9213   | 0.94769  | 893.366 | 897.614 | 831.827 | 758.317 | 944.047 | 897.755 |
| ENSMUSG00000045193 | 13_Cirbp         | 1708.04 | 0.23031  | 0.17442  | 0.27015  | 1825.8  | 1922.8  | 1784.37 | 1978.3  | 1318.8  | 1418.17 |
| ENSMUSG00000045201 | 5_Lrrc3b         | 10.1344 | -2.07621 | 0.00631  | 0.01714  | 4.34094 | 3.67122 | 3.58546 | 18.0337 | 13.448  | 17.7272 |
| ENSMUSG00000045205 | 16_Dpy19l4       | 962.452 | -0.54608 | 1.20E-05 | 7.95E-05 | 769.215 | 795.737 | 782.826 | 1065.79 | 1250.66 | 1110.48 |
| ENSMUSG00000045210 | 8_Vcpip1         | 1211.39 | -0.1453  | 0.32722  | 0.44359  | 1159.03 | 1123.39 | 1168.86 | 1061.28 | 1460.45 | 1295.35 |
| ENSMUSG00000045211 | 4_Nudt18         | 970.347 | 0.55442  | 0.00043  | 0.00174  | 1071.34 | 1133.49 | 1258.5  | 865.618 | 647.295 | 845.84  |
| ENSMUSG00000045215 | 16_Asx13         | 20.7177 | -1.05107 | 0.04658  | 0.09139  | 13.0228 | 15.6027 | 11.9515 | 32.4607 | 32.2751 | 18.9934 |
| ENSMUSG00000045216 | 7_Hs6st1         | 2846.01 | 0.63115  | 1.17E-05 | 7.81E-05 | 3172.36 | 3218.74 | 3984.64 | 2136.09 | 2049.47 | 2514.73 |
| ENSMUSG00000045231 | 4_BC106179       | 21.7052 | -0.72318 | 0.24045  | 0.3481   | 14.7592 | 24.7808 | 9.56123 | 20.7388 | 43.93   | 16.4609 |
| ENSMUSG00000045232 | 4_Rln3           | 0.35574 | -0.03469 | 0.99322  | NA       | 0.86819 | 0       | 0       | 0       | 0       | 1.26623 |
| ENSMUSG00000045237 | 5_1110012L19Rik  | 370.142 | -0.51682 | 0.00034  | 0.00142  | 308.207 | 312.054 | 292.813 | 438.219 | 427.645 | 441.913 |
| ENSMUSG00000045246 | 11_Kcng4         | 23.1399 | -0.60776 | 0.30906  | 0.42396  | 16.4956 | 22.9451 | 15.537  | 45.986  | 12.5514 | 25.3245 |
| ENSMUSG00000045248 | 5_Med26          | 229.857 | 0.77134  | 0.00015  | 0.0007   | 253.511 | 301.958 | 314.326 | 192.059 | 142.548 | 174.739 |
| ENSMUSG00000045251 | 13_Zfp688        | 133.07  | 0.30663  | 0.17857  | 0.27534  | 160.615 | 134     | 147.004 | 136.155 | 106.687 | 113.96  |
| ENSMUSG00000045252 | 11_Zfp574        | 331.174 | 0.99437  | 0.00016  | 0.00074  | 359.43  | 435.958 | 528.258 | 301.163 | 153.307 | 208.927 |
| ENSMUSG00000045257 | 9_Morn2          | 164.657 | -0.4602  | 0.06357  | 0.11852  | 124.151 | 140.424 | 150.589 | 165.91  | 158.686 | 248.18  |
| ENSMUSG00000045259 | 4_Klhdc9         | 9.38726 | -0.31085 | 0.72012  | 0.80082  | 13.0228 | 7.34244 | 4.78062 | 19.8371 | 6.27571 | 5.06491 |
| ENSMUSG00000045267 | 3_Tas2r119       | 0.30239 | -0.03469 | 0.99322  | NA       | 0       | 0.91781 | 0       | 0       | 0.89653 | 0       |
| ENSMUSG00000045268 | 13_Zfp691        | 142.811 | 0.30168  | 0.1906   | 0.28994  | 171.901 | 141.342 | 160.151 | 151.483 | 112.963 | 119.025 |
| ENSMUSG00000045273 | 8_Cenpf          | 87.3032 | 0.3149   | 0.2942   | 0.40843  | 96.3689 | 91.7806 | 101.588 | 54.1011 | 82.4808 | 97.4995 |
| ENSMUSG00000045275 | 15_Lca5l         | 33.7561 | -0.25189 | 0.5192   | 0.62926  | 30.3866 | 31.2054 | 31.074  | 37.8708 | 40.3439 | 31.6557 |
| ENSMUSG00000045281 | 5_Gpr20          | 6.34181 | -0.30339 | 0.75946  | 0.83084  | 5.20913 | 9.17806 | 2.39031 | 2.70506 | 7.17224 | 11.396  |
| ENSMUSG00000045282 | 7_Tmem86b        | 53.7938 | 0.13355  | 0.69564  | 0.78224  | 54.6959 | 51.3971 | 63.3432 | 64.9214 | 46.6196 | 41.7855 |
| ENSMUSG00000045284 | 9_Dcaf12l1       | 94.9201 | -0.63677 | 0.0305   | 0.06436  | 87.687  | 79.8491 | 54.9771 | 139.761 | 108.48  | 98.7657 |
| ENSMUSG00000045287 | 6_Rtn4r1         | 240.008 | -0.46664 | 0.13836  | 0.22347  | 202.288 | 250.561 | 151.785 | 420.185 | 215.167 | 200.064 |
| ENSMUSG00000045288 | 10_Ush1g         | 0.51429 | -1.01187 | 0.76286  | NA       | 0       | 0.91781 | 0       | 0.90169 | 0       | 1.26623 |
| ENSMUSG00000045294 | 11_Insig1        | 5972    | -0.2632  | 0.01184  | 0.02914  | 5681.42 | 4952.48 | 5653.08 | 6474.1  | 6596.67 | 6474.22 |
| ENSMUSG00000045302 | 13_Preb          | 1150.3  | 0.41112  | 0.00028  | 0.0012   | 1291.86 | 1298.69 | 1348.13 | 1002.67 | 929.702 | 1030.71 |
| ENSMUSG00000045312 | 11_Lhfp12        | 2132.48 | -0.63838 | 5.19E-05 | 0.00028  | 1582.71 | 1965.02 | 1456.89 | 2890.8  | 2636.7  | 2262.75 |
| ENSMUSG00000045314 | 5_Sowahb         | 536.111 | 0.49369  | 0.00079  | 0.00293  | 567.795 | 613.094 | 700.36  | 437.317 | 432.128 | 465.972 |
| ENSMUSG00000045316 | 4_Fahd1          | 120.099 | -0.36996 | 0.10746  | 0.18258  | 94.6325 | 119.315 | 100.393 | 131.646 | 141.652 | 132.954 |
| ENSMUSG00000045318 | 6_Adra2c         | 46.1738 | -0.72357 | 0.11236  | 0.18935  | 35.5957 | 49.5615 | 19.1225 | 79.3483 | 52.8953 | 40.5193 |
| ENSMUSG00000045319 | 13_Proser2       | 1373.1  | 0.97499  | 4.55E-10 | 1.20E-08 | 1684.29 | 1867.73 | 1907.47 | 1012.59 | 745.913 | 1020.58 |
| ENSMUSG00000045322 | 10_Tlr9          | 47.5963 | 3.57587  | 3.65E-11 | 1.33E-09 | 137.174 | 49.5615 | 76.4899 | 7.21348 | 6.27571 | 8.86359 |
| ENSMUSG00000045326 | 13_Fndc7         | 5.33032 | -1.53236 | 0.14206  | 0.22854  | 1.73638 | 1.83561 | 4.78062 | 9.01685 | 4.48265 | 10.1298 |
| ENSMUSG00000045328 | 11_Cenpe         | 696.299 | 0.12917  | 0.50569  | 0.61619  | 831.724 | 582.807 | 767.289 | 532.896 | 732.465 | 730.613 |
| ENSMUSG00000045333 | 15_Zfp423        | 121.693 | 0.14862  | 0.67081  | 0.76131  | 91.1598 | 144.095 | 149.394 | 173.124 | 82.4808 | 89.9021 |
| ENSMUSG00000045337 | 4_Defb11         | 1.64879 | -4.20135 | 0.09738  | NA       | 0       | 0       | 0       | 5.41011 | 4.48265 | 0       |
| ENSMUSG00000045348 | 15_Nyap1         | 434.555 | 1.16236  | 1.79E-07 | 2.08E-06 | 489.658 | 567.204 | 744.581 | 273.211 | 209.788 | 322.888 |
| ENSMUSG00000045349 | 15_Sh2d5         | 134.52  | 2.25317  | 1.41E-16 | 1.68E-14 | 214.443 | 174.383 | 278.471 | 45.986  | 45.7231 | 48.1166 |
| ENSMUSG00000045350 | 14_Fam186a       | 3.53428 | 0.48575  | 0.70197  | 0.78702  | 6.94551 | 1.83561 | 3.58546 | 5.41011 | 0.89653 | 2.53245 |
| ENSMUSG00000045362 | 2_Tnfrsf26       | 18.7304 | -0.06495 | 0.90531  | 0.93611  | 21.7047 | 12.8493 | 20.3176 | 21.6405 | 14.3445 | 21.5259 |
| ENSMUSG00000045364 | 2_Ilfne          | 0.39838 | 2.07058  | 0.60634  | NA       | 0       | 0       | 2.39031 | 0       | 0       | 0       |
| ENSMUSG00000045374 | 18_Wdr81         | 568.956 | 1.09308  | 7.03E-08 | 9.26E-07 | 694.551 | 803.998 | 825.851 | 452.646 | 270.752 | 365.94  |
| ENSMUSG00000045377 | 5_Tmem88         | 55.4218 | 0.07356  | 0.83336  | 0.886    | 52.0913 | 62.4108 | 56.1722 | 71.2332 | 41.2404 | 49.3828 |
| ENSMUSG00000045378 | 4_Pxt1           | 0.2997  | -1.76345 | 0.66322  | NA       | 0       | 0       | 0       | 0.90169 | 0.89653 | 0       |
| ENSMUSG00000045381 | 5_Olfr433        | 1.30437 | 2.67433  | 0.22574  | NA       | 0.86819 | 3.67122 | 2.39031 | 0       | 0.89653 | 0       |
| ENSMUSG00000045382 | 6_Cxcr4          | 41.8195 | 1.20031  | 0.02132  | 0.04786  | 100.71  | 41.3013 | 32.2692 | 27.0506 | 17.9306 | 31.6557 |
| ENSMUSG00000045394 | 8_Epcam          | 2906.69 | 0.54302  | 0.00046  | 0.00187  | 3247.02 | 3230.68 | 3862.74 | 2104.53 | 2158.85 | 2836.35 |

|                    |                  |         |          |          |          |         |         |         |         |         |         |
|--------------------|------------------|---------|----------|----------|----------|---------|---------|---------|---------|---------|---------|
| ENSMUSG00000045404 | 15_Kcnk13        | 40.7121 | -0.2857  | 0.4362   | 0.55167  | 31.2548 | 43.1369 | 35.8546 | 46.8876 | 46.6196 | 40.5193 |
| ENSMUSG00000045409 | 16_Trim39        | 762.113 | -0.18284 | 0.1246   | 0.20575  | 699.76  | 734.244 | 707.531 | 781.761 | 836.463 | 812.918 |
| ENSMUSG00000045410 | 17_Akr1e1        | 630.244 | -0.6394  | 3.20E-06 | 2.51E-05 | 516.572 | 491.026 | 470.891 | 739.382 | 841.842 | 721.749 |
| ENSMUSG00000045411 | 16_2410002F23Rik | 978.542 | 0.20594  | 0.08059  | 0.14418  | 1104.34 | 1044.46 | 994.368 | 888.16  | 890.255 | 949.67  |
| ENSMUSG00000045414 | 7_1190002N15Rik  | 567.055 | -0.73732 | 2.32E-05 | 0.00014  | 447.117 | 468.081 | 359.741 | 648.312 | 825.705 | 653.373 |
| ENSMUSG00000045427 | 13_Hnrnp2        | 2408.74 | -0.21363 | 0.10069  | 0.17308  | 2344.11 | 2036.61 | 2311.43 | 2285.77 | 2820.49 | 2654.01 |
| ENSMUSG00000045435 | 9_Tmem60         | 313.856 | -0.52507 | 0.00506  | 0.01423  | 311.68  | 223.027 | 236.641 | 357.067 | 383.715 | 371.004 |
| ENSMUSG00000045438 | 12_Cox19         | 341.441 | 0.07518  | 0.66064  | 0.75273  | 354.221 | 345.095 | 352.57  | 388.626 | 309.303 | 298.83  |
| ENSMUSG00000045440 | 3_Insm2          | 0.30239 | -0.03469 | 0.99322  | NA       | 0       | 0.91781 | 0       | 0       | 0.89653 | 0       |
| ENSMUSG00000045441 | 5_Gprn3          | 36.1237 | -0.6917  | 0.16537  | 0.25872  | 32.9912 | 37.63   | 11.9515 | 54.1011 | 48.4127 | 31.6557 |
| ENSMUSG00000045455 | 7_Gm9797         | 192.675 | -0.06585 | 0.76535  | 0.83476  | 197.079 | 158.78  | 209.152 | 162.303 | 222.34  | 206.395 |
| ENSMUSG00000045466 | 18_Zfp956        | 211.657 | 0.17192  | 0.39487  | 0.5125   | 215.311 | 252.397 | 205.567 | 227.225 | 197.237 | 172.207 |
| ENSMUSG00000045467 | 13_Ttl13         | 43.9639 | 0.31715  | 0.37962  | 0.4972   | 54.6959 | 42.2191 | 49.0013 | 33.3624 | 37.6543 | 46.8504 |
| ENSMUSG00000045475 | 5_Lce3c          | 3.27442 | 1.47742  | 0.26008  | 0.37029  | 1.73638 | 5.50683 | 7.17092 | 1.80337 | 0.89653 | 2.53245 |
| ENSMUSG00000045482 | 15_Ttrap         | 2905.69 | 0.72315  | 2.14E-08 | 3.29E-07 | 3287.83 | 3779.52 | 3789.83 | 2384.96 | 1941.89 | 2250.09 |
| ENSMUSG00000045493 | 4_Bhlhe23        | 1.19377 | -0.75487 | 0.76943  | NA       | 1.73638 | 0.91781 | 0       | 4.50843 | 0       | 0       |
| ENSMUSG00000045498 | 1_Pcdhb3         | 23.4813 | -0.17209 | 0.71795  | 0.79903  | 19.9683 | 20.1917 | 26.2934 | 29.7556 | 20.6202 | 24.0583 |
| ENSMUSG00000045502 | 6_Hcar2          | 640.94  | 0.70076  | 0.00021  | 0.00096  | 776.16  | 690.19  | 913.098 | 424.694 | 437.507 | 603.99  |
| ENSMUSG00000045503 | 16_Sys1          | 637.116 | 0.77553  | 3.57E-06 | 2.76E-05 | 766.61  | 836.121 | 810.314 | 552.733 | 384.612 | 472.303 |
| ENSMUSG00000045506 | 3_A930002H24Rik  | 0.44795 | 0.74833  | 0.83022  | NA       | 0.86819 | 0.91781 | 0       | 0.90169 | 0       | 0       |
| ENSMUSG00000045515 | 3_Pou3f3         | 422.941 | -0.64361 | 0.00399  | 0.0117   | 391.553 | 376.3   | 221.104 | 510.354 | 549.573 | 488.764 |
| ENSMUSG00000045518 | 8_Onecut3        | 1.03994 | -1.34682 | 0.61415  | NA       | 1.73638 | 0       | 0       | 3.60674 | 0.89653 | 0       |
| ENSMUSG00000045519 | 14_Zfp560        | 274.836 | -0.45769 | 0.0079   | 0.02071  | 234.411 | 248.725 | 211.542 | 311.081 | 346.957 | 296.297 |
| ENSMUSG00000045521 | 6_Tssk2          | 2.44926 | 1.43277  | 0.30889  | NA       | 3.47275 | 3.67122 | 3.58546 | 1.80337 | 0.89653 | 1.26623 |
| ENSMUSG00000045532 | 5_C1ql1          | 15.0894 | -1.00757 | 0.28486  | 0.39813  | 14.7592 | 12.8493 | 2.39031 | 45.0843 | 11.6549 | 3.79868 |
| ENSMUSG00000045534 | 4_Kcna5          | 18.7929 | -0.47779 | 0.47286  | 0.58585  | 20.8365 | 20.1917 | 5.97577 | 34.264  | 18.8271 | 12.6623 |
| ENSMUSG00000045538 | 6_Ddx28          | 181.338 | 0.31074  | 0.12249  | 0.20307  | 179.715 | 194.575 | 228.274 | 156.893 | 155.1   | 173.473 |
| ENSMUSG00000045539 | 3_Spr3           | 2.02763 | 4.43786  | 0.07225  | NA       | 2.60457 | 0       | 9.56123 | 0       | 0       | 0       |
| ENSMUSG00000045545 | 8_Krt14          | 26459.3 | 2.83939  | 2.49E-28 | 1.14E-25 | 44456.5 | 31280.6 | 63555.9 | 7563.34 | 4435.14 | 7464.41 |
| ENSMUSG00000045551 | 7_Fpr1           | 10.3259 | 3.82215  | 9.57E-05 | 0.00048  | 21.7047 | 15.6027 | 20.3176 | 0.90169 | 0.89653 | 2.53245 |
| ENSMUSG00000045555 | 3_Mettl24        | 12.0242 | -0.16771 | 0.81253  | 0.87061  | 6.07732 | 10.0959 | 17.9273 | 11.7219 | 9.86184 | 16.4609 |
| ENSMUSG00000045573 | 9_Penk           | 1382.19 | -0.68811 | 0.00046  | 0.00187  | 958.48  | 1333.57 | 883.219 | 2036.01 | 1428.17 | 1653.69 |
| ENSMUSG00000045575 | 1_Vmn1r233       | 0.30594 | 1.73752  | 0.66765  | NA       | 0       | 1.83561 | 0       | 0       | 0       | 0       |
| ENSMUSG00000045576 | 16_Stl7          | 381.853 | -0.46328 | 0.0124   | 0.03024  | 333.384 | 290.027 | 340.619 | 386.823 | 532.539 | 407.725 |
| ENSMUSG00000045589 | 7_Frrs1l         | 9.99605 | -2.64049 | 0.01197  | 0.02942  | 2.60457 | 5.50683 | 0       | 31.559  | 15.241  | 5.06491 |
| ENSMUSG00000045591 | 5_Olig3          | 0.15028 | -0.99647 | 0.80707  | NA       | 0       | 0       | 0       | 0.90169 | 0       | 0       |
| ENSMUSG00000045594 | 9_Glb1           | 526.16  | -0.00366 | 0.98158  | 0.98781  | 540.881 | 558.944 | 475.671 | 584.292 | 459.024 | 538.146 |
| ENSMUSG00000045598 | 10_Zfp553        | 328.386 | 0.55933  | 0.00018  | 0.00082  | 391.553 | 381.807 | 400.377 | 263.292 | 263.58  | 269.706 |
| ENSMUSG00000045608 | 6_Dbx2           | 265.275 | 0.17856  | 0.32137  | 0.43713  | 280.425 | 307.465 | 255.763 | 223.618 | 248.339 | 276.037 |
| ENSMUSG00000045613 | 9_Chrm2          | 90.4936 | -1.96739 | 1.21E-05 | 8.04E-05 | 30.3866 | 65.1642 | 14.3418 | 146.975 | 172.134 | 113.96  |
| ENSMUSG00000045620 | 6_Odf3l1         | 1.62411 | -1.33788 | 0.51425  | NA       | 0.86819 | 1.83561 | 0       | 4.50843 | 0       | 2.53245 |
| ENSMUSG00000045624 | 15_Esf1          | 611.385 | -0.61713 | 5.38E-05 | 0.00029  | 487.922 | 473.588 | 486.428 | 643.803 | 847.221 | 729.347 |
| ENSMUSG00000045625 | 4_Plgz           | 87.3898 | 0.91694  | 0.00314  | 0.00956  | 121.546 | 84.4381 | 137.443 | 73.9382 | 53.7918 | 53.1815 |
| ENSMUSG00000045629 | 7_Sh3tc2         | 1453.36 | 0.68176  | 1.86E-06 | 1.57E-05 | 1702.52 | 1658.47 | 2010.25 | 1165.88 | 976.322 | 1206.71 |
| ENSMUSG00000045631 | 9_Tmprss12       | 1.85372 | -0.0828  | 0.96046  | NA       | 2.60457 | 2.75342 | 0       | 2.70506 | 1.79306 | 1.26623 |
| ENSMUSG00000045636 | 16_Mtus1         | 5502.49 | -0.14571 | 0.22581  | 0.33118  | 5051.12 | 5444.42 | 5177.41 | 5087.31 | 5926.07 | 6328.6  |
| ENSMUSG00000045639 | 14_Zfp629        | 638.043 | 0.11391  | 0.40336  | 0.52073  | 634.646 | 659.902 | 694.385 | 607.736 | 563.021 | 668.568 |
| ENSMUSG00000045648 | 15_Vwv2l         | 2.52171 | -4.81018 | 0.01214  | 0.02973  | 0       | 0       | 0       | 8.11517 | 4.48265 | 2.53245 |
| ENSMUSG00000045655 | 9_Fam216b        | 0.1447  | 0.92709  | 0.82027  | NA       | 0.86819 | 0       | 0       | 0       | 0       | 0       |
| ENSMUSG00000045657 | 3_Pcdhb10        | 34.6187 | -0.46782 | 0.26706  | 0.37836  | 24.3093 | 38.5478 | 23.9031 | 37.8708 | 34.9647 | 48.1166 |
| ENSMUSG00000045658 | 16_Pid1          | 2288.02 | 0.01577  | 0.89507  | 0.92918  | 2266.84 | 2218.34 | 2415.41 | 2063.06 | 2270.02 | 2494.47 |
| ENSMUSG00000045659 | 17_Plekha7       | 3039.59 | 0.90734  | 1.09E-10 | 3.44E-09 | 3550.02 | 3829.08 | 4517.68 | 2351.6  | 1923.95 | 2065.22 |
| ENSMUSG00000045662 | 16_Henmt1        | 1.55488 | 0.45787  | 0.82149  | NA       | 2.60457 | 2.75342 | 0       | 2.70506 | 0       | 1.26623 |
| ENSMUSG00000045664 | 4_Cdc42ep2       | 143.253 | 0.16068  | 0.50041  | 0.61146  | 148.46  | 161.534 | 143.418 | 161.402 | 106.687 | 138.019 |
| ENSMUSG00000045665 | 4_Mfsd5          | 1139.21 | 1.05577  | 4.69E-08 | 6.47E-07 | 1361.32 | 1479.5  | 1773.61 | 825.042 | 548.677 | 847.106 |
| ENSMUSG00000045667 | 14_Smtnl2        | 39.8255 | -0.9394  | 0.04776  | 0.09331  | 22.5729 | 37.63   | 21.5128 | 74.8399 | 30.482  | 51.9153 |
| ENSMUSG00000045671 | 17_Spred2        | 915.807 | 0.20879  | 0.16864  | 0.26302  | 884.684 | 981.134 | 1079.22 | 806.107 | 767.43  | 976.261 |
| ENSMUSG00000045672 | 15_Col27a1       | 377.324 | -0.11792 | 0.6412   | 0.73686  | 341.198 | 472.67  | 271.3   | 497.73  | 307.51  | 373.537 |
| ENSMUSG00000045679 | 13_Pqlc3         | 1720.83 | -0.17468 | 0.15782  | 0.24935  | 1656.5  | 1507.04 | 1687.56 | 1674.43 | 2000.16 | 1799.31 |
| ENSMUSG00000045680 | 7_Tcf21          | 2.65167 | -1.66279 | 0.24858  | 0.3575   | 1.73638 | 0.91781 | 1.19515 | 6.3118  | 4.48265 | 1.26623 |
| ENSMUSG00000045689 | 3_Pcdhb4         | 18.9218 | -1.11301 | 0.05186  | 0.09993  | 14.7592 | 13.7671 | 7.17092 | 34.264  | 23.3098 | 20.2596 |
| ENSMUSG00000045690 | 8_Wdr89          | 175.065 | 0.06958  | 0.74172  | 0.81739  | 171.033 | 187.232 | 180.468 | 201.076 | 164.962 | 145.616 |
| ENSMUSG00000045691 | 13_Thtpa         | 534.958 | 0.05403  | 0.68786  | 0.7752   | 535.672 | 545.177 | 553.356 | 488.714 | 527.16  | 559.672 |
| ENSMUSG00000045693 | 7_Nlrp4e         | 0.21104 | -0.99647 | 0.80707  | NA       | 0       | 0       | 0       | 0       | 0       | 1.26623 |
| ENSMUSG00000045699 | 3_Gm21411        | 1.25453 | -0.83957 | 0.70609  | NA       | 1.73638 | 0.91781 | 0       | 3.60674 | 0       | 1.26623 |
| ENSMUSG00000045709 | 10_Smkr-ps       | 1.10693 | 0.26178  | 0.90782  | NA       | 1.73638 | 1.83561 | 0       | 1.80337 | 0       | 1.26623 |
| ENSMUSG00000045725 | 5_Prr15          | 41.3838 | 0.73878  | 0.05631  | 0.10698  | 43.4094 | 44.9725 | 66.9286 | 27.9522 | 29.5855 | 35.4544 |
| ENSMUSG00000045730 | 3_Adrb2          | 1202.9  | -0.37494 | 0.02917  | 0.062    | 1383.02 | 1214.26 | 1476.02 | 880.045 | 976.322 | 1287.75 |
| ENSMUSG00000045731 | 5_Pnoc           | 0.44827 | -2.3261  | 0.56139  | NA       | 0       | 0       | 0       | 0       | 2.68959 | 0       |
| ENSMUSG00000045733 | 7_Sprn           | 39.5975 | -1.04167 | 0.00923  | 0.02362  | 30.3866 | 25.6986 | 21.5128 | 67.6264 | 49.3092 | 43.0517 |
| ENSMUSG00000045744 | 10_Bricd3        | 1.05197 | -3.54869 | 0.3225   | NA       | 0       | 0       | 0       | 6.3118  | 0       | 0       |
| ENSMUSG00000045746 | 3_B230317F23Rik  | 4.12206 | -0.32854 | 0.76431  | 0.83411  | 2.60457 | 3.67122 | 4.78062 | 2.70506 | 7.17224 | 3.79868 |
| ENSMUSG00000045751 | 16_Mms22l        | 250.914 | 0.69513  | 0.00296  | 0.00907  | 292.579 | 263.41  | 374.083 | 147.876 | 194.547 | 232.986 |
| ENSMUSG00000045752 | 12_Tssc4         | 370.021 | 0.80771  | 0.00035  | 0.00147  | 436.699 | 472.67  | 504.355 | 359.773 | 203.512 | 243.116 |
| ENSMUSG00000045757 | 6_Zfp764         | 215.159 | 0.01169  | 0.94756  | 0.96556  | 214.443 | 201.917 | 231.86  | 210.093 | 209.788 | 222.856 |
| ENSMUSG00000045761 | 15_Fam179a       | 96.0279 | 0.92315  | 0.0046   | 0.01316  | 111.128 | 100.041 | 166.126 | 77.545  | 46.6196 | 74.7074 |
| ENSMUSG00000045763 | 7_Basp1          | 242.995 | -1.21536 | 6.67E-06 | 4.76E-05 | 163.219 | 178.972 | 95.6123 | 423.792 | 288.683 | 307.693 |
| ENSMUSG00000045767 | 8_B230219D22Rik  | 2090.44 | -0.49213 | 1.51E-05 | 9.70E-05 | 1820.59 | 1733.73 | 1657.68 | 2392.17 | 2640.28 | 2298.2  |
| ENSMUSG00000045775 | 15_Slc16a5       | 10.3585 | 0.00134  | 0.99866  | 0.99896  | 11.2864 | 14.6849 | 4.78062 | 11.7219 | 4.48265 | 15.1947 |

|                    |                  |         |          |          |          |         |         |         |         |         |         |
|--------------------|------------------|---------|----------|----------|----------|---------|---------|---------|---------|---------|---------|
| ENSMUSG00000045776 | 2_Lrtm1          | 46.7451 | -2.74368 | 0.06733  | 0.12444  | 23.4411 | 12.8493 | 0       | 156.893 | 70.8259 | 16.4609 |
| ENSMUSG00000045777 | 14_Ifitm10       | 141.86  | 0.21129  | 0.31592  | 0.431    | 156.274 | 162.452 | 137.443 | 136.155 | 124.618 | 134.22  |
| ENSMUSG00000045790 | 9_Ccdc149        | 227.197 | -0.72094 | 0.00177  | 0.00587  | 182.32  | 194.575 | 137.443 | 348.952 | 255.511 | 244.382 |
| ENSMUSG00000045795 | 9_Whamm          | 430.191 | 0.80827  | 8.97E-08 | 1.15E-06 | 520.045 | 534.163 | 588.016 | 305.671 | 291.372 | 341.881 |
| ENSMUSG00000045802 | 13_Hsf3          | 2.29051 | -0.97642 | 0.55312  | NA       | 0.86819 | 3.67122 | 0       | 4.50843 | 0.89653 | 3.79868 |
| ENSMUSG00000045817 | 8_Zfp36l2        | 2949.16 | 0.10636  | 0.39611  | 0.5136   | 3028.24 | 3010.4  | 3133.69 | 2456.19 | 2975.58 | 3090.86 |
| ENSMUSG00000045822 | 4_Zswim3         | 88.1618 | 0.00787  | 0.97549  | 0.9838   | 91.1598 | 87.1915 | 87.2462 | 96.4803 | 89.6531 | 77.2398 |
| ENSMUSG00000045826 | 8_Ptprcap        | 11.1474 | 1.80069  | 0.01196  | 0.0294   | 21.7047 | 14.6849 | 15.537  | 5.41011 | 4.48265 | 5.06491 |
| ENSMUSG00000045827 | 10_Serpinb9      | 757.08  | 0.062    | 0.69703  | 0.78317  | 852.561 | 648.889 | 819.876 | 748.399 | 804.188 | 668.568 |
| ENSMUSG00000045838 | 8_A430105119Rik  | 880.064 | 0.37981  | 0.01348  | 0.03245  | 994.944 | 899.449 | 1091.18 | 826.846 | 649.985 | 817.983 |
| ENSMUSG00000045854 | 4_Lyrm2          | 300.88  | -0.77003 | 8.82E-06 | 6.06E-05 | 237.015 | 226.698 | 203.176 | 352.559 | 424.955 | 360.875 |
| ENSMUSG00000045867 | 9_Cradd          | 158.284 | 0.01361  | 0.94804  | 0.9659   | 149.328 | 154.191 | 174.492 | 175.829 | 151.514 | 144.35  |
| ENSMUSG00000045868 | 12_Gvin1         | 0       | NA       | NA       | NA       | 0       | 0       | 0       | 0       | 0       | 0       |
| ENSMUSG00000045871 | 4_Slitrk6        | 330.804 | 0.01912  | 0.91752  | 0.94513  | 342.066 | 323.985 | 332.253 | 263.292 | 364.888 | 358.342 |
| ENSMUSG00000045875 | 12_Adra1a        | 62.11   | -1.15467 | 0.02105  | 0.0473   | 34.7275 | 56.9039 | 23.9031 | 104.596 | 118.342 | 34.1881 |
| ENSMUSG00000045876 | 4_Pcdhb8         | 40.3196 | -1.21523 | 0.01509  | 0.03577  | 19.1001 | 40.3834 | 13.1467 | 71.2332 | 60.0675 | 37.9868 |
| ENSMUSG00000045877 | 2_4933415A04Rik  | 37.9733 | 0.06432  | 0.87107  | 0.91248  | 34.7275 | 32.1232 | 50.1965 | 42.3792 | 36.7578 | 31.6557 |
| ENSMUSG00000045886 | 6_Gm9803         | 131.503 | 0.63061  | 0.06369  | 0.1187   | 138.042 | 145.013 | 197.2   | 157.795 | 69.9294 | 81.0385 |
| ENSMUSG00000045896 | 14_Paip2b        | 2635.41 | -0.35671 | 0.00249  | 0.00785  | 2441.35 | 2232.1  | 2258.84 | 2659.97 | 3078.69 | 3141.51 |
| ENSMUSG00000045903 | 8_Npas4          | 5.46835 | 0.2226   | 0.82771  | 0.88219  | 5.20913 | 10.0959 | 2.39031 | 5.41011 | 7.17224 | 2.53245 |
| ENSMUSG00000045912 | 8_C2cd4c         | 6.68537 | 0.20554  | 0.80936  | 0.86836  | 5.20913 | 9.17806 | 7.17092 | 7.21348 | 6.27571 | 5.06491 |
| ENSMUSG00000045915 | 15_Ccdc42        | 2.1995  | -1.1098  | 0.5192   | NA       | 0.86819 | 0.91781 | 2.39031 | 0       | 2.68959 | 6.33113 |
| ENSMUSG00000045917 | 17_6330416G13Rik | 275.763 | 0.09251  | 0.70426  | 0.7884   | 302.13  | 321.232 | 230.665 | 353.461 | 233.098 | 213.992 |
| ENSMUSG00000045928 | 2_4933440M02Rik  | 0.51697 | 0.77694  | 0.84161  | NA       | 0       | 1.83561 | 0       | 0       | 0       | 1.26623 |
| ENSMUSG00000045929 | 8_Gm20715        | 1.19001 | 0.6993   | 0.75004  | NA       | 2.60457 | 1.83561 | 0       | 1.80337 | 0.89653 | 0       |
| ENSMUSG00000045930 | 2_Clec14a        | 280.681 | -0.79208 | 0.00205  | 0.00664  | 225.729 | 200.082 | 191.225 | 492.32  | 322.751 | 251.979 |
| ENSMUSG00000045932 | 12_Ifit2         | 1557.73 | 1.54288  | 1.14E-09 | 2.65E-08 | 2523.82 | 1575.87 | 2860    | 651.919 | 1083.91 | 650.841 |
| ENSMUSG00000045934 | 15_Mtmr11        | 486.719 | 0.07443  | 0.60998  | 0.70963  | 523.518 | 509.382 | 463.72  | 498.632 | 431.231 | 493.828 |
| ENSMUSG00000045942 | 12_BC049762      | 8.26323 | -1.12254 | 0.1949   | 0.29508  | 5.20913 | 4.58903 | 5.97577 | 9.01685 | 19.7237 | 5.06491 |
| ENSMUSG00000045948 | 8_Mrps12         | 95.4127 | 1.39334  | 7.83E-07 | 7.41E-06 | 110.26  | 152.356 | 151.785 | 55.0028 | 44.8265 | 58.2464 |
| ENSMUSG00000045954 | 7_Sdpr           | 338.849 | -1.12018 | 5.13E-07 | 5.18E-06 | 222.256 | 256.068 | 161.346 | 560.848 | 415.99  | 416.589 |
| ENSMUSG00000045962 | 16_Wnk1          | 8491.77 | -0.16493 | 0.21033  | 0.31353  | 8005.57 | 7880.28 | 8134.22 | 7517.35 | 9901.28 | 9511.9  |
| ENSMUSG00000045967 | 11_Gpr158        | 34.7469 | -1.94646 | 0.00108  | 0.00083  | 8.68188 | 20.1917 | 14.3418 | 69.4298 | 65.4467 | 30.3894 |
| ENSMUSG00000045968 | 7_Teddm2         | 16.4917 | -0.77572 | 0.18647  | 0.28491  | 10.4183 | 17.4383 | 8.36608 | 20.7388 | 17.9306 | 24.0583 |
| ENSMUSG00000045969 | 7_Inlg1          | 703.284 | 0.33074  | 0.02516  | 0.05494  | 789.183 | 743.423 | 818.681 | 710.528 | 551.366 | 606.523 |
| ENSMUSG00000045973 | 18_Slc25a51      | 1533.82 | -0.00979 | 0.9254   | 0.95078  | 1523.67 | 1491.43 | 1570.43 | 1493.19 | 1531.27 | 1592.91 |
| ENSMUSG00000045975 | 7_C2cd2          | 2328.61 | 0.07957  | 0.54407  | 0.6508   | 2314.59 | 2338.57 | 2524.17 | 1967.48 | 2296.91 | 2529.92 |
| ENSMUSG00000045980 | 13_Tmem104       | 287.884 | 1.01634  | 4.25E-05 | 0.00024  | 311.68  | 389.15  | 455.354 | 239.848 | 136.273 | 194.999 |
| ENSMUSG00000045983 | 15_Eif4g1        | 10015.1 | 0.57056  | 4.16E-05 | 0.00023  | 11191.8 | 11768.1 | 12948.3 | 7117    | 7620.51 | 9444.79 |
| ENSMUSG00000045991 | 18_Onecut2       | 4.39099 | -1.64755 | 0.18395  | 0.28184  | 4.34094 | 1.83561 | 0       | 3.60674 | 8.96531 | 7.59736 |
| ENSMUSG00000045994 | 16_B3gat1        | 57.4146 | -1.48585 | 0.00186  | 0.00613  | 37.3321 | 33.9588 | 19.1225 | 141.565 | 61.8606 | 50.6491 |
| ENSMUSG00000045996 | 12_Polr2k        | 377.534 | -0.70595 | 7.97E-06 | 5.56E-05 | 304.734 | 267.999 | 288.032 | 425.596 | 506.54  | 472.303 |
| ENSMUSG00000046005 | 3_D830044D21Rik  | 0.34947 | -0.03469 | 0.99322  | NA       | 0       | 0       | 1.19515 | 0.90169 | 0       | 0       |
| ENSMUSG00000046006 | 5_Gapt           | 43.8423 | 0.14285  | 0.70635  | 0.78996  | 57.3004 | 39.4656 | 40.6352 | 38.7725 | 34.9647 | 51.9153 |
| ENSMUSG00000046008 | 7_Pnlip          | 0.86021 | -1.90838 | 0.44436  | NA       | 0       | 0       | 1.19515 | 1.80337 | 0.89653 | 1.26623 |
| ENSMUSG00000046010 | 7_Zfp830         | 270.209 | -0.02937 | 0.8674   | 0.91015  | 273.479 | 275.342 | 252.178 | 269.604 | 242.96  | 307.693 |
| ENSMUSG00000046020 | 13_Pofut1        | 1605.14 | 0.04865  | 0.66684  | 0.75765  | 1587.05 | 1671.32 | 1638.56 | 1696.97 | 1475.69 | 1561.26 |
| ENSMUSG00000046027 | 16_Stard5        | 296.039 | 0.41121  | 0.01704  | 0.03966  | 347.275 | 306.547 | 359.741 | 226.323 | 265.373 | 270.973 |
| ENSMUSG00000046031 | 6_Fam26f         | 20.9235 | 2.73588  | 9.05E-05 | 0.00046  | 52.0913 | 15.6027 | 41.8304 | 6.3118  | 7.17224 | 2.53245 |
| ENSMUSG00000046032 | 16_Snx12         | 1793.81 | -0.06974 | 0.59405  | 0.69599  | 1785.86 | 1696.1  | 1767.63 | 1614.92 | 1821.75 | 2076.61 |
| ENSMUSG00000046034 | 7_Otulin         | 525.579 | -0.03721 | 0.80283  | 0.86362  | 516.572 | 514.889 | 524.673 | 584.292 | 463.506 | 549.542 |
| ENSMUSG00000046049 | 6_Rp1l1          | 127.498 | -1.82936 | 0.03089  | 0.06503  | 83.3461 | 60.5752 | 23.9031 | 386.823 | 147.031 | 63.3113 |
| ENSMUSG00000046056 | 14_Sbsn          | 209.801 | 0.99995  | 1.67E-05 | 0.00011  | 276.952 | 219.356 | 344.204 | 154.188 | 142.548 | 121.558 |
| ENSMUSG00000046058 | 7_Eid2           | 84.1154 | -0.65856 | 0.01865  | 0.04267  | 57.3004 | 79.8491 | 58.5626 | 111.809 | 102.204 | 94.967  |
| ENSMUSG00000046062 | 5_Ppp1r15b       | 2629.39 | 0.06191  | 0.61724  | 0.71556  | 2662.73 | 2407.4  | 2987.89 | 2448.08 | 2575.73 | 2694.53 |
| ENSMUSG00000046070 | 8_Igfals         | 2.77331 | -0.54014 | 0.7646   | 0.83429  | 0       | 5.50683 | 1.19515 | 3.60674 | 0       | 6.33113 |
| ENSMUSG00000046079 | 16_Lrrc8d        | 623.434 | -0.45557 | 0.0013   | 0.0045   | 536.54  | 545.177 | 495.989 | 798.893 | 705.57  | 658.438 |
| ENSMUSG00000046080 | 17_Clec9a        | 14.5386 | -0.64065 | 0.3374   | 0.4539   | 18.232  | 7.34244 | 8.36608 | 12.6236 | 24.2063 | 16.4609 |
| ENSMUSG00000046085 | 7_4931422A03Rik  | 2.31283 | 1.31337  | 0.36943  | NA       | 1.73638 | 4.58903 | 3.58546 | 1.80337 | 0.89653 | 1.26623 |
| ENSMUSG00000046088 | 8_Gm9805         | 0.15028 | -0.99647 | 0.80707  | NA       | 0       | 0       | 0       | 0.90169 | 0       | 0       |
| ENSMUSG00000046093 | 9_Hpcal4         | 19.0356 | -2.22895 | 0.00958  | 0.02436  | 11.2864 | 7.34244 | 1.19515 | 62.2163 | 23.3098 | 8.86359 |
| ENSMUSG00000046095 | 5_Krt32          | 2.80529 | 1.27835  | 0.34143  | 0.45781  | 2.60457 | 4.58903 | 4.78062 | 0.90169 | 2.68959 | 1.26623 |
| ENSMUSG00000046096 | 6_BC030336       | 644.472 | -0.5024  | 0.00029  | 0.00126  | 535.672 | 539.67  | 525.868 | 778.155 | 817.636 | 669.834 |
| ENSMUSG00000046101 | 16_Mcmdc2        | 2.29632 | 0.33967  | 0.81324  | NA       | 4.34094 | 0.91781 | 2.39031 | 1.80337 | 1.79306 | 2.53245 |
| ENSMUSG00000046108 | 3_Ill17c         | 1.52498 | 2.91954  | 0.22089  | NA       | 3.47275 | 0       | 4.78062 | 0       | 0.89653 | 0       |
| ENSMUSG00000046110 | 15_Serinc4       | 17.0097 | -2.59675 | 0.00016  | 0.00074  | 6.07732 | 3.67122 | 4.78062 | 42.3792 | 28.689  | 16.4609 |
| ENSMUSG00000046111 | 16_Cep295        | 775.843 | -0.2196  | 0.2004   | 0.3014   | 764.874 | 618.601 | 767.289 | 686.183 | 943.15  | 874.963 |
| ENSMUSG00000046119 | 2_1110008E08Rik  | 0.1447  | 0.92709  | 0.82027  | NA       | 0.86819 | 0       | 0       | 0       | 0       | 0       |
| ENSMUSG00000046133 | 3_C130073F10Rik  | 0.14942 | -0.99647 | 0.80707  | NA       | 0       | 0       | 0       | 0       | 0.89653 | 0       |
| ENSMUSG00000046138 | 14_9930021J03Rik | 1396.63 | -0.33811 | 0.01342  | 0.03236  | 1284.92 | 1197.74 | 1217.86 | 1338.1  | 1726.72 | 1614.44 |
| ENSMUSG00000046139 | 7_Pat1           | 793.73  | 0.08606  | 0.46145  | 0.57516  | 799.602 | 807.669 | 844.974 | 760.121 | 761.154 | 788.859 |
| ENSMUSG00000046152 | 16_Fut10         | 99.6324 | -0.22953 | 0.45794  | 0.57175  | 87.687  | 114.726 | 72.9044 | 139.761 | 100.411 | 82.3047 |
| ENSMUSG00000046157 | 13_Tmem229b      | 549.587 | 0.44288  | 0.02336  | 0.0517   | 623.359 | 580.053 | 697.97  | 594.211 | 404.335 | 397.595 |
| ENSMUSG00000046159 | 15_Chmr3         | 63.0256 | -0.44099 | 0.18002  | 0.27699  | 52.9595 | 53.2327 | 53.7819 | 77.545  | 51.9988 | 88.6359 |
| ENSMUSG00000046160 | 6_Olig1          | 0.29884 | -1.76064 | 0.66373  | NA       | 0       | 0       | 0       | 0       | 1.79306 | 0       |
| ENSMUSG00000046167 | 5_Gldn           | 92.1545 | -1.36133 | 0.00028  | 0.0012   | 56.4322 | 62.4108 | 35.8546 | 115.416 | 195.444 | 87.3697 |
| ENSMUSG00000046168 | 8_Kcnrg          | 11.1147 | -0.95277 | 0.18972  | 0.28898  | 9.55007 | 8.26025 | 4.78062 | 9.91854 | 21.5167 | 12.6623 |
| ENSMUSG00000046169 | 9_Adams6         | 73.1314 | -0.46615 | 0.09249  | 0.1612   | 58.1686 | 66.082  | 59.7577 | 77.545  | 86.0669 | 91.1683 |
| ENSMUSG00000046178 | 3_Nxph1          | 4.65639 | -1.15973 | 0.33646  | 0.45304  | 1.73638 | 4.58903 | 2.39031 | 4.50843 | 13.448  | 1.26623 |

|                    |                  |         |          |          |          |         |         |         |         |         |         |
|--------------------|------------------|---------|----------|----------|----------|---------|---------|---------|---------|---------|---------|
| ENSMUSG00000046179 | 17_E2f8          | 202.616 | 1.24966  | 5.62E-07 | 5.62E-06 | 269.138 | 243.218 | 343.009 | 87.4635 | 133.583 | 139.285 |
| ENSMUSG00000046180 | 11_4930550L24Rik | 0       | NA       | NA       | NA       | 0       | 0       | 0       | 0       | 0       | 0       |
| ENSMUSG00000046182 | 8_Gsg1l          | 94.3271 | -0.55152 | 0.04089  | 0.08206  | 81.6097 | 79.8491 | 68.1238 | 135.253 | 104.894 | 96.2332 |
| ENSMUSG00000046185 | 10_Zfp84         | 402.123 | -0.10436 | 0.48089  | 0.59347  | 388.948 | 401.999 | 370.498 | 291.331 | 407.921 | 452.043 |
| ENSMUSG00000046186 | 8_Cd109          | 3030.95 | 0.20286  | 0.24454  | 0.3527   | 3274.81 | 2963.59 | 3491.05 | 3197.41 | 2779.24 | 3479.59 |
| ENSMUSG00000046191 | 7_Pcdhb20        | 115.061 | -0.63033 | 0.00908  | 0.0233   | 85.0825 | 104.63  | 81.2705 | 150.581 | 143.445 | 125.356 |
| ENSMUSG00000046192 | 4_Iqub           | 0.79387 | -0.45428 | 0.85954  | NA       | 0.86819 | 0       | 1.19515 | 1.80337 | 0.89653 | 0       |
| ENSMUSG00000046196 | 4_Ttc39d         | 0.74207 | 0.5415   | 0.83559  | NA       | 1.73638 | 0.91781 | 0       | 0.90169 | 0.89653 | 0       |
| ENSMUSG00000046201 | 8_Scaf8          | 1692.18 | -0.05027 | 0.68296  | 0.77111  | 1679.94 | 1606.16 | 1701.9  | 1531.96 | 1869.27 | 1763.85 |
| ENSMUSG00000046204 | 13_Pnma2         | 7.61911 | -1.20836 | 0.20059  | 0.30156  | 6.07732 | 6.42464 | 1.19515 | 9.91854 | 17.0341 | 5.06491 |
| ENSMUSG00000046207 | 14_Pik3r6        | 38.7511 | 0.56598  | 0.23141  | 0.33753  | 58.1686 | 40.3834 | 40.6352 | 49.5927 | 25.9994 | 17.7272 |
| ENSMUSG00000046213 | 9_Cym            | 0.45622 | 0.77574  | 0.84797  | NA       | 0       | 1.83561 | 0       | 0.90169 | 0       | 0       |
| ENSMUSG00000046215 | 3_Rprml          | 2.92158 | 0.99148  | 0.52963  | 0.63838  | 0       | 4.58903 | 7.17092 | 3.60674 | 0.89653 | 1.26623 |
| ENSMUSG00000046223 | 10_Plaur         | 61.7868 | 2.36408  | 1.04E-06 | 9.51E-06 | 86.8188 | 58.7396 | 164.931 | 27.0506 | 11.6549 | 21.5259 |
| ENSMUSG00000046229 | 9_Scand1         | 27.8227 | 2.74695  | 4.50E-07 | 4.63E-06 | 41.673  | 39.4656 | 64.5383 | 9.91854 | 6.27571 | 5.06491 |
| ENSMUSG00000046230 | 9_Vps13a         | 1549.6  | -0.34103 | 0.03385  | 0.07018  | 1483.73 | 1268.41 | 1348.13 | 1400.32 | 1784.99 | 2012.03 |
| ENSMUSG00000046240 | 7_Hepacam        | 8.97421 | -1.79201 | 0.06175  | 0.11563  | 4.34094 | 6.42464 | 1.19515 | 10.8202 | 25.9994 | 5.06491 |
| ENSMUSG00000046245 | 13_Plira         | 25.0871 | 0.62291  | 0.24415  | 0.35235  | 44.2776 | 28.452  | 17.9273 | 18.0337 | 15.241  | 26.5908 |
| ENSMUSG00000046259 | 2_Spr2h          | 1.29965 | 3.80988  | 0.10213  | NA       | 1.73638 | 3.67122 | 2.39031 | 0       | 0       | 0       |
| ENSMUSG00000046262 | 14_C87977        | 0.19919 | 0.92709  | 0.82027  | NA       | 0       | 0       | 1.19515 | 0       | 0       | 0       |
| ENSMUSG00000046269 | 16_Usp27x        | 84.2691 | -0.47795 | 0.08481  | 0.15009  | 74.6642 | 69.7532 | 66.9286 | 84.7584 | 118.342 | 91.1683 |
| ENSMUSG00000046272 | 2_Olfr1444       | 0.4444  | -0.80729 | 0.81753  | NA       | 0.86819 | 0       | 0       | 0.90169 | 0.89653 | 0       |
| ENSMUSG00000046275 | 2_Tusc5          | 25.2378 | 0.02078  | 0.96641  | 0.97817  | 31.2548 | 25.6986 | 19.1225 | 33.3624 | 17.9306 | 24.0583 |
| ENSMUSG00000046280 | 9_She            | 110.31  | -0.75362 | 0.00995  | 0.02515  | 85.0825 | 94.534  | 66.9286 | 169.517 | 147.031 | 98.7657 |
| ENSMUSG00000046287 | 7_Pnma3          | 5.7775  | -0.97854 | 0.36732  | 0.48471  | 5.20913 | 1.83561 | 4.78062 | 9.91854 | 11.6549 | 1.26623 |
| ENSMUSG00000046295 | 15_Ankle1        | 85.645  | 0.97205  | 0.00167  | 0.00558  | 112.864 | 96.3696 | 130.272 | 52.2978 | 44.8265 | 77.2398 |
| ENSMUSG00000046311 | 13_Zfp62         | 935.678 | -0.57187 | 0.00017  | 0.00079  | 795.261 | 719.56  | 743.386 | 990.051 | 1316.11 | 1049.7  |
| ENSMUSG00000046312 | 4_Al464131       | 501.736 | 0.07989  | 0.60234  | 0.70325  | 457.535 | 584.642 | 504.355 | 489.615 | 471.575 | 502.692 |
| ENSMUSG00000046314 | 15_Stxbp6        | 254.145 | -1.31012 | 9.24E-09 | 1.59E-07 | 161.483 | 152.356 | 124.296 | 391.331 | 423.162 | 272.239 |
| ENSMUSG00000046317 | 14_BC107364      | 1.27216 | 2.63725  | 0.2941   | NA       | 4.34094 | 0       | 2.39031 | 0.90169 | 0       | 0       |
| ENSMUSG00000046318 | 15_Ccbe1         | 126.776 | -0.85753 | 0.00158  | 0.00532  | 106.787 | 101.876 | 60.9529 | 165.008 | 176.617 | 149.415 |
| ENSMUSG00000046321 | 8_Hs3st2         | 3.94424 | -2.01241 | 0.13407  | 0.21804  | 0.86819 | 3.67122 | 0       | 5.41011 | 3.58612 | 10.1298 |
| ENSMUSG00000046324 | 12_Ermp1         | 6377.29 | -0.00374 | 0.98108  | 0.98754  | 6299.58 | 5950.13 | 6856.6  | 5020.58 | 6867.42 | 7269.41 |
| ENSMUSG00000046329 | 14_Slc25a23      | 708.875 | -0.65411 | 0.00946  | 0.02409  | 493.999 | 742.505 | 415.914 | 1137.93 | 772.809 | 690.094 |
| ENSMUSG00000046330 | 9_Rpl37a         | 10302.8 | 0.20715  | 0.15854  | 0.25027  | 11046.8 | 10637.4 | 11440   | 11354.9 | 7902.02 | 9435.92 |
| ENSMUSG00000046337 | 17_Fam178b       | 25.9732 | 0.4476   | 0.39856  | 0.51603  | 16.4956 | 45.8903 | 27.4885 | 24.3455 | 18.8271 | 22.7921 |
| ENSMUSG00000046338 | 4_Gpat2          | 37.0546 | 0.16675  | 0.72721  | 0.80578  | 62.5096 | 27.5342 | 27.4885 | 36.0674 | 42.1369 | 26.5908 |
| ENSMUSG00000046345 | 4_Smco1          | 10.24   | -2.29615 | 0.01151  | 0.02846  | 2.60457 | 6.42464 | 1.19515 | 27.9522 | 8.06878 | 15.1947 |
| ENSMUSG00000046351 | 10_Zfp322a       | 589.368 | -0.72953 | 1.24E-06 | 1.10E-05 | 465.349 | 415.766 | 449.378 | 653.722 | 823.912 | 728.08  |
| ENSMUSG00000046352 | 7_Gjb2           | 2544.95 | 0.40339  | 0.00933  | 0.02383  | 2730.45 | 2639.61 | 3324.92 | 1839.44 | 2276.29 | 2459.01 |
| ENSMUSG00000046354 | 3_Defb14         | 18.032  | -0.98508 | 0.12353  | 0.2044   | 17.3638 | 12.8493 | 5.97577 | 29.7556 | 29.5855 | 12.6623 |
| ENSMUSG00000046364 | 14_Rpl27a        | 12115.9 | -0.20174 | 0.06952  | 0.12784  | 11433.2 | 10868.7 | 11509.3 | 11850.9 | 14279.9 | 12753.4 |
| ENSMUSG00000046367 | 10_Mgat4e        | 1.38738 | 0.3577   | 0.86815  | NA       | 2.60457 | 0.91781 | 1.19515 | 3.60674 | 0       | 0       |
| ENSMUSG00000046378 | 11_Aspdh1        | 3.23719 | -0.91331 | 0.51587  | 0.62589  | 2.60457 | 1.83561 | 2.39031 | 7.21348 | 5.37918 | 0       |
| ENSMUSG00000046380 | 3_Jrk            | 285.739 | 0.37231  | 0.02359  | 0.0521   | 314.284 | 305.629 | 347.79  | 262.39  | 234.891 | 249.447 |
| ENSMUSG00000046387 | 5_Pcdhb17        | 220.958 | -0.38726 | 0.05429  | 0.1038   | 184.924 | 216.602 | 173.297 | 270.506 | 268.959 | 211.46  |
| ENSMUSG00000046402 | 10_Rbp1          | 2213.75 | 0.07214  | 0.72473  | 0.80394  | 2499.51 | 1954.93 | 2353.26 | 2839.41 | 1611.96 | 2023.43 |
| ENSMUSG00000046404 | 5_Yod1           | 459.174 | -0.22981 | 0.2079   | 0.31059  | 457.535 | 370.793 | 439.817 | 410.267 | 576.469 | 500.16  |
| ENSMUSG00000046408 | 13_1700067K01Rik | 1.51208 | -0.8765  | 0.63769  | NA       | 0       | 0.91781 | 2.39031 | 2.70506 | 1.79306 | 1.26623 |
| ENSMUSG00000046410 | 9_Kcnk6          | 868.091 | 0.6503   | 3.56E-05 | 0.0002   | 1047.9  | 932.49  | 1201.13 | 586.096 | 721.707 | 719.217 |
| ENSMUSG00000046413 | 12_Irx3os        | 14.0998 | 0.92174  | 0.15684  | 0.24816  | 12.1546 | 27.5342 | 15.537  | 8.11517 | 9.86184 | 11.396  |
| ENSMUSG00000046417 | 14_Lrrc75a       | 135.358 | -0.13324 | 0.53138  | 0.63985  | 136.306 | 126.657 | 124.296 | 153.287 | 133.583 | 138.019 |
| ENSMUSG00000046432 | 12_Ngfrap1       | 758.935 | -0.51419 | 0.00234  | 0.00744  | 633.778 | 678.258 | 562.918 | 1069.4  | 771.016 | 838.242 |
| ENSMUSG00000046434 | 15_Hnmpa1        | 9756.34 | -0.15217 | 0.26207  | 0.37273  | 9882.59 | 8263    | 9580.36 | 8825.7  | 10815.7 | 11170.7 |
| ENSMUSG00000046435 | 7_Gm13078        | 0.59758 | 2.66585  | 0.50308  | NA       | 0       | 0       | 3.58546 | 0       | 0       | 0       |
| ENSMUSG00000046441 | 5_Cmtr2          | 209.053 | -0.29584 | 0.09322  | 0.16223  | 193.606 | 177.136 | 192.42  | 229.028 | 230.408 | 231.72  |
| ENSMUSG00000046442 | 4_Ppm1e          | 81.6758 | -1.53942 | 0.00078  | 0.00289  | 46.014  | 54.1505 | 25.0982 | 182.14  | 128.204 | 54.4478 |
| ENSMUSG00000046447 | 3_Camk2n1        | 375.769 | -1.15741 | 4.31E-12 | 1.94E-10 | 231.806 | 253.314 | 212.737 | 558.143 | 541.504 | 457.108 |
| ENSMUSG00000046449 | 15_C77370        | 47.3525 | -1.15076 | 0.00294  | 0.00902  | 26.9138 | 38.5478 | 22.7079 | 74.8399 | 71.7224 | 49.3828 |
| ENSMUSG00000046450 | 2_Olfr71         | 0.75388 | 1.75922  | 0.54965  | NA       | 0.86819 | 2.75342 | 0       | 0.90169 | 0       | 0       |
| ENSMUSG00000046456 | 14_Tmem150b      | 3.96896 | 0.97473  | 0.40961  | 0.52632  | 1.73638 | 4.58903 | 9.56123 | 2.70506 | 2.68959 | 2.53245 |
| ENSMUSG00000046460 | 14_Sh2d7         | 0.44709 | 0.74829  | 0.83033  | NA       | 0.86819 | 0.91781 | 0       | 0       | 0.89653 | 0       |
| ENSMUSG00000046470 | 5_Sox18          | 57.6296 | 0.36755  | 0.30473  | 0.41977  | 65.9823 | 55.9861 | 72.9044 | 64.9214 | 34.0682 | 51.9153 |
| ENSMUSG00000046480 | 5_Scn4b          | 100.153 | -1.33956 | 0.00087  | 0.00317  | 46.8822 | 83.5203 | 39.4401 | 211.896 | 88.7565 | 130.421 |
| ENSMUSG00000046490 | 7_Rnf222         | 61.675  | 0.4373   | 0.13531  | 0.21946  | 71.1914 | 68.8354 | 72.9044 | 54.1011 | 51.1022 | 51.9153 |
| ENSMUSG00000046491 | 10_C1qtnf2       | 176.527 | 0.35477  | 0.17191  | 0.2669   | 176.242 | 225.78  | 192.42  | 201.076 | 112.963 | 150.681 |
| ENSMUSG00000046500 | 8_Fam19a4        | 1.98114 | -1.70442 | 0.32462  | NA       | 0.86819 | 1.83561 | 0       | 0.90169 | 4.48265 | 3.79868 |
| ENSMUSG00000046516 | 10_Cox17         | 503.851 | 0.21185  | 0.12406  | 0.20513  | 501.813 | 541.505 | 579.65  | 458.056 | 469.782 | 472.303 |
| ENSMUSG00000046519 | 15_Golph3l       | 917.388 | -0.36654 | 0.00346  | 0.01036  | 819.57  | 823.272 | 761.313 | 947.671 | 1074.94 | 1077.56 |
| ENSMUSG00000046523 | 4_Kctd4          | 80.1732 | -1.30587 | 0.00087  | 0.0032   | 50.3549 | 61.493  | 26.2934 | 114.514 | 152.41  | 75.9736 |
| ENSMUSG00000046532 | 7_Ar             | 111.906 | -0.68542 | 0.0036   | 0.01073  | 87.687  | 92.6984 | 76.4899 | 127.138 | 144.341 | 143.084 |
| ENSMUSG00000046541 | 9_Zfp526         | 309.273 | 0.81691  | 4.51E-05 | 0.00025  | 383.739 | 363.451 | 436.231 | 254.275 | 174.823 | 243.116 |
| ENSMUSG00000046546 | 3_Fam43a         | 227.486 | 0.48472  | 0.016    | 0.03764  | 250.906 | 250.561 | 294.008 | 193.862 | 157.789 | 217.791 |
| ENSMUSG00000046550 | 8_Spin2c         | 38.811  | -1.02594 | 0.02359  | 0.0521   | 37.3321 | 25.6986 | 13.1467 | 53.1994 | 59.171  | 44.3179 |
| ENSMUSG00000046556 | 6_Zfp319         | 355.128 | 0.74073  | 5.87E-05 | 0.00031  | 382.003 | 459.821 | 491.208 | 289.441 | 225.926 | 282.369 |
| ENSMUSG00000046561 | 9_Arsj           | 74.8362 | -0.78742 | 0.04316  | 0.08577  | 57.3004 | 78.9313 | 27.4885 | 82.0534 | 90.5496 | 112.694 |
| ENSMUSG00000046562 | 5_Unc119b        | 3006.71 | 0.4753   | 0.0002   | 0.0009   | 3366.83 | 3450.95 | 3675.1  | 2791.62 | 2192.91 | 2562.84 |
| ENSMUSG00000046567 | 9_4930430F08Rik  | 118.322 | -0.20101 | 0.45863  | 0.57241  | 98.9735 | 134.917 | 96.8075 | 131.646 | 148.824 | 98.7657 |
| ENSMUSG00000046572 | 10_Zfp518b       | 348.02  | -0.26554 | 0.07759  | 0.13976  | 330.78  | 315.725 | 301.179 | 395.84  | 362.198 | 382.401 |

|                    |                  |         |          |          |          |         |         |         |         |         |         |
|--------------------|------------------|---------|----------|----------|----------|---------|---------|---------|---------|---------|---------|
| ENSMUSG00000046573 | 6_Lymr4          | 132.821 | -0.5731  | 0.0111   | 0.02759  | 111.996 | 100.959 | 107.564 | 142.466 | 181.996 | 151.947 |
| ENSMUSG00000046574 | 7_Prr12          | 626.167 | 1.21832  | 7.07E-07 | 6.77E-06 | 759.665 | 896.696 | 971.66  | 513.961 | 246.546 | 368.472 |
| ENSMUSG00000046585 | 8_Cfap58         | 2.39119 | -0.01675 | 0.99239  | NA       | 3.47275 | 3.67122 | 0       | 5.41011 | 1.79306 | 0       |
| ENSMUSG00000046589 | 6_Lrrc8e         | 593.613 | 0.60372  | 0.00012  | 0.0006   | 685.001 | 713.135 | 748.166 | 422.89  | 436.61  | 555.874 |
| ENSMUSG00000046591 | 10_Ticrr         | 179.503 | 1.19684  | 7.27E-07 | 6.94E-06 | 255.247 | 233.123 | 260.544 | 77.545  | 120.135 | 130.421 |
| ENSMUSG00000046593 | 3_Tmem215        | 233.592 | 0.55717  | 0.00618  | 0.01684  | 286.502 | 240.465 | 307.155 | 201.978 | 157.789 | 207.661 |
| ENSMUSG00000046598 | 14_Bdh1          | 580.536 | 0.58453  | 0.00037  | 0.00154  | 675.451 | 642.464 | 770.874 | 468.876 | 396.267 | 529.283 |
| ENSMUSG00000046603 | 15_Tcain         | 257.246 | -0.47078 | 0.00458  | 0.01311  | 203.156 | 226.698 | 217.518 | 301.163 | 307.51  | 287.434 |
| ENSMUSG00000046605 | 14_B3gnt11       | 1461.17 | 0.43039  | 0.00302  | 0.00925  | 1587.92 | 1502.45 | 1943.32 | 1335.4  | 1136.8  | 1261.16 |
| ENSMUSG00000046607 | 6_Hrk            | 3.91432 | -1.87508 | 0.11565  | 0.19375  | 0.86819 | 1.83561 | 2.39031 | 6.3118  | 4.48265 | 7.59736 |
| ENSMUSG00000046610 | 14_Oacyl         | 19.913  | 0.76636  | 0.15572  | 0.24673  | 19.1001 | 32.1232 | 23.9031 | 17.132  | 10.7584 | 16.4609 |
| ENSMUSG00000046613 | 18_Vwa5b2        | 4.40065 | -1.00042 | 0.3844   | 0.5019   | 2.60457 | 2.75342 | 3.58546 | 9.91854 | 6.27571 | 1.26623 |
| ENSMUSG00000046618 | 7_Olfml2a        | 1528.45 | -0.5196  | 0.00571  | 0.01573  | 1130.38 | 1545.58 | 1092.37 | 2188.39 | 1608.38 | 1605.58 |
| ENSMUSG00000046623 | 8_Gjb4           | 486.262 | 1.02667  | 1.98E-06 | 1.66E-05 | 604.259 | 613.094 | 738.605 | 350.756 | 225.926 | 384.933 |
| ENSMUSG00000046634 | 12_Pkd111        | 2.05151 | -0.66919 | 0.70148  | NA       | 1.73638 | 1.83561 | 1.19515 | 0       | 6.27571 | 1.26623 |
| ENSMUSG00000046637 | 2_Ttc34          | 1.92671 | -0.25712 | 0.89419  | NA       | 4.34094 | 0.91781 | 0       | 4.50843 | 1.79306 | 0       |
| ENSMUSG00000046652 | 3_Tas2r143       | 0.99017 | 2.20973  | 0.35197  | NA       | 1.73638 | 0.91781 | 2.39031 | 0       | 0.89653 | 0       |
| ENSMUSG00000046658 | 16_Zfp316        | 359.343 | 0.32405  | 0.03269  | 0.06819  | 405.444 | 370.793 | 423.085 | 333.624 | 312.889 | 310.226 |
| ENSMUSG00000046667 | 14_Rbm12b1       | 196.135 | -0.75111 | 0.0055   | 0.01525  | 144.987 | 166.123 | 127.881 | 231.733 | 332.613 | 173.473 |
| ENSMUSG00000046668 | 8_Cxxc5          | 475.359 | 0.07892  | 0.69508  | 0.78186  | 429.753 | 598.409 | 437.426 | 551.832 | 438.403 | 396.329 |
| ENSMUSG00000046671 | 18_Mtfr11        | 905.061 | -0.36888 | 0.00379  | 0.0112   | 796.997 | 839.792 | 732.629 | 1094.65 | 979.908 | 986.391 |
| ENSMUSG00000046675 | 6_Tmem251        | 267.018 | -0.37075 | 0.02702  | 0.05832  | 233.543 | 251.479 | 212.737 | 293.048 | 298.545 | 312.758 |
| ENSMUSG00000046679 | 16_C87436        | 411.82  | -0.24773 | 0.09534  | 0.16532  | 366.376 | 358.862 | 405.157 | 419.284 | 474.265 | 446.978 |
| ENSMUSG00000046687 | 5_Gm5424         | 28.2194 | 0.26404  | 0.5896   | 0.692    | 36.4639 | 24.7808 | 31.074  | 35.1657 | 15.241  | 26.5908 |
| ENSMUSG00000046688 | 14_Tifa          | 435.488 | 0.05654  | 0.74699  | 0.82123  | 483.581 | 373.547 | 475.671 | 392.233 | 481.437 | 406.459 |
| ENSMUSG00000046691 | 13_Chtf8         | 2478.97 | 0.51252  | 8.61E-06 | 5.94E-05 | 2762.58 | 2872.73 | 3108.6  | 2100.03 | 1877.34 | 2152.59 |
| ENSMUSG00000046694 | 6_Fam46b         | 1625.21 | 0.98984  | 1.54E-08 | 2.51E-07 | 1974.26 | 1894.35 | 2617.39 | 1219.98 | 908.185 | 1137.07 |
| ENSMUSG00000046699 | 14_Slitrrk4      | 1.40727 | -3.96935 | 0.09918  | NA       | 0       | 0       | 0       | 0.90169 | 6.27571 | 1.26623 |
| ENSMUSG00000046707 | 8_Csnk2a2        | 559.847 | 0.16866  | 0.24734  | 0.35616  | 566.059 | 615.848 | 595.187 | 463.466 | 563.918 | 554.607 |
| ENSMUSG00000046709 | 16_Mapk10        | 42.7511 | -1.88343 | 0.00022  | 0.00098  | 18.232  | 26.6164 | 9.56123 | 100.087 | 62.7571 | 39.253  |
| ENSMUSG00000046711 | 15_Hmga1         | 1182.89 | 1.05328  | 5.35E-09 | 9.96E-08 | 1402.12 | 1489.6  | 1896.71 | 774.548 | 630.261 | 904.086 |
| ENSMUSG00000046714 | 7_Foxc2          | 37.7977 | 0.14278  | 0.7174   | 0.79857  | 30.3866 | 37.63   | 51.3916 | 35.1657 | 36.7578 | 35.4544 |
| ENSMUSG00000046718 | 7_Bst2           | 1699.89 | 2.68232  | 1.66E-32 | 1.12E-29 | 2614.12 | 2096.27 | 4114.92 | 486.91  | 446.472 | 440.647 |
| ENSMUSG00000046719 | 7_Nxph3          | 26.4082 | -0.46856 | 0.48567  | 0.59754  | 19.9683 | 31.2054 | 15.537  | 41.4775 | 43.93   | 6.33113 |
| ENSMUSG00000046722 | 14_Cdc42se1      | 4958.32 | 0.58289  | 1.80E-05 | 0.00011  | 5675.35 | 5451.77 | 6711.99 | 3980.04 | 3539.5  | 4391.27 |
| ENSMUSG00000046727 | 12_Cystm1        | 142.889 | -0.49142 | 0.10292  | 0.17638  | 115.469 | 152.356 | 88.4414 | 223.618 | 147.031 | 130.421 |
| ENSMUSG00000046731 | 4_Kctd11         | 1403.99 | 0.8826   | 1.31E-08 | 2.16E-07 | 1696.44 | 1723.64 | 2040.13 | 972.017 | 844.532 | 1147.2  |
| ENSMUSG00000046733 | 7_Gprc5a         | 2536.85 | 0.94658  | 2.26E-11 | 8.78E-10 | 3189.72 | 3481.24 | 3347.63 | 1675.33 | 1493.62 | 2033.56 |
| ENSMUSG00000046743 | 6_Fat4           | 1517.51 | -0.45435 | 0.00286  | 0.00882  | 1294.47 | 1486.85 | 1058.91 | 1878.21 | 1696.24 | 1690.41 |
| ENSMUSG00000046748 | 7_Tmem45a2       | 0.78339 | -3.0917  | 0.35328  | NA       | 0       | 0       | 0       | 0.90169 | 0       | 3.79868 |
| ENSMUSG00000046750 | 16_BC089491      | 38.8079 | -0.22605 | 0.56729  | 0.67227  | 39.0685 | 41.3013 | 26.2934 | 39.6742 | 35.8612 | 50.6491 |
| ENSMUSG00000046753 | 9_Ccdc66         | 411.444 | -0.56511 | 0.00022  | 0.00098  | 335.121 | 315.725 | 345.4   | 453.548 | 541.504 | 477.368 |
| ENSMUSG00000046756 | 10_Mrps7         | 760.4   | 0.34574  | 0.04077  | 0.08188  | 816.965 | 771.874 | 964.489 | 739.382 | 550.47  | 719.217 |
| ENSMUSG00000046761 | 12_Fam83h        | 4575.69 | 1.55107  | 1.20E-14 | 1.01E-12 | 5927.99 | 6268.61 | 8271.66 | 2659.97 | 1684.58 | 2641.35 |
| ENSMUSG00000046768 | 13_Rhoj          | 909.687 | -0.71146 | 0.00292  | 0.00898  | 740.565 | 775.546 | 553.356 | 1568.03 | 986.184 | 834.444 |
| ENSMUSG00000046774 | 16_8030474K03Rik | 0.15028 | -0.99647 | 0.80707  | NA       | 0       | 0       | 0       | 0.90169 | 0       | 0       |
| ENSMUSG00000046782 | 14_4921506M07Rik | 5.57422 | -0.17242 | 0.85773  | 0.90363  | 3.47275 | 7.34244 | 4.78062 | 3.60674 | 5.37918 | 8.86359 |
| ENSMUSG00000046785 | 8_Epm2aip1       | 1616.33 | -0.69757 | 2.71E-07 | 2.98E-06 | 1294.47 | 1287.68 | 1116.27 | 1871.9  | 2257.46 | 1870.22 |
| ENSMUSG00000046791 | 7_2410016O06Rik  | 249.483 | 0.51766  | 0.00474  | 0.01346  | 288.239 | 273.506 | 319.106 | 209.191 | 180.203 | 226.655 |
| ENSMUSG00000046792 | 7_Zfp787         | 196.616 | 0.38686  | 0.11939  | 0.19894  | 187.529 | 221.191 | 260.544 | 217.306 | 133.583 | 159.545 |
| ENSMUSG00000046793 | 8_Gpr61          | 3.28221 | -2.03375 | 0.11929  | 0.19884  | 1.73638 | 0.91781 | 1.19515 | 3.60674 | 7.17224 | 5.06491 |
| ENSMUSG00000046794 | 8_Ppp1r3b        | 240.794 | -0.28566 | 0.1149   | 0.19271  | 217.047 | 222.109 | 212.737 | 272.309 | 291.372 | 229.187 |
| ENSMUSG00000046798 | 14_Cldn12        | 649.649 | -0.44209 | 0.00195  | 0.00636  | 592.973 | 573.628 | 485.233 | 747.497 | 790.74  | 707.821 |
| ENSMUSG00000046804 | 13_Phgr1         | 0.19919 | 0.92709  | 0.82027  | NA       | 0       | 0       | 1.19515 | 0       | 0       | 0       |
| ENSMUSG00000046805 | 9_Mpeg1          | 1481.79 | 2.42914  | 9.41E-25 | 2.90E-22 | 3014.35 | 1551.09 | 2934.1  | 498.632 | 488.609 | 403.926 |
| ENSMUSG00000046806 | 13_3110062M04Rik | 141.506 | 0.31206  | 0.16285  | 0.25563  | 136.306 | 169.794 | 163.736 | 122.629 | 114.756 | 141.817 |
| ENSMUSG00000046807 | 9_Lrrc75b        | 72.0687 | -1.26771 | 0.0002   | 0.00089  | 41.673  | 51.3971 | 33.4643 | 131.646 | 77.9982 | 96.2332 |
| ENSMUSG00000046811 | 3_Gltpd2         | 0.73766 | -0.61831 | 0.8578   | NA       | 1.73638 | 0       | 0       | 0       | 2.68959 | 0       |
| ENSMUSG00000046814 | 3_Gchfr          | 114.866 | 0.45966  | 0.13242  | 0.21595  | 149.328 | 130.328 | 119.515 | 136.155 | 69.0329 | 84.8372 |
| ENSMUSG00000046818 | 7_Ddit4l         | 164.399 | -1.75468 | 2.28E-12 | 1.12E-10 | 67.7187 | 91.7806 | 65.7335 | 307.475 | 223.236 | 230.453 |
| ENSMUSG00000046822 | 12_Slc39a3       | 727.861 | 0.81701  | 0.00034  | 0.00142  | 854.297 | 923.312 | 1008.71 | 709.626 | 362.198 | 509.023 |
| ENSMUSG00000046826 | 7_Fam187b        | 137.743 | 0.11837  | 0.57288  | 0.67734  | 144.119 | 137.671 | 148.199 | 135.253 | 121.928 | 139.285 |
| ENSMUSG00000046828 | 3_Mettl21e       | 1.80402 | -4.30207 | 0.0434   | NA       | 0       | 0       | 0       | 1.80337 | 2.68959 | 6.33113 |
| ENSMUSG00000046834 | 6_Krt1           | 106.866 | 0.12016  | 0.63132  | 0.728    | 101.578 | 107.383 | 125.491 | 89.2669 | 117.446 | 100.032 |
| ENSMUSG00000046836 | 13_Brox          | 2417.26 | -0.0532  | 0.64265  | 0.73802  | 2403.15 | 2217.42 | 2497.87 | 2272.25 | 2598.15 | 2514.73 |
| ENSMUSG00000046841 | 4_Ckap4          | 4671.25 | 0.71543  | 6.11E-06 | 4.42E-05 | 5309.84 | 5527.03 | 6580.52 | 3403.86 | 2993.52 | 4212.74 |
| ENSMUSG00000046844 | 6_Vat1l          | 1612.99 | -1.34073 | 4.84E-08 | 6.66E-07 | 887.289 | 1221.6  | 629.846 | 2693.33 | 2554.22 | 1691.68 |
| ENSMUSG00000046845 | 1_Ilh1f10        | 0.82291 | 1.77254  | 0.59619  | NA       | 0       | 3.67122 | 0       | 0       | 0       | 1.26623 |
| ENSMUSG00000046854 | 16_Pip5k11       | 4.74102 | -0.46405 | 0.73208  | 0.80995  | 1.73638 | 5.50683 | 4.78062 | 12.6236 | 0       | 3.79868 |
| ENSMUSG00000046856 | 13_Gpr1          | 10.63   | -1.51334 | 0.03576  | 0.07348  | 6.94551 | 3.67122 | 5.97577 | 15.3287 | 17.9306 | 13.9285 |
| ENSMUSG00000046861 | 9_Hectd3         | 1090.82 | 0.50524  | 0.00033  | 0.0014   | 1191.15 | 1325.31 | 1323.04 | 992.756 | 778.189 | 934.475 |
| ENSMUSG00000046862 | 14_Primef8       | 884.818 | 0.11334  | 0.45469  | 0.5687   | 926.357 | 839.792 | 991.978 | 722.25  | 890.255 | 938.274 |
| ENSMUSG00000046865 | 6_Fbl            | 1320.68 | 1.11675  | 3.69E-09 | 7.20E-08 | 1665.19 | 1571.28 | 2187.13 | 972.017 | 659.847 | 868.632 |
| ENSMUSG00000046873 | 18_Mbtps2        | 668.87  | -0.22785 | 0.10957  | 0.1856   | 644.196 | 582.807 | 621.48  | 644.705 | 797.016 | 723.016 |
| ENSMUSG00000046876 | 15_Atnx1         | 670.839 | 0.01497  | 0.90651  | 0.93694  | 688.473 | 683.765 | 651.359 | 684.379 | 696.604 | 620.451 |
| ENSMUSG00000046879 | 6_Irgm1          | 5623.02 | 1.34834  | 6.12E-10 | 1.54E-08 | 8015.12 | 6586.17 | 9623.38 | 2241.59 | 4108.8  | 3163.03 |
| ENSMUSG00000046897 | 16_Zfp740        | 2544.01 | 0.04013  | 0.68976  | 0.77698  | 2530.77 | 2662.55 | 2544.48 | 2602.26 | 2399.12 | 2524.86 |
| ENSMUSG00000046908 | 5_Ltb4r1         | 162.922 | 1.05468  | 8.60E-06 | 5.93E-05 | 213.574 | 195.493 | 249.787 | 89.2669 | 97.7218 | 131.688 |
| ENSMUSG00000046909 | 9_Tefm           | 165.917 | -0.4273  | 0.02821  | 0.0604   | 131.096 | 147.767 | 145.809 | 189.354 | 186.478 | 194.999 |

|                    |                 |         |          |          |          |         |         |         |         |         |         |
|--------------------|-----------------|---------|----------|----------|----------|---------|---------|---------|---------|---------|---------|
| ENSMUSG00000046916 | 8_Myct1         | 24.1742 | -0.17103 | 0.72585  | 0.80477  | 26.9138 | 25.6986 | 15.537  | 27.0506 | 29.5855 | 20.2596 |
| ENSMUSG00000046924 | 3_Vmn1r179      | 0.15028 | -0.99647 | 0.80707  | NA       | 0       | 0       | 0       | 0.90169 | 0       | 0       |
| ENSMUSG00000046934 | 4_Csl           | 4.04388 | 0.19229  | 0.86777  | 0.91023  | 3.47275 | 3.67122 | 5.97577 | 2.70506 | 7.17224 | 1.26623 |
| ENSMUSG00000046942 | 17_Mageb16      | 0.39838 | 2.07058  | 0.60634  | NA       | 0       | 0       | 2.39031 | 0       | 0       | 0       |
| ENSMUSG00000046947 | 12_Adck2        | 505.06  | 0.30168  | 0.03597  | 0.07382  | 526.99  | 543.341 | 602.358 | 435.514 | 432.128 | 490.03  |
| ENSMUSG00000046949 | 15_Nqo2         | 706.988 | -0.69273 | 4.14E-06 | 3.14E-05 | 589.5   | 534.163 | 497.184 | 805.205 | 991.563 | 824.314 |
| ENSMUSG00000046957 | 4_Spz1          | 0.30594 | 1.73752  | 0.66765  | NA       | 0       | 1.83561 | 0       | 0       | 0       | 0       |
| ENSMUSG00000046959 | 16_Slc26a1      | 19.5526 | -0.23413 | 0.69224  | 0.77925  | 15.6274 | 27.5342 | 10.7564 | 27.9522 | 21.5167 | 13.9285 |
| ENSMUSG00000046961 | 7_Gpr156        | 71.0384 | -0.73573 | 0.03611  | 0.07401  | 59.0368 | 56.9039 | 44.2207 | 99.1854 | 111.17  | 55.714  |
| ENSMUSG00000046962 | 15_Zbtb21       | 606.785 | 0.33676  | 0.01343  | 0.03237  | 690.21  | 658.984 | 681.238 | 528.388 | 493.092 | 588.796 |
| ENSMUSG00000046971 | 7_Pla2g4f       | 50.7532 | 0.85818  | 0.0281   | 0.0602   | 59.905  | 58.7396 | 77.685  | 47.7893 | 22.4133 | 37.9868 |
| ENSMUSG00000046974 | 6_BC053393      | 1.67488 | -1.3966  | 0.43073  | NA       | 1.73638 | 0.91781 | 0       | 1.80337 | 1.79306 | 3.79868 |
| ENSMUSG00000046982 | 10_Tshz1        | 894.041 | 0.32002  | 0.05291  | 0.1015   | 920.28  | 1040.79 | 1018.27 | 964.803 | 683.156 | 736.944 |
| ENSMUSG00000046985 | 11_Tapt1        | 1231.47 | -0.3085  | 0.00622  | 0.01692  | 1146.01 | 1062.82 | 1092.37 | 1327.28 | 1437.14 | 1323.21 |
| ENSMUSG00000046991 | 9_Wdr27         | 10.0123 | -0.50263 | 0.50399  | 0.61473  | 4.34094 | 11.0137 | 9.56123 | 14.427  | 8.06878 | 12.6623 |
| ENSMUSG00000046994 | 9_Mars2         | 206.465 | -0.1058  | 0.58156  | 0.68487  | 221.388 | 185.397 | 190.03  | 207.388 | 235.788 | 198.798 |
| ENSMUSG00000046997 | 5_Spsb4         | 16.5747 | -0.61498 | 0.27404  | 0.38615  | 10.4183 | 14.6849 | 14.3418 | 24.3455 | 17.9306 | 17.7272 |
| ENSMUSG00000046999 | 2_1110032F04Rik | 14.4559 | -0.89737 | 0.15755  | 0.24909  | 10.4183 | 13.7671 | 5.97577 | 24.3455 | 17.0341 | 15.1947 |
| ENSMUSG00000047003 | 14_Zfp41        | 219.206 | 0.07028  | 0.70054  | 0.78589  | 237.884 | 217.52  | 217.518 | 191.157 | 223.236 | 227.921 |
| ENSMUSG00000047013 | 15_Fbxo41       | 15.5765 | -0.51906 | 0.37607  | 0.49362  | 14.7592 | 12.8493 | 10.7564 | 14.427  | 24.2063 | 16.4609 |
| ENSMUSG00000047021 | 14_Ccdc108      | 0.1447  | 0.92709  | 0.82027  | NA       | 0.86819 | 0       | 0       | 0       | 0       | 0       |
| ENSMUSG00000047022 | 18_Mipol1       | 101.757 | -0.50296 | 0.04351  | 0.0863   | 86.8188 | 70.671  | 95.6123 | 118.121 | 122.825 | 116.493 |
| ENSMUSG00000047025 | 4_Ccer1         | 0.39838 | 2.07058  | 0.60634  | NA       | 0       | 0       | 2.39031 | 0       | 0       | 0       |
| ENSMUSG00000047030 | 15_Spata2       | 656.197 | 0.72649  | 0.00012  | 0.00058  | 738.828 | 777.381 | 938.196 | 584.292 | 388.198 | 510.289 |
| ENSMUSG00000047033 | 2_Pcdhb15       | 44.2462 | -0.76025 | 0.10837  | 0.18391  | 40.8049 | 38.5478 | 19.1225 | 59.5112 | 77.1016 | 30.3894 |
| ENSMUSG00000047034 | 9_Ankrd33       | 26.3017 | -2.27543 | 0.00251  | 0.0079   | 15.6274 | 6.42464 | 4.78062 | 87.4635 | 29.5855 | 13.9285 |
| ENSMUSG00000047036 | 7_Zfp445        | 1347.63 | -0.39127 | 0.00156  | 0.00525  | 1238.04 | 1150.93 | 1107.91 | 1393.1  | 1637.06 | 1558.73 |
| ENSMUSG00000047037 | 5_Nipa1         | 178.101 | -0.77268 | 0.00017  | 0.00079  | 140.647 | 132.164 | 121.906 | 247.062 | 233.098 | 193.733 |
| ENSMUSG00000047040 | 9_Prr15l        | 139.862 | 0.68335  | 0.00237  | 0.00751  | 164.956 | 178.054 | 174.492 | 126.236 | 94.1357 | 101.298 |
| ENSMUSG00000047044 | 7_D030056L22Rik | 276.62  | -0.43014 | 0.02631  | 0.05701  | 254.379 | 232.205 | 219.908 | 262.39  | 366.681 | 324.154 |
| ENSMUSG00000047045 | 17_Tmem164      | 2093.73 | -0.01473 | 0.89144  | 0.92677  | 2103.62 | 2107.28 | 2036.54 | 2128.88 | 1956.23 | 2229.83 |
| ENSMUSG00000047048 | 3_Olfr432       | 0.63329 | 2.77543  | 0.43496  | NA       | 2.60457 | 0       | 1.19515 | 0       | 0       | 0       |
| ENSMUSG00000047053 | 5_Teddm1a       | 0.19919 | 0.92709  | 0.82027  | NA       | 0       | 0       | 1.19515 | 0       | 0       | 0       |
| ENSMUSG00000047061 | 6_Gm9817        | 3.87019 | 2.1973   | 0.08532  | 0.15075  | 5.20913 | 10.0959 | 3.58546 | 0.90169 | 0.89653 | 2.53245 |
| ENSMUSG00000047067 | 7_Dusp28        | 182.808 | -0.05591 | 0.77969  | 0.84605  | 173.638 | 175.301 | 190.03  | 204.683 | 193.651 | 159.545 |
| ENSMUSG00000047084 | 8_Ngrn          | 664.199 | -0.02456 | 0.84447  | 0.8939   | 636.382 | 676.423 | 662.115 | 655.525 | 648.192 | 706.555 |
| ENSMUSG00000047085 | 14_Lrrc4b       | 39.7359 | 0.37448  | 0.44578  | 0.56073  | 41.673  | 58.7396 | 34.6595 | 50.4944 | 37.6543 | 15.1947 |
| ENSMUSG00000047090 | 13_Tmem198b     | 377.116 | 0.12136  | 0.54124  | 0.64818  | 411.521 | 442.382 | 325.082 | 431.907 | 341.578 | 310.226 |
| ENSMUSG00000047094 | 8_Ofcc1         | 31.7776 | -0.28449 | 0.50275  | 0.61377  | 23.4411 | 34.8766 | 27.4885 | 27.9522 | 37.6543 | 39.253  |
| ENSMUSG00000047098 | 17_Rnf31        | 840.027 | 1.44144  | 9.33E-16 | 9.96E-14 | 1035.75 | 1137.16 | 1510.67 | 456.253 | 405.232 | 495.095 |
| ENSMUSG00000047104 | 5_Pbp2          | 50.2008 | 0.9065   | 0.01209  | 0.02967  | 72.9278 | 52.3149 | 71.7092 | 33.3624 | 43.0335 | 27.857  |
| ENSMUSG00000047108 | 4_Dnajb7        | 4.99248 | -0.33871 | 0.7464   | 0.82084  | 6.94551 | 3.67122 | 2.39031 | 2.70506 | 5.37918 | 8.86359 |
| ENSMUSG00000047115 | 15_Fam221a      | 75.5944 | -0.00341 | 0.99006  | 0.9934   | 76.4006 | 61.6847 | 68.1238 | 69.4298 | 80.6878 | 77.2398 |
| ENSMUSG00000047117 | 12_Ankdd1b      | 496.262 | 0.34607  | 0.01751  | 0.04053  | 540.881 | 507.546 | 619.09  | 440.023 | 435.714 | 434.316 |
| ENSMUSG00000047123 | 8_Ticam1        | 428.358 | 0.78728  | 0.00093  | 0.00337  | 501.813 | 492.862 | 632.237 | 376.003 | 208.892 | 358.342 |
| ENSMUSG00000047126 | 17_Cltc         | 10222   | -0.25793 | 0.06097  | 0.11444  | 9577.85 | 8970.63 | 9383.15 | 9237.77 | 12631.2 | 11531.5 |
| ENSMUSG00000047139 | 8_Cd24a         | 8111.27 | -0.14648 | 0.28473  | 0.39805  | 7944.79 | 7028.56 | 8125.85 | 7189.14 | 9276.4  | 9102.91 |
| ENSMUSG00000047141 | 4_Zfp654        | 635.146 | -0.47715 | 0.00191  | 0.00626  | 537.409 | 534.163 | 522.282 | 680.773 | 865.152 | 671.1   |
| ENSMUSG00000047143 | 3_Dmrta2        | 541.874 | 0.81958  | 3.48E-05 | 0.0002   | 584.291 | 660.82  | 829.437 | 329.115 | 376.543 | 471.036 |
| ENSMUSG00000047146 | 15_Tet1         | 138.913 | -1.3223  | 1.46E-08 | 2.39E-07 | 85.9507 | 83.5203 | 68.1238 | 227.225 | 183.789 | 184.869 |
| ENSMUSG00000047150 | 8_1700001C19Rik | 39.7118 | 0.42958  | 0.27918  | 0.39184  | 37.3321 | 59.6574 | 39.4401 | 35.1657 | 28.689  | 37.9868 |
| ENSMUSG00000047153 | 3_Khny1         | 2480.89 | 0.79972  | 3.61E-11 | 1.32E-09 | 2929.27 | 3097.59 | 3426.51 | 1707.79 | 1758.99 | 1965.18 |
| ENSMUSG00000047155 | 13_Cyp4x1       | 0.99307 | 0.18979  | 0.93649  | NA       | 0.86819 | 0       | 2.39031 | 1.80337 | 0.89653 | 0       |
| ENSMUSG00000047161 | 12_Chst9        | 781.081 | -0.38789 | 0.00437  | 0.01259  | 733.619 | 634.204 | 662.115 | 825.042 | 962.874 | 868.632 |
| ENSMUSG00000047180 | 8_Neurl3        | 90.3946 | 1.48639  | 3.94E-05 | 0.00022  | 194.474 | 89.0271 | 115.93  | 55.0028 | 38.5508 | 49.3828 |
| ENSMUSG00000047181 | 12_Samd14       | 523.335 | -0.21997 | 0.44226  | 0.55759  | 434.094 | 654.395 | 362.132 | 808.812 | 450.058 | 430.517 |
| ENSMUSG00000047182 | 6_Irs3          | 22.9309 | -0.4135  | 0.50474  | 0.61544  | 26.0457 | 26.6164 | 5.97577 | 35.1657 | 19.7237 | 24.0583 |
| ENSMUSG00000047187 | 9_Rab2a         | 4295.37 | -0.31971 | 0.00943  | 0.02403  | 4061.39 | 3543.65 | 3859.15 | 4299.24 | 5261.74 | 4747.08 |
| ENSMUSG00000047193 | 15_Dync2h1      | 806.177 | -0.90958 | 2.98E-10 | 8.35E-09 | 603.391 | 559.861 | 516.307 | 952.18  | 1177.14 | 1028.18 |
| ENSMUSG00000047205 | 12_Dusp18       | 123.912 | -0.76436 | 0.00909  | 0.02332  | 97.2371 | 101.876 | 76.4899 | 210.093 | 142.548 | 115.227 |
| ENSMUSG00000047213 | 14_Ythdf3       | 2371.39 | -0.11407 | 0.36292  | 0.48007  | 2275.52 | 2286.25 | 2270.79 | 2145.11 | 2709.32 | 2541.32 |
| ENSMUSG00000047215 | 14_Rpl9         | 16301.9 | -0.3416  | 0.00051  | 0.00202  | 15118.6 | 13829.5 | 14193.7 | 17223.1 | 18883.6 | 18562.9 |
| ENSMUSG00000047216 | 8_Cdh19         | 134.019 | -1.13004 | 3.27E-05 | 0.00019  | 72.0596 | 112.89  | 66.9286 | 186.649 | 203.512 | 162.077 |
| ENSMUSG00000047220 | 5_Ccdc36        | 4.97304 | -0.75115 | 0.459    | 0.5728   | 3.47275 | 1.83561 | 5.97577 | 7.21348 | 6.27571 | 5.06491 |
| ENSMUSG00000047221 | 5_Fam185a       | 130.89  | -0.35169 | 0.11544  | 0.19348  | 111.128 | 125.739 | 107.564 | 130.744 | 150.617 | 159.545 |
| ENSMUSG00000047222 | 6_Rnase2a       | 0.74496 | -1.79256 | 0.54299  | NA       | 0.86819 | 0       | 0       | 2.70506 | 0.89653 | 0       |
| ENSMUSG00000047225 | 6_Olfr684       | 0       | NA       | NA       | NA       | 0       | 0       | 0       | 0       | 0       | 0       |
| ENSMUSG00000047227 | 4_Gm527         | 46.9389 | -0.43019 | 0.23418  | 0.3408   | 31.2548 | 36.7122 | 52.5868 | 55.0028 | 52.8953 | 53.1815 |
| ENSMUSG00000047228 | 9_BC048546      | 10.8101 | 0.95348  | 0.27898  | 0.39163  | 9.55007 | 8.26025 | 25.0982 | 1.80337 | 12.5514 | 7.59736 |
| ENSMUSG00000047230 | 6_Cldn2         | 463.042 | -0.90449 | 1.61E-05 | 0.0001   | 305.602 | 411.177 | 249.787 | 688.888 | 571.987 | 550.809 |
| ENSMUSG00000047237 | 13_Fbxw21       | 0.34389 | 1.87986  | 0.64119  | NA       | 0.86819 | 0       | 1.19515 | 0       | 0       | 0       |
| ENSMUSG00000047238 | 4_Mageh1        | 223.22  | -0.76687 | 0.00016  | 0.00076  | 162.351 | 196.41  | 136.248 | 301.163 | 273.442 | 269.706 |
| ENSMUSG00000047242 | 14_Taf9b        | 629.006 | -0.46549 | 0.00293  | 0.009    | 526.122 | 471.752 | 588.016 | 641.098 | 789.843 | 757.204 |
| ENSMUSG00000047246 | 6_Hist1h2be     | 74.9117 | -0.7064  | 0.01664  | 0.03887  | 49.4867 | 58.7396 | 63.3432 | 100.989 | 102.204 | 74.7074 |
| ENSMUSG00000047248 | 19_C2cd3        | 841.112 | 0.45001  | 0.00131  | 0.00453  | 869.925 | 977.463 | 1066.08 | 669.952 | 692.122 | 771.132 |
| ENSMUSG00000047250 | 13_Ptgs1        | 921.476 | 0.72735  | 3.50E-05 | 0.0002   | 1068.74 | 1036.2  | 1340.96 | 583.391 | 677.777 | 821.781 |
| ENSMUSG00000047257 | 13_Prss45       | 0.41023 | -0.03469 | 0.99322  | NA       | 0       | 0       | 1.19515 | 0       | 0       | 1.26623 |
| ENSMUSG00000047259 | 2_Mc4r          | 1.73919 | -0.85454 | 0.63727  | NA       | 1.73638 | 1.83561 | 0       | 0.90169 | 0.89653 | 5.06491 |
| ENSMUSG00000047260 | 4_Emc6          | 438.59  | -0.23768 | 0.12533  | 0.20666  | 376.794 | 371.711 | 460.134 | 461.663 | 472.472 | 488.764 |

|                    |                  |         |          |          |          |         |         |         |         |         |         |
|--------------------|------------------|---------|----------|----------|----------|---------|---------|---------|---------|---------|---------|
| ENSMUSG00000047261 | 9_Gap43          | 69.5051 | -0.77605 | 0.02273  | 0.05051  | 62.5096 | 51.3971 | 39.4401 | 113.612 | 69.0329 | 81.0385 |
| ENSMUSG00000047264 | 7_Zfp358         | 228.566 | 0.35342  | 0.10729  | 0.18233  | 241.356 | 279.931 | 248.592 | 254.275 | 171.237 | 176.006 |
| ENSMUSG00000047281 | 3_Sfn            | 17616.5 | 1.6806   | 3.19E-11 | 1.20E-09 | 23460.2 | 24471.4 | 32633.7 | 10413.6 | 4820.64 | 9899.36 |
| ENSMUSG00000047284 | 14_Neurl4        | 987.548 | 0.59632  | 5.81E-05 | 0.00031  | 1146.88 | 1249.13 | 1170.06 | 896.275 | 665.226 | 797.723 |
| ENSMUSG00000047293 | 6_Gpr15          | 0.86819 | 3.23798  | 0.39696  | NA       | 5.20913 | 0       | 0       | 0       | 0       | 0       |
| ENSMUSG00000047298 | 3_Kcnv2          | 129.062 | -2.25517 | 0.01567  | 0.03696  | 61.6414 | 61.493  | 10.7564 | 371.494 | 204.409 | 64.5776 |
| ENSMUSG00000047307 | 2_Pcdhb13        | 47.0319 | -0.79749 | 0.02432  | 0.05341  | 30.3866 | 39.4656 | 33.4643 | 68.5281 | 60.9641 | 49.3828 |
| ENSMUSG00000047324 | 5_4931429P17Rik  | 0       | NA       | NA       | NA       | 0       | 0       | 0       | 0       | 0       | 0       |
| ENSMUSG00000047330 | 8_Kcne4          | 221.244 | -0.80103 | 0.00018  | 0.00084  | 175.374 | 164.287 | 144.614 | 330.017 | 287.786 | 225.388 |
| ENSMUSG00000047342 | 16_Zfp286        | 82.3279 | -1.07401 | 0.00713  | 0.01898  | 70.3233 | 59.6574 | 28.6837 | 142.466 | 121.928 | 70.9087 |
| ENSMUSG00000047343 | 4_Mettl21c       | 1.20496 | -0.32703 | 0.8852   | NA       | 0.86819 | 0       | 2.39031 | 2.70506 | 0       | 1.26623 |
| ENSMUSG00000047344 | 9_Lanc13         | 9.86842 | -0.16991 | 0.8159   | 0.87305  | 10.4183 | 10.0959 | 7.17092 | 6.3118  | 12.5514 | 12.6623 |
| ENSMUSG00000047352 | 5_Olfr976        | 0.15028 | -0.99647 | 0.80707  | NA       | 0       | 0       | 0       | 0.90169 | 0       | 0       |
| ENSMUSG00000047361 | 15_Gm973         | 165.511 | -0.55399 | 0.00938  | 0.02393  | 123.283 | 142.26  | 137.443 | 228.126 | 184.685 | 177.272 |
| ENSMUSG00000047363 | 4_Cstad          | 8.92042 | -1.21012 | 0.15776  | 0.24931  | 4.34094 | 3.67122 | 8.36608 | 20.7388 | 6.27571 | 10.1298 |
| ENSMUSG00000047368 | 3_Abhd17b        | 788.635 | -0.03164 | 0.82599  | 0.88069  | 770.083 | 702.121 | 868.877 | 733.972 | 861.566 | 795.191 |
| ENSMUSG00000047369 | 14_Dnah14        | 0.29884 | -1.76064 | 0.66373  | NA       | 0       | 0       | 0       | 0       | 1.79306 | 0       |
| ENSMUSG00000047370 | 4_Gm7367         | 1.91867 | 1.95309  | 0.37753  | NA       | 3.47275 | 5.50683 | 0       | 0       | 0       | 2.53245 |
| ENSMUSG00000047371 | 7_Zfp768         | 348.791 | 0.603    | 0.0005   | 0.00198  | 392.421 | 467.163 | 401.572 | 297.556 | 240.27  | 293.765 |
| ENSMUSG00000047379 | 6_B4gat1         | 515.837 | 0.15743  | 0.26536  | 0.37652  | 509.627 | 548.848 | 574.869 | 522.978 | 484.127 | 454.575 |
| ENSMUSG00000047388 | 10_Atmin         | 2017.88 | 0.45737  | 0.00035  | 0.00148  | 2259.89 | 2241.28 | 2502.65 | 1630.25 | 1559.96 | 1913.27 |
| ENSMUSG00000047390 | 6_Defb9          | 39.5183 | -2.11055 | 1.25E-05 | 8.27E-05 | 13.891  | 22.0273 | 8.36608 | 73.9382 | 77.1016 | 41.7855 |
| ENSMUSG00000047394 | 7_Odf3b          | 2.42649 | 0.59208  | 0.70913  | NA       | 5.20913 | 0       | 3.58546 | 2.70506 | 1.79306 | 1.26623 |
| ENSMUSG00000047407 | 17_Tgif1         | 921.398 | 0.3854   | 0.0376   | 0.07652  | 1060.93 | 945.34  | 1123.44 | 615.851 | 801.498 | 981.326 |
| ENSMUSG00000047409 | 13_Ctcdspl       | 1337.63 | 0.43599  | 0.0007   | 0.00264  | 1516.73 | 1474.91 | 1621.82 | 1143.34 | 1016.67 | 1252.3  |
| ENSMUSG00000047412 | 5_Zbtb44         | 741.997 | -0.20837 | 0.13446  | 0.21863  | 718.86  | 671.834 | 674.067 | 699.708 | 860.669 | 826.846 |
| ENSMUSG00000047414 | 6_Flirt2         | 1207.55 | -0.32208 | 0.01513  | 0.03585  | 1150.35 | 1020.6  | 1049.35 | 1257.85 | 1503.48 | 1263.69 |
| ENSMUSG00000047415 | 11_Gpr68         | 323.421 | 0.41406  | 0.05859  | 0.1107   | 371.585 | 301.958 | 435.036 | 312.885 | 215.167 | 303.894 |
| ENSMUSG00000047417 | 17_Rexo1         | 557.477 | 1.41967  | 5.28E-10 | 1.36E-08 | 719.728 | 807.669 | 907.122 | 381.413 | 203.512 | 325.42  |
| ENSMUSG00000047419 | 5_Cmya5          | 402.063 | -1.50862 | 3.22E-06 | 2.53E-05 | 160.615 | 307.465 | 158.955 | 872.832 | 418.68  | 493.828 |
| ENSMUSG00000047420 | 8_Fam180a        | 74.4638 | -0.80483 | 0.0071   | 0.01891  | 54.6959 | 56.9039 | 51.3916 | 98.2837 | 112.066 | 73.4412 |
| ENSMUSG00000047423 | 9_Al837181       | 583.449 | 0.87156  | 0.00016  | 0.00074  | 655.482 | 802.162 | 806.729 | 563.553 | 303.027 | 369.738 |
| ENSMUSG00000047428 | 14_Dlk2          | 88.0359 | 2.64456  | 1.91E-10 | 5.66E-09 | 111.996 | 131.246 | 211.542 | 28.8539 | 11.6549 | 32.9219 |
| ENSMUSG00000047434 | 13_Xyyl1         | 553.22  | 0.08326  | 0.59407  | 0.69599  | 541.75  | 576.382 | 590.406 | 623.966 | 484.127 | 502.692 |
| ENSMUSG00000047441 | 3_Antxr1         | 0.35216 | 1.91112  | 0.63543  | NA       | 0       | 0.91781 | 1.19515 | 0       | 0       | 0       |
| ENSMUSG00000047443 | 14_Fam132b       | 333.745 | 1.02355  | 1.21E-06 | 1.08E-05 | 458.403 | 402.917 | 479.257 | 217.306 | 168.548 | 276.037 |
| ENSMUSG00000047446 | 18_Arl4a         | 634.181 | -1.2779  | 1.07E-09 | 2.50E-08 | 368.98  | 453.396 | 288.032 | 956.688 | 1023.84 | 714.152 |
| ENSMUSG00000047454 | 11_Gphn          | 1010.13 | 0.09619  | 0.51601  | 0.62601  | 1036.62 | 965.531 | 1129.42 | 832.256 | 1077.63 | 1019.31 |
| ENSMUSG00000047459 | 14_Dynlrb1       | 1888.42 | -0.17556 | 0.11313  | 0.19035  | 1853.58 | 1697.02 | 1771.22 | 2135.19 | 1974.16 | 1899.34 |
| ENSMUSG00000047462 | 8_A530099J19Rik  | 3.48483 | -0.29491 | 0.81219  | 0.87048  | 6.07732 | 0.91781 | 2.39031 | 4.50843 | 4.48265 | 2.53245 |
| ENSMUSG00000047466 | 9_8030462N17Rik  | 449.997 | -0.16386 | 0.25649  | 0.36623  | 450.59  | 435.958 | 386.035 | 494.124 | 463.506 | 469.77  |
| ENSMUSG00000047473 | 14_Zfp30         | 100.37  | -0.54183 | 0.08519  | 0.15062  | 85.0825 | 99.123  | 60.9529 | 155.992 | 111.17  | 89.9021 |
| ENSMUSG00000047485 | 6_Klhl34         | 7.35722 | -0.34069 | 0.68777  | 0.77517  | 6.07732 | 6.42464 | 7.17092 | 9.01685 | 11.6549 | 3.79868 |
| ENSMUSG00000047490 | 1_4932411E22Rik  | 22.4767 | -1.02682 | 0.16997  | 0.26441  | 20.8365 | 22.0273 | 1.19515 | 42.3792 | 26.8959 | 21.5259 |
| ENSMUSG00000047495 | 15_Dlgap2        | 6.61635 | -1.91888 | 0.09216  | 0.16074  | 1.73638 | 6.42464 | 0       | 18.0337 | 7.17224 | 6.33113 |
| ENSMUSG00000047496 | 6_Rnf152         | 4441.21 | -0.12641 | 0.41687  | 0.53282  | 4327.05 | 4090.66 | 4321.68 | 3619.37 | 5179.26 | 5109.23 |
| ENSMUSG00000047497 | 9_Adamts12       | 49.5343 | -0.4702  | 0.22028  | 0.32506  | 34.7275 | 59.6574 | 29.8789 | 54.1011 | 61.8606 | 56.9802 |
| ENSMUSG00000047501 | 3_Cldn4          | 5628.7  | 1.14159  | 2.25E-08 | 3.43E-07 | 7080.94 | 7339.69 | 8816.65 | 3741.99 | 2420.63 | 4372.28 |
| ENSMUSG00000047502 | 14_Mroh7         | 89.6773 | -0.27557 | 0.48133  | 0.59379  | 74.6642 | 122.986 | 45.4159 | 129.843 | 81.5843 | 83.571  |
| ENSMUSG00000047507 | 12_Baiap3        | 74.3524 | 0.6741   | 0.03036  | 0.06408  | 88.5552 | 110.137 | 75.2947 | 68.5281 | 46.6196 | 56.9802 |
| ENSMUSG00000047508 | 8_Mbd3l2         | 0       | NA       | NA       | NA       | 0       | 0       | 0       | 0       | 0       | 0       |
| ENSMUSG00000047511 | 3_Olfr1396       | 1.29256 | 1.65732  | 0.44019  | NA       | 1.73638 | 1.83561 | 2.39031 | 0       | 1.79306 | 0       |
| ENSMUSG00000047514 | 6_Tsyp11         | 1084.16 | -0.21503 | 0.06942  | 0.12771  | 995.812 | 1079.34 | 934.611 | 1152.35 | 1190.59 | 1152.27 |
| ENSMUSG00000047515 | 8_BC049715       | 20.859  | -0.57045 | 0.29788  | 0.41239  | 19.1001 | 11.9315 | 19.1225 | 17.132  | 22.4133 | 35.4544 |
| ENSMUSG00000047517 | 9_Dmbt1          | 7.0624  | 0.38791  | 0.6576   | 0.75041  | 4.34094 | 10.0959 | 9.56123 | 3.60674 | 7.17224 | 7.59736 |
| ENSMUSG00000047518 | 3_Slfn1          | 0.49686 | 2.41829  | 0.46418  | NA       | 0.86819 | 0.91781 | 1.19515 | 0       | 0       | 0       |
| ENSMUSG00000047528 | 13_Als2cr12      | 150.489 | -0.26358 | 0.25078  | 0.35984  | 157.142 | 119.315 | 133.857 | 145.171 | 189.168 | 158.278 |
| ENSMUSG00000047534 | 16_Mis18bp1      | 162.936 | -0.24436 | 0.37187  | 0.4892   | 188.397 | 121.15  | 137.443 | 130.744 | 212.478 | 187.402 |
| ENSMUSG00000047539 | 9_Fbxo28         | 1234.96 | 0.06798  | 0.55847  | 0.66418  | 1241.51 | 1213.34 | 1338.57 | 1157.76 | 1278.45 | 1180.12 |
| ENSMUSG00000047547 | 14_Cltb          | 3968.05 | 0.53437  | 0.00055  | 0.00215  | 4254.12 | 4585.36 | 5244.34 | 3592.31 | 2641.18 | 3490.99 |
| ENSMUSG00000047554 | 13_Tmem41b       | 1372.92 | -0.12737 | 0.36623  | 0.48369  | 1355.24 | 1240.87 | 1339.77 | 1215.47 | 1494.52 | 1591.65 |
| ENSMUSG00000047557 | 2_Lxn            | 969.79  | 0.48692  | 8.34E-05 | 0.00043  | 1140.8  | 1118.8  | 1135.4  | 730.365 | 852.601 | 840.775 |
| ENSMUSG00000047562 | 2_Mmp10          | 30.2874 | 0.69449  | 0.21071  | 0.31399  | 30.3866 | 28.452  | 53.7819 | 10.8202 | 36.7578 | 21.5259 |
| ENSMUSG00000047565 | 4_Acot10         | 2.95417 | -1.09074 | 0.42635  | 0.5418   | 1.73638 | 2.75342 | 1.19515 | 2.70506 | 0.86878 | 1.26623 |
| ENSMUSG00000047583 | 9_Tyw3           | 122.729 | -0.42553 | 0.05257  | 0.10098  | 100.71  | 111.972 | 101.588 | 137.056 | 147.031 | 138.019 |
| ENSMUSG00000047586 | 3_Nccrp1         | 5637.35 | 1.41523  | 1.52E-12 | 7.75E-11 | 6918.59 | 7975.73 | 9705.85 | 3717.65 | 2230.57 | 3275.73 |
| ENSMUSG00000047591 | 4_Mafa           | 0.9448  | 2.14412  | 0.37025  | NA       | 1.73638 | 1.83561 | 1.19515 | 0.90169 | 0       | 0       |
| ENSMUSG00000047592 | 17_Nxpe5         | 50.2601 | 0.39601  | 0.26097  | 0.37138  | 66.8505 | 48.6437 | 56.1722 | 53.1994 | 41.2404 | 35.4544 |
| ENSMUSG00000047603 | 9_Zfp235         | 218.243 | -0.33479 | 0.12574  | 0.20718  | 165.824 | 223.027 | 191.225 | 257.882 | 275.235 | 196.265 |
| ENSMUSG00000047604 | 2_Frat2          | 54.2929 | 0.47946  | 0.15812  | 0.24975  | 64.2459 | 49.5615 | 76.4899 | 48.691  | 47.5161 | 39.253  |
| ENSMUSG00000047606 | 3_Ankrd34c       | 5.8285  | -0.47012 | 0.64604  | 0.74097  | 9.55007 | 3.67122 | 1.19515 | 6.3118  | 5.37918 | 8.86359 |
| ENSMUSG00000047613 | 10_A430005L14Rik | 517.679 | 0.34436  | 0.05087  | 0.09847  | 592.104 | 602.08  | 543.795 | 558.143 | 397.163 | 412.79  |
| ENSMUSG00000047617 | 11_BC029214      | 470.165 | 0.34554  | 0.04939  | 0.09609  | 532.199 | 561.697 | 485.233 | 499.534 | 373.853 | 368.472 |
| ENSMUSG00000047619 | 4_Ddi1           | 0.2997  | -1.76345 | 0.66322  | NA       | 0       | 0       | 0       | 0.90169 | 0.89653 | 0       |
| ENSMUSG00000047631 | 2_Apof           | 2.93976 | 1.5101   | 0.35899  | 0.4758   | 4.34094 | 6.42464 | 2.39031 | 0       | 4.48265 | 0       |
| ENSMUSG00000047632 | 10_Fgfbp3        | 199.246 | 0.21356  | 0.3573   | 0.47404  | 192.738 | 196.41  | 252.178 | 165.91  | 157.789 | 230.453 |
| ENSMUSG00000047635 | 6_2810006K23Rik  | 227.037 | -0.22575 | 0.22434  | 0.32958  | 236.147 | 183.561 | 207.957 | 237.143 | 249.235 | 248.18  |
| ENSMUSG00000047638 | 15_Nr1h4         | 29.5976 | -0.86596 | 0.07771  | 0.13994  | 13.891  | 31.2054 | 17.9273 | 46.8876 | 38.5508 | 29.1232 |
| ENSMUSG00000047641 | 7_Krt83          | 1.82266 | 0.09518  | 0.96229  | NA       | 0       | 0.91781 | 4.78062 | 2.70506 | 0       | 2.53245 |

|                     |                  |         |          |          |          |         |         |         |         |         |         |
|---------------------|------------------|---------|----------|----------|----------|---------|---------|---------|---------|---------|---------|
| ENSMUSG000000047642 | 14_D930020B18Rik | 0.21104 | -0.99647 | 0.80707  | NA       | 0       | 0       | 0       | 0       | 0       | 1.26623 |
| ENSMUSG000000047648 | 13_Fbxo30        | 355.841 | -0.60947 | 0.00015  | 0.00073  | 266.534 | 262.492 | 317.911 | 440.924 | 441.99  | 405.193 |
| ENSMUSG000000047649 | 8_Cd3eap         | 360.233 | 0.41242  | 0.01583  | 0.03731  | 409.785 | 375.382 | 448.183 | 302.966 | 274.338 | 350.745 |
| ENSMUSG000000047654 | 6_Tssk6          | 6.29934 | 2.25198  | 0.05057  | 0.09805  | 5.20913 | 13.7671 | 11.9515 | 1.80337 | 0       | 5.06491 |
| ENSMUSG000000047656 | 8_Trp1           | 136.645 | 0.62004  | 0.00865  | 0.02234  | 151.933 | 147.767 | 197.2   | 112.711 | 95.0322 | 115.227 |
| ENSMUSG000000047658 | 6_Gal3st3        | 13.8717 | -0.27231 | 0.68888  | 0.77624  | 13.0228 | 17.4383 | 7.17092 | 23.4438 | 10.7584 | 11.396  |
| ENSMUSG000000047669 | 7_Msl3l2         | 132.95  | 0.22064  | 0.36745  | 0.48485  | 139.778 | 139.506 | 149.394 | 93.7753 | 130.893 | 144.35  |
| ENSMUSG000000047671 | 8_Tctex1d4       | 1.29413 | -3.81881 | 0.11387  | NA       | 0       | 0       | 0       | 1.80337 | 0.89653 | 5.06491 |
| ENSMUSG000000047675 | 15_Rps8          | 16004   | 0.42108  | 0.00352  | 0.01052  | 18353.5 | 17937.6 | 18677.9 | 15813.8 | 11102.6 | 14138.7 |
| ENSMUSG000000047678 | 1_Gpr82          | 1.79028 | -0.50057 | 0.79348  | NA       | 2.60457 | 1.83561 | 0       | 4.50843 | 1.79306 | 0       |
| ENSMUSG000000047686 | 9_Zcchc5         | 44.2358 | -0.00165 | 0.99664  | 0.99776  | 49.4867 | 54.1505 | 28.6837 | 40.5758 | 51.9988 | 40.5193 |
| ENSMUSG000000047692 | 5_4930533K18Rik  | 1.00405 | -0.97771 | 0.65225  | NA       | 0.86819 | 0       | 1.19515 | 0.90169 | 1.79306 | 1.26623 |
| ENSMUSG000000047694 | 12_Yipf6         | 1413.51 | -0.55783 | 7.82E-06 | 5.47E-05 | 1134.72 | 1147.26 | 1148.54 | 1494.09 | 1828.03 | 1728.4  |
| ENSMUSG000000047696 | 16_Ccdc144b      | 2.17918 | -1.36439 | 0.41302  | NA       | 2.60457 | 0.91781 | 0       | 0.90169 | 3.58612 | 5.06491 |
| ENSMUSG000000047710 | 7_Champ1         | 810.379 | 0.28392  | 0.04889  | 0.0953   | 813.493 | 874.669 | 981.222 | 656.427 | 738.741 | 797.723 |
| ENSMUSG000000047712 | 7_Ust            | 192.845 | -0.42682 | 0.03529  | 0.07269  | 192.738 | 145.931 | 154.175 | 223.618 | 208.892 | 231.72  |
| ENSMUSG000000047714 | 14_Ppp1r2        | 2592.32 | -0.25845 | 0.01759  | 0.04069  | 2360.6  | 2384.46 | 2336.53 | 2585.13 | 2992.62 | 2894.59 |
| ENSMUSG000000047719 | 2_Ubiad1         | 450.252 | 0.28342  | 0.0551   | 0.10507  | 461.008 | 513.971 | 507.94  | 429.202 | 370.267 | 419.121 |
| ENSMUSG000000047721 | 8_Bola2          | 247.395 | 1.08896  | 1.53E-05 | 9.84E-05 | 330.78  | 293.698 | 386.035 | 213.699 | 118.342 | 141.817 |
| ENSMUSG000000047728 | 12_BC025446      | 9.24689 | -0.30646 | 0.68684  | 0.77457  | 11.2864 | 6.42464 | 7.17092 | 10.8202 | 13.448  | 6.33113 |
| ENSMUSG000000047730 | 17_Fcgbp         | 830.689 | 1.57089  | 4.05E-11 | 1.46E-09 | 920.28  | 1314.3  | 1492.75 | 389.528 | 316.475 | 550.809 |
| ENSMUSG000000047731 | 17_Wbp1l         | 2094.38 | 0.78499  | 2.74E-08 | 4.04E-07 | 2460.45 | 2647.87 | 2843.27 | 1717.71 | 1305.35 | 1591.65 |
| ENSMUSG000000047733 | 10_BC048609      | 0.89793 | -0.99948 | 0.68611  | NA       | 0.86819 | 0.91781 | 0       | 2.70506 | 0.89653 | 0       |
| ENSMUSG000000047735 | 14_Samd9l        | 7958.43 | 0.17771  | 0.40874  | 0.52548  | 8371.07 | 7079.95 | 9893.49 | 5187.4  | 9631.43 | 7587.23 |
| ENSMUSG000000047746 | 14_Fbxo40        | 33.8065 | -1.69936 | 0.00184  | 0.00606  | 8.68188 | 24.7808 | 14.3418 | 77.545  | 33.1716 | 44.3179 |
| ENSMUSG000000047747 | 9_Rnf150         | 375.837 | -1.10493 | 1.76E-06 | 1.50E-05 | 236.147 | 270.753 | 209.152 | 581.587 | 601.572 | 355.81  |
| ENSMUSG000000047749 | 2_Zc3hav1l       | 167.074 | -0.55057 | 0.00899  | 0.02309  | 129.36  | 153.274 | 124.296 | 210.093 | 210.685 | 174.739 |
| ENSMUSG000000047751 | 9_Utf1           | 0.54308 | 2.53494  | 0.50107  | NA       | 0.86819 | 0       | 2.39031 | 0       | 0       | 0       |
| ENSMUSG000000047757 | 16_Fancb         | 73.9034 | -0.23971 | 0.47397  | 0.58671  | 77.2688 | 50.4793 | 75.2947 | 57.7079 | 85.1704 | 97.4995 |
| ENSMUSG000000047759 | 6_Hs3st3a1       | 167.846 | -0.97408 | 0.00102  | 0.00364  | 115.469 | 154.191 | 69.3189 | 248.865 | 233.098 | 186.135 |
| ENSMUSG000000047766 | 15_Lrrc49        | 262.481 | -0.4889  | 0.00933  | 0.02383  | 217.915 | 232.205 | 205.567 | 357.067 | 294.959 | 267.174 |
| ENSMUSG000000047767 | 16_Atg16l2       | 125.731 | -0.02706 | 0.91844  | 0.94576  | 137.174 | 130.328 | 106.369 | 161.402 | 116.549 | 102.564 |
| ENSMUSG000000047773 | 12_Ankfn1        | 14.2017 | -1.32761 | 0.04723  | 0.09248  | 13.0228 | 7.34244 | 3.58546 | 22.5421 | 19.7237 | 18.9934 |
| ENSMUSG000000047777 | 9_Phf13          | 537.233 | 0.22742  | 0.1331   | 0.21685  | 568.663 | 570.875 | 598.772 | 545.52  | 426.749 | 512.822 |
| ENSMUSG000000047786 | 12_Lix1          | 103.618 | -1.78831 | 2.31E-06 | 1.90E-05 | 37.3321 | 71.5888 | 29.8789 | 178.534 | 109.377 | 194.999 |
| ENSMUSG000000047787 | 7_Flrl1          | 103.015 | -0.74459 | 0.04014  | 0.08077  | 65.9823 | 111.054 | 53.7819 | 180.337 | 103.101 | 103.831 |
| ENSMUSG000000047789 | 4_Slc38a9        | 469.209 | -0.33276 | 0.066    | 0.12229  | 446.249 | 437.793 | 362.132 | 510.354 | 616.813 | 441.913 |
| ENSMUSG000000047793 | 13_Sned1         | 6222.54 | 0.04357  | 0.76886  | 0.8375   | 5627.6  | 7549.87 | 5772.59 | 6389.34 | 6458.61 | 5537.21 |
| ENSMUSG000000047794 | 5_Olfr685        | 0.87389 | -2.01399 | 0.47208  | NA       | 0       | 0.91781 | 0       | 0       | 1.79306 | 2.53245 |
| ENSMUSG000000047797 | 14_Gjb1          | 6.50728 | 0.43754  | 0.64752  | 0.74215  | 4.34094 | 7.34244 | 10.7564 | 7.21348 | 1.79306 | 7.59736 |
| ENSMUSG000000047798 | 15_Cd300lf       | 63.6534 | 4.10441  | 5.25E-13 | 3.08E-11 | 195.342 | 49.5615 | 115.93  | 7.21348 | 6.27571 | 7.59736 |
| ENSMUSG000000047804 | 15_Akap10        | 802.411 | -0.0717  | 0.57597  | 0.68009  | 753.588 | 766.368 | 828.242 | 763.728 | 879.496 | 823.047 |
| ENSMUSG000000047810 | 8_Ccdc88b        | 111.706 | 2.19062  | 3.84E-14 | 2.97E-12 | 204.024 | 142.26  | 203.176 | 44.1826 | 32.2751 | 44.3179 |
| ENSMUSG000000047819 | 3_Tigd4          | 100.55  | -1.0558  | 0.00025  | 0.00109  | 70.3233 | 72.5066 | 52.5868 | 167.713 | 108.48  | 131.688 |
| ENSMUSG000000047821 | 16_Trim16        | 1754.5  | 0.40431  | 0.00096  | 0.00345  | 1883.1  | 1910.87 | 2202.67 | 1410.24 | 1541.14 | 1578.98 |
| ENSMUSG000000047822 | 7_Gm6484         | 2.19737 | 3.51121  | 0.06191  | NA       | 3.47275 | 6.42464 | 2.39031 | 0       | 0.89653 | 0       |
| ENSMUSG000000047824 | 13_Pygo2         | 1185.62 | 0.39529  | 0.00048  | 0.00193  | 1283.18 | 1372.12 | 1385.18 | 1006.28 | 990.666 | 1076.29 |
| ENSMUSG000000047832 | 8_Cdca4          | 708.709 | 0.61539  | 0.00011  | 0.00052  | 856.902 | 757.19  | 959.709 | 631.18  | 500.264 | 547.01  |
| ENSMUSG000000047841 | 8_BC051628       | 1.1956  | -0.01793 | 0.99348  | NA       | 1.73638 | 1.83561 | 0       | 2.70506 | 0.89653 | 0       |
| ENSMUSG000000047842 | 6_Diras2         | 135.042 | -0.95727 | 0.00628  | 0.01708  | 118.074 | 71.5888 | 86.0511 | 267.801 | 151.514 | 115.227 |
| ENSMUSG000000047843 | 16_Brl3          | 683.858 | 0.05304  | 0.70875  | 0.79159  | 662.428 | 679.176 | 748.166 | 729.464 | 598.882 | 685.029 |
| ENSMUSG000000047844 | 3_Bex4           | 88.6548 | -1.63232 | 3.87E-05 | 0.00022  | 33.8593 | 72.5066 | 22.7079 | 146.975 | 131.79  | 124.09  |
| ENSMUSG000000047854 | 5_Stx19          | 263.23  | -0.45427 | 0.05278  | 0.10128  | 234.411 | 193.657 | 237.836 | 216.405 | 336.199 | 360.875 |
| ENSMUSG000000047861 | 2_Foxi1          | 0.45622 | 0.77574  | 0.84797  | NA       | 0       | 1.83561 | 0       | 0.90169 | 0       | 0       |
| ENSMUSG000000047866 | 18_Lonp2         | 2757.85 | -0.17022 | 0.16159  | 0.25405  | 2535.98 | 2688.25 | 2560.02 | 2592.35 | 2950.48 | 3220.02 |
| ENSMUSG000000047867 | 11_Gimap6        | 143.891 | -0.41179 | 0.09791  | 0.16907  | 151.933 | 102.794 | 115.93  | 186.649 | 166.755 | 139.285 |
| ENSMUSG000000047875 | 6_Gpr157         | 89.8158 | 0.11921  | 0.66638  | 0.75734  | 85.9507 | 96.3696 | 99.1978 | 100.087 | 91.4461 | 65.8438 |
| ENSMUSG000000047878 | 12_A4galt        | 269.379 | 0.29054  | 0.10804  | 0.18343  | 297.789 | 293.698 | 296.398 | 234.438 | 211.581 | 282.369 |
| ENSMUSG000000047879 | 16_Usp14         | 1409.07 | -0.14629 | 0.42625  | 0.54175  | 1399.52 | 1243.63 | 1369.65 | 1097.35 | 1780.51 | 1563.79 |
| ENSMUSG000000047880 | 14_Cxcr5         | 4.87414 | 0.25427  | 0.81308  | 0.87085  | 8.68188 | 3.67122 | 3.58546 | 2.70506 | 8.06878 | 2.53245 |
| ENSMUSG000000047881 | 14_Rell1         | 1582.61 | 0.2463   | 0.06676  | 0.12351  | 1664.32 | 1553.84 | 1934.95 | 1331.79 | 1533.07 | 1477.69 |
| ENSMUSG000000047884 | 6_Klk9           | 8.86343 | 1.44186  | 0.06484  | 0.12056  | 11.2864 | 11.9315 | 15.537  | 4.50843 | 3.58612 | 6.33113 |
| ENSMUSG000000047888 | 9_Tnrc6b         | 2272.59 | -0.09913 | 0.39666  | 0.51416  | 2273.79 | 2026.51 | 2285.13 | 2364.22 | 2506.7  | 2179.18 |
| ENSMUSG000000047894 | 1_Ang2           | 0.15028 | -0.99647 | 0.80707  | NA       | 0       | 0       | 0       | 0.90169 | 0       | 0       |
| ENSMUSG000000047898 | 6_Ccr4           | 2.76621 | 0.36727  | 0.78627  | 0.85178  | 4.34094 | 3.67122 | 1.19515 | 0.90169 | 2.68959 | 3.79868 |
| ENSMUSG000000047904 | 6_Sstr2          | 1.46943 | -1.90633 | 0.31525  | NA       | 0.86819 | 0.91781 | 0       | 2.70506 | 1.79306 | 2.53245 |
| ENSMUSG000000047907 | 11_Tshz2         | 2422.8  | 0.16547  | 0.27072  | 0.38231  | 2486.49 | 2599.23 | 2597.07 | 2283.97 | 1875.54 | 2694.53 |
| ENSMUSG000000047909 | 11_Ankrd16       | 764.081 | -0.07091 | 0.5761   | 0.68016  | 767.479 | 777.381 | 689.604 | 743.891 | 797.016 | 809.119 |
| ENSMUSG000000047910 | 6_Pcdhb16        | 145.794 | -1.27503 | 4.14E-08 | 5.80E-07 | 84.2143 | 97.2874 | 74.0996 | 231.733 | 208.892 | 178.538 |
| ENSMUSG000000047911 | 5_Npm2           | 5.84184 | 0.31308  | 0.76749  | 0.83661  | 6.07732 | 2.75342 | 10.7564 | 1.80337 | 9.86184 | 3.79868 |
| ENSMUSG000000047921 | 15_Trappc9       | 1259.91 | 1.03135  | 1.99E-08 | 3.09E-07 | 1494.15 | 1687.84 | 1893.12 | 915.211 | 625.778 | 943.339 |
| ENSMUSG000000047940 | 13_Stpg2         | 4.11434 | -0.96939 | 0.45279  | 0.5672   | 0       | 3.67122 | 4.78062 | 7.21348 | 2.68959 | 6.33113 |
| ENSMUSG000000047945 | 6_Marcks1l       | 1439.28 | 0.85439  | 7.74E-08 | 1.01E-06 | 1733.77 | 1615.34 | 2211.04 | 1019.81 | 928.806 | 1126.94 |
| ENSMUSG000000047953 | 6_Gp5            | 0.74593 | -0.58743 | 0.84364  | NA       | 0.86819 | 0.91781 | 0       | 0       | 2.68959 | 0       |
| ENSMUSG000000047959 | 4_Kcna3          | 2.34603 | 0.64558  | 0.71743  | NA       | 2.60457 | 3.67122 | 2.39031 | 5.41011 | 0       | 0       |
| ENSMUSG000000047963 | 7_Stbd1          | 177.794 | -0.64006 | 0.00496  | 0.014    | 119.81  | 135.835 | 161.346 | 192.961 | 197.237 | 259.577 |
| ENSMUSG000000047976 | 4_Kcna1          | 44.6174 | -0.98118 | 0.00766  | 0.02016  | 27.782  | 34.8766 | 27.4885 | 59.5112 | 69.9294 | 48.1166 |
| ENSMUSG000000047977 | 3_Synb           | 1.61026 | -0.75253 | 0.71141  | NA       | 2.60457 | 0.91781 | 0       | 3.60674 | 0       | 2.53245 |
| ENSMUSG000000047986 | 12_Palm3         | 4.46332 | -0.29417 | 0.79757  | 0.86017  | 2.60457 | 4.58903 | 4.78062 | 6.3118  | 0.89653 | 7.59736 |

|                    |                  |         |          |          |          |         |         |         |         |         |         |
|--------------------|------------------|---------|----------|----------|----------|---------|---------|---------|---------|---------|---------|
| ENSMUSG00000047988 | 1_4933428G20Rik  | 12.4946 | -0.68493 | 0.28289  | 0.39603  | 9.55007 | 7.34244 | 11.9515 | 13.5253 | 16.1376 | 16.4609 |
| ENSMUSG00000047989 | 11_Ino80c        | 750.869 | -0.0001  | 0.99938  | 0.99938  | 777.897 | 721.395 | 751.752 | 700.61  | 727.983 | 825.58  |
| ENSMUSG00000047990 | 5_C2cd4a         | 0.45622 | 0.77574  | 0.84797  | NA       | 0       | 1.83561 | 0       | 0.90169 | 0       | 0       |
| ENSMUSG00000047992 | 10_Fam69c        | 33.6327 | -1.10519 | 0.02842  | 0.06079  | 25.1775 | 26.6164 | 11.9515 | 68.5281 | 34.0682 | 35.4544 |
| ENSMUSG00000047996 | 16_Prg1          | 93.7501 | -1.09577 | 0.00024  | 0.00107  | 67.7187 | 66.9998 | 44.2207 | 131.646 | 150.617 | 101.298 |
| ENSMUSG00000048000 | 15_Gigyf2        | 2795.64 | -0.0374  | 0.76038  | 0.83166  | 2705.28 | 2782.79 | 2788.29 | 2528.33 | 2790.9  | 3178.23 |
| ENSMUSG00000048001 | 7_Hes5           | 7.14254 | 0.36869  | 0.70343  | 0.78793  | 4.34094 | 9.17806 | 10.7564 | 11.7219 | 1.79306 | 5.06491 |
| ENSMUSG00000048003 | 12_Catsper4      | 22.3074 | 0.80992  | 0.13507  | 0.2192   | 19.1001 | 31.2054 | 34.6595 | 15.3287 | 10.7584 | 22.7921 |
| ENSMUSG00000048004 | 14_Tmem196       | 3.41457 | -1.0763  | 0.45557  | 0.56955  | 1.73638 | 3.67122 | 1.19515 | 11.7219 | 0.89653 | 1.26623 |
| ENSMUSG00000048007 | 4_Timm8a1        | 141.601 | -0.3313  | 0.20232  | 0.30371  | 158.01  | 103.712 | 114.735 | 173.124 | 172.134 | 127.889 |
| ENSMUSG00000048012 | 18_Zfp473        | 24.7018 | 0.06177  | 0.90083  | 0.93293  | 26.9138 | 15.6027 | 33.4643 | 22.5421 | 26.8959 | 22.7921 |
| ENSMUSG00000048013 | 9_Krt35          | 1.51872 | 2.93375  | 0.23587  | NA       | 0.86819 | 7.34244 | 0       | 0.90169 | 0       | 0       |
| ENSMUSG00000048015 | 3_Neurod4        | 29.3032 | -2.32654 | 0.00323  | 0.00977  | 17.3638 | 9.17806 | 2.39031 | 84.7584 | 51.9988 | 10.1298 |
| ENSMUSG00000048022 | 11_Tmem229a      | 12.9368 | -0.87317 | 0.21128  | 0.31458  | 6.07732 | 12.8493 | 8.36608 | 19.8371 | 8.96531 | 21.5259 |
| ENSMUSG00000048027 | 7_Rgmb           | 641.93  | 0.47601  | 0.00046  | 0.00187  | 755.324 | 742.505 | 743.386 | 596.014 | 500.264 | 514.088 |
| ENSMUSG00000048029 | 10_Eno4          | 5.70452 | 0.91226  | 0.40766  | 0.52452  | 10.4183 | 7.34244 | 4.78062 | 5.41011 | 6.27571 | 0       |
| ENSMUSG00000048031 | 15_Fcrl5         | 0.63329 | 2.77543  | 0.43496  | NA       | 2.60457 | 0       | 1.19515 | 0       | 0       | 0       |
| ENSMUSG00000048038 | 6_4932418E24Rik  | 3.82358 | -0.62011 | 0.62214  | 0.71988  | 5.20913 | 3.67122 | 0       | 5.41011 | 3.58612 | 5.06491 |
| ENSMUSG00000048039 | 8_Isg20l2        | 768.617 | -0.15577 | 0.30409  | 0.41912  | 695.419 | 692.025 | 793.582 | 701.511 | 814.946 | 914.216 |
| ENSMUSG00000048040 | 8_Arxes2         | 98.9658 | -1.23418 | 3.30E-05 | 0.00019  | 61.6414 | 75.2601 | 39.4401 | 154.188 | 135.376 | 127.889 |
| ENSMUSG00000048047 | 3_Zbtb33         | 944.633 | -0.43749 | 0.00459  | 0.01312  | 836.065 | 759.025 | 812.705 | 928.736 | 1273.97 | 1057.3  |
| ENSMUSG00000048058 | 17_Ldlrad3       | 657.79  | -0.50112 | 0.00023  | 0.00103  | 540.881 | 579.135 | 512.721 | 706.02  | 792.533 | 815.45  |
| ENSMUSG00000048065 | 18_8958          | 18.8958 | -0.49777 | 0.38384  | 0.50145  | 20.8365 | 16.5205 | 9.56123 | 27.9522 | 23.3098 | 15.1947 |
| ENSMUSG00000048070 | 4_Pirt           | 8.84035 | -3.04762 | 0.00174  | 0.0058   | 2.60457 | 1.83561 | 1.19515 | 26.1489 | 9.86184 | 11.396  |
| ENSMUSG00000048076 | 14_Arf1          | 12534.4 | 0.42013  | 0.00021  | 0.00096  | 14064.7 | 13448.6 | 15526.2 | 10767.9 | 9897.7  | 11501.1 |
| ENSMUSG00000048078 | 16_Tenm4         | 1118.15 | -0.34947 | 0.0948   | 0.16444  | 921.148 | 1259.23 | 769.679 | 1480.57 | 1255.14 | 1023.11 |
| ENSMUSG00000048087 | 5_Gm4737         | 1449.63 | 0.62067  | 2.21E-07 | 2.49E-06 | 1806.7  | 1596.98 | 1866.83 | 1176.7  | 1091.97 | 1158.6  |
| ENSMUSG00000048096 | 7_Lmod1          | 151.829 | -0.90223 | 0.00326  | 0.00985  | 95.5007 | 144.095 | 77.685  | 261.489 | 173.927 | 158.278 |
| ENSMUSG00000048100 | 13_Taf13         | 923.576 | -0.64008 | 0.00018  | 0.00083  | 775.292 | 687.436 | 702.751 | 894.472 | 1324.18 | 1157.33 |
| ENSMUSG00000048106 | 5_4632415L05Rik  | 358.726 | -0.49773 | 0.00091  | 0.00332  | 297.789 | 311.136 | 283.252 | 444.531 | 407.921 | 407.725 |
| ENSMUSG00000048108 | 13_Tmem72        | 178.631 | -1.3887  | 4.88E-06 | 3.62E-05 | 121.546 | 108.301 | 65.7335 | 339.935 | 250.132 | 186.135 |
| ENSMUSG00000048109 | 10_Rbm15         | 322.314 | 0.00786  | 0.96004  | 0.97414  | 336.857 | 294.616 | 338.229 | 324.607 | 312.889 | 326.687 |
| ENSMUSG00000048118 | 17_Arid4a        | 1177.17 | 0.00716  | 0.95423  | 0.9703   | 1130.38 | 1172.04 | 1236.98 | 1082.02 | 1153.83 | 1287.75 |
| ENSMUSG00000048120 | 16_Entpd1        | 828.322 | -0.19479 | 0.13073  | 0.21388  | 839.538 | 720.477 | 757.728 | 922.424 | 890.255 | 839.508 |
| ENSMUSG00000048126 | 16_Col6a3        | 7739.03 | -0.0339  | 0.86114  | 0.90593  | 7143.45 | 9591.07 | 6207.63 | 6291.06 | 7905.61 | 9295.37 |
| ENSMUSG00000048138 | 9_Dmrt2          | 1.41694 | -1.83129 | 0.3876   | NA       | 0       | 1.83561 | 0       | 3.60674 | 1.79306 | 1.26623 |
| ENSMUSG00000048142 | 9_Nat8l          | 211.208 | 1.59013  | 3.61E-08 | 5.15E-07 | 295.184 | 248.725 | 408.743 | 145.171 | 89.6531 | 79.7723 |
| ENSMUSG00000048148 | 16_Nwd1          | 220.84  | -0.57935 | 0.04618  | 0.09074  | 165.824 | 238.629 | 126.686 | 344.444 | 251.925 | 197.531 |
| ENSMUSG00000048153 | 5_Olfr49         | 0.36046 | -1.978   | 0.62369  | NA       | 0       | 0       | 0       | 0       | 0.89653 | 1.26623 |
| ENSMUSG00000048154 | 16_Kmt2d         | 2742.41 | 0.107109 | 2.42E-12 | 1.18E-10 | 3358.15 | 3686.82 | 4104.16 | 2065.76 | 1497.21 | 1742.33 |
| ENSMUSG00000048163 | 13_Selplg        | 114.921 | 2.87388  | 1.59E-12 | 8.06E-11 | 300.393 | 128.493 | 178.078 | 40.5758 | 17.9306 | 24.0583 |
| ENSMUSG00000048170 | 14_Mcmbp         | 1735.76 | 0.39661  | 0.00262  | 0.00819  | 1925.64 | 1902.61 | 2089.13 | 1309.25 | 1524.1  | 1663.82 |
| ENSMUSG00000048174 | 2_Tmem81         | 85.8494 | -0.10062 | 0.70492  | 0.78877  | 83.3461 | 79.8491 | 86.0511 | 96.4803 | 95.9288 | 73.4412 |
| ENSMUSG00000048175 | 13_Asb8          | 716.789 | 0.11647  | 0.38152  | 0.49943  | 716.255 | 709.464 | 811.51  | 648.312 | 685.846 | 729.347 |
| ENSMUSG00000048185 | 4_Gm7075         | 0.43882 | 0.71095  | 0.86073  | NA       | 1.73638 | 0       | 0       | 0       | 0.89653 | 0       |
| ENSMUSG00000048186 | 14_Bend7         | 122.419 | -0.5313  | 0.03702  | 0.07555  | 92.028  | 115.644 | 92.0269 | 153.287 | 115.652 | 165.876 |
| ENSMUSG00000048191 | 15_Muc6          | 7.92826 | 0.31159  | 0.70313  | 0.78781  | 12.1546 | 9.17806 | 4.78062 | 7.21348 | 5.37918 | 8.86359 |
| ENSMUSG00000048200 | 11_Cracr2b       | 300.856 | 0.69892  | 0.00303  | 0.00928  | 337.725 | 394.656 | 384.84  | 299.36  | 163.169 | 225.388 |
| ENSMUSG00000048206 | 6_Dnajb8         | 0.60112 | -2.7448  | 0.49049  | NA       | 0       | 0       | 0       | 3.60674 | 0       | 0       |
| ENSMUSG00000048215 | 14_A630023P12Rik | 2.97034 | -0.68563 | 0.57781  | 0.68155  | 2.60457 | 1.83561 | 2.39031 | 3.60674 | 3.58612 | 3.79868 |
| ENSMUSG00000048216 | 13_Gpr85         | 8.08511 | -1.99944 | 0.02355  | 0.05204  | 3.47275 | 2.75342 | 3.58546 | 16.2303 | 16.1376 | 6.33113 |
| ENSMUSG00000048218 | 5_Amigo2         | 180.147 | -0.678   | 0.0014   | 0.00479  | 147.592 | 135.835 | 132.662 | 260.587 | 214.271 | 189.934 |
| ENSMUSG00000048222 | 3_Mfap1b         | 1420.15 | -0.28818 | 0.03563  | 0.07324  | 1277.11 | 1158.27 | 1401.92 | 1397.61 | 1706.99 | 1578.98 |
| ENSMUSG00000048230 | 5_Fbxo43         | 1.19774 | -0.72676 | 0.77766  | NA       | 0.86819 | 1.83561 | 0       | 0       | 4.48265 | 0       |
| ENSMUSG00000048232 | 12_Fbxo10        | 307.15  | -0.06328 | 0.81379  | 0.87135  | 289.107 | 362.533 | 249.787 | 444.531 | 241.167 | 255.778 |
| ENSMUSG00000048234 | 13_Rnf149        | 1015    | -0.17205 | 0.13474  | 0.21893  | 990.603 | 948.093 | 923.854 | 1022.51 | 1098.25 | 1106.68 |
| ENSMUSG00000048240 | 14_Gng7          | 237.582 | -0.39686 | 0.11411  | 0.19159  | 192.738 | 237.712 | 185.249 | 365.183 | 226.822 | 217.791 |
| ENSMUSG00000048249 | 14_Crebrf        | 1359.18 | -0.61443 | 7.07E-07 | 6.77E-06 | 1095.65 | 1021.52 | 1106.71 | 1708.69 | 1747.34 | 1475.15 |
| ENSMUSG00000048251 | 15_Bcl11b        | 115.686 | 0.96359  | 0.0017   | 0.00567  | 150.197 | 129.411 | 178.078 | 67.6264 | 57.378  | 111.428 |
| ENSMUSG00000048264 | 15_Dip2c         | 1130.38 | -0.17004 | 0.13268  | 0.21629  | 1067.87 | 1116.05 | 1006.32 | 1167.68 | 1198.66 | 1225.71 |
| ENSMUSG00000048271 | 14_Rbm33         | 1742.2  | 0.14729  | 0.15617  | 0.24733  | 1893.52 | 1739.24 | 1860.85 | 1668.12 | 1656.79 | 1634.7  |
| ENSMUSG00000048277 | 15_Syng2         | 1731.62 | 1.11482  | 5.15E-10 | 1.33E-08 | 2211.28 | 2207.32 | 2687.9  | 1173.09 | 833.773 | 1276.36 |
| ENSMUSG00000048279 | 17_Sacs          | 151.824 | -1.70608 | 1.75E-07 | 2.04E-06 | 85.9507 | 86.2737 | 40.6352 | 256.079 | 276.131 | 165.876 |
| ENSMUSG00000048280 | 17_Zfp738        | 303.144 | -0.43944 | 0.03836  | 0.07783  | 280.425 | 271.67  | 218.713 | 269.604 | 399.853 | 378.602 |
| ENSMUSG00000048281 | 8_Dleu7          | 1.96292 | -1.44035 | 0.41206  | NA       | 0       | 0.91781 | 2.39031 | 5.41011 | 1.79306 | 1.26623 |
| ENSMUSG00000048285 | 8_Frmd6          | 3041.72 | 0.26781  | 0.03315  | 0.06902  | 3191.46 | 3286.66 | 3489.85 | 2512.1  | 2637.59 | 3132.65 |
| ENSMUSG00000048292 | 2_Olfr1417       | 2.48465 | -0.3587  | 0.8172   | 0.87389  | 0       | 1.83561 | 4.78062 | 1.80337 | 2.68959 | 3.79868 |
| ENSMUSG00000048304 | 8_Slitrk3        | 16.1752 | -1.45495 | 0.01306  | 0.0316   | 9.55007 | 9.17806 | 7.17092 | 27.9522 | 24.2063 | 18.9934 |
| ENSMUSG00000048307 | 7_Ankrd46        | 1232.36 | -0.16964 | 0.16174  | 0.25422  | 1214.6  | 1200.49 | 1063.69 | 1376.87 | 1238.11 | 1300.42 |
| ENSMUSG00000048310 | 8_Pskh1          | 825.127 | 0.36349  | 0.01752  | 0.04057  | 847.352 | 957.271 | 981.222 | 813.32  | 615.917 | 735.678 |
| ENSMUSG00000048312 | 7_Gm4884         | 1.68654 | -1.32417 | 0.50695  | NA       | 1.73638 | 0       | 1.19515 | 2.70506 | 4.48265 | 0       |
| ENSMUSG00000048327 | 6_Ckap2l         | 1247.41 | 0.23949  | 0.17601  | 0.27206  | 1376.08 | 1225.27 | 1449.72 | 874.635 | 1222.87 | 1335.87 |
| ENSMUSG00000048329 | 7_Mfsd6l         | 12.1762 | 1.27463  | 0.06977  | 0.12822  | 13.891  | 24.7808 | 13.1467 | 6.3118  | 9.86184 | 5.06491 |
| ENSMUSG00000048330 | 14_Ric3          | 278.76  | -0.89732 | 0.00037  | 0.00155  | 233.543 | 209.26  | 141.028 | 399.447 | 419.576 | 269.706 |
| ENSMUSG00000048332 | 13_Lhfp          | 707.858 | -0.43388 | 0.01081  | 0.02698  | 605.996 | 657.149 | 543.795 | 973.82  | 767.43  | 698.957 |
| ENSMUSG00000048337 | 3_Npy4r          | 30.0037 | 0.32698  | 0.43711  | 0.55245  | 30.3866 | 29.3698 | 40.6352 | 25.2472 | 27.7924 | 26.5908 |
| ENSMUSG00000048347 | 5_Pcdhb18        | 67.8726 | -1.05715 | 0.00074  | 0.00279  | 45.1458 | 33.9588 | 53.7819 | 97.382  | 95.9288 | 81.0385 |
| ENSMUSG00000048349 | 9_Pou4f1         | 7.18243 | 0.00328  | 0.99708  | 0.99796  | 9.55007 | 7.34244 | 4.78062 | 10.8202 | 8.06878 | 2.53245 |
| ENSMUSG00000048351 | 14_Coa7          | 316.171 | -0.10248 | 0.49869  | 0.60976  | 310.811 | 307.465 | 296.398 | 339.034 | 319.165 | 324.154 |

|                    |                  |         |          |          |          |         |         |         |         |         |         |
|--------------------|------------------|---------|----------|----------|----------|---------|---------|---------|---------|---------|---------|
| ENSMUSG00000048355 | 2_Arxes1         | 21.6712 | -1.45428 | 0.00561  | 0.0155   | 9.55007 | 15.6027 | 9.56123 | 37.8708 | 29.5855 | 27.857  |
| ENSMUSG00000048368 | 8_Omd            | 290.801 | -1.15408 | 7.78E-09 | 1.38E-07 | 161.483 | 210.177 | 169.712 | 412.972 | 453.644 | 336.816 |
| ENSMUSG00000048371 | 7_Pdp2           | 480.861 | 0.47791  | 0.00922  | 0.0236   | 542.618 | 514.889 | 621.48  | 374.199 | 340.682 | 491.296 |
| ENSMUSG00000048373 | 8_Fgfbp1         | 13516.9 | 0.11864  | 0.34403  | 0.46064  | 14096.8 | 12435.3 | 15685.2 | 12811.1 | 12162.3 | 13910.8 |
| ENSMUSG00000048376 | 5_F2r            | 645.579 | -0.48523 | 0.0014   | 0.00479  | 538.277 | 584.642 | 490.013 | 822.337 | 660.743 | 777.463 |
| ENSMUSG00000048379 | 8_Socs4          | 1158.21 | -0.40429 | 0.00127  | 0.00441  | 1025.33 | 934.326 | 1031.42 | 1201.95 | 1410.24 | 1346    |
| ENSMUSG00000048385 | 8_Scrt1          | 4.67909 | -2.09624 | 0.17858  | 0.27534  | 5.20913 | 0       | 0       | 14.427  | 7.17224 | 1.26623 |
| ENSMUSG00000048387 | 7_Osr1           | 17.3861 | -0.45805 | 0.40184  | 0.51944  | 12.1546 | 12.8493 | 19.1225 | 19.8371 | 18.8271 | 21.5259 |
| ENSMUSG00000048388 | 3_Fam171b        | 243.892 | -1.63559 | 1.46E-06 | 1.27E-05 | 138.91  | 157.863 | 58.5626 | 434.612 | 415.094 | 258.31  |
| ENSMUSG00000048399 | 4_Tprg           | 1553.96 | -0.01913 | 0.8725   | 0.91341  | 1568.82 | 1449.21 | 1612.26 | 1442.7  | 1574.31 | 1676.48 |
| ENSMUSG00000048402 | 14_Gli2          | 284.279 | 0.51246  | 0.0186   | 0.04258  | 292.579 | 413.93  | 296.398 | 277.719 | 209.788 | 215.259 |
| ENSMUSG00000048410 | 16_Zfp407        | 501.319 | 0.22719  | 0.10194  | 0.17502  | 560.85  | 493.779 | 567.698 | 458.958 | 458.127 | 468.504 |
| ENSMUSG00000048416 | 15_Mlf1          | 66.2876 | -0.82918 | 0.02477  | 0.05423  | 51.2231 | 42.2191 | 50.1965 | 124.433 | 66.3433 | 63.3113 |
| ENSMUSG00000048424 | 15_Ranbp3l       | 3.94157 | -0.21203 | 0.8712   | 0.91255  | 2.60457 | 8.26025 | 0       | 3.60674 | 5.37918 | 3.79868 |
| ENSMUSG00000048429 | 10_1810026J23Rik | 992.025 | -0.42374 | 0.00083  | 0.00305  | 827.384 | 792.984 | 922.659 | 1063.99 | 1178.94 | 1166.19 |
| ENSMUSG00000048439 | 15_Nupl2         | 292.896 | -0.05904 | 0.75417  | 0.82687  | 305.602 | 279.931 | 273.69  | 248.865 | 298.545 | 350.745 |
| ENSMUSG00000048440 | 15_Cyp4f16       | 246.047 | 0.21289  | 0.20586  | 0.30809  | 265.666 | 255.15  | 271.3   | 214.601 | 227.719 | 241.849 |
| ENSMUSG00000048442 | 15_Snim5         | 68.6647 | 0.32863  | 0.36572  | 0.48313  | 71.1914 | 67.9176 | 90.8317 | 88.3652 | 43.0335 | 50.6491 |
| ENSMUSG00000048445 | 6_Ccdc57         | 121.787 | 0.54661  | 0.023    | 0.05103  | 143.251 | 128.493 | 162.541 | 113.612 | 87.86   | 94.967  |
| ENSMUSG00000048450 | 10_Msx1          | 28.7676 | -0.26931 | 0.56041  | 0.66612  | 25.1775 | 34.8766 | 17.9273 | 36.9691 | 25.9994 | 31.6557 |
| ENSMUSG00000048455 | 9_Spr1b          | 23.4053 | 7.97901  | 1.40E-09 | 3.15E-08 | 62.5096 | 22.9451 | 54.9771 | 0       | 0       | 0       |
| ENSMUSG00000048458 | 8_Fam212b        | 227.887 | -0.21858 | 0.24019  | 0.3479   | 191.001 | 222.109 | 219.908 | 268.702 | 246.546 | 219.057 |
| ENSMUSG00000048473 | 15_Gm766         | 0.74711 | -3.05659 | 0.44093  | NA       | 0       | 0       | 0       | 0       | 4.48265 | 0       |
| ENSMUSG00000048478 | 6_Spata33        | 7.55234 | -0.35025 | 0.6746   | 0.76437  | 3.47275 | 8.26025 | 8.36608 | 9.91854 | 8.96531 | 6.33113 |
| ENSMUSG00000048480 | 5_Cxcr1          | 0.30325 | -0.03469 | 0.99322  | NA       | 0       | 0.91781 | 0       | 0.90169 | 0       | 0       |
| ENSMUSG00000048481 | 15_Mypop         | 56.3622 | 0.23412  | 0.51679  | 0.62674  | 54.6959 | 78.9313 | 49.0013 | 64.9214 | 41.2404 | 49.3828 |
| ENSMUSG00000048482 | 14_Bdnf          | 35.2239 | -1.36255 | 0.00254  | 0.00797  | 24.3093 | 20.1917 | 14.3418 | 67.6264 | 36.7578 | 48.1166 |
| ENSMUSG00000048483 | 5_Zdhhc22        | 0.30056 | -1.76625 | 0.6627   | NA       | 0       | 0       | 0       | 1.80337 | 0       | 0       |
| ENSMUSG00000048484 | 4_Gm7461         | 1.61498 | 1.6206   | 0.42462  | NA       | 1.73638 | 1.83561 | 3.58546 | 0       | 0       | 2.53245 |
| ENSMUSG00000048485 | 12_Zbtb8b        | 552.204 | 0.64989  | 0.00087  | 0.00319  | 586.895 | 664.491 | 770.874 | 395.84  | 359.509 | 535.614 |
| ENSMUSG00000048486 | 6_Fitm2          | 635.638 | 0.25713  | 0.08412  | 0.14909  | 671.11  | 625.026 | 780.436 | 579.784 | 537.022 | 620.451 |
| ENSMUSG00000048489 | 12_8430408G22Rik | 5.77799 | 0.67445  | 0.48482  | 0.59666  | 10.4183 | 7.34244 | 3.58546 | 5.41011 | 5.37918 | 2.53245 |
| ENSMUSG00000048490 | 13_Nrip1         | 1990.96 | 0.10993  | 0.38599  | 0.50324  | 2035.9  | 2011.83 | 2151.28 | 1689.76 | 1928.44 | 2128.53 |
| ENSMUSG00000048495 | 16_Tyw5          | 126.979 | -0.51162 | 0.03222  | 0.0674   | 104.183 | 102.794 | 107.564 | 131.646 | 180.203 | 135.486 |
| ENSMUSG00000048497 | 11_Mmgt2         | 412.69  | -0.22188 | 0.15729  | 0.24877  | 355.957 | 417.602 | 369.303 | 405.758 | 480.54  | 446.978 |
| ENSMUSG00000048498 | 7_Cd300e         | 9.03158 | 1.18955  | 0.14343  | 0.23025  | 18.232  | 6.42464 | 13.1467 | 6.3118  | 6.27571 | 3.79868 |
| ENSMUSG00000048500 | 2_Defb15         | 0.59855 | -2.74206 | 0.44803  | NA       | 0       | 0       | 0       | 0.90169 | 2.68959 | 0       |
| ENSMUSG00000048502 | 14_Duxbl1        | 17.6166 | -0.19963 | 0.95667  | 0.97173  | 0       | 34.8766 | 14.3418 | 0       | 56.4814 | 0       |
| ENSMUSG00000048503 | 6_Tmem136        | 242.354 | -1.44167 | 9.31E-07 | 8.61E-06 | 145.856 | 158.78  | 86.0511 | 441.826 | 381.025 | 240.583 |
| ENSMUSG00000048520 | 16_Fbxl13        | 2.87112 | -2.38845 | 0.11641  | 0.19482  | 1.73638 | 0.91781 | 0       | 2.70506 | 8.06878 | 3.79868 |
| ENSMUSG00000048521 | 7_Cxcr6          | 10.5115 | 0.72777  | 0.28966  | 0.40331  | 14.7592 | 13.7671 | 10.7564 | 9.01685 | 7.17224 | 7.59736 |
| ENSMUSG00000048534 | 6_Amica1         | 73.7913 | 1.794    | 1.44E-06 | 1.26E-05 | 161.483 | 73.4244 | 108.759 | 32.4607 | 34.9647 | 31.6557 |
| ENSMUSG00000048537 | 15_Phldb1        | 840.596 | 0.49952  | 0.01152  | 0.02849  | 983.657 | 1100.45 | 870.072 | 894.472 | 556.745 | 638.178 |
| ENSMUSG00000048540 | 8_Nhlh2          | 7.46628 | -2.83503 | 0.01765  | 0.04078  | 2.60457 | 2.75342 | 0       | 26.1489 | 10.7584 | 2.53245 |
| ENSMUSG00000048544 | 8_5930422O12Rik  | 0.49975 | -0.80545 | 0.83771  | NA       | 0       | 0       | 1.19515 | 1.80337 | 0       | 0       |
| ENSMUSG00000048546 | 7_Tob2           | 1037.9  | 0.3362   | 0.07331  | 0.13354  | 1078.29 | 1149.09 | 1247.74 | 1127.11 | 689.432 | 935.742 |
| ENSMUSG00000048550 | 17_Thns1l        | 206.68  | -0.43636 | 0.02019  | 0.04561  | 190.133 | 154.191 | 182.859 | 230.831 | 246.546 | 235.518 |
| ENSMUSG00000048562 | 6_Sp8            | 0.59533 | 2.69681  | 0.45239  | NA       | 1.73638 | 1.83561 | 0       | 0       | 0       | 0       |
| ENSMUSG00000048572 | 4_Tmem252        | 52.8121 | -1.07581 | 0.0021   | 0.00678  | 39.0685 | 33.041  | 29.8789 | 84.7584 | 74.412  | 55.714  |
| ENSMUSG00000048578 | 11_Mlec          | 8179.11 | 0.13515  | 0.22135  | 0.32633  | 8547.31 | 8163.88 | 8973.22 | 7464.15 | 7367.69 | 8558.43 |
| ENSMUSG00000048581 | 12_E130311K13Rik | 145.097 | -0.41771 | 0.04398  | 0.0871   | 131.096 | 123.904 | 117.125 | 169.517 | 154.203 | 174.739 |
| ENSMUSG00000048582 | 6_Gja3           | 55.3082 | -0.8097  | 0.2137   | 0.31727  | 18.232  | 77.0957 | 25.0982 | 124.433 | 22.4133 | 64.5776 |
| ENSMUSG00000048583 | 16_Igf2          | 681.77  | -0.52635 | 0.00656  | 0.0177   | 578.213 | 626.861 | 470.891 | 1004.48 | 701.087 | 709.087 |
| ENSMUSG00000048602 | 8_Morc2b         | 0.50516 | -1.00911 | 0.76476  | NA       | 0.86819 | 0       | 0       | 0.89653 | 1.26623 |         |
| ENSMUSG00000048612 | 15_Myof          | 6841.98 | 0.35533  | 0.03459  | 0.07148  | 7298.86 | 7422.29 | 8318.27 | 4634.66 | 6134.96 | 7242.82 |
| ENSMUSG00000048616 | 4_Nog            | 49.4692 | -0.57489 | 0.19944  | 0.30039  | 39.0685 | 55.0683 | 25.0982 | 82.9551 | 59.171  | 35.4544 |
| ENSMUSG00000048617 | 16_Rtbdn         | 72.9404 | -1.31685 | 0.05089  | 0.0985   | 59.0368 | 54.1505 | 11.9515 | 207.388 | 79.7912 | 25.3245 |
| ENSMUSG00000048621 | 3_Gm6377         | 4.55336 | 1.60527  | 0.17878  | 0.27561  | 9.55007 | 2.75342 | 8.36608 | 0.90169 | 4.48265 | 1.26623 |
| ENSMUSG00000048626 | 5_Klf17          | 0.5116  | -2.49497 | 0.51548  | NA       | 0       | 0       | 0       | 1.80337 | 0       | 1.26623 |
| ENSMUSG00000048636 | 7_A730049H05Rik  | 25.057  | -1.17934 | 0.02563  | 0.0558   | 16.4956 | 22.0273 | 7.17092 | 37.8708 | 37.6543 | 29.1232 |
| ENSMUSG00000048644 | 7_Ctxn1          | 42.8492 | -0.75117 | 0.05374  | 0.10282  | 24.3093 | 40.3834 | 31.074  | 61.3146 | 43.0335 | 56.9802 |
| ENSMUSG00000048647 | 9_Exd1           | 78.5408 | -0.48536 | 0.11969  | 0.19932  | 84.2143 | 62.4108 | 49.0013 | 78.4466 | 102.204 | 94.967  |
| ENSMUSG00000048652 | 12_Samd13        | 2.96655 | -0.84686 | 0.54013  | 0.64732  | 2.60457 | 3.67122 | 0       | 4.50843 | 4.48265 | 2.53245 |
| ENSMUSG00000048655 | 17_Ccdc169       | 1.05358 | 0.40553  | 0.86115  | NA       | 0.86819 | 2.75342 | 0       | 1.80337 | 0.89653 | 0       |
| ENSMUSG00000048661 | 14_Lemd3         | 526.55  | -0.1797  | 0.28987  | 0.40344  | 500.077 | 472.67  | 507.94  | 450.843 | 606.055 | 621.717 |
| ENSMUSG00000048668 | 15_Rhno1         | 596.779 | 0.3364   | 0.02465  | 0.05403  | 652.009 | 626.861 | 718.288 | 477.893 | 509.229 | 596.393 |
| ENSMUSG00000048677 | 8_Tpcn2          | 689.098 | 0.87183  | 1.15E-06 | 1.04E-05 | 862.979 | 871.915 | 937.001 | 376.905 | 502.057 | 583.731 |
| ENSMUSG00000048693 | 3_Olf435         | 0.30056 | -1.76625 | 0.6627   | NA       | 0       | 0       | 0       | 1.80337 | 0       | 0       |
| ENSMUSG00000048696 | 10_Mex3d         | 111.162 | 0.6158   | 0.03184  | 0.06677  | 131.096 | 126.657 | 145.809 | 110.907 | 60.0675 | 92.4346 |
| ENSMUSG00000048699 | 4_4732456N10Rik  | 1038.26 | 0.79703  | 1.25E-05 | 8.26E-05 | 1399.52 | 1135.33 | 1419.84 | 618.556 | 933.288 | 723.016 |
| ENSMUSG00000048701 | 13_Ccdc6         | 1778.11 | 0.38503  | 0.00622  | 0.01694  | 1889.18 | 1876.91 | 2275.57 | 1375.07 | 1550.1  | 1701.81 |
| ENSMUSG00000048706 | 3_Lurap1l        | 228.802 | -0.2825  | 0.11892  | 0.19834  | 212.706 | 201.917 | 205.567 | 271.407 | 260.89  | 220.323 |
| ENSMUSG00000048707 | 9_Tprn           | 1028.92 | 0.61602  | 0.00028  | 0.00122  | 1168.58 | 1057.31 | 1510.67 | 857.503 | 723.5   | 855.969 |
| ENSMUSG00000048720 | 7_Tbc1d12        | 274.884 | -0.56745 | 0.00039  | 0.00162  | 218.783 | 220.273 | 225.884 | 321.902 | 343.371 | 319.089 |
| ENSMUSG00000048721 | 2_Fndc9          | 37.6927 | 0.66558  | 0.12971  | 0.21251  | 39.9367 | 41.3013 | 57.3674 | 17.132  | 34.9647 | 35.4544 |
| ENSMUSG00000048728 | 15_Zfp454        | 44.659  | -1.16769 | 0.00222  | 0.0071   | 35.5957 | 22.9451 | 23.9031 | 66.7247 | 68.1363 | 50.6491 |
| ENSMUSG00000048731 | 14_Ggnbp1        | 140.42  | 0.15838  | 0.69186  | 0.77895  | 109.392 | 187.232 | 148.199 | 224.52  | 74.412  | 98.7657 |
| ENSMUSG00000048732 | 5_Klhl11         | 169.097 | -0.60888 | 0.00285  | 0.00878  | 135.437 | 116.561 | 150.589 | 202.879 | 211.581 | 197.531 |
| ENSMUSG00000048747 | 14_E130114P18Rik | 14.9551 | -0.76414 | 0.18534  | 0.28358  | 11.2864 | 10.0959 | 11.9515 | 20.7388 | 17.9306 | 17.7272 |

|                    |                 |         |          |          |          |         |         |         |         |         |         |
|--------------------|-----------------|---------|----------|----------|----------|---------|---------|---------|---------|---------|---------|
| ENSMUSG00000048752 | 7_Prss50        | 3.89975 | 0.0191   | 0.98607  | 0.99045  | 4.34094 | 2.75342 | 4.78062 | 4.50843 | 4.48265 | 2.53245 |
| ENSMUSG00000048755 | 8_Mcat          | 347.595 | 0.49757  | 0.00378  | 0.01117  | 413.258 | 413.013 | 394.401 | 330.919 | 246.546 | 287.434 |
| ENSMUSG00000048756 | 11_Foxo3        | 2766.87 | 0.37871  | 0.00089  | 0.00324  | 2940.55 | 3077.4  | 3365.55 | 2267.74 | 2382.08 | 2567.91 |
| ENSMUSG00000048758 | 13_Rpl29        | 3148.48 | 0.01433  | 0.90397  | 0.93527  | 3274.81 | 3107.69 | 3108.6  | 3336.24 | 2767.59 | 3295.99 |
| ENSMUSG00000048763 | 11_Hoxb3        | 0.893   | 3.28092  | 0.2897   | NA       | 2.60457 | 2.75342 | 0       | 0       | 0       | 0       |
| ENSMUSG00000048764 | 16_Tmprss11f    | 351.296 | 0.18408  | 0.35112  | 0.46774  | 395.894 | 336.835 | 387.23  | 256.98  | 343.371 | 387.465 |
| ENSMUSG00000048766 | 6_Skint10       | 0       | NA       | NA       | NA       | 0       | 0       | 0       | 0       | 0       | 0       |
| ENSMUSG00000048772 | 15_Tmem53       | 114.179 | 0.6583   | 0.00407  | 0.01188  | 142.383 | 142.26  | 135.052 | 96.4803 | 87.86   | 81.0385 |
| ENSMUSG00000048776 | 8_Pthlh         | 659.129 | 1.92217  | 4.19E-18 | 6.30E-16 | 947.194 | 914.134 | 1265.67 | 243.455 | 219.65  | 364.673 |
| ENSMUSG00000048779 | 4_P2ry6         | 70.9446 | 1.34824  | 0.00093  | 0.00335  | 105.051 | 89.9449 | 111.149 | 65.823  | 23.3098 | 30.3894 |
| ENSMUSG00000048782 | 15_Insc         | 62.4086 | -0.55495 | 0.15007  | 0.23915  | 47.7504 | 55.0683 | 49.0013 | 110.907 | 48.4127 | 63.3113 |
| ENSMUSG00000048787 | 12_Dcun1d3      | 389.784 | 0.02466  | 0.89556  | 0.92941  | 405.444 | 328.574 | 446.988 | 383.216 | 440.197 | 334.284 |
| ENSMUSG00000048794 | 14_Ccdc37       | 19.9997 | -0.40481 | 0.44516  | 0.56016  | 19.9683 | 17.4383 | 14.3418 | 27.9522 | 25.1029 | 15.1947 |
| ENSMUSG00000048796 | 7_Cyb5b1d1      | 727.268 | 0.50402  | 0.00017  | 0.00077  | 895.102 | 844.381 | 817.485 | 573.472 | 568.4   | 664.769 |
| ENSMUSG00000048799 | 7_Cep120        | 747.714 | -0.28163 | 0.02744  | 0.05905  | 698.892 | 662.656 | 663.311 | 886.357 | 771.016 | 804.054 |
| ENSMUSG00000048806 | 4_lfnb1         | 2.11429 | 3.40419  | 0.07494  | NA       | 2.60457 | 6.42464 | 2.39031 | 0       | 0       | 1.26623 |
| ENSMUSG00000048807 | 2_Slc35e4       | 178.604 | 1.22068  | 2.98E-05 | 0.00017  | 236.147 | 263.41  | 249.787 | 138.86  | 61.8606 | 121.558 |
| ENSMUSG00000048814 | 10_Lonrf2       | 168.807 | -1.4451  | 1.78E-08 | 2.83E-07 | 86.8188 | 116.561 | 68.1238 | 264.194 | 270.752 | 206.395 |
| ENSMUSG00000048824 | 7_Gm568         | 0.77798 | 3.07458  | 0.35415  | NA       | 3.47275 | 0       | 1.19515 | 0       | 0       | 0       |
| ENSMUSG00000048826 | 6_Dact2         | 249.939 | 0.9849   | 6.67E-05 | 0.00035  | 290.843 | 352.437 | 352.57  | 204.683 | 112.963 | 186.135 |
| ENSMUSG00000048827 | 11_Pkd1l3       | 18.3524 | 0.30458  | 0.57656  | 0.6806   | 19.1001 | 16.5205 | 25.0982 | 13.5253 | 14.3445 | 21.5259 |
| ENSMUSG00000048832 | 8_Vps37c        | 679.157 | 0.77709  | 5.91E-07 | 5.86E-06 | 801.338 | 826.943 | 945.367 | 557.242 | 431.231 | 512.822 |
| ENSMUSG00000048833 | 8_Slc39a9       | 1827.17 | 0.00772  | 0.94357  | 0.96314  | 1862.26 | 1777.79 | 1856.07 | 1700.58 | 1923.95 | 1842.36 |
| ENSMUSG00000048834 | 15_Vstm2a       | 74.4834 | -1.4781  | 0.00012  | 0.00057  | 37.3321 | 54.1505 | 26.2934 | 149.68  | 102.204 | 77.2398 |
| ENSMUSG00000048852 | 13_Gm12185      | 73.259  | 2.86224  | 7.55E-18 | 1.10E-15 | 122.415 | 132.164 | 131.467 | 13.5253 | 19.7237 | 20.2596 |
| ENSMUSG00000048856 | 8_Slc25a47      | 37.7995 | 0.48284  | 0.23986  | 0.34745  | 41.673  | 48.6437 | 41.8304 | 41.4775 | 21.5167 | 31.6557 |
| ENSMUSG00000048865 | 16_Arhgap30     | 206.675 | 1.38171  | 1.49E-06 | 1.30E-05 | 423.676 | 204.671 | 267.715 | 128.039 | 105.791 | 110.162 |
| ENSMUSG00000048874 | 15_Phf3         | 2050.15 | -0.30327 | 0.00858  | 0.02219  | 1796.28 | 1801.65 | 1908.66 | 2055.84 | 2409.87 | 2328.59 |
| ENSMUSG00000048878 | 6_Hexim1        | 1073.7  | 0.37943  | 0.00437  | 0.0126   | 1100.86 | 1293.19 | 1247.74 | 970.214 | 846.325 | 983.858 |
| ENSMUSG00000048895 | 13_Cdk5r1       | 21.2688 | -0.63004 | 0.31351  | 0.42856  | 17.3638 | 22.0273 | 10.7564 | 44.1826 | 20.6202 | 12.6623 |
| ENSMUSG00000048897 | 15_Zfp710       | 903.325 | 1.20246  | 1.77E-12 | 8.84E-11 | 1150.35 | 1158.27 | 1468.84 | 570.767 | 456.334 | 615.386 |
| ENSMUSG00000048899 | 8_Rimk1a        | 48.1918 | -1.40369 | 0.0009   | 0.00328  | 31.2548 | 32.1232 | 15.537  | 92.8736 | 65.4467 | 51.9153 |
| ENSMUSG00000048905 | 4_4930539E08Rik | 3.91396 | 0.42129  | 0.70326  | 0.78787  | 5.20913 | 4.58903 | 3.58546 | 4.50843 | 1.79306 | 3.79868 |
| ENSMUSG00000048911 | 15_Rnf24        | 228.455 | -0.80346 | 5.91E-05 | 0.00031  | 138.042 | 185.397 | 176.883 | 300.261 | 309.303 | 260.843 |
| ENSMUSG00000048915 | 12_Efna5        | 818.343 | -0.25882 | 0.03421  | 0.07082  | 717.992 | 797.573 | 719.483 | 917.014 | 867.842 | 890.158 |
| ENSMUSG00000048920 | 8_Fkrp          | 419.826 | -0.1699  | 0.28262  | 0.39569  | 388.948 | 391.903 | 405.157 | 506.747 | 400.749 | 425.452 |
| ENSMUSG00000048921 | 11_Zfp689       | 83.3666 | 0.05556  | 0.85994  | 0.90523  | 59.0368 | 110.137 | 86.0511 | 79.3483 | 89.6531 | 75.9736 |
| ENSMUSG00000048922 | 18_Cdca2        | 224.51  | 0.77493  | 0.00153  | 0.00517  | 267.402 | 238.629 | 344.204 | 122.629 | 191.858 | 182.337 |
| ENSMUSG00000048924 | 13_Ccdc125      | 44.9785 | -0.47884 | 0.18995  | 0.28926  | 37.3321 | 37.63   | 38.2449 | 58.6096 | 60.0675 | 37.9868 |
| ENSMUSG00000048930 | 12_Tada3        | 525.567 | 0.84639  | 7.89E-06 | 5.51E-05 | 570.4   | 706.71  | 749.362 | 431.006 | 302.131 | 393.797 |
| ENSMUSG00000048938 | 12_Nr1h5        | 2.28232 | 0.32983  | 0.82856  | NA       | 0.86819 | 5.50683 | 1.19515 | 0.90169 | 2.68959 | 2.53245 |
| ENSMUSG00000048939 | 13_Atp13a5      | 10.1392 | -1.22269 | 0.08901  | 0.15623  | 6.94551 | 6.42464 | 4.78062 | 11.7219 | 17.0341 | 13.9285 |
| ENSMUSG00000048960 | 13_Prex2        | 437.483 | -1.21267 | 3.23E-11 | 1.21E-09 | 273.479 | 302.876 | 213.933 | 641.098 | 655.364 | 538.146 |
| ENSMUSG00000048965 | 8_Mrgpre        | 109.845 | -0.65289 | 0.04032  | 0.08107  | 85.9507 | 104.63  | 65.7335 | 177.632 | 132.687 | 92.4346 |
| ENSMUSG00000048967 | 15_Yjefn3       | 1.92    | 1.6599   | 0.45744  | NA       | 0       | 6.42464 | 2.39031 | 2.70506 | 0       | 0       |
| ENSMUSG00000048970 | 9_C1galt1c1     | 391.144 | -0.49236 | 0.00598  | 0.01637  | 355.957 | 295.533 | 323.887 | 403.053 | 537.918 | 430.517 |
| ENSMUSG00000048978 | 13_Nrsn1        | 23.2673 | -2.00348 | 0.00241  | 0.00761  | 10.4183 | 9.17806 | 8.36608 | 63.118  | 35.8612 | 12.6623 |
| ENSMUSG00000048981 | 1_Krt31         | 3.03751 | 1.2144   | 0.39557  | 0.51317  | 0.86819 | 4.58903 | 7.17092 | 0.90169 | 0.89653 | 3.79868 |
| ENSMUSG00000048982 | 2_Gphb5         | 87.4033 | 2.56598  | 1.79E-09 | 3.86E-08 | 155.406 | 107.383 | 185.249 | 9.91854 | 32.2751 | 34.1881 |
| ENSMUSG00000048988 | 8_Elfn1         | 135.601 | 0.34356  | 0.21857  | 0.32315  | 152.801 | 157.863 | 144.614 | 164.107 | 87.86   | 106.363 |
| ENSMUSG00000048992 | 8_Prss32        | 1740.81 | 0.84496  | 2.79E-07 | 3.05E-06 | 2185.23 | 2068.73 | 2454.85 | 1388.6  | 979.908 | 1367.53 |
| ENSMUSG00000048997 | 17_Atxn7l2      | 108.444 | 0.45383  | 0.11021  | 0.18642  | 111.996 | 153.274 | 111.149 | 116.317 | 80.6878 | 77.2398 |
| ENSMUSG00000049001 | 5_Ndnf          | 347.386 | -1.06619 | 3.99E-05 | 0.00022  | 240.488 | 272.588 | 160.151 | 463.466 | 600.675 | 346.946 |
| ENSMUSG00000049008 | 4_BB014433      | 0.87206 | -3.25858 | 0.22791  | NA       | 0       | 0       | 0       | 1.80337 | 0.89653 | 2.53245 |
| ENSMUSG00000049013 | 3_Prss48        | 0.64986 | -0.24781 | 0.9367   | NA       | 1.73638 | 0       | 0       | 0       | 0.89653 | 1.26623 |
| ENSMUSG00000049036 | 7_Tmem121       | 5.28072 | -0.10511 | 0.91809  | 0.94562  | 8.68188 | 1.83561 | 4.78062 | 6.3118  | 6.27571 | 3.79868 |
| ENSMUSG00000049037 | 8_Clec4a1       | 87.378  | 1.81832  | 1.40E-06 | 1.23E-05 | 198.815 | 85.3559 | 124.296 | 32.4607 | 46.6196 | 36.7206 |
| ENSMUSG00000049038 | 2_Mterf2        | 117.2   | -0.8313  | 0.0003   | 0.00129  | 81.6097 | 88.1093 | 83.6608 | 160.5   | 155.1   | 134.22  |
| ENSMUSG00000049044 | 16_Rapgef4      | 343.133 | -0.84182 | 4.82E-06 | 3.58E-05 | 236.147 | 279.931 | 221.104 | 509.452 | 413.301 | 398.861 |
| ENSMUSG00000049047 | 11_Armcx3       | 641.633 | -1.02346 | 3.41E-07 | 3.62E-06 | 432.358 | 511.218 | 325.082 | 920.621 | 947.633 | 712.886 |
| ENSMUSG00000049076 | 9_Acap2         | 4013.56 | 0.1184   | 0.34006  | 0.45658  | 4115.21 | 4096.17 | 4321.68 | 3357.88 | 3923.22 | 4267.18 |
| ENSMUSG00000049086 | 8_Bmyc          | 95.1856 | 0.37771  | 0.13316  | 0.21693  | 101.578 | 115.644 | 105.174 | 87.4635 | 72.619  | 88.6359 |
| ENSMUSG00000049090 | 2_Zadh2         | 1429.77 | -0.19154 | 0.08126  | 0.14515  | 1320.51 | 1343.67 | 1342.16 | 1601.39 | 1543.83 | 1427.04 |
| ENSMUSG00000049091 | 6_Seps2         | 389.956 | 0.14067  | 0.37854  | 0.49601  | 452.326 | 394.656 | 378.864 | 392.233 | 337.992 | 383.667 |
| ENSMUSG00000049092 | 10_Gpr137c      | 15.0416 | -2.10777 | 0.00222  | 0.0071   | 5.20913 | 9.17806 | 2.39031 | 27.9522 | 27.7924 | 17.7272 |
| ENSMUSG00000049093 | 9_Il23r         | 5.62264 | -0.3395  | 0.74164  | 0.81739  | 6.07732 | 7.34244 | 1.19515 | 4.50843 | 4.48265 | 10.1298 |
| ENSMUSG00000049097 | 9_Ankrd34a      | 7.44153 | -1.11699 | 0.20507  | 0.30712  | 5.20913 | 6.42464 | 2.39031 | 15.3287 | 8.96531 | 6.33113 |
| ENSMUSG00000049100 | 15_Pcdh10       | 19.6856 | -1.36599 | 0.02691  | 0.05814  | 15.6274 | 10.0959 | 7.17092 | 44.1826 | 23.3098 | 17.7272 |
| ENSMUSG00000049103 | 3_Ccr2          | 236.81  | 1.80259  | 1.08E-06 | 9.78E-06 | 604.259 | 218.438 | 282.056 | 95.5787 | 140.755 | 79.7723 |
| ENSMUSG00000049106 | 6_Dcaf5         | 1249.17 | 0.39685  | 0.00404  | 0.01183  | 1337.88 | 1432.69 | 1489.16 | 1192.03 | 931.495 | 1111.75 |
| ENSMUSG00000049107 | 13_Ntf3         | 451.396 | 0.11102  | 0.46416  | 0.57782  | 462.744 | 464.41  | 478.062 | 384.118 | 436.61  | 482.432 |
| ENSMUSG00000049109 | 14_Themis       | 1.84019 | -0.57011 | 0.75002  | NA       | 3.47275 | 0.91781 | 0       | 0.90169 | 4.48265 | 1.26623 |
| ENSMUSG00000049112 | 9_Oxtr          | 99.2621 | -0.80331 | 0.00783  | 0.02055  | 79.0051 | 86.2737 | 51.3916 | 137.958 | 143.445 | 97.4995 |
| ENSMUSG00000049115 | 14_Agtr1a       | 30.7805 | -1.45811 | 0.00145  | 0.00493  | 19.1001 | 20.1917 | 9.56123 | 48.691  | 46.6196 | 40.5193 |
| ENSMUSG00000049119 | 14_Fam110b      | 161.162 | 0.11056  | 0.6111   | 0.7105   | 154.538 | 189.986 | 157.76  | 177.632 | 145.238 | 141.817 |
| ENSMUSG00000049122 | 17_Frmd3        | 38.5259 | -1.71476 | 0.0007   | 0.00264  | 17.3638 | 25.6986 | 10.7564 | 77.545  | 68.1363 | 31.6557 |
| ENSMUSG00000049123 | 9_Catsperg2     | 6.56837 | 0.52085  | 0.56601  | 0.6713   | 5.20913 | 11.0137 | 7.17092 | 6.3118  | 7.17224 | 2.53245 |
| ENSMUSG00000049124 | 3_Gm8186        | 388.251 | -0.14484 | 0.39012  | 0.50757  | 362.903 | 359.78  | 382.449 | 375.101 | 369.371 | 479.9   |
| ENSMUSG00000049128 | 7_Ivl           | 348.83  | 0.2107   | 0.20218  | 0.3036   | 384.607 | 357.944 | 378.864 | 293.949 | 306.613 | 371.004 |

|                    |                  |         |          |          |          |         |         |         |         |          |         |
|--------------------|------------------|---------|----------|----------|----------|---------|---------|---------|---------|----------|---------|
| ENSMUSG00000049130 | 5_C5ar1          | 31.9885 | 0.89135  | 0.06821  | 0.12584  | 62.5096 | 29.3698 | 32.2692 | 18.9354 | 19.7237  | 29.1232 |
| ENSMUSG00000049133 | 6_Flg2           | 0.21104 | -0.99647 | 0.80707  | NA       | 0       | 0       | 0       | 0       | 0        | 1.26623 |
| ENSMUSG00000049134 | 15_Nrap          | 224.971 | -0.9381  | 0.00705  | 0.01881  | 123.283 | 222.109 | 117.125 | 422.89  | 175.72   | 288.7   |
| ENSMUSG00000049148 | 8_Plcxd3         | 15.1872 | -2.2754  | 0.00078  | 0.0029   | 2.60457 | 8.26025 | 4.78062 | 27.9522 | 25.9994  | 21.5259 |
| ENSMUSG00000049152 | 11_Ugt3a2        | 0.14942 | -0.99647 | 0.80707  | NA       | 0       | 0       | 0       | 0       | 0.89653  | 0       |
| ENSMUSG00000049154 | 11_Fam183b       | 0.60123 | -1.36744 | 0.71131  | NA       | 0       | 0.91781 | 0       | 0       | 2.68959  | 0       |
| ENSMUSG00000049164 | 6_Zfp518a        | 992.128 | -0.69363 | 3.19E-07 | 3.41E-06 | 842.143 | 700.286 | 731.434 | 1150.55 | 1324.18  | 1204.18 |
| ENSMUSG00000049173 | 7_Myo23          | 6.97815 | -0.95098 | 0.43642  | 0.5519   | 0.86819 | 11.0137 | 2.39031 | 20.7388 | 1.79306  | 5.06491 |
| ENSMUSG00000049176 | 14_Frmpd4        | 160.055 | -1.3604  | 9.08E-05 | 0.00046  | 82.4779 | 135.835 | 50.1965 | 293.048 | 215.167  | 183.603 |
| ENSMUSG00000049184 | 5_Purg           | 94.1429 | -0.87929 | 0.00066  | 0.00252  | 66.8505 | 73.4244 | 58.5626 | 125.334 | 131.79   | 108.896 |
| ENSMUSG00000049191 | 12_Rgag4         | 96.3566 | -0.35229 | 0.23539  | 0.3422   | 75.5324 | 90.8628 | 88.4414 | 137.056 | 110.273  | 75.9736 |
| ENSMUSG00000049214 | 13_Skint7        | 0       | NA       | NA       | NA       | 0       | 0       | 0       | 0       | 0        | 0       |
| ENSMUSG00000049225 | 14_Pdp1          | 397.628 | -0.42989 | 0.01479  | 0.03518  | 386.344 | 325.821 | 303.569 | 405.758 | 517.298  | 446.978 |
| ENSMUSG00000049230 | 8_Gm9833         | 50.5265 | -0.9386  | 0.01443  | 0.03441  | 32.9912 | 39.4656 | 31.074  | 43.2809 | 75.3086  | 81.0385 |
| ENSMUSG00000049232 | 3_Tigd2          | 356.478 | -0.38729 | 0.0248   | 0.05428  | 336.857 | 305.629 | 284.447 | 394.938 | 459.92   | 357.076 |
| ENSMUSG00000049233 | 6_Apoo-ps        | 126.047 | -0.15626 | 0.67988  | 0.76825  | 94.6325 | 107.383 | 155.37  | 67.6264 | 136.273  | 194.999 |
| ENSMUSG00000049241 | 5_Hcar1          | 312.246 | 0.63795  | 0.00122  | 0.00425  | 378.53  | 371.711 | 388.425 | 220.913 | 206.202  | 307.693 |
| ENSMUSG00000049252 | 17_Lrp1b         | 26.9842 | -1.4054  | 0.00403  | 0.0118   | 13.891  | 17.4383 | 13.1467 | 50.4944 | 40.3439  | 26.5908 |
| ENSMUSG00000049265 | 7_Kcnk3          | 23.6547 | -0.92792 | 0.18636  | 0.28483  | 26.9138 | 14.6849 | 7.17092 | 58.6096 | 20.6202  | 13.9285 |
| ENSMUSG00000049281 | 15_Scn3b         | 16.906  | -0.82241 | 0.21213  | 0.31549  | 19.9683 | 8.26025 | 8.36608 | 31.559  | 20.6202  | 12.6623 |
| ENSMUSG00000049285 | 4_Mblac1         | 56.0508 | 0.41304  | 0.28193  | 0.39488  | 46.014  | 52.3149 | 94.4172 | 44.1826 | 53.7918  | 45.5842 |
| ENSMUSG00000049287 | 5_lba57          | 141.187 | 0.39299  | 0.08053  | 0.1441   | 134.569 | 173.465 | 173.297 | 130.744 | 114.756  | 120.292 |
| ENSMUSG00000049288 | 4_Lix1l          | 1259.94 | -1.14439 | 2.34E-07 | 2.62E-06 | 814.361 | 960.025 | 579.65  | 2026.09 | 1885.4   | 1294.08 |
| ENSMUSG00000049291 | 6_Prss38         | 3.33099 | -1.37354 | 0.33742  | 0.4539   | 2.60457 | 2.75342 | 0       | 2.70506 | 1.79306  | 10.1298 |
| ENSMUSG00000049295 | 16_Zfp219        | 836.492 | 1.18507  | 4.23E-07 | 4.38E-06 | 1005.36 | 1212.42 | 1268.06 | 669.051 | 333.509  | 530.549 |
| ENSMUSG00000049299 | 14_Trappc1       | 875.493 | -0.43527 | 0.00258  | 0.00806  | 810.888 | 712.217 | 709.922 | 914.309 | 1139.589 | 966.131 |
| ENSMUSG00000049300 | 11_Prm16         | 229.379 | -0.1302  | 0.47163  | 0.58468  | 230.938 | 204.671 | 222.299 | 248.865 | 255.511  | 213.992 |
| ENSMUSG00000049303 | 10_Syt12         | 104.513 | 0.18461  | 0.45316  | 0.56752  | 98.1053 | 111.972 | 124.296 | 97.382  | 106.687  | 88.6359 |
| ENSMUSG00000049305 | 6_Ccdc71         | 991.102 | 0.58086  | 4.96E-05 | 0.00027  | 1086.1  | 1205.08 | 1272.84 | 867.421 | 692.122  | 823.047 |
| ENSMUSG00000049307 | 5_Fut4           | 222.664 | 0.45246  | 0.02877  | 0.06052  | 219.652 | 253.314 | 298.789 | 167.713 | 183.789  | 212.726 |
| ENSMUSG00000049313 | 8_Sor1           | 10485.8 | 0.70551  | 4.95E-06 | 3.66E-05 | 12239.7 | 12889.7 | 13867.4 | 6769.85 | 7389.21  | 9758.81 |
| ENSMUSG00000049321 | 17_Zfp2          | 185.524 | -0.87731 | 2.77E-05 | 0.00016  | 147.592 | 122.068 | 121.906 | 207.388 | 254.615  | 259.577 |
| ENSMUSG00000049323 | 8_Smcr8          | 1264.25 | 0.06005  | 0.60137  | 0.7024   | 1322.25 | 1230.78 | 1318.25 | 1155.96 | 1279.35  | 1278.89 |
| ENSMUSG00000049327 | 17_Setd8         | 3598.74 | 0.30514  | 0.01724  | 0.04002  | 3756.65 | 3804.3  | 4371.87 | 2988.19 | 3065.24  | 3606.21 |
| ENSMUSG00000049336 | 16_Tenm2         | 294.38  | -0.94853 | 0.00064  | 0.00246  | 185.792 | 283.602 | 132.662 | 472.483 | 346.061  | 345.68  |
| ENSMUSG00000049339 | 16_Fam134a       | 1949.12 | 0.3584   | 0.0296   | 0.06279  | 2087.12 | 2178.87 | 2304.26 | 2054.94 | 1353.76  | 1715.74 |
| ENSMUSG00000049349 | 3_Gm5105         | 0.44988 | -2.33107 | 0.56049  | NA       | 0       | 0       | 0       | 1.80337 | 0.89653  | 0       |
| ENSMUSG00000049350 | 6_Zg16           | 0.14942 | -0.99647 | 0.80707  | NA       | 0       | 0       | 0       | 0       | 0.89653  | 0       |
| ENSMUSG00000049353 | 17_Rd3           | 38.0138 | -1.36501 | 0.0262   | 0.05682  | 20.8365 | 32.1232 | 10.7564 | 88.3652 | 58.2745  | 17.7272 |
| ENSMUSG00000049354 | 8_Dcaf7          | 3667.27 | 0.22465  | 0.0466   | 0.09142  | 3886.01 | 3856.62 | 4112.53 | 3299.27 | 3131.58  | 3717.64 |
| ENSMUSG00000049357 | 11_4933408B17Rik | 14.8682 | -0.69267 | 0.28971  | 0.40332  | 15.6274 | 5.50683 | 13.1467 | 22.5421 | 19.7237  | 12.6623 |
| ENSMUSG00000049382 | 9_Krt8           | 1456.65 | 0.78729  | 0.00013  | 0.00064  | 1667.79 | 1974.2  | 1890.73 | 1274.98 | 727.983  | 1204.18 |
| ENSMUSG00000049387 | 9_Cox7b2         | 0.19919 | 0.92709  | 0.82027  | NA       | 0       | 0       | 1.19515 | 0       | 0        | 0       |
| ENSMUSG00000049396 | 6_Gemin4         | 60.0015 | 2.27325  | 0.0003   | 0.00127  | 151.933 | 70.671  | 76.4899 | 18.9354 | 39.4473  | 2.53245 |
| ENSMUSG00000049401 | 10_Ogfr          | 2029.2  | 1.36102  | 3.79E-18 | 5.79E-16 | 2688.78 | 2618.5  | 3456.39 | 1228.1  | 990.666  | 1192.79 |
| ENSMUSG00000049404 | 7_Rarres1        | 217.488 | 0.2843   | 0.1272   | 0.20921  | 215.311 | 247.808 | 254.568 | 201.978 | 207.995  | 177.272 |
| ENSMUSG00000049409 | 9_Prokr1         | 43.2833 | -0.36385 | 0.34112  | 0.45744  | 34.7275 | 42.2191 | 37.0498 | 60.4129 | 51.1022  | 34.1881 |
| ENSMUSG00000049411 | 13_Tmem241       | 147.646 | -0.77477 | 0.00015  | 0.0007   | 111.996 | 112.89  | 101.588 | 183.944 | 191.858  | 183.603 |
| ENSMUSG00000049420 | 8_Tmem200a       | 51.8629 | -0.66787 | 0.04451  | 0.08802  | 44.2776 | 36.7122 | 39.4401 | 69.4298 | 68.1363  | 53.1815 |
| ENSMUSG00000049421 | 13_Zfp260        | 1454.27 | -0.62056 | 2.10E-05 | 0.00013  | 1218.94 | 1151.85 | 1067.27 | 1525.65 | 2036.02  | 1725.87 |
| ENSMUSG00000049422 | 6_Chchd10        | 395.483 | 0.42542  | 0.16927  | 0.26368  | 348.144 | 628.697 | 383.644 | 499.534 | 239.374  | 273.505 |
| ENSMUSG00000049436 | 4_Upk1b          | 25252.3 | 0.08746  | 0.48802  | 0.59984  | 26812.3 | 24485.2 | 26753.5 | 21227.5 | 24876    | 27359.4 |
| ENSMUSG00000049439 | 13_Cyp20a1       | 239.13  | -0.40559 | 0.02742  | 0.05904  | 212.706 | 197.328 | 207.957 | 267.801 | 308.407  | 240.583 |
| ENSMUSG00000049470 | 13_Aff4          | 5775.66 | -0.28154 | 0.00822  | 0.02146  | 5392.32 | 5071.79 | 5177.41 | 5860.05 | 6828.87  | 6323.54 |
| ENSMUSG00000049482 | 15_Ctut2         | 345.172 | 1.24181  | 1.05E-07 | 1.31E-06 | 435.831 | 477.259 | 541.405 | 228.126 | 138.962  | 249.447 |
| ENSMUSG00000049488 | 14_Tmem67        | 175.169 | -0.40374 | 0.04648  | 0.09125  | 164.088 | 136.753 | 151.785 | 185.747 | 221.443  | 191.2   |
| ENSMUSG00000049489 | 5_Fam58b         | 300.219 | 0.06442  | 0.68473  | 0.7727   | 307.339 | 323.068 | 290.422 | 309.278 | 291.372  | 279.836 |
| ENSMUSG00000049491 | 15_Slc36a3       | 1.09801 | 2.27839  | 0.38471  | NA       | 1.73638 | 0       | 3.58546 | 0       | 0        | 1.26623 |
| ENSMUSG00000049493 | 13_Pls1          | 19.2048 | -1.31671 | 0.03374  | 0.07002  | 8.68188 | 19.2739 | 4.78062 | 27.9522 | 30.482   | 24.0583 |
| ENSMUSG00000049502 | 16_Dtx3l         | 4211.84 | 0.92991  | 1.24E-07 | 1.51E-06 | 5203.92 | 4772.59 | 6596.06 | 2318.23 | 3289.37  | 3090.86 |
| ENSMUSG00000049504 | 12_Proser1       | 476.621 | 0.44084  | 0.00707  | 0.01884  | 507.89  | 527.738 | 610.724 | 418.382 | 350.543  | 444.446 |
| ENSMUSG00000049511 | 5_Htr1b          | 33.2635 | -1.4504  | 0.00338  | 0.01017  | 13.891  | 27.5342 | 11.9515 | 55.9045 | 57.378   | 32.9219 |
| ENSMUSG00000049515 | 12_Espnl         | 12.7401 | 0.58712  | 0.34704  | 0.46391  | 13.0228 | 17.4383 | 15.537  | 10.8202 | 10.7584  | 8.86359 |
| ENSMUSG00000049516 | 8_Spty2d1        | 1288.7  | 0.09934  | 0.46626  | 0.57975  | 1295.34 | 1260.15 | 1443.75 | 1086.53 | 1329.55  | 1316.88 |
| ENSMUSG00000049517 | 7_Rps23          | 14465.5 | -0.17582 | 0.06883  | 0.12681  | 14109.8 | 13211.8 | 13433.5 | 16143.8 | 14567.7  | 15326.4 |
| ENSMUSG00000049521 | 1_Cdc42ep1       | 441.575 | 0.96942  | 5.63E-05 | 0.0003   | 567.795 | 620.437 | 565.308 | 394.938 | 194.547  | 306.427 |
| ENSMUSG00000049526 | 7_Tmem202        | 18.3881 | -0.69939 | 0.22221  | 0.32716  | 18.232  | 11.9315 | 11.9515 | 21.6405 | 31.3786  | 15.1947 |
| ENSMUSG00000049532 | 10_Sall2         | 191.661 | -0.97267 | 0.00231  | 0.00735  | 129.36  | 181.726 | 76.4899 | 321     | 243.856  | 197.531 |
| ENSMUSG00000049536 | 5_Tceal1         | 186.549 | -0.98974 | 0.0001   | 0.0005   | 139.778 | 141.342 | 93.222  | 305.671 | 236.684  | 202.596 |
| ENSMUSG00000049537 | 10_Tecr1         | 0.66188 | -2.87123 | 0.41242  | NA       | 0       | 0       | 0       | 2.70506 | 0        | 1.26623 |
| ENSMUSG00000049538 | 14_Adams16       | 294.209 | -1.44358 | 0.02783  | 0.05969  | 105.919 | 303.794 | 64.5383 | 434.612 | 505.643  | 350.745 |
| ENSMUSG00000049539 | 2_Hist1h1a       | 2.27039 | 1.6436   | 0.31421  | NA       | 1.73638 | 3.67122 | 4.78062 | 0.90169 | 0        | 2.53245 |
| ENSMUSG00000049548 | 8_Krt82          | 0.19919 | 0.92709  | 0.82027  | NA       | 0       | 0       | 1.19515 | 0       | 0        | 0       |
| ENSMUSG00000049550 | 17_Clip1         | 2250.5  | 0.26511  | 0.01768  | 0.04084  | 2378.84 | 2389.05 | 2601.85 | 2071.17 | 1900.64  | 2161.45 |
| ENSMUSG00000049551 | 2_Fzd9           | 8.60901 | -0.60359 | 0.46142  | 0.57516  | 3.47275 | 11.0137 | 5.97577 | 12.6236 | 7.17224  | 11.396  |
| ENSMUSG00000049553 | 10_Polr1a        | 1214.38 | 0.19255  | 0.09281  | 0.1617   | 1306.62 | 1257.39 | 1320.65 | 1084.73 | 1100.04  | 1216.84 |
| ENSMUSG00000049555 | 10_Tmie          | 284.782 | 0.39158  | 0.0303   | 0.06398  | 295.184 | 333.163 | 340.619 | 253.374 | 211.581  | 274.771 |
| ENSMUSG00000049556 | 4_Lingo1         | 25.873  | 0.58993  | 0.2379   | 0.34526  | 28.6502 | 34.8766 | 29.8789 | 30.6573 | 13.448   | 17.7272 |
| ENSMUSG00000049562 | 5_Ap5b1          | 117.52  | 1.76753  | 8.00E-06 | 5.57E-05 | 162.351 | 176.219 | 206.762 | 87.4635 | 24.2063  | 48.1166 |

|                    |                  |         |          |          |          |         |         |         |         |         |         |
|--------------------|------------------|---------|----------|----------|----------|---------|---------|---------|---------|---------|---------|
| ENSMUSG00000049565 | 16_Aknad1        | 104.333 | -0.26581 | 0.33469  | 0.45128  | 98.9735 | 88.1093 | 96.8075 | 82.9551 | 129.997 | 129.155 |
| ENSMUSG00000049571 | 16_Cfap46        | 14.0393 | -0.79902 | 0.25344  | 0.36276  | 5.20913 | 18.3561 | 7.17092 | 21.6405 | 17.9306 | 13.9285 |
| ENSMUSG00000049577 | 14_Zfpm1         | 70.7095 | 1.08714  | 0.00282  | 0.00873  | 75.5324 | 98.2052 | 114.735 | 58.6096 | 27.7924 | 49.3828 |
| ENSMUSG00000049580 | 12_Tsku          | 429.174 | 0.71507  | 2.05E-06 | 1.71E-05 | 494.867 | 559.861 | 544.99  | 335.427 | 296.752 | 343.147 |
| ENSMUSG00000049583 | 14_Grm5          | 5.65622 | -2.60446 | 0.03734  | 0.0761   | 0.86819 | 2.75342 | 1.19515 | 10.8202 | 17.0341 | 1.26623 |
| ENSMUSG00000049588 | 13_Ccdc69        | 89.2498 | 0.44011  | 0.18468  | 0.28274  | 83.3461 | 99.123  | 126.686 | 105.497 | 60.0675 | 60.7789 |
| ENSMUSG00000049598 | 9_Vsig8          | 23.4642 | 0.9822   | 0.04298  | 0.08547  | 27.782  | 32.1232 | 33.4643 | 18.0337 | 11.6549 | 17.7272 |
| ENSMUSG00000049600 | 7_Zbtb45         | 139.533 | 0.7377   | 0.00224  | 0.00715  | 173.638 | 173.465 | 175.688 | 119.022 | 78.8947 | 116.493 |
| ENSMUSG00000049606 | 16_Zfp644        | 1214.55 | -0.50203 | 0.00022  | 0.00099  | 1059.19 | 961.86  | 995.563 | 1326.38 | 1623.62 | 1320.67 |
| ENSMUSG00000049608 | 8_Gpr55          | 4.13046 | 5.48123  | 0.0011   | 0.00388  | 13.0228 | 4.58903 | 7.17092 | 0       | 0       | 0       |
| ENSMUSG00000049612 | 10_Omg           | 13.426  | -2.49284 | 0.00218  | 0.00698  | 4.34094 | 6.42464 | 1.19515 | 33.3624 | 25.1029 | 10.1298 |
| ENSMUSG00000049620 | 8_Prss33         | 1.53866 | -0.69388 | 0.73439  | NA       | 3.47275 | 0       | 0       | 1.80337 | 2.68959 | 1.26623 |
| ENSMUSG00000049624 | 13_Slc17a5       | 885.963 | 0.00946  | 0.94361  | 0.96314  | 869.057 | 848.97  | 947.757 | 823.239 | 845.428 | 981.326 |
| ENSMUSG00000049625 | 5_Tifab          | 108.344 | 1.44846  | 3.50E-06 | 2.71E-05 | 218.783 | 122.986 | 133.857 | 66.7247 | 51.9988 | 55.714  |
| ENSMUSG00000049630 | 6_C1ql3          | 30.5438 | -1.92925 | 0.00041  | 0.00168  | 16.4956 | 17.4383 | 3.58546 | 57.7079 | 47.5161 | 40.5193 |
| ENSMUSG00000049641 | 12_Vgll2         | 6.83623 | -0.52364 | 0.58927  | 0.69165  | 2.60457 | 8.26025 | 5.97577 | 12.6236 | 2.68959 | 8.86359 |
| ENSMUSG00000049643 | 15_2310022A10Rik | 442.897 | 0.74059  | 0.00147  | 0.00501  | 487.054 | 557.108 | 617.895 | 400.348 | 221.443 | 373.537 |
| ENSMUSG00000049649 | 8_Gpr3           | 2.33705 | 0.14974  | 0.91989  | NA       | 4.34094 | 1.83561 | 1.19515 | 0.90169 | 4.48265 | 1.26623 |
| ENSMUSG00000049653 | 4_Spatc1         | 1.16411 | 1.20903  | 0.56283  | NA       | 0.86819 | 2.75342 | 1.19515 | 0.90169 | 0       | 1.26623 |
| ENSMUSG00000049657 | 9_Zbtb5          | 816.027 | 0.32894  | 0.01455  | 0.03465  | 887.289 | 915.97  | 921.464 | 742.087 | 639.226 | 790.126 |
| ENSMUSG00000049658 | 13_Bdp1          | 1390.46 | -0.29766 | 0.05002  | 0.09716  | 1335.27 | 1111.46 | 1295.55 | 1288.51 | 1696.24 | 1615.71 |
| ENSMUSG00000049659 | 15_Aftph         | 3511.42 | 0.00227  | 0.98623  | 0.99055  | 3465.81 | 3282.99 | 3793.42 | 3039.58 | 3676.67 | 3810.08 |
| ENSMUSG00000049670 | 8_Morn4          | 136.867 | -1.0032  | 0.00348  | 0.01041  | 105.051 | 104.63  | 63.3432 | 272.309 | 141.652 | 134.22  |
| ENSMUSG00000049672 | 14_Zbtb14        | 657.743 | -0.01786 | 0.89698  | 0.93059  | 602.523 | 661.738 | 697.97  | 716.84  | 626.675 | 640.711 |
| ENSMUSG00000049676 | 12_Catsperg1     | 110.652 | 0.10564  | 0.69004  | 0.77724  | 116.337 | 113.808 | 114.735 | 100.087 | 135.376 | 83.571  |
| ENSMUSG00000049680 | 17_Urgcp         | 743.896 | 0.43542  | 0.00651  | 0.01757  | 731.015 | 903.121 | 932.22  | 692.494 | 554.952 | 649.574 |
| ENSMUSG00000049685 | 8_Cyp2g1         | 1.80298 | 1.35517  | 0.4299   | NA       | 2.60457 | 2.75342 | 2.39031 | 1.80337 | 0       | 1.26623 |
| ENSMUSG00000049686 | 14_Orai1         | 178.084 | 0.99605  | 1.26E-05 | 8.31E-05 | 240.488 | 231.287 | 240.226 | 148.778 | 95.0322 | 112.694 |
| ENSMUSG00000049687 | 5_Fam109b        | 65.7378 | -0.74886 | 0.03715  | 0.07575  | 67.7187 | 40.3834 | 38.2449 | 85.6601 | 63.6537 | 98.7657 |
| ENSMUSG00000049690 | 15_Nckap5        | 95.0198 | -1.01622 | 0.00025  | 0.00108  | 68.5869 | 70.671  | 49.0013 | 137.958 | 136.273 | 107.629 |
| ENSMUSG00000049691 | 8_Nkx3-2         | 0.15297 | 0.92709  | 0.82027  | NA       | 0       | 0.91781 | 0       | 0       | 0       | 0       |
| ENSMUSG00000049692 | 7_Tmem239        | 0.14942 | -0.99647 | 0.80707  | NA       | 0       | 0       | 0       | 0       | 0.89653 | 0       |
| ENSMUSG00000049699 | 4_Ucn2           | 29.641  | 0.66501  | 0.14714  | 0.23514  | 34.7275 | 44.0547 | 29.8789 | 15.3287 | 25.9994 | 27.857  |
| ENSMUSG00000049709 | 3_Nlrp10         | 47.6193 | 0.13946  | 0.7417   | 0.81739  | 53.8277 | 49.5615 | 45.4159 | 32.4607 | 32.2751 | 72.1749 |
| ENSMUSG00000049717 | 8_Lig4           | 263.558 | -0.34584 | 0.05801  | 0.10975  | 215.311 | 211.095 | 271.3   | 288.539 | 310.2   | 284.901 |
| ENSMUSG00000049719 | 14_Prss46        | 1.25656 | 1.3307   | 0.52041  | NA       | 0.86819 | 0.91781 | 3.58546 | 0.90169 | 0       | 1.26623 |
| ENSMUSG00000049721 | 12_Gal3st1       | 158.924 | 1.14894  | 6.15E-07 | 6.06E-06 | 202.288 | 203.753 | 250.982 | 108.202 | 80.6878 | 107.629 |
| ENSMUSG00000049723 | 14_Mmp12         | 182.208 | 0.56052  | 0.18306  | 0.28085  | 332.516 | 162.452 | 156.565 | 247.964 | 79.7912 | 113.96  |
| ENSMUSG00000049728 | 14_Zfp668        | 146.539 | 0.71152  | 0.00142  | 0.00484  | 164.956 | 178.054 | 203.176 | 123.531 | 96.8253 | 112.694 |
| ENSMUSG00000049734 | 9_Trex1          | 774.554 | 3.00311  | 2.68E-27 | 1.06E-24 | 1119.96 | 1105.04 | 1907.47 | 234.438 | 118.342 | 162.077 |
| ENSMUSG00000049739 | 10_Zfp646        | 1442.24 | 0.48147  | 0.00169  | 0.00563  | 1589.65 | 1630.94 | 1821.41 | 1354.33 | 987.08  | 1270.03 |
| ENSMUSG00000049740 | 2_5330417H12Rik  | 0       | NA       | NA       | NA       | 0       | 0       | 0       | 0       | 0       | 0       |
| ENSMUSG00000049741 | 4_Rxfp4          | 0.34389 | 1.87986  | 0.64119  | NA       | 0.86819 | 0       | 1.19515 | 0       | 0       | 0       |
| ENSMUSG00000049744 | 15_Arhgap15      | 22.899  | 0.58856  | 0.24033  | 0.34803  | 28.6502 | 30.2876 | 23.9031 | 21.6405 | 21.5167 | 11.396  |
| ENSMUSG00000049751 | 6_Rpl36a1        | 4012.55 | -0.15924 | 0.15773  | 0.2493   | 3985.85 | 3439.02 | 3948.79 | 4264.07 | 4014.66 | 4422.93 |
| ENSMUSG00000049755 | 14_Zfp672        | 624.3   | 0.07313  | 0.60782  | 0.7077   | 584.291 | 662.656 | 675.262 | 641.098 | 632.951 | 549.542 |
| ENSMUSG00000049760 | 5_2410015M20Rik  | 1445.85 | -0.09252 | 0.51026  | 0.62046  | 1422.96 | 1467.57 | 1307.5  | 1705.09 | 1304.45 | 1467.56 |
| ENSMUSG00000049761 | 6_Pmis2          | 0.19919 | 0.92709  | 0.82027  | NA       | 0       | 0       | 1.19515 | 0       | 0       | 0       |
| ENSMUSG00000049764 | 7_Zfp280b        | 478.329 | 0.09686  | 0.48347  | 0.59556  | 511.363 | 481.848 | 488.818 | 453.548 | 439.3   | 495.095 |
| ENSMUSG00000049775 | 16_Tmsb4x        | 123248  | -0.54641 | 2.49E-05 | 0.00015  | 105011  | 96594.4 | 98945.6 | 127361  | 168335  | 143241  |
| ENSMUSG00000049791 | 3_Fzd4           | 615.522 | -0.62846 | 0.00017  | 0.00081  | 515.704 | 522.231 | 412.328 | 747.497 | 844.532 | 650.841 |
| ENSMUSG00000049792 | 6_Bag5           | 831.353 | -0.01412 | 0.91228  | 0.94106  | 790.92  | 815.929 | 874.853 | 853.896 | 767.43  | 885.093 |
| ENSMUSG00000049796 | 4_Crh            | 0.14942 | -0.99647 | 0.80707  | NA       | 0       | 0       | 0       | 0       | 0.89653 | 0       |
| ENSMUSG00000049799 | 13_Lrrc19        | 1.72766 | -1.30188 | 0.48045  | NA       | 0.86819 | 0.91781 | 1.19515 | 0       | 3.58612 | 3.79868 |
| ENSMUSG00000049800 | 13_Sertad2       | 1483.64 | 0.31758  | 0.01359  | 0.03267  | 1583.58 | 1532.74 | 1822.61 | 1339.9  | 1217.49 | 1405.51 |
| ENSMUSG00000049804 | 9_Armcx4         | 484.513 | -1.12822 | 6.24E-07 | 6.12E-06 | 322.098 | 370.793 | 218.713 | 790.778 | 658.95  | 545.744 |
| ENSMUSG00000049807 | 16_Arhgap23      | 1835.31 | 0.86143  | 5.20E-07 | 5.25E-06 | 2073.23 | 2276.16 | 2752.44 | 1369.66 | 1052.53 | 1487.82 |
| ENSMUSG00000049809 | 2_Krtap9-3       | 0.34389 | 1.87986  | 0.64119  | NA       | 0.86819 | 0       | 1.19515 | 0       | 0       | 0       |
| ENSMUSG00000049811 | 15_Fam161a       | 105.969 | -1.34821 | 0.00051  | 0.002    | 74.6642 | 56.9039 | 47.8062 | 215.503 | 164.962 | 75.9736 |
| ENSMUSG00000049823 | 9_Zbtb12         | 176.132 | 0.93367  | 8.49E-05 | 0.00043  | 204.892 | 240.465 | 248.592 | 149.68  | 94.1357 | 119.025 |
| ENSMUSG00000049848 | 7_Ceacam19       | 225.667 | 0.71251  | 0.00216  | 0.00695  | 259.588 | 242.301 | 338.229 | 143.368 | 157.789 | 212.726 |
| ENSMUSG00000049858 | 7_Suox           | 331.936 | -0.57992 | 0.00261  | 0.00815  | 246.566 | 313.89  | 237.836 | 460.761 | 372.957 | 359.608 |
| ENSMUSG00000049866 | 12_Arl4c         | 447.537 | 0.27573  | 0.13114  | 0.21434  | 560.85  | 386.396 | 523.477 | 424.694 | 384.612 | 405.193 |
| ENSMUSG00000049871 | 13_Nlrc3         | 56.5334 | -0.36077 | 0.32925  | 0.44578  | 62.5096 | 49.5615 | 35.8546 | 77.545  | 46.6196 | 67.11   |
| ENSMUSG00000049872 | 7_Fam26e         | 145.066 | -0.72506 | 0.00178  | 0.00591  | 105.051 | 122.986 | 100.393 | 199.272 | 194.547 | 148.149 |
| ENSMUSG00000049878 | 12_Rif           | 1150.15 | -0.29381 | 0.05104  | 0.09867  | 1081.76 | 957.271 | 1061.3  | 1067.6  | 1445.21 | 1287.75 |
| ENSMUSG00000049882 | 9_Vcpkmt         | 286.288 | 0.24046  | 0.16351  | 0.25641  | 296.92  | 284.52  | 348.985 | 254.275 | 251.925 | 281.102 |
| ENSMUSG00000049892 | 7_Rasd1          | 15.4535 | 1.46266  | 0.01994  | 0.04514  | 32.123  | 15.6027 | 20.3176 | 8.11517 | 8.96531 | 7.59736 |
| ENSMUSG00000049897 | 14_Stklid1       | 3.91246 | -0.26426 | 0.80766  | 0.86703  | 4.34094 | 2.75342 | 3.58546 | 5.41011 | 3.58612 | 3.79868 |
| ENSMUSG00000049902 | 5_4921517D22Rik  | 0       | NA       | NA       | NA       | 0       | 0       | 0       | 0       | 0       | 0       |
| ENSMUSG00000049904 | 7_Tmem17         | 52.0567 | -0.42502 | 0.22788  | 0.33358  | 59.0368 | 35.7944 | 38.2449 | 62.2163 | 60.0675 | 56.9802 |
| ENSMUSG00000049907 | 8_Rasl11b        | 582.616 | -0.01683 | 0.90514  | 0.93611  | 575.609 | 607.587 | 553.356 | 616.753 | 524.47  | 617.919 |
| ENSMUSG00000049908 | 6_Gja8           | 611.481 | -2.32641 | 0.05118  | 0.09889  | 41.673  | 477.259 | 90.8317 | 1096.45 | 202.616 | 1760.06 |
| ENSMUSG00000049916 | 9_2610318N02Rik  | 8.52818 | 1.10822  | 0.19581  | 0.29587  | 13.891  | 5.50683 | 15.537  | 7.21348 | 2.68959 | 6.33113 |
| ENSMUSG00000049922 | 8_Slc35c1        | 829.422 | 0.88177  | 4.98E-07 | 5.05E-06 | 995.812 | 1005    | 1223.84 | 587.899 | 475.161 | 688.827 |
| ENSMUSG00000049926 | 3_Olfrr21        | 0.85818 | 0.49771  | 0.82827  | NA       | 0.86819 | 0.91781 | 1.19515 | 0.90169 | 0       | 1.26623 |
| ENSMUSG00000049928 | 15_Glp2r         | 13.6194 | -1.90891 | 0.02547  | 0.05551  | 6.94551 | 5.50683 | 4.78062 | 43.2809 | 16.1376 | 5.06491 |
| ENSMUSG00000049929 | 7_Lpar4          | 43.6182 | -1.65223 | 0.00012  | 0.00057  | 27.782  | 22.9451 | 11.9515 | 79.3483 | 69.0329 | 50.6491 |
| ENSMUSG00000049932 | 3_H2afx          | 341.802 | 0.89443  | 1.17E-06 | 1.05E-05 | 421.071 | 404.752 | 506.745 | 221.815 | 217.857 | 278.57  |

|                    |                 |         |          |          |          |         |         |         |         |         |         |
|--------------------|-----------------|---------|----------|----------|----------|---------|---------|---------|---------|---------|---------|
| ENSMUSG00000049939 | 6_Lrrc4         | 498.078 | 0.40786  | 0.01932  | 0.04392  | 574.741 | 516.725 | 611.919 | 459.86  | 347.854 | 477.368 |
| ENSMUSG00000049940 | 7_Pgrmc2        | 1130.93 | -0.49795 | 5.58E-05 | 0.0003   | 895.97  | 962.778 | 954.928 | 1228.1  | 1443.41 | 1300.42 |
| ENSMUSG00000049946 | 7_BC030500      | 0.44526 | -0.80448 | 0.84252  | NA       | 0.86819 | 0       | 0       | 1.80337 | 0       | 0       |
| ENSMUSG00000049950 | 6_Rpp38         | 148.184 | -0.39795 | 0.07155  | 0.13086  | 144.119 | 109.219 | 130.272 | 155.09  | 181.996 | 168.408 |
| ENSMUSG00000049957 | 14_Ccdc137      | 508.757 | -0.04421 | 0.73589  | 0.81297  | 492.263 | 501.122 | 510.331 | 524.781 | 528.953 | 495.095 |
| ENSMUSG00000049960 | 3_Mrps16        | 554.508 | 0.02736  | 0.85387  | 0.90096  | 605.127 | 496.533 | 578.455 | 589.702 | 540.608 | 516.621 |
| ENSMUSG00000049969 | 3_Plekhf2       | 1837.16 | 0.03811  | 0.76926  | 0.83784  | 1848.37 | 1728.23 | 2007.86 | 1605    | 1932.92 | 1900.61 |
| ENSMUSG00000049971 | 17_Glt1d1       | 2.01903 | -1.74359 | 0.35293  | NA       | 0       | 2.75342 | 0       | 4.50843 | 3.58612 | 1.26623 |
| ENSMUSG00000049985 | 14_Ankrd55      | 8.72781 | -0.49384 | 0.56277  | 0.66809  | 2.60457 | 11.9315 | 7.17092 | 11.7219 | 6.27571 | 12.6623 |
| ENSMUSG00000049988 | 3_Lrrc25        | 34.3965 | 2.77221  | 1.97E-06 | 1.66E-05 | 96.3689 | 34.8766 | 49.0013 | 13.5253 | 6.27571 | 6.33113 |
| ENSMUSG00000049999 | 4_Ppp1r3d       | 97.1553 | 0.17403  | 0.50826  | 0.61856  | 106.787 | 107.383 | 94.4172 | 104.596 | 73.5155 | 96.2332 |
| ENSMUSG00000050002 | 13_Idnk         | 301.893 | 0.10655  | 0.49786  | 0.60891  | 335.989 | 303.794 | 298.789 | 289.441 | 289.579 | 293.765 |
| ENSMUSG00000050010 | 8_Shisa3        | 71.5769 | -1.1624  | 0.0003   | 0.00127  | 46.014  | 49.5615 | 37.0498 | 119.924 | 102.204 | 74.7074 |
| ENSMUSG00000050014 | 7_Apol10b       | 13.199  | 1.486    | 0.02036  | 0.04597  | 16.4956 | 19.2739 | 22.7079 | 7.21348 | 7.17224 | 6.33113 |
| ENSMUSG00000050017 | 11_Pitpnb       | 4066.33 | 0.09429  | 0.36224  | 0.47947  | 4020.58 | 4164.08 | 4412.51 | 3735.68 | 3916.94 | 4148.16 |
| ENSMUSG00000050022 | 16_Amz1         | 26.2149 | 0.73147  | 0.15077  | 0.24008  | 45.1458 | 22.9451 | 29.8789 | 24.3455 | 13.448  | 21.5259 |
| ENSMUSG00000050023 | 3_Olfr1176      | 0       | NA       | NA       | NA       | 0       | 0       | 0       | 0       | 0       | 0       |
| ENSMUSG00000050029 | 7_Rap2c         | 715.871 | 0.00385  | 0.98178  | 0.98784  | 765.742 | 594.738 | 791.192 | 660.935 | 814.05  | 668.568 |
| ENSMUSG00000050035 | 6_Fhl4          | 9.31017 | -1.113   | 0.13402  | 0.21801  | 4.34094 | 7.34244 | 5.97577 | 11.7219 | 12.5514 | 13.9285 |
| ENSMUSG00000050043 | 16_Tmx2         | 1622.44 | -0.51659 | 9.30E-07 | 8.61E-06 | 1361.32 | 1345.5  | 1297.94 | 1852.06 | 1997.47 | 1880.35 |
| ENSMUSG00000050050 | 16_Ccdc158      | 34.2276 | -0.64664 | 0.13796  | 0.22295  | 19.1001 | 31.2054 | 29.8789 | 30.6573 | 50.2057 | 44.3179 |
| ENSMUSG00000050052 | 11_Tdrp         | 401.705 | 0.35551  | 0.01646  | 0.03852  | 424.544 | 437.793 | 491.208 | 340.837 | 361.302 | 354.544 |
| ENSMUSG00000050058 | 6_Prm3          | 0.39838 | 2.07058  | 0.60634  | NA       | 0       | 0       | 2.39031 | 0       | 0       | 0       |
| ENSMUSG00000050063 | 18_Klk6         | 0.79216 | -0.43471 | 0.8822   | NA       | 0.86819 | 0       | 1.19515 | 0       | 2.68959 | 0       |
| ENSMUSG00000050064 | 14_Zfp697       | 154.392 | -0.8908  | 0.00024  | 0.00107  | 110.26  | 122.068 | 92.0269 | 246.16  | 181.099 | 174.739 |
| ENSMUSG00000050069 | 3_Grem2         | 81.9843 | -0.65242 | 0.04505  | 0.08883  | 68.5869 | 77.0957 | 45.4159 | 122.629 | 102.204 | 75.9736 |
| ENSMUSG00000050071 | 8_Bex1          | 56.5185 | -0.87973 | 0.05699  | 0.10808  | 38.2003 | 60.5752 | 20.3176 | 106.399 | 59.171  | 54.4478 |
| ENSMUSG00000050074 | 12_Spink8       | 14.9706 | 0.76433  | 0.21744  | 0.32177  | 21.7047 | 14.6849 | 20.3176 | 8.11517 | 16.1376 | 8.86359 |
| ENSMUSG00000050075 | 8_Gpr171        | 15.0589 | 2.49843  | 0.00408  | 0.01191  | 42.5412 | 6.42464 | 27.4885 | 4.50843 | 1.79306 | 7.59736 |
| ENSMUSG00000050079 | 9_Rspry1        | 666.964 | -0.1889  | 0.14673  | 0.23462  | 643.328 | 605.752 | 621.48  | 680.773 | 769.223 | 681.23  |
| ENSMUSG00000050088 | 9_1600012H06Rik | 668.807 | -0.13287 | 0.28692  | 0.40028  | 629.437 | 629.615 | 656.14  | 694.298 | 736.052 | 667.302 |
| ENSMUSG00000050097 | 6_Ces2b         | 203.23  | -0.17784 | 0.34299  | 0.45943  | 201.42  | 174.383 | 196.005 | 197.469 | 219.65  | 230.453 |
| ENSMUSG00000050100 | 13_Hmx2         | 0.1447  | 0.92709  | 0.82027  | NA       | 0.86819 | 0       | 0       | 0       | 0       | 0       |
| ENSMUSG00000050103 | 17_Agmo         | 107.635 | -0.48748 | 0.0657   | 0.12185  | 97.2371 | 96.3696 | 74.0996 | 105.497 | 121.928 | 150.681 |
| ENSMUSG00000050105 | 5_Grrp1         | 14.4969 | 1.24354  | 0.06235  | 0.11662  | 15.6274 | 14.6849 | 31.074  | 11.7219 | 6.27571 | 7.59736 |
| ENSMUSG00000050106 | 17_Tmrc8        | 66.8057 | 1.35852  | 0.00075  | 0.00282  | 82.4779 | 92.6984 | 112.344 | 38.7725 | 18.8271 | 55.714  |
| ENSMUSG00000050107 | 2_Gsg2          | 41.2755 | 0.26195  | 0.57154  | 0.67618  | 49.4867 | 42.2191 | 43.0255 | 17.132  | 50.2057 | 45.5842 |
| ENSMUSG00000050108 | 12_Bpifc        | 9.68038 | 0.4605   | 0.52483  | 0.63399  | 12.1546 | 8.26025 | 13.1467 | 8.11517 | 6.27571 | 10.1298 |
| ENSMUSG00000050114 | 7_Prdx6b        | 0.15028 | -0.99647 | 0.80707  | NA       | 0       | 0       | 0       | 0.90169 | 0       | 0       |
| ENSMUSG00000050122 | 18_Vwa3b        | 6.79338 | -0.92134 | 0.29715  | 0.41162  | 6.94551 | 4.58903 | 2.39031 | 7.21348 | 10.7584 | 8.86359 |
| ENSMUSG00000050132 | 13_Sarm1        | 31.5389 | -1.79431 | 0.01113  | 0.02764  | 16.4956 | 17.4383 | 8.36608 | 92.8736 | 43.93   | 10.1298 |
| ENSMUSG00000050138 | 7_Kcnk12        | 0.15297 | 0.92709  | 0.82027  | NA       | 0       | 0.91781 | 0       | 0       | 0       | 0       |
| ENSMUSG00000050141 | 13_Fam205c      | 4.95938 | -3.24548 | 0.01842  | 0.04225  | 0       | 2.75342 | 0       | 9.01685 | 11.6549 | 6.33113 |
| ENSMUSG00000050144 | 13_Slc25a44     | 785.917 | 0.39369  | 0.00542  | 0.01507  | 840.406 | 893.943 | 944.172 | 765.531 | 616.813 | 654.639 |
| ENSMUSG00000050147 | 8_F2r3          | 14.0669 | -0.08615 | 0.8953   | 0.92937  | 15.6274 | 6.42464 | 19.1225 | 14.427  | 16.1376 | 12.6623 |
| ENSMUSG00000050148 | 9_Ubqln2        | 529.282 | 0.04336  | 0.79832  | 0.86071  | 507.022 | 588.313 | 517.502 | 611.343 | 508.333 | 443.179 |
| ENSMUSG00000050150 | 16_Slc9b1       | 5.24789 | -0.89146 | 0.40828  | 0.52505  | 0.86819 | 5.50683 | 4.78062 | 4.50843 | 10.7584 | 5.06491 |
| ENSMUSG00000050164 | 10_Mchr1        | 52.3082 | -0.43969 | 0.21599  | 0.32001  | 48.6186 | 43.1369 | 41.8304 | 72.1348 | 66.3433 | 41.7855 |
| ENSMUSG00000050174 | 15_Nudt6        | 63.6942 | 0.33344  | 0.25011  | 0.35922  | 66.8505 | 73.4244 | 72.9044 | 54.1011 | 59.171  | 55.714  |
| ENSMUSG00000050179 | 3_A930002121Rik | 0       | NA       | NA       | NA       | 0       | 0       | 0       | 0       | 0       | 0       |
| ENSMUSG00000050188 | 8_Lsm10         | 173.842 | 0.52682  | 0.01515  | 0.03589  | 205.761 | 207.424 | 203.176 | 174.025 | 127.307 | 125.356 |
| ENSMUSG00000050189 | 4_Etos1         | 0.74293 | 0.53888  | 0.85492  | NA       | 1.73638 | 0.91781 | 0       | 1.80337 | 0       | 0       |
| ENSMUSG00000050192 | 8_Elfsa2        | 99.4873 | -1.21423 | 8.41E-05 | 0.00043  | 68.5869 | 63.3286 | 47.8062 | 158.697 | 162.272 | 96.2332 |
| ENSMUSG00000050195 | 8_Scd4          | 60.7158 | -0.12484 | 0.6735   | 0.76343  | 55.5641 | 61.493  | 57.3674 | 63.118  | 67.2398 | 59.5127 |
| ENSMUSG00000050199 | 13_Lgr4         | 1602.02 | -0.3715  | 0.00059  | 0.00229  | 1417.75 | 1402.41 | 1370.84 | 1758.29 | 1923.06 | 1739.8  |
| ENSMUSG00000050211 | 14_Pla2g4e      | 35.2373 | 0.01652  | 0.96617  | 0.9781   | 29.5184 | 37.63   | 39.4401 | 33.3624 | 38.5508 | 32.9219 |
| ENSMUSG00000050212 | 4_Eva1b         | 46.2692 | 1.0122   | 0.01528  | 0.03617  | 56.4322 | 61.493  | 68.1238 | 46.8876 | 20.6202 | 24.0583 |
| ENSMUSG00000050213 | 5_Snip1         | 427.539 | -0.12614 | 0.37109  | 0.48847  | 417.599 | 419.437 | 388.425 | 442.728 | 428.542 | 468.504 |
| ENSMUSG00000050217 | 13_Lgsn         | 718.875 | -0.55676 | 0.70928  | 0.79204  | 251.775 | 1463.9  | 29.8789 | 2023.38 | 264.477 | 279.836 |
| ENSMUSG00000050222 | 10_Il17d        | 7.79449 | 0.64977  | 0.42769  | 0.54302  | 9.55007 | 12.8493 | 5.97577 | 6.3118  | 4.48265 | 7.59736 |
| ENSMUSG00000050229 | 3_Pigm          | 515.428 | -0.05518 | 0.75918  | 0.83062  | 512.231 | 457.067 | 547.381 | 419.284 | 594.4   | 562.205 |
| ENSMUSG00000050232 | 6_Cxcr3         | 5.5114  | 1.80047  | 0.14111  | 0.22724  | 16.4956 | 4.58903 | 4.78062 | 5.41011 | 1.79306 | 0       |
| ENSMUSG00000050234 | 7_Gja4          | 67.6764 | 0.38582  | 0.29123  | 0.40502  | 70.3233 | 74.3423 | 86.0511 | 87.4635 | 44.8265 | 43.0517 |
| ENSMUSG00000050240 | 14_Hic2         | 178.125 | 0.4827   | 0.05706  | 0.1082   | 232.674 | 193.657 | 196.005 | 180.337 | 103.998 | 162.077 |
| ENSMUSG00000050241 | 8_Klre1         | 4.17429 | 4.48835  | 0.0059   | 0.01617  | 9.55007 | 11.0137 | 3.58546 | 0       | 0.89653 | 0       |
| ENSMUSG00000050244 | 8_Heatr1        | 927.463 | 0.22724  | 0.19527  | 0.29545  | 999.285 | 922.395 | 1079.22 | 661.837 | 985.287 | 916.748 |
| ENSMUSG00000050248 | 11_Evc2         | 266.169 | -0.0281  | 0.90094  | 0.93294  | 228.334 | 328.574 | 234.25  | 321     | 258.201 | 226.655 |
| ENSMUSG00000050266 | 4_Olfr690       | 0.14942 | -0.99647 | 0.80707  | NA       | 0       | 0       | 0       | 0       | 0.89653 | 0       |
| ENSMUSG00000050270 | 12_Tmem220      | 90.8538 | -0.75841 | 0.00343  | 0.01029  | 71.1914 | 72.5066 | 58.5626 | 124.433 | 112.066 | 106.363 |
| ENSMUSG00000050271 | 12_D8Ert82e     | 156.338 | 1.02946  | 8.84E-06 | 6.08E-05 | 185.792 | 188.15  | 255.763 | 97.382  | 99.5149 | 111.428 |
| ENSMUSG00000050272 | 9_Dscam         | 10.2656 | -1.67626 | 0.09631  | 0.1667   | 6.94551 | 6.42464 | 1.19515 | 34.264  | 8.96531 | 3.79868 |
| ENSMUSG00000050276 | 6_Mrgprg        | 15.1811 | -0.43442 | 0.5634   | 0.66874  | 22.5729 | 10.0959 | 5.97577 | 30.6573 | 11.6549 | 10.1298 |
| ENSMUSG00000050288 | 6_Fzd2          | 219.622 | 0.36906  | 0.05522  | 0.10525  | 217.915 | 273.506 | 252.178 | 205.584 | 196.34  | 172.207 |
| ENSMUSG00000050295 | 3_Foxc1         | 1099.24 | 0.20387  | 0.20216  | 0.3036   | 1091.31 | 1080.26 | 1358.89 | 868.323 | 1072.25 | 1124.41 |
| ENSMUSG00000050296 | 14_Abca12       | 3.39114 | 1.24144  | 0.43739  | 0.55264  | 13.0228 | 0       | 1.19515 | 1.80337 | 1.79306 | 2.53245 |
| ENSMUSG00000050299 | 7_Gm9843        | 3481.4  | 0.82151  | 5.20E-05 | 0.00028  | 3988.46 | 3942.89 | 5409.27 | 3123.44 | 1866.58 | 2557.78 |
| ENSMUSG00000050304 | 3_Slc25a2       | 2.46636 | 0.48367  | 0.76561  | NA       | 0.86819 | 1.83561 | 5.97577 | 0       | 3.58612 | 2.53245 |
| ENSMUSG00000050310 | 8_Rictor        | 1530.5  | -0.19167 | 0.10428  | 0.17835  | 1521.07 | 1324.39 | 1441.36 | 1539.18 | 1715.96 | 1641.03 |
| ENSMUSG00000050312 | 11_Nsun3        | 409.792 | -0.1132  | 0.50342  | 0.61421  | 414.126 | 368.04  | 397.986 | 358.871 | 441.093 | 478.634 |

|                     |                  |         |          |          |          |         |         |         |         |         |         |
|---------------------|------------------|---------|----------|----------|----------|---------|---------|---------|---------|---------|---------|
| ENSMUSG000000050315 | 13_Synpo2        | 520.115 | -1.31827 | 1.39E-09 | 3.13E-08 | 244.829 | 402.917 | 245.007 | 772.744 | 785.361 | 669.834 |
| ENSMUSG000000050321 | 2_Neto1          | 2.59277 | -2.25776 | 0.1983   | 0.29902  | 2.60457 | 0       | 0       | 5.41011 | 6.27571 | 1.26623 |
| ENSMUSG000000050323 | 14_Ndufaf6       | 78.0219 | -0.15056 | 0.58986  | 0.69225  | 63.3778 | 83.5203 | 75.2947 | 91.0702 | 78.8947 | 75.9736 |
| ENSMUSG000000050332 | 7_Amer1          | 1411.3  | -0.03595 | 0.80014  | 0.86183  | 1444.67 | 1243.63 | 1492.75 | 1242.52 | 1528.58 | 1515.67 |
| ENSMUSG000000050334 | 12_C130071C03Rik | 16.9649 | -2.68604 | 0.00724  | 0.01924  | 5.20913 | 8.26025 | 0       | 43.2809 | 41.2404 | 3.79868 |
| ENSMUSG000000050335 | 16_Lgals3        | 10163.7 | 0.54396  | 1.68E-06 | 1.45E-05 | 11193.6 | 11623.1 | 13355.8 | 7884.34 | 8270.49 | 8654.66 |
| ENSMUSG000000050345 | 8_4930486L24Rik  | 7.56504 | 0.05729  | 0.94283  | 0.96274  | 7.8137  | 8.26025 | 7.17092 | 8.11517 | 8.96531 | 5.06491 |
| ENSMUSG000000050350 | 7_Gpr18          | 7.02741 | 2.27412  | 0.04023  | 0.08092  | 19.9683 | 6.42464 | 8.36608 | 3.60674 | 0       | 3.79868 |
| ENSMUSG000000050357 | 8_Rltp1r         | 8.34333 | 1.17351  | 0.17401  | 0.26962  | 13.891  | 5.50683 | 15.537  | 7.21348 | 5.37918 | 2.53245 |
| ENSMUSG000000050359 | 7_Spr1a          | 202.271 | 3.44541  | 1.01E-42 | 1.72E-39 | 301.261 | 408.423 | 401.572 | 35.1657 | 30.482  | 36.7206 |
| ENSMUSG000000050368 | 4_Hoxd10         | 0.72907 | 1.69958  | 0.62474  | NA       | 3.47275 | 0       | 0       | 0.90169 | 0       | 0       |
| ENSMUSG000000050370 | 4_Ch25h          | 91.4455 | 1.37529  | 1.39E-05 | 9.06E-05 | 123.283 | 121.15  | 152.98  | 64.0197 | 55.5849 | 31.6557 |
| ENSMUSG000000050373 | 13_Snx21         | 360.902 | 0.37267  | 0.02522  | 0.05505  | 370.716 | 407.506 | 444.597 | 350.756 | 290.476 | 301.362 |
| ENSMUSG000000050377 | 7_Il31ra         | 9.2879  | -1.40418 | 0.06996  | 0.12851  | 6.07732 | 5.50683 | 3.58546 | 18.0337 | 9.86184 | 12.6623 |
| ENSMUSG000000050379 | 15_Sept6         | 223.917 | -0.67062 | 0.00119  | 0.00418  | 188.397 | 191.821 | 137.443 | 300.261 | 276.131 | 249.447 |
| ENSMUSG000000050382 | 14_Kif7          | 93.8612 | 0.15841  | 0.61078  | 0.71022  | 98.1053 | 105.548 | 93.222  | 117.219 | 59.171  | 89.9021 |
| ENSMUSG000000050390 | 12_C77080        | 4373.93 | 1.40149  | 6.42E-11 | 2.22E-09 | 5432.25 | 5849.17 | 7755.35 | 2837.6  | 1659.48 | 2709.73 |
| ENSMUSG000000050394 | 14_Armcx6        | 170.405 | -1.35241 | 1.11E-05 | 7.46E-05 | 71.1914 | 147.767 | 68.1238 | 255.177 | 235.788 | 244.382 |
| ENSMUSG000000050395 | 8_Tnfsf15        | 5.42268 | 0.47183  | 0.63834  | 0.73436  | 9.55007 | 5.50683 | 3.58546 | 3.60674 | 2.68959 | 7.59736 |
| ENSMUSG000000050397 | 3_Foxl2          | 0.39838 | 2.07058  | 0.60634  | NA       | 0       | 0       | 2.39031 | 0       | 0       | 0       |
| ENSMUSG000000050410 | 15_Tcf19         | 308.962 | 0.94749  | 2.12E-09 | 4.47E-08 | 424.544 | 389.15  | 406.352 | 201.978 | 208.892 | 222.856 |
| ENSMUSG000000050423 | 10_Ppp1r3g       | 1.93876 | 0.00754  | 0.99652  | NA       | 3.47275 | 0       | 2.39031 | 3.60674 | 0.89653 | 1.26623 |
| ENSMUSG000000050424 | 9_Pnma5          | 48.4795 | 0.52384  | 0.11393  | 0.19138  | 61.6414 | 51.3971 | 58.5626 | 40.5758 | 39.4473 | 39.253  |
| ENSMUSG000000050425 | 2_Mrgprb2        | 7.06564 | -1.8108  | 0.04731  | 0.0926   | 3.47275 | 4.58903 | 1.19515 | 11.7219 | 12.5514 | 8.86359 |
| ENSMUSG000000050428 | 7_Fbxo46         | 248.084 | 0.66137  | 0.00245  | 0.00774  | 287.37  | 288.191 | 335.838 | 214.601 | 143.445 | 219.057 |
| ENSMUSG000000050439 | 6_Enthd1         | 2.59803 | 2.0335   | 0.1954   | 0.29552  | 2.60457 | 2.75342 | 7.17092 | 0       | 1.79306 | 1.26623 |
| ENSMUSG000000050440 | 8_Hamp           | 0.15297 | 0.92709  | 0.82027  | NA       | 0       | 0.91781 | 0       | 0       | 0       | 0       |
| ENSMUSG000000050445 | 4_Cyp8b1         | 0.34389 | 1.87986  | 0.64119  | NA       | 0.86819 | 0       | 1.19515 | 0       | 0       | 0       |
| ENSMUSG000000050447 | 15_Lypd6         | 671.426 | -0.70115 | 1.43E-06 | 1.25E-05 | 527.859 | 534.163 | 472.086 | 798.893 | 933.288 | 762.269 |
| ENSMUSG000000050463 | 8_Krtf8          | 2004.69 | 0.83323  | 3.15E-05 | 0.00018  | 2460.45 | 2631.35 | 2610.22 | 1511.22 | 997.839 | 1817.04 |
| ENSMUSG000000050468 | 12_Astl          | 0.84364 | 0.77776  | 0.78572  | NA       | 0.86819 | 0       | 2.39031 | 1.80337 | 0       | 0       |
| ENSMUSG000000050471 | 16_Fam118b       | 477.29  | -0.43043 | 0.00577  | 0.01586  | 447.985 | 387.314 | 383.644 | 489.615 | 591.71  | 563.471 |
| ENSMUSG000000050473 | 4_Slc35d3        | 0.45181 | -0.79887 | 0.84362  | NA       | 0       | 0.91781 | 0       | 0       | 1.79306 | 0       |
| ENSMUSG000000050490 | 7_Gm8394         | 8.47845 | -0.61834 | 0.57051  | 0.67528  | 4.34094 | 6.42464 | 9.56123 | 10.8202 | 19.7237 | 0       |
| ENSMUSG000000050493 | 8_Fam167b        | 35.788  | 0.0952   | 0.81198  | 0.87048  | 36.4639 | 34.8766 | 39.4401 | 25.2472 | 39.4473 | 39.253  |
| ENSMUSG000000050503 | 8_Fbxl22         | 33.8143 | -0.65764 | 0.14155  | 0.22779  | 24.3093 | 33.041  | 21.5128 | 41.4775 | 54.6884 | 27.857  |
| ENSMUSG000000050505 | 7_Pcdh20         | 82.0831 | -0.75399 | 0.00514  | 0.01443  | 54.6959 | 63.3286 | 65.7335 | 97.382  | 113.859 | 97.4995 |
| ENSMUSG000000050511 | 1_Oprd1          | 0.29767 | 1.70332  | 0.67406  | NA       | 0.86819 | 0.91781 | 0       | 0       | 0       | 0       |
| ENSMUSG000000050520 | 4_Cldn8          | 101.627 | 0.23066  | 0.40649  | 0.52358  | 121.546 | 85.3559 | 121.906 | 78.4466 | 92.3426 | 110.162 |
| ENSMUSG000000050526 | 5_4933406M09Rik  | 0.36132 | -1.98116 | 0.62311  | NA       | 0       | 0       | 0       | 0.90169 | 0       | 1.26623 |
| ENSMUSG000000050530 | 14_Fam171a1      | 1517.18 | 0.26887  | 0.03713  | 0.07572  | 1655.64 | 1649.3  | 1667.24 | 1303.84 | 1256.94 | 1570.12 |
| ENSMUSG000000050534 | 8_Htr5b          | 47.3784 | -0.22286 | 0.56276  | 0.66809  | 50.3549 | 47.7259 | 32.2692 | 37.8708 | 50.2057 | 65.8438 |
| ENSMUSG000000050538 | 7_B230217C12Rik  | 25.504  | -1.38119 | 0.00409  | 0.01191  | 10.4183 | 15.6027 | 16.7322 | 43.2809 | 34.0682 | 32.9219 |
| ENSMUSG000000050541 | 14_Adra1b        | 23.2193 | -0.38868 | 0.41665  | 0.53263  | 16.4956 | 24.7808 | 19.1225 | 29.7556 | 25.1029 | 24.0583 |
| ENSMUSG000000050545 | 8_Fam228b        | 26.0474 | -0.82015 | 0.08101  | 0.14478  | 25.1775 | 15.6027 | 15.537  | 30.6573 | 37.6543 | 31.6557 |
| ENSMUSG000000050549 | 8_5730508B09Rik  | 558.994 | -0.04778 | 0.8076   | 0.86702  | 546.091 | 452.478 | 651.359 | 462.565 | 652.674 | 588.796 |
| ENSMUSG000000050552 | 8_Lamtor4        | 724.098 | 0.59     | 0.00214  | 0.00688  | 821.306 | 825.107 | 964.489 | 715.037 | 443.783 | 574.867 |
| ENSMUSG000000050553 | 3_Gk2            | 0.45267 | -0.80756 | 0.8164   | NA       | 0       | 0.91781 | 0       | 0.90169 | 0.89653 | 0       |
| ENSMUSG000000050555 | 9_Hyls1          | 102.522 | -0.21381 | 0.37422  | 0.49181  | 94.6325 | 92.6984 | 98.0026 | 109.104 | 121.928 | 98.7657 |
| ENSMUSG000000050556 | 8_Kcnb1          | 84.7802 | -1.50723 | 0.00824  | 0.02149  | 67.7187 | 44.0547 | 20.3176 | 244.357 | 81.5843 | 50.6491 |
| ENSMUSG000000050558 | 13_Prokr2        | 39.901  | 0.49462  | 0.19425  | 0.2944   | 44.2776 | 39.4656 | 56.1722 | 29.7556 | 30.482  | 39.253  |
| ENSMUSG000000050565 | 16_Tor1aip2      | 8060.88 | 0.43257  | 0.00322  | 0.00975  | 8832.08 | 8451.15 | 10498.2 | 5777.1  | 7561.34 | 7245.35 |
| ENSMUSG000000050567 | 16_Maml1         | 719.313 | 0.64988  | 2.64E-05 | 0.00016  | 850.825 | 825.107 | 960.904 | 642     | 491.299 | 545.744 |
| ENSMUSG000000050578 | 9_Mmp13          | 118.499 | 0.66628  | 0.16699  | 0.26087  | 165.824 | 89.0271 | 180.468 | 83.8567 | 32.2751 | 159.545 |
| ENSMUSG000000050587 | 14_Llrc4c        | 102.791 | -1.9929  | 5.04E-09 | 9.48E-08 | 41.673  | 54.1505 | 27.4885 | 216.405 | 154.203 | 122.824 |
| ENSMUSG000000050592 | 8_Fam78a         | 42.7092 | -0.04476 | 0.9192   | 0.94636  | 49.4867 | 37.63   | 39.4401 | 65.823  | 38.5508 | 25.3245 |
| ENSMUSG000000050600 | 5_Zfp831         | 2.20792 | 1.73986  | 0.28755  | NA       | 1.73638 | 3.67122 | 4.78062 | 0       | 1.79306 | 1.26623 |
| ENSMUSG000000050605 | 17_Zfp61         | 158.637 | -0.22389 | 0.34927  | 0.46612  | 138.042 | 183.561 | 117.125 | 184.846 | 171.237 | 157.012 |
| ENSMUSG000000050608 | 11_Minos1        | 1521.1  | -0.39216 | 0.00067  | 0.00254  | 1342.22 | 1359.27 | 1245.35 | 1690.66 | 1853.13 | 1635.97 |
| ENSMUSG000000050612 | 5_Txndc2         | 1.57234 | 0.67057  | 0.74581  | NA       | 2.60457 | 1.83561 | 1.19515 | 0       | 0       | 3.79868 |
| ENSMUSG000000050619 | 14_Zscan29       | 770.098 | -0.11568 | 0.39647  | 0.51402  | 748.378 | 719.56  | 749.362 | 705.118 | 862.462 | 835.71  |
| ENSMUSG000000050621 | 6_Rps27rt        | 1277.23 | -0.69352 | 0.0009   | 0.00328  | 1034.01 | 1006.83 | 887.999 | 2031.5  | 1597.62 | 1105.42 |
| ENSMUSG000000050623 | 4_Tex40          | 34.0424 | -0.01114 | 0.97853  | 0.98585  | 37.3321 | 35.7944 | 28.6837 | 30.6573 | 43.93   | 27.857  |
| ENSMUSG000000050625 | 4_Ccdc121        | 0.36401 | -0.03469 | 0.99322  | NA       | 0       | 0.91781 | 0       | 0       | 0       | 1.26623 |
| ENSMUSG000000050627 | 3_Gpdl1          | 3080.6  | 0.07     | 0.54019  | 0.64734  | 3002.2  | 3089.33 | 3373.92 | 2944    | 2818.69 | 3255.47 |
| ENSMUSG000000050628 | 6_Ubald2         | 1350.17 | 0.98777  | 6.01E-07 | 5.95E-06 | 1651.29 | 1672.24 | 2061.64 | 1078.42 | 653.571 | 983.858 |
| ENSMUSG000000050635 | 1_Spr2f          | 11.1327 | 3.3219   | 0.00055  | 0.00215  | 23.4411 | 7.34244 | 29.8789 | 2.70506 | 0.89653 | 2.53245 |
| ENSMUSG000000050640 | 16_Tmem150c      | 185.781 | -0.87555 | 0.0037   | 0.01097  | 123.283 | 170.712 | 99.1978 | 328.214 | 222.34  | 170.941 |
| ENSMUSG000000050663 | 7_Trhde          | 12.9632 | -2.4106  | 0.00268  | 0.00835  | 4.34094 | 5.50683 | 2.39031 | 34.264  | 22.4133 | 8.86359 |
| ENSMUSG000000050666 | 13_Vstm4         | 140.631 | -1.20681 | 0.00011  | 0.00056  | 73.796  | 102.794 | 78.8802 | 273.211 | 184.685 | 130.421 |
| ENSMUSG000000050668 | 9_Gpatch11       | 856.757 | -0.34379 | 0.00408  | 0.01191  | 784.842 | 723.231 | 756.533 | 944.065 | 925.22  | 1006.65 |
| ENSMUSG000000050671 | 12_Ism2          | 186.001 | -0.22825 | 0.54207  | 0.64905  | 164.088 | 251.479 | 98.0026 | 295.753 | 134.48  | 172.207 |
| ENSMUSG000000050675 | 7_Gp1ba          | 17.375  | -0.79032 | 0.17884  | 0.27567  | 10.4183 | 13.7671 | 14.3418 | 28.5539 | 24.063  | 12.6623 |
| ENSMUSG000000050677 | 2_Ccdc96         | 11.8851 | -0.24186 | 0.71121  | 0.79356  | 11.2864 | 11.9315 | 9.56123 | 14.427  | 15.241  | 8.86359 |
| ENSMUSG000000050697 | 8_Prkaa1         | 957.598 | -0.24504 | 0.06943  | 0.12771  | 901.18  | 816.847 | 911.903 | 938.655 | 1147.56 | 1029.44 |
| ENSMUSG000000050700 | 11_Emilin3       | 93.1441 | -0.57494 | 0.18297  | 0.28074  | 56.4322 | 120.233 | 47.8062 | 167.713 | 93.2392 | 73.4412 |
| ENSMUSG000000050702 | 5_4930563M21Rik  | 0.51429 | -1.01187 | 0.76286  | NA       | 0       | 0.91781 | 0       | 0.90169 | 0       | 1.26623 |
| ENSMUSG000000050705 | 15_2310061I04Rik | 304.434 | 0.28086  | 0.07013  | 0.12875  | 316.021 | 343.259 | 343.009 | 281.326 | 270.752 | 272.239 |
| ENSMUSG000000050708 | 14_Ftl1          | 9810.34 | 0.57903  | 0.00703  | 0.01876  | 11928   | 12094.8 | 11236.8 | 11027.6 | 5653.52 | 6921.2  |

|                     |                  |         |          |          |          |         |         |         |         |         |         |
|---------------------|------------------|---------|----------|----------|----------|---------|---------|---------|---------|---------|---------|
| ENSMUSG000000050711 | 7_Scg2           | 262.616 | -0.63934 | 0.00472  | 0.01344  | 203.156 | 247.808 | 164.931 | 310.18  | 383.715 | 265.908 |
| ENSMUSG000000050714 | 9_Zbtb26         | 250.56  | -0.58282 | 0.0039   | 0.01149  | 219.652 | 165.205 | 217.518 | 268.702 | 339.785 | 292.498 |
| ENSMUSG000000050721 | 8_Plekho2        | 545.207 | 0.69258  | 0.00024  | 0.00106  | 777.897 | 607.587 | 634.627 | 483.303 | 333.509 | 434.316 |
| ENSMUSG000000050730 | 16_Arhgap42      | 607.341 | -0.36176 | 0.02145  | 0.0481   | 563.454 | 512.136 | 518.697 | 579.784 | 771.016 | 698.957 |
| ENSMUSG000000050732 | 9_Vamp8          | 3372.42 | 0.09179  | 0.44764  | 0.56262  | 3594.3  | 3293.09 | 3552    | 3623.87 | 2948.69 | 3222.55 |
| ENSMUSG000000050737 | 13_Ptges         | 1319.17 | 0.88752  | 5.60E-08 | 7.56E-07 | 1610.49 | 1553.84 | 1973.2  | 1002.67 | 765.637 | 1009.18 |
| ENSMUSG000000050742 | 4_Olfir164       | 0       | NA       | NA       | NA       | 0       | 0       | 0       | 0       | 0       | 0       |
| ENSMUSG000000050747 | 14_Trim15        | 16.4961 | 2.21921  | 0.00097  | 0.00351  | 34.7275 | 16.5205 | 29.8789 | 3.60674 | 5.37918 | 8.86359 |
| ENSMUSG000000050751 | 14_Pgbd5         | 8.62483 | -0.43024 | 0.62293  | 0.7205   | 9.55007 | 5.50683 | 7.17092 | 16.2303 | 10.7584 | 2.53245 |
| ENSMUSG000000050761 | 3_Gp1bb          | 81.3076 | 1.04861  | 0.00019  | 0.00085  | 111.996 | 111.972 | 103.978 | 50.4944 | 44.8265 | 64.5776 |
| ENSMUSG000000050762 | 5_Prss27         | 5469.1  | 1.32359  | 3.37E-13 | 2.09E-11 | 7278.89 | 7851.83 | 8315.88 | 3854.71 | 2299.6  | 3213.68 |
| ENSMUSG000000050765 | 2_Gm5084         | 5.27531 | -0.05906 | 0.95495  | 0.97074  | 7.8137  | 1.83561 | 5.97577 | 8.11517 | 5.37918 | 2.53245 |
| ENSMUSG000000050777 | 7_Tmem37         | 101.755 | -0.42528 | 0.21273  | 0.31616  | 85.9507 | 99.123  | 75.2947 | 164.107 | 70.8259 | 115.227 |
| ENSMUSG000000050783 | 4_Htr1f          | 0.2997  | -1.76345 | 0.66322  | NA       | 0       | 0       | 0       | 0.90169 | 0.89653 | 0       |
| ENSMUSG000000050786 | 8_Ccdc126        | 181.883 | -0.82274 | 0.00054  | 0.00211  | 151.065 | 133.082 | 109.954 | 265.997 | 250.132 | 181.07  |
| ENSMUSG000000050796 | 4_B3galt6        | 153.893 | 0.12056  | 0.58039  | 0.68393  | 161.483 | 155.109 | 164.931 | 174.927 | 132.687 | 134.22  |
| ENSMUSG000000050808 | 13_Muc15         | 5413.89 | -0.32712 | 0.02553  | 0.05563  | 4889.64 | 4451.36 | 5066.26 | 4941.24 | 6275.71 | 6859.15 |
| ENSMUSG000000050812 | 18_Al314180      | 3508.14 | -0.22211 | 0.08185  | 0.14593  | 3283.49 | 3190.29 | 3241.26 | 3228.03 | 4107.01 | 3998.74 |
| ENSMUSG000000050821 | 13_Fam131a       | 63.3932 | -0.51175 | 0.20833  | 0.31115  | 41.673  | 60.5752 | 54.9771 | 116.317 | 51.1022 | 55.714  |
| ENSMUSG000000050822 | 11_Slc29a4       | 6.44884 | 0.86495  | 0.35957  | 0.47649  | 4.34094 | 14.6849 | 5.97577 | 5.41011 | 4.48265 | 3.79868 |
| ENSMUSG000000050824 | 11_Sstr5         | 0.2997  | -1.76345 | 0.66322  | NA       | 0       | 0       | 0       | 0.90169 | 0.89653 | 0       |
| ENSMUSG000000050830 | 17_Vwc2          | 20.764  | -1.75007 | 0.00248  | 0.00781  | 8.68188 | 13.7671 | 5.97577 | 38.7725 | 35.8612 | 21.5259 |
| ENSMUSG000000050840 | 8_Cdh20          | 89.4889 | -1.39384 | 0.00581  | 0.01596  | 44.2776 | 89.9449 | 13.1467 | 138.86  | 144.341 | 106.363 |
| ENSMUSG000000050844 | 5_1700020N01Rik  | 0.45536 | 0.77574  | 0.84797  | NA       | 0       | 1.83561 | 0       | 0       | 0.89653 | 0       |
| ENSMUSG000000050846 | 8_Zfp623         | 441.283 | -0.06589 | 0.64085  | 0.73651  | 401.971 | 453.396 | 438.622 | 465.27  | 440.197 | 448.244 |
| ENSMUSG000000050854 | 9_Tmem125        | 289.206 | 0.76878  | 0.00051  | 0.00203  | 320.362 | 299.205 | 474.476 | 216.405 | 198.133 | 226.655 |
| ENSMUSG000000050855 | 16_Zfp940        | 35.6808 | -0.91253 | 0.03205  | 0.06714  | 22.5729 | 32.1232 | 19.1225 | 48.691  | 35.8612 | 55.714  |
| ENSMUSG000000050856 | 16_Atp5k         | 1272.69 | -0.04167 | 0.74542  | 0.82003  | 1293.6  | 1199.57 | 1269.25 | 1393.1  | 1142.18 | 1338.4  |
| ENSMUSG000000050860 | 6_Phospho1       | 170.616 | 0.42416  | 0.09691  | 0.16753  | 166.692 | 204.671 | 215.128 | 174.927 | 103.998 | 158.278 |
| ENSMUSG000000050866 | 7_Clnr3          | 0.91536 | 1.94673  | 0.04094  | NA       | 0       | 1.83561 | 2.39031 | 0       | 0       | 1.26623 |
| ENSMUSG000000050870 | 4_Mrgprb8        | 0.19919 | 0.92709  | 0.82027  | NA       | 0       | 0       | 1.19515 | 0       | 0       | 0       |
| ENSMUSG000000050875 | 11_A730017C20Rik | 329.955 | -1.55036 | 4.95E-08 | 6.79E-07 | 157.142 | 239.547 | 106.369 | 559.045 | 535.229 | 382.401 |
| ENSMUSG000000050890 | 15_Pdik11        | 604.442 | -0.19655 | 0.20053  | 0.30152  | 579.082 | 503.875 | 607.138 | 567.16  | 689.432 | 679.964 |
| ENSMUSG000000050891 | 8_Tatdn1         | 248.998 | -0.54225 | 0.00512  | 0.0144   | 205.761 | 200.999 | 200.786 | 240.75  | 316.475 | 329.219 |
| ENSMUSG000000050896 | 12_Rtn4rl2       | 4.44187 | 1.21654  | 0.28112  | 0.39394  | 5.20913 | 2.75342 | 10.7564 | 3.60674 | 1.79306 | 2.53245 |
| ENSMUSG000000050908 | 12_Tvp23a        | 113.238 | -0.29924 | 0.24926  | 0.35829  | 95.5007 | 120.233 | 88.4414 | 143.368 | 103.998 | 127.889 |
| ENSMUSG000000050910 | 5_Cdr2l          | 190.329 | -0.03713 | 0.88054  | 0.91954  | 175.374 | 226.698 | 161.346 | 240.75  | 154.203 | 183.603 |
| ENSMUSG000000050912 | 15_Tmem123       | 5558.88 | -0.3327  | 0.00841  | 0.02184  | 5049.38 | 4517.44 | 5195.33 | 5431.75 | 6637.02 | 6522.33 |
| ENSMUSG000000050914 | 15_Ankrd37       | 41.2781 | 0.44971  | 0.29496  | 0.40931  | 63.3778 | 29.3698 | 50.1965 | 41.4775 | 27.7924 | 35.4544 |
| ENSMUSG000000050919 | 8_Zfp366         | 17.3585 | 0.11058  | 0.84933  | 0.89785  | 13.0228 | 21.1095 | 20.3176 | 21.6405 | 17.9306 | 10.1298 |
| ENSMUSG000000050921 | 12_P2ry10        | 15.9119 | 1.9698   | 0.00286  | 0.00881  | 31.2548 | 14.6849 | 29.8789 | 5.41011 | 5.37918 | 8.86359 |
| ENSMUSG000000050926 | 5_Dcaf12l2       | 5.46577 | -0.58262 | 0.58097  | 0.68442  | 4.34094 | 6.42464 | 2.39031 | 12.6236 | 4.48265 | 2.53245 |
| ENSMUSG000000050930 | 5_Map10          | 211.872 | 0.17466  | 0.37361  | 0.49122  | 209.233 | 236.794 | 227.079 | 173.124 | 194.547 | 230.453 |
| ENSMUSG000000050931 | 7_Sgms2          | 1158.49 | 0.14897  | 0.2051   | 0.30715  | 1182.47 | 1163.78 | 1308.69 | 1061.28 | 1087.49 | 1147.2  |
| ENSMUSG000000050936 | 5_Hist2h2bb      | 72.4345 | 0.23576  | 0.42718  | 0.54252  | 65.1141 | 89.0271 | 81.2705 | 61.3146 | 77.1016 | 60.7789 |
| ENSMUSG000000050944 | 14_Efcab5        | 21.2555 | 0.77644  | 0.20754  | 0.31019  | 40.8049 | 26.6164 | 13.1467 | 13.5253 | 23.3098 | 10.1298 |
| ENSMUSG000000050945 | 7_Zfp438         | 108.11  | -0.44091 | 0.08995  | 0.15763  | 88.5552 | 75.2601 | 112.344 | 123.531 | 136.273 | 112.694 |
| ENSMUSG000000050947 | 9_Amigo1         | 291.006 | -0.60143 | 0.00122  | 0.00425  | 222.256 | 259.739 | 211.542 | 403.955 | 321.854 | 326.687 |
| ENSMUSG000000050953 | 9_Gja1           | 14997   | -0.50139 | 4.40E-06 | 3.31E-05 | 12343.9 | 13529.4 | 11376.7 | 17692   | 18206.7 | 16833.2 |
| ENSMUSG000000050954 | 15_Zfp169        | 342.166 | 0.06377  | 0.70532  | 0.7889   | 368.112 | 306.547 | 374.083 | 311.081 | 327.234 | 365.94  |
| ENSMUSG000000050957 | 4_Insl6          | 36.8948 | 0.45408  | 0.28628  | 0.39978  | 42.5412 | 39.4656 | 46.611  | 42.3792 | 31.3786 | 18.9934 |
| ENSMUSG000000050961 | 4_AY358078       | 1.10284 | -2.45004 | 0.35695  | NA       | 0.86819 | 0       | 0       | 0       | 4.48265 | 1.26623 |
| ENSMUSG000000050963 | 6_Kcns2          | 0.90351 | -2.1129  | 0.44909  | NA       | 0       | 0.91781 | 0       | 3.60674 | 0.89653 | 0       |
| ENSMUSG000000050965 | 14_Prka          | 1242.55 | -0.01867 | 0.88788  | 0.92443  | 1276.24 | 1080.26 | 1348.13 | 1203.75 | 1309.83 | 1237.1  |
| ENSMUSG000000050966 | 9_Lin28a         | 0.81216 | -3.16909 | 0.33278  | NA       | 0       | 0       | 0       | 3.60674 | 0       | 1.26623 |
| ENSMUSG000000050967 | 5_Creg2          | 126.65  | -1.21946 | 0.00348  | 0.0104   | 61.6414 | 130.328 | 35.8546 | 195.666 | 209.788 | 126.623 |
| ENSMUSG000000050973 | 11_Gdpgp1        | 174.628 | 0.45902  | 0.02137  | 0.04795  | 208.365 | 200.082 | 197.2   | 149.68  | 129.1   | 163.343 |
| ENSMUSG000000050982 | 12_Apol10a       | 0.14942 | -0.99647 | 0.80707  | NA       | 0       | 0       | 0       | 0       | 0.89653 | 0       |
| ENSMUSG000000050989 | 9_Sepn1          | 610.098 | -0.18927 | 0.32514  | 0.44116  | 551.3   | 681.012 | 478.062 | 779.056 | 605.158 | 566.003 |
| ENSMUSG000000050994 | 19_Adgb          | 23.7077 | -1.20233 | 0.05434  | 0.10389  | 12.1546 | 24.7808 | 5.97577 | 31.559  | 47.5161 | 20.2596 |
| ENSMUSG000000051000 | 17_Fam160a1      | 2232.33 | 0.82544  | 9.86E-10 | 2.34E-08 | 2645.37 | 2801.14 | 3114.57 | 1630.25 | 1414.73 | 1787.91 |
| ENSMUSG000000051007 | 14_Pddc1         | 719.234 | 0.54321  | 0.00034  | 0.00143  | 785.711 | 819.6   | 953.733 | 608.638 | 514.609 | 633.113 |
| ENSMUSG000000051008 | 5_4930412M03Rik  | 3.58213 | -0.89406 | 0.46523  | 0.57877  | 3.47275 | 2.75342 | 1.19515 | 7.21348 | 1.79306 | 5.06491 |
| ENSMUSG000000051022 | 7_Hs3st1         | 251.288 | 0.13459  | 0.56895  | 0.67367  | 223.993 | 276.259 | 290.422 | 298.458 | 243.856 | 174.739 |
| ENSMUSG000000051029 | 7_Serpinb1b      | 3.4667  | 0.54407  | 0.65393  | 0.74764  | 6.07732 | 3.67122 | 2.39031 | 1.80337 | 1.79306 | 5.06491 |
| ENSMUSG000000051034 | 7_Zfp11          | 126.309 | -0.32035 | 0.16968  | 0.26408  | 107.655 | 120.233 | 108.759 | 117.219 | 153.307 | 150.681 |
| ENSMUSG000000051037 | 15_Zfp455        | 86.2941 | -0.49633 | 0.08266  | 0.14713  | 69.4551 | 68.8354 | 76.4899 | 76.6433 | 117.446 | 108.896 |
| ENSMUSG000000051041 | 7_Olfml1         | 351.579 | -0.93537 | 1.42E-07 | 1.70E-06 | 243.961 | 260.657 | 219.908 | 500.435 | 495.781 | 388.732 |
| ENSMUSG000000051043 | 16_Gprc5c        | 240.959 | -0.71374 | 0.00827  | 0.02157  | 182.32  | 233.123 | 131.467 | 384.118 | 234.891 | 279.836 |
| ENSMUSG000000051048 | 16_P4ha3         | 63.9974 | 0.17258  | 0.60053  | 0.70196  | 67.7187 | 72.5066 | 63.3432 | 79.3483 | 46.6196 | 54.4478 |
| ENSMUSG000000051050 | 9_Spink14        | 0       | NA       | NA       | NA       | 0       | 0       | 0       | 0       | 0       | 0       |
| ENSMUSG000000051054 | 3_1700014D04Rik  | 3.07061 | 0.41329  | 0.74006  | 0.81622  | 2.60457 | 5.50683 | 2.39031 | 1.80337 | 3.58612 | 2.53245 |
| ENSMUSG000000051056 | 4_Gja10          | 1.3477  | 0.30605  | 0.88269  | NA       | 1.73638 | 2.75342 | 0       | 1.80337 | 1.79306 | 0       |
| ENSMUSG000000051062 | 6_Fbll1          | 1.04842 | 0.34445  | 0.91192  | NA       | 0       | 0       | 3.58546 | 2.70506 | 0       | 0       |
| ENSMUSG000000051065 | 8_Mb21d2         | 972.786 | -0.01184 | 0.93048  | 0.95403  | 962.821 | 932.49  | 1009.91 | 869.225 | 968.253 | 1094.02 |
| ENSMUSG000000051067 | 7_Lingo3         | 17.4994 | -2.07139 | 0.00337  | 0.01015  | 6.07732 | 9.17806 | 4.78062 | 44.1826 | 11.6549 | 29.1232 |
| ENSMUSG000000051076 | 8_Vtcn1          | 51.3989 | 0.04324  | 0.90205  | 0.93359  | 46.014  | 45.8903 | 64.5383 | 44.1826 | 45.7231 | 62.0451 |
| ENSMUSG000000051079 | 8_Rgs13          | 0.71705 | -1.66754 | 0.57973  | NA       | 0.86819 | 0       | 0       | 0.90169 | 0       | 2.53245 |
| ENSMUSG000000051098 | 5_Mblac2         | 374.285 | -0.42073 | 0.01048  | 0.0263   | 293.448 | 299.205 | 369.303 | 426.497 | 448.265 | 408.991 |

|                     |                 |         |          |          |          |         |         |         |         |         |         |
|---------------------|-----------------|---------|----------|----------|----------|---------|---------|---------|---------|---------|---------|
| ENSMUSG000000051107 | 4_Gm15440       | 186.835 | 0.76065  | 0.00174  | 0.00579  | 198.815 | 255.15  | 250.982 | 167.713 | 103.998 | 144.35  |
| ENSMUSG000000051111 | 15_Sv2c         | 60.4102 | -0.81079 | 0.01445  | 0.03446  | 37.3321 | 45.8903 | 49.0013 | 94.677  | 73.5155 | 62.0451 |
| ENSMUSG000000051113 | 9_Fam71e1       | 41.6156 | -0.03604 | 0.92121  | 0.94768  | 34.7275 | 46.8081 | 41.8304 | 46.8876 | 37.6543 | 41.7855 |
| ENSMUSG000000051124 | 6_Gimap9        | 208.748 | -0.26863 | 0.19844  | 0.29918  | 202.288 | 196.41  | 168.517 | 186.649 | 255.511 | 243.116 |
| ENSMUSG000000051136 | 1_Ghshr         | 0.78608 | -1.80845 | 0.59702  | NA       | 0       | 0.91781 | 0       | 0       | 0       | 3.79868 |
| ENSMUSG000000051146 | 2_Camk2n2       | 12.4844 | -0.97234 | 0.16992  | 0.26436  | 12.1546 | 8.26025 | 4.78062 | 23.4438 | 16.1376 | 10.1298 |
| ENSMUSG000000051147 | 9_Nat2          | 344.713 | -0.2908  | 0.11358  | 0.19096  | 335.121 | 278.095 | 316.716 | 314.688 | 422.266 | 401.394 |
| ENSMUSG000000051149 | 15_Adnp         | 209.508 | 1.01252  | 0.00132  | 0.00456  | 296.052 | 196.41  | 347.79  | 82.9551 | 173.03  | 160.811 |
| ENSMUSG000000051154 | 11_Commd3       | 1094.14 | -0.22298 | 0.08304  | 0.14761  | 1058.32 | 998.572 | 972.855 | 1132.52 | 1309.83 | 1092.75 |
| ENSMUSG000000051159 | 16_Cited1       | 54.8743 | -0.90885 | 0.03344  | 0.06947  | 29.5184 | 55.0683 | 29.8789 | 103.694 | 59.171  | 51.9153 |
| ENSMUSG000000051166 | 9_Emi5          | 492.913 | -1.4346  | 2.22E-06 | 1.84E-05 | 256.984 | 372.629 | 168.517 | 856.601 | 841.842 | 460.907 |
| ENSMUSG000000051169 | 14_Rpusd3       | 56.624  | 1.41496  | 7.98E-05 | 0.00041  | 70.3233 | 71.5888 | 105.174 | 34.264  | 24.2063 | 34.1881 |
| ENSMUSG000000051177 | 16_Plcb1        | 82.3369 | -0.97673 | 0.00237  | 0.00752  | 68.5869 | 62.4108 | 34.6595 | 107.301 | 121.032 | 100.032 |
| ENSMUSG000000051184 | 6_Zfp524        | 226.56  | 1.23219  | 4.00E-05 | 0.00023  | 280.425 | 295.533 | 377.669 | 187.551 | 78.8947 | 139.285 |
| ENSMUSG000000051185 | 9_Fam174a       | 441.893 | -0.3315  | 0.0173   | 0.04012  | 385.476 | 381.807 | 407.548 | 479.697 | 518.195 | 478.634 |
| ENSMUSG000000051207 | 6_Mrgprd        | 0.15028 | -0.99647 | 0.80707  | NA       | 0       | 0       | 0       | 0.90169 | 0       | 0       |
| ENSMUSG000000051212 | 7_Gpr183        | 30.0612 | 0.21253  | 0.6381   | 0.73434  | 40.8049 | 23.8629 | 32.2692 | 35.1657 | 24.2063 | 24.0583 |
| ENSMUSG000000051220 | 2_Errcc6l       | 207.709 | 0.09547  | 0.68023  | 0.76854  | 215.311 | 186.315 | 241.421 | 156.893 | 198.133 | 248.18  |
| ENSMUSG000000051223 | 14_Bzw1         | 8452.24 | -0.37574 | 0.00928  | 0.02372  | 7558.45 | 6720.17 | 7794.8  | 7899.67 | 10800.5 | 9939.88 |
| ENSMUSG000000051224 | 13_Tceanc       | 137.93  | -0.43767 | 0.05912  | 0.11147  | 137.174 | 108.301 | 105.174 | 139.761 | 164.962 | 172.207 |
| ENSMUSG000000051225 | 9_Fam83a        | 14792.5 | 0.69386  | 2.80E-07 | 3.06E-06 | 16658.8 | 17729.3 | 20458.6 | 10783.3 | 10296.7 | 12828.1 |
| ENSMUSG000000051228 | 5_Nyx           | 11.9892 | -0.61632 | 0.48463  | 0.59652  | 12.1546 | 9.17806 | 7.17092 | 32.4607 | 7.17224 | 3.79868 |
| ENSMUSG000000051232 | 13_Tmem199      | 353.873 | -0.17154 | 0.25681  | 0.36654  | 355.089 | 313.89  | 329.863 | 386.823 | 379.232 | 358.342 |
| ENSMUSG000000051234 | 6_Rnf7          | 1835.14 | -0.34558 | 0.00101  | 0.00361  | 1637.4  | 1663.98 | 1547.72 | 2133.39 | 2053.06 | 1975.31 |
| ENSMUSG000000051235 | 8_Gen1          | 111.424 | 0.11701  | 0.70279  | 0.78748  | 136.306 | 87.1915 | 124.296 | 75.7416 | 133.583 | 111.428 |
| ENSMUSG000000051236 | 13_Msrh3        | 830.06  | -1.10341 | 8.16E-09 | 1.44E-07 | 508.758 | 651.642 | 420.694 | 1228.1  | 1213.9  | 957.268 |
| ENSMUSG000000051237 | 6_9230109A22Rik | 0.34861 | -0.03469 | 0.99322  | NA       | 0       | 0       | 1.19515 | 0       | 0.89653 | 0       |
| ENSMUSG000000051238 | 5_Swsap1        | 280.646 | -0.09896 | 0.54329  | 0.65027  | 283.898 | 260.657 | 267.715 | 275.916 | 284.2   | 311.492 |
| ENSMUSG000000051242 | 1_Pcdh9b        | 108.971 | -0.81122 | 0.00493  | 0.01391  | 69.4551 | 105.548 | 62.148  | 156.893 | 140.755 | 119.025 |
| ENSMUSG000000051243 | 13_Islr2        | 128.173 | 0.11248  | 0.72614  | 0.80493  | 102.446 | 108.759 | 156.893 | 95.0322 | 117.759 |         |
| ENSMUSG000000051246 | 2_Msantd1       | 4.39823 | 0.1702   | 0.87392  | 0.91455  | 6.07732 | 5.50683 | 2.39031 | 3.60674 | 6.27571 | 2.53245 |
| ENSMUSG000000051251 | 3_Nhlh1         | 1.00402 | 1.14886  | 0.63114  | NA       | 0       | 1.83561 | 2.39031 | 0.90169 | 0.89653 | 0       |
| ENSMUSG000000051255 | 5_Gm6563        | 245.327 | -0.26075 | 0.30332  | 0.41817  | 236.147 | 158.78  | 276.081 | 257.882 | 322.751 | 220.323 |
| ENSMUSG000000051256 | 10_Jagn1        | 565.348 | -0.06365 | 0.67078  | 0.76131  | 537.409 | 500.204 | 621.48  | 536.503 | 583.641 | 612.854 |
| ENSMUSG000000051257 | 3_Trap1a        | 0.14942 | -0.99647 | 0.80707  | NA       | 0       | 0       | 0       | 0       | 0.89653 | 0       |
| ENSMUSG000000051262 | 9_Cml3          | 50.8964 | -1.1073  | 0.06722  | 0.12426  | 40.8049 | 49.5615 | 5.97577 | 104.596 | 53.7918 | 50.6491 |
| ENSMUSG000000051278 | 12_Zgrf1        | 249.665 | 0.17495  | 0.40659  | 0.5236   | 292.579 | 238.629 | 261.739 | 191.157 | 227.719 | 286.167 |
| ENSMUSG000000051279 | 2_Gdf6          | 5.79832 | -0.70373 | 0.46609  | 0.57959  | 4.34094 | 6.42464 | 2.39031 | 10.8202 | 4.48265 | 6.33113 |
| ENSMUSG000000051285 | 17_Pcmtd1       | 2699.99 | -0.64635 | 4.89E-07 | 4.97E-06 | 2157.45 | 2177.03 | 1980.37 | 2976.46 | 3736.74 | 3171.9  |
| ENSMUSG000000051306 | 7_Usp42         | 465.659 | 0.4727   | 0.00245  | 0.00772  | 526.99  | 486.437 | 611.919 | 388.626 | 411.508 | 368.472 |
| ENSMUSG000000051314 | 11_Ffar2        | 3.34847 | 0.17471  | 0.91735  | 0.94508  | 8.68188 | 1.83561 | 0       | 4.50843 | 0       | 5.06491 |
| ENSMUSG000000051316 | 8_Taf7          | 309.975 | -0.40332 | 0.01768  | 0.04084  | 274.348 | 249.643 | 276.081 | 316.492 | 346.957 | 396.329 |
| ENSMUSG000000051319 | 6_1500011K16Rik | 214.86  | 1.03013  | 2.64E-05 | 0.00016  | 257.852 | 269.835 | 338.229 | 179.435 | 105.791 | 138.019 |
| ENSMUSG000000051323 | 16_Pcdh19       | 232.498 | -0.98827 | 0.00082  | 0.00303  | 168.429 | 198.246 | 100.393 | 327.312 | 382.819 | 217.791 |
| ENSMUSG000000051329 | 13_Nup160       | 795.996 | -0.10395 | 0.57524  | 0.67955  | 789.183 | 727.82  | 784.021 | 612.244 | 911.772 | 950.936 |
| ENSMUSG000000051331 | 14_Cacna1c      | 175.837 | -0.44034 | 0.11269  | 0.18977  | 139.778 | 200.082 | 107.564 | 239.848 | 204.409 | 163.343 |
| ENSMUSG000000051335 | 5_Gfod1         | 333.532 | 0.04624  | 0.79874  | 0.86098  | 325.571 | 313.89  | 377.669 | 369.691 | 278.821 | 335.55  |
| ENSMUSG000000051339 | 8_2900026A02Rik | 3829.4  | 0.75581  | 4.20E-06 | 3.18E-05 | 4220.26 | 4555.99 | 5653.08 | 2524.72 | 2640.28 | 3382.09 |
| ENSMUSG000000051341 | 5_Zfp52         | 122.243 | -0.47419 | 0.05593  | 0.10635  | 105.919 | 89.0271 | 112.344 | 118.121 | 164.962 | 143.084 |
| ENSMUSG000000051343 | 11_Rab11fip5    | 442.84  | 0.01645  | 0.94452  | 0.96389  | 481.845 | 479.095 | 375.278 | 603.228 | 347.854 | 369.738 |
| ENSMUSG000000051344 | 13_Plekhm3      | 906.446 | 0.21655  | 0.07812  | 0.14054  | 1015.78 | 905.874 | 1001.54 | 874.635 | 798.809 | 842.041 |
| ENSMUSG000000051346 | 8_Spryd4        | 276.745 | 0.15237  | 0.35518  | 0.47197  | 300.393 | 267.081 | 307.155 | 258.784 | 272.545 | 254.512 |
| ENSMUSG000000051351 | 14_Zfp46        | 1140.98 | 0.4778   | 0.00129  | 0.00446  | 1246.72 | 1211.5  | 1526.21 | 944.966 | 864.255 | 1052.23 |
| ENSMUSG000000051354 | 13_Samd3        | 3.46747 | 2.56752  | 0.11     | 0.18616  | 15.6274 | 0.91781 | 1.19515 | 0.90169 | 0.89653 | 1.26623 |
| ENSMUSG000000051355 | 18_Commd1       | 801.358 | -0.05037 | 0.6908   | 0.77795  | 827.384 | 720.477 | 815.095 | 834.059 | 824.808 | 786.327 |
| ENSMUSG000000051359 | 14_Ncald        | 341.063 | -1.79904 | 5.01E-07 | 5.08E-06 | 139.778 | 243.218 | 72.9044 | 669.051 | 535.229 | 386.199 |
| ENSMUSG000000051361 | 7_6030498E09Rik | 0.14942 | -0.99647 | 0.80707  | NA       | 0       | 0       | 0       | 0       | 0.89653 | 0       |
| ENSMUSG000000051367 | 8_Six1          | 59.4075 | 0.06492  | 0.84705  | 0.89588  | 57.3004 | 58.7396 | 66.9286 | 74.8399 | 55.5849 | 43.0517 |
| ENSMUSG000000051373 | 5_Ppapdc3       | 43.8236 | -0.60019 | 0.22211  | 0.32704  | 27.782  | 33.9588 | 43.0255 | 82.0534 | 24.2063 | 51.9153 |
| ENSMUSG000000051375 | 15_Pcdh1        | 3487.87 | 1.28237  | 9.17E-13 | 5.00E-11 | 4424.29 | 4812.97 | 5590.93 | 2031.5  | 1574.31 | 2493.2  |
| ENSMUSG000000051378 | 10_Kif18b       | 185.502 | 1.20811  | 6.75E-08 | 8.94E-07 | 247.434 | 233.123 | 295.203 | 100.087 | 100.411 | 136.753 |
| ENSMUSG000000051379 | 12_Flrt3        | 178.584 | -1.19528 | 6.16E-06 | 4.45E-05 | 108.524 | 142.26  | 74.0996 | 264.194 | 267.166 | 215.259 |
| ENSMUSG000000051390 | 9_Zbtb22        | 839.105 | 0.83286  | 3.08E-05 | 0.00018  | 998.417 | 1015.09 | 1210.69 | 720.447 | 436.61  | 653.373 |
| ENSMUSG000000051391 | 9_Ywhag         | 3627.58 | 0.72519  | 2.30E-07 | 2.58E-06 | 4080.49 | 4291.66 | 5189.36 | 2775.39 | 2446.63 | 2981.96 |
| ENSMUSG000000051396 | 14_Hspa14       | 969.609 | -0.14326 | 0.247    | 0.35576  | 925.489 | 895.778 | 942.977 | 925.129 | 1072.25 | 1056.03 |
| ENSMUSG000000051397 | 5_Tacstd2       | 13713   | 0.88748  | 2.92E-09 | 5.85E-08 | 15813.2 | 17026.2 | 20567.4 | 9027.67 | 8703.52 | 11140.3 |
| ENSMUSG000000051401 | 6_Kctd16        | 3.48261 | -2.17565 | 0.19179  | 0.29156  | 2.60457 | 0       | 1.19515 | 10.8202 | 6.27571 | 0       |
| ENSMUSG000000051403 | 8_Ppp1r37       | 1386.84 | 1.10407  | 2.29E-06 | 1.89E-05 | 1633.06 | 1990.72 | 2055.67 | 1197.44 | 581.848 | 862.301 |
| ENSMUSG000000051413 | 17_Plagl2       | 881.544 | 0.38551  | 0.00763  | 0.02011  | 1004.49 | 909.545 | 1081.61 | 810.615 | 668.812 | 814.184 |
| ENSMUSG000000051427 | 14_Ccdc157      | 502.71  | -0.03926 | 0.82164  | 0.87748  | 447.985 | 556.19  | 484.037 | 600.523 | 459.024 | 468.504 |
| ENSMUSG000000051431 | 7_Gpr87         | 2947.78 | -0.13349 | 0.38819  | 0.50561  | 2875.44 | 2501.02 | 3058.4  | 2538.24 | 3518.88 | 3194.69 |
| ENSMUSG000000051435 | 11_Fhad1        | 152.184 | 0.35433  | 0.11615  | 0.19448  | 170.165 | 168.876 | 172.102 | 116.317 | 121.032 | 164.609 |
| ENSMUSG000000051439 | 6_Cd14          | 165.222 | 0.79707  | 0.0013   | 0.00449  | 173.638 | 191.821 | 264.129 | 132.548 | 101.308 | 127.889 |
| ENSMUSG000000051444 | 9_Bbs12         | 118.073 | -0.67805 | 0.01586  | 0.03736  | 89.4234 | 108.301 | 74.0996 | 109.104 | 173.03  | 154.48  |
| ENSMUSG000000051451 | 5_Crebzf        | 898.856 | -0.29066 | 0.02311  | 0.05125  | 789.183 | 794.82  | 843.779 | 1013.49 | 1057.91 | 893.956 |
| ENSMUSG000000051452 | 8_Gm11437       | 0.29884 | -1.76064 | 0.66373  | NA       | 0       | 0       | 0       | 0       | 1.79306 | 0       |
| ENSMUSG000000051455 | 13_Gm1564       | 4.58096 | -0.02323 | 0.98436  | 0.98955  | 6.94551 | 5.50683 | 1.19515 | 3.60674 | 8.96531 | 1.26623 |
| ENSMUSG000000051456 | 4_Hspb3         | 6.83023 | -1.6284  | 0.09029  | 0.1581   | 2.60457 | 2.75342 | 4.78062 | 16.2303 | 4.48265 | 10.1298 |
| ENSMUSG000000051457 | 7_Spn           | 100.896 | 1.59056  | 2.27E-09 | 4.75E-08 | 173.638 | 127.575 | 152.98  | 48.691  | 49.3092 | 53.1815 |

|                     |                 |         |          |          |          |         |         |         |         |         |         |
|---------------------|-----------------|---------|----------|----------|----------|---------|---------|---------|---------|---------|---------|
| ENSMUSG000000051469 | 14_Zfp191       | 888.582 | -0.62709 | 1.17E-07 | 1.43E-06 | 724.937 | 696.614 | 672.872 | 1027.92 | 1112.59 | 1096.55 |
| ENSMUSG000000051481 | 5_Krtap31-2     | 0.15028 | -0.99647 | 0.80707  | NA       | 0       | 0       | 0       | 0.90169 | 0       | 0       |
| ENSMUSG000000051483 | 8_Cbr1          | 873.942 | 0.33048  | 0.00845  | 0.02193  | 900.311 | 1017.85 | 1002.73 | 800.697 | 730.672 | 791.392 |
| ENSMUSG000000051486 | 5_Pcdhb11       | 61.1057 | -0.92101 | 0.01204  | 0.02956  | 52.0913 | 46.8081 | 27.4885 | 92.8736 | 87.86   | 59.5127 |
| ENSMUSG000000051490 | 2_Foxd4         | 0.15297 | 0.92709  | 0.82027  | NA       | 0       | 0.91781 | 0       | 0       | 0       | 0       |
| ENSMUSG000000051495 | 7_Irf2bp2       | 827.637 | 0.11448  | 0.47079  | 0.58388  | 855.166 | 875.587 | 849.755 | 889.964 | 641.916 | 853.437 |
| ENSMUSG000000051497 | 15_Kcnj16       | 389.709 | 0.1279   | 0.52059  | 0.63054  | 431.49  | 353.355 | 435.036 | 294.851 | 376.543 | 446.978 |
| ENSMUSG000000051498 | 6_Tlr6          | 192.085 | -0.03508 | 0.86247  | 0.90654  | 202.288 | 167.041 | 199.591 | 169.517 | 202.616 | 211.46  |
| ENSMUSG000000051499 | 7_Zfp786        | 19.6452 | -0.04974 | 0.93348  | 0.95622  | 13.0228 | 29.3698 | 15.537  | 13.5253 | 28.689  | 17.7272 |
| ENSMUSG000000051502 | 6_Ufsp1         | 68.2234 | 0.41003  | 0.18815  | 0.28706  | 88.5552 | 72.5066 | 72.9044 | 55.9045 | 72.619  | 46.8504 |
| ENSMUSG000000051503 | 2_Gm6583        | 2.32992 | 0.2556   | 0.87357  | NA       | 3.47275 | 1.83561 | 2.39031 | 0.90169 | 5.37918 | 0       |
| ENSMUSG000000051504 | 18_Siglech      | 37.2918 | -0.51472 | 0.24099  | 0.34856  | 34.7275 | 22.0273 | 35.8546 | 59.5112 | 41.2404 | 30.3894 |
| ENSMUSG000000051506 | 16_Wdfy4        | 79.3576 | 1.71817  | 9.80E-08 | 1.23E-06 | 149.328 | 111.054 | 103.978 | 39.6742 | 27.7924 | 44.3179 |
| ENSMUSG000000051510 | 13_Mafg         | 1311.46 | 0.51295  | 0.00054  | 0.00212  | 1482.87 | 1563.94 | 1579.99 | 1256.95 | 909.979 | 1075.03 |
| ENSMUSG000000051517 | 14_Arhgef39     | 119.492 | 0.96949  | 7.32E-05 | 0.00038  | 154.538 | 145.013 | 174.492 | 67.6264 | 81.5843 | 93.7008 |
| ENSMUSG000000051518 | 7_Rps19bp1      | 253.809 | 0.26235  | 0.16159  | 0.25405  | 292.579 | 246.89  | 291.618 | 263.292 | 210.685 | 217.791 |
| ENSMUSG000000051527 | 10_Usp29        | 6.54233 | -2.86519 | 0.01199  | 0.02945  | 3.47275 | 0       | 1.19515 | 16.2303 | 10.7584 | 7.59736 |
| ENSMUSG000000051550 | 10_Zfp579       | 196.763 | 0.2879   | 0.23882  | 0.34639  | 197.947 | 245.054 | 206.762 | 232.635 | 155.1   | 143.084 |
| ENSMUSG000000051557 | 15_Pusi1        | 162.934 | 0.5549   | 0.02376  | 0.05245  | 147.592 | 199.164 | 235.445 | 143.368 | 116.549 | 135.486 |
| ENSMUSG000000051579 | 10_Tceal8       | 879.111 | -0.82846 | 8.04E-11 | 2.69E-09 | 598.182 | 687.436 | 614.309 | 1067.6  | 1178.94 | 1128.21 |
| ENSMUSG000000051582 | 2_Otud6a        | 0.15028 | -0.99647 | 0.80707  | NA       | 0       | 0       | 0       | 0.90169 | 0       | 0       |
| ENSMUSG000000051586 | 14_Mical3       | 1857.48 | 0.29754  | 0.03143  | 0.06603  | 2038.51 | 2009.99 | 2095.11 | 1751.07 | 1397.69 | 1852.49 |
| ENSMUSG000000051590 | 8_Map3k19       | 2.13871 | -0.08688 | 0.95735  | NA       | 4.34094 | 1.83561 | 0       | 1.80337 | 3.58612 | 1.26623 |
| ENSMUSG000000051591 | 2_Olfr697       | 0.43409 | 2.24584  | 0.57502  | NA       | 2.60457 | 0       | 0       | 0       | 0       | 0       |
| ENSMUSG000000051596 | 13_Otop1        | 3.39035 | 0.20197  | 0.86511  | 0.90834  | 2.60457 | 4.58903 | 3.58546 | 2.70506 | 1.79306 | 5.06491 |
| ENSMUSG000000051599 | 4_Pcdhb2        | 9.98329 | -0.39298 | 0.61264  | 0.71211  | 6.94551 | 11.9315 | 7.17092 | 17.132  | 11.6549 | 5.06491 |
| ENSMUSG000000051615 | 13_Rap2a        | 448.109 | -0.59778 | 0.00055  | 0.00216  | 354.221 | 378.136 | 338.229 | 611.343 | 564.814 | 441.913 |
| ENSMUSG000000051627 | 2_Hist1h1e      | 7.61987 | 0.72074  | 0.42417  | 0.53967  | 6.07732 | 4.58903 | 17.9273 | 6.3118  | 4.48265 | 6.33113 |
| ENSMUSG000000051638 | 1_Gm9857        | 0.1447  | 0.92709  | 0.82027  | NA       | 0.86819 | 0       | 0       | 0       | 0       | 0       |
| ENSMUSG000000051648 | 13_Kctd19       | 2.46143 | 0.14903  | 0.91361  | NA       | 2.60457 | 2.75342 | 2.39031 | 0.90169 | 3.58612 | 2.53245 |
| ENSMUSG000000051650 | 10_B3gnt2       | 285.138 | 0.59701  | 0.02819  | 0.06038  | 325.571 | 292.78  | 412.328 | 316.492 | 155.996 | 207.661 |
| ENSMUSG000000051652 | 4_Lrrc3         | 91.3727 | -0.38564 | 0.21517  | 0.319    | 82.4779 | 84.4381 | 70.5141 | 135.253 | 71.7224 | 103.831 |
| ENSMUSG000000051663 | 4_Pcdhb1        | 1.27289 | -0.08946 | 0.96788  | NA       | 0       | 3.67122 | 0       | 1.80337 | 0.89653 | 1.26623 |
| ENSMUSG000000051669 | 5_AU021092      | 14.7229 | 0.17553  | 0.79718  | 0.85997  | 10.4183 | 21.1095 | 15.537  | 23.4438 | 8.96531 | 8.86359 |
| ENSMUSG000000051671 | 6_Coa6          | 155.928 | -0.30797 | 0.14013  | 0.22592  | 150.197 | 121.15  | 147.004 | 166.812 | 181.996 | 168.408 |
| ENSMUSG000000051674 | 14_Dcun1d4      | 822.542 | -0.04607 | 0.71552  | 0.79722  | 843.011 | 798.491 | 785.216 | 770.941 | 843.635 | 893.956 |
| ENSMUSG000000051675 | 13_Trim32       | 403.668 | -0.33416 | 0.09319  | 0.16222  | 297.789 | 454.314 | 319.106 | 483.303 | 435.714 | 431.783 |
| ENSMUSG000000051678 | 4_Pcdhb6        | 15.7084 | -0.87075 | 0.24168  | 0.34939  | 11.2864 | 18.3561 | 3.58546 | 27.9522 | 24.2063 | 8.86359 |
| ENSMUSG000000051680 | 2_Olfr693       | 0.14942 | -0.99647 | 0.80707  | NA       | 0       | 0       | 0       | 0       | 0.89653 | 0       |
| ENSMUSG000000051682 | 15_Trem14       | 4.20406 | 1.52417  | 0.22252  | 0.32748  | 7.8137  | 2.75342 | 8.36608 | 2.70506 | 3.58612 | 0       |
| ENSMUSG000000051695 | 6_Pcbp1         | 3749.14 | 0.70394  | 1.26E-06 | 1.12E-05 | 4239.36 | 4342.14 | 5356.68 | 2992.69 | 2480.7  | 3083.26 |
| ENSMUSG000000051703 | 14_Tmem198      | 11.1589 | 0.34066  | 0.61482  | 0.71391  | 15.6274 | 11.0137 | 10.7564 | 12.6236 | 8.06878 | 8.86359 |
| ENSMUSG000000051705 | 12_Senp8        | 300.729 | -0.54963 | 0.00211  | 0.00681  | 246.566 | 210.177 | 276.081 | 329.115 | 361.302 | 381.134 |
| ENSMUSG000000051716 | 5_Apon          | 0.59651 | -0.02118 | 0.90471  | NA       | 0.86819 | 0.91781 | 0       | 0       | 1.79306 | 0       |
| ENSMUSG000000051721 | 4_BC068281      | 74.5008 | -0.2626  | 0.33734  | 0.45388  | 63.3778 | 69.7532 | 70.5141 | 82.9551 | 86.9635 | 73.4412 |
| ENSMUSG000000051726 | 6_Kcnf1         | 6.6714  | -1.47231 | 0.11047  | 0.18682  | 4.34094 | 2.75342 | 3.58546 | 13.5253 | 10.7584 | 5.06491 |
| ENSMUSG000000051727 | 14_Kctd14       | 102.403 | 0.08724  | 0.7198   | 0.80061  | 105.051 | 110.137 | 101.588 | 112.711 | 95.0322 | 89.9021 |
| ENSMUSG000000051728 | 5_4930563D23Rik | 4.39458 | -1.25728 | 0.25797  | 0.36794  | 1.73638 | 3.67122 | 2.39031 | 9.91854 | 3.58612 | 5.06491 |
| ENSMUSG000000051729 | 11_Gm5087       | 0.60564 | 0.00735  | 0.99816  | NA       | 0       | 1.83561 | 0       | 0.90169 | 0.89653 | 0       |
| ENSMUSG000000051730 | 15_Mett15       | 262.995 | -0.26272 | 0.20837  | 0.31116  | 256.116 | 217.52  | 243.811 | 229.93  | 346.957 | 283.635 |
| ENSMUSG000000051735 | 6_Rin1          | 50.8708 | 0.71922  | 0.50223  | 0.10049  | 75.5324 | 51.3971 | 63.3432 | 50.4944 | 34.0682 | 30.3894 |
| ENSMUSG000000051736 | 8_Fam229b       | 94.1705 | -1.03064 | 0.00054  | 0.00211  | 61.6414 | 71.5888 | 52.5868 | 136.155 | 150.617 | 92.4346 |
| ENSMUSG000000051747 | 14_Ttn          | 2012.37 | -1.654   | 3.63E-12 | 1.67E-10 | 843.011 | 1301.45 | 766.094 | 3868.23 | 2247.6  | 3047.81 |
| ENSMUSG000000051748 | 2_Wfdc21        | 0.58352 | 1.28689  | 0.73023  | NA       | 2.60457 | 0       | 0       | 0       | 0.89653 | 0       |
| ENSMUSG000000051758 | 6_4930544M13Rik | 0.35574 | -0.03469 | 0.99322  | NA       | 0.86819 | 0       | 0       | 0       | 0       | 1.26623 |
| ENSMUSG000000051768 | 9_Xrcc1         | 542.906 | 0.79706  | 4.50E-06 | 3.38E-05 | 613.809 | 679.176 | 774.46  | 435.514 | 329.027 | 425.452 |
| ENSMUSG000000051769 | 2_Wfdc15a       | 0       | NA       | NA       | NA       | 0       | 0       | 0       | 0       | 0       | 0       |
| ENSMUSG000000051777 | 6_Iqj           | 0.65186 | 0.14793  | 0.95721  | NA       | 0       | 0.91781 | 1.19515 | 0.90169 | 0.89653 | 0       |
| ENSMUSG000000051786 | 14_Wtgcpc6      | 888.732 | 0.67693  | 3.91E-07 | 4.08E-06 | 1023.59 | 1120.64 | 1135.4  | 706.02  | 612.33  | 734.412 |
| ENSMUSG000000051790 | 15_Nlgn2        | 723.767 | 0.21468  | 0.19817  | 0.29886  | 727.542 | 870.997 | 735.02  | 791.68  | 637.433 | 579.932 |
| ENSMUSG000000051804 | 3_Adam6b        | 0       | NA       | NA       | NA       | 0       | 0       | 0       | 0       | 0       | 0       |
| ENSMUSG000000051811 | 14_Cox6b2       | 128.825 | -0.53978 | 0.10005  | 0.1722   | 88.5552 | 148.685 | 77.685  | 203.781 | 132.687 | 121.558 |
| ENSMUSG000000051817 | 8_Sox12         | 172.538 | 0.28321  | 0.19093  | 0.29035  | 188.397 | 212.931 | 167.322 | 176.73  | 156.893 | 132.954 |
| ENSMUSG000000051839 | 6_Gypa          | 2.0922  | -0.2133  | 0.89886  | NA       | 1.73638 | 2.75342 | 1.19515 | 1.80337 | 0       | 5.06491 |
| ENSMUSG000000051851 | 5_Cxx1c         | 88.039  | -0.11548 | 0.78826  | 0.85278  | 79.8733 | 121.15  | 52.5868 | 146.975 | 68.1363 | 59.5127 |
| ENSMUSG000000051853 | 9_Arf3          | 4928.64 | 0.36963  | 0.00497  | 0.01401  | 5215.21 | 5507.75 | 5945.89 | 4470.56 | 3695.5  | 4736.95 |
| ENSMUSG000000051855 | 15_Mest         | 699.383 | -0.80138 | 2.91E-05 | 0.00017  | 545.222 | 596.574 | 387.23  | 946.77  | 955.702 | 764.801 |
| ENSMUSG000000051860 | 13_Samd7        | 39.5837 | -2.62668 | 0.00022  | 0.00098  | 19.9683 | 9.17806 | 3.58546 | 126.236 | 58.2745 | 20.2596 |
| ENSMUSG000000051864 | 9_Tbc1d22a      | 893.63  | 0.8242   | 2.64E-05 | 0.00016  | 1034.01 | 1104.12 | 1288.38 | 775.45  | 476.058 | 683.763 |
| ENSMUSG000000051879 | 3_Krt71         | 0.71079 | -1.53034 | 0.61038  | NA       | 0       | 0       | 1.19515 | 1.80337 | 0       | 1.26623 |
| ENSMUSG000000051890 | 13_Klhdcl       | 137.426 | -0.72501 | 0.0021   | 0.00676  | 93.7643 | 120.233 | 96.8075 | 197.469 | 154.203 | 162.077 |
| ENSMUSG000000051900 | 12_Abca16       | 12.6204 | -0.19505 | 0.7625   | 0.83298  | 12.1546 | 14.6849 | 8.36608 | 10.8202 | 17.0341 | 12.6623 |
| ENSMUSG000000051906 | 14_Cd209f       | 19.0244 | -0.34245 | 0.5264   | 0.6354   | 21.7047 | 16.5205 | 11.9515 | 26.1489 | 18.8271 | 18.9934 |
| ENSMUSG000000051910 | 13_Sox6         | 345.798 | -0.61674 | 0.00055  | 0.00214  | 272.611 | 291.862 | 254.568 | 492.32  | 381.025 | 382.401 |
| ENSMUSG000000051920 | 6_Rspo2         | 133.341 | -1.40232 | 0.00015  | 0.00071  | 53.8277 | 116.561 | 49.0013 | 215.503 | 232.201 | 132.954 |
| ENSMUSG000000051934 | 4_Spats2        | 295.165 | 0.00187  | 0.99151  | 0.99427  | 298.657 | 333.163 | 253.373 | 305.671 | 285.097 | 295.031 |
| ENSMUSG000000051940 | 2_5031410I06Rik | 0.72349 | 2.97602  | 0.45311  | NA       | 4.34094 | 0       | 0       | 0       | 0       | 0       |
| ENSMUSG000000051950 | 10_B3glct       | 990.636 | -0.96024 | 1.75E-06 | 1.49E-05 | 642.459 | 819.6   | 555.747 | 1419.25 | 1496.31 | 1010.45 |
| ENSMUSG000000051951 | 5_Xkr4          | 124.434 | -0.87182 | 0.00168  | 0.00562  | 90.2916 | 97.2874 | 76.4899 | 201.978 | 164.065 | 116.493 |

|                     |                 |         |          |          |          |         |         |         |         |         |         |
|---------------------|-----------------|---------|----------|----------|----------|---------|---------|---------|---------|---------|---------|
| ENSMUSG000000051956 | 4_Rnf133        | 0.21104 | -0.99647 | 0.80707  | NA       | 0       | 0       | 0       | 0       | 0       | 1.26623 |
| ENSMUSG000000051965 | 8_Nanos2        | 0.21104 | -0.99647 | 0.80707  | NA       | 0       | 0       | 0       | 0       | 0       | 1.26623 |
| ENSMUSG000000051969 | 7_Tlr11         | 4.84695 | 1.58865  | 0.13232  | 0.21586  | 7.8137  | 5.50683 | 8.36608 | 1.80337 | 1.79306 | 3.79868 |
| ENSMUSG000000051977 | 14_Prdrn9       | 261.597 | -0.07913 | 0.73385  | 0.81141  | 262.193 | 246.89  | 253.373 | 185.747 | 304.82  | 316.557 |
| ENSMUSG000000051978 | 8_Erich1        | 217.059 | 0.05166  | 0.81176  | 0.87038  | 220.52  | 225.78  | 216.323 | 256.98  | 164.962 | 217.791 |
| ENSMUSG000000051980 | 13_Casr         | 0.74969 | -3.06636 | 0.35271  | NA       | 0       | 0       | 0       | 2.70506 | 1.79306 | 0       |
| ENSMUSG000000051984 | 13_Sec31b       | 23.3089 | 0.71247  | 0.17674  | 0.27298  | 33.8593 | 30.2876 | 22.7079 | 26.1489 | 11.6549 | 15.1947 |
| ENSMUSG000000051985 | 12_Igfn1        | 469.229 | -1.06659 | 0.00177  | 0.00588  | 250.906 | 499.286 | 158.955 | 755.612 | 658.053 | 492.562 |
| ENSMUSG000000051989 | 11_Smim11       | 487.575 | -0.44179 | 0.00563  | 0.01555  | 382.003 | 410.259 | 449.378 | 636.59  | 506.54  | 540.679 |
| ENSMUSG000000051998 | 14_Lax1         | 10.3611 | 1.30424  | 0.10511  | 0.1794   | 26.0457 | 7.34244 | 10.7564 | 6.3118  | 5.37918 | 6.33113 |
| ENSMUSG000000052013 | 14_Btla         | 6.88784 | 1.36414  | 0.15151  | 0.24108  | 16.4956 | 7.34244 | 5.97577 | 2.70506 | 6.27571 | 2.53245 |
| ENSMUSG000000052026 | 7_Slc6a7        | 21.237  | -0.81232 | 0.12906  | 0.21171  | 13.891  | 14.6849 | 17.9273 | 38.7725 | 20.6202 | 21.5259 |
| ENSMUSG000000052031 | 7_Tagap1        | 593.896 | 0.03351  | 0.82511  | 0.88008  | 632.909 | 566.286 | 602.358 | 504.042 | 628.468 | 629.315 |
| ENSMUSG000000052033 | 13_Pfdn4        | 560.518 | -0.53698 | 0.00028  | 0.0012   | 450.59  | 440.547 | 481.647 | 592.407 | 736.948 | 660.97  |
| ENSMUSG000000052040 | 10_Klf13        | 715.761 | 0.4209   | 0.00338  | 0.01017  | 804.811 | 842.546 | 811.51  | 699.708 | 552.263 | 583.731 |
| ENSMUSG000000052056 | 14_Zfp217       | 2421.91 | 0.75494  | 1.52E-06 | 1.32E-05 | 2814.67 | 2950.74 | 3357.19 | 1552.7  | 1684.58 | 2171.58 |
| ENSMUSG000000052062 | 14_Pard3b       | 691.465 | -0.5409  | 1.64E-05 | 0.0001   | 554.772 | 585.56  | 549.771 | 795.287 | 866.945 | 796.457 |
| ENSMUSG000000052075 | 6_1700029F12Rik | 0.30594 | 1.73752  | 0.66765  | NA       | 0       | 1.83561 | 0       | 0       | 0       | 0       |
| ENSMUSG000000052085 | 6_Dock8         | 453.835 | 0.61189  | 3.41E-05 | 0.0002   | 586.895 | 558.026 | 499.574 | 357.067 | 341.578 | 379.868 |
| ENSMUSG000000052087 | 13_Rgs14        | 20.0915 | 2.4895   | 3.60E-05 | 0.00021  | 36.4639 | 23.8629 | 41.8304 | 6.3118  | 4.48265 | 7.59736 |
| ENSMUSG000000052102 | 14_Gnpda1       | 504.012 | -0.48019 | 0.00738  | 0.01954  | 455.799 | 479.095 | 326.277 | 613.146 | 571.09  | 578.666 |
| ENSMUSG000000052105 | 16_Mtcl1        | 570.417 | 0.63124  | 0.0027   | 0.00841  | 655.482 | 689.272 | 735.02  | 563.553 | 318.268 | 460.907 |
| ENSMUSG000000052117 | 5_D630039A03Rik | 60.2902 | -1.19918 | 0.00074  | 0.00278  | 32.123  | 47.7259 | 29.8789 | 102.792 | 83.3773 | 65.8438 |
| ENSMUSG000000052131 | 7_Akr1b7        | 3616.21 | 0.01616  | 0.89646  | 0.93021  | 3656.81 | 3276.57 | 3977.47 | 3356.07 | 3896.32 | 3534.04 |
| ENSMUSG000000052133 | 16_Sema5b       | 114.542 | -0.33372 | 0.35455  | 0.47131  | 101.578 | 141.342 | 60.9529 | 174.025 | 115.652 | 93.7008 |
| ENSMUSG000000052135 | 8_Foxo6         | 12.5332 | -0.43001 | 0.53471  | 0.64252  | 6.94551 | 11.0137 | 14.3418 | 21.6405 | 9.86184 | 11.396  |
| ENSMUSG000000052137 | 11_Rbm12b2      | 419.683 | -0.20134 | 0.18737  | 0.28612  | 375.926 | 379.054 | 417.109 | 410.267 | 491.299 | 444.446 |
| ENSMUSG000000052139 | 18_Bre          | 1714.74 | 0.36591  | 0.0136   | 0.0327   | 1783.26 | 1938.41 | 2071.2  | 1241.62 | 1649.62 | 1604.31 |
| ENSMUSG000000052142 | 15_Rasal3       | 30.2779 | 1.54814  | 0.0045   | 0.01293  | 69.4551 | 23.8629 | 41.8304 | 18.0337 | 10.7584 | 17.7272 |
| ENSMUSG000000052143 | 7_Gm9869        | 177.867 | 0.54314  | 0.0131   | 0.03166  | 201.42  | 222.109 | 207.957 | 134.351 | 122.825 | 178.538 |
| ENSMUSG000000052144 | 8_Ppp4r2        | 2512.11 | -0.2358  | 0.07924  | 0.14227  | 2402.28 | 2079.75 | 2440.5  | 2421.93 | 3037.45 | 2690.73 |
| ENSMUSG000000052146 | 15_Rps10        | 10814.3 | 0.22276  | 0.04202  | 0.08385  | 11375.9 | 11546   | 12022.1 | 11019.5 | 9295.23 | 9627.12 |
| ENSMUSG000000052151 | 11_Ppap2c       | 2740.28 | 0.73217  | 2.41E-06 | 1.97E-05 | 3232.27 | 3238.94 | 3791.03 | 2179.37 | 1670.24 | 2329.86 |
| ENSMUSG000000052155 | 5_Acvr2a        | 830.624 | -0.26958 | 0.05345  | 0.10236  | 790.051 | 713.135 | 756.533 | 807.91  | 1009.49 | 906.618 |
| ENSMUSG000000052160 | 6_Pld4          | 242.462 | 1.73068  | 3.41E-09 | 6.74E-08 | 526.99  | 274.424 | 316.716 | 143.368 | 93.2392 | 100.032 |
| ENSMUSG000000052180 | 14_Serpinb6c    | 17.7487 | -0.50573 | 0.40404  | 0.52129  | 13.891  | 18.3561 | 11.9515 | 28.8539 | 23.3098 | 10.1298 |
| ENSMUSG000000052212 | 6_Cd17f         | 8.64519 | 1.0426   | 0.23509  | 0.34185  | 21.7047 | 8.26025 | 4.78062 | 6.3118  | 4.48265 | 6.33113 |
| ENSMUSG000000052214 | 9_Opa3          | 1106.46 | 0.33362  | 0.01828  | 0.04199  | 1156.43 | 1205.08 | 1339.77 | 1040.55 | 847.221 | 1049.7  |
| ENSMUSG000000052221 | 7_Ppp1r36       | 21.3934 | -0.43314 | 0.41891  | 0.53475  | 19.1001 | 16.5205 | 19.1225 | 16.2303 | 35.8612 | 21.5259 |
| ENSMUSG000000052229 | 5_Gpr17         | 8.26822 | -0.25544 | 0.74676  | 0.82107  | 9.55007 | 8.26025 | 4.78062 | 11.7219 | 8.96531 | 6.33113 |
| ENSMUSG000000052234 | 2_Epx           | 0.2997  | -1.76345 | 0.66322  | NA       | 0       | 0       | 0       | 0.90169 | 0.89653 | 0       |
| ENSMUSG000000052236 | 7_Gm9871        | 1.17262 | -3.69406 | 0.13339  | NA       | 0       | 0       | 0       | 3.60674 | 0.89653 | 2.53245 |
| ENSMUSG000000052253 | 5_Zfp622        | 542.704 | -0.02188 | 0.88309  | 0.92103  | 509.627 | 492.862 | 614.309 | 528.388 | 551.366 | 559.672 |
| ENSMUSG000000052270 | 7_Fpr2          | 32.7089 | 3.30005  | 8.11E-08 | 1.05E-06 | 89.4234 | 40.3834 | 49.0013 | 7.21348 | 8.96531 | 1.26623 |
| ENSMUSG000000052271 | 7_Bhlha15       | 14.8868 | -0.37532 | 0.53191  | 0.64031  | 15.6274 | 14.6849 | 8.36608 | 19.8371 | 14.3445 | 16.4609 |
| ENSMUSG000000052273 | 2_Dnah3         | 3.05188 | 0.76117  | 0.57772  | 0.6815   | 1.73638 | 2.75342 | 7.17092 | 0.90169 | 4.48265 | 1.26623 |
| ENSMUSG000000052276 | 8_Ostn          | 4.71301 | -0.59516 | 0.5981   | 0.69984  | 2.60457 | 7.34244 | 1.19515 | 8.11517 | 2.68959 | 6.33113 |
| ENSMUSG000000052293 | 14_Taf9         | 55.568  | 0.57259  | 0.18906  | 0.28822  | 46.8822 | 57.8218 | 94.4172 | 26.1489 | 44.8265 | 63.3113 |
| ENSMUSG000000052295 | 4_8030423F21Rik | 7.90516 | -0.96746 | 0.31227  | 0.42716  | 1.73638 | 2.75342 | 11.9515 | 14.427  | 8.96531 | 7.59736 |
| ENSMUSG000000052296 | 7_Ppp6r1        | 2613.41 | 0.85509  | 2.14E-08 | 3.29E-07 | 3097.7  | 3231.59 | 3769.52 | 2155.03 | 1571.62 | 1855.02 |
| ENSMUSG000000052298 | 12_Cdc42se2     | 1055.02 | -0.09536 | 0.39486  | 0.5125   | 1058.32 | 991.23  | 1011.1  | 1128.91 | 1073.15 | 1067.43 |
| ENSMUSG000000052299 | 8_Ltn1          | 1327.3  | -0.27736 | 0.02945  | 0.06254  | 1198.97 | 1133.49 | 1268.06 | 1300.23 | 1553.69 | 1509.34 |
| ENSMUSG000000052301 | 14_Doc2a        | 3.06757 | -0.04893 | 0.97506  | 0.9838   | 2.60457 | 6.42464 | 0       | 7.21348 | 0.89653 | 1.26623 |
| ENSMUSG000000052302 | 5_Tbc1d30       | 710.756 | 0.19498  | 0.14305  | 0.22975  | 816.965 | 695.697 | 763.703 | 640.197 | 698.397 | 649.574 |
| ENSMUSG000000052305 | 5_Hbb-bs        | 339.552 | -1.6032  | 7.44E-06 | 5.24E-05 | 169.297 | 208.342 | 126.686 | 865.618 | 304.682 | 326.687 |
| ENSMUSG000000052310 | 9_Slc39a1       | 3307.3  | 0.32093  | 0.00463  | 0.01323  | 3528.32 | 3446.36 | 4046.79 | 2887.2  | 2873.38 | 3061.74 |
| ENSMUSG000000052316 | 9_Lrrc15        | 24.6069 | -0.07717 | 0.87009  | 0.91195  | 21.7047 | 22.9451 | 27.4885 | 32.4607 | 21.5167 | 21.5259 |
| ENSMUSG000000052331 | 14_Ankrd44      | 2250.48 | -0.4821  | 0.00019  | 0.00088  | 1882.23 | 2032.02 | 1719.83 | 2765.47 | 2774.76 | 2328.59 |
| ENSMUSG000000052336 | 6_Cx3cr1        | 203.131 | -0.47319 | 0.08224  | 0.14649  | 174.506 | 223.945 | 111.149 | 275.014 | 221.443 | 212.726 |
| ENSMUSG000000052337 | 15_Immt         | 2498.65 | -0.34758 | 0.00201  | 0.00654  | 2259.89 | 2123.8  | 2213.43 | 2558.98 | 3000.69 | 2835.08 |
| ENSMUSG000000052353 | 13_Cemip        | 910.136 | -0.34037 | 0.06577  | 0.12195  | 893.366 | 927.901 | 586.821 | 1039.64 | 1007.7  | 1005.38 |
| ENSMUSG000000052363 | 7_Zdhhc19       | 0.5116  | -2.49497 | 0.51548  | NA       | 0       | 0       | 0       | 1.80337 | 0       | 1.26623 |
| ENSMUSG000000052364 | 4_B630019K06Rik | 103.64  | -0.39331 | 0.12361  | 0.20452  | 93.7643 | 84.4381 | 90.8317 | 101.89  | 140.755 | 110.162 |
| ENSMUSG000000052368 | 2_Gm9873        | 4.98876 | -1.33123 | 0.23426  | 0.34085  | 4.34094 | 2.75342 | 1.19515 | 2.70506 | 6.27571 | 12.6623 |
| ENSMUSG000000052369 | 7_Tmem106c      | 1085.53 | -0.25691 | 0.05273  | 0.10121  | 1007.97 | 1000.41 | 958.514 | 1311.05 | 1046.25 | 1188.99 |
| ENSMUSG000000052372 | 10_Illrap1      | 29.6084 | -1.8683  | 5.41E-05 | 0.00029  | 13.891  | 15.6027 | 8.36608 | 49.5927 | 48.4127 | 41.7855 |
| ENSMUSG000000052373 | 14_Mpp3         | 42.4035 | -0.54195 | 0.17844  | 0.27518  | 32.9912 | 43.1369 | 27.4885 | 66.7247 | 44.8265 | 39.253  |
| ENSMUSG000000052374 | 14_Actn2        | 248.885 | -0.64214 | 0.09918  | 0.171    | 151.933 | 282.684 | 148.199 | 454.449 | 140.755 | 315.291 |
| ENSMUSG000000052384 | 13_Nrros        | 157.372 | 1.55026  | 4.36E-08 | 6.04E-07 | 305.602 | 179.89  | 218.713 | 100.087 | 69.0329 | 70.9087 |
| ENSMUSG000000052387 | 15_Trpm3        | 4801.29 | -0.36787 | 0.00171  | 0.0057   | 4373.07 | 4496.33 | 3706.17 | 5628.32 | 5252.77 | 5351.07 |
| ENSMUSG000000052392 | 4_Acol4         | 17.309  | -0.48306 | 0.37087  | 0.48826  | 12.1546 | 15.6027 | 15.537  | 19.8371 | 17.9306 | 22.7921 |
| ENSMUSG000000052395 | 15_Rft1         | 609.716 | -0.18516 | 0.14411  | 0.23113  | 588.632 | 544.259 | 579.65  | 658.23  | 660.743 | 626.782 |
| ENSMUSG000000052396 | 7_Mogat2        | 0.1447  | 0.92709  | 0.82027  | NA       | 0.86819 | 0       | 0       | 0       | 0       | 0       |
| ENSMUSG000000052397 | 8_Ezr           | 10966.6 | 0.76536  | 9.69E-07 | 8.91E-06 | 12565.3 | 13669.8 | 15190.4 | 7683.26 | 6870.11 | 9820.86 |
| ENSMUSG000000052406 | 14_Rexo4        | 913.698 | 0.25013  | 0.04301  | 0.08552  | 1013.18 | 949.011 | 1014.69 | 788.073 | 813.153 | 904.086 |
| ENSMUSG000000052407 | 16_Cdc171       | 36.6256 | -0.15204 | 0.69837  | 0.78407  | 41.673  | 27.5342 | 34.6595 | 37.8708 | 34.9647 | 43.0517 |
| ENSMUSG000000052414 | 9_Gm28047       | 0       | NA       | NA       | NA       | 0       | 0       | 0       | 0       | 0       | 0       |
| ENSMUSG000000052415 | 5_Tchh          | 65.4159 | 0.46064  | 0.15434  | 0.24485  | 65.9823 | 69.7532 | 92.0269 | 66.7247 | 44.8265 | 53.1815 |
| ENSMUSG000000052419 | 7_2610001J05Rik | 1259.35 | -0.57001 | 1.49E-05 | 9.56E-05 | 1113.02 | 920.559 | 1007.51 | 1405.73 | 1622.72 | 1486.55 |

|                     |                  |         |          |          |          |         |         |         |         |         |         |
|---------------------|------------------|---------|----------|----------|----------|---------|---------|---------|---------|---------|---------|
| ENSMUSG000000052423 | 14_B4galt3       | 1055.31 | 1.06664  | 6.64E-11 | 2.28E-09 | 1303.15 | 1245.46 | 1737.75 | 702.413 | 636.537 | 706.555 |
| ENSMUSG000000052428 | 10_Tmco1         | 1674.06 | -0.38262 | 0.00028  | 0.00122  | 1455.95 | 1420.76 | 1484.38 | 1852.96 | 1992.99 | 1837.3  |
| ENSMUSG000000052429 | 17_Prm1          | 211.738 | 0.26017  | 0.21621  | 0.32028  | 217.915 | 232.205 | 243.811 | 214.601 | 212.478 | 149.415 |
| ENSMUSG000000052430 | 15_Bmpr1b        | 33.9183 | -1.76941 | 0.00017  | 0.00078  | 11.2864 | 23.8629 | 10.7564 | 46.8876 | 60.0675 | 50.6491 |
| ENSMUSG000000052435 | 6_Cebpe          | 0.57879 | 2.65671  | 0.50459  | NA       | 3.47275 | 0       | 0       | 0       | 0       | 0       |
| ENSMUSG000000052446 | 16_Zfp961        | 354.998 | -0.44405 | 0.01337  | 0.03225  | 308.207 | 299.205 | 295.203 | 353.461 | 487.713 | 386.199 |
| ENSMUSG000000052456 | 8_Asna1          | 1492.53 | 0.49478  | 0.00245  | 0.00772  | 1752    | 1688.76 | 1797.51 | 1500.4  | 999.632 | 1216.84 |
| ENSMUSG000000052459 | 13_Atp6v1a       | 5519.95 | -0.25124 | 0.01096  | 0.02728  | 5144.88 | 5008.46 | 4967.06 | 5606.68 | 6199.51 | 6193.12 |
| ENSMUSG000000052468 | 7_Pmp2           | 3.71061 | -1.30429 | 0.30636  | 0.42134  | 0.86819 | 0.91781 | 4.78062 | 5.41011 | 2.68959 | 7.59736 |
| ENSMUSG000000052469 | 8_Tcp10c         | 0.15297 | 0.92709  | 0.82027  | NA       | 0       | 0.91781 | 0       | 0       | 0       | 0       |
| ENSMUSG000000052477 | 15_C130026I21Rik | 104.399 | 1.61454  | 2.55E-08 | 3.81E-07 | 176.242 | 126.657 | 169.712 | 42.3792 | 64.5502 | 46.8504 |
| ENSMUSG000000052479 | 5_A330008L17Rik  | 0.45181 | -0.79887 | 0.84362  | NA       | 0       | 0.91781 | 0       | 0       | 1.79306 | 0       |
| ENSMUSG000000052485 | 7_Tmem171        | 53.0276 | 0.71246  | 0.04425  | 0.08756  | 68.5869 | 55.9861 | 72.9044 | 28.8539 | 47.5161 | 44.3179 |
| ENSMUSG000000052488 | 6_Cherp          | 944.682 | 1.17712  | 2.58E-12 | 1.24E-10 | 1183.34 | 1364.78 | 1381.6  | 665.444 | 462.61  | 610.321 |
| ENSMUSG000000052496 | 4_Pkdrej         | 21.5683 | -0.98261 | 0.05947  | 0.11199  | 18.232  | 16.5205 | 8.36608 | 27.9522 | 30.482  | 27.857  |
| ENSMUSG000000052504 | 6_Epha3          | 55.1585 | -0.70723 | 0.02742  | 0.05904  | 46.8822 | 39.4656 | 39.4401 | 72.1348 | 73.5155 | 59.5127 |
| ENSMUSG000000052512 | 15_Nav2          | 325.356 | 0.38262  | 0.04349  | 0.08628  | 371.585 | 345.095 | 389.62  | 339.935 | 271.649 | 234.252 |
| ENSMUSG000000052516 | 17_Robo2         | 392.786 | -1.2205  | 1.21E-05 | 8.01E-05 | 239.62  | 324.903 | 142.223 | 620.36  | 595.296 | 434.316 |
| ENSMUSG000000052525 | 14_SpdyA         | 38.5474 | -0.39473 | 0.35435  | 0.47116  | 32.123  | 29.3698 | 38.2449 | 27.0506 | 47.5161 | 56.9802 |
| ENSMUSG000000052533 | 14_Nup188        | 1547.26 | 0.96642  | 2.97E-10 | 8.34E-09 | 1812.78 | 1987.05 | 2340.11 | 1045.05 | 917.151 | 1181.39 |
| ENSMUSG000000052534 | 15_Pbx1          | 3822.94 | -0.12234 | 0.29719  | 0.41162  | 3631.63 | 3573.02 | 3776.69 | 3619.37 | 3902.6  | 4434.33 |
| ENSMUSG000000052539 | 15_Magi3         | 2215.18 | -0.22113 | 0.05073  | 0.09826  | 1987.28 | 2036.61 | 2114.23 | 2212.74 | 2590.08 | 2350.12 |
| ENSMUSG000000052544 | 9_St6galnac3     | 54.049  | -1.19348 | 0.00363  | 0.0108   | 28.6502 | 50.4793 | 19.1225 | 80.25   | 82.4808 | 63.3113 |
| ENSMUSG000000052549 | 4_Arl13a         | 0.6593  | -2.86602 | 0.41383  | NA       | 0       | 0       | 0       | 0       | 2.68959 | 1.26623 |
| ENSMUSG000000052551 | 15_Adarb2        | 8.01724 | -0.96446 | 0.26969  | 0.38119  | 5.20913 | 6.42464 | 4.78062 | 17.132  | 10.7584 | 3.79868 |
| ENSMUSG000000052557 | 11_Gan           | 2397    | 0.38624  | 0.00137  | 0.00472  | 2787.75 | 2638.69 | 2718.98 | 1967.48 | 1932.92 | 2336.19 |
| ENSMUSG000000052560 | 15_Cpne8         | 1973.35 | -0.00789 | 0.95693  | 0.97193  | 2028.96 | 1866.82 | 2007.86 | 1638.36 | 2255.67 | 2042.42 |
| ENSMUSG000000052562 | 15_Slc22a30      | 1.23252 | -3.75604 | 0.11477  | NA       | 0       | 0       | 0       | 1.80337 | 1.79306 | 3.79868 |
| ENSMUSG000000052563 | 13_D930048N14Rik | 921.335 | 0.57904  | 1.98E-05 | 0.00012  | 1067.87 | 1141.75 | 1100.74 | 643.803 | 786.257 | 787.593 |
| ENSMUSG000000052565 | 6_Hist1h1d       | 1.96983 | -0.08313 | 0.95634  | NA       | 1.73638 | 2.75342 | 1.19515 | 2.70506 | 0.89653 | 2.53245 |
| ENSMUSG000000052566 | 7_Hook2          | 1122.54 | 1.18901  | 4.30E-11 | 1.55E-09 | 1343.09 | 1432.69 | 1905.08 | 634.787 | 616.813 | 802.788 |
| ENSMUSG000000052572 | 15_Dlg2          | 1376.45 | -0.40375 | 0.00117  | 0.0041   | 1198.97 | 1134.41 | 1221.45 | 1399.42 | 1640.65 | 1663.82 |
| ENSMUSG000000052581 | 13_Lrrtm4        | 16.0865 | -2.42245 | 0.00023  | 0.00103  | 6.07732 | 6.42464 | 2.39031 | 33.3624 | 24.2063 | 24.0583 |
| ENSMUSG000000052584 | 9_Serp2          | 12.1143 | -0.91691 | 0.26802  | 0.37944  | 13.891  | 6.42464 | 4.78062 | 30.6573 | 8.06878 | 8.86359 |
| ENSMUSG000000052593 | 15_Adam17        | 2539.67 | 0.01186  | 0.93039  | 0.95401  | 2476.94 | 2412.91 | 2759.61 | 2205.52 | 2526.42 | 2856.61 |
| ENSMUSG000000052595 | 6_A1cf           | 0.19919 | 0.92709  | 0.82027  | NA       | 0       | 0       | 1.19515 | 0       | 0       | 0       |
| ENSMUSG000000052605 | 11_Isoc2b        | 60.1422 | -0.41467 | 0.26659  | 0.37785  | 52.0913 | 41.3013 | 60.9529 | 64.9214 | 46.6196 | 94.967  |
| ENSMUSG000000052609 | 8_Plekhg3        | 2394    | 0.75766  | 1.61E-06 | 1.39E-05 | 2755.63 | 3078.32 | 3191.06 | 1989.12 | 1413.83 | 1936.06 |
| ENSMUSG000000052613 | 16_Pcdh15        | 46.5685 | -2.59413 | 6.07E-05 | 0.00032  | 7.8137  | 25.6986 | 5.97577 | 139.761 | 67.2398 | 32.9219 |
| ENSMUSG000000052616 | 10_Ccdc79        | 33.616  | -0.58309 | 0.16751  | 0.26146  | 30.3866 | 18.3561 | 32.2692 | 37.8708 | 44.8265 | 37.9868 |
| ENSMUSG000000052631 | 14_Sh2d6         | 2.19779 | 2.56632  | 0.16587  | NA       | 1.73638 | 3.67122 | 5.97577 | 1.80337 | 0       | 0       |
| ENSMUSG000000052632 | 15_Asap2         | 840.119 | 0.17925  | 0.20837  | 0.31116  | 865.584 | 829.696 | 981.222 | 703.315 | 802.395 | 858.502 |
| ENSMUSG000000052656 | 12_Rnf103        | 1539.98 | -0.37031 | 0.00345  | 0.01034  | 1373.47 | 1332.65 | 1323.04 | 1520.24 | 1846.85 | 1843.63 |
| ENSMUSG000000052658 | 4_5830454E08Rik  | 8.01356 | -0.77638 | 0.36236  | 0.47954  | 9.55007 | 5.50683 | 2.39031 | 7.21348 | 10.7584 | 12.6623 |
| ENSMUSG000000052673 | 1_Gm9887         | 1.31374 | 2.5888   | 0.30211  | NA       | 0       | 1.83561 | 4.78062 | 0       | 0       | 1.26623 |
| ENSMUSG000000052675 | 10_Zfp112        | 124.481 | -0.56501 | 0.01252  | 0.03049  | 103.314 | 109.219 | 88.4414 | 158.697 | 147.928 | 139.285 |
| ENSMUSG000000052676 | 16_Zmat1         | 179.912 | -1.33909 | 8.88E-09 | 1.54E-07 | 104.183 | 122.068 | 78.8802 | 269.604 | 280.614 | 224.122 |
| ENSMUSG000000052681 | 7_Rap1b          | 3549.19 | -0.23559 | 0.06964  | 0.128    | 3491.85 | 2986.54 | 3302.21 | 3483.21 | 4321.28 | 3710.04 |
| ENSMUSG000000052684 | 4_Jun            | 1410.17 | 1.17264  | 7.63E-11 | 2.56E-09 | 1831.01 | 1643.79 | 2385.53 | 871.028 | 736.948 | 992.722 |
| ENSMUSG000000052688 | 12_Rab7b         | 1931.06 | 0.32355  | 0.02848  | 0.06087  | 2070.63 | 2038.45 | 2329.36 | 1539.18 | 1575.2  | 2033.56 |
| ENSMUSG000000052698 | 14_Tln2          | 883.592 | 0.09314  | 0.60068  | 0.70196  | 860.375 | 1008.67 | 867.682 | 1060.38 | 718.121 | 786.327 |
| ENSMUSG000000052707 | 8_Tnrc6a         | 2925.38 | -0.19839 | 0.07505  | 0.13601  | 2807.72 | 2794.72 | 2570.78 | 2956.63 | 3383.51 | 3038.94 |
| ENSMUSG000000052712 | 16_BC004004      | 1743.26 | -0.09565 | 0.39283  | 0.51037  | 1777.18 | 1640.12 | 1638.56 | 1905.26 | 1695.34 | 1803.11 |
| ENSMUSG000000052713 | 8_Zfp608         | 952.26  | 0.24169  | 0.08327  | 0.14788  | 989.735 | 1074.75 | 1029.03 | 823.239 | 795.223 | 1001.59 |
| ENSMUSG000000052726 | 15_Knt2          | 18.4436 | -1.2949  | 0.02253  | 0.05012  | 8.68188 | 8.26025 | 15.537  | 30.6573 | 25.9994 | 21.5259 |
| ENSMUSG000000052727 | 5_Map1b          | 1598.88 | -0.95646 | 6.08E-07 | 6.00E-06 | 1145.14 | 1277.59 | 838.998 | 2270.44 | 2360.57 | 1700.54 |
| ENSMUSG000000052730 | 6_Gm5111         | 0.21104 | -0.99647 | 0.80707  | NA       | 0       | 0       | 0       | 0       | 0       | 1.26623 |
| ENSMUSG000000052736 | 15_Klrc2         | 3.42232 | 1.77839  | 0.24904  | 0.35803  | 5.20913 | 3.67122 | 7.17092 | 0       | 4.48265 | 0       |
| ENSMUSG000000052738 | 14_Suc1g1        | 1619.4  | -0.03927 | 0.71987  | 0.80064  | 1637.4  | 1487.76 | 1667.24 | 1603.2  | 1653.2  | 1667.62 |
| ENSMUSG000000052748 | 14_Swt1          | 434.461 | -0.31642 | 0.06455  | 0.12007  | 400.235 | 374.465 | 387.23  | 448.138 | 573.78  | 422.92  |
| ENSMUSG000000052749 | 8_Trim30b        | 29.3407 | 2.97307  | 1.49E-07 | 1.78E-06 | 60.7732 | 32.1232 | 63.3432 | 4.50843 | 8.96531 | 6.33113 |
| ENSMUSG000000052751 | 16_Repin1        | 244.966 | 0.12758  | 0.5392   | 0.6468   | 240.488 | 296.451 | 230.665 | 279.522 | 212.478 | 210.194 |
| ENSMUSG000000052752 | 15_Traf7         | 2269.1  | 0.65172  | 2.37E-06 | 1.94E-05 | 2667.07 | 2742.4  | 2909.01 | 1925.1  | 1479.28 | 1891.74 |
| ENSMUSG000000052759 | 7_Gpr25          | 0       | NA       | NA       | NA       | 0       | 0       | 0       | 0       | 0       | 0       |
| ENSMUSG000000052760 | 15_A630001G21Rik | 31.116  | 0.30195  | 0.48232  | 0.59462  | 40.8049 | 26.6164 | 35.8546 | 33.3624 | 25.9994 | 24.0583 |
| ENSMUSG000000052763 | 7_Zfp212         | 510.397 | 0.56398  | 2.84E-05 | 0.00017  | 603.391 | 615.848 | 607.138 | 431.006 | 384.612 | 420.387 |
| ENSMUSG000000052769 | 7_Gm9889         | 0.93857 | 0.07366  | 0.97558  | NA       | 1.73638 | 0       | 1.19515 | 1.80337 | 0.89653 | 0       |
| ENSMUSG000000052776 | 10_Oas1a         | 3085.52 | 1.85627  | 7.30E-23 | 1.85E-20 | 4261.94 | 3945.65 | 6298.46 | 1221.78 | 1293.69 | 1491.62 |
| ENSMUSG000000052783 | 16_Grk4          | 42.8772 | -1.10738 | 0.00336  | 0.01013  | 32.123  | 26.6164 | 22.7079 | 68.5281 | 59.171  | 48.1166 |
| ENSMUSG000000052794 | 13_1700030K09Rik | 244.808 | -0.05314 | 0.78506  | 0.85073  | 252.643 | 234.04  | 234.25  | 294.851 | 212.478 | 240.583 |
| ENSMUSG000000052798 | 12_Nup107        | 576.851 | 0.12063  | 0.43472  | 0.55     | 655.482 | 529.574 | 616.7   | 513.059 | 533.436 | 612.854 |
| ENSMUSG000000052812 | 4_Atd2b          | 528.88  | -0.12445 | 0.48613  | 0.59805  | 577.345 | 440.547 | 499.574 | 458.958 | 604.262 | 592.594 |
| ENSMUSG000000052819 | 5_Best2          | 224.709 | -0.18837 | 0.55061  | 0.6569   | 184.924 | 294.616 | 150.589 | 337.23  | 190.961 | 189.934 |
| ENSMUSG000000052821 | 3_Cysl1r1        | 101.899 | -0.53288 | 0.05539  | 0.10551  | 100.71  | 71.5888 | 77.685  | 112.711 | 146.134 | 102.564 |
| ENSMUSG000000052833 | 8_Sae1           | 2400.14 | 0.09504  | 0.52836  | 0.63712  | 2477.81 | 2303.69 | 2654.44 | 1979.2  | 2227.88 | 2757.84 |
| ENSMUSG000000052837 | 5_Junb           | 1918.89 | 2.52285  | 9.48E-08 | 1.20E-06 | 2854.6  | 2914.95 | 4037.23 | 807.91  | 268.063 | 630.581 |
| ENSMUSG000000052848 | 7_C130026L21Rik  | 0.60112 | -2.7448  | 0.49049  | NA       | 0       | 0       | 0       | 3.60674 | 0       | 0       |
| ENSMUSG000000052850 | 5_Tas2r137       | 0.30239 | -0.03469 | 0.99322  | NA       | 0       | 0.91781 | 0       | 0       | 0.89653 | 0       |
| ENSMUSG000000052852 | 7_Reep1          | 296.997 | -1.52273 | 1.77E-07 | 2.06E-06 | 172.769 | 200.082 | 86.0511 | 520.273 | 448.265 | 354.544 |

|                     |                  |         |          |          |          |         |         |         |         |         |         |
|---------------------|------------------|---------|----------|----------|----------|---------|---------|---------|---------|---------|---------|
| ENSMUSG000000052854 | 15_Nrk           | 63.7293 | -0.92715 | 0.00551  | 0.01527  | 50.3549 | 47.7259 | 33.4643 | 80.25   | 102.204 | 68.3763 |
| ENSMUSG000000052861 | 13_Dnah6         | 10.4873 | -0.92764 | 0.20068  | 0.30164  | 7.8137  | 10.0959 | 3.58546 | 13.5253 | 15.241  | 12.6623 |
| ENSMUSG000000052889 | 11_Prkc          | 1158.9  | -0.65163 | 0.00045  | 0.00181  | 948.062 | 1089.44 | 665.701 | 1451.71 | 1482.86 | 1315.61 |
| ENSMUSG000000052906 | 6_Ubxn8          | 391.661 | -0.45716 | 0.00204  | 0.00663  | 331.648 | 318.479 | 340.619 | 423.792 | 485.92  | 449.511 |
| ENSMUSG000000052909 | 7_Gm9894         | 10.3824 | 0.19215  | 0.80365  | 0.86425  | 18.232  | 10.0959 | 4.78062 | 12.6236 | 8.96531 | 7.59736 |
| ENSMUSG000000052911 | 9_Lamb2          | 2010.93 | 0.92416  | 8.06E-06 | 5.61E-05 | 2209.54 | 3164.59 | 2527.75 | 1781.73 | 1065.08 | 1316.88 |
| ENSMUSG000000052914 | 4_Cyp2j6         | 852.264 | -0.43659 | 0.0009   | 0.00328  | 753.588 | 750.765 | 666.896 | 897.177 | 1022.04 | 1023.11 |
| ENSMUSG000000052915 | 14_Msl1          | 2538.12 | -0.0531  | 0.62601  | 0.7233   | 2585.47 | 2422.09 | 2465.6  | 2381.35 | 2686.01 | 2688.2  |
| ENSMUSG000000052917 | 14_Senp7         | 577.831 | -0.49066 | 0.0007   | 0.00267  | 460.14  | 522.231 | 458.939 | 623.065 | 737.845 | 664.769 |
| ENSMUSG000000052920 | 14_Prkg1         | 442.626 | -1.02513 | 2.89E-12 | 1.37E-10 | 309.075 | 302.876 | 261.739 | 577.98  | 605.158 | 598.925 |
| ENSMUSG000000052921 | 13_Arhgef15      | 105.785 | -0.27573 | 0.33103  | 0.44762  | 95.5007 | 86.2737 | 106.369 | 146.975 | 114.756 | 84.8372 |
| ENSMUSG000000052926 | 15_Rnaseh2a      | 531.452 | 0.42249  | 0.00583  | 0.01601  | 610.336 | 566.286 | 648.969 | 475.188 | 395.37  | 492.562 |
| ENSMUSG000000052928 | 8_Ctif           | 424.135 | 0.55349  | 0.00934  | 0.02385  | 467.085 | 516.725 | 530.648 | 452.646 | 272.545 | 305.161 |
| ENSMUSG000000052934 | 13_Fbxo31        | 348.635 | 0.61733  | 0.00406  | 0.01185  | 388.948 | 446.971 | 431.451 | 360.674 | 229.512 | 234.252 |
| ENSMUSG000000052942 | 13_Glis3         | 278.262 | 0.38679  | 0.02701  | 0.0583   | 308.207 | 291.862 | 346.595 | 220.011 | 263.58  | 239.317 |
| ENSMUSG000000052949 | 14_Rnf157        | 131.767 | -0.62374 | 0.0966   | 0.16708  | 110.26  | 130.328 | 70.5141 | 252.472 | 121.928 | 105.097 |
| ENSMUSG000000052957 | 7_Gas1           | 2406.97 | -0.34913 | 0.00058  | 0.00226  | 2007.25 | 2215.58 | 2128.57 | 2666.28 | 2687.8  | 2736.32 |
| ENSMUSG000000052962 | 3_Mrp35          | 557.745 | -0.32395 | 0.01167  | 0.02877  | 507.89  | 493.779 | 484.037 | 596.916 | 638.33  | 625.516 |
| ENSMUSG000000052974 | 8_Cyp2f2         | 4108.3  | 0.55104  | 0.00317  | 0.00965  | 4597.06 | 4971.75 | 5079.4  | 3258.69 | 2474.42 | 4268.45 |
| ENSMUSG000000052981 | 5_Ube2ql1        | 19.1002 | -0.77426 | 0.22401  | 0.32915  | 9.55007 | 22.0273 | 10.7564 | 38.7725 | 17.0341 | 16.4609 |
| ENSMUSG000000052997 | 15_Uba2          | 2849.78 | 0.01072  | 0.92815  | 0.95237  | 2915.38 | 2718.54 | 2946.05 | 2540.05 | 2902.97 | 3075.67 |
| ENSMUSG000000053004 | 9_Hrh1           | 9.01602 | -0.17707 | 0.82019  | 0.87649  | 11.2864 | 4.58903 | 9.56123 | 12.6236 | 7.17224 | 8.86359 |
| ENSMUSG000000053007 | 8_Creb5          | 181.099 | 0.35349  | 0.06706  | 0.12401  | 213.574 | 199.164 | 196.005 | 144.27  | 161.376 | 172.207 |
| ENSMUSG000000053012 | 17_Krcc1         | 3108.34 | -0.43386 | 0.00307  | 0.00937  | 2702.67 | 2407.4  | 2822.95 | 2953.02 | 3848.81 | 3915.17 |
| ENSMUSG000000053024 | 14_Cntrn2        | 7.90375 | -1.3565  | 0.11912  | 0.1986   | 4.34094 | 6.42464 | 2.39031 | 15.3287 | 6.27571 | 12.6623 |
| ENSMUSG000000053025 | 13_Sv2b          | 652.623 | -1.70046 | 1.84E-07 | 2.13E-06 | 322.966 | 414.848 | 182.859 | 1425.56 | 971.839 | 597.659 |
| ENSMUSG000000053030 | 11_Spink2        | 5.8811  | 1.73446  | 0.07424  | 0.13489  | 11.2864 | 7.34244 | 8.36608 | 1.80337 | 2.68959 | 3.79868 |
| ENSMUSG000000053040 | 13_Aph1c         | 349.169 | -1.31042 | 1.15E-05 | 7.65E-05 | 206.629 | 276.259 | 118.32  | 605.031 | 525.367 | 363.407 |
| ENSMUSG000000053044 | 8_Cd8b1          | 3.78757 | 1.56036  | 0.25979  | 0.36997  | 13.0228 | 2.75342 | 1.19515 | 0.90169 | 3.58612 | 1.26623 |
| ENSMUSG000000053046 | 14_Brsk2         | 25.5625 | -1.78323 | 0.02641  | 0.05719  | 20.8365 | 11.0137 | 2.39031 | 82.0534 | 20.6202 | 16.4609 |
| ENSMUSG000000053054 | 13_Adh6a         | 85.4037 | 1.52635  | 1.20E-07 | 1.47E-06 | 151.065 | 121.15  | 107.564 | 44.1826 | 40.3439 | 48.1166 |
| ENSMUSG000000053062 | 15_Jam2          | 572.94  | -1.25978 | 5.75E-10 | 1.46E-08 | 324.702 | 427.697 | 259.348 | 877.34  | 844.532 | 704.022 |
| ENSMUSG000000053063 | 11_Clec12a       | 56.2464 | 0.84982  | 0.0404   | 0.08122  | 104.183 | 60.5752 | 52.5868 | 53.1994 | 40.3439 | 26.5908 |
| ENSMUSG000000053070 | 4_9230110C19Rik  | 72.4824 | -0.7302  | 0.01294  | 0.03134  | 44.2776 | 63.3286 | 56.1722 | 84.7584 | 97.7218 | 88.6359 |
| ENSMUSG000000053080 | 10_2700081O15Rik | 406.403 | -0.47732 | 0.01774  | 0.04097  | 322.966 | 409.341 | 286.837 | 561.75  | 438.403 | 419.121 |
| ENSMUSG000000053091 | 16_Lins1         | 266.277 | -0.05639 | 0.74331  | 0.8184   | 238.752 | 264.328 | 280.861 | 254.275 | 292.269 | 267.174 |
| ENSMUSG000000053093 | 15_Myh7          | 21.7499 | -1.44164 | 0.02205  | 0.04919  | 11.2864 | 17.4383 | 5.97577 | 38.7725 | 15.241  | 41.7855 |
| ENSMUSG000000053094 | 15_Tmem248       | 3085.73 | 0.19087  | 0.08199  | 0.14611  | 3112.46 | 3218.74 | 3537.66 | 2732.11 | 2892.21 | 3021.22 |
| ENSMUSG000000053101 | 2_Gpr141         | 32.5078 | 2.96848  | 6.87E-07 | 6.62E-06 | 98.1053 | 33.9588 | 40.6352 | 6.3118  | 7.17224 | 8.86359 |
| ENSMUSG000000053110 | 13_Yap1          | 6360.35 | 0.1604   | 0.10536  | 0.17972  | 6454.11 | 6687.13 | 6998.82 | 5811.36 | 5866.9  | 6343.8  |
| ENSMUSG000000053111 | 12_Fank1         | 2.35909 | -1.5407  | 0.32589  | NA       | 2.60457 | 0.91781 | 0       | 5.41011 | 2.68959 | 2.53245 |
| ENSMUSG000000053113 | 3_Socs3          | 294.029 | 2.0766   | 1.05E-12 | 5.56E-11 | 479.24  | 289.109 | 657.335 | 105.497 | 101.308 | 131.688 |
| ENSMUSG000000053117 | 10_E330013P04Rik | 96.7544 | -0.9882  | 0.00014  | 0.00066  | 67.7187 | 72.5066 | 53.7819 | 139.761 | 120.135 | 126.623 |
| ENSMUSG000000053119 | 11_Chmp3         | 4674.9  | -0.31957 | 0.00179  | 0.00591  | 4258.46 | 3993.37 | 4224.87 | 4879.02 | 5200.77 | 5492.89 |
| ENSMUSG000000053128 | 14_Rnf26         | 505.101 | 0.7744   | 2.03E-05 | 0.00013  | 599.918 | 588.313 | 724.263 | 419.284 | 301.234 | 397.595 |
| ENSMUSG000000053134 | 13_Supt17l       | 447.147 | 0.28217  | 0.0682   | 0.12584  | 467.085 | 456.149 | 549.771 | 427.399 | 374.75  | 407.725 |
| ENSMUSG000000053137 | 6_Mapk11         | 1188.16 | 0.60331  | 0.00013  | 0.00061  | 1222.41 | 1373.95 | 1703.09 | 896.275 | 912.668 | 1020.58 |
| ENSMUSG000000053141 | 16_Ptprt         | 86.8294 | -1.78992 | 3.75E-06 | 2.88E-05 | 46.8822 | 42.2191 | 27.4885 | 196.567 | 125.514 | 82.3047 |
| ENSMUSG000000053153 | 14_Spag16        | 2.09523 | -1.41529 | 0.51001  | NA       | 0       | 0       | 3.58546 | 3.60674 | 5.37918 | 0       |
| ENSMUSG000000053158 | 10_Fes           | 312.516 | 1.77642  | 1.76E-16 | 2.06E-14 | 527.859 | 430.451 | 493.599 | 179.435 | 112.066 | 131.688 |
| ENSMUSG000000053161 | 16_Daw1          | 1.05476 | -1.28642 | 0.62189  | NA       | 0       | 1.83561 | 0       | 1.80337 | 2.68959 | 0       |
| ENSMUSG000000053164 | 6_Gpr21          | 9.09183 | -1.16784 | 0.17005  | 0.26451  | 6.07732 | 8.26025 | 2.39031 | 19.8371 | 11.6549 | 6.33113 |
| ENSMUSG000000053166 | 14_Cdh22         | 37.8018 | -0.42559 | 0.38153  | 0.49943  | 27.782  | 49.5615 | 19.1225 | 57.7079 | 29.5855 | 43.0517 |
| ENSMUSG000000053175 | 5_Bcl3           | 427.056 | 1.59645  | 1.57E-09 | 3.48E-08 | 542.618 | 454.314 | 928.635 | 207.388 | 190.064 | 239.317 |
| ENSMUSG000000053178 | 16_Mterf1b       | 28.652  | -0.28045 | 0.56662  | 0.67176  | 35.5957 | 19.2739 | 22.7079 | 23.4438 | 43.0335 | 27.857  |
| ENSMUSG000000053181 | 1_A830005F24Rik  | 36.77   | -0.06552 | 0.86403  | 0.90767  | 32.9912 | 40.3834 | 34.6595 | 42.3792 | 38.5508 | 31.6557 |
| ENSMUSG000000053182 | 10_Gm609         | 0.95396 | -0.15982 | 0.94688  | NA       | 1.73638 | 0.91781 | 0       | 1.80337 | 0       | 1.26623 |
| ENSMUSG000000053184 | 15_Spaca3        | 0.50602 | -1.01212 | 0.76398  | NA       | 0.86819 | 0       | 0       | 0.90169 | 0       | 1.26623 |
| ENSMUSG000000053185 | 2_Gm9898         | 0.19919 | 0.92709  | 0.82027  | NA       | 0       | 0       | 1.19515 | 0       | 0       | 0       |
| ENSMUSG000000053192 | 9_Mlil11         | 254.942 | -0.17184 | 0.37604  | 0.49362  | 226.597 | 211.095 | 283.252 | 293.048 | 272.545 | 243.116 |
| ENSMUSG000000053198 | 13_Prx           | 241.952 | 0.16012  | 0.52919  | 0.63795  | 230.07  | 298.287 | 237.836 | 304.77  | 166.755 | 213.992 |
| ENSMUSG000000053199 | 13_Arhgap20      | 443.775 | -1.86542 | 8.97E-09 | 1.55E-07 | 168.429 | 291.862 | 112.344 | 709.626 | 899.22  | 481.166 |
| ENSMUSG000000053205 | 8_Styx           | 42.7709 | -0.26107 | 0.53704  | 0.64466  | 28.6502 | 55.9861 | 32.2692 | 46.8876 | 57.378  | 35.4544 |
| ENSMUSG000000053216 | 14_Btn2a2        | 0       | NA       | NA       | NA       | 0       | 0       | 0       | 0       | 0       | 0       |
| ENSMUSG000000053219 | 15_Raet1e        | 31.4688 | -1.11484 | 0.01536  | 0.03632  | 27.782  | 14.6849 | 16.7322 | 39.6742 | 36.7578 | 53.1815 |
| ENSMUSG000000053226 | 6_Dand5          | 58.8914 | 0.01223  | 0.97062  | 0.98097  | 52.0913 | 71.5888 | 53.7819 | 71.2332 | 50.2057 | 54.4478 |
| ENSMUSG000000053228 | 12_Ceacam3       | 0.15028 | -0.99647 | 0.80707  | NA       | 0       | 0       | 0       | 0.90169 | 0       | 0       |
| ENSMUSG000000053251 | 5_Olftr212       | 1.43121 | -0.44444 | 0.85745  | NA       | 2.60457 | 0.91781 | 0       | 0       | 0       | 5.06491 |
| ENSMUSG000000053253 | 16_Ndfip2        | 1379.84 | -0.00714 | 0.95093  | 0.96793  | 1380.42 | 1320.72 | 1428.21 | 1277.69 | 1455.07 | 1416.91 |
| ENSMUSG000000053279 | 6_Aldh1a1        | 4407.15 | -0.72438 | 2.33E-08 | 3.55E-07 | 3380.73 | 3439.02 | 3148.04 | 5337.98 | 4859.2  | 6277.95 |
| ENSMUSG000000053286 | 11_Tmt11l        | 764.192 | 0.05178  | 0.75249  | 0.82547  | 728.41  | 741.587 | 864.096 | 619.458 | 842.739 | 788.859 |
| ENSMUSG000000053289 | 7_Ddx10          | 654.325 | -0.28102 | 0.1241   | 0.20518  | 639.855 | 505.711 | 626.261 | 571.669 | 774.602 | 807.853 |
| ENSMUSG000000053291 | 15_Rab4b         | 420.761 | 0.92525  | 5.53E-08 | 7.49E-07 | 540.013 | 551.601 | 562.918 | 345.346 | 253.718 | 270.973 |
| ENSMUSG000000053293 | 9_Pom121         | 984.758 | 1.06516  | 1.60E-09 | 3.53E-08 | 1264.08 | 1244.54 | 1489.16 | 742.087 | 497.574 | 671.1   |
| ENSMUSG000000053297 | 14_Al854703      | 50.7689 | -0.12859 | 0.71359  | 0.79564  | 50.3549 | 47.7259 | 47.8062 | 68.5281 | 48.4127 | 41.7855 |
| ENSMUSG000000053303 | 14_Slc22a26      | 0       | NA       | NA       | NA       | 0       | 0       | 0       | 0       | 0       | 0       |
| ENSMUSG000000053310 | 11_Nrgn          | 2.6838  | 0.58842  | 0.67844  | 0.76749  | 3.47275 | 2.75342 | 3.58546 | 2.70506 | 3.58612 | 0       |
| ENSMUSG000000053317 | 11_Sec61b        | 842.405 | 0.51374  | 0.00073  | 0.00276  | 888.157 | 1019.68 | 1066.08 | 797.09  | 633.847 | 649.574 |
| ENSMUSG000000053318 | 7_Slamf8         | 23.9809 | 2.2529   | 2.77E-05 | 0.00016  | 51.2231 | 29.3698 | 38.2449 | 8.11517 | 8.06878 | 8.86359 |

|                     |                  |         |          |          |          |         |         |         |         |         |         |
|---------------------|------------------|---------|----------|----------|----------|---------|---------|---------|---------|---------|---------|
| ENSMUSG000000053329 | 6_D10Jhu81e      | 968.736 | 0.60323  | 0.00343  | 0.01028  | 1050.51 | 1170.2  | 1284.79 | 982.837 | 556.745 | 767.334 |
| ENSMUSG000000053333 | 15_Dis3l2        | 620.734 | 0.63111  | 5.27E-06 | 3.89E-05 | 706.705 | 733.327 | 823.461 | 504.944 | 454.541 | 501.426 |
| ENSMUSG000000053334 | 6_Ficd           | 206.682 | 0.47082  | 0.04396  | 0.08707  | 239.62  | 248.725 | 231.86  | 218.208 | 128.204 | 173.473 |
| ENSMUSG000000053338 | 9_Tarm1          | 3.80893 | 4.31502  | 0.00893  | 0.02296  | 9.55007 | 3.67122 | 8.36608 | 0       | 0       | 1.26623 |
| ENSMUSG000000053347 | 14_Zfp943        | 336.588 | -0.71603 | 9.62E-05 | 0.00048  | 243.961 | 291.862 | 227.079 | 363.379 | 428.542 | 464.705 |
| ENSMUSG000000053358 | 2_Gm9905         | 17.1245 | -0.46729 | 0.42099  | 0.53667  | 13.891  | 14.6849 | 14.3418 | 11.7219 | 21.5167 | 26.5908 |
| ENSMUSG000000053360 | 4_F730035P03Rik  | 0.44827 | -2.3261  | 0.56139  | NA       | 0       | 0       | 0       | 0       | 2.68959 | 0       |
| ENSMUSG000000053367 | 15_Gm6792        | 0.29884 | -1.76064 | 0.66373  | NA       | 0       | 0       | 0       | 0       | 1.79306 | 0       |
| ENSMUSG000000053368 | 13_Rxrp2         | 4.84095 | -0.33432 | 0.75056  | 0.82387  | 3.47275 | 4.58903 | 4.78062 | 1.80337 | 8.06878 | 6.33113 |
| ENSMUSG000000053375 | 7_Atp6v1e2       | 0.15028 | -0.99647 | 0.80707  | NA       | 0       | 0       | 0       | 0.90169 | 0       | 0       |
| ENSMUSG000000053388 | 10_Trim50        | 0.1447  | 0.92709  | 0.82027  | NA       | 0.86819 | 0       | 0       | 0       | 0       | 0       |
| ENSMUSG000000053390 | 15_Zfp952        | 460.65  | -0.47727 | 0.00367  | 0.01088  | 409.785 | 363.451 | 382.449 | 477.893 | 621.296 | 509.023 |
| ENSMUSG000000053395 | 15_Cacng8        | 0.804   | -1.9047  | 0.51039  | NA       | 0.86819 | 0       | 0       | 0       | 2.68959 | 1.26623 |
| ENSMUSG000000053398 | 11_Phgdh         | 2238.44 | 0.66916  | 0.0002   | 0.0009   | 2610.64 | 2667.14 | 2967.57 | 2099.12 | 1291.9  | 1794.24 |
| ENSMUSG000000053399 | 8_Adamts18       | 131.797 | -0.73855 | 0.09064  | 0.15865  | 75.5324 | 162.452 | 57.3674 | 150.581 | 94.1357 | 250.713 |
| ENSMUSG000000053411 | 16_Cbx7          | 583.234 | -0.03894 | 0.84621  | 0.89533  | 551.3   | 647.053 | 528.258 | 761.924 | 505.643 | 505.225 |
| ENSMUSG000000053414 | 7_Hunk           | 791.336 | -0.63685 | 0.00108  | 0.00383  | 582.554 | 788.395 | 486.428 | 1078.42 | 892.944 | 919.281 |
| ENSMUSG000000053420 | 5_Gm4792         | 3.18979 | -0.38638 | 0.78677  | 0.85201  | 3.47275 | 3.67122 | 1.19515 | 7.21348 | 3.58612 | 0       |
| ENSMUSG000000053436 | 14_Mapk14        | 2615.25 | 0.24047  | 0.02053  | 0.0463   | 2863.29 | 2721.29 | 2912.59 | 2281.26 | 2385.67 | 2527.39 |
| ENSMUSG000000053441 | 4_Adamts19       | 2.06766 | -1.25858 | 0.43504  | NA       | 1.73638 | 1.83561 | 0       | 4.50843 | 1.79306 | 2.53245 |
| ENSMUSG000000053453 | 8_Thoc7          | 963.09  | -0.55847 | 5.66E-05 | 0.0003   | 819.57  | 728.738 | 788.802 | 1026.12 | 1282.04 | 1133.27 |
| ENSMUSG000000053460 | 8_Ggcx           | 642.35  | 0.23716  | 0.07678  | 0.13861  | 645.064 | 682.847 | 757.728 | 568.964 | 591.71  | 607.789 |
| ENSMUSG000000053461 | 9_Hhip12         | 3.31538 | -0.23535 | 0.84417  | 0.89372  | 1.73638 | 2.75342 | 4.78062 | 3.60674 | 4.48265 | 2.53245 |
| ENSMUSG000000053465 | 5_Hs6st3         | 3.16778 | -1.22698 | 0.32961  | 0.4462   | 1.73638 | 2.75342 | 1.19515 | 5.41011 | 5.37918 | 2.53245 |
| ENSMUSG000000053469 | 13_Tg            | 14.9912 | -0.58078 | 0.3879   | 0.50531  | 11.2864 | 13.7671 | 10.7564 | 21.6405 | 7.17224 | 25.3245 |
| ENSMUSG000000053470 | 13_Kdm3a         | 2245.35 | -0.05716 | 0.63826  | 0.73436  | 2188.7  | 2122.88 | 2291.11 | 2033.3  | 2477.11 | 2358.98 |
| ENSMUSG000000053475 | 5_Tnfaip6        | 53.3542 | 0.32597  | 0.35432  | 0.47115  | 67.7187 | 41.3013 | 69.3189 | 47.7893 | 48.4127 | 45.5842 |
| ENSMUSG000000053477 | 15_Tcf4          | 1804.91 | -0.82935 | 1.94E-09 | 4.15E-08 | 1304.89 | 1440.04 | 1154.52 | 2510.29 | 2350.7  | 2069.01 |
| ENSMUSG000000053483 | 13_Usp21         | 621.281 | 0.55642  | 0.00017  | 0.00078  | 654.614 | 792.984 | 772.07  | 545.52  | 472.472 | 490.03  |
| ENSMUSG000000053490 | 7_Trim60         | 0.2997  | -1.76345 | 0.66322  | NA       | 0       | 0       | 0       | 0.90169 | 0.89653 | 0       |
| ENSMUSG000000053510 | 12_Nrd1          | 4806.58 | -0.20432 | 0.08184  | 0.14593  | 4549.31 | 4454.11 | 4395.78 | 4522.85 | 5505.59 | 5411.85 |
| ENSMUSG000000053519 | 15_Kcnp1         | 6.16041 | -2.21515 | 0.06436  | 0.11976  | 3.47275 | 1.83561 | 1.19515 | 23.4438 | 4.48265 | 2.53245 |
| ENSMUSG000000053522 | 11_Lgals7        | 567.142 | 2.18905  | 1.51E-15 | 1.56E-13 | 934.171 | 677.341 | 1179.62 | 275.916 | 134.48  | 201.33  |
| ENSMUSG000000053536 | 6_Cstf2t         | 2125.86 | 0.04064  | 0.70523  | 0.7889   | 2153.11 | 2161.43 | 2151.28 | 1958.46 | 2087.12 | 2243.75 |
| ENSMUSG000000053550 | 13_Shisa7        | 10.2973 | -1.9238  | 0.02484  | 0.05436  | 8.68188 | 2.75342 | 1.19515 | 18.0337 | 19.7237 | 11.396  |
| ENSMUSG000000053552 | 14_Ebf4          | 102.043 | 0.08258  | 0.78474  | 0.8505   | 93.7643 | 117.479 | 103.978 | 135.253 | 74.412  | 87.3697 |
| ENSMUSG000000053553 | 11_3110082l17Rik | 192.566 | 0.49763  | 0.02873  | 0.06125  | 210.102 | 198.246 | 267.715 | 162.303 | 130.893 | 186.135 |
| ENSMUSG000000053559 | 12_Smagp         | 1184.88 | 0.43886  | 0.00554  | 0.01534  | 1327.46 | 1347.34 | 1416.26 | 1168.58 | 811.36  | 1038.31 |
| ENSMUSG000000053560 | 4_Ier2           | 663.911 | 1.43879  | 2.86E-09 | 5.79E-08 | 903.784 | 854.477 | 1152.13 | 477.893 | 239.374 | 355.81  |
| ENSMUSG000000053565 | 9_Eif3k          | 2954.69 | 0.40586  | 0.01447  | 0.03448  | 3354.68 | 3243.52 | 3504.19 | 2999.01 | 1949.95 | 2676.8  |
| ENSMUSG000000053580 | 15_Tanc2         | 979.474 | 0.24325  | 0.08315  | 0.14772  | 1021.86 | 1088.52 | 1073.25 | 807.009 | 851.704 | 1034.51 |
| ENSMUSG000000053581 | 13_Zfand2a       | 491.32  | 0.00896  | 0.95136  | 0.96825  | 499.208 | 466.245 | 513.916 | 542.815 | 457.231 | 468.504 |
| ENSMUSG000000053588 | 3_A730061H03Rik  | 5.77973 | 1.26183  | 0.25936  | 0.36951  | 5.20913 | 6.42464 | 13.1467 | 6.3118  | 3.58612 | 0       |
| ENSMUSG000000053593 | 10_Fate1         | 0.14942 | -0.99647 | 0.80707  | NA       | 0       | 0       | 0       | 0       | 0.89653 | 0       |
| ENSMUSG000000053600 | 7_Zfp472         | 286.351 | -0.48328 | 0.0227   | 0.05045  | 238.752 | 233.123 | 245.007 | 264.194 | 420.473 | 316.557 |
| ENSMUSG000000053603 | 4_4930442H23Rik  | 1.58284 | 0.49813  | 0.79126  | NA       | 4.34094 | 0       | 1.19515 | 0.90169 | 1.79306 | 1.26623 |
| ENSMUSG000000053604 | 5_Rpia           | 1146.61 | 0.46223  | 0.00037  | 0.00153  | 1284.05 | 1243.63 | 1458.09 | 922.424 | 924.323 | 1047.17 |
| ENSMUSG000000053615 | 1_Gm9913         | 2.11662 | 1.84334  | 0.39296  | NA       | 0       | 6.42464 | 3.58546 | 0       | 2.68959 | 0       |
| ENSMUSG000000053617 | 11_Sh3pxd2a      | 5821.12 | 0.51151  | 0.00012  | 0.00057  | 6454.11 | 6467.78 | 7604.77 | 4943.94 | 4203.83 | 5252.31 |
| ENSMUSG000000053626 | 4_Tll1           | 101.001 | -0.65614 | 0.00662  | 0.01783  | 83.3461 | 76.1779 | 75.2947 | 114.514 | 123.721 | 132.954 |
| ENSMUSG000000053640 | 2_Gm9915         | 0.15028 | -0.99647 | 0.80707  | NA       | 0       | 0       | 0       | 0.90169 | 0       | 0       |
| ENSMUSG000000053641 | 8_Dennd4a        | 607.452 | -0.57777 | 0.00037  | 0.00153  | 541.75  | 490.108 | 430.255 | 805.205 | 746.81  | 630.581 |
| ENSMUSG000000053644 | 13_Aldh7a1       | 839.397 | -0.28044 | 0.09843  | 0.16988  | 745.774 | 881.093 | 646.578 | 1057.68 | 817.636 | 887.625 |
| ENSMUSG000000053646 | 13_Plxbn1        | 6132.77 | 1.12333  | 5.83E-15 | 5.32E-13 | 7549.77 | 8250.15 | 9419.01 | 4033.24 | 3284.89 | 4259.59 |
| ENSMUSG000000053647 | 4_Gper1          | 4.87059 | 0.01509  | 0.98949  | 0.99288  | 6.07732 | 7.34244 | 1.19515 | 9.01685 | 1.79306 | 3.79868 |
| ENSMUSG000000053654 | 7_Krt42          | 1.45486 | 3.95934  | 0.14087  | NA       | 0       | 2.75342 | 5.97577 | 0       | 0       | 0       |
| ENSMUSG000000053675 | 8_Tgm5           | 411.47  | 0.56624  | 0.00029  | 0.00123  | 474.899 | 450.643 | 548.576 | 311.983 | 343.371 | 339.349 |
| ENSMUSG000000053684 | 8_BC048403       | 127.839 | 0.63158  | 0.00751  | 0.01982  | 146.724 | 167.958 | 150.589 | 101.89  | 83.3773 | 116.493 |
| ENSMUSG000000053687 | 14_Dpep2         | 44.6398 | 0.89952  | 0.02858  | 0.06103  | 81.6097 | 45.8903 | 46.611  | 36.9691 | 25.1029 | 31.6557 |
| ENSMUSG000000053693 | 16_Mast1         | 43.424  | 0.38323  | 0.36235  | 0.47954  | 41.673  | 59.6574 | 46.611  | 55.0028 | 32.2751 | 25.3245 |
| ENSMUSG000000053702 | 16_Nebl          | 3627.5  | -0.33302 | 0.01488  | 0.03536  | 3192.33 | 3094.84 | 3345.24 | 3429.11 | 4613.55 | 4089.91 |
| ENSMUSG000000053716 | 9_Dusp7          | 1415.89 | 1.06576  | 4.70E-07 | 4.81E-06 | 1735.51 | 1566.69 | 2447.68 | 1119.89 | 725.293 | 900.287 |
| ENSMUSG000000053730 | 15_Tmem39b       | 157.356 | 1.23251  | 1.64E-07 | 1.94E-06 | 192.738 | 208.342 | 261.739 | 107.301 | 81.5843 | 92.4346 |
| ENSMUSG000000053742 | 8_Gm5114         | 0.45084 | -2.33355 | 0.56009  | NA       | 0       | 0       | 0       | 2.70506 | 0       | 0       |
| ENSMUSG000000053746 | 8_Pthr1          | 80.771  | 1.02537  | 0.00024  | 0.00105  | 101.578 | 97.2874 | 126.686 | 55.0028 | 54.6884 | 49.3828 |
| ENSMUSG000000053749 | 12_Gm9920        | 3.3472  | -0.55881 | 0.70497  | 0.78877  | 0       | 4.58903 | 3.58546 | 7.21348 | 0.89653 | 3.79868 |
| ENSMUSG000000053754 | 13_Chnd8         | 2865.9  | 0.14468  | 0.22778  | 0.33354  | 2898.88 | 3013.16 | 3115.77 | 2404.8  | 2864.42 | 2898.39 |
| ENSMUSG000000053765 | 4_Oas1f          | 3.51737 | -0.78705 | 0.5191   | 0.62917  | 1.73638 | 3.67122 | 2.39031 | 2.70506 | 8.06878 | 2.53245 |
| ENSMUSG000000053768 | 13_Chchd3        | 1792.97 | -0.36449 | 0.00033  | 0.00138  | 1549.72 | 1527.23 | 1626.6  | 1983.71 | 2024.37 | 2046.22 |
| ENSMUSG000000053769 | 5_Lysmd1         | 208.047 | 0.05502  | 0.84131  | 0.89203  | 145.856 | 189.068 | 302.374 | 210.994 | 199.926 | 200.064 |
| ENSMUSG000000053773 | 4_Rdh8           | 16.0836 | -1.90487 | 0.01544  | 0.0365   | 10.4183 | 7.34244 | 2.39031 | 43.2809 | 24.2063 | 8.86359 |
| ENSMUSG000000053774 | 5_Ubxn7          | 1328.2  | -0.38079 | 0.00135  | 0.00464  | 1205.05 | 1099.53 | 1156.91 | 1387.69 | 1596.72 | 1523.27 |
| ENSMUSG000000053783 | 5_1700016K19Rik  | 0.30239 | -0.03469 | 0.99322  | NA       | 0       | 0.91781 | 0       | 0       | 0.89653 | 0       |
| ENSMUSG000000053797 | 10_Krt16         | 4099.76 | 4.71214  | 2.48E-66 | 2.11E-62 | 7170.37 | 4637.67 | 11885.8 | 279.522 | 283.304 | 341.881 |
| ENSMUSG000000053799 | 6_Exoc6          | 501.013 | -0.47468 | 0.00342  | 0.01026  | 453.194 | 393.739 | 411.133 | 519.371 | 671.501 | 557.14  |
| ENSMUSG000000053801 | 16_Gwnd1         | 303.046 | 1.30166  | 2.67E-10 | 7.61E-09 | 364.639 | 410.259 | 518.697 | 188.452 | 188.824 | 187.402 |
| ENSMUSG000000053819 | 16_Camk2d        | 1682.44 | -0.42492 | 0.00014  | 0.00065  | 1504.57 | 1400.57 | 1404.31 | 1867.39 | 2060.23 | 1857.55 |
| ENSMUSG000000053820 | 4_Bcl2a1c        | 0.14942 | -0.99647 | 0.80707  | NA       | 0       | 0       | 0       | 0       | 0.89653 | 0       |
| ENSMUSG000000053821 | 3_Gm9922         | 1.44391 | 2.81436  | 0.20786  | NA       | 0.86819 | 0.91781 | 5.97577 | 0.90169 | 0       | 0       |

|                     |                  |         |          |          |          |         |         |         |         |         |         |
|---------------------|------------------|---------|----------|----------|----------|---------|---------|---------|---------|---------|---------|
| ENSMUSG000000053825 | 14_Ppfia2        | 375.126 | -0.50881 | 0.00086  | 0.00314  | 327.307 | 297.369 | 304.764 | 447.236 | 468.885 | 405.193 |
| ENSMUSG000000053830 | 3_Gm9923         | 78.0585 | 0.23678  | 0.448    | 0.5629   | 69.4551 | 75.2601 | 108.759 | 72.1348 | 59.171  | 83.571  |
| ENSMUSG000000053835 | 17_H2-T24        | 652.138 | 2.0101   | 2.14E-23 | 5.75E-21 | 1053.98 | 867.326 | 1215.47 | 247.062 | 320.061 | 208.927 |
| ENSMUSG000000053838 | 14_Nudcd3        | 2802.53 | 0.22911  | 0.06035  | 0.1135   | 2931.87 | 2977.36 | 3163.57 | 2661.78 | 2277.19 | 2803.43 |
| ENSMUSG000000053841 | 15_Tltna         | 1677.6  | 0.48841  | 3.27E-05 | 0.00019  | 1911.75 | 1891.6  | 2072.4  | 1396.71 | 1290.11 | 1503.01 |
| ENSMUSG000000053846 | 4_Lipg           | 142.126 | 1.19395  | 1.98E-06 | 1.66E-05 | 213.574 | 149.602 | 230.665 | 91.0702 | 84.2739 | 83.571  |
| ENSMUSG000000053861 | 1_Gm9925         | 1.0377  | 3.49767  | 0.23499  | NA       | 3.47275 | 2.75342 | 0       | 0       | 0       | 0       |
| ENSMUSG000000053870 | 7_Fpgt           | 591.9   | -0.38446 | 0.0341   | 0.07061  | 534.804 | 498.368 | 507.94  | 574.374 | 838.256 | 597.659 |
| ENSMUSG000000053877 | 12_Srcap         | 3033.69 | 0.71364  | 7.53E-07 | 7.15E-06 | 3575.2  | 3827.25 | 3904.57 | 2623.9  | 1897.06 | 2374.18 |
| ENSMUSG000000053886 | 3_Sh2d4a         | 2025.18 | -0.14687 | 0.31733  | 0.43268  | 1990.76 | 1743.83 | 2031.76 | 1775.42 | 2345.32 | 2264.01 |
| ENSMUSG000000053897 | 15_Slc39a8       | 2631.43 | -0.22006 | 0.08145  | 0.14537  | 2594.15 | 2360.6  | 2336.53 | 2503.98 | 2879.66 | 3113.65 |
| ENSMUSG000000053898 | 12_Ech1          | 2788.82 | 0.18988  | 0.15691  | 0.24823  | 3013.48 | 2914.03 | 2989.08 | 3007.12 | 2262.84 | 2546.38 |
| ENSMUSG000000053907 | 10_Mat2a         | 7004.3  | -0.4334  | 0.00184  | 0.00607  | 6066.03 | 5799.61 | 6015.21 | 6955.6  | 9527.43 | 7661.94 |
| ENSMUSG000000053914 | 9_Kdm4d          | 7.43036 | -0.26833 | 0.73806  | 0.81477  | 6.94551 | 7.34244 | 5.97577 | 9.91854 | 8.06878 | 6.33113 |
| ENSMUSG000000053916 | 4_Nanp           | 3.44889 | 4.17424  | 0.05303  | 0.1017   | 18.232  | 0       | 1.19515 | 0       | 0       | 1.26623 |
| ENSMUSG000000053929 | 16_Cyhr1         | 2043.62 | 0.47797  | 0.005    | 0.01409  | 2200.86 | 2521.21 | 2415.41 | 2083.8  | 1347.49 | 1692.95 |
| ENSMUSG000000053930 | 13_Shisa6        | 29.9563 | -1.392   | 0.00788  | 0.02067  | 19.1001 | 22.9451 | 7.17092 | 43.2809 | 55.5849 | 31.6557 |
| ENSMUSG000000053931 | 11_Cnn3          | 6670.16 | -0.3466  | 0.00041  | 0.00166  | 6069.51 | 5928.11 | 5619.61 | 7818.51 | 7137.28 | 7447.95 |
| ENSMUSG000000053950 | 10_Adnp2         | 1032.24 | 0.31209  | 0.03002  | 0.06352  | 1104.34 | 1103.2  | 1223.84 | 1054.97 | 813.153 | 893.956 |
| ENSMUSG000000053957 | 5_Gm12474        | 2.08237 | -1.79227 | 0.35048  | NA       | 0       | 2.75342 | 0       | 6.3118  | 0.89653 | 2.53245 |
| ENSMUSG000000053963 | 6_6330403A02Rik  | 42.814  | -1.72772 | 0.00125  | 0.00437  | 13.0228 | 36.7122 | 9.56123 | 85.6601 | 66.3433 | 45.5842 |
| ENSMUSG000000053964 | 16_Lgals4        | 191.42  | -0.11692 | 0.60322  | 0.70394  | 174.506 | 193.657 | 184.054 | 229.93  | 216.96  | 149.415 |
| ENSMUSG000000053965 | 10_Pde5a         | 2585.24 | -0.59502 | 3.13E-07 | 3.36E-06 | 2127.06 | 2144.91 | 1906.27 | 3057.62 | 3361.99 | 2913.59 |
| ENSMUSG000000053977 | 13_Cd8a          | 8.07199 | 3.99132  | 0.00182  | 0.00602  | 30.3866 | 4.58903 | 10.7564 | 1.80337 | 0.89653 | 0       |
| ENSMUSG000000053980 | 4_Gm9930         | 0       | NA       | NA       | NA       | 0       | 0       | 0       | 0       | 0       | 0       |
| ENSMUSG000000053985 | 9_Zfp14          | 33.0142 | -0.81564 | 0.08892  | 0.15612  | 33.8593 | 21.1095 | 16.7322 | 48.691  | 51.1022 | 26.5908 |
| ENSMUSG000000054000 | 5_Tusc1          | 51.609  | 0.2331   | 0.49944  | 0.61046  | 52.9595 | 53.2327 | 60.9529 | 35.1657 | 52.8953 | 54.4478 |
| ENSMUSG000000054003 | 13_Tdrd9         | 15.4926 | -1.03204 | 0.13935  | 0.22483  | 15.6274 | 11.0137 | 3.58546 | 30.6573 | 14.3445 | 17.7272 |
| ENSMUSG000000054005 | 4_Mill1          | 0.44709 | 0.74829  | 0.83033  | NA       | 0.86819 | 0.91781 | 0       | 0       | 0.89653 | 0       |
| ENSMUSG000000054008 | 8_Ndst1          | 3380.96 | 0.53015  | 3.36E-06 | 2.62E-05 | 3851.28 | 4020.91 | 4112.53 | 2865.56 | 2485.18 | 2950.31 |
| ENSMUSG000000054013 | 5_Tmem179        | 4.64038 | -0.82428 | 0.54911  | 0.65553  | 1.73638 | 8.26025 | 0       | 12.6236 | 2.68959 | 2.53245 |
| ENSMUSG000000054021 | 5_Sirt5          | 145.185 | -0.00508 | 0.98117  | 0.98754  | 130.228 | 154.191 | 150.589 | 158.697 | 131.79  | 145.616 |
| ENSMUSG000000054027 | 7_Nt5dc3         | 525.395 | -0.12079 | 0.41611  | 0.53205  | 480.976 | 561.697 | 467.305 | 587.899 | 522.677 | 531.815 |
| ENSMUSG000000054034 | 10_Tceal5        | 74.3847 | -1.48265 | 2.71E-05 | 0.00016  | 29.5184 | 57.8218 | 29.8789 | 122.629 | 95.0322 | 111.428 |
| ENSMUSG000000054046 | 7_Klk13          | 29.9236 | 3.26038  | 0.00025  | 0.00109  | 54.6959 | 11.9315 | 95.6123 | 0       | 7.17224 | 10.1298 |
| ENSMUSG000000054051 | 6_Ercc6          | 707.79  | 0.00665  | 0.96253  | 0.97587  | 690.21  | 686.519 | 750.557 | 642.902 | 681.363 | 795.191 |
| ENSMUSG000000054052 | 5_Rdh19          | 65.4576 | 1.64421  | 1.10E-05 | 7.36E-05 | 96.3689 | 71.5888 | 129.077 | 23.4438 | 30.482  | 41.7855 |
| ENSMUSG000000054057 | 2_A930004D18Rik  | 47.4015 | 0.16113  | 0.68359  | 0.77162  | 39.0685 | 68.8354 | 41.8304 | 48.691  | 34.0682 | 51.9153 |
| ENSMUSG000000054061 | 8_Gm9934         | 3.10209 | -0.0201  | 0.98746  | 0.99122  | 3.47275 | 4.58903 | 1.19515 | 3.60674 | 4.48265 | 1.26623 |
| ENSMUSG000000054065 | 11_Pkp3          | 7847.42 | 1.71636  | 1.10E-17 | 1.54E-15 | 10190.8 | 11388.1 | 14518.7 | 3937.66 | 2668.07 | 4381.15 |
| ENSMUSG000000054072 | 11_ligp1         | 1305.76 | 3.58535  | 1.62E-38 | 2.30E-35 | 2493.44 | 1928.31 | 2812.2  | 151.483 | 311.096 | 138.019 |
| ENSMUSG000000054074 | 9_Skida1         | 58.8733 | -1.30863 | 0.00141  | 0.00481  | 33.8593 | 40.3834 | 27.4885 | 108.202 | 97.7218 | 45.5842 |
| ENSMUSG000000054079 | 12_Utp18         | 546.835 | -0.24843 | 0.10572  | 0.18017  | 513.968 | 517.642 | 467.305 | 518.469 | 663.433 | 600.192 |
| ENSMUSG000000054083 | 7_Capn12         | 4.58496 | -0.63141 | 0.62708  | 0.72415  | 7.8137  | 2.75342 | 0       | 1.80337 | 6.27571 | 8.86359 |
| ENSMUSG000000054091 | 9_1810037117Rik  | 1636.57 | 0.10876  | 0.34715  | 0.46398  | 1725.96 | 1574.95 | 1795.12 | 1669.02 | 1528.58 | 1525.8  |
| ENSMUSG000000054099 | 11_Slc25a40      | 245.59  | -0.54659 | 0.00569  | 0.01569  | 188.397 | 214.767 | 196.005 | 255.177 | 346.957 | 272.239 |
| ENSMUSG000000054115 | 11_Skp2          | 161.274 | 0.15872  | 0.4853   | 0.59717  | 198.815 | 147.767 | 163.736 | 134.351 | 174.823 | 148.149 |
| ENSMUSG000000054128 | 16_H2-T3         | 6.57843 | 1.72493  | 0.08394  | 0.14881  | 10.4183 | 5.50683 | 14.3418 | 4.50843 | 0.89653 | 3.79868 |
| ENSMUSG000000054135 | 2_A430110L20Rik  | 37.1503 | 0.15742  | 0.67515  | 0.76469  | 42.5412 | 41.3013 | 33.4643 | 36.9691 | 33.1716 | 35.4544 |
| ENSMUSG000000054136 | 5_Adm2           | 0.79925 | 1.84822  | 0.46767  | NA       | 0.86819 | 1.83561 | 1.19515 | 0       | 0.89653 | 0       |
| ENSMUSG000000054146 | 8_Krt15          | 37763.1 | 0.89813  | 1.19E-08 | 1.99E-07 | 44944.4 | 44732   | 57778.5 | 26204.8 | 22454.5 | 30464.2 |
| ENSMUSG000000054150 | 11_Syne3         | 893.666 | 0.74132  | 2.88E-06 | 2.30E-05 | 1044.43 | 1045.38 | 1265.67 | 747.497 | 570.193 | 688.827 |
| ENSMUSG000000054161 | 10_Fam83e        | 152.103 | 1.03118  | 3.14E-05 | 0.00018  | 180.583 | 193.657 | 237.836 | 100.087 | 78.8947 | 121.558 |
| ENSMUSG000000054162 | 15_Spock3        | 82.601  | -1.81999 | 5.88E-09 | 1.08E-07 | 31.2548 | 45.8903 | 32.2692 | 148.778 | 133.583 | 103.831 |
| ENSMUSG000000054169 | 7_Ceacam10       | 3.7316  | -0.78458 | 0.56189  | 0.66732  | 1.73638 | 6.42464 | 0       | 7.21348 | 4.48265 | 2.53245 |
| ENSMUSG000000054178 | 1_Gm9938         | 104.863 | -0.85897 | 0.00048  | 0.00192  | 76.4006 | 78.0135 | 69.3189 | 138.86  | 148.824 | 117.759 |
| ENSMUSG000000054191 | 7_Klf1           | 1.30201 | 0.18591  | 0.94025  | NA       | 0       | 1.83561 | 2.39031 | 0       | 3.58612 | 0       |
| ENSMUSG000000054196 | 6_Cthrc1         | 272.057 | -1.18366 | 1.90E-07 | 2.19E-06 | 170.165 | 203.753 | 124.296 | 394.938 | 421.369 | 317.823 |
| ENSMUSG000000054199 | 16_Gon4l         | 1528.13 | 0.44542  | 0.00017  | 0.00079  | 1710.33 | 1745.67 | 1829.78 | 1339    | 1172.66 | 1371.32 |
| ENSMUSG000000054200 | 6_Ffar4          | 0.2894  | 1.67273  | 0.67976  | NA       | 1.73638 | 0       | 0       | 0       | 0       | 0       |
| ENSMUSG000000054203 | 7_lfl205         | 244.672 | 1.94329  | 2.22E-07 | 2.49E-06 | 450.59  | 267.999 | 446.988 | 50.4944 | 165.858 | 86.1034 |
| ENSMUSG000000054204 | 6_Fam150b        | 3.57616 | -0.74949 | 0.54122  | 0.64818  | 0.86819 | 3.67122 | 3.58546 | 7.21348 | 3.58612 | 2.53245 |
| ENSMUSG000000054206 | 2_Gzmm           | 33.0433 | -0.55761 | 0.2591   | 0.36925  | 32.9912 | 21.1095 | 26.2934 | 62.2163 | 27.7924 | 27.857  |
| ENSMUSG000000054215 | 2_Spr2k          | 0.1447  | 0.92709  | 0.82027  | NA       | 0.86819 | 0       | 0       | 0       | 0       | 0       |
| ENSMUSG000000054226 | 13_Tprkb         | 742.334 | -1.03744 | 3.00E-07 | 3.24E-06 | 493.131 | 603.916 | 360.937 | 1129.81 | 986.184 | 880.028 |
| ENSMUSG000000054237 | 5_Fra10ac1       | 272.413 | -0.37111 | 0.03224  | 0.06743  | 256.984 | 208.342 | 247.397 | 293.048 | 314.682 | 314.024 |
| ENSMUSG000000054252 | 17_Fgfr3         | 2439.17 | 1.26157  | 2.26E-11 | 8.78E-10 | 3016.09 | 3069.14 | 4241.6  | 1522.05 | 1135.01 | 1651.16 |
| ENSMUSG000000054256 | 11_Msi1          | 234.862 | -0.76732 | 0.03217  | 0.06735  | 178.847 | 247.808 | 94.4172 | 428.301 | 248.339 | 211.46  |
| ENSMUSG000000054258 | 8_Gm5082         | 0.29767 | 1.70332  | 0.67406  | NA       | 0.86819 | 0.91781 | 0       | 0       | 0       | 0       |
| ENSMUSG000000054263 | 11_Lifr          | 2753.58 | 0.11561  | 0.4591   | 0.57285  | 2953.58 | 2676.32 | 2960.4  | 2096.42 | 2824.97 | 3009.82 |
| ENSMUSG000000054277 | 7_Arfgap3        | 2089.46 | 0.49763  | 6.15E-05 | 0.00033  | 2319.8  | 2514.79 | 2502.65 | 1747.47 | 1543.83 | 1908.2  |
| ENSMUSG000000054280 | 14_Prr14l        | 1354.97 | 0.0303   | 0.80218  | 0.86317  | 1322.25 | 1335.41 | 1450.92 | 1241.62 | 1448.79 | 1330.8  |
| ENSMUSG000000054293 | 10_A630033H20Rik | 16.9965 | -0.02933 | 0.96028  | 0.97417  | 13.891  | 12.8493 | 23.9031 | 11.7219 | 20.6202 | 18.9934 |
| ENSMUSG000000054302 | 15_Eapp          | 1010.21 | -0.43291 | 0.00058  | 0.00226  | 878.607 | 812.258 | 889.195 | 1084.73 | 1263.21 | 1133.27 |
| ENSMUSG000000054309 | 8_Cpsf3          | 1267.31 | 0.1169   | 0.47229  | 0.5854   | 1297.94 | 1212.42 | 1444.94 | 977.427 | 1297.28 | 1373.86 |
| ENSMUSG000000054312 | 6_Mrps21         | 758.197 | 0.0486   | 0.73956  | 0.81581  | 727.542 | 742.505 | 843.779 | 828.649 | 663.433 | 743.275 |
| ENSMUSG000000054320 | 14_Lrrc36        | 41.8156 | 0.44034  | 0.28187  | 0.39483  | 38.2003 | 48.6437 | 57.3674 | 23.4438 | 37.6543 | 45.5842 |
| ENSMUSG000000054321 | 6_Taf4b          | 143.892 | -0.11752 | 0.61615  | 0.71495  | 136.306 | 142.26  | 136.248 | 140.663 | 183.789 | 124.09  |
| ENSMUSG000000054325 | 5_Lce3a          | 308.379 | 0.87811  | 0.00052  | 0.00206  | 416.73  | 456.149 | 326.277 | 296.655 | 193.651 | 160.811 |

|                     |                  |         |          |          |          |         |         |         |         |         |         |
|---------------------|------------------|---------|----------|----------|----------|---------|---------|---------|---------|---------|---------|
| ENSMUSG000000054342 | 8_Kcnn4          | 111.725 | 1.76313  | 2.23E-07 | 2.50E-06 | 167.56  | 130.328 | 219.908 | 66.7247 | 31.3786 | 54.4478 |
| ENSMUSG000000054360 | 3_Bsx            | 0.15028 | -0.99647 | 0.80707  | NA       | 0       | 0       | 0       | 0.90169 | 0       | 0       |
| ENSMUSG000000054362 | 9_Lexm           | 2.82957 | 1.394    | 0.34064  | 0.45704  | 3.47275 | 1.83561 | 7.17092 | 2.70506 | 1.79306 | 0       |
| ENSMUSG000000054364 | 4_Rhob           | 1785.63 | 0.51027  | 0.0002   | 0.00089  | 1984.68 | 2144.91 | 2164.42 | 1622.13 | 1251.56 | 1546.06 |
| ENSMUSG000000054381 | 5_Zfp747         | 218.417 | 0.44634  | 0.05377  | 0.10285  | 226.597 | 239.547 | 289.227 | 199.272 | 138.066 | 217.791 |
| ENSMUSG000000054383 | 2_Pnma1          | 16.7158 | 0.60769  | 0.28795  | 0.40136  | 19.1001 | 17.4383 | 23.9031 | 14.427  | 8.96531 | 16.4609 |
| ENSMUSG000000054385 | 14_Ceacam2       | 10.3028 | 0.27779  | 0.74706  | 0.82124  | 6.07732 | 5.50683 | 22.7079 | 8.11517 | 14.3445 | 5.06491 |
| ENSMUSG000000054387 | 13_Mdm4          | 3333.48 | -0.31659 | 0.02276  | 0.05056  | 3017.82 | 3026.92 | 2862.39 | 3126.14 | 4263.9  | 3703.71 |
| ENSMUSG000000054400 | 15_Cklf          | 151.502 | 0.07585  | 0.70857  | 0.79151  | 165.824 | 156.945 | 143.418 | 144.27  | 154.203 | 144.35  |
| ENSMUSG000000054404 | 12_Slfn5         | 913.56  | 1.44151  | 3.20E-10 | 8.91E-09 | 1360.45 | 903.121 | 1743.73 | 446.334 | 563.021 | 464.705 |
| ENSMUSG000000054405 | 14_Dnajc8        | 3516.76 | -0.28423 | 0.01825  | 0.04195  | 3243.55 | 3002.14 | 3267.55 | 3440.83 | 3922.32 | 4224.13 |
| ENSMUSG000000054408 | 9_Spcs3          | 1696.26 | -0.39942 | 0.00899  | 0.02309  | 1545.38 | 1362.94 | 1480.8  | 1630.25 | 2281.67 | 1876.55 |
| ENSMUSG000000054409 | 4_Tmem74         | 9.00648 | -2.58022 | 0.00455  | 0.01304  | 1.73638 | 3.67122 | 2.39031 | 16.2303 | 22.4133 | 7.59736 |
| ENSMUSG000000054414 | 4_Slc30a7        | 2153.91 | -0.25161 | 0.03897  | 0.07879  | 2006.38 | 1903.53 | 1989.93 | 2099.12 | 2588.28 | 2336.19 |
| ENSMUSG000000054423 | 13_Cadps         | 78.1077 | -1.57731 | 0.0064   | 0.01735  | 36.4639 | 64.2464 | 16.7322 | 186.649 | 129.1   | 35.4544 |
| ENSMUSG000000054428 | 12_Atpif1        | 3009.88 | 0.05655  | 0.65517  | 0.74855  | 3070.78 | 2863.55 | 3273.53 | 3309.19 | 2686.9  | 2855.34 |
| ENSMUSG000000054434 | 14_Tmem120b      | 68.0289 | 0.04385  | 0.88252  | 0.92066  | 68.5869 | 69.7532 | 69.3189 | 80.25   | 64.5502 | 55.714  |
| ENSMUSG000000054435 | 16_Gimap4        | 117.555 | 0.38088  | 0.19447  | 0.29458  | 174.506 | 96.3696 | 127.881 | 86.5618 | 117.446 | 102.564 |
| ENSMUSG000000054450 | 1_Gm9945         | 0.14942 | -0.99647 | 0.80707  | NA       | 0       | 0       | 0       | 0       | 0.89653 | 0       |
| ENSMUSG000000054452 | 9_Aes            | 4801.01 | 0.62317  | 0.00252  | 0.00791  | 5429.65 | 5849.17 | 6187.31 | 4822.21 | 2550.63 | 3967.09 |
| ENSMUSG000000054453 | 11_Sytl5         | 14.177  | -0.50298 | 0.43298  | 0.54829  | 7.8137  | 11.0137 | 16.7322 | 14.427  | 22.4133 | 12.6623 |
| ENSMUSG000000054455 | 4_Vapb           | 2276.56 | 0.06088  | 0.61086  | 0.71027  | 2226.9  | 2387.21 | 2360.43 | 2471.52 | 2046.78 | 2166.51 |
| ENSMUSG000000054459 | 6_Vsnl1          | 1016.56 | -0.14881 | 0.26617  | 0.37742  | 1035.75 | 853.559 | 1002.73 | 1008.99 | 1065.08 | 1133.27 |
| ENSMUSG000000054469 | 13_Lclat1        | 705.752 | -0.20097 | 0.14117  | 0.22731  | 684.132 | 658.984 | 625.066 | 687.084 | 748.603 | 830.645 |
| ENSMUSG000000054474 | 15_Thnsl2        | 312.506 | 0.12331  | 0.42122  | 0.53681  | 336.857 | 323.068 | 317.911 | 308.376 | 303.924 | 284.901 |
| ENSMUSG000000054477 | 14_Kcnn2         | 10.7072 | -1.43796 | 0.12436  | 0.20546  | 2.60457 | 5.50683 | 9.56123 | 18.9354 | 25.1029 | 2.53245 |
| ENSMUSG000000054484 | 14_Tmem62        | 346.203 | -0.03789 | 0.81411  | 0.87158  | 343.803 | 332.246 | 350.18  | 353.461 | 387.301 | 310.226 |
| ENSMUSG000000054499 | 9_Dedd2          | 885.825 | 0.82486  | 2.20E-07 | 2.48E-06 | 1078.29 | 1078.42 | 1239.37 | 669.952 | 527.16  | 721.749 |
| ENSMUSG000000054509 | 7_Parp4          | 2246.99 | 0.25692  | 0.09184  | 0.16027  | 2275.52 | 2522.13 | 2540.9  | 1650.99 | 2192.91 | 2299.47 |
| ENSMUSG000000054510 | 5_Gm14461        | 0.15028 | -0.99647 | 0.80707  | NA       | 0       | 0       | 0       | 0.90169 | 0       | 0       |
| ENSMUSG000000054517 | 9_Trim65         | 243.857 | 0.14601  | 0.43794  | 0.55321  | 233.543 | 245.972 | 289.227 | 204.683 | 240.27  | 249.447 |
| ENSMUSG000000054519 | 8_Zfp867         | 554.601 | -0.45278 | 0.0008   | 0.00296  | 495.736 | 449.725 | 458.939 | 605.031 | 672.398 | 645.776 |
| ENSMUSG000000054520 | 15_Sh3bp2        | 773.904 | 0.95489  | 4.15E-09 | 8.00E-08 | 1007.1  | 895.778 | 1159.3  | 514.862 | 466.196 | 600.192 |
| ENSMUSG000000054537 | 8_Tmprss11e      | 4859.27 | -0.1885  | 0.18441  | 0.2824   | 4663.91 | 4257.7  | 4704.13 | 4267.68 | 5467.94 | 5794.25 |
| ENSMUSG000000054545 | 17_Ugt1a6a       | 3082.97 | 0.30593  | 0.06931  | 0.12755  | 3426.74 | 3117.79 | 3679.88 | 2156.83 | 2807.93 | 3308.65 |
| ENSMUSG000000054555 | 11_Adam12        | 39.6819 | -1.63284 | 4.82E-05 | 0.00026  | 19.1001 | 21.1095 | 17.9273 | 73.0365 | 60.0675 | 46.8504 |
| ENSMUSG000000054568 | 7_Usp17la        | 0.19919 | 0.92709  | 0.82027  | NA       | 0       | 0       | 1.19515 | 0       | 0       | 0       |
| ENSMUSG000000054580 | 14_Pla2r1        | 301.627 | -0.39519 | 0.08535  | 0.15077  | 274.348 | 238.629 | 270.105 | 414.775 | 373.853 | 238.051 |
| ENSMUSG000000054582 | 4_Pabpc1l        | 28.5673 | -0.54228 | 0.26964  | 0.38115  | 13.0228 | 33.041  | 23.9031 | 38.7725 | 32.2751 | 30.3894 |
| ENSMUSG000000054589 | 1_Gm9949         | 11.6511 | 0.20184  | 0.76848  | 0.83725  | 11.2864 | 8.26025 | 17.9273 | 8.11517 | 11.6549 | 12.6623 |
| ENSMUSG000000054594 | 13_Oscar         | 0.15297 | 0.92709  | 0.82027  | NA       | 0       | 0.91781 | 0       | 0       | 0       | 0       |
| ENSMUSG000000054598 | 13_9130230L23Rik | 14.8105 | 0.27351  | 0.63641  | 0.73274  | 17.3638 | 15.6027 | 15.537  | 10.8202 | 14.3445 | 15.1947 |
| ENSMUSG000000054604 | 7_Cggbp1         | 2852.69 | -0.16486 | 0.16078  | 0.25311  | 2695.73 | 2482.66 | 2892.27 | 2798.83 | 3214.06 | 3032.61 |
| ENSMUSG000000054611 | 16_Kdm2a         | 4117.83 | 0.23976  | 0.03603  | 0.07389  | 4337.47 | 4207.22 | 4833.2  | 3485.01 | 3897.22 | 3946.83 |
| ENSMUSG000000054612 | 3_Mgmt           | 144.909 | 0.63262  | 0.00709  | 0.0189   | 162.351 | 176.219 | 190.03  | 132.548 | 90.5496 | 117.759 |
| ENSMUSG000000054618 | 8_Gm9951         | 0.74948 | 0.56593  | 0.84741  | NA       | 0.86819 | 1.83561 | 0       | 0       | 1.79306 | 0       |
| ENSMUSG000000054619 | 6_Mettl7a1       | 1320.56 | 0.02459  | 0.86054  | 0.90562  | 1299.68 | 1298.69 | 1395.94 | 1335.4  | 1119.77 | 1473.89 |
| ENSMUSG000000054622 | 4_D730045B01Rik  | 2.03841 | 1.58634  | 0.35672  | NA       | 3.47275 | 0.91781 | 4.78062 | 0       | 1.79306 | 1.26623 |
| ENSMUSG000000054626 | 11_Xlr           | 25.0311 | -0.74053 | 0.19929  | 0.30025  | 27.782  | 22.0273 | 5.97577 | 35.1657 | 31.3786 | 27.857  |
| ENSMUSG000000054640 | 14_Slc8a1        | 87.8694 | -0.92622 | 0.00102  | 0.00364  | 56.4322 | 71.5888 | 53.7819 | 110.006 | 135.376 | 100.032 |
| ENSMUSG000000054641 | 10_Mmrn1         | 61.7629 | -0.71072 | 0.04695  | 0.092    | 41.673  | 46.8081 | 52.5868 | 59.5112 | 106.687 | 63.3113 |
| ENSMUSG000000054648 | 7_Zfp869         | 525.063 | -0.63451 | 0.00016  | 0.00075  | 438.435 | 432.286 | 362.132 | 541.011 | 702.88  | 673.633 |
| ENSMUSG000000054659 | 13_Pm20d2        | 34.1539 | -0.8514  | 0.0431   | 0.08567  | 26.0457 | 21.1095 | 26.2934 | 53.1994 | 46.6196 | 31.6557 |
| ENSMUSG000000054662 | 7_Ano9           | 591.889 | 0.6612   | 4.95E-05 | 0.00027  | 740.565 | 709.464 | 724.263 | 372.396 | 493.092 | 511.556 |
| ENSMUSG000000054667 | 7_Irs4           | 1.68439 | 2.11781  | 0.29906  | NA       | 2.60457 | 0.91781 | 4.78062 | 1.80337 | 0       | 0       |
| ENSMUSG000000054672 | 12_5830411N06Rik | 3.10822 | 1.88334  | 0.1876   | 0.2864   | 3.47275 | 6.42464 | 4.78062 | 2.70506 | 0       | 1.26623 |
| ENSMUSG000000054675 | 5_Tmem119        | 224.334 | 0.40294  | 0.1105   | 0.18684  | 256.984 | 277.177 | 231.86  | 249.767 | 132.687 | 197.531 |
| ENSMUSG000000054676 | 15_1600014C10Rik | 8312.35 | 0.48963  | 0.00015  | 0.0007   | 9295.69 | 9250.56 | 10580.7 | 6501.15 | 6366.26 | 7879.73 |
| ENSMUSG000000054679 | 8_Srsf12         | 29.1426 | -1.24411 | 0.00577  | 0.01587  | 16.4956 | 16.5205 | 19.1225 | 52.2978 | 34.9647 | 35.4544 |
| ENSMUSG000000054690 | 17_Emcn          | 425.773 | -1.15877 | 1.07E-10 | 3.43E-09 | 277.82  | 268.917 | 243.811 | 661.837 | 624.882 | 477.368 |
| ENSMUSG000000054693 | 14_Adam10        | 3449.75 | -0.23207 | 0.07543  | 0.13658  | 3211.43 | 3026    | 3280.7  | 3176.64 | 4022.73 | 3981.02 |
| ENSMUSG000000054702 | 14_Ap1s3         | 681.418 | 0.02907  | 0.86463  | 0.90802  | 692.814 | 599.327 | 773.265 | 567.16  | 762.051 | 693.892 |
| ENSMUSG000000054708 | 17_Ankrd24       | 498.295 | 0.11818  | 0.41235  | 0.52861  | 521.781 | 560.779 | 472.086 | 476.992 | 455.438 | 502.692 |
| ENSMUSG000000054715 | 10_Zscan22       | 325.343 | 0.22729  | 0.19207  | 0.29193  | 320.362 | 363.451 | 368.107 | 264.194 | 294.062 | 341.881 |
| ENSMUSG000000054716 | 4_Zfp771         | 59.7275 | 0.77493  | 0.0504   | 0.09779  | 78.137  | 62.4108 | 84.8559 | 43.2809 | 25.1029 | 64.5776 |
| ENSMUSG000000054717 | 6_Hmgb2          | 3141.85 | 0.01273  | 0.93381  | 0.95635  | 3442.37 | 2759.84 | 3263.97 | 2590.54 | 3341.37 | 3453    |
| ENSMUSG000000054720 | 12_Lrrc8c        | 354.25  | 0.09563  | 0.53622  | 0.64395  | 335.989 | 390.067 | 371.693 | 325.508 | 345.164 | 357.076 |
| ENSMUSG000000054723 | 5_Vmac           | 419.608 | -0.45084 | 0.00403  | 0.0118   | 378.53  | 356.109 | 328.667 | 539.208 | 449.162 | 465.972 |
| ENSMUSG000000054727 | 2_1700013H16Rik  | 0.30239 | -0.03469 | 0.93322  | NA       | 0       | 0.91781 | 0       | 0       | 0.89653 | 0       |
| ENSMUSG000000054728 | 16_Phactr1       | 274.601 | -0.32379 | 0.13362  | 0.21751  | 251.775 | 244.136 | 236.641 | 390.43  | 281.511 | 243.116 |
| ENSMUSG000000054733 | 8_Msra           | 288.651 | 0.0383   | 0.83617  | 0.88814  | 265.666 | 306.547 | 304.764 | 301.163 | 238.477 | 315.291 |
| ENSMUSG000000054737 | 11_Zfp182        | 285.083 | -0.65921 | 0.00081  | 0.003    | 222.256 | 234.04  | 206.762 | 293.949 | 420.473 | 333.018 |
| ENSMUSG000000054752 | 16_Fsd1l         | 119.299 | -1.3527  | 7.35E-07 | 7.00E-06 | 61.6414 | 73.4244 | 66.9286 | 199.272 | 189.168 | 125.356 |
| ENSMUSG000000054753 | 9_AU018091       | 18.7605 | 0.59026  | 0.33194  | 0.44853  | 20.8365 | 20.1917 | 26.2934 | 6.3118  | 16.1376 | 22.7921 |
| ENSMUSG000000054758 | 4_Gm9956         | 1.94783 | -1.50934 | 0.38934  | NA       | 0       | 1.83561 | 1.19515 | 0.90169 | 2.68959 | 5.06491 |
| ENSMUSG000000054763 | 9_Dmfb42         | 0.59264 | 1.31812  | 0.67678  | NA       | 1.73638 | 0.91781 | 0       | 0.90169 | 0       | 0       |
| ENSMUSG000000054764 | 8_Mtnr1a         | 0.36401 | -0.03469 | 0.99322  | NA       | 0       | 0.91781 | 0       | 0       | 0       | 1.26623 |
| ENSMUSG000000054766 | 13_Set           | 5609.81 | -0.17086 | 0.22321  | 0.32821  | 5556.41 | 4732.21 | 5544.32 | 5073.78 | 6067.72 | 6684.41 |
| ENSMUSG000000054770 | 16_Kctd18        | 358.988 | 0.01739  | 0.91699  | 0.94494  | 383.739 | 355.191 | 343.009 | 311.983 | 358.612 | 401.394 |

|                     |                  |         |          |          |          |         |         |         |         |         |         |
|---------------------|------------------|---------|----------|----------|----------|---------|---------|---------|---------|---------|---------|
| ENSMUSG000000054792 | 15_Kihl18        | 874.4   | 0.4932   | 0.00491  | 0.01389  | 969.766 | 948.093 | 1150.93 | 889.964 | 626.675 | 660.97  |
| ENSMUSG000000054793 | 8_Cadm4          | 1426.79 | 1.29092  | 4.71E-13 | 2.80E-11 | 1880.5  | 1924.64 | 2271.99 | 985.542 | 638.33  | 859.768 |
| ENSMUSG000000054808 | 13_Actn4         | 60995.6 | 1.24398  | 4.40E-13 | 2.64E-11 | 77142.9 | 81855.4 | 98327.7 | 36947.5 | 28373.4 | 43326.5 |
| ENSMUSG000000054814 | 15_Usp46         | 2250.84 | -0.27516 | 0.02262  | 0.05029  | 2155.71 | 1894.35 | 2059.25 | 2247    | 2489.67 | 2659.08 |
| ENSMUSG000000054823 | 15_Whsc11        | 2780.19 | 0.0977   | 0.44099  | 0.55628  | 2832.03 | 2786.46 | 3003.42 | 2331.76 | 2787.31 | 2940.18 |
| ENSMUSG000000054836 | 12_Elp6          | 129.703 | 0.59208  | 0.00702  | 0.01875  | 157.142 | 154.191 | 156.565 | 114.514 | 93.2392 | 102.564 |
| ENSMUSG000000054843 | 8_Atrnl1         | 1445.86 | -0.66952 | 1.51E-05 | 9.75E-05 | 1139.93 | 1258.31 | 950.148 | 1928.71 | 1855.82 | 1542.26 |
| ENSMUSG000000054850 | 4_Smim10l2a      | 26.8728 | -0.99531 | 0.0456   | 0.08978  | 15.6274 | 23.8629 | 14.3418 | 49.5927 | 28.689  | 29.1232 |
| ENSMUSG000000054855 | 13_Rnd1          | 32.0011 | 0.18059  | 0.69913  | 0.78478  | 37.3321 | 23.8629 | 40.6352 | 33.3624 | 18.8271 | 37.9868 |
| ENSMUSG000000054863 | 8_Fam19a5        | 93.0061 | -0.46876 | 0.10974  | 0.18581  | 82.4779 | 91.7806 | 59.7577 | 123.531 | 115.652 | 84.8372 |
| ENSMUSG000000054871 | 4_Tmem158        | 59.7834 | -0.02313 | 0.94523  | 0.96432  | 51.2231 | 48.6437 | 78.8802 | 63.118  | 63.6537 | 53.1815 |
| ENSMUSG000000054874 | 12_Pcnxl3        | 1629.68 | 1.38263  | 1.08E-11 | 4.49E-10 | 2123.59 | 2450.54 | 2493.09 | 1128.91 | 628.468 | 953.469 |
| ENSMUSG000000054885 | 11_4930578G10Rik | 1.07748 | -0.14366 | 0.95118  | NA       | 0       | 1.83561 | 1.19515 | 0.90169 | 0       | 2.53245 |
| ENSMUSG000000054889 | 9_Dsp            | 102442  | 0.74407  | 3.94E-05 | 0.00022  | 118724  | 124960  | 141181  | 62240.6 | 67955.2 | 99592.5 |
| ENSMUSG000000054892 | 14_Txk           | 9.42601 | 2.21867  | 0.00883  | 0.02274  | 22.5729 | 11.9315 | 11.9515 | 4.50843 | 1.79306 | 3.79868 |
| ENSMUSG000000054893 | 15_Zfp667        | 75.6466 | -0.87563 | 0.005    | 0.01408  | 47.7504 | 66.9998 | 45.4159 | 99.1854 | 114.756 | 79.7723 |
| ENSMUSG000000054894 | 5_Atp5s          | 183.718 | -0.62259 | 0.00728  | 0.0193   | 164.088 | 134.917 | 135.052 | 191.157 | 277.028 | 200.064 |
| ENSMUSG000000054901 | 5_Arhgef33       | 8.6326  | -0.95944 | 0.20375  | 0.30558  | 6.07732 | 5.50683 | 5.97577 | 9.91854 | 11.6549 | 12.6623 |
| ENSMUSG000000054905 | 2_Stfa3          | 204.596 | -0.39492 | 0.08183  | 0.14593  | 183.188 | 171.63  | 175.688 | 184.846 | 293.165 | 219.057 |
| ENSMUSG000000054920 | 12_Kihl5         | 418.701 | -0.28318 | 0.07208  | 0.13159  | 373.321 | 385.478 | 375.278 | 522.978 | 441.093 | 414.056 |
| ENSMUSG000000054931 | 6_Zkscan4        | 92.1588 | -0.51696 | 0.04748  | 0.09288  | 81.6097 | 73.4244 | 71.7092 | 97.382  | 102.204 | 126.623 |
| ENSMUSG000000054932 | 6_Afp            | 0       | NA       | NA       | NA       | 0       | 0       | 0       | 0       | 0       | 0       |
| ENSMUSG000000054934 | 10_Kcnmb4        | 14.852  | -0.0566  | 0.9239   | 0.94954  | 11.2864 | 19.2739 | 13.1467 | 17.132  | 14.3445 | 13.9285 |
| ENSMUSG000000054939 | 6_Zfp174         | 138.23  | -0.53681 | 0.01574  | 0.03711  | 118.074 | 111.972 | 107.564 | 142.466 | 163.169 | 186.135 |
| ENSMUSG000000054942 | 13_Fam73a        | 333.747 | -1.23151 | 7.35E-12 | 3.17E-10 | 211.838 | 214.767 | 170.907 | 486.008 | 507.436 | 411.524 |
| ENSMUSG000000054944 | 7_5330416C01Rik  | 0       | NA       | NA       | NA       | 0       | 0       | 0       | 0       | 0       | 0       |
| ENSMUSG000000054945 | 3_Gm9958         | 47.1762 | -0.98707 | 0.00492  | 0.0139   | 34.7275 | 31.2054 | 28.6837 | 52.2978 | 69.0329 | 67.11   |
| ENSMUSG000000054951 | 2_9130008F23Rik  | 310.938 | 0.26569  | 0.16955  | 0.26399  | 323.834 | 298.287 | 396.791 | 239.848 | 309.303 | 297.563 |
| ENSMUSG000000054958 | 6_Nt5c1a         | 1.53969 | 1.95545  | 0.35322  | NA       | 1.73638 | 0.91781 | 4.78062 | 1.80337 | 0       | 0       |
| ENSMUSG000000054966 | 13_Lmntd1        | 6.36614 | -0.14548 | 0.87451  | 0.91484  | 4.34094 | 10.0959 | 3.58546 | 4.50843 | 8.06878 | 7.59736 |
| ENSMUSG000000054967 | 6_Zfp647         | 16.082  | -0.53468 | 0.48475  | 0.59662  | 15.6274 | 16.5205 | 7.17092 | 36.9691 | 6.27571 | 13.9285 |
| ENSMUSG000000054976 | 14_Nyap2         | 14.1678 | -2.7586  | 0.00208  | 0.00671  | 6.94551 | 3.67122 | 0       | 41.4775 | 21.5167 | 11.396  |
| ENSMUSG000000054978 | 3_Kbtbd13        | 41.989  | 0.1454   | 0.69963  | 0.7851   | 45.1458 | 45.8903 | 40.6352 | 36.9691 | 31.3786 | 51.9153 |
| ENSMUSG000000054986 | 13_Sec14l3       | 0.6065  | 0.00563  | 0.99878  | NA       | 0       | 1.83561 | 0       | 1.80337 | 0       | 0       |
| ENSMUSG000000054988 | 9_Agrt1b         | 0.74679 | -0.58966 | 0.82082  | NA       | 0.86819 | 0.91781 | 0       | 0.90169 | 1.79306 | 0       |
| ENSMUSG000000054994 | 2_AV320801       | 1.11369 | -2.45652 | 0.2818   | NA       | 0       | 0.91781 | 0       | 2.70506 | 1.79306 | 1.26623 |
| ENSMUSG000000054999 | 2_Naalad1        | 8.9039  | 0.60337  | 0.45327  | 0.56759  | 7.8137  | 9.17806 | 15.537  | 10.8202 | 6.27571 | 3.79868 |
| ENSMUSG000000055003 | 14_Lrtm2         | 171.606 | -0.72075 | 0.06554  | 0.12159  | 116.337 | 194.575 | 77.685  | 333.624 | 154.203 | 153.213 |
| ENSMUSG000000055013 | 14_Agap1         | 718.923 | 0.09374  | 0.52316  | 0.63253  | 735.356 | 762.696 | 729.044 | 799.795 | 616.813 | 669.834 |
| ENSMUSG000000055015 | 5_Gm9961         | 0       | NA       | NA       | NA       | 0       | 0       | 0       | 0       | 0       | 0       |
| ENSMUSG000000055022 | 14_Cntn1         | 475.716 | -1.32773 | 3.51E-06 | 2.72E-05 | 250.038 | 376.3   | 186.444 | 852.994 | 728.879 | 459.64  |
| ENSMUSG000000055024 | 12_Ep300         | 3135.85 | 0.52721  | 1.73E-06 | 1.48E-05 | 3446.71 | 3629    | 4032.45 | 2535.54 | 2523.73 | 2647.68 |
| ENSMUSG000000055026 | 13_Gabrg3        | 27.3806 | -1.41863 | 0.02456  | 0.05387  | 7.8137  | 29.3698 | 7.17092 | 43.2809 | 25.9994 | 50.6491 |
| ENSMUSG000000055027 | 17_Smyd1         | 165.269 | -1.5446  | 2.05E-06 | 1.72E-05 | 84.2143 | 103.712 | 64.5383 | 329.115 | 147.928 | 262.109 |
| ENSMUSG000000055030 | 1_Sprr2e         | 0.30594 | 1.73752  | 0.66765  | NA       | 0       | 1.83561 | 0       | 0       | 0       | 0       |
| ENSMUSG000000055041 | 7_Commnd5        | 360.015 | 0.78719  | 6.72E-06 | 4.79E-05 | 439.303 | 457.985 | 469.696 | 291.244 | 216.96  | 284.901 |
| ENSMUSG000000055044 | 12_Pdlm1         | 6041.28 | 0.72126  | 1.79E-06 | 1.53E-05 | 7022.78 | 6949.62 | 8588.38 | 4044.96 | 4284.52 | 5357.41 |
| ENSMUSG000000055045 | 5_Gm11190        | 0.19919 | 0.92709  | 0.82027  | NA       | 0       | 0       | 1.19515 | 0       | 0       | 0       |
| ENSMUSG000000055053 | 17_Nfic          | 1455.25 | 0.6018   | 0.00395  | 0.0116   | 1604.41 | 1863.15 | 1796.32 | 1543.69 | 840.049 | 1083.89 |
| ENSMUSG000000055065 | 6_Ddx17          | 11404.7 | -0.20928 | 0.02843  | 0.06079  | 10486   | 10970.5 | 10279.5 | 11631.7 | 12754.9 | 12305.2 |
| ENSMUSG000000055067 | 15_Smyd3         | 248.724 | -0.21157 | 0.30744  | 0.42242  | 217.915 | 244.136 | 230.665 | 321     | 267.166 | 211.46  |
| ENSMUSG000000055069 | 3_Rab39          | 5.30556 | -0.47709 | 0.62363  | 0.72116  | 6.94551 | 2.75342 | 3.58546 | 6.3118  | 7.17224 | 5.06491 |
| ENSMUSG000000055078 | 7_Gabra5         | 2.636   | -1.59259 | 0.38258  | 0.5001   | 0       | 2.75342 | 1.19515 | 0       | 8.06878 | 3.79868 |
| ENSMUSG000000055102 | 15_Zfp819        | 0.44912 | -2.32858 | 0.56096  | NA       | 0       | 0       | 0       | 0.90169 | 1.79306 | 0       |
| ENSMUSG000000055108 | 6_Phrx2          | 1.08106 | -1.30271 | 0.58632  | NA       | 0.86819 | 0.91781 | 0       | 0.90169 | 0       | 3.79868 |
| ENSMUSG000000055116 | 7_Arntl          | 815.691 | -0.72385 | 4.60E-07 | 4.71E-06 | 550.431 | 653.478 | 642.993 | 950.376 | 1126.94 | 969.93  |
| ENSMUSG000000055125 | 7_M5C100l18Rik   | 2.95604 | -0.79193 | 0.59193  | 0.69396  | 0.86819 | 5.50683 | 0       | 3.60674 | 2.68959 | 5.06491 |
| ENSMUSG000000055128 | 14_Cgrrf1        | 449.175 | -0.19941 | 0.18742  | 0.28618  | 447.117 | 420.355 | 387.23  | 519.371 | 484.127 | 436.848 |
| ENSMUSG000000055137 | 6_Sugct          | 42.3052 | -0.65724 | 0.17059  | 0.26522  | 33.8593 | 47.7259 | 16.7322 | 51.3961 | 69.9294 | 34.1881 |
| ENSMUSG000000055138 | 9_Gm4861         | 0       | NA       | NA       | NA       | 0       | 0       | 0       | 0       | 0       | 0       |
| ENSMUSG000000055148 | 7_Klf2           | 106.848 | 0.18067  | 0.57128  | 0.67596  | 110.26  | 112.89  | 118.32  | 146.073 | 85.1704 | 68.3763 |
| ENSMUSG000000055150 | 14_Zfp78         | 39.2375 | -0.72563 | 0.07531  | 0.13638  | 34.7275 | 18.3561 | 35.8546 | 48.691  | 48.4127 | 49.3828 |
| ENSMUSG000000055170 | 3_lfng           | 7.14582 | 4.24278  | 0.00152  | 0.00516  | 15.6274 | 9.17806 | 15.537  | 0       | 0       | 2.53245 |
| ENSMUSG000000055172 | 10_C1ra          | 2140.34 | 0.60456  | 1.15E-06 | 1.04E-05 | 2871.97 | 2398.23 | 2477.55 | 1721.32 | 1787.68 | 1585.32 |
| ENSMUSG000000055177 | 15_Cstl1         | 0.64832 | -1.37909 | 0.65362  | NA       | 0       | 0       | 1.19515 | 0.90169 | 1.79306 | 0       |
| ENSMUSG000000055184 | 4_Fam72a         | 45.6573 | 0.09761  | 0.82893  | 0.88294  | 61.6414 | 22.9451 | 57.3674 | 41.4775 | 53.7918 | 36.7206 |
| ENSMUSG000000055194 | 3_Actbl2         | 0.30056 | -1.76625 | 0.6627   | NA       | 0       | 0       | 0       | 1.80337 | 0       | 0       |
| ENSMUSG000000055197 | 4_Fev            | 0.45622 | 0.77574  | 0.84797  | NA       | 0       | 1.83561 | 0       | 0.90169 | 0       | 0       |
| ENSMUSG000000055198 | 3_Gm12830        | 0.21104 | -0.99647 | 0.80707  | NA       | 0       | 0       | 0       | 0       | 0       | 1.26623 |
| ENSMUSG000000055200 | 7_Sertad3        | 278.368 | 0.2482   | 0.22229  | 0.32725  | 309.075 | 270.753 | 327.472 | 307.475 | 209.788 | 245.648 |
| ENSMUSG000000055202 | 10_Zfp811        | 37.0699 | -1.46247 | 0.00043  | 0.00176  | 15.6274 | 25.6986 | 17.9273 | 51.3961 | 63.6537 | 48.1166 |
| ENSMUSG000000055204 | 14_Akndr17       | 4547.67 | 0.02375  | 0.86716  | 0.91012  | 4500.69 | 4578.01 | 4675.44 | 3673.47 | 4840.37 | 5018.06 |
| ENSMUSG000000055210 | 4_Foxd2          | 11.0701 | -0.66137 | 0.34188  | 0.45827  | 8.68188 | 6.42464 | 10.7564 | 18.0337 | 9.86184 | 12.6623 |
| ENSMUSG000000055214 | 15_Pld5          | 1033.45 | -0.86548 | 4.74E-05 | 0.00026  | 760.533 | 866.408 | 570.089 | 1634.76 | 1354.66 | 1014.25 |
| ENSMUSG000000055228 | 7_Zfp935         | 121.719 | -0.25811 | 0.23925  | 0.34684  | 111.128 | 104.63  | 117.125 | 128.941 | 138.066 | 130.421 |
| ENSMUSG000000055235 | 11_Wdr86         | 58.1629 | -1.00572 | 0.03762  | 0.07655  | 38.2003 | 59.6574 | 17.9273 | 105.497 | 83.3773 | 44.3179 |
| ENSMUSG000000055239 | 10_Kcmf1         | 2072.51 | 0.0455   | 0.71176  | 0.79391  | 2036.77 | 2002.65 | 2276.77 | 1843.05 | 2177.67 | 2098.14 |
| ENSMUSG000000055240 | 16_Zfp101        | 382.388 | -0.32387 | 0.15465  | 0.24524  | 410.653 | 290.027 | 317.911 | 324.607 | 530.746 | 420.387 |
| ENSMUSG000000055254 | 14_Ntrk2         | 2604.76 | -0.88171 | 1.39E-05 | 9.02E-05 | 1847.5  | 2377.12 | 1271.64 | 3529.2  | 3267.85 | 3335.24 |

|                     |                 |         |          |          |          |         |         |         |         |         |         |
|---------------------|-----------------|---------|----------|----------|----------|---------|---------|---------|---------|---------|---------|
| ENSMUSG000000055271 | 4_9330161L09Rik | 8.09486 | 0.64723  | 0.43326  | 0.54853  | 9.55007 | 11.9315 | 8.36608 | 9.01685 | 7.17224 | 2.53245 |
| ENSMUSG000000055296 | 14_Tmem245      | 3063.18 | -0.41646 | 0.00071  | 0.0027   | 2766.05 | 2647.87 | 2457.24 | 3136.06 | 3841.63 | 3530.24 |
| ENSMUSG000000055301 | 8_Adh7          | 6930.35 | 0.08115  | 0.55395  | 0.66011  | 7260.66 | 6588.93 | 7524.69 | 5732.92 | 6824.39 | 7650.54 |
| ENSMUSG000000055302 | 5_Mrfap1        | 4695.41 | -0.40255 | 0.00175  | 0.00581  | 4035.34 | 3850.19 | 4247.58 | 4590.48 | 5614.07 | 5834.77 |
| ENSMUSG000000055305 | 15_Zfp93        | 182.032 | -0.33764 | 0.09911  | 0.17091  | 166.692 | 179.89  | 135.052 | 191.157 | 214.271 | 205.129 |
| ENSMUSG000000055312 | 2_Them7         | 16.848  | -0.89173 | 0.13718  | 0.22187  | 10.4183 | 16.5205 | 8.36608 | 29.7556 | 17.0341 | 18.9934 |
| ENSMUSG000000055313 | 14_Pgbd1        | 61.4591 | -0.43581 | 0.1974   | 0.2979   | 69.4551 | 44.0547 | 43.0255 | 79.3483 | 70.8259 | 62.0451 |
| ENSMUSG000000055319 | 8_Sec23ip       | 1208.3  | 0.15149  | 0.24553  | 0.35395  | 1212.86 | 1245.46 | 1356.5  | 1016.2  | 1196.87 | 1221.91 |
| ENSMUSG000000055320 | 16_Tead1        | 3251.03 | -0.00812 | 0.94203  | 0.96222  | 3152.39 | 3201.31 | 3372.72 | 2996.3  | 3530.54 | 3252.94 |
| ENSMUSG000000055322 | 14_Tns1         | 3890.13 | -0.39778 | 0.08702  | 0.15328  | 2878.04 | 4572.51 | 2620.97 | 5692.34 | 3912.46 | 3664.46 |
| ENSMUSG000000055333 | 14_Fat2         | 2476.46 | 0.94505  | 5.78E-07 | 5.75E-06 | 2983.96 | 3059.96 | 3733.66 | 1281.3  | 1689.06 | 2110.8  |
| ENSMUSG000000055334 | 4_Snupn         | 294     | -0.31016 | 0.04552  | 0.08964  | 263.929 | 266.164 | 256.958 | 315.59  | 324.544 | 336.816 |
| ENSMUSG000000055341 | 9_Zfp457        | 23.8603 | -0.66977 | 0.16903  | 0.26343  | 19.9683 | 22.9451 | 11.9515 | 27.9522 | 28.689  | 31.6557 |
| ENSMUSG000000055357 | 8_4933400A11Rik | 0.29884 | -1.76064 | 0.66373  | NA       | 0       | 0       | 0       | 0       | 1.79306 | 0       |
| ENSMUSG000000055360 | 13_Prl2c5       | 0       | NA       | NA       | NA       | 0       | 0       | 0       | 0       | 0       | 0       |
| ENSMUSG000000055368 | 13_Slc6a2       | 17.4096 | -0.9576  | 0.10587  | 0.18034  | 12.1546 | 14.6849 | 8.36608 | 27.0506 | 14.3445 | 27.857  |
| ENSMUSG000000055370 | 3_Gm9968        | 1.15974 | -1.52245 | 0.55233  | NA       | 1.73638 | 0       | 0       | 0       | 2.68959 | 2.53245 |
| ENSMUSG000000055371 | 17_Stam2        | 1906    | -0.00366 | 0.97805  | 0.98554  | 1858.79 | 1808.99 | 2042.52 | 1657.3  | 1986.71 | 2081.68 |
| ENSMUSG000000055373 | 8_Fut9          | 259.938 | -0.48186 | 0.00877  | 0.02261  | 217.047 | 188.15  | 246.202 | 279.522 | 314.682 | 314.024 |
| ENSMUSG000000055385 | 11_Rnf212       | 0.14942 | -0.99647 | 0.80707  | NA       | 0       | 0       | 0       | 0       | 0.89653 | 0       |
| ENSMUSG000000055401 | 14_Fbxo6        | 778.132 | 0.52493  | 0.00642  | 0.01739  | 892.498 | 840.71  | 1021.86 | 793.483 | 492.195 | 628.049 |
| ENSMUSG000000055407 | 13_Map6         | 86.3582 | -0.37267 | 0.19472  | 0.29491  | 77.2688 | 81.6847 | 66.9286 | 122.629 | 86.0669 | 83.571  |
| ENSMUSG000000055409 | 13_Nell1        | 13.5379 | -1.37248 | 0.03686  | 0.07526  | 9.55007 | 9.17806 | 3.58546 | 18.0337 | 20.6202 | 20.2596 |
| ENSMUSG000000055415 | 7_Atp10b        | 847.507 | 0.57519  | 0.00068  | 0.00259  | 910.73  | 958.189 | 1173.64 | 567.16  | 718.121 | 757.204 |
| ENSMUSG000000055416 | 5_Fam136b-ps    | 0       | NA       | NA       | NA       | 0       | 0       | 0       | 0       | 0       | 0       |
| ENSMUSG000000055421 | 8_Pcdh9         | 67.9184 | -1.24847 | 0.02014  | 0.04555  | 51.2231 | 55.9861 | 13.1467 | 135.253 | 107.584 | 44.3179 |
| ENSMUSG000000055430 | 4_Nap1i5        | 400.485 | -1.18552 | 1.32E-05 | 8.67E-05 | 217.915 | 334.081 | 181.663 | 647.41  | 635.64  | 386.199 |
| ENSMUSG000000055435 | 6_Maf           | 460.512 | -0.84747 | 8.22E-07 | 7.72E-06 | 333.384 | 357.026 | 296.398 | 693.396 | 545.987 | 536.88  |
| ENSMUSG000000055436 | 18_Srsf11       | 3574.72 | -0.12349 | 0.31429  | 0.42939  | 3454.52 | 3351.83 | 3458.78 | 3250.58 | 4090.87 | 3841.73 |
| ENSMUSG000000055447 | 18_Cd47         | 2457.79 | 0.09164  | 0.45318  | 0.56752  | 2641.9  | 2294.51 | 2672.36 | 2272.25 | 2586.49 | 2279.21 |
| ENSMUSG000000055456 | 1_Gm9972        | 4.20122 | -1.82429 | 0.14892  | 0.23762  | 1.73638 | 3.67122 | 0       | 3.60674 | 9.86184 | 6.33113 |
| ENSMUSG000000055471 | 6_Alk           | 51.6198 | 0.48296  | 0.13802  | 0.22301  | 53.8277 | 63.3286 | 63.3432 | 45.0843 | 38.5508 | 45.5842 |
| ENSMUSG000000055480 | 6_Zfp458        | 79.2461 | -0.82333 | 0.00519  | 0.01454  | 72.9278 | 50.4793 | 47.8062 | 98.2837 | 108.48  | 97.4995 |
| ENSMUSG000000055485 | 6_Soga1         | 225.514 | -0.26295 | 0.25667  | 0.3664   | 199.683 | 244.136 | 170.907 | 302.966 | 206.202 | 229.187 |
| ENSMUSG000000055489 | 7_Ano5          | 98.703  | -1.99697 | 1.34E-08 | 2.21E-07 | 32.9912 | 57.8218 | 27.4885 | 170.419 | 188.271 | 115.227 |
| ENSMUSG000000055491 | 13_Pprc1        | 883.124 | 0.68286  | 3.23E-07 | 3.45E-06 | 1013.18 | 1027.94 | 1225.03 | 687.986 | 669.708 | 674.899 |
| ENSMUSG000000055493 | 4_Epm2a         | 331.504 | -1.05981 | 6.68E-07 | 6.48E-06 | 208.365 | 256.986 | 179.273 | 531.093 | 447.369 | 365.94  |
| ENSMUSG000000055494 | 5_Gm14168       | 10.7758 | 0.99198  | 0.22509  | 0.33034  | 16.4956 | 18.3561 | 8.36608 | 13.5253 | 5.37918 | 2.53245 |
| ENSMUSG000000055523 | 6_Gucy2g        | 7.47367 | 0.52925  | 0.57211  | 0.67668  | 11.2864 | 4.58903 | 10.7564 | 11.7219 | 2.68959 | 3.79868 |
| ENSMUSG000000055531 | 12_Cpsf6        | 1906.1  | -0.17542 | 0.17082  | 0.26551  | 1735.51 | 1802.57 | 1833.37 | 1780.83 | 2258.36 | 2025.96 |
| ENSMUSG000000055538 | 7_Zcchc24       | 860.208 | -0.29691 | 0.08819  | 0.15504  | 783.106 | 835.203 | 697.97  | 1167.68 | 851.704 | 825.58  |
| ENSMUSG000000055540 | 15_Epha6        | 1.16618 | -2.52785 | 0.25743  | NA       | 0.86819 | 0       | 0       | 1.80337 | 1.79306 | 2.53245 |
| ENSMUSG000000055541 | 17_Lair1        | 91.023  | 0.49712  | 0.15174  | 0.24133  | 157.142 | 79.8491 | 82.4656 | 90.1685 | 68.1363 | 68.3763 |
| ENSMUSG000000055546 | 6_Timd4         | 25.9448 | 0.95361  | 0.11877  | 0.19814  | 51.2231 | 22.9451 | 28.6837 | 31.559  | 9.86184 | 11.396  |
| ENSMUSG000000055547 | 4_Apobec4       | 0       | NA       | NA       | NA       | 0       | 0       | 0       | 0       | 0       | 0       |
| ENSMUSG000000055553 | 16_Kxd1         | 670.812 | 0.38607  | 0.0169   | 0.03937  | 779.633 | 748.929 | 751.752 | 689.789 | 491.299 | 563.471 |
| ENSMUSG000000055555 | 1_4930502E18Rik | 1.13287 | -2.3815  | 0.3603   | NA       | 0       | 0       | 1.19515 | 1.80337 | 0       | 3.79868 |
| ENSMUSG000000055560 | 7_Zfp459        | 64.12   | -0.7379  | 0.02058  | 0.0464   | 55.5641 | 40.3834 | 47.8062 | 68.5281 | 76.2051 | 96.2332 |
| ENSMUSG000000055561 | 9_Spink5        | 1904.09 | 1.20851  | 1.55E-07 | 1.84E-06 | 2905.83 | 1786.05 | 3281.89 | 889.964 | 1273.07 | 1287.75 |
| ENSMUSG000000055567 | 16_Unc80        | 160.398 | -1.45349 | 0.00141  | 0.00483  | 125.887 | 88.1093 | 43.0255 | 371.494 | 231.305 | 102.564 |
| ENSMUSG000000055602 | 16_Tcp10b       | 6.01739 | -0.69158 | 0.46527  | 0.57877  | 5.20913 | 2.75342 | 5.97577 | 11.7219 | 5.37918 | 5.06491 |
| ENSMUSG000000055612 | 15_Cdca7        | 2021.74 | 0.35591  | 0.02838  | 0.06071  | 2162.66 | 2139.4  | 2506.24 | 1440.89 | 1774.23 | 2107    |
| ENSMUSG000000055629 | 4_B4galnt4      | 21.3279 | 0.35987  | 0.5397   | 0.64713  | 30.3866 | 20.1917 | 21.5128 | 31.559  | 11.6549 | 12.6623 |
| ENSMUSG000000055632 | 17_Hmcn2        | 166.69  | 0.68058  | 0.07025  | 0.1289   | 170.165 | 245.054 | 200.786 | 202.879 | 60.9641 | 120.292 |
| ENSMUSG000000055633 | 5_Zfp580        | 35.1517 | -0.55544 | 0.21269  | 0.31614  | 22.5729 | 42.2191 | 20.3176 | 46.8876 | 35.8612 | 43.0517 |
| ENSMUSG000000055639 | 16_Dach1        | 618.742 | -0.88181 | 1.92E-07 | 2.21E-06 | 380.267 | 528.656 | 396.791 | 788.073 | 852.601 | 766.067 |
| ENSMUSG000000055652 | 14_Kihl25       | 639.109 | 0.53366  | 0.00094  | 0.00339  | 699.76  | 732.409 | 835.413 | 555.438 | 439.3   | 572.335 |
| ENSMUSG000000055653 | 13_Gpc3         | 1585.74 | -0.23339 | 0.02577  | 0.05607  | 1442.93 | 1439.12 | 1491.55 | 1775.42 | 1643.34 | 1722.07 |
| ENSMUSG000000055660 | 8_Mettl4        | 176.082 | -0.57866 | 0.0063   | 0.01713  | 153.669 | 132.164 | 137.443 | 177.632 | 233.994 | 221.59  |
| ENSMUSG000000055670 | 13_Zzef1        | 2200.99 | 0.45844  | 3.32E-05 | 0.00019  | 2517.75 | 2452.38 | 2672.36 | 1733.04 | 1857.61 | 1972.78 |
| ENSMUSG000000055675 | 6_Kbtbd11       | 1061.16 | -0.12051 | 0.42204  | 0.53761  | 878.607 | 1117.89 | 1055.32 | 1036.94 | 1239.9  | 1038.31 |
| ENSMUSG000000055681 | 14_Cope         | 2096.88 | 1.07503  | 4.14E-08 | 5.80E-07 | 2654.92 | 2795.64 | 3081.11 | 1699.68 | 964.667 | 1385.25 |
| ENSMUSG000000055691 | 5_Gja6          | 2.47992 | 0.00497  | 0.99721  | 0.99802  | 0.86819 | 1.83561 | 4.78062 | 1.80337 | 1.79306 | 3.79868 |
| ENSMUSG000000055692 | 18_Tmem191c     | 83.7371 | 0.36538  | 0.24418  | 0.35236  | 90.2916 | 100.959 | 92.0269 | 100.989 | 57.378  | 60.7789 |
| ENSMUSG000000055704 | 4_Gm9978        | 1.993   | -0.6546  | 0.77477  | NA       | 0       | 0       | 4.78062 | 0.90169 | 6.27571 | 0       |
| ENSMUSG000000055707 | 12_Kihl26       | 480.934 | 0.50402  | 0.00087  | 0.00318  | 509.627 | 568.122 | 614.309 | 392.233 | 372.06  | 429.251 |
| ENSMUSG000000055717 | 13_Slain1       | 44.8563 | -0.94171 | 0.03599  | 0.07382  | 28.6502 | 43.1369 | 20.3176 | 79.3483 | 60.9641 | 36.7206 |
| ENSMUSG000000055720 | 9_Ubi7          | 821.477 | 0.46395  | 0.00031  | 0.00133  | 895.97  | 973.792 | 987.197 | 715.938 | 632.951 | 723.016 |
| ENSMUSG000000055723 | 5_Rras2         | 1422.43 | -0.36852 | 0.00306  | 0.00934  | 1213.73 | 1252.8  | 1258.5  | 1423.76 | 1732.1  | 1653.69 |
| ENSMUSG000000055725 | 11_Paqr3        | 99.2236 | 0.52786  | 0.06726  | 0.12432  | 95.5007 | 112.89  | 143.418 | 93.7753 | 63.6537 | 86.1034 |
| ENSMUSG000000055732 | 1_Gm9979        | 0.57236 | -2.64079 | 0.47559  | NA       | 0       | 0       | 0       | 0.90169 | 0       | 2.53245 |
| ENSMUSG000000055733 | 6_Nap1i3        | 79.7513 | -0.88106 | 0.00613  | 0.01673  | 67.7187 | 65.1642 | 34.6595 | 108.202 | 103.998 | 98.7657 |
| ENSMUSG000000055737 | 12_Ghr          | 2758.04 | -0.23814 | 0.05649  | 0.10728  | 2612.38 | 2344.08 | 2635.31 | 2676.2  | 2994.41 | 3285.86 |
| ENSMUSG000000055745 | 4_Ldoc1l        | 385.524 | 0.48253  | 0.00674  | 0.0181   | 448.853 | 471.752 | 427.865 | 385.02  | 277.028 | 302.628 |
| ENSMUSG000000055746 | 9_Magea2        | 0.14942 | -0.99647 | 0.80707  | NA       | 0       | 0       | 0       | 0       | 0.89653 | 0       |
| ENSMUSG000000055748 | 12_Gsdmc4       | 0.36046 | -1.978   | 0.62369  | NA       | 0       | 0       | 0       | 0       | 0.89653 | 1.26623 |
| ENSMUSG000000055760 | 12_Gemin6       | 127.769 | 0.19159  | 0.46246  | 0.57607  | 120.678 | 115.644 | 173.297 | 105.497 | 136.273 | 115.227 |
| ENSMUSG000000055761 | 14_Nkain3       | 3.71666 | -4.35419 | 0.01076  | 0.02687  | 0.86819 | 0       | 0       | 12.6236 | 6.27571 | 2.53245 |
| ENSMUSG000000055762 | 15_Eef1d        | 3632.33 | 0.49704  | 0.00128  | 0.00445  | 4108.27 | 4086.99 | 4559.51 | 3267.71 | 2391.94 | 3379.56 |

|                     |                  |         |          |          |          |         |         |         |         |         |         |
|---------------------|------------------|---------|----------|----------|----------|---------|---------|---------|---------|---------|---------|
| ENSMUSG000000055775 | 16_Myh8          | 108.031 | -0.52834 | 0.1253   | 0.20662  | 80.7415 | 122.986 | 60.9529 | 155.992 | 86.9635 | 140.551 |
| ENSMUSG000000055782 | 8_Abcd2          | 66.4822 | -1.40863 | 0.00014  | 0.00066  | 47.7504 | 30.2876 | 31.074  | 122.629 | 101.308 | 65.8438 |
| ENSMUSG000000055795 | 5_Gm5160         | 0.65458 | -1.52643 | 0.6202   | NA       | 0.86819 | 0       | 0       | 0       | 1.79306 | 1.26623 |
| ENSMUSG000000055799 | 13_Tcf711        | 554.358 | 0.58007  | 0.00213  | 0.00686  | 577.345 | 689.272 | 725.459 | 466.171 | 348.75  | 519.153 |
| ENSMUSG000000055805 | 14_Fmnl1         | 799.979 | 0.85916  | 9.06E-07 | 8.41E-06 | 1027.94 | 981.134 | 1082.81 | 538.306 | 464.403 | 705.288 |
| ENSMUSG000000055809 | 7_Dnaaf3         | 24.1946 | 0.68408  | 0.1958   | 0.29587  | 26.9138 | 41.3013 | 21.5128 | 19.8371 | 24.2063 | 11.396  |
| ENSMUSG000000055811 | 2_Cldn17         | 230.39  | 0.18101  | 0.3528   | 0.4695   | 242.225 | 241.383 | 249.787 | 214.601 | 181.099 | 253.245 |
| ENSMUSG000000055817 | 17_Mta3          | 1456.69 | 0.71397  | 2.83E-08 | 4.16E-07 | 1682.55 | 1726.39 | 2021.01 | 1104.56 | 1038.18 | 1167.46 |
| ENSMUSG000000055827 | 13_Gsdmc3        | 0.2894  | 1.67273  | 0.67976  | NA       | 1.73638 | 0       | 0       | 0       | 0       | 0       |
| ENSMUSG000000055835 | 9_Zfp1           | 230.677 | -0.17639 | 0.3347   | 0.45128  | 233.543 | 199.164 | 217.518 | 269.604 | 237.581 | 226.655 |
| ENSMUSG000000055839 | 5_Tceb2          | 1637.27 | 1.32139  | 1.84E-08 | 2.91E-07 | 2154.84 | 2302.77 | 2558.82 | 1286.71 | 602.469 | 918.015 |
| ENSMUSG000000055850 | 12_Rnf181        | 1494.95 | -0.10971 | 0.29656  | 0.41093  | 1435.12 | 1407    | 1473.63 | 1591.47 | 1573.41 | 1489.08 |
| ENSMUSG000000055862 | 6_Izumo4         | 127.153 | 0.20699  | 0.40488  | 0.52209  | 144.987 | 123.904 | 139.833 | 140.663 | 93.2392 | 120.292 |
| ENSMUSG000000055865 | 8_Fam19a3        | 61.6191 | -1.1581  | 0.01279  | 0.03107  | 39.9367 | 45.8903 | 28.6837 | 137.056 | 78.8947 | 39.253  |
| ENSMUSG000000055866 | 9_Per2           | 666.443 | 0.86847  | 7.19E-09 | 1.29E-07 | 882.079 | 880.176 | 819.876 | 507.649 | 399.853 | 509.023 |
| ENSMUSG000000055874 | 6_Foxi3          | 16.5288 | -0.86322 | 0.25558  | 0.36524  | 7.8137  | 20.1917 | 7.17092 | 40.5758 | 10.7584 | 12.6623 |
| ENSMUSG000000055882 | 8_Abhd16b        | 4.86952 | 1.6546   | 0.13492  | 0.21911  | 8.68188 | 2.75342 | 10.7564 | 1.80337 | 2.68959 | 2.53245 |
| ENSMUSG000000055884 | 7_Fancm          | 222.745 | -0.23301 | 0.25765  | 0.36763  | 220.52  | 209.26  | 184.054 | 200.174 | 280.614 | 241.849 |
| ENSMUSG000000055900 | 2_Tmem69         | 234.135 | -0.53641 | 0.01399  | 0.03349  | 192.738 | 165.205 | 216.323 | 237.143 | 338.889 | 254.512 |
| ENSMUSG000000055912 | 8_Tmem150a       | 146.891 | 0.07099  | 0.78582  | 0.85141  | 171.901 | 158.78  | 120.711 | 182.14  | 123.721 | 124.09  |
| ENSMUSG000000055917 | 14_Zfp277        | 536.428 | -0.36082 | 0.02312  | 0.05126  | 474.899 | 413.93  | 521.087 | 541.913 | 658.95  | 607.789 |
| ENSMUSG000000055923 | 16_Aasdh         | 333.034 | -0.08559 | 0.61661  | 0.71513  | 306.471 | 327.657 | 334.643 | 294.851 | 349.647 | 384.933 |
| ENSMUSG000000055926 | 2_Gm14137        | 811.334 | 0.44722  | 0.00083  | 0.00307  | 896.839 | 932.49  | 977.636 | 666.346 | 631.158 | 763.535 |
| ENSMUSG000000055932 | 14_Fto           | 1483.57 | 0.0926   | 0.47165  | 0.58468  | 1460.29 | 1652.97 | 1479.6  | 1552.7  | 1288.31 | 1467.56 |
| ENSMUSG000000055937 | 1_Krt28          | 0.74593 | -0.58743 | 0.84364  | NA       | 0.86819 | 0.91781 | 0       | 0       | 2.68959 | 0       |
| ENSMUSG000000055943 | 5_Emc7           | 1170.73 | -0.38123 | 0.00405  | 0.01184  | 1009.7  | 1027.94 | 1014.69 | 1329.99 | 1478.38 | 1163.66 |
| ENSMUSG000000055944 | 3_E130018O15Rik  | 1.96085 | 0.64581  | 0.76955  | NA       | 0       | 3.67122 | 3.58546 | 4.50843 | 0       | 0       |
| ENSMUSG000000055945 | 7_Prr18          | 19.418  | 0.64676  | 0.22399  | 0.32915  | 19.1001 | 30.2876 | 21.5128 | 15.3287 | 12.5514 | 17.7272 |
| ENSMUSG000000055963 | 12_Triqk         | 127.843 | -1.17591 | 1.17E-06 | 1.05E-05 | 82.4779 | 84.4381 | 68.1238 | 164.107 | 207.099 | 160.811 |
| ENSMUSG000000055972 | 5_2810407A14Rik  | 6.77222 | 0.21438  | 0.84361  | 0.89351  | 15.6274 | 3.67122 | 2.39031 | 10.8202 | 1.79306 | 6.33113 |
| ENSMUSG000000055976 | 5_Cldn23         | 1325.41 | 0.8976   | 2.38E-11 | 9.18E-10 | 1565.34 | 1641.95 | 1968.42 | 949.475 | 890.255 | 937.008 |
| ENSMUSG000000055978 | 4_Fut2           | 15.0893 | -0.52187 | 0.38311  | 0.50068  | 13.891  | 9.17806 | 14.3418 | 20.7388 | 19.7237 | 12.6623 |
| ENSMUSG000000055980 | 2_Irs1           | 185.678 | -0.53235 | 0.03322  | 0.06913  | 145.856 | 163.369 | 147.004 | 283.129 | 215.167 | 159.545 |
| ENSMUSG000000055991 | 15_ZKscan5       | 369.305 | 0.02337  | 0.89869  | 0.93169  | 377.662 | 362.533 | 376.474 | 426.497 | 294.062 | 378.602 |
| ENSMUSG000000055994 | 15_Nod2          | 132.163 | 1.76886  | 6.39E-06 | 4.59E-05 | 205.761 | 109.219 | 297.593 | 38.7725 | 61.8606 | 79.7723 |
| ENSMUSG000000056004 | 16_9330182L06Rik | 36.0984 | -1.4245  | 0.00201  | 0.00654  | 13.0228 | 31.2054 | 14.3418 | 55.0028 | 51.1022 | 51.9153 |
| ENSMUSG000000056008 | 1_Gm11541        | 0.55965 | -1.00752 | 0.75768  | NA       | 0       | 0       | 1.19515 | 0       | 0.89653 | 1.26623 |
| ENSMUSG000000056014 | 15_A430033K04Rik | 244.913 | -0.08933 | 0.65013  | 0.7441   | 266.534 | 221.191 | 223.494 | 211.896 | 277.924 | 268.44  |
| ENSMUSG000000056018 | 14_Ccdc7b        | 0.36046 | -1.978   | 0.62369  | NA       | 0       | 0       | 0       | 0       | 0.89653 | 1.26623 |
| ENSMUSG000000056019 | 12_Zfp709        | 177.806 | -0.66979 | 0.00158  | 0.00532  | 138.91  | 149.602 | 123.101 | 200.174 | 253.718 | 201.33  |
| ENSMUSG000000056025 | 12_Clca3a1       | 44.6492 | 0.85574  | 0.02528  | 0.05516  | 55.5641 | 47.7259 | 69.3189 | 23.4438 | 37.6543 | 34.1881 |
| ENSMUSG000000056043 | 5_Rgs9bp         | 211.57  | -2.27393 | 0.01679  | 0.03916  | 102.446 | 94.534  | 20.3176 | 614.949 | 352.337 | 84.8372 |
| ENSMUSG000000056050 | 12_Mia3          | 1812.51 | 0.21124  | 0.07514  | 0.13614  | 1871.81 | 2009.99 | 1951.69 | 1520.24 | 1704.3  | 1817.04 |
| ENSMUSG000000056054 | 9_S100a8         | 29.556  | 1.27735  | 0.0173   | 0.04012  | 66.8505 | 22.9451 | 35.8546 | 18.0337 | 17.7237 | 13.9285 |
| ENSMUSG000000056055 | 13_Sag           | 1287.94 | -1.92958 | 0.01979  | 0.04486  | 777.897 | 619.519 | 209.152 | 3604.04 | 1888.99 | 628.049 |
| ENSMUSG000000056069 | 8_Fam105a        | 161.948 | -0.37194 | 0.16057  | 0.25289  | 190.133 | 122.986 | 109.954 | 180.337 | 206.202 | 162.077 |
| ENSMUSG000000056071 | 12_S100a9        | 84.8267 | 1.29117  | 0.01038  | 0.0261   | 213.574 | 44.9725 | 102.783 | 36.9691 | 66.3433 | 44.3179 |
| ENSMUSG000000056073 | 14_Grik2         | 30.7607 | -1.86585 | 3.66E-05 | 0.00021  | 11.2864 | 16.5205 | 11.9515 | 50.4944 | 53.7918 | 40.5193 |
| ENSMUSG000000056076 | 13_Eif3b         | 4732.12 | 0.69643  | 1.11E-06 | 1.01E-05 | 5603.29 | 5313.18 | 6640.28 | 3530.1  | 3203.3  | 4102.58 |
| ENSMUSG000000056078 | 5_Lipm           | 2031.74 | -0.19264 | 0.1925   | 0.29234  | 1961.24 | 1764.94 | 1962.44 | 1785.34 | 2438.56 | 2277.94 |
| ENSMUSG000000056089 | 5_Gm5468         | 7.36474 | -0.91844 | 0.26476  | 0.37601  | 6.07732 | 5.50683 | 3.58546 | 10.8202 | 8.06878 | 10.1298 |
| ENSMUSG000000056091 | 12_St3gal5       | 616.314 | -0.55525 | 0.01668  | 0.03893  | 487.922 | 617.683 | 392.011 | 905.292 | 759.361 | 535.614 |
| ENSMUSG000000056116 | 18_H2-T22        | 4065    | 1.49359  | 2.59E-20 | 4.88E-18 | 6202.34 | 4721.19 | 7075.31 | 2256.92 | 1986.71 | 2147.52 |
| ENSMUSG000000056121 | 15_Fez2          | 741.465 | -0.39567 | 0.00364  | 0.0108   | 637.25  | 695.697 | 588.016 | 906.194 | 823.912 | 797.723 |
| ENSMUSG000000056124 | 5_B4galT6        | 228.789 | -1.22027 | 7.49E-05 | 0.00039  | 147.592 | 173.465 | 90.8317 | 367.888 | 389.094 | 203.863 |
| ENSMUSG000000056128 | 3_Gm9991         | 35.5866 | -0.77543 | 0.08689  | 0.15312  | 33.8593 | 31.2054 | 13.1467 | 49.5927 | 43.93   | 41.7855 |
| ENSMUSG000000056130 | 9_Ticam2         | 14.6148 | 0.62437  | 0.31693  | 0.43223  | 19.9683 | 15.6027 | 17.9273 | 11.7219 | 16.1376 | 6.33113 |
| ENSMUSG000000056131 | 13_Pgm3          | 297.45  | -0.00881 | 0.96206  | 0.97551  | 301.261 | 288.191 | 298.789 | 256.079 | 283.304 | 357.076 |
| ENSMUSG000000056133 | 4_Gm9992         | 19.4479 | -0.02801 | 0.9692   | 0.98021  | 17.3638 | 20.1917 | 20.3176 | 37.8708 | 4.48265 | 16.4609 |
| ENSMUSG000000056144 | 13_Trim34a       | 656.922 | 0.45033  | 0.00623  | 0.01696  | 760.533 | 686.519 | 829.437 | 471.582 | 640.123 | 553.341 |
| ENSMUSG000000056145 | 5_AI504432       | 20.8668 | 0.56004  | 0.4104   | 0.52682  | 43.4094 | 14.6849 | 16.7322 | 19.8371 | 24.2063 | 6.33113 |
| ENSMUSG000000056148 | 8_Rdh9           | 0       | NA       | NA       | NA       | 0       | 0       | 0       | 0       | 0       | 0       |
| ENSMUSG000000056153 | 14_Socs6         | 1111.84 | -0.05493 | 0.62533  | 0.72264  | 1057.45 | 1074.75 | 1141.37 | 1147.85 | 1161.9  | 1087.69 |
| ENSMUSG000000056155 | 5_Nanos3         | 2.10297 | 0.78981  | 0.62785  | NA       | 0.86819 | 3.67122 | 3.58546 | 1.80337 | 2.68959 | 0       |
| ENSMUSG000000056158 | 14_Car10         | 10.7569 | -2.34569 | 0.02091  | 0.04705  | 4.34094 | 2.75342 | 3.58546 | 39.6742 | 11.6549 | 2.53245 |
| ENSMUSG000000056162 | 13_Cndp1         | 25.2033 | -0.09116 | 0.85637  | 0.90275  | 21.7047 | 17.4383 | 34.6595 | 26.1489 | 32.2751 | 18.9934 |
| ENSMUSG000000056167 | 6_Cnot10         | 1044.02 | 0.24891  | 0.02852  | 0.06092  | 1153.82 | 1115.13 | 1131.81 | 900.784 | 973.632 | 988.923 |
| ENSMUSG000000056174 | 8_Col8a2         | 4922    | -0.75508 | 0.00044  | 0.00177  | 3739.29 | 4535.8  | 2711.8  | 7902.37 | 5275.19 | 5367.54 |
| ENSMUSG000000056185 | 4_Snx32          | 171.324 | -0.4198  | 0.11552  | 0.19358  | 145.856 | 173.465 | 120.711 | 247.964 | 198.133 | 141.817 |
| ENSMUSG000000056201 | 6_Cfl1           | 3420.58 | -0.03219 | 0.80995  | 0.86893  | 3734.95 | 2988.37 | 3425.31 | 3721.26 | 3553.85 | 3099.72 |
| ENSMUSG000000056203 | 4_Tas2r135       | 0.96051 | -0.13586 | 0.95477  | NA       | 0.86819 | 1.83561 | 0       | 0       | 1.79306 | 1.26623 |
| ENSMUSG000000056204 | 7_Pgpep1         | 832.467 | 0.32087  | 0.07047  | 0.1292   | 893.366 | 926.984 | 953.733 | 897.177 | 576.469 | 747.074 |
| ENSMUSG000000056209 | 7_Npm3           | 486.086 | 0.5307   | 0.00069  | 0.00261  | 573.004 | 527.738 | 622.675 | 425.596 | 349.647 | 417.855 |
| ENSMUSG000000056211 | 13_R3hdm1        | 1435.85 | 0.124    | 0.34319  | 0.45962  | 1420.36 | 1543.75 | 1527.41 | 1201.95 | 1423.69 | 1497.95 |
| ENSMUSG000000056214 | 8_Pard6g         | 3156.15 | 0.76355  | 5.15E-08 | 7.05E-07 | 3649    | 3711.61 | 4555.93 | 2288.48 | 2131.05 | 2600.83 |
| ENSMUSG000000056215 | 12_Lrguk         | 4.95243 | -0.91182 | 0.40999  | 0.52649  | 6.94551 | 0.91781 | 2.39031 | 0.91685 | 5.37918 | 5.06491 |
| ENSMUSG000000056216 | 9_Cebpg          | 1440.86 | -0.15434 | 0.22636  | 0.33187  | 1389.97 | 1280.34 | 1422.23 | 1394.01 | 1687.27 | 1471.36 |
| ENSMUSG000000056220 | 14_Pla2g4a       | 1843.98 | -0.07991 | 0.58505  | 0.68792  | 1937.8  | 1497.86 | 1943.32 | 1722.22 | 1991.19 | 1971.52 |
| ENSMUSG000000056222 | 14_Spock1        | 848.252 | -0.98051 | 0.00031  | 0.00134  | 538.277 | 801.244 | 371.693 | 1441.8  | 1076.73 | 859.768 |

|                    |                  |         |          |          |          |         |         |         |         |         |         |
|--------------------|------------------|---------|----------|----------|----------|---------|---------|---------|---------|---------|---------|
| ENSMUSG00000056228 | 9_Cars2          | 217.338 | 0.60358  | 0.00195  | 0.00637  | 244.829 | 252.397 | 290.422 | 196.567 | 164.065 | 155.746 |
| ENSMUSG00000056234 | 14_Ncoa4         | 7417.07 | -0.2164  | 0.06827  | 0.12593  | 7060.98 | 6628.39 | 6894.84 | 6985.36 | 8322.49 | 8610.34 |
| ENSMUSG00000056257 | 2_Gm5447         | 1.83275 | 0.50025  | 0.76667  | NA       | 3.47275 | 1.83561 | 1.19515 | 1.80337 | 2.68959 | 0       |
| ENSMUSG00000056258 | 8_Kcnq3          | 45.3522 | -1.85621 | 8.67E-05 | 0.00044  | 14.7592 | 33.041  | 10.7564 | 73.9382 | 85.1704 | 54.4478 |
| ENSMUSG00000056260 | 15_Lrif1         | 575.579 | -0.44615 | 0.00737  | 0.01952  | 534.804 | 447.889 | 478.062 | 553.635 | 704.673 | 734.412 |
| ENSMUSG00000056267 | 14_Cep70         | 311.78  | -0.63716 | 0.00254  | 0.00796  | 271.743 | 227.616 | 231.86  | 286.736 | 428.542 | 424.186 |
| ENSMUSG00000056268 | 15_Dennd1b       | 1432.42 | -0.04327 | 0.7674   | 0.83661  | 1430.77 | 1306.04 | 1496.33 | 1231.7  | 1646.93 | 1482.75 |
| ENSMUSG00000056271 | 13_Lman1l        | 19.0221 | 0.69325  | 0.2624   | 0.37307  | 16.4956 | 34.8766 | 19.1225 | 21.6405 | 8.06878 | 13.9285 |
| ENSMUSG00000056290 | 15_Ms4a4b        | 40.1388 | 4.22024  | 7.44E-09 | 1.32E-07 | 140.647 | 26.6164 | 60.9529 | 1.80337 | 4.48265 | 6.33113 |
| ENSMUSG00000056293 | 12_Gsdmc2        | 0.49804 | -0.79984 | 0.839    | NA       | 0       | 0       | 1.19515 | 0       | 1.79306 | 0       |
| ENSMUSG00000056296 | 16_Synpr         | 478.524 | -1.50381 | 7.71E-06 | 5.41E-05 | 191.87  | 401.999 | 154.175 | 889.062 | 756.672 | 477.368 |
| ENSMUSG00000056300 | 14_Gm13247       | 4.48677 | -1.59008 | 0.19427  | 0.29441  | 3.47275 | 0.91781 | 2.39031 | 8.11517 | 10.7584 | 1.26623 |
| ENSMUSG00000056305 | 4_Usp39          | 577.455 | 0.06499  | 0.65351  | 0.74721  | 559.982 | 567.204 | 644.188 | 512.157 | 574.676 | 606.523 |
| ENSMUSG00000056306 | 5_Sertm1         | 1.51098 | -0.55917 | 0.81069  | NA       | 0       | 3.67122 | 0       | 2.70506 | 2.68959 | 0       |
| ENSMUSG00000056310 | 14_Tyw1          | 447.133 | 0.06069  | 2.07E-05 | 0.00013  | 542.618 | 533.245 | 542.6   | 368.789 | 324.544 | 371.004 |
| ENSMUSG00000056313 | 5_1810011O10Rik  | 1423.22 | 0.16333  | 0.19121  | 0.29075  | 1474.18 | 1396.9  | 1639.75 | 1300.23 | 1278.45 | 1449.83 |
| ENSMUSG00000056316 | 2_Gm9996         | 0.15028 | -0.99647 | 0.80707  | NA       | 0       | 0       | 0       | 0.90169 | 0       | 0       |
| ENSMUSG00000056328 | 14_Myh1          | 2058.14 | -0.9901  | 0.0451   | 0.08891  | 1019.25 | 2017.34 | 1098.35 | 3856.51 | 1479.28 | 2878.13 |
| ENSMUSG00000056342 | 16_Usp34         | 3982.59 | -0.55618 | 4.99E-05 | 0.00027  | 3503.14 | 3079.24 | 3089.47 | 4046.76 | 5293.12 | 4883.84 |
| ENSMUSG00000056366 | 4_Fabp3-ps1      | 3.86351 | -0.02813 | 0.98546  | 0.99013  | 7.8137  | 3.67122 | 0       | 7.21348 | 4.48265 | 0       |
| ENSMUSG00000056367 | 14_Actr3b        | 43.3435 | -0.64801 | 0.13049  | 0.21358  | 26.0457 | 42.2191 | 33.4643 | 73.9382 | 50.2057 | 34.1881 |
| ENSMUSG00000056380 | 13_Gpr50         | 13.0507 | 1.91687  | 0.00663  | 0.01787  | 22.5729 | 12.8493 | 26.2934 | 4.50843 | 4.48265 | 7.59736 |
| ENSMUSG00000056383 | 10_AI987944      | 335.426 | -0.54403 | 0.00555  | 0.01538  | 264.797 | 240.465 | 314.326 | 300.017 | 459.024 | 403.926 |
| ENSMUSG00000056394 | 17_Lig1          | 930.25  | 1.0188   | 6.12E-09 | 1.12E-07 | 1191.15 | 1118.8  | 1425.82 | 504.944 | 611.434 | 729.347 |
| ENSMUSG00000056399 | 1_Prss34         | 0.15028 | -0.99647 | 0.80707  | NA       | 0       | 0       | 0       | 0.90169 | 0       | 0       |
| ENSMUSG00000056413 | 16_Adap1         | 933.492 | 1.29588  | 6.54E-13 | 3.73E-11 | 1203.31 | 1230.78 | 1546.53 | 641.098 | 441.093 | 538.146 |
| ENSMUSG00000056418 | 3_BC043934       | 100     | -1.07212 | 0.00338  | 0.01017  | 63.3778 | 93.6162 | 35.8546 | 171.32  | 128.204 | 107.629 |
| ENSMUSG00000056423 | 7_Uts2b          | 0.15028 | -0.99647 | 0.80707  | NA       | 0       | 0       | 0       | 0.90169 | 0       | 0       |
| ENSMUSG00000056426 | 3_Nat3           | 4.03733 | -0.88488 | 0.45722  | 0.57106  | 4.34094 | 1.83561 | 2.39031 | 8.11517 | 6.27571 | 1.26623 |
| ENSMUSG00000056427 | 10_Slit3         | 700.805 | 0.45351  | 0.01329  | 0.03208  | 803.942 | 910.463 | 714.702 | 684.379 | 467.092 | 624.25  |
| ENSMUSG00000056429 | 4_Tgoln1         | 4629.22 | -0.60784 | 6.47E-08 | 8.60E-07 | 3813.08 | 3788.7  | 3402.6  | 5674.31 | 5943.1  | 5153.54 |
| ENSMUSG00000056436 | 4_Cyct           | 0.70432 | 2.91493  | 0.39205  | NA       | 0       | 1.83561 | 2.39031 | 0       | 0       | 0       |
| ENSMUSG00000056458 | 16_Mok           | 105.346 | 0.1484   | 0.63543  | 0.73171  | 125.887 | 95.4518 | 111.149 | 138.86  | 70.8259 | 89.9021 |
| ENSMUSG00000056459 | 13_Zbtb25        | 153.368 | -0.07291 | 0.75302  | 0.82587  | 180.583 | 129.411 | 138.638 | 165.008 | 168.548 | 138.019 |
| ENSMUSG00000056476 | 13_Med12l        | 365.418 | -0.48982 | 0.00952  | 0.02421  | 254.379 | 372.629 | 284.447 | 431.006 | 404.335 | 445.712 |
| ENSMUSG00000056481 | 6_Cd248          | 440.382 | 0.31783  | 0.18     | 0.27699  | 467.954 | 574.546 | 423.085 | 503.14  | 273.442 | 400.128 |
| ENSMUSG00000056486 | 17_Chn1          | 256.21  | -0.91927 | 0.00018  | 0.00082  | 189.265 | 213.849 | 127.881 | 410.267 | 311.096 | 284.901 |
| ENSMUSG00000056487 | 8_Mettl7a2       | 1.31353 | 0.67385  | 0.71192  | NA       | 0.86819 | 2.75342 | 1.19515 | 0.90169 | 0.89653 | 1.26623 |
| ENSMUSG00000056492 | 5_Adgrf5         | 483.372 | -0.52709 | 0.00059  | 0.0023   | 395.894 | 417.602 | 375.278 | 614.949 | 598.882 | 497.627 |
| ENSMUSG00000056493 | 9_Foxk1          | 1993.17 | 0.8439   | 2.39E-07 | 2.67E-06 | 2394.46 | 2354.17 | 2930.52 | 1479.67 | 1165.49 | 1634.7  |
| ENSMUSG00000056494 | 7_Cngb3          | 64.4949 | -0.16164 | 0.60301  | 0.70383  | 52.0913 | 59.6574 | 71.7092 | 69.4298 | 77.1016 | 56.9802 |
| ENSMUSG00000056498 | 13_Tmem154       | 3608.6  | 0.17726  | 0.22205  | 0.32699  | 3890.35 | 3458.29 | 4140.01 | 2925.97 | 3302.82 | 3934.17 |
| ENSMUSG00000056501 | 3_Cebpb          | 75.9361 | 1.29214  | 5.82E-05 | 0.00031  | 108.524 | 78.9313 | 136.248 | 45.986  | 40.3439 | 45.5842 |
| ENSMUSG00000056508 | 5_1700001K19Rik  | 5.56332 | 0.21713  | 0.86147  | 0.9061   | 3.47275 | 11.0137 | 3.58546 | 11.7219 | 3.58612 | 0       |
| ENSMUSG00000056509 | 10_Gm9999        | 0.15028 | -0.99647 | 0.80707  | NA       | 0       | 0       | 0       | 0.90169 | 0       | 0       |
| ENSMUSG00000056515 | 8_Rab31          | 980.1   | 0.01901  | 0.87434  | 0.91476  | 1025.33 | 912.299 | 1023.05 | 995.461 | 986.184 | 938.274 |
| ENSMUSG00000056529 | 7_Ptafr          | 144.929 | 1.43577  | 1.90E-06 | 1.60E-05 | 276.952 | 165.205 | 193.615 | 100.087 | 77.9982 | 55.714  |
| ENSMUSG00000056531 | 11_Ccdc18        | 97.2642 | -0.42332 | 0.10993  | 0.1861   | 92.8962 | 77.0957 | 78.8802 | 91.0702 | 124.618 | 119.025 |
| ENSMUSG00000056536 | 14_Pign          | 2219.25 | -0.26037 | 0.05998  | 0.11284  | 2126.19 | 1820.93 | 2111.84 | 2117.16 | 2712    | 2427.36 |
| ENSMUSG00000056537 | 11_Rlim          | 2186.89 | -0.33174 | 0.01154  | 0.02853  | 2074.97 | 1801.65 | 1932.56 | 2140.6  | 2670.76 | 2500.8  |
| ENSMUSG00000056553 | 14_Ptpn2         | 42.8609 | -1.0324  | 0.03911  | 0.07901  | 30.3866 | 39.4656 | 14.3418 | 88.3652 | 46.6196 | 37.9868 |
| ENSMUSG00000056564 | 6_Olfir324       | 0       | NA       | NA       | NA       | 0       | 0       | 0       | 0       | 0       | 0       |
| ENSMUSG00000056569 | 10_Mpz           | 223.046 | -0.24425 | 0.31487  | 0.42995  | 177.11  | 227.616 | 207.957 | 302.065 | 176.617 | 246.914 |
| ENSMUSG00000056592 | 14_Zfp658        | 87.2658 | -0.74864 | 0.00546  | 0.01516  | 63.3778 | 74.3423 | 57.3674 | 122.629 | 99.5149 | 106.363 |
| ENSMUSG00000056596 | 8_Tmp1           | 82.3564 | -1.12334 | 0.00224  | 0.00714  | 52.0913 | 70.671  | 32.2692 | 151.483 | 97.7218 | 89.9021 |
| ENSMUSG00000056598 | 16_Lrrc48        | 78.2987 | -0.37403 | 0.17826  | 0.27496  | 77.2688 | 60.5752 | 66.9286 | 98.2837 | 86.9635 | 79.7723 |
| ENSMUSG00000056600 | 2_Olfir90        | 0       | NA       | NA       | NA       | 0       | 0       | 0       | 0       | 0       | 0       |
| ENSMUSG00000056602 | 11_Fry           | 548.342 | -0.71866 | 0.00114  | 0.00401  | 388.948 | 530.492 | 323.887 | 807.009 | 687.639 | 552.075 |
| ENSMUSG00000056605 | 6_Krt72          | 0.8546  | 1.94752  | 0.48975  | NA       | 0       | 1.83561 | 2.39031 | 0.90169 | 0       | 0       |
| ENSMUSG00000056606 | 2_Gm10000        | 0.44998 | -2.33107 | 0.56049  | NA       | 0       | 0       | 0       | 1.80337 | 0.89653 | 0       |
| ENSMUSG00000056608 | 13_Chld9         | 2763.88 | -0.17513 | 0.17361  | 0.26903  | 2545.53 | 2515.71 | 2727.34 | 2525.62 | 3113.65 | 3155.44 |
| ENSMUSG00000056612 | 6_Ppp1r14b       | 2787.66 | 0.72012  | 1.69E-05 | 0.00011  | 3308.67 | 3217.83 | 3880.67 | 2320.94 | 1638.86 | 2358.98 |
| ENSMUSG00000056617 | 12_4931429L15Rik | 0.35574 | -0.03469 | 0.99322  | NA       | 0.86819 | 0       | 0       | 0       | 0       | 1.26623 |
| ENSMUSG00000056629 | 15_Fkbp2         | 976.135 | 0.41045  | 0.00834  | 0.02171  | 1028.8  | 1125.23 | 1187.98 | 935.048 | 692.122 | 887.625 |
| ENSMUSG00000056632 | 7_Dsg3           | 13029.3 | 0.55899  | 0.00175  | 0.00581  | 15107.3 | 13815.7 | 17642.9 | 8102.55 | 10642.7 | 12864.9 |
| ENSMUSG00000056643 | 5_Cstt13         | 1.72267 | 0.70713  | 0.70286  | NA       | 0.86819 | 5.50683 | 0       | 0.90169 | 1.79306 | 1.26623 |
| ENSMUSG00000056648 | 5_Hoxb8          | 0.57879 | 2.65671  | 0.50459  | NA       | 3.47275 | 0       | 0       | 0       | 0       | 0       |
| ENSMUSG00000056656 | 5_Apol8          | 17.1045 | 0.9409   | 0.13497  | 0.21916  | 28.6502 | 16.5205 | 22.7079 | 17.132  | 12.5514 | 5.06491 |
| ENSMUSG00000056665 | 2_Them6          | 276.369 | 1.15378  | 1.78E-05 | 0.00011  | 342.066 | 384.561 | 417.109 | 221.815 | 103.998 | 188.668 |
| ENSMUSG00000056666 | 13_Retsat        | 589.027 | 0.10896  | 0.42917  | 0.54453  | 553.036 | 630.532 | 651.359 | 557.242 | 589.917 | 552.075 |
| ENSMUSG00000056671 | 6_Prelid2        | 75.0048 | -0.43474 | 0.16208  | 0.25463  | 70.3233 | 65.1642 | 56.1722 | 89.2669 | 105.791 | 63.3113 |
| ENSMUSG00000056673 | 14_Kdm5d         | 3.05532 | -0.05514 | 0.03466  | 0.07161  | 0       | 0.91781 | 0       | 1.80337 | 14.3445 | 1.26623 |
| ENSMUSG00000056679 | 13_Gpr173        | 52.953  | -1.14442 | 0.00064  | 0.00245  | 34.7275 | 37.63   | 26.2934 | 77.545  | 74.412  | 67.11   |
| ENSMUSG00000056692 | 12_D17Wsu92e     | 4570.78 | 0.66742  | 8.86E-07 | 8.25E-06 | 5172.67 | 5359.98 | 6296.07 | 3751.01 | 3086.75 | 3758.16 |
| ENSMUSG00000056698 | 11_Elmod3        | 441.281 | 0.33551  | 0.08252  | 0.14692  | 457.535 | 484.601 | 534.234 | 422.89  | 297.648 | 450.777 |
| ENSMUSG00000056699 | 7_Gm5533         | 0       | NA       | NA       | NA       | 0       | 0       | 0       | 0       | 0       | 0       |
| ENSMUSG00000056706 | 2_Krtap7-1       | 0.44998 | -2.33107 | 0.56049  | NA       | 0       | 0       | 0       | 1.80337 | 0.89653 | 0       |
| ENSMUSG00000056708 | 5_Ier5           | 2056.78 | 0.47168  | 0.00185  | 0.00609  | 2321.54 | 2049.46 | 2799.05 | 1600.49 | 1665.75 | 1904.41 |
| ENSMUSG00000056716 | 9_Gm5420         | 0.19919 | 0.92709  | 0.82027  | NA       | 0       | 0       | 1.19515 | 0       | 0       | 0       |

|                    |                  |         |          |          |          |         |         |         |         |         |         |
|--------------------|------------------|---------|----------|----------|----------|---------|---------|---------|---------|---------|---------|
| ENSMUSG00000056718 | 2_Gm13199        | 14.497  | -0.41807 | 0.48872  | 0.60055  | 11.2864 | 12.8493 | 13.1467 | 11.7219 | 21.5167 | 16.4609 |
| ENSMUSG00000056724 | 14_Nbeal2        | 7312.47 | 1.78009  | 6.66E-20 | 1.18E-17 | 9438.08 | 11432.2 | 13108.5 | 3336.24 | 2469.94 | 4089.91 |
| ENSMUSG00000056737 | 14_Capg          | 10915.4 | 0.91832  | 1.11E-09 | 2.57E-08 | 13252.9 | 13560.6 | 16016.3 | 8384.77 | 6184.27 | 8093.72 |
| ENSMUSG00000056738 | 11_A730036117Rik | 0.74024 | -0.62549 | 0.85603  | NA       | 1.73638 | 0       | 0       | 2.70506 | 0       | 0       |
| ENSMUSG00000056749 | 7_Nfil3          | 99.7035 | -0.57895 | 0.02356  | 0.05206  | 87.687  | 72.5066 | 80.0753 | 135.253 | 120.135 | 102.564 |
| ENSMUSG00000056752 | 16_Dnah9         | 27.3731 | -1.52157 | 0.00333  | 0.01006  | 14.7592 | 14.6849 | 13.1467 | 41.4775 | 57.378  | 22.7921 |
| ENSMUSG00000056753 | 3_C330011M18Rik  | 24.1542 | -0.16412 | 0.72396  | 0.8035   | 19.9683 | 25.6986 | 22.7079 | 21.6405 | 29.5855 | 25.3245 |
| ENSMUSG00000056755 | 13_Grm7          | 52.2137 | -1.27947 | 0.00383  | 0.01129  | 31.2548 | 43.1369 | 16.7322 | 84.7584 | 90.5496 | 46.8504 |
| ENSMUSG00000056758 | 14_Hmga2         | 14.2544 | 1.85704  | 0.00524  | 0.01465  | 19.1001 | 20.1917 | 27.4885 | 3.60674 | 6.27571 | 8.86359 |
| ENSMUSG00000056763 | 16_Cspp1         | 676.253 | -0.28621 | 0.09771  | 0.16877  | 589.5   | 591.985 | 646.578 | 585.194 | 842.739 | 801.522 |
| ENSMUSG00000056770 | 15_Setd3         | 3160.99 | -0.08461 | 0.47034  | 0.58341  | 3021.3  | 2981.95 | 3200.62 | 2946.71 | 3238.27 | 3577.09 |
| ENSMUSG00000056771 | 7_Gm10010        | 16.6465 | -0.92032 | 0.12546  | 0.20682  | 8.68188 | 17.4383 | 8.36608 | 26.1489 | 21.5167 | 17.7272 |
| ENSMUSG00000056797 | 6_Gm4889         | 1.1347  | -1.14516 | 0.62875  | NA       | 0       | 0.91781 | 1.19515 | 0       | 0.89653 | 3.79868 |
| ENSMUSG00000056812 | 13_Sts3ia3       | 7.79301 | -1.66986 | 0.0869   | 0.15312  | 3.47275 | 6.42464 | 1.19515 | 20.7388 | 9.86184 | 5.06491 |
| ENSMUSG00000056815 | 1_Gm6812         | 0       | NA       | NA       | NA       | 0       | 0       | 0       | 0       | 0       | 0       |
| ENSMUSG00000056820 | 6_Tsnax          | 1836.56 | -0.2016  | 0.06091  | 0.11435  | 1751.14 | 1733.73 | 1638.56 | 1870.1  | 1951.75 | 2074.08 |
| ENSMUSG00000056821 | 13_170002816Rik  | 1.38752 | -0.45498 | 0.85356  | NA       | 3.47275 | 0       | 0       | 0       | 3.58612 | 1.26623 |
| ENSMUSG00000056824 | 15_Zfp663        | 0.49804 | -0.79984 | 0.839    | NA       | 0       | 0       | 1.19515 | 0       | 1.79306 | 0       |
| ENSMUSG00000056829 | 3_Foxb2          | 0.1447  | 0.92709  | 0.82027  | NA       | 0.86819 | 0       | 0       | 0       | 0       | 0       |
| ENSMUSG00000056832 | 14_Ttc26         | 160.558 | -0.36165 | 0.11419  | 0.1917   | 159.747 | 124.822 | 137.443 | 171.32  | 214.271 | 155.746 |
| ENSMUSG00000056851 | 13_Pcbp2         | 6304.88 | -0.07776 | 0.40118  | 0.51875  | 6416.78 | 5979.5  | 6008.04 | 6388.44 | 6557.22 | 6479.28 |
| ENSMUSG00000056854 | 4_Pou3f4         | 1.46803 | -0.02209 | 0.13488  | NA       | 0       | 0       | 0       | 0       | 6.27571 | 2.53245 |
| ENSMUSG00000056856 | 11_Jakmip3       | 6.08837 | -0.03939 | 0.96822  | 0.97945  | 9.55007 | 3.67122 | 4.78062 | 2.70506 | 10.7584 | 5.06491 |
| ENSMUSG00000056870 | 9_Gulp1          | 272.18  | -1.42128 | 1.67E-09 | 3.63E-08 | 132.833 | 184.479 | 126.686 | 460.761 | 423.162 | 305.161 |
| ENSMUSG00000056880 | 12_Gad1l         | 9.00739 | -0.44735 | 0.58508  | 0.68792  | 9.55007 | 2.75342 | 10.7564 | 13.5253 | 9.86184 | 7.59736 |
| ENSMUSG00000056888 | 11_Glipr1        | 50.3325 | 0.21383  | 0.55784  | 0.66363  | 65.9823 | 45.8903 | 50.1965 | 36.0674 | 58.2745 | 45.5842 |
| ENSMUSG00000056895 | 4_Hist3h2ba      | 7.53808 | 0.24039  | 0.8046   | 0.86478  | 3.47275 | 12.8493 | 8.36608 | 13.5253 | 4.48265 | 2.53245 |
| ENSMUSG00000056899 | 10_Immp2l        | 33.1053 | -0.63653 | 0.11765  | 0.19657  | 30.3866 | 22.0273 | 25.0982 | 39.6742 | 35.8612 | 45.5842 |
| ENSMUSG00000056900 | 13_Uspl3         | 106.06  | -1.51973 | 8.53E-07 | 7.99E-06 | 54.6959 | 65.1642 | 44.2207 | 203.781 | 116.549 | 151.947 |
| ENSMUSG00000056912 | 11_1700017N19Rik | 0.45536 | 0.77574  | 0.84797  | NA       | 0       | 1.83561 | 0       | 0       | 0.89653 | 0       |
| ENSMUSG00000056917 | 12_Sipa1         | 194.944 | 0.74834  | 0.00238  | 0.00753  | 230.07  | 282.684 | 219.908 | 176.73  | 105.791 | 154.48  |
| ENSMUSG00000056919 | 9_Cep162         | 509.615 | -0.11317 | 0.46979  | 0.58299  | 537.409 | 443.3   | 487.623 | 469.778 | 567.504 | 552.075 |
| ENSMUSG00000056938 | 16_Acbd4         | 634.687 | 0.70917  | 0.00018  | 0.00082  | 707.574 | 852.641 | 803.144 | 598.719 | 386.405 | 459.64  |
| ENSMUSG00000056941 | 17_Command7      | 909.907 | 0.22699  | 0.1453   | 0.2327   | 928.962 | 845.299 | 1171.25 | 861.11  | 815.843 | 836.976 |
| ENSMUSG00000056946 | 2_Olfr512        | 0.15028 | -0.99647 | 0.80707  | NA       | 0       | 0       | 0       | 0.90169 | 0       | 0       |
| ENSMUSG00000056947 | 5_Mab211l        | 1069.12 | -0.09962 | 0.51216  | 0.62236  | 948.062 | 1164.7  | 983.612 | 1243.42 | 968.253 | 1106.68 |
| ENSMUSG00000056952 | 13_Tatdn2        | 1657.09 | 0.11776  | 0.31512  | 0.43008  | 1747.66 | 1604.32 | 1821.41 | 1553.6  | 1512.45 | 1703.08 |
| ENSMUSG00000056962 | 11_Jmjd6         | 1101.35 | 0.50424  | 1.68E-05 | 0.00011  | 1248.45 | 1253.72 | 1373.23 | 900.784 | 875.91  | 956.001 |
| ENSMUSG00000056966 | 7_Gjc3           | 41.1254 | -1.63245 | 3.38E-05 | 0.00019  | 18.232  | 22.9451 | 19.1225 | 74.8399 | 60.9641 | 50.6491 |
| ENSMUSG00000056973 | 6_Ces1d          | 7999.19 | -0.13827 | 0.23726  | 0.34456  | 7989.07 | 7400.27 | 7456.57 | 7855.48 | 7889.47 | 9404.27 |
| ENSMUSG00000056987 | 7_Fam71d         | 1.10167 | -0.53597 | 0.81569  | NA       | 1.73638 | 0.91781 | 0       | 0       | 2.68959 | 1.26623 |
| ENSMUSG00000056999 | 14_Ide           | 2904.98 | -0.05597 | 0.698    | 0.78382  | 2937.08 | 2709.36 | 2898.25 | 2424.63 | 3162.06 | 3298.52 |
| ENSMUSG00000057000 | 12_Nxf3          | 0.2997  | -1.76345 | 0.66322  | NA       | 0       | 0       | 0       | 0.90169 | 0.89653 | 0       |
| ENSMUSG00000057003 | 12_Myh4          | 716.014 | -2.74066 | 0.00108  | 0.00382  | 115.469 | 371.711 | 71.7092 | 2200.11 | 771.016 | 766.067 |
| ENSMUSG00000057047 | 5_1700010B08Rik  | 0.30594 | 1.73752  | 0.66765  | NA       | 0       | 1.83561 | 0       | 0       | 0       | 0       |
| ENSMUSG00000057054 | 11_Inca1         | 34.0565 | -0.49844 | 0.24147  | 0.34917  | 28.6502 | 32.1232 | 23.9031 | 53.1994 | 32.2751 | 34.1881 |
| ENSMUSG00000057058 | 16_Skap1         | 9.50302 | 1.49408  | 0.10928  | 0.18524  | 24.3093 | 4.58903 | 13.1467 | 8.11517 | 1.79306 | 5.06491 |
| ENSMUSG00000057060 | 7_Slc35f3        | 220.499 | -0.83775 | 0.00021  | 0.00095  | 146.724 | 203.753 | 123.101 | 279.522 | 276.131 | 293.765 |
| ENSMUSG00000057068 | 15_Fam47e        | 4.94841 | 0.93665  | 0.43182  | 0.54709  | 4.34094 | 0.91781 | 14.3418 | 2.70506 | 3.58612 | 3.79868 |
| ENSMUSG00000057069 | 6_Ero11b         | 171.238 | -0.39374 | 0.06868  | 0.12661  | 172.769 | 141.342 | 129.077 | 173.124 | 209.788 | 201.33  |
| ENSMUSG00000057072 | 11_Spata45       | 0.64714 | 1.45445  | 0.59427  | NA       | 0.86819 | 0.91781 | 1.19515 | 0.90169 | 0       | 0       |
| ENSMUSG00000057074 | 6_Ces1g          | 1.37364 | -1.58055 | 0.416    | NA       | 0       | 0.91781 | 1.19515 | 1.80337 | 1.79306 | 2.53245 |
| ENSMUSG00000057092 | 12_Fxyd3         | 5862.7  | 0.21835  | 0.0977   | 0.16877  | 6002.65 | 5692.23 | 7222.32 | 4974.6  | 5552.21 | 5732.21 |
| ENSMUSG00000057093 | 14_C030039L03Rik | 61.3753 | -0.43431 | 0.17794  | 0.27459  | 45.1458 | 56.9039 | 54.9771 | 62.2163 | 86.9635 | 62.0451 |
| ENSMUSG00000057098 | 14_Ebf1          | 176.581 | -0.31736 | 0.15268  | 0.24254  | 174.506 | 141.342 | 156.565 | 229.028 | 192.237 | 160.811 |
| ENSMUSG00000057101 | 8_Zfp180         | 874.402 | -0.04579 | 0.68945  | 0.77674  | 869.057 | 877.422 | 834.218 | 894.472 | 863.359 | 907.885 |
| ENSMUSG00000057103 | 10_Cml1          | 58.7744 | -1.02069 | 0.0046   | 0.01316  | 48.6186 | 42.2191 | 25.0982 | 91.9719 | 78.8947 | 65.8438 |
| ENSMUSG00000057110 | 15_Cntrl         | 1080.18 | 0.12757  | 0.30852  | 0.42344  | 1154.69 | 1045.38 | 1183.2  | 953.082 | 1050.73 | 1094.02 |
| ENSMUSG00000057113 | 13_Npm1          | 5437.98 | -0.231   | 0.13933  | 0.22483  | 5541.65 | 4101.67 | 5367.44 | 5076.49 | 6442.47 | 6098.15 |
| ENSMUSG00000057116 | 4_AF366264       | 0.70907 | -1.5261  | 0.61157  | NA       | 0       | 0       | 1.19515 | 0       | 1.79306 | 1.26623 |
| ENSMUSG00000057123 | 14_Gja5          | 30.4999 | -0.22342 | 0.61613  | 0.71495  | 19.1001 | 33.041  | 32.2692 | 28.8539 | 30.482  | 39.253  |
| ENSMUSG00000057130 | 11_Txnl4a        | 528.438 | -0.0235  | 0.86136  | 0.90605  | 528.727 | 488.273 | 555.747 | 531.994 | 522.677 | 543.211 |
| ENSMUSG00000057132 | 15_Rpgrip1       | 304.878 | -1.72681 | 0.00557  | 0.01542  | 187.529 | 125.739 | 111.149 | 769.138 | 463.506 | 172.207 |
| ENSMUSG00000057133 | 14_Chd6          | 2933.96 | -0.07017 | 0.46132  | 0.57512  | 2911.9  | 2834.18 | 2840.88 | 2909.74 | 3027.58 | 3079.46 |
| ENSMUSG00000057134 | 4_Ado            | 512.792 | -0.12793 | 0.35091  | 0.4676   | 476.635 | 462.574 | 531.844 | 524.781 | 541.504 | 539.413 |
| ENSMUSG00000057135 | 12_Scimp         | 33.075  | 1.65125  | 0.00102  | 0.00366  | 67.7187 | 26.6164 | 56.1722 | 18.0337 | 13.448  | 16.4609 |
| ENSMUSG00000057137 | 9_Tmem140        | 554.038 | 0.71699  | 1.18E-05 | 7.86E-05 | 682.396 | 690.19  | 695.58  | 502.239 | 382.819 | 371.004 |
| ENSMUSG00000057143 | 14_Trim12c       | 2564.98 | 0.00591  | 0.96629  | 0.97811  | 2555.08 | 2388.13 | 2767.98 | 2182.98 | 2873.38 | 2622.36 |
| ENSMUSG00000057147 | 13_Dph6          | 1049.17 | -0.28363 | 0.09088  | 0.15895  | 992.339 | 863.655 | 982.417 | 908.899 | 1265    | 1282.69 |
| ENSMUSG00000057156 | 10_Homez         | 235.785 | -0.18538 | 0.28751  | 0.40095  | 204.024 | 235.876 | 222.299 | 240.75  | 263.58  | 248.18  |
| ENSMUSG00000057160 | 2_Gm16372        | 0.15028 | -0.99647 | 0.80707  | NA       | 0       | 0       | 0       | 0.90169 | 0       | 0       |
| ENSMUSG00000057163 | 3_Prss2          | 0.49686 | 2.41829  | 0.46418  | NA       | 0.86819 | 0.91781 | 1.19515 | 0       | 0       | 0       |
| ENSMUSG00000057173 | 8_Rfx8           | 2.38414 | -1.81104 | 0.25317  | NA       | 0       | 0.91781 | 2.39031 | 4.50843 | 2.68959 | 3.79868 |
| ENSMUSG00000057176 | 4_Gm166          | 153.817 | 0.27339  | 0.20213  | 0.3036   | 150.197 | 179.89  | 174.492 | 137.958 | 124.618 | 155.746 |
| ENSMUSG00000057177 | 12_Gsk3a         | 2409.7  | 0.636    | 4.68E-06 | 3.49E-05 | 2806.85 | 2775.44 | 3214.96 | 2068.47 | 1614.65 | 1977.85 |
| ENSMUSG00000057181 | 15_5730455P16Rik | 569.197 | -0.57837 | 0.0004   | 0.00163  | 502.022 | 456.149 | 406.352 | 653.722 | 779.085 | 612.854 |
| ENSMUSG00000057182 | 14_Scn3a         | 7.8364  | -1.33479 | 0.11228  | 0.18928  | 6.07732 | 3.67122 | 3.58546 | 15.3287 | 10.7584 | 7.59736 |
| ENSMUSG00000057191 | 13_AB124611      | 49.3382 | 2.84682  | 1.10E-07 | 1.36E-06 | 140.647 | 39.4656 | 80.0753 | 14.427  | 12.5514 | 8.86359 |
| ENSMUSG00000057193 | 7_Slc44a2        | 3474.87 | 0.50735  | 0.00019  | 0.00086  | 3762.73 | 4014.48 | 4460.32 | 2706.86 | 2615.18 | 3289.66 |

|                     |                  |         |          |          |          |         |         |         |         |         |         |
|---------------------|------------------|---------|----------|----------|----------|---------|---------|---------|---------|---------|---------|
| ENSMUSG000000057219 | 11_Armc7         | 226.855 | 0.37128  | 0.03594  | 0.07378  | 270.007 | 245.972 | 250.982 | 201.978 | 181.996 | 210.194 |
| ENSMUSG000000057228 | 5_Aadat          | 1.26225 | -2.66617 | 0.22802  | NA       | 0       | 0.91781 | 0       | 1.80337 | 3.58612 | 1.26623 |
| ENSMUSG000000057229 | 11_Atp5sl        | 363.786 | 0.49166  | 0.00203  | 0.0066   | 407.18  | 441.464 | 426.67  | 329.115 | 268.063 | 310.226 |
| ENSMUSG000000057230 | 13_Aak1          | 4093.33 | 0.14672  | 0.13478  | 0.21896  | 4326.18 | 4142.06 | 4435.22 | 3714.04 | 3913.36 | 4029.13 |
| ENSMUSG000000057234 | 9_Mettl15        | 169.543 | -0.3809  | 0.07749  | 0.13963  | 171.033 | 133.082 | 137.443 | 174.025 | 214.271 | 187.402 |
| ENSMUSG000000057236 | 10_Rbbp4         | 4507.16 | -0.43001 | 0.00027  | 0.00116  | 4003.22 | 3634.51 | 3883.06 | 4617.53 | 5582.7  | 5321.95 |
| ENSMUSG000000057246 | 14_BC051142      | 14.7882 | -1.05526 | 0.08585  | 0.15153  | 7.8137  | 13.7671 | 7.17092 | 19.8371 | 22.4133 | 17.7272 |
| ENSMUSG000000057262 | 1_Gm10020        | 888.971 | -1.69641 | 0.00105  | 0.00372  | 522.649 | 383.643 | 351.375 | 946.77  | 2335.46 | 793.924 |
| ENSMUSG000000057265 | 12_Ccdc176       | 30.142  | -0.69671 | 0.10426  | 0.17834  | 26.9138 | 18.3561 | 23.9031 | 40.5758 | 39.4473 | 31.6557 |
| ENSMUSG000000057278 | 8_Snrpg          | 830.959 | -0.35254 | 0.01276  | 0.031    | 777.897 | 629.615 | 782.826 | 886.357 | 968.253 | 940.807 |
| ENSMUSG000000057280 | 15_Musk          | 47.5562 | -0.75361 | 0.03425  | 0.07089  | 39.9367 | 31.2054 | 34.6595 | 53.1994 | 52.8953 | 73.4412 |
| ENSMUSG000000057286 | 5_St6galnac2     | 3864.14 | 0.3705   | 0.00478  | 0.01356  | 4217.66 | 4285.23 | 4567.88 | 3021.55 | 3192.55 | 3899.98 |
| ENSMUSG000000057315 | 14_Arhgap24      | 321.362 | -0.50124 | 0.00834  | 0.02171  | 263.929 | 286.355 | 247.397 | 435.514 | 307.51  | 387.465 |
| ENSMUSG000000057321 | 2_Usp17ld        | 0       | NA       | NA       | NA       | 0       | 0       | 0       | 0       | 0       | 0       |
| ENSMUSG000000057322 | 12_Rpl38         | 5098.43 | -0.01257 | 0.91588  | 0.94409  | 5214.34 | 4997.45 | 5016.06 | 5589.55 | 4500.58 | 5272.57 |
| ENSMUSG000000057329 | 7_Bcl2           | 1058.53 | -0.08521 | 0.45452  | 0.56863  | 1018.39 | 1015.09 | 1048.15 | 1025.22 | 1122.46 | 1121.88 |
| ENSMUSG000000057335 | 11_Cep170        | 357.89  | -0.76147 | 0.0005   | 0.00198  | 307.339 | 267.081 | 222.299 | 458.056 | 546.884 | 345.68  |
| ENSMUSG000000057337 | 13_Chst3         | 31.8636 | -1.64799 | 0.00592  | 0.01622  | 23.4411 | 11.9315 | 10.7564 | 85.6601 | 34.0682 | 25.3245 |
| ENSMUSG000000057342 | 13_Yipf2         | 1360.69 | 1.36389  | 1.62E-11 | 6.46E-10 | 1722.49 | 1909.04 | 2248.08 | 931.441 | 547.78  | 805.32  |
| ENSMUSG000000057346 | 11_Apol9a        | 3185.06 | 1.78292  | 8.18E-27 | 2.95E-24 | 4323.58 | 4297.17 | 6187.31 | 1508.52 | 1337.62 | 1456.16 |
| ENSMUSG000000057363 | 12_Uxs1          | 808.007 | -0.31871 | 0.01201  | 0.0295   | 719.728 | 671.834 | 766.094 | 844.879 | 913.565 | 931.943 |
| ENSMUSG000000057367 | 12_Birc2         | 1369.33 | -0.42551 | 0.00381  | 0.01125  | 1241.51 | 1166.53 | 1097.15 | 1310.15 | 1732.99 | 1667.62 |
| ENSMUSG000000057375 | 13_Yipf1         | 916.794 | -0.04073 | 0.72958  | 0.80774  | 915.071 | 855.395 | 941.781 | 963     | 903.703 | 921.813 |
| ENSMUSG000000057378 | 14_Ryr3          | 95.7155 | -1.74689 | 6.76E-07 | 6.54E-06 | 43.4094 | 61.493  | 26.2934 | 138.86  | 186.478 | 117.759 |
| ENSMUSG000000057388 | 9_Mrp18          | 819.817 | 0.10239  | 0.42106  | 0.53668  | 860.375 | 783.806 | 902.341 | 759.219 | 779.982 | 833.177 |
| ENSMUSG000000057396 | 6_Zfp759         | 170.332 | -0.68037 | 0.00222  | 0.0071   | 151.933 | 122.068 | 118.32  | 186.649 | 242.96  | 200.064 |
| ENSMUSG000000057402 | 5_Cldn34b2       | 0.51697 | 0.77694  | 0.84161  | NA       | 0       | 1.83561 | 0       | 0       | 0       | 1.26623 |
| ENSMUSG000000057406 | 16_Whsc1         | 1449.37 | 0.09131  | 0.48743  | 0.59938  | 1559.27 | 1400.57 | 1525.02 | 1228.1  | 1489.14 | 1494.15 |
| ENSMUSG000000057409 | 6_Zfp53          | 219.269 | -0.27493 | 0.28313  | 0.3963   | 204.024 | 177.136 | 213.933 | 159.598 | 288.683 | 272.239 |
| ENSMUSG000000057411 | 8_Fam173a        | 471.622 | 0.82375  | 0.00015  | 0.0007   | 567.795 | 608.505 | 632.237 | 444.531 | 247.442 | 329.219 |
| ENSMUSG000000057421 | 12_Las1l         | 1809.37 | -0.08037 | 0.53702  | 0.64466  | 1630.46 | 1732.82 | 1913.44 | 1677.13 | 1861.2  | 2041.16 |
| ENSMUSG000000057440 | 7_Mpp7           | 1709.32 | -0.11102 | 0.42407  | 0.53959  | 1699.91 | 1507.04 | 1723.41 | 1520.24 | 1912.3  | 1893.01 |
| ENSMUSG000000057454 | 5_Lypd3          | 10151.6 | 1.50304  | 1.61E-12 | 8.13E-11 | 13242.5 | 13727.6 | 18052.8 | 5505.69 | 3680.26 | 6700.87 |
| ENSMUSG000000057455 | 12_Rit2          | 34.8949 | -2.08723 | 6.08E-05 | 0.00032  | 13.891  | 17.4383 | 8.36608 | 83.8567 | 52.8953 | 32.9219 |
| ENSMUSG000000057457 | 11_Phex          | 18.7659 | -1.60556 | 0.02098  | 0.04717  | 9.55007 | 15.6027 | 2.39031 | 42.3792 | 22.4133 | 20.2596 |
| ENSMUSG000000057464 | 3_Olfr1415       | 0.1447  | 0.92709  | 0.82027  | NA       | 0.86819 | 0       | 0       | 0       | 0       | 0       |
| ENSMUSG000000057465 | 4_Saa2           | 12.4092 | 5.16297  | 6.04E-05 | 0.00032  | 46.014  | 11.9315 | 14.3418 | 0.90169 | 0       | 1.26623 |
| ENSMUSG000000057469 | 7_E2f6           | 686.426 | -0.43546 | 0.00036  | 0.0015   | 592.104 | 588.313 | 570.089 | 761.924 | 818.532 | 787.593 |
| ENSMUSG000000057497 | 8_Fam136a        | 607.914 | -0.33531 | 0.02659  | 0.0575   | 530.463 | 488.273 | 595.187 | 618.556 | 747.706 | 667.302 |
| ENSMUSG000000057506 | 4_Bloc1s2        | 477.476 | -0.29275 | 0.04294  | 0.08543  | 424.544 | 411.177 | 452.963 | 501.337 | 574.676 | 500.16  |
| ENSMUSG000000057522 | 15_Spop          | 2924.4  | -0.21239 | 0.02858  | 0.06103  | 2735.66 | 2708.44 | 2683.12 | 3047.7  | 3089.44 | 3282.06 |
| ENSMUSG000000057530 | 14_Ece1          | 4174.58 | 0.97088  | 1.23E-09 | 2.82E-08 | 5023.34 | 5174.59 | 6386.9  | 2974.66 | 2314.84 | 3173.16 |
| ENSMUSG000000057531 | 13_Dtnbp1        | 737.544 | 0.22766  | 0.16902  | 0.26343  | 787.447 | 797.573 | 801.948 | 808.812 | 555.849 | 673.633 |
| ENSMUSG000000057534 | 13_Gm15698       | 2.36141 | -2.59388 | 0.13114  | NA       | 0       | 0.91781 | 1.19515 | 5.41011 | 5.37918 | 1.26623 |
| ENSMUSG000000057541 | 14_Pus7          | 468.776 | 0.09378  | 0.60744  | 0.7074   | 484.449 | 453.396 | 512.721 | 382.315 | 421.369 | 558.406 |
| ENSMUSG000000057551 | 8_Zfp317         | 358.887 | -0.64524 | 5.14E-05 | 0.00028  | 268.27  | 299.205 | 272.495 | 409.365 | 482.333 | 421.654 |
| ENSMUSG000000057554 | 13_Lgals8        | 2183.89 | 0.07778  | 0.57062  | 0.67532  | 2212.14 | 2112.79 | 2404.65 | 1895.34 | 2444.84 | 2033.56 |
| ENSMUSG000000057561 | 9_Eif1a          | 3248.01 | -0.32322 | 0.0176   | 0.04071  | 3022.16 | 2589.13 | 3046.45 | 3194.67 | 4064.87 | 3570.76 |
| ENSMUSG000000057572 | 15_Zbtb8os       | 636.316 | -0.4961  | 0.0005   | 0.00198  | 576.477 | 484.601 | 522.282 | 683.478 | 786.257 | 764.801 |
| ENSMUSG000000057594 | 12_Arl16         | 167.414 | -0.37712 | 0.06297  | 0.11763  | 144.119 | 159.698 | 132.662 | 202.879 | 173.927 | 191.2   |
| ENSMUSG000000057596 | 13_Trim30d       | 97.21   | 3.06282  | 3.89E-08 | 5.50E-07 | 186.661 | 85.3559 | 249.787 | 11.7219 | 42.1369 | 7.59736 |
| ENSMUSG000000057604 | 9_Lmcd1          | 87.7691 | -0.3657  | 0.31035  | 0.42525  | 69.4551 | 100.959 | 59.7577 | 143.368 | 77.1016 | 75.9736 |
| ENSMUSG000000057606 | 14_Colq          | 9.46442 | -0.46011 | 0.54516  | 0.65178  | 9.55007 | 8.26025 | 5.97577 | 15.3287 | 6.27571 | 11.396  |
| ENSMUSG000000057609 | 6_Lce1a1         | 0.1447  | 0.92709  | 0.82027  | NA       | 0.86819 | 0       | 0       | 0       | 0       | 0       |
| ENSMUSG000000057614 | 6_Gnai1          | 144.055 | -0.80044 | 0.00079  | 0.00293  | 108.524 | 119.315 | 87.2462 | 208.289 | 186.478 | 154.48  |
| ENSMUSG000000057637 | 13_Prdr2         | 1626.15 | 0.211    | 0.07153  | 0.13083  | 1660.84 | 1660.31 | 1914.64 | 1547.29 | 1456.86 | 1516.94 |
| ENSMUSG000000057649 | 5_Brd9           | 1110.29 | -0.03293 | 0.76373  | 0.8338   | 1098.26 | 1105.96 | 1087.59 | 1099.15 | 1098.25 | 1172.53 |
| ENSMUSG000000057657 | 3_Rps18-ps3      | 3041.16 | 0.49152  | 0.01417  | 0.03388  | 3660.28 | 3496.84 | 3506.58 | 3443.54 | 1958.02 | 2181.71 |
| ENSMUSG000000057666 | 18_Gapdh         | 7970.51 | 0.73636  | 5.12E-05 | 0.00028  | 9921.66 | 9804    | 10158.8 | 7432.59 | 4350.86 | 6155.13 |
| ENSMUSG000000057667 | 6_Bloc1s3        | 259.584 | -0.13474 | 0.43065  | 0.54595  | 230.938 | 240.465 | 271.3   | 257.882 | 270.752 | 286.167 |
| ENSMUSG000000057672 | 15_Pkn1          | 1068.94 | 0.85277  | 2.72E-07 | 2.99E-06 | 1264.95 | 1395.98 | 1466.45 | 861.11  | 603.365 | 821.781 |
| ENSMUSG000000057674 | 3_Gm11938        | 0.1447  | 0.92709  | 0.82027  | NA       | 0.86819 | 0       | 0       | 0       | 0       | 0       |
| ENSMUSG000000057691 | 8_Zfp746         | 693.054 | 0.41759  | 0.00158  | 0.00532  | 745.774 | 789.313 | 842.584 | 596.014 | 554.056 | 630.581 |
| ENSMUSG000000057697 | 2_Vmn1r53        | 0.21104 | -0.99647 | 0.80707  | NA       | 0       | 0       | 0       | 0       | 0       | 1.26623 |
| ENSMUSG000000057706 | 6_Mex3b          | 27.8039 | -0.05189 | 0.91678  | 0.94489  | 28.6502 | 33.9588 | 19.1225 | 39.6742 | 18.8271 | 26.5908 |
| ENSMUSG000000057710 | 6_9630041A04Rik  | 0.21104 | -0.99647 | 0.80707  | NA       | 0       | 0       | 0       | 0       | 0       | 1.26623 |
| ENSMUSG000000057715 | 13_A830018L16Rik | 1.04563 | -1.31185 | 0.58184  | NA       | 0.86819 | 0.91781 | 0       | 0.90169 | 3.58612 | 0       |
| ENSMUSG000000057716 | 6_Tmem178b       | 26.2817 | -1.67414 | 0.00134  | 0.00463  | 13.891  | 11.9315 | 11.9515 | 52.2978 | 44.8265 | 22.7921 |
| ENSMUSG000000057719 | 10_Sh3rf2        | 693.184 | 0.22126  | 0.11186  | 0.18871  | 714.519 | 689.272 | 835.413 | 615.851 | 632.951 | 671.1   |
| ENSMUSG000000057722 | 17_Lepr          | 234.74  | -0.69431 | 0.00089  | 0.00324  | 213.574 | 156.027 | 168.517 | 304.77  | 317.372 | 248.18  |
| ENSMUSG000000057723 | 3_Krt33b         | 3.9976  | 0.01045  | 0.99289  | 0.99518  | 5.20913 | 0.91781 | 5.97577 | 2.70506 | 5.37918 | 3.79868 |
| ENSMUSG000000057729 | 12_Prtb1         | 3.9119  | 1.51639  | 0.23596  | 0.34288  | 5.20913 | 7.34244 | 4.78062 | 3.60674 | 0       | 2.53245 |
| ENSMUSG000000057738 | 13_Sptan1        | 17626.3 | 0.31323  | 0.00293  | 0.00899  | 18554.1 | 19710.8 | 20330.8 | 15592.8 | 14651.1 | 16918.1 |
| ENSMUSG000000057751 | 14_Megf6         | 228.386 | 0.76812  | 0.00021  | 0.00093  | 267.402 | 340.506 | 255.763 | 192.059 | 161.376 | 153.213 |
| ENSMUSG000000057762 | 4_Gm6169         | 64.1584 | -1.02759 | 0.02587  | 0.05623  | 51.2231 | 26.6164 | 49.0013 | 42.3792 | 130.893 | 84.8372 |
| ENSMUSG000000057766 | 13_Ankrd29       | 418.354 | -0.30778 | 0.04749  | 0.09289  | 383.739 | 387.314 | 348.985 | 421.087 | 453.644 | 515.354 |
| ENSMUSG000000057777 | 4_Mab21l2        | 240.251 | -0.71231 | 0.02319  | 0.05137  | 160.615 | 271.67  | 113.54  | 376.905 | 268.063 | 250.713 |
| ENSMUSG000000057778 | 14_Cyb5d2        | 261.827 | -0.43429 | 0.00938  | 0.02391  | 210.97  | 226.698 | 230.665 | 315.59  | 280.614 | 306.427 |
| ENSMUSG000000057788 | 13_Ddx49         | 749.703 | 0.88649  | 2.21E-05 | 0.00013  | 930.698 | 918.723 | 1069.66 | 655.525 | 370.267 | 553.341 |

|                     |                 |         |          |          |          |         |         |         |         |         |         |
|---------------------|-----------------|---------|----------|----------|----------|---------|---------|---------|---------|---------|---------|
| ENSMUSG000000057789 | 13_Bak1         | 1519.85 | 1.09828  | 2.89E-10 | 8.14E-09 | 1971.66 | 1808.08 | 2435.72 | 1059.48 | 781.775 | 1062.36 |
| ENSMUSG000000057816 | 7_1700007G11Rik | 6.00902 | -0.07165 | 0.93974  | 0.96068  | 2.60457 | 5.50683 | 9.56123 | 4.50843 | 6.27571 | 7.59736 |
| ENSMUSG000000057835 | 7_Zfp119a       | 158.504 | -0.5118  | 0.01657  | 0.03873  | 144.119 | 128.493 | 119.515 | 189.354 | 206.202 | 163.343 |
| ENSMUSG000000057836 | 12_Xlr3a        | 18.1791 | -1.20447 | 0.03174  | 0.06659  | 10.4183 | 11.9315 | 10.7564 | 21.6405 | 34.0682 | 20.2596 |
| ENSMUSG000000057841 | 5_Rpl32         | 14612.4 | -0.2371  | 0.01124  | 0.02788  | 14187.9 | 13025.5 | 13028.4 | 15983.3 | 15488.5 | 15960.8 |
| ENSMUSG000000057842 | 13_Zfp595       | 137.435 | -0.62521 | 0.01189  | 0.02925  | 121.546 | 110.137 | 92.0269 | 135.253 | 197.237 | 168.408 |
| ENSMUSG000000057858 | 7_Fam204a       | 386.678 | -0.34037 | 0.01831  | 0.04204  | 361.166 | 327.657 | 334.643 | 439.121 | 423.162 | 434.316 |
| ENSMUSG000000057863 | 5_Rpl36         | 2449.53 | 1.50765  | 3.35E-08 | 4.82E-07 | 3102.91 | 3474.81 | 4295.38 | 1752.88 | 694.811 | 1376.39 |
| ENSMUSG000000057880 | 12_Abat         | 1012.15 | -1.16532 | 2.96E-07 | 3.21E-06 | 622.491 | 797.573 | 451.768 | 1750.17 | 1284.73 | 1166.19 |
| ENSMUSG000000057894 | 10_Zfp329       | 448.901 | -0.79869 | 5.96E-06 | 4.33E-05 | 318.625 | 364.369 | 299.984 | 505.846 | 671.501 | 533.082 |
| ENSMUSG000000057895 | 11_Zfp105       | 137.637 | -0.73612 | 0.00111  | 0.00392  | 104.183 | 111.972 | 93.222  | 151.483 | 192.754 | 172.207 |
| ENSMUSG000000057897 | 14_Camk2b       | 85.1057 | -0.98328 | 0.03059  | 0.06451  | 62.5096 | 70.671  | 38.2449 | 198.371 | 69.9294 | 70.9087 |
| ENSMUSG000000057899 | 6_Adgrf2        | 40.6224 | 0.77996  | 0.04877  | 0.0951   | 57.3004 | 41.3013 | 54.9771 | 29.7556 | 22.4133 | 37.9868 |
| ENSMUSG000000057914 | 15_Cacnb2       | 209.571 | -1.57484 | 1.27E-06 | 1.13E-05 | 119.81  | 127.575 | 68.1238 | 424.694 | 320.958 | 196.265 |
| ENSMUSG000000057924 | 4_Gm10033       | 30.9547 | -0.76006 | 0.09852  | 0.16998  | 28.6502 | 25.6986 | 14.3418 | 36.9691 | 48.4127 | 31.6557 |
| ENSMUSG000000057933 | 10_Gsta2        | 1656.8  | -0.41296 | 7.60E-05 | 0.00039  | 1429.91 | 1474.91 | 1357.7  | 1869.19 | 1875.54 | 1933.53 |
| ENSMUSG000000057948 | 12_Unc13d       | 143.412 | 1.43458  | 1.29E-10 | 4.03E-09 | 219.652 | 196.41  | 211.542 | 82.9551 | 66.3433 | 83.571  |
| ENSMUSG000000057963 | 9_Itpk1         | 315.757 | 0.40915  | 0.08898  | 0.15619  | 366.376 | 355.191 | 359.741 | 375.101 | 202.616 | 235.518 |
| ENSMUSG000000057967 | 10_Zfp18        | 32.1392 | -0.47083 | 0.31274  | 0.42769  | 16.4956 | 36.7122 | 27.4885 | 36.9691 | 29.5855 | 45.5842 |
| ENSMUSG000000057969 | 15_Sema3b       | 764.594 | -0.24683 | 0.30522  | 0.42019  | 601.655 | 905.874 | 590.406 | 1100.06 | 637.433 | 752.139 |
| ENSMUSG000000057982 | 7_Zfp809        | 361.129 | -0.12498 | 0.47457  | 0.58721  | 354.221 | 291.862 | 390.815 | 346.247 | 387.301 | 396.329 |
| ENSMUSG000000058006 | 12_Mdn1         | 1761.66 | -0.11787 | 0.33957  | 0.45623  | 1769.37 | 1545.58 | 1753.29 | 1702.38 | 1810.1  | 1989.24 |
| ENSMUSG000000058013 | 11_Sept11       | 1288.29 | -0.23949 | 0.04346  | 0.08623  | 1182.47 | 1183.97 | 1179.62 | 1374.17 | 1520.52 | 1289.02 |
| ENSMUSG000000058017 | 6_Serpinb3d     | 0.19919 | 0.92709  | 0.82027  | NA       | 0       | 0       | 1.19515 | 0       | 0       | 0       |
| ENSMUSG000000058019 | 12_Ces5a        | 33.6064 | -1.21907 | 0.02414  | 0.05312  | 14.7592 | 34.8766 | 10.7564 | 64.9214 | 42.1369 | 34.1881 |
| ENSMUSG000000058022 | 13_Adtrp        | 1686.22 | 0.09119  | 0.60922  | 0.70894  | 1648.69 | 1440.04 | 2129.76 | 1480.57 | 1515.14 | 1903.14 |
| ENSMUSG000000058028 | 14_Zscan5b      | 0.51074 | -2.49114 | 0.44681  | NA       | 0       | 0       | 0       | 0.90169 | 0.89653 | 1.26623 |
| ENSMUSG000000058046 | 1_4933430117Rik | 4.28544 | -0.59735 | 0.59586  | 0.6977   | 6.07732 | 2.75342 | 1.19515 | 3.60674 | 4.48265 | 7.59736 |
| ENSMUSG000000058052 | 2_Defb35        | 0.15028 | -0.99647 | 0.80707  | NA       | 0       | 0       | 0       | 0.90169 | 0       | 0       |
| ENSMUSG000000058056 | 15_Palld        | 1193.09 | 0.56711  | 8.37E-06 | 5.80E-05 | 1340.48 | 1489.6  | 1442.55 | 982.837 | 866.049 | 1037.04 |
| ENSMUSG000000058057 | 4_Mettl7a3      | 0.66285 | -1.52638 | 0.61885  | NA       | 0       | 0.91781 | 0       | 0       | 1.79306 | 1.26623 |
| ENSMUSG000000058063 | 4_Trim31        | 0.80838 | 1.86427  | 0.51923  | NA       | 0       | 2.75342 | 1.19515 | 0.90169 | 0       | 0       |
| ENSMUSG000000058064 | 5_Gm10036       | 152.294 | 0.43627  | 0.10054  | 0.17289  | 210.97  | 179.89  | 133.857 | 101.89  | 154.203 | 132.954 |
| ENSMUSG000000058070 | 12_Em1          | 336.123 | -0.43176 | 0.02371  | 0.05235  | 288.239 | 314.807 | 255.763 | 460.761 | 366.681 | 330.485 |
| ENSMUSG000000058076 | 12_Sdhc         | 1535.98 | -0.29802 | 0.03894  | 0.07875  | 1379.55 | 1419.85 | 1334.99 | 2004.45 | 1541.14 | 1535.93 |
| ENSMUSG000000058093 | 12_Zfp729b      | 375.291 | -0.4966  | 0.00225  | 0.00718  | 340.33  | 290.944 | 302.374 | 398.545 | 481.437 | 438.115 |
| ENSMUSG000000058099 | 15_Nfam1        | 62.6409 | 1.21333  | 0.00427  | 0.01236  | 131.965 | 69.7532 | 60.9529 | 53.1994 | 29.5855 | 30.3894 |
| ENSMUSG000000058126 | 6_Tpm3-rs7      | 4627.44 | 0.58998  | 4.51E-06 | 3.39E-05 | 5287.27 | 5086.48 | 6308.02 | 3588.71 | 3492.88 | 4001.28 |
| ENSMUSG000000058135 | 12_Gstm1        | 1731.82 | -0.35411 | 0.03086  | 0.06499  | 1452.48 | 1672.24 | 1435.38 | 2224.46 | 1541.14 | 2065.22 |
| ENSMUSG000000058145 | 15_Adamts17     | 102.144 | 0.67757  | 0.01021  | 0.02573  | 120.678 | 135.835 | 119.515 | 64.9214 | 74.412  | 97.4995 |
| ENSMUSG000000058147 | 1_Xlr3c         | 5.27486 | -2.91541 | 0.01847  | 0.04232  | 1.73638 | 1.83561 | 0       | 12.6236 | 11.6549 | 3.79868 |
| ENSMUSG000000058152 | 7_Chcy3         | 285.181 | -0.69323 | 0.00687  | 0.01838  | 242.225 | 276.259 | 133.857 | 340.837 | 353.233 | 364.673 |
| ENSMUSG000000058153 | 14_Seiz6l       | 17.3834 | -1.60489 | 0.03219  | 0.06738  | 12.1546 | 11.0137 | 2.39031 | 45.986  | 18.8271 | 13.9285 |
| ENSMUSG000000058163 | 13_Gm5431       | 1020.39 | 0.84178  | 1.61E-05 | 0.0001   | 1288.39 | 1145.42 | 1496.33 | 554.537 | 895.634 | 742.009 |
| ENSMUSG000000058173 | 11_Smco4        | 469.921 | 0.17386  | 0.33033  | 0.44699  | 478.372 | 501.122 | 513.916 | 458.056 | 351.44  | 516.621 |
| ENSMUSG000000058174 | 7_Gm5148        | 164.709 | -0.02285 | 0.92629  | 0.95135  | 159.747 | 204.671 | 125.491 | 188.452 | 160.479 | 149.415 |
| ENSMUSG000000058176 | 2_Gm5407        | 0       | NA       | NA       | NA       | 0       | 0       | 0       | 0       | 0       | 0       |
| ENSMUSG000000058183 | 14_Mme1l        | 3.71763 | -0.1444  | 0.90804  | 0.93794  | 0.86819 | 2.75342 | 7.17092 | 2.70506 | 6.27571 | 2.53245 |
| ENSMUSG000000058186 | 13_Gm13242      | 0.50043 | 0.71218  | 0.85616  | NA       | 1.73638 | 0       | 0       | 0       | 0       | 1.26623 |
| ENSMUSG000000058192 | 15_Zfp846       | 186.647 | -0.64111 | 0.00186  | 0.00613  | 147.592 | 134     | 156.565 | 203.781 | 262.683 | 215.259 |
| ENSMUSG000000058207 | 6_Serpina3k     | 0.1447  | 0.92709  | 0.82027  | NA       | 0.86819 | 0       | 0       | 0       | 0       | 0       |
| ENSMUSG000000058216 | 12_BC021614     | 5.76348 | 1.16153  | 0.23098  | 0.33724  | 11.2864 | 5.50683 | 7.17092 | 2.70506 | 5.37918 | 2.53245 |
| ENSMUSG000000058230 | 12_Arhgap35     | 2829.39 | 0.09041  | 0.35152  | 0.46808  | 2879.78 | 3024.17 | 2849.25 | 2668.09 | 2769.38 | 2785.7  |
| ENSMUSG000000058239 | 13_Usf2         | 1183.36 | 0.24449  | 0.10861  | 0.18424  | 1262.35 | 1324.39 | 1263.28 | 1263.26 | 899.22  | 1087.69 |
| ENSMUSG000000058240 | 13_Cryz1        | 892.563 | -0.43821 | 0.00095  | 0.00342  | 799.602 | 787.477 | 686.018 | 969.312 | 1106.32 | 1006.65 |
| ENSMUSG000000058246 | 6_Gm10037       | 0.30056 | -1.76625 | 0.6627   | NA       | 0       | 0       | 0       | 1.80337 | 0       | 0       |
| ENSMUSG000000058248 | 12_Kcnh1        | 788.624 | 0.22921  | 0.12092  | 0.20104  | 768.347 | 822.354 | 963.294 | 759.219 | 656.26  | 762.269 |
| ENSMUSG000000058252 | 6_Tcp11x2       | 0.1447  | 0.92709  | 0.82027  | NA       | 0.86819 | 0       | 0       | 0       | 0       | 0       |
| ENSMUSG000000058254 | 12_Tspan7       | 1277.75 | -0.69479 | 0.00026  | 0.00114  | 952.403 | 1151.85 | 823.461 | 1926    | 1540.24 | 1272.56 |
| ENSMUSG000000058258 | 14_Idi1         | 4661.79 | -0.25262 | 0.07786  | 0.14012  | 4483.32 | 3847.44 | 4432.83 | 4223.49 | 5547.73 | 5435.91 |
| ENSMUSG000000058260 | 2_Serpina9      | 123.691 | 0.38769  | 0.20023  | 0.30127  | 129.36  | 155.109 | 135.052 | 68.5281 | 108.48  | 145.616 |
| ENSMUSG000000058267 | 13_Mrps14       | 1116.98 | -0.16713 | 0.17186  | 0.26688  | 1127.78 | 965.531 | 1063.69 | 1229    | 1133.21 | 1182.66 |
| ENSMUSG000000058287 | 5_Gm12253       | 0.84902 | 3.18694  | 0.24212  | NA       | 0.86819 | 1.83561 | 2.39031 | 0       | 0       | 0       |
| ENSMUSG000000058290 | 3_Espl1         | 250.434 | 1.20192  | 3.19E-06 | 2.51E-05 | 330.78  | 303.794 | 411.133 | 119.924 | 125.514 | 211.46  |
| ENSMUSG000000058291 | 14_Zfp68        | 1147.92 | -0.24964 | 0.10633  | 0.1809   | 1108.68 | 937.079 | 1100.74 | 1045.96 | 1395.9  | 1299.15 |
| ENSMUSG000000058297 | 16_Spock2       | 680.155 | -0.81623 | 0.00348  | 0.0104   | 453.194 | 679.176 | 345.4   | 1204.65 | 710.949 | 687.561 |
| ENSMUSG000000058298 | 7_Mcm9          | 298.668 | 0.02352  | 0.89194  | 0.92712  | 296.052 | 279.931 | 327.472 | 260.587 | 316.475 | 311.492 |
| ENSMUSG000000058301 | 6_Upf1          | 1333.1  | 1.13727  | 6.32E-16 | 7.10E-14 | 1685.15 | 1876.91 | 1934.95 | 834.961 | 727.086 | 939.54  |
| ENSMUSG000000058317 | 11_Ube2e2       | 971.073 | -0.17068 | 0.16597  | 0.25952  | 912.466 | 852.641 | 976.441 | 970.214 | 1056.11 | 1058.57 |
| ENSMUSG000000058318 | 15_Phf21a       | 1000.88 | -0.09078 | 0.43825  | 0.55357  | 955.007 | 954.518 | 1000.34 | 1073.91 | 1057.91 | 963.599 |
| ENSMUSG000000058325 | 5_Dock1         | 5855.68 | 0.37134  | 0.00645  | 0.01745  | 6264.85 | 6356.72 | 7192.44 | 4501.21 | 4930.92 | 5887.96 |
| ENSMUSG000000058328 | 13_Xlr5a        | 0.14942 | -0.99647 | 0.80707  | NA       | 0       | 0       | 0       | 0       | 0.89653 | 0       |
| ENSMUSG000000058331 | 14_Zfp85        | 89.799  | -0.7592  | 0.0062   | 0.01689  | 80.7415 | 61.493  | 57.3674 | 100.087 | 126.411 | 112.694 |
| ENSMUSG000000058351 | 10_Smim4        | 76.5569 | -0.22649 | 0.56797  | 0.67288  | 57.3004 | 97.2874 | 57.3674 | 124.433 | 67.2398 | 55.714  |
| ENSMUSG000000058354 | 6_Krt6a         | 144230  | 1.23003  | 3.87E-14 | 2.97E-12 | 186801  | 181481  | 238444  | 84364.4 | 72831.5 | 101459  |
| ENSMUSG000000058355 | 6_Abce1         | 2899.64 | -0.41616 | 0.00462  | 0.01319  | 2638.42 | 2278.91 | 2534.92 | 2730.3  | 3653.36 | 3561.9  |
| ENSMUSG000000058385 | 7_Hist1h2bg     | 1.7834  | -0.98924 | 0.67302  | NA       | 3.47275 | 0       | 0       | 0       | 0.89653 | 6.33113 |
| ENSMUSG000000058388 | 14_Phft1        | 828.182 | -0.32681 | 0.01194  | 0.02935  | 782.238 | 735.162 | 686.018 | 860.208 | 986.184 | 919.281 |
| ENSMUSG000000058392 | 12_Rrp1b        | 416.486 | 0.20688  | 0.16703  | 0.26091  | 413.258 | 460.738 | 464.915 | 403.955 | 355.923 | 400.128 |

|                    |                  |         |          |          |          |         |         |         |         |         |         |
|--------------------|------------------|---------|----------|----------|----------|---------|---------|---------|---------|---------|---------|
| ENSMUSG00000058396 | 7_Gpr182         | 29.6039 | -0.13656 | 0.74409  | 0.81909  | 28.6502 | 27.5342 | 28.6837 | 33.3624 | 34.0682 | 25.3245 |
| ENSMUSG00000058400 | 13_Qrpr          | 1.83719 | -3.25311 | 0.10954  | NA       | 0       | 0.91781 | 0       | 5.41011 | 0.89653 | 3.79868 |
| ENSMUSG00000058402 | 13_Zfp420        | 101.416 | -0.74035 | 0.00366  | 0.01086  | 77.2688 | 69.7532 | 81.2705 | 114.514 | 147.928 | 117.759 |
| ENSMUSG00000058407 | 12_Txndc9        | 1977.92 | -0.3294  | 0.01245  | 0.03034  | 1848.37 | 1626.35 | 1784.37 | 1931.41 | 2420.63 | 2256.42 |
| ENSMUSG00000058420 | 7_Syt17          | 55.7999 | -1.10356 | 0.01296  | 0.03139  | 31.2548 | 57.8218 | 16.7322 | 88.3652 | 73.5155 | 67.11   |
| ENSMUSG00000058427 | 10_Cxcl2         | 7.14541 | 1.76761  | 0.11404  | 0.1915   | 10.4183 | 4.58903 | 17.9273 | 3.60674 | 0       | 6.33113 |
| ENSMUSG00000058435 | 5_Btnl4          | 0.19919 | 0.92709  | 0.82027  | NA       | 0       | 0       | 1.19515 | 0       | 0       | 0       |
| ENSMUSG00000058440 | 14_Nrf1          | 772.501 | 0.32043  | 0.01662  | 0.03883  | 809.152 | 848.052 | 916.683 | 720.447 | 623.985 | 716.684 |
| ENSMUSG00000058441 | 7_Panx2          | 9.92586 | 0.34087  | 0.67932  | 0.76786  | 14.7592 | 5.50683 | 13.1467 | 15.3287 | 4.48265 | 6.33113 |
| ENSMUSG00000058443 | 4_Rpl10-ps3      | 14813.9 | -0.17677 | 0.12063  | 0.20064  | 14931.1 | 13163.2 | 13629.5 | 16214.1 | 16709.5 | 14236.2 |
| ENSMUSG00000058444 | 7_Map2k5         | 382.149 | 0.19601  | 0.23063  | 0.33685  | 358.562 | 435.04  | 430.255 | 349.854 | 331.716 | 387.465 |
| ENSMUSG00000058446 | 14_Znrf2         | 4976.78 | -0.30136 | 0.01456  | 0.03467  | 4538.89 | 4203.55 | 4633.61 | 4796.07 | 5794.28 | 5894.29 |
| ENSMUSG00000058447 | 8_Gm26920        | 23.6032 | 0.11176  | 0.96381  | 0.97656  | 0       | 41.3013 | 32.2692 | 47.7893 | 0       | 20.2596 |
| ENSMUSG00000058454 | 14_Dhcr7         | 1825.75 | 0.65952  | 3.14E-05 | 0.00018  | 2232.11 | 2033.86 | 2440.5  | 1461.63 | 1152.94 | 1633.43 |
| ENSMUSG00000058470 | 10_Gm8369        | 6.30317 | 1.30487  | 0.17941  | 0.27634  | 15.6274 | 6.42464 | 4.78062 | 2.70506 | 4.48265 | 3.79868 |
| ENSMUSG00000058486 | 11_Wdr91         | 475.403 | 0.39407  | 0.04324  | 0.08588  | 470.558 | 629.615 | 519.892 | 495.927 | 345.164 | 391.264 |
| ENSMUSG00000058488 | 7_Kl             | 1.77374 | -4.29789 | 0.05324  | NA       | 0       | 0       | 0       | 7.21348 | 0.89653 | 2.53245 |
| ENSMUSG00000058498 | 12_Rnf207        | 55.3743 | -0.50103 | 0.40347  | 0.52083  | 54.6959 | 57.8218 | 25.0982 | 132.548 | 36.7578 | 25.3245 |
| ENSMUSG00000058499 | 9_Pip            | 0.36401 | -0.03469 | 0.99322  | NA       | 0       | 0.91781 | 0       | 0       | 0       | 1.26623 |
| ENSMUSG00000058503 | 11_Fam133b       | 547.006 | -0.34674 | 0.01553  | 0.03668  | 481.845 | 459.821 | 504.355 | 589.702 | 677.777 | 568.536 |
| ENSMUSG00000058546 | 8_Rpl23a         | 15765.1 | 0.0004   | 0.99796  | 0.99846  | 15944.3 | 14920.8 | 16437   | 18838   | 12477   | 15973.5 |
| ENSMUSG00000058550 | 14_Dppa4         | 0.1447  | 0.92709  | 0.82027  | NA       | 0.86819 | 0       | 0       | 0       | 0       | 0       |
| ENSMUSG00000058558 | 12_Rpl5          | 26352.2 | -0.57139 | 6.33E-07 | 6.20E-06 | 22413.2 | 20632.3 | 20556.7 | 28356.2 | 34529.9 | 31625.3 |
| ENSMUSG00000058568 | 6_Defb50         | 0.30594 | 1.73752  | 0.66765  | NA       | 0       | 1.83561 | 0       | 0       | 0       | 0       |
| ENSMUSG00000058569 | 7_Tmed9          | 3528.55 | 0.60061  | 1.98E-05 | 0.00012  | 4202.9  | 4022.74 | 4530.83 | 2929.58 | 2339.94 | 3145.31 |
| ENSMUSG00000058571 | 10_Gpc6          | 1437.25 | -0.48056 | 1.55E-05 | 9.96E-05 | 1165.98 | 1273.91 | 1160.49 | 1682.55 | 1731.2  | 1609.37 |
| ENSMUSG00000058586 | 11_Serhl         | 936.916 | 0.13041  | 0.31377  | 0.42883  | 988.867 | 941.669 | 1007.51 | 981.034 | 812.257 | 890.158 |
| ENSMUSG00000058587 | 7_Tmod3          | 6334.05 | 0.11231  | 0.36716  | 0.48458  | 6609.52 | 6047.42 | 7083.68 | 5464.21 | 6097.3  | 6702.14 |
| ENSMUSG00000058588 | 5_Vmn1r21        | 0.36046 | -1.978   | 0.62369  | NA       | 0       | 0       | 0       | 0       | 0.89653 | 1.26623 |
| ENSMUSG00000058589 | 14_Anks1b        | 1197.37 | -0.09085 | 0.47434  | 0.587    | 1157.3  | 1132.57 | 1187.98 | 1104.56 | 1244.38 | 1357.4  |
| ENSMUSG00000058594 | 15_Fbxo18        | 1572.45 | -0.07293 | 0.49988  | 0.61086  | 1553.19 | 1531.82 | 1511.87 | 1513.93 | 1633.48 | 1690.41 |
| ENSMUSG00000058600 | 13_Rpl30         | 8105.41 | -0.61197 | 9.41E-07 | 8.69E-06 | 6906.44 | 6253.01 | 6074.97 | 8897.83 | 11039   | 9461.25 |
| ENSMUSG00000058618 | 6_AY761184       | 0.29884 | -1.76064 | 0.66373  | NA       | 0       | 0       | 0       | 0       | 1.79306 | 0       |
| ENSMUSG00000058620 | 5_Adrab2         | 0.5891  | -0.05433 | 0.98647  | NA       | 1.73638 | 0       | 0       | 0.90169 | 0.89653 | 0       |
| ENSMUSG00000058624 | 12_Gda           | 6611.58 | 0.07961  | 0.6473   | 0.74196  | 6767.53 | 6240.16 | 7374.1  | 4822.21 | 7587.34 | 6878.14 |
| ENSMUSG00000058626 | 16_Capn11        | 0.89621 | -0.99618 | 0.68719  | NA       | 0.86819 | 0.91781 | 0       | 0.90169 | 2.68959 | 0       |
| ENSMUSG00000058638 | 12_Rpl110        | 1272.12 | -0.33536 | 0.00445  | 0.01278  | 1135.59 | 1133.49 | 1104.32 | 1298.43 | 1445.21 | 1515.67 |
| ENSMUSG00000058655 | 8_Elf4b          | 7947.46 | 0.13603  | 0.21487  | 0.31873  | 8412.75 | 7959.21 | 8591.96 | 7097.17 | 7305.83 | 8317.84 |
| ENSMUSG00000058656 | 12_Samd12        | 222.961 | -0.17569 | 0.34061  | 0.45704  | 202.288 | 200.082 | 225.884 | 210.093 | 247.442 | 251.979 |
| ENSMUSG00000058665 | 8_En1            | 0.59533 | 2.69681  | 0.45239  | NA       | 1.73638 | 1.83561 | 0       | 0       | 0       | 0       |
| ENSMUSG00000058672 | 6_Tubb2a         | 1033.01 | 0.49182  | 0.00037  | 0.00154  | 1179    | 1167.45 | 1277.62 | 979.23  | 812.257 | 782.528 |
| ENSMUSG00000058690 | 14_Ccser2        | 4148.44 | -0.16847 | 0.1587   | 0.25048  | 3947.65 | 3707.93 | 4063.52 | 3879.95 | 4652.1  | 4639.46 |
| ENSMUSG00000058704 | 7_Memo1          | 935.986 | 0.04177  | 0.76748  | 0.83661  | 949.798 | 870.08  | 1029.03 | 814.222 | 994.252 | 958.534 |
| ENSMUSG00000058706 | 5_0610030E20Rik  | 1065.34 | -0.20897 | 0.18834  | 0.28729  | 1005.36 | 972.874 | 986.002 | 912.506 | 1288.31 | 1226.97 |
| ENSMUSG00000058709 | 11_Egln2         | 893.166 | 1.18731  | 1.70E-08 | 2.73E-07 | 1086.97 | 1294.11 | 1343.35 | 714.135 | 402.542 | 517.887 |
| ENSMUSG00000058715 | 11_Fcer1g        | 191.344 | 1.52514  | 2.58E-06 | 2.08E-05 | 423.676 | 190.904 | 237.836 | 123.531 | 92.3426 | 79.7723 |
| ENSMUSG00000058728 | 14_Cd300c        | 0.1447  | 0.92709  | 0.82027  | NA       | 0.86819 | 0       | 0       | 0       | 0       | 0       |
| ENSMUSG00000058729 | 13_Lin9          | 162.431 | 0.12524  | 0.55166  | 0.65784  | 186.661 | 149.602 | 172.102 | 140.663 | 168.548 | 157.012 |
| ENSMUSG00000058731 | 1_Vmn1r15        | 0.34947 | -0.03469 | 0.99322  | NA       | 0       | 0       | 1.19515 | 0.90169 | 0       | 0       |
| ENSMUSG00000058740 | 14_Kcnt1         | 17.5103 | -1.23361 | 0.0806   | 0.14419  | 9.55007 | 14.6849 | 7.17092 | 42.3792 | 22.4133 | 8.86359 |
| ENSMUSG00000058741 | 4_Prr19          | 0.60209 | -1.37773 | 0.66139  | NA       | 0       | 0.91781 | 0       | 0.90169 | 1.79306 | 0       |
| ENSMUSG00000058743 | 5_Kcnj14         | 97.3226 | -1.74602 | 0.0025   | 0.00785  | 57.3004 | 55.0683 | 21.5128 | 282.228 | 127.307 | 40.5193 |
| ENSMUSG00000058748 | 8_Zfp958         | 160.69  | -0.64175 | 0.01168  | 0.0288   | 117.205 | 160.616 | 98.0026 | 166.812 | 221.443 | 200.064 |
| ENSMUSG00000058755 | 3_Osm            | 11.8069 | 3.01486  | 0.00028  | 0.0012   | 22.5729 | 15.6027 | 25.0982 | 4.50843 | 1.79306 | 1.26623 |
| ENSMUSG00000058756 | 13_Thra          | 2476.49 | 0.28829  | 0.07762  | 0.1398   | 2586.33 | 2908.53 | 2674.75 | 2726.7  | 1816.37 | 2146.25 |
| ENSMUSG00000058761 | 4_Rnf169         | 1165.02 | 0.17932  | 0.16448  | 0.25766  | 1204.18 | 1183.97 | 1324.23 | 981.935 | 1172.66 | 1123.14 |
| ENSMUSG00000058773 | 2_Hist1h1b       | 1.27484 | 3.78472  | 0.11545  | NA       | 4.34094 | 0.91781 | 2.39031 | 0       | 0       | 0       |
| ENSMUSG00000058793 | 14_Cds2          | 3956.54 | -0.17028 | 0.19782  | 0.2984   | 3621.21 | 4047.52 | 3501.8  | 4782.54 | 3976.11 | 3810.08 |
| ENSMUSG00000058794 | 12_Nfe2          | 2.51796 | 2.15991  | 0.28668  | 0.40008  | 7.8137  | 4.58903 | 0       | 2.70506 | 0       | 0       |
| ENSMUSG00000058799 | 14_Nap111        | 3028.01 | -0.52047 | 0.0001   | 0.0005   | 2564.63 | 2397.31 | 2500.26 | 3009.83 | 3884.67 | 3811.34 |
| ENSMUSG00000058806 | 14_Col13a1       | 101.731 | 0.2652   | 0.40249  | 0.52004  | 99.8417 | 148.685 | 83.6608 | 94.677  | 70.8259 | 112.694 |
| ENSMUSG00000058818 | 13_Pirb          | 219.378 | 1.95507  | 7.25E-11 | 2.47E-09 | 482.713 | 245.054 | 319.106 | 117.219 | 76.2051 | 75.9736 |
| ENSMUSG00000058831 | 13_Opn1sw        | 88.9948 | -1.98654 | 0.0007   | 0.00267  | 52.0913 | 43.1369 | 11.9515 | 225.421 | 159.582 | 41.7855 |
| ENSMUSG00000058833 | 11_2810428115Rik | 288.169 | 1.03452  | 2.48E-05 | 0.00015  | 365.507 | 358.862 | 437.426 | 239.848 | 127.307 | 200.064 |
| ENSMUSG00000058835 | 12_Abi1          | 3909.47 | 0.02421  | 0.85379  | 0.90096  | 3924.21 | 3657.46 | 4245.19 | 3352.47 | 4178.73 | 4098.78 |
| ENSMUSG00000058881 | 12_Zfp516        | 691.362 | 0.4682   | 0.00956  | 0.0243   | 704.969 | 801.244 | 902.341 | 691.593 | 476.954 | 571.068 |
| ENSMUSG00000058883 | 14_Zfp708        | 16.9879 | -0.81364 | 0.35743  | 0.47413  | 15.6274 | 21.1095 | 0       | 27.9522 | 23.3098 | 13.9285 |
| ENSMUSG00000058886 | 8_Deaf1          | 552.605 | 0.92851  | 1.96E-07 | 2.25E-06 | 675.451 | 759.025 | 739.8   | 465.27  | 316.475 | 359.608 |
| ENSMUSG00000058897 | 17_Col25a1       | 40.8125 | -1.52257 | 5.15E-05 | 0.00028  | 19.1001 | 23.8629 | 20.3176 | 64.0197 | 61.8606 | 55.714  |
| ENSMUSG00000058900 | 4_Rsl1           | 81.6699 | -0.70499 | 0.01169  | 0.02882  | 68.5869 | 62.4108 | 54.9771 | 87.4635 | 116.549 | 100.032 |
| ENSMUSG00000058914 | 12_C1qtnf3       | 60.3189 | -0.57545 | 0.07423  | 0.13489  | 46.8822 | 44.9725 | 53.7819 | 87.4635 | 59.171  | 69.6425 |
| ENSMUSG00000058921 | 3_Slc10a5        | 21.9437 | 0.20325  | 0.67676  | 0.76605  | 26.0457 | 23.8629 | 20.3176 | 16.2303 | 22.4133 | 22.7921 |
| ENSMUSG00000058925 | 11_1700011103Rik | 0.45084 | -2.33355 | 0.56009  | NA       | 0       | 0       | 0       | 2.70506 | 0       | 0       |
| ENSMUSG00000058927 | 5_Gm10053        | 1663.79 | -0.43722 | 0.00018  | 0.00083  | 1402.99 | 1387.72 | 1449.72 | 1731.24 | 2002.85 | 2008.24 |
| ENSMUSG00000058932 | 6_Gm2174         | 171.8   | 0.61567  | 0.01242  | 0.03027  | 205.761 | 176.219 | 242.616 | 170.419 | 112.963 | 122.824 |
| ENSMUSG00000058952 | 12_Cfi           | 0.72264 | -2.98517 | 0.37645  | NA       | 0       | 0       | 0       | 1.80337 | 0       | 2.53245 |
| ENSMUSG00000058966 | 13_Fam57b        | 174.981 | -1.15582 | 0.11431  | 0.19187  | 145.856 | 106.465 | 72.9044 | 473.385 | 161.376 | 89.9021 |
| ENSMUSG00000058975 | 6_Kcnc1          | 64.4046 | -1.93508 | 0.00045  | 0.00182  | 26.0457 | 39.4656 | 14.3418 | 192.059 | 60.0675 | 54.4478 |
| ENSMUSG00000058976 | 4_Usp17lc        | 0.34389 | 1.87986  | 0.64119  | NA       | 0.86819 | 0       | 1.19515 | 0       | 0       | 0       |

|                    |                  |         |          |          |          |         |         |         |         |         |         |
|--------------------|------------------|---------|----------|----------|----------|---------|---------|---------|---------|---------|---------|
| ENSMUSG00000058979 | 7_Cecr5          | 285.083 | 0.31871  | 0.05576  | 0.1061   | 301.261 | 331.328 | 316.716 | 274.112 | 231.305 | 255.778 |
| ENSMUSG00000058997 | 7_Vwa8           | 1280.27 | -0.10858 | 0.38241  | 0.49996  | 1113.89 | 1357.43 | 1225.03 | 1339.9  | 1304.45 | 1340.93 |
| ENSMUSG00000059003 | 12_Grin2a        | 5.99611 | -1.75004 | 0.1013   | 0.17396  | 3.47275 | 4.58903 | 0       | 11.7219 | 9.86184 | 6.33113 |
| ENSMUSG00000059005 | 13_Hnnpa3        | 19229.9 | -0.26829 | 0.07316  | 0.13333  | 17781.4 | 15790.8 | 18768.7 | 17020.2 | 23423.7 | 22594.6 |
| ENSMUSG00000059013 | 12_Sh2d3c        | 70.8541 | 0.98273  | 0.02088  | 0.04698  | 94.6325 | 109.219 | 78.8802 | 81.1517 | 29.5855 | 31.6557 |
| ENSMUSG00000059022 | 14_Kcp           | 18.0907 | 0.75911  | 0.20848  | 0.3113   | 15.6274 | 31.2054 | 21.5128 | 19.8371 | 8.96531 | 11.396  |
| ENSMUSG00000059040 | 4_Eno1b          | 8176.74 | 0.87124  | 3.74E-08 | 5.32E-07 | 10007.6 | 10343.7 | 11368.3 | 6691.41 | 4531.07 | 6118.41 |
| ENSMUSG00000059042 | 3_Klk1b9         | 0.1447  | 0.92709  | 0.82027  | NA       | 0.86819 | 0       | 0       | 0       | 0       | 0       |
| ENSMUSG00000059043 | 1_Olfr15         | 0.15297 | 0.92709  | 0.82027  | NA       | 0       | 0.91781 | 0       | 0       | 0       | 0       |
| ENSMUSG00000059049 | 14_Frem1         | 320.429 | -0.85045 | 0.00043  | 0.00174  | 256.984 | 267.999 | 160.151 | 495.025 | 404.335 | 338.083 |
| ENSMUSG00000059060 | 13_Rad51b        | 21.9061 | -0.58265 | 0.2687   | 0.38015  | 12.1546 | 19.2739 | 21.5128 | 20.7388 | 34.9647 | 22.7921 |
| ENSMUSG00000059070 | 14_Rpl18         | 8424.68 | 0.97616  | 1.54E-06 | 1.33E-05 | 10694.3 | 10878.7 | 11939.6 | 7364.97 | 3905.29 | 5765.13 |
| ENSMUSG00000059089 | 4_Fcgr4          | 114.402 | 2.89874  | 1.65E-14 | 1.36E-12 | 289.975 | 122.986 | 192.42  | 21.6405 | 34.0682 | 25.3245 |
| ENSMUSG00000059108 | 3_Ilfm6          | 14.7488 | 2.21409  | 0.01526  | 0.03613  | 49.4867 | 11.0137 | 11.9515 | 0.90169 | 6.27571 | 8.86359 |
| ENSMUSG00000059119 | 8_Nap114         | 3140.01 | -0.05217 | 0.59863  | 0.70031  | 3102.04 | 2959.92 | 3187.48 | 3186.56 | 3090.34 | 3313.72 |
| ENSMUSG00000059128 | 3_Ifln2          | 0.19919 | 0.92709  | 0.82027  | NA       | 0       | 0       | 1.19515 | 0       | 0       | 0       |
| ENSMUSG00000059142 | 15_Zfp945        | 691.179 | -0.41962 | 0.00415  | 0.01206  | 632.041 | 591.985 | 549.771 | 728.562 | 893.841 | 750.873 |
| ENSMUSG00000059146 | 12_Ntrk3         | 383.717 | -0.54957 | 0.00072  | 0.00273  | 340.33  | 299.205 | 295.203 | 502.239 | 456.334 | 408.991 |
| ENSMUSG00000059149 | 17_Fmsd4         | 579.487 | 0.08752  | 0.55572  | 0.66185  | 589.5   | 550.683 | 651.359 | 502.239 | 600.675 | 582.464 |
| ENSMUSG00000059173 | 19_Pde1a         | 102.655 | -0.56618 | 0.03788  | 0.07701  | 87.687  | 89.0271 | 71.7092 | 118.121 | 150.617 | 98.7657 |
| ENSMUSG00000059182 | 7_Skap2          | 832.963 | 0.17525  | 0.26855  | 0.38003  | 935.907 | 763.614 | 950.148 | 680.773 | 789.843 | 877.495 |
| ENSMUSG00000059183 | 12_Mtfmt         | 307.977 | 0.09307  | 0.57353  | 0.67796  | 302.998 | 323.068 | 327.472 | 264.194 | 317.372 | 312.758 |
| ENSMUSG00000059187 | 12_Fam19a1       | 4.15652 | -1.47742 | 0.23545  | 0.34223  | 1.73638 | 3.67122 | 1.19515 | 6.3118  | 10.7584 | 1.26623 |
| ENSMUSG00000059201 | 12_Lep           | 0.19919 | 0.92709  | 0.82027  | NA       | 0       | 0       | 1.19515 | 0       | 0       | 0       |
| ENSMUSG00000059203 | 10_I1rapl2       | 1.2503  | -2.59621 | 0.31254  | NA       | 0       | 0       | 1.19515 | 5.41011 | 0.89653 | 0       |
| ENSMUSG00000059208 | 14_Hnnpm         | 3742.68 | 0.26571  | 0.06271  | 0.11719  | 3932.89 | 3863.96 | 4461.51 | 2844.82 | 3552.95 | 3799.95 |
| ENSMUSG00000059213 | 6_Ddn            | 3.88718 | -0.0508  | 0.96529  | 0.97762  | 2.60457 | 6.42464 | 2.39031 | 6.3118  | 1.79306 | 3.79868 |
| ENSMUSG00000059244 | 6_Gm10062        | 0.14942 | -0.99647 | 0.80707  | NA       | 0       | 0       | 0       | 0       | 0.89653 | 0       |
| ENSMUSG00000059246 | 4_Foxb1          | 0.39838 | 2.07058  | 0.60634  | NA       | 0       | 0       | 2.39031 | 0       | 0       | 0       |
| ENSMUSG00000059248 | 13_Sep9          | 1682.77 | 0.84478  | 3.79E-08 | 5.38E-07 | 1908.28 | 2090.76 | 2485.92 | 1223.59 | 1047.15 | 1340.93 |
| ENSMUSG00000059256 | 6_Gzmd           | 0.1447  | 0.92709  | 0.82027  | NA       | 0.86819 | 0       | 0       | 0       | 0       | 0       |
| ENSMUSG00000059263 | 7_Usq47          | 4856.27 | -0.23884 | 0.05303  | 0.1017   | 4507.63 | 4370.59 | 4486.61 | 4533.67 | 5686.69 | 5552.41 |
| ENSMUSG00000059273 | 7_Zc3h4          | 1409.85 | 0.65061  | 4.78E-06 | 3.55E-05 | 1677.34 | 1710.79 | 1778.39 | 1199.24 | 914.461 | 1178.86 |
| ENSMUSG00000059278 | 9_Naa38          | 432.89  | 0.14274  | 0.4984   | 0.60945  | 403.708 | 450.643 | 510.331 | 526.584 | 381.922 | 324.154 |
| ENSMUSG00000059279 | 10_Olfr224       | 0.15028 | -0.99647 | 0.80707  | NA       | 0       | 0       | 0       | 0.90169 | 0       | 0       |
| ENSMUSG00000059280 | 3_Vpreb2         | 0.50516 | -1.00911 | 0.76476  | NA       | 0.86819 | 0       | 0       | 0       | 0.89653 | 1.26623 |
| ENSMUSG00000059288 | 13_Cdyl          | 507.844 | 0.27882  | 0.05662  | 0.10747  | 546.091 | 513.971 | 610.724 | 426.497 | 478.747 | 471.036 |
| ENSMUSG00000059291 | 15_Rpl11         | 12796.2 | 0.09361  | 0.40591  | 0.52303  | 13570.7 | 12754.7 | 13308   | 13504.5 | 11106.2 | 12533.1 |
| ENSMUSG00000059301 | 5_Gm5434         | 0.50988 | -2.49048 | 0.5167   | NA       | 0       | 0       | 0       | 0       | 1.79306 | 1.26623 |
| ENSMUSG00000059305 | 10_Vpreb1        | 2.87152 | 0.52421  | 0.72121  | 0.80166  | 1.73638 | 3.67122 | 4.78062 | 4.50843 | 0       | 2.53245 |
| ENSMUSG00000059316 | 2_Slc27a4        | 2611.41 | 0.98301  | 2.51E-09 | 5.17E-08 | 3204.48 | 3309.61 | 3889.03 | 1821.4  | 1397.69 | 2046.22 |
| ENSMUSG00000059323 | 13_Tonsl         | 1087.11 | 0.39285  | 0.02533  | 0.05527  | 1192.02 | 1275.75 | 1235.79 | 1188.42 | 783.568 | 847.106 |
| ENSMUSG00000059325 | 14_Hopx          | 8514.51 | 0.30239  | 0.00158  | 0.00531  | 9086.46 | 9253.32 | 9870.78 | 7478.58 | 7466.31 | 7931.65 |
| ENSMUSG00000059326 | 6_Csf2ra         | 201.825 | 1.20245  | 1.17E-08 | 1.96E-07 | 261.325 | 280.849 | 302.374 | 145.171 | 102.204 | 119.025 |
| ENSMUSG00000059327 | 9_Eda            | 577.36  | 0.07489  | 0.68926  | 0.77662  | 548.695 | 599.327 | 627.456 | 507.649 | 470.679 | 710.353 |
| ENSMUSG00000059334 | 6_Zfp36i3        | 0       | NA       | NA       | NA       | 0       | 0       | 0       | 0       | 0       | 0       |
| ENSMUSG00000059336 | 14_Slc14a1       | 546.154 | -1.57025 | 2.76E-06 | 2.22E-05 | 323.834 | 380.889 | 119.515 | 991.854 | 802.395 | 658.438 |
| ENSMUSG00000059343 | 4_Aldoat1        | 12.9594 | -1.46367 | 0.146    | 0.23361  | 6.94551 | 10.0959 | 3.58546 | 1.80337 | 43.93   | 11.396  |
| ENSMUSG00000059355 | 13_Wdr83os       | 550.757 | 0.16451  | 0.26813  | 0.37956  | 550.431 | 594.738 | 601.163 | 567.16  | 455.438 | 535.614 |
| ENSMUSG00000059361 | 6_Nrsn2          | 3.05457 | -2.00819 | 0.17466  | 0.27047  | 1.73638 | 1.83561 | 0       | 7.21348 | 6.27571 | 1.26623 |
| ENSMUSG00000059363 | 10_Fxn           | 162.501 | 0.08206  | 0.72168  | 0.80192  | 188.397 | 154.191 | 157.76  | 165.91  | 126.411 | 182.337 |
| ENSMUSG00000059395 | 4_Nkapl          | 21.4045 | -0.59782 | 0.2229   | 0.3279   | 18.232  | 13.7671 | 19.1225 | 24.3455 | 25.1029 | 27.857  |
| ENSMUSG00000059401 | 13_Mamld1        | 120.533 | -0.77923 | 0.00633  | 0.01719  | 84.2143 | 113.808 | 68.1238 | 163.205 | 174.823 | 119.025 |
| ENSMUSG00000059406 | 7_Tmprss9        | 2.09556 | 0.77771  | 0.62253  | NA       | 1.73638 | 2.75342 | 3.58546 | 2.70506 | 1.79306 | 0       |
| ENSMUSG00000059408 | 2_Mrgprh         | 0.71147 | -0.45937 | 0.89616  | NA       | 1.73638 | 0       | 0       | 0       | 0       | 2.53245 |
| ENSMUSG00000059409 | 8_Ppp2r5d        | 1215.55 | 0.4068   | 0.00198  | 0.00645  | 1350.9  | 1441.87 | 1362.48 | 1027.02 | 935.978 | 1175.06 |
| ENSMUSG00000059412 | 6_Fxyd2          | 17.5575 | -1.04231 | 0.15129  | 0.24077  | 12.1546 | 18.3561 | 3.58546 | 35.1657 | 10.7584 | 25.3245 |
| ENSMUSG00000059423 | 13_Zfp933        | 350.404 | -0.73087 | 7.57E-06 | 5.32E-05 | 276.084 | 248.725 | 265.324 | 386.823 | 467.092 | 458.374 |
| ENSMUSG00000059430 | 14_Actg2         | 86.8658 | -1.00401 | 0.00924  | 0.02365  | 41.673  | 95.4518 | 35.8546 | 119.924 | 121.928 | 106.363 |
| ENSMUSG00000059434 | 8_Gckr           | 183.174 | -0.95978 | 0.00146  | 0.00496  | 115.469 | 167.958 | 89.6366 | 301.163 | 256.408 | 168.408 |
| ENSMUSG00000059436 | 12_Max           | 1423.32 | 0.23387  | 0.06055  | 0.11381  | 1451.61 | 1475.83 | 1688.75 | 1375.97 | 1215.7  | 1332.07 |
| ENSMUSG00000059439 | 15_Bcas3         | 714.606 | 0.46064  | 0.0009   | 0.00326  | 748.378 | 881.093 | 853.34  | 617.655 | 554.056 | 633.113 |
| ENSMUSG00000059447 | 13_Hadhb         | 2742.23 | -0.51736 | 3.19E-06 | 2.51E-05 | 2313.72 | 2240.36 | 2213.43 | 3056.71 | 3533.23 | 3095.92 |
| ENSMUSG00000059455 | 2_Plac8l1        | 0       | NA       | NA       | NA       | 0       | 0       | 0       | 0       | 0       | 0       |
| ENSMUSG00000059456 | 13_Ptk2b         | 1122.99 | 0.66306  | 9.32E-07 | 8.62E-06 | 1314.44 | 1347.34 | 1466.45 | 799.795 | 824.808 | 985.125 |
| ENSMUSG00000059474 | 13_Mbtb1         | 1078.05 | -0.43028 | 0.00549  | 0.01524  | 994.944 | 830.614 | 929.83  | 1054.07 | 1419.21 | 1239.64 |
| ENSMUSG00000059475 | 13_Zfp426        | 720.627 | -0.5695  | 5.19E-05 | 0.00028  | 579.95  | 573.628 | 586.821 | 752.006 | 938.668 | 892.69  |
| ENSMUSG00000059479 | 7_B3gnt8         | 1024.61 | 1.44941  | 9.22E-13 | 5.01E-11 | 1293.6  | 1449.21 | 1756.88 | 652.82  | 402.542 | 592.594 |
| ENSMUSG00000059481 | 4_Plg            | 0.2894  | 1.67273  | 0.67976  | NA       | 1.73638 | 0       | 0       | 0       | 0       | 0       |
| ENSMUSG00000059482 | 15_2610301B20Rik | 371.634 | -0.50541 | 0.00129  | 0.00447  | 331.648 | 297.369 | 292.813 | 448.138 | 463.506 | 396.329 |
| ENSMUSG00000059486 | 11_Kbtbd2        | 1003.61 | -0.2282  | 0.06481  | 0.12051  | 960.216 | 850.806 | 962.099 | 1019.81 | 1108.11 | 1120.61 |
| ENSMUSG00000059493 | 13_Nhs           | 410.826 | -1.12955 | 4.54E-07 | 4.65E-06 | 237.884 | 294.616 | 241.421 | 675.362 | 616.813 | 398.861 |
| ENSMUSG00000059495 | 13_Arhgef12      | 11046.8 | 0.0406   | 0.69132  | 0.77848  | 10841.1 | 11370.7 | 11393.4 | 10248.6 | 10671.4 | 11755.7 |
| ENSMUSG00000059498 | 13_Fcgr3         | 192.337 | 0.29498  | 0.25005  | 0.35918  | 270.875 | 187.232 | 178.078 | 203.781 | 181.099 | 132.954 |
| ENSMUSG00000059518 | 14_Znhit1        | 491.052 | 0.81331  | 1.26E-05 | 8.32E-05 | 581.686 | 548.848 | 748.166 | 407.562 | 309.303 | 350.745 |
| ENSMUSG00000059534 | 8_Uqcr10         | 1074.48 | 0.62101  | 0.00346  | 0.01037  | 1225.88 | 1313.38 | 1368.45 | 1157.76 | 641.916 | 739.477 |
| ENSMUSG00000059540 | 15_Tcea2         | 109.412 | -0.29369 | 0.30166  | 0.41646  | 105.919 | 119.315 | 69.3189 | 137.056 | 121.032 | 103.831 |
| ENSMUSG00000059547 | 3_Fbxw26         | 1.04563 | -1.31185 | 0.58184  | NA       | 0.86819 | 0.91781 | 0       | 0.90169 | 3.58612 | 0       |
| ENSMUSG00000059552 | 13_Trp53         | 1081.61 | 0.711    | 2.51E-06 | 2.04E-05 | 1251.06 | 1251.89 | 1525.02 | 823.239 | 721.707 | 916.748 |

|                    |                  |         |          |          |          |         |         |         |         |         |         |
|--------------------|------------------|---------|----------|----------|----------|---------|---------|---------|---------|---------|---------|
| ENSMUSG00000059554 | 12_Ccdc28a       | 249.642 | 0.2936   | 0.09214  | 0.16073  | 268.27  | 265.246 | 291.618 | 242.553 | 203.512 | 226.655 |
| ENSMUSG00000059555 | 6_Tor4a          | 856.703 | 0.47665  | 0.00091  | 0.00329  | 944.589 | 986.641 | 1058.91 | 752.006 | 616.813 | 781.262 |
| ENSMUSG00000059562 | 14_Ccdc154       | 1.36253 | 0.34365  | 0.90484  | NA       | 0       | 4.58903 | 0       | 0       | 3.58612 | 0       |
| ENSMUSG00000059586 | 9_Nsmce2         | 507.989 | -0.07322 | 0.64925  | 0.74342  | 539.145 | 432.286 | 513.916 | 466.171 | 568.4   | 528.017 |
| ENSMUSG00000059588 | 13_Calcr1        | 501.523 | -1.0819  | 3.76E-08 | 5.34E-07 | 325.571 | 380.889 | 258.153 | 806.107 | 629.364 | 609.055 |
| ENSMUSG00000059602 | 14_Syn3          | 154.244 | 0.59588  | 0.0104   | 0.02614  | 157.142 | 217.52  | 181.663 | 124.433 | 106.687 | 138.019 |
| ENSMUSG00000059606 | 3_Rnase2b        | 0.1447  | 0.92709  | 0.82027  | NA       | 0.86819 | 0       | 0       | 0       | 0       | 0       |
| ENSMUSG00000059610 | 4_Olfir222       | 0.14942 | -0.99647 | 0.80707  | NA       | 0       | 0       | 0       | 0       | 0.89653 | 0       |
| ENSMUSG00000059625 | 6_Sohlh1         | 0.51074 | -2.49114 | 0.44681  | NA       | 0       | 0       | 0       | 0.90169 | 0.89653 | 1.26623 |
| ENSMUSG00000059626 | 13_Rhox3e        | 0       | NA       | NA       | NA       | 0       | 0       | 0       | 0       | 0       | 0       |
| ENSMUSG00000059631 | 6_1500035N22Rik  | 0.50602 | -1.01212 | 0.76398  | NA       | 0.86819 | 0       | 0       | 0.90169 | 0       | 1.26623 |
| ENSMUSG00000059639 | 2_Clec4a4        | 0.58438 | 1.28692  | 0.7301   | NA       | 2.60457 | 0       | 0       | 0.90169 | 0       | 0       |
| ENSMUSG00000059645 | 6_Gm7361         | 0.39838 | 2.07058  | 0.60634  | NA       | 0       | 0       | 2.39031 | 0       | 0       | 0       |
| ENSMUSG00000059657 | 4_Stfa211        | 3.39528 | 0.4426   | 0.73464  | 0.81186  | 0.86819 | 3.67122 | 7.17092 | 1.80337 | 1.79306 | 5.06491 |
| ENSMUSG00000059668 | 5_Krt4           | 5375.4  | 0.90486  | 0.0001   | 0.00051  | 6072.98 | 4972.67 | 9978.34 | 3314.6  | 3552.95 | 4360.89 |
| ENSMUSG00000059669 | 7_Taf1b          | 563.79  | -0.27003 | 0.07982  | 0.14309  | 559.982 | 440.547 | 533.039 | 571.669 | 648.192 | 629.315 |
| ENSMUSG00000059674 | 6_Cdh24          | 54.3543 | 0.93249  | 0.0062   | 0.01689  | 79.8733 | 56.9039 | 77.685  | 37.8708 | 42.1369 | 31.6557 |
| ENSMUSG00000059689 | 14_Zfp637        | 472.157 | -0.0698  | 0.63998  | 0.73575  | 435.831 | 502.04  | 444.597 | 527.486 | 460.817 | 462.173 |
| ENSMUSG00000059690 | 1_1700020N15Rik  | 0       | NA       | NA       | NA       | 0       | 0       | 0       | 0       | 0       | 0       |
| ENSMUSG00000059708 | 12_Akap17b       | 661.837 | -0.44799 | 0.00909  | 0.02332  | 638.118 | 535.081 | 505.55  | 644.705 | 877.703 | 769.866 |
| ENSMUSG00000059713 | 12_Rcan3         | 723.812 | -0.21619 | 0.10553  | 0.17989  | 642.459 | 678.258 | 689.604 | 857.503 | 749.5   | 725.548 |
| ENSMUSG00000059714 | 13_Flot1         | 720.608 | 0.57517  | 0.00039  | 0.00159  | 829.988 | 852.641 | 905.927 | 697.003 | 516.402 | 521.685 |
| ENSMUSG00000059734 | 6_Ndufs8         | 1366.74 | 0.55444  | 0.00285  | 0.00879  | 1620.04 | 1555.68 | 1703.09 | 1391.3  | 833.773 | 1096.55 |
| ENSMUSG00000059741 | 13_Myl3          | 23.5487 | 0.89793  | 0.13554  | 0.2198   | 26.9138 | 21.1095 | 44.2207 | 27.0506 | 8.06878 | 13.9285 |
| ENSMUSG00000059742 | 10_Kcnh7         | 22.0282 | -0.39876 | 0.44588  | 0.56082  | 23.4411 | 14.6849 | 19.1225 | 32.4607 | 25.9994 | 16.4609 |
| ENSMUSG00000059743 | 12_Fdps          | 7846.35 | 0.55969  | 1.31E-05 | 8.59E-05 | 8943.21 | 8557.62 | 10547.2 | 6068.34 | 5992.41 | 6969.31 |
| ENSMUSG00000059768 | 3_Olfir682-ps1   | 0.44827 | -2.3261  | 0.56139  | NA       | 0       | 0       | 0       | 0       | 2.68959 | 0       |
| ENSMUSG00000059772 | 12_Slx1b         | 240.611 | 0.21085  | 0.28263  | 0.39569  | 259.588 | 299.205 | 215.128 | 239.848 | 213.374 | 216.525 |
| ENSMUSG00000059775 | 4_Rps26-ps1      | 35.6776 | 0.27096  | 0.5158   | 0.62584  | 45.1458 | 31.2054 | 40.6352 | 23.4438 | 39.4473 | 34.1881 |
| ENSMUSG00000059791 | 14_Nrm           | 369.79  | 0.87853  | 3.21E-05 | 0.00019  | 409.785 | 425.862 | 601.163 | 254.275 | 225.029 | 302.628 |
| ENSMUSG00000059796 | 16_Eif4a1        | 16613.9 | -0.068   | 0.59128  | 0.69344  | 16987   | 14896.9 | 16782.4 | 14766   | 17910.9 | 18340   |
| ENSMUSG00000059810 | 18_Rgs3          | 553.186 | 0.13835  | 0.45149  | 0.5662   | 557.377 | 623.19  | 559.332 | 658.23  | 462.61  | 458.374 |
| ENSMUSG00000059811 | 12_Ati2          | 2928.45 | -0.24552 | 0.09006  | 0.15777  | 2785.15 | 2532.23 | 2721.37 | 2598.66 | 3486.61 | 3446.67 |
| ENSMUSG00000059816 | 5_Fam159a        | 0.14942 | -0.99647 | 0.80707  | NA       | 0       | 0       | 0       | 0       | 0.89653 | 0       |
| ENSMUSG00000059820 | 14_AU019823      | 780.095 | -0.28992 | 0.04066  | 0.08169  | 711.046 | 654.395 | 739.8   | 762.826 | 861.566 | 950.936 |
| ENSMUSG00000059824 | 10_Dbp           | 2261.81 | 0.82749  | 7.52E-07 | 7.15E-06 | 2926.66 | 2937.9  | 2813.39 | 1797.06 | 1234.52 | 1861.35 |
| ENSMUSG00000059830 | 2_Gm16380        | 0.19919 | 0.92709  | 0.82027  | NA       | 0       | 0       | 1.19515 | 0       | 0       | 0       |
| ENSMUSG00000059832 | 4_Kprp           | 102.089 | 0.07292  | 0.78752  | 0.85242  | 95.5007 | 116.561 | 102.783 | 111.809 | 111.17  | 74.7074 |
| ENSMUSG00000059834 | 12_Sclt1         | 200.178 | -0.49577 | 0.01217  | 0.02978  | 171.033 | 145.931 | 181.663 | 209.191 | 250.132 | 243.116 |
| ENSMUSG00000059835 | 1_Rpl13-ps3      | 13.7375 | 0.54481  | 0.40371  | 0.5211   | 17.3638 | 15.6027 | 15.537  | 9.91854 | 6.27571 | 17.7272 |
| ENSMUSG00000059839 | 8_Zfp874b        | 197.548 | -0.77773 | 0.00018  | 0.00083  | 168.429 | 137.671 | 130.272 | 240.75  | 281.511 | 226.655 |
| ENSMUSG00000059842 | 12_Zfp341        | 75.2756 | 0.86801  | 0.00528  | 0.01474  | 72.0596 | 109.219 | 111.149 | 54.1011 | 58.2745 | 46.8504 |
| ENSMUSG00000059845 | 5_Gm11567        | 0.19919 | 0.92709  | 0.82027  | NA       | 0       | 0       | 1.19515 | 0       | 0       | 0       |
| ENSMUSG00000059851 | 15_Suv420h2      | 561.616 | 0.85597  | 2.26E-06 | 1.87E-05 | 701.496 | 713.135 | 756.533 | 493.222 | 325.441 | 379.868 |
| ENSMUSG00000059852 | 7_Kcng2          | 1.27021 | -0.79953 | 0.71719  | NA       | 0       | 2.75342 | 0       | 2.70506 | 0.89653 | 1.26623 |
| ENSMUSG00000059854 | 7_Hydl1          | 2.1004  | -1.29994 | 0.48892  | NA       | 0.86819 | 2.75342 | 0       | 2.70506 | 6.27571 | 0       |
| ENSMUSG00000059857 | 15_Ntng1         | 146.667 | -1.38916 | 9.61E-07 | 8.86E-06 | 79.8733 | 96.3696 | 66.9286 | 234.438 | 255.511 | 146.882 |
| ENSMUSG00000059864 | 1_Olfir1393      | 0       | NA       | NA       | NA       | 0       | 0       | 0       | 0       | 0       | 0       |
| ENSMUSG00000059866 | 13_Tnip2         | 557.027 | 0.42849  | 0.0023   | 0.00732  | 618.15  | 606.669 | 693.189 | 441.826 | 501.161 | 481.166 |
| ENSMUSG00000059878 | 12_Zfp422        | 664.979 | -0.41342 | 0.00163  | 0.00547  | 614.677 | 524.985 | 571.284 | 746.596 | 776.395 | 755.937 |
| ENSMUSG00000059883 | 16_Irak4         | 661.567 | 0.62801  | 1.91E-05 | 0.00012  | 751.851 | 763.614 | 893.975 | 501.337 | 485.023 | 573.601 |
| ENSMUSG00000059887 | 5_Olfir1507      | 0.21104 | -0.99647 | 0.80707  | NA       | 0       | 0       | 0       | 0       | 0       | 1.26623 |
| ENSMUSG00000059890 | 15_Ube4a         | 2237.23 | -0.17178 | 0.17309  | 0.26845  | 2150.5  | 2077.91 | 2083.15 | 2054.04 | 2550.63 | 2507.13 |
| ENSMUSG00000059891 | 13_Tsks          | 1.31729 | -0.70478 | 0.74966  | NA       | 0       | 1.83561 | 1.19515 | 3.60674 | 0       | 1.26623 |
| ENSMUSG00000059895 | 12_Ptp4a3        | 376.593 | -0.01422 | 0.96263  | 0.97592  | 340.33  | 437.793 | 346.595 | 595.112 | 251.029 | 288.7   |
| ENSMUSG00000059897 | 4_Zfp930         | 203.89  | -0.74722 | 9.31E-05 | 0.00047  | 157.142 | 152.356 | 147.004 | 228.126 | 284.2   | 254.512 |
| ENSMUSG00000059898 | 8_Dsc3           | 26366   | -0.0644  | 0.71607  | 0.79762  | 26847.9 | 23594.9 | 26888.6 | 20049.9 | 27920.7 | 32894   |
| ENSMUSG00000059900 | 14_Tmem40        | 1118.21 | 0.74813  | 1.22E-05 | 8.09E-05 | 1330.06 | 1324.39 | 1551.31 | 987.346 | 665.226 | 850.904 |
| ENSMUSG00000059901 | 12_Adamts14      | 47.9734 | 1.31021  | 0.00035  | 0.00147  | 68.5869 | 68.8354 | 66.9286 | 26.1489 | 20.6202 | 36.7206 |
| ENSMUSG00000059908 | 9_Mug1           | 0.4589  | 2.31815  | 0.56231  | NA       | 0       | 2.75342 | 0       | 0       | 0       | 0       |
| ENSMUSG00000059920 | 9_4930453N24Rik  | 1027.92 | -0.1957  | 0.17561  | 0.2716   | 976.712 | 877.422 | 1021.86 | 986.444 | 1251.56 | 1053.5  |
| ENSMUSG00000059921 | 15_Unc5c         | 371.528 | -1.37743 | 7.91E-07 | 7.47E-06 | 187.529 | 297.369 | 133.857 | 536.503 | 638.33  | 435.582 |
| ENSMUSG00000059923 | 13_Grb2          | 1298.84 | 0.20277  | 0.12132  | 0.20154  | 1409.07 | 1240.87 | 1521.43 | 1293.02 | 1163.7  | 1164.93 |
| ENSMUSG00000059939 | 13_9430015G10Rik | 537.5   | 0.21263  | 0.14076  | 0.22677  | 573.873 | 556.19  | 599.967 | 453.548 | 486.816 | 554.607 |
| ENSMUSG00000059956 | 14_Serpinb12     | 0.72092 | -2.98196 | 0.3773   | NA       | 0       | 0       | 0       | 0       | 1.79306 | 2.53245 |
| ENSMUSG00000059970 | 6_Hspa2          | 189.997 | 0.41108  | 0.06109  | 0.1146   | 211.838 | 178.054 | 261.739 | 155.09  | 177.513 | 155.746 |
| ENSMUSG00000059974 | 10_Ntm           | 110.469 | -1.41189 | 1.41E-05 | 9.15E-05 | 73.796  | 71.5888 | 34.6595 | 194.764 | 139.859 | 148.149 |
| ENSMUSG00000059975 | 14_Zfp74         | 211.684 | -0.70132 | 0.00012  | 0.0006   | 165.824 | 166.123 | 151.785 | 279.522 | 266.27  | 240.583 |
| ENSMUSG00000059981 | 11-Taok2         | 1811.09 | 0.67695  | 1.10E-07 | 1.36E-06 | 1998.57 | 2338.57 | 2349.67 | 1516.63 | 1347.49 | 1315.61 |
| ENSMUSG00000059991 | 7_Nptx2          | 35.2936 | 1.29537  | 0.00614  | 0.01675  | 41.673  | 34.8766 | 74.0996 | 24.3455 | 15.241  | 21.5259 |
| ENSMUSG00000059994 | 10_Fcrl1         | 2.33404 | 0.52088  | 0.71926  | NA       | 5.20913 | 1.83561 | 1.19515 | 2.70506 | 1.79306 | 1.26623 |
| ENSMUSG00000059995 | 12_Atnx713       | 1651.33 | 0.52987  | 0.0002   | 0.00092  | 1863.13 | 2009.08 | 1981.57 | 1552.7  | 1146.66 | 1354.86 |
| ENSMUSG00000060002 | 14_Chpt1         | 550.36  | -1.2379  | 1.30E-08 | 2.15E-07 | 335.989 | 408.423 | 237.836 | 848.486 | 831.98  | 639.445 |
| ENSMUSG00000060012 | 7_Kif13b         | 1970.68 | 0.67856  | 1.34E-05 | 8.77E-05 | 2167.87 | 2449.62 | 2658.02 | 1382.28 | 1355.55 | 1810.7  |
| ENSMUSG00000060019 | 5_Gm10073        | 26.1047 | 0.35775  | 0.48128  | 0.59379  | 17.3638 | 43.1369 | 27.4885 | 21.6405 | 24.2063 | 22.7921 |
| ENSMUSG00000060030 | 4_Olfir317       | 0.36401 | -0.03469 | 0.99322  | NA       | 0       | 0.91781 | 0       | 0       | 0       | 1.26623 |
| ENSMUSG00000060032 | 6_H2afj          | 181.57  | 0.57349  | 0.00389  | 0.01147  | 206.629 | 230.369 | 215.128 | 165.008 | 138.066 | 134.22  |
| ENSMUSG00000060034 | 5_Ctf2           | 6.7394  | -0.3595  | 0.68542  | 0.77333  | 7.8137  | 7.34244 | 2.39031 | 9.01685 | 6.27571 | 7.59736 |
| ENSMUSG00000060036 | 13_Rpl3          | 23339.2 | -0.06998 | 0.51425  | 0.62437  | 24113.1 | 21646.4 | 22559.7 | 25611.5 | 22109.3 | 23995   |

|                     |                 |         |          |          |          |         |         |         |         |         |         |
|---------------------|-----------------|---------|----------|----------|----------|---------|---------|---------|---------|---------|---------|
| ENSMUSG000000060038 | 14_Dhps         | 401.986 | 0.15919  | 0.30709  | 0.42217  | 424.544 | 390.985 | 457.744 | 414.775 | 354.13  | 369.738 |
| ENSMUSG000000060044 | 7_Tmem26        | 28.5802 | -0.16553 | 0.72665  | 0.80528  | 34.7275 | 21.1095 | 25.0982 | 25.2472 | 41.2404 | 24.0583 |
| ENSMUSG000000060063 | 9_Alox5ap       | 107.802 | 1.70895  | 4.63E-06 | 3.46E-05 | 223.124 | 128.493 | 144.614 | 74.8399 | 46.6196 | 29.1232 |
| ENSMUSG000000060073 | 9_Psma3         | 3053.27 | -0.37347 | 0.00481  | 0.01365  | 2855.47 | 2417.5  | 2708.22 | 3102.7  | 3873.91 | 3361.83 |
| ENSMUSG000000060090 | 16_Rp2          | 470.222 | -0.68146 | 9.89E-06 | 6.71E-05 | 354.221 | 342.341 | 388.425 | 556.34  | 648.192 | 531.815 |
| ENSMUSG000000060093 | 6_Hist1h4a      | 0.15297 | 0.92709  | 0.82027  | NA       | 0       | 0.91781 | 0       | 0       | 0       | 0       |
| ENSMUSG000000060098 | 11_Prm7         | 554.142 | 0.57959  | 0.00315  | 0.00957  | 664.164 | 594.738 | 733.825 | 556.34  | 354.13  | 421.654 |
| ENSMUSG000000060112 | 1_Olfr60        | 0.15297 | 0.92709  | 0.82027  | NA       | 0       | 0.91781 | 0       | 0       | 0       | 0       |
| ENSMUSG000000060121 | 15_Gemin2       | 269.293 | -0.19737 | 0.30489  | 0.41993  | 256.984 | 234.04  | 261.739 | 237.143 | 330.82  | 295.031 |
| ENSMUSG000000060126 | 14_Tpt1         | 49521.9 | -0.45995 | 3.66E-07 | 3.85E-06 | 42776.5 | 41827.2 | 40476.3 | 54936.1 | 58107.7 | 59007.4 |
| ENSMUSG000000060131 | 11_Atp8b4       | 23.7815 | 2.67353  | 8.60E-05 | 0.00044  | 72.0596 | 19.2739 | 32.2692 | 8.11517 | 7.17224 | 3.79868 |
| ENSMUSG000000060143 | 6_Gm10076       | 1411.72 | -0.26289 | 0.03665  | 0.07488  | 1251.93 | 1326.23 | 1270.45 | 1399.42 | 1505.27 | 1717    |
| ENSMUSG000000060147 | 15_Serpib6a     | 1884.47 | -0.37908 | 0.00129  | 0.00448  | 1738.98 | 1619.01 | 1557.29 | 2274.05 | 2162.43 | 1955.05 |
| ENSMUSG000000060149 | 6_BC002059      | 251.379 | -0.58783 | 0.00174  | 0.00579  | 206.629 | 206.506 | 188.834 | 256.079 | 336.199 | 314.024 |
| ENSMUSG000000060152 | 14_Pop5         | 495.757 | 0.02992  | 0.82071  | 0.87663  | 515.704 | 484.601 | 501.965 | 480.598 | 487.713 | 503.958 |
| ENSMUSG000000060166 | 5_Zdhc8         | 499.98  | 0.9686   | 0.00011  | 0.00054  | 607.732 | 708.546 | 669.286 | 468.876 | 218.753 | 326.687 |
| ENSMUSG000000060170 | 3_Olfr1371      | 0       | NA       | NA       | NA       | 0       | 0       | 0       | 0       | 0       | 0       |
| ENSMUSG000000060176 | 3_Kif27         | 9.07674 | -0.66887 | 0.3745   | 0.49212  | 6.07732 | 10.0959 | 4.78062 | 11.7219 | 11.6549 | 10.1298 |
| ENSMUSG000000060180 | 12_Myh13        | 7.99051 | -4.51858 | 0.0006   | 0.00231  | 0       | 0.91781 | 1.19515 | 17.132  | 7.17224 | 21.5259 |
| ENSMUSG000000060181 | 5_Slc35e3       | 291.28  | -0.35015 | 0.04312  | 0.0857   | 251.775 | 283.602 | 233.055 | 342.64  | 341.578 | 295.031 |
| ENSMUSG000000060187 | 4_Lrrc10        | 0.15297 | 0.92709  | 0.82027  | NA       | 0       | 0.91781 | 0       | 0       | 0       | 0       |
| ENSMUSG000000060188 | 6_Cxcl17        | 153.98  | 0.9849   | 0.00128  | 0.00445  | 167.56  | 191.821 | 253.373 | 95.5787 | 69.9294 | 145.616 |
| ENSMUSG000000060204 | 5_Gm5868        | 0.29884 | -1.76064 | 0.66373  | NA       | 0       | 0       | 0       | 0       | 1.79306 | 0       |
| ENSMUSG000000060206 | 11_Zfp462       | 1786.49 | -0.17945 | 0.09183  | 0.16025  | 1664.32 | 1736.49 | 1624.21 | 1885.42 | 1815.47 | 1993.04 |
| ENSMUSG000000060208 | 5_Defaf17       | 1.1393  | 1.16004  | 0.62074  | NA       | 3.47275 | 0       | 1.19515 | 0.90169 | 0       | 1.26623 |
| ENSMUSG000000060212 | 13_Pcnxl2       | 14.2822 | 0.00542  | 0.0938   | 0.99574  | 18.232  | 9.17806 | 15.537  | 22.5421 | 6.27571 | 13.9285 |
| ENSMUSG000000060216 | 15_Arrb2        | 281.064 | 0.91771  | 0.0003   | 0.0013   | 474.031 | 316.643 | 311.935 | 249.767 | 154.203 | 179.804 |
| ENSMUSG000000060224 | 3_Pyroxd2       | 192.241 | 0.32666  | 0.14799  | 0.23626  | 198.815 | 254.232 | 188.834 | 203.781 | 153.307 | 154.48  |
| ENSMUSG000000060227 | 15_Casc4        | 763.982 | -0.98736 | 1.27E-11 | 5.20E-10 | 505.286 | 569.957 | 461.329 | 1040.55 | 1087.49 | 919.281 |
| ENSMUSG000000060240 | 12_Cend1        | 36.4759 | -0.91241 | 0.12139  | 0.20164  | 21.7047 | 42.2191 | 11.9515 | 73.9382 | 47.5161 | 21.5259 |
| ENSMUSG000000060244 | 1_Alyref2       | 71.7848 | 0.37632  | 0.2908   | 0.40449  | 94.6325 | 79.8491 | 68.1238 | 75.7416 | 37.6543 | 74.7074 |
| ENSMUSG000000060257 | 2_Scrl2         | 2.11388 | -1.19639 | 0.42695  | NA       | 1.73638 | 0.91781 | 1.19515 | 4.50843 | 1.79306 | 2.53245 |
| ENSMUSG000000060260 | 12_Pwwp2b       | 1080.6  | 0.87722  | 1.77E-05 | 0.00011  | 1298.81 | 1310.63 | 1588.36 | 914.309 | 537.022 | 834.444 |
| ENSMUSG000000060261 | 15_Gtf2i        | 3328.03 | -0.01457 | 0.89735  | 0.93075  | 3201.88 | 3592.29 | 3138.47 | 3504.85 | 3133.37 | 3397.29 |
| ENSMUSG000000060268 | 11_Gm1661       | 4.97927 | -0.38453 | 0.71817  | 0.79922  | 7.8137  | 2.75342 | 2.39031 | 7.21348 | 7.17224 | 2.53245 |
| ENSMUSG000000060275 | 11_Nrg2         | 123.12  | 1.3373   | 5.97E-07 | 5.91E-06 | 148.46  | 178.054 | 201.981 | 69.4298 | 54.6884 | 86.1034 |
| ENSMUSG000000060279 | 13_Ap2a1        | 1259.81 | 0.95126  | 2.13E-07 | 2.42E-06 | 1471.58 | 1666.73 | 1844.12 | 1036.04 | 661.64  | 878.761 |
| ENSMUSG000000060284 | 6_Sp7           | 16.7242 | -0.86216 | 0.17778  | 0.27439  | 13.0228 | 16.5205 | 5.97577 | 28.8539 | 23.3098 | 12.6623 |
| ENSMUSG000000060288 | 13_Ppih         | 321.419 | -0.29742 | 0.10492  | 0.17917  | 328.175 | 245.054 | 291.618 | 316.492 | 377.439 | 369.738 |
| ENSMUSG000000060301 | 5_2610008E11Rik | 648.752 | -0.77973 | 4.41E-06 | 3.32E-05 | 515.704 | 503.875 | 412.328 | 726.758 | 960.184 | 773.665 |
| ENSMUSG000000060314 | 12_Zfp941       | 109.844 | -0.53635 | 0.04035  | 0.08113  | 92.028  | 104.63  | 71.7092 | 113.612 | 147.928 | 129.155 |
| ENSMUSG000000060317 | 9_Acnat2        | 0.15028 | -0.99647 | 0.80707  | NA       | 0       | 0       | 0       | 0.90169 | 0       | 0       |
| ENSMUSG000000060332 | 9_Tmc2          | 0.73648 | 1.72463  | 0.55976  | NA       | 2.60457 | 0.91781 | 0       | 0       | 0.89653 | 0       |
| ENSMUSG000000060336 | 6_Zfp937        | 145.187 | -0.86967 | 0.00019  | 0.00087  | 101.578 | 108.301 | 98.0026 | 153.287 | 218.753 | 191.2   |
| ENSMUSG000000060371 | 12_Caln1        | 13.4171 | -1.14214 | 0.15708  | 0.24847  | 9.55007 | 11.9315 | 3.58546 | 28.8539 | 21.5167 | 5.06491 |
| ENSMUSG000000060373 | 14_HnrnpC       | 5340.54 | -0.27031 | 0.02348  | 0.05192  | 4890.51 | 4611.97 | 5022.04 | 5140.51 | 6148.41 | 6229.84 |
| ENSMUSG000000060376 | 7_Bckdha        | 702.801 | 1.06562  | 9.74E-05 | 0.00048  | 783.106 | 1045.38 | 1025.44 | 659.132 | 277.028 | 426.718 |
| ENSMUSG000000060380 | 2_C030014I23Rik | 117.901 | 0.05704  | 0.82073  | 0.87663  | 137.174 | 117.479 | 106.369 | 132.548 | 120.135 | 93.7008 |
| ENSMUSG000000060397 | 6_Zfp128        | 68.3926 | -0.90835 | 0.00305  | 0.00932  | 50.3549 | 51.3971 | 40.6352 | 106.399 | 77.9982 | 83.571  |
| ENSMUSG000000060402 | 7_Chs18         | 8.80802 | 0.03197  | 0.96611  | 0.9781   | 9.55007 | 11.0137 | 5.97577 | 7.21348 | 8.96531 | 10.1298 |
| ENSMUSG000000060407 | 6_Cyp2a12       | 0.89882 | 1.91615  | 0.48955  | NA       | 1.73638 | 0       | 2.39031 | 0       | 0       | 1.26623 |
| ENSMUSG000000060416 | 2_Gm839         | 0.1447  | 0.92709  | 0.82027  | NA       | 0.86819 | 0       | 0       | 0       | 0       | 0       |
| ENSMUSG000000060424 | 14_Pantr1       | 93.9193 | -1.26712 | 0.00015  | 0.00073  | 72.9278 | 61.493  | 29.8789 | 128.039 | 140.755 | 130.421 |
| ENSMUSG000000060427 | 15_Zfp868       | 594.123 | -0.36132 | 0.0188   | 0.00429  | 559.113 | 502.957 | 498.379 | 611.343 | 767.43  | 625.516 |
| ENSMUSG000000060429 | 11_Sntb1        | 526.41  | -0.7487  | 5.77E-05 | 0.00031  | 366.376 | 459.821 | 352.57  | 761.924 | 673.294 | 544.478 |
| ENSMUSG000000060441 | 14_Trim5        | 40.3918 | 0.46063  | 0.2102   | 0.31339  | 48.6186 | 43.1369 | 49.0013 | 38.7725 | 34.9647 | 27.857  |
| ENSMUSG000000060445 | 11_Sypc2        | 8.10188 | -0.29051 | 0.75722  | 0.82933  | 12.1546 | 3.67122 | 5.97577 | 2.70506 | 15.241  | 8.86359 |
| ENSMUSG000000060450 | 13_Rnf14        | 1848.88 | -0.34628 | 0.00111  | 0.00391  | 1723.35 | 1608.91 | 1551.31 | 2111.75 | 2080.85 | 2017.1  |
| ENSMUSG000000060459 | 13_Kng2         | 0.54308 | 2.53494  | 0.50107  | NA       | 0.86819 | 0       | 2.39031 | 0       | 0       | 0       |
| ENSMUSG000000060461 | 5_Dppa5a        | 3.2058  | 0.82367  | 0.60091  | 0.70202  | 11.2864 | 0.91781 | 0       | 2.70506 | 1.79306 | 2.53245 |
| ENSMUSG000000060470 | 6_Adgrg3        | 20.4845 | 0.27146  | 0.6031   | 0.70385  | 20.8365 | 19.2739 | 27.4885 | 24.3455 | 17.0341 | 13.9285 |
| ENSMUSG000000060475 | 12_Wtap         | 2127.68 | -0.38183 | 0.00523  | 0.01463  | 1972.52 | 1733.73 | 1836.95 | 2109.04 | 2737.11 | 2376.71 |
| ENSMUSG000000060477 | 14_Irak2        | 3046.76 | 0.52317  | 0.0001   | 0.00051  | 3398.96 | 3427.09 | 3952.37 | 2431.85 | 2237.74 | 2832.55 |
| ENSMUSG000000060487 | 5_Samd5         | 73.6935 | -1.58999 | 9.21E-08 | 1.17E-06 | 31.2548 | 42.2191 | 37.0498 | 117.219 | 115.652 | 98.7657 |
| ENSMUSG000000060499 | 7_Rpl10l        | 0.14942 | -0.99647 | 0.80707  | NA       | 0       | 0       | 0       | 0       | 0.89653 | 0       |
| ENSMUSG000000060509 | 4_Xcr1          | 4.86448 | 1.19681  | 0.3473   | 0.46414  | 10.4183 | 2.75342 | 7.17092 | 6.3118  | 0       | 2.53245 |
| ENSMUSG000000060510 | 13_Zfp266       | 1457.85 | -0.45081 | 0.00188  | 0.00618  | 1362.19 | 1230.78 | 1101.93 | 1528.36 | 1913.2  | 1610.64 |
| ENSMUSG000000060512 | 7_0610040J01Rik | 70.3767 | 0.51552  | 0.11968  | 0.19932  | 79.8733 | 68.8354 | 99.1978 | 50.4944 | 46.6196 | 77.2398 |
| ENSMUSG000000060519 | 11_Tor3a        | 3706.86 | 0.76265  | 7.38E-07 | 7.01E-06 | 4357.44 | 4026.41 | 5610.05 | 2479.64 | 2874.28 | 2893.33 |
| ENSMUSG000000060534 | 15_Dcc          | 2.13689 | -3.49357 | 0.06769  | NA       | 0       | 0.91781 | 0       | 6.3118  | 1.79306 | 3.79868 |
| ENSMUSG000000060538 | 14_Tmem219      | 363.588 | 0.60124  | 0.00072  | 0.00271  | 459.272 | 400.163 | 455.354 | 330.017 | 242.96  | 293.765 |
| ENSMUSG000000060548 | 12_Tnfrsf19     | 589.664 | -1.19263 | 4.74E-06 | 3.52E-05 | 368.112 | 481.848 | 225.884 | 912.506 | 906.392 | 643.243 |
| ENSMUSG000000060550 | 15_H2-Q7        | 813.108 | 4.7865   | 1.96E-70 | 3.32E-66 | 1736.38 | 1023.35 | 1946.91 | 56.8062 | 43.0335 | 72.1749 |
| ENSMUSG000000060556 | 3_Olfr1418      | 0.39838 | 2.07058  | 0.60634  | NA       | 0       | 0       | 2.39031 | 0       | 0       | 0       |
| ENSMUSG000000060559 | 5_Gm10083       | 9.48123 | -1.13387 | 0.13481  | 0.21899  | 3.47275 | 7.34244 | 7.17092 | 14.427  | 14.3445 | 10.1298 |
| ENSMUSG000000060565 | 5_Gm5591        | 0.8502  | 0.80215  | 0.77881  | NA       | 0       | 0.91781 | 2.39031 | 0       | 1.79306 | 0       |
| ENSMUSG000000060568 | 14_Fam78b       | 58.7893 | -0.35308 | 0.33906  | 0.45572  | 44.2776 | 63.3286 | 47.8062 | 76.6433 | 78.8947 | 41.7855 |
| ENSMUSG000000060572 | 17_Mfap2        | 247.077 | 0.30091  | 0.36239  | 0.47955  | 226.597 | 376.3   | 215.128 | 316.492 | 132.687 | 215.259 |
| ENSMUSG000000060579 | 12_Fhit         | 50.538  | -0.20543 | 0.53035  | 0.63891  | 51.2231 | 48.6437 | 40.6352 | 56.8062 | 50.2057 | 55.714  |

|                     |                 |         |          |          |          |         |         |         |         |         |         |
|---------------------|-----------------|---------|----------|----------|----------|---------|---------|---------|---------|---------|---------|
| ENSMUSG000000060586 | 10_H2-Eb1       | 730.09  | 1.45108  | 4.34E-12 | 1.95E-10 | 1249.32 | 978.381 | 980.026 | 506.747 | 303.924 | 362.141 |
| ENSMUSG000000060591 | 8_lftm2         | 3523.55 | 0.33471  | 0.02451  | 0.05377  | 3916.4  | 3824.5  | 4050.38 | 3624.78 | 2531.8  | 3193.42 |
| ENSMUSG000000060594 | 5_Layn          | 92.3304 | -0.36787 | 0.15853  | 0.25027  | 82.4779 | 84.4381 | 75.2947 | 111.809 | 113.859 | 86.1034 |
| ENSMUSG000000060600 | 15_Eno3         | 925.886 | -1.0287  | 0.07208  | 0.13159  | 498.34  | 850.806 | 478.062 | 2043.22 | 584.538 | 1100.35 |
| ENSMUSG000000060601 | 12_Nr1h2        | 1182.81 | 1.31138  | 4.69E-08 | 6.47E-07 | 1436.85 | 1689.68 | 1932.56 | 931.441 | 449.162 | 657.172 |
| ENSMUSG000000060613 | 10_Cyp2c70      | 0.58706 | 2.67811  | 0.46198  | NA       | 2.60457 | 0.91781 | 0       | 0       | 0       | 0       |
| ENSMUSG000000060621 | 4_Nkpd1         | 33.795  | 1.03784  | 0.01366  | 0.03281  | 39.0685 | 44.9725 | 52.5868 | 27.9522 | 17.9306 | 20.2596 |
| ENSMUSG000000060636 | 13_Rpl35a       | 7291.75 | -0.5583  | 1.52E-07 | 1.81E-06 | 6210.15 | 5935.45 | 5547.91 | 8230.59 | 9290.75 | 8535.64 |
| ENSMUSG000000060639 | 5_Hist1h4i      | 72.8049 | -0.23434 | 0.40881  | 0.52549  | 63.3778 | 61.493  | 76.4899 | 86.5618 | 77.9982 | 70.9087 |
| ENSMUSG000000060657 | 7_Marf1         | 2329.4  | -0.08892 | 0.4824   | 0.59463  | 2292.02 | 2150.42 | 2330.55 | 2107.24 | 2644.77 | 2451.42 |
| ENSMUSG000000060671 | 12_Atp8b2       | 586.876 | -0.15918 | 0.41156  | 0.52794  | 574.741 | 606.669 | 482.842 | 752.907 | 620.399 | 483.699 |
| ENSMUSG000000060675 | 13_Pla2g16      | 2568.51 | -0.01275 | 0.90623  | 0.93681  | 2575.92 | 2556.09 | 2539.7  | 2793.42 | 2413.46 | 2532.45 |
| ENSMUSG000000060678 | 4_Hist1h4c      | 0.30056 | -1.76625 | 0.6627   | NA       | 0       | 0       | 0       | 1.80337 | 0       | 0       |
| ENSMUSG000000060679 | 14_Mrps9        | 506.308 | 0.13632  | 0.34936  | 0.46616  | 490.526 | 511.218 | 590.406 | 503.14  | 477.851 | 464.705 |
| ENSMUSG000000060681 | 14_Slc9a6       | 1402.27 | -0.48611 | 0.00019  | 0.00085  | 1261.48 | 1128.9  | 1113.88 | 1504.01 | 1813.68 | 1591.65 |
| ENSMUSG000000060688 | 3_Olfr292       | 0       | NA       | NA       | NA       | 0       | 0       | 0       | 0       | 0       | 0       |
| ENSMUSG000000060699 | 1_Vmn1r35       | 0.14942 | -0.99647 | 0.80707  | NA       | 0       | 0       | 0       | 0       | 0.89653 | 0       |
| ENSMUSG000000060703 | 12_Cd302        | 336.005 | -0.77469 | 0.00036  | 0.00151  | 301.261 | 245.972 | 196.005 | 460.761 | 468.885 | 343.147 |
| ENSMUSG000000060708 | 4_Bloc1s4       | 128.771 | -0.08212 | 0.70493  | 0.78877  | 121.546 | 130.328 | 123.101 | 120.826 | 136.273 | 140.551 |
| ENSMUSG000000060715 | 9_1700019A02Rik | 0.14942 | -0.99647 | 0.80707  | NA       | 0       | 0       | 0       | 0       | 0.89653 | 0       |
| ENSMUSG000000060716 | 6_Plekhh1       | 1617.27 | 0.96006  | 3.97E-09 | 7.68E-08 | 1928.25 | 1923.72 | 2556.43 | 1016.2  | 1022.94 | 1256.1  |
| ENSMUSG000000060726 | 10_Tmsb15a      | 0.15297 | 0.92709  | 0.82027  | NA       | 0       | 0.91781 | 0       | 0       | 0       | 0       |
| ENSMUSG000000060733 | 13_lpmk         | 2173.89 | 0.06816  | 0.56811  | 0.67296  | 2257.29 | 2080.67 | 2337.72 | 1922.39 | 2245.81 | 2199.44 |
| ENSMUSG000000060735 | 4_Rxfp3         | 10.0174 | -1.33258 | 0.08166  | 0.14571  | 6.07732 | 2.75342 | 8.36608 | 13.5253 | 11.6549 | 17.7272 |
| ENSMUSG000000060739 | 7_Nsa2          | 2916.03 | -0.43384 | 0.00024  | 0.00106  | 2571.57 | 2258.72 | 2612.61 | 3092.78 | 3518.88 | 3441.6  |
| ENSMUSG000000060743 | 12_H3f3a        | 14493.3 | -0.19311 | 0.02698  | 0.05826  | 13659.2 | 13080.6 | 13835.1 | 15388.2 | 15572.7 | 15423.9 |
| ENSMUSG000000060747 | 3_lfnl3         | 0.44236 | 2.27028  | 0.57071  | NA       | 1.73638 | 0.91781 | 0       | 0       | 0       | 0       |
| ENSMUSG000000060771 | 14_Tsga10       | 194.496 | -0.57096 | 0.00153  | 0.00516  | 155.406 | 155.109 | 158.955 | 232.635 | 226.822 | 238.051 |
| ENSMUSG000000060780 | 2_Lrrtm1        | 61.8772 | -0.41098 | 0.31691  | 0.43223  | 43.4094 | 79.8491 | 35.8546 | 94.677  | 52.8953 | 64.5776 |
| ENSMUSG000000060791 | 15_Gmfg         | 64.6192 | 0.32344  | 0.41034  | 0.52682  | 100.71  | 62.4108 | 52.5868 | 76.6433 | 57.378  | 37.9868 |
| ENSMUSG000000060794 | 6_Tssk5         | 0.21104 | -0.99647 | 0.80707  | NA       | 0       | 0       | 0       | 0       | 0       | 1.26623 |
| ENSMUSG000000060798 | 7_Intu          | 245.231 | -0.40708 | 0.02476  | 0.05423  | 242.225 | 197.328 | 192.42  | 284.031 | 280.614 | 274.771 |
| ENSMUSG000000060802 | 8_B2m           | 16313   | 1.6419   | 6.30E-21 | 1.32E-18 | 26044.8 | 18773.7 | 29308.8 | 7510.14 | 8953.65 | 7287.14 |
| ENSMUSG000000060803 | 5_Gstp1         | 2747.22 | 0.03403  | 0.84335  | 0.8933   | 2582.86 | 2994.8  | 2762    | 3426.4  | 2249.4  | 2467.88 |
| ENSMUSG000000060807 | 7_Serpina6      | 0.90534 | -0.96977 | 0.72314  | NA       | 0       | 1.83561 | 0       | 1.80337 | 1.79306 | 0       |
| ENSMUSG000000060843 | 11_Ctnna3       | 3.04476 | -2.39404 | 0.13674  | 0.22125  | 0.86819 | 0.91781 | 1.19515 | 8.11517 | 7.17224 | 0       |
| ENSMUSG000000060860 | 8_Ube2s         | 1176.36 | 0.49801  | 0.00524  | 0.01464  | 1363.92 | 1211.5  | 1557.29 | 1160.47 | 777.292 | 987.657 |
| ENSMUSG000000060862 | 9_Zbtb40        | 410.543 | 0.95121  | 2.96E-07 | 3.21E-06 | 454.931 | 602.08  | 565.308 | 251.57  | 262.683 | 326.687 |
| ENSMUSG000000060878 | 2_Olfr1420      | 6.59526 | -0.77999 | 0.36465  | 0.48201  | 6.07732 | 3.67122 | 4.78062 | 7.21348 | 8.96531 | 8.86359 |
| ENSMUSG000000060882 | 5_Kcnd2         | 3.2421  | -1.68221 | 0.21281  | 0.31623  | 1.73638 | 2.75342 | 0       | 6.3118  | 3.58612 | 5.06491 |
| ENSMUSG000000060890 | 11_Arr3         | 35.89   | -1.92025 | 0.00423  | 0.01227  | 24.3093 | 15.6027 | 4.78062 | 89.2669 | 63.6537 | 17.7272 |
| ENSMUSG000000060904 | 14_Arl1         | 3247.02 | -0.30448 | 0.00875  | 0.02256  | 2941.42 | 2769.02 | 3007.01 | 3257.79 | 3913.36 | 3593.55 |
| ENSMUSG000000060913 | 6_Trim55        | 16.8741 | -1.72187 | 0.00741  | 0.0196   | 8.68188 | 5.50683 | 9.56123 | 39.6742 | 18.8271 | 18.9934 |
| ENSMUSG000000060923 | 5_Acyp2         | 88.0334 | -0.87652 | 0.00285  | 0.0088   | 55.5641 | 67.9176 | 63.3432 | 142.466 | 110.273 | 88.6359 |
| ENSMUSG000000060924 | 14_Csmd1        | 54.4173 | -0.67328 | 0.06139  | 0.11508  | 28.6502 | 44.0547 | 53.7819 | 75.7416 | 60.9641 | 63.3113 |
| ENSMUSG000000060935 | 5_Tmem263       | 300.351 | -0.85781 | 1.04E-06 | 9.49E-06 | 223.124 | 234.04  | 182.859 | 382.315 | 415.094 | 364.673 |
| ENSMUSG000000060938 | 14_Rpl26        | 9529.92 | -0.26147 | 0.00897  | 0.02305  | 9121.19 | 8269.43 | 8614.67 | 10743.6 | 9819.7  | 10611   |
| ENSMUSG000000060950 | 11_Trmf61a      | 219.834 | 0.95452  | 0.00012  | 0.00057  | 228.334 | 301.958 | 339.424 | 165.91  | 111.17  | 172.207 |
| ENSMUSG000000060961 | 14_Slc4a4       | 3381.93 | -1.02731 | 1.93E-06 | 1.62E-05 | 2410.96 | 2716.7  | 1550.11 | 5075.59 | 4971.26 | 3566.96 |
| ENSMUSG000000060962 | 12_Dmkn         | 72.2427 | 3.21746  | 4.39E-11 | 1.57E-09 | 155.406 | 55.9861 | 180.468 | 15.3287 | 16.1376 | 10.1298 |
| ENSMUSG000000060969 | 8_Irx1          | 39.1913 | 0.27873  | 0.49674  | 0.60781  | 52.0913 | 30.2876 | 46.611  | 43.2809 | 28.689  | 34.1881 |
| ENSMUSG000000060981 | 6_Hist1h4h      | 4.98633 | 1.44449  | 0.24333  | 0.3514   | 4.34094 | 0.91781 | 16.7322 | 2.70506 | 2.68959 | 2.53245 |
| ENSMUSG000000060985 | 15_Tdrd5        | 3.04027 | -0.47788 | 0.74919  | 0.82295  | 0       | 6.42464 | 1.19515 | 3.60674 | 4.48265 | 2.53245 |
| ENSMUSG000000060988 | 12_Galnt13      | 13.9483 | -1.86824 | 0.02036  | 0.04597  | 9.55007 | 3.67122 | 4.78062 | 32.4607 | 26.8959 | 6.33113 |
| ENSMUSG000000060992 | 8_Copz1         | 3124.1  | 0.00049  | 0.9965   | 0.99774  | 3192.33 | 3089.33 | 3090.67 | 2820.47 | 3220.34 | 3331.44 |
| ENSMUSG000000061013 | 5_Mkx           | 208.347 | -0.33848 | 0.06655  | 0.1232   | 190.133 | 183.561 | 178.078 | 253.374 | 210.685 | 234.252 |
| ENSMUSG000000061024 | 8_Rrs1          | 391.138 | 0.34457  | 0.03304  | 0.06883  | 394.158 | 423.108 | 495.989 | 329.115 | 339.785 | 364.673 |
| ENSMUSG000000061028 | 6_Clasrp        | 417.472 | 0.81231  | 6.67E-06 | 4.76E-05 | 482.713 | 556.19  | 556.942 | 347.149 | 246.546 | 315.291 |
| ENSMUSG000000061032 | 8_Rrp1          | 3485.26 | 0.49745  | 0.00056  | 0.00218  | 3813.95 | 3999.8  | 4425.66 | 2937.69 | 2429.6  | 3304.85 |
| ENSMUSG000000061039 | 3_Olfr920       | 21.9677 | -0.72348 | 0.15787  | 0.2494   | 17.3638 | 20.1917 | 11.9515 | 21.6405 | 34.0682 | 26.5908 |
| ENSMUSG000000061046 | 9_Haghl         | 235.239 | 0.65101  | 0.00725  | 0.01925  | 262.193 | 357.026 | 242.616 | 220.913 | 142.548 | 186.135 |
| ENSMUSG000000061048 | 7_Cdh3          | 668.925 | 1.15263  | 2.24E-08 | 3.42E-07 | 827.384 | 773.71  | 1167.67 | 472.483 | 337.992 | 434.316 |
| ENSMUSG000000061062 | 4_Gm10093       | 1039.74 | -0.19519 | 0.12239  | 0.20299  | 961.085 | 880.176 | 1068.47 | 1120.8  | 1091.08 | 1116.81 |
| ENSMUSG000000061068 | 6_Mcpt4         | 101.489 | -1.19418 | 0.00095  | 0.00342  | 75.5324 | 47.7259 | 62.148  | 212.798 | 103.101 | 107.629 |
| ENSMUSG000000061079 | 13_Zfp143       | 576.294 | 0.06421  | 0.70364  | 0.78806  | 597.314 | 574.546 | 593.992 | 458.056 | 572.883 | 660.97  |
| ENSMUSG000000061080 | 11_Lsmp         | 811.867 | -0.48289 | 0.00455  | 0.01306  | 693.683 | 758.107 | 579.65  | 1114.48 | 885.772 | 839.508 |
| ENSMUSG000000061082 | 11_Plac1        | 0       | NA       | NA       | NA       | 0       | 0       | 0       | 0       | 0       | 0       |
| ENSMUSG000000061086 | 12_Myl4         | 24.1072 | -0.51478 | 0.33806  | 0.45451  | 21.7047 | 16.5205 | 21.5128 | 44.1826 | 17.9306 | 22.7921 |
| ENSMUSG000000061099 | 12_Gapdhs       | 13.3912 | 0.03317  | 0.96273  | 0.97596  | 11.2864 | 21.1095 | 8.36608 | 14.427  | 18.8271 | 6.33113 |
| ENSMUSG000000061100 | 3_Retnla        | 149.792 | -0.97292 | 0.01498  | 0.03555  | 133.701 | 112.89  | 56.1722 | 311.983 | 121.928 | 162.077 |
| ENSMUSG000000061104 | 4_Gm10094       | 591.155 | 0.51749  | 0.06741  | 0.12455  | 638.118 | 675.505 | 774.46  | 668.149 | 262.683 | 528.017 |
| ENSMUSG000000061111 | 8_Fam195b       | 1062.95 | 0.78576  | 0.0003   | 0.00127  | 1285.79 | 1346.42 | 1404.31 | 1027.92 | 530.746 | 782.528 |
| ENSMUSG000000061118 | 8_Dnajc30       | 262.746 | 0.16931  | 0.33903  | 0.45572  | 272.611 | 246.89  | 315.521 | 243.455 | 244.753 | 253.245 |
| ENSMUSG000000061119 | 6_Prcp          | 284.57  | -0.22478 | 0.20925  | 0.31229  | 296.052 | 242.301 | 248.592 | 337.23  | 280.614 | 302.628 |
| ENSMUSG000000061126 | 4_Cyp4f39       | 22.4    | 1.44647  | 0.01758  | 0.04067  | 25.1775 | 27.5342 | 45.4159 | 15.3287 | 4.48265 | 16.4609 |
| ENSMUSG000000061130 | 12_Ppm1b        | 1752.82 | -0.30075 | 0.00391  | 0.0115   | 1571.42 | 1540.08 | 1600.31 | 1848.46 | 1938.3  | 2018.37 |
| ENSMUSG000000061132 | 13_Blnk         | 829.335 | 0.49658  | 8.12E-05 | 0.00042  | 956.744 | 927.901 | 1026.64 | 658.23  | 667.019 | 739.477 |
| ENSMUSG000000061136 | 13_Prp40a       | 2753.75 | -0.27201 | 0.05934  | 0.11181  | 2547.26 | 2280.75 | 2656.83 | 2519.31 | 3356.61 | 3161.77 |
| ENSMUSG000000061143 | 15_Maml3        | 840.859 | 0.5567   | 0.00109  | 0.00385  | 971.503 | 1051.81 | 978.831 | 761.924 | 528.953 | 752.139 |

|                     |                 |         |          |          |          |         |         |         |         |         |         |
|---------------------|-----------------|---------|----------|----------|----------|---------|---------|---------|---------|---------|---------|
| ENSMUSG000000061144 | 5_Spink12       | 0.45084 | -2.33355 | 0.56009  | NA       | 0       | 0       | 0       | 2.70506 | 0       | 0       |
| ENSMUSG000000061171 | 15_Slc38a11     | 136.145 | -1.29183 | 5.87E-07 | 5.83E-06 | 74.6642 | 96.3696 | 65.7335 | 209.191 | 215.167 | 155.746 |
| ENSMUSG000000061175 | 11_Fnip2        | 1606.7  | 0.12831  | 0.26135  | 0.37176  | 1630.46 | 1635.53 | 1767.63 | 1495.9  | 1459.55 | 1651.16 |
| ENSMUSG000000061184 | 8_Tmprss11c     | 0.1447  | 0.92709  | 0.82027  | NA       | 0.86819 | 0       | 0       | 0       | 0       | 0       |
| ENSMUSG000000061186 | 15_Sfmbt2       | 32.1774 | -1.56574 | 0.00712  | 0.01896  | 14.7592 | 26.6164 | 7.17092 | 56.8062 | 63.6537 | 24.0583 |
| ENSMUSG000000061207 | 11_Stk19        | 427.37  | 0.64259  | 1.92E-05 | 0.00012  | 512.231 | 475.423 | 576.064 | 330.017 | 336.199 | 334.284 |
| ENSMUSG000000061232 | 15_H2-K1        | 6481.16 | 2.44668  | 1.02E-42 | 1.72E-39 | 10683.9 | 8379.56 | 13795.7 | 2018.87 | 1879.13 | 2129.79 |
| ENSMUSG000000061244 | 13_Exoc5        | 1235.9  | -0.35289 | 0.0233   | 0.05157  | 1144.27 | 982.97  | 1129.42 | 1159.57 | 1594.93 | 1404.25 |
| ENSMUSG000000061259 | 11_Tmprss11d    | 3943.56 | -0.32924 | 0.02496  | 0.05458  | 3648.13 | 3436.26 | 3400.21 | 3589.61 | 4503.27 | 5083.9  |
| ENSMUSG000000061273 | 3_Mmgt1         | 819.783 | -0.70489 | 2.92E-06 | 2.33E-05 | 627.7   | 651.642 | 590.406 | 876.438 | 1164.59 | 1007.92 |
| ENSMUSG000000061286 | 7_Exosc5        | 310.73  | 0.93969  | 4.93E-05 | 0.00027  | 377.662 | 421.273 | 425.475 | 239.848 | 144.341 | 255.778 |
| ENSMUSG000000061288 | 13-Taok3        | 2429.81 | 0.65525  | 1.53E-05 | 9.82E-05 | 2792.09 | 2701.1  | 3422.92 | 1866.49 | 1648.72 | 2147.52 |
| ENSMUSG000000061298 | 14_Agbl4        | 1.0379  | 0.3733   | 0.88815  | NA       | 2.60457 | 0.91781 | 0       | 2.70506 | 0       | 0       |
| ENSMUSG000000061306 | 15_Slc38a10     | 2350.07 | 0.55883  | 0.00406  | 0.01185  | 2567.23 | 3027.84 | 2803.83 | 2422.83 | 1386.93 | 1891.74 |
| ENSMUSG000000061311 | 6_Rag1          | 1.83278 | -4.33934 | 0.03604  | NA       | 0       | 0       | 0       | 4.50843 | 2.68959 | 3.79868 |
| ENSMUSG000000061313 | 7_Ddhd2         | 506.189 | -0.78021 | 3.46E-06 | 2.69E-05 | 356.825 | 424.026 | 337.033 | 685.281 | 683.156 | 550.809 |
| ENSMUSG000000061315 | 13_Naca         | 12516.8 | -0.28731 | 0.00291  | 0.00894  | 11499.2 | 10698.9 | 11626.5 | 13246.7 | 14360.6 | 13668.9 |
| ENSMUSG000000061322 | 15_Dnaic1       | 19.8083 | -1.27489 | 0.02304  | 0.05111  | 10.4183 | 14.6849 | 9.56123 | 37.8708 | 19.7237 | 26.5908 |
| ENSMUSG000000061353 | 11_Cxcl12       | 1071.94 | -0.53263 | 0.00435  | 0.01253  | 961.953 | 917.806 | 749.362 | 1529.26 | 1285.62 | 987.657 |
| ENSMUSG000000061356 | 13_Nuggc        | 6.7119  | 0.21503  | 0.82015  | 0.87649  | 2.60457 | 11.9315 | 7.17092 | 9.01685 | 4.48265 | 5.06491 |
| ENSMUSG000000061360 | 7_Phfa5a        | 840.575 | 0.23747  | 0.06264  | 0.11708  | 890.761 | 846.217 | 993.173 | 799.795 | 757.568 | 755.937 |
| ENSMUSG000000061371 | 6_Zfp873        | 92.4124 | -0.85159 | 0.00168  | 0.0056   | 73.796  | 65.1642 | 58.5626 | 107.301 | 140.755 | 108.896 |
| ENSMUSG000000061374 | 13_Fiz1         | 568.645 | 0.63451  | 2.06E-05 | 0.00013  | 638.118 | 649.806 | 788.802 | 448.138 | 459.024 | 427.985 |
| ENSMUSG000000061388 | 11_Csn1s2b      | 0.50244 | 0.94285  | 0.78015  | NA       | 0       | 0.91781 | 1.19515 | 0.90169 | 0       | 0       |
| ENSMUSG000000061393 | 13_Acvr2b       | 31.8171 | 0.40601  | 0.49019  | 0.60196  | 30.3866 | 44.9725 | 33.4643 | 47.7893 | 8.96531 | 25.3245 |
| ENSMUSG000000061397 | 7_Krt79         | 4.13992 | 0.41355  | 0.71378  | 0.7958   | 6.94551 | 3.67122 | 3.58546 | 6.3118  | 1.79306 | 2.53245 |
| ENSMUSG000000061410 | 6_Zcchc14       | 926.776 | 0.38485  | 0.00433  | 0.0125   | 937.643 | 1097.7  | 1115.08 | 864.716 | 778.189 | 767.334 |
| ENSMUSG000000061411 | 12_Nol4l        | 152.071 | -0.79268 | 0.0034   | 0.01021  | 111.128 | 134     | 88.4414 | 247.964 | 158.686 | 172.207 |
| ENSMUSG000000061414 | 7_Cracr2a       | 24.7196 | -0.90933 | 0.10684  | 0.18163  | 16.4956 | 27.5342 | 7.17092 | 39.6742 | 29.5855 | 27.857  |
| ENSMUSG000000061436 | 15_Hipk2        | 1431.72 | 0.08928  | 0.49056  | 0.60225  | 1381.29 | 1519.89 | 1527.41 | 1533.77 | 1245.28 | 1382.72 |
| ENSMUSG000000061451 | 13_Tmem151a     | 20.9015 | 0.63379  | 0.22138  | 0.32633  | 25.1775 | 27.5342 | 23.9031 | 19.8371 | 18.8271 | 10.1298 |
| ENSMUSG000000061455 | 13_Stx17        | 1589.06 | -0.06223 | 0.61444  | 0.71359  | 1688.63 | 1431.78 | 1542.94 | 1503.11 | 1671.13 | 1696.74 |
| ENSMUSG000000061458 | 8_Nol10         | 441.849 | -0.0348  | 0.82509  | 0.88008  | 444.512 | 402.917 | 462.525 | 397.643 | 493.988 | 449.511 |
| ENSMUSG000000061461 | 11_Smim20       | 890.432 | 0.13361  | 0.26215  | 0.37278  | 994.076 | 916.888 | 883.219 | 859.306 | 844.532 | 844.573 |
| ENSMUSG000000061462 | 15_Obscn        | 259.078 | -0.74325 | 0.07345  | 0.13373  | 134.569 | 318.479 | 127.881 | 485.107 | 160.479 | 327.953 |
| ENSMUSG000000061474 | 11_Mrps36       | 258.458 | -0.39175 | 0.02351  | 0.05198  | 243.093 | 220.273 | 206.762 | 312.885 | 275.235 | 292.498 |
| ENSMUSG000000061477 | 3_Rps7          | 12854.6 | -0.12807 | 0.23208  | 0.33835  | 12459.4 | 11730.5 | 12663.9 | 14490.1 | 12347.9 | 13435.9 |
| ENSMUSG000000061479 | 15_Snrpa        | 797.204 | 1.15402  | 3.45E-10 | 9.44E-09 | 938.512 | 1090.35 | 1271.64 | 572.57  | 399.853 | 510.289 |
| ENSMUSG000000061482 | 6_Hist1h4d      | 0.6534  | 1.31976  | 0.66692  | NA       | 1.73638 | 0.91781 | 0       | 0       | 0       | 1.26623 |
| ENSMUSG000000061490 | 5_Ube2d4        | 0.45353 | -0.80448 | 0.84252  | NA       | 0       | 0.91781 | 0       | 1.80337 | 0       | 0       |
| ENSMUSG000000061510 | 3_Gm10101       | 18.1004 | 0.04988  | 0.9266   | 0.95151  | 16.4956 | 22.0273 | 16.7322 | 22.5421 | 14.3445 | 16.4609 |
| ENSMUSG000000061517 | 8_Sox21         | 255.637 | 0.82011  | 0.00078  | 0.0029   | 269.138 | 331.328 | 377.669 | 138.86  | 177.513 | 239.317 |
| ENSMUSG000000061518 | 10_Cox5b        | 1726.08 | -0.00848 | 0.94712  | 0.96537  | 1798.89 | 1637.37 | 1728.19 | 1940.43 | 1689.06 | 1562.52 |
| ENSMUSG000000061524 | 8_Zic2          | 101.464 | -0.68893 | 0.06044  | 0.11363  | 71.1914 | 109.219 | 52.5868 | 174.927 | 114.756 | 86.1034 |
| ENSMUSG000000061527 | 6_Krt5          | 474199  | 1.25026  | 1.67E-10 | 5.03E-09 | 603053  | 619480  | 780601  | 284727  | 204864  | 352471  |
| ENSMUSG000000061531 | 8_Tmem236       | 5.70194 | -0.60866 | 0.57398  | 0.67835  | 5.20913 | 3.67122 | 4.78062 | 15.3287 | 2.68959 | 2.53245 |
| ENSMUSG000000061533 | 15_Cep128       | 169.693 | -0.16889 | 0.38458  | 0.50199  | 155.406 | 152.356 | 172.102 | 173.124 | 189.168 | 176.006 |
| ENSMUSG000000061535 | 11_C1qtnf7      | 415.216 | -0.51718 | 0.00378  | 0.01117  | 364.639 | 381.807 | 277.276 | 538.306 | 467.092 | 462.173 |
| ENSMUSG000000061536 | 12_Sec22c       | 667.386 | 0.34142  | 0.01746  | 0.04045  | 723.201 | 726.902 | 787.607 | 631.18  | 513.712 | 621.717 |
| ENSMUSG000000061540 | 3_Orm2          | 0       | NA       | NA       | NA       | 0       | 0       | 0       | 0       | 0       | 0       |
| ENSMUSG000000061544 | 13_Zfp229       | 220.957 | -0.67542 | 0.00035  | 0.00146  | 170.165 | 188.15  | 151.785 | 259.685 | 297.648 | 258.31  |
| ENSMUSG000000061559 | 15_Wdr61        | 1351.36 | -0.18616 | 0.12296  | 0.20369  | 1337.88 | 1173.87 | 1281.21 | 1348.92 | 1530.38 | 1435.9  |
| ENSMUSG000000061561 | 4_Olfcr373      | 0.21104 | -0.99647 | 0.80707  | NA       | 0       | 0       | 0       | 0       | 0       | 1.26623 |
| ENSMUSG000000061576 | 15_Dpp6         | 71.9319 | -1.61582 | 0.0006   | 0.00232  | 26.9138 | 58.7396 | 20.3176 | 155.992 | 107.584 | 62.0451 |
| ENSMUSG000000061577 | 11_Adgrg5       | 51.9614 | 2.17962  | 1.04E-06 | 9.49E-06 | 122.415 | 56.9039 | 75.2947 | 14.427  | 16.1376 | 26.5908 |
| ENSMUSG000000061578 | 8_Ksr2          | 42.5106 | -0.54807 | 0.15361  | 0.24387  | 39.0685 | 27.5342 | 37.0498 | 61.3146 | 39.4473 | 50.6491 |
| ENSMUSG000000061584 | 6_Lyg2          | 0.14942 | -0.99647 | 0.80707  | NA       | 0       | 0       | 0       | 0       | 0.89653 | 0       |
| ENSMUSG000000061589 | 14_Dot1l        | 993.762 | 1.1219   | 1.43E-14 | 1.20E-12 | 1277.97 | 1326.23 | 1481.99 | 709.626 | 551.366 | 615.386 |
| ENSMUSG000000061601 | 15_Pclo         | 217.136 | -0.8261  | 0.00034  | 0.00142  | 170.165 | 171.63  | 127.881 | 333.624 | 277.924 | 221.59  |
| ENSMUSG000000061603 | 7_Akap6         | 93.8767 | -1.74068 | 1.27E-06 | 1.13E-05 | 53.8277 | 42.2191 | 33.4643 | 202.879 | 137.169 | 93.7008 |
| ENSMUSG000000061607 | 14_Mdc1         | 1135.86 | 0.24387  | 0.07294  | 0.13303  | 1192.02 | 1211.5  | 1290.77 | 898.079 | 1100.94 | 1121.88 |
| ENSMUSG000000061613 | 12_U2af1        | 1671.25 | 0.27637  | 0.0472   | 0.09244  | 1872.68 | 1682.34 | 1936.15 | 1315.56 | 1515.14 | 1705.61 |
| ENSMUSG000000061619 | 3_Vma21-ps      | 0.9463  | -2.1011  | 0.51239  | NA       | 0       | 0       | 1.19515 | 0       | 4.48265 | 0       |
| ENSMUSG000000061633 | 3_1700029P11Rik | 0       | NA       | NA       | NA       | 0       | 0       | 0       | 0       | 0       | 0       |
| ENSMUSG000000061650 | 6_Med9          | 414.388 | 0.40667  | 0.00765  | 0.02015  | 462.744 | 473.588 | 481.647 | 399.447 | 330.82  | 338.083 |
| ENSMUSG000000061665 | 6_Cd2ap         | 3646.33 | -0.307   | 0.02088  | 0.04698  | 3305.19 | 3091.17 | 3383.48 | 3472.39 | 4562.44 | 4063.32 |
| ENSMUSG000000061666 | 6_Gdpd1         | 218.729 | -0.33371 | 0.05964  | 0.11229  | 198.815 | 188.15  | 193.615 | 260.587 | 226.822 | 244.382 |
| ENSMUSG000000061689 | 15_Dlgap4       | 892.731 | 0.50671  | 0.0025   | 0.00788  | 995.812 | 1096.78 | 1051.74 | 898.98  | 614.123 | 698.957 |
| ENSMUSG000000061702 | 10_Tmem91       | 10.079  | -0.79213 | 0.30791  | 0.42296  | 2.60457 | 10.0959 | 9.56123 | 13.5253 | 10.7584 | 13.9285 |
| ENSMUSG000000061707 | 5_Gm4871        | 0.19919 | 0.92709  | 0.82027  | NA       | 0       | 0       | 1.19515 | 0       | 0       | 0       |
| ENSMUSG000000061718 | 12_Ppp1r1b      | 99.6136 | -0.89859 | 0.01754  | 0.04059  | 59.0368 | 102.794 | 46.611  | 183.944 | 103.998 | 101.298 |
| ENSMUSG000000061723 | 17_Tnnt3        | 1145.65 | -1.78703 | 0.00038  | 0.00159  | 411.521 | 760.861 | 371.693 | 2604.97 | 1053.42 | 1671.42 |
| ENSMUSG000000061731 | 9_Ext1          | 987.131 | -0.09934 | 0.40881  | 0.52549  | 929.83  | 903.121 | 1027.83 | 1056.78 | 996.045 | 1009.18 |
| ENSMUSG000000061740 | 7_Cyp2d22       | 248.504 | -0.42116 | 0.07004  | 0.12863  | 186.661 | 277.177 | 173.297 | 325.508 | 266.27  | 262.109 |
| ENSMUSG000000061742 | 11_Slc22a12     | 0.45267 | -0.80756 | 0.8164   | NA       | 0       | 0.91781 | 0       | 0.90169 | 0.89653 | 0       |
| ENSMUSG000000061751 | 15_Kalm         | 1369.32 | 0.57782  | 7.79E-06 | 5.45E-05 | 1547.98 | 1558.43 | 1813.05 | 1088.33 | 1022.94 | 1185.19 |
| ENSMUSG000000061755 | 10_Bod1l        | 1863.1  | -0.29395 | 0.01108  | 0.02754  | 1716.41 | 1628.19 | 1676.8  | 1862.88 | 2191.12 | 2103.2  |
| ENSMUSG000000061758 | 13_Akr1b10      | 1646.66 | -0.04238 | 0.73672  | 0.81352  | 1653.03 | 1482.26 | 1731.78 | 1526.55 | 1690.86 | 1795.51 |
| ENSMUSG000000061759 | 15_Armt1        | 515.989 | -0.16942 | 0.23134  | 0.33748  | 484.449 | 471.752 | 500.77  | 492.32  | 575.573 | 571.068 |

|                     |                 |         |          |          |          |         |         |         |         |         |         |
|---------------------|-----------------|---------|----------|----------|----------|---------|---------|---------|---------|---------|---------|
| ENSMUSG000000061762 | 12_Tac1         | 14.4467 | -0.05625 | 0.92318  | 0.94914  | 15.6274 | 13.7671 | 13.1467 | 17.132  | 14.3445 | 12.6623 |
| ENSMUSG000000061769 | 2_Klra6         | 0       | NA       | NA       | NA       | 0       | 0       | 0       | 0       | 0       | 0       |
| ENSMUSG000000061778 | 10_Mospd2       | 621.821 | -0.43774 | 0.00403  | 0.01181  | 579.95  | 488.273 | 516.307 | 649.214 | 803.291 | 693.892 |
| ENSMUSG000000061780 | 5_Cfd           | 0.89707 | -0.99772 | 0.68229  | NA       | 0.86819 | 0.91781 | 0       | 1.80337 | 1.79306 | 0       |
| ENSMUSG000000061787 | 14_Rps17        | 14434   | -0.26634 | 0.01094  | 0.02724  | 13608   | 12622.6 | 13085.7 | 17049.1 | 14724.6 | 15513.8 |
| ENSMUSG000000061802 | 5_Armc4         | 0.29767 | 1.70332  | 0.67406  | NA       | 0.86819 | 0.91781 | 0       | 0       | 0       | 0       |
| ENSMUSG000000061808 | 3_Ttr           | 2972.18 | -1.21154 | 0.02949  | 0.06259  | 2217.35 | 2209.16 | 951.343 | 6695.92 | 2869.79 | 2889.53 |
| ENSMUSG000000061815 | 11_Rufy4        | 7.59654 | 0.70269  | 0.42009  | 0.53593  | 11.2864 | 11.0137 | 5.97577 | 9.91854 | 3.58612 | 3.79868 |
| ENSMUSG000000061816 | 15_Myl1         | 1682.33 | -1.97443 | 0.00012  | 0.00059  | 564.322 | 989.394 | 493.599 | 4054.88 | 1527.69 | 2464.08 |
| ENSMUSG000000061825 | 9_Ces2c         | 4.16098 | 0.70041  | 0.67409  | 0.764    | 6.94551 | 8.26025 | 0       | 0       | 0.89653 | 8.86359 |
| ENSMUSG000000061838 | 7_Suclg2        | 2369.24 | -0.26858 | 0.0093   | 0.02378  | 2174.81 | 2086.17 | 2187.13 | 2448.08 | 2705.73 | 2613.49 |
| ENSMUSG000000061859 | 16_Inadl        | 2016.64 | 0.36251  | 0.00989  | 0.02503  | 2184.36 | 2241.28 | 2378.36 | 1565.33 | 1657.69 | 2072.81 |
| ENSMUSG000000061877 | 12_BC048679     | 2.71926 | -2.02156 | 0.26715  | 0.37842  | 0       | 0.91781 | 2.39031 | 5.41011 | 0       | 7.59736 |
| ENSMUSG000000061878 | 15_Sphk1        | 98.8481 | 1.6045   | 8.35E-07 | 7.84E-06 | 138.91  | 113.808 | 193.615 | 58.6096 | 34.9647 | 53.1815 |
| ENSMUSG000000061882 | 12_Ccdc62       | 120.869 | -0.08974 | 0.70152  | 0.78662  | 127.624 | 122.068 | 101.588 | 126.236 | 136.273 | 111.428 |
| ENSMUSG000000061887 | 14_Ssbp3        | 1279.83 | 0.41419  | 0.00281  | 0.0087   | 1367.4  | 1519.89 | 1498.72 | 1168.58 | 940.461 | 1183.92 |
| ENSMUSG000000061894 | 15_Zscan20      | 164.183 | 0.23627  | 0.23872  | 0.34632  | 167.56  | 168.876 | 197.2   | 151.483 | 156.893 | 143.084 |
| ENSMUSG000000061898 | 10_Rbak         | 453.603 | -0.23827 | 0.10553  | 0.17989  | 420.203 | 420.355 | 407.548 | 439.121 | 525.367 | 509.023 |
| ENSMUSG000000061904 | 12_Slc25a3      | 7537.38 | -0.15571 | 0.11073  | 0.18716  | 6948.11 | 7098.31 | 7347.81 | 7603.01 | 8422.01 | 7805.02 |
| ENSMUSG000000061911 | 14_Myt1l        | 7.73886 | -2.33134 | 0.05447  | 0.10406  | 2.60457 | 2.75342 | 2.39031 | 23.4438 | 15.241  | 0       |
| ENSMUSG000000061928 | 6_Dsg1b         | 2051.37 | 0.14839  | 0.38585  | 0.50314  | 2143.56 | 1974.2  | 2350.87 | 1632.05 | 1775.13 | 2432.42 |
| ENSMUSG000000061937 | 7_Csn1s2a       | 0.15297 | 0.92709  | 0.82027  | NA       | 0       | 0.91781 | 0       | 0       | 0       | 0       |
| ENSMUSG000000061950 | 17_Ppp4r1       | 1991.4  | 0.3794   | 0.00206  | 0.00666  | 2119.25 | 2108.2  | 2528.95 | 1660.9  | 1769.75 | 1761.32 |
| ENSMUSG000000061959 | 13_Ces1e        | 399.437 | -0.05984 | 0.7288   | 0.80703  | 429.753 | 346.931 | 395.596 | 361.576 | 398.06  | 464.705 |
| ENSMUSG000000061972 | 2_Olfr99        | 3.78371 | 0.1341   | 0.92661  | 0.95151  | 2.60457 | 0.91781 | 8.36608 | 0       | 4.48265 | 6.33113 |
| ENSMUSG000000061979 | 8_Wbscr16       | 331.96  | 0.6573   | 0.00298  | 0.00914  | 403.708 | 375.382 | 439.817 | 320.098 | 185.582 | 267.174 |
| ENSMUSG000000061981 | 14_Flot2        | 924.547 | 0.31338  | 0.09404  | 0.16339  | 930.698 | 1110.54 | 1032.61 | 1018.9  | 636.537 | 817.983 |
| ENSMUSG000000061983 | 6_Rps12         | 14141.6 | 0.61222  | 5.36E-05 | 0.00029  | 16689.2 | 17618.2 | 16986.7 | 13588.4 | 9255.78 | 10711   |
| ENSMUSG000000062006 | 12_Rpl34        | 7848.26 | -0.05714 | 0.61039  | 0.70995  | 8104.54 | 7593.01 | 7381.27 | 8822.99 | 7589.13 | 7598.63 |
| ENSMUSG000000062007 | 12_Hsh2d        | 54.8969 | 2.69079  | 1.62E-12 | 8.14E-11 | 93.7643 | 78.9313 | 112.344 | 15.3287 | 12.5514 | 16.4609 |
| ENSMUSG000000062012 | 13_Zfp13        | 70.3975 | 0.40331  | 0.28036  | 0.3932   | 71.1914 | 87.1915 | 82.4656 | 91.0702 | 38.5508 | 51.9153 |
| ENSMUSG000000062014 | 12_Gmfb         | 3701.39 | -0.56562 | 3.27E-05 | 0.00019  | 3161.94 | 2847.95 | 2944.86 | 3813.23 | 5068.09 | 4372.28 |
| ENSMUSG000000062017 | 14_Abca14       | 0.95221 | 2.15661  | 0.374    | NA       | 0.86819 | 2.75342 | 1.19515 | 0       | 0.89653 | 0       |
| ENSMUSG000000062028 | 8_Irgc1         | 0.15297 | 0.92709  | 0.82027  | NA       | 0       | 0.91781 | 0       | 0       | 0       | 0       |
| ENSMUSG000000062031 | 12_Athl1        | 778.079 | 0.49505  | 0.00094  | 0.00339  | 856.034 | 920.559 | 954.928 | 741.185 | 563.918 | 631.847 |
| ENSMUSG000000062040 | 14_Zfp27        | 204.067 | -0.39443 | 0.02962  | 0.06282  | 177.979 | 182.643 | 168.517 | 247.062 | 230.408 | 217.791 |
| ENSMUSG000000062044 | 13_Lmtk3        | 38.5964 | 0.18011  | 0.72502  | 0.80421  | 34.7275 | 55.0683 | 33.4643 | 62.2163 | 23.3098 | 22.7921 |
| ENSMUSG000000062046 | 1_5730460C07Rik | 0.2997  | -1.76345 | 0.66322  | NA       | 0       | 0       | 0       | 0.90169 | 0.89653 | 0       |
| ENSMUSG000000062054 | 6_Iah1          | 525.415 | -0.06982 | 0.63843  | 0.73437  | 500.945 | 471.752 | 566.503 | 580.685 | 502.057 | 530.549 |
| ENSMUSG000000062064 | 6_Slc2a7        | 1.04177 | -0.43372 | 0.84945  | NA       | 1.73638 | 0.91781 | 0       | 1.80337 | 1.79306 | 0       |
| ENSMUSG000000062070 | 12_Pgk1         | 3788.14 | -0.02381 | 0.88774  | 0.92435  | 3888.62 | 3298.59 | 4085.04 | 4742.87 | 3355.71 | 3358.03 |
| ENSMUSG000000062074 | 6_Wisp3         | 5.19589 | 0.17399  | 0.85676  | 0.903    | 6.94551 | 3.67122 | 5.97577 | 4.50843 | 6.27571 | 3.79868 |
| ENSMUSG000000062075 | 13_Lmnb2        | 545.338 | 1.16238  | 9.64E-08 | 1.22E-06 | 638.118 | 756.272 | 866.487 | 380.511 | 239.374 | 391.264 |
| ENSMUSG000000062077 | 14_Trim54       | 20.9594 | 0.01742  | 0.98007  | 0.98688  | 13.0228 | 31.2054 | 19.1225 | 38.7725 | 7.17224 | 16.4609 |
| ENSMUSG000000062078 | 14_Qk           | 3244.66 | -0.24931 | 0.02253  | 0.05012  | 2964    | 2839.69 | 3091.86 | 3257.79 | 3750.19 | 3564.43 |
| ENSMUSG000000062082 | 16_Cd200r4      | 29.7681 | -0.74877 | 0.11634  | 0.19475  | 31.2548 | 17.4383 | 17.9273 | 39.6742 | 45.7231 | 26.5908 |
| ENSMUSG000000062083 | 1_Rpl13a-ps1    | 8.56218 | -1.07301 | 0.24444  | 0.35258  | 5.20913 | 5.50683 | 5.97577 | 5.41011 | 24.2063 | 5.06491 |
| ENSMUSG000000062093 | 1_Gm10110       | 31.9079 | -0.59198 | 0.23267  | 0.33901  | 38.2003 | 21.1095 | 16.7322 | 27.9522 | 51.9988 | 35.4544 |
| ENSMUSG000000062098 | 11_Btbd3        | 2950.51 | 0.46407  | 3.27E-05 | 0.00019  | 3205.35 | 3358.25 | 3700.2  | 2346.19 | 2569.46 | 2523.59 |
| ENSMUSG000000062101 | 12_Zfp119b      | 155.651 | -0.36489 | 0.08461  | 0.14984  | 128.492 | 150.52  | 129.077 | 158.697 | 193.651 | 173.473 |
| ENSMUSG000000062110 | 14_Scfd2        | 207.296 | 0.33423  | 0.08061  | 0.1442   | 205.761 | 225.78  | 262.934 | 179.435 | 190.064 | 179.804 |
| ENSMUSG000000062115 | 15_Rai1         | 792.017 | 1.22673  | 2.65E-08 | 3.94E-07 | 960.216 | 1169.28 | 1199.93 | 605.031 | 326.337 | 491.296 |
| ENSMUSG000000062116 | 8_Zfp954        | 353.752 | 0.02827  | 0.87139  | 0.91264  | 323.834 | 363.451 | 383.644 | 311.983 | 334.406 | 405.193 |
| ENSMUSG000000062127 | 11_Cttnbp2nl    | 1715.1  | 0.38107  | 0.00409  | 0.01192  | 1962.97 | 1716.3  | 2141.72 | 1526.55 | 1371.69 | 1571.39 |
| ENSMUSG000000062128 | 7_Olfr20        | 0.29498 | -0.03469 | 0.99322  | NA       | 0.86819 | 0       | 0       | 0.90169 | 0       | 0       |
| ENSMUSG000000062151 | 13_Unc13c       | 234.605 | -1.77955 | 7.83E-10 | 1.92E-08 | 79.0051 | 152.356 | 86.0511 | 401.25  | 414.197 | 274.771 |
| ENSMUSG000000062154 | 13_Tex33        | 1.10746 | 0.18632  | 0.94408  | NA       | 0       | 0       | 3.58546 | 0       | 1.79306 | 1.26623 |
| ENSMUSG000000062157 | 6_Iflnr1        | 664.309 | 0.39656  | 0.01593  | 0.03748  | 775.292 | 682.847 | 805.534 | 558.143 | 490.402 | 673.633 |
| ENSMUSG000000062162 | 2_Mageb1        | 0.55493 | 0.9119   | 0.78046  | NA       | 0.86819 | 0       | 1.19515 | 0       | 0       | 1.26623 |
| ENSMUSG000000062168 | 12_Ppef1        | 4.02427 | -1.41516 | 0.21788  | 0.32227  | 3.47275 | 1.83561 | 1.19515 | 4.50843 | 8.06878 | 5.06491 |
| ENSMUSG000000062169 | 13_Cnih4        | 1418.24 | -0.31144 | 0.00853  | 0.02209  | 1250.19 | 1217.93 | 1330.21 | 1467.94 | 1697.13 | 1546.06 |
| ENSMUSG000000062170 | 12_Fmr1nb       | 0.1447  | 0.92709  | 0.82027  | NA       | 0.86819 | 0       | 0       | 0       | 0       | 0       |
| ENSMUSG000000062175 | 13_Tgif2        | 377.102 | 0.41895  | 0.01549  | 0.03661  | 400.235 | 448.807 | 445.792 | 373.298 | 277.924 | 316.557 |
| ENSMUSG000000062184 | 11_Hs6st2       | 135.823 | -1.1074  | 1.01E-05 | 6.83E-05 | 79.8733 | 106.465 | 71.7092 | 178.534 | 212.478 | 165.876 |
| ENSMUSG000000062190 | 12_Lanc12       | 490.996 | -0.09923 | 0.52181  | 0.63147  | 474.899 | 494.697 | 452.963 | 462.565 | 580.952 | 479.9   |
| ENSMUSG000000062198 | 4_2700097O09Rik | 282.741 | -0.25129 | 0.15163  | 0.2412   | 238.752 | 265.246 | 271.3   | 281.326 | 346.061 | 293.765 |
| ENSMUSG000000062200 | 12_Vmn2r7       | 8.25366 | -1.40836 | 0.07999  | 0.1433   | 3.47275 | 6.42464 | 3.58546 | 11.7219 | 11.6549 | 12.6623 |
| ENSMUSG000000062202 | 13_Btbd9        | 1037.34 | 0.4433   | 0.0005   | 0.00198  | 1125.17 | 1202.33 | 1259.69 | 953.983 | 810.464 | 872.43  |
| ENSMUSG000000062203 | 14_Gsp1         | 2761.22 | -0.20591 | 0.16427  | 0.25739  | 2601.96 | 2405.57 | 2685.51 | 2402.99 | 3258.89 | 3212.42 |
| ENSMUSG000000062204 | 1_Olfr1373      | 0.19919 | 0.92709  | 0.82027  | NA       | 0       | 0       | 1.19515 | 0       | 0       | 0       |
| ENSMUSG000000062209 | 15_Erbp4        | 122.161 | -1.73495 | 6.84E-09 | 1.23E-07 | 66.8505 | 67.9176 | 33.4643 | 204.683 | 195.444 | 164.609 |
| ENSMUSG000000062210 | 13_Tnfaip8      | 1735.79 | -0.03231 | 0.80421  | 0.86457  | 1703.39 | 1590.56 | 1854.88 | 1561.72 | 1807.41 | 1896.81 |
| ENSMUSG000000062232 | 14_Rapgef2      | 1088.68 | 0.19351  | 0.07739  | 0.13949  | 1205.91 | 1149.09 | 1129.42 | 1025.22 | 1015.77 | 1006.65 |
| ENSMUSG000000062234 | 14_Gak          | 3918.07 | 0.59928  | 2.15E-07 | 2.43E-06 | 4556.25 | 4587.19 | 5016.06 | 3015.24 | 2904.76 | 3428.94 |
| ENSMUSG000000062248 | 5_Cks2          | 477.478 | 0.04514  | 0.80661  | 0.86634  | 545.222 | 418.519 | 491.208 | 397.643 | 551.366 | 460.907 |
| ENSMUSG000000062252 | 8_Lhfp15        | 0.36132 | -1.98116 | 0.62311  | NA       | 0       | 0       | 0       | 0.90169 | 0       | 1.26623 |
| ENSMUSG000000062257 | 12_Opcml        | 89.0236 | -1.45677 | 1.70E-06 | 1.46E-05 | 46.014  | 61.493  | 34.6595 | 145.171 | 135.376 | 111.428 |
| ENSMUSG000000062270 | 13_Morf41l      | 9615.79 | -0.37567 | 0.00055  | 0.00215  | 8501.3  | 8034.47 | 8576.43 | 9815.75 | 11444.2 | 11322.6 |
| ENSMUSG000000062275 | 7_Fbxw24        | 1.70311 | -3.15947 | 0.12306  | NA       | 0.86819 | 0       | 0       | 2.70506 | 5.37918 | 1.26623 |

|                    |                  |         |          |          |          |         |         |         |         |         |         |
|--------------------|------------------|---------|----------|----------|----------|---------|---------|---------|---------|---------|---------|
| ENSMUSG00000062282 | 3_Gm10113        | 0.45181 | -0.79887 | 0.84362  | NA       | 0       | 0.91781 | 0       | 0       | 1.79306 | 0       |
| ENSMUSG00000062296 | 8_Trunk1         | 73.587  | -0.57219 | 0.10596  | 0.18044  | 73.796  | 55.9861 | 47.8062 | 121.728 | 78.8947 | 63.3113 |
| ENSMUSG00000062300 | 13_Pvrl2         | 1901.28 | 1.08592  | 1.45E-09 | 3.23E-08 | 2324.14 | 2458.8  | 2969.96 | 1207.36 | 964.667 | 1482.75 |
| ENSMUSG00000062309 | 7_Rpp25          | 6.15772 | -0.06401 | 0.94971  | 0.96704  | 9.55007 | 3.67122 | 4.78062 | 10.8202 | 1.79306 | 6.33113 |
| ENSMUSG00000062310 | 7_Glrp1          | 0.29767 | 1.70332  | 0.67406  | NA       | 0.86819 | 0.91781 | 0       | 0       | 0       | 0       |
| ENSMUSG00000062312 | 5_Erbb2          | 2972.61 | 1.24475  | 2.41E-13 | 1.55E-11 | 3722.79 | 4026.41 | 4792.57 | 1889.93 | 1393.21 | 2010.77 |
| ENSMUSG00000062328 | 7_Rpl17          | 18436.6 | -0.51422 | 4.68E-06 | 3.49E-05 | 15955.6 | 14971.2 | 14628.7 | 20052.6 | 23976.8 | 21034.6 |
| ENSMUSG00000062329 | 4_Cyt11          | 22.5821 | -1.23642 | 0.04447  | 0.08796  | 13.891  | 10.0959 | 16.7322 | 55.0028 | 23.3098 | 16.4609 |
| ENSMUSG00000062345 | 10_Serpinb2      | 301.504 | 3.11072  | 5.15E-20 | 9.39E-18 | 730.146 | 271.67  | 620.285 | 64.9214 | 72.619  | 49.3828 |
| ENSMUSG00000062352 | 13_Iitgb1bp1     | 499.433 | -0.47473 | 0.00143  | 0.00489  | 421.071 | 437.793 | 395.596 | 583.391 | 638.33  | 520.419 |
| ENSMUSG00000062369 | 2_Usp17lb        | 0       | NA       | NA       | NA       | 0       | 0       | 0       | 0       | 0       | 0       |
| ENSMUSG00000062372 | 13_Otof          | 2.82225 | -0.91937 | 0.52663  | 0.63559  | 0.86819 | 3.67122 | 1.19515 | 2.70506 | 0.89653 | 7.59736 |
| ENSMUSG00000062373 | 7_Tmem65         | 1928.36 | -0.37194 | 0.00048  | 0.00192  | 1661.71 | 1600.65 | 1781.97 | 2104.53 | 2211.74 | 2209.57 |
| ENSMUSG00000062376 | 7_Borcs7         | 273.726 | -0.27239 | 0.12622  | 0.20783  | 262.193 | 266.164 | 215.128 | 296.655 | 323.648 | 278.57  |
| ENSMUSG00000062380 | 3_Tubb3          | 27.3574 | 0.64318  | 0.27624  | 0.38864  | 52.0913 | 22.0273 | 26.2934 | 31.559  | 23.3098 | 8.86359 |
| ENSMUSG00000062382 | 7_Gm10116        | 243.626 | -0.00428 | 0.98533  | 0.99006  | 225.729 | 240.465 | 265.324 | 289.441 | 269.856 | 170.941 |
| ENSMUSG00000062391 | 3_4932435O22Rik  | 1.6766  | -1.41543 | 0.48359  | NA       | 1.73638 | 0.91781 | 0       | 3.60674 | 0       | 3.79868 |
| ENSMUSG00000062393 | 13_Dgkk          | 12.4173 | -1.90514 | 0.00727  | 0.01928  | 4.34094 | 5.50683 | 5.97577 | 14.427  | 27.7924 | 16.4609 |
| ENSMUSG00000062397 | 7_Zfp706         | 3864.22 | -0.17444 | 0.11255  | 0.18961  | 3555.23 | 3541.81 | 3795.81 | 3737.49 | 4325.76 | 4229.2  |
| ENSMUSG00000062410 | 14_Hsd3b3        | 0.94802 | -2.11178 | 0.43412  | NA       | 0       | 0       | 1.19515 | 1.80337 | 2.68959 | 0       |
| ENSMUSG00000062421 | 13_Arf2          | 2085.04 | -0.01099 | 0.92324  | 0.94914  | 2193.91 | 1925.56 | 2113.03 | 2097.32 | 2206.36 | 1974.05 |
| ENSMUSG00000062432 | 4_Cyp26c1        | 3.83439 | 2.72925  | 0.04626  | 0.09085  | 7.8137  | 7.34244 | 4.78062 | 1.80337 | 0       | 1.26623 |
| ENSMUSG00000062438 | 4_Adam1b         | 6.53423 | 0.27969  | 0.74578  | 0.82038  | 5.20913 | 9.17806 | 7.17092 | 5.41011 | 7.17224 | 5.06491 |
| ENSMUSG00000062444 | 14_Ap3b2         | 54.7296 | -1.73485 | 0.0053   | 0.0148   | 30.3866 | 41.3013 | 3.58546 | 127.138 | 53.7918 | 72.1749 |
| ENSMUSG00000062456 | 3_Rpl9-ps6       | 925.738 | -0.6769  | 0.01708  | 0.03972  | 644.196 | 699.368 | 794.777 | 744.792 | 1791.27 | 880.028 |
| ENSMUSG00000062464 | 5_Cyp4f37        | 0.14942 | -0.99647 | 0.80707  | NA       | 0       | 0       | 0       | 0       | 0.89653 | 0       |
| ENSMUSG00000062480 | 11_Acat3         | 38.951  | -0.58173 | 0.13526  | 0.21939  | 24.3093 | 33.9588 | 35.8546 | 50.4944 | 51.1022 | 37.9868 |
| ENSMUSG00000062488 | 9_Iift3b         | 7066.3  | 0.78918  | 0.00048  | 0.00194  | 8526.48 | 7400.27 | 10930.9 | 3675.27 | 6963.35 | 4901.56 |
| ENSMUSG00000062496 | 9_4930431F12Rik  | 0.21104 | -0.99647 | 0.80707  | NA       | 0       | 0       | 0       | 0       | 0       | 1.26623 |
| ENSMUSG00000062510 | 12_Nsl1          | 139.581 | 0.71284  | 0.00275  | 0.00854  | 168.429 | 158.78  | 192.42  | 84.7584 | 110.273 | 122.824 |
| ENSMUSG00000062511 | 6_4930512M02Rik  | 0.15297 | 0.92709  | 0.82027  | NA       | 0       | 0.91781 | 0       | 0       | 0       | 0       |
| ENSMUSG00000062515 | 3_Fabp4          | 72.645  | -1.0001  | 0.00869  | 0.02242  | 61.6414 | 40.3834 | 43.0255 | 136.155 | 60.9641 | 93.7008 |
| ENSMUSG00000062518 | 7_Zfp534         | 0.44827 | -2.3261  | 0.56139  | NA       | 0       | 0       | 0       | 0       | 2.68959 | 0       |
| ENSMUSG00000062519 | 13_Zfp398        | 740.135 | -0.06409 | 0.68714  | 0.77475  | 710.178 | 703.957 | 756.533 | 616.753 | 832.877 | 820.515 |
| ENSMUSG00000062524 | 4_Ncr1           | 15.4787 | 2.93057  | 5.38E-05 | 0.00029  | 39.0685 | 19.2739 | 23.9031 | 4.50843 | 3.58612 | 2.53245 |
| ENSMUSG00000062526 | 3_Mppe1          | 315.45  | 0.13743  | 0.44216  | 0.55751  | 291.711 | 355.191 | 345.4   | 341.739 | 278.821 | 279.836 |
| ENSMUSG00000062542 | 11_Syt9          | 317.121 | -1.094   | 4.02E-05 | 0.00023  | 220.52  | 249.643 | 136.248 | 509.452 | 471.575 | 315.291 |
| ENSMUSG00000062545 | 4_Tlr12          | 13.2652 | 0.16754  | 0.81601  | 0.87308  | 10.4183 | 22.9451 | 8.36608 | 7.21348 | 11.6549 | 18.9934 |
| ENSMUSG00000062546 | 4_V1ra8          | 0.29884 | -1.76064 | 0.66373  | NA       | 0       | 0       | 0       | 0       | 1.79306 | 0       |
| ENSMUSG00000062553 | 2_Olfr709-ps1    | 0       | NA       | NA       | NA       | 0       | 0       | 0       | 0       | 0       | 0       |
| ENSMUSG00000062556 | 3_Scgb1b2        | 8.36927 | -1.05108 | 0.18957  | 0.28883  | 5.20913 | 7.34244 | 3.58546 | 9.91854 | 8.96531 | 15.1947 |
| ENSMUSG00000062561 | 3_Gm10118        | 0.29884 | -1.76064 | 0.66373  | NA       | 0       | 0       | 0       | 0       | 1.79306 | 0       |
| ENSMUSG00000062563 | 14_Cys1          | 173.817 | -0.25617 | 0.22536  | 0.33062  | 149.328 | 182.643 | 143.418 | 210.093 | 186.478 | 170.941 |
| ENSMUSG00000062564 | 12_Tex28         | 0.15028 | -0.99647 | 0.80707  | NA       | 0       | 0       | 0       | 0.90169 | 0       | 0       |
| ENSMUSG00000062580 | 9_Timm17a        | 1017.25 | -0.30203 | 0.01245  | 0.03034  | 981.921 | 868.244 | 883.219 | 1113.58 | 1172.66 | 1083.89 |
| ENSMUSG00000062585 | 11_Cnr2          | 16.222  | 0.65927  | 0.30972  | 0.42458  | 26.9138 | 17.4383 | 15.537  | 18.0337 | 14.3445 | 5.06491 |
| ENSMUSG00000062590 | 13_Armc9         | 212.457 | -0.13127 | 0.5166   | 0.6266   | 217.915 | 196.41  | 194.81  | 256.079 | 225.926 | 183.603 |
| ENSMUSG00000062591 | 5_Tubb4a         | 95.3578 | -0.54239 | 0.12131  | 0.20154  | 92.8962 | 82.6025 | 57.3674 | 164.107 | 94.1357 | 81.0385 |
| ENSMUSG00000062593 | 15_Lilrb4a       | 206.288 | 1.87984  | 2.05E-07 | 2.34E-06 | 513.099 | 165.205 | 295.203 | 88.3652 | 98.6184 | 77.2398 |
| ENSMUSG00000062604 | 11_SrpK2         | 2965.29 | -0.13066 | 0.29527  | 0.40968  | 2805.98 | 2765.35 | 2920.96 | 2696.04 | 3208.68 | 3394.75 |
| ENSMUSG00000062609 | 13_Kcnj15        | 288.722 | 0.71818  | 0.00172  | 0.00573  | 355.957 | 314.807 | 405.157 | 180.337 | 187.375 | 288.7   |
| ENSMUSG00000062619 | 5_2310039H08Rik  | 58.0157 | 0.10253  | 0.75585  | 0.82823  | 60.7732 | 53.2327 | 66.9286 | 67.6264 | 56.4814 | 43.0517 |
| ENSMUSG00000062627 | 9_Mysm1          | 831.095 | -0.37344 | 0.00531  | 0.01482  | 746.642 | 743.423 | 681.238 | 842.174 | 1009.49 | 963.599 |
| ENSMUSG00000062646 | 12_Ganc          | 957.337 | -0.1942  | 0.08501  | 0.15036  | 893.366 | 920.559 | 864.096 | 1006.28 | 1011.29 | 1048.44 |
| ENSMUSG00000062647 | 16_Rpl7a         | 16609.9 | 0.38898  | 0.00711  | 0.01892  | 18738.1 | 18147.8 | 19620.8 | 16647.8 | 11732.9 | 14771.8 |
| ENSMUSG00000062661 | 6_Ncs1           | 224.295 | 0.15298  | 0.41522  | 0.5313   | 243.093 | 228.534 | 237.836 | 241.652 | 209.788 | 184.869 |
| ENSMUSG00000062683 | 11_Atp5g2        | 474.457 | 0.01585  | 0.93436  | 0.95673  | 462.744 | 487.355 | 479.257 | 421.087 | 393.577 | 602.724 |
| ENSMUSG00000062687 | 5_Cks1brt        | 1.19656 | 0.72017  | 0.77354  | NA       | 1.73638 | 2.75342 | 0       | 0       | 2.68959 | 0       |
| ENSMUSG00000062691 | 10_Cebpzos       | 267.037 | -0.57081 | 0.0024   | 0.00758  | 227.465 | 186.315 | 231.86  | 308.376 | 359.509 | 288.7   |
| ENSMUSG00000062694 | 7_Cav3           | 35.8133 | 0.02251  | 0.96573  | 0.97789  | 40.8049 | 46.8081 | 20.3176 | 52.2978 | 17.9306 | 36.7206 |
| ENSMUSG00000062704 | 3_9430002A10Rik  | 3.06819 | -0.68991 | 0.62709  | 0.72415  | 3.47275 | 0       | 3.58546 | 1.80337 | 4.48265 | 5.06491 |
| ENSMUSG00000062713 | 7_Sim2           | 6.44432 | 1.27083  | 0.18247  | 0.28009  | 8.68188 | 12.8493 | 5.97577 | 5.41011 | 4.48265 | 1.26623 |
| ENSMUSG00000062727 | 4_Hist1h2bk      | 17.4292 | 0.88893  | 0.23868  | 0.34631  | 17.3638 | 21.1095 | 29.8789 | 26.1489 | 6.27571 | 3.79868 |
| ENSMUSG00000062729 | 11_Ppox          | 798.654 | 0.37374  | 0.00218  | 0.007    | 876.002 | 952.682 | 876.048 | 726.758 | 680.467 | 679.964 |
| ENSMUSG00000062742 | 3_Gm5239         | 17.4106 | 0.63611  | 0.31266  | 0.42762  | 21.7047 | 21.1095 | 20.3176 | 14.427  | 5.37918 | 21.5259 |
| ENSMUSG00000062743 | 9_Zfp677         | 146.616 | -0.49379 | 0.05326  | 0.1021   | 151.065 | 124.822 | 88.4414 | 157.795 | 189.168 | 168.408 |
| ENSMUSG00000062753 | 13_Al413582      | 490.192 | 0.61386  | 0.00473  | 0.01344  | 549.563 | 560.779 | 669.286 | 505.846 | 292.269 | 363.407 |
| ENSMUSG00000062757 | 1_Olfr1206       | 0       | NA       | NA       | NA       | 0       | 0       | 0       | 0       | 0       | 0       |
| ENSMUSG00000062760 | 10_1810041L15Rik | 192.505 | -0.75093 | 0.00354  | 0.01055  | 136.306 | 182.643 | 111.149 | 299.36  | 211.581 | 213.992 |
| ENSMUSG00000062761 | 7_Zfp512         | 926.62  | -0.07125 | 0.54115  | 0.64817  | 948.062 | 854.477 | 908.317 | 944.065 | 938.668 | 966.131 |
| ENSMUSG00000062762 | 15_Ei24          | 2716.01 | -0.40058 | 0.001    | 0.00358  | 2456.97 | 2267.9  | 2298.28 | 2735.71 | 3338.68 | 3198.49 |
| ENSMUSG00000062785 | 13_Kcnc3         | 62.3672 | -0.14381 | 0.72249  | 0.80223  | 67.7187 | 66.9998 | 43.0255 | 100.087 | 45.7231 | 50.6491 |
| ENSMUSG00000062791 | 4_Gm382          | 0       | NA       | NA       | NA       | 0       | 0       | 0       | 0       | 0       | 0       |
| ENSMUSG00000062794 | 8_Zfp599         | 68.9475 | -0.28372 | 0.38244  | 0.49996  | 69.4551 | 60.5752 | 56.1722 | 54.1011 | 92.3426 | 81.0385 |
| ENSMUSG00000062797 | 11_I7Rn6         | 499.346 | -0.16153 | 0.25282  | 0.36211  | 454.931 | 450.643 | 509.136 | 493.222 | 542.401 | 545.744 |
| ENSMUSG00000062814 | 9_Ssxa1          | 0       | NA       | NA       | NA       | 0       | 0       | 0       | 0       | 0       | 0       |
| ENSMUSG00000062818 | 6_Vmn1r51        | 0.19919 | 0.92709  | 0.82027  | NA       | 0       | 0       | 1.19515 | 0       | 0       | 0       |
| ENSMUSG00000062822 | 7_4833420G17Rik  | 721.255 | -0.29998 | 0.03217  | 0.06735  | 609.468 | 675.505 | 656.14  | 797.992 | 876.807 | 711.62  |
| ENSMUSG00000062825 | 15_Actg1         | 90461.3 | 0.58225  | 4.98E-07 | 5.05E-06 | 104371  | 103218  | 117825  | 73285.4 | 65837.6 | 78230   |

|                    |                  |         |          |          |          |         |         |         |         |         |         |
|--------------------|------------------|---------|----------|----------|----------|---------|---------|---------|---------|---------|---------|
| ENSMUSG00000062826 | 6_Ces2f          | 1463.95 | 0.62556  | 8.22E-05 | 0.00042  | 1722.49 | 1693.35 | 1912.25 | 924.228 | 1209.42 | 1321.94 |
| ENSMUSG00000062859 | 14_Tcp11         | 28.3337 | -0.14305 | 0.87125  | 0.91255  | 18.232  | 57.8218 | 4.78062 | 62.2163 | 20.6202 | 6.33113 |
| ENSMUSG00000062861 | 7_Zfp28          | 114.988 | -0.46534 | 0.09008  | 0.15779  | 99.8417 | 121.15  | 68.1238 | 130.744 | 143.445 | 126.623 |
| ENSMUSG00000062866 | 15_Phactr2       | 1961.17 | -0.50085 | 5.82E-05 | 0.00031  | 1666.92 | 1653.89 | 1552.51 | 2445.37 | 2428.7  | 2019.63 |
| ENSMUSG00000062867 | 13_Impdh2        | 2313.55 | 0.26602  | 0.04881  | 0.09517  | 2394.46 | 2447.79 | 2735.71 | 1823.21 | 2142.71 | 2337.45 |
| ENSMUSG00000062874 | 5_Gm4978         | 1.63742 | -0.27832 | 0.89006  | NA       | 2.60457 | 1.83561 | 0       | 0.90169 | 4.48265 | 0       |
| ENSMUSG00000062901 | 2_Klh124         | 845.362 | -0.83985 | 2.16E-08 | 3.31E-07 | 616.414 | 658.984 | 542.6   | 1181.21 | 1129.63 | 943.339 |
| ENSMUSG00000062905 | 1_Vmn1r32        | 0.15297 | 0.92709  | 0.82027  | NA       | 0       | 0.91781 | 0       | 0       | 0       | 0       |
| ENSMUSG00000062906 | 12_Hdac10        | 359.322 | 0.92133  | 7.94E-07 | 7.49E-06 | 434.094 | 471.752 | 505.55  | 294.851 | 205.306 | 244.382 |
| ENSMUSG00000062908 | 12_Acadm         | 3739.16 | -0.18848 | 0.07529  | 0.13637  | 3506.61 | 3402.31 | 3575.9  | 3679.78 | 4027.22 | 4243.13 |
| ENSMUSG00000062929 | 7_Cfl2           | 1265.88 | -0.60234 | 3.32E-06 | 2.60E-05 | 1005.36 | 953.6   | 1058.91 | 1471.55 | 1701.62 | 1404.25 |
| ENSMUSG00000062931 | 15_Zfp938        | 229.762 | -0.89674 | 1.92E-06 | 1.62E-05 | 165.824 | 170.712 | 144.614 | 272.309 | 332.613 | 292.498 |
| ENSMUSG00000062937 | 7_Mtap           | 892.794 | -0.1479  | 0.28665  | 0.40007  | 836.934 | 804.915 | 898.756 | 826.846 | 954.805 | 1034.51 |
| ENSMUSG00000062939 | 11_Stat4         | 14.0223 | 1.11792  | 0.119    | 0.19843  | 30.3866 | 11.9315 | 15.537  | 11.7219 | 10.7584 | 3.79868 |
| ENSMUSG00000062944 | 4_9130023H24Rik  | 336.791 | 0.00583  | 0.97286  | 0.98265  | 348.144 | 322.15  | 341.814 | 285.834 | 372.06  | 350.745 |
| ENSMUSG00000062949 | 13_Atp11c        | 351.31  | -0.7035  | 9.31E-05 | 0.00047  | 240.488 | 278.095 | 284.447 | 396.742 | 509.229 | 398.861 |
| ENSMUSG00000062960 | 10_Kdr           | 809.57  | -0.36611 | 0.03266  | 0.06814  | 805.679 | 743.423 | 572.479 | 973.82  | 965.563 | 796.457 |
| ENSMUSG00000062961 | 6_Ccdc177        | 11.9857 | -2.09328 | 0.01461  | 0.03479  | 2.60457 | 6.42464 | 4.78062 | 25.2472 | 27.7924 | 5.06491 |
| ENSMUSG00000062963 | 12_Ufc1          | 1206    | -0.04511 | 0.66789  | 0.75859  | 1201.57 | 1193.15 | 1166.47 | 1220.88 | 1234.52 | 1219.38 |
| ENSMUSG00000062980 | 15_Cped1         | 1409.41 | -0.91015 | 2.77E-08 | 4.09E-07 | 1020.99 | 1143.59 | 770.874 | 1910.67 | 1890.78 | 1719.54 |
| ENSMUSG00000062981 | 4_Mrp142         | 1241.43 | -0.47251 | 6.54E-05 | 0.00034  | 1075.69 | 946.258 | 1098.35 | 1422.86 | 1435.35 | 1470.09 |
| ENSMUSG00000062991 | 6_Nrg1           | 297.965 | 0.67665  | 0.00054  | 0.00214  | 377.662 | 304.711 | 417.109 | 199.272 | 235.788 | 253.245 |
| ENSMUSG00000062995 | 12_Ufc1          | 55.2094 | -0.59329 | 0.07643  | 0.13809  | 46.014  | 46.8081 | 39.4401 | 73.0365 | 75.3086 | 50.6491 |
| ENSMUSG00000062997 | 6_Rpl35          | 4171.91 | 0.20563  | 0.27575  | 0.38801  | 4639.6  | 4279.73 | 4486.61 | 4867.3  | 2787.31 | 3970.89 |
| ENSMUSG00000063011 | 6_Msln           | 18.5251 | 1.19359  | 0.02607  | 0.05658  | 29.5184 | 23.8629 | 23.9031 | 9.91854 | 12.5514 | 11.396  |
| ENSMUSG00000063015 | 12_Ccni          | 2905.34 | -0.49499 | 4.96E-06 | 3.67E-05 | 2313.72 | 2580.87 | 2341.31 | 3476.9  | 3514.4  | 3204.82 |
| ENSMUSG00000063019 | 5_Manbal         | 388.701 | 0.63117  | 0.0002   | 0.0009   | 454.931 | 487.355 | 474.476 | 341.739 | 254.615 | 319.089 |
| ENSMUSG00000063047 | 8_Zfp780b        | 306.636 | -0.66426 | 0.00022  | 0.001    | 257.852 | 249.643 | 203.176 | 339.034 | 411.508 | 378.602 |
| ENSMUSG00000063049 | 4_Ing2           | 253.188 | -0.15852 | 0.42462  | 0.54012  | 254.379 | 231.287 | 233.055 | 318.295 | 261.787 | 220.323 |
| ENSMUSG00000063052 | 9_Lrrc40         | 492.956 | -0.36445 | 0.00999  | 0.02524  | 443.644 | 403.834 | 445.792 | 516.666 | 588.124 | 559.672 |
| ENSMUSG00000063060 | 5_Sox7           | 519.346 | 0.66479  | 0.00208  | 0.00671  | 579.95  | 583.724 | 745.776 | 311.983 | 372.957 | 521.685 |
| ENSMUSG00000063063 | 12_Ctnna2        | 42.5548 | -2.02937 | 0.00058  | 0.00226  | 26.9138 | 20.1917 | 2.39031 | 87.4635 | 53.7918 | 64.5776 |
| ENSMUSG00000063065 | 13_Mapk3         | 3608.11 | 0.39388  | 0.01225  | 0.02994  | 3904.24 | 4088.82 | 4300.16 | 3738.39 | 2514.77 | 3102.26 |
| ENSMUSG00000063077 | 14_Kif1b         | 5464.99 | -0.22401 | 0.02445  | 0.05368  | 4900.06 | 5304.92 | 4920.45 | 6099    | 5963.72 | 5601.79 |
| ENSMUSG00000063108 | 14_Zfp26         | 899.894 | -0.44973 | 0.00271  | 0.00843  | 833.461 | 719.56  | 729.044 | 924.228 | 1191.49 | 1001.59 |
| ENSMUSG00000063129 | 1_Aldoat2        | 3.20928 | 0.43875  | 0.75762  | 0.82953  | 6.94551 | 1.83561 | 2.39031 | 2.70506 | 5.37918 | 0       |
| ENSMUSG00000063130 | 3_Calm13         | 103278  | 0.2593   | 0.04564  | 0.08982  | 113147  | 102803  | 121651  | 87614.1 | 87062.1 | 107390  |
| ENSMUSG00000063137 | 3_Olf1r177       | 0.21104 | -0.99647 | 0.80707  | NA       | 0       | 0       | 0       | 0       | 0       | 1.26623 |
| ENSMUSG00000063142 | 13_Kcnma1        | 60.2936 | -1.52046 | 4.29E-05 | 0.00024  | 29.5184 | 37.63   | 26.2934 | 122.629 | 73.5155 | 72.1749 |
| ENSMUSG00000063145 | 10_Bbs5          | 128.819 | -0.82277 | 0.00055  | 0.00215  | 94.6325 | 78.9313 | 106.369 | 154.188 | 185.582 | 153.213 |
| ENSMUSG00000063146 | 11_Clip2         | 475.62  | 0.69546  | 0.00188  | 0.00617  | 549.563 | 618.601 | 596.382 | 480.598 | 259.097 | 349.479 |
| ENSMUSG00000063160 | 12_Numbl         | 395.098 | 0.4416   | 0.02149  | 0.04817  | 429.753 | 453.396 | 484.037 | 409.365 | 328.13  | 265.908 |
| ENSMUSG00000063166 | 4_Gm5449         | 0.74593 | -0.58743 | 0.84364  | NA       | 0.86819 | 0.91781 | 0       | 0       | 2.68959 | 0       |
| ENSMUSG00000063172 | 15_Hspb11        | 219.034 | -0.66151 | 0.00085  | 0.00314  | 177.11  | 166.123 | 166.126 | 244.357 | 317.372 | 243.116 |
| ENSMUSG00000063177 | 6_Klk1b27        | 0.88473 | 3.26848  | 0.29498  | NA       | 3.47275 | 1.83561 | 0       | 0       | 0       | 0       |
| ENSMUSG00000063179 | 12_Pstk          | 241.937 | -0.63916 | 0.00091  | 0.00332  | 204.024 | 165.205 | 198.396 | 256.98  | 321.854 | 305.161 |
| ENSMUSG00000063193 | 8_Cd300lb        | 27.7688 | 1.14486  | 0.02969  | 0.06292  | 53.8277 | 26.6164 | 34.6595 | 24.3455 | 17.0341 | 10.1298 |
| ENSMUSG00000063200 | 3_Nol7           | 1210.11 | -0.45391 | 0.00048  | 0.00191  | 1012.31 | 981.134 | 1070.86 | 1243.42 | 1525.9  | 1427.04 |
| ENSMUSG00000063229 | 14_Ldha          | 12934   | 0.49762  | 4.53E-05 | 0.00025  | 15455.5 | 13889.2 | 16083.2 | 11401.8 | 9502.33 | 11272   |
| ENSMUSG00000063232 | 16_Serpina11     | 0.14942 | -0.99647 | 0.80707  | NA       | 0       | 0       | 0       | 0       | 0.89653 | 0       |
| ENSMUSG00000063234 | 4_Gpr84          | 4.6845  | 2.69164  | 0.03582  | 0.07356  | 13.0228 | 5.50683 | 5.97577 | 2.70506 | 0.89653 | 0       |
| ENSMUSG00000063236 | 5_1110038F14Rik  | 347.563 | 0.71662  | 0.00036  | 0.00151  | 375.057 | 394.656 | 528.258 | 302.966 | 243.856 | 240.583 |
| ENSMUSG00000063239 | 16_Grm4          | 239.078 | 1.67973  | 2.56E-08 | 3.83E-07 | 270.875 | 386.396 | 435.036 | 128.039 | 67.2398 | 146.882 |
| ENSMUSG00000063245 | 11_Gm13248       | 161.58  | -0.67516 | 0.01439  | 0.03434  | 118.074 | 111.054 | 144.614 | 136.155 | 251.925 | 207.661 |
| ENSMUSG00000063253 | 10_Scoc          | 567.528 | -1.00264 | 3.55E-13 | 2.20E-11 | 397.63  | 387.314 | 347.79  | 727.66  | 801.498 | 743.275 |
| ENSMUSG00000063260 | 2_Syt10          | 0.39838 | 2.07058  | 0.60634  | NA       | 0       | 0       | 2.39031 | 0       | 0       | 0       |
| ENSMUSG00000063268 | 12_Parp10        | 1275.05 | 2.05264  | 6.99E-28 | 2.89E-25 | 1831.01 | 1821.84 | 2511.02 | 547.323 | 397.163 | 541.945 |
| ENSMUSG00000063273 | 11_Naa15         | 3337.65 | -0.26255 | 0.11196  | 0.18885  | 3085.54 | 2832.35 | 3186.28 | 2805.14 | 4234.31 | 3882.25 |
| ENSMUSG00000063275 | 15_Hacd1         | 51.7887 | -1.54464 | 4.66E-05 | 0.00026  | 24.3093 | 25.6986 | 29.8789 | 91.0702 | 87.86   | 51.9153 |
| ENSMUSG00000063277 | 7_Gm10128        | 0       | NA       | NA       | NA       | 0       | 0       | 0       | 0       | 0       | 0       |
| ENSMUSG00000063281 | 9_Zfp35          | 536.521 | -0.45727 | 0.00126  | 0.00438  | 443.644 | 456.149 | 457.744 | 597.817 | 687.639 | 576.133 |
| ENSMUSG00000063296 | 4_Tmem117        | 32.0491 | -1.51927 | 0.00144  | 0.00492  | 14.7592 | 22.9451 | 11.9515 | 59.5112 | 50.2057 | 32.9219 |
| ENSMUSG00000063297 | 7_Luzp2          | 110.905 | -1.865   | 3.83E-07 | 4.00E-06 | 49.4867 | 62.4108 | 31.074  | 212.798 | 207.099 | 102.564 |
| ENSMUSG00000063316 | 13_Rpl27         | 450.043 | -0.69426 | 0.00032  | 0.00137  | 364.639 | 326.739 | 340.619 | 486.008 | 701.087 | 481.166 |
| ENSMUSG00000063317 | 7_Usp31          | 1083.86 | 0.00985  | 0.93137  | 0.9546   | 1109.54 | 1038.04 | 1115.08 | 1027.92 | 1113.49 | 1099.08 |
| ENSMUSG00000063320 | 11_1190007I07Rik | 31.5554 | -0.44338 | 0.27915  | 0.39183  | 26.0457 | 31.2054 | 22.7079 | 33.3624 | 36.7578 | 39.253  |
| ENSMUSG00000063334 | 16_Krr1          | 947.151 | -0.38697 | 0.00486  | 0.01377  | 850.825 | 765.45  | 846.169 | 944.065 | 1158.32 | 1118.08 |
| ENSMUSG00000063354 | 6_Slc39a4        | 1047.16 | 0.77892  | 1.15E-07 | 1.42E-06 | 1180.74 | 1387.72 | 1401.92 | 871.93  | 688.535 | 752.139 |
| ENSMUSG00000063358 | 15_Mapk1         | 5020.92 | -0.24049 | 0.05934  | 0.11181  | 4599.66 | 4390.78 | 4820.06 | 4709.5  | 6041.72 | 5563.8  |
| ENSMUSG00000063362 | 13_Alg11         | 598.422 | -0.56278 | 4.22E-05 | 0.00024  | 515.704 | 484.601 | 448.183 | 669.952 | 756.672 | 715.418 |
| ENSMUSG00000063364 | 10_3300002I08Rik | 23.5119 | -0.22174 | 0.70431  | 0.7884   | 19.1001 | 33.9588 | 11.9515 | 37.8708 | 17.9306 | 20.2596 |
| ENSMUSG00000063376 | 6_Ilna13         | 3.26789 | 0.66139  | 0.61361  | 0.71283  | 7.8137  | 1.83561 | 2.39031 | 4.50843 | 1.79306 | 1.26623 |
| ENSMUSG00000063382 | 5_Bcl9l          | 1245.21 | 1.65384  | 9.36E-11 | 3.06E-09 | 1664.32 | 1786.05 | 2219.4  | 834.961 | 667.578 | 598.925 |
| ENSMUSG00000063383 | 5_Zfp947         | 58.025  | -0.3318  | 0.28686  | 0.40023  | 53.8277 | 56.9039 | 43.0255 | 60.4129 | 68.1363 | 65.8438 |
| ENSMUSG00000063406 | 11_Tmed5         | 972.519 | -0.1057  | 0.42616  | 0.54168  | 922.016 | 859.066 | 1030.22 | 931.441 | 1042.67 | 1049.7  |
| ENSMUSG00000063409 | 12_Lrrc43        | 0.14942 | -0.99647 | 0.80707  | NA       | 0       | 0       | 0       | 0       | 0.89653 | 0       |
| ENSMUSG00000063410 | 7_Stk24          | 4754.38 | 0.20846  | 0.1308   | 0.21394  | 4862.72 | 4912.1  | 5515.64 | 3833.97 | 4307.83 | 5094.03 |
| ENSMUSG00000063415 | 12_Cyp26b1       | 1460.69 | 0.61791  | 0.00096  | 0.00346  | 1587.05 | 1898.02 | 1819.02 | 1045.96 | 928.806 | 1485.28 |
| ENSMUSG00000063428 | 7_Ddo            | 64.5849 | -1.35809 | 0.00271  | 0.00842  | 35.5957 | 55.9861 | 16.7322 | 125.334 | 90.5496 | 63.3113 |

|                    |                  |         |          |          |          |         |         |         |         |         |         |
|--------------------|------------------|---------|----------|----------|----------|---------|---------|---------|---------|---------|---------|
| ENSMUSG00000063430 | 9_Wscd2          | 57.9774 | -0.29455 | 0.37704  | 0.49451  | 49.4867 | 62.4108 | 44.2207 | 77.545  | 54.6884 | 59.5127 |
| ENSMUSG00000063434 | 5_Sorcs3         | 60.4461 | -1.35939 | 0.00211  | 0.00681  | 32.9912 | 50.4793 | 17.9273 | 110.006 | 96.8253 | 54.4478 |
| ENSMUSG00000063439 | 7_B9d2           | 129.918 | 0.76209  | 0.00852  | 0.02208  | 130.228 | 182.643 | 178.078 | 128.941 | 73.5155 | 86.1034 |
| ENSMUSG00000063445 | 14_Nmral1        | 243.878 | 0.56608  | 0.00409  | 0.01191  | 297.789 | 281.766 | 294.008 | 234.438 | 164.065 | 191.2   |
| ENSMUSG00000063446 | 4_Lppr1          | 10.0353 | -1.6807  | 0.04383  | 0.08684  | 4.34094 | 6.42464 | 3.58546 | 14.427  | 25.1029 | 6.33113 |
| ENSMUSG00000063447 | 7_Ube2d2b        | 0.19919 | 0.92709  | 0.82027  | NA       | 0       | 0       | 1.19515 | 0       | 0       | 0       |
| ENSMUSG00000063450 | 14_Syne2         | 7414.65 | 0.33543  | 0.00439  | 0.01263  | 8186.15 | 8022.54 | 8607.5  | 6164.82 | 6119.72 | 7387.17 |
| ENSMUSG00000063455 | 16_D630045J12Rik | 119.554 | -0.70529 | 0.00983  | 0.02489  | 86.8188 | 118.397 | 66.9286 | 160.5   | 147.928 | 136.753 |
| ENSMUSG00000063457 | 14_Rps15         | 11124.7 | 0.73265  | 0.00273  | 0.00847  | 13331   | 13492.7 | 14847.4 | 11785.9 | 5015.19 | 8276.06 |
| ENSMUSG00000063458 | 12_1700112E06Rik | 40.6902 | -0.26786 | 0.53036  | 0.63891  | 52.9595 | 35.7944 | 21.5128 | 47.7893 | 43.0335 | 43.0517 |
| ENSMUSG00000063480 | 7_Nhp211         | 1917.96 | -0.12227 | 0.25193  | 0.36109  | 1886.57 | 1716.3  | 1907.47 | 1953.95 | 2001.06 | 2042.42 |
| ENSMUSG00000063488 | 5_Zkscan7        | 352.397 | -0.18441 | 0.30741  | 0.42241  | 335.989 | 307.465 | 345.4   | 311.081 | 380.129 | 434.316 |
| ENSMUSG00000063506 | 13_Arhgap22      | 284.094 | 1.07464  | 4.07E-05 | 0.00023  | 337.725 | 321.232 | 497.184 | 227.225 | 129.997 | 191.2   |
| ENSMUSG00000063511 | 9_Snnp70         | 5152.86 | 0.45615  | 3.79E-06 | 2.90E-05 | 5704.87 | 5918.93 | 6259.02 | 4462.44 | 4167.97 | 4403.94 |
| ENSMUSG00000063522 | 5_2010109I03Rik  | 8.21431 | 1.83289  | 0.03658  | 0.07475  | 11.2864 | 8.26025 | 19.1225 | 2.70506 | 5.37918 | 2.53245 |
| ENSMUSG00000063524 | 13_Eno1          | 5315.61 | 0.78069  | 6.44E-06 | 4.62E-05 | 6608.65 | 6761.47 | 6788.48 | 4687.86 | 2900.28 | 4146.89 |
| ENSMUSG00000063529 | 3_Stmnd1         | 5.96304 | -1.81204 | 0.05939  | 0.11188  | 2.60457 | 1.83561 | 3.58546 | 10.8202 | 8.06878 | 8.86359 |
| ENSMUSG00000063531 | 7_Sema3e         | 74.9337 | -0.89537 | 0.00275  | 0.00853  | 46.8822 | 61.493  | 49.0013 | 115.416 | 93.2392 | 83.571  |
| ENSMUSG00000063535 | 6_Zfp773         | 12.6295 | -0.71711 | 0.30633  | 0.42134  | 6.07732 | 16.5205 | 5.97577 | 18.0337 | 15.241  | 13.9285 |
| ENSMUSG00000063543 | 4_Gm5616         | 41.1679 | 5.3109   | 5.03E-14 | 3.72E-12 | 64.2459 | 89.0271 | 87.2462 | 0       | 2.68959 | 3.79868 |
| ENSMUSG00000063550 | 7_Nup98          | 1009.43 | 0.04503  | 0.80092  | 0.8623   | 961.085 | 1024.27 | 1089.98 | 752.907 | 1152.04 | 1076.29 |
| ENSMUSG00000063558 | 4_Aox1           | 392.861 | -0.46129 | 0.00933  | 0.02383  | 354.221 | 364.369 | 272.495 | 454.449 | 497.574 | 414.056 |
| ENSMUSG00000063564 | 13_Col23a1       | 1640.7  | -0.54127 | 0.0175   | 0.04052  | 1262.35 | 1754.84 | 991.978 | 2430.94 | 1850.44 | 1553.66 |
| ENSMUSG00000063568 | 11_Jazf1         | 92.4394 | -0.67614 | 0.00801  | 0.02095  | 68.5869 | 72.5066 | 72.9044 | 123.531 | 118.342 | 98.7657 |
| ENSMUSG00000063576 | 11_Klhd3         | 913.731 | 0.69051  | 2.29E-05 | 0.00014  | 1061.79 | 1079.34 | 1244.16 | 806.107 | 575.573 | 715.418 |
| ENSMUSG00000063590 | 3_Slc22a28       | 0.30056 | -1.76625 | 0.6627   | NA       | 0       | 0       | 0       | 1.80337 | 0       | 0       |
| ENSMUSG00000063594 | 5_Gng8           | 33.2923 | -0.547   | 0.26419  | 0.37529  | 26.0457 | 39.4656 | 15.537  | 52.2978 | 38.5508 | 27.857  |
| ENSMUSG00000063600 | 14_Egfm1         | 4.43866 | -3.08355 | 0.02178  | 0.04869  | 0.86819 | 1.83561 | 0       | 6.3118  | 12.5514 | 5.06491 |
| ENSMUSG00000063605 | 5_Ccdc102a       | 87.393  | -0.33895 | 0.26256  | 0.37323  | 75.5324 | 84.4381 | 71.7092 | 129.843 | 77.9982 | 84.8372 |
| ENSMUSG00000063611 | 4_Gm10134        | 14.5246 | -0.4664  | 0.47029  | 0.58341  | 15.6274 | 13.7671 | 7.17092 | 18.9354 | 21.5167 | 10.1298 |
| ENSMUSG00000063623 | 2_C230062116Rik  | 2.13674 | -1.21107 | 0.52624  | NA       | 2.60457 | 0       | 1.19515 | 0       | 2.68959 | 6.33113 |
| ENSMUSG00000063626 | 5_Unc5d          | 6.22277 | -3.12585 | 0.00768  | 0.0202   | 1.73638 | 0.91781 | 1.19515 | 18.0337 | 11.6549 | 3.79868 |
| ENSMUSG00000063632 | 6_Sox11          | 55.3138 | -1.00539 | 0.02977  | 0.06306  | 51.2231 | 43.1369 | 15.537  | 82.0534 | 90.5496 | 49.3828 |
| ENSMUSG00000063646 | 13_Jakmp1        | 270.556 | 0.92073  | 7.17E-05 | 0.00037  | 319.493 | 324.903 | 417.109 | 199.272 | 137.169 | 225.388 |
| ENSMUSG00000063651 | 11_Cnfn          | 124.765 | 3.91883  | 4.03E-36 | 4.28E-33 | 223.124 | 267.999 | 211.542 | 15.3287 | 17.9306 | 12.6623 |
| ENSMUSG00000063652 | 10_Slc22a21      | 282.87  | -0.01996 | 0.90697  | 0.93735  | 301.261 | 292.78  | 247.397 | 284.933 | 270.752 | 300.096 |
| ENSMUSG00000063659 | 11_Zbtb18        | 1440.28 | 0.0657   | 0.55571  | 0.66185  | 1452.48 | 1394.15 | 1574.02 | 1394.91 | 1443.41 | 1382.72 |
| ENSMUSG00000063660 | 4_Olf98          | 0.21104 | -0.99647 | 0.80707  | NA       | 0       | 0       | 0       | 0       | 0       | 1.26623 |
| ENSMUSG00000063663 | 11_Brwd3         | 1015.32 | -0.25822 | 0.08957  | 0.15706  | 942.853 | 858.148 | 972.855 | 918.818 | 1216.59 | 1182.66 |
| ENSMUSG00000063681 | 14_Crb1          | 266.809 | -2.301   | 1.48E-08 | 2.43E-07 | 77.2688 | 156.027 | 35.8546 | 555.438 | 463.506 | 312.758 |
| ENSMUSG00000063683 | 12_Glyat         | 140.425 | -0.66372 | 0.0052   | 0.01457  | 128.492 | 100.959 | 95.6123 | 147.876 | 178.41  | 191.2   |
| ENSMUSG00000063687 | 3_Pcdhb5         | 17.678  | -0.16181 | 0.76259  | 0.83298  | 17.3638 | 18.3561 | 14.3418 | 17.132  | 22.4133 | 16.4609 |
| ENSMUSG00000063694 | 5_Cyca           | 610.517 | -0.35276 | 0.05916  | 0.11152  | 597.314 | 411.177 | 601.163 | 638.393 | 762.948 | 652.107 |
| ENSMUSG00000063696 | 6_Gm8730         | 10895.4 | 1.59679  | 1.29E-09 | 2.93E-08 | 14957.1 | 15820.2 | 18352.8 | 8036.72 | 3171.03 | 5034.52 |
| ENSMUSG00000063698 | 9_Sfxn4          | 73.9624 | -0.95633 | 0.00712  | 0.01896  | 54.6959 | 67.9176 | 27.4885 | 100.087 | 98.6184 | 94.967  |
| ENSMUSG00000063704 | 12_Mapk15        | 21.6635 | 1.40591  | 0.00838  | 0.02179  | 28.6502 | 33.9588 | 32.2692 | 14.427  | 14.3445 | 6.33113 |
| ENSMUSG00000063713 | 7_Klk1b24        | 0.15297 | 0.92709  | 0.82027  | NA       | 0       | 0.91781 | 0       | 0       | 0       | 0       |
| ENSMUSG00000063727 | 3_Tnfrsf11b      | 356.413 | -0.10195 | 0.60645  | 0.70668  | 343.803 | 360.698 | 325.082 | 332.722 | 310.2   | 465.972 |
| ENSMUSG00000063730 | 13_Hsd3b2        | 0.4589  | 2.31815  | 0.56231  | NA       | 0       | 2.75342 | 0       | 0       | 0       | 0       |
| ENSMUSG00000063757 | 3_4632433K11Rik  | 21.0052 | -1.04177 | 0.05448  | 0.10407  | 13.891  | 12.8493 | 14.3418 | 32.4607 | 17.0341 | 35.4544 |
| ENSMUSG00000063760 | 9_Rnf217         | 610.816 | -0.16549 | 0.2244   | 0.32962  | 583.423 | 547.93  | 596.382 | 592.407 | 693.915 | 650.841 |
| ENSMUSG00000063765 | 11_Chadl         | 19.4412 | 0.21888  | 0.70521  | 0.7889   | 14.7592 | 23.8629 | 23.9031 | 18.9354 | 9.86184 | 25.3245 |
| ENSMUSG00000063767 | 3_S100a7a        | 1412.53 | 0.39457  | 0.00976  | 0.02475  | 1818.85 | 1651.13 | 1343.35 | 1238.01 | 1319.69 | 1104.15 |
| ENSMUSG00000063779 | 6_Chil4          | 0.44827 | -2.3261  | 0.56139  | NA       | 0       | 0       | 0       | 0       | 2.68959 | 0       |
| ENSMUSG00000063780 | 5_Olf282         | 0.15297 | 0.92709  | 0.82027  | NA       | 0       | 0.91781 | 0       | 0       | 0       | 0       |
| ENSMUSG00000063785 | 12_Utp14a        | 1056.18 | -0.13586 | 0.40668  | 0.5236   | 1034.88 | 925.148 | 1058.91 | 881.848 | 1221.97 | 1214.31 |
| ENSMUSG00000063787 | 3_Chchd1         | 530.923 | -0.52315 | 0.00011  | 0.00053  | 461.876 | 413.013 | 431.451 | 609.539 | 615.02  | 654.639 |
| ENSMUSG00000063796 | 8_Slc22a8        | 240.457 | -1.29272 | 0.00013  | 0.00062  | 137.174 | 199.164 | 81.2705 | 476.09  | 302.131 | 246.914 |
| ENSMUSG00000063800 | 5_Prp38a         | 1050.63 | -0.24844 | 0.08202  | 0.14613  | 1012.31 | 843.463 | 1025.44 | 1018.9  | 1205.83 | 1197.85 |
| ENSMUSG00000063801 | 7_Ap3s2          | 1406.23 | 0.0438   | 0.67735  | 0.7666   | 1428.17 | 1411.58 | 1442.55 | 1406.63 | 1327.76 | 1420.71 |
| ENSMUSG00000063802 | 5_Hsbbp1         | 445.959 | 1.33671  | 1.89E-06 | 1.59E-05 | 552.168 | 630.532 | 735.02  | 378.708 | 164.065 | 215.259 |
| ENSMUSG00000063804 | 7_Lin28b         | 2.43414 | 0.38001  | 0.81102  | NA       | 2.60457 | 5.50683 | 0       | 0.90169 | 1.79306 | 3.79868 |
| ENSMUSG00000063808 | 14_Gpatch1       | 501.919 | 0.23847  | 0.12769  | 0.20987  | 520.913 | 555.272 | 552.161 | 436.416 | 412.404 | 534.348 |
| ENSMUSG00000063810 | 6_Alms1          | 474.161 | -0.36477 | 0.02642  | 0.0572   | 448.853 | 382.725 | 411.133 | 454.449 | 566.607 | 581.198 |
| ENSMUSG00000063820 | 11_Arl9          | 3.59465 | 0.33618  | 0.77817  | 0.84494  | 3.47275 | 2.75342 | 5.97577 | 5.41011 | 2.68959 | 1.26623 |
| ENSMUSG00000063821 | 5_Dupd1          | 4.40776 | -1.8903  | 0.21781  | 0.32219  | 0       | 5.50683 | 0       | 9.01685 | 1.79306 | 10.1298 |
| ENSMUSG00000063838 | 6_1700027J19Rik  | 470.403 | 0.96584  | 2.39E-08 | 3.61E-07 | 599.05  | 633.286 | 633.432 | 352.559 | 254.615 | 349.479 |
| ENSMUSG00000063846 | 7_Gm21731        | 0.34861 | -0.03469 | 0.99322  | NA       | 0       | 0       | 1.19515 | 0       | 0.89653 | 0       |
| ENSMUSG00000063849 | 5_Ppcdc          | 353.203 | 0.28919  | 0.08133  | 0.14522  | 340.33  | 437.793 | 387.23  | 309.278 | 319.165 | 325.42  |
| ENSMUSG00000063851 | 12_Rnf183        | 93.8804 | 1.74453  | 1.20E-07 | 1.47E-06 | 120.678 | 138.589 | 175.688 | 37.8708 | 60.0675 | 30.3894 |
| ENSMUSG00000063856 | 7_Gpx1           | 4616.08 | 0.86008  | 6.87E-07 | 6.62E-06 | 5769.11 | 5598.61 | 6490.88 | 4052.17 | 2547.94 | 3237.74 |
| ENSMUSG00000063870 | 12_Chdd4         | 7705.5  | 0.28604  | 0.02906  | 0.06183  | 7836.27 | 8872.43 | 8689.97 | 6229.74 | 6623.57 | 7981.03 |
| ENSMUSG00000063873 | 10_Slc24a3       | 371.169 | -1.13418 | 3.49E-05 | 0.0002   | 194.474 | 326.739 | 175.688 | 608.638 | 550.47  | 371.004 |
| ENSMUSG00000063882 | 12_Uqcrh         | 4036.54 | -0.80197 | 6.60E-14 | 4.75E-12 | 3068.18 | 2927.8  | 2830.12 | 4743.77 | 5237.53 | 5411.85 |
| ENSMUSG00000063884 | 6_Ptcd3          | 955.82  | -0.42417 | 0.0012   | 0.00421  | 854.297 | 757.19  | 837.803 | 1008.99 | 1191.49 | 1085.16 |
| ENSMUSG00000063887 | 13_Nlgn1         | 67.2088 | -1.73674 | 5.74E-05 | 0.00031  | 29.5184 | 38.5478 | 25.0982 | 124.433 | 136.273 | 49.3828 |
| ENSMUSG00000063888 | 6_Rpl711         | 2052.58 | -0.02176 | 0.84334  | 0.8933   | 2069.76 | 1941.16 | 2101.08 | 2208.23 | 1955.33 | 2039.89 |
| ENSMUSG00000063889 | 16_Crem          | 181.871 | -0.46295 | 0.05334  | 0.10222  | 172.769 | 138.589 | 148.199 | 225.421 | 249.235 | 157.012 |
| ENSMUSG00000063894 | 14_Zkscan8       | 1150.71 | -0.50231 | 0.00013  | 0.00062  | 952.403 | 941.669 | 963.294 | 1198.34 | 1502.59 | 1346    |

|                     |                  |         |          |          |          |         |         |         |         |         |         |
|---------------------|------------------|---------|----------|----------|----------|---------|---------|---------|---------|---------|---------|
| ENSMUSG000000063895 | 6_Nupl1          | 1362.39 | -0.06659 | 0.65411  | 0.74775  | 1351.77 | 1274.83 | 1366.06 | 1152.35 | 1583.27 | 1446.03 |
| ENSMUSG000000063902 | 12_Gm7964        | 881.65  | 0.23565  | 0.08672  | 0.15287  | 931.566 | 890.271 | 1038.59 | 725.857 | 840.049 | 863.567 |
| ENSMUSG000000063903 | 5_Kik1           | 9.6331  | 6.70023  | 2.15E-05 | 0.00013  | 34.7275 | 2.75342 | 20.3176 | 0       | 0       | 0       |
| ENSMUSG000000063904 | 3_4930533O14Rik  | 2203.91 | 0.80421  | 3.06E-08 | 4.47E-07 | 2614.12 | 2728.64 | 3064.38 | 1669.02 | 1349.28 | 1798.04 |
| ENSMUSG000000063919 | 10_Srrm4         | 77.6051 | -1.28174 | 0.00214  | 0.00687  | 64.2459 | 41.3013 | 29.8789 | 164.107 | 97.7218 | 68.3763 |
| ENSMUSG000000063929 | 6_Cyp4a32        | 15.6757 | 0.26884  | 0.66453  | 0.75593  | 13.891  | 22.9451 | 14.3418 | 8.11517 | 17.0341 | 17.7272 |
| ENSMUSG000000063931 | 14_Pepd          | 773.63  | 0.78702  | 6.16E-06 | 4.45E-05 | 908.993 | 1035.28 | 993.173 | 621.261 | 441.093 | 641.977 |
| ENSMUSG000000063932 | 4_Poteg          | 0.14942 | -0.99647 | 0.80707  | NA       | 0       | 0       | 0       | 0       | 0.89653 | 0       |
| ENSMUSG000000063935 | 3_Zar1           | 0.15028 | -0.99647 | 0.80707  | NA       | 0       | 0       | 0       | 0.90169 | 0       | 0       |
| ENSMUSG000000063952 | 15_Brpf3         | 929.854 | 0.79186  | 9.32E-08 | 1.18E-06 | 1086.1  | 1191.31 | 1258.5  | 733.07  | 578.262 | 731.879 |
| ENSMUSG000000063953 | 2_Amd2           | 390.789 | -0.22902 | 0.20662  | 0.30906  | 427.149 | 326.739 | 325.082 | 388.626 | 470.679 | 406.459 |
| ENSMUSG000000063954 | 7_Hist2h2aa2     | 51.7378 | 1.56202  | 0.29154  | 0.40529  | 59.905  | 66.9998 | 105.174 | 61.3146 | 17.0341 | 0       |
| ENSMUSG000000063971 | 6_1700011A15Rik  | 0.19919 | 0.92709  | 0.82027  | NA       | 0       | 0       | 1.19515 | 0       | 0       | 0       |
| ENSMUSG000000063972 | 13_Nr6a1         | 322.475 | 0.0518   | 0.79106  | 0.85512  | 345.539 | 320.314 | 317.911 | 245.258 | 348.75  | 357.076 |
| ENSMUSG000000063975 | 13_Slco1a5       | 116.58  | 0.37155  | 0.12493  | 0.20621  | 130.228 | 113.808 | 150.589 | 90.1685 | 105.791 | 108.896 |
| ENSMUSG000000064010 | 12_Dppa1         | 0.71974 | -0.40283 | 0.89458  | NA       | 0.86819 | 0.91781 | 0       | 0       | 0       | 2.53245 |
| ENSMUSG000000064016 | 4_Gm648          | 0.2894  | 1.67273  | 0.67976  | NA       | 1.73638 | 0       | 0       | 0       | 0       | 0       |
| ENSMUSG000000064023 | 4_Kik8           | 49.2137 | 1.0298   | 0.00404  | 0.01183  | 58.1686 | 56.9039 | 83.6608 | 32.4607 | 34.9647 | 29.1232 |
| ENSMUSG000000064030 | 14_Pym1          | 493.513 | 0.92732  | 5.91E-06 | 4.29E-05 | 640.723 | 577.3   | 721.873 | 383.216 | 249.235 | 388.732 |
| ENSMUSG000000064036 | 15_Mro           | 6.50756 | -0.21362 | 0.81104  | 0.86973  | 6.94551 | 6.42464 | 4.78062 | 10.8202 | 6.27571 | 3.79868 |
| ENSMUSG000000064037 | 13_Gpn1          | 589.77  | -0.19088 | 0.13109  | 0.21428  | 574.741 | 548.848 | 528.258 | 626.671 | 632.054 | 628.049 |
| ENSMUSG000000064039 | 3_Ccr1l1         | 0.15028 | -0.99647 | 0.80707  | NA       | 0       | 0       | 0       | 0.90169 | 0       | 0       |
| ENSMUSG000000064057 | 12_Scgb3a1       | 2.04293 | 0.17888  | 0.90706  | NA       | 3.47275 | 1.83561 | 1.19515 | 0.90169 | 3.58612 | 1.26623 |
| ENSMUSG000000064061 | 13_Dzip3         | 343.73  | -0.70597 | 0.00019  | 0.00089  | 243.961 | 288.191 | 252.178 | 390.43  | 512.815 | 374.803 |
| ENSMUSG000000064063 | 5_BC048507       | 3.08554 | -0.62635 | 0.72771  | 0.80619  | 2.60457 | 0       | 4.78062 | 0       | 9.86184 | 1.26623 |
| ENSMUSG000000064065 | 15_Ipcef1        | 11.1586 | 0.71784  | 0.40241  | 0.51998  | 23.4411 | 2.75342 | 15.537  | 10.8202 | 8.06878 | 6.33113 |
| ENSMUSG000000064068 | 13_Mtx1          | 637.986 | 0.58406  | 3.03E-05 | 0.00018  | 721.465 | 758.107 | 816.29  | 530.191 | 459.92  | 541.945 |
| ENSMUSG000000064080 | 12_Fbln2         | 973.403 | 0.49814  | 0.00737  | 0.01952  | 1024.46 | 1307.87 | 1086.4  | 942.261 | 622.192 | 857.236 |
| ENSMUSG000000064081 | 3_Gm8973         | 0.29767 | 1.70332  | 0.67406  | NA       | 0.86819 | 0.91781 | 0       | 0       | 0       | 0       |
| ENSMUSG000000064090 | 14_Vrk2          | 319.34  | -0.08002 | 0.68308  | 0.77115  | 331.648 | 277.177 | 322.692 | 265.997 | 385.508 | 333.018 |
| ENSMUSG000000064105 | 12_Cnnm2         | 155.55  | 0.23085  | 0.2836   | 0.39673  | 151.065 | 164.287 | 188.834 | 153.287 | 126.411 | 149.415 |
| ENSMUSG000000064109 | 7_Hcst           | 6.95112 | 1.32519  | 0.16679  | 0.26063  | 10.4183 | 11.0137 | 8.36608 | 7.21348 | 0.89653 | 3.79868 |
| ENSMUSG000000064115 | 13_Cadm2         | 191.45  | -1.48728 | 2.31E-07 | 2.58E-06 | 105.051 | 124.822 | 71.7092 | 308.376 | 342.475 | 196.265 |
| ENSMUSG000000064120 | 13_Mocs1         | 786.23  | 0.89023  | 1.22E-07 | 1.49E-06 | 943.721 | 962.778 | 1158.1  | 631.18  | 458.127 | 563.471 |
| ENSMUSG000000064125 | 14_Prr36         | 25.763  | -0.02131 | 0.96818  | 0.97945  | 32.9912 | 31.2054 | 11.9515 | 27.0506 | 19.7237 | 31.6557 |
| ENSMUSG000000064127 | 13_Med14         | 2960.9  | -0.06128 | 0.71148  | 0.79371  | 2959.65 | 2691.92 | 3041.67 | 2319.14 | 3334.2  | 3418.81 |
| ENSMUSG000000064128 | 6_Cenpj          | 342.438 | 0.05376  | 0.78859  | 0.85309  | 349.012 | 289.109 | 408.743 | 279.522 | 371.164 | 357.076 |
| ENSMUSG000000064137 | 6_Rhox8          | 0.19919 | 0.92709  | 0.82027  | NA       | 0       | 0       | 1.19515 | 0       | 0       | 0       |
| ENSMUSG000000064138 | 13_Fam172a       | 620.97  | -0.31554 | 0.01952  | 0.04432  | 527.859 | 560.779 | 572.479 | 660.935 | 750.396 | 653.373 |
| ENSMUSG000000064140 | 2_Trim38         | 1.84423 | -1.48146 | 0.40963  | NA       | 0.86819 | 0.91781 | 1.19515 | 2.70506 | 5.37918 | 0       |
| ENSMUSG000000064141 | 14_Zfp69         | 37.8816 | -0.23099 | 0.56447  | 0.66981  | 40.8049 | 34.8766 | 28.6837 | 51.3961 | 32.2751 | 39.253  |
| ENSMUSG000000064145 | 12_Arih2         | 1558.66 | 0.11146  | 0.28398  | 0.39716  | 1687.76 | 1574.95 | 1593.14 | 1476.96 | 1503.48 | 1515.67 |
| ENSMUSG000000064147 | 6_Rab44          | 110.755 | 0.38229  | 0.2687   | 0.38015  | 146.724 | 86.2737 | 142.223 | 90.1685 | 63.6537 | 135.486 |
| ENSMUSG000000064158 | 4_Izumot1        | 5.10513 | 0.53616  | 0.58693  | 0.68962  | 6.07732 | 7.34244 | 4.78062 | 6.3118  | 3.58612 | 2.53245 |
| ENSMUSG000000064168 | 4_Hist1h2bh      | 0.15028 | -0.99647 | 0.80707  | NA       | 0       | 0       | 0       | 0.90169 | 0       | 0       |
| ENSMUSG000000064177 | 8_Ghrl           | 11.1378 | -1.04673 | 0.14959  | 0.23847  | 11.2864 | 5.50683 | 4.78062 | 18.0337 | 10.7584 | 16.4609 |
| ENSMUSG000000064179 | 13_Tnnt1         | 48.8596 | -0.93971 | 0.01133  | 0.02808  | 28.6502 | 33.9588 | 38.2449 | 82.9551 | 51.1022 | 58.2464 |
| ENSMUSG000000064181 | 5_Rab3ip         | 472.981 | 0.0074   | 0.95936  | 0.97364  | 477.504 | 500.204 | 444.597 | 512.157 | 443.783 | 459.64  |
| ENSMUSG000000064201 | 8_Krt2           | 0.21104 | -0.99647 | 0.80707  | NA       | 0       | 0       | 0       | 0       | 0       | 1.26623 |
| ENSMUSG000000064202 | 15_4430402I18Rik | 35.3066 | -0.60477 | 0.11931  | 0.19885  | 26.9138 | 27.5342 | 29.8789 | 42.3792 | 48.4127 | 36.7206 |
| ENSMUSG000000064210 | 6_Ano6           | 1356.38 | -0.64665 | 0.00107  | 0.00378  | 1078.29 | 1299.61 | 793.582 | 1861.08 | 1720.44 | 1385.25 |
| ENSMUSG000000064215 | 13_Ilf27         | 2918.17 | -0.33865 | 0.02307  | 0.05117  | 2804.25 | 2827.76 | 2097.5  | 3441.73 | 2996.21 | 3341.57 |
| ENSMUSG000000064220 | 6_Hist2h2aa1     | 10.0331 | -0.2683  | 0.93855  | 0.95964  | 0       | 16.5205 | 10.7564 | 0       | 0       | 32.9219 |
| ENSMUSG000000064224 | 10_Gsdma3        | 0       | NA       | NA       | NA       | 0       | 0       | 0       | 0       | 0       | 0       |
| ENSMUSG000000064225 | 6_Paqr9          | 73.3191 | -0.98691 | 0.0139   | 0.0333   | 57.3004 | 57.8218 | 32.2692 | 141.565 | 91.4461 | 59.5127 |
| ENSMUSG000000064232 | 2_Gm5414         | 2.56451 | 1.39742  | 0.32146  | 0.43722  | 2.60457 | 3.67122 | 4.78062 | 0.90169 | 0.89653 | 2.53245 |
| ENSMUSG000000064246 | 10_Chil1         | 1760.57 | 1.41754  | 0.00161  | 0.00539  | 4053.57 | 1584.13 | 2048.49 | 1146.04 | 892.944 | 838.242 |
| ENSMUSG000000064247 | 14_Plcxd1        | 58.2903 | -0.06774 | 0.84039  | 0.8914   | 58.1686 | 57.8218 | 54.9771 | 78.4466 | 48.4127 | 51.9153 |
| ENSMUSG000000064254 | 6_Ethe1          | 277.854 | 0.81705  | 0.00024  | 0.00106  | 369.848 | 318.479 | 375.278 | 251.57  | 150.617 | 201.33  |
| ENSMUSG000000064262 | 7_Gimap8         | 81.6333 | -0.27696 | 0.41271  | 0.52878  | 102.446 | 56.9039 | 62.148  | 91.9719 | 106.687 | 69.6425 |
| ENSMUSG000000064264 | 14_Zfp428        | 31.0163 | 0.78217  | 0.07456  | 0.13537  | 33.8593 | 45.8903 | 38.2449 | 29.7556 | 20.6202 | 17.7272 |
| ENSMUSG000000064267 | 13_Hvcn1         | 193.178 | -0.40566 | 0.17656  | 0.27276  | 163.219 | 212.013 | 123.101 | 307.475 | 165.858 | 187.402 |
| ENSMUSG000000064272 | 3_Gpbar1         | 0.76215 | 1.77194  | 0.60562  | NA       | 0       | 3.67122 | 0       | 0.90169 | 0       | 0       |
| ENSMUSG000000064280 | 13_Ccdc146       | 2.53713 | -2.71908 | 0.0941   | 0.16346  | 0.86819 | 0       | 1.19515 | 4.50843 | 3.58612 | 5.06491 |
| ENSMUSG000000064284 | 12_Cdpf1         | 189.289 | 0.54096  | 0.03447  | 0.07129  | 246.566 | 227.616 | 198.396 | 194.764 | 107.584 | 160.811 |
| ENSMUSG000000064288 | 4_Hist1h4k       | 0.39838 | 2.70758  | 0.60634  | NA       | 0       | 0       | 2.39031 | 0       | 0       | 0       |
| ENSMUSG000000064289 | 15_Tank          | 1536.06 | -0.1606  | 0.3455   | 0.46217  | 1482    | 1358.35 | 1510.67 | 1240.72 | 1767.06 | 1857.55 |
| ENSMUSG000000064293 | 14_Cntn4         | 50.2381 | -2.13189 | 9.42E-07 | 8.69E-06 | 18.232  | 26.6164 | 10.7564 | 100.087 | 88.7565 | 56.9802 |
| ENSMUSG000000064294 | 12_Aox3          | 605.899 | -0.36731 | 0.0162   | 0.03801  | 519.177 | 608.505 | 458.939 | 677.166 | 705.57  | 666.035 |
| ENSMUSG000000064302 | 13_Claspl        | 1743.63 | 0.02641  | 0.79465  | 0.85768  | 1735.51 | 1746.58 | 1796.32 | 1721.32 | 1679.2  | 1782.85 |
| ENSMUSG000000064307 | 12_Lrrc51        | 115.257 | 0.0816   | 0.72626  | 0.805    | 130.228 | 121.15  | 103.978 | 119.022 | 112.066 | 105.097 |
| ENSMUSG000000064308 | 10_2410137M14Rik | 1.87407 | -0.91066 | 0.56029  | NA       | 1.73638 | 0.91781 | 1.19515 | 1.80337 | 1.79306 | 3.79868 |
| ENSMUSG000000064310 | 10_Zpld1         | 2.7164  | -1.68039 | 0.26645  | 0.37769  | 0.86819 | 1.83561 | 1.19515 | 0.90169 | 8.96531 | 2.53245 |
| ENSMUSG000000064317 | 4_Gm10146        | 246.195 | 0.59045  | 0.00656  | 0.01771  | 278.688 | 320.314 | 289.227 | 249.767 | 163.169 | 176.006 |
| ENSMUSG000000064325 | 3_Hhip           | 439.049 | -0.3476  | 0.02176  | 0.04866  | 397.63  | 416.684 | 344.204 | 477.893 | 521.781 | 476.101 |
| ENSMUSG000000064326 | 12_Siva1         | 220.861 | 0.95881  | 0.00041  | 0.00169  | 263.061 | 278.095 | 334.643 | 210.994 | 106.687 | 131.688 |
| ENSMUSG000000064329 | 13_Scn1a         | 19.4367 | -1.40364 | 0.01994  | 0.04514  | 13.0228 | 12.8493 | 5.97577 | 30.6573 | 37.6543 | 16.4609 |
| ENSMUSG000000064330 | 9_Pde6h          | 18.7726 | -1.21636 | 0.24135  | 0.34902  | 19.9683 | 13.7671 | 0       | 55.9045 | 17.9306 | 5.06491 |
| ENSMUSG000000064341 | 1_mtNd1          | 57609.6 | -1.04313 | 1.89E-23 | 5.18E-21 | 40452.4 | 36429.5 | 36051.8 | 74333.1 | 82687   | 75703.9 |

|                     |                  |         |          |          |          |         |         |         |         |         |         |
|---------------------|------------------|---------|----------|----------|----------|---------|---------|---------|---------|---------|---------|
| ENSMUSG000000064345 | 1_mt-Nd2         | 35364.9 | -0.91627 | 2.54E-23 | 6.73E-21 | 25121.9 | 23304   | 25067.2 | 45406.2 | 47756.4 | 45533.5 |
| ENSMUSG000000064351 | 1_mt-Co1         | 226908  | -0.95727 | 6.04E-20 | 1.08E-17 | 161696  | 148792  | 152334  | 295915  | 323890  | 278823  |
| ENSMUSG000000064354 | 1_mt-Co2         | 109203  | -0.99773 | 2.96E-23 | 7.74E-21 | 76286.8 | 71420.9 | 70927.6 | 141914  | 156229  | 138442  |
| ENSMUSG000000064356 | 3_mt-Atp8        | 14368.8 | -0.92492 | 8.78E-21 | 1.77E-18 | 10498.1 | 9453.4  | 9791.9  | 18988.6 | 19518.4 | 17962.7 |
| ENSMUSG000000064357 | 1_mt-Atp6        | 104889  | -0.98002 | 1.12E-20 | 2.23E-18 | 74223.2 | 67466.1 | 70030.1 | 140531  | 148620  | 128461  |
| ENSMUSG000000064358 | 1_mt-Co3         | 112640  | -1.05158 | 8.88E-17 | 1.10E-14 | 77195.8 | 73508.9 | 69238.9 | 151098  | 171843  | 132958  |
| ENSMUSG000000064360 | 1_mt-Nd3         | 6274.45 | -1.20595 | 1.28E-17 | 1.77E-15 | 3929.42 | 3972.26 | 3482.68 | 8886.11 | 9995.42 | 7380.84 |
| ENSMUSG000000064363 | 1_mt-Nd4         | 69567.9 | -1.01075 | 7.18E-24 | 2.06E-21 | 47568.9 | 44915.6 | 45962   | 95042.2 | 98091.2 | 85827.4 |
| ENSMUSG000000064367 | 1_mt-Nd5         | 51392.9 | -1.0438  | 4.77E-27 | 1.80E-24 | 35107.8 | 33360.4 | 32247.6 | 69622.7 | 72437   | 65581.7 |
| ENSMUSG000000064368 | 1_mt-Nd6         | 15443.2 | -1.02672 | 6.37E-28 | 2.77E-25 | 10103.1 | 10087.6 | 10316.6 | 21961.5 | 20133.4 | 20057   |
| ENSMUSG000000064370 | 1_mt-Cytb        | 95828.1 | -1.05143 | 6.09E-23 | 1.57E-20 | 66134.3 | 61955.5 | 59038.2 | 124385  | 140078  | 123377  |
| ENSMUSG000000064373 | 11_Sepp1         | 5385.19 | -0.708   | 6.20E-08 | 8.27E-07 | 4188.14 | 4368.75 | 3712.15 | 7474.97 | 6636.12 | 5931.01 |
| ENSMUSG000000065947 | 3_mt-Nd4l        | 9512.98 | -1.12952 | 1.89E-35 | 1.89E-32 | 6058.22 | 5918.93 | 5927.96 | 12937.4 | 13595.9 | 12639.5 |
| ENSMUSG000000065952 | 13_C330021F23Rik | 43.5708 | -1.23575 | 0.00373  | 0.01104  | 32.9912 | 31.2054 | 13.1467 | 65.823  | 66.3433 | 51.9153 |
| ENSMUSG000000065954 | 10_Tacc1         | 2487.38 | -0.03334 | 0.73809  | 0.81477  | 2337.16 | 2537.73 | 2501.46 | 2543.65 | 2480.7  | 2523.59 |
| ENSMUSG000000065968 | 7_lftm7          | 1.26129 | -3.811   | 0.1128   | NA       | 0       | 0       | 0       | 4.50843 | 1.79306 | 1.26623 |
| ENSMUSG000000065979 | 12_Cpped1        | 1208.95 | 0.18165  | 0.11779  | 0.19679  | 1234.56 | 1277.59 | 1342.16 | 1123.5  | 1070.46 | 1205.45 |
| ENSMUSG000000065987 | 12_Cd209b        | 16.3035 | -1.11964 | 0.09463  | 0.16419  | 10.4183 | 11.0137 | 9.56123 | 37.8708 | 18.8271 | 10.1298 |
| ENSMUSG000000065990 | 12_Aurkaip1      | 959.331 | 0.32945  | 0.07087  | 0.12984  | 1036.62 | 982.97  | 1186.79 | 1063.99 | 699.294 | 786.327 |
| ENSMUSG000000065999 | 13_Gm13154       | 1.00964 | -2.20816 | 0.34768  | NA       | 0       | 0       | 1.19515 | 1.80337 | 1.79306 | 1.26623 |
| ENSMUSG000000066000 | 12_2610305D13Rik | 51.8789 | -1.31118 | 0.00026  | 0.00113  | 36.4639 | 26.6164 | 26.2934 | 84.7584 | 78.8947 | 58.2464 |
| ENSMUSG000000066007 | 15_Zfp600        | 0.84902 | 3.18694  | 0.24212  | NA       | 0.86819 | 1.83561 | 2.39031 | 0       | 0       | 0       |
| ENSMUSG000000066009 | 8_Gm13051        | 0.51697 | 0.77694  | 0.84161  | NA       | 0       | 1.83561 | 0       | 0       | 0       | 1.26623 |
| ENSMUSG000000066026 | 14_Dhrs3         | 1907.26 | 0.13106  | 0.42146  | 0.537    | 1858.79 | 2073.32 | 2047.3  | 1662.71 | 1550.1  | 2251.35 |
| ENSMUSG000000066036 | 14_Ubr4          | 6200.06 | 0.93437  | 2.92E-13 | 1.83E-11 | 7194.68 | 8188.66 | 9037.76 | 4332.6  | 3909.77 | 4536.89 |
| ENSMUSG000000066037 | 14_Hnmp1         | 3151.27 | -0.34859 | 0.00412  | 0.01197  | 2712.22 | 2834.18 | 2770.37 | 3096.39 | 3845.22 | 3649.27 |
| ENSMUSG000000066042 | 4_Med18          | 88.3879 | 0.61378  | 0.03635  | 0.07441  | 100.71  | 122.068 | 96.8075 | 58.6096 | 60.9641 | 91.1683 |
| ENSMUSG000000066043 | 13_Phac1         | 1792.83 | 0.456    | 0.00405  | 0.01183  | 1976    | 1970.53 | 2273.18 | 1320.97 | 1381.55 | 1834.76 |
| ENSMUSG000000066057 | 6_Gm1976         | 43.1391 | 0.06343  | 0.87299  | 0.91381  | 47.7504 | 46.8081 | 37.0498 | 27.9522 | 44.8265 | 54.4478 |
| ENSMUSG000000066058 | 11_Cldn19        | 243.384 | -0.92999 | 0.00324  | 0.00982  | 129.36  | 256.986 | 115.93  | 405.758 | 285.097 | 267.174 |
| ENSMUSG000000066060 | 5_Gm12866        | 0.65458 | -1.52643 | 0.6202   | NA       | 0.86819 | 0       | 0       | 0       | 1.79306 | 1.26623 |
| ENSMUSG000000066071 | 6_Cyp4a12a       | 298.071 | -0.9194  | 1.70E-05 | 0.00011  | 226.597 | 215.684 | 174.492 | 378.708 | 315.579 | 477.368 |
| ENSMUSG000000066072 | 13_Cyp4a10       | 2.65556 | -1.04699 | 0.49397  | 0.60529  | 1.73638 | 0       | 3.58546 | 1.80337 | 6.27571 | 2.53245 |
| ENSMUSG000000066090 | 5_Insl5          | 2.42661 | -3.69892 | 0.04032  | NA       | 0.86819 | 0       | 0       | 5.41011 | 4.48265 | 3.79868 |
| ENSMUSG000000066097 | 6_Cyp2j11        | 0.19919 | 0.92709  | 0.82027  | NA       | 0       | 0       | 1.19515 | 0       | 0       | 0       |
| ENSMUSG000000066107 | 6_Gm12666        | 49.9492 | 0.06139  | 0.85598  | 0.90251  | 59.0368 | 44.9725 | 49.0013 | 55.9045 | 43.93   | 46.8504 |
| ENSMUSG000000066108 | 7_Muc5b          | 274.852 | 1.02201  | 0.0011   | 0.00389  | 322.966 | 541.505 | 239.031 | 165.008 | 142.548 | 238.051 |
| ENSMUSG000000066113 | 15_Adamts1       | 542.975 | 0.05064  | 0.75332  | 0.82609  | 513.968 | 605.752 | 537.819 | 607.736 | 467.092 | 525.484 |
| ENSMUSG000000066129 | 14_Kndc1         | 172.98  | 0.13088  | 0.57418  | 0.67854  | 197.947 | 178.054 | 167.322 | 192.059 | 178.41  | 124.09  |
| ENSMUSG000000066141 | 2_Gm11232        | 0.15297 | 0.92709  | 0.82027  | NA       | 0       | 0.91781 | 0       | 0       | 0       | 0       |
| ENSMUSG000000066148 | 3_Prrp4          | 842.606 | 0.16314  | 0.25138  | 0.3605   | 858.638 | 890.271 | 920.269 | 698.806 | 783.568 | 904.086 |
| ENSMUSG000000066149 | 11_Cdc26         | 740.73  | -0.12625 | 0.28921  | 0.40277  | 704.101 | 688.354 | 732.629 | 757.416 | 769.223 | 792.658 |
| ENSMUSG000000066150 | 12_Slc31a1       | 2800.19 | -0.18309 | 0.14425  | 0.23128  | 2695.73 | 2519.38 | 2652.05 | 2586.03 | 3134.27 | 3213.68 |
| ENSMUSG000000066151 | 11_Fkbp15        | 1993.95 | 0.56109  | 2.32E-05 | 0.00014  | 2287.68 | 2233.94 | 2607.83 | 1522.05 | 1499    | 1813.24 |
| ENSMUSG000000066152 | 11_Slc31a2       | 2711.08 | 0.25766  | 0.00875  | 0.02256  | 2960.52 | 2843.36 | 3053.62 | 2466.11 | 2411.67 | 2531.19 |
| ENSMUSG000000066153 | 2_Mup21          | 0       | NA       | NA       | NA       | 0       | 0       | 0       | 0       | 0       | 0       |
| ENSMUSG000000066170 | 6_E230001N04Rik  | 5.97707 | -0.51926 | 0.57545  | 0.67971  | 5.20913 | 4.58903 | 4.78062 | 4.50843 | 5.37918 | 11.396  |
| ENSMUSG000000066176 | 3_Gm12511        | 1.31829 | -1.70579 | 0.3923   | NA       | 0.86819 | 0.91781 | 0       | 0.90169 | 2.68959 | 2.53245 |
| ENSMUSG000000066178 | 2_6030445D17Rik  | 4.60901 | -0.43663 | 0.67496  | 0.76455  | 4.34094 | 3.67122 | 3.58546 | 3.60674 | 3.58612 | 8.86359 |
| ENSMUSG000000066189 | 9_Cacng3         | 6.26446 | -2.29605 | 0.07221  | 0.13179  | 3.47275 | 2.75342 | 0       | 24.3455 | 4.48265 | 2.53245 |
| ENSMUSG000000066191 | 11_Anks6         | 161.626 | 0.74035  | 0.00672  | 0.01805  | 205.761 | 188.15  | 212.737 | 159.598 | 80.6878 | 122.824 |
| ENSMUSG000000066196 | 11_Spag8         | 8.85468 | -0.25731 | 0.7434   | 0.81845  | 5.20913 | 11.9315 | 7.17092 | 12.6236 | 9.86184 | 6.33113 |
| ENSMUSG000000066197 | 4_Gpr139         | 0.95686 | -2.20873 | 0.42328  | NA       | 0.86819 | 0       | 0       | 3.60674 | 0       | 1.26623 |
| ENSMUSG000000066224 | 13_Arid3c        | 0.1447  | 0.92709  | 0.82027  | NA       | 0.86819 | 0       | 0       | 0       | 0       | 0       |
| ENSMUSG000000066232 | 3_Ipo7           | 2240.16 | -0.3358  | 0.03294  | 0.06865  | 2041.98 | 1835.61 | 2064.03 | 1991.82 | 2850.97 | 2656.54 |
| ENSMUSG000000066233 | 5_Tmem42         | 133.842 | -0.28876 | 0.23014  | 0.33627  | 125.887 | 120.233 | 115.93  | 178.534 | 143.445 | 119.025 |
| ENSMUSG000000066235 | 6_Pomgnt2        | 158.036 | 0.43298  | 0.10921  | 0.18517  | 153.669 | 211.095 | 180.468 | 179.435 | 105.791 | 117.759 |
| ENSMUSG000000066258 | 13_Trim12a       | 3.15612 | 0.12727  | 0.92735  | 0.95195  | 6.07732 | 3.67122 | 0       | 1.80337 | 3.58612 | 3.79868 |
| ENSMUSG000000066272 | 4_Olf559         | 0.14942 | -0.99647 | 0.80707  | NA       | 0       | 0       | 0       | 0       | 0.89653 | 0       |
| ENSMUSG000000066278 | 6_Vps37b         | 1033.58 | 1.07737  | 4.62E-10 | 1.21E-08 | 1220.67 | 1260.15 | 1727    | 687.986 | 595.296 | 710.353 |
| ENSMUSG000000066279 | 2_Chna10         | 2.41223 | -2.72363 | 0.14493  | NA       | 0       | 1.83561 | 0       | 5.41011 | 0.89653 | 6.33113 |
| ENSMUSG000000066306 | 12_Numa1         | 4920.8  | 0.86914  | 3.92E-08 | 5.53E-07 | 5587.66 | 6481.54 | 7009.58 | 3819.54 | 2808.83 | 3817.67 |
| ENSMUSG000000066319 | 6_Rtp3           | 10.7733 | -0.90477 | 0.35408  | 0.47087  | 10.4183 | 11.9315 | 0       | 17.132  | 18.8271 | 6.33113 |
| ENSMUSG000000066324 | 2_Impad1         | 1997.94 | -0.5848  | 1.20E-08 | 2.00E-07 | 1653.03 | 1559.35 | 1582.38 | 2301.1  | 2461.87 | 2429.89 |
| ENSMUSG000000066357 | 6_Wdr6           | 1511.01 | 0.27362  | 0.25201  | 0.36116  | 1475.92 | 2013.67 | 1472.43 | 1926    | 1006.8  | 1171.26 |
| ENSMUSG000000066361 | 3_Serpina3c      | 17.9733 | -0.66524 | 0.239    | 0.34659  | 14.7592 | 9.17806 | 17.9273 | 26.1489 | 17.0341 | 22.7921 |
| ENSMUSG000000066363 | 12_Serpina3f     | 33.1056 | 2.31466  | 5.03E-05 | 0.00027  | 69.4551 | 22.9451 | 72.9044 | 8.11517 | 12.5514 | 12.6623 |
| ENSMUSG000000066364 | 2_Serpina3b      | 0.96403 | 3.38075  | 0.27655  | NA       | 0       | 4.58903 | 1.19515 | 0       | 0       | 0       |
| ENSMUSG000000066366 | 14_Serpina1a     | 4.0036  | -0.50285 | 0.66372  | 0.75527  | 0.86819 | 5.50683 | 3.58546 | 5.41011 | 3.58612 | 5.06491 |
| ENSMUSG000000066368 | 1_Act11          | 0.30594 | 1.73752  | 0.66765  | NA       | 0       | 1.83561 | 0       | 0       | 0       | 0       |
| ENSMUSG000000066383 | 6_Iqcf1          | 0.45536 | 0.77574  | 0.84797  | NA       | 0       | 1.83561 | 0       | 0       | 0.89653 | 0       |
| ENSMUSG000000066392 | 11_Nrxn3         | 39.5229 | -1.90968 | 0.00462  | 0.01319  | 24.3093 | 14.6849 | 10.7564 | 129.843 | 38.5508 | 18.9934 |
| ENSMUSG000000066406 | 14_Akap13        | 4035.46 | 0.48259  | 1.25E-05 | 8.25E-05 | 4685.61 | 4495.41 | 4930.01 | 3264.1  | 3171.93 | 3665.73 |
| ENSMUSG000000066407 | 3_Gm10263        | 16.4358 | 1.49848  | 0.01351  | 0.03252  | 20.8365 | 21.1095 | 31.074  | 11.7219 | 6.27571 | 7.59736 |
| ENSMUSG000000066415 | 4_Msl2           | 1276.58 | -0.19729 | 0.14901  | 0.23774  | 1225.88 | 1145.42 | 1197.54 | 1219.98 | 1562.65 | 1308.01 |
| ENSMUSG000000066438 | 6_Plekhd1        | 19.6371 | -1.35714 | 0.0503   | 0.09765  | 18.232  | 11.0137 | 3.58546 | 41.4775 | 29.5855 | 13.9285 |
| ENSMUSG000000066440 | 4_Zfyve26        | 857.769 | 0.61047  | 5.94E-06 | 4.32E-05 | 957.612 | 1064.65 | 1088.79 | 748.399 | 640.123 | 647.042 |
| ENSMUSG000000066441 | 14_Rdh11         | 860.701 | -0.29365 | 0.01415  | 0.03384  | 770.951 | 734.244 | 816.29  | 943.163 | 979.011 | 920.547 |
| ENSMUSG000000066442 | 16_Mthfs         | 118.14  | -0.24137 | 0.37838  | 0.49583  | 131.096 | 89.0271 | 105.174 | 128.039 | 154.203 | 101.298 |

|                    |                  |         |          |          |          |         |         |         |         |         |         |
|--------------------|------------------|---------|----------|----------|----------|---------|---------|---------|---------|---------|---------|
| ENSMUSG00000066456 | 14_Hmgn3         | 2350.91 | -0.49297 | 0.00011  | 0.00053  | 2107.96 | 1828.27 | 1921.81 | 2437.26 | 2866.21 | 2943.98 |
| ENSMUSG00000066487 | 3_Gm5786         | 14.8663 | -0.00114 | 0.99892  | 0.9991   | 6.07732 | 22.9451 | 15.537  | 2.70506 | 24.2063 | 17.7272 |
| ENSMUSG00000066510 | 4_Ankdd1a        | 4.54214 | 2.17212  | 0.05786  | 0.10951  | 5.20913 | 6.42464 | 10.7564 | 1.80337 | 1.79306 | 1.26623 |
| ENSMUSG00000066537 | 4_Vmn2r57        | 4.36172 | -0.81526 | 0.4686   | 0.58201  | 5.20913 | 1.83561 | 2.39031 | 2.70506 | 8.96531 | 5.06491 |
| ENSMUSG00000066551 | 12_Hmgb1         | 5889.06 | -0.35769 | 0.0038   | 0.01121  | 5280.32 | 4713.85 | 5494.12 | 5880.79 | 7001.01 | 6964.25 |
| ENSMUSG00000066568 | 12_Lsm14a        | 3101.79 | -0.1031  | 0.3873   | 0.50469  | 2972.68 | 2869.06 | 3131.3  | 2855.64 | 3441.78 | 3340.31 |
| ENSMUSG00000066571 | 13_4931406P16Rik | 1628.42 | 0.2754   | 0.01288  | 0.03125  | 1686.02 | 1756.68 | 1908.66 | 1513.93 | 1438.93 | 1466.29 |
| ENSMUSG00000066584 | 10_Scgb2b27      | 0.14942 | -0.99647 | 0.80707  | NA       | 0       | 0       | 0       | 0       | 0.89653 | 0       |
| ENSMUSG00000066595 | 9_Mfsd7b         | 398.773 | -0.43947 | 0.00789  | 0.02068  | 294.316 | 374.465 | 347.79  | 467.073 | 488.609 | 420.387 |
| ENSMUSG00000066607 | 4_6030419C18Rik  | 103.785 | -0.07265 | 0.8122   | 0.87048  | 95.5007 | 107.383 | 101.588 | 110.006 | 139.859 | 68.3763 |
| ENSMUSG00000066613 | 14_Zfp932        | 363.658 | -0.68815 | 0.00024  | 0.00106  | 289.975 | 283.602 | 261.739 | 371.494 | 537.022 | 438.115 |
| ENSMUSG00000066621 | 12_Tecpr1        | 877.628 | 0.17532  | 0.43368  | 0.54898  | 841.275 | 1139    | 812.705 | 1100.96 | 658.95  | 712.886 |
| ENSMUSG00000066629 | 1_Rpl36-ps3      | 3.04126 | 2.31906  | 0.09635  | 0.16673  | 4.34094 | 3.67122 | 7.17092 | 0.90169 | 0.89653 | 1.26623 |
| ENSMUSG00000066632 | 2_Pgk1-rs7       | 2639.38 | -0.18676 | 0.40581  | 0.52294  | 2884.12 | 2519.38 | 2001.88 | 1924.2  | 3633.64 | 2873.07 |
| ENSMUSG00000066637 | 1_Ttc32          | 66.8047 | -0.69263 | 0.03226  | 0.06744  | 53.8277 | 58.7396 | 40.6352 | 91.9719 | 92.3426 | 63.3113 |
| ENSMUSG00000066640 | 11_Fbxl18        | 330.153 | 0.53767  | 0.00453  | 0.01298  | 329.043 | 456.149 | 387.23  | 280.424 | 239.774 | 288.7   |
| ENSMUSG00000066643 | 12_Wdr35         | 694.362 | -0.66149 | 5.04E-06 | 3.73E-05 | 557.377 | 591.067 | 463.72  | 887.259 | 815.843 | 850.904 |
| ENSMUSG00000066647 | 5_Gm5113         | 64.9325 | -0.38363 | 0.21973  | 0.32444  | 65.9823 | 54.1505 | 49.0013 | 82.0534 | 78.8947 | 59.5127 |
| ENSMUSG00000066652 | 5_Lefty2         | 0.1447  | 0.92709  | 0.82027  | NA       | 0.86819 | 0       | 0       | 0       | 0       | 0       |
| ENSMUSG00000066677 | 11_Pydc3         | 38.6809 | 3.81934  | 1.33E-09 | 3.02E-08 | 105.051 | 35.7944 | 76.4899 | 6.3118  | 7.17224 | 1.26623 |
| ENSMUSG00000066682 | 11_Pilrb2        | 8.77725 | 0.29314  | 0.74523  | 0.81993  | 18.232  | 3.67122 | 7.17092 | 11.7219 | 8.06878 | 3.79868 |
| ENSMUSG00000066684 | 10_Pilrb1        | 9.79747 | 1.34875  | 0.11205  | 0.18897  | 14.7592 | 7.34244 | 20.3176 | 2.70506 | 9.86184 | 3.79868 |
| ENSMUSG00000066687 | 4_Zbtb16         | 230.174 | 0.54081  | 0.05987  | 0.11268  | 243.961 | 381.807 | 191.225 | 162.303 | 164.962 | 236.784 |
| ENSMUSG00000066704 | 6_Cyp2b19        | 589.471 | -0.33837 | 0.12608  | 0.20764  | 562.586 | 555.272 | 442.207 | 467.073 | 677.777 | 831.911 |
| ENSMUSG00000066705 | 6_Fxyd6          | 697.43  | -0.74516 | 9.96E-05 | 0.00049  | 531.331 | 579.135 | 452.963 | 1098.25 | 759.361 | 763.535 |
| ENSMUSG00000066720 | 6_Cldn9          | 1.46316 | 1.63151  | 0.45595  | NA       | 0       | 1.83561 | 4.78062 | 0       | 0.89653 | 1.26623 |
| ENSMUSG00000066721 | 3_Zfp575         | 5.76825 | 1.09238  | 0.34887  | 0.4658   | 7.8137  | 6.42464 | 9.56123 | 9.01685 | 1.79306 | 0       |
| ENSMUSG00000066723 | 3_Vmn1r183       | 0.44354 | -0.79887 | 0.84362  | NA       | 0.86819 | 0       | 0       | 0       | 1.79306 | 0       |
| ENSMUSG00000066724 | 2_Gm10175        | 3520.72 | 0.56682  | 0.00237  | 0.00751  | 4040.55 | 4140.22 | 4430.44 | 3628.38 | 2110.43 | 2774.3  |
| ENSMUSG00000066735 | 8_Vkorc11        | 1926.21 | -0.19156 | 0.16061  | 0.25293  | 1770.24 | 1774.12 | 1850.1  | 1737.55 | 2134.64 | 2290.6  |
| ENSMUSG00000066755 | 2_Tnfsf18        | 15.0616 | 0.94546  | 0.17329  | 0.26869  | 19.1001 | 15.6027 | 25.0982 | 5.41011 | 18.8271 | 6.33113 |
| ENSMUSG00000066756 | 5_Igfl3          | 0.15028 | -0.99647 | 0.80707  | NA       | 0       | 0       | 0       | 0.90169 | 0       | 0       |
| ENSMUSG00000066760 | 12_Psg16         | 61.1317 | -1.1167  | 0.00148  | 0.00504  | 47.7504 | 41.3013 | 26.2934 | 95.5787 | 88.7565 | 67.11   |
| ENSMUSG00000066797 | 12_Pfp648        | 1.09798 | -0.31679 | 0.89276  | NA       | 0.86819 | 0.91781 | 1.19515 | 3.60674 | 0       | 0       |
| ENSMUSG00000066798 | 3_Zbtb6          | 606.925 | -0.41686 | 0.00473  | 0.01345  | 523.518 | 521.314 | 515.111 | 628.475 | 793.43  | 659.704 |
| ENSMUSG00000066800 | 11_Rnasel        | 2735.57 | 0.27453  | 0.07424  | 0.13489  | 3005.67 | 2621.25 | 3358.38 | 2071.17 | 2715.59 | 2641.35 |
| ENSMUSG00000066829 | 6_Zfp810         | 368.119 | -0.35825 | 0.02969  | 0.06292  | 335.121 | 325.821 | 307.155 | 382.315 | 473.368 | 384.933 |
| ENSMUSG00000066838 | 6_Zfp772         | 226.848 | -0.15305 | 0.37152  | 0.48897  | 224.861 | 205.588 | 213.933 | 232.635 | 244.753 | 239.317 |
| ENSMUSG00000066839 | 11_Ecsit         | 349.627 | 0.42318  | 0.01909  | 0.04347  | 378.53  | 415.766 | 407.548 | 350.756 | 250.132 | 295.031 |
| ENSMUSG00000066842 | 18_Hmcn1         | 514.994 | -0.72219 | 6.47E-05 | 0.00034  | 405.444 | 447.889 | 311.935 | 714.135 | 629.364 | 581.198 |
| ENSMUSG00000066861 | 14_Oas1g         | 1032.62 | 1.97046  | 9.92E-27 | 3.51E-24 | 1523.67 | 1353.76 | 2060.45 | 421.087 | 458.127 | 378.602 |
| ENSMUSG00000066867 | 8_Oas1e          | 35.106  | 1.35044  | 0.00405  | 0.01183  | 35.5957 | 62.4108 | 53.7819 | 16.2303 | 28.689  | 13.9285 |
| ENSMUSG00000066877 | 11_Nck2          | 858.176 | 0.76404  | 3.74E-07 | 3.92E-06 | 944.589 | 1094.94 | 1201.13 | 660.034 | 568.4   | 679.964 |
| ENSMUSG00000066878 | 4_Gm10184        | 3144.26 | -0.22178 | 0.11552  | 0.19358  | 3036.05 | 2599.23 | 3073.94 | 2889.9  | 3734.95 | 3531.51 |
| ENSMUSG00000066880 | 15_Zfp617        | 652.524 | -0.63363 | 4.60E-05 | 0.00025  | 513.968 | 526.82  | 493.599 | 688.888 | 920.737 | 771.132 |
| ENSMUSG00000066892 | 13_Fbxl12        | 254.335 | 0.34314  | 0.06889  | 0.1269   | 279.557 | 293.698 | 280.861 | 265.997 | 207.099 | 198.798 |
| ENSMUSG00000066894 | 14_Vsig10        | 2283.28 | 0.50454  | 0.00074  | 0.00278  | 2501.25 | 2597.39 | 2935.3  | 1640.17 | 1795.75 | 2229.83 |
| ENSMUSG00000066897 | 5_Olfrr2         | 0.29884 | -1.76064 | 0.66373  | NA       | 0       | 0       | 0       | 0       | 1.79306 | 0       |
| ENSMUSG00000066900 | 11_Suds3         | 3499.53 | 0.18655  | 0.1367   | 0.22121  | 3688.93 | 3589.54 | 3896.2  | 3191.06 | 2928.97 | 3702.45 |
| ENSMUSG00000066936 | 4_Gm10188        | 0.2894  | 1.67273  | 0.67976  | NA       | 1.73638 | 0       | 0       | 0       | 0       | 0       |
| ENSMUSG00000066944 | 1_4921513D11Rik  | 0.50516 | -1.00911 | 0.76476  | NA       | 0.86819 | 0       | 0       | 0       | 0.89653 | 1.26623 |
| ENSMUSG00000066952 | 11_Myo1h         | 19.432  | 0.07914  | 0.89812  | 0.93133  | 22.5729 | 23.8629 | 13.1467 | 26.1489 | 8.06878 | 22.7921 |
| ENSMUSG00000066964 | 2_Tmem211        | 23.4319 | 0.19306  | 0.67338  | 0.76339  | 26.0457 | 23.8629 | 25.0982 | 22.5421 | 21.5167 | 21.5259 |
| ENSMUSG00000066975 | 12_Cryba4        | 1618.54 | -0.99297 | 0.32047  | 0.43608  | 880.343 | 2077.91 | 289.227 | 4208.17 | 643.709 | 1611.91 |
| ENSMUSG00000066979 | 5_Bub3           | 2347.81 | 0.36584  | 0.00095  | 0.00342  | 2589.81 | 2571.69 | 2769.17 | 2026.09 | 1923.06 | 2207.03 |
| ENSMUSG00000066983 | 6_Gm16519        | 0.65455 | 1.47675  | 0.63184  | NA       | 0       | 1.83561 | 1.19515 | 0       | 0.89653 | 0       |
| ENSMUSG00000067001 | 11_Serpinb7      | 24.1339 | 0.09876  | 0.85513  | 0.90167  | 34.7275 | 16.5205 | 23.9031 | 24.3455 | 31.3786 | 13.9285 |
| ENSMUSG00000067006 | 12_Serpinb5      | 14088.2 | -0.10342 | 0.55759  | 0.6635   | 13891.9 | 12013.2 | 14845   | 10879.7 | 16491.7 | 16407.8 |
| ENSMUSG00000067028 | 11_Cntnap5b      | 4.70179 | -1.20395 | 0.3004   | 0.4151   | 4.34094 | 1.83561 | 2.39031 | 13.5253 | 3.58612 | 2.53245 |
| ENSMUSG00000067038 | 5_Rps12-ps3      | 3605.48 | -0.61796 | 3.29E-05 | 0.00019  | 3041.26 | 2432.18 | 3061.98 | 3822.24 | 4949.75 | 4325.43 |
| ENSMUSG00000067049 | 7_Unc93a         | 30.737  | -1.06982 | 0.01978  | 0.04485  | 13.891  | 26.6164 | 19.1225 | 36.9691 | 51.1022 | 36.7206 |
| ENSMUSG00000067071 | 8_Hes6           | 307.336 | 0.63604  | 0.00342  | 0.01028  | 376.794 | 355.191 | 389.62  | 288.539 | 173.03  | 260.843 |
| ENSMUSG00000067081 | 12_Asb18         | 2.49531 | -2.11563 | 0.18116  | 0.27846  | 0.86819 | 1.83561 | 0       | 5.41011 | 1.79306 | 5.06491 |
| ENSMUSG00000067085 | 1_Gm10197        | 81.4658 | 0.37782  | 0.21202  | 0.31539  | 83.3461 | 81.6847 | 112.344 | 78.4466 | 79.7912 | 53.1815 |
| ENSMUSG00000067148 | 15_Polr1c        | 686.113 | 0.35043  | 0.00938  | 0.02393  | 757.06  | 761.779 | 788.802 | 665.444 | 552.263 | 591.328 |
| ENSMUSG00000067149 | 6_Jchain         | 21.733  | -1.8321  | 0.0009   | 0.00326  | 13.0228 | 9.17806 | 5.97577 | 36.9691 | 25.9994 | 39.253  |
| ENSMUSG00000067150 | 5_Xpo5           | 1311.8  | 0.26713  | 0.07046  | 0.1292   | 1459.42 | 1353.76 | 1484.38 | 985.542 | 1263.21 | 1324.47 |
| ENSMUSG00000067158 | 9_Col4a4         | 1249.83 | -1.34685 | 1.86E-06 | 1.58E-05 | 707.574 | 1010.5  | 396.791 | 2222.65 | 1511.55 | 1649.89 |
| ENSMUSG00000067173 | 3_Mrgpra4        | 0.64445 | 0.13084  | 0.96662  | NA       | 0.86819 | 0       | 1.19515 | 1.80337 | 0       | 0       |
| ENSMUSG00000067194 | 6_Elflax         | 2150.49 | -0.44682 | 0.00069  | 0.00261  | 1837.09 | 1747.5  | 1875.2  | 2123.47 | 2655.52 | 2664.14 |
| ENSMUSG00000067201 | 11_H2-M9         | 0       | NA       | NA       | NA       | 0       | 0       | 0       | 0       | 0       | 0       |
| ENSMUSG00000067206 | 3_Lrrc66         | 175.703 | 0.22985  | 0.33079  | 0.44742  | 191.87  | 179.89  | 196.005 | 151.483 | 127.307 | 207.661 |
| ENSMUSG00000067212 | 8_H2-T23         | 4376.3  | 2.14805  | 5.33E-31 | 3.12E-28 | 6639.04 | 6225.48 | 8559.69 | 1920.59 | 1254.25 | 1658.76 |
| ENSMUSG00000067215 | 5_Usp51          | 5.49442 | -1.29057 | 0.19028  | 0.28957  | 3.47275 | 3.67122 | 2.39031 | 11.7219 | 5.37918 | 6.33113 |
| ENSMUSG00000067219 | 9_Nipal1         | 18.2492 | 0.985    | 0.1465   | 0.23432  | 26.9138 | 9.17806 | 37.0498 | 11.7219 | 17.0341 | 7.59736 |
| ENSMUSG00000067220 | 12_Cnga1         | 172.665 | -2.563   | 0.00267  | 0.00832  | 80.7415 | 48.6437 | 20.3176 | 499.534 | 305.717 | 81.0385 |
| ENSMUSG00000067231 | 4_Cyp2c65        | 1.49486 | 1.90926  | 0.45204  | NA       | 0       | 0       | 7.17092 | 0.90169 | 0.89653 | 0       |
| ENSMUSG00000067235 | 14_H2-Q10        | 324.606 | 3.23063  | 2.43E-28 | 1.14E-25 | 553.036 | 486.437 | 719.483 | 74.8399 | 34.0682 | 79.7723 |
| ENSMUSG00000067242 | 11_Lgi1          | 364.343 | -1.48728 | 3.03E-06 | 2.40E-05 | 222.256 | 244.136 | 107.564 | 626.671 | 641.019 | 344.414 |

|                    |                  |         |          |          |          |         |         |         |         |         |         |
|--------------------|------------------|---------|----------|----------|----------|---------|---------|---------|---------|---------|---------|
| ENSMUSG00000067261 | 4_Foxd3          | 6.11742 | 0.63487  | 0.49532  | 0.60644  | 5.20913 | 10.0959 | 7.17092 | 7.21348 | 4.48265 | 2.53245 |
| ENSMUSG00000067274 | 10_Rplp0         | 23567.2 | 0.60651  | 5.38E-06 | 3.96E-05 | 27617.1 | 27231.3 | 30500.3 | 21267.2 | 16021.9 | 18765.5 |
| ENSMUSG00000067276 | 5_Capn6          | 398.448 | -0.90204 | 8.15E-06 | 5.66E-05 | 289.975 | 323.985 | 218.713 | 603.228 | 506.54  | 448.244 |
| ENSMUSG00000067279 | 2_Ppp1r3c        | 10261   | -0.36874 | 0.00117  | 0.00412  | 9430.26 | 8557.62 | 8881.19 | 10358.6 | 12070   | 12268.5 |
| ENSMUSG00000067285 | 4_Gm16223        | 6.57653 | 0.02248  | 0.98084  | 0.98741  | 3.47275 | 9.17806 | 7.17092 | 2.70506 | 8.06878 | 8.86359 |
| ENSMUSG00000067288 | 12_Rps28         | 5895.67 | 0.42858  | 0.01833  | 0.04208  | 6564.37 | 6803.69 | 6927.11 | 6351.47 | 3729.57 | 4997.8  |
| ENSMUSG00000067297 | 4_lft1bl2        | 195.638 | 1.01929  | 2.17E-05 | 0.00013  | 230.938 | 215.684 | 340.619 | 133.449 | 135.376 | 117.759 |
| ENSMUSG00000067299 | 11_Crygd         | 2162.53 | -0.61337 | 0.67731  | 0.7666   | 930.698 | 4075.06 | 123.101 | 6429.92 | 489.506 | 926.878 |
| ENSMUSG00000067336 | 6_Bmpr2          | 2488.56 | -0.43043 | 1.35E-05 | 8.83E-05 | 2147.03 | 2126.56 | 2086.74 | 2794.32 | 2987.24 | 2789.5  |
| ENSMUSG00000067338 | 6_Tuba3b         | 0.35216 | 1.91112  | 0.63543  | NA       | 0       | 0.91781 | 1.19515 | 0       | 0       | 0       |
| ENSMUSG00000067341 | 5_H2-Eb2         | 0.1447  | 0.92709  | 0.82027  | NA       | 0.86819 | 0       | 0       | 0       | 0       | 0       |
| ENSMUSG00000067356 | 5_B430203G13Rik  | 10.0919 | -0.97277 | 0.26221  | 0.37284  | 5.20913 | 13.7671 | 1.19515 | 14.427  | 10.7584 | 15.1947 |
| ENSMUSG00000067360 | 12_Pramel3       | 0.19919 | 0.92709  | 0.82027  | NA       | 0       | 0       | 1.19515 | 0       | 0       | 0       |
| ENSMUSG00000067365 | 10_Tmem128       | 589.091 | -0.0345  | 0.81669  | 0.87357  | 608.6   | 510.3   | 628.651 | 632.082 | 601.572 | 553.341 |
| ENSMUSG00000067367 | 9_Lyar           | 514.341 | 0.08982  | 0.56629  | 0.67146  | 539.145 | 455.232 | 597.577 | 478.795 | 516.402 | 498.893 |
| ENSMUSG00000067369 | 12_Trmt2b        | 625.092 | -0.59993 | 2.85E-05 | 0.00017  | 482.713 | 513.971 | 494.794 | 699.708 | 849.014 | 710.353 |
| ENSMUSG00000067370 | 3_B3galt4        | 101.12  | 0.79945  | 0.01228  | 0.02998  | 126.756 | 110.137 | 148.199 | 91.0702 | 45.7231 | 84.8372 |
| ENSMUSG00000067377 | 12_Tspan6        | 816.935 | -1.47854 | 1.73E-12 | 8.65E-11 | 472.294 | 506.629 | 314.326 | 1309.25 | 1330.45 | 968.664 |
| ENSMUSG00000067399 | 10_Trim43c       | 7.14367 | -2.45666 | 0.01163  | 0.0287   | 3.47275 | 1.83561 | 1.19515 | 12.6236 | 16.1376 | 7.59736 |
| ENSMUSG00000067424 | 12_Zfp563        | 120.599 | -0.61895 | 0.00891  | 0.02293  | 94.6325 | 99.123  | 92.0269 | 146.073 | 167.651 | 124.09  |
| ENSMUSG00000067430 | 7_Zfp763         | 271.248 | -0.88519 | 1.00E-07 | 1.26E-06 | 186.661 | 199.164 | 185.249 | 329.115 | 355.026 | 372.271 |
| ENSMUSG00000067438 | 5_Hmx1           | 16.472  | 0.12783  | 0.83915  | 0.89027  | 14.7592 | 25.6986 | 10.7564 | 16.2303 | 9.86184 | 21.5259 |
| ENSMUSG00000067455 | 5_Hist1h4j       | 2.19876 | 0.48249  | 0.7554   | NA       | 1.73638 | 3.67122 | 2.39031 | 2.70506 | 2.68959 | 0       |
| ENSMUSG00000067526 | 1_Olfr1425       | 0       | NA       | NA       | NA       | 0       | 0       | 0       | 0       | 0       | 0       |
| ENSMUSG00000067543 | 8_Prb1           | 1429.1  | -0.68237 | 0.17982  | 0.2768   | 861.243 | 1868.65 | 561.722 | 2191.1  | 1664.86 | 1427.04 |
| ENSMUSG00000067545 | 2_Olfr1419       | 0.30239 | -0.03469 | 0.99322  | NA       | 0       | 0.91781 | 0       | 0       | 0.89653 | 0       |
| ENSMUSG00000067567 | 12_Hdac8         | 208.966 | -0.25495 | 0.14915  | 0.23793  | 182.32  | 197.328 | 192.42  | 231.733 | 232.201 | 217.791 |
| ENSMUSG00000067578 | 3_Cbln4          | 0.44998 | -2.33107 | 0.56049  | NA       | 0       | 0       | 0       | 1.80337 | 0.89653 | 0       |
| ENSMUSG00000067586 | 3_S1pr3          | 259.679 | -1.08868 | 1.75E-05 | 0.00011  | 153.669 | 227.616 | 115.93  | 389.528 | 321.854 | 349.479 |
| ENSMUSG00000067591 | 12_Klra3         | 6.79336 | 3.64997  | 0.00346  | 0.01037  | 21.7047 | 6.42464 | 9.56123 | 1.80337 | 0       | 1.26623 |
| ENSMUSG00000067594 | 5_Krt77          | 6.96077 | -0.357   | 0.66887  | 0.75961  | 6.94551 | 6.42464 | 4.78062 | 6.3118  | 7.17224 | 10.1298 |
| ENSMUSG00000067596 | 3_Krt74          | 0.70163 | 1.58347  | 0.60114  | NA       | 0       | 0.91781 | 2.39031 | 0.90169 | 0       | 0       |
| ENSMUSG00000067597 | 5_Dgat2l6        | 0.14942 | -0.99647 | 0.80707  | NA       | 0       | 0       | 0       | 0       | 0.89653 | 0       |
| ENSMUSG00000067599 | 13_Klra7         | 2.84714 | 3.01543  | 0.07707  | 0.139    | 10.4183 | 3.67122 | 1.19515 | 0.90169 | 0.89653 | 0       |
| ENSMUSG00000067604 | 8_Nms            | 0.59855 | -2.74206 | 0.44803  | NA       | 0       | 0       | 0       | 0.90169 | 2.68959 | 0       |
| ENSMUSG00000067608 | 4_Pcna-ps2       | 23.4831 | -0.14288 | 0.84237  | 0.89271  | 25.1775 | 22.9451 | 19.1225 | 14.427  | 52.8953 | 6.33113 |
| ENSMUSG00000067610 | 1_Klri1          | 3.41621 | 2.16791  | 0.11798  | 0.19703  | 7.8137  | 5.50683 | 3.58546 | 0.90169 | 2.68959 | 0       |
| ENSMUSG00000067613 | 5_5430421N21Rik  | 1.68622 | 3.07759  | 0.12713  | NA       | 2.60457 | 1.83561 | 4.78062 | 0       | 0.89653 | 0       |
| ENSMUSG00000067614 | 4_Krt86          | 0.92268 | 3.32202  | 0.29066  | NA       | 4.34094 | 0       | 1.19515 | 0       | 0       | 0       |
| ENSMUSG00000067615 | 3_Krt81          | 0.50988 | -2.49048 | 0.5167   | NA       | 0       | 0       | 0       | 0       | 1.79306 | 1.26623 |
| ENSMUSG00000067616 | 11_Klik11        | 303.564 | 1.11616  | 5.94E-07 | 5.89E-06 | 410.653 | 338.67  | 495.989 | 162.303 | 175.72  | 238.051 |
| ENSMUSG00000067627 | 2_Gm10217        | 0.15297 | 0.92709  | 0.82027  | NA       | 0       | 0.91781 | 0       | 0       | 0       | 0       |
| ENSMUSG00000067629 | 10_Syngap1       | 329.361 | -0.15759 | 0.45594  | 0.56995  | 274.348 | 390.985 | 268.91  | 401.25  | 331.716 | 308.959 |
| ENSMUSG00000067642 | 11_Adgrf3        | 0.75388 | 1.75922  | 0.54965  | NA       | 0.86819 | 2.75342 | 0       | 0.90169 | 0       | 0       |
| ENSMUSG00000067649 | 3_Mageb18        | 0       | NA       | NA       | NA       | 0       | 0       | 0       | 0       | 0       | 0       |
| ENSMUSG00000067653 | 11_Ankrd23       | 494.711 | -0.14991 | 0.53986  | 0.64727  | 443.644 | 515.807 | 448.183 | 740.284 | 387.301 | 433.05  |
| ENSMUSG00000067684 | 1_Obp1a          | 1.10636 | 0.51509  | 0.84413  | NA       | 0       | 2.75342 | 1.19515 | 0       | 2.68959 | 0       |
| ENSMUSG00000067700 | 5_Gm5862         | 2.40106 | 0.34906  | 0.8296   | NA       | 6.07732 | 1.83561 | 0       | 0.90169 | 1.79306 | 3.79868 |
| ENSMUSG00000067702 | 5_Tuba3a         | 0       | NA       | NA       | NA       | 0       | 0       | 0       | 0       | 0       | 0       |
| ENSMUSG00000067713 | 6_Prkg1          | 1391.89 | 0.1231   | 0.27778  | 0.39035  | 1513.25 | 1429.02 | 1411.48 | 1424.66 | 1277.56 | 1295.35 |
| ENSMUSG00000067714 | 13_Lpar5         | 418.674 | 1.50894  | 8.65E-10 | 2.09E-08 | 579.95  | 542.423 | 735.02  | 223.618 | 146.134 | 284.901 |
| ENSMUSG00000067722 | 3_BC003965       | 276.142 | 0.22228  | 0.20458  | 0.3066   | 278.688 | 283.602 | 329.863 | 230.831 | 259.097 | 274.771 |
| ENSMUSG00000067724 | 5_Gbx1           | 1.14786 | 1.42758  | 0.52864  | NA       | 0.86819 | 1.83561 | 2.39031 | 0       | 1.79306 | 0       |
| ENSMUSG00000067750 | 3_Khdc1a         | 11.5333 | -0.17506 | 0.79127  | 0.85528  | 11.2864 | 9.17806 | 11.9515 | 12.6236 | 8.96531 | 15.1947 |
| ENSMUSG00000067764 | 11_Xlrf5c        | 0       | NA       | NA       | NA       | 0       | 0       | 0       | 0       | 0       | 0       |
| ENSMUSG00000067768 | 12_Xlrf4b        | 689.573 | -0.67734 | 0.00029  | 0.00124  | 529.595 | 541.505 | 521.087 | 689.789 | 1076.73 | 778.73  |
| ENSMUSG00000067771 | 9_Gm14685        | 6.56042 | 0.24841  | 0.78673  | 0.85201  | 5.20913 | 9.17806 | 7.17092 | 5.41011 | 9.86184 | 2.53245 |
| ENSMUSG00000067780 | 3_Pi15           | 149.514 | -0.59941 | 0.02139  | 0.04798  | 145.856 | 91.7806 | 119.515 | 193.862 | 201.719 | 144.35  |
| ENSMUSG00000067786 | 16_Nnat          | 129.33  | -0.99694 | 0.02144  | 0.04808  | 63.3778 | 130.328 | 64.5383 | 167.713 | 81.5843 | 268.44  |
| ENSMUSG00000067787 | 10_Bicap         | 944.674 | -0.14097 | 0.20038  | 0.3014   | 897.707 | 899.449 | 898.756 | 1002.67 | 990.666 | 978.793 |
| ENSMUSG00000067795 | 13_4930444P10Rik | 5.7006  | -3.00025 | 0.04481  | 0.08847  | 0       | 3.67122 | 0       | 7.21348 | 1.79306 | 21.5259 |
| ENSMUSG00000067813 | 3_Xkr9           | 1.3385  | 1.4803   | 0.50377  | NA       | 3.47275 | 0       | 2.39031 | 0.90169 | 0       | 1.26623 |
| ENSMUSG00000067818 | 6_Myl9           | 1679.52 | -0.78465 | 0.00576  | 0.01584  | 1112.15 | 1800.73 | 787.607 | 2872.77 | 1694.44 | 1809.44 |
| ENSMUSG00000067825 | 11_Pex26         | 586.69  | 0.41     | 0.00853  | 0.0221   | 597.314 | 681.012 | 730.239 | 536.503 | 441.99  | 533.082 |
| ENSMUSG00000067847 | 13_Romo1         | 340.726 | 0.79955  | 0.00406  | 0.01185  | 412.389 | 419.437 | 467.305 | 370.593 | 163.169 | 211.46  |
| ENSMUSG00000067848 | 12_4933402N22Rik | 0.2894  | 1.67273  | 0.67976  | NA       | 1.73638 | 0       | 0       | 0       | 0       | 0       |
| ENSMUSG00000067851 | 11_Arfgef1       | 3750.44 | -0.17281 | 0.20691  | 0.30941  | 3561.31 | 3462.88 | 3553.19 | 3293.86 | 4355.35 | 4276.05 |
| ENSMUSG00000067860 | 11_Zic3          | 24.4931 | -1.07693 | 0.04119  | 0.08257  | 12.1546 | 22.0273 | 13.1467 | 45.986  | 29.5855 | 24.0583 |
| ENSMUSG00000067872 | 2_Ccdc87         | 1.80241 | -0.98425 | 0.61041  | NA       | 0.86819 | 2.75342 | 0       | 3.60674 | 3.58612 | 0       |
| ENSMUSG00000067873 | 11_Htatsf1       | 1504.69 | -0.58763 | 6.63E-06 | 4.74E-05 | 1204.18 | 1241.79 | 1160.49 | 1579.75 | 1983.13 | 1858.82 |
| ENSMUSG00000067878 | 13_Mtap7d3       | 21.5528 | -1.34742 | 0.01755  | 0.0406   | 15.6274 | 15.6027 | 4.78062 | 27.9522 | 34.9647 | 30.3894 |
| ENSMUSG00000067879 | 3_3110035E14Rik  | 2.55909 | 0.52011  | 0.80441  | 0.86468  | 1.73638 | 7.34244 | 0       | 0       | 6.27571 | 0       |
| ENSMUSG00000067889 | 4_Sptbn2         | 7576.82 | 1.31677  | 9.76E-13 | 5.26E-11 | 9676.83 | 10314.3 | 12446.3 | 4654.5  | 3223.03 | 5145.95 |
| ENSMUSG00000067916 | 9_Gm13139        | 929.191 | -0.53285 | 2.33E-05 | 0.00014  | 793.524 | 717.724 | 767.289 | 1018    | 1174.46 | 1104.15 |
| ENSMUSG00000067919 | 8_Rex2           | 0.30056 | -1.76625 | 0.6627   | NA       | 0       | 0       | 0       | 1.80337 | 0       | 0       |
| ENSMUSG00000067924 | 4_Cxx1b          | 222.493 | 0.34295  | 0.23954  | 0.34707  | 243.093 | 299.205 | 204.371 | 284.933 | 142.548 | 160.811 |
| ENSMUSG00000067925 | 4_Cxx1a          | 338.758 | 0.29895  | 0.20951  | 0.31265  | 364.639 | 422.191 | 334.643 | 412.07  | 233.098 | 265.908 |
| ENSMUSG00000067928 | 6_Zfp760         | 302.338 | -0.77509 | 7.55E-06 | 5.31E-05 | 217.915 | 230.369 | 221.104 | 348.051 | 435.714 | 360.875 |
| ENSMUSG00000067929 | 3_Gm10226        | 13.2324 | -0.79317 | 0.2278   | 0.33354  | 13.891  | 10.0959 | 4.78062 | 17.132  | 17.0341 | 16.4609 |

|                    |                  |         |          |          |          |         |         |         |         |         |         |
|--------------------|------------------|---------|----------|----------|----------|---------|---------|---------|---------|---------|---------|
| ENSMUSG00000067931 | 5_Zfp948         | 188.073 | -0.26869 | 0.21627  | 0.32033  | 171.901 | 183.561 | 156.565 | 183.944 | 250.132 | 182.337 |
| ENSMUSG00000067941 | 5_Gm7168         | 0.6036  | 2.71474  | 0.45183  | NA       | 0.86819 | 2.75342 | 0       | 0       | 0       | 0       |
| ENSMUSG00000067942 | 5_Zfp160         | 409.408 | -0.38724 | 0.01857  | 0.04251  | 355.089 | 367.122 | 341.814 | 399.447 | 524.47  | 468.504 |
| ENSMUSG00000067995 | 4_Gtf2f2         | 809.451 | -0.40032 | 0.0032   | 0.00972  | 701.496 | 671.834 | 719.483 | 818.73  | 935.978 | 1009.18 |
| ENSMUSG00000067998 | 11_Bpifb9a       | 0.19919 | 0.92709  | 0.82027  | NA       | 0       | 0       | 1.19515 | 0       | 0       | 0       |
| ENSMUSG00000068009 | 11_Bpifb6        | 0.75034 | 0.5621   | 0.82905  | NA       | 0.86819 | 1.83561 | 0       | 0.90169 | 0.89653 | 0       |
| ENSMUSG00000068011 | 4_Mkrc2os        | 82.5581 | 0.10883  | 0.7122   | 0.7943   | 80.7415 | 72.5066 | 103.978 | 88.3652 | 63.6537 | 86.1034 |
| ENSMUSG00000068015 | 6_Lrch1          | 626.449 | 0.39296  | 0.00816  | 0.02132  | 742.301 | 621.354 | 769.679 | 510.354 | 532.539 | 582.464 |
| ENSMUSG00000068036 | 14_Mlit4         | 9613.19 | 0.34366  | 0.00642  | 0.0174   | 10367.9 | 10351   | 11538   | 7522.76 | 8352.08 | 9547.35 |
| ENSMUSG00000068037 | 10_Mas1          | 1.93733 | -2.45845 | 0.26057  | NA       | 1.73638 | 0       | 0       | 4.50843 | 5.37918 | 0       |
| ENSMUSG00000068039 | 12_Top1          | 4965.14 | -0.20337 | 0.14422  | 0.23126  | 4860.99 | 4300.84 | 4685    | 4446.21 | 5946.69 | 5551.14 |
| ENSMUSG00000068040 | 10_Tm9sf4        | 1900.51 | 0.30155  | 0.03241  | 0.06771  | 1947.35 | 2133.9  | 2212.23 | 1550.9  | 1570.72 | 1987.98 |
| ENSMUSG00000068074 | 2_Gm10228        | 0       | NA       | NA       | NA       | 0       | 0       | 0       | 0       | 0       | 0       |
| ENSMUSG00000068079 | 5_Tcf15          | 1.44101 | 0.42238  | 0.82149  | NA       | 1.73638 | 0.91781 | 2.39031 | 2.70506 | 0.89653 | 0       |
| ENSMUSG00000068099 | 4_1500009C09Rik  | 6.9881  | -1.76949 | 0.07003  | 0.12862  | 4.34094 | 2.75342 | 2.39031 | 19.8371 | 6.27571 | 6.33113 |
| ENSMUSG00000068101 | 10_Cenpm         | 91.8991 | 1.47309  | 2.71E-06 | 2.18E-05 | 107.655 | 120.233 | 178.078 | 57.7079 | 42.1369 | 45.5842 |
| ENSMUSG00000068105 | 10_Tnfrsf13c     | 1.3975  | -0.42571 | 0.82054  | NA       | 2.60457 | 0.91781 | 0       | 1.80337 | 1.79306 | 1.26623 |
| ENSMUSG00000068113 | 6_Gm4907         | 0.89181 | -2.1004  | 0.52061  | NA       | 0.86819 | 0       | 0       | 0       | 4.48265 | 0       |
| ENSMUSG00000068114 | 6_Ccdc134        | 224.172 | 0.34622  | 0.06597  | 0.12226  | 234.411 | 251.479 | 266.519 | 171.32  | 203.512 | 217.791 |
| ENSMUSG00000068115 | 13_Nin1          | 129.157 | -0.21266 | 0.35968  | 0.47659  | 102.446 | 138.589 | 118.32  | 141.565 | 146.134 | 127.889 |
| ENSMUSG00000068117 | 9_Mei1           | 24.6777 | 1.21095  | 0.01035  | 0.02603  | 29.5184 | 35.7944 | 38.2449 | 17.132  | 13.448  | 13.9285 |
| ENSMUSG00000068122 | 10_Agrt2         | 580.9   | -0.77995 | 0.00145  | 0.00494  | 520.045 | 503.875 | 256.958 | 690.691 | 741.431 | 772.398 |
| ENSMUSG00000068129 | 5_Cst7           | 6.66287 | 2.02064  | 0.0484   | 0.09443  | 19.1001 | 4.58903 | 8.36608 | 1.80337 | 3.58612 | 2.53245 |
| ENSMUSG00000068130 | 11_Zfp442        | 76.4378 | -0.65441 | 0.03013  | 0.06369  | 70.3233 | 54.1505 | 53.7819 | 90.1685 | 112.963 | 77.2398 |
| ENSMUSG00000068134 | 13_Zfp120        | 455.486 | -0.52599 | 0.0029   | 0.00892  | 427.149 | 336.835 | 354.961 | 455.351 | 571.09  | 587.529 |
| ENSMUSG00000068151 | 7_A230006K03Rik  | 0.30056 | -1.76625 | 0.6627   | NA       | 0       | 0       | 0       | 1.80337 | 0       | 0       |
| ENSMUSG00000068154 | 5_Insm1          | 7.86459 | -1.31007 | 0.14044  | 0.22634  | 4.34094 | 4.58903 | 4.78062 | 16.2303 | 13.448  | 3.79868 |
| ENSMUSG00000068167 | 4_Csnka2ip       | 0.19919 | 0.92709  | 0.82027  | NA       | 0       | 0       | 1.19515 | 0       | 0       | 0       |
| ENSMUSG00000068184 | 6_Ndufaf2        | 133.691 | -0.21462 | 0.3448   | 0.46146  | 139.778 | 122.986 | 107.564 | 146.073 | 129.997 | 155.746 |
| ENSMUSG00000068196 | 4_Col8a1         | 1814.17 | -0.96901 | 3.66E-06 | 2.82E-05 | 1393.44 | 1397.82 | 887.999 | 2971.96 | 2138.23 | 2095.61 |
| ENSMUSG00000068205 | 14_Macrod2       | 85.2319 | -1.24801 | 5.87E-06 | 4.27E-05 | 49.4867 | 58.7396 | 43.0255 | 129.843 | 120.135 | 110.162 |
| ENSMUSG00000068206 | 12_Pick1         | 556.452 | 0.61243  | 0.00012  | 0.0006   | 627.7   | 710.382 | 680.043 | 491.419 | 372.06  | 457.108 |
| ENSMUSG00000068220 | 5_Lgal51         | 2110.69 | -0.09076 | 0.64269  | 0.73802  | 2372.76 | 2104.53 | 1655.29 | 2764.57 | 1848.65 | 1918.33 |
| ENSMUSG00000068227 | 8_Il2rb          | 53.298  | 4.76408  | 1.35E-13 | 9.07E-12 | 168.429 | 65.1642 | 74.0996 | 2.70506 | 1.79306 | 7.59736 |
| ENSMUSG00000068231 | 4_Vmn1r43        | 4.15391 | -0.06123 | 0.95463  | 0.97059  | 6.07732 | 3.67122 | 2.39031 | 3.60674 | 5.37918 | 3.79868 |
| ENSMUSG00000068232 | 2_Vmn1r42        | 0.45536 | 0.77574  | 0.84797  | NA       | 0       | 1.83561 | 0       | 0       | 0.89653 | 0       |
| ENSMUSG00000068234 | 6_Vmn1r44        | 3.46993 | 0.27584  | 0.82802  | 0.88238  | 1.73638 | 7.34244 | 2.39031 | 2.70506 | 5.37918 | 1.26623 |
| ENSMUSG00000068240 | 5_Gm11808        | 2674.58 | 0.98466  | 0.0002   | 0.00091  | 3237.47 | 3496.84 | 3926.08 | 2543.65 | 1002.32 | 1841.09 |
| ENSMUSG00000068245 | 14_Phf11d        | 3810.7  | 0.90881  | 2.09E-06 | 1.75E-05 | 4726.42 | 4201.71 | 5991.31 | 2103.63 | 3273.23 | 2567.91 |
| ENSMUSG00000068246 | 5_Apol9b         | 2139.53 | 1.99109  | 4.34E-26 | 1.42E-23 | 3011.75 | 2821.33 | 4423.27 | 791.68  | 823.015 | 966.131 |
| ENSMUSG00000068250 | 13_Amn1          | 352.645 | -0.40009 | 0.05036  | 0.09774  | 327.307 | 287.273 | 297.593 | 316.492 | 498.471 | 388.732 |
| ENSMUSG00000068252 | 5_Apol7b         | 9.25112 | 1.72001  | 0.03133  | 0.06587  | 9.55007 | 12.8493 | 20.3176 | 4.50843 | 4.48265 | 3.79868 |
| ENSMUSG00000068259 | 2_Olfra61        | 0.90998 | -0.41864 | 0.8814   | NA       | 0       | 0       | 2.39031 | 1.80337 | 0       | 1.26623 |
| ENSMUSG00000068263 | 11_Efcc1         | 57.6645 | 0.45206  | 0.27993  | 0.39265  | 52.0913 | 97.2874 | 50.1965 | 63.118  | 31.3786 | 51.9153 |
| ENSMUSG00000068264 | 11_Ap5s1         | 311.858 | 0.64773  | 0.0022   | 0.00705  | 336.857 | 372.629 | 432.646 | 281.326 | 185.582 | 262.109 |
| ENSMUSG00000068267 | 5_Cenpb          | 3560.09 | 0.5787   | 0.00045  | 0.00181  | 3952.86 | 4118.19 | 4723.25 | 3356.98 | 2253.88 | 2955.37 |
| ENSMUSG00000068270 | 15_Shroom4       | 448.442 | -0.1691  | 0.2999   | 0.41467  | 390.685 | 385.478 | 491.208 | 444.531 | 476.058 | 502.692 |
| ENSMUSG00000068284 | 14_Gm608         | 2614.71 | -0.1052  | 0.39582  | 0.51342  | 2700.07 | 2307.36 | 2549.26 | 2509.39 | 2646.56 | 2975.63 |
| ENSMUSG00000068289 | 5_Cma2           | 0.19919 | 0.92709  | 0.82027  | NA       | 0       | 0       | 1.19515 | 0       | 0       | 0       |
| ENSMUSG00000068290 | 11_Ddrgk1        | 1226.13 | 0.31386  | 0.09311  | 0.16211  | 1210.25 | 1348.26 | 1519.04 | 1340.81 | 841.842 | 1096.55 |
| ENSMUSG00000068299 | 11_1700019G17Rik | 79.354  | -0.88926 | 0.00133  | 0.0046   | 55.5641 | 57.8218 | 53.7819 | 117.219 | 103.101 | 88.6359 |
| ENSMUSG00000068314 | 4_Gm6899         | 0.14942 | -0.99647 | 0.80707  | NA       | 0       | 0       | 0       | 0       | 0.89653 | 0       |
| ENSMUSG00000068323 | 12_Slc4a5        | 3306.45 | -0.78501 | 0.00131  | 0.00452  | 2434.4  | 3226.09 | 1624.21 | 5242.4  | 4089.08 | 3222.55 |
| ENSMUSG00000068328 | 9_Aup1           | 1458.14 | 0.63157  | 1.46E-06 | 1.27E-05 | 1630.46 | 1800.73 | 1885.95 | 1238.01 | 1021.15 | 1172.53 |
| ENSMUSG00000068329 | 12_Htra2         | 613.506 | 0.34343  | 0.02004  | 0.04533  | 664.164 | 707.628 | 687.214 | 615.851 | 483.23  | 522.952 |
| ENSMUSG00000068335 | 6_Dok1           | 278.203 | 0.90527  | 1.35E-06 | 1.19E-05 | 350.748 | 365.287 | 371.693 | 217.306 | 157.789 | 206.395 |
| ENSMUSG00000068349 | 12_Gml           | 0.19919 | 0.92709  | 0.82027  | NA       | 0       | 0       | 1.19515 | 0       | 0       | 0       |
| ENSMUSG00000068373 | 14_D430041D05Rik | 17.3471 | -1.14926 | 0.07463  | 0.13545  | 13.0228 | 11.0137 | 8.36608 | 37.8708 | 22.4133 | 11.396  |
| ENSMUSG00000068391 | 8_Chrc1          | 637.37  | 0.11129  | 0.52577  | 0.63473  | 648.537 | 700.286 | 637.017 | 742.989 | 500.264 | 595.127 |
| ENSMUSG00000068394 | 4_Cep152         | 244.855 | 0.36222  | 0.05299  | 0.10164  | 308.207 | 241.383 | 277.276 | 230.831 | 215.167 | 196.265 |
| ENSMUSG00000068407 | 2_Rnase12        | 0.1447  | 0.92709  | 0.82027  | NA       | 0.86819 | 0       | 0       | 0       | 0       | 0       |
| ENSMUSG00000068417 | 7_Pnp2           | 39.667  | 0.05783  | 0.89542  | 0.92937  | 56.4322 | 22.9451 | 41.8304 | 39.6742 | 34.0682 | 43.0517 |
| ENSMUSG00000068428 | 6_Gmnc           | 0.44827 | -2.3261  | 0.56139  | NA       | 0       | 0       | 0       | 0       | 2.68959 | 0       |
| ENSMUSG00000068452 | 7_Duox2          | 75.9659 | 0.73465  | 0.03593  | 0.07376  | 106.787 | 58.7396 | 119.515 | 49.5927 | 65.4467 | 55.714  |
| ENSMUSG00000068457 | 14_Uty           | 0.74239 | -1.78004 | 0.60641  | NA       | 0.86819 | 0       | 0       | 0       | 3.58612 | 0       |
| ENSMUSG00000068479 | 5_Mfap1a         | 2147.38 | -0.52017 | 1.56E-05 | 0.0001   | 1844.9  | 1745.67 | 1700.7  | 2272.25 | 2573.04 | 2747.71 |
| ENSMUSG00000068522 | 4_Aard           | 8.42803 | -1.2261  | 0.17128  | 0.26615  | 2.60457 | 10.0959 | 2.39031 | 15.3287 | 12.5514 | 7.59736 |
| ENSMUSG00000068523 | 12_Gng5          | 2686.82 | -0.1924  | 0.08021  | 0.14367  | 2496.04 | 2426.68 | 2603.05 | 2833.1  | 3090.34 | 2671.74 |
| ENSMUSG00000068547 | 6_Clc4a4         | 1131.18 | -0.45064 | 0.01879  | 0.04289  | 1048.77 | 944.422 | 873.658 | 961.197 | 1572.51 | 1386.52 |
| ENSMUSG00000068551 | 12_Zfp467        | 1096.62 | 0.57987  | 5.56E-06 | 4.07E-05 | 1277.97 | 1286.76 | 1378.01 | 962.098 | 796.119 | 878.761 |
| ENSMUSG00000068566 | 12_Myadm         | 1546.15 | 0.22692  | 0.0662   | 0.12261  | 1503.7  | 1655.72 | 1844.12 | 1430.97 | 1388.73 | 1453.63 |
| ENSMUSG00000068579 | 4_Rpl7a-ps3      | 17.9309 | -0.47768 | 0.54087  | 0.64792  | 19.9683 | 7.34244 | 17.9273 | 10.8202 | 43.93   | 7.59736 |
| ENSMUSG00000068580 | 11_Zfyve19       | 487.817 | 0.3959   | 0.03844  | 0.07796  | 524.386 | 533.245 | 605.943 | 515.764 | 333.509 | 414.056 |
| ENSMUSG00000068587 | 9_Mgam           | 10.2077 | -1.0388  | 0.17594  | 0.27198  | 10.4183 | 4.58903 | 4.78062 | 9.01685 | 13.448  | 18.9934 |
| ENSMUSG00000068604 | 4_Gm8225         | 1.61046 | 4.11943  | 0.11254  | NA       | 0.67732 | 0       | 3.58546 | 0       | 0       | 0       |
| ENSMUSG00000068606 | 5_Gm4841         | 112.605 | 4.17958  | 6.99E-30 | 3.60E-27 | 200.552 | 223.027 | 217.518 | 7.21348 | 19.7237 | 7.59736 |
| ENSMUSG00000068614 | 7_Actc1          | 18.598  | -2.19993 | 0.01285  | 0.03118  | 1.73638 | 15.6027 | 2.39031 | 41.4775 | 9.86184 | 40.5193 |
| ENSMUSG00000068615 | 4_Gjd2           | 16.6656 | -2.45912 | 0.00375  | 0.0111   | 10.4183 | 4.58903 | 0       | 40.5758 | 30.482  | 13.9285 |
| ENSMUSG00000068617 | 4_Efcab1         | 56.4595 | -0.68203 | 0.03493  | 0.07204  | 46.014  | 47.7259 | 35.8546 | 60.4129 | 75.3086 | 73.4412 |

|                    |                 |         |          |          |          |         |         |         |         |         |         |
|--------------------|-----------------|---------|----------|----------|----------|---------|---------|---------|---------|---------|---------|
| ENSMUSG00000068631 | 7_Gm7676        | 2.52969 | 0.34343  | 0.8074   | 0.86695  | 5.20913 | 0.91781 | 2.39031 | 2.70506 | 2.68959 | 1.26623 |
| ENSMUSG00000068663 | 13_Clec16a      | 1224.46 | 0.51064  | 9.07E-05 | 0.00046  | 1393.44 | 1438.2  | 1484.38 | 1074.81 | 882.186 | 1073.76 |
| ENSMUSG00000068686 | 12_Cd59b        | 53.9245 | -1.35501 | 0.00012  | 0.0006   | 25.1775 | 33.9588 | 32.2692 | 86.5618 | 86.0669 | 59.5127 |
| ENSMUSG00000068696 | 6_Gpr88         | 7.85533 | 0.48693  | 0.55446  | 0.66061  | 6.07732 | 8.26025 | 13.1467 | 4.50843 | 6.27571 | 8.86359 |
| ENSMUSG00000068697 | 6_Myoz1         | 142.913 | -1.92761 | 5.37E-05 | 0.00029  | 51.2231 | 94.534  | 32.2692 | 390.43  | 106.687 | 182.337 |
| ENSMUSG00000068699 | 12_Flnc         | 365.589 | -0.4219  | 0.15691  | 0.24823  | 259.588 | 400.163 | 278.471 | 369.691 | 615.917 | 269.706 |
| ENSMUSG00000068706 | 2_Gm10250       | 31.8649 | -0.39319 | 0.38901  | 0.50633  | 17.3638 | 32.1232 | 33.4643 | 28.8539 | 43.93   | 35.4544 |
| ENSMUSG00000068732 | 5_Tmem167b      | 1780.15 | -0.36299 | 0.00206  | 0.00666  | 1613.96 | 1502.45 | 1554.9  | 1809.68 | 2106.85 | 2093.07 |
| ENSMUSG00000068735 | 14_Trp53i11     | 597.29  | 0.96012  | 1.08E-05 | 7.28E-05 | 741.433 | 770.039 | 855.73  | 522.978 | 283.304 | 410.258 |
| ENSMUSG00000068739 | 13_Sars         | 2441.72 | 0.49888  | 6.81E-05 | 0.00036  | 2766.05 | 2769.94 | 3042.86 | 2154.13 | 1778.72 | 2138.66 |
| ENSMUSG00000068740 | 13_Celsr2       | 1725.06 | 1.30522  | 7.02E-14 | 5.00E-12 | 2146.16 | 2467.98 | 2753.64 | 1100.06 | 774.602 | 1107.95 |
| ENSMUSG00000068742 | 11_Cry2         | 1404.06 | 0.66812  | 2.46E-05 | 0.00015  | 1732.04 | 1742.91 | 1694.73 | 1250.64 | 860.669 | 1143.4  |
| ENSMUSG00000068744 | 12_Psrc1        | 126.206 | 0.57244  | 0.0159   | 0.03742  | 158.01  | 133.082 | 161.346 | 108.202 | 85.1704 | 111.428 |
| ENSMUSG00000068745 | 6_Mybphl        | 6.62653 | -1.32298 | 0.27244  | 0.38438  | 0.86819 | 9.17806 | 1.19515 | 15.3287 | 1.79306 | 11.396  |
| ENSMUSG00000068747 | 14_Sort1        | 3974.99 | -0.35244 | 0.00295  | 0.00905  | 3309.53 | 3876.81 | 3289.06 | 4757.29 | 4322.17 | 4295.04 |
| ENSMUSG00000068748 | 7_Ptprz1        | 589.237 | -0.94682 | 6.58E-05 | 0.00035  | 411.521 | 441.464 | 354.961 | 692.494 | 1074.04 | 560.939 |
| ENSMUSG00000068749 | 9_Psma5         | 2187.42 | 0.03928  | 0.7781   | 0.84494  | 2361.47 | 1975.12 | 2315.01 | 1882.72 | 2379.39 | 2210.83 |
| ENSMUSG00000068758 | 7_Il3ra         | 39.1559 | 1.77911  | 0.00049  | 0.00194  | 33.8593 | 74.3423 | 74.0996 | 27.0506 | 11.6549 | 13.9285 |
| ENSMUSG00000068762 | 11_Gstm6        | 39.7356 | -0.72552 | 0.05467  | 0.10439  | 32.123  | 32.1232 | 25.0982 | 47.7893 | 43.0335 | 58.2464 |
| ENSMUSG00000068794 | 6_Col28a1       | 59.9612 | -0.13737 | 0.66326  | 0.75497  | 57.3004 | 66.082  | 47.8062 | 58.6096 | 71.7224 | 58.2464 |
| ENSMUSG00000068798 | 10_Rap1a        | 1643.27 | -0.5104  | 0.0003   | 0.00129  | 1428.17 | 1230.78 | 1407.89 | 1668.12 | 2148.09 | 1976.58 |
| ENSMUSG00000068806 | 4_Olfr1259      | 0.15028 | -0.99647 | 0.80707  | NA       | 0       | 0       | 0       | 0.90169 | 0       | 0       |
| ENSMUSG00000068823 | 10_Csde1        | 7921.37 | -0.47073 | 0.00016  | 0.00076  | 7192.94 | 6364.06 | 6363    | 8104.35 | 10037.6 | 9466.31 |
| ENSMUSG00000068854 | 7_Hist2h2be     | 226.532 | -1.25656 | 7.43E-09 | 1.32E-07 | 140.647 | 147.767 | 112.344 | 329.115 | 368.474 | 260.843 |
| ENSMUSG00000068855 | 3_Hist2h2ac     | 1.696   | 1.42193  | 0.47139  | NA       | 2.60457 | 3.67122 | 1.19515 | 2.70506 | 0       | 0       |
| ENSMUSG00000068856 | 3_St3b4         | 669.299 | -1.15676 | 3.46E-15 | 3.33E-13 | 827.384 | 893.943 | 1051.74 | 417.48  | 406.128 | 419.121 |
| ENSMUSG00000068859 | 5_Sp9           | 0.1447  | 0.92709  | 0.82027  | NA       | 0.86819 | 0       | 0       | 0       | 0       | 0       |
| ENSMUSG00000068860 | 5_Gm128         | 32.1743 | 0.20565  | 0.71264  | 0.79471  | 18.232  | 44.9725 | 40.6352 | 49.5927 | 20.6202 | 18.9934 |
| ENSMUSG00000068874 | 13_Selenbp1     | 828.276 | 0.2841   | 0.14181  | 0.22815  | 886.42  | 952.682 | 889.195 | 917.014 | 546.884 | 777.463 |
| ENSMUSG00000068876 | 14_Cgn          | 3008.58 | 0.57688  | 9.47E-05 | 0.00047  | 3416.32 | 3620.74 | 3767.13 | 2254.21 | 2093.4  | 2899.66 |
| ENSMUSG00000068877 | 12_Selenbp2     | 80.2021 | 0.33306  | 0.23318  | 0.3396   | 95.5007 | 84.4381 | 88.4414 | 84.7584 | 60.9641 | 67.11   |
| ENSMUSG00000068879 | 4_Gm5773        | 0       | NA       | NA       | NA       | 0       | 0       | 0       | 0       | 0       | 0       |
| ENSMUSG00000068882 | 13_Ssb          | 3402.74 | -0.46698 | 0.00226  | 0.0072   | 2990.04 | 2575.36 | 3004.62 | 3198.28 | 4360.72 | 4287.44 |
| ENSMUSG00000068885 | 4_Lce3f         | 14.3368 | 0.34462  | 0.61266  | 0.71211  | 24.3093 | 16.5205 | 7.17092 | 17.132  | 10.7584 | 10.1298 |
| ENSMUSG00000068893 | 5_Spr2a2        | 29.161  | 2.78301  | 0.00037  | 0.00155  | 73.796  | 17.4383 | 62.148  | 11.7219 | 9.86184 | 0       |
| ENSMUSG00000068917 | 12_Clk2         | 960.908 | 0.39446  | 0.00078  | 0.00291  | 1039.22 | 1080.26 | 1155.71 | 807.009 | 852.601 | 830.645 |
| ENSMUSG00000068921 | 14_Dap3         | 845.951 | 0.06995  | 0.57959  | 0.68322  | 827.384 | 826.025 | 946.562 | 802.5   | 818.532 | 854.703 |
| ENSMUSG00000068922 | 14_Msto1        | 483.62  | 0.60003  | 0.0003   | 0.00126  | 560.85  | 582.807 | 604.748 | 442.728 | 321.854 | 388.732 |
| ENSMUSG00000068923 | 14_Syt11        | 223.789 | -1.04983 | 2.54E-06 | 2.06E-05 | 157.142 | 156.945 | 123.101 | 359.773 | 303.924 | 241.849 |
| ENSMUSG00000068957 | 1_4930589L23Rik | 0       | NA       | NA       | NA       | 0       | 0       | 0       | 0       | 0       | 0       |
| ENSMUSG00000068959 | 6_Zfp619        | 66.5365 | -0.76539 | 0.01063  | 0.02661  | 56.4322 | 50.4793 | 40.6352 | 88.3652 | 86.0669 | 77.2398 |
| ENSMUSG00000068962 | 7_Zfp114        | 47.0745 | -0.57652 | 0.10857  | 0.18419  | 36.4639 | 47.7259 | 28.6837 | 55.0028 | 53.7918 | 60.7789 |
| ENSMUSG00000068966 | 10_Zbtb34       | 512.227 | 0.22214  | 0.11227  | 0.18928  | 553.036 | 505.711 | 596.382 | 467.073 | 466.196 | 484.965 |
| ENSMUSG00000068999 | 12_Vmn2r5       | 5.44099 | -1.75173 | 0.17569  | 0.27171  | 2.60457 | 3.67122 | 1.19515 | 12.6236 | 12.5514 | 0       |
| ENSMUSG00000069020 | 9_Urm1          | 650.842 | 0.58846  | 0.00066  | 0.00253  | 759.665 | 750.765 | 835.413 | 623.966 | 424.955 | 510.289 |
| ENSMUSG00000069041 | 8_Slc25a31      | 6.73624 | 0.32979  | 0.761    | 0.83205  | 0.86819 | 7.34244 | 14.3418 | 6.3118  | 2.68959 | 8.86359 |
| ENSMUSG00000069045 | 11_Ddx3y        | 2.84342 | -3.94469 | 0.07462  | 0.13545  | 0       | 0.91781 | 0       | 0.90169 | 15.241  | 0       |
| ENSMUSG00000069049 | 11_Eif2s3y      | 5.52732 | -4.9422  | 0.0103   | 0.02592  | 0.86819 | 0       | 0       | 3.60674 | 28.689  | 0       |
| ENSMUSG00000069053 | 11_Uba1y        | 0       | NA       | NA       | NA       | 0       | 0       | 0       | 0       | 0       | 0       |
| ENSMUSG00000069072 | 9_Slc7a14       | 11.648  | -2.54239 | 0.00533  | 0.01487  | 5.20913 | 3.67122 | 1.19515 | 37.8708 | 14.3445 | 7.59736 |
| ENSMUSG00000069085 | 5_Dytn          | 0.30056 | -1.76625 | 0.6627   | NA       | 0       | 0       | 0       | 1.80337 | 0       | 0       |
| ENSMUSG00000069089 | 7_Cdk7          | 869.496 | -0.48667 | 0.00012  | 0.00058  | 773.556 | 676.423 | 723.068 | 997.264 | 1076.73 | 969.93  |
| ENSMUSG00000069094 | 12_Pde7a        | 1300.6  | -0.08141 | 0.60662  | 0.70674  | 1286.66 | 1184.89 | 1320.65 | 1104.56 | 1582.38 | 1324.47 |
| ENSMUSG00000069114 | 8_Zbtb10        | 165.449 | -0.95087 | 6.34E-06 | 4.56E-05 | 113.733 | 128.493 | 95.6123 | 218.208 | 227.719 | 208.927 |
| ENSMUSG00000069117 | 3_Gm10260       | 10035.6 | 0.11802  | 0.50825  | 0.61856  | 11159.7 | 10003.2 | 10174.3 | 11849   | 7134.59 | 9893.03 |
| ENSMUSG00000069132 | 3_Nxph2         | 0.43968 | 0.71095  | 0.86073  | NA       | 1.73638 | 0       | 0       | 0.90169 | 0       | 0       |
| ENSMUSG00000069135 | 11_Fgfr1op      | 582.295 | -0.42481 | 0.00431  | 0.01245  | 550.431 | 492.862 | 446.988 | 614.949 | 713.638 | 674.899 |
| ENSMUSG00000069170 | 13_Adgrv1       | 548.446 | -1.73479 | 8.21E-09 | 1.45E-07 | 279.557 | 330.41  | 149.394 | 1073.01 | 903.703 | 554.607 |
| ENSMUSG00000069171 | 13_Nr2f1        | 195.069 | -0.72397 | 0.02251  | 0.05008  | 129.36  | 213.849 | 98.0026 | 293.048 | 262.683 | 173.473 |
| ENSMUSG00000069184 | 2_Zfp72         | 56.1554 | -0.85256 | 0.01262  | 0.03069  | 44.2776 | 47.7259 | 27.4885 | 69.4298 | 77.1016 | 70.9087 |
| ENSMUSG00000069189 | 4_Zdhhc11       | 0.15028 | -0.99647 | 0.80707  | NA       | 0       | 0       | 0       | 0.90169 | 0       | 0       |
| ENSMUSG00000069206 | 13_Zfp874a      | 121.587 | -0.86936 | 0.00076  | 0.00285  | 92.8962 | 100.959 | 63.3432 | 146.975 | 172.134 | 153.213 |
| ENSMUSG00000069208 | 8_Zfp825        | 205.801 | -0.56761 | 0.00743  | 0.01965  | 184.056 | 164.287 | 148.199 | 201.076 | 272.545 | 264.641 |
| ENSMUSG00000069227 | 4_Gprin1        | 16.2598 | -0.87432 | 0.1528   | 0.2427   | 13.0228 | 11.9315 | 9.56123 | 30.6573 | 19.7237 | 12.6623 |
| ENSMUSG00000069237 | 8_Fam8a1        | 1457.3  | -0.51874 | 0.00023  | 0.00104  | 1200.7  | 1249.13 | 1143.76 | 1465.24 | 1940.09 | 1744.86 |
| ENSMUSG00000069248 | 11_Serpinb6e    | 0.1447  | 0.92709  | 0.82027  | NA       | 0.86819 | 0       | 0       | 0       | 0       | 0       |
| ENSMUSG00000069255 | 12_Dusp22       | 1081.22 | 0.03466  | 0.78674  | 0.85201  | 1038.35 | 1070.16 | 1173.64 | 990.051 | 1048.94 | 1166.19 |
| ENSMUSG00000069259 | 10_Prl6a1       | 1.58689 | -0.4426  | 0.82368  | NA       | 1.73638 | 0       | 2.39031 | 2.70506 | 2.68959 | 0       |
| ENSMUSG00000069265 | 2_Hist1h3a      | 0.4589  | 2.31815  | 0.56231  | NA       | 0       | 2.75342 | 0       | 0       | 0       | 0       |
| ENSMUSG00000069266 | 5_Hist1h4b      | 0.30594 | 1.73752  | 0.66765  | NA       | 0       | 1.83561 | 0       | 0       | 0       | 0       |
| ENSMUSG00000069267 | 2_Hist1h3b      | 0.45084 | -2.33355 | 0.56009  | NA       | 0       | 0       | 0       | 2.70506 | 0       | 0       |
| ENSMUSG00000069268 | 4_Hist1h2bf     | 0.19919 | 0.92709  | 0.82027  | NA       | 0       | 0       | 1.19515 | 0       | 0       | 0       |
| ENSMUSG00000069272 | 5_Hist1h2ae     | 0.39838 | 2.07058  | 0.60634  | NA       | 0       | 0       | 2.39031 | 0       | 0       | 0       |
| ENSMUSG00000069273 | 2_Hist1h3e      | 0.93385 | 1.03049  | 0.70886  | NA       | 2.60457 | 0       | 1.19515 | 1.80337 | 0       | 0       |
| ENSMUSG00000069280 | 1_Vmn1r223      | 0.44912 | -2.32858 | 0.56096  | NA       | 0       | 0       | 0       | 0.90169 | 1.79306 | 0       |
| ENSMUSG00000069295 | 1_Vmn1r196      | 0.96223 | -0.13978 | 0.95346  | NA       | 0.86819 | 1.83561 | 0       | 1.80337 | 0       | 1.26623 |
| ENSMUSG00000069300 | 3_Hist1h2bj     | 0.86819 | 3.23798  | 0.39696  | NA       | 5.20913 | 0       | 0       | 0       | 0       | 0       |
| ENSMUSG00000069301 | 5_Hist1h2ag     | 0       | NA       | NA       | NA       | 0       | 0       | 0       | 0       | 0       | 0       |
| ENSMUSG00000069303 | 5_Hist1h2br     | 13.1638 | -0.6297  | 0.60336  | 0.704    | 2.60457 | 4.58903 | 23.9031 | 16.2303 | 0       | 31.6557 |

|                    |                   |         |          |          |          |         |         |         |         |         |         |
|--------------------|-------------------|---------|----------|----------|----------|---------|---------|---------|---------|---------|---------|
| ENSMUSG00000069305 | 3_Hist1h4n        | 0.29767 | 1.70332  | 0.67406  | NA       | 0.86819 | 0.91781 | 0       | 0       | 0       | 0       |
| ENSMUSG00000069306 | 5_Hist1h4m        | 0.79677 | 3.08628  | 0.43582  | NA       | 0       | 0       | 4.78062 | 0       | 0       | 0       |
| ENSMUSG00000069307 | 5_Hist1h2bq       | 17.0683 | 0.88876  | 0.6969   | 0.78317  | 24.3093 | 30.2876 | 11.9515 | 0       | 35.8612 | 0       |
| ENSMUSG00000069308 | 7_Hist1h2bp       | 1.06454 | 1.31376  | 0.62871  | NA       | 0       | 4.58903 | 0       | 0.90169 | 0.89653 | 0       |
| ENSMUSG00000069310 | 3_Hist1h3c        | 0.19919 | 0.92709  | 0.82027  | NA       | 0       | 0       | 1.19515 | 0       | 0       | 0       |
| ENSMUSG00000069372 | 2_Ctnx3           | 36.334  | -1.38157 | 0.00075  | 0.0028   | 20.8365 | 24.7808 | 14.3418 | 49.5927 | 50.2057 | 58.2464 |
| ENSMUSG00000069378 | 13_Prdm6          | 26.6629 | 0.06192  | 0.89305  | 0.92788  | 31.2548 | 26.6164 | 23.9031 | 34.264  | 22.4133 | 21.5259 |
| ENSMUSG00000069379 | 2_Gm4950          | 3.1218  | 0.03414  | 0.97939  | 0.98636  | 1.73638 | 1.83561 | 5.97577 | 0.90169 | 4.48265 | 3.79868 |
| ENSMUSG00000069390 | 2_Olfr707         | 0       | NA       | NA       | NA       | 0       | 0       | 0       | 0       | 0       | 0       |
| ENSMUSG00000069439 | 2_Gm8444          | 0.15028 | -0.99647 | 0.80707  | NA       | 0       | 0       | 0       | 0.90169 | 0       | 0       |
| ENSMUSG00000069441 | 3_Dsg1a           | 17327   | -0.08733 | 0.5842   | 0.68704  | 17357.7 | 15458.6 | 17590.3 | 14408.9 | 17459.9 | 21686.7 |
| ENSMUSG00000069456 | 4_Rdh16           | 1209.18 | 0.4531   | 0.01139  | 0.0282   | 1453.35 | 1229.86 | 1508.28 | 784.466 | 1096.46 | 1182.66 |
| ENSMUSG00000069495 | 12_Epc2           | 901.623 | -0.25546 | 0.06604  | 0.12234  | 870.793 | 732.409 | 864.096 | 961.197 | 1069.56 | 911.683 |
| ENSMUSG00000069515 | 5_Lyz1            | 68.7987 | -0.82094 | 0.00677  | 0.01817  | 46.8822 | 55.9861 | 46.611  | 95.5787 | 96.8253 | 70.9087 |
| ENSMUSG00000069516 | 7_Lyz2            | 3114.13 | 0.17047  | 0.41266  | 0.52878  | 4175.12 | 2719.46 | 2999.84 | 3676.17 | 2794.49 | 2319.73 |
| ENSMUSG00000069520 | 5_Tmem19          | 732.959 | 0.06708  | 0.57737  | 0.68117  | 746.642 | 737.916 | 764.899 | 710.528 | 689.432 | 748.34  |
| ENSMUSG00000069539 | 11_Scyl2          | 1005.22 | 0.05335  | 0.72039  | 0.80107  | 1056.59 | 961.86  | 1052.93 | 833.157 | 1118.87 | 1007.92 |
| ENSMUSG00000069554 | 4_I830134H01Rik   | 0.71262 | -0.03086 | 0.99088  | NA       | 0       | 0.91781 | 1.19515 | 0       | 0.89653 | 1.26623 |
| ENSMUSG00000069565 | 12_Dazap1         | 954.7   | 0.9197   | 9.81E-10 | 2.33E-08 | 1115.62 | 1170.2  | 1461.67 | 631.18  | 645.502 | 704.022 |
| ENSMUSG00000069581 | 11_Tspear         | 13.5626 | 0.78488  | 0.21026  | 0.31346  | 13.891  | 22.0273 | 15.537  | 11.7219 | 8.06878 | 10.1298 |
| ENSMUSG00000069588 | 3_Gm11733         | 0.15028 | -0.99647 | 0.80707  | NA       | 0       | 0       | 0       | 0.90169 | 0       | 0       |
| ENSMUSG00000069601 | 13_Ank3           | 1546.49 | 0.10319  | 0.61509  | 0.53119  | 1422.09 | 1709.87 | 1674.41 | 1579.75 | 1429.07 | 1463.76 |
| ENSMUSG00000069607 | 4_Cd300lh         | 79.5288 | -0.72513 | 0.16528  | 0.75648  | 146.724 | 33.041  | 0       | 118.121 | 99.5149 | 79.7723 |
| ENSMUSG00000069622 | 4_Gm10273         | 1236.27 | -0.87342 | 0.00013  | 0.00062  | 1185.95 | 616.765 | 816.29  | 1504.91 | 1875.54 | 1418.17 |
| ENSMUSG00000069631 | 14_Strada         | 378.364 | 0.28329  | 0.0862   | 0.15202  | 397.63  | 401.081 | 446.988 | 352.559 | 295.855 | 376.069 |
| ENSMUSG00000069633 | 12_Pext11g        | 138.408 | 0.44528  | 0.04761  | 0.09306  | 156.274 | 146.849 | 175.688 | 127.138 | 100.411 | 124.09  |
| ENSMUSG00000069662 | 5_Marcks          | 2030.09 | -0.27491 | 0.03153  | 0.06621  | 1808.44 | 1709.87 | 1994.71 | 2021.58 | 2443.94 | 2201.97 |
| ENSMUSG00000069670 | 7_Nkain2          | 10.3415 | -1.61954 | 0.12576  | 0.20718  | 9.55007 | 5.50683 | 0       | 27.9522 | 15.241  | 3.79868 |
| ENSMUSG00000069678 | 10_Pcgl1          | 161.356 | -0.09089 | 0.67003  | 0.76061  | 170.165 | 160.616 | 137.443 | 184.846 | 147.928 | 167.142 |
| ENSMUSG00000069706 | 3_Taar5           | 0.15297 | 0.92709  | 0.82027  | NA       | 0       | 0.91781 | 0       | 0       | 0       | 0       |
| ENSMUSG00000069707 | 1_Taar4           | 0.56677 | -1.21693 | 0.74863  | NA       | 0.86819 | 0       | 0       | 0       | 0       | 2.53245 |
| ENSMUSG00000069712 | 5_4930444G20Rik   | 0.73852 | -0.62001 | 0.83362  | NA       | 1.73638 | 0       | 0       | 0.90169 | 1.79306 | 0       |
| ENSMUSG00000069713 | 2_4933406P04Rik   | 16.3694 | -1.04859 | 0.07077  | 0.12968  | 7.8137  | 10.0959 | 14.3418 | 24.3455 | 18.8271 | 22.7921 |
| ENSMUSG00000069720 | 4_4930572O03Rik   | 0.86819 | 3.23798  | 0.39696  | NA       | 5.20913 | 0       | 0       | 0       | 0       | 0       |
| ENSMUSG00000069721 | 2_Krtap3-2        | 0.15297 | 0.92709  | 0.82027  | NA       | 0       | 0.91781 | 0       | 0       | 0       | 0       |
| ENSMUSG00000069727 | 5_Gm5595          | 146.159 | -0.71628 | 0.00152  | 0.00514  | 103.314 | 119.315 | 108.759 | 151.483 | 192.754 | 201.33  |
| ENSMUSG00000069729 | 13_Arid1b         | 2057.4  | 0.74509  | 2.26E-06 | 1.87E-05 | 2347.58 | 2605.65 | 2777.54 | 1687.96 | 1232.73 | 1692.95 |
| ENSMUSG00000069733 | 11_Ube2u          | 0.15028 | -0.99647 | 0.80707  | NA       | 0       | 0       | 0       | 0.90169 | 0       | 0       |
| ENSMUSG00000069743 | 4_Zfp820          | 133.957 | -0.56813 | 0.00868  | 0.02241  | 108.524 | 100.959 | 114.735 | 152.385 | 173.927 | 153.213 |
| ENSMUSG00000069744 | 7_Psmb3           | 2199.01 | 0.32412  | 0.04983  | 0.09682  | 2510.8  | 2233.94 | 2591.09 | 2395.78 | 1613.76 | 1848.69 |
| ENSMUSG00000069755 | 4_Zfp125          | 61.8658 | -0.2234  | 0.50508  | 0.61567  | 50.3549 | 54.1505 | 66.9286 | 48.691  | 78.8947 | 72.1749 |
| ENSMUSG00000069763 | 3_Tmem100         | 241.28  | -0.70305 | 0.00043  | 0.00175  | 193.606 | 190.904 | 166.126 | 355.264 | 264.477 | 277.304 |
| ENSMUSG00000069769 | 13_Msi2           | 2703.66 | -0.41334 | 0.00041  | 0.00168  | 2344.98 | 2499.18 | 2111.84 | 3286.64 | 2987.24 | 2992.09 |
| ENSMUSG00000069785 | 4_Gm11444         | 0       | NA       | NA       | NA       | 0       | 0       | 0       | 0       | 0       | 0       |
| ENSMUSG00000069792 | 5_Wfdc17          | 67.7271 | 0.69949  | 0.12508  | 0.20634  | 129.36  | 37.63   | 84.8559 | 61.3146 | 56.4814 | 36.7206 |
| ENSMUSG00000069793 | 11_Slfn9          | 1165.6  | 0.89081  | 0.00013  | 0.00061  | 1529.75 | 1202.33 | 1810.66 | 546.421 | 939.564 | 964.865 |
| ENSMUSG00000069804 | 2_Gm10277         | 7.52481 | -0.54599 | 0.53348  | 0.64172  | 8.68188 | 3.67122 | 5.97577 | 4.50843 | 13.448  | 8.86359 |
| ENSMUSG00000069805 | 10_Fbp1           | 3.50542 | -0.89686 | 0.49838  | 0.60945  | 3.47275 | 3.67122 | 0       | 2.70506 | 3.5862  | 7.59736 |
| ENSMUSG00000069806 | 5_Cacng7          | 185.286 | -0.82897 | 0.02639  | 0.05716  | 120.678 | 198.246 | 81.2705 | 356.166 | 194.547 | 160.811 |
| ENSMUSG00000069808 | 13_Fam57a         | 823.178 | 0.03175  | 0.81824  | 0.87474  | 829.12  | 771.874 | 895.17  | 739.382 | 809.567 | 893.956 |
| ENSMUSG00000069814 | 6_E130309D14Rik   | 19.0749 | -0.89462 | 0.09247  | 0.16118  | 15.6274 | 14.6849 | 9.56123 | 27.0506 | 25.9994 | 21.5259 |
| ENSMUSG00000069825 | 11_Spata22        | 0.64359 | 0.12079  | 0.96515  | NA       | 0.86819 | 0       | 1.19515 | 0.90169 | 0.89653 | 0       |
| ENSMUSG00000069830 | 10_Nlrp1a         | 0.99847 | -0.05438 | 0.98176  | NA       | 1.73638 | 0       | 1.19515 | 0       | 1.79306 | 1.26623 |
| ENSMUSG00000069833 | 12_Ahnak          | 57384.6 | 0.07995  | 0.52751  | 0.63638  | 62489.6 | 54492   | 59939.4 | 48367.3 | 58136.4 | 60882.7 |
| ENSMUSG00000069835 | 10_Sat2           | 103.635 | -0.95357 | 0.00044  | 0.00179  | 71.1914 | 86.2737 | 53.7819 | 148.778 | 138.962 | 122.824 |
| ENSMUSG00000069844 | 12_Sco1           | 300.142 | -0.11811 | 0.52104  | 0.63085  | 303.866 | 264.328 | 295.203 | 261.489 | 350.543 | 325.42  |
| ENSMUSG00000069855 | 9_Slc47a2         | 9.70034 | 0.24716  | 0.73515  | 0.81234  | 12.1546 | 6.42464 | 13.1467 | 9.01685 | 9.86184 | 7.59736 |
| ENSMUSG00000069867 | 2_Pabpn1l         | 1.5012  | -2.95521 | 0.21073  | NA       | 0       | 0.91781 | 0       | 3.60674 | 4.48265 | 0       |
| ENSMUSG00000069873 | 3_4930438A08Rik   | 1.36957 | 1.29637  | 0.54707  | NA       | 1.73638 | 2.75342 | 1.19515 | 0       | 0       | 2.53245 |
| ENSMUSG00000069874 | 6_Irgm2           | 2264.97 | 1.98419  | 3.71E-20 | 6.85E-18 | 3450.18 | 3029.68 | 4368.29 | 651.017 | 1157.42 | 933.209 |
| ENSMUSG00000069892 | 9_9930111J21Rik2  | 1582.47 | 0.89922  | 6.45E-05 | 0.00034  | 1880.5  | 1626.35 | 2674.75 | 832.256 | 1365.42 | 1115.55 |
| ENSMUSG00000069893 | 10_9930111J21Rik1 | 462.05  | 1.19051  | 2.18E-08 | 3.34E-07 | 746.642 | 528.656 | 652.554 | 222.716 | 346.957 | 274.771 |
| ENSMUSG00000069895 | 3_Atxn1l          | 1867.13 | 0.06768  | 0.50294  | 0.6138   | 1934.32 | 1880.58 | 1917.03 | 1828.62 | 1758.1  | 1884.15 |
| ENSMUSG00000069899 | 3_Gm12166         | 122.956 | -0.33305 | 0.16895  | 0.26336  | 118.942 | 118.397 | 88.4414 | 151.483 | 123.721 | 136.753 |
| ENSMUSG00000069910 | 2_Spd1            | 153.437 | 0.17316  | 0.47793  | 0.59052  | 184.056 | 138.589 | 164.931 | 112.711 | 165.858 | 154.48  |
| ENSMUSG00000069911 | 10_Fam196b        | 17.5139 | -1.20429 | 0.05773  | 0.10929  | 13.0228 | 13.7671 | 4.78062 | 35.1657 | 20.6202 | 17.7272 |
| ENSMUSG00000069917 | 7_Hba-a2          | 164.49  | -1.76299 | 9.29E-07 | 8.61E-06 | 66.8505 | 81.6847 | 76.4899 | 415.677 | 182.892 | 163.343 |
| ENSMUSG00000069919 | 7_Hba-a1          | 46.2982 | -0.05344 | 0.93259  | 0.95539  | 43.4094 | 78.0135 | 14.3418 | 60.4129 | 17.0341 | 64.5776 |
| ENSMUSG00000069920 | 10_B3gnt9         | 224.52  | -0.09416 | 0.62274  | 0.72033  | 211.838 | 241.383 | 198.396 | 261.489 | 218.753 | 215.259 |
| ENSMUSG00000069971 | 5_4933402J07Rik   | 0.15297 | 0.92709  | 0.82027  | NA       | 0       | 0.91781 | 0       | 0       | 0       | 0       |
| ENSMUSG00000070000 | 13_Fcho1          | 191.166 | 1.49637  | 1.38E-09 | 3.10E-08 | 246.566 | 248.725 | 351.375 | 110.006 | 78.8947 | 111.428 |
| ENSMUSG00000070002 | 6_Ell             | 927.385 | 0.81157  | 1.77E-07 | 2.06E-06 | 1099.99 | 1134.41 | 1309.89 | 725.857 | 564.814 | 729.347 |
| ENSMUSG00000070003 | 6_Ssbp4           | 281.935 | 1.41259  | 2.69E-07 | 2.96E-06 | 325.571 | 412.095 | 492.403 | 207.388 | 102.204 | 151.947 |
| ENSMUSG00000070031 | 11_Sp140          | 790.237 | 0.63541  | 0.00081  | 0.00298  | 989.735 | 794.82  | 1099.54 | 488.714 | 675.984 | 692.626 |
| ENSMUSG00000070034 | 13_Sp110          | 1026.65 | 1.48957  | 7.52E-11 | 2.53E-09 | 1469.84 | 1252.8  | 1819.02 | 362.478 | 636.537 | 619.185 |
| ENSMUSG00000070044 | 15_Fam149a        | 254.32  | -0.15512 | 0.45656  | 0.57048  | 264.797 | 241.383 | 216.323 | 320.098 | 268.063 | 215.259 |
| ENSMUSG00000070047 | 12_Fat1           | 9722.28 | 0.19888  | 0.13085  | 0.21395  | 9254.02 | 11894.8 | 10023.8 | 8640.85 | 8698.14 | 9822.12 |
| ENSMUSG00000070056 | 5_Mfhas1          | 577.066 | 0.54105  | 0.00017  | 0.00081  | 628.568 | 671.834 | 752.947 | 504.042 | 449.162 | 455.842 |
| ENSMUSG00000070280 | 13_Slc22a14       | 4.00017 | -1.72751 | 0.18791  | 0.28678  | 0.86819 | 4.58903 | 0       | 5.41011 | 8.06878 | 5.06491 |

|                    |                  |         |          |          |          |         |         |         |         |         |         |
|--------------------|------------------|---------|----------|----------|----------|---------|---------|---------|---------|---------|---------|
| ENSMUSG00000070283 | 4_Nduf4f3        | 360.451 | 0.45986  | 0.03585  | 0.07361  | 428.885 | 392.821 | 431.451 | 403.955 | 244.753 | 260.843 |
| ENSMUSG00000070284 | 10_Gmppb         | 1085.23 | 1.35753  | 1.70E-13 | 1.12E-11 | 1397.78 | 1333.57 | 1951.69 | 595.112 | 540.608 | 692.626 |
| ENSMUSG00000070287 | 3_Slc35g2        | 44.3311 | -1.50108 | 0.00016  | 0.00076  | 24.3093 | 30.2876 | 14.3418 | 64.0197 | 73.5155 | 59.5127 |
| ENSMUSG00000070291 | 4_Ddx43          | 35.0268 | -0.46878 | 0.25584  | 0.36555  | 32.123  | 33.041  | 22.7079 | 32.4607 | 49.3092 | 40.5193 |
| ENSMUSG00000070304 | 11_Scn2b         | 85.4906 | -0.96018 | 0.00545  | 0.01514  | 59.0368 | 74.3423 | 40.6352 | 139.761 | 121.928 | 77.2398 |
| ENSMUSG00000070305 | 10_Mpzl3         | 2526.19 | 0.02324  | 0.85277  | 0.90036  | 2699.2  | 2394.55 | 2544.48 | 2213.64 | 2604.42 | 2700.86 |
| ENSMUSG00000070311 | 2_Olfr894        | 0.19919 | 0.92709  | 0.82027  | NA       | 0       | 0       | 1.19515 | 0       | 0       | 0       |
| ENSMUSG00000070313 | 8_A630095E13Rik  | 0.19919 | 0.92709  | 0.82027  | NA       | 0       | 0       | 1.19515 | 0       | 0       | 0       |
| ENSMUSG00000070319 | 5_Eif3g          | 1749.04 | 0.53269  | 0.00013  | 0.00064  | 1929.98 | 2020.09 | 2254.06 | 1471.55 | 1234.52 | 1584.05 |
| ENSMUSG00000070323 | 11_Mmp27         | 35.8502 | 0.23037  | 0.56764  | 0.67259  | 39.0685 | 32.1232 | 45.4159 | 31.559  | 40.3439 | 26.5908 |
| ENSMUSG00000070327 | 13_Rnf213        | 8789.98 | 1.43879  | 2.02E-14 | 1.66E-12 | 12767.6 | 10333.6 | 15427   | 3748.31 | 5593.45 | 4869.91 |
| ENSMUSG00000070330 | 2_Tmem235        | 0.36046 | -1.978   | 0.62369  | NA       | 0       | 0       | 0       | 0       | 0.89653 | 1.26623 |
| ENSMUSG00000070331 | 13_Qrich2        | 2.0128  | -0.35485 | 0.83257  | NA       | 0       | 1.83561 | 3.58546 | 1.80337 | 3.58612 | 1.26623 |
| ENSMUSG00000070336 | 3_Fbxo47         | 22.8473 | -0.02295 | 0.96157  | 0.97507  | 22.5729 | 20.1917 | 25.0982 | 21.6405 | 19.7237 | 27.857  |
| ENSMUSG00000070337 | 4_Gpr179         | 125.417 | -1.03107 | 0.00202  | 0.00657  | 82.4779 | 108.301 | 56.1722 | 232.635 | 148.824 | 124.09  |
| ENSMUSG00000070342 | 3_Gm10287        | 0.2894  | 1.67273  | 0.67976  | NA       | 1.73638 | 0       | 0       | 0       | 0       | 0       |
| ENSMUSG00000070345 | 3_Hsf5           | 1.6867  | -0.77668 | 0.66639  | NA       | 0.86819 | 2.75342 | 0       | 1.80337 | 0.89653 | 3.79868 |
| ENSMUSG00000070348 | 4_Ccnd1          | 10846   | 0.66212  | 8.42E-06 | 5.83E-05 | 12277.1 | 12964.9 | 14632.3 | 7383    | 7780.09 | 10038.6 |
| ENSMUSG00000070354 | 13_Gm21975       | 4.82035 | 0.83584  | 0.5257   | 0.63468  | 11.2864 | 0       | 7.17092 | 3.60674 | 1.79306 | 5.06491 |
| ENSMUSG00000070366 | 5_Ppapdc1a       | 0.65458 | -1.52643 | 0.6202   | NA       | 0.86819 | 0       | 0       | 0       | 1.79306 | 1.26623 |
| ENSMUSG00000070368 | 9_Prok1          | 4.58428 | -0.63165 | 0.57592  | 0.68008  | 4.34094 | 1.83561 | 4.78062 | 7.21348 | 8.06878 | 1.26623 |
| ENSMUSG00000070369 | 13_Iltgad        | 0.65455 | 1.47675  | 0.63184  | NA       | 0       | 1.83561 | 1.19515 | 0       | 0.89653 | 0       |
| ENSMUSG00000070371 | 11_Prss36        | 104.169 | 0.40741  | 0.1648   | 0.25808  | 111.128 | 104.63  | 141.028 | 114.514 | 66.3433 | 87.3697 |
| ENSMUSG00000070372 | 11_Capza1        | 5213.83 | -0.13275 | 0.30892  | 0.42387  | 5136.2  | 4481.64 | 5305.29 | 4854.67 | 6057.86 | 5447.31 |
| ENSMUSG00000070375 | 6_Olfr406        | 0       | NA       | NA       | NA       | 0       | 0       | 0       | 0       | 0       | 0       |
| ENSMUSG00000070385 | 12_Ampd1         | 47.535  | -0.24975 | 0.66639  | 0.75734  | 25.1775 | 83.5203 | 21.5128 | 81.1517 | 35.8612 | 37.9868 |
| ENSMUSG00000070388 | 3_Fbxo39         | 2.69285 | 1.18621  | 0.43858  | 0.55386  | 3.47275 | 1.83561 | 5.97577 | 3.60674 | 0       | 1.26623 |
| ENSMUSG00000070390 | 12_Nlrp1b        | 10.515  | 1.13406  | 0.2152   | 0.319    | 28.6502 | 3.67122 | 10.7564 | 3.60674 | 6.27571 | 10.1298 |
| ENSMUSG00000070394 | 10_Tmem256       | 574.408 | -0.18597 | 0.19436  | 0.29449  | 573.004 | 513.971 | 525.868 | 675.362 | 593.503 | 564.737 |
| ENSMUSG00000070407 | 5_Hs3st3b1       | 886.48  | 0.17179  | 0.18275  | 0.28045  | 975.844 | 899.449 | 940.586 | 797.09  | 785.361 | 920.547 |
| ENSMUSG00000070419 | 11_Cyp3a57       | 0.21104 | -0.99647 | 0.80707  | NA       | 0       | 0       | 0       | 0       | 0       | 1.26623 |
| ENSMUSG00000070420 | 4_Zscan25        | 214.157 | 1.07564  | 2.28E-05 | 0.00014  | 265.666 | 283.602 | 322.692 | 183.944 | 98.6184 | 130.421 |
| ENSMUSG00000070421 | 3_Olfr658        | 0.43409 | 2.24584  | 0.57502  | NA       | 2.60457 | 0       | 0       | 0       | 0       | 0       |
| ENSMUSG00000070423 | 3_Olfr558        | 11.0416 | -2.21459 | 0.00685  | 0.01834  | 3.47275 | 3.67122 | 4.78062 | 18.9354 | 27.7924 | 7.59736 |
| ENSMUSG00000070424 | 11_Art5          | 39.0537 | -0.73029 | 0.17407  | 0.26969  | 22.5729 | 48.6437 | 16.7322 | 75.7416 | 31.3786 | 39.253  |
| ENSMUSG00000070425 | 12_Xntrpc        | 71.4337 | 0.51108  | 0.08189  | 0.14597  | 78.137  | 75.2601 | 99.1978 | 64.9214 | 59.171  | 51.9153 |
| ENSMUSG00000070426 | 12_Rnf121        | 1078.83 | -0.04053 | 0.70858  | 0.79151  | 1072.21 | 1054.56 | 1063.69 | 1094.65 | 1065.97 | 1121.88 |
| ENSMUSG00000070427 | 3_Ill8bp         | 388.918 | 3.03654  | 1.05E-32 | 7.43E-30 | 836.934 | 470.834 | 773.265 | 82.0534 | 99.5149 | 70.9087 |
| ENSMUSG00000070436 | 11_Serpinh1      | 2423.2  | 0.49988  | 0.00034  | 0.00143  | 2624.53 | 3018.66 | 2871.96 | 2103.63 | 1700.72 | 2219.7  |
| ENSMUSG00000070448 | 11_Vmn2r89       | 0       | NA       | NA       | NA       | 0       | 0       | 0       | 0       | 0       | 0       |
| ENSMUSG00000070462 | 4_Mesdc1         | 284.218 | 0.50377  | 0.00817  | 0.02134  | 328.175 | 279.013 | 393.206 | 226.323 | 230.408 | 248.18  |
| ENSMUSG00000070469 | 11_Adamtsl3      | 332.663 | -0.51601 | 0.00648  | 0.01752  | 311.68  | 267.081 | 242.616 | 452.646 | 386.405 | 335.55  |
| ENSMUSG00000070471 | 3_Erich6         | 3.77138 | -0.51195 | 0.66372  | 0.75527  | 2.60457 | 5.50683 | 1.19515 | 5.41011 | 5.37918 | 2.53245 |
| ENSMUSG00000070473 | 4_Cldn3          | 284.237 | 1.59348  | 1.41E-07 | 1.69E-06 | 350.748 | 426.78  | 503.16  | 189.354 | 77.1016 | 158.278 |
| ENSMUSG00000070476 | 10_Fam217b       | 202.499 | -0.37734 | 0.04812  | 0.09393  | 175.374 | 197.328 | 155.37  | 227.225 | 239.374 | 220.323 |
| ENSMUSG00000070493 | 3_Chchd2         | 2315.19 | 0.08122  | 0.53931  | 0.64683  | 2293.75 | 2318.38 | 2530.14 | 2568    | 2011.81 | 2169.05 |
| ENSMUSG00000070495 | 11_Ctcf1         | 0.1447  | 0.92709  | 0.82027  | NA       | 0.86819 | 0       | 0       | 0       | 0       | 0       |
| ENSMUSG00000070498 | 3_Tmem132b       | 95.4988 | -1.79515 | 3.04E-06 | 2.41E-05 | 42.5412 | 58.7396 | 26.2934 | 211.896 | 103.101 | 130.421 |
| ENSMUSG00000070501 | 13_BC094916      | 108.037 | 1.04651  | 0.01374  | 0.03298  | 187.529 | 105.548 | 143.418 | 28.8539 | 103.101 | 79.7723 |
| ENSMUSG00000070504 | 9_Fcrlb          | 0.2894  | 1.67273  | 0.67976  | NA       | 1.73638 | 0       | 0       | 0       | 0       | 0       |
| ENSMUSG00000070509 | 15_Rgma          | 413.649 | 0.89856  | 5.57E-06 | 4.07E-05 | 496.604 | 541.505 | 577.259 | 347.149 | 220.547 | 298.83  |
| ENSMUSG00000070520 | 4_Ndn12          | 320.092 | 0.07194  | 0.6461   | 0.74099  | 326.439 | 312.054 | 345.4   | 297.556 | 304.82  | 334.284 |
| ENSMUSG00000070524 | 1_Fcrlb          | 1.23689 | 3.74752  | 0.11741  | NA       | 3.47275 | 2.75342 | 1.19515 | 0       | 0       | 0       |
| ENSMUSG00000070526 | 2_Peg12          | 8.14223 | -0.66921 | 0.40802  | 0.52475  | 6.94551 | 8.26025 | 3.58546 | 9.01685 | 13.448  | 7.59736 |
| ENSMUSG00000070527 | 3_Mktn3          | 33.3754 | -0.03873 | 0.9232   | 0.94914  | 32.9912 | 35.7944 | 29.8789 | 27.9522 | 39.4473 | 34.1881 |
| ENSMUSG00000070530 | 5_Wfdc16         | 0.1447  | 0.92709  | 0.82027  | NA       | 0.86819 | 0       | 0       | 0       | 0       | 0       |
| ENSMUSG00000070532 | 5_1700084C01Rik  | 3.32078 | -1.74909 | 0.19019  | 0.28946  | 2.60457 | 1.83561 | 0       | 5.41011 | 6.27571 | 3.79868 |
| ENSMUSG00000070533 | 11_Wfdc8         | 0.21104 | -0.99647 | 0.80707  | NA       | 0       | 0       | 0       | 0       | 0       | 1.26623 |
| ENSMUSG00000070544 | 6_Top1           | 2763.67 | -0.2046  | 0.26635  | 0.37761  | 2468.26 | 2461.55 | 2773.95 | 2136.09 | 3415.78 | 3326.38 |
| ENSMUSG00000070546 | 2_Mrgprb3        | 0.30325 | -0.03469 | 0.99322  | NA       | 0       | 0.91781 | 0       | 0.90169 | 0       | 0       |
| ENSMUSG00000070547 | 4_Mrgprb1        | 13.2639 | -1.74034 | 0.02759  | 0.05928  | 12.1546 | 4.58903 | 1.19515 | 25.2472 | 16.1376 | 20.2596 |
| ENSMUSG00000070551 | 3_Mrgprb5        | 0.19919 | 0.92709  | 0.82027  | NA       | 0       | 0       | 1.19515 | 0       | 0       | 0       |
| ENSMUSG00000070552 | 2_Mrgprx1        | 0.14942 | -0.99647 | 0.80707  | NA       | 0       | 0       | 0       | 0       | 0.89653 | 0       |
| ENSMUSG00000070563 | 4_Spaca4         | 3.42221 | 1.4176   | 0.29029  | 0.40385  | 5.20913 | 2.75342 | 7.17092 | 3.60674 | 1.79306 | 0       |
| ENSMUSG00000070564 | 13_Ntn5          | 2.87131 | -0.0622  | 0.96366  | 0.97656  | 2.60457 | 4.58903 | 1.19515 | 5.41011 | 0.89653 | 2.53245 |
| ENSMUSG00000070565 | 11_Rasal2        | 1866.7  | 0.14416  | 0.26363  | 0.37463  | 2028.09 | 1987.05 | 1862.05 | 1568.03 | 1773.34 | 1981.65 |
| ENSMUSG00000070568 | 10_1700039E15Rik | 0.2894  | 1.67273  | 0.67976  | NA       | 1.73638 | 0       | 0       | 0       | 0       | 0       |
| ENSMUSG00000070570 | 4_Slc17a7        | 187.66  | -1.6959  | 0.04335  | 0.08608  | 126.756 | 102.794 | 35.8546 | 553.635 | 210.685 | 96.2332 |
| ENSMUSG00000070574 | 1_2310016G11Rik  | 1.92231 | -0.70445 | 0.68011  | NA       | 0       | 0.91781 | 3.58546 | 2.70506 | 1.79306 | 2.53245 |
| ENSMUSG00000070576 | 4_Mn1            | 154.478 | 0.31725  | 0.19715  | 0.29763  | 153.669 | 209.26  | 151.785 | 160.5   | 138.962 | 112.694 |
| ENSMUSG00000070577 | 5_Gm572          | 0.74582 | -1.7875  | 0.60443  | NA       | 0.86819 | 0       | 0       | 3.60674 | 0       | 0       |
| ENSMUSG00000070583 | 1_Fv1            | 93.1699 | -0.81197 | 0.00706  | 0.01883  | 64.2459 | 77.0957 | 60.9529 | 83.8567 | 133.583 | 139.285 |
| ENSMUSG00000070594 | 10_Gm4788        | 4.73454 | -0.38532 | 0.7015   | 0.78662  | 5.20913 | 4.58903 | 2.39031 | 4.50843 | 5.37918 | 6.33113 |
| ENSMUSG00000070601 | 4_Vmn2r84        | 0.5891  | -0.05433 | 0.98647  | NA       | 1.73638 | 0       | 0       | 0.90169 | 0.89653 | 0       |
| ENSMUSG00000070604 | 5_Vsig10l        | 1112.5  | 1.0443   | 6.94E-14 | 4.97E-12 | 1387.37 | 1380.38 | 1728.19 | 727.66  | 705.57  | 745.808 |
| ENSMUSG00000070605 | 4_Gm13251        | 523.335 | -0.6283  | 6.61E-05 | 0.00035  | 456.667 | 358.862 | 418.304 | 609.539 | 693.915 | 602.724 |
| ENSMUSG00000070617 | 2_Gm13089        | 0       | NA       | NA       | NA       | 0       | 0       | 0       | 0       | 0       | 0       |
| ENSMUSG00000070618 | 10_BC080695      | 0       | NA       | NA       | NA       | 0       | 0       | 0       | 0       | 0       | 0       |
| ENSMUSG00000070632 | 4_Btbd8          | 20.855  | -0.38302 | 0.46857  | 0.58201  | 16.4956 | 25.6986 | 11.9515 | 26.1489 | 23.3098 | 21.5259 |

|                    |                  |         |          |          |          |         |         |         |         |         |         |
|--------------------|------------------|---------|----------|----------|----------|---------|---------|---------|---------|---------|---------|
| ENSMUSG00000070637 | 2_Gm694          | 1.55366 | -1.098   | 0.59013  | NA       | 0       | 1.83561 | 1.19515 | 2.70506 | 3.58612 | 0       |
| ENSMUSG00000070639 | 5_Lrrc8b         | 3263.32 | 0.07968  | 0.54879  | 0.65525  | 3278.28 | 3305.02 | 3475.51 | 2705.06 | 3242.75 | 3573.29 |
| ENSMUSG00000070643 | 11_Sox13         | 878.152 | 1.00209  | 5.06E-07 | 5.12E-06 | 1025.33 | 1175.71 | 1312.28 | 645.607 | 424.955 | 685.029 |
| ENSMUSG00000070644 | 13_Etnk2         | 106.578 | 0.48343  | 0.09133  | 0.15959  | 112.864 | 133.082 | 126.686 | 110.006 | 61.8606 | 94.967  |
| ENSMUSG00000070661 | 6_Rnf186         | 0.64156 | 2.79342  | 0.35281  | NA       | 1.73638 | 0.91781 | 1.19515 | 0       | 0       | 0       |
| ENSMUSG00000070683 | 7_Lactbl1        | 14.2465 | -2.3405  | 0.00327  | 0.00989  | 6.94551 | 4.58903 | 2.39031 | 43.2809 | 14.3445 | 13.9285 |
| ENSMUSG00000070686 | 10_C87414        | 0.21104 | -0.99647 | 0.80707  | NA       | 0       | 0       | 0       | 0       | 0       | 1.26623 |
| ENSMUSG00000070687 | 11_Htr1d         | 3.13061 | -0.79639 | 0.52728  | 0.63623  | 1.73638 | 2.75342 | 2.39031 | 6.3118  | 1.79306 | 3.79868 |
| ENSMUSG00000070690 | 7_5830473C10Rik  | 2.09792 | -4.54819 | 0.05425  | NA       | 0       | 0       | 0       | 6.3118  | 6.27571 | 0       |
| ENSMUSG00000070691 | 10_Runx3         | 32.4872 | 2.31255  | 1.58E-05 | 0.0001   | 78.137  | 33.9588 | 50.1965 | 15.3287 | 7.17224 | 10.1298 |
| ENSMUSG00000070695 | 4_Cntnap5a       | 2.65825 | -2.94845 | 0.09081  | 0.15888  | 1.73638 | 0       | 0       | 4.50843 | 7.17224 | 2.53245 |
| ENSMUSG00000070697 | 4_Utp3           | 899     | 0.05481  | 0.72384  | 0.80342  | 918.543 | 820.518 | 1008.71 | 754.711 | 906.392 | 985.125 |
| ENSMUSG00000070699 | 4_Sars2          | 151.735 | 1.3362   | 2.19E-06 | 1.82E-05 | 166.692 | 223.027 | 262.934 | 110.006 | 65.4467 | 82.3047 |
| ENSMUSG00000070705 | 2_Eid2b          | 127.276 | -0.69162 | 0.0028   | 0.00867  | 92.028  | 99.123  | 101.588 | 179.435 | 155.996 | 135.486 |
| ENSMUSG00000070708 | 5_Gtsf1l         | 0.1447  | 0.92709  | 0.82027  | NA       | 0.86819 | 0       | 0       | 0       | 0       | 0       |
| ENSMUSG00000070709 | 12_1700049G17Rik | 435.449 | -0.40078 | 0.02448  | 0.05371  | 376.794 | 351.52  | 397.986 | 404.857 | 573.78  | 507.757 |
| ENSMUSG00000070713 | 4_Gm10282        | 549.412 | -0.22251 | 0.20626  | 0.30858  | 617.282 | 422.191 | 481.647 | 614.949 | 594.4   | 566.003 |
| ENSMUSG00000070717 | 1_Gm10300        | 2.4378  | -0.56441 | 0.79079  | NA       | 0       | 0       | 5.97577 | 0       | 3.58612 | 5.06491 |
| ENSMUSG00000070719 | 4_Pla2g4d        | 0.30056 | -1.76625 | 0.6627   | NA       | 0       | 0       | 0       | 1.80337 | 0       | 0       |
| ENSMUSG00000070720 | 3_Tmem200b       | 74.7201 | 0.61784  | 0.09845  | 0.16989  | 72.9278 | 106.465 | 92.0269 | 82.0534 | 34.0682 | 60.7789 |
| ENSMUSG00000070730 | 11_Rmdn3         | 641.484 | 0.40067  | 0.01349  | 0.03248  | 691.946 | 651.642 | 847.364 | 605.031 | 495.781 | 557.14  |
| ENSMUSG00000070732 | 2_Rbm44          | 0.63887 | 1.43476  | 0.64357  | NA       | 1.73638 | 0       | 1.19515 | 0.90169 | 0       | 0       |
| ENSMUSG00000070733 | 13_Fryl          | 4823.54 | -0.01222 | 0.89794  | 0.93119  | 4670.85 | 5007.55 | 4731.62 | 4875.41 | 4963.19 | 4692.64 |
| ENSMUSG00000070737 | 10_Gm12942       | 307.832 | -0.04301 | 0.78272  | 0.84879  | 286.502 | 316.643 | 307.155 | 323.705 | 312.889 | 300.096 |
| ENSMUSG00000070738 | 4_Dgkd           | 968.991 | -0.17445 | 0.20293  | 0.30449  | 940.248 | 985.723 | 804.339 | 1104.56 | 967.356 | 1011.72 |
| ENSMUSG00000070777 | 4_Ceacam20       | 0.50602 | -1.01212 | 0.76398  | NA       | 0.86819 | 0       | 0       | 0.90169 | 0       | 1.26623 |
| ENSMUSG00000070778 | 5_Rpl7a-ps8      | 9.17841 | -0.08935 | 0.91705  | 0.94495  | 13.891  | 9.17806 | 3.58546 | 7.21348 | 16.1376 | 5.06491 |
| ENSMUSG00000070780 | 11_Rbm47         | 966.081 | 0.75891  | 1.21E-06 | 1.08E-05 | 1097.39 | 1201.41 | 1343.35 | 699.708 | 623.985 | 830.645 |
| ENSMUSG00000070798 | 4_Psg25          | 0       | NA       | NA       | NA       | 0       | 0       | 0       | 0       | 0       | 0       |
| ENSMUSG00000070799 | 3_Psg26          | 0.15297 | 0.92709  | 0.82027  | NA       | 0       | 0.91781 | 0       | 0       | 0       | 0       |
| ENSMUSG00000070802 | 5_Pnmal2         | 357.132 | -0.61461 | 0.03866  | 0.07828  | 249.17  | 396.492 | 200.786 | 596.916 | 376.543 | 322.888 |
| ENSMUSG00000070803 | 6_Cited4         | 237.686 | 0.93565  | 0.00011  | 0.00055  | 274.348 | 338.67  | 323.887 | 213.699 | 121.032 | 154.48  |
| ENSMUSG00000070806 | 5_Zmynd12        | 7.28981 | 0.06805  | 0.93425  | 0.95668  | 8.68188 | 6.42464 | 7.17092 | 8.11517 | 4.48265 | 8.86359 |
| ENSMUSG00000070808 | 3_Gltscr1        | 319.643 | 1.46549  | 1.91E-10 | 5.66E-09 | 405.444 | 452.478 | 548.576 | 163.205 | 129.1   | 219.057 |
| ENSMUSG00000070814 | 14_6330408A02Rik | 307.274 | -0.09831 | 0.534    | 0.64211  | 299.525 | 310.218 | 280.861 | 333.624 | 321.854 | 297.563 |
| ENSMUSG00000070822 | 4_Zscan18        | 58.9936 | -1.05367 | 0.00512  | 0.01439  | 36.4639 | 53.2327 | 25.0982 | 88.3652 | 88.7565 | 62.0451 |
| ENSMUSG00000070823 | 4_Gm1043         | 0.45622 | 0.77574  | 0.84797  | NA       | 0       | 1.83561 | 0       | 0.90169 | 0       | 0       |
| ENSMUSG00000070837 | 4_Aurkc          | 2.31584 | -1.02546 | 0.52454  | NA       | 0.86819 | 3.67122 | 0       | 3.60674 | 4.48265 | 1.26623 |
| ENSMUSG00000070844 | 10_Vmn2r42       | 0       | NA       | NA       | NA       | 0       | 0       | 0       | 0       | 0       | 0       |
| ENSMUSG00000070847 | 11_Vmn2r30       | 3.25937 | 0.24627  | 0.85381  | 0.90096  | 1.73638 | 1.83561 | 7.17092 | 0.90169 | 5.37918 | 2.53245 |
| ENSMUSG00000070858 | 11_Gm1673        | 3.8393  | 1.98181  | 0.17811  | 0.27483  | 5.20913 | 7.34244 | 5.97577 | 4.50843 | 0       | 0       |
| ENSMUSG00000070866 | 4_Zfp804a        | 7.07756 | -1.07494 | 0.39717  | 0.51462  | 6.94551 | 5.50683 | 1.19515 | 22.5421 | 6.27571 | 0       |
| ENSMUSG00000070867 | 4_Trib2b         | 142.069 | -0.81503 | 0.00284  | 0.00877  | 105.919 | 129.411 | 72.9044 | 215.503 | 164.065 | 164.609 |
| ENSMUSG00000070870 | 6_Cryge          | 726.857 | -0.72555 | 0.62243  | 0.72006  | 302.13  | 1284.01 | 57.3674 | 234.168 | 135.376 | 240.583 |
| ENSMUSG00000070871 | 10_Ccnyl1        | 700.286 | -0.24193 | 0.07204  | 0.13155  | 630.305 | 648.889 | 646.578 | 706.02  | 841.842 | 728.08  |
| ENSMUSG00000070873 | 5_Llra5          | 29.6691 | -0.44915 | 0.33158  | 0.44814  | 17.3638 | 33.041  | 25.0982 | 42.3792 | 32.2751 | 27.857  |
| ENSMUSG00000070877 | 4_Ldlrad1        | 0.14942 | -0.99647 | 0.80707  | NA       | 0       | 0       | 0       | 0       | 0.89653 | 0       |
| ENSMUSG00000070880 | 10_Gad1          | 48.04   | -2.34285 | 0.00023  | 0.00101  | 22.5729 | 17.4383 | 7.17092 | 136.155 | 83.3773 | 21.5259 |
| ENSMUSG00000070883 | 3_Ccdc173        | 68.6234 | -0.63774 | 0.0832   | 0.14778  | 35.5957 | 48.6437 | 77.685  | 67.6264 | 98.6184 | 83.571  |
| ENSMUSG00000070890 | 3_Gm12794        | 0.48859 | 2.39711  | 0.53861  | NA       | 1.73638 | 0       | 1.19515 | 0       | 0       | 0       |
| ENSMUSG00000070891 | 2_Gm12689        | 6.14569 | 1.05599  | 0.35148  | 0.46807  | 9.55007 | 3.67122 | 11.9515 | 8.11517 | 3.58612 | 0       |
| ENSMUSG00000070900 | 1_Gm10306        | 0.35574 | -0.03469 | 0.99322  | NA       | 0.86819 | 0       | 0       | 0       | 0       | 1.26623 |
| ENSMUSG00000070902 | 5_Zfp352         | 0.15028 | -0.99647 | 0.80707  | NA       | 0       | 0       | 0       | 0.90169 | 0       | 0       |
| ENSMUSG00000070904 | 4_Ilna4          | 0       | NA       | NA       | NA       | 0       | 0       | 0       | 0       | 0       | 0       |
| ENSMUSG00000070923 | 4_Klhl9          | 1530.07 | -0.54406 | 0.00013  | 0.00064  | 1295.34 | 1102.28 | 1338.57 | 1679.84 | 2057.54 | 1706.87 |
| ENSMUSG00000070933 | 10_Speer4d       | 0.30056 | -1.76625 | 0.6627   | NA       | 0       | 0       | 0       | 1.80337 | 0       | 0       |
| ENSMUSG00000070934 | 6_Rraga          | 1188.28 | -0.30264 | 0.01024  | 0.02578  | 1050.51 | 1077.5  | 1064.88 | 1241.62 | 1426.38 | 1268.76 |
| ENSMUSG00000070939 | 9_Tgfbp1         | 1038.76 | 0.10309  | 0.40205  | 0.51968  | 1063.53 | 1115.13 | 1048.15 | 1064.89 | 912.668 | 1028.18 |
| ENSMUSG00000070942 | 8_Il1rl2         | 1278.45 | 0.49358  | 0.00638  | 0.01729  | 1553.19 | 1251.89 | 1679.19 | 842.174 | 1113.49 | 1230.77 |
| ENSMUSG00000070953 | 13_Rabepk        | 411.019 | 0.04319  | 0.80189  | 0.86302  | 446.249 | 365.287 | 439.817 | 441.826 | 348.75  | 424.186 |
| ENSMUSG00000070972 | 13_Dnajc25       | 223.324 | -0.42209 | 0.03304  | 0.06883  | 215.311 | 198.246 | 157.76  | 235.34  | 263.58  | 269.706 |
| ENSMUSG00000070979 | 5_Actl7a         | 0.35574 | -0.03469 | 0.99322  | NA       | 0.86819 | 0       | 0       | 0       | 0       | 1.26623 |
| ENSMUSG00000070985 | 3_Acnat1         | 5.11156 | -0.8645  | 0.40099  | 0.51854  | 2.60457 | 3.67122 | 4.78062 | 8.11517 | 8.96531 | 2.53245 |
| ENSMUSG00000070990 | 2_Foxe1          | 27.2401 | 1.34022  | 0.00331  | 0.01     | 40.8049 | 36.7122 | 39.4401 | 11.7219 | 17.0341 | 17.7272 |
| ENSMUSG00000070999 | 2_Ccin           | 0.15028 | -0.99647 | 0.80707  | NA       | 0       | 0       | 0       | 0.90169 | 0       | 0       |
| ENSMUSG00000071001 | 4_Hrct1          | 14.7362 | 0.36286  | 0.60251  | 0.7034   | 16.4956 | 20.1917 | 13.1467 | 23.4438 | 6.27571 | 8.86359 |
| ENSMUSG00000071005 | 7_Ccl19          | 42.1678 | 2.41148  | 4.24E-06 | 3.21E-05 | 80.7415 | 44.9725 | 87.2462 | 20.7388 | 5.37918 | 13.9285 |
| ENSMUSG00000071014 | 10_Ndufb6        | 533.252 | 0.00443  | 0.97377  | 0.98302  | 540.881 | 562.615 | 498.379 | 527.486 | 552.263 | 517.887 |
| ENSMUSG00000071019 | 11_Sdr16c6       | 0       | NA       | NA       | NA       | 0       | 0       | 0       | 0       | 0       | 0       |
| ENSMUSG00000071033 | 1_Gm10308        | 1.20225 | -3.741   | 0.2766   | NA       | 0       | 0       | 0       | 7.21348 | 0       | 0       |
| ENSMUSG00000071036 | 2_Gm10309        | 4.62233 | 1.3965   | 0.36857  | 0.48592  | 10.4183 | 0       | 9.56123 | 0       | 2.68959 | 5.06491 |
| ENSMUSG00000071037 | 5_Camkmt         | 64.5439 | -0.30208 | 0.31187  | 0.42681  | 54.6959 | 58.7396 | 59.7577 | 60.4129 | 72.619  | 81.0385 |
| ENSMUSG00000071042 | 11_Rasgrp3       | 669.206 | -1.69677 | 3.12E-10 | 8.71E-09 | 302.998 | 435.958 | 206.762 | 1256.05 | 1058.8  | 754.671 |
| ENSMUSG00000071047 | 4_Ces1a          | 1.34888 | -0.98779 | 0.64185  | NA       | 0.86819 | 1.83561 | 0       | 1.80337 | 3.58612 | 0       |
| ENSMUSG00000071052 | 3_Rpl7a-ps5      | 58.2516 | 0.76419  | 0.0122   | 0.02985  | 76.4006 | 75.2601 | 68.1238 | 41.4775 | 43.93   | 44.3179 |
| ENSMUSG00000071054 | 12_Safb          | 2073.68 | 0.5401   | 2.94E-05 | 0.00017  | 2150.5  | 2531.31 | 2690.29 | 1627.54 | 1646.93 | 1795.51 |
| ENSMUSG00000071064 | 13_Zfp827        | 507.31  | -0.13291 | 0.33427  | 0.45095  | 477.504 | 516.725 | 457.744 | 547.323 | 540.608 | 503.958 |
| ENSMUSG00000071068 | 6_Trem12         | 24.5266 | 4.54988  | 2.20E-08 | 3.36E-07 | 61.6414 | 22.0273 | 57.3674 | 0.90169 | 2.68959 | 2.53245 |
| ENSMUSG00000071072 | 12_Ptges3        | 3021.67 | -0.24068 | 0.10779  | 0.18307  | 2848.53 | 2478.08 | 2984.3  | 2724.89 | 3698.19 | 3396.02 |

|                     |                  |         |          |          |          |         |         |         |         |         |         |
|---------------------|------------------|---------|----------|----------|----------|---------|---------|---------|---------|---------|---------|
| ENSMUSG000000071073 | 4_Lrrc73         | 9.77805 | 0.11966  | 0.86768  | 0.91022  | 6.94551 | 12.8493 | 10.7564 | 9.91854 | 8.06878 | 10.1298 |
| ENSMUSG000000071074 | 9_Yipf3          | 1096.34 | 0.86742  | 1.39E-05 | 9.04E-05 | 1303.15 | 1476.75 | 1468.84 | 961.197 | 551.366 | 816.716 |
| ENSMUSG000000071076 | 5_Jund           | 759.47  | 0.73581  | 5.17E-05 | 0.00028  | 836.065 | 950.847 | 1060.1  | 649.214 | 446.472 | 614.12  |
| ENSMUSG000000071078 | 5_Nr2c2ap        | 248.851 | 0.57425  | 0.00393  | 0.01154  | 304.734 | 277.177 | 310.74  | 221.815 | 159.582 | 219.057 |
| ENSMUSG000000071083 | 1_Gm10311        | 13.0492 | -0.47904 | 0.47326  | 0.58614  | 6.07732 | 14.6849 | 11.9515 | 10.8202 | 17.0341 | 17.7272 |
| ENSMUSG000000071089 | 2_Trim75         | 0.94974 | -2.11364 | 0.44223  | NA       | 0       | 0       | 1.19515 | 3.60674 | 0.89653 | 0       |
| ENSMUSG000000071103 | 9_1700029J07Rik  | 119     | -0.72636 | 0.01161  | 0.02866  | 85.9507 | 111.972 | 70.5141 | 115.416 | 181.996 | 148.149 |
| ENSMUSG000000071104 | 9_Ccdc110        | 1.08578 | -2.37422 | 0.31624  | NA       | 0       | 0.91781 | 0       | 0.90169 | 0.89653 | 3.79868 |
| ENSMUSG000000071112 | 11_Spx           | 11.9703 | 0.36546  | 0.56694  | 0.672    | 14.7592 | 13.7671 | 11.9515 | 11.7219 | 10.7584 | 8.86359 |
| ENSMUSG000000071113 | 3_Mboat4         | 4.85492 | 0.09368  | 0.92937  | 0.95319  | 6.07732 | 1.83561 | 7.17092 | 2.70506 | 6.27571 | 5.06491 |
| ENSMUSG000000071138 | 4_Tex24          | 0.34947 | -0.03469 | 0.99322  | NA       | 0       | 0       | 1.19515 | 0.90169 | 0       | 0       |
| ENSMUSG000000071151 | 3_Gm4799         | 3.85685 | -2.02955 | 0.12941  | 0.21214  | 2.60457 | 1.83561 | 0       | 5.41011 | 10.7584 | 2.53245 |
| ENSMUSG000000071158 | 9_Gm156          | 0.15297 | 0.92709  | 0.82027  | NA       | 0       | 0.91781 | 0       | 0       | 0       | 0       |
| ENSMUSG000000071165 | 3_Gm6040         | 0.65186 | 0.14793  | 0.95721  | NA       | 0       | 0.91781 | 1.19515 | 0.90169 | 0.89653 | 0       |
| ENSMUSG000000071172 | 12_Srsf3         | 6973.91 | -0.28454 | 0.01628  | 0.03817  | 6501.86 | 5824.39 | 6538.69 | 6841.09 | 8101.95 | 8035.48 |
| ENSMUSG000000071176 | 10_Arhgef10      | 676.977 | 0.24027  | 0.20217  | 0.3036   | 671.978 | 790.231 | 737.41  | 753.809 | 477.851 | 630.581 |
| ENSMUSG000000071177 | 4_Serpina1d      | 2.20839 | -0.87103 | 0.6375   | NA       | 0       | 4.58903 | 0       | 1.80337 | 1.79306 | 5.06491 |
| ENSMUSG000000071178 | 11_Serpina1b     | 18.356  | 0.61796  | 0.32478  | 0.44088  | 32.123  | 19.2739 | 15.537  | 19.8371 | 17.0341 | 6.33113 |
| ENSMUSG000000071180 | 4_Smim15         | 1075.2  | -0.31866 | 0.03991  | 0.08037  | 999.285 | 860.902 | 1011.1  | 1016.2  | 1373.48 | 1190.25 |
| ENSMUSG000000071181 | 1_3830408C21Rik  | 12.825  | -0.60414 | 0.34651  | 0.46337  | 9.55007 | 9.17806 | 11.9515 | 11.7219 | 20.6202 | 13.9285 |
| ENSMUSG000000071192 | 5_Wfikkn1        | 13.3437 | 1.86005  | 0.01157  | 0.02857  | 26.9138 | 16.5205 | 19.1225 | 8.11517 | 1.79306 | 7.59736 |
| ENSMUSG000000071202 | 4_Ccdc78         | 7.74233 | -0.66408 | 0.41588  | 0.53184  | 5.20913 | 4.58903 | 8.36608 | 12.6236 | 8.06878 | 7.59736 |
| ENSMUSG000000071203 | 6_Naip5          | 31.9796 | 1.24087  | 0.00752  | 0.01985  | 61.6414 | 30.2876 | 43.0255 | 20.7388 | 19.7237 | 16.4609 |
| ENSMUSG000000071226 | 11_Cecr2         | 70.8079 | -1.34399 | 0.00064  | 0.00247  | 42.5412 | 53.2327 | 23.9031 | 138.86  | 94.1357 | 72.1749 |
| ENSMUSG000000071229 | 3_Timm8a2        | 0.41023 | -0.03469 | 0.99322  | NA       | 0       | 0       | 1.19515 | 0       | 0       | 1.26623 |
| ENSMUSG000000071234 | 2_Syndig1l       | 1.93122 | 0.64316  | 0.72842  | NA       | 4.34094 | 2.75342 | 0       | 1.80337 | 2.68959 | 0       |
| ENSMUSG000000071252 | 5_2210408I21Rik  | 104.766 | -0.48768 | 0.04983  | 0.09682  | 99.8417 | 77.0957 | 84.8559 | 133.449 | 121.928 | 111.428 |
| ENSMUSG000000071253 | 8_Slc25a16       | 566.38  | -0.43923 | 0.00054  | 0.00213  | 492.263 | 462.574 | 487.623 | 645.607 | 651.778 | 658.438 |
| ENSMUSG000000071256 | 3_Zfp213         | 203.635 | 0.63023  | 0.0087   | 0.02245  | 231.806 | 248.725 | 261.739 | 200.174 | 114.756 | 164.609 |
| ENSMUSG000000071262 | 9_Zfp957         | 1.6615  | -1.09066 | 0.54504  | NA       | 0       | 0.91781 | 2.39031 | 2.70506 | 2.68959 | 1.26623 |
| ENSMUSG000000071265 | 9_1700086L19Rik  | 8.37477 | -1.47856 | 0.07169  | 0.13104  | 4.34094 | 6.42464 | 2.39031 | 11.7219 | 15.241  | 10.1298 |
| ENSMUSG000000071266 | 13_Zfp946        | 323.69  | -0.44481 | 0.00469  | 0.01337  | 283.029 | 269.835 | 268.91  | 342.64  | 380.129 | 397.595 |
| ENSMUSG000000071267 | 11_Zfp942        | 333.272 | -0.59395 | 0.00084  | 0.0031   | 272.611 | 250.561 | 273.69  | 337.23  | 452.748 | 412.79  |
| ENSMUSG000000071273 | 3_Gm5145         | 0.78271 | 1.81534  | 0.53334  | NA       | 2.60457 | 0       | 1.19515 | 0       | 0.89653 | 0       |
| ENSMUSG000000071280 | 1_Gm10322        | 0.68778 | 2.88297  | 0.40065  | NA       | 1.73638 | 0       | 2.39031 | 0       | 0       | 0       |
| ENSMUSG000000071281 | 10_Zfp65         | 341.231 | -0.52156 | 0.00883  | 0.02274  | 310.811 | 250.561 | 279.666 | 348.952 | 493.988 | 363.407 |
| ENSMUSG000000071291 | 10_Zfp58         | 157.32  | -0.67773 | 0.00111  | 0.00393  | 123.283 | 127.575 | 112.344 | 195.666 | 211.581 | 173.473 |
| ENSMUSG000000071302 | 10_2610044O15Rik | 349.586 | -0.83136 | 9.69E-07 | 8.91E-06 | 278.688 | 232.205 | 243.811 | 424.694 | 500.264 | 417.855 |
| ENSMUSG000000071311 | 1_Gpr31b         | 4.87413 | 2.57012  | 0.04997  | 0.09707  | 7.8137  | 2.75342 | 14.3418 | 1.80337 | 0       | 2.53245 |
| ENSMUSG000000071317 | 3_Bves           | 167.965 | -0.24333 | 0.2739   | 0.38602  | 171.901 | 164.287 | 124.296 | 161.402 | 197.237 | 188.668 |
| ENSMUSG000000071322 | 12_Tcp10a        | 1.18829 | 0.70658  | 0.77799  | NA       | 2.60457 | 1.83561 | 0       | 0       | 2.68959 | 0       |
| ENSMUSG000000071324 | 11_Armc2         | 53.2425 | -0.00621 | 0.98675  | 0.99089  | 38.2003 | 63.3286 | 58.5626 | 60.4129 | 60.9641 | 37.9868 |
| ENSMUSG000000071335 | 4_G630090E17Rik  | 30.7674 | -0.01454 | 0.97347  | 0.98291  | 27.782  | 24.7808 | 39.4401 | 24.3455 | 34.0682 | 34.1881 |
| ENSMUSG000000071337 | 11_Tia1          | 1396.97 | -0.48103 | 0.00132  | 0.00456  | 1214.6  | 1183.05 | 1100.74 | 1399.42 | 1917.68 | 1566.32 |
| ENSMUSG000000071340 | 1_Trappc3l       | 0.43409 | 2.24584  | 0.57502  | NA       | 2.60457 | 0       | 0       | 0       | 0       | 0       |
| ENSMUSG000000071341 | 4_Egr4           | 0.39838 | 2.07058  | 0.60634  | NA       | 0       | 0       | 2.39031 | 0       | 0       | 0       |
| ENSMUSG000000071342 | 4_Lsmem1         | 4.09673 | -1.43137 | 0.02227  | 0.30366  | 2.60457 | 2.75342 | 1.19515 | 7.21348 | 4.48265 | 6.33113 |
| ENSMUSG000000071347 | 3_C1qtnf9        | 15.1298 | -0.67164 | 0.29014  | 0.40368  | 7.8137  | 16.5205 | 10.7564 | 26.1489 | 14.3445 | 15.1947 |
| ENSMUSG000000071350 | 12_Setdb2        | 372.365 | 0.25945  | 0.2019   | 0.30328  | 384.607 | 401.999 | 431.451 | 271.407 | 429.438 | 315.291 |
| ENSMUSG000000071359 | 13_Tbpl1         | 563.713 | -0.22548 | 0.09023  | 0.15804  | 493.131 | 509.382 | 558.137 | 617.655 | 617.71  | 586.263 |
| ENSMUSG000000071361 | 1_Mcpt9          | 0.14942 | -0.99647 | 0.80707  | NA       | 0       | 0       | 0       | 0       | 0.89653 | 0       |
| ENSMUSG000000071362 | 2_Gm10330        | 2.71329 | -1.69669 | 0.22312  | 0.3281   | 1.73638 | 0.91781 | 1.19515 | 6.3118  | 3.58612 | 2.53245 |
| ENSMUSG000000071369 | 10_Map3k5        | 1848.82 | -0.22661 | 0.06093  | 0.11438  | 1629.59 | 1676.83 | 1805.88 | 1800.67 | 2133.74 | 2046.22 |
| ENSMUSG000000071379 | 1_Hpcal1         | 1022.62 | 0.79268  | 2.42E-06 | 1.97E-05 | 1167.71 | 1284.93 | 1437.77 | 869.225 | 608.744 | 767.334 |
| ENSMUSG000000071392 | 4_Ect2l          | 2.26038 | 0.41726  | 0.76805  | NA       | 1.73638 | 3.67122 | 2.39031 | 2.70506 | 1.79306 | 1.26623 |
| ENSMUSG000000071398 | 8_2410004P03Rik  | 1.53508 | 0.03741  | 0.98357  | NA       | 2.60457 | 0.91781 | 1.19515 | 1.80337 | 2.68959 | 0       |
| ENSMUSG000000071415 | 6_Rpl23          | 18266.3 | -0.49289 | 2.77E-06 | 2.22E-05 | 15986.8 | 14528.9 | 15011.1 | 19649.5 | 22260   | 22161.5 |
| ENSMUSG000000071424 | 9_Grid2          | 10.5493 | -0.2075  | 0.7669   | 0.83623  | 9.55007 | 10.0959 | 9.56123 | 11.7219 | 7.17224 | 15.1947 |
| ENSMUSG000000071451 | 9_Psmg4          | 173.098 | 0.52053  | 0.01292  | 0.03131  | 192.738 | 185.397 | 234.25  | 152.385 | 128.204 | 145.616 |
| ENSMUSG000000071452 | 4_Gm11397        | 0.30325 | -0.03469 | 0.99322  | NA       | 0       | 0.91781 | 0       | 0.90169 | 0       | 0       |
| ENSMUSG000000071454 | 13_Dtnb          | 1132.97 | 0.71126  | 1.23E-05 | 8.13E-05 | 1277.97 | 1446.46 | 1495.14 | 953.983 | 688.535 | 935.742 |
| ENSMUSG000000071470 | 3_Ccnb1ip1       | 16.2724 | 0.29533  | 0.60215  | 0.70312  | 23.4411 | 14.6849 | 15.537  | 15.3287 | 13.448  | 15.1947 |
| ENSMUSG000000071477 | 10_Zfp777        | 425.349 | 0.68017  | 0.00061  | 0.00235  | 468.822 | 493.779 | 609.529 | 391.331 | 264.477 | 324.154 |
| ENSMUSG000000071478 | 5_Hist1h2ad      | 0.7338  | 0.51912  | 0.86226  | NA       | 2.60457 | 0       | 0       | 0.90169 | 0.89653 | 0       |
| ENSMUSG000000071489 | 1_Ptgdrr         | 2.3823  | -0.18303 | 0.90752  | NA       | 4.34094 | 0       | 2.39031 | 3.60674 | 2.68959 | 1.26623 |
| ENSMUSG000000071494 | 4_Olfra455       | 0       | NA       | NA       | NA       | 0       | 0       | 0       | 0       | 0       | 0       |
| ENSMUSG000000071497 | 3_Nutf2-ps1      | 795.554 | 0.15681  | 0.24374  | 0.35189  | 887.289 | 787.477 | 840.193 | 761.924 | 682.26  | 814.184 |
| ENSMUSG000000071506 | 3_Tmem139        | 118.591 | -0.07217 | 0.75148  | 0.82451  | 105.051 | 122.068 | 119.515 | 114.514 | 117.446 | 132.954 |
| ENSMUSG000000071528 | 3_Usmg5          | 1113.21 | -0.6998  | 3.91E-08 | 5.53E-07 | 828.252 | 911.381 | 805.534 | 1325.48 | 1504.38 | 1304.21 |
| ENSMUSG000000071531 | 2_Gprin2         | 4.11623 | 0.98599  | 0.43883  | 0.55405  | 6.94551 | 3.67122 | 5.97577 | 6.3118  | 1.79306 | 0       |
| ENSMUSG000000071533 | 11_Pcnp          | 2445.2  | -0.44819 | 0.00012  | 0.0006   | 2093.2  | 2001.73 | 2110.64 | 2563.49 | 3088.55 | 2813.56 |
| ENSMUSG000000071537 | 6_Klrg2          | 1157.58 | 0.75358  | 2.37E-06 | 1.94E-05 | 1389.97 | 1339.08 | 1629    | 787.171 | 774.602 | 1025.64 |
| ENSMUSG000000071540 | 3_3425401B19Rik  | 55.6414 | -0.98341 | 0.02315  | 0.05131  | 38.2003 | 40.3834 | 33.4643 | 112.711 | 39.4473 | 69.6425 |
| ENSMUSG000000071547 | 3_Nt5dc2         | 740.349 | 0.29353  | 0.20271  | 0.30424  | 750.115 | 995.819 | 700.36  | 889.964 | 505.643 | 600.192 |
| ENSMUSG000000071550 | 13_Cfap44        | 1.09895 | 0.47772  | 0.81637  | NA       | 0.86819 | 1.83561 | 1.19515 | 0.90169 | 1.79306 | 0       |
| ENSMUSG000000071551 | 12_Akrlc19       | 0.56677 | -1.21693 | 0.74863  | NA       | 0.86819 | 0       | 0       | 0       | 0       | 2.53245 |
| ENSMUSG000000071552 | 4_Tigit          | 5.39464 | 2.47789  | 0.0287   | 0.06121  | 12.1546 | 4.58903 | 10.7564 | 2.70506 | 0.89653 | 1.26623 |
| ENSMUSG000000071553 | 10_Cpa2          | 16.5402 | -0.74605 | 0.18723  | 0.28596  | 11.2864 | 12.8493 | 13.1467 | 25.2472 | 21.5167 | 15.1947 |
| ENSMUSG000000071561 | 2_BC100530       | 16810.2 | -0.33829 | 0.04492  | 0.08863  | 14936.3 | 14451.8 | 15158.1 | 15650.6 | 24046.7 | 16618   |

|                     |                  |         |          |          |          |         |         |         |         |         |         |
|---------------------|------------------|---------|----------|----------|----------|---------|---------|---------|---------|---------|---------|
| ENSMUSG000000071562 | 5_Stfa1          | 3.4783  | 2.07485  | 0.18239  | 0.28     | 0       | 7.34244 | 9.56123 | 1.80337 | 0.89653 | 1.26623 |
| ENSMUSG000000071567 | 6_A830039N20Rik  | 25.5344 | -2.14275 | 0.00027  | 0.00118  | 7.8137  | 5.50683 | 15.537  | 61.3146 | 31.3786 | 31.6557 |
| ENSMUSG000000071573 | 13_Rnls          | 96.9286 | -0.0123  | 0.96412  | 0.97673  | 79.0051 | 115.644 | 94.4172 | 88.3652 | 91.4461 | 112.694 |
| ENSMUSG000000071586 | 4_Gm10337        | 3.13326 | -1.26687 | 0.40553  | 0.52269  | 0.86819 | 4.58903 | 0       | 9.01685 | 1.79306 | 2.53245 |
| ENSMUSG000000071591 | 2_Gm10339        | 0       | NA       | NA       | NA       | 0       | 0       | 0       | 0       | 0       | 0       |
| ENSMUSG000000071604 | 4_Fam189a2       | 293.578 | -1.15563 | 0.00023  | 0.00101  | 163.219 | 270.753 | 111.149 | 514.862 | 389.991 | 311.492 |
| ENSMUSG000000071613 | 11_Gm10340       | 0       | NA       | NA       | NA       | 0       | 0       | 0       | 0       | 0       | 0       |
| ENSMUSG000000071632 | 10_2510002D24Rik | 333.996 | 0.03178  | 0.84987  | 0.89814  | 311.68  | 331.328 | 370.498 | 356.166 | 294.959 | 339.349 |
| ENSMUSG000000071633 | 11_Gm4952        | 1.38731 | -1.7716  | 0.4665   | NA       | 0       | 1.83561 | 0       | 0       | 2.68959 | 3.79868 |
| ENSMUSG000000071636 | 6_Rimbp3         | 3.86412 | -1.61463 | 0.21492  | 0.31878  | 0.86819 | 3.67122 | 1.19515 | 8.11517 | 8.06878 | 1.26623 |
| ENSMUSG000000071644 | 10_Eef1g         | 10284.5 | 0.18892  | 0.06528  | 0.12115  | 11217.9 | 10349.2 | 11302.6 | 9075.46 | 9556.12 | 10205.8 |
| ENSMUSG000000071645 | 5_Tut1           | 415.878 | 0.46435  | 0.00191  | 0.00626  | 471.426 | 460.738 | 513.916 | 337.23  | 330.82  | 381.134 |
| ENSMUSG000000071646 | 9_Mta2           | 4195.86 | 0.3001   | 0.00602  | 0.01646  | 4579.69 | 4543.14 | 4767.47 | 3519.28 | 3645.29 | 4120.3  |
| ENSMUSG000000071647 | 4_Eml3           | 1425.05 | 0.73285  | 9.76E-08 | 1.23E-06 | 1687.76 | 1746.58 | 1905.08 | 1220.88 | 959.288 | 1030.71 |
| ENSMUSG000000071648 | 3_Rom1           | 407.649 | -1.17277 | 0.07705  | 0.13899  | 322.966 | 294.616 | 133.857 | 998.166 | 445.576 | 250.713 |
| ENSMUSG000000071649 | 5_B3gat3         | 643.75  | 0.75428  | 0.0005   | 0.00198  | 724.069 | 807.669 | 893.975 | 633.885 | 355.923 | 446.978 |
| ENSMUSG000000071650 | 5_Ganab          | 5025.4  | 0.13776  | 0.24841  | 0.35731  | 5245.59 | 5225.98 | 5322.02 | 4224.4  | 4825.13 | 5309.29 |
| ENSMUSG000000071652 | 6_Ints5          | 572.789 | 0.79438  | 6.13E-06 | 4.43E-05 | 691.078 | 649.806 | 838.998 | 458.958 | 349.647 | 448.244 |
| ENSMUSG000000071653 | 9_1810009A15Rik  | 284.247 | 0.20457  | 0.35245  | 0.46911  | 282.161 | 316.643 | 315.521 | 343.542 | 234.891 | 212.726 |
| ENSMUSG000000071654 | 5_Uqcc3          | 365.432 | 0.45925  | 0.03624  | 0.07422  | 402.839 | 421.273 | 445.792 | 403.053 | 232.201 | 287.434 |
| ENSMUSG000000071655 | 11_Ubxn1         | 2169.9  | 0.3881   | 0.00474  | 0.01348  | 2305.91 | 2361.51 | 2713    | 2052.24 | 1631.69 | 1955.05 |
| ENSMUSG000000071656 | 6_Lrrn4cl        | 569.455 | -0.5505  | 0.00084  | 0.0031   | 455.799 | 481.848 | 449.378 | 807.009 | 627.571 | 595.127 |
| ENSMUSG000000071657 | 12_Bscl2         | 1213.82 | 0.57394  | 0.00016  | 0.00075  | 1302.28 | 1506.12 | 1548.92 | 1129.81 | 849.911 | 945.872 |
| ENSMUSG000000071658 | 4_Gng3           | 24.0564 | -1.04145 | 0.12155  | 0.20187  | 24.3093 | 15.6027 | 7.17092 | 55.9045 | 28.689  | 12.6623 |
| ENSMUSG000000071659 | 3_Hnrnpul2       | 6905.88 | -0.02759 | 0.83734  | 0.88911  | 6557.43 | 6721.09 | 7240.24 | 5867.27 | 7313.9  | 7735.38 |
| ENSMUSG000000071660 | 10_Ttc9c         | 1402.8  | -0.25713 | 0.06227  | 0.1165   | 1324.86 | 1139.91 | 1370.84 | 1414.74 | 1705.2  | 1461.23 |
| ENSMUSG000000071661 | 6_Zbtb3          | 71.7407 | 0.21517  | 0.48143  | 0.59383  | 71.1914 | 87.1915 | 72.9044 | 82.0534 | 53.7918 | 63.3113 |
| ENSMUSG000000071662 | 3_Polr2g         | 794.455 | -0.35661 | 0.00282  | 0.00873  | 691.078 | 686.519 | 712.312 | 852.093 | 890.255 | 934.475 |
| ENSMUSG000000071665 | 10_Foxr2         | 1.63259 | -0.29561 | 0.88615  | NA       | 3.47275 | 0.91781 | 0       | 4.50843 | 0.89653 | 0       |
| ENSMUSG000000071669 | 14_Snx29         | 533.818 | 0.55942  | 0.00055  | 0.00216  | 598.182 | 689.272 | 619.09  | 440.023 | 367.578 | 488.764 |
| ENSMUSG000000071679 | 4_Zcchc16        | 1.90209 | -0.48582 | 0.78331  | NA       | 1.73638 | 1.83561 | 1.19515 | 0       | 5.37918 | 1.26623 |
| ENSMUSG000000071691 | 10_Gm960         | 44.972  | -0.43787 | 0.22348  | 0.32855  | 38.2003 | 30.2876 | 46.611  | 52.2978 | 55.5849 | 46.8504 |
| ENSMUSG000000071708 | 11_Sms           | 418.278 | -0.95299 | 1.37E-10 | 4.25E-09 | 283.029 | 280.849 | 291.618 | 527.486 | 602.469 | 524.218 |
| ENSMUSG000000071711 | 11_Mpst          | 991.578 | 0.93285  | 2.97E-07 | 3.22E-06 | 1088.71 | 1344.59 | 1471.23 | 788.073 | 547.78  | 709.087 |
| ENSMUSG000000071713 | 4_Csf2rb         | 199.774 | 2.02587  | 2.40E-09 | 4.98E-08 | 462.744 | 168.876 | 331.058 | 81.1517 | 85.1704 | 69.6425 |
| ENSMUSG000000071714 | 5_Csf2rb2        | 110.189 | 1.78394  | 1.07E-05 | 7.20E-05 | 231.806 | 95.4518 | 184.054 | 30.6573 | 45.7231 | 73.4412 |
| ENSMUSG000000071715 | 11_Ncf4          | 83.2234 | 2.30352  | 1.33E-07 | 1.61E-06 | 221.388 | 75.2601 | 118.32  | 33.3624 | 20.6202 | 30.3894 |
| ENSMUSG000000071716 | 4_Apol7e         | 9.44746 | 1.14311  | 0.25995  | 0.37014  | 12.1546 | 13.7671 | 13.1467 | 0       | 12.5514 | 5.06491 |
| ENSMUSG000000071719 | 2_Tmem28         | 11.7602 | -0.41625 | 0.55765  | 0.6635   | 9.55007 | 14.6849 | 5.97577 | 18.9354 | 12.5514 | 8.86359 |
| ENSMUSG000000071722 | 4_Spin4          | 76.3971 | -0.31171 | 0.3248   | 0.44088  | 65.1141 | 70.671  | 68.1238 | 59.5112 | 86.0669 | 108.896 |
| ENSMUSG000000071723 | 7_Gspt2          | 158.031 | -0.7512  | 0.00857  | 0.02217  | 144.987 | 132.164 | 75.2947 | 174.927 | 238.477 | 182.337 |
| ENSMUSG000000071724 | 4_Smpd5          | 8.27941 | -0.19387 | 0.79778  | 0.86028  | 8.68188 | 7.34244 | 7.17092 | 9.91854 | 8.96531 | 7.59736 |
| ENSMUSG000000071726 | 2_Gm5941         | 14.1712 | -0.01786 | 0.97768  | 0.98545  | 17.3638 | 17.4383 | 7.17092 | 11.7219 | 16.1376 | 15.1947 |
| ENSMUSG000000071748 | 2_Gm14698        | 604.281 | -0.45883 | 0.00483  | 0.01369  | 566.927 | 460.738 | 499.574 | 641.098 | 807.774 | 649.574 |
| ENSMUSG000000071757 | 10_Zhx2          | 87.3203 | -0.15545 | 0.61175  | 0.71115  | 102.446 | 81.6847 | 63.3432 | 113.612 | 77.9982 | 84.8372 |
| ENSMUSG000000071767 | 4_Rhox7a         | 0.21104 | -0.99647 | 0.80707  | NA       | 0       | 0       | 0       | 0       | 0       | 1.26623 |
| ENSMUSG000000071770 | 5_Rhox4e         | 1.78233 | -1.60465 | 0.4674   | NA       | 2.60457 | 0       | 0       | 3.60674 | 4.48265 | 0       |
| ENSMUSG000000071771 | 4_Rhox4b         | 78.133  | -0.48036 | 0.07469  | 0.13553  | 72.0596 | 61.493  | 62.148  | 90.1685 | 96.8253 | 86.1034 |
| ENSMUSG000000071815 | 6_Fthl17e        | 0.1447  | 0.92709  | 0.82027  | NA       | 0.86819 | 0       | 0       | 0       | 0       | 0       |
| ENSMUSG000000071816 | 5_Ssxb5          | 1.74372 | -0.65733 | 0.71347  | NA       | 0.86819 | 0.91781 | 2.39031 | 1.80337 | 4.48265 | 0       |
| ENSMUSG000000071847 | 12_Apcdd1        | 435.925 | 0.01778  | 0.91489  | 0.94329  | 424.544 | 484.601 | 406.352 | 490.517 | 382.819 | 426.718 |
| ENSMUSG000000071855 | 4_Ccdc112        | 87.1973 | -0.41242 | 0.11611  | 0.19443  | 77.2688 | 83.5203 | 63.3432 | 100.087 | 103.998 | 94.967  |
| ENSMUSG000000071856 | 10_Mcc           | 475.746 | -0.23268 | 0.11232  | 0.18933  | 414.994 | 432.286 | 466.11  | 479.697 | 561.228 | 500.16  |
| ENSMUSG000000071858 | 3_Gm94           | 82.3062 | -0.09047 | 0.79458  | 0.85768  | 84.2143 | 57.8218 | 98.0026 | 73.9382 | 116.549 | 63.3113 |
| ENSMUSG000000071860 | 1_2900055J20Rik  | 0.19919 | 0.92709  | 0.82027  | NA       | 0       | 0       | 1.19515 | 0       | 0       | 0       |
| ENSMUSG000000071862 | 2_Lrrtm2         | 53.8209 | -1.50919 | 0.00065  | 0.0025   | 26.0457 | 43.1369 | 14.3418 | 101.89  | 77.9982 | 59.5127 |
| ENSMUSG000000071866 | 11_Ppia          | 31497   | -0.22123 | 0.02114  | 0.04748  | 30001.1 | 28017.9 | 29241.8 | 32477.8 | 35890.8 | 33352.4 |
| ENSMUSG000000071890 | 4_Mroh9          | 0.21104 | -0.99647 | 0.80707  | NA       | 0       | 0       | 0       | 0       | 0       | 1.26623 |
| ENSMUSG000000071893 | 6_Vmn1r4         | 9.5141  | 0.3018   | 0.69613  | 0.78258  | 13.891  | 8.26025 | 9.56123 | 9.91854 | 11.6549 | 3.79868 |
| ENSMUSG000000071984 | 10_Fndc1         | 1200.7  | 0.1869   | 0.22619  | 0.3317   | 1217.2  | 1418.01 | 1199.93 | 1312.85 | 979.908 | 1076.29 |
| ENSMUSG000000072049 | 5_Vmn2r121       | 0.30325 | -0.03469 | 0.99322  | NA       | 0       | 0.91781 | 0       | 0.90169 | 0       | 0       |
| ENSMUSG000000072066 | 6_6720489N17Rik  | 38.5439 | -0.88739 | 0.03454  | 0.0714   | 27.782  | 28.452  | 25.0982 | 43.2809 | 69.9294 | 36.7206 |
| ENSMUSG000000072082 | 6_Ccnf           | 296.109 | 0.95168  | 1.95E-05 | 0.00012  | 397.63  | 314.807 | 457.744 | 165.91  | 193.651 | 246.914 |
| ENSMUSG000000072100 | 4_Cldn34b1       | 0       | NA       | NA       | NA       | 0       | 0       | 0       | 0       | 0       | 0       |
| ENSMUSG000000072115 | 10_Ang           | 31.0898 | -0.36735 | 0.36646  | 0.48385  | 25.1775 | 26.6164 | 29.8789 | 38.7725 | 33.1716 | 32.9219 |
| ENSMUSG000000072188 | 4_Gm10354        | 0.74228 | 2.98374  | 0.37863  | NA       | 0.86819 | 0       | 3.58546 | 0       | 0       | 0       |
| ENSMUSG000000072214 | 6_Sept5          | 3590.21 | 0.84201  | 5.35E-06 | 3.94E-05 | 4211.58 | 4508.26 | 5106.89 | 2971.96 | 1865.68 | 2876.87 |
| ENSMUSG000000072235 | 5_Tuba1a         | 6792.24 | -0.13023 | 0.34472  | 0.4614   | 6333.43 | 7034.98 | 6089.31 | 8267.55 | 6313.37 | 6714.8  |
| ENSMUSG000000072244 | 9_Trim6          | 51.8414 | 1.64492  | 1.45E-05 | 9.38E-05 | 68.5869 | 65.1642 | 101.588 | 21.6405 | 22.4133 | 31.6557 |
| ENSMUSG000000072249 | 3_Fthl17f        | 0       | NA       | NA       | NA       | 0       | 0       | 0       | 0       | 0       | 0       |
| ENSMUSG000000072258 | 10_Taf1a         | 329.404 | -0.12432 | 0.49491  | 0.6061   | 309.943 | 300.122 | 335.838 | 284.933 | 393.577 | 352.011 |
| ENSMUSG000000072259 | 3_Gm5592         | 0.30239 | -0.03469 | 0.99322  | NA       | 0       | 0.91781 | 0       | 0       | 0.89653 | 0       |
| ENSMUSG000000072294 | 4_Klf12          | 50.275  | -0.58458 | 0.12543  | 0.2068   | 39.9367 | 48.6437 | 32.2692 | 73.9382 | 66.3433 | 40.5193 |
| ENSMUSG000000072419 | 4_Dppa2          | 0.94956 | -1.12903 | 0.64008  | NA       | 1.73638 | 0       | 0       | 0.90169 | 1.79306 | 1.26623 |
| ENSMUSG000000072423 | 4_Psmb11         | 1.36236 | 2.75818  | 0.27598  | NA       | 6.07732 | 0       | 1.19515 | 0.90169 | 0       | 0       |
| ENSMUSG000000072437 | 3_Nanos1         | 14.9061 | -0.25064 | 0.68556  | 0.77343  | 19.9683 | 10.0959 | 10.7564 | 16.2303 | 19.7237 | 12.6623 |
| ENSMUSG000000072476 | 6_Gm9008         | 1.64092 | -0.07822 | 0.97762  | NA       | 0       | 0       | 4.78062 | 0       | 0       | 5.06491 |
| ENSMUSG000000072479 | 10_Xlr5b         | 0       | NA       | NA       | NA       | 0       | 0       | 0       | 0       | 0       | 0       |
| ENSMUSG000000072487 | 10_Mroh5         | 0       | NA       | NA       | NA       | 0       | 0       | 0       | 0       | 0       | 0       |

|                    |                   |         |          |          |          |         |         |         |         |         |         |
|--------------------|-------------------|---------|----------|----------|----------|---------|---------|---------|---------|---------|---------|
| ENSMUSG00000072494 | 7_Ppp1r3e         | 19.4255 | 0.0013   | 0.99799  | 0.99846  | 23.4411 | 15.6027 | 19.1225 | 18.0337 | 18.8271 | 21.5259 |
| ENSMUSG00000072501 | 4_Phft20l1        | 1780.95 | -0.34926 | 0.01283  | 0.03115  | 1646.09 | 1485.01 | 1568.04 | 1708.69 | 2270.91 | 2006.97 |
| ENSMUSG00000072553 | 10_Gm525          | 17.7854 | -1.66168 | 0.0135   | 0.0325   | 13.891  | 5.50683 | 5.97577 | 37.8708 | 14.3445 | 29.1232 |
| ENSMUSG00000072568 | 4_Fam84b          | 1717.29 | -0.02256 | 0.84786  | 0.89657  | 1608.75 | 1656.64 | 1846.51 | 1632.05 | 1733.89 | 1825.9  |
| ENSMUSG00000072571 | 2_Tmem253         | 15.5069 | 0.16516  | 0.77764  | 0.84452  | 13.891  | 22.0273 | 13.1467 | 16.2303 | 12.5514 | 15.1947 |
| ENSMUSG00000072572 | 8_Slc39a2         | 13.7575 | -0.01694 | 0.97894  | 0.98608  | 18.232  | 7.34244 | 15.537  | 14.427  | 14.3445 | 12.6623 |
| ENSMUSG00000072575 | 3_Eddm3b          | 1.67488 | -1.3966  | 0.43073  | NA       | 1.73638 | 0.91781 | 0       | 1.80337 | 1.79306 | 3.79868 |
| ENSMUSG00000072582 | 9_Pthr2           | 484.31  | -0.23712 | 0.12573  | 0.20718  | 449.722 | 423.108 | 460.134 | 457.155 | 530.746 | 584.997 |
| ENSMUSG00000072591 | 10_5930412G12Rik  | 44.7112 | 0.25731  | 0.50512  | 0.61567  | 39.9367 | 44.9725 | 60.9529 | 33.3624 | 35.8612 | 53.1815 |
| ENSMUSG00000072596 | 4_Ear2            | 3.7337  | -1.25031 | 0.27846  | 0.39105  | 2.60457 | 2.75342 | 1.19515 | 4.50843 | 6.27571 | 5.06491 |
| ENSMUSG00000072601 | 4_Ear1            | 0.15297 | 0.92709  | 0.82027  | NA       | 0       | 0.91781 | 0       | 0       | 0       | 0       |
| ENSMUSG00000072612 | 2_Gm10382         | 0.95225 | -0.1559  | 0.9482   | NA       | 1.73638 | 0.91781 | 0       | 0       | 1.79306 | 1.26623 |
| ENSMUSG00000072613 | 12_1700049E17Rik2 | 0.2997  | -1.76345 | 0.66322  | NA       | 0       | 0       | 0       | 0.90169 | 0.89653 | 0       |
| ENSMUSG00000072618 | 2_Gm10384         | 4.85977 | 0.49159  | 0.62601  | 0.7233   | 7.8137  | 5.50683 | 3.58546 | 2.70506 | 4.48265 | 5.06491 |
| ENSMUSG00000072620 | 3_Slfn2           | 4070.47 | 0.91921  | 3.41E-06 | 2.65E-05 | 5180.48 | 4284.32 | 6511.2  | 2212.74 | 3431.92 | 2802.16 |
| ENSMUSG00000072623 | 6_Zfp9            | 190.524 | -0.95904 | 2.61E-06 | 2.10E-05 | 122.415 | 151.438 | 113.54  | 243.455 | 243.856 | 268.44  |
| ENSMUSG00000072624 | 2_Gm5460          | 1.41243 | -3.97413 | 0.09856  | NA       | 0       | 0       | 0       | 6.3118  | 0.89653 | 1.26623 |
| ENSMUSG00000072625 | 1_Gdf2            | 0.29884 | -1.76064 | 0.66373  | NA       | 0       | 0       | 0       | 0       | 1.79306 | 0       |
| ENSMUSG00000072640 | 11_Lyrm9          | 478.437 | -0.44349 | 0.00351  | 0.01049  | 403.708 | 444.218 | 368.107 | 600.523 | 529.85  | 524.218 |
| ENSMUSG00000072647 | 5_Adam1a          | 106.788 | -0.06599 | 0.77763  | 0.84452  | 103.314 | 112.89  | 96.8075 | 113.612 | 110.273 | 103.831 |
| ENSMUSG00000072662 | 2_Mansc4          | 3.03868 | -0.94645 | 0.49706  | 0.60811  | 0       | 2.75342 | 3.58546 | 4.50843 | 3.58612 | 3.79868 |
| ENSMUSG00000072663 | 11_Spef2          | 8.34432 | -0.80994 | 0.30047  | 0.41513  | 6.07732 | 7.34244 | 4.78062 | 10.8202 | 13.448  | 7.59736 |
| ENSMUSG00000072664 | 10_Ugt3a1         | 0.15028 | -0.99647 | 0.80707  | NA       | 0       | 0       | 0       | 0.90169 | 0       | 0       |
| ENSMUSG00000072672 | 10_Duxbl3         | 13.9679 | -0.7616  | 0.41703  | 0.53291  | 15.6274 | 0       | 15.537  | 18.9354 | 13.448  | 20.2596 |
| ENSMUSG00000072673 | 2_Gm10392         | 0.59533 | 2.69681  | 0.45239  | NA       | 1.73638 | 1.83561 | 0       | 0       | 0       | 0       |
| ENSMUSG00000072674 | 10_Plac9b         | 143.515 | 0.35369  | 0.3234   | 0.4394   | 158.01  | 181.726 | 143.418 | 198.371 | 68.1363 | 111.428 |
| ENSMUSG00000072675 | 12_Duxbl2         | 81.6876 | -0.49558 | 0.13913  | 0.22457  | 72.9278 | 55.9861 | 74.0996 | 103.694 | 61.8606 | 121.558 |
| ENSMUSG00000072676 | 11_Tmem254a       | 161.185 | -0.25848 | 0.23029  | 0.3364   | 128.492 | 155.109 | 157.76  | 174.927 | 196.34  | 154.48  |
| ENSMUSG00000072679 | 10_D6Erdt474e     | 1.14249 | -0.22222 | 0.92128  | NA       | 0.86819 | 0       | 2.39031 | 1.80337 | 1.79306 | 0       |
| ENSMUSG00000072680 | 11_Tmem254c       | 718.621 | 0.29828  | 0.03612  | 0.07402  | 791.788 | 776.464 | 807.924 | 617.655 | 580.952 | 736.944 |
| ENSMUSG00000072693 | 2_Gm10401         | 2.54017 | -4.81842 | 0.08549  | 0.15098  | 0       | 0       | 0       | 0       | 15.241  | 0       |
| ENSMUSG00000072694 | 7_1500011B03Rik   | 232.81  | -0.36092 | 0.09271  | 0.16155  | 200.552 | 242.301 | 168.517 | 301.163 | 256.408 | 227.921 |
| ENSMUSG00000072704 | 6_Smim101i        | 1381.47 | -0.52076 | 5.95E-06 | 4.32E-05 | 1093.92 | 1181.22 | 1129.42 | 1528.36 | 1733.89 | 1622.04 |
| ENSMUSG00000072707 | 2_Olfr31          | 0.1447  | 0.92709  | 0.82027  | NA       | 0.86819 | 0       | 0       | 0       | 0       | 0       |
| ENSMUSG00000072714 | 1_Rpl21-ps4       | 216.981 | -0.04308 | 0.84693  | 0.89588  | 182.32  | 220.273 | 239.031 | 258.784 | 174.823 | 226.655 |
| ENSMUSG00000072718 | 6_Klra10          | 0.43409 | 2.24584  | 0.57502  | NA       | 2.60457 | 0       | 0       | 0       | 0       | 0       |
| ENSMUSG00000072720 | 9_Myo18b          | 56.8246 | -0.81942 | 0.10456  | 0.17869  | 33.8593 | 47.7259 | 41.8304 | 122.629 | 27.7924 | 67.11   |
| ENSMUSG00000072738 | 3_Gm16440         | 0.2894  | 1.67273  | 0.67976  | NA       | 1.73638 | 0       | 0       | 0       | 0       | 0       |
| ENSMUSG00000072753 | 11_9230020A06Rik  | 19.539  | -1.25781 | 0.03342  | 0.06943  | 14.7592 | 14.6849 | 4.78062 | 26.1489 | 34.0682 | 22.7921 |
| ENSMUSG00000072761 | 10_Gm6712         | 56.2562 | -0.18183 | 0.56238  | 0.66784  | 46.8822 | 57.8218 | 53.7819 | 62.2163 | 63.6537 | 53.1815 |
| ENSMUSG00000072762 | 9_4930522L14Rik   | 169.068 | -0.52    | 0.01899  | 0.04328  | 142.383 | 142.26  | 131.467 | 158.697 | 220.547 | 219.057 |
| ENSMUSG00000072763 | 2_5430403G16Rik   | 76.3232 | -0.69441 | 0.01227  | 0.02997  | 60.7732 | 62.4108 | 51.3916 | 86.5618 | 103.101 | 93.7008 |
| ENSMUSG00000072769 | 6_Gm10419         | 25.0351 | -1.44212 | 0.00847  | 0.02197  | 16.4956 | 16.5205 | 7.17092 | 46.8876 | 40.3439 | 22.7921 |
| ENSMUSG00000072770 | 9_Acrbp           | 77.7171 | 0.22527  | 0.4105   | 0.5269   | 84.2143 | 86.2737 | 81.2705 | 80.25   | 73.5155 | 60.7789 |
| ENSMUSG00000072772 | 3_Grcc10          | 589.688 | 0.4812   | 0.03007  | 0.06359  | 624.227 | 725.984 | 712.312 | 674.461 | 390.887 | 410.258 |
| ENSMUSG00000072774 | 10_Zfp951         | 60.9288 | -0.82141 | 0.01636  | 0.03833  | 48.6186 | 30.2876 | 53.7819 | 77.545  | 86.9635 | 68.3763 |
| ENSMUSG00000072791 | 11_Abcb5          | 0       | NA       | NA       | NA       | 0       | 0       | 0       | 0       | 0       | 0       |
| ENSMUSG00000072812 | 4_AhnaK2          | 4775.04 | 0.5894   | 2.41E-06 | 1.97E-05 | 5449.62 | 5456.35 | 6304.44 | 3792.49 | 3456.13 | 4191.21 |
| ENSMUSG00000072814 | 10_Gm7982         | 0.2894  | 1.67273  | 0.67976  | NA       | 1.73638 | 0       | 0       | 0       | 0       | 0       |
| ENSMUSG00000072821 | 4_Gm6351          | 0       | NA       | NA       | NA       | 0       | 0       | 0       | 0       | 0       | 0       |
| ENSMUSG00000072825 | 10_Cep170b        | 4165.12 | 1.45796  | 1.39E-13 | 9.34E-12 | 5170.06 | 5840    | 7310.76 | 2513    | 1630.79 | 2526.12 |
| ENSMUSG00000072845 | 3_Tmprss11a       | 36230.6 | -0.3236  | 0.02526  | 0.05513  | 33249   | 30014.1 | 33288.6 | 32604   | 43542.7 | 44685.1 |
| ENSMUSG00000072847 | 4_A530017D24Rik   | 144.29  | -0.4914  | 0.01612  | 0.03786  | 125.019 | 122.068 | 112.344 | 167.713 | 167.651 | 170.941 |
| ENSMUSG00000072849 | 10_Serpina1e      | 0.57879 | 2.65671  | 0.50459  | NA       | 3.47275 | 0       | 0       | 0       | 0       | 0       |
| ENSMUSG00000072872 | 3_Rybp            | 1117.33 | -0.07503 | 0.50475  | 0.61544  | 1112.15 | 1057.31 | 1095.96 | 1115.38 | 1207.63 | 1115.55 |
| ENSMUSG00000072875 | 2_Gpr27           | 50.68   | -0.59573 | 0.07931  | 0.14238  | 41.673  | 43.1369 | 35.8546 | 49.5927 | 65.4467 | 68.3763 |
| ENSMUSG00000072889 | 9_Nfx1            | 469.967 | 0.04713  | 0.7387   | 0.81518  | 484.449 | 437.793 | 511.526 | 464.368 | 467.092 | 454.575 |
| ENSMUSG00000072905 | 3_Gm2016          | 0.73294 | 0.52063  | 0.88031  | NA       | 2.60457 | 0       | 0       | 0       | 1.79306 | 0       |
| ENSMUSG00000072915 | 3_Gm12258         | 242.223 | -0.61282 | 0.00032  | 0.00137  | 197.947 | 192.739 | 184.054 | 302.065 | 303.027 | 273.505 |
| ENSMUSG00000072919 | 3_Noxxed1         | 8.11875 | -0.19101 | 0.81246  | 0.87061  | 6.07732 | 7.34244 | 9.56123 | 8.11517 | 12.5514 | 5.06491 |
| ENSMUSG00000072923 | 6_Gm10439         | 0       | NA       | NA       | NA       | 0       | 0       | 0       | 0       | 0       | 0       |
| ENSMUSG00000072941 | 5_Sod3            | 1263.7  | 0.27776  | 0.13319  | 0.21695  | 1571.42 | 1330.82 | 1252.52 | 1429.17 | 920.737 | 1077.56 |
| ENSMUSG00000072944 | 11_Nup62cl        | 25.2111 | -1.84859 | 0.00053  | 0.00208  | 15.6274 | 11.9315 | 4.78062 | 44.1826 | 36.7578 | 37.9868 |
| ENSMUSG00000072945 | 3_Ripply1         | 3.7001  | 0.01242  | 0.99177  | 0.99447  | 3.47275 | 2.75342 | 4.78062 | 1.80337 | 1.79306 | 7.59736 |
| ENSMUSG00000072946 | 12_Ptgr2          | 1432.65 | -0.46499 | 1.86E-05 | 0.00012  | 1205.91 | 1239.04 | 1165.28 | 1577.95 | 1703.41 | 1704.34 |
| ENSMUSG00000072949 | 5_Acot1           | 43.0136 | -0.99947 | 0.01117  | 0.02774  | 21.7047 | 34.8766 | 29.8789 | 64.0197 | 64.5502 | 43.0517 |
| ENSMUSG00000072952 | 6_Gm5878          | 0.51074 | -2.49114 | 0.44681  | NA       | 0       | 0       | 0       | 0.90169 | 0.89653 | 1.26623 |
| ENSMUSG00000072955 | 13_Tmsb15l        | 37.6904 | -1.37529 | 0.00047  | 0.0019   | 20.8365 | 22.9451 | 19.1225 | 64.0197 | 51.1022 | 48.1166 |
| ENSMUSG00000072963 | 2_Gm10447         | 0.9033  | 0.97591  | 0.69322  | NA       | 0.86819 | 2.75342 | 0       | 0.90169 | 0.89653 | 0       |
| ENSMUSG00000072964 | 13_Bhlhb9         | 350.516 | -1.20197 | 1.35E-08 | 2.23E-07 | 246.566 | 229.451 | 160.151 | 493.222 | 555.849 | 417.855 |
| ENSMUSG00000072966 | 11_Gprasp2        | 355.868 | -1.10162 | 0.00012  | 0.00059  | 213.574 | 312.972 | 151.785 | 549.126 | 568.4   | 339.349 |
| ENSMUSG00000072968 | 4_Gm17728         | 0       | NA       | NA       | NA       | 0       | 0       | 0       | 0       | 0       | 0       |
| ENSMUSG00000072969 | 2_Armcx5          | 199.884 | -0.51073 | 0.00623  | 0.01695  | 164.956 | 166.123 | 163.736 | 219.11  | 259.994 | 225.388 |
| ENSMUSG00000072972 | 3_Adam4           | 14.6441 | 0.0664   | 0.92717  | 0.95193  | 16.4956 | 9.17806 | 19.1225 | 4.50843 | 17.0341 | 21.5259 |
| ENSMUSG00000072974 | 4_Gm4787          | 18.0977 | -0.47451 | 0.42424  | 0.53972  | 14.7592 | 8.26025 | 22.7079 | 16.2303 | 25.1029 | 21.5259 |
| ENSMUSG00000072980 | 3_Oip5            | 72.8858 | -0.00647 | 0.98479  | 0.98964  | 81.6097 | 48.6437 | 88.4414 | 64.0197 | 88.7565 | 65.8438 |
| ENSMUSG00000072982 | 1_9230009I02Rik   | 22.0954 | -0.28267 | 0.60836  | 0.70819  | 19.1001 | 20.1917 | 20.3176 | 11.7219 | 29.5855 | 31.6557 |
| ENSMUSG00000073000 | 2_Gm10451         | 4.78387 | -1.55059 | 0.21434  | 0.31811  | 5.20913 | 1.83561 | 0       | 5.41011 | 3.58612 | 12.6623 |
| ENSMUSG00000073002 | 9_Vamp5           | 136.017 | -0.50737 | 0.05487  | 0.10469  | 123.283 | 106.465 | 107.564 | 210.093 | 134.48  | 134.22  |

|                    |                  |         |          |          |          |         |         |         |         |         |         |
|--------------------|------------------|---------|----------|----------|----------|---------|---------|---------|---------|---------|---------|
| ENSMUSG00000073007 | 10_Fam46d        | 0.2997  | -1.76345 | 0.66322  | NA       | 0       | 0       | 0       | 0.90169 | 0.89653 | 0       |
| ENSMUSG00000073008 | 11_Gpr174        | 2.83379 | 2.19968  | 0.12262  | 0.20323  | 5.20913 | 2.75342 | 5.97577 | 0.90169 | 0.89653 | 1.26623 |
| ENSMUSG00000073010 | 9_Gm5127         | 23.0174 | -0.66881 | 0.15682  | 0.24816  | 19.9683 | 16.5205 | 16.7322 | 30.6573 | 25.1029 | 29.1232 |
| ENSMUSG00000073012 | 2_Fnd3c2         | 0.66285 | -1.52638 | 0.61885  | NA       | 0       | 0.91781 | 0       | 0       | 1.79306 | 1.26623 |
| ENSMUSG00000073016 | 3_Uprt           | 205.282 | -0.18022 | 0.35488  | 0.47163  | 200.552 | 204.671 | 172.102 | 207.388 | 245.649 | 201.33  |
| ENSMUSG00000073018 | 5_Gm1070         | 6.62359 | 0.66888  | 0.47714  | 0.58973  | 6.94551 | 5.50683 | 11.9515 | 7.21348 | 1.79306 | 6.33113 |
| ENSMUSG00000073051 | 4_Gm14812        | 1.55227 | 2.00519  | 0.3354   | NA       | 1.73638 | 4.58903 | 1.19515 | 0       | 1.79306 | 0       |
| ENSMUSG00000073062 | 3_Zxdb           | 193.238 | 0.26399  | 0.24078  | 0.3484   | 163.219 | 225.78  | 243.811 | 176.73  | 158.686 | 191.2   |
| ENSMUSG00000073077 | 6_Gm7173         | 21.8399 | -1.14246 | 0.04105  | 0.08235  | 13.0228 | 14.6849 | 13.1467 | 17.132  | 43.93   | 29.1232 |
| ENSMUSG00000073079 | 5_Srp54a         | 808.253 | -0.7581  | 1.71E-05 | 0.00011  | 611.205 | 601.163 | 589.211 | 788.975 | 1206.73 | 1052.23 |
| ENSMUSG00000073094 | 9_Smim9          | 0.30594 | 1.73752  | 0.66765  | NA       | 0       | 1.83561 | 0       | 0       | 0       | 0       |
| ENSMUSG00000073096 | 11_Lrrc61        | 471.729 | 0.40085  | 0.01645  | 0.03852  | 526.122 | 554.355 | 529.453 | 458.056 | 334.406 | 427.985 |
| ENSMUSG00000073102 | 7_Drc1           | 1.39779 | -0.24471 | 0.89884  | NA       | 0.86819 | 1.83561 | 1.19515 | 0.90169 | 3.58612 | 0       |
| ENSMUSG00000073103 | 2_Gm10466        | 28.5334 | -0.54753 | 0.25966  | 0.36986  | 31.2548 | 19.2739 | 19.1225 | 40.5758 | 39.4473 | 21.5259 |
| ENSMUSG00000073117 | 2_Gm7347         | 0.59758 | 2.66585  | 0.50308  | NA       | 0       | 0       | 3.58546 | 0       | 0       | 0       |
| ENSMUSG00000073119 | 3_Speer4a        | 0.87271 | 0.19389  | 0.94543  | NA       | 0.86819 | 1.83561 | 0       | 0       | 0       | 2.53245 |
| ENSMUSG00000073125 | 10_Xlr3b         | 41.697  | -2.21312 | 5.69E-05 | 0.0003   | 16.4956 | 9.17806 | 19.1225 | 57.7079 | 114.756 | 32.9219 |
| ENSMUSG00000073130 | 8_Gm1141         | 2.88172 | -0.35513 | 0.79453  | 0.85768  | 0.86819 | 5.50683 | 1.19515 | 2.70506 | 4.48265 | 2.53245 |
| ENSMUSG00000073131 | 12_Vma21         | 928.367 | -0.4226  | 0.00302  | 0.00924  | 767.479 | 753.518 | 860.511 | 966.607 | 1204.04 | 1018.05 |
| ENSMUSG00000073139 | 9_BC023829       | 734.016 | -0.52896 | 6.83E-05 | 0.00036  | 655.482 | 587.396 | 559.332 | 850.289 | 917.151 | 834.444 |
| ENSMUSG00000073147 | 3_5031425E22Rik  | 282.182 | 0.09597  | 0.54526  | 0.6518   | 279.557 | 304.711 | 290.422 | 279.522 | 265.373 | 273.505 |
| ENSMUSG00000073154 | 10_9330158H04Rik | 1.88947 | -1.03881 | 0.54706  | NA       | 1.73638 | 1.83561 | 0       | 1.80337 | 0.89653 | 5.06491 |
| ENSMUSG00000073155 | 12_1810058I24Rik | 513.376 | -0.06646 | 0.69699  | 0.78317  | 450.59  | 544.259 | 510.331 | 613.146 | 455.438 | 506.491 |
| ENSMUSG00000073158 | 3_9030624G23Rik  | 11.7583 | 0.22754  | 0.75891  | 0.8305   | 8.68188 | 21.1095 | 8.36608 | 10.8202 | 15.241  | 6.33113 |
| ENSMUSG00000073164 | 11_2410018L13Rik | 20.4379 | 0.09266  | 0.86236  | 0.90652  | 15.6274 | 24.7808 | 22.7079 | 20.7388 | 13.448  | 25.3245 |
| ENSMUSG00000073176 | 4_Zfp449         | 93.4521 | -1.44842 | 1.33E-05 | 8.67E-05 | 44.2776 | 68.8354 | 37.0498 | 147.876 | 161.376 | 101.298 |
| ENSMUSG00000073184 | 3_Gm10479        | 0.77424 | -0.21793 | 0.9418   | NA       | 0       | 0.91781 | 1.19515 | 0       | 0       | 2.53245 |
| ENSMUSG00000073197 | 8_5730507C01Rik  | 37.9729 | -0.28118 | 0.50408  | 0.61475  | 28.6502 | 48.6437 | 25.0982 | 39.6742 | 37.6543 | 48.1166 |
| ENSMUSG00000073207 | 1_Ccdc160        | 4.03149 | -2.51126 | 0.11898  | 0.19841  | 2.60457 | 0.91781 | 0       | 8.11517 | 12.5514 | 0       |
| ENSMUSG00000073208 | 12_Speer4c       | 0.89653 | -3.31885 | 0.37986  | NA       | 0       | 0       | 0       | 0       | 5.37918 | 0       |
| ENSMUSG00000073209 | 4_Klf14          | 0.36132 | -1.98116 | 0.62311  | NA       | 0       | 0       | 0       | 0.90169 | 0       | 1.26623 |
| ENSMUSG00000073226 | 9_Gm10482        | 0.14942 | -0.99647 | 0.80707  | NA       | 0       | 0       | 0       | 0       | 0.89653 | 0       |
| ENSMUSG00000073234 | 3_Gm8773         | 6.76251 | -0.57124 | 0.53891  | 0.64649  | 4.34094 | 7.34244 | 4.78062 | 10.8202 | 10.7584 | 2.53245 |
| ENSMUSG00000073243 | 2_Gm9            | 2.06538 | 2.31498  | 0.19701  | NA       | 2.60457 | 6.42464 | 1.19515 | 0.90169 | 0       | 1.26623 |
| ENSMUSG00000073290 | 1_Gm10490        | 0.34389 | 1.87986  | 0.64119  | NA       | 0.86819 | 0       | 1.19515 | 0       | 0       | 0       |
| ENSMUSG00000073293 | 4_Nudt10         | 13.4176 | -1.46757 | 0.02015  | 0.04555  | 7.8137  | 6.42464 | 7.17092 | 22.5421 | 18.8271 | 17.7272 |
| ENSMUSG00000073294 | 4_AU022751       | 0.15028 | -0.99647 | 0.80707  | NA       | 0       | 0       | 0       | 0.90169 | 0       | 0       |
| ENSMUSG00000073295 | 4_Nudt11         | 39.6842 | -1.0175  | 0.01649  | 0.03857  | 28.6502 | 33.9588 | 15.537  | 43.2809 | 60.9641 | 55.714  |
| ENSMUSG00000073371 | 3_Gm6594         | 82.4493 | 0.26972  | 0.30106  | 0.41576  | 94.6325 | 83.5203 | 92.0269 | 70.3315 | 74.412  | 79.7723 |
| ENSMUSG00000073374 | 3_C030034I22Rik  | 57.9238 | -0.44286 | 0.15124  | 0.24074  | 44.2776 | 55.0683 | 47.8062 | 66.7247 | 62.7571 | 70.9087 |
| ENSMUSG00000073375 | 2_Lrrc30         | 19.2843 | -2.65261 | 0.0002   | 0.00091  | 7.8137  | 6.42464 | 1.19515 | 46.8876 | 17.9306 | 35.4544 |
| ENSMUSG00000073388 | 2_A330017A19Rik  | 2.74155 | 0.8696   | 0.51874  | 0.62883  | 4.34094 | 2.75342 | 3.58546 | 3.60674 | 0.89653 | 1.26623 |
| ENSMUSG00000073399 | 9_Trim40         | 41.9073 | 1.47282  | 0.00077  | 0.00287  | 72.0596 | 55.9861 | 57.3674 | 18.0337 | 34.0682 | 13.9285 |
| ENSMUSG00000073400 | 6_Trim10         | 1.86757 | -0.53658 | 0.75669  | NA       | 0.86819 | 3.67122 | 0       | 3.60674 | 1.79306 | 1.26623 |
| ENSMUSG00000073402 | 11_Gm8909        | 60.3602 | 4.17696  | 1.70E-16 | 2.00E-14 | 101.578 | 86.2737 | 155.37  | 9.91854 | 2.68959 | 6.33113 |
| ENSMUSG00000073407 | 1_Gm6034         | 11.9933 | 1.11654  | 0.13305  | 0.21682  | 16.4956 | 12.8493 | 20.3176 | 7.21348 | 12.5514 | 2.53245 |
| ENSMUSG00000073408 | 12_Dpcr1         | 6.75676 | 0.5863   | 0.52752  | 0.63638  | 11.2864 | 3.67122 | 9.56123 | 7.21348 | 6.27571 | 2.53245 |
| ENSMUSG00000073409 | 12_H2-Q6         | 1065.07 | 3.36122  | 1.02E-47 | 2.88E-44 | 1997.7  | 1348.26 | 2477.55 | 153.287 | 216.064 | 197.531 |
| ENSMUSG00000073411 | 11_H2-D1         | 18956.9 | 2.06758  | 7.16E-33 | 5.28E-30 | 29796.2 | 24644   | 37392.8 | 7819.42 | 6197.72 | 7891.13 |
| ENSMUSG00000073412 | 6_Lst1           | 94.915  | 1.36089  | 4.45E-05 | 0.00025  | 191.001 | 115.644 | 102.783 | 61.3146 | 43.0335 | 55.714  |
| ENSMUSG00000073413 | 9_Ly6g6d         | 5.27059 | 0.10318  | 0.92391  | 0.94954  | 2.60457 | 10.0959 | 3.58546 | 7.21348 | 1.79306 | 6.33113 |
| ENSMUSG00000073414 | 8_G6b            | 28.9773 | 0.63559  | 0.18065  | 0.27778  | 34.7275 | 31.2054 | 39.4401 | 13.5253 | 23.3098 | 31.6557 |
| ENSMUSG00000073418 | 4_C4b            | 2973.69 | 0.56074  | 0.00201  | 0.00654  | 3430.21 | 4257.7  | 2946.05 | 2884.49 | 2310.36 | 2013.3  |
| ENSMUSG00000073421 | 5_H2-Ab1         | 560.295 | 1.78572  | 6.36E-21 | 1.32E-18 | 977.58  | 810.422 | 818.681 | 314.688 | 212.478 | 227.921 |
| ENSMUSG00000073422 | 10_H2-Ke6        | 692.527 | 0.12214  | 0.42025  | 0.53602  | 731.883 | 723.231 | 709.922 | 750.202 | 561.228 | 678.698 |
| ENSMUSG00000073423 | 9_Zfp414         | 304.554 | 1.13803  | 1.24E-06 | 1.11E-05 | 382.003 | 414.848 | 460.134 | 251.57  | 138.962 | 179.804 |
| ENSMUSG00000073424 | 9_Cyp4f15        | 145.811 | 0.21081  | 0.38171  | 0.49947  | 182.32  | 137.671 | 148.199 | 129.843 | 114.756 | 162.077 |
| ENSMUSG00000073427 | 3_Gm4924         | 43.4152 | -0.64406 | 0.07677  | 0.1386   | 39.0685 | 26.6164 | 35.8546 | 51.3961 | 49.3092 | 58.2464 |
| ENSMUSG00000073430 | 4_Gm10505        | 2.96867 | -0.44487 | 0.75733  | 0.82937  | 0.86819 | 5.50683 | 1.19515 | 1.80337 | 7.17224 | 1.26623 |
| ENSMUSG00000073433 | 10_Arhgdig       | 9.2249  | -0.84124 | 0.27435  | 0.3865   | 7.8137  | 8.26025 | 3.58546 | 15.3287 | 8.96531 | 11.396  |
| ENSMUSG00000073434 | 11_Wdr90         | 250.857 | 0.96842  | 1.26E-07 | 1.53E-06 | 338.593 | 346.931 | 310.74  | 193.862 | 154.203 | 160.811 |
| ENSMUSG00000073435 | 10_Nme3          | 246.205 | 0.32841  | 0.15783  | 0.24935  | 236.147 | 258.821 | 328.667 | 275.916 | 186.478 | 191.2   |
| ENSMUSG00000073436 | 11_Eme2          | 511.2   | 0.58087  | 0.00024  | 0.00105  | 538.277 | 647.053 | 652.554 | 421.989 | 366.681 | 440.647 |
| ENSMUSG00000073448 | 1_Gm10509        | 12.2793 | -0.51346 | 0.52032  | 0.6303   | 6.94551 | 5.50683 | 17.9273 | 7.21348 | 10.7584 | 25.3245 |
| ENSMUSG00000073457 | 4_Smok2b         | 0       | NA       | NA       | NA       | 0       | 0       | 0       | 0       | 0       | 0       |
| ENSMUSG00000073460 | 4_Pnlcd1         | 13.6047 | 0.22295  | 0.7224   | 0.80223  | 11.2864 | 13.7671 | 19.1225 | 9.91854 | 16.1376 | 11.396  |
| ENSMUSG00000073468 | 11_Stf2d1        | 560.032 | 0.39573  | 0.00713  | 0.01898  | 612.073 | 587.396 | 711.117 | 467.975 | 518.195 | 463.439 |
| ENSMUSG00000073471 | 2_Rsph3a         | 276.181 | -0.07416 | 0.72433  | 0.80366  | 248.302 | 253.314 | 305.959 | 220.913 | 327.234 | 301.362 |
| ENSMUSG00000073478 | 6_D73000315Rik   | 34.7877 | -0.59845 | 0.16719  | 0.2611   | 26.9138 | 35.7944 | 20.3176 | 48.691  | 46.6196 | 30.3894 |
| ENSMUSG00000073481 | 9_Marc2          | 1345.57 | -0.10803 | 0.35649  | 0.47324  | 1260.61 | 1236.28 | 1388.77 | 1345.31 | 1360.93 | 1481.49 |
| ENSMUSG00000073486 | 2_Gm10518        | 0.15297 | 0.92709  | 0.82027  | NA       | 0       | 0.91781 | 0       | 0       | 0       | 0       |
| ENSMUSG00000073489 | 5_lfi204         | 1425.89 | 2.02284  | 8.50E-13 | 4.65E-11 | 2331.09 | 1544.67 | 2990.28 | 351.657 | 760.258 | 577.399 |
| ENSMUSG00000073490 | 6_D730007873     | 344.08  | 2.06763  | 4.51E-22 | 1.06E-19 | 590.368 | 417.602 | 729.044 | 87.4635 | 127.307 | 112.694 |
| ENSMUSG00000073491 | 10_Pydc4         | 6.80369 | 3.74029  | 0.00686  | 0.01835  | 25.1775 | 4.58903 | 8.36608 | 0       | 2.68959 | 0       |
| ENSMUSG00000073492 | 2_Gm10521        | 0.92268 | 3.32202  | 0.29066  | NA       | 4.34094 | 0       | 1.19515 | 0       | 0       | 0       |
| ENSMUSG00000073494 | 5_Sh2d1b2        | 1.77997 | 4.26385  | 0.04087  | NA       | 4.34094 | 2.75342 | 3.58546 | 0       | 0       | 0       |
| ENSMUSG00000073497 | 6_AA792892       | 1.9719  | -2.44778 | 0.19052  | NA       | 1.73638 | 0       | 0       | 3.60674 | 2.68959 | 3.79868 |
| ENSMUSG00000073514 | 3_Dok6           | 1.85221 | -1.62697 | 0.34672  | NA       | 1.73638 | 0.91781 | 0       | 3.60674 | 3.58612 | 1.26623 |
| ENSMUSG00000073530 | 11_Pappa2        | 143.272 | 0.03602  | 0.87779  | 0.91736  | 160.615 | 151.438 | 123.101 | 165.91  | 134.48  | 124.09  |

|                    |                  |         |          |          |          |         |         |         |         |         |         |
|--------------------|------------------|---------|----------|----------|----------|---------|---------|---------|---------|---------|---------|
| ENSMUSG00000073535 | 5_Gm5532         | 7.22865 | 0.49986  | 0.6298   | 0.72655  | 14.7592 | 4.58903 | 5.97577 | 10.8202 | 0.89653 | 6.33113 |
| ENSMUSG00000073542 | 2_Cep76          | 135.777 | -0.10071 | 0.66615  | 0.75722  | 128.492 | 122.068 | 143.418 | 128.941 | 167.651 | 124.09  |
| ENSMUSG00000073551 | 4_Spink13        | 0.44912 | -2.32858 | 0.56096  | NA       | 0       | 0       | 0       | 0.90169 | 1.79306 | 0       |
| ENSMUSG00000073555 | 1_Gm4951         | 150.794 | 3.09579  | 1.08E-22 | 2.70E-20 | 260.457 | 188.15  | 362.132 | 34.264  | 33.1716 | 26.5908 |
| ENSMUSG00000073557 | 11_Ppp1r12b      | 1877.93 | -0.40543 | 0.01123  | 0.02785  | 1447.27 | 1966.86 | 1432.99 | 2345.28 | 2080.85 | 1994.31 |
| ENSMUSG00000073563 | 2_Csnk1g3        | 1511.93 | -0.27642 | 0.0438   | 0.08682  | 1365.66 | 1309.71 | 1427.01 | 1411.14 | 1805.61 | 1752.46 |
| ENSMUSG00000073565 | 4_Prr16          | 46.0726 | -0.16631 | 0.66457  | 0.75593  | 58.1686 | 38.5478 | 33.4643 | 55.0028 | 51.9988 | 39.253  |
| ENSMUSG00000073568 | 1_Arl14epl       | 6.48645 | -0.93198 | 0.28797  | 0.40136  | 6.07732 | 3.67122 | 3.58546 | 9.91854 | 8.06878 | 7.59736 |
| ENSMUSG00000073590 | 3_3222401L13Rik  | 79.2567 | -0.7714  | 0.00722  | 0.01918  | 62.5096 | 65.1642 | 47.8062 | 101.89  | 112.066 | 86.1034 |
| ENSMUSG00000073591 | 4_Pcdhb22        | 213.556 | -0.38501 | 0.0658   | 0.12199  | 177.979 | 217.52  | 160.151 | 274.112 | 237.581 | 213.992 |
| ENSMUSG00000073598 | 3_1700066B19Rik  | 21.7573 | 0.9104   | 0.07672  | 0.13855  | 26.0457 | 31.2054 | 27.4885 | 12.6236 | 11.6549 | 21.5259 |
| ENSMUSG00000073599 | 9_Ecscr          | 105.005 | -0.36517 | 0.18631  | 0.28483  | 116.337 | 83.5203 | 75.2947 | 132.548 | 121.032 | 101.298 |
| ENSMUSG00000073600 | 3_Prob1          | 65.8481 | -0.81802 | 0.03351  | 0.06959  | 36.4639 | 58.7396 | 47.8062 | 112.711 | 51.9988 | 87.3697 |
| ENSMUSG00000073602 | 10_Serpib3b      | 0.14942 | -0.99647 | 0.80707  | NA       | 0       | 0       | 0       | 0       | 0.89653 | 0       |
| ENSMUSG00000073608 | 4_Gm6086         | 1.14875 | -0.43914 | 0.82966  | NA       | 1.73638 | 0       | 1.19515 | 0.90169 | 1.79306 | 1.26623 |
| ENSMUSG00000073609 | 9_D2hgdh         | 297.545 | 0.63376  | 0.0007   | 0.00265  | 353.353 | 385.478 | 346.595 | 272.309 | 194.547 | 232.986 |
| ENSMUSG00000073610 | 3_Gm10549        | 0.99357 | -3.43429 | 0.26742  | NA       | 0       | 0       | 0       | 0       | 0.89653 | 5.06491 |
| ENSMUSG00000073616 | 10_Myeov2        | 818.936 | -0.31534 | 0.01507  | 0.03574  | 716.255 | 699.368 | 775.655 | 970.214 | 918.944 | 833.177 |
| ENSMUSG00000073631 | 1_Gm10553        | 6.37923 | 2.75812  | 0.00988  | 0.02502  | 14.7592 | 5.50683 | 13.1467 | 1.80337 | 1.79306 | 1.26623 |
| ENSMUSG00000073633 | 9_Fbxo36         | 124.957 | -0.32561 | 0.16067  | 0.25296  | 118.942 | 105.548 | 107.564 | 119.022 | 141.652 | 157.012 |
| ENSMUSG00000073639 | 5_Rab18          | 3167.82 | -0.34364 | 0.00464  | 0.01326  | 2852.87 | 2661.64 | 2862.39 | 3136.06 | 3864.94 | 3629.01 |
| ENSMUSG00000073640 | 2_Rpl27-ps3      | 6938.73 | 0.39923  | 0.00107  | 0.00381  | 8009.04 | 7305.73 | 8363.69 | 6544.43 | 5337.94 | 6071.56 |
| ENSMUSG00000073643 | 11_Wdfy1         | 877.602 | -0.05293 | 0.65062  | 0.74455  | 879.475 | 825.107 | 880.829 | 895.374 | 922.53  | 862.301 |
| ENSMUSG00000073650 | 8_Catip          | 6.5025  | -1.20421 | 0.207    | 0.30953  | 5.20913 | 1.83561 | 4.78062 | 4.50843 | 12.5514 | 10.1298 |
| ENSMUSG00000073658 | 4_Crygb          | 4768.14 | -0.87872 | 0.49406  | 0.60529  | 1815.38 | 7975.73 | 286.837 | 13924.7 | 2009.13 | 2597.03 |
| ENSMUSG00000073664 | 11_Nbeal1        | 1552.87 | -0.62577 | 5.58E-07 | 5.59E-06 | 1200.7  | 1254.64 | 1208.3  | 1683.45 | 2074.57 | 1895.54 |
| ENSMUSG00000073676 | 4_Hspe1          | 1470.4  | -0.26377 | 0.02789  | 0.05978  | 1360.45 | 1246.38 | 1403.11 | 1502.21 | 1724.92 | 1585.32 |
| ENSMUSG00000073678 | 4_Pgap1          | 765.326 | -0.50227 | 0.00424  | 0.01229  | 721.465 | 648.889 | 528.258 | 752.907 | 999.632 | 940.807 |
| ENSMUSG00000073680 | 2_Tmem88b        | 14.8677 | -0.96305 | 0.13702  | 0.22167  | 9.55007 | 15.6027 | 4.78062 | 16.2303 | 21.5167 | 21.5259 |
| ENSMUSG00000073684 | 13_Faap20        | 284.531 | 0.48846  | 0.01693  | 0.03942  | 297.789 | 363.451 | 335.838 | 287.638 | 194.547 | 227.921 |
| ENSMUSG00000073699 | 3_Gm833          | 0.30056 | -1.76625 | 0.6627   | NA       | 0       | 0       | 0       | 1.80337 | 0       | 0       |
| ENSMUSG00000073700 | 3_Klhl21         | 1178.05 | 0.56549  | 0.00047  | 0.00187  | 1337.88 | 1396.9  | 1481.99 | 1008.99 | 754.879 | 1087.69 |
| ENSMUSG00000073702 | 11_Rpl31         | 14366.5 | -0.3202  | 0.0041   | 0.01194  | 13980.4 | 12250   | 12104.5 | 16871.4 | 14943.4 | 16049.4 |
| ENSMUSG00000073705 | 10_Apitd1        | 176.908 | 0.88703  | 2.99E-05 | 0.00018  | 243.961 | 193.657 | 252.178 | 132.548 | 126.411 | 112.694 |
| ENSMUSG00000073724 | 12_Pramel4       | 0       | NA       | NA       | NA       | 0       | 0       | 0       | 0       | 0       | 0       |
| ENSMUSG00000073725 | 8_Lmbrd1         | 1573.62 | -0.50531 | 3.71E-06 | 2.85E-05 | 1284.92 | 1350.09 | 1268.06 | 1896.24 | 1905.13 | 1737.26 |
| ENSMUSG00000073733 | 4_Rsg1           | 13.8713 | -0.01677 | 0.979    | 0.98609  | 7.8137  | 19.2739 | 14.3418 | 13.5253 | 14.3445 | 13.9285 |
| ENSMUSG00000073752 | 1_Gm10570        | 0.30239 | -0.03469 | 0.99322  | NA       | 0       | 0.91781 | 0       | 0       | 0.89653 | 0       |
| ENSMUSG00000073755 | 4_5730409E04Rik  | 492.948 | -0.49168 | 0.00536  | 0.01493  | 408.917 | 455.232 | 364.522 | 674.461 | 494.885 | 559.672 |
| ENSMUSG00000073758 | 10_Sh3d21        | 119.611 | 0.3891   | 0.12508  | 0.20634  | 129.36  | 118.397 | 158.955 | 104.596 | 86.0669 | 120.292 |
| ENSMUSG00000073759 | 6_4933407E24Rik  | 0.42208 | -2.1835  | 0.58658  | NA       | 0       | 0       | 0       | 0       | 0       | 2.53245 |
| ENSMUSG00000073761 | 2_4933427I04Rik  | 1.55248 | 0.05929  | 0.97395  | NA       | 0.86819 | 2.75342 | 1.19515 | 2.70506 | 1.79306 | 0       |
| ENSMUSG00000073764 | 2_Gm12888        | 0.30594 | 1.73752  | 0.66765  | NA       | 0       | 1.83561 | 0       | 0       | 0       | 0       |
| ENSMUSG00000073771 | 11_Btdb19        | 89.2568 | 0.49695  | 0.06369  | 0.1187   | 109.392 | 111.054 | 93.222  | 70.3315 | 86.9635 | 64.5776 |
| ENSMUSG00000073774 | 2_Kncn           | 0.14942 | -0.99647 | 0.80707  | NA       | 0       | 0       | 0       | 0       | 0.89653 | 0       |
| ENSMUSG00000073775 | 4_Kti12          | 217.517 | 0.42121  | 0.01611  | 0.03782  | 246.566 | 252.397 | 248.592 | 182.14  | 198.133 | 177.272 |
| ENSMUSG00000073789 | 1_Gm10577        | 0.30594 | 1.73752  | 0.66765  | NA       | 0       | 1.83561 | 0       | 0       | 0       | 0       |
| ENSMUSG00000073791 | 11_Efcab7        | 132.632 | -0.28116 | 0.22279  | 0.32782  | 120.678 | 104.63  | 133.857 | 128.941 | 144.341 | 163.343 |
| ENSMUSG00000073792 | 11_Alg6          | 321.596 | -0.33934 | 0.04612  | 0.09064  | 274.348 | 267.081 | 311.935 | 355.264 | 398.06  | 322.888 |
| ENSMUSG00000073795 | 10_6430531B16Rik | 4.94849 | 0.57754  | 0.59465  | 0.69657  | 1.73638 | 10.0959 | 5.97577 | 2.70506 | 5.37918 | 3.79868 |
| ENSMUSG00000073802 | 4_Cdkn2b         | 574.444 | 0.30322  | 0.05694  | 0.10803  | 632.041 | 582.807 | 688.409 | 438.219 | 537.918 | 567.27  |
| ENSMUSG00000073804 | 4_Nps            | 2.97999 | -0.74403 | 0.61639  | 0.71502  | 4.34094 | 0       | 2.39031 | 3.60674 | 6.27571 | 1.26623 |
| ENSMUSG00000073805 | 4_Fam196a        | 13.4218 | -0.72968 | 0.28739  | 0.40081  | 12.1546 | 11.0137 | 7.17092 | 15.3287 | 25.9994 | 8.86359 |
| ENSMUSG00000073830 | 11_Mup14         | 1.34244 | -0.32843 | 0.89326  | NA       | 1.73638 | 1.83561 | 0       | 0       | 4.48265 | 0       |
| ENSMUSG00000073834 | 10_Mup11         | 0.15028 | -0.99647 | 0.80707  | NA       | 0       | 0       | 0       | 0.90169 | 0       | 0       |
| ENSMUSG00000073838 | 10_Tufm          | 1117.66 | 0.69935  | 2.63E-08 | 3.91E-07 | 1331.8  | 1368.45 | 1448.53 | 843.978 | 779.982 | 933.209 |
| ENSMUSG00000073856 | 10_Iqck          | 43.4622 | -0.05082 | 0.88734  | 0.9241   | 47.7504 | 40.3834 | 39.4401 | 39.6742 | 40.3439 | 53.1815 |
| ENSMUSG00000073867 | 2_AA474408       | 27.7855 | 0.11565  | 0.80046  | 0.86197  | 24.3093 | 29.3698 | 33.4643 | 24.3455 | 34.9647 | 20.2596 |
| ENSMUSG00000073876 | 3_Gm13305        | 11.2926 | -0.03309 | 0.96666  | 0.97831  | 10.4183 | 13.7671 | 9.56123 | 17.132  | 14.3445 | 2.53245 |
| ENSMUSG00000073877 | 10_Gm13306       | 9.66647 | -0.31652 | 0.72586  | 0.80477  | 4.34094 | 15.6027 | 5.97577 | 20.7388 | 6.27571 | 5.06491 |
| ENSMUSG00000073888 | 12_Ccl27a        | 39.214  | -0.10213 | 0.7787   | 0.84524  | 33.8593 | 40.3834 | 39.4401 | 41.4775 | 42.1369 | 37.9868 |
| ENSMUSG00000073889 | 10_Ill11ra1      | 1645.27 | 0.06785  | 0.72091  | 0.80143  | 1633.93 | 1850.3  | 1568.04 | 2091.91 | 1292.8  | 1434.64 |
| ENSMUSG00000073899 | 1_Olfr1532-ps1   | 0       | NA       | NA       | NA       | 0       | 0       | 0       | 0       | 0       | 0       |
| ENSMUSG00000073906 | 2_Olfr692        | 1.44438 | 1.66018  | 0.39238  | NA       | 3.47275 | 1.83561 | 1.19515 | 0       | 0.89653 | 1.26623 |
| ENSMUSG00000073907 | 2_Olfr689        | 0       | NA       | NA       | NA       | 0       | 0       | 0       | 0       | 0       | 0       |
| ENSMUSG00000073910 | 10_Mob3b         | 509.415 | -0.18977 | 0.17941  | 0.27634  | 458.403 | 519.478 | 449.378 | 516.666 | 563.021 | 549.542 |
| ENSMUSG00000073940 | 3_Hbb-bt         | 45.7339 | -1.0107  | 0.13168  | 0.21503  | 36.4639 | 41.3013 | 13.1467 | 130.744 | 28.689  | 24.0583 |
| ENSMUSG00000073954 | 3_Olfr594        | 0.15028 | -0.99647 | 0.80707  | NA       | 0       | 0       | 0       | 0.90169 | 0       | 0       |
| ENSMUSG00000073967 | 2_Olfr557        | 0       | NA       | NA       | NA       | 0       | 0       | 0       | 0       | 0       | 0       |
| ENSMUSG00000073968 | 3_Trim68         | 498.574 | 0.07148  | 0.63341  | 0.72988  | 534.804 | 474.505 | 522.282 | 445.433 | 472.472 | 541.945 |
| ENSMUSG00000073977 | 1_Olfr549        | 0       | NA       | NA       | NA       | 0       | 0       | 0       | 0       | 0       | 0       |
| ENSMUSG00000073982 | 10_Rhog          | 1061.75 | 1.00866  | 3.63E-15 | 3.47E-13 | 1358.71 | 1374.87 | 1522.63 | 762.826 | 649.985 | 701.49  |
| ENSMUSG00000073987 | 4_Ggh            | 577.431 | -0.91335 | 7.84E-11 | 2.62E-09 | 415.862 | 410.259 | 375.278 | 745.694 | 818.532 | 698.957 |
| ENSMUSG00000073988 | 13_Ttpa          | 21.0766 | -1.52155 | 0.00605  | 0.01653  | 8.68188 | 15.6027 | 8.36608 | 33.3624 | 37.6543 | 22.7921 |
| ENSMUSG00000073991 | 4_Cnbd1          | 0.15028 | -0.99647 | 0.80707  | NA       | 0       | 0       | 0       | 0.90169 | 0       | 0       |
| ENSMUSG00000073995 | 2_Gm10604        | 10.3614 | -0.3363  | 0.66419  | 0.7557   | 4.34094 | 10.0959 | 13.1467 | 6.3118  | 14.3445 | 13.9285 |
| ENSMUSG00000073998 | 1_Olfr520        | 0.14942 | -0.99647 | 0.80707  | NA       | 0       | 0       | 0       | 0       | 0.89653 | 0       |
| ENSMUSG00000074001 | 2_Klhl40         | 19.2233 | -0.34372 | 0.64305  | 0.73823  | 6.07732 | 29.3698 | 15.537  | 38.7725 | 11.6549 | 13.9285 |
| ENSMUSG00000074003 | 4_Gucy2d         | 0.29884 | -1.76064 | 0.66373  | NA       | 0       | 0       | 0       | 0       | 1.79306 | 0       |

|                    |                 |         |          |          |          |         |         |         |         |         |         |
|--------------------|-----------------|---------|----------|----------|----------|---------|---------|---------|---------|---------|---------|
| ENSMUSG00000074004 | 3_B3gnt6        | 33.9174 | 0.38917  | 0.37255  | 0.49001  | 35.5957 | 33.9588 | 45.4159 | 22.5421 | 24.2063 | 41.7855 |
| ENSMUSG00000074006 | 3_Omp           | 1619.53 | 0.89441  | 1.28E-09 | 2.92E-08 | 1980.34 | 2173.36 | 2164.42 | 1299.33 | 944.943 | 1154.8  |
| ENSMUSG00000074028 | 3_Slc22a13      | 4.37895 | 0.95917  | 0.39587  | 0.51345  | 1.73638 | 7.34244 | 8.36608 | 3.60674 | 2.68959 | 2.53245 |
| ENSMUSG00000074029 | 2_Gm10608       | 0.21104 | -0.99647 | 0.80707  | NA       | 0       | 0       | 0       | 0       | 0       | 1.26623 |
| ENSMUSG00000074030 | 2_Exoc8         | 518.024 | 0.32796  | 0.01876  | 0.04284  | 566.927 | 550.683 | 613.114 | 432.809 | 491.299 | 453.309 |
| ENSMUSG00000074037 | 3_Mc1r          | 33.6926 | -1.05157 | 0.04488  | 0.08861  | 23.4411 | 30.2876 | 11.9515 | 61.3146 | 51.1022 | 24.0583 |
| ENSMUSG00000074059 | 3_Fbxw18        | 4.8657  | -2.65298 | 0.03304  | 0.06883  | 0.86819 | 0.91781 | 2.39031 | 12.6236 | 9.86184 | 2.53245 |
| ENSMUSG00000074060 | 10_Fbxw15       | 4.21138 | -0.78385 | 0.48971  | 0.6015   | 3.47275 | 4.58903 | 1.19515 | 5.41011 | 8.06878 | 2.53245 |
| ENSMUSG00000074062 | 5_Fbxw16        | 0.15028 | -0.99647 | 0.80707  | NA       | 0       | 0       | 0       | 0.90169 | 0       | 0       |
| ENSMUSG00000074063 | 9_Osgin1        | 720.594 | 1.33923  | 2.68E-07 | 2.96E-06 | 919.412 | 976.545 | 1202.33 | 516.666 | 237.581 | 471.036 |
| ENSMUSG00000074064 | 6_Mlycd         | 332.767 | 0.29342  | 0.10935  | 0.18531  | 353.353 | 398.328 | 347.79  | 351.657 | 255.511 | 289.966 |
| ENSMUSG00000074067 | 9_Gm10619       | 1.5583  | -0.77406 | 0.70829  | NA       | 0       | 0       | 3.58546 | 2.70506 | 1.79306 | 1.26623 |
| ENSMUSG00000074071 | 9_Fam169b       | 42.3556 | 0.39713  | 0.29358  | 0.40777  | 61.6414 | 38.5478 | 44.2207 | 39.6742 | 35.8612 | 34.1881 |
| ENSMUSG00000074088 | 6_Snrnp40       | 866.841 | 0.32435  | 0.01434  | 0.03422  | 947.194 | 890.271 | 1054.13 | 722.25  | 769.223 | 817.983 |
| ENSMUSG00000074093 | 3_Svip          | 1387.43 | -0.3374  | 0.01058  | 0.02652  | 1231.09 | 1166.53 | 1281.21 | 1406.63 | 1750.03 | 1489.08 |
| ENSMUSG00000074102 | 4_Rbm15b        | 1061.33 | 0.34521  | 0.00353  | 0.01054  | 1149.48 | 1139.91 | 1274.03 | 941.36  | 898.324 | 964.865 |
| ENSMUSG00000074109 | 4_Mrgprx2       | 4.83478 | -1.07931 | 0.315    | 0.43003  | 1.73638 | 1.83561 | 5.97577 | 9.01685 | 5.37918 | 5.06491 |
| ENSMUSG00000074115 | 3_Saa1          | 17.8445 | 2.09955  | 0.00536  | 0.01493  | 55.5641 | 20.1917 | 10.7564 | 6.3118  | 5.37918 | 8.86359 |
| ENSMUSG00000074121 | 2_Ntf5          | 62.7464 | 0.50117  | 0.10529  | 0.17963  | 60.7732 | 78.9313 | 81.2705 | 57.7079 | 48.4127 | 49.3828 |
| ENSMUSG00000074123 | 1_7420426K07Rik | 0       | NA       | NA       | NA       | 0       | 0       | 0       | 0       | 0       | 0       |
| ENSMUSG00000074129 | 12_Rpl13a       | 13602.3 | 0.28801  | 0.04292  | 0.0854   | 14819.1 | 14554.6 | 15494   | 14622.6 | 10483.1 | 11640.4 |
| ENSMUSG00000074141 | 12_Il4i1        | 1020.23 | 0.92881  | 1.74E-08 | 2.78E-07 | 1225.88 | 1277.59 | 1509.48 | 773.646 | 573.78  | 761.002 |
| ENSMUSG00000074146 | 9_4930579C12Rik | 4.42002 | -1.04607 | 0.35406  | 0.47087  | 1.73638 | 4.58903 | 2.39031 | 5.41011 | 9.86184 | 2.53245 |
| ENSMUSG00000074151 | 12_Nlrc5        | 830.941 | 4.5191   | 4.37E-61 | 2.47E-57 | 1586.18 | 1211.5  | 1981.57 | 58.6096 | 102.204 | 45.5842 |
| ENSMUSG00000074156 | 4_Ces1h         | 9.87968 | -1.52248 | 0.11293  | 0.19012  | 11.2864 | 3.67122 | 0       | 11.7219 | 16.1376 | 16.4609 |
| ENSMUSG00000074158 | 9_9830147E19Rik | 118.832 | -0.77062 | 0.00258  | 0.00807  | 96.3689 | 93.6162 | 72.9044 | 126.236 | 175.72  | 148.149 |
| ENSMUSG00000074165 | 10_Zfp788       | 407.387 | -0.64904 | 0.00025  | 0.00109  | 331.648 | 339.588 | 279.666 | 426.497 | 569.297 | 497.627 |
| ENSMUSG00000074166 | 7_AW146154      | 317.465 | -0.58321 | 0.00094  | 0.00339  | 247.434 | 287.273 | 227.079 | 346.247 | 416.887 | 379.868 |
| ENSMUSG00000074170 | 5_Plekhf1       | 206.631 | 0.23944  | 0.24771  | 0.3566   | 197.079 | 220.273 | 254.568 | 215.503 | 164.962 | 187.402 |
| ENSMUSG00000074171 | 1_Gm6658        | 0.54867 | 1.10538  | 0.77323  | NA       | 0       | 0       | 2.39031 | 0.90169 | 0       | 0       |
| ENSMUSG00000074178 | 2_Gm10638       | 13.4191 | 0.11777  | 0.8624   | 0.90652  | 11.2864 | 21.1095 | 9.56123 | 18.9354 | 10.7584 | 8.86359 |
| ENSMUSG00000074179 | 11_Gm10639      | 30.7725 | -0.92893 | 0.04287  | 0.08531  | 15.6274 | 27.5342 | 20.3176 | 45.986  | 29.5855 | 45.5842 |
| ENSMUSG00000074182 | 8_Znhit6        | 664.06  | -0.32029 | 0.02355  | 0.05204  | 555.641 | 617.683 | 597.577 | 673.559 | 718.121 | 821.781 |
| ENSMUSG00000074183 | 3_Gsta1         | 945.782 | -0.71618 | 8.95E-09 | 1.55E-07 | 701.496 | 783.806 | 660.92  | 1174.9  | 1186.11 | 1167.46 |
| ENSMUSG00000074194 | 3_Zfp791        | 145.7   | -0.12489 | 0.55802  | 0.6637   | 142.383 | 135.835 | 139.833 | 167.713 | 132.687 | 155.746 |
| ENSMUSG00000074195 | 3_Clca4b        | 148.609 | -0.53063 | 0.02832  | 0.0606   | 126.756 | 128.493 | 108.759 | 135.253 | 199.926 | 192.466 |
| ENSMUSG00000074199 | 7_Krtdap        | 7.82893 | 3.08327  | 0.00407  | 0.01187  | 13.891  | 5.50683 | 22.7079 | 2.70506 | 0.89653 | 1.26623 |
| ENSMUSG00000074203 | 4_G430095P16Rik | 2.94411 | 1.6884   | 0.21179  | 0.3151   | 6.07732 | 3.67122 | 3.58546 | 0.90169 | 0.89653 | 2.53245 |
| ENSMUSG00000074207 | 10_Adh1         | 15265.3 | 0.36032  | 0.00334  | 0.01006  | 17326.4 | 16906.9 | 17249.7 | 13345.8 | 11677.3 | 15085.8 |
| ENSMUSG00000074211 | 4_Sdhaf1        | 147.676 | -0.16051 | 0.45419  | 0.56848  | 146.724 | 146.849 | 124.296 | 170.419 | 140.755 | 157.012 |
| ENSMUSG00000074212 | 7_Dnajb14       | 988.754 | -0.5744  | 2.31E-06 | 1.90E-05 | 823.043 | 827.861 | 731.434 | 1146.04 | 1235.42 | 1168.73 |
| ENSMUSG00000074213 | 2_Gm10642       | 7.73559 | 0.60534  | 0.48183  | 0.59406  | 4.34094 | 11.9315 | 11.9515 | 8.11517 | 6.27571 | 3.79868 |
| ENSMUSG00000074215 | 2_Gm10643       | 21.9135 | 0.07334  | 0.89001  | 0.92597  | 13.891  | 32.1232 | 21.5128 | 23.4438 | 21.5167 | 18.9934 |
| ENSMUSG00000074217 | 8_2210011C24Rik | 0.14942 | -0.99647 | 0.80707  | NA       | 0       | 0       | 0       | 0       | 0.89653 | 0       |
| ENSMUSG00000074218 | 2_Cox7a1        | 85.0017 | -1.08692 | 0.03335  | 0.06932  | 47.7504 | 72.5066 | 43.0255 | 221.815 | 50.2057 | 74.7074 |
| ENSMUSG00000074219 | 2_Gm10644       | 35.7522 | 0.13185  | 0.74073  | 0.81674  | 28.6502 | 44.0547 | 39.4401 | 35.1657 | 30.482  | 36.7206 |
| ENSMUSG00000074220 | 9_Zfp382        | 45.6586 | -1.06738 | 0.00295  | 0.00904  | 36.4639 | 26.6164 | 25.0982 | 65.823  | 59.171  | 60.7789 |
| ENSMUSG00000074221 | 11_Zfp568       | 502.729 | 0.03851  | 0.80073  | 0.86215  | 524.386 | 464.41  | 540.21  | 550.028 | 453.644 | 483.699 |
| ENSMUSG00000074224 | 2_4932431P20Rik | 1.26105 | 0.80481  | 0.71777  | NA       | 0       | 3.67122 | 1.19515 | 1.80337 | 0.89653 | 0       |
| ENSMUSG00000074227 | 11_Spint2       | 7035.01 | 0.77756  | 6.49E-07 | 6.33E-06 | 7999.49 | 8519.99 | 10138.5 | 5486.76 | 4249.55 | 5815.78 |
| ENSMUSG00000074228 | 2_Gm10645       | 1.19362 | -2.46322 | 0.34854  | NA       | 0       | 0       | 1.19515 | 0.90169 | 0       | 5.06491 |
| ENSMUSG00000074232 | 2_Gm10647       | 5.12308 | -0.72673 | 0.46078  | 0.57457  | 3.47275 | 4.58903 | 3.58546 | 9.01685 | 6.27571 | 3.79868 |
| ENSMUSG00000074238 | 6_Ap1ar         | 2299.68 | 0.0109   | 0.92611  | 0.95127  | 2344.11 | 2136.65 | 2444.09 | 2109.04 | 2344.43 | 2419.76 |
| ENSMUSG00000074240 | 3_Cib3          | 0.39838 | 2.07058  | 0.60634  | NA       | 0       | 0       | 2.39031 | 0       | 0       | 0       |
| ENSMUSG00000074247 | 10_Dda1         | 876.369 | 0.91567  | 6.47E-08 | 8.60E-07 | 1036.62 | 1180.3  | 1220.25 | 727.66  | 502.057 | 591.328 |
| ENSMUSG00000074254 | 4_Cyp2a4        | 0.74024 | -0.62549 | 0.85603  | NA       | 1.73638 | 0       | 0       | 2.70506 | 0       | 0       |
| ENSMUSG00000074256 | 3_Gm10655       | 0.19919 | 0.92709  | 0.82027  | NA       | 0       | 0       | 1.19515 | 0       | 0       | 0       |
| ENSMUSG00000074259 | 10_Grand2       | 450.047 | 0.33664  | 0.01616  | 0.03792  | 477.504 | 509.382 | 519.892 | 376.905 | 402.542 | 414.056 |
| ENSMUSG00000074261 | 2_Erich4        | 0.19919 | 0.92709  | 0.82027  | NA       | 0       | 0       | 1.19515 | 0       | 0       | 0       |
| ENSMUSG00000074264 | 12_Amy1         | 167.367 | -1.47413 | 3.87E-06 | 2.95E-05 | 86.8188 | 116.561 | 62.148  | 281.326 | 300.338 | 157.012 |
| ENSMUSG00000074268 | 4_Amy2a5        | 0.60295 | -1.38005 | 0.66074  | NA       | 0       | 0.91781 | 0       | 1.80337 | 0.89653 | 0       |
| ENSMUSG00000074269 | 10_Rec114       | 6.63906 | 1.95377  | 0.04183  | 0.0835   | 10.4183 | 9.17806 | 11.9515 | 0.90169 | 3.58612 | 3.79868 |
| ENSMUSG00000074272 | 10_Ceacam1      | 14300.1 | 0.84307  | 8.63E-06 | 5.95E-05 | 17743.2 | 16148.8 | 21197.3 | 7431.69 | 11383.2 | 11896.2 |
| ENSMUSG00000074277 | 4_Phldb3        | 1079.42 | 1.56993  | 1.64E-09 | 3.59E-08 | 1383.89 | 1462.06 | 1998.3  | 685.281 | 322.751 | 624.25  |
| ENSMUSG00000074282 | 10_Zfp94        | 100.533 | 0.08628  | 0.73185  | 0.80977  | 112.864 | 106.465 | 90.8317 | 108.202 | 86.0669 | 98.7657 |
| ENSMUSG00000074283 | 5_Zfp109        | 89.8784 | -0.0562  | 0.82914  | 0.88305  | 102.446 | 82.6025 | 78.8802 | 94.677  | 86.9635 | 93.7008 |
| ENSMUSG00000074300 | 4_BC030870      | 288.137 | -0.22738 | 0.15663  | 0.2479   | 266.534 | 245.972 | 284.447 | 310.18  | 310.2   | 311.492 |
| ENSMUSG00000074305 | 9_Peak1         | 923.753 | -0.68931 | 2.04E-05 | 0.00013  | 721.465 | 811.34  | 588.016 | 1171.29 | 1233.63 | 1016.78 |
| ENSMUSG00000074336 | 4_Apoc4         | 0.1447  | 0.92709  | 0.82027  | NA       | 0.86819 | 0       | 0       | 0       | 0       | 0       |
| ENSMUSG00000074340 | 9_Ovgp1         | 40.2128 | -0.21624 | 0.64974  | 0.7438   | 41.673  | 40.3834 | 29.8789 | 40.5758 | 67.2398 | 21.5259 |
| ENSMUSG00000074342 | 3_J830077J02Rik | 35.061  | 1.47441  | 0.00213  | 0.00686  | 79.0051 | 34.8766 | 40.6352 | 17.132  | 19.7237 | 18.9934 |
| ENSMUSG00000074344 | 6_Tmigd3        | 1.24626 | -0.86799 | 0.73181  | NA       | 2.60457 | 0       | 0       | 3.60674 | 0       | 1.26623 |
| ENSMUSG00000074345 | 3_Tnfai813      | 33.701  | -0.10851 | 0.80479  | 0.86487  | 31.2548 | 28.452  | 38.2449 | 43.2809 | 39.4473 | 21.5259 |
| ENSMUSG00000074357 | 2_AA386476      | 10.1846 | -0.66932 | 0.37899  | 0.49649  | 5.20913 | 10.0959 | 8.36608 | 7.21348 | 18.8271 | 11.396  |
| ENSMUSG00000074358 | 9_Ccdc61        | 237.455 | 1.1162   | 3.95E-10 | 1.07E-08 | 297.789 | 325.821 | 351.375 | 146.073 | 147.928 | 155.746 |
| ENSMUSG00000074359 | 2_Psg23         | 0.59554 | -1.37459 | 0.71084  | NA       | 0.86819 | 0       | 0       | 2.70506 | 0       | 0       |
| ENSMUSG00000074361 | 9_C5ar2         | 5.86157 | 1.03846  | 0.36155  | 0.47863  | 10.4183 | 8.26025 | 4.78062 | 0       | 5.37918 | 6.33113 |
| ENSMUSG00000074364 | 5_Ehd2          | 3883    | 0.80933  | 3.29E-08 | 4.76E-07 | 4556.25 | 4839.59 | 5435.56 | 2632.92 | 2502.22 | 3331.44 |
| ENSMUSG00000074365 | 13_Crxos        | 4.65348 | -1.91437 | 0.11434  | 0.19191  | 1.73638 | 1.83561 | 2.39031 | 12.6236 | 8.06878 | 1.26623 |

|                    |                  |         |          |          |          |         |         |         |         |         |         |
|--------------------|------------------|---------|----------|----------|----------|---------|---------|---------|---------|---------|---------|
| ENSMUSG00000074378 | 5_Bsph1          | 0       | NA       | NA       | NA       | 0       | 0       | 0       | 0       | 0       | 0       |
| ENSMUSG00000074384 | 3_Al429214       | 267.792 | -0.6064  | 0.00141  | 0.00481  | 195.342 | 218.438 | 223.494 | 272.309 | 366.681 | 330.485 |
| ENSMUSG00000074385 | 2_Gm10684        | 1.52478 | -1.78583 | 0.35426  | NA       | 0       | 0.91781 | 1.19515 | 3.60674 | 0.89653 | 2.53245 |
| ENSMUSG00000074388 | 3_Gm5544         | 0.75775 | 0.59029  | 0.8632   | NA       | 0       | 2.75342 | 0       | 0       | 1.79306 | 0       |
| ENSMUSG00000074403 | 2_Hist2h3b       | 0.19919 | 0.92709  | 0.82027  | NA       | 0       | 0       | 1.19515 | 0       | 0       | 0       |
| ENSMUSG00000074404 | 5_Gm1698         | 0       | NA       | NA       | NA       | 0       | 0       | 0       | 0       | 0       | 0       |
| ENSMUSG00000074405 | 6_Zfp865         | 216.176 | 0.68251  | 0.00056  | 0.0022   | 296.052 | 257.903 | 245.007 | 189.354 | 147.928 | 160.811 |
| ENSMUSG00000074406 | 4_Zfp628         | 175.205 | 1.39749  | 5.15E-06 | 3.81E-05 | 212.706 | 251.479 | 297.593 | 126.236 | 55.5849 | 107.629 |
| ENSMUSG00000074417 | 9_Gm14548        | 69.2118 | 2.72658  | 9.20E-10 | 2.21E-08 | 195.342 | 81.6847 | 83.6608 | 17.132  | 19.7237 | 17.7272 |
| ENSMUSG00000074419 | 11_Gm15448       | 14.7902 | 1.95757  | 0.00217  | 0.00695  | 28.6502 | 20.1917 | 21.5128 | 5.41011 | 5.37918 | 7.59736 |
| ENSMUSG00000074433 | 4_Lce3e          | 0.21104 | -0.99647 | 0.80707  | NA       | 0       | 0       | 0       | 0       | 0       | 1.26623 |
| ENSMUSG00000074435 | 10_Smcp          | 1.05476 | -1.28642 | 0.62189  | NA       | 0       | 1.83561 | 0       | 1.80337 | 2.68959 | 0       |
| ENSMUSG00000074437 | 5_Defar-s1       | 3.37431 | -0.54629 | 0.64785  | 0.74231  | 1.73638 | 1.83561 | 4.78062 | 4.50843 | 3.58612 | 3.79868 |
| ENSMUSG00000074445 | 4_Spr2a3         | 20.0989 | 1.73526  | 0.02197  | 0.04903  | 46.014  | 13.7671 | 33.4643 | 14.427  | 11.6549 | 1.26623 |
| ENSMUSG00000074449 | 3_Gm15319        | 8.63418 | -2.57985 | 0.00631  | 0.01715  | 4.34094 | 2.75342 | 0       | 15.3287 | 11.6549 | 17.7272 |
| ENSMUSG00000074452 | 12_Pate2         | 4.55679 | -0.86684 | 0.44127  | 0.55651  | 0.86819 | 6.42464 | 2.39031 | 7.21348 | 5.37918 | 5.06491 |
| ENSMUSG00000074454 | 3_Defb33         | 0.15297 | 0.92709  | 0.82027  | NA       | 0       | 0.91781 | 0       | 0       | 0       | 0       |
| ENSMUSG00000074457 | 10_S100a16       | 11551.7 | 0.42494  | 0.00017  | 0.0008   | 12969.9 | 12426.2 | 14326.3 | 10315.3 | 9036.13 | 10236.2 |
| ENSMUSG00000074461 | 2_Gm10699        | 18.5793 | -1.51989 | 0.01335  | 0.03222  | 6.07732 | 16.5205 | 5.97577 | 25.2472 | 25.9994 | 31.6557 |
| ENSMUSG00000074469 | 6_Gm15348        | 5.55089 | -0.11261 | 0.90785  | 0.93786  | 6.07732 | 7.34244 | 2.39031 | 6.3118  | 3.58612 | 7.59736 |
| ENSMUSG00000074472 | 9_Zfp872         | 0.9531  | -0.14785 | 0.94581  | NA       | 1.73638 | 0.91781 | 0       | 0.90169 | 0.89653 | 1.26623 |
| ENSMUSG00000074476 | 5_Spc24          | 181.883 | 1.00633  | 0.00025  | 0.00109  | 247.434 | 164.287 | 317.911 | 120.826 | 134.48  | 106.363 |
| ENSMUSG00000074480 | 4_Mex3a          | 161.068 | 0.01705  | 0.94468  | 0.96399  | 146.724 | 152.356 | 186.444 | 128.039 | 151.514 | 201.33  |
| ENSMUSG00000074483 | 2_Bglap          | 2.42921 | 0.17799  | 0.9166   | NA       | 1.73638 | 0       | 5.97577 | 0.90169 | 0.89653 | 5.06491 |
| ENSMUSG00000074486 | 2_Bglap2         | 1.50561 | -1.95683 | 0.40437  | NA       | 0       | 1.83561 | 0       | 4.50843 | 2.68959 | 0       |
| ENSMUSG00000074489 | 9_Bglap3         | 130.703 | 1.57399  | 1.64E-10 | 4.96E-09 | 190.133 | 164.287 | 233.055 | 65.823  | 66.3433 | 64.5776 |
| ENSMUSG00000074491 | 9_Clec4g         | 0       | NA       | NA       | NA       | 0       | 0       | 0       | 0       | 0       | 0       |
| ENSMUSG00000074497 | 4_A430078G23Rik  | 1.2342  | 2.59791  | 0.24279  | NA       | 3.47275 | 1.83561 | 1.19515 | 0.90169 | 0       | 0       |
| ENSMUSG00000074500 | 11_Zfp558        | 42.9815 | -0.73526 | 0.0544   | 0.10397  | 34.7275 | 32.1232 | 29.8789 | 41.4775 | 69.0329 | 50.6491 |
| ENSMUSG00000074505 | 4_Fat3           | 128.448 | -1.63454 | 8.40E-08 | 1.08E-06 | 53.8277 | 88.1093 | 45.4159 | 211.896 | 216.96  | 154.48  |
| ENSMUSG00000074507 | 6_Gm14340        | 0       | NA       | NA       | NA       | 0       | 0       | 0       | 0       | 0       | 0       |
| ENSMUSG00000074513 | 9_Arfip1         | 2114.26 | -0.17431 | 0.24373  | 0.35189  | 2058.47 | 1769.53 | 2132.15 | 1877.31 | 2494.15 | 2353.92 |
| ENSMUSG00000074516 | 5_Gm10709        | 905.878 | 0.99856  | 1.58E-05 | 0.0001   | 1267.56 | 1079.34 | 1275.23 | 790.778 | 391.784 | 630.581 |
| ENSMUSG00000074517 | 2_Gm10710        | 1.61971 | -2.08284 | 0.26102  | NA       | 0.86819 | 0.91781 | 0       | 3.60674 | 1.79306 | 2.53245 |
| ENSMUSG00000074519 | 11_Etoh1         | 222.486 | -1.10625 | 1.93E-06 | 1.62E-05 | 123.283 | 165.205 | 135.052 | 251.57  | 377.439 | 282.369 |
| ENSMUSG00000074521 | 9_Gm14327        | 32.517  | -0.34285 | 0.40629  | 0.52344  | 24.3093 | 27.5342 | 34.6595 | 36.9691 | 41.2404 | 30.3894 |
| ENSMUSG00000074527 | 11_Gm14296       | 349.985 | -0.82542 | 3.09E-05 | 0.00018  | 283.029 | 253.314 | 221.104 | 431.006 | 537.918 | 373.537 |
| ENSMUSG00000074529 | 10_C330013J21Rik | 7.06842 | 0.42566  | 0.62485  | 0.72232  | 6.94551 | 5.50683 | 11.9515 | 3.60674 | 8.06878 | 6.33113 |
| ENSMUSG00000074564 | 3_Gm10720        | 0.19919 | 0.92709  | 0.82027  | NA       | 0       | 0       | 1.19515 | 0       | 0       | 0       |
| ENSMUSG00000074569 | 4_Gcnt7          | 18.079  | -0.62327 | 0.30808  | 0.42305  | 15.6274 | 10.0959 | 16.7322 | 14.427  | 16.1376 | 35.4544 |
| ENSMUSG00000074570 | 13_Cass4         | 12.4527 | 0.16905  | 0.7874   | 0.85239  | 13.0228 | 11.0137 | 15.537  | 11.7219 | 10.7584 | 12.6623 |
| ENSMUSG00000074575 | 4_Kcng1          | 9.56834 | -1.021   | 0.22078  | 0.32566  | 9.55007 | 4.58903 | 4.78062 | 7.21348 | 22.4133 | 8.86359 |
| ENSMUSG00000074576 | 4_Mocs3          | 114.644 | 0.26948  | 0.29684  | 0.41125  | 111.128 | 126.657 | 138.638 | 126.236 | 85.1704 | 100.032 |
| ENSMUSG00000074577 | 9_Fam65c         | 311.664 | 1.46342  | 3.97E-11 | 1.44E-09 | 378.53  | 463.492 | 530.648 | 200.174 | 129.997 | 167.142 |
| ENSMUSG00000074578 | 12_1500012F01Rik | 590.677 | 0.33277  | 0.03913  | 0.07903  | 621.623 | 583.724 | 770.874 | 479.697 | 542.401 | 545.744 |
| ENSMUSG00000074579 | 13_Lekr1         | 81.5138 | -0.96107 | 0.0007   | 0.00265  | 47.7504 | 54.1505 | 64.5383 | 92.8736 | 118.342 | 111.428 |
| ENSMUSG00000074582 | 10_Arfgef2       | 2859.67 | 0.30265  | 0.00471  | 0.0134   | 3049.08 | 3310.52 | 3114.57 | 2590.54 | 2393.74 | 2699.6  |
| ENSMUSG00000074591 | 7_Ankub1         | 1.81734 | -0.92555 | 0.69232  | NA       | 0       | 3.67122 | 0       | 0.90169 | 0       | 6.33113 |
| ENSMUSG00000074595 | 9_Wfdc6a         | 10.093  | -1.63001 | 0.06049  | 0.11371  | 2.60457 | 6.42464 | 5.97577 | 25.2472 | 15.241  | 5.06491 |
| ENSMUSG00000074604 | 9_Mgst2          | 110.821 | 0.05452  | 0.8319   | 0.8851   | 103.314 | 103.712 | 131.467 | 99.1854 | 96.8253 | 130.421 |
| ENSMUSG00000074607 | 11_Tox2          | 27.9448 | -0.65012 | 0.1462   | 0.23386  | 21.7047 | 21.1095 | 22.7079 | 43.2809 | 32.2751 | 26.5908 |
| ENSMUSG00000074619 | 5_1700034123Rik  | 1.67488 | -1.3966  | 0.43073  | NA       | 1.73638 | 0.91781 | 0       | 1.80337 | 1.79306 | 3.79868 |
| ENSMUSG00000074622 | 4_Mafb           | 731.593 | 0.77479  | 2.32E-06 | 1.90E-05 | 949.798 | 760.861 | 1060.1  | 564.455 | 498.471 | 555.874 |
| ENSMUSG00000074623 | 4_Gm826          | 12.4181 | -0.0008  | 0.999    | 0.99911  | 13.891  | 9.17806 | 14.3418 | 12.6236 | 14.3445 | 10.1298 |
| ENSMUSG00000074625 | 10_Arhgap40      | 508.742 | 1.36003  | 1.20E-11 | 4.96E-10 | 669.373 | 704.875 | 822.266 | 339.935 | 213.374 | 302.628 |
| ENSMUSG00000074627 | 11_Mroh8         | 1.84963 | -1.62799 | 0.37361  | NA       | 1.73638 | 0.91781 | 0       | 0.90169 | 6.27571 | 1.26623 |
| ENSMUSG00000074628 | 9_Tlhc2          | 0       | NA       | NA       | NA       | 0       | 0       | 0       | 0       | 0       | 0       |
| ENSMUSG00000074629 | 2_4930518115Rik  | 33.6589 | -0.11141 | 0.79238  | 0.85615  | 35.5957 | 30.2876 | 31.074  | 24.3455 | 43.93   | 36.7206 |
| ENSMUSG00000074634 | 11_Gm7120        | 53.2248 | 0.10405  | 0.74954  | 0.82307  | 53.8277 | 53.2327 | 58.5626 | 60.4129 | 43.93   | 49.3828 |
| ENSMUSG00000074635 | 2_3110070M22Rik  | 18.2208 | -0.70432 | 0.21645  | 0.32055  | 19.1001 | 13.7671 | 8.36608 | 18.0337 | 25.9994 | 24.0583 |
| ENSMUSG00000074637 | 7_Sox2           | 25.1855 | -2.12074 | 0.00342  | 0.01028  | 7.8137  | 11.0137 | 9.56123 | 18.0337 | 86.9635 | 17.7272 |
| ENSMUSG00000074639 | 6_BC089597       | 24.7652 | 1.37137  | 0.0063   | 0.01713  | 33.8593 | 34.8766 | 38.2449 | 8.11517 | 17.0341 | 16.4609 |
| ENSMUSG00000074643 | 12_Cpne1         | 647.158 | 1.37416  | 5.24E-09 | 9.79E-08 | 789.183 | 801.244 | 1213.08 | 468.876 | 300.338 | 310.226 |
| ENSMUSG00000074646 | 10_6430550D23Rik | 26.6262 | -0.30628 | 0.52237  | 0.63187  | 18.232  | 33.9588 | 19.1225 | 26.1489 | 33.1716 | 29.1232 |
| ENSMUSG00000074647 | 3_Fam83c         | 305.848 | 0.54339  | 0.0217   | 0.04856  | 304.734 | 340.506 | 442.207 | 213.699 | 209.788 | 324.154 |
| ENSMUSG00000074649 | 6_BC029722       | 324.464 | -0.15939 | 0.44548  | 0.5604   | 284.766 | 334.081 | 301.179 | 431.907 | 277.028 | 317.823 |
| ENSMUSG00000074650 | 2_Gm10735        | 5.44643 | -2.46791 | 0.03699  | 0.07549  | 0       | 2.75342 | 2.39031 | 9.91854 | 12.5514 | 5.06491 |
| ENSMUSG00000074651 | 2_Mcidas         | 1.58872 | 0.10979  | 0.95207  | NA       | 1.73638 | 0.91781 | 2.39031 | 0.90169 | 3.58612 | 0       |
| ENSMUSG00000074652 | 3_Myh7b          | 16.7687 | 0.27858  | 0.67937  | 0.76786  | 18.232  | 20.1917 | 16.7322 | 26.1489 | 5.37918 | 13.9285 |
| ENSMUSG00000074653 | 10_Lrrc31        | 56.1528 | -0.15383 | 0.63443  | 0.73075  | 59.0368 | 53.2327 | 46.611  | 49.5927 | 60.0675 | 68.3763 |
| ENSMUSG00000074656 | 12_Elf2s2        | 4124.68 | -0.35022 | 0.00799  | 0.02092  | 3767.94 | 3259.13 | 3853.18 | 4120.7  | 5153.26 | 4593.87 |
| ENSMUSG00000074657 | 4_Kif5a          | 70.6849 | -0.91952 | 0.02216  | 0.04941  | 52.0913 | 54.1505 | 40.6352 | 142.466 | 81.5843 | 53.1815 |
| ENSMUSG00000074665 | 10_Bpifb4        | 0.63887 | 1.43476  | 0.64357  | NA       | 1.73638 | 0       | 1.19515 | 0.90169 | 0       | 0       |
| ENSMUSG00000074671 | 6_Tsyp13         | 88.2654 | -0.7883  | 0.00715  | 0.01903  | 78.137  | 68.8354 | 46.611  | 125.334 | 109.377 | 101.298 |
| ENSMUSG00000074673 | 15_Tll9          | 4.04384 | -2.95234 | 0.05132  | 0.09911  | 2.60457 | 0       | 0       | 5.41011 | 3.58612 | 12.6623 |
| ENSMUSG00000074676 | 2_Foxs1          | 6.5529  | 0.10839  | 0.90452  | 0.93573  | 6.07732 | 7.34244 | 7.17092 | 9.91854 | 6.27571 | 2.53245 |
| ENSMUSG00000074677 | 11_Sirpb1c       | 19.9371 | 3.25196  | 8.11E-05 | 0.00042  | 59.0368 | 20.1917 | 28.6837 | 0       | 5.37918 | 6.33113 |
| ENSMUSG00000074678 | 1_Defb25         | 0.1447  | 0.92709  | 0.82027  | NA       | 0.86819 | 0       | 0       | 0       | 0       | 0       |
| ENSMUSG00000074682 | 4_Zcchc3         | 218.211 | -0.01809 | 0.92833  | 0.95241  | 213.574 | 201.917 | 234.25  | 201.076 | 196.34  | 262.109 |

|                     |                  |         |          |          |          |         |         |         |         |         |         |
|---------------------|------------------|---------|----------|----------|----------|---------|---------|---------|---------|---------|---------|
| ENSMUSG000000074698 | 10_Csnk2a1       | 3418.25 | -0.29633 | 0.0198   | 0.04488  | 3153.26 | 3054.46 | 2996.25 | 3230.74 | 4046.94 | 4027.87 |
| ENSMUSG000000074704 | 9_Rad21l         | 0.14942 | -0.99647 | 0.80707  | NA       | 0       | 0       | 0       | 0       | 0.89653 | 0       |
| ENSMUSG000000074715 | 2_Ccl28          | 85.026  | -1.6396  | 2.83E-06 | 2.27E-05 | 39.9367 | 46.8081 | 37.0498 | 84.7584 | 177.513 | 124.09  |
| ENSMUSG000000074731 | 3_Zfp345         | 1.25077 | 0.58478  | 0.7677   | NA       | 2.60457 | 1.83561 | 0       | 0.90169 | 0.89653 | 1.26623 |
| ENSMUSG000000074733 | 14_Zfp950        | 496.046 | -0.78482 | 2.62E-06 | 2.11E-05 | 363.771 | 386.396 | 343.009 | 568.964 | 740.534 | 573.601 |
| ENSMUSG000000074735 | 2_Gm21994        | 42.9609 | -0.74427 | 0.06352  | 0.11846  | 24.3093 | 39.4656 | 32.2692 | 45.986  | 44.8265 | 70.9087 |
| ENSMUSG000000074736 | 10_Syndig1       | 5.72896 | -1.58219 | 0.10864  | 0.18427  | 3.47275 | 2.75342 | 2.39031 | 12.6236 | 8.06878 | 5.06491 |
| ENSMUSG000000074738 | 2_B930041F14Rik  | 193.736 | 0.01197  | 0.96492  | 0.97736  | 204.892 | 224.862 | 154.175 | 259.685 | 175.72  | 143.084 |
| ENSMUSG000000074739 | 2_Gm10750        | 0.1447  | 0.92709  | 0.82027  | NA       | 0.86819 | 0       | 0       | 0       | 0       | 0       |
| ENSMUSG000000074743 | 4_Thbd           | 1348.42 | -0.98501 | 6.22E-06 | 4.48E-05 | 965.426 | 1121.56 | 627.456 | 2110.85 | 1763.48 | 1501.75 |
| ENSMUSG000000074746 | 2_Pdzd8          | 1528.83 | -0.2092  | 0.10448  | 0.17863  | 1407.33 | 1385.89 | 1461.67 | 1448.11 | 1822.65 | 1647.36 |
| ENSMUSG000000074748 | 3_Atnx7l3b       | 2104.6  | -0.42858 | 7.48E-05 | 0.00039  | 1859.66 | 1838.36 | 1683.97 | 2347.99 | 2539.87 | 2357.71 |
| ENSMUSG000000074749 | 10_Kiz           | 397.396 | -0.49245 | 0.00155  | 0.00524  | 358.562 | 295.533 | 337.033 | 490.517 | 460.817 | 441.913 |
| ENSMUSG000000074754 | 4_Gm561          | 114.757 | -0.49794 | 0.03479  | 0.07183  | 100.71  | 97.2874 | 87.2462 | 122.629 | 151.514 | 129.155 |
| ENSMUSG000000074758 | 9_Gm5535         | 0.8888  | -1.02821 | 0.70868  | NA       | 1.73638 | 0       | 0       | 1.80337 | 1.79306 | 0       |
| ENSMUSG000000074766 | 10_Ism1          | 82.7525 | -0.12002 | 0.69531  | 0.78199  | 81.6097 | 86.2737 | 70.5141 | 110.006 | 86.0669 | 62.0451 |
| ENSMUSG000000074768 | 5_Bhmt           | 33.8502 | -1.38667 | 0.01275  | 0.03098  | 15.6274 | 33.041  | 7.17092 | 46.8876 | 63.6537 | 36.7206 |
| ENSMUSG000000074771 | 10_Ankef1        | 4.01122 | -1.21593 | 0.33711  | 0.45368  | 3.47275 | 3.67122 | 0       | 8.11517 | 6.27571 | 2.53245 |
| ENSMUSG000000074776 | 3_Gm10754        | 0.51697 | 0.77694  | 0.84161  | NA       | 0       | 1.83561 | 0       | 0       | 0       | 1.26623 |
| ENSMUSG000000074780 | 1_Anapc15-ps     | 0.61187 | 2.73082  | 0.49238  | NA       | 0       | 3.67122 | 0       | 0       | 0       | 0       |
| ENSMUSG000000074781 | 4_Ube2n          | 3202.52 | -0.28231 | 0.03446  | 0.07128  | 2972.68 | 2713.95 | 2983.1  | 2988.19 | 3726.88 | 3830.34 |
| ENSMUSG000000074783 | 10_AU019990      | 1.01741 | 0.60251  | 0.82128  | NA       | 1.73638 | 1.83561 | 0       | 0       | 0       | 2.53245 |
| ENSMUSG000000074785 | 4_Plxnc1         | 345.703 | -0.97336 | 4.64E-05 | 0.00026  | 246.566 | 280.849 | 172.102 | 528.388 | 499.368 | 346.946 |
| ENSMUSG000000074793 | 10_Hspa12b       | 136.155 | -0.06637 | 0.79616  | 0.85903  | 121.546 | 165.205 | 112.344 | 165.91  | 129.1   | 122.824 |
| ENSMUSG000000074794 | 9_Arrdc3         | 4786.55 | -0.06417 | 0.70349  | 0.78795  | 4686.48 | 4697.33 | 4655.13 | 3657.24 | 5335.25 | 5687.89 |
| ENSMUSG000000074796 | 10_Slc4a11       | 2274.02 | -0.77309 | 0.0011   | 0.00389  | 1778.92 | 2111.87 | 1144.96 | 3714.94 | 2396.43 | 2497    |
| ENSMUSG000000074797 | 11_Itpa          | 680.949 | -0.11712 | 0.38171  | 0.49947  | 680.66  | 632.368 | 647.774 | 774.548 | 695.708 | 654.639 |
| ENSMUSG000000074802 | 2_Gas2l3         | 349.813 | -0.14742 | 0.33991  | 0.45647  | 357.694 | 325.821 | 311.935 | 353.461 | 389.094 | 360.875 |
| ENSMUSG000000074807 | 10_Gm10762       | 15.336  | -0.12258 | 0.83261  | 0.88547  | 14.7592 | 13.7671 | 15.537  | 19.8371 | 11.6549 | 16.4609 |
| ENSMUSG000000074811 | 2_Hps6           | 145.917 | 0.97925  | 0.00103  | 0.00367  | 160.615 | 194.575 | 225.884 | 130.744 | 63.6537 | 100.032 |
| ENSMUSG000000074812 | 10_Spdye4c       | 0.14942 | -0.99647 | 0.80707  | NA       | 0       | 0       | 0       | 0       | 0.89653 | 0       |
| ENSMUSG000000074817 | 2_Papalb         | 5.22905 | -3.79532 | 0.01071  | 0.02678  | 0       | 0       | 2.39031 | 14.427  | 10.7584 | 3.79868 |
| ENSMUSG000000074818 | 10_Pdzd7         | 52.1925 | 0.40459  | 0.24326  | 0.35137  | 55.5641 | 57.8218 | 64.5383 | 44.1826 | 34.0682 | 56.9802 |
| ENSMUSG000000074824 | 3_Rslcan18       | 6.40382 | 0.21456  | 0.85408  | 0.90105  | 8.68188 | 11.9315 | 0       | 6.3118  | 8.96531 | 2.53245 |
| ENSMUSG000000074825 | 4_Itpripl1       | 152.334 | 0.69744  | 0.00091  | 0.00329  | 193.606 | 175.301 | 197.2   | 128.941 | 113.859 | 105.097 |
| ENSMUSG000000074826 | 10_Gm10767       | 17.794  | -0.56893 | 0.31091  | 0.42573  | 18.232  | 12.8493 | 11.9515 | 21.6405 | 26.8959 | 15.1947 |
| ENSMUSG000000074829 | 10_2010315B03Rik | 654.205 | -0.3292  | 0.02955  | 0.0627   | 567.795 | 569.957 | 602.358 | 630.278 | 829.291 | 725.548 |
| ENSMUSG000000074832 | 10_2410141K09Rik | 0.21104 | -0.99647 | 0.80707  | NA       | 0       | 0       | 0       | 0       | 0       | 1.26623 |
| ENSMUSG000000074847 | 2_Gm10775        | 0.29498 | -0.03469 | 0.99322  | NA       | 0.86819 | 0       | 0       | 0.90169 | 0       | 0       |
| ENSMUSG000000074852 | 3_Hpse2          | 0.14942 | -0.99647 | 0.80707  | NA       | 0       | 0       | 0       | 0       | 0.89653 | 0       |
| ENSMUSG000000074862 | 11_BC025920      | 50.7394 | -0.57528 | 0.10605  | 0.18049  | 28.6502 | 49.5615 | 44.2207 | 61.3146 | 57.378  | 63.3113 |
| ENSMUSG000000074863 | 4_Platr25        | 5.89706 | -0.31042 | 0.7345   | 0.81175  | 6.07732 | 3.67122 | 5.97577 | 6.3118  | 4.48265 | 8.86359 |
| ENSMUSG000000074865 | 10_Zfp934        | 58.569  | -0.40477 | 0.19009  | 0.2894   | 49.4867 | 51.3971 | 50.1965 | 56.8052 | 72.619  | 70.9087 |
| ENSMUSG000000074867 | 3_Zfp808         | 128.962 | -0.54248 | 0.03241  | 0.06771  | 117.205 | 106.465 | 90.8317 | 123.531 | 183.789 | 151.947 |
| ENSMUSG000000074872 | 2_Ctxn2          | 0.59941 | -2.74429 | 0.44299  | NA       | 0       | 0       | 0       | 1.80337 | 1.79306 | 0       |
| ENSMUSG000000074873 | 3_Al606181       | 104.495 | -0.12671 | 0.58865  | 0.69126  | 99.8417 | 99.123  | 100.393 | 103.694 | 104.894 | 119.025 |
| ENSMUSG000000074874 | 9_Ctla2b         | 35.2745 | 0.43911  | 0.35102  | 0.46771  | 58.1686 | 38.5478 | 25.0982 | 29.7556 | 38.5508 | 21.5259 |
| ENSMUSG000000074881 | 4_Mageb3         | 0.30325 | -0.03469 | 0.99322  | NA       | 0       | 0.91781 | 0       | 0.90169 | 0       | 0       |
| ENSMUSG000000074884 | 12_Serf2         | 8571.92 | 0.24947  | 0.04542  | 0.08948  | 9168.07 | 9180.81 | 9585.14 | 8854.55 | 6846.8  | 7796.16 |
| ENSMUSG000000074886 | 10_Grk6          | 976.442 | 0.7123   | 2.68E-05 | 0.00016  | 1159.03 | 1135.33 | 1344.55 | 885.455 | 608.744 | 725.548 |
| ENSMUSG000000074890 | 4_Lcmt2          | 178.154 | 0.17712  | 0.36131  | 0.47846  | 172.769 | 199.164 | 196.005 | 169.517 | 175.72  | 155.746 |
| ENSMUSG000000074892 | 9_B3galt5        | 916.189 | 1.09288  | 1.55E-08 | 2.53E-07 | 1121.7  | 1170.2  | 1450.92 | 446.334 | 700.19  | 607.789 |
| ENSMUSG000000074895 | 10_Elf4e1b       | 1.07855 | 1.32866  | 0.61651  | NA       | 3.47275 | 0       | 1.19515 | 1.80337 | 0       | 0       |
| ENSMUSG000000074896 | 3_Iift3          | 6604.53 | 1.99962  | 2.14E-15 | 2.17E-13 | 9776.67 | 8038.14 | 13886.5 | 1918.79 | 3693.71 | 2313.4  |
| ENSMUSG000000074899 | 4_Sptbn5         | 110.577 | 0.74229  | 0.00791  | 0.02072  | 132.833 | 161.534 | 120.711 | 103.694 | 63.6537 | 81.0385 |
| ENSMUSG000000074909 | 4_Ranbp6         | 690.493 | -0.64111 | 6.60E-06 | 4.72E-05 | 544.354 | 540.587 | 534.234 | 780.86  | 956.598 | 786.327 |
| ENSMUSG000000074916 | 5_Chs14          | 191.98  | 0.22053  | 0.32797  | 0.44429  | 184.924 | 215.684 | 218.713 | 191.157 | 136.273 | 205.129 |
| ENSMUSG000000074922 | 1_Fam122a        | 156.07  | 0.03538  | 0.88379  | 0.9213   | 163.219 | 166.123 | 144.614 | 194.764 | 124.618 | 143.084 |
| ENSMUSG000000074923 | 10_Pak6          | 1289.52 | 1.41336  | 7.13E-16 | 7.75E-14 | 1624.38 | 1737.41 | 2262.43 | 694.298 | 606.951 | 811.651 |
| ENSMUSG000000074925 | 3_Ptar1          | 106.907 | -0.62324 | 0.02077  | 0.04677  | 105.051 | 74.3423 | 72.9044 | 147.876 | 127.307 | 113.96  |
| ENSMUSG000000074934 | 3_Grem1          | 594.799 | -2.0613  | 4.13E-10 | 1.10E-08 | 193.606 | 379.054 | 115.93  | 879.143 | 1119.77 | 881.294 |
| ENSMUSG000000074939 | 3_Chrm5          | 4.27498 | -1.48515 | 0.2283   | 0.33406  | 4.34094 | 0       | 2.39031 | 6.3118  | 6.27571 | 6.33113 |
| ENSMUSG000000074968 | 11_Ano3          | 32.4042 | -0.36956 | 0.36251  | 0.47963  | 29.5184 | 30.2876 | 25.0982 | 41.4775 | 37.6543 | 30.3894 |
| ENSMUSG000000074971 | 4_Fibin          | 788.904 | -0.23637 | 0.1437   | 0.23058  | 797.865 | 749.847 | 623.87  | 935.048 | 731.569 | 895.222 |
| ENSMUSG000000074991 | 4_Gabrr3         | 1.20053 | -3.74398 | 0.18679  | NA       | 0       | 0       | 0       | 5.41011 | 1.79306 | 0       |
| ENSMUSG000000074994 | 4_Qser1          | 1387.09 | -0.36344 | 0.01715  | 0.03984  | 1251.93 | 1219.76 | 1167.67 | 1286.71 | 1813.68 | 1582.78 |
| ENSMUSG000000074997 | 3_Pin1rt1        | 0.89653 | -3.31885 | 0.37986  | NA       | 0       | 0       | 0       | 0       | 5.37918 | 0       |
| ENSMUSG000000075000 | 11_Nrbf2         | 371.116 | 0.01872  | 0.91107  | 0.94025  | 375.926 | 337.752 | 406.352 | 334.525 | 356.819 | 415.322 |
| ENSMUSG000000075010 | 4_AW112010       | 136.812 | 2.07041  | 3.60E-09 | 7.06E-08 | 335.989 | 146.849 | 180.468 | 49.5927 | 63.6537 | 44.3179 |
| ENSMUSG000000075012 | 4_Fjx1           | 638.612 | 0.47077  | 0.00255  | 0.008    | 680.66  | 743.423 | 801.948 | 597.817 | 460.817 | 547.01  |
| ENSMUSG000000075014 | 1_Gm10800        | 31.9141 | -1.11147 | 0.00668  | 0.01799  | 20.8365 | 18.3561 | 21.5128 | 41.4775 | 47.5161 | 41.7855 |
| ENSMUSG000000075015 | 3_Gm10801        | 6.767   | -3.04738 | 0.01624  | 0.03809  | 0       | 0       | 4.78062 | 10.8202 | 16.1376 | 8.86359 |
| ENSMUSG000000075020 | 5_E530001K10Rik  | 1.50206 | -2.95603 | 0.21056  | NA       | 0       | 0.91781 | 0       | 4.50843 | 3.58612 | 0       |
| ENSMUSG000000075023 | 11_Accs1         | 1.97273 | -1.02623 | 0.51649  | NA       | 0.86819 | 1.83561 | 1.19515 | 4.50843 | 0.89653 | 2.53245 |
| ENSMUSG000000075024 | 2_Gm10803        | 0       | NA       | NA       | NA       | 0       | 0       | 0       | 0       | 0       | 0       |
| ENSMUSG000000075025 | 10_Gm10804       | 1.4808  | 1.13172  | 0.58728  | NA       | 2.60457 | 0       | 3.58546 | 0.90169 | 1.79306 | 0       |
| ENSMUSG000000075028 | 11_Prdr11        | 884.76  | 0.20496  | 0.19217  | 0.29203  | 885.552 | 968.285 | 989.588 | 973.82  | 710.052 | 781.262 |
| ENSMUSG000000075031 | 3_Hist1h2bb      | 1.70545 | 0.31246  | 0.86017  | NA       | 0.86819 | 3.67122 | 1.19515 | 2.70506 | 1.79306 | 0       |
| ENSMUSG000000075033 | 3_Nxpe3          | 58.9619 | -0.90629 | 0.0061   | 0.01664  | 40.8049 | 43.1369 | 39.4401 | 93.7753 | 77.1016 | 59.5127 |

|                    |                 |         |          |          |          |         |         |         |         |         |         |
|--------------------|-----------------|---------|----------|----------|----------|---------|---------|---------|---------|---------|---------|
| ENSMUSG00000075040 | 9_Zfp408        | 421.04  | 0.68176  | 1.43E-05 | 9.25E-05 | 513.968 | 497.451 | 543.795 | 283.129 | 330.82  | 357.076 |
| ENSMUSG00000075044 | 11_Slc22a29     | 4.76963 | -0.4132  | 0.70708  | 0.79046  | 3.47275 | 2.75342 | 5.97577 | 1.80337 | 4.48265 | 10.1298 |
| ENSMUSG00000075045 | 4_Gm4981        | 0.15028 | -0.99647 | 0.80707  | NA       | 0       | 0       | 0       | 0.90169 | 0       | 0       |
| ENSMUSG00000075046 | 7_Duxf3         | 0.55135 | 2.55533  | 0.49555  | NA       | 0       | 0.91781 | 2.39031 | 0       | 0       | 0       |
| ENSMUSG00000075053 | 2_Vdac3-ps1     | 43.1442 | -0.46041 | 0.33089  | 0.4475   | 36.4639 | 44.0547 | 28.6837 | 43.2809 | 79.7912 | 26.5908 |
| ENSMUSG00000075054 | 4_Yae1d1        | 613.344 | -0.33094 | 0.01211  | 0.02969  | 569.532 | 528.656 | 531.844 | 659.132 | 732.465 | 658.438 |
| ENSMUSG00000075081 | 4_Olfr1247      | 0.15028 | -0.99647 | 0.80707  | NA       | 0       | 0       | 0       | 0.90169 | 0       | 0       |
| ENSMUSG00000075122 | 4_Cd80          | 32.3996 | 0.11071  | 0.81312  | 0.87085  | 44.2776 | 18.3561 | 38.2449 | 27.9522 | 31.3786 | 34.1881 |
| ENSMUSG00000075184 | 2_F930017D23Rik | 0.64156 | 2.79342  | 0.35281  | NA       | 1.73638 | 0.91781 | 1.19515 | 0       | 0       | 0       |
| ENSMUSG00000075212 | 3_Olfr154       | 0       | NA       | NA       | NA       | 0       | 0       | 0       | 0       | 0       | 0       |
| ENSMUSG00000075214 | 1_Olfr1002      | 0.55135 | 2.55533  | 0.49555  | NA       | 0       | 0.91781 | 2.39031 | 0       | 0       | 0       |
| ENSMUSG00000075215 | 1_Olfr1000      | 0       | NA       | NA       | NA       | 0       | 0       | 0       | 0       | 0       | 0       |
| ENSMUSG00000075217 | 1_4833423E24Rik | 826.335 | -0.14934 | 0.45154  | 0.56622  | 856.034 | 658.984 | 835.413 | 647.41  | 997.839 | 962.332 |
| ENSMUSG00000075224 | 8_Lrrc55        | 14.4276 | -1.11731 | 0.0671   | 0.12407  | 11.2864 | 6.42464 | 9.56123 | 19.8371 | 17.9306 | 21.5259 |
| ENSMUSG00000075225 | 11_Ccdc162      | 92.5983 | 0.11909  | 0.63296  | 0.72947  | 102.446 | 90.8628 | 95.6123 | 81.1517 | 90.5496 | 94.967  |
| ENSMUSG00000075227 | 6_Znhit2        | 169.546 | 1.52223  | 2.74E-05 | 0.00016  | 198.815 | 227.616 | 328.667 | 136.155 | 47.5161 | 78.5061 |
| ENSMUSG00000075229 | 10_Ccdc58       | 287.384 | -0.43794 | 0.02543  | 0.05544  | 265.666 | 222.109 | 243.811 | 266.899 | 358.612 | 367.206 |
| ENSMUSG00000075232 | 4_Amd1          | 4278.63 | -0.44217 | 0.00026  | 0.00112  | 3800.93 | 3414.24 | 3669.12 | 4436.29 | 5450.91 | 4900.3  |
| ENSMUSG00000075249 | 12_Fsfp2        | 0.50988 | -2.49048 | 0.5167   | NA       | 0       | 0       | 0       | 0       | 1.79306 | 1.26623 |
| ENSMUSG00000075254 | 11_Heg1         | 1405.86 | -0.28425 | 0.023    | 0.05103  | 1310.1  | 1161.94 | 1332.6  | 1679.84 | 1473    | 1477.69 |
| ENSMUSG00000075256 | 9_Cerkl         | 58.0408 | -1.39756 | 0.00603  | 0.0165   | 29.5184 | 36.7122 | 29.8789 | 145.171 | 75.3086 | 31.6557 |
| ENSMUSG00000075266 | 4_Cenpw         | 44.5179 | 0.55132  | 0.13943  | 0.22492  | 47.7504 | 43.1369 | 68.1238 | 31.559  | 38.5508 | 37.9868 |
| ENSMUSG00000075267 | 9_Dfnb59        | 1.57727 | -1.86522 | 0.32872  | NA       | 0.86819 | 0       | 1.19515 | 2.70506 | 0.89653 | 3.79868 |
| ENSMUSG00000075269 | 4_Bex6          | 0.98276 | 2.19938  | 0.41443  | NA       | 2.60457 | 0       | 2.39031 | 0.90169 | 0       | 0       |
| ENSMUSG00000075270 | 11_Pde11a       | 2.66781 | -2.2837  | 0.22389  | 0.32904  | 1.73638 | 0.91781 | 0       | 10.8202 | 0       | 2.53245 |
| ENSMUSG00000075271 | 4_Ttc30a1       | 156.543 | -0.04864 | 0.82449  | 0.87975  | 165.824 | 147.767 | 147.004 | 137.056 | 154.203 | 187.402 |
| ENSMUSG00000075272 | 4_Ttc30a2       | 2.57466 | 0.19047  | 0.92708  | 0.95193  | 0       | 8.26025 | 0       | 2.70506 | 4.48265 | 0       |
| ENSMUSG00000075273 | 4_Ttc30b        | 238.309 | -0.12095 | 0.54207  | 0.64905  | 211.838 | 263.41  | 209.152 | 214.601 | 272.545 | 258.31  |
| ENSMUSG00000075277 | 4_Haglr         | 0.49975 | -0.80545 | 0.83771  | NA       | 0       | 0       | 1.19515 | 1.80337 | 0       | 0       |
| ENSMUSG00000075284 | 10_Wipf1        | 370.545 | -0.0821  | 0.61597  | 0.71492  | 392.421 | 346.931 | 340.619 | 427.399 | 355.026 | 360.875 |
| ENSMUSG00000075286 | 3_Gm1968        | 0       | NA       | NA       | NA       | 0       | 0       | 0       | 0       | 0       | 0       |
| ENSMUSG00000075289 | 4_Carns1        | 58.9657 | -0.31935 | 0.35406  | 0.47087  | 52.9595 | 58.7396 | 45.4159 | 82.0534 | 47.5161 | 67.11   |
| ENSMUSG00000075296 | 4_Aldh3b2       | 5798.74 | 1.29959  | 3.93E-15 | 3.73E-13 | 7639.19 | 7443.4  | 9658.04 | 3602.23 | 2706.63 | 3742.97 |
| ENSMUSG00000075297 | 10_H60b         | 9.87998 | -1.13659 | 0.21465  | 0.3185   | 13.0228 | 1.83561 | 3.58546 | 11.7219 | 21.5167 | 7.59736 |
| ENSMUSG00000075302 | 10_Erich2       | 10.0698 | 0.26513  | 0.70729  | 0.79059  | 11.2864 | 11.0137 | 10.7564 | 7.21348 | 12.5514 | 7.59736 |
| ENSMUSG00000075304 | 2_Sp5           | 2.6645  | 0.71173  | 0.67857  | 0.76749  | 4.34094 | 5.50683 | 0       | 3.60674 | 0       | 2.53245 |
| ENSMUSG00000075307 | 3_Klhl41        | 234.616 | -1.75294 | 1.82E-11 | 7.24E-10 | 94.6325 | 122.068 | 105.174 | 434.612 | 244.753 | 406.459 |
| ENSMUSG00000075316 | 11_Scn9a        | 1.50921 | -1.05705 | 0.57048  | NA       | 1.73638 | 0       | 1.19515 | 0.90169 | 2.68959 | 2.53245 |
| ENSMUSG00000075318 | 12_Scn2a1       | 67.0241 | -1.46285 | 4.51E-05 | 0.00025  | 32.123  | 44.9725 | 29.8789 | 132.548 | 81.5843 | 81.0385 |
| ENSMUSG00000075324 | 13_Fign         | 82.0134 | -1.20866 | 0.00024  | 0.00106  | 52.9595 | 55.0683 | 40.6352 | 140.663 | 125.514 | 77.2398 |
| ENSMUSG00000075325 | 3_Gm13582       | 1.71396 | -3.16158 | 0.12233  | NA       | 0       | 0.91781 | 0       | 5.41011 | 2.68959 | 1.26623 |
| ENSMUSG00000075327 | 9_Zbtb2         | 248.153 | 0.22236  | 0.22448  | 0.32969  | 270.875 | 237.712 | 294.008 | 251.57  | 216.96  | 217.791 |
| ENSMUSG00000075330 | 3_A930003A15Rik | 15.9804 | -1.75081 | 0.02404  | 0.05294  | 11.2864 | 9.17806 | 1.19515 | 39.6742 | 20.6202 | 13.9285 |
| ENSMUSG00000075334 | 2_Rprm          | 22.7036 | -0.8504  | 0.16151  | 0.25405  | 13.891  | 28.452  | 5.97577 | 33.3624 | 30.482  | 24.0583 |
| ENSMUSG00000075370 | 10_Igll1        | 0.42208 | -2.1835  | 0.58658  | NA       | 0       | 0       | 0       | 0       | 0       | 2.53245 |
| ENSMUSG00000075376 | 10_Rc3h2        | 1274.34 | -0.38288 | 0.00652  | 0.0176   | 1179.87 | 1032.53 | 1106.71 | 1301.13 | 1653.2  | 1372.59 |
| ENSMUSG00000075394 | 4_Hoxc4         | 2.63882 | 2.91223  | 0.16396  | 0.25697  | 11.2864 | 2.75342 | 0       | 0       | 1.79306 | 0       |
| ENSMUSG00000075402 | 1_Krt76         | 6.858   | 1.28798  | 0.16206  | 0.25463  | 6.94551 | 9.17806 | 13.1467 | 1.80337 | 6.27571 | 3.79868 |
| ENSMUSG00000075405 | 3_9430097D07Rik | 0.45353 | -0.80448 | 0.84252  | NA       | 0       | 0.91781 | 0       | 1.80337 | 0       | 0       |
| ENSMUSG00000075408 | 5_6030408B16Rik | 2.81974 | 1.91109  | 0.25297  | 0.36223  | 3.47275 | 3.67122 | 5.97577 | 0       | 0       | 3.79868 |
| ENSMUSG00000075410 | 12_Gm11744      | 83.9056 | -0.38564 | 0.30763  | 0.42265  | 79.8733 | 83.5203 | 54.9771 | 146.073 | 74.412  | 64.5776 |
| ENSMUSG00000075415 | 13_Fnbp1        | 2341.4  | 0.12289  | 0.25075  | 0.35982  | 2395.33 | 2548.75 | 2378.36 | 2347.09 | 2099.67 | 2279.21 |
| ENSMUSG00000075419 | 4_Dolk          | 256.56  | -0.02804 | 0.8856   | 0.92257  | 251.775 | 256.068 | 254.568 | 309.278 | 216.96  | 250.713 |
| ENSMUSG00000075420 | 6_Smim6         | 5.95683 | 1.05198  | 0.25659  | 0.36631  | 6.94551 | 10.0959 | 7.17092 | 5.41011 | 3.58612 | 2.53245 |
| ENSMUSG00000075425 | 10_Gm13547      | 2.31171 | 0.24318  | 0.86834  | NA       | 4.34094 | 1.83561 | 1.19515 | 1.80337 | 0.89653 | 3.79868 |
| ENSMUSG00000075437 | 4_Gm11681       | 1.16875 | 1.50267  | 0.61828  | NA       | 5.20913 | 0       | 0       | 1.80337 | 0       | 0       |
| ENSMUSG00000075467 | 4_Dnlz          | 615.556 | 0.38694  | 0.03211  | 0.06723  | 684.132 | 645.217 | 763.703 | 628.475 | 422.266 | 549.542 |
| ENSMUSG00000075470 | 1_Alg10b        | 898.52  | -0.28243 | 0.02162  | 0.04841  | 812.624 | 773.71  | 847.364 | 949.475 | 1057.01 | 950.936 |
| ENSMUSG00000075478 | 2_Slitrk1       | 2.60197 | -3.78317 | 0.0813   | 0.1452   | 0       | 0       | 1.19515 | 12.6236 | 1.79306 | 0       |
| ENSMUSG00000075480 | 1_Gm10840       | 0.29884 | -1.76064 | 0.66373  | NA       | 0       | 0       | 0       | 0       | 1.79306 | 0       |
| ENSMUSG00000075486 | 9_Commnd6       | 503.888 | -0.387   | 0.01003  | 0.02532  | 434.962 | 456.149 | 419.499 | 547.323 | 643.709 | 521.685 |
| ENSMUSG00000075502 | 1_Kbtbd6        | 25.3436 | 0.65928  | 0.17633  | 0.2725   | 42.5412 | 27.5342 | 22.7079 | 17.132  | 20.6202 | 21.5259 |
| ENSMUSG00000075510 | 3_Fam187a       | 0.29498 | -0.03469 | 0.99322  | NA       | 0.86819 | 0       | 0       | 0.90169 | 0       | 0       |
| ENSMUSG00000075511 | 8_1700001L05Rik | 208.832 | 0.16388  | 0.40291  | 0.52042  | 214.443 | 222.109 | 224.689 | 165.91  | 201.719 | 224.122 |
| ENSMUSG00000075517 | 3_Cyp2d37-ps    | 0.21104 | -0.99647 | 0.80707  | NA       | 0       | 0       | 0       | 0       | 0       | 1.26623 |
| ENSMUSG00000075520 | 5_Malrd1        | 1.10929 | -3.62493 | 0.14532  | NA       | 0       | 0       | 0       | 1.80337 | 3.58612 | 1.26623 |
| ENSMUSG00000075524 | 2_4930407110Rik | 0.15297 | 0.92709  | 0.82027  | NA       | 0       | 0.91781 | 0       | 0       | 0       | 0       |
| ENSMUSG00000075528 | 13_Aarsd1       | 457.267 | 0.78108  | 9.92E-06 | 6.73E-05 | 513.968 | 551.601 | 670.481 | 385.02  | 317.372 | 305.161 |
| ENSMUSG00000075551 | 4_Cyp3a41a      | 0.1447  | 0.92709  | 0.82027  | NA       | 0.86819 | 0       | 0       | 0       | 0       | 0       |
| ENSMUSG00000075553 | 1_Gm5464        | 3.63708 | -1.83363 | 0.14776  | 0.23602  | 2.60457 | 0.91781 | 1.19515 | 2.70506 | 8.06878 | 6.33113 |
| ENSMUSG00000075569 | 9_Rsph10b       | 49.7661 | -0.99348 | 0.02367  | 0.05227  | 35.5957 | 41.3013 | 22.7079 | 100.087 | 45.7231 | 53.1815 |
| ENSMUSG00000075570 | 2_Krt26         | 0.15297 | 0.92709  | 0.82027  | NA       | 0       | 0.91781 | 0       | 0       | 0       | 0       |
| ENSMUSG00000075574 | 2_Defb48        | 0       | NA       | NA       | NA       | 0       | 0       | 0       | 0       | 0       | 0       |
| ENSMUSG00000075588 | 6_Hoxb2         | 0.1447  | 0.92709  | 0.82027  | NA       | 0.86819 | 0       | 0       | 0       | 0       | 0       |
| ENSMUSG00000075590 | 2_Nrbp2         | 1389.32 | 0.02453  | 0.84773  | 0.89649  | 1343.09 | 1543.75 | 1317.06 | 1477.86 | 1375.28 | 1278.89 |
| ENSMUSG00000075591 | 2_Gm10874       | 6.59373 | 0.08368  | 0.92336  | 0.94921  | 6.94551 | 7.34244 | 5.97577 | 8.11517 | 3.58612 | 7.59736 |
| ENSMUSG00000075592 | 9_Nynrin        | 664.256 | 0.21745  | 0.33552  | 0.45218  | 592.973 | 874.669 | 675.262 | 796.188 | 471.575 | 574.867 |
| ENSMUSG00000075593 | 10_Gal3st4      | 355.204 | -0.39421 | 0.02903  | 0.0618   | 283.029 | 315.725 | 321.496 | 338.132 | 404.335 | 468.504 |
| ENSMUSG00000075595 | 9_Zfp652        | 1854.14 | -0.14122 | 0.14858  | 0.23711  | 1757.21 | 1786.97 | 1746.12 | 1942.23 | 1956.23 | 1936.06 |

|                    |                  |         |          |          |          |         |         |         |         |         |         |
|--------------------|------------------|---------|----------|----------|----------|---------|---------|---------|---------|---------|---------|
| ENSMUSG00000075596 | 2_B130006D01Rik  | 0.15028 | -0.99647 | 0.80707  | NA       | 0       | 0       | 0       | 0.90169 | 0       | 0       |
| ENSMUSG00000075598 | 5_Smok3c         | 0.19919 | 0.92709  | 0.82027  | NA       | 0       | 0       | 1.19515 | 0       | 0       | 0       |
| ENSMUSG00000075600 | 2_Zc3h3          | 340.967 | 1.02556  | 1.72E-06 | 1.47E-05 | 391.553 | 477.259 | 503.16  | 270.506 | 170.341 | 232.986 |
| ENSMUSG00000075602 | 10_Ly6a          | 15775.1 | 1.95333  | 1.06E-21 | 2.38E-19 | 24345.7 | 18162.5 | 32718.5 | 5625.62 | 7405.34 | 6393.18 |
| ENSMUSG00000075604 | 5_Cyp11b1        | 0.30594 | 1.73752  | 0.66765  | NA       | 0       | 1.83561 | 0       | 0       | 0       | 0       |
| ENSMUSG00000075605 | 3_2300005B03Rik  | 36.1967 | 0.74108  | 0.07695  | 0.13887  | 34.7275 | 49.5615 | 51.3916 | 28.8539 | 19.7237 | 32.9219 |
| ENSMUSG00000075610 | 9_Tmem92         | 1.03725 | 2.27908  | 0.39242  | NA       | 1.73638 | 0       | 3.58546 | 0.90169 | 0       | 0       |
| ENSMUSG00000075700 | 9_Selt           | 3744.57 | -0.33358 | 0.00504  | 0.01419  | 3347.73 | 3118.7  | 3475.51 | 3852    | 4627.89 | 4045.6  |
| ENSMUSG00000075701 | 9_Vimp           | 1572.81 | -0.23771 | 0.04462  | 0.08817  | 1540.17 | 1383.13 | 1405.5  | 1591.47 | 1688.17 | 1828.43 |
| ENSMUSG00000075702 | 9_Selm           | 362.859 | -0.07003 | 0.79281  | 0.85645  | 349.012 | 439.629 | 273.69  | 516.666 | 311.993 | 286.167 |
| ENSMUSG00000075703 | 15_Ept1          | 920.459 | -0.15835 | 0.2825   | 0.39558  | 941.116 | 762.696 | 905.927 | 861.11  | 1036.39 | 1015.51 |
| ENSMUSG00000075704 | 16_Txnrd2        | 169.527 | 0.28042  | 0.15746  | 0.24899  | 199.683 | 179.89  | 178.078 | 165.91  | 141.652 | 151.947 |
| ENSMUSG00000075705 | 12_Msrbl         | 639.931 | 0.15463  | 0.35218  | 0.46885  | 720.596 | 683.765 | 617.895 | 715.037 | 517.298 | 584.997 |
| ENSMUSG00000075706 | 10_Gpx4          | 4354.04 | -0.05568 | 0.76204  | 0.83279  | 4174.25 | 4435.75 | 4200.97 | 5848.33 | 3606.74 | 3858.19 |
| ENSMUSG00000075707 | 5_Dio3           | 73.1382 | -0.72785 | 0.07267  | 0.13259  | 39.9367 | 80.7669 | 44.2207 | 119.924 | 56.4814 | 97.4995 |
| ENSMUSG00000076430 | 1_Hus1b          | 0.49417 | 0.91318  | 0.78785  | NA       | 0.86819 | 0       | 1.19515 | 0.90169 | 0       | 0       |
| ENSMUSG00000076431 | 4_Sox4           | 175.28  | 0.11015  | 0.61336  | 0.71269  | 170.165 | 189.986 | 186.444 | 204.683 | 149.721 | 150.681 |
| ENSMUSG00000076432 | 12_Ywhaq         | 6262.01 | -0.22584 | 0.08468  | 0.14993  | 5967.93 | 5560.07 | 5790.52 | 5787.92 | 7654.58 | 6811.03 |
| ENSMUSG00000076433 | 4_BC100451       | 12.2639 | 0.26268  | 0.70171  | 0.78679  | 13.0228 | 16.5205 | 10.7564 | 9.91854 | 17.0341 | 6.33113 |
| ENSMUSG00000076434 | 9_Wfdc3          | 9.01852 | -0.41998 | 0.62626  | 0.72346  | 11.2864 | 3.67122 | 8.36608 | 16.2303 | 10.7584 | 3.79868 |
| ENSMUSG00000076435 | 3_Acsf2          | 589.974 | 0.08331  | 0.54057  | 0.64766  | 567.795 | 648.889 | 604.748 | 609.539 | 550.47  | 558.406 |
| ENSMUSG00000076436 | 1_Oxct2a         | 0       | NA       | NA       | NA       | 0       | 0       | 0       | 0       | 0       | 0       |
| ENSMUSG00000076437 | 10_2700094K13Rik | 332.511 | 0.60659  | 0.00034  | 0.00143  | 382.003 | 375.382 | 448.183 | 253.374 | 290.476 | 245.648 |
| ENSMUSG00000076438 | 5_Oxct2b         | 0.57879 | 2.65671  | 0.50459  | NA       | 3.47275 | 0       | 0       | 0       | 0       | 0       |
| ENSMUSG00000076439 | 12_Mog           | 0.30056 | -1.76625 | 0.6627   | NA       | 0       | 0       | 0       | 1.80337 | 0       | 0       |
| ENSMUSG00000076441 | 9_Ass1           | 1361.74 | 0.15367  | 0.42754  | 0.5429   | 1429.04 | 1468.49 | 1403.11 | 1314.66 | 930.599 | 1624.57 |
| ENSMUSG00000077450 | 12_Rab11b        | 3821.85 | 0.4519   | 7.55E-05 | 0.00039  | 4112.61 | 4386.19 | 4748.35 | 3383.12 | 2984.55 | 3316.25 |
| ENSMUSG00000078091 | 1_Gm10912        | 1.50174 | -1.21035 | 0.57079  | NA       | 0.86819 | 1.83561 | 0       | 5.41011 | 0.89653 | 0       |
| ENSMUSG00000078117 | 2_Gm16485        | 1.61616 | 0.31391  | 0.86533  | NA       | 0.86819 | 0.91781 | 3.58546 | 0       | 1.79306 | 2.53245 |
| ENSMUSG00000078126 | 3_Rpl23a-ps3     | 1057.7  | -2.11371 | 0.00524  | 0.01464  | 347.275 | 478.177 | 365.717 | 812.419 | 3624.67 | 717.951 |
| ENSMUSG00000078127 | 2_Fam170b        | 0.15028 | -0.99647 | 0.80707  | NA       | 0       | 0       | 0       | 0.90169 | 0       | 0       |
| ENSMUSG00000078129 | 1_Actl10         | 0.15028 | -0.99647 | 0.80707  | NA       | 0       | 0       | 0       | 0.90169 | 0       | 0       |
| ENSMUSG00000078134 | 1_Gm12355        | 16.1923 | -0.37332 | 0.59187  | 0.69396  | 14.7592 | 8.26025 | 19.1225 | 8.11517 | 15.241  | 31.6557 |
| ENSMUSG00000078137 | 1_Ankrd63        | 0.89739 | -3.32491 | 0.29325  | NA       | 0       | 0       | 0       | 0.90169 | 4.48265 | 0       |
| ENSMUSG00000078139 | 3_AK157302       | 329.943 | -0.74071 | 3.59E-05 | 0.0002   | 226.597 | 290.944 | 223.494 | 412.07  | 442.886 | 383.667 |
| ENSMUSG00000078144 | 3_Capns2         | 549.178 | 0.47689  | 0.00734  | 0.01946  | 687.605 | 587.396 | 640.603 | 461.663 | 372.06  | 545.744 |
| ENSMUSG00000078153 | 3_Psme2b         | 336.664 | 0.83615  | 3.13E-06 | 2.47E-05 | 457.535 | 357.944 | 479.257 | 231.733 | 240.27  | 253.245 |
| ENSMUSG00000078154 | 3_Gm12184        | 63.1872 | -0.03341 | 0.9169   | 0.94491  | 60.7732 | 56.9039 | 69.3189 | 50.4944 | 61.8606 | 79.7723 |
| ENSMUSG00000078157 | 1_4931440F15Rik  | 1.15347 | -1.28042 | 0.54026  | NA       | 0.86819 | 0       | 1.19515 | 0.90169 | 2.68959 | 1.26623 |
| ENSMUSG00000078160 | 2_Gm16503        | 28.1986 | -1.84045 | 0.00016  | 0.00077  | 10.4183 | 14.6849 | 11.9515 | 39.6742 | 58.2745 | 34.1881 |
| ENSMUSG00000078161 | 8_Erich3         | 9.67542 | -0.23899 | 0.76676  | 0.83619  | 6.94551 | 9.17806 | 10.7564 | 18.9354 | 7.17224 | 5.06491 |
| ENSMUSG00000078173 | 3_Lenep          | 159.193 | -2.49249 | 0.38445  | 0.50193  | 0       | 144.095 | 0       | 650.115 | 45.7231 | 115.227 |
| ENSMUSG00000078179 | 1_Rnf148         | 0.19919 | 0.92709  | 0.82027  | NA       | 0       | 0       | 1.19515 | 0       | 0       | 0       |
| ENSMUSG00000078184 | 1_Rbm8a2         | 12.2676 | -0.54807 | 0.51375  | 0.62399  | 9.55007 | 15.6027 | 4.78062 | 9.91854 | 28.689  | 5.06491 |
| ENSMUSG00000078185 | 2_Chml           | 171.004 | -0.78536 | 0.00037  | 0.00155  | 129.36  | 142.26  | 103.978 | 188.452 | 227.719 | 234.252 |
| ENSMUSG00000078193 | 2_Gm2000         | 3894.33 | 0.1071   | 0.34973  | 0.46647  | 4047.49 | 3823.58 | 4246.38 | 4094.55 | 3464.19 | 3689.79 |
| ENSMUSG00000078201 | 5_Tmem203        | 78.6664 | 0.85323  | 0.04763  | 0.09308  | 89.4234 | 118.397 | 96.8075 | 96.4803 | 43.0335 | 27.857  |
| ENSMUSG00000078202 | 3_Nrarp          | 1083.57 | 0.20008  | 0.29618  | 0.41057  | 1106.94 | 909.545 | 1460.48 | 1118.09 | 885.772 | 1020.58 |
| ENSMUSG00000078234 | 6_Klhdc7a        | 538.959 | 0.06236  | 0.7679   | 0.83687  | 457.535 | 631.45  | 564.113 | 672.657 | 478.747 | 429.251 |
| ENSMUSG00000078235 | 3_Fam43b         | 2.94033 | -0.09823 | 0.94277  | 0.96274  | 1.73638 | 5.50683 | 1.19515 | 4.50843 | 0.89653 | 3.79868 |
| ENSMUSG00000078240 | 2_Gm3550         | 11.3495 | -1.25546 | 0.19538  | 0.29552  | 4.34094 | 11.0137 | 4.78062 | 3.60674 | 36.7578 | 7.59736 |
| ENSMUSG00000078249 | 5_Hmga1-rs1      | 2511.98 | 1.48092  | 4.22E-10 | 1.12E-08 | 3204.48 | 3321.54 | 4570.27 | 1674.43 | 852.601 | 1448.56 |
| ENSMUSG00000078252 | 1_Krtap17-1      | 0.19919 | 0.92709  | 0.82027  | NA       | 0       | 0       | 1.19515 | 0       | 0       | 0       |
| ENSMUSG00000078302 | 4_Foxd1          | 13.7077 | 0.2467   | 0.71131  | 0.79361  | 8.68188 | 18.3561 | 17.9273 | 17.132  | 12.5514 | 7.59736 |
| ENSMUSG00000078307 | 2_Al593442       | 15.9878 | -1.73262 | 0.00583  | 0.01601  | 8.68188 | 6.42464 | 7.17092 | 31.559  | 26.8959 | 15.1947 |
| ENSMUSG00000078308 | 1_Gm7293         | 23.2517 | -2.23995 | 0.02599  | 0.05645  | 6.94551 | 13.7671 | 3.58546 | 5.41011 | 102.204 | 7.59736 |
| ENSMUSG00000078314 | 2_Gm14762        | 1.32473 | -2.73062 | 0.20333  | NA       | 0       | 0.91781 | 0       | 2.70506 | 1.79306 | 2.53245 |
| ENSMUSG00000078317 | 6_F8a            | 362.595 | 0.47569  | 0.00361  | 0.01074  | 382.003 | 408.423 | 475.671 | 312.885 | 285.097 | 311.492 |
| ENSMUSG00000078348 | 4_Sf3b5          | 363.813 | 1.10215  | 0.00017  | 0.0008   | 468.822 | 456.149 | 564.113 | 320.098 | 125.514 | 248.18  |
| ENSMUSG00000078349 | 2_AW011738       | 546.139 | 1.01106  | 4.61E-09 | 8.76E-08 | 711.046 | 614.012 | 865.292 | 366.986 | 337.095 | 382.401 |
| ENSMUSG00000078350 | 11_Smim1         | 275.767 | -0.23637 | 0.49716  | 0.60818  | 251.775 | 345.095 | 162.541 | 458.056 | 192.754 | 244.382 |
| ENSMUSG00000078354 | 1_lfna2          | 0       | NA       | NA       | NA       | 0       | 0       | 0       | 0       | 0       | 0       |
| ENSMUSG00000078365 | 5_Mos            | 1.02857 | -1.19061 | 0.65479  | NA       | 0       | 1.83561 | 0       | 1.80337 | 0       | 2.53245 |
| ENSMUSG00000078380 | 1_Gm6096         | 3.40944 | -0.38938 | 0.74245  | 0.81787  | 2.60457 | 2.75342 | 3.58546 | 2.70506 | 6.27571 | 2.53245 |
| ENSMUSG00000078384 | 2_Gm10935        | 0.30325 | -0.03469 | 0.99322  | NA       | 0       | 0.91781 | 0       | 0.90169 | 0       | 0       |
| ENSMUSG00000078427 | 2_Sarp           | 1058.54 | -0.69392 | 1.26E-05 | 8.32E-05 | 815.229 | 814.094 | 795.973 | 1045.05 | 1427.28 | 1453.63 |
| ENSMUSG00000078429 | 8_Ctdsp2         | 7567.15 | 0.42328  | 0.00167  | 0.00558  | 8016.85 | 9094.54 | 8896.73 | 7310.87 | 5538.77 | 6545.13 |
| ENSMUSG00000078435 | 5_AU041133       | 133.288 | -0.82691 | 0.00233  | 0.00742  | 104.183 | 89.0271 | 95.6123 | 154.188 | 225.029 | 131.688 |
| ENSMUSG00000078439 | 9_Smim24         | 150.936 | 0.15913  | 0.50281  | 0.61377  | 169.297 | 130.328 | 178.078 | 155.09  | 118.342 | 154.48  |
| ENSMUSG00000078440 | 9_Dohh           | 394.624 | 1.2351   | 1.38E-06 | 1.22E-05 | 496.604 | 516.725 | 648.969 | 321.902 | 156.893 | 226.655 |
| ENSMUSG00000078441 | 10_Scampa4       | 935.291 | 0.86706  | 1.81E-05 | 0.00011  | 1074.82 | 1180.3  | 1369.65 | 817.829 | 484.127 | 685.029 |
| ENSMUSG00000078442 | 2_Ccdc105        | 0.64832 | -1.37909 | 0.65362  | NA       | 0       | 0       | 1.19515 | 0.90169 | 1.79306 | 0       |
| ENSMUSG00000078444 | 3_Gm10941        | 6.04267 | -0.8449  | 0.38593  | 0.50321  | 5.20913 | 6.42464 | 1.19515 | 10.8202 | 6.27571 | 6.33113 |
| ENSMUSG00000078451 | 4_Ppil6          | 39.7254 | -0.56892 | 0.13587  | 0.22013  | 39.9367 | 28.452  | 27.4885 | 48.691  | 51.9988 | 41.7855 |
| ENSMUSG00000078452 | 10_Raet1d        | 16.0629 | -1.76911 | 0.02397  | 0.05281  | 10.4183 | 11.0137 | 0       | 27.0506 | 25.1029 | 22.7921 |
| ENSMUSG00000078453 | 2_Abracl         | 873.251 | -0.35486 | 0.03941  | 0.07953  | 829.988 | 678.258 | 791.192 | 809.714 | 1165.49 | 964.865 |
| ENSMUSG00000078484 | 3_Klhl17         | 466.748 | 0.58777  | 0.00397  | 0.01165  | 510.495 | 619.519 | 552.161 | 476.992 | 299.441 | 341.881 |
| ENSMUSG00000078485 | 2_Plekhn1        | 3566.07 | 1.15789  | 1.35E-12 | 6.97E-11 | 4495.48 | 4729.45 | 5547.91 | 2159.54 | 1816.37 | 2647.68 |
| ENSMUSG00000078486 | 3_Perm1          | 973.68  | 0.75889  | 2.09E-08 | 3.22E-07 | 1155.56 | 1220.68 | 1294.35 | 656.427 | 704.673 | 810.385 |

|                    |                  |         |          |          |          |         |         |         |         |         |         |
|--------------------|------------------|---------|----------|----------|----------|---------|---------|---------|---------|---------|---------|
| ENSMUSG00000078487 | 8_Ankrd65        | 24.027  | 0.36195  | 0.4624   | 0.57605  | 26.0457 | 32.1232 | 22.7079 | 26.1489 | 14.3445 | 22.7921 |
| ENSMUSG00000078490 | 9_Cfap74         | 57.4723 | -0.80324 | 0.0439   | 0.08698  | 41.673  | 59.6574 | 23.9031 | 88.3652 | 71.7224 | 59.5127 |
| ENSMUSG00000078495 | 10_Gm13157       | 400.343 | -0.70532 | 9.92E-05 | 0.00049  | 352.484 | 270.753 | 289.227 | 429.202 | 551.366 | 509.023 |
| ENSMUSG00000078496 | 9_Gm13152        | 79.4565 | -1.32904 | 7.41E-05 | 0.00038  | 48.6186 | 57.8218 | 28.6837 | 110.006 | 135.376 | 96.2332 |
| ENSMUSG00000078497 | 9_Gm13145        | 3.22116 | -2.12131 | 0.16988  | 0.26431  | 3.47275 | 0       | 0       | 5.41011 | 5.37918 | 5.06491 |
| ENSMUSG00000078498 | 5_Gm13151        | 0.15028 | -0.99647 | 0.80707  | NA       | 0       | 0       | 0       | 0.90169 | 0       | 0       |
| ENSMUSG00000078500 | 3_Gm13235        | 0       | NA       | NA       | NA       | 0       | 0       | 0       | 0       | 0       | 0       |
| ENSMUSG00000078502 | 10_Gm13212       | 24.7917 | -0.6414  | 0.25162  | 0.36077  | 22.5729 | 8.26025 | 27.4885 | 22.5421 | 34.9647 | 32.9219 |
| ENSMUSG00000078503 | 9_Gm13225        | 1.17327 | -0.61824 | 0.78252  | NA       | 0.86819 | 1.83561 | 0       | 1.80337 | 0       | 2.53245 |
| ENSMUSG00000078505 | 1_Gm436          | 0.66994 | 1.35912  | 0.70305  | NA       | 0       | 2.75342 | 0       | 0       | 0       | 1.26623 |
| ENSMUSG00000078508 | 1_Gm13128        | 0.14942 | -0.99647 | 0.80707  | NA       | 0       | 0       | 0       | 0       | 0.89653 | 0       |
| ENSMUSG00000078511 | 3_Pramef25       | 0.19919 | 0.92709  | 0.82027  | NA       | 0       | 0       | 1.19515 | 0       | 0       | 0       |
| ENSMUSG00000078515 | 4_Ddi2           | 2957.42 | 0.16111  | 0.10637  | 0.18095  | 3129.82 | 2965.43 | 3272.33 | 2797.03 | 2746.07 | 2833.82 |
| ENSMUSG00000078517 | 11_Emc1          | 806.295 | 0.10297  | 0.37621  | 0.49376  | 816.097 | 850.806 | 838.998 | 791.68  | 788.05  | 752.139 |
| ENSMUSG00000078518 | 1_Gm13030        | 9.01856 | -0.17533 | 0.81461  | 0.87195  | 6.07732 | 11.0137 | 8.36608 | 11.7219 | 8.06878 | 8.86359 |
| ENSMUSG00000078519 | 3_2310026L22Rik  | 4.62336 | -0.22875 | 0.81987  | 0.87626  | 4.34094 | 3.67122 | 4.78062 | 3.60674 | 6.27571 | 5.06491 |
| ENSMUSG00000078521 | 2_Aunip          | 24.1992 | 0.79857  | 0.09535  | 0.16532  | 31.2548 | 32.1232 | 28.6837 | 12.6236 | 21.5167 | 18.9934 |
| ENSMUSG00000078531 | 3_Gm831          | 1.86016 | 2.11074  | 0.23704  | NA       | 1.73638 | 3.67122 | 3.58546 | 0.90169 | 0       | 1.26623 |
| ENSMUSG00000078532 | 9_Nkain1         | 22.124  | -0.79499 | 0.17223  | 0.26731  | 16.4956 | 20.1917 | 11.9515 | 43.2809 | 26.8959 | 13.9285 |
| ENSMUSG00000078546 | 8_2210404O09Rik  | 126.523 | -0.31344 | 0.19664  | 0.29696  | 125.019 | 104.63  | 108.759 | 118.121 | 165.858 | 136.753 |
| ENSMUSG00000078552 | 10_Dcdc2b        | 9.6895  | 1.39362  | 0.07847  | 0.14109  | 18.232  | 16.5205 | 7.17092 | 3.60674 | 6.27571 | 6.33113 |
| ENSMUSG00000078554 | 2_Fam229a        | 0.1447  | 0.92709  | 0.82027  | NA       | 0.86819 | 0       | 0       | 0       | 0       | 0       |
| ENSMUSG00000078566 | 8_Bnip3          | 370.92  | -0.80744 | 4.36E-06 | 3.29E-05 | 288.239 | 291.862 | 228.274 | 528.388 | 445.576 | 443.179 |
| ENSMUSG00000078570 | 10_1110065P20Rik | 161.248 | 0.3347   | 0.20265  | 0.30417  | 193.606 | 196.41  | 149.394 | 185.747 | 109.377 | 132.954 |
| ENSMUSG00000078572 | 3_1810043H04Rik  | 140.455 | 0.61976  | 0.04321  | 0.08585  | 138.91  | 167.958 | 204.371 | 155.992 | 77.9982 | 97.4995 |
| ENSMUSG00000078576 | 1_Gm12886        | 5.8221  | -1.52622 | 0.132    | 0.21552  | 2.60457 | 2.75342 | 3.58546 | 6.3118  | 4.48265 | 15.1947 |
| ENSMUSG00000078578 | 9_Ube2d3         | 7336.53 | -0.27817 | 0.03955  | 0.07973  | 6834.38 | 6335.61 | 6723.94 | 6745.51 | 9050.48 | 8329.24 |
| ENSMUSG00000078580 | 3_E430018J23Rik  | 118.263 | 0.26499  | 0.26753  | 0.37887  | 128.492 | 127.575 | 131.467 | 127.138 | 92.3426 | 102.564 |
| ENSMUSG00000078584 | 9_AU022252       | 418.716 | -0.16187 | 0.30211  | 0.41695  | 398.498 | 365.287 | 423.085 | 492.32  | 417.783 | 415.322 |
| ENSMUSG00000078588 | 10_Ccdc24        | 79.0529 | -0.58274 | 0.21979  | 0.3245   | 83.3461 | 49.5615 | 57.3674 | 163.205 | 81.5843 | 39.253  |
| ENSMUSG00000078591 | 1_Hs3st4         | 3.65215 | -2.80176 | 0.06207  | 0.11616  | 1.73638 | 0.91781 | 0       | 10.8202 | 7.17224 | 1.26623 |
| ENSMUSG00000078593 | 2_1700042G07Rik  | 0       | NA       | NA       | NA       | 0       | 0       | 0       | 0       | 0       | 0       |
| ENSMUSG00000078597 | 2_Cyp4a12b       | 20385.3 | 0.03041  | 0.8311   | 0.88436  | 20969.4 | 18815   | 22014.7 | 16833.6 | 20698.2 | 22980.8 |
| ENSMUSG00000078598 | 11_Skint5        | 6.05314 | 0.91347  | 0.31824  | 0.43378  | 6.07732 | 8.26025 | 9.56123 | 4.50843 | 5.37918 | 2.53245 |
| ENSMUSG00000078599 | 9_Skint8         | 6.93169 | -0.59987 | 0.536    | 0.64378  | 6.94551 | 8.26025 | 1.19515 | 5.41011 | 13.448  | 6.33113 |
| ENSMUSG00000078601 | 4_Gm12525        | 1.15788 | -0.42477 | 0.82194  | NA       | 0.86819 | 0.91781 | 1.19515 | 1.80337 | 0.89653 | 1.26623 |
| ENSMUSG00000078605 | 2_E030025P04Rik  | 0.49331 | 0.9132   | 0.78796  | NA       | 0.86819 | 0       | 1.19515 | 0       | 0.89653 | 0       |
| ENSMUSG00000078606 | 8_Gm4070         | 3179.81 | 1.58014  | 1.87E-09 | 4.02E-08 | 5089.32 | 3346.32 | 5862.23 | 1064.89 | 2220.71 | 1495.41 |
| ENSMUSG00000078612 | 9_1700024P16Rik  | 6.39984 | -0.13667 | 0.88976  | 0.92576  | 10.4183 | 1.83561 | 5.97577 | 3.60674 | 8.96531 | 7.59736 |
| ENSMUSG00000078616 | 1_Trim30c        | 80.8066 | 2.04724  | 0.00016  | 0.00074  | 122.415 | 92.6984 | 175.688 | 9.01685 | 60.9641 | 24.0583 |
| ENSMUSG00000078619 | 10_Smarcd2       | 2923.53 | 0.6002   | 2.55E-05 | 0.00015  | 3253.97 | 3371.1  | 3942.81 | 2229.87 | 2075.47 | 2667.94 |
| ENSMUSG00000078621 | 1_Hbb-bh2        | 0.94398 | -0.18863 | 0.94524  | NA       | 2.60457 | 0       | 0       | 0       | 1.79306 | 1.26623 |
| ENSMUSG00000078622 | 8_Ccdc47         | 2759.88 | -0.48595 | 2.69E-06 | 2.17E-05 | 2361.47 | 2334.9  | 2200.28 | 3038.68 | 3300.13 | 3323.85 |
| ENSMUSG00000078624 | 2_Olfrr613       | 1.39768 | -0.90293 | 0.64851  | NA       | 0.86819 | 0.91781 | 1.19515 | 4.50843 | 0.89653 | 0       |
| ENSMUSG00000078626 | 2_Gm12790        | 0.15028 | -0.99647 | 0.80707  | NA       | 0       | 0       | 0       | 0.90169 | 0       | 0       |
| ENSMUSG00000078627 | 9_March10        | 0.50602 | -1.01212 | 0.76398  | NA       | 0.86819 | 0       | 0       | 0.90169 | 0       | 1.26623 |
| ENSMUSG00000078630 | 7_Tomt           | 11.4495 | 0.88477  | 0.22387  | 0.32904  | 13.0228 | 11.0137 | 20.3176 | 4.50843 | 7.17224 | 12.6623 |
| ENSMUSG00000078632 | 3_Lrrc37a        | 0.60295 | -1.38005 | 0.66074  | NA       | 0       | 0.91781 | 0       | 1.80337 | 0.89653 | 0       |
| ENSMUSG00000078639 | 1_Gm12695        | 35.4558 | -1.15382 | 0.01013  | 0.02554  | 25.1775 | 21.1095 | 19.1225 | 36.9691 | 39.4473 | 70.9087 |
| ENSMUSG00000078640 | 9_Gm11627        | 3.56138 | 0.6613   | 0.64054  | 0.73624  | 0.86819 | 6.42464 | 5.97577 | 5.41011 | 2.68959 | 0       |
| ENSMUSG00000078648 | 2_Gm17546        | 2.48441 | -0.19259 | 0.89975  | 0.93227  | 0       | 4.58903 | 2.39031 | 2.70506 | 2.68959 | 2.53245 |
| ENSMUSG00000078650 | 2_G6pc           | 0.14942 | -0.99647 | 0.80707  | NA       | 0       | 0       | 0       | 0       | 0.89653 | 0       |
| ENSMUSG00000078651 | 8_Aoc2           | 78.4562 | 0.8098   | 0.00432  | 0.01247  | 96.3689 | 100.041 | 103.978 | 53.1994 | 69.0329 | 48.1166 |
| ENSMUSG00000078652 | 9_Psme3          | 2367.83 | 0.10693  | 0.39705  | 0.51455  | 2384.91 | 2378.03 | 2603.05 | 1999.94 | 2366.84 | 2474.21 |
| ENSMUSG00000078653 | 4_Cntd1          | 61.7536 | -0.12208 | 0.73545  | 0.81254  | 67.7187 | 41.3013 | 68.1238 | 47.7893 | 64.5502 | 81.0385 |
| ENSMUSG00000078656 | 11_Vps25         | 3024.79 | 0.17071  | 0.10349  | 0.17723  | 3166.28 | 3094.84 | 3348.82 | 2824.08 | 2698.56 | 3016.15 |
| ENSMUSG00000078657 | 6_Crn            | 41.0323 | -0.12234 | 0.76865  | 0.83733  | 46.014  | 37.63   | 33.4643 | 29.7556 | 38.5508 | 60.7789 |
| ENSMUSG00000078664 | 2_Spr2a1         | 1.30228 | 3.82187  | 0.25493  | NA       | 7.8137  | 0       | 0       | 0       | 0       | 0       |
| ENSMUSG00000078670 | 3_Fam174b        | 377.985 | -0.73293 | 0.00013  | 0.00063  | 267.402 | 349.684 | 234.25  | 503.14  | 477.851 | 435.582 |
| ENSMUSG00000078671 | 10_Chd2          | 2513.57 | -0.08835 | 0.36522  | 0.48262  | 2485.62 | 2352.34 | 2471.58 | 2539.15 | 2583.8  | 2648.95 |
| ENSMUSG00000078676 | 9_Casc3          | 1383.78 | 0.22209  | 0.05135  | 0.09915  | 1420.36 | 1541.91 | 1507.09 | 1283.1  | 1200.45 | 1349.8  |
| ENSMUSG00000078680 | 3_Mup10          | 0       | NA       | NA       | NA       | 0       | 0       | 0       | 0       | 0       | 0       |
| ENSMUSG00000078681 | 10_Tm2d3         | 549.794 | 0.45735  | 0.00911  | 0.02337  | 630.305 | 615.848 | 663.311 | 566.258 | 389.991 | 433.05  |
| ENSMUSG00000078683 | 9_Mup1           | 0.14942 | -0.99647 | 0.80707  | NA       | 0       | 0       | 0       | 0       | 0.89653 | 0       |
| ENSMUSG00000078686 | 11_Mup9          | 1.32094 | 0.6818   | 0.57565  | NA       | 0       | 3.67122 | 1.19515 | 0       | 1.79306 | 1.26623 |
| ENSMUSG00000078688 | 11_Mup2          | 0.14942 | -0.99647 | 0.80707  | NA       | 0       | 0       | 0       | 0       | 0.89653 | 0       |
| ENSMUSG00000078695 | 8_Cisd3          | 225.007 | 0.21233  | 0.27462  | 0.38668  | 253.511 | 246.89  | 223.494 | 232.635 | 175.72  | 217.791 |
| ENSMUSG00000078706 | 4_Gm53           | 0.1447  | 0.92709  | 0.82027  | NA       | 0.86819 | 0       | 0       | 0       | 0       | 0       |
| ENSMUSG00000078713 | 8_Tomm5          | 530.919 | -0.1046  | 0.43448  | 0.54974  | 532.199 | 501.122 | 501.965 | 584.292 | 537.918 | 528.017 |
| ENSMUSG00000078716 | 9_Tmem8b         | 162.38  | 0.15196  | 0.48065  | 0.59325  | 167.56  | 182.643 | 162.541 | 179.435 | 132.687 | 149.415 |
| ENSMUSG00000078719 | 2_Msmp           | 3.58249 | -0.01317 | 0.99326  | 0.99531  | 5.20913 | 5.50683 | 0       | 3.60674 | 7.17224 | 0       |
| ENSMUSG00000078721 | 1_Fam205a1       | 1.10757 | -3.61976 | 0.22394  | NA       | 0       | 0       | 0       | 0       | 5.37918 | 1.26623 |
| ENSMUSG00000078722 | 2_Gm12394        | 8.46074 | -0.15968 | 0.61947  | 0.71753  | 6.94551 | 13.7671 | 0       | 7.21348 | 15.241  | 7.59736 |
| ENSMUSG00000078735 | 3_Ill1ra2        | 10.2427 | 0.84354  | 0.42069  | 0.53637  | 12.1546 | 21.1095 | 5.97577 | 10.8202 | 0       | 11.396  |
| ENSMUSG00000078746 | 2_Fam205a4       | 1.08617 | 3.53686  | 0.23106  | NA       | 1.73638 | 0       | 4.78062 | 0       | 0       | 0       |
| ENSMUSG00000078747 | 9_Gm20878        | 18.2323 | -1.41914 | 0.02243  | 0.04994  | 13.891  | 11.9315 | 3.58546 | 32.4607 | 25.9994 | 21.5259 |
| ENSMUSG00000078752 | 3_Scgb1b30       | 0.44998 | -2.33107 | 0.56049  | NA       | 0       | 0       | 0       | 1.80337 | 0.89653 | 0       |
| ENSMUSG00000078757 | 4_Scgb1b29       | 0.1447  | 0.92709  | 0.82027  | NA       | 0.86819 | 0       | 0       | 0       | 0       | 0       |
| ENSMUSG00000078762 | 10_Haus5         | 158.661 | 0.76984  | 0.0018   | 0.00595  | 204.892 | 170.712 | 224.689 | 142.466 | 91.4461 | 117.759 |

|                    |                  |         |          |          |          |         |         |         |         |         |         |
|--------------------|------------------|---------|----------|----------|----------|---------|---------|---------|---------|---------|---------|
| ENSMUSG00000078763 | 2_Slfn1          | 311.358 | 2.83285  | 8.02E-20 | 1.40E-17 | 746.642 | 334.999 | 556.942 | 59.5112 | 100.411 | 69.6425 |
| ENSMUSG00000078765 | 10_U2af114       | 536.311 | 0.2796   | 0.04768  | 0.09317  | 578.213 | 600.245 | 586.821 | 537.405 | 464.403 | 450.777 |
| ENSMUSG00000078768 | 2_Zfp566         | 69.551  | -0.32973 | 0.2568   | 0.36654  | 63.3778 | 66.082  | 54.9771 | 82.9551 | 66.3433 | 83.571  |
| ENSMUSG00000078771 | 10_Evi2a         | 76.0333 | 1.06506  | 0.00465  | 0.01328  | 151.933 | 81.6847 | 75.2947 | 51.3961 | 59.171  | 36.7206 |
| ENSMUSG00000078772 | 2_Gm12353        | 1.1679  | -2.53212 | 0.32484  | NA       | 0.86819 | 0       | 0       | 3.60674 | 0       | 2.53245 |
| ENSMUSG00000078773 | 11_Rad54b        | 156.362 | 0.13878  | 0.62253  | 0.72013  | 172.769 | 116.561 | 203.176 | 125.334 | 187.375 | 132.954 |
| ENSMUSG00000078776 | 9_9530053A07Rik  | 3.33541 | -1.59159 | 0.21166  | 0.31494  | 1.73638 | 0.91781 | 2.39031 | 7.21348 | 2.68959 | 5.06491 |
| ENSMUSG00000078779 | 4_Zfp59          | 224.714 | -0.69453 | 0.00415  | 0.01206  | 229.202 | 149.602 | 135.052 | 250.669 | 303.924 | 279.836 |
| ENSMUSG00000078780 | 7_Gm5150         | 14.083  | 3.19575  | 0.00038  | 0.00158  | 45.1458 | 9.17806 | 21.5128 | 1.80337 | 1.79306 | 5.06491 |
| ENSMUSG00000078783 | 1_Gm9733         | 1.82623 | 2.07327  | 0.31226  | NA       | 5.20913 | 0       | 3.58546 | 0       | 0.89653 | 1.26623 |
| ENSMUSG00000078784 | 8_1810022K09Rik  | 719.605 | -0.7767  | 1.12E-05 | 7.48E-05 | 572.136 | 483.684 | 535.429 | 730.365 | 1076.73 | 919.281 |
| ENSMUSG00000078786 | 9_BC024978       | 528.486 | 0.11187  | 0.46096  | 0.57476  | 553.036 | 594.738 | 497.184 | 467.073 | 496.678 | 562.205 |
| ENSMUSG00000078787 | 8_Cyp214         | 4.02035 | 1.01675  | 0.3713   | 0.48872  | 2.60457 | 6.42464 | 7.17092 | 1.80337 | 3.58612 | 2.53245 |
| ENSMUSG00000078789 | 9_Dph1           | 224.852 | 0.74374  | 0.00308  | 0.0094   | 291.711 | 276.259 | 276.081 | 207.388 | 110.273 | 187.402 |
| ENSMUSG00000078794 | 4_Dact3          | 133.644 | -0.57227 | 0.02758  | 0.05927  | 111.128 | 128.493 | 82.4656 | 188.452 | 153.307 | 138.019 |
| ENSMUSG00000078796 | 3_Zfp541         | 2.27349 | 1.41111  | 0.39054  | NA       | 4.34094 | 0.91781 | 4.78062 | 2.70506 | 0.89653 | 0       |
| ENSMUSG00000078799 | 5_Sult2a5        | 0.14942 | -0.99647 | 0.80707  | NA       | 0       | 0       | 0       | 0       | 0.89653 | 0       |
| ENSMUSG00000078808 | 4_Vmn1r58        | 0.15297 | 0.92709  | 0.82027  | NA       | 0       | 0.91781 | 0       | 0       | 0       | 0       |
| ENSMUSG00000078810 | 4_Gp6            | 0.1447  | 0.92709  | 0.82027  | NA       | 0.86819 | 0       | 0       | 0       | 0       | 0       |
| ENSMUSG00000078812 | 10_Elf5a         | 10408.9 | 0.53307  | 0.00019  | 0.00086  | 12293.5 | 10977.9 | 13659.4 | 9234.16 | 7204.52 | 9083.91 |
| ENSMUSG00000078813 | 3_Leng1          | 266.504 | 0.35511  | 0.03636  | 0.07442  | 294.316 | 312.972 | 289.227 | 238.947 | 211.581 | 251.979 |
| ENSMUSG00000078815 | 8_Cacng6         | 15.6933 | -2.27788 | 0.00401  | 0.01176  | 5.20913 | 8.26025 | 2.39031 | 41.4775 | 8.96531 | 27.857  |
| ENSMUSG00000078816 | 9_Pkrkg          | 24.1897 | 0.30192  | 0.55204  | 0.65817  | 31.2548 | 32.1232 | 16.7322 | 27.0506 | 21.5167 | 16.4609 |
| ENSMUSG00000078817 | 4_Nlrp12         | 8.52102 | -1.0256  | 0.25187  | 0.36107  | 11.2864 | 1.83561 | 3.58546 | 14.427  | 9.86184 | 10.1298 |
| ENSMUSG00000078838 | 2_Gm17382        | 0.81044 | -3.16783 | 0.24943  | NA       | 0       | 0       | 0       | 1.80337 | 1.79306 | 1.26623 |
| ENSMUSG00000078851 | 4_Hist3h2a       | 205.578 | -0.10493 | 0.62904  | 0.72584  | 204.024 | 217.52  | 173.297 | 232.635 | 237.581 | 168.408 |
| ENSMUSG00000078853 | 8_Igtp           | 3023.21 | 2.50679  | 2.64E-32 | 1.72E-29 | 4940.86 | 4141.14 | 6343.88 | 687.084 | 1147.56 | 878.761 |
| ENSMUSG00000078861 | 8_Zfp931         | 122.695 | -1.09217 | 1.37E-05 | 8.91E-05 | 94.6325 | 69.7532 | 70.5141 | 174.025 | 182.892 | 144.35  |
| ENSMUSG00000078862 | 10_Gm14326       | 315.141 | -0.72581 | 0.00013  | 0.00061  | 277.82  | 237.712 | 196.005 | 378.708 | 432.128 | 368.472 |
| ENSMUSG00000078864 | 10_Gm14322       | 151.701 | -1.25269 | 6.02E-06 | 4.36E-05 | 90.2916 | 83.5203 | 95.6123 | 155.992 | 285.993 | 198.798 |
| ENSMUSG00000078865 | 8_Gm14406        | 20.9116 | -0.80011 | 0.34763  | 0.46451  | 23.4411 | 22.0273 | 0       | 35.1657 | 23.3098 | 21.5259 |
| ENSMUSG00000078866 | 10_Gm14420       | 228.522 | -1.0445  | 2.98E-07 | 3.22E-06 | 150.197 | 149.602 | 148.199 | 269.604 | 371.164 | 282.369 |
| ENSMUSG00000078867 | 9_Gm14418        | 138.939 | -0.93386 | 0.00011  | 0.00055  | 108.524 | 96.3696 | 81.2705 | 174.025 | 215.167 | 158.278 |
| ENSMUSG00000078868 | 3_Gm14412        | 12.6317 | -1.4931  | 0.04472  | 0.08833  | 5.20913 | 11.0137 | 3.58546 | 22.5421 | 23.3098 | 10.1298 |
| ENSMUSG00000078869 | 2_Gm14409        | 25.6424 | -0.1778  | 0.73103  | 0.80903  | 26.0457 | 29.3698 | 16.7322 | 19.8371 | 40.3439 | 21.5259 |
| ENSMUSG00000078870 | 9_Gm14410        | 195.255 | -1.24624 | 3.87E-07 | 4.04E-06 | 128.492 | 122.986 | 95.6123 | 251.57  | 348.75  | 224.122 |
| ENSMUSG00000078872 | 9_Gm14401        | 10.5963 | -0.68049 | 0.3449   | 0.46156  | 6.07732 | 11.0137 | 7.17092 | 12.6236 | 8.96531 | 17.7272 |
| ENSMUSG00000078875 | 10_Gm14419       | 43.8524 | -0.81386 | 0.11676  | 0.19531  | 39.9367 | 43.1369 | 11.9515 | 45.986  | 81.5843 | 40.5193 |
| ENSMUSG00000078876 | 10_Gm14408       | 0       | NA       | NA       | NA       | 0       | 0       | 0       | 0       | 0       | 0       |
| ENSMUSG00000078877 | 11_Gm14295       | 215.417 | -1.06062 | 2.67E-06 | 2.15E-05 | 144.119 | 134.917 | 139.833 | 226.323 | 358.612 | 288.7   |
| ENSMUSG00000078878 | 9_Gm14305        | 330.626 | -1.17052 | 1.91E-08 | 2.99E-07 | 232.674 | 223.945 | 151.785 | 401.25  | 490.402 | 483.699 |
| ENSMUSG00000078879 | 10_Gm14306       | 11.6594 | -0.33578 | 0.62114  | 0.719    | 11.2864 | 11.0137 | 8.36608 | 8.11517 | 13.448  | 17.7272 |
| ENSMUSG00000078880 | 10_Gm14308       | 23.7941 | -1.90314 | 0.01873  | 0.0428   | 10.4183 | 19.2739 | 0       | 53.1994 | 20.6202 | 39.253  |
| ENSMUSG00000078881 | 10_Gm14434       | 15.6152 | 0.32676  | 0.79399  | 0.85725  | 2.60457 | 49.5615 | 0       | 12.6236 | 25.1029 | 3.98686 |
| ENSMUSG00000078886 | 12_Gm2026        | 99.3009 | -0.9901  | 0.07973  | 0.14298  | 86.8188 | 12.8493 | 100.393 | 188.452 | 123.721 | 83.571  |
| ENSMUSG00000078887 | 10_Gm6710        | 157.441 | -0.97707 | 0.00564  | 0.01558  | 118.942 | 68.8354 | 131.467 | 220.011 | 285.097 | 120.292 |
| ENSMUSG00000078889 | 11_Gm14288       | 37.2495 | -8.68698 | 3.35E-10 | 9.26E-09 | 0       | 0       | 0       | 152.385 | 17.9306 | 53.1815 |
| ENSMUSG00000078891 | 4_Gm11008        | 7.85864 | -1.83129 | 0.1424   | 0.22894  | 5.20913 | 2.75342 | 2.39031 | 7.21348 | 29.5855 | 0       |
| ENSMUSG00000078894 | 9_2210418O10Rik  | 130.938 | -1.01446 | 2.08E-05 | 0.00013  | 87.687  | 100.041 | 71.7092 | 158.697 | 192.754 | 174.739 |
| ENSMUSG00000078896 | 11_Gm8923        | 23.5846 | -0.49213 | 0.31724  | 0.43262  | 13.891  | 24.7808 | 20.3176 | 32.4607 | 25.9994 | 24.0583 |
| ENSMUSG00000078897 | 10_Gm4724        | 69.738  | -1.05515 | 0.00347  | 0.01039  | 51.2231 | 30.2876 | 54.9771 | 78.4466 | 123.721 | 79.7723 |
| ENSMUSG00000078898 | 9_Gm4723         | 87.7037 | -1.12223 | 0.00062  | 0.00238  | 61.6414 | 55.9861 | 47.8062 | 86.5618 | 164.065 | 110.162 |
| ENSMUSG00000078899 | 9_Gm4631         | 956.063 | -0.91558 | 2.20E-08 | 3.36E-07 | 716.255 | 695.697 | 574.869 | 1163.17 | 1472.1  | 1114.28 |
| ENSMUSG00000078901 | 8_Gm14440        | 226.221 | -0.81676 | 0.01207  | 0.02963  | 170.165 | 175.301 | 145.809 | 154.188 | 423.162 | 288.7   |
| ENSMUSG00000078902 | 3_Gm14443        | 24.6432 | -1.06443 | 0.02548  | 0.05553  | 16.4956 | 14.6849 | 16.7322 | 27.0506 | 41.2404 | 31.6557 |
| ENSMUSG00000078903 | 10_Gm14391       | 290.889 | -0.98837 | 0.00086  | 0.00314  | 218.783 | 242.301 | 147.004 | 257.882 | 443.783 | 435.582 |
| ENSMUSG00000078905 | 8_Gm14393        | 4.36932 | -2.56351 | 0.08047  | 0.14403  | 0       | 3.67122 | 0       | 3.60674 | 6.27571 | 12.6623 |
| ENSMUSG00000078906 | 9_Gm14444        | 26.4283 | -0.47514 | 0.38133  | 0.49924  | 17.3638 | 18.3561 | 31.074  | 18.9354 | 47.5161 | 25.3245 |
| ENSMUSG00000078907 | 1_Fam186b        | 1.78001 | -0.64154 | 0.72063  | NA       | 0.86819 | 0.91781 | 2.39031 | 2.70506 | 0       | 3.79868 |
| ENSMUSG00000078908 | 9_Mon1b          | 1011.64 | 0.65374  | 6.66E-07 | 6.46E-06 | 1163.37 | 1217.01 | 1330.21 | 809.714 | 710.052 | 839.508 |
| ENSMUSG00000078919 | 10_Dpm1          | 446.199 | -0.53102 | 0.00275  | 0.00854  | 381.135 | 323.985 | 390.815 | 469.778 | 623.985 | 487.497 |
| ENSMUSG00000078920 | 2_Ilf47          | 3045.47 | 1.09223  | 2.68E-07 | 2.95E-06 | 4100.45 | 3467.47 | 4871.45 | 1412.94 | 2530.01 | 1890.48 |
| ENSMUSG00000078921 | 3_Tgtp2          | 952.022 | 3.95745  | 8.97E-38 | 1.17E-34 | 1895.26 | 1415.26 | 2058.06 | 83.8567 | 190.064 | 69.6425 |
| ENSMUSG00000078922 | 9_Tgtp1          | 1870    | 4.00616  | 3.02E-16 | 3.48E-14 | 3502.27 | 2766.27 | 4294.19 | 100.087 | 340.682 | 216.525 |
| ENSMUSG00000078923 | 10_Ube2v1        | 3164.69 | 0.42362  | 0.00109  | 0.00386  | 3481.44 | 3410.57 | 3985.84 | 2833.1  | 2383.87 | 2893.33 |
| ENSMUSG00000078924 | 1_Gm12169        | 0.7957  | 0.66816  | 0.79506  | NA       | 0.86819 | 0.91781 | 1.19515 | 0       | 1.79306 | 0       |
| ENSMUSG00000078925 | 10_D030018L15Rik | 1.02857 | -1.19061 | 0.65479  | NA       | 0       | 1.83561 | 0       | 1.80337 | 0       | 2.53245 |
| ENSMUSG00000078926 | 8_Cdc20b         | 0.4989  | -0.80902 | 0.81036  | NA       | 0       | 0       | 1.19515 | 0.90169 | 0.89653 | 0       |
| ENSMUSG00000078931 | 4_Pdf            | 125.131 | -0.03287 | 0.88366  | 0.92124  | 118.074 | 129.411 | 124.296 | 137.056 | 131.79  | 110.162 |
| ENSMUSG00000078932 | 8_CN725425       | 0.30239 | -0.03469 | 0.99322  | NA       | 0       | 0.91781 | 0       | 0       | 0.89653 | 0       |
| ENSMUSG00000078937 | 8_Cpt1b          | 77.0233 | -0.36293 | 0.34245  | 0.4589   | 48.6186 | 89.9449 | 63.3432 | 108.202 | 51.9988 | 100.032 |
| ENSMUSG00000078941 | 9_Ak6            | 1332.51 | -0.48081 | 0.00013  | 0.00062  | 1189.42 | 1041.71 | 1106.71 | 1474.26 | 1698.93 | 1484.02 |
| ENSMUSG00000078942 | 10_Naip6         | 15.031  | 0.54012  | 0.42239  | 0.53798  | 25.1775 | 16.5205 | 11.9515 | 16.2303 | 15.241  | 5.06491 |
| ENSMUSG00000078945 | 10_Naip2         | 117.571 | 0.52569  | 0.06378  | 0.11884  | 169.297 | 109.219 | 137.443 | 73.9382 | 112.963 | 102.564 |
| ENSMUSG00000078949 | 2_R3hdml         | 207.272 | -1.32915 | 0.34406  | 0.46065  | 16.4956 | 287.273 | 50.1965 | 447.236 | 23.3098 | 419.121 |
| ENSMUSG00000078952 | 9_Lincenc1       | 6.00093 | -0.93424 | 0.33312  | 0.44977  | 6.07732 | 2.75342 | 3.58546 | 11.7219 | 8.06878 | 3.79868 |
| ENSMUSG00000078954 | 9_Arhgap8        | 121.216 | 1.59508  | 3.10E-09 | 6.19E-08 | 170.165 | 155.109 | 222.299 | 60.4129 | 69.9294 | 49.3828 |
| ENSMUSG00000078958 | 9_Atp6ap1l       | 0.59941 | -2.74429 | 0.44299  | NA       | 0       | 0       | 0       | 1.80337 | 1.79306 | 0       |
| ENSMUSG00000078962 | 4_4932414J04Rik  | 0.21104 | -0.99647 | 0.80707  | NA       | 0       | 0       | 0       | 0       | 0       | 1.26623 |

|                    |                 |         |          |          |          |         |         |         |         |         |         |
|--------------------|-----------------|---------|----------|----------|----------|---------|---------|---------|---------|---------|---------|
| ENSMUSG00000078963 | 2_Hsbp111       | 151.315 | -0.13265 | 0.51998  | 0.63002  | 131.965 | 152.356 | 149.394 | 167.713 | 159.582 | 146.882 |
| ENSMUSG00000078964 | 1_Ces1b         | 0.89353 | -2.11082 | 0.44256  | NA       | 0.86819 | 0       | 0       | 1.80337 | 2.68959 | 0       |
| ENSMUSG00000078970 | 5_Wdr92         | 406.832 | -0.27009 | 0.06284  | 0.11739  | 363.771 | 347.848 | 395.596 | 428.301 | 457.231 | 448.244 |
| ENSMUSG00000078972 | 1_Gm15557       | 0.14942 | -0.99647 | 0.80707  | NA       | 0       | 0       | 0       | 0       | 0.89653 | 0       |
| ENSMUSG00000078974 | 10_Sec61g       | 1350.16 | -0.57692 | 7.40E-05 | 0.00038  | 1199.84 | 1010.5  | 1040.98 | 1492.29 | 1859.4  | 1497.95 |
| ENSMUSG00000078984 | 1_Gm11027       | 0.15028 | -0.99647 | 0.80707  | NA       | 0       | 0       | 0       | 0.90169 | 0       | 0       |
| ENSMUSG00000078994 | 8_Zfp429        | 145.827 | -0.33163 | 0.1145   | 0.19209  | 127.624 | 126.657 | 132.662 | 150.581 | 155.1   | 182.337 |
| ENSMUSG00000078995 | 9_Zfp456        | 23.149  | -1.37729 | 0.00545  | 0.01514  | 14.7592 | 12.8493 | 10.7564 | 27.0506 | 36.7578 | 36.7206 |
| ENSMUSG00000079003 | 1_Samd1         | 212.434 | 0.55097  | 0.01082  | 0.027    | 248.302 | 279.931 | 228.274 | 190.256 | 135.376 | 192.466 |
| ENSMUSG00000079008 | 2_Gm14124       | 0       | NA       | NA       | NA       | 0       | 0       | 0       | 0       | 0       | 0       |
| ENSMUSG00000079009 | 8_Gm14139       | 0       | NA       | NA       | NA       | 0       | 0       | 0       | 0       | 0       | 0       |
| ENSMUSG00000079011 | 9_Gm11033       | 24.2171 | -0.14387 | 0.76384  | 0.83386  | 25.1775 | 22.0273 | 21.5128 | 18.0337 | 26.8959 | 31.6557 |
| ENSMUSG00000079012 | 11_Serpina3m    | 136.015 | 1.69072  | 2.76E-06 | 2.22E-05 | 296.052 | 136.753 | 191.225 | 69.4298 | 83.3773 | 39.253  |
| ENSMUSG00000079013 | 2_Serpina3j     | 0.1447  | 0.92709  | 0.82027  | NA       | 0.86819 | 0       | 0       | 0       | 0       | 0       |
| ENSMUSG00000079014 | 4_Serpina3i     | 110.026 | 1.13046  | 0.0014   | 0.00478  | 172.769 | 84.4381 | 196.005 | 78.4466 | 53.7918 | 74.7074 |
| ENSMUSG00000079015 | 2_Serpina1c     | 0.72349 | 2.97602  | 0.45311  | NA       | 4.34094 | 0       | 0       | 0       | 0       | 0       |
| ENSMUSG00000079017 | 3_Ilf127l2a     | 5270.46 | 2.74083  | 5.52E-37 | 6.24E-34 | 8168.78 | 6724.76 | 12614.9 | 1550    | 1239.9  | 1324.47 |
| ENSMUSG00000079018 | 10_Ly6c1        | 1463.65 | 2.01349  | 6.65E-16 | 7.33E-14 | 3167.15 | 1519.89 | 2352.06 | 715.938 | 497.574 | 529.283 |
| ENSMUSG00000079019 | 2_Insl3         | 4.52638 | 0.37587  | 0.78429  | 0.85011  | 0.86819 | 11.0137 | 3.58546 | 6.3118  | 5.37918 | 0       |
| ENSMUSG00000079020 | 9_Slc45a4       | 670.375 | 0.68003  | 6.08E-07 | 6.00E-06 | 797.865 | 820.518 | 859.316 | 570.767 | 485.023 | 488.764 |
| ENSMUSG00000079022 | 9_Col22a1       | 29.1376 | -0.38837 | 0.41236  | 0.52861  | 20.8365 | 35.7944 | 19.1225 | 40.5758 | 33.1716 | 25.3245 |
| ENSMUSG00000079025 | 8_Gsdmc         | 1.93557 | 4.39283  | 0.08868  | NA       | 10.4183 | 0       | 1.19515 | 0       | 0       | 0       |
| ENSMUSG00000079029 | 2_Gm5662        | 0       | NA       | NA       | NA       | 0       | 0       | 0       | 0       | 0       | 0       |
| ENSMUSG00000079031 | 1_BB287469      | 0       | NA       | NA       | NA       | 0       | 0       | 0       | 0       | 0       | 0       |
| ENSMUSG00000079033 | 9_Mef2b         | 4.75678 | 0.04982  | 0.96084  | 0.97451  | 6.94551 | 2.75342 | 4.78062 | 5.41011 | 3.58612 | 5.06491 |
| ENSMUSG00000079034 | 2_Gm8300        | 0.14942 | -0.99647 | 0.80707  | NA       | 0       | 0       | 0       | 0       | 0.89653 | 0       |
| ENSMUSG00000079036 | 10_Alkbh1       | 420.831 | -0.13953 | 0.3535   | 0.47031  | 414.994 | 378.136 | 408.743 | 409.365 | 483.23  | 430.517 |
| ENSMUSG00000079037 | 9_Prnp          | 1652.09 | -0.23356 | 0.09744  | 0.1684   | 1449.01 | 1581.38 | 1527.41 | 2045.92 | 1780.51 | 1528.34 |
| ENSMUSG00000079038 | 2_D130040H23Rik | 13.7465 | -1.20981 | 0.08502  | 0.15037  | 6.07732 | 12.8493 | 5.97577 | 15.3287 | 29.5855 | 12.6623 |
| ENSMUSG00000079042 | 9_Apela         | 3.45911 | -1.76111 | 0.18148  | 0.27885  | 2.60457 | 0.91781 | 1.19515 | 9.91854 | 3.58612 | 2.53245 |
| ENSMUSG00000079043 | 2_Fastkd5       | 246.93  | -0.28608 | 0.10791  | 0.18326  | 232.674 | 221.191 | 213.933 | 256.98  | 304.82  | 251.979 |
| ENSMUSG00000079049 | 8_Serpina1c     | 33.6702 | -0.65014 | 0.10957  | 0.1856   | 26.9138 | 22.0273 | 29.8789 | 35.1657 | 47.5161 | 40.5193 |
| ENSMUSG00000079051 | 4_Gm14025       | 2.48976 | -0.5717  | 0.69705  | 0.78317  | 2.60457 | 0.91781 | 2.39031 | 0.90169 | 1.79306 | 6.33113 |
| ENSMUSG00000079053 | 3_Gm14010       | 0       | NA       | NA       | NA       | 0       | 0       | 0       | 0       | 0       | 0       |
| ENSMUSG00000079055 | 10_Slc8a3       | 68.5373 | -1.25681 | 0.00319  | 0.00969  | 44.2776 | 45.8903 | 31.074  | 157.795 | 66.3433 | 65.8438 |
| ENSMUSG00000079056 | 12_Knip3        | 111.276 | -0.81794 | 0.00428  | 0.01239  | 79.8733 | 102.794 | 58.5626 | 165.008 | 139.859 | 121.558 |
| ENSMUSG00000079057 | 3_Cyp4v3        | 286.379 | -0.8118  | 2.28E-06 | 1.89E-05 | 212.706 | 228.534 | 181.663 | 375.101 | 372.06  | 348.212 |
| ENSMUSG00000079065 | 3_BC005561      | 235.917 | -0.73709 | 0.00067  | 0.00257  | 166.692 | 206.506 | 156.565 | 237.143 | 315.579 | 333.018 |
| ENSMUSG00000079069 | 1_8430423G03Rik | 0.59823 | -0.02642 | 0.99339  | NA       | 0.86819 | 0.91781 | 0       | 1.80337 | 0       | 0       |
| ENSMUSG00000079070 | 10_Gm3985       | 0.87206 | -3.25858 | 0.22791  | NA       | 0       | 0       | 0       | 1.80337 | 0.89653 | 2.53245 |
| ENSMUSG00000079071 | 2_Gm14085       | 8.98849 | 3.71365  | 0.00087  | 0.00319  | 28.6502 | 7.34244 | 14.3418 | 1.80337 | 1.79306 | 0       |
| ENSMUSG00000079076 | 1_Gm3086        | 4.32655 | 0.57269  | 0.61731  | 0.71556  | 3.47275 | 3.67122 | 8.36608 | 0.90169 | 4.48265 | 5.06491 |
| ENSMUSG00000079083 | 2_Jrkl          | 355.998 | -0.38762 | 0.02775  | 0.05956  | 325.571 | 280.849 | 319.106 | 346.247 | 459.024 | 405.193 |
| ENSMUSG00000079084 | 9_Ccdc82        | 386.209 | -0.63862 | 0.00022  | 0.00098  | 302.998 | 295.533 | 308.35  | 414.775 | 554.952 | 440.647 |
| ENSMUSG00000079092 | 3_Prl2c2        | 0.29767 | 1.70332  | 0.67406  | NA       | 0.86819 | 0.91781 | 0       | 0       | 0       | 0       |
| ENSMUSG00000079103 | 2_Tgm7          | 0.75237 | -1.79164 | 0.53681  | NA       | 0       | 0.91781 | 0       | 1.80337 | 1.79306 | 0       |
| ENSMUSG00000079104 | 4_Prps1l13      | 519.641 | -0.33099 | 0.07469  | 0.13553  | 504.417 | 457.985 | 417.109 | 452.646 | 643.709 | 641.977 |
| ENSMUSG00000079105 | 3_C7            | 18.279  | -1.45662 | 0.01816  | 0.04177  | 9.55007 | 14.6849 | 4.78062 | 20.7388 | 35.8612 | 24.0583 |
| ENSMUSG00000079108 | 5_Srp54b        | 2140.94 | -0.21237 | 0.04572  | 0.08999  | 2058.47 | 1886.09 | 2006.66 | 2206.42 | 2412.56 | 2275.41 |
| ENSMUSG00000079109 | 11_Pms2         | 268.153 | -0.03404 | 0.83784  | 0.88945  | 248.302 | 276.259 | 270.105 | 254.275 | 272.545 | 287.434 |
| ENSMUSG00000079110 | 11_Capn3        | 34.6277 | -0.44154 | 0.3023   | 0.41712  | 36.4639 | 27.5342 | 23.9031 | 51.3961 | 30.482  | 37.9868 |
| ENSMUSG00000079111 | 3_Kdelr2        | 1521.63 | 0.41833  | 0.00124  | 0.00431  | 1640.88 | 1693.35 | 1887.15 | 1302.03 | 1178.04 | 1428.3  |
| ENSMUSG00000079120 | 2_AY761185      | 0.54308 | 2.53494  | 0.50107  | NA       | 0.86819 | 0       | 2.39031 | 0       | 0       | 0       |
| ENSMUSG00000079144 | 7_A130010J15Rik | 557.261 | 0.15414  | 0.33437  | 0.45098  | 564.322 | 537.834 | 658.53  | 468.876 | 522.677 | 591.328 |
| ENSMUSG00000079157 | 3_Fam155a       | 8.09951 | -1.39223 | 0.2368   | 0.34393  | 3.47275 | 6.42464 | 3.58546 | 26.1489 | 8.96531 | 0       |
| ENSMUSG00000079162 | 8_Trim43b       | 14.0476 | -1.66721 | 0.00959  | 0.02437  | 8.68188 | 5.50683 | 5.97577 | 25.2472 | 22.4133 | 16.4609 |
| ENSMUSG00000079163 | 3_Gm15498       | 0.30239 | -0.03469 | 0.99322  | NA       | 0       | 0.91781 | 0       | 0       | 0.89653 | 0       |
| ENSMUSG00000079164 | 8_Tlr5          | 562.724 | 0.20227  | 0.3121   | 0.42702  | 603.391 | 499.286 | 703.946 | 410.267 | 599.779 | 559.672 |
| ENSMUSG00000079165 | 10_Sap25        | 80.5698 | 1.19382  | 0.01416  | 0.03386  | 111.996 | 104.63  | 120.711 | 91.0702 | 38.5508 | 16.4609 |
| ENSMUSG00000079168 | 3_Cd209g        | 18.9032 | -0.18339 | 0.77832  | 0.84494  | 15.6274 | 22.0273 | 15.537  | 36.0674 | 8.96531 | 15.1947 |
| ENSMUSG00000079173 | 11_Zan          | 29.2459 | -0.44921 | 0.50696  | 0.61729  | 28.6502 | 26.6164 | 19.1225 | 71.2332 | 19.7237 | 10.1298 |
| ENSMUSG00000079177 | 2_Fam228a       | 7.99371 | -0.41888 | 0.65843  | 0.75082  | 9.55007 | 8.26025 | 2.39031 | 2.70506 | 9.86184 | 15.1947 |
| ENSMUSG00000079184 | 10_Mphosph8     | 629.836 | -0.63625 | 8.98E-06 | 6.16E-05 | 502.681 | 507.546 | 468.5   | 680.773 | 838.256 | 781.262 |
| ENSMUSG00000079186 | 2_Gzmc          | 7.72981 | 1.3135   | 0.14265  | 0.22928  | 16.4956 | 9.17806 | 7.17092 | 5.41011 | 1.79306 | 6.33113 |
| ENSMUSG00000079197 | 10_Psme2        | 5147.11 | 0.34886  | 0.00481  | 0.01366  | 6026.1  | 5132.37 | 6140.7  | 4124.31 | 4761.47 | 4697.7  |
| ENSMUSG00000079215 | 8_Zfp664        | 2212.88 | -0.35959 | 0.00096  | 0.00345  | 1936.06 | 2049.46 | 1829.78 | 2453.49 | 2617.87 | 2390.64 |
| ENSMUSG00000079227 | 9_Ccr5          | 142.564 | 2.01125  | 1.01E-08 | 1.72E-07 | 355.089 | 149.602 | 180.468 | 49.5927 | 63.6537 | 56.9802 |
| ENSMUSG00000079235 | 10_Ccdc13       | 16.31   | -0.61888 | 0.35812  | 0.47494  | 13.0228 | 13.7671 | 11.9515 | 36.0674 | 11.6549 | 11.396  |
| ENSMUSG00000079242 | 2_C730034F03Rik | 17.5273 | -0.68847 | 0.24692  | 0.35568  | 13.0228 | 7.34244 | 20.3176 | 23.4438 | 23.3098 | 17.7272 |
| ENSMUSG00000079243 | 2_Xirp1         | 32.0057 | -0.60748 | 0.24414  | 0.35235  | 18.232  | 38.5478 | 19.1225 | 53.1994 | 22.4133 | 40.5193 |
| ENSMUSG00000079244 | 3_Gm5622        | 0       | NA       | NA       | NA       | 0       | 0       | 0       | 0       | 0       | 0       |
| ENSMUSG00000079247 | 2_Gm13691       | 0.34861 | -0.03469 | 0.99322  | NA       | 0       | 0       | 1.19515 | 0       | 0.89653 | 0       |
| ENSMUSG00000079259 | 2_Trim71        | 0.48859 | 2.39711  | 0.53861  | NA       | 1.73638 | 0       | 1.19515 | 0       | 0       | 0       |
| ENSMUSG00000079260 | 2_Tmppe         | 465.744 | 0.25865  | 0.05928  | 0.11171  | 516.572 | 491.026 | 513.916 | 424.694 | 402.542 | 445.712 |
| ENSMUSG00000079261 | 2_Gm15217       | 1.60497 | -0.02935 | 0.98552  | NA       | 1.73638 | 1.83561 | 1.19515 | 1.80337 | 1.79306 | 1.26623 |
| ENSMUSG00000079262 | 3_Slco1a6       | 3.91535 | 0.3487   | 0.76969  | 0.83825  | 7.8137  | 1.83561 | 3.58546 | 4.50843 | 4.48265 | 1.26623 |
| ENSMUSG00000079263 | 8_Gm6614        | 1.40692 | -0.22496 | 0.91465  | NA       | 0       | 2.75342 | 1.19515 | 1.80337 | 2.68959 | 0       |
| ENSMUSG00000079277 | 9_Hoxd3         | 0.14942 | -0.99647 | 0.80707  | NA       | 0       | 0       | 0       | 0       | 0.89653 | 0       |
| ENSMUSG00000079278 | 1_Tmem233       | 6.30792 | -1.77356 | 0.09636  | 0.16673  | 1.73638 | 5.50683 | 1.19515 | 14.427  | 3.58612 | 11.396  |

|                    |                  |         |          |          |          |         |         |         |         |         |         |
|--------------------|------------------|---------|----------|----------|----------|---------|---------|---------|---------|---------|---------|
| ENSMUSG00000079283 | 2_2310009B15Rik  | 126.228 | 0.7786   | 0.00131  | 0.00453  | 140.647 | 183.561 | 154.175 | 104.596 | 80.6878 | 93.7008 |
| ENSMUSG00000079298 | 9_Klr1b          | 3.71856 | -0.74027 | 0.54988  | 0.65629  | 5.20913 | 1.83561 | 1.19515 | 7.21348 | 1.79306 | 5.06491 |
| ENSMUSG00000079299 | 3_Klr1b          | 0       | NA       | NA       | NA       | 0       | 0       | 0       | 0       | 0       | 0       |
| ENSMUSG00000079304 | 5_4933413G19Rik  | 0.99307 | 0.18979  | 0.93649  | NA       | 0.86819 | 0       | 2.39031 | 1.80337 | 0.89653 | 0       |
| ENSMUSG00000079316 | 10_Rab9          | 947.386 | -0.31785 | 0.03202  | 0.06709  | 909.861 | 765.45  | 854.535 | 905.292 | 1147.56 | 1101.62 |
| ENSMUSG00000079317 | 10_Trappc2       | 232.196 | -0.95798 | 5.99E-06 | 4.34E-05 | 140.647 | 183.561 | 149.394 | 274.112 | 363.095 | 282.369 |
| ENSMUSG00000079323 | 9_Gm20661        | 8.64263 | 0.65393  | 0.44882  | 0.56373  | 7.8137  | 11.9315 | 11.9515 | 1.80337 | 10.7584 | 7.59736 |
| ENSMUSG00000079324 | 11_4932414N04Rik | 0.15297 | 0.92709  | 0.82027  | NA       | 0       | 0.91781 | 0       | 0       | 0       | 0       |
| ENSMUSG00000079330 | 8_Lemd1          | 100.665 | 0.10877  | 0.65777  | 0.75042  | 118.074 | 94.534  | 100.393 | 91.9719 | 97.7218 | 101.298 |
| ENSMUSG00000079334 | 8_Nat6           | 415.777 | 0.97763  | 8.71E-05 | 0.00044  | 501.813 | 566.286 | 586.821 | 387.725 | 187.375 | 264.641 |
| ENSMUSG00000079339 | 6_lfit1b1        | 16595   | 0.34588  | 0.08044  | 0.14401  | 18309.2 | 16617.8 | 20798.1 | 10630   | 18950.9 | 14264   |
| ENSMUSG00000079343 | 3_C1s2           | 383.869 | -0.14885 | 0.45182  | 0.5664   | 433.226 | 377.218 | 280.861 | 388.626 | 444.679 | 378.602 |
| ENSMUSG00000079355 | 3_Ackr4          | 74.5845 | -1.29529 | 6.44E-05 | 0.00034  | 35.5957 | 56.9039 | 37.0498 | 123.531 | 105.791 | 88.6359 |
| ENSMUSG00000079362 | 5_Gbp6           | 1338.52 | 2.53473  | 4.52E-34 | 3.65E-31 | 2437    | 1631.86 | 2781.12 | 351.657 | 457.231 | 372.271 |
| ENSMUSG00000079363 | 7_Gbp4           | 3029.86 | 2.37265  | 1.01E-25 | 3.24E-23 | 5784.74 | 3550.07 | 5902.87 | 769.138 | 1241.69 | 930.677 |
| ENSMUSG00000079364 | 3_Gm3558         | 15.5645 | -0.36092 | 0.56742  | 0.67238  | 14.7592 | 16.5205 | 9.56123 | 11.7219 | 26.8959 | 13.9285 |
| ENSMUSG00000079378 | 8_Gm8279         | 0       | NA       | NA       | NA       | 0       | 0       | 0       | 0       | 0       | 0       |
| ENSMUSG00000079383 | 9_Gm3298         | 0       | NA       | NA       | NA       | 0       | 0       | 0       | 0       | 0       | 0       |
| ENSMUSG00000079386 | 8_Gm3173         | 3.13775 | -2.1531  | 0.37025  | 0.48763  | 0       | 0       | 3.58546 | 0       | 15.241  | 0       |
| ENSMUSG00000079387 | 10_Luzp4         | 0.1447  | 0.92709  | 0.82027  | NA       | 0.86819 | 0       | 0       | 0       | 0       | 0       |
| ENSMUSG00000079388 | 9_2610042L04Rik  | 1.30701 | 2.69482  | 0.36045  | NA       | 6.94551 | 0       | 0       | 0       | 0.89653 | 0       |
| ENSMUSG00000079389 | 10_Gm3149        | 0.15028 | -0.99647 | 0.80707  | NA       | 0       | 0       | 0       | 0.90169 | 0       | 0       |
| ENSMUSG00000079391 | 10_Gm2974        | 2.09684 | 0.36243  | 0.88968  | NA       | 0       | 0       | 7.17092 | 5.41011 | 0       | 0       |
| ENSMUSG00000079396 | 4_Gm3411         | 4.82344 | -2.40101 | 0.18549  | 0.28374  | 0       | 0       | 4.78062 | 0       | 8.96531 | 15.1947 |
| ENSMUSG00000079402 | 9_Gm3020         | 2.79505 | -1.21414 | 0.36781  | 0.48518  | 1.73638 | 0.91781 | 2.39031 | 2.70506 | 2.68959 | 6.33113 |
| ENSMUSG00000079407 | 9_1700110I01Rik  | 0.45084 | -2.33355 | 0.56009  | NA       | 0       | 0       | 0       | 2.70506 | 0       | 0       |
| ENSMUSG00000079409 | 8_Gm5795         | 0       | NA       | NA       | NA       | 0       | 0       | 0       | 0       | 0       | 0       |
| ENSMUSG00000079410 | 4_Gm2897         | 16.1818 | -0.53898 | 0.37681  | 0.49428  | 8.68188 | 20.1917 | 10.7564 | 22.5421 | 19.7237 | 15.1947 |
| ENSMUSG00000079414 | 2_Gm11110        | 4.67439 | -0.69543 | 0.51223  | 0.6224   | 2.60457 | 4.58903 | 3.58546 | 3.60674 | 9.86184 | 3.79868 |
| ENSMUSG00000079415 | 2_Cntf           | 320.271 | -1.08434 | 6.11E-07 | 6.03E-06 | 182.32  | 267.999 | 164.931 | 454.449 | 458.127 | 393.797 |
| ENSMUSG00000079418 | 3_Atg4a          | 410.907 | -0.65852 | 3.03E-05 | 0.00018  | 322.098 | 328.574 | 305.959 | 493.222 | 564.814 | 450.777 |
| ENSMUSG00000079419 | 4_Ms4a6c         | 275.585 | 2.0863   | 1.95E-08 | 3.05E-07 | 744.037 | 219.356 | 375.278 | 112.711 | 114.756 | 87.3697 |
| ENSMUSG00000079426 | 12_Arpc4         | 2306.69 | 0.43822  | 2.95E-05 | 0.00017  | 2623.67 | 2520.29 | 2819.37 | 1922.39 | 1943.68 | 2010.77 |
| ENSMUSG00000079427 | 10_Mthfsl        | 195.083 | -0.37487 | 0.05891  | 0.1112   | 164.956 | 193.657 | 150.589 | 238.045 | 207.995 | 215.259 |
| ENSMUSG00000079428 | 8_Tceal7         | 12.63   | -1.38763 | 0.04941  | 0.09611  | 6.07732 | 5.50683 | 9.56123 | 26.1489 | 10.7584 | 17.7272 |
| ENSMUSG00000079429 | 9_Mroh2a         | 73.0821 | 0.07597  | 0.79574  | 0.85868  | 82.4779 | 64.2464 | 78.8802 | 76.6433 | 77.9982 | 58.2464 |
| ENSMUSG00000079432 | 1_Gm15023        | 1.11369 | -2.45652 | 0.2818   | NA       | 0       | 0.91781 | 0       | 2.70506 | 1.79306 | 1.26623 |
| ENSMUSG00000079434 | 8_Neu2           | 66.4788 | 0.53648  | 0.07578  | 0.13709  | 73.796  | 79.8491 | 82.4656 | 63.118  | 43.93   | 55.714  |
| ENSMUSG00000079435 | 9_Rpl36a         | 6673.28 | -0.56505 | 1.37E-08 | 2.25E-07 | 5663.19 | 5140.63 | 5344.73 | 7682.36 | 8340.42 | 7868.33 |
| ENSMUSG00000079436 | 3_Kcnj13         | 821.445 | -1.61443 | 1.67E-07 | 1.97E-06 | 420.203 | 578.218 | 213.933 | 1427.37 | 1416.52 | 872.43  |
| ENSMUSG00000079440 | 2_Alpi           | 0.14942 | -0.99647 | 0.80707  | NA       | 0       | 0       | 0       | 0       | 0.89653 | 0       |
| ENSMUSG00000079442 | 12_St6galnac4    | 120.47  | -0.01321 | 0.96652  | 0.97822  | 130.228 | 142.26  | 87.2462 | 166.812 | 101.308 | 94.967  |
| ENSMUSG00000079444 | 9_Gm21981        | 19.2425 | -0.86407 | 0.11688  | 0.19549  | 8.68188 | 15.6027 | 16.7322 | 20.7388 | 23.3098 | 30.3894 |
| ENSMUSG00000079445 | 3_B3gnt7         | 334.67  | 0.46465  | 0.00521  | 0.01457  | 387.212 | 390.985 | 384.84  | 285.834 | 243.856 | 315.291 |
| ENSMUSG00000079450 | 11_Cldn34c1      | 1.51012 | -0.55792 | 0.8123   | NA       | 0       | 3.67122 | 0       | 1.80337 | 3.58612 | 0       |
| ENSMUSG00000079451 | 9_Tmprss11g      | 15194.8 | 0.15195  | 0.34802  | 0.46495  | 15842.7 | 14180.1 | 17959.6 | 11406.3 | 15838.1 | 15941.8 |
| ENSMUSG00000079460 | 11_4933403O08Rik | 0.29884 | -1.76064 | 0.66373  | NA       | 0       | 0       | 0       | 0       | 1.79306 | 0       |
| ENSMUSG00000079462 | 1_Gm15737        | 0.5632  | 0.94119  | 0.77273  | NA       | 0       | 0.91781 | 1.19515 | 0       | 0       | 1.26623 |
| ENSMUSG00000079465 | 8_Col4a3         | 1372.21 | -1.65184 | 0.00137  | 0.0047   | 653.746 | 1038.04 | 295.203 | 2464.31 | 1707.89 | 2074.08 |
| ENSMUSG00000079466 | 2_Prdm12         | 0.59758 | 2.66585  | 0.50308  | NA       | 0       | 0       | 3.58546 | 0       | 0       | 0       |
| ENSMUSG00000079469 | 10_Pigb          | 474.309 | 0.01478  | 0.92137  | 0.94769  | 434.094 | 499.286 | 497.184 | 431.907 | 504.747 | 478.634 |
| ENSMUSG00000079470 | 8_Utp14b         | 568.351 | -0.53779 | 9.77E-05 | 0.00049  | 498.34  | 460.738 | 430.255 | 637.492 | 674.191 | 709.087 |
| ENSMUSG00000079471 | 3_Gm7325         | 4.90759 | -0.09138 | 0.9292   | 0.95313  | 3.47275 | 8.26025 | 2.39031 | 4.50843 | 4.48265 | 6.33113 |
| ENSMUSG00000079477 | 9_Rab7           | 7042.86 | 0.06022  | 0.52979  | 0.63839  | 7133.9  | 6967.06 | 7468.52 | 7019.62 | 6573.36 | 7094.67 |
| ENSMUSG00000079478 | 8_Ssca1          | 220.505 | 0.5613   | 0.03905  | 0.07891  | 231.806 | 228.534 | 328.667 | 227.225 | 121.928 | 184.869 |
| ENSMUSG00000079480 | 3_Pin4           | 585.377 | -0.58733 | 0.00141  | 0.00483  | 455.799 | 468.999 | 478.062 | 534.699 | 771.913 | 802.788 |
| ENSMUSG00000079481 | 11_Nhs12         | 188.932 | -0.70702 | 0.00237  | 0.00751  | 136.306 | 158.78  | 136.248 | 247.062 | 277.924 | 177.272 |
| ENSMUSG00000079484 | 12_Phyhd1        | 347.871 | -0.253   | 0.25494  | 0.36445  | 290.843 | 402.917 | 258.153 | 451.744 | 329.027 | 354.544 |
| ENSMUSG00000079487 | 11_Med12         | 2754.13 | 0.56692  | 1.38E-06 | 1.21E-05 | 3139.37 | 3345.4  | 3378.7  | 2017.97 | 2204.57 | 2438.75 |
| ENSMUSG00000079492 | 2_Gm11127        | 1791.31 | 3.05795  | 8.17E-41 | 1.26E-37 | 3004.8  | 2573.53 | 4016.91 | 475.188 | 267.166 | 410.258 |
| ENSMUSG00000079494 | 2_Cml5           | 9.36943 | -1.21731 | 0.15821  | 0.24987  | 1.73638 | 9.17806 | 5.97577 | 14.427  | 7.17224 | 17.7272 |
| ENSMUSG00000079495 | 2_Gm11128        | 3.0826  | 0.59106  | 0.73257  | 0.8102   | 1.73638 | 0       | 9.56123 | 4.50843 | 2.68959 | 0       |
| ENSMUSG00000079502 | 8_1700101E01Rik  | 3.19924 | 2.0496   | 0.20957  | 0.3127   | 1.73638 | 5.50683 | 8.36608 | 0       | 3.58612 | 0       |
| ENSMUSG00000079507 | 10_H2-Q1         | 365.318 | 2.51639  | 5.10E-30 | 2.79E-27 | 625.096 | 510.3   | 730.239 | 128.039 | 84.2739 | 113.96  |
| ENSMUSG00000079508 | 8_Apoo           | 205.561 | -1.01952 | 0.00019  | 0.00088  | 171.033 | 150.52  | 84.8559 | 302.966 | 292.269 | 231.72  |
| ENSMUSG00000079509 | 10_Zfx           | 1135    | -0.40847 | 0.00182  | 0.006    | 1052.24 | 908.628 | 965.685 | 1233.51 | 1425.48 | 1224.44 |
| ENSMUSG00000079511 | 8_Ccdc142        | 137.626 | 0.53356  | 0.03641  | 0.0745   | 137.174 | 196.41  | 154.175 | 120.826 | 90.5496 | 126.623 |
| ENSMUSG00000079523 | 8_Tmsb10         | 2102.35 | 0.42505  | 0.00252  | 0.00791  | 2725.24 | 2085.25 | 2417.8  | 1826.81 | 1640.65 | 1918.33 |
| ENSMUSG00000079531 | 1_Gm5936         | 4.15572 | 1.11099  | 0.47686  | 0.58943  | 7.8137  | 9.17806 | 0       | 5.41011 | 0       | 2.53245 |
| ENSMUSG00000079532 | 1_Gm6890         | 29.5076 | -0.41804 | 0.38306  | 0.50065  | 25.1775 | 22.9451 | 27.4885 | 18.9354 | 39.4473 | 43.0517 |
| ENSMUSG00000079534 | 1_Gm5640         | 3.18902 | 0.68697  | 0.73902  | 0.81542  | 0       | 0       | 11.9515 | 1.80337 | 5.37918 | 0       |
| ENSMUSG00000079536 | 1_Gm6880         | 23.7458 | -0.12921 | 0.82431  | 0.87973  | 18.232  | 23.8629 | 26.2934 | 43.2809 | 14.3445 | 16.4609 |
| ENSMUSG00000079537 | 3_C030048H21Rik  | 1.99602 | -0.17529 | 0.91457  | NA       | 1.73638 | 2.75342 | 1.19515 | 2.70506 | 3.58612 | 0       |
| ENSMUSG00000079547 | 3_H2-DMb1        | 62.1288 | 1.96907  | 6.41E-07 | 6.27E-06 | 110.26  | 86.2737 | 99.1978 | 23.4438 | 14.3445 | 39.253  |
| ENSMUSG00000079550 | 9_Mpp4           | 135.054 | -2.17095 | 3.95E-05 | 0.00022  | 63.3778 | 64.2464 | 19.1225 | 396.742 | 181.996 | 84.8372 |
| ENSMUSG00000079553 | 10_Kifc1         | 192.666 | 1.42894  | 8.47E-09 | 1.48E-07 | 290.843 | 289.109 | 261.739 | 118.121 | 70.8259 | 125.356 |
| ENSMUSG00000079554 | 2_Aox2           | 49.604  | -0.51283 | 0.14542  | 0.23284  | 46.8822 | 29.3698 | 46.611  | 58.6096 | 59.171  | 56.9802 |
| ENSMUSG00000079555 | 2_Haus3          | 231.898 | -0.44782 | 0.02679  | 0.05792  | 230.938 | 169.794 | 187.639 | 246.16  | 298.545 | 258.31  |
| ENSMUSG00000079557 | 10_March2        | 966.446 | 0.02086  | 0.89887  | 0.93175  | 963.689 | 1005.91 | 951.343 | 1175.8  | 825.705 | 876.229 |

|                    |                 |         |          |          |          |         |         |         |         |         |         |
|--------------------|-----------------|---------|----------|----------|----------|---------|---------|---------|---------|---------|---------|
| ENSMUSG00000079559 | 3_Gm684         | 55.3305 | -0.21592 | 0.52972  | 0.63838  | 56.4322 | 60.5752 | 35.8546 | 55.0028 | 58.2745 | 65.8438 |
| ENSMUSG00000079560 | 13_Hoxa3        | 0.1447  | 0.92709  | 0.82027  | NA       | 0.86819 | 0       | 0       | 0       | 0       | 0       |
| ENSMUSG00000079562 | 6_Maea          | 2700.06 | 0.69807  | 1.41E-08 | 2.31E-07 | 3083.81 | 3349.99 | 3589.05 | 2206.42 | 1860.3  | 2110.8  |
| ENSMUSG00000079563 | 9_Pglyrp2       | 2.65935 | 1.60795  | 0.28883  | 0.40235  | 8.68188 | 0.91781 | 2.39031 | 1.80337 | 0.89653 | 1.26623 |
| ENSMUSG00000079564 | 2_Gm11149       | 0.14942 | -0.99647 | 0.80707  | NA       | 0       | 0       | 0       | 0       | 0.89653 | 0       |
| ENSMUSG00000079566 | 1_Spin2d        | 5.01031 | 0.96133  | 0.42259  | 0.53817  | 2.60457 | 1.83561 | 15.537  | 1.80337 | 4.48265 | 3.79868 |
| ENSMUSG00000079577 | 1_Gm14692       | 1.01203 | -1.2483  | 0.64075  | NA       | 1.73638 | 0       | 0       | 1.80337 | 0       | 2.53245 |
| ENSMUSG00000079578 | 1_Gm1140        | 1.01203 | -1.2483  | 0.64075  | NA       | 1.73638 | 0       | 0       | 1.80337 | 0       | 2.53245 |
| ENSMUSG00000079580 | 8_Tmem217       | 0.65544 | -1.52662 | 0.57491  | NA       | 0.86819 | 0       | 0       | 0.90169 | 0.89653 | 1.26623 |
| ENSMUSG00000079588 | 3_Tmem182       | 59.2819 | -1.98673 | 4.30E-05 | 0.00024  | 18.232  | 37.63   | 15.537  | 148.778 | 58.2745 | 77.2398 |
| ENSMUSG00000079592 | 9_C1qtnf5       | 436.218 | 0.58661  | 0.0443   | 0.08764  | 547.827 | 602.08  | 421.889 | 535.601 | 268.063 | 241.849 |
| ENSMUSG00000079594 | 2_BC117090      | 8.36522 | 1.15508  | 0.29143  | 0.40521  | 13.891  | 5.50683 | 15.537  | 2.70506 | 12.5514 | 0       |
| ENSMUSG00000079597 | 1_Gm5483        | 1.53211 | 2.86774  | 0.22823  | NA       | 4.34094 | 0       | 3.58546 | 0       | 0       | 1.26623 |
| ENSMUSG00000079598 | 3_Clec2l        | 104.166 | 0.75724  | 0.01983  | 0.04493  | 128.492 | 138.589 | 125.491 | 107.301 | 46.6196 | 78.5061 |
| ENSMUSG00000079604 | 9_Gm13219       | 0.45084 | -2.33355 | 0.56009  | NA       | 0       | 0       | 0       | 2.70506 | 0       | 0       |
| ENSMUSG00000079605 | 4_Zbtb9         | 442.766 | 0.15823  | 0.39656  | 0.51411  | 443.644 | 465.327 | 491.208 | 324.607 | 445.576 | 486.231 |
| ENSMUSG00000079606 | 1_Gm595         | 0.15297 | 0.92709  | 0.82027  | NA       | 0       | 0.91781 | 0       | 0       | 0       | 0       |
| ENSMUSG00000079608 | 10_StarD6       | 17.5979 | -1.46424 | 0.01572  | 0.03707  | 6.07732 | 14.6849 | 7.17092 | 20.7388 | 27.7924 | 29.1232 |
| ENSMUSG00000079610 | 8_Ankrd39       | 0.65004 | -1.37582 | 0.70216  | NA       | 0       | 0       | 1.19515 | 2.70506 | 0       | 0       |
| ENSMUSG00000079614 | 3_Seh1l         | 1618.82 | -0.32768 | 0.00343  | 0.01029  | 1472.45 | 1430.86 | 1403.11 | 1666.31 | 1895.27 | 1844.89 |
| ENSMUSG00000079620 | 13_Muc4         | 77854   | 0.67291  | 0.00038  | 0.00159  | 94202.8 | 92149.5 | 100711  | 43089.7 | 60226.2 | 76744.7 |
| ENSMUSG00000079625 | 2_Tm4sf19       | 2.60149 | 3.76143  | 0.04685  | 0.09186  | 7.8137  | 0.91781 | 5.97577 | 0.90169 | 0       | 0       |
| ENSMUSG00000079626 | 2_Rhox7b        | 0.45084 | -2.33355 | 0.56009  | NA       | 0       | 0       | 0       | 2.70506 | 0       | 0       |
| ENSMUSG00000079628 | 3_Rhox4g        | 0.59758 | 2.66585  | 0.50308  | NA       | 0       | 0       | 3.58546 | 0       | 0       | 0       |
| ENSMUSG00000079630 | 2_Rhox4f        | 0.29884 | -1.76064 | 0.66373  | NA       | 0       | 0       | 0       | 0       | 1.79306 | 0       |
| ENSMUSG00000079633 | 3_Rhox4d        | 0.90975 | 0.01645  | 0.99593  | NA       | 0       | 2.75342 | 0       | 2.70506 | 0       | 0       |
| ENSMUSG00000079636 | 11_Rhox3c       | 0.21104 | -0.99647 | 0.80707  | NA       | 0       | 0       | 0       | 0       | 0       | 1.26623 |
| ENSMUSG00000079637 | 10_Rhox2c       | 0.51343 | -1.00887 | 0.76364  | NA       | 0       | 0.91781 | 0       | 0       | 0.89653 | 1.26623 |
| ENSMUSG00000079639 | 4_Rhox4a        | 3.84753 | 0.53547  | 0.65566  | 0.74891  | 2.60457 | 7.34244 | 3.58546 | 0.90169 | 3.58612 | 5.06491 |
| ENSMUSG00000079641 | 3_Rpl39         | 11853.4 | -0.74313 | 3.65E-08 | 5.19E-07 | 9530.97 | 8596.17 | 8471.25 | 12964.4 | 17164.1 | 14393.2 |
| ENSMUSG00000079644 | 1_Gm1110        | 0.64918 | -1.3814  | 0.65297  | NA       | 0       | 0       | 1.19515 | 1.80337 | 0.89653 | 0       |
| ENSMUSG00000079652 | 8_Fam71f2       | 2.40002 | -0.93492 | 0.51306  | NA       | 1.73638 | 0.91781 | 2.39031 | 3.60674 | 4.48265 | 1.26623 |
| ENSMUSG00000079654 | 3_Prrt4         | 26.4571 | -0.43642 | 0.42339  | 0.53899  | 22.5729 | 31.2054 | 13.1467 | 34.264  | 17.0341 | 40.5193 |
| ENSMUSG00000079657 | 10_Rab26        | 11.0076 | -1.36428 | 0.04625  | 0.09085  | 6.07732 | 6.42464 | 5.97577 | 17.132  | 15.241  | 15.1947 |
| ENSMUSG00000079658 | 9_Tceb1         | 1020.29 | -0.52614 | 9.05E-05 | 0.00046  | 841.275 | 856.313 | 811.51  | 1107.27 | 1364.52 | 1140.87 |
| ENSMUSG00000079659 | 5_Tmem243       | 267.901 | -0.36951 | 0.09168  | 0.16007  | 258.72  | 204.671 | 239.031 | 308.376 | 364.888 | 231.72  |
| ENSMUSG00000079677 | 1_Fdx1l         | 260.95  | 0.27038  | 0.20982  | 0.31294  | 288.239 | 251.479 | 316.716 | 287.638 | 187.375 | 234.252 |
| ENSMUSG00000079679 | 3_Vwde          | 4.13022 | -2.87641 | 0.0315   | 0.06617  | 0.86819 | 0.91781 | 1.19515 | 2.70506 | 8.96531 | 10.1298 |
| ENSMUSG00000079681 | 2_Zglp1         | 4.89932 | -0.09426 | 0.92568  | 0.95095  | 4.34094 | 7.34244 | 2.39031 | 4.50843 | 4.48265 | 6.33113 |
| ENSMUSG00000079685 | 9_Ulbp1         | 100.171 | -0.08909 | 0.77647  | 0.84375  | 116.337 | 76.1779 | 98.0026 | 72.1348 | 106.687 | 131.688 |
| ENSMUSG00000079694 | 2_Gm14862       | 0.19919 | 0.92709  | 0.82027  | NA       | 0       | 0       | 1.19515 | 0       | 0       | 0       |
| ENSMUSG00000079697 | 1_Gm5751        | 1.71213 | -0.42649 | 0.81738  | NA       | 0       | 0.91781 | 3.58546 | 3.60674 | 0.89653 | 1.26623 |
| ENSMUSG00000079699 | 2_Gm6592        | 0.5891  | -0.05433 | 0.98647  | NA       | 1.73638 | 0       | 0       | 0.90169 | 0.89653 | 0       |
| ENSMUSG00000079704 | 2_Gm14459       | 0       | NA       | NA       | NA       | 0       | 0       | 0       | 0       | 0       | 0       |
| ENSMUSG00000079707 | 9_Tcte3         | 2.81304 | -0.17964 | 0.93088  | 0.95421  | 6.07732 | 1.83561 | 0       | 0       | 8.96531 | 0       |
| ENSMUSG00000079710 | 9_Gm3448        | 11.68   | 0.31524  | 0.65743  | 0.75028  | 14.7592 | 6.42464 | 17.9273 | 10.8202 | 12.5514 | 7.59736 |
| ENSMUSG00000079722 | 1_Tlll2         | 27.3156 | -0.04173 | 0.93771  | 0.95918  | 20.8365 | 44.0547 | 15.537  | 31.559  | 21.5167 | 30.3894 |
| ENSMUSG00000079737 | 3_3110001122Rik | 63.5906 | -0.27611 | 0.39074  | 0.50822  | 52.0913 | 45.8903 | 75.2947 | 70.3315 | 70.8259 | 67.11   |
| ENSMUSG00000079845 | 8_Xlr4a         | 325.118 | -0.5856  | 0.01615  | 0.03791  | 303.866 | 215.684 | 260.544 | 286.736 | 506.54  | 377.336 |
| ENSMUSG00000079852 | 4_Klra4         | 0.51697 | 0.77694  | 0.84161  | NA       | 0       | 1.83561 | 0       | 0       | 0       | 1.26623 |
| ENSMUSG00000079853 | 5_Klra1         | 0       | NA       | NA       | NA       | 0       | 0       | 0       | 0       | 0       | 0       |
| ENSMUSG00000079941 | 1_Gm11273       | 10.3155 | -1.2294  | 0.23568  | 0.34251  | 3.47275 | 9.17806 | 5.97577 | 3.60674 | 35.8612 | 3.79868 |
| ENSMUSG00000080058 | 1_Gm11175       | 15.1906 | 7.34815  | 2.71E-07 | 2.98E-06 | 9.55007 | 26.6164 | 54.9771 | 0       | 0       | 0       |
| ENSMUSG00000080115 | 3_Mettl21b      | 12.9287 | 0.23161  | 0.76251  | 0.83298  | 6.94551 | 15.6027 | 19.1225 | 5.41011 | 8.96531 | 21.5259 |
| ENSMUSG00000080268 | 3_Brns1         | 694.577 | 0.81378  | 2.28E-05 | 0.00014  | 849.088 | 792.984 | 1014.69 | 607.736 | 392.68  | 510.289 |
| ENSMUSG00000080316 | 10_Spaca6       | 656.601 | -0.28226 | 0.11529  | 0.19326  | 579.082 | 657.149 | 541.405 | 606.834 | 877.703 | 677.431 |
| ENSMUSG00000080717 | 9_B230307C23Rik | 50.4651 | -0.28188 | 0.40308  | 0.52057  | 46.014  | 44.9725 | 45.4159 | 60.4129 | 43.93   | 62.0451 |
| ENSMUSG00000080907 | 1_4930455H04Rik | 0.21104 | -0.99647 | 0.80707  | NA       | 0       | 0       | 0       | 0       | 0       | 1.26623 |
| ENSMUSG00000081044 | 8_AU015836      | 0.45353 | -0.80448 | 0.84252  | NA       | 0       | 0.91781 | 0       | 1.80337 | 0       | 0       |
| ENSMUSG00000081058 | 5_Hist2h3c2     | 8.15766 | -0.63487 | 0.45332  | 0.56761  | 4.34094 | 10.0959 | 4.78062 | 15.3287 | 8.06878 | 6.33113 |
| ENSMUSG00000081362 | 3_Cyp2j7        | 0.21104 | -0.99647 | 0.80707  | NA       | 0       | 0       | 0       | 0       | 0       | 1.26623 |
| ENSMUSG00000081512 | 1_Gm15821       | 28.9383 | 1.68286  | 0.00024  | 0.00105  | 52.0913 | 42.2191 | 38.2449 | 16.2303 | 13.448  | 11.396  |
| ENSMUSG00000081534 | 2_Slc48a1       | 2239.1  | -0.11235 | 0.5018   | 0.61281  | 2113.17 | 2431.27 | 1911.05 | 2808.75 | 1954.44 | 2215.9  |
| ENSMUSG00000081607 | 2_Gm15294       | 2.16233 | -2.57022 | 0.18725  | NA       | 0       | 1.83561 | 0       | 1.80337 | 8.06878 | 1.26623 |
| ENSMUSG00000081650 | 1_Gm16181       | 2.39394 | 0.46411  | 0.7489   | NA       | 5.20913 | 1.83561 | 1.19515 | 0.90169 | 2.68959 | 2.53245 |
| ENSMUSG00000081683 | 5_Fzd10         | 204.623 | 1.03998  | 1.18E-05 | 7.86E-05 | 259.588 | 252.397 | 313.13  | 140.663 | 98.6184 | 163.343 |
| ENSMUSG00000081769 | 8_Gm12216       | 26.8959 | 1.29542  | 0.00751  | 0.01982  | 47.7504 | 34.8766 | 32.2692 | 20.7388 | 14.3445 | 11.396  |
| ENSMUSG00000081906 | 2_Rpl9-ps1      | 1.11111 | -2.45008 | 0.35592  | NA       | 0       | 0.91781 | 0       | 0       | 4.48265 | 1.26623 |
| ENSMUSG00000081984 | 3_Dnajb3        | 13.2219 | -0.27912 | 0.66158  | 0.75344  | 13.0228 | 7.34244 | 15.537  | 12.6236 | 14.3445 | 16.4609 |
| ENSMUSG00000082101 | 3_Slfn14        | 0       | NA       | NA       | NA       | 0       | 0       | 0       | 0       | 0       | 0       |
| ENSMUSG00000082229 | 1_Nap1l2        | 16.5409 | -2.07732 | 0.00183  | 0.00603  | 9.55007 | 4.58903 | 4.78062 | 36.9691 | 26.8959 | 16.4609 |
| ENSMUSG00000082361 | 6_Btc           | 371.531 | 0.00494  | 0.97878  | 0.98604  | 361.166 | 311.136 | 444.597 | 358.871 | 346.957 | 406.459 |
| ENSMUSG00000082766 | 1_1700064H15Rik | 1.17273 | -2.5277  | 0.32497  | NA       | 0       | 0.91781 | 0       | 0       | 3.58612 | 2.53245 |
| ENSMUSG00000082932 | 3_Cyp2j8        | 1.0509  | -0.41571 | 0.85769  | NA       | 0.86819 | 1.83561 | 0       | 2.70506 | 0.89653 | 0       |
| ENSMUSG00000082976 | 9_Gm15056       | 15.586  | 6.42209  | 2.24E-06 | 1.86E-05 | 50.3549 | 18.3561 | 23.9031 | 0.90169 | 0       | 0       |
| ENSMUSG00000083012 | 8_Fam220a       | 477.624 | 0.09416  | 0.56459  | 0.6699   | 487.054 | 452.478 | 540.21  | 502.239 | 396.267 | 487.497 |
| ENSMUSG00000083193 | 1_4930595D18Rik | 0.21104 | -0.99647 | 0.80707  | NA       | 0       | 0       | 0       | 0       | 0       | 1.26623 |
| ENSMUSG00000083282 | 2_Ctsf          | 958.759 | -0.24849 | 0.19672  | 0.29706  | 757.928 | 1116.97 | 754.142 | 1202.85 | 964.667 | 956.001 |
| ENSMUSG00000083649 | 5_Rasl2-9       | 5.2282  | -1.01002 | 0.33667  | 0.45329  | 6.07732 | 1.83561 | 2.39031 | 3.60674 | 9.86184 | 7.59736 |

|                     |                 |         |          |          |          |         |         |         |         |         |         |
|---------------------|-----------------|---------|----------|----------|----------|---------|---------|---------|---------|---------|---------|
| ENSMUSG000000083695 | 6_Rnf138rt1     | 0.90803 | 0.01786  | 0.99486  | NA       | 0       | 2.75342 | 0       | 0.90169 | 1.79306 | 0       |
| ENSMUSG000000083780 | 8_Gm12728       | 15.0739 | -1.96993 | 0.05194  | 0.10006  | 6.07732 | 6.42464 | 5.97577 | 5.41011 | 62.7571 | 3.79868 |
| ENSMUSG000000083929 | 3_Gm10600       | 8.94401 | -2.02451 | 0.01377  | 0.03306  | 4.34094 | 3.67122 | 2.39031 | 10.8202 | 13.448  | 18.9934 |
| ENSMUSG000000084128 | 10_Esrp2        | 4149.4  | 0.87864  | 1.94E-09 | 4.15E-08 | 5102.34 | 4970.83 | 6051.07 | 2792.52 | 2581.11 | 3398.55 |
| ENSMUSG000000084174 | 2_Sync          | 5.25145 | 1.48894  | 0.18341  | 0.28117  | 5.20913 | 3.67122 | 14.3418 | 0.90169 | 3.58612 | 3.79868 |
| ENSMUSG000000084346 | 4_Cyp4a30b      | 0.21104 | -0.99647 | 0.80707  | NA       | 0       | 0       | 0       | 0       | 0       | 1.26623 |
| ENSMUSG000000084754 | 1_Gm12532       | 0.21104 | -0.99647 | 0.80707  | NA       | 0       | 0       | 0       | 0       | 0       | 1.26623 |
| ENSMUSG000000084756 | 1_Gm13881       | 0.29498 | -0.03469 | 0.99322  | NA       | 0.86819 | 0       | 0       | 0.90169 | 0       | 0       |
| ENSMUSG000000084758 | 1_Gm12798       | 1.20321 | 1.50128  | 0.51126  | NA       | 0       | 1.83561 | 3.58546 | 0.90169 | 0.89653 | 0       |
| ENSMUSG000000084772 | 1_Gm15473       | 0.44998 | -2.33107 | 0.56049  | NA       | 0       | 0       | 0       | 1.80337 | 0.89653 | 0       |
| ENSMUSG000000084773 | 1_Gm12159       | 0.15028 | -0.99647 | 0.80707  | NA       | 0       | 0       | 0       | 0.90169 | 0       | 0       |
| ENSMUSG000000084776 | 1_Gm14951       | 0.51074 | -2.49114 | 0.44681  | NA       | 0       | 0       | 0       | 0.90169 | 0.89653 | 1.26623 |
| ENSMUSG000000084786 | 9_Ubl5          | 2278.14 | -0.25687 | 0.01553  | 0.03668  | 2207.8  | 2069.65 | 1949.3  | 2529.23 | 2490.56 | 2422.29 |
| ENSMUSG000000084788 | 1_Gm11342       | 2.34703 | 0.15554  | 0.91151  | NA       | 3.47275 | 2.75342 | 1.19515 | 2.70506 | 2.68959 | 1.26623 |
| ENSMUSG000000084789 | 1_Gm12974       | 0.62127 | -1.21388 | 0.74137  | NA       | 0       | 0       | 1.19515 | 0       | 0       | 2.53245 |
| ENSMUSG000000084792 | 1_1700056N10Rik | 5.44927 | -0.12824 | 0.90047  | 0.93273  | 3.47275 | 7.34244 | 4.78062 | 1.80337 | 8.96531 | 6.33113 |
| ENSMUSG000000084796 | 1_Mir142hg      | 10.6753 | 2.67614  | 0.00368  | 0.01091  | 26.9138 | 11.9315 | 16.7322 | 6.3118  | 0.89653 | 1.26623 |
| ENSMUSG000000084797 | 1_Gm14321       | 9.77457 | 1.27316  | 0.09196  | 0.16045  | 9.55007 | 12.8493 | 19.1225 | 6.3118  | 4.48265 | 6.33113 |
| ENSMUSG000000084799 | 7_Ino80dos      | 75.7784 | -0.50269 | 0.06489  | 0.12062  | 64.2459 | 59.6574 | 64.5383 | 88.3652 | 96.8253 | 81.0385 |
| ENSMUSG000000084805 | 1_Gm12273       | 0.14942 | -0.99647 | 0.80707  | NA       | 0       | 0       | 0       | 0       | 0.89653 | 0       |
| ENSMUSG000000084806 | 1_Gm15232       | 1.04446 | 0.39152  | 0.86395  | NA       | 1.73638 | 1.83561 | 0       | 0.90169 | 1.79306 | 0       |
| ENSMUSG000000084816 | 1_Platr29       | 0.57504 | -1.21646 | 0.74749  | NA       | 0       | 0.91781 | 0       | 0       | 0       | 2.53245 |
| ENSMUSG000000084823 | 2_Gm17216       | 2.34252 | -0.60061 | 0.687    | NA       | 3.47275 | 0.91781 | 1.19515 | 5.41011 | 1.79306 | 1.26623 |
| ENSMUSG000000084840 | 1_Gm11468       | 0.29884 | -1.76064 | 0.66373  | NA       | 0       | 0       | 0       | 0       | 1.79306 | 0       |
| ENSMUSG000000084843 | 1_B230312C02Rik | 4.93206 | -0.27754 | 0.80829  | 0.86748  | 4.34094 | 6.42464 | 2.39031 | 5.41011 | 0.89653 | 10.1298 |
| ENSMUSG000000084845 | 9_Tmem240       | 24.0374 | -0.47501 | 0.34104  | 0.45736  | 21.7047 | 22.0273 | 16.7322 | 37.8708 | 26.8959 | 18.9934 |
| ENSMUSG000000084861 | 1_1700095J07Rik | 0.15297 | 0.92709  | 0.82027  | NA       | 0       | 0.91781 | 0       | 0       | 0       | 0       |
| ENSMUSG000000084883 | 1_Ccdc85c       | 59.6908 | 1.18665  | 0.00111  | 0.00391  | 69.4551 | 84.4381 | 94.4172 | 39.6742 | 23.3098 | 46.8504 |
| ENSMUSG000000084891 | 1_Gm12958       | 0.14942 | -0.99647 | 0.80707  | NA       | 0       | 0       | 0       | 0       | 0.89653 | 0       |
| ENSMUSG000000084897 | 1_Gm14226       | 2.75747 | -0.8649  | 0.5161   | 0.62608  | 2.60457 | 0.91781 | 2.39031 | 5.41011 | 2.68959 | 2.53245 |
| ENSMUSG000000084898 | 1_Gm12371       | 0.21104 | -0.99647 | 0.80707  | NA       | 0       | 0       | 0       | 0       | 0       | 1.26623 |
| ENSMUSG000000084902 | 1_Gm281         | 4.52781 | -0.19534 | 0.86906  | 0.91121  | 3.47275 | 0.91781 | 8.36608 | 1.80337 | 6.27571 | 6.33113 |
| ENSMUSG000000084904 | 1_Gm14827       | 8.00646 | -0.82155 | 0.40986  | 0.52649  | 2.60457 | 5.50683 | 9.56123 | 7.21348 | 20.6202 | 2.53245 |
| ENSMUSG000000084907 | 1_Gm14505       | 2.46054 | -0.77344 | 0.61433  | NA       | 1.73638 | 3.67122 | 0       | 3.60674 | 4.48265 | 1.26623 |
| ENSMUSG000000084909 | 1_4930528G23Rik | 0.15028 | -0.99647 | 0.80707  | NA       | 0       | 0       | 0       | 0.90169 | 0       | 0       |
| ENSMUSG000000084917 | 3_Gm17477       | 10.1353 | -0.32925 | 0.65517  | 0.74855  | 11.2864 | 8.26025 | 7.17092 | 12.6236 | 6.27571 | 15.1947 |
| ENSMUSG000000084918 | 1_Gm12708       | 0.96244 | -3.41564 | 0.27109  | NA       | 0       | 0       | 0       | 4.50843 | 0       | 1.26623 |
| ENSMUSG000000084920 | 1_Gm15230       | 20.7679 | -0.01396 | 0.9789   | 0.98608  | 21.7047 | 16.5205 | 23.9031 | 14.427  | 27.7924 | 20.2596 |
| ENSMUSG000000084921 | 1_Gm13838       | 0.15028 | -0.99647 | 0.80707  | NA       | 0       | 0       | 0       | 0.90169 | 0       | 0       |
| ENSMUSG000000084923 | 1_Gm15611       | 0.5116  | -2.49497 | 0.51548  | NA       | 0       | 0       | 0       | 1.80337 | 0       | 1.26623 |
| ENSMUSG000000084945 | 1_C030037F17Rik | 0.49331 | 0.9132   | 0.78796  | NA       | 0.86819 | 0       | 1.19515 | 0       | 0.89653 | 0       |
| ENSMUSG000000084954 | 1_Gm16351       | 0.30056 | -1.76625 | 0.6627   | NA       | 0       | 0       | 0       | 1.80337 | 0       | 0       |
| ENSMUSG000000084956 | 7_Gm16194       | 1.19022 | 2.50976  | 0.26785  | NA       | 1.73638 | 0.91781 | 3.58546 | 0.90169 | 0       | 0       |
| ENSMUSG000000084957 | 2_Bbip1         | 439.106 | -0.80194 | 1.06E-07 | 1.32E-06 | 316.021 | 308.383 | 337.033 | 534.699 | 616.813 | 521.685 |
| ENSMUSG000000084966 | 1_2810471M01Rik | 0.14942 | -0.99647 | 0.80707  | NA       | 0       | 0       | 0       | 0       | 0.89653 | 0       |
| ENSMUSG000000084969 | 1_Gm11205       | 0.74121 | 0.544    | 0.85364  | NA       | 1.73638 | 0.91781 | 0       | 0       | 1.79306 | 0       |
| ENSMUSG000000084973 | 1_Gm13848       | 2.30864 | -0.32221 | 0.82341  | NA       | 0.86819 | 1.83561 | 3.58546 | 3.60674 | 2.68959 | 1.26623 |
| ENSMUSG000000084979 | 1_Gm16267       | 2.44001 | 0.12954  | 0.93818  | NA       | 0       | 6.42464 | 1.19515 | 0.90169 | 3.58612 | 2.53245 |
| ENSMUSG000000084989 | 3_Crocc2        | 60.8819 | -0.08736 | 0.80057  | 0.86203  | 53.8277 | 74.3423 | 49.0013 | 80.25   | 54.6884 | 53.1815 |
| ENSMUSG000000084996 | 1_Gm11419       | 0.1447  | 0.92709  | 0.82027  | NA       | 0.86819 | 0       | 0       | 0       | 0       | 0       |
| ENSMUSG000000084999 | 1_Gm15839       | 2.35755 | 0.1095   | 0.93967  | NA       | 0.86819 | 1.83561 | 4.78062 | 2.70506 | 2.68959 | 1.26623 |
| ENSMUSG000000085000 | 1_Gm14553       | 0       | NA       | NA       | NA       | 0       | 0       | 0       | 0       | 0       | 0       |
| ENSMUSG000000085007 | 2_Gm11549       | 0.50043 | 0.71218  | 0.85616  | NA       | 1.73638 | 0       | 0       | 0       | 0       | 1.26623 |
| ENSMUSG000000085014 | 1_Gm13490       | 1.72194 | -0.03678 | 0.98339  | NA       | 0.86819 | 1.83561 | 2.39031 | 2.70506 | 0       | 2.53245 |
| ENSMUSG000000085020 | 1_2310081003Rik | 0.50516 | -1.00911 | 0.76476  | NA       | 0.86819 | 0       | 0       | 0       | 0.89653 | 1.26623 |
| ENSMUSG000000085024 | 1_C230035116Rik | 10.0661 | -1.57642 | 0.04147  | 0.08293  | 4.34094 | 8.26025 | 2.39031 | 17.132  | 14.3445 | 13.9285 |
| ENSMUSG000000085025 | 1_Gm13715       | 0.77781 | -1.80873 | 0.59824  | NA       | 0.86819 | 0       | 0       | 0       | 0       | 3.79868 |
| ENSMUSG000000085027 | 1_Gm11840       | 0       | NA       | NA       | NA       | 0       | 0       | 0       | 0       | 0       | 0       |
| ENSMUSG000000085032 | 1_Gm11217       | 0.14942 | -0.99647 | 0.80707  | NA       | 0       | 0       | 0       | 0       | 0.89653 | 0       |
| ENSMUSG000000085035 | 1_Gm12031       | 4.41504 | -1.44674 | 0.19195  | 0.29177  | 0.86819 | 2.75342 | 3.58546 | 5.41011 | 6.27571 | 7.59736 |
| ENSMUSG000000085046 | 1_Gm11467       | 0.30056 | -1.76625 | 0.6627   | NA       | 0       | 0       | 0       | 1.80337 | 0       | 0       |
| ENSMUSG000000085053 | 1_Gm14809       | 0.45267 | -0.80756 | 0.8164   | NA       | 0       | 0.91781 | 0       | 0.90169 | 0.89653 | 0       |
| ENSMUSG000000085054 | 2_Gm15834       | 15.311  | -0.51231 | 0.41399  | 0.53014  | 19.1001 | 9.17806 | 9.56123 | 21.6405 | 19.7237 | 12.6623 |
| ENSMUSG000000085067 | 2_Gm15631       | 0.94415 | -0.86628 | 0.72314  | NA       | 0.86819 | 0       | 1.19515 | 2.70506 | 0.89653 | 0       |
| ENSMUSG000000085074 | 1_Gm11494       | 0.15028 | -0.99647 | 0.80707  | NA       | 0       | 0       | 0       | 0.90169 | 0       | 0       |
| ENSMUSG000000085079 | 3_Khdc1b        | 0.50602 | -1.01212 | 0.76398  | NA       | 0.86819 | 0       | 0       | 0.90169 | 0       | 1.26623 |
| ENSMUSG000000085084 | 7_4930570G19Rik | 10.9352 | -1.3073  | 0.0865   | 0.15252  | 7.8137  | 7.34244 | 3.58546 | 24.3455 | 9.86184 | 12.6623 |
| ENSMUSG000000085085 | 2_1700086P04Rik | 4.22798 | -0.72293 | 0.52397  | 0.63341  | 3.47275 | 3.67122 | 2.39031 | 1.80337 | 8.96531 | 5.06491 |
| ENSMUSG000000085111 | 3_Asc4          | 1.13218 | 1.40276  | 0.54304  | NA       | 2.60457 | 0       | 2.39031 | 0.90169 | 0.89653 | 0       |
| ENSMUSG000000085113 | 1_B130011K05Rik | 0.21104 | -0.99647 | 0.80707  | NA       | 0       | 0       | 0       | 0       | 0       | 1.26623 |
| ENSMUSG000000085124 | 1_Gm12766       | 63.3405 | 0.04064  | 0.89428  | 0.92865  | 58.1686 | 66.9998 | 68.1238 | 62.2163 | 72.619  | 51.9153 |
| ENSMUSG000000085126 | 1_Gm12589       | 0.45267 | -0.80756 | 0.8164   | NA       | 0       | 0.91781 | 0       | 0.90169 | 0.89653 | 0       |
| ENSMUSG000000085129 | 1_5031425F14Rik | 0.30325 | -0.03469 | 0.99322  | NA       | 0       | 0.91781 | 0       | 0.90169 | 0       | 0       |
| ENSMUSG000000085139 | 1_A730046J19Rik | 10.9842 | -1.09339 | 0.12636  | 0.208    | 8.68188 | 6.42464 | 5.97577 | 17.132  | 18.8271 | 8.86359 |
| ENSMUSG000000085146 | 1_Elf2c5        | 3.56677 | -0.14925 | 0.2774   | 0.38996  | 4.34094 | 0       | 1.19515 | 7.21348 | 3.58612 | 5.06491 |
| ENSMUSG000000085152 | 1_Gm11496       | 15.2557 | -0.01284 | 0.98361  | 0.98903  | 11.2864 | 20.1917 | 14.3418 | 16.2303 | 20.6202 | 8.86359 |
| ENSMUSG000000085158 | 1_Gm14264       | 0.21104 | -0.99647 | 0.80707  | NA       | 0       | 0       | 0       | 0       | 0       | 1.26623 |
| ENSMUSG000000085162 | 7_Gm12295       | 1.31829 | -1.70579 | 0.3923   | NA       | 0.86819 | 0.91781 | 0       | 0.90169 | 2.68959 | 2.53245 |
| ENSMUSG000000085167 | 1_Gm12063       | 0.90599 | 2.08305  | 0.45603  | NA       | 0.86819 | 3.67122 | 0       | 0       | 0.89653 | 0       |

|                     |                 |         |          |          |          |         |         |         |         |         |         |
|---------------------|-----------------|---------|----------|----------|----------|---------|---------|---------|---------|---------|---------|
| ENSMUSG000000085171 | 7_D830026I12Rik | 0.30056 | -1.76625 | 0.6627   | NA       | 0       | 0       | 0       | 1.80337 | 0       | 0       |
| ENSMUSG000000085180 | 1_AI838599      | 20.0899 | -0.92208 | 0.11976  | 0.19942  | 12.1546 | 7.34244 | 22.7079 | 29.7556 | 29.5855 | 18.9934 |
| ENSMUSG000000085183 | 1_Gm12603       | 6.14893 | -1.04915 | 0.27812  | 0.39067  | 1.73638 | 5.50683 | 4.78062 | 4.50843 | 8.96531 | 11.396  |
| ENSMUSG000000085188 | 1_Gm11368       | 0.15028 | -0.99647 | 0.80707  | NA       | 0       | 0       | 0       | 0.90169 | 0       | 0       |
| ENSMUSG000000085217 | 1_6030471H07Rik | 1.47318 | -0.42759 | 0.08238  | NA       | 0       | 0       | 0       | 5.41011 | 0.89653 | 2.53245 |
| ENSMUSG000000085222 | 1_Gm13974       | 0.34861 | -0.03469 | 0.99322  | NA       | 0       | 0       | 1.19515 | 0       | 0.89653 | 0       |
| ENSMUSG000000085237 | 2_Gm15406       | 16.4724 | -0.35449 | 0.52434  | 0.63373  | 16.4956 | 14.6849 | 11.9515 | 18.9354 | 15.241  | 21.5259 |
| ENSMUSG000000085238 | 1_4930479D17Rik | 0.71348 | -0.03363 | 0.99006  | NA       | 0       | 0.91781 | 1.19515 | 0.90169 | 0       | 1.26623 |
| ENSMUSG000000085250 | 1_Gm15234       | 10.8701 | -0.10052 | 0.89706  | 0.93062  | 14.7592 | 8.26025 | 8.36608 | 4.50843 | 17.9306 | 11.396  |
| ENSMUSG000000085251 | 1_Gm12326       | 0.14942 | -0.99647 | 0.80707  | NA       | 0       | 0       | 0       | 0       | 0.89653 | 0       |
| ENSMUSG000000085261 | 1_Gm13814       | 1.85665 | 0.19689  | 0.8998   | NA       | 2.60457 | 0.91781 | 2.39031 | 0.90169 | 1.79306 | 2.53245 |
| ENSMUSG000000085271 | 7_E130006D01Rik | 2.55302 | -1.59687 | 0.29653  | 0.41092  | 2.60457 | 0       | 1.19515 | 3.60674 | 5.37918 | 2.53245 |
| ENSMUSG000000085272 | 7_Sbk3          | 10.3812 | -0.64638 | 0.37806  | 0.49561  | 6.94551 | 9.17806 | 8.36608 | 15.3287 | 16.1376 | 6.33113 |
| ENSMUSG000000085275 | 1_Gm14487       | 0.15028 | -0.99647 | 0.80707  | NA       | 0       | 0       | 0       | 0.90169 | 0       | 0       |
| ENSMUSG000000085277 | 1_Gm13943       | 0.1447  | 0.92709  | 0.82027  | NA       | 0.86819 | 0       | 0       | 0       | 0       | 0       |
| ENSMUSG000000085287 | 8_4833418N02Rik | 28.6574 | -0.50951 | 0.24527  | 0.3536   | 26.0457 | 25.6986 | 19.1225 | 40.5758 | 31.3786 | 29.1232 |
| ENSMUSG000000085298 | 2_F730035M05Rik | 0.29412 | -0.03469 | 0.99322  | NA       | 0.86819 | 0       | 0       | 0       | 0.89653 | 0       |
| ENSMUSG000000085312 | 1_Gm12763       | 0.63311 | -2.78041 | 0.48468  | NA       | 0       | 0       | 0       | 0       | 0       | 3.79868 |
| ENSMUSG000000085316 | 1_D330050G23Rik | 3.16757 | -0.33083 | 0.79161  | 0.85559  | 2.60457 | 4.58903 | 1.19515 | 2.70506 | 5.37918 | 2.53245 |
| ENSMUSG000000085318 | 1_Gm12524       | 0.44827 | -2.3261  | 0.56139  | NA       | 0       | 0       | 0       | 0       | 2.68959 | 0       |
| ENSMUSG000000085325 | 7_Gm14974       | 0.14942 | -0.99647 | 0.80707  | NA       | 0       | 0       | 0       | 0       | 0.89653 | 0       |
| ENSMUSG000000085338 | 1_2410004I01Rik | 0.5632  | 0.94119  | 0.77273  | NA       | 0       | 0.91781 | 1.19515 | 0       | 0       | 1.26623 |
| ENSMUSG000000085354 | 1_Gm2044        | 1.48165 | 1.12981  | 0.58788  | NA       | 2.60457 | 0       | 3.58546 | 1.80337 | 0.89653 | 0       |
| ENSMUSG000000085357 | 1_Gm13480       | 0.57879 | 2.65671  | 0.50459  | NA       | 3.47275 | 0       | 0       | 0       | 0       | 0       |
| ENSMUSG000000085375 | 1_Gm12506       | 0.14942 | -0.99647 | 0.80707  | NA       | 0       | 0       | 0       | 0       | 0.89653 | 0       |
| ENSMUSG000000085377 | 1_4930551L18Rik | 1.64582 | 1.85591  | 0.3851   | NA       | 1.73638 | 0       | 5.97577 | 0       | 0.89653 | 1.26623 |
| ENSMUSG000000085380 | 1_E130120K24Rik | 1.23252 | -3.75604 | 0.11477  | NA       | 0       | 0       | 0       | 1.80337 | 1.79306 | 3.79868 |
| ENSMUSG000000085382 | 1_Gm13861       | 1.85049 | -1.62674 | 0.35708  | NA       | 1.73638 | 0.91781 | 0       | 1.80337 | 5.37918 | 1.26623 |
| ENSMUSG000000085389 | 7_1700003M07Rik | 0.9661  | -1.07601 | 0.65434  | NA       | 0       | 1.83561 | 0       | 0.90169 | 1.79306 | 1.26623 |
| ENSMUSG000000085395 | 1_Gm13056       | 26.0572 | 0.17896  | 0.71428  | 0.79625  | 26.9138 | 22.0273 | 34.6595 | 29.7556 | 27.7924 | 15.1947 |
| ENSMUSG000000085402 | 1_Gm12111       | 0.21104 | -0.99647 | 0.80707  | NA       | 0       | 0       | 0       | 0       | 0       | 1.26623 |
| ENSMUSG000000085411 | 1_Gm14319       | 0.29412 | -0.03469 | 0.99322  | NA       | 0.86819 | 0       | 0       | 0       | 0.89653 | 0       |
| ENSMUSG000000085412 | 7_Halr1         | 0       | NA       | NA       | NA       | 0       | 0       | 0       | 0       | 0       | 0       |
| ENSMUSG000000085419 | 1_Gm11734       | 9.62666 | -1.41029 | 0.10455  | 0.17869  | 4.34094 | 10.0959 | 1.19515 | 16.2303 | 17.0341 | 8.86359 |
| ENSMUSG000000085421 | 1_4732490B19Rik | 1.77653 | 0.45308  | 0.84088  | NA       | 4.34094 | 1.83561 | 0       | 0       | 4.48265 | 0       |
| ENSMUSG000000085427 | 7_6430710C18Rik | 0.83806 | 1.91677  | 0.49852  | NA       | 1.73638 | 0       | 2.39031 | 0.90169 | 0       | 0       |
| ENSMUSG000000085429 | 1_Gm13485       | 0.35216 | 1.91112  | 0.63543  | NA       | 0       | 0.91781 | 1.19515 | 0       | 0       | 0       |
| ENSMUSG000000085433 | 2_Gm16001       | 32.4954 | 0.51791  | 0.21647  | 0.32055  | 37.3321 | 31.2054 | 46.611  | 31.559  | 24.2063 | 24.0583 |
| ENSMUSG000000085438 | 1_1700020I14Rik | 5109.47 | -0.6083  | 1.11E-07 | 1.37E-06 | 4363.51 | 3906.18 | 3873.49 | 5750.05 | 6697.08 | 6066.49 |
| ENSMUSG000000085451 | 1_Gm15137       | 4.75459 | -0.67587 | 0.58121  | 0.68466  | 2.60457 | 8.26025 | 0       | 8.11517 | 4.48265 | 5.06491 |
| ENSMUSG000000085463 | 1_9430024E24Rik | 0.41023 | -0.03469 | 0.99322  | NA       | 0       | 0       | 1.19515 | 0       | 0       | 1.26623 |
| ENSMUSG000000085469 | 1_Gm14242       | 0       | NA       | NA       | NA       | 0       | 0       | 0       | 0       | 0       | 0       |
| ENSMUSG000000085470 | 1_1700012C14Rik | 0.79928 | -0.76399 | 0.79193  | NA       | 1.73638 | 0       | 0       | 0       | 1.79306 | 1.26623 |
| ENSMUSG000000085473 | 2_Gm16686       | 0.74228 | 2.98374  | 0.37863  | NA       | 0.86819 | 0       | 3.58546 | 0       | 0       | 0       |
| ENSMUSG000000085478 | 1_Gm11851       | 0       | NA       | NA       | NA       | 0       | 0       | 0       | 0       | 0       | 0       |
| ENSMUSG000000085489 | 7_Gm3669        | 0       | NA       | NA       | NA       | 0       | 0       | 0       | 0       | 0       | 0       |
| ENSMUSG000000085497 | 2_Gm15985       | 0.43882 | 0.71095  | 0.86073  | NA       | 1.73638 | 0       | 0       | 0       | 0.89653 | 0       |
| ENSMUSG000000085504 | 1_Gm14055       | 1.61141 | -0.57961 | 0.73178  | NA       | 0.86819 | 1.83561 | 1.19515 | 3.60674 | 0.89653 | 1.26623 |
| ENSMUSG000000085515 | 1_C630028M04Rik | 0.1447  | 0.92709  | 0.82027  | NA       | 0.86819 | 0       | 0       | 0       | 0       | 0       |
| ENSMUSG000000085524 | 1_Gm14224       | 0.90827 | -0.41442 | 0.83263  | NA       | 0       | 0       | 2.39031 | 0       | 1.79306 | 1.26623 |
| ENSMUSG000000085525 | 7_Gm13166       | 29.3308 | -0.4332  | 0.11462  | 0.42971  | 24.3093 | 21.1095 | 29.8789 | 36.9691 | 35.8612 | 27.857  |
| ENSMUSG000000085532 | 1_B430319H21Rik | 0.2894  | 1.67273  | 0.67976  | NA       | 1.73638 | 0       | 0       | 0       | 0       | 0       |
| ENSMUSG000000085542 | 1_1700037C06Rik | 0.30594 | 1.73752  | 0.66765  | NA       | 0       | 1.83561 | 0       | 0       | 0       | 0       |
| ENSMUSG000000085549 | 7_1700047F07Rik | 2.81454 | 2.97268  | 0.08783  | 0.1545   | 6.07732 | 1.83561 | 7.17092 | 1.80337 | 0       | 0       |
| ENSMUSG000000085562 | 7_2610028E06Rik | 0.50158 | 0.94287  | 0.78026  | NA       | 0       | 0.91781 | 1.19515 | 0       | 0.89653 | 0       |
| ENSMUSG000000085565 | 1_Gm15721       | 2.31207 | -2.71222 | 0.18922  | NA       | 0.86819 | 0.91781 | 0       | 10.8202 | 0       | 1.26623 |
| ENSMUSG000000085576 | 2_Dpy1912       | 0.55965 | -1.00752 | 0.75768  | NA       | 0       | 0       | 1.19515 | 0       | 0.89653 | 1.26623 |
| ENSMUSG000000085578 | 1_Gm11527       | 1.30057 | -0.25058 | 0.9099   | NA       | 3.47275 | 0       | 0       | 0.90169 | 0.89653 | 2.53245 |
| ENSMUSG000000085582 | 7_3110099E03Rik | 10.4851 | -0.54207 | 0.49264  | 0.60427  | 12.1546 | 8.26025 | 4.78062 | 9.01685 | 7.17224 | 21.5259 |
| ENSMUSG000000085583 | 1_Gm15676       | 7.5787  | 1.19749  | 0.15548  | 0.2464   | 11.2864 | 7.34244 | 13.1467 | 6.3118  | 3.58612 | 3.79868 |
| ENSMUSG000000085584 | 3_Rgag1         | 8.50024 | -1.52429 | 0.06517  | 0.12099  | 6.94551 | 3.67122 | 2.39031 | 12.6236 | 15.241  | 10.1298 |
| ENSMUSG000000085591 | 1_Gm13479       | 2.22921 | -1.91529 | 0.27998  | NA       | 0       | 2.75342 | 0       | 3.60674 | 4.48265 | 2.53245 |
| ENSMUSG000000085601 | 7_Gm4969        | 6.10367 | 0.80312  | 0.44267  | 0.55782  | 12.1546 | 7.34244 | 3.58546 | 6.3118  | 0.89653 | 6.33113 |
| ENSMUSG000000085620 | 1_G630018N14Rik | 1.6838  | 0.28248  | 0.88919  | NA       | 1.73638 | 3.67122 | 0       | 0       | 0.89653 | 3.79868 |
| ENSMUSG000000085632 | 1_Gm12381       | 0       | NA       | NA       | NA       | 0       | 0       | 0       | 0       | 0       | 0       |
| ENSMUSG000000085640 | 1_Gm14064       | 0.14942 | -0.99647 | 0.80707  | NA       | 0       | 0       | 0       | 0       | 0.89653 | 0       |
| ENSMUSG000000085643 | 1_Gm12519       | 0.14942 | -0.99647 | 0.80707  | NA       | 0       | 0       | 0       | 0       | 0.89653 | 0       |
| ENSMUSG000000085654 | 1_Gm12536       | 0.55493 | 0.9119   | 0.78046  | NA       | 0.86819 | 0       | 1.19515 | 0       | 0       | 1.26623 |
| ENSMUSG000000085656 | 1_Gm13180       | 0.14942 | -0.99647 | 0.80707  | NA       | 0       | 0       | 0       | 0       | 0.89653 | 0       |
| ENSMUSG000000085658 | 1_Gm15704       | 2.1243  | -1.70875 | 0.30635  | NA       | 0       | 1.83561 | 1.19515 | 1.80337 | 5.37918 | 2.53245 |
| ENSMUSG000000085660 | 1_Gm12434       | 0.1447  | 0.92709  | 0.82027  | NA       | 0.86819 | 0       | 0       | 0       | 0       | 0       |
| ENSMUSG000000085668 | 2_Gm13447       | 1.06027 | -0.80348 | 0.76429  | NA       | 0       | 0       | 2.39031 | 2.70506 | 0       | 1.26623 |
| ENSMUSG000000085675 | 1_Gm12022       | 3.43904 | -2.10425 | 0.11147  | 0.18815  | 0.86819 | 1.83561 | 1.19515 | 2.70506 | 8.96531 | 5.06491 |
| ENSMUSG000000085677 | 7_4930594O21Rik | 0.14942 | -0.99647 | 0.80707  | NA       | 0       | 0       | 0       | 0       | 0.89653 | 0       |
| ENSMUSG000000085682 | 1_Gm14267       | 0.30056 | -1.76625 | 0.6627   | NA       | 0       | 0       | 0       | 1.80337 | 0       | 0       |
| ENSMUSG000000085683 | 1_9130409J20Rik | 1.1826  | 0.68679  | 0.78852  | NA       | 3.47275 | 0.91781 | 0       | 2.70506 | 0       | 0       |
| ENSMUSG000000085701 | 1_Gm12968       | 1.5012  | 0.54049  | 0.8205   | NA       | 0       | 1.83561 | 3.58546 | 0       | 3.58612 | 0       |
| ENSMUSG000000085708 | 1_Gm16063       | 0.66285 | -1.52638 | 0.61885  | NA       | 0       | 0.91781 | 0       | 0       | 1.79306 | 1.26623 |
| ENSMUSG000000085709 | 1_Gm14211       | 0       | NA       | NA       | NA       | 0       | 0       | 0       | 0       | 0       | 0       |

|                    |                 |         |          |         |         |         |         |         |         |         |         |
|--------------------|-----------------|---------|----------|---------|---------|---------|---------|---------|---------|---------|---------|
| ENSMUSG00000085721 | 1_Gm12796       | 0.21104 | -0.99647 | 0.80707 | NA      | 0       | 0       | 0       | 0       | 0       | 1.26623 |
| ENSMUSG00000085740 | 1_4930505K14Rik | 0.14942 | -0.99647 | 0.80707 | NA      | 0       | 0       | 0       | 0       | 0.89653 | 0       |
| ENSMUSG00000085744 | 1_Gm12259       | 0.70432 | 2.91493  | 0.39205 | NA      | 0       | 1.83561 | 2.39031 | 0       | 0       | 0       |
| ENSMUSG00000085750 | 1_Gm14009       | 0.55965 | -1.00752 | 0.75768 | NA      | 0       | 0       | 1.19515 | 0       | 0.89653 | 1.26623 |
| ENSMUSG00000085757 | 7_1700019B21Rik | 0.14942 | -0.99647 | 0.80707 | NA      | 0       | 0       | 0       | 0       | 0.89653 | 0       |
| ENSMUSG00000085772 | 7_D630024D03Rik | 40.0757 | -0.78145 | 0.07321 | 0.13338 | 33.8593 | 33.041  | 21.5128 | 71.2332 | 46.6196 | 34.1881 |
| ENSMUSG00000085793 | 1_Lin52         | 293.165 | -0.31152 | 0.05263 | 0.10106 | 282.161 | 260.657 | 241.421 | 328.214 | 323.648 | 322.888 |
| ENSMUSG00000085795 | 7_Zfp703        | 471.278 | 0.4761   | 0.00679 | 0.01821 | 480.976 | 568.122 | 595.187 | 403.053 | 330.82  | 449.511 |
| ENSMUSG00000085798 | 1_Gm2018        | 0.15028 | -0.99647 | 0.80707 | NA      | 0       | 0       | 0       | 0.90169 | 0       | 0       |
| ENSMUSG00000085806 | 1_Gm12023       | 0.14942 | -0.99647 | 0.80707 | NA      | 0       | 0       | 0       | 0       | 0.89653 | 0       |
| ENSMUSG00000085833 | 2_Gm13003       | 11.6766 | 0.63532  | 0.36416 | 0.48148 | 13.891  | 12.8493 | 15.537  | 6.3118  | 6.27571 | 15.1947 |
| ENSMUSG00000085836 | 1_Gm13074       | 28.7238 | 0.58274  | 0.23237 | 0.33872 | 24.3093 | 29.3698 | 50.1965 | 28.8539 | 20.6202 | 18.9934 |
| ENSMUSG00000085840 | 1_Gm11261       | 1.43987 | 0.24398  | 0.90937 | NA      | 3.47275 | 0       | 1.19515 | 2.70506 | 0       | 1.26623 |
| ENSMUSG00000085844 | 1_Gm11690       | 0.21104 | -0.99647 | 0.80707 | NA      | 0       | 0       | 0       | 0       | 0       | 1.26623 |
| ENSMUSG00000085868 | 1_Gm13632       | 0.7441  | -1.79146 | 0.53825 | NA      | 0.86819 | 0       | 0       | 1.80337 | 1.79306 | 0       |
| ENSMUSG00000085870 | 1_Gm12829       | 1.91383 | -1.67218 | 0.31879 | NA      | 1.73638 | 0.91781 | 0       | 3.60674 | 2.68959 | 2.53245 |
| ENSMUSG00000085896 | 2_5330429C05Rik | 0.15028 | -0.99647 | 0.80707 | NA      | 0       | 0       | 0       | 0.90169 | 0       | 0       |
| ENSMUSG00000085912 | 1_Trp53cor1     | 7.70872 | 0.48292  | 0.5653  | 0.67066 | 10.4183 | 4.58903 | 11.9515 | 7.21348 | 4.48265 | 7.59736 |
| ENSMUSG00000085920 | 1_Gm12951       | 0.90913 | -0.43207 | 0.86262 | NA      | 0       | 0       | 2.39031 | 0.90169 | 0.89653 | 1.26623 |
| ENSMUSG00000085925 | 2_Rtl1          | 5.03152 | -0.31519 | 0.74289 | 0.81824 | 4.34094 | 5.50683 | 3.58546 | 6.3118  | 5.37918 | 5.06491 |
| ENSMUSG00000085931 | 1_Gm12648       | 0.94512 | 0.09843  | 0.96781 | NA      | 0.86819 | 0.91781 | 1.19515 | 0       | 2.68959 | 0       |
| ENSMUSG00000085932 | 1_Gm15556       | 0.86175 | -0.90155 | 0.75145 | NA      | 1.73638 | 0       | 0       | 0.90169 | 0       | 2.53245 |
| ENSMUSG00000085933 | 2_Tmem61        | 0.1447  | 0.92709  | 0.82027 | NA      | 0.86819 | 0       | 0       | 0       | 0       | 0       |
| ENSMUSG00000085949 | 1_Gm14275       | 1.92759 | 0.94262  | 0.59287 | NA      | 5.20913 | 0       | 2.39031 | 1.80337 | 0.89653 | 1.26623 |
| ENSMUSG00000085950 | 1_Gm13589       | 1.86843 | -0.53837 | 0.76332 | NA      | 0.86819 | 3.67122 | 0       | 4.50843 | 0.89653 | 1.26623 |
| ENSMUSG00000085952 | 1_Gm12315       | 0.29412 | -0.03469 | 0.99322 | NA      | 0.86819 | 0       | 0       | 0       | 0.89653 | 0       |
| ENSMUSG00000085957 | 4_Syna          | 7.8548  | 0.47329  | 0.55357 | 0.65979 | 12.1546 | 9.17806 | 5.97577 | 7.21348 | 6.27571 | 6.33113 |
| ENSMUSG00000085962 | 8_Gm16984       | 17.0133 | -1.2091  | 0.03458 | 0.07147 | 6.94551 | 11.0137 | 13.1467 | 24.3455 | 25.1029 | 21.5259 |
| ENSMUSG00000085965 | 1_2310016D23Rik | 0.1447  | 0.92709  | 0.82027 | NA      | 0.86819 | 0       | 0       | 0       | 0       | 0       |
| ENSMUSG00000085973 | 1_Gm14742       | 0.78829 | 0.64615  | 0.80202 | NA      | 1.73638 | 0       | 1.19515 | 0.90169 | 0.89653 | 0       |
| ENSMUSG00000085975 | 1_Gm13572       | 1.49733 | 1.13664  | 0.54349 | NA      | 0.86819 | 1.83561 | 3.58546 | 0.90169 | 1.79306 | 0       |
| ENSMUSG00000085976 | 1_Gm13816       | 1.83718 | -0.10487 | 0.95205 | NA      | 4.34094 | 0.91781 | 0       | 2.70506 | 1.79306 | 1.26623 |
| ENSMUSG00000085980 | 1_Gm12408       | 0.30594 | 1.73752  | 0.66765 | NA      | 0       | 1.83561 | 0       | 0       | 0       | 0       |
| ENSMUSG00000085981 | 1_Gm11375       | 1.15723 | 1.13799  | 0.67169 | NA      | 0       | 0       | 4.78062 | 0       | 0.89653 | 1.26623 |
| ENSMUSG00000085985 | 1_Gm11682       | 0.15297 | 0.92709  | 0.82027 | NA      | 0       | 0.91781 | 0       | 0       | 0       | 0       |
| ENSMUSG00000085987 | 2_Gm13403       | 1.01318 | -0.95564 | 0.65902 | NA      | 0       | 0.91781 | 1.19515 | 1.80337 | 0.89653 | 1.26623 |
| ENSMUSG00000085989 | 1_Gm7437        | 0       | NA       | NA      | NA      | 0       | 0       | 0       | 0       | 0       | 0       |
| ENSMUSG00000085991 | 1_Gm11479       | 0.21104 | -0.99647 | 0.80707 | NA      | 0       | 0       | 0       | 0       | 0       | 1.26623 |
| ENSMUSG00000085992 | 1_Gm11515       | 0.43409 | 2.24584  | 0.57502 | NA      | 2.60457 | 0       | 0       | 0       | 0       | 0       |
| ENSMUSG00000085999 | 1_Gm13411       | 0.39838 | 2.07058  | 0.60634 | NA      | 0       | 0       | 2.39031 | 0       | 0       | 0       |
| ENSMUSG00000086006 | 2_Gm13293       | 82.6791 | -0.02997 | 0.92823 | 0.95237 | 95.5007 | 89.0271 | 59.7577 | 60.4129 | 82.4808 | 108.896 |
| ENSMUSG00000086007 | 1_1700057H21Rik | 1.72497 | -2.03622 | 0.27543 | NA      | 0.86819 | 0       | 1.19515 | 0.90169 | 3.58612 | 3.79868 |
| ENSMUSG00000086008 | 8_Gm8817        | 2.3606  | -0.31453 | 0.84172 | NA      | 3.47275 | 2.75342 | 0       | 4.50843 | 0.89653 | 2.53245 |
| ENSMUSG00000086013 | 1_Gm15706       | 37.2238 | -1.15412 | 0.00868 | 0.02241 | 23.4411 | 31.2054 | 14.3418 | 60.4129 | 54.6884 | 39.253  |
| ENSMUSG00000086022 | 1_Rad51ap2      | 7.60912 | -0.13128 | 0.87694 | 0.91673 | 7.8137  | 5.50683 | 8.36608 | 3.60674 | 8.96531 | 11.396  |
| ENSMUSG00000086025 | 1_4933406G16Rik | 0.34389 | 1.87986  | 0.64119 | NA      | 0.86819 | 0       | 1.19515 | 0       | 0       | 0       |
| ENSMUSG00000086040 | 8_Wipf3         | 182.042 | -0.8864  | 0.00166 | 0.00556 | 118.942 | 174.383 | 89.6366 | 285.834 | 225.926 | 197.531 |
| ENSMUSG00000086042 | 1_Gm12670       | 0.29412 | -0.03469 | 0.99322 | NA      | 0.86819 | 0       | 0       | 0       | 0.89653 | 0       |
| ENSMUSG00000086048 | 7_Drr1          | 0.1447  | 0.92709  | 0.82027 | NA      | 0.86819 | 0       | 0       | 0       | 0       | 0       |
| ENSMUSG00000086070 | 1_8430436N08Rik | 1.67881 | -0.22938 | 0.91127 | NA      | 3.47275 | 0       | 1.19515 | 4.50843 | 0.89653 | 0       |
| ENSMUSG00000086075 | 1_Gm15728       | 8.48188 | 0.26193  | 0.74052 | 0.81659 | 7.8137  | 12.8493 | 7.17092 | 10.8202 | 7.17224 | 5.06491 |
| ENSMUSG00000086095 | 1_Gm15328       | 1.01676 | -2.29303 | 0.33133 | NA      | 0.86819 | 0       | 0       | 1.80337 | 0.89653 | 2.53245 |
| ENSMUSG00000086096 | 1_Gm12688       | 11.0276 | 0.12391  | 0.86215 | 0.90643 | 9.55007 | 16.5205 | 8.36608 | 14.427  | 7.17224 | 10.1298 |
| ENSMUSG00000086105 | 1_Gm11636       | 7.71873 | -0.61445 | 0.43703 | 0.5524  | 6.07732 | 7.34244 | 4.78062 | 9.01685 | 8.96531 | 10.1298 |
| ENSMUSG00000086109 | 2_Gm13391       | 1.7559  | 1.31955  | 0.42371 | NA      | 2.60457 | 3.67122 | 1.19515 | 0.90169 | 0.89653 | 1.26623 |
| ENSMUSG00000086111 | 1_Gm15326       | 13.5276 | 0.42467  | 0.50084 | 0.61186 | 19.1001 | 16.5205 | 10.7564 | 14.427  | 8.96531 | 11.396  |
| ENSMUSG00000086124 | 1_A530076117Rik | 0.7338  | 0.51912  | 0.86226 | NA      | 2.60457 | 0       | 0       | 0.90169 | 0.89653 | 0       |
| ENSMUSG00000086130 | 1_Gm16211       | 26.7141 | -0.27278 | 0.57133 | 0.67597 | 26.0457 | 23.8629 | 22.7079 | 19.8371 | 41.2404 | 26.5908 |
| ENSMUSG00000086136 | 1_Gm12718       | 0.29412 | -0.03469 | 0.99322 | NA      | 0.86819 | 0       | 0       | 0       | 0.89653 | 0       |
| ENSMUSG00000086138 | 7_4930471C06Rik | 0.30325 | -0.03469 | 0.99322 | NA      | 0       | 0.91781 | 0       | 0.90169 | 0       | 0       |
| ENSMUSG00000086147 | 2_Gm13150       | 0.34861 | -0.03469 | 0.99322 | NA      | 0       | 0       | 1.19515 | 0       | 0.89653 | 0       |
| ENSMUSG00000086148 | 1_Gm15271       | 0       | NA       | NA      | NA      | 0       | 0       | 0       | 0       | 0       | 0       |
| ENSMUSG00000086152 | 1_Gm11454       | 0.74851 | -0.59424 | 0.84172 | NA      | 0.86819 | 0.91781 | 0       | 2.70506 | 0       | 0       |
| ENSMUSG00000086154 | 1_Gm16196       | 4.55002 | -0.26481 | 0.80445 | 0.86468 | 2.60457 | 7.34244 | 2.39031 | 6.3118  | 3.58612 | 5.06491 |
| ENSMUSG00000086158 | 2_Ccpg1os       | 154.334 | -0.424   | 0.03757 | 0.07646 | 132.833 | 132.164 | 130.272 | 159.598 | 190.064 | 181.07  |
| ENSMUSG00000086166 | 1_Gm14342       | 0.29884 | -1.76064 | 0.66373 | NA      | 0       | 0       | 0       | 0       | 1.79306 | 0       |
| ENSMUSG00000086177 | 1_Gm14616       | 0.15028 | -0.99647 | 0.80707 | NA      | 0       | 0       | 0       | 0.90169 | 0       | 0       |
| ENSMUSG00000086179 | 1_Gm14317       | 0.2997  | -1.76345 | 0.66322 | NA      | 0       | 0       | 0       | 0.90169 | 0.89653 | 0       |
| ENSMUSG00000086187 | 1_Gm12860       | 2.91384 | -0.82821 | 0.5506  | 0.6569  | 0.86819 | 1.83561 | 3.58546 | 1.80337 | 1.79306 | 7.59736 |
| ENSMUSG00000086197 | 1_Gm13976       | 0       | NA       | NA      | NA      | 0       | 0       | 0       | 0       | 0       | 0       |
| ENSMUSG00000086202 | 1_1700019E08Rik | 0       | NA       | NA      | NA      | 0       | 0       | 0       | 0       | 0       | 0       |
| ENSMUSG00000086203 | 1_Gm13985       | 0.15028 | -0.99647 | 0.80707 | NA      | 0       | 0       | 0       | 0.90169 | 0       | 0       |
| ENSMUSG00000086212 | 7_Mkln1os       | 13.3136 | -0.65261 | 0.31075 | 0.42562 | 13.891  | 11.0137 | 5.97577 | 18.9354 | 16.1376 | 13.9285 |
| ENSMUSG00000086214 | 1_Gm14062       | 0       | NA       | NA      | NA      | 0       | 0       | 0       | 0       | 0       | 0       |
| ENSMUSG00000086228 | 1_Ubap1l        | 36.6471 | -0.99983 | 0.08165 | 0.1457  | 28.6502 | 34.8766 | 9.56123 | 76.6433 | 44.8265 | 25.3245 |
| ENSMUSG00000086232 | 1_Gm7546        | 2.54286 | -2.21026 | 0.22454 | 0.32974 | 1.73638 | 0.91781 | 0       | 0.91685 | 3.58612 | 0       |
| ENSMUSG00000086238 | 1_Gm14258       | 1.5243  | 1.98639  | 0.48147 | NA      | 0       | 7.34244 | 0       | 1.80337 | 0       | 0       |
| ENSMUSG00000086254 | 1_3100003L05Rik | 0       | NA       | NA      | NA      | 0       | 0       | 0       | 0       | 0       | 0       |
| ENSMUSG00000086256 | 1_Gm12052       | 6.2912  | -0.70303 | 0.44032 | 0.55571 | 4.34094 | 6.42464 | 3.58546 | 5.41011 | 11.6549 | 6.33113 |

|                    |                 |         |          |         |         |         |         |         |         |         |         |
|--------------------|-----------------|---------|----------|---------|---------|---------|---------|---------|---------|---------|---------|
| ENSMUSG00000086262 | 7_A930031H19Rik | 13.585  | -2.00075 | 0.0083  | 0.02163 | 6.07732 | 5.50683 | 4.78062 | 29.7556 | 27.7924 | 7.59736 |
| ENSMUSG00000086277 | 2_4930558K02Rik | 1.00878 | -2.20662 | 0.35535 | NA      | 0       | 0       | 1.19515 | 0.90169 | 2.68959 | 1.26623 |
| ENSMUSG00000086283 | 7_2810433D01Rik | 42.784  | -0.50759 | 0.23092 | 0.33721 | 36.4639 | 47.7259 | 21.5128 | 64.0197 | 43.93   | 43.0517 |
| ENSMUSG00000086290 | 8_Snhg12        | 294.07  | 0.14827  | 0.36141 | 0.47852 | 337.725 | 297.369 | 291.618 | 279.522 | 270.752 | 287.434 |
| ENSMUSG00000086308 | 1_G630016G05Rik | 7.8674  | 0.88887  | 0.28339 | 0.39659 | 6.94551 | 11.9315 | 11.9515 | 4.50843 | 8.06878 | 3.79868 |
| ENSMUSG00000086316 | 7_2210013O21Rik | 380.501 | -0.51794 | 0.00087 | 0.00318 | 316.889 | 340.506 | 280.861 | 467.975 | 450.058 | 426.718 |
| ENSMUSG00000086319 | 1_Gm16087       | 3.86487 | 0.33121  | 0.77829 | 0.84494 | 6.94551 | 4.58903 | 1.19515 | 2.70506 | 2.68959 | 5.06491 |
| ENSMUSG00000086320 | 1_Gm12840       | 9.15205 | 1.95857  | 0.03985 | 0.08026 | 12.1546 | 14.6849 | 16.7322 | 0       | 6.27571 | 5.06491 |
| ENSMUSG00000086322 | 7_E130218I03Rik | 900.852 | 0.71799  | 0.00043 | 0.00175 | 1038.35 | 1083.93 | 1239.37 | 852.093 | 488.609 | 702.756 |
| ENSMUSG00000086328 | 1_2700033N17Rik | 102.586 | 0.06521  | 0.78937 | 0.85372 | 109.392 | 113.808 | 90.8317 | 100.989 | 94.1357 | 106.363 |
| ENSMUSG00000086335 | 1_Gm12107       | 6.56702 | 0.17185  | 0.8519  | 0.89967 | 11.2864 | 4.58903 | 4.78062 | 3.60674 | 6.27571 | 8.86359 |
| ENSMUSG00000086339 | 1_Gm11916       | 0.30056 | -1.76625 | 0.6627  | NA      | 0       | 0       | 0       | 1.80337 | 0       | 0       |
| ENSMUSG00000086344 | 1_Gm11345       | 0.96782 | -1.08575 | 0.69132 | NA      | 0       | 1.83561 | 0       | 2.70506 | 0       | 1.26623 |
| ENSMUSG00000086346 | 1_Gm12510       | 0.15297 | 0.92709  | 0.82027 | NA      | 0       | 0.91781 | 0       | 0       | 0       | 0       |
| ENSMUSG00000086348 | 1_1700017J07Rik | 0.15297 | 0.92709  | 0.82027 | NA      | 0       | 0.91781 | 0       | 0       | 0       | 0       |
| ENSMUSG00000086349 | 1_Gm13497       | 0       | NA       | NA      | NA      | 0       | 0       | 0       | 0       | 0       | 0       |
| ENSMUSG00000086352 | 1_4930401G09Rik | 0       | NA       | NA      | NA      | 0       | 0       | 0       | 0       | 0       | 0       |
| ENSMUSG00000086353 | 1_Gm13481       | 0.34861 | -0.03469 | 0.99322 | NA      | 0       | 0       | 1.19515 | 0       | 0.89653 | 0       |
| ENSMUSG00000086363 | 7_A330102110Rik | 6.31165 | -2.79132 | 0.0083  | 0.02162 | 2.60457 | 0.91781 | 1.19515 | 14.427  | 9.86184 | 8.86359 |
| ENSMUSG00000086368 | 2_Gm13830       | 18.7615 | 0.52045  | 0.33632 | 0.45295 | 19.9683 | 29.3698 | 16.7322 | 14.427  | 14.3445 | 17.7272 |
| ENSMUSG00000086370 | 8_Ftx           | 260.005 | -0.54097 | 0.00493 | 0.01391 | 205.761 | 245.054 | 184.054 | 281.326 | 342.475 | 301.362 |
| ENSMUSG00000086405 | 1_9330198N18Rik | 0.78983 | 1.70067  | 0.6151  | NA      | 3.47275 | 0       | 0       | 0       | 0       | 1.26623 |
| ENSMUSG00000086425 | 7_F730016J06Rik | 0.14942 | -0.99647 | 0.80707 | NA      | 0       | 0       | 0       | 0       | 0.89653 | 0       |
| ENSMUSG00000086441 | 1_Gm15046       | 0.15028 | -0.99647 | 0.80707 | NA      | 0       | 0       | 0       | 0.90169 | 0       | 0       |
| ENSMUSG00000086455 | 1_Gm11815       | 4.44293 | 1.73522  | 0.20568 | 0.30794 | 4.34094 | 1.83561 | 14.3418 | 3.60674 | 0       | 2.53245 |
| ENSMUSG00000086470 | 1_Gm12580       | 5.61752 | -0.24402 | 0.79755 | 0.86017 | 3.47275 | 8.26025 | 3.58546 | 5.41011 | 5.37918 | 7.59736 |
| ENSMUSG00000086474 | 2_9130204K15Rik | 8.11707 | 0.88696  | 0.27929 | 0.39193 | 9.55007 | 10.0959 | 11.9515 | 2.70506 | 8.06878 | 6.33113 |
| ENSMUSG00000086477 | 1_Gm15506       | 14.9627 | -0.17527 | 0.7677  | 0.83679 | 11.2864 | 15.6027 | 15.537  | 16.2303 | 19.7237 | 11.396  |
| ENSMUSG00000086478 | 1_Gm14102       | 2.19596 | -1.63695 | 0.39234 | NA      | 0.86819 | 0       | 2.39031 | 0       | 3.58612 | 6.33113 |
| ENSMUSG00000086481 | 1_Gm11707       | 0.34389 | 1.87986  | 0.64119 | NA      | 0.86819 | 0       | 1.19515 | 0       | 0       | 0       |
| ENSMUSG00000086485 | 2_Gm15458       | 0.14942 | -0.99647 | 0.80707 | NA      | 0       | 0       | 0       | 0       | 0.89653 | 0       |
| ENSMUSG00000086491 | 1_Gm13291       | 0.36046 | -1.978   | 0.62369 | NA      | 0       | 0       | 0       | 0       | 0.89653 | 1.26623 |
| ENSMUSG00000086494 | 1_2210417A02Rik | 0.36132 | -1.98116 | 0.62311 | NA      | 0       | 0       | 0       | 0.90169 | 0       | 1.26623 |
| ENSMUSG00000086498 | 1_Gm12681       | 1.04177 | -0.43372 | 0.84945 | NA      | 1.73638 | 0.91781 | 0       | 1.80337 | 1.79306 | 0       |
| ENSMUSG00000086501 | 1_4930597A21Rik | 0.1447  | 0.92709  | 0.82027 | NA      | 0.86819 | 0       | 0       | 0       | 0       | 0       |
| ENSMUSG00000086503 | 3_Xist          | 28584.9 | -0.49284 | 0.00204 | 0.00662 | 25652.4 | 23837.2 | 21757.8 | 27053.3 | 40470.3 | 32738.3 |
| ENSMUSG00000086523 | 1_Gm13499       | 0.34861 | -0.03469 | 0.99322 | NA      | 0       | 0       | 1.19515 | 0       | 0.89653 | 0       |
| ENSMUSG00000086526 | 2_Gm12762       | 0.8502  | 0.80215  | 0.77881 | NA      | 0       | 0.91781 | 2.39031 | 0       | 1.79306 | 0       |
| ENSMUSG00000086540 | 1_ScmI1         | 0.15297 | 0.92709  | 0.82027 | NA      | 0       | 0.91781 | 0       | 0       | 0       | 0       |
| ENSMUSG00000086557 | 1_Gm15999       | 0.55965 | -1.00752 | 0.75768 | NA      | 0       | 0       | 1.19515 | 0       | 0.89653 | 1.26623 |
| ENSMUSG00000086563 | 1_Platr15       | 1.37515 | 0.55959  | 0.77485 | NA      | 0.86819 | 2.75342 | 1.19515 | 0.90169 | 0       | 2.53245 |
| ENSMUSG00000086564 | 9_Cd101         | 4.5997  | 2.58063  | 0.03236 | 0.06762 | 12.1546 | 5.50683 | 5.97577 | 0.90169 | 1.79306 | 1.26623 |
| ENSMUSG00000086588 | 1_Gm11729       | 1.46095 | 0.09994  | 0.96115 | NA      | 2.60457 | 1.83561 | 0       | 0       | 1.79306 | 2.53245 |
| ENSMUSG00000086593 | 2_Gm16548       | 1.80012 | 1.19618  | 0.50312 | NA      | 4.34094 | 1.83561 | 1.19515 | 0       | 0.89653 | 2.53245 |
| ENSMUSG00000086596 | 1_Susd5         | 14.2404 | -1.15599 | 0.05657 | 0.10738 | 8.68188 | 8.26025 | 9.56123 | 22.5421 | 16.1376 | 20.2596 |
| ENSMUSG00000086598 | 9_Btbd18        | 4.59126 | 1.59965  | 0.16043 | 0.25274 | 4.34094 | 4.58903 | 11.9515 | 3.60674 | 1.79306 | 1.26623 |
| ENSMUSG00000086605 | 1_Gm14290       | 77.7463 | -1.63779 | 0.00134 | 0.0046  | 54.6959 | 31.2054 | 27.4885 | 192.961 | 118.342 | 41.7855 |
| ENSMUSG00000086610 | 1_Gm15408       | 25.2823 | -0.05861 | 0.89783 | 0.93114 | 26.9138 | 24.7808 | 22.7079 | 31.559  | 24.2063 | 21.5259 |
| ENSMUSG00000086613 | 1_1700007M16Rik | 0.1447  | 0.92709  | 0.82027 | NA      | 0.86819 | 0       | 0       | 0       | 0       | 0       |
| ENSMUSG00000086628 | 7_Gm16157       | 0       | NA       | NA      | NA      | 0       | 0       | 0       | 0       | 0       | 0       |
| ENSMUSG00000086631 | 2_Gm12784       | 14.6945 | -0.5006  | 0.44948 | 0.5643  | 17.3638 | 7.34244 | 11.9515 | 24.3455 | 17.0341 | 10.1298 |
| ENSMUSG00000086632 | 1_1700112J05Rik | 0.63329 | 2.77543  | 0.43496 | NA      | 2.60457 | 0       | 1.19515 | 0       | 0       | 0       |
| ENSMUSG00000086644 | 1_Gm13470       | 6.10495 | -1.99879 | 0.05814 | 0.10995 | 4.34094 | 2.75342 | 0       | 9.01685 | 11.6549 | 8.86359 |
| ENSMUSG00000086650 | 1_A430048G15Rik | 0.45181 | -0.79887 | 0.84362 | NA      | 0       | 0.91781 | 0       | 0       | 1.79306 | 0       |
| ENSMUSG00000086653 | 1_9130015L21Rik | 0.59769 | -2.73717 | 0.49174 | NA      | 0       | 0       | 0       | 0       | 3.58612 | 0       |
| ENSMUSG00000086658 | 1_Gm14260       | 0.1447  | 0.92709  | 0.82027 | NA      | 0.86819 | 0       | 0       | 0       | 0       | 0       |
| ENSMUSG00000086662 | 7_BC046251      | 3.78451 | -2.83117 | 0.04684 | 0.09184 | 0.86819 | 1.83561 | 0       | 11.7219 | 4.48265 | 3.79868 |
| ENSMUSG00000086665 | 1_Gm13067       | 0       | NA       | NA      | NA      | 0       | 0       | 0       | 0       | 0       | 0       |
| ENSMUSG00000086702 | 1_Gm12347       | 0.78829 | 0.64615  | 0.80202 | NA      | 1.73638 | 0       | 1.19515 | 0.90169 | 0.89653 | 0       |
| ENSMUSG00000086707 | 1_Gm12088       | 0.36401 | -0.03469 | 0.99322 | NA      | 0       | 0.91781 | 0       | 0       | 0       | 1.26623 |
| ENSMUSG00000086712 | 2_AI427809      | 21.4937 | -0.4622  | 0.40378 | 0.52115 | 23.4411 | 18.3561 | 11.9515 | 27.0506 | 15.241  | 32.9219 |
| ENSMUSG00000086713 | 1_4930407G08Rik | 0       | NA       | NA      | NA      | 0       | 0       | 0       | 0       | 0       | 0       |
| ENSMUSG00000086715 | 1_B230112J18Rik | 3.13802 | -0.78851 | 0.53409 | 0.64212 | 0.86819 | 3.67122 | 2.39031 | 5.41011 | 2.68959 | 3.79868 |
| ENSMUSG00000086733 | 1_Gm11685       | 0.15297 | 0.92709  | 0.82027 | NA      | 0       | 0.91781 | 0       | 0       | 0       | 0       |
| ENSMUSG00000086749 | 1_Gm12037       | 0.64918 | -1.3814  | 0.65297 | NA      | 0       | 0       | 1.19515 | 1.80337 | 0.89653 | 0       |
| ENSMUSG00000086752 | 1_Gm11674       | 0.2894  | 1.67273  | 0.67976 | NA      | 1.73638 | 0       | 0       | 0       | 0       | 0       |
| ENSMUSG00000086755 | 1_Gm11216       | 1.04821 | 3.48619  | 0.1725  | NA      | 0.86819 | 1.83561 | 3.58546 | 0       | 0       | 0       |
| ENSMUSG00000086757 | 1_Gm2309        | 0.44236 | 2.27028  | 0.57071 | NA      | 1.73638 | 0.91781 | 0       | 0       | 0       | 0       |
| ENSMUSG00000086764 | 1_4930527A07Rik | 0.64746 | -1.36853 | 0.704   | NA      | 0       | 0       | 1.19515 | 0       | 2.68959 | 0       |
| ENSMUSG00000086765 | 7_Gm11827       | 4.23802 | -0.8949  | 0.58602 | 0.68889 | 5.20913 | 0       | 3.58546 | 2.70506 | 0       | 13.9285 |
| ENSMUSG00000086771 | 1_1700080G11Rik | 0.44998 | -2.33107 | 0.56049 | NA      | 0       | 0       | 0       | 1.80337 | 0.89653 | 0       |
| ENSMUSG00000086782 | 2_E130102H24Rik | 100.021 | -0.16389 | 0.5408  | 0.64789 | 75.5324 | 108.301 | 99.1978 | 91.0702 | 112.066 | 113.96  |
| ENSMUSG00000086784 | 1_Isoc2a        | 202.582 | -0.03861 | 0.89428 | 0.92865 | 195.342 | 244.136 | 160.151 | 291.244 | 152.41  | 172.207 |
| ENSMUSG00000086788 | 2_1700029M20Rik | 0.50988 | -2.49048 | 0.5167  | NA      | 0       | 0       | 0       | 0       | 1.79306 | 1.26623 |
| ENSMUSG00000086804 | 7_Gm43154       | 0.44912 | -2.32858 | 0.56096 | NA      | 0       | 0       | 0       | 0.90169 | 1.79306 | 0       |
| ENSMUSG00000086825 | 1_Gm15675       | 45.3112 | -0.69525 | 0.10997 | 0.18615 | 52.0913 | 29.3698 | 21.5128 | 45.986  | 51.9988 | 70.9087 |
| ENSMUSG00000086848 | 3_Lce6a         | 0.36401 | -0.03469 | 0.99322 | NA      | 0       | 0.91781 | 0       | 0       | 0       | 1.26623 |
| ENSMUSG00000086852 | 1_Gm11374       | 0.29884 | -1.76064 | 0.66373 | NA      | 0       | 0       | 0       | 0       | 1.79306 | 0       |
| ENSMUSG00000086855 | 1_Gm13844       | 1.29699 | 0.65125  | 0.72147 | NA      | 2.60457 | 0.91781 | 1.19515 | 0.90169 | 0.89653 | 1.26623 |

|                    |                  |         |          |          |         |         |         |         |         |         |         |
|--------------------|------------------|---------|----------|----------|---------|---------|---------|---------|---------|---------|---------|
| ENSMUSG00000086859 | 3_Snhg20         | 162.431 | -0.03774 | 0.86737  | 0.91015 | 171.033 | 181.726 | 127.881 | 175.829 | 171.237 | 146.882 |
| ENSMUSG00000086860 | 1_Gm1720         | 3.10825 | -0.38308 | 0.78679  | 0.85201 | 4.34094 | 3.67122 | 0       | 6.3118  | 1.79306 | 2.53245 |
| ENSMUSG00000086872 | 1_Gm14225        | 0.54308 | 2.53494  | 0.50107  | NA      | 0.86819 | 0       | 2.39031 | 0       | 0       | 0       |
| ENSMUSG00000086885 | 1_Gm13846        | 0.56051 | -1.01049 | 0.75689  | NA      | 0       | 0       | 1.19515 | 0.90169 | 0       | 1.26623 |
| ENSMUSG00000086892 | 1_4933430M04Rik  | 9.30102 | -1.58489 | 0.07363  | 0.13398 | 7.8137  | 3.67122 | 2.39031 | 18.9354 | 17.9306 | 5.06491 |
| ENSMUSG00000086899 | 7_1600002D24Rik  | 0.1447  | 0.92709  | 0.82027  | NA      | 0.86819 | 0       | 0       | 0       | 0       | 0       |
| ENSMUSG00000086904 | 1_Gm13404        | 19.2227 | -0.86364 | 0.1007   | 0.17308 | 16.4956 | 10.0959 | 14.3418 | 24.3455 | 25.9994 | 24.0583 |
| ENSMUSG00000086907 | 1_Gm15298        | 1.41759 | 0.22223  | 0.90797  | NA      | 0.86819 | 3.67122 | 0       | 1.80337 | 0.89653 | 1.26623 |
| ENSMUSG00000086917 | 1_Gm11630        | 0.4444  | -0.80729 | 0.81753  | NA      | 0.86819 | 0       | 0       | 0.90169 | 0.89653 | 0       |
| ENSMUSG00000086919 | 1_Gm11497        | 0.5087  | 0.75055  | 0.82276  | NA      | 0.86819 | 0.91781 | 0       | 0       | 0       | 1.26623 |
| ENSMUSG00000086924 | 1_Gm11766        | 14.7597 | -0.02132 | 0.97421  | 0.98319 | 16.4956 | 12.8493 | 14.3418 | 6.3118  | 17.0341 | 21.5259 |
| ENSMUSG00000086939 | 1_Gm13530        | 2.05291 | 0.18532  | 0.89993  | NA      | 2.60457 | 2.75342 | 1.19515 | 2.70506 | 1.79306 | 1.26623 |
| ENSMUSG00000086940 | 1_Gm12746        | 0.75409 | -1.78763 | 0.60306  | NA      | 0       | 0.91781 | 0       | 3.60674 | 0       | 0       |
| ENSMUSG00000086943 | 2_4732414G09Rik  | 3.54932 | -0.22133 | 0.88002  | 0.91916 | 0       | 2.75342 | 7.17092 | 5.41011 | 0.89653 | 5.06491 |
| ENSMUSG00000086952 | 1_Gm12596        | 0.2894  | 1.67273  | 0.67976  | NA      | 1.73638 | 0       | 0       | 0       | 0       | 0       |
| ENSMUSG00000086957 | 1_Gm13869        | 0.8629  | -0.56728 | 0.80449  | NA      | 0       | 0.91781 | 1.19515 | 0.90169 | 0.89653 | 1.26623 |
| ENSMUSG00000086965 | 1_Gm16314        | 37.3524 | 1.27596  | 0.00392  | 0.01153 | 53.8277 | 50.4793 | 53.7819 | 25.2472 | 11.6549 | 29.1232 |
| ENSMUSG00000086981 | 2_Gm12171        | 0.45267 | -0.80756 | 0.8164   | NA      | 0       | 0.91781 | 0       | 0.90169 | 0.89653 | 0       |
| ENSMUSG00000086987 | 1_Gm12484        | 0.34861 | -0.03469 | 0.99322  | NA      | 0       | 0       | 1.19515 | 0       | 0.89653 | 0       |
| ENSMUSG00000087006 | 3_Gm13889        | 23.9302 | 0.41775  | 0.39135  | 0.50875 | 22.5729 | 28.452  | 31.074  | 24.3455 | 14.3445 | 22.7921 |
| ENSMUSG00000087018 | 1_2900072N19Rik  | 0.1447  | 0.92709  | 0.82027  | NA      | 0.86819 | 0       | 0       | 0       | 0       | 0       |
| ENSMUSG00000087028 | 7_Gm13387        | 5.25511 | 0.02687  | 0.97781  | 0.98547 | 5.20913 | 3.67122 | 7.17092 | 4.50843 | 7.17224 | 3.79868 |
| ENSMUSG00000087029 | 1_Gm14133        | 2.95449 | -1.84599 | 0.21756  | 0.32191 | 0.86819 | 1.83561 | 1.19515 | 1.80337 | 10.7584 | 1.26623 |
| ENSMUSG00000087032 | 1_Gm13874        | 0.90083 | -3.32999 | 0.292    | NA      | 0       | 0       | 0       | 4.50843 | 0.89653 | 0       |
| ENSMUSG00000087038 | 9_2900079G21Rik  | 0.34947 | -0.03469 | 0.99322  | NA      | 0       | 0       | 1.19515 | 0.90169 | 0       | 0       |
| ENSMUSG00000087040 | 1_Gm14033        | 0.30056 | -1.76625 | 0.6627   | NA      | 0       | 0       | 0       | 1.80337 | 0       | 0       |
| ENSMUSG00000087041 | 1_Gm16295        | 17.9    | 0.82362  | 0.20015  | 0.30116 | 23.4411 | 23.8629 | 21.5128 | 23.4438 | 6.27571 | 8.86359 |
| ENSMUSG00000087075 | 1_A230065H16Rik  | 0.64359 | 0.12079  | 0.96515  | NA      | 0.86819 | 0       | 1.19515 | 0.90169 | 0.89653 | 0       |
| ENSMUSG00000087085 | 1_Gm12068        | 1.45876 | -2.85122 | 0.17804  | NA      | 0       | 0       | 1.19515 | 2.70506 | 3.58612 | 1.26623 |
| ENSMUSG00000087094 | 1_Gm13093        | 0.15297 | 0.92709  | 0.82027  | NA      | 0       | 0.91781 | 0       | 0       | 0       | 0       |
| ENSMUSG00000087107 | 7_Al662270       | 32.8    | 0.9951   | 0.04337  | 0.0861  | 67.7187 | 28.452  | 34.6595 | 25.2472 | 17.9306 | 22.7921 |
| ENSMUSG00000087112 | 1_Gm7237         | 0.21104 | -0.99647 | 0.80707  | NA      | 0       | 0       | 0       | 0       | 0       | 1.26623 |
| ENSMUSG00000087116 | 1_Gm12324        | 0.14942 | -0.99647 | 0.80707  | NA      | 0       | 0       | 0       | 0       | 0.89653 | 0       |
| ENSMUSG00000087119 | 4_Atg4a-ps       | 1.83757 | 0.48168  | 0.83172  | NA      | 1.73638 | 0       | 4.78062 | 4.50843 | 0       | 0       |
| ENSMUSG00000087124 | 1_Gm13839        | 0.15028 | -0.99647 | 0.80707  | NA      | 0       | 0       | 0       | 0.90169 | 0       | 0       |
| ENSMUSG00000087141 | 1_Plcxd2         | 137.919 | -1.05053 | 8.51E-05 | 0.00043 | 107.655 | 90.8628 | 70.5141 | 228.126 | 178.41  | 151.947 |
| ENSMUSG00000087147 | 1_Gm14228        | 0.34861 | -0.03469 | 0.99322  | NA      | 0       | 0       | 1.19515 | 0       | 0.89653 | 0       |
| ENSMUSG00000087153 | 7_Gm6483         | 1832.92 | -0.31857 | 0.02144  | 0.04808 | 1690.36 | 1621.76 | 1581.19 | 1720.42 | 2278.08 | 2105.74 |
| ENSMUSG00000087166 | 9_L1td1          | 0.65272 | 0.15968  | 0.95914  | NA      | 0       | 0.91781 | 1.19515 | 1.80337 | 0       | 0       |
| ENSMUSG00000087172 | 1_Gm12153        | 0.9062  | -0.9714  | 0.72623  | NA      | 0       | 1.83561 | 0       | 2.70506 | 0.89653 | 0       |
| ENSMUSG00000087179 | 8_Gm14230        | 18.7094 | -0.44249 | 0.44276  | 0.55789 | 13.891  | 22.9451 | 10.7564 | 27.9522 | 21.5167 | 15.1947 |
| ENSMUSG00000087187 | 1_Gm13431        | 5.65422 | -0.31091 | 0.75004  | 0.82345 | 5.20913 | 6.42464 | 3.58546 | 6.3118  | 9.86184 | 2.53245 |
| ENSMUSG00000087194 | 9_Skint6         | 6.38518 | -0.46506 | 0.64987  | 0.7439  | 4.34094 | 3.67122 | 8.36608 | 8.11517 | 12.5514 | 1.26623 |
| ENSMUSG00000087196 | 1_Gm13373        | 3.52784 | 0.81694  | 0.55014  | 0.65644 | 3.47275 | 2.75342 | 7.17092 | 2.70506 | 0       | 5.06491 |
| ENSMUSG00000087210 | 1_Gm15391        | 0.30056 | -1.76625 | 0.6627   | NA      | 0       | 0       | 0       | 1.80337 | 0       | 0       |
| ENSMUSG00000087211 | 7_Lhx1os         | 0.44998 | -2.33107 | 0.56049  | NA      | 0       | 0       | 0       | 1.80337 | 0.89653 | 0       |
| ENSMUSG00000087214 | 1_Gm15555        | 0.35574 | -0.03469 | 0.99322  | NA      | 0.86819 | 0       | 0       | 0       | 0       | 1.26623 |
| ENSMUSG00000087215 | 1_Gm14618        | 0.1447  | 0.92709  | 0.82027  | NA      | 0.86819 | 0       | 0       | 0       | 0       | 0       |
| ENSMUSG00000087220 | 1_Gm11377        | 0.94212 | 1.03891  | 0.6676   | NA      | 1.73638 | 0.91781 | 1.19515 | 1.80337 | 0       | 0       |
| ENSMUSG00000087225 | 1_Gm14014        | 0       | NA       | NA       | NA      | 0       | 0       | 0       | 0       | 0       | 0       |
| ENSMUSG00000087226 | 1_Gm14015        | 0.29498 | -0.03469 | 0.99322  | NA      | 0.86819 | 0       | 0       | 0.90169 | 0       | 0       |
| ENSMUSG00000087228 | 1_Gm12827        | 0.60209 | -1.37773 | 0.66139  | NA      | 0       | 0.91781 | 0       | 0.90169 | 1.79306 | 0       |
| ENSMUSG00000087230 | 8_Mroh3          | 11.2342 | 0.88213  | 0.19586  | 0.29592 | 19.1001 | 13.7671 | 10.7564 | 8.11517 | 8.06878 | 7.59736 |
| ENSMUSG00000087236 | 1_Gm1305         | 2.10941 | 0.37442  | 0.83858  | NA      | 0       | 3.67122 | 3.58546 | 3.60674 | 1.79306 | 0       |
| ENSMUSG00000087238 | 1_Gm12865        | 0.15028 | -0.99647 | 0.80707  | NA      | 0       | 0       | 0       | 0.90169 | 0       | 0       |
| ENSMUSG00000087246 | 1_Gm13346        | 1.5611  | -3.0123  | 0.15413  | NA      | 0       | 0.91781 | 0       | 1.80337 | 5.37918 | 1.26623 |
| ENSMUSG00000087247 | 3_Fam150a        | 0.1447  | 0.92709  | 0.82027  | NA      | 0.86819 | 0       | 0       | 0       | 0       | 0       |
| ENSMUSG00000087259 | 7_2610035D17Rik  | 182.831 | 0.52987  | 0.02018  | 0.0456  | 204.024 | 211.095 | 231.86  | 143.368 | 119.239 | 187.402 |
| ENSMUSG00000087260 | 5_Lamtor5        | 928.365 | -0.38598 | 0.00706  | 0.01883 | 816.965 | 783.806 | 815.095 | 982.837 | 1219.28 | 952.203 |
| ENSMUSG00000087265 | 1_Gm12349        | 10.6416 | 0.56541  | 0.48257  | 0.59476 | 10.4183 | 10.0959 | 17.9273 | 16.2303 | 5.37918 | 3.79868 |
| ENSMUSG00000087268 | 1_Gm14486        | 0.19919 | 0.92709  | 0.82027  | NA      | 0       | 0       | 1.19515 | 0       | 0       | 0       |
| ENSMUSG00000087272 | 1_Gm15409        | 1.69697 | 2.16178  | 0.28306  | NA      | 2.60457 | 4.58903 | 1.19515 | 0       | 1.79306 | 0       |
| ENSMUSG00000087273 | 1_Gm13203        | 0.30594 | 1.73752  | 0.66765  | NA      | 0       | 1.83561 | 0       | 0       | 0       | 0       |
| ENSMUSG00000087277 | 1_2010013B24Rik  | 0       | NA       | NA       | NA      | 0       | 0       | 0       | 0       | 0       | 0       |
| ENSMUSG00000087278 | 1_A930006I01Rik  | 5.66427 | -1.05131 | 0.29418  | 0.40843 | 6.07732 | 3.67122 | 1.19515 | 8.11517 | 9.86184 | 5.06491 |
| ENSMUSG00000087279 | 10_4930544D05Rik | 0.21104 | -0.99647 | 0.80707  | NA      | 0       | 0       | 0       | 0       | 0       | 1.26623 |
| ENSMUSG00000087289 | 2_4933424M12Rik  | 0.1447  | 0.92709  | 0.82027  | NA      | 0.86819 | 0       | 0       | 0       | 0       | 0       |
| ENSMUSG00000087292 | 1_Gm13832        | 1.40126 | -1.88222 | 0.38921  | NA      | 1.73638 | 0       | 0       | 4.50843 | 0.89653 | 1.26623 |
| ENSMUSG00000087303 | 2_Lipo2          | 6.63827 | -0.87965 | 0.3204   | 0.43603 | 3.47275 | 4.58903 | 5.97577 | 9.01685 | 5.37918 | 11.396  |
| ENSMUSG00000087308 | 1_Gm16195        | 1.45575 | -1.74522 | 0.38073  | NA      | 0.86819 | 0       | 1.19515 | 4.50843 | 0.89653 | 1.26623 |
| ENSMUSG00000087312 | 1_Gm13833        | 2.57588 | 1.21799  | 0.41077  | 0.52717 | 4.34094 | 1.83561 | 4.78062 | 2.70506 | 1.79306 | 0       |
| ENSMUSG00000087319 | 1_Gm15907        | 0       | NA       | NA       | NA      | 0       | 0       | 0       | 0       | 0       | 0       |
| ENSMUSG00000087333 | 1_Gm13652        | 0.44526 | -0.80448 | 0.84252  | NA      | 0.86819 | 0       | 0       | 1.80337 | 0       | 0       |
| ENSMUSG00000087335 | 2_4930526F13Rik  | 0.1447  | 0.92709  | 0.82027  | NA      | 0.86819 | 0       | 0       | 0       | 0       | 0       |
| ENSMUSG00000087340 | 1_Gm15228        | 18.0134 | 0.16062  | 0.76045  | 0.83166 | 19.9683 | 15.6027 | 21.5128 | 17.132  | 16.1376 | 17.7272 |
| ENSMUSG00000087344 | 1_Gm15627        | 1.31442 | -0.90559 | 0.6399   | NA      | 1.73638 | 0.91781 | 0       | 1.80337 | 0.89653 | 2.53245 |
| ENSMUSG00000087351 | 1_Gm11464        | 0.30239 | -0.03469 | 0.99322  | NA      | 0       | 0.91781 | 0       | 0       | 0.89653 | 0       |
| ENSMUSG00000087357 | 1_Gm12498        | 4.01187 | -0.49599 | 0.70205  | 0.78702 | 0       | 6.42464 | 3.58546 | 5.41011 | 3.58612 | 5.06491 |
| ENSMUSG00000087358 | 8_4930453H23Rik  | 1.22422 | -1.33993 | 0.51168  | NA      | 0       | 0.91781 | 1.19515 | 1.80337 | 0.89653 | 2.53245 |

|                     |                 |         |           |          |          |         |         |         |         |         |         |
|---------------------|-----------------|---------|-----------|----------|----------|---------|---------|---------|---------|---------|---------|
| ENSMUSG000000087360 | 2_Gm15104       | 0.89503 | 0.95973   | 0.69431  | NA       | 1.73638 | 1.83561 | 0       | 0.90169 | 0.89653 | 0       |
| ENSMUSG000000087361 | 7_0610043K17Rik | 8.96066 | -0.41494  | 0.57721  | 0.68111  | 7.8137  | 9.17806 | 5.97577 | 8.11517 | 12.5514 | 10.1298 |
| ENSMUSG000000087362 | 7_Gm13710       | 7.96235 | -1.53522  | 0.07478  | 0.13563  | 6.94551 | 2.75342 | 2.39031 | 14.427  | 9.86184 | 11.396  |
| ENSMUSG000000087370 | 2_Tmem170b      | 793.776 | -0.26062  | 0.0553   | 0.10537  | 724.937 | 646.135 | 797.168 | 843.978 | 904.599 | 845.84  |
| ENSMUSG000000087373 | 7_Gm15892       | 4.60765 | -0.73602  | 0.48272  | 0.5949   | 5.20913 | 2.75342 | 2.39031 | 8.11517 | 5.37918 | 3.79868 |
| ENSMUSG000000087378 | 1_Gm12414       | 0.34947 | -0.03469  | 0.99322  | NA       | 0       | 0       | 1.19515 | 0.90169 | 0       | 0       |
| ENSMUSG000000087385 | 8_AA415398      | 75.627  | -0.24796  | 0.39969  | 0.51717  | 68.5869 | 83.5203 | 54.9771 | 91.0702 | 77.1016 | 78.5061 |
| ENSMUSG000000087388 | 1_Gm12128       | 0.15028 | -0.99647  | 0.80707  | NA       | 0       | 0       | 0       | 0.90169 | 0       | 0       |
| ENSMUSG000000087390 | 1_Gm7598        | 23.72   | -1.24317  | 0.01026  | 0.02582  | 17.3638 | 12.8493 | 11.9515 | 36.0674 | 34.9647 | 29.1232 |
| ENSMUSG000000087403 | 8_Kantr         | 29.9264 | -0.00584  | 0.98911  | 0.99262  | 26.0457 | 33.9588 | 29.8789 | 29.7556 | 35.8612 | 24.0583 |
| ENSMUSG000000087407 | 1_Gm11431       | 0.15028 | -0.99647  | 0.80707  | NA       | 0       | 0       | 0       | 0.90169 | 0       | 0       |
| ENSMUSG000000087408 | 9_Cers1         | 43.4185 | 0.34436   | 0.48042  | 0.59306  | 44.2776 | 63.3286 | 38.2449 | 64.0197 | 21.5167 | 29.1232 |
| ENSMUSG000000087410 | 7_2310065F04Rik | 10.527  | -2.63366  | 0.00135  | 0.00465  | 1.73638 | 4.58903 | 2.39031 | 20.7388 | 13.448  | 20.2596 |
| ENSMUSG000000087444 | 1_Gm5475        | 7.75518 | -0.15532  | 0.86186  | 0.90624  | 13.0228 | 6.42464 | 2.39031 | 10.8202 | 6.27571 | 7.59736 |
| ENSMUSG000000087450 | 1_Gm13994       | 0.21104 | -0.99647  | 0.80707  | NA       | 0       | 0       | 0       | 0       | 0       | 1.26623 |
| ENSMUSG000000087461 | 2_C230014O12Rik | 0.64714 | 1.45445   | 0.59427  | NA       | 0.86819 | 0.91781 | 1.19515 | 0.90169 | 0       | 0       |
| ENSMUSG000000087464 | 1_Gm12862       | 1.23069 | -0.07738  | 0.97943  | NA       | 0       | 0       | 3.58546 | 0       | 0       | 3.79868 |
| ENSMUSG000000087470 | 1_A630031M04Rik | 1.00964 | -2.20816  | 0.34768  | NA       | 0       | 0       | 1.19515 | 1.80337 | 1.79306 | 1.26623 |
| ENSMUSG000000087475 | 3_4933406118Rik | 0.81668 | -0.69771  | 0.78481  | NA       | 0       | 1.83561 | 0       | 0.90169 | 0.89653 | 1.26623 |
| ENSMUSG000000087485 | 1_Gm13383       | 1.52005 | 1.96745   | 0.32083  | NA       | 5.20913 | 0.91781 | 1.19515 | 0.90169 | 0.89653 | 0       |
| ENSMUSG000000087491 | 7_Gm14552       | 0.21104 | -0.99647  | 0.80707  | NA       | 0       | 0       | 0       | 0       | 0       | 1.26623 |
| ENSMUSG000000087501 | 1_Gm12116       | 15.1157 | -0.2185   | 0.73213  | 0.80995  | 19.9683 | 11.9315 | 9.56123 | 12.6236 | 12.5514 | 24.0583 |
| ENSMUSG000000087523 | 1_Gm12319       | 16.4506 | -0.08562  | 0.88509  | 0.92227  | 13.891  | 12.8493 | 21.5128 | 23.4438 | 14.3445 | 12.6623 |
| ENSMUSG000000087543 | 1_Gm16576       | 57.6358 | -0.0566   | 0.86416  | 0.9077   | 59.905  | 66.082  | 43.0255 | 64.9214 | 51.1022 | 60.7789 |
| ENSMUSG000000087547 | 1_Platr27       | 0.29498 | -0.03469  | 0.99322  | NA       | 0.86819 | 0       | 0       | 0.90169 | 0       | 0       |
| ENSMUSG000000087559 | 1_Gm13802       | 0.44526 | -0.80448  | 0.84252  | NA       | 0.86819 | 0       | 0       | 1.80337 | 0       | 0       |
| ENSMUSG000000087574 | 1_C030037D09Rik | 104.649 | -0.71339  | 0.00991  | 0.02506  | 70.3233 | 97.2874 | 70.5141 | 146.975 | 138.962 | 103.831 |
| ENSMUSG000000087575 | 7_Gm12976       | 1.0539  | -1.28495  | 0.62917  | NA       | 0       | 1.83561 | 0       | 0.90169 | 3.58612 | 0       |
| ENSMUSG000000087585 | 1_Gm14100       | 0.74711 | -3.05659  | 0.44093  | NA       | 0       | 0       | 0       | 0       | 4.48265 | 0       |
| ENSMUSG000000087586 | 1_Gm6938        | 6.57759 | 0.25526   | 0.76817  | 0.83699  | 6.94551 | 7.34244 | 7.17092 | 3.60674 | 8.06878 | 6.33113 |
| ENSMUSG000000087587 | 1_Gm15245       | 0.36046 | -1.978    | 0.62369  | NA       | 0       | 0       | 0       | 0       | 0.89653 | 1.26623 |
| ENSMUSG000000087590 | 2_Epb4114aos    | 19.7482 | 0.04738   | 0.92743  | 0.95195  | 23.4411 | 16.5205 | 20.3176 | 24.3455 | 16.1376 | 17.7272 |
| ENSMUSG000000087595 | 1_1810012K08Rik | 13.7195 | 0.42013   | 0.54344  | 0.65032  | 19.9683 | 16.5205 | 10.7564 | 9.01685 | 19.7237 | 6.33113 |
| ENSMUSG000000087598 | 9_Zfp111        | 363.008 | -0.39152  | 0.01562  | 0.03687  | 312.548 | 348.766 | 279.666 | 385.921 | 423.162 | 427.985 |
| ENSMUSG000000087602 | 1_Gm12753       | 0.44998 | -2.33107  | 0.56049  | NA       | 0       | 0       | 0       | 1.80337 | 0.89653 | 0       |
| ENSMUSG000000087610 | 1_Gm16253       | 6.10443 | -1.07094  | 0.26564  | 0.37679  | 1.73638 | 6.42464 | 3.58546 | 6.3118  | 7.17224 | 11.396  |
| ENSMUSG000000087617 | 1_Gm14268       | 3.21204 | -3.23331  | 0.06384  | 0.11889  | 0.86819 | 0.91781 | 0       | 14.427  | 1.79306 | 1.26623 |
| ENSMUSG000000087620 | 7_5330434G04Rik | 1.85865 | -2.33837  | 0.20029  | NA       | 0.86819 | 0.91781 | 0       | 5.41011 | 2.68959 | 1.26623 |
| ENSMUSG000000087622 | 1_Gm12290       | 1.19409 | -2.59514  | 0.30254  | NA       | 0.86819 | 0       | 0       | 3.60674 | 2.68959 | 0       |
| ENSMUSG000000087624 | 1_9230111E07Rik | 18.72   | 0.18784   | 0.76165  | 0.83243  | 13.0228 | 22.0273 | 25.0982 | 10.8202 | 28.689  | 12.6623 |
| ENSMUSG000000087637 | 1_Gm11986       | 0.21104 | -0.99647  | 0.80707  | NA       | 0       | 0       | 0       | 0       | 0       | 1.26623 |
| ENSMUSG000000087647 | 2_Gm15407       | 0       | NA        | NA       | NA       | 0       | 0       | 0       | 0       | 0       | 0       |
| ENSMUSG000000087648 | 1_E130018N17Rik | 3.01078 | -3.08391  | 0.06275  | 0.11725  | 0       | 1.83561 | 0       | 6.3118  | 3.58612 | 6.33113 |
| ENSMUSG000000087651 | 2_1500009L16Rik | 14.6757 | -0.101613 | 0.138    | 0.22299  | 6.94551 | 13.7671 | 8.36608 | 28.8539 | 9.86184 | 20.2596 |
| ENSMUSG000000087659 | 7_Gm12606       | 2.43927 | 1.43005   | 0.35351  | NA       | 4.34094 | 2.75342 | 3.58546 | 0       | 2.68959 | 1.26623 |
| ENSMUSG000000087662 | 1_Gm11373       | 0.34947 | -0.03469  | 0.99322  | NA       | 0       | 0       | 1.19515 | 0.90169 | 0       | 0       |
| ENSMUSG000000087674 | 7_4930447M23Rik | 4.91007 | -2.35724  | 0.03411  | 0.07063  | 1.73638 | 1.83561 | 1.19515 | 10.8202 | 6.27571 | 7.59736 |
| ENSMUSG000000087677 | 1_Gm15226       | 0.14942 | -0.99647  | 0.80707  | NA       | 0       | 0       | 0       | 0       | 0.89653 | 0       |
| ENSMUSG000000087678 | 1_Gm14120       | 0       | NA        | NA       | NA       | 0       | 0       | 0       | 0       | 0       | 0       |
| ENSMUSG000000087679 | 2_C330006A16Rik | 1050.47 | 0.10795   | 0.41167  | 0.52805  | 1005.36 | 1087.6  | 1177.23 | 1089.24 | 927.909 | 1015.51 |
| ENSMUSG000000087681 | 1_Gm13565       | 0.35574 | -0.03469  | 0.99322  | NA       | 0.86819 | 0       | 0       | 0       | 0       | 1.26623 |
| ENSMUSG000000087684 | 1_1200007C13Rik | 3.62454 | 0.79368   | 0.51455  | 0.62464  | 2.60457 | 6.42464 | 4.78062 | 4.50843 | 0.89653 | 2.53245 |
| ENSMUSG000000087687 | 2_Pet100        | 437.236 | -0.38742  | 0.01286  | 0.0312   | 414.126 | 328.574 | 394.401 | 495.025 | 510.126 | 481.166 |
| ENSMUSG000000089652 | 1_Gm16025       | 378.807 | 0.27697   | 0.24922  | 0.35826  | 383.739 | 359.78  | 501.965 | 238.045 | 419.576 | 369.738 |
| ENSMUSG000000089661 | 9_Mia           | 9.62513 | -0.65157  | 0.42405  | 0.53959  | 5.20913 | 11.0137 | 5.97577 | 9.01685 | 6.27571 | 20.2596 |
| ENSMUSG000000089669 | 7_Tnfsf13       | 362.22  | -0.63934  | 3.94E-05 | 0.00022  | 271.743 | 291.862 | 286.837 | 424.694 | 484.127 | 414.056 |
| ENSMUSG000000089672 | 4_Lilr4b        | 174.268 | 2.04326   | 1.94E-06 | 1.63E-05 | 507.022 | 127.575 | 206.762 | 59.5112 | 78.8947 | 65.8438 |
| ENSMUSG000000089678 | 8_Agxt2         | 0.61187 | 2.73082   | 0.49238  | NA       | 0       | 3.67122 | 0       | 0       | 0       | 0       |
| ENSMUSG000000089682 | 9_Bcl2l2        | 1593.66 | -0.08257  | 0.53553  | 0.64335  | 1554.06 | 1597.9  | 1492.75 | 1883.62 | 1505.27 | 1528.34 |
| ENSMUSG000000089687 | 2_Rab42         | 9.97004 | -0.02602  | 0.97386  | 0.98302  | 6.07732 | 11.9315 | 11.9515 | 10.8202 | 15.241  | 3.79868 |
| ENSMUSG000000089694 | 2_Gm4477        | 7.22039 | -1.08545  | 0.39569  | 0.5133   | 0       | 4.58903 | 9.56123 | 19.8371 | 8.06878 | 1.26623 |
| ENSMUSG000000089704 | 9_Galnt2        | 36.0201 | 3.10383   | 0.13154  | 0.21483  | 65.1141 | 68.8354 | 59.7577 | 0       | 22.4133 | 0       |
| ENSMUSG000000089712 | 1_Gm15889       | 0.29767 | 1.70332   | 0.67406  | NA       | 0.86819 | 0.91781 | 0       | 0       | 0       | 0       |
| ENSMUSG000000089714 | 1_Gm16092       | 188.074 | 0.18071   | 0.4765   | 0.58907  | 213.574 | 164.287 | 222.299 | 138.86  | 228.615 | 160.811 |
| ENSMUSG000000089715 | 11_Cbx6         | 1535.37 | -0.07148  | 0.73922  | 0.81558  | 1389.1  | 1849.38 | 1253.72 | 2066.66 | 1325.07 | 1328.27 |
| ENSMUSG000000089719 | 1_Gm15758       | 2.54437 | -0.87845  | 0.61927  | 0.71734  | 2.60457 | 2.75342 | 0       | 8.11517 | 1.79306 | 0       |
| ENSMUSG000000089722 | 2_Gm11711       | 57.3826 | 1.03573   | 0.02724  | 0.05872  | 32.123  | 99.123  | 100.393 | 45.0843 | 29.5855 | 37.9868 |
| ENSMUSG000000089726 | 2_Mir17hg       | 100.209 | 0.03291   | 0.91019  | 0.93963  | 110.26  | 86.2737 | 107.564 | 72.1348 | 123.721 | 101.298 |
| ENSMUSG000000089736 | 1_Tgfbf3l       | 53.8271 | -0.00329  | 0.99262  | 0.99513  | 62.5096 | 61.493  | 37.0498 | 53.1994 | 61.8606 | 46.8504 |
| ENSMUSG000000089739 | 2_Gm20431       | 284.016 | 3.90736   | 0.13063  | 0.21376  | 299.525 | 624.108 | 674.067 | 106.399 | 0       | 0       |
| ENSMUSG000000089751 | 3_Olfir1213     | 0.15297 | 0.92709   | 0.82027  | NA       | 0       | 0.91781 | 0       | 0       | 0       | 0       |
| ENSMUSG000000089753 | 9_Gm11709       | 1.3701  | -2.72965  | 0.19968  | NA       | 0       | 0       | 1.19515 | 1.80337 | 2.68959 | 2.53245 |
| ENSMUSG000000089756 | 2_Gm8898        | 362.047 | -1.09378  | 3.55E-08 | 5.08E-07 | 217.047 | 247.808 | 228.274 | 394.938 | 597.986 | 486.231 |
| ENSMUSG000000089762 | 3_Ier5l         | 43.2743 | 1.79732   | 0.00027  | 0.00116  | 39.9367 | 52.3149 | 109.954 | 18.9354 | 23.3098 | 15.1947 |
| ENSMUSG000000089768 | 2_Tmsb15b1      | 76.5492 | -1.32887  | 6.78E-05 | 0.00035  | 55.5641 | 41.3013 | 33.4643 | 92.8736 | 139.859 | 96.2332 |
| ENSMUSG000000089773 | 7_Skint1        | 8.26151 | 0.09238   | 0.90734  | 0.9375   | 13.0228 | 6.42464 | 5.97577 | 7.21348 | 8.06878 | 8.86359 |
| ENSMUSG000000089774 | 2_Slc5a3        | 702.586 | -1.17844  | 5.15E-11 | 1.81E-09 | 397.63  | 531.409 | 362.132 | 1027.92 | 1026.53 | 869.898 |
| ENSMUSG000000089789 | 1_Rdh1          | 40.5733 | -0.60144  | 0.16443  | 0.2576   | 44.2776 | 23.8629 | 28.6837 | 63.118  | 49.3092 | 34.1881 |
| ENSMUSG000000089798 | 9_1700028K03Rik | 3.8552  | -2.79285  | 0.04756  | 0.09299  | 0.86819 | 0.91781 | 1.19515 | 9.91854 | 8.96531 | 1.26623 |

|                    |                 |         |          |          |          |         |         |         |         |         |         |
|--------------------|-----------------|---------|----------|----------|----------|---------|---------|---------|---------|---------|---------|
| ENSMUSG00000089809 | 8_A930011G23Rik | 4.59426 | -1.69014 | 0.1675   | 0.26146  | 3.47275 | 1.83561 | 1.19515 | 12.6236 | 7.17224 | 1.26623 |
| ENSMUSG00000089815 | 7_Gm5083        | 0.45267 | -0.80756 | 0.8164   | NA       | 0       | 0.91781 | 0       | 0.90169 | 0.89653 | 0       |
| ENSMUSG00000089824 | 10_Rbm12        | 810.134 | 0.10829  | 0.46737  | 0.58088  | 812.624 | 831.532 | 877.243 | 656.427 | 862.462 | 820.515 |
| ENSMUSG00000089830 | 1_Gm15749       | 3.15813 | 0.21558  | 0.86172  | 0.90615  | 4.34094 | 4.58903 | 1.19515 | 2.70506 | 3.58612 | 2.53245 |
| ENSMUSG00000089832 | 8_Shkbp1        | 527.683 | 1.16157  | 3.08E-09 | 6.16E-08 | 648.537 | 725.984 | 813.9   | 397.643 | 254.615 | 325.42  |
| ENSMUSG00000089837 | 9_Npcd          | 2.35566 | 1.23401  | 0.49056  | NA       | 5.20913 | 4.58903 | 0       | 1.80337 | 0       | 2.53245 |
| ENSMUSG00000089840 | 1_Gm4491        | 2.17061 | 0.7596   | 0.64844  | NA       | 1.73638 | 6.42464 | 0       | 1.80337 | 1.79306 | 1.26623 |
| ENSMUSG00000089844 | 7_A530032D15Rik | 21.2546 | 1.65872  | 0.00587  | 0.01612  | 36.4639 | 26.6164 | 33.4643 | 3.60674 | 13.448  | 13.9285 |
| ENSMUSG00000089847 | 7_Timm10b       | 300.187 | 0.44309  | 0.00798  | 0.02089  | 326.439 | 357.944 | 353.766 | 281.326 | 232.201 | 249.447 |
| ENSMUSG00000089857 | 9_Zfp882        | 84.5639 | -1.18348 | 3.22E-05 | 0.00019  | 65.1141 | 44.0547 | 45.4159 | 118.121 | 115.652 | 119.025 |
| ENSMUSG00000089862 | 8_Umad1         | 178.743 | -0.17096 | 0.3753   | 0.49299  | 171.901 | 156.027 | 176.883 | 177.632 | 202.616 | 187.402 |
| ENSMUSG00000089872 | 10_Rps6kc1      | 345.867 | 0.29513  | 0.06602  | 0.1223   | 375.057 | 345.095 | 424.28  | 321     | 308.407 | 301.362 |
| ENSMUSG00000089876 | 3_Tmem102       | 246.852 | 0.93789  | 4.22E-06 | 3.19E-05 | 306.471 | 312.972 | 352.57  | 137.056 | 169.444 | 202.596 |
| ENSMUSG00000089879 | 1_4930448H16Rik | 0       | NA       | NA       | NA       | 0       | 0       | 0       | 0       | 0       | 0       |
| ENSMUSG00000089901 | 1_Gm8113        | 164.363 | -0.66564 | 0.00238  | 0.00754  | 133.701 | 134     | 113.54  | 188.452 | 236.684 | 179.804 |
| ENSMUSG00000089911 | 4_Hiat1         | 1665.3  | -0.23943 | 0.04503  | 0.0888   | 1556.66 | 1476.75 | 1548.92 | 1634.76 | 1958.92 | 1815.77 |
| ENSMUSG00000089917 | 7_Uckl1         | 921.596 | 0.23494  | 0.09082  | 0.15888  | 940.248 | 990.312 | 1058.91 | 917.014 | 740.534 | 882.56  |
| ENSMUSG00000089922 | 2_3110039M20Rik | 0.15028 | -0.99647 | 0.80707  | NA       | 0       | 0       | 0       | 0.90169 | 0       | 0       |
| ENSMUSG00000089926 | 1_Gm15734       | 0       | NA       | NA       | NA       | 0       | 0       | 0       | 0       | 0       | 0       |
| ENSMUSG00000089929 | 1_Bcl2a1b       | 31.682  | 1.1169   | 0.01985  | 0.04495  | 48.6186 | 25.6986 | 56.1722 | 18.9354 | 24.2063 | 16.4609 |
| ENSMUSG00000089942 | 9_Pira2         | 51.8855 | 2.15311  | 4.66E-05 | 0.00026  | 137.174 | 45.8903 | 71.7092 | 27.9522 | 19.7237 | 8.86359 |
| ENSMUSG00000089943 | 1_Ugt1a5        | 1.88896 | 4.33893  | 0.03608  | NA       | 2.60457 | 2.75342 | 5.97577 | 0       | 0       | 0       |
| ENSMUSG00000089945 | 10_Pakap        | 393.215 | -0.57901 | 0.09426  | 0.16366  | 306.471 | 212.013 | 429.06  | 697.003 | 465.299 | 249.447 |
| ENSMUSG00000089951 | 8_Gm14435       | 45.9261 | -0.82757 | 0.08456  | 0.14978  | 36.4639 | 17.4383 | 45.4159 | 56.8062 | 35.8612 | 83.571  |
| ENSMUSG00000089953 | 3_Rnf224        | 28.0391 | 0.6997   | 0.1066   | 0.1813   | 31.2548 | 35.7944 | 37.0498 | 18.0337 | 23.3098 | 22.7921 |
| ENSMUSG00000089960 | 1_Ugt1a1        | 37.8847 | 0.74064  | 0.1137   | 0.19111  | 32.123  | 62.4108 | 47.8062 | 18.0337 | 40.3439 | 26.5908 |
| ENSMUSG00000089984 | 7_Fbxo24        | 38.5103 | 1.38819  | 0.00204  | 0.00661  | 56.4322 | 48.6437 | 62.148  | 30.6573 | 11.6549 | 21.5259 |
| ENSMUSG00000089989 | 9_Fli3l         | 145.502 | 0.69348  | 0.00174  | 0.0058   | 171.033 | 172.547 | 196.005 | 124.433 | 95.0322 | 113.96  |
| ENSMUSG00000089992 | 3_G6pd2         | 1.49465 | 0.49316  | 0.79154  | NA       | 0.86819 | 0.91781 | 3.58546 | 1.80337 | 1.79306 | 0       |
| ENSMUSG00000089996 | 5_Tmsb15b2      | 53.2797 | -1.43551 | 2.56E-05 | 0.00015  | 27.782  | 27.5342 | 31.074  | 64.0197 | 86.9635 | 82.3047 |
| ENSMUSG00000089997 | 1_1810020O05Rik | 2.96053 | -0.93483 | 0.47142  | 0.58449  | 1.73638 | 0.91781 | 3.58546 | 4.50843 | 4.48265 | 2.53245 |
| ENSMUSG00000090000 | 1_Ier3ip1       | 758.65  | -0.29921 | 0.02857  | 0.06101  | 704.969 | 610.341 | 726.654 | 811.517 | 895.634 | 802.788 |
| ENSMUSG00000090013 | 1_Gm6507        | 0.1447  | 0.92709  | 0.82027  | NA       | 0.86819 | 0       | 0       | 0       | 0       | 0       |
| ENSMUSG00000090015 | 8_Gm15446       | 205.475 | -1.01779 | 4.19E-06 | 3.17E-05 | 149.328 | 139.506 | 118.32  | 238.045 | 334.406 | 253.245 |
| ENSMUSG00000090019 | 5_Gimap1        | 21.8629 | 1.01817  | 0.05419  | 0.10361  | 34.7275 | 18.3561 | 34.6595 | 13.5253 | 13.448  | 16.4609 |
| ENSMUSG00000090023 | 1_Gm16302       | 0.96988 | -0.55177 | 0.84197  | NA       | 0       | 0       | 2.39031 | 0       | 0.89653 | 2.53245 |
| ENSMUSG00000090035 | 3_Galnt4        | 5324.9  | 0.03185  | 0.84244  | 0.89273  | 5196.98 | 5267.29 | 5685.35 | 4132.42 | 5409.67 | 6257.69 |
| ENSMUSG00000090053 | 9_Palm2         | 19.5543 | -1.04289 | 0.14963  | 0.23852  | 6.94551 | 27.5342 | 3.58546 | 25.2472 | 28.689  | 25.3245 |
| ENSMUSG00000090061 | 9_Nwd2          | 7.22577 | -0.92729 | 0.30732  | 0.42236  | 6.07732 | 6.42464 | 2.39031 | 15.3287 | 8.06878 | 5.06491 |
| ENSMUSG00000090066 | 2_1110002E22Rik | 68.3566 | -1.66231 | 2.03E-05 | 0.00013  | 33.8593 | 40.3834 | 23.9031 | 150.581 | 75.3086 | 86.1034 |
| ENSMUSG00000090071 | 4_Cdk5r2        | 15.0568 | -1.96029 | 0.02068  | 0.04659  | 10.4183 | 5.50683 | 2.39031 | 43.2809 | 22.4133 | 6.33113 |
| ENSMUSG00000090077 | 9_Lime1         | 234.688 | 0.49425  | 0.03945  | 0.07959  | 308.207 | 287.273 | 228.274 | 254.275 | 166.755 | 163.343 |
| ENSMUSG00000090083 | 10_Rnf8         | 427.103 | 0.15755  | 0.26314  | 0.37402  | 439.303 | 438.711 | 473.281 | 385.02  | 409.714 | 416.589 |
| ENSMUSG00000090084 | 7_Srxp          | 638.525 | -0.69142 | 6.71E-06 | 4.78E-05 | 474.899 | 567.204 | 421.889 | 809.714 | 779.982 | 777.463 |
| ENSMUSG00000090086 | 7_Al480526      | 306.277 | -0.01447 | 0.93441  | 0.95673  | 296.92  | 351.52  | 265.324 | 319.197 | 308.407 | 296.297 |
| ENSMUSG00000090093 | 8_Gm14399       | 123.323 | -1.02015 | 0.00028  | 0.00121  | 87.687  | 98.2052 | 57.3674 | 134.351 | 183.789 | 178.538 |
| ENSMUSG00000090100 | 7_Ttbk2         | 545.351 | -0.86728 | 1.77E-07 | 2.06E-06 | 401.971 | 425.862 | 329.863 | 656.427 | 797.016 | 660.97  |
| ENSMUSG00000090104 | 1_Slimpos2      | 0.59941 | -2.74429 | 0.44299  | NA       | 0       | 0       | 0       | 1.80337 | 1.79306 | 0       |
| ENSMUSG00000090110 | 8_Cmc4          | 59.8842 | -0.14681 | 0.67616  | 0.76548  | 52.9595 | 73.4244 | 44.2207 | 62.2163 | 77.1016 | 49.3828 |
| ENSMUSG00000090112 | 8_Shrph         | 1008.75 | -0.40377 | 0.00082  | 0.00302  | 843.011 | 893.025 | 868.877 | 1057.68 | 1187.01 | 1202.92 |
| ENSMUSG00000090113 | 7_Nhlrc4        | 6.50148 | 1.86494  | 0.05549  | 0.10567  | 10.4183 | 9.17806 | 10.7564 | 0.90169 | 2.68959 | 5.06491 |
| ENSMUSG00000090115 | 7_Usp49         | 695.372 | 0.06339  | 0.61743  | 0.71565  | 750.115 | 678.258 | 703.946 | 715.037 | 671.501 | 653.373 |
| ENSMUSG00000090121 | 10_Abhd12b      | 1.21151 | -0.31716 | 0.87559  | NA       | 0       | 0.91781 | 2.39031 | 0.90169 | 1.79306 | 1.26623 |
| ENSMUSG00000090122 | 3_Kcne1l        | 14.7691 | -1.60418 | 0.02916  | 0.062    | 3.47275 | 14.6849 | 3.58546 | 26.1489 | 17.9306 | 22.7921 |
| ENSMUSG00000090124 | 7_Ugt1a7c       | 208.933 | 0.03056  | 0.90033  | 0.93271  | 182.32  | 231.287 | 219.908 | 150.581 | 255.511 | 213.992 |
| ENSMUSG00000090125 | 3_Pou3f1        | 12.4419 | 3.85913  | 0.00015  | 0.0007   | 18.232  | 10.0959 | 41.8304 | 1.80337 | 2.68959 | 0       |
| ENSMUSG00000090137 | 8_Uba52         | 8722.53 | 0.58086  | 0.00177  | 0.00587  | 10584.1 | 10212.4 | 10568.7 | 8825.7  | 5054.64 | 7089.6  |
| ENSMUSG00000090141 | 1_Gm614         | 1.22862 | 3.73862  | 0.12256  | NA       | 4.34094 | 1.83561 | 1.19515 | 0       | 0       | 0       |
| ENSMUSG00000090145 | 7_Ugt1a6b       | 92.7581 | -0.6148  | 0.09156  | 0.15993  | 60.7732 | 100.041 | 58.5626 | 68.5281 | 140.755 | 127.889 |
| ENSMUSG00000090150 | 8_Acad11        | 927.005 | -0.11338 | 0.33055  | 0.44722  | 910.73  | 891.189 | 870.072 | 1018    | 941.357 | 930.677 |
| ENSMUSG00000090164 | 8_BC035044      | 8.23643 | 0.44573  | 0.65936  | 0.75157  | 13.0228 | 7.34244 | 8.36608 | 11.7219 | 8.96531 | 0       |
| ENSMUSG00000090171 | 1_Ugt1a2        | 1.95742 | -1.69689 | 0.43067  | NA       | 0       | 2.75342 | 0       | 4.50843 | 4.48265 | 0       |
| ENSMUSG00000090173 | 8_Fbxw10        | 37.3332 | 0.25948  | 0.56678  | 0.67185  | 38.2003 | 45.8903 | 38.2449 | 23.4438 | 52.8953 | 25.3245 |
| ENSMUSG00000090176 | 1_Cd200r2       | 10.3525 | -0.94087 | 0.2865   | 0.39999  | 12.1546 | 6.42464 | 2.39031 | 18.9354 | 4.48265 | 17.7272 |
| ENSMUSG00000090202 | 1_4930503B20Rik | 1.24254 | -1.10402 | 0.71306  | NA       | 0       | 0       | 2.39031 | 0       | 0       | 5.06491 |
| ENSMUSG00000090206 | 7_Tepp          | 17.6693 | -0.70659 | 0.20337  | 0.30503  | 12.1546 | 18.3561 | 9.56123 | 20.7388 | 22.4133 | 22.7921 |
| ENSMUSG00000090210 | 7_Iltga10       | 46.2432 | -0.31334 | 0.37749  | 0.49502  | 40.8049 | 44.9725 | 38.2449 | 56.8062 | 57.378  | 39.253  |
| ENSMUSG00000090211 | 2_Gm16050       | 3.20295 | -0.30274 | 0.8356   | 0.8877   | 3.47275 | 2.75342 | 2.39031 | 0       | 0.06878 | 2.53245 |
| ENSMUSG00000090213 | 1_Tmem189       | 982.764 | 0.21321  | 0.25807  | 0.36806  | 1009.7  | 1081.17 | 1074.44 | 1091.04 | 665.226 | 974.995 |
| ENSMUSG00000090215 | 8_Trim34b       | 386.701 | 0.70952  | 8.32E-06 | 5.77E-05 | 456.667 | 442.382 | 541.405 | 281.326 | 302.131 | 296.297 |
| ENSMUSG00000090223 | 1_Pcp4          | 338.177 | -1.78349 | 1.00E-07 | 1.26E-06 | 157.142 | 226.698 | 71.7092 | 640.197 | 500.264 | 433.05  |
| ENSMUSG00000090231 | 10_Cfb          | 1207.92 | 3.79064  | 2.18E-46 | 5.30E-43 | 2796.43 | 1442.79 | 2518.19 | 165.91  | 116.549 | 207.661 |
| ENSMUSG00000090236 | 2_Car15         | 17.6627 | 0.72128  | 0.2305   | 0.33669  | 26.9138 | 16.5205 | 22.7079 | 20.7388 | 8.96531 | 10.1298 |
| ENSMUSG00000090247 | 7_Bloc1s1       | 849.089 | 0.23502  | 0.31938  | 0.43495  | 895.102 | 905.874 | 953.733 | 1087.43 | 521.781 | 730.613 |
| ENSMUSG00000090254 | 7_Gm1965        | 0       | NA       | NA       | NA       | 0       | 0       | 0       | 0       | 0       | 0       |
| ENSMUSG00000090258 | 7_Churc1        | 852.646 | -0.43873 | 0.00029  | 0.00123  | 721.465 | 705.792 | 745.776 | 955.787 | 1046.25 | 940.807 |
| ENSMUSG00000090263 | 1_D730045A05Rik | 0.74679 | -0.58966 | 0.82082  | NA       | 0.86819 | 0.91781 | 0       | 0.90169 | 1.79306 | 0       |
| ENSMUSG00000090264 | 1_Elf4ebp3      | 28.7987 | 1.30051  | 0.01384  | 0.03319  | 29.5184 | 56.9039 | 35.8546 | 15.3287 | 9.86184 | 25.3245 |
| ENSMUSG00000090266 | 10_Mettl23      | 219.845 | -0.48942 | 0.00933  | 0.02383  | 184.924 | 200.999 | 162.541 | 251.57  | 279.718 | 239.317 |

|                     |                 |         |          |          |          |         |         |         |         |         |         |
|---------------------|-----------------|---------|----------|----------|----------|---------|---------|---------|---------|---------|---------|
| ENSMUSG000000090268 | 1_Gm5286        | 0.15297 | 0.92709  | 0.82027  | NA       | 0       | 0.91781 | 0       | 0       | 0       | 0       |
| ENSMUSG000000090272 | 7_Mndal         | 1820.21 | 0.81182  | 0.00223  | 0.00713  | 2108.83 | 1868.65 | 2980.71 | 809.714 | 1792.16 | 1361.19 |
| ENSMUSG000000090273 | 3_Prr22         | 7.43908 | 1.53408  | 0.13339  | 0.21723  | 6.07732 | 8.26025 | 19.1225 | 8.11517 | 1.79306 | 1.26623 |
| ENSMUSG000000090284 | 2_Gm17613       | 0       | NA       | NA       | NA       | 0       | 0       | 0       | 0       | 0       | 0       |
| ENSMUSG000000090286 | 1_Gm17615       | 1.10185 | -1.1623  | 0.61416  | NA       | 0       | 0.91781 | 1.19515 | 2.70506 | 1.79306 | 0       |
| ENSMUSG000000090290 | 1_Gm17296       | 245.228 | 0.31312  | 0.07171  | 0.13106  | 275.216 | 290.944 | 248.592 | 230.831 | 207.995 | 217.791 |
| ENSMUSG000000090291 | 2_Lrrc10b       | 2.85633 | 1.09573  | 0.53167  | 0.64012  | 3.47275 | 8.26025 | 0       | 4.50843 | 0.89653 | 0       |
| ENSMUSG000000090308 | 1_Gm5174        | 0.15028 | -0.99647 | 0.80707  | NA       | 0       | 0       | 0       | 0.90169 | 0       | 0       |
| ENSMUSG000000090317 | 1_Gm17324       | 0.15028 | -0.99647 | 0.80707  | NA       | 0       | 0       | 0       | 0.90169 | 0       | 0       |
| ENSMUSG000000090326 | 1_Dthd1         | 0       | NA       | NA       | NA       | 0       | 0       | 0       | 0       | 0       | 0       |
| ENSMUSG000000090342 | 1_Vmn2r46       | 6.54894 | -1.20954 | 0.27534  | 0.38753  | 3.47275 | 8.26025 | 0       | 14.427  | 8.06878 | 5.06491 |
| ENSMUSG000000090346 | 1_Vmn1r5        | 0.15297 | 0.92709  | 0.82027  | NA       | 0       | 0.91781 | 0       | 0       | 0       | 0       |
| ENSMUSG000000090356 | 2_Teddm3        | 1.75516 | 4.24462  | 0.0943   | NA       | 6.94551 | 0       | 3.58546 | 0       | 0       | 0       |
| ENSMUSG000000090363 | 8_Gm3512        | 29.9681 | -0.54689 | 0.23398  | 0.34057  | 33.8593 | 22.0273 | 16.7322 | 29.7556 | 39.4473 | 37.9868 |
| ENSMUSG000000090369 | 3_4933411K16Rik | 5.57153 | -0.33607 | 0.72191  | 0.80196  | 3.47275 | 6.42464 | 4.78062 | 4.50843 | 5.37918 | 8.86359 |
| ENSMUSG000000090383 | 1_Vmn2r58       | 0       | NA       | NA       | NA       | 0       | 0       | 0       | 0       | 0       | 0       |
| ENSMUSG000000090394 | 8_4930523C07Rik | 645.577 | -0.94424 | 2.90E-06 | 2.32E-05 | 500.077 | 468.081 | 356.156 | 965.705 | 928.806 | 654.639 |
| ENSMUSG000000090399 | 1_Gm38399       | 18.4022 | -0.57417 | 0.28437  | 0.39761  | 16.4956 | 14.6849 | 13.1467 | 18.0337 | 27.7924 | 20.2596 |
| ENSMUSG000000090439 | 1_Gm17455       | 2.82709 | 1.45446  | 0.42307  | 0.53868  | 8.68188 | 0       | 3.58546 | 0       | 0.89653 | 3.79868 |
| ENSMUSG000000090440 | 1_Gm9732        | 0       | NA       | NA       | NA       | 0       | 0       | 0       | 0       | 0       | 0       |
| ENSMUSG000000090451 | 1_Gm6133        | 2.32675 | -0.92325 | 0.50854  | NA       | 1.73638 | 1.83561 | 1.19515 | 2.70506 | 2.68959 | 3.79868 |
| ENSMUSG000000090470 | 2_Prr23a3       | 0.94158 | -0.8466  | 0.76226  | NA       | 0.86819 | 0       | 1.19515 | 0       | 3.58612 | 0       |
| ENSMUSG000000090472 | 8_Gm3047        | 0       | NA       | NA       | NA       | 0       | 0       | 0       | 0       | 0       | 0       |
| ENSMUSG000000090486 | 2_BC035947      | 1.80703 | -2.27608 | 0.31843  | NA       | 0       | 1.83561 | 0       | 7.21348 | 1.79306 | 0       |
| ENSMUSG000000090509 | 2_Sfta2         | 1.23742 | -0.65291 | 0.76444  | NA       | 1.73638 | 0       | 1.19515 | 1.80337 | 2.68959 | 0       |
| ENSMUSG000000090512 | 8_Gm3424        | 0       | NA       | NA       | NA       | 0       | 0       | 0       | 0       | 0       | 0       |
| ENSMUSG000000090523 | 2_Gypc          | 263.417 | -0.13206 | 0.47472  | 0.58722  | 240.488 | 225.78  | 289.227 | 301.163 | 268.063 | 255.778 |
| ENSMUSG000000090544 | 2_Gm6576        | 1562.78 | 0.11601  | 0.38235  | 0.49993  | 1633.93 | 1583.21 | 1657.68 | 1329.99 | 1458.66 | 1713.21 |
| ENSMUSG000000090546 | 1_Cdr1          | 1.34265 | -2.78534 | 0.25376  | NA       | 0.86819 | 0       | 0       | 2.70506 | 4.48265 | 0       |
| ENSMUSG000000090550 | 2_Prlh          | 1.52628 | 4.05254  | 0.07313  | NA       | 5.20913 | 2.75342 | 1.19515 | 0       | 0       | 0       |
| ENSMUSG000000090551 | 1_A730015C16Rik | 10.4639 | 0.14285  | 0.84853  | 0.89711  | 10.4183 | 11.9315 | 10.7564 | 6.3118  | 17.0341 | 6.33113 |
| ENSMUSG000000090553 | 8_Snrpe         | 977.558 | -0.37338 | 0.01559  | 0.0368   | 895.97  | 791.148 | 868.877 | 973.82  | 1303.56 | 1031.97 |
| ENSMUSG000000090581 | 2_Vmn2r6        | 0.58996 | -0.05829 | 0.9875   | NA       | 1.73638 | 0       | 0       | 1.80337 | 0       | 0       |
| ENSMUSG000000090588 | 2_Gm9573        | 17650   | 1.51047  | 1.08E-18 | 1.76E-16 | 23942.9 | 25168.1 | 29274.1 | 9840.09 | 6989.35 | 10685.7 |
| ENSMUSG000000090602 | 2_Gm5611        | 32.3298 | 1.47865  | 0.09175  | 0.16015  | 104.183 | 26.6164 | 11.9515 | 2.70506 | 35.8612 | 12.6623 |
| ENSMUSG000000090622 | 1_A930033H14Rik | 44.6984 | -0.25538 | 0.45191  | 0.56641  | 39.9367 | 39.4656 | 43.0255 | 51.3961 | 47.5161 | 46.8504 |
| ENSMUSG000000090625 | 2_Mpm20721      | 173.491 | 0.8512   | 0.00049  | 0.00195  | 182.32  | 271.67  | 216.323 | 147.876 | 113.859 | 108.896 |
| ENSMUSG000000090626 | 9_Tex9          | 258.017 | -0.46729 | 0.01388  | 0.03327  | 231.806 | 236.794 | 180.468 | 287.638 | 329.027 | 282.369 |
| ENSMUSG000000090631 | 3_Olfr456       | 0.96137 | -0.12921 | 0.95256  | NA       | 0.86819 | 1.83561 | 0       | 0.90169 | 0.89653 | 1.26623 |
| ENSMUSG000000090634 | 1_Gm8126        | 0.14942 | -0.99647 | 0.80707  | NA       | 0       | 0       | 0       | 0       | 0.89653 | 0       |
| ENSMUSG000000090638 | 1_Gm17028       | 1.0924  | 0.46843  | 0.83889  | NA       | 1.73638 | 0.91781 | 1.19515 | 2.70506 | 0       | 0       |
| ENSMUSG000000090639 | 1_Gm20425       | 268.328 | -0.05055 | 0.76688  | 0.83623  | 283.898 | 246.89  | 259.348 | 251.57  | 277.028 | 291.232 |
| ENSMUSG000000090641 | 1_Zfp712        | 64.3135 | -0.82542 | 0.00849  | 0.022    | 47.7504 | 54.1505 | 37.0498 | 80.25   | 93.2392 | 73.4412 |
| ENSMUSG000000090659 | 8_Zfp493        | 33.1113 | -0.84827 | 0.0724   | 0.13213  | 26.0457 | 30.2876 | 14.3418 | 34.264  | 58.2745 | 35.4544 |
| ENSMUSG000000090665 | 1_Gad1-ps       | 6.75116 | 3.63895  | 0.0065   | 0.01756  | 26.0457 | 1.83561 | 9.56123 | 0.90169 | 0.89653 | 1.26623 |
| ENSMUSG000000090667 | 2_Gm765         | 2.52797 | -1.44029 | 0.30508  | 0.42007  | 0.86819 | 0.91781 | 2.39031 | 3.60674 | 3.58612 | 3.79868 |
| ENSMUSG000000090673 | 1_Gm340         | 198.31  | 0.25599  | 0.22533  | 0.33061  | 210.97  | 211.095 | 224.689 | 144.27  | 187.375 | 211.46  |
| ENSMUSG000000090675 | 1_Olfr111       | 0       | NA       | NA       | NA       | 0       | 0       | 0       | 0       | 0       | 0       |
| ENSMUSG000000090691 | 3_Gm3667        | 4.01326 | -1.76771 | 0.16893  | 0.26336  | 2.60457 | 2.75342 | 0       | 9.01685 | 7.17224 | 2.53245 |
| ENSMUSG000000090693 | 3_Trim43a       | 4.61513 | -3.78389 | 0.01023  | 0.02577  | 1.73638 | 0       | 0       | 9.91854 | 7.17224 | 8.86359 |
| ENSMUSG000000090698 | 2_Apold1        | 47.8393 | -0.42768 | 0.27439  | 0.38652  | 33.8593 | 44.9725 | 44.2207 | 56.8062 | 71.7224 | 35.4544 |
| ENSMUSG000000090700 | 1_Cyp4f40       | 6.94778 | 0.39706  | 0.65517  | 0.74855  | 8.68188 | 6.42464 | 8.36608 | 2.70506 | 5.37918 | 10.1298 |
| ENSMUSG000000090707 | 8_Gm8237        | 3.90344 | -1.19443 | 0.30584  | 0.42082  | 0.86819 | 2.75342 | 3.58546 | 3.60674 | 6.27571 | 6.33113 |
| ENSMUSG000000090713 | 1_Gm8127        | 1.43253 | 2.8322   | 0.17755  | NA       | 3.47275 | 1.83561 | 2.39031 | 0       | 0.89653 | 0       |
| ENSMUSG000000090733 | 6_Rps27         | 11277.3 | -0.57559 | 1.16E-07 | 1.43E-06 | 9454.57 | 8988.07 | 8728.21 | 12647   | 14787.4 | 13058.6 |
| ENSMUSG000000090744 | 7_Gm6871        | 1.1582  | -2.45403 | 0.28797  | NA       | 0       | 0       | 1.19515 | 0.90169 | 3.58612 | 1.26623 |
| ENSMUSG000000090747 | 2_Esp8          | 0       | NA       | NA       | NA       | 0       | 0       | 0       | 0       | 0       | 0       |
| ENSMUSG000000090799 | 1_Klhl33        | 27.8678 | -0.60158 | 0.24806  | 0.35696  | 23.4411 | 23.8629 | 19.1225 | 53.1994 | 19.7237 | 27.857  |
| ENSMUSG000000090812 | 8_Samd15        | 8.92075 | -0.86431 | 0.27028  | 0.38191  | 8.68188 | 5.50683 | 4.78062 | 10.8202 | 16.1376 | 7.59736 |
| ENSMUSG000000090817 | 7_Gm4450        | 0.29498 | -0.03469 | 0.99322  | NA       | 0.86819 | 0       | 0       | 0.90169 | 0       | 0       |
| ENSMUSG000000090827 | 8_Gm8297        | 0       | NA       | NA       | NA       | 0       | 0       | 0       | 0       | 0       | 0       |
| ENSMUSG000000090840 | 2_1700092M07Rik | 2.54794 | 0.35461  | 0.79937  | 0.86146  | 3.47275 | 2.75342 | 2.39031 | 4.50843 | 0.89653 | 1.26623 |
| ENSMUSG000000090841 | 1_Myl6          | 12521.7 | 0.1146   | 0.39014  | 0.50757  | 13503.8 | 12477.6 | 13075   | 13886   | 10337   | 11850.6 |
| ENSMUSG000000090843 | 2_Heatr4        | 1.54799 | 0.39005  | 0.83375  | NA       | 1.73638 | 0       | 3.58546 | 1.80337 | 0.89653 | 1.26623 |
| ENSMUSG000000090862 | 3_Rps13         | 6827.69 | -0.00107 | 0.99238  | 0.99496  | 6689.39 | 6688.05 | 7099.22 | 6291.06 | 7531.75 | 6666.68 |
| ENSMUSG000000090863 | 1_A530084C06Rik | 40.4492 | 0.67094  | 0.10771  | 0.18295  | 31.2548 | 55.9861 | 62.148  | 27.9522 | 34.9647 | 30.3894 |
| ENSMUSG000000090872 | 8_Gm3239        | 0       | NA       | NA       | NA       | 0       | 0       | 0       | 0       | 0       | 0       |
| ENSMUSG000000090877 | 3_Hspa1b        | 6643.33 | 1.54934  | 2.89E-13 | 1.82E-11 | 7855.37 | 9857.23 | 11994.6 | 2749.24 | 2932.55 | 4471.05 |
| ENSMUSG000000090881 | 1_Gm6904        | 23.4603 | 0.62088  | 0.29448  | 0.40875  | 30.3866 | 28.452  | 26.2934 | 6.3118  | 27.7924 | 21.5259 |
| ENSMUSG000000090891 | 3_D6Ert527e     | 10.705  | 1.00061  | 0.17181  | 0.26685  | 17.3638 | 10.0959 | 15.537  | 5.41011 | 10.7584 | 5.06491 |
| ENSMUSG000000090894 | 2_Olfr110       | 0.36132 | -1.98116 | 0.62311  | NA       | 0       | 0       | 0       | 0.90169 | 0       | 1.26623 |
| ENSMUSG000000090897 | 1_Esp6Esp5      | 73.0502 | 0.30139  | 0.29721  | 0.41162  | 85.9507 | 70.671  | 84.8559 | 60.4129 | 59.171  | 77.2398 |
| ENSMUSG000000090919 | 6_Pabpc4l       | 26.823  | -1.13624 | 0.02159  | 0.04836  | 20.8365 | 17.4383 | 11.9515 | 37.8708 | 47.5161 | 25.3245 |
| ENSMUSG000000090935 | 10_Synj2bp      | 1161.76 | -0.67793 | 1.14E-07 | 1.41E-06 | 894.234 | 904.956 | 882.024 | 1298.43 | 1590.45 | 1400.45 |
| ENSMUSG000000090936 | 2_Gm17705       | 35.0458 | -0.02144 | 0.95796  | 0.9728   | 29.5184 | 41.3013 | 33.4643 | 41.4775 | 27.7924 | 36.7206 |
| ENSMUSG000000090942 | 1_F830016B08Rik | 115.759 | 2.33445  | 2.65E-14 | 2.11E-12 | 186.661 | 177.136 | 217.518 | 46.8876 | 44.8265 | 21.5259 |
| ENSMUSG000000090946 | 3_Ccdc71l       | 358.607 | -0.10762 | 0.54011  | 0.64732  | 356.825 | 286.355 | 393.206 | 354.362 | 381.025 | 379.868 |
| ENSMUSG000000090957 | 1_Gm7535        | 3.43727 | -0.03503 | 0.97801  | 0.98554  | 3.47275 | 0.91781 | 5.97577 | 4.50843 | 4.48265 | 1.26623 |
| ENSMUSG000000090958 | 2_Lrrc32        | 172.26  | 0.82443  | 0.00052  | 0.00207  | 233.543 | 219.356 | 207.957 | 159.598 | 100.411 | 112.694 |

|                     |                 |         |          |          |          |         |         |         |         |         |         |
|---------------------|-----------------|---------|----------|----------|----------|---------|---------|---------|---------|---------|---------|
| ENSMUSG000000090961 | 1_Vmn2r8        | 0.80637 | 1.74371  | 0.53944  | NA       | 1.73638 | 1.83561 | 0       | 0       | 0       | 1.26623 |
| ENSMUSG000000090963 | 1_Gm17655       | 12.2728 | -0.76352 | 0.28561  | 0.39901  | 13.891  | 7.34244 | 5.97577 | 11.7219 | 23.3098 | 11.396  |
| ENSMUSG000000090965 | 1_Gm17203       | 2.65189 | -1.19199 | 0.41029  | 0.52682  | 2.60457 | 0.91781 | 1.19515 | 1.80337 | 1.79306 | 7.59736 |
| ENSMUSG000000090967 | 2_Vmn2r61       | 0.2894  | 1.67273  | 0.67976  | NA       | 1.73638 | 0       | 0       | 0       | 0       | 0       |
| ENSMUSG000000090966 | 1_Gm20458       | 0       | NA       | NA       | NA       | 0       | 0       | 0       | 0       | 0       | 0       |
| ENSMUSG000000091002 | 2_Tcerg1l       | 0.84075 | 3.1742   | 0.24509  | NA       | 1.73638 | 0.91781 | 2.39031 | 0       | 0       | 0       |
| ENSMUSG000000091007 | 1_D630036H23Rik | 9.49514 | -0.45741 | 0.64177  | 0.73721  | 1.73638 | 12.8493 | 9.56123 | 21.6405 | 3.58612 | 7.59736 |
| ENSMUSG000000091017 | 1_Fam71a        | 0.29498 | -0.03469 | 0.99322  | NA       | 0.86819 | 0       | 0       | 0.90169 | 0       | 0       |
| ENSMUSG000000091021 | 1_Gm17300       | 272.284 | -0.09021 | 0.62983  | 0.72655  | 290.843 | 252.397 | 247.397 | 238.947 | 312.889 | 291.232 |
| ENSMUSG000000091022 | 8_Gm3115        | 0       | NA       | NA       | NA       | 0       | 0       | 0       | 0       | 0       | 0       |
| ENSMUSG000000091028 | 1_Gm10722       | 0       | NA       | NA       | NA       | 0       | 0       | 0       | 0       | 0       | 0       |
| ENSMUSG000000091034 | 8_Gm17660       | 0.6593  | -2.86602 | 0.41383  | NA       | 0       | 0       | 0       | 0       | 2.68959 | 1.26623 |
| ENSMUSG000000091043 | 1_Glyatl3       | 0.15028 | -0.99647 | 0.80707  | NA       | 0       | 0       | 0       | 0.90169 | 0       | 0       |
| ENSMUSG000000091049 | 8_Gm1979        | 0.91512 | 2.09291  | 0.51963  | NA       | 0       | 4.58903 | 0       | 0.90169 | 0       | 0       |
| ENSMUSG000000091055 | 2_Siglec15      | 0.15028 | -0.99647 | 0.80707  | NA       | 0       | 0       | 0       | 0.90169 | 0       | 0       |
| ENSMUSG000000091060 | 2_7420461P10Rik | 9.61241 | -0.02093 | 0.97634  | 0.98434  | 7.8137  | 10.0959 | 10.7564 | 9.01685 | 9.86184 | 10.1298 |
| ENSMUSG000000091086 | 1_Gm5428        | 218.522 | -1.16412 | 8.42E-05 | 0.00043  | 182.32  | 100.041 | 121.906 | 228.126 | 405.232 | 273.505 |
| ENSMUSG000000091089 | 1_A930018M24Rik | 18.4184 | -0.70501 | 0.23949  | 0.34706  | 21.7047 | 12.8493 | 7.17092 | 19.8371 | 28.689  | 20.2596 |
| ENSMUSG000000091091 | 2_Kcnmb3        | 0.65071 | -0.25074 | 0.93593  | NA       | 1.73638 | 0       | 0       | 0.90169 | 0       | 1.26623 |
| ENSMUSG000000091110 | 1_Gm2832        | 0.21104 | -0.99647 | 0.80707  | NA       | 0       | 0       | 0       | 0       | 0       | 1.26623 |
| ENSMUSG000000091119 | 1_Ccdc152       | 3.88956 | -0.38191 | 0.73443  | 0.81175  | 1.73638 | 3.67122 | 4.78062 | 2.70506 | 5.37918 | 5.06491 |
| ENSMUSG000000091140 | 1_Gm17124       | 0       | NA       | NA       | NA       | 0       | 0       | 0       | 0       | 0       | 0       |
| ENSMUSG000000091144 | 2_Phf11c        | 162.232 | 0.57864  | 0.03092  | 0.06509  | 199.683 | 155.109 | 228.274 | 93.7753 | 155.996 | 140.551 |
| ENSMUSG000000091155 | 1_Serpine3      | 66.9105 | -0.68298 | 0.08059  | 0.14418  | 65.9823 | 54.1505 | 33.4643 | 114.514 | 57.378  | 75.9736 |
| ENSMUSG000000091183 | 5_Gm5141        | 79.5131 | -0.62124 | 0.02419  | 0.0532   | 64.2459 | 70.671  | 52.5868 | 102.792 | 90.5496 | 96.2332 |
| ENSMUSG000000091185 | 1_Gm3278        | 0.86819 | 3.23798  | 0.39696  | NA       | 5.20913 | 0       | 0       | 0       | 0       | 0       |
| ENSMUSG000000091191 | 1_Gm17334       | 46.187  | 0.91181  | 0.03742  | 0.07621  | 56.4322 | 66.082  | 57.3674 | 22.5421 | 21.5167 | 53.1815 |
| ENSMUSG000000091198 | 1_Gm5218        | 0.30056 | -1.76625 | 0.6627   | NA       | 0       | 0       | 0       | 1.80337 | 0       | 0       |
| ENSMUSG000000091215 | 3_Gm17252       | 0.30239 | -0.03469 | 0.99322  | NA       | 0       | 0.91781 | 0       | 0       | 0.89653 | 0       |
| ENSMUSG000000091227 | 1_Gm3755        | 0       | NA       | NA       | NA       | 0       | 0       | 0       | 0       | 0       | 0       |
| ENSMUSG000000091228 | 1_Gm20390       | 1173.78 | 1.22496  | 2.10E-07 | 2.39E-06 | 1640.01 | 1465.74 | 1826.2  | 883.652 | 435.714 | 791.392 |
| ENSMUSG000000091230 | 1_Gm6970        | 0.1447  | 0.92709  | 0.82027  | NA       | 0.86819 | 0       | 0       | 0       | 0       | 0       |
| ENSMUSG000000091243 | 1_Vgll3         | 323.98  | 0.1725   | 0.24836  | 0.35729  | 340.33  | 343.259 | 346.595 | 314.688 | 297.648 | 301.362 |
| ENSMUSG000000091255 | 1_Speer4e       | 1.20762 | -1.55115 | 0.60373  | NA       | 0       | 1.83561 | 0       | 5.41011 | 0       | 0       |
| ENSMUSG000000091264 | 2_Smim13        | 474.643 | -0.60575 | 0.00019  | 0.00088  | 428.885 | 357.026 | 343.009 | 555.438 | 632.951 | 530.549 |
| ENSMUSG000000091272 | 1_Gm17641       | 2.14141 | -1.83147 | 0.30604  | NA       | 0       | 2.75342 | 0       | 3.60674 | 2.68959 | 3.79868 |
| ENSMUSG000000091275 | 1_Gm3248        | 5.06159 | -0.63409 | 0.60748  | 0.7074   | 0.86819 | 7.34244 | 3.58546 | 0.90169 | 6.27571 | 11.396  |
| ENSMUSG000000091277 | 1_Gm1818        | 4.89961 | -2.06822 | 0.14496  | 0.23227  | 0       | 0       | 5.97577 | 9.91854 | 7.17224 | 6.33113 |
| ENSMUSG000000091285 | 1_Gm17430       | 0.14942 | -0.99647 | 0.80707  | NA       | 0       | 0       | 0       | 0       | 0.89653 | 0       |
| ENSMUSG000000091297 | 1_Gm8439        | 4.61391 | 0.15383  | 0.87831  | 0.91779  | 6.07732 | 3.67122 | 4.78062 | 3.60674 | 4.48265 | 5.06491 |
| ENSMUSG000000091311 | 2_Spata31d1b    | 0.15028 | -0.99647 | 0.80707  | NA       | 0       | 0       | 0       | 0.90169 | 0       | 0       |
| ENSMUSG000000091318 | 2_Gm5415        | 3.70422 | -2.29998 | 0.12164  | 0.20197  | 0       | 3.67122 | 0       | 7.21348 | 6.27571 | 5.06491 |
| ENSMUSG000000091337 | 3_Eld1          | 895.713 | -0.88547 | 4.42E-11 | 1.58E-09 | 645.064 | 667.245 | 574.869 | 1198.34 | 1232.73 | 1056.03 |
| ENSMUSG000000091345 | 8_Col6a5        | 59.5086 | -0.00663 | 0.98445  | 0.98955  | 77.2688 | 47.7259 | 52.5868 | 51.3961 | 60.9641 | 67.11   |
| ENSMUSG000000091350 | 1_Vmn2r92       | 0.15297 | 0.92709  | 0.82027  | NA       | 0       | 0.91781 | 0       | 0       | 0       | 0       |
| ENSMUSG000000091376 | 1_Aadacl2       | 43.2342 | 0.23048  | 0.52189  | 0.63149  | 50.3549 | 40.3834 | 49.0013 | 34.264  | 38.5508 | 46.8504 |
| ENSMUSG000000091381 | 2_Vmn2r83       | 0.95328 | -0.82568 | 0.76734  | NA       | 0       | 0.91781 | 1.19515 | 3.60674 | 0       | 0       |
| ENSMUSG000000091383 | 1_Hist1h2al     | 4.3684  | 3.55082  | 0.01577  | 0.03718  | 3.47275 | 11.0137 | 9.56123 | 0       | 0.89653 | 1.26623 |
| ENSMUSG000000091387 | 1_Gcnt4         | 16.501  | -0.65166 | 0.29558  | 0.40997  | 14.7592 | 11.9315 | 11.9515 | 32.4607 | 15.241  | 12.6623 |
| ENSMUSG000000091388 | 1_Gm17576       | 0.80011 | 1.84822  | 0.46755  | NA       | 0.86819 | 1.83561 | 1.19515 | 0.90169 | 0       | 0       |
| ENSMUSG000000091400 | 1_Gm6356        | 0.21104 | -0.99647 | 0.80707  | NA       | 0       | 0       | 0       | 0       | 0       | 1.26623 |
| ENSMUSG000000091402 | 7_Rd3l          | 75.2944 | -1.7754  | 5.10E-05 | 0.00028  | 44.2776 | 39.4656 | 17.9273 | 165.91  | 118.342 | 65.8438 |
| ENSMUSG000000091405 | 2_Hist2h4       | 24.3438 | -1.02725 | 0.02983  | 0.06318  | 18.232  | 16.5205 | 13.1467 | 28.8539 | 37.6543 | 31.6557 |
| ENSMUSG000000091415 | 4_Ak9           | 0.64983 | 2.80989  | 0.34835  | NA       | 0.86819 | 1.83561 | 1.19515 | 0       | 0       | 0       |
| ENSMUSG000000091423 | 1_Gm17509       | 1.16328 | -0.63466 | 0.7772   | NA       | 1.73638 | 0.91781 | 0       | 0       | 1.79306 | 2.53245 |
| ENSMUSG000000091430 | 1_Platr19       | 0.15028 | -0.99647 | 0.80707  | NA       | 0       | 0       | 0       | 0.90169 | 0       | 0       |
| ENSMUSG000000091449 | 2_Gm10269       | 5.13028 | -1.90473 | 0.12499  | 0.20626  | 3.47275 | 2.75342 | 0       | 4.50843 | 3.58612 | 16.4609 |
| ENSMUSG000000091455 | 3_Otogl         | 1.18178 | -1.01284 | 0.69936  | NA       | 0       | 0       | 2.39031 | 0.90169 | 0       | 3.79868 |
| ENSMUSG000000091460 | 2_Gm7808        | 3.73515 | -0.53961 | 0.69469  | 0.78155  | 1.73638 | 7.34244 | 0       | 7.21348 | 3.58612 | 2.53245 |
| ENSMUSG000000091471 | 1_Gm20538       | 1.20407 | 1.51272  | 0.55245  | NA       | 0       | 1.83561 | 3.58546 | 1.80337 | 0       | 0       |
| ENSMUSG000000091472 | 2_Gm3739        | 4.63552 | -0.87747 | 0.40857  | 0.52535  | 3.47275 | 2.75342 | 3.58546 | 2.70506 | 8.96531 | 6.33113 |
| ENSMUSG000000091474 | 2_2610021A01Rik | 406.5   | -0.41748 | 0.01067  | 0.02671  | 361.166 | 328.574 | 354.961 | 415.677 | 531.643 | 446.978 |
| ENSMUSG000000091476 | 6_Gm16432       | 29.9033 | -1.06832 | 0.03612  | 0.07402  | 27.782  | 20.1917 | 9.56123 | 36.0674 | 52.8953 | 32.9219 |
| ENSMUSG000000091477 | 1_Gm5799        | 0.39838 | 2.07058  | 0.60634  | NA       | 0       | 0       | 2.39031 | 0       | 0       | 0       |
| ENSMUSG000000091504 | 1_Vmn2r118      | 0.1447  | 0.92709  | 0.82027  | NA       | 0.86819 | 0       | 0       | 0       | 0       | 0       |
| ENSMUSG000000091511 | 2_Vmn2r87       | 0.14942 | -0.99647 | 0.80707  | NA       | 0       | 0       | 0       | 0       | 0.89653 | 0       |
| ENSMUSG000000091512 | 5_Lamtor3       | 874.392 | -0.01502 | 0.91526  | 0.94362  | 803.074 | 810.422 | 997.954 | 923.326 | 860.669 | 850.904 |
| ENSMUSG000000091514 | 1_Gm17484       | 20.7115 | -1.02932 | 0.04642  | 0.09114  | 13.891  | 12.8493 | 14.3418 | 29.7556 | 33.1716 | 20.2596 |
| ENSMUSG000000091519 | 1_Skor2         | 0.29498 | -0.03469 | 0.99322  | NA       | 0.86819 | 0       | 0       | 0.90169 | 0       | 0       |
| ENSMUSG000000091530 | 1_Cldn20        | 8.86476 | 0.02953  | 0.96826  | 0.97945  | 6.94551 | 9.17806 | 10.7564 | 7.21348 | 8.96531 | 10.1298 |
| ENSMUSG000000091531 | 1_Olfr102       | 0.15297 | 0.92709  | 0.82027  | NA       | 0       | 0.91781 | 0       | 0       | 0       | 0       |
| ENSMUSG000000091537 | 2_Tma7          | 2634.42 | -0.3281  | 0.0018   | 0.00594  | 2429.19 | 2194.47 | 2385.53 | 2870.97 | 3063.44 | 2862.94 |
| ENSMUSG000000091541 | 1_Vmn1r9        | 0.15028 | -0.99647 | 0.80707  | NA       | 0       | 0       | 0       | 0.90169 | 0       | 0       |
| ENSMUSG000000091550 | 1_Gm6811        | 0.44795 | 0.74833  | 0.83022  | NA       | 0.86819 | 0.91781 | 0       | 0.90169 | 0       | 0       |
| ENSMUSG000000091556 | 8_Gm14569       | 0.66102 | -2.86976 | 0.33535  | NA       | 0       | 0       | 0       | 1.80337 | 0.89653 | 1.26623 |
| ENSMUSG000000091561 | 2_Gm6665        | 0.29884 | -1.76064 | 0.66373  | NA       | 0       | 0       | 0       | 0       | 1.79306 | 0       |
| ENSMUSG000000091563 | 8_Gm8108        | 14.6339 | -1.90222 | 0.02908  | 0.06186  | 0       | 9.17806 | 9.56123 | 21.6405 | 17.0341 | 30.3894 |
| ENSMUSG000000091568 | 7_Gm8206        | 8.33665 | -1.63865 | 0.14681  | 0.2347   | 9.55007 | 0       | 2.39031 | 8.11517 | 7.17224 | 22.7921 |
| ENSMUSG000000091586 | 1_Cyp4f17       | 151.884 | 0.24766  | 0.39111  | 0.50852  | 174.506 | 173.465 | 147.004 | 198.371 | 103.998 | 113.96  |

|                     |                 |         |          |          |          |         |         |         |         |         |         |
|---------------------|-----------------|---------|----------|----------|----------|---------|---------|---------|---------|---------|---------|
| ENSMUSG000000091594 | 2_Gm17067       | 0.21104 | -0.99647 | 0.80707  | NA       | 0       | 0       | 0       | 0       | 0       | 1.26623 |
| ENSMUSG000000091614 | 1_Gm17657       | 0.51074 | -2.49114 | 0.44681  | NA       | 0       | 0       | 0       | 0.90169 | 0.89653 | 1.26623 |
| ENSMUSG000000091617 | 8_Gm3752        | 2.39075 | -4.73115 | 0.09604  | NA       | 0       | 0       | 0       | 0       | 14.3445 | 0       |
| ENSMUSG000000091618 | 2_H60c          | 287.81  | 0.0935   | 0.6338   | 0.73018  | 282.161 | 256.068 | 353.766 | 243.455 | 297.648 | 293.765 |
| ENSMUSG000000091625 | 8_Lsm5          | 169.584 | -0.62151 | 0.02053  | 0.0463   | 168.429 | 119.315 | 112.344 | 154.188 | 249.235 | 213.992 |
| ENSMUSG000000091635 | 1_Vmn2r13       | 0       | NA       | NA       | NA       | 0       | 0       | 0       | 0       | 0       | 0       |
| ENSMUSG000000091636 | 1_A330050F15Rik | 1.66298 | -0.7811  | 0.74014  | NA       | 0       | 3.67122 | 0       | 5.41011 | 0.89653 | 0       |
| ENSMUSG000000091648 | 2_C2cd4d        | 4.14212 | -0.64705 | 0.6287   | 0.72549  | 0       | 7.34244 | 2.39031 | 6.3118  | 6.27571 | 2.53245 |
| ENSMUSG000000091649 | 3_Ph1f11b       | 520.214 | 1.81623  | 6.13E-11 | 2.13E-09 | 836.065 | 557.108 | 1038.59 | 165.91  | 314.682 | 208.927 |
| ENSMUSG000000091680 | 2_Klhd7b        | 0.15297 | 0.92709  | 0.82027  | NA       | 0       | 0.91781 | 0       | 0       | 0       | 0       |
| ENSMUSG000000091685 | 6_Gm17359       | 0       | NA       | NA       | NA       | 0       | 0       | 0       | 0       | 0       | 0       |
| ENSMUSG000000091694 | 8_Apol11b       | 1.2401  | 0.05701  | 0.97703  | NA       | 1.73638 | 0.91781 | 1.19515 | 0.90169 | 2.68959 | 0       |
| ENSMUSG000000091695 | 1_Gm17669       | 1.94302 | -2.42929 | 0.23589  | NA       | 0.86819 | 0.91781 | 0       | 1.80337 | 8.06878 | 0       |
| ENSMUSG000000091698 | 8_Gm6526        | 0.44795 | 0.74833  | 0.83022  | NA       | 0.86819 | 0.91781 | 0       | 0.90169 | 0       | 0       |
| ENSMUSG000000091705 | 8_H2-Q2         | 810.302 | 2.98034  | 3.09E-51 | 1.05E-47 | 1481.13 | 1111.46 | 1722.22 | 200.174 | 156.893 | 189.934 |
| ENSMUSG000000091712 | 1_Sec14I5       | 6.98841 | 0.58578  | 0.49001  | 0.60179  | 6.07732 | 11.9315 | 7.17092 | 5.41011 | 6.27571 | 5.06491 |
| ENSMUSG000000091721 | 3_Gm5549        | 0       | NA       | NA       | NA       | 0       | 0       | 0       | 0       | 0       | 0       |
| ENSMUSG000000091722 | 1_Slah3         | 0.74797 | -3.06283 | 0.36079  | NA       | 0       | 0       | 0       | 0.90169 | 3.58612 | 0       |
| ENSMUSG000000091725 | 8_Gm8220        | 0.39838 | 2.07058  | 0.60634  | NA       | 0       | 0       | 2.39031 | 0       | 0       | 0       |
| ENSMUSG000000091732 | 1_Gm17541       | 4.17423 | 0.07006  | 0.94703  | 0.96537  | 4.34094 | 3.67122 | 4.78062 | 2.70506 | 4.48265 | 5.06491 |
| ENSMUSG000000091735 | 2_Gpr62         | 4.69937 | -1.00575 | 0.3647   | 0.48204  | 3.47275 | 4.58903 | 1.19515 | 9.91854 | 2.68959 | 6.33113 |
| ENSMUSG000000091736 | 3_Yy2           | 57.4964 | 0.25457  | 0.50846  | 0.61866  | 70.3233 | 44.9725 | 72.9044 | 41.4775 | 73.5155 | 41.7855 |
| ENSMUSG000000091740 | 2_Gm7929        | 0       | NA       | NA       | NA       | 0       | 0       | 0       | 0       | 0       | 0       |
| ENSMUSG000000091742 | 1_Gm5093        | 0.49686 | 2.41829  | 0.46418  | NA       | 0.86819 | 0.91781 | 1.19515 | 0       | 0       | 0       |
| ENSMUSG000000091754 | 8_Gm3636        | 17.8978 | -0.09188 | 0.871    | 0.91245  | 23.4411 | 11.9315 | 16.7322 | 19.8371 | 21.5167 | 13.9285 |
| ENSMUSG000000091756 | 1_Gm3095        | 0.39838 | 2.07058  | 0.60634  | NA       | 0       | 0       | 2.39031 | 0       | 0       | 0       |
| ENSMUSG000000091764 | 3_Zfp964        | 118.976 | -0.70673 | 0.01177  | 0.02898  | 114.601 | 88.1093 | 68.1238 | 153.287 | 169.444 | 120.292 |
| ENSMUSG000000091779 | 8_Gm21293       | 0       | NA       | NA       | NA       | 0       | 0       | 0       | 0       | 0       | 0       |
| ENSMUSG000000091780 | 2_Sco2          | 8.21427 | -0.03042 | 0.97514  | 0.9838   | 2.60457 | 11.0137 | 10.7564 | 11.7219 | 1.79306 | 11.396  |
| ENSMUSG000000091794 | 2_Vmn2r18       | 1.65863 | -1.26049 | 0.48825  | NA       | 1.73638 | 0       | 1.19515 | 0.90169 | 3.58612 | 2.53245 |
| ENSMUSG000000091803 | 7_Cox16         | 406.735 | -0.3155  | 0.03381  | 0.07013  | 354.221 | 334.999 | 399.181 | 453.548 | 452.748 | 445.712 |
| ENSMUSG000000091811 | 1_Inafm1        | 457.487 | 0.25684  | 0.12082  | 0.20091  | 507.89  | 487.355 | 499.574 | 491.419 | 364.888 | 393.797 |
| ENSMUSG000000091814 | 1_Gm8050        | 0.59769 | -2.73717 | 0.49174  | NA       | 0       | 0       | 0       | 0       | 3.58612 | 0       |
| ENSMUSG000000091827 | 2_Speer4f2      | 0       | NA       | NA       | NA       | 0       | 0       | 0       | 0       | 0       | 0       |
| ENSMUSG000000091831 | 4_Gm4707        | 7.06354 | -1.06254 | 0.3856   | 0.50293  | 6.94551 | 0.91781 | 5.97577 | 1.80337 | 24.2063 | 2.53245 |
| ENSMUSG000000091844 | 1_Gm8251        | 1.44996 | 0.91063  | 0.60071  | NA       | 2.60457 | 1.83561 | 1.19515 | 0.90169 | 0.89653 | 1.26623 |
| ENSMUSG000000091864 | 1_Gm17102       | 4.02341 | -1.41542 | 0.22531  | 0.33061  | 3.47275 | 1.83561 | 1.19515 | 3.60674 | 8.96531 | 5.06491 |
| ENSMUSG000000091867 | 2_Cyp2a22       | 0.2894  | 1.67273  | 0.67976  | NA       | 1.73638 | 0       | 0       | 0       | 0       | 0       |
| ENSMUSG000000091882 | 8_Gm6337        | 0       | NA       | NA       | NA       | 0       | 0       | 0       | 0       | 0       | 0       |
| ENSMUSG000000091896 | 7_Ube2d2a       | 2844.04 | -0.38163 | 0.00483  | 0.01369  | 2607.17 | 2399.14 | 2403.45 | 2773.58 | 3665.91 | 3214.95 |
| ENSMUSG000000091897 | 1_Gm17019       | 0.85617 | 0.12072  | 0.97092  | NA       | 2.60457 | 0       | 0       | 0       | 0       | 2.53245 |
| ENSMUSG000000091898 | 8_Tnnc1         | 23.2113 | -1.26037 | 0.01343  | 0.03236  | 13.891  | 13.7671 | 13.1467 | 34.264  | 22.4133 | 41.7855 |
| ENSMUSG000000091900 | 2_Gm4353        | 195.428 | 0.11653  | 0.63135  | 0.728    | 230.07  | 170.712 | 210.347 | 201.978 | 221.443 | 138.019 |
| ENSMUSG000000091922 | 1_Gm17409       | 0.6593  | -2.86602 | 0.41383  | NA       | 0       | 0       | 0       | 0       | 2.68959 | 1.26623 |
| ENSMUSG000000091923 | 7_Gm8267        | 0.1447  | 0.92709  | 0.82027  | NA       | 0.86819 | 0       | 0       | 0       | 0       | 0       |
| ENSMUSG000000091931 | 5_AKO10878      | 89.1654 | -0.18746 | 0.474    | 0.58671  | 88.5552 | 87.1915 | 74.0996 | 84.7584 | 106.687 | 93.7008 |
| ENSMUSG000000091938 | 2_Gm2564        | 57.84   | 3.19839  | 1.66E-13 | 1.10E-11 | 117.205 | 73.4244 | 123.101 | 14.427  | 12.5514 | 6.33113 |
| ENSMUSG000000091945 | 1_Vmn2r114      | 0.14942 | -0.99647 | 0.80707  | NA       | 0       | 0       | 0       | 0       | 0.89653 | 0       |
| ENSMUSG000000091955 | 2_Gm9844        | 1.99068 | 0.06996  | 0.96744  | NA       | 2.60457 | 0       | 3.58546 | 0.90169 | 3.58612 | 1.26623 |
| ENSMUSG000000091956 | 2_C2cd4b        | 2.28504 | 3.57177  | 0.10868  | NA       | 10.4183 | 0       | 2.39031 | 0.90169 | 0       | 0       |
| ENSMUSG000000091962 | 2_Vmn2r78       | 0       | NA       | NA       | NA       | 0       | 0       | 0       | 0       | 0       | 0       |
| ENSMUSG000000091971 | 3_Hspa1a        | 2211.13 | 1.24228  | 1.43E-09 | 3.20E-08 | 2529.9  | 3116.87 | 3676.29 | 1082.92 | 1147.56 | 1713.21 |
| ENSMUSG000000091972 | 1_Tmem207       | 0       | NA       | NA       | NA       | 0       | 0       | 0       | 0       | 0       | 0       |
| ENSMUSG000000091985 | 1_Gm17354       | 88.8798 | -0.18611 | 0.47423  | 0.58691  | 79.0051 | 92.6984 | 77.685  | 86.5618 | 104.894 | 92.4346 |
| ENSMUSG000000091996 | 7_BC049352      | 3.69108 | 0.91749  | 0.43283  | 0.54818  | 5.20913 | 4.58903 | 4.78062 | 4.50843 | 1.79306 | 1.26623 |
| ENSMUSG000000092009 | 1_Myh15         | 626.715 | -2.18435 | 1.80E-10 | 5.37E-09 | 210.97  | 357.026 | 108.759 | 1275.88 | 735.155 | 1072.49 |
| ENSMUSG000000092019 | 2_Gm4027        | 0.63801 | 1.43476  | 0.6437   | NA       | 1.73638 | 0       | 1.19515 | 0       | 0.89653 | 0       |
| ENSMUSG000000092035 | 8_Peg10         | 57.7583 | -0.77558 | 0.02248  | 0.05003  | 46.8822 | 49.5615 | 31.074  | 81.1517 | 77.1016 | 60.7789 |
| ENSMUSG000000092043 | 1_Esp6          | 338.708 | 0.40472  | 0.08789  | 0.15458  | 455.799 | 274.424 | 426.67  | 273.211 | 250.132 | 352.011 |
| ENSMUSG000000092060 | 4_Bend4         | 70      | -0.73842 | 0.03058  | 0.0645   | 60.7732 | 55.9861 | 40.6352 | 110.907 | 89.6531 | 62.0451 |
| ENSMUSG000000092071 | 1_A230065N10Rik | 12.475  | 0.19322  | 0.7988   | 0.86098  | 15.6274 | 19.2739 | 4.78062 | 16.2303 | 6.27571 | 12.6623 |
| ENSMUSG000000092074 | 1_Dynl1a        | 49.2387 | -1.32375 | 0.02555  | 0.05566  | 8.68188 | 33.041  | 43.0255 | 30.6573 | 97.7218 | 82.3047 |
| ENSMUSG000000092080 | 1_Vmn2r16       | 0.15028 | -0.99647 | 0.80707  | NA       | 0       | 0       | 0       | 0.90169 | 0       | 0       |
| ENSMUSG000000092083 | 4_Kcnb2         | 35.2344 | -1.60798 | 0.00131  | 0.00453  | 15.6274 | 25.6986 | 10.7564 | 63.118  | 64.5502 | 31.6557 |
| ENSMUSG000000092086 | 1_Gm6793        | 151.06  | -0.16455 | 0.52744  | 0.63638  | 128.492 | 139.506 | 160.151 | 126.236 | 208.892 | 143.084 |
| ENSMUSG000000092090 | 2_Gm3294        | 1.55606 | -0.65822 | 0.71146  | NA       | 1.73638 | 1.83561 | 0       | 2.70506 | 1.79306 | 1.26623 |
| ENSMUSG000000092094 | 5_Zfp804b       | 1.64203 | -1.41593 | 0.47945  | NA       | 1.73638 | 0.91781 | 0       | 4.50843 | 2.68959 | 0       |
| ENSMUSG000000092097 | 1_Gm5819        | 14.9975 | 1.03814  | 0.15425  | 0.24473  | 13.0228 | 19.2739 | 28.6837 | 18.0337 | 7.17224 | 3.79868 |
| ENSMUSG000000092116 | 1_Gm10320       | 1.25667 | -1.63938 | 0.42415  | NA       | 0.86819 | 0.91781 | 0       | 0.90169 | 3.58612 | 1.26623 |
| ENSMUSG000000092118 | 1_Fancf         | 39.1148 | -0.04938 | 0.89139  | 0.92677  | 39.0685 | 36.7122 | 39.4401 | 36.9691 | 39.4473 | 43.0517 |
| ENSMUSG000000092124 | 1_B930094E09Rik | 5.0132  | -0.36868 | 0.72077  | 0.80133  | 4.34094 | 6.42464 | 2.39031 | 8.11517 | 6.27571 | 2.53245 |
| ENSMUSG000000092130 | 1_D030025P21Rik | 1.05541 | 1.30202  | 0.62517  | NA       | 0.86819 | 3.67122 | 0       | 0       | 1.79306 | 0       |
| ENSMUSG000000092137 | 7_Gcom1         | 95.7892 | 2.05096  | 1.91E-05 | 0.00012  | 173.638 | 139.506 | 148.199 | 23.4438 | 15.241  | 74.7074 |
| ENSMUSG000000092148 | 1_Gm8005        | 0       | NA       | NA       | NA       | 0       | 0       | 0       | 0       | 0       | 0       |
| ENSMUSG000000092152 | 1_Gm17026       | 0       | NA       | NA       | NA       | 0       | 0       | 0       | 0       | 0       | 0       |
| ENSMUSG000000092164 | 2_Rergl         | 1.00674 | -0.0347  | 0.98715  | NA       | 0.86819 | 0.91781 | 1.19515 | 0       | 1.79306 | 1.26623 |
| ENSMUSG000000092166 | 1_Gm7942        | 0.64983 | 2.80989  | 0.34835  | NA       | 0.86819 | 1.83561 | 1.19515 | 0       | 0       | 0       |
| ENSMUSG000000092167 | 8_Gm3696        | 8.13995 | -1.19468 | 0.22286  | 0.3279   | 6.94551 | 0.91781 | 7.17092 | 9.01685 | 19.7237 | 5.06491 |
| ENSMUSG000000092171 | 1_4833427F10Rik | 5.60918 | 1.29159  | 0.18363  | 0.28146  | 6.94551 | 11.0137 | 5.97577 | 2.70506 | 4.48265 | 2.53245 |

|                     |                 |         |          |          |          |         |         |         |         |         |         |
|---------------------|-----------------|---------|----------|----------|----------|---------|---------|---------|---------|---------|---------|
| ENSMUSG000000092192 | 7_Dyx1c1        | 25.9797 | -0.89681 | 0.05242  | 0.10077  | 15.6274 | 21.1095 | 17.9273 | 36.9691 | 37.6543 | 26.5908 |
| ENSMUSG000000092210 | 1_A930009A15Rik | 5.02074 | -2.39782 | 0.03255  | 0.06795  | 2.60457 | 0.91781 | 1.19515 | 6.3118  | 8.96531 | 10.1298 |
| ENSMUSG000000092216 | 2_Gm19345       | 0.2894  | 1.67273  | 0.67976  | NA       | 1.73638 | 0       | 0       | 0       | 0       | 0       |
| ENSMUSG000000092219 | 1_Gm20443       | 0.29884 | -1.76064 | 0.66373  | NA       | 0       | 0       | 0       | 0       | 1.79306 | 0       |
| ENSMUSG000000092233 | 1_Gm20403       | 1.62175 | -4.16825 | 0.05375  | NA       | 0       | 0       | 0       | 4.50843 | 2.68959 | 2.53245 |
| ENSMUSG000000092242 | 1_Gm20515       | 0       | NA       | NA       | NA       | 0       | 0       | 0       | 0       | 0       | 0       |
| ENSMUSG000000092243 | 8_Gm7030        | 6.10079 | 3.0341   | 0.00617  | 0.01682  | 12.1546 | 7.34244 | 13.1467 | 0.90169 | 1.79306 | 1.26623 |
| ENSMUSG000000092252 | 1_Gm20499       | 0       | NA       | NA       | NA       | 0       | 0       | 0       | 0       | 0       | 0       |
| ENSMUSG000000092260 | 7_Zfp963        | 145.287 | -0.89036 | 0.00013  | 0.00061  | 105.919 | 102.794 | 96.8075 | 165.008 | 227.719 | 173.473 |
| ENSMUSG000000092274 | 2_Neat1         | 31340.8 | 0.48538  | 0.00117  | 0.0041   | 34186.7 | 39599.6 | 35904.8 | 21324   | 30432.7 | 26597.1 |
| ENSMUSG000000092276 | 2_1700116B05Rik | 0.15028 | -0.99647 | 0.80707  | NA       | 0       | 0       | 0       | 0.90169 | 0       | 0       |
| ENSMUSG000000092277 | 1_Gm19684       | 1.47403 | 3.98929  | 0.08213  | NA       | 4.34094 | 0.91781 | 3.58546 | 0       | 0       | 0       |
| ENSMUSG000000092305 | 1_Prps111       | 5.09835 | 0.70141  | 0.50053  | 0.61156  | 5.20913 | 5.50683 | 8.36608 | 1.80337 | 7.17224 | 2.53245 |
| ENSMUSG000000092310 | 2_Gm20509       | 0.74883 | -3.06485 | 0.35312  | NA       | 0       | 0       | 0       | 1.80337 | 2.68959 | 0       |
| ENSMUSG000000092329 | 1_Gm20388       | 2797.82 | 0.60506  | 0.00012  | 0.0006   | 3218.37 | 3345.4  | 3563.95 | 2541.85 | 1748.23 | 2369.11 |
| ENSMUSG000000092335 | 1_Gm7221        | 14.6353 | -0.73736 | 0.33485  | 0.45134  | 14.7592 | 15.6027 | 2.39031 | 18.0337 | 26.8959 | 10.1298 |
| ENSMUSG000000092341 | 2_Malat1        | 16561.3 | -0.8647  | 1.29E-06 | 1.14E-05 | 13249.4 | 11604.7 | 10370.4 | 18131.1 | 27282.3 | 18730   |
| ENSMUSG000000092349 | 1_Platr17       | 14.462  | -1.64716 | 0.07886  | 0.14164  | 13.891  | 4.58903 | 2.39031 | 42.3792 | 19.7237 | 3.79868 |
| ENSMUSG000000092356 | 1_Gm20532       | 0       | NA       | NA       | NA       | 0       | 0       | 0       | 0       | 0       | 0       |
| ENSMUSG000000092367 | 1_Gm20479       | 17.2392 | -7.56804 | 1.74E-08 | 2.78E-07 | 0       | 0       | 0       | 18.0337 | 38.5508 | 46.8504 |
| ENSMUSG000000092392 | 1_Gm20546       | 4.44474 | -0.7085  | 0.54506  | 0.65175  | 4.34094 | 4.58903 | 1.19515 | 6.3118  | 8.96531 | 1.26623 |
| ENSMUSG000000092403 | 1_Gm20497       | 2.03431 | 2.45691  | 0.18661  | NA       | 4.34094 | 3.67122 | 2.39031 | 1.80337 | 0       | 0       |
| ENSMUSG000000092416 | 2_Zfp141        | 397.216 | -0.48655 | 0.00191  | 0.00627  | 338.593 | 315.725 | 338.229 | 411.169 | 504.747 | 474.835 |
| ENSMUSG000000092417 | 3_Gpank1        | 242.691 | 0.76341  | 0.00056  | 0.00218  | 317.757 | 288.191 | 310.74  | 229.028 | 140.755 | 169.674 |
| ENSMUSG000000092443 | 1_Gm20726       | 1.50732 | 1.1724   | 0.61916  | NA       | 0       | 2.75342 | 3.58546 | 2.70506 | 0       | 0       |
| ENSMUSG000000092463 | 1_Gm20489       | 0       | NA       | NA       | NA       | 0       | 0       | 0       | 0       | 0       | 0       |
| ENSMUSG000000092470 | 1_Gm20518       | 14.739  | 0.22049  | 0.78143  | 0.84767  | 14.7592 | 25.6986 | 7.17092 | 6.3118  | 26.8959 | 7.59736 |
| ENSMUSG000000092473 | 3_Vmn1r180      | 0.14942 | -0.99647 | 0.80707  | NA       | 0       | 0       | 0       | 0       | 0.89653 | 0       |
| ENSMUSG000000092486 | 1_2610524H06Rik | 165.67  | -0.61029 | 0.00579  | 0.01593  | 129.36  | 141.342 | 123.101 | 192.961 | 237.581 | 169.674 |
| ENSMUSG000000092511 | 7_Gm20547       | 164.334 | 0.72957  | 0.39937  | 0.51683  | 441.04  | 72.5066 | 101.588 | 165.008 | 142.548 | 63.3113 |
| ENSMUSG000000092518 | 9_Fam71e2       | 2.96924 | 0.94738  | 0.50607  | 0.61655  | 2.60457 | 5.50683 | 3.58546 | 0       | 3.58612 | 2.53245 |
| ENSMUSG000000092519 | 2_Actl9         | 0.51697 | 0.77694  | 0.84161  | NA       | 0       | 1.83561 | 0       | 0       | 0       | 1.26623 |
| ENSMUSG000000092534 | 8_Pagrib        | 66.204  | -2.28853 | 3.50E-10 | 9.55E-09 | 24.3093 | 13.7671 | 29.8789 | 97.382  | 103.998 | 127.889 |
| ENSMUSG000000092539 | 1_Gm20468       | 0.44795 | 0.74833  | 0.83022  | NA       | 0.86819 | 0.91781 | 0       | 0.90169 | 0       | 0       |
| ENSMUSG000000092541 | 7_Gm20537       | 1.73638 | 4.23607  | 0.17037  | NA       | 10.4183 | 0       | 0       | 0       | 0       | 0       |
| ENSMUSG000000092544 | 8_Gm20422       | 3.18522 | 5.09936  | 0.01844  | 0.04227  | 9.55007 | 0       | 9.56123 | 0       | 0       | 0       |
| ENSMUSG000000092558 | 3_Med20         | 1297.01 | 0.06897  | 0.5377   | 0.64527  | 1370.87 | 1293.19 | 1319.45 | 1191.13 | 1319.69 | 1287.75 |
| ENSMUSG000000092586 | 8_Ly6g6c        | 6381.34 | 0.53513  | 0.0011   | 0.0039   | 7431.69 | 7006.53 | 8214.29 | 5161.25 | 4154.52 | 6319.74 |
| ENSMUSG000000092592 | 1_Gm20449       | 10.4291 | -1.13343 | 0.11077  | 0.18721  | 5.20913 | 7.34244 | 7.17092 | 13.5253 | 17.9306 | 11.396  |
| ENSMUSG000000092600 | 1_Gm20442       | 5.29102 | -0.43609 | 0.66533  | 0.7565   | 6.94551 | 1.83561 | 4.78062 | 7.21348 | 7.17224 | 3.79868 |
| ENSMUSG000000092602 | 1_4931413107Rik | 0.30239 | -0.03469 | 0.99322  | NA       | 0       | 0.91781 | 0       | 0       | 0.89653 | 0       |
| ENSMUSG000000092604 | 1_Gm20508       | 0.1447  | 0.92709  | 0.82027  | NA       | 0.86819 | 0       | 0       | 0       | 0       | 0       |
| ENSMUSG000000092607 | 9_Scnm1         | 328.802 | 0.23299  | 0.148    | 0.23626  | 358.562 | 328.574 | 378.864 | 318.295 | 277.028 | 311.492 |
| ENSMUSG000000092609 | 1_Gm20481       | 267.003 | 11.4903  | 1.54E-21 | 3.39E-19 | 408.049 | 486.437 | 707.531 | 0       | 0       | 0       |
| ENSMUSG000000092622 | 8_Khd3c         | 3.77825 | -0.04519 | 0.96969  | 0.98037  | 6.07732 | 3.67122 | 1.19515 | 2.70506 | 2.68959 | 6.33113 |
| ENSMUSG000000093376 | 1_Vmn1r23       | 0.14942 | -0.99647 | 0.80707  | NA       | 0       | 0       | 0       | 0       | 0.89653 | 0       |
| ENSMUSG000000093387 | 1_Gm20732       | 4.34817 | -0.08193 | 0.93747  | 0.95911  | 3.47275 | 5.50683 | 3.58546 | 3.60674 | 3.58612 | 6.33113 |
| ENSMUSG000000093445 | 7_Lrch4         | 953.015 | 1.16315  | 1.12E-07 | 1.38E-06 | 1151.22 | 1233.53 | 1568.04 | 714.135 | 407.921 | 643.243 |
| ENSMUSG000000093456 | 7_Gm20662       | 2.32142 | -4.66618 | 0.1066   | NA       | 0       | 0       | 0       | 0       | 0       | 13.9285 |
| ENSMUSG000000093482 | 8_Gm20619       | 0.14942 | -0.99647 | 0.80707  | NA       | 0       | 0       | 0       | 0       | 0.89653 | 0       |
| ENSMUSG000000093485 | 1_Gm20708       | 11.2199 | 0.58429  | 0.86443  | 0.90787  | 0       | 16.5205 | 23.9031 | 0       | 26.8959 | 0       |
| ENSMUSG000000093489 | 1_Gm20625       | 0.19919 | 0.92709  | 0.82027  | NA       | 0       | 0       | 1.19515 | 0       | 0       | 0       |
| ENSMUSG000000093536 | 7_Smim17        | 1.79349 | -0.0824  | 0.96281  | NA       | 0.86819 | 0.91781 | 3.58546 | 1.80337 | 3.58612 | 0       |
| ENSMUSG000000093550 | 7_Higd1c        | 0.29884 | -1.76064 | 0.66373  | NA       | 0       | 0       | 0       | 0       | 1.79306 | 0       |
| ENSMUSG000000093573 | 1_Gm20610       | 0       | NA       | NA       | NA       | 0       | 0       | 0       | 0       | 0       | 0       |
| ENSMUSG000000093574 | 1_Gm20671       | 26.8325 | 8.16987  | 2.46E-09 | 5.07E-08 | 28.6502 | 24.7808 | 107.564 | 0       | 0       | 0       |
| ENSMUSG000000093575 | 1_Gm20695       | 2.07764 | 4.48937  | 0.02369  | NA       | 5.20913 | 3.67122 | 3.58546 | 0       | 0       | 0       |
| ENSMUSG000000093587 | 2_Gm20554       | 6.27562 | -0.60899 | 0.54278  | 0.64972  | 3.47275 | 10.0959 | 1.19515 | 9.01685 | 6.27571 | 7.59736 |
| ENSMUSG000000093593 | 1_Gm20683       | 118.936 | 1.49299  | 6.45E-08 | 8.59E-07 | 184.924 | 196.41  | 144.614 | 73.9382 | 46.6196 | 67.11   |
| ENSMUSG000000093594 | 1_Gm20707       | 52.7367 | -0.79193 | 0.02536  | 0.05532  | 46.014  | 33.9588 | 35.8546 | 56.8062 | 84.2739 | 59.5127 |
| ENSMUSG000000093639 | 2_Gm42419       | 8.92613 | -0.46804 | 0.65321  | 0.74692  | 4.34094 | 15.6027 | 2.39031 | 18.0337 | 1.79306 | 11.396  |
| ENSMUSG000000093661 | 1_Eif4e3        | 216.6   | 0.22459  | 0.35035  | 0.46708  | 269.138 | 200.082 | 231.86  | 256.98  | 181.996 | 159.545 |
| ENSMUSG000000093662 | 2_Gm20649       | 0.19919 | 0.92709  | 0.82027  | NA       | 0       | 0       | 1.19515 | 0       | 0       | 0       |
| ENSMUSG000000093668 | 3_Pou5f2        | 0.35216 | 1.91112  | 0.63543  | NA       | 0       | 0.91781 | 1.19515 | 0       | 0       | 0       |
| ENSMUSG000000093674 | 7_Rpl41         | 15007   | 0.76654  | 0.00064  | 0.00245  | 18232.8 | 18232.2 | 20243.5 | 15619.9 | 7485.13 | 10228.6 |
| ENSMUSG000000093675 | 7_Gm20618       | 0       | NA       | NA       | NA       | 0       | 0       | 0       | 0       | 0       | 0       |
| ENSMUSG000000093701 | 7_Gm21970       | 69.1526 | -1.97672 | 1.63E-05 | 0.0001   | 39.0685 | 32.1232 | 11.9515 | 64.9214 | 138.962 | 127.889 |
| ENSMUSG000000093752 | 1_Gm20716       | 4121.6  | -0.17742 | 0.12229  | 0.20287  | 3941.58 | 3847.44 | 3816.13 | 3934.05 | 4799.13 | 4391.27 |
| ENSMUSG000000093769 | 3_Hist2h3c1     | 53.7359 | -0.28392 | 0.39825  | 0.51574  | 44.2776 | 46.8081 | 54.9771 | 70.3315 | 59.171  | 46.8504 |
| ENSMUSG000000093795 | 1_Gm9476        | 0.19919 | 0.92709  | 0.82027  | NA       | 0       | 0       | 1.19515 | 0       | 0       | 0       |
| ENSMUSG000000093803 | 2_Ppp2r3d       | 175.409 | 1.20914  | 1.90E-05 | 0.00012  | 223.993 | 235.876 | 274.885 | 141.565 | 67.2398 | 108.896 |
| ENSMUSG000000093805 | 7_Gm9994        | 5.06089 | 0.07283  | 0.94817  | 0.9659   | 2.60457 | 4.58903 | 8.36608 | 6.3118  | 0.89653 | 7.59736 |
| ENSMUSG000000093812 | 1_Gm5627        | 0.1447  | 0.92709  | 0.82027  | NA       | 0.86819 | 0       | 0       | 0       | 0       | 0       |
| ENSMUSG000000093817 | 7_Gm2101        | 0       | NA       | NA       | NA       | 0       | 0       | 0       | 0       | 0       | 0       |
| ENSMUSG000000093833 | 1_Gm7970        | 0       | NA       | NA       | NA       | 0       | 0       | 0       | 0       | 0       | 0       |
| ENSMUSG000000093844 | 1_Gm16381       | 0.14942 | -0.99647 | 0.80707  | NA       | 0       | 0       | 0       | 0       | 0.89653 | 0       |
| ENSMUSG000000093846 | 1_Gm4425        | 6.37232 | -0.65252 | 0.49375  | 0.60513  | 6.07732 | 7.34244 | 1.19515 | 7.21348 | 6.27571 | 10.1298 |
| ENSMUSG000000093847 | 1_Gm5039        | 0.79928 | -0.76399 | 0.79193  | NA       | 1.73638 | 0       | 0       | 0       | 1.79306 | 1.26623 |
| ENSMUSG000000093857 | 1_Gm21645       | 0       | NA       | NA       | NA       | 0       | 0       | 0       | 0       | 0       | 0       |

|                    |                  |         |          |          |          |         |         |         |         |         |         |
|--------------------|------------------|---------|----------|----------|----------|---------|---------|---------|---------|---------|---------|
| ENSMUSG00000093862 | 1_Gm5117         | 0.9044  | 0.59102  | 0.81332  | NA       | 0.86819 | 0       | 2.39031 | 0.90169 | 0       | 1.26623 |
| ENSMUSG00000093865 | 7_Lrit3          | 25.8319 | -1.55215 | 0.00821  | 0.02144  | 16.4956 | 15.6027 | 7.17092 | 47.7893 | 50.2057 | 17.7272 |
| ENSMUSG00000093877 | 1_Olfr1348       | 0       | NA       | NA       | NA       | 0       | 0       | 0       | 0       | 0       | 0       |
| ENSMUSG00000093898 | 2_Gm3629         | 0.59758 | 2.66585  | 0.50308  | NA       | 0       | 0       | 3.58546 | 0       | 0       | 0       |
| ENSMUSG00000093901 | 1_Olfr893        | 1.04263 | -0.4354  | 0.85124  | NA       | 1.73638 | 0.91781 | 0       | 2.70506 | 0.89653 | 0       |
| ENSMUSG00000093904 | 1_Tomm20         | 2607.13 | -0.57408 | 1.37E-06 | 1.21E-05 | 2225.17 | 2086.17 | 1974.39 | 3196.48 | 3336.89 | 2823.69 |
| ENSMUSG00000093908 | 1_Gm5784         | 5.73261 | -1.19397 | 0.21123  | 0.31458  | 3.47275 | 4.58903 | 2.39031 | 9.01685 | 9.86184 | 5.06491 |
| ENSMUSG00000093910 | 1_Zfp853         | 20.5599 | -0.02475 | 0.9611   | 0.97472  | 19.9683 | 21.1095 | 20.3176 | 26.1489 | 20.6202 | 15.1947 |
| ENSMUSG00000093920 | 1_Olfr463        | 0.19919 | 0.92709  | 0.82027  | NA       | 0       | 0       | 1.19515 | 0       | 0       | 0       |
| ENSMUSG00000093926 | 1_Gm17027        | 0       | NA       | NA       | NA       | 0       | 0       | 0       | 0       | 0       | 0       |
| ENSMUSG00000093930 | 1_Hmgcs1         | 14702.5 | -0.00774 | 0.95118  | 0.96812  | 14773.1 | 13184.3 | 16031.8 | 13216.9 | 15057.2 | 15951.9 |
| ENSMUSG00000093931 | 2_Amy2a3         | 0       | NA       | NA       | NA       | 0       | 0       | 0       | 0       | 0       | 0       |
| ENSMUSG00000093938 | 2_Evi2b          | 76.2919 | 1.30269  | 0.00148  | 0.00502  | 172.769 | 87.1915 | 65.7335 | 53.1994 | 42.1369 | 36.7206 |
| ENSMUSG00000093948 | 7_Gm10378        | 0       | NA       | NA       | NA       | 0       | 0       | 0       | 0       | 0       | 0       |
| ENSMUSG00000093954 | 8_Gm16867        | 24.4287 | -0.6723  | 0.19351  | 0.2935   | 21.7047 | 23.8629 | 10.7564 | 37.8708 | 29.5855 | 22.7921 |
| ENSMUSG00000093962 | 7_Gm11756        | 0.14942 | -0.99647 | 0.80707  | NA       | 0       | 0       | 0       | 0       | 0.89653 | 0       |
| ENSMUSG00000093973 | 1_Mrgpra2a       | 0.14942 | -0.99647 | 0.80707  | NA       | 0       | 0       | 0       | 0       | 0.89653 | 0       |
| ENSMUSG00000093979 | 7_Gm2237         | 21.0923 | -1.16632 | 0.05168  | 0.09963  | 8.68188 | 22.9451 | 7.17092 | 35.1657 | 25.9994 | 26.5908 |
| ENSMUSG00000093985 | 7_Gm10406        | 5.21238 | -1.34978 | 0.39123  | 0.50864  | 1.73638 | 0       | 7.17092 | 0       | 7.17224 | 15.1947 |
| ENSMUSG00000093989 | 1_Rnasek         | 481.759 | 0.58966  | 0.00514  | 0.01443  | 546.091 | 625.026 | 566.503 | 510.354 | 320.958 | 321.622 |
| ENSMUSG00000093996 | 1_Fam205a3       | 0.66994 | 1.35912  | 0.70305  | NA       | 0       | 2.75342 | 0       | 0       | 0       | 1.26623 |
| ENSMUSG00000094002 | 2_Gm9866         | 1.98606 | -1.24705 | 0.52975  | NA       | 3.47275 | 0       | 0       | 0.90169 | 6.27571 | 1.26623 |
| ENSMUSG00000094004 | 7_Gm5128         | 1.41919 | -2.81818 | 0.33306  | NA       | 0       | 0.91781 | 0       | 0       | 0       | 7.59736 |
| ENSMUSG00000094018 | 1_S100a2         | 31.2127 | -0.1665  | 0.70435  | 0.7884   | 33.8593 | 25.6986 | 28.6837 | 24.3455 | 43.0335 | 31.6557 |
| ENSMUSG00000094024 | 1_Esp18          | 1.20496 | -0.32703 | 0.8852   | NA       | 0.86819 | 0       | 2.39031 | 2.70506 | 0       | 1.26623 |
| ENSMUSG00000094025 | 7_Gm8879         | 0       | NA       | NA       | NA       | 0       | 0       | 0       | 0       | 0       | 0       |
| ENSMUSG00000094027 | 1_Gm21762        | 0.34861 | -0.03469 | 0.99322  | NA       | 0       | 0       | 1.19515 | 0       | 0.89653 | 0       |
| ENSMUSG00000094030 | 1_Gm21833        | 0.19919 | 0.92709  | 0.82027  | NA       | 0       | 0       | 1.19515 | 0       | 0       | 0       |
| ENSMUSG00000094053 | 2_Scgb2b7        | 0.36401 | -0.03469 | 0.99322  | NA       | 0       | 0.91781 | 0       | 0       | 0       | 1.26623 |
| ENSMUSG00000094066 | 1_Fam205a2       | 0.66994 | 1.35912  | 0.70305  | NA       | 0       | 2.75342 | 0       | 0       | 0       | 1.26623 |
| ENSMUSG00000094076 | 7_Gm4767         | 30.7189 | -0.80972 | 0.06979  | 0.12823  | 19.1001 | 22.9451 | 25.0982 | 50.4944 | 28.689  | 37.9868 |
| ENSMUSG00000094081 | 2_Gm20826        | 1.56852 | 1.80773  | 0.39657  | NA       | 1.73638 | 5.50683 | 0       | 0.90169 | 0       | 1.26623 |
| ENSMUSG00000094083 | 1_Gm1604a        | 0.58996 | -0.05829 | 0.9875   | NA       | 1.73638 | 0       | 0       | 1.80337 | 0       | 0       |
| ENSMUSG00000094084 | 2_Tdpoz1         | 0       | NA       | NA       | NA       | 0       | 0       | 0       | 0       | 0       | 0       |
| ENSMUSG00000094091 | 1_Gm21885        | 0.1447  | 0.92709  | 0.82027  | NA       | 0.86819 | 0       | 0       | 0       | 0       | 0       |
| ENSMUSG00000094103 | 1_1700047117Rik2 | 351.064 | 0.56397  | 0.00233  | 0.0074   | 396.762 | 368.04  | 492.403 | 311.983 | 251.029 | 286.167 |
| ENSMUSG00000094105 | 7_Gm8922         | 0       | NA       | NA       | NA       | 0       | 0       | 0       | 0       | 0       | 0       |
| ENSMUSG00000094107 | 1_Vmn2r47        | 1.16769 | 0.14121  | 0.94976  | NA       | 1.73638 | 1.83561 | 0       | 0.90169 | 0       | 2.53245 |
| ENSMUSG00000094113 | 7_5430401F13Rik  | 0.21104 | -0.99647 | 0.80707  | NA       | 0       | 0       | 0       | 0       | 0       | 1.26623 |
| ENSMUSG00000094114 | 1_Gm21967        | 142.021 | -0.46036 | 0.12992  | 0.21281  | 151.933 | 134.917 | 70.5141 | 140.663 | 173.03  | 181.07  |
| ENSMUSG00000094115 | 1_Spin2-ps6      | 0       | NA       | NA       | NA       | 0       | 0       | 0       | 0       | 0       | 0       |
| ENSMUSG00000094116 | 1_Gm11237        | 1.257   | 2.55199  | 0.30426  | NA       | 2.60457 | 3.67122 | 0       | 0       | 0       | 1.26623 |
| ENSMUSG00000094125 | 1_Gm13698        | 0.34861 | -0.03469 | 0.99322  | NA       | 0       | 0       | 1.19515 | 0       | 0.89653 | 0       |
| ENSMUSG00000094127 | 1_G530012D18Rik  | 0       | NA       | NA       | NA       | 0       | 0       | 0       | 0       | 0       | 0       |
| ENSMUSG00000094133 | 1_Olfr1431       | 0.15028 | -0.99647 | 0.80707  | NA       | 0       | 0       | 0       | 0.90169 | 0       | 0       |
| ENSMUSG00000094144 | 8_Gm21312        | 0       | NA       | NA       | NA       | 0       | 0       | 0       | 0       | 0       | 0       |
| ENSMUSG00000094155 | 1_Gm21699        | 0       | NA       | NA       | NA       | 0       | 0       | 0       | 0       | 0       | 0       |
| ENSMUSG00000094157 | 7_Gm7995         | 0       | NA       | NA       | NA       | 0       | 0       | 0       | 0       | 0       | 0       |
| ENSMUSG00000094195 | 2_Gm6509         | 0.1447  | 0.92709  | 0.82027  | NA       | 0.86819 | 0       | 0       | 0       | 0       | 0       |
| ENSMUSG00000094205 | 7_Gm8926         | 0       | NA       | NA       | NA       | 0       | 0       | 0       | 0       | 0       | 0       |
| ENSMUSG00000094248 | 1_Hist1h2ao      | 0.39838 | 2.07058  | 0.60634  | NA       | 0       | 0       | 2.39031 | 0       | 0       | 0       |
| ENSMUSG00000094258 | 7_Gm8159         | 0       | NA       | NA       | NA       | 0       | 0       | 0       | 0       | 0       | 0       |
| ENSMUSG00000094271 | 1_Gm13290        | 6.2454  | 0.21149  | 0.85182  | 0.89967  | 3.47275 | 7.34244 | 9.56123 | 10.8202 | 6.27571 | 0       |
| ENSMUSG00000094282 | 1_Ccdc42b        | 0.15297 | 0.92709  | 0.82027  | NA       | 0       | 0.91781 | 0       | 0       | 0       | 0       |
| ENSMUSG00000094293 | 1_Gm3893         | 1.74382 | 3.12225  | 0.26055  | NA       | 0       | 0       | 9.56123 | 0.90169 | 0       | 0       |
| ENSMUSG00000094296 | 1_Gm21798        | 0       | NA       | NA       | NA       | 0       | 0       | 0       | 0       | 0       | 0       |
| ENSMUSG00000094305 | 1_Scgb2b20       | 0.35574 | -0.03469 | 0.99322  | NA       | 0.86819 | 0       | 0       | 0       | 0       | 1.26623 |
| ENSMUSG00000094311 | 1_Rfpl4b         | 0.15297 | 0.92709  | 0.82027  | NA       | 0       | 0.91781 | 0       | 0       | 0       | 0       |
| ENSMUSG00000094336 | 1_Gm13693        | 0.34861 | -0.03469 | 0.99322  | NA       | 0       | 0       | 1.19515 | 0       | 0.89653 | 0       |
| ENSMUSG00000094338 | 1_Hist1h2bl      | 27.1957 | 6.30224  | 1.81E-08 | 2.87E-07 | 44.2776 | 69.7532 | 46.611  | 0       | 0       | 2.53245 |
| ENSMUSG00000094370 | 7_Gm3373         | 2.30512 | 0.20934  | 0.9228   | NA       | 0       | 7.34244 | 0       | 0       | 2.68959 | 3.79868 |
| ENSMUSG00000094374 | 1_Gm5435         | 0       | NA       | NA       | NA       | 0       | 0       | 0       | 0       | 0       | 0       |
| ENSMUSG00000094379 | 1_Vmn1r202       | 0.14942 | -0.99647 | 0.80707  | NA       | 0       | 0       | 0       | 0       | 0.89653 | 0       |
| ENSMUSG00000094385 | 1_Vmn1r123       | 0       | NA       | NA       | NA       | 0       | 0       | 0       | 0       | 0       | 0       |
| ENSMUSG00000094410 | 7_Gm38394        | 1820.29 | -0.41195 | 0.00206  | 0.00666  | 1519.33 | 1611.67 | 1556.09 | 1861.98 | 2391.05 | 1981.65 |
| ENSMUSG00000094421 | 1_Gm20946        | 1.32107 | 3.83056  | 0.16344  | NA       | 4.34094 | 0       | 3.58546 | 0       | 0       | 0       |
| ENSMUSG00000094430 | 2_Gm933          | 0.14942 | -0.99647 | 0.80707  | NA       | 0       | 0       | 0       | 0       | 0.89653 | 0       |
| ENSMUSG00000094437 | 1_Gm9830         | 216.706 | -0.20454 | 0.38481  | 0.50214  | 216.179 | 190.904 | 196.005 | 166.812 | 249.235 | 281.102 |
| ENSMUSG00000094441 | 1_Zfp955a        | 221.484 | -0.65718 | 0.00434  | 0.01251  | 195.342 | 158.78  | 161.346 | 214.601 | 337.992 | 260.843 |
| ENSMUSG00000094475 | 7_Gm11007        | 47.5376 | -0.48933 | 0.16749  | 0.26146  | 31.2548 | 37.63   | 50.1965 | 55.0028 | 52.8953 | 58.2464 |
| ENSMUSG00000094483 | 2_Purb           | 5001.77 | -0.46232 | 0.00015  | 0.00069  | 4295.8  | 4201.71 | 4123.28 | 5073.78 | 6412.88 | 5903.15 |
| ENSMUSG00000094487 | 1_Gm21958        | 11.0477 | 0.23317  | 0.73215  | 0.80995  | 10.4183 | 14.6849 | 10.7564 | 8.11517 | 13.448  | 8.86359 |
| ENSMUSG00000094500 | 2_Smim18         | 0.1447  | 0.92709  | 0.82027  | NA       | 0.86819 | 0       | 0       | 0       | 0       | 0       |
| ENSMUSG00000094504 | 2_Gm5294         | 0       | NA       | NA       | NA       | 0       | 0       | 0       | 0       | 0       | 0       |
| ENSMUSG00000094559 | 1_Cyp2d34        | 0.36401 | -0.03469 | 0.99322  | NA       | 0       | 0.91781 | 0       | 0       | 0       | 1.26623 |
| ENSMUSG00000094590 | 2_Gm10251        | 0.58996 | -0.05829 | 0.9875   | NA       | 1.73638 | 0       | 0       | 1.80337 | 0       | 0       |
| ENSMUSG00000094595 | 1_Fsbp           | 69.8729 | -0.73195 | 0.03075  | 0.0648   | 57.3004 | 66.082  | 33.4643 | 99.1854 | 77.1016 | 86.1034 |
| ENSMUSG00000094606 | 7_Vmn2r50        | 0.1447  | 0.92709  | 0.82027  | NA       | 0.86819 | 0       | 0       | 0       | 0       | 0       |
| ENSMUSG00000094613 | 2_A630076J17Rik  | 0.6065  | 0.00563  | 0.99878  | NA       | 0       | 1.83561 | 0       | 1.80337 | 0       | 0       |

|                     |                 |         |          |          |          |         |         |         |         |         |         |
|---------------------|-----------------|---------|----------|----------|----------|---------|---------|---------|---------|---------|---------|
| ENSMUSG000000094618 | 1_Gm13271       | 0.72907 | 1.69958  | 0.62474  | NA       | 3.47275 | 0       | 0       | 0.90169 | 0       | 0       |
| ENSMUSG000000094620 | 1_Cldn34c3      | 0.2997  | -1.76345 | 0.66322  | NA       | 0       | 0       | 0       | 0.90169 | 0.89653 | 0       |
| ENSMUSG000000094622 | 1_Gm3055        | 36.5753 | -0.95903 | 0.0208   | 0.04683  | 29.5184 | 22.0273 | 22.7079 | 35.1657 | 55.5849 | 54.4478 |
| ENSMUSG000000094626 | 1_Cecr6         | 1.68654 | -1.32417 | 0.50695  | NA       | 1.73638 | 0       | 1.19515 | 2.70506 | 4.48265 | 0       |
| ENSMUSG000000094628 | 7_Gm3252        | 1.05293 | -2.37438 | 0.36555  | NA       | 0       | 0.91781 | 0       | 3.60674 | 1.79306 | 0       |
| ENSMUSG000000094634 | 7_Gm3468        | 14.9307 | -0.83545 | 0.15217  | 0.24189  | 12.1546 | 9.17806 | 10.7564 | 18.9354 | 17.0341 | 21.5259 |
| ENSMUSG000000094638 | 1_Gm21972       | 0.89653 | -3.31885 | 0.37986  | NA       | 0       | 0       | 0       | 0       | 5.37918 | 0       |
| ENSMUSG000000094648 | 1_Gm13287       | 0       | NA       | NA       | NA       | 0       | 0       | 0       | 0       | 0       | 0       |
| ENSMUSG000000094649 | 1_Gm7102        | 4.62934 | -1.34707 | 0.20967  | 0.31277  | 2.60457 | 2.75342 | 2.39031 | 6.3118  | 3.58612 | 10.1298 |
| ENSMUSG000000094651 | 2_Gal3st2       | 0.34389 | 1.87986  | 0.64119  | NA       | 0.86819 | 0       | 1.19515 | 0       | 0       | 0       |
| ENSMUSG000000094685 | 1_Gm5900        | 327.006 | -0.34962 | 0.02492  | 0.0545   | 310.811 | 269.835 | 282.056 | 366.084 | 377.439 | 355.81  |
| ENSMUSG000000094686 | 1_Ccl21a        | 278.783 | 0.1469   | 0.45913  | 0.57285  | 319.493 | 273.506 | 286.837 | 318.295 | 255.511 | 219.057 |
| ENSMUSG000000094690 | 1_1600014C23Rik | 1.40598 | -2.85222 | 0.18663  | NA       | 0.86819 | 0       | 0       | 4.50843 | 1.79306 | 1.26623 |
| ENSMUSG000000094706 | 7_Gm10338       | 0       | NA       | NA       | NA       | 0       | 0       | 0       | 0       | 0       | 0       |
| ENSMUSG000000094707 | 1_A830019P07Rik | 38.2765 | -1.76759 | 0.00032  | 0.00136  | 26.9138 | 17.4383 | 7.17092 | 68.5281 | 62.7571 | 46.8504 |
| ENSMUSG000000094724 | 7_Rnaset2b      | 3934.25 | -0.18663 | 0.05341  | 0.1023   | 3700.22 | 3786.87 | 3553.19 | 4127.01 | 4357.14 | 4081.05 |
| ENSMUSG000000094732 | 1_1500015L24Rik | 2.01692 | -0.03893 | 0.98113  | NA       | 1.73638 | 1.83561 | 2.39031 | 3.60674 | 0       | 2.53245 |
| ENSMUSG000000094733 | 1_Gm5416        | 0.64513 | 1.28844  | 0.72081  | NA       | 2.60457 | 0       | 0       | 0       | 0       | 1.26623 |
| ENSMUSG000000094764 | 1_Olfr346       | 0.19919 | 0.92709  | 0.82027  | NA       | 0       | 0       | 1.19515 | 0       | 0       | 0       |
| ENSMUSG000000094778 | 1_Olfr143       | 0.21104 | -0.99647 | 0.80707  | NA       | 0       | 0       | 0       | 0       | 0       | 1.26623 |
| ENSMUSG000000094786 | 1_Gm14403       | 84.6131 | -1.48138 | 1.13E-06 | 1.02E-05 | 41.673  | 55.0683 | 37.0498 | 137.056 | 138.066 | 98.7657 |
| ENSMUSG000000094790 | 1_Gm6625        | 0.15028 | -0.99647 | 0.80707  | NA       | 0       | 0       | 0       | 0.90169 | 0       | 0       |
| ENSMUSG000000094796 | 1_BC147527      | 14.0036 | 3.69203  | 4.53E-05 | 0.00025  | 38.2003 | 11.0137 | 28.6837 | 0.90169 | 2.68959 | 2.53245 |
| ENSMUSG000000094800 | 8_Gm9780        | 36.1943 | -1.14876 | 0.02286  | 0.05076  | 32.9912 | 12.8493 | 21.5128 | 30.6573 | 67.2398 | 51.9153 |
| ENSMUSG000000094804 | 1_Gm21977       | 0       | NA       | NA       | NA       | 0       | 0       | 0       | 0       | 0       | 0       |
| ENSMUSG000000094811 | 7_Gm21103       | 0       | NA       | NA       | NA       | 0       | 0       | 0       | 0       | 0       | 0       |
| ENSMUSG000000094814 | 1_Gm21973       | 0.15297 | 0.92709  | 0.82027  | NA       | 0       | 0.91781 | 0       | 0       | 0       | 0       |
| ENSMUSG000000094817 | 8_Cphx3         | 0.21104 | -0.99647 | 0.80707  | NA       | 0       | 0       | 0       | 0       | 0       | 1.26623 |
| ENSMUSG000000094825 | 8_Gm3194        | 8.80858 | -0.71305 | 0.34697  | 0.46385  | 8.68188 | 6.42464 | 4.78062 | 9.01685 | 12.5514 | 11.396  |
| ENSMUSG000000094840 | 5_Muc3a         | 1.90996 | -1.11953 | 0.51842  | NA       | 2.60457 | 0.91781 | 0       | 4.50843 | 0.89653 | 2.53245 |
| ENSMUSG000000094841 | 1_Gm10610       | 0.29884 | -1.76064 | 0.66373  | NA       | 0       | 0       | 0       | 0       | 1.79306 | 0       |
| ENSMUSG000000094845 | 1_Tmem95        | 0.74003 | 3.01088  | 0.364    | NA       | 2.60457 | 1.83561 | 0       | 0       | 0       | 0       |
| ENSMUSG000000094870 | 7_Zfp131        | 727.911 | -0.52996 | 0.00039  | 0.00159  | 650.273 | 556.19  | 580.845 | 797.992 | 978.115 | 804.054 |
| ENSMUSG000000094904 | 1_Gm14476       | 0       | NA       | NA       | NA       | 0       | 0       | 0       | 0       | 0       | 0       |
| ENSMUSG000000094910 | 1_D430019H16Rik | 43.9282 | -1.04403 | 0.01244  | 0.03033  | 26.0457 | 33.9588 | 26.2934 | 83.8567 | 52.8953 | 40.5193 |
| ENSMUSG000000094918 | 3_Gm8765        | 0       | NA       | NA       | NA       | 0       | 0       | 0       | 0       | 0       | 0       |
| ENSMUSG000000094925 | 7_Gm5798        | 0.30325 | -0.03469 | 0.99322  | NA       | 0       | 0.91781 | 0       | 0.90169 | 0       | 0       |
| ENSMUSG000000094929 | 1_Gm3526        | 0       | NA       | NA       | NA       | 0       | 0       | 0       | 0       | 0       | 0       |
| ENSMUSG000000094931 | 1_Vmn1r160      | 0       | NA       | NA       | NA       | 0       | 0       | 0       | 0       | 0       | 0       |
| ENSMUSG000000094932 | 7_Gm2007        | 47.5376 | -0.48933 | 0.16749  | 0.26146  | 31.2548 | 37.63   | 50.1965 | 55.0028 | 52.8953 | 58.2464 |
| ENSMUSG000000094935 | 1_Gm9726        | 101.158 | 0.52107  | 0.24161  | 0.34934  | 165.824 | 143.178 | 47.8062 | 95.5787 | 51.9988 | 102.564 |
| ENSMUSG000000094936 | 7_Rbm4          | 387.245 | 0.16481  | 0.34011  | 0.45658  | 452.326 | 352.437 | 424.28  | 367.888 | 399.853 | 326.687 |
| ENSMUSG000000094942 | 7_Gm3604        | 69.3342 | -0.40178 | 0.1681   | 0.26222  | 69.4551 | 57.8218 | 51.3916 | 80.25   | 73.5155 | 83.571  |
| ENSMUSG000000094945 | 3_Rhox4a2       | 507.706 | -0.11869 | 0.57258  | 0.67707  | 493.131 | 416.684 | 549.771 | 504.042 | 411.508 | 671.1   |
| ENSMUSG000000094954 | 1_Gm8011        | 0.30325 | -0.03469 | 0.99322  | NA       | 0       | 0.91781 | 0       | 0.90169 | 0       | 0       |
| ENSMUSG000000094958 | 1_3110021N24Rik | 5.41963 | -0.14241 | 0.87912  | 0.91853  | 6.94551 | 3.67122 | 4.78062 | 5.41011 | 5.37918 | 6.33113 |
| ENSMUSG000000094973 | 2_Gm8994        | 1.19065 | -2.58367 | 0.39181  | NA       | 0.86819 | 0       | 0       | 0       | 6.27571 | 0       |
| ENSMUSG000000094978 | 2_Scgb1b20      | 0.21104 | -0.99647 | 0.80707  | NA       | 0       | 0       | 0       | 0       | 0       | 1.26623 |
| ENSMUSG000000094985 | 1_Topaz1        | 0.34861 | -0.03469 | 0.99322  | NA       | 0       | 0       | 1.19515 | 0       | 0.89653 | 0       |
| ENSMUSG000000094991 | 2_Gm21718       | 0.15028 | -0.99647 | 0.80707  | NA       | 0       | 0       | 0       | 0.90169 | 0       | 0       |
| ENSMUSG000000094992 | 1_Fbxw25        | 0.58824 | -0.05279 | 0.98869  | NA       | 1.73638 | 0       | 0       | 0       | 1.79306 | 0       |
| ENSMUSG000000095022 | 8_Gm20765       | 0       | NA       | NA       | NA       | 0       | 0       | 0       | 0       | 0       | 0       |
| ENSMUSG000000095026 | 1_Gm3336        | 26.1056 | 0.34758  | 0.45267  | 0.56709  | 32.9912 | 24.7808 | 29.8789 | 17.132  | 27.7924 | 24.0583 |
| ENSMUSG000000095028 | 6_Sirpb1b       | 15.6057 | 2.71472  | 0.0025   | 0.00785  | 51.2231 | 8.26025 | 21.5128 | 5.41011 | 0.89653 | 6.33113 |
| ENSMUSG000000095029 | 1_Gm21370       | 8.84607 | 6.56806  | 1.48E-05 | 9.56E-05 | 16.4956 | 5.50683 | 31.074  | 0       | 0       | 0       |
| ENSMUSG000000095040 | 2_1700001J03Rik | 2.77081 | -1.01721 | 0.52778  | 0.63661  | 0.86819 | 0       | 4.78062 | 0.90169 | 6.27571 | 3.79868 |
| ENSMUSG000000095048 | 7_Gm11239       | 1.38512 | -0.90061 | 0.71762  | NA       | 1.73638 | 0       | 1.19515 | 0       | 5.37918 | 0       |
| ENSMUSG000000095061 | 1_E030018B13Rik | 0.50043 | 0.71218  | 0.85616  | NA       | 1.73638 | 0       | 0       | 0       | 0       | 1.26623 |
| ENSMUSG000000095071 | 2_AF067061      | 0.36401 | -0.03469 | 0.99322  | NA       | 0       | 0.91781 | 0       | 0       | 0       | 1.26623 |
| ENSMUSG000000095098 | 1_Ccdc85b       | 13.9758 | 2.05722  | 0.01492  | 0.03544  | 11.2864 | 19.2739 | 37.0498 | 9.01685 | 0.89653 | 6.33113 |
| ENSMUSG000000095101 | 2_Gm13285       | 7.25281 | 1.46455  | 0.16157  | 0.25405  | 11.2864 | 7.34244 | 13.1467 | 5.41011 | 0       | 6.33113 |
| ENSMUSG000000095104 | 1_Esp15         | 0.36046 | -1.978   | 0.62369  | NA       | 0       | 0       | 0       | 0       | 0.89653 | 1.26623 |
| ENSMUSG000000095105 | 1_Edaradd       | 328.477 | 0.05265  | 0.74623  | 0.82071  | 353.353 | 319.396 | 329.863 | 287.638 | 336.199 | 344.414 |
| ENSMUSG000000095113 | 1_Gm3633        | 0       | NA       | NA       | NA       | 0       | 0       | 0       | 0       | 0       | 0       |
| ENSMUSG000000095115 | 1_Itpripl2      | 613.536 | -0.58772 | 9.27E-05 | 0.00046  | 470.558 | 540.587 | 460.134 | 752.006 | 803.291 | 654.639 |
| ENSMUSG000000095123 | 1_Gm21781       | 400.01  | -0.28209 | 0.11522  | 0.19319  | 354.221 | 397.41  | 331.058 | 373.298 | 511.022 | 433.05  |
| ENSMUSG000000095125 | 1_Vmn1r198      | 0       | NA       | NA       | NA       | 0       | 0       | 0       | 0       | 0       | 0       |
| ENSMUSG000000095139 | 2_Pou3f2        | 3.32106 | -0.24466 | 0.86942  | 0.91148  | 5.20913 | 2.75342 | 1.19515 | 1.80337 | 8.96531 | 0       |
| ENSMUSG000000095143 | 5_Hsd3b4        | 0       | NA       | NA       | NA       | 0       | 0       | 0       | 0       | 0       | 0       |
| ENSMUSG000000095180 | 8_Rhox5         | 10.5713 | 0.44095  | 0.52085  | 0.63076  | 12.1546 | 10.0959 | 14.3418 | 7.21348 | 10.7584 | 8.86359 |
| ENSMUSG000000095186 | 1_Gm10718       | 1.79307 | 0.47284  | 0.83215  | NA       | 2.60457 | 3.67122 | 0       | 0       | 4.48265 | 0       |
| ENSMUSG000000095187 | 1_Olfr1381      | 0.19919 | 0.92709  | 0.82027  | NA       | 0       | 0       | 1.19515 | 0       | 0       | 0       |
| ENSMUSG000000095190 | 2_Gm10668       | 0       | NA       | NA       | NA       | 0       | 0       | 0       | 0       | 0       | 0       |
| ENSMUSG000000095193 | 1_Gm20939       | 52.1294 | -0.73581 | 0.03247  | 0.06781  | 40.8049 | 38.5478 | 38.2449 | 60.4129 | 81.5843 | 53.1815 |
| ENSMUSG000000095195 | 7_Gm3005        | 0       | NA       | NA       | NA       | 0       | 0       | 0       | 0       | 0       | 0       |
| ENSMUSG000000095199 | 7_Gm14431       | 0.19919 | 0.92709  | 0.82027  | NA       | 0       | 0       | 1.19515 | 0       | 0       | 0       |
| ENSMUSG000000095217 | 1_Hist1h2bn     | 0       | NA       | NA       | NA       | 0       | 0       | 0       | 0       | 0       | 0       |
| ENSMUSG000000095241 | 1_Gm5478        | 2713.59 | 1.60995  | 2.05E-12 | 1.01E-10 | 3514.43 | 3707.93 | 5041.16 | 1653.69 | 886.669 | 1477.69 |
| ENSMUSG000000095253 | 4_Zfp799        | 423.16  | -0.68978 | 8.21E-06 | 5.70E-05 | 324.702 | 330.41  | 315.521 | 461.663 | 534.332 | 572.335 |

|                     |                 |         |          |          |          |         |         |         |         |         |         |
|---------------------|-----------------|---------|----------|----------|----------|---------|---------|---------|---------|---------|---------|
| ENSMUSG000000095257 | 1_Scgb1b3       | 0.63311 | -2.78041 | 0.48468  | NA       | 0       | 0       | 0       | 0       | 0       | 3.79868 |
| ENSMUSG000000095264 | 1_Gm2854        | 0       | NA       | NA       | NA       | 0       | 0       | 0       | 0       | 0       | 0       |
| ENSMUSG000000095276 | 1_Gfy           | 0.21104 | -0.99647 | 0.80707  | NA       | 0       | 0       | 0       | 0       | 0       | 1.26623 |
| ENSMUSG000000095280 | 1_Gm21738       | 3.33863 | -1.30852 | 0.41559  | 0.53158  | 0       | 0       | 5.97577 | 4.50843 | 4.48265 | 5.06491 |
| ENSMUSG000000095294 | 1_Gm21119       | 1.77042 | -3.20215 | 0.16994  | NA       | 0       | 0.91781 | 0       | 0       | 7.17224 | 2.53245 |
| ENSMUSG000000095295 | 8_Gm3488        | 1.04939 | -3.55072 | 0.22574  | NA       | 0       | 0       | 0       | 3.60674 | 2.68959 | 0       |
| ENSMUSG000000095300 | 1_Gm906         | 0       | NA       | NA       | NA       | 0       | 0       | 0       | 0       | 0       | 0       |
| ENSMUSG000000095304 | 8_Plac9a        | 17.3124 | -1.98863 | 0.40002  | 0.51752  | 4.34094 | 16.5205 | 0       | 64.0197 | 0       | 18.9934 |
| ENSMUSG000000095306 | 2_Gm21807       | 8.69693 | 0.70278  | 0.35069  | 0.46742  | 12.1546 | 8.26025 | 11.9515 | 6.3118  | 7.17224 | 6.33113 |
| ENSMUSG000000095315 | 1_Gm10130       | 9.02044 | -0.02956 | 0.97355  | 0.98294  | 9.55007 | 1.83561 | 15.537  | 6.3118  | 10.7584 | 10.1298 |
| ENSMUSG000000095318 | 1_Gm8024        | 0       | NA       | NA       | NA       | 0       | 0       | 0       | 0       | 0       | 0       |
| ENSMUSG000000095325 | 1_Zfp870        | 257.689 | -0.51872 | 0.00408  | 0.01191  | 239.62  | 192.739 | 203.176 | 299.36  | 326.337 | 284.901 |
| ENSMUSG000000095330 | 1_Gm21834       | 0.73766 | -0.61831 | 0.8578   | NA       | 1.73638 | 0       | 0       | 0       | 2.68959 | 0       |
| ENSMUSG000000095332 | 1_Gm9821        | 127.684 | -0.59953 | 0.02451  | 0.05376  | 94.6325 | 122.986 | 87.2462 | 175.829 | 167.651 | 117.759 |
| ENSMUSG000000095339 | 1_Zscan4b       | 0       | NA       | NA       | NA       | 0       | 0       | 0       | 0       | 0       | 0       |
| ENSMUSG000000095362 | 7_Gm14325       | 468.878 | -0.82467 | 5.68E-06 | 4.14E-05 | 356.825 | 343.259 | 315.521 | 574.374 | 724.397 | 498.893 |
| ENSMUSG000000095363 | 2_Gm4567        | 0       | NA       | NA       | NA       | 0       | 0       | 0       | 0       | 0       | 0       |
| ENSMUSG000000095366 | 1_Gm21860       | 3.35312 | -0.70031 | 0.55685  | 0.66272  | 3.47275 | 1.83561 | 2.39031 | 4.50843 | 5.37918 | 2.53245 |
| ENSMUSG000000095368 | 7_Gm3012        | 0       | NA       | NA       | NA       | 0       | 0       | 0       | 0       | 0       | 0       |
| ENSMUSG000000095369 | 1_Gm21859       | 0.66371 | -1.52656 | 0.57363  | NA       | 0       | 0.91781 | 0       | 0.90169 | 0.89653 | 1.26623 |
| ENSMUSG000000095371 | 1_Gm9611        | 0       | NA       | NA       | NA       | 0       | 0       | 0       | 0       | 0       | 0       |
| ENSMUSG000000095377 | 1_Olfr91        | 0.14942 | -0.99647 | 0.80707  | NA       | 0       | 0       | 0       | 0       | 0.89653 | 0       |
| ENSMUSG000000095385 | 1_D630033O11Rik | 23.6925 | -0.65344 | 0.21828  | 0.32282  | 17.3638 | 15.6027 | 22.7079 | 43.2809 | 24.2063 | 18.9934 |
| ENSMUSG000000095388 | 7_Gm10681       | 0       | NA       | NA       | NA       | 0       | 0       | 0       | 0       | 0       | 0       |
| ENSMUSG000000095403 | 7_Gm21092       | 6069.9  | -0.41409 | 0.0042   | 0.01218  | 5593.74 | 5161.74 | 4857.11 | 5687.83 | 7654.58 | 7464.41 |
| ENSMUSG000000095406 | 1_Gm18025       | 13.7151 | 0.03032  | 0.9661   | 0.9781   | 8.68188 | 18.3561 | 14.3418 | 5.41011 | 15.241  | 20.2596 |
| ENSMUSG000000095407 | 1_Tmem200c      | 64.6493 | -0.82176 | 0.07317  | 0.13333  | 42.5412 | 78.0135 | 19.1225 | 93.7753 | 86.0669 | 68.3763 |
| ENSMUSG000000095409 | 1_Gm13043       | 0.15297 | 0.92709  | 0.82027  | NA       | 0       | 0.91781 | 0       | 0       | 0       | 0       |
| ENSMUSG000000095427 | 1_Rps2-ps6      | 3962.66 | 0.45306  | 0.01264  | 0.03075  | 4577.09 | 4302.67 | 4860.69 | 4328.99 | 2644.77 | 3061.74 |
| ENSMUSG000000095432 | 8_Zfp748        | 427.941 | -0.65644 | 6.90E-06 | 4.89E-05 | 335.989 | 329.492 | 331.058 | 480.598 | 561.228 | 529.283 |
| ENSMUSG000000095440 | 1_Fignl2        | 241.92  | 0.58675  | 0.00121  | 0.00424  | 266.534 | 280.849 | 323.887 | 184.846 | 186.478 | 208.927 |
| ENSMUSG000000095445 | 1_Gm14475       | 0       | NA       | NA       | NA       | 0       | 0       | 0       | 0       | 0       | 0       |
| ENSMUSG000000095448 | 1_Olfr859       | 0       | NA       | NA       | NA       | 0       | 0       | 0       | 0       | 0       | 0       |
| ENSMUSG000000095463 | 8_Entpd4        | 784.926 | -0.01033 | 0.93792  | 0.95923  | 776.16  | 862.737 | 706.336 | 791.68  | 779.982 | 792.658 |
| ENSMUSG000000095464 | 1_Gm21987       | 0.61187 | 2.73082  | 0.49238  | NA       | 0       | 3.67122 | 0       | 0       | 0       | 0       |
| ENSMUSG000000095466 | 7_Gm3015        | 0       | NA       | NA       | NA       | 0       | 0       | 0       | 0       | 0       | 0       |
| ENSMUSG000000095470 | 1_Gm21863       | 0.19919 | 0.92709  | 0.82027  | NA       | 0       | 0       | 1.19515 | 0       | 0       | 0       |
| ENSMUSG000000095474 | 1_Cldn34c2      | 0       | NA       | NA       | NA       | 0       | 0       | 0       | 0       | 0       | 0       |
| ENSMUSG000000095490 | 1_Gm7951        | 0.14942 | -0.99647 | 0.80707  | NA       | 0       | 0       | 0       | 0       | 0.89653 | 0       |
| ENSMUSG000000095493 | 1_A630023A22Rik | 1.58034 | 2.96985  | 0.21198  | NA       | 2.60457 | 0       | 5.97577 | 0.90169 | 0       | 0       |
| ENSMUSG000000095498 | 1_lfna1         | 0.1447  | 0.92709  | 0.82027  | NA       | 0.86819 | 0       | 0       | 0       | 0       | 0       |
| ENSMUSG000000095503 | 4_Gm3147        | 0       | NA       | NA       | NA       | 0       | 0       | 0       | 0       | 0       | 0       |
| ENSMUSG000000095514 | 2_D13Ert608e    | 6.58815 | 3.59705  | 0.00552  | 0.01531  | 20.8365 | 3.67122 | 11.9515 | 1.80337 | 0       | 1.26623 |
| ENSMUSG000000095518 | 1_Gm8068        | 0.49975 | -0.80545 | 0.83771  | NA       | 0       | 0       | 1.19515 | 1.80337 | 0       | 0       |
| ENSMUSG000000095533 | 7_Gm10413       | 0       | NA       | NA       | NA       | 0       | 0       | 0       | 0       | 0       | 0       |
| ENSMUSG000000095538 | 1_Gm21983       | 4.04556 | -5.49322 | 0.00649  | 0.01754  | 0       | 0       | 0       | 11.7219 | 12.5514 | 0       |
| ENSMUSG000000095540 | 1_Esp4          | 0.21104 | -0.99647 | 0.80707  | NA       | 0       | 0       | 0       | 0       | 0       | 1.26623 |
| ENSMUSG000000095545 | 7_Gm4245        | 27.4499 | -0.97385 | 0.19639  | 0.29666  | 35.5957 | 18.3561 | 1.19515 | 46.8876 | 32.2751 | 30.3894 |
| ENSMUSG000000095547 | 1_Gm10719       | 1.04939 | -3.55072 | 0.22574  | NA       | 0       | 0       | 0       | 3.60674 | 2.68959 | 0       |
| ENSMUSG000000095550 | 2_Gm21671       | 0.45536 | 0.77574  | 0.84797  | NA       | 0       | 1.83561 | 0       | 0       | 0.89653 | 0       |
| ENSMUSG000000095551 | 1_Gm7980        | 0       | NA       | NA       | NA       | 0       | 0       | 0       | 0       | 0       | 0       |
| ENSMUSG000000095557 | 7_Gm3415        | 0.21104 | -0.99647 | 0.80707  | NA       | 0       | 0       | 0       | 0       | 0       | 1.26623 |
| ENSMUSG000000095562 | 7_Gm21887       | 0.9463  | -2.1011  | 0.51239  | NA       | 0       | 0       | 1.19515 | 0       | 4.48265 | 0       |
| ENSMUSG000000095567 | 7_Noc2l         | 1368.63 | 0.75098  | 1.99E-07 | 2.27E-06 | 1601.81 | 1630.02 | 1918.22 | 1012.59 | 901.91  | 1147.2  |
| ENSMUSG000000095576 | 5_Fmo6          | 3.74316 | 0.00174  | 0.99884  | 0.99908  | 3.47275 | 6.42464 | 1.19515 | 4.50843 | 1.79306 | 5.06491 |
| ENSMUSG000000095595 | 1_Fam177a       | 1154.73 | -0.32993 | 0.01143  | 0.02829  | 1014.04 | 985.723 | 1069.66 | 1134.32 | 1345.69 | 1378.92 |
| ENSMUSG000000095609 | 1_Gm21188       | 8.84607 | 6.56806  | 1.48E-05 | 9.56E-05 | 16.4956 | 5.50683 | 31.074  | 0       | 0       | 0       |
| ENSMUSG000000095620 | 7_2010005H15Rik | 0.34861 | -0.03469 | 0.99322  | NA       | 0       | 0       | 1.19515 | 0       | 0.89653 | 0       |
| ENSMUSG000000095648 | 7_Gm2004        | 22.6606 | -2.00667 | 0.00905  | 0.02323  | 11.2864 | 1.83561 | 14.3418 | 48.691  | 48.4127 | 11.396  |
| ENSMUSG000000095651 | 1_Gm21817       | 19.141  | -0.71285 | 0.19011  | 0.2894   | 13.0228 | 18.3561 | 11.9515 | 17.132  | 27.7924 | 26.5908 |
| ENSMUSG000000095653 | 1_Gm21818       | 0.59758 | 2.66585  | 0.50308  | NA       | 0       | 0       | 3.58546 | 0       | 0       | 0       |
| ENSMUSG000000095654 | 2_Plscr5        | 5.37586 | 0.12513  | 0.9039   | 0.93526  | 4.34094 | 1.83561 | 10.7564 | 4.50843 | 4.48265 | 6.33113 |
| ENSMUSG000000095655 | 1_Gm14479       | 0       | NA       | NA       | NA       | 0       | 0       | 0       | 0       | 0       | 0       |
| ENSMUSG000000095663 | 1_Gm2310        | 0.14942 | -0.99647 | 0.80707  | NA       | 0       | 0       | 0       | 0       | 0.89653 | 0       |
| ENSMUSG000000095677 | 1_Dynl1f        | 1752.5  | -0.33526 | 0.01565  | 0.03694  | 1514.99 | 1394.15 | 1741.34 | 1750.17 | 2108.64 | 2005.7  |
| ENSMUSG000000095681 | 7_Gm8281        | 6.7979  | -0.3953  | 0.74424  | 0.81916  | 8.68188 | 6.42464 | 2.39031 | 14.427  | 0       | 8.86359 |
| ENSMUSG000000095687 | 1_Rnaset2a      | 1327.59 | -0.09625 | 0.47285  | 0.58585  | 1382.16 | 1266.57 | 1201.13 | 1543.69 | 1276.66 | 1295.35 |
| ENSMUSG000000095717 | 1_Gm2056        | 0.14942 | -0.99647 | 0.80707  | NA       | 0       | 0       | 0       | 0       | 0.89653 | 0       |
| ENSMUSG000000095718 | 2_Gm6502        | 0       | NA       | NA       | NA       | 0       | 0       | 0       | 0       | 0       | 0       |
| ENSMUSG000000095720 | 1_Gm1604b       | 1.11283 | -2.45542 | 0.28207  | NA       | 0       | 0.91781 | 0       | 1.80337 | 2.68959 | 1.26623 |
| ENSMUSG000000095724 | 1_Gm21319       | 0.49417 | 0.91318  | 0.78785  | NA       | 0.86819 | 0       | 1.19515 | 0.90169 | 0       | 0       |
| ENSMUSG000000095730 | 2_Vmn2r29       | 4.07668 | 0.04444  | 0.97758  | 0.98542  | 5.20913 | 0       | 7.17092 | 0       | 4.48265 | 7.59736 |
| ENSMUSG000000095741 | 3_Rhox2f        | 0.15028 | -0.99647 | 0.80707  | NA       | 0       | 0       | 0       | 0.90169 | 0       | 0       |
| ENSMUSG000000095743 | 1_Gm17654       | 0       | NA       | NA       | NA       | 0       | 0       | 0       | 0       | 0       | 0       |
| ENSMUSG000000095770 | 1_Gm21637       | 0.1447  | 0.92709  | 0.82027  | NA       | 0.86819 | 0       | 0       | 0       | 0       | 0       |
| ENSMUSG000000095779 | 1_Gm2163        | 16.7302 | -0.86339 | 0.19251  | 0.29234  | 13.891  | 11.0137 | 10.7564 | 37.8708 | 11.6549 | 15.1947 |
| ENSMUSG000000095788 | 6_Sirpb1a       | 22.3472 | 2.95127  | 0.00011  | 0.00054  | 77.2688 | 20.1917 | 21.5128 | 4.50843 | 8.06878 | 2.53245 |
| ENSMUSG000000095789 | 6_Nupr1l        | 21.1327 | -0.19245 | 0.7216   | 0.80192  | 22.5729 | 22.9451 | 13.1467 | 15.3287 | 22.4133 | 30.3894 |
| ENSMUSG000000095797 | 8_Gm8246        | 0.54781 | 1.10543  | 0.77334  | NA       | 0       | 0       | 2.39031 | 0       | 0.89653 | 0       |

|                     |                 |         |          |          |         |         |         |         |         |         |         |
|---------------------|-----------------|---------|----------|----------|---------|---------|---------|---------|---------|---------|---------|
| ENSMUSG000000095799 | 1_Gm8332        | 0       | NA       | NA       | NA      | 0       | 0       | 0       | 0       | 0       | 0       |
| ENSMUSG000000095821 | 1_Tcstv3        | 0       | NA       | NA       | NA      | 0       | 0       | 0       | 0       | 0       | 0       |
| ENSMUSG000000095822 | 2_Gm9117        | 0.63801 | 1.43476  | 0.6437   | NA      | 1.73638 | 0       | 1.19515 | 0       | 0.89653 | 0       |
| ENSMUSG000000095824 | 1_Gm13697       | 0.34861 | -0.03469 | 0.99322  | NA      | 0       | 0       | 1.19515 | 0       | 0.89653 | 0       |
| ENSMUSG000000095829 | 8_Speer1        | 0       | NA       | NA       | NA      | 0       | 0       | 0       | 0       | 0       | 0       |
| ENSMUSG000000095845 | 1_Gm5741        | 1.38986 | 3.91594  | 0.0899   | NA      | 3.47275 | 3.67122 | 1.19515 | 0       | 0       | 0       |
| ENSMUSG000000095872 | 7_Gm15128       | 0       | NA       | NA       | NA      | 0       | 0       | 0       | 0       | 0       | 0       |
| ENSMUSG000000095891 | 7_Gm10717       | 0.34389 | 1.87986  | 0.64119  | NA      | 0.86819 | 0       | 1.19515 | 0       | 0       | 0       |
| ENSMUSG000000095912 | 1_Gm3317        | 0       | NA       | NA       | NA      | 0       | 0       | 0       | 0       | 0       | 0       |
| ENSMUSG000000095930 | 1_Nim1k         | 65.536  | -1.13441 | 0.00429  | 0.01241 | 48.6186 | 46.8081 | 27.4885 | 119.924 | 95.9288 | 54.4478 |
| ENSMUSG000000095935 | 1_Gm11238       | 0.7514  | -3.06435 | 0.43974  | NA      | 0       | 0       | 0       | 4.50843 | 0       | 0       |
| ENSMUSG000000095941 | 1_Gm21964       | 0.15028 | -0.99647 | 0.80707  | NA      | 0       | 0       | 0       | 0.90169 | 0       | 0       |
| ENSMUSG000000095956 | 2_1700036A12Rik | 2.09513 | -2.53988 | 0.18995  | NA      | 1.73638 | 0       | 0       | 3.60674 | 0.89653 | 6.33113 |
| ENSMUSG000000095959 | 1_Gm10845       | 0.94483 | -0.17963 | 0.94129  | NA      | 2.60457 | 0       | 0       | 0.90169 | 0.89653 | 1.26623 |
| ENSMUSG000000095975 | 3_Cphx1         | 1.22135 | -1.60697 | 0.52642  | NA      | 1.73638 | 0       | 0       | 0       | 1.79306 | 3.79868 |
| ENSMUSG000000095990 | 1_Zfp97         | 269.289 | -0.46046 | 0.01336  | 0.03223 | 237.884 | 245.054 | 196.005 | 275.014 | 338.889 | 322.888 |
| ENSMUSG000000096001 | 2_2610528A11Rik | 17992.6 | -0.20819 | 0.03315  | 0.06901 | 16776.9 | 15755.1 | 17558   | 19093.2 | 18683.7 | 20088.7 |
| ENSMUSG000000096003 | 7_Gm3500        | 3.38517 | 0.07454  | 0.9696   | 0.98037 | 10.4183 | 0       | 0       | 5.41011 | 4.48265 | 0       |
| ENSMUSG000000096010 | 2_Hist4h4       | 0.92268 | 3.32202  | 0.29066  | NA      | 4.34094 | 0       | 1.19515 | 0       | 0       | 0       |
| ENSMUSG000000096014 | 1_Sox1          | 10.8114 | -1.43457 | 0.15632  | 0.2475  | 3.47275 | 13.7671 | 0       | 18.0337 | 8.06878 | 21.5259 |
| ENSMUSG000000096035 | 2_Gm1045        | 3.35969 | 1.22324  | 0.32872  | 0.4452  | 5.20913 | 6.42464 | 2.39031 | 2.70506 | 0.89653 | 2.53245 |
| ENSMUSG000000096039 | 7_D830030K20Rik | 31.4534 | -0.90934 | 0.03036  | 0.06408 | 18.232  | 25.6986 | 21.5128 | 38.7725 | 37.6543 | 46.8504 |
| ENSMUSG000000096042 | 1_Vmn2r125      | 0.14942 | -0.99647 | 0.80707  | NA      | 0       | 0       | 0       | 0       | 0.89653 | 0       |
| ENSMUSG000000096045 | 7_Gm21698       | 0.15297 | 0.92709  | 0.82027  | NA      | 0       | 0.91781 | 0       | 0       | 0       | 0       |
| ENSMUSG000000096049 | 1_Gm2075        | 0.44236 | 2.27028  | 0.57071  | NA      | 1.73638 | 0.91781 | 0       | 0       | 0       | 0       |
| ENSMUSG000000096051 | 1_Vmn1r40       | 0.19919 | 0.92709  | 0.82027  | NA      | 0       | 0       | 1.19515 | 0       | 0       | 0       |
| ENSMUSG000000096054 | 2_Syne1         | 3374.56 | 0.41445  | 0.00017  | 0.00078 | 3701.96 | 3797.88 | 4067.11 | 2704.15 | 2862.62 | 3113.65 |
| ENSMUSG000000096066 | 4_Gm10424       | 0       | NA       | NA       | NA      | 0       | 0       | 0       | 0       | 0       | 0       |
| ENSMUSG000000096083 | 1_Gm10428       | 0.44526 | -0.80448 | 0.84252  | NA      | 0.86819 | 0       | 0       | 1.80337 | 0       | 0       |
| ENSMUSG000000096094 | 2_A630095N17Rik | 4.87046 | 0.33467  | 0.74003  | 0.81622 | 3.47275 | 4.58903 | 8.36608 | 5.41011 | 3.58612 | 3.79868 |
| ENSMUSG000000096097 | 1_Gm14477       | 0       | NA       | NA       | NA      | 0       | 0       | 0       | 0       | 0       | 0       |
| ENSMUSG000000096139 | 4_Gm7978        | 0       | NA       | NA       | NA      | 0       | 0       | 0       | 0       | 0       | 0       |
| ENSMUSG000000096140 | 1_Ankrd66       | 2.54904 | 2.16106  | 0.23914  | 0.34673 | 7.8137  | 0       | 4.78062 | 1.80337 | 0.89653 | 0       |
| ENSMUSG000000096141 | 2_Dnah7a        | 8.12361 | -1.1027  | 0.16709  | 0.26098 | 6.94551 | 3.67122 | 4.78062 | 10.8202 | 9.86184 | 12.6623 |
| ENSMUSG000000096145 | 2_Vkorc1        | 633.911 | -0.24862 | 0.08406  | 0.14899 | 604.259 | 553.437 | 580.845 | 772.744 | 624.882 | 667.302 |
| ENSMUSG000000096146 | 1_Kcnj11        | 9.65948 | -0.52036 | 0.67423  | 0.76405 | 3.47275 | 20.1917 | 0       | 19.8371 | 1.79306 | 12.6623 |
| ENSMUSG000000096156 | 1_Gm9242        | 358.149 | -0.10319 | 0.64626  | 0.74112 | 433.226 | 281.766 | 320.301 | 293.949 | 425.852 | 393.797 |
| ENSMUSG000000096169 | 1_Gm4461        | 0       | NA       | NA       | NA      | 0       | 0       | 0       | 0       | 0       | 0       |
| ENSMUSG000000096175 | 3_Gm21761       | 0.83806 | 1.91677  | 0.49852  | NA      | 1.73638 | 0       | 2.39031 | 0.90169 | 0       | 0       |
| ENSMUSG000000096180 | 1_Vmn2r49       | 0       | NA       | NA       | NA      | 0       | 0       | 0       | 0       | 0       | 0       |
| ENSMUSG000000096188 | 1_Cmtm4         | 2173.26 | 0.04254  | 0.66266  | 0.75447 | 2160.05 | 2268.82 | 2187.13 | 2127.08 | 2170.5  | 2125.99 |
| ENSMUSG000000096192 | 1_Gm18856       | 0.89535 | -0.99566 | 0.72519  | NA      | 0.86819 | 0.91781 | 0       | 0       | 3.58612 | 0       |
| ENSMUSG000000096199 | 1_Pthrhd1       | 158.513 | 0.06509  | 0.76239  | 0.83297 | 151.065 | 166.123 | 169.712 | 181.239 | 139.859 | 143.084 |
| ENSMUSG000000096210 | 1_H1f0          | 4479.52 | -0.08603 | 0.4465   | 0.56148 | 4521.53 | 4449.52 | 4064.72 | 4759.1  | 4204.73 | 4877.51 |
| ENSMUSG000000096215 | 8_Smim22        | 129.214 | 0.86969  | 0.00069  | 0.00261 | 161.483 | 166.123 | 173.297 | 110.907 | 67.2398 | 96.2332 |
| ENSMUSG000000096218 | 2_Gm2916        | 0       | NA       | NA       | NA      | 0       | 0       | 0       | 0       | 0       | 0       |
| ENSMUSG000000096228 | 1_Olfr5         | 0.15028 | -0.99647 | 0.80707  | NA      | 0       | 0       | 0       | 0.90169 | 0       | 0       |
| ENSMUSG000000096230 | 4_Gm16429       | 0.2894  | 1.67273  | 0.67976  | NA      | 1.73638 | 0       | 0       | 0       | 0       | 0       |
| ENSMUSG000000096255 | 1_Dynlt1b       | 6559.03 | -0.02344 | 0.81609  | 0.87308 | 6648.59 | 6259.43 | 6609.2  | 6973.64 | 6194.13 | 6669.22 |
| ENSMUSG000000096256 | 1_Gm21093       | 6.88683 | -0.67363 | 0.46594  | 0.57944 | 8.68188 | 3.67122 | 3.58546 | 11.7219 | 9.86184 | 3.79868 |
| ENSMUSG000000096265 | 1_4930467E23Rik | 1.65578 | -3.10389 | 0.2643   | NA      | 0       | 0.91781 | 0       | 9.01685 | 0       | 0       |
| ENSMUSG000000096276 | 8_Gm2042        | 1.96608 | 0.8448   | 0.6143   | NA      | 2.60457 | 3.67122 | 1.19515 | 0       | 1.79306 | 2.53245 |
| ENSMUSG000000096283 | 1_Gm6176        | 0       | NA       | NA       | NA      | 0       | 0       | 0       | 0       | 0       | 0       |
| ENSMUSG000000096284 | 2_Tcstv1        | 0.84902 | 3.18694  | 0.24212  | NA      | 0.86819 | 1.83561 | 2.39031 | 0       | 0       | 0       |
| ENSMUSG000000096299 | 3_Gm21814       | 2.02031 | -0.30256 | 0.86517  | NA      | 4.34094 | 0.91781 | 0       | 0.90169 | 0.89653 | 5.06491 |
| ENSMUSG000000096322 | 1_Gm3898        | 0.90975 | 0.01645  | 0.99593  | NA      | 0       | 2.75342 | 0       | 2.70506 | 0       | 0       |
| ENSMUSG000000096323 | 1_Gm20767       | 0.2894  | 1.67273  | 0.67976  | NA      | 1.73638 | 0       | 0       | 0       | 0       | 0       |
| ENSMUSG000000096327 | 1_Gm21980       | 0.14942 | -0.99647 | 0.80707  | NA      | 0       | 0       | 0       | 0       | 0.89653 | 0       |
| ENSMUSG000000096330 | 7_Gm21976       | 0.45267 | -0.80756 | 0.8164   | NA      | 0       | 0.91781 | 0       | 0.90169 | 0.89653 | 0       |
| ENSMUSG000000096337 | 1_Gm13694       | 0.34861 | -0.03469 | 0.99322  | NA      | 0       | 0       | 1.19515 | 0       | 0.89653 | 0       |
| ENSMUSG000000096345 | 1_Esp16         | 0.19919 | 0.92709  | 0.82027  | NA      | 0       | 0       | 1.19515 | 0       | 0       | 0       |
| ENSMUSG000000096351 | 1_Samd11        | 64.3677 | -0.24568 | 0.59687  | 0.69869 | 65.9823 | 63.3286 | 47.8062 | 115.416 | 64.5502 | 29.1232 |
| ENSMUSG000000096368 | 2_Olfr1328      | 0.30056 | -1.76625 | 0.6627   | NA      | 0       | 0       | 0       | 1.80337 | 0       | 0       |
| ENSMUSG000000096370 | 8_Gm21992       | 166.437 | 1.02498  | 3.24E-05 | 0.00019 | 217.047 | 235.876 | 216.323 | 135.253 | 78.8947 | 115.227 |
| ENSMUSG000000096373 | 1_Vmn2r31       | 0       | NA       | NA       | NA      | 0       | 0       | 0       | 0       | 0       | 0       |
| ENSMUSG000000096385 | 7_Gm11168       | 0.72178 | -2.97888 | 0.30629  | NA      | 0       | 0       | 0       | 0.90169 | 0.89653 | 2.53245 |
| ENSMUSG000000096393 | 1_Gm590         | 0.1447  | 0.92709  | 0.82027  | NA      | 0.86819 | 0       | 0       | 0       | 0       | 0       |
| ENSMUSG000000096433 | 1_Gm4944        | 423.478 | -0.52177 | 0.0015   | 0.0051  | 357.694 | 301.958 | 383.644 | 457.155 | 498.471 | 541.945 |
| ENSMUSG000000096445 | 1_Dcpp1         | 0       | NA       | NA       | NA      | 0       | 0       | 0       | 0       | 0       | 0       |
| ENSMUSG000000096446 | 1_Gm8104        | 0.41023 | -0.03469 | 0.99322  | NA      | 0       | 0       | 1.19515 | 0       | 0       | 1.26623 |
| ENSMUSG000000096449 | 1_Gm4076        | 0.60209 | -1.37773 | 0.66139  | NA      | 0       | 0.91781 | 0       | 0.90169 | 1.79306 | 0       |
| ENSMUSG000000096458 | 7_Moap1         | 129.25  | -0.12197 | 0.69616  | 0.78258 | 168.429 | 103.712 | 99.1978 | 118.121 | 178.41  | 107.629 |
| ENSMUSG000000096463 | 1_Gm21750       | 0.45536 | 0.77574  | 0.84797  | NA      | 0       | 1.83561 | 0       | 0       | 0.89653 | 0       |
| ENSMUSG000000096472 | 1_Cdkn2d        | 282.877 | 0.68828  | 0.00075  | 0.00282 | 339.462 | 298.287 | 409.938 | 243.455 | 181.996 | 224.122 |
| ENSMUSG000000096477 | 1_Olfr92        | 0.29412 | -0.03469 | 0.99322  | NA      | 0.86819 | 0       | 0       | 0       | 0.89653 | 0       |
| ENSMUSG000000096484 | 1_Gm13696       | 0.34861 | -0.03469 | 0.99322  | NA      | 0       | 0       | 1.19515 | 0       | 0.89653 | 0       |
| ENSMUSG000000096486 | 1_Gm5426        | 0.14942 | -0.99647 | 0.80707  | NA      | 0       | 0       | 0       | 0       | 0.89653 | 0       |
| ENSMUSG000000096488 | 1_Gm10409       | 2.79505 | -1.21414 | 0.36781  | 0.48518 | 1.73638 | 0.91781 | 2.39031 | 2.70506 | 2.68959 | 6.33113 |
| ENSMUSG000000096508 | 7_Gm7903        | 2.09674 | -2.55451 | 0.19149  | NA      | 0.86819 | 0.91781 | 0       | 6.3118  | 4.48265 | 0       |

|                    |                 |         |          |          |          |         |         |         |         |          |         |
|--------------------|-----------------|---------|----------|----------|----------|---------|---------|---------|---------|----------|---------|
| ENSMUSG00000096519 | 1_Gm10721       | 0       | NA       | NA       | NA       | 0       | 0       | 0       | 0       | 0        | 0       |
| ENSMUSG00000096527 | 5_Gm6370        | 0.19919 | 0.92709  | 0.82027  | NA       | 0       | 0       | 1.19515 | 0       | 0        | 0       |
| ENSMUSG00000096528 | 1_G430049J08Rik | 6.08885 | 1.84664  | 0.06419  | 0.11951  | 8.68188 | 9.17806 | 10.7564 | 0.90169 | 4.48265  | 2.53245 |
| ENSMUSG00000096537 | 5_1190003K10Rik | 0.74883 | -3.06485 | 0.35312  | NA       | 0       | 0       | 0       | 1.80337 | 2.68959  | 0       |
| ENSMUSG00000096549 | 9_Prickle4      | 21.6048 | 0.71841  | 0.18903  | 0.28819  | 32.9912 | 25.6986 | 21.5128 | 18.9354 | 8.96531  | 21.5259 |
| ENSMUSG00000096553 | 1_Gm10097       | 2.85115 | -3.95169 | 0.05185  | 0.09993  | 0       | 0.91781 | 0       | 9.01685 | 7.17224  | 0       |
| ENSMUSG00000096569 | 2_Amy2a2        | 0       | NA       | NA       | NA       | 0       | 0       | 0       | 0       | 0        | 0       |
| ENSMUSG00000096573 | 2_1700009J07Rik | 0.21104 | -0.99647 | 0.80707  | NA       | 0       | 0       | 0       | 0       | 0        | 1.26623 |
| ENSMUSG00000096574 | 7_Gm2956        | 0.14942 | -0.99647 | 0.80707  | NA       | 0       | 0       | 0       | 0       | 0.89653  | 0       |
| ENSMUSG00000096582 | 1_Gm13289       | 0       | NA       | NA       | NA       | 0       | 0       | 0       | 0       | 0        | 0       |
| ENSMUSG00000096593 | 1_Vmn2r54       | 0.15028 | -0.99647 | 0.80707  | NA       | 0       | 0       | 0       | 0.90169 | 0        | 0       |
| ENSMUSG00000096597 | 1_Gm21886       | 0.9578  | 1.07277  | 0.6612   | NA       | 0       | 2.75342 | 1.19515 | 0.90169 | 0.89653  | 0       |
| ENSMUSG00000096606 | 2_Gm4980        | 18.9595 | -0.26483 | 0.62953  | 0.7263   | 18.232  | 20.1917 | 13.1467 | 27.9522 | 15.241   | 18.9934 |
| ENSMUSG00000096607 | 1_7530416G11Rik | 0.15028 | -0.99647 | 0.80707  | NA       | 0       | 0       | 0       | 0.90169 | 0        | 0       |
| ENSMUSG00000096612 | 2_Gm4565        | 0       | NA       | NA       | NA       | 0       | 0       | 0       | 0       | 0        | 0       |
| ENSMUSG00000096619 | 1_Gm2035        | 0.51343 | -1.00887 | 0.76364  | NA       | 0       | 0.91781 | 0       | 0       | 0.89653  | 1.26623 |
| ENSMUSG00000096620 | 1_Gm5169        | 0.29884 | -1.76064 | 0.66373  | NA       | 0       | 0       | 0       | 0       | 1.79306  | 0       |
| ENSMUSG00000096629 | 7_Gm3383        | 8.80858 | -0.71305 | 0.34697  | 0.46385  | 8.68188 | 6.42464 | 4.78062 | 9.01685 | 12.5514  | 11.396  |
| ENSMUSG00000096644 | 1_Magea1        | 0.66188 | -2.87123 | 0.41242  | NA       | 0       | 0       | 0       | 2.70506 | 0        | 1.26623 |
| ENSMUSG00000096658 | 1_Vmn2r39       | 0.15297 | 0.92709  | 0.82027  | NA       | 0       | 0.91781 | 0       | 0       | 0        | 0       |
| ENSMUSG00000096682 | 1_lfna5         | 0.1447  | 0.92709  | 0.82027  | NA       | 0.86819 | 0       | 0       | 0       | 0        | 0       |
| ENSMUSG00000096687 | 7_AA474331      | 178.262 | -0.70407 | 0.00207  | 0.00669  | 158.878 | 144.095 | 102.783 | 207.388 | 241.167  | 215.259 |
| ENSMUSG00000096688 | 1_Mup17         | 0.30056 | -1.76625 | 0.6627   | NA       | 0       | 0       | 0       | 1.80337 | 0        | 0       |
| ENSMUSG00000096696 | 1_Zfp960        | 165.737 | -0.79091 | 0.00021  | 0.00096  | 129.36  | 119.315 | 114.735 | 178.534 | 216.96   | 235.518 |
| ENSMUSG00000096700 | 1_Gm11236       | 1.257   | 2.55199  | 0.30426  | NA       | 2.60457 | 3.67122 | 0       | 0       | 0        | 1.26623 |
| ENSMUSG00000096719 | 1_Mrgpra2b      | 5.06455 | 3.7822   | 0.01218  | 0.02979  | 15.6274 | 1.83561 | 10.7564 | 0.90169 | 0        | 1.26623 |
| ENSMUSG00000096727 | 2_Psmb9         | 1541.46 | 1.97349  | 8.72E-28 | 3.52E-25 | 2268.58 | 2012.75 | 3090.67 | 672.657 | 562.125  | 641.977 |
| ENSMUSG00000096729 | 1_Gm13695       | 0.34861 | -0.03469 | 0.99322  | NA       | 0       | 0       | 1.19515 | 0       | 0.89653  | 0       |
| ENSMUSG00000096736 | 1_Gm17535       | 0.36046 | -1.978   | 0.62369  | NA       | 0       | 0       | 0       | 0       | 0.89653  | 1.26623 |
| ENSMUSG00000096740 | 7_Lbhd1         | 412.315 | -0.60911 | 0.00013  | 0.00063  | 364.639 | 309.3   | 304.764 | 531.093 | 456.334  | 507.757 |
| ENSMUSG00000096753 | 7_Fam181a       | 1.26623 | -3.78805 | 0.26668  | NA       | 0       | 0       | 0       | 0       | 0        | 7.59736 |
| ENSMUSG00000096764 | 1_Gm21985       | 2.89396 | 4.97148  | 0.06782  | 0.12521  | 17.3638 | 0       | 0       | 0       | 0        | 0       |
| ENSMUSG00000096768 | 7_Erd1          | 42.9577 | 2.97563  | 1.43E-06 | 1.26E-05 | 61.6414 | 52.3149 | 114.735 | 17.132  | 1.79306  | 10.1298 |
| ENSMUSG00000096770 | 2_Amy2a4        | 0       | NA       | NA       | NA       | 0       | 0       | 0       | 0       | 0        | 0       |
| ENSMUSG00000096775 | 1_Gm5796        | 9.57072 | 0.2807   | 0.76404  | 0.83392  | 12.1546 | 16.5205 | 2.39031 | 6.3118  | 3.58612  | 16.4609 |
| ENSMUSG00000096793 | 7_Gm3002        | 0.15297 | 0.92709  | 0.82027  | NA       | 0       | 0.91781 | 0       | 0       | 0        | 0       |
| ENSMUSG00000096795 | 4_Zfp433        | 185.583 | -0.53111 | 0.00856  | 0.02215  | 160.615 | 148.685 | 145.809 | 190.256 | 246.546  | 221.59  |
| ENSMUSG00000096796 | 1_1700021P04Rik | 0       | NA       | NA       | NA       | 0       | 0       | 0       | 0       | 0        | 0       |
| ENSMUSG00000096798 | 1_Gm6309        | 0.60209 | -1.37773 | 0.66139  | NA       | 0       | 0.91781 | 0       | 0.90169 | 1.79306  | 0       |
| ENSMUSG00000096807 | 1_Hist1h2bm     | 2.29229 | -0.52145 | 0.78475  | NA       | 1.73638 | 2.75342 | 1.19515 | 0       | 0.806878 | 0       |
| ENSMUSG00000096839 | 7_Gm3460        | 0       | NA       | NA       | NA       | 0       | 0       | 0       | 0       | 0        | 0       |
| ENSMUSG00000096846 | 7_Gm8890        | 0.14942 | -0.99647 | 0.80707  | NA       | 0       | 0       | 0       | 0       | 0.89653  | 0       |
| ENSMUSG00000096847 | 1_Tmem151b      | 9.84281 | -0.29736 | 0.73599  | 0.81298  | 12.1546 | 11.9315 | 2.39031 | 16.2303 | 12.5514  | 3.79868 |
| ENSMUSG00000096850 | 1_Gm21748       | 3.35312 | -0.70031 | 0.55685  | 0.66272  | 3.47275 | 1.83561 | 2.39031 | 4.50843 | 5.37918  | 2.53245 |
| ENSMUSG00000096856 | 7_Gm10778       | 174.253 | -0.61824 | 0.0035   | 0.01045  | 145.856 | 140.424 | 125.491 | 178.534 | 234.891  | 220.323 |
| ENSMUSG00000096872 | 2_Scgb2a2       | 0.43409 | 2.24584  | 0.57502  | NA       | 2.60457 | 0       | 0       | 0       | 0        | 0       |
| ENSMUSG00000096878 | 2_Gm21655       | 1.45035 | -1.47578 | 0.60577  | NA       | 0       | 0       | 2.39031 | 6.3118  | 0        | 0       |
| ENSMUSG00000096879 | 2_Gm4858        | 603.449 | -0.59435 | 1.41E-05 | 9.13E-05 | 479.24  | 483.684 | 479.257 | 653.722 | 770.12   | 754.671 |
| ENSMUSG00000096883 | 1_Shisa8        | 2.20166 | -0.30772 | 0.84815  | NA       | 0.86819 | 2.75342 | 2.39031 | 4.50843 | 2.68959  | 0       |
| ENSMUSG00000096901 | 7_Gm3029        | 0.15028 | -0.99647 | 0.80707  | NA       | 0       | 0       | 0       | 0.90169 | 0        | 0       |
| ENSMUSG00000096904 | 7_Gm3591        | 2.45083 | 4.71062  | 0.04687  | NA       | 0       | 2.75342 | 11.9515 | 0       | 0        | 0       |
| ENSMUSG00000096910 | 1_Zfp955b       | 228.833 | -0.53194 | 0.00543  | 0.0151   | 176.242 | 203.753 | 180.468 | 238.045 | 268.063  | 306.427 |
| ENSMUSG00000096911 | 7_Gm2165        | 0       | NA       | NA       | NA       | 0       | 0       | 0       | 0       | 0        | 0       |
| ENSMUSG00000096914 | 3_Galnt16       | 2.77078 | -2.10481 | 0.16918  | 0.26358  | 0       | 0.91781 | 2.39031 | 4.50843 | 6.27571  | 2.53245 |
| ENSMUSG00000096915 | 1_Gm2964        | 0       | NA       | NA       | NA       | 0       | 0       | 0       | 0       | 0        | 0       |
| ENSMUSG00000096916 | 7_Zfp850        | 93.6992 | -0.29802 | 0.25994  | 0.37014  | 86.8188 | 80.7669 | 84.8559 | 90.1685 | 124.618  | 94.967  |
| ENSMUSG00000096917 | 1_2500002B13Rik | 35.1782 | -0.05488 | 0.88953  | 0.92558  | 37.3321 | 33.9588 | 32.2692 | 30.6573 | 43.93    | 32.9219 |
| ENSMUSG00000096918 | 1_Gm16863       | 0.6593  | -2.86602 | 0.41383  | NA       | 0       | 0       | 0       | 0       | 2.68959  | 1.26623 |
| ENSMUSG00000096921 | 1_Gm26822       | 0.15028 | -0.99647 | 0.80707  | NA       | 0       | 0       | 0       | 0.90169 | 0        | 0       |
| ENSMUSG00000096922 | 1_Gm17308       | 2.21557 | -3.56447 | 0.0558   | NA       | 0.86819 | 0       | 0       | 5.41011 | 4.48265  | 2.53245 |
| ENSMUSG00000096923 | 1_A730071L15Rik | 2.46852 | 0.91056  | 0.51267  | NA       | 2.60457 | 4.58903 | 2.39031 | 0.90169 | 1.79306  | 2.53245 |
| ENSMUSG00000096924 | 1_Gm26824       | 3.62875 | -1.8985  | 0.14556  | 0.23302  | 1.73638 | 2.75342 | 0       | 6.3118  | 7.17224  | 3.79868 |
| ENSMUSG00000096926 | 1_Gm26823       | 27.9245 | -0.96631 | 0.04597  | 0.09039  | 16.4956 | 15.6027 | 25.0982 | 29.7556 | 50.2057  | 30.3894 |
| ENSMUSG00000096930 | 1_Gm26657       | 0.19919 | 0.92709  | 0.82027  | NA       | 0       | 0       | 1.19515 | 0       | 0        | 0       |
| ENSMUSG00000096932 | 1_5033403F01Rik | 11.3618 | 0.44808  | 0.5209   | 0.63078  | 12.1546 | 8.26025 | 19.1225 | 8.11517 | 11.6549  | 8.86359 |
| ENSMUSG00000096934 | 1_Gm26658       | 0.85463 | -0.59174 | 0.79663  | NA       | 0.86819 | 0       | 1.19515 | 0.90169 | 0.89653  | 1.26623 |
| ENSMUSG00000096936 | 1_Gm3510        | 0.66188 | -2.87123 | 0.41242  | NA       | 0       | 0       | 0       | 2.70506 | 0        | 1.26623 |
| ENSMUSG00000096937 | 1_Gm10825       | 8.01757 | -0.46021 | 0.74759  | 0.82173  | 9.55007 | 0       | 10.7564 | 18.9354 | 0        | 8.86359 |
| ENSMUSG00000096938 | 7_9530052E02Rik | 9.27718 | -0.55234 | 0.46989  | 0.58303  | 9.55007 | 9.17806 | 3.58546 | 11.7219 | 8.96531  | 12.6623 |
| ENSMUSG00000096940 | 1_Gm4755        | 27.6395 | -0.15468 | 0.73237  | 0.81014  | 30.3866 | 27.5342 | 20.3176 | 35.1657 | 23.3098  | 29.1232 |
| ENSMUSG00000096941 | 1_Gm26720       | 0.2997  | -1.76345 | 0.66322  | NA       | 0       | 0       | 0       | 0.90169 | 0.89653  | 0       |
| ENSMUSG00000096943 | 1_Gm26721       | 2.28267 | -1.43815 | 0.4408   | NA       | 0.86819 | 2.75342 | 0       | 0       | 6.27571  | 3.79868 |
| ENSMUSG00000096944 | 1_Gm26722       | 6.99775 | -0.49015 | 0.60934  | 0.70898  | 12.1546 | 2.75342 | 2.39031 | 9.91854 | 7.17224  | 7.59736 |
| ENSMUSG00000096945 | 1_Gm26546       | 5.38293 | 0.09744  | 0.94044  | 0.96117  | 6.07732 | 0       | 10.7564 | 1.80337 | 9.86184  | 3.79868 |
| ENSMUSG00000096946 | 1_Fmr1os        | 0.90803 | 0.01786  | 0.99486  | NA       | 0       | 2.75342 | 0       | 0.90169 | 1.79306  | 0       |
| ENSMUSG00000096947 | 1_Gm26723       | 0.14942 | -0.99647 | 0.80707  | NA       | 0       | 0       | 0       | 0       | 0.89653  | 0       |
| ENSMUSG00000096948 | 1_Gm4221        | 3.04665 | 1.98745  | 0.23933  | 0.3469   | 9.55007 | 2.75342 | 2.39031 | 0       | 3.58612  | 0       |
| ENSMUSG00000096950 | 2_Gm9530        | 19.8754 | -0.11765 | 0.82946  | 0.88311  | 27.782  | 13.7671 | 15.537  | 24.3455 | 18.8271  | 18.9934 |
| ENSMUSG00000096954 | 1_Gdap10        | 96.0353 | -0.59752 | 0.02757  | 0.05925  | 94.6325 | 69.7532 | 64.5383 | 114.514 | 126.411  | 106.363 |

|                    |                 |         |          |         |         |         |         |         |         |         |         |
|--------------------|-----------------|---------|----------|---------|---------|---------|---------|---------|---------|---------|---------|
| ENSMUSG00000096956 | 2_Snhg18        | 372.637 | -0.73012 | 0.00078 | 0.00289 | 273.479 | 346.013 | 221.104 | 545.52  | 463.506 | 386.199 |
| ENSMUSG00000096957 | 1_E230013L22Rik | 10.0298 | -0.68973 | 0.32871 | 0.4452  | 9.55007 | 7.34244 | 5.97577 | 12.6236 | 10.7584 | 13.9285 |
| ENSMUSG00000096958 | 1_Gm26573       | 0.29884 | -1.76064 | 0.66373 | NA      | 0       | 0       | 0       | 0       | 1.79306 | 0       |
| ENSMUSG00000096959 | 1_4930509G22Rik | 25.2627 | 0.16255  | 0.72802 | 0.8064  | 22.5729 | 26.6164 | 31.074  | 18.9354 | 29.5855 | 22.7921 |
| ENSMUSG00000096960 | 1_A230028O05Rik | 6.57042 | 0.19574  | 0.82843 | 0.88257 | 7.8137  | 3.67122 | 9.56123 | 3.60674 | 7.17224 | 7.59736 |
| ENSMUSG00000096965 | 7_3300005D01Rik | 1.25815 | 2.62544  | 0.24866 | NA      | 0.86819 | 4.58903 | 1.19515 | 0       | 0.89653 | 0       |
| ENSMUSG00000096968 | 1_Gm26620       | 1.0978  | 0.25595  | 0.90246 | NA      | 2.60457 | 0.91781 | 0       | 0.90169 | 0.89653 | 1.26623 |
| ENSMUSG00000096971 | 1_4930556M19Rik | 117.49  | -0.83585 | 0.00076 | 0.00285 | 89.4234 | 86.2737 | 77.685  | 170.419 | 159.582 | 121.558 |
| ENSMUSG00000096972 | 7_Gm26883       | 83.9457 | -4.79996 | 0.03614 | 0.07404 | 17.3638 | 0       | 0       | 168.615 | 301.234 | 16.4609 |
| ENSMUSG00000096974 | 1_Gm26881       | 4.54228 | -1.32648 | 0.21217 | 0.3155  | 1.73638 | 3.67122 | 2.39031 | 8.11517 | 6.27571 | 5.06491 |
| ENSMUSG00000096975 | 1_Gm16386       | 16.2967 | -0.00229 | 0.99705 | 0.99796 | 12.1546 | 16.5205 | 20.3176 | 9.01685 | 23.3098 | 16.4609 |
| ENSMUSG00000096976 | 1_Gm26882       | 8.04753 | -0.80416 | 0.64512 | 0.74008 | 17.3638 | 0       | 0       | 0.90169 | 0.89653 | 29.1232 |
| ENSMUSG00000096977 | 1_Gm10827       | 1.45672 | -0.9777  | 0.57365 | NA      | 0.86819 | 0.91781 | 1.19515 | 1.80337 | 2.68959 | 1.26623 |
| ENSMUSG00000096978 | 1_Gm26851       | 0.36046 | -1.978   | 0.62369 | NA      | 0       | 0       | 0       | 0       | 0.89653 | 1.26623 |
| ENSMUSG00000096979 | 1_Gm26880       | 3.50645 | 0.14992  | 0.9004  | 0.93272 | 6.07732 | 3.67122 | 1.19515 | 3.60674 | 2.68959 | 3.79868 |
| ENSMUSG00000096980 | 1_Gm26526       | 19.0605 | -0.22921 | 0.82937 | 0.88311 | 18.232  | 29.3698 | 4.78062 | 0       | 27.7924 | 34.1881 |
| ENSMUSG00000096981 | 1_Gm16845       | 38.2618 | 0.44171  | 0.26895 | 0.38037 | 45.1458 | 44.0547 | 43.0255 | 42.3792 | 23.3098 | 31.6557 |
| ENSMUSG00000096982 | 1_Redrum        | 0.44709 | 0.74829  | 0.83033 | NA      | 0.86819 | 0.91781 | 0       | 0       | 0.89653 | 0       |
| ENSMUSG00000096983 | 1_2010015M23Rik | 6.45746 | -0.39068 | 0.66156 | 0.75344 | 5.20913 | 4.58903 | 7.17092 | 8.11517 | 9.86184 | 3.79868 |
| ENSMUSG00000096984 | 1_Gm26523       | 0.64986 | -0.24781 | 0.9367  | NA      | 1.73638 | 0       | 0       | 0       | 0.89653 | 1.26623 |
| ENSMUSG00000096986 | 2_4930509E16Rik | 0.7441  | -1.79146 | 0.53825 | NA      | 0.86819 | 0       | 0       | 1.80337 | 1.79306 | 0       |
| ENSMUSG00000096987 | 1_Gm26525       | 50.0457 | -0.71932 | 0.08784 | 0.15451 | 32.9912 | 49.5615 | 31.074  | 91.0702 | 53.7918 | 41.7855 |
| ENSMUSG00000096988 | 1_A930029G22Rik | 3.67262 | -0.69584 | 0.54899 | 0.65543 | 3.47275 | 3.67122 | 1.19515 | 6.3118  | 3.58612 | 3.79868 |
| ENSMUSG00000096990 | 1_Gm26790       | 9.69791 | 0.32518  | 0.66236 | 0.75421 | 15.6274 | 8.26025 | 8.36608 | 6.3118  | 10.7584 | 8.86359 |
| ENSMUSG00000096991 | 1_Gm26789       | 12.7055 | -0.50002 | 0.43142 | 0.54672 | 10.4183 | 9.17806 | 11.9515 | 10.8202 | 16.1376 | 17.7272 |
| ENSMUSG00000096995 | 1_2810029C07Rik | 48.5853 | -0.02336 | 0.94514 | 0.96429 | 54.6959 | 42.2191 | 47.8062 | 46.8876 | 55.5849 | 44.3179 |
| ENSMUSG00000096996 | 1_Gm26792       | 52.6046 | -0.51347 | 0.10554 | 0.17989 | 39.9367 | 45.8903 | 44.2207 | 59.5112 | 62.7571 | 63.3113 |
| ENSMUSG00000096997 | 1_Gm26791       | 0.2894  | 1.67273  | 0.67976 | NA      | 1.73638 | 0       | 0       | 0       | 0       | 0       |
| ENSMUSG00000096999 | 1_Gm26793       | 0.15028 | -0.99647 | 0.80707 | NA      | 0       | 0       | 0       | 0.90169 | 0       | 0       |
| ENSMUSG00000097000 | 1_Gm17435       | 59.0489 | 0.02628  | 0.9441  | 0.96352 | 74.6642 | 39.4656 | 64.5383 | 43.2809 | 69.0329 | 63.3113 |
| ENSMUSG00000097002 | 1_Gm2670        | 24.864  | 0.30994  | 0.53401 | 0.64211 | 34.7275 | 28.452  | 19.1225 | 27.9522 | 16.1376 | 22.7921 |
| ENSMUSG00000097005 | 1_4930598A11Rik | 0.15028 | -0.99647 | 0.80707 | NA      | 0       | 0       | 0       | 0.90169 | 0       | 0       |
| ENSMUSG00000097006 | 7_9530082P21Rik | 641.232 | 0.6396   | 0.00075 | 0.0028  | 767.479 | 779.217 | 797.168 | 637.492 | 396.267 | 469.77  |
| ENSMUSG00000097007 | 1_4930432B10Rik | 2.0644  | -1.66554 | 0.32462 | NA      | 0       | 1.83561 | 1.19515 | 3.60674 | 4.48265 | 1.26623 |
| ENSMUSG00000097008 | 1_Gm26860       | 0.64983 | 2.80989  | 0.34835 | NA      | 0.86819 | 1.83561 | 1.19515 | 0       | 0       | 0       |
| ENSMUSG00000097013 | 1_Gm26710       | 8.09824 | 0.25017  | 0.77824 | 0.84494 | 8.68188 | 13.7671 | 3.58546 | 5.41011 | 4.48265 | 12.6623 |
| ENSMUSG00000097014 | 1_Gm26706       | 1.01232 | -0.95415 | 0.65955 | NA      | 0       | 0.91781 | 1.19515 | 0.90169 | 1.79306 | 1.26623 |
| ENSMUSG00000097015 | 1_Gm26705       | 1.19709 | -3.74017 | 0.18755 | NA      | 0       | 0       | 0       | 1.80337 | 5.37918 | 0       |
| ENSMUSG00000097016 | 1_Gm26708       | 8.23512 | 0.03055  | 0.97302 | 0.98275 | 10.4183 | 2.75342 | 11.9515 | 4.50843 | 13.448  | 6.33113 |
| ENSMUSG00000097017 | 1_Gm26707       | 6.22247 | 0.34915  | 0.69928 | 0.78489 | 6.07732 | 10.0959 | 4.78062 | 5.41011 | 7.17224 | 3.79868 |
| ENSMUSG00000097019 | 1_Gm26663       | 61.9867 | -0.08168 | 0.8496  | 0.89802 | 83.3461 | 44.0547 | 52.5868 | 34.264  | 69.0329 | 88.6359 |
| ENSMUSG00000097020 | 1_Gm26613       | 10.1372 | -0.14065 | 0.85307 | 0.90051 | 6.94551 | 11.0137 | 10.7564 | 6.3118  | 8.06878 | 17.7272 |
| ENSMUSG00000097021 | 7_4933433G15Rik | 5.45789 | -0.37066 | 0.72555 | 0.80454 | 3.47275 | 7.34244 | 3.58546 | 8.11517 | 8.96531 | 1.26623 |
| ENSMUSG00000097023 | 8_A1854517      | 1.23924 | 0.06704  | 0.97602 | NA      | 1.73638 | 0.91781 | 1.19515 | 0       | 3.58612 | 0       |
| ENSMUSG00000097025 | 1_Gm26558       | 1.2713  | 2.63725  | 0.29419 | NA      | 4.34094 | 0       | 2.39031 | 0       | 0.89653 | 0       |
| ENSMUSG00000097026 | 1_Gm26786       | 71.5576 | -0.8606  | 0.01069 | 0.02674 | 59.0368 | 46.8081 | 46.611  | 71.2332 | 124.618 | 81.0385 |
| ENSMUSG00000097027 | 1_Gm26559       | 15.8321 | -1.25425 | 0.04757 | 0.093   | 12.1546 | 6.42464 | 9.56123 | 32.4607 | 17.9306 | 16.4609 |
| ENSMUSG00000097031 | 2_Gm26820       | 0.57504 | -1.21646 | 0.74749 | NA      | 0       | 0.91781 | 0       | 0       | 0       | 2.53245 |
| ENSMUSG00000097033 | 1_Gm26819       | 110.437 | 0.36163  | 0.14125 | 0.22742 | 131.965 | 123.904 | 115.93  | 80.25   | 100.411 | 110.162 |
| ENSMUSG00000097035 | 2_Gm26692       | 0.6534  | 1.31976  | 0.66692 | NA      | 1.73638 | 0.91781 | 0       | 0       | 0       | 1.26623 |
| ENSMUSG00000097038 | 1_Gm26821       | 0.84415 | -3.20085 | 0.40996 | NA      | 0       | 0       | 0       | 0       | 0       | 5.06491 |
| ENSMUSG00000097039 | 8_Pvt1          | 20.2945 | -0.36405 | 0.523   | 0.63241 | 23.4411 | 15.6027 | 14.3418 | 23.4438 | 32.2751 | 12.6623 |
| ENSMUSG00000097042 | 1_Gm17491       | 212.12  | -0.47078 | 0.02701 | 0.0583  | 188.397 | 184.479 | 160.151 | 203.781 | 294.062 | 241.849 |
| ENSMUSG00000097045 | 1_Gm26641       | 2.79988 | -0.24232 | 0.68693 | 0.91113 | 1.73638 | 3.67122 | 2.39031 | 6.3118  | 2.68959 | 0       |
| ENSMUSG00000097047 | 1_1110020A21Rik | 10.0635 | -0.56264 | 0.45854 | 0.57234 | 10.4183 | 9.17806 | 4.78062 | 15.3287 | 14.3445 | 6.33113 |
| ENSMUSG00000097050 | 1_Gm9918        | 17.2417 | -1.18986 | 0.11403 | 0.1915  | 14.7592 | 11.9315 | 4.78062 | 35.1657 | 30.482  | 6.33113 |
| ENSMUSG00000097051 | 1_Gm26836       | 5.25649 | -0.83719 | 0.43698 | 0.55237 | 3.47275 | 0.91781 | 7.17092 | 7.21348 | 8.96531 | 3.79868 |
| ENSMUSG00000097055 | 1_Gm4419        | 5.22859 | -0.93547 | 0.39879 | 0.51624 | 5.20913 | 1.83561 | 3.58546 | 1.80337 | 6.27571 | 12.6623 |
| ENSMUSG00000097056 | 1_Gm4262        | 3.37584 | -0.34457 | 0.76977 | 0.83827 | 3.47275 | 1.83561 | 3.58546 | 3.60674 | 2.68959 | 5.06491 |
| ENSMUSG00000097057 | 1_Gm17638       | 29.1857 | -0.01366 | 0.97519 | 0.9838  | 32.123  | 24.7808 | 29.8789 | 24.3455 | 25.9994 | 37.9868 |
| ENSMUSG00000097058 | 1_4930556M19Rik | 10.1278 | -1.13645 | 0.13417 | 0.21818 | 7.8137  | 6.42464 | 4.78062 | 14.427  | 19.7237 | 7.59736 |
| ENSMUSG00000097059 | 1_Fam120aos     | 58.0777 | -0.53623 | 0.08367 | 0.14846 | 48.6186 | 45.8903 | 47.8062 | 78.4466 | 61.8606 | 65.8438 |
| ENSMUSG00000097061 | 1_9330151L19Rik | 120.183 | -0.40252 | 0.09861 | 0.17012 | 111.996 | 101.876 | 96.8075 | 123.531 | 164.065 | 122.824 |
| ENSMUSG00000097062 | 1_Gm17586       | 37.6092 | 0.1751   | 0.68126 | 0.76955 | 40.8049 | 28.452  | 50.1965 | 31.559  | 27.7924 | 46.8504 |
| ENSMUSG00000097065 | 1_A630075F10Rik | 1.74523 | 0.87752  | 0.61013 | NA      | 1.73638 | 2.75342 | 2.39031 | 0.90169 | 2.68959 | 0       |
| ENSMUSG00000097068 | 1_Gm26760       | 0.14942 | -0.99647 | 0.80707 | NA      | 0       | 0       | 0       | 0       | 0.89653 | 0       |
| ENSMUSG00000097069 | 1_Gm16998       | 3.27624 | 0.28405  | 0.81443 | 0.87182 | 1.73638 | 5.50683 | 3.58546 | 3.60674 | 2.68959 | 2.53245 |
| ENSMUSG00000097073 | 7_9430037G07Rik | 69.984  | -1.45112 | 0.0002  | 0.00089 | 24.3093 | 55.9861 | 32.2692 | 102.792 | 127.307 | 77.2398 |
| ENSMUSG00000097074 | 1_4833428L15Rik | 0.2997  | -1.76345 | 0.66322 | NA      | 0       | 0       | 0       | 0.90169 | 0.89653 | 0       |
| ENSMUSG00000097075 | 2_D830044I16Rik | 19.0276 | -0.44706 | 0.41891 | 0.53475 | 22.5729 | 10.0959 | 15.537  | 23.4438 | 19.7237 | 22.7921 |
| ENSMUSG00000097076 | 1_Plati7        | 3.59937 | 1.41276  | 0.25819 | 0.36816 | 2.60457 | 3.67122 | 9.56123 | 1.80337 | 2.68959 | 1.26623 |
| ENSMUSG00000097077 | 1_Gm16712       | 3.70035 | 0.60104  | 0.5977  | 0.69946 | 5.20913 | 4.58903 | 3.58546 | 1.80337 | 4.48265 | 2.53245 |
| ENSMUSG00000097078 | 1_Gm26566       | 0.6581  | 2.82669  | 0.42105 | NA      | 0       | 2.75342 | 1.19515 | 0       | 0       | 0       |
| ENSMUSG00000097080 | 7_1700086O06Rik | 31.4991 | -0.5919  | 0.14247 | 0.22904 | 26.9138 | 25.6986 | 22.7079 | 38.7725 | 39.4473 | 35.4544 |
| ENSMUSG00000097081 | 1_Gm10425       | 13.1597 | 0.00968  | 0.98897 | 0.99254 | 20.8365 | 5.50683 | 13.1467 | 11.7219 | 12.5514 | 15.1947 |
| ENSMUSG00000097084 | 1_Fox11         | 6.77321 | -0.7819  | 0.38402 | 0.5016  | 6.07732 | 6.42464 | 2.39031 | 10.8202 | 9.86184 | 5.06491 |
| ENSMUSG00000097085 | 1_Gm26634       | 2.87272 | -0.85175 | 0.51503 | 0.62518 | 1.73638 | 0.91781 | 3.58546 | 4.50843 | 2.68959 | 3.79868 |
| ENSMUSG00000097088 | 1_Gm26615       | 7.74083 | -0.7606  | 0.38878 | 0.50615 | 6.94551 | 5.50683 | 4.78062 | 17.132  | 4.48265 | 7.59736 |
| ENSMUSG00000097090 | 1_Gm26724       | 58.7468 | -0.18544 | 0.5948  | 0.69669 | 58.1686 | 61.493  | 45.4159 | 56.8062 | 82.4808 | 48.1166 |

|                    |                 |         |          |          |          |         |         |         |         |         |         |
|--------------------|-----------------|---------|----------|----------|----------|---------|---------|---------|---------|---------|---------|
| ENSMUSG00000097093 | 1_C330013E15Rik | 12.0608 | 0.83806  | 0.22831  | 0.33406  | 13.0228 | 19.2739 | 14.3418 | 7.21348 | 13.448  | 5.06491 |
| ENSMUSG00000097094 | 1_Gm26548       | 1.05004 | -0.41424 | 0.85594  | NA       | 0.86819 | 1.83561 | 0       | 1.80337 | 1.79306 | 0       |
| ENSMUSG00000097097 | 1_5033426Q07Rik | 0.15028 | -0.99647 | 0.80707  | NA       | 0       | 0       | 0       | 0.90169 | 0       | 0       |
| ENSMUSG00000097098 | 7_9330111N05Rik | 11.4546 | -0.27246 | 0.69654  | 0.78291  | 14.7592 | 9.17806 | 7.17092 | 11.7219 | 17.0341 | 8.86359 |
| ENSMUSG00000097100 | 1_9230104M06Rik | 1.74426 | 0.35053  | 0.84008  | NA       | 1.73638 | 1.83561 | 2.39031 | 3.60674 | 0.89653 | 0       |
| ENSMUSG00000097102 | 1_2310069G16Rik | 1.23045 | 0.24978  | 0.91192  | NA       | 0       | 2.75342 | 1.19515 | 0.90169 | 0       | 2.53245 |
| ENSMUSG00000097103 | 1_Gm2885        | 9.32797 | -0.73902 | 0.37628  | 0.49377  | 3.47275 | 13.7671 | 3.58546 | 11.7219 | 10.7584 | 12.6623 |
| ENSMUSG00000097104 | 1_Gm26579       | 0       | NA       | NA       | NA       | 0       | 0       | 0       | 0       | 0       | 0       |
| ENSMUSG00000097107 | 1_Platr6        | 5.33873 | 0.46235  | 0.63187  | 0.72845  | 6.94551 | 4.58903 | 7.17092 | 6.3118  | 4.48265 | 2.53245 |
| ENSMUSG00000097108 | 1_Gm26581       | 11.3273 | -1.86273 | 0.02837  | 0.06069  | 6.94551 | 7.34244 | 0       | 15.3287 | 20.6202 | 17.7272 |
| ENSMUSG00000097109 | 1_Gm26580       | 0.75946 | 0.58488  | 0.86435  | NA       | 0       | 2.75342 | 0       | 1.80337 | 0       | 0       |
| ENSMUSG00000097113 | 7_Gm19705       | 9.03212 | -0.36003 | 0.66276  | 0.75449  | 13.891  | 3.67122 | 5.97577 | 10.8202 | 7.17224 | 12.6623 |
| ENSMUSG00000097115 | 2_1810019N24Rik | 2.44937 | -0.06669 | 0.96555  | NA       | 3.47275 | 3.67122 | 0       | 1.80337 | 4.48265 | 1.26623 |
| ENSMUSG00000097117 | 1_Gm26730       | 0.1447  | 0.92709  | 0.82027  | NA       | 0.86819 | 0       | 0       | 0       | 0       | 0       |
| ENSMUSG00000097119 | 1_B230354K17Rik | 449.252 | -0.55333 | 0.00076  | 0.00285  | 359.43  | 373.547 | 359.741 | 470.68  | 623.089 | 509.023 |
| ENSMUSG00000097121 | 1_D130020L05Rik | 14.0387 | 0.47569  | 0.47033  | 0.58341  | 21.7047 | 17.4383 | 9.56123 | 14.427  | 7.17224 | 13.9285 |
| ENSMUSG00000097122 | 1_Gm26624       | 6.23249 | 0.02849  | 0.9747   | 0.9835   | 6.07732 | 9.17806 | 3.58546 | 7.21348 | 6.27571 | 5.06491 |
| ENSMUSG00000097123 | 1_Gm26297       | 30.0451 | -1.06429 | 0.01114  | 0.02767  | 20.8365 | 18.3561 | 19.1225 | 38.7725 | 43.93   | 39.253  |
| ENSMUSG00000097125 | 1_Gm26885       | 3.89604 | 1.7449   | 0.18604  | 0.2845   | 8.68188 | 5.50683 | 3.58546 | 1.80337 | 0       | 3.79868 |
| ENSMUSG00000097128 | 1_Gm26884       | 7.39967 | 1.05755  | 0.21019  | 0.31339  | 8.68188 | 11.9315 | 9.56123 | 6.3118  | 5.37918 | 2.53245 |
| ENSMUSG00000097129 | 1_4930507D05Rik | 3.2854  | -0.32956 | 0.78419  | 0.85006  | 1.73638 | 4.58903 | 2.39031 | 4.50843 | 2.68959 | 3.79868 |
| ENSMUSG00000097131 | 1_D230017M19Rik | 53.6074 | -0.68708 | 0.08393  | 0.14881  | 46.8822 | 53.2327 | 22.7079 | 70.3315 | 75.3086 | 53.1815 |
| ENSMUSG00000097134 | 1_D130020J07Rik | 3.54219 | -0.18892 | 0.87638  | 0.91634  | 3.47275 | 1.83561 | 4.78062 | 6.3118  | 3.58612 | 1.26623 |
| ENSMUSG00000097136 | 1_Gm26772       | 4.91822 | 0.44914  | 0.66756  | 0.75831  | 9.55007 | 2.75342 | 4.78062 | 5.41011 | 4.48265 | 2.53245 |
| ENSMUSG00000097138 | 1_Gm26625       | 2.30217 | -0.92622 | 0.5692   | NA       | 0.86819 | 2.75342 | 1.19515 | 5.41011 | 3.58612 | 0       |
| ENSMUSG00000097140 | 1_Gm26779       | 9.24363 | -0.84929 | 0.29828  | 0.41287  | 9.55007 | 5.50683 | 4.78062 | 13.5253 | 17.0341 | 5.06491 |
| ENSMUSG00000097142 | 1_Gm26778       | 1085.28 | 0.06818  | 0.67907  | 0.76774  | 1108.68 | 1147.26 | 1074.44 | 998.166 | 883.979 | 1299.15 |
| ENSMUSG00000097146 | 1_Gm4211        | 7.97103 | 0.05316  | 0.946    | 0.96476  | 6.94551 | 10.0959 | 7.17092 | 6.3118  | 7.17224 | 10.1298 |
| ENSMUSG00000097147 | 1_Gm26780       | 0.42208 | -2.1835  | 0.58658  | NA       | 0       | 0       | 0       | 0       | 0       | 2.53245 |
| ENSMUSG00000097148 | 2_Gm3839        | 29.8018 | 0.14685  | 0.80124  | 0.86249  | 29.5184 | 34.8766 | 29.8789 | 54.1011 | 15.241  | 15.1947 |
| ENSMUSG00000097151 | 1_Gm26514       | 21.9292 | -0.55551 | 0.27789  | 0.39041  | 20.8365 | 11.0137 | 21.5128 | 26.1489 | 24.2063 | 27.857  |
| ENSMUSG00000097152 | 1_Gm26515       | 1.26014 | 0.29878  | 0.89269  | NA       | 1.73638 | 0       | 2.39031 | 0.90169 | 0       | 2.53245 |
| ENSMUSG00000097154 | 2_Gm26510       | 3.39731 | -0.13697 | 0.90725  | 0.93746  | 4.34094 | 1.83561 | 3.58546 | 3.60674 | 4.48265 | 2.53245 |
| ENSMUSG00000097155 | 1_Gm26511       | 1.81128 | 0.14934  | 0.92398  | NA       | 2.60457 | 1.83561 | 1.19515 | 1.80337 | 0.89653 | 2.53245 |
| ENSMUSG00000097156 | 7_Gm3764        | 43.3596 | -0.56546 | 0.18775  | 0.2866   | 46.8822 | 38.5478 | 19.1225 | 57.7079 | 57.378  | 40.5193 |
| ENSMUSG00000097157 | 1_Gm26512       | 2.8722  | -0.78097 | 0.60107  | 0.70216  | 3.47275 | 2.75342 | 0       | 6.3118  | 0.89653 | 3.79868 |
| ENSMUSG00000097158 | 1_Gm26516       | 24.4155 | 0.51691  | 0.26616  | 0.37742  | 30.3866 | 33.041  | 22.7079 | 21.6405 | 19.7237 | 18.9934 |
| ENSMUSG00000097159 | 1_Gm26517       | 8.67164 | 0.05782  | 0.94368  | 0.96315  | 12.1546 | 7.34244 | 7.17092 | 8.11517 | 13.448  | 3.79868 |
| ENSMUSG00000097160 | 1_A630072L19Rik | 1.23895 | -0.1504  | 0.94624  | NA       | 3.47275 | 0       | 0       | 0.90169 | 1.79306 | 1.26623 |
| ENSMUSG00000097162 | 1_2310010J17Rik | 28.9624 | -0.49615 | 0.25034  | 0.35945  | 27.782  | 23.8629 | 20.3176 | 39.6742 | 30.482  | 31.6557 |
| ENSMUSG00000097163 | 2_BC051077      | 5.49474 | -0.7858  | 0.40761  | 0.52452  | 2.60457 | 3.67122 | 5.97577 | 7.21348 | 7.17224 | 6.33113 |
| ENSMUSG00000097164 | 1_Cep83os       | 374.834 | -0.5231  | 0.00073  | 0.00276  | 322.966 | 300.122 | 299.984 | 423.792 | 486.816 | 415.322 |
| ENSMUSG00000097165 | 1_2210008F06Rik | 1.19677 | -1.57167 | 0.48281  | NA       | 0.86819 | 0.91781 | 0       | 2.70506 | 2.68959 | 0       |
| ENSMUSG00000097168 | 1_C230088H06Rik | 0.98259 | -2.11806 | 0.44219  | NA       | 0       | 0       | 1.19515 | 0.90169 | 0       | 3.79868 |
| ENSMUSG00000097172 | 1_4930444M15Rik | 0       | NA       | NA       | NA       | 0       | 0       | 0       | 0       | 0       | 0       |
| ENSMUSG00000097173 | 1_Gm26829       | 0.42208 | -2.1835  | 0.58658  | NA       | 0       | 0       | 0       | 0       | 0       | 2.53245 |
| ENSMUSG00000097174 | 1_Gm4890        | 31.2701 | -0.44825 | 0.35453  | 0.47131  | 26.0457 | 38.5478 | 14.3418 | 42.3792 | 29.5855 | 36.7206 |
| ENSMUSG00000097176 | 1_Gm26830       | 1.45014 | 0.44526  | 0.83259  | NA       | 0.86819 | 1.83561 | 2.39031 | 3.60674 | 0       | 0       |
| ENSMUSG00000097180 | 5_2700038G22Rik | 67.1176 | -0.25165 | 0.40501  | 0.52216  | 62.5096 | 63.3286 | 57.3674 | 59.5112 | 72.619  | 87.3697 |
| ENSMUSG00000097182 | 2_A830009L08Rik | 1.15788 | -0.42477 | 0.82194  | NA       | 0.86819 | 0.91781 | 1.19515 | 1.80337 | 0.89653 | 1.26623 |
| ENSMUSG00000097183 | 2_Gm17501       | 36.4206 | -0.63487 | 0.10495  | 0.17918  | 26.9138 | 31.2054 | 27.4885 | 36.9691 | 52.8953 | 43.0517 |
| ENSMUSG00000097184 | 1_4632428C04Rik | 27.0825 | -0.73846 | 0.12066  | 0.20066  | 25.1775 | 15.6027 | 20.3176 | 41.4775 | 35.8612 | 24.0583 |
| ENSMUSG00000097185 | 1_Gm26596       | 0.14942 | -0.99647 | 0.80707  | NA       | 0       | 0       | 0       | 0       | 0.89653 | 0       |
| ENSMUSG00000097187 | 1_Gm19426       | 38.8563 | 0.19577  | 0.63446  | 0.73075  | 35.5957 | 51.3971 | 37.0498 | 39.6742 | 25.1029 | 44.3179 |
| ENSMUSG00000097189 | 1_Gm26594       | 2.8181  | -0.408   | 0.77943  | 0.84588  | 2.60457 | 4.58903 | 0       | 1.80337 | 5.37918 | 2.53245 |
| ENSMUSG00000097191 | 2_5730422E09Rik | 5.85302 | -0.39621 | 0.68236  | 0.77054  | 2.60457 | 5.50683 | 7.17092 | 9.91854 | 3.58612 | 6.33113 |
| ENSMUSG00000097193 | 1_Gm26664       | 5.81611 | 0.25698  | 0.81205  | 0.87048  | 0.86819 | 11.0137 | 7.17092 | 3.60674 | 7.17224 | 5.06491 |
| ENSMUSG00000097194 | 1_9330175E14Rik | 54.7548 | 3.24702  | 9.88E-15 | 8.60E-13 | 104.183 | 82.6025 | 111.149 | 9.91854 | 14.3445 | 6.33113 |
| ENSMUSG00000097196 | 2_Gm26665       | 0.80658 | -1.90969 | 0.50897  | NA       | 0.86819 | 0       | 0       | 2.70506 | 0       | 1.26623 |
| ENSMUSG00000097197 | 1_9530027J09Rik | 14.614  | -0.56327 | 0.35842  | 0.47519  | 15.6274 | 10.0959 | 9.56123 | 13.5253 | 22.4133 | 16.4609 |
| ENSMUSG00000097201 | 1_Gm26700       | 3.72493 | -0.35687 | 0.85369  | 0.90096  | 5.20913 | 4.58903 | 0       | 0       | 12.5514 | 0       |
| ENSMUSG00000097203 | 1_4732419C18Rik | 4.07468 | -1.67068 | 0.2477   | 0.3566   | 3.47275 | 0       | 2.39031 | 12.6236 | 0.89653 | 5.06491 |
| ENSMUSG00000097206 | 1_Gm26699       | 4.5066  | -0.83872 | 0.42936  | 0.54473  | 4.34094 | 1.83561 | 3.58546 | 5.41011 | 8.06878 | 3.79868 |
| ENSMUSG00000097207 | 7_6030443J06Rik | 34.3263 | -0.4107  | 0.29857  | 0.41322  | 32.9912 | 31.2054 | 23.9031 | 41.4775 | 35.8612 | 40.5193 |
| ENSMUSG00000097208 | 1_Gm26698       | 8.23556 | 0.133    | 0.87022  | 0.91203  | 5.20913 | 11.0137 | 9.56123 | 9.01685 | 4.48265 | 10.1298 |
| ENSMUSG00000097209 | 1_AU022754      | 26.5842 | 0.46418  | 0.36135  | 0.47847  | 26.0457 | 43.1369 | 22.7079 | 17.132  | 18.8271 | 31.6557 |
| ENSMUSG00000097213 | 1_Gm26745       | 2.11409 | -0.36791 | 0.83096  | NA       | 0.86819 | 0       | 4.78062 | 3.60674 | 0.89653 | 2.53245 |
| ENSMUSG00000097217 | 1_Gm26549       | 22.0684 | -0.679   | 0.20925  | 0.31229  | 13.891  | 21.1095 | 15.537  | 19.8371 | 21.5167 | 40.5193 |
| ENSMUSG00000097219 | 1_Gm26551       | 2.3564  | 0.00075  | 0.99957  | NA       | 2.60457 | 0.91781 | 3.58546 | 2.70506 | 1.79306 | 2.53245 |
| ENSMUSG00000097220 | 1_Gm26599       | 1.0159  | -2.29179 | 0.33165  | NA       | 0.86819 | 0       | 0       | 0.90169 | 1.79306 | 2.53245 |
| ENSMUSG00000097221 | 1_1810049J17Rik | 0.1447  | 0.92709  | 0.82027  | NA       | 0.86819 | 0       | 0       | 0       | 0       | 0       |
| ENSMUSG00000097222 | 1_1010001N08Rik | 0.21104 | -0.99647 | 0.80707  | NA       | 0       | 0       | 0       | 0       | 0       | 1.26623 |
| ENSMUSG00000097223 | 1_Gm2449        | 1.01976 | -3.49093 | 0.24409  | NA       | 0       | 0       | 0       | 0       | 3.58612 | 2.53245 |
| ENSMUSG00000097226 | 1_Gm26600       | 1.64117 | 1.34201  | 0.49725  | NA       | 1.73638 | 1.83561 | 3.58546 | 0       | 2.68959 | 0       |
| ENSMUSG00000097229 | 1_Platr23       | 0.14942 | -0.99647 | 0.80707  | NA       | 0       | 0       | 0       | 0       | 0.89653 | 0       |
| ENSMUSG00000097230 | 1_Gm26853       | 17.2962 | -0.5021  | 0.36978  | 0.48716  | 19.1001 | 12.8493 | 10.7564 | 17.132  | 22.4133 | 21.5259 |
| ENSMUSG00000097231 | 1_Gm26852       | 46.498  | 0.36029  | 0.33327  | 0.44989  | 48.6186 | 65.1642 | 43.0255 | 50.4944 | 34.9647 | 36.7206 |
| ENSMUSG00000097232 | 1_Gm26854       | 7.61023 | 0.06544  | 0.94154  | 0.96205  | 10.4183 | 5.50683 | 7.17092 | 7.21348 | 2.68959 | 12.6623 |
| ENSMUSG00000097233 | 1_Gm17552       | 21.0246 | -1.57703 | 0.00268  | 0.00835  | 11.2864 | 11.9315 | 8.36608 | 36.0674 | 33.1716 | 25.3245 |

|                     |                  |         |          |          |          |         |         |         |         |         |         |
|---------------------|------------------|---------|----------|----------|----------|---------|---------|---------|---------|---------|---------|
| ENSMUSG000000097234 | 1_Gm26518        | 13.7167 | -0.4993  | 0.41554  | 0.53158  | 10.4183 | 12.8493 | 10.7564 | 11.7219 | 18.8271 | 17.7272 |
| ENSMUSG000000097236 | 1_4831440E17Rik  | 10.9794 | -0.19751 | 0.79976  | 0.86165  | 8.68188 | 13.7671 | 8.36608 | 7.21348 | 21.5167 | 6.33113 |
| ENSMUSG000000097237 | 1_Gm26519        | 0.15028 | -0.99647 | 0.80707  | NA       | 0       | 0       | 0       | 0.90169 | 0       | 0       |
| ENSMUSG000000097239 | 7_Gm27029        | 74.8562 | -0.5365  | 0.25284  | 0.36211  | 78.137  | 82.6025 | 21.5128 | 80.25   | 66.3433 | 120.292 |
| ENSMUSG000000097240 | 1_Gm26614        | 1.05004 | -0.41424 | 0.85594  | NA       | 0.86819 | 1.83561 | 0       | 1.80337 | 1.79306 | 0       |
| ENSMUSG000000097242 | 1_Gm16907        | 40.5399 | -0.43477 | 0.25863  | 0.36869  | 32.123  | 41.3013 | 29.8789 | 37.8708 | 56.4814 | 45.5842 |
| ENSMUSG000000097243 | 1_Gm26908        | 20.5752 | -0.68741 | 0.2496   | 0.35866  | 19.9683 | 7.34244 | 20.3176 | 33.3624 | 25.9994 | 16.4609 |
| ENSMUSG000000097246 | 1_Gm26890        | 10.5862 | -0.28809 | 0.68628  | 0.77404  | 10.4183 | 11.0137 | 7.17092 | 9.01685 | 17.0341 | 8.86359 |
| ENSMUSG000000097248 | 8_Gm2694         | 241.43  | 0.33867  | 0.04491  | 0.08862  | 279.557 | 259.739 | 270.105 | 216.405 | 221.443 | 201.33  |
| ENSMUSG000000097252 | 1_Gm6634         | 1.54872 | 1.24993  | 0.54068  | NA       | 1.73638 | 3.67122 | 1.19515 | 0       | 2.68959 | 0       |
| ENSMUSG000000097254 | 1_C430042M11Rik  | 42.1612 | -0.45811 | 0.22242  | 0.32739  | 39.9367 | 27.5342 | 39.4401 | 47.7893 | 56.4814 | 41.7855 |
| ENSMUSG000000097257 | 1_Gm26768        | 6.57517 | -0.27081 | 0.77405  | 0.8416   | 6.07732 | 9.17806 | 2.39031 | 3.60674 | 8.06878 | 10.1298 |
| ENSMUSG000000097258 | 1_Gm26767        | 34.1093 | -0.1857  | 0.6559   | 0.74914  | 36.4639 | 33.9588 | 25.0982 | 28.8539 | 44.8265 | 35.4544 |
| ENSMUSG000000097259 | 1_Gm26766        | 1.41436 | -1.82935 | 0.40118  | NA       | 0       | 1.83561 | 0       | 0.90169 | 4.48265 | 1.26623 |
| ENSMUSG000000097261 | 2_4930532G15Rik  | 0.60026 | -2.74584 | 0.447    | NA       | 0       | 0       | 0       | 2.70506 | 0.89653 | 0       |
| ENSMUSG000000097262 | 1_4933416M07Rik  | 15.6586 | 0.62823  | 0.44459  | 0.5595   | 17.3638 | 16.5205 | 22.7079 | 1.80337 | 8.96531 | 26.5908 |
| ENSMUSG000000097263 | 1_Gm26804        | 20.0886 | -1.3433  | 0.01944  | 0.04416  | 18.232  | 8.26025 | 7.17092 | 27.0506 | 26.8959 | 32.9219 |
| ENSMUSG000000097265 | 1_Gm26803        | 0.2997  | -1.76345 | 0.66322  | NA       | 0       | 0       | 0       | 0.90169 | 0.89653 | 0       |
| ENSMUSG000000097267 | 1_1700109K24Rik  | 23.072  | -0.02836 | 0.96048  | 0.97426  | 26.9138 | 24.7808 | 16.7322 | 11.7219 | 36.7578 | 21.5259 |
| ENSMUSG000000097271 | 1_Gm9903         | 9.10338 | 0.60526  | 0.40595  | 0.52304  | 12.1546 | 10.0959 | 10.7564 | 7.21348 | 8.06878 | 6.33113 |
| ENSMUSG000000097272 | 1_Gm26649        | 25.4928 | -4.28816 | 2.03E-06 | 1.70E-05 | 0.86819 | 0       | 7.17092 | 29.7556 | 27.7924 | 87.3697 |
| ENSMUSG000000097274 | 1_Gm26564        | 1.56057 | 0.47286  | 0.81703  | NA       | 1.73638 | 3.67122 | 0       | 0       | 2.68959 | 1.26623 |
| ENSMUSG000000097277 | 7_2900076A07Rik  | 120.446 | -0.81398 | 0.00078  | 0.00289  | 72.0596 | 102.794 | 87.2462 | 158.697 | 146.134 | 155.746 |
| ENSMUSG000000097280 | 1_A1849053       | 0.1447  | 0.92709  | 0.82027  | NA       | 0.86819 | 0       | 0       | 0       | 0       | 0       |
| ENSMUSG000000097281 | 2_Gm26685        | 0.45267 | -0.80756 | 0.8164   | NA       | 0       | 0.91781 | 0       | 0.90169 | 0.89653 | 0       |
| ENSMUSG000000097282 | 1_5031415H12Rik  | 3.08807 | -0.91444 | 0.5017   | 0.61277  | 2.60457 | 3.67122 | 0       | 2.70506 | 4.48265 | 5.06491 |
| ENSMUSG000000097283 | 1_Gm26686        | 0.41023 | -0.03469 | 0.99322  | NA       | 0       | 0       | 1.19515 | 0       | 0       | 1.26623 |
| ENSMUSG000000097284 | 7_4930480K23Rik  | 157.192 | -0.71812 | 0.00203  | 0.0066   | 136.306 | 117.479 | 101.588 | 163.205 | 201.719 | 222.856 |
| ENSMUSG000000097285 | 1_Gm26683        | 0.87034 | -3.25887 | 0.30214  | NA       | 0       | 0       | 0       | 0       | 2.68959 | 2.53245 |
| ENSMUSG000000097286 | 1_Gm26684        | 0.45181 | -0.79887 | 0.84362  | NA       | 0       | 0.91781 | 0       | 0       | 1.79306 | 0       |
| ENSMUSG000000097287 | 2_D130017N08Rik  | 132.075 | -0.45963 | 0.03081  | 0.0649   | 105.051 | 116.561 | 112.344 | 155.09  | 157.789 | 145.616 |
| ENSMUSG000000097289 | 1_2010300F17Rik  | 5.97707 | -0.51926 | 0.57545  | 0.67971  | 5.20913 | 4.58903 | 4.78062 | 4.50843 | 5.37918 | 11.396  |
| ENSMUSG000000097290 | 7_1300002E11Rik  | 415.35  | -0.46976 | 0.0015   | 0.00509  | 316.021 | 357.026 | 372.888 | 473.385 | 496.678 | 476.101 |
| ENSMUSG000000097294 | 1_Gm26888        | 18.4581 | 0.14187  | 0.81252  | 0.87061  | 24.3093 | 13.7671 | 20.3176 | 15.3287 | 26.8959 | 10.1298 |
| ENSMUSG000000097296 | 1_Gm26532        | 172.078 | 0.07509  | 0.74209  | 0.81769  | 206.629 | 163.369 | 160.151 | 183.042 | 183.789 | 135.486 |
| ENSMUSG000000097298 | 1_A130057D12Rik  | 0.39838 | 2.07058  | 0.60634  | NA       | 0       | 0       | 2.39031 | 0       | 0       | 0       |
| ENSMUSG000000097300 | 1_Gm26835        | 1.8116  | -0.85698 | 0.59419  | NA       | 1.73638 | 0.91781 | 1.19515 | 0.90169 | 3.58612 | 2.53245 |
| ENSMUSG000000097301 | 1_AW121686       | 0.90265 | -2.1124  | 0.44084  | NA       | 0       | 0.91781 | 0       | 2.70506 | 1.79306 | 0       |
| ENSMUSG000000097303 | 1_31110083C13Rik | 4.60862 | -0.53417 | 0.60415  | 0.70454  | 5.20913 | 3.67122 | 2.39031 | 5.41011 | 7.17224 | 3.79868 |
| ENSMUSG000000097305 | 1_Gm17276        | 10.9382 | -0.13233 | 0.85399  | 0.90103  | 7.8137  | 8.26025 | 15.537  | 9.01685 | 16.1376 | 8.86359 |
| ENSMUSG000000097307 | 1_Gm26834        | 1.6099  | 0.47312  | 0.80327  | NA       | 0       | 0.91781 | 4.78062 | 0.90169 | 1.79306 | 1.26623 |
| ENSMUSG000000097308 | 1_Gm6410         | 0.89793 | -0.99948 | 0.68611  | NA       | 0.86819 | 0.91781 | 0       | 2.70506 | 0.89653 | 0       |
| ENSMUSG000000097309 | 1_Gm17249        | 36.631  | 0.21681  | 0.60615  | 0.70638  | 31.2548 | 36.7122 | 50.1965 | 24.3455 | 36.7578 | 40.5193 |
| ENSMUSG000000097310 | 1_A930038B10Rik  | 4.12213 | 1.47854  | 0.2341   | 0.3407   | 5.20913 | 3.67122 | 9.56123 | 2.70506 | 3.58612 | 0       |
| ENSMUSG000000097312 | 1_Gm26870        | 15.0451 | -0.9956  | 0.08593  | 0.15167  | 10.4183 | 10.0959 | 9.56123 | 20.7388 | 17.9306 | 21.5259 |
| ENSMUSG000000097313 | 1_Gm26569        | 5.40214 | 0.17449  | 0.85731  | 0.90347  | 6.07732 | 6.42464 | 4.78062 | 8.11517 | 4.48265 | 2.53245 |
| ENSMUSG000000097317 | 1_Gm17281        | 10.3577 | -0.98916 | 0.21105  | 0.31439  | 6.07732 | 11.0137 | 3.58546 | 20.7388 | 8.06878 | 12.6623 |
| ENSMUSG000000097318 | 1_1700007L15Rik  | 25.1929 | -0.43983 | 0.37181  | 0.48915  | 26.9138 | 19.2739 | 17.9273 | 39.6742 | 23.3098 | 24.0583 |
| ENSMUSG000000097322 | 7_A530083I20Rik  | 17.2779 | -1.21615 | 0.07778  | 0.14004  | 8.68188 | 16.5205 | 5.97577 | 22.5421 | 38.5508 | 11.396  |
| ENSMUSG000000097323 | 1_4930426I24Rik  | 2.45271 | -0.33763 | 0.85148  | NA       | 0       | 6.42464 | 0       | 1.80337 | 2.68959 | 3.79868 |
| ENSMUSG000000097324 | 8_Mir143hg       | 31.3284 | -0.67891 | 0.25305  | 0.3623   | 15.6274 | 46.8081 | 9.56123 | 35.1657 | 46.6196 | 34.1881 |
| ENSMUSG000000097326 | 1_A330048O09Rik  | 4.72337 | -0.81267 | 0.47456  | 0.58721  | 0.86819 | 3.67122 | 5.97577 | 9.01685 | 6.27571 | 2.53245 |
| ENSMUSG000000097327 | 7_E030030I06Rik  | 3.77143 | 0.56876  | 0.71785  | 0.79901  | 6.07732 | 7.34244 | 0       | 5.41011 | 0       | 3.79868 |
| ENSMUSG000000097328 | 7_Tnfsf12        | 258.394 | -0.25513 | 0.35564  | 0.47244  | 246.566 | 264.328 | 196.005 | 404.857 | 210.685 | 227.921 |
| ENSMUSG000000097329 | 1_4931403G20Rik  | 0.55965 | -1.00752 | 0.75768  | NA       | 0       | 0       | 1.19515 | 0       | 0.89653 | 1.26623 |
| ENSMUSG000000097331 | 1_F420014N23Rik  | 47.5784 | -0.3745  | 0.27823  | 0.39077  | 45.1458 | 44.0547 | 34.6595 | 45.986  | 57.378  | 58.2464 |
| ENSMUSG000000097332 | 1_2610020F03Rik  | 0.54867 | 1.10538  | 0.77323  | NA       | 0       | 0       | 2.39031 | 0.90169 | 0       | 0       |
| ENSMUSG000000097333 | 7_Zfp87          | 268.728 | -0.45768 | 0.01004  | 0.02532  | 224.861 | 244.136 | 210.347 | 292.146 | 349.647 | 291.232 |
| ENSMUSG000000097334 | 1_2700012I20Rik  | 3.7195  | 0.05874  | 0.95813  | 0.97286  | 4.34094 | 4.58903 | 2.39031 | 4.50843 | 2.68959 | 3.79868 |
| ENSMUSG000000097335 | 1_Gm26563        | 7.18116 | 0.17966  | 0.83869  | 0.89006  | 8.68188 | 3.67122 | 10.7564 | 7.21348 | 8.96531 | 3.79868 |
| ENSMUSG000000097336 | 8_Fendrr         | 3.51378 | 0.78984  | 0.61529  | 0.71438  | 0       | 2.75342 | 10.7564 | 5.41011 | 0.89653 | 1.26623 |
| ENSMUSG000000097337 | 1_Gm26606        | 17.8679 | -1.66978 | 0.00406  | 0.01185  | 5.20913 | 11.0137 | 9.56123 | 25.2472 | 29.5855 | 26.5908 |
| ENSMUSG000000097339 | 5_Gm26671        | 3.75342 | -0.45149 | 0.7141   | 0.7961   | 2.60457 | 4.58903 | 2.39031 | 2.70506 | 8.96531 | 1.26623 |
| ENSMUSG000000097340 | 1_Gm26617        | 113.167 | 0.41624  | 0.12106  | 0.20121  | 122.415 | 103.712 | 162.541 | 106.399 | 85.1704 | 98.7657 |
| ENSMUSG000000097343 | 1_9030407P20Rik  | 81.2461 | -0.3144  | 0.31003  | 0.42493  | 72.9278 | 56.9039 | 88.4414 | 92.8736 | 106.687 | 69.6425 |
| ENSMUSG000000097344 | 1_Gm26732        | 0.19919 | 0.92709  | 0.82027  | NA       | 0       | 0       | 1.19515 | 0       | 0       | 0       |
| ENSMUSG000000097345 | 1_AA543186       | 20.2261 | -0.47435 | 0.38656  | 0.50382  | 11.2864 | 23.8629 | 15.537  | 26.1489 | 17.9306 | 26.5908 |
| ENSMUSG000000097346 | 1_Gm26619        | 8.78485 | 0.2549   | 0.74585  | 0.82039  | 12.1546 | 8.26025 | 8.36608 | 6.3118  | 12.5514 | 5.06491 |
| ENSMUSG000000097347 | 1_Gm17275        | 1082.97 | -0.01275 | 0.93953  | 0.96053  | 1073.95 | 894.86  | 1268.06 | 1194.73 | 1115.28 | 950.936 |
| ENSMUSG000000097348 | 8_Rmst           | 48.2253 | -0.96219 | 0.02762  | 0.05933  | 24.3093 | 53.2327 | 20.3176 | 70.3315 | 65.4467 | 55.714  |
| ENSMUSG000000097350 | 1_4732491K20Rik  | 32.4208 | -0.51029 | 0.30284  | 0.41765  | 35.5957 | 31.2054 | 13.1467 | 49.5927 | 35.8612 | 29.1232 |
| ENSMUSG000000097353 | 1_A430046D13Rik  | 46.4862 | -0.57246 | 0.09777  | 0.16883  | 33.8593 | 40.3834 | 38.2449 | 59.5112 | 60.0675 | 46.8504 |
| ENSMUSG000000097354 | 7_2310001H17Rik  | 101.522 | -0.1764  | 0.55621  | 0.66224  | 114.601 | 81.6847 | 89.6366 | 82.0534 | 139.859 | 101.298 |
| ENSMUSG000000097356 | 1_Gm26774        | 0.14942 | -0.99647 | 0.80707  | NA       | 0       | 0       | 0       | 0       | 0.89653 | 0       |
| ENSMUSG000000097357 | 1_Gm16793        | 11.4579 | -0.76787 | 0.2577   | 0.36763  | 9.55007 | 6.42464 | 9.56123 | 11.7219 | 18.8271 | 12.6623 |
| ENSMUSG000000097358 | 1_Gm26773        | 65.8311 | -0.29611 | 0.34395  | 0.46058  | 46.8822 | 65.1642 | 65.7335 | 65.823  | 84.2739 | 67.11   |
| ENSMUSG000000097360 | 7_9430065F17Rik  | 2.26459 | -1.85365 | 0.24965  | NA       | 0.86819 | 0.91781 | 1.19515 | 0.90169 | 7.17224 | 2.53245 |
| ENSMUSG000000097363 | 1_Gm26717        | 1.18733 | -0.03338 | 0.98806  | NA       | 2.60457 | 0.91781 | 0       | 2.70506 | 0.89653 | 0       |
| ENSMUSG000000097364 | 1_Gm26719        | 8.46999 | -1.01793 | 0.19447  | 0.29458  | 4.34094 | 6.42464 | 5.97577 | 9.91854 | 8.96531 | 15.1947 |

|                    |                 |         |          |          |          |         |         |         |         |         |         |
|--------------------|-----------------|---------|----------|----------|----------|---------|---------|---------|---------|---------|---------|
| ENSMUSG00000097365 | 7_C030034L19Rik | 2.53867 | -2.18965 | 0.19941  | 0.30039  | 2.60457 | 0       | 0       | 3.60674 | 2.68959 | 6.33113 |
| ENSMUSG00000097367 | 1_Gm26718       | 31.5619 | -8.44722 | 8.76E-05 | 0.00044  | 0       | 0       | 0       | 16.2303 | 160.479 | 12.6623 |
| ENSMUSG00000097369 | 1_Gm26545       | 0       | NA       | NA       | NA       | 0       | 0       | 0       | 0       | 0       | 0       |
| ENSMUSG00000097372 | 1_Gm26876       | 6.77043 | -1.03571 | 0.26524  | 0.37637  | 2.60457 | 8.26025 | 2.39031 | 8.11517 | 11.6549 | 7.59736 |
| ENSMUSG00000097373 | 1_Gm26877       | 0.59554 | -1.37459 | 0.71084  | NA       | 0.86819 | 0       | 0       | 2.70506 | 0       | 0       |
| ENSMUSG00000097375 | 2_6720427I07Rik | 195.237 | -0.85151 | 4.75E-05 | 0.00026  | 157.142 | 138.589 | 120.711 | 218.208 | 258.201 | 278.57  |
| ENSMUSG00000097376 | 1_Gm8705        | 0.30239 | -0.03469 | 0.99322  | NA       | 0       | 0.91781 | 0       | 0       | 0.89653 | 0       |
| ENSMUSG00000097377 | 1_Gm10822       | 2.05881 | -1.13794 | 0.45856  | NA       | 0.86819 | 1.83561 | 1.19515 | 2.70506 | 4.48265 | 1.26623 |
| ENSMUSG00000097378 | 7_B230208H11Rik | 8.84132 | -0.33489 | 0.70716  | 0.7905   | 6.94551 | 13.7671 | 2.39031 | 6.3118  | 7.17224 | 16.4609 |
| ENSMUSG00000097379 | 1_Gm26873       | 33.2526 | -0.46532 | 0.25366  | 0.36304  | 34.7275 | 23.8629 | 25.0982 | 36.9691 | 42.1369 | 36.7206 |
| ENSMUSG00000097380 | 1_Gm26816       | 23.9357 | -0.57891 | 0.25656  | 0.36629  | 22.5729 | 20.1917 | 14.3418 | 18.9354 | 29.5855 | 37.9868 |
| ENSMUSG00000097381 | 1_A230087F16Rik | 7.31919 | -0.256   | 0.78697  | 0.85209  | 12.1546 | 6.42464 | 1.19515 | 6.3118  | 8.96531 | 8.86359 |
| ENSMUSG00000097383 | 1_1500026H17Rik | 6.39546 | -1.24141 | 0.1756   | 0.2716   | 3.47275 | 5.50683 | 2.39031 | 9.01685 | 11.6549 | 6.33113 |
| ENSMUSG00000097384 | 1_Gm26815       | 2.06851 | 0.93079  | 0.56679  | NA       | 1.73638 | 2.75342 | 3.58546 | 1.80337 | 0       | 2.53245 |
| ENSMUSG00000097386 | 1_9130213A22Rik | 6.81914 | -1.23151 | 0.19956  | 0.30052  | 2.60457 | 3.67122 | 5.97577 | 3.60674 | 9.86184 | 15.1947 |
| ENSMUSG00000097387 | 1_4930563E18Rik | 0.87206 | -3.25858 | 0.22791  | NA       | 0       | 0       | 0       | 1.80337 | 0.89653 | 2.53245 |
| ENSMUSG00000097390 | 1_Gm26785       | 9.67277 | 0.21982  | 0.79194  | 0.85584  | 15.6274 | 9.17806 | 5.97577 | 6.3118  | 4.48265 | 16.4609 |
| ENSMUSG00000097391 | 8_Mirg          | 30.304  | -0.56736 | 0.20867  | 0.31152  | 27.782  | 28.452  | 16.7322 | 45.0843 | 29.5855 | 34.1881 |
| ENSMUSG00000097392 | 2_D930016D06Rik | 161.12  | -0.70126 | 0.00194  | 0.00633  | 138.91  | 123.904 | 103.978 | 174.927 | 194.547 | 230.453 |
| ENSMUSG00000097393 | 7_D030068K23Rik | 2.89834 | 0.44734  | 0.7681   | 0.83699  | 5.20913 | 0       | 4.78062 | 2.70506 | 0.89653 | 3.79868 |
| ENSMUSG00000097397 | 1_Gm16861       | 44.8887 | 0.37871  | 0.33151  | 0.44809  | 43.4094 | 49.5615 | 59.7577 | 53.1994 | 30.482  | 32.9219 |
| ENSMUSG00000097398 | 2_Platr5        | 1.08123 | 2.37761  | 0.31131  | NA       | 3.47275 | 0.91781 | 1.19515 | 0.90169 | 0       | 0       |
| ENSMUSG00000097401 | 1_Gm26744       | 2.70592 | 0.28009  | 0.8519   | 0.89967  | 0.86819 | 4.58903 | 3.58546 | 3.60674 | 3.58612 | 0       |
| ENSMUSG00000097402 | 1_Gm17399       | 9.21678 | -0.39737 | 0.63834  | 0.73436  | 4.34094 | 10.0959 | 9.56123 | 4.50843 | 17.9306 | 8.86359 |
| ENSMUSG00000097404 | 1_Gm10814       | 20.6578 | 1.42014  | 0.00735  | 0.01947  | 31.2548 | 27.5342 | 31.074  | 10.8202 | 8.06878 | 15.1947 |
| ENSMUSG00000097405 | 1_D630044L22Rik | 56.5863 | 1.84175  | 5.21E-07 | 5.25E-06 | 85.0825 | 82.6025 | 96.8075 | 21.6405 | 17.9306 | 35.4544 |
| ENSMUSG00000097408 | 1_Gm26831       | 5.72335 | -0.97771 | 0.31205  | 0.42698  | 3.47275 | 4.58903 | 3.58546 | 11.7219 | 7.17224 | 3.79868 |
| ENSMUSG00000097410 | 1_Gm26668       | 11.9583 | -0.1099  | 0.87346  | 0.91424  | 8.68188 | 12.8493 | 13.1467 | 8.11517 | 18.8271 | 10.1298 |
| ENSMUSG00000097411 | 1_B430218F22Rik | 0       | NA       | NA       | NA       | 0       | 0       | 0       | 0       | 0       | 0       |
| ENSMUSG00000097412 | 1_1810014B01Rik | 105.127 | -0.53083 | 0.03716  | 0.07575  | 81.6097 | 86.2737 | 90.8317 | 119.022 | 147.928 | 105.097 |
| ENSMUSG00000097413 | 1_A830052D11Rik | 0.2894  | 1.67273  | 0.67976  | NA       | 1.73638 | 0       | 0       | 0       | 0       | 0       |
| ENSMUSG00000097414 | 1_B130046B21Rik | 58.6395 | 0.05779  | 0.8748   | 0.91508  | 47.7504 | 76.1779 | 54.9771 | 60.4129 | 40.3439 | 72.1749 |
| ENSMUSG00000097415 | 2_AU020206      | 493.796 | 0.73903  | 1.81E-06 | 1.54E-05 | 684.132 | 559.861 | 609.529 | 367.888 | 400.749 | 340.615 |
| ENSMUSG00000097417 | 1_Gm26669       | 210.937 | -3.38173 | 3.71E-05 | 0.00021  | 28.6502 | 32.1232 | 50.1965 | 75.7416 | 543.298 | 535.614 |
| ENSMUSG00000097418 | 7_Mir155hg      | 3.02097 | -0.33985 | 0.78557  | 0.85123  | 2.60457 | 1.83561 | 3.58546 | 4.50843 | 1.79306 | 3.79868 |
| ENSMUSG00000097422 | 1_Gm26521       | 16.7001 | -0.37762 | 0.57813  | 0.68179  | 20.8365 | 17.4383 | 4.78062 | 12.6236 | 17.9306 | 26.5908 |
| ENSMUSG00000097423 | 1_Gm26522       | 1.09898 | -1.42539 | 0.53811  | NA       | 1.73638 | 0       | 0       | 0.90169 | 2.68959 | 1.26623 |
| ENSMUSG00000097425 | 2_Vmn1r181      | 0.89739 | -3.32491 | 0.29325  | NA       | 0       | 0       | 0       | 0.90169 | 4.48265 | 0       |
| ENSMUSG00000097429 | 1_Gm26520       | 0.90975 | 0.01645  | 0.99593  | NA       | 0       | 2.75342 | 0       | 2.70506 | 0       | 0       |
| ENSMUSG00000097431 | 1_Gm26782       | 32.1654 | -1.48426 | 0.00212  | 0.00682  | 24.3093 | 16.5205 | 9.56123 | 43.2809 | 60.0675 | 39.253  |
| ENSMUSG00000097434 | 2_Gm16630       | 0.36401 | -0.03469 | 0.99322  | NA       | 0       | 0.91781 | 0       | 0       | 0       | 1.26623 |
| ENSMUSG00000097435 | 1_Gm26783       | 0.2894  | 1.67273  | 0.67976  | NA       | 1.73638 | 0       | 0       | 0       | 0       | 0       |
| ENSMUSG00000097440 | 1_Gm26777       | 10.9291 | -0.95627 | 0.1613   | 0.2538   | 7.8137  | 7.34244 | 7.17092 | 18.0337 | 12.5514 | 12.6623 |
| ENSMUSG00000097443 | 1_Gm17529       | 16.5896 | 0.1696   | 0.7623   | 0.83293  | 22.5729 | 15.6027 | 14.3418 | 13.5253 | 17.0341 | 16.4609 |
| ENSMUSG00000097444 | 1_Gm10489       | 2.5742  | -1.37502 | 0.36881  | 0.48615  | 0.86819 | 0       | 3.58546 | 3.60674 | 3.58612 | 3.79868 |
| ENSMUSG00000097445 | 1_Gm26631       | 18.3402 | -0.56731 | 0.30461  | 0.41965  | 13.891  | 17.4383 | 13.1467 | 28.8539 | 21.5167 | 15.1947 |
| ENSMUSG00000097448 | 1_Platr22       | 2.1575  | -2.58879 | 0.14009  | NA       | 0.86819 | 0.91781 | 0       | 5.41011 | 4.48265 | 1.26623 |
| ENSMUSG00000097452 | 1_Gm2824        | 0.49975 | -0.80545 | 0.83771  | NA       | 0       | 0       | 1.19515 | 1.80337 | 0       | 0       |
| ENSMUSG00000097453 | 1_Gm26894       | 0.15028 | -0.99647 | 0.80707  | NA       | 0       | 0       | 0       | 0.90169 | 0       | 0       |
| ENSMUSG00000097454 | 1_Gm26892       | 8.73295 | 0.68731  | 0.57293  | 0.67735  | 4.34094 | 19.2739 | 8.36608 | 0       | 2.68959 | 17.7272 |
| ENSMUSG00000097457 | 1_2310031A07Rik | 7.77407 | 0.51918  | 0.65743  | 0.75028  | 15.6274 | 0       | 11.9515 | 4.50843 | 10.7584 | 3.79868 |
| ENSMUSG00000097459 | 1_Gm26895       | 0.73938 | -0.62227 | 0.83297  | NA       | 1.73638 | 0       | 0       | 1.80337 | 0.89653 | 0       |
| ENSMUSG00000097460 | 1_Gm26734       | 5.98735 | -1.25529 | 0.18496  | 0.28313  | 2.60457 | 5.50683 | 2.39031 | 9.01685 | 6.27571 | 10.1298 |
| ENSMUSG00000097461 | 1_Gm26735       | 81.0172 | -1.88498 | 8.08E-05 | 0.00041  | 57.3004 | 32.1232 | 13.1467 | 76.6433 | 152.41  | 154.48  |
| ENSMUSG00000097463 | 1_4930448E22Rik | 1.52478 | -1.78583 | 0.35426  | NA       | 0       | 0.91781 | 1.19515 | 3.60674 | 0.89653 | 2.53245 |
| ENSMUSG00000097465 | 1_Gm16619       | 0.19919 | 0.92709  | 0.82027  | NA       | 0       | 0       | 1.19515 | 0       | 0       | 0       |
| ENSMUSG00000097467 | 1_Gm26737       | 7.15742 | 0.38423  | 0.6368   | 0.73304  | 8.68188 | 7.34244 | 8.36608 | 7.21348 | 6.27571 | 5.06491 |
| ENSMUSG00000097468 | 1_2310010G23Rik | 21.7562 | -0.65726 | 0.19908  | 0.30006  | 19.1001 | 18.3561 | 13.1467 | 23.4438 | 34.9647 | 21.5259 |
| ENSMUSG00000097469 | 1_Gm26733       | 21.3236 | 0.11765  | 0.84416  | 0.89372  | 28.6502 | 15.6027 | 22.7079 | 20.7388 | 31.3786 | 8.86359 |
| ENSMUSG00000097471 | 7_5830432E09Rik | 5.66756 | 0.67061  | 0.52101  | 0.63085  | 9.55007 | 5.50683 | 5.97577 | 9.01685 | 2.68959 | 1.26623 |
| ENSMUSG00000097472 | 1_Gm26586       | 8.83071 | -0.36674 | 0.69331  | 0.78021  | 9.55007 | 2.75342 | 10.7564 | 2.70506 | 10.7584 | 16.4609 |
| ENSMUSG00000097474 | 1_Gm26584       | 0.15028 | -0.99647 | 0.80707  | NA       | 0       | 0       | 0       | 0.90169 | 0       | 0       |
| ENSMUSG00000097476 | 1_Gm26583       | 1.1523  | 0.3495   | 0.85321  | NA       | 1.73638 | 0.91781 | 1.19515 | 0.90169 | 0.89653 | 1.26623 |
| ENSMUSG00000097479 | 1_Gm26582       | 32.1088 | -0.01732 | 0.97529  | 0.9838   | 19.1001 | 41.3013 | 35.8546 | 25.2472 | 54.6884 | 16.4609 |
| ENSMUSG00000097487 | 7_Ptges3l       | 43.6739 | -0.07118 | 0.86162  | 0.9061   | 31.2548 | 39.4656 | 57.3674 | 52.2978 | 32.2751 | 49.3828 |
| ENSMUSG00000097488 | 1_4732487G21Rik | 109.93  | -0.32238 | 0.16913  | 0.26353  | 99.8417 | 94.534  | 99.1978 | 122.629 | 134.48  | 108.896 |
| ENSMUSG00000097489 | 1_Gm26808       | 3.47159 | -1.96878 | 0.16278  | 0.25561  | 0.86819 | 0       | 3.58546 | 4.50843 | 8.06878 | 3.79868 |
| ENSMUSG00000097494 | 7_4933406C10Rik | 28.5726 | 0.32034  | 0.51702  | 0.62697  | 34.7275 | 35.7944 | 23.9031 | 18.0337 | 19.7237 | 39.253  |
| ENSMUSG00000097495 | 1_Gm26651       | 0.60942 | 1.10242  | 0.76561  | NA       | 0       | 0       | 2.39031 | 0       | 0       | 1.26623 |
| ENSMUSG00000097497 | 1_Gm26652       | 0.29767 | 1.70332  | 0.67406  | NA       | 0.86819 | 0.91781 | 0       | 0       | 0       | 0       |
| ENSMUSG00000097500 | 1_Gm26537       | 0.29412 | -0.03469 | 0.99322  | NA       | 0.86819 | 0       | 0       | 0       | 0.89653 | 0       |
| ENSMUSG00000097501 | 1_Gm26536       | 0.55965 | -1.00752 | 0.57568  | NA       | 0       | 0       | 1.19515 | 0       | 0.89653 | 1.26623 |
| ENSMUSG00000097502 | 1_4930528D03Rik | 0.29498 | -0.03469 | 0.99322  | NA       | 0.86819 | 0       | 0       | 0.90169 | 0       | 0       |
| ENSMUSG00000097504 | 1_4930516B21Rik | 35.6641 | -0.44795 | 0.26133  | 0.37176  | 26.9138 | 33.9588 | 29.8789 | 50.4944 | 38.5508 | 34.1881 |
| ENSMUSG00000097505 | 1_Gm26540       | 0.43409 | 2.24584  | 0.57502  | NA       | 2.60457 | 0       | 0       | 0       | 0       | 0       |
| ENSMUSG00000097507 | 1_Gm26538       | 11.1507 | 0.40381  | 0.588    | 0.69054  | 20.8365 | 10.0959 | 7.17092 | 9.91854 | 12.5514 | 6.33113 |
| ENSMUSG00000097511 | 1_Gm16677       | 0.45181 | -0.79887 | 0.84362  | NA       | 0       | 0.91781 | 0       | 0       | 1.79306 | 0       |
| ENSMUSG00000097514 | 1_Gm17619       | 0.88236 | -0.04516 | 0.98892  | NA       | 2.60457 | 0       | 0       | 0       | 2.68959 | 0       |
| ENSMUSG00000097515 | 2_1700040D17Rik | 2.42628 | -0.09337 | 0.95418  | NA       | 6.07732 | 0.91781 | 0       | 3.60674 | 2.68959 | 1.26623 |

|                    |                 |         |          |          |          |         |         |         |         |         |         |
|--------------------|-----------------|---------|----------|----------|----------|---------|---------|---------|---------|---------|---------|
| ENSMUSG00000097517 | 1_Gm26695       | 6.03184 | 2.22645  | 0.19629  | 0.29655  | 22.5729 | 7.34244 | 0       | 0       | 6.27571 | 0       |
| ENSMUSG00000097518 | 1_Gm26694       | 17.6741 | 0.77076  | 0.15663  | 0.2479   | 19.1001 | 22.9451 | 25.0982 | 14.427  | 14.3445 | 10.1298 |
| ENSMUSG00000097519 | 2_4930558J18Rik | 8.79384 | -0.8814  | 0.24036  | 0.34803  | 5.20913 | 7.34244 | 5.97577 | 9.91854 | 11.6549 | 12.6623 |
| ENSMUSG00000097520 | 1_Gm26843       | 4.01992 | -1.74025 | 0.16549  | 0.25886  | 2.60457 | 2.75342 | 0       | 6.3118  | 3.58612 | 8.86359 |
| ENSMUSG00000097523 | 1_1700022N22Rik | 8.38795 | -0.61104 | 0.47167  | 0.58468  | 6.94551 | 9.17806 | 3.58546 | 4.50843 | 13.448  | 12.6623 |
| ENSMUSG00000097524 | 1_Gm26846       | 0       | NA       | NA       | NA       | 0       | 0       | 0       | 0       | 0       | 0       |
| ENSMUSG00000097526 | 1_Gm26847       | 179.995 | -2.12242 | 1.86E-08 | 2.94E-07 | 48.6186 | 117.479 | 34.6595 | 304.77  | 252.822 | 321.622 |
| ENSMUSG00000097527 | 1_1700112J16Rik | 10.5525 | -0.77102 | 0.2641   | 0.3752   | 7.8137  | 7.34244 | 8.36608 | 13.5253 | 16.1376 | 10.1298 |
| ENSMUSG00000097532 | 1_Gm4349        | 9.0525  | -0.22224 | 0.76255  | 0.83298  | 10.4183 | 7.34244 | 7.17092 | 9.91854 | 8.06878 | 11.396  |
| ENSMUSG00000097533 | 1_Gm26590       | 20.962  | -0.24703 | 0.684    | 0.77198  | 12.1546 | 19.2739 | 26.2934 | 10.8202 | 33.1716 | 24.0583 |
| ENSMUSG00000097534 | 1_Gm16675       | 52.5553 | 0.27658  | 0.43     | 0.54542  | 62.5096 | 46.8081 | 63.3432 | 36.0674 | 54.6884 | 51.9153 |
| ENSMUSG00000097535 | 1_Gm26592       | 1.06478 | 0.98519  | 0.67646  | NA       | 0       | 1.83561 | 2.39031 | 0       | 0.89653 | 1.26623 |
| ENSMUSG00000097536 | 2_2610037D02Rik | 109.168 | -0.90165 | 0.00043  | 0.00174  | 81.6097 | 75.2601 | 71.7092 | 137.958 | 169.444 | 119.025 |
| ENSMUSG00000097537 | 1_2610020C07Rik | 36.4157 | -0.48462 | 0.21609  | 0.32013  | 35.5957 | 30.2876 | 25.0982 | 42.3792 | 48.4127 | 36.7206 |
| ENSMUSG00000097540 | 1_1700037F24Rik | 8.33489 | 0.78706  | 0.3717   | 0.48908  | 5.20913 | 14.6849 | 11.9515 | 3.60674 | 10.7584 | 3.79868 |
| ENSMUSG00000097541 | 1_Gm26752       | 1.10135 | 1.10676  | 0.63153  | NA       | 2.60457 | 1.83561 | 0       | 0.90169 | 0       | 1.26623 |
| ENSMUSG00000097542 | 1_Gm26751       | 144.459 | -0.09302 | 0.76286  | 0.83311  | 187.529 | 149.602 | 81.2705 | 161.402 | 136.273 | 150.681 |
| ENSMUSG00000097544 | 1_Gm26750       | 2.412   | -2.13433 | 0.30763  | NA       | 2.60457 | 0       | 0       | 0       | 8.06878 | 3.79868 |
| ENSMUSG00000097545 | 7_Mir124a-1hg   | 333.217 | -2.17171 | 0.02174  | 0.04862  | 188.397 | 142.26  | 32.2692 | 993.657 | 489.506 | 153.213 |
| ENSMUSG00000097546 | 1_Gm26749       | 0.66371 | -1.52656 | 0.57363  | NA       | 0       | 0.91781 | 0       | 0.90169 | 0.89653 | 1.26623 |
| ENSMUSG00000097547 | 7_B230110C06Rik | 0.64513 | 1.28844  | 0.72081  | NA       | 2.60457 | 0       | 0       | 0       | 0       | 1.26623 |
| ENSMUSG00000097550 | 7_Gm21304       | 0       | NA       | NA       | NA       | 0       | 0       | 0       | 0       | 0       | 0       |
| ENSMUSG00000097553 | 1_4930455D15Rik | 0.19919 | 0.92709  | 0.82027  | NA       | 0       | 0       | 1.19515 | 0       | 0       | 0       |
| ENSMUSG00000097554 | 1_Gm26825       | 14825.5 | 0.0131   | 0.91689  | 0.94491  | 14569.9 | 14172.8 | 15936.2 | 12860.7 | 16294.4 | 15118.7 |
| ENSMUSG00000097557 | 1_C130060C02Rik | 1.37719 | -0.78643 | 0.68254  | NA       | 0       | 1.83561 | 1.19515 | 1.80337 | 0.89653 | 2.53245 |
| ENSMUSG00000097558 | 1_Gm26902       | 98.0044 | -0.23366 | 0.34935  | 0.46616  | 87.687  | 99.123  | 83.6608 | 108.202 | 115.652 | 93.7008 |
| ENSMUSG00000097560 | 1_Gm26904       | 0.30594 | 1.73752  | 0.66765  | NA       | 0       | 1.83561 | 0       | 0       | 0       | 0       |
| ENSMUSG00000097561 | 1_4632411P08Rik | 6.15442 | -0.246   | 0.80296  | 0.86362  | 10.4183 | 2.75342 | 3.58546 | 3.60674 | 8.96531 | 7.59736 |
| ENSMUSG00000097565 | 1_Gm26965       | 6.59004 | -6.18613 | 0.11396  | 0.19139  | 0       | 0       | 0       | 24.3455 | 0       | 15.1947 |
| ENSMUSG00000097566 | 1_A930024N18Rik | 37.7346 | 0.41058  | 0.27287  | 0.38485  | 40.8049 | 39.4656 | 49.0013 | 33.3624 | 29.5855 | 34.1881 |
| ENSMUSG00000097567 | 1_Gm26637       | 11.9115 | -0.28012 | 0.72219  | 0.80217  | 6.94551 | 5.50683 | 20.3176 | 16.2303 | 16.1376 | 6.33113 |
| ENSMUSG00000097569 | 2_Gm26640       | 2.01455 | 0.84552  | 0.63405  | NA       | 0.86819 | 0.91781 | 5.97577 | 0       | 1.79306 | 2.53245 |
| ENSMUSG00000097571 | 8_Jpx           | 47.1037 | -0.04171 | 0.90134  | 0.93312  | 46.014  | 46.8081 | 46.611  | 44.1826 | 54.6884 | 44.3179 |
| ENSMUSG00000097572 | 1_Gm26797       | 169.881 | 0.09518  | 0.64417  | 0.73927  | 174.506 | 161.534 | 190.03  | 146.073 | 162.272 | 184.869 |
| ENSMUSG00000097574 | 1_C920006O11Rik | 14.503  | -1.02669 | 0.10547  | 0.17986  | 7.8137  | 14.6849 | 5.97577 | 18.0337 | 21.5167 | 18.9934 |
| ENSMUSG00000097575 | 1_Gm26796       | 0.72532 | -1.66729 | 0.57846  | NA       | 0       | 0.91781 | 0       | 0.90169 | 0       | 2.53245 |
| ENSMUSG00000097576 | 1_D930030I03Rik | 6.10005 | 0.29194  | 0.7413   | 0.81719  | 7.8137  | 6.42464 | 5.97577 | 6.3118  | 6.27571 | 3.79868 |
| ENSMUSG00000097577 | 1_6230400D17Rik | 47.1274 | -0.25533 | 0.45624  | 0.57018  | 46.014  | 41.3013 | 41.8304 | 51.3961 | 59.171  | 43.0517 |
| ENSMUSG00000097578 | 1_Gm26798       | 8.43906 | -0.29    | 0.7042   | 0.7884   | 7.8137  | 5.50683 | 9.56123 | 10.8202 | 8.06878 | 8.86359 |
| ENSMUSG00000097579 | 1_Gm26799       | 11.3021 | -0.20413 | 0.77958  | 0.84599  | 8.68188 | 11.0137 | 11.9515 | 6.3118  | 19.7237 | 10.1298 |
| ENSMUSG00000097580 | 1_Gm5432        | 3.53354 | -0.45355 | 0.68961  | 0.77686  | 2.60457 | 2.75342 | 3.58546 | 3.60674 | 3.58612 | 5.06491 |
| ENSMUSG00000097581 | 1_Gm21936       | 0.15297 | 0.92709  | 0.82027  | NA       | 0       | 0.91781 | 0       | 0       | 0       | 0       |
| ENSMUSG00000097582 | 1_Gm26527       | 43.9515 | -8.92394 | 0.02239  | 0.04987  | 0       | 0       | 0       | 0       | 207.995 | 55.714  |
| ENSMUSG00000097584 | 1_1700125G22Rik | 0.15297 | 0.92709  | 0.82027  | NA       | 0       | 0.91781 | 0       | 0       | 0       | 0       |
| ENSMUSG00000097585 | 1_Gm26529       | 2.4596  | -0.21785 | 0.86991  | NA       | 2.60457 | 1.83561 | 2.39031 | 2.70506 | 2.68959 | 2.53245 |
| ENSMUSG00000097587 | 1_4930578M01Rik | 15.8485 | -0.79907 | 0.18248  | 0.28009  | 8.68188 | 12.8493 | 13.1467 | 21.6405 | 13.448  | 25.3245 |
| ENSMUSG00000097590 | 1_Gm26675       | 5.41194 | -4.90691 | 0.01687  | 0.03931  | 0       | 0.91781 | 0       | 30.6573 | 0.89653 | 0       |
| ENSMUSG00000097591 | 1_A330032B11Rik | 1.52392 | -1.78701 | 0.34232  | NA       | 0       | 0.91781 | 1.19515 | 2.70506 | 1.79306 | 2.53245 |
| ENSMUSG00000097595 | 1_1500002F19Rik | 7.65907 | -0.66198 | 0.40658  | 0.5236   | 6.07732 | 4.58903 | 7.17092 | 9.91854 | 8.06878 | 10.1298 |
| ENSMUSG00000097597 | 1_Gm26674       | 0.75861 | 0.58527  | 0.8437   | NA       | 0       | 2.75342 | 0       | 0.90169 | 0.89653 | 0       |
| ENSMUSG00000097598 | 1_Gm26677       | 1.46889 | -4.02376 | 0.08282  | NA       | 0       | 0       | 0       | 0.90169 | 5.37918 | 2.53245 |
| ENSMUSG00000097601 | 1_Gm26660       | 10.0662 | -0.91182 | 0.22168  | 0.32658  | 6.07732 | 10.0959 | 4.78062 | 17.132  | 13.448  | 8.86359 |
| ENSMUSG00000097602 | 1_4930519P11Rik | 0.34947 | -0.03469 | 0.99322  | NA       | 0       | 0       | 1.19515 | 0.90169 | 0       | 0       |
| ENSMUSG00000097604 | 1_Gm17322       | 2.42726 | -1.562   | 0.29596  | NA       | 1.73638 | 1.83561 | 0       | 3.60674 | 3.58612 | 3.79868 |
| ENSMUSG00000097609 | 1_Gm26659       | 0.14942 | -0.99647 | 0.80707  | NA       | 0       | 0       | 0       | 0       | 0.89653 | 0       |
| ENSMUSG00000097613 | 1_Gm17597       | 13.3376 | -1.04924 | 0.09478  | 0.16443  | 8.68188 | 10.0959 | 7.17092 | 20.7388 | 14.3445 | 18.9934 |
| ENSMUSG00000097615 | 1_Gm2061        | 1.60429 | -0.41478 | 0.83572  | NA       | 0       | 1.83561 | 2.39031 | 3.60674 | 1.79306 | 0       |
| ENSMUSG00000097616 | 7_1110019D14Rik | 75.2189 | -0.88856 | 0.00415  | 0.01204  | 55.5641 | 47.7259 | 54.9771 | 73.0365 | 117.446 | 102.564 |
| ENSMUSG00000097617 | 1_Gm10687       | 7.9734  | -0.58857 | 0.48381  | 0.59589  | 4.34094 | 5.50683 | 9.56123 | 9.91854 | 13.448  | 5.06491 |
| ENSMUSG00000097618 | 1_Gm26507       | 0.57504 | -1.21646 | 0.74749  | NA       | 0       | 0.91781 | 0       | 0       | 0       | 2.53245 |
| ENSMUSG00000097619 | 7_4833422M21Rik | 10.5455 | -1.10161 | 0.12018  | 0.20003  | 6.07732 | 9.17806 | 4.78062 | 16.2303 | 14.3445 | 12.6623 |
| ENSMUSG00000097621 | 1_Gm26562       | 1.20097 | 1.54604  | 0.49365  | NA       | 1.73638 | 3.67122 | 0       | 0.90169 | 0.89653 | 0       |
| ENSMUSG00000097622 | 1_A330033J07Rik | 2.19024 | -0.53757 | 0.75272  | NA       | 0.86819 | 0.91781 | 3.58546 | 2.70506 | 0       | 5.06491 |
| ENSMUSG00000097624 | 1_Gm5091        | 1.0203  | -1.20506 | 0.61291  | NA       | 0.86819 | 0.91781 | 0       | 1.80337 | 0       | 2.53245 |
| ENSMUSG00000097625 | 1_Gm26561       | 8.10598 | 0.82541  | 0.32744  | 0.44381  | 15.6274 | 9.17806 | 5.97577 | 4.50843 | 4.48265 | 8.86359 |
| ENSMUSG00000097627 | 1_4930519A11Rik | 0.15028 | -0.99647 | 0.80707  | NA       | 0       | 0       | 0       | 0.90169 | 0       | 0       |
| ENSMUSG00000097632 | 1_4930552P12Rik | 1.14131 | 1.41109  | 0.53372  | NA       | 1.73638 | 0.91781 | 2.39031 | 1.80337 | 0       | 0       |
| ENSMUSG00000097633 | 1_Gm16617       | 7.09838 | -0.54621 | 0.51553  | 0.62562  | 7.8137  | 4.58903 | 4.78062 | 6.3118  | 8.96531 | 10.1298 |
| ENSMUSG00000097636 | 7_Mir1          | 501.365 | 0.58407  | 0.00055  | 0.00215  | 661.56  | 527.738 | 615.504 | 355.264 | 458.127 | 389.998 |
| ENSMUSG00000097637 | 1_4933417D19Rik | 4.72361 | -0.1007  | 0.92725  | 0.95193  | 6.94551 | 1.83561 | 4.78062 | 1.80337 | 5.37918 | 7.59736 |
| ENSMUSG00000097638 | 1_Carlr         | 1.61788 | -3.0665  | 0.14553  | NA       | 0.86819 | 0       | 0       | 5.41011 | 0.89653 | 2.53245 |
| ENSMUSG00000097639 | 2_Platr4        | 0.74765 | -0.59178 | 0.82015  | NA       | 0.86819 | 0.91781 | 0       | 1.80337 | 0.89653 | 0       |
| ENSMUSG00000097641 | 1_Gm26865       | 0.29767 | 1.70332  | 0.67406  | NA       | 0.86819 | 0.91781 | 0       | 0       | 0       | 0       |
| ENSMUSG00000097643 | 1_A130051J06Rik | 8.86804 | -0.07183 | 0.92517  | 0.95066  | 7.8137  | 6.42464 | 11.9515 | 11.7219 | 8.96531 | 6.33113 |
| ENSMUSG00000097645 | 1_Gm26863       | 4.49264 | 1.24662  | 0.38412  | 0.50166  | 1.73638 | 2.75342 | 14.3418 | 0       | 1.79306 | 6.33113 |
| ENSMUSG00000097648 | 1_9330185C12Rik | 1.40241 | -1.64697 | 0.44921  | NA       | 0       | 0.91781 | 1.19515 | 4.50843 | 1.79306 | 0       |
| ENSMUSG00000097650 | 1_4921507G05Rik | 3.13152 | 0.92727  | 0.59296  | 0.69506  | 1.73638 | 0       | 10.7564 | 3.60674 | 2.68959 | 0       |
| ENSMUSG00000097651 | 1_4930461G14Rik | 0.30239 | -0.03469 | 0.99322  | NA       | 0       | 0.91781 | 0       | 0       | 0.89653 | 0       |
| ENSMUSG00000097654 | 1_Gm26714       | 8.07023 | 0.26741  | 0.73625  | 0.81321  | 9.55007 | 7.34244 | 9.56123 | 4.50843 | 9.86184 | 7.59736 |

|                     |                 |         |          |          |         |         |         |         |         |         |         |
|---------------------|-----------------|---------|----------|----------|---------|---------|---------|---------|---------|---------|---------|
| ENSMUSG000000097658 | 1_Gm16755       | 4.45547 | -0.51184 | 0.65428  | 0.74786 | 6.94551 | 2.75342 | 1.19515 | 2.70506 | 8.06878 | 5.06491 |
| ENSMUSG000000097660 | 1_Gm26762       | 12.9839 | -0.12298 | 0.84403  | 0.89372 | 9.55007 | 14.6849 | 13.1467 | 11.7219 | 16.1376 | 12.6623 |
| ENSMUSG000000097661 | 1_Gm26763       | 0       | NA       | NA       | NA      | 0       | 0       | 0       | 0       | 0       | 0       |
| ENSMUSG000000097662 | 1_Gm2093        | 5.60766 | -1.15778 | 0.26512  | 0.37634 | 3.47275 | 4.58903 | 2.39031 | 7.21348 | 13.448  | 2.53245 |
| ENSMUSG000000097664 | 1_Gm26765       | 37.7832 | 0.38639  | 0.33318  | 0.4498  | 36.4639 | 37.63   | 54.9771 | 36.9691 | 34.0682 | 26.5908 |
| ENSMUSG000000097665 | 1_Gm16853       | 0.4444  | -0.80729 | 0.81753  | NA      | 0.86819 | 0       | 0       | 0.90169 | 0.89653 | 0       |
| ENSMUSG000000097666 | 1_A330094K24Rik | 17.0571 | -1.42541 | 0.05031  | 0.09766 | 13.891  | 10.0959 | 3.58546 | 43.2809 | 18.8271 | 12.6623 |
| ENSMUSG000000097667 | 1_Gm26764       | 7.06688 | -0.916   | 0.29082  | 0.40449 | 5.20913 | 3.67122 | 5.97577 | 11.7219 | 10.7584 | 5.06491 |
| ENSMUSG000000097668 | 2_Gm26761       | 2.83406 | 0.97915  | 0.53337  | 0.64171 | 4.34094 | 5.50683 | 1.19515 | 0       | 0.89653 | 5.06491 |
| ENSMUSG000000097672 | 1_Gm26609       | 0.15028 | -0.99647 | 0.80707  | NA      | 0       | 0       | 0       | 0.90169 | 0       | 0       |
| ENSMUSG000000097673 | 1_Gm26608       | 0.59769 | -2.73717 | 0.49174  | NA      | 0       | 0       | 0       | 0       | 3.58612 | 0       |
| ENSMUSG000000097674 | 1_Gm26610       | 15.9981 | -0.41898 | 0.50319  | 0.61407 | 8.68188 | 15.6027 | 16.7322 | 10.8202 | 18.8271 | 25.3245 |
| ENSMUSG000000097676 | 1_Gm26612       | 0       | NA       | NA       | NA      | 0       | 0       | 0       | 0       | 0       | 0       |
| ENSMUSG000000097677 | 1_Gm26611       | 0.44526 | -0.80448 | 0.84252  | NA      | 0.86819 | 0       | 0       | 1.80337 | 0       | 0       |
| ENSMUSG000000097681 | 1_Gm26643       | 3.26883 | 0.27822  | 0.81718  | 0.87389 | 2.60457 | 4.58903 | 3.58546 | 4.50843 | 1.79306 | 2.53245 |
| ENSMUSG000000097682 | 1_4930554H23Rik | 0.15028 | -0.99647 | 0.80707  | NA      | 0       | 0       | 0       | 0.90169 | 0       | 0       |
| ENSMUSG000000097690 | 1_4930505N22Rik | 1.33878 | 1.71255  | 0.43077  | NA      | 1.73638 | 0.91781 | 3.58546 | 0       | 1.79306 | 0       |
| ENSMUSG000000097693 | 2_4930471M09Rik | 0.36401 | -0.03469 | 0.99322  | NA      | 0       | 0.91781 | 0       | 0       | 0       | 1.26623 |
| ENSMUSG000000097694 | 7_G730013B05Rik | 0.36401 | -0.03469 | 0.99322  | NA      | 0       | 0.91781 | 0       | 0       | 0       | 1.26623 |
| ENSMUSG000000097695 | 1_Gm26905       | 0.8712  | -3.25729 | 0.2282   | NA      | 0       | 0       | 0       | 0.90169 | 1.79306 | 2.53245 |
| ENSMUSG000000097697 | 1_4833412C05Rik | 2.41839 | -0.51064 | 0.74994  | NA      | 0       | 3.67122 | 2.39031 | 1.80337 | 5.37918 | 1.26623 |
| ENSMUSG000000097701 | 1_Gm17508       | 0.59855 | -2.74206 | 0.44803  | NA      | 0       | 0       | 0       | 0.90169 | 2.68959 | 0       |
| ENSMUSG000000097702 | 1_Gm26739       | 1.66593 | -1.98738 | 0.28014  | NA      | 0.86819 | 0       | 1.19515 | 3.60674 | 1.79306 | 2.53245 |
| ENSMUSG000000097703 | 1_Gm26623       | 1.85787 | -0.39452 | 0.84525  | NA      | 0       | 3.67122 | 1.19515 | 0.90169 | 5.37918 | 0       |
| ENSMUSG000000097706 | 1_E030037K01Rik | 0.93654 | 2.1311   | 0.38096  | NA      | 2.60457 | 0.91781 | 1.19515 | 0.90169 | 0       | 0       |
| ENSMUSG000000097707 | 1_Gm26742       | 0.30239 | -0.03469 | 0.99322  | NA      | 0       | 0.91781 | 0       | 0       | 0.89653 | 0       |
| ENSMUSG000000097709 | 7_2810429I04Rik | 15.2671 | -0.03964 | 0.95491  | 0.97074 | 10.4183 | 27.5342 | 7.17092 | 20.7388 | 14.3445 | 11.396  |
| ENSMUSG000000097710 | 1_2310026I22Rik | 0.1447  | 0.92709  | 0.82027  | NA      | 0.86819 | 0       | 0       | 0       | 0       | 0       |
| ENSMUSG000000097712 | 1_Gm10532       | 0.15297 | 0.92709  | 0.82027  | NA      | 0       | 0.91781 | 0       | 0       | 0       | 0       |
| ENSMUSG000000097714 | 1_Gm20109       | 1.99393 | 0.38774  | 0.81986  | NA      | 4.34094 | 0       | 2.39031 | 1.80337 | 0.89653 | 2.53245 |
| ENSMUSG000000097715 | 1_Gpr137b-ps    | 97.5259 | 0.39332  | 0.13262  | 0.21621 | 102.446 | 117.479 | 112.344 | 69.4298 | 98.6184 | 84.8372 |
| ENSMUSG000000097716 | 1_1700026J14Rik | 0.1447  | 0.92709  | 0.82027  | NA      | 0.86819 | 0       | 0       | 0       | 0       | 0       |
| ENSMUSG000000097717 | 1_1700066J03Rik | 0.29884 | -1.76064 | 0.66373  | NA      | 0       | 0       | 0       | 0       | 1.79306 | 0       |
| ENSMUSG000000097718 | 1_Gm26896       | 16.1513 | -1.56378 | 0.06168  | 0.1155  | 10.4183 | 13.7671 | 0       | 26.1489 | 31.3786 | 15.1947 |
| ENSMUSG000000097722 | 1_Gm26841       | 5.90571 | -0.27942 | 0.81725  | 0.87389 | 13.0228 | 2.75342 | 0       | 6.3118  | 4.48265 | 8.86359 |
| ENSMUSG000000097723 | 1_Gm26848       | 161.662 | 0.30616  | 0.19722  | 0.29768 | 172.769 | 199.164 | 163.736 | 110.907 | 167.651 | 155.746 |
| ENSMUSG000000097727 | 7_F630040K05Rik | 11.8081 | -1.44674 | 0.04345  | 0.08623 | 8.68188 | 5.50683 | 4.78062 | 24.3455 | 16.1376 | 11.396  |
| ENSMUSG000000097728 | 1_Gm26840       | 16.3888 | -0.17139 | 0.77556  | 0.84312 | 10.4183 | 14.6849 | 21.5128 | 23.4438 | 14.3445 | 13.9285 |
| ENSMUSG000000097729 | 1_2310015A10Rik | 444.477 | -0.36837 | 0.0235   | 0.05196 | 388.08  | 439.629 | 335.838 | 535.601 | 496.678 | 471.036 |
| ENSMUSG000000097731 | 1_2700016F22Rik | 5.56933 | -0.1965  | 0.85869  | 0.90419 | 4.34094 | 1.83561 | 9.56123 | 10.8202 | 1.79306 | 5.06491 |
| ENSMUSG000000097732 | 2_D930048G16Rik | 1.5542  | 0.0661   | 0.97495  | NA      | 0.86819 | 2.75342 | 1.19515 | 4.50843 | 0       | 0       |
| ENSMUSG000000097734 | 1_B930082K07Rik | 5.63829 | -0.72675 | 0.43381  | 0.54903 | 5.20913 | 2.75342 | 4.78062 | 7.21348 | 6.27571 | 7.59736 |
| ENSMUSG000000097735 | 7_D930032P07Rik | 0.30239 | -0.03469 | 0.99322  | NA      | 0       | 0.91781 | 0       | 0       | 0.89653 | 0       |
| ENSMUSG000000097736 | 7_9530059O14Rik | 0.30325 | -0.03469 | 0.99322  | NA      | 0       | 0.91781 | 0       | 0.90169 | 0       | 0       |
| ENSMUSG000000097737 | 1_Gm26530       | 42.8267 | 0.27735  | 0.42688  | 0.54222 | 45.1458 | 51.3971 | 44.2207 | 36.9691 | 41.2404 | 37.9868 |
| ENSMUSG000000097738 | 1_4930445N18Rik | 0.93299 | 1.02675  | 0.67628  | NA      | 2.60457 | 0       | 1.19515 | 0.90169 | 0.89653 | 0       |
| ENSMUSG000000097740 | 1_E030044B06Rik | 0       | NA       | NA       | NA      | 0       | 0       | 0       | 0       | 0       | 0       |
| ENSMUSG000000097742 | 1_Gm26535       | 0.30594 | 1.73752  | 0.66765  | NA      | 0       | 1.83561 | 0       | 0       | 0       | 0       |
| ENSMUSG000000097743 | 1_Gm16973       | 174.469 | -0.44423 | 0.04369  | 0.08664 | 138.91  | 176.219 | 127.881 | 182.14  | 224.133 | 197.531 |
| ENSMUSG000000097744 | 1_D030040B21Rik | 0.58996 | -0.05829 | 0.9875   | NA      | 1.73638 | 0       | 0       | 1.80337 | 0       | 0       |
| ENSMUSG000000097746 | 1_Gm6225        | 5.36231 | -0.12267 | 0.90598  | 0.93665 | 6.94551 | 3.67122 | 4.78062 | 9.91854 | 1.79306 | 5.06491 |
| ENSMUSG000000097747 | 1_Gm26534       | 16.2399 | -1.97287 | 0.00416  | 0.01209 | 6.07732 | 11.0137 | 2.39031 | 18.9354 | 34.9647 | 24.0583 |
| ENSMUSG000000097748 | 1_Gm26533       | 11.623  | -1.29909 | 0.21123  | 0.31458 | 6.94551 | 7.34244 | 5.97577 | 28.8539 | 20.6202 | 0       |
| ENSMUSG000000097751 | 1_Gm26690       | 13.9439 | -7.26705 | 0.06309  | 0.1178  | 0       | 0       | 0       | 0       | 30.482  | 53.1815 |
| ENSMUSG000000097754 | 1_Ptgs2os2      | 10.3021 | -0.71499 | 0.33017  | 0.44683 | 4.34094 | 11.9315 | 7.17092 | 13.5253 | 13.448  | 11.396  |
| ENSMUSG000000097755 | 1_2010110K18Rik | 6.61836 | 0.18973  | 0.83001  | 0.88353 | 6.07732 | 10.0959 | 4.78062 | 5.41011 | 4.48265 | 8.86359 |
| ENSMUSG000000097757 | 1_Gm17518       | 10.779  | -0.96639 | 0.17449  | 0.27022 | 6.94551 | 10.0959 | 4.78062 | 13.5253 | 17.9306 | 11.396  |
| ENSMUSG000000097759 | 1_Gm26753       | 0.45353 | -0.80448 | 0.84252  | NA      | 0       | 0.91781 | 0       | 1.80337 | 0       | 0       |
| ENSMUSG000000097762 | 1_4732463B04Rik | 1.1753  | 1.51745  | 0.5579   | NA      | 4.34094 | 0.91781 | 0       | 0       | 1.79306 | 0       |
| ENSMUSG000000097764 | 1_Gm26635       | 1.83561 | 4.31273  | 0.1571   | NA      | 0       | 11.0137 | 0       | 0       | 0       | 0       |
| ENSMUSG000000097766 | 1_5730420D15Rik | 0.48859 | 2.39711  | 0.53861  | NA      | 1.73638 | 0       | 1.19515 | 0       | 0       | 0       |
| ENSMUSG000000097767 | 8_Miat          | 33.9153 | -1.29361 | 0.01884  | 0.04298 | 21.7047 | 18.3561 | 19.1225 | 84.7584 | 36.7578 | 22.7921 |
| ENSMUSG000000097768 | 1_2310043M15Rik | 49.8915 | 0.42093  | 0.22449  | 0.32969 | 60.7732 | 59.6574 | 50.1965 | 40.5758 | 34.9647 | 53.1815 |
| ENSMUSG000000097770 | 1_Gm26776       | 139.843 | -1.77148 | 0.07943  | 0.14255 | 22.5729 | 154.191 | 13.1467 | 199.272 | 266.27  | 183.603 |
| ENSMUSG000000097772 | 7_5430416N02Rik | 165.562 | 0.36133  | 0.09844  | 0.16988 | 178.847 | 167.041 | 212.737 | 123.531 | 154.203 | 157.012 |
| ENSMUSG000000097773 | 1_Gm10614       | 12.6274 | 0.56746  | 0.38356  | 0.50115 | 17.3638 | 11.0137 | 16.7322 | 10.8202 | 7.17224 | 12.6623 |
| ENSMUSG000000097774 | 1_Gm26565       | 0       | NA       | NA       | NA      | 0       | 0       | 0       | 0       | 0       | 0       |
| ENSMUSG000000097775 | 1_4931440J10Rik | 0       | NA       | NA       | NA      | 0       | 0       | 0       | 0       | 0       | 0       |
| ENSMUSG000000097776 | 1_Gm26795       | 2.49091 | -2.79581 | 0.08703  | 0.15329 | 0.86819 | 0.91781 | 0       | 4.50843 | 3.58612 | 5.06491 |
| ENSMUSG000000097779 | 1_4833407H14Rik | 43.6629 | -0.01082 | 0.97551  | 0.9838  | 48.6186 | 37.63   | 44.2207 | 39.6742 | 47.5161 | 44.3179 |
| ENSMUSG000000097781 | 1_9330136K24Rik | 13.8763 | -0.61238 | 0.34092  | 0.45732 | 15.6274 | 6.42464 | 10.7564 | 13.5253 | 17.9306 | 18.9934 |
| ENSMUSG000000097783 | 1_Gm26747       | 1.10636 | 0.51509  | 0.84413  | NA      | 0       | 2.75342 | 1.19515 | 0       | 2.68959 | 0       |
| ENSMUSG000000097784 | 1_A430105J06Rik | 14.7401 | -0.68458 | 0.26132  | 0.37176 | 10.4183 | 12.8493 | 10.7564 | 25.2472 | 15.241  | 13.9285 |
| ENSMUSG000000097785 | 1_B230217O12Rik | 12.8758 | -0.78362 | 0.33345  | 0.45009 | 13.0228 | 12.8493 | 2.39031 | 27.0506 | 14.3445 | 7.59736 |
| ENSMUSG000000097787 | 1_2700046G09Rik | 55.1511 | -0.20506 | 0.56554  | 0.67085 | 40.8049 | 68.8354 | 44.2207 | 62.2163 | 65.4467 | 49.3828 |
| ENSMUSG000000097788 | 1_Gm16596       | 3.85191 | 0.19266  | 0.86859  | 0.91088 | 3.47275 | 1.83561 | 7.17092 | 5.41011 | 2.68959 | 2.53245 |
| ENSMUSG000000097789 | 1_Gm2115        | 180.843 | -0.86256 | 5.15E-05 | 0.00028 | 126.756 | 146.849 | 111.149 | 262.39  | 227.719 | 210.194 |
| ENSMUSG000000097791 | 1_Gm17315       | 8.05317 | 0.29835  | 0.70328  | 0.78787 | 8.68188 | 8.26025 | 9.56123 | 5.41011 | 6.27571 | 10.1298 |
| ENSMUSG000000097792 | 1_Gm27042       | 42.7671 | -0.36435 | 0.29881  | 0.41337 | 41.673  | 35.7944 | 34.6595 | 47.7893 | 51.1022 | 45.5842 |

|                    |                 |         |          |          |          |         |         |         |         |         |         |
|--------------------|-----------------|---------|----------|----------|----------|---------|---------|---------|---------|---------|---------|
| ENSMUSG00000097793 | 1_Gm17259       | 32.9224 | -0.36707 | 0.38213  | 0.49971  | 34.7275 | 22.9451 | 28.6837 | 45.0843 | 33.1716 | 32.9219 |
| ENSMUSG00000097796 | 1_Gm16702       | 0.59296 | -1.36724 | 0.71268  | NA       | 0.86819 | 0       | 0       | 0       | 2.68959 | 0       |
| ENSMUSG00000097797 | 6_Gm26901       | 6.4673  | 0.08873  | 0.9284   | 0.95242  | 2.60457 | 5.50683 | 11.9515 | 2.70506 | 7.17224 | 8.86359 |
| ENSMUSG00000097799 | 1_Gm26899       | 3.32922 | -1.69324 | 0.48147  | 0.59383  | 0       | 0       | 4.78062 | 0       | 0       | 15.1947 |
| ENSMUSG00000097800 | 1_B230344G16Rik | 33.0793 | 1.4832   | 0.00301  | 0.00923  | 37.3321 | 35.7944 | 72.9044 | 11.7219 | 17.9306 | 22.7921 |
| ENSMUSG00000097801 | 1_Gm26777       | 0.59468 | -1.37981 | 0.66218  | NA       | 0.86819 | 0       | 0       | 1.80337 | 0.89653 | 0       |
| ENSMUSG00000097805 | 1_Gm17473       | 0.91181 | 0.61234  | 0.80645  | NA       | 0       | 0.91781 | 2.39031 | 0       | 0.89653 | 1.26623 |
| ENSMUSG00000097809 | 1_Gm26554       | 0.15028 | -0.99647 | 0.80707  | NA       | 0       | 0       | 0       | 0.90169 | 0       | 0       |
| ENSMUSG00000097811 | 1_2810425M01Rik | 1.33535 | -1.82438 | 0.53085  | NA       | 1.73638 | 0       | 0       | 0       | 6.27571 | 0       |
| ENSMUSG00000097812 | 1_Gm26812       | 0.5715  | -2.63875 | 0.47614  | NA       | 0       | 0       | 0       | 0       | 0.89653 | 2.53245 |
| ENSMUSG00000097815 | 1_Gm26809       | 877.319 | 0.07826  | 0.61644  | 0.71504  | 842.143 | 912.299 | 947.757 | 713.233 | 863.359 | 985.125 |
| ENSMUSG00000097817 | 1_Gm26810       | 0.42208 | -2.1835  | 0.58658  | NA       | 0       | 0       | 0       | 0       | 0       | 2.53245 |
| ENSMUSG00000097818 | 1_Gm26681       | 0       | NA       | NA       | NA       | 0       | 0       | 0       | 0       | 0       | 0       |
| ENSMUSG00000097819 | 1_Gm26813       | 15.1598 | 0.46009  | 0.46774  | 0.58124  | 24.3093 | 16.5205 | 11.9515 | 17.132  | 13.448  | 7.59736 |
| ENSMUSG00000097823 | 2_Gm16701       | 19.6034 | -0.4395  | 0.49244  | 0.60416  | 25.1775 | 17.4383 | 7.17092 | 19.8371 | 34.0682 | 13.9285 |
| ENSMUSG00000097824 | 1_Gm26593       | 13.4583 | -1.51099 | 0.03558  | 0.07317  | 11.2864 | 3.67122 | 5.97577 | 28.8539 | 17.0341 | 13.9285 |
| ENSMUSG00000097827 | 1_5330439K02Rik | 4.73373 | -0.24745 | 0.82444  | 0.87975  | 3.47275 | 8.26025 | 1.19515 | 3.60674 | 8.06878 | 3.79868 |
| ENSMUSG00000097828 | 1_6430562O15Rik | 7.55586 | 0.53522  | 0.52562  | 0.63466  | 8.68188 | 11.9315 | 5.97577 | 3.60674 | 6.27571 | 8.86359 |
| ENSMUSG00000097831 | 1_4930540M05Rik | 1.13201 | -2.37346 | 0.31139  | NA       | 0       | 0       | 1.19515 | 0.90169 | 0.89653 | 3.79868 |
| ENSMUSG00000097832 | 1_Gm26912       | 14.6902 | -0.51744 | 0.40421  | 0.52147  | 10.4183 | 12.8493 | 13.1467 | 25.2472 | 12.5514 | 13.9285 |
| ENSMUSG00000097835 | 1_Gm26910       | 15.8434 | -0.65599 | 0.28544  | 0.39883  | 17.3638 | 11.9315 | 7.17092 | 17.132  | 16.1376 | 25.3245 |
| ENSMUSG00000097837 | 1_Gm26794       | 4.83114 | -1.46113 | 0.15923  | 0.25118  | 2.60457 | 2.75342 | 2.39031 | 6.3118  | 9.86184 | 5.06491 |
| ENSMUSG00000097838 | 1_C530050E15Rik | 1.18206 | -0.77025 | 0.7634   | NA       | 2.60457 | 0       | 0       | 0.90169 | 3.58612 | 0       |
| ENSMUSG00000097839 | 1_Gm26909       | 10.3356 | -0.66265 | 0.34239  | 0.45888  | 6.07732 | 7.34244 | 10.7564 | 12.6236 | 12.5514 | 12.6623 |
| ENSMUSG00000097841 | 1_4930511A02Rik | 2.24649 | 1.92026  | 0.22915  | NA       | 2.60457 | 4.58903 | 3.58546 | 1.80337 | 0.89653 | 0       |
| ENSMUSG00000097842 | 2_9330104G04Rik | 23.2642 | -0.08279 | 0.87723  | 0.91689  | 21.7047 | 12.8493 | 33.4643 | 26.1489 | 18.8271 | 26.5908 |
| ENSMUSG00000097847 | 1_4930478K11Rik | 0.30239 | -0.03469 | 0.99322  | NA       | 0       | 0.91781 | 0       | 0       | 0.89653 | 0       |
| ENSMUSG00000097848 | 1_Gm807         | 0.65272 | 0.15968  | 0.95914  | NA       | 0       | 0.91781 | 1.19515 | 1.80337 | 0       | 0       |
| ENSMUSG00000097850 | 2_4631405K08Rik | 147.376 | -0.09343 | 0.72429  | 0.80366  | 158.01  | 124.822 | 144.614 | 107.301 | 181.099 | 168.408 |
| ENSMUSG00000097854 | 1_Gm26602       | 160.557 | 1.44149  | 0.39868  | 0.51614  | 217.047 | 231.287 | 255.763 | 166.812 | 0       | 92.4346 |
| ENSMUSG00000097855 | 7_A930007119Rik | 10.0085 | -1.01888 | 0.21763  | 0.32196  | 8.68188 | 6.42464 | 4.78062 | 23.4438 | 11.6549 | 5.06491 |
| ENSMUSG00000097857 | 1_Gm26603       | 0.89793 | -0.99948 | 0.68611  | NA       | 0.86819 | 0.91781 | 0       | 2.70506 | 0.89653 | 0       |
| ENSMUSG00000097858 | 2_9530052C20Rik | 6.38222 | -1.53472 | 0.08999  | 0.15767  | 3.47275 | 2.75342 | 3.58546 | 9.01685 | 8.06878 | 11.396  |
| ENSMUSG00000097859 | 1_Gm26601       | 0.55135 | 2.55533  | 0.49555  | NA       | 0       | 0.91781 | 2.39031 | 0       | 0       | 0       |
| ENSMUSG00000097860 | 1_Gm26857       | 3.60531 | 0.47233  | 0.74113  | 0.81712  | 8.68188 | 2.75342 | 1.19515 | 6.3118  | 2.68959 | 0       |
| ENSMUSG00000097861 | 1_Gm26858       | 49.9196 | 0.8839   | 0.03787  | 0.07701  | 65.1141 | 65.1642 | 64.5383 | 56.8062 | 25.1029 | 22.7921 |
| ENSMUSG00000097863 | 1_1010001B22Rik | 3.36848 | -0.15421 | 0.89547  | 0.92937  | 2.60457 | 4.58903 | 2.39031 | 4.50843 | 3.58612 | 2.53245 |
| ENSMUSG00000097864 | 1_Gm26856       | 4.31931 | 1.49255  | 0.19853  | 0.29928  | 6.94551 | 2.75342 | 9.56123 | 1.80337 | 3.58612 | 1.26623 |
| ENSMUSG00000097867 | 1_Lppos         | 61.0628 | -0.10568 | 0.73108  | 0.80903  | 54.6959 | 66.9998 | 54.9771 | 71.2332 | 62.7571 | 55.714  |
| ENSMUSG00000097868 | 1_A330069E16Rik | 8.52678 | 0.31841  | 0.67738  | 0.7666   | 11.2864 | 11.0137 | 5.97577 | 8.11517 | 7.17224 | 7.59736 |
| ENSMUSG00000097869 | 1_C230021G24Rik | 0.86734 | -2.01721 | 0.47244  | NA       | 0.86819 | 0       | 0       | 1.80337 | 0       | 2.53245 |
| ENSMUSG00000097870 | 1_Gm26868       | 0.14942 | -0.99647 | 0.80707  | NA       | 0       | 0       | 0       | 0       | 0.89653 | 0       |
| ENSMUSG00000097871 | 1_B230104I21Rik | 0.2894  | 1.67273  | 0.67976  | NA       | 1.73638 | 0       | 0       | 0       | 0       | 0       |
| ENSMUSG00000097872 | 1_Gm26702       | 14.6847 | 0.13086  | 0.89351  | 0.92813  | 12.1546 | 14.6849 | 19.1225 | 0       | 20.6202 | 21.5259 |
| ENSMUSG00000097873 | 1_Gm26867       | 3.72902 | 0.13174  | 0.93351  | 0.95622  | 6.94551 | 4.58903 | 0       | 4.50843 | 0       | 6.33113 |
| ENSMUSG00000097875 | 1_Gm26704       | 35.6501 | -0.74563 | 0.05038  | 0.09778  | 26.9138 | 26.6164 | 26.2934 | 45.986  | 41.2404 | 46.8504 |
| ENSMUSG00000097876 | 1_Gm16892       | 42.3487 | -0.32944 | 0.39099  | 0.50848  | 35.5957 | 45.8903 | 31.074  | 40.5758 | 59.171  | 41.7855 |
| ENSMUSG00000097879 | 1_Gm26869       | 31.4429 | -0.97133 | 0.01983  | 0.04493  | 22.5729 | 22.9451 | 17.9273 | 36.0674 | 44.8265 | 44.3179 |
| ENSMUSG00000097881 | 7_Celrr         | 0.59855 | -2.74206 | 0.44803  | NA       | 0       | 0       | 0       | 0.90169 | 2.68959 | 0       |
| ENSMUSG00000097884 | 1_Gm26543       | 0.90083 | -3.32999 | 0.292    | NA       | 0       | 0       | 0       | 4.50843 | 0.89653 | 0       |
| ENSMUSG00000097886 | 2_Gsg112        | 1.63376 | -1.43913 | 0.52633  | NA       | 2.60457 | 0       | 0       | 4.50843 | 2.68959 | 0       |
| ENSMUSG00000097887 | 1_Gm26542       | 2.57353 | -2.04128 | 0.18835  | 0.28729  | 0.86819 | 0.91781 | 1.19515 | 1.80337 | 1.79306 | 8.86359 |
| ENSMUSG00000097888 | 1_Gm26682       | 1.98475 | 0.24147  | 0.88758  | NA       | 3.47275 | 1.83561 | 1.19515 | 4.50843 | 0.89653 | 0       |
| ENSMUSG00000097889 | 1_Gm26541       | 33.2216 | 0.18055  | 0.75637  | 0.82848  | 28.6502 | 22.0273 | 54.9771 | 26.1489 | 14.3445 | 53.1815 |
| ENSMUSG00000097890 | 1_4930547M16Rik | 9.82102 | -1.31576 | 0.10464  | 0.17879  | 5.20913 | 9.17806 | 2.39031 | 19.8371 | 13.448  | 8.86359 |
| ENSMUSG00000097902 | 1_Gm26531       | 0.44998 | -2.33107 | 0.56049  | NA       | 0       | 0       | 0       | 1.80337 | 0.89653 | 0       |
| ENSMUSG00000097903 | 1_Gm26679       | 3.89893 | -1.81011 | 0.13665  | 0.22116  | 0.86819 | 0.91781 | 3.58546 | 6.3118  | 5.37918 | 6.33113 |
| ENSMUSG00000097904 | 1_Gm26711       | 23.7987 | 0.94462  | 0.06479  | 0.12048  | 20.8365 | 39.4656 | 33.4643 | 13.5253 | 15.241  | 20.2596 |
| ENSMUSG00000097907 | 1_Raxos1        | 26.6759 | -0.44023 | 0.34592  | 0.46267  | 21.7047 | 29.3698 | 16.7322 | 36.9691 | 28.689  | 26.5908 |
| ENSMUSG00000097908 | 7_4933404O12Rik | 130.696 | 0.29372  | 0.17158  | 0.26654  | 134.569 | 147.767 | 149.394 | 110.907 | 117.446 | 124.09  |
| ENSMUSG00000097912 | 1_6330403N20Rik | 0.29767 | 1.70332  | 0.67406  | NA       | 0.86819 | 0.91781 | 0       | 0       | 0       | 0       |
| ENSMUSG00000097913 | 1_Gm26837       | 0.15028 | -0.99647 | 0.80707  | NA       | 0       | 0       | 0       | 0.90169 | 0       | 0       |
| ENSMUSG00000097914 | 1_Gm26838       | 0.30325 | -0.03469 | 0.99322  | NA       | 0       | 0.91781 | 0       | 0.90169 | 0       | 0       |
| ENSMUSG00000097915 | 1_A330009N23Rik | 10.3092 | -0.14629 | 0.84697  | 0.89588  | 12.1546 | 10.0959 | 7.17092 | 18.0337 | 8.06878 | 6.33113 |
| ENSMUSG00000097917 | 1_Gm26839       | 0.15028 | -0.99647 | 0.80707  | NA       | 0       | 0       | 0       | 0.90169 | 0       | 0       |
| ENSMUSG00000097921 | 1_Gm26576       | 1.78587 | -1.01337 | 0.60014  | NA       | 2.60457 | 0.91781 | 0       | 3.60674 | 3.58612 | 0       |
| ENSMUSG00000097922 | 1_4930448N21Rik | 2.85595 | 0.84973  | 0.50491  | 0.61559  | 3.47275 | 2.75342 | 4.78062 | 1.80337 | 1.79306 | 2.53245 |
| ENSMUSG00000097927 | 1_Gm6999        | 0       | NA       | NA       | NA       | 0       | 0       | 0       | 0       | 0       | 0       |
| ENSMUSG00000097928 | 1_Gm26578       | 34.1235 | 1.27035  | 0.00641  | 0.01737  | 45.1458 | 44.0547 | 54.9771 | 10.8202 | 20.6202 | 29.1232 |
| ENSMUSG00000097929 | 7_Tunar         | 1.19495 | -2.59574 | 0.30675  | NA       | 0.86819 | 0       | 0       | 4.50843 | 1.79306 | 0       |
| ENSMUSG00000097930 | 1_C330002G04Rik | 1.39307 | 0.3659   | 0.84556  | NA       | 1.73638 | 1.83561 | 1.19515 | 0.90169 | 2.68959 | 0       |
| ENSMUSG00000097934 | 1_6720483E21Rik | 3.09976 | -1.64766 | 0.25863  | 0.36869  | 3.47275 | 0.91781 | 0       | 3.60674 | 8.06878 | 2.53245 |
| ENSMUSG00000097944 | 1_A130014A01Rik | 56.5313 | -0.51898 | 0.16018  | 0.25242  | 52.0913 | 55.9861 | 31.074  | 61.3146 | 84.2739 | 54.4478 |
| ENSMUSG00000097960 | 1_A330074K22Rik | 34.167  | -0.69123 | 0.18112  | 0.27846  | 24.3093 | 38.5478 | 15.537  | 60.4129 | 42.1369 | 24.0583 |
| ENSMUSG00000097961 | 1_Gm27000       | 4.58893 | -5.6621  | 0.00498  | 0.01404  | 0       | 0       | 0       | 0       | 16.1376 | 11.396  |
| ENSMUSG00000097970 | 1_Gm27028       | 6.26624 | 0.13916  | 0.88367  | 0.92124  | 10.4183 | 4.58903 | 4.78062 | 6.3118  | 8.96531 | 2.53245 |
| ENSMUSG00000097971 | 3_Gm26917       | 406.99  | 3.74845  | 5.70E-28 | 2.55E-25 | 612.073 | 494.697 | 1165.28 | 64.0197 | 34.9647 | 70.9087 |
| ENSMUSG00000097974 | 1_Gm10605       | 4.33393 | -0.99651 | 0.36009  | 0.47702  | 1.73638 | 4.58903 | 2.39031 | 7.21348 | 6.27571 | 3.79868 |
| ENSMUSG00000097986 | 1_Gm26953       | 0.2894  | 1.67273  | 0.67976  | NA       | 1.73638 | 0       | 0       | 0       | 0       | 0       |

|                    |                 |         |          |          |          |         |         |         |         |         |         |
|--------------------|-----------------|---------|----------|----------|----------|---------|---------|---------|---------|---------|---------|
| ENSMUSG00000097992 | 1_Gm27016       | 1.85819 | 0.54247  | 0.7652   | NA       | 4.34094 | 0.91781 | 1.19515 | 0       | 0.89653 | 3.79868 |
| ENSMUSG00000097997 | 1_Gm27017       | 1.03973 | 1.26973  | 0.58716  | NA       | 2.60457 | 1.83561 | 0       | 0.90169 | 0.89653 | 0       |
| ENSMUSG00000097998 | 1_Gm27019       | 0.51074 | -2.49114 | 0.44681  | NA       | 0       | 0       | 0       | 0.90169 | 0.89653 | 1.26623 |
| ENSMUSG00000098001 | 1_Gm27048       | 0.59533 | 2.69681  | 0.45239  | NA       | 1.73638 | 1.83561 | 0       | 0       | 0       | 0       |
| ENSMUSG00000098004 | 1_Gm27027       | 0.1447  | 0.92709  | 0.82027  | NA       | 0.86819 | 0       | 0       | 0       | 0       | 0       |
| ENSMUSG00000098008 | 1_A930001A20Rik | 2.65666 | -1.27023 | 0.46003  | 0.57372  | 0       | 4.58903 | 0       | 1.80337 | 4.48265 | 5.06491 |
| ENSMUSG00000098022 | 7_Zfp82         | 42.8034 | -0.53583 | 0.30802  | 0.42303  | 51.2231 | 33.9588 | 19.1225 | 23.4438 | 70.8259 | 58.2464 |
| ENSMUSG00000098040 | 1_Gm20757       | 2.06883 | -2.50637 | 0.14609  | NA       | 0.86819 | 0.91781 | 0       | 4.50843 | 3.58612 | 2.53245 |
| ENSMUSG00000098041 | 1_Gm26981       | 25.535  | -1.07714 | 0.03755  | 0.07644  | 23.4411 | 13.7671 | 11.9515 | 35.1657 | 44.8265 | 24.0583 |
| ENSMUSG00000098045 | 1_Gm26979       | 0.21104 | -0.99647 | 0.80707  | NA       | 0       | 0       | 0       | 0       | 0       | 1.26623 |
| ENSMUSG00000098051 | 1_Gm27032       | 1.14958 | 1.42312  | 0.5298   | NA       | 0.86819 | 1.83561 | 2.39031 | 1.80337 | 0       | 0       |
| ENSMUSG00000098061 | 1_Gm26945       | 0.49975 | -0.80545 | 0.83771  | NA       | 0       | 0       | 1.19515 | 1.80337 | 0       | 0       |
| ENSMUSG00000098066 | 1_Gm26944       | 13.1693 | -0.50803 | 0.45124  | 0.56601  | 15.6274 | 11.9315 | 4.78062 | 18.0337 | 13.448  | 15.1947 |
| ENSMUSG00000098086 | 1_1700120C18Rik | 0.14942 | -0.99647 | 0.80707  | NA       | 0       | 0       | 0       | 0       | 0.89653 | 0       |
| ENSMUSG00000098087 | 1_Gm17750       | 1.33879 | -1.82027 | 0.45224  | NA       | 1.73638 | 0       | 0       | 3.60674 | 2.68959 | 0       |
| ENSMUSG00000098088 | 1_Gm26916       | 16.1017 | -0.78877 | 0.21274  | 0.31616  | 12.1546 | 14.6849 | 8.36608 | 10.8202 | 27.7924 | 22.7921 |
| ENSMUSG00000098097 | 7_6530403H02Rik | 0.44795 | 0.74833  | 0.83022  | NA       | 0.86819 | 0.91781 | 0       | 0.90169 | 0       | 0       |
| ENSMUSG00000098098 | 7_Bvht          | 62.3948 | -0.30282 | 0.44833  | 0.56323  | 56.4322 | 75.2601 | 35.8546 | 95.5787 | 61.8606 | 49.3828 |
| ENSMUSG00000098109 | 1_9530085P06Rik | 0.1447  | 0.92709  | 0.82027  | NA       | 0.86819 | 0       | 0       | 0       | 0       | 0       |
| ENSMUSG00000098112 | 7_Bin2          | 49.5791 | 1.62337  | 0.00034  | 0.00142  | 108.524 | 39.4656 | 76.4899 | 27.0506 | 20.6202 | 25.3245 |
| ENSMUSG00000098120 | 1_Gm5914        | 6.74129 | 0.85526  | 0.42892  | 0.54425  | 12.1546 | 0.91781 | 13.1467 | 7.21348 | 4.48265 | 2.53245 |
| ENSMUSG00000098132 | 1_Rassf10       | 19.3556 | -0.33111 | 0.54747  | 0.65394  | 13.0228 | 23.8629 | 14.3418 | 23.4438 | 16.1376 | 25.3245 |
| ENSMUSG00000098134 | 1_Rnf113a2      | 296.28  | -0.00677 | 0.96939  | 0.9803   | 298.657 | 261.575 | 326.277 | 283.129 | 278.821 | 329.219 |
| ENSMUSG00000098144 | 7_1700029N11Rik | 0.1447  | 0.92709  | 0.82027  | NA       | 0.86819 | 0       | 0       | 0       | 0       | 0       |
| ENSMUSG00000098164 | 1_Gm5493        | 0.79656 | 0.65655  | 0.77834  | NA       | 0.86819 | 0.91781 | 1.19515 | 0.90169 | 0.89653 | 0       |
| ENSMUSG00000098176 | 1_Ccdc166       | 172.968 | 0.20458  | 0.30598  | 0.42099  | 172.769 | 194.575 | 187.639 | 155.992 | 147.031 | 179.804 |
| ENSMUSG00000098178 | 1_Gm42418       | 16234.5 | 0.12191  | 0.19946  | 0.30039  | 17163.2 | 17305.2 | 16290   | 14706.5 | 16016.5 | 15925.3 |
| ENSMUSG00000098183 | 1_Gm27010       | 13.6583 | 0.02516  | 0.96976  | 0.98039  | 17.3638 | 7.34244 | 16.7322 | 9.91854 | 17.9306 | 12.6623 |
| ENSMUSG00000098188 | 1_Sowahc        | 1452.81 | 0.24273  | 0.06384  | 0.11889  | 1428.17 | 1551.09 | 1744.92 | 1285.8  | 1265.9  | 1440.97 |
| ENSMUSG00000098196 | 1_Gm26964       | 2.05412 | 0.36496  | 0.88835  | NA       | 6.94551 | 0       | 0       | 0       | 5.37918 | 0       |
| ENSMUSG00000098202 | 1_B830012L14Rik | 0       | NA       | NA       | NA       | 0       | 0       | 0       | 0       | 0       | 0       |
| ENSMUSG00000098206 | 1_A430106G13Rik | 32.0075 | -0.55309 | 0.18736  | 0.28612  | 26.0457 | 21.1095 | 31.074  | 36.0674 | 44.8265 | 32.9219 |
| ENSMUSG00000098207 | 1_Arl14         | 0.74228 | 2.98374  | 0.37863  | NA       | 0.86819 | 0       | 3.58546 | 0       | 0       | 0       |
| ENSMUSG00000098221 | 1_Gm27030       | 3.21123 | 1.85283  | 0.1932   | 0.29323  | 5.20913 | 7.34244 | 2.39031 | 0       | 1.79306 | 2.53245 |
| ENSMUSG00000098234 | 7_Snhg6         | 142.61  | -0.18564 | 0.46727  | 0.5808   | 129.36  | 114.726 | 156.565 | 116.317 | 176.617 | 162.077 |
| ENSMUSG00000098274 | 7_Rpl24         | 9091.86 | -0.20782 | 0.02071  | 0.04665  | 8548.18 | 8112.48 | 8654.11 | 9762.55 | 9631.43 | 9842.38 |
| ENSMUSG00000098292 | 1_Gm27194       | 60.6859 | 0.27668  | 0.3671   | 0.48454  | 60.7732 | 65.1642 | 74.0996 | 54.1011 | 61.8606 | 48.1166 |
| ENSMUSG00000098294 | 1_Gm27204       | 3.39345 | 0.11974  | 0.91991  | 0.94673  | 5.20913 | 1.83561 | 3.58546 | 4.50843 | 2.68959 | 2.53245 |
| ENSMUSG00000098304 | 1_1700027I24Rik | 0       | NA       | NA       | NA       | 0       | 0       | 0       | 0       | 0       | 0       |
| ENSMUSG00000098306 | 7_Gm28040       | 0.50513 | 2.44144  | 0.52662  | NA       | 0       | 1.83561 | 1.19515 | 0       | 0       | 0       |
| ENSMUSG00000098318 | 7_1190002F15Rik | 54.3183 | -0.08453 | 0.78778  | 0.85259  | 49.4867 | 50.4793 | 58.5626 | 59.5112 | 54.6884 | 53.1815 |
| ENSMUSG00000098340 | 1_Gm27253       | 0.15028 | -0.99647 | 0.80707  | NA       | 0       | 0       | 0       | 0.90169 | 0       | 0       |
| ENSMUSG00000098348 | 7_Btg1-ps2      | 1.1753  | 1.51745  | 0.5579   | NA       | 4.34094 | 0.91781 | 0       | 0       | 1.79306 | 0       |
| ENSMUSG00000098374 | 1_Gm28043       | 744.95  | 0.03938  | 0.79883  | 0.86098  | 707.574 | 753.518 | 803.144 | 637.492 | 714.535 | 853.437 |
| ENSMUSG00000098387 | 2_Pet117        | 0       | NA       | NA       | NA       | 0       | 0       | 0       | 0       | 0       | 0       |
| ENSMUSG00000098424 | 1_Gm27202       | 10.5581 | -1.51557 | 0.07336  | 0.13362  | 3.47275 | 8.26025 | 4.78062 | 27.9522 | 12.5514 | 6.33113 |
| ENSMUSG00000098434 | 1_2010110E17Rik | 0.74121 | 0.544    | 0.85364  | NA       | 1.73638 | 0.91781 | 0       | 0       | 1.79306 | 0       |
| ENSMUSG00000098456 | 1_Gm12117       | 1.01673 | -0.01996 | 0.99328  | NA       | 0       | 1.83561 | 1.19515 | 1.80337 | 0       | 1.26623 |
| ENSMUSG00000098463 | 1_Cphx2         | 1.71385 | -4.25073 | 0.10902  | NA       | 0       | 0       | 0       | 9.01685 | 0       | 1.26623 |
| ENSMUSG00000098470 | 1_C1rb          | 214.371 | 0.08889  | 0.69744  | 0.78352  | 275.216 | 193.657 | 193.615 | 181.239 | 241.167 | 201.33  |
| ENSMUSG00000098488 | 7_Pla2g4b       | 59.8957 | 0.19332  | 0.59356  | 0.69563  | 66.8505 | 45.8903 | 78.8802 | 40.5758 | 60.0675 | 67.11   |
| ENSMUSG00000098505 | 2_Gm14496       | 0       | NA       | NA       | NA       | 0       | 0       | 0       | 0       | 0       | 0       |
| ENSMUSG00000098509 | 2_Rgs21         | 0       | NA       | NA       | NA       | 0       | 0       | 0       | 0       | 0       | 0       |
| ENSMUSG00000098519 | 1_Gm27166       | 0.14942 | -0.99647 | 0.80707  | NA       | 0       | 0       | 0       | 0       | 0.89653 | 0       |
| ENSMUSG00000098534 | 1_Gm27167       | 1.77356 | -0.11443 | 0.9443   | NA       | 1.73638 | 0.91781 | 2.39031 | 0.90169 | 0.89653 | 3.79868 |
| ENSMUSG00000098549 | 1_Gm5269        | 1.93937 | -0.76365 | 0.69671  | NA       | 0.86819 | 0       | 3.58546 | 1.80337 | 5.37918 | 0       |
| ENSMUSG00000098557 | 1_Kctd12        | 2991.96 | -0.24435 | 0.03305  | 0.06884  | 2675.76 | 2696.51 | 2844.47 | 2941.3  | 3272.34 | 3521.38 |
| ENSMUSG00000098559 | 1_Gm15013       | 3.2504  | 0.46581  | 0.7403   | 0.81641  | 6.07732 | 2.75342 | 2.39031 | 0       | 4.48265 | 3.79868 |
| ENSMUSG00000098627 | 7_4930524O08Rik | 7.51856 | -0.24341 | 0.76079  | 0.83187  | 6.07732 | 7.34244 | 7.17092 | 8.11517 | 6.27571 | 10.1298 |
| ENSMUSG00000098630 | 1_Gm27198       | 1.26397 | -2.66809 | 0.22761  | NA       | 0       | 0.91781 | 0       | 3.60674 | 1.79306 | 1.26623 |
| ENSMUSG00000098640 | 1_Gm14214       | 0.29498 | -0.03469 | 0.99322  | NA       | 0.86819 | 0       | 0       | 0.90169 | 0       | 0       |
| ENSMUSG00000098650 | 1_Gm28048       | 590.514 | -0.45077 | 0.00963  | 0.02446  | 573.873 | 474.505 | 448.183 | 608.638 | 799.705 | 638.178 |
| ENSMUSG00000098659 | 7_1110015O18Rik | 0       | NA       | NA       | NA       | 0       | 0       | 0       | 0       | 0       | 0       |
| ENSMUSG00000098678 | 1_Mroh6         | 139.068 | 1.86967  | 4.73E-15 | 4.41E-13 | 191.001 | 222.109 | 241.421 | 57.7079 | 53.7918 | 68.3763 |
| ENSMUSG00000098682 | 7_Otx2os1       | 15.5599 | -2.11669 | 0.00251  | 0.0079   | 2.60457 | 10.0959 | 4.78062 | 33.3624 | 19.7237 | 22.7921 |
| ENSMUSG00000098684 | 1_Gm27246       | 0.15028 | -0.99647 | 0.80707  | NA       | 0       | 0       | 0       | 0.90169 | 0       | 0       |
| ENSMUSG00000098692 | 1_Gm28041       | 4.63821 | -1.74174 | 0.13825  | 0.22333  | 3.47275 | 2.75342 | 0       | 5.41011 | 9.86184 | 6.33113 |
| ENSMUSG00000098715 | 6_Gm28053       | 3.67889 | -2.28119 | 0.1378   | 0.22274  | 0       | 3.67122 | 0       | 8.11517 | 2.68959 | 7.59736 |
| ENSMUSG00000098727 | 1_1700017I07Rik | 0.42208 | -2.1835  | 0.58658  | NA       | 0       | 0       | 0       | 0       | 0       | 2.53245 |
| ENSMUSG00000098754 | 7_Gm28045       | 1.64364 | -4.19169 | 0.18113  | NA       | 0       | 0       | 0       | 0       | 9.86184 | 0       |
| ENSMUSG00000098758 | 1_7630403G23Rik | 0.30056 | -1.76625 | 0.6627   | NA       | 0       | 0       | 0       | 1.80337 | 0       | 0       |
| ENSMUSG00000098773 | 1_Gm27179       | 0.79688 | -1.78096 | 0.59759  | NA       | 0       | 0       | 1.19515 | 0       | 3.58612 | 0       |
| ENSMUSG00000098781 | 1_Gm28044       | 5.98751 | -0.47998 | 0.67919  | 0.76781  | 3.47275 | 4.58903 | 7.17092 | 12.6236 | 8.06878 | 0       |
| ENSMUSG00000098784 | 1_Gm27174       | 0.45181 | -0.79887 | 0.84362  | NA       | 0       | 0.91781 | 0       | 0       | 1.79306 | 0       |
| ENSMUSG00000098789 | 7_Jmjd7         | 115.457 | 0.67518  | 0.03328  | 0.06921  | 129.36  | 141.342 | 154.175 | 85.6601 | 55.5849 | 126.623 |
| ENSMUSG00000098794 | 1_Gm28038       | 0.74711 | -3.05659 | 0.44093  | NA       | 0       | 0       | 0       | 0       | 4.48265 | 0       |
| ENSMUSG00000098905 | 1_Zfp953        | 123.109 | -0.71924 | 0.01215  | 0.02976  | 104.183 | 72.5066 | 102.783 | 118.121 | 195.444 | 145.616 |
| ENSMUSG00000098923 | 1_Tmem185b      | 373.919 | -0.02543 | 0.86076  | 0.90564  | 374.189 | 368.958 | 368.107 | 357.067 | 380.129 | 395.063 |
| ENSMUSG00000098950 | 7_Gm28036       | 1098.88 | -0.23842 | 0.22838  | 0.33414  | 1003.63 | 1089.44 | 929.83  | 871.93  | 1194.18 | 1504.28 |

|                    |                 |         |          |          |          |         |         |         |         |         |         |
|--------------------|-----------------|---------|----------|----------|----------|---------|---------|---------|---------|---------|---------|
| ENSMUSG00000099009 | 1_Gm28046       | 83.2112 | -0.8959  | 0.00771  | 0.02028  | 38.2003 | 82.6025 | 53.7819 | 118.121 | 103.998 | 102.564 |
| ENSMUSG00000099032 | 2_Tcf24         | 13.7641 | -1.5104  | 0.02891  | 0.06157  | 8.68188 | 10.0959 | 2.39031 | 22.5421 | 22.4133 | 16.4609 |
| ENSMUSG00000099041 | 1_Gm28035       | 122.359 | 0.69176  | 0.05217  | 0.10042  | 180.583 | 134.917 | 138.638 | 148.778 | 71.7224 | 59.5127 |
| ENSMUSG00000099061 | 1_Gm28050       | 1.46825 | -0.50006 | 0.80723  | NA       | 1.73638 | 1.83561 | 0       | 2.70506 | 0       | 2.53245 |
| ENSMUSG00000099083 | 7_Atf7          | 2237.2  | -0.00708 | 0.94944  | 0.96688  | 2191.31 | 2256.88 | 2248.08 | 2137.9  | 2452.91 | 2136.12 |
| ENSMUSG00000099102 | 1_Gm11983       | 0.15028 | -0.99647 | 0.80707  | NA       | 0       | 0       | 0       | 0.90169 | 0       | 0       |
| ENSMUSG00000099104 | 1_Gm17087       | 0.49686 | 2.41829  | 0.46418  | NA       | 0.86819 | 0.91781 | 1.19515 | 0       | 0       | 0       |
| ENSMUSG00000099115 | 1_Gm17190       | 0       | NA       | NA       | NA       | 0       | 0       | 0       | 0       | 0       | 0       |
| ENSMUSG00000099137 | 1_Gm10603       | 39.4556 | -0.52528 | 0.19336  | 0.29334  | 22.5729 | 41.3013 | 33.4643 | 45.0843 | 53.7918 | 40.5193 |
| ENSMUSG00000099139 | 1_1110028F18Rik | 0.69963 | 1.43467  | 0.63415  | NA       | 1.73638 | 0       | 1.19515 | 0       | 0       | 1.26623 |
| ENSMUSG00000099170 | 1_5730403107Rik | 8.87734 | -1.51014 | 0.05219  | 0.10044  | 4.34094 | 3.67122 | 5.97577 | 15.3287 | 12.5514 | 11.396  |
| ENSMUSG00000099190 | 1_Gm27188       | 0       | NA       | NA       | NA       | 0       | 0       | 0       | 0       | 0       | 0       |
| ENSMUSG00000099207 | 7_Gm10637       | 2.36242 | 0.06134  | 0.96776  | NA       | 3.47275 | 3.67122 | 0       | 2.70506 | 1.79306 | 2.53245 |
| ENSMUSG00000099269 | 2_Calm5         | 0.21104 | -0.99647 | 0.80707  | NA       | 0       | 0       | 0       | 0       | 0       | 1.26623 |
| ENSMUSG00000099294 | 1_Gm11214       | 0.14942 | -0.99647 | 0.80707  | NA       | 0       | 0       | 0       | 0       | 0.89653 | 0       |
| ENSMUSG00000099338 | 1_2810030D12Rik | 7.54113 | -0.79227 | 0.33436  | 0.45098  | 6.94551 | 3.67122 | 5.97577 | 11.7219 | 8.06878 | 8.86359 |
| ENSMUSG00000099349 | 6_1700047G03Rik | 0.1447  | 0.92709  | 0.82027  | NA       | 0.86819 | 0       | 0       | 0       | 0       | 0       |
| ENSMUSG00000099364 | 1_5730419F03Rik | 1.77289 | -4.29772 | 0.04546  | NA       | 0       | 0       | 0       | 6.3118  | 1.79306 | 2.53245 |
| ENSMUSG00000099375 | 1_Gm28187       | 0.80486 | -1.90675 | 0.45267  | NA       | 0.86819 | 0       | 0       | 0.90169 | 1.79306 | 1.26623 |
| ENSMUSG00000099378 | 1_1700067G17Rik | 0       | NA       | NA       | NA       | 0       | 0       | 0       | 0       | 0       | 0       |
| ENSMUSG00000099384 | 6_1700110C19Rik | 1.05737 | 0.97101  | 0.65221  | NA       | 0.86819 | 0.91781 | 2.39031 | 0.90169 | 0       | 1.26623 |
| ENSMUSG00000099391 | 2_1700003C15Rik | 0       | NA       | NA       | NA       | 0       | 0       | 0       | 0       | 0       | 0       |
| ENSMUSG00000099398 | 1_Ms4a14        | 10.9567 | 1.00199  | 0.16341  | 0.2563   | 21.7047 | 10.0959 | 11.9515 | 8.11517 | 6.27571 | 7.59736 |
| ENSMUSG00000099411 | 1_2310015D24Rik | 2.56386 | -1.58733 | 0.26548  | 0.37663  | 1.73638 | 0.91781 | 1.19515 | 6.3118  | 2.68959 | 2.53245 |
| ENSMUSG00000099413 | 1_Gm17767       | 12.9008 | 0.77785  | 0.28637  | 0.39988  | 23.4411 | 18.3561 | 7.17092 | 10.8202 | 12.5514 | 5.06491 |
| ENSMUSG00000099418 | 1_Gm6657        | 0.19919 | 0.92709  | 0.82027  | NA       | 0       | 0       | 1.19515 | 0       | 0       | 0       |
| ENSMUSG00000099419 | 1_1700001D01Rik | 0.1447  | 0.92709  | 0.82027  | NA       | 0.86819 | 0       | 0       | 0       | 0       | 0       |
| ENSMUSG00000099420 | 1_Gm13279       | 0       | NA       | NA       | NA       | 0       | 0       | 0       | 0       | 0       | 0       |
| ENSMUSG00000099422 | 1_Gm4275        | 0.50516 | -1.00911 | 0.76476  | NA       | 0.86819 | 0       | 0       | 0       | 0.89653 | 1.26623 |
| ENSMUSG00000099443 | 1_Gm14478       | 0       | NA       | NA       | NA       | 0       | 0       | 0       | 0       | 0       | 0       |
| ENSMUSG00000099446 | 1_2310005E17Rik | 1.3745  | -1.58041 | 0.42366  | NA       | 0       | 0.91781 | 1.19515 | 2.70506 | 0.89653 | 2.53245 |
| ENSMUSG00000099452 | 1_Gm28502       | 0.97718 | 3.39722  | 0.26324  | NA       | 3.47275 | 0       | 2.39031 | 0       | 0       | 0       |
| ENSMUSG00000099465 | 1_Gm3830        | 3.67474 | -0.37604 | 0.75017  | 0.82352  | 1.73638 | 5.50683 | 2.39031 | 3.60674 | 6.27571 | 2.53245 |
| ENSMUSG00000099470 | 1_Gm29340       | 1.93722 | -0.30366 | 0.87314  | NA       | 1.73638 | 0       | 3.58546 | 4.50843 | 1.79306 | 0       |
| ENSMUSG00000099481 | 6_Xndc1         | 529.872 | 0.25843  | 0.0625   | 0.11685  | 567.795 | 570.875 | 592.796 | 438.219 | 511.919 | 497.627 |
| ENSMUSG00000099512 | 1_Gm28703       | 1.65459 | -4.1743  | 0.05873  | NA       | 0       | 0       | 0       | 1.80337 | 1.79306 | 6.33113 |
| ENSMUSG00000099516 | 1_Gm29066       | 0       | NA       | NA       | NA       | 0       | 0       | 0       | 0       | 0       | 0       |
| ENSMUSG00000099517 | 1_Hist1h3g      | 0.19919 | 0.92709  | 0.82027  | NA       | 0       | 0       | 1.19515 | 0       | 0       | 0       |
| ENSMUSG00000099518 | 1_Gm13275       | 0       | NA       | NA       | NA       | 0       | 0       | 0       | 0       | 0       | 0       |
| ENSMUSG00000099545 | 1_Gm13276       | 1.55936 | 4.08004  | 0.0745   | NA       | 1.73638 | 6.42464 | 1.19515 | 0       | 0       | 0       |
| ENSMUSG00000099564 | 1_Gm28729       | 0.59382 | -1.37748 | 0.66284  | NA       | 0.86819 | 0       | 0       | 0.90169 | 1.79306 | 0       |
| ENSMUSG00000099574 | 1_1700121L03Rik | 0.21104 | -0.99647 | 0.80707  | NA       | 0       | 0       | 0       | 0       | 0       | 1.26623 |
| ENSMUSG00000099576 | 1_Gm29040       | 0.21104 | -0.99647 | 0.80707  | NA       | 0       | 0       | 0       | 0       | 0       | 1.26623 |
| ENSMUSG00000099583 | 1_Hist1h3d      | 1.13304 | 1.41004  | 0.58411  | NA       | 2.60457 | 0       | 2.39031 | 1.80337 | 0       | 0       |
| ENSMUSG00000099597 | 1_Gm28933       | 441.309 | -0.2855  | 0.04787  | 0.0935   | 414.994 | 365.287 | 413.523 | 468.876 | 506.54  | 478.634 |
| ENSMUSG00000099608 | 1_4933411E06Rik | 0.15297 | 0.92709  | 0.82027  | NA       | 0       | 0.91781 | 0       | 0       | 0       | 0       |
| ENSMUSG00000099622 | 1_Gm29188       | 0       | NA       | NA       | NA       | 0       | 0       | 0       | 0       | 0       | 0       |
| ENSMUSG00000099625 | 1_Gm29325       | 0.15028 | -0.99647 | 0.80707  | NA       | 0       | 0       | 0       | 0.90169 | 0       | 0       |
| ENSMUSG00000099630 | 1_1700096J18Rik | 0.4989  | -0.80902 | 0.81036  | NA       | 0       | 0       | 1.19515 | 0.90169 | 0.89653 | 0       |
| ENSMUSG00000099664 | 1_Gm28511       | 0.1447  | 0.92709  | 0.82027  | NA       | 0.86819 | 0       | 0       | 0       | 0       | 0       |
| ENSMUSG00000099689 | 6_Zfp383        | 269.137 | -0.83212 | 1.50E-06 | 1.30E-05 | 204.024 | 192.739 | 184.054 | 380.511 | 334.406 | 319.089 |
| ENSMUSG00000099696 | 6_2900052N01Rik | 63.5922 | -1.88508 | 7.74E-06 | 5.42E-05 | 20.8365 | 42.2191 | 17.9273 | 136.155 | 83.3773 | 81.0385 |
| ENSMUSG00000099703 | 6_Gm28285       | 29.0761 | 0.10617  | 0.82704  | 0.88159  | 23.4411 | 29.3698 | 38.2449 | 39.6742 | 25.9994 | 17.7272 |
| ENSMUSG00000099715 | 2_Gm28077       | 0.15297 | 0.92709  | 0.82027  | NA       | 0       | 0.91781 | 0       | 0       | 0       | 0       |
| ENSMUSG00000099762 | 3_Gm8579        | 2.10146 | -3.4841  | 0.10845  | NA       | 0       | 0.91781 | 0       | 6.3118  | 5.37918 | 0       |
| ENSMUSG00000099784 | 1_Dalir         | 0.2997  | -1.76345 | 0.66322  | NA       | 0       | 0       | 0       | 0.90169 | 0.89653 | 0       |
| ENSMUSG00000099804 | 1_Gm28497       | 84.5664 | -0.44598 | 0.22302  | 0.32799  | 56.4322 | 93.6162 | 64.5383 | 59.5112 | 128.204 | 105.097 |
| ENSMUSG00000099810 | 1_Gm29509       | 0.15028 | -0.99647 | 0.80707  | NA       | 0       | 0       | 0       | 0.90169 | 0       | 0       |
| ENSMUSG00000099812 | 1_Gm28515       | 0.15297 | 0.92709  | 0.82027  | NA       | 0       | 0.91781 | 0       | 0       | 0       | 0       |
| ENSMUSG00000099825 | 1_1810012K16Rik | 0.9578  | 1.07277  | 0.6612   | NA       | 0       | 2.75342 | 1.19515 | 0.90169 | 0.89653 | 0       |
| ENSMUSG00000099843 | 1_Gm7160        | 24.5831 | 0.8105   | 0.08433  | 0.1494   | 36.4639 | 28.452  | 28.6837 | 17.132  | 15.241  | 21.5259 |
| ENSMUSG00000099847 | 1_Gm29458       | 0.55493 | 0.9119   | 0.78046  | NA       | 0.86819 | 0       | 1.19515 | 0       | 0       | 1.26623 |
| ENSMUSG00000099853 | 1_Gm29328       | 0.58824 | -0.05279 | 0.98869  | NA       | 1.73638 | 0       | 0       | 0       | 1.79306 | 0       |
| ENSMUSG00000099877 | 6_Pinc          | 0.59758 | 2.66585  | 0.50308  | NA       | 0       | 0       | 3.58546 | 0       | 0       | 0       |
| ENSMUSG00000099878 | 1_Gm28178       | 1.52209 | 0.59454  | 0.77427  | NA       | 4.34094 | 0       | 1.19515 | 1.80337 | 1.79306 | 0       |
| ENSMUSG00000099899 | 1_Gm28784       | 0.44998 | -2.33107 | 0.56049  | NA       | 0       | 0       | 0       | 1.80337 | 0.89653 | 0       |
| ENSMUSG00000099906 | 1_Gm28653       | 4.27572 | -2.53693 | 0.07194  | 0.13143  | 0       | 3.67122 | 0       | 7.21348 | 7.17224 | 7.59736 |
| ENSMUSG00000099913 | 1_Gm28551       | 15.1508 | -0.0716  | 0.92301  | 0.94907  | 18.232  | 22.0273 | 3.58546 | 10.8202 | 13.448  | 22.7921 |
| ENSMUSG00000099922 | 1_Gm29016       | 0.59758 | 2.66585  | 0.50308  | NA       | 0       | 0       | 3.58546 | 0       | 0       | 0       |
| ENSMUSG00000099950 | 1_9130227L01Rik | 0.15297 | 0.92709  | 0.82027  | NA       | 0       | 0.91781 | 0       | 0       | 0       | 0       |
| ENSMUSG00000099968 | 6_1700029J03Rik | 0.15028 | -0.99647 | 0.80707  | NA       | 0       | 0       | 0       | 0.90169 | 0       | 0       |
| ENSMUSG00000099974 | 1_Bcl2a1d       | 33.0363 | 1.23221  | 0.01038  | 0.02609  | 65.9823 | 41.3013 | 31.074  | 17.132  | 16.1376 | 26.5908 |
| ENSMUSG00000099983 | 1_1700022E09Rik | 0.14942 | -0.99647 | 0.80707  | NA       | 0       | 0       | 0       | 0       | 0.89653 | 0       |
| ENSMUSG00000099988 | 6_1700054A03Rik | 0.66457 | -1.53065 | 0.61764  | NA       | 0       | 0.91781 | 0       | 1.80337 | 0       | 1.26623 |
| ENSMUSG00000100002 | 1_Gm29642       | 0.99357 | -3.43429 | 0.26742  | NA       | 0       | 0       | 0       | 0       | 0.89653 | 5.06491 |
| ENSMUSG00000100009 | 6_Gm7967        | 8.1696  | -0.56472 | 0.59574  | 0.6976   | 13.0228 | 6.42464 | 0       | 5.41011 | 8.96531 | 15.1947 |
| ENSMUSG00000100014 | 1_Gm29290       | 0.19919 | 0.92709  | 0.82027  | NA       | 0       | 0       | 1.19515 | 0       | 0       | 0       |
| ENSMUSG00000100022 | 1_Gm29590       | 2.23104 | -1.37845 | 0.44767  | NA       | 0       | 3.67122 | 0       | 1.80337 | 5.37918 | 2.53245 |
| ENSMUSG00000100029 | 1_Gm29440       | 0.35574 | -0.03469 | 0.99322  | NA       | 0.86819 | 0       | 0       | 0       | 0       | 1.26623 |

|                     |                 |         |          |         |         |         |         |         |         |         |         |
|---------------------|-----------------|---------|----------|---------|---------|---------|---------|---------|---------|---------|---------|
| ENSMUSG000000100071 | 1_Gm28707       | 0.6925  | 1.56391  | 0.60682 | NA      | 0.86819 | 0       | 2.39031 | 0       | 0.89653 | 0       |
| ENSMUSG000000100079 | 1_lfnab         | 0.48859 | 2.39711  | 0.53861 | NA      | 1.73638 | 0       | 1.19515 | 0       | 0       | 0       |
| ENSMUSG000000100094 | 1_181000818Rik  | 0.85549 | -0.5905  | 0.81537 | NA      | 0.86819 | 0       | 1.19515 | 1.80337 | 0       | 1.26623 |
| ENSMUSG000000100096 | 1_Gm28760       | 0.19919 | 0.92709  | 0.82027 | NA      | 0       | 0       | 1.19515 | 0       | 0       | 0       |
| ENSMUSG000000100106 | 1_Gm28856       | 34.7477 | -0.10453 | 0.84137 | 0.89204 | 29.5184 | 31.2054 | 39.4401 | 14.427  | 39.4473 | 54.4478 |
| ENSMUSG000000100108 | 1_Gm28100       | 0       | NA       | NA      | NA      | 0       | 0       | 0       | 0       | 0       | 0       |
| ENSMUSG000000100110 | 1_Gm28783       | 0.21104 | -0.99647 | 0.80707 | NA      | 0       | 0       | 0       | 0       | 0       | 1.26623 |
| ENSMUSG000000100113 | 1_Gm28592       | 0.6065  | 0.00563  | 0.99878 | NA      | 0       | 1.83561 | 0       | 1.80337 | 0       | 0       |
| ENSMUSG000000100120 | 1_Gm553         | 1.74583 | -0.45124 | 0.82142 | NA      | 4.34094 | 0       | 0       | 2.70506 | 0.89653 | 2.53245 |
| ENSMUSG000000100129 | 1_Gm29064       | 0       | NA       | NA      | NA      | 0       | 0       | 0       | 0       | 0       | 0       |
| ENSMUSG000000100147 | 2_1700047M11Rik | 115.86  | -0.74612 | 0.02508 | 0.05478 | 116.337 | 84.4381 | 58.5626 | 140.663 | 190.064 | 105.097 |
| ENSMUSG000000100150 | 1_Gm19585       | 1.46588 | 0.53217  | 0.85014 | NA      | 5.20913 | 0       | 0       | 0       | 3.58612 | 0       |
| ENSMUSG000000100155 | 1_Gm2109        | 0.36046 | -1.978   | 0.62369 | NA      | 0       | 0       | 0       | 0       | 0.89653 | 1.26623 |
| ENSMUSG000000100157 | 6_2310034O05Rik | 111.739 | -0.23276 | 0.31899 | 0.43459 | 111.996 | 95.4518 | 100.393 | 124.433 | 110.273 | 127.889 |
| ENSMUSG000000100175 | 6_1700025M24Rik | 0.1447  | 0.92709  | 0.82027 | NA      | 0.86819 | 0       | 0       | 0       | 0       | 0       |
| ENSMUSG000000100181 | 1_Gm29096       | 35.6047 | 0.64603  | 0.12009 | 0.19995 | 31.2548 | 43.1369 | 56.1722 | 26.1489 | 27.7924 | 29.1232 |
| ENSMUSG000000100182 | 6_1810006J02Rik | 0.59941 | -2.74429 | 0.44299 | NA      | 0       | 0       | 0       | 1.80337 | 1.79306 | 0       |
| ENSMUSG000000100188 | 1_Gm29561       | 0.15028 | -0.99647 | 0.80707 | NA      | 0       | 0       | 0       | 0.90169 | 0       | 0       |
| ENSMUSG000000100210 | 1_Hist1h3f      | 0.60123 | -1.36744 | 0.71131 | NA      | 0       | 0.91781 | 0       | 0       | 2.68959 | 0       |
| ENSMUSG000000100211 | 1_1700064M15Rik | 0       | NA       | NA      | NA      | 0       | 0       | 0       | 0       | 0       | 0       |
| ENSMUSG000000100213 | 1_Gm28151       | 30.183  | -0.8305  | 0.07476 | 0.13561 | 21.7047 | 25.6986 | 17.9273 | 45.986  | 45.7231 | 24.0583 |
| ENSMUSG000000100217 | 1_9930111H07Rik | 0.1447  | 0.92709  | 0.82027 | NA      | 0.86819 | 0       | 0       | 0       | 0       | 0       |
| ENSMUSG000000100234 | 1_Gm13277       | 0       | NA       | NA      | NA      | 0       | 0       | 0       | 0       | 0       | 0       |
| ENSMUSG000000100235 | 6_Gm28557       | 60.8865 | -1.08424 | 0.01746 | 0.04045 | 49.4867 | 21.1095 | 46.611  | 45.986  | 114.756 | 87.3697 |
| ENSMUSG000000100241 | 1_Slc18a3       | 0.8961  | -2.10793 | 0.51859 | NA      | 0.86819 | 0       | 0       | 4.50843 | 0       | 0       |
| ENSMUSG000000100247 | 1_A530053M12Rik | 0.2894  | 1.67273  | 0.67976 | NA      | 1.73638 | 0       | 0       | 0       | 0       | 0       |
| ENSMUSG000000100252 | 6_Mir124-2hg    | 181.752 | -2.49524 | 0.00811 | 0.02119 | 92.8962 | 53.2327 | 17.9273 | 515.764 | 339.785 | 70.9087 |
| ENSMUSG000000100253 | 1_1700020N18Rik | 0.51697 | 0.77694  | 0.84161 | NA      | 0       | 1.83561 | 0       | 0       | 0       | 1.26623 |
| ENSMUSG000000100254 | 1_Trpc2         | 4.48979 | 5.60597  | 0.00486 | 0.01377 | 10.4183 | 16.5205 | 0       | 0       | 0       | 0       |
| ENSMUSG000000100255 | 1_Gm28196       | 1.89486 | -0.85177 | 0.62168 | NA      | 0.86819 | 0.91781 | 2.39031 | 3.60674 | 3.58612 | 0       |
| ENSMUSG000000100287 | 1_Gm28068       | 2.18169 | 3.50116  | 0.06137 | NA      | 5.20913 | 4.58903 | 2.39031 | 0.90169 | 0       | 0       |
| ENSMUSG000000100291 | 6_2310069B03Rik | 1.42403 | -0.3945  | 0.87214 | NA      | 0       | 3.67122 | 0       | 3.60674 | 0       | 1.26623 |
| ENSMUSG000000100301 | 6_6030407O03Rik | 5.4614  | -1.16723 | 0.26347 | 0.37443 | 0.86819 | 4.58903 | 4.78062 | 10.8202 | 5.37918 | 6.33113 |
| ENSMUSG000000100306 | 1_Gm29362       | 0.21104 | -0.99647 | 0.80707 | NA      | 0       | 0       | 0       | 0       | 0       | 1.26623 |
| ENSMUSG000000100334 | 1_C230024C17Rik | 0.14942 | -0.99647 | 0.80707 | NA      | 0       | 0       | 0       | 0       | 0.89653 | 0       |
| ENSMUSG000000100335 | 1_2310008N11Rik | 1.40932 | 0.21172  | 0.91011 | NA      | 1.73638 | 2.75342 | 0       | 1.80337 | 0.89653 | 1.26623 |
| ENSMUSG000000100345 | 1_Gm29418       | 0.14942 | -0.99647 | 0.80707 | NA      | 0       | 0       | 0       | 0       | 0.89653 | 0       |
| ENSMUSG000000100354 | 1_Gm29113       | 1.20969 | -1.12866 | 0.61879 | NA      | 0       | 0       | 2.39031 | 2.70506 | 0.89653 | 1.26623 |
| ENSMUSG000000100367 | 1_Gm29336       | 0.93654 | 2.1311   | 0.38096 | NA      | 2.60457 | 0.91781 | 1.19515 | 0.90169 | 0       | 0       |
| ENSMUSG000000100371 | 1_Gm29669       | 0       | NA       | NA      | NA      | 0       | 0       | 0       | 0       | 0       | 0       |
| ENSMUSG000000100387 | 1_Gm28514       | 0       | NA       | NA      | NA      | 0       | 0       | 0       | 0       | 0       | 0       |
| ENSMUSG000000100392 | 1_Gm28935       | 0.15297 | 0.92709  | 0.82027 | NA      | 0       | 0.91781 | 0       | 0       | 0       | 0       |
| ENSMUSG000000100396 | 1_Gm29367       | 9.97582 | -0.21187 | 0.80212 | 0.86316 | 12.1546 | 7.34244 | 8.36608 | 5.41011 | 21.5167 | 5.06491 |
| ENSMUSG000000100410 | 1_2310020H05Rik | 0.2997  | -1.76345 | 0.66322 | NA      | 0       | 0       | 0       | 0.90169 | 0.89653 | 0       |
| ENSMUSG000000100417 | 1_Gm28578       | 0.2997  | -1.76345 | 0.66322 | NA      | 0       | 0       | 0       | 0.90169 | 0.89653 | 0       |
| ENSMUSG000000100426 | 1_Gm4208        | 2.29068 | 0.59675  | 0.71291 | NA      | 3.47275 | 3.67122 | 1.19515 | 4.50843 | 0.89653 | 0       |
| ENSMUSG000000100437 | 1_Gm29152       | 0.15028 | -0.99647 | 0.80707 | NA      | 0       | 0       | 0       | 0.90169 | 0       | 0       |
| ENSMUSG000000100444 | 1_C530043A13Rik | 0.15297 | 0.92709  | 0.82027 | NA      | 0       | 0.91781 | 0       | 0       | 0       | 0       |
| ENSMUSG000000100448 | 1_Gm14501       | 0.45622 | 0.77574  | 0.84797 | NA      | 0       | 1.83561 | 0       | 0.90169 | 0       | 0       |
| ENSMUSG000000100454 | 1_Gm28901       | 350.642 | -0.61345 | 0.03476 | 0.07178 | 303.866 | 332.246 | 193.615 | 295.753 | 375.646 | 602.724 |
| ENSMUSG000000100465 | 1_Gm29264       | 1.25484 | -2.66728 | 0.22539 | NA      | 0.86819 | 0       | 0       | 2.70506 | 2.68959 | 1.26623 |
| ENSMUSG000000100475 | 1_Gm29543       | 0.15028 | -0.99647 | 0.80707 | NA      | 0       | 0       | 0       | 0.90169 | 0       | 0       |
| ENSMUSG000000100480 | 1_Gm29156       | 2.56429 | -2.08375 | 0.17232 | 0.26743 | 0.86819 | 0.91781 | 1.19515 | 1.80337 | 8.06878 | 2.53245 |
| ENSMUSG000000100486 | 6_Gm4131        | 0.50988 | -2.49048 | 0.5167  | NA      | 0       | 0       | 0       | 0       | 1.79306 | 1.26623 |
| ENSMUSG000000100502 | 1_Gm28286       | 21.2713 | -0.18244 | 0.72301 | 0.80261 | 16.4956 | 23.8629 | 19.1225 | 18.0337 | 19.7237 | 30.3894 |
| ENSMUSG000000100512 | 1_Ovol3         | 0.39838 | 2.07058  | 0.60634 | NA      | 0       | 0       | 2.39031 | 0       | 0       | 0       |
| ENSMUSG000000100536 | 1_Gm28873       | 12.6411 | -0.62672 | 0.33589 | 0.45257 | 10.4183 | 11.9315 | 7.17092 | 11.7219 | 14.3445 | 20.2596 |
| ENSMUSG000000100546 | 1_Gm29483       | 0.34861 | -0.03469 | 0.99322 | NA      | 0       | 0       | 1.19515 | 0       | 0.89653 | 0       |
| ENSMUSG000000100550 | 1_2310039L15Rik | 0.15028 | -0.99647 | 0.80707 | NA      | 0       | 0       | 0       | 0.90169 | 0       | 0       |
| ENSMUSG000000100552 | 1_Gm29019       | 0.50513 | 2.44144  | 0.52662 | NA      | 0       | 1.83561 | 1.19515 | 0       | 0       | 0       |
| ENSMUSG000000100553 | 6_Gm17751       | 0       | NA       | NA      | NA      | 0       | 0       | 0       | 0       | 0       | 0       |
| ENSMUSG000000100558 | 1_1700025F24Rik | 0.51074 | -2.49114 | 0.44681 | NA      | 0       | 0       | 0       | 0.90169 | 0.89653 | 1.26623 |
| ENSMUSG000000100562 | 1_Gm29611       | 0.30239 | -0.03469 | 0.99322 | NA      | 0       | 0.91781 | 0       | 0       | 0.89653 | 0       |
| ENSMUSG000000100580 | 6_4933436I20Rik | 0.30056 | -1.76625 | 0.6627  | NA      | 0       | 0       | 0       | 1.80337 | 0       | 0       |
| ENSMUSG000000100586 | 1_Vmn1r90       | 3.61556 | -2.25312 | 0.13141 | 0.21467 | 0       | 3.67122 | 0       | 6.3118  | 5.37918 | 6.33113 |
| ENSMUSG000000100594 | 1_2810414N06Rik | 46.7186 | -0.20831 | 0.54741 | 0.65392 | 45.1458 | 43.1369 | 41.8304 | 43.2809 | 60.0675 | 46.8504 |
| ENSMUSG000000100596 | 1_Gm29502       | 0.75323 | -1.79274 | 0.54159 | NA      | 0       | 0.91781 | 0       | 2.70506 | 0.89653 | 0       |
| ENSMUSG000000100605 | 1_Gm29243       | 0.15297 | 0.92709  | 0.82027 | NA      | 0       | 0.91781 | 0       | 0       | 0       | 0       |
| ENSMUSG000000100612 | 1_Gm29177       | 0.39838 | 2.07058  | 0.60634 | NA      | 0       | 0       | 2.39031 | 0       | 0       | 0       |
| ENSMUSG000000100617 | 1_Gm7145        | 0.29884 | -1.76064 | 0.66373 | NA      | 0       | 0       | 0       | 0       | 1.79306 | 0       |
| ENSMUSG000000100618 | 1_Gm29595       | 1.35887 | -0.97045 | 0.6877  | NA      | 0       | 2.75342 | 0       | 3.60674 | 1.79306 | 0       |
| ENSMUSG000000100621 | 1_Gm28374       | 0.1447  | 0.92709  | 0.82027 | NA      | 0.86819 | 0       | 0       | 0       | 0       | 0       |
| ENSMUSG000000100622 | 1_Gm20379       | 1.97015 | -1.0241  | 0.5035  | NA      | 0.86819 | 1.83561 | 1.19515 | 1.80337 | 3.58612 | 2.53245 |
| ENSMUSG000000100625 | 6_1700016G22Rik | 0.1447  | 0.92709  | 0.82027 | NA      | 0.86819 | 0       | 0       | 0       | 0       | 0       |
| ENSMUSG000000100627 | 6_A830008E24Rik | 73.3813 | -0.71618 | 0.01241 | 0.03026 | 57.3004 | 49.5615 | 59.7577 | 78.4466 | 97.7218 | 97.4995 |
| ENSMUSG000000100631 | 1_Olfr996       | 0.50516 | -1.00911 | 0.76476 | NA      | 0.86819 | 0       | 0       | 0       | 0.89653 | 1.26623 |
| ENSMUSG000000100635 | 1_Gm29157       | 2.71193 | -2.9155  | 0.09671 | 0.16725 | 0       | 1.83561 | 0       | 6.3118  | 1.79306 | 6.33113 |
| ENSMUSG000000100642 | 1_Gm28230       | 0.39838 | 2.07058  | 0.60634 | NA      | 0       | 0       | 2.39031 | 0       | 0       | 0       |
| ENSMUSG000000100658 | 1_F730311O21Rik | 17.5413 | 0.5579   | 0.3428  | 0.45925 | 18.232  | 18.3561 | 26.2934 | 20.7388 | 8.96531 | 12.6623 |

|                     |                 |         |          |         |         |         |         |         |         |         |         |
|---------------------|-----------------|---------|----------|---------|---------|---------|---------|---------|---------|---------|---------|
| ENSMUSG000000100666 | 1_1700007F19Rik | 0.2997  | -1.76345 | 0.66322 | NA      | 0       | 0       | 0       | 0.90169 | 0.89653 | 0       |
| ENSMUSG000000100671 | 1_Gm28322       | 0.48859 | 2.39711  | 0.53861 | NA      | 1.73638 | 0       | 1.19515 | 0       | 0       | 0       |
| ENSMUSG000000100679 | 1_Gm28778       | 3.98385 | 5.41605  | 0.03559 | 0.07317 | 0       | 0       | 23.9031 | 0       | 0       | 0       |
| ENSMUSG000000100680 | 1_1810044D09Rik | 19.7937 | 0.39812  | 0.50919 | 0.61938 | 29.5184 | 16.5205 | 21.5128 | 27.0506 | 8.96531 | 15.1947 |
| ENSMUSG000000100684 | 1_Gm20268       | 1.66304 | -0.6526  | 0.68606 | NA      | 1.73638 | 0.91781 | 1.19515 | 1.80337 | 1.79306 | 2.53245 |
| ENSMUSG000000100691 | 1_2010320M18Rik | 129.237 | 0.02194  | 0.93358 | 0.95623 | 116.337 | 143.178 | 131.467 | 164.107 | 101.308 | 119.025 |
| ENSMUSG000000100704 | 1_Gm28434       | 0.1447  | 0.92709  | 0.82027 | NA      | 0.86819 | 0       | 0       | 0       | 0       | 0       |
| ENSMUSG000000100714 | 6_2010308F09Rik | 0.15028 | -0.99647 | 0.80707 | NA      | 0       | 0       | 0       | 0.90169 | 0       | 0       |
| ENSMUSG000000100717 | 6_1700120G07Rik | 0.34389 | 1.87986  | 0.64119 | NA      | 0.86819 | 0       | 1.19515 | 0       | 0       | 0       |
| ENSMUSG000000100725 | 6_Gm28062       | 5112.67 | -0.0578  | 0.71556 | 0.79722 | 4920.02 | 4802.88 | 5307.68 | 4062.99 | 5971.79 | 5610.65 |
| ENSMUSG000000100727 | 6_1700003P14Rik | 0       | NA       | NA      | NA      | 0       | 0       | 0       | 0       | 0       | 0       |
| ENSMUSG000000100729 | 1_Gm29010       | 0       | NA       | NA      | NA      | 0       | 0       | 0       | 0       | 0       | 0       |
| ENSMUSG000000100733 | 1_4932411K12Rik | 4.75678 | -0.86887 | 0.43832 | 0.55361 | 6.94551 | 1.83561 | 1.19515 | 9.01685 | 4.48265 | 5.06491 |
| ENSMUSG000000100760 | 1_Gm4035        | 4.84686 | -0.48555 | 0.64158 | 0.7371  | 4.34094 | 6.42464 | 1.19515 | 5.41011 | 5.37918 | 6.33113 |
| ENSMUSG000000100775 | 1_Gm29107       | 0.34389 | 1.87986  | 0.64119 | NA      | 0.86819 | 0       | 1.19515 | 0       | 0       | 0       |
| ENSMUSG000000100782 | 1_Gm28231       | 0.1447  | 0.92709  | 0.82027 | NA      | 0.86819 | 0       | 0       | 0       | 0       | 0       |
| ENSMUSG000000100783 | 1_2310047D07Rik | 4.05624 | -0.20552 | 0.86058 | 0.90562 | 3.47275 | 5.50683 | 2.39031 | 8.11517 | 3.58612 | 1.26623 |
| ENSMUSG000000100796 | 1_Gm28163       | 0.15297 | 0.92709  | 0.82027 | NA      | 0       | 0.91781 | 0       | 0       | 0       | 0       |
| ENSMUSG000000100798 | 1_Gm19589       | 0.1447  | 0.92709  | 0.82027 | NA      | 0.86819 | 0       | 0       | 0       | 0       | 0       |
| ENSMUSG000000100813 | 1_Gm28874       | 9.88249 | -0.53216 | 0.44803 | 0.5629  | 7.8137  | 9.17806 | 7.17092 | 9.91854 | 12.5514 | 12.6623 |
| ENSMUSG000000100816 | 1_Gm28321       | 0.54867 | 1.10538  | 0.77323 | NA      | 0       | 0       | 2.39031 | 0.90169 | 0       | 0       |
| ENSMUSG000000100824 | 1_Gm29375       | 0.21104 | -0.99647 | 0.80707 | NA      | 0       | 0       | 0       | 0       | 0       | 1.26623 |
| ENSMUSG000000100832 | 1_Gm29260       | 2.98505 | -1.00131 | 0.43774 | 0.55301 | 0.86819 | 2.75342 | 2.39031 | 5.41011 | 2.68959 | 3.79868 |
| ENSMUSG000000100837 | 6_1700063D05Rik | 0.14942 | -0.99647 | 0.80707 | NA      | 0       | 0       | 0       | 0       | 0.89653 | 0       |
| ENSMUSG000000100838 | 1_Gm29094       | 2.81475 | 1.05554  | 0.61721 | 0.71556 | 11.2864 | 0       | 0       | 1.80337 | 0       | 3.79868 |
| ENSMUSG000000100846 | 1_Gm28845       | 0.30056 | -1.76625 | 0.6627  | NA      | 0       | 0       | 0       | 1.80337 | 0       | 0       |
| ENSMUSG000000100850 | 1_4930434B07Rik | 0.21104 | -0.99647 | 0.80707 | NA      | 0       | 0       | 0       | 0       | 0       | 1.26623 |
| ENSMUSG000000100855 | 1_Gm6976        | 40.1844 | 0.33463  | 0.35618 | 0.47296 | 47.7504 | 45.8903 | 40.6352 | 31.559  | 38.5508 | 36.7206 |
| ENSMUSG000000100872 | 2_1700065J18Rik | 0.15297 | 0.92709  | 0.82027 | NA      | 0       | 0.91781 | 0       | 0       | 0       | 0       |
| ENSMUSG000000100891 | 1_2810049E08Rik | 1.19967 | -3.74335 | 0.18256 | NA      | 0       | 0       | 0       | 4.50843 | 2.68959 | 0       |
| ENSMUSG000000100911 | 2_1700027F09Rik | 0       | NA       | NA      | NA      | 0       | 0       | 0       | 0       | 0       | 0       |
| ENSMUSG000000100923 | 1_Olfr10        | 0       | NA       | NA      | NA      | 0       | 0       | 0       | 0       | 0       | 0       |
| ENSMUSG000000100932 | 1_Gm29459       | 1.091   | -1.16666 | 0.66528 | NA      | 0.86819 | 0       | 1.19515 | 0       | 4.48265 | 0       |
| ENSMUSG000000100936 | 1_Gm28865       | 0.14942 | -0.99647 | 0.80707 | NA      | 0       | 0       | 0       | 0       | 0.89653 | 0       |
| ENSMUSG000000100937 | 1_1700020D05Rik | 9.04488 | 0.14208  | 0.86093 | 0.90576 | 11.2864 | 10.0959 | 7.17092 | 5.41011 | 15.241  | 5.06491 |
| ENSMUSG000000100967 | 1_Gm29666       | 49.2341 | -0.23331 | 0.55082 | 0.65707 | 39.9367 | 49.5615 | 46.611  | 38.7725 | 76.2051 | 44.3179 |
| ENSMUSG000000100969 | 6_1700030N03Rik | 0       | NA       | NA      | NA      | 0       | 0       | 0       | 0       | 0       | 0       |
| ENSMUSG000000100975 | 1_Gm28875       | 167.96  | -0.05268 | 0.78675 | 0.85201 | 167.56  | 170.712 | 156.565 | 182.14  | 171.237 | 159.545 |
| ENSMUSG000000100987 | 1_Gm1627        | 1.88169 | -3.25133 | 0.09287 | NA      | 0       | 0       | 1.19515 | 3.60674 | 2.68959 | 3.79868 |
| ENSMUSG000000100992 | 1_Gm23925       | 5.50052 | 0.12183  | 0.90126 | 0.9331  | 3.47275 | 10.0959 | 3.58546 | 4.50843 | 6.27571 | 5.06491 |
| ENSMUSG000000101007 | 1_Gm29541       | 1.08628 | -0.32175 | 0.90308 | NA      | 1.73638 | 0       | 1.19515 | 0       | 3.58612 | 0       |
| ENSMUSG000000101008 | 1_Gm29442       | 0.64359 | 0.12079  | 0.96515 | NA      | 0.86819 | 0       | 1.19515 | 0.90169 | 0.89653 | 0       |
| ENSMUSG000000101012 | 6_1700008K24Rik | 0.15028 | -0.99647 | 0.80707 | NA      | 0       | 0       | 0       | 0.90169 | 0       | 0       |
| ENSMUSG000000101026 | 1_D730001G18Rik | 32.3407 | 1.0044   | 0.01984 | 0.04495 | 38.2003 | 47.7259 | 43.0255 | 18.9354 | 17.0341 | 29.1232 |
| ENSMUSG000000101028 | 1_Gm28723       | 2.24098 | -1.80882 | 0.23787 | NA      | 0.86819 | 0.91781 | 1.19515 | 3.60674 | 1.79306 | 5.06491 |
| ENSMUSG000000101061 | 1_Platr1        | 0.71079 | -1.53034 | 0.61038 | NA      | 0       | 0       | 1.19515 | 1.80337 | 0       | 1.26623 |
| ENSMUSG000000101067 | 1_Gm29007       | 0.72178 | -2.97888 | 0.30629 | NA      | 0       | 0       | 0       | 0.90169 | 0.89653 | 2.53245 |
| ENSMUSG000000101086 | 1_Gm28651       | 0.36132 | -1.98116 | 0.62311 | NA      | 0       | 0       | 0       | 0.90169 | 0       | 1.26623 |
| ENSMUSG000000101089 | 1_2610016A17Rik | 0.19919 | 0.92709  | 0.82027 | NA      | 0       | 0       | 1.19515 | 0       | 0       | 0       |
| ENSMUSG000000101112 | 1_Gm29185       | 0.15028 | -0.99647 | 0.80707 | NA      | 0       | 0       | 0       | 0.90169 | 0       | 0       |
| ENSMUSG000000101152 | 1_Gm28305       | 4.19165 | -0.89158 | 0.55503 | 0.66115 | 0.86819 | 0.91781 | 7.17092 | 0       | 9.86184 | 6.33113 |
| ENSMUSG000000101163 | 1_Gm13278       | 0       | NA       | NA      | NA      | 0       | 0       | 0       | 0       | 0       | 0       |
| ENSMUSG000000101174 | 6_Hoxd4         | 2.72085 | 0.32617  | 0.82487 | 0.87994 | 4.34094 | 4.58903 | 0       | 1.80337 | 1.79306 | 3.79868 |
| ENSMUSG000000101176 | 1_Gm29095       | 9.14604 | 0.29059  | 0.71921 | 0.80009 | 7.8137  | 12.8493 | 9.56123 | 3.60674 | 13.448  | 7.59736 |
| ENSMUSG000000101179 | 1_Gm29455       | 0.45353 | -0.80448 | 0.84252 | NA      | 0       | 0.91781 | 0       | 1.80337 | 0       | 0       |
| ENSMUSG000000101211 | 1_Gm28818       | 0       | NA       | NA      | NA      | 0       | 0       | 0       | 0       | 0       | 0       |
| ENSMUSG000000101223 | 6_4930568A12Rik | 0.65544 | -1.52662 | 0.57491 | NA      | 0.86819 | 0       | 0       | 0.90169 | 0.89653 | 1.26623 |
| ENSMUSG000000101224 | 1_Gm28209       | 0.15297 | 0.92709  | 0.82027 | NA      | 0       | 0.91781 | 0       | 0       | 0       | 0       |
| ENSMUSG000000101252 | 1_lfna6         | 0.29767 | 1.70332  | 0.67406 | NA      | 0.86819 | 0.91781 | 0       | 0       | 0       | 0       |
| ENSMUSG000000101257 | 1_2310015K22Rik | 1.71127 | -4.25311 | 0.05305 | NA      | 0       | 0       | 0       | 6.3118  | 2.68959 | 1.26623 |
| ENSMUSG000000101264 | 1_Gm28347       | 0       | NA       | NA      | NA      | 0       | 0       | 0       | 0       | 0       | 0       |
| ENSMUSG000000101265 | 1_Gm29099       | 0.15028 | -0.99647 | 0.80707 | NA      | 0       | 0       | 0       | 0.90169 | 0       | 0       |
| ENSMUSG000000101287 | 1_Gm28166       | 0.15297 | 0.92709  | 0.82027 | NA      | 0       | 0.91781 | 0       | 0       | 0       | 0       |
| ENSMUSG000000101299 | 1_Gm28175       | 1.33964 | -1.82177 | 0.45617 | NA      | 1.73638 | 0       | 0       | 4.50843 | 1.79306 | 0       |
| ENSMUSG000000101324 | 1_Gm29187       | 1.0076  | -0.03603 | 0.98557 | NA      | 0.86819 | 0.91781 | 1.19515 | 0.90169 | 0.89653 | 1.26623 |
| ENSMUSG000000101337 | 6_Dnah7c        | 11.9029 | -1.56397 | 0.02536 | 0.05532 | 6.07732 | 8.26025 | 3.58546 | 20.7388 | 18.8271 | 13.9285 |
| ENSMUSG000000101344 | 1_Gm29183       | 4.1717  | -1.02004 | 0.42991 | 0.54534 | 3.47275 | 4.58903 | 0       | 6.3118  | 1.79306 | 8.86359 |
| ENSMUSG000000101355 | 1_Hist1h3h      | 0.15297 | 0.92709  | 0.82027 | NA      | 0       | 0.91781 | 0       | 0       | 0       | 0       |
| ENSMUSG000000101356 | 1_Gm28876       | 0.15297 | 0.92709  | 0.82027 | NA      | 0       | 0.91781 | 0       | 0       | 0       | 0       |
| ENSMUSG000000101365 | 1_Gm19325       | 0.99017 | 2.20973  | 0.35197 | NA      | 1.73638 | 0.91781 | 2.39031 | 0       | 0.89653 | 0       |
| ENSMUSG000000101378 | 1_Gm28086       | 0       | NA       | NA      | NA      | 0       | 0       | 0       | 0       | 0       | 0       |
| ENSMUSG000000101389 | 1_Ms4a4a        | 39.4816 | 1.12964  | 0.03406 | 0.07056 | 91.1598 | 28.452  | 43.0255 | 35.1657 | 18.8271 | 20.2596 |
| ENSMUSG000000101429 | 1_BC055402      | 7.3062  | -1.88519 | 0.08985 | 0.15751 | 2.60457 | 5.50683 | 1.19515 | 16.2303 | 17.0341 | 1.26623 |
| ENSMUSG000000101493 | 1_2810405F17Rik | 26.8259 | -0.19188 | 0.67223 | 0.7626  | 23.4411 | 30.2876 | 21.5128 | 28.8539 | 34.0682 | 22.7921 |
| ENSMUSG000000101514 | 1_Gm5524        | 0.15028 | -0.99647 | 0.80707 | NA      | 0       | 0       | 0       | 0.90169 | 0       | 0       |
| ENSMUSG000000101517 | 6_4732465J04Rik | 2.4493  | -1.33577 | 0.4052  | NA      | 0       | 1.83561 | 2.39031 | 4.50843 | 0.89653 | 5.06491 |
| ENSMUSG000000101523 | 1_Gm10031       | 89.8907 | 0.45104  | 0.31502 | 0.43003 | 107.655 | 39.4656 | 164.931 | 67.6264 | 88.7565 | 70.9087 |
| ENSMUSG000000101540 | 1_Gm28465       | 0.15028 | -0.99647 | 0.80707 | NA      | 0       | 0       | 0       | 0.90169 | 0       | 0       |
| ENSMUSG000000101549 | 1_Gm29630       | 6.73193 | -1.05106 | 0.28831 | 0.40169 | 4.34094 | 1.83561 | 7.17092 | 16.2303 | 4.48265 | 6.33113 |

|                     |                 |         |          |          |         |         |         |         |         |         |         |
|---------------------|-----------------|---------|----------|----------|---------|---------|---------|---------|---------|---------|---------|
| ENSMUSG000000101559 | 1_Gm28258       | 0.15028 | -0.99647 | 0.80707  | NA      | 0       | 0       | 0       | 0.90169 | 0       | 0       |
| ENSMUSG000000101583 | 1_Gm20753       | 1.4022  | 0.37609  | 0.84123  | NA      | 0.86819 | 2.75342 | 1.19515 | 1.80337 | 1.79306 | 0       |
| ENSMUSG000000101585 | 6_1600010M07Rik | 3.59663 | 0.8041   | 0.51246  | 0.6226  | 6.94551 | 5.50683 | 1.19515 | 3.60674 | 1.79306 | 2.53245 |
| ENSMUSG000000101588 | 1_Gm28265       | 0.30056 | -1.76625 | 0.6627   | NA      | 0       | 0       | 0       | 1.80337 | 0       | 0       |
| ENSMUSG000000101595 | 1_Gm29395       | 3.62642 | 1.0886   | 0.43033  | 0.54563 | 8.68188 | 3.67122 | 2.39031 | 0       | 4.48265 | 2.53245 |
| ENSMUSG000000101599 | 1_Gm20342       | 179.884 | -0.34959 | 0.19556  | 0.29565 | 171.901 | 168.876 | 133.857 | 160.5   | 277.028 | 167.142 |
| ENSMUSG000000101603 | 1_Gm28730       | 1.35275 | -1.76348 | 0.48087  | NA      | 0       | 1.83561 | 0       | 0.90169 | 5.37918 | 0       |
| ENSMUSG000000101625 | 1_Gm29371       | 0.44795 | 0.74833  | 0.83022  | NA      | 0.86819 | 0.91781 | 0       | 0.90169 | 0       | 0       |
| ENSMUSG000000101643 | 1_Gm28307       | 0.50988 | -2.49048 | 0.5167   | NA      | 0       | 0       | 0       | 0       | 1.79306 | 1.26623 |
| ENSMUSG000000101645 | 1_Gm28635       | 38.6324 | 8.70263  | 6.48E-05 | 0.00034 | 4.34094 | 105.548 | 121.906 | 0       | 0       | 0       |
| ENSMUSG000000101655 | 1_2310040G24Rik | 17.2201 | -0.05966 | 0.92117  | 0.94768 | 17.3638 | 15.6027 | 17.9273 | 27.9522 | 14.3445 | 10.1298 |
| ENSMUSG000000101659 | 1_Gm29009       | 0       | NA       | NA       | NA      | 0       | 0       | 0       | 0       | 0       | 0       |
| ENSMUSG000000101677 | 1_Gm29415       | 0.14942 | -0.99647 | 0.80707  | NA      | 0       | 0       | 0       | 0       | 0.89653 | 0       |
| ENSMUSG000000101678 | 3_Gm29609       | 70.086  | -0.6303  | 0.03545  | 0.07295 | 53.8277 | 46.8081 | 64.5383 | 73.9382 | 85.1704 | 96.2332 |
| ENSMUSG000000101698 | 1_Gm29562       | 1.83636 | -1.27901 | 0.47828  | NA      | 0.86819 | 0       | 2.39031 | 0.90169 | 1.79306 | 5.06491 |
| ENSMUSG000000101702 | 1_1700072G22Rik | 0.1447  | 0.92709  | 0.82027  | NA      | 0.86819 | 0       | 0       | 0       | 0       | 0       |
| ENSMUSG000000101716 | 1_Gm12057       | 1.72938 | -1.30067 | 0.43008  | NA      | 0.86819 | 0.91781 | 1.19515 | 1.80337 | 1.79306 | 3.79868 |
| ENSMUSG000000101722 | 1_Gm29125       | 1.93733 | -2.45845 | 0.26057  | NA      | 1.73638 | 0       | 0       | 4.50843 | 5.37918 | 0       |
| ENSMUSG000000101731 | 1_3830432H09Rik | 1.01135 | -2.2089  | 0.41576  | NA      | 0       | 0       | 1.19515 | 3.60674 | 0       | 1.26623 |
| ENSMUSG000000101734 | 1_4933400C23Rik | 0       | NA       | NA       | NA      | 0       | 0       | 0       | 0       | 0       | 0       |
| ENSMUSG000000101741 | 1_Gm28055       | 0       | NA       | NA       | NA      | 0       | 0       | 0       | 0       | 0       | 0       |
| ENSMUSG000000101746 | 1_2310043L19Rik | 1.24271 | 2.50302  | 0.32032  | NA      | 2.60457 | 0       | 3.58546 | 0       | 0       | 1.26623 |
| ENSMUSG000000101750 | 1_Olfr1392      | 0.21104 | -0.99647 | 0.80707  | NA      | 0       | 0       | 0       | 0       | 0       | 1.26623 |
| ENSMUSG000000101791 | 1_2210011K15Rik | 12.9466 | 0.2064   | 0.75501  | 0.82759 | 12.1546 | 13.7671 | 15.537  | 6.3118  | 13.448  | 16.4609 |
| ENSMUSG000000101797 | 1_Gm29266       | 0       | NA       | NA       | NA      | 0       | 0       | 0       | 0       | 0       | 0       |
| ENSMUSG000000101818 | 1_Gm28269       | 1.20121 | 1.26227  | 0.53788  | NA      | 1.73638 | 0.91781 | 2.39031 | 0       | 0.89653 | 1.26623 |
| ENSMUSG000000101828 | 1_D130051D11Rik | 12.5772 | -0.3914  | 0.57904  | 0.68281 | 15.6274 | 6.42464 | 10.7564 | 16.2303 | 18.8271 | 7.59736 |
| ENSMUSG000000101832 | 1_Gm28982       | 0.60026 | -2.74584 | 0.447    | NA      | 0       | 0       | 0       | 2.70506 | 0.89653 | 0       |
| ENSMUSG000000101848 | 1_4933417E11Rik | 0.15028 | -0.99647 | 0.80707  | NA      | 0       | 0       | 0       | 0.90169 | 0       | 0       |
| ENSMUSG000000101849 | 1_Gm28386       | 3.26292 | -0.83761 | 0.49198  | 0.60375 | 1.73638 | 1.83561 | 3.58546 | 4.50843 | 5.37918 | 2.53245 |
| ENSMUSG000000101856 | 1_1700096K18Rik | 38.4722 | -0.07588 | 0.83636  | 0.88823 | 34.7275 | 39.4656 | 38.2449 | 43.2809 | 35.8612 | 39.253  |
| ENSMUSG000000101859 | 1_Gm29233       | 0.80032 | -1.78838 | 0.59564  | NA      | 0       | 0       | 1.19515 | 3.60674 | 0       | 0       |
| ENSMUSG000000101880 | 1_Gm29282       | 0.14942 | -0.99647 | 0.80707  | NA      | 0       | 0       | 0       | 0       | 0.89653 | 0       |
| ENSMUSG000000101888 | 1_1700025H01Rik | 0.19919 | 0.92709  | 0.82027  | NA      | 0       | 0       | 1.19515 | 0       | 0       | 0       |
| ENSMUSG000000101892 | 1_9130401M01Rik | 352.685 | 0.44212  | 0.00605  | 0.01653 | 396.762 | 371.711 | 450.573 | 300.261 | 281.511 | 315.291 |
| ENSMUSG000000101895 | 1_Gm28981       | 0.58438 | 1.28692  | 0.7301   | NA      | 2.60457 | 0       | 0       | 0.90169 | 0       | 0       |
| ENSMUSG000000101903 | 1_Gm29291       | 4.39782 | -0.52395 | 0.63934  | 0.73516 | 5.20913 | 0.91781 | 4.78062 | 4.50843 | 7.17224 | 3.79868 |
| ENSMUSG000000101904 | 1_Gm29427       | 21.2463 | -0.29247 | 0.65476  | 0.74832 | 29.5184 | 14.6849 | 13.1467 | 15.3287 | 42.1369 | 12.6623 |
| ENSMUSG000000101941 | 1_Gm28979       | 0.4444  | -0.80729 | 0.81753  | NA      | 0.86819 | 0       | 0       | 0.90169 | 0.89653 | 0       |
| ENSMUSG000000101951 | 1_Gm28721       | 1.97305 | -2.27152 | 0.19226  | NA      | 0       | 0.91781 | 1.19515 | 3.60674 | 3.58612 | 2.53245 |
| ENSMUSG000000101959 | 1_Ldhal6b       | 12.3796 | 0.31719  | 0.65777  | 0.75042 | 6.94551 | 17.4383 | 16.7322 | 6.3118  | 11.6549 | 15.1947 |
| ENSMUSG000000101966 | 1_Gm5248        | 0.14942 | -0.99647 | 0.80707  | NA      | 0       | 0       | 0       | 0       | 0.89653 | 0       |
| ENSMUSG000000101972 | 1_Hist1h3i      | 0.15297 | 0.92709  | 0.82027  | NA      | 0       | 0.91781 | 0       | 0       | 0       | 0       |
| ENSMUSG000000101976 | 1_Olfr998       | 0       | NA       | NA       | NA      | 0       | 0       | 0       | 0       | 0       | 0       |
| ENSMUSG000000101997 | 1_Gm28722       | 0.30239 | -0.03469 | 0.99322  | NA      | 0       | 0.91781 | 0       | 0       | 0.89653 | 0       |
| ENSMUSG000000102018 | 6_K230010J24Rik | 119.444 | 0.45224  | 0.07698  | 0.13889 | 139.778 | 140.424 | 132.662 | 98.2837 | 78.8947 | 126.623 |
| ENSMUSG000000102030 | 1_Gm29106       | 3.41294 | -0.31978 | 0.81369  | 0.8713  | 4.34094 | 0       | 4.78062 | 2.70506 | 3.58612 | 5.06491 |
| ENSMUSG000000102037 | 1_Bcl2a1a       | 13.6086 | 3.27761  | 9.65E-05 | 0.00048 | 27.782  | 15.6027 | 31.074  | 3.60674 | 3.58612 | 0       |
| ENSMUSG000000102049 | 1_Zbed6         | 621.761 | -0.76695 | 0.00095  | 0.00343 | 625.096 | 358.862 | 395.596 | 635.688 | 845.428 | 869.898 |
| ENSMUSG000000102067 | 1_Gm29230       | 0.19919 | 0.92709  | 0.82027  | NA      | 0       | 0       | 1.19515 | 0       | 0       | 0       |
| ENSMUSG000000102084 | 1_Gm29638       | 0.14942 | -0.99647 | 0.80707  | NA      | 0       | 0       | 0       | 0       | 0.89653 | 0       |
| ENSMUSG000000102098 | 1_2310016D03Rik | 0.15028 | -0.99647 | 0.80707  | NA      | 0       | 0       | 0       | 0.90169 | 0       | 0       |
| ENSMUSG000000102121 | 1_Gm28065       | 0.4589  | 2.31815  | 0.56231  | NA      | 0       | 2.75342 | 0       | 0       | 0       | 0       |
| ENSMUSG000000102123 | 1_Gm4319        | 3.07322 | -0.24642 | 0.84491  | 0.89423 | 3.47275 | 3.67122 | 1.19515 | 4.50843 | 1.79306 | 3.79868 |
| ENSMUSG000000102144 | 1_4930429P21Rik | 0.29884 | -1.76064 | 0.66373  | NA      | 0       | 0       | 0       | 0       | 1.79306 | 0       |
| ENSMUSG000000102202 | 1_Gm33280       | 25.1781 | -0.67845 | 0.13572  | 0.21998 | 18.232  | 22.9451 | 16.7322 | 29.7556 | 30.482  | 32.9219 |
| ENSMUSG000000102206 | 5_Pcdha11       | 3.83449 | -0.37438 | 0.794    | 0.85725 | 0       | 1.83561 | 8.36608 | 7.21348 | 1.79306 | 3.79868 |
| ENSMUSG000000102222 | 1_Pcdhga10      | 146.074 | 0.11389  | 0.66548  | 0.75656 | 130.228 | 190.904 | 133.857 | 160.5   | 110.273 | 150.681 |
| ENSMUSG000000102252 | 5_Snrpn         | 327.841 | -0.91042 | 0.0006   | 0.00231 | 219.652 | 302.876 | 160.151 | 530.191 | 424.955 | 329.219 |
| ENSMUSG000000102279 | 1_Gm37146       | 0.2894  | 1.67273  | 0.67976  | NA      | 1.73638 | 0       | 0       | 0       | 0       | 0       |
| ENSMUSG000000102312 | 1_Pcdha3        | 1.49669 | -0.67432 | 0.77539  | NA      | 0       | 0       | 3.58546 | 2.70506 | 2.68959 | 0       |
| ENSMUSG000000102336 | 1_Gm37233       | 39.8314 | -0.4868  | 0.19016  | 0.28945 | 27.782  | 39.4656 | 32.2692 | 48.691  | 43.93   | 46.8504 |
| ENSMUSG000000102343 | 1_Gm37381       | 0.1447  | 0.92709  | 0.82027  | NA      | 0.86819 | 0       | 0       | 0       | 0       | 0       |
| ENSMUSG000000102395 | 1_Flg           | 0.19919 | 0.92709  | 0.82027  | NA      | 0       | 0       | 1.19515 | 0       | 0       | 0       |
| ENSMUSG000000102418 | 1_Sh2d1b1       | 16.0361 | 1.28524  | 0.0449   | 0.08862 | 26.9138 | 14.6849 | 26.2934 | 9.01685 | 5.37918 | 13.9285 |
| ENSMUSG000000102422 | 1_Schip1        | 16.9212 | -1.30137 | 0.16919  | 0.26358 | 6.07732 | 22.9451 | 0       | 33.3624 | 12.5514 | 26.5908 |
| ENSMUSG000000102424 | 1_Paupar        | 54.8158 | 0.24323  | 0.48402  | 0.59603 | 63.3778 | 60.5752 | 53.7819 | 35.1657 | 56.4814 | 59.5127 |
| ENSMUSG000000102428 | 1_Pcdhga12      | 36.1701 | -0.27508 | 0.50621  | 0.61668 | 29.5184 | 27.5342 | 41.8304 | 45.0843 | 43.93   | 29.1232 |
| ENSMUSG000000102439 | 2_Flg           | 1.07565 | 3.54623  | 0.16818  | NA      | 4.34094 | 0.91781 | 1.19515 | 0       | 0       | 0       |
| ENSMUSG000000102440 | 1_Pcdhga9       | 114.246 | -0.1256  | 0.6217   | 0.71952 | 92.8962 | 136.753 | 98.0026 | 120.826 | 119.239 | 117.759 |
| ENSMUSG000000102476 | 1_Gm37245       | 0.74207 | 0.5415   | 0.83559  | NA      | 1.73638 | 0.91781 | 0       | 0.90169 | 0.89653 | 0       |
| ENSMUSG000000102531 | 1_1110002O04Rik | 0.85549 | -0.5905  | 0.81537  | NA      | 0.86819 | 0       | 1.19515 | 1.80337 | 0       | 1.26623 |
| ENSMUSG000000102543 | 5_Pcdhgc5       | 52.2322 | -0.41146 | 0.355    | 0.47176 | 59.0368 | 46.8081 | 28.6837 | 58.6096 | 86.0669 | 34.1881 |
| ENSMUSG000000102544 | 1_Gm5103        | 12.4011 | 0.33764  | 0.65179  | 0.74549 | 14.7592 | 19.2739 | 7.17092 | 13.5253 | 4.48265 | 15.1947 |
| ENSMUSG000000102545 | 1_6430573P05Rik | 17.907  | -0.58686 | 0.29005  | 0.40366 | 17.3638 | 11.0137 | 14.3418 | 18.9354 | 17.9306 | 27.857  |
| ENSMUSG000000102548 | 1_Gm16701       | 0.15028 | -0.99647 | 0.80707  | NA      | 0       | 0       | 0       | 0.90169 | 0       | 0       |
| ENSMUSG000000102569 | 1_Gm37041       | 0.30056 | -1.76625 | 0.6627   | NA      | 0       | 0       | 0       | 1.80337 | 0       | 0       |
| ENSMUSG000000102590 | 1_Mannr         | 0.2997  | -1.76345 | 0.66322  | NA      | 0       | 0       | 0       | 0.90169 | 0.89653 | 0       |
| ENSMUSG000000102595 | 1_Gm30097       | 0       | NA       | NA       | NA      | 0       | 0       | 0       | 0       | 0       | 0       |

|                     |                 |         |          |          |          |         |         |         |         |         |         |
|---------------------|-----------------|---------|----------|----------|----------|---------|---------|---------|---------|---------|---------|
| ENSMUSG000000102627 | 1_Snurf         | 17.9327 | -1.10733 | 0.19756  | 0.29812  | 13.0228 | 9.17806 | 11.9515 | 50.4944 | 2.68959 | 20.2596 |
| ENSMUSG000000102669 | 5_Gm42415       | 0.34861 | -0.03469 | 0.99322  | NA       | 0       | 0       | 1.19515 | 0       | 0.89653 | 0       |
| ENSMUSG000000102674 | 1_8030442B05Rik | 2.25837 | 0.31132  | 0.82577  | NA       | 3.47275 | 2.75342 | 1.19515 | 1.80337 | 1.79306 | 2.53245 |
| ENSMUSG000000102679 | 1_Gm20557       | 0.30056 | -1.76625 | 0.6627   | NA       | 0       | 0       | 0       | 1.80337 | 0       | 0       |
| ENSMUSG000000102692 | 1_Dchs2         | 70.2739 | -0.5689  | 0.06556  | 0.1216   | 62.5096 | 66.082  | 40.6352 | 89.2669 | 83.3773 | 79.7723 |
| ENSMUSG000000102697 | 1_Pcdhac2       | 120.048 | -0.97833 | 0.0008   | 0.00296  | 91.1598 | 93.6162 | 57.3674 | 180.337 | 177.513 | 120.292 |
| ENSMUSG000000102724 | 1_Flg           | 0.19919 | 0.92709  | 0.82027  | NA       | 0       | 0       | 1.19515 | 0       | 0       | 0       |
| ENSMUSG000000102742 | 1_Pcdhga11      | 35.468  | -0.31592 | 0.44267  | 0.55782  | 32.9912 | 36.7122 | 25.0982 | 49.5927 | 36.7578 | 31.6557 |
| ENSMUSG000000102748 | 1_Pcdhgb2       | 100.534 | -0.21672 | 0.46488  | 0.57838  | 102.446 | 114.726 | 60.9529 | 113.612 | 101.308 | 110.162 |
| ENSMUSG000000102752 | 1_Gm7694        | 621.458 | -0.18816 | 0.28969  | 0.40332  | 544.354 | 688.354 | 510.331 | 767.334 | 625.778 | 592.594 |
| ENSMUSG000000102758 | 3_Naalad12      | 160.381 | -0.58976 | 0.00533  | 0.01487  | 135.437 | 141.342 | 106.369 | 193.862 | 186.478 | 198.798 |
| ENSMUSG000000102762 | 1_4930403P22Rik | 3.10448 | -2.04685 | 0.16483  | 0.25808  | 2.60457 | 0.91781 | 0       | 3.60674 | 8.96531 | 2.53245 |
| ENSMUSG000000102777 | 1_Gm38161       | 0.59737 | -0.0229  | 0.99351  | NA       | 0.86819 | 0.91781 | 0       | 0.90169 | 0.89653 | 0       |
| ENSMUSG000000102785 | 5_Gm2447        | 0.64273 | 0.13611  | 0.9653   | NA       | 0.86819 | 0       | 1.19515 | 0       | 1.79306 | 0       |
| ENSMUSG000000102794 | 1_Gm37712       | 0       | NA       | NA       | NA       | 0       | 0       | 0       | 0       | 0       | 0       |
| ENSMUSG000000102805 | 5_Gm37240       | 183.111 | -0.38489 | 0.32977  | 0.44634  | 158.01  | 250.561 | 66.9286 | 153.287 | 233.098 | 236.784 |
| ENSMUSG000000102829 | 1_Flg           | 0       | NA       | NA       | NA       | 0       | 0       | 0       | 0       | 0       | 0       |
| ENSMUSG000000102836 | 1_Gm37013       | 0.15028 | -0.99647 | 0.80707  | NA       | 0       | 0       | 0       | 0.90169 | 0       | 0       |
| ENSMUSG000000102843 | 1_Serpinb10     | 139.61  | 0.10891  | 0.68508  | 0.77305  | 179.715 | 117.479 | 137.443 | 111.809 | 165.858 | 125.356 |
| ENSMUSG000000102885 | 1_Gm37280       | 0.21104 | -0.99647 | 0.80707  | NA       | 0       | 0       | 0       | 0       | 0       | 1.26623 |
| ENSMUSG000000102886 | 1_Gm30667       | 0.15028 | -0.99647 | 0.80707  | NA       | 0       | 0       | 0       | 0.90169 | 0       | 0       |
| ENSMUSG000000102887 | 1_Gm10857       | 0.84075 | 3.1742   | 0.24509  | NA       | 1.73638 | 0.91781 | 2.39031 | 0       | 0       | 0       |
| ENSMUSG000000102893 | 1_Gm37855       | 2.00811 | -0.97361 | 0.55242  | NA       | 1.73638 | 0       | 2.39031 | 1.80337 | 3.58612 | 2.53245 |
| ENSMUSG000000102909 | 1_Gm2453        | 0.98662 | 1.13406  | 0.67345  | NA       | 1.73638 | 0       | 2.39031 | 0       | 1.79306 | 0       |
| ENSMUSG000000102917 | 1_Gm37724       | 12.2321 | -0.05194 | 0.93594  | 0.9579   | 15.6274 | 11.9315 | 8.36608 | 12.6236 | 13.448  | 11.396  |
| ENSMUSG000000102918 | 1_Pcdhgc3       | 1117.87 | -0.22527 | 0.25784  | 0.36779  | 1089.58 | 1174.79 | 828.242 | 1434.58 | 1256.94 | 923.079 |
| ENSMUSG000000102938 | 1_Gm38112       | 0.30056 | -1.76625 | 0.6627   | NA       | 0       | 0       | 0       | 1.80337 | 0       | 0       |
| ENSMUSG000000102941 | 1_Gm37552       | 0.19919 | 0.92709  | 0.82027  | NA       | 0       | 0       | 1.19515 | 0       | 0       | 0       |
| ENSMUSG000000102976 | 5_Zc3h11a       | 4282.71 | -0.07355 | 0.56143  | 0.66696  | 4172.51 | 4154.91 | 4192.6  | 3755.52 | 4811.68 | 4609.07 |
| ENSMUSG000000103034 | 1_Gm8797        | 135.69  | -1.90284 | 0.01771  | 0.0409   | 60.7732 | 59.6574 | 51.3916 | 82.0534 | 465.299 | 94.967  |
| ENSMUSG000000103037 | 1_Pcdhgb1       | 61.3372 | -0.94607 | 0.01703  | 0.03964  | 50.3549 | 53.2327 | 21.5128 | 71.2332 | 99.5149 | 72.1749 |
| ENSMUSG000000103067 | 1_Gm30414       | 0.51074 | -2.49114 | 0.44681  | NA       | 0       | 0       | 0       | 0.90169 | 0.89653 | 1.26623 |
| ENSMUSG000000103088 | 1_Pcdhgb6       | 78.6642 | -0.40737 | 0.2264   | 0.33189  | 68.5869 | 71.5888 | 63.3432 | 112.711 | 101.308 | 54.4478 |
| ENSMUSG000000103092 | 1_Pcdha5        | 1.34909 | -3.9125  | 0.14694  | NA       | 0       | 0       | 0       | 4.50843 | 3.58612 | 0       |
| ENSMUSG000000103103 | 1_4833445107Rik | 26.4037 | 0.43054  | 0.36927  | 0.48664  | 26.0457 | 34.8766 | 29.8789 | 27.9522 | 14.3445 | 25.3245 |
| ENSMUSG000000103114 | 1_Gm32200       | 0.63801 | 1.43476  | 0.6437   | NA       | 1.73638 | 0       | 1.19515 | 0       | 0.89653 | 0       |
| ENSMUSG000000103115 | 1_Gm37584       | 14.577  | -0.0882  | 0.88489  | 0.92217  | 11.2864 | 20.1917 | 10.7564 | 13.5253 | 15.241  | 16.4609 |
| ENSMUSG000000103126 | 2_Gm37387       | 0.73176 | 2.99558  | 0.37533  | NA       | 3.47275 | 0.91781 | 0       | 0       | 0       | 0       |
| ENSMUSG000000103144 | 1_Pcdhga1       | 89.9568 | -0.56436 | 0.13241  | 0.21595  | 62.5096 | 107.383 | 47.8062 | 137.958 | 109.377 | 74.7074 |
| ENSMUSG000000103156 | 1_Gm38293       | 1.50646 | -1.95785 | 0.40976  | NA       | 0       | 1.83561 | 0       | 5.41011 | 1.79306 | 0       |
| ENSMUSG000000103158 | 5_Gm31925       | 0.42208 | -2.1835  | 0.58658  | NA       | 0       | 0       | 0       | 0       | 0       | 2.53245 |
| ENSMUSG000000103164 | 1_Gm38150       | 4.53889 | -0.32502 | 0.76129  | 0.8322   | 5.20913 | 5.50683 | 1.19515 | 4.50843 | 4.48265 | 6.33113 |
| ENSMUSG000000103168 | 1_Gm30948       | 0.39838 | 2.07058  | 0.60634  | NA       | 0       | 0       | 2.39031 | 0       | 0       | 0       |
| ENSMUSG000000103170 | 1_Gm37170       | 6.09975 | -0.05637 | 0.95328  | 0.96963  | 6.94551 | 2.75342 | 8.36608 | 3.60674 | 9.86184 | 5.06491 |
| ENSMUSG000000103174 | 1_Gm37168       | 0.78743 | 0.65682  | 0.82121  | NA       | 1.73638 | 0       | 1.19515 | 0       | 1.79306 | 0       |
| ENSMUSG000000103181 | 1_A330069K06Rik | 0.72446 | -1.66533 | 0.57902  | NA       | 0       | 0.91781 | 0       | 0       | 0.89653 | 2.53245 |
| ENSMUSG000000103255 | 1_Pcdhac1       | 5.11246 | -3.31388 | 0.06378  | 0.11884  | 0       | 2.75342 | 0       | 22.5421 | 5.37918 | 0       |
| ENSMUSG000000103283 | 2_Gm37276       | 17.182  | -0.83642 | 0.15308  | 0.24308  | 15.6274 | 13.7671 | 7.17092 | 20.7388 | 17.9306 | 27.857  |
| ENSMUSG000000103305 | 1_Gm34068       | 0       | NA       | NA       | NA       | 0       | 0       | 0       | 0       | 0       | 0       |
| ENSMUSG000000103308 | 5_Gm37800       | 0.2894  | 1.67273  | 0.67976  | NA       | 1.73638 | 0       | 0       | 0       | 0       | 0       |
| ENSMUSG000000103310 | 1_Pcdha12       | 10.3371 | -0.1607  | 0.84253  | 0.89277  | 12.1546 | 10.0959 | 7.17092 | 19.8371 | 8.96531 | 3.79868 |
| ENSMUSG000000103332 | 1_Pcdhga2       | 55.9104 | -0.06598 | 0.87222  | 0.91323  | 59.905  | 63.3286 | 40.6352 | 86.5618 | 39.4473 | 45.5842 |
| ENSMUSG000000103334 | 1_Gm29771       | 0.50043 | 0.71218  | 0.85616  | NA       | 1.73638 | 0       | 0       | 0       | 0       | 1.26623 |
| ENSMUSG000000103335 | 1_Flg           | 0.61187 | 2.73082  | 0.49238  | NA       | 0       | 3.67122 | 0       | 0       | 0       | 0       |
| ENSMUSG000000103346 | 1_C230057A21Rik | 0.59382 | -1.37748 | 0.66284  | NA       | 0.86819 | 0       | 0       | 0.90169 | 1.79306 | 0       |
| ENSMUSG000000103362 | 1_Tdpoz2        | 0.29884 | -1.76064 | 0.66373  | NA       | 0       | 0       | 0       | 0       | 1.79306 | 0       |
| ENSMUSG000000103383 | 1_Gm37754       | 0       | NA       | NA       | NA       | 0       | 0       | 0       | 0       | 0       | 0       |
| ENSMUSG000000103392 | 1_Gm38303       | 0.15028 | -0.99647 | 0.80707  | NA       | 0       | 0       | 0       | 0.90169 | 0       | 0       |
| ENSMUSG000000103400 | 1_Gm15853       | 7.76518 | -0.66329 | 0.43951  | 0.55481  | 10.4183 | 2.75342 | 4.78062 | 9.01685 | 10.7584 | 8.86359 |
| ENSMUSG000000103408 | 1_Gm37933       | 2.5215  | -2.15182 | 0.16588  | 0.2594   | 0.86819 | 1.83561 | 0       | 5.41011 | 4.48265 | 2.53245 |
| ENSMUSG000000103409 | 1_Lsmem2        | 3.36955 | 0.33627  | 0.78361  | 0.84948  | 1.73638 | 3.67122 | 5.97577 | 4.50843 | 1.79306 | 2.53245 |
| ENSMUSG000000103428 | 1_Gm20754       | 0       | NA       | NA       | NA       | 0       | 0       | 0       | 0       | 0       | 0       |
| ENSMUSG000000103442 | 5_Pcdha1        | 5.08261 | -0.20309 | 0.86388  | 0.90763  | 5.20913 | 5.50683 | 3.58546 | 9.91854 | 6.27571 | 0       |
| ENSMUSG000000103451 | 1_Gm33973       | 0.4989  | -0.80902 | 0.81036  | NA       | 0       | 0       | 1.19515 | 0.90169 | 0.89653 | 0       |
| ENSMUSG000000103464 | 1_Gm38246       | 3.27728 | 0.10284  | 0.94722  | 0.96537  | 0       | 5.50683 | 4.78062 | 7.21348 | 0.89653 | 1.26623 |
| ENSMUSG000000103472 | 1_Pcdhga7       | 198.081 | -0.04107 | 0.82588  | 0.88063  | 177.11  | 208.342 | 200.786 | 195.666 | 211.581 | 194.999 |
| ENSMUSG000000103517 | 1_Gm37432       | 0.19919 | 0.92709  | 0.82027  | NA       | 0       | 0       | 1.19515 | 0       | 0       | 0       |
| ENSMUSG000000103523 | 1_2210017101Rik | 0.35216 | 1.91112  | 0.63543  | NA       | 0       | 0.91781 | 1.19515 | 0       | 0       | 0       |
| ENSMUSG000000103565 | 1_Sgsm3         | 58.0834 | 4.86102  | 1.60E-16 | 1.89E-14 | 85.9507 | 147.767 | 103.978 | 8.11517 | 2.68959 | 0       |
| ENSMUSG000000103567 | 1_Pcdhga5       | 160.156 | -0.30278 | 0.26504  | 0.37628  | 151.933 | 179.89  | 98.0026 | 182.14  | 200.823 | 148.149 |
| ENSMUSG000000103585 | 1_Pcdhgb4       | 75.4652 | -0.44528 | 0.20663  | 0.30906  | 70.3233 | 81.6847 | 39.4401 | 101.89  | 92.3426 | 67.11   |
| ENSMUSG000000103586 | 5_5830405F06Rik | 0.14942 | -0.99647 | 0.80707  | NA       | 0       | 0       | 0       | 0       | 0.89653 | 0       |
| ENSMUSG000000103594 | 1_A430034D21Rik | 0.14942 | -0.99647 | 0.80707  | NA       | 0       | 0       | 0       | 0       | 0.89653 | 0       |
| ENSMUSG000000103640 | 1_Gm31406       | 0.15028 | -0.99647 | 0.80707  | NA       | 0       | 0       | 0       | 0.90169 | 0       | 0       |
| ENSMUSG000000103655 | 1_Gm37202       | 0.14942 | -0.99647 | 0.80707  | NA       | 0       | 0       | 0       | 0       | 0.89653 | 0       |
| ENSMUSG000000103677 | 1_Pcdhga4       | 252.094 | -0.33072 | 0.08129  | 0.14519  | 237.015 | 240.465 | 192.42  | 301.163 | 295.855 | 245.648 |
| ENSMUSG000000103686 | 1_Gm37073       | 1.21775 | 1.28033  | 0.57312  | NA       | 0       | 2.75342 | 2.39031 | 0       | 0.89653 | 1.26623 |
| ENSMUSG000000103692 | 1_4930503O07Rik | 0       | NA       | NA       | NA       | 0       | 0       | 0       | 0       | 0       | 0       |
| ENSMUSG000000103707 | 5_Pcdha6        | 0.44827 | -2.3261  | 0.56139  | NA       | 0       | 0       | 0       | 0       | 2.68959 | 0       |

|                     |                 |         |          |          |          |         |         |         |         |         |         |
|---------------------|-----------------|---------|----------|----------|----------|---------|---------|---------|---------|---------|---------|
| ENSMUSG000000103708 | 1_Gm33222       | 0.59758 | 2.66585  | 0.50308  | NA       | 0       | 0       | 3.58546 | 0       | 0       | 0       |
| ENSMUSG000000103711 | 1_Tstd1         | 24.9154 | 0.37846  | 0.42647  | 0.54187  | 24.3093 | 33.041  | 27.4885 | 26.1489 | 23.3098 | 15.1947 |
| ENSMUSG000000103718 | 1_Gm35299       | 0.4589  | 2.31815  | 0.56231  | NA       | 0       | 2.75342 | 0       | 0       | 0       | 0       |
| ENSMUSG000000103726 | 1_Gm30074       | 0.80927 | -0.72724 | 0.77643  | NA       | 0.86819 | 0.91781 | 0       | 1.80337 | 0       | 1.26623 |
| ENSMUSG000000103749 | 1_Pcdhgb5       | 68.9533 | -0.71063 | 0.04134  | 0.08276  | 39.0685 | 73.4244 | 44.2207 | 98.2837 | 72.619  | 86.1034 |
| ENSMUSG000000103750 | 1_Flg           | 0.19919 | 0.92709  | 0.82027  | NA       | 0       | 0       | 1.19515 | 0       | 0       | 0       |
| ENSMUSG000000103766 | 5_Gm38392       | 192.304 | 1.23613  | 3.49E-08 | 5.00E-07 | 304.734 | 230.369 | 273.69  | 113.612 | 95.9288 | 135.486 |
| ENSMUSG000000103770 | 1_Pcdha9        | 0.7514  | -3.06435 | 0.43974  | NA       | 0       | 0       | 0       | 4.50843 | 0       | 0       |
| ENSMUSG000000103777 | 1_Flg           | 0.1447  | 0.92709  | 0.82027  | NA       | 0.86819 | 0       | 0       | 0       | 0       | 0       |
| ENSMUSG000000103793 | 1_Pcdhga6       | 132.363 | -0.30902 | 0.16602  | 0.25957  | 113.733 | 132.164 | 108.759 | 138.86  | 161.376 | 139.285 |
| ENSMUSG000000103800 | 1_Pcdha8        | 4.37189 | -0.9757  | 0.35568  | 0.47244  | 2.60457 | 2.75342 | 3.58546 | 7.21348 | 6.27571 | 3.79868 |
| ENSMUSG000000103827 | 1_Gm32950       | 0.7441  | -1.79146 | 0.53825  | NA       | 0.86819 | 0       | 0       | 1.80337 | 1.79306 | 0       |
| ENSMUSG000000103844 | 1_4933436E23Rik | 0.15297 | 0.92709  | 0.82027  | NA       | 0       | 0.91781 | 0       | 0       | 0       | 0       |
| ENSMUSG000000103897 | 1_Pcdhga8       | 66.2799 | -0.59789 | 0.08716  | 0.15348  | 55.5641 | 64.2464 | 38.2449 | 103.694 | 72.619  | 63.3113 |
| ENSMUSG000000103906 | 1_Tigd5         | 63.5028 | 0.80669  | 0.02897  | 0.06169  | 79.8733 | 82.6025 | 80.0753 | 66.7247 | 28.689  | 43.0517 |
| ENSMUSG000000103912 | 1_Gm33819       | 0.30325 | -0.03469 | 0.99322  | NA       | 0       | 0.91781 | 0       | 0.90169 | 0       | 0       |
| ENSMUSG000000103923 | 1_Gm37896       | 0.8888  | -1.02821 | 0.70868  | NA       | 1.73638 | 0       | 0       | 1.80337 | 1.79306 | 0       |
| ENSMUSG000000103927 | 1_Gm9932        | 1.62798 | -2.06783 | 0.30151  | NA       | 0       | 1.83561 | 0       | 3.60674 | 1.79306 | 2.53245 |
| ENSMUSG000000103965 | 1_Gm30173       | 1.18378 | -0.7726  | 0.75785  | NA       | 2.60457 | 0       | 0       | 2.70506 | 1.79306 | 0       |
| ENSMUSG000000103983 | 1_Gm20045       | 120.554 | -0.48707 | 0.03142  | 0.06602  | 98.9735 | 111.054 | 90.8317 | 135.253 | 147.928 | 139.285 |
| ENSMUSG000000103998 | 1_Gm38025       | 4.5995  | 0.819    | 0.45247  | 0.56697  | 8.68188 | 6.42464 | 2.39031 | 4.50843 | 1.79306 | 3.79868 |
| ENSMUSG000000104000 | 1_Gm38335       | 0.30056 | -1.76625 | 0.6627   | NA       | 0       | 0       | 0       | 1.80337 | 0       | 0       |
| ENSMUSG000000104003 | 1_Gm42414       | 13.4875 | 0.21468  | 0.75444  | 0.82706  | 19.9683 | 9.17806 | 14.3418 | 7.21348 | 18.8271 | 11.396  |
| ENSMUSG000000104004 | 1_4930565D16Rik | 0       | NA       | NA       | NA       | 0       | 0       | 0       | 0       | 0       | 0       |
| ENSMUSG000000104011 | 1_Gm32391       | 6.11406 | -0.41028 | 0.68738  | 0.77492  | 5.20913 | 9.17806 | 1.19515 | 9.91854 | 3.58612 | 7.59736 |
| ENSMUSG000000104043 | 1_Gm6525        | 32.5591 | -1.01167 | 0.02737  | 0.05895  | 28.6502 | 16.5205 | 19.1225 | 34.264  | 38.5508 | 58.2464 |
| ENSMUSG000000104063 | 1_Pcdhgb7       | 87.8231 | -0.06349 | 0.83239  | 0.88538  | 61.6414 | 89.0271 | 107.564 | 96.4803 | 79.7912 | 92.4346 |
| ENSMUSG000000104077 | 1_Gm37027       | 0.86204 | -0.56015 | 0.8244   | NA       | 0       | 0.91781 | 1.19515 | 0       | 1.79306 | 1.26623 |
| ENSMUSG000000104109 | 1_Gm30292       | 0       | NA       | NA       | NA       | 0       | 0       | 0       | 0       | 0       | 0       |
| ENSMUSG000000104111 | 1_Gm37294       | 0       | NA       | NA       | NA       | 0       | 0       | 0       | 0       | 0       | 0       |
| ENSMUSG000000104148 | 5_Pcdha2        | 4.63798 | -2.86292 | 0.11368  | 0.1911   | 0       | 0       | 3.58546 | 6.3118  | 17.9306 | 0       |
| ENSMUSG000000104156 | 2_Gm38102       | 217.738 | 0.44606  | 0.03864  | 0.07823  | 230.938 | 308.383 | 213.933 | 174.025 | 204.409 | 174.739 |
| ENSMUSG000000104158 | 2_Gm38100       | 0       | NA       | NA       | NA       | 0       | 0       | 0       | 0       | 0       | 0       |
| ENSMUSG000000104212 | 1_Gm37986       | 0.19919 | 0.92709  | 0.82027  | NA       | 0       | 0       | 1.19515 | 0       | 0       | 0       |
| ENSMUSG000000104217 | 1_Gm37988       | 23.9629 | 0.77344  | 0.7509   | 0.82408  | 27.782  | 41.3013 | 21.5128 | 0       | 0       | 53.1815 |
| ENSMUSG000000104237 | 1_Gm33533       | 6.54207 | -0.50617 | 0.60983  | 0.70951  | 3.47275 | 9.17806 | 3.58546 | 3.60674 | 14.3445 | 5.06491 |
| ENSMUSG000000104252 | 5_Pcdha4        | 9.79056 | -1.03308 | 0.30639  | 0.42134  | 12.1546 | 0       | 7.17092 | 12.6236 | 17.9306 | 8.86359 |
| ENSMUSG000000104266 | 1_Gm37748       | 3.20373 | -1.28437 | 0.3628   | 0.47998  | 4.34094 | 0       | 1.19515 | 4.50843 | 5.37918 | 3.79868 |
| ENSMUSG000000104275 | 1_Gm37867       | 0.14942 | -0.99647 | 0.80707  | NA       | 0       | 0       | 0       | 0       | 0.89653 | 0       |
| ENSMUSG000000104301 | 3_Wdr49         | 3.49676 | -1.02442 | 0.39684  | 0.51431  | 0.86819 | 3.67122 | 2.39031 | 3.60674 | 5.37918 | 5.06491 |
| ENSMUSG000000104318 | 1_Pcdha7        | 0.44827 | -2.3261  | 0.56139  | NA       | 0       | 0       | 0       | 0       | 2.68959 | 0       |
| ENSMUSG000000104328 | 1_Gm37323       | 2.83777 | -1.23671 | 0.39192  | 0.50938  | 0       | 2.75342 | 2.39031 | 2.70506 | 5.37918 | 3.79868 |
| ENSMUSG000000104336 | 1_Gm34240       | 0.19919 | 0.92709  | 0.82027  | NA       | 0       | 0       | 1.19515 | 0       | 0       | 0       |
| ENSMUSG000000104340 | 1_Gm10522       | 0.19919 | 0.92709  | 0.82027  | NA       | 0       | 0       | 1.19515 | 0       | 0       | 0       |
| ENSMUSG000000104346 | 1_Pcdhga3       | 57.449  | -0.68643 | 0.03999  | 0.08051  | 56.4322 | 34.8766 | 40.6352 | 70.3315 | 75.3086 | 67.11   |
| ENSMUSG000000104367 | 1_Gm38079       | 23.6616 | 0.64929  | 0.20412  | 0.30602  | 32.123  | 22.0273 | 32.2692 | 19.8371 | 11.6549 | 24.0583 |
| ENSMUSG000000104401 | 1_Gm20750       | 0.15028 | -0.99647 | 0.80707  | NA       | 0       | 0       | 0       | 0.90169 | 0       | 0       |
| ENSMUSG000000104411 | 1_Gm30340       | 1.18378 | -0.7726  | 0.75785  | NA       | 2.60457 | 0       | 0       | 2.70506 | 1.79306 | 0       |
| ENSMUSG000000104414 | 1_Gm37799       | 0.43968 | 0.71095  | 0.86073  | NA       | 1.73638 | 0       | 0       | 0.90169 | 0       | 0       |
| ENSMUSG000000104445 | 1_Rhbg          | 399.857 | 1.55279  | 2.22E-11 | 8.71E-10 | 517.44  | 578.218 | 691.994 | 202.879 | 145.238 | 263.375 |
| ENSMUSG000000104448 | 1_Gm37256       | 0.21104 | -0.99647 | 0.80707  | NA       | 0       | 0       | 0       | 0       | 0       | 1.26623 |
| ENSMUSG000000104509 | 1_Gm33994       | 0.1447  | 0.92709  | 0.82027  | NA       | 0.86819 | 0       | 0       | 0       | 0       | 0       |
| ENSMUSG000000104520 | 1_Gm37336       | 2.01055 | -0.28263 | 0.86389  | NA       | 1.73638 | 3.67122 | 0       | 1.80337 | 3.58612 | 1.26623 |
| ENSMUSG000000104529 | 4_Rbakdn        | 1.52457 | 0.20179  | 0.90686  | NA       | 0.86819 | 2.75342 | 1.19515 | 0.90169 | 0.89653 | 2.53245 |
| ENSMUSG000000104556 | 1_Gm43192       | 0.4444  | -0.80729 | 0.81753  | NA       | 0.86819 | 0       | 0       | 0.90169 | 0.89653 | 0       |
| ENSMUSG000000104557 | 1_Gm36520       | 0       | NA       | NA       | NA       | 0       | 0       | 0       | 0       | 0       | 0       |
| ENSMUSG000000104586 | 1_4921539H07Rik | 3.39013 | -2.64345 | 0.06607  | 0.12238  | 0.86819 | 1.83561 | 0       | 3.60674 | 8.96531 | 5.06491 |
| ENSMUSG000000104588 | 1_Gm43666       | 0.39838 | 2.07058  | 0.60634  | NA       | 0       | 0       | 2.39031 | 0       | 0       | 0       |
| ENSMUSG000000104607 | 1_Gm43202       | 0.2997  | -1.76345 | 0.66322  | NA       | 0       | 0       | 0       | 0.90169 | 0.89653 | 0       |
| ENSMUSG000000104619 | 1_Gm42678       | 0.81044 | -3.16783 | 0.24943  | NA       | 0       | 0       | 0       | 1.80337 | 1.79306 | 1.26623 |
| ENSMUSG000000104633 | 1_Gm43687       | 1.84366 | -1.93768 | 0.39194  | NA       | 0       | 0       | 2.39031 | 3.60674 | 0       | 5.06491 |
| ENSMUSG000000104667 | 1_Gm4961        | 1.69538 | 1.21526  | 0.46984  | NA       | 2.60457 | 0.91781 | 3.58546 | 0.90169 | 0.89653 | 1.26623 |
| ENSMUSG000000104671 | 1_Gm43062       | 14.4083 | -1.04942 | 0.09922  | 0.17105  | 6.07732 | 9.17806 | 13.1467 | 23.4438 | 14.3445 | 20.2596 |
| ENSMUSG000000104675 | 1_Gm43689       | 0.1447  | 0.92709  | 0.82027  | NA       | 0.86819 | 0       | 0       | 0       | 0       | 0       |
| ENSMUSG000000104684 | 1_5430427N15Rik | 3.26328 | -0.07072 | 0.95223  | 0.96877  | 4.34094 | 2.75342 | 2.39031 | 3.60674 | 2.68959 | 3.79868 |
| ENSMUSG000000104701 | 1_Gm42555       | 1.55798 | -3.01262 | 0.22077  | NA       | 0.86819 | 0       | 0       | 7.21348 | 0       | 1.26623 |
| ENSMUSG000000104713 | 4_Gbp6          | 793.803 | 2.49779  | 2.06E-29 | 1.03E-26 | 1362.19 | 1148.17 | 1536.97 | 177.632 | 320.061 | 217.791 |
| ENSMUSG000000104736 | 1_Gm43146       | 0       | NA       | NA       | NA       | 0       | 0       | 0       | 0       | 0       | 0       |
| ENSMUSG000000104752 | 1_Gm5565        | 0.81936 | 0.3965   | 0.89166  | NA       | 0       | 2.75342 | 0       | 0       | 0.89653 | 1.26623 |
| ENSMUSG000000104763 | 1_9830132P13Rik | 3.44776 | 0.34177  | 0.77626  | 0.84367  | 6.07732 | 1.83561 | 3.58546 | 1.80337 | 3.58612 | 3.79868 |
| ENSMUSG000000104781 | 1_Gm43303       | 1.01941 | 0.90357  | 0.70808  | NA       | 0       | 2.75342 | 1.19515 | 0.90169 | 0       | 1.26623 |
| ENSMUSG000000104818 | 1_Gm43661       | 0.84432 | 1.81559  | 0.52387  | NA       | 2.60457 | 0       | 1.19515 | 0       | 0       | 1.26623 |
| ENSMUSG000000104824 | 1_Gm21663       | 0.96696 | -1.07757 | 0.65382  | NA       | 0       | 1.83561 | 0       | 1.80337 | 0.89653 | 1.26623 |
| ENSMUSG000000104833 | 1_Gm42489       | 0.2894  | 1.67273  | 0.67976  | NA       | 1.73638 | 0       | 0       | 0       | 0       | 0       |
| ENSMUSG000000104835 | 4_Gm5547        | 2.63017 | 0.55149  | 0.70246  | 0.78721  | 4.34094 | 2.75342 | 2.39031 | 3.60674 | 2.68959 | 0       |
| ENSMUSG000000104861 | 1_RP24-490H13   | 0.74679 | -0.58966 | 0.82082  | NA       | 0.86819 | 0.91781 | 0       | 0.90169 | 1.79306 | 0       |
| ENSMUSG000000104878 | 1_Gm43567       | 0.19919 | 0.92709  | 0.82027  | NA       | 0       | 0       | 1.19515 | 0       | 0       | 0       |
| ENSMUSG000000104904 | 1_Gm43082       | 3.34175 | -0.64088 | 0.59102  | 0.69323  | 1.73638 | 3.67122 | 2.39031 | 2.70506 | 4.48265 | 5.06491 |
| ENSMUSG000000104937 | 1_Gm43057       | 0.69336 | 1.56389  | 0.60669  | NA       | 0.86819 | 0       | 2.39031 | 0.90169 | 0       | 0       |

|                     |                 |         |          |          |          |         |         |         |         |         |         |
|---------------------|-----------------|---------|----------|----------|----------|---------|---------|---------|---------|---------|---------|
| ENSMUSG000000104939 | 1_Gm33651       | 0.75678 | -0.56237 | 0.86956  | NA       | 0       | 1.83561 | 0       | 2.70506 | 0       | 0       |
| ENSMUSG000000104941 | 1_Gm8953        | 4.27162 | 4.51717  | 0.00588  | 0.01613  | 13.891  | 3.67122 | 7.17092 | 0       | 0.89653 | 0       |
| ENSMUSG000000104955 | 1_1700016F12Rik | 0.58706 | 2.67811  | 0.46198  | NA       | 2.60457 | 0.91781 | 0       | 0       | 0       | 0       |
| ENSMUSG000000105000 | 1_Gm43616       | 0       | NA       | NA       | NA       | 0       | 0       | 0       | 0       | 0       | 0       |
| ENSMUSG000000105003 | 1_Gm42512       | 1.51012 | -0.55792 | 0.8123   | NA       | 0       | 3.67122 | 0       | 1.80337 | 3.58612 | 0       |
| ENSMUSG000000105006 | 1_Gm9484        | 8.41365 | -0.03572 | 0.96383  | 0.97656  | 6.07732 | 12.8493 | 5.97577 | 9.01685 | 8.96531 | 7.59736 |
| ENSMUSG000000105039 | 1_Gm42637       | 0.44709 | 0.74829  | 0.83033  | NA       | 0.86819 | 0.91781 | 0       | 0       | 0.89653 | 0       |
| ENSMUSG000000105053 | 1_Gm43064       | 0       | NA       | NA       | NA       | 0       | 0       | 0       | 0       | 0       | 0       |
| ENSMUSG000000105057 | 1_Gm40190       | 0.45063 | 2.29438  | 0.56648  | NA       | 0.86819 | 1.83561 | 0       | 0       | 0       | 0       |
| ENSMUSG000000105068 | 1_Gm42950       | 0.64445 | 0.13084  | 0.96662  | NA       | 0.86819 | 0       | 1.19515 | 1.80337 | 0       | 0       |
| ENSMUSG000000105076 | 1_A930003O13Rik | 13.9667 | -1.49081 | 0.05511  | 0.10508  | 6.94551 | 9.17806 | 5.97577 | 27.0506 | 29.5855 | 5.06491 |
| ENSMUSG000000105078 | 1_Gm35911       | 0.14942 | -0.99647 | 0.80707  | NA       | 0       | 0       | 0       | 0       | 0.89653 | 0       |
| ENSMUSG000000105096 | 1_Gbp10         | 394.045 | 2.86232  | 1.49E-33 | 1.15E-30 | 675.451 | 602.08  | 800.753 | 64.9214 | 121.032 | 100.032 |
| ENSMUSG000000105103 | 1_Gm43191       | 49.9529 | 0.54836  | 0.45066  | 0.56549  | 70.3233 | 42.2191 | 65.7335 | 5.41011 | 93.2392 | 22.7921 |
| ENSMUSG000000105127 | 1_Gm42470       | 5.11431 | 0.60418  | 0.52886  | 0.63764  | 6.94551 | 5.50683 | 5.97577 | 3.60674 | 3.58612 | 5.06491 |
| ENSMUSG000000105161 | 1_Gm42595       | 64.0095 | -0.10196 | 0.7502   | 0.82352  | 71.1914 | 51.3971 | 62.148  | 54.1011 | 65.4467 | 79.7723 |
| ENSMUSG000000105168 | 1_Gm43565       | 0.60091 | 1.34072  | 0.67044  | NA       | 0.86819 | 1.83561 | 0       | 0.90169 | 0       | 0       |
| ENSMUSG000000105204 | 1_Gm43738       | 3.3572  | -0.50706 | 0.7592   | 0.83062  | 0       | 8.26025 | 0       | 2.70506 | 5.37918 | 3.79868 |
| ENSMUSG000000105208 | 1_Gm43525       | 0       | NA       | NA       | NA       | 0       | 0       | 0       | 0       | 0       | 0       |
| ENSMUSG000000105218 | 4_Gm43248       | 0.14942 | -0.99647 | 0.80707  | NA       | 0       | 0       | 0       | 0       | 0.89653 | 0       |
| ENSMUSG000000105219 | 1_Gm43821       | 0.21104 | -0.99647 | 0.80707  | NA       | 0       | 0       | 0       | 0       | 0       | 1.26623 |
| ENSMUSG000000105239 | 1_Gm43091       | 0.44236 | 2.27028  | 0.57071  | NA       | 1.73638 | 0.91781 | 0       | 0       | 0       | 0       |
| ENSMUSG000000105258 | 1_Gm42784       | 0       | NA       | NA       | NA       | 0       | 0       | 0       | 0       | 0       | 0       |
| ENSMUSG000000105260 | 1_Gm42434       | 0.30239 | -0.03469 | 0.99322  | NA       | 0       | 0.91781 | 0       | 0       | 0.89653 | 0       |
| ENSMUSG000000105276 | 1_Gm42691       | 0.14942 | -0.99647 | 0.80707  | NA       | 0       | 0       | 0       | 0       | 0.89653 | 0       |
| ENSMUSG000000105279 | 1_Gm6260        | 0.21104 | -0.99647 | 0.80707  | NA       | 0       | 0       | 0       | 0       | 0       | 1.26623 |
| ENSMUSG000000105283 | 1_Gm33370       | 1.39886 | 0.99378  | 0.65063  | NA       | 0       | 0.91781 | 4.78062 | 0.90169 | 1.79306 | 0       |
| ENSMUSG000000105324 | 1_Gm42705       | 0       | NA       | NA       | NA       | 0       | 0       | 0       | 0       | 0       | 0       |
| ENSMUSG000000105331 | 1_Gm29865       | 0.36046 | -1.978   | 0.62369  | NA       | 0       | 0       | 0       | 0       | 0.89653 | 1.26623 |
| ENSMUSG000000105335 | 1_Gm42423       | 0       | NA       | NA       | NA       | 0       | 0       | 0       | 0       | 0       | 0       |
| ENSMUSG000000105337 | 4_Gm43832       | 0.21104 | -0.99647 | 0.80707  | NA       | 0       | 0       | 0       | 0       | 0       | 1.26623 |
| ENSMUSG000000105340 | 4_Gm42878       | 54.9281 | -1.43586 | 8.37E-05 | 0.00043  | 23.4411 | 40.3834 | 25.0982 | 88.3652 | 85.1704 | 67.11   |
| ENSMUSG000000105345 | 1_BC030343      | 26.1783 | -0.65838 | 0.19563  | 0.29568  | 13.891  | 31.2054 | 15.537  | 30.6573 | 27.7924 | 37.9868 |
| ENSMUSG000000105352 | 4_C030018K13Rik | 0       | NA       | NA       | NA       | 0       | 0       | 0       | 0       | 0       | 0       |
| ENSMUSG000000105353 | 1_Gm42428       | 6.95022 | -0.05012 | 0.95515  | 0.97082  | 8.68188 | 9.17806 | 2.39031 | 6.3118  | 6.27571 | 8.86359 |
| ENSMUSG000000105354 | 1_RP23-151C5    | 2.95764 | 1.94096  | 0.32077  | 0.43639  | 9.55007 | 4.58903 | 0       | 3.60674 | 0       | 0       |
| ENSMUSG000000105361 | 1_Yam1          | 39611.6 | 0.03879  | 0.77047  | 0.83874  | 42663.6 | 40608.3 | 37157.3 | 38764.4 | 33874.5 | 44601.6 |
| ENSMUSG000000105376 | 4_Gm42487       | 1.81403 | -1.88444 | 0.42863  | NA       | 0       | 0       | 2.39031 | 0       | 0.89653 | 7.59736 |
| ENSMUSG000000105383 | 4_Gm42641       | 216.038 | 0.20386  | 0.35669  | 0.47331  | 204.024 | 200.999 | 289.227 | 201.978 | 178.41  | 221.59  |
| ENSMUSG000000105402 | 4_Gm3716        | 119.648 | -0.91402 | 6.05E-05 | 0.00032  | 83.3461 | 90.8628 | 74.0996 | 155.09  | 152.41  | 162.077 |
| ENSMUSG000000105437 | 1_Gm42450       | 0.74293 | 0.53888  | 0.85492  | NA       | 1.73638 | 0.91781 | 0       | 1.80337 | 0       | 0       |
| ENSMUSG000000105440 | 1_Gm43673       | 3.37524 | 0.34564  | 0.7862   | 0.85175  | 0.86819 | 4.58903 | 5.97577 | 1.80337 | 4.48265 | 2.53245 |
| ENSMUSG000000105443 | 1_Gm43837       | 0.21104 | -0.99647 | 0.80707  | NA       | 0       | 0       | 0       | 0       | 0       | 1.26623 |
| ENSMUSG000000105471 | 1_A430073D23Rik | 0.51429 | -1.01187 | 0.76286  | NA       | 0       | 0.91781 | 0       | 0.90169 | 0       | 1.26623 |
| ENSMUSG000000105475 | 1_4930431L21Rik | 0.15028 | -0.99647 | 0.80707  | NA       | 0       | 0       | 0       | 0.90169 | 0       | 0       |
| ENSMUSG000000105476 | 1_Gm43740       | 26.5281 | -0.36831 | 0.51226  | 0.6224   | 31.2548 | 15.6027 | 22.7079 | 17.132  | 48.4127 | 24.0583 |
| ENSMUSG000000105484 | 1_Gm42775       | 0.1447  | 0.92709  | 0.82027  | NA       | 0.86819 | 0       | 0       | 0       | 0       | 0       |
| ENSMUSG000000105501 | 1_5330426L24Rik | 0.30594 | 1.73752  | 0.66765  | NA       | 0       | 1.83561 | 0       | 0       | 0       | 0       |
| ENSMUSG000000105504 | 4_Gbp5          | 397.169 | 3.085    | 5.78E-24 | 1.69E-21 | 801.338 | 431.369 | 897.561 | 61.3146 | 76.2051 | 115.227 |
| ENSMUSG000000105511 | 1_Gm42703       | 0.15028 | -0.99647 | 0.80707  | NA       | 0       | 0       | 0       | 0.90169 | 0       | 0       |
| ENSMUSG000000105516 | 4_Gm43536       | 1.82427 | -0.32863 | 0.83361  | NA       | 0.86819 | 2.75342 | 1.19515 | 1.80337 | 1.79306 | 2.53245 |
| ENSMUSG000000105518 | 1_Gm42674       | 0       | NA       | NA       | NA       | 0       | 0       | 0       | 0       | 0       | 0       |
| ENSMUSG000000105527 | 1_4933424H11Rik | 0.6065  | 0.00563  | 0.99878  | NA       | 0       | 1.83561 | 0       | 1.80337 | 0       | 0       |
| ENSMUSG000000105535 | 1_Gm43077       | 0.51343 | -1.00887 | 0.76364  | NA       | 0       | 0.91781 | 0       | 0       | 0.89653 | 1.26623 |
| ENSMUSG000000105550 | 1_Gm42586       | 1.74494 | 0.73038  | 0.65069  | NA       | 3.47275 | 1.83561 | 1.19515 | 1.80337 | 0.89653 | 1.26623 |
| ENSMUSG000000105552 | 1_Gm19710       | 10.1965 | 0.02491  | 0.97326  | 0.98287  | 16.4956 | 8.26025 | 5.97577 | 11.7219 | 9.86184 | 8.86359 |
| ENSMUSG000000105560 | 1_Gm42744       | 0.45622 | 0.77574  | 0.84797  | NA       | 0       | 1.83561 | 0       | 0.90169 | 0       | 0       |
| ENSMUSG000000105570 | 1_Gm42682       | 0.29498 | -0.03469 | 0.99322  | NA       | 0.86819 | 0       | 0       | 0.90169 | 0       | 0       |
| ENSMUSG000000105575 | 1_Gm43475       | 0       | NA       | NA       | NA       | 0       | 0       | 0       | 0       | 0       | 0       |
| ENSMUSG000000105579 | 2_Gm43251       | 0.60478 | 0.01114  | 0.99759  | NA       | 0       | 1.83561 | 0       | 0       | 1.79306 | 0       |
| ENSMUSG000000105602 | 1_Gm10636       | 1.60139 | 0.6772   | 0.70321  | NA       | 0.86819 | 2.75342 | 2.39031 | 1.80337 | 1.79306 | 0       |
| ENSMUSG000000105636 | 1_Gm43625       | 2.4855  | -0.38862 | 0.78663  | 0.85201  | 4.34094 | 0.91781 | 1.19515 | 3.60674 | 3.58612 | 1.26623 |
| ENSMUSG000000105646 | 1_Gm43291       | 1.07211 | -2.29744 | 0.38264  | NA       | 0       | 0       | 1.19515 | 2.70506 | 0       | 2.53245 |
| ENSMUSG000000105650 | 1_Gm42889       | 1.37181 | -2.73163 | 0.20992  | NA       | 0       | 0       | 1.19515 | 3.60674 | 0.89653 | 2.53245 |
| ENSMUSG000000105651 | 1_Gm43003       | 0.74786 | 1.69624  | 0.62517  | NA       | 0       | 0       | 3.58546 | 0.90169 | 0       | 0       |
| ENSMUSG000000105652 | 1_4930519L02Rik | 0.44795 | 0.74833  | 0.83022  | NA       | 0.86819 | 0.91781 | 0       | 0.90169 | 0       | 0       |
| ENSMUSG000000105664 | 1_Gm42797       | 0.30056 | -1.76625 | 0.6627   | NA       | 0       | 0       | 0       | 1.80337 | 0       | 0       |
| ENSMUSG000000105686 | 1_Gm43252       | 2.97269 | -2.24615 | 0.13245  | 0.21597  | 0.86819 | 0       | 2.39031 | 3.60674 | 7.17224 | 3.79868 |
| ENSMUSG000000105699 | 1_Gm43703       | 1.87791 | -0.26299 | 0.87802  | NA       | 0       | 2.75342 | 2.39031 | 0.90169 | 2.68959 | 2.53245 |
| ENSMUSG000000105704 | 1_Gm43055       | 1.04595 | -3.54085 | 0.3244   | NA       | 0       | 0       | 0       | 0       | 6.27571 | 0       |
| ENSMUSG000000105734 | 1_4930558C23Rik | 0.98276 | 2.19938  | 0.41443  | NA       | 2.60457 | 0       | 2.39031 | 0.90169 | 0       | 0       |
| ENSMUSG000000105765 | 1_4930539C22Rik | 0.58438 | 1.28692  | 0.7301   | NA       | 2.60457 | 0       | 0       | 0.90169 | 0       | 0       |
| ENSMUSG000000105769 | 1_Gm43351       | 0.5891  | -0.05433 | 0.98647  | NA       | 1.73638 | 0       | 0       | 0.90169 | 0.89653 | 0       |
| ENSMUSG000000105789 | 1_Gm42997       | 1.78387 | -1.20885 | 0.49218  | NA       | 0       | 0.91781 | 2.39031 | 1.80337 | 1.79306 | 3.79868 |
| ENSMUSG000000105797 | 1_Gm42649       | 0.19919 | 0.92709  | 0.82027  | NA       | 0       | 0       | 1.19515 | 0       | 0       | 0       |
| ENSMUSG000000105827 | 1_Hist2h2bb     | 9.29975 | 0.60446  | 0.44983  | 0.56466  | 17.3638 | 10.0959 | 5.97577 | 9.01685 | 4.48265 | 8.86359 |
| ENSMUSG000000105838 | 1_4930425O10Rik | 0.15028 | -0.99647 | 0.80707  | NA       | 0       | 0       | 0       | 0.90169 | 0       | 0       |
| ENSMUSG000000105845 | 1_Gm42808       | 0.51074 | -2.49114 | 0.44681  | NA       | 0       | 0       | 0       | 0.90169 | 0.89653 | 1.26623 |
| ENSMUSG000000105851 | 1_9130604C24Rik | 9.45958 | 0.06445  | 0.93075  | 0.95416  | 9.55007 | 10.0959 | 9.56123 | 12.6236 | 9.86184 | 5.06491 |

|                     |                 |         |          |         |         |         |         |         |         |         |         |
|---------------------|-----------------|---------|----------|---------|---------|---------|---------|---------|---------|---------|---------|
| ENSMUSG000000105858 | 1_2310074N15Rik | 0.2894  | 1.67273  | 0.67976 | NA      | 1.73638 | 0       | 0       | 0       | 0       | 0       |
| ENSMUSG000000105867 | 1_Gm42517       | 5.21343 | -1.88037 | 0.07175 | 0.13109 | 1.73638 | 3.67122 | 1.19515 | 8.11517 | 8.96531 | 7.59736 |
| ENSMUSG000000105875 | 1_Gm43518       | 2.9526  | -0.86115 | 0.61404 | 0.71328 | 0       | 2.75342 | 3.58546 | 6.3118  | 0       | 5.06491 |
| ENSMUSG000000105881 | 1_4932422M17Rik | 165.813 | 0.25924  | 0.30613 | 0.42109 | 177.979 | 185.397 | 179.273 | 121.728 | 202.616 | 127.889 |
| ENSMUSG000000105888 | 1_BC037156      | 1.51362 | -0.41355 | 0.80734 | NA      | 1.73638 | 0.91781 | 1.19515 | 1.80337 | 0.89653 | 2.53245 |
| ENSMUSG000000105891 | 4_A230001M10Rik | 1.70368 | -0.05687 | 0.97433 | NA      | 2.60457 | 0       | 2.39031 | 0.90169 | 1.79306 | 2.53245 |
| ENSMUSG000000105912 | 1_Gm10440       | 0.1447  | 0.92709  | 0.82027 | NA      | 0.86819 | 0       | 0       | 0       | 0       | 0       |
| ENSMUSG000000105923 | 4_A830019L24Rik | 0.45353 | -0.80448 | 0.84252 | NA      | 0       | 0.91781 | 0       | 1.80337 | 0       | 0       |
| ENSMUSG000000105957 | 1_Gm43254       | 57.5046 | -0.45938 | 0.19798 | 0.29862 | 36.4639 | 67.9176 | 40.6352 | 64.9214 | 65.4467 | 69.6425 |
| ENSMUSG000000105961 | 1_Gm42754       | 0.21104 | -0.99647 | 0.80707 | NA      | 0       | 0       | 0       | 0       | 0       | 1.26623 |
| ENSMUSG000000105966 | 1_Gm43242       | 0.71262 | -0.03086 | 0.99088 | NA      | 0       | 0.91781 | 1.19515 | 0       | 0.89653 | 1.26623 |
| ENSMUSG000000105993 | 1_Gm43337       | 0.21104 | -0.99647 | 0.80707 | NA      | 0       | 0       | 0       | 0       | 0       | 1.26623 |
| ENSMUSG000000106000 | 1_Gm16508       | 0       | NA       | NA      | NA      | 0       | 0       | 0       | 0       | 0       | 0       |
| ENSMUSG000000106002 | 1_5430434I15Rik | 0       | NA       | NA      | NA      | 0       | 0       | 0       | 0       | 0       | 0       |
| ENSMUSG000000106008 | 1_Gm42920       | 0.15297 | 0.92709  | 0.82027 | NA      | 0       | 0.91781 | 0       | 0       | 0       | 0       |
| ENSMUSG000000106015 | 1_Gm42980       | 0.95511 | 0.11197  | 0.96277 | NA      | 0       | 1.83561 | 1.19515 | 1.80337 | 0.89653 | 0       |
| ENSMUSG000000106019 | 1_Gm43672       | 87.3709 | -0.10829 | 0.67773 | 0.76678 | 93.7643 | 85.3559 | 72.9044 | 90.1685 | 95.9288 | 86.1034 |
| ENSMUSG000000106020 | 1_4930573C15Rik | 0.49804 | -0.79984 | 0.839   | NA      | 0       | 0       | 1.19515 | 0       | 1.79306 | 0       |
| ENSMUSG000000106052 | 1_Gm43614       | 0       | NA       | NA      | NA      | 0       | 0       | 0       | 0       | 0       | 0       |
| ENSMUSG000000106053 | 1_Gm20752       | 346.225 | -0.04369 | 0.85647 | 0.90281 | 342.066 | 328.574 | 351.375 | 228.126 | 389.094 | 438.115 |
| ENSMUSG000000106070 | 1_Gm43135       | 0.15028 | -0.99647 | 0.80707 | NA      | 0       | 0       | 0       | 0.90169 | 0       | 0       |
| ENSMUSG000000106139 | 1_Gm43194       | 11.6135 | -1.19857 | 0.09987 | 0.17194 | 6.07732 | 9.17806 | 5.97577 | 24.3455 | 15.241  | 8.86359 |
| ENSMUSG000000106144 | 1_RP24-121I11   | 0.75302 | 1.75921  | 0.54979 | NA      | 0.86819 | 2.75342 | 0       | 0       | 0.89653 | 0       |
| ENSMUSG000000106157 | 1_4930555A03Rik | 2.84847 | -1.84642 | 0.20014 | 0.30116 | 1.73638 | 1.83561 | 0       | 2.70506 | 4.48265 | 6.33113 |
| ENSMUSG000000106198 | 1_Gm42504       | 1.72397 | -1.1501  | 0.52553 | NA      | 0       | 0.91781 | 2.39031 | 3.60674 | 0.89653 | 2.53245 |
| ENSMUSG000000106219 | 1_5830416I19Rik | 3.0341  | -1.03994 | 0.43723 | 0.55248 | 1.73638 | 1.83561 | 2.39031 | 0.90169 | 6.27571 | 5.06491 |
| ENSMUSG000000106223 | 1_Gm43733       | 4.18988 | 0.57508  | 0.61451 | 0.71363 | 1.73638 | 7.34244 | 5.97577 | 1.80337 | 4.48265 | 3.79868 |
| ENSMUSG000000106230 | 1_Gm29811       | 3.27054 | -1.84378 | 0.20319 | 0.3048  | 0       | 0.91781 | 3.58546 | 6.3118  | 6.27571 | 2.53245 |
| ENSMUSG000000106237 | 1_Gm8066        | 2.20113 | 1.89953  | 0.29019 | NA      | 2.60457 | 5.50683 | 2.39031 | 2.70506 | 0       | 0       |
| ENSMUSG000000106245 | 1_Gm43824       | 5.34363 | -1.14206 | 0.24799 | 0.35689 | 3.47275 | 1.83561 | 4.78062 | 5.41011 | 8.96531 | 7.59736 |
| ENSMUSG000000106247 | 1_Gm43720       | 5.80228 | -1.26194 | 0.38177 | 0.49947 | 0       | 10.0959 | 0       | 5.41011 | 5.37918 | 13.9285 |
| ENSMUSG000000106261 | 1_Gm34086       | 0.1447  | 0.92709  | 0.82027 | NA      | 0.86819 | 0       | 0       | 0       | 0       | 0       |
| ENSMUSG000000106269 | 1_4930580E04Rik | 0.29498 | -0.03469 | 0.99322 | NA      | 0.86819 | 0       | 0       | 0.90169 | 0       | 0       |
| ENSMUSG000000106280 | 1_Gm42880       | 0.30594 | 1.73752  | 0.66765 | NA      | 0       | 1.83561 | 0       | 0       | 0       | 0       |
| ENSMUSG000000106304 | 1_Gm42518       | 0.15028 | -0.99647 | 0.80707 | NA      | 0       | 0       | 0       | 0.90169 | 0       | 0       |
| ENSMUSG000000106317 | 1_Gm43848       | 12.1284 | -0.15319 | 0.81427 | 0.8717  | 14.7592 | 10.0959 | 9.56123 | 10.8202 | 16.1376 | 11.396  |
| ENSMUSG000000106319 | 1_Gm42601       | 0       | NA       | NA      | NA      | 0       | 0       | 0       | 0       | 0       | 0       |
| ENSMUSG000000106321 | 1_Gm43674       | 0.44526 | -0.80448 | 0.84252 | NA      | 0.86819 | 0       | 0       | 1.80337 | 0       | 0       |
| ENSMUSG000000106334 | 1_Gm43549       | 112.142 | 0.29384  | 0.34023 | 0.45669 | 130.228 | 109.219 | 130.272 | 64.0197 | 104.894 | 134.22  |
| ENSMUSG000000106357 | 1_Gm8013        | 0.74883 | -3.06485 | 0.35312 | NA      | 0       | 0       | 0       | 1.80337 | 2.68959 | 0       |
| ENSMUSG000000106365 | 1_Gm43568       | 5.85219 | -0.76207 | 0.40857 | 0.52535 | 3.47275 | 3.67122 | 5.97577 | 9.01685 | 5.37918 | 7.59736 |
| ENSMUSG000000106367 | 1_Gm42709       | 0.21104 | -0.99647 | 0.80707 | NA      | 0       | 0       | 0       | 0       | 0       | 1.26623 |
| ENSMUSG000000106379 | 1_LhfpI3        | 16.7392 | -2.13468 | 0.00206 | 0.00666 | 11.2864 | 4.58903 | 2.39031 | 36.0674 | 23.3098 | 22.7921 |
| ENSMUSG000000106426 | 1_Gm36211       | 0.1447  | 0.92709  | 0.82027 | NA      | 0.86819 | 0       | 0       | 0       | 0       | 0       |
| ENSMUSG000000106438 | 1_Gm42749       | 4.33695 | 1.41799  | 0.23335 | 0.33983 | 5.20913 | 1.83561 | 11.9515 | 1.80337 | 2.68959 | 2.53245 |
| ENSMUSG000000106441 | 1_Gm42921       | 0.89642 | 0.92163  | 0.77842 | NA      | 0       | 0       | 3.58546 | 0       | 1.79306 | 0       |
| ENSMUSG000000106445 | 1_Gm21190       | 1.117   | 3.59403  | 0.22706 | NA      | 0       | 5.50683 | 1.19515 | 0       | 0       | 0       |
| ENSMUSG000000106447 | 1_Gm42957       | 0.89353 | -2.11082 | 0.44256 | NA      | 0.86819 | 0       | 0       | 1.80337 | 2.68959 | 0       |
| ENSMUSG000000106461 | 1_Gm20755       | 0.81485 | -1.9097  | 0.50766 | NA      | 0       | 0.91781 | 0       | 2.70506 | 0       | 1.26623 |
| ENSMUSG000000106464 | 1_C130083M11Rik | 40.307  | -0.54081 | 0.14579 | 0.23333 | 34.7275 | 35.7944 | 27.4885 | 45.0843 | 43.0335 | 55.714  |
| ENSMUSG000000106466 | 1_Gm42562       | 0       | NA       | NA      | NA      | 0       | 0       | 0       | 0       | 0       | 0       |
| ENSMUSG000000106492 | 1_Gm29707       | 0.45267 | -0.80756 | 0.8164  | NA      | 0       | 0.91781 | 0       | 0.90169 | 0.89653 | 0       |
| ENSMUSG000000106501 | 1_Gm42711       | 0.14942 | -0.99647 | 0.80707 | NA      | 0       | 0       | 0       | 0       | 0.89653 | 0       |
| ENSMUSG000000106505 | 1_Gm32693       | 0       | NA       | NA      | NA      | 0       | 0       | 0       | 0       | 0       | 0       |
| ENSMUSG000000106507 | 1_Gm43056       | 1.61678 | 0.53905  | 0.75005 | NA      | 0.86819 | 3.67122 | 1.19515 | 1.80337 | 0.89653 | 1.26623 |
| ENSMUSG000000106515 | 4_Gm30382       | 0.30056 | -1.76625 | 0.6627  | NA      | 0       | 0       | 0       | 1.80337 | 0       | 0       |
| ENSMUSG000000106519 | 1_Gm38509       | 0.50244 | 0.94285  | 0.78015 | NA      | 0       | 0.91781 | 1.19515 | 0.90169 | 0       | 0       |
| ENSMUSG000000106524 | 1_Gm42706       | 3.99533 | -0.52289 | 0.68159 | 0.76982 | 6.07732 | 3.67122 | 0       | 6.3118  | 5.37918 | 2.53245 |
| ENSMUSG000000106525 | 1_Gm42695       | 0.21104 | -0.99647 | 0.80707 | NA      | 0       | 0       | 0       | 0       | 0       | 1.26623 |
| ENSMUSG000000106538 | 1_Gm42746       | 0.15297 | 0.92709  | 0.82027 | NA      | 0       | 0.91781 | 0       | 0       | 0       | 0       |
| ENSMUSG000000106547 | 1_B230303O12Rik | 15.3355 | -0.5604  | 0.41199 | 0.52833 | 7.8137  | 11.9315 | 17.9273 | 21.6405 | 25.1029 | 7.59736 |
| ENSMUSG000000106554 | 1_Gm43419       | 0.15297 | 0.92709  | 0.82027 | NA      | 0       | 0.91781 | 0       | 0       | 0       | 0       |
| ENSMUSG000000106577 | 1_Gm31026       | 4.0902  | 1.65597  | 0.20579 | 0.30803 | 2.60457 | 1.83561 | 14.3418 | 1.80337 | 2.68959 | 1.26623 |
| ENSMUSG000000106627 | 1_Gm21680       | 1.70405 | -0.69217 | 0.76954 | NA      | 0       | 2.75342 | 1.19515 | 0       | 6.27571 | 0       |
| ENSMUSG000000106631 | 1_Gm42669       | 189.55  | -0.36803 | 0.04811 | 0.09393 | 165.824 | 159.698 | 170.907 | 197.469 | 220.547 | 222.856 |
| ENSMUSG000000106632 | 1_Gm33466       | 1.40374 | 0.85181  | 0.65601 | NA      | 2.60457 | 2.75342 | 0       | 0.90169 | 0.89653 | 1.26623 |
| ENSMUSG000000106634 | 1_Gm43042       | 118.231 | 0.27952  | 0.3344  | 0.45099 | 116.337 | 118.397 | 154.175 | 73.0365 | 124.618 | 122.824 |
| ENSMUSG000000106647 | 1_Gm42523       | 5.25955 | -2.12004 | 0.04464 | 0.08819 | 1.73638 | 1.83561 | 2.39031 | 11.7219 | 6.27571 | 7.59736 |
| ENSMUSG000000106658 | 1_Gm42426       | 0.29884 | -1.76064 | 0.66373 | NA      | 0       | 0       | 0       | 0       | 1.79306 | 0       |
| ENSMUSG000000106659 | 1_Gm43095       | 0.15028 | -0.99647 | 0.80707 | NA      | 0       | 0       | 0       | 0.90169 | 0       | 0       |
| ENSMUSG000000106674 | 1_Gm43153       | 0.44998 | -2.33107 | 0.56049 | NA      | 0       | 0       | 0       | 1.80337 | 0.89653 | 0       |
| ENSMUSG000000106683 | 1_Gm43263       | 11.2679 | -0.56409 | 0.41509 | 0.53119 | 11.2864 | 11.0137 | 4.78062 | 12.6236 | 15.241  | 12.6623 |
| ENSMUSG000000106688 | 1_Gm42851       | 0.90351 | 3.2714   | 0.29586 | NA      | 0       | 1.83561 | 3.58546 | 0       | 0       | 0       |
| ENSMUSG000000106692 | 1_Gm43299       | 0       | NA       | NA      | NA      | 0       | 0       | 0       | 0       | 0       | 0       |
| ENSMUSG000000106715 | 3_Tmem265       | 383.472 | 0.19214  | 0.19138 | 0.29098 | 390.685 | 397.41  | 439.817 | 367.888 | 356.819 | 348.212 |
| ENSMUSG000000106738 | 1_Gm5           | 0.45084 | -2.33355 | 0.56009 | NA      | 0       | 0       | 0       | 2.70506 | 0       | 0       |
| ENSMUSG000000106740 | 1_Gm21221       | 0       | NA       | NA      | NA      | 0       | 0       | 0       | 0       | 0       | 0       |
| ENSMUSG000000106741 | 3_4930513D17Rik | 0       | NA       | NA      | NA      | 0       | 0       | 0       | 0       | 0       | 0       |
| ENSMUSG000000106779 | 1_RP23-258F1    | 0.6065  | 0.00563  | 0.99878 | NA      | 0       | 1.83561 | 0       | 1.80337 | 0       | 0       |

|                     |                 |         |          |          |          |         |         |         |         |         |         |
|---------------------|-----------------|---------|----------|----------|----------|---------|---------|---------|---------|---------|---------|
| ENSMUSG000000106783 | 1_Gm42757       | 0.14942 | -0.99647 | 0.80707  | NA       | 0       | 0       | 0       | 0       | 0.89653 | 0       |
| ENSMUSG000000106791 | 1_4930553P18Rik | 1.80006 | 0.97659  | 0.66021  | NA       | 2.60457 | 4.58903 | 0       | 3.60674 | 0       | 0       |
| ENSMUSG000000106795 | 1_Gm43050       | 4.88429 | -0.30609 | 0.79107  | 0.85512  | 0.86819 | 6.42464 | 5.97577 | 9.91854 | 3.58612 | 2.53245 |
| ENSMUSG000000106799 | 1_Gm20756       | 54.499  | 0.063    | 0.86855  | 0.91088  | 64.2459 | 48.6437 | 53.7819 | 32.4607 | 64.5502 | 63.3113 |
| ENSMUSG000000106820 | 1_D5Ertdd605e   | 6.43221 | -1.30107 | 0.17891  | 0.27573  | 4.34094 | 5.50683 | 1.19515 | 12.6236 | 9.86184 | 5.06491 |
| ENSMUSG000000106824 | 1_Gm7697        | 0       | NA       | NA       | NA       | 0       | 0       | 0       | 0       | 0       | 0       |
| ENSMUSG000000106864 | 3_Gtf3c2        | 2033.72 | 0.15974  | 0.14228  | 0.22878  | 2069.76 | 2116.46 | 2252.87 | 1803.37 | 2007.33 | 1952.52 |
| ENSMUSG000000106871 | 1_Gm3289        | 2.12236 | 2.09836  | 0.3499   | NA       | 0       | 1.83561 | 8.36608 | 0       | 0       | 2.53245 |
| ENSMUSG000000106874 | 1_Gm20186       | 87.4509 | -0.50722 | 0.07175  | 0.13109  | 78.137  | 65.1642 | 72.9044 | 81.1517 | 105.791 | 121.558 |
| ENSMUSG000000106892 | 1_Gm42791       | 2.27753 | 0.59775  | 0.78756  | NA       | 0       | 8.26025 | 0       | 4.50843 | 0.89653 | 0       |
| ENSMUSG000000106918 | 3_Mrpl33        | 966.874 | -0.36251 | 0.00726  | 0.01927  | 839.538 | 918.723 | 779.24  | 1009.89 | 1191.49 | 1062.36 |
| ENSMUSG000000106927 | 1_Gm43598       | 4.9684  | -0.8473  | 0.39418  | 0.51184  | 3.47275 | 3.67122 | 3.58546 | 7.21348 | 8.06878 | 3.79868 |
| ENSMUSG000000106943 | 1_Snora26       | 128.663 | -0.28362 | 0.2689   | 0.38036  | 134.569 | 117.479 | 95.6123 | 118.121 | 169.444 | 136.753 |
| ENSMUSG000000106951 | 1_5930430L01Rik | 381.414 | -0.54584 | 0.00515  | 0.01447  | 360.298 | 318.479 | 250.982 | 516.666 | 448.265 | 393.797 |
| ENSMUSG000000106980 | 1_Gm43690       | 1.06009 | -0.18011 | 0.93899  | NA       | 1.73638 | 0       | 1.19515 | 0       | 0.89653 | 2.53245 |
| ENSMUSG000000106981 | 1_RP23-425N12   | 89.0687 | -0.46439 | 0.08248  | 0.14687  | 63.3778 | 86.2737 | 75.2947 | 104.596 | 111.17  | 93.7008 |
| ENSMUSG000000106985 | 1_Gm42761       | 0.19919 | 0.92709  | 0.82027  | NA       | 0       | 0       | 1.19515 | 0       | 0       | 0       |
| ENSMUSG000000107002 | 1_NCBP2-AS2     | 270.905 | -0.21567 | 0.21245  | 0.31586  | 268.27  | 250.561 | 233.055 | 321.902 | 274.338 | 277.304 |
| ENSMUSG000000107008 | 3_Gm2762        | 1.02148 | -3.49148 | 0.16655  | NA       | 0       | 0       | 0       | 1.80337 | 1.79306 | 2.53245 |
| ENSMUSG000000107013 | 1_Gm43635       | 1.14635 | -1.00686 | 0.70002  | NA       | 0       | 0       | 2.39031 | 0.90169 | 3.58612 | 0       |
| ENSMUSG000000107022 | 1_Gm36669       | 0       | NA       | NA       | NA       | 0       | 0       | 0       | 0       | 0       | 0       |
| ENSMUSG000000107023 | 2_Gm42715       | 951.877 | -0.36786 | 0.03017  | 0.06376  | 811.756 | 858.148 | 823.461 | 848.486 | 1276.66 | 1092.75 |
| ENSMUSG000000107043 | 1_Gm42849       | 3.78014 | -0.22098 | 0.86994  | 0.91191  | 4.34094 | 3.67122 | 2.39031 | 7.21348 | 0       | 5.06491 |
| ENSMUSG000000107044 | 1_Gm43086       | 0.15297 | 0.92709  | 0.82027  | NA       | 0       | 0.91781 | 0       | 0       | 0       | 0       |
| ENSMUSG000000107060 | 1_Gm42810       | 1.85587 | -0.54856 | 0.78077  | NA       | 1.73638 | 2.75342 | 0       | 0       | 5.37918 | 1.26623 |
| ENSMUSG000000107061 | 1_Gm19590       | 0.80958 | -3.1663  | 0.25644  | NA       | 0       | 0       | 0       | 0.90169 | 2.68959 | 1.26623 |
| ENSMUSG000000107068 | 1_Gm42742       | 591.296 | 0.49798  | 0.00039  | 0.00161  | 666.769 | 725.066 | 686.018 | 543.716 | 465.299 | 460.907 |
| ENSMUSG000000107071 | 1_Gm43816       | 6.32459 | 6.09111  | 0.11963  | 0.19927  | 0       | 12.8493 | 25.0982 | 0       | 0       | 0       |
| ENSMUSG000000107096 | 3_Gm43597       | 68.0102 | -0.61171 | 0.03221  | 0.0674   | 56.4322 | 51.3971 | 53.7819 | 88.3652 | 83.3773 | 74.7074 |
| ENSMUSG000000107108 | 1_Gm9936        | 0.98834 | 1.1291   | 0.67467  | NA       | 1.73638 | 0       | 2.39031 | 1.80337 | 0       | 0       |
| ENSMUSG000000107121 | 1_1110006O24Rik | 6.26666 | 0.65235  | 0.46329  | 0.5769   | 6.94551 | 10.0959 | 5.97577 | 4.50843 | 6.27571 | 3.79868 |
| ENSMUSG000000107126 | 1_Gm42505       | 0       | NA       | NA       | NA       | 0       | 0       | 0       | 0       | 0       | 0       |
| ENSMUSG000000107133 | 1_Gm42787       | 0.51429 | -1.01187 | 0.76286  | NA       | 0       | 0.91781 | 0       | 0.90169 | 0       | 1.26623 |
| ENSMUSG000000107153 | 1_Gm38404       | 0.14942 | -0.99647 | 0.80707  | NA       | 0       | 0       | 0       | 0       | 0.89653 | 0       |
| ENSMUSG000000107169 | 1_Gm43796       | 17.4846 | -0.15037 | 0.87269  | 0.91355  | 9.55007 | 20.1917 | 20.3176 | 27.9522 | 26.8959 | 0       |
| ENSMUSG000000107192 | 1_Gm19583       | 0.36132 | -1.98116 | 0.62311  | NA       | 0       | 0       | 0       | 0.90169 | 0       | 1.26623 |
| ENSMUSG000000107193 | 1_Gm43700       | 0       | NA       | NA       | NA       | 0       | 0       | 0       | 0       | 0       | 0       |
| ENSMUSG000000107198 | 1_Gm19619       | 0.1447  | 0.92709  | 0.82027  | NA       | 0.86819 | 0       | 0       | 0       | 0       | 0       |
| ENSMUSG000000107218 | 1_Gm42530       | 1.85868 | -0.79465 | 0.6356   | NA       | 1.73638 | 0       | 2.39031 | 1.80337 | 2.68959 | 2.53245 |
| ENSMUSG000000107241 | 1_Gm43129       | 0.45063 | 2.29438  | 0.56648  | NA       | 0.86819 | 1.83561 | 0       | 0       | 0       | 0       |
| ENSMUSG000000107244 | 1_Gm43699       | 0.64832 | -1.37909 | 0.65362  | NA       | 0       | 0       | 1.19515 | 0.90169 | 1.79306 | 0       |
| ENSMUSG000000107252 | 1_Gm43786       | 0.69895 | 0.32545  | 0.92671  | NA       | 0       | 0       | 2.39031 | 1.80337 | 0       | 0       |
| ENSMUSG000000107253 | 1_Gm43634       | 14.292  | -0.07024 | 0.9208   | 0.94737  | 15.6274 | 20.1917 | 5.97577 | 22.5421 | 12.5514 | 8.86359 |
| ENSMUSG000000107266 | 1_Gm43698       | 0       | NA       | NA       | NA       | 0       | 0       | 0       | 0       | 0       | 0       |
| ENSMUSG000000107271 | 3_BC028471      | 2.02049 | -0.61759 | 0.71793  | NA       | 2.60457 | 0.91781 | 1.19515 | 3.60674 | 0       | 3.79868 |
| ENSMUSG000000107280 | 1_Gm9495        | 1.01762 | -2.29782 | 0.38983  | NA       | 0.86819 | 0       | 0       | 2.70506 | 0       | 2.53245 |
| ENSMUSG000000107283 | 3_Mpv17         | 1061.04 | -0.57375 | 1.39E-05 | 9.06E-05 | 840.406 | 923.312 | 794.777 | 1382.28 | 1260.52 | 1164.93 |
| ENSMUSG000000107287 | 1_Gm43458       | 0.59758 | 2.66585  | 0.50308  | NA       | 0       | 0       | 3.58546 | 0       | 0       | 0       |
| ENSMUSG000000107288 | 1_Gm42903       | 1.24365 | 0.77172  | 0.69236  | NA       | 1.73638 | 1.83561 | 1.19515 | 0.90169 | 1.79306 | 0       |
| ENSMUSG000000107313 | 1_Gm43332       | 6.86106 | -0.1892  | 0.82848  | 0.88257  | 5.20913 | 9.17806 | 4.78062 | 9.91854 | 4.48265 | 7.59736 |
| ENSMUSG000000107325 | 1_Gm43425       | 0.79098 | 1.83269  | 0.4723   | NA       | 1.73638 | 0.91781 | 1.19515 | 0       | 0.89653 | 0       |
| ENSMUSG000000107352 | 1_Gm43660       | 50.2106 | -0.25965 | 0.45303  | 0.56745  | 40.8049 | 56.9039 | 39.4401 | 60.4129 | 55.5849 | 48.1166 |
| ENSMUSG000000107355 | 1_Al839979      | 29.9023 | 0.1733   | 0.71734  | 0.79856  | 32.9912 | 22.0273 | 40.6352 | 37.8708 | 26.8959 | 18.9934 |
| ENSMUSG000000107365 | 1_Gm43479       | 0.4589  | 2.31815  | 0.56231  | NA       | 0       | 2.75342 | 0       | 0       | 0       | 0       |
| ENSMUSG000000107387 | 1_Gm42904       | 0       | NA       | NA       | NA       | 0       | 0       | 0       | 0       | 0       | 0       |
| ENSMUSG000000107388 | 1_Gm42788       | 141.494 | -0.32404 | 0.1355   | 0.21974  | 131.965 | 116.561 | 127.881 | 148.778 | 145.238 | 178.538 |
| ENSMUSG000000107412 | 1_RP23-436D14   | 139.048 | -0.084   | 0.72679  | 0.80539  | 131.965 | 142.26  | 131.467 | 176.73  | 135.376 | 116.493 |
| ENSMUSG000000107417 | 1_Olfr1383      | 6.14702 | -0.8559  | 0.43416  | 0.54938  | 0.86819 | 1.83561 | 10.7564 | 9.91854 | 7.17224 | 6.33113 |
| ENSMUSG000000107419 | 1_RP23-206K5    | 0.15028 | -0.99647 | 0.80707  | NA       | 0       | 0       | 0       | 0.90169 | 0       | 0       |
| ENSMUSG000000107422 | 1_RP24-423A5    | 0.14942 | -0.99647 | 0.80707  | NA       | 0       | 0       | 0       | 0       | 0.89653 | 0       |
| ENSMUSG000000107444 | 1_Olfr1396      | 1.29256 | 1.65732  | 0.44019  | NA       | 1.73638 | 1.83561 | 2.39031 | 0       | 1.79306 | 0       |
| ENSMUSG000000107451 | 1_RP23-370A2    | 8.22407 | -2.02943 | 0.03187  | 0.06681  | 0.86819 | 6.42464 | 2.39031 | 18.0337 | 8.96531 | 12.6623 |
| ENSMUSG000000107478 | 1_Atn1          | 173.489 | 2.88128  | 0.13456  | 0.21874  | 22.5729 | 268.917 | 625.066 | 83.8567 | 0       | 40.5193 |
| ENSMUSG000000107479 | 1_RP23-111G16   | 3.93561 | -0.65209 | 0.63864  | 0.73457  | 4.34094 | 3.67122 | 1.19515 | 10.8202 | 3.58612 | 0       |
| ENSMUSG000000107481 | 1_RP24-315D19   | 3.86985 | 0.65164  | 0.67301  | 0.76313  | 7.8137  | 6.42464 | 0       | 2.70506 | 6.27571 | 0       |
| ENSMUSG000000107482 | 2_RP23-74K24    | 6.63577 | 2.35768  | 0.08368  | 0.14846  | 9.55007 | 3.67122 | 20.3176 | 0       | 6.27571 | 0       |
| ENSMUSG000000107499 | 1_Ccdc142       | 13.5849 | 1.39308  | 0.03337  | 0.06936  | 15.6274 | 17.4383 | 26.2934 | 9.01685 | 8.06878 | 5.06491 |
| ENSMUSG000000107503 | 1_RP23-214M22   | 2.4875  | 1.57597  | 0.30708  | 0.42217  | 2.60457 | 2.75342 | 5.97577 | 0.90169 | 2.68959 | 0       |
| ENSMUSG000000107504 | 2_RP23-438P19   | 1.63108 | 0.72148  | 0.71575  | NA       | 2.60457 | 0       | 3.58546 | 0.80337 | 1.79306 | 0       |
| ENSMUSG000000107526 | 1_RP24-328H10   | 2.09473 | -0.19765 | 0.89429  | NA       | 2.60457 | 0.91781 | 2.39031 | 1.80337 | 3.58612 | 1.26623 |
| ENSMUSG000000107539 | 1_RP23-281H4    | 11.8977 | 1.23888  | 0.2965   | 0.41092  | 16.4956 | 26.6164 | 7.17092 | 19.8371 | 0       | 1.26623 |
| ENSMUSG000000107585 | 1_RP23-449F12   | 6.8181  | -2.38465 | 0.03349  | 0.06956  | 4.34094 | 0.91781 | 1.19515 | 20.7388 | 3.58612 | 10.1298 |
| ENSMUSG000000107605 | 1_RP23-370A2    | 1.16618 | -2.52785 | 0.25743  | NA       | 0.86819 | 0       | 0       | 1.80337 | 1.79306 | 2.53245 |
| ENSMUSG000000107614 | 1_RP23-281L18   | 1.25299 | -1.42268 | 0.53426  | NA       | 0       | 0.91781 | 1.19515 | 4.50843 | 0.89653 | 0       |
| ENSMUSG000000107619 | 1_RP24-83C9     | 0.15028 | -0.99647 | 0.80707  | NA       | 0       | 0       | 0       | 0.90169 | 0       | 0       |
| ENSMUSG000000107622 | 1_RP24-226D9    | 0.94752 | 0.77631  | 0.7508   | NA       | 2.60457 | 0.91781 | 0       | 0       | 0.89653 | 1.26623 |
| ENSMUSG000000107623 | 1_RP23-240C17   | 0.2997  | -1.76345 | 0.66322  | NA       | 0       | 0       | 0       | 0.90169 | 0.89653 | 0       |
| ENSMUSG000000107638 | 2_RP24-338D12   | 0.2997  | -1.76345 | 0.66322  | NA       | 0       | 0       | 0       | 0.90169 | 0.89653 | 0       |
| ENSMUSG000000107660 | 1_RP24-83C9     | 0.39838 | 2.07058  | 0.60634  | NA       | 0       | 0       | 2.39031 | 0       | 0       | 0       |

|                     |                |         |          |          |          |         |         |         |         |         |         |
|---------------------|----------------|---------|----------|----------|----------|---------|---------|---------|---------|---------|---------|
| ENSMUSG000000107667 | 2_RP23-210L10  | 3.09166 | -1.96179 | 0.1941   | 0.2942   | 2.60457 | 0       | 1.19515 | 6.3118  | 7.17224 | 1.26623 |
| ENSMUSG000000107689 | 1_RP23-281H4   | 10.8427 | -1.66344 | 0.06524  | 0.12111  | 5.20913 | 10.0959 | 0       | 20.7388 | 12.5514 | 16.4609 |
| ENSMUSG000000107704 | 1_RP23-119D13  | 0.72446 | -1.66533 | 0.57902  | NA       | 0       | 0.91781 | 0       | 0       | 0.89653 | 2.53245 |
| ENSMUSG000000107705 | 1_Umad1        | 273.894 | -0.50618 | 0.0303   | 0.06398  | 237.884 | 209.26  | 233.055 | 329.115 | 406.128 | 227.921 |
| ENSMUSG000000107726 | 1_RP23-47A6    | 17.5487 | -0.67327 | 0.27163  | 0.38336  | 15.6274 | 11.9315 | 13.1467 | 14.427  | 34.9647 | 15.1947 |
| ENSMUSG000000107728 | 1_RP23-174M4   | 34.8868 | -0.84243 | 0.06534  | 0.12125  | 22.5729 | 37.63   | 14.3418 | 48.691  | 43.0335 | 43.0517 |
| ENSMUSG000000107736 | 1_RP23-27C9    | 9.52774 | -1.08205 | 0.16284  | 0.25563  | 6.07732 | 6.42464 | 5.97577 | 14.427  | 17.9306 | 6.33113 |
| ENSMUSG000000107768 | 1_RP23-200M5   | 55.6184 | 1.17956  | 0.00024  | 0.00107  | 76.4006 | 72.5066 | 82.4656 | 29.7556 | 35.8612 | 36.7206 |
| ENSMUSG000000107773 | 1_RP24-174O2   | 0.15028 | -0.99647 | 0.80707  | NA       | 0       | 0       | 0       | 0.90169 | 0       | 0       |
| ENSMUSG000000107789 | 1_RP24-124B23  | 0       | NA       | NA       | NA       | 0       | 0       | 0       | 0       | 0       | 0       |
| ENSMUSG000000107815 | 1_RP23-449F12  | 0.59941 | -2.74429 | 0.44299  | NA       | 0       | 0       | 0       | 1.80337 | 1.79306 | 0       |
| ENSMUSG000000107859 | 1_RP23-381K3   | 0.14942 | -0.99647 | 0.80707  | NA       | 0       | 0       | 0       | 0       | 0.89653 | 0       |
| ENSMUSG000000107872 | 2_RP24-127M20  | 1.34254 | 0.22769  | 0.91723  | NA       | 0.86819 | 0       | 3.58546 | 2.70506 | 0.89653 | 0       |
| ENSMUSG000000107874 | 1_Prpmp5       | 470.088 | -1.37961 | 0.05269  | 0.10116  | 177.979 | 513.971 | 90.8317 | 825.042 | 673.294 | 539.413 |
| ENSMUSG000000107875 | 1_RP23-205F19  | 2.40649 | -0.32588 | 0.83512  | NA       | 1.73638 | 0       | 4.78062 | 1.80337 | 3.58612 | 2.53245 |
| ENSMUSG000000107876 | 1_RP23-281H4   | 1.95713 | 0.48407  | 0.7452   | NA       | 1.73638 | 2.75342 | 2.39031 | 1.80337 | 1.79306 | 1.26623 |
| ENSMUSG000000107877 | 1_RP23-207N15  | 40.0735 | 0.51252  | 0.18307  | 0.28085  | 50.3549 | 47.7259 | 43.0255 | 39.6742 | 24.2063 | 35.4544 |
| ENSMUSG000000107879 | 1_RP24-363O21  | 112.264 | -0.74408 | 0.0043   | 0.01244  | 96.3689 | 79.8491 | 75.2947 | 168.615 | 119.239 | 134.22  |
| ENSMUSG000000107895 | 1_RP23-472D18  | 0.30325 | -0.03469 | 0.99322  | NA       | 0       | 0.91781 | 0       | 0.90169 | 0       | 0       |
| ENSMUSG000000107906 | 1_Gm5580       | 4.2664  | -3.40332 | 0.07069  | 0.12955  | 0       | 0       | 2.39031 | 0       | 14.3445 | 8.86359 |
| ENSMUSG000000107928 | 1_RP23-4F16    | 742.381 | 0.06227  | 0.73947  | 0.81576  | 809.152 | 759.943 | 706.336 | 923.326 | 597.089 | 658.438 |
| ENSMUSG000000107929 | 1_RP23-102M16  | 0.29884 | -1.76064 | 0.66373  | NA       | 0       | 0       | 0       | 0       | 1.79306 | 0       |
| ENSMUSG000000107946 | 1_RP24-127M20  | 1.4022  | 0.37609  | 0.84123  | NA       | 0.86819 | 2.75342 | 1.19515 | 1.80337 | 1.79306 | 0       |
| ENSMUSG000000107956 | 1_CAAA01093181 | 0.44912 | -2.32858 | 0.56096  | NA       | 0       | 0       | 0       | 0.90169 | 1.79306 | 0       |
| ENSMUSG000000107961 | 1_RP23-20K24   | 1.21509 | -1.36123 | 0.50564  | NA       | 0.86819 | 0       | 1.19515 | 0.90169 | 1.79306 | 2.53245 |
| ENSMUSG000000107978 | 1_RP23-210L10  | 0.74786 | 1.69624  | 0.62517  | NA       | 0       | 0       | 3.58546 | 0.90169 | 0       | 0       |
| ENSMUSG000000107985 | 1_RP23-449F12  | 0.29884 | -1.76064 | 0.66373  | NA       | 0       | 0       | 0       | 0       | 1.79306 | 0       |
| ENSMUSG000000108010 | 1_RP23-74G1    | 0.34861 | -0.03469 | 0.99322  | NA       | 0       | 0       | 1.19515 | 0       | 0.89653 | 0       |
| ENSMUSG000000108015 | 2_RP23-81F19   | 1.39278 | 0.18581  | 0.92314  | NA       | 3.47275 | 0.91781 | 0       | 1.80337 | 0.89653 | 1.26623 |
| ENSMUSG000000108022 | 1_RP23-78P7    | 4.14869 | 0.73488  | 0.54109  | 0.64814  | 9.55007 | 4.58903 | 1.19515 | 1.80337 | 2.68959 | 5.06491 |
| ENSMUSG000000108025 | 1_RP24-434O21  | 0       | NA       | NA       | NA       | 0       | 0       | 0       | 0       | 0       | 0       |
| ENSMUSG000000108071 | 1_RP23-114F22  | 0.15297 | 0.92709  | 0.82027  | NA       | 0       | 0.91781 | 0       | 0       | 0       | 0       |
| ENSMUSG000000108072 | 1_RP23-271E2   | 0.93771 | 0.07573  | 0.9749   | NA       | 1.73638 | 0       | 1.19515 | 0.90169 | 1.79306 | 0       |
| ENSMUSG000000108084 | 1_RP24-315D19  | 16.5387 | -1.48432 | 0.02446  | 0.05369  | 7.8137  | 10.0959 | 8.36608 | 39.6742 | 20.6202 | 12.6623 |
| ENSMUSG000000108085 | 1_RP24-392D22  | 0.2997  | -1.76345 | 0.66322  | NA       | 0       | 0       | 0       | 0.90169 | 0.89653 | 0       |
| ENSMUSG000000108103 | 1_RP23-418F10  | 5.6258  | 0.882    | 0.3817   | 0.49947  | 11.2864 | 4.58903 | 5.97577 | 6.3118  | 1.79306 | 3.79868 |
| ENSMUSG000000108111 | 1_RP24-457L7   | 0.45063 | 2.29438  | 0.56648  | NA       | 0.86819 | 1.83561 | 0       | 0       | 0       | 0       |
| ENSMUSG000000108118 | 1_RP24-475M20  | 0.42208 | -2.1835  | 0.58658  | NA       | 0       | 0       | 0       | 0       | 0       | 2.53245 |
| ENSMUSG000000108127 | 1_Gm12845      | 2.39211 | 0.08764  | 0.95187  | NA       | 5.20913 | 0.91781 | 1.19515 | 2.70506 | 1.79306 | 2.53245 |
| ENSMUSG000000108132 | 1_RP23-322E20  | 2.92315 | -1.05906 | 0.42236  | 0.53798  | 2.60457 | 1.83561 | 1.19515 | 6.3118  | 1.79306 | 3.79868 |
| ENSMUSG000000108137 | 1_RP23-392K24  | 17.4762 | -0.51037 | 0.3767   | 0.49421  | 16.4956 | 15.6027 | 10.7564 | 13.5253 | 20.6202 | 27.857  |
| ENSMUSG000000108161 | 1_CAAA01219085 | 3.0774  | -1.15541 | 0.36475  | 0.48207  | 1.73638 | 2.75342 | 1.19515 | 2.70506 | 6.27571 | 3.79868 |
| ENSMUSG000000108187 | 1_RP24-67N3    | 29.7309 | 0.15851  | 0.73521  | 0.81234  | 20.8365 | 43.1369 | 29.8789 | 24.3455 | 25.9994 | 34.1881 |
| ENSMUSG000000108197 | 1_RP23-20K24   | 1.05293 | -2.37438 | 0.36555  | NA       | 0       | 0.91781 | 0       | 3.60674 | 1.79306 | 0       |
| ENSMUSG000000108206 | 1_RP24-92L16   | 1.48165 | 1.12981  | 0.58788  | NA       | 2.60457 | 0       | 3.58546 | 1.80337 | 0.89653 | 0       |
| ENSMUSG000000108213 | 1_RP24-419M4   | 1.93456 | 0.32887  | 0.85231  | NA       | 0.86819 | 5.50683 | 0       | 1.80337 | 0.89653 | 2.53245 |
| ENSMUSG000000108228 | 1_RP23-132J21  | 4.28878 | -0.76777 | 0.51333  | 0.62357  | 2.60457 | 5.50683 | 1.19515 | 3.60674 | 2.68959 | 10.1298 |
| ENSMUSG000000108236 | 1_RP24-83C9    | 5.74467 | -1.27421 | 0.26595  | 0.3772   | 3.47275 | 1.83561 | 4.78062 | 10.8202 | 0.89653 | 12.6623 |
| ENSMUSG000000108237 | 1_RP24-369J3   | 0.2894  | 1.67273  | 0.67976  | NA       | 1.73638 | 0       | 0       | 0       | 0       | 0       |
| ENSMUSG000000108255 | 1_RP23-446E21  | 2.90566 | 1.10664  | 0.51206  | 0.62229  | 1.73638 | 5.50683 | 4.78062 | 5.41011 | 0       | 0       |
| ENSMUSG000000108258 | 1_RP24-325P20  | 0.5087  | 0.75055  | 0.82276  | NA       | 0.86819 | 0.91781 | 0       | 0       | 0       | 1.26623 |
| ENSMUSG000000108273 | 1_Zfand4       | 17.2442 | -0.52502 | 0.58278  | 0.68602  | 0       | 21.1095 | 21.5128 | 14.427  | 28.689  | 17.7272 |
| ENSMUSG000000108274 | 1_RP24-183K24  | 0.15028 | -0.99647 | 0.80707  | NA       | 0       | 0       | 0       | 0.90169 | 0       | 0       |
| ENSMUSG000000108285 | 1_RP23-64M7    | 0.19919 | 0.92709  | 0.82027  | NA       | 0       | 0       | 1.19515 | 0       | 0       | 0       |
| ENSMUSG000000108288 | 1_RP23-436D14  | 62.3774 | -0.17601 | 0.59038  | 0.69262  | 61.6414 | 69.7532 | 44.2207 | 67.6264 | 75.3086 | 55.714  |
| ENSMUSG000000108298 | 1_RP24-315D19  | 8.78437 | -0.93173 | 0.30259  | 0.41744  | 3.47275 | 1.83561 | 13.1467 | 12.6236 | 8.96531 | 12.6623 |
| ENSMUSG000000108303 | 1_RP23-174K7   | 1.49293 | -2.95514 | 0.21145  | NA       | 0.86819 | 0       | 0       | 3.60674 | 4.48265 | 0       |
| ENSMUSG000000108308 | 1_RP23-292C5   | 8.7035  | -1.00712 | 0.28952  | 0.40315  | 3.47275 | 9.17806 | 4.78062 | 24.3455 | 5.37918 | 5.06491 |
| ENSMUSG000000108311 | 1_RP23-32A8    | 0.50988 | -2.49048 | 0.5167   | NA       | 0       | 0       | 0       | 0       | 1.79306 | 1.26623 |
| ENSMUSG000000108315 | 1_RP24-160N8   | 0.15028 | -0.99647 | 0.80707  | NA       | 0       | 0       | 0       | 0.90169 | 0       | 0       |
| ENSMUSG000000108322 | 1_RP23-455C13  | 2.00332 | -0.60843 | 0.72306  | NA       | 0.86819 | 2.75342 | 1.19515 | 5.41011 | 1.79306 | 0       |
| ENSMUSG000000108329 | 1_RP24-136L4   | 0.30325 | -0.03469 | 0.99322  | NA       | 0       | 0.91781 | 0       | 0.90169 | 0       | 0       |
| ENSMUSG000000108345 | 1_RP24-136L4   | 0.15028 | -0.99647 | 0.80707  | NA       | 0       | 0       | 0       | 0.90169 | 0       | 0       |
| ENSMUSG000000108356 | 1_RP23-276L17  | 0.85105 | 0.78325  | 0.75773  | NA       | 0       | 0.91781 | 2.39031 | 0.90169 | 0.89653 | 0       |
| ENSMUSG000000108360 | 1_RP23-26A14   | 0.15028 | -0.99647 | 0.80707  | NA       | 0       | 0       | 0       | 0.90169 | 0       | 0       |
| ENSMUSG000000108371 | 1_RP24-416M6   | 0.49331 | 0.9132   | 0.78796  | NA       | 0.86819 | 0       | 1.19515 | 0       | 0.89653 | 0       |
| ENSMUSG000000108373 | 1_RP23-207N5   | 0.15297 | 0.92709  | 0.82027  | NA       | 0       | 0.91781 | 0       | 0       | 0       | 0       |
| ENSMUSG000000108379 | 1_RP23-370I17  | 0.14942 | -0.99647 | 0.80707  | NA       | 0       | 0       | 0       | 0       | 0.89653 | 0       |
| ENSMUSG000000108383 | 1_RP24-136L4   | 0       | NA       | NA       | NA       | 0       | 0       | 0       | 0       | 0       | 0       |
| ENSMUSG000000108393 | 1_RP23-402A4   | 0.63887 | 1.43476  | 0.64357  | NA       | 1.73638 | 0       | 1.19515 | 0.90169 | 0       | 0       |
| ENSMUSG000000108398 | 1_RP23-354H24  | 19.5209 | 0.63151  | 0.23541  | 0.34221  | 20.8365 | 22.0273 | 28.6837 | 19.8371 | 14.3445 | 11.396  |
| ENSMUSG000000108409 | 1_RP23-166E8   | 3.60628 | -0.42222 | 0.72199  | 0.802    | 4.34094 | 3.67122 | 1.19515 | 6.3118  | 3.58612 | 2.53245 |
| ENSMUSG000000108411 | 1_RP23-74K24   | 0.1447  | 0.92709  | 0.82027  | NA       | 0.86819 | 0       | 0       | 0       | 0       | 0       |
| ENSMUSG000000108413 | 1_RP23-432D9   | 0.15297 | 0.92709  | 0.82027  | NA       | 0       | 0.91781 | 0       | 0       | 0       | 0       |
| ENSMUSG000000108415 | 1_RP24-191C15  | 0       | NA       | NA       | NA       | 0       | 0       | 0       | 0       | 0       | 0       |
| ENSMUSG000000108434 | 1_RP23-291B1   | 13.6077 | -1.39744 | 0.04432  | 0.08769  | 12.1546 | 6.42464 | 3.58546 | 25.2472 | 15.241  | 18.9934 |
| ENSMUSG000000108439 | 1_Myh14        | 2371.3  | 2.15384  | 2.71E-18 | 4.26E-16 | 2964    | 4109.93 | 4541.59 | 940.458 | 548.677 | 1123.14 |
| ENSMUSG000000108441 | 1_RP24-549B12  | 0.1447  | 0.92709  | 0.82027  | NA       | 0.86819 | 0       | 0       | 0       | 0       | 0       |
| ENSMUSG000000108456 | 1_RP24-143K11  | 22.7809 | -0.6073  | 0.25316  | 0.36243  | 27.782  | 12.8493 | 13.1467 | 26.1489 | 25.1029 | 31.6557 |

|                     |               |         |          |          |          |         |         |         |         |         |         |
|---------------------|---------------|---------|----------|----------|----------|---------|---------|---------|---------|---------|---------|
| ENSMUSG000000108470 | 1_RP23-26A14  | 0.86559 | 0.51365  | 0.83871  | NA       | 0       | 1.83561 | 1.19515 | 0       | 0.89653 | 1.26623 |
| ENSMUSG000000108473 | 1_RP23-32A8   | 16.2109 | -0.03005 | 0.96334  | 0.97646  | 25.1775 | 11.0137 | 11.9515 | 12.6236 | 25.1029 | 11.396  |
| ENSMUSG000000108483 | 1_RP23-4H17   | 0.7986  | -1.79267 | 0.52899  | NA       | 0       | 0       | 1.19515 | 1.80337 | 1.79306 | 0       |
| ENSMUSG000000108504 | 1_RP23-307M24 | 0.45622 | 0.77574  | 0.84797  | NA       | 0       | 1.83561 | 0       | 0.90169 | 0       | 0       |
| ENSMUSG000000108513 | 1_RP24-136L4  | 1.25009 | 0.06813  | 0.97252  | NA       | 0.86819 | 1.83561 | 1.19515 | 2.70506 | 0.89653 | 0       |
| ENSMUSG000000108530 | 1_RP23-259N3  | 3.52166 | 0.45205  | 0.70228  | 0.78711  | 1.73638 | 4.58903 | 5.97577 | 3.60674 | 2.68959 | 2.53245 |
| ENSMUSG000000108532 | 1_RP23-231J2  | 0.21104 | -0.99647 | 0.80707  | NA       | 0       | 0       | 0       | 0       | 0       | 1.26623 |
| ENSMUSG000000108546 | 1_RP24-63G4   | 5.3768  | 2.11288  | 0.04533  | 0.08932  | 10.4183 | 7.34244 | 8.36608 | 2.70506 | 0.89653 | 2.53245 |
| ENSMUSG000000108550 | 1_RP23-32A8   | 0.30239 | -0.03469 | 0.99322  | NA       | 0       | 0.91781 | 0       | 0       | 0.89653 | 0       |
| ENSMUSG000000108569 | 1_RP23-44H21  | 1.61702 | -3.06604 | 0.13362  | NA       | 0.86819 | 0       | 0       | 4.50843 | 1.79306 | 2.53245 |
| ENSMUSG000000108580 | 1_RP23-68N11  | 0.7079  | 1.45412  | 0.58539  | NA       | 0.86819 | 0.91781 | 1.19515 | 0       | 0       | 1.26623 |
| ENSMUSG000000108596 | 1_ltgam       | 109.115 | 1.31798  | 3.61E-05 | 0.00021  | 177.11  | 119.315 | 169.712 | 43.2809 | 59.171  | 86.1034 |
| ENSMUSG000000108600 | 1_RP23-145H5  | 0.44526 | -0.80448 | 0.84252  | NA       | 0.86819 | 0       | 0       | 1.80337 | 0       | 0       |
| ENSMUSG000000108621 | 1_Gm37494     | 705.931 | -0.78631 | 1.58E-07 | 1.87E-06 | 539.145 | 539.67  | 475.671 | 862.913 | 1016.67 | 801.522 |
| ENSMUSG000000108622 | 1_RP23-184D18 | 0.71705 | -1.66754 | 0.57973  | NA       | 0.86819 | 0       | 0       | 0.90169 | 0       | 2.53245 |
| ENSMUSG000000108626 | 1_RP23-178C20 | 0.15028 | -0.99647 | 0.80707  | NA       | 0       | 0       | 0       | 0.90169 | 0       | 0       |
| ENSMUSG000000108632 | 1_Zfp865      | 37.9405 | 5.59576  | 0.00594  | 0.01626  | 3.47275 | 91.7806 | 127.881 | 4.50843 | 0       | 0       |
| ENSMUSG000000108634 | 1_RP24-402O2  | 0       | NA       | NA       | NA       | 0       | 0       | 0       | 0       | 0       | 0       |
| ENSMUSG000000108644 | 1_WI1-2587D24 | 0.15028 | -0.99647 | 0.80707  | NA       | 0       | 0       | 0       | 0.90169 | 0       | 0       |
| ENSMUSG000000108652 | 1_RP23-53N23  | 0.15028 | -0.99647 | 0.80707  | NA       | 0       | 0       | 0       | 0.90169 | 0       | 0       |
| ENSMUSG000000108653 | 1_AC155806    | 1745.29 | 0.38995  | 0.00751  | 0.01982  | 2003.78 | 1890.68 | 2043.71 | 1643.77 | 1239.9  | 1649.89 |
| ENSMUSG000000108657 | 1_RP23-435E16 | 0.21104 | -0.99647 | 0.80707  | NA       | 0       | 0       | 0       | 0       | 0       | 1.26623 |
| ENSMUSG000000108683 | 1_RP23-370I17 | 0.14942 | -0.99647 | 0.80707  | NA       | 0       | 0       | 0       | 0       | 0.89653 | 0       |
| ENSMUSG000000108684 | 1_Pik3c2g     | 1.40875 | 0.40987  | 0.86753  | NA       | 0       | 3.67122 | 1.19515 | 0       | 3.58612 | 0       |
| ENSMUSG000000108695 | 1_RP23-74K24  | 0.15028 | -0.99647 | 0.80707  | NA       | 0       | 0       | 0       | 0.90169 | 0       | 0       |
| ENSMUSG000000108713 | 1_RP23-223O9  | 1.90825 | -1.11407 | 0.50236  | NA       | 2.60457 | 0.91781 | 0       | 2.70506 | 2.68959 | 2.53245 |
| ENSMUSG000000108723 | 1_RP23-324J22 | 12.8525 | -0.99137 | 0.18929  | 0.28845  | 14.7592 | 8.26025 | 2.39031 | 11.7219 | 19.7237 | 20.2596 |
| ENSMUSG000000108726 | 1_RP23-470P9  | 0.89524 | -2.11277 | 0.45036  | NA       | 0.86819 | 0       | 0       | 3.60674 | 0.89653 | 0       |
| ENSMUSG000000108736 | 1_RP24-143K11 | 6.27285 | -0.53311 | 0.56715  | 0.67216  | 4.34094 | 7.34244 | 3.58546 | 9.91854 | 3.58612 | 8.86359 |
| ENSMUSG000000108763 | 1_RP23-198F11 | 1.78759 | -1.01552 | 0.60645  | NA       | 2.60457 | 0.91781 | 0       | 5.41011 | 1.79306 | 0       |
| ENSMUSG000000108777 | 1_RP24-172H24 | 0.51074 | -2.49114 | 0.44681  | NA       | 0       | 0       | 0       | 0.90169 | 0.89653 | 1.26623 |
| ENSMUSG000000108783 | 1_RP23-298C3  | 0.1447  | 0.92709  | 0.82027  | NA       | 0.86819 | 0       | 0       | 0       | 0       | 0       |
| ENSMUSG000000108789 | 1_Ccdc106     | 38.7935 | -0.49405 | 0.26079  | 0.37116  | 31.2548 | 40.3834 | 25.0982 | 64.9214 | 39.4473 | 31.6557 |
| ENSMUSG000000108795 | 1_RP24-143L4  | 0.81936 | 0.3965   | 0.89166  | NA       | 0       | 2.75342 | 0       | 0       | 0.89653 | 1.26623 |
| ENSMUSG000000108801 | 1_RP23-430B14 | 18.1798 | -0.25224 | 0.6654   | 0.75652  | 14.7592 | 13.7671 | 21.5128 | 12.6236 | 28.689  | 17.7272 |
| ENSMUSG000000108803 | 1_RP23-268E17 | 0.1447  | 0.92709  | 0.82027  | NA       | 0.86819 | 0       | 0       | 0       | 0       | 0       |
| ENSMUSG000000108815 | 1_RP23-325D10 | 61.8492 | 2.37271  | 0.09271  | 0.16155  | 123.283 | 106.465 | 81.2705 | 0       | 38.5508 | 21.5259 |

**S2 Table. Differentially expressed genes of HSV-CD80 infected mouse corneas vs. Uninfected corneas**

| Row                 | names     | baseMean | log2FoldC | pvalue   | padj     | HSV-CD80 | HSV-CD80 | HSV-CD80 | Uninfected | Uninfected | Uninfected 3 |
|---------------------|-----------|----------|-----------|----------|----------|----------|----------|----------|------------|------------|--------------|
| ENSMUSG00000000001  | 4_Gnai3   | 6562.25  | 0.53781   | 0.233684 | 0.625443 | 12942.9  | 5411.34  | 4959.84  | 4184.23    | 6322.68    | 5552.49      |
| ENSMUSG000000000028 | 14_Cdc45  | 211.548  | 0.84497   | 0.038173 | 0.24549  | 176.968  | 353.653  | 284.394  | 105.637    | 160.535    | 188.1        |
| ENSMUSG000000000031 | 15_H19    | 486.852  | -0.85707  | 0.010645 | 0.105362 | 299.328  | 334.383  | 405.391  | 804.66     | 460.144    | 617.205      |
| ENSMUSG000000000037 | 16_Scm12  | 194.954  | 0.17523   | 0.679416 | 0.902041 | 317.531  | 162.091  | 140.646  | 155.155    | 221.487    | 172.817      |
| ENSMUSG000000000049 | 11_Apoh   | 6.47811  | -0.26363  | 0.772772 | 0.932508 | 7.07871  | 2.26701  | 8.27329  | 9.90351    | 4.29238    | 7.05377      |
| ENSMUSG000000000056 | 7_Narf    | 968.548  | 0.27114   | 0.318128 | 0.698986 | 1233.72  | 906.802  | 1037.26  | 978.797    | 781.214    | 873.491      |
| ENSMUSG000000000058 | 6_Cav2    | 4227.86  | 0.70213   | 0.149347 | 0.522751 | 9428.84  | 3269.02  | 3012.51  | 3054.41    | 3417.6     | 3184.78      |
| ENSMUSG000000000078 | 6_Klf6    | 4278.66  | 0.72863   | 0.043099 | 0.263582 | 7770.4   | 4394.59  | 3845.01  | 2921.53    | 3409.87    | 3330.55      |
| ENSMUSG000000000085 | 16_Scmh   | 858.903  | 0.26182   | 0.483195 | 0.811892 | 544.049  | 1063.23  | 1202.73  | 821.166    | 745.158    | 777.09       |
| ENSMUSG000000000088 | 6_Cox5a   | 1817.98  | 0.38887   | 0.287506 | 0.673035 | 2980.14  | 1657.18  | 1547.11  | 1345.23    | 1821.69    | 1556.53      |
| ENSMUSG000000000093 | 6_Tbx2    | 301.823  | -1.09758  | 0.00625  | 0.072529 | 123.372  | 171.159  | 282.326  | 494.35     | 381.164    | 358.566      |
| ENSMUSG000000000094 | 12_Tbx4   | 12.7325  | -1.20533  | 0.07392  | 0.363567 | 6.06747  | 5.66751  | 11.3758  | 15.6806    | 22.3204    | 15.2832      |
| ENSMUSG000000000120 | 6_Ngfr    | 638.401  | 0.71716   | 0.128201 | 0.486444 | 337.756  | 1054.16  | 989.693  | 510.031    | 389.749    | 549.018      |
| ENSMUSG000000000125 | 5_Wnt3    | 0.63637  | 0.32817   | 0.912305 | NA       | 0        | 1.1335   | 1.03416  | 1.65058    | 0          | 0            |
| ENSMUSG000000000126 | 11_Wnt9a  | 903.308  | 0.69174   | 0.118735 | 0.4687   | 545.061  | 1493.96  | 1308.21  | 673.439    | 546.85     | 852.33       |
| ENSMUSG000000000127 | 14_Fer    | 992.91   | 0.31335   | 0.348453 | 0.725753 | 1460.24  | 986.148  | 854.217  | 718.83     | 965.787    | 972.244      |
| ENSMUSG000000000131 | 15_Xpo6   | 1878.47  | 0.3169    | 0.345101 | 0.722149 | 1357.09  | 2621.79  | 2273.09  | 1670.39    | 1619.09    | 1729.35      |
| ENSMUSG000000000134 | 17_Tfe3   | 1329.82  | 0.30465   | 0.474202 | 0.806964 | 712.927  | 1996.1   | 1700.16  | 1199.15    | 1099.71    | 1270.85      |
| ENSMUSG000000000142 | 15_Axin2  | 373.217  | -0.91319  | 0.014253 | 0.128506 | 184.046  | 238.036  | 354.717  | 609.891    | 412.927    | 439.685      |
| ENSMUSG000000000148 | 17_Brat1  | 202.743  | 0.11657   | 0.787301 | 0.936722 | 107.192  | 253.905  | 271.984  | 219.528    | 195.733    | 168.115      |
| ENSMUSG000000000149 | 10_Gna12  | 608.391  | -0.29734  | 0.543162 | 0.84123  | 227.53   | 646.097  | 764.245  | 834.371    | 505.643    | 672.459      |
| ENSMUSG000000000154 | 15_Slc22a | 272.313  | 0.26641   | 0.654336 | 0.893223 | 77.8658  | 394.459  | 419.87   | 291.328    | 181.139    | 269.219      |
| ENSMUSG000000000159 | 15_Igfb5  | 0.65252  | 1.60581   | 0.582146 | NA       | 2.02249  | 0        | 1.03416  | 0          | 0.85848    | 0            |
| ENSMUSG000000000167 | 14_Pih1d  | 49.8397  | 0.28342   | 0.49211  | 0.815612 | 71.7983  | 48.7406  | 43.4348  | 38.7887    | 48.0747    | 48.2007      |
| ENSMUSG000000000168 | 9_Dlat    | 1101.46  | 0.31232   | 0.318574 | 0.699702 | 1622.04  | 1039.42  | 999      | 903.695    | 1046.48    | 998.108      |
| ENSMUSG000000000171 | 4_Sdhb    | 2455.96  | -0.12613  | 0.574155 | 0.856242 | 2545.3   | 2219.4   | 2281.36  | 2588.94    | 2626.08    | 2474.7       |
| ENSMUSG000000000182 | 9_Fgf23   | 5.73717  | 4.1705    | 0.008455 | 0.089061 | 9.1012   | 21.5366  | 2.06832  | 0          | 1.71695    | 0            |
| ENSMUSG000000000183 | 6_Fgf6    | 4.07751  | 0.01854   | 0.987352 | 0.996462 | 5.05622  | 1.1335   | 6.20497  | 6.60234    | 4.29238    | 1.17563      |
| ENSMUSG000000000184 | 12_Ccnd2  | 5383.22  | 0.55179   | 0.025652 | 0.191868 | 7404.33  | 5577.97  | 6218.41  | 4469.78    | 4179.07    | 4449.75      |
| ENSMUSG000000000194 | 13_Gpr10  | 1624.06  | 0.27597   | 0.384745 | 0.750802 | 1236.75  | 2142.32  | 1957.67  | 1476.45    | 1345.23    | 1585.92      |
| ENSMUSG000000000197 | 7_Nalcn   | 149.95   | -1.37212  | 0.010011 | 0.100795 | 152.698  | 43.0731  | 54.8106  | 222.829    | 255.826    | 170.466      |
| ENSMUSG000000000202 | 9_Btbd17  | 1.16984  | -3.5987   | 0.126334 | NA       | 0        | 0        | 0        | 4.12646    | 1.71695    | 1.17563      |
| ENSMUSG000000000204 | 15_Slfn4  | 14037.5  | 2.44883   | 1.66E-08 | 2.06E-06 | 27559.4  | 28214    | 15413.1  | 2596.37    | 6313.24    | 4128.8       |
| ENSMUSG000000000214 | 10_Th     | 11.2818  | -0.68877  | 0.426736 | 0.777557 | 7.07871  | 2.26701  | 16.5466  | 21.4576    | 8.58477    | 11.7563      |
| ENSMUSG000000000215 | 10_Ins2   | 7.39366  | -3.7235   | 0.004042 | 0.053704 | 1.01124  | 0        | 2.06832  | 26.4094    | 4.29238    | 10.5807      |
| ENSMUSG000000000216 | 8_Scnn1g  | 23.3037  | 0.54401   | 0.354378 | 0.729885 | 17.1912  | 27.2041  | 38.264   | 11.5541    | 19.745     | 25.8638      |
| ENSMUSG000000000223 | 13_Drp2   | 136.169  | -0.22513  | 0.538325 | 0.839833 | 169.889  | 94.0807  | 112.724  | 143.601    | 167.403    | 129.319      |
| ENSMUSG000000000244 | 16_Tspan  | 3.16109  | 4.16068   | 0.013238 | 0.123006 | 3.03373  | 6.80102  | 8.27329  | 0          | 0.85848    | 0            |
| ENSMUSG000000000247 | 11_Lhx2   | 214.099  | -1.21583  | 0.001666 | 0.028406 | 156.743  | 86.1462  | 143.748  | 354.876    | 327.938    | 215.14       |
| ENSMUSG000000000248 | 16_Clec2t | 159.506  | 0.1278    | 0.812656 | 0.946314 | 311.463  | 91.8137  | 96.177   | 132.047    | 156.243    | 169.29       |
| ENSMUSG000000000253 | 12_Gmpr   | 585.837  | -0.08406  | 0.880118 | 0.966708 | 170.9    | 753.779  | 781.826  | 759.269    | 488.473    | 560.774      |
| ENSMUSG000000000263 | 15_Glra1  | 3.19086  | -1.8822   | 0.257947 | 0.648822 | 2.02249  | 0        | 2.06832  | 9.90351    | 5.15086    | 0            |
| ENSMUSG000000000266 | 11_Mid2   | 2673.54  | 0.54441   | 0.227074 | 0.617764 | 5299.93  | 2074.31  | 2141.75  | 1726.51    | 2469.84    | 2328.92      |
| ENSMUSG000000000275 | 16_Trim2t | 7010.17  | 0.85923   | 0.000314 | 0.008172 | 8561.19  | 9513.49  | 9039.61  | 4400.46    | 5547.48    | 4998.77      |
| ENSMUSG000000000276 | 11_Dgke   | 461.64   | 0.23094   | 0.540423 | 0.84046  | 734.163  | 415.996  | 345.41   | 444.833    | 443.833    | 385.606      |
| ENSMUSG000000000278 | 10_Scpep  | 955.78   | -0.42189  | 0.103056 | 0.436784 | 788.771  | 763.981  | 898.686  | 1181.82    | 1172.68    | 928.746      |
| ENSMUSG000000000282 | 12_Mnt    | 424.092  | 0.29553   | 0.513477 | 0.828304 | 238.654  | 532.746  | 630.839  | 486.922    | 272.137    | 383.255      |
| ENSMUSG000000000290 | 13_Itgb2  | 193.825  | 2.48963   | 0.000107 | 0.003504 | 117.304  | 655.165  | 215.106  | 83.3545    | 53.2256    | 38.7957      |
| ENSMUSG000000000295 | 12_Hddc2  | 285.998  | -0.19591  | 0.509983 | 0.827179 | 319.553  | 253.905  | 226.481  | 288.027    | 349.4      | 278.624      |
| ENSMUSG000000000296 | 7_Tpdc2l  | 140.957  | -0.3395   | 0.376698 | 0.74591  | 177.979  | 92.9472  | 102.382  | 179.088    | 151.092    | 142.251      |
| ENSMUSG000000000301 | 16_Pemt   | 29.3043  | -0.24802  | 0.739864 | 0.921762 | 4.04498  | 34.0051  | 42.4006  | 32.1864    | 32.6221    | 30.5663      |
| ENSMUSG000000000303 | 12_Cdh1   | 10348.7  | 0.90728   | 0.002715 | 0.040585 | 12367.5  | 15390.7  | 12739.8  | 5659.03    | 6785.4     | 9149.91      |
| ENSMUSG000000000305 | 12_Cdh4   | 204.182  | -0.52857  | 0.239745 | 0.631622 | 83.9333  | 175.693  | 241.994  | 276.473    | 196.591    | 250.409      |
| ENSMUSG000000000308 | 14_Ckmt1  | 4379.32  | 0.54416   | 0.198867 | 0.590911 | 2640.36  | 6755.68  | 6190.49  | 2930.61    | 3453.65    | 4305.15      |
| ENSMUSG000000000317 | 11_Bcl6b  | 57.919   | -0.45487  | 0.272687 | 0.659209 | 54.6072  | 34.0051  | 57.913   | 81.7039    | 55.801     | 63.4839      |
| ENSMUSG000000000318 | 16_Clec1t | 59.5665  | 0.17404   | 0.690581 | 0.905638 | 45.506   | 63.4762  | 80.6646  | 74.2763    | 42.9238    | 50.552       |
| ENSMUSG000000000320 | 10_Alox12 | 1582     | 0.72058   | 0.012727 | 0.119666 | 1628.1   | 2101.51  | 2176.91  | 1051.42    | 1086.83    | 1447.2       |
| ENSMUSG000000000325 | 15_Arvf   | 677.178  | -0.09615  | 0.868233 | 0.962942 | 189.103  | 804.787  | 970.044  | 890.49     | 473.879    | 734.767      |
| ENSMUSG000000000326 | 12_Comt   | 831.158  | -0.08256  | 0.845156 | 0.954862 | 416.633  | 973.679  | 1032.09  | 1048.12    | 732.281    | 784.144      |
| ENSMUSG000000000339 | 14_Rtca   | 454.811  | -0.03089  | 0.898733 | 0.971885 | 485.397  | 435.265  | 429.177  | 443.182    | 486.756    | 449.09       |
| ENSMUSG000000000340 | 10_Dbt    | 689.622  | -0.15716  | 0.624369 | 0.879534 | 868.659  | 502.142  | 585.335  | 689.944    | 789.799    | 701.85       |
| ENSMUSG000000000346 | 8_Dazap2  | 7523.37  | 0.29023   | 0.264363 | 0.653062 | 9727.16  | 7850.64  | 7254.64  | 6057.65    | 7139.95    | 7110.2       |
| ENSMUSG000000000355 | 13_Mcts1  | 715.825  | 0.58421   | 0.250673 | 0.642255 | 1550.24  | 580.353  | 445.724  | 472.067    | 679.914    | 566.653      |
| ENSMUSG000000000359 | 3_Rem1    | 25.9808  | -1.1714   | 0.052981 | 0.299004 | 7.07871  | 20.4031  | 20.6832  | 48.6922    | 34.3391    | 24.6882      |
| ENSMUSG000000000365 | 8_Rnf17   | 3.54366  | 0.81073   | 0.617241 | 0.877328 | 9.1012   | 4.53401  | 0        | 2.47588    | 5.15086    | 0            |
| ENSMUSG000000000374 | 7_Trappc  | 1787.01  | 0.26756   | 0.391435 | 0.754323 | 1375.29  | 2293.08  | 2188.29  | 1587.86    | 1502.33    | 1775.2       |
| ENSMUSG000000000378 | 15_Ccm2   | 376.22   | 0.39025   | 0.528448 | 0.835633 | 95.057   | 652.898  | 532.593  | 392.014    | 275.571    | 309.19       |
| ENSMUSG000000000381 | 10_Wap    | 0.17236  | 1.1315    | 0.781553 | NA       | 0        | 0        | 1.03416  | 0          | 0          | 0            |
| ENSMUSG000000000384 | 15_Tbgr4  | 336.036  | 0.4799    | 0.410172 | 0.76693  | 104.158  | 565.618  | 504.671  | 339.195    | 249.817    | 252.76       |
| ENSMUSG000000000385 | 7_Tmprss  | 627.701  | 0.17432   | 0.536145 | 0.838659 | 563.263  | 692.57   | 740.46   | 503.428    | 584.623    | 681.864      |
| ENSMUSG000000000386 | 14_Mx1    | 3870.83  | 3.59567   | 4.27E-12 | 1.26E-09 | 7437.7   | 8477.47  | 5535.87  | 287.202    | 1079.96    | 406.767      |
| ENSMUSG000000000392 | 17_Fap    | 338.626  | -0.61559  | 0.218886 | 0.609939 | 484.386  | 157.557  | 160.295  | 440.706    | 413.786    | 375.025      |
| ENSMUSG000000000394 | 15_Gcg    | 0.34472  | 1.99863   | 0.620844 | NA       | 0        | 0        | 2.06832  | 0          | 0          | 0            |

|                    |           |         |          |          |          |         |         |         |         |         |         |
|--------------------|-----------|---------|----------|----------|----------|---------|---------|---------|---------|---------|---------|
| ENSMUSG00000000399 | 10_Ndufa1 | 1733.85 | -0.21839 | 0.416515 | 0.770435 | 1273.16 | 1839.68 | 1696.02 | 1851.13 | 1925.56 | 1817.52 |
| ENSMUSG00000000402 | 2_Egfl6   | 236.278 | -0.58679 | 0.205894 | 0.59724  | 314.497 | 100.882 | 150.988 | 271.521 | 285.873 | 293.907 |
| ENSMUSG00000000409 | 14_Lck    | 52.307  | 1.42809  | 0.016162 | 0.13955  | 27.3036 | 119.018 | 82.7329 | 34.6623 | 26.6128 | 23.5126 |
| ENSMUSG00000000411 | 7_Tssk3   | 0.49883 | 1.09243  | 0.73138  | NA       | 0       | 1.1335  | 1.03416 | 0.82529 | 0       | 0       |
| ENSMUSG00000000416 | 16_Cttnbp | 107.243 | -1.04331 | 0.016142 | 0.139521 | 104.158 | 54.4081 | 51.7081 | 163.408 | 163.969 | 105.807 |
| ENSMUSG00000000420 | 15_Galnt1 | 3060.09 | 0.22071  | 0.544994 | 0.842106 | 4820.6  | 2727.21 | 2333.07 | 2551.8  | 2961.75 | 2966.11 |
| ENSMUSG00000000435 | 1_Myf5    | 2.26648 | -0.65767 | 0.69048  | 0.905638 | 4.04498 | 1.1335  | 0       | 0.82529 | 1.71695 | 5.87814 |
| ENSMUSG00000000439 | 9_Mkrn2   | 1089.68 | 0.08029  | 0.723265 | 0.914458 | 1068.89 | 1100.63 | 1190.32 | 1069.58 | 1013    | 1095.69 |
| ENSMUSG00000000440 | 12_Pparg  | 23.7872 | -0.04495 | 0.93852  | 0.985118 | 23.2586 | 32.8716 | 14.4783 | 30.5358 | 27.4713 | 14.1075 |
| ENSMUSG00000000441 | 17_Raf1   | 2677.07 | 0.24552  | 0.373101 | 0.744037 | 2264.18 | 3348.37 | 3100.42 | 2299.26 | 2508.47 | 2541.71 |
| ENSMUSG00000000486 | 13_Sept1  | 46.551  | 0.39598  | 0.461932 | 0.799907 | 25.2811 | 74.8112 | 58.9472 | 53.644  | 36.056  | 30.5663 |
| ENSMUSG00000000489 | 6_Pdgfr   | 86.9285 | -0.08937 | 0.842855 | 0.953771 | 45.506  | 87.2797 | 119.963 | 99.8604 | 77.2629 | 91.699  |
| ENSMUSG00000000530 | 16_Acvr1  | 254.883 | -0.59616 | 0.170901 | 0.553078 | 109.214 | 253.905 | 246.13  | 400.267 | 276.43  | 243.355 |
| ENSMUSG00000000531 | 4_Grasp   | 58.6128 | -0.29829 | 0.624288 | 0.879492 | 16.1799 | 60.0757 | 81.6988 | 80.0534 | 67.8197 | 45.8495 |
| ENSMUSG00000000532 | 10_Acvr1  | 1715.49 | 0.35275  | 0.284488 | 0.670663 | 1334.84 | 2098.11 | 2339.27 | 1418.68 | 1340.94 | 1761.09 |
| ENSMUSG00000000538 | 18_Tom1   | 1954.81 | -0.00967 | 0.981388 | 0.993854 | 986.974 | 2318.01 | 2539.9  | 2163.92 | 1723.82 | 1996.22 |
| ENSMUSG00000000544 | 12_Gpa3   | 25.5789 | 1.31505  | 0.023132 | 0.179283 | 21.2361 | 38.5391 | 49.6398 | 18.1564 | 9.44325 | 16.4588 |
| ENSMUSG00000000552 | 9_Zfp385  | 321.502 | -0.72736 | 0.259224 | 0.64893  | 56.6297 | 304.912 | 365.059 | 612.367 | 286.731 | 303.312 |
| ENSMUSG00000000555 | 6_Igfa5   | 261.374 | 0.15421  | 0.772413 | 0.932508 | 98.0907 | 426.197 | 301.975 | 307.834 | 215.478 | 218.667 |
| ENSMUSG00000000560 | 9_Gabra2  | 19.3587 | -1.07043 | 0.257621 | 0.648651 | 26.2924 | 10.2015 | 1.03416 | 37.1382 | 30.9052 | 10.5807 |
| ENSMUSG00000000561 | 14_Wdr7   | 1333.75 | 0.30755  | 0.331716 | 0.711299 | 1871.81 | 1422.55 | 1131.37 | 993.652 | 1249.94 | 1333.16 |
| ENSMUSG00000000562 | 5_Adora3  | 5.36032 | -0.23597 | 0.802548 | 0.942594 | 7.07871 | 5.66751 | 2.06832 | 5.77705 | 6.86782 | 4.70251 |
| ENSMUSG00000000563 | 17_Atp5f1 | 4744.66 | 0.29856  | 0.451104 | 0.793229 | 8163.78 | 3843.71 | 3694.03 | 4078.59 | 4646.08 | 4041.81 |
| ENSMUSG00000000567 | 5_Sox9    | 395.38  | 0.69239  | 0.014112 | 0.127702 | 538.993 | 474.938 | 450.894 | 302.057 | 251.534 | 353.864 |
| ENSMUSG00000000568 | 15_Hnmp   | 3232.1  | 0.73136  | 0.090021 | 0.408797 | 6430.5  | 3240.68 | 2431.31 | 1941.09 | 2772.02 | 2576.98 |
| ENSMUSG00000000579 | 14_Dynl1  | 710.732 | 0.21993  | 0.431102 | 0.780048 | 875.738 | 681.235 | 737.357 | 563.675 | 769.195 | 637.19  |
| ENSMUSG00000000581 | 8_C1d     | 1281.93 | 0.38439  | 0.384768 | 0.750802 | 2409.8  | 1049.62 | 895.584 | 992.001 | 1255.95 | 1088.63 |
| ENSMUSG00000000594 | 7_Gm2a    | 1248.98 | -0.17322 | 0.474379 | 0.806964 | 1106.3  | 1125.57 | 1290.63 | 1458.29 | 1273.98 | 1239.11 |
| ENSMUSG00000000600 | 15_Krit1  | 1387.45 | 0.54595  | 0.222115 | 0.612538 | 2756.65 | 1105.17 | 1078.63 | 958.99  | 1273.12 | 1152.12 |
| ENSMUSG00000000605 | 8_Clc4    | 1380.33 | 0.09368  | 0.778141 | 0.934544 | 1970.92 | 1088.16 | 1216.17 | 1296.53 | 1431.08 | 1279.08 |
| ENSMUSG00000000617 | 14_Grm6   | 23.1251 | -1.63037 | 0.039709 | 0.250561 | 15.1687 | 14.7355 | 4.13665 | 66.0234 | 25.7543 | 12.9319 |
| ENSMUSG00000000627 | 15_Sema   | 12.895  | 0.33918  | 0.627684 | 0.880942 | 8.08995 | 13.602  | 21.7174 | 14.03   | 12.8772 | 7.05377 |
| ENSMUSG00000000628 | 10_Hk2    | 892.59  | 0.88575  | 0.004525 | 0.05803  | 887.873 | 1481.49 | 1105.52 | 659.409 | 551.142 | 670.108 |
| ENSMUSG00000000631 | 19_Myo1E  | 4116.9  | 0.46569  | 0.410565 | 0.767001 | 1329.79 | 6582.25 | 6414.9  | 3812.03 | 2688.75 | 3873.69 |
| ENSMUSG00000000632 | 13_Seiz6  | 26.9815 | -2.373   | 0.001216 | 0.022752 | 12.1349 | 7.93452 | 6.20497 | 66.0234 | 56.6595 | 12.9319 |
| ENSMUSG00000000673 | 8_Haao    | 9.72644 | 0.08529  | 0.920716 | 0.977466 | 4.04498 | 14.7355 | 11.3758 | 15.6806 | 4.29238 | 8.22939 |
| ENSMUSG00000000682 | 7_Cd52    | 159.279 | 2.50741  | 2.44E-08 | 2.92E-06 | 182.024 | 426.197 | 204.764 | 44.5658 | 55.801  | 42.3226 |
| ENSMUSG00000000686 | 11_Abhd1  | 7.85428 | 0.43611  | 0.616995 | 0.877219 | 3.03373 | 14.7355 | 9.30745 | 4.95175 | 6.86782 | 8.22939 |
| ENSMUSG00000000690 | 5_Hoxb6   | 0       | NA       | NA       | NA       | 0       | 0       | 0       | 0       | 0       | 0       |
| ENSMUSG00000000693 | 10_Loxl3  | 282.41  | -0.36954 | 0.348621 | 0.725753 | 146.63  | 289.043 | 304.043 | 377.159 | 323.646 | 253.936 |
| ENSMUSG00000000706 | 15_Btn1a  | 0.88728 | 3.35639  | 0.187202 | NA       | 2.02249 | 2.26701 | 1.03416 | 0       | 0       | 0       |
| ENSMUSG00000000708 | 14_Kat2b  | 2047.66 | 0.57346  | 0.182169 | 0.568167 | 4004.53 | 1724.06 | 1619.5  | 1609.32 | 1863.75 | 1464.83 |
| ENSMUSG00000000711 | 2_Rab5b   | 4255.8  | -0.08895 | 0.686518 | 0.904408 | 4371.61 | 3913.99 | 4088.04 | 4173.5  | 4452.06 | 4535.57 |
| ENSMUSG00000000724 | 10_Cryba  | 6360.73 | -4.28621 | 8.36E-16 | 4.44E-13 | 279.103 | 630.228 | 951.429 | 18007.9 | 6805.15 | 11490.6 |
| ENSMUSG00000000730 | 13_Dnmt3  | 36.2472 | -0.0537  | 0.908618 | 0.974731 | 29.3261 | 43.0731 | 34.1273 | 24.7588 | 40.3484 | 45.8495 |
| ENSMUSG00000000731 | 15_Aire   | 4.17431 | 1.68195  | 0.1953   | 0.586541 | 3.03373 | 4.53401 | 11.3758 | 0       | 2.57543 | 3.52688 |
| ENSMUSG00000000732 | 8_Icosl   | 1050.55 | 0.58014  | 0.09609  | 0.420286 | 866.636 | 1412.34 | 1497.47 | 708.926 | 765.761 | 1052.19 |
| ENSMUSG00000000738 | 17_Spg7   | 936.938 | 0.12333  | 0.789054 | 0.937308 | 427.756 | 1198.11 | 1305.11 | 1028.31 | 738.29  | 924.043 |
| ENSMUSG00000000739 | 13_Sult5a | 188.094 | 0.17035  | 0.690195 | 0.905638 | 108.203 | 224.434 | 264.745 | 173.311 | 145.083 | 212.789 |
| ENSMUSG00000000740 | 11_Rpl13  | 15833.6 | -0.02471 | 0.938496 | 0.985118 | 1064.9  | 17673.6 | 18771.1 | 17133.9 | 14867.1 | 15906.2 |
| ENSMUSG00000000743 | 8_Chmp1   | 2226.91 | 0.21889  | 0.647229 | 0.890168 | 956.637 | 3024.19 | 3205.9  | 2347.96 | 1775.33 | 2051.47 |
| ENSMUSG00000000751 | 13_Rpa1   | 1945.32 | 0.23839  | 0.287346 | 0.672979 | 2174.18 | 2144.59 | 1998    | 1675.34 | 1797.65 | 1882.18 |
| ENSMUSG00000000753 | 15_Serpin | 4706.63 | -0.74429 | 0.094242 | 0.417467 | 1704.96 | 3386.91 | 5464.51 | 6184.74 | 5454.76 | 6043.9  |
| ENSMUSG00000000759 | 14_Tubgc  | 969.159 | 0.02276  | 0.920595 | 0.977466 | 920.232 | 990.682 | 1019.68 | 944.96  | 1013    | 926.395 |
| ENSMUSG00000000766 | 18_Oprm1  | 0.52982 | 2.61357  | 0.388937 | NA       | 1.01124 | 1.1335  | 1.03416 | 0       | 0       | 0       |
| ENSMUSG00000000776 | 12_Polr3d | 341.134 | 0.17081  | 0.574966 | 0.85664  | 273.036 | 414.862 | 396.084 | 341.671 | 288.448 | 332.703 |
| ENSMUSG00000000782 | 15_Tcf7   | 117.937 | -0.527   | 0.114498 | 0.459698 | 82.922  | 100.882 | 106.519 | 155.155 | 152.809 | 109.333 |
| ENSMUSG00000000787 | 12_Ddx3x  | 18071.6 | 0.31792  | 0.490291 | 0.814631 | 34430.8 | 13846.9 | 11886.7 | 14057.2 | 18142.2 | 16066.1 |
| ENSMUSG00000000791 | 8_Ii12rb1 | 12.4096 | 1.10173  | 0.163104 | 0.541016 | 7.07871 | 23.8036 | 19.6491 | 4.12646 | 6.86782 | 12.9319 |
| ENSMUSG00000000792 | 2_Slc5a5  | 24.716  | -1.37788 | 0.076484 | 0.370931 | 3.03373 | 11.335  | 26.8882 | 54.4693 | 23.1789 | 29.3907 |
| ENSMUSG00000000794 | 9_Kcnn3   | 125.413 | -0.8426  | 0.095388 | 0.419222 | 149.664 | 43.0731 | 76.528  | 199.721 | 145.941 | 137.548 |
| ENSMUSG00000000804 | 14_Usp32  | 2979.93 | 0.47797  | 0.216757 | 0.607835 | 5273.64 | 2570.78 | 2562.65 | 2167.22 | 2791.77 | 2513.49 |
| ENSMUSG00000000805 | 18_Car4   | 15.1541 | -0.89425 | 0.133939 | 0.49748  | 10.1124 | 12.4685 | 9.30745 | 16.5058 | 24.8958 | 17.6344 |
| ENSMUSG00000000811 | 13_Txnrd  | 505.216 | 0.00208  | 0.994505 | 0.998043 | 462.139 | 582.62  | 471.578 | 396.14  | 513.369 | 605.448 |
| ENSMUSG00000000817 | 10_FasI   | 9.98084 | 3.87598  | 0.000101 | 0.003335 | 24.2699 | 18.136  | 13.4441 | 0.82529 | 0.85848 | 2.35126 |
| ENSMUSG00000000823 | 16_Znf51  | 1118.96 | -0.02093 | 0.95968  | 0.989708 | 553.151 | 1353.4  | 1426.11 | 1145.51 | 1102.28 | 1133.31 |
| ENSMUSG00000000826 | 16_Dnajc  | 4161.77 | 0.11107  | 0.603353 | 0.870656 | 4369.59 | 4451.27 | 4144.92 | 4072.82 | 3958.44 | 3973.62 |
| ENSMUSG00000000827 | 18_Tpd52  | 1988.6  | -0.07303 | 0.746094 | 0.924339 | 1788.89 | 1971.16 | 2054.88 | 2118.53 | 1970.2  | 2027.96 |
| ENSMUSG00000000838 | 17_Fmr1   | 2314.02 | 0.84239  | 0.07739  | 0.373237 | 5224.09 | 1947.36 | 1741.53 | 1439.31 | 1857.74 | 1674.09 |
| ENSMUSG00000000861 | 15_Bcl11  | 201.586 | 0.89359  | 0.12782  | 0.119977 | 366.07  | 201.764 | 218.208 | 133.697 | 141.649 | 148.129 |
| ENSMUSG00000000869 | 12_Ii4    | 7.32193 | -0.46322 | 0.644207 | 0.889191 | 13.1462 | 2.26701 | 3.10248 | 10.7288 | 11.1602 | 3.52688 |
| ENSMUSG00000000876 | 11_Pxmp   | 443.24  | -0.0768  | 0.796796 | 0.939968 | 337.756 | 471.537 | 485.022 | 491.874 | 388.89  | 484.359 |
| ENSMUSG00000000881 | 12_Dlg3   | 2437.87 | 0.26953  | 0.245053 | 0.6364   | 2782.94 | 2744.21 | 2467.51 | 2016.19 | 2346.22 | 2270.14 |
| ENSMUSG00000000884 | 16_Gnb1   | 112.117 | -0.08044 | 0.856457 | 0.959059 | 56.6297 | 123.552 | 146.851 | 128.746 | 97.0079 | 119.914 |
| ENSMUSG00000000889 | 8_Dbh     | 0.13755 | -0.79206 | 0.84609  | NA       | 0       | 0       | 0       | 0.82529 | 0       | 0       |

|                    |            |         |          |          |          |         |         |         |         |         |         |
|--------------------|------------|---------|----------|----------|----------|---------|---------|---------|---------|---------|---------|
| ENSMUSG00000000901 | 15_Mmp1    | 99.7263 | -1.66869 | 7.64E-05 | 0.002645 | 33.3711 | 51.0076 | 58.9472 | 203.847 | 112.46  | 138.724 |
| ENSMUSG00000000902 | 13_Smarc   | 1088.73 | 0.13498  | 0.760601 | 0.92827  | 515.735 | 1525.69 | 1377.5  | 1016.76 | 978.664 | 1118.02 |
| ENSMUSG00000000903 | 3_Vpreb3   | 1.51814 | 3.03251  | 0.213397 | NA       | 1.01124 | 0       | 7.23913 | 0       | 0.85848 | 0       |
| ENSMUSG00000000915 | 15_Hip1r   | 1653.92 | 0.57411  | 0.264045 | 0.652958 | 690.68  | 2693.2  | 2552.31 | 1421.15 | 1082.54 | 1483.64 |
| ENSMUSG00000000916 | 15_Nsun5   | 196.634 | 0.02201  | 0.953303 | 0.988326 | 120.338 | 228.968 | 245.096 | 188.992 | 187.148 | 209.262 |
| ENSMUSG00000000934 | 8_Top1mt   | 227.577 | 0.06346  | 0.895225 | 0.971421 | 94.0457 | 306.046 | 297.839 | 225.305 | 231.789 | 210.437 |
| ENSMUSG00000000938 | 11_Hoxa1   | 0.18892 | 1.1315   | 0.781553 | NA       | 0       | 1.1335  | 0       | 0       | 0       | 0       |
| ENSMUSG00000000942 | 10_Hoxa4   | 0.56675 | 2.70271  | 0.498103 | NA       | 0       | 3.40051 | 0       | 0       | 0       | 0       |
| ENSMUSG00000000948 | 16_Gm38    | 35.5071 | -0.53339 | 0.50498  | 0.824886 | 62.6971 | 6.80102 | 17.5807 | 54.4693 | 51.5086 | 19.9857 |
| ENSMUSG00000000957 | 9_Mmp14    | 3069.26 | 0.25777  | 0.502119 | 0.823005 | 1849.57 | 4290.31 | 3888.45 | 2909.16 | 2607.19 | 2870.88 |
| ENSMUSG00000000958 | 9_Slc7a7   | 98.6596 | 0.06246  | 0.871118 | 0.963578 | 65.7309 | 119.018 | 117.894 | 92.4327 | 109.885 | 86.9965 |
| ENSMUSG00000000959 | 6_Oxa1l    | 808.278 | 0.01115  | 0.979204 | 0.993796 | 390.34  | 985.014 | 1058.98 | 868.208 | 738.29  | 808.832 |
| ENSMUSG00000000976 | 13_Heatf   | 542.926 | 0.18755  | 0.530028 | 0.836496 | 447.981 | 694.837 | 591.54  | 464.64  | 491.907 | 566.653 |
| ENSMUSG00000000982 | 5_Ccl3     | 17.1247 | 3.46947  | 2.20E-05 | 0.000978 | 22.2474 | 53.2746 | 18.6149 | 1.65058 | 3.43391 | 3.52688 |
| ENSMUSG00000000983 | 13_Wfdc1   | 534.763 | 0.99115  | 0.002637 | 0.039678 | 661.354 | 637.029 | 835.603 | 255.015 | 384.598 | 434.982 |
| ENSMUSG00000001014 | 5_Icam4    | 0.53684 | 1.02757  | 0.740993 | NA       | 1.01124 | 0       | 1.03416 | 0       | 0       | 1.17563 |
| ENSMUSG00000001016 | 12_Ilf2    | 1567.31 | -0.03823 | 0.871544 | 0.963578 | 1640.24 | 1512.09 | 1487.12 | 1422.8  | 1720.39 | 1621.19 |
| ENSMUSG00000001017 | 15_Chtop   | 3228.97 | 0.34323  | 0.30201  | 0.685243 | 5047.12 | 2883.63 | 2902.89 | 2721.81 | 2978.06 | 2840.32 |
| ENSMUSG00000001018 | 15_Snapir  | 1072.34 | -0.01492 | 0.965552 | 0.990781 | 1500.69 | 770.782 | 928.677 | 1016.76 | 1133.19 | 1083.93 |
| ENSMUSG00000001020 | 8_S100a4   | 484.715 | -0.29193 | 0.521575 | 0.831998 | 217.418 | 666.5   | 424.006 | 517.458 | 645.575 | 437.334 |
| ENSMUSG00000001021 | 12_S100a   | 684.524 | 0.30849  | 0.549639 | 0.843939 | 260.901 | 1063.23 | 948.326 | 683.342 | 549.425 | 601.921 |
| ENSMUSG00000001023 | 10_S100a   | 0.13755 | -0.79206 | 0.84609  | NA       | 0       | 0       | 0       | 0.82529 | 0       | 0       |
| ENSMUSG00000001025 | 8_S100a6   | 58858.2 | 0.09508  | 0.838316 | 0.952966 | 24954.5 | 79014.2 | 78422.5 | 55420   | 52206.6 | 63131.2 |
| ENSMUSG00000001027 | 7_Scn4a    | 284.24  | 0.1795   | 0.65926  | 0.894805 | 160.788 | 369.522 | 375.401 | 255.015 | 256.685 | 288.029 |
| ENSMUSG00000001029 | 15_Icam2   | 39.504  | -0.05379 | 0.909353 | 0.974731 | 26.2924 | 51.0076 | 39.2981 | 51.9934 | 34.3391 | 34.0932 |
| ENSMUSG00000001034 | 17_Mapk7   | 318.737 | 0.2089   | 0.724568 | 0.915505 | 83.9333 | 452.268 | 489.158 | 302.882 | 264.411 | 319.771 |
| ENSMUSG00000001036 | 17_Epn2    | 1216.92 | -0.10759 | 0.692856 | 0.905638 | 921.244 | 1285.39 | 1308.21 | 1310.56 | 1218.18 | 1257.92 |
| ENSMUSG00000001039 | 12_B9d1    | 143.929 | -0.19738 | 0.709419 | 0.909942 | 47.5285 | 167.758 | 187.183 | 183.215 | 135.639 | 142.251 |
| ENSMUSG00000001052 | 15_Sec24   | 1683.41 | 0.4794   | 0.047001 | 0.277829 | 1828.33 | 2137.79 | 1915.27 | 1261.05 | 1437.95 | 1520.09 |
| ENSMUSG00000001053 | 15_N4bp3   | 1403.34 | 0.89435  | 0.221643 | 0.612307 | 223.485 | 2416.63 | 2834.64 | 1256.09 | 646.433 | 1042.78 |
| ENSMUSG00000001054 | 9_Rmnd5l   | 738.417 | 0.2082   | 0.621802 | 0.878215 | 390.34  | 955.543 | 1028.99 | 717.179 | 618.962 | 719.484 |
| ENSMUSG00000001056 | 3_Nhp2     | 645.458 | 0.13696  | 0.803805 | 0.942928 | 201.238 | 964.611 | 862.491 | 694.896 | 519.379 | 630.137 |
| ENSMUSG00000001062 | 17_Vps9d   | 423.91  | 0.12823  | 0.816004 | 0.947424 | 132.473 | 557.683 | 638.078 | 420.899 | 351.117 | 443.212 |
| ENSMUSG00000001065 | 14_Zfp27f  | 359.743 | 0.31621  | 0.555035 | 0.846508 | 129.439 | 559.95  | 507.773 | 364.779 | 275.571 | 320.946 |
| ENSMUSG00000001082 | 12_Mfsd1l  | 302.963 | 0.8389   | 0.244268 | 0.636183 | 51.5735 | 549.749 | 564.652 | 267.395 | 152.809 | 231.599 |
| ENSMUSG00000001089 | 14_Luzp1   | 3272.08 | 0.35892  | 0.200381 | 0.592148 | 4530.37 | 3394.84 | 3105.59 | 2560.06 | 3057.9  | 2983.74 |
| ENSMUSG00000001095 | 5_Slc13a2  | 326.374 | -0.18799 | 0.738382 | 0.921641 | 88.9895 | 344.585 | 481.919 | 377.984 | 316.778 | 347.986 |
| ENSMUSG00000001098 | 15_Kctd1l  | 2352.06 | -0.09316 | 0.742063 | 0.922751 | 1759.57 | 2449.5  | 2619.53 | 2649.19 | 2226.89 | 2407.69 |
| ENSMUSG00000001100 | 10_Poldip  | 1070.16 | -0.14376 | 0.676069 | 0.901041 | 642.14  | 1240.05 | 1168.6  | 1138.08 | 1079.96 | 1152.12 |
| ENSMUSG00000001103 | 7_Sebox    | 6.26435 | -2.31833 | 0.056712 | 0.311361 | 3.03373 | 2.26701 | 1.03416 | 20.6323 | 9.44325 | 1.17563 |
| ENSMUSG00000001105 | 15_Ift20   | 725.264 | -0.20664 | 0.474011 | 0.806913 | 514.723 | 744.711 | 761.143 | 828.594 | 782.931 | 719.484 |
| ENSMUSG00000001119 | 7_Col6a1   | 5861.9  | -0.43842 | 0.31123  | 0.693321 | 2505.86 | 5008.95 | 7419.07 | 6273.87 | 6162.15 | 7801.47 |
| ENSMUSG00000001120 | 15_Pcbp3   | 291.334 | -0.92925 | 0.022619 | 0.17728  | 126.406 | 250.504 | 225.447 | 482.796 | 398.333 | 264.516 |
| ENSMUSG00000001123 | 15_Lgals9  | 3368.23 | 2.05396  | 8.77E-08 | 9.00E-06 | 3451.38 | 7866.51 | 4969.15 | 1093.51 | 1466.28 | 1362.55 |
| ENSMUSG00000001127 | 12_Araf    | 1738.88 | -0.02882 | 0.909415 | 0.974731 | 1474.39 | 1752.4  | 1938.02 | 1903.95 | 1709.23 | 1655.28 |
| ENSMUSG00000001128 | 7_Cfp      | 102.264 | 0.58049  | 0.349064 | 0.726134 | 31.3486 | 182.494 | 154.09  | 104.812 | 73.829  | 67.0108 |
| ENSMUSG00000001131 | 11_Timp1   | 288.039 | 2.22529  | 0.001196 | 0.022489 | 123.372 | 1009.95 | 290.599 | 135.348 | 77.2629 | 91.699  |
| ENSMUSG00000001134 | 9_Uxt      | 284.844 | -0.15942 | 0.516468 | 0.830302 | 259.89  | 276.575 | 270.95  | 297.105 | 304.759 | 299.785 |
| ENSMUSG00000001138 | 13_Cnnm1   | 472.231 | 0.13238  | 0.609601 | 0.873276 | 425.734 | 506.676 | 549.14  | 458.037 | 422.371 | 471.427 |
| ENSMUSG00000001143 | 13_Lman2   | 636.585 | -0.02394 | 0.933525 | 0.98311  | 492.476 | 760.58  | 641.18  | 660.234 | 649.009 | 616.029 |
| ENSMUSG00000001150 | 6_Mcm3a1   | 772.522 | 0.3063   | 0.362936 | 0.735803 | 564.274 | 1006.55 | 991.761 | 679.216 | 632.698 | 760.631 |
| ENSMUSG00000001151 | 9_Pcnt     | 660.723 | 0.4251   | 0.182997 | 0.569443 | 534.948 | 824.057 | 913.165 | 609.066 | 508.218 | 574.882 |
| ENSMUSG00000001155 | 13_Ftcd    | 1.60074 | -0.358   | 0.834853 | NA       | 0       | 1.1335  | 3.10248 | 2.47588 | 1.71695 | 1.17563 |
| ENSMUSG00000001156 | 9_Mxd1     | 7036.58 | 0.84358  | 0.002314 | 0.03614  | 7134.33 | 10940.6 | 9036.5  | 4847.77 | 5035.83 | 5224.49 |
| ENSMUSG00000001157 | 13_Gmcl1   | 773.6   | 0.39819  | 0.304707 | 0.687401 | 1321.7  | 656.298 | 660.829 | 561.199 | 750.309 | 691.269 |
| ENSMUSG00000001158 | 13_Snrnp1  | 783.547 | 0.18389  | 0.613701 | 0.875588 | 1221.58 | 675.568 | 602.916 | 707.276 | 748.592 | 745.348 |
| ENSMUSG00000001166 | 17_Oas1c   | 346.572 | -0.05067 | 0.889485 | 0.970235 | 207.305 | 394.459 | 419.87  | 372.207 | 339.957 | 345.635 |
| ENSMUSG00000001168 | 16_Oas1h   | 18.2482 | 2.01409  | 0.002807 | 0.041483 | 26.2924 | 27.2041 | 34.1273 | 2.47588 | 1.1602  | 8.22939 |
| ENSMUSG00000001173 | 15_Ocrl    | 1404.24 | -0.07716 | 0.825451 | 0.949822 | 1923.39 | 1093.83 | 1082.77 | 1284.15 | 1674.03 | 1367.26 |
| ENSMUSG00000001175 | 13_Calm1   | 11556.6 | 0.08082  | 0.806773 | 0.944059 | 16584.4 | 9756.06 | 9300.21 | 10983.8 | 11650.4 | 11065   |
| ENSMUSG00000001211 | 14_Agpat1  | 2721.83 | -0.1323  | 0.717414 | 0.912533 | 1596.75 | 2964.11 | 3230.72 | 3364.72 | 2480.14 | 2694.54 |
| ENSMUSG00000001225 | 12_Slc26a1 | 0.45852 | -0.61845 | 0.874837 | NA       | 0       | 0       | 1.03416 | 0       | 1.71695 | 0       |
| ENSMUSG00000001227 | 11_Sema4   | 20.4529 | -0.06557 | 0.934862 | 0.983653 | 4.04498 | 27.2041 | 28.9565 | 32.1864 | 19.745  | 10.5807 |
| ENSMUSG00000001228 | 14_Uhrf1   | 1178.72 | 1.42019  | 0.000442 | 0.010611 | 1048.66 | 2239.8  | 1859.42 | 530.663 | 529.68  | 864.086 |
| ENSMUSG00000001229 | 7_Dpp9     | 446.348 | 0.31051  | 0.575838 | 0.856895 | 148.653 | 683.502 | 650.488 | 449.784 | 314.203 | 431.455 |
| ENSMUSG00000001240 | 13_Ramp1   | 215.257 | -0.5559  | 0.092867 | 0.414981 | 131.462 | 187.028 | 204.764 | 299.581 | 252.392 | 216.316 |
| ENSMUSG00000001247 | 16_Lsr     | 928.635 | 0.74832  | 0.22421  | 0.613921 | 259.89  | 1734.26 | 1498.5  | 760.094 | 531.397 | 787.671 |
| ENSMUSG00000001248 | 14_Gramc1  | 451.48  | -0.26305 | 0.454797 | 0.79605  | 270.002 | 459.069 | 502.603 | 568.626 | 484.181 | 424.402 |
| ENSMUSG00000001249 | 14_Hpn     | 23.0589 | -0.23828 | 0.724735 | 0.915512 | 7.07871 | 32.8716 | 23.7857 | 34.6623 | 22.3204 | 17.6344 |
| ENSMUSG00000001260 | 10_Gabrg1  | 7.24111 | -0.99854 | 0.265943 | 0.654446 | 9.1012  | 2.26701 | 3.10248 | 9.90351 | 0.12187 | 7.05377 |
| ENSMUSG00000001270 | 8_Ckb      | 564.527 | -1.51725 | 0.013823 | 0.126103 | 78.8771 | 341.184 | 457.099 | 1249.49 | 718.545 | 541.964 |
| ENSMUSG00000001280 | 12_Sp1     | 4923.58 | 0.51376  | 0.180994 | 0.567286 | 8704.79 | 4435.4  | 4232.82 | 3371.32 | 4388.53 | 4408.6  |
| ENSMUSG00000001281 | 9_Iltgb7   | 767.448 | 0.84288  | 0.12408  | 0.478866 | 315.508 | 1339.8  | 1300.98 | 574.403 | 399.192 | 674.81  |
| ENSMUSG00000001285 | 12_Myg1    | 340.087 | 0.01699  | 0.967143 | 0.991132 | 176.968 | 418.263 | 431.245 | 363.129 | 328.797 | 322.122 |
| ENSMUSG00000001288 | 14_Rarg    | 3713.04 | 0.49806  | 0.280643 | 0.667117 | 1834.4  | 5514.49 | 5694.09 | 3140.24 | 2693.9  | 3401.09 |

|                    |           |         |          |          |          |         |         |         |         |         |         |
|--------------------|-----------|---------|----------|----------|----------|---------|---------|---------|---------|---------|---------|
| ENSMUSG00000001289 | 12_Pfdn5  | 3257.17 | -0.63803 | 0.187366 | 0.574659 | 978.885 | 3190.81 | 3475.82 | 4412.01 | 3735.23 | 3750.25 |
| ENSMUSG00000001300 | 15_Efnb2  | 2131.74 | 0.52673  | 0.126455 | 0.483956 | 3538.34 | 1977.96 | 2033.16 | 1538.34 | 1758.16 | 1944.49 |
| ENSMUSG00000001305 | 5_Rrp15   | 376.494 | 0.00526  | 0.985596 | 0.995304 | 335.733 | 465.87  | 329.898 | 346.623 | 371.721 | 409.118 |
| ENSMUSG00000001313 | 12_Rnd2   | 206.1   | -1.02953 | 0.003947 | 0.052641 | 103.147 | 124.685 | 178.91  | 337.545 | 248.958 | 243.355 |
| ENSMUSG00000001323 | 17_Srr    | 751.951 | -0.30343 | 0.328534 | 0.709501 | 871.693 | 540.681 | 607.053 | 786.504 | 935.74  | 770.036 |
| ENSMUSG00000001333 | 9_Sync    | 18.6444 | -1.3862  | 0.043594 | 0.265204 | 3.03373 | 13.602  | 14.4783 | 33.837  | 25.7543 | 21.1613 |
| ENSMUSG00000001334 | 9_Fndc5   | 51.0736 | -1.95993 | 0.000194 | 0.005633 | 19.2136 | 11.335  | 32.059  | 110.589 | 72.1121 | 61.1326 |
| ENSMUSG00000001348 | 14_Acp5   | 349.831 | 0.80784  | 0.168529 | 0.549859 | 132.473 | 618.893 | 584.301 | 252.539 | 163.969 | 346.81  |
| ENSMUSG00000001349 | 4_Cnn1    | 127.103 | -1.81601 | 1.72E-06 | 0.000125 | 63.7084 | 40.8061 | 64.118  | 194.769 | 246.383 | 152.832 |
| ENSMUSG00000001366 | 14_Fbxo9  | 1219.44 | -0.08209 | 0.707717 | 0.909597 | 1198.32 | 1156.17 | 1199.63 | 1222.26 | 1257.67 | 1282.61 |
| ENSMUSG00000001376 | 17_Ccdc1  | 918.001 | 0.37299  | 0.379111 | 0.74711  | 1661.47 | 774.182 | 672.205 | 687.469 | 897.967 | 814.71  |
| ENSMUSG00000001380 | 6_Hars    | 987.021 | 0.08692  | 0.761588 | 0.928515 | 783.714 | 1224.18 | 1042.43 | 922.677 | 958.06  | 991.054 |
| ENSMUSG00000001383 | 8_Zmat2   | 2689.39 | -0.06468 | 0.842341 | 0.953733 | 3481.71 | 2357.69 | 2047.64 | 2293.49 | 3026.13 | 2929.66 |
| ENSMUSG00000001403 | 13_Ube2c  | 379.154 | 0.3992   | 0.184792 | 0.571925 | 342.812 | 503.275 | 447.792 | 280.599 | 366.57  | 333.878 |
| ENSMUSG00000001415 | 10_Smg5   | 1650.91 | 0.32558  | 0.472272 | 0.805666 | 814.052 | 2586.65 | 2108.66 | 1605.19 | 1304.89 | 1485.99 |
| ENSMUSG00000001416 | 13_Cct3   | 3753.13 | 0.27551  | 0.34625  | 0.723461 | 3301.71 | 4981.75 | 4047.71 | 2863.76 | 3647.67 | 3676.19 |
| ENSMUSG00000001418 | 13_Glmp   | 1634.6  | 0.02157  | 0.961605 | 0.990106 | 742.253 | 2073.18 | 2125.2  | 1855.26 | 1397.6  | 1614.14 |
| ENSMUSG00000001419 | 17_Mef2d  | 1836.4  | 0.17358  | 0.653589 | 0.893223 | 1089.11 | 2353.15 | 2398.22 | 1976.58 | 1581.31 | 1620.02 |
| ENSMUSG00000001420 | 13_Tmem   | 1020.51 | 0.85924  | 0.131315 | 0.492768 | 367.082 | 1991.56 | 1588.47 | 687.469 | 613.811 | 874.667 |
| ENSMUSG00000001424 | 14_Snd1   | 1594.55 | 0.39377  | 0.404064 | 0.76248  | 737.197 | 2432.5  | 2262.75 | 1334.5  | 1247.37 | 1553    |
| ENSMUSG00000001435 | 14_Col18i | 1471.24 | -1.11709 | 0.07066  | 0.355    | 244.721 | 1038.29 | 1502.64 | 3010.67 | 1408.76 | 1622.37 |
| ENSMUSG00000001436 | 15_Slc19a | 200.978 | -0.83812 | 0.142703 | 0.511466 | 46.5172 | 171.159 | 215.106 | 363.129 | 207.751 | 202.208 |
| ENSMUSG00000001440 | 5_Kpnb1   | 7396.73 | 0.33632  | 0.21875  | 0.609854 | 9418.73 | 8390.19 | 6955.77 | 5488.19 | 7067.84 | 7059.65 |
| ENSMUSG00000001441 | 13_Npepp  | 4206.41 | 0.54626  | 0.064677 | 0.336949 | 6013.87 | 4846.86 | 4119.07 | 2772.16 | 3773.86 | 3712.63 |
| ENSMUSG00000001444 | 2_Tbx21   | 3.81131 | 2.16899  | 0.121986 | 0.475065 | 4.04498 | 11.335  | 3.10248 | 0       | 0.85848 | 3.52688 |
| ENSMUSG00000001445 | 10_Mrp11c | 816.909 | 0.06417  | 0.852442 | 0.957929 | 527.87  | 980.48  | 996.932 | 792.281 | 769.195 | 834.696 |
| ENSMUSG00000001467 | 5_Cyp51   | 4309.22 | 0.36655  | 0.269185 | 0.656292 | 6590.28 | 4335.65 | 3635.08 | 3315.2  | 4197.09 | 3781.99 |
| ENSMUSG00000001472 | 16_Tcf25  | 4701.39 | -0.01202 | 0.977553 | 0.993796 | 2220.69 | 5785.4  | 6039.5  | 5111.04 | 4418.58 | 4633.15 |
| ENSMUSG00000001473 | 6_Tubb6   | 544.148 | 0.51075  | 0.252705 | 0.644229 | 303.373 | 943.074 | 672.205 | 494.35  | 418.078 | 433.807 |
| ENSMUSG00000001482 | 14_Def8   | 1244.44 | -0.17729 | 0.697602 | 0.905638 | 517.757 | 1390.81 | 1595.71 | 1463.24 | 1095.42 | 1403.7  |
| ENSMUSG00000001493 | 9_Meox1   | 131.402 | -0.48997 | 0.111746 | 0.453024 | 114.271 | 102.015 | 111.689 | 180.739 | 133.922 | 145.778 |
| ENSMUSG00000001494 | 6_Sost    | 7.64456 | -0.68364 | 0.47249  | 0.805818 | 5.05622 | 1.1335  | 11.3758 | 13.2047 | 6.86782 | 8.22939 |
| ENSMUSG00000001497 | 18_Pax9   | 6.29151 | 0.58226  | 0.541952 | 0.840837 | 8.08995 | 12.4685 | 2.06832 | 4.95175 | 4.29238 | 5.87814 |
| ENSMUSG00000001504 | 10_Irx2   | 62.9408 | 0.01635  | 0.970027 | 0.991939 | 91.012  | 55.5416 | 43.4348 | 72.6257 | 60.9519 | 54.0789 |
| ENSMUSG00000001506 | 10_Col1a1 | 14061.2 | -0.23507 | 0.615155 | 0.876237 | 6139.26 | 12116   | 20499.2 | 14884.1 | 12302   | 18426.8 |
| ENSMUSG00000001507 | 16_Iltga3 | 3608.75 | 0.8863   | 0.169323 | 0.550793 | 905.064 | 7121.8  | 6023.99 | 2562.53 | 1886.07 | 3153.03 |
| ENSMUSG00000001508 | 15_Sgca   | 19.0572 | -0.96335 | 0.113121 | 0.456222 | 15.1687 | 9.06802 | 14.4783 | 35.4876 | 15.4526 | 24.6882 |
| ENSMUSG00000001510 | 8_Dlx3    | 72.9341 | 0.22231  | 0.589946 | 0.864564 | 60.6747 | 69.1437 | 105.484 | 68.4993 | 51.5086 | 82.2939 |
| ENSMUSG00000001517 | 14_Foxm1  | 350.567 | 0.70124  | 0.119415 | 0.470231 | 199.215 | 610.958 | 492.261 | 256.666 | 260.977 | 283.326 |
| ENSMUSG00000001518 | 12_Iltfg2 | 326.602 | 0.10597  | 0.795791 | 0.939559 | 189.103 | 394.459 | 432.28  | 364.779 | 249.817 | 329.176 |
| ENSMUSG00000001520 | 12_Nrip2  | 33.0269 | -0.82514 | 0.083029 | 0.388964 | 28.3148 | 22.6701 | 20.6832 | 56.1199 | 38.6315 | 31.742  |
| ENSMUSG00000001521 | 12_Tulp3  | 420.679 | -0.22023 | 0.480365 | 0.810093 | 310.452 | 420.53  | 435.382 | 552.946 | 421.512 | 383.255 |
| ENSMUSG00000001524 | 14_Gtf2h4 | 181.274 | 0.16968  | 0.721893 | 0.913923 | 80.8995 | 256.172 | 238.891 | 183.215 | 167.403 | 161.061 |
| ENSMUSG00000001525 | 10_Tubb5  | 6462.94 | 0.52226  | 0.194229 | 0.58434  | 4061.16 | 10244.6 | 8554.58 | 5060.69 | 4831.51 | 6025.09 |
| ENSMUSG00000001542 | 6_Eil2    | 1603.12 | 0.43049  | 0.276407 | 0.662853 | 2847.66 | 1445.22 | 1228.58 | 1275.08 | 1452.54 | 1369.61 |
| ENSMUSG00000001552 | 14_Jup    | 12875   | 0.91393  | 0.174585 | 0.55808  | 2798.11 | 24840.7 | 22827   | 9442.17 | 6271.17 | 11070.9 |
| ENSMUSG00000001555 | 10_Fkbp1  | 371.785 | -0.63178 | 0.213478 | 0.604733 | 110.226 | 313.98  | 450.894 | 521.585 | 415.503 | 418.524 |
| ENSMUSG00000001558 | 5_Klhl10  | 4.54544 | -1.15684 | 0.263969 | 0.652958 | 2.02249 | 3.40051 | 3.10248 | 5.77705 | 9.44325 | 3.52688 |
| ENSMUSG00000001566 | 9_Mnx1    | 0       | NA       | NA       | NA       | 0       | 0       | 0       | 0       | 0       | 0       |
| ENSMUSG00000001569 | 10_Nom1   | 838.458 | 0.19195  | 0.539634 | 0.840325 | 1126.53 | 853.528 | 702.196 | 656.107 | 876.505 | 815.886 |
| ENSMUSG00000001576 | 14_Ergic1 | 2027.77 | 0.22248  | 0.426417 | 0.777537 | 1691.81 | 2466.5  | 2393.05 | 1856.91 | 1740.99 | 2017.38 |
| ENSMUSG00000001583 | 13_Tnk1   | 179.831 | 0.3536   | 0.596821 | 0.868228 | 37.416  | 259.572 | 308.18  | 143.601 | 124.479 | 205.735 |
| ENSMUSG00000001588 | 12_Acap1  | 23.4599 | 1.57239  | 0.052575 | 0.190693 | 12.1349 | 58.9422 | 34.1273 | 8.25292 | 12.0187 | 15.2832 |
| ENSMUSG00000001604 | 14_Tcea3  | 110.614 | -0.64078 | 0.103092 | 0.436784 | 59.6634 | 96.3477 | 103.416 | 164.233 | 101.3   | 138.724 |
| ENSMUSG00000001622 | 15_Csn3   | 68.7518 | 0.38566  | 0.385828 | 0.751206 | 111.237 | 48.7406 | 73.4255 | 65.1981 | 48.0747 | 65.8352 |
| ENSMUSG00000001627 | 11_Ildr1  | 1004.75 | 0.59037  | 0.139708 | 0.507179 | 1835.41 | 1025.82 | 761.143 | 702.324 | 877.363 | 826.466 |
| ENSMUSG00000001630 | 13_Stk38l | 1286.9  | 0.41063  | 0.192504 | 0.58228  | 1841.48 | 1404.41 | 1160.33 | 898.743 | 1261.96 | 1154.47 |
| ENSMUSG00000001632 | 16_Brpf1  | 726.926 | 0.3402   | 0.39781  | 0.758469 | 439.891 | 1025.82 | 971.078 | 706.45  | 539.982 | 678.337 |
| ENSMUSG00000001642 | 18_Akr1b1 | 6100.77 | 0.1587   | 0.618029 | 0.877535 | 4351.38 | 7712.35 | 7244.3  | 5664.81 | 5750.08 | 5881.67 |
| ENSMUSG00000001655 | 6_Hoxc13  | 0.16854 | 1.1315   | 0.781553 | NA       | 1.01124 | 0       | 0       | 0       | 0       | 0       |
| ENSMUSG00000001656 | 3_Hoxc11  | 0.18892 | 1.1315   | 0.781553 | NA       | 0       | 1.1335  | 0       | 0       | 0       | 0       |
| ENSMUSG00000001657 | 7_Hoxc8   | 0.36128 | 2.05714  | 0.610196 | NA       | 0       | 1.1335  | 1.03416 | 0       | 0       | 0       |
| ENSMUSG00000001661 | 5_Hoxc6   | 0.70983 | 1.73787  | 0.615365 | NA       | 0       | 3.40051 | 0       | 0       | 0.85848 | 0       |
| ENSMUSG00000001663 | 10_Gstt1  | 368.728 | -0.99982 | 0.046396 | 0.275675 | 110.226 | 244.837 | 382.64  | 675.089 | 406.918 | 392.66  |
| ENSMUSG00000001665 | 10_Gstt3  | 810.868 | 0.10348  | 0.742631 | 0.923125 | 603.713 | 904.535 | 1011.41 | 783.202 | 697.083 | 865.262 |
| ENSMUSG00000001666 | 8_Ddt     | 319.209 | -0.27874 | 0.632503 | 0.883233 | 76.8546 | 372.922 | 415.733 | 414.297 | 281.58  | 353.864 |
| ENSMUSG00000001672 | 14_Marve  | 613.233 | 0.72548  | 0.005088 | 0.062837 | 756.411 | 844.46  | 691.854 | 408.52  | 509.077 | 469.076 |
| ENSMUSG00000001674 | 11_Ddx18  | 1011.2  | 0.23617  | 0.383337 | 0.749884 | 1173.04 | 1149.37 | 958.668 | 767.522 | 1018.15 | 1000.46 |
| ENSMUSG00000001687 | 15_Ubl3   | 2619.64 | 0.27986  | 0.260182 | 0.649568 | 3369.47 | 2569.65 | 2679.51 | 2367.76 | 2349.65 | 2381.82 |
| ENSMUSG00000001700 | 9_Gramd3  | 2093.02 | 0.42016  | 0.076653 | 0.371177 | 2605.98 | 2412.09 | 2168.64 | 1645.63 | 1848.3  | 1877.48 |
| ENSMUSG00000001707 | 7_Eef1e1  | 333.668 | 0.33519  | 0.352201 | 0.728607 | 515.735 | 345.718 | 255.438 | 308.659 | 310.769 | 265.692 |
| ENSMUSG00000001729 | 14_Akt1   | 2119.58 | 0.24318  | 0.687459 | 0.904573 | 558.207 | 3138.67 | 3196.59 | 2420.58 | 1368.41 | 2035.01 |
| ENSMUSG00000001739 | 12_Cldn1f | 6.94637 | 0.40272  | 0.635103 | 0.884141 | 5.05622 | 12.4685 | 6.20497 | 6.60234 | 4.29238 | 7.05377 |
| ENSMUSG00000001741 | 11_Ill16  | 85.3283 | 0.13538  | 0.789728 | 0.937308 | 37.416  | 119.018 | 111.689 | 94.9086 | 67.8197 | 81.1183 |
| ENSMUSG00000001750 | 15_Tcirg1 | 757.853 | 1.3684   | 0.024595 | 0.186944 | 249.777 | 1662.85 | 1365.09 | 490.224 | 357.126 | 422.05  |

|                    |            |         |          |          |          |         |         |         |         |         |         |
|--------------------|------------|---------|----------|----------|----------|---------|---------|---------|---------|---------|---------|
| ENSMUSG00000001751 | 9_Naglu    | 320.467 | -0.15771 | 0.805306 | 0.943213 | 62.6971 | 381.99  | 464.339 | 431.628 | 263.552 | 318.595 |
| ENSMUSG00000001755 | 12_Coasy   | 433.65  | 0.06857  | 0.882848 | 0.967903 | 198.204 | 545.215 | 588.438 | 466.29  | 328.797 | 474.954 |
| ENSMUSG00000001761 | 7_Smo      | 1109.37 | -0.49213 | 0.186024 | 0.573178 | 583.488 | 974.812 | 1207.9  | 1591.16 | 1176.11 | 1122.72 |
| ENSMUSG00000001763 | 14_Tspan   | 166.872 | 0.24671  | 0.554627 | 0.846341 | 101.124 | 221.033 | 221.311 | 179.914 | 126.196 | 151.656 |
| ENSMUSG00000001767 | 5_Crnk1    | 1275.42 | 0.39706  | 0.336357 | 0.714638 | 2267.21 | 1064.36 | 1017.61 | 881.412 | 1199.29 | 1222.65 |
| ENSMUSG00000001768 | 15_Rin2    | 3146.16 | 0.26295  | 0.378404 | 0.746646 | 4442.4  | 3083.13 | 2770.52 | 2640.94 | 3002.09 | 2937.89 |
| ENSMUSG00000001773 | 13_Folh1   | 123.435 | -1.09123 | 0.109353 | 0.449508 | 168.878 | 28.3376 | 39.2981 | 177.438 | 223.204 | 103.455 |
| ENSMUSG00000001774 | 7_Chordc   | 1435.14 | 0.58953  | 0.248969 | 0.640449 | 3121.71 | 1138.04 | 913.165 | 890.49  | 1394.17 | 1153.29 |
| ENSMUSG00000001783 | 3_Rtcb     | 2929.99 | -0.07345 | 0.813298 | 0.946572 | 2004.29 | 3508.19 | 3053.88 | 2911.63 | 2958.31 | 3143.63 |
| ENSMUSG00000001785 | 11_Pwp1    | 847.485 | 0.10921  | 0.69678  | 0.905638 | 1035.51 | 875.064 | 728.05  | 732.034 | 915.995 | 798.251 |
| ENSMUSG00000001786 | 14_Fbxo7   | 736.604 | 0.27438  | 0.27385  | 0.660339 | 825.175 | 877.331 | 716.674 | 602.463 | 699.659 | 698.323 |
| ENSMUSG00000001794 | 12_Capns   | 9791.53 | 0.20945  | 0.658267 | 0.894702 | 4247.23 | 13553.3 | 13702.6 | 9634.46 | 7683.37 | 9928.18 |
| ENSMUSG00000001802 | 16_Lrp3    | 114.32  | -1.36857 | 0.052649 | 0.191868 | 19.2136 | 54.4081 | 117.894 | 210.45  | 128.772 | 155.183 |
| ENSMUSG00000001804 | 9_Dsg4     | 2.28958 | -0.22651 | 0.863678 | 0.961581 | 3.03373 | 2.26701 | 1.03416 | 2.47588 | 2.57543 | 2.35126 |
| ENSMUSG00000001815 | 15_Evx2    | 0 NA    | NA       | NA       | NA       | 0       | 0       | 0       | 0       | 0       | 0       |
| ENSMUSG00000001819 | 4_Hoxd13   | 1.24091 | 3.84108  | 0.16589  | NA       | 4.04498 | 3.40051 | 0       | 0       | 0       | 0       |
| ENSMUSG00000001827 | 11_Folr1   | 1175.12 | -1.34213 | 0.004949 | 0.061779 | 288.205 | 695.971 | 1010.38 | 2068.18 | 1449.11 | 1538.9  |
| ENSMUSG00000001829 | 16_Clpb    | 514.288 | -0.18396 | 0.639029 | 0.886641 | 262.924 | 575.819 | 606.019 | 566.151 | 521.096 | 553.721 |
| ENSMUSG00000001833 | 16_Sept7   | 5693.71 | 0.47401  | 0.366173 | 0.739399 | 12436.3 | 3911.72 | 3514.08 | 3952.33 | 5505.41 | 4842.41 |
| ENSMUSG00000001844 | 10_Zdhhc   | 495.564 | 0.03255  | 0.933704 | 0.98311  | 281.126 | 567.885 | 654.624 | 543.868 | 453.276 | 472.602 |
| ENSMUSG00000001847 | 14_Rac1    | 9547.99 | 0.4724   | 0.071395 | 0.35673  | 12822.6 | 11034.7 | 9434.66 | 7085.13 | 8571.03 | 8339.9  |
| ENSMUSG00000001855 | 15_Nup21   | 998.463 | 0.51449  | 0.232881 | 0.624695 | 565.286 | 1615.24 | 1343.38 | 751.016 | 812.978 | 902.882 |
| ENSMUSG00000001864 | 13_Aif1l   | 3209.28 | 0.05608  | 0.804224 | 0.942928 | 2978.11 | 3504.79 | 3332.07 | 3037.08 | 3191.82 | 3211.82 |
| ENSMUSG00000001865 | 2_Cpa3     | 117.385 | -0.84758 | 0.091266 | 0.411747 | 145.619 | 51.0076 | 54.8106 | 182.39  | 127.055 | 143.427 |
| ENSMUSG00000001870 | 15_Ltbp1   | 2209.21 | 0.05517  | 0.807799 | 0.944603 | 2429.01 | 2237.53 | 2087.97 | 2208.48 | 2224.31 | 2067.93 |
| ENSMUSG00000001891 | 16_Ugp2    | 2913.41 | 0.39882  | 0.466981 | 0.803613 | 6462.86 | 1696.85 | 1780.83 | 2207.66 | 2814.09 | 2518.19 |
| ENSMUSG00000001901 | 15_Kcnh6   | 2.63173 | -1.97027 | 0.273728 | 0.660339 | 1.01124 | 2.26701 | 0       | 9.07822 | 3.43391 | 0       |
| ENSMUSG00000001909 | 15_Trrmt1  | 387.175 | -0.03699 | 0.930906 | 0.981773 | 187.08  | 447.734 | 511.91  | 392.014 | 384.598 | 399.713 |
| ENSMUSG00000001910 | 4_Nacc1    | 1983.92 | 0.28649  | 0.631436 | 0.882534 | 524.836 | 3142.07 | 2873.93 | 2029.39 | 1386.44 | 1946.84 |
| ENSMUSG00000001911 | 16_Nfix    | 1085.19 | 0.08003  | 0.800925 | 0.941902 | 821.13  | 1149.37 | 1375.43 | 1204.1  | 906.552 | 1054.54 |
| ENSMUSG00000001918 | 17_Slc1a5  | 349.825 | 0.1782   | 0.639689 | 0.887038 | 224.496 | 454.535 | 435.382 | 384.586 | 279.005 | 320.946 |
| ENSMUSG00000001924 | 15_Uba1    | 8501.44 | 0.61487  | 0.13449  | 0.498485 | 5373.75 | 14074.7 | 11409.9 | 5961.91 | 6470.34 | 7718    |
| ENSMUSG00000001930 | 17_Vwf     | 328.746 | -0.64851 | 0.194865 | 0.585542 | 102.136 | 310.58  | 355.752 | 514.982 | 343.391 | 345.635 |
| ENSMUSG00000001942 | 7_Siae     | 515.023 | -0.10013 | 0.756854 | 0.927594 | 668.433 | 409.195 | 413.665 | 495.175 | 573.463 | 530.208 |
| ENSMUSG00000001943 | 7_Vsig2    | 6.11963 | -0.93181 | 0.387497 | 0.752117 | 2.02249 | 4.53401 | 6.20497 | 9.90351 | 12.8772 | 1.17563 |
| ENSMUSG00000001946 | 13_Esam    | 132.088 | -0.49443 | 0.258224 | 0.64893  | 62.6971 | 115.617 | 150.988 | 196.42  | 143.366 | 123.441 |
| ENSMUSG00000001948 | 9_Spa17    | 87.309  | -0.29718 | 0.425024 | 0.776698 | 106.181 | 63.4762 | 65.1522 | 94.9086 | 91.857  | 102.28  |
| ENSMUSG00000001962 | 8_Fam50c   | 972.526 | 0.00619  | 0.983927 | 0.994713 | 735.175 | 1063.23 | 1125.17 | 822.816 | 977.805 | 1110.97 |
| ENSMUSG00000001964 | 14_Emd     | 1211.17 | 0.23655  | 0.41746  | 0.771067 | 992.031 | 1552.9  | 1385.78 | 1025.84 | 1125.46 | 1185.03 |
| ENSMUSG00000001983 | 7_Taco1    | 197.571 | -0.12019 | 0.679457 | 0.902041 | 159.777 | 207.431 | 200.627 | 192.293 | 194.874 | 230.423 |
| ENSMUSG00000001985 | 9_Grik3    | 68.9632 | -1.38977 | 0.001681 | 0.028552 | 32.3598 | 26.0706 | 55.8447 | 122.143 | 92.7155 | 84.6452 |
| ENSMUSG00000001986 | 16_Gria3   | 261.482 | -1.06767 | 0.045991 | 0.274393 | 292.25  | 74.8112 | 139.612 | 377.159 | 446.408 | 238.652 |
| ENSMUSG00000001988 | 8_Npas1    | 1.91938 | -0.83348 | 0.597783 | 0.868406 | 1.01124 | 0       | 3.10248 | 2.47588 | 2.57543 | 2.35126 |
| ENSMUSG00000001995 | 8_Sipa1l2  | 620.847 | 0.31261  | 0.471837 | 0.805416 | 334.722 | 917.004 | 811.817 | 576.054 | 463.578 | 621.907 |
| ENSMUSG00000001998 | 15_Ap4e1   | 381.556 | 0.40792  | 0.321038 | 0.702176 | 678.545 | 328.716 | 297.839 | 317.738 | 296.175 | 370.323 |
| ENSMUSG00000001999 | 15_Blvra   | 139.304 | -0.08127 | 0.806618 | 0.944049 | 121.349 | 173.426 | 111.689 | 156.806 | 137.356 | 135.197 |
| ENSMUSG00000002006 | 12_Pdzd4   | 134.907 | -0.53342 | 0.156843 | 0.534279 | 74.8321 | 113.35  | 142.714 | 188.992 | 139.073 | 150.48  |
| ENSMUSG00000002007 | 5_Srpk3    | 17.1403 | -0.75063 | 0.233426 | 0.625427 | 6.06747 | 13.602  | 18.6149 | 19.807  | 18.8865 | 25.8638 |
| ENSMUSG00000002010 | 17_Idh3g   | 1496.94 | -0.48099 | 0.216614 | 0.607835 | 688.657 | 1469.02 | 1591.57 | 1930.36 | 1585.61 | 1716.42 |
| ENSMUSG00000002012 | 13_Pnck    | 67.7837 | -1.75726 | 0.00476  | 0.060084 | 12.1349 | 24.9371 | 55.8447 | 160.107 | 77.2629 | 76.4158 |
| ENSMUSG00000002014 | 12_Ssr4    | 1106.81 | -0.03295 | 0.924871 | 0.979382 | 687.646 | 1303.53 | 1291.67 | 1147.98 | 1200.15 | 1009.86 |
| ENSMUSG00000002015 | 5_Bcap31   | 3352.29 | 0.07397  | 0.759103 | 0.92777  | 3710.26 | 3339.3  | 3264.85 | 2866.24 | 3556.67 | 3376.4  |
| ENSMUSG00000002017 | 9_Fam98a   | 1147.4  | 0.20374  | 0.50461  | 0.824602 | 1565.41 | 1147.1  | 972.112 | 934.231 | 1158.09 | 1107.44 |
| ENSMUSG00000002020 | 15_Ltbp2   | 492.798 | -0.78507 | 0.094709 | 0.41805  | 173.934 | 352.519 | 559.481 | 793.106 | 532.256 | 545.491 |
| ENSMUSG00000002028 | 12_Kmt2a   | 2880.09 | 0.03775  | 0.864698 | 0.962077 | 2707.1  | 2944.84 | 3101.45 | 2823.33 | 2899.94 | 2803.87 |
| ENSMUSG00000002031 | 11_Ift46   | 701.501 | -0.09835 | 0.738676 | 0.921641 | 516.746 | 697.104 | 819.056 | 774.124 | 682.489 | 719.484 |
| ENSMUSG00000002032 | 16_Tmem    | 88.9805 | -0.71293 | 0.119357 | 0.470107 | 45.506  | 56.6751 | 100.314 | 146.077 | 103.017 | 82.2939 |
| ENSMUSG00000002033 | 13_Cd3g    | 13.0713 | 2.12772  | 0.003503 | 0.048625 | 23.2586 | 28.3376 | 12.4099 | 6.60234 | 4.29238 | 3.52688 |
| ENSMUSG00000002043 | 16_Trappc  | 185.408 | 0.13062  | 0.864009 | 0.961748 | 21.2361 | 232.368 | 327.829 | 228.606 | 120.187 | 182.222 |
| ENSMUSG00000002052 | 6_Supt6    | 4152.76 | 0.24546  | 0.521599 | 0.831998 | 2557.44 | 5972.43 | 4985.69 | 3530.6  | 3619.34 | 4251.07 |
| ENSMUSG00000002055 | 9_Spag5    | 511.771 | -0.33523 | 0.239055 | 0.630782 | 356.969 | 471.537 | 529.491 | 598.337 | 582.906 | 531.384 |
| ENSMUSG00000002057 | 4_Foxn1    | 20.0511 | 0.93787  | 0.16595  | 0.545533 | 12.1349 | 44.2066 | 22.7516 | 9.07822 | 18.028  | 14.1075 |
| ENSMUSG00000002058 | 13_Unc11   | 441.769 | -1.47547 | 0.007901 | 0.085034 | 105.169 | 301.512 | 294.736 | 1076.18 | 516.803 | 356.215 |
| ENSMUSG00000002059 | 17_Rab34   | 463.105 | -0.76424 | 0.030292 | 0.212974 | 223.485 | 376.323 | 430.211 | 653.632 | 590.632 | 504.344 |
| ENSMUSG00000002064 | 10_Sdf2    | 2389.95 | -0.22727 | 0.548722 | 0.843853 | 1249.9  | 2756.68 | 2599.88 | 2796.92 | 2317.03 | 2619.3  |
| ENSMUSG00000002068 | 16_Ccne1   | 261.081 | 1.02599  | 0.003802 | 0.051497 | 254.834 | 448.867 | 346.444 | 150.203 | 154.526 | 211.613 |
| ENSMUSG00000002076 | 11_Hsf2b1  | 11.8397 | 0.76584  | 0.260834 | 0.649878 | 10.1124 | 17.0025 | 17.5807 | 5.77705 | 11.1602 | 9.40502 |
| ENSMUSG00000002083 | 12_Bbc3    | 8.34207 | 0.19212  | 0.828133 | 0.950998 | 2.02249 | 10.2015 | 14.4783 | 8.25292 | 6.86782 | 8.22939 |
| ENSMUSG00000002100 | 15_Mybp3   | 1.14609 | -1.05476 | 0.67983  | NA       | 0       | 2.26701 | 0       | 0       | 3.43391 | 1.17563 |
| ENSMUSG00000002102 | 15_Psmc3   | 2465.21 | -0.0889  | 0.837628 | 0.952966 | 1116.41 | 3146.6  | 2904.96 | 2742.45 | 2282.69 | 2598.14 |
| ENSMUSG00000002103 | 15_Acp2    | 1064.25 | -0.24621 | 0.354608 | 0.729885 | 1138.66 | 856.928 | 925.575 | 1237.11 | 1204.44 | 1022.8  |
| ENSMUSG00000002104 | 11_Rap80   | 91.1556 | -1.35863 | 0.052427 | 0.297283 | 10.1124 | 55.5416 | 87.9037 | 200.546 | 85.8477 | 106.982 |
| ENSMUSG00000002105 | 15_Slc39a1 | 359.21  | -0.68008 | 0.137593 | 0.503287 | 135.507 | 308.313 | 384.708 | 574.403 | 404.343 | 347.986 |
| ENSMUSG00000002107 | 18_Celf2   | 1088.54 | -0.11325 | 0.790779 | 0.937373 | 1665.52 | 665.366 | 806.646 | 1168.61 | 1305.74 | 919.341 |
| ENSMUSG00000002108 | 10_Nr1h3   | 59.2411 | 0.02097  | 0.975666 | 0.993623 | 12.1349 | 89.5467 | 77.5621 | 80.8787 | 50.6501 | 44.6739 |

|                    |            |         |          |          |          |         |         |         |         |         |         |
|--------------------|------------|---------|----------|----------|----------|---------|---------|---------|---------|---------|---------|
| ENSMUSG00000002109 | 14_Ddb2    | 480.864 | -0.27003 | 0.401907 | 0.760561 | 558.207 | 329.849 | 419.87  | 498.477 | 602.651 | 476.129 |
| ENSMUSG00000002111 | 8_Spi1     | 56.4953 | 1.49655  | 0.044464 | 0.268708 | 12.1349 | 132.62  | 105.484 | 28.8852 | 25.7543 | 34.0932 |
| ENSMUSG00000002129 | 11_Sf3a1   | 1581.69 | 0.09629  | 0.742118 | 0.922751 | 1312.6  | 1958.69 | 1631.91 | 1297.36 | 1577.88 | 1711.71 |
| ENSMUSG00000002147 | 18_Stat6   | 3155.21 | 0.35743  | 0.266928 | 0.654888 | 2418.9  | 4070.41 | 4142.85 | 2794.44 | 2493.88 | 3010.78 |
| ENSMUSG00000002190 | 13_Clgn    | 5.252   | 0.14124  | 0.891369 | 0.970606 | 10.1124 | 3.40051 | 3.10248 | 8.25292 | 4.29238 | 2.35126 |
| ENSMUSG00000002204 | 8_Napsa    | 31.0007 | 1.41683  | 0.051324 | 0.293295 | 13.1462 | 87.2797 | 35.1615 | 20.6323 | 18.028  | 11.7563 |
| ENSMUSG00000002205 | 15_Vrk3    | 621.418 | 0.0696   | 0.870508 | 0.963272 | 310.452 | 814.989 | 783.894 | 656.107 | 539.982 | 623.083 |
| ENSMUSG00000002210 | 11_Smg9    | 227.761 | 0.34899  | 0.593579 | 0.866332 | 52.5847 | 346.852 | 366.093 | 240.985 | 129.63  | 230.423 |
| ENSMUSG00000002221 | 11_Paxip1  | 511.349 | 0.19519  | 0.543182 | 0.84123  | 378.205 | 650.631 | 609.121 | 490.224 | 488.473 | 451.441 |
| ENSMUSG00000002222 | 14_Rmnd1   | 4462.86 | 0.1152   | 0.773579 | 0.932641 | 7230.4  | 3093.33 | 3598.88 | 3815.33 | 4675.27 | 4363.93 |
| ENSMUSG00000002227 | 15_Mov1c   | 534.184 | 1.53105  | 0.006448 | 0.07412  | 225.507 | 1209.45 | 946.258 | 276.473 | 265.269 | 282.151 |
| ENSMUSG00000002228 | 7_Ppm1j    | 55.0399 | 0.41786  | 0.561191 | 0.849404 | 11.1237 | 117.884 | 59.9814 | 47.867  | 46.3578 | 47.0251 |
| ENSMUSG00000002233 | 13_Rhoc    | 910.473 | -0.0127  | 0.975345 | 0.993623 | 480.341 | 1076.83 | 1162.4  | 1075.36 | 770.912 | 897.004 |
| ENSMUSG00000002249 | 17_Tead3   | 962.144 | 0.51442  | 0.359783 | 0.733629 | 319.553 | 1623.18 | 1453    | 878.111 | 658.452 | 840.574 |
| ENSMUSG00000002250 | 15_Ppard   | 577.413 | 0.69099  | 0.327965 | 0.709062 | 102.136 | 1108.57 | 928.677 | 552.121 | 303.901 | 469.076 |
| ENSMUSG00000002257 | 7_Def6     | 280.943 | 0.58252  | 0.241628 | 0.633024 | 130.451 | 438.666 | 441.587 | 236.859 | 188.865 | 249.233 |
| ENSMUSG00000002265 | 15_Peg3    | 1221.69 | -0.922   | 0.035489 | 0.251118 | 1344.95 | 446.6   | 740.46  | 1639.86 | 1663.66 | 1463.66 |
| ENSMUSG00000002266 | 15_Zim1    | 110.437 | -0.83312 | 0.148453 | 0.521449 | 142.585 | 27.2041 | 68.2547 | 166.709 | 126.196 | 131.67  |
| ENSMUSG00000002274 | 12_Metn1   | 50.0536 | -0.83305 | 0.18636  | 0.573401 | 14.1574 | 46.4736 | 47.5714 | 106.463 | 38.6315 | 47.0251 |
| ENSMUSG00000002279 | 18_Lmf1    | 152.824 | -0.3201  | 0.625928 | 0.880099 | 27.3036 | 176.826 | 203.73  | 202.197 | 117.611 | 189.276 |
| ENSMUSG00000002280 | 10_Narf1   | 305.821 | -0.05919 | 0.908814 | 0.974731 | 107.192 | 383.124 | 408.494 | 371.382 | 266.128 | 298.609 |
| ENSMUSG00000002289 | 15_Angptl  | 188.666 | 0.79244  | 0.14209  | 0.5109   | 91.012  | 412.595 | 214.071 | 131.221 | 127.913 | 155.183 |
| ENSMUSG00000002297 | 15_Dbf4    | 322.69  | 0.87087  | 0.055539 | 0.308674 | 645.174 | 345.718 | 260.609 | 154.33  | 289.307 | 241.004 |
| ENSMUSG00000002307 | 15_Daxx    | 1032.63 | 1.7995   | 0.00019  | 0.005553 | 671.466 | 2525.44 | 1616.39 | 495.175 | 455.851 | 431.455 |
| ENSMUSG00000002308 | 15_Cd32c   | 160.069 | -0.36743 | 0.350281 | 0.727131 | 92.0232 | 176.826 | 150.988 | 229.431 | 166.545 | 144.602 |
| ENSMUSG00000002319 | 15_Ipo4    | 745.017 | 0.40032  | 0.465319 | 0.802438 | 251.8   | 1224.18 | 1067.25 | 666.836 | 573.463 | 686.567 |
| ENSMUSG00000002320 | 15_Tm9sf   | 1350.19 | 0.22839  | 0.389927 | 0.753305 | 1204.39 | 1658.31 | 1507.81 | 1289.11 | 1127.18 | 1314.35 |
| ENSMUSG00000002324 | 7_Rec8     | 3.25821 | -1.86399 | 0.168241 | 0.549231 | 0       | 1.1335  | 3.10248 | 5.77705 | 6.00934 | 3.52688 |
| ENSMUSG00000002325 | 14_Irf9    | 3924.94 | 1.04908  | 2.55E-05 | 0.001112 | 5777.24 | 5198.24 | 4900.89 | 2195.28 | 2763.44 | 2714.52 |
| ENSMUSG00000002326 | 5_Gmpr2    | 343.452 | -0.20648 | 0.412563 | 0.767985 | 301.351 | 316.247 | 339.205 | 344.972 | 399.192 | 359.742 |
| ENSMUSG00000002329 | 6_Mdp1     | 997.416 | -0.0292  | 0.91139  | 0.975173 | 877.76  | 991.815 | 1092.07 | 861.605 | 1058.5  | 1102.74 |
| ENSMUSG00000002332 | 15_Dhrs1   | 1977.15 | -0.71502 | 0.05425  | 0.303788 | 934.39  | 1609.57 | 1947.33 | 2942.17 | 2400.3  | 2029.13 |
| ENSMUSG00000002341 | 8_Ncan     | 50.0277 | -2.12476 | NA       | NA       | 29.3261 | 9.06802 | 17.5807 | 9.90351 | 215.478 | 18.81   |
| ENSMUSG00000002342 | 17_Tmem    | 410.173 | -0.34445 | 0.357387 | 0.731914 | 213.373 | 428.464 | 442.621 | 494.35  | 415.503 | 466.724 |
| ENSMUSG00000002343 | 11_Armc6   | 142.311 | 0.15414  | 0.818647 | 0.948003 | 27.3036 | 218.766 | 203.73  | 163.408 | 99.5833 | 141.075 |
| ENSMUSG00000002345 | 17_Borcs1  | 274.051 | 0.00258  | 0.995816 | 0.998321 | 109.214 | 368.388 | 345.41  | 311.961 | 228.355 | 280.975 |
| ENSMUSG00000002346 | 16_Slc25a5 | 296.239 | -0.48877 | 0.317585 | 0.698985 | 97.0795 | 311.713 | 330.932 | 385.412 | 299.608 | 352.688 |
| ENSMUSG00000002365 | 9_Snx9     | 1247.66 | 0.06796  | 0.776341 | 0.933844 | 1329.79 | 1253.65 | 1247.2  | 1082.78 | 1227.62 | 1344.92 |
| ENSMUSG00000002372 | 8_Ranbp3   | 696.433 | 0.40178  | 0.527524 | 0.834813 | 166.855 | 1139.17 | 1072.43 | 761.745 | 422.371 | 616.029 |
| ENSMUSG00000002379 | 6_Ndufa1   | 643.55  | 0.11483  | 0.886809 | 0.969051 | 49.551  | 923.805 | 1034.16 | 817.865 | 416.361 | 619.556 |
| ENSMUSG00000002384 | 2_Bmp8b    | 5.03156 | -0.45683 | 0.642096 | 0.888256 | 4.04498 | 3.40051 | 5.17081 | 2.47588 | 6.86782 | 8.22939 |
| ENSMUSG00000002393 | 14_Nr2f6   | 387.496 | 0.18265  | 0.701367 | 0.906605 | 178.99  | 506.676 | 550.174 | 356.526 | 285.873 | 446.739 |
| ENSMUSG00000002395 | 14_Use1    | 1253.69 | -0.43556 | 0.459443 | 0.798898 | 274.047 | 1298.99 | 1624.67 | 1755.4  | 1128.9  | 1440.14 |
| ENSMUSG00000002396 | 8_Ocel1    | 359.396 | 0.05219  | 0.914396 | 0.976048 | 147.642 | 515.744 | 434.348 | 362.303 | 301.325 | 395.011 |
| ENSMUSG00000002409 | 17_Dyrk1l  | 117.223 | 0.02108  | 0.972996 | 0.992972 | 28.3148 | 157.557 | 168.568 | 146.902 | 105.593 | 96.4015 |
| ENSMUSG00000002413 | 15_Braf    | 2862.68 | 0.34938  | 0.412141 | 0.767619 | 5162.4  | 2027.84 | 2432.35 | 2105.32 | 2745.41 | 2702.77 |
| ENSMUSG00000002416 | 13_Ndufb1  | 794.892 | -0.23852 | 0.398939 | 0.759197 | 907.086 | 631.361 | 649.453 | 828.594 | 922.863 | 829.993 |
| ENSMUSG00000002428 | 12_Hlrf    | 1218.05 | 0.37797  | 0.433204 | 0.781488 | 2413.84 | 889.8   | 826.295 | 865.732 | 1253.38 | 1059.24 |
| ENSMUSG00000002455 | 14_Prp6    | 1923.03 | 0.08612  | 0.773185 | 0.932641 | 1446.08 | 2225.07 | 2269.98 | 1729.81 | 1856.89 | 2010.32 |
| ENSMUSG00000002458 | 13_Rgs19   | 171.509 | 0.22194  | 0.457805 | 0.797971 | 149.664 | 214.232 | 190.286 | 156.806 | 160.535 | 157.534 |
| ENSMUSG00000002459 | 17_Rgs20   | 199.924 | 0.97671  | 0.033642 | 0.226782 | 426.745 | 228.968 | 139.612 | 133.697 | 136.498 | 134.022 |
| ENSMUSG00000002475 | 15_Abhd3   | 58.9453 | -1.54601 | 0.002933 | 0.042733 | 44.4948 | 12.4685 | 30.9932 | 103.162 | 87.5647 | 72.8889 |
| ENSMUSG00000002477 | 4_Snrpd1   | 1185.48 | 0.34504  | 0.347947 | 0.72526  | 1864.73 | 1215.12 | 899.721 | 873.985 | 1203.58 | 1055.71 |
| ENSMUSG00000002486 | 15_Tchp    | 320.802 | 0.22183  | 0.601575 | 0.870033 | 172.923 | 398.993 | 464.339 | 284.726 | 287.59  | 316.244 |
| ENSMUSG00000002489 | 15_Tiam1   | 2629.9  | 0.60421  | 0.022247 | 0.175369 | 2834.52 | 3270.16 | 3412.73 | 1813.17 | 1988.23 | 2460.59 |
| ENSMUSG00000002496 | 9_Tsc2     | 1370.86 | 0.08703  | 0.836006 | 0.952513 | 693.714 | 1697.99 | 1844.94 | 1379.06 | 1210.45 | 1399    |
| ENSMUSG00000002500 | 15_Rpl3l   | 64.8375 | -1.01604 | 0.05222  | 0.296722 | 50.5622 | 28.3376 | 49.6398 | 119.667 | 42.0654 | 98.7527 |
| ENSMUSG00000002504 | 14_Slc9a3  | 200.27  | -0.72819 | 0.109434 | 0.449508 | 80.8995 | 157.557 | 214.071 | 334.243 | 200.884 | 213.964 |
| ENSMUSG00000002524 | 15_Puf60   | 2162.47 | 0.10453  | 0.83546  | 0.952513 | 807.984 | 3116    | 2798.44 | 2250.57 | 1769.32 | 2232.52 |
| ENSMUSG00000002546 | 16_Golga3  | 3005.31 | 0.19702  | 0.628293 | 0.881165 | 1650.35 | 3960.46 | 4019.79 | 2824.98 | 2519.63 | 3056.63 |
| ENSMUSG00000002550 | 16_Uck1    | 582.643 | -0.20587 | 0.682169 | 0.902515 | 196.181 | 686.903 | 740.46  | 680.866 | 555.435 | 636.015 |
| ENSMUSG00000002565 | 16_Scin    | 3861.78 | -0.09301 | 0.747942 | 0.924734 | 4631.5  | 3324.56 | 3255.54 | 3387.83 | 4220.27 | 4351    |
| ENSMUSG00000002578 | 15_Ikzf4   | 132.991 | -1.64784 | 8.72E-06 | 0.000466 | 76.8546 | 52.1411 | 64.118  | 232.732 | 227.496 | 144.602 |
| ENSMUSG00000002580 | 7_Mien1    | 944.251 | -0.18936 | 0.480177 | 0.810012 | 707.871 | 946.475 | 992.795 | 963.941 | 1019.87 | 1034.55 |
| ENSMUSG00000002588 | 12_Pon1    | 102.39  | -2.09156 | 0.005759 | 0.068273 | 78.8771 | 5.66751 | 32.059  | 252.539 | 138.215 | 106.982 |
| ENSMUSG00000002602 | 16_Axl     | 3087.7  | 0.38352  | 0.102853 | 0.436754 | 3311.83 | 3462.85 | 3712.64 | 2976.83 | 2460.4  | 2601.66 |
| ENSMUSG00000002603 | 15_Tgfb1   | 312.334 | 0.37225  | 0.41048  | 0.767001 | 166.855 | 413.729 | 476.748 | 321.039 | 224.062 | 271.57  |
| ENSMUSG00000002608 | 8_Ccdc97   | 685.934 | 0.31343  | 0.566261 | 0.851799 | 230.564 | 1064.36 | 985.556 | 634.65  | 515.086 | 685.391 |
| ENSMUSG00000002617 | 14_Zfp40   | 164.782 | 0.11865  | 0.850798 | 0.957445 | 355.958 | 63.4762 | 95.1429 | 142.776 | 191.44  | 139.9   |
| ENSMUSG00000002625 | 9_Akap8l   | 744.185 | -0.36143 | 0.280748 | 0.667117 | 430.79  | 725.442 | 798.373 | 836.846 | 895.391 | 778.266 |
| ENSMUSG00000002633 | 4_Shh      | 0.33349 | -1.76186 | 0.662172 | NA       | 0       | 0       | 0       | 0.82529 | 0       | 1.17563 |
| ENSMUSG00000002635 | 11_Pdcd2   | 218.887 | 0.18438  | 0.651229 | 0.891935 | 131.462 | 264.106 | 303.009 | 226.955 | 169.12  | 218.667 |
| ENSMUSG00000002658 | 9_Gtf2f1   | 1280.23 | 0.17653  | 0.739452 | 0.92175  | 399.891 | 1940.56 | 1694.99 | 1265.17 | 1005.28 | 1335.51 |
| ENSMUSG00000002660 | 7_Clpp     | 323.594 | 0.02698  | 0.962659 | 0.990106 | 96.0682 | 421.663 | 462.27  | 420.899 | 232.647 | 308.014 |
| ENSMUSG00000002661 | 14_Alkbh1  | 163.701 | -0.15171 | 0.692104 | 0.905638 | 94.0457 | 189.295 | 182.012 | 177.438 | 153.667 | 185.749 |

|                    |           |         |          |          |          |         |         |         |         |         |         |
|--------------------|-----------|---------|----------|----------|----------|---------|---------|---------|---------|---------|---------|
| ENSMUSG00000002664 | 2_Pspn    | 1.78882 | -1.29062 | 0.50412  | 0.824491 | 1.01124 | 0       | 2.06832 | 4.12646 | 0       | 3.52688 |
| ENSMUSG00000002668 | 7_Dennd1  | 75.667  | 0.67728  | 0.159899 | 0.538192 | 44.4948 | 131.486 | 103.416 | 60.2463 | 53.2256 | 61.1326 |
| ENSMUSG00000002679 | 14_Med6   | 583.679 | 0.26727  | 0.49204  | 0.815612 | 956.637 | 523.678 | 432.28  | 465.465 | 582.047 | 541.964 |
| ENSMUSG00000002688 | 7_Prkd1   | 70.7003 | -0.80385 | 0.058035 | 0.315822 | 69.7759 | 34.0051 | 50.6739 | 86.6557 | 109.027 | 74.0646 |
| ENSMUSG00000002699 | 12_Lcp2   | 80.1546 | 2.29036  | 4.67E-06 | 0.000281 | 119.327 | 192.695 | 87.9037 | 38.7887 | 25.7543 | 16.4588 |
| ENSMUSG00000002718 | 14_Cse1l  | 2758.02 | 0.351    | 0.399771 | 0.759207 | 4889.37 | 2362.22 | 2023.85 | 2011.24 | 2760.86 | 2500.56 |
| ENSMUSG00000002728 | 14_Naa20  | 2257.01 | 0.80274  | 0.028021 | 0.202426 | 3986.33 | 2661.46 | 1959.74 | 1341.93 | 1925.56 | 1667.04 |
| ENSMUSG00000002731 | 6_Prkra   | 782.799 | -0.05897 | 0.85618  | 0.959059 | 1031.47 | 610.958 | 657.727 | 710.577 | 871.354 | 814.71  |
| ENSMUSG00000002732 | 14_Fkbp7  | 313.255 | -0.45487 | 0.368575 | 0.740739 | 478.319 | 141.688 | 172.705 | 368.08  | 396.616 | 322.122 |
| ENSMUSG00000002733 | 8_Plekha3 | 482.41  | -0.02518 | 0.942133 | 0.986006 | 674.5   | 400.127 | 359.888 | 494.35  | 495.341 | 470.251 |
| ENSMUSG00000002741 | 9_Ykt6    | 3316.46 | 0.08854  | 0.732922 | 0.919789 | 2921.48 | 3974.06 | 3358.96 | 2938.87 | 3237.32 | 3468.1  |
| ENSMUSG00000002748 | 7_Baz1b   | 3766.57 | 0.27692  | 0.274595 | 0.660991 | 4160.26 | 4124.82 | 4095.28 | 2798.57 | 3627.92 | 3792.58 |
| ENSMUSG00000002763 | 16_Pex6   | 362.319 | 0.16855  | 0.794666 | 0.9388   | 75.8433 | 532.746 | 541.901 | 432.453 | 252.392 | 338.581 |
| ENSMUSG00000002767 | 13_Mrpl2  | 343.799 | 0.15351  | 0.766641 | 0.930427 | 126.406 | 487.406 | 472.612 | 373.857 | 303.901 | 298.609 |
| ENSMUSG00000002768 | 7_Mea1    | 1100.36 | -0.11793 | 0.81995  | 0.948338 | 356.969 | 1352.27 | 1457.13 | 1286.63 | 1005.28 | 1143.89 |
| ENSMUSG00000002769 | 8_Gnmt    | 11.9889 | -0.68176 | 0.376397 | 0.745684 | 4.04498 | 9.06802 | 14.4783 | 18.9817 | 7.72629 | 17.6344 |
| ENSMUSG00000002771 | 10_Grin2c | 38.5412 | -0.6741  | 0.283964 | 0.670663 | 9.1012  | 28.3376 | 51.7081 | 53.644  | 43.7823 | 44.6739 |
| ENSMUSG00000002778 | 12_Kdelr1 | 2273.06 | -0.04804 | 0.862137 | 0.96084  | 1783.83 | 2466.5  | 2455.1  | 2110.27 | 2226.89 | 2595.79 |
| ENSMUSG00000002781 | 17_Tmem   | 128.848 | 0.16148  | 0.803761 | 0.942928 | 30.3373 | 206.298 | 171.671 | 163.408 | 84.9892 | 116.387 |
| ENSMUSG00000002797 | 9_Ggct    | 203.236 | 0.41264  | 0.263497 | 0.652524 | 317.531 | 201.764 | 176.842 | 141.125 | 203.459 | 178.695 |
| ENSMUSG00000002799 | 5_Jag2    | 732.6   | 0.89293  | 0.187183 | 0.574405 | 166.855 | 1266.12 | 1424.04 | 632.999 | 323.646 | 581.936 |
| ENSMUSG00000002803 | 13_Btbd6  | 291.828 | -0.17505 | 0.732016 | 0.919754 | 99.1019 | 337.784 | 385.742 | 353.225 | 295.316 | 279.799 |
| ENSMUSG00000002804 | 3_Nudt14  | 248.797 | -0.18414 | 0.776555 | 0.933844 | 49.551  | 293.577 | 355.752 | 339.195 | 172.554 | 282.151 |
| ENSMUSG00000002808 | 6_Epdr1   | 261.69  | -1.01259 | 0.026918 | 0.1976   | 274.047 | 95.2142 | 150.988 | 431.628 | 340.815 | 277.448 |
| ENSMUSG00000002812 | 4_Flii    | 3647.93 | 0.52602  | 0.321108 | 0.702242 | 1382.37 | 6273.94 | 5260.78 | 2894.3  | 2671.58 | 3404.62 |
| ENSMUSG00000002814 | 15_Top3a  | 300.694 | 0.37825  | 0.302454 | 0.685303 | 208.316 | 419.396 | 391.947 | 252.539 | 249.817 | 282.151 |
| ENSMUSG00000002820 | 5_Atg4d   | 711.734 | 0.3863   | 0.524245 | 0.832968 | 194.159 | 1106.3  | 1118.96 | 741.113 | 442.116 | 667.757 |
| ENSMUSG00000002825 | 6_Qtrt1   | 115.223 | 0.27091  | 0.680217 | 0.902203 | 26.2924 | 167.758 | 184.081 | 134.523 | 76.4045 | 102.28  |
| ENSMUSG00000002831 | 13_Plin4  | 294.452 | -1.29474 | 0.006891 | 0.077228 | 99.1019 | 141.688 | 270.95  | 588.433 | 359.702 | 306.839 |
| ENSMUSG00000002833 | 10_Hdgfr3 | 606.626 | 0.27372  | 0.624097 | 0.879366 | 194.159 | 830.858 | 966.941 | 552.946 | 454.134 | 640.717 |
| ENSMUSG00000002835 | 8_Chaf1a  | 381.53  | 0.77229  | 0.175806 | 0.559175 | 141.574 | 720.908 | 581.199 | 232.732 | 250.675 | 362.093 |
| ENSMUSG00000002844 | 8_Adprh   | 555.051 | 0.1592   | 0.566673 | 0.85205  | 478.319 | 665.366 | 613.258 | 552.946 | 467.87  | 552.545 |
| ENSMUSG00000002845 | 14_Tmem   | 596.063 | 0.17001  | 0.473938 | 0.806867 | 619.893 | 676.701 | 596.711 | 529.838 | 566.595 | 586.638 |
| ENSMUSG00000002846 | 9_Timmdc  | 360.277 | -0.00342 | 0.988628 | 0.997023 | 353.936 | 360.454 | 365.059 | 365.605 | 345.108 | 371.498 |
| ENSMUSG00000002847 | 6_Pla1a   | 81.1584 | 1.90834  | 6.41E-05 | 0.002315 | 100.113 | 182.494 | 102.382 | 50.3428 | 25.7543 | 25.8638 |
| ENSMUSG00000002870 | 8_Mcm2    | 896.454 | 0.10769  | 0.012721 | 0.119666 | 603.713 | 1581.24 | 1464.37 | 515.808 | 508.218 | 705.377 |
| ENSMUSG00000002871 | 14_Tpra1  | 401.564 | -0.3474  | 0.523303 | 0.83254  | 116.293 | 460.202 | 483.988 | 565.325 | 335.665 | 447.914 |
| ENSMUSG00000002881 | 14_Nab1   | 4155.55 | 0.81259  | 0.040523 | 0.253896 | 8101.08 | 4273.31 | 3513.05 | 2569.96 | 3387.55 | 3088.37 |
| ENSMUSG00000002885 | 14_Adgre1 | 490.694 | -0.17226 | 0.711843 | 0.910709 | 195.17  | 626.827 | 562.584 | 557.898 | 540.84  | 460.846 |
| ENSMUSG00000002897 | 5_Ilf17a  | 413.666 | 0.77846  | 0.064525 | 0.336509 | 282.137 | 720.908 | 564.652 | 271.521 | 271.279 | 371.498 |
| ENSMUSG00000002900 | 15_Lamb1  | 3580.57 | -0.11067 | 0.711071 | 0.910557 | 2578.67 | 3539.93 | 4211.11 | 3589.2  | 3454.51 | 4109.99 |
| ENSMUSG00000002908 | 15_Kcnn1  | 24.0629 | -0.70187 | 0.158117 | 0.536274 | 14.1574 | 17.0025 | 23.7857 | 30.5358 | 28.3297 | 30.5663 |
| ENSMUSG00000002910 | 10_Arrdc2 | 104.938 | 0.0103   | 0.984758 | 0.994992 | 36.4048 | 134.887 | 144.783 | 118.017 | 94.4325 | 101.104 |
| ENSMUSG00000002930 | 6_Ppp1r1  | 1.45959 | -1.73366 | 0.451628 | NA       | 2.02249 | 0       | 0       | 3.30117 | 3.43391 | 0       |
| ENSMUSG00000002944 | 15_Cd36   | 206.793 | 0.78171  | 0.181778 | 0.567796 | 460.116 | 243.703 | 80.6646 | 183.215 | 129.63  | 143.427 |
| ENSMUSG00000002948 | 18_Map2k  | 1258.21 | -0.16482 | 0.69029  | 0.905638 | 608.769 | 1406.68 | 1544    | 1524.31 | 1186.42 | 1279.08 |
| ENSMUSG00000002949 | 14_Timm4  | 797.15  | 0.13188  | 0.637244 | 0.885525 | 666.41  | 963.477 | 870.764 | 779.901 | 687.64  | 814.71  |
| ENSMUSG00000002957 | 11_Ap2a2  | 1779.47 | 0.11436  | 0.705145 | 0.908152 | 1332.82 | 2065.24 | 2152.09 | 1834.62 | 1660.29 | 1631.77 |
| ENSMUSG00000002963 | 16_Pnpk   | 367.037 | 0.03552  | 0.948485 | 0.986924 | 113.259 | 476.071 | 525.354 | 382.11  | 302.184 | 403.24  |
| ENSMUSG00000002968 | 7_Med25   | 315.108 | 0.27675  | 0.713466 | 0.911038 | 36.4048 | 464.736 | 534.662 | 363.954 | 214.619 | 276.273 |
| ENSMUSG00000002980 | 14_Bcam   | 1408.97 | 0.51623  | 0.467435 | 0.803613 | 229.552 | 2264.74 | 2480.95 | 1478.92 | 773.488 | 1226.18 |
| ENSMUSG00000002981 | 9_Clptm1  | 1852.82 | 0.05642  | 0.893372 | 0.971054 | 922.255 | 2516.38 | 2228.62 | 1845.35 | 1699.78 | 1904.52 |
| ENSMUSG00000002983 | 16_Relb   | 233.389 | 0.48761  | 0.391641 | 0.754323 | 83.9333 | 404.661 | 328.863 | 236.034 | 139.932 | 206.91  |
| ENSMUSG00000002984 | 16_Tomm   | 406.168 | 0.50294  | 0.44517  | 0.788998 | 85.9558 | 690.303 | 652.556 | 387.062 | 256.685 | 364.445 |
| ENSMUSG00000002985 | 15_Apoe   | 6942.99 | -1.11314 | 0.060603 | 0.324419 | 1250.91 | 5006.68 | 6912.34 | 13825.3 | 7098.75 | 7563.99 |
| ENSMUSG00000002992 | 16_Apoc2  | 4.54231 | 3.71721  | 0.019819 | 0.162073 | 1.01124 | 17.0025 | 7.23913 | 0.82529 | 0       | 1.17563 |
| ENSMUSG00000002996 | 17_Hbp1   | 3873.24 | 0.28078  | 0.452784 | 0.794975 | 6371.85 | 3024.19 | 3350.68 | 3275.59 | 3736.09 | 3481.03 |
| ENSMUSG00000002997 | 15_Prkar2 | 941.297 | 0.35802  | 0.409053 | 0.766223 | 1731.25 | 666.5   | 774.587 | 741.938 | 921.146 | 812.359 |
| ENSMUSG00000003031 | 14_Cdkn1  | 2332.49 | 0.58032  | 0.165569 | 0.54523  | 4533.41 | 1891.82 | 1960.77 | 1785.11 | 1939.3  | 1884.53 |
| ENSMUSG00000003032 | 8_Klf4    | 14298.1 | 0.73325  | 0.003674 | 0.050278 | 20426.1 | 17380   | 15759.6 | 9885.35 | 10441.7 | 11896.2 |
| ENSMUSG00000003033 | 14_Ap1m1  | 551.122 | -0.06772 | 0.902274 | 0.973635 | 159.777 | 777.583 | 677.376 | 642.077 | 496.2   | 553.721 |
| ENSMUSG00000003037 | 16_Rab8a  | 1531.01 | 0.30663  | 0.291406 | 0.676558 | 1301.47 | 2028.97 | 1748.77 | 1348.53 | 1259.39 | 1498.93 |
| ENSMUSG00000003038 | 15_Hmgn1  | 2916.79 | 0.45778  | 0.264457 | 0.653062 | 5338.36 | 2542.45 | 2246.2  | 2177.12 | 2754.85 | 2441.78 |
| ENSMUSG00000003039 | 8_Fam32c  | 1918.68 | -0.12393 | 0.627632 | 0.880942 | 1531.02 | 2014.23 | 1963.87 | 2130.08 | 1876.63 | 1996.22 |
| ENSMUSG00000003051 | 13_Elf3   | 12214.5 | 0.74149  | 0.141215 | 0.509656 | 5504.2  | 20671.7 | 19682.2 | 8708.48 | 7928.03 | 10792.3 |
| ENSMUSG00000003062 | 12_Stard3 | 401.088 | -0.00387 | 0.989286 | 0.997255 | 461.127 | 404.661 | 336.103 | 380.46  | 464.436 | 359.742 |
| ENSMUSG00000003068 | 15_Stk11  | 1091.81 | 0.19758  | 0.706054 | 0.908735 | 404.498 | 1471.29 | 1623.63 | 1176.87 | 768.337 | 1106.27 |
| ENSMUSG00000003070 | 6_Efna2   | 14.1965 | 0.0317   | 0.963522 | 0.990106 | 13.1462 | 11.335  | 18.6149 | 22.2829 | 6.86782 | 12.9319 |
| ENSMUSG00000003072 | 15_Atp5d  | 1505.46 | 0.16405  | 0.824436 | 0.949196 | 188.091 | 2141.19 | 2443.72 | 1965.02 | 958.06  | 1336.69 |
| ENSMUSG00000003099 | 11_Ppp5c  | 933.189 | -0.00327 | 0.994765 | 0.998046 | 343.823 | 1175.44 | 1277.19 | 1007.68 | 799.242 | 995.757 |
| ENSMUSG00000003119 | 14_Cdk12  | 1261.28 | 0.5216   | 0.054692 | 0.30549  | 1757.54 | 1456.55 | 1246.16 | 930.104 | 1094.56 | 1082.75 |
| ENSMUSG00000003123 | 15_Lipe   | 549.923 | 0.81059  | 0.210346 | 0.602436 | 143.597 | 932.873 | 1024.85 | 438.23  | 262.694 | 497.291 |
| ENSMUSG00000003131 | 6_Pafah1l | 3539.61 | 0.31536  | 0.413645 | 0.768597 | 5966.34 | 3108.06 | 2700.2  | 2821.67 | 3410.73 | 3230.63 |
| ENSMUSG00000003134 | 10_Tbc1d  | 628.711 | 0.36001  | 0.126894 | 0.484181 | 661.354 | 691.437 | 767.348 | 543.868 | 545.133 | 563.126 |
| ENSMUSG00000003135 | 15_Cnot1  | 659.221 | 0.2791   | 0.36601  | 0.739295 | 914.165 | 632.495 | 621.531 | 505.079 | 682.489 | 599.57  |

|                    |           |         |          |          |          |         |         |         |         |         |         |
|--------------------|-----------|---------|----------|----------|----------|---------|---------|---------|---------|---------|---------|
| ENSMUSG00000003153 | 10_Slc2a  | 74.6219 | -1.82756 | 9.28E-06 | 0.000488 | 33.3711 | 37.4056 | 27.9224 | 147.727 | 120.187 | 81.1183 |
| ENSMUSG00000003154 | 15_Foxj2  | 659.392 | 0.22148  | 0.365813 | 0.739044 | 667.421 | 695.971 | 766.314 | 657.758 | 552.859 | 616.029 |
| ENSMUSG00000003161 | 15_Sri    | 3864.83 | 0.19617  | 0.496581 | 0.818881 | 5292.85 | 3508.19 | 3580.27 | 3429.92 | 3708.62 | 3669.13 |
| ENSMUSG00000003166 | 19_Dgcr2  | 2828    | 0.15337  | 0.716344 | 0.912108 | 1467.32 | 3783.63 | 3683.68 | 2924.84 | 2296.43 | 2812.1  |
| ENSMUSG00000003184 | 14_Irf3   | 681.077 | 0.1449   | 0.736944 | 0.920922 | 341.801 | 842.193 | 961.77  | 642.077 | 602.651 | 695.972 |
| ENSMUSG00000003190 | 11_Bcl2l1 | 46.6745 | 0.55509  | 0.454634 | 0.795965 | 9.1012  | 74.8112 | 82.7329 | 47.0417 | 24.0374 | 42.3226 |
| ENSMUSG00000003198 | 9_Zfp959  | 204.744 | 0.34852  | 0.54933  | 0.843853 | 457.082 | 121.285 | 109.621 | 168.36  | 205.176 | 166.939 |
| ENSMUSG00000003199 | 16_Mpnd   | 614.144 | -0.15434 | 0.832618 | 0.951799 | 73.8208 | 756.046 | 914.199 | 875.635 | 432.672 | 632.488 |
| ENSMUSG00000003200 | 9_Sh3gl1  | 793.774 | 0.37795  | 0.563668 | 0.85076  | 159.777 | 1287.66 | 1244.1  | 784.028 | 551.142 | 735.943 |
| ENSMUSG00000003206 | 6_Ebi3    | 9.22826 | 1.25755  | 0.203036 | 0.594033 | 2.02249 | 20.4031 | 16.5466 | 2.47588 | 6.86782 | 7.05377 |
| ENSMUSG00000003208 | 8_Ccdc94  | 101.369 | 0.07633  | 0.88847  | 0.969793 | 37.416  | 149.622 | 125.134 | 106.463 | 75.546  | 114.036 |
| ENSMUSG00000003226 | 6_Ranbp2  | 5072.69 | 0.43926  | 0.388669 | 0.752716 | 10698   | 3560.33 | 3258.64 | 3488.51 | 5098.49 | 4332.19 |
| ENSMUSG00000003227 | 4_Edar    | 86.6012 | -0.12068 | 0.178819 | 0.931306 | 69.7759 | 72.5442 | 106.519 | 112.24  | 60.9519 | 97.5771 |
| ENSMUSG00000003228 | 8_Grk5    | 225.073 | -0.35393 | 0.187894 | 0.575566 | 197.193 | 185.894 | 209.935 | 256.666 | 273.854 | 226.896 |
| ENSMUSG00000003233 | 11_Dvl3   | 333.095 | 0.2771   | 0.643152 | 0.888737 | 87.9783 | 505.542 | 501.568 | 345.797 | 266.128 | 291.556 |
| ENSMUSG00000003234 | 15_Abcf3  | 1289.7  | 0.02889  | 0.935316 | 0.983964 | 786.748 | 1571.04 | 1550.21 | 1276.73 | 1269.69 | 1283.79 |
| ENSMUSG00000003235 | 12_Eif2b5 | 1753.52 | -0.04238 | 0.9092   | 0.974731 | 1000.12 | 2219.4  | 1963.87 | 1742.19 | 1720.39 | 1875.13 |
| ENSMUSG00000003269 | 14_Cyth2  | 750.888 | 0.05182  | 0.905342 | 0.974391 | 353.936 | 994.082 | 945.224 | 742.763 | 713.394 | 755.929 |
| ENSMUSG00000003271 | 15_Sult2b | 29.0162 | 1.287    | 0.02285  | 0.178213 | 23.2586 | 55.5416 | 44.4689 | 17.3311 | 11.1602 | 22.3369 |
| ENSMUSG00000003273 | 13_Car11  | 63.4732 | -0.93416 | 0.066427 | 0.341959 | 19.2136 | 48.7406 | 63.0839 | 94.9086 | 86.7062 | 68.1864 |
| ENSMUSG00000003279 | 16_Dlgap1 | 74.108  | -1.36722 | 0.022413 | 0.176153 | 76.8546 | 20.4031 | 26.8882 | 155.98  | 89.2816 | 75.2402 |
| ENSMUSG00000003282 | 9_Plag1   | 102.641 | 0.0757   | 0.849926 | 0.957257 | 146.63  | 94.0807 | 75.4938 | 116.366 | 102.159 | 81.1183 |
| ENSMUSG00000003283 | 13_Hck    | 94.6846 | 2.42724  | 6.60E-05 | 0.00236  | 54.6072 | 289.043 | 135.475 | 33.837  | 25.7543 | 29.3907 |
| ENSMUSG00000003299 | 9_Mrp14   | 371.422 | 0.12566  | 0.861357 | 0.960565 | 49.551  | 561.084 | 552.242 | 449.784 | 277.288 | 338.581 |
| ENSMUSG00000003308 | 14_Keap1  | 1437.78 | 0.54275  | 0.185062 | 0.572285 | 913.154 | 2149.12 | 2052.81 | 1158.71 | 959.777 | 1393.12 |
| ENSMUSG00000003309 | 13_Ap1m1  | 1382.21 | 0.43665  | 0.364206 | 0.737599 | 623.938 | 2177.46 | 1968.01 | 1117.45 | 1088.55 | 1317.88 |
| ENSMUSG00000003316 | 14_Glg1   | 3624.55 | 0.12303  | 0.574882 | 0.85664  | 3538.34 | 3845.98 | 3952.57 | 3355.64 | 3491.43 | 3563.33 |
| ENSMUSG00000003341 | 8_Atp8b3  | 3.29368 | -1.84955 | 0.159924 | 0.538192 | 2.02249 | 2.26701 | 0       | 4.12646 | 4.29238 | 7.05377 |
| ENSMUSG00000003344 | 14_Btdb2  | 420.963 | 0.40209  | 0.594202 | 0.866684 | 55.6184 | 620.026 | 762.177 | 506.73  | 221.487 | 359.742 |
| ENSMUSG00000003345 | 15_Csnk1  | 1163.45 | 0.13817  | 0.830526 | 0.951256 | 244.721 | 1640.18 | 1772.55 | 1412.08 | 752.026 | 1159.17 |
| ENSMUSG00000003346 | 14_Abhd1  | 373.264 | 0.17506  | 0.814036 | 0.946895 | 47.5285 | 584.887 | 555.345 | 486.922 | 227.496 | 337.405 |
| ENSMUSG00000003348 | 9_Mob3a   | 388.297 | 0.29884  | 0.471232 | 0.804868 | 223.485 | 563.351 | 498.466 | 388.713 | 312.486 | 343.283 |
| ENSMUSG00000003352 | 13_Cacnb  | 135.15  | -0.75218 | 0.169467 | 0.550908 | 34.3823 | 119.018 | 148.919 | 204.673 | 173.412 | 130.495 |
| ENSMUSG00000003354 | 5_Ccdc65  | 6.81492 | -2.74342 | 0.009215 | 0.094704 | 0       | 2.26701 | 3.10248 | 12.3794 | 13.7356 | 9.40502 |
| ENSMUSG00000003355 | 6_Fkbp11  | 24.5423 | 0.20569  | 0.793835 | 0.938336 | 6.06747 | 51.0076 | 21.7174 | 20.6323 | 13.7356 | 34.0932 |
| ENSMUSG00000003360 | 14_Ddx23  | 1318.7  | 0.13333  | 0.793276 | 0.938313 | 478.319 | 1836.27 | 1824.26 | 1307.26 | 1143.49 | 1322.58 |
| ENSMUSG00000003363 | 15_Pld3   | 1067.44 | 0.22422  | 0.751153 | 0.925449 | 158.765 | 1631.11 | 1660.86 | 1217.31 | 686.782 | 1049.84 |
| ENSMUSG00000003378 | 9_Grik5   | 215.578 | -0.7467  | 0.219382 | 0.61072  | 45.506  | 167.758 | 269.916 | 379.634 | 224.921 | 205.735 |
| ENSMUSG00000003379 | 7_Cd79a   | 4.61647 | -0.00956 | 0.99311  | 0.997864 | 1.01124 | 4.53401 | 8.27329 | 6.60234 | 2.57543 | 4.70251 |
| ENSMUSG00000003380 | 11_Rabac  | 833.878 | -0.50319 | 0.482965 | 0.811715 | 100.113 | 893.2   | 1076.56 | 1436.83 | 630.122 | 866.438 |
| ENSMUSG00000003382 | 18_Etv3   | 1457.41 | 0.43735  | 0.064506 | 0.336509 | 1567.43 | 1767.13 | 1694.99 | 1218.96 | 1135.77 | 1360.2  |
| ENSMUSG00000003402 | 13_Prkcs1 | 1003.31 | 0.28179  | 0.612356 | 0.874367 | 321.576 | 1544.96 | 1436.45 | 984.574 | 727.13  | 1005.16 |
| ENSMUSG00000003410 | 7_Elavl3  | 14.5293 | -2.42906 | 0.014704 | 0.131275 | 5.05622 | 4.53401 | 4.13665 | 54.4693 | 15.4526 | 3.52688 |
| ENSMUSG00000003411 | 10_Rab3b  | 37.8803 | -2.88238 | 4.26E-07 | 3.73E-05 | 10.1124 | 4.53401 | 12.4099 | 89.1316 | 65.2443 | 45.8495 |
| ENSMUSG00000003418 | 11_St8sia | 4983.28 | 0.57196  | 0.255291 | 0.646363 | 10800.1 | 3222.55 | 3852.25 | 3238.45 | 4548.21 | 4238.14 |
| ENSMUSG00000003420 | 7_Fcgrt   | 579.69  | -0.75709 | 0.164569 | 0.54307  | 147.642 | 455.668 | 689.786 | 949.086 | 594.066 | 641.893 |
| ENSMUSG00000003421 | 12_Nosip  | 521.923 | 0.26513  | 0.583097 | 0.860399 | 259.89  | 739.044 | 710.469 | 628.873 | 325.363 | 467.9   |
| ENSMUSG00000003423 | 14_Pih1d1 | 412.951 | 0.03147  | 0.961611 | 0.990106 | 77.8658 | 600.757 | 573.96  | 519.934 | 376.013 | 329.176 |
| ENSMUSG00000003429 | 10_Rps11  | 10543.5 | -0.28274 | 0.404818 | 0.763404 | 6064.43 | 11588.9 | 10887.7 | 10770.1 | 12175.8 | 11773.9 |
| ENSMUSG00000003435 | 8_Supt5   | 2701.13 | 0.26692  | 0.615265 | 0.876321 | 499.558 | 4133.89 | 3767.45 | 2484.13 | 2052.62 | 2819.16 |
| ENSMUSG00000003436 | 11_Dll3   | 3.2713  | 1.39068  | 0.353325 | 0.729327 | 11.1237 | 0       | 3.10248 | 1.65058 | 2.57543 | 1.17563 |
| ENSMUSG00000003437 | 14_Paf1   | 1414.13 | 0.01802  | 0.946917 | 0.986649 | 1246.86 | 1532.5  | 1489.19 | 1162.01 | 1467.14 | 1587.1  |
| ENSMUSG00000003438 | 17_Timm8  | 436.311 | 0.34585  | 0.406225 | 0.764314 | 249.777 | 592.822 | 622.565 | 414.297 | 343.391 | 395.011 |
| ENSMUSG00000003444 | 8_Med29   | 271.313 | -0.06463 | 0.903183 | 0.973742 | 91.012  | 360.454 | 344.376 | 330.117 | 219.77  | 282.151 |
| ENSMUSG00000003452 | 15_Bicd1  | 110.601 | -0.32157 | 0.555103 | 0.846508 | 177.979 | 48.7406 | 68.2547 | 136.999 | 139.932 | 91.699  |
| ENSMUSG00000003458 | 12_Ncstn  | 2363.63 | 0.49466  | 0.223639 | 0.613683 | 1421.81 | 3705.42 | 3167.64 | 1977.4  | 1879.21 | 2030.31 |
| ENSMUSG00000003464 | 13_Pex19  | 1738.81 | -0.12302 | 0.637817 | 0.885931 | 1350.01 | 1792.07 | 1852.18 | 1868.46 | 1734.98 | 1835.16 |
| ENSMUSG00000003469 | 9_Phyhip  | 3033.33 | 0.67914  | 0.207764 | 0.599235 | 1189.22 | 5039.55 | 4974.32 | 2406.55 | 1808.81 | 2781.54 |
| ENSMUSG00000003476 | 15_Chrh2  | 28.2728 | -2.01952 | 0.001439 | 0.025581 | 7.07871 | 6.80102 | 19.6491 | 64.3728 | 31.7636 | 39.9713 |
| ENSMUSG00000003477 | 5_Inmt    | 197.399 | -1.28523 | 0.004544 | 0.058184 | 75.8433 | 106.549 | 162.363 | 411.821 | 210.327 | 217.491 |
| ENSMUSG00000003484 | 4_Cyp4f11 | 5.47605 | 4.97964  | 0.00343  | 0.0478   | 2.02249 | 23.8036 | 6.20497 | 0.82529 | 0       | 0       |
| ENSMUSG00000003500 | 13_Impdh  | 178.315 | -0.82526 | 0.123662 | 0.478085 | 56.6297 | 163.224 | 166.5   | 341.671 | 204.318 | 137.548 |
| ENSMUSG00000003518 | 13_Dusp3  | 910.078 | -0.33163 | 0.19837  | 0.590646 | 908.097 | 682.369 | 827.329 | 1082.78 | 1005.28 | 954.61  |
| ENSMUSG00000003526 | 11_Prodh  | 414.971 | -0.36537 | 0.491424 | 0.815538 | 124.383 | 425.064 | 538.798 | 571.102 | 383.739 | 446.739 |
| ENSMUSG00000003527 | 8_Dgcr14  | 304.684 | -0.05754 | 0.906625 | 0.974391 | 115.282 | 376.323 | 404.357 | 333.418 | 291.882 | 306.839 |
| ENSMUSG00000003528 | 14_Slc25a | 1280.01 | 0.15216  | 0.73711  | 0.920922 | 585.51  | 1767.13 | 1689.82 | 1277.55 | 1096.28 | 1263.8  |
| ENSMUSG00000003531 | 14_Dgcr6  | 526.097 | -0.09682 | 0.849537 | 0.956943 | 189.103 | 629.094 | 707.366 | 684.167 | 460.144 | 486.71  |
| ENSMUSG00000003534 | 17_Ddr1   | 2928.41 | 0.58301  | 0.259001 | 0.64893  | 1203.38 | 4600.89 | 4732.32 | 2546.85 | 1922.99 | 2564.04 |
| ENSMUSG00000003541 | 6_Ier3    | 1266.8  | 0.39915  | 0.266163 | 0.654446 | 920.232 | 1953.03 | 1449.89 | 1212.35 | 1041.33 | 1023.97 |
| ENSMUSG00000003545 | 2_Fosb    | 60.3849 | 0.76773  | 0.134785 | 0.498606 | 42.4723 | 105.416 | 80.6646 | 64.3728 | 31.7636 | 37.6201 |
| ENSMUSG00000003546 | 9_Klc4    | 497.892 | 0.10243  | 0.878016 | 0.965868 | 88.9895 | 703.905 | 753.904 | 606.59  | 374.296 | 459.67  |
| ENSMUSG00000003549 | 9_Ercc1   | 424.153 | 1.03271  | 0.091523 | 0.412313 | 137.529 | 968.011 | 603.95  | 317.738 | 234.364 | 283.326 |
| ENSMUSG00000003555 | 7_Cyp17a  | 51.5478 | 0.46658  | 0.239075 | 0.630782 | 68.7646 | 46.4736 | 64.118  | 49.5175 | 36.9145 | 43.4982 |
| ENSMUSG00000003559 | 7_As3mt   | 600.095 | -0.40304 | 0.079624 | 0.379461 | 494.498 | 532.746 | 523.286 | 670.963 | 703.093 | 675.986 |
| ENSMUSG00000003573 | 15_Homei  | 301.74  | 0.20903  | 0.719925 | 0.913031 | 87.9783 | 456.802 | 426.075 | 349.924 | 227.496 | 262.165 |

|                    |           |         |          |          |          |         |         |         |         |         |         |
|--------------------|-----------|---------|----------|----------|----------|---------|---------|---------|---------|---------|---------|
| ENSMUSG00000003575 | 13_Crtc1  | 356.355 | -0.24727 | 0.640481 | 0.887258 | 109.214 | 400.127 | 468.475 | 451.435 | 337.381 | 371.498 |
| ENSMUSG00000003581 | 14_Rnf21  | 331.219 | -0.01287 | 0.974869 | 0.993623 | 180.001 | 385.391 | 424.006 | 387.887 | 286.731 | 323.298 |
| ENSMUSG00000003585 | 13_Sec14  | 55.0287 | -1.12497 | 0.008141 | 0.086764 | 25.2811 | 37.4056 | 41.3665 | 94.9086 | 71.2536 | 59.957  |
| ENSMUSG00000003604 | 14_Aven   | 95.3983 | -0.59674 | 0.069157 | 0.349981 | 75.8433 | 73.6777 | 78.5963 | 118.017 | 132.205 | 94.0502 |
| ENSMUSG00000003617 | 16_Cp     | 2605.42 | -0.06871 | 0.865154 | 0.962158 | 4015.65 | 1912.22 | 1702.23 | 2779.58 | 2753.99 | 2468.82 |
| ENSMUSG00000003623 | 4_Crot    | 7450.49 | 0.34688  | 0.416867 | 0.770621 | 13553.7 | 5696.99 | 5774.76 | 5497.27 | 7322.81 | 6857.44 |
| ENSMUSG00000003644 | 17_Rps6k  | 795.573 | 0.47077  | 0.410678 | 0.767001 | 258.879 | 1259.32 | 1254.44 | 683.342 | 503.926 | 813.534 |
| ENSMUSG00000003657 | 8_Calb2   | 24.4926 | -3.04705 | 0.000783 | 0.016308 | 7.07871 | 6.80102 | 2.06832 | 85.0051 | 37.773  | 8.22939 |
| ENSMUSG00000003660 | 10_Snrnp  | 3845.73 | 0.09349  | 0.774079 | 0.933044 | 2701.03 | 4702.9  | 4506.88 | 3280.54 | 3782.45 | 4100.59 |
| ENSMUSG00000003662 | 10_Ciao1  | 735.072 | 0.13868  | 0.548767 | 0.843853 | 731.13  | 753.779 | 826.295 | 722.131 | 689.357 | 687.742 |
| ENSMUSG00000003665 | 6_Has1    | 13.7509 | 0.63962  | 0.327413 | 0.708848 | 9.1012  | 22.6701 | 18.6149 | 11.5541 | 11.1602 | 9.40502 |
| ENSMUSG00000003680 | 15_Taf6l  | 555.425 | 0.09567  | 0.692897 | 0.905638 | 514.723 | 614.359 | 592.575 | 552.946 | 525.388 | 532.559 |
| ENSMUSG00000003721 | 14_Insig2 | 2366.9  | 0.20128  | 0.545542 | 0.842379 | 3508.01 | 2159.32 | 1927.68 | 2027.74 | 2317.89 | 2260.73 |
| ENSMUSG00000003731 | 13_Kpna6  | 2263.83 | 0.02049  | 0.932233 | 0.982317 | 2276.31 | 2412.09 | 2151.06 | 1960.89 | 2370.25 | 2412.39 |
| ENSMUSG00000003746 | 15_Man1ε  | 790.454 | 0.34153  | 0.489286 | 0.814396 | 1591.7  | 507.809 | 551.208 | 713.878 | 759.752 | 618.38  |
| ENSMUSG00000003752 | 9_Itpkc   | 1546.17 | 0.41677  | 0.432728 | 0.780874 | 567.308 | 2314.61 | 2422.01 | 1417.85 | 1105.72 | 1449.55 |
| ENSMUSG00000003762 | 13_Adck4  | 206.095 | 0.15748  | 0.782007 | 0.935592 | 61.6859 | 318.514 | 271.984 | 217.052 | 186.29  | 181.047 |
| ENSMUSG00000003778 | 14_Brd8   | 1750.71 | 0.15875  | 0.543908 | 0.841539 | 2111.48 | 1686.65 | 1742.56 | 1454.99 | 1869.76 | 1638.83 |
| ENSMUSG00000003779 | 15_Kif20a | 704.58  | 0.28325  | 0.390648 | 0.753901 | 569.331 | 936.273 | 814.919 | 503.428 | 722.838 | 680.689 |
| ENSMUSG00000003808 | 18_Farsa  | 747.439 | 0.26524  | 0.58205  | 0.860395 | 324.609 | 1145.97 | 977.283 | 642.077 | 625.83  | 768.861 |
| ENSMUSG00000003809 | 14_Gcdh   | 368.53  | -0.18658 | 0.478638 | 0.809227 | 389.329 | 310.58  | 334.034 | 358.177 | 414.644 | 404.416 |
| ENSMUSG00000003810 | 12_Mast2  | 1005.4  | 0.04286  | 0.919956 | 0.977296 | 489.442 | 1306.93 | 1264.78 | 1056.37 | 920.287 | 994.581 |
| ENSMUSG00000003812 | 13_Dnase  | 526.272 | -0.02549 | 0.94741  | 0.986649 | 292.25  | 609.825 | 662.898 | 557.072 | 493.624 | 541.964 |
| ENSMUSG00000003813 | 15_Rad23  | 919.967 | 0.23403  | 0.624778 | 0.879812 | 404.498 | 1317.13 | 1261.68 | 920.201 | 691.074 | 925.219 |
| ENSMUSG00000003814 | 8_Calr    | 15322.4 | 0.56129  | 0.055706 | 0.308674 | 15715.7 | 22111.2 | 16970.6 | 10038   | 12928.7 | 14169.8 |
| ENSMUSG00000003824 | 12_Syce2  | 159.744 | 0.1543   | 0.654365 | 0.983223 | 224.496 | 140.554 | 139.612 | 136.999 | 163.969 | 152.832 |
| ENSMUSG00000003847 | 16_Nfat5  | 7091.54 | 0.21272  | 0.589377 | 0.864227 | 11670.8 | 5419.28 | 5749.94 | 5590.53 | 7511.67 | 6607.03 |
| ENSMUSG00000003848 | 14_Nob1   | 381.699 | 0.29485  | 0.439322 | 0.785475 | 245.732 | 513.477 | 502.603 | 374.683 | 302.184 | 351.513 |
| ENSMUSG00000003849 | 8_Nqo1    | 1970.04 | -0.26698 | 0.319183 | 0.700329 | 2053.84 | 1455.42 | 1855.29 | 1971.62 | 2303.29 | 2180.79 |
| ENSMUSG00000003863 | 16_Ppfia3 | 267.09  | 0.94019  | 0.120452 | 0.471646 | 84.9445 | 502.142 | 466.407 | 199.721 | 145.941 | 203.384 |
| ENSMUSG00000003865 | 14_Gys1   | 354.132 | -0.14816 | 0.691264 | 0.905638 | 211.35  | 380.857 | 415.733 | 422.55  | 300.467 | 393.835 |
| ENSMUSG00000003868 | 12_Ruvbl  | 425.069 | 0.24852  | 0.699739 | 0.905844 | 92.0232 | 744.711 | 548.106 | 437.405 | 297.892 | 430.28  |
| ENSMUSG00000003872 | 7_Lin7b   | 12.9721 | 0.72671  | 0.387842 | 0.752312 | 4.04498 | 12.4685 | 32.059  | 10.7288 | 10.3017 | 8.22939 |
| ENSMUSG00000003873 | 10_Bax    | 318.723 | -0.17341 | 0.78128  | 0.93555  | 69.7759 | 397.86  | 431.245 | 439.881 | 232.647 | 340.932 |
| ENSMUSG00000003882 | 4_Ilf7r   | 34.803  | 2.00704  | 0.000782 | 0.016308 | 59.6634 | 83.8792 | 23.7857 | 15.6806 | 12.8772 | 12.9319 |
| ENSMUSG00000003923 | 10_Tfam   | 795.589 | 0.23499  | 0.560041 | 0.848816 | 1345.97 | 622.293 | 612.224 | 657.758 | 773.488 | 761.807 |
| ENSMUSG00000003929 | 14_Zfp81  | 445.188 | 0.23366  | 0.634182 | 0.883719 | 858.546 | 300.378 | 284.394 | 364.779 | 451.559 | 411.47  |
| ENSMUSG00000003934 | 5_Efnb3   | 45.7569 | -1.81327 | 0.000386 | 0.009524 | 9.1012  | 26.0706 | 25.854  | 82.5292 | 68.6782 | 62.3083 |
| ENSMUSG00000003948 | 16_Mmd    | 223.113 | -0.58379 | 0.217136 | 0.607835 | 299.328 | 113.35  | 123.065 | 311.961 | 287.59  | 203.384 |
| ENSMUSG00000003949 | 16_Hlf    | 6257.05 | 0.45931  | 0.191796 | 0.580886 | 10218.6 | 5389.81 | 6125.34 | 4516.83 | 5260.75 | 6030.97 |
| ENSMUSG00000003955 | 7_Fam16f  | 1289.27 | 0.00528  | 0.984913 | 0.995072 | 1490.57 | 1267.26 | 1116.89 | 1076.18 | 1468    | 1316.7  |
| ENSMUSG00000003970 | 8_Rpl8    | 8527.77 | 0.10205  | 0.892394 | 0.970752 | 896.974 | 12195.4 | 13395.5 | 10405.3 | 5702    | 8571.5  |
| ENSMUSG00000003974 | 6_Grm3    | 0.2751  | -1.54073 | 0.703687 | NA       | 0       | 0       | 0       | 1.65058 | 0       | 0       |
| ENSMUSG00000003992 | 14_Ssbp2  | 1141.46 | -0.22216 | 0.411268 | 0.767001 | 1264.06 | 864.863 | 1032.09 | 1201.63 | 1261.1  | 1225    |
| ENSMUSG00000004018 | 9_Fanci   | 413.517 | 0.2802   | 0.471895 | 0.805416 | 687.646 | 347.985 | 324.727 | 354.05  | 362.277 | 404.416 |
| ENSMUSG00000004031 | 13_Brinp2 | 15.1364 | -2.63467 | 0.000309 | 0.008078 | 4.04498 | 3.40051 | 5.17081 | 38.7887 | 20.6034 | 18.81   |
| ENSMUSG00000004032 | 10_Gstm5  | 507.028 | -1.05978 | 3.01E-05 | 0.00126  | 313.486 | 315.114 | 357.82  | 758.444 | 673.046 | 624.258 |
| ENSMUSG00000004035 | 12_Gstm7  | 59.3212 | -1.59751 | 0.004056 | 0.053721 | 14.1574 | 21.5366 | 52.7422 | 105.637 | 90.1401 | 71.7133 |
| ENSMUSG00000004040 | 16_Stat3  | 4271.89 | 0.67795  | 0.041949 | 0.259289 | 3527.22 | 6771.55 | 5473.82 | 3066.79 | 3209.85 | 3582.14 |
| ENSMUSG00000004043 | 14_Stat5a | 261.411 | 0.14108  | 0.763233 | 0.929409 | 122.361 | 354.786 | 345.41  | 270.696 | 196.591 | 278.624 |
| ENSMUSG00000004044 | 9_Ptrf    | 5127.14 | 0.07791  | 0.739726 | 0.92176  | 5350.49 | 5150.64 | 5294.91 | 4543.23 | 4781.72 | 5641.84 |
| ENSMUSG00000004054 | 8_Map3k1  | 412.253 | 0.61588  | 0.422352 | 0.774546 | 53.5959 | 727.709 | 715.64  | 481.971 | 207.751 | 286.853 |
| ENSMUSG00000004056 | 15_Akt2   | 2380.09 | 0.04271  | 0.92185  | 0.978035 | 1136.64 | 3052.52 | 3056.98 | 2676.42 | 2043.18 | 2314.81 |
| ENSMUSG00000004069 | 16_Dnaja  | 1168.2  | 0.07894  | 0.747099 | 0.924734 | 1104.28 | 1278.59 | 1217.21 | 1025.84 | 1119.45 | 1263.8  |
| ENSMUSG00000004070 | 15_Hmox   | 888.184 | -0.07097 | 0.76654  | 0.930427 | 769.557 | 923.805 | 905.926 | 918.55  | 936.598 | 874.667 |
| ENSMUSG00000004071 | 12_Cdip1  | 1230.32 | -0.59039 | 0.015225 | 0.134475 | 920.232 | 958.943 | 1067.25 | 1589.51 | 1528.09 | 1317.88 |
| ENSMUSG00000004085 | 14_Zak    | 2505.77 | 0.26485  | 0.377426 | 0.746447 | 3546.43 | 2369.02 | 2289.63 | 2053.33 | 2368.54 | 2407.69 |
| ENSMUSG00000004096 | 8_Cwc15   | 2108.77 | 0.04449  | 0.867471 | 0.962942 | 2441.14 | 2086.78 | 1895.62 | 1755.4  | 2264.66 | 2209    |
| ENSMUSG00000004098 | 7_Col5a3  | 203.093 | -0.59339 | 0.236721 | 0.6287   | 64.7196 | 179.093 | 241.994 | 283.901 | 204.318 | 244.531 |
| ENSMUSG00000004099 | 15_Dnmt1  | 1867.35 | 0.70202  | 0.09873  | 0.426922 | 1159.9  | 3029.85 | 2748.8  | 1279.2  | 1272.26 | 1714.07 |
| ENSMUSG00000004100 | 11_Ppan   | 184.692 | 0.4689   | 0.456424 | 0.796846 | 46.5172 | 309.446 | 287.497 | 184.04  | 131.347 | 149.305 |
| ENSMUSG00000004105 | 8_Angptl2 | 1247.01 | -1.23483 | 0.001382 | 0.024804 | 545.061 | 582.62  | 1103.45 | 2135.86 | 1585.61 | 1529.49 |
| ENSMUSG00000004110 | 14_Cacna  | 49.8578 | -0.62734 | 0.208789 | 0.600293 | 59.6634 | 23.8036 | 34.1273 | 75.9269 | 60.9519 | 44.6739 |
| ENSMUSG00000004113 | 18_Cacna  | 8.4181  | -1.22976 | 0.203805 | 0.594896 | 4.04498 | 10.2015 | 1.03416 | 17.3311 | 12.0187 | 5.87814 |
| ENSMUSG00000004127 | 12_Trmt1l | 241.699 | 0.26885  | 0.406956 | 0.76469  | 334.722 | 252.771 | 204.764 | 192.293 | 235.223 | 230.423 |
| ENSMUSG00000004151 | 16_Etv1   | 122.927 | -0.39076 | 0.408659 | 0.766014 | 169.889 | 63.4762 | 85.8354 | 166.709 | 149.375 | 102.28  |
| ENSMUSG00000004187 | 10_Kifc2  | 124.981 | -0.81258 | 0.150108 | 0.523236 | 30.3373 | 92.9472 | 148.919 | 198.895 | 145.941 | 132.846 |
| ENSMUSG00000004207 | 14_Psap   | 16093.5 | -0.02423 | 0.955517 | 0.988764 | 7416.47 | 20947.1 | 19511.5 | 17639   | 14509.1 | 16537.6 |
| ENSMUSG00000004221 | 16_Ikbg   | 1582.57 | 0.1501   | 0.634563 | 0.883912 | 2226.76 | 1440.68 | 1326.83 | 1380.71 | 1606.21 | 1514.21 |
| ENSMUSG00000004231 | 15_Pax2   | 0.13755 | -0.79206 | 0.84609  | NA       | 0       | 0       | 0       | 0.82529 | 0       | 0       |
| ENSMUSG00000004233 | 14_Wars2  | 238.539 | 0.18645  | 0.483685 | 0.811981 | 255.845 | 251.638 | 254.404 | 203.847 | 251.534 | 213.964 |
| ENSMUSG00000004263 | 15_Atn1   | 857.736 | 0.06889  | 0.915198 | 0.976474 | 165.844 | 1195.85 | 1273.05 | 1029.96 | 657.593 | 824.115 |
| ENSMUSG00000004264 | 17_Phb2   | 1205.22 | 0.1579   | 0.718676 | 0.912716 | 591.578 | 1763.73 | 1458.17 | 1214.83 | 1047.34 | 1155.64 |
| ENSMUSG00000004266 | 15_Ptpn6  | 582.515 | 0.53392  | 0.300507 | 0.683516 | 239.665 | 970.278 | 857.32  | 469.591 | 419.795 | 538.438 |
| ENSMUSG00000004267 | 16_Eno2   | 466.247 | -1.30117 | 0.001027 | 0.019976 | 178.99  | 272.041 | 356.786 | 875.635 | 624.971 | 489.061 |

|                    |           |         |          |           |          |         |         |         |         |         |         |
|--------------------|-----------|---------|----------|-----------|----------|---------|---------|---------|---------|---------|---------|
| ENSMUSG00000004268 | 11_Emg1   | 1062.56 | 0.11127  | 0.70428   | 0.908152 | 831.243 | 1340.93 | 1138.61 | 1003.56 | 1059.36 | 1001.63 |
| ENSMUSG00000004270 | 13_Lpcat3 | 1926.78 | 0.30994  | 0.358446  | 0.732668 | 1403.61 | 2633.13 | 2362.02 | 1565.58 | 1680.04 | 1916.27 |
| ENSMUSG00000004285 | 12_Atp6v  | 902.45  | -0.17928 | 0.643305  | 0.888806 | 488.431 | 972.545 | 1078.63 | 1139.73 | 852.468 | 882.896 |
| ENSMUSG00000004296 | 14_Il12b  | 3.54001 | 1.53576  | 0.177081  | 0.56149  | 6.06747 | 5.66751 | 4.13665 | 2.47588 | 1.71695 | 1.17563 |
| ENSMUSG00000004317 | 15_ClcN5  | 512.905 | -0.36733 | 0.350519  | 0.727211 | 678.545 | 358.187 | 307.146 | 587.608 | 640.424 | 505.52  |
| ENSMUSG00000004319 | 14_ClcN3  | 2894.64 | 0.44086  | 0.270941  | 0.657711 | 5186.67 | 2461.97 | 2351.68 | 2140.81 | 2762.58 | 2464.12 |
| ENSMUSG00000004328 | 15_Hif3a  | 82.0126 | -0.52742 | 0.18423   | 0.571103 | 82.922  | 41.9396 | 76.528  | 105.637 | 90.9986 | 94.0502 |
| ENSMUSG00000004347 | 16_Pde1c  | 610.503 | -1.44661 | 0.003531  | 0.048857 | 554.162 | 149.622 | 279.224 | 1013.46 | 962.353 | 704.201 |
| ENSMUSG00000004356 | 7_Utp20   | 1362.75 | 0.46434  | 0.118577  | 0.4687   | 1773.72 | 1526.83 | 1439.55 | 858.304 | 1304.89 | 1273.2  |
| ENSMUSG00000004359 | 16_Spic   | 5.24142 | 0.01319  | 0.988383  | 0.99695  | 4.04498 | 4.53401 | 7.23913 | 5.77705 | 5.15086 | 4.70251 |
| ENSMUSG00000004360 | 8_933015  | 81.127  | 0.11747  | 0.872978  | 0.963908 | 190.114 | 22.6701 | 40.3323 | 89.1316 | 57.518  | 86.9965 |
| ENSMUSG00000004364 | 14_Cul3   | 3126.11 | 0.45317  | 0.374196  | 0.744821 | 6640.84 | 2189.93 | 2008.34 | 2177.95 | 3054.46 | 2685.13 |
| ENSMUSG00000004366 | 3_Sst     | 2.2473  | 0.23278  | 0.886096  | 0.969051 | 5.05622 | 2.26701 | 0       | 4.12646 | 0.85848 | 1.17563 |
| ENSMUSG00000004371 | 14_Il11   | 11.1722 | 0.93039  | 0.213082  | 0.604264 | 14.1574 | 22.6701 | 7.23913 | 9.90351 | 6.00934 | 7.05377 |
| ENSMUSG00000004383 | 17_Large  | 432.802 | -0.04427 | 0.853489  | 0.958406 | 448.992 | 427.331 | 402.289 | 437.405 | 457.568 | 423.226 |
| ENSMUSG00000004393 | 10_Ddx56  | 630.476 | 0.26531  | 0.593055  | 0.866249 | 256.856 | 983.881 | 824.227 | 596.686 | 522.812 | 598.395 |
| ENSMUSG00000004394 | 12_Tmed4  | 896.589 | -0.39716 | 0.149084  | 0.522715 | 633.039 | 828.591 | 860.422 | 1142.2  | 915.995 | 999.284 |
| ENSMUSG00000004415 | 15_Col26i | 8.74279 | -0.68931 | 0.399507  | 0.759197 | 7.07871 | 4.53401 | 8.27329 | 4.95175 | 11.1602 | 16.4588 |
| ENSMUSG00000004446 | 12_Bid    | 244.904 | 0.71979  | 0.037846  | 0.243932 | 231.575 | 415.996 | 266.814 | 193.118 | 169.12  | 192.803 |
| ENSMUSG00000004451 | 14_Ralb   | 1225.38 | 0.39946  | 0.106367  | 0.44289  | 1260.01 | 1438.42 | 1482.99 | 1037.39 | 955.485 | 1177.98 |
| ENSMUSG00000004455 | 16_Ppp1c  | 4127.18 | -0.07984 | 0.809586  | 0.94521  | 5374.76 | 3424.31 | 3240.03 | 3905.28 | 5090.77 | 3727.92 |
| ENSMUSG00000004460 | 16_Dnajb  | 1539.41 | 0.29744  | 0.268972  | 0.656292 | 1667.54 | 1942.82 | 1481.95 | 1181.82 | 1419.92 | 1542.42 |
| ENSMUSG00000004462 | 6_Tbccd1  | 370.005 | -0.14133 | 0.568046  | 0.852443 | 342.812 | 384.257 | 328.863 | 394.49  | 395.758 | 373.85  |
| ENSMUSG00000004473 | 10_Clec1  | 210.733 | -0.45324 | 0.177521  | 0.562065 | 162.81  | 136.02  | 234.755 | 265.744 | 224.062 | 241.004 |
| ENSMUSG00000004500 | 8_Zfp324  | 363.64  | 0.30025  | 0.28487   | 0.671071 | 323.598 | 467.003 | 413.665 | 328.466 | 330.514 | 318.595 |
| ENSMUSG00000004508 | 6_Gab2    | 363.8   | -0.38975 | 0.14072   | 0.508609 | 300.34  | 311.713 | 333     | 474.543 | 371.721 | 391.484 |
| ENSMUSG00000004530 | 12_Coro1  | 6366.72 | 0.2278   | 0.608792  | 0.872658 | 3110.59 | 8985.28 | 8509.08 | 5818.31 | 5083.04 | 6694.02 |
| ENSMUSG00000004535 | 12_Tax1b  | 8843.79 | 0.43005  | 0.302273  | 0.685243 | 16217.3 | 7432.38 | 6806.85 | 6445.53 | 8514.37 | 7646.28 |
| ENSMUSG00000004540 | 7_Psg17   | 69.0354 | 0.81433  | 0.046184  | 0.274979 | 92.0232 | 86.1462 | 85.8354 | 33.0117 | 67.8197 | 49.3764 |
| ENSMUSG00000004542 | 15_Psg19  | 7.08395 | 1.11966  | 0.298266  | 0.681298 | 12.1349 | 13.602  | 3.10248 | 0.82529 | 3.43391 | 9.40502 |
| ENSMUSG00000004552 | 16_Ctse   | 31.5692 | 1.55166  | 0.016276  | 0.140304 | 28.3148 | 75.9447 | 37.2298 | 26.4094 | 8.58477 | 12.9319 |
| ENSMUSG00000004558 | 14_Ndrg2  | 1122.44 | -0.7105  | 0.021996  | 0.174059 | 888.884 | 703.905 | 961.77  | 1762    | 1146.07 | 1272.03 |
| ENSMUSG00000004561 | 14_Mettl1 | 303.338 | -0.09398 | 0.799498  | 0.940925 | 190.114 | 324.182 | 366.093 | 251.714 | 362.277 | 325.649 |
| ENSMUSG00000004562 | 16_Arhge1 | 560.531 | -0.70053 | 0.159466  | 0.537379 | 161.799 | 478.338 | 641.18  | 764.221 | 681.631 | 636.015 |
| ENSMUSG00000004565 | 14_Pnplaf | 390.241 | -0.01687 | 0.975678  | 0.993623 | 116.293 | 496.474 | 551.208 | 448.959 | 328.797 | 399.713 |
| ENSMUSG00000004567 | 15_Mcoln  | 403.009 | -0.18703 | 0.678839  | 0.901686 | 171.912 | 453.401 | 505.705 | 493.525 | 413.786 | 379.728 |
| ENSMUSG00000004568 | 12_Arhge1 | 2842.29 | 0.41901  | 0.228586  | 0.61986  | 2037.66 | 3962.73 | 3756.07 | 2358.92 | 2250.93 | 2660.45 |
| ENSMUSG00000004591 | 16_Pkn2   | 3435.42 | 0.55576  | 0.200302  | 0.592148 | 6645.9  | 2883.63 | 2737.43 | 2224.16 | 3204.69 | 2916.73 |
| ENSMUSG00000004609 | 11_Cd33   | 118.749 | -0.4179  | 0.201732  | 0.593308 | 122.361 | 91.8137 | 91.0062 | 151.854 | 139.073 | 116.387 |
| ENSMUSG00000004610 | 4_Etfb    | 1037.44 | -0.14041 | 0.808958  | 0.945066 | 267.98  | 1276.32 | 1416.8  | 1374.94 | 816.412 | 1072.17 |
| ENSMUSG00000004612 | 9_Nkg7    | 17.9567 | 4.21427  | 2.19E-06  | 0.000153 | 15.1687 | 51.0076 | 36.1957 | 2.47588 | 1.71695 | 1.17563 |
| ENSMUSG00000004613 | 7_Lim2    | 273.193 | -3.97692 | 7.79E-08  | 8.18E-06 | 6.06747 | 46.4736 | 45.5031 | 968.893 | 239.515 | 332.703 |
| ENSMUSG00000004626 | 14_Stxbp2 | 1444.47 | 0.20408  | 0.652794  | 0.892598 | 667.421 | 1957.56 | 2014.55 | 1435.18 | 1254.23 | 1337.86 |
| ENSMUSG00000004630 | 18_Pcp2   | 9.13488 | -2.89892 | 0.021165  | 0.169336 | 0       | 4.53401 | 2.06832 | 33.837  | 12.0187 | 2.35126 |
| ENSMUSG00000004631 | 15_Sgce   | 412.362 | -1.05878 | 0.006723  | 0.075958 | 362.025 | 163.224 | 277.155 | 636.3   | 595.783 | 439.685 |
| ENSMUSG00000004633 | 17_Chn2   | 179.152 | -0.69402 | 0.015443  | 0.135294 | 141.574 | 116.751 | 152.022 | 222.004 | 208.61  | 233.95  |
| ENSMUSG00000004637 | 15_Wwox   | 237.018 | 0.00687  | 0.979058  | 0.993796 | 220.451 | 261.839 | 230.618 | 243.461 | 231.789 | 233.95  |
| ENSMUSG00000004642 | 13_Slbp   | 1487.9  | 0.69651  | 0.102806  | 0.436754 | 2927.55 | 1335.27 | 1257.54 | 882.238 | 1210.45 | 1314.35 |
| ENSMUSG00000004651 | 5_Tyr     | 2492.61 | -1.54043 | 0.001469  | 0.025983 | 2145.86 | 632.495 | 1047.61 | 3845.04 | 4466.66 | 2817.98 |
| ENSMUSG00000004654 | 6_Ghrhr   | 0.2751  | -1.54073 | 0.703687  | NA       | 0       | 0       | 0       | 1.65058 | 0       | 0       |
| ENSMUSG00000004655 | 5_Aqp1    | 7870.05 | -1.2304  | 0.003045  | 0.043874 | 2430.02 | 5551.9  | 6129.48 | 13274.8 | 10027   | 9807.09 |
| ENSMUSG00000004661 | 15_Arid3b | 55.2693 | -0.38108 | 0.46839   | 0.804054 | 34.3823 | 52.1411 | 57.913  | 99.8604 | 53.2256 | 34.0932 |
| ENSMUSG00000004665 | 10_Cnn2   | 1642.29 | -0.11752 | 0.783147  | 0.935592 | 788.771 | 1907.69 | 2030.06 | 2062.41 | 1435.37 | 1629.42 |
| ENSMUSG00000004667 | 18_Polr2e | 672.369 | 0.17827  | 0.787581  | 0.936803 | 126.406 | 998.616 | 1016.58 | 718.004 | 461.002 | 713.606 |
| ENSMUSG00000004668 | 14_Abca1  | 8.85249 | -1.09403 | 0.230847  | 0.622309 | 1.01124 | 5.66751 | 10.3416 | 11.5541 | 16.3111 | 8.22939 |
| ENSMUSG00000004677 | 15_Myo9t  | 1381.8  | 0.41699  | 0.413745  | 0.768701 | 553.151 | 2240.94 | 1946.29 | 1182.64 | 1049.92 | 1317.88 |
| ENSMUSG00000004698 | 9_Hdac9   | 40.2505 | -1.23603 | 0.018129  | 0.152434 | 36.4048 | 17.0025 | 18.6149 | 7.26257 | 59.2349 | 37.6201 |
| ENSMUSG00000004707 | 14_Ly9    | 24.5549 | 3.08916  | 0.129E-05 | 0.000654 | 28.3148 | 74.8112 | 28.9565 | 7.42763 | 4.29238 | 3.52688 |
| ENSMUSG00000004709 | 14_Cd244  | 11.1207 | 2.81763  | 0.000437  | 0.010518 | 19.2136 | 23.8036 | 15.5124 | 4.12646 | 1.71695 | 2.35126 |
| ENSMUSG00000004730 | 14_Adgre  | 188.285 | 0.6093   | 0.042547  | 0.261774 | 258.879 | 234.635 | 189.252 | 157.631 | 158.818 | 130.495 |
| ENSMUSG00000004748 | 5_Mtfp1   | 77.2642 | -1.04633 | 0.00972   | 0.098553 | 42.4723 | 52.1411 | 56.8789 | 142.776 | 85.8477 | 83.4696 |
| ENSMUSG00000004768 | 12_Rab23  | 381.063 | -0.11973 | 0.659174  | 0.894805 | 431.801 | 330.983 | 333     | 423.375 | 386.315 | 380.903 |
| ENSMUSG00000004771 | 12_Rab11  | 7406.39 | 0.6492   | 0.132026  | 0.493758 | 14514.4 | 6976.71 | 5644.45 | 4633.19 | 6769.09 | 5900.48 |
| ENSMUSG00000004788 | 11_Eif2b2 | 440.421 | 0.15415  | 0.778553  | 0.934544 | 144.608 | 638.162 | 609.121 | 491.874 | 329.655 | 429.104 |
| ENSMUSG00000004789 | 9_Dlst    | 2179.92 | 0.07911  | 0.768224  | 0.931118 | 1788.89 | 2600.26 | 2329.97 | 2031.04 | 2155.64 | 2173.74 |
| ENSMUSG00000004791 | 6_Pgf     | 95.8884 | -1.43031 | 0.002062  | 0.033111 | 28.3148 | 51.0076 | 76.528  | 177.438 | 124.479 | 117.563 |
| ENSMUSG00000004798 | 14_Ulk2   | 980.797 | -0.02449 | 0.949566  | 0.987335 | 1488.55 | 678.968 | 749.767 | 1018.41 | 1002.7  | 946.38  |
| ENSMUSG00000004814 | 10_Ccl24  | 19.7175 | -1.37064 | 0.014777  | 0.131656 | 8.08995 | 14.7355 | 10.3416 | 33.837  | 26.6128 | 24.6882 |
| ENSMUSG00000004815 | 12_Dgkq   | 462.341 | 0.44142  | 0.356121  | 0.731176 | 213.373 | 703.905 | 680.478 | 425.026 | 378.588 | 372.674 |
| ENSMUSG00000004837 | 2_Grap    | 46.1905 | -0.65248 | 0.221173  | 0.612045 | 16.1799 | 44.2066 | 47.5714 | 73.451  | 46.3578 | 49.3764 |
| ENSMUSG00000004842 | 18_Pou1f  | 1.23292 | -2.45557 | 0.267442  | NA       | 1.01124 | 0       | 0       | 0.82529 | 0.85848 | 4.70251 |
| ENSMUSG00000004843 | 6_Chmp2l  | 3796.21 | 0.46873  | 0.287317  | 0.672979 | 7302.2  | 3170.41 | 2749.84 | 2735.02 | 3615.05 | 3204.76 |
| ENSMUSG00000004846 | 10_Plod3  | 669.659 | 0.47746  | 0.36651   | 0.739417 | 255.845 | 1131.24 | 951.429 | 609.891 | 487.615 | 581.936 |
| ENSMUSG00000004849 | 14_Ap1s1  | 880.718 | 0.24896  | 0.6007    | 0.869869 | 382.25  | 1336.4  | 1151.02 | 797.232 | 780.356 | 837.047 |
| ENSMUSG00000004864 | 12_Mapk1  | 536.499 | 0.59128  | 0.302706  | 0.685338 | 172.923 | 964.611 | 797.339 | 463.814 | 379.447 | 440.86  |

|                    |           |         |          |          |          |         |         |         |         |         |         |
|--------------------|-----------|---------|----------|----------|----------|---------|---------|---------|---------|---------|---------|
| ENSMUSG00000004865 | 15_Srp1   | 1392.75 | 0.28589  | 0.27514  | 0.661359 | 1643.27 | 1569.9  | 1377.5  | 1050.6  | 1395.03 | 1320.23 |
| ENSMUSG00000004872 | 15_Pax3   | 39.8927 | -0.80174 | 0.12492  | 0.480594 | 42.4723 | 14.7355 | 29.9907 | 49.5175 | 62.6688 | 39.9713 |
| ENSMUSG00000004880 | 11_Lbr    | 1698.57 | 0.51196  | 0.071952 | 0.357998 | 2477.55 | 1835.14 | 1677.41 | 1256.92 | 1443.1  | 1501.28 |
| ENSMUSG00000004885 | 5_Crabp2  | 102.862 | 0.26285  | 0.500626 | 0.822198 | 81.9108 | 158.69  | 96.177  | 99.8604 | 84.1307 | 96.4015 |
| ENSMUSG00000004891 | 16_Nes    | 552.816 | 0.01568  | 0.953038 | 0.988326 | 563.263 | 582.62  | 521.217 | 455.561 | 582.906 | 611.326 |
| ENSMUSG00000004892 | 13_Bcan   | 4.29822 | -2.88671 | 0.064767 | 0.337013 | 3.03373 | 0       | 0       | 4.95175 | 15.4526 | 2.35126 |
| ENSMUSG00000004894 | 10_Hapln  | 0.13755 | -0.79206 | 0.84609  | NA       | 0       | 0       | 0       | 0.82529 | 0       | 0       |
| ENSMUSG00000004895 | 9_Prcc    | 568.83  | 0.1665   | 0.705805 | 0.90855  | 278.092 | 783.251 | 743.562 | 546.344 | 483.323 | 578.409 |
| ENSMUSG00000004896 | 16_Rrnad  | 386.527 | -0.20132 | 0.448687 | 0.791834 | 309.441 | 368.388 | 401.255 | 417.598 | 440.399 | 382.079 |
| ENSMUSG00000004897 | 16_Hdgf   | 6774.66 | 0.44591  | 0.088227 | 0.40361  | 6465.9  | 8805.05 | 8168.84 | 5375.95 | 5500.26 | 6331.93 |
| ENSMUSG00000004902 | 7_Slc25a1 | 4.99368 | 0.58504  | 0.528645 | 0.835695 | 7.07871 | 6.80102 | 4.13665 | 4.12646 | 4.29238 | 3.52688 |
| ENSMUSG00000004929 | 12_Thop1  | 280.727 | 0.68832  | 0.354152 | 0.729858 | 39.4385 | 518.011 | 481.919 | 245.937 | 154.526 | 244.531 |
| ENSMUSG00000004931 | 10_Apba3  | 172.595 | 0.27336  | 0.726409 | 0.916094 | 22.2474 | 266.373 | 278.189 | 243.461 | 80.6968 | 144.602 |
| ENSMUSG00000004933 | 17_Matk   | 9.28342 | -0.09804 | 0.923602 | 0.978636 | 1.01124 | 13.602  | 12.4099 | 17.3311 | 4.29238 | 7.05377 |
| ENSMUSG00000004934 | 13_Pias4  | 226.148 | 0.25607  | 0.682084 | 0.902515 | 53.5959 | 323.048 | 361.957 | 241.811 | 174.271 | 202.208 |
| ENSMUSG00000004936 | 8_Map2k1  | 3112.19 | 0.47385  | 0.030507 | 0.213799 | 3662.73 | 3798.37 | 3395.15 | 2541.9  | 2660.42 | 2614.6  |
| ENSMUSG00000004937 | 5_Sgta    | 1173.06 | 0.19758  | 0.740401 | 0.922137 | 305.396 | 1714.99 | 1739.46 | 1242.07 | 836.157 | 1200.32 |
| ENSMUSG00000004939 | 6_Nmrk2   | 4.38707 | -0.87436 | 0.41266  | 0.768002 | 5.05622 | 1.1335  | 3.10248 | 5.77705 | 7.72629 | 3.52688 |
| ENSMUSG00000004945 | 15_Tmem   | 710.366 | -0.46061 | 0.126651 | 0.483956 | 442.925 | 654.031 | 697.025 | 904.52  | 766.62  | 797.076 |
| ENSMUSG00000004947 | 15_Dtx2   | 458.882 | 0.47822  | 0.401401 | 0.76035  | 150.675 | 745.845 | 706.332 | 458.037 | 305.618 | 386.782 |
| ENSMUSG00000004951 | 10_Hspb1  | 5736.79 | 0.54372  | 0.380532 | 0.747982 | 1601.81 | 8971.68 | 9842.12 | 5566.6  | 2924.83 | 5513.69 |
| ENSMUSG00000004952 | 13_Rasa4  | 187.34  | 0.37256  | 0.512675 | 0.828304 | 69.7759 | 318.514 | 246.13  | 223.654 | 120.187 | 145.778 |
| ENSMUSG00000004961 | 7_Syt5    | 6.51431 | -0.72161 | 0.440439 | 0.7861   | 6.06747 | 5.66751 | 3.10248 | 4.95175 | 14.5941 | 4.70251 |
| ENSMUSG00000004980 | 16_Hnrnp  | 19929.8 | 0.40216  | 0.301497 | 0.684667 | 33454   | 18518   | 16096.7 | 13028.9 | 19105.4 | 19375.5 |
| ENSMUSG00000004988 | 9_Fxyd4   | 254.054 | -0.6255  | 0.027387 | 0.199732 | 167.867 | 232.368 | 199.593 | 311.961 | 324.504 | 288.029 |
| ENSMUSG00000004994 | 12_Ccdc1  | 207.178 | 0.07757  | 0.873555 | 0.964019 | 84.9445 | 272.041 | 281.292 | 188.992 | 198.308 | 217.491 |
| ENSMUSG00000004996 | 9_Mri1    | 139.894 | 0.08554  | 0.84529  | 0.954951 | 73.8208 | 183.627 | 174.773 | 151.029 | 115.036 | 141.075 |
| ENSMUSG00000005034 | 15_Prkc   | 1379.26 | -0.09201 | 0.78867  | 0.937308 | 1890.02 | 1013.35 | 1102.42 | 1505.33 | 1424.21 | 1340.22 |
| ENSMUSG00000005043 | 13_Sgsh   | 441.08  | -0.06376 | 0.892356 | 0.970752 | 190.114 | 502.142 | 601.882 | 547.169 | 363.136 | 442.036 |
| ENSMUSG00000005045 | 16_Chd5   | 79.3278 | -1.26033 | 0.020782 | 0.166888 | 23.2586 | 37.4056 | 79.6304 | 151.854 | 103.876 | 79.9427 |
| ENSMUSG00000005054 | 6_Cstb    | 3406.62 | 0.21209  | 0.450899 | 0.79295  | 2894.18 | 4472.8  | 3603.02 | 3045.33 | 3358.36 | 3066.04 |
| ENSMUSG00000005057 | 13_Sh2b2  | 18.394  | 0.29543  | 0.72424  | 0.915357 | 3.03373 | 36.2721 | 21.7174 | 18.1564 | 20.6034 | 10.5807 |
| ENSMUSG00000005069 | 12_Pex5   | 575.498 | -0.05651 | 0.881953 | 0.967808 | 321.576 | 695.971 | 675.307 | 628.047 | 544.274 | 587.814 |
| ENSMUSG00000005078 | 16_Jkamp  | 670.896 | -0.09377 | 0.759498 | 0.927999 | 811.018 | 505.542 | 630.839 | 762.57  | 709.96  | 605.448 |
| ENSMUSG00000005087 | 17_Cd44   | 17341.5 | 0.76005  | 0.031482 | 0.218285 | 25662.3 | 21838.1 | 17918.9 | 8506.29 | 13530.5 | 16592.8 |
| ENSMUSG00000005089 | 15_Slc1a2 | 171.75  | -0.80932 | 0.119805 | 0.47059  | 204.271 | 78.2117 | 92.0404 | 289.678 | 246.383 | 119.914 |
| ENSMUSG00000005102 | 15_Eif2ak | 1595.75 | 0.13333  | 0.603602 | 0.870943 | 1608.89 | 1588.04 | 1810.82 | 1289.11 | 1552.98 | 1724.65 |
| ENSMUSG00000005103 | 12_Wdr1   | 9536.53 | 0.31699  | 0.360161 | 0.733776 | 6918.93 | 13452.4 | 11368.5 | 7403.7  | 8292.03 | 9783.57 |
| ENSMUSG00000005107 | 13_Slc2a5 | 176.27  | 0.7054   | 0.040778 | 0.254913 | 153.709 | 274.308 | 227.516 | 129.571 | 127.913 | 144.602 |
| ENSMUSG00000005124 | 9_Wisp1   | 362.913 | -0.57245 | 0.191879 | 0.580896 | 465.172 | 173.426 | 236.823 | 414.297 | 515.086 | 372.674 |
| ENSMUSG00000005125 | 12_Ndrp1  | 3032.54 | -0.21344 | 0.426265 | 0.777537 | 2381.48 | 2986.78 | 3058.02 | 3790.57 | 3015.83 | 2962.58 |
| ENSMUSG00000005131 | 3_A93055  | 61.531  | -0.17725 | 0.755975 | 0.927148 | 105.169 | 31.7381 | 36.1957 | 48.6922 | 81.5553 | 65.8352 |
| ENSMUSG00000005142 | 9_Man2b1  | 1170.3  | 0.2383   | 0.584037 | 0.860838 | 587.533 | 1671.92 | 1540.9  | 1134.78 | 1012.14 | 1074.52 |
| ENSMUSG00000005148 | 7_Klf5    | 1600.56 | 0.54226  | 0.142547 | 0.511466 | 1161.92 | 2451.77 | 2079.7  | 1183.47 | 1186.42 | 1540.07 |
| ENSMUSG00000005156 | 16_Wdr3   | 261.031 | 0.022    | 0.967218 | 0.991132 | 92.0232 | 343.451 | 353.683 | 316.912 | 189.723 | 270.394 |
| ENSMUSG00000005161 | 15_Prdx2  | 3005.18 | -0.41303 | 0.324442 | 0.705087 | 1276.19 | 3037.79 | 3419.97 | 3833.48 | 3255.34 | 3208.29 |
| ENSMUSG00000005198 | 15_Polr2a | 2818.75 | 0.14739  | 0.662046 | 0.895681 | 1897.09 | 3562.6  | 3428.25 | 2552.63 | 2703.34 | 2768.6  |
| ENSMUSG00000005202 | 2_Shbg    | 0.14308 | -0.79206 | 0.84609  | NA       | 0       | 0       | 0       | 0       | 0.85848 | 0       |
| ENSMUSG00000005204 | 12_Senp3  | 1217.15 | 0.0755   | 0.773996 | 0.933014 | 1014.28 | 1410.08 | 1322.69 | 1143.86 | 1197.58 | 1214.42 |
| ENSMUSG00000005220 | 10_Corin  | 18.5094 | 1.14801  | 0.101641 | 0.43384  | 44.4948 | 12.4685 | 19.6491 | 9.90351 | 16.3111 | 8.22939 |
| ENSMUSG00000005225 | 15_Plekh  | 966.18  | 0.16241  | 0.583444 | 0.860596 | 1284.28 | 962.344 | 814.919 | 864.906 | 1001.84 | 868.789 |
| ENSMUSG00000005233 | 16_Spc25  | 267.961 | 0.62948  | 0.219476 | 0.610798 | 585.51  | 201.764 | 189.252 | 185.691 | 260.977 | 184.574 |
| ENSMUSG00000005237 | 13_Dnah2  | 21.22   | -1.78655 | 0.00223  | 0.035221 | 6.06747 | 11.335  | 11.3758 | 42.0899 | 31.7636 | 24.6882 |
| ENSMUSG00000005251 | 14_Ripk4  | 3824.92 | 0.72368  | 0.011172 | 0.109214 | 3756.77 | 5210.71 | 5325.93 | 2753.18 | 2580.58 | 3322.32 |
| ENSMUSG00000005262 | 12_Ufd1l  | 1225.83 | 0.11064  | 0.691663 | 0.905638 | 1582.6  | 1131.24 | 1104.48 | 1120.75 | 1247.37 | 1168.57 |
| ENSMUSG00000005267 | 13_Zfp281 | 121.738 | -0.63468 | 0.044377 | 0.268458 | 113.259 | 81.6122 | 91.0062 | 150.203 | 135.639 | 158.71  |
| ENSMUSG00000005268 | 20_Prlr   | 11.9974 | 0.68125  | 0.457803 | 0.797971 | 33.3711 | 6.80102 | 4.13665 | 7.42763 | 12.0187 | 8.22939 |
| ENSMUSG00000005299 | 6_Letm1   | 1242.37 | 0.31145  | 0.432397 | 0.780765 | 739.22  | 1767.13 | 1621.57 | 1141.38 | 997.55  | 1187.38 |
| ENSMUSG00000005312 | 14_Ubqln  | 3166.13 | 0.61755  | 0.062467 | 0.329935 | 5255.44 | 3324.56 | 2920.47 | 2220.04 | 2593.46 | 2682.78 |
| ENSMUSG00000005320 | 9_Fgfr4   | 6.22978 | -1.56631 | 0.107316 | 0.445772 | 2.02249 | 2.26701 | 5.17081 | 14.8553 | 6.00934 | 7.05377 |
| ENSMUSG00000005338 | 13_Cadm   | 352.245 | -0.15824 | 0.608643 | 0.872658 | 335.733 | 313.98  | 349.547 | 478.67  | 332.231 | 303.312 |
| ENSMUSG00000005339 | 10_Fcgr1  | 4.23399 | -0.27252 | 0.828587 | 0.951064 | 8.08995 | 3.40051 | 0       | 5.77705 | 3.43391 | 4.70251 |
| ENSMUSG00000005354 | 15_Txn2   | 1435.88 | 0.02958  | 0.948288 | 0.986924 | 661.354 | 1824.94 | 1865.63 | 1707.53 | 1107.44 | 1448.37 |
| ENSMUSG00000005355 | 8_Casp14  | 122.965 | 0.57296  | 0.070065 | 0.353191 | 162.81  | 139.421 | 138.578 | 80.8787 | 105.593 | 110.509 |
| ENSMUSG00000005357 | 8_Slc1a6  | 7.12286 | -2.84373 | 0.005088 | 0.062837 | 2.02249 | 1.1335  | 2.06832 | 18.9817 | 10.3017 | 8.22939 |
| ENSMUSG00000005360 | 14_Slc1a5 | 600.249 | -0.24546 | 0.503109 | 0.82377  | 775.624 | 431.865 | 440.553 | 654.457 | 773.488 | 525.506 |
| ENSMUSG00000005362 | 14_Crbn   | 874.759 | 0.22895  | 0.596671 | 0.868228 | 1553.27 | 631.361 | 647.385 | 805.485 | 873.93  | 737.119 |
| ENSMUSG00000005364 | 11_Il5ra  | 0.41265 | -2.10335 | 0.599583 | NA       | 0       | 0       | 0       | 2.47588 | 0       | 0       |
| ENSMUSG00000005370 | 3_Msh6    | 1679.9  | 0.61601  | 0.034314 | 0.229616 | 2324.85 | 1953.03 | 1821.16 | 1028.31 | 1441.38 | 1510.68 |
| ENSMUSG00000005371 | 14_Fbxo1  | 2722.95 | 0.52149  | 0.264568 | 0.653245 | 5520.38 | 2208.06 | 1900.79 | 1850.31 | 2576.29 | 2281.89 |
| ENSMUSG00000005373 | 13_Mlxip  | 40.8285 | -0.86976 | 0.120232 | 0.471199 | 26.2924 | 15.869  | 44.4689 | 76.7522 | 36.9145 | 44.6739 |
| ENSMUSG00000005374 | 13_Tbl2   | 619.191 | 0.12382  | 0.649117 | 0.891437 | 593.6   | 720.908 | 622.565 | 491.874 | 649.009 | 637.19  |
| ENSMUSG00000005378 | 17_Wbscr  | 393.426 | 0.218    | 0.534335 | 0.838255 | 272.025 | 524.812 | 472.612 | 390.363 | 333.948 | 366.796 |
| ENSMUSG00000005397 | 7_Nid1    | 3428.3  | 0.05753  | 0.867541 | 0.962942 | 4753.86 | 2643.33 | 3092.14 | 3168.3  | 2852.72 | 4059.44 |
| ENSMUSG00000005410 | 5_Mcm5    | 1176.52 | 1.18503  | 0.018403 | 0.153995 | 590.567 | 2345.22 | 1966.98 | 698.197 | 670.471 | 787.671 |

|                    |            |         |          |          |          |         |         |         |         |         |         |
|--------------------|------------|---------|----------|----------|----------|---------|---------|---------|---------|---------|---------|
| ENSMUSG00000005413 | 7_Hmox1    | 185.192 | 0.33116  | 0.470929 | 0.804868 | 114.271 | 313.98  | 191.32  | 201.371 | 169.12  | 121.09  |
| ENSMUSG00000005417 | 17_Mprip   | 11544.7 | 0.31229  | 0.445927 | 0.789732 | 6417.36 | 16382.5 | 15568.3 | 10415.2 | 9777.19 | 10707.6 |
| ENSMUSG00000005442 | 13_Cic     | 1792.09 | 0.49586  | 0.441599 | 0.786839 | 405.509 | 2777.08 | 3108.69 | 1816.47 | 1098.85 | 1545.95 |
| ENSMUSG00000005447 | 12_Pafah   | 651.796 | 0.06302  | 0.911118 | 0.975173 | 190.114 | 829.724 | 978.317 | 732.034 | 511.652 | 668.932 |
| ENSMUSG00000005465 | 8_Il27ra   | 13.4116 | 1.31557  | 0.186036 | 0.573178 | 1.01124 | 30.6046 | 25.854  | 9.07822 | 6.86782 | 7.05377 |
| ENSMUSG00000005469 | 9_Prka     | 1349.17 | -0.14449 | 0.66806  | 0.898206 | 831.243 | 1490.56 | 1523.32 | 1494.6  | 1305.74 | 1449.55 |
| ENSMUSG00000005470 | 8_Asf1b    | 250.266 | 0.50516  | 0.147315 | 0.519469 | 229.552 | 385.391 | 265.78  | 165.884 | 216.336 | 238.652 |
| ENSMUSG00000005474 | 9_Myl10    | 13.5198 | -1.82979 | 0.007074 | 0.07881  | 9.1012  | 4.53401 | 4.13665 | 23.9335 | 20.6034 | 18.81   |
| ENSMUSG00000005481 | 17_Ddx39   | 806.056 | 0.63394  | 0.136649 | 0.501691 | 492.476 | 1413.48 | 1035.2  | 586.783 | 642.999 | 665.405 |
| ENSMUSG00000005483 | 9_Dnajb1   | 3398.06 | 0.35112  | 0.260437 | 0.649568 | 2674.74 | 4609.96 | 4143.89 | 2780.41 | 2974.62 | 3204.76 |
| ENSMUSG00000005493 | 15_Msh4    | 1.322   | 1.85027  | 0.383701 | NA       | 1.01124 | 1.1335  | 4.13665 | 1.65058 | 0       | 0       |
| ENSMUSG00000005501 | 14_Usp40   | 2095.85 | 0.30962  | 0.322516 | 0.703281 | 3007.44 | 1997.23 | 1954.57 | 1558.98 | 2005.4  | 2051.47 |
| ENSMUSG00000005505 | 12_Kbtbd   | 584.108 | 0.0073   | 0.979997 | 0.993796 | 480.341 | 642.696 | 633.941 | 582.656 | 598.358 | 566.653 |
| ENSMUSG00000005506 | 16_Celf1   | 2979.41 | 0.08098  | 0.772222 | 0.932508 | 3838.68 | 2755.55 | 2594.71 | 2807.64 | 3063.05 | 2816.8  |
| ENSMUSG00000005510 | 9_Ndufs3   | 1646.46 | -0.17135 | 0.45482  | 0.79605  | 1406.64 | 1624.31 | 1615.36 | 1718.26 | 1695.49 | 1818.7  |
| ENSMUSG00000005514 | 14_Por     | 2230.28 | 0.6362   | 0.257647 | 0.648651 | 804.95  | 3577.34 | 3760.21 | 1749.62 | 1281.71 | 2207.83 |
| ENSMUSG00000005533 | 9_Igf1r    | 1027.43 | 0.1298   | 0.575768 | 0.927112 | 530.903 | 1382.87 | 1307.18 | 992.827 | 928.014 | 1022.8  |
| ENSMUSG00000005534 | 9_Insr     | 1600.63 | 0.39389  | 0.269269 | 0.656292 | 2629.24 | 1447.48 | 1376.47 | 1261.87 | 1501.48 | 1387.24 |
| ENSMUSG00000005540 | 9_Fcer2a   | 2.03015 | 0.07152  | 0.96934  | 0.991822 | 0       | 1.1335  | 5.17081 | 3.30117 | 2.57543 | 0       |
| ENSMUSG00000005547 | 14_Cyp2a   | 3751.07 | 0.66665  | 0.029414 | 0.209006 | 4538.46 | 3747.36 | 5521.39 | 2876.14 | 2338.49 | 3484.56 |
| ENSMUSG00000005566 | 13_Trim2f  | 2527.4  | 0.26345  | 0.621165 | 0.878215 | 559.558 | 3860.71 | 3552.34 | 2335.58 | 2082.67 | 2753.52 |
| ENSMUSG00000005575 | 15_Ube2n   | 1075.35 | 0.09192  | 0.827024 | 0.950636 | 545.061 | 1473.55 | 1310.28 | 1031.62 | 992.399 | 1099.21 |
| ENSMUSG00000005580 | 11_Adcy9   | 189.279 | -0.29345 | 0.479046 | 0.809393 | 99.1019 | 184.761 | 226.481 | 246.762 | 162.252 | 216.316 |
| ENSMUSG00000005583 | 16_Mef2c   | 496.804 | -0.21936 | 0.739068 | 0.921641 | 997.087 | 148.489 | 231.652 | 660.234 | 469.587 | 473.778 |
| ENSMUSG00000005609 | 15_Ctr9    | 1506.99 | 0.06469  | 0.779367 | 0.93466  | 1533.05 | 1606.17 | 1482.99 | 1336.15 | 1565.86 | 1517.74 |
| ENSMUSG00000005610 | 16_Eif4g2  | 42828.4 | 0.28381  | 0.461674 | 0.799907 | 70663.7 | 36798   | 33620.6 | 31968.5 | 43921.4 | 39998.4 |
| ENSMUSG00000005611 | 15_Mrvi1   | 235.553 | -1.4462  | 0.000674 | 0.014712 | 136.518 | 68.0102 | 174.773 | 362.303 | 396.616 | 275.097 |
| ENSMUSG00000005615 | 14_Pcyt1e  | 7025.71 | 0.31351  | 0.206487 | 0.597842 | 8656.25 | 7633.01 | 7068.49 | 5598.78 | 6205.07 | 6992.63 |
| ENSMUSG00000005621 | 11_Zfp59f  | 828.871 | 0.17554  | 0.586641 | 0.86255  | 601.69  | 979.347 | 1056.91 | 835.196 | 760.611 | 739.47  |
| ENSMUSG00000005625 | 15_Psmd3   | 1974.17 | 0.24683  | 0.623478 | 0.879151 | 772.591 | 3003.78 | 2651.59 | 1869.29 | 1563.29 | 1984.46 |
| ENSMUSG00000005628 | 12_Tmod4   | 112.013 | -0.63183 | 0.041775 | 0.258864 | 84.9445 | 94.0807 | 84.8012 | 156.806 | 124.479 | 126.968 |
| ENSMUSG00000005640 | 11_Insr    | 76.6    | -0.3328  | 0.579717 | 0.859144 | 23.2586 | 88.4132 | 92.0404 | 128.746 | 69.5366 | 57.6058 |
| ENSMUSG00000005649 | 17_Cabp5   | 25.0588 | -1.63175 | 0.100682 | 0.431864 | 23.2586 | 12.4685 | 1.03416 | 61.8969 | 44.6408 | 7.05377 |
| ENSMUSG00000005656 | 8_Snx6     | 2257.61 | 0.48386  | 0.229371 | 0.620605 | 4067.22 | 2090.18 | 1740.49 | 1601.89 | 2117.86 | 1928.03 |
| ENSMUSG00000005667 | 8_Mthfd2   | 208.496 | 0.35898  | 0.361924 | 0.734636 | 182.024 | 333.25  | 188.217 | 226.13  | 180.28  | 141.075 |
| ENSMUSG00000005672 | 12_Kit     | 3854.78 | 0.49499  | 0.070223 | 0.353829 | 4207.79 | 4430.86 | 4889.52 | 2651.66 | 3071.63 | 3877.22 |
| ENSMUSG00000005674 | 9_Tomm4    | 508.956 | -0.08297 | 0.819827 | 0.948338 | 301.351 | 574.686 | 607.053 | 566.151 | 469.587 | 534.911 |
| ENSMUSG00000005677 | 14_Nr1i3   | 4.42204 | 0.40973  | 0.694526 | 0.905638 | 2.02249 | 7.93452 | 5.17081 | 4.12646 | 2.57543 | 4.70251 |
| ENSMUSG00000005682 | 8_Pan2     | 901.09  | 0.23014  | 0.475298 | 0.806964 | 658.32  | 1127.84 | 1132.41 | 804.66  | 853.326 | 829.993 |
| ENSMUSG00000005683 | 7-Cs       | 6768.68 | 0.36883  | 0.271224 | 0.657711 | 5162.4  | 9375.2  | 8349.82 | 5221.62 | 5603.28 | 6899.76 |
| ENSMUSG00000005686 | 16_Ampd1   | 246.295 | 0.26999  | 0.38629  | 0.751493 | 298.317 | 306.046 | 203.73  | 217.877 | 247.241 | 204.559 |
| ENSMUSG00000005687 | 14_Bcas2   | 1230.78 | 0.08335  | 0.764311 | 0.929808 | 1567.43 | 1105.17 | 1126.2  | 1119.1  | 1268.83 | 1197.96 |
| ENSMUSG00000005696 | 11_Sh2d1   | 5.12695 | 0.77903  | 0.492576 | 0.815769 | 13.1462 | 2.26701 | 4.13665 | 6.60234 | 3.43391 | 1.17563 |
| ENSMUSG00000005698 | 15_Ctcf    | 2289.26 | 0.28301  | 0.390809 | 0.753993 | 3374.52 | 2110.58 | 2053.84 | 1710.83 | 2305.01 | 2180.79 |
| ENSMUSG00000005699 | 15_Pard6i  | 56.6073 | -0.39758 | 0.564721 | 0.850965 | 9.1012  | 71.4107 | 66.1863 | 81.7039 | 48.9332 | 62.3083 |
| ENSMUSG00000005705 | 10_Agrp    | 2.5793  | 0.24663  | 0.869556 | 0.963129 | 5.05622 | 3.40051 | 0       | 4.12646 | 1.71695 | 1.17563 |
| ENSMUSG00000005716 | 16_Pvalb   | 494.892 | -1.19863 | 0.07852  | 0.376279 | 508.656 | 75.9447 | 316.453 | 1218.13 | 416.361 | 433.807 |
| ENSMUSG00000005718 | 7_Tfap4    | 146.846 | 0.5019   | 0.179367 | 0.564711 | 112.248 | 208.565 | 195.457 | 120.493 | 105.593 | 138.724 |
| ENSMUSG00000005732 | 14_Ranbp   | 1395.81 | 0.48166  | 0.077165 | 0.372775 | 1853.61 | 1713.86 | 1312.35 | 1050.6  | 1214.74 | 1229.71 |
| ENSMUSG00000005763 | 15_Cd247   | 39.0752 | 1.07663  | 0.258054 | 0.648822 | 112.248 | 29.4711 | 17.5807 | 25.5841 | 47.2162 | 2.35126 |
| ENSMUSG00000005774 | 12_Rfx5    | 803.607 | 0.56921  | 0.011548 | 0.11192  | 983.941 | 915.87  | 980.385 | 648.68  | 634.414 | 658.352 |
| ENSMUSG00000005779 | 12_Psmb4   | 2727.65 | -0.00365 | 0.990748 | 0.997381 | 1880.91 | 3293.96 | 2998.03 | 2834.88 | 2750.56 | 2607.54 |
| ENSMUSG00000005800 | 2_Mmp8     | 3.88471 | 2.86528  | 0.04386  | 0.266127 | 7.07871 | 11.335  | 2.06832 | 1.65058 | 0       | 1.17563 |
| ENSMUSG00000005802 | 12_Slc30a  | 1760.91 | 0.55029  | 0.249197 | 0.640655 | 3670.82 | 1370.41 | 1236.86 | 1234.64 | 1652.57 | 1400.17 |
| ENSMUSG00000005803 | 14_Sqrdl   | 230.484 | -0.67801 | 0.040034 | 0.251765 | 213.373 | 168.892 | 149.953 | 329.292 | 303.901 | 217.491 |
| ENSMUSG00000005804 | 14_Bloc1s  | 1141.44 | 0.52543  | 0.125969 | 0.482661 | 1885.97 | 1131.24 | 1023.82 | 861.605 | 1039.62 | 906.409 |
| ENSMUSG00000005813 | 12_Metap   | 1450.18 | 0.37005  | 0.206716 | 0.598038 | 1976.98 | 1611.84 | 1316.49 | 1081.96 | 1414.77 | 1299.07 |
| ENSMUSG00000005823 | 8_Gpr108   | 1122.2  | 0.23256  | 0.651071 | 0.891804 | 425.734 | 1658.31 | 1553.31 | 1080.31 | 838.732 | 1176.8  |
| ENSMUSG00000005824 | 6_Tnfrsf14 | 3.61258 | 2.7398   | 0.084424 | 0.392004 | 1.01124 | 14.7355 | 3.10248 | 1.65058 | 0       | 1.17563 |
| ENSMUSG00000005836 | 8_Gata6    | 5.07308 | 0.0463   | 0.96616  | 0.990834 | 10.1124 | 1.1335  | 4.13665 | 6.60234 | 2.57543 | 5.87814 |
| ENSMUSG00000005846 | 11_Rsl1d   | 2053.56 | 0.46631  | 0.288204 | 0.673216 | 3907.45 | 1735.39 | 1504.71 | 1419.5  | 1977.93 | 1776.37 |
| ENSMUSG00000005864 | 7_Cnga2    | 2.166   | 1.00251  | 0.573909 | 0.856024 | 0       | 5.66751 | 3.10248 | 1.65058 | 2.57543 | 0       |
| ENSMUSG00000005871 | 14_Apc     | 5220.07 | 0.30477  | 0.386264 | 0.751493 | 8220.41 | 4581.62 | 4505.84 | 4001.84 | 4941.39 | 5069.31 |
| ENSMUSG00000005873 | 5_Reep5    | 5837.05 | 0.04182  | 0.848574 | 0.956293 | 6209.04 | 5650.51 | 5905.06 | 5701.12 | 5498.55 | 6058.01 |
| ENSMUSG00000005881 | 13_Ergic3  | 2146.96 | -0.0369  | 0.949752 | 0.987438 | 531.915 | 2870.03 | 2956.67 | 2489.08 | 1761.59 | 2272.49 |
| ENSMUSG00000005882 | 18_Uqcc1   | 621.369 | -0.1569  | 0.519576 | 0.831665 | 545.061 | 658.565 | 559.481 | 673.439 | 653.301 | 638.366 |
| ENSMUSG00000005883 | 15_Spo11   | 5.10448 | 0.6508   | 0.562242 | 0.850204 | 13.1462 | 4.53401 | 1.03416 | 4.95175 | 3.43391 | 3.52688 |
| ENSMUSG00000005886 | 14_Ncoa2   | 2447.98 | 0.34984  | 0.119566 | 0.470397 | 2850.7  | 2647.86 | 2731.22 | 2237.37 | 1978.79 | 2241.92 |
| ENSMUSG00000005892 | 4_Trh      | 1.03084 | -2.19103 | 0.485576 | NA       | 0       | 0       | 1.03416 | 0       | 5.15086 | 0       |
| ENSMUSG00000005893 | 14_Nr2c2   | 1591.58 | 0.08763  | 0.812629 | 0.946314 | 2386.54 | 1208.31 | 1324.76 | 1363.38 | 1812.24 | 1454.25 |
| ENSMUSG00000005897 | 14_Nr2c1   | 1147.35 | 0.5546   | 0.10907  | 0.44918  | 1837.43 | 1085.9  | 1171.71 | 730.384 | 960.636 | 1098.04 |
| ENSMUSG00000005899 | 12_Smpd4   | 755.626 | 0.27354  | 0.413616 | 0.768597 | 542.027 | 956.676 | 982.453 | 664.36  | 668.754 | 719.484 |
| ENSMUSG00000005907 | 15_Pex1    | 362.068 | -0.07604 | 0.814761 | 0.947066 | 461.127 | 299.245 | 296.804 | 319.388 | 382.022 | 413.821 |
| ENSMUSG00000005917 | 15_Otx1    | 1589.66 | 0.44295  | 0.055204 | 0.307364 | 1675.63 | 1856.68 | 1962.84 | 1312.21 | 1305.74 | 1424.86 |
| ENSMUSG00000005936 | 18_Kctd2f  | 1765.41 | 0.18912  | 0.426576 | 0.777541 | 1704.96 | 2049.37 | 1888.38 | 1521.84 | 1680.9  | 1746.98 |

|                    |           |         |          |          |          |         |         |         |         |         |         |
|--------------------|-----------|---------|----------|----------|----------|---------|---------|---------|---------|---------|---------|
| ENSMUSG00000005947 | 11_Iltgae | 12.7807 | 2.00282  | 0.015595 | 0.136075 | 9.1012  | 32.8716 | 19.6491 | 4.12646 | 8.58477 | 2.35126 |
| ENSMUSG00000005949 | 9_Ctns    | 548.467 | -0.1068  | 0.686579 | 0.904414 | 442.925 | 553.149 | 588.438 | 526.537 | 596.642 | 583.111 |
| ENSMUSG00000005950 | 14_P2rx5  | 4.94425 | -1.37229 | 0.202917 | 0.594033 | 5.05622 | 1.1335  | 2.06832 | 11.5541 | 5.15086 | 4.70251 |
| ENSMUSG00000005951 | 13_ShpK   | 224.578 | -0.26297 | 0.404466 | 0.76299  | 163.822 | 214.232 | 234.755 | 292.153 | 221.487 | 221.018 |
| ENSMUSG00000005952 | 15_Trpv1  | 0.4821  | -2.30304 | 0.543942 | NA       | 0       | 0       | 0       | 0       | 1.71695 | 1.17563 |
| ENSMUSG00000005958 | 14_Ephb3  | 2160.94 | 0.63507  | 0.329282 | 0.709946 | 482.364 | 3789.3  | 3615.43 | 1913.03 | 1264.54 | 1900.99 |
| ENSMUSG00000005968 | 14_Tuft1  | 3798.06 | 0.25519  | 0.439004 | 0.785475 | 2784.97 | 4691.57 | 4922.61 | 3464.58 | 3054.46 | 3870.17 |
| ENSMUSG00000005973 | 6_Rcn1    | 5038.9  | 0.24519  | 0.463157 | 0.8007   | 7573.21 | 4579.35 | 4245.23 | 4171.85 | 4566.24 | 5097.52 |
| ENSMUSG00000005980 | 15_Dnase  | 62.2464 | -0.5952  | 0.107713 | 0.446399 | 42.4723 | 46.4736 | 59.9814 | 80.0534 | 79.8384 | 64.6595 |
| ENSMUSG00000005981 | 11_Trap1  | 1418.11 | 0.03956  | 0.897113 | 0.97156  | 1027.42 | 1695.72 | 1589.51 | 1359.26 | 1336.65 | 1500.1  |
| ENSMUSG00000005982 | 13_Naa60  | 1467.8  | 0.33696  | 0.16913  | 0.550579 | 1405.63 | 1780.73 | 1729.12 | 1348.53 | 1250.8  | 1292.01 |
| ENSMUSG00000005983 | 15_17000  | 51.2846 | 0.4435   | 0.502864 | 0.82368  | 13.1462 | 79.3452 | 84.8012 | 42.0899 | 37.773  | 50.552  |
| ENSMUSG00000005986 | 15_Ankrd1 | 129.144 | 0.07969  | 0.892082 | 0.970752 | 37.416  | 163.224 | 197.525 | 142.776 | 98.7249 | 135.197 |
| ENSMUSG00000005994 | 14_Typr1  | 15563.3 | -1.50537 | 0.001251 | 0.023179 | 13056.2 | 4173.56 | 7094.35 | 24982.4 | 27260.9 | 16812.7 |
| ENSMUSG00000006005 | 17_Tpr    | 5811.22 | 0.30958  | 0.371944 | 0.74286  | 8896.93 | 5583.64 | 4816.09 | 4258.51 | 5635.04 | 5677.11 |
| ENSMUSG00000006007 | 14_Pdc    | 320.924 | -1.48749 | 0.107519 | 0.446362 | 402.475 | 86.1462 | 17.5807 | 802.184 | 490.19  | 126.968 |
| ENSMUSG00000006010 | 14_BC003  | 1366.78 | 0.20894  | 0.663821 | 0.896403 | 2593.84 | 911.336 | 891.447 | 1162.84 | 1449.11 | 1192.09 |
| ENSMUSG00000006014 | 16_Prg4   | 242.071 | 1.8799   | 8.87E-06 | 0.00047  | 570.342 | 350.252 | 221.311 | 101.511 | 96.1494 | 112.86  |
| ENSMUSG00000006019 | 15_Dhx34  | 216.072 | 0.2149   | 0.722733 | 0.914253 | 57.6409 | 315.114 | 323.693 | 231.082 | 150.233 | 218.667 |
| ENSMUSG00000006021 | 5_Kptn    | 206.594 | 0.04716  | 0.914019 | 0.976048 | 104.158 | 241.436 | 284.394 | 220.353 | 181.139 | 208.086 |
| ENSMUSG00000006024 | 12_Napa   | 1852.29 | 0.08759  | 0.843317 | 0.954449 | 851.468 | 2384.89 | 2489.23 | 1908.08 | 1609.64 | 1870.42 |
| ENSMUSG00000006050 | 11_Sra1   | 1078.51 | -0.05061 | 0.827137 | 0.950636 | 1050.68 | 1091.56 | 1036.23 | 1001.9  | 1109.15 | 1181.51 |
| ENSMUSG00000006056 | 13_Calcoc | 0.47508 | -0.61882 | 0.873279 | NA       | 0       | 1.1335  | 0       | 0       | 1.71695 | 0       |
| ENSMUSG00000006057 | 15_Atp5g  | 1104.46 | -0.17406 | 0.760807 | 0.928347 | 285.171 | 1384.01 | 1444.72 | 1454.17 | 960.636 | 1098.04 |
| ENSMUSG00000006058 | 10_Snf8   | 921.268 | 0.0569   | 0.850866 | 0.957445 | 685.624 | 1099.5  | 1033.13 | 864.081 | 863.628 | 981.649 |
| ENSMUSG00000006095 | 12_Tbcb   | 672.735 | -0.02186 | 0.964862 | 0.99063  | 252.811 | 912.47  | 837.671 | 700.673 | 567.453 | 765.334 |
| ENSMUSG00000006127 | 9_Inpp5k  | 1392.1  | -0.5789  | 0.038292 | 0.245746 | 1024.39 | 1093.83 | 1231.69 | 2007.11 | 1625.96 | 1369.61 |
| ENSMUSG00000006134 | 3_Crk1    | 1141.71 | 0.3337   | 0.175867 | 0.559175 | 1453.16 | 1241.19 | 1125.17 | 1002.73 | 1040.47 | 987.527 |
| ENSMUSG00000006143 | 12_Upk3b  | 22595.1 | 0.36084  | 0.603748 | 0.871008 | 3913.52 | 33670.7 | 38634.2 | 26069.3 | 12724.3 | 20558.2 |
| ENSMUSG00000006154 | 13_Eps8l1 | 5357.69 | 0.55734  | 0.247442 | 0.638878 | 2464.4  | 8525.08 | 8150.23 | 4284.09 | 3948.14 | 4774.22 |
| ENSMUSG00000006169 | 19_Clint1 | 5666.86 | 0.53847  | 0.024403 | 0.1859   | 6595.34 | 7170.54 | 6370.44 | 4208.99 | 4434.89 | 5220.96 |
| ENSMUSG00000006179 | 8_Prss16  | 13.9618 | 1.17449  | 0.082383 | 0.387193 | 13.1462 | 30.6046 | 14.4783 | 9.90351 | 8.58477 | 7.05377 |
| ENSMUSG00000006191 | 17_Cdkal  | 396.889 | 0.19341  | 0.617008 | 0.877219 | 622.927 | 315.114 | 331.966 | 299.581 | 402.626 | 409.118 |
| ENSMUSG00000006204 | 5_543041  | 9.05775 | -1.28423 | 0.237617 | 0.630377 | 9.1012  | 6.80102 | 0       | 14.8553 | 18.8865 | 4.70251 |
| ENSMUSG00000006205 | 13_Htra1  | 1849    | -0.71937 | 0.057107 | 0.312738 | 782.703 | 1685.52 | 1723.95 | 2234.89 | 2323.9  | 2343.03 |
| ENSMUSG00000006215 | 12_Zbtb17 | 432.888 | 0.45513  | 0.511055 | 0.827179 | 79.8883 | 684.636 | 737.357 | 467.115 | 240.374 | 387.957 |
| ENSMUSG00000006216 | 10_Clcnk1 | 0.33902 | -1.78366 | 0.658108 | NA       | 0       | 0       | 0       | 0       | 0.85848 | 1.17563 |
| ENSMUSG00000006218 | 4_Fam13c  | 31.1059 | 0.73743  | 0.306598 | 0.689379 | 8.08995 | 61.2092 | 47.5714 | 27.2346 | 24.8958 | 17.6344 |
| ENSMUSG00000006219 | 12_Fblim1 | 122.246 | 0.11991  | 0.745193 | 0.924057 | 98.0907 | 153.023 | 131.339 | 150.203 | 105.593 | 95.2259 |
| ENSMUSG00000006221 | 7_Hspb7   | 100.507 | -0.75656 | 0.214433 | 0.605122 | 51.5735 | 46.4736 | 126.168 | 206.323 | 54.9425 | 117.563 |
| ENSMUSG00000006235 | 5_Epor    | 5.49044 | -0.46157 | 0.652186 | 0.892215 | 1.01124 | 4.53401 | 8.27329 | 6.60234 | 4.29238 | 8.22939 |
| ENSMUSG00000006241 | 15_Ccdc1c | 67.6699 | -0.45725 | 0.345241 | 0.722149 | 27.3036 | 61.2092 | 82.7329 | 86.6557 | 76.4045 | 71.7133 |
| ENSMUSG00000006262 | 15_Mob1t  | 2427.18 | 0.55497  | 0.25017  | 0.641919 | 5130.04 | 1722.92 | 1811.85 | 1692.67 | 2169.37 | 2036.19 |
| ENSMUSG00000006269 | 7_Atp6v1t | 1.10763 | -0.09393 | 0.965024 | NA       | 1.01124 | 2.26701 | 0       | 1.65058 | 1.71695 | 0       |
| ENSMUSG00000006273 | 14_Atp6v  | 5115.12 | 0.29841  | 0.206972 | 0.59848  | 6117.02 | 5859.08 | 4950.53 | 4335.26 | 4689.86 | 4738.96 |
| ENSMUSG00000006276 | 9_Eps15l1 | 1564.47 | 0.38525  | 0.2955   | 0.679579 | 1072.93 | 2136.65 | 2106.59 | 1205.75 | 1273.12 | 1591.8  |
| ENSMUSG00000006281 | 7_Tep1    | 1206.6  | 0.5662   | 0.160399 | 0.53885  | 747.31  | 1874.81 | 1699.13 | 948.261 | 987.249 | 982.825 |
| ENSMUSG00000006288 | 7_Ttc5    | 645.073 | -0.18499 | 0.529214 | 0.836038 | 447.981 | 677.835 | 685.649 | 684.993 | 685.065 | 688.918 |
| ENSMUSG00000006289 | 14_Osgep  | 739.805 | -0.18703 | 0.503528 | 0.824301 | 542.027 | 720.908 | 812.851 | 784.028 | 776.063 | 802.954 |
| ENSMUSG00000006299 | 13_Aamp   | 2455.74 | -0.00828 | 0.989249 | 0.997255 | 541.016 | 3213.48 | 3591.64 | 2886.05 | 1904.1  | 2598.14 |
| ENSMUSG00000006301 | 17_Tmbirr | 4574.03 | 0.27384  | 0.379946 | 0.747815 | 3501.94 | 6101.65 | 5416.94 | 3896.21 | 4167.05 | 4360.4  |
| ENSMUSG00000006304 | 14_Arpe2  | 13182.9 | 0.52024  | 0.108989 | 0.448955 | 20778   | 13483   | 12341.7 | 9095.55 | 11760.3 | 11638.7 |
| ENSMUSG00000006307 | 16_Kmt2b  | 1369.37 | 0.44808  | 0.39187  | 0.754331 | 517.757 | 2168.39 | 2054.88 | 1190.07 | 1031.89 | 1253.22 |
| ENSMUSG00000006310 | 10_Zbtb33 | 31.5137 | 1.25884  | 0.035976 | 0.237442 | 18.2024 | 62.3427 | 52.7422 | 14.03   | 20.6034 | 21.1613 |
| ENSMUSG00000006313 | 4_Upk1a   | 11.9117 | 0.34681  | 0.671108 | 0.899688 | 3.03373 | 20.4031 | 16.5466 | 8.25292 | 10.3017 | 12.9319 |
| ENSMUSG00000006315 | 8_Tmem1   | 761.071 | -0.08683 | 0.837042 | 0.952966 | 363.037 | 938.54  | 913.165 | 869.033 | 731.422 | 751.226 |
| ENSMUSG00000006333 | 14_Rps9   | 8138.27 | -0.06    | 0.925808 | 0.979816 | 1544.17 | 10483.8 | 11879.4 | 10506   | 6149.27 | 8267.01 |
| ENSMUSG00000006335 | 16_Tfpt   | 169.243 | -0.17444 | 0.698874 | 0.905638 | 76.8546 | 200.63  | 199.593 | 187.341 | 147.658 | 203.384 |
| ENSMUSG00000006342 | 14_Susd2  | 109.192 | -1.22468 | 0.009021 | 0.093084 | 34.3823 | 80.4787 | 81.6988 | 206.323 | 115.894 | 136.373 |
| ENSMUSG00000006344 | 16_Ggt5   | 53.4573 | 0.07839  | 0.87426  | 0.964209 | 30.3373 | 73.6777 | 61.0155 | 70.1499 | 42.0654 | 43.4982 |
| ENSMUSG00000006345 | 10_Ggt1   | 74.4052 | -1.51753 | 0.013962 | 0.12705  | 11.1237 | 48.7406 | 55.8447 | 155.155 | 72.1121 | 103.455 |
| ENSMUSG00000006356 | 10_Crip2  | 316.583 | 0.14234  | 0.842925 | 0.953771 | 44.4948 | 445.467 | 506.739 | 402.743 | 234.364 | 265.692 |
| ENSMUSG00000006360 | 11_Crip1  | 1397.53 | 0.02895  | 0.965973 | 0.990781 | 227.53  | 2016.5  | 1990.76 | 1812.34 | 1063.65 | 1274.38 |
| ENSMUSG00000006362 | 15_Cbfa2l | 47.2292 | -0.02435 | 0.95072  | 0.987571 | 48.5397 | 47.6071 | 44.4689 | 58.5958 | 39.4899 | 44.6739 |
| ENSMUSG00000006369 | 14_Fbln1  | 2764.23 | 0.07133  | 0.890134 | 0.97035  | 1036.53 | 3573.93 | 3887.41 | 3531.43 | 2108.42 | 2447.66 |
| ENSMUSG00000006373 | 10_Pgrmc  | 5085.96 | 0.38227  | 0.43498  | 0.783106 | 10352.1 | 3361.97 | 3553.38 | 3900.33 | 4972.3  | 4375.69 |
| ENSMUSG00000006378 | 13_Gcat   | 888.784 | 0.2318   | 0.677297 | 0.901447 | 291.238 | 1243.45 | 1345.44 | 963.941 | 597.5   | 891.126 |
| ENSMUSG00000006386 | 15_Tek    | 403.753 | -0.6317  | 0.132528 | 0.494888 | 471.24  | 177.96  | 300.941 | 553.771 | 504.784 | 413.821 |
| ENSMUSG00000006389 | 12_Mpl    | 0.44746 | -0.57987 | 0.8834   | NA       | 0       | 0       | 1.03416 | 1.65058 | 0       | 0       |
| ENSMUSG00000006390 | 15_Elov1l | 2218.87 | 0.33709  | 0.389001 | 0.752914 | 1374.28 | 3213.48 | 2842.91 | 1891.57 | 1747.86 | 2243.1  |
| ENSMUSG00000006392 | 16_Med8   | 920.426 | 0.37627  | 0.167847 | 0.548893 | 918.21  | 1241.19 | 959.702 | 743.588 | 764.045 | 895.828 |
| ENSMUSG00000006398 | 15_Cdc20  | 540.965 | 0.75086  | 0.173321 | 0.556848 | 204.271 | 980.48  | 851.115 | 368.08  | 365.711 | 476.129 |
| ENSMUSG00000006403 | 12_Adamt1 | 39.3207 | 0.8446   | 0.180869 | 0.567284 | 17.1912 | 83.8792 | 50.6739 | 36.3129 | 23.1789 | 24.6882 |
| ENSMUSG00000006411 | 12_Pvrl4  | 7003.68 | 0.61171  | 0.154194 | 0.529664 | 4128.91 | 10988.2 | 10282.7 | 5403.19 | 4696.73 | 6522.38 |
| ENSMUSG00000006412 | 10_Pfdn2  | 604.399 | -0.00116 | 0.997366 | 0.998756 | 391.352 | 709.573 | 711.503 | 631.349 | 512.511 | 670.108 |

|                    |           |         |          |          |          |         |         |         |         |         |         |
|--------------------|-----------|---------|----------|----------|----------|---------|---------|---------|---------|---------|---------|
| ENSMUSG00000006418 | 17_Rnf11  | 4617.53 | 0.74142  | 0.042251 | 0.260696 | 3410.93 | 7397.24 | 6527.63 | 3333.36 | 3357.5  | 3678.54 |
| ENSMUSG00000006423 | 15_C330C  | 1411.37 | 0.20754  | 0.62165  | 0.878215 | 2434.07 | 1054.16 | 1049.67 | 1133.13 | 1418.2  | 1379.01 |
| ENSMUSG00000006435 | 15_Neur1  | 58.7018 | -0.82378 | 0.169022 | 0.550386 | 19.2136 | 41.9396 | 66.1863 | 121.318 | 50.6501 | 52.9033 |
| ENSMUSG00000006442 | 10_Srm    | 586.868 | 0.29932  | 0.621989 | 0.878215 | 149.664 | 940.807 | 852.149 | 568.626 | 419.795 | 590.165 |
| ENSMUSG00000006445 | 3_Epha2   | 2360.78 | 1.1401   | 0.074776 | 0.366128 | 640.118 | 4777.71 | 4325.9  | 1716.61 | 1080.82 | 1623.54 |
| ENSMUSG00000006456 | 10_Rbm1   | 560.71  | 0.16725  | 0.699792 | 0.905844 | 284.16  | 766.248 | 729.084 | 499.302 | 485.898 | 599.57  |
| ENSMUSG00000006457 | 3_Actn3   | 29.4973 | -1.81661 | 0.04629  | 0.275233 | 20.2249 | 3.40051 | 15.5124 | 101.511 | 25.7543 | 10.5807 |
| ENSMUSG00000006462 | 6_A53001  | 3.59161 | 0.22882  | 0.838289 | 0.952966 | 3.03373 | 4.53401 | 4.13665 | 5.77705 | 1.71695 | 2.35126 |
| ENSMUSG00000006463 | 13_Zdhhc  | 284.536 | 0.01405  | 0.955946 | 0.988869 | 282.137 | 287.91  | 287.497 | 289.678 | 256.685 | 303.312 |
| ENSMUSG00000006464 | 8_Bbs1    | 210.222 | -0.19632 | 0.544041 | 0.841593 | 162.81  | 205.164 | 220.276 | 278.949 | 206.034 | 188.1   |
| ENSMUSG00000006469 | 13_Slc34a | 0.76269 | 1.73729  | 0.607535 | NA       | 0       | 3.40051 | 0       | 0       | 0       | 1.17563 |
| ENSMUSG00000006471 | 17_Ndor1  | 1180.02 | 0.12806  | 0.781177 | 0.935516 | 516.746 | 1585.77 | 1594.68 | 1171.92 | 1054.21 | 1156.82 |
| ENSMUSG00000006476 | 19_Nsmf   | 331.016 | -0.74111 | 0.199806 | 0.591685 | 70.7871 | 290.177 | 382.64  | 534.789 | 337.381 | 370.323 |
| ENSMUSG00000006494 | 11_Pdk1   | 1644.79 | -0.1836  | 0.56569  | 0.851457 | 2051.81 | 1155.04 | 1413.7  | 1620.05 | 1861.18 | 1766.97 |
| ENSMUSG00000006498 | 16_Ptbp1  | 4094    | 0.541    | 0.189663 | 0.578028 | 2505.86 | 6645.73 | 5406.6  | 3377.1  | 2923.11 | 3705.58 |
| ENSMUSG00000006517 | 4_Mvd     | 428.458 | 0.26492  | 0.728779 | 0.917597 | 46.5172 | 693.704 | 662.898 | 489.398 | 264.411 | 413.821 |
| ENSMUSG00000006519 | 10_Cyba   | 192.239 | -0.01846 | 0.980785 | 0.993796 | 20.2249 | 326.449 | 226.481 | 254.19  | 135.639 | 190.452 |
| ENSMUSG00000006522 | 15_Ith3   | 5.97167 | 0.20547  | 0.826033 | 0.950197 | 3.03373 | 7.93452 | 8.27329 | 3.30117 | 8.58477 | 4.70251 |
| ENSMUSG00000006526 | 11_Tmem   | 393.837 | 0.03984  | 0.907239 | 0.974519 | 267.98  | 440.933 | 489.158 | 438.23  | 362.277 | 364.445 |
| ENSMUSG00000006527 | 14_Sfmbt  | 1594.01 | 0.56916  | 0.097391 | 0.423413 | 2599.91 | 1654.91 | 1458.17 | 1048.95 | 1443.1  | 1359.03 |
| ENSMUSG00000006538 | 10_Ihh    | 5.80698 | -1.22556 | 0.199272 | 0.5911   | 4.04498 | 1.1335  | 5.17081 | 9.07822 | 6.00934 | 9.40502 |
| ENSMUSG00000006542 | 13_Prkg   | 7.12766 | 0.24174  | 0.772793 | 0.932508 | 5.05622 | 5.66751 | 12.4099 | 7.42763 | 5.15086 | 7.05377 |
| ENSMUSG00000006546 | 3_Cryba2  | 1259.81 | -3.52927 | 2.96E-05 | 0.001253 | 20.2249 | 201.764 | 380.571 | 4158.65 | 815.553 | 1982.11 |
| ENSMUSG00000006567 | 11_Atp7b  | 56.4248 | -1.29306 | 0.010857 | 0.106776 | 20.2249 | 29.4711 | 48.6056 | 109.764 | 76.4045 | 54.0789 |
| ENSMUSG00000006570 | 3_Defb2   | 28.9978 | -1.28776 | 0.011494 | 0.111516 | 17.1912 | 17.0025 | 16.5466 | 41.2646 | 54.9425 | 27.0394 |
| ENSMUSG00000006574 | 15_Slc4a1 | 0.56424 | -1.00342 | 0.787021 | NA       | 0       | 0       | 1.03416 | 0       | 0       | 2.35126 |
| ENSMUSG00000006575 | 14_Rundc  | 59.3174 | -0.76135 | 0.141629 | 0.510149 | 20.2249 | 52.1411 | 59.9814 | 89.9569 | 80.6968 | 52.9033 |
| ENSMUSG00000006576 | 16_Slc4a3 | 294.171 | -0.99243 | 0.039566 | 0.250092 | 94.0457 | 190.428 | 306.112 | 509.205 | 353.693 | 311.541 |
| ENSMUSG00000006585 | 2_Cdt1    | 155.313 | 1.33919  | 0.005429 | 0.065459 | 109.214 | 342.318 | 216.14  | 76.7522 | 78.1214 | 109.333 |
| ENSMUSG00000006586 | 15_Runx1  | 68.2836 | -0.33243 | 0.553652 | 0.846015 | 109.214 | 32.8716 | 39.2981 | 94.0833 | 78.9799 | 55.2545 |
| ENSMUSG00000006587 | 5_Snai3   | 6.13567 | 0.83956  | 0.401666 | 0.760434 | 4.04498 | 13.602  | 6.20497 | 5.77705 | 6.00934 | 1.17563 |
| ENSMUSG00000006589 | 7_Aprt    | 432.755 | 0.25865  | 0.715663 | 0.911627 | 64.7196 | 650.631 | 699.093 | 510.031 | 297.033 | 375.025 |
| ENSMUSG00000006599 | 13_Gtf2h1 | 1349.56 | 0.212    | 0.522477 | 0.832206 | 1987.1  | 1208.31 | 1149.99 | 1115.8  | 1364.12 | 1272.03 |
| ENSMUSG00000006611 | 14_Hfe    | 317.253 | -0.13566 | 0.648462 | 0.890982 | 346.857 | 272.041 | 288.531 | 382.936 | 345.108 | 268.043 |
| ENSMUSG00000006641 | 12_Slc5af | 339.627 | -0.07536 | 0.827963 | 0.950974 | 228.541 | 324.182 | 439.519 | 368.906 | 313.344 | 363.269 |
| ENSMUSG00000006642 | 3_Tcf23   | 0.4547  | -0.61836 | 0.875203 | NA       | 1.01124 | 0       | 0       | 0       | 1.71695 | 0       |
| ENSMUSG00000006649 | 16_Nphs1  | 50.7744 | -2.31557 | 8.48E-07 | 6.75E-05 | 13.1462 | 20.4031 | 17.5807 | 113.89  | 64.3858 | 75.2402 |
| ENSMUSG00000006651 | 7_Aplp1   | 105.891 | -1.70406 | 0.005221 | 0.063833 | 16.1799 | 56.6751 | 76.528  | 253.365 | 115.036 | 117.563 |
| ENSMUSG00000006673 | 14_Qrich1 | 1805.63 | 0.22484  | 0.354428 | 0.729885 | 2066.98 | 1948.49 | 1822.19 | 1466.54 | 1692.06 | 1837.51 |
| ENSMUSG00000006675 | 10_P4htm  | 72.6186 | -1.26153 | 0.040578 | 0.253896 | 14.1574 | 40.8061 | 73.4255 | 147.727 | 86.7062 | 72.8889 |
| ENSMUSG00000006676 | 16_Usp19  | 2088.7  | 0.25294  | 0.593595 | 0.866332 | 906.075 | 2995.85 | 2912.2  | 2063.23 | 1744.43 | 1910.4  |
| ENSMUSG00000006678 | 6_Pola1   | 777.479 | 1.01709  | 0.025718 | 0.192205 | 1728.22 | 787.785 | 606.019 | 420.074 | 594.925 | 527.857 |
| ENSMUSG00000006699 | 17_Cdc42  | 14165.9 | 0.4521   | 0.249454 | 0.640937 | 25028.3 | 12776.8 | 11297.2 | 10191.5 | 13371.6 | 12330   |
| ENSMUSG00000006705 | 12_Pknx   | 593.622 | 0.00351  | 0.989208 | 0.997255 | 527.87  | 617.759 | 637.044 | 573.578 | 536.548 | 668.932 |
| ENSMUSG00000006711 | 15_D130C  | 1.48997 | -1.70636 | 0.342972 | NA       | 1.01124 | 0       | 1.03416 | 1.65058 | 1.71695 | 3.52688 |
| ENSMUSG00000006715 | 11_Gmn    | 375.101 | 0.53884  | 0.108894 | 0.448862 | 515.735 | 445.467 | 371.264 | 218.702 | 327.938 | 371.498 |
| ENSMUSG00000006717 | 6_Acot13  | 455.936 | -0.64225 | 0.009319 | 0.09531  | 361.014 | 330.983 | 376.435 | 575.229 | 582.906 | 509.047 |
| ENSMUSG00000006720 | 16_Zfp18  | 30.7998 | -1.02317 | 0.032093 | 0.220977 | 28.3148 | 17.0025 | 15.5124 | 40.4393 | 41.2069 | 42.3226 |
| ENSMUSG00000006724 | 12_Cyp27  | 2.3974  | 0.98662  | 0.477109 | 0.808121 | 5.05622 | 3.40051 | 1.03416 | 0.82529 | 1.71695 | 2.35126 |
| ENSMUSG00000006728 | 12_Cdk4   | 2351.22 | 0.18562  | 0.600047 | 0.869649 | 1527.99 | 2907.43 | 3071.46 | 2286.89 | 2045.75 | 2267.79 |
| ENSMUSG00000006731 | 9_B4galt  | 422.579 | 0.74456  | 0.232642 | 0.624408 | 118.316 | 778.716 | 690.82  | 380.46  | 230.93  | 336.23  |
| ENSMUSG00000006732 | 14_Mett11 | 330.873 | 0.11648  | 0.713601 | 0.911072 | 250.789 | 426.197 | 355.752 | 315.262 | 302.184 | 335.054 |
| ENSMUSG00000006736 | 8_Tspan3  | 1279.13 | 0.07468  | 0.782288 | 0.935592 | 1048.66 | 1508.69 | 1379.57 | 1204.1  | 1313.47 | 1220.3  |
| ENSMUSG00000006740 | 13_Kif5b  | 9815.09 | 0.43104  | 0.262043 | 0.651254 | 17038.5 | 8777.85 | 7995.1  | 7179.22 | 9222.62 | 8677.31 |
| ENSMUSG00000006763 | 12_Saal1  | 403.572 | -0.00462 | 0.985556 | 0.995304 | 350.902 | 430.731 | 427.109 | 390.363 | 402.626 | 419.699 |
| ENSMUSG00000006764 | 8_Tph2    | 3.28552 | 0.15523  | 0.912011 | 0.975378 | 6.06747 | 3.40051 | 1.03416 | 5.77705 | 3.43391 | 0       |
| ENSMUSG00000006777 | 7_Krt23   | 452.507 | 0.4236   | 0.214847 | 0.605891 | 356.969 | 616.626 | 582.233 | 458.037 | 361.419 | 339.756 |
| ENSMUSG00000006782 | 16_Cnp    | 411.368 | 0.24808  | 0.507387 | 0.826249 | 274.047 | 576.953 | 489.158 | 429.152 | 326.221 | 372.674 |
| ENSMUSG00000006784 | 14_Ttc25  | 11.9102 | -0.47172 | 0.50799  | 0.826498 | 8.08995 | 15.869  | 6.20497 | 18.1564 | 13.7356 | 9.40502 |
| ENSMUSG00000006800 | 13_Sulf2  | 342.409 | 0.38329  | 0.254199 | 0.645159 | 263.935 | 452.268 | 446.758 | 319.388 | 265.269 | 306.839 |
| ENSMUSG00000006818 | 4_Sod2    | 2087.52 | 0.24273  | 0.379258 | 0.74731  | 2779.91 | 2144.59 | 1863.56 | 1818.12 | 1996.82 | 1922.15 |
| ENSMUSG00000006850 | 7_Tmco6   | 168.954 | 0.16295  | 0.750423 | 0.925182 | 68.7646 | 216.499 | 250.267 | 185.691 | 127.913 | 164.588 |
| ENSMUSG00000006906 | 10_Stamb  | 974.445 | 0.41742  | 0.19981  | 0.591685 | 1484.51 | 945.341 | 913.165 | 705.625 | 915.136 | 882.896 |
| ENSMUSG00000006920 | 14_Ezh1   | 1802.9  | 0.26188  | 0.286181 | 0.672241 | 1670.58 | 2089.05 | 2138.65 | 1595.29 | 1647.42 | 1676.45 |
| ENSMUSG00000006930 | 15_Hap1   | 314.679 | 1.55618  | 0.001081 | 0.02075  | 212.361 | 618.893 | 578.096 | 205.498 | 145.083 | 128.143 |
| ENSMUSG00000006931 | 15_P3h4   | 545.123 | -0.3097  | 0.44395  | 0.788487 | 260.901 | 580.353 | 619.463 | 690.77  | 540.84  | 578.409 |
| ENSMUSG00000006932 | 16_Ctnnb  | 23103.2 | 0.08776  | 0.681276 | 0.902515 | 25180   | 23372.8 | 22864.3 | 22508.2 | 22456.9 | 22237   |
| ENSMUSG00000006941 | 4_Eif1b   | 429.287 | -0.35201 | 0.216152 | 0.607397 | 448.992 | 344.585 | 338.171 | 520.759 | 508.218 | 414.997 |
| ENSMUSG00000006948 | 7_Klk4    | 0.54638 | 2.65324  | 0.465678 | NA       | 1.01124 | 2.26701 | 0       | 0       | 0       | 0       |
| ENSMUSG00000006958 | 13_Chrd   | 66.9537 | -0.75661 | 0.137104 | 0.502349 | 29.3261 | 36.2721 | 83.7671 | 102.336 | 71.2536 | 78.7671 |
| ENSMUSG00000006998 | 15_Psmd   | 5762.19 | 0.28056  | 0.366978 | 0.739587 | 4498.01 | 7910.72 | 6553.48 | 4956.71 | 5086.48 | 5567.77 |
| ENSMUSG00000007021 | 4_Syng3   | 7.06096 | -1.2616  | 0.24626  | 0.637806 | 7.07871 | 3.40051 | 2.06832 | 21.4576 | 6.00934 | 2.35126 |
| ENSMUSG00000007029 | 16_Vars   | 904.275 | 0.88671  | 0.150627 | 0.524129 | 258.879 | 1704.79 | 1557.45 | 595.861 | 524.529 | 784.144 |
| ENSMUSG00000007030 | 8_Vwa7    | 167.469 | 0.22467  | 0.659567 | 0.894942 | 75.8433 | 177.96  | 287.497 | 151.029 | 127.913 | 184.574 |
| ENSMUSG00000007033 | 4_Hspa11  | 43.7267 | 0.19958  | 0.693679 | 0.905638 | 32.3598 | 73.6777 | 34.1273 | 33.0117 | 38.6315 | 50.552  |

|                    |           |         |          |          |          |         |         |         |         |         |         |
|--------------------|-----------|---------|----------|----------|----------|---------|---------|---------|---------|---------|---------|
| ENSMUSG00000007034 | 15_Slc44e | 612.559 | 0.76591  | 0.104429 | 0.439432 | 320.564 | 1073.43 | 920.404 | 401.917 | 487.615 | 471.427 |
| ENSMUSG00000007035 | 15_Msh5   | 95.75   | 0.36438  | 0.327869 | 0.709013 | 73.8208 | 124.685 | 125.134 | 86.6557 | 90.1401 | 74.0646 |
| ENSMUSG00000007036 | 15_Abhd1  | 784.077 | 0.12596  | 0.830831 | 0.951387 | 213.373 | 1116.5  | 1125.17 | 977.971 | 596.642 | 674.81  |
| ENSMUSG00000007038 | 5_Neu1    | 351.77  | -0.30176 | 0.482764 | 0.811533 | 164.833 | 377.456 | 403.323 | 489.398 | 328.797 | 346.81  |
| ENSMUSG00000007039 | 12_Ddah2  | 247.6   | -0.82505 | 0.108063 | 0.446839 | 77.8658 | 179.093 | 279.224 | 436.58  | 250.675 | 262.165 |
| ENSMUSG00000007041 | 9_Clic1   | 7588.89 | 0.39698  | 0.394572 | 0.755773 | 3552.5  | 11863.2 | 10463.6 | 6578.41 | 5972.42 | 7103.14 |
| ENSMUSG00000007050 | 17_Lsm2   | 225.623 | 0.36109  | 0.221249 | 0.612045 | 231.575 | 306.046 | 223.379 | 189.817 | 185.431 | 217.491 |
| ENSMUSG00000007080 | 14_Pole   | 463.487 | 1.2206   | 0.002045 | 0.032982 | 425.734 | 833.125 | 686.683 | 190.643 | 307.335 | 337.405 |
| ENSMUSG00000007097 | 14_Atp1a1 | 3230.08 | -1.33844 | 0.000346 | 0.008789 | 1754.51 | 1228.72 | 2508.88 | 5789.43 | 4372.22 | 3726.74 |
| ENSMUSG00000007107 | 6_Atp1a4  | 11.9611 | -2.11395 | 0.007818 | 0.084611 | 6.06747 | 1.1335  | 6.20497 | 23.1082 | 22.3204 | 12.9319 |
| ENSMUSG00000007122 | 11_Casq1  | 359.444 | -0.96642 | 0.113345 | 0.456885 | 424.723 | 72.5442 | 232.686 | 694.896 | 326.221 | 405.592 |
| ENSMUSG00000007207 | 10_Stx1a  | 46.2109 | 0.04352  | 0.961065 | 0.990106 | 2.02249 | 73.6777 | 65.1522 | 54.4693 | 45.4993 | 36.4445 |
| ENSMUSG00000007216 | 6_Zfp775  | 66.2021 | -0.2175  | 0.67425  | 0.900436 | 26.2924 | 74.8112 | 82.7329 | 88.3063 | 59.2349 | 65.8352 |
| ENSMUSG00000007279 | 14_Scube  | 12.2736 | -1.29729 | 0.070505 | 0.354584 | 0.44498 | 6.80102 | 10.3416 | 14.03   | 13.7356 | 24.6882 |
| ENSMUSG00000007338 | 9_Mrp149  | 909.863 | -0.20447 | 0.409605 | 0.766592 | 727.085 | 940.807 | 868.696 | 963.941 | 964.07  | 994.581 |
| ENSMUSG00000007379 | 15_Dennd  | 2793.86 | 0.6568   | 0.03363  | 0.226782 | 4205.77 | 3197.61 | 2853.25 | 1705.05 | 2293.85 | 2507.61 |
| ENSMUSG00000007411 | 15_Mark3  | 1939.7  | 0.35743  | 0.117623 | 0.466589 | 2339.01 | 2176.33 | 2020.75 | 1602.72 | 1741.65 | 1757.56 |
| ENSMUSG00000007415 | 15_Gatad  | 1481.23 | 0.04577  | 0.895199 | 0.971421 | 2147.88 | 1213.98 | 1152.06 | 1350.18 | 1503.19 | 1520.09 |
| ENSMUSG00000007440 | 10_Pcdha  | 3.80282 | -5.27796 | 0.002383 | 0.036818 | 0       | 0       | 0       | 2.47588 | 8.58477 | 11.7563 |
| ENSMUSG00000007457 | 3_231000  | 0.14308 | -0.79206 | 0.84609  | NA       | 0       | 0       | 0       | 0       | 0.85848 | 0       |
| ENSMUSG00000007458 | 14_M6pr   | 4917.41 | 0.34066  | 0.23625  | 0.628499 | 6889.61 | 5109.83 | 4486.19 | 3912.71 | 4525.89 | 4580.25 |
| ENSMUSG00000007476 | 18_Lrrc8a | 429.685 | 0.16568  | 0.704601 | 0.908152 | 221.463 | 589.422 | 552.242 | 464.64  | 336.523 | 413.821 |
| ENSMUSG00000007480 | 3_Mc5r    | 0.59607 | -1.18871 | 0.690318 | NA       | 0       | 0       | 1.03416 | 0.82529 | 1.71695 | 0       |
| ENSMUSG00000007564 | 14_Ppp2r  | 4478.45 | 0.10947  | 0.816802 | 0.947571 | 1857.66 | 6124.32 | 5962.98 | 4448.33 | 3907.79 | 4569.67 |
| ENSMUSG00000007570 | 15_Fance  | 215.646 | 0.15346  | 0.815641 | 0.947273 | 44.4948 | 304.912 | 331.966 | 253.365 | 141.649 | 217.491 |
| ENSMUSG00000007589 | 8_Tinf2   | 316.625 | 0.42358  | 0.112982 | 0.455953 | 321.576 | 419.396 | 347.478 | 262.443 | 277.288 | 271.57  |
| ENSMUSG00000007591 | 14_Tssk4  | 12.3763 | -0.02926 | 0.967896 | 0.991244 | 7.07871 | 10.2015 | 19.6491 | 15.6806 | 14.5941 | 7.05377 |
| ENSMUSG00000007594 | 9_Hapln1  | 4.40611 | 0.45444  | 0.687502 | 0.904573 | 1.01124 | 10.2015 | 4.13665 | 4.12646 | 3.43391 | 3.52688 |
| ENSMUSG00000007603 | 8_Dus3l   | 227.621 | -0.06881 | 0.903947 | 0.97394  | 69.7759 | 260.706 | 336.103 | 277.298 | 159.677 | 262.165 |
| ENSMUSG00000007610 | 15_Gtpbp  | 172.469 | 0.04124  | 0.93632  | 0.98432  | 62.6971 | 235.769 | 226.481 | 182.39  | 160.535 | 166.939 |
| ENSMUSG00000007613 | 15_Tgfb1  | 5856.42 | 0.50154  | 0.261276 | 0.650488 | 11540.3 | 4451.27 | 4600.98 | 4142.14 | 5338.01 | 5065.78 |
| ENSMUSG00000007617 | 17_Home1  | 339.065 | 0.46422  | 0.331937 | 0.711299 | 680.567 | 260.706 | 237.857 | 246.762 | 278.147 | 330.351 |
| ENSMUSG00000007646 | 13_Rad51  | 88.1593 | 0.33115  | 0.327067 | 0.708327 | 119.327 | 90.6802 | 84.8012 | 80.8787 | 81.5553 | 71.7133 |
| ENSMUSG00000007653 | 12_Gabrb  | 51.5486 | -0.76654 | 0.142915 | 0.511661 | 64.7196 | 24.9371 | 24.8199 | 70.9751 | 72.1121 | 51.7276 |
| ENSMUSG00000007655 | 16_Cav1   | 2449.02 | 0.10884  | 0.778658 | 0.934571 | 3905.43 | 1789.8  | 1928.71 | 2295.96 | 2507.61 | 2266.61 |
| ENSMUSG00000007656 | 13_Arpp1  | 2555.92 | 0.29299  | 0.462184 | 0.799907 | 4375.65 | 2093.58 | 1974.21 | 2010.41 | 2481    | 2400.63 |
| ENSMUSG00000007659 | 18_Bcl2l1 | 1715.54 | 0.33546  | 0.421124 | 0.77414  | 966.75  | 2524.31 | 2251.37 | 1666.27 | 1318.62 | 1565.94 |
| ENSMUSG00000007670 | 9_Khsrp   | 1331.06 | 0.41523  | 0.270781 | 0.657638 | 894.951 | 1919.02 | 1749.8  | 1126.52 | 986.39  | 1309.65 |
| ENSMUSG00000007682 | 5_Dio2    | 335.42  | 1.63667  | 0.000566 | 0.012774 | 634.05  | 667.633 | 221.311 | 146.077 | 200.025 | 143.427 |
| ENSMUSG00000007721 | 5_Ccdc12  | 242.824 | 0.25888  | 0.761399 | 0.928449 | 15.1687 | 363.854 | 414.699 | 304.533 | 136.498 | 222.194 |
| ENSMUSG00000007739 | 10_Cct4   | 4612.94 | 0.44132  | 0.287303 | 0.672979 | 8345.8  | 4063.61 | 3529.59 | 3228.54 | 4611.74 | 3898.38 |
| ENSMUSG00000007777 | 9_O61000  | 499.278 | 0.02094  | 0.957175 | 0.98909  | 761.467 | 405.794 | 341.273 | 458.037 | 527.105 | 501.993 |
| ENSMUSG00000007783 | 9_Cpt1c   | 107.034 | -1.1185  | 0.038365 | 0.245902 | 29.3261 | 65.7432 | 107.553 | 204.673 | 105.593 | 129.319 |
| ENSMUSG00000007805 | 4_Twist2  | 50.2662 | -0.24687 | 0.511488 | 0.827179 | 49.551  | 38.5391 | 49.6398 | 55.2946 | 49.7917 | 58.7814 |
| ENSMUSG00000007812 | 16_Zfp651 | 1113.45 | 0.29041  | 0.54778  | 0.843822 | 2173.16 | 761.714 | 740.46  | 926.803 | 1148.64 | 929.922 |
| ENSMUSG00000007815 | 13_Rhoa   | 10432.2 | 0.24409  | 0.421704 | 0.77436  | 14418.3 | 10117.6 | 9401.56 | 8004.51 | 10131.7 | 10519.5 |
| ENSMUSG00000007817 | 14_Zmiz1  | 1141.32 | 0.23829  | 0.445007 | 0.788998 | 891.917 | 1362.47 | 1451.96 | 1187.6  | 951.192 | 1002.81 |
| ENSMUSG00000007827 | 10_Ankrd1 | 355.961 | -0.03947 | 0.913048 | 0.975712 | 496.521 | 249.371 | 307.146 | 326.816 | 391.466 | 364.445 |
| ENSMUSG00000007833 | 13_Aldh1f | 288.684 | 0.4116   | 0.550338 | 0.84423  | 57.6409 | 489.673 | 441.587 | 350.749 | 159.677 | 232.774 |
| ENSMUSG00000007836 | 6_Hnmpa1  | 1689.4  | 0.54104  | 0.200391 | 0.592148 | 3245.08 | 1404.41 | 1357.85 | 1221.43 | 1475.72 | 1431.91 |
| ENSMUSG00000007837 | 10_Prrg2  | 176.026 | 0.54317  | 0.388134 | 0.752363 | 49.551  | 268.64  | 308.18  | 179.088 | 97.8664 | 152.832 |
| ENSMUSG00000007850 | 16_Hnmp1  | 7292.6  | 0.2579   | 0.487117 | 0.814019 | 11689   | 6241.07 | 5897.82 | 5637.57 | 7464.46 | 6825.7  |
| ENSMUSG00000007867 | 8_Ift43   | 177.154 | -0.30212 | 0.426028 | 0.777537 | 97.0795 | 196.096 | 183.047 | 217.052 | 176.846 | 192.803 |
| ENSMUSG00000007872 | 3_Id3     | 839.759 | -0.68527 | 0.128862 | 0.609939 | 228.541 | 748.112 | 955.565 | 1549.9  | 795.808 | 760.631 |
| ENSMUSG00000007877 | 2_Tcap    | 192.172 | -0.91187 | 0.175175 | 0.558565 | 80.8995 | 79.3452 | 239.925 | 453.911 | 84.9892 | 213.964 |
| ENSMUSG00000007880 | 16_Arid1a | 2749.08 | 0.43041  | 0.167912 | 0.548893 | 2179.23 | 3545.6  | 3743.66 | 2320.72 | 2318.75 | 2386.52 |
| ENSMUSG00000007888 | 15_Crlf1  | 356.777 | 0.67436  | 0.264939 | 0.653546 | 104.158 | 540.681 | 671.171 | 287.202 | 231.789 | 305.663 |
| ENSMUSG00000007891 | 15_Ctsd   | 15630.8 | -0.14418 | 0.760223 | 0.928156 | 6076.57 | 19218.5 | 19256.1 | 18711.9 | 13712.5 | 16809.1 |
| ENSMUSG00000007892 | 7_Rplp1   | 6006.71 | 0.21385  | 0.735031 | 0.920451 | 1518.89 | 8253.03 | 9581.51 | 8102.72 | 3517.18 | 5066.96 |
| ENSMUSG00000007907 | 4_Cabs1   | 0       | NA       | NA       | NA       | 0       | 0       | 0       | 0       | 0       | 0       |
| ENSMUSG00000007908 | 14_Hmgcl  | 62.9373 | 0.65883  | 0.171323 | 0.553868 | 119.327 | 62.3427 | 49.6398 | 45.3911 | 60.9519 | 39.9713 |
| ENSMUSG00000007944 | 8_Ttc9b   | 2.26092 | -1.73489 | 0.243373 | 0.634745 | 1.01124 | 1.1335  | 1.03416 | 5.77705 | 3.43391 | 1.17563 |
| ENSMUSG00000007946 | 10_Phox2  | 0.17236 | 1.1315   | 0.781553 | NA       | 0       | 0       | 1.03416 | 0       | 0       | 0       |
| ENSMUSG00000007950 | 8_Abhd8   | 189.025 | -0.48936 | 0.51085  | 0.827179 | 23.2586 | 187.028 | 261.643 | 345.797 | 123.621 | 192.803 |
| ENSMUSG00000007987 | 12_Ift22  | 459.3   | -0.04666 | 0.89625  | 0.97156  | 278.092 | 556.55  | 521.217 | 486.097 | 463.578 | 450.265 |
| ENSMUSG00000007989 | 6_Fzd3    | 59.7099 | -0.7024  | 0.205184 | 0.596792 | 73.8208 | 30.6046 | 32.059  | 76.7522 | 103.876 | 41.147  |
| ENSMUSG00000008028 | 15_17000  | 2.54    | 0.32535  | 0.851337 | 0.957649 | 0       | 3.40051 | 5.17081 | 4.95175 | 1.71695 | 0       |
| ENSMUSG00000008035 | 12_Mid1p  | 1912.62 | 0.24334  | 0.539747 | 0.840425 | 1114.39 | 2544.71 | 2561.62 | 1927.06 | 1540.97 | 1786.95 |
| ENSMUSG00000008036 | 11_Ap2s1  | 922.081 | 0.27369  | 0.517218 | 0.830976 | 502.588 | 1285.39 | 1239.96 | 922.677 | 714.253 | 867.613 |
| ENSMUSG00000008090 | 14_Fgfr11 | 193.535 | -0.75483 | 0.041238 | 0.256911 | 106.181 | 147.355 | 178.91  | 311.135 | 228.355 | 189.276 |
| ENSMUSG00000008129 | 14_49304  | 12.8894 | -0.35602 | 0.61844  | 0.87757  | 5.05622 | 12.4685 | 16.5466 | 19.807  | 12.8772 | 10.5807 |
| ENSMUSG00000008136 | 14_Fhl2   | 102.26  | 0.15819  | 0.666696 | 0.897452 | 88.9895 | 122.418 | 112.724 | 122.969 | 93.574  | 72.8889 |
| ENSMUSG00000008140 | 17_Emc1f  | 827.7   | 0.1169   | 0.398993 | 0.95317  | 245.732 | 1094.96 | 1243.06 | 1037.39 | 559.727 | 785.319 |
| ENSMUSG00000008153 | 11_Cln3n  | 83.9799 | -2.10068 | 0.001382 | 0.024804 | 7.07871 | 40.8061 | 47.5714 | 201.371 | 114.177 | 92.8746 |
| ENSMUSG00000008167 | 14_Fbxw5  | 252.767 | 0.11837  | 0.843054 | 0.953854 | 66.7421 | 353.653 | 369.196 | 304.533 | 212.044 | 210.437 |

|                    |            |         |          |          |          |         |         |         |         |         |         |
|--------------------|------------|---------|----------|----------|----------|---------|---------|---------|---------|---------|---------|
| ENSMUSG00000008193 | 13_Spib    | 6.48309 | 2.42591  | 0.067685 | 0.345256 | 1.01124 | 22.6701 | 9.30745 | 2.47588 | 3.43391 | 0       |
| ENSMUSG00000008200 | 14_Fnbp4   | 2042.49 | 0.49574  | 0.083522 | 0.390431 | 2923.51 | 2242.07 | 2004.21 | 1464.89 | 1869.76 | 1750.51 |
| ENSMUSG00000008206 | 15_Cers4   | 729.781 | -1.10277 | 0.002609 | 0.039484 | 630.005 | 329.849 | 431.245 | 1133.13 | 1099.71 | 754.753 |
| ENSMUSG00000008226 | 14_Scrn3   | 630.618 | -0.14433 | 0.708636 | 0.909864 | 907.086 | 419.396 | 470.544 | 604.114 | 693.649 | 688.918 |
| ENSMUSG00000008301 | 11_Phax    | 697.057 | 0.00792  | 0.976361 | 0.993796 | 832.254 | 620.026 | 644.283 | 646.204 | 704.81  | 734.767 |
| ENSMUSG00000008305 | 18_Tle1    | 235.792 | -0.37099 | 0.174002 | 0.557641 | 224.496 | 183.627 | 208.901 | 290.503 | 262.694 | 244.531 |
| ENSMUSG00000008307 | 11_17001   | 46.6261 | -0.06488 | 0.875809 | 0.964726 | 59.6634 | 41.9396 | 35.1615 | 52.8187 | 45.4993 | 44.6739 |
| ENSMUSG00000008318 | 9_Relt     | 13.6456 | -0.08002 | 0.926507 | 0.980037 | 3.03373 | 20.4031 | 16.5466 | 24.7588 | 7.72629 | 9.40502 |
| ENSMUSG00000008333 | 12_Snrpb:  | 1035.05 | 0.28411  | 0.557691 | 0.848179 | 2002.26 | 743.578 | 663.932 | 779.901 | 1095.42 | 925.219 |
| ENSMUSG00000008348 | 9_Ubc      | 13716.7 | 0.70598  | 0.277578 | 0.664438 | 3103.51 | 26172.6 | 21746.3 | 11196.7 | 8075.69 | 12005.5 |
| ENSMUSG00000008373 | 16_Prpf31  | 741.386 | 0.15636  | 0.658668 | 0.894702 | 491.465 | 1014.49 | 838.705 | 691.595 | 667.895 | 744.172 |
| ENSMUSG00000008384 | 8_Sertad1  | 487.323 | 0.56849  | 0.31466  | 0.696039 | 170.9   | 820.656 | 754.938 | 491.874 | 308.193 | 377.377 |
| ENSMUSG00000008393 | 8_Carhsp   | 1580.92 | 0.31937  | 0.307535 | 0.690412 | 1272.15 | 2238.67 | 1754.97 | 1483.05 | 1308.32 | 1428.39 |
| ENSMUSG00000008398 | 14_Elk3    | 1052.98 | 0.38741  | 0.109708 | 0.450058 | 1119.45 | 1343.2  | 1117.93 | 939.183 | 857.619 | 940.502 |
| ENSMUSG00000008429 | 7_Herpud:  | 910.178 | 0.33409  | 0.232881 | 0.624695 | 1260.01 | 897.734 | 887.311 | 755.968 | 833.581 | 826.466 |
| ENSMUSG00000008435 | 15_Rdh13   | 727.339 | -0.00922 | 0.969562 | 0.991889 | 638.095 | 770.782 | 766.314 | 736.986 | 728.847 | 723.011 |
| ENSMUSG00000008438 | 3_Adam2'   | 5.5577  | 0.1859   | 0.843986 | 0.954374 | 10.1124 | 4.53401 | 3.10248 | 6.60234 | 4.29238 | 4.70251 |
| ENSMUSG00000008450 | 7_Nuttf2   | 305.805 | -0.18968 | 0.542393 | 0.84107  | 357.98  | 276.575 | 222.345 | 310.31  | 309.052 | 358.566 |
| ENSMUSG00000008461 | 5_Fut1     | 9.47287 | -0.90194 | 0.268254 | 0.656133 | 5.05622 | 3.40051 | 11.3758 | 18.1564 | 9.44325 | 9.40502 |
| ENSMUSG00000008475 | 13_Arpc5   | 5338.4  | 0.48443  | 0.213178 | 0.60433  | 9467.27 | 4877.46 | 4334.17 | 3892.9  | 5077.03 | 4381.56 |
| ENSMUSG00000008482 | 8_Rnf151   | 2.60901 | 0.58646  | 0.650153 | 0.891567 | 2.02249 | 2.26701 | 5.17081 | 3.30117 | 1.71695 | 1.17563 |
| ENSMUSG00000008489 | 18_Elavl2  | 15.2438 | 0.02792  | 0.968184 | 0.991244 | 22.2474 | 15.869  | 8.27329 | 23.1082 | 13.7356 | 8.22939 |
| ENSMUSG00000008496 | 18_Pou2f:  | 38.8584 | 1.07771  | 0.039983 | 0.251536 | 37.416  | 83.8792 | 37.2298 | 28.8852 | 25.7543 | 19.9857 |
| ENSMUSG00000008540 | 11_Mgst1   | 1451.11 | -0.8299  | 0.035389 | 0.234907 | 1542.15 | 694.837 | 897.652 | 2115.22 | 2013.13 | 1443.67 |
| ENSMUSG00000008575 | 17_Nfib    | 2395.83 | 0.03224  | 0.943492 | 0.986388 | 4091.49 | 1336.4  | 1839.77 | 2366.94 | 2519.63 | 2220.76 |
| ENSMUSG00000008590 | 4_Htr3b    | 0.13755 | -0.79206 | 0.84609  | NA       | 0       | 0       | 0       | 0.82529 | 0       | 0       |
| ENSMUSG00000008601 | 12_Rab25   | 3780.48 | 0.35864  | 0.486682 | 0.81371  | 1432.93 | 5668.65 | 5642.39 | 3533.9  | 2892.21 | 3512.78 |
| ENSMUSG00000008604 | 11_Ubqln:  | 1148.51 | 0.15699  | 0.626907 | 0.880676 | 824.164 | 1425.95 | 1382.67 | 1016.76 | 1067.09 | 1174.45 |
| ENSMUSG00000008658 | 15_Rbfox:  | 120.469 | 0.63521  | 0.220602 | 0.611594 | 260.901 | 81.6122 | 97.2112 | 108.939 | 91.857  | 82.2939 |
| ENSMUSG00000008668 | 14_Rps18   | 2603.78 | -0.07375 | 0.906021 | 0.974391 | 553.151 | 3486.65 | 3571.99 | 3276.41 | 1870.62 | 2863.83 |
| ENSMUSG00000008682 | 13_Rpl10   | 8313.85 | 0.10899  | 0.710175 | 0.910052 | 10989.2 | 7654.55 | 7239.13 | 7150.33 | 8099.73 | 8750.2  |
| ENSMUSG00000008683 | 16_Rps15   | 11119   | -0.3602  | 0.149753 | 0.523169 | 8145.57 | 10691.2 | 10377.8 | 11921.3 | 13263.5 | 12314.7 |
| ENSMUSG00000008690 | 15_Ncaph   | 3178.97 | 0.10012  | 0.840849 | 0.953262 | 1203.38 | 4297.11 | 4367.26 | 3277.24 | 2599.47 | 3329.38 |
| ENSMUSG00000008730 | 17_Hipk1   | 5963.51 | 0.33368  | 0.239099 | 0.630782 | 8423.67 | 5825.07 | 5701.33 | 4948.45 | 5489.96 | 5392.6  |
| ENSMUSG00000008734 | 8_Gprc5b   | 638.388 | -0.62139 | 0.064735 | 0.337006 | 401.464 | 497.608 | 610.155 | 1003.56 | 630.981 | 686.567 |
| ENSMUSG00000008763 | 16_Man1a   | 2431.7  | 0.32523  | 0.401636 | 0.760434 | 4139.02 | 2022.17 | 1952.5  | 1925.41 | 2325.61 | 2225.46 |
| ENSMUSG00000008813 | 12_Tppp2   | 0.14308 | -0.79206 | 0.84609  | NA       | 0       | 0       | 0       | 0       | 0.85848 | 0       |
| ENSMUSG00000008822 | 15_Acyp1   | 138.889 | -0.51154 | 0.13354  | 0.497275 | 88.9895 | 107.683 | 146.851 | 176.613 | 145.083 | 168.115 |
| ENSMUSG00000008845 | 9_Cd163    | 181.019 | -0.19467 | 0.666655 | 0.897452 | 248.766 | 81.6122 | 175.807 | 194.769 | 179.422 | 205.735 |
| ENSMUSG00000008855 | 17_Hdac5   | 528.964 | 0.00355  | 0.995429 | 0.998321 | 131.462 | 630.228 | 827.329 | 751.841 | 380.305 | 452.617 |
| ENSMUSG00000008859 | 7_Rala     | 2567.55 | 0.40231  | 0.322735 | 0.703332 | 4561.72 | 2168.39 | 2039.37 | 1827.2  | 2474.99 | 2333.62 |
| ENSMUSG00000008874 | 3_Clec3a   | 17.8567 | -1.63738 | 0.06599  | 0.340728 | 3.03373 | 2.26701 | 20.6832 | 36.3129 | 15.4526 | 29.3907 |
| ENSMUSG00000008892 | 11_Vdac3   | 2684.48 | 0.16908  | 0.698082 | 0.905638 | 4697.23 | 1947.36 | 1880.11 | 2254.7  | 2871.61 | 2455.89 |
| ENSMUSG00000008932 | 9_Slc1a7   | 27.7649 | -2.21577 | 0.002894 | 0.042305 | 14.1574 | 11.335  | 4.13665 | 77.5775 | 42.9238 | 16.4588 |
| ENSMUSG00000008958 | 14_Vps72   | 498.325 | 0.19616  | 0.649756 | 0.891567 | 262.924 | 678.968 | 654.624 | 514.982 | 381.164 | 497.291 |
| ENSMUSG00000008976 | 16_Gabpa   | 1721.35 | 0.34709  | 0.385879 | 0.751221 | 3010.47 | 1428.21 | 1343.38 | 1360.91 | 1637.97 | 1547.13 |
| ENSMUSG00000008999 | 7_Bmp7     | 1136.34 | -0.18577 | 0.647418 | 0.890232 | 636.073 | 1079.09 | 1474.71 | 1476.45 | 899.684 | 1252.04 |
| ENSMUSG00000009013 | 5_Dynl1    | 6687.91 | 0.53287  | 0.103289 | 0.436784 | 10729.3 | 7112.73 | 5885.41 | 5012.83 | 5956.97 | 5430.22 |
| ENSMUSG00000009030 | 14_Pdcl    | 1146.95 | 0.07044  | 0.857598 | 0.959059 | 1821.25 | 839.926 | 863.525 | 1105.07 | 1159.8  | 1092.16 |
| ENSMUSG00000009035 | 13_Tmem    | 1074.81 | 0.61793  | 0.188121 | 0.575956 | 561.241 | 1687.79 | 1655.69 | 1014.28 | 670.471 | 859.384 |
| ENSMUSG00000009070 | 14_Rsph1   | 0       | NA       | NA       | NA       | 0       | 0       | 0       | 0       | 0       | 0       |
| ENSMUSG00000009073 | 16_Nf2     | 2662.71 | -0.03784 | 0.895855 | 0.97156  | 1959.79 | 2914.24 | 3009.41 | 2791.96 | 2520.49 | 2780.36 |
| ENSMUSG00000009075 | 2_Cabp7    | 2.14136 | 1.441    | 0.346771 | 0.724201 | 4.04498 | 3.40051 | 2.06832 | 2.47588 | 0.85848 | 0       |
| ENSMUSG00000009076 | 10_Zmat5   | 190.417 | -0.01546 | 0.983773 | 0.994713 | 20.2249 | 270.907 | 277.155 | 253.365 | 133.922 | 186.925 |
| ENSMUSG00000009079 | 16_Ewsr1   | 5144.42 | 0.18717  | 0.487661 | 0.814019 | 4303.86 | 6141.32 | 5987.8  | 4598.53 | 4786.87 | 5048.15 |
| ENSMUSG00000009090 | 17_Ap1b1   | 2470.08 | 0.47189  | 0.342562 | 0.720325 | 1065.85 | 4028.47 | 3517.18 | 2220.04 | 1747    | 2241.92 |
| ENSMUSG00000009092 | 4_Derl3    | 8.47986 | -0.57037 | 0.589879 | 0.864564 | 0       | 10.2015 | 10.3416 | 13.2047 | 7.72629 | 9.40502 |
| ENSMUSG00000009093 | 7_Gstt4    | 0.7043  | 1.73793  | 0.616215 | NA       | 0       | 3.40051 | 0       | 0.82529 | 0       | 0       |
| ENSMUSG00000009097 | 9_Tbx1     | 21.9131 | -0.97632 | 0.073838 | 0.363567 | 10.1124 | 12.4685 | 21.7174 | 28.0599 | 30.9052 | 28.2151 |
| ENSMUSG00000009108 | 15_Gnat2   | 47.1556 | -1.63149 | 0.005331 | 0.064787 | 35.3936 | 19.2695 | 14.4783 | 99.8604 | 79.8384 | 34.0932 |
| ENSMUSG00000009112 | 4_Bcl2l13  | 8316.14 | 0.30362  | 0.238291 | 0.630377 | 8228.5  | 9678.98 | 9655.97 | 6480.2  | 7201.76 | 8651.45 |
| ENSMUSG00000009114 | 17_26100   | 0.30991 | 0.16972  | 0.966824 | NA       | 0       | 0       | 1.03416 | 0.82529 | 0       | 0       |
| ENSMUSG00000009115 | 5_Spatc1l  | 5.42964 | 1.60009  | 0.147154 | 0.519094 | 2.02249 | 10.2015 | 12.4099 | 2.47588 | 4.29238 | 1.17563 |
| ENSMUSG00000009145 | 6_Dqx1     | 155.458 | -0.05406 | 0.90566  | 0.974391 | 76.8546 | 154.156 | 226.481 | 144.426 | 145.083 | 185.749 |
| ENSMUSG00000009185 | 2_Ccl8     | 143.976 | 2.94691  | 6.71E-14 | 2.53E-11 | 227.53  | 340.051 | 197.525 | 31.3611 | 40.3484 | 27.0394 |
| ENSMUSG00000009207 | 15_Lnp     | 547.642 | 0.53134  | 0.2746   | 0.660991 | 1148.77 | 425.064 | 368.162 | 417.598 | 493.624 | 432.631 |
| ENSMUSG00000009210 | 10_Prr29   | 0.60709 | -1.17361 | 0.692296 | NA       | 0       | 1.1335  | 0       | 1.65058 | 0.85848 | 0       |
| ENSMUSG00000009214 | 9_Tmem8    | 2.62267 | -1.97924 | 0.178358 | 0.563632 | 2.02249 | 1.1335  | 0       | 4.12646 | 2.57543 | 5.87814 |
| ENSMUSG00000009216 | 7_Fam16c   | 2.56551 | -2.71338 | 0.188653 | 0.576566 | 2.02249 | 0       | 0       | 9.07822 | 4.29238 | 0       |
| ENSMUSG00000009246 | 14_Trpm5   | 8.61133 | -1.17802 | 0.156189 | 0.533493 | 2.02249 | 4.53401 | 9.30745 | 13.2047 | 12.0187 | 10.5807 |
| ENSMUSG00000009248 | 5_Asc12    | 26.7716 | 0.06294  | 0.90977  | 0.974731 | 19.2136 | 34.0051 | 28.9565 | 37.1382 | 15.4526 | 25.8638 |
| ENSMUSG00000009281 | 6_Rarres2  | 852.117 | -0.11789 | 0.723067 | 0.914338 | 588.544 | 960.077 | 903.857 | 1080.31 | 840.449 | 739.47  |
| ENSMUSG00000009291 | 12_Pttg1ij | 1433.53 | -0.24654 | 0.32342  | 0.703628 | 1343.94 | 1237.79 | 1352.68 | 1774.38 | 1539.25 | 1353.15 |
| ENSMUSG00000009292 | 17_Trpm2   | 19.1401 | 1.42686  | 0.072705 | 0.360261 | 6.06747 | 49.8741 | 27.9224 | 10.7288 | 12.0187 | 8.22939 |
| ENSMUSG00000009293 | 17_Ube2g   | 1430.32 | -0.01299 | 0.974553 | 0.99352  | 750.343 | 1781.87 | 1739.46 | 1529.27 | 1204.44 | 1576.52 |

|                    |            |         |          |          |          |         |         |         |         |         |         |
|--------------------|------------|---------|----------|----------|----------|---------|---------|---------|---------|---------|---------|
| ENSMUSG00000009350 | 13_Mpo     | 0.39188 | -1.97195 | 0.623385 | NA       | 0       | 0       | 0       | 0       | 0       | 2.35126 |
| ENSMUSG00000009356 | 12_Lpo     | 7.09118 | 0.4792   | 0.652589 | 0.892459 | 1.01124 | 10.2015 | 13.4441 | 2.47588 | 6.00934 | 9.40502 |
| ENSMUSG00000009376 | 15_Met     | 7488.26 | 0.50635  | 0.151656 | 0.525674 | 12471.7 | 7459.58 | 6435.59 | 5286    | 6716.72 | 6560    |
| ENSMUSG00000009378 | 3_Slc16a1  | 2085.27 | 0.35111  | 0.315695 | 0.696716 | 3334.07 | 1727.46 | 1951.46 | 1659.66 | 1901.53 | 1937.43 |
| ENSMUSG00000009394 | 13_Syn2    | 31.5994 | -1.73862 | 0.001502 | 0.026361 | 19.2136 | 6.80102 | 17.5807 | 61.0716 | 43.7823 | 41.147  |
| ENSMUSG00000009406 | 13_Elk1    | 212.497 | -0.40871 | 0.192017 | 0.581115 | 223.485 | 149.622 | 174.773 | 251.714 | 266.128 | 209.262 |
| ENSMUSG00000009418 | 15_Nav1    | 1675    | -0.28903 | 0.20668  | 0.598033 | 1553.27 | 1405.54 | 1564.69 | 1897.35 | 1922.13 | 1707.01 |
| ENSMUSG00000009470 | 16_Tnpo1   | 5731.68 | 0.24813  | 0.543133 | 0.84123  | 9842.44 | 4483    | 4344.51 | 4636.49 | 5890.87 | 5192.75 |
| ENSMUSG00000009471 | 3_Myod1    | 2.88034 | -0.07978 | 0.95039  | 0.987526 | 4.04498 | 3.40051 | 1.03416 | 2.47588 | 5.15086 | 1.17563 |
| ENSMUSG00000009487 | 9_Otog     | 0.41818 | -2.121   | 0.592183 | NA       | 0       | 0       | 0       | 1.65058 | 0.85848 | 0       |
| ENSMUSG00000009535 | 13_Rnmt    | 670.485 | 0.13925  | 0.699061 | 0.90565  | 1010.23 | 553.149 | 545.003 | 590.084 | 723.696 | 600.746 |
| ENSMUSG00000009545 | 14_Kcnq1   | 17.3178 | -0.13308 | 0.845145 | 0.954862 | 13.1462 | 11.335  | 24.8199 | 18.9817 | 8.58477 | 27.0394 |
| ENSMUSG00000009549 | 14_Srp14   | 1543.94 | -0.24173 | 0.337737 | 0.715971 | 1662.49 | 1260.46 | 1321.66 | 1683.6  | 1708.37 | 1627.07 |
| ENSMUSG00000009551 | 2_633040   | 0.44917 | -0.60728 | 0.852512 | NA       | 1.01124 | 0       | 0       | 0.82529 | 0.85848 | 0       |
| ENSMUSG00000009555 | 16_Cdk9    | 811.912 | 0.14152  | 0.744788 | 0.923721 | 402.475 | 1165.24 | 987.624 | 839.322 | 740.866 | 735.943 |
| ENSMUSG00000009563 | 16_Tor2a   | 407.613 | 0.25104  | 0.680335 | 0.902274 | 104.158 | 595.089 | 629.804 | 448.134 | 287.59  | 380.903 |
| ENSMUSG00000009566 | 12_Fpgs    | 298.415 | 0.18308  | 0.742928 | 0.923215 | 94.0457 | 431.865 | 426.075 | 291.328 | 230.93  | 316.244 |
| ENSMUSG00000009569 | 14_Mkl2    | 1138.82 | 0.27007  | 0.271248 | 0.657711 | 1090.12 | 1317.13 | 1327.86 | 957.339 | 1044.77 | 1095.69 |
| ENSMUSG00000009575 | 14_Cbx5    | 4306.17 | 0.06467  | 0.871336 | 0.963578 | 6884.55 | 3096.73 | 3226.58 | 3863.19 | 4660.67 | 4105.29 |
| ENSMUSG00000009580 | 15_Odam    | 5.42501 | 1.49478  | 0.160382 | 0.53885  | 15.1687 | 5.66751 | 3.10248 | 1.65058 | 3.43391 | 3.52688 |
| ENSMUSG00000009585 | 17_Apob    | 509.986 | 0.76786  | 0.00231  | 0.036109 | 591.578 | 719.774 | 616.36  | 350.749 | 392.324 | 389.133 |
| ENSMUSG00000009588 | 9_St6gain  | 2741.24 | 0.28051  | 0.454349 | 0.795918 | 1920.35 | 3486.65 | 3613.36 | 1872.59 | 2476.71 | 3077.79 |
| ENSMUSG00000009596 | 9_Taf7l    | 0.19594 | -0.79206 | 0.84609  | NA       | 0       | 0       | 0       | 0       | 0       | 1.17563 |
| ENSMUSG00000009614 | 16_Sardh   | 151.09  | -1.51716 | 0.006158 | 0.071803 | 32.3598 | 68.0102 | 134.441 | 313.611 | 179.422 | 178.695 |
| ENSMUSG00000009621 | 18_Vav2    | 1115.52 | -0.10127 | 0.812355 | 0.946225 | 517.757 | 1404.41 | 1307.18 | 1256.09 | 1069.66 | 1138.01 |
| ENSMUSG00000009628 | 14_Tex15   | 80.1657 | -1.12179 | 0.04428  | 0.26797  | 93.0345 | 28.3376 | 29.9907 | 112.24  | 133.922 | 83.4696 |
| ENSMUSG00000009630 | 9_Ppp2cb   | 2400.04 | -0.00674 | 0.980196 | 0.993796 | 2924.52 | 2181.99 | 2076.6  | 2224.99 | 2557.4  | 2434.73 |
| ENSMUSG00000009633 | 3_G0s2     | 25.6081 | -1.51778 | 0.062666 | 0.330345 | 1.01124 | 18.136  | 20.6832 | 44.5658 | 25.7543 | 43.4982 |
| ENSMUSG00000009640 | 11_Dmap    | 315.638 | 0.2108   | 0.694001 | 0.905638 | 108.203 | 435.265 | 472.612 | 316.087 | 271.279 | 290.38  |
| ENSMUSG00000009646 | 13_Pla2g   | 5.85365 | -0.63412 | 0.468516 | 0.804191 | 3.03373 | 4.53401 | 6.20497 | 7.42763 | 6.86782 | 7.05377 |
| ENSMUSG00000009647 | 13_Mcu     | 1244.32 | 0.44824  | 0.092782 | 0.414922 | 1487.54 | 1450.88 | 1369.23 | 850.876 | 1098.85 | 1208.55 |
| ENSMUSG00000009654 | 4_Oit3     | 6.63413 | -0.24444 | 0.787772 | 0.936803 | 6.06747 | 9.06802 | 3.10248 | 9.90351 | 3.43391 | 8.22939 |
| ENSMUSG00000009670 | 11_Tex11   | 17.5354 | -0.70579 | 0.401375 | 0.76035  | 29.3261 | 3.40051 | 7.23913 | 30.5358 | 20.6034 | 14.1075 |
| ENSMUSG00000009681 | 9_Bcr      | 1458.24 | 0.16939  | 0.664975 | 0.89688  | 854.501 | 1934.89 | 1841.84 | 1404.65 | 1186.42 | 1527.14 |
| ENSMUSG00000009687 | 14_Fxyd5   | 323.388 | 0.92504  | 0.081696 | 0.385306 | 181.013 | 745.845 | 344.376 | 280.599 | 186.29  | 202.208 |
| ENSMUSG00000009731 | 4_Kcnd1    | 38.5513 | -1.04067 | 0.050172 | 0.290147 | 11.1237 | 30.6046 | 34.1273 | 55.2946 | 56.6595 | 43.4982 |
| ENSMUSG00000009733 | 8_Tfcp2l1  | 321.001 | -0.2338  | 0.389991 | 0.753305 | 259.89  | 279.975 | 345.41  | 358.177 | 354.551 | 328     |
| ENSMUSG00000009734 | 17_Pou6f1  | 12.4903 | -1.13252 | 0.097434 | 0.423427 | 9.1012  | 10.2015 | 4.13665 | 14.03   | 16.3111 | 21.1613 |
| ENSMUSG00000009739 | 16_Pou6f1  | 268.191 | -0.64859 | 0.057468 | 0.313849 | 154.72  | 221.033 | 251.301 | 401.917 | 303.901 | 276.273 |
| ENSMUSG00000009741 | 14_Ubp1    | 1551.71 | 0.23386  | 0.345151 | 0.722149 | 1906.2  | 1569.9  | 1555.38 | 1311.39 | 1536.67 | 1430.74 |
| ENSMUSG00000009772 | 15_Nuak2   | 1389.78 | 0.46025  | 0.208563 | 0.600076 | 984.952 | 1991.56 | 1852.18 | 1186.77 | 992.399 | 1330.81 |
| ENSMUSG00000009828 | 15_Ick     | 647.722 | 0.17387  | 0.562024 | 0.850139 | 834.277 | 508.943 | 716.674 | 615.668 | 601.792 | 608.975 |
| ENSMUSG00000009863 | 14_Sdhb    | 1894.65 | -0.18494 | 0.552919 | 0.845776 | 1261.02 | 2008.57 | 2050.74 | 2233.24 | 1812.24 | 2002.09 |
| ENSMUSG00000009876 | 13_Cox4i2  | 16.1712 | -1.23306 | 0.086764 | 0.399236 | 3.03373 | 14.7355 | 11.3758 | 31.3611 | 18.8865 | 17.6344 |
| ENSMUSG00000009894 | 15_Snap4   | 1187.26 | -0.05855 | 0.876473 | 0.965114 | 666.41  | 1355.67 | 1467.48 | 1249.49 | 1106.58 | 1277.91 |
| ENSMUSG00000009900 | 7_Wnt3a    | 277.938 | 0.70922  | 0.209811 | 0.601596 | 106.181 | 410.328 | 518.115 | 222.829 | 156.243 | 253.936 |
| ENSMUSG00000009905 | 5_Kdsr     | 1092.28 | -0.02162 | 0.955424 | 0.98876  | 1630.13 | 726.575 | 895.584 | 1174.39 | 1160.66 | 966.366 |
| ENSMUSG00000009907 | 17_Vps4b   | 5006.63 | 0.57089  | 0.175779 | 0.559175 | 9503.67 | 4560.08 | 3889.48 | 3228.54 | 4484.68 | 4373.34 |
| ENSMUSG00000009927 | 8_Rps25    | 12199.7 | -0.4574  | 0.061339 | 0.326929 | 11396.7 | 9675.58 | 9772.83 | 12612.9 | 15707.6 | 14032.3 |
| ENSMUSG00000009941 | 10_Nxf2    | 1.52177 | -1.73295 | 0.359704 | NA       | 1.01124 | 1.1335  | 0       | 4.95175 | 0.85848 | 1.17563 |
| ENSMUSG00000009995 | 17_Taz     | 1677.15 | 0.118    | 0.633369 | 0.88353  | 1569.45 | 1869.15 | 1798.41 | 1416.2  | 1733.27 | 1676.45 |
| ENSMUSG00000010021 | 13_Kif19a  | 5.80741 | -1.35999 | 0.234306 | 0.626139 | 0       | 6.80102 | 3.10248 | 9.07822 | 11.1602 | 4.70251 |
| ENSMUSG00000010025 | 18_Aldh3a1 | 1065.22 | -0.12061 | 0.625621 | 0.87994  | 1163.94 | 938.54  | 959.702 | 1086.08 | 1183.84 | 1059.24 |
| ENSMUSG00000010044 | 12_Zmync1  | 16.5298 | -1.99106 | 0.001813 | 0.030052 | 7.07871 | 5.66751 | 7.23913 | 35.4876 | 24.8958 | 18.81   |
| ENSMUSG00000010045 | 2_Tmem1    | 445.252 | 0.11687  | 0.860567 | 0.960445 | 79.8883 | 646.097 | 663.932 | 510.856 | 332.231 | 438.509 |
| ENSMUSG00000010047 | 12_Hyal2   | 351.871 | 0.15891  | 0.797224 | 0.940227 | 86.967  | 506.676 | 520.183 | 433.278 | 245.524 | 318.595 |
| ENSMUSG00000010048 | 10_lfrd2   | 323.597 | 0.85802  | 0.071231 | 0.356424 | 193.148 | 519.144 | 538.798 | 253.365 | 159.677 | 277.448 |
| ENSMUSG00000010051 | 15_Hyal1   | 917.324 | -0.19948 | 0.503788 | 0.824384 | 665.399 | 869.397 | 1026.92 | 918.55  | 896.25  | 1127.43 |
| ENSMUSG00000010054 | 4_Tusc2    | 466.18  | -0.2858  | 0.352551 | 0.728926 | 307.418 | 470.404 | 482.953 | 556.247 | 503.926 | 476.129 |
| ENSMUSG00000010057 | 8_Nprl2    | 308.245 | -0.14461 | 0.790458 | 0.937373 | 93.0345 | 347.985 | 437.45  | 353.225 | 272.137 | 345.635 |
| ENSMUSG00000010064 | 15_Slc38a1 | 357.986 | -1.66338 | 0.00301  | 0.043524 | 76.8546 | 167.758 | 270.95  | 891.316 | 387.173 | 353.864 |
| ENSMUSG00000010066 | 15_Cacna   | 529.836 | -0.04825 | 0.918551 | 0.977109 | 216.406 | 649.497 | 697.025 | 536.44  | 473.021 | 606.624 |
| ENSMUSG00000010067 | 13_Rassf1  | 828.508 | 0.36216  | 0.273191 | 0.659507 | 635.061 | 1198.11 | 962.804 | 729.558 | 691.932 | 753.577 |
| ENSMUSG00000010080 | 15_Epn3    | 2759.47 | 0.58176  | 0.26903  | 0.656292 | 1076.98 | 4555.55 | 4292.8  | 2413.98 | 1869.76 | 2347.73 |
| ENSMUSG00000010086 | 17_Rnf11   | 26.3732 | -1.45592 | 0.007691 | 0.083611 | 8.08995 | 13.602  | 20.6832 | 42.9152 | 41.2069 | 31.742  |
| ENSMUSG00000010095 | 13_Slc3a2  | 2944.22 | -0.20581 | 0.543716 | 0.841422 | 1750.46 | 3272.42 | 3181.08 | 3399.38 | 3034.72 | 3027.24 |
| ENSMUSG00000010097 | 13_Nxf1    | 3174.34 | 0.06739  | 0.784755 | 0.936054 | 3011.49 | 3461.72 | 3272.09 | 2673.12 | 3419.31 | 3208.29 |
| ENSMUSG00000010110 | 17_Stx5a   | 1548.67 | -0.04206 | 0.890425 | 0.970415 | 1089.11 | 1665.12 | 1824.26 | 1559.8  | 1646.56 | 1507.15 |
| ENSMUSG00000010122 | 14_Slc47e2 | 249.243 | 0.35505  | 0.203472 | 0.594896 | 314.497 | 236.902 | 287.497 | 215.401 | 206.034 | 235.126 |
| ENSMUSG00000010136 | 14_Pifo    | 0       | NA       | NA       | NA       | 0       | 0       | 0       | 0       | 0       | 0       |
| ENSMUSG00000010142 | 12_Tnfrsf1 | 26.0412 | 1.10322  | 0.027493 | 0.200033 | 35.3936 | 45.3401 | 25.854  | 14.8553 | 17.1695 | 17.6344 |
| ENSMUSG00000010154 | 6_Spire2   | 185.853 | 0.2148   | 0.713828 | 0.911072 | 53.5959 | 277.708 | 267.848 | 204.673 | 150.233 | 161.061 |
| ENSMUSG00000010175 | 13_Prox1   | 128.358 | -1.99875 | 2.82E-06 | 0.000186 | 71.7983 | 40.8061 | 41.3665 | 264.094 | 141.649 | 210.437 |
| ENSMUSG00000010205 | 10_Raver   | 669.762 | 0.52616  | 0.280722 | 0.667117 | 310.452 | 1100.63 | 960.736 | 625.572 | 472.162 | 549.018 |
| ENSMUSG00000010277 | 7_261050   | 14085.6 | 0.24082  | 0.372603 | 0.743491 | 12134.9 | 17606.7 | 16033.6 | 11960.1 | 13090.1 | 13687.8 |

|                    |            |         |          |          |          |         |         |         |         |         |         |
|--------------------|------------|---------|----------|----------|----------|---------|---------|---------|---------|---------|---------|
| ENSMUSG00000010290 | 7_Ai5974:  | 798.204 | -0.04111 | 0.917243 | 0.976775 | 1202.37 | 539.547 | 618.429 | 729.558 | 924.58  | 774.739 |
| ENSMUSG00000010307 | 5_Tmem8    | 173.729 | -0.6311  | 0.119917 | 0.47082  | 84.9445 | 148.489 | 175.807 | 272.346 | 178.563 | 182.222 |
| ENSMUSG00000010311 | 15_Optc    | 815.232 | -1.87929 | 4.70E-05 | 0.001817 | 262.924 | 231.235 | 551.208 | 1830.5  | 969.221 | 1046.31 |
| ENSMUSG00000010342 | 16_Tex14   | 10.9678 | 0.57451  | 0.383182 | 0.749884 | 12.1349 | 14.7355 | 12.4099 | 9.07822 | 6.86782 | 10.5807 |
| ENSMUSG00000010358 | 13_Ilf35   | 2706.72 | 0.96805  | 0.032107 | 0.220989 | 1563.38 | 5003.28 | 4180.08 | 1828.02 | 1759.88 | 1905.69 |
| ENSMUSG00000010362 | 9_Rdm1     | 376.699 | -0.52542 | 0.280421 | 0.667117 | 124.383 | 351.386 | 450.894 | 502.603 | 388.89  | 442.036 |
| ENSMUSG00000010376 | 14_Nedd8   | 1923.71 | -0.40728 | 0.17987  | 0.565745 | 1175.07 | 1911.09 | 1875.97 | 2168.04 | 2281.83 | 2130.24 |
| ENSMUSG00000010392 | 8_Gosr1    | 1290.63 | 0.20036  | 0.373329 | 0.744082 | 1472.37 | 1352.27 | 1315.45 | 1170.26 | 1187.27 | 1246.17 |
| ENSMUSG00000010406 | 11_Mrpl5z  | 576.406 | 0.16451  | 0.536903 | 0.839104 | 498.543 | 689.17  | 640.146 | 547.994 | 538.265 | 544.316 |
| ENSMUSG00000010453 | 12_KanslC  | 1800.05 | -0.10992 | 0.732893 | 0.919789 | 1163.94 | 2060.71 | 1970.08 | 1927.06 | 1813.96 | 1864.55 |
| ENSMUSG00000010461 | 14_Eya4    | 52.6876 | -0.30903 | 0.621869 | 0.878215 | 91.012  | 17.0025 | 33.0932 | 64.3728 | 60.0934 | 50.552  |
| ENSMUSG00000010476 | 15_Ebf3    | 58.2802 | 0.02776  | 0.952743 | 0.988194 | 78.8771 | 41.9396 | 55.8447 | 82.5292 | 44.6408 | 45.8495 |
| ENSMUSG00000010505 | 13_Myt1    | 12.9311 | -1.43883 | 0.131916 | 0.493664 | 12.1349 | 6.80102 | 2.06832 | 25.5841 | 27.4713 | 3.52688 |
| ENSMUSG00000010517 | 7_Faf1     | 2425    | 0.273    | 0.447529 | 0.790953 | 3789.13 | 2171.79 | 2000.07 | 1821.42 | 2426.91 | 2340.68 |
| ENSMUSG00000010529 | 5_Gm266    | 30.0216 | -0.05775 | 0.920504 | 0.977466 | 46.5172 | 14.7355 | 26.8882 | 23.1082 | 39.4899 | 29.3907 |
| ENSMUSG00000010538 | 14_Tsacc   | 20.995  | 0.03776  | 0.941114 | 0.985874 | 22.2474 | 24.9371 | 16.5466 | 18.9817 | 19.745  | 23.5126 |
| ENSMUSG00000010554 | 12_Mettl1i | 809.777 | 0.06037  | 0.865026 | 0.962077 | 1185.18 | 660.832 | 633.941 | 714.703 | 861.052 | 802.954 |
| ENSMUSG00000010592 | 8_Dazl     | 6.15849 | -0.3132  | 0.754509 | 0.926508 | 11.1237 | 1.1335  | 4.13665 | 5.77705 | 7.72629 | 7.05377 |
| ENSMUSG00000010601 | 13_Apol7z  | 3656.41 | 0.97605  | 0.000288 | 0.007645 | 4866.11 | 5377.34 | 4301.08 | 2074.78 | 2875.04 | 2444.13 |
| ENSMUSG00000010607 | 8_Pigyl    | 152.065 | 0.04703  | 0.924642 | 0.979199 | 68.7646 | 175.693 | 219.242 | 186.516 | 108.168 | 154.007 |
| ENSMUSG00000010608 | 15_Rbm2i   | 5499    | 0.47138  | 0.268206 | 0.656133 | 10201.4 | 4560.08 | 4406.56 | 3594.15 | 5275.34 | 4956.45 |
| ENSMUSG00000010609 | 15_Psen2   | 268.124 | -0.40297 | 0.439376 | 0.785475 | 84.9445 | 306.046 | 301.975 | 390.363 | 242.091 | 283.326 |
| ENSMUSG00000010651 | 4_Acaa1b   | 32.6801 | 0.46386  | 0.536562 | 0.838957 | 8.08995 | 37.4056 | 68.2547 | 39.614  | 18.028  | 24.6882 |
| ENSMUSG00000010660 | 2_Plcd1    | 1367.69 | 0.48145  | 0.388363 | 0.752507 | 454.409 | 2093.58 | 2233.79 | 1199.15 | 951.192 | 1274.38 |
| ENSMUSG00000010663 | 4_Fads1    | 4039.53 | -0.09501 | 0.681508 | 0.902515 | 3805.31 | 3584.14 | 4330.03 | 3969.66 | 4286.38 | 4261.65 |
| ENSMUSG00000010721 | 15_Lmbr1   | 556.684 | 0.11237  | 0.75301  | 0.925804 | 80.232  | 445.467 | 459.168 | 490.224 | 577.755 | 537.262 |
| ENSMUSG00000010751 | 14_Tnfrsf  | 134.42  | 0.07763  | 0.807182 | 0.944263 | 121.349 | 166.625 | 126.168 | 139.474 | 114.177 | 138.724 |
| ENSMUSG00000010755 | 16_Cars    | 1113.42 | 0.72405  | 0.033264 | 0.225285 | 942.48  | 1871.41 | 1347.51 | 816.214 | 835.298 | 867.613 |
| ENSMUSG00000010760 | 4_Phlda2   | 30.5043 | 0.01684  | 0.982691 | 0.994334 | 8.08995 | 38.5391 | 45.5031 | 50.3428 | 11.1602 | 29.3907 |
| ENSMUSG00000010796 | 11_Asz1    | 0.64699 | 1.60576  | 0.583061 | NA       | 2.02249 | 0       | 1.03416 | 0.82529 | 0       | 0       |
| ENSMUSG00000010797 | 6_Wnt2     | 171.358 | -0.36955 | 0.204251 | 0.595277 | 147.642 | 131.486 | 169.602 | 207.974 | 197.45  | 173.993 |
| ENSMUSG00000010803 | 12_Gabra   | 34.0897 | -1.44731 | 0.084215 | 0.391665 | 39.4385 | 11.335  | 4.13665 | 69.3246 | 62.6688 | 17.6344 |
| ENSMUSG00000010825 | 17_Grid2ij | 23.2978 | 1.06413  | 0.085531 | 0.395978 | 19.2136 | 43.0731 | 32.059  | 7.42763 | 18.028  | 19.9857 |
| ENSMUSG00000010830 | 7_Kdelr3   | 243.836 | -1.15529 | 2.15E-05 | 0.000959 | 133.484 | 171.159 | 148.919 | 332.593 | 347.683 | 329.176 |
| ENSMUSG00000010841 | 13_17000   | 0       | NA       | NA       | NA       | 0       | 0       | 0       | 0       | 0       | 0       |
| ENSMUSG00000010911 | 12_Ap1p    | 1066.33 | -0.10569 | 0.683328 | 0.902945 | 1199.34 | 944.208 | 937.985 | 1004.38 | 1143.49 | 1168.57 |
| ENSMUSG00000010914 | 10_Pdhx    | 838.584 | -0.34426 | 0.222738 | 0.613522 | 913.154 | 634.762 | 669.103 | 940.833 | 1009.57 | 864.086 |
| ENSMUSG00000010936 | 10_Vac14   | 403.653 | 0.21385  | 0.659009 | 0.89471  | 169.889 | 571.285 | 559.481 | 396.966 | 343.391 | 380.903 |
| ENSMUSG00000011008 | 13_Mcoln   | 53.6537 | 3.02042  | 3.01E-06 | 0.000198 | 75.8433 | 166.625 | 44.4689 | 9.90351 | 18.028  | 7.05377 |
| ENSMUSG00000011034 | 6_Slc5a1   | 4963.72 | 0.14957  | 0.613266 | 0.875416 | 4938.92 | 6194.59 | 4528.59 | 3688.23 | 5067.59 | 5364.39 |
| ENSMUSG00000011096 | 16_Akt1s   | 377.734 | -0.03792 | 0.945189 | 0.986649 | 113.259 | 482.872 | 522.252 | 430.803 | 311.627 | 405.592 |
| ENSMUSG00000011114 | 17_Tbrg1   | 3103.93 | 0.47679  | 0.142607 | 0.511466 | 2487.66 | 4616.76 | 3732.29 | 2376.02 | 2690.47 | 2720.4  |
| ENSMUSG00000011118 | 3_Panx3    | 0.14308 | -0.79206 | 0.84609  | NA       | 0       | 0       | 0       | 0       | 0.85848 | 0       |
| ENSMUSG00000011148 | 13_Adssl1  | 157.756 | -0.96348 | 0.049153 | 0.286725 | 111.237 | 79.3452 | 130.304 | 335.894 | 109.885 | 179.871 |
| ENSMUSG00000011154 | 16_17000   | 0.14308 | -0.79206 | 0.84609  | NA       | 0       | 0       | 0       | 0       | 0.85848 | 0       |
| ENSMUSG00000011158 | 7_Brf1     | 634.87  | -0.1424  | 0.702252 | 0.907074 | 355.958 | 766.248 | 688.752 | 732.034 | 626.688 | 639.542 |
| ENSMUSG00000011171 | 11_Vipr2   | 220.586 | -1.79529 | 1.82E-06 | 0.000131 | 125.394 | 70.2772 | 100.314 | 392.839 | 385.456 | 249.233 |
| ENSMUSG00000011179 | 7_Odc1     | 8701.17 | 0.1162   | 0.622029 | 0.878215 | 8478.27 | 9945.35 | 8730.39 | 7564.63 | 8573.61 | 8914.79 |
| ENSMUSG00000011254 | 16_Thg1l   | 248.833 | -0.18391 | 0.559997 | 0.848816 | 177.979 | 294.711 | 226.481 | 254.19  | 270.42  | 269.219 |
| ENSMUSG00000011256 | 16_Adam    | 177.217 | -0.3172  | 0.251387 | 0.642532 | 149.664 | 157.557 | 166.5   | 213.751 | 198.308 | 177.52  |
| ENSMUSG00000011257 | 19_Pabpc   | 677.892 | 0.28754  | 0.297309 | 0.680853 | 619.893 | 828.591 | 786.997 | 628.873 | 530.539 | 672.459 |
| ENSMUSG00000011263 | 15_Exoc3   | 105.959 | -0.82139 | 0.185206 | 0.572285 | 21.2361 | 66.8767 | 141.68  | 157.631 | 120.187 | 128.143 |
| ENSMUSG00000011267 | 7_Zfp296   | 132.695 | 0.53011  | 0.420282 | 0.773633 | 34.3823 | 219.9   | 216.14  | 135.348 | 66.9612 | 123.441 |
| ENSMUSG00000011305 | 11_Plin5   | 3.50931 | 0.23212  | 0.859887 | 0.960099 | 9.1012  | 1.1335  | 1.03416 | 1.65058 | 3.43391 | 4.70251 |
| ENSMUSG00000011306 | 6_Sugp1    | 524.119 | 0.0096   | 0.980745 | 0.993796 | 286.182 | 612.092 | 679.444 | 570.277 | 474.738 | 521.979 |
| ENSMUSG00000011382 | 6_Dhdh     | 251.968 | -0.62245 | 0.092778 | 0.414922 | 279.103 | 138.287 | 177.876 | 322.689 | 330.514 | 263.341 |
| ENSMUSG00000011427 | 15_Zfp79f  | 373.66  | -0.05234 | 0.858578 | 0.959215 | 447.981 | 351.386 | 300.941 | 355.701 | 367.428 | 418.524 |
| ENSMUSG00000011463 | 5_Cpb1     | 4.23036 | 0.37499  | 0.76253  | 0.929057 | 8.08995 | 0       | 6.20497 | 4.12646 | 3.43391 | 3.52688 |
| ENSMUSG00000011486 | 14_Slc25e  | 0.91147 | -0.64783 | 0.812528 | NA       | 0       | 1.1335  | 1.03416 | 3.30117 | 0       | 0       |
| ENSMUSG00000011589 | 8_Fsd1     | 5.70787 | -3.90971 | 0.004958 | 0.061803 | 0       | 1.1335  | 1.03416 | 14.8553 | 4.29238 | 12.9319 |
| ENSMUSG00000011632 | 7_Pinlyp   | 8.32597 | 1.96684  | 0.183895 | 0.570805 | 0       | 19.2695 | 20.6832 | 7.42763 | 2.57543 | 0       |
| ENSMUSG00000011658 | 14_Fuz     | 214.182 | -0.07277 | 0.87434  | 0.964209 | 96.0682 | 234.635 | 295.77  | 249.238 | 196.591 | 212.789 |
| ENSMUSG00000011751 | 16_Sptbn   | 6.78869 | -1.90415 | 0.075879 | 0.368928 | 1.01124 | 5.66751 | 2.06832 | 18.1564 | 10.3017 | 3.52688 |
| ENSMUSG00000011752 | 6_Pgam1    | 4489.05 | 0.43409  | 0.086127 | 0.397675 | 4742.74 | 6120.92 | 4614.43 | 3703.91 | 3802.19 | 3950.11 |
| ENSMUSG00000011831 | 15_Evi5    | 2440.81 | 0.28846  | 0.493488 | 0.816268 | 4353.41 | 1820.41 | 1878.04 | 1984.83 | 2365.1  | 2243.1  |
| ENSMUSG00000011832 | 15_Evi5l   | 427.778 | -0.27442 | 0.55139  | 0.845045 | 172.923 | 438.666 | 550.174 | 534.789 | 406.918 | 463.197 |
| ENSMUSG00000011837 | 3_Snapc2   | 255.309 | 0.11333  | 0.815902 | 0.947424 | 121.349 | 315.114 | 359.888 | 333.418 | 216.336 | 185.749 |
| ENSMUSG00000011877 | 13_Git1    | 827.161 | 0.39609  | 0.517776 | 0.831239 | 215.395 | 1329.6  | 1275.12 | 880.587 | 545.133 | 717.133 |
| ENSMUSG00000011884 | 13_Gltp    | 4181.82 | 0.45258  | 0.197719 | 0.589909 | 3054.97 | 5737.79 | 5704.44 | 3680.8  | 3009.82 | 3903.08 |
| ENSMUSG00000011958 | 17_Bnip2   | 1993.73 | 0.10376  | 0.744123 | 0.923424 | 2788    | 1728.59 | 1679.48 | 1810.69 | 2075.8  | 1879.83 |
| ENSMUSG00000011960 | 12_Ccnt1   | 1505.39 | 0.45304  | 0.191753 | 0.580886 | 2458.33 | 1425.95 | 1335.1  | 1152.11 | 1418.2  | 1242.64 |
| ENSMUSG00000012017 | 3_Scarf2   | 205.43  | -0.77512 | 0.270006 | 0.656915 | 27.3036 | 132.62  | 294.736 | 349.099 | 194.874 | 233.95  |
| ENSMUSG00000012042 | 8_493057   | 0.31544 | 0.16972  | 0.966824 | NA       | 0       | 0       | 1.03416 | 0       | 0.85848 | 0       |
| ENSMUSG00000012076 | 7_Brms1l   | 654.181 | -0.0535  | 0.88602  | 0.969051 | 949.558 | 485.139 | 491.227 | 595.861 | 720.262 | 683.04  |
| ENSMUSG00000012114 | 16_Med1f   | 1006.65 | 0.60466  | 0.223621 | 0.613683 | 458.094 | 1751.26 | 1434.38 | 845.099 | 679.914 | 871.14  |

|                    |           |         |          |          |          |         |         |         |         |         |         |
|--------------------|-----------|---------|----------|----------|----------|---------|---------|---------|---------|---------|---------|
| ENSMUSG00000012117 | 13_Dhdds  | 789.667 | 0.05872  | 0.857279 | 0.959059 | 544.049 | 913.603 | 959.702 | 821.991 | 726.272 | 772.387 |
| ENSMUSG00000012123 | 15_Aim1l  | 2902.5  | 0.78616  | 0.147704 | 0.519979 | 1113.38 | 5123.43 | 4786.1  | 2112.75 | 1832.85 | 2446.48 |
| ENSMUSG00000012126 | 16_Ubxn1  | 30.5498 | -0.74356 | 0.234371 | 0.626192 | 8.08995 | 31.7381 | 28.9565 | 52.8187 | 33.4806 | 28.2151 |
| ENSMUSG00000012187 | 13_Mogat  | 87.9844 | -1.78913 | 3.35E-06 | 0.000214 | 41.461  | 28.3376 | 48.6056 | 137.824 | 158.818 | 112.86  |
| ENSMUSG00000012282 | 2_Wnt8a   | 0       | NA       | NA       | NA       | 0       | 0       | 0       | 0       | 0       | 0       |
| ENSMUSG00000012296 | 15_Tjap1  | 238.962 | 0.27743  | 0.6404   | 0.887258 | 71.7983 | 370.655 | 343.342 | 288.852 | 163.969 | 195.154 |
| ENSMUSG00000012350 | 15_Ehf    | 20841.5 | 0.65944  | 0.123464 | 0.478085 | 40911.9 | 17997.8 | 17660.4 | 12487.5 | 17767.9 | 18223.4 |
| ENSMUSG00000012396 | 12_Nanog  | 0.81005 | -3.04708 | 0.244783 | NA       | 0       | 0       | 0       | 1.65058 | 0.85848 | 2.35126 |
| ENSMUSG00000012405 | 15_Rpl15  | 9293.82 | -0.05958 | 0.884325 | 0.967903 | 4833.75 | 10913.4 | 11558.8 | 11090.3 | 7652.46 | 9714.21 |
| ENSMUSG00000012422 | 14_Tmem   | 1624.57 | 0.3092   | 0.511999 | 0.827773 | 3114.63 | 1203.78 | 1075.53 | 1282.5  | 1727.26 | 1343.74 |
| ENSMUSG00000012428 | 9_Steap4  | 1881.21 | 0.78199  | 0.005065 | 0.062775 | 2941.71 | 2246.6  | 1948.36 | 1322.12 | 1435.37 | 1393.12 |
| ENSMUSG00000012429 | 8_Mplkip  | 258.582 | 0.56813  | 0.290054 | 0.675059 | 572.364 | 182.494 | 171.671 | 176.613 | 266.128 | 182.222 |
| ENSMUSG00000012443 | 3_Kif11   | 676.651 | 0.56242  | 0.170638 | 0.552625 | 1207.43 | 673.301 | 539.832 | 417.598 | 673.904 | 547.843 |
| ENSMUSG00000012483 | 4_Rpa3    | 270.618 | 0.36838  | 0.393467 | 0.755289 | 484.386 | 226.701 | 203.73  | 200.546 | 275.571 | 232.774 |
| ENSMUSG00000012519 | 14_Mkl    | 480.099 | 2.67857  | 4.16E-11 | 9.01E-09 | 867.648 | 1094.96 | 528.457 | 89.1316 | 151.092 | 149.305 |
| ENSMUSG00000012520 | 10_Phox2  | 0       | NA       | NA       | NA       | 0       | 0       | 0       | 0       | 0       | 0       |
| ENSMUSG00000012535 | 14_Tnpo3  | 2705.69 | 0.13836  | 0.626412 | 0.880481 | 3448.34 | 2624.06 | 2433.38 | 2205.18 | 2873.32 | 2649.87 |
| ENSMUSG00000012609 | 18_Ttl5   | 368.839 | -0.14603 | 0.563338 | 0.85076  | 329.666 | 359.32  | 361.957 | 422.55  | 388.032 | 351.513 |
| ENSMUSG00000012640 | 16_Zfp711 | 644.473 | 0.1035   | 0.833902 | 0.952011 | 1193.27 | 409.195 | 400.221 | 574.403 | 734.856 | 554.896 |
| ENSMUSG00000012705 | 16_Retrn  | 1.49098 | -0.92837 | 0.689308 | NA       | 0       | 0       | 3.10248 | 4.12646 | 1.71695 | 0       |
| ENSMUSG00000012777 | 14_Acpt   | 0       | NA       | NA       | NA       | 0       | 0       | 0       | 0       | 0       | 0       |
| ENSMUSG00000012819 | 15_Cdh23  | 57.5697 | -1.09983 | 0.10622  | 0.442704 | 9.1012  | 43.0731 | 57.913  | 122.969 | 61.8103 | 50.552  |
| ENSMUSG00000012848 | 14_Rps5   | 10014.8 | -0.17455 | 0.768795 | 0.931306 | 2340.02 | 12286   | 13603.4 | 13570.3 | 8483.47 | 9805.91 |
| ENSMUSG00000012889 | 8_Podnl1  | 3.3012  | 0.92577  | 0.567959 | 0.852443 | 0       | 7.93452 | 5.17081 | 4.12646 | 2.57543 | 0       |
| ENSMUSG00000013033 | 15_Adgrl1 | 717.568 | -1.21842 | 0.004684 | 0.059581 | 228.541 | 443.2   | 622.565 | 1250.32 | 901.401 | 859.384 |
| ENSMUSG00000013076 | 15_Amotl  | 4619.38 | 0.01455  | 0.950191 | 0.987438 | 4078.35 | 4842.32 | 5007.41 | 4642.27 | 4488.12 | 4657.84 |
| ENSMUSG00000013089 | 15_Etv5   | 571.184 | 0.09119  | 0.739677 | 0.92176  | 510.678 | 569.018 | 687.717 | 567.801 | 487.615 | 604.273 |
| ENSMUSG00000013091 | 5_Tmem1   | 4.72604 | -0.12292 | 0.900201 | 0.972744 | 4.04498 | 2.26701 | 7.23913 | 4.95175 | 5.15086 | 4.70251 |
| ENSMUSG00000013150 | 15_Gfod2  | 310.039 | -0.05961 | 0.909585 | 0.974731 | 106.181 | 392.192 | 412.63  | 370.556 | 250.675 | 328     |
| ENSMUSG00000013155 | 9_Enkd1   | 48.4134 | 0.18827  | 0.747644 | 0.924734 | 18.2024 | 60.0757 | 76.528  | 56.1199 | 36.056  | 43.4982 |
| ENSMUSG00000013158 | 5_493340  | 0.36128 | 2.05714  | 0.610196 | NA       | 0       | 1.1335  | 1.03416 | 0       | 0       | 0       |
| ENSMUSG00000013160 | 7_Atp6v0c | 1829.73 | -0.01324 | 0.967121 | 0.991132 | 1224.62 | 2153.66 | 2085.9  | 1824.72 | 1854.31 | 1835.16 |
| ENSMUSG00000013236 | 16_Ptprs  | 2326.2  | 0.1267   | 0.835776 | 0.952513 | 546.072 | 3023.05 | 3715.74 | 2519.62 | 1755.59 | 2397.11 |
| ENSMUSG00000013275 | 9_Slc41a1 | 2782.08 | 0.08824  | 0.781553 | 0.935592 | 1987.1  | 3280.36 | 3334.14 | 2974.35 | 2433.78 | 2682.78 |
| ENSMUSG00000013338 | 16_Fer14  | 166.809 | 0.79627  | 0.200904 | 0.592148 | 47.5285 | 309.446 | 278.189 | 128.746 | 106.451 | 130.495 |
| ENSMUSG00000013353 | 10_49314  | 0.37783 | 2.11394  | 0.599927 | NA       | 0       | 2.26701 | 0       | 0       | 0       | 0       |
| ENSMUSG00000013367 | 5_Igln5   | 30.8166 | -1.3935  | 0.039828 | 0.251043 | 6.06747 | 19.2695 | 25.854  | 61.8969 | 50.6501 | 21.1613 |
| ENSMUSG00000013415 | 9_Igf2bp1 | 83.8284 | -1.27553 | 0.000537 | 0.012265 | 43.4835 | 52.1411 | 51.7081 | 147.727 | 115.036 | 92.8746 |
| ENSMUSG00000013418 | 8_B4galnt | 0.30609 | 0.16972  | 0.966824 | NA       | 1.01124 | 0       | 0       | 0.82529 | 0       | 0       |
| ENSMUSG00000013419 | 6_Zfp651  | 373.424 | -0.99606 | 0.112783 | 0.45592  | 64.7196 | 248.237 | 435.382 | 718.83  | 376.013 | 397.362 |
| ENSMUSG00000013465 | 18_Nelfb  | 1325.3  | 0.11826  | 0.804174 | 0.942928 | 550.117 | 1795.47 | 1793.24 | 1351.83 | 1109.15 | 1351.97 |
| ENSMUSG00000013483 | 14_Card1  | 492.823 | 0.25654  | 0.646672 | 0.889998 | 158.765 | 671.034 | 779.758 | 481.971 | 352.834 | 512.574 |
| ENSMUSG00000013495 | 15_Tmem   | 635.896 | -0.06627 | 0.789433 | 0.937308 | 673.489 | 540.681 | 649.453 | 623.921 | 663.603 | 664.23  |
| ENSMUSG00000013523 | 13_Bcas1  | 1676.92 | 0.17036  | 0.456165 | 0.796623 | 1780.8  | 1676.45 | 1869.76 | 1480.57 | 1559.85 | 1694.08 |
| ENSMUSG00000013539 | 13_Tango  | 178.997 | -0.22833 | 0.510842 | 0.827179 | 114.271 | 199.497 | 180.978 | 212.925 | 169.978 | 196.33  |
| ENSMUSG00000013562 | 12_48334  | 0.30609 | 0.16972  | 0.966824 | NA       | 1.01124 | 0       | 0       | 0.82529 | 0       | 0       |
| ENSMUSG00000013584 | 5_Aldh1a2 | 213.47  | -0.85972 | 0.011068 | 0.108353 | 151.687 | 109.95  | 193.388 | 294.629 | 290.165 | 241.004 |
| ENSMUSG00000013593 | 12_Ndufs  | 2294.93 | -0.24838 | 0.446248 | 0.789898 | 1402.6  | 2463.1  | 2428.21 | 2692.1  | 2444.08 | 2339.5  |
| ENSMUSG00000013611 | 14_Snx31  | 821.346 | 0.08034  | 0.746487 | 0.924339 | 890.906 | 743.578 | 897.652 | 765.046 | 759.752 | 871.14  |
| ENSMUSG00000013622 | 15_Atraid | 1206.35 | -0.38449 | 0.166252 | 0.545717 | 895.962 | 977.08  | 1266.85 | 1467.37 | 1419.92 | 1210.9  |
| ENSMUSG00000013629 | 16_Cad    | 683.156 | 0.91415  | 0.110507 | 0.451399 | 239.665 | 1342.07 | 1096.21 | 501.778 | 417.22  | 501.993 |
| ENSMUSG00000013643 | 13_Lypd8  | 226.439 | 1.97137  | 4.89E-07 | 4.20E-05 | 264.946 | 507.809 | 310.248 | 84.1798 | 115.036 | 76.4158 |
| ENSMUSG00000013646 | 17_Sh3bp  | 1774.07 | 0.64806  | 0.174362 | 0.557899 | 863.603 | 2989.05 | 2645.39 | 1530.92 | 1248.23 | 1367.26 |
| ENSMUSG00000013653 | 2_181006  | 0.50054 | 1.08003  | 0.733943 | NA       | 1.01124 | 1.1335  | 0       | 0       | 0.85848 | 0       |
| ENSMUSG00000013662 | 5_Atd1    | 2784.58 | 0.24685  | 0.597293 | 0.868406 | 5228.13 | 2024.44 | 1813.92 | 2168.87 | 2871.61 | 2600.49 |
| ENSMUSG00000013663 | 7_Pten    | 5057.05 | 0.64393  | 0.204137 | 0.595244 | 11335   | 3573.93 | 3592.68 | 3328.4  | 4510.44 | 4001.84 |
| ENSMUSG00000013698 | 12_Pea15  | 5985.07 | -0.4739  | 0.036583 | 0.239348 | 4583.97 | 5175.57 | 5273.19 | 6986.93 | 7333.11 | 6557.65 |
| ENSMUSG00000013701 | 12_Timm2  | 424.368 | 0.4381   | 0.376111 | 0.745684 | 867.648 | 309.446 | 287.497 | 334.243 | 315.92  | 431.455 |
| ENSMUSG00000013707 | 3_Tnfai8  | 30.1211 | 0.63196  | 0.455808 | 0.796332 | 5.05622 | 63.4762 | 41.3665 | 34.6623 | 10.3017 | 25.8638 |
| ENSMUSG00000013736 | 16_Trnt1  | 830.962 | 0.49792  | 0.278454 | 0.665542 | 1656.42 | 656.298 | 606.019 | 603.289 | 788.94  | 674.81  |
| ENSMUSG00000013766 | 11_Ly6g6  | 596.964 | 0.31294  | 0.454526 | 0.795965 | 349.891 | 771.915 | 862.491 | 575.229 | 421.512 | 600.746 |
| ENSMUSG00000013787 | 15_Ehmt2  | 1647.21 | 0.30014  | 0.629021 | 0.88129  | 395.397 | 2471.04 | 2587.47 | 1804.09 | 1104    | 1521.26 |
| ENSMUSG00000013822 | 6_Elof1   | 1036.91 | -0.02226 | 0.963009 | 0.990106 | 405.509 | 1354.54 | 1326.83 | 1158.71 | 936.598 | 1039.25 |
| ENSMUSG00000013833 | 15_Med1f  | 504.869 | 0.26729  | 0.700505 | 0.906172 | 82.922  | 763.981 | 807.68  | 571.102 | 326.221 | 477.305 |
| ENSMUSG00000013846 | 9_St3gal1 | 1090.77 | -0.94294 | 0.00151  | 0.026393 | 611.803 | 889.8   | 738.391 | 1667.09 | 1443.1  | 1194.44 |
| ENSMUSG00000013858 | 14_Tmem   | 732.046 | 0.14039  | 0.830229 | 0.95122  | 146.63  | 1004.28 | 1152.06 | 876.46  | 481.606 | 731.241 |
| ENSMUSG00000013878 | 17_Rnf17l | 1417.71 | 0.19488  | 0.646053 | 0.889625 | 2443.17 | 971.412 | 1125.17 | 1167.79 | 1471.43 | 1327.28 |
| ENSMUSG00000013921 | 14_Clip3  | 233.674 | -1.28538 | 0.001552 | 0.027016 | 114.271 | 106.549 | 187.183 | 454.736 | 293.599 | 245.706 |
| ENSMUSG00000013928 | 12_Thap8  | 0.14308 | -0.79206 | 0.84609  | NA       | 0       | 0       | 0       | 0       | 0.85848 | 0       |
| ENSMUSG00000013936 | 12_Myl2   | 17.8891 | -2.05093 | 0.003543 | 0.048982 | 9.1012  | 2.26701 | 9.30745 | 32.1864 | 18.028  | 36.4445 |
| ENSMUSG00000013973 | 12_Dedd   | 607.824 | 0.26598  | 0.555829 | 0.846956 | 298.317 | 931.739 | 761.143 | 577.705 | 499.634 | 578.409 |
| ENSMUSG00000013974 | 2_Mcemp   | 15.663  | 3.24175  | 0.000422 | 0.010187 | 17.1912 | 56.6751 | 11.3758 | 4.12646 | 3.43391 | 1.17563 |
| ENSMUSG00000013997 | 10_Nit1   | 829.245 | -0.10343 | 0.669162 | 0.898502 | 750.343 | 786.651 | 861.457 | 775.775 | 915.995 | 885.248 |
| ENSMUSG00000014030 | 15_Pax5   | 14.8244 | 2.92123  | 0.000364 | 0.009145 | 40.4498 | 20.4031 | 17.5807 | 4.95175 | 0.85848 | 4.70251 |
| ENSMUSG00000014039 | 17_Prdm1  | 432.968 | 0.34688  | 0.211055 | 0.602834 | 400.453 | 566.751 | 487.09  | 354.05  | 389.749 | 399.713 |

|                    |            |         |          |          |          |         |         |         |         |         |         |
|--------------------|------------|---------|----------|----------|----------|---------|---------|---------|---------|---------|---------|
| ENSMUSG00000014074 | 17_Rnf16i  | 1329.93 | 0.34135  | 0.392839 | 0.754813 | 2281.37 | 1109.7  | 1068.29 | 966.417 | 1322.91 | 1230.88 |
| ENSMUSG00000014075 | 15_Tctex1  | 402.902 | -0.11202 | 0.781784 | 0.935592 | 602.702 | 265.24  | 293.702 | 398.616 | 451.559 | 405.592 |
| ENSMUSG00000014077 | 13_Chp1    | 6681.93 | 0.22044  | 0.423984 | 0.775611 | 8659.29 | 6442.83 | 6471.78 | 5293.43 | 6658.35 | 6565.88 |
| ENSMUSG00000014158 | 11_Trpv4   | 284.471 | 0.3601   | 0.606286 | 0.871807 | 49.551  | 362.721 | 547.071 | 278.949 | 182.856 | 285.678 |
| ENSMUSG00000014164 | 14_Khlh3   | 22.0724 | -2.05619 | 0.00131  | 0.023985 | 5.05622 | 13.602  | 7.23913 | 51.1681 | 28.3297 | 27.0394 |
| ENSMUSG00000014177 | 10_Tvp23   | 1095.99 | -0.02317 | 0.946275 | 0.986649 | 1536.08 | 828.591 | 896.618 | 1021.71 | 1144.35 | 1148.59 |
| ENSMUSG00000014195 | 15_Dnajc1  | 4237.22 | 0.10131  | 0.703691 | 0.907783 | 4895.43 | 4319.78 | 3942.22 | 3370.49 | 4494.99 | 4400.37 |
| ENSMUSG00000014198 | 15_Zfp384  | 27.8489 | -1.7157  | 0.002152 | 0.034171 | 8.08995 | 11.335  | 19.6491 | 55.2946 | 38.6315 | 34.0932 |
| ENSMUSG00000014226 | 10_Cacyb   | 1929.55 | 0.77181  | 0.121417 | 0.473806 | 4356.44 | 1656.05 | 1288.57 | 1180.99 | 1677.46 | 1417.81 |
| ENSMUSG00000014232 | 14_Cluap1  | 455.347 | -0.13272 | 0.606134 | 0.871767 | 493.487 | 413.729 | 396.084 | 462.164 | 511.652 | 454.968 |
| ENSMUSG00000014243 | 5_Zswim7   | 80.1675 | -0.83865 | 0.021664 | 0.172257 | 45.506  | 60.0757 | 67.2205 | 111.414 | 113.319 | 83.4696 |
| ENSMUSG00000014245 | 8_Pigl     | 136.904 | 0.16721  | 0.613834 | 0.875588 | 144.608 | 126.952 | 162.363 | 101.511 | 129.63  | 156.359 |
| ENSMUSG00000014294 | 4_Ndufa2   | 623.285 | -0.26587 | 0.652192 | 0.892215 | 154.72  | 714.107 | 829.398 | 928.454 | 509.935 | 603.097 |
| ENSMUSG00000014301 | 12_Pam18   | 107.397 | -0.01697 | 0.9607   | 0.989899 | 120.338 | 121.285 | 78.5963 | 98.2098 | 110.744 | 115.212 |
| ENSMUSG00000014303 | 13_Glis2   | 436.783 | -0.72157 | 0.106189 | 0.442704 | 166.855 | 347.985 | 474.68  | 689.119 | 463.578 | 478.481 |
| ENSMUSG00000014313 | 14_Cox6c   | 2350.52 | -0.08858 | 0.756339 | 0.927332 | 2846.65 | 1932.62 | 2055.91 | 2677.25 | 2361.67 | 2228.99 |
| ENSMUSG00000014329 | 14_Bicc1   | 658.566 | 0.03894  | 0.911623 | 0.95181  | 945.513 | 506.676 | 550.174 | 704.8   | 657.593 | 586.638 |
| ENSMUSG00000014349 | 7_Ube2z    | 4070.86 | 0.12874  | 0.583093 | 0.860399 | 3929.7  | 4561.22 | 4265.92 | 3535.55 | 3927.53 | 4205.22 |
| ENSMUSG00000014351 | 12_Gip     | 7.01161 | -1.99619 | 0.032657 | 0.223271 | 2.02249 | 3.40051 | 3.10248 | 16.5058 | 11.1602 | 5.87814 |
| ENSMUSG00000014353 | 14_Tmem    | 1818.29 | 0.24533  | 0.544777 | 0.842093 | 3085.31 | 1433.88 | 1398.19 | 1429.41 | 1868.9  | 1694.08 |
| ENSMUSG00000014355 | 10_Anapc   | 3487.36 | 0.24468  | 0.337729 | 0.715971 | 4318.01 | 3737.16 | 3291.74 | 2854.69 | 3407.3  | 3315.27 |
| ENSMUSG00000014361 | 5_Meritk   | 258.168 | -0.46536 | 0.172955 | 0.556705 | 291.238 | 172.292 | 187.183 | 323.515 | 318.495 | 256.287 |
| ENSMUSG00000014402 | 14_Tsg10   | 2501.92 | 0.32896  | 0.23845  | 0.630522 | 3439.24 | 2569.65 | 2348.58 | 2017.84 | 2286.12 | 2350.08 |
| ENSMUSG00000014418 | 15_Hps5    | 982.956 | 0.15124  | 0.57254  | 0.855307 | 1136.64 | 983.881 | 982.453 | 765.046 | 1042.19 | 987.527 |
| ENSMUSG00000014426 | 8_Map3k4   | 706.113 | 0.11414  | 0.762611 | 0.929057 | 831.801 | 836.525 | 933.848 | 751.016 | 586.34  | 697.147 |
| ENSMUSG00000014444 | 16_Plezo1  | 2341.96 | 0.46704  | 0.427559 | 0.77823  | 664.388 | 3712.22 | 3776.76 | 2220.86 | 1654.29 | 2023.26 |
| ENSMUSG00000014453 | 3_Blk      | 3.50544 | 1.41692  | 0.279188 | 0.666376 | 4.04498 | 10.2015 | 1.03416 | 0.82529 | 2.57543 | 2.35126 |
| ENSMUSG00000014470 | 4_Rnf166   | 315.419 | 0.35238  | 0.472303 | 0.805666 | 162.81  | 411.462 | 487.09  | 368.906 | 187.148 | 275.097 |
| ENSMUSG00000014496 | 7_Ankrd2l  | 1262.14 | 0.08545  | 0.828564 | 0.951064 | 1991.14 | 912.47  | 994.863 | 1152.93 | 1410.48 | 1110.97 |
| ENSMUSG00000014498 | 9_Ankrd5   | 1276.25 | 0.28068  | 0.505403 | 0.825121 | 679.556 | 1762.6  | 1758.07 | 1205.75 | 1154.65 | 1096.86 |
| ENSMUSG00000014503 | 14_Pkd2l2  | 96.2137 | -0.19243 | 0.574777 | 0.856635 | 86.967  | 79.3452 | 103.416 | 119.667 | 105.593 | 82.2939 |
| ENSMUSG00000014504 | 16_Srp19   | 798.234 | 0.11897  | 0.742787 | 0.923215 | 1192.26 | 694.837 | 606.019 | 657.758 | 824.996 | 813.534 |
| ENSMUSG00000014542 | 3_Clec4f   | 0       | NA       | NA       | NA       | 0       | 0       | 0       | 0       | 0       | 0       |
| ENSMUSG00000014543 | 14_Klra17  | 3.45619 | 2.07724  | 0.22384  | 0.613717 | 12.1349 | 4.53401 | 0       | 0       | 1.71695 | 2.35126 |
| ENSMUSG00000014547 | 9_Wdfy2    | 234.544 | -0.04341 | 0.882012 | 0.967808 | 192.136 | 257.305 | 244.062 | 263.268 | 241.232 | 209.262 |
| ENSMUSG00000014550 | 14_Rbsn    | 1152.37 | 0.17571  | 0.478814 | 0.809366 | 1364.17 | 1250.25 | 1052.78 | 1038.22 | 1082.54 | 1126.25 |
| ENSMUSG00000014551 | 8_Mrps25   | 937.059 | 0.09278  | 0.735119 | 0.920451 | 1171.02 | 910.203 | 820.09  | 836.846 | 946.042 | 938.151 |
| ENSMUSG00000014554 | 13_Dguok   | 866.673 | -0.07565 | 0.757646 | 0.927689 | 770.568 | 863.729 | 897.652 | 815.389 | 980.381 | 872.316 |
| ENSMUSG00000014592 | 19_Camta   | 586.55  | 0.56141  | 0.117477 | 0.466305 | 1008.21 | 561.084 | 528.457 | 511.681 | 458.427 | 451.441 |
| ENSMUSG00000014599 | 10_Csf1    | 681.409 | 0.47428  | 0.127736 | 0.48592  | 642.14  | 911.336 | 823.193 | 496.826 | 501.351 | 713.606 |
| ENSMUSG00000014601 | 13_Strip1  | 1356.84 | 0.23226  | 0.591178 | 0.865185 | 683.601 | 1950.76 | 1763.25 | 1256.92 | 1225.05 | 1261.45 |
| ENSMUSG00000014602 | 15_Kif1a   | 819.098 | -1.7284  | 0.96E-05 | 0.001883 | 248.766 | 358.187 | 532.593 | 1734.76 | 1195    | 845.276 |
| ENSMUSG00000014603 | 2_Alx3     | 2.6689  | -0.18894 | 0.881123 | 0.967415 | 3.03373 | 3.40051 | 1.03416 | 3.30117 | 1.71695 | 3.52688 |
| ENSMUSG00000014606 | 14_Slc25a5 | 1633.27 | -0.21147 | 0.543963 | 0.841548 | 941.468 | 1783    | 1817.02 | 1838.75 | 1637.12 | 1782.25 |
| ENSMUSG00000014609 | 16_Chme    | 0.9425  | 0.23784  | 0.928569 | NA       | 1.01124 | 0       | 2.06832 | 0       | 2.57543 | 0       |
| ENSMUSG00000014633 | 15_Cmc2    | 167.087 | 0.04451  | 0.888948 | 0.970015 | 129.439 | 202.897 | 176.842 | 155.98  | 175.129 | 162.237 |
| ENSMUSG00000014668 | 15_Chfr    | 1120.24 | 0.2443   | 0.303244 | 0.685929 | 1189.22 | 1193.58 | 1261.68 | 917.725 | 1121.17 | 1038.08 |
| ENSMUSG00000014686 | 7_Ceacan   | 1.23794 | 2.69901  | 0.272994 | NA       | 0       | 4.53401 | 2.06832 | 0.82529 | 0       | 0       |
| ENSMUSG00000014704 | 10_Hoxa2   | 0       | NA       | NA       | NA       | 0       | 0       | 0       | 0       | 0       | 0       |
| ENSMUSG00000014725 | 14_Adam10  | 2180.59 | 0.48283  | 0.14153  | 0.510149 | 3317.89 | 2274.94 | 2033.16 | 1440.14 | 2051.76 | 1965.65 |
| ENSMUSG00000014747 | 6_Ankrd5   | 2.02981 | -2.23434 | 0.189898 | 0.578028 | 0       | 1.1335  | 1.03416 | 1.65058 | 6.00934 | 2.35126 |
| ENSMUSG00000014748 | 13_Tex26   | 1501.24 | -0.068   | 0.847702 | 0.955789 | 897.985 | 1700.25 | 1799.44 | 1591.16 | 1426.79 | 1591.8  |
| ENSMUSG00000014763 | 7_Fam12f   | 980.141 | 0.18785  | 0.473717 | 0.806769 | 1215.52 | 962.344 | 953.497 | 820.341 | 989.824 | 939.327 |
| ENSMUSG00000014767 | 16_Tbp     | 603.272 | 0.18348  | 0.601998 | 0.870033 | 891.917 | 550.882 | 481.919 | 505.079 | 658.452 | 531.384 |
| ENSMUSG00000014769 | 9_Psmb1    | 3852.33 | 0.06346  | 0.779217 | 0.93466  | 4297.79 | 3908.32 | 3605.09 | 3769.94 | 3842.54 | 3690.3  |
| ENSMUSG00000014771 | 12_Pdcd2   | 361.194 | 0.23222  | 0.497627 | 0.819569 | 535.959 | 310.58  | 323.693 | 296.28  | 337.381 | 363.269 |
| ENSMUSG00000014773 | 13_Dll1    | 738.839 | 0.789    | 0.037867 | 0.243976 | 566.297 | 1196.98 | 1044.5  | 557.072 | 440.399 | 627.785 |
| ENSMUSG00000014776 | 6_Nol3     | 152.086 | -0.93488 | 0.017083 | 0.145405 | 75.8433 | 92.9472 | 144.783 | 249.238 | 186.29  | 163.412 |
| ENSMUSG00000014778 | 10_Fhod1   | 183.544 | -0.24649 | 0.637304 | 0.885525 | 59.6634 | 218.766 | 225.447 | 234.383 | 172.554 | 190.452 |
| ENSMUSG00000014782 | 15_Plekha7 | 6.0124  | -1.01125 | 0.348239 | 0.725587 | 2.02249 | 9.06802 | 1.03416 | 12.3794 | 6.86782 | 4.70251 |
| ENSMUSG00000014786 | 7_Slc9a5   | 44.4194 | -0.95704 | 0.106877 | 0.444267 | 10.1124 | 35.1386 | 45.5031 | 75.1016 | 48.9332 | 51.7276 |
| ENSMUSG00000014791 | 9_Elmo3    | 953.2   | 0.39356  | 0.46191  | 0.799907 | 339.778 | 1410.08 | 1497.47 | 898.743 | 721.979 | 851.155 |
| ENSMUSG00000014813 | 8_Stc1     | 138.294 | -0.67687 | 0.136664 | 0.501691 | 170.9   | 62.3427 | 85.8354 | 148.553 | 194.016 | 168.115 |
| ENSMUSG00000014837 | 14_49314   | 120.755 | 0.18653  | 0.746583 | 0.924391 | 42.4723 | 140.554 | 202.696 | 145.251 | 80.6968 | 112.86  |
| ENSMUSG00000014846 | 12_Tppp3   | 474.316 | 0.19108  | 0.772219 | 0.932508 | 95.057  | 661.966 | 760.109 | 572.753 | 311.627 | 444.387 |
| ENSMUSG00000014850 | 15_Msh3    | 402.96  | 0.34034  | 0.405721 | 0.764192 | 685.624 | 367.255 | 297.839 | 299.581 | 420.654 | 346.81  |
| ENSMUSG00000014852 | 16_Adam1   | 11.3888 | -0.88545 | 0.280315 | 0.667117 | 6.06747 | 5.66751 | 12.4099 | 21.4576 | 18.028  | 4.70251 |
| ENSMUSG00000014856 | 12_Tmem    | 364.815 | -0.09239 | 0.81496  | 0.947066 | 203.26  | 437.532 | 418.835 | 444.833 | 317.636 | 366.796 |
| ENSMUSG00000014859 | 8_E2f4     | 1016.97 | 0.38655  | 0.468223 | 0.804041 | 376.183 | 1679.85 | 1401.29 | 1001.08 | 719.404 | 924.043 |
| ENSMUSG00000014867 | 9_Surf4    | 3393.96 | 0.22108  | 0.454402 | 0.795918 | 2683.84 | 4429.73 | 3847.08 | 3169.12 | 3043.3  | 3190.65 |
| ENSMUSG00000014873 | 15_Surf2   | 388.249 | -0.18936 | 0.580062 | 0.859399 | 236.631 | 411.462 | 440.553 | 426.676 | 421.512 | 392.66  |
| ENSMUSG00000014905 | 3_Dnajb9   | 1093.26 | 0.35036  | 0.510962 | 0.827179 | 2334.96 | 692.57  | 648.419 | 846.75  | 1070.52 | 966.366 |
| ENSMUSG00000014907 | 9_Naf1     | 363.256 | 0.84131  | 0.08697  | 0.399438 | 797.872 | 328.716 | 271.984 | 185.691 | 310.769 | 284.502 |
| ENSMUSG00000014932 | 15_Yes1    | 1275.39 | 0.6303   | 0.200908 | 0.592148 | 2782.94 | 994.082 | 871.798 | 878.111 | 1133.19 | 992.23  |
| ENSMUSG00000014956 | 15_Ppp1c   | 9983.07 | 0.87626  | 0.083652 | 0.390586 | 23751.1 | 7826.84 | 7196.73 | 5952.83 | 7944.35 | 7226.58 |

|                    |           |         |          |          |          |         |         |         |         |         |         |
|--------------------|-----------|---------|----------|----------|----------|---------|---------|---------|---------|---------|---------|
| ENSMUSG00000014959 | 12_Goras  | 1933.93 | 0.30014  | 0.21312  | 0.604264 | 1940.58 | 2359.95 | 2102.45 | 1582.09 | 1782.2  | 1836.33 |
| ENSMUSG00000014980 | 14_Tsen1  | 337.29  | -0.24302 | 0.450598 | 0.79295  | 397.419 | 232.368 | 296.804 | 333.418 | 395.758 | 367.972 |
| ENSMUSG00000015001 | 17_Oc90   | 1.3059  | -2.58034 | 0.279484 | NA       | 0       | 1.1335  | 0       | 4.12646 | 2.57543 | 0       |
| ENSMUSG00000015002 | 16_Efr3a  | 3048.95 | 0.38138  | 0.314823 | 0.696225 | 5137.12 | 2849.63 | 2362.02 | 2385.92 | 3005.53 | 2553.46 |
| ENSMUSG00000015013 | 8_Trappc  | 540.76  | -0.43282 | 0.216995 | 0.607835 | 288.205 | 562.217 | 530.525 | 645.379 | 597.5   | 620.731 |
| ENSMUSG00000015016 | 7_Acsf3   | 134.173 | -0.1349  | 0.815001 | 0.947066 | 36.4048 | 165.491 | 182.012 | 160.107 | 139.932 | 121.09  |
| ENSMUSG00000015023 | 7_Ddx19a  | 1130.24 | 0.37041  | 0.11367  | 0.457475 | 1311.58 | 1271.79 | 1239.96 | 883.063 | 1040.47 | 1034.55 |
| ENSMUSG00000015027 | 10_Galns  | 165.82  | 0.02992  | 0.950605 | 0.987571 | 74.8321 | 221.033 | 206.832 | 193.118 | 122.762 | 176.344 |
| ENSMUSG00000015053 | 10_Gata2  | 37.3305 | -0.22609 | 0.664168 | 0.896403 | 26.2924 | 31.7381 | 45.5031 | 60.2463 | 34.3391 | 25.8638 |
| ENSMUSG00000015083 | 11_C8g    | 37.018  | -0.34989 | 0.510619 | 0.827179 | 17.1912 | 48.7406 | 32.059  | 51.1681 | 41.2069 | 31.742  |
| ENSMUSG00000015085 | 8_Entpd2  | 231.608 | -0.01714 | 0.970748 | 0.992167 | 106.181 | 262.973 | 321.624 | 275.648 | 184.573 | 238.652 |
| ENSMUSG00000015087 | 14_Rabl6  | 1691.11 | 0.20195  | 0.571899 | 0.854795 | 1110.35 | 2121.92 | 2195.52 | 1585.39 | 1405.33 | 1728.17 |
| ENSMUSG00000015090 | 13_Ptdgs  | 16332.1 | -1.96598 | 0.000371 | 0.00927  | 2661.6  | 6001.9  | 11307.5 | 38690.5 | 20737.5 | 18593.7 |
| ENSMUSG00000015092 | 9_Edf1    | 857.817 | 0.08907  | 0.888483 | 0.969793 | 175.957 | 1264.99 | 1212.04 | 998.604 | 665.32  | 829.993 |
| ENSMUSG00000015093 | 15_Clic3  | 1552.91 | 0.40228  | 0.590311 | 0.864793 | 192.136 | 2526.58 | 2585.4  | 1662.96 | 890.241 | 1460.13 |
| ENSMUSG00000015094 | 16_Npdc1  | 435.333 | -0.40288 | 0.465898 | 0.803159 | 121.349 | 430.731 | 572.925 | 647.855 | 411.21  | 427.929 |
| ENSMUSG00000015095 | 12_Fbxw5  | 1059.58 | 0.16993  | 0.783791 | 0.935592 | 246.744 | 1487.16 | 1631.91 | 1213.18 | 758.035 | 1020.44 |
| ENSMUSG00000015112 | 15_Slc25a | 1242.45 | 0.83266  | 0.008523 | 0.089671 | 2000.24 | 1470.15 | 1303.04 | 727.083 | 890.241 | 1063.94 |
| ENSMUSG00000015120 | 15_Ube2i  | 3016.41 | 0.10809  | 0.640995 | 0.887523 | 3030.7  | 3283.76 | 3073.53 | 2602.15 | 3135.16 | 2973.16 |
| ENSMUSG00000015126 | 9_Tsr3    | 256.514 | -0.06996 | 0.862086 | 0.96084  | 137.529 | 308.313 | 305.078 | 270.696 | 231.789 | 285.678 |
| ENSMUSG00000015127 | 15_Unkl   | 581.035 | 0.23898  | 0.389098 | 0.752914 | 521.802 | 651.764 | 713.571 | 581.006 | 467.87  | 550.194 |
| ENSMUSG00000015133 | 16_Lrrk1  | 1375.68 | 0.38275  | 0.396545 | 0.757228 | 681.579 | 2100.38 | 1889.41 | 1215.66 | 1099.71 | 1267.33 |
| ENSMUSG00000015134 | 14_Aldh1e | 6471.2  | 0.94612  | 0.002198 | 0.034838 | 7112.08 | 10674.2 | 7773.79 | 3699.79 | 4241.73 | 5325.59 |
| ENSMUSG00000015143 | 14_Actn1  | 1040.84 | -0.55924 | 0.058756 | 0.317811 | 662.365 | 972.545 | 890.413 | 1313.87 | 1370.13 | 1035.73 |
| ENSMUSG00000015149 | 13_Sirt2  | 1150.03 | -0.2036  | 0.618773 | 0.87757  | 564.274 | 1245.72 | 1397.15 | 1381.54 | 1033.61 | 1277.91 |
| ENSMUSG00000015165 | 16_Hnrnp1 | 4618.01 | 0.03802  | 0.879223 | 0.966582 | 3977.22 | 5312.73 | 4746.8  | 4322.06 | 4816.06 | 4533.22 |
| ENSMUSG00000015176 | 9_Nolc1   | 1146.71 | 0.36985  | 0.335016 | 0.713724 | 790.793 | 1767.13 | 1320.62 | 824.467 | 999.267 | 1177.98 |
| ENSMUSG00000015189 | 12_Casd1  | 1237.91 | 0.10397  | 0.811583 | 0.946092 | 2115.52 | 797.986 | 933.848 | 1104.24 | 1323.77 | 1152.12 |
| ENSMUSG00000015202 | 13_Cnksr1 | 1638.88 | 0.46035  | 0.063111 | 0.33148  | 1847.54 | 1962.09 | 1884.24 | 1190.9  | 1377.86 | 1570.64 |
| ENSMUSG00000015214 | 14_Mtmr1  | 1445.23 | 0.39137  | 0.306046 | 0.688731 | 2481.59 | 1225.32 | 1213.07 | 1117.45 | 1347.81 | 1286.14 |
| ENSMUSG00000015217 | 11_Hmgb1  | 764.083 | 0.22622  | 0.549134 | 0.843853 | 1220.57 | 631.361 | 619.463 | 609.066 | 788.082 | 715.957 |
| ENSMUSG00000015222 | 17_Map2   | 771.501 | -0.01541 | 0.974301 | 0.993497 | 1353.04 | 444.333 | 504.671 | 802.184 | 814.695 | 710.079 |
| ENSMUSG00000015224 | 10_Cyp2j6 | 246.821 | 0.11619  | 0.741362 | 0.922625 | 348.879 | 190.428 | 230.618 | 204.673 | 252.392 | 253.936 |
| ENSMUSG00000015243 | 4_Abca1   | 1250.54 | -0.31755 | 0.337958 | 0.716073 | 1534.06 | 904.535 | 901.789 | 1464.89 | 1448.25 | 1249.69 |
| ENSMUSG00000015247 | 10_Nipsn2 | 353.328 | 0.22692  | 0.467602 | 0.803736 | 457.082 | 408.061 | 278.189 | 344.972 | 323.646 | 308.014 |
| ENSMUSG00000015289 | 4_Lage3   | 452.353 | -0.24444 | 0.482123 | 0.811069 | 273.036 | 430.731 | 538.798 | 532.314 | 480.747 | 458.495 |
| ENSMUSG00000015290 | 15_Ubl4a  | 1398.02 | -0.0846  | 0.698332 | 0.905638 | 1743.94 | 1406.68 | 1320.62 | 1438.48 | 1459.41 | 1418.98 |
| ENSMUSG00000015291 | 10_Gdi1   | 3114.67 | -0.12668 | 0.580958 | 0.859684 | 2329.35 | 3032.12 | 3172.81 | 3181.5  | 3476.83 | 3095.43 |
| ENSMUSG00000015305 | 5_Sash1   | 825.663 | -0.11131 | 0.667706 | 0.898113 | 918.21  | 683.502 | 779.758 | 913.599 | 843.024 | 815.886 |
| ENSMUSG00000015312 | 8_Gadd45  | 240.437 | 0.57498  | 0.111746 | 0.453024 | 224.496 | 309.446 | 328.863 | 210.45  | 133.064 | 236.301 |
| ENSMUSG00000015314 | 10_Slamf6 | 14.2254 | 2.29977  | 0.003521 | 0.048793 | 26.2924 | 35.1386 | 9.30745 | 4.12646 | 3.43391 | 7.05377 |
| ENSMUSG00000015316 | 11_Slamf8 | 3.68927 | 1.25279  | 0.32316  | 0.703484 | 11.1237 | 3.40051 | 1.03416 | 1.65058 | 2.57543 | 2.35126 |
| ENSMUSG00000015335 | 16_Zdhhc  | 112.305 | 0.4445   | 0.407255 | 0.764774 | 48.5397 | 163.224 | 176.842 | 122.143 | 77.2629 | 85.8208 |
| ENSMUSG00000015337 | 5_Endog   | 17.6958 | -0.28042 | 0.690467 | 0.905638 | 5.05622 | 18.136  | 24.8199 | 24.7588 | 14.5941 | 18.81   |
| ENSMUSG00000015340 | 10_Cybb   | 500.657 | 1.67398  | 0.000114 | 0.003676 | 1038.55 | 869.397 | 379.537 | 269.045 | 246.383 | 201.032 |
| ENSMUSG00000015341 | 16_Golga  | 3939.64 | 0.5028   | 0.15587  | 0.533034 | 6659.04 | 3703.15 | 3495.47 | 2920.71 | 3539.5  | 3319.97 |
| ENSMUSG00000015342 | 6_Xk      | 93.5503 | 0.10138  | 0.833682 | 0.952011 | 161.799 | 64.6097 | 64.118  | 98.2098 | 96.1494 | 76.4158 |
| ENSMUSG00000015354 | 8_Pcolce2 | 368.983 | -0.24153 | 0.474783 | 0.806964 | 334.722 | 239.169 | 440.553 | 448.959 | 374.296 | 376.201 |
| ENSMUSG00000015355 | 13_Cd48   | 60.5089 | 0.98273  | 0.028106 | 0.202638 | 85.9558 | 105.416 | 49.6398 | 32.1864 | 46.3578 | 43.4982 |
| ENSMUSG00000015357 | 10_ClpX   | 2304.16 | 0.36868  | 0.301945 | 0.685243 | 3619.24 | 2284.01 | 1887.34 | 1617.57 | 2183.11 | 2233.69 |
| ENSMUSG00000015363 | 13_Trabd  | 1344.86 | 0.4456   | 0.440887 | 0.786478 | 428.768 | 2118.52 | 2105.55 | 1440.14 | 827.572 | 1148.59 |
| ENSMUSG00000015365 | 15_Mov1C  | 1.09638 | -1.12105 | 0.610248 | NA       | 0       | 0       | 2.06832 | 2.47588 | 0.85848 | 1.17563 |
| ENSMUSG00000015377 | 9_Dennd6  | 209.465 | 0.48931  | 0.44533  | 0.788998 | 48.5397 | 364.988 | 320.59  | 190.643 | 176.846 | 155.183 |
| ENSMUSG00000015396 | 3_Cd83    | 71.7107 | 0.26454  | 0.482594 | 0.811473 | 94.0457 | 82.7457 | 57.913  | 56.1199 | 71.2536 | 68.1864 |
| ENSMUSG00000015401 | 12_Tmem   | 459.312 | -1.07439 | 0.046283 | 0.275233 | 552.139 | 141.688 | 193.388 | 729.558 | 665.32  | 473.778 |
| ENSMUSG00000015405 | 15_Ace2   | 113.041 | 0.28583  | 0.539185 | 0.84017  | 204.271 | 77.0782 | 91.0062 | 94.0833 | 101.3   | 110.509 |
| ENSMUSG00000015437 | 4_Gzmb    | 129.02  | 10.5416  | 1.59E-16 | 1.02E-13 | 243.71  | 376.323 | 154.09  | 0       | 0       | 0       |
| ENSMUSG00000015441 | 3_Gzmf    | 0       | NA       | NA       | NA       | 0       | 0       | 0       | 0       | 0       | 0       |
| ENSMUSG00000015452 | 14_Ager   | 14.6692 | -0.96224 | 0.300422 | 0.683516 | 1.01124 | 11.335  | 17.5807 | 32.1864 | 9.44325 | 16.4588 |
| ENSMUSG00000015461 | 15_Atf6b  | 450.234 | 0.45455  | 0.361937 | 0.734636 | 204.271 | 678.968 | 678.41  | 391.189 | 293.599 | 454.968 |
| ENSMUSG00000015467 | 14_Egfl8  | 21.9763 | -0.37669 | 0.639279 | 0.886848 | 3.03373 | 19.2695 | 35.1615 | 34.6623 | 19.745  | 19.9857 |
| ENSMUSG00000015468 | 14_Notch1 | 57.7105 | -0.47124 | 0.33192  | 0.711299 | 26.2924 | 60.0757 | 58.9472 | 88.3063 | 51.5086 | 61.1326 |
| ENSMUSG00000015474 | 16_Ppt2   | 317.729 | -0.57659 | 0.218408 | 0.609256 | 108.203 | 324.182 | 333     | 427.501 | 340.815 | 372.674 |
| ENSMUSG00000015476 | 6_Prrt1   | 77.0917 | -1.22901 | 0.00057  | 0.012859 | 40.4498 | 45.3401 | 52.7422 | 120.493 | 114.177 | 89.3477 |
| ENSMUSG00000015478 | 13_Rnf5   | 621.268 | -0.08055 | 0.820481 | 0.948338 | 394.385 | 692.57  | 724.947 | 736.986 | 526.246 | 652.473 |
| ENSMUSG00000015484 | 3_Fam16c  | 5.19618 | -2.32419 | 0.057704 | 0.314714 | 3.03373 | 1.1335  | 1.03416 | 18.1564 | 4.29238 | 3.52688 |
| ENSMUSG00000015488 | 14_Cacfd1 | 1007.85 | -0.12476 | 0.675567 | 0.900812 | 715.961 | 1064.36 | 1112.76 | 1146.33 | 964.928 | 1042.78 |
| ENSMUSG00000015501 | 10_Hivep2 | 1440.92 | 0.33826  | 0.155188 | 0.53175  | 1576.53 | 1673.05 | 1577.1  | 1173.57 | 1212.17 | 1433.09 |
| ENSMUSG00000015522 | 18_Arnt   | 2232.86 | 0.27466  | 0.298289 | 0.681298 | 2928.56 | 2205.8  | 2199.66 | 1847.83 | 2123.87 | 2091.44 |
| ENSMUSG00000015533 | 8_Iltga2  | 398.714 | 0.37248  | 0.252467 | 0.643959 | 538.993 | 429.598 | 380.571 | 260.792 | 370.862 | 411.47  |
| ENSMUSG00000015536 | 14_Mocs2  | 1913.56 | 0.04965  | 0.871479 | 0.963578 | 2519.01 | 1730.86 | 1589.51 | 1690.2  | 2130.74 | 1821.05 |
| ENSMUSG00000015542 | 17_Nat9   | 279.475 | 0.01409  | 0.982111 | 0.993958 | 62.6971 | 354.786 | 425.04  | 317.738 | 199.167 | 317.42  |
| ENSMUSG00000015568 | 15_Lpl    | 957.288 | -0.93822 | 0.023096 | 0.179251 | 1036.53 | 462.469 | 470.544 | 1320.47 | 1393.31 | 1060.42 |
| ENSMUSG00000015575 | 14_Atp6v1 | 1656.09 | -0.09631 | 0.691308 | 0.905638 | 1443.05 | 1734.26 | 1625.7  | 1835.45 | 1752.15 | 1545.95 |
| ENSMUSG00000015597 | 16_Zfp311 | 875.467 | -0.04789 | 0.896467 | 0.97156  | 1227.65 | 640.429 | 714.606 | 754.317 | 1070.52 | 845.276 |

|                    |            |         |          |          |          |         |         |         |         |         |         |
|--------------------|------------|---------|----------|----------|----------|---------|---------|---------|---------|---------|---------|
| ENSMUSG00000015599 | 8_Ttbbk1   | 3.32987 | -1.1253  | 0.401792 | 0.760434 | 2.02249 | 2.26701 | 2.06832 | 10.7288 | 1.71695 | 1.17563 |
| ENSMUSG00000015605 | 5_Srf      | 627.919 | 0.07388  | 0.891012 | 0.970606 | 207.305 | 894.334 | 830.432 | 704.8   | 478.172 | 652.473 |
| ENSMUSG00000015619 | 10_Gata3   | 5.95611 | 1.30353  | 0.155393 | 0.532136 | 9.1012  | 9.06802 | 7.23913 | 1.65058 | 5.15086 | 3.52688 |
| ENSMUSG00000015627 | 5_Gata5    | 0.2751  | -1.54073 | 0.703687 | NA       | 0       | 0       | 0       | 1.65058 | 0       | 0       |
| ENSMUSG00000015647 | 9_Lama5    | 1645.59 | 0.37314  | 0.568263 | 0.852443 | 332.699 | 2358.82 | 2880.14 | 1593.64 | 1134.05 | 1574.17 |
| ENSMUSG00000015652 | 9_Steap1   | 59.9333 | -0.28596 | 0.563639 | 0.85076  | 88.9895 | 40.8061 | 32.059  | 60.2463 | 66.9612 | 70.5377 |
| ENSMUSG00000015653 | 13_Steap3  | 654.571 | -0.17929 | 0.65101  | 0.891804 | 921.244 | 415.996 | 504.671 | 760.92  | 761.469 | 563.126 |
| ENSMUSG00000015656 | 16_Hspa8   | 7136.13 | 0.33742  | 0.287493 | 0.673035 | 5797.46 | 10480.4 | 7622.8  | 6232.61 | 5970.71 | 6712.83 |
| ENSMUSG00000015659 | 12_Serac1  | 328.294 | -0.17853 | 0.515577 | 0.829821 | 306.407 | 259.572 | 357.82  | 331.768 | 357.985 | 356.215 |
| ENSMUSG00000015668 | 13_Pdzd1   | 953.117 | -0.05629 | 0.819089 | 0.948173 | 994.053 | 966.878 | 842.842 | 919.376 | 1077.39 | 918.165 |
| ENSMUSG00000015671 | 10_Psma2   | 3780.41 | 0.15556  | 0.582968 | 0.860399 | 4739.7  | 3989.93 | 3222.45 | 3172.42 | 4054.59 | 3503.37 |
| ENSMUSG00000015672 | 3_Mrpl32   | 397.931 | 0.4098   | 0.353041 | 0.729327 | 744.276 | 323.048 | 294.736 | 297.105 | 386.315 | 342.108 |
| ENSMUSG00000015697 | 14_Setdb1  | 1337.58 | 0.23695  | 0.33801  | 0.716083 | 1409.67 | 1507.56 | 1424.04 | 1045.65 | 1328.92 | 1309.65 |
| ENSMUSG00000015702 | 13_Anxa9   | 1844.73 | 0.34913  | 0.262219 | 0.651432 | 1444.06 | 2424.56 | 2332.03 | 1517.71 | 1691.2  | 1658.81 |
| ENSMUSG00000015709 | 8_Arnt2    | 272.788 | -0.99063 | 0.002618 | 0.039533 | 130.451 | 200.63  | 217.174 | 404.393 | 363.136 | 320.946 |
| ENSMUSG00000015711 | 8_Prune    | 1121.65 | 0.20192  | 0.471196 | 0.804868 | 937.423 | 1363.6  | 1298.91 | 1001.08 | 993.258 | 1135.66 |
| ENSMUSG00000015714 | 12_Cers2   | 2429.07 | -0.04011 | 0.859825 | 0.960099 | 2338    | 2491.44 | 2356.85 | 2442.87 | 2671.58 | 2273.66 |
| ENSMUSG00000015721 | 17_Nlrp5   | 0.948   | 0.28013  | 0.89052  | NA       | 1.01124 | 1.1335  | 1.03416 | 1.65058 | 0.85848 | 0       |
| ENSMUSG00000015733 | 13_Capza2  | 7468    | 0.76419  | 0.116723 | 0.464482 | 16667.3 | 6292.07 | 5243.2  | 4600.18 | 6448.02 | 5557.19 |
| ENSMUSG00000015745 | 9_Plekho1  | 134.306 | 0.20949  | 0.705191 | 0.908152 | 51.5735 | 215.366 | 165.466 | 168.36  | 100.442 | 104.631 |
| ENSMUSG00000015747 | 5_Vps45    | 511.706 | 0.21511  | 0.485807 | 0.813523 | 689.669 | 494.207 | 465.373 | 406.869 | 548.567 | 465.549 |
| ENSMUSG00000015748 | 13_Prpf3   | 768.148 | 0.19117  | 0.462323 | 0.799907 | 768.546 | 876.198 | 811.817 | 602.463 | 756.318 | 793.549 |
| ENSMUSG00000015749 | 12_Anpr32  | 2833.22 | -0.12059 | 0.702218 | 0.907074 | 3676.88 | 2205.8  | 2261.71 | 2990.86 | 2854.44 | 3009.61 |
| ENSMUSG00000015750 | 15_Aph1a   | 2257.36 | 0.22989  | 0.499429 | 0.821156 | 1574.51 | 2897.23 | 2838.77 | 2177.95 | 1843.15 | 2212.53 |
| ENSMUSG00000015755 | 16_Tab2    | 3435.6  | 0.28817  | 0.304573 | 0.687401 | 4694.2  | 3445.85 | 3192.46 | 2808.47 | 3259.64 | 3212.99 |
| ENSMUSG00000015757 | 10_Ppil4   | 1349.25 | 0.39262  | 0.385283 | 0.750802 | 2588.79 | 1003.15 | 1003.14 | 1039.87 | 1346.09 | 1114.5  |
| ENSMUSG00000015759 | 10_Cnih1   | 1451.09 | 0.054    | 0.889829 | 0.97035  | 2271.25 | 1059.83 | 1103.45 | 1305.61 | 1542.68 | 1423.69 |
| ENSMUSG00000015766 | 14_Eps8    | 2859.1  | 0.69265  | 0.017714 | 0.149596 | 4172.39 | 3595.47 | 2829.47 | 1815.64 | 2376.26 | 2365.36 |
| ENSMUSG00000015776 | 12_Med22   | 1303.57 | -0.17531 | 0.570288 | 0.853903 | 871.693 | 1406.68 | 1395.08 | 1440.96 | 1255.09 | 1451.9  |
| ENSMUSG00000015787 | 15_Abo     | 0.32647 | 0.16972  | 0.966824 | NA       | 0       | 1.1335  | 0       | 0.82529 | 0       | 0       |
| ENSMUSG00000015790 | 16_Surf1   | 651.358 | -0.27218 | 0.317952 | 0.698985 | 508.656 | 606.424 | 655.658 | 809.612 | 708.244 | 619.556 |
| ENSMUSG00000015804 | 14_Med24   | 951.955 | 0.44738  | 0.090485 | 0.409937 | 1261.02 | 1100.63 | 933.848 | 840.973 | 849.892 | 725.362 |
| ENSMUSG00000015806 | 12_Qdpr    | 788.587 | -0.26792 | 0.304713 | 0.687401 | 808.995 | 604.157 | 733.221 | 793.931 | 895.391 | 895.828 |
| ENSMUSG00000015812 | 7_Gnrlr1   | 6.50824 | 0.57065  | 0.484685 | 0.812793 | 7.07871 | 9.06802 | 7.23913 | 4.95175 | 6.00934 | 4.70251 |
| ENSMUSG00000015829 | 13_Tnr     | 96.2536 | -1.64335 | 0.006066 | 0.071061 | 76.8546 | 37.4056 | 25.854  | 145.251 | 227.496 | 64.6595 |
| ENSMUSG00000015837 | 15_Sqstm   | 4386.17 | -0.08678 | 0.798531 | 0.940596 | 2756.65 | 5167.64 | 4838.84 | 5052.44 | 4106.95 | 4394.5  |
| ENSMUSG00000015839 | 6_Nfe2l2   | 3129.95 | 0.46111  | 0.120418 | 0.471646 | 4561.72 | 3187.41 | 3128.34 | 2229.94 | 2902.51 | 2769.78 |
| ENSMUSG00000015843 | 10_Rxrg    | 31.4943 | -1.2005  | 0.026151 | 0.194332 | 13.1462 | 21.5366 | 22.7516 | 63.5475 | 29.1882 | 38.7957 |
| ENSMUSG00000015846 | 14_Rxra    | 2719.13 | 0.50016  | 0.299023 | 0.682038 | 1269.11 | 4218.9  | 4069.43 | 2457.72 | 1831.99 | 2467.64 |
| ENSMUSG00000015850 | 11_Adamt   | 741.384 | 0.55661  | 0.263096 | 0.652524 | 340.789 | 1157.31 | 1149.99 | 721.306 | 478.172 | 600.746 |
| ENSMUSG00000015852 | 13_Fcrls   | 59.5855 | -1.81585 | 3.93E-05 | 0.001575 | 18.2024 | 22.6701 | 38.264  | 95.7339 | 103.876 | 78.7671 |
| ENSMUSG00000015854 | 7_Cd5l     | 0.13755 | -0.79206 | 0.84609  | NA       | 0       | 0       | 0       | 0.82529 | 0       | 0       |
| ENSMUSG00000015869 | 16_Prpsa1  | 711.555 | 0.03898  | 0.898092 | 0.97174  | 524.836 | 836.525 | 802.509 | 739.462 | 719.404 | 646.595 |
| ENSMUSG00000015879 | 8_Fam18a   | 29.9618 | -0.85879 | 0.084355 | 0.391892 | 30.3373 | 15.869  | 17.5807 | 44.5658 | 32.6221 | 38.7957 |
| ENSMUSG00000015880 | 13_Ncapg   | 408.741 | 0.86998  | 0.720416 | 0.366219 | 900.007 | 393.326 | 291.634 | 215.401 | 351.117 | 300.961 |
| ENSMUSG00000015882 | 17_Lcorl   | 980.097 | 0.6576   | 0.226943 | 0.617698 | 2303.61 | 655.165 | 640.146 | 637.126 | 907.41  | 737.119 |
| ENSMUSG00000015889 | 7_Lta4h    | 1757.59 | -0.03084 | 0.893599 | 0.971063 | 1667.54 | 1786.4  | 1762.21 | 1603.54 | 1835.42 | 1890.41 |
| ENSMUSG00000015890 | 2_Amdhd1   | 6.97015 | 0.0582   | 0.942733 | 0.986023 | 5.05622 | 9.06802 | 7.23913 | 8.25292 | 5.15086 | 7.05377 |
| ENSMUSG00000015932 | 8_Dstn     | 22122.9 | 0.56916  | 0.157079 | 0.534741 | 40514.5 | 20999.3 | 17779.3 | 14346.9 | 20468.7 | 18629   |
| ENSMUSG00000015937 | 14_H2afy   | 2923.69 | 0.59777  | 0.088419 | 0.404275 | 2279.34 | 4548.75 | 3734.36 | 2149.06 | 2138.47 | 2692.19 |
| ENSMUSG00000015942 | 9_Gtf2ird2 | 173.61  | -0.08965 | 0.804797 | 0.942951 | 113.259 | 173.426 | 218.208 | 199.721 | 175.988 | 161.061 |
| ENSMUSG00000015943 | 11_Bola1   | 54.0055 | 0.0625   | 0.896344 | 0.97156  | 36.4048 | 47.6071 | 81.6988 | 69.3246 | 45.4993 | 43.4982 |
| ENSMUSG00000015944 | 9_Gatsl2   | 946.062 | -0.15129 | 0.659841 | 0.89509  | 572.364 | 1079.09 | 1038.3  | 1080.31 | 943.466 | 962.839 |
| ENSMUSG00000015947 | 10_Fcgr1   | 245.914 | 3.31219  | 5.71E-13 | 1.94E-10 | 299.328 | 731.109 | 310.248 | 48.6922 | 43.7823 | 42.3226 |
| ENSMUSG00000015950 | 13_Ncf1    | 103.952 | 1.22051  | 0.005042 | 0.062555 | 91.012  | 216.499 | 129.27  | 69.3246 | 63.5273 | 54.0789 |
| ENSMUSG00000015957 | 11_Wnt11   | 196.732 | -0.63291 | 0.120168 | 0.471162 | 92.0232 | 149.622 | 221.311 | 270.696 | 238.657 | 208.086 |
| ENSMUSG00000015961 | 8_Adss     | 10313.5 | 0.87429  | 0.055768 | 0.308815 | 22588.2 | 9075.96 | 8374.64 | 5843.9  | 8326.37 | 7672.15 |
| ENSMUSG00000015962 | 5_170001   | 34.8006 | 0.65329  | 0.170514 | 0.552593 | 58.6522 | 34.0051 | 35.1615 | 28.0599 | 31.7636 | 21.1613 |
| ENSMUSG00000015966 | 16_Ilt1rb  | 12.9973 | -0.37096 | 0.551068 | 0.84485  | 12.1349 | 13.602  | 8.27329 | 12.3794 | 16.3111 | 15.2832 |
| ENSMUSG00000015968 | 16_Cacna   | 278.979 | -1.25655 | 0.000161 | 0.004877 | 159.777 | 145.088 | 189.252 | 493.525 | 392.324 | 293.907 |
| ENSMUSG00000015970 | 18_Chdh    | 80.3917 | -0.37394 | 0.377885 | 0.746591 | 70.7871 | 43.0731 | 96.177  | 107.288 | 81.5553 | 83.4696 |
| ENSMUSG00000015971 | 4_Actr8    | 580.79  | -0.08557 | 0.750355 | 0.925182 | 460.116 | 612.092 | 618.429 | 584.307 | 572.604 | 637.19  |
| ENSMUSG00000015980 | 14_Lrrc27  | 83.9081 | -0.79704 | 0.06213  | 0.329195 | 61.6859 | 37.4056 | 84.8012 | 108.939 | 123.621 | 86.9965 |
| ENSMUSG00000015981 | 12_Stk32c  | 140.706 | 0.86057  | 0.131915 | 0.493664 | 54.6072 | 281.109 | 208.901 | 108.113 | 102.159 | 89.3477 |
| ENSMUSG00000015994 | 9_Fnta     | 2134.15 | -0.27507 | 0.324535 | 0.705143 | 2374.4  | 1717.26 | 1702.23 | 2175.47 | 2608.91 | 2226.64 |
| ENSMUSG00000016018 | 3_Skiv2l2  | 1580.7  | 0.18191  | 0.632167 | 0.8832   | 2503.84 | 1331.87 | 1204.8  | 1276.73 | 1677.46 | 1489.52 |
| ENSMUSG00000016024 | 9_Lbp      | 645.931 | 0.66671  | 0.074322 | 0.364833 | 473.262 | 1034.89 | 869.73  | 541.392 | 447.267 | 509.047 |
| ENSMUSG00000016028 | 9_Celsr1   | 2254.58 | 0.93198  | 0.103361 | 0.436784 | 820.119 | 4166.76 | 3888.45 | 1463.24 | 1226.76 | 1962.12 |
| ENSMUSG00000016087 | 13_Fli1    | 105.183 | -0.20864 | 0.645725 | 0.889456 | 154.72  | 77.0782 | 61.0155 | 125.444 | 117.611 | 95.2259 |
| ENSMUSG00000016128 | 14_Stard1  | 465.937 | -0.3092  | 0.264827 | 0.653546 | 397.419 | 404.661 | 446.758 | 621.445 | 451.559 | 473.778 |
| ENSMUSG00000016150 | 15_Tenm1   | 34.5559 | -1.78051 | 0.003892 | 0.05235  | 28.3148 | 9.06802 | 9.30745 | 70.9751 | 53.2256 | 36.4445 |
| ENSMUSG00000016179 | 11_Camk1   | 11.5897 | -1.09788 | 0.121512 | 0.473965 | 5.05622 | 7.93452 | 9.30745 | 19.807  | 18.028  | 9.40502 |
| ENSMUSG00000016181 | 9_Diexf    | 327.152 | 0.04094  | 0.886121 | 0.969051 | 302.362 | 377.456 | 315.419 | 267.395 | 351.117 | 349.161 |
| ENSMUSG00000016194 | 14_Hsd11   | 81.3456 | 0.42944  | 0.335281 | 0.713739 | 139.552 | 82.7457 | 57.913  | 79.2281 | 68.6782 | 59.957  |
| ENSMUSG00000016200 | 13_Syt14   | 17.4719 | -1.54043 | 0.101954 | 0.434128 | 19.2136 | 4.53401 | 3.10248 | 42.9152 | 29.1882 | 5.87814 |

|                    |           |         |          |          |          |         |         |         |         |         |         |
|--------------------|-----------|---------|----------|----------|----------|---------|---------|---------|---------|---------|---------|
| ENSMUSG00000016206 | 6_H2-M3   | 231.26  | 1.51396  | 0.000676 | 0.014724 | 176.968 | 503.275 | 347.478 | 130.396 | 101.3   | 128.143 |
| ENSMUSG00000016239 | 11_Lonrf3 | 81.6897 | -0.69159 | 0.098994 | 0.427379 | 90.0007 | 46.4736 | 50.6739 | 80.8787 | 111.602 | 110.509 |
| ENSMUSG00000016252 | 7_Atp5e   | 1647.35 | -0.22109 | 0.536724 | 0.839034 | 957.648 | 1729.73 | 1877    | 2084.69 | 1585.61 | 1649.41 |
| ENSMUSG00000016253 | 12_Nelfcd | 517.836 | 0.19616  | 0.687094 | 0.904573 | 219.44  | 719.774 | 719.776 | 523.235 | 395.758 | 529.033 |
| ENSMUSG00000016255 | 5_Tubb1   | 0       | NA       | NA       | NA       | 0       | 0       | 0       | 0       | 0       | 0       |
| ENSMUSG00000016256 | 10_Ctsz   | 950.874 | -0.08684 | 0.87321  | 0.963908 | 305.396 | 1420.28 | 1041.4  | 1271.78 | 816.412 | 849.979 |
| ENSMUSG00000016257 | 15_Slmo2  | 1231    | 0.19833  | 0.39174  | 0.754323 | 1328.78 | 1404.41 | 1213.07 | 1139.73 | 1090.27 | 1209.72 |
| ENSMUSG00000016262 | 14_Sertac | 1011.49 | 0.3856   | 0.135641 | 0.500051 | 1346.98 | 1017.89 | 1072.43 | 822.816 | 895.391 | 913.463 |
| ENSMUSG00000016283 | 13_H2-M2  | 4.88078 | 0.51236  | 0.610795 | 0.874284 | 3.03373 | 9.06802 | 5.17081 | 2.47588 | 6.00934 | 3.52688 |
| ENSMUSG00000016308 | 12_Ube2a  | 896.453 | 0.47582  | 0.27379  | 0.660339 | 1702.94 | 751.512 | 674.273 | 643.728 | 855.043 | 751.226 |
| ENSMUSG00000016319 | 3_Slc25a1 | 10437.8 | 0.35201  | 0.10798  | 0.446711 | 11112.6 | 12619.3 | 11383   | 8966.8  | 9222.62 | 9322.73 |
| ENSMUSG00000016327 | 9_Atp1b4  | 11.4484 | 0.67861  | 0.467245 | 0.803613 | 32.3598 | 5.66751 | 4.13665 | 9.07822 | 6.86782 | 10.5807 |
| ENSMUSG00000016344 | 14_Pdpf1  | 601.865 | -0.2112  | 0.701625 | 0.906669 | 174.945 | 676.701 | 822.158 | 809.612 | 508.218 | 619.556 |
| ENSMUSG00000016346 | 17_Kcnc2  | 24.1763 | -2.92309 | 0.006669 | 0.075476 | 8.08995 | 6.80102 | 2.06832 | 96.5592 | 29.1882 | 2.35126 |
| ENSMUSG00000016349 | 10_Eef1a1 | 132.687 | -1.45202 | 0.025536 | 0.191495 | 31.3486 | 44.2066 | 137.543 | 313.611 | 101.3   | 168.115 |
| ENSMUSG00000016356 | 17_Col201 | 140.606 | -0.19327 | 0.748227 | 0.924776 | 34.3823 | 170.025 | 189.252 | 174.962 | 111.602 | 163.412 |
| ENSMUSG00000016382 | 15_Pls3   | 11826.4 | 0.50469  | 0.224369 | 0.614062 | 21842.9 | 10421.4 | 9358.13 | 7900.52 | 11368.8 | 10066.9 |
| ENSMUSG00000016386 | 15_Mppep  | 256.516 | 0.30459  | 0.420856 | 0.714031 | 413.599 | 215.366 | 221.311 | 203.022 | 250.675 | 235.126 |
| ENSMUSG00000016409 | 4_Nkap    | 581.112 | 0.51987  | 0.243016 | 0.634644 | 1139.67 | 472.671 | 441.587 | 422.55  | 530.539 | 479.656 |
| ENSMUSG00000016427 | 7_Ndufa1  | 800.295 | -0.3161  | 0.185082 | 0.572285 | 712.927 | 695.971 | 730.118 | 983.748 | 817.27  | 861.735 |
| ENSMUSG00000016458 | 13_Wt1    | 1.87056 | -0.79603 | 0.721567 | 0.913923 | 4.04498 | 0       | 0       | 2.47588 | 0       | 4.70251 |
| ENSMUSG00000016477 | 17_E2f3   | 312.906 | 0.33906  | 0.223499 | 0.613683 | 391.352 | 329.849 | 326.795 | 236.859 | 279.863 | 312.717 |
| ENSMUSG00000016481 | 15_Cr1l   | 2244.74 | 0.24914  | 0.522241 | 0.832206 | 3707.22 | 1837.41 | 1769.45 | 1776.85 | 2343.64 | 2033.84 |
| ENSMUSG00000016487 | 15_Ppflbp | 5030.25 | 0.18962  | 0.503816 | 0.824384 | 6624.66 | 4679.1  | 4776.79 | 4113.26 | 4803.18 | 5184.52 |
| ENSMUSG00000016493 | 13_Cd46   | 223.527 | -0.41181 | 0.418738 | 0.772648 | 334.722 | 91.8137 | 148.919 | 271.521 | 288.448 | 205.735 |
| ENSMUSG00000016494 | 9_Cd34    | 2330.4  | 0.044    | 0.911324 | 0.975173 | 3641.49 | 1509.83 | 1946.29 | 2402.43 | 2215.73 | 2266.61 |
| ENSMUSG00000016495 | 12_Plgkrt | 1559.59 | 0.4084   | 0.18832  | 0.576158 | 2180.24 | 1616.38 | 1539.87 | 1067.93 | 1619.95 | 1333.16 |
| ENSMUSG00000016496 | 7_Cd274   | 6231.55 | 1.01057  | 0.000212 | 0.006055 | 9138.61 | 8894.6  | 6953.7  | 3522.35 | 4701.88 | 4178.18 |
| ENSMUSG00000016498 | 9_Pdcd1l1 | 3.30627 | 5.2499   | 0.005557 | 0.066445 | 3.03373 | 14.7355 | 2.06832 | 0       | 0       | 0       |
| ENSMUSG00000016503 | 16_Gtf3a  | 208.037 | -0.13088 | 0.720402 | 0.913102 | 126.406 | 226.701 | 243.028 | 226.955 | 233.506 | 191.627 |
| ENSMUSG00000016510 | 11_Mtif3  | 352.678 | -0.01253 | 0.960472 | 0.989875 | 329.666 | 360.454 | 362.991 | 330.117 | 342.532 | 390.308 |
| ENSMUSG00000016520 | 7_Lnx2    | 1056.11 | 0.76927  | 0.001303 | 0.023983 | 1341.92 | 1399.88 | 1251.34 | 772.474 | 711.677 | 859.384 |
| ENSMUSG00000016524 | 12_Ii19   | 1.69521 | 0.65788  | 0.700656 | 0.906172 | 3.03373 | 0       | 3.10248 | 0.82529 | 0.85848 | 2.35126 |
| ENSMUSG00000016526 | 8_Dyrk3   | 71.6654 | 0.28235  | 0.422453 | 0.774546 | 66.7421 | 91.8137 | 77.5621 | 58.5958 | 72.9705 | 62.3083 |
| ENSMUSG00000016528 | 10_Mapk1  | 2627.89 | 0.27286  | 0.470368 | 0.804531 | 1657.43 | 3722.42 | 3247.27 | 2581.51 | 2098.12 | 2460.59 |
| ENSMUSG00000016529 | 5_Ii10    | 3.03202 | 5.12896  | 0.007261 | 0.080181 | 8.08995 | 9.06802 | 1.03416 | 0       | 0       | 0       |
| ENSMUSG00000016534 | 15_Lamp2  | 15361.5 | 0.57106  | 0.229908 | 0.620993 | 32380   | 11985.7 | 10722.2 | 11351.9 | 13911.6 | 11817.4 |
| ENSMUSG00000016541 | 9_Atnx10  | 2571.84 | 0.11102  | 0.992206 | 0.905638 | 3249.13 | 2459.7  | 2303.08 | 2139.98 | 2671.58 | 2607.54 |
| ENSMUSG00000016552 | 13_Foxrec | 88.9953 | -0.86081 | 0.042906 | 0.262587 | 57.6409 | 43.0731 | 88.9379 | 146.077 | 103.017 | 95.2259 |
| ENSMUSG00000016554 | 8_Eif3d   | 2294.15 | 0.45606  | 0.393433 | 0.755289 | 860.569 | 3848.24 | 3252.44 | 1891.57 | 1589.04 | 2323.04 |
| ENSMUSG00000016559 | 14_H3f3b  | 20095.4 | 0.66558  | 0.06581  | 0.340197 | 35956.8 | 19750.2 | 18243.6 | 13606.6 | 16417.5 | 16597.5 |
| ENSMUSG00000016619 | 9_Nup50   | 1617.25 | 0.49802  | 0.028919 | 0.206506 | 1794.96 | 2072.04 | 1813.92 | 1313.87 | 1333.21 | 1375.48 |
| ENSMUSG00000016624 | 15_Phf21l | 17.6681 | -0.82529 | 0.273878 | 0.660339 | 7.07871 | 15.869  | 15.5124 | 42.9152 | 12.8772 | 11.7563 |
| ENSMUSG00000016637 | 6_Iif27   | 146.993 | -0.39491 | 0.262199 | 0.651432 | 90.0007 | 148.489 | 142.714 | 193.118 | 144.224 | 163.412 |
| ENSMUSG00000016664 | 16_Pacsir | 2368.24 | -0.00845 | 0.977753 | 0.993796 | 1730.24 | 2761.21 | 2592.64 | 2612.88 | 2111.85 | 2400.63 |
| ENSMUSG00000016756 | 16_Cmah   | 9047.84 | 0.81785  | 0.033866 | 0.227747 | 16698.7 | 8955.81 | 8982.73 | 4766.89 | 7562.32 | 7320.63 |
| ENSMUSG00000016757 | 10_Ttll12 | 572.13  | 0.31694  | 0.550301 | 0.84423  | 207.305 | 895.467 | 801.475 | 556.247 | 432.672 | 539.613 |
| ENSMUSG00000016758 | 3_Bik     | 143.346 | 0.2451   | 0.672216 | 0.900129 | 46.5172 | 201.764 | 218.208 | 151.029 | 94.4325 | 148.129 |
| ENSMUSG00000016763 | 14_Scubp  | 358.519 | -1.26867 | 0.014173 | 0.128121 | 82.922  | 261.839 | 286.463 | 697.372 | 449.842 | 372.674 |
| ENSMUSG00000016831 | 11_Tox4   | 1869.74 | 0.42589  | 0.096713 | 0.42186  | 2235.86 | 2270.41 | 1924.57 | 1352.65 | 1690.34 | 1744.63 |
| ENSMUSG00000016833 | 14_Mrps1  | 733.399 | 0.34914  | 0.413967 | 0.768871 | 1319.67 | 595.089 | 550.174 | 538.091 | 733.139 | 664.23  |
| ENSMUSG00000016918 | 15_Sulf1  | 1345.99 | -0.54675 | 0.057614 | 0.314319 | 1355.07 | 921.538 | 1005.21 | 1804.91 | 1503.19 | 1485.99 |
| ENSMUSG00000016921 | 14_Srsf6  | 5274.6  | 0.42014  | 0.221757 | 0.612417 | 8460.07 | 5046.35 | 4605.12 | 3920.96 | 5006.64 | 4608.46 |
| ENSMUSG00000016933 | 17_Pleg1  | 1651.87 | -0.1399  | 0.700543 | 0.906172 | 924.277 | 1937.16 | 1854.25 | 1721.56 | 1737.56 | 1736.4  |
| ENSMUSG00000016940 | 18_Kctd2  | 616.678 | -0.24579 | 0.475031 | 0.806964 | 363.037 | 637.029 | 692.888 | 711.402 | 623.254 | 672.459 |
| ENSMUSG00000016942 | 5_Tmprss  | 3.37492 | -0.70115 | 0.629981 | 0.881724 | 0       | 5.66751 | 2.06832 | 5.77705 | 0.85848 | 5.87814 |
| ENSMUSG00000016946 | 5_Kctd5   | 1973.56 | 0.41717  | 0.100932 | 0.432301 | 1901.14 | 2605.92 | 2263.78 | 1678.64 | 1654.29 | 1737.58 |
| ENSMUSG00000016982 | 6_Pom121  | 0.53364 | 2.62307  | 0.473724 | NA       | 0       | 1.1335  | 2.06832 | 0       | 0       | 0       |
| ENSMUSG00000016984 | 7_Etaa1   | 468.427 | 0.56989  | 0.269516 | 0.656453 | 1029.45 | 333.25  | 316.453 | 318.563 | 437.823 | 375.025 |
| ENSMUSG00000016995 | 17_Matn4  | 532.721 | -0.71044 | 0.150401 | 0.52373  | 180.001 | 345.718 | 686.683 | 713.053 | 585.481 | 685.391 |
| ENSMUSG00000017002 | 14_Slpi   | 81.9048 | 0.05616  | 0.932664 | 0.982615 | 20.2249 | 163.224 | 67.2205 | 78.4028 | 82.4138 | 79.9427 |
| ENSMUSG00000017007 | 9_Rbpjl   | 68.0024 | -1.29427 | 0.012108 | 0.115535 | 19.2136 | 31.7381 | 67.2205 | 97.3845 | 99.5833 | 92.8746 |
| ENSMUSG00000017009 | 3_Sdc4    | 7302.35 | 0.35988  | 0.215986 | 0.607397 | 6599.38 | 9880.74 | 8145.06 | 6547.87 | 5433.3  | 7207.77 |
| ENSMUSG00000017057 | 9_Ii13ra1 | 2828.05 | 1.50602  | 0.00227  | 0.03562  | 7162.64 | 3458.32 | 1928.71 | 1218.96 | 1719.53 | 1480.12 |
| ENSMUSG00000017119 | 19_Nbr1   | 4567.9  | 0.2536   | 0.336044 | 0.714362 | 5971.4  | 4392.32 | 4541    | 3821.93 | 4356.77 | 4323.96 |
| ENSMUSG00000017132 | 17_Cyth1  | 1721.29 | 0.2922   | 0.414392 | 0.768913 | 1160.91 | 2237.53 | 2286.53 | 1577.13 | 1372.7  | 1692.9  |
| ENSMUSG00000017144 | 8_Rnd3    | 5854.12 | 0.28363  | 0.385127 | 0.750802 | 8533.89 | 5793.33 | 4955.7  | 4417.79 | 5933.79 | 5490.18 |
| ENSMUSG00000017146 | 12_Brac1  | 726.676 | -0.09473 | 0.783864 | 0.935592 | 966.75  | 566.751 | 574.994 | 693.246 | 889.382 | 668.932 |
| ENSMUSG00000017165 | 1_Gast    | 0.91849 | 2.09392  | 0.427247 | NA       | 0       | 2.26701 | 2.06832 | 0       | 0       | 1.17563 |
| ENSMUSG00000017167 | 6_Cntnap  | 193.739 | -0.70771 | 0.178414 | 0.563655 | 52.5847 | 167.758 | 221.311 | 273.997 | 248.1   | 198.681 |
| ENSMUSG00000017176 | 17_Nt5c3l | 343.014 | -0.42203 | 0.182737 | 0.569121 | 208.316 | 344.585 | 326.795 | 390.363 | 377.73  | 410.294 |
| ENSMUSG00000017188 | 3_Coa3    | 1034.24 | -0.15686 | 0.709298 | 0.909938 | 476.296 | 1237.79 | 1220.31 | 1133.95 | 1060.22 | 1076.88 |
| ENSMUSG00000017195 | 15_Zpbb2  | 10.5778 | -0.70051 | 0.317876 | 0.698985 | 11.1237 | 7.93452 | 5.17081 | 13.2047 | 15.4526 | 10.5807 |
| ENSMUSG00000017204 | 4_Gsdma   | 23.0188 | 0.94277  | 0.136103 | 0.50133  | 17.1912 | 47.6071 | 25.854  | 15.6806 | 9.44325 | 22.3369 |
| ENSMUSG00000017210 | 14_Med24  | 743.011 | 0.38298  | 0.431865 | 0.780264 | 327.643 | 1181.11 | 1014.51 | 697.372 | 561.444 | 675.986 |

|                    |            |         |          |          |          |         |         |         |         |         |         |
|--------------------|------------|---------|----------|----------|----------|---------|---------|---------|---------|---------|---------|
| ENSMUSG00000017211 | 14_Gsdmi   | 0.13755 | -0.79206 | 0.84609  | NA       | 0       | 0       | 0       | 0.82529 | 0       | 0       |
| ENSMUSG00000017221 | 14_Psmd3   | 1692.26 | 0.46573  | 0.419897 | 0.773473 | 517.757 | 2880.23 | 2491.3  | 1625.83 | 1147.78 | 1490.7  |
| ENSMUSG00000017264 | 16_Exosc   | 1328.97 | 0.22091  | 0.575997 | 0.856895 | 765.512 | 1836.27 | 1689.82 | 1180.99 | 1191.57 | 1309.65 |
| ENSMUSG00000017286 | 15_Glod4   | 3190.62 | -0.06405 | 0.810566 | 0.945675 | 3725.42 | 2814.49 | 2819.12 | 2890.17 | 3406.44 | 3488.09 |
| ENSMUSG00000017288 | 15_Vps53   | 1228.03 | 0.47079  | 0.144238 | 0.514037 | 1011.24 | 1728.59 | 1539.87 | 897.918 | 1017.3  | 1173.28 |
| ENSMUSG00000017291 | 13_Taok1   | 4355.3  | 0.50847  | 0.276298 | 0.662838 | 8877.71 | 3343.83 | 3123.17 | 3126.21 | 4052.87 | 3608    |
| ENSMUSG00000017299 | 13_Dnrtip  | 457.635 | 0.27575  | 0.545818 | 0.842614 | 223.485 | 695.971 | 584.301 | 422.55  | 365.711 | 453.792 |
| ENSMUSG00000017300 | 9_Tnnc2    | 626.087 | -1.55527 | 0.005082 | 0.062837 | 292.25  | 171.159 | 490.193 | 1499.56 | 427.522 | 875.843 |
| ENSMUSG00000017307 | 15_Acot8   | 183.598 | 0.40264  | 0.483439 | 0.811892 | 58.6522 | 281.109 | 287.497 | 178.263 | 137.356 | 158.71  |
| ENSMUSG00000017309 | 11_Cd30c   | 33.3828 | -0.24245 | 0.588622 | 0.863631 | 32.3598 | 27.2041 | 32.059  | 42.0899 | 26.6128 | 39.9713 |
| ENSMUSG00000017314 | 12_Mpp2    | 173.177 | -0.67689 | 0.228221 | 0.619358 | 46.5172 | 139.421 | 214.071 | 291.328 | 172.554 | 175.169 |
| ENSMUSG00000017344 | 4_Vtn      | 118.376 | -2.37845 | 0.00012  | 0.003836 | 21.2361 | 53.2746 | 40.3323 | 340.846 | 182.856 | 71.7133 |
| ENSMUSG00000017376 | 15_Nlk     | 934.46  | -0.05135 | 0.882556 | 0.967828 | 1312.6  | 722.041 | 718.742 | 971.369 | 961.494 | 920.517 |
| ENSMUSG00000017386 | 10_Traf4   | 478.522 | 0.55143  | 0.374215 | 0.744821 | 143.597 | 761.714 | 801.475 | 555.422 | 251.534 | 357.391 |
| ENSMUSG00000017390 | 15_Aldoc   | 2118.21 | -0.84594 | 0.041948 | 0.259289 | 875.738 | 1504.16 | 2163.47 | 3509.97 | 2242.34 | 2413.56 |
| ENSMUSG00000017400 | 10_Stac2   | 19.6785 | -1.74969 | 0.034119 | 0.22886  | 2.02249 | 17.0025 | 8.27329 | 51.9934 | 22.3204 | 16.4588 |
| ENSMUSG00000017404 | 12_Rpl19   | 10824.8 | -0.14467 | 0.75539  | 0.92689  | 4319.02 | 13030.7 | 13497.9 | 13231.9 | 10175.5 | 10693.5 |
| ENSMUSG00000017405 | 14_Nek8    | 190.633 | -0.22156 | 0.651861 | 0.892215 | 73.8208 | 205.164 | 249.233 | 248.413 | 170.837 | 196.33  |
| ENSMUSG00000017412 | 15_Cacnb   | 302.696 | -0.3463  | 0.54318  | 0.84123  | 519.78  | 124.685 | 155.124 | 373.032 | 383.739 | 259.814 |
| ENSMUSG00000017417 | 14_Plxdc1  | 91.7807 | -0.34957 | 0.501412 | 0.822545 | 34.3823 | 81.6122 | 126.168 | 119.667 | 80.6968 | 108.158 |
| ENSMUSG00000017418 | 13_Arl5b   | 2305.5  | 0.46918  | 0.319261 | 0.700381 | 4678.02 | 1703.65 | 1649.49 | 1676.99 | 2110.99 | 2013.85 |
| ENSMUSG00000017421 | 18_Zfp207  | 5727.97 | 0.41076  | 0.238823 | 0.630726 | 9286.26 | 5524.69 | 4802.65 | 4394.68 | 5311.4  | 5048.15 |
| ENSMUSG00000017428 | 16_Psmd7   | 2413.5  | 0.36051  | 0.179553 | 0.565195 | 2923.51 | 2871.16 | 2345.48 | 1755.4  | 2270.67 | 2314.81 |
| ENSMUSG00000017446 | 14_C1qtnl  | 639.796 | -0.51296 | 0.15819  | 0.536416 | 345.846 | 519.144 | 716.674 | 816.214 | 634.414 | 806.481 |
| ENSMUSG00000017453 | 4_Pipox    | 21.4263 | -2.19024 | 0.001235 | 0.022943 | 4.04498 | 5.66751 | 13.4441 | 47.867  | 35.1976 | 22.3369 |
| ENSMUSG00000017466 | 9_Timp2    | 7126.35 | -0.7616  | 0.006987 | 0.078005 | 5350.49 | 4149.75 | 6363.2  | 9818.5  | 8623.4  | 8452.76 |
| ENSMUSG00000017478 | 15_Zc3h1   | 757.595 | 0.38206  | 0.353997 | 0.729719 | 443.936 | 1153.91 | 974.18  | 669.312 | 590.632 | 713.606 |
| ENSMUSG00000017485 | 10_Top2b   | 4683.23 | 0.50531  | 0.32455  | 0.705143 | 10130.6 | 3204.41 | 3150.06 | 3092.37 | 4436.61 | 4085.31 |
| ENSMUSG00000017491 | 8_Rarb     | 299.8   | -0.50922 | 0.195658 | 0.587008 | 349.891 | 143.955 | 248.199 | 365.605 | 340.815 | 350.337 |
| ENSMUSG00000017493 | 12_Igfbp4  | 2387.21 | -0.41983 | 0.190114 | 0.578279 | 1696.87 | 2017.64 | 2412.7  | 3539.68 | 2234.62 | 2421.79 |
| ENSMUSG00000017499 | 15_Cdc6    | 174.802 | 1.04017  | 0.001434 | 0.025535 | 196.181 | 261.839 | 247.165 | 89.9569 | 118.47  | 135.197 |
| ENSMUSG00000017548 | 15_Suz12   | 1815.86 | 0.68133  | 0.176064 | 0.559596 | 4098.57 | 1339.8  | 1272.02 | 1237.11 | 1561.57 | 1386.07 |
| ENSMUSG00000017550 | 14_Atad5   | 412.313 | 0.82329  | 0.058767 | 0.317811 | 839.333 | 346.852 | 394.016 | 234.383 | 312.486 | 346.81  |
| ENSMUSG00000017561 | 16_Crlf3   | 483.424 | 0.23084  | 0.338656 | 0.717188 | 565.286 | 513.477 | 487.09  | 429.152 | 444.691 | 460.846 |
| ENSMUSG00000017588 | 2_Krt27    | 0.56679 | -2.55638 | 0.475485 | NA       | 0       | 0       | 0       | 0.82529 | 2.57543 | 0       |
| ENSMUSG00000017607 | 9_Tns4     | 8160.76 | 0.97216  | 0.009349 | 0.095464 | 6938.15 | 13034.1 | 12459.6 | 4286.57 | 5204.09 | 7042.01 |
| ENSMUSG00000017615 | 12_Tnfaip  | 2966.82 | 0.21689  | 0.368015 | 0.740043 | 2906.32 | 3536.53 | 3125.24 | 2489.08 | 2836.41 | 2907.33 |
| ENSMUSG00000017631 | 18_Abr     | 1758.78 | 0.00675  | 0.983292 | 0.994651 | 1188.21 | 2008.57 | 2092.11 | 1856.08 | 1687.77 | 1719.94 |
| ENSMUSG00000017639 | 13_Rab11   | 766.237 | -0.16065 | 0.643661 | 0.889156 | 494.498 | 744.711 | 931.78  | 949.086 | 688.499 | 788.846 |
| ENSMUSG00000017652 | 16_Cd40    | 133.36  | 0.58813  | 0.076663 | 0.371177 | 118.316 | 180.227 | 182.012 | 108.113 | 102.159 | 109.333 |
| ENSMUSG00000017664 | 16_Slc35c  | 570.607 | 0.05431  | 0.920751 | 0.977466 | 197.193 | 742.444 | 804.578 | 755.143 | 403.484 | 520.803 |
| ENSMUSG00000017667 | 9_Zfp334   | 178.151 | -0.43048 | 0.193606 | 0.583577 | 182.024 | 136.02  | 137.543 | 246.762 | 204.318 | 162.237 |
| ENSMUSG00000017670 | 16_Elmo2   | 1211.29 | 0.03802  | 0.927407 | 0.98063  | 620.904 | 1557.43 | 1503.67 | 1388.14 | 1084.26 | 1113.32 |
| ENSMUSG00000017677 | 11_Wsb1    | 2542.13 | 0.36465  | 0.321259 | 0.702307 | 4199.7  | 2305.54 | 2079.7  | 1973.27 | 2474.99 | 2219.59 |
| ENSMUSG00000017679 | 12_Ttpal   | 1607.99 | 0.32253  | 0.266037 | 0.654446 | 2221.7  | 1608.44 | 1530.56 | 1240.41 | 1566.72 | 1480.12 |
| ENSMUSG00000017686 | 16_Rhot1   | 1038.77 | 0.21287  | 0.595456 | 0.867492 | 1735.3  | 827.457 | 782.86  | 856.653 | 1062.79 | 967.542 |
| ENSMUSG00000017688 | 14_Hnf4g   | 7.22167 | 0.55516  | 0.548232 | 0.843853 | 14.1574 | 2.26701 | 9.30745 | 7.42763 | 4.29238 | 5.87814 |
| ENSMUSG00000017692 | 8_Rhbd13   | 313.588 | 0.42388  | 0.222078 | 0.612533 | 234.609 | 408.061 | 435.382 | 280.599 | 248.958 | 273.921 |
| ENSMUSG00000017697 | 3_Ada      | 42.9056 | 0.73069  | 0.207122 | 0.598763 | 28.3148 | 96.3477 | 36.1957 | 37.1382 | 30.0467 | 29.3907 |
| ENSMUSG00000017707 | 9_Serinc3  | 7598.29 | 0.17955  | 0.603925 | 0.871008 | 11572.7 | 6386.16 | 6252.54 | 6929.15 | 7571.77 | 6877.42 |
| ENSMUSG00000017713 | 9_Tha1     | 65.6981 | -0.3726  | 0.506696 | 0.825822 | 19.2136 | 65.7432 | 86.8696 | 71.8004 | 72.9705 | 77.5914 |
| ENSMUSG00000017715 | 11_Pgs1    | 799.685 | 0.78829  | 0.111185 | 0.453007 | 380.228 | 1448.62 | 1209.97 | 642.903 | 548.567 | 567.828 |
| ENSMUSG00000017716 | 15_Birc5   | 449.745 | 0.5118   | 0.075998 | 0.369092 | 524.836 | 565.618 | 495.363 | 288.852 | 424.088 | 399.713 |
| ENSMUSG00000017718 | 15_Afmid   | 189.522 | -0.2044  | 0.676271 | 0.901105 | 73.8208 | 183.627 | 270.95  | 212.1   | 189.723 | 206.91  |
| ENSMUSG00000017720 | 2_Trp53tg  | 1.2522  | -1.34917 | 0.475189 | NA       | 1.01124 | 1.1335  | 0       | 2.47588 | 1.71695 | 1.17563 |
| ENSMUSG00000017721 | 15_Pigt    | 1727.08 | 0.41385  | 0.46117  | 0.799907 | 562.252 | 2833.76 | 2523.35 | 1619.22 | 1170.96 | 1652.93 |
| ENSMUSG00000017723 | 11_Wfdc2   | 1263.04 | 0.51511  | 0.39148  | 0.754323 | 362.025 | 2031.24 | 2065.22 | 1220.61 | 752.884 | 1146.24 |
| ENSMUSG00000017724 | 14_Etv4    | 165.068 | 0.36143  | 0.436544 | 0.784325 | 88.9895 | 192.695 | 275.087 | 135.348 | 131.347 | 166.939 |
| ENSMUSG00000017734 | 15_Dbndd   | 1139.54 | -0.07336 | 0.861332 | 0.960565 | 561.241 | 1405.54 | 1365.09 | 1332.85 | 989.824 | 1182.68 |
| ENSMUSG00000017737 | 2_Mmp9     | 20.1071 | 0.33971  | 0.70993  | 0.910052 | 5.05622 | 52.1411 | 10.3416 | 28.0599 | 8.58477 | 16.4588 |
| ENSMUSG00000017740 | 16_Slc12a1 | 142.612 | -1.75266 | 0.003306 | 0.046597 | 54.6072 | 80.4787 | 61.0155 | 417.598 | 159.677 | 82.2939 |
| ENSMUSG00000017747 | 13_Ghdcl   | 220.68  | -0.00057 | 0.998996 | 0.999484 | 105.169 | 265.24  | 291.634 | 254.19  | 188.006 | 219.842 |
| ENSMUSG00000017754 | 13_Pltpl   | 604.017 | -0.66734 | 0.23904  | 0.630782 | 145.619 | 571.285 | 683.581 | 1036.57 | 576.897 | 610.151 |
| ENSMUSG00000017756 | 8_Slc12a7  | 506.515 | -0.05019 | 0.904736 | 0.974255 | 253.822 | 608.691 | 630.839 | 595.861 | 467.87  | 482.007 |
| ENSMUSG00000017760 | 15_Ctsa    | 2194.87 | 0.00439  | 0.992197 | 0.997548 | 967.761 | 2892.7  | 2734.32 | 2378.49 | 1982.22 | 2213.71 |
| ENSMUSG00000017764 | 2_Zswim1   | 118.965 | -0.01256 | 0.978084 | 0.993796 | 57.6409 | 154.156 | 143.748 | 139.474 | 104.734 | 114.036 |
| ENSMUSG00000017765 | 16_Slc12a2 | 625.665 | -0.15419 | 0.758632 | 0.927759 | 218.429 | 756.046 | 802.509 | 772.474 | 593.208 | 611.326 |
| ENSMUSG00000017767 | 3_Spata2l  | 2.88097 | 1.22433  | 0.633575 | 0.88353  | 12.1349 | 0       | 0       | 0       | 5.15086 | 0       |
| ENSMUSG00000017774 | 19_Myo1c   | 3215.22 | 0.56029  | 0.258125 | 0.648886 | 1411.7  | 5236.78 | 4847.12 | 2834.88 | 2279.26 | 2681.61 |
| ENSMUSG00000017776 | 15_Crk     | 5716.58 | 0.4305   | 0.272962 | 0.659357 | 9989.07 | 5227.72 | 4472.75 | 4217.24 | 5629.03 | 4763.64 |
| ENSMUSG00000017778 | 14_Cox7c   | 1429.85 | 0.04518  | 0.873191 | 0.963908 | 1766.64 | 1294.46 | 1295.8  | 1610.97 | 1352.1  | 1259.1  |
| ENSMUSG00000017781 | 17_Pitpna  | 4637.5  | 0.24878  | 0.366373 | 0.739399 | 6124.1  | 4767.51 | 4217.31 | 3837.61 | 4598    | 4280.46 |
| ENSMUSG00000017801 | 15_Mlx     | 826.415 | 0.06201  | 0.823969 | 0.949196 | 687.646 | 979.347 | 865.593 | 718.004 | 879.08  | 828.818 |
| ENSMUSG00000017802 | 14_Fam1l3  | 4364.12 | 0.26474  | 0.263314 | 0.652524 | 4207.79 | 4887.66 | 5194.59 | 3794.69 | 3888.9  | 4211.1  |
| ENSMUSG00000017817 | 11_Jph2    | 168.747 | -1.29298 | 0.008256 | 0.0876   | 58.6522 | 83.8792 | 150.988 | 347.448 | 162.252 | 209.262 |

|                    |            |         |          |          |          |         |         |         |         |         |         |
|--------------------|------------|---------|----------|----------|----------|---------|---------|---------|---------|---------|---------|
| ENSMUSG00000017830 | 15_Dhx58   | 1905.68 | 1.97643  | 1.21E-05 | 0.000616 | 1352.03 | 4361.72 | 3403.43 | 724.607 | 775.205 | 817.061 |
| ENSMUSG00000017831 | 7_Rab5a    | 2472.85 | 0.77169  | 0.130425 | 0.491137 | 5740.83 | 1890.68 | 1724.98 | 1536.69 | 2107.56 | 1836.33 |
| ENSMUSG00000017832 | 2_Hspb9    | 1.81346 | -0.02493 | 0.987215 | 0.99641  | 1.01124 | 3.40051 | 1.03416 | 0.82529 | 3.43391 | 1.17563 |
| ENSMUSG00000017837 | 12_Nkiras  | 1789.2  | 0.1209   | 0.802253 | 0.942368 | 728.096 | 2427.96 | 2436.48 | 1939.44 | 1499.76 | 1703.48 |
| ENSMUSG00000017843 | 13_Ppp2r   | 3324.26 | 0.34984  | 0.200854 | 0.592148 | 4544.53 | 3423.18 | 3207.97 | 2650.01 | 2979.77 | 3140.1  |
| ENSMUSG00000017858 | 12_Ift52   | 1255.96 | 0.27145  | 0.333106 | 0.711957 | 1663.5  | 1198.11 | 1259.61 | 1017.59 | 1286    | 1110.97 |
| ENSMUSG00000017861 | 11_Mybl2   | 161.623 | 1.14753  | 0.063421 | 0.332504 | 52.5847 | 345.718 | 269.916 | 89.1316 | 112.46  | 99.9284 |
| ENSMUSG00000017868 | 16_Sgk2    | 0.61982 | 0.2847   | 0.936624 | NA       | 0       | 0       | 2.06832 | 1.65058 | 0       | 0       |
| ENSMUSG00000017897 | 18_Eya2    | 645.275 | -0.02798 | 0.958077 | 0.989261 | 211.35  | 735.643 | 970.044 | 674.264 | 550.284 | 730.065 |
| ENSMUSG00000017929 | 13_B4galt  | 231.578 | 0.1802   | 0.707271 | 0.909346 | 135.507 | 367.255 | 235.789 | 312.786 | 179.422 | 158.71  |
| ENSMUSG00000017943 | 15_Gdap1   | 7.64901 | -1.89115 | 0.070793 | 0.355357 | 1.01124 | 6.80102 | 2.06832 | 21.4576 | 5.15086 | 9.40502 |
| ENSMUSG00000017950 | 16_Hnf4a   | 19.4454 | -1.83695 | 0.005769 | 0.068273 | 7.07871 | 12.4685 | 6.20497 | 40.4393 | 35.1976 | 15.2832 |
| ENSMUSG00000017969 | 13_Ptgis   | 297.565 | -0.7551  | 0.129415 | 0.488846 | 105.169 | 197.23  | 361.957 | 489.398 | 291.882 | 339.756 |
| ENSMUSG00000017978 | 18_Cadps   | 503.24  | 0.52661  | 0.111307 | 0.453007 | 783.714 | 497.608 | 500.534 | 339.195 | 448.125 | 450.265 |
| ENSMUSG00000017999 | 16_Ddx27   | 810.65  | 0.30776  | 0.373887 | 0.74451  | 583.488 | 1123.3  | 983.488 | 692.42  | 665.32  | 815.886 |
| ENSMUSG00000018001 | 18_Cyth3   | 3630.02 | 0.18615  | 0.525854 | 0.833782 | 2870.92 | 4597.49 | 4123.2  | 3189.75 | 3356.65 | 3642.1  |
| ENSMUSG00000018008 | 7_Cyth4    | 185.817 | 1.10342  | 0.044695 | 0.26957  | 97.0795 | 425.064 | 238.891 | 152.679 | 91.857  | 109.333 |
| ENSMUSG00000018012 | 11_Rac3    | 253.526 | 0.15415  | 0.82163  | 0.948384 | 43.4835 | 326.449 | 431.245 | 268.22  | 183.714 | 268.043 |
| ENSMUSG00000018040 | 9_Rrp7a    | 869.296 | -0.00381 | 0.994651 | 0.998043 | 237.642 | 1235.52 | 1131.37 | 958.164 | 721.979 | 931.097 |
| ENSMUSG00000018042 | 17_Cyb5r   | 2826.33 | 0.03592  | 0.924006 | 0.978884 | 1681.7  | 3303.03 | 3599.92 | 3146.84 | 2346.22 | 2880.29 |
| ENSMUSG00000018068 | 12_Ints2   | 762.132 | 0.42122  | 0.242312 | 0.633507 | 1206.41 | 771.915 | 639.112 | 516.633 | 703.951 | 734.767 |
| ENSMUSG00000018076 | 12_Med13   | 1672.53 | 0.53065  | 0.054484 | 0.304528 | 1559.34 | 2293.08 | 2077.63 | 1359.26 | 1283.42 | 1462.48 |
| ENSMUSG00000018102 | 4_Hist1h2  | 426.387 | 0.37309  | 0.271137 | 0.657711 | 660.343 | 395.593 | 387.811 | 381.285 | 401.767 | 331.527 |
| ENSMUSG00000018126 | 15_Baiap2  | 5.01051 | -1.91358 | 0.120669 | 0.472269 | 0       | 1.1335  | 5.17081 | 11.5541 | 5.15086 | 7.05377 |
| ENSMUSG00000018143 | 10_Mafk    | 964.856 | 0.73709  | 0.068809 | 0.348936 | 640.118 | 1498.49 | 1479.89 | 825.292 | 635.273 | 710.079 |
| ENSMUSG00000018160 | 15_Med1    | 1598.71 | 0.46721  | 0.124287 | 0.479256 | 2343.05 | 1773.93 | 1448.86 | 1175.22 | 1475.72 | 1375.48 |
| ENSMUSG00000018166 | 8_ErbB3    | 4928.45 | 0.75624  | 0.004308 | 0.056066 | 5847.01 | 6654.8  | 6071.56 | 3107.23 | 3499.15 | 4390.97 |
| ENSMUSG00000018167 | 10_Stdar3  | 471.701 | 0.36429  | 0.524063 | 0.832756 | 143.597 | 784.384 | 664.966 | 452.26  | 370.004 | 414.997 |
| ENSMUSG00000018168 | 8_Ikzf3    | 172.03  | 0.4016   | 0.183788 | 0.570805 | 175.957 | 206.298 | 204.764 | 122.969 | 149.375 | 172.817 |
| ENSMUSG00000018169 | 12_Mfng    | 29.9216 | -0.35919 | 0.540637 | 0.84046  | 12.1349 | 29.4711 | 37.2298 | 47.0417 | 26.6128 | 27.0394 |
| ENSMUSG00000018171 | 9_Vmp1     | 3114.64 | 0.62196  | 0.090465 | 0.409937 | 5425.33 | 3197.61 | 2704.33 | 2033.52 | 2821.81 | 2505.26 |
| ENSMUSG00000018189 | 12_Uchl5   | 735.67  | 0.80292  | 0.111652 | 0.453024 | 1674.62 | 597.356 | 533.627 | 409.345 | 642.999 | 556.072 |
| ENSMUSG00000018196 | 18_Glrx2   | 702.668 | 0.05578  | 0.89227  | 0.970752 | 1126.53 | 498.741 | 523.286 | 596.686 | 779.497 | 691.269 |
| ENSMUSG00000018199 | 8_Trove2   | 1137.37 | 0.0978   | 0.856834 | 0.959059 | 2276.31 | 589.422 | 661.863 | 1122.4  | 1144.35 | 1029.85 |
| ENSMUSG00000018209 | 15_Stk4    | 1637.99 | 0.37827  | 0.209276 | 0.60089  | 2394.63 | 1631.11 | 1528.49 | 1280.03 | 1500.62 | 1493.05 |
| ENSMUSG00000018211 | 13_Wfdc1   | 0       | NA       | NA       | NA       | 0       | 0       | 0       | 0       | 0       | 0       |
| ENSMUSG00000018217 | 12_Pmp2f   | 1713.69 | -0.51583 | 0.068616 | 0.348571 | 1652.37 | 1133.5  | 1445.76 | 2303.39 | 1895.52 | 1851.61 |
| ENSMUSG00000018238 | 6_Gdf9     | 5.62589 | -1.60612 | 0.205974 | 0.59724  | 0       | 1.1335  | 7.23913 | 11.5541 | 10.3017 | 3.52688 |
| ENSMUSG00000018239 | 9_Zcchc1l  | 198.913 | 0.37389  | 0.383481 | 0.7499   | 354.947 | 163.224 | 155.124 | 160.107 | 161.394 | 198.681 |
| ENSMUSG00000018263 | 11_Tbx5    | 29.8643 | -1.4494  | 0.011303 | 0.11028  | 19.2136 | 11.335  | 17.5807 | 50.3428 | 58.3764 | 22.3369 |
| ENSMUSG00000018286 | 6_Psmb6    | 2042.7  | -0.02453 | 0.963583 | 0.990106 | 633.039 | 2812.22 | 2630.91 | 2412.33 | 1776.19 | 1991.51 |
| ENSMUSG00000018287 | 12_Spag7   | 1026.61 | -0.17721 | 0.591447 | 0.86536  | 678.545 | 1126.7  | 1085.87 | 1272.6  | 910.844 | 1085.1  |
| ENSMUSG00000018293 | 4_Pfn1     | 5479.15 | 0.22676  | 0.516907 | 0.830673 | 3710.26 | 7662.48 | 6353.89 | 4884.08 | 4828.07 | 5436.1  |
| ENSMUSG00000018322 | 10_Tomm    | 537.599 | -0.00567 | 0.987774 | 0.996742 | 315.508 | 655.165 | 639.112 | 557.898 | 515.945 | 541.964 |
| ENSMUSG00000018326 | 9_Ywhab    | 8285.75 | 0.26282  | 0.404011 | 0.762463 | 12117.7 | 7619.41 | 7377.71 | 6769.87 | 7958.94 | 7870.83 |
| ENSMUSG00000018334 | 16_Ksr1    | 446.262 | -0.03797 | 0.939055 | 0.858171 | 165.844 | 629.094 | 526.388 | 488.573 | 410.352 | 457.319 |
| ENSMUSG00000018339 | 11_Gpx3    | 3698    | -1.37014 | 0.000222 | 0.006266 | 1606.87 | 1819.27 | 2763.28 | 7076.88 | 4977.45 | 3944.23 |
| ENSMUSG00000018340 | 13_Anxa6   | 2115.82 | -0.27843 | 0.50687  | 0.825872 | 938.435 | 2418.9  | 2379.61 | 2409.03 | 2089.53 | 2459.41 |
| ENSMUSG00000018341 | 12_Ilt2rb2 | 5.00019 | 2.52692  | 0.028896 | 0.206426 | 6.06747 | 12.4685 | 7.23913 | 1.65058 | 2.57543 | 0       |
| ENSMUSG00000018347 | 16_Zksca1  | 364.343 | 0.37494  | 0.202971 | 0.594303 | 320.564 | 489.673 | 424.006 | 305.358 | 309.052 | 337.405 |
| ENSMUSG00000018362 | 14_Kpna2   | 381.082 | 0.86013  | 0.150222 | 0.523423 | 988.997 | 239.169 | 246.13  | 220.353 | 361.419 | 230.423 |
| ENSMUSG00000018363 | 16_Smurf1  | 1911.83 | 0.17756  | 0.608751 | 0.872658 | 2867.89 | 1564.23 | 1655.69 | 1602.72 | 1999.39 | 1781.08 |
| ENSMUSG00000018372 | 13_Cep95   | 339.991 | 0.21886  | 0.55798  | 0.848187 | 513.712 | 295.844 | 287.497 | 252.539 | 381.164 | 309.19  |
| ENSMUSG00000018377 | 10_Vezf1   | 2452.27 | 0.29325  | 0.366491 | 0.739417 | 3667.78 | 2082.24 | 2351.68 | 2007.11 | 2371.11 | 2233.69 |
| ENSMUSG00000018378 | 13_Cuedc   | 816.465 | 0.03432  | 0.935943 | 0.984134 | 422.7   | 885.266 | 1170.67 | 936.707 | 691.074 | 792.373 |
| ENSMUSG00000018379 | 17_Srsf1   | 7048.95 | 0.55785  | 0.217781 | 0.608427 | 14151.4 | 5901.02 | 5132.54 | 4730.58 | 6415.4  | 5962.78 |
| ENSMUSG00000018381 | 15_Abi3    | 31.5376 | -0.0166  | 0.980097 | 0.993796 | 9.1012  | 52.1411 | 33.0932 | 39.614  | 31.7636 | 23.5126 |
| ENSMUSG00000018387 | 12_Shroo1  | 17.7508 | -1.64846 | 0.104444 | 0.129553 | 3.03373 | 13.602  | 9.30745 | 33.0117 | 24.0374 | 23.5126 |
| ENSMUSG00000018395 | 19_Kif3a   | 585.962 | -0.24772 | 0.305392 | 0.688273 | 581.465 | 542.948 | 482.953 | 624.746 | 655.876 | 627.785 |
| ENSMUSG00000018398 | 18_Sept8   | 2140.71 | -0.08554 | 0.763122 | 0.92934  | 1579.56 | 2415.49 | 2236.89 | 2276.98 | 2075.8  | 2259.56 |
| ENSMUSG00000018401 | 17_Mtmr4   | 2354.88 | 0.39046  | 0.103229 | 0.436784 | 2615.08 | 2842.83 | 2556.45 | 1830.5  | 2003.69 | 2280.72 |
| ENSMUSG00000018405 | 7_Mrm1     | 183.62  | 0.02487  | 0.939615 | 0.985484 | 141.574 | 179.093 | 234.755 | 172.486 | 175.129 | 198.681 |
| ENSMUSG00000018411 | 17_Mapt    | 159.552 | -0.62334 | 0.074603 | 0.365615 | 119.327 | 147.355 | 110.655 | 247.588 | 185.431 | 146.953 |
| ENSMUSG00000018412 | 16_Kansl1  | 1808.36 | 0.22077  | 0.317716 | 0.698985 | 1848.55 | 1956.43 | 2034.2  | 1629.95 | 1642.27 | 1738.75 |
| ENSMUSG00000018415 | 14_Gid4    | 1197.39 | -0.03677 | 0.891361 | 0.970606 | 1431.92 | 1065.49 | 1048.64 | 1135.6  | 1213.03 | 1289.66 |
| ENSMUSG00000018417 | 14_Myo1t   | 424.379 | -0.00819 | 0.981199 | 0.993854 | 495.51  | 502.142 | 271.984 | 459.688 | 394.899 | 422.05  |
| ENSMUSG00000018425 | 18_Dhx40   | 810.663 | 0.26641  | 0.563307 | 0.85076  | 1484.51 | 598.49  | 572.925 | 661.884 | 925.438 | 620.731 |
| ENSMUSG00000018427 | 7_Ypel2    | 1498.63 | 0.39266  | 0.16741  | 0.548375 | 2104.4  | 1597.11 | 1402.32 | 1184.29 | 1401.03 | 1302.6  |
| ENSMUSG00000018428 | 15_Akap1   | 473.742 | -0.09011 | 0.80335  | 0.942928 | 284.16  | 493.074 | 599.814 | 500.952 | 504.784 | 459.67  |
| ENSMUSG00000018433 | 14_Nol1    | 901.552 | 0.25113  | 0.500078 | 0.821679 | 1406.64 | 788.918 | 743.562 | 649.505 | 914.278 | 906.409 |
| ENSMUSG00000018442 | 13_Der12   | 1213.73 | 0.25821  | 0.470989 | 0.804868 | 1916.31 | 1002.02 | 1047.61 | 1001.08 | 1172.68 | 1142.71 |
| ENSMUSG00000018446 | 8_C1qbp    | 1003.67 | 0.13934  | 0.636892 | 0.88546  | 1264.06 | 1068.89 | 823.193 | 829.419 | 1043.05 | 993.406 |
| ENSMUSG00000018449 | 12_Rpain   | 197.796 | -0.23974 | 0.403373 | 0.761674 | 149.664 | 197.23  | 197.525 | 222.004 | 214.619 | 205.735 |
| ENSMUSG00000018451 | 6_633040   | 55.3097 | -1.85218 | 0.000297 | 0.007841 | 26.2924 | 13.602  | 32.059  | 122.143 | 78.9799 | 58.7814 |
| ENSMUSG00000018459 | 15_Slc13e  | 59.6888 | -1.72206 | 0.001534 | 0.026752 | 15.1687 | 22.6701 | 45.5031 | 128.746 | 66.1027 | 79.9427 |

|                    |            |         |          |          |          |         |         |         |         |         |         |
|--------------------|------------|---------|----------|----------|----------|---------|---------|---------|---------|---------|---------|
| ENSMUSG00000018470 | 8_Kcnab3   | 17.1659 | -1.6887  | 0.014425 | 0.129516 | 8.08995 | 11.335  | 5.17081 | 37.1382 | 28.3297 | 12.9319 |
| ENSMUSG00000018474 | 17_Chd3    | 4392    | -0.32319 | 0.420538 | 0.773868 | 2049.79 | 4467.13 | 5189.42 | 5025.21 | 4473.52 | 5146.9  |
| ENSMUSG00000018476 | 7_Kdm6b    | 523.789 | 0.52737  | 0.322884 | 0.703332 | 211.35  | 871.664 | 772.519 | 526.537 | 324.504 | 436.158 |
| ENSMUSG00000018479 | 12_17001   | 1.00787 | -0.92447 | 0.683225 | NA       | 1.01124 | 0       | 1.03416 | 1.65058 | 0       | 2.35126 |
| ENSMUSG00000018481 | 9_Appbp2   | 2654.86 | 0.40913  | 0.201374 | 0.59266  | 4037.9  | 2709.07 | 2339.27 | 2030.22 | 2508.47 | 2304.23 |
| ENSMUSG00000018486 | 2_Wnt9b    | 2.36511 | 0.2381   | 0.884035 | 0.967903 | 1.01124 | 5.66751 | 1.03416 | 4.12646 | 0       | 2.35126 |
| ENSMUSG00000018500 | 2_Adora2l  | 310.722 | 0.48348  | 0.099052 | 0.427426 | 317.531 | 450.001 | 319.556 | 269.871 | 246.383 | 260.989 |
| ENSMUSG00000018501 | 17_Ncor1   | 4544.6  | 0.3168   | 0.248306 | 0.639857 | 6046.23 | 4579.35 | 4498.6  | 3524.82 | 4088.93 | 4529.69 |
| ENSMUSG00000018507 | 16_Trpv2   | 60.0723 | 0.0322   | 0.960409 | 0.989875 | 16.1799 | 92.9472 | 73.4255 | 69.3246 | 72.1121 | 36.4445 |
| ENSMUSG00000018509 | 8_Cenpv    | 59.2332 | -0.44056 | 0.421372 | 0.77414  | 23.2586 | 54.4081 | 73.4255 | 84.1798 | 78.9799 | 41.147  |
| ENSMUSG00000018537 | 16_Pcgf2   | 413.338 | -0.03062 | 0.945681 | 0.986649 | 185.058 | 501.008 | 540.866 | 443.182 | 372.579 | 437.334 |
| ENSMUSG00000018541 | 10_Cwc2f   | 604.979 | 0.35136  | 0.153337 | 0.528463 | 712.927 | 708.439 | 613.258 | 538.091 | 489.332 | 567.828 |
| ENSMUSG00000018543 | 8_170000   | 3.09032 | -0.90344 | 0.521353 | 0.831998 | 0       | 2.26701 | 4.13665 | 1.65058 | 3.43391 | 7.05377 |
| ENSMUSG00000018547 | 8_Pip4k2t  | 1567.18 | 0.01136  | 0.969334 | 0.991822 | 1159.9  | 1763.73 | 1796.34 | 1508.63 | 1488.6  | 1685.85 |
| ENSMUSG00000018548 | 15_Trim3i  | 1422.56 | 0.04446  | 0.901324 | 0.973382 | 2091.25 | 1096.1  | 1145.85 | 1254.44 | 1526.37 | 1421.33 |
| ENSMUSG00000018554 | 13_Ybx2    | 23.6234 | 0.76211  | 0.148775 | 0.522232 | 21.2361 | 30.6046 | 37.2298 | 19.807  | 12.8772 | 19.9857 |
| ENSMUSG00000018559 | 16_Ctdnej  | 901.723 | 0.27475  | 0.481671 | 0.810876 | 552.139 | 1244.59 | 1165.5  | 936.707 | 733.139 | 778.266 |
| ENSMUSG00000018565 | 17_Elp5    | 633.027 | -0.22007 | 0.579071 | 0.858589 | 313.486 | 739.044 | 702.196 | 723.781 | 650.726 | 668.932 |
| ENSMUSG00000018566 | 14_Slc2a4  | 134.199 | -1.18671 | 0.006602 | 0.074982 | 58.6522 | 70.2772 | 116.86  | 251.714 | 131.347 | 176.344 |
| ENSMUSG00000018567 | 14_Gabar   | 5803.31 | -0.14849 | 0.503869 | 0.824392 | 5844.99 | 5338.8  | 5331.1  | 5936.33 | 6517.56 | 5851.1  |
| ENSMUSG00000018569 | 12_Cldn7   | 3783.46 | 0.79234  | 0.049708 | 0.288242 | 2590.81 | 6247.87 | 5552.41 | 2833.23 | 2286.98 | 3189.48 |
| ENSMUSG00000018570 | 17_28104   | 46.1844 | 0.074    | 0.862835 | 0.961065 | 38.4273 | 39.6726 | 64.118  | 51.9934 | 42.9238 | 39.9713 |
| ENSMUSG00000018572 | 10_Phf23   | 1040.75 | 0.06935  | 0.841278 | 0.9534   | 676.522 | 1283.13 | 1237.89 | 1114.14 | 951.192 | 981.649 |
| ENSMUSG00000018574 | 14_Acadv   | 1564.78 | -0.24332 | 0.545569 | 0.842379 | 742.253 | 1814.74 | 1742.56 | 1752.92 | 1604.49 | 1731.7  |
| ENSMUSG00000018581 | 15_Dnah1   | 6.62237 | -1.85567 | 0.054953 | 0.306161 | 2.02249 | 5.66751 | 1.03416 | 9.90351 | 12.8772 | 8.22939 |
| ENSMUSG00000018583 | 5_G3bp1    | 6767.02 | 0.24527  | 0.33743  | 0.71586  | 6597.36 | 7919.78 | 7504.91 | 5487.37 | 5903.75 | 7188.96 |
| ENSMUSG00000018585 | 9_Atox1    | 1387.12 | -0.09559 | 0.881195 | 0.967415 | 266.969 | 1836.27 | 1920.44 | 1844.53 | 1104.86 | 1349.62 |
| ENSMUSG00000018589 | 8_Glra2    | 2.21042 | -1.72615 | 0.311736 | 0.693466 | 3.03373 | 0       | 0       | 4.12646 | 2.57543 | 3.52688 |
| ENSMUSG00000018593 | 12_Sparc   | 26167   | -0.61133 | 0.013299 | 0.123205 | 18928.5 | 19025.8 | 24159   | 30956.7 | 30415   | 33517.1 |
| ENSMUSG00000018595 | 6_Glra4    | 1.5668  | -0.25623 | 0.875091 | NA       | 2.02249 | 1.1335  | 1.03416 | 0.82529 | 0.85848 | 3.52688 |
| ENSMUSG00000018599 | 5_Mief2    | 187.329 | 0.04268  | 0.941989 | 0.986006 | 51.5735 | 255.038 | 263.711 | 202.197 | 143.366 | 208.086 |
| ENSMUSG00000018604 | 18_Tbx3    | 33.7032 | -1.19526 | 0.027825 | 0.201444 | 32.3598 | 13.602  | 15.5124 | 51.1681 | 56.6595 | 32.9176 |
| ENSMUSG00000018620 | 2_Mmp20    | 0.58501 | -1.14575 | 0.75298  | NA       | 0       | 0       | 1.03416 | 2.47588 | 0       | 0       |
| ENSMUSG00000018623 | 9_Mmp7     | 1.23011 | 1.45201  | 0.449943 | NA       | 1.01124 | 2.26701 | 2.06832 | 0       | 0.85848 | 1.17563 |
| ENSMUSG00000018634 | 10_Crhr1   | 1.5241  | -3.98197 | 0.135694 | NA       | 0       | 0       | 0       | 7.42763 | 1.71695 | 0       |
| ENSMUSG00000018648 | 15_Dusp1   | 297.63  | 0.31343  | 0.337752 | 0.715971 | 230.564 | 400.127 | 358.854 | 257.491 | 260.119 | 278.624 |
| ENSMUSG00000018651 | 14_Tada2   | 370.788 | -0.23091 | 0.40872  | 0.766014 | 379.217 | 329.849 | 314.385 | 340.02  | 462.719 | 398.538 |
| ENSMUSG00000018654 | 17_Ikzf1   | 93.7607 | 1.8973   | 6.08E-06 | 0.00035  | 197.193 | 155.29  | 91.0062 | 39.614  | 39.4899 | 39.9713 |
| ENSMUSG00000018656 | 5_Tcaf3    | 0.14308 | -0.79206 | 0.84609  | NA       | 0       | 0       | 0       | 0       | 0.85848 | 0       |
| ENSMUSG00000018659 | 12_Pnpo    | 452.914 | 0.03399  | 0.914237 | 0.976048 | 331.688 | 501.008 | 541.901 | 434.929 | 409.494 | 498.466 |
| ENSMUSG00000018661 | 17_Cog1    | 642.682 | 0.22345  | 0.679613 | 0.902041 | 215.395 | 922.671 | 939.019 | 629.698 | 494.483 | 654.825 |
| ENSMUSG00000018666 | 13_Cbx1    | 1341.89 | 0.24287  | 0.517239 | 0.830976 | 2137.77 | 1194.71 | 1031.06 | 1053.07 | 1383.86 | 1250.87 |
| ENSMUSG00000018669 | 14_Cdk5r   | 733.587 | -0.05416 | 0.914286 | 0.976048 | 270.002 | 839.926 | 1049.67 | 888.84  | 642.999 | 710.079 |
| ENSMUSG00000018672 | 15_Copz2   | 240.354 | -0.82773 | 0.005079 | 0.062837 | 145.619 | 163.224 | 210.969 | 323.515 | 310.769 | 288.029 |
| ENSMUSG00000018677 | 9_Slc25a3  | 1081.49 | 0.04824  | 0.938927 | 0.985171 | 234.609 | 1474.69 | 1589.51 | 1351.83 | 774.346 | 1063.94 |
| ENSMUSG00000018678 | 12_Sp2     | 250.894 | 0.4543   | 0.279013 | 0.666235 | 155.732 | 364.988 | 349.547 | 237.684 | 171.695 | 225.721 |
| ENSMUSG00000018697 | 14_Aatf    | 441.573 | 0.38227  | 0.161217 | 0.539714 | 508.656 | 549.749 | 440.553 | 325.99  | 409.494 | 414.997 |
| ENSMUSG00000018698 | 15_Lhx1    | 1.24091 | 3.84108  | 0.16589  | NA       | 4.04498 | 3.40051 | 0       | 0       | 0       | 0       |
| ENSMUSG00000018707 | 13_Dync1   | 9235.14 | 0.63858  | 0.149244 | 0.522746 | 5064.31 | 14812.6 | 13861.9 | 6960.52 | 6677.23 | 8034.24 |
| ENSMUSG00000018727 | 19_Cpsf4l  | 9.09164 | -1.15109 | 0.198919 | 0.590917 | 2.02249 | 6.80102 | 8.27329 | 18.1564 | 14.5941 | 4.70251 |
| ENSMUSG00000018733 | 10_Pex12   | 401.405 | 0.43652  | 0.274526 | 0.660991 | 702.815 | 347.985 | 334.034 | 291.328 | 385.456 | 346.81  |
| ENSMUSG00000018736 | 14_Ndel1   | 1594.46 | 0.19439  | 0.431222 | 0.780048 | 1867.77 | 1714.99 | 1522.29 | 1339.45 | 1613.94 | 1508.33 |
| ENSMUSG00000018740 | 14_Slc25e3 | 429.946 | -0.14846 | 0.57637  | 0.856895 | 340.789 | 431.865 | 450.894 | 461.338 | 429.238 | 465.549 |
| ENSMUSG00000018750 | 14_Zbtb4   | 1773.87 | -0.3802  | 0.148495 | 0.521494 | 1685.74 | 1280.86 | 1657.76 | 2229.11 | 1862.9  | 1926.85 |
| ENSMUSG00000018752 | 19_Tnfrsf1 | 119.98  | -0.31912 | 0.490029 | 0.814523 | 55.6184 | 121.285 | 143.748 | 146.902 | 157.101 | 95.2259 |
| ENSMUSG00000018761 | 14_Mpdu1   | 1030.49 | 0.08217  | 0.857476 | 0.959059 | 455.06  | 1374.94 | 1349.58 | 1048.12 | 893.675 | 1061.59 |
| ENSMUSG00000018765 | 5_Fxr2     | 1247.54 | 0.06285  | 0.881997 | 0.967808 | 613.825 | 1574.44 | 1636.04 | 1275.9  | 1194.14 | 1190.91 |
| ENSMUSG00000018770 | 9_Atp5g3   | 3910.7  | 0.10854  | 0.73109  | 0.91894  | 5441.51 | 3543.33 | 3188.32 | 3589.2  | 4091.5  | 3610.35 |
| ENSMUSG00000018774 | 13_Cd68    | 470.24  | 0.94327  | 0.077622 | 0.374013 | 227.53  | 1025.82 | 602.916 | 382.11  | 251.534 | 331.527 |
| ENSMUSG00000018776 | 9_Slc35g3  | 1.09472 | -2.26467 | 0.309696 | NA       | 0       | 1.1335  | 0       | 0.82529 | 3.43391 | 1.17563 |
| ENSMUSG00000018796 | 12_Acs1    | 7809.7  | 0.59702  | 0.024085 | 0.184367 | 9595.7  | 9717.52 | 8894.82 | 5110.21 | 6157    | 7382.94 |
| ENSMUSG00000018800 | 14_Abca5   | 426.215 | -0.63152 | 0.212123 | 0.603396 | 610.792 | 180.227 | 212.003 | 536.44  | 541.699 | 476.129 |
| ENSMUSG00000018809 | 2_Smyd4    | 283.305 | -0.06511 | 0.829514 | 0.951112 | 218.429 | 272.041 | 340.239 | 300.406 | 271.279 | 297.434 |
| ENSMUSG00000018819 | 10_Lsp1    | 1231.48 | -0.22447 | 0.610953 | 0.874284 | 519.78  | 1541.56 | 1346.48 | 1452.51 | 1235.35 | 1293.19 |
| ENSMUSG00000018820 | 13_Zfyve2  | 752.594 | -0.0083  | 0.984568 | 0.994897 | 368.093 | 910.203 | 973.146 | 866.557 | 649.867 | 747.699 |
| ENSMUSG00000018821 | 3_Avp1     | 780.728 | 0.33691  | 0.500899 | 0.822326 | 321.576 | 1241.19 | 1051.74 | 732.034 | 598.358 | 739.47  |
| ENSMUSG00000018822 | 7_Sfrp5    | 9.21802 | -1.2992  | 0.095097 | 0.418582 | 4.04498 | 5.66751 | 6.20497 | 14.03   | 7.72629 | 17.6344 |
| ENSMUSG00000018830 | 8_Myh11    | 3962.49 | -1.76378 | 3.61E-06 | 0.000228 | 1454.17 | 1281.99 | 2672.27 | 6604.81 | 6757.07 | 5004.65 |
| ENSMUSG00000018841 | 17_Rad51   | 385.521 | 0.06613  | 0.815768 | 0.94734  | 321.576 | 451.134 | 410.562 | 413.471 | 342.532 | 373.85  |
| ENSMUSG00000018844 | 6_Fndc8    | 2.43007 | -0.8103  | 0.639079 | 0.886641 | 0       | 2.26701 | 3.10248 | 5.77705 | 3.43391 | 0       |
| ENSMUSG00000018845 | 14_Unc45   | 66.9099 | -0.27295 | 0.588132 | 0.863131 | 71.7983 | 39.6726 | 70.323  | 110.589 | 42.0654 | 67.0108 |
| ENSMUSG00000018846 | 8_Pank3    | 3902.28 | 0.32266  | 0.482644 | 0.811473 | 7489.28 | 2757.81 | 2763.28 | 3193.88 | 3760.13 | 3449.29 |
| ENSMUSG00000018848 | 4_Rars     | 1981.63 | 0.30279  | 0.317763 | 0.698985 | 2700.02 | 2164.99 | 1701.2  | 1501.21 | 1927.28 | 1895.11 |
| ENSMUSG00000018849 | 6_Wwc1     | 2544.57 | 0.30049  | 0.4875   | 0.814019 | 1341.92 | 3598.87 | 3485.12 | 2503.11 | 1908.39 | 2430.02 |
| ENSMUSG00000018858 | 15_Ict1    | 471.16  | -0.41981 | 0.236535 | 0.6287   | 253.822 | 473.804 | 481.919 | 599.162 | 515.086 | 503.169 |

|                    |           |         |          |          |          |         |         |         |         |         |         |
|--------------------|-----------|---------|----------|----------|----------|---------|---------|---------|---------|---------|---------|
| ENSMUSG00000018861 | 8_Fdxr    | 71.9055 | -0.27058 | 0.68967  | 0.905638 | 12.1349 | 88.4132 | 95.1429 | 97.3845 | 67.8197 | 70.5377 |
| ENSMUSG00000018862 | 11_Otop3  | 4.44322 | -0.20731 | 0.884072 | 0.967903 | 2.02249 | 1.1335  | 9.30745 | 9.90351 | 4.29238 | 0       |
| ENSMUSG00000018865 | 8_Sult4a1 | 18.7919 | -1.08317 | 0.21669  | 0.607835 | 12.1349 | 17.0025 | 7.23913 | 53.644  | 18.028  | 4.70251 |
| ENSMUSG00000018882 | 12_Mrpl4f | 472.046 | -0.05459 | 0.8208   | 0.948338 | 444.948 | 489.673 | 455.031 | 478.67  | 512.511 | 451.441 |
| ENSMUSG00000018893 | 14_Mb     | 1164.09 | -1.06304 | 0.044085 | 0.267255 | 960.682 | 354.786 | 945.224 | 2353.73 | 801.818 | 1568.29 |
| ENSMUSG00000018899 | 16_Irf1   | 7915.07 | 0.91785  | 0.024853 | 0.188346 | 5497.12 | 14376.2 | 11180.3 | 4714.9  | 5538.04 | 6183.8  |
| ENSMUSG00000018900 | 7_Slc22a2 | 1267.62 | 0.07216  | 0.782264 | 0.935592 | 1503.72 | 1122.17 | 1272.02 | 1169.44 | 1361.54 | 1176.8  |
| ENSMUSG00000018906 | 14_P4ha2  | 495.433 | -0.36681 | 0.367525 | 0.739818 | 232.586 | 479.472 | 586.37  | 604.939 | 488.473 | 580.76  |
| ENSMUSG00000018907 | 10_Alox12 | 5357.05 | 1.30981  | 0.001066 | 0.020568 | 4216.89 | 8438.93 | 10247.5 | 3103.92 | 2559.98 | 3575.08 |
| ENSMUSG00000018909 | 15_Arrb1  | 829.488 | -0.62183 | 0.033146 | 0.225101 | 505.622 | 719.774 | 735.289 | 1138.08 | 962.353 | 915.814 |
| ENSMUSG00000018914 | 5_Ii3     | 0.68944 | 2.99651  | 0.450864 | NA       | 0       | 0       | 4.13665 | 0       | 0       | 0       |
| ENSMUSG00000018916 | 5_Csf2    | 1.64127 | 0.8769   | 0.599462 | NA       | 1.01124 | 3.40051 | 2.06832 | 1.65058 | 1.71695 | 0       |
| ENSMUSG00000018919 | 10_Tm4sf  | 1.88794 | 0.90975  | 0.548831 | 0.843853 | 2.02249 | 1.1335  | 4.13665 | 0.82529 | 0.85848 | 2.35126 |
| ENSMUSG00000018920 | 11_Cxcl1f | 804.027 | 0.80592  | 0.020381 | 0.164765 | 676.522 | 1374.94 | 1017.61 | 580.181 | 612.953 | 561.95  |
| ENSMUSG00000018921 | 11_Pelp1  | 395.192 | 0.44291  | 0.266814 | 0.654888 | 271.013 | 579.22  | 516.047 | 405.219 | 257.543 | 342.108 |
| ENSMUSG00000018923 | 13_Med11  | 235.737 | 0.08639  | 0.805482 | 0.943315 | 162.81  | 284.509 | 281.292 | 260.792 | 205.176 | 219.842 |
| ENSMUSG00000018924 | 6_Alox15  | 2452.5  | 2.91132  | 1.25E-13 | 4.62E-11 | 2552.38 | 6029.1  | 4406.56 | 491.049 | 552.859 | 683.04  |
| ENSMUSG00000018925 | 3_Heatr9  | 2.40625 | 4.79253  | 0.045948 | 0.274322 | 0       | 11.335  | 3.10248 | 0       | 0       | 0       |
| ENSMUSG00000018927 | 3_Ccl6    | 413.976 | 1.58578  | 0.000102 | 0.003362 | 950.57  | 503.275 | 409.528 | 213.751 | 229.213 | 177.52  |
| ENSMUSG00000018930 | 3_Ccl4    | 45.5699 | 5.16129  | 5.18E-11 | 1.07E-08 | 42.4723 | 155.29  | 68.2547 | 2.47588 | 2.57543 | 2.35126 |
| ENSMUSG00000018931 | 3_Natd1   | 624.853 | -0.04794 | 0.913544 | 0.975947 | 292.25  | 708.439 | 842.842 | 728.733 | 540.84  | 636.015 |
| ENSMUSG00000018932 | 9_Map2k2  | 1912.04 | 0.10962  | 0.782448 | 0.935592 | 1059.78 | 2532.25 | 2362.02 | 1970.8  | 1653.43 | 1893.94 |
| ENSMUSG00000018965 | 11_Ywhaf  | 3264.7  | 0.59306  | 0.041641 | 0.25849  | 4836.78 | 3848.24 | 3094.21 | 2343.83 | 2868.17 | 2596.96 |
| ENSMUSG00000018974 | 7_Sart3   | 616.186 | 0.36481  | 0.465099 | 0.802138 | 252.811 | 943.074 | 885.242 | 557.072 | 500.492 | 558.423 |
| ENSMUSG00000018983 | 9_E2f2    | 71.345  | 0.90466  | 0.021962 | 0.173953 | 66.7421 | 97.4812 | 114.792 | 56.1199 | 41.2069 | 51.7276 |
| ENSMUSG00000018986 | 9_Slfn3   | 460.092 | 1.46275  | 0.000695 | 0.014953 | 1068.89 | 555.416 | 401.255 | 214.576 | 274.713 | 245.706 |
| ENSMUSG00000018995 | 12_Nars2  | 256.482 | 0.03797  | 0.911441 | 0.975173 | 350.902 | 226.701 | 201.662 | 226.13  | 258.402 | 275.097 |
| ENSMUSG00000018999 | 14_Slc35t | 1091.38 | -0.10823 | 0.661162 | 0.895458 | 1109.34 | 1022.42 | 1019.68 | 1020.89 | 1292.01 | 1083.93 |
| ENSMUSG00000019027 | 7_Dnah1   | 48.3167 | -1.55114 | 0.001164 | 0.021963 | 17.1912 | 21.5366 | 35.1615 | 77.5775 | 86.7062 | 51.7276 |
| ENSMUSG00000019039 | 13_Dalrd3 | 628.595 | 0.19206  | 0.72212  | 0.914077 | 205.283 | 888.666 | 917.301 | 637.951 | 545.133 | 577.233 |
| ENSMUSG00000019054 | 13_Fis1   | 1417.35 | -0.1409  | 0.776864 | 0.933844 | 507.645 | 1713.86 | 1823.23 | 1767.78 | 1249.08 | 1442.5  |
| ENSMUSG00000019055 | 15_Plod1  | 1130.2  | -0.64988 | 0.150796 | 0.524223 | 398.43  | 992.949 | 1248.23 | 1465.72 | 1167.53 | 1508.33 |
| ENSMUSG00000019066 | 13_Rab3d  | 9097.84 | 0.38104  | 0.332975 | 0.711944 | 5547.69 | 12987.7 | 12341.7 | 7966.55 | 7066.12 | 8677.31 |
| ENSMUSG00000019080 | 7_Mfsd3   | 56.6569 | -0.08638 | 0.890849 | 0.970606 | 15.1687 | 55.5416 | 94.1087 | 51.9934 | 54.9425 | 68.1864 |
| ENSMUSG00000019082 | 17_Slc25e | 324.259 | 0.69008  | 0.272176 | 0.658801 | 92.0232 | 586.021 | 523.286 | 341.671 | 199.167 | 203.384 |
| ENSMUSG00000019087 | 13_Atp6aj | 6063.06 | 0.08461  | 0.713255 | 0.910879 | 6553.87 | 6152.65 | 6015.72 | 5295.08 | 6385.35 | 5975.72 |
| ENSMUSG00000019088 | 13_Dnase  | 609.632 | -0.0915  | 0.691993 | 0.905638 | 605.735 | 599.623 | 565.686 | 618.144 | 658.452 | 610.151 |
| ENSMUSG00000019102 | 10_Aldh3e | 297399  | 0.26379  | 0.56113  | 0.849386 | 143057  | 402349  | 428129  | 265764  | 230215  | 314877  |
| ENSMUSG00000019122 | 8_Ccl9    | 269.734 | 1.99932  | 7.32E-06 | 0.00041  | 676.522 | 384.257 | 233.721 | 102.336 | 109.885 | 111.685 |
| ENSMUSG00000019124 | 10_Scrn1  | 929.463 | -1.04129 | 0.000436 | 0.01051  | 619.893 | 496.474 | 707.366 | 1464.07 | 1247.37 | 1041.61 |
| ENSMUSG00000019132 | 10_BC00f  | 5058.19 | 0.66504  | 0.13382  | 0.497275 | 10340   | 4450.13 | 3821.23 | 3401.86 | 4443.48 | 3892.5  |
| ENSMUSG00000019139 | 9_Isyna1  | 316.646 | 0.12902  | 0.857197 | 0.959059 | 44.4948 | 491.94  | 456.065 | 392.839 | 220.629 | 293.907 |
| ENSMUSG00000019143 | 15_Hars2  | 705.425 | 0.10302  | 0.671619 | 0.899887 | 793.827 | 703.905 | 693.922 | 622.27  | 729.705 | 688.918 |
| ENSMUSG00000019146 | 2_Cacng2  | 2.31079 | -2.48142 | 0.188237 | 0.576108 | 1.01124 | 1.1335  | 0       | 7.42763 | 4.29238 | 0       |
| ENSMUSG00000019158 | 8_Tmem1   | 74.0309 | -0.12824 | 0.871308 | 0.963578 | 8.08995 | 113.35  | 91.0062 | 121.318 | 57.518  | 52.9033 |
| ENSMUSG00000019173 | 11_Rab5c  | 4376.45 | 0.4327   | 0.324273 | 0.704896 | 2333.95 | 6898.5  | 5851.29 | 4036.5  | 3255.34 | 3883.1  |
| ENSMUSG00000019178 | 17_Styx11 | 15.1562 | -0.58199 | 0.388042 | 0.752356 | 12.1349 | 17.0025 | 7.23913 | 9.90351 | 22.3204 | 22.3369 |
| ENSMUSG00000019179 | 10_Mdh2   | 2085.95 | -0.00915 | 0.985659 | 0.995304 | 736.186 | 2846.23 | 2655.73 | 2399.95 | 1755.59 | 2122.01 |
| ENSMUSG00000019188 | 16_H13    | 1238.46 | -0.08616 | 0.817452 | 0.947772 | 692.702 | 1518.89 | 1393.02 | 1314.69 | 1192.42 | 1319.05 |
| ENSMUSG00000019189 | 13_Rnf14  | 3754.39 | 0.37949  | 0.094322 | 0.41765  | 4183.52 | 4443.33 | 4108.72 | 3096.5  | 3117.99 | 3576.26 |
| ENSMUSG00000019194 | 14_Scn1b  | 115.284 | -0.97778 | 0.066227 | 0.341158 | 31.3486 | 96.3477 | 105.484 | 214.576 | 119.328 | 124.617 |
| ENSMUSG00000019210 | 10_Atp6v  | 6772.75 | 0.05872  | 0.783904 | 0.935592 | 6810.73 | 6960.84 | 6959.91 | 6325.04 | 6643.75 | 6936.2  |
| ENSMUSG00000019214 | 13_Chtf1f | 64.543  | 1.09571  | 0.115037 | 0.461051 | 21.2361 | 115.617 | 127.202 | 66.0234 | 26.6128 | 30.5663 |
| ENSMUSG00000019230 | 14_Lhx9   | 1.95626 | 1.26596  | 0.418388 | 0.772197 | 3.03373 | 2.26701 | 3.10248 | 2.47588 | 0.85848 | 0       |
| ENSMUSG00000019232 | 14_Etnppl | 66.5722 | -1.50062 | 0.010273 | 0.102761 | 62.6971 | 12.4685 | 28.9565 | 119.667 | 90.9986 | 84.6452 |
| ENSMUSG00000019235 | 8_Rps6kl  | 4.83433 | -1.26517 | 0.216869 | 0.607835 | 1.01124 | 3.40051 | 4.13665 | 8.25292 | 5.15086 | 7.05377 |
| ENSMUSG00000019254 | 16_Ppp1r  | 696.401 | -0.04201 | 0.934789 | 0.983652 | 236.631 | 910.203 | 912.13  | 792.281 | 655.876 | 671.283 |
| ENSMUSG00000019256 | 17_Ahr    | 706.81  | 0.30286  | 0.391914 | 0.754331 | 1125.51 | 617.759 | 598.78  | 626.397 | 648.15  | 624.258 |
| ENSMUSG00000019261 | 2_Map1s   | 57.9001 | 0.32404  | 0.706562 | 0.90886  | 5.05622 | 70.2772 | 117.894 | 79.2281 | 32.6221 | 42.3226 |
| ENSMUSG00000019278 | 4_Dpep1   | 533.706 | -0.47874 | 0.185935 | 0.573178 | 284.16  | 460.202 | 593.609 | 690.77  | 556.293 | 617.205 |
| ENSMUSG00000019295 | 8_Tmem1   | 552.902 | -0.00696 | 0.980841 | 0.993796 | 430.79  | 588.288 | 636.009 | 595.861 | 569.17  | 497.291 |
| ENSMUSG00000019297 | 8_Nop9    | 518.862 | 0.25419  | 0.478242 | 0.80884  | 348.879 | 697.104 | 647.385 | 466.29  | 442.116 | 511.398 |
| ENSMUSG00000019301 | 5_Hsd17b  | 3.29636 | -0.09322 | 0.938495 | 0.985118 | 1.01124 | 3.40051 | 5.17081 | 4.95175 | 1.71695 | 3.52688 |
| ENSMUSG00000019302 | 16_Atp6v  | 3663.23 | 0.16556  | 0.583909 | 0.860815 | 2773.84 | 4430.86 | 4414.84 | 3308.6  | 3338.62 | 3712.63 |
| ENSMUSG00000019303 | 14_Psmc   | 146.518 | 0.56549  | 0.08464  | 0.392904 | 133.484 | 207.431 | 184.081 | 122.969 | 125.338 | 105.807 |
| ENSMUSG00000019312 | 10_Grb7   | 1592.96 | 0.65805  | 0.153071 | 0.528133 | 835.288 | 2469.9  | 2545.07 | 1339.45 | 1052.49 | 1315.53 |
| ENSMUSG00000019320 | 13_Noxo1  | 88.7857 | -0.61373 | 0.099743 | 0.429504 | 51.5735 | 70.2772 | 88.9379 | 116.366 | 115.036 | 90.5233 |
| ENSMUSG00000019326 | 14_Aoc3   | 88.3256 | -1.16451 | 0.004463 | 0.057422 | 67.7534 | 43.0731 | 52.7422 | 165.884 | 106.451 | 94.0502 |
| ENSMUSG00000019338 | 13_Zfp68i | 750.793 | 0.21969  | 0.612178 | 0.874367 | 391.352 | 1005.42 | 1026.92 | 799.708 | 588.915 | 692.445 |
| ENSMUSG00000019359 | 14_Gdpc2  | 1219.46 | 1.05529  | 0.001395 | 0.024981 | 1199.34 | 2109.45 | 1630.87 | 654.457 | 877.363 | 845.276 |
| ENSMUSG00000019362 | 7_D8Ert   | 485.823 | -0.13649 | 0.80061  | 0.941902 | 156.743 | 616.626 | 615.326 | 638.776 | 363.136 | 524.33  |
| ENSMUSG00000019368 | 13_Sec14  | 93.2158 | -0.08406 | 0.840014 | 0.95317  | 56.6297 | 100.882 | 113.758 | 89.1316 | 78.9799 | 119.914 |
| ENSMUSG00000019370 | 10_Calm3  | 2294.44 | -0.49681 | 0.298923 | 0.682038 | 800.906 | 2405.29 | 2503.71 | 3339.96 | 2077.51 | 2639.28 |
| ENSMUSG00000019373 | 11_Cops3  | 1899.76 | 0.13592  | 0.674981 | 0.900711 | 2657.55 | 1742.19 | 1567.79 | 1643.16 | 2084.38 | 1703.48 |
| ENSMUSG00000019428 | 16_Fkbp8  | 2009.19 | 0.24694  | 0.698478 | 0.905638 | 444.948 | 2842.83 | 3254.51 | 2340.53 | 1338.37 | 1833.98 |

|                    |           |         |          |          |          |         |         |         |         |         |         |
|--------------------|-----------|---------|----------|----------|----------|---------|---------|---------|---------|---------|---------|
| ENSMUSG00000019432 | 15_Ddx39  | 2694.46 | 0.15426  | 0.778527 | 0.934544 | 823.153 | 4000.13 | 3691.96 | 2671.47 | 2319.6  | 2660.45 |
| ENSMUSG00000019433 | 8_Gipc1   | 2625.72 | 0.37228  | 0.550018 | 0.844063 | 652.253 | 4125.95 | 4109.76 | 2805.99 | 1604.49 | 2455.89 |
| ENSMUSG00000019437 | 17_Tlcd1  | 358.871 | -0.38541 | 0.167012 | 0.547589 | 348.879 | 252.771 | 331.966 | 411.821 | 429.238 | 378.552 |
| ENSMUSG00000019461 | 12_Plscr3 | 1468.55 | 0.35476  | 0.489558 | 0.814396 | 566.297 | 2262.47 | 2115.89 | 1334.5  | 1123.75 | 1408.4  |
| ENSMUSG00000019464 | 5_Ptger1  | 321.017 | 0.03392  | 0.934692 | 0.983652 | 173.934 | 378.59  | 421.938 | 359.002 | 266.986 | 325.649 |
| ENSMUSG00000019467 | 13_Arhge1 | 411.991 | -1.18421 | 0.001648 | 0.028201 | 173.934 | 216.499 | 365.059 | 627.222 | 596.642 | 492.588 |
| ENSMUSG00000019470 | 12_Xab2   | 846.863 | 0.17229  | 0.77995  | 0.935056 | 192.136 | 1244.59 | 1255.47 | 892.141 | 673.904 | 822.939 |
| ENSMUSG00000019471 | 9_Cdc37   | 2036    | 0.07041  | 0.898995 | 0.972108 | 601.69  | 2850.76 | 2804.65 | 2225.81 | 1643.98 | 2089.09 |
| ENSMUSG00000019478 | 15_Rab4a  | 89.191  | -0.89744 | 0.012047 | 0.115028 | 60.6747 | 63.4762 | 63.0839 | 147.727 | 107.31  | 92.8746 |
| ENSMUSG00000019487 | 10_Trip10 | 1762.34 | 0.54066  | 0.318041 | 0.698985 | 636.073 | 2928.97 | 2701.23 | 1473.97 | 1239.64 | 1594.15 |
| ENSMUSG00000019494 | 14_Cops6  | 2250.87 | -0.05746 | 0.852893 | 0.958158 | 1555.29 | 2688.67 | 2374.43 | 2413.98 | 2196.84 | 2276.02 |
| ENSMUSG00000019505 | 7_Ubb     | 16772.1 | -0.03061 | 0.959574 | 0.989708 | 3906.44 | 23277.6 | 22598.5 | 21111.8 | 12953.6 | 16784.4 |
| ENSMUSG00000019518 | 10_Ap4m   | 514.701 | 0.27265  | 0.47321  | 0.806475 | 323.598 | 682.369 | 683.581 | 450.61  | 437.823 | 510.222 |
| ENSMUSG00000019528 | 18_Gyg    | 12125.7 | 0.00239  | 0.994511 | 0.998043 | 17084   | 9258.45 | 10064.5 | 10292.2 | 12917.5 | 13137.6 |
| ENSMUSG00000019539 | 10_Rcn3   | 567.293 | -0.73134 | 0.300404 | 0.683516 | 65.7309 | 493.074 | 720.811 | 982.098 | 469.587 | 672.459 |
| ENSMUSG00000019558 | 14_Slc6a1 | 2793.52 | 0.36599  | 0.320067 | 0.701224 | 1861.7  | 3975.19 | 3600.95 | 2356.21 | 2246.63 | 2720.4  |
| ENSMUSG00000019564 | 12_Arid3a | 332.571 | 0.11997  | 0.697499 | 0.905638 | 257.867 | 385.391 | 396.084 | 348.273 | 292.741 | 315.068 |
| ENSMUSG00000019577 | 6_Pdk4    | 122.88  | -0.27085 | 0.671845 | 0.89998  | 229.552 | 35.1386 | 69.2888 | 132.872 | 139.932 | 130.495 |
| ENSMUSG00000019578 | 11_Ubxm6  | 1083.29 | 0.11397  | 0.78515  | 0.936054 | 569.331 | 1323.93 | 1485.06 | 1176.04 | 910.844 | 1034.55 |
| ENSMUSG00000019579 | 13_Mydgf  | 887.943 | 0.03217  | 0.928057 | 0.980839 | 555.173 | 1132.37 | 1006.24 | 955.689 | 825.855 | 852.33  |
| ENSMUSG00000019590 | 16_Cyb56  | 496.792 | 0.50728  | 0.090413 | 0.409937 | 461.127 | 632.495 | 655.658 | 370.556 | 377.73  | 483.183 |
| ENSMUSG00000019647 | 16_Semat  | 167.55  | -0.97511 | 0.004741 | 0.060065 | 129.439 | 91.8137 | 117.894 | 250.889 | 250.675 | 164.588 |
| ENSMUSG00000019659 | 8_Ccdc12  | 1064.65 | 0.17724  | 0.750117 | 0.925182 | 323.598 | 1523.43 | 1542.97 | 1131.48 | 854.185 | 1012.22 |
| ENSMUSG00000019689 | 4_111000  | 128.299 | -0.85149 | 0.093579 | 0.416339 | 40.4498 | 99.7483 | 134.441 | 218.702 | 123.621 | 152.832 |
| ENSMUSG00000019699 | 15_Akt3   | 1309.74 | 0.71333  | 0.061483 | 0.327248 | 2438.11 | 1293.33 | 1149.99 | 1040.69 | 1072.24 | 864.086 |
| ENSMUSG00000019710 | 13_Mrp124 | 1483.35 | -0.25149 | 0.302122 | 0.685243 | 1188.21 | 1428.21 | 1446.79 | 1491.3  | 1712.66 | 1632.95 |
| ENSMUSG00000019715 | 14_Gle1   | 820.198 | -0.04455 | 0.86107  | 0.960565 | 679.556 | 869.397 | 873.867 | 870.683 | 812.978 | 814.71  |
| ENSMUSG00000019718 | 8_L3hypo1 | 125.081 | -0.34446 | 0.37814  | 0.746633 | 147.642 | 81.6122 | 101.348 | 176.613 | 111.602 | 131.67  |
| ENSMUSG00000019726 | 10_Lyst   | 1015.32 | -0.20742 | 0.497237 | 0.819208 | 1235.74 | 826.324 | 765.28  | 1150.46 | 1084.26 | 1029.85 |
| ENSMUSG00000019731 | 13_Slc35e | 1625.09 | 0.21378  | 0.382369 | 0.749501 | 1549.23 | 1894.08 | 1792.2  | 1411.25 | 1450.83 | 1652.93 |
| ENSMUSG00000019732 | 14_Calr3  | 30.2686 | -0.60747 | 0.184415 | 0.571473 | 23.2586 | 26.0706 | 22.7516 | 45.3911 | 30.0467 | 34.0932 |
| ENSMUSG00000019734 | 16_Tmc4   | 3311.7  | 0.62831  | 0.12742  | 0.485365 | 2092.26 | 5406.81 | 4565.82 | 2204.36 | 2681.88 | 2919.08 |
| ENSMUSG00000019737 | 14_Syne4  | 28.2724 | -0.03345 | 0.958095 | 0.989261 | 11.1237 | 29.4711 | 43.4348 | 41.2646 | 23.1789 | 21.1613 |
| ENSMUSG00000019738 | 15_Polr2i | 288.676 | -0.03281 | 0.956465 | 0.988881 | 72.8096 | 431.865 | 351.615 | 349.924 | 215.478 | 310.366 |
| ENSMUSG00000019761 | 9_Krt10   | 151.591 | 0.64838  | 0.091716 | 0.412925 | 246.744 | 192.695 | 115.826 | 112.24  | 124.479 | 117.563 |
| ENSMUSG00000019762 | 4_lyd     | 21.4076 | -1.61517 | 0.002088 | 0.033426 | 12.1349 | 9.06802 | 10.3416 | 31.3611 | 32.6221 | 32.9176 |
| ENSMUSG00000019763 | 11_Rmnd1  | 427.415 | -0.21215 | 0.439838 | 0.785475 | 458.094 | 342.318 | 387.811 | 453.911 | 507.36  | 414.997 |
| ENSMUSG00000019767 | 12_Ccdc1  | 4.80985 | 0.00448  | 0.996603 | 0.998331 | 9.1012  | 2.26701 | 3.10248 | 7.42763 | 3.43391 | 3.52688 |
| ENSMUSG00000019768 | 16_Esr1   | 202.247 | 0.46738  | 0.276329 | 0.662838 | 365.059 | 162.091 | 176.842 | 137.824 | 200.025 | 171.642 |
| ENSMUSG00000019772 | 4_Vip     | 1.31208 | -2.57775 | 0.218458 | NA       | 1.01124 | 0       | 0       | 2.47588 | 0.85848 | 3.52688 |
| ENSMUSG00000019773 | 7_Fbxo5   | 213.99  | 0.66159  | 0.092064 | 0.413309 | 360.003 | 253.905 | 172.705 | 134.523 | 201.742 | 161.061 |
| ENSMUSG00000019774 | 8_Mtrf1l  | 180.964 | 0.0333   | 0.930558 | 0.981773 | 261.912 | 149.622 | 137.543 | 157.631 | 208.61  | 170.466 |
| ENSMUSG00000019775 | 17_Rgs17  | 9.78027 | -1.23545 | 0.158866 | 0.537239 | 10.1124 | 1.1335  | 6.20497 | 19.807  | 12.0187 | 9.40502 |
| ENSMUSG00000019777 | 16_Hdac2  | 1816.43 | 0.23413  | 0.611114 | 0.874284 | 3352.27 | 1276.32 | 1261.68 | 1384.02 | 1884.36 | 1739.93 |
| ENSMUSG00000019779 | 14_Frk    | 1517.2  | 0.477    | 0.292582 | 0.676822 | 2919.46 | 1359.07 | 1018.65 | 1057.2  | 1523.8  | 1225    |
| ENSMUSG00000019782 | 9_Rwdd1   | 1225.21 | 0.27652  | 0.519811 | 0.831665 | 2201.48 | 954.409 | 870.764 | 1027.49 | 1196.72 | 1100.39 |
| ENSMUSG00000019785 | 13_Clvs2  | 0.56042 | -1.00363 | 0.787433 | NA       | 1.01124 | 0       | 0       | 0       | 0       | 2.35126 |
| ENSMUSG00000019787 | 8_Trdn    | 288.071 | -0.00188 | 0.998425 | 0.999289 | 759.444 | 20.4031 | 83.7671 | 411.821 | 224.921 | 228.072 |
| ENSMUSG00000019789 | 8_Hey2    | 21.8634 | -0.44892 | 0.426435 | 0.777537 | 26.2924 | 15.869  | 13.4441 | 32.1864 | 25.7543 | 17.6344 |
| ENSMUSG00000019790 | 16_Stxbp1 | 2164.08 | 0.36913  | 0.156598 | 0.534279 | 2850.7  | 2346.35 | 2121.07 | 1706.7  | 2023.43 | 1936.26 |
| ENSMUSG00000019791 | 11_Hint3  | 442.074 | 0.37041  | 0.35262  | 0.728926 | 759.444 | 375.189 | 360.922 | 363.129 | 448.125 | 345.635 |
| ENSMUSG00000019792 | 7_Trmt11  | 298.899 | 0.43945  | 0.418082 | 0.771713 | 654.275 | 192.695 | 185.115 | 218.702 | 291.024 | 251.584 |
| ENSMUSG00000019794 | 13_Katna1 | 1713.16 | 0.70914  | 0.017058 | 0.145334 | 2459.35 | 2191.06 | 1727.05 | 1039.87 | 1460.27 | 1401.35 |
| ENSMUSG00000019795 | 17_Pcmt1  | 1354.24 | 0.13559  | 0.676119 | 0.901041 | 1939.57 | 1148.24 | 1165.5  | 1211.53 | 1361.54 | 1299.07 |
| ENSMUSG00000019796 | 12_Lrp11  | 99.0787 | -0.13655 | 0.752127 | 0.925804 | 142.585 | 71.4107 | 69.2888 | 114.716 | 114.177 | 82.2939 |
| ENSMUSG00000019797 | 10_17000  | 333.464 | 0.10548  | 0.712221 | 0.910879 | 421.689 | 318.514 | 296.804 | 334.243 | 326.221 | 303.312 |
| ENSMUSG00000019802 | 13_Sec63  | 2990.83 | 0.25669  | 0.539602 | 0.840325 | 5203.86 | 2345.22 | 2219.31 | 2289.36 | 3039.87 | 2847.37 |
| ENSMUSG00000019803 | 11_Nr2e1  | 19.3374 | -2.57892 | 0.00085  | 0.017335 | 11.1237 | 3.40051 | 2.06832 | 44.5658 | 36.056  | 18.81   |
| ENSMUSG00000019804 | 12_Snx3   | 1736.91 | 0.21566  | 0.352773 | 0.729095 | 1827.32 | 2048.24 | 1723.95 | 1526.79 | 1664.59 | 1630.6  |
| ENSMUSG00000019806 | 13_Aig1   | 801.899 | 0.2333   | 0.465959 | 0.803159 | 1170.01 | 699.371 | 730.118 | 700.673 | 740.007 | 771.212 |
| ENSMUSG00000019808 | 8_Adat2   | 85.1064 | 0.41459  | 0.200307 | 0.592148 | 86.967  | 94.0807 | 110.655 | 69.3246 | 75.546  | 74.0646 |
| ENSMUSG00000019809 | 16_Pex3   | 565.307 | 0.14611  | 0.715253 | 0.911362 | 914.165 | 420.53  | 446.758 | 460.513 | 582.047 | 567.828 |
| ENSMUSG00000019810 | 15_Fuca2  | 1823.86 | 0.16567  | 0.644846 | 0.889294 | 2762.72 | 1529.1  | 1493.33 | 1445.09 | 1921.27 | 1791.66 |
| ENSMUSG00000019813 | 15_Cep57  | 342.325 | 0.87238  | 0.010962 | 0.107496 | 582.477 | 426.197 | 319.556 | 210.45  | 269.562 | 245.706 |
| ENSMUSG00000019814 | 4_Ltv1    | 882.071 | 0.44158  | 0.188652 | 0.576566 | 1331.81 | 932.873 | 782.86  | 605.765 | 759.752 | 879.37  |
| ENSMUSG00000019817 | 18_Plagl1 | 441.425 | -0.19962 | 0.698432 | 0.905638 | 749.332 | 205.164 | 278.189 | 550.47  | 429.238 | 436.158 |
| ENSMUSG00000019818 | 15_Cd164  | 16732.9 | 0.67299  | 0.157804 | 0.535946 | 36020.5 | 13313   | 12365.5 | 10488.6 | 14029.2 | 14180.4 |
| ENSMUSG00000019820 | 9_Utrn    | 5609.96 | -0.07425 | 0.778273 | 0.934544 | 6591.29 | 4595.22 | 5210.11 | 5566.6  | 5810.17 | 5886.37 |
| ENSMUSG00000019822 | 12_Smpd1  | 359.802 | -0.57803 | 0.201122 | 0.592148 | 127.417 | 358.187 | 380.571 | 434.929 | 426.753 | 426.753 |
| ENSMUSG00000019823 | 17_Mical1 | 274.754 | -0.54056 | 0.333389 | 0.712065 | 69.7759 | 273.174 | 328.863 | 420.074 | 272.137 | 284.502 |
| ENSMUSG00000019826 | 10_Zbtb24 | 355.546 | 0.15274  | 0.540659 | 0.84046  | 394.385 | 347.985 | 380.571 | 315.262 | 358.843 | 336.23  |
| ENSMUSG00000019828 | 13_Grm1   | 10.1464 | -1.43481 | 0.120498 | 0.471708 | 9.1012  | 1.1335  | 6.20497 | 23.1082 | 15.4526 | 5.87814 |
| ENSMUSG00000019831 | 14_Wasf1  | 23.5114 | -0.90806 | 0.105465 | 0.440829 | 19.2136 | 11.335  | 18.6149 | 39.614  | 33.4806 | 18.81   |
| ENSMUSG00000019832 | 3_Rab32   | 542.178 | 0.43641  | 0.263368 | 0.652524 | 949.558 | 478.338 | 442.621 | 423.375 | 493.624 | 465.549 |
| ENSMUSG00000019834 | 15_Slc22e | 0.39188 | -1.97195 | 0.623385 | NA       | 0       | 0       | 0       | 0       | 0       | 2.35126 |

|                    |           |         |          |          |          |         |         |         |         |         |         |
|--------------------|-----------|---------|----------|----------|----------|---------|---------|---------|---------|---------|---------|
| ENSMUSG00000019837 | 7_Gtf3c6  | 798.778 | -0.01503 | 0.962473 | 0.990106 | 992.031 | 750.379 | 641.18  | 634.65  | 918.57  | 855.857 |
| ENSMUSG00000019838 | 10_Slc16e | 152.206 | -0.73752 | 0.060024 | 0.322098 | 161.799 | 77.0782 | 103.416 | 184.865 | 221.487 | 164.588 |
| ENSMUSG00000019841 | 15_Rev3l  | 1429.4  | -0.05439 | 0.907847 | 0.974731 | 2448.22 | 882.999 | 875.935 | 1285.81 | 1559.85 | 1523.61 |
| ENSMUSG00000019842 | 6_Traf3ip | 503.603 | 0.53067  | 0.08512  | 0.394496 | 440.903 | 702.772 | 642.214 | 392.014 | 459.285 | 384.43  |
| ENSMUSG00000019843 | 14_Fyn    | 291.416 | -0.2079  | 0.501738 | 0.82269  | 310.452 | 257.305 | 244.062 | 347.448 | 349.4   | 239.828 |
| ENSMUSG00000019845 | 7_Tube1   | 52.4844 | -0.21995 | 0.560166 | 0.848816 | 44.4948 | 44.2066 | 56.8789 | 64.3728 | 53.2256 | 51.7276 |
| ENSMUSG00000019846 | 11_Lama4  | 495.249 | -0.05177 | 0.84625  | 0.955537 | 557.196 | 464.736 | 437.45  | 525.711 | 540.84  | 445.563 |
| ENSMUSG00000019848 | 14_Popdc  | 218.21  | 0.14163  | 0.633753 | 0.883636 | 257.867 | 236.902 | 192.354 | 215.401 | 229.213 | 177.52  |
| ENSMUSG00000019849 | 10_Prep   | 1612.89 | 0.49217  | 0.091485 | 0.412313 | 1558.33 | 2242.07 | 1855.29 | 1157.89 | 1282.56 | 1581.22 |
| ENSMUSG00000019850 | 11_Tnfaip | 568.592 | 0.5498   | 0.109512 | 0.449722 | 498.543 | 932.873 | 595.677 | 495.175 | 415.503 | 473.778 |
| ENSMUSG00000019851 | 7_Perp    | 55072.4 | 0.53386  | 0.09064  | 0.410103 | 85795   | 57167.1 | 52479.6 | 38537.9 | 46038.4 | 50416.8 |
| ENSMUSG00000019852 | 6_Arfgef3 | 53.3256 | -1.62246 | 0.001335 | 0.024325 | 36.4048 | 19.2695 | 22.7516 | 119.667 | 58.3764 | 63.4839 |
| ENSMUSG00000019853 | 5_Hebp2   | 3261.21 | 0.06944  | 0.75327  | 0.925861 | 3403.85 | 3321.16 | 3293.8  | 2937.22 | 3307.71 | 3303.51 |
| ENSMUSG00000019854 | 16_Reps1  | 1367.96 | 0.46415  | 0.058538 | 0.317521 | 1431.92 | 1776.2  | 1550.21 | 1052.25 | 1202.73 | 1194.44 |
| ENSMUSG00000019856 | 13_Fam1f  | 404.838 | -0.7482  | 0.023981 | 0.18389  | 381.239 | 219.9   | 305.078 | 441.531 | 586.34  | 494.939 |
| ENSMUSG00000019857 | 6_Asf1a   | 585.281 | 0.39655  | 0.345327 | 0.72223  | 1054.73 | 468.137 | 472.612 | 428.327 | 581.189 | 506.696 |
| ENSMUSG00000019861 | 14_Gopc   | 1198.9  | 0.39386  | 0.295814 | 0.679765 | 2016.42 | 1034.89 | 1033.13 | 886.364 | 1169.25 | 1053.36 |
| ENSMUSG00000019863 | 6_Qrs1    | 365.071 | 0.16384  | 0.543276 | 0.84123  | 368.093 | 436.399 | 352.649 | 303.708 | 354.551 | 375.025 |
| ENSMUSG00000019864 | 13_Rtn4ip | 466.639 | -0.04375 | 0.855685 | 0.959059 | 436.858 | 467.003 | 474.68  | 439.056 | 488.473 | 493.764 |
| ENSMUSG00000019865 | 9_Nmbr    | 0.86142 | -1.80023 | 0.446285 | NA       | 0       | 1.1335  | 0       | 0.82529 | 0.85848 | 2.35126 |
| ENSMUSG00000019866 | 13_Aim1   | 8909.51 | 0.62626  | 0.018314 | 0.153553 | 11086.3 | 11187.7 | 10165.8 | 5679.66 | 7127.08 | 8210.58 |
| ENSMUSG00000019867 | 4_Gje1    | 0.83082 | -3.10906 | 0.330544 | NA       | 0       | 0       | 0       | 4.12646 | 0.85848 | 0       |
| ENSMUSG00000019868 | 16_Vta1   | 828.196 | 0.50185  | 0.036406 | 0.239    | 1049.67 | 962.344 | 900.755 | 725.432 | 699.659 | 631.312 |
| ENSMUSG00000019872 | 13_Smpdl  | 3103.12 | 0.26507  | 0.509451 | 0.827179 | 5262.52 | 2627.46 | 2272.05 | 2477.53 | 3195.25 | 2783.89 |
| ENSMUSG00000019873 | 7_Reep3   | 4877.87 | 0.44813  | 0.210199 | 0.602314 | 8151.64 | 4268.77 | 4467.58 | 3623.03 | 4391.11 | 4365.11 |
| ENSMUSG00000019874 | 11_Fabp7  | 56.7413 | -1.73102 | 0.104619 | 0.130648 | 33.3711 | 23.8036 | 21.7174 | 37.9634 | 187.148 | 36.4445 |
| ENSMUSG00000019876 | 15_Pkib   | 26.8429 | -0.19901 | 0.719633 | 0.913031 | 35.3936 | 17.0025 | 22.7516 | 31.3611 | 36.9145 | 17.6344 |
| ENSMUSG00000019877 | 10_Serinc | 4833.97 | 0.01628  | 0.971885 | 0.992434 | 8391.31 | 3042.32 | 3150.06 | 4747.08 | 5406.69 | 4266.35 |
| ENSMUSG00000019878 | 7_Hsf2    | 191.212 | 0.06849  | 0.882259 | 0.967828 | 326.632 | 141.688 | 118.929 | 192.293 | 204.318 | 161.412 |
| ENSMUSG00000019880 | 9_Rspo3   | 15.4323 | -1.27471 | 0.078557 | 0.37634  | 17.1912 | 5.66751 | 4.13665 | 26.4094 | 18.028  | 21.1613 |
| ENSMUSG00000019883 | 10_Echdc  | 2079.05 | 0.60057  | 0.201781 | 0.593308 | 4317    | 1711.59 | 1488.16 | 1334.5  | 1897.23 | 1725.82 |
| ENSMUSG00000019888 | 15_Mgat4  | 3.35025 | 0.63188  | 0.691021 | 0.905638 | 11.1237 | 1.1335  | 0       | 4.95175 | 1.71695 | 1.17563 |
| ENSMUSG00000019889 | 9_Ptpkr   | 1324.54 | -0.23569 | 0.371569 | 0.742488 | 1416.75 | 1160.71 | 1072.43 | 1369.99 | 1603.64 | 1323.76 |
| ENSMUSG00000019890 | 3_Nts     | 2.92977 | -0.104   | 0.929467 | 0.98161  | 2.02249 | 3.40051 | 3.10248 | 4.12646 | 2.57543 | 2.35126 |
| ENSMUSG00000019891 | 13_Dcbld  | 177.054 | 0.21809  | 0.445196 | 0.788998 | 220.451 | 176.826 | 173.739 | 155.155 | 165.686 | 170.466 |
| ENSMUSG00000019892 | 12_Lrriq1 | 9.46822 | -2.32978 | 0.008823 | 0.091872 | 6.06747 | 2.26701 | 1.03416 | 11.5541 | 20.6034 | 15.2832 |
| ENSMUSG00000019893 | 11_Ros1   | 1.58844 | 0.30825  | 0.881044 | NA       | 4.04498 | 1.1335  | 0       | 0.82529 | 0       | 3.52688 |
| ENSMUSG00000019894 | 13_Slc6a1 | 588.025 | -1.40102 | 0.008445 | 0.089017 | 568.319 | 133.753 | 266.814 | 906.996 | 1023.3  | 628.961 |
| ENSMUSG00000019897 | 8_Ccdc59  | 784.489 | 0.32562  | 0.374867 | 0.744881 | 1283.27 | 676.701 | 657.727 | 638.776 | 726.272 | 724.187 |
| ENSMUSG00000019899 | 15_Lama2  | 1240.73 | -0.73686 | 0.036498 | 0.239259 | 1235.74 | 617.759 | 937.985 | 1346.05 | 1776.19 | 1530.67 |
| ENSMUSG00000019906 | 14_Lin7a  | 51.4166 | -0.75457 | 0.265156 | 0.653914 | 75.8433 | 20.4031 | 18.6149 | 96.5592 | 61.8103 | 35.2688 |
| ENSMUSG00000019907 | 9_Ppp1r1  | 2657.89 | 0.26616  | 0.372466 | 0.743353 | 3664.75 | 2625.19 | 2416.84 | 2056.63 | 2582.3  | 2601.66 |
| ENSMUSG00000019909 | 3_Fam16c  | 0.39188 | -1.97195 | 0.623385 | NA       | 0       | 0       | 0       | 0       | 0       | 2.35126 |
| ENSMUSG00000019913 | 3_Sim1    | 3.04381 | -0.26752 | 0.847903 | 0.955848 | 5.05622 | 0       | 3.10248 | 1.65058 | 2.57543 | 5.87814 |
| ENSMUSG00000019916 | 14_P4ha1  | 1268.23 | 0.08426  | 0.761427 | 0.928449 | 1570.46 | 1257.05 | 1087.94 | 1100.11 | 1278.27 | 1315.53 |
| ENSMUSG00000019917 | 9_Sept10  | 816.938 | 0.31879  | 0.437496 | 0.785066 | 1421.81 | 656.298 | 642.214 | 622.27  | 830.147 | 728.889 |
| ENSMUSG00000019920 | 17_Lims1  | 3835.28 | 0.6061   | 0.145115 | 0.515151 | 7406.35 | 3223.68 | 3257.61 | 2645.06 | 3404.72 | 3074.27 |
| ENSMUSG00000019923 | 13_Zwint  | 2022.43 | -0.15876 | 0.503808 | 0.824384 | 2114.51 | 1898.62 | 1720.84 | 2258    | 2117    | 2025.61 |
| ENSMUSG00000019927 | 6_Ube2d1  | 659.199 | 0.53558  | 0.1839   | 0.570805 | 1192.26 | 603.024 | 545.003 | 439.056 | 610.377 | 565.477 |
| ENSMUSG00000019929 | 15_Dcn    | 53882.8 | -0.49554 | 0.227428 | 0.161853 | 70163.2 | 27087.3 | 36906.1 | 64750.8 | 67161.2 | 57228.4 |
| ENSMUSG00000019932 | 7_Kera    | 12008.9 | -0.48176 | 0.331844 | 0.711299 | 18058.8 | 5074.69 | 6933.02 | 12484.2 | 14752.1 | 14750.6 |
| ENSMUSG00000019935 | 16_Slc17e | 6.75656 | 0.23131  | 0.833891 | 0.952011 | 10.1124 | 6.80102 | 5.17081 | 10.7288 | 7.72629 | 0       |
| ENSMUSG00000019936 | 10_Epyc   | 196.429 | 0.38517  | 0.53594  | 0.83864  | 461.127 | 88.4132 | 117.894 | 205.498 | 152.809 | 152.832 |
| ENSMUSG00000019942 | 12_Cdk1   | 700.426 | 0.37302  | 0.157303 | 0.535082 | 768.546 | 896.601 | 706.332 | 539.741 | 676.48  | 614.853 |
| ENSMUSG00000019943 | 9_Atp2b1  | 8534.37 | 0.78534  | 0.019893 | 0.162536 | 14505.3 | 9824.07 | 8074.73 | 5134.14 | 6574.22 | 7093.74 |
| ENSMUSG00000019944 | 14_Rhobtl | 329.822 | 0.20344  | 0.465933 | 0.803159 | 349.891 | 317.381 | 391.947 | 355.701 | 271.279 | 292.731 |
| ENSMUSG00000019945 | 9_170004  | 28.1173 | -1.84573 | 0.000653 | 0.014325 | 10.1124 | 9.06802 | 17.5807 | 48.6922 | 51.5086 | 31.742  |
| ENSMUSG00000019947 | 9_Arid5b  | 1312.9  | 0.68414  | 0.015589 | 0.136075 | 1235.74 | 1878.21 | 1741.53 | 1001.08 | 980.381 | 1040.43 |
| ENSMUSG00000019948 | 3_Actr6   | 243.728 | 0.34304  | 0.501844 | 0.822726 | 493.487 | 158.69  | 165.466 | 198.895 | 250.675 | 195.154 |
| ENSMUSG00000019951 | 9_Uhrf1b  | 925.596 | 0.66433  | 0.042228 | 0.260687 | 1531.02 | 1004.28 | 869.73  | 670.137 | 790.657 | 687.742 |
| ENSMUSG00000019952 | 14_Poc1b  | 821.642 | 0.18288  | 0.45272  | 0.794942 | 935.401 | 844.46  | 840.773 | 683.342 | 814.695 | 811.183 |
| ENSMUSG00000019960 | 7_Dusp6   | 1697.79 | 0.75078  | 0.012831 | 0.120315 | 2772.83 | 1803.4  | 1812.89 | 1196.67 | 1220.75 | 1380.19 |
| ENSMUSG00000019961 | 16_Tmpo   | 5019.09 | 0.66857  | 0.087326 | 0.400861 | 9383.34 | 4965.88 | 4135.61 | 3347.39 | 4178.21 | 4104.12 |
| ENSMUSG00000019966 | 17_Kitl   | 1516.73 | 0.34988  | 0.510473 | 0.827179 | 3240.03 | 905.669 | 953.497 | 1299.84 | 1496.33 | 1205.02 |
| ENSMUSG00000019969 | 13_Psen1  | 3519.49 | 0.47134  | 0.123157 | 0.477482 | 3021.6  | 5001.01 | 4245.23 | 2730.89 | 2780.61 | 3337.61 |
| ENSMUSG00000019970 | 15_Sgk1   | 7141.9  | 0.08007  | 0.733492 | 0.919947 | 8182.99 | 6870.16 | 6967.15 | 7350.88 | 7037.79 | 6442.44 |
| ENSMUSG00000019971 | 9_Cep290  | 849.428 | 0.51939  | 0.309972 | 0.692089 | 1842.49 | 580.353 | 579.13  | 602.463 | 804.393 | 687.742 |
| ENSMUSG00000019975 | 11_Ikbip  | 563.148 | -0.62811 | 0.146275 | 0.517317 | 722.028 | 298.111 | 307.146 | 701.499 | 752.884 | 597.219 |
| ENSMUSG00000019977 | 15_Hbs1   | 801.435 | 0.03979  | 0.866378 | 0.962585 | 839.333 | 817.256 | 780.792 | 719.655 | 853.326 | 798.251 |
| ENSMUSG00000019978 | 15_Epb41  | 2728.77 | -0.52187 | 0.062319 | 0.329792 | 2639.35 | 1809.07 | 2273.09 | 3635.41 | 2930.84 | 3084.85 |
| ENSMUSG00000019979 | 12_Apaf1  | 864.501 | 0.68759  | 0.027089 | 0.198424 | 1356.08 | 1039.42 | 804.578 | 607.415 | 730.564 | 648.947 |
| ENSMUSG00000019982 | 14_Myb    | 112.065 | 1.00429  | 0.00534  | 0.064833 | 126.406 | 192.695 | 129.27  | 66.8487 | 67.8197 | 89.3477 |
| ENSMUSG00000019984 | 16_Med2c  | 1283.36 | 0.57188  | 0.028416 | 0.204174 | 1693.83 | 1484.89 | 1424.04 | 872.334 | 1067.09 | 1157.99 |
| ENSMUSG00000019986 | 16_Ahi1   | 327.453 | -1.0496  | 0.009502 | 0.096907 | 317.531 | 138.287 | 184.081 | 516.633 | 447.267 | 360.918 |
| ENSMUSG00000019987 | 8_Arg1    | 5785.47 | 0.51832  | 0.039862 | 0.251043 | 6175.67 | 7834.77 | 6430.42 | 4330.31 | 4701.88 | 5239.77 |

|                    |            |         |          |           |          |         |         |         |         |         |         |
|--------------------|------------|---------|----------|-----------|----------|---------|---------|---------|---------|---------|---------|
| ENSMUSG00000019988 | 6_Nedd1    | 487.963 | 0.4149   | 0.293276  | 0.677859 | 842.367 | 436.399 | 394.016 | 357.352 | 475.596 | 422.05  |
| ENSMUSG00000019989 | 7_Enpp3    | 5462.3  | 0.45214  | 0.101401  | 0.433589 | 7267.81 | 5974.69 | 5690.99 | 3746.83 | 5108.8  | 4984.66 |
| ENSMUSG00000019990 | 14_Pde7b   | 347.675 | -0.28189 | 0.454245  | 0.795918 | 455.06  | 227.834 | 258.54  | 442.357 | 364.853 | 337.405 |
| ENSMUSG00000019992 | 7_Mtfr2    | 70.758  | 0.83776  | 0.036363  | 0.2389   | 123.372 | 82.7457 | 66.1863 | 51.9934 | 53.2256 | 47.0251 |
| ENSMUSG00000019996 | 16_Map7    | 1873.39 | 0.12711  | 0.573109  | 0.855421 | 1955.75 | 1997.23 | 1914.23 | 1734.76 | 1690.34 | 1948.02 |
| ENSMUSG00000019997 | 11_Ctgf    | 2989.75 | -0.38845 | 0.271436  | 0.657836 | 3414.97 | 1832.87 | 2521.29 | 4091.8  | 3412.45 | 2665.15 |
| ENSMUSG00000019998 | 5_Stx7     | 3521.21 | 0.48133  | 0.17591   | 0.559208 | 5978.48 | 3255.42 | 3075.6  | 2800.22 | 3069.06 | 2948.47 |
| ENSMUSG00000020000 | 7_Moxd1    | 151.209 | 0.64137  | 0.040904  | 0.255474 | 217.418 | 165.491 | 169.602 | 99.8604 | 127.913 | 126.968 |
| ENSMUSG00000020003 | 15_Pex7    | 781.369 | 0.18955  | 0.57997   | 0.859399 | 1134.62 | 673.301 | 689.786 | 612.367 | 851.609 | 726.538 |
| ENSMUSG00000020007 | 3_Il20ra   | 200.407 | 1.10257  | 0.000376  | 0.009341 | 309.441 | 293.577 | 217.174 | 111.414 | 135.639 | 135.197 |
| ENSMUSG00000020009 | 12_lfngr1  | 2897.01 | 1.07903  | 0.000558  | 0.012642 | 3778.01 | 4997.61 | 3021.82 | 1567.23 | 1965.91 | 2051.47 |
| ENSMUSG00000020010 | 7_Vnn3     | 3.31779 | 1.78879  | 0.27809   | 0.665222 | 3.03373 | 9.06802 | 3.10248 | 0       | 0       | 4.70251 |
| ENSMUSG00000020014 | 15_Cfap5   | 606.457 | -1.29541 | 0.012948  | 0.121152 | 624.949 | 166.625 | 261.643 | 864.081 | 1084.26 | 637.19  |
| ENSMUSG00000020015 | 9_Cdk17    | 666.075 | 0.47442  | 0.253842  | 0.645041 | 1210.46 | 607.558 | 505.705 | 472.893 | 647.292 | 552.545 |
| ENSMUSG00000020017 | 14_Hal     | 110.778 | 0.22249  | 0.509877  | 0.827179 | 99.1019 | 143.955 | 114.792 | 108.113 | 85.8477 | 112.86  |
| ENSMUSG00000020018 | 6_Snrpf    | 788.965 | -0.01183 | 0.965914  | 0.990781 | 838.322 | 841.059 | 677.376 | 665.186 | 798.384 | 913.463 |
| ENSMUSG00000020019 | 4_Ntn4     | 1961.72 | 0.03497  | 0.916968  | 0.976775 | 2738.45 | 1421.41 | 1796.34 | 1911.38 | 1900.67 | 2002.09 |
| ENSMUSG00000020020 | 7_Usp44    | 0.13755 | -0.79206 | 0.84609   | NA       | 0       | 0       | 0       | 0.82529 | 0       | 0       |
| ENSMUSG00000020021 | 4_Fgd6     | 1527.56 | 0.45777  | 0.06581   | 0.340197 | 1766.64 | 1896.35 | 1640.18 | 1129.83 | 1285.14 | 1447.2  |
| ENSMUSG00000020022 | 16_Ndufa   | 967.205 | -0.33753 | 0.199763  | 0.591685 | 730.118 | 898.868 | 934.882 | 1201.63 | 963.211 | 1074.52 |
| ENSMUSG00000020023 | 17_Tmcc3   | 2053.6  | 0.44301  | 0.080639  | 0.382419 | 2616.09 | 2379.22 | 2103.48 | 1554.85 | 1715.24 | 1952.72 |
| ENSMUSG00000020024 | 6_Cep83    | 495.854 | 0.53872  | 0.211627  | 0.602834 | 916.187 | 493.074 | 352.649 | 320.213 | 462.719 | 430.28  |
| ENSMUSG00000020027 | 18_Socs2   | 189.43  | 0.2273   | 0.640284  | 0.887258 | 346.857 | 143.955 | 122.031 | 138.649 | 214.619 | 170.466 |
| ENSMUSG00000020029 | 5_Nudt4    | 16550.1 | 0.49649  | 0.24665   | 0.638314 | 31536.7 | 14040.7 | 12533   | 11678.7 | 15414.8 | 14097   |
| ENSMUSG00000020032 | 14_Nuak1   | 341.537 | -0.39387 | 0.142768  | 0.511466 | 259.89  | 310.58  | 315.419 | 435.754 | 363.136 | 364.445 |
| ENSMUSG00000020033 | 2_493046   | 0.16854 | 1.1315   | 0.781553  | NA       | 1.01124 | 0       | 0       | 0       | 0       | 0       |
| ENSMUSG00000020034 | 7_Tcp11l2  | 1445.09 | 0.34855  | 0.202695  | 0.593838 | 1986.08 | 1408.94 | 1461.27 | 1197.5  | 1352.96 | 1263.8  |
| ENSMUSG00000020037 | 15_Rfx4    | 3.72467 | -1.7317  | 0.421991  | 0.774546 | 4.04498 | 1.1335  | 0       | 0       | 17.1695 | 0       |
| ENSMUSG00000020038 | 9_Cry1     | 264.189 | -0.02649 | 0.917005  | 0.976775 | 246.744 | 258.439 | 280.258 | 269.871 | 274.713 | 255.111 |
| ENSMUSG00000020042 | 15_Btbd1   | 430.281 | 0.35593  | 0.159272  | 0.537367 | 447.981 | 520.278 | 480.885 | 339.195 | 398.333 | 395.011 |
| ENSMUSG00000020044 | 13_Timp3   | 12709.1 | -0.78553 | 0.085694  | 0.396626 | 15408.3 | 4803.79 | 7784.13 | 17332   | 17084.6 | 13841.8 |
| ENSMUSG00000020048 | 13_Hsp90   | 17929.2 | 0.56181  | 0.185336  | 0.572587 | 33732.1 | 17021.8 | 13375.8 | 11351.9 | 16436.4 | 15657   |
| ENSMUSG00000020051 | 15_Pah     | 0       | NA       | NA        | NA       | 0       | 0       | 0       | 0       | 0       | 0       |
| ENSMUSG00000020052 | 7_Asc1     | 1.1953  | -2.45148 | 0.263999  | NA       | 1.01124 | 0       | 0       | 4.12646 | 0.85848 | 1.17563 |
| ENSMUSG00000020053 | 18_Igf1    | 1258.94 | -0.86762 | 0.124333  | 0.479256 | 1713.05 | 393.326 | 567.755 | 1733.94 | 1989.95 | 1155.64 |
| ENSMUSG00000020056 | 16_Ccdc5   | 755.7   | -0.20803 | 0.360596  | 0.733982 | 664.388 | 733.376 | 706.332 | 825.292 | 811.261 | 793.549 |
| ENSMUSG00000020057 | 2_Dram1    | 160.609 | 1.68225  | 1.63E-06  | 0.000121 | 275.058 | 289.043 | 170.637 | 71.8004 | 80.6968 | 76.4158 |
| ENSMUSG00000020059 | 9_Sycp3    | 2.64026 | 0.07825  | 0.963666  | 0.990106 | 4.04498 | 0       | 4.13665 | 1.65058 | 6.00934 | 0       |
| ENSMUSG00000020061 | 17_Mybp1   | 1031.44 | -0.5834  | 0.369316  | 0.740977 | 1642.26 | 213.099 | 621.531 | 1615.92 | 847.317 | 1248.52 |
| ENSMUSG00000020062 | 6_Slc5a8   | 1168.91 | 0.29992  | 0.48821   | 0.814112 | 2041.7  | 915.87  | 912.13  | 778.251 | 1275.7  | 1089.81 |
| ENSMUSG00000020063 | 16_Sirt1   | 770.351 | 0.60137  | 0.200554  | 0.592148 | 1612.93 | 614.359 | 558.447 | 552.946 | 675.621 | 607.8   |
| ENSMUSG00000020064 | 8_Herc4    | 1917.73 | 0.71856  | 0.129668  | 0.489598 | 4018.68 | 1822.67 | 1315.45 | 1077.83 | 1705.79 | 1565.94 |
| ENSMUSG00000020067 | 7_Mypn     | 62.2287 | -1.47766 | 0.002387  | 0.03685  | 35.3936 | 24.9371 | 38.264  | 133.697 | 54.084  | 86.9965 |
| ENSMUSG00000020069 | 16_Hnrnp1  | 1222.41 | 0.00738  | 0.979681  | 0.993796 | 1543.16 | 1081.36 | 1051.74 | 1095.99 | 1261.96 | 1300.24 |
| ENSMUSG00000020070 | 18_Rufy2   | 474.512 | -0.04653 | 0.918924  | 0.977142 | 790.793 | 277.708 | 331.966 | 476.194 | 523.671 | 446.739 |
| ENSMUSG00000020072 | 14_Pblid2  | 32.1567 | 0.29773  | 0.560714  | 0.849082 | 24.2699 | 41.9396 | 40.3323 | 39.614  | 19.745  | 27.0394 |
| ENSMUSG00000020074 | 6_Ccar1    | 2476.08 | 0.32451  | 0.421973  | 0.774546 | 4257.34 | 2034.64 | 1968.01 | 1807.39 | 2565.99 | 2223.11 |
| ENSMUSG00000020075 | 7_Ddx21    | 2888.52 | 0.46156  | 0.133879  | 0.497363 | 3907.45 | 3392.57 | 2739.49 | 1860.21 | 2606.34 | 2825.03 |
| ENSMUSG00000020076 | 6_Ddx50    | 2111.56 | 0.17894  | 0.687501  | 0.904573 | 3757.78 | 1474.69 | 1494.36 | 1715.78 | 2201.13 | 2025.61 |
| ENSMUSG00000020077 | 14_Srgn    | 317.563 | 2.02725  | 0.308E-05 | 0.00128  | 695.736 | 603.024 | 231.652 | 168.36  | 109.027 | 97.5771 |
| ENSMUSG00000020078 | 15_Vps26   | 2780.29 | 0.50413  | 0.231668  | 0.622974 | 5261.5  | 2329.35 | 2192.42 | 1980.7  | 2481.86 | 2435.9  |
| ENSMUSG00000020079 | 15_Supv3   | 312.589 | 0.11049  | 0.660965  | 0.895438 | 348.879 | 307.179 | 317.488 | 283.075 | 316.778 | 302.136 |
| ENSMUSG00000020080 | 8_Hkdc1    | 45.5779 | -1.66077 | 0.002086  | 0.033425 | 11.1237 | 22.6701 | 32.059  | 96.5592 | 55.801  | 55.2545 |
| ENSMUSG00000020081 | 5_Tacr2    | 0.83955 | -0.42561 | 0.859124  | NA       | 1.01124 | 1.1335  | 0       | 0       | 1.71695 | 1.17563 |
| ENSMUSG00000020083 | 13_20101   | 303.869 | -0.0985  | 0.708326  | 0.909748 | 301.351 | 267.507 | 311.283 | 319.388 | 281.58  | 342.108 |
| ENSMUSG00000020085 | 15_Aifm2   | 466.419 | 0.44941  | 0.200738  | 0.592148 | 353.936 | 564.484 | 697.025 | 423.375 | 349.4   | 410.294 |
| ENSMUSG00000020086 | 6_H2afy2   | 291.673 | -0.25538 | 0.366639  | 0.739458 | 245.732 | 243.703 | 308.18  | 344.147 | 275.571 | 332.703 |
| ENSMUSG00000020087 | 4_Tysnd1   | 227.953 | -0.03318 | 0.935328  | 0.983964 | 121.349 | 276.575 | 278.189 | 248.413 | 206.893 | 236.301 |
| ENSMUSG00000020088 | 9_Sar1a    | 4519.5  | 0.04155  | 0.861238  | 0.960565 | 5192.74 | 4378.72 | 4182.15 | 4265.11 | 4664.96 | 4433.29 |
| ENSMUSG00000020089 | 8_Ppa1     | 3595.44 | 0.79989  | 0.003646  | 0.05004  | 5059.26 | 5005.55 | 3637.15 | 2320.72 | 2753.14 | 2796.82 |
| ENSMUSG00000020090 | 7_Npffr1   | 2.04654 | -3.32252 | 0.078895  | 0.37734  | 0       | 0       | 1.03416 | 5.77705 | 4.29238 | 1.17563 |
| ENSMUSG00000020091 | 14_Eif4eb  | 641.988 | 0.27969  | 0.45324   | 0.795452 | 412.588 | 820.656 | 879.037 | 631.349 | 554.576 | 553.721 |
| ENSMUSG00000020092 | 8_Pald1    | 137.252 | -0.59215 | 0.141016  | 0.509254 | 66.7421 | 121.285 | 140.646 | 200.546 | 148.517 | 145.778 |
| ENSMUSG00000020097 | 14_Sgpl1   | 3187.77 | 0.15053  | 0.504057  | 0.824491 | 3543.4  | 3420.91 | 3097.31 | 2851.39 | 3111.12 | 3102.48 |
| ENSMUSG00000020098 | 6_Pcbd1    | 35.1001 | -1.64725 | 0.000415  | 0.010041 | 14.1574 | 21.5366 | 15.5124 | 56.1199 | 60.9519 | 42.3226 |
| ENSMUSG00000020099 | 7_Unc5b    | 559.303 | 0.65072  | 0.182598  | 0.568891 | 283.148 | 796.853 | 970.044 | 510.031 | 331.372 | 464.373 |
| ENSMUSG00000020100 | 15_Slc29a1 | 1039.58 | 0.77327  | 0.005594  | 0.066796 | 1147.76 | 1533.63 | 1253.4  | 643.728 | 807.827 | 851.155 |
| ENSMUSG00000020101 | 14_46324   | 238.499 | 0.17054  | 0.661087  | 0.895458 | 180.001 | 341.184 | 236.823 | 286.376 | 169.12  | 217.491 |
| ENSMUSG00000020102 | 14_Slc16a1 | 63.1521 | -0.24205 | 0.644287  | 0.889191 | 99.1019 | 32.8716 | 41.3665 | 54.4693 | 74.6875 | 76.4158 |
| ENSMUSG00000020105 | 8_Lrig3    | 794.601 | 0.08596  | 0.752999  | 0.925804 | 667.421 | 839.926 | 947.292 | 772.474 | 711.677 | 828.818 |
| ENSMUSG00000020107 | 10_Anapc   | 604.791 | -0.33242 | 0.186903  | 0.573937 | 481.352 | 544.081 | 581.199 | 723.781 | 689.357 | 608.975 |
| ENSMUSG00000020108 | 3_Ddit4    | 318.647 | 0.00901  | 0.97649   | 0.993796 | 246.744 | 342.318 | 370.23  | 358.177 | 309.91  | 284.502 |
| ENSMUSG00000020109 | 13_Dnajb1  | 600.236 | 0.09675  | 0.820113  | 0.948338 | 310.452 | 760.58  | 790.099 | 641.252 | 484.181 | 614.853 |
| ENSMUSG00000020111 | 15_Micu1   | 2448.98 | -0.02117 | 0.955016  | 0.98876  | 1403.61 | 2914.24 | 2975.28 | 2669.82 | 2163.36 | 2567.57 |
| ENSMUSG00000020114 | 12_Cand1   | 2737.61 | 0.27688  | 0.354921  | 0.730256 | 3762.84 | 2741.94 | 2493.36 | 2076.44 | 2674.16 | 2676.9  |

|                    |            |         |          |          |          |         |         |         |         |         |         |
|--------------------|------------|---------|----------|----------|----------|---------|---------|---------|---------|---------|---------|
| ENSMUSG00000020115 | 2_Tbk1     | 1532.52 | 0.73796  | 0.015336 | 0.135044 | 2361.26 | 1853.28 | 1533.66 | 949.912 | 1292.01 | 1205.02 |
| ENSMUSG00000020116 | 7_Pno1     | 687.458 | 0.48873  | 0.263241 | 0.652524 | 1309.56 | 595.089 | 503.637 | 500.127 | 656.735 | 559.599 |
| ENSMUSG00000020120 | 15_Plek    | 323.993 | 1.53651  | 0.001593 | 0.027537 | 738.208 | 498.741 | 208.901 | 170.836 | 189.723 | 137.548 |
| ENSMUSG00000020121 | 15_Srgap   | 69.3332 | -0.3705  | 0.327077 | 0.708327 | 58.6522 | 60.0757 | 63.0839 | 99.8604 | 75.546  | 58.7814 |
| ENSMUSG00000020122 | 16_Egrf    | 6715.86 | 0.68643  | 0.039511 | 0.249924 | 10020.4 | 7766.76 | 7064.36 | 3624.68 | 5501.12 | 6317.82 |
| ENSMUSG00000020123 | 5_Avpr1a   | 5.41313 | -0.08063 | 0.931556 | 0.981962 | 6.06747 | 4.53401 | 5.17081 | 8.25292 | 2.57543 | 5.87814 |
| ENSMUSG00000020124 | 9_Usp15    | 3018.47 | 0.42926  | 0.266492 | 0.654637 | 5195.77 | 2726.07 | 2470.61 | 2110.27 | 2853.58 | 2754.5  |
| ENSMUSG00000020128 | 15_Vps54   | 2811.64 | 0.75876  | 0.078977 | 0.377521 | 5743.87 | 2616.12 | 2243.1  | 1736.42 | 2353.09 | 2177.26 |
| ENSMUSG00000020130 | 8_Tbc1d1   | 1665.79 | 0.42005  | 0.291402 | 0.676558 | 2962.95 | 1470.15 | 1286.5  | 1299.84 | 1528.09 | 1447.2  |
| ENSMUSG00000020131 | 14_Pcsk4   | 12.2617 | -0.93427 | 0.338701 | 0.717196 | 1.01124 | 5.66751 | 18.6149 | 25.5841 | 8.58477 | 14.1075 |
| ENSMUSG00000020132 | 9_Rab21    | 1588.88 | 0.67394  | 0.085918 | 0.396921 | 3006.43 | 1526.83 | 1326.83 | 1159.54 | 1329.78 | 1183.86 |
| ENSMUSG00000020133 | 8_231001   | 453.137 | 0.14267  | 0.822916 | 0.948912 | 98.0907 | 669.9   | 658.761 | 562.849 | 345.966 | 383.255 |
| ENSMUSG00000020134 | 13_Peli1   | 946.015 | 0.8906   | 0.015443 | 0.135294 | 1701.92 | 1155.04 | 830.432 | 601.638 | 799.242 | 587.814 |
| ENSMUSG00000020135 | 13_Apc2    | 46.1377 | -1.5833  | 0.032551 | 0.222897 | 4.04498 | 26.0706 | 39.2981 | 108.113 | 55.801  | 43.4982 |
| ENSMUSG00000020137 | 4_Thap2    | 388.443 | 0.17536  | 0.686085 | 0.904398 | 662.365 | 266.373 | 307.146 | 310.31  | 422.371 | 362.093 |
| ENSMUSG00000020140 | 15_Lgr5    | 69.7164 | -1.14643 | 0.045246 | 0.271821 | 76.8546 | 17.0025 | 36.1957 | 109.764 | 105.593 | 72.8889 |
| ENSMUSG00000020142 | 12_Slc1a4  | 456.505 | 0.22275  | 0.426855 | 0.77756  | 422.7   | 508.943 | 542.935 | 363.954 | 415.786 | 486.71  |
| ENSMUSG00000020143 | 15_Dock2   | 116.134 | 1.85207  | 4.84E-05 | 0.001848 | 115.282 | 286.776 | 143.748 | 56.1199 | 45.4993 | 49.3764 |
| ENSMUSG00000020149 | 17_Rab1a   | 7392.11 | 0.54272  | 0.171218 | 0.553632 | 13515.3 | 6799.88 | 5983.66 | 5149.82 | 6630.88 | 6273.15 |
| ENSMUSG00000020150 | 13_Gamt    | 64.9953 | -0.6599  | 0.32639  | 0.707722 | 12.1349 | 64.6097 | 74.4596 | 105.637 | 43.7823 | 89.3477 |
| ENSMUSG00000020151 | 16_Ptpr    | 11.7619 | -0.24187 | 0.76839  | 0.931242 | 10.1124 | 7.93452 | 14.4783 | 24.7588 | 8.58477 | 4.70251 |
| ENSMUSG00000020152 | 7_Actr2    | 10188.6 | 0.68     | 0.116138 | 0.463637 | 20422.1 | 9294.72 | 7921.68 | 6426.55 | 8713.54 | 8352.84 |
| ENSMUSG00000020153 | 14_Ndufs3  | 384.626 | -0.00904 | 0.990532 | 0.997381 | 46.5172 | 523.678 | 580.165 | 576.879 | 204.318 | 376.201 |
| ENSMUSG00000020154 | 9_Ptprb    | 538.803 | -0.55035 | 0.117333 | 0.46616  | 602.702 | 301.512 | 407.46  | 673.439 | 670.471 | 577.233 |
| ENSMUSG00000020155 | 2_Kcnmb1   | 22.829  | -1.39107 | 0.012509 | 0.11819  | 19.2136 | 10.2015 | 8.27329 | 30.5358 | 33.4806 | 35.2688 |
| ENSMUSG00000020156 | 16_Mum1    | 681.23  | -0.03491 | 0.930226 | 0.981773 | 357.98  | 853.528 | 807.68  | 732.86  | 668.754 | 666.581 |
| ENSMUSG00000020159 | 8_Gabrp    | 327.725 | 0.22762  | 0.499979 | 0.821672 | 453.037 | 272.041 | 335.068 | 241.811 | 330.514 | 333.878 |
| ENSMUSG00000020160 | 18_Meis1   | 1349.82 | 0.33313  | 0.227686 | 0.618748 | 1863.72 | 1337.53 | 1313.39 | 1130.65 | 1212.17 | 1241.46 |
| ENSMUSG00000020163 | 12_Uqcr1   | 557.409 | -0.10701 | 0.897311 | 0.97156  | 38.4273 | 719.774 | 852.149 | 883.063 | 340.815 | 510.222 |
| ENSMUSG00000020166 | 14_Cnot2   | 2157.73 | 0.21323  | 0.539426 | 0.840302 | 3199.58 | 2006.3  | 1744.63 | 1661.31 | 2300.72 | 2033.84 |
| ENSMUSG00000020167 | 14_Tcf3    | 448.098 | 0.30462  | 0.585318 | 0.861846 | 151.687 | 660.832 | 673.239 | 482.796 | 294.458 | 425.577 |
| ENSMUSG00000020169 | 4_Best3    | 17.8879 | -1.49629 | 0.019032 | 0.157285 | 11.1237 | 4.53401 | 12.4099 | 33.837  | 26.6128 | 18.81   |
| ENSMUSG00000020170 | 3_Frs2     | 1537.08 | 0.3059   | 0.288036 | 0.673216 | 2136.76 | 1529.1  | 1432.31 | 1262.7  | 1492.03 | 1369.61 |
| ENSMUSG00000020171 | 7_Yeats4   | 688.484 | 0.11631  | 0.711129 | 0.910557 | 940.457 | 649.497 | 558.447 | 608.24  | 674.763 | 699.499 |
| ENSMUSG00000020173 | 17_Cobl    | 2294.36 | 0.2237   | 0.374941 | 0.744899 | 2652.49 | 2540.18 | 2222.41 | 1875.06 | 2070.65 | 2405.33 |
| ENSMUSG00000020175 | 13_Rab36   | 100.884 | -1.45243 | 0.000121 | 0.003868 | 51.5735 | 46.4736 | 64.118  | 179.914 | 156.243 | 106.982 |
| ENSMUSG00000020176 | 17_Grb10   | 847.263 | -0.96659 | 0.002797 | 0.04148  | 750.343 | 428.464 | 541.901 | 1211.53 | 1174.4  | 976.947 |
| ENSMUSG00000020178 | 5_Adora2a  | 11.1051 | 0.49814  | 0.574464 | 0.856411 | 3.03373 | 23.8036 | 12.4099 | 12.3794 | 10.3017 | 4.70251 |
| ENSMUSG00000020180 | 9_Snrpd3   | 1443.83 | -0.09089 | 0.702895 | 0.907431 | 1337.88 | 1505.29 | 1351.65 | 1348.53 | 1493.75 | 1625.89 |
| ENSMUSG00000020181 | 15_Nav3    | 316.222 | 0.02424  | 0.926735 | 0.980099 | 356.969 | 316.247 | 283.36  | 294.629 | 332.231 | 313.893 |
| ENSMUSG00000020182 | 16_Ddc     | 22.5107 | -1.55682 | 0.019585 | 0.160857 | 15.1687 | 5.66751 | 13.4441 | 53.644  | 28.3297 | 18.81   |
| ENSMUSG00000020183 | 11_Cpm     | 2983.31 | 0.24791  | 0.317003 | 0.698196 | 3163.17 | 3409.58 | 3143.85 | 2310.82 | 2847.57 | 3024.89 |
| ENSMUSG00000020184 | 14_Mdm2    | 1596.54 | 0.43463  | 0.098207 | 0.425558 | 2195.41 | 1733.13 | 1577.1  | 1313.87 | 1424.21 | 1335.51 |
| ENSMUSG00000020185 | 16_E2f7    | 637.075 | 1.26125  | 7.47E-06 | 0.000415 | 838.322 | 918.137 | 940.053 | 296.28  | 392.324 | 437.334 |
| ENSMUSG00000020186 | 6_Csrp2    | 321.833 | -0.7195  | 0.039334 | 0.249504 | 167.867 | 238.036 | 323.693 | 428.327 | 354.551 | 418.524 |
| ENSMUSG00000020189 | 13_Osbpl1  | 2474.7  | 0.66526  | 0.167948 | 0.548893 | 5371.73 | 1851.01 | 1883.21 | 1616.75 | 2195.13 | 1930.38 |
| ENSMUSG00000020190 | 13_Mknk2   | 6488.74 | 0.55677  | 0.335703 | 0.713986 | 2082.15 | 9871.68 | 11222.7 | 5977.59 | 3851.99 | 5926.34 |
| ENSMUSG00000020191 | 11_49304   | 4.2799  | -0.08108 | 0.946909 | 0.986649 | 8.08995 | 2.26701 | 2.06832 | 0.82529 | 7.72629 | 4.70251 |
| ENSMUSG00000020193 | 3_Zbp      | 32.6543 | 0.59465  | 0.344643 | 0.72201  | 72.8096 | 19.2695 | 25.854  | 30.5358 | 27.4713 | 19.9857 |
| ENSMUSG00000020196 | 9_Cabin1   | 856.578 | 0.39576  | 0.491677 | 0.815538 | 258.879 | 1348.87 | 1312.35 | 855.003 | 606.085 | 758.28  |
| ENSMUSG00000020198 | 7_Ap3d1    | 2528.09 | 0.06592  | 0.889051 | 0.970015 | 1043.6  | 3519.53 | 3194.53 | 2662.39 | 2198.56 | 2549.94 |
| ENSMUSG00000020205 | 8_Phlda1   | 1746.76 | 0.4758   | 0.061721 | 0.328016 | 1841.48 | 2251.14 | 2004.21 | 1643.16 | 1285.14 | 1455.43 |
| ENSMUSG00000020211 | 15_Sf3a2   | 291.073 | 0.47491  | 0.412814 | 0.768146 | 94.0457 | 486.273 | 435.382 | 278.124 | 184.573 | 268.043 |
| ENSMUSG00000020212 | 13_Mdm1    | 143.985 | -0.21745 | 0.590212 | 0.864793 | 196.181 | 102.015 | 101.348 | 178.263 | 157.96  | 128.143 |
| ENSMUSG00000020214 | 10_Glipr1l | 0.16854 | 1.1315   | 0.781553 | NA       | 1.01124 | 0       | 0       | 0       | 0       | 0       |
| ENSMUSG00000020216 | 13_Jsrp1   | 13.8671 | -0.85825 | 0.438425 | 0.785475 | 1.01124 | 6.80102 | 21.7174 | 26.4094 | 2.57543 | 24.6882 |
| ENSMUSG00000020218 | 11_Wif1    | 326.759 | -1.30925 | 0.013634 | 0.124871 | 321.576 | 82.7457 | 159.261 | 491.049 | 593.208 | 312.717 |
| ENSMUSG00000020219 | 6_Timm1c   | 359.543 | 0.32819  | 0.689792 | 0.905638 | 27.3036 | 575.819 | 597.745 | 431.628 | 212.044 | 312.717 |
| ENSMUSG00000020220 | 16_Vps13   | 2252.72 | 0.01521  | 0.945815 | 0.986649 | 2223.73 | 2324.81 | 2245.16 | 2064.06 | 2371.97 | 2286.6  |
| ENSMUSG00000020224 | 14_Llph    | 1842.32 | 0.05099  | 0.834324 | 0.952109 | 1744.4  | 1906.55 | 1973.18 | 1685.25 | 1686.05 | 2058.52 |
| ENSMUSG00000020225 | 10_Tmbir   | 1353.84 | 0.14572  | 0.602515 | 0.870033 | 1742.37 | 1293.33 | 1230.65 | 1169.44 | 1419.92 | 1267.33 |
| ENSMUSG00000020226 | 9_Slc5a4t  | 6.91019 | -2.47648 | 0.008969 | 0.092837 | 2.02249 | 2.26701 | 2.06832 | 14.8553 | 12.0187 | 8.22939 |
| ENSMUSG00000020227 | 10_Irak3   | 217.028 | 0.85723  | 0.002355 | 0.036564 | 315.508 | 269.774 | 253.37  | 155.155 | 139.073 | 169.29  |
| ENSMUSG00000020228 | 11_Helb    | 446.642 | 0.54685  | 0.037921 | 0.244235 | 595.623 | 470.404 | 524.32  | 346.623 | 340.815 | 402.065 |
| ENSMUSG00000020229 | 4_Slc5a4e  | 0.32647 | 0.16972  | 0.966824 | NA       | 0       | 1.1335  | 0       | 0.82529 | 0       | 0       |
| ENSMUSG00000020230 | 14_Prmt2   | 470.795 | -0.30507 | 0.49343  | 0.816268 | 196.181 | 522.545 | 545.003 | 585.958 | 437.823 | 537.262 |
| ENSMUSG00000020231 | 15_Dip2a   | 827.248 | 0.35069  | 0.296818 | 0.680358 | 643.151 | 1161.84 | 977.283 | 851.702 | 655.876 | 673.635 |
| ENSMUSG00000020232 | 17_Hmg2l   | 446.724 | 0.03184  | 0.951713 | 0.988    | 151.687 | 561.084 | 642.214 | 463.814 | 376.013 | 485.534 |
| ENSMUSG00000020234 | 10_49304   | 6.11625 | -0.68145 | 0.53435  | 0.838255 | 0       | 7.93452 | 6.20497 | 6.60234 | 7.72629 | 8.22939 |
| ENSMUSG00000020235 | 16_Fzr1    | 745.438 | 0.4479   | 0.522805 | 0.832206 | 121.349 | 1217.38 | 1242.03 | 765.871 | 465.295 | 660.703 |
| ENSMUSG00000020238 | 14_Ncln    | 582.117 | 0.59875  | 0.417719 | 0.771372 | 83.9333 | 1014.49 | 1005.21 | 557.898 | 292.741 | 538.438 |
| ENSMUSG00000020241 | 13_Col6a2  | 4068.42 | -0.51711 | 0.307244 | 0.690205 | 1247.88 | 3594.34 | 5198.73 | 4501.97 | 4224.57 | 5643.01 |
| ENSMUSG00000020246 | 13_Hcfc2   | 828.555 | 0.34715  | 0.366703 | 0.739461 | 1378.33 | 689.17  | 715.64  | 614.843 | 855.043 | 718.309 |
| ENSMUSG00000020248 | 18_Nfyb    | 901.522 | -0.01192 | 0.968507 | 0.99132  | 1144.73 | 769.648 | 778.724 | 787.329 | 984.673 | 944.029 |
| ENSMUSG00000020250 | 9_Txnrd1   | 1601.89 | 0.25312  | 0.287577 | 0.673035 | 1758.55 | 1891.82 | 1576.06 | 1405.47 | 1580.46 | 1399    |

|                    |           |         |          |          |          |         |         |         |         |         |         |
|--------------------|-----------|---------|----------|----------|----------|---------|---------|---------|---------|---------|---------|
| ENSMUSG00000020251 | 13_Glt8d2 | 206.22  | -0.67445 | 0.125383 | 0.481826 | 225.507 | 77.0782 | 173.739 | 249.238 | 247.241 | 264.516 |
| ENSMUSG00000020253 | 14_Ppm1r  | 165.704 | -0.59372 | 0.221565 | 0.612307 | 58.6522 | 149.622 | 188.217 | 250.064 | 185.431 | 162.237 |
| ENSMUSG00000020255 | 7_D10Ws   | 785.921 | 0.19781  | 0.493525 | 0.816268 | 1034.5  | 782.117 | 702.196 | 647.029 | 763.186 | 786.495 |
| ENSMUSG00000020256 | 14_Aldh1l | 99.4317 | -0.10564 | 0.776086 | 0.933817 | 130.451 | 78.2117 | 78.5963 | 94.9086 | 113.319 | 101.104 |
| ENSMUSG00000020257 | 12_Wdr82  | 2135.49 | -0.02757 | 0.919399 | 0.977244 | 2527.1  | 1983.63 | 1834.6  | 2015.36 | 2437.22 | 2015.03 |
| ENSMUSG00000020258 | 15_Glyctk | 38.9619 | 0.09783  | 0.850636 | 0.957445 | 23.2586 | 38.5391 | 58.9472 | 42.9152 | 26.6128 | 43.4982 |
| ENSMUSG00000020260 | 8_Pofut2  | 372.776 | -0.33799 | 0.528756 | 0.835695 | 115.282 | 413.729 | 459.168 | 559.548 | 346.825 | 342.108 |
| ENSMUSG00000020261 | 15_Slc36a | 390.696 | 0.04281  | 0.914307 | 0.976048 | 218.429 | 522.545 | 448.826 | 398.616 | 407.777 | 347.986 |
| ENSMUSG00000020262 | 15_Adarb  | 901.608 | -0.20713 | 0.459195 | 0.798708 | 663.376 | 905.669 | 942.121 | 1060.5  | 883.373 | 954.61  |
| ENSMUSG00000020263 | 14_Appl2  | 3087.41 | -1.01793 | 0.00108  | 0.02075  | 2501.82 | 1513.23 | 2108.66 | 4263.46 | 4628.05 | 3509.25 |
| ENSMUSG00000020264 | 5_Slc36a2 | 21.9671 | -0.54805 | 0.400519 | 0.75972  | 10.1124 | 27.2041 | 16.5466 | 27.2346 | 37.773  | 12.9319 |
| ENSMUSG00000020265 | 15_Sumo1  | 3191.3  | -0.13043 | 0.554841 | 0.846444 | 2865.87 | 3202.15 | 3073.53 | 3468.7  | 3195.25 | 3342.31 |
| ENSMUSG00000020267 | 6_Hint1   | 2062.33 | -0.14263 | 0.521825 | 0.832021 | 2087.21 | 1899.75 | 1894.58 | 2210.13 | 2222.6  | 2059.7  |
| ENSMUSG00000020268 | 13_Lyrm7  | 89.6135 | -0.34231 | 0.426222 | 0.777537 | 117.304 | 69.1437 | 50.6739 | 98.2098 | 114.177 | 88.1721 |
| ENSMUSG00000020271 | 17_Fbxw1  | 2743.41 | 0.39546  | 0.103288 | 0.436784 | 3511.04 | 3116    | 2723.98 | 2261.3  | 2393.43 | 2454.71 |
| ENSMUSG00000020272 | 8_Stk10   | 184.305 | 0.5885   | 0.21718  | 0.607835 | 94.0457 | 299.245 | 270.95  | 155.155 | 134.781 | 151.656 |
| ENSMUSG00000020273 | 13_Papolc | 832.537 | 0.48683  | 0.28759  | 0.673035 | 1642.26 | 668.767 | 603.95  | 604.939 | 818.129 | 657.176 |
| ENSMUSG00000020275 | 9_Rel     | 1192.04 | 0.77356  | 0.05123  | 0.292853 | 2297.55 | 1161.84 | 1052.78 | 738.637 | 905.693 | 995.757 |
| ENSMUSG00000020277 | 9_Pfkl    | 1296.58 | 0.32687  | 0.619844 | 0.877704 | 263.935 | 2104.91 | 1959.74 | 1413.73 | 799.242 | 1237.94 |
| ENSMUSG00000020279 | 10_Il9r   | 2.51735 | -0.49428 | 0.708363 | 0.909748 | 3.03373 | 2.26701 | 1.03416 | 3.30117 | 4.29238 | 1.17563 |
| ENSMUSG00000020280 | 12_Pus10  | 969.954 | 0.53441  | 0.206753 | 0.598045 | 117.21  | 821.79  | 803.544 | 634.65  | 934.881 | 807.656 |
| ENSMUSG00000020282 | 18_Rhbdf  | 996.106 | 0.52568  | 0.455036 | 0.796201 | 164.833 | 1568.77 | 1793.24 | 988.7   | 582.906 | 878.194 |
| ENSMUSG00000020283 | 5_Pex13   | 955.684 | 0.35132  | 0.47327  | 0.806475 | 1880.91 | 688.036 | 645.317 | 651.981 | 1028.46 | 839.398 |
| ENSMUSG00000020284 | 16_18100  | 179.281 | -0.51263 | 0.270068 | 0.656915 | 69.7759 | 168.892 | 204.764 | 257.491 | 172.554 | 202.208 |
| ENSMUSG00000020286 | 12_17000  | 2.78507 | -1.58705 | 0.232397 | 0.624406 | 2.02249 | 1.1335  | 1.03416 | 3.30117 | 6.86782 | 2.35126 |
| ENSMUSG00000020287 | 15_Mpg    | 193.621 | -0.15594 | 0.737291 | 0.920922 | 83.9333 | 216.499 | 249.233 | 242.636 | 174.271 | 195.154 |
| ENSMUSG00000020288 | 13_Ahsa2  | 693.546 | -0.00895 | 0.98205  | 0.993958 | 1060.8  | 540.681 | 472.612 | 634.65  | 790.657 | 661.878 |
| ENSMUSG00000020289 | 15_Nprl3  | 452.344 | -0.07887 | 0.859043 | 0.959609 | 207.305 | 484.006 | 628.77  | 511.681 | 434.389 | 447.914 |
| ENSMUSG00000020290 | 14_Xpo1   | 4884.49 | 0.81455  | 0.115192 | 0.461441 | 11593.9 | 3615.87 | 3473.75 | 2942.99 | 4047.72 | 3632.69 |
| ENSMUSG00000020297 | 10_Nsg2   | 67.7588 | -1.5479  | 0.00342  | 0.047736 | 44.4948 | 39.6726 | 19.6491 | 155.98  | 83.2723 | 63.4839 |
| ENSMUSG00000020299 | 6_493052  | 0.39188 | -1.97195 | 0.623385 | NA       | 0       | 0       | 0       | 0       | 0       | 2.35126 |
| ENSMUSG00000020300 | 14_Cpeb4  | 4134.51 | 0.60966  | 0.153709 | 0.52919  | 8094    | 3672.55 | 3219.34 | 2857.99 | 3790.18 | 3173.02 |
| ENSMUSG00000020303 | 2_Stc2    | 77.0974 | -0.69461 | 0.030805 | 0.215188 | 59.6634 | 61.2092 | 55.8447 | 97.3845 | 94.4325 | 94.0502 |
| ENSMUSG00000020305 | 13_Asb3   | 313.852 | 0.27781  | 0.548006 | 0.843853 | 578.432 | 217.633 | 235.789 | 251.714 | 337.381 | 262.165 |
| ENSMUSG00000020307 | 14_Cdc34  | 557.7   | 0.20235  | 0.751073 | 0.925449 | 122.361 | 871.664 | 796.304 | 633.825 | 377.73  | 544.316 |
| ENSMUSG00000020308 | 5_Tpgs1   | 42.803  | 0.26577  | 0.779062 | 0.93466  | 2.02249 | 66.8767 | 71.3571 | 59.421  | 17.1695 | 39.9713 |
| ENSMUSG00000020309 | 6_Chac2   | 166.319 | 0.43008  | 0.379897 | 0.747815 | 333.711 | 117.884 | 120.997 | 130.396 | 146.8   | 148.129 |
| ENSMUSG00000020310 | 8_Madcar  | 3.44473 | 0.19092  | 0.897261 | 0.97156  | 1.01124 | 7.93452 | 2.06832 | 4.95175 | 0       | 4.70251 |
| ENSMUSG00000020311 | 17_Erlec1 | 949.717 | 0.27451  | 0.584556 | 0.861237 | 1897.09 | 610.958 | 611.189 | 762.57  | 960.636 | 855.857 |
| ENSMUSG00000020312 | 11_Shc2   | 119.159 | -0.7436  | 0.048544 | 0.283824 | 76.8546 | 74.8112 | 115.826 | 190.643 | 132.205 | 124.617 |
| ENSMUSG00000020315 | 18_Sptbn1 | 13727   | -0.4608  | 0.056925 | 0.312074 | 12592   | 10394.2 | 11673.6 | 17440.9 | 15944.5 | 14316.8 |
| ENSMUSG00000020319 | 9_Wdpcp   | 486.157 | -0.06023 | 0.845847 | 0.955207 | 608.769 | 413.729 | 405.391 | 438.23  | 560.585 | 490.237 |
| ENSMUSG00000020321 | 15_Mdh1   | 8103.98 | -0.31131 | 0.149149 | 0.522746 | 6991.74 | 7194.34 | 7513.18 | 9268.03 | 9123.89 | 8532.71 |
| ENSMUSG00000020323 | 14_Prss57 | 1.68692 | -1.18176 | 0.541145 | 0.84046  | 0       | 0       | 3.10248 | 4.12646 | 1.71695 | 1.17563 |
| ENSMUSG00000020325 | 10_Fstl3  | 172.466 | -0.00121 | 0.997512 | 0.988756 | 117.304 | 219.9   | 179.944 | 193.944 | 126.196 | 197.505 |
| ENSMUSG00000020326 | 7_Ccng1   | 4127.3  | 0.21231  | 0.64018  | 0.887258 | 7552.98 | 2815.62 | 2922.54 | 3353.99 | 4252.04 | 3866.64 |
| ENSMUSG00000020327 | 3_Fgf22   | 0.28616 | -1.57932 | 0.696464 | NA       | 0       | 0       | 0       | 0       | 1.71695 | 0       |
| ENSMUSG00000020328 | 10_Nudcd  | 558.614 | 0.39707  | 0.371156 | 0.742177 | 1031.47 | 453.401 | 419.87  | 371.382 | 547.708 | 527.857 |
| ENSMUSG00000020329 | 12_Polrmt | 189.932 | 0.3596   | 0.61427  | 0.875923 | 30.3373 | 307.179 | 303.009 | 210.45  | 119.328 | 169.29  |
| ENSMUSG00000020330 | 16_Hmnmr  | 550.835 | 0.52277  | 0.171079 | 0.553349 | 932.367 | 548.615 | 467.441 | 352.4   | 524.529 | 479.656 |
| ENSMUSG00000020331 | 9_Hcn2    | 50.0738 | -0.06804 | 0.913578 | 0.975947 | 15.1687 | 61.2092 | 70.323  | 64.3728 | 31.7636 | 57.6058 |
| ENSMUSG00000020332 | 7_Meikin  | 3.83015 | 5.46892  | 0.011493 | 0.111516 | 16.1799 | 6.80102 | 0       | 0       | 0       | 0       |
| ENSMUSG00000020333 | 17_Acsl6  | 490.596 | -1.641   | 0.000328 | 0.008425 | 367.082 | 141.688 | 205.798 | 1016.76 | 677.338 | 534.911 |
| ENSMUSG00000020334 | 6_Slc22a4 | 182.702 | 0.80982  | 0.018989 | 0.157128 | 221.463 | 213.099 | 262.677 | 97.3845 | 128.772 | 172.817 |
| ENSMUSG00000020335 | 13_Zfp354 | 29.8132 | -0.81473 | 0.147031 | 0.518871 | 33.3711 | 18.136  | 13.4441 | 43.7405 | 45.4993 | 24.6882 |
| ENSMUSG00000020340 | 16_Cyfp2  | 2772.36 | 0.46563  | 0.071711 | 0.357586 | 2848.68 | 3314.36 | 3484.09 | 2146.59 | 2134.17 | 2706.3  |
| ENSMUSG00000020346 | 16_Mgat1  | 1042.09 | 0.10771  | 0.809303 | 0.94521  | 512.701 | 1431.61 | 1298.91 | 1247.84 | 864.486 | 897.004 |
| ENSMUSG00000020349 | 4_Ppp2ca  | 12341.3 | 0.41939  | 0.227428 | 0.618533 | 19823.4 | 12181.8 | 10362.3 | 9126.08 | 11679.6 | 10874.6 |
| ENSMUSG00000020354 | 15_Sgcd   | 100.385 | -0.9725  | 0.041571 | 0.258381 | 102.136 | 31.7381 | 69.2888 | 149.378 | 132.205 | 117.563 |
| ENSMUSG00000020357 | 3_Flt4    | 136.476 | 0.05685  | 0.896861 | 0.97156  | 72.8096 | 196.096 | 148.919 | 145.251 | 138.215 | 117.563 |
| ENSMUSG00000020358 | 17_Hnmp1  | 7173.39 | 0.46194  | 0.173687 | 0.557148 | 11271.3 | 7389.31 | 6275.29 | 4940.2  | 6356.16 | 6808.06 |
| ENSMUSG00000020359 | 13_Phykp  | 427.808 | 0.22546  | 0.475874 | 0.807493 | 592.589 | 401.26  | 389.879 | 402.743 | 442.974 | 337.405 |
| ENSMUSG00000020361 | 13_Hspa4  | 6710.33 | 0.33082  | 0.36074  | 0.733982 | 10686.8 | 6348.75 | 5393.15 | 4917.09 | 6410.25 | 6505.92 |
| ENSMUSG00000020362 | 13_Cnot6  | 4956.55 | 0.60872  | 0.208036 | 0.599354 | 10494.7 | 3923.05 | 3543.04 | 3094.02 | 4706.17 | 3978.32 |
| ENSMUSG00000020363 | 6_Gfp2    | 342.13  | -0.30562 | 0.291414 | 0.676558 | 339.778 | 277.708 | 300.941 | 446.483 | 375.154 | 312.717 |
| ENSMUSG00000020364 | 14_Zfp354 | 238.486 | 0.23637  | 0.608529 | 0.872658 | 416.633 | 170.025 | 187.183 | 168.36  | 284.156 | 204.559 |
| ENSMUSG00000020366 | 18_Mapk8  | 1215.78 | -0.03625 | 0.917762 | 0.976865 | 1727.21 | 911.336 | 962.804 | 1186.77 | 1298.02 | 1208.55 |
| ENSMUSG00000020368 | 15_Canx   | 10743.4 | 0.40331  | 0.319157 | 0.700329 | 19022.5 | 9489.69 | 8193.66 | 7730.51 | 10455.4 | 9568.43 |
| ENSMUSG00000020372 | 15_Gnb2l  | 18239.1 | -0.19652 | 0.677228 | 0.901447 | 6821.85 | 21834.7 | 22340   | 21257.9 | 17391   | 19789.3 |
| ENSMUSG00000020374 | 16_Rasge  | 10.0194 | -1.45036 | 0.053631 | 0.301314 | 4.04498 | 7.93452 | 4.13665 | 14.03   | 11.1602 | 18.81   |
| ENSMUSG00000020375 | 9_Rufy1   | 924.39  | 0.05312  | 0.821543 | 0.948384 | 871.693 | 1025.82 | 926.609 | 867.382 | 901.401 | 953.434 |
| ENSMUSG00000020376 | 16_Rnf13l | 800.625 | -0.08606 | 0.799002 | 0.940596 | 1082.03 | 613.225 | 634.975 | 851.702 | 867.062 | 754.753 |
| ENSMUSG00000020377 | 14_Ltc4c  | 4.20893 | -1.25982 | 0.372422 | 0.743353 | 0       | 2.26701 | 5.17081 | 9.90351 | 0.85848 | 7.05377 |
| ENSMUSG00000020380 | 16_Rad5c  | 1473.66 | 0.42282  | 0.229027 | 0.620351 | 2311.7  | 1382.87 | 1369.23 | 975.496 | 1390.73 | 1411.93 |
| ENSMUSG00000020381 | 10_30100  | 62.3388 | -0.06354 | 0.919325 | 0.977244 | 15.1687 | 86.1462 | 81.6988 | 73.451  | 54.084  | 63.4839 |

|                    |           |         |          |          |          |         |         |         |         |         |         |
|--------------------|-----------|---------|----------|----------|----------|---------|---------|---------|---------|---------|---------|
| ENSMUSG00000020383 | 1_Il13    | 0.34472 | 1.99863  | 0.620844 | NA       | 0       | 0       | 2.06832 | 0       | 0       | 0       |
| ENSMUSG00000020385 | 16_Clk4   | 1830.25 | 0.12331  | 0.755383 | 0.92689  | 2886.09 | 1301.26 | 1537.8  | 1528.44 | 2106.7  | 1621.19 |
| ENSMUSG00000020386 | 5_Sar1b   | 1363.05 | 0.38182  | 0.309949 | 0.692089 | 2308.67 | 1249.12 | 1069.32 | 1202.45 | 1231.91 | 1116.85 |
| ENSMUSG00000020387 | 15_Jade2  | 796.047 | 0.00615  | 0.985556 | 0.995304 | 543.038 | 828.591 | 1021.75 | 902.045 | 710.819 | 770.036 |
| ENSMUSG00000020388 | 12_Pdlim4 | 116.638 | -0.71459 | 0.188987 | 0.577384 | 31.3486 | 107.683 | 126.168 | 187.341 | 126.196 | 121.09  |
| ENSMUSG00000020389 | 18_Cdkl3  | 221.618 | 0.45659  | 0.25665  | 0.648281 | 387.307 | 189.295 | 192.354 | 160.107 | 204.318 | 196.33  |
| ENSMUSG00000020390 | 12_Ube2b  | 3871.96 | 0.44648  | 0.302106 | 0.685243 | 7371.97 | 3019.65 | 3007.34 | 3000.76 | 3674.28 | 3157.74 |
| ENSMUSG00000020392 | 8_Cdkn2a  | 1010.71 | 0.0242   | 0.915918 | 0.976702 | 1017.31 | 1057.56 | 982.453 | 932.58  | 1010.43 | 1063.94 |
| ENSMUSG00000020393 | 16_Kreme  | 2767.96 | 0.35539  | 0.399172 | 0.759197 | 1516.87 | 3951.39 | 3853.29 | 2489.08 | 2171.95 | 2625.18 |
| ENSMUSG00000020395 | 13_Itk    | 16.3644 | 2.01976  | 0.004077 | 0.053903 | 13.1462 | 41.9396 | 23.7857 | 7.42763 | 6.00934 | 5.87814 |
| ENSMUSG00000020396 | 8_Nefh    | 19.0918 | 0.41272  | 0.560506 | 0.848965 | 15.1687 | 35.1386 | 15.5124 | 23.1082 | 19.745  | 5.87814 |
| ENSMUSG00000020397 | 15_Med7   | 592.605 | 0.65276  | 0.156925 | 0.534368 | 1222.59 | 521.411 | 429.177 | 395.315 | 535.69  | 451.441 |
| ENSMUSG00000020399 | 14_Havcr1 | 54.833  | 2.28411  | 5.91E-06 | 0.00342  | 93.0345 | 129.219 | 50.6739 | 20.6323 | 15.4526 | 19.9857 |
| ENSMUSG00000020400 | 17_Tnfr1  | 534.524 | 0.44906  | 0.443121 | 0.787841 | 166.855 | 858.062 | 826.295 | 552.946 | 324.504 | 478.481 |
| ENSMUSG00000020401 | 6_Fam71t  | 0.57232 | -2.56648 | 0.518957 | NA       | 0       | 0       | 0       | 0       | 3.43391 | 0       |
| ENSMUSG00000020402 | 11_Vdac1  | 8745.15 | 0.13395  | 0.543702 | 0.841422 | 9329.74 | 9058.96 | 9063.39 | 7812.22 | 8181.29 | 9025.29 |
| ENSMUSG00000020405 | 4_Fabp6   | 357.126 | -0.24685 | 0.578336 | 0.858251 | 154.72  | 423.93  | 401.255 | 344.972 | 360.56  | 457.319 |
| ENSMUSG00000020407 | 13_Upp1   | 1348.21 | 1.36054  | 0.006378 | 0.073674 | 750.343 | 3081.99 | 1989.73 | 785.678 | 696.225 | 785.319 |
| ENSMUSG00000020409 | 10_Slu7   | 1808.45 | 0.17397  | 0.526561 | 0.834202 | 2313.73 | 1738.79 | 1699.13 | 1496.26 | 1754.73 | 1848.09 |
| ENSMUSG00000020411 | 2_Nipal4  | 5.57677 | 1.22327  | 0.233947 | 0.625952 | 10.1124 | 11.335  | 2.06832 | 3.30117 | 4.29238 | 2.35126 |
| ENSMUSG00000020412 | 16_Asc2   | 1150.34 | 0.37032  | 0.250654 | 0.642255 | 919.221 | 1556.3  | 1415.77 | 902.045 | 946.042 | 1162.7  |
| ENSMUSG00000020413 | 11_Hus1   | 560.419 | 0.36637  | 0.279303 | 0.666376 | 863.603 | 552.016 | 477.783 | 436.58  | 530.539 | 501.993 |
| ENSMUSG00000020415 | 16_Pttg1  | 413.222 | 0.28493  | 0.358855 | 0.732887 | 349.891 | 562.217 | 449.86  | 341.671 | 420.654 | 355.04  |
| ENSMUSG00000020419 | 11_Horm2  | 0.45299 | -0.6074  | 0.85212  | NA       | 0       | 0       | 1.03416 | 0.82529 | 0.85848 | 0       |
| ENSMUSG00000020420 | 8_Zfp607  | 221.146 | 0.27364  | 0.521762 | 0.831998 | 379.217 | 191.562 | 155.124 | 171.661 | 209.468 | 219.842 |
| ENSMUSG00000020422 | 13_Tns3   | 2953.07 | -0.38306 | 0.164565 | 0.54307  | 2208.56 | 2413.23 | 3068.36 | 3821.93 | 3140.31 | 3066.04 |
| ENSMUSG00000020423 | 6_Btg2    | 909.95  | 0.34048  | 0.272071 | 0.658686 | 826.187 | 1020.15 | 1203.76 | 840.148 | 630.122 | 939.327 |
| ENSMUSG00000020424 | 3_Gatsl3  | 231.646 | 0.08741  | 0.879762 | 0.966669 | 69.7759 | 306.046 | 340.239 | 277.298 | 161.394 | 235.126 |
| ENSMUSG00000020427 | 11_lgfbp3 | 500.828 | 0.09692  | 0.723637 | 0.914795 | 542.027 | 588.288 | 422.972 | 499.302 | 505.643 | 446.739 |
| ENSMUSG00000020428 | 13_Gabra2 | 2.10386 | -1.05731 | 0.546795 | 0.843295 | 4.04498 | 0       | 0       | 2.47588 | 2.57543 | 3.52688 |
| ENSMUSG00000020430 | 12_Pes1   | 1444.47 | -0.04172 | 0.911384 | 0.975173 | 823.153 | 1802.27 | 1645.35 | 1407.95 | 1369.27 | 1618.84 |
| ENSMUSG00000020431 | 5_Adcy1   | 315.829 | -1.63454 | 1.94E-05 | 0.000898 | 177.979 | 134.887 | 148.919 | 687.469 | 409.494 | 336.23  |
| ENSMUSG00000020432 | 12_Tcn2   | 1678.49 | -0.17802 | 0.738239 | 0.921563 | 498.543 | 2031.24 | 2195.52 | 1990.61 | 1537.53 | 1817.52 |
| ENSMUSG00000020434 | 4_A92153  | 2.34687 | 0.19937  | 0.892927 | 0.970997 | 0       | 3.40051 | 4.13665 | 2.47588 | 1.71695 | 2.35126 |
| ENSMUSG00000020435 | 17_Osbp2  | 148.082 | -2.15883 | 4.79E-06 | 0.000287 | 51.5735 | 53.2746 | 57.913  | 382.11  | 215.478 | 128.143 |
| ENSMUSG00000020436 | 17_Gabrg  | 26.1244 | -1.49856 | 0.154956 | 0.531478 | 35.3936 | 4.53401 | 1.03416 | 60.2463 | 43.7823 | 11.7563 |
| ENSMUSG00000020437 | 12_Myo1c  | 60.9063 | 2.16305  | 0.005742 | 0.068141 | 17.1912 | 206.298 | 75.4938 | 29.7105 | 21.4619 | 15.2832 |
| ENSMUSG00000020439 | 17_Smtn   | 526.656 | -1.34927 | 0.030102 | 0.212301 | 71.7983 | 306.046 | 512.944 | 10.1016 | 633.556 | 625.434 |
| ENSMUSG00000020440 | 13_Arf5   | 1372.21 | 0.4091   | 0.162812 | 0.540938 | 1191.25 | 1763.73 | 1741.53 | 1288.28 | 1038.76 | 1209.72 |
| ENSMUSG00000020441 | 6_231003  | 189.012 | 0.02571  | 0.958165 | 0.989261 | 82.922  | 248.237 | 240.96  | 217.052 | 135.639 | 209.262 |
| ENSMUSG00000020444 | 19_Guk1   | 482.827 | -0.49968 | 0.200348 | 0.592148 | 232.586 | 457.935 | 509.842 | 677.565 | 497.058 | 521.979 |
| ENSMUSG00000020447 | 5_Npc1l1  | 1.84993 | -0.77003 | 0.657188 | 0.894515 | 1.01124 | 0       | 3.10248 | 4.95175 | 0.85848 | 1.17563 |
| ENSMUSG00000020448 | 16_Rnf18l | 1127.32 | 0.12195  | 0.616663 | 0.877103 | 1090.12 | 1339.8  | 1095.18 | 1068.75 | 1123.75 | 1046.31 |
| ENSMUSG00000020451 | 17_Limk2  | 7609.65 | 0.35752  | 0.334774 | 0.713724 | 4993.52 | 10709.3 | 9940.36 | 6753.37 | 5950.1  | 7311.23 |
| ENSMUSG00000020453 | 17_Patz1  | 259.129 | -0.59665 | 0.065268 | 0.338553 | 161.799 | 190.428 | 266.814 | 342.496 | 309.91  | 283.326 |
| ENSMUSG00000020454 | 17_Eif4en | 1366.57 | 0.32069  | 0.176308 | 0.560022 | 1514.84 | 1581.24 | 1457.13 | 1075.36 | 1279.99 | 1290.84 |
| ENSMUSG00000020455 | 16_Trim11 | 710.564 | 0.3583   | 0.336769 | 0.715201 | 462.139 | 981.614 | 951.429 | 597.512 | 646.433 | 624.258 |
| ENSMUSG00000020456 | 17_Ogdh   | 4417.6  | 0.00452  | 0.990544 | 0.997381 | 2470.47 | 5336.53 | 5466.58 | 4414.49 | 4069.18 | 4748.36 |
| ENSMUSG00000020457 | 13_Drg1   | 1705.38 | 0.31063  | 0.342794 | 0.720325 | 2547.32 | 1690.05 | 1427.14 | 1347.7  | 1607.07 | 1612.96 |
| ENSMUSG00000020458 | 16_Rtn4   | 3322.13 | 0.1957   | 0.702748 | 0.907308 | 6530.62 | 2264.74 | 1845.98 | 3074.21 | 3607.32 | 2609.89 |
| ENSMUSG00000020459 | 14_Mtif2  | 582.38  | 0.14793  | 0.718521 | 0.912653 | 940.457 | 453.401 | 442.621 | 447.308 | 666.178 | 544.316 |
| ENSMUSG00000020460 | 15_Rps27  | 15710.9 | -0.24063 | 0.436396 | 0.784309 | 18924.4 | 12133   | 12153.5 | 15116.1 | 19072.8 | 16865.6 |
| ENSMUSG00000020461 | 9_Cihc1   | 6.09452 | 0.8912   | 0.348637 | 0.725753 | 14.1574 | 3.40051 | 6.20497 | 4.12646 | 5.15086 | 3.52688 |
| ENSMUSG00000020462 | 14_Cfap3l | 498.48  | -0.19699 | 0.658189 | 0.894702 | 761.467 | 284.509 | 347.478 | 522.41  | 622.396 | 452.617 |
| ENSMUSG00000020463 | 15_Smek2  | 3340.78 | 0.68744  | 0.172983 | 0.556705 | 7557.03 | 2536.78 | 2272.05 | 2243.97 | 2889.63 | 2545.23 |
| ENSMUSG00000020464 | 15_Pnpt1  | 1222.08 | 1.49476  | 0.004052 | 0.053721 | 3288.57 | 1172.04 | 951.429 | 497.651 | 813.836 | 608.975 |
| ENSMUSG00000020467 | 15_Efemp  | 7838.29 | 0.54591  | 0.115376 | 0.461772 | 12981.3 | 7677.22 | 7252.57 | 5258.76 | 6901.3  | 6958.54 |
| ENSMUSG00000020469 | 8_Myl7    | 25.9777 | -0.66908 | 0.295016 | 0.679514 | 8.08995 | 30.6046 | 21.7174 | 25.5841 | 46.3578 | 23.5126 |
| ENSMUSG00000020471 | 11_Pold2  | 312.669 | 0.18754  | 0.772823 | 0.932508 | 65.7309 | 512.343 | 420.904 | 353.225 | 214.619 | 309.19  |
| ENSMUSG00000020472 | 14_Zksca1 | 458.5   | 0.04537  | 0.915461 | 0.976514 | 232.586 | 508.943 | 655.658 | 479.495 | 414.644 | 459.67  |
| ENSMUSG00000020473 | 13_Aebp1  | 1405.15 | -0.49398 | 0.303787 | 0.686401 | 495.51  | 1144.84 | 1860.46 | 1807.39 | 1533.24 | 1589.45 |
| ENSMUSG00000020474 | 11_Polm   | 262.977 | -0.09237 | 0.855623 | 0.959059 | 93.0345 | 326.449 | 344.376 | 306.183 | 251.534 | 256.287 |
| ENSMUSG00000020475 | 3_Pgam2   | 201.528 | -1.35737 | 0.03395  | 0.228059 | 53.5959 | 75.9447 | 209.935 | 495.175 | 138.215 | 236.301 |
| ENSMUSG00000020476 | 14_Dbnl   | 3853.01 | 0.54792  | 0.299694 | 0.682798 | 1501.7  | 6601.52 | 5624.8  | 3273.11 | 2567.7  | 3549.22 |
| ENSMUSG00000020477 | 10_Mrps2  | 410.238 | -0.13695 | 0.698352 | 0.905638 | 251.8   | 429.598 | 491.227 | 477.844 | 420.654 | 390.308 |
| ENSMUSG00000020481 | 15_Ankrd1 | 0.28063 | -1.56014 | 0.700051 | NA       | 0       | 0       | 0       | 0.82529 | 0.85848 | 0       |
| ENSMUSG00000020482 | 4_Ccdc11  | 800.65  | 0.02327  | 0.946948 | 0.986649 | 1146.75 | 616.626 | 657.727 | 725.432 | 856.76  | 800.603 |
| ENSMUSG00000020483 | 14_Dynl1  | 5206.37 | -0.40446 | 0.108874 | 0.448862 | 5171.5  | 3832.37 | 4439.66 | 5565.77 | 6001.61 | 6227.3  |
| ENSMUSG00000020484 | 18_Xbp1   | 3234.16 | 0.24603  | 0.356799 | 0.731487 | 3994.42 | 3543.33 | 2989.76 | 2539.42 | 3172.07 | 3165.97 |
| ENSMUSG00000020485 | 14_Supt4i | 663.244 | -0.23493 | 0.436715 | 0.784396 | 448.992 | 658.565 | 720.811 | 763.395 | 721.121 | 666.581 |
| ENSMUSG00000020486 | 18_Sept4  | 210.373 | -1.56222 | 6.58E-05 | 0.00236  | 82.922  | 104.282 | 132.373 | 427.501 | 295.316 | 219.842 |
| ENSMUSG00000020490 | 16_Btnl10 | 0       | NA       | NA       | NA       | 0       | 0       | 0       | 0       | 0       | 0       |
| ENSMUSG00000020491 | 15_28100  | 239.883 | -0.28206 | 0.383457 | 0.7499   | 281.126 | 180.227 | 188.217 | 269.045 | 286.731 | 233.95  |
| ENSMUSG00000020492 | 11_Ska2   | 564.599 | 0.0693   | 0.865796 | 0.962254 | 911.131 | 402.394 | 420.904 | 559.548 | 597.5   | 496.115 |
| ENSMUSG00000020493 | 8_Prr11   | 314.659 | 0.72322  | 0.077374 | 0.373237 | 559.218 | 351.386 | 264.745 | 167.534 | 265.269 | 279.799 |

|                    |           |         |          |          |          |         |         |         |         |         |         |
|--------------------|-----------|---------|----------|----------|----------|---------|---------|---------|---------|---------|---------|
| ENSMUSG00000020495 | 13_Smg8   | 433.502 | 0.20555  | 0.483304 | 0.811892 | 367.082 | 569.018 | 457.099 | 385.412 | 421.512 | 400.889 |
| ENSMUSG00000020496 | 8_Rnf187  | 1499.16 | -0.23366 | 0.555848 | 0.846956 | 739.22  | 1685.52 | 1709.47 | 1766.13 | 1440.52 | 1654.11 |
| ENSMUSG00000020513 | 15_Tubd1  | 289.086 | 0.14216  | 0.618883 | 0.877639 | 326.632 | 307.179 | 276.121 | 231.082 | 321.929 | 271.57  |
| ENSMUSG00000020514 | 8_Mrpl22  | 274.107 | -0.09434 | 0.717929 | 0.912538 | 243.71  | 287.91  | 263.711 | 261.618 | 286.731 | 300.961 |
| ENSMUSG00000020515 | 13_Cnot8  | 1010.29 | -0.04494 | 0.864891 | 0.962077 | 815.063 | 1065.49 | 1103.45 | 1043.17 | 1079.96 | 954.61  |
| ENSMUSG00000020516 | 15_Rps6k  | 1758.55 | 0.36259  | 0.38493  | 0.750802 | 3139.91 | 1495.09 | 1299.94 | 1302.31 | 1728.11 | 1585.92 |
| ENSMUSG00000020519 | 5_Sap30l  | 258.859 | -0.0992  | 0.82019  | 0.948338 | 127.417 | 295.844 | 326.795 | 323.515 | 219.77  | 259.814 |
| ENSMUSG00000020520 | 14_Galnt1 | 842.681 | -0.832   | 0.145358 | 0.515494 | 193.148 | 648.364 | 977.283 | 1515.24 | 812.119 | 909.936 |
| ENSMUSG00000020521 | 7_Rnft1   | 751.667 | 0.30047  | 0.542196 | 0.84099  | 1498.66 | 501.008 | 489.158 | 637.126 | 715.111 | 668.932 |
| ENSMUSG00000020522 | 13_Mfap3  | 789.951 | 0.30543  | 0.351717 | 0.728508 | 1180.12 | 731.109 | 708.401 | 632.174 | 787.223 | 700.674 |
| ENSMUSG00000020523 | 14_Fam17  | 1138.17 | -0.06526 | 0.783815 | 0.935592 | 1216.53 | 1011.08 | 1109.66 | 1127.35 | 1240.5  | 1123.9  |
| ENSMUSG00000020524 | 16_Gria1  | 159.459 | -0.90931 | 0.006848 | 0.076966 | 113.259 | 80.4787 | 138.578 | 217.877 | 213.761 | 192.803 |
| ENSMUSG00000020525 | 17_Ppm1c  | 579.817 | 0.38087  | 0.242221 | 0.633507 | 869.67  | 609.825 | 488.124 | 465.465 | 539.124 | 506.696 |
| ENSMUSG00000020526 | 12_Znhit3 | 166.162 | -0.11002 | 0.689675 | 0.905638 | 163.822 | 170.025 | 145.817 | 181.564 | 169.978 | 165.764 |
| ENSMUSG00000020527 | 14_Myo1E  | 381.122 | 0.5559   | 0.196132 | 0.588024 | 226.519 | 576.953 | 557.413 | 259.142 | 321.07  | 345.635 |
| ENSMUSG00000020528 | 14_Prpsaj | 838.495 | 0.21959  | 0.421155 | 0.77414  | 1097.2  | 851.261 | 758.04  | 765.046 | 794.091 | 765.334 |
| ENSMUSG00000020530 | 14_Ggnbf  | 2899.48 | 0.29781  | 0.438559 | 0.785475 | 4803.41 | 2493.71 | 2295.84 | 2240.67 | 3009.82 | 2553.46 |
| ENSMUSG00000020532 | 18_Acaca  | 2827.92 | 0.00014  | 0.999556 | 0.999729 | 2473.5  | 3080.86 | 2929.78 | 2524.57 | 3033.86 | 2924.96 |
| ENSMUSG00000020534 | 14_Shmt1  | 702.917 | 0.49861  | 0.081077 | 0.383655 | 657.309 | 949.875 | 862.491 | 518.284 | 646.433 | 583.111 |
| ENSMUSG00000020536 | 12_Ligl1  | 947.999 | 0.52809  | 0.382663 | 0.749501 | 257.867 | 1551.77 | 1549.17 | 858.304 | 623.254 | 847.628 |
| ENSMUSG00000020537 | 9_Drg2    | 686.624 | 0.09023  | 0.846492 | 0.955568 | 300.34  | 953.276 | 870.764 | 732.034 | 570.887 | 692.445 |
| ENSMUSG00000020538 | 15_Srebf1 | 1541    | 0.23156  | 0.733162 | 0.919861 | 270.002 | 2233    | 2490.26 | 1752.1  | 995.833 | 1504.8  |
| ENSMUSG00000020541 | 12_Tom1l  | 464.34  | -0.05763 | 0.872453 | 0.963879 | 644.163 | 355.92  | 365.059 | 433.278 | 550.284 | 437.334 |
| ENSMUSG00000020542 | 18_Myocd  | 16.7215 | -1.08909 | 0.067313 | 0.344271 | 10.1124 | 14.7355 | 7.23913 | 21.4576 | 19.745  | 27.0394 |
| ENSMUSG00000020544 | 12_Cox11  | 157.97  | 0.65326  | 0.193899 | 0.583952 | 336.744 | 122.418 | 119.963 | 95.7339 | 133.064 | 139.9   |
| ENSMUSG00000020545 | 11_Lrrc72 | 0       | NA       | NA       | NA       | 0       | 0       | 0       | 0       | 0       | 0       |
| ENSMUSG00000020546 | 14_Stxbp4 | 305.612 | -0.58785 | 0.201279 | 0.592491 | 411.576 | 145.088 | 175.807 | 381.285 | 396.616 | 323.298 |
| ENSMUSG00000020547 | 4_Bzw2    | 714.826 | 0.03623  | 0.88264  | 0.967828 | 804.95  | 712.973 | 653.59  | 694.896 | 747.733 | 674.81  |
| ENSMUSG00000020549 | 14_Elac2  | 471.92  | 0.1665   | 0.716764 | 0.912293 | 228.541 | 706.172 | 562.584 | 411.821 | 386.315 | 536.086 |
| ENSMUSG00000020553 | 8_Pctp    | 76.994  | -0.10834 | 0.762329 | 0.929057 | 68.7646 | 62.3427 | 91.0062 | 68.4993 | 86.7062 | 84.6452 |
| ENSMUSG00000020561 | 7_Twistnb | 545.445 | 0.53004  | 0.311237 | 0.693321 | 1186.19 | 408.061 | 339.205 | 355.701 | 539.124 | 444.387 |
| ENSMUSG00000020564 | 16_Atnx7l | 623.21  | 0.47156  | 0.050608 | 0.291317 | 678.545 | 758.313 | 735.289 | 482.796 | 517.662 | 566.653 |
| ENSMUSG00000020566 | 18_Atp6v1 | 5.90971 | -0.31932 | 0.721693 | 0.913923 | 8.08995 | 4.53401 | 3.10248 | 4.95175 | 7.72629 | 7.05377 |
| ENSMUSG00000020570 | 14_Sypl   | 10859.3 | 0.51452  | 0.204424 | 0.595444 | 20016.6 | 9023.82 | 9285.74 | 7497.78 | 9594.34 | 9737.73 |
| ENSMUSG00000020571 | 12_Pdia6  | 4704.96 | 0.34298  | 0.203638 | 0.594896 | 4552.62 | 6468.9  | 4763.35 | 3976.26 | 4103.52 | 4365.11 |
| ENSMUSG00000020572 | 7_Nampt   | 3898.59 | 1.04938  | 0.032678 | 0.223323 | 9259.96 | 3624.94 | 2886.34 | 2137.51 | 3183.23 | 2299.53 |
| ENSMUSG00000020573 | 16_Pik3cc | 106.729 | 0.27657  | 0.439769 | 0.785475 | 122.361 | 143.955 | 84.8012 | 107.288 | 96.1494 | 85.8208 |
| ENSMUSG00000020576 | 9_Nbas    | 973.034 | 0.34369  | 0.220607 | 0.611594 | 869.67  | 1253.65 | 1141.71 | 763.395 | 883.373 | 926.395 |
| ENSMUSG00000020577 | 15_Tspan  | 277.9   | -0.49888 | 0.256186 | 0.647683 | 368.093 | 143.955 | 178.91  | 362.303 | 351.976 | 262.165 |
| ENSMUSG00000020580 | 9_Rock2   | 6946.64 | 0.5771   | 0.121878 | 0.604072 | 14316.2 | 5352.4  | 5284.57 | 4675.28 | 6316.67 | 5734.71 |
| ENSMUSG00000020581 | 11_Agr2   | 246.506 | 0.52717  | 0.092059 | 0.413309 | 361.014 | 270.907 | 240.96  | 174.137 | 218.053 | 213.964 |
| ENSMUSG00000020583 | 4_Matn3   | 73.4361 | -2.70434 | 1.34E-08 | 1.75E-06 | 29.3261 | 14.7355 | 14.4783 | 157.631 | 133.922 | 90.5233 |
| ENSMUSG00000020585 | 4_Laptn4  | 29311   | 0.25402  | 0.52778  | 0.835066 | 50077.8 | 22901.3 | 22675   | 24018.5 | 29927.4 | 26265.9 |
| ENSMUSG00000020589 | 16_Fam4c  | 488.451 | -0.54968 | 0.253962 | 0.645047 | 689.669 | 251.638 | 248.199 | 615.668 | 667.037 | 458.495 |
| ENSMUSG00000020590 | 15_Snx13  | 1690.39 | 0.39716  | 0.38022  | 0.74793  | 3253.17 | 1220.78 | 1290.63 | 1247.84 | 1602.78 | 1527.14 |
| ENSMUSG00000020591 | 10_Ntsr2  | 1.49401 | -0.85318 | 0.640573 | NA       | 1.01124 | 1.1335  | 1.03416 | 0       | 3.43391 | 2.35126 |
| ENSMUSG00000020592 | 14_Sdc1   | 32160.8 | 0.48331  | 0.195634 | 0.587008 | 22721.6 | 46266.2 | 43506.1 | 26061.9 | 22180.5 | 32228.7 |
| ENSMUSG00000020593 | 14_Lpin1  | 323.512 | -0.09919 | 0.761132 | 0.92841  | 224.496 | 334.383 | 378.503 | 377.984 | 304.759 | 320.946 |
| ENSMUSG00000020594 | 14_Pum2   | 6286.29 | 0.41044  | 0.336661 | 0.71506  | 11671.8 | 5005.55 | 4846.08 | 4640.62 | 6145.84 | 5407.89 |
| ENSMUSG00000020598 | 15_Nrcam  | 305.652 | -1.86992 | 5.52E-06 | 0.000323 | 195.17  | 95.2142 | 103.416 | 621.445 | 396.616 | 422.05  |
| ENSMUSG00000020599 | 13_Rgs9   | 279.789 | -1.81089 | 3.14E-05 | 0.001301 | 141.574 | 109.95  | 120.997 | 660.234 | 402.626 | 243.355 |
| ENSMUSG00000020600 | 13_Slc7a1 | 0.14308 | -0.79206 | 0.84609  | NA       | 0       | 0       | 0       | 0       | 0.85848 | 0       |
| ENSMUSG00000020601 | 7_Trib2   | 631.389 | 0.12379  | 0.710669 | 0.910417 | 896.974 | 478.338 | 599.814 | 594.21  | 601.792 | 617.205 |
| ENSMUSG00000020604 | 13_Arsg   | 108.034 | -1.49398 | 0.000119 | 0.00381  | 61.6859 | 43.0731 | 65.1522 | 201.371 | 160.535 | 116.387 |
| ENSMUSG00000020605 | 8_Hs1bp3  | 515.078 | -0.02561 | 0.958764 | 0.989585 | 191.125 | 651.764 | 688.752 | 567.801 | 467.87  | 523.154 |
| ENSMUSG00000020607 | 6_Fam84c  | 2675.19 | 0.83323  | 0.004458 | 0.057422 | 4058.12 | 3529.73 | 2692.96 | 1672.04 | 2201.99 | 1896.29 |
| ENSMUSG00000020608 | 6_Smc6    | 2039.57 | 0.48     | 0.317416 | 0.698985 | 4184.53 | 1491.69 | 1450.93 | 1437.66 | 1966.77 | 1705.84 |
| ENSMUSG00000020609 | 14_Apob   | 0.36448 | 0.16972  | 0.966824 | NA       | 1.01124 | 0       | 0       | 0       | 0       | 1.17563 |
| ENSMUSG00000020610 | 16_Amz2   | 992.277 | -0.06398 | 0.779405 | 0.93466  | 1026.41 | 923.805 | 960.736 | 1016.76 | 1061.94 | 964.015 |
| ENSMUSG00000020611 | 14_Gna1c  | 2735.34 | 0.47447  | 0.121885 | 0.474779 | 4123.85 | 2918.77 | 2500.6  | 2056.63 | 2506.75 | 2305.41 |
| ENSMUSG00000020612 | 16_Prkar1 | 5400.64 | 0.06303  | 0.819898 | 0.948338 | 6913.88 | 4899    | 4742.66 | 5060.69 | 5371.49 | 5416.12 |
| ENSMUSG00000020614 | 13_Fam2c  | 82.2091 | -0.81609 | 0.074428 | 0.36515  | 36.4048 | 56.6751 | 85.8354 | 132.872 | 103.876 | 77.5914 |
| ENSMUSG00000020620 | 14_Abca8  | 498.584 | -0.20955 | 0.700705 | 0.906172 | 853.49  | 176.826 | 356.786 | 534.789 | 528.822 | 540.789 |
| ENSMUSG00000020621 | 5_Rdh14   | 348.239 | 0.13422  | 0.748554 | 0.924799 | 575.398 | 265.24  | 252.335 | 288.852 | 340.815 | 366.796 |
| ENSMUSG00000020622 | 15_Nt5c1l | 0.32647 | 0.16972  | 0.966824 | NA       | 0       | 1.1335  | 0       | 0.82529 | 0       | 0       |
| ENSMUSG00000020623 | 11_Map2k  | 176.026 | 0.02992  | 0.937376 | 0.984983 | 252.811 | 120.151 | 160.295 | 176.613 | 160.535 | 185.749 |
| ENSMUSG00000020627 | 9_Kihl29  | 208.259 | -0.01173 | 0.970511 | 0.992083 | 156.743 | 241.436 | 224.413 | 232.732 | 202.601 | 191.627 |
| ENSMUSG00000020628 | 15_Trapp1 | 986.27  | 0.22171  | 0.489618 | 0.814396 | 735.175 | 1234.38 | 1216.17 | 954.038 | 813.836 | 964.015 |
| ENSMUSG00000020629 | 12_Adi1   | 574.941 | -0.29638 | 0.393506 | 0.755289 | 725.062 | 375.189 | 447.792 | 604.114 | 666.178 | 631.312 |
| ENSMUSG00000020630 | 8_Rnaseh  | 165.634 | 0.09711  | 0.840718 | 0.953262 | 71.7983 | 241.436 | 200.627 | 173.311 | 159.677 | 146.953 |
| ENSMUSG00000020633 | 13_Dcdc2  | 0.28063 | -1.56014 | 0.700051 | NA       | 0       | 0       | 0       | 0.82529 | 0.85848 | 0       |
| ENSMUSG00000020634 | 12_Ubxn2  | 1432.95 | 0.35145  | 0.447093 | 0.790586 | 2748.56 | 1047.36 | 1023.82 | 1066.28 | 1461.99 | 1249.69 |
| ENSMUSG00000020635 | 7_Fkbp1b  | 30.3481 | -0.87528 | 0.092948 | 0.415236 | 17.1912 | 32.8716 | 14.4783 | 43.7405 | 42.0654 | 31.742  |
| ENSMUSG00000020638 | 7_Cmpk2   | 3867.97 | 2.00079  | 6.44E-05 | 0.002321 | 7438.71 | 6692.2  | 4437.59 | 740.287 | 2645.83 | 1253.22 |
| ENSMUSG00000020639 | 13_Pfn4   | 20.0039 | -0.28633 | 0.659882 | 0.89509  | 29.3261 | 7.93452 | 16.5466 | 15.6806 | 22.3204 | 28.2151 |

|                    |           |         |          |          |          |         |         |         |         |         |         |
|--------------------|-----------|---------|----------|----------|----------|---------|---------|---------|---------|---------|---------|
| ENSMUSG00000020640 | 9_Itns2   | 2507.4  | 0.33437  | 0.245283 | 0.636635 | 3467.56 | 2638.79 | 2283.43 | 1966.67 | 2371.97 | 2315.99 |
| ENSMUSG00000020641 | 15_Rsad2  | 9391.68 | 2.39662  | 9.08E-06 | 0.00048  | 20690.1 | 16235.2 | 10431.6 | 1240.41 | 5213.53 | 2539.36 |
| ENSMUSG00000020642 | 12_Rnf14  | 131.959 | -0.58472 | 0.141967 | 0.510781 | 156.743 | 77.0782 | 82.7329 | 170.01  | 147.658 | 157.534 |
| ENSMUSG00000020644 | 8_Id2     | 2439.7  | 0.26603  | 0.395061 | 0.755773 | 3421.04 | 1966.63 | 2604.02 | 2327.32 | 1989.09 | 2330.09 |
| ENSMUSG00000020646 | 16_Mboat  | 731.287 | -0.22265 | 0.411812 | 0.767412 | 758.433 | 715.24  | 551.208 | 720.48  | 846.458 | 795.9   |
| ENSMUSG00000020647 | 9_Ncoa1   | 1312.62 | 0.08449  | 0.726645 | 0.916126 | 1537.09 | 1284.26 | 1231.69 | 1241.24 | 1311.75 | 1269.68 |
| ENSMUSG00000020648 | 2_Dus4l   | 130.656 | 0.22336  | 0.623175 | 0.878923 | 225.507 | 83.8792 | 112.724 | 108.939 | 136.498 | 116.387 |
| ENSMUSG00000020649 | 11_Rrm2   | 1025.72 | 1.05712  | 0.001721 | 0.028978 | 1595.74 | 1509.83 | 1050.71 | 483.621 | 763.186 | 751.226 |
| ENSMUSG00000020650 | 14_Bcap2  | 800.553 | 0.21498  | 0.681544 | 0.902515 | 1619    | 464.736 | 496.398 | 684.167 | 820.704 | 718.309 |
| ENSMUSG00000020651 | 7_Slc26a4 | 454.811 | -1.27217 | 8.15E-05 | 0.002783 | 306.407 | 205.164 | 287.497 | 700.673 | 727.13  | 501.993 |
| ENSMUSG00000020652 | 17_Cenpc  | 247.922 | 0.179    | 0.49771  | 0.819575 | 250.789 | 270.907 | 267.848 | 207.974 | 236.081 | 253.936 |
| ENSMUSG00000020653 | 11_Klf11  | 408.637 | 0.26245  | 0.407819 | 0.765068 | 558.207 | 363.854 | 414.699 | 404.393 | 303.901 | 406.767 |
| ENSMUSG00000020654 | 15_Adcy3  | 150.182 | -0.6428  | 0.217052 | 0.607835 | 41.461  | 156.423 | 154.09  | 203.022 | 167.403 | 178.695 |
| ENSMUSG00000020656 | 15_Grhl1  | 2907.63 | 0.33479  | 0.217139 | 0.607835 | 2941.71 | 3657.81 | 3130.41 | 2252.22 | 2391.72 | 3071.92 |
| ENSMUSG00000020657 | 15_Dnajc3 | 391.606 | -0.35401 | 0.23755  | 0.630341 | 408.543 | 289.043 | 334.034 | 496.001 | 457.568 | 364.445 |
| ENSMUSG00000020658 | 9_Efr3b   | 201.426 | -1.37707 | 4.15E-05 | 0.001649 | 108.203 | 112.217 | 115.826 | 380.46  | 266.128 | 225.721 |
| ENSMUSG00000020659 | 15_Cbl1   | 477.269 | 0.53002  | 0.18225  | 0.568216 | 841.355 | 486.273 | 364.025 | 330.117 | 419.795 | 422.05  |
| ENSMUSG00000020660 | 5_Pomc    | 1.15328 | -0.22098 | 0.908387 | NA       | 0       | 1.1335  | 2.06832 | 0.82529 | 1.71695 | 1.17563 |
| ENSMUSG00000020661 | 15_Dnmt3  | 1326.99 | -0.29018 | 0.23936  | 0.631143 | 1079    | 1172.04 | 1330.97 | 1589.51 | 1344.37 | 1446.02 |
| ENSMUSG00000020664 | 9_Dld     | 2559.56 | 0.32367  | 0.513586 | 0.828304 | 5133.08 | 1755.8  | 1647.42 | 1949.34 | 2641.53 | 2230.17 |
| ENSMUSG00000020668 | 9_Kif3c   | 416.312 | -0.74785 | 0.01537  | 0.135136 | 351.913 | 251.638 | 328.863 | 630.523 | 498.775 | 436.158 |
| ENSMUSG00000020669 | 15_Sh3yl1 | 567.452 | 0.47437  | 0.23033  | 0.621454 | 1014.28 | 487.406 | 477.783 | 427.501 | 491.049 | 506.696 |
| ENSMUSG00000020671 | 8_Rab10   | 7916.92 | 0.80178  | 0.053693 | 0.301468 | 16006   | 7494.72 | 6684.82 | 4849.42 | 6211.08 | 6255.52 |
| ENSMUSG00000020672 | 13_Sntg2  | 15.5843 | -1.60316 | 0.050434 | 0.290796 | 11.1237 | 9.06802 | 3.10248 | 30.5358 | 32.6221 | 7.05377 |
| ENSMUSG00000020673 | 14_Tpo    | 1.13801 | -3.54081 | 0.215335 | NA       | 0       | 0       | 0       | 3.30117 | 0       | 3.52688 |
| ENSMUSG00000020674 | 16_Pxdn   | 719.041 | -1.41171 | 7.16E-06 | 0.000403 | 336.744 | 328.716 | 512.944 | 1131.48 | 903.976 | 1100.39 |
| ENSMUSG00000020676 | 2_Ccl11   | 210.854 | 1.03569  | 0.03341  | 0.225919 | 493.487 | 189.295 | 167.534 | 153.504 | 129.63  | 131.67  |
| ENSMUSG00000020677 | 7_Ddx52   | 1050.88 | 0.45424  | 0.292483 | 0.676777 | 1977.99 | 869.397 | 797.339 | 764.221 | 1008.71 | 887.599 |
| ENSMUSG00000020679 | 11_Hnf1b  | 0.332   | 0.16972  | 0.966824 | NA       | 0       | 1.1335  | 0       | 0       | 0.85848 | 0       |
| ENSMUSG00000020680 | 15_Taf15  | 2078.49 | 0.37121  | 0.211834 | 0.602983 | 2721.26 | 2206.93 | 2104.52 | 1388.97 | 1949.6  | 2099.67 |
| ENSMUSG00000020681 | 14_Ace    | 520.705 | -0.81898 | 0.020414 | 0.164777 | 287.193 | 335.517 | 507.773 | 811.262 | 636.99  | 545.491 |
| ENSMUSG00000020682 | 17_Mmp2   | 554.013 | 0.61123  | 0.178072 | 0.563195 | 319.553 | 948.742 | 740.46  | 376.333 | 392.324 | 546.667 |
| ENSMUSG00000020684 | 12_Ras1l  | 22.3209 | -1.71152 | 0.007978 | 0.085646 | 10.1124 | 6.80102 | 14.4783 | 52.8187 | 30.9052 | 18.81   |
| ENSMUSG00000020686 | 12_Gas2l  | 0.13755 | -0.79206 | 0.84609  | NA       | 0       | 0       | 0       | 0.82529 | 0       | 0       |
| ENSMUSG00000020687 | 13_Cdc27  | 2006.01 | 0.50699  | 0.246709 | 0.638314 | 3869.02 | 1651.51 | 1544    | 1380.71 | 1904.96 | 1685.85 |
| ENSMUSG00000020689 | 4_Iltgb3  | 90.95   | -0.1712  | 0.629166 | 0.881422 | 72.8096 | 87.2797 | 96.177  | 83.3545 | 84.9892 | 121.09  |
| ENSMUSG00000020690 | 12_Efcab3 | 1.2558  | 0.27022  | 0.896214 | NA       | 3.03373 | 1.1335  | 0       | 1.65058 | 1.71695 | 0       |
| ENSMUSG00000020691 | 13_Mettl2 | 411.058 | 0.12955  | 0.628156 | 0.881165 | 450.004 | 456.802 | 381.606 | 340.846 | 432.672 | 404.416 |
| ENSMUSG00000020692 | 14_Nle1   | 119.984 | 0.51839  | 0.384126 | 0.750377 | 41.461  | 188.161 | 194.422 | 128.746 | 69.5366 | 97.5771 |
| ENSMUSG00000020694 | 16_Tlk2   | 1587.28 | 0.50921  | 0.134688 | 0.498606 | 2575.64 | 1687.79 | 1329.93 | 1203.28 | 1350.38 | 1376.66 |
| ENSMUSG00000020695 | 14_Mrc2   | 1303.43 | -0.66525 | 0.212411 | 0.603702 | 345.846 | 1004.28 | 1674.31 | 1788.41 | 1392.45 | 1615.31 |
| ENSMUSG00000020696 | 18_Rfl1   | 1038.49 | 0.33337  | 0.270301 | 0.657126 | 1496.64 | 949.875 | 1026.92 | 836.021 | 937.457 | 984     |
| ENSMUSG00000020697 | 16_Lig3   | 1752.96 | 0.24916  | 0.319563 | 0.700808 | 1803.05 | 1972.3  | 1935.95 | 1401.35 | 1554.7  | 1850.44 |
| ENSMUSG00000020698 | 11_Cct6b  | 19.0307 | -0.11076 | 0.828953 | 0.951083 | 19.2136 | 18.136  | 17.5807 | 18.9817 | 21.4619 | 18.81   |
| ENSMUSG00000020700 | 11_Map3k  | 1159.4  | 0.17156  | 0.650344 | 0.891567 | 697.759 | 1574.44 | 1412.66 | 1101.77 | 1025.88 | 1143.89 |
| ENSMUSG00000020701 | 12_Tmem   | 34.4665 | 0.03961  | 0.956357 | 0.988881 | 7.07871 | 43.0731 | 54.8106 | 47.867  | 25.7543 | 28.2151 |
| ENSMUSG00000020702 | 13_Ccl1   | 0.89492 | 3.36821  | 0.272271 | NA       | 0       | 2.26701 | 3.10248 | 0       | 0       | 0       |
| ENSMUSG00000020703 | 3_553040  | 0.67803 | -2.78772 | 0.408039 | NA       | 0       | 0       | 0       | 0       | 1.71695 | 2.35126 |
| ENSMUSG00000020704 | 13_Asic2  | 13.2328 | -1.98795 | 0.004027 | 0.053544 | 4.04498 | 7.93452 | 4.13665 | 25.5841 | 18.8865 | 18.81   |
| ENSMUSG00000020705 | 6_Ddx42   | 2442.35 | 0.17228  | 0.549465 | 0.843939 | 3144.97 | 2302.14 | 2316.52 | 1908.08 | 2526.5  | 2455.89 |
| ENSMUSG00000020706 | 13_Ftsj3  | 1377.4  | 0.14188  | 0.66436  | 0.896403 | 1053.72 | 1817.01 | 1464.37 | 1077.01 | 1370.99 | 1481.29 |
| ENSMUSG00000020707 | 6_Rnf135  | 205.722 | 0.74937  | 0.01045  | 0.104067 | 260.901 | 277.708 | 234.755 | 134.523 | 144.224 | 182.222 |
| ENSMUSG00000020708 | 12_Psmc5  | 2958.71 | 0.21436  | 0.542592 | 0.84123  | 1992.15 | 3928.72 | 3613.36 | 2619.48 | 2500.74 | 3097.78 |
| ENSMUSG00000020709 | 15_Adap2  | 42.874  | 0.63268  | 0.272408 | 0.65881  | 22.2474 | 82.7457 | 51.7081 | 42.9152 | 31.7636 | 25.8638 |
| ENSMUSG00000020712 | 11_Tcam1  | 4.48363 | 0.13514  | 0.895278 | 0.971421 | 3.03373 | 6.80102 | 4.13665 | 3.30117 | 2.57543 | 7.05377 |
| ENSMUSG00000020713 | 6_Gh      | 0.18892 | 1.1315   | 0.781553 | NA       | 0       | 1.1335  | 0       | 0       | 0       | 0       |
| ENSMUSG00000020715 | 9_Ern1    | 759.279 | 0.12403  | 0.608208 | 0.872658 | 697.759 | 855.795 | 822.158 | 715.528 | 720.262 | 744.172 |
| ENSMUSG00000020716 | 15_Nf1    | 1305.17 | -0.07325 | 0.818643 | 0.948003 | 1713.05 | 1008.82 | 1094.14 | 1282.5  | 1453.4  | 1279.08 |
| ENSMUSG00000020717 | 19_Pecan  | 423.639 | -0.0008  | 0.998084 | 0.999063 | 304.385 | 538.414 | 428.143 | 485.272 | 390.607 | 395.011 |
| ENSMUSG00000020718 | 12_Polg2  | 163.703 | -0.23414 | 0.466707 | 0.803611 | 177.979 | 137.154 | 136.509 | 184.865 | 203.459 | 142.251 |
| ENSMUSG00000020719 | 14_Ddx5   | 35535.3 | 0.3001   | 0.470454 | 0.804531 | 61910.4 | 28189.1 | 27554.2 | 25822.6 | 37450.2 | 32285.1 |
| ENSMUSG00000020720 | 13_Psmc1  | 2157.59 | 0.50317  | 0.185786 | 0.573178 | 3756.77 | 2060.71 | 1772.55 | 1511.11 | 2004.54 | 1839.86 |
| ENSMUSG00000020721 | 16_Helz   | 1193.93 | 0.10992  | 0.661187 | 0.895458 | 1425.85 | 1148.24 | 1143.78 | 1059.68 | 1191.57 | 1194.44 |
| ENSMUSG00000020722 | 5_Cacng1  | 16.9166 | -0.82491 | 0.25777  | 0.648651 | 12.1349 | 7.93452 | 16.5466 | 36.3129 | 8.58477 | 19.9857 |
| ENSMUSG00000020723 | 3_Cacng4  | 254.441 | -1.67079 | 3.35E-06 | 0.000214 | 98.0907 | 107.683 | 159.261 | 481.971 | 375.154 | 304.488 |
| ENSMUSG00000020728 | 17_Cep11  | 107.226 | -0.44227 | 0.32366  | 0.704005 | 141.574 | 56.6751 | 74.4596 | 122.969 | 144.224 | 103.455 |
| ENSMUSG00000020732 | 13_Rab37  | 17.1202 | -0.90917 | 0.138414 | 0.505014 | 13.1462 | 11.335  | 11.3758 | 33.0117 | 19.745  | 14.1075 |
| ENSMUSG00000020733 | 3_Slc9a3r | 1438.71 | 0.6645   | 0.204314 | 0.595303 | 585.51  | 2476.7  | 2230.69 | 1081.96 | 979.522 | 1277.91 |
| ENSMUSG00000020734 | 12_Grin2c | 10.4535 | -1.85649 | 0.02956  | 0.209737 | 4.04498 | 1.1335  | 8.27329 | 18.9817 | 10.3017 | 19.9857 |
| ENSMUSG00000020736 | 12_Nt5c   | 268.501 | -0.07504 | 0.888205 | 0.969763 | 88.9895 | 350.252 | 345.41  | 321.039 | 213.761 | 291.556 |
| ENSMUSG00000020737 | 12_Hn1    | 1674.71 | 0.3288   | 0.363369 | 0.736251 | 1113.38 | 2322.55 | 2158.3  | 1436.83 | 1433.66 | 1583.57 |
| ENSMUSG00000020738 | 16_Sumo1  | 7081.56 | 0.4588   | 0.330478 | 0.710498 | 14336.4 | 5276.46 | 4981.56 | 5142.4  | 6646.33 | 6106.21 |
| ENSMUSG00000020739 | 11_Nup85  | 700.789 | 0.12819  | 0.719226 | 0.913031 | 459.105 | 922.671 | 813.885 | 612.367 | 649.009 | 747.699 |
| ENSMUSG00000020740 | 13_Gga3   | 636.024 | 0.03914  | 0.921671 | 0.977953 | 346.857 | 790.052 | 797.339 | 666.011 | 651.584 | 564.301 |
| ENSMUSG00000020741 | 17_Cluh   | 1175.58 | 0.08887  | 0.8617   | 0.960596 | 415.621 | 1586.9  | 1632.94 | 1192.55 | 1107.44 | 1118.02 |

|                    |           |         |          |          |          |         |         |         |         |         |         |
|--------------------|-----------|---------|----------|----------|----------|---------|---------|---------|---------|---------|---------|
| ENSMUSG00000020743 | 15_Mif4gc | 790.855 | -0.26746 | 0.410568 | 0.767001 | 485.397 | 826.324 | 841.807 | 921.026 | 846.458 | 824.115 |
| ENSMUSG00000020744 | 13_Slc25e | 186.351 | -0.67731 | 0.167832 | 0.548893 | 67.7534 | 160.957 | 201.662 | 316.087 | 168.261 | 203.384 |
| ENSMUSG00000020745 | 15_Pafah  | 6849.72 | 0.31666  | 0.456093 | 0.796589 | 12348.3 | 5343.33 | 5103.59 | 5389.16 | 6915.89 | 5998.05 |
| ENSMUSG00000020747 | 17_23100  | 766.164 | 0.45348  | 0.470282 | 0.804531 | 191.125 | 1159.57 | 1306.15 | 793.931 | 467.87  | 678.337 |
| ENSMUSG00000020752 | 11_Recqlf | 365.788 | 0.35393  | 0.430838 | 0.780048 | 185.058 | 515.744 | 530.525 | 312.786 | 307.335 | 343.283 |
| ENSMUSG00000020755 | 9_Sap30b  | 714.667 | -0.11841 | 0.72714  | 0.916484 | 441.914 | 813.855 | 800.441 | 765.046 | 710.819 | 755.929 |
| ENSMUSG00000020758 | 15_Irgb4  | 5474.41 | 1.22017  | 0.076424 | 0.370742 | 1169    | 11613.9 | 10198.9 | 3017.27 | 2496.45 | 4351    |
| ENSMUSG00000020766 | 4_Galk1   | 89.6883 | -0.74276 | 0.268639 | 0.656292 | 15.1687 | 71.4107 | 114.792 | 156.806 | 72.9705 | 106.982 |
| ENSMUSG00000020770 | 13_Unk    | 324.072 | 0.01114  | 0.979936 | 0.993796 | 162.81  | 370.655 | 442.621 | 389.538 | 256.685 | 322.122 |
| ENSMUSG00000020773 | 11_Trim4  | 93.7305 | 0.14976  | 0.820059 | 0.948338 | 20.2249 | 137.154 | 138.578 | 113.065 | 78.1214 | 75.2402 |
| ENSMUSG00000020774 | 9_Aspa    | 188.541 | -0.08456 | 0.883429 | 0.967903 | 354.947 | 78.2117 | 115.826 | 186.516 | 233.506 | 162.237 |
| ENSMUSG00000020775 | 13_Mrpl3e | 334.32  | 0.18814  | 0.73692  | 0.920922 | 108.203 | 465.87  | 494.329 | 389.538 | 244.666 | 303.312 |
| ENSMUSG00000020776 | 18_Fbf1   | 632.186 | 0.05571  | 0.917518 | 0.976775 | 206.294 | 824.057 | 902.823 | 656.107 | 499.634 | 704.201 |
| ENSMUSG00000020777 | 16_Acox1  | 2101.28 | -0.0123  | 0.956656 | 0.988881 | 1913.27 | 2142.32 | 2221.38 | 2151.54 | 2037.17 | 2141.99 |
| ENSMUSG00000020778 | 12_Ten1   | 392.617 | -0.09718 | 0.846586 | 0.955568 | 140.563 | 481.739 | 516.047 | 463.814 | 359.702 | 393.835 |
| ENSMUSG00000020780 | 15_Srp68  | 1860.75 | 0.15534  | 0.722933 | 0.914307 | 906.075 | 2573.05 | 2403.39 | 1809.04 | 1558.99 | 1913.92 |
| ENSMUSG00000020781 | 10_Tsen5  | 200.541 | 0.35459  | 0.55377  | 0.846076 | 56.6297 | 308.313 | 310.248 | 185.691 | 142.507 | 199.857 |
| ENSMUSG00000020782 | 18_Ligl2  | 771.548 | 0.7535   | 0.302337 | 0.685243 | 120.338 | 1302.39 | 1482.99 | 701.499 | 374.296 | 647.771 |
| ENSMUSG00000020783 | 14_12000  | 1319.29 | 0.18897  | 0.495808 | 0.818294 | 1700.91 | 1278.59 | 1236.86 | 1080.31 | 1311.75 | 1307.3  |
| ENSMUSG00000020785 | 17_Camkl  | 171.693 | 0.13847  | 0.754985 | 0.926786 | 91.012  | 224.434 | 224.413 | 188.167 | 130.489 | 171.642 |
| ENSMUSG00000020787 | 14_P2rx1  | 2.91916 | -1.63433 | 0.25795  | 0.648822 | 0       | 2.26701 | 2.06832 | 8.25292 | 2.57543 | 2.35126 |
| ENSMUSG00000020788 | 15_Atp2a  | 71.1832 | -0.09316 | 0.845357 | 0.954965 | 38.4273 | 80.4787 | 87.9037 | 97.3845 | 52.3671 | 70.5377 |
| ENSMUSG00000020790 | 14_Ankyf1 | 4202.81 | 0.94722  | 0.000353 | 0.008925 | 6169.6  | 5775.2  | 4659.93 | 2481.65 | 3097.38 | 3033.12 |
| ENSMUSG00000020792 | 15_Exoc7  | 967.232 | 0.18112  | 0.739258 | 0.921641 | 317.531 | 1424.81 | 1341.31 | 999.429 | 724.555 | 995.757 |
| ENSMUSG00000020793 | 5_Gair2   | 9.51592 | -1.12605 | 0.21492  | 0.605999 | 2.02249 | 5.66751 | 10.3416 | 23.1082 | 7.72629 | 8.22939 |
| ENSMUSG00000020794 | 13_Ube2g  | 1568.34 | 0.82806  | 0.106136 | 0.442704 | 3692.05 | 1219.65 | 1107.59 | 944.134 | 1329.78 | 1116.85 |
| ENSMUSG00000020798 | 14_Spns3  | 15.2962 | -0.11214 | 0.856867 | 0.959059 | 10.1124 | 21.5366 | 12.4099 | 14.8553 | 12.8772 | 19.9857 |
| ENSMUSG00000020799 | 16_Tekt1  | 1.78312 | -3.07999 | 0.117569 | 0.466561 | 1.01124 | 0       | 0       | 4.12646 | 0.85848 | 4.70251 |
| ENSMUSG00000020801 | 8_Med31   | 211.592 | 0.19784  | 0.541373 | 0.84046  | 288.205 | 192.695 | 197.525 | 205.498 | 216.336 | 169.29  |
| ENSMUSG00000020802 | 8_Ube2o   | 462.148 | -0.06851 | 0.904595 | 0.974255 | 125.394 | 573.552 | 654.624 | 525.711 | 375.154 | 518.452 |
| ENSMUSG00000020803 | 3_Txndc1  | 6394.75 | 0.21487  | 0.439479 | 0.785475 | 8548.05 | 6379.35 | 5682.72 | 5633.45 | 6216.23 | 5908.71 |
| ENSMUSG00000020804 | 12_Aanat  | 7.10038 | -1.38609 | 0.122949 | 0.477042 | 1.01124 | 5.66751 | 5.17081 | 10.7288 | 9.44325 | 10.5807 |
| ENSMUSG00000020805 | 13_Slc13e | 6.34191 | -2.04815 | 0.030279 | 0.212974 | 2.02249 | 3.40051 | 2.06832 | 13.2047 | 10.3017 | 7.05377 |
| ENSMUSG00000020806 | 15_Rhbf   | 523.789 | 0.89897  | 0.183409 | 0.570202 | 114.271 | 1057.56 | 873.867 | 416.773 | 265.269 | 414.997 |
| ENSMUSG00000020807 | 14_49334  | 581.352 | 0.40719  | 0.116511 | 0.464061 | 627.983 | 714.107 | 646.351 | 427.501 | 553.718 | 518.452 |
| ENSMUSG00000020808 | 3_Fam64e  | 93.8748 | 0.13096  | 0.775584 | 0.93365  | 47.5285 | 126.952 | 119.963 | 89.1316 | 83.2723 | 96.4015 |
| ENSMUSG00000020810 | 5_Cygb    | 452.002 | -0.75827 | 0.218562 | 0.609526 | 93.0345 | 360.454 | 554.311 | 850.051 | 399.192 | 454.968 |
| ENSMUSG00000020811 | 16_Wscd   | 256.757 | -1.73311 | 0.003019 | 0.043587 | 38.4273 | 111.083 | 206.832 | 546.344 | 322.787 | 315.068 |
| ENSMUSG00000020812 | 17_18100  | 174.399 | 0.22152  | 0.518938 | 0.831665 | 135.507 | 209.698 | 218.208 | 139.474 | 187.148 | 156.359 |
| ENSMUSG00000020814 | 13_Mxra7  | 4203.71 | -0.18415 | 0.44961  | 0.792693 | 3676.88 | 3969.53 | 4160.43 | 4142.14 | 4149.88 | 5123.39 |
| ENSMUSG00000020817 | 16_Rabep  | 1233.3  | -0.18709 | 0.692036 | 0.905638 | 1999.23 | 703.905 | 757.006 | 1097.64 | 1532.38 | 1309.65 |
| ENSMUSG00000020818 | 16_Mfsd1  | 496.416 | -0.05915 | 0.854399 | 0.958493 | 344.834 | 572.419 | 541.901 | 522.41  | 553.718 | 443.212 |
| ENSMUSG00000020821 | 17_Kif1c  | 9205.64 | 0.09427  | 0.831163 | 0.951642 | 4394.87 | 12050.3 | 12073.8 | 9949.72 | 7323.67 | 9441.47 |
| ENSMUSG00000020823 | 16_Sec14  | 1441.2  | -0.29492 | 0.422567 | 0.774546 | 761.467 | 1496.22 | 1625.7  | 1717.43 | 1498.04 | 1548.3  |
| ENSMUSG00000020826 | 6_Nos2    | 25.949  | 1.82486  | 0.016466 | 0.141577 | 15.1687 | 82.7457 | 23.7857 | 13.2047 | 13.7356 | 7.05377 |
| ENSMUSG00000020827 | 18_Mink1  | 4247.8  | 0.25087  | 0.612014 | 0.874367 | 1717.09 | 6120.92 | 6010.55 | 3703.91 | 3439.92 | 4494.43 |
| ENSMUSG00000020828 | 13_Pld2   | 834.755 | 0.33523  | 0.486524 | 0.81371  | 363.037 | 1281.99 | 1148.95 | 705.625 | 727.13  | 781.793 |
| ENSMUSG00000020829 | 9_Slc46a1 | 95.1971 | -0.65381 | 0.192348 | 0.581911 | 34.3823 | 78.2117 | 109.621 | 146.077 | 115.894 | 86.9965 |
| ENSMUSG00000020830 | 3_Vmo1    | 0.28063 | -1.56014 | 0.700051 | NA       | 0       | 0       | 0       | 0.82529 | 0.85848 | 0       |
| ENSMUSG00000020831 | 18_06100  | 361.768 | 0.10176  | 0.860046 | 0.960173 | 101.124 | 469.27  | 553.276 | 405.219 | 299.608 | 342.108 |
| ENSMUSG00000020832 | 14_Eral1  | 374.169 | 0.09327  | 0.790847 | 0.937373 | 251.8   | 426.197 | 480.885 | 399.442 | 321.07  | 365.62  |
| ENSMUSG00000020834 | 17_Dhrs1  | 68.8707 | 0.14694  | 0.678658 | 0.901585 | 60.6747 | 77.0782 | 79.6304 | 63.5475 | 74.6875 | 57.6058 |
| ENSMUSG00000020836 | 15_Coro6  | 55.0043 | -1.236   | 0.018034 | 0.151857 | 25.2811 | 19.2695 | 53.7764 | 102.336 | 63.5273 | 65.8352 |
| ENSMUSG00000020838 | 12_Slc6a2 | 84.4845 | -0.11907 | 0.715073 | 0.911362 | 69.7759 | 90.6802 | 82.7329 | 94.0833 | 84.9892 | 84.6452 |
| ENSMUSG00000020839 | 16_Tmigd  | 672.961 | 0.61574  | 0.124327 | 0.479256 | 1244.84 | 646.097 | 552.242 | 460.513 | 612.094 | 521.979 |
| ENSMUSG00000020840 | 10_Blmh   | 2266.14 | 0.26309  | 0.330795 | 0.710785 | 2726.31 | 2499.37 | 2190.35 | 1700.1  | 2124.73 | 2355.96 |
| ENSMUSG00000020841 | 5_Cpd     | 17377.7 | 0.58886  | 0.136635 | 0.501691 | 31148.3 | 15973.3 | 15505.2 | 10385.5 | 15113.5 | 16140.2 |
| ENSMUSG00000020843 | 15_Timmz  | 643.957 | -0.16746 | 0.589742 | 0.864543 | 432.813 | 678.968 | 708.401 | 703.149 | 709.102 | 631.312 |
| ENSMUSG00000020844 | 6_Nxn     | 2577.87 | -0.10862 | 0.785181 | 0.936054 | 1330.8  | 2890.43 | 3221.41 | 2780.41 | 2333.34 | 2910.85 |
| ENSMUSG00000020846 | 6_Fam10   | 1079.97 | 0.16942  | 0.568107 | 0.852443 | 1401.58 | 882.999 | 1144.82 | 941.659 | 977.805 | 1130.95 |
| ENSMUSG00000020847 | 15_Rph3a  | 58.4615 | -0.08517 | 0.849159 | 0.956642 | 32.3598 | 75.9447 | 62.0497 | 65.1981 | 54.084  | 61.1326 |
| ENSMUSG00000020848 | 7_Doc2b   | 20.4215 | -2.28828 | 0.002011 | 0.032703 | 11.1237 | 4.53401 | 5.17081 | 57.7705 | 27.4713 | 16.4588 |
| ENSMUSG00000020849 | 13_Ywhae  | 12884.6 | 0.38802  | 0.203857 | 0.594896 | 19010.4 | 13291.5 | 11518.5 | 9987.69 | 11545.7 | 11953.8 |
| ENSMUSG00000020850 | 14_Prpf8  | 7363.28 | 0.20532  | 0.539546 | 0.840325 | 5205.89 | 9564.5  | 8888.62 | 6050.22 | 6938.21 | 7532.25 |
| ENSMUSG00000020857 | 11_Nme2   | 2356.7  | 0.15389  | 0.501525 | 0.822575 | 2257.1  | 2706.8  | 2483.02 | 2177.95 | 2279.26 | 2236.04 |
| ENSMUSG00000020859 | 16_Spag9  | 4029.26 | 0.19117  | 0.621581 | 0.878215 | 6569.04 | 3275.82 | 3042.5  | 3459.63 | 4187.65 | 3640.92 |
| ENSMUSG00000020863 | 15_Luc7l3 | 3688.7  | 0.13118  | 0.774827 | 0.933172 | 6576.12 | 2520.91 | 2471.65 | 2964.45 | 4067.46 | 3531.59 |
| ENSMUSG00000020864 | 13_Ankrd  | 1407.84 | -0.31343 | 0.187444 | 0.574717 | 1313.61 | 1167.51 | 1285.46 | 1724.04 | 1442.24 | 1514.21 |
| ENSMUSG00000020865 | 16_Abccc3 | 46.9082 | 0.10502  | 0.841429 | 0.95351  | 24.2699 | 78.2117 | 43.4348 | 42.9152 | 42.0654 | 50.552  |
| ENSMUSG00000020866 | 17_Cacna  | 352.661 | -1.3684  | 0.10429  | 0.103923 | 79.8883 | 177.96  | 333     | 687.469 | 412.069 | 425.577 |
| ENSMUSG00000020867 | 13_Spata  | 4.3955  | 0.57412  | 0.635126 | 0.884141 | 1.01124 | 4.53401 | 10.3416 | 3.30117 | 6.00934 | 1.17563 |
| ENSMUSG00000020868 | 15_Xylt2  | 167.717 | -0.20613 | 0.741371 | 0.922625 | 39.4385 | 199.497 | 228.55  | 257.491 | 139.073 | 142.251 |
| ENSMUSG00000020869 | 8_Lrrc59  | 2236.56 | 0.63472  | 0.037677 | 0.243112 | 2209.57 | 3492.32 | 2460.27 | 1512.76 | 1810.53 | 1933.91 |
| ENSMUSG00000020870 | 7_Cdc34   | 1.86762 | -1.35322 | 0.477043 | 0.808107 | 0       | 0       | 3.10248 | 0.82529 | 2.57543 | 4.70251 |
| ENSMUSG00000020871 | 8_Dlx4    | 19.0358 | -0.22418 | 0.667592 | 0.8981   | 17.1912 | 14.7355 | 20.6832 | 18.9817 | 21.4619 | 21.1613 |

|                    |           |         |          |          |          |         |         |         |         |         |         |
|--------------------|-----------|---------|----------|----------|----------|---------|---------|---------|---------|---------|---------|
| ENSMUSG00000020872 | 4_Tac4    | 0.28616 | -1.57932 | 0.696464 | NA       | 0       | 0       | 0       | 0       | 1.71695 | 0       |
| ENSMUSG00000020873 | 13_Slc35l | 1029.34 | 0.14606  | 0.575774 | 0.856895 | 944.502 | 1260.46 | 1039.33 | 893.792 | 1042.19 | 995.757 |
| ENSMUSG00000020875 | 9_Hoxb9   | 1.27658 | 2.74128  | 0.36016  | NA       | 0       | 6.80102 | 0       | 0       | 0.85848 | 0       |
| ENSMUSG00000020876 | 14_Snx11  | 434.139 | 0.14589  | 0.704925 | 0.908152 | 259.89  | 574.686 | 533.627 | 394.49  | 387.173 | 454.968 |
| ENSMUSG00000020877 | 11_Scrn2  | 120.942 | 0.07916  | 0.916912 | 0.976775 | 14.1574 | 163.224 | 195.457 | 151.029 | 80.6968 | 121.09  |
| ENSMUSG00000020878 | 6_Lrrc46  | 9.18036 | -0.33575 | 0.662883 | 0.896048 | 4.04498 | 9.06802 | 11.3758 | 12.3794 | 11.1602 | 7.05377 |
| ENSMUSG00000020882 | 17_Cacnb  | 101.204 | -0.78264 | 0.126537 | 0.483956 | 35.3936 | 66.8767 | 120.997 | 160.932 | 99.5833 | 123.441 |
| ENSMUSG00000020883 | 18_Fbxl2C | 1472.27 | -0.06507 | 0.791952 | 0.937626 | 1562.37 | 1224.18 | 1530.56 | 1563.1  | 1479.16 | 1474.24 |
| ENSMUSG00000020884 | 15_Asgr1  | 0.95866 | -3.29387 | 0.186154 | NA       | 0       | 0       | 0       | 0.82529 | 2.57543 | 2.35126 |
| ENSMUSG00000020886 | 16_Dlg4   | 235.827 | -1.51603 | 0.003512 | 0.048706 | 55.6184 | 165.491 | 145.817 | 518.284 | 309.91  | 219.842 |
| ENSMUSG00000020888 | 16_Dvl2   | 304.844 | 0.083    | 0.872797 | 0.963879 | 117.304 | 383.124 | 440.553 | 374.683 | 230.072 | 283.326 |
| ENSMUSG00000020889 | 11_Nr1d1  | 3535.37 | 0.41239  | 0.482617 | 0.811473 | 1052.71 | 5259.45 | 5799.58 | 3525.65 | 2170.23 | 3404.62 |
| ENSMUSG00000020890 | 11_Gucy2  | 217.703 | -1.8349  | 0.001706 | 0.028891 | 157.754 | 71.4107 | 56.8789 | 517.458 | 363.994 | 138.724 |
| ENSMUSG00000020891 | 11_Alox8  | 2.91542 | -1.09468 | 0.502515 | 0.823386 | 1.01124 | 4.53401 | 0       | 0.82529 | 1.71695 | 9.40502 |
| ENSMUSG00000020892 | 10_Aloxe3 | 18.9365 | -1.39626 | 0.029894 | 0.211636 | 11.1237 | 6.80102 | 13.4441 | 34.6623 | 33.4806 | 14.1075 |
| ENSMUSG00000020893 | 17_Per1   | 719.797 | 0.61385  | 0.326651 | 0.707923 | 223.485 | 845.593 | 1542.97 | 766.697 | 386.315 | 553.721 |
| ENSMUSG00000020894 | 16_Vamp3  | 1845.14 | -0.58379 | 0.026758 | 0.196918 | 1362.15 | 1384.01 | 1684.65 | 2521.27 | 2194.27 | 1924.5  |
| ENSMUSG00000020895 | 14_Tmem   | 78.182  | -0.37072 | 0.390369 | 0.753566 | 48.5397 | 60.0757 | 96.177  | 113.065 | 80.6968 | 70.5377 |
| ENSMUSG00000020897 | 12_Aurkb  | 199.53  | 0.73764  | 0.05433  | 0.303801 | 154.72  | 306.046 | 287.497 | 123.794 | 160.535 | 164.588 |
| ENSMUSG00000020898 | 18_Ctc1   | 466.834 | 0.31658  | 0.476354 | 0.807493 | 236.631 | 618.893 | 698.059 | 413.471 | 396.616 | 437.334 |
| ENSMUSG00000020899 | 15_Pfas   | 482.718 | 0.20379  | 0.458993 | 0.798708 | 415.621 | 581.487 | 553.276 | 465.465 | 426.663 | 453.792 |
| ENSMUSG00000020900 | 15_Myh1C  | 1418.48 | -0.5566  | 0.038042 | 0.244828 | 998.098 | 1059.83 | 1386.81 | 1792.54 | 1700.64 | 1572.99 |
| ENSMUSG00000020901 | 13_Pik3r5 | 58.6071 | 1.79011  | 0.001006 | 0.019669 | 45.506  | 151.889 | 75.4938 | 29.7105 | 23.1789 | 25.8638 |
| ENSMUSG00000020902 | 12_Ntn1   | 1532.12 | 0.08278  | 0.848666 | 0.956336 | 806.973 | 1813.6  | 2107.62 | 1750.45 | 1102.28 | 1611.79 |
| ENSMUSG00000020903 | 13_Stx8   | 671.93  | -0.15382 | 0.556717 | 0.847577 | 525.847 | 709.573 | 673.239 | 698.197 | 732.281 | 692.445 |
| ENSMUSG00000020904 | 11_Cfap5  | 3.39233 | -0.8372  | 0.483837 | 0.812102 | 2.02249 | 2.26701 | 3.10248 | 5.77705 | 6.00934 | 1.17563 |
| ENSMUSG00000020905 | 11_Usp43  | 451.099 | 0.7275   | 0.094233 | 0.417467 | 273.036 | 715.24  | 699.093 | 340.02  | 293.599 | 385.606 |
| ENSMUSG00000020907 | 1_Rcvrn   | 90.3249 | -2.84897 | 1.78E-05 | 0.00084  | 20.2249 | 29.4711 | 16.5466 | 309.485 | 113.319 | 52.9033 |
| ENSMUSG00000020908 | 16_Myh3   | 927.787 | -1.04771 | 0.387396 | 0.401077 | 869.67  | 150.756 | 794.236 | 1623.35 | 783.789 | 1344.92 |
| ENSMUSG00000020910 | 16_Adprm  | 314.275 | 0.1801   | 0.608968 | 0.872658 | 471.24  | 267.507 | 262.677 | 279.774 | 308.193 | 296.258 |
| ENSMUSG00000020911 | 14_Krt19  | 3194.25 | 0.58913  | 0.312268 | 0.693849 | 991.019 | 5202.78 | 5318.69 | 2511.36 | 2028.58 | 3113.06 |
| ENSMUSG00000020912 | 4_Krt12   | 535534  | 0.48965  | 0.067289 | 0.344249 | 559716  | 652912  | 664026  | 386733  | 413618  | 536200  |
| ENSMUSG00000020913 | 3_Krt24   | 0.2751  | -1.54073 | 0.703687 | NA       | 0       | 0       | 0       | 1.65058 | 0       | 0       |
| ENSMUSG00000020914 | 17_Top2a  | 3229.48 | 0.71448  | 0.065343 | 0.338689 | 5324.2  | 3933.26 | 2781.89 | 1640.68 | 3004.67 | 2692.19 |
| ENSMUSG00000020916 | 8_Krt36   | 14.2007 | -0.38769 | 0.647269 | 0.890168 | 3.03373 | 10.2015 | 23.7857 | 25.5841 | 12.0187 | 10.5807 |
| ENSMUSG00000020917 | 17_Acly   | 9225.29 | 0.44804  | 0.206476 | 0.597842 | 6751.07 | 13249.5 | 11938.4 | 7049.65 | 7157.98 | 9205.17 |
| ENSMUSG00000020918 | 14_Kat2a  | 977.002 | 0.48788  | 0.337545 | 0.71586  | 397.419 | 1517.76 | 1506.77 | 806.311 | 752.026 | 881.721 |
| ENSMUSG00000020919 | 11_Stat5b | 692.891 | -0.07739 | 0.831454 | 0.951683 | 422.7   | 762.847 | 837.671 | 840.148 | 643.858 | 650.122 |
| ENSMUSG00000020921 | 6_Tmem1   | 250.373 | 0.1346   | 0.750257 | 0.925182 | 140.563 | 286.776 | 358.854 | 272.346 | 199.167 | 244.531 |
| ENSMUSG00000020922 | 11_Lsm12  | 884.588 | 0.4165   | 0.150659 | 0.524129 | 1226.64 | 999.75  | 807.68  | 677.565 | 825.855 | 770.036 |
| ENSMUSG00000020923 | 17_Ubtf   | 2364.67 | -0.00362 | 0.991648 | 0.997512 | 1481.47 | 2791.82 | 2811.89 | 2432.96 | 2182.25 | 2487.63 |
| ENSMUSG00000020925 | 16_Ccdc4  | 479.301 | 0.32857  | 0.430386 | 0.780048 | 847.423 | 394.459 | 358.854 | 382.11  | 453.276 | 439.685 |
| ENSMUSG00000020926 | 16_Adam10 | 63.753  | -1.24749 | 0.072626 | 0.359974 | 7.07871 | 46.4736 | 59.9814 | 127.92  | 76.4045 | 64.6595 |
| ENSMUSG00000020928 | 14_Higd1  | 9.26357 | -1.06581 | 0.199151 | 0.591045 | 5.05622 | 7.93452 | 5.17081 | 18.9817 | 13.7356 | 4.70251 |
| ENSMUSG00000020929 | 14_Eftud2 | 1575.52 | 0.39939  | 0.341571 | 0.719594 | 896.974 | 2367.89 | 2111.76 | 1321.29 | 1210.45 | 1544.77 |
| ENSMUSG00000020930 | 9_Ccdc10  | 8.59221 | 0.09361  | 0.909281 | 0.974731 | 6.06747 | 9.06802 | 11.3758 | 3.30117 | 11.1602 | 10.5807 |
| ENSMUSG00000020932 | 14_Gfap   | 90.7593 | -1.57043 | 0.009743 | 0.09867  | 57.6409 | 47.6071 | 32.059  | 78.4028 | 261.835 | 67.0108 |
| ENSMUSG00000020935 | 8_Dcald   | 356.877 | 0.2705   | 0.621459 | 0.878215 | 123.372 | 528.212 | 519.149 | 360.653 | 248.958 | 360.918 |
| ENSMUSG00000020936 | 8_Nmt1    | 2089.98 | 0.0812   | 0.812937 | 0.946432 | 1389.45 | 2796.35 | 2260.68 | 1905.6  | 2064.64 | 2123.18 |
| ENSMUSG00000020937 | 14_Plcd3  | 443.145 | 0.19307  | 0.774909 | 0.933206 | 79.8883 | 616.626 | 721.845 | 527.362 | 309.91  | 403.24  |
| ENSMUSG00000020940 | 13_17000  | 2.57742 | -0.4222  | 0.781191 | 0.935516 | 0       | 4.53401 | 2.06832 | 3.30117 | 0.85848 | 4.70251 |
| ENSMUSG00000020941 | 7_Map3k1  | 177.058 | 0.126    | 0.857233 | 0.959059 | 27.3036 | 256.172 | 270.95  | 200.546 | 132.205 | 175.169 |
| ENSMUSG00000020946 | 13_Gosr2  | 3337.91 | -0.03072 | 0.901681 | 0.973437 | 2809.24 | 3733.76 | 3364.13 | 3325.93 | 3251.05 | 3543.34 |
| ENSMUSG00000020948 | 8_Klhl28  | 261.769 | 0.14303  | 0.693458 | 0.905638 | 392.363 | 228.968 | 202.696 | 237.684 | 254.968 | 253.936 |
| ENSMUSG00000020949 | 8_Fkbp3   | 1154.33 | 0.17181  | 0.742108 | 0.922751 | 2295.52 | 695.971 | 677.376 | 1010.16 | 1246.51 | 1000.46 |
| ENSMUSG00000020950 | 10_Foxg1  | 19.9585 | -1.30774 | 0.156802 | 0.534279 | 17.1912 | 9.06802 | 8.27329 | 12.3794 | 66.9612 | 5.87814 |
| ENSMUSG00000020952 | 9_Scd1    | 1769.48 | 0.46791  | 0.267828 | 0.65577  | 3287.56 | 1594.84 | 1279.26 | 1297.36 | 1644.84 | 1513.03 |
| ENSMUSG00000020953 | 16_Coch   | 112.402 | 0.25992  | 0.564111 | 0.850768 | 193.148 | 90.6802 | 83.7671 | 103.162 | 120.187 | 83.4696 |
| ENSMUSG00000020954 | 15_Strn3  | 3992.7  | 0.63585  | 0.179042 | 0.564484 | 8499.51 | 3131.87 | 2944.26 | 2709.43 | 3581.57 | 3089.55 |
| ENSMUSG00000020955 | 8_Ap4s1   | 394.301 | 0.0897   | 0.839748 | 0.95317  | 675.511 | 284.509 | 259.575 | 392.839 | 398.333 | 355.04  |
| ENSMUSG00000020956 | 14_Dtd2   | 162.806 | -0.28978 | 0.319888 | 0.701203 | 133.484 | 149.622 | 156.158 | 178.263 | 157.101 | 202.208 |
| ENSMUSG00000020961 | 14_Ston2  | 629.673 | 0.64255  | 0.033767 | 0.227451 | 583.488 | 949.875 | 769.416 | 475.368 | 466.153 | 533.735 |
| ENSMUSG00000020962 | 13_Gtf2a1 | 854.551 | 0.21249  | 0.608333 | 0.872658 | 1466.3  | 664.233 | 621.531 | 803.009 | 842.166 | 730.065 |
| ENSMUSG00000020963 | 14_Tshr   | 108.684 | -1.59231 | 0.006603 | 0.074982 | 97.0795 | 24.9371 | 40.3323 | 220.353 | 177.705 | 91.699  |
| ENSMUSG00000020964 | 14_Sel1l  | 3571.45 | 0.29261  | 0.300308 | 0.683516 | 4714.42 | 3840.31 | 3242.1  | 2754.83 | 3390.13 | 3486.91 |
| ENSMUSG00000020973 | 7_Dnaaf2  | 163.677 | 0.3615   | 0.284528 | 0.670663 | 225.507 | 140.554 | 186.149 | 128.746 | 168.261 | 132.846 |
| ENSMUSG00000020974 | 5_Pole2   | 177.111 | 0.86356  | 0.018329 | 0.153599 | 287.193 | 236.902 | 161.329 | 99.0351 | 134.781 | 143.427 |
| ENSMUSG00000020978 | 10_Klhdcc | 840.593 | -0.00362 | 0.993001 | 0.997864 | 1322.71 | 558.817 | 637.044 | 818.69  | 959.777 | 746.524 |
| ENSMUSG00000020982 | 8_Nemf1   | 1523.28 | 0.18054  | 0.672588 | 0.90042  | 2582.72 | 1196.98 | 1075.53 | 1140.55 | 1682.61 | 1461.31 |
| ENSMUSG00000020986 | 13_Sec23  | 1776.16 | 0.11353  | 0.739385 | 0.921733 | 2598.9  | 1521.16 | 1417.84 | 1590.34 | 1853.45 | 1675.27 |
| ENSMUSG00000020988 | 8_L2hgdh  | 449.828 | 0.12668  | 0.735921 | 0.920596 | 694.725 | 379.723 | 334.034 | 401.092 | 443.833 | 445.563 |
| ENSMUSG00000020990 | 4_Cdk11   | 5.07956 | -1.9447  | 0.056531 | 0.310855 | 3.03373 | 1.1335  | 2.06832 | 7.42763 | 8.58477 | 8.22939 |
| ENSMUSG00000020993 | 8_Trappc1 | 1140.19 | 0.2887   | 0.506851 | 0.825872 | 2066.98 | 868.263 | 826.295 | 928.454 | 1149.5  | 1001.63 |
| ENSMUSG00000020994 | 4_Pnn     | 3045.41 | 0.2874   | 0.394241 | 0.755773 | 4565.77 | 2822.42 | 2654.69 | 2258.83 | 2995.23 | 2975.51 |
| ENSMUSG00000021000 | 15_Ctagel | 2830.15 | 0.66685  | 0.056844 | 0.311986 | 4922.74 | 2890.43 | 2605.05 | 1895.7  | 2342.78 | 2324.22 |

|                    |           |         |          |          |          |         |         |         |         |         |         |
|--------------------|-----------|---------|----------|----------|----------|---------|---------|---------|---------|---------|---------|
| ENSMUSG00000021003 | 9_Galc    | 628.198 | -0.31111 | 0.256916 | 0.648401 | 682.59  | 476.071 | 523.286 | 680.041 | 706.527 | 700.674 |
| ENSMUSG00000021007 | 13_Spata  | 141.916 | 0.04904  | 0.907871 | 0.974731 | 214.384 | 100.882 | 117.894 | 161.757 | 151.95  | 104.631 |
| ENSMUSG00000021009 | 14_Ptpn2  | 947.297 | -0.01332 | 0.965341 | 0.990727 | 715.961 | 1089.3  | 1023.82 | 1115.8  | 830.147 | 908.76  |
| ENSMUSG00000021010 | 7_Npas3   | 30.8219 | -1.0256  | 0.038464 | 0.246301 | 27.3036 | 17.0025 | 16.5466 | 51.1681 | 31.7636 | 41.147  |
| ENSMUSG00000021012 | 15_Zc3h1  | 3007.4  | 0.19004  | 0.589632 | 0.864455 | 4578.91 | 2466.5  | 2569.89 | 2444.52 | 3059.61 | 2924.96 |
| ENSMUSG00000021013 | 15_Ttc8   | 532.974 | -0.23303 | 0.457532 | 0.797816 | 647.196 | 396.726 | 426.075 | 581.831 | 605.226 | 540.789 |
| ENSMUSG00000021018 | 7_Polr2h  | 425.839 | 0.00911  | 0.969749 | 0.991889 | 394.385 | 447.734 | 439.519 | 420.074 | 430.097 | 423.226 |
| ENSMUSG00000021022 | 8_Ppp2r3i | 527.044 | 0.28242  | 0.558022 | 0.848187 | 1005.18 | 388.791 | 341.273 | 386.237 | 562.302 | 478.481 |
| ENSMUSG00000021023 | 14_11100  | 308.833 | 0.31946  | 0.375829 | 0.745495 | 465.172 | 277.708 | 285.429 | 212.1   | 311.627 | 300.961 |
| ENSMUSG00000021024 | 14_Psmat  | 3366.22 | 0.25458  | 0.488167 | 0.814112 | 5313.08 | 3018.52 | 2655.73 | 2722.64 | 3595.3  | 2892.04 |
| ENSMUSG00000021025 | 7_Nfkbia  | 838.243 | 0.70394  | 0.059116 | 0.318855 | 840.344 | 1335.27 | 940.053 | 491.049 | 533.973 | 888.775 |
| ENSMUSG00000021027 | 15_Ralga  | 2225.71 | 0.40435  | 0.326687 | 0.707923 | 4030.82 | 1788.67 | 1787.03 | 1658.01 | 2072.36 | 2017.38 |
| ENSMUSG00000021028 | 7_Mbip    | 362.916 | 0.33975  | 0.415412 | 0.770028 | 643.151 | 295.844 | 277.155 | 292.979 | 335.665 | 332.703 |
| ENSMUSG00000021032 | 13_Ngb    | 2.21761 | 0.31749  | 0.819981 | 0.948338 | 3.03373 | 1.1335  | 3.10248 | 1.65058 | 0.85848 | 3.52688 |
| ENSMUSG00000021033 | 10_Gstz1  | 854.056 | -0.31052 | 0.166142 | 0.545562 | 776.636 | 765.114 | 745.63  | 905.346 | 964.07  | 967.542 |
| ENSMUSG00000021036 | 10_Sptlc2 | 2669.66 | 0.35006  | 0.226096 | 0.616555 | 3669.81 | 2828.09 | 2477.85 | 2034.35 | 2638.96 | 2368.89 |
| ENSMUSG00000021037 | 6_Ahsa1   | 1629.88 | 0.10509  | 0.691453 | 0.905638 | 1366.19 | 1939.42 | 1762.21 | 1514.41 | 1613.11 | 1565.94 |
| ENSMUSG00000021038 | 16_Vipas  | 904.57  | 0.05838  | 0.853654 | 0.958468 | 641.129 | 1125.57 | 1002.1  | 859.955 | 931.42  | 885.248 |
| ENSMUSG00000021039 | 8_Snw1    | 3138.83 | 0.13538  | 0.661918 | 0.895681 | 4309.92 | 2850.76 | 2697.09 | 2633.51 | 3286.25 | 3055.46 |
| ENSMUSG00000021040 | 15_Slirp  | 629.92  | 0.06074  | 0.833205 | 0.952011 | 766.523 | 609.825 | 553.276 | 556.247 | 721.121 | 572.531 |
| ENSMUSG00000021044 | 14_Adck1  | 292.845 | -0.1223  | 0.794492 | 0.938665 | 119.327 | 381.99  | 340.239 | 340.846 | 290.165 | 284.502 |
| ENSMUSG00000021047 | 6_Nova1   | 123.502 | -0.05489 | 0.923858 | 0.978787 | 225.507 | 52.1411 | 85.8354 | 158.456 | 126.196 | 92.8746 |
| ENSMUSG00000021048 | 6_Mthfd1  | 1545.24 | 0.35685  | 0.337405 | 0.71586  | 1029.45 | 2178.59 | 1998    | 1180.99 | 1357.25 | 1527.14 |
| ENSMUSG00000021051 | 9_Ppp2r5i | 2284.58 | 0.47897  | 0.251123 | 0.642467 | 4166.33 | 1905.42 | 1909.06 | 1472.32 | 2180.53 | 2073.81 |
| ENSMUSG00000021054 | 5_Sgpp1   | 2560.3  | 0.41096  | 0.368433 | 0.740626 | 5008.69 | 1798.87 | 1959.74 | 1956.77 | 2317.03 | 2320.69 |
| ENSMUSG00000021055 | 13_Esr2   | 12.4863 | -0.43776 | 0.544933 | 0.842106 | 5.05622 | 12.4685 | 14.4783 | 20.6323 | 12.8772 | 9.40502 |
| ENSMUSG00000021057 | 15_Akap5  | 23.0268 | -0.57197 | 0.321608 | 0.702605 | 29.3261 | 13.602  | 12.4099 | 26.4094 | 22.3204 | 34.0932 |
| ENSMUSG00000021061 | 15_Sptb   | 689.047 | -1.52303 | 0.002131 | 0.033955 | 175.957 | 340.051 | 551.208 | 1342.75 | 630.981 | 1093.33 |
| ENSMUSG00000021062 | 15_Rab15  | 1498.54 | 0.36437  | 0.320542 | 0.701497 | 1009.22 | 2210.33 | 1840.81 | 1267.65 | 1243.07 | 1024.16 |
| ENSMUSG00000021065 | 15_Fut8   | 727.163 | 0.16452  | 0.654714 | 0.893223 | 1123.49 | 614.359 | 567.755 | 622.27  | 761.469 | 673.635 |
| ENSMUSG00000021066 | 8_Atl1    | 104.53  | -0.37074 | 0.438764 | 0.785475 | 132.473 | 53.2746 | 87.9037 | 124.619 | 153.667 | 75.2402 |
| ENSMUSG00000021067 | 7_Sav1    | 1176.77 | 0.38226  | 0.263439 | 0.652524 | 1837.43 | 1198.11 | 959.702 | 950.737 | 1130.61 | 984     |
| ENSMUSG00000021068 | 15_Nin    | 612.726 | 0.14578  | 0.596851 | 0.868228 | 762.478 | 615.492 | 553.276 | 629.698 | 595.783 | 519.627 |
| ENSMUSG00000021069 | 16_Pygl   | 2333.97 | 0.17165  | 0.508462 | 0.826991 | 2477.55 | 2330.48 | 2609.19 | 1907.25 | 2070.65 | 2608.72 |
| ENSMUSG00000021070 | 5_Bdkrb2  | 6.26458 | 0.39002  | 0.708334 | 0.909748 | 1.01124 | 6.80102 | 13.4441 | 4.12646 | 5.15086 | 7.05377 |
| ENSMUSG00000021071 | 15_Trim9  | 184.615 | -1.70444 | 2.26E-08 | 2.72E-06 | 100.113 | 79.3452 | 80.6646 | 318.563 | 283.297 | 245.706 |
| ENSMUSG00000021072 | 12_Tmx1   | 2020.59 | 0.44371  | 0.360853 | 0.733982 | 4161.27 | 1486.02 | 1339.24 | 1564.75 | 1907.54 | 1664.69 |
| ENSMUSG00000021076 | 5_Actr10  | 2204.35 | 0.13781  | 0.686861 | 0.904498 | 3221.82 | 1973.43 | 1733.25 | 1866.81 | 2317.03 | 2113.78 |
| ENSMUSG00000021078 | 4_Tomm2   | 0.13755 | -0.79206 | 0.84609  | NA       | 0       | 0       | 0       | 0.82529 | 0       | 0       |
| ENSMUSG00000021079 | 15_Timm5  | 236.593 | -0.06667 | 0.818292 | 0.948003 | 274.047 | 228.968 | 190.286 | 231.907 | 249.817 | 244.531 |
| ENSMUSG00000021087 | 17_Rtn1   | 95.7498 | -1.41645 | 0.013974 | 0.12705  | 76.8546 | 24.9371 | 54.8106 | 195.594 | 158.818 | 63.4839 |
| ENSMUSG00000021090 | 15_Lrrc9  | 2.09219 | -1.0669  | 0.56332  | 0.85076  | 3.03373 | 0       | 1.03416 | 2.47588 | 6.00934 | 0       |
| ENSMUSG00000021091 | 8_Serpina | 2896.17 | 1.36201  | 0.012226 | 0.116343 | 1702.94 | 7781.5  | 3025.96 | 1549.9  | 1921.27 | 1395.47 |
| ENSMUSG00000021094 | 9_Dhrs7   | 478.853 | 0.06215  | 0.802048 | 0.942326 | 528.881 | 503.275 | 435.382 | 453.911 | 488.473 | 463.197 |
| ENSMUSG00000021095 | 5_Gsc     | 1.08132 | 0.87787  | 0.777985 | NA       | 0       | 0       | 4.13665 | 0       | 0       | 2.35126 |
| ENSMUSG00000021096 | 10_Ppm1a  | 2767.47 | 0.08192  | 0.742045 | 0.922751 | 3325.98 | 2603.66 | 2608.16 | 2556.76 | 2742.83 | 2767.43 |
| ENSMUSG00000021097 | 14_Clmn   | 755.299 | -0.50343 | 0.082851 | 0.388445 | 583.488 | 512.343 | 778.724 | 954.863 | 887.665 | 814.71  |
| ENSMUSG00000021098 | 14_49304  | 80.1257 | -0.69148 | 0.260029 | 0.649568 | 121.349 | 28.3376 | 34.1273 | 120.493 | 104.734 | 71.7133 |
| ENSMUSG00000021099 | 6_Six6    | 49.9206 | -1.69563 | 0.005608 | 0.066852 | 44.4948 | 14.7355 | 11.3758 | 98.2098 | 78.9799 | 51.7276 |
| ENSMUSG00000021102 | 3_Glrx5   | 372.027 | 0.08204  | 0.782332 | 0.935592 | 482.364 | 334.383 | 330.932 | 342.496 | 384.598 | 357.391 |
| ENSMUSG00000021103 | 12_Mnat1  | 487.212 | 0.13837  | 0.693982 | 0.905638 | 728.096 | 387.658 | 415.733 | 449.784 | 476.455 | 465.549 |
| ENSMUSG00000021108 | 17_Prkc   | 1855.3  | 0.17149  | 0.48846  | 0.814112 | 1760.58 | 2243.2  | 1892.52 | 1611.8  | 1796.79 | 1826.93 |
| ENSMUSG00000021109 | 13_Hif1a  | 5714.7  | -0.03741 | 0.930393 | 0.981773 | 9270.08 | 4011.47 | 3640.25 | 5739.08 | 6248.85 | 5378.5  |
| ENSMUSG00000021111 | 15_Papoli | 6303.34 | 0.5201   | 0.199592 | 0.591643 | 11378.5 | 5879.48 | 5023.96 | 4061.26 | 5978.43 | 5498.41 |
| ENSMUSG00000021112 | 8_Mpp5    | 2317.58 | 0.42176  | 0.350876 | 0.727659 | 4465.65 | 1752.4  | 1743.6  | 1620.87 | 2239.77 | 2083.21 |
| ENSMUSG00000021113 | 4_Snapc1  | 414.093 | -0.17769 | 0.581756 | 0.860188 | 520.791 | 324.182 | 320.59  | 418.423 | 432.672 | 467.9   |
| ENSMUSG00000021114 | 8_Atp6v1c | 3129.37 | 0.28911  | 0.379687 | 0.747645 | 4630.49 | 3030.99 | 2664    | 2419.76 | 3191.82 | 2839.14 |
| ENSMUSG00000021115 | 14_Vrk1   | 446.296 | 0.53328  | 0.046798 | 0.277206 | 600.679 | 507.809 | 474.68  | 321.864 | 377.73  | 395.011 |
| ENSMUSG00000021116 | 9_Eif2s1  | 2769.25 | 0.51018  | 0.224167 | 0.613921 | 5153.3  | 2546.98 | 2061.08 | 1894.87 | 2576.29 | 2383    |
| ENSMUSG00000021118 | 7_Plek2   | 731.631 | 0.55023  | 0.03281  | 0.223786 | 904.052 | 903.402 | 800.441 | 513.332 | 594.925 | 673.635 |
| ENSMUSG00000021120 | 10_Pigh   | 1517.71 | 0.58125  | 0.168855 | 0.550027 | 2870.92 | 1244.59 | 1342.34 | 944.134 | 1399.32 | 1304.95 |
| ENSMUSG00000021123 | 12_Rdh12  | 129.753 | -2.36121 | 3.37E-05 | 0.001373 | 46.5172 | 45.3401 | 35.1615 | 341.671 | 236.94  | 72.8889 |
| ENSMUSG00000021124 | 13_Vti1b  | 1548.94 | -0.05255 | 0.841803 | 0.953593 | 1832.37 | 1328.47 | 1401.29 | 1560.63 | 1641.41 | 1529.49 |
| ENSMUSG00000021125 | 6_Arg2    | 30.2453 | 0.70976  | 0.181342 | 0.567796 | 43.4835 | 47.6071 | 21.7174 | 19.807  | 30.0467 | 18.81   |
| ENSMUSG00000021127 | 6_Zfp361i | 3676    | 0.71652  | 0.006559 | 0.074762 | 5458.7  | 4199.63 | 4052.88 | 2804.34 | 2540.23 | 3000.2  |
| ENSMUSG00000021130 | 7_Galnt16 | 90.1947 | -0.38283 | 0.394895 | 0.755773 | 63.7084 | 54.4081 | 116.86  | 134.523 | 85.8477 | 85.8208 |
| ENSMUSG00000021131 | 13_Erh    | 2151.34 | 0.04479  | 0.857171 | 0.959059 | 2336.99 | 2312.35 | 1904.93 | 1938.61 | 2330.77 | 2084.39 |
| ENSMUSG00000021133 | 8_Susd6   | 1773.8  | 0.41701  | 0.08584  | 0.396669 | 1810.13 | 2261.34 | 2013.51 | 1479.75 | 1443.96 | 1634.12 |
| ENSMUSG00000021134 | 17_Srsf5  | 11514.1 | 0.16849  | 0.530355 | 0.836542 | 14076.5 | 11192.2 | 11287.9 | 9035.3  | 11742.2 | 11750.4 |
| ENSMUSG00000021135 | 7_Slc10a1 | 5.06459 | 1.04718  | 0.300224 | 0.683516 | 7.07871 | 9.06802 | 4.13665 | 1.65058 | 2.57543 | 5.87814 |
| ENSMUSG00000021136 | 13_Smoc   | 749.401 | -1.3492  | 0.000106 | 0.003473 | 386.295 | 355.92  | 525.354 | 1431.88 | 965.787 | 831.169 |
| ENSMUSG00000021139 | 17_Gm20   | 101.025 | -0.12354 | 0.759834 | 0.928029 | 65.7309 | 97.4812 | 127.202 | 132.047 | 97.8664 | 85.8208 |
| ENSMUSG00000021140 | 8_Pcnx    | 1906.87 | -0.05205 | 0.817851 | 0.948003 | 1766.64 | 1881.61 | 1969.04 | 1988.13 | 1811.39 | 2024.43 |
| ENSMUSG00000021143 | 9_Pacs2   | 1094.41 | -0.26553 | 0.495078 | 0.817604 | 563.263 | 1179.98 | 1238.93 | 1406.3  | 1048.2  | 1129.78 |
| ENSMUSG00000021144 | 14_Mta1   | 623.34  | 0.02127  | 0.959871 | 0.989785 | 309.441 | 808.188 | 766.314 | 662.71  | 559.727 | 633.663 |

|                    |            |         |          |          |          |         |         |         |         |         |         |
|--------------------|------------|---------|----------|----------|----------|---------|---------|---------|---------|---------|---------|
| ENSMUSG00000021147 | 16_Wdr37   | 869.365 | 0.27889  | 0.473628 | 0.806769 | 1457.2  | 706.172 | 695.991 | 773.299 | 859.335 | 724.187 |
| ENSMUSG00000021149 | 7_Gtpbp4   | 1950.7  | 0.26781  | 0.514727 | 0.829322 | 3299.69 | 1611.84 | 1481.95 | 1388.14 | 2069.79 | 1852.79 |
| ENSMUSG00000021156 | 16_Zmync   | 4191.93 | 0.19467  | 0.42785  | 0.778472 | 5103.75 | 4023.94 | 4294.87 | 3603.23 | 3978.18 | 4147.61 |
| ENSMUSG00000021171 | 7_Esyt2    | 3578.92 | 0.43918  | 0.260355 | 0.649568 | 6252.52 | 3080.86 | 3024.92 | 2580.69 | 3524.91 | 3009.61 |
| ENSMUSG00000021175 | 15_Cdca7   | 314.759 | 0.78895  | 0.003628 | 0.049887 | 438.88  | 398.993 | 357.82  | 212.1   | 219.77  | 260.989 |
| ENSMUSG00000021176 | 5_Efcab1   | 52.9465 | 0.03547  | 0.923805 | 0.978787 | 60.6747 | 45.3401 | 54.8106 | 51.9934 | 56.6595 | 48.2007 |
| ENSMUSG00000021177 | 15_Tdp1    | 218.314 | 0.05989  | 0.886437 | 0.969051 | 116.293 | 295.844 | 256.472 | 214.576 | 197.45  | 229.247 |
| ENSMUSG00000021178 | 8_Psmc1    | 2843.8  | 0.15022  | 0.521125 | 0.831998 | 2918.45 | 3190.81 | 2865.66 | 2410.68 | 2796.92 | 2880.29 |
| ENSMUSG00000021179 | 7_Nrde2    | 303.146 | 0.18074  | 0.627335 | 0.880806 | 197.193 | 361.587 | 407.46  | 281.425 | 254.968 | 316.244 |
| ENSMUSG00000021180 | 8_Rps6ka   | 245.088 | 0.27296  | 0.498076 | 0.82002  | 407.531 | 188.161 | 208.901 | 215.401 | 250.675 | 199.857 |
| ENSMUSG00000021182 | 14_Ccdc8   | 169.223 | 0.34023  | 0.512838 | 0.828304 | 80.8995 | 214.232 | 271.984 | 168.36  | 95.2909 | 184.574 |
| ENSMUSG00000021185 | 15_90306   | 494.279 | -0.11115 | 0.722541 | 0.914147 | 339.778 | 531.613 | 554.311 | 478.67  | 509.935 | 551.369 |
| ENSMUSG00000021186 | 8_Fbln5    | 1945.58 | -0.99991 | 0.000128 | 0.004022 | 1224.62 | 1115.37 | 1551.24 | 2679.72 | 2605.48 | 2497.03 |
| ENSMUSG00000021187 | 14_Tc2n    | 201.808 | 0.41392  | 0.521064 | 0.831998 | 492.476 | 88.4132 | 110.655 | 144.426 | 200.884 | 173.993 |
| ENSMUSG00000021188 | 14_Trip11  | 2536.42 | 0.30887  | 0.407134 | 0.764774 | 4161.27 | 2225.07 | 2034.2  | 1996.38 | 2493.88 | 2307.76 |
| ENSMUSG00000021189 | 11_Atnx3   | 2109.6  | 0.47224  | 0.235758 | 0.627794 | 3791.15 | 1773.93 | 1790.13 | 1506.98 | 1959.04 | 1836.33 |
| ENSMUSG00000021190 | 14_Lgmn    | 3361.01 | 0.38912  | 0.286733 | 0.672535 | 2327.88 | 5144.97 | 3961.87 | 3008.19 | 2640.68 | 3082.5  |
| ENSMUSG00000021192 | 15_Golga   | 956.627 | 0.20433  | 0.416545 | 0.770435 | 1135.63 | 1016.75 | 920.404 | 813.738 | 982.098 | 871.14  |
| ENSMUSG00000021193 | 9_Pitrm1   | 1042.86 | -0.1189  | 0.606777 | 0.871953 | 984.952 | 1065.49 | 949.36  | 1023.36 | 1151.22 | 1082.75 |
| ENSMUSG00000021194 | 5_Chga     | 14.1538 | -1.88407 | 0.056451 | 0.310712 | 5.05622 | 9.06802 | 4.13665 | 44.5658 | 19.745  | 2.35126 |
| ENSMUSG00000021196 | 13_Pfkp    | 1365.31 | -0.5461  | 0.080858 | 0.382934 | 856.524 | 1394.21 | 1079.66 | 1867.64 | 1614.8  | 1379.01 |
| ENSMUSG00000021198 | 16_Unc79   | 133.411 | 0.18939  | 0.539084 | 0.84017  | 122.361 | 141.688 | 162.363 | 110.589 | 136.498 | 126.968 |
| ENSMUSG00000021200 | 14_Asb2    | 82.1674 | -1.30274 | 0.049517 | 0.287808 | 12.1349 | 45.3401 | 84.8012 | 170.01  | 77.2629 | 103.455 |
| ENSMUSG00000021203 | 15_Otub2   | 346.69  | 0.38819  | 0.156113 | 0.533441 | 324.609 | 428.464 | 426.075 | 307.009 | 282.439 | 311.541 |
| ENSMUSG00000021207 | 8_Akr1c2   | 0.13755 | -0.79206 | 0.84609  | NA       | 0       | 0       | 0       | 0.82529 | 0       | 0       |
| ENSMUSG00000021208 | 9_lfi27l2b | 7.81335 | -0.27687 | 0.733838 | 0.919947 | 9.1012  | 9.06802 | 3.10248 | 8.25292 | 10.3017 | 7.05377 |
| ENSMUSG00000021209 | 12_Ppp4r   | 56.7019 | -0.18942 | 0.732679 | 0.919789 | 87.9783 | 32.8716 | 38.264  | 66.8487 | 78.9799 | 35.2688 |
| ENSMUSG00000021211 | 3_Akr1c1   | 8.5343  | -0.2764  | 0.76426  | 0.929808 | 14.1574 | 5.66751 | 3.10248 | 4.95175 | 6.86782 | 16.4588 |
| ENSMUSG00000021213 | 11_Akr1c   | 922.668 | 0.13647  | 0.692963 | 0.905638 | 1338.89 | 817.256 | 742.528 | 757.618 | 1002.7  | 877.018 |
| ENSMUSG00000021214 | 13_Akr1c   | 184.504 | 0.06768  | 0.874926 | 0.964429 | 294.272 | 119.018 | 153.056 | 160.107 | 207.751 | 172.817 |
| ENSMUSG00000021215 | 14_Net1    | 13664.8 | 0.44742  | 0.11649  | 0.464061 | 19221.7 | 14275.3 | 13803   | 9750.83 | 12005.8 | 12931.9 |
| ENSMUSG00000021217 | 7_Tshz3    | 57.1797 | -0.18857 | 0.70255  | 0.907188 | 87.9783 | 34.0051 | 38.264  | 66.8487 | 58.3764 | 57.6058 |
| ENSMUSG00000021218 | 9_Gdi2     | 8894.19 | 0.36317  | 0.423126 | 0.774868 | 16912.1 | 6844.09 | 6267.02 | 6475.24 | 8923.01 | 7943.72 |
| ENSMUSG00000021219 | 16_Rgs6    | 164.066 | -1.71925 | 2.03E-06 | 0.000143 | 92.0232 | 55.5416 | 81.6988 | 302.882 | 252.392 | 199.857 |
| ENSMUSG00000021221 | 15_Dpf3    | 33.8923 | -1.64986 | 0.033504 | 0.22629  | 19.2136 | 12.4685 | 17.5807 | 103.162 | 40.3484 | 10.5807 |
| ENSMUSG00000021222 | 8_Dcaf4    | 719.501 | 0.2729   | 0.559359 | 0.848409 | 333.711 | 960.077 | 1068.29 | 703.974 | 550.284 | 700.674 |
| ENSMUSG00000021223 | 13_Papln   | 91.109  | 0.81741  | 0.174817 | 0.558368 | 35.3936 | 140.554 | 172.705 | 74.2763 | 43.7823 | 79.9427 |
| ENSMUSG00000021224 | 14_Numb    | 1428.06 | 0.28273  | 0.234069 | 0.626031 | 1442.03 | 1599.37 | 1660.86 | 1176.87 | 1293.72 | 1395.47 |
| ENSMUSG00000021226 | 7_Acot2    | 88.8311 | -0.48368 | 0.186069 | 0.573178 | 68.7646 | 79.3452 | 74.4596 | 136.173 | 88.4231 | 85.8208 |
| ENSMUSG00000021228 | 14_Acot3   | 0.42924 | -2.15458 | 0.590406 | NA       | 0       | 0       | 0       | 0       | 2.57543 | 0       |
| ENSMUSG00000021234 | 9_Fam16    | 102.726 | -0.31103 | 0.355804 | 0.731089 | 104.158 | 70.2772 | 100.314 | 103.987 | 114.177 | 123.441 |
| ENSMUSG00000021235 | 13_Coq6    | 280.589 | 0.0196   | 0.966742 | 0.991132 | 118.316 | 355.92  | 373.332 | 279.774 | 266.986 | 289.204 |
| ENSMUSG00000021236 | 16_Entpd   | 1042.82 | -0.08808 | 0.777597 | 0.934238 | 1306.53 | 756.046 | 970.044 | 994.477 | 1098.85 | 1130.95 |
| ENSMUSG00000021238 | 10_Aldh6   | 1794.73 | -0.0422  | 0.921644 | 0.977953 | 2882.05 | 1075.69 | 1347.51 | 1707.53 | 1974.5  | 1781.08 |
| ENSMUSG00000021239 | 12_Vsx2    | 122.048 | -1.52874 | 0.001944 | 0.031773 | 60.6747 | 43.0731 | 84.8012 | 289.678 | 136.498 | 117.563 |
| ENSMUSG00000021240 | 5_Abcd4    | 365.052 | 0.10267  | 0.820994 | 0.948338 | 166.855 | 464.736 | 502.603 | 345.797 | 349.4   | 360.918 |
| ENSMUSG00000021241 | 6_Isca2    | 424.743 | 0.08488  | 0.763646 | 0.929545 | 529.892 | 413.729 | 368.162 | 413.471 | 435.248 | 387.957 |
| ENSMUSG00000021242 | 8_Npc2     | 4434.72 | 0.03245  | 0.901408 | 0.973382 | 3638.46 | 5054.29 | 4761.28 | 4672.81 | 4170.48 | 4311.03 |
| ENSMUSG00000021243 | 14_Fcf1    | 763.01  | 0.0597   | 0.820642 | 0.948338 | 909.109 | 756.046 | 671.171 | 700.673 | 799.247 | 741.821 |
| ENSMUSG00000021244 | 15_Ylpm1   | 1448.99 | 0.12451  | 0.651691 | 0.892215 | 1802.04 | 1364.74 | 1367.16 | 1195.02 | 1431.94 | 1533.02 |
| ENSMUSG00000021245 | 14_Mlh3    | 646.927 | 0.14753  | 0.721193 | 0.913771 | 1072.93 | 435.265 | 531.559 | 570.277 | 669.612 | 601.921 |
| ENSMUSG00000021248 | 8_Tmed1    | 6022.14 | 0.33108  | 0.258222 | 0.64893  | 8478.27 | 6182.12 | 5469.68 | 4723.15 | 5643.63 | 5635.96 |
| ENSMUSG00000021250 | 13_Fos     | 873.894 | 1.55812  | 8.10E-06 | 0.00044  | 1137.65 | 1695.72 | 1080.7  | 526.537 | 321.929 | 480.832 |
| ENSMUSG00000021252 | 11_06100   | 993.19  | 0.09861  | 0.673387 | 0.900436 | 965.738 | 1130.1  | 985.556 | 922.677 | 976.947 | 978.122 |
| ENSMUSG00000021253 | 6_Tgfb3    | 995.604 | -0.81998 | 0.030373 | 0.213389 | 519.78  | 629.094 | 1011.41 | 1636.55 | 1070.52 | 1106.27 |
| ENSMUSG00000021254 | 8_Gpatch   | 538.336 | 0.05397  | 0.833812 | 0.952011 | 480.341 | 569.018 | 595.677 | 537.265 | 479.889 | 567.828 |
| ENSMUSG00000021255 | 17_Esrrb   | 46.1385 | -2.79405 | 0.000219 | 0.006197 | 14.1574 | 13.602  | 7.23913 | 146.077 | 78.1214 | 17.6344 |
| ENSMUSG00000021256 | 5_Vash1    | 14.2342 | -1.43992 | 0.04968  | 0.288242 | 6.06747 | 5.66751 | 11.3758 | 29.7105 | 23.1789 | 9.40502 |
| ENSMUSG00000021257 | 14_Angel   | 147.579 | 0.09256  | 0.8324   | 0.951799 | 75.8433 | 183.627 | 197.525 | 145.251 | 133.922 | 149.305 |
| ENSMUSG00000021258 | 9_Ccnk     | 582.276 | 0.46412  | 0.049232 | 0.286918 | 666.41  | 719.774 | 639.112 | 465.465 | 496.2   | 506.696 |
| ENSMUSG00000021259 | 4_Cyp46a   | 16.8684 | -1.7359  | 0.004368 | 0.056489 | 6.06747 | 10.2015 | 7.23913 | 32.1864 | 23.1789 | 22.3369 |
| ENSMUSG00000021260 | 7_Hhipl1   | 3.85955 | -2.21981 | 0.104447 | 0.439432 | 3.03373 | 0       | 1.03416 | 10.7288 | 6.00934 | 2.35126 |
| ENSMUSG00000021262 | 14_Evl     | 191.318 | -0.53394 | 0.148071 | 0.520689 | 113.259 | 180.227 | 175.807 | 295.455 | 188.006 | 195.154 |
| ENSMUSG00000021263 | 10_Degs2   | 29.9967 | -0.18122 | 0.755785 | 0.927112 | 13.1462 | 47.6071 | 23.7857 | 30.5358 | 34.3391 | 30.5663 |
| ENSMUSG00000021264 | 11_Yy1     | 1359.38 | 0.76832  | 0.076956 | 0.371973 | 2811.26 | 1190.18 | 1137.58 | 888.015 | 1154.65 | 974.595 |
| ENSMUSG00000021265 | 3_Slc25a2  | 61.2634 | -0.23211 | 0.742924 | 0.923215 | 11.1237 | 55.5416 | 102.382 | 83.3545 | 44.6408 | 70.5377 |
| ENSMUSG00000021266 | 16_Wars    | 1286.79 | 1.20294  | 0.003687 | 0.050375 | 990.008 | 2696.6  | 1696.02 | 801.359 | 709.102 | 827.642 |
| ENSMUSG00000021268 | 17_Meg3    | 1307.68 | -1.01507 | 0.006553 | 0.074751 | 863.603 | 606.424 | 1127.24 | 2309.99 | 1582.17 | 1356.67 |
| ENSMUSG00000021270 | 13_Hsp90   | 12255.3 | 0.2777   | 0.499353 | 0.821154 | 21137   | 10652.7 | 8503.91 | 10089.2 | 12668.5 | 10480.7 |
| ENSMUSG00000021271 | 4_Zfp839   | 373.122 | 0.03349  | 0.894547 | 0.971192 | 336.744 | 380.857 | 414.699 | 365.605 | 362.277 | 378.552 |
| ENSMUSG00000021273 | 9_Fdft1    | 4564.83 | -0.00037 | 0.998909 | 0.999484 | 3771.94 | 5380.74 | 4539.97 | 4087.67 | 4635.78 | 4972.91 |
| ENSMUSG00000021275 | 15_Tecpr   | 466.626 | 0.03713  | 0.895768 | 0.97156  | 383.262 | 491.94  | 542.935 | 513.332 | 430.955 | 437.334 |
| ENSMUSG00000021276 | 9_Cinp     | 481.061 | 0.04264  | 0.86899  | 0.962942 | 544.049 | 470.404 | 449.86  | 423.375 | 510.794 | 487.886 |
| ENSMUSG00000021277 | 16_Traf3   | 896.177 | 0.05546  | 0.836261 | 0.952635 | 754.388 | 1007.68 | 978.317 | 963.941 | 799.242 | 873.491 |
| ENSMUSG00000021279 | 4_Cdc42b   | 1835.46 | 0.28658  | 0.567776 | 0.852443 | 731.13  | 2722.67 | 2597.81 | 1864.34 | 1425.07 | 1671.74 |

|                    |           |         |          |          |          |         |         |         |         |         |         |
|--------------------|-----------|---------|----------|----------|----------|---------|---------|---------|---------|---------|---------|
| ENSMUSG00000021280 | 8_Exoc3l4 | 36.6431 | -0.20179 | 0.804741 | 0.942951 | 4.04498 | 36.2721 | 62.0497 | 58.5958 | 28.3297 | 30.5663 |
| ENSMUSG00000021281 | 15_Tnfaip | 343.29  | 0.86641  | 0.03678  | 0.240032 | 246.744 | 647.23  | 436.416 | 268.22  | 228.355 | 232.774 |
| ENSMUSG00000021282 | 16_Eif5   | 6099.3  | 0.55392  | 0.25133  | 0.642532 | 12716.4 | 4903.53 | 4148.02 | 3951.5  | 5850.52 | 5025.81 |
| ENSMUSG00000021285 | 14_Ppp1r  | 842.093 | 0.19722  | 0.560496 | 0.848965 | 580.454 | 1101.76 | 1016.58 | 766.697 | 782.931 | 804.129 |
| ENSMUSG00000021286 | 7_Zfyve21 | 338.318 | -0.55083 | 0.127659 | 0.48592  | 197.193 | 308.313 | 318.522 | 500.127 | 409.494 | 296.258 |
| ENSMUSG00000021287 | 12_Xrcc3  | 337.074 | 0.23777  | 0.616054 | 0.87673  | 152.698 | 514.61  | 427.109 | 307.009 | 282.439 | 338.581 |
| ENSMUSG00000021288 | 18_Klc1   | 2134.78 | 0.00547  | 0.991861 | 0.997512 | 663.376 | 2951.64 | 2801.54 | 2273.68 | 1848.3  | 2270.14 |
| ENSMUSG00000021290 | 5_201010  | 1419.86 | -0.15665 | 0.703989 | 0.908099 | 2120.58 | 941.941 | 965.907 | 1335.32 | 1747    | 1408.4  |
| ENSMUSG00000021294 | 7_Kif26a  | 578.397 | 0.35592  | 0.44378  | 0.788345 | 300.34  | 700.505 | 947.292 | 583.482 | 389.749 | 549.018 |
| ENSMUSG00000021298 | 7_Gpr132  | 30.6051 | 2.36783  | 0.000355 | 0.008953 | 27.3036 | 90.6802 | 36.1957 | 11.5541 | 12.0187 | 5.87814 |
| ENSMUSG00000021301 | 8_Hecw1   | 13.2564 | -1.33527 | 0.160898 | 0.539316 | 17.1912 | 2.26701 | 3.10248 | 33.837  | 13.7356 | 9.40502 |
| ENSMUSG00000021302 | 9_Ggps1   | 669.095 | 0.34757  | 0.447439 | 0.790876 | 1267.09 | 523.678 | 457.099 | 541.392 | 683.348 | 541.964 |
| ENSMUSG00000021303 | 13_Gng4   | 27.6987 | -0.32044 | 0.564176 | 0.850768 | 32.3598 | 13.602  | 27.9224 | 42.0899 | 23.1789 | 27.0394 |
| ENSMUSG00000021306 | 10_Gpr13  | 764.789 | -0.16794 | 0.50111  | 0.822414 | 686.635 | 792.319 | 682.547 | 877.286 | 829.289 | 720.66  |
| ENSMUSG00000021311 | 8_Mtr     | 392.394 | -0.08222 | 0.749701 | 0.925082 | 394.385 | 371.789 | 377.469 | 359.002 | 456.71  | 395.011 |
| ENSMUSG00000021313 | 15_Ryr2   | 57.6319 | -1.01941 | 0.096464 | 0.421283 | 65.7309 | 35.1386 | 13.4441 | 106.463 | 72.1121 | 52.9033 |
| ENSMUSG00000021314 | 11_Amph   | 295.035 | -1.97066 | 8.72E-08 | 9.00E-06 | 144.608 | 96.3477 | 118.929 | 566.976 | 527.105 | 316.244 |
| ENSMUSG00000021318 | 15_Gli3   | 429.002 | -0.22604 | 0.470674 | 0.804708 | 518.768 | 311.713 | 355.752 | 476.194 | 460.144 | 451.441 |
| ENSMUSG00000021319 | 6_Sfrp4   | 137.59  | -0.53558 | 0.226396 | 0.617274 | 158.765 | 60.0757 | 117.894 | 184.865 | 128.772 | 175.169 |
| ENSMUSG00000021322 | 7_Aoah    | 20.5711 | 1.65591  | 0.003683 | 0.05036  | 32.3598 | 39.6726 | 21.7174 | 8.25292 | 12.0187 | 9.40502 |
| ENSMUSG00000021326 | 11_Trim2i | 771.217 | 0.28829  | 0.236964 | 0.629075 | 823.153 | 909.069 | 811.817 | 623.921 | 756.318 | 703.025 |
| ENSMUSG00000021327 | 18_Zksca1 | 1734.26 | 0.03846  | 0.906644 | 0.974391 | 2342.04 | 1441.82 | 1488.16 | 1469.85 | 2013.13 | 1650.58 |
| ENSMUSG00000021335 | 13_Slc17e | 1.70141 | -1.21842 | 0.494814 | 0.817604 | 2.02249 | 0       | 1.03416 | 0.82529 | 5.15086 | 1.17563 |
| ENSMUSG00000021336 | 16_Slc17e | 0.78266 | -1.69846 | 0.478699 | NA       | 1.01124 | 0       | 0       | 1.65058 | 0.85848 | 1.17563 |
| ENSMUSG00000021337 | 7_Scgn    | 10.6873 | -2.39051 | 0.052771 | 0.298513 | 8.08995 | 1.1335  | 1.03416 | 34.6623 | 18.028  | 1.17563 |
| ENSMUSG00000021338 | 17_Lrrc16 | 788.175 | 0.75847  | 0.101051 | 0.101733 | 830.232 | 1189.04 | 952.463 | 494.35  | 584.623 | 678.337 |
| ENSMUSG00000021339 | 3_Mrs2    | 371.002 | 0.13414  | 0.620577 | 0.87799  | 454.049 | 342.318 | 368.162 | 330.117 | 375.154 | 356.215 |
| ENSMUSG00000021340 | 12_Gpld1  | 469.38  | -0.10219 | 0.698795 | 0.905638 | 410.565 | 426.197 | 521.217 | 481.145 | 448.125 | 529.033 |
| ENSMUSG00000021342 | 13_Prl    | 1.69413 | -1.16066 | 0.481894 | 0.811016 | 1.01124 | 1.1335  | 1.03416 | 4.95175 | 0.85848 | 1.17563 |
| ENSMUSG00000021345 | 15_Prl8a6 | 0.18892 | 1.1315   | 0.781553 | NA       | 0       | 1.1335  | 0       | 0       | 0       | 0       |
| ENSMUSG00000021356 | 9_Irf4    | 59.7117 | -0.24511 | 0.513624 | 0.828304 | 66.7421 | 48.7406 | 48.6056 | 67.674  | 71.2536 | 55.2545 |
| ENSMUSG00000021357 | 13_Exoc2  | 1740.15 | 0.38665  | 0.199757 | 0.591685 | 2568.56 | 1680.98 | 1666.03 | 1378.24 | 1588.18 | 1558.88 |
| ENSMUSG00000021359 | 15_Tfap2i | 885.462 | 0.88589  | 0.000711 | 0.015207 | 1310.57 | 1091.56 | 1044.5  | 587.608 | 574.321 | 704.201 |
| ENSMUSG00000021360 | 15_Gcnt2  | 275.38  | 0.40933  | 0.219538 | 0.180872 | 414.61  | 256.172 | 271.984 | 257.491 | 249.817 | 202.208 |
| ENSMUSG00000021361 | 6_Tmem1   | 1133.78 | 0.17626  | 0.586752 | 0.862567 | 830.232 | 1496.22 | 1282.36 | 1021.71 | 1003.56 | 1168.57 |
| ENSMUSG00000021363 | 13_Mak    | 47.4969 | -2.40168 | 0.002112 | 0.033723 | 22.2474 | 17.0025 | 6.20497 | 155.155 | 64.3858 | 19.9857 |
| ENSMUSG00000021364 | 15_Elov12 | 30.7308 | -1.62122 | 0.03445  | 0.230241 | 32.3598 | 4.53401 | 8.27329 | 55.2946 | 59.2349 | 24.6882 |
| ENSMUSG00000021365 | 14_Nedd9  | 796.863 | -0.32066 | 0.200815 | 0.592148 | 796.861 | 664.233 | 664.966 | 972.194 | 835.298 | 847.628 |
| ENSMUSG00000021366 | 7_Hivep1  | 2263.01 | 0.29287  | 0.249948 | 0.64154  | 2071.03 | 2798.62 | 2606.09 | 1960.89 | 2008.84 | 2132.59 |
| ENSMUSG00000021367 | 7_Edn1    | 229.287 | 0.16721  | 0.649821 | 0.891567 | 332.699 | 206.298 | 188.217 | 173.311 | 218.912 | 256.287 |
| ENSMUSG00000021368 | 14_Tbc1d  | 339.001 | -0.16072 | 0.616079 | 0.87673  | 228.541 | 374.056 | 357.82  | 362.303 | 324.504 | 386.782 |
| ENSMUSG00000021371 | 4_Mcur1   | 792.961 | 0.28193  | 0.373283 | 0.744082 | 1164.95 | 751.512 | 693.922 | 678.39  | 736.573 | 732.416 |
| ENSMUSG00000021373 | 15_Cap2   | 191.257 | -0.83389 | 0.090335 | 0.409794 | 229.552 | 66.8767 | 115.826 | 297.931 | 216.336 | 221.018 |
| ENSMUSG00000021374 | 9_Nup153  | 2653.33 | 0.55397  | 0.137889 | 0.503967 | 4602.17 | 2567.38 | 2299.98 | 1772.73 | 2479.28 | 2198.42 |
| ENSMUSG00000021375 | 9_Kif13a  | 1565.28 | -0.10609 | 0.72464  | 0.915512 | 1198.32 | 1425.95 | 1898.72 | 1624.18 | 1429.36 | 1815.17 |
| ENSMUSG00000021376 | 10_Tpmt   | 182.104 | 0.13965  | 0.7665   | 0.930427 | 322.587 | 114.484 | 135.475 | 154.33  | 190.582 | 175.169 |
| ENSMUSG00000021377 | 14_Dek    | 3945.19 | 0.84898  | 0.113    | 0.455953 | 9675.59 | 2866.63 | 2678.48 | 2302.57 | 3215.85 | 2932.02 |
| ENSMUSG00000021379 | 1_Id4     | 236.85  | 0.10939  | 0.841034 | 0.953262 | 469.217 | 121.285 | 146.851 | 224.48  | 242.949 | 216.316 |
| ENSMUSG00000021381 | 4_Barx1   | 0       | NA       | NA       | NA       | 0       | 0       | 0       | 0       | 0       | 0       |
| ENSMUSG00000021384 | 14_Susd3  | 28.7975 | -0.69764 | 0.343026 | 0.720633 | 10.1124 | 38.5391 | 17.5807 | 65.1981 | 24.8958 | 16.4588 |
| ENSMUSG00000021385 | 9_Ippk    | 318.534 | 0.14319  | 0.619983 | 0.877704 | 323.598 | 383.124 | 296.804 | 303.708 | 347.683 | 256.287 |
| ENSMUSG00000021388 | 13_Aspn   | 905.812 | 0.10505  | 0.858231 | 0.959189 | 1895.07 | 362.721 | 558.447 | 936.707 | 904.835 | 777.09  |
| ENSMUSG00000021390 | 5_Ogn     | 4024.1  | -0.25278 | 0.685016 | 0.903819 | 7723.88 | 1258.19 | 2035.23 | 4679.41 | 4783.43 | 3664.43 |
| ENSMUSG00000021391 | 9_Cenpp   | 81.9841 | 0.37599  | 0.477908 | 0.808634 | 160.788 | 60.0757 | 56.8789 | 55.2946 | 91.857  | 67.0108 |
| ENSMUSG00000021392 | 7_Nol8    | 625.446 | 0.32148  | 0.50539  | 0.825121 | 1207.43 | 459.069 | 417.801 | 432.453 | 638.707 | 597.219 |
| ENSMUSG00000021395 | 10_Spin1  | 3663.88 | 0.37895  | 0.198357 | 0.590646 | 5299.93 | 3781.37 | 3345.51 | 2924.01 | 3380.68 | 3251.79 |
| ENSMUSG00000021396 | 4_Nxn12   | 8.79004 | -2.195   | 0.042492 | 0.261623 | 3.03373 | 3.40051 | 3.10248 | 22.2829 | 19.745  | 1.17563 |
| ENSMUSG00000021400 | 6_Wrnp1   | 701.206 | 0.04648  | 0.859924 | 0.960099 | 611.803 | 831.991 | 693.922 | 729.558 | 649.867 | 690.094 |
| ENSMUSG00000021403 | 2_Serpinb | 11.0046 | 3.73209  | 0.000101 | 0.003335 | 15.1687 | 32.8716 | 13.4441 | 1.65058 | 1.71695 | 1.17563 |
| ENSMUSG00000021404 | 12_Serpin | 7.40846 | 1.50053  | 0.106867 | 0.444267 | 17.1912 | 11.335  | 4.13665 | 2.47588 | 3.43391 | 5.87814 |
| ENSMUSG00000021408 | 14_Ripk1  | 1304.74 | 0.41271  | 0.177307 | 0.561694 | 1851.59 | 1439.55 | 1178.94 | 940.008 | 1256.81 | 1161.52 |
| ENSMUSG00000021411 | 15_Pxdc1  | 627.893 | 0.64964  | 0.055327 | 0.307752 | 512.701 | 966.878 | 821.124 | 483.621 | 448.125 | 534.911 |
| ENSMUSG00000021413 | 8_Prpf4b  | 2577.53 | 0.1892   | 0.622675 | 0.878719 | 4063.18 | 2118.52 | 2056.95 | 1907.25 | 2795.2  | 2524.07 |
| ENSMUSG00000021414 | 7_Fam21f  | 6.07738 | 0.50289  | 0.610142 | 0.873762 | 10.1124 | 7.93452 | 3.10248 | 2.47588 | 3.43391 | 9.40502 |
| ENSMUSG00000021416 | 11_Eci3   | 14.8556 | -1.22902 | 0.134944 | 0.498709 | 12.1349 | 13.602  | 1.03416 | 24.7588 | 22.3204 | 15.2832 |
| ENSMUSG00000021417 | 14_Eci2   | 1330.1  | -0.36159 | 0.1437   | 0.513176 | 1012.26 | 1251.39 | 1229.62 | 1531.74 | 1581.31 | 1374.31 |
| ENSMUSG00000021418 | 15_Rpp40  | 227.771 | 0.24401  | 0.52532  | 0.833379 | 363.037 | 193.829 | 184.081 | 200.546 | 233.506 | 191.627 |
| ENSMUSG00000021420 | 12_Fars2  | 265.874 | -0.04102 | 0.922143 | 0.978156 | 133.484 | 323.048 | 329.898 | 287.202 | 252.392 | 269.219 |
| ENSMUSG00000021423 | 5_Ly86    | 144.255 | 0.93313  | 0.010757 | 0.105965 | 211.35  | 227.834 | 129.27  | 110.589 | 103.017 | 83.4696 |
| ENSMUSG00000021427 | 9_Ssr1    | 5472.27 | 0.3369   | 0.401588 | 0.760434 | 9560.3  | 4435.4  | 4329    | 4204.04 | 5083.9  | 5220.96 |
| ENSMUSG00000021428 | 8_Riok1   | 638.417 | 0.21078  | 0.549671 | 0.843939 | 950.57  | 586.021 | 518.115 | 495.175 | 670.471 | 610.151 |
| ENSMUSG00000021431 | 14_Snrnp  | 397.451 | 0.3004   | 0.444976 | 0.788998 | 656.298 | 351.386 | 308.18  | 301.232 | 404.343 | 363.269 |
| ENSMUSG00000021432 | 12_Slc35t | 446.314 | 0.15551  | 0.618636 | 0.87757  | 602.702 | 431.865 | 376.435 | 386.237 | 473.879 | 406.767 |
| ENSMUSG00000021441 | 4_Cts6    | 0.16854 | 1.1315   | 0.781553 | NA       | 1.01124 | 0       | 0       | 0       | 0       | 0       |
| ENSMUSG00000021448 | 6_Shc3    | 2.64454 | -2.02586 | 0.254896 | 0.645986 | 2.02249 | 1.1335  | 0       | 4.12646 | 8.58477 | 0       |

|                    |           |         |          |          |          |         |         |         |         |         |         |
|--------------------|-----------|---------|----------|----------|----------|---------|---------|---------|---------|---------|---------|
| ENSMUSG00000021451 | 15_Sema   | 2477.86 | 0.81584  | 0.02711  | 0.198494 | 1943.61 | 3979.73 | 3557.52 | 1712.48 | 1530.66 | 2143.17 |
| ENSMUSG00000021453 | 2_Gadd4   | 48.9154 | 1.54504  | 0.072029 | 0.358142 | 6.06747 | 148.489 | 64.118  | 26.4094 | 24.8958 | 23.5126 |
| ENSMUSG00000021456 | 7_Fbp2    | 71.0217 | -0.63036 | 0.130577 | 0.491416 | 33.3711 | 64.6097 | 69.2888 | 85.8304 | 78.9799 | 94.0502 |
| ENSMUSG00000021457 | 14_Syk    | 1450.76 | 0.50497  | 0.219705 | 0.610945 | 908.097 | 2257.94 | 1940.09 | 993.652 | 1188.13 | 1416.63 |
| ENSMUSG00000021458 | 16_20101  | 678.306 | -0.02458 | 0.944931 | 0.986649 | 415.621 | 769.648 | 832.5   | 736.161 | 648.15  | 667.757 |
| ENSMUSG00000021460 | 16_Auh    | 410.515 | -0.10997 | 0.71963  | 0.913031 | 412.588 | 341.184 | 431.245 | 528.187 | 407.777 | 342.108 |
| ENSMUSG00000021461 | 16_Fancc  | 130.311 | -0.1425  | 0.666194 | 0.897234 | 95.057  | 124.685 | 152.022 | 134.523 | 145.083 | 130.495 |
| ENSMUSG00000021464 | 14_Ror2   | 43.9732 | -0.3992  | 0.34166  | 0.719594 | 33.3711 | 43.0731 | 37.2298 | 54.4693 | 36.9145 | 58.7814 |
| ENSMUSG00000021466 | 11_Ptch1  | 657.302 | -0.0336  | 0.910219 | 0.97482  | 776.636 | 552.016 | 620.497 | 798.058 | 614.67  | 581.936 |
| ENSMUSG00000021468 | 7_Sptlc1  | 1729.92 | 0.28785  | 0.27208  | 0.658686 | 2210.58 | 1820.41 | 1674.31 | 1407.12 | 1540.11 | 1727    |
| ENSMUSG00000021469 | 9_Msx2    | 54.4314 | 0.3728   | 0.347203 | 0.724592 | 58.6522 | 64.6097 | 61.0155 | 58.5958 | 34.3391 | 49.3764 |
| ENSMUSG00000021470 | 17_Ercc6l | 784.334 | 0.14671  | 0.703199 | 0.90765  | 1241.81 | 600.757 | 629.804 | 662.71  | 836.157 | 734.767 |
| ENSMUSG00000021474 | 8_Sfxn1   | 910.643 | 0.14441  | 0.607456 | 0.872222 | 1189.22 | 831.991 | 846.978 | 826.118 | 849.034 | 920.517 |
| ENSMUSG00000021476 | 8_Habp4   | 415.954 | -0.83811 | 0.003083 | 0.04421  | 268.991 | 293.577 | 333     | 632.174 | 504.784 | 463.197 |
| ENSMUSG00000021477 | 8_Ctsl    | 38694.2 | 0.09531  | 0.72003  | 0.913099 | 36555.5 | 47997   | 35363.2 | 33778.4 | 37766.1 | 40704.9 |
| ENSMUSG00000021478 | 5_Drd1    | 79.0366 | -0.59226 | 0.148796 | 0.522232 | 91.012  | 44.2066 | 53.7764 | 103.162 | 92.7155 | 89.3477 |
| ENSMUSG00000021481 | 11_Zfp34  | 544.976 | -0.17118 | 0.521297 | 0.831998 | 446.97  | 485.139 | 606.019 | 611.542 | 560.585 | 559.599 |
| ENSMUSG00000021482 | 9_Aaed1   | 806.825 | -0.04344 | 0.884308 | 0.967903 | 1021.36 | 642.696 | 719.776 | 780.727 | 859.335 | 817.061 |
| ENSMUSG00000021483 | 7_Cdk20   | 156.367 | -0.11037 | 0.828507 | 0.951064 | 58.6522 | 207.431 | 185.115 | 172.486 | 128.772 | 185.749 |
| ENSMUSG00000021484 | 7_Lman2   | 3029.99 | 0.1701   | 0.66994  | 0.898766 | 1728.22 | 4169.02 | 3728.15 | 3178.2  | 2456.1  | 2920.26 |
| ENSMUSG00000021485 | 13_Mxd3   | 42.0783 | 0.70174  | 0.22819  | 0.619358 | 22.2474 | 69.1437 | 65.1522 | 45.3911 | 22.3204 | 28.2151 |
| ENSMUSG00000021486 | 6_Prelid1 | 3057.63 | 0.34423  | 0.491207 | 0.815371 | 1233.72 | 4758.45 | 4270.05 | 2964.45 | 2436.36 | 2682.78 |
| ENSMUSG00000021488 | 7_Nsd1    | 4732.66 | 0.18361  | 0.518315 | 0.831479 | 6226.23 | 4408.19 | 4465.51 | 3851.64 | 4819.49 | 4624.92 |
| ENSMUSG00000021490 | 10_Slc34  | 0.64191 | 0.29808  | 0.908164 | NA       | 0       | 1.1335  | 1.03416 | 0.82529 | 0.85848 | 0       |
| ENSMUSG00000021492 | 15_F12    | 0.41818 | -2.121   | 0.592183 | NA       | 0       | 0       | 0       | 1.65058 | 0.85848 | 0       |
| ENSMUSG00000021493 | 15_Pdlim7 | 348.952 | -0.06967 | 0.906333 | 0.974391 | 85.9558 | 470.404 | 465.373 | 430.803 | 297.892 | 343.283 |
| ENSMUSG00000021494 | 8_Ddx41   | 539.277 | 0.11519  | 0.836166 | 0.952589 | 165.844 | 833.125 | 683.581 | 607.415 | 437.823 | 507.871 |
| ENSMUSG00000021495 | 8_Fam19   | 722.515 | 0.18182  | 0.743237 | 0.923215 | 225.507 | 978.213 | 1100.35 | 789.805 | 573.463 | 667.757 |
| ENSMUSG00000021496 | 12_Pcbd2  | 281.393 | -0.08446 | 0.77067  | 0.932375 | 232.586 | 252.771 | 334.034 | 296.28  | 276.43  | 296.258 |
| ENSMUSG00000021497 | 9_Txndc1  | 738.683 | -0.03736 | 0.906875 | 0.974391 | 977.873 | 570.152 | 639.112 | 710.577 | 785.506 | 748.875 |
| ENSMUSG00000021499 | 12_Catsp  | 9.66962 | -0.45234 | 0.545403 | 0.84237  | 5.05622 | 11.335  | 8.27329 | 15.6806 | 9.44325 | 8.22939 |
| ENSMUSG00000021500 | 15_Ddx46  | 2520.93 | 0.20146  | 0.530711 | 0.836649 | 3590.93 | 2243.2  | 2255.51 | 1987.3  | 2553.97 | 2494.68 |
| ENSMUSG00000021501 | 4_Caml    | 433.15  | 0.31409  | 0.288127 | 0.673216 | 597.645 | 432.998 | 409.528 | 347.448 | 419.795 | 391.484 |
| ENSMUSG00000021504 | 14_B4galt | 236.173 | 0.11841  | 0.741471 | 0.922675 | 156.743 | 292.444 | 288.531 | 242.636 | 208.61  | 228.072 |
| ENSMUSG00000021506 | 7_Pitx1   | 14.1903 | 0.92876  | 0.41118  | 0.767001 | 0       | 35.1386 | 20.6832 | 11.5541 | 6.00934 | 11.7563 |
| ENSMUSG00000021508 | 10_Cxcl14 | 297.885 | 0.51936  | 0.247952 | 0.639446 | 214.384 | 575.819 | 262.677 | 258.317 | 206.893 | 269.219 |
| ENSMUSG00000021509 | 5_Slc25a4 | 614.055 | 1.3727   | 0.006034 | 0.070739 | 364.048 | 1453.15 | 840.773 | 362.303 | 299.608 | 364.445 |
| ENSMUSG00000021510 | 10_Zfp72  | 654.333 | 0.55973  | 0.307038 | 0.689923 | 1497.65 | 395.593 | 445.724 | 438.23  | 632.698 | 516.101 |
| ENSMUSG00000021514 | 17_Zfp36  | 317.509 | -0.2156  | 0.458575 | 0.798202 | 326.632 | 228.968 | 325.761 | 333.418 | 362.277 | 328     |
| ENSMUSG00000021518 | 3_Ptdss1  | 1857.99 | 0.01334  | 0.954189 | 0.988514 | 1907.21 | 1949.62 | 1742.56 | 1740.54 | 1784.77 | 2023.26 |
| ENSMUSG00000021519 | 10_Mterf3 | 479.552 | 0.17835  | 0.694034 | 0.905638 | 854.501 | 313.98  | 358.854 | 406.869 | 511.652 | 431.455 |
| ENSMUSG00000021520 | 4_Uqcrb   | 2809.59 | 0.38929  | 0.448405 | 0.791834 | 5870.27 | 1921.29 | 1767.38 | 1995.56 | 2896.5  | 2406.51 |
| ENSMUSG00000021532 | 10_Fastkc | 154.816 | 0.18348  | 0.559055 | 0.848321 | 192.136 | 173.426 | 128.236 | 140.3   | 140.79  | 154.007 |
| ENSMUSG00000021534 | 7_170000  | 13.0088 | -0.82724 | 0.206148 | 0.597493 | 12.1349 | 5.66751 | 10.3416 | 19.807  | 17.1695 | 12.9319 |
| ENSMUSG00000021536 | 7_Adcy2   | 281.753 | -0.59722 | 0.079644 | 0.379461 | 232.586 | 156.423 | 283.36  | 340.846 | 298.75  | 378.552 |
| ENSMUSG00000021537 | 8_Cetn3   | 1768.01 | 0.23672  | 0.606589 | 0.871949 | 3275.42 | 1230.98 | 1231.69 | 1432.71 | 1865.47 | 1571.81 |
| ENSMUSG00000021538 | 3_Ii9     | 0.45852 | -0.61845 | 0.874837 | NA       | 0       | 0       | 1.03416 | 0       | 1.71695 | 0       |
| ENSMUSG00000021539 | 8_Lect2   | 0.57232 | -2.56648 | 0.518957 | NA       | 0       | 0       | 0       | 0       | 3.43391 | 0       |
| ENSMUSG00000021540 | 16_Smad1  | 2534.68 | 0.03158  | 0.92086  | 0.97747  | 3430.14 | 2033.5  | 2223.45 | 2295.96 | 2770.31 | 2454.71 |
| ENSMUSG00000021541 | 13_Trpc7  | 0.97943 | -3.34563 | 0.256873 | NA       | 0       | 0       | 0       | 3.30117 | 2.57543 | 0       |
| ENSMUSG00000021546 | 17_Hnmp1  | 17597.7 | 0.55255  | 0.196869 | 0.589213 | 33808.9 | 15136.8 | 13835   | 11501.3 | 15722.1 | 15581.8 |
| ENSMUSG00000021548 | 10_Ccnh   | 558.993 | 0.53195  | 0.294051 | 0.67843  | 1207.43 | 383.124 | 391.947 | 393.664 | 500.492 | 477.305 |
| ENSMUSG00000021549 | 13_Rasa1  | 2203.23 | 0.56004  | 0.279992 | 0.667101 | 4840.83 | 1527.96 | 1507.81 | 1396.39 | 2177.1  | 1769.32 |
| ENSMUSG00000021550 | 5_221001  | 1014.52 | 0.14766  | 0.540202 | 0.84046  | 1052.71 | 1185.64 | 960.736 | 952.387 | 924.58  | 1011.04 |
| ENSMUSG00000021552 | 6_Gkap1   | 266.234 | -0.71178 | 0.155694 | 0.532812 | 362.025 | 109.95  | 133.407 | 302.882 | 371.721 | 317.42  |
| ENSMUSG00000021553 | 13_Slc28  | 2976.2  | 0.38342  | 0.161963 | 0.540792 | 3571.71 | 3508.19 | 3028.03 | 2068.18 | 2990.08 | 2691.01 |
| ENSMUSG00000021555 | 14_Naa35  | 1987.58 | 0.19796  | 0.481279 | 0.810775 | 2572.61 | 1966.63 | 1831.5  | 1598.59 | 1915.26 | 2040.89 |
| ENSMUSG00000021556 | 11_Golm1  | 744.893 | 0.1077   | 0.655905 | 0.893821 | 838.322 | 717.507 | 762.177 | 673.439 | 776.063 | 701.85  |
| ENSMUSG00000021557 | 14_Agtbp1 | 470.569 | -0.27054 | 0.472162 | 0.80561  | 628.994 | 333.25  | 317.488 | 527.362 | 564.878 | 451.441 |
| ENSMUSG00000021559 | 13_Dapk1  | 3151.34 | -0.01631 | 0.955174 | 0.98876  | 2376.42 | 3598.87 | 3425.14 | 2910.81 | 3069.91 | 3526.88 |
| ENSMUSG00000021565 | 16_Slc6a1 | 10.326  | 0.25572  | 0.709151 | 0.909883 | 12.1349 | 9.06802 | 12.4099 | 6.60234 | 11.1602 | 10.5807 |
| ENSMUSG00000021567 | 14_Nkd2   | 550.999 | -1.10344 | 0.000998 | 0.019524 | 347.868 | 284.509 | 417.801 | 914.424 | 792.374 | 549.018 |
| ENSMUSG00000021569 | 9_Trip13  | 220.84  | 0.68217  | 0.070706 | 0.355025 | 349.891 | 281.109 | 185.115 | 129.571 | 198.308 | 181.047 |
| ENSMUSG00000021572 | 8_Cep72   | 161.007 | 0.31694  | 0.258616 | 0.64893  | 161.799 | 196.096 | 177.876 | 137.824 | 140.79  | 151.656 |
| ENSMUSG00000021573 | 14_Tppp   | 1568.43 | -0.03688 | 0.903658 | 0.973878 | 1981.03 | 1189.04 | 1474.71 | 1440.14 | 1645.7  | 1679.97 |
| ENSMUSG00000021575 | 15_Ahrr   | 53.7134 | -0.43873 | 0.388282 | 0.752435 | 62.6971 | 34.0051 | 40.3323 | 94.0833 | 52.3671 | 38.7957 |
| ENSMUSG00000021576 | 5_Pdcd6   | 1774.22 | 0.26392  | 0.284504 | 0.670663 | 2071.03 | 2049.37 | 1687.75 | 1481.4  | 1739.27 | 1616.49 |
| ENSMUSG00000021577 | 13_Sdha   | 4847.09 | -0.25094 | 0.24504  | 0.6364   | 4614.31 | 4275.57 | 4390.02 | 5474.99 | 5228.98 | 5098.7  |
| ENSMUSG00000021578 | 16_Ccdc1  | 1249.48 | 0.08034  | 0.824016 | 0.949196 | 1873.84 | 972.545 | 1006.24 | 1124.87 | 1323.77 | 1195.61 |
| ENSMUSG00000021579 | 4_Lrrc14b | 2.12766 | -3.35586 | 0.063914 | 0.334481 | 1.01124 | 0       | 0       | 3.30117 | 2.57543 | 5.87814 |
| ENSMUSG00000021583 | 6_Erap1   | 2677.02 | 1.19904  | 0.005673 | 0.067457 | 6026    | 2879.1  | 2283.43 | 1334.5  | 1850.88 | 1688.2  |
| ENSMUSG00000021585 | 8_Cast    | 13416   | 0.66029  | 0.046767 | 0.277206 | 21428.3 | 14753.7 | 13118.3 | 8095.29 | 10859.7 | 12240.6 |
| ENSMUSG00000021587 | 4_Pcsk1   | 7.08565 | -0.05057 | 0.950178 | 0.987438 | 9.1012  | 5.66751 | 6.20497 | 8.25292 | 8.58477 | 4.70251 |
| ENSMUSG00000021589 | 12_Rhobtl | 313.027 | -0.47163 | 0.348644 | 0.725753 | 465.172 | 142.821 | 178.91  | 389.538 | 417.22  | 284.502 |
| ENSMUSG00000021590 | 6_Spata9  | 12.3091 | -0.22575 | 0.778762 | 0.934571 | 17.1912 | 4.53401 | 12.4099 | 12.3794 | 21.4619 | 5.87814 |

|                    |           |         |          |          |          |         |         |         |         |         |         |
|--------------------|-----------|---------|----------|----------|----------|---------|---------|---------|---------|---------|---------|
| ENSMUSG00000021591 | 7_Glrx    | 970.919 | 0.44896  | 0.121625 | 0.47416  | 1167.99 | 1335.27 | 859.388 | 802.184 | 885.948 | 774.739 |
| ENSMUSG00000021592 | 15_Arsk   | 584.025 | -0.01103 | 0.980571 | 0.993796 | 970.795 | 327.582 | 446.758 | 531.488 | 623.254 | 604.273 |
| ENSMUSG00000021594 | 10_Srd5a  | 762.051 | 0.34368  | 0.200844 | 0.592148 | 789.782 | 1026.95 | 740.46  | 653.632 | 658.452 | 703.025 |
| ENSMUSG00000021595 | 18_Nsun2  | 2604.56 | 0.39604  | 0.107839 | 0.446545 | 2904.29 | 3215.75 | 2759.14 | 1949.34 | 2380.56 | 2418.27 |
| ENSMUSG00000021596 | 16_Mctp1  | 65.1688 | 0.18396  | 0.74125  | 0.922625 | 126.406 | 44.2066 | 37.2298 | 52.8187 | 70.3951 | 59.957  |
| ENSMUSG00000021597 | 16_Slf1   | 392.525 | 0.74846  | 0.111605 | 0.453007 | 846.412 | 329.849 | 299.907 | 254.19  | 316.778 | 308.014 |
| ENSMUSG00000021598 | 8_Med10   | 477.417 | 0.18774  | 0.455549 | 0.796332 | 458.094 | 569.018 | 498.466 | 439.056 | 469.587 | 430.28  |
| ENSMUSG00000021604 | 15_Irx4   | 0.44364 | -0.57976 | 0.883757 | NA       | 1.01124 | 0       | 0       | 1.65058 | 0       | 0       |
| ENSMUSG00000021606 | 7_Ndufs6  | 854.406 | -0.26056 | 0.547296 | 0.843648 | 369.104 | 998.616 | 964.873 | 1048.12 | 849.892 | 895.828 |
| ENSMUSG00000021607 | 8_Mrpl36  | 404.042 | 0.11171  | 0.728956 | 0.917639 | 557.196 | 360.454 | 341.273 | 360.653 | 424.946 | 379.728 |
| ENSMUSG00000021608 | 14_Lpcat1 | 541.766 | -0.03477 | 0.899505 | 0.972372 | 477.307 | 631.361 | 497.432 | 618.144 | 509.077 | 517.276 |
| ENSMUSG00000021609 | 6_Slc6a3  | 14.7277 | -1.96647 | 0.01338  | 0.123457 | 7.07871 | 7.93452 | 3.10248 | 42.0899 | 12.8772 | 15.2832 |
| ENSMUSG00000021610 | 7_Clptm1l | 2753.6  | 0.2102   | 0.356723 | 0.731487 | 2794.07 | 3208.95 | 2858.42 | 2395.82 | 2609.77 | 2654.57 |
| ENSMUSG00000021611 | 8_Tert    | 62.3194 | -0.26864 | 0.581931 | 0.860367 | 26.2924 | 68.0102 | 75.4938 | 73.451  | 69.5366 | 61.1326 |
| ENSMUSG00000021612 | 14_Slc6a1 | 0.16854 | 1.1315   | 0.781553 | NA       | 1.01124 | 0       | 0       | 0       | 0       | 0       |
| ENSMUSG00000021613 | 8_Hapln1  | 4.55859 | -0.53437 | 0.695046 | 0.905638 | 10.1124 | 0       | 1.03416 | 4.95175 | 7.72629 | 3.52688 |
| ENSMUSG00000021614 | 16_Vcan   | 687.475 | -0.17209 | 0.668723 | 0.898323 | 982.929 | 544.081 | 412.63  | 803.009 | 761.469 | 620.731 |
| ENSMUSG00000021615 | 13_Xrcc4  | 349.023 | 0.07693  | 0.873399 | 0.963908 | 623.938 | 224.434 | 226.481 | 291.328 | 403.484 | 324.473 |
| ENSMUSG00000021619 | 5_Atg10   | 212.717 | -0.10247 | 0.824027 | 0.949196 | 331.688 | 123.552 | 160.295 | 218.702 | 270.42  | 171.642 |
| ENSMUSG00000021620 | 4_Acot12  | 0.88772 | -1.90811 | 0.468631 | NA       | 0       | 1.1335  | 0       | 2.47588 | 1.71695 | 0       |
| ENSMUSG00000021621 | 15_Zcchc1 | 750.22  | 0.17653  | 0.563522 | 0.85076  | 992.031 | 766.248 | 629.804 | 612.367 | 796.667 | 704.201 |
| ENSMUSG00000021622 | 3_Ckmt2   | 396.624 | -1.11632 | 0.094617 | 0.41805  | 430.79  | 66.8767 | 253.37  | 852.527 | 250.675 | 525.506 |
| ENSMUSG00000021624 | 9_Cd180   | 62.6144 | 2.09631  | 2.42E-05 | 0.001058 | 138.54  | 105.416 | 61.0155 | 30.5358 | 24.8958 | 15.2832 |
| ENSMUSG00000021629 | 9_Slc30a1 | 1311.19 | 0.06392  | 0.866537 | 0.962585 | 2015.41 | 1037.16 | 967.975 | 1151.28 | 1413.91 | 1281.43 |
| ENSMUSG00000021635 | 13_Rad17  | 556.905 | 0.38328  | 0.407602 | 0.764994 | 1068.89 | 462.469 | 359.888 | 432.453 | 545.133 | 472.602 |
| ENSMUSG00000021636 | 14_Marve  | 577.467 | 0.40478  | 0.125417 | 0.81826  | 575.398 | 671.034 | 727.016 | 444.007 | 493.624 | 553.721 |
| ENSMUSG00000021638 | 12_Ocln   | 1596.51 | 0.43697  | 0.173388 | 0.556848 | 2382.49 | 1557.43 | 1568.82 | 1137.25 | 1317.76 | 1615.31 |
| ENSMUSG00000021639 | 16_Gtf2h2 | 388.078 | 0.1155   | 0.776665 | 0.933844 | 622.927 | 287.91  | 299.907 | 339.195 | 435.248 | 343.283 |
| ENSMUSG00000021640 | 5_Naip1   | 777.411 | 0.9572   | 0.005765 | 0.068273 | 1367.2  | 946.475 | 765.28  | 476.194 | 647.292 | 462.022 |
| ENSMUSG00000021643 | 14_Serf1  | 107.876 | -0.25727 | 0.638302 | 0.868272 | 182.024 | 46.4736 | 66.1863 | 109.764 | 128.772 | 114.036 |
| ENSMUSG00000021645 | 16_Smn1   | 382.238 | 0.40317  | 0.134712 | 0.498606 | 503.6   | 432.998 | 369.196 | 332.593 | 317.636 | 337.405 |
| ENSMUSG00000021646 | 8_Mccc2   | 402.145 | -0.11082 | 0.660915 | 0.895438 | 350.902 | 385.391 | 424.006 | 446.483 | 405.201 | 400.889 |
| ENSMUSG00000021647 | 6_Carpt1  | 9.78626 | -1.84638 | 0.136822 | 0.502096 | 6.06747 | 6.80102 | 0       | 36.3129 | 6.00934 | 3.52688 |
| ENSMUSG00000021650 | 6_Ptcd2   | 476.178 | 0.28009  | 0.357987 | 0.732364 | 653.264 | 507.809 | 405.391 | 398.616 | 424.088 | 467.9   |
| ENSMUSG00000021660 | 14_Btf3   | 7224.12 | 0.20222  | 0.420773 | 0.77399  | 8803.89 | 7545.73 | 6838.91 | 6010.6  | 7158.84 | 6986.76 |
| ENSMUSG00000021661 | 15_Ankra1 | 615.366 | 0.11957  | 0.718518 | 0.912653 | 870.681 | 495.341 | 556.379 | 543.868 | 649.867 | 576.058 |
| ENSMUSG00000021662 | 9_Arhgef2 | 995.361 | 0.16025  | 0.554345 | 0.846134 | 873.715 | 1079.09 | 1198.59 | 874.81  | 890.241 | 1055.71 |
| ENSMUSG00000021665 | 7_Hexb    | 3916.5  | 0.39092  | 0.29507  | 0.679514 | 6624.66 | 3460.58 | 3246.23 | 3009.84 | 3683.72 | 3473.98 |
| ENSMUSG00000021666 | 16_Gfm2   | 835.803 | 0.29076  | 0.28046  | 0.667117 | 1051.69 | 941.941 | 765.28  | 680.041 | 762.328 | 813.534 |
| ENSMUSG00000021668 | 14_Polk   | 537.16  | 0.44802  | 0.263458 | 0.652524 | 949.558 | 448.867 | 461.236 | 410.17  | 532.256 | 420.875 |
| ENSMUSG00000021669 | 14_Col4a1 | 2955.15 | 0.58813  | 0.186006 | 0.573178 | 5962.3  | 2367.89 | 2317.56 | 2090.47 | 2622.65 | 2370.07 |
| ENSMUSG00000021670 | 14_Hmgcr  | 6380.58 | 0.41815  | 0.092224 | 0.413496 | 7264.78 | 7786.03 | 6845.12 | 4744.61 | 5401.54 | 6241.41 |
| ENSMUSG00000021671 | 8_Poc5    | 398.45  | 0.22722  | 0.416205 | 0.770359 | 503.6   | 432.998 | 352.649 | 346.623 | 388.032 | 366.796 |
| ENSMUSG00000021675 | 4_F2rl2   | 1.06284 | 2.36762  | 0.289946 | NA       | 3.03373 | 1.1335  | 1.03416 | 0       | 0       | 1.17563 |
| ENSMUSG00000021676 | 9_Iqgap2  | 1731.78 | -0.88641 | 0.022758 | 0.177898 | 1753.5  | 893.2   | 1001.07 | 2682.2  | 2427.77 | 1632.95 |
| ENSMUSG00000021678 | 8_F2rl1   | 700.993 | 0.77308  | 0.030463 | 0.213629 | 711.916 | 1116.5  | 824.227 | 406.869 | 448.125 | 698.323 |
| ENSMUSG00000021680 | 7_Crhbp   | 298.51  | -1.81199 | 2.06E-05 | 0.000939 | 156.743 | 72.5442 | 167.534 | 605.765 | 382.881 | 405.592 |
| ENSMUSG00000021681 | 8_Aggf1   | 1220.11 | 0.02691  | 0.912578 | 0.97554  | 1414.73 | 1111.97 | 1167.57 | 1180.17 | 1225.91 | 1220.3  |
| ENSMUSG00000021684 | 16_Pde8b  | 54.5015 | -0.89117 | 0.055913 | 0.309321 | 49.551  | 36.2721 | 28.9565 | 97.3845 | 67.8197 | 47.0251 |
| ENSMUSG00000021686 | 4_Ap3b1   | 3218.8  | 0.389    | 0.111507 | 0.453007 | 3707.22 | 3780.23 | 3462.37 | 2424.71 | 2784.04 | 3154.21 |
| ENSMUSG00000021687 | 14_Scam1  | 3472.81 | 0.20044  | 0.607872 | 0.872658 | 5688.25 | 2587.79 | 2864.63 | 2827.45 | 3348.92 | 3519.83 |
| ENSMUSG00000021690 | 9_Jmy     | 1142.05 | 0.022    | 0.962284 | 0.990106 | 1975.97 | 630.228 | 845.944 | 1114.97 | 1213.03 | 1072.17 |
| ENSMUSG00000021692 | 8_Dimt1   | 261.919 | 0.28802  | 0.537321 | 0.839407 | 468.206 | 208.565 | 187.183 | 191.468 | 315.061 | 201.032 |
| ENSMUSG00000021693 | 19_Kif2a  | 828.713 | 0.34222  | 0.445164 | 0.788998 | 1539.11 | 652.898 | 587.404 | 600.813 | 826.713 | 765.334 |
| ENSMUSG00000021694 | 18_Ercc8  | 226.045 | 0.21339  | 0.410891 | 0.767001 | 228.541 | 260.706 | 238.891 | 206.323 | 204.318 | 217.491 |
| ENSMUSG00000021696 | 8_Elov17  | 425.766 | -0.49042 | 0.304444 | 0.687389 | 605.735 | 217.633 | 238.891 | 514.157 | 594.925 | 383.255 |
| ENSMUSG00000021697 | 12_Depdc  | 41.86   | 0.08372  | 0.840219 | 0.95317  | 36.4048 | 43.0731 | 49.6398 | 32.1864 | 46.3578 | 43.4982 |
| ENSMUSG00000021699 | 17_Pde4d  | 314.48  | -0.45758 | 0.079373 | 0.378692 | 278.092 | 235.769 | 281.292 | 375.508 | 381.164 | 335.054 |
| ENSMUSG00000021700 | 9_Rab3c   | 68.7601 | -1.67394 | 0.025458 | 0.191321 | 71.7983 | 7.93452 | 18.6149 | 122.143 | 135.639 | 56.4301 |
| ENSMUSG00000021701 | 7_Plk2    | 3935.27 | 0.52244  | 0.039851 | 0.251043 | 4917.68 | 5029.35 | 3973.25 | 2871.19 | 3493.14 | 3327.03 |
| ENSMUSG00000021702 | 7_Thbs4   | 3147.83 | -0.26109 | 0.455276 | 0.796225 | 1823.27 | 3154.54 | 3613.36 | 3309.42 | 3097.38 | 3888.98 |
| ENSMUSG00000021703 | 8_Serinc5 | 1501.67 | 0.21168  | 0.455024 | 0.796201 | 1983.05 | 1328.47 | 1523.32 | 1310.56 | 1534.96 | 1329.64 |
| ENSMUSG00000021704 | 7_Mtx3    | 753.443 | -0.47624 | 0.246071 | 0.637806 | 973.828 | 380.857 | 535.696 | 804.66  | 970.937 | 854.681 |
| ENSMUSG00000021706 | 14_Zfyve1 | 826.304 | 0.05283  | 0.90829  | 0.974731 | 1426.87 | 567.885 | 529.491 | 751.016 | 957.202 | 725.362 |
| ENSMUSG00000021707 | 4_Dhfr    | 556.302 | 0.84745  | 0.023469 | 0.180768 | 1027.42 | 625.694 | 492.261 | 347.448 | 455.851 | 389.133 |
| ENSMUSG00000021708 | 16_Rasgr1 | 94.9827 | -1.21678 | 0.033455 | 0.22605  | 93.0345 | 34.0051 | 44.4689 | 205.498 | 127.055 | 65.8352 |
| ENSMUSG00000021709 | 14_Erbb2i | 7990.95 | 0.56893  | 0.20878  | 0.600293 | 16200.1 | 6220.66 | 6218.41 | 5450.23 | 7076.43 | 6779.85 |
| ENSMUSG00000021710 | 10_Nln    | 470.016 | 0.24378  | 0.365657 | 0.738988 | 609.78  | 468.137 | 450.894 | 425.851 | 438.682 | 426.753 |
| ENSMUSG00000021711 | 16_Trapp1 | 1469.11 | 0.37591  | 0.355871 | 0.731119 | 2586.76 | 1208.31 | 1183.08 | 1084.43 | 1489.46 | 1262.62 |
| ENSMUSG00000021712 | 14_Trim2  | 836.215 | 0.39406  | 0.438712 | 0.785475 | 1752.49 | 535.013 | 561.55  | 699.023 | 793.233 | 675.986 |
| ENSMUSG00000021713 | 8_Ppwd1   | 477.138 | 0.38455  | 0.378318 | 0.746641 | 876.749 | 395.593 | 348.512 | 346.623 | 462.719 | 432.631 |
| ENSMUSG00000021714 | 14_Cenpk  | 137.264 | 1.19121  | 0.049405 | 0.28735  | 386.295 | 96.3477 | 89.9721 | 71.8004 | 90.9986 | 88.1721 |
| ENSMUSG00000021715 | 12_Cwc2i  | 501.255 | 0.04393  | 0.883129 | 0.967903 | 644.163 | 439.799 | 442.621 | 459.688 | 545.133 | 476.129 |
| ENSMUSG00000021716 | 14_Srek1i | 548.187 | 0.10292  | 0.791603 | 0.937551 | 843.378 | 427.331 | 432.28  | 431.628 | 617.245 | 537.262 |
| ENSMUSG00000021719 | 8_Rgs7bp  | 196.214 | -0.74668 | 0.179259 | 0.564516 | 279.103 | 72.5442 | 87.9037 | 290.503 | 253.251 | 193.979 |

|                    |           |         |          |          |          |         |         |         |         |         |         |
|--------------------|-----------|---------|----------|----------|----------|---------|---------|---------|---------|---------|---------|
| ENSMUSG00000021720 | 10_Rnf18l | 20.2294 | -1.33612 | 0.036133 | 0.237923 | 11.1237 | 6.80102 | 16.5466 | 43.7405 | 23.1789 | 19.9857 |
| ENSMUSG00000021721 | 4_Htr1a   | 0.56126 | -2.54391 | 0.473253 | NA       | 0       | 0       | 0       | 1.65058 | 1.71695 | 0       |
| ENSMUSG00000021725 | 8_Parp8   | 599.398 | 0.0823   | 0.74751  | 0.924734 | 665.399 | 635.895 | 548.106 | 522.41  | 634.414 | 590.165 |
| ENSMUSG00000021728 | 7_Emb     | 920.819 | -0.06673 | 0.886604 | 0.969051 | 1559.34 | 584.887 | 554.311 | 955.689 | 1043.05 | 827.642 |
| ENSMUSG00000021730 | 7_Hcn1    | 38.3913 | -2.61411 | 0.000163 | 0.004918 | 18.2024 | 7.93452 | 6.20497 | 111.414 | 58.3764 | 28.2151 |
| ENSMUSG00000021731 | 9_Mrps30  | 363.363 | 0.31475  | 0.3815   | 0.748946 | 559.218 | 349.119 | 299.907 | 268.22  | 354.551 | 349.161 |
| ENSMUSG00000021732 | 14_Fgf10  | 389.211 | -1.25587 | 0.012193 | 0.116135 | 413.599 | 122.418 | 153.056 | 609.066 | 556.293 | 480.832 |
| ENSMUSG00000021733 | 9_Slc4a7  | 398.743 | 0.1378   | 0.77242  | 0.932508 | 717.983 | 313.98  | 221.311 | 378.809 | 411.21  | 349.161 |
| ENSMUSG00000021737 | 3_Psmc6   | 2145.92 | 0.21504  | 0.535413 | 0.83864  | 3247.11 | 1889.55 | 1779.79 | 1725.69 | 2205.43 | 2027.96 |
| ENSMUSG00000021738 | 4_Atxn7   | 1162.41 | 0.41848  | 0.175192 | 0.558565 | 1726.19 | 1184.51 | 1078.63 | 888.015 | 1104.86 | 992.23  |
| ENSMUSG00000021743 | 5_Fezf2   | 5.71599 | -3.95769 | 0.005288 | 0.064383 | 1.01124 | 0       | 1.03416 | 11.5541 | 17.1695 | 3.52688 |
| ENSMUSG00000021745 | 13_Ptprg  | 1804.92 | 0.37619  | 0.241255 | 0.632619 | 2760.7  | 1734.26 | 1621.57 | 1440.14 | 1664.59 | 1608.26 |
| ENSMUSG00000021747 | 11_49304  | 307.842 | 0.20539  | 0.4386   | 0.785475 | 350.902 | 302.645 | 335.068 | 269.871 | 265.269 | 323.298 |
| ENSMUSG00000021748 | 8_Pdhb    | 1901.49 | 0.04439  | 0.87241  | 0.963879 | 2401.71 | 1693.45 | 1697.06 | 1867.64 | 1963.34 | 1785.78 |
| ENSMUSG00000021749 | 5_Oit1    | 1093.98 | 0.34873  | 0.315316 | 0.696604 | 764.501 | 1452.02 | 1460.24 | 966.417 | 933.164 | 987.527 |
| ENSMUSG00000021750 | 15_Fam1l  | 405.829 | -1.35889 | 0.00086  | 0.01749  | 323.598 | 134.887 | 224.413 | 716.354 | 553.718 | 482.007 |
| ENSMUSG00000021751 | 15_Acox2  | 10.038  | -1.32228 | 0.143792 | 0.513294 | 1.01124 | 7.93452 | 8.27329 | 17.3311 | 6.86782 | 18.81   |
| ENSMUSG00000021752 | 12_Kctd6  | 425.225 | -0.16594 | 0.602265 | 0.870033 | 529.892 | 342.318 | 329.898 | 410.17  | 465.295 | 473.778 |
| ENSMUSG00000021754 | 17_Map3k  | 2188.71 | 0.45467  | 0.076908 | 0.371948 | 2801.15 | 2350.89 | 2439.59 | 1610.15 | 1809.67 | 2120.83 |
| ENSMUSG00000021756 | 12_Il6st  | 4853    | 0.12801  | 0.57749  | 0.857517 | 5674.09 | 4808.32 | 4721.98 | 4620.81 | 4644.36 | 4648.43 |
| ENSMUSG00000021758 | 13_Ddx4   | 4.82106 | 2.85267  | 0.121411 | 0.473806 | 14.1574 | 11.335  | 0       | 0       | 3.43391 | 0       |
| ENSMUSG00000021759 | 13_Ppap2  | 940.582 | -0.32909 | 0.326469 | 0.707805 | 1151.81 | 634.762 | 714.606 | 1010.98 | 1142.63 | 988.703 |
| ENSMUSG00000021760 | 3_Gpx8    | 948.75  | -0.12355 | 0.78928  | 0.937308 | 1554.28 | 547.482 | 622.565 | 914.424 | 1142.63 | 911.112 |
| ENSMUSG00000021763 | 16_BC067  | 487.57  | -1.65292 | 8.85E-06 | 0.00047  | 271.013 | 145.088 | 289.565 | 805.485 | 814.695 | 599.57  |
| ENSMUSG00000021764 | 18_Ndufs4 | 2094.83 | 0.16124  | 0.673967 | 0.900436 | 3358.34 | 1718.39 | 1558.48 | 1873.41 | 2171.09 | 1889.23 |
| ENSMUSG00000021765 | 7_Fst     | 220.331 | -0.76635 | 0.067354 | 0.344377 | 223.485 | 158.69  | 107.553 | 331.768 | 315.92  | 184.574 |
| ENSMUSG00000021767 | 16_Kat6b  | 1382.07 | -0.10605 | 0.639668 | 0.887038 | 1386.42 | 1218.52 | 1388.88 | 1434.36 | 1449.97 | 1414.28 |
| ENSMUSG00000021768 | 15_Dusp1  | 11.3313 | -0.92151 | 0.240292 | 0.631907 | 4.04498 | 10.2015 | 9.30745 | 22.2829 | 6.86782 | 15.2832 |
| ENSMUSG00000021770 | 10_Samd1  | 1140.94 | 0.16098  | 0.699708 | 0.905844 | 1912.26 | 898.868 | 802.509 | 1073.71 | 1231.91 | 926.395 |
| ENSMUSG00000021771 | 13_Vdac2  | 5323.74 | 0.3424   | 0.351943 | 0.728508 | 8631.98 | 4740.31 | 4485.16 | 3913.54 | 5451.33 | 4720.15 |
| ENSMUSG00000021772 | 14_Nkiras | 314.121 | -0.22003 | 0.488792 | 0.814186 | 383.262 | 236.902 | 250.267 | 341.671 | 330.514 | 342.108 |
| ENSMUSG00000021773 | 10_Comtd  | 25.0972 | -0.26595 | 0.718993 | 0.912985 | 6.06747 | 29.4711 | 33.0932 | 42.0899 | 25.7543 | 14.1075 |
| ENSMUSG00000021774 | 12_Ube2e  | 1753.62 | 0.36693  | 0.362695 | 0.735659 | 3097.44 | 1501.89 | 1326.83 | 1417.03 | 1674.89 | 1503.63 |
| ENSMUSG00000021775 | 10_Nr1d2  | 6185.41 | 0.79658  | 0.110135 | 0.450628 | 14297   | 4306.18 | 4949.5  | 3955.63 | 4822.92 | 4781.28 |
| ENSMUSG00000021779 | 16_Thrb   | 629.411 | -0.52752 | 0.174669 | 0.55808  | 753.377 | 332.116 | 461.236 | 732.034 | 859.335 | 638.366 |
| ENSMUSG00000021782 | 14_Dlg5   | 1110.47 | 0.25402  | 0.532159 | 0.837484 | 635.061 | 1476.95 | 1511.94 | 1077.83 | 865.345 | 1095.69 |
| ENSMUSG00000021785 | 7_Ngly1   | 1058.22 | 0.3946   | 0.356178 | 0.731393 | 1938.56 | 867.13  | 800.441 | 845.925 | 1082.54 | 814.71  |
| ENSMUSG00000021786 | 12_Oxsm   | 356.769 | 0.15397  | 0.681209 | 0.902515 | 548.094 | 292.444 | 286.463 | 296.28  | 339.957 | 377.377 |
| ENSMUSG00000021791 | 6_Dydc2   | 0.38486 | 0.16972  | 0.966824 | NA       | 0       | 1.1335  | 0       | 0       | 0       | 1.17563 |
| ENSMUSG00000021792 | 15_Fam2   | 994.859 | -0.83902 | 0.021982 | 0.174026 | 1007.2  | 528.212 | 604.985 | 1504.51 | 1301.45 | 1022.8  |
| ENSMUSG00000021794 | 15_Glud1  | 3674.23 | 0.32962  | 0.32325  | 0.703484 | 5655.89 | 3287.16 | 3333.1  | 2854.69 | 3447.64 | 3466.93 |
| ENSMUSG00000021795 | 9_Sftpd   | 76.0046 | -0.18413 | 0.735723 | 0.920596 | 38.4273 | 47.6071 | 127.202 | 70.9751 | 69.5366 | 102.28  |
| ENSMUSG00000021796 | 14_Bmpr1  | 4163.58 | 0.30773  | 0.521329 | 0.831998 | 8153.66 | 2748.74 | 2915.3  | 3288.79 | 4243.45 | 3631.51 |
| ENSMUSG00000021797 | 1_923011  | 0       | NA       | NA       | NA       | 0       | 0       | 0       | 0       | 0       | 0       |
| ENSMUSG00000021798 | 13_Ldb3   | 335.098 | -0.36956 | 0.541164 | 0.84046  | 505.622 | 97.4812 | 274.053 | 571.928 | 233.506 | 328     |
| ENSMUSG00000021799 | 8_Oprn4   | 45.6893 | -1.86947 | 0.020654 | 0.166169 | 3.03373 | 12.4685 | 43.4348 | 108.939 | 59.2349 | 47.0251 |
| ENSMUSG00000021803 | 9_Cdhr1   | 595.345 | -0.5574  | 0.080749 | 0.382701 | 493.487 | 469.27  | 482.953 | 933.406 | 662.744 | 530.208 |
| ENSMUSG00000021804 | 5_Rgr     | 2742.15 | -2.21849 | 5.25E-05 | 0.001963 | 1642.26 | 396.726 | 870.764 | 6573.45 | 3995.35 | 2974.34 |
| ENSMUSG00000021806 | 3_Nid2    | 460.467 | -1.5236  | 3.25E-06 | 0.00021  | 196.181 | 223.3   | 293.702 | 840.973 | 658.452 | 550.194 |
| ENSMUSG00000021807 | 5_270006  | 2698.46 | 0.21834  | 0.584633 | 0.861277 | 4443.41 | 2247.74 | 2015.58 | 2134.21 | 2979.77 | 2370.07 |
| ENSMUSG00000021809 | 9_Nudt13  | 331.356 | 0.29784  | 0.294059 | 0.67843  | 292.25  | 409.195 | 395.05  | 314.436 | 283.297 | 293.907 |
| ENSMUSG00000021810 | 2_Ecd     | 950.183 | 0.36615  | 0.176598 | 0.560574 | 942.48  | 1221.92 | 1045.54 | 784.028 | 744.3   | 962.839 |
| ENSMUSG00000021811 | 6_Dnajc9  | 872.321 | 0.3152   | 0.38729  | 0.752114 | 1404.62 | 783.251 | 713.571 | 682.517 | 825.855 | 824.115 |
| ENSMUSG00000021814 | 16_Anxa7  | 9113.41 | 0.53889  | 0.023346 | 0.180489 | 10376.4 | 11526.6 | 10484.3 | 6821.04 | 7078.14 | 8393.98 |
| ENSMUSG00000021815 | 3_Mss51   | 21.3976 | 0.36142  | 0.508227 | 0.826685 | 33.3711 | 18.136  | 20.6832 | 23.1082 | 15.4526 | 17.6344 |
| ENSMUSG00000021816 | 10_Ppp3c  | 1836.36 | 0.531    | 0.261947 | 0.651131 | 3804.3  | 1378.34 | 1328.9  | 1364.21 | 1705.79 | 1436.62 |
| ENSMUSG00000021819 | 10_Zswim  | 1461.28 | 0.27827  | 0.646681 | 0.889998 | 366.07  | 2214.86 | 2224.48 | 1568.06 | 1051.63 | 1342.57 |
| ENSMUSG00000021820 | 16_Camk2  | 887.959 | -0.12082 | 0.678789 | 0.901686 | 638.095 | 995.216 | 919.37  | 975.496 | 901.401 | 898.18  |
| ENSMUSG00000021822 | 2_Plau    | 1405.13 | 0.39918  | 0.232687 | 0.624411 | 1266.08 | 2184.26 | 1344.41 | 1067.93 | 1185.56 | 1382.54 |
| ENSMUSG00000021823 | 9_Vcl     | 4576.05 | 0.44587  | 0.112877 | 0.455953 | 4460.6  | 6220.66 | 5151.16 | 3283.01 | 3905.21 | 4435.64 |
| ENSMUSG00000021824 | 12_Ap3m1  | 3573.29 | 0.51867  | 0.297914 | 0.681161 | 7578.26 | 2728.34 | 2319.62 | 2455.24 | 3489.71 | 2868.53 |
| ENSMUSG00000021830 | 13_Txndc  | 917.537 | -0.42678 | 0.352001 | 0.728508 | 1317.65 | 431.865 | 598.78  | 1083.61 | 1146.93 | 926.395 |
| ENSMUSG00000021831 | 8_Ero1l   | 1186.73 | 0.29326  | 0.485248 | 0.813108 | 2087.21 | 978.213 | 855.252 | 935.056 | 1211.31 | 1053.36 |
| ENSMUSG00000021832 | 7_Psmc6   | 2682.27 | 0.43499  | 0.349806 | 0.726601 | 5271.62 | 2130.99 | 1848.05 | 1873.41 | 2685.32 | 2284.24 |
| ENSMUSG00000021835 | 14_Bmp4   | 333.548 | -1.50433 | 0.000766 | 0.016074 | 130.451 | 133.753 | 257.506 | 708.101 | 435.248 | 336.23  |
| ENSMUSG00000021838 | 16_Samd1  | 193.443 | -0.64813 | 0.116611 | 0.464143 | 231.575 | 108.816 | 111.689 | 267.395 | 237.798 | 203.384 |
| ENSMUSG00000021840 | 16_Mapk1  | 2258.79 | 0.56061  | 0.08237  | 0.387193 | 3605.09 | 2354.29 | 2116.93 | 1587.04 | 1904.96 | 1984.46 |
| ENSMUSG00000021843 | 16_Ktn1   | 6558.34 | 0.51391  | 0.223351 | 0.613683 | 12265.4 | 5495.22 | 5381.78 | 4237.05 | 6032.52 | 5938.1  |
| ENSMUSG00000021846 | 8_Peli2   | 1239.7  | 0.2338   | 0.342765 | 0.720325 | 1432.93 | 1178.84 | 1407.49 | 1076.18 | 1095.42 | 1247.34 |
| ENSMUSG00000021848 | 15_Otx2   | 479.495 | -1.31714 | 0.004354 | 0.056381 | 438.88  | 168.892 | 216.14  | 855.003 | 734.856 | 463.197 |
| ENSMUSG00000021850 | 13_17000  | 0.50756 | -0.81123 | 0.79835  | NA       | 1.01124 | 0       | 0       | 0       | 0.85848 | 1.17563 |
| ENSMUSG00000021852 | 13_Slc35f | 0.55019 | -2.51397 | 0.52782  | NA       | 0       | 0       | 0       | 3.30117 | 0       | 0       |
| ENSMUSG00000021866 | 15_Anxa1  | 2532.4  | 0.26328  | 0.490157 | 0.814619 | 1547.2  | 3393.71 | 3347.58 | 2305.04 | 2104.99 | 2495.86 |
| ENSMUSG00000021867 | 16_Tmem   | 181.053 | 0.27436  | 0.397137 | 0.757822 | 242.699 | 158.69  | 193.388 | 160.107 | 188.006 | 143.427 |
| ENSMUSG00000021868 | 6_Ppif    | 301.923 | 0.34099  | 0.360692 | 0.733982 | 223.485 | 460.202 | 328.863 | 307.834 | 226.638 | 264.516 |

|                    |           |         |          |          |          |         |         |         |         |         |         |
|--------------------|-----------|---------|----------|----------|----------|---------|---------|---------|---------|---------|---------|
| ENSMUSG00000021870 | 17_Slmap  | 3848.83 | 0.38958  | 0.340474 | 0.719259 | 6905.79 | 3275.82 | 2914.27 | 2943.82 | 3622.77 | 3430.48 |
| ENSMUSG00000021871 | 17_Pnp    | 1713.44 | 0.79738  | 0.004956 | 0.061803 | 2124.62 | 2597.99 | 1803.58 | 1176.87 | 1443.1  | 1134.48 |
| ENSMUSG00000021872 | 7_Rnase1  | 4.64036 | -1.7912  | 0.095962 | 0.420219 | 3.03373 | 1.1335  | 2.06832 | 6.60234 | 10.3017 | 4.70251 |
| ENSMUSG00000021874 | 12_49334  | 11.166  | 0.097    | 0.890724 | 0.970549 | 17.1912 | 7.93452 | 9.30745 | 10.7288 | 7.72629 | 14.1075 |
| ENSMUSG00000021876 | 14_Rnase  | 1382.33 | -0.06615 | 0.838975 | 0.953167 | 1789.9  | 1079.09 | 1183.08 | 1620.87 | 1424.21 | 1196.79 |
| ENSMUSG00000021877 | 11_Arf4   | 5745.41 | 0.91401  | 0.036028 | 0.237513 | 12244.1 | 5615.37 | 4660.97 | 3318.5  | 4637.49 | 3995.96 |
| ENSMUSG00000021879 | 12_Dnah1  | 5.20923 | 0.0245   | 0.981861 | 0.993958 | 7.07871 | 3.40051 | 5.17081 | 0.82529 | 7.72629 | 7.05377 |
| ENSMUSG00000021880 | 6_Rnase6  | 22.6213 | 2.46524  | 0.000131 | 0.004106 | 44.4948 | 46.4736 | 23.7857 | 3.30117 | 9.44325 | 8.22939 |
| ENSMUSG00000021884 | 17_Hacl1  | 310.827 | -0.49566 | 0.10675  | 0.444057 | 276.07  | 191.562 | 306.112 | 371.382 | 377.73  | 342.108 |
| ENSMUSG00000021886 | 6_Gpr65   | 63.7283 | 1.56721  | 0.000186 | 0.00546  | 130.451 | 86.1462 | 69.2888 | 33.837  | 30.9052 | 31.742  |
| ENSMUSG00000021890 | 5_Eaf1    | 1614.41 | 0.245    | 0.338177 | 0.716348 | 2065.97 | 1616.38 | 1570.89 | 1391.44 | 1526.37 | 1515.38 |
| ENSMUSG00000021891 | 7_Mettl6  | 483.637 | 0.1969   | 0.567888 | 0.852443 | 712.927 | 403.527 | 433.314 | 426.676 | 515.086 | 410.294 |
| ENSMUSG00000021892 | 14_Sh3bp  | 356.208 | -0.23245 | 0.431908 | 0.780264 | 401.464 | 296.978 | 284.394 | 434.929 | 369.145 | 350.337 |
| ENSMUSG00000021893 | 13_Capn7  | 2670.51 | 0.37524  | 0.422537 | 0.774546 | 5164.42 | 2038.04 | 1844.94 | 1853.61 | 2753.14 | 2368.89 |
| ENSMUSG00000021895 | 9_Arhgef3 | 3315.18 | 0.34023  | 0.184834 | 0.571952 | 4143.07 | 3503.66 | 3465.48 | 2548.5  | 2893.93 | 3336.43 |
| ENSMUSG00000021898 | 14_Asb14  | 17.1288 | -0.47766 | 0.583476 | 0.860596 | 30.3373 | 2.26701 | 10.3416 | 21.4576 | 26.6128 | 11.7563 |
| ENSMUSG00000021900 | 10_Btd    | 329.686 | -0.53332 | 0.237534 | 0.630341 | 129.439 | 315.114 | 364.025 | 485.272 | 356.268 | 328     |
| ENSMUSG00000021901 | 10_Bap1   | 890.705 | -0.09155 | 0.820442 | 0.948338 | 460.116 | 1064.36 | 1063.12 | 1057.2  | 822.421 | 877.018 |
| ENSMUSG00000021902 | 6_Phf7    | 188.857 | -0.02342 | 0.941123 | 0.985874 | 228.541 | 168.892 | 164.432 | 163.408 | 219.77  | 188.1   |
| ENSMUSG00000021903 | 11_Galnt1 | 167.149 | 0.23245  | 0.53818  | 0.839833 | 241.687 | 117.884 | 182.012 | 171.661 | 135.639 | 154.007 |
| ENSMUSG00000021904 | 5_Sema3   | 121.493 | -0.79752 | 0.042353 | 0.261021 | 61.6859 | 108.816 | 96.177  | 193.944 | 151.95  | 116.387 |
| ENSMUSG00000021905 | 13_Dph3   | 935.803 | -0.01341 | 0.95739  | 0.98909  | 1067.87 | 819.523 | 906.96  | 949.086 | 974.371 | 897.004 |
| ENSMUSG00000021906 | 13_Oxnad  | 591.764 | 0.11337  | 0.683562 | 0.903102 | 726.073 | 502.142 | 616.36  | 530.663 | 564.019 | 611.326 |
| ENSMUSG00000021907 | 12_Msmb   | 0.19594 | -0.79206 | 0.84609  | NA       | 0       | 0       | 0       | 0       | 0       | 1.17563 |
| ENSMUSG00000021908 | 9_Gm676   | 116.7   | -0.20807 | 0.599225 | 0.869111 | 156.743 | 86.1462 | 81.6988 | 123.794 | 110.744 | 141.075 |
| ENSMUSG00000021910 | 15_Nisch  | 4013.67 | -0.1725  | 0.662128 | 0.895681 | 2002.26 | 4472.8  | 4847.12 | 4445.85 | 4060.6  | 4253.42 |
| ENSMUSG00000021911 | 15_Parg   | 1120.36 | 0.39044  | 0.340539 | 0.719259 | 1992.15 | 951.009 | 869.73  | 817.039 | 1067.09 | 1025.15 |
| ENSMUSG00000021913 | 7_Ogdhl   | 164.473 | -1.66922 | 0.000751 | 0.015879 | 37.416  | 86.1462 | 112.724 | 349.099 | 218.053 | 183.398 |
| ENSMUSG00000021916 | 15_Glt8d1 | 699.796 | -0.21957 | 0.610335 | 0.873966 | 1038.55 | 430.731 | 470.544 | 653.632 | 911.703 | 693.62  |
| ENSMUSG00000021917 | 14_Spcs1  | 2319.72 | 0.13252  | 0.709905 | 0.910052 | 3477.67 | 1984.76 | 1815.99 | 1959.24 | 2499.88 | 2180.79 |
| ENSMUSG00000021918 | 9_Nek4    | 300.412 | 0.07772  | 0.769417 | 0.93151  | 344.834 | 287.91  | 292.668 | 269.045 | 317.636 | 290.38  |
| ENSMUSG00000021919 | 7_Chat    | 2.15665 | -2.36206 | 0.234833 | 0.626451 | 1.01124 | 1.1335  | 0       | 9.07822 | 1.71695 | 0       |
| ENSMUSG00000021922 | 15_Lih4   | 6.68458 | -4.1686  | 0.00134  | 0.024325 | 1.01124 | 1.1335  | 0       | 15.6806 | 12.8772 | 9.40502 |
| ENSMUSG00000021928 | 8_Ebpl    | 214.082 | -0.66897 | 0.402082 | 0.260023 | 205.283 | 131.486 | 159.261 | 307.009 | 259.26  | 222.194 |
| ENSMUSG00000021929 | 8_Kpna3   | 2017.59 | 0.66688  | 0.157775 | 0.535946 | 4311.95 | 1619.78 | 1495.4  | 1317.99 | 1752.15 | 1608.26 |
| ENSMUSG00000021930 | 14_Spryd  | 689.34  | 0.73015  | 0.101455 | 0.433589 | 1413.72 | 639.296 | 527.422 | 460.513 | 618.962 | 476.129 |
| ENSMUSG00000021932 | 13_Rnase  | 546.864 | 0.4493   | 0.296777 | 0.680354 | 1024.39 | 434.132 | 435.382 | 414.297 | 526.246 | 446.739 |
| ENSMUSG00000021933 | 11_Gucy1  | 0.13755 | -0.79206 | 0.84609  | NA       | 0       | 0       | 0       | 0.82529 | 0       | 0       |
| ENSMUSG00000021936 | 13_Mapk8  | 864.582 | 0.38574  | 0.369021 | 0.740777 | 1589.68 | 674.434 | 674.273 | 684.993 | 870.496 | 693.62  |
| ENSMUSG00000021938 | 11_Pspc1  | 823.924 | -0.08094 | 0.776372 | 0.933844 | 963.716 | 717.507 | 720.811 | 718.004 | 897.108 | 926.395 |
| ENSMUSG00000021939 | 7_Ctsb    | 16468.6 | 0.31496  | 0.270775 | 0.657638 | 14101.8 | 22622.5 | 18053.4 | 15117.7 | 14290.2 | 14626   |
| ENSMUSG00000021940 | 9_Ptpn20  | 1.08875 | -1.14092 | 0.604309 | NA       | 2.02249 | 0       | 0       | 2.47588 | 0.85848 | 1.17563 |
| ENSMUSG00000021943 | 6_Gdf10   | 120.374 | -0.37171 | 0.394285 | 0.755773 | 126.406 | 58.9422 | 129.27  | 162.583 | 100.442 | 144.602 |
| ENSMUSG00000021944 | 15_Gata4  | 0.18892 | 1.1315   | 0.781553 | NA       | 0       | 1.1335  | 0       | 0       | 0       | 0       |
| ENSMUSG00000021945 | 8_Zmyrn2  | 2544.05 | 0.35833  | 0.46079  | 0.799907 | 5054.2  | 1752.4  | 1768.42 | 1865.99 | 2693.04 | 2130.24 |
| ENSMUSG00000021947 | 10_Cryl1  | 321.255 | -0.19006 | 0.706734 | 0.908936 | 118.316 | 321.915 | 460.202 | 398.616 | 278.147 | 350.337 |
| ENSMUSG00000021948 | 15_Prkd   | 2424.68 | 0.21983  | 0.573527 | 0.855676 | 1437.99 | 3375.57 | 3013.55 | 2056.63 | 2136.75 | 2527.6  |
| ENSMUSG00000021950 | 15_Anxa8  | 24745.1 | 0.10822  | 0.762747 | 0.929057 | 15775.4 | 31537.5 | 29705.3 | 21028.4 | 23271.6 | 27152.3 |
| ENSMUSG00000021951 | 5_N6amt2  | 307.903 | -0.10254 | 0.70351  | 0.907691 | 250.789 | 332.116 | 308.18  | 312.786 | 329.655 | 313.893 |
| ENSMUSG00000021952 | 15_Xpo4   | 548.351 | 0.25274  | 0.486605 | 0.81371  | 848.434 | 463.603 | 476.748 | 457.212 | 591.491 | 452.617 |
| ENSMUSG00000021953 | 14_Tdh    | 4.73424 | 1.4401   | 0.238084 | 0.630377 | 1.01124 | 12.4685 | 7.23913 | 3.30117 | 0.85848 | 3.52688 |
| ENSMUSG00000021957 | 6_Tkt     | 75512.1 | 0.34839  | 0.574072 | 0.856194 | 18427.9 | 108457  | 126872  | 69630.7 | 49674.1 | 80010.9 |
| ENSMUSG00000021958 | 4_Pinx1   | 384.58  | 0.20792  | 0.464027 | 0.801564 | 393.374 | 460.202 | 382.64  | 311.961 | 331.372 | 427.929 |
| ENSMUSG00000021959 | 15_Lats2  | 1008.56 | 0.04065  | 0.902597 | 0.973635 | 1402.6  | 822.923 | 842.842 | 1096.81 | 991.541 | 894.653 |
| ENSMUSG00000021961 | 5_493057  | 0.66016 | 1.6214   | 0.645133 | NA       | 0       | 0       | 3.10248 | 0       | 0.85848 | 0       |
| ENSMUSG00000021962 | 8_Dcp1a   | 1394.21 | 0.41039  | 0.095497 | 0.419517 | 1405.63 | 1753.53 | 1614.33 | 1093.51 | 1256.81 | 1241.46 |
| ENSMUSG00000021963 | 16_Sap18  | 1469.31 | 0.175    | 0.660253 | 0.895103 | 2389.57 | 1176.58 | 1108.62 | 1165.31 | 1596.77 | 1379.01 |
| ENSMUSG00000021965 | 2_Ska3    | 118.311 | 0.83118  | 0.016402 | 0.141128 | 185.058 | 146.222 | 123.065 | 70.9751 | 98.7249 | 85.8208 |
| ENSMUSG00000021966 | 7_Prss52  | 1.62283 | -0.34385 | 0.837606 | NA       | 0       | 2.26701 | 2.06832 | 1.65058 | 2.57543 | 1.17563 |
| ENSMUSG00000021967 | 3_Mrpl57  | 159.975 | 0.60488  | 0.08767  | 0.401776 | 261.912 | 149.622 | 167.534 | 138.649 | 121.045 | 121.09  |
| ENSMUSG00000021969 | 7_Zdhhc2  | 2707.22 | 0.50732  | 0.26759  | 0.655756 | 5463.75 | 2050.51 | 2020.75 | 2077.26 | 2465.55 | 2165.51 |
| ENSMUSG00000021972 | 14_Hmbo   | 1181.64 | 0.19754  | 0.390147 | 0.753438 | 1325.74 | 1285.39 | 1175.84 | 1036.57 | 1108.29 | 1157.99 |
| ENSMUSG00000021973 | 8_Micu2   | 3285.65 | 0.34174  | 0.362801 | 0.735692 | 5434.43 | 2828.09 | 2756.04 | 2448.64 | 2951.44 | 3295.28 |
| ENSMUSG00000021974 | 14_Fgf9   | 28.2178 | -0.02884 | 0.963775 | 0.99016  | 48.5397 | 24.9371 | 10.3416 | 33.0117 | 26.6128 | 25.8638 |
| ENSMUSG00000021975 | 7_Ints9   | 567.143 | 0.48555  | 0.143836 | 0.513345 | 464.161 | 831.991 | 688.752 | 421.724 | 460.144 | 536.086 |
| ENSMUSG00000021978 | 8_Extl3   | 1460.9  | 0.07415  | 0.854562 | 0.958493 | 784.726 | 1843.08 | 1867.7  | 1594.46 | 1279.99 | 1395.47 |
| ENSMUSG00000021981 | 9_Cab39l  | 4065.93 | 0.37627  | 0.342617 | 0.720325 | 7078.71 | 3271.29 | 3429.28 | 3006.54 | 3974.75 | 3635.04 |
| ENSMUSG00000021982 | 13_Cdadc  | 582.372 | -0.07422 | 0.825103 | 0.949657 | 779.669 | 435.265 | 487.09  | 559.548 | 650.726 | 581.936 |
| ENSMUSG00000021983 | 15_Atp8a  | 45.3195 | -0.75967 | 0.060744 | 0.324854 | 35.3936 | 30.6046 | 35.1615 | 66.8487 | 59.2349 | 44.6739 |
| ENSMUSG00000021986 | 7_Amer2   | 16.6869 | -2.9139  | 0.000391 | 0.009566 | 3.03373 | 6.80102 | 2.06832 | 41.2646 | 35.1976 | 11.7563 |
| ENSMUSG00000021987 | 8_Mtmr6   | 2595.57 | 0.39911  | 0.329299 | 0.709946 | 4639.59 | 2193.33 | 2023.85 | 1908.9  | 2550.54 | 2257.21 |
| ENSMUSG00000021990 | 15_Spata  | 476.113 | -0.80279 | 0.006463 | 0.074207 | 347.868 | 333.25  | 359.888 | 756.793 | 491.049 | 567.828 |
| ENSMUSG00000021991 | 8_Cacna2  | 109.878 | -0.63126 | 0.069337 | 0.350486 | 102.136 | 61.2092 | 95.1429 | 136.999 | 135.639 | 128.143 |
| ENSMUSG00000021993 | 9_Mipep   | 464.025 | 0.14852  | 0.558394 | 0.848273 | 546.072 | 474.938 | 442.621 | 415.947 | 469.587 | 434.982 |
| ENSMUSG00000021994 | 14_Wnt5a  | 1700.14 | -0.21158 | 0.581994 | 0.860386 | 2399.68 | 1065.49 | 1261.68 | 1785.11 | 1865.47 | 1823.4  |

|                    |            |         |          |          |          |         |         |         |         |         |         |
|--------------------|------------|---------|----------|----------|----------|---------|---------|---------|---------|---------|---------|
| ENSMUSG00000021996 | 16_Esd     | 2666.54 | 0.16402  | 0.574812 | 0.856635 | 3505.98 | 2706.8  | 2241.03 | 2284.41 | 2787.47 | 2473.52 |
| ENSMUSG00000021997 | 4_Lrrc63   | 0.69454 | 3.00678  | 0.371611 | NA       | 3.03373 | 1.1335  | 0       | 0       | 0       | 0       |
| ENSMUSG00000021998 | 16_Lcp1    | 652.44  | 1.30996  | 0.000459 | 0.010945 | 898.996 | 1292.19 | 598.78  | 379.634 | 424.088 | 320.946 |
| ENSMUSG00000021999 | 8_Cpb2     | 0.35746 | 2.04359  | 0.612655 | NA       | 1.01124 | 1.1335  | 0       | 0       | 0       | 0       |
| ENSMUSG00000022000 | 10_Zc3h1   | 1229.06 | 0.11912  | 0.636642 | 0.885362 | 1261.02 | 1293.33 | 1284.43 | 999.429 | 1192.42 | 1343.74 |
| ENSMUSG00000022003 | 6_Slc25a3  | 102.712 | -0.16347 | 0.667794 | 0.898163 | 63.7084 | 126.952 | 100.314 | 111.414 | 111.602 | 102.28  |
| ENSMUSG00000022008 | 3_Gpalpp   | 1584.85 | 0.26512  | 0.524877 | 0.833133 | 2765.75 | 1181.11 | 1243.06 | 1239.59 | 1551.27 | 1528.32 |
| ENSMUSG00000022009 | 1_Nufip1   | 346.579 | 0.49425  | 0.257752 | 0.648651 | 645.174 | 304.912 | 265.78  | 225.305 | 327.938 | 310.366 |
| ENSMUSG00000022010 | 19_Tsc22   | 4385.84 | -0.67454 | 0.07776  | 0.374151 | 5102.74 | 2280.61 | 2752.94 | 5541.84 | 5738.06 | 4898.84 |
| ENSMUSG00000022012 | 8_Enox1    | 17.9427 | -0.29729 | 0.608283 | 0.872658 | 20.2249 | 15.869  | 12.4099 | 24.7588 | 21.4619 | 12.9319 |
| ENSMUSG00000022013 | 3_Dnajc1f  | 446.991 | 0.31844  | 0.375739 | 0.745495 | 697.759 | 442.066 | 348.512 | 369.731 | 442.974 | 380.903 |
| ENSMUSG00000022014 | 14_Epsti1  | 377.956 | 2.09797  | 7.15E-12 | 1.97E-09 | 725.062 | 638.162 | 474.68  | 132.047 | 139.073 | 158.71  |
| ENSMUSG00000022015 | 8_Tnfsf11  | 1.59329 | 3.09994  | 0.180132 | NA       | 3.03373 | 5.66751 | 0       | 0       | 0.85848 | 0       |
| ENSMUSG00000022016 | 15_Akap1   | 1706.53 | -0.09438 | 0.824743 | 0.949368 | 2703.06 | 1141.44 | 1107.59 | 1710.01 | 1900.67 | 1676.45 |
| ENSMUSG00000022018 | 7_Rgcc     | 55.3081 | -0.10969 | 0.785519 | 0.936103 | 55.6184 | 38.5391 | 65.1522 | 57.7705 | 48.9332 | 65.8352 |
| ENSMUSG00000022019 | 15_Tdrd3   | 843.574 | 0.15012  | 0.701609 | 0.906669 | 1354.06 | 682.369 | 625.668 | 708.101 | 885.948 | 805.305 |
| ENSMUSG00000022020 | 14_Naa16   | 256.524 | 0.33372  | 0.448563 | 0.791834 | 447.981 | 221.033 | 189.252 | 199.721 | 291.882 | 189.276 |
| ENSMUSG00000022021 | 13_Diap3   | 558.407 | 0.92049  | 0.036556 | 0.239348 | 1161.92 | 578.086 | 451.929 | 292.979 | 435.248 | 430.28  |
| ENSMUSG00000022022 | 2_Mtrf1    | 134.707 | -0.29445 | 0.449911 | 0.79287  | 169.889 | 77.0782 | 115.826 | 150.203 | 145.941 | 149.305 |
| ENSMUSG00000022023 | 5_Wbp4     | 1200.84 | 0.20761  | 0.542706 | 0.84123  | 1794.96 | 1034.89 | 1031.06 | 981.273 | 1146.07 | 1216.77 |
| ENSMUSG00000022024 | 9_Sugt1    | 1222.23 | 0.2731   | 0.519884 | 0.831665 | 2170.13 | 963.477 | 879.037 | 1048.95 | 1230.2  | 1041.61 |
| ENSMUSG00000022025 | 13_Lect1   | 55.2404 | -1.52357 | 0.002568 | 0.039049 | 42.4723 | 18.136  | 24.8199 | 113.89  | 59.2349 | 72.8889 |
| ENSMUSG00000022026 | 6_Olfm4    | 193.64  | -0.70878 | 0.107165 | 0.445357 | 195.17  | 77.0782 | 168.568 | 193.118 | 302.184 | 225.721 |
| ENSMUSG00000022031 | 5_Elp3     | 1088.11 | -0.11795 | 0.657026 | 0.894491 | 845.4   | 1133.5  | 1152.06 | 1139.73 | 1067.09 | 1190.91 |
| ENSMUSG00000022032 | 14_Scaraf  | 802.372 | 0.09467  | 0.82439  | 0.949196 | 1288.33 | 485.139 | 712.537 | 933.406 | 685.923 | 708.904 |
| ENSMUSG00000022033 | 9_Pbk      | 371.362 | 0.58958  | 0.160715 | 0.539243 | 673.489 | 389.925 | 275.087 | 237.684 | 354.551 | 297.434 |
| ENSMUSG00000022034 | 9_Esco2    | 251.258 | 1.06058  | 0.038201 | 0.245561 | 599.668 | 227.834 | 191.32  | 120.493 | 196.591 | 171.642 |
| ENSMUSG00000022035 | 5_Ccdc25   | 1638.39 | 0.54223  | 0.096737 | 0.42186  | 2515.98 | 1895.22 | 1416.8  | 1147.16 | 1503.19 | 1351.97 |
| ENSMUSG00000022037 | 14_Clu     | 12759.1 | -0.40833 | 0.3988   | 0.759197 | 4593.07 | 15726.2 | 12577.5 | 18536.9 | 11458.1 | 13663.1 |
| ENSMUSG00000022039 | 5_Adam2    | 0.3409  | 1.98467  | 0.623395 | NA       | 1.01124 | 0       | 1.03416 | 0       | 0       | 0       |
| ENSMUSG00000022040 | 7_Ephx2    | 1689.36 | 0.27841  | 0.312436 | 0.694132 | 2272.27 | 1658.31 | 1624.67 | 1388.97 | 1581.31 | 1610.61 |
| ENSMUSG00000022041 | 10_Chrrna  | 12.8791 | -0.20493 | 0.776116 | 0.933817 | 8.08995 | 13.602  | 14.4783 | 20.6323 | 14.5941 | 5.87814 |
| ENSMUSG00000022043 | 18_Trim3f  | 806.714 | -0.86227 | 0.005904 | 0.069536 | 646.185 | 451.134 | 620.497 | 1266    | 1014.72 | 841.75  |
| ENSMUSG00000022044 | 14_Stmn4   | 6.69937 | -2.42844 | 0.014776 | 0.131656 | 3.03373 | 2.26701 | 1.03416 | 16.5058 | 10.3017 | 7.05377 |
| ENSMUSG00000022048 | 8_Dpysl2   | 293.132 | -0.51223 | 0.248865 | 0.640276 | 387.307 | 158.69  | 178.91  | 347.448 | 417.22  | 269.219 |
| ENSMUSG00000022051 | 15_Bnip3l  | 6527.27 | 0.19403  | 0.627946 | 0.881137 | 10932.6 | 4976.08 | 4987.76 | 5493.97 | 6555.33 | 6217.9  |
| ENSMUSG00000022052 | 8_Ppp2r2i  | 2507.1  | 0.62545  | 0.108779 | 0.448862 | 4569.81 | 2490.31 | 2066.25 | 1635.73 | 2224.31 | 2056.17 |
| ENSMUSG00000022053 | 13_Ebf2    | 63.351  | -0.11817 | 0.849016 | 0.956543 | 109.214 | 18.136  | 54.8106 | 77.5775 | 59.2349 | 61.1326 |
| ENSMUSG00000022054 | 11_Nefm    | 46.4768 | -0.60473 | 0.128245 | 0.486444 | 42.4723 | 36.2721 | 32.059  | 64.3728 | 56.6595 | 47.0251 |
| ENSMUSG00000022055 | 7_Nefl     | 46.3002 | -1.24175 | 0.089966 | 0.408797 | 54.6072 | 12.4685 | 15.5124 | 108.939 | 59.2349 | 27.0394 |
| ENSMUSG00000022056 | 8_Adam7    | 17.3812 | -1.58547 | 0.02389  | 0.18328  | 16.1799 | 5.66751 | 4.13665 | 33.0117 | 20.6034 | 24.6882 |
| ENSMUSG00000022057 | 7_Adamd8   | 284.69  | 0.85038  | 0.0657   | 0.340069 | 596.634 | 215.366 | 286.463 | 155.155 | 233.506 | 221.018 |
| ENSMUSG00000022061 | 8_Nkx3-1   | 2.00008 | -2.27602 | 0.207997 | 0.599354 | 2.02249 | 0       | 0       | 2.47588 | 5.15086 | 2.35126 |
| ENSMUSG00000022064 | 9_Pibf1    | 244.134 | 0.13024  | 0.771319 | 0.932465 | 419.666 | 191.562 | 154.09  | 218.702 | 251.534 | 229.247 |
| ENSMUSG00000022066 | 16_Gm21b   | 389.833 | -0.52615 | 0.110099 | 0.450628 | 218.429 | 377.456 | 362.991 | 497.651 | 449.842 | 432.631 |
| ENSMUSG00000022070 | 6_Bora     | 158.085 | 0.61585  | 0.064887 | 0.337359 | 220.451 | 196.096 | 157.193 | 97.3845 | 143.366 | 134.022 |
| ENSMUSG00000022074 | 5_Tnfrsf1f | 227.476 | -0.07948 | 0.769223 | 0.931453 | 198.204 | 235.769 | 229.584 | 212.1   | 244.666 | 244.531 |
| ENSMUSG00000022075 | 6_Rhobtb2  | 424.192 | -0.85489 | 0.006733 | 0.075998 | 222.474 | 346.852 | 337.137 | 625.572 | 487.615 | 525.506 |
| ENSMUSG00000022076 | 9_Klhl1    | 5.76136 | -1.25853 | 0.311096 | 0.693311 | 9.1012  | 0       | 1.03416 | 8.25292 | 10.3017 | 5.87814 |
| ENSMUSG00000022085 | 3_Pebp4    | 5.69552 | -1.61834 | 0.092198 | 0.413496 | 4.04498 | 2.26701 | 2.06832 | 11.5541 | 6.00934 | 8.22939 |
| ENSMUSG00000022089 | 8_Bin3     | 418.959 | 0.23753  | 0.52969  | 0.83618  | 286.182 | 630.228 | 443.655 | 355.701 | 357.126 | 440.86  |
| ENSMUSG00000022090 | 10_Pdlim2  | 867.569 | 0.518    | 0.381514 | 0.748946 | 259.89  | 1457.68 | 1347.51 | 860.78  | 536.548 | 742.997 |
| ENSMUSG00000022091 | 5_Sorbs3   | 553.36  | -0.81123 | 0.126629 | 0.483956 | 154.72  | 388.791 | 661.863 | 927.629 | 551.142 | 636.015 |
| ENSMUSG00000022092 | 10_Ppp3c   | 160.607 | -0.73888 | 0.091077 | 0.411243 | 191.125 | 86.1462 | 83.7671 | 224.48  | 211.185 | 166.939 |
| ENSMUSG00000022094 | 15_Slc39a1 | 380.152 | -0.0407  | 0.885684 | 0.968893 | 364.048 | 442.066 | 318.522 | 357.352 | 430.955 | 367.972 |
| ENSMUSG00000022095 | 9_Fam16f   | 828.832 | 0.36447  | 0.471069 | 0.804868 | 340.789 | 1250.25 | 1207.9  | 790.63  | 586.34  | 797.076 |
| ENSMUSG00000022096 | 14_Hr      | 2671.71 | 0.69947  | 0.254224 | 0.645159 | 783.714 | 4723.31 | 4413.8  | 2034.35 | 1408.76 | 2666.32 |
| ENSMUSG00000022097 | 3_Sftpc    | 0.2751  | -1.54073 | 0.703687 | NA       | 0       | 0       | 0       | 1.65058 | 0       | 0       |
| ENSMUSG00000022098 | 9_Bmp1     | 866.353 | -0.26419 | 0.580353 | 0.859474 | 324.609 | 896.601 | 1140.68 | 1097.64 | 831.006 | 907.585 |
| ENSMUSG00000022099 | 16_Dmtn    | 80.9979 | -0.48398 | 0.299447 | 0.682414 | 35.3936 | 82.7457 | 84.8012 | 118.842 | 90.1401 | 74.0646 |
| ENSMUSG00000022100 | 13_Xpo7    | 2153.42 | 0.15105  | 0.576739 | 0.857002 | 2734.4  | 2069.78 | 1993.86 | 1862.68 | 2238.91 | 2020.9  |
| ENSMUSG00000022101 | 5_Fgf17    | 1.72175 | 0.80114  | 0.650134 | 0.891567 | 1.01124 | 4.53401 | 1.03416 | 0       | 2.57543 | 1.17563 |
| ENSMUSG00000022102 | 13_Dok2    | 39.509  | 1.23479  | 0.048964 | 0.28584  | 23.2586 | 97.4812 | 45.5031 | 23.9335 | 16.3111 | 30.5663 |
| ENSMUSG00000022103 | 9_Gfra2    | 106.693 | -1.20122 | 0.004322 | 0.056176 | 54.6072 | 44.2066 | 95.1429 | 180.739 | 127.913 | 137.548 |
| ENSMUSG00000022105 | 6_Rb1      | 1387.56 | 0.6402   | 0.168637 | 0.54995  | 2887.1  | 1132.37 | 1051.74 | 873.159 | 1246.51 | 1134.48 |
| ENSMUSG00000022106 | 14_Rcbtb2  | 1536.51 | -0.17425 | 0.628183 | 0.881165 | 2104.4  | 1077.96 | 1148.95 | 1532.57 | 1772.75 | 1582.4  |
| ENSMUSG00000022108 | 7_Iitm2b   | 26288.6 | 0.54978  | 0.068707 | 0.348694 | 41033.3 | 27503.3 | 25176.7 | 20018.3 | 21519.4 | 22480.4 |
| ENSMUSG00000022109 | 5_Med4     | 546.324 | 0.09707  | 0.701917 | 0.90691  | 593.6   | 564.484 | 535.696 | 456.387 | 562.302 | 565.477 |
| ENSMUSG00000022110 | 13_Sucla2  | 1909.83 | 0.19042  | 0.672952 | 0.90042  | 3447.33 | 1401.01 | 1258.57 | 1608.49 | 1994.24 | 1749.33 |
| ENSMUSG00000022111 | 8_Uchl3    | 908.813 | 0.50217  | 0.228631 | 0.61986  | 1677.65 | 841.059 | 677.376 | 651.156 | 856.76  | 748.875 |
| ENSMUSG00000022112 | 14_Gpc5    | 0.44364 | -0.57976 | 0.883757 | NA       | 1.01124 | 0       | 0       | 1.65058 | 0       | 0       |
| ENSMUSG00000022113 | 6_Trim52   | 0.18892 | 1.1315   | 0.781553 | NA       | 0       | 1.1335  | 0       | 0       | 0       | 0       |
| ENSMUSG00000022114 | 4_Spry2    | 509.966 | 0.25722  | 0.346019 | 0.723239 | 656.298 | 482.872 | 526.388 | 473.718 | 423.229 | 497.291 |
| ENSMUSG00000022119 | 15_Rbm2l   | 1874.06 | 0.53402  | 0.230021 | 0.621014 | 3676.88 | 1517.76 | 1456.1  | 1239.59 | 1728.11 | 1625.89 |
| ENSMUSG00000022120 | 3_Rnf219   | 320.983 | 0.22321  | 0.496465 | 0.818867 | 457.082 | 267.507 | 312.317 | 270.696 | 296.175 | 322.122 |

|                    |            |         |          |          |          |         |         |         |         |         |         |
|--------------------|------------|---------|----------|----------|----------|---------|---------|---------|---------|---------|---------|
| ENSMUSG00000022122 | 14_Ednrb   | 2339.57 | -1.59174 | 0.001392 | 0.024953 | 2060.92 | 583.754 | 852.149 | 4070.34 | 3673.42 | 2796.82 |
| ENSMUSG00000022123 | 8_Scel     | 14416.3 | 0.59229  | 0.159421 | 0.537367 | 27676.7 | 12397.1 | 11930.1 | 9253.18 | 12751   | 12489.9 |
| ENSMUSG00000022124 | 14_Fbxl3   | 2330.62 | 0.07871  | 0.840624 | 0.953262 | 3710.26 | 1668.52 | 1803.58 | 2191.15 | 2356.52 | 2253.68 |
| ENSMUSG00000022125 | 6_Cln5     | 898.378 | 0.05096  | 0.897854 | 0.971722 | 1412.71 | 695.971 | 633.941 | 821.991 | 980.381 | 845.276 |
| ENSMUSG00000022126 | 6_Irg1     | 103.472 | 7.34621  | 1.99E-16 | 1.23E-13 | 134.495 | 334.383 | 147.885 | 0       | 1.71695 | 2.35126 |
| ENSMUSG00000022129 | 3_Dct      | 26515.6 | -1.75571 | 5.90E-07 | 4.87E-05 | 14156.4 | 8043.34 | 14148.4 | 47143.2 | 43772   | 31830.1 |
| ENSMUSG00000022130 | 9_Tgds     | 446.828 | -0.15994 | 0.57032  | 0.853903 | 518.768 | 385.391 | 361.957 | 457.212 | 485.039 | 472.602 |
| ENSMUSG00000022131 | 2_Gpr180   | 994.874 | -0.92794 | 0.004329 | 0.056185 | 524.836 | 714.107 | 818.022 | 1580.43 | 1303.17 | 1028.67 |
| ENSMUSG00000022132 | 15_Cldn1f  | 356.463 | -1.65005 | 0.00041  | 0.009946 | 285.171 | 104.282 | 127.202 | 699.023 | 479.889 | 443.212 |
| ENSMUSG00000022136 | 7_Dnajc3   | 4477.43 | 0.25915  | 0.466688 | 0.803611 | 7074.67 | 3962.73 | 3597.85 | 3722.07 | 4282.08 | 4225.21 |
| ENSMUSG00000022139 | 16_Mbnl2   | 7385.07 | 0.66394  | 0.097621 | 0.423879 | 14171.6 | 6385.02 | 6608.29 | 5022.73 | 6218.81 | 5904    |
| ENSMUSG00000022141 | 6_Nipbl    | 3490.17 | 0.47933  | 0.255318 | 0.646363 | 6458.82 | 2968.64 | 2766.38 | 2333.1  | 3370.38 | 3043.7  |
| ENSMUSG00000022142 | 7_Nup155   | 1099.93 | 0.46289  | 0.166133 | 0.545562 | 1697.88 | 1123.3  | 1003.14 | 749.365 | 1020.73 | 1005.16 |
| ENSMUSG00000022144 | 3_Gdnf     | 64.1721 | 0.19998  | 0.576222 | 0.856895 | 61.6859 | 63.4762 | 80.6646 | 66.0234 | 53.2256 | 59.957  |
| ENSMUSG00000022146 | 12_Osmr    | 4466.96 | 0.9953   | 0.004625 | 0.059057 | 7947.37 | 5482.75 | 4417.94 | 2256.35 | 3360.94 | 3336.43 |
| ENSMUSG00000022148 | 15_Fyb     | 103.737 | 1.46542  | 0.00015  | 0.004608 | 143.597 | 174.559 | 139.612 | 70.1499 | 59.2349 | 35.2688 |
| ENSMUSG00000022149 | 17_C9      | 0.18892 | 1.1315   | 0.781553 | NA       | 0       | 1.1335  | 0       | 0       | 0       | 0       |
| ENSMUSG00000022150 | 16_Dab2    | 843.904 | -0.31821 | 0.405334 | 0.763962 | 1122.48 | 552.016 | 579.13  | 959.815 | 1048.2  | 801.778 |
| ENSMUSG00000022151 | 16_Ttc33   | 551.099 | 0.09487  | 0.810781 | 0.94579  | 876.749 | 393.326 | 437.45  | 576.879 | 510.794 | 511.398 |
| ENSMUSG00000022156 | 7_Gzme     | 1.11313 | 3.67873  | 0.214568 | NA       | 1.01124 | 5.66751 | 0       | 0       | 0       | 0       |
| ENSMUSG00000022157 | 17_Mcpt8   | 0.36128 | 2.05714  | 0.610196 | NA       | 0       | 1.1335  | 1.03416 | 0       | 0       | 0       |
| ENSMUSG00000022159 | 16_Rab2b   | 510.775 | -0.33367 | 0.324212 | 0.704851 | 615.848 | 324.182 | 415.733 | 589.259 | 581.189 | 538.438 |
| ENSMUSG00000022160 | 17_Mettl3  | 403.588 | -0.10108 | 0.749176 | 0.924897 | 286.182 | 461.336 | 420.904 | 363.129 | 454.993 | 434.982 |
| ENSMUSG00000022174 | 8_Dad1     | 1162.82 | -0.1909  | 0.735398 | 0.920521 | 307.418 | 1489.42 | 1461.27 | 1469.02 | 968.362 | 1281.43 |
| ENSMUSG00000022175 | 8_Lrp10    | 1902.97 | 0.45582  | 0.443772 | 0.788345 | 531.915 | 3256.55 | 2814.99 | 1860.21 | 1298.88 | 1655.28 |
| ENSMUSG00000022176 | 11_Rem2    | 1.85551 | -1.35124 | 0.42544  | 0.777104 | 2.02249 | 1.1335  | 0       | 1.65058 | 5.15086 | 1.17563 |
| ENSMUSG00000022177 | 8_Haus4    | 175.285 | 0.04616  | 0.916022 | 0.976753 | 92.0232 | 199.497 | 243.028 | 200.546 | 170.837 | 145.778 |
| ENSMUSG00000022178 | 10_Ajuba   | 1639.14 | 0.41223  | 0.167216 | 0.547946 | 1357.09 | 2226.2  | 2032.13 | 1416.2  | 1401.89 | 1401.35 |
| ENSMUSG00000022179 | 4_493141   | 146.824 | 0.24192  | 0.47047  | 0.804531 | 132.473 | 158.69  | 186.149 | 158.456 | 106.451 | 138.724 |
| ENSMUSG00000022180 | 6_Slc7a8   | 1506.93 | -1.52246 | 8.28E-06 | 0.000449 | 555.173 | 765.114 | 1014.51 | 2706.96 | 2007.12 | 1992.69 |
| ENSMUSG00000022181 | 15_C6      | 9.78603 | 1.99378  | 0.012048 | 0.115028 | 15.1687 | 10.2015 | 21.7174 | 4.12646 | 5.15086 | 2.35126 |
| ENSMUSG00000022184 | 8_Fbxo4    | 447.637 | 0.20703  | 0.553159 | 0.845971 | 663.376 | 410.328 | 365.059 | 356.526 | 434.389 | 456.144 |
| ENSMUSG00000022185 | 18_Acin1   | 3211.78 | 0.23471  | 0.535939 | 0.83864  | 1944.62 | 4388.92 | 4083.9  | 2907.5  | 2833.83 | 3111.89 |
| ENSMUSG00000022186 | 14_Oxct1   | 8066.7  | -0.15756 | 0.664328 | 0.896403 | 11143.9 | 5335.4  | 6400.43 | 7986.35 | 9229.49 | 8304.63 |
| ENSMUSG00000022187 | 2_Gm554l   | 1.01512 | -0.96729 | 0.708195 | NA       | 2.02249 | 0       | 0       | 0       | 1.71695 | 2.35126 |
| ENSMUSG00000022191 | 15_Drosh;  | 1522.36 | -0.00606 | 0.980774 | 0.993796 | 1298.44 | 1678.72 | 1580.2  | 1441.79 | 1490.32 | 1644.7  |
| ENSMUSG00000022193 | 6_Psmb5    | 1165.81 | 0.08942  | 0.86783  | 0.962942 | 393.374 | 1609.57 | 1602.95 | 1380.71 | 858.477 | 1149.76 |
| ENSMUSG00000022194 | 15_Pabpn   | 1524.29 | -0.17438 | 0.606363 | 0.871807 | 915.176 | 1724.06 | 1657.76 | 1575.48 | 1615.65 | 1657.64 |
| ENSMUSG00000022195 | 6_603045   | 1531.96 | 0.27124  | 0.330015 | 0.710342 | 2074.06 | 1413.48 | 1538.83 | 1294.06 | 1437.09 | 1434.27 |
| ENSMUSG00000022197 | 15_Pdzd2   | 3372.05 | 0.45231  | 0.101813 | 0.434051 | 3097.44 | 4101.01 | 4490.33 | 2772.98 | 2617.5  | 3153.03 |
| ENSMUSG00000022199 | 10_Slc22e1 | 535.49  | -1.45113 | 0.023082 | 0.179251 | 70.7871 | 255.038 | 534.662 | 1083.61 | 638.707 | 630.137 |
| ENSMUSG00000022200 | 7_Golph3   | 6006.18 | 0.56136  | 0.134851 | 0.498671 | 10596.8 | 5639.18 | 5244.23 | 4054.66 | 5319.98 | 5182.17 |
| ENSMUSG00000022201 | 15_Zfr     | 3547.56 | 0.20161  | 0.603791 | 0.871008 | 5823.76 | 2802.02 | 2759.14 | 2952.07 | 3566.11 | 3382.28 |
| ENSMUSG00000022203 | 6_Efs      | 379.177 | -0.02541 | 0.964711 | 0.99063  | 109.214 | 469.27  | 549.14  | 485.272 | 282.439 | 379.728 |
| ENSMUSG00000022204 | 8_Ngdn     | 518.361 | -0.17938 | 0.637255 | 0.885525 | 279.103 | 621.16  | 558.447 | 585.132 | 509.077 | 557.248 |
| ENSMUSG00000022205 | 15_Sub1    | 4817.07 | 0.24568  | 0.566565 | 0.85205  | 8566.25 | 3661.21 | 3451    | 3878.05 | 4745.66 | 4600.23 |
| ENSMUSG00000022206 | 6_Npr3     | 1378.83 | -1.09765 | 0.028148 | 0.20284  | 1539.11 | 427.331 | 668.068 | 1874.24 | 2262.95 | 1501.28 |
| ENSMUSG00000022208 | 11_Jph4    | 149.43  | -0.97726 | 0.00776  | 0.084089 | 96.0682 | 69.1437 | 136.509 | 198.895 | 181.997 | 213.964 |
| ENSMUSG00000022209 | 12_Dhrs2   | 2.03464 | -2.28738 | 0.189306 | 0.577749 | 1.01124 | 0       | 1.03416 | 5.77705 | 0.85848 | 3.52688 |
| ENSMUSG00000022210 | 6_Dhrs4    | 403.918 | 0.04108  | 0.89008  | 0.97035  | 319.553 | 427.331 | 481.919 | 358.177 | 399.192 | 437.334 |
| ENSMUSG00000022211 | 8_Lrrc16b  | 34.7895 | -1.52738 | 0.013046 | 0.121604 | 8.08995 | 14.7355 | 31.0248 | 72.6257 | 44.6408 | 37.6201 |
| ENSMUSG00000022212 | 15_Cpne6   | 4.56996 | -3.58574 | 0.027286 | 0.199275 | 1.01124 | 1.1335  | 0       | 19.807  | 4.29238 | 1.17563 |
| ENSMUSG00000022214 | 14_Dcaf1f  | 2693.62 | -0.12309 | 0.729324 | 0.917707 | 1568.44 | 2965.24 | 3202.8  | 2985.08 | 2617.5  | 2822.68 |
| ENSMUSG00000022215 | 5_Fitm1    | 16.8316 | -2.44334 | 0.013921 | 0.126833 | 2.02249 | 2.26701 | 11.3758 | 56.1199 | 6.86782 | 22.3369 |
| ENSMUSG00000022216 | 16_Psme1   | 4313.02 | 0.88455  | 0.002803 | 0.041483 | 4437.34 | 6967.64 | 5380.74 | 2646.71 | 3103.39 | 3342.31 |
| ENSMUSG00000022217 | 14_Emc9    | 183.404 | 0.07433  | 0.817366 | 0.947736 | 168.878 | 168.892 | 226.481 | 203.847 | 144.224 | 188.1   |
| ENSMUSG00000022218 | 15_Tgm1    | 674.433 | 0.24235  | 0.671215 | 0.899694 | 202.249 | 1144.84 | 845.944 | 711.402 | 552.001 | 590.165 |
| ENSMUSG00000022219 | 9_Cideb    | 12.2342 | -1.2886  | 0.086302 | 0.398033 | 3.03373 | 7.93452 | 10.3416 | 20.6323 | 10.3017 | 21.1613 |
| ENSMUSG00000022220 | 13_Adcy4   | 80.676  | 0.21822  | 0.68712  | 0.904573 | 33.3711 | 114.484 | 112.724 | 96.5592 | 66.9612 | 59.957  |
| ENSMUSG00000022221 | 13_Ripk3   | 382.37  | 1.54312  | 0.005379 | 0.065076 | 201.238 | 991.815 | 515.012 | 153.504 | 216.336 | 216.316 |
| ENSMUSG00000022223 | 8_Sdr39u   | 972.022 | 0.38334  | 0.15218  | 0.526432 | 895.962 | 1216.25 | 1189.29 | 914.424 | 802.676 | 813.534 |
| ENSMUSG00000022225 | 6_Cma1     | 95.4014 | -0.88789 | 0.021288 | 0.17017  | 60.6747 | 80.4787 | 59.9814 | 165.884 | 99.5833 | 105.807 |
| ENSMUSG00000022226 | 5_Mcpt2    | 3.97144 | -0.36278 | 0.781652 | 0.935592 | 8.08995 | 2.26701 | 0       | 3.30117 | 4.29238 | 5.87814 |
| ENSMUSG00000022227 | 4_Mcpt1    | 5.95673 | 1.52548  | 0.104536 | 0.439595 | 7.07871 | 10.2015 | 9.30745 | 1.65058 | 5.15086 | 2.35126 |
| ENSMUSG00000022228 | 13_Zscan4  | 1798.27 | 0.04622  | 0.89816  | 0.97174  | 2635.3  | 1319.4  | 1526.42 | 1654.71 | 2011.41 | 1642.35 |
| ENSMUSG00000022229 | 2_Atp12a   | 5.15331 | 1.38346  | 0.171626 | 0.554434 | 6.06747 | 7.93452 | 8.27329 | 0.82529 | 4.29238 | 3.52688 |
| ENSMUSG00000022231 | 9_Sema5a   | 2303.81 | 0.40902  | 0.300505 | 0.683516 | 4066.21 | 1853.28 | 1964.91 | 1749.62 | 2125.59 | 2063.23 |
| ENSMUSG00000022234 | 14_Cct5    | 4872.27 | 0.02843  | 0.921196 | 0.977759 | 3677.9  | 5804.67 | 5278.36 | 4791.65 | 4665.82 | 5015.23 |
| ENSMUSG00000022235 | 14_Cmb1    | 322.496 | -0.6645  | 0.032764 | 0.223702 | 299.328 | 192.695 | 256.472 | 384.586 | 451.559 | 350.337 |
| ENSMUSG00000022236 | 9_Ropn1l   | 27.8228 | 0.33688  | 0.518649 | 0.831665 | 18.2024 | 41.9396 | 33.0932 | 27.2346 | 20.6034 | 25.8638 |
| ENSMUSG00000022237 | 16_Ankrd1  | 149.285 | -1.26344 | 0.029747 | 0.210859 | 142.585 | 70.2772 | 50.6739 | 329.292 | 211.185 | 91.699  |
| ENSMUSG00000022240 | 9_Ctnnd2   | 78.0497 | -1.33098 | 0.000743 | 0.015752 | 46.5172 | 34.0051 | 52.7422 | 113.89  | 136.498 | 84.6452 |
| ENSMUSG00000022241 | 5_Tars     | 1689.79 | 0.3958   | 0.115252 | 0.461441 | 1991.14 | 2157.06 | 1612.26 | 1422.8  | 1467.14 | 1488.34 |
| ENSMUSG00000022243 | 10_Slc45a1 | 531.055 | -1.46106 | 1.32E-05 | 0.000664 | 337.756 | 204.031 | 307.146 | 872.334 | 849.034 | 616.029 |
| ENSMUSG00000022244 | 6_Amacr    | 119.054 | -0.28204 | 0.374833 | 0.744881 | 115.282 | 105.416 | 101.348 | 135.348 | 106.451 | 150.48  |

|                    |            |         |          |          |          |         |         |         |         |         |         |
|--------------------|------------|---------|----------|----------|----------|---------|---------|---------|---------|---------|---------|
| ENSMUSG00000022245 | 15_Skor1   | 0.526   | 2.60438  | 0.478686 | NA       | 2.02249 | 1.1335  | 0       | 0       | 0       | 0       |
| ENSMUSG00000022246 | 13_Rai14   | 1486.09 | 0.09032  | 0.716513 | 0.912108 | 1652.37 | 1605.04 | 1340.27 | 1299.84 | 1540.11 | 1478.94 |
| ENSMUSG00000022247 | 12_Brix1   | 1100.74 | 0.39334  | 0.351999 | 0.728508 | 1989.12 | 921.538 | 838.705 | 774.124 | 1072.24 | 1008.69 |
| ENSMUSG00000022248 | 14_Rad1    | 247.463 | 0.2322   | 0.530383 | 0.836542 | 383.262 | 219.9   | 198.559 | 203.847 | 233.506 | 245.706 |
| ENSMUSG00000022249 | 13_Ttc23l  | 2.2847  | -1.22587 | 0.430707 | 0.780048 | 1.01124 | 0       | 3.10248 | 4.12646 | 4.29238 | 1.17563 |
| ENSMUSG00000022253 | 14_Nadk2   | 494.514 | -0.0339  | 0.940237 | 0.985535 | 816.074 | 289.043 | 360.922 | 562.849 | 486.756 | 451.441 |
| ENSMUSG00000022255 | 15_Mtdh    | 2719.85 | 0.47217  | 0.328071 | 0.709062 | 5608.36 | 2047.11 | 1827.36 | 1958.42 | 2523.06 | 2354.78 |
| ENSMUSG00000022257 | 3_Laptn4   | 1863.2  | -0.28335 | 0.299428 | 0.682414 | 1987.1  | 1398.74 | 1656.73 | 2219.21 | 2096.4  | 1821.05 |
| ENSMUSG00000022261 | 5_Sdc2     | 1762.4  | -0.64223 | 0.153333 | 0.528463 | 2291.48 | 756.046 | 1081.73 | 2252.22 | 2235.47 | 1957.42 |
| ENSMUSG00000022262 | 7_Dnah5    | 7.60163 | -1.10426 | 0.275089 | 0.661359 | 8.08995 | 2.26701 | 4.13665 | 4.95175 | 21.4619 | 4.70251 |
| ENSMUSG00000022263 | 9_Trio     | 1182.77 | -0.06901 | 0.793079 | 0.938313 | 962.705 | 1195.85 | 1305.11 | 1322.12 | 1134.05 | 1176.8  |
| ENSMUSG00000022265 | 6_Ank      | 2238.74 | 0.16087  | 0.504799 | 0.824668 | 2171.14 | 2433.63 | 2485.09 | 2069.01 | 1915.26 | 2358.31 |
| ENSMUSG00000022269 | 13_March   | 0.56126 | -2.54391 | 0.473253 | NA       | 0       | 0       | 0       | 1.65058 | 1.71695 | 0       |
| ENSMUSG00000022270 | 15_Fam1c   | 806.334 | 0.06748  | 0.888234 | 0.969763 | 1462.26 | 480.605 | 532.593 | 803.009 | 822.421 | 737.119 |
| ENSMUSG00000022272 | 17_Myo1c   | 1759.56 | 0.2971   | 0.28629  | 0.672319 | 1540.13 | 2286.28 | 1993.86 | 1606.02 | 1440.52 | 1690.55 |
| ENSMUSG00000022280 | 8_Rnf19a   | 1209.53 | 0.18179  | 0.571901 | 0.854795 | 1742.37 | 1091.56 | 1022.79 | 1058.85 | 1203.58 | 1138.01 |
| ENSMUSG00000022283 | 17_Pabpc   | 12390   | 0.45331  | 0.106846 | 0.444267 | 16753.3 | 14063.4 | 12145.2 | 8606.15 | 11362.8 | 11409.5 |
| ENSMUSG00000022285 | 16_Ywhaz   | 18342.5 | 0.616    | 0.05956  | 0.32403  | 29441.4 | 20131   | 17027.5 | 12017.1 | 15326.4 | 16112   |
| ENSMUSG00000022286 | 15_Grhl2   | 2466.06 | 0.51582  | 0.074852 | 0.366219 | 2437.1  | 3199.88 | 3069.39 | 1620.87 | 2095.54 | 2373.59 |
| ENSMUSG00000022292 | 15_Rrm2t   | 635.707 | 0.03659  | 0.943805 | 0.986418 | 1199.34 | 326.449 | 405.391 | 620.62  | 668.754 | 593.692 |
| ENSMUSG00000022295 | 7_Atp6v1c  | 1215.94 | 0.03918  | 0.910963 | 0.975173 | 1742.37 | 958.943 | 995.898 | 1072.88 | 1367.55 | 1157.99 |
| ENSMUSG00000022296 | 8_Baalc    | 6.00184 | -0.10206 | 0.916292 | 0.976775 | 2.02249 | 9.06802 | 6.20497 | 3.30117 | 6.00934 | 9.40502 |
| ENSMUSG00000022297 | 14_Fzd6    | 4220.98 | 0.41566  | 0.111392 | 0.453007 | 5517.35 | 4564.62 | 4392.08 | 3116.3  | 3694.88 | 4040.63 |
| ENSMUSG00000022299 | 8_Slc25a3  | 347.091 | 0.44522  | 0.340734 | 0.719259 | 679.556 | 278.842 | 241.994 | 247.588 | 303.042 | 331.527 |
| ENSMUSG00000022300 | 9_Dcaf13   | 1142.53 | 0.22533  | 0.521605 | 0.831998 | 1714.06 | 1062.09 | 918.335 | 876.46  | 1183.84 | 1100.39 |
| ENSMUSG00000022303 | 8_Dcstam   | 12.3609 | -1.20939 | 0.078734 | 0.376887 | 6.06747 | 11.335  | 5.17081 | 20.6323 | 18.028  | 12.9319 |
| ENSMUSG00000022304 | 12_Dpys    | 0.68774 | -2.83311 | 0.475143 | NA       | 0       | 0       | 0       | 4.12646 | 0       | 0       |
| ENSMUSG00000022305 | 12_Lrp12   | 1278.39 | 0.13926  | 0.601405 | 0.870033 | 1582.6  | 1139.17 | 1297.87 | 1151.28 | 1170.96 | 1328.46 |
| ENSMUSG00000022306 | 8_Zfpm2    | 19.2145 | -1.17129 | 0.052625 | 0.298077 | 18.2024 | 7.93452 | 9.30745 | 27.2346 | 32.6221 | 19.9857 |
| ENSMUSG00000022307 | 15_Oxr1    | 14335.4 | 0.30541  | 0.453333 | 0.795535 | 24666.3 | 10868   | 12006.6 | 10444.1 | 13294.4 | 14733   |
| ENSMUSG00000022309 | 8_Angpt1   | 285.226 | -0.46449 | 0.429121 | 0.779159 | 472.251 | 114.484 | 132.373 | 428.327 | 328.797 | 235.126 |
| ENSMUSG00000022311 | 15_Csmd1   | 45.0846 | -1.43129 | 0.031329 | 0.217968 | 48.5397 | 7.93452 | 16.5466 | 86.6557 | 53.2256 | 57.6058 |
| ENSMUSG00000022312 | 10_Eif3h   | 5296.8  | -0.14467 | 0.560733 | 0.849082 | 4205.77 | 5379.6  | 5508.98 | 5394.11 | 5497.69 | 5794.67 |
| ENSMUSG00000022313 | 10_Utp23   | 304.624 | 0.28241  | 0.33645  | 0.714698 | 390.34  | 308.313 | 304.043 | 227.781 | 302.184 | 295.083 |
| ENSMUSG00000022314 | 9_Rad21    | 5159.57 | 0.46057  | 0.153956 | 0.529412 | 8075.8  | 5063.36 | 4789.2  | 3800.47 | 4550.79 | 4677.82 |
| ENSMUSG00000022321 | 15_Cdh1c   | 6.75336 | -1.01038 | 0.367118 | 0.739612 | 5.05622 | 2.26701 | 6.20497 | 19.807  | 6.00934 | 1.17563 |
| ENSMUSG00000022322 | 7_Shcbp1   | 262.631 | 0.89866  | 0.062972 | 0.331259 | 561.241 | 269.774 | 194.422 | 127.92  | 224.921 | 197.505 |
| ENSMUSG00000022323 | 11_Hrsp1   | 404.611 | -0.41487 | 0.370557 | 0.741633 | 592.589 | 199.497 | 248.199 | 442.357 | 484.181 | 460.846 |
| ENSMUSG00000022324 | 14_Matn2   | 436.231 | -0.37699 | 0.254571 | 0.645757 | 446.97  | 269.774 | 421.938 | 581.006 | 462.719 | 434.982 |
| ENSMUSG00000022325 | 14_Pop1    | 189.309 | 0.26733  | 0.45844  | 0.798202 | 156.743 | 274.308 | 189.252 | 136.999 | 184.573 | 193.979 |
| ENSMUSG00000022329 | 14_Stk3    | 996.522 | 0.49657  | 0.2921   | 0.676701 | 2029.57 | 787.785 | 681.512 | 729.558 | 893.675 | 857.033 |
| ENSMUSG00000022330 | 4_Osr2     | 395.97  | 0.95743  | 0.003497 | 0.048582 | 364.048 | 604.157 | 599.814 | 253.365 | 255.826 | 298.609 |
| ENSMUSG00000022332 | 7_Khdrbs1  | 235.37  | -0.33977 | 0.327565 | 0.708848 | 238.654 | 228.968 | 156.158 | 325.165 | 257.543 | 205.735 |
| ENSMUSG00000022335 | 16_Zfat    | 103.456 | 0.21438  | 0.569065 | 0.85313  | 85.9558 | 136.02  | 111.689 | 121.318 | 76.4045 | 89.3477 |
| ENSMUSG00000022336 | 2_Eif3e    | 6192.57 | 0.32956  | 0.513552 | 0.828304 | 12592   | 4127.08 | 3971.18 | 4542.41 | 6400.8  | 5521.92 |
| ENSMUSG00000022337 | 6_Emc2     | 1362.65 | 0.17149  | 0.73007  | 0.918442 | 2610.02 | 868.263 | 852.149 | 1085.26 | 1438.81 | 1321.41 |
| ENSMUSG00000022338 | 6_Eny2     | 848.028 | 0.26867  | 0.55196  | 0.845171 | 1536.08 | 673.301 | 570.857 | 661.884 | 938.315 | 707.728 |
| ENSMUSG00000022339 | 8_Ebag9    | 519.94  | 0.38113  | 0.368968 | 0.740777 | 941.468 | 435.265 | 387.811 | 401.092 | 510.794 | 443.212 |
| ENSMUSG00000022340 | 14_Sybu    | 76.1111 | -1.27439 | 0.004285 | 0.055902 | 60.6747 | 29.4711 | 43.4348 | 113.065 | 134.781 | 75.2402 |
| ENSMUSG00000022342 | 5_Kcnn1    | 426.684 | 1.05765  | 0.007858 | 0.084743 | 831.243 | 519.144 | 378.503 | 215.401 | 290.165 | 325.649 |
| ENSMUSG00000022346 | 14_Myc     | 262.686 | 0.89947  | 0.045405 | 0.27249  | 163.822 | 481.739 | 380.571 | 159.281 | 202.601 | 188.1   |
| ENSMUSG00000022350 | 6_E43002   | 1676.94 | 0.24263  | 0.359749 | 0.733629 | 2151.93 | 1695.72 | 1605.02 | 1384.84 | 1662.87 | 1561.23 |
| ENSMUSG00000022351 | 14_Sqlc    | 5710.98 | 0.45557  | 0.134864 | 0.498671 | 8088.94 | 6110.71 | 5615.5  | 3829.36 | 4965.43 | 5655.95 |
| ENSMUSG00000022353 | 9_Mtss1    | 1335.88 | 0.16218  | 0.564885 | 0.850965 | 1724.17 | 1187.91 | 1320.62 | 1410.42 | 1181.26 | 1190.91 |
| ENSMUSG00000022354 | 3_Ndufb9   | 1906.36 | -0.23203 | 0.301577 | 0.684749 | 1736.31 | 1755.8  | 1768.42 | 2105.32 | 2183.11 | 1889.23 |
| ENSMUSG00000022357 | 2_Kihl38   | 15.2738 | -0.32949 | 0.646887 | 0.890016 | 17.1912 | 5.66751 | 17.5807 | 21.4576 | 8.58477 | 21.1613 |
| ENSMUSG00000022358 | 6_Fbxo32   | 2099.47 | 0.14983  | 0.668801 | 0.898323 | 3180.36 | 1650.38 | 1794.27 | 1933.66 | 2078.37 | 1959.77 |
| ENSMUSG00000022359 | 9_Wdyhvv   | 382.277 | 0.15887  | 0.616704 | 0.877103 | 507.645 | 353.653 | 348.512 | 305.358 | 425.805 | 352.688 |
| ENSMUSG00000022360 | 7_Atdad2   | 1001.1  | 0.95686  | 0.021772 | 0.172839 | 2037.66 | 1023.55 | 902.823 | 514.982 | 797.525 | 730.065 |
| ENSMUSG00000022361 | 14_Zhx1    | 1985.33 | 0.17734  | 0.696735 | 0.905638 | 3593.96 | 1373.81 | 1353.72 | 1710.83 | 2112.71 | 1766.97 |
| ENSMUSG00000022362 | 13_Gm29    | 26.964  | 0.92229  | 0.131249 | 0.49266  | 60.6747 | 19.2695 | 25.854  | 14.8553 | 22.3204 | 18.81   |
| ENSMUSG00000022364 | 14_Tbc1d   | 440.244 | 0.10478  | 0.697431 | 0.905638 | 519.78  | 431.865 | 416.767 | 370.556 | 459.285 | 443.212 |
| ENSMUSG00000022365 | 5_Der1     | 3037.98 | 0.21102  | 0.367352 | 0.739795 | 3650.59 | 3187.41 | 2941.16 | 2756.48 | 2838.98 | 2853.25 |
| ENSMUSG00000022366 | 12_Slc22a3 | 0.18892 | 1.1315   | 0.781553 | NA       | 0       | 1.1335  | 0       | 0       | 0       | 0       |
| ENSMUSG00000022367 | 7_Has2     | 439.272 | 0.94629  | 0.016545 | 0.141942 | 863.603 | 412.595 | 459.168 | 310.31  | 344.249 | 245.706 |
| ENSMUSG00000022369 | 13_Mtbp    | 235.144 | 0.43381  | 0.10292  | 0.436784 | 295.283 | 253.905 | 261.643 | 195.594 | 216.336 | 188.1   |
| ENSMUSG00000022370 | 13_Mrpl1c  | 828.958 | 0.12054  | 0.686327 | 0.904398 | 1095.18 | 804.787 | 690.82  | 780.727 | 862.769 | 739.47  |
| ENSMUSG00000022371 | 15_Col14a3 | 1927.2  | 0.08691  | 0.798876 | 0.940596 | 2635.3  | 1303.53 | 2016.62 | 1881.67 | 1847.44 | 1878.65 |
| ENSMUSG00000022372 | 14_Sla     | 101.849 | 1.50843  | 0.000521 | 0.011991 | 206.294 | 160.957 | 84.8012 | 52.8187 | 49.7917 | 56.4301 |
| ENSMUSG00000022375 | 6_Lrrcc6   | 1.30208 | 0.32399  | 0.877969 | NA       | 1.01124 | 3.40051 | 0       | 0.82529 | 2.57543 | 0       |
| ENSMUSG00000022376 | 7_Adcy8    | 9.49198 | -1.02053 | 0.199021 | 0.590962 | 5.05622 | 4.53401 | 9.30745 | 18.9817 | 12.0187 | 7.05377 |
| ENSMUSG00000022377 | 16_Asap1   | 1003.96 | -0.102   | 0.696676 | 0.905638 | 1149.78 | 845.593 | 910.062 | 1064.63 | 1069.66 | 984     |
| ENSMUSG00000022378 | 13_Fam4c   | 1514.27 | 0.8655   | 0.029369 | 0.20886  | 2944.74 | 1707.06 | 1214.11 | 945.785 | 1195.86 | 1078.05 |
| ENSMUSG00000022382 | 14_Wnt7b   | 1235.04 | 0.37602  | 0.460463 | 0.799755 | 523.825 | 1894.08 | 1767.38 | 1261.05 | 781.214 | 1182.68 |
| ENSMUSG00000022383 | 13_Ppara   | 89.076  | -0.16311 | 0.661678 | 0.895681 | 82.922  | 70.2772 | 99.2795 | 113.89  | 98.7249 | 69.362  |

|                    |            |         |          |           |          |         |         |         |         |         |         |
|--------------------|------------|---------|----------|-----------|----------|---------|---------|---------|---------|---------|---------|
| ENSMUSG00000022385 | 10_Gtse1   | 118.173 | 0.8562   | 0.102069  | 0.434382 | 61.6859 | 209.698 | 185.115 | 75.9269 | 66.1027 | 110.509 |
| ENSMUSG00000022386 | 12_Trmu    | 206.879 | -0.06853 | 0.822753  | 0.948842 | 154.72  | 230.101 | 221.311 | 222.829 | 207.751 | 204.559 |
| ENSMUSG00000022387 | 16_Brd1    | 1516.01 | 0.36962  | 0.163232  | 0.541263 | 1407.65 | 1780.73 | 1939.05 | 1393.09 | 1203.58 | 1371.96 |
| ENSMUSG00000022388 | 14_TtlI8   | 0.42924 | -2.15458 | 0.590406  | NA       | 0       | 0       | 0       | 0       | 2.57543 | 0       |
| ENSMUSG00000022389 | 14_Tef     | 5628.68 | 0.2278   | 0.407265  | 0.764774 | 5804.54 | 5044.09 | 7367.37 | 5211.72 | 4722.48 | 5621.85 |
| ENSMUSG00000022390 | 10_Zc3h7   | 2629.04 | 0.09941  | 0.781912  | 0.935592 | 1659.45 | 3028.72 | 3470.65 | 2733.37 | 2292.13 | 2589.91 |
| ENSMUSG00000022391 | 15_Ranga   | 2095.55 | 0.46475  | 0.310361  | 0.692451 | 1065.85 | 3114.87 | 3109.72 | 1611.8  | 1557.28 | 2113.78 |
| ENSMUSG00000022394 | 14_L3mbt   | 377.588 | 0.00623  | 0.991257  | 0.997512 | 105.169 | 544.081 | 486.056 | 412.646 | 320.212 | 397.362 |
| ENSMUSG00000022400 | 8_Rbx1     | 2230.65 | -0.14039 | 0.529594  | 0.836104 | 2260.13 | 2073.18 | 2033.16 | 2217.56 | 2428.63 | 2371.24 |
| ENSMUSG00000022401 | 11_Xpnpe   | 439.203 | 0.17266  | 0.509066  | 0.827179 | 529.892 | 443.2   | 422.972 | 376.333 | 426.663 | 436.158 |
| ENSMUSG00000022403 | 14_St13    | 3699.39 | 0.26904  | 0.450451  | 0.79295  | 5862.18 | 3239.55 | 3028.03 | 3022.22 | 3538.64 | 3505.72 |
| ENSMUSG00000022404 | 7_Slc25a1  | 2334.81 | 0.40308  | 0.178822  | 0.564266 | 3337.11 | 2500.51 | 2138.65 | 1718.26 | 2135.89 | 2178.44 |
| ENSMUSG00000022407 | 8_Adsl     | 828.383 | 0.24159  | 0.536207  | 0.838679 | 487.42  | 1105.17 | 1100.35 | 786.504 | 753.743 | 737.119 |
| ENSMUSG00000022408 | 6_Fam83f   | 856.291 | 0.45787  | 0.280273  | 0.667117 | 494.498 | 1305.8  | 1172.74 | 671.788 | 655.876 | 837.047 |
| ENSMUSG00000022412 | 12_Mief1   | 647.66  | 0.21011  | 0.405566  | 0.76415  | 764.501 | 669.9   | 649.453 | 531.488 | 627.547 | 643.068 |
| ENSMUSG00000022414 | 7_Tab1     | 436.428 | 0.23244  | 0.726124  | 0.91596  | 82.922  | 644.963 | 686.683 | 462.989 | 301.325 | 439.685 |
| ENSMUSG00000022415 | 12_Syngr   | 567.493 | -1.85102 | 0.408E-05 | 0.001628 | 145.619 | 223.3   | 370.23  | 1223.91 | 803.534 | 638.366 |
| ENSMUSG00000022416 | 15_Cacna   | 183.504 | 1.2037   | 0.017831  | 0.150421 | 96.0682 | 347.985 | 323.693 | 106.463 | 111.602 | 115.212 |
| ENSMUSG00000022419 | 15_Depto1  | 477.799 | -0.89868 | 0.042235  | 0.260687 | 521.802 | 177.96  | 300.941 | 628.047 | 712.536 | 525.506 |
| ENSMUSG00000022420 | 15_Dnal4   | 356.631 | 0.118    | 0.838431  | 0.952966 | 105.169 | 487.406 | 521.217 | 445.658 | 265.699 | 315.068 |
| ENSMUSG00000022421 | 18_Nptxr   | 116.892 | -0.93528 | 0.019999  | 0.163099 | 63.7084 | 63.4762 | 113.758 | 188.992 | 146.8   | 124.617 |
| ENSMUSG00000022422 | 13_Dscc1   | 96.4258 | 1.09     | 0.018987  | 0.157128 | 206.294 | 106.549 | 80.6646 | 51.1681 | 70.3951 | 63.4839 |
| ENSMUSG00000022425 | 15_Enpp2   | 2394.98 | -1.54647 | 0.002489  | 0.038088 | 2168.11 | 567.885 | 928.677 | 3991.94 | 3989.34 | 2723.93 |
| ENSMUSG00000022426 | 5_Josd1    | 1072.73 | 0.01963  | 0.939018  | 0.985171 | 908.097 | 1177.71 | 1154.12 | 1023.36 | 1023.3  | 1149.76 |
| ENSMUSG00000022427 | 3_Tomm2    | 1265.11 | 0.19032  | 0.445792  | 0.579654 | 1550.24 | 1314.86 | 1179.98 | 1144.68 | 1173.54 | 1227.36 |
| ENSMUSG00000022428 | 7_Cby1     | 220.156 | -0.65859 | 0.176838  | 0.861026 | 73.8208 | 190.428 | 248.199 | 337.545 | 224.062 | 246.882 |
| ENSMUSG00000022429 | 10_Dmc1    | 5.06831 | -1.38754 | 0.181426  | 0.567796 | 2.02249 | 1.1335  | 5.17081 | 4.95175 | 7.72629 | 9.40502 |
| ENSMUSG00000022431 | 2_Ribc2    | 4.67583 | 1.61763  | 0.175066  | 0.558502 | 4.04498 | 9.06802 | 8.27329 | 4.95175 | 1.71695 | 0       |
| ENSMUSG00000022432 | 6_Smc1b    | 100.626 | 0.84001  | 0.12173   | 0.474283 | 230.564 | 64.6097 | 92.0404 | 56.9452 | 86.7062 | 72.8889 |
| ENSMUSG00000022433 | 18_Csnk1   | 1388.51 | 0.30165  | 0.494384  | 0.817202 | 701.804 | 1982.5  | 1915.27 | 1375.76 | 1104.86 | 1250.87 |
| ENSMUSG00000022434 | 7_Fam11f   | 259.079 | 0.133    | 0.741788  | 0.922751 | 416.633 | 190.428 | 205.798 | 228.606 | 266.128 | 246.882 |
| ENSMUSG00000022435 | 5_Upk3a    | 3.91467 | 0.46178  | 0.750007  | 0.925182 | 0       | 2.26701 | 11.3758 | 5.77705 | 1.71695 | 2.35126 |
| ENSMUSG00000022436 | 15_Sh3bp   | 1390.68 | 0.81567  | 0.175647  | 0.559171 | 422.7   | 2483.5  | 2414.77 | 1101.77 | 756.318 | 1165.05 |
| ENSMUSG00000022437 | 6_Samm5    | 1298.44 | 0.1377   | 0.649715  | 0.891567 | 973.828 | 1555.17 | 1552.28 | 1295.71 | 1189.85 | 1223.83 |
| ENSMUSG00000022438 | 6_Parvb    | 143.863 | -0.97517 | 0.021631  | 0.172199 | 74.8321 | 86.1462 | 130.304 | 270.696 | 164.828 | 136.373 |
| ENSMUSG00000022439 | 9_Parvg    | 26.0094 | 0.63423  | 0.317535  | 0.698985 | 11.1237 | 47.6071 | 36.1957 | 17.3311 | 21.4619 | 22.3369 |
| ENSMUSG00000022440 | 8_C1qtnf6  | 149.574 | -0.72864 | 0.081514  | 0.384779 | 64.7196 | 120.151 | 153.056 | 225.305 | 161.394 | 172.817 |
| ENSMUSG00000022441 | 17_Efcabf  | 901.607 | 0.00573  | 0.992335  | 0.997629 | 220.451 | 1162.97 | 1326.83 | 1040.69 | 709.96  | 948.732 |
| ENSMUSG00000022442 | 15_Ttl1    | 257.764 | -0.299   | 0.556097  | 0.847214 | 84.9445 | 289.043 | 319.556 | 313.611 | 245.524 | 293.907 |
| ENSMUSG00000022443 | 16_Myh9    | 8551.56 | 0.87042  | 0.125592  | 0.482199 | 3047.89 | 15828.2 | 14291.1 | 5678.84 | 5029.82 | 7433.49 |
| ENSMUSG00000022445 | 6_Cyp2d2   | 1.44643 | 0.81857  | 0.689543  | NA       | 0       | 3.40051 | 2.06832 | 0       | 0.85848 | 2.35126 |
| ENSMUSG00000022449 | 14_Adamt1  | 17.8047 | -0.8686  | 0.137982  | 0.503967 | 10.1124 | 9.06802 | 18.6149 | 26.4094 | 21.4619 | 21.1613 |
| ENSMUSG00000022450 | 5_Ndufa6   | 973.796 | -0.27869 | 0.268819  | 0.656292 | 1021.36 | 816.122 | 802.509 | 1024.19 | 1122.89 | 1055.71 |
| ENSMUSG00000022451 | 12_Twif1   | 3164.38 | 0.35742  | 0.230514  | 0.621855 | 4483.86 | 3360.84 | 2818.09 | 2437.09 | 2908.52 | 2977.87 |
| ENSMUSG00000022452 | 14_Smdt1   | 988.145 | -0.09508 | 0.839978  | 0.95317  | 398.43  | 1215.12 | 1253.4  | 1185.95 | 869.637 | 1006.34 |
| ENSMUSG00000022453 | 7_Naga     | 805.736 | 0.1499   | 0.732945  | 0.919789 | 389.329 | 1077.96 | 1075.53 | 819.515 | 709.102 | 762.982 |
| ENSMUSG00000022454 | 16_Nell2   | 80.7986 | -0.73405 | 0.122442  | 0.475979 | 53.5959 | 37.4056 | 91.0062 | 136.173 | 77.2629 | 89.3477 |
| ENSMUSG00000022455 | 3_Wbp2nl   | 0.54066 | 1.03766  | 0.780535  | NA       | 0       | 0       | 2.06832 | 0       | 0       | 1.17563 |
| ENSMUSG00000022456 | 15_Sept3   | 43.0214 | -1.42763 | 0.045357  | 0.272301 | 40.4498 | 19.2695 | 10.3416 | 105.637 | 60.0934 | 22.3369 |
| ENSMUSG00000022462 | 6_Slc38a2  | 8584.48 | 0.75767  | 0.007348  | 0.080939 | 13142.1 | 10435   | 8787.27 | 5612.81 | 6700.41 | 6829.22 |
| ENSMUSG00000022463 | 7_Srebfb2  | 4484.93 | 0.45222  | 0.366658  | 0.739458 | 1943.61 | 7037.92 | 6564.86 | 4100.05 | 2927.41 | 4335.72 |
| ENSMUSG00000022464 | 13_Slc38e  | 89.8382 | -1.65318 | 0.000113  | 0.00365  | 53.5959 | 29.4711 | 46.5373 | 116.366 | 107.31  | 185.749 |
| ENSMUSG00000022466 | 5_Rpap3    | 485.455 | 0.23217  | 0.40606   | 0.764314 | 607.758 | 497.608 | 467.441 | 382.936 | 454.993 | 501.993 |
| ENSMUSG00000022468 | 11_Endou   | 27.8565 | -0.90961 | 0.051009  | 0.292507 | 16.1799 | 18.136  | 23.7857 | 36.3129 | 38.6315 | 34.0932 |
| ENSMUSG00000022469 | 16_Rapge   | 486.799 | -0.32934 | 0.604803  | 0.871119 | 93.0345 | 469.27  | 732.186 | 667.662 | 415.503 | 543.14  |
| ENSMUSG00000022471 | 13_Xrcc6   | 638.606 | 0.15339  | 0.531164  | 0.8369   | 634.05  | 701.638 | 681.512 | 545.518 | 603.509 | 665.405 |
| ENSMUSG00000022472 | 16_Des1    | 2265.83 | 0.3198   | 0.204746  | 0.595918 | 2132.71 | 2894.97 | 2520.25 | 1946.04 | 2057.77 | 2043.24 |
| ENSMUSG00000022474 | 14_Pmm1    | 1038.24 | -0.29533 | 0.1614773 | 0.876197 | 259.89  | 1007.68 | 1529.52 | 1440.96 | 840.449 | 1150.94 |
| ENSMUSG00000022475 | 18_Hdac7   | 2614.73 | 0.34237  | 0.566143  | 0.85179  | 687.646 | 3952.52 | 4130.44 | 2396.65 | 1922.99 | 2598.14 |
| ENSMUSG00000022476 | 7_Polr3h   | 255.381 | -0.31707 | 0.510855  | 0.827179 | 100.113 | 260.706 | 321.624 | 355.701 | 224.921 | 269.219 |
| ENSMUSG00000022477 | 12_Aco2    | 4137.33 | -0.11297 | 0.770621  | 0.932375 | 2204.51 | 4859.33 | 4862.63 | 4807.33 | 3785.03 | 4305.15 |
| ENSMUSG00000022479 | 15_Vdr     | 429.323 | 0.64141  | 0.047014  | 0.277829 | 412.588 | 630.228 | 526.388 | 272.346 | 328.797 | 405.592 |
| ENSMUSG00000022483 | 16_Col2a1  | 43.4558 | -1.62767 | 0.013682  | 0.125182 | 8.08995 | 22.6701 | 33.0932 | 107.288 | 34.3391 | 55.2545 |
| ENSMUSG00000022484 | 7_Hoxc10   | 1.12397 | 2.45036  | 0.341223  | NA       | 0       | 4.53401 | 1.03416 | 0       | 0       | 1.17563 |
| ENSMUSG00000022485 | 3_Hoxc5    | 0.17236 | 1.1315   | 0.781553  | NA       | 0       | 0       | 1.03416 | 0       | 0       | 0       |
| ENSMUSG00000022487 | 14_Gtsf1   | 0.13755 | -0.79206 | 0.84609   | NA       | 0       | 0       | 0       | 0.82529 | 0       | 0       |
| ENSMUSG00000022488 | 8_Nckap1   | 261.097 | 0.94372  | 0.007492  | 0.081948 | 258.879 | 478.338 | 293.702 | 188.167 | 169.978 | 177.52  |
| ENSMUSG00000022489 | 5_Pde1b    | 209.612 | -1.15832 | 0.003942  | 0.052617 | 81.9108 | 146.222 | 161.329 | 377.984 | 260.977 | 229.247 |
| ENSMUSG00000022490 | 6_Ppp1r1i  | 88.2819 | -1.80972 | 7.11E-05  | 0.002518 | 23.2586 | 39.6726 | 54.8106 | 179.088 | 127.055 | 105.807 |
| ENSMUSG00000022491 | 4_Glycam   | 11.3599 | -1.22957 | 0.127058  | 0.48448  | 4.04498 | 11.335  | 5.17081 | 26.4094 | 9.44325 | 11.7563 |
| ENSMUSG00000022494 | 13_Shisa6  | 34.8379 | -1.81022 | 0.00785   | 0.084743 | 28.3148 | 3.40051 | 14.4783 | 68.4993 | 43.7823 | 50.552  |
| ENSMUSG00000022496 | 5_Tnfrsf11 | 2.07559 | 0.48902  | 0.746324  | 0.924339 | 3.03373 | 2.26701 | 2.06832 | 1.65058 | 3.43391 | 0       |
| ENSMUSG00000022498 | 16_Txndc   | 741.94  | 0.18776  | 0.470807  | 0.804776 | 699.781 | 915.87  | 754.938 | 639.602 | 744.3   | 697.147 |
| ENSMUSG00000022500 | 14_Litaf   | 978.245 | 0.77551  | 0.005515  | 0.066141 | 1085.07 | 1514.36 | 1105.52 | 730.384 | 655.876 | 778.266 |
| ENSMUSG00000022501 | 5_Prm1     | 0.75567 | 3.11976  | 0.431825  | NA       | 0       | 4.53401 | 0       | 0       | 0       | 0       |

|                    |           |         |          |          |          |         |         |         |         |         |         |
|--------------------|-----------|---------|----------|----------|----------|---------|---------|---------|---------|---------|---------|
| ENSMUSG00000022503 | 10_Nubp1  | 588.129 | 0.30316  | 0.48844  | 0.814112 | 305.396 | 892.067 | 751.835 | 565.325 | 503.926 | 510.222 |
| ENSMUSG00000022504 | 9_Ciita   | 81.3888 | 3.06577  | 5.16E-10 | 8.86E-08 | 82.922  | 200.63  | 153.056 | 17.3311 | 21.4619 | 12.9319 |
| ENSMUSG00000022505 | 8_Emp2    | 11062   | 0.40909  | 0.115508 | 0.462102 | 10486.6 | 14134.8 | 13238.3 | 8899.13 | 9103.29 | 10510.1 |
| ENSMUSG00000022507 | 5_181001  | 1703.55 | 0.57936  | 0.157618 | 0.535525 | 3245.08 | 1487.16 | 1390.95 | 1290.76 | 1498.9  | 1308.47 |
| ENSMUSG00000022508 | 5_Bcl6    | 969.282 | 0.43453  | 0.072879 | 0.361024 | 1149.78 | 1141.44 | 1050.71 | 766.697 | 779.497 | 927.57  |
| ENSMUSG00000022510 | 14_Trp63  | 8599.05 | 0.88596  | 0.011955 | 0.114584 | 15368.9 | 9435.28 | 8673.51 | 4810.63 | 6048.83 | 7257.15 |
| ENSMUSG00000022512 | 2_Cldn1   | 1026.63 | 0.7667   | 0.047457 | 0.279537 | 1938.56 | 1118.77 | 822.158 | 759.269 | 780.356 | 740.646 |
| ENSMUSG00000022514 | 14_Il1rap | 534.689 | 0.83144  | 0.048073 | 0.282249 | 1086.08 | 539.547 | 428.143 | 349.099 | 413.786 | 391.484 |
| ENSMUSG00000022515 | 5_Anks3   | 415.498 | -0.19366 | 0.678447 | 0.901447 | 167.867 | 499.875 | 495.363 | 512.507 | 368.287 | 449.09  |
| ENSMUSG00000022516 | 9_Nudt16l | 685.046 | -0.20579 | 0.634839 | 0.884141 | 310.452 | 797.986 | 800.441 | 807.136 | 598.358 | 795.9   |
| ENSMUSG00000022517 | 16_Mgrn1  | 999.592 | -0.2118  | 0.669987 | 0.898766 | 348.879 | 1181.11 | 1249.27 | 1283.33 | 948.617 | 986.352 |
| ENSMUSG00000022518 | 15_49305  | 4.63517 | -0.06795 | 0.946608 | 0.986649 | 3.03373 | 3.40051 | 7.23913 | 5.77705 | 6.00934 | 2.35126 |
| ENSMUSG00000022519 | 13_Srl    | 511.594 | -0.70893 | 0.25296  | 0.644241 | 730.118 | 134.887 | 299.907 | 896.268 | 347.683 | 660.703 |
| ENSMUSG00000022521 | 10_Crebbi | 1439.24 | 0.48035  | 0.03794  | 0.244265 | 1752.49 | 1697.99 | 1579.16 | 1099.29 | 1234.49 | 1272.03 |
| ENSMUSG00000022523 | 9_Fgf12   | 59.4178 | -1.1777  | 0.093697 | 0.416648 | 79.8883 | 15.869  | 13.4441 | 88.3063 | 97.8664 | 61.1326 |
| ENSMUSG00000022525 | 13_Hrasls | 27.2335 | -1.04973 | 0.22151  | 0.612307 | 33.3711 | 2.26701 | 17.5807 | 44.5658 | 51.5086 | 14.1075 |
| ENSMUSG00000022526 | 7_Zfp251  | 214.987 | -0.23671 | 0.685312 | 0.750802 | 200.226 | 176.826 | 215.106 | 222.004 | 252.392 | 232.369 |
| ENSMUSG00000022528 | 7_Hes1    | 1685.34 | 0.58146  | 0.050386 | 0.290796 | 2537.21 | 1771.67 | 1751.87 | 1295.71 | 1196.72 | 1558.88 |
| ENSMUSG00000022529 | 11_Zfp263 | 797.508 | 0.16908  | 0.63382  | 0.883658 | 1177.09 | 750.379 | 604.985 | 651.981 | 857.619 | 742.997 |
| ENSMUSG00000022533 | 13_Atp13a | 1947.83 | 0.28266  | 0.539269 | 0.84017  | 3685.99 | 1367    | 1360.96 | 1604.37 | 1939.3  | 1729.35 |
| ENSMUSG00000022534 | 13_Mefv   | 33.684  | 4.87717  | 4.22E-09 | 6.36E-07 | 41.461  | 114.484 | 39.2981 | 2.47588 | 0.85848 | 3.52688 |
| ENSMUSG00000022536 | 13_Glyr1  | 3267.96 | 0.16742  | 0.456551 | 0.796908 | 3220.81 | 3681.62 | 3469.61 | 2900.08 | 3162.63 | 3173.02 |
| ENSMUSG00000022537 | 17_Tmem   | 53.3034 | -0.95392 | 0.032023 | 0.220741 | 23.2586 | 34.0051 | 51.7081 | 79.2281 | 66.9612 | 64.6595 |
| ENSMUSG00000022538 | 19_Lsg1   | 721.307 | 0.11627  | 0.675316 | 0.900812 | 650.23  | 844.46  | 755.972 | 604.114 | 661.886 | 811.183 |
| ENSMUSG00000022540 | 16_Rogdi  | 217.289 | -0.38515 | 0.53525  | 0.83862  | 46.5172 | 222.167 | 296.804 | 330.117 | 177.705 | 230.423 |
| ENSMUSG00000022542 | 6_Sept12  | 0.13755 | -0.79206 | 0.84609  | NA       | 0       | 0       | 0       | 0.82529 | 0       | 0       |
| ENSMUSG00000022543 | 8_493045  | 21.2778 | 0.25486  | 0.642217 | 0.888256 | 18.2024 | 20.4031 | 31.0248 | 25.5841 | 17.1695 | 15.2832 |
| ENSMUSG00000022544 | 13_Eef2kr | 367.578 | 0.03833  | 0.930946 | 0.981773 | 173.934 | 465.87  | 477.783 | 406.044 | 337.381 | 344.459 |
| ENSMUSG00000022545 | 13_Ercc4  | 306.275 | 0.20334  | 0.427168 | 0.777757 | 301.351 | 349.119 | 333     | 298.756 | 262.694 | 292.731 |
| ENSMUSG00000022546 | 4_Gpt     | 657.412 | 0.19023  | 0.752004 | 0.925804 | 173.934 | 807.054 | 1121.03 | 648.68  | 469.587 | 724.187 |
| ENSMUSG00000022548 | 14_Apod   | 11166.4 | 0.24075  | 0.289978 | 0.675032 | 11514   | 13048.9 | 11725.3 | 11071.3 | 9972.93 | 9666.01 |
| ENSMUSG00000022550 | 17_Adck5  | 132.78  | -0.02439 | 0.966922 | 0.991132 | 35.3936 | 174.559 | 185.115 | 150.203 | 115.036 | 136.373 |
| ENSMUSG00000022551 | 7_Cyc1    | 1444.97 | -0.17129 | 0.750393 | 0.925182 | 430.79  | 1897.48 | 1749.8  | 1858.56 | 1286    | 1447.2  |
| ENSMUSG00000022552 | 15_Sharpi | 482.311 | 0.29434  | 0.488111 | 0.814112 | 259.89  | 650.631 | 683.581 | 442.357 | 409.494 | 447.914 |
| ENSMUSG00000022553 | 15_Maf1   | 863.695 | -0.13741 | 0.684987 | 0.903819 | 548.094 | 926.072 | 993.829 | 1029.96 | 809.544 | 874.667 |
| ENSMUSG00000022554 | 6_Hgh1    | 151.968 | 0.10935  | 0.836035 | 0.952513 | 55.6184 | 211.965 | 205.798 | 171.661 | 133.922 | 132.846 |
| ENSMUSG00000022555 | 11_Dgat1  | 337.728 | -0.14276 | 0.686733 | 0.904498 | 204.271 | 363.854 | 395.05  | 372.207 | 325.363 | 365.62  |
| ENSMUSG00000022556 | 9_Hsf1    | 449.195 | 0.19339  | 0.737953 | 0.921405 | 125.394 | 614.359 | 698.059 | 437.405 | 370.862 | 449.09  |
| ENSMUSG00000022557 | 10_Bop1   | 619.164 | 0.45316  | 0.490629 | 0.815035 | 126.406 | 1082.5  | 937.985 | 575.229 | 421.512 | 571.355 |
| ENSMUSG00000022558 | 15_Mroh1  | 686.762 | -0.12293 | 0.845549 | 0.955057 | 137.529 | 868.263 | 966.941 | 923.502 | 600.075 | 624.258 |
| ENSMUSG00000022559 | 7_Fbxl6   | 192.286 | 0.29625  | 0.689126 | 0.95638  | 27.3036 | 290.177 | 318.522 | 244.287 | 115.894 | 157.534 |
| ENSMUSG00000022560 | 8_Slc52a2 | 82.9559 | -0.23195 | 0.668403 | 0.898206 | 30.3373 | 95.2142 | 103.416 | 111.414 | 60.9519 | 96.4015 |
| ENSMUSG00000022561 | 12_Gpaa1  | 410.292 | 0.46816  | 0.457602 | 0.797858 | 103.147 | 708.439 | 617.394 | 434.929 | 259.26  | 338.581 |
| ENSMUSG00000022562 | 13_Oplah  | 355.685 | 0.05127  | 0.940101 | 0.985498 | 64.7196 | 432.998 | 588.438 | 496.001 | 249.817 | 302.136 |
| ENSMUSG00000022564 | 6_Grina   | 1338.74 | -0.17213 | 0.771187 | 0.932465 | 616.519 | 1726.32 | 1734.29 | 1815.64 | 1240.5  | 1199.14 |
| ENSMUSG00000022565 | 15_Plec   | 6680.14 | 1.04013  | 0.116413 | 0.463991 | 1570.46 | 13496.6 | 11900.1 | 4960.83 | 3131.72 | 5021.11 |
| ENSMUSG00000022568 | 16_Scrib  | 1499.2  | 0.75091  | 0.287349 | 0.672979 | 271.013 | 2629.73 | 2741.56 | 1291.58 | 711.677 | 1349.62 |
| ENSMUSG00000022570 | 5_Tsta3   | 497.589 | -0.04516 | 0.941192 | 0.985886 | 109.214 | 700.505 | 659.795 | 576.054 | 421.512 | 518.452 |
| ENSMUSG00000022571 | 8_Pyclr   | 229.652 | -0.05556 | 0.923262 | 0.978561 | 68.7646 | 270.907 | 336.103 | 301.232 | 162.252 | 238.652 |
| ENSMUSG00000022574 | 6_Naprt   | 511.246 | 0.42643  | 0.550754 | 0.844636 | 80.8995 | 808.188 | 869.73  | 549.645 | 287.59  | 471.427 |
| ENSMUSG00000022575 | 4_Gsdmd   | 620.226 | 1.07317  | 0.038484 | 0.246301 | 291.238 | 1257.05 | 974.18  | 384.586 | 373.437 | 440.86  |
| ENSMUSG00000022577 | 16_Ly6h   | 0.6725  | -2.77083 | 0.325128 | NA       | 0       | 0       | 0       | 0.82529 | 0.85848 | 2.35126 |
| ENSMUSG00000022579 | 10_Gpihb1 | 15.6281 | -1.02223 | 0.205609 | 0.59724  | 2.02249 | 12.4685 | 16.5466 | 31.3611 | 13.7356 | 17.6344 |
| ENSMUSG00000022580 | 12_Rhpn1  | 14.4001 | -0.86348 | 0.312257 | 0.693849 | 3.03373 | 10.2015 | 17.5807 | 31.3611 | 17.1695 | 7.05377 |
| ENSMUSG00000022582 | 4_Ly6g    | 1.52536 | 2.06343  | 0.257173 | NA       | 3.03373 | 3.40051 | 1.03416 | 0.82529 | 0.85848 | 0       |
| ENSMUSG00000022583 | 12_Ly6f   | 0.67416 | 2.9665   | 0.455571 | NA       | 4.04498 | 0       | 0       | 0       | 0       | 0       |
| ENSMUSG00000022584 | 14_Ly6c2  | 540.072 | 4.3582   | 2.13E-15 | 1.06E-12 | 656.298 | 1823.81 | 610.155 | 43.7405 | 74.6875 | 31.742  |
| ENSMUSG00000022586 | 11_Ly6i   | 19.2311 | 3.12847  | 7.49E-05 | 0.002603 | 30.3373 | 58.9422 | 14.4783 | 4.12646 | 5.15086 | 2.35126 |
| ENSMUSG00000022587 | 14_Ly6e   | 17793.7 | 1.83566  | 2.49E-06 | 0.000169 | 16009   | 40088.6 | 27299.8 | 7291.46 | 7894.55 | 8178.84 |
| ENSMUSG00000022591 | 5_Gm974   | 121.712 | -0.24113 | 0.69285  | 0.905638 | 228.541 | 53.2746 | 52.7422 | 127.095 | 141.649 | 126.968 |
| ENSMUSG00000022594 | 14_Lynx1  | 6225.57 | 0.29026  | 0.530286 | 0.836542 | 2885.08 | 9153.04 | 8511.15 | 5836.47 | 4842.67 | 6125.02 |
| ENSMUSG00000022595 | 7_Lypd2   | 29887.4 | 0.11793  | 0.857141 | 0.959059 | 5564.88 | 41690.2 | 46069.8 | 34874.4 | 21713.5 | 29411.9 |
| ENSMUSG00000022596 | 3_Slurp1  | 8532.14 | 0.16659  | 0.800958 | 0.941902 | 1648.33 | 10082.5 | 15341.8 | 9303.52 | 5905.46 | 8911.26 |
| ENSMUSG00000022598 | 6_Psca    | 13400.7 | 0.02828  | 0.956644 | 0.988881 | 4507.12 | 17037.7 | 19051.3 | 15231.6 | 11851.3 | 12725   |
| ENSMUSG00000022601 | 11_Zbtb17 | 759.093 | 0.34565  | 0.349527 | 0.726455 | 1222.59 | 676.701 | 649.453 | 583.482 | 799.242 | 623.083 |
| ENSMUSG00000022602 | 14_Arc    | 61.0681 | 1.81063  | 0.006439 | 0.074085 | 27.3036 | 148.489 | 109.621 | 41.2646 | 19.745  | 19.9857 |
| ENSMUSG00000022603 | 9_Mroh4   | 2.06162 | -0.44827 | 0.780893 | 0.935516 | 2.02249 | 0       | 3.10248 | 0.82529 | 1.71695 | 4.70251 |
| ENSMUSG00000022604 | 18_Cep97  | 215.1   | -0.48192 | 0.169885 | 0.551739 | 245.732 | 129.219 | 163.398 | 258.317 | 254.109 | 239.828 |
| ENSMUSG00000022607 | 14_Ptk2   | 1194.16 | 0.45809  | 0.088894 | 0.405588 | 1651.36 | 1317.13 | 1177.91 | 929.279 | 1078.25 | 1011.04 |
| ENSMUSG00000022610 | 9_Mapk12  | 371.329 | -0.06959 | 0.861083 | 0.960565 | 207.305 | 374.056 | 505.705 | 385.412 | 341.674 | 413.821 |
| ENSMUSG00000022614 | 7_Lmf2    | 382.42  | 0.30344  | 0.638201 | 0.886203 | 83.9333 | 596.223 | 587.404 | 423.375 | 253.251 | 350.337 |
| ENSMUSG00000022615 | 7_Tymp    | 2.57868 | 0.3157   | 0.855079 | 0.958888 | 0       | 4.53401 | 4.13665 | 1.65058 | 5.15086 | 0       |
| ENSMUSG00000022617 | 14_Chkb   | 471.544 | -0.12517 | 0.645353 | 0.889294 | 365.059 | 479.472 | 508.807 | 488.573 | 484.181 | 503.169 |
| ENSMUSG00000022619 | 5_Mapk8ip | 29.8693 | -2.12573 | 0.002259 | 0.035579 | 14.1574 | 7.93452 | 11.3758 | 88.3063 | 38.6315 | 18.81   |
| ENSMUSG00000022620 | 14_Arsa   | 501.65  | 0.11922  | 0.790103 | 0.937308 | 237.642 | 631.361 | 698.059 | 445.658 | 457.568 | 539.613 |

|                    |           |         |          |          |          |         |         |         |         |         |         |
|--------------------|-----------|---------|----------|----------|----------|---------|---------|---------|---------|---------|---------|
| ENSMUSG00000022621 | 16_Rab12  | 312.133 | -0.01786 | 0.944973 | 0.986649 | 275.058 | 342.318 | 313.351 | 304.533 | 323.646 | 313.893 |
| ENSMUSG00000022622 | 4_Acr     | 1.12251 | -0.09276 | 0.971147 | NA       | 0       | 2.26701 | 1.03416 | 0       | 3.43391 | 0       |
| ENSMUSG00000022623 | 15_Shank  | 77.1961 | -0.00313 | 0.995754 | 0.998321 | 24.2699 | 99.7483 | 107.553 | 102.336 | 66.9612 | 62.3083 |
| ENSMUSG00000022629 | 16_Kif21a | 9393.88 | 0.37636  | 0.175075 | 0.558502 | 12155.2 | 9580.37 | 10100.7 | 6694.77 | 8266.27 | 9566.08 |
| ENSMUSG00000022634 | 9_Yaf2    | 342.487 | 0.2733   | 0.540517 | 0.84046  | 622.927 | 234.635 | 266.814 | 302.057 | 332.231 | 296.258 |
| ENSMUSG00000022635 | 9_Zcrb1   | 1021.81 | 0.1948   | 0.612014 | 0.874367 | 1642.26 | 822.923 | 806.646 | 824.467 | 1048.2  | 986.352 |
| ENSMUSG00000022636 | 13_Alcam  | 5241.18 | 0.52321  | 0.191751 | 0.580886 | 9465.25 | 4748.24 | 4330.03 | 3416.71 | 4695.01 | 4791.86 |
| ENSMUSG00000022637 | 10_Cblb   | 717.434 | 0.71464  | 0.03011  | 0.212301 | 1220.57 | 741.311 | 712.537 | 519.109 | 527.963 | 583.111 |
| ENSMUSG00000022639 | 14_Dubr   | 173.437 | 0.16334  | 0.717532 | 0.912533 | 294.272 | 142.821 | 112.724 | 165.884 | 189.723 | 135.197 |
| ENSMUSG00000022641 | 15_Bbx    | 1502.12 | 0.52279  | 0.199893 | 0.591828 | 2794.07 | 1304.66 | 1215.14 | 1095.99 | 1355.54 | 1247.34 |
| ENSMUSG00000022651 | 5_Retnlg  | 2.29826 | 1.0222   | 0.490039 | 0.814523 | 7.07871 | 1.1335  | 1.03416 | 1.65058 | 1.71695 | 1.17563 |
| ENSMUSG00000022652 | 6_Morc1   | 4.87055 | 1.84201  | 0.144962 | 0.515056 | 11.1237 | 4.53401 | 7.23913 | 0       | 5.15086 | 1.17563 |
| ENSMUSG00000022656 | 15_Pvrl3  | 1142.29 | -1.17737 | 0.046584 | 0.27641  | 1371.25 | 233.502 | 496.398 | 1720.73 | 1740.99 | 1290.84 |
| ENSMUSG00000022657 | 9_Cd96    | 9.25395 | 1.64076  | 0.114379 | 0.459477 | 16.1799 | 22.6701 | 3.10248 | 0.82529 | 6.86782 | 5.87814 |
| ENSMUSG00000022658 | 10_Tagln  | 20.8967 | -2.13107 | 0.002943 | 0.042842 | 8.08995 | 10.2015 | 5.17081 | 60.2463 | 24.0374 | 17.6344 |
| ENSMUSG00000022659 | 13_Gcsan  | 3.42394 | 0.33811  | 0.80507  | 0.943001 | 8.08995 | 3.40051 | 0       | 4.12646 | 2.57543 | 2.35126 |
| ENSMUSG00000022661 | 14_Cd200  | 683.032 | 0.17749  | 0.645075 | 0.889294 | 1085.07 | 542.948 | 547.071 | 692.42  | 691.074 | 539.613 |
| ENSMUSG00000022663 | 3_Atg3    | 1574.23 | 0.45522  | 0.269436 | 0.656383 | 2839.57 | 1371.54 | 1250.3  | 1065.45 | 1519.5  | 1399    |
| ENSMUSG00000022664 | 11_Slc35e | 719.092 | 0.33035  | 0.429036 | 0.779158 | 1284.28 | 588.288 | 530.525 | 611.542 | 685.065 | 614.853 |
| ENSMUSG00000022665 | 14_Ccdc8  | 766.823 | -0.66918 | 0.018856 | 0.156645 | 666.41  | 462.469 | 647.385 | 961.466 | 1015.58 | 847.628 |
| ENSMUSG00000022667 | 17_Cd200  | 19.867  | 0.36755  | 0.557359 | 0.848091 | 33.7111 | 19.2695 | 14.4783 | 10.7288 | 24.8958 | 16.4588 |
| ENSMUSG00000022668 | 10_Gtpbp  | 503.798 | 0.23656  | 0.575971 | 0.656895 | 876.749 | 391.059 | 367.127 | 438.23  | 509.935 | 439.685 |
| ENSMUSG00000022671 | 12_Mzt2   | 194.801 | -0.11384 | 0.835213 | 0.952442 | 58.6522 | 226.701 | 276.121 | 218.702 | 192.299 | 196.33  |
| ENSMUSG00000022672 | 8_Prkc4   | 1189.06 | 0.25728  | 0.527177 | 0.834617 | 1980.02 | 994.082 | 910.062 | 840.973 | 1255.95 | 1153.29 |
| ENSMUSG00000022673 | 4_Mcm4    | 1589.2  | 1.02512  | 0.000257 | 0.007045 | 2367.32 | 2174.06 | 1791.17 | 855.003 | 1074.81 | 1182.68 |
| ENSMUSG00000022674 | 14_Ube2v  | 1589.2  | 0.53023  | 0.334982 | 0.713724 | 3625.31 | 1135.77 | 872.832 | 1122.4  | 1540.97 | 1237.94 |
| ENSMUSG00000022676 | 6_Snai2   | 578.846 | 0.95665  | 0.015777 | 0.137319 | 1138.66 | 649.497 | 503.637 | 324.34  | 426.663 | 430.28  |
| ENSMUSG00000022677 | 14_Fopnl  | 1005.75 | -0.02123 | 0.950331 | 0.987524 | 1405.63 | 800.253 | 789.065 | 985.399 | 1084.26 | 969.893 |
| ENSMUSG00000022678 | 16_Nde1   | 675.189 | 0.08972  | 0.848797 | 0.924822 | 551.128 | 773.049 | 764.245 | 651.156 | 602.651 | 708.904 |
| ENSMUSG00000022679 | 13_Mpv17  | 113.779 | -0.56058 | 0.268904 | 0.656292 | 161.799 | 48.7406 | 65.1522 | 137.824 | 143.366 | 125.792 |
| ENSMUSG00000022680 | 13_Pdxdc  | 4264.07 | 0.02762  | 0.90471  | 0.974255 | 4422.17 | 4220.03 | 4272.12 | 3740.22 | 4458.93 | 4470.91 |
| ENSMUSG00000022681 | 14_Ntan1  | 627.301 | 0.12026  | 0.734324 | 0.920121 | 925.289 | 494.207 | 540.866 | 632.999 | 647.292 | 523.154 |
| ENSMUSG00000022682 | 7_Rrm3    | 1131.74 | 0.40047  | 0.187967 | 0.575689 | 1650.35 | 1201.51 | 1011.41 | 881.412 | 1046.48 | 999.284 |
| ENSMUSG00000022683 | 13_Pla2g  | 0.17236 | 1.1315   | 0.781553 | NA       | 0       | 0       | 1.03416 | 0       | 0       | 0       |
| ENSMUSG00000022684 | 14_Bfar   | 792.272 | -0.10831 | 0.699866 | 0.905844 | 933.379 | 631.361 | 722.879 | 826.118 | 872.213 | 767.685 |
| ENSMUSG00000022685 | 8_Parn    | 777.1   | -0.08856 | 0.715128 | 0.911362 | 838.322 | 675.568 | 745.63  | 774.124 | 809.544 | 819.413 |
| ENSMUSG00000022686 | 14_B3gntf | 85.5147 | -0.54471 | 0.187893 | 0.575566 | 70.7871 | 87.2797 | 50.6739 | 124.619 | 70.3951 | 109.333 |
| ENSMUSG00000022687 | 11_Boc    | 978.221 | 0.10017  | 0.783216 | 0.935592 | 614.837 | 1130.1  | 1291.67 | 1030.79 | 847.317 | 954.61  |
| ENSMUSG00000022696 | 17_Sidt1  | 85.9197 | 1.67918  | 5.74E-05 | 0.002125 | 96.0682 | 188.161 | 108.587 | 37.1382 | 42.0654 | 43.4982 |
| ENSMUSG00000022698 | 17_Naa50  | 4499.35 | 0.88712  | 0.095072 | 0.418579 | 11078.2 | 3467.39 | 2976.32 | 2617    | 3513.75 | 3343.49 |
| ENSMUSG00000022701 | 17_26100  | 375.719 | 0.15807  | 0.64092  | 0.887523 | 504.611 | 284.509 | 399.186 | 302.882 | 352.834 | 410.294 |
| ENSMUSG00000022702 | 15_Hira   | 661.479 | 0.18743  | 0.568099 | 0.852443 | 475.285 | 861.462 | 776.655 | 651.981 | 599.217 | 604.273 |
| ENSMUSG00000022704 | 15_Qtrtd1 | 365.248 | 0.09298  | 0.732847 | 0.919789 | 416.633 | 400.127 | 314.385 | 335.894 | 381.164 | 343.283 |
| ENSMUSG00000022705 | 4_Drd3    | 0.99936 | 1.27598  | 0.532417 | NA       | 1.01124 | 2.26701 | 1.03416 | 0.82529 | 0.85848 | 0       |
| ENSMUSG00000022706 | 15_Mrpl4C | 599.403 | 0.06958  | 0.78004  | 0.935099 | 675.511 | 610.958 | 555.345 | 591.735 | 623.254 | 539.613 |
| ENSMUSG00000022707 | 16_Gbe1   | 522.297 | 0.29641  | 0.479472 | 0.809556 | 912.142 | 400.127 | 414.699 | 396.14  | 491.049 | 519.627 |
| ENSMUSG00000022708 | 16_Zbtb2l | 2675.6  | -0.5789  | 0.232099 | 0.623799 | 3743.63 | 1072.29 | 1621.57 | 3227.72 | 3570.41 | 2817.98 |
| ENSMUSG00000022710 | 17_Usp7   | 5543.34 | 0.33055  | 0.333474 | 0.712065 | 8249.73 | 5337.67 | 4939.16 | 3768.28 | 5606.71 | 5358.51 |
| ENSMUSG00000022711 | 15_Pmm2   | 1341.28 | 0.36168  | 0.134526 | 0.498485 | 1352.03 | 1684.39 | 1489.19 | 1103.42 | 1211.31 | 1207.37 |
| ENSMUSG00000022715 | 2_Tmem1   | 3.78245 | -0.77852 | 0.594554 | 0.866686 | 0       | 1.1335  | 7.23913 | 9.07822 | 1.71695 | 3.52688 |
| ENSMUSG00000022718 | 11_Dgcr8  | 923.687 | 0.19107  | 0.440914 | 0.786478 | 1117.42 | 945.341 | 891.447 | 814.564 | 915.136 | 858.208 |
| ENSMUSG00000022721 | 18_Trmt2i | 604.638 | 0.1151   | 0.776375 | 0.933844 | 327.643 | 757.18  | 801.475 | 584.307 | 549.425 | 607.8   |
| ENSMUSG00000022722 | 18_Arl6   | 327.024 | 0.22917  | 0.577277 | 0.857361 | 554.162 | 247.104 | 257.506 | 320.213 | 302.184 | 280.975 |
| ENSMUSG00000022723 | 15_Crybg  | 2492.24 | 0.31183  | 0.265524 | 0.654114 | 3338.12 | 2545.85 | 2397.19 | 1919.63 | 2282.69 | 2469.99 |
| ENSMUSG00000022724 | 15_Mina   | 1645.21 | 0.29785  | 0.356742 | 0.731487 | 2285.41 | 1677.58 | 1479.89 | 1133.95 | 1615.65 | 1678.8  |
| ENSMUSG00000022738 | 6_Gsc2    | 0       | NA       | NA       | NA       | 0       | 0       | 0       | 0       | 0       | 0       |
| ENSMUSG00000022742 | 5_Cpox    | 676.768 | 0.80128  | 0.003346 | 0.047018 | 1010.23 | 871.664 | 698.059 | 493.525 | 481.606 | 505.52  |
| ENSMUSG00000022744 | 12_Cldnd  | 2877.98 | 0.5582   | 0.064891 | 0.337359 | 4481.83 | 3020.79 | 2780.86 | 2152.36 | 2446.66 | 2385.35 |
| ENSMUSG00000022747 | 16_St3gal | 483.91  | -0.76919 | 0.215542 | 0.606964 | 746.298 | 122.418 | 204.764 | 614.018 | 670.471 | 545.491 |
| ENSMUSG00000022748 | 7_Cmss1   | 116.005 | 0.03852  | 0.913728 | 0.975975 | 153.709 | 94.0807 | 104.45  | 104.812 | 107.31  | 131.67  |
| ENSMUSG00000022749 | 6_Tbc1d2  | 1491.42 | 0.38192  | 0.342808 | 0.720325 | 2639.35 | 1209.45 | 1214.11 | 1157.89 | 1443.96 | 1283.79 |
| ENSMUSG00000022750 | 17_Klhl22 | 514.061 | -0.27432 | 0.431235 | 0.780048 | 336.744 | 489.673 | 569.823 | 709.751 | 457.568 | 520.803 |
| ENSMUSG00000022751 | 8_Nit2    | 480.529 | 0.1814   | 0.582695 | 0.860399 | 686.635 | 430.731 | 414.699 | 416.773 | 509.935 | 424.402 |
| ENSMUSG00000022752 | 8_Tomn7   | 2473.38 | 0.54     | 0.261143 | 0.650251 | 5135.1  | 1991.56 | 1666.03 | 1672.87 | 2347.93 | 2026.78 |
| ENSMUSG00000022753 | 15_Tmem   | 1.34198 | -0.73554 | 0.756402 | NA       | 3.03373 | 0       | 0       | 3.30117 | 1.71695 | 0       |
| ENSMUSG00000022754 | 5_Tmem4   | 204.563 | 0.08093  | 0.841767 | 0.953593 | 319.553 | 154.156 | 157.193 | 197.245 | 224.062 | 175.169 |
| ENSMUSG00000022755 | 4_Adgrg7  | 6.93729 | 0.43531  | 0.682592 | 0.902936 | 17.1912 | 5.66751 | 1.03416 | 4.12646 | 7.72629 | 5.87814 |
| ENSMUSG00000022756 | 15_Slc7a  | 158.046 | -1.03474 | 0.08327  | 0.389776 | 30.3373 | 100.882 | 179.944 | 273.172 | 192.299 | 171.642 |
| ENSMUSG00000022757 | 18_Tfg    | 1867.38 | 0.54325  | 0.062416 | 0.329854 | 2737.44 | 2096.98 | 1809.78 | 1319.64 | 1580.46 | 1659.99 |
| ENSMUSG00000022758 | 12_P2rx6  | 97.1868 | -1.71714 | 0.000275 | 0.007397 | 27.3036 | 37.4056 | 71.3571 | 190.643 | 136.498 | 119.914 |
| ENSMUSG00000022759 | 13_Lrrc74 | 5.09672 | -1.44443 | 0.197568 | 0.58977  | 4.04498 | 0       | 4.13665 | 8.25292 | 9.44325 | 4.70251 |
| ENSMUSG00000022760 | 15_Thap7  | 154.997 | 0.13672  | 0.815259 | 0.947066 | 44.4948 | 213.099 | 229.584 | 177.438 | 131.347 | 134.022 |
| ENSMUSG00000022761 | 10_Lztr1  | 1040.64 | -0.10719 | 0.801257 | 0.941972 | 487.42  | 1221.92 | 1296.84 | 1204.93 | 973.513 | 1059.24 |
| ENSMUSG00000022762 | 17_Ncam   | 15.6892 | -1.31586 | 0.093982 | 0.417315 | 18.2024 | 5.66751 | 3.10248 | 25.5841 | 27.4713 | 14.1075 |
| ENSMUSG00000022763 | 16_Aifm3  | 51.9202 | -1.75688 | 0.003694 | 0.050426 | 14.1574 | 12.4685 | 44.4689 | 112.24  | 63.5273 | 64.6595 |

|                    |           |         |          |          |          |         |         |         |         |         |         |
|--------------------|-----------|---------|----------|----------|----------|---------|---------|---------|---------|---------|---------|
| ENSMUSG00000022765 | 8_Snap29  | 2138.98 | 0.37576  | 0.315367 | 0.696628 | 3517.11 | 1973.43 | 1757.04 | 1503.68 | 2008.84 | 2073.81 |
| ENSMUSG00000022766 | 12_Serpin | 9.57993 | -2.53133 | 0.004055 | 0.053721 | 3.03373 | 3.40051 | 2.06832 | 23.9335 | 8.58477 | 16.4588 |
| ENSMUSG00000022768 | 15_Ccdc1  | 44.0758 | 0.92865  | 0.101044 | 0.43246  | 23.2586 | 61.2092 | 88.9379 | 33.0117 | 27.4713 | 30.5663 |
| ENSMUSG00000022769 | 7_Sdf2l1  | 177.086 | 0.5128   | 0.167568 | 0.548791 | 142.585 | 289.043 | 193.388 | 154.33  | 146.8   | 136.373 |
| ENSMUSG00000022770 | 16_Dlg1   | 3563.74 | 0.21436  | 0.52857  | 0.835695 | 5352.52 | 3052.52 | 3078.7  | 2879.45 | 3542.93 | 3476.33 |
| ENSMUSG00000022771 | 15_Ppil2  | 1595.06 | 0.15576  | 0.617388 | 0.877328 | 1169    | 1998.37 | 1875.97 | 1469.02 | 1501.48 | 1556.53 |
| ENSMUSG00000022772 | 11_Senp5  | 652.709 | 0.33104  | 0.312985 | 0.694375 | 958.66  | 599.623 | 623.599 | 531.488 | 686.782 | 516.101 |
| ENSMUSG00000022773 | 16_Ypel1  | 43.4558 | -0.73766 | 0.120754 | 0.472497 | 35.3936 | 30.6046 | 32.059  | 74.2763 | 56.6595 | 31.742  |
| ENSMUSG00000022774 | 12_Ncbp2  | 1615.47 | 0.08412  | 0.806716 | 0.944059 | 2339.01 | 1274.06 | 1374.4  | 1418.68 | 1728.97 | 1557.71 |
| ENSMUSG00000022779 | 14_Top3b  | 1146.18 | 0.13974  | 0.681317 | 0.902515 | 776.636 | 1402.14 | 1426.11 | 994.477 | 1099.71 | 1177.98 |
| ENSMUSG00000022780 | 5_Mfi2    | 19.3917 | 1.02362  | 0.103567 | 0.437218 | 13.1462 | 31.7381 | 33.0932 | 15.6806 | 8.58477 | 14.1075 |
| ENSMUSG00000022781 | 8_Pak2    | 4471.18 | 0.49194  | 0.179153 | 0.564484 | 7576.24 | 4216.63 | 3885.34 | 3079.17 | 4053.73 | 4015.94 |
| ENSMUSG00000022783 | 11_Spag6  | 1.02702 | -2.191   | 0.48605  | NA       | 1.01124 | 0       | 0       | 0       | 5.15086 | 0       |
| ENSMUSG00000022787 | 10_Wdr53  | 262.821 | 0.24516  | 0.463841 | 0.801483 | 223.485 | 315.114 | 316.453 | 180.739 | 269.562 | 271.57  |
| ENSMUSG00000022788 | 16_Fgd4   | 730.152 | 0.03935  | 0.933666 | 0.98311  | 1291.36 | 438.666 | 490.193 | 689.944 | 801.818 | 668.932 |
| ENSMUSG00000022789 | 14_Dnm1l  | 3694.64 | 0.53812  | 0.247548 | 0.638878 | 7483.21 | 2992.45 | 2651.59 | 2443.69 | 3543.79 | 3053.11 |
| ENSMUSG00000022790 | 12_Igsf11 | 70.8327 | -1.21908 | 0.00923  | 0.094746 | 47.5285 | 31.7381 | 48.6056 | 112.24  | 129.63  | 55.2545 |
| ENSMUSG00000022791 | 16_Tnk2   | 1068.62 | 0.47618  | 0.951162 | 0.806964 | 215.395 | 1767.13 | 1747.73 | 1105.89 | 642.141 | 933.448 |
| ENSMUSG00000022792 | 16_Yars2  | 236.117 | 0.58109  | 0.143054 | 0.511849 | 423.711 | 225.567 | 199.593 | 165.058 | 201.742 | 201.032 |
| ENSMUSG00000022793 | 16_B4galt | 131.464 | -0.46622 | 0.243399 | 0.634745 | 160.788 | 80.4787 | 89.9721 | 169.185 | 161.394 | 126.968 |
| ENSMUSG00000022797 | 15_Tfrc   | 1286.19 | 0.68115  | 0.159161 | 0.537367 | 2700.02 | 1286.53 | 766.314 | 870.683 | 1158.94 | 934.624 |
| ENSMUSG00000022799 | 4_Arhgap: | 532.86  | -0.6044  | 0.028632 | 0.205219 | 447.981 | 398.993 | 421.938 | 757.618 | 640.424 | 530.208 |
| ENSMUSG00000022800 | 13_Fytt1  | 2848.36 | 0.35556  | 0.442209 | 0.787297 | 5479.93 | 2098.11 | 2014.55 | 2078.09 | 2870.75 | 2548.76 |
| ENSMUSG00000022801 | 13_Lrch3  | 1165.84 | 0.17341  | 0.547378 | 0.843648 | 1551.25 | 1048.49 | 1107.59 | 1012.63 | 1195.86 | 1079.23 |
| ENSMUSG00000022802 | 2_Lmln    | 107.477 | -0.03545 | 0.908019 | 0.974731 | 111.237 | 99.7483 | 107.553 | 122.969 | 98.7249 | 104.631 |
| ENSMUSG00000022803 | 12_Popdc  | 13.5957 | -1.15493 | 0.066591 | 0.342397 | 10.1124 | 6.80102 | 8.27329 | 20.6323 | 14.5941 | 21.1613 |
| ENSMUSG00000022805 | 16_Maats  | 2.73063 | -0.68307 | 0.651033 | 0.891804 | 1.01124 | 2.26701 | 3.10248 | 7.42763 | 2.57543 | 0       |
| ENSMUSG00000022807 | 8_Osbpl1  | 643.276 | 0.23617  | 0.315307 | 0.696604 | 676.522 | 750.379 | 660.829 | 604.114 | 603.509 | 564.301 |
| ENSMUSG00000022808 | 4_Snx4    | 2072.41 | 0.30025  | 0.363273 | 0.736142 | 3135.87 | 1932.62 | 1793.24 | 1681.12 | 2051.76 | 1839.86 |
| ENSMUSG00000022809 | 4_Nr1i2   | 2.95277 | -2.21017 | 0.161377 | 0.539936 | 0       | 0       | 3.10248 | 4.12646 | 3.43391 | 7.05377 |
| ENSMUSG00000022811 | 16_Zfp14f | 2193.65 | 0.28788  | 0.480763 | 0.810607 | 3800.26 | 1716.12 | 1718.78 | 1693.5  | 2177.1  | 2056.17 |
| ENSMUSG00000022812 | 13_Gsk3b  | 4210.41 | 0.46386  | 0.161838 | 0.540542 | 6755.11 | 4053.41 | 3835.71 | 3190.58 | 3678.57 | 3749.08 |
| ENSMUSG00000022814 | 6_Umps    | 547.24  | 0.41283  | 0.120969 | 0.472812 | 573.376 | 725.442 | 576.028 | 422.55  | 478.172 | 507.871 |
| ENSMUSG00000022816 | 11_Fstl1  | 6655.58 | -0.46152 | 0.124094 | 0.478866 | 7343.66 | 4505.67 | 4950.53 | 7882.37 | 7854.21 | 7397.05 |
| ENSMUSG00000022817 | 14_Irgb5  | 2279.56 | -0.15452 | 0.721837 | 0.913923 | 1065.85 | 2506.17 | 2900.82 | 2754    | 1881.78 | 2568.75 |
| ENSMUSG00000022818 | 12_Cyp2a  | 1.5492  | -2.86429 | 0.140253 | NA       | 0       | 0       | 1.03416 | 2.47588 | 3.43391 | 2.35126 |
| ENSMUSG00000022820 | 3_Ndufb4  | 933.283 | -0.19842 | 0.480877 | 0.810618 | 1054.73 | 751.512 | 801.475 | 1123.22 | 962.353 | 906.409 |
| ENSMUSG00000022821 | 13_Hgd    | 2.23079 | -0.0819  | 0.953336 | 0.988326 | 2.02249 | 3.40051 | 1.03416 | 0.82529 | 2.57543 | 3.52688 |
| ENSMUSG00000022822 | 15_Abcc5  | 943.12  | -0.62354 | 0.02128  | 0.17017  | 824.164 | 598.49  | 804.578 | 1181.82 | 1201.01 | 1048.66 |
| ENSMUSG00000022824 | 12_Muc13  | 141.017 | 0.42051  | 0.271707 | 0.6584   | 221.463 | 137.154 | 125.134 | 103.162 | 109.885 | 149.305 |
| ENSMUSG00000022827 | 12_Rab13  | 328.926 | 0.44224  | 0.274278 | 0.660753 | 555.173 | 325.315 | 256.472 | 245.112 | 352.834 | 238.652 |
| ENSMUSG00000022828 | 10_Gtf2e1 | 681.241 | -0.45542 | 0.123845 | 0.478461 | 725.062 | 504.409 | 494.329 | 760.92  | 877.363 | 725.362 |
| ENSMUSG00000022829 | 14_Stxbp1 | 107.795 | -1.69315 | 0.00085  | 0.017335 | 86.967  | 29.4711 | 36.1957 | 155.98  | 211.185 | 126.968 |
| ENSMUSG00000022831 | 14_Hc1s1  | 185.684 | 1.04882  | 0.072412 | 0.359531 | 84.9445 | 442.066 | 224.413 | 156.806 | 114.177 | 91.699  |
| ENSMUSG00000022833 | 6_Ccdc14  | 200.226 | 0.26318  | 0.380122 | 0.747885 | 259.89  | 188.161 | 206.832 | 162.583 | 182.856 | 201.032 |
| ENSMUSG00000022836 | 10_Mylk   | 5206.08 | -0.98547 | 0.000888 | 0.017912 | 3955.99 | 2626.33 | 3899.82 | 6989.4  | 7724.58 | 6040.38 |
| ENSMUSG00000022837 | 13_Iqcb1  | 443.88  | 0.34131  | 0.471138 | 0.804868 | 863.603 | 318.514 | 306.112 | 350.749 | 416.361 | 407.943 |
| ENSMUSG00000022838 | 13_Eaf2   | 71.0694 | 0.7722   | 0.085831 | 0.396669 | 133.484 | 70.2772 | 65.1522 | 43.7405 | 64.3858 | 49.3764 |
| ENSMUSG00000022840 | 8_Adcy5   | 154.323 | -1.2128  | 0.009835 | 0.099417 | 45.506  | 106.549 | 127.202 | 280.599 | 167.403 | 198.681 |
| ENSMUSG00000022841 | 14_Ap2m   | 4436.59 | 0.0667   | 0.882203 | 0.967828 | 1996.2  | 6153.79 | 5467.61 | 4763.59 | 3934.4  | 4303.97 |
| ENSMUSG00000022842 | 16_Ece2   | 243.285 | 0.66386  | 0.136483 | 0.501691 | 165.844 | 442.066 | 287.497 | 226.955 | 197.45  | 139.9   |
| ENSMUSG00000022843 | 16_Cln2   | 164.15  | -0.21527 | 0.69758  | 0.905638 | 50.5622 | 189.295 | 216.14  | 231.082 | 148.517 | 149.305 |
| ENSMUSG00000022844 | 7_Pdia5   | 138.702 | -0.85084 | 0.03738  | 0.242169 | 60.6747 | 114.484 | 122.031 | 223.654 | 169.12  | 142.251 |
| ENSMUSG00000022847 | 14_Thpo   | 13.0961 | -0.4691  | 0.534102 | 0.838255 | 4.04498 | 12.4685 | 16.5466 | 22.2829 | 10.3017 | 12.9319 |
| ENSMUSG00000022848 | 8_Dirc2   | 1183.22 | 0.05687  | 0.815074 | 0.947066 | 1300.46 | 1063.23 | 1255.47 | 1094.34 | 1144.35 | 1241.46 |
| ENSMUSG00000022849 | 4_Hspbp1  | 194.621 | 0.53193  | 0.075097 | 0.366817 | 224.496 | 236.902 | 228.55  | 125.444 | 175.988 | 176.344 |
| ENSMUSG00000022853 | 6_Ehhadh  | 359.271 | 0.16656  | 0.586467 | 0.86244  | 479.33  | 301.512 | 358.854 | 311.135 | 357.985 | 346.81  |
| ENSMUSG00000022855 | 8_Senp2   | 3178.74 | 0.19874  | 0.554789 | 0.846438 | 4568.8  | 2917.64 | 2705.37 | 2405.73 | 3447.64 | 3027.24 |
| ENSMUSG00000022856 | 8_Tmem4   | 706.134 | 0.40357  | 0.239273 | 0.63105  | 535.959 | 975.946 | 900.755 | 516.633 | 632.698 | 674.81  |
| ENSMUSG00000022858 | 15_Tra2b  | 4557.49 | 0.45926  | 0.247325 | 0.638878 | 8138.49 | 4020.53 | 3671.27 | 3296.22 | 4335.31 | 3883.1  |
| ENSMUSG00000022860 | 14_Chodl  | 57.4225 | -0.52569 | 0.410614 | 0.767001 | 88.9895 | 18.136  | 34.1273 | 88.3063 | 73.829  | 41.147  |
| ENSMUSG00000022861 | 16_Dgkg   | 12.4326 | -1.55205 | 0.031856 | 0.220013 | 4.04498 | 5.66751 | 9.30745 | 14.8553 | 26.6128 | 14.1075 |
| ENSMUSG00000022863 | 14_Btg3   | 142.343 | 1.26908  | 0.05897  | 0.318624 | 397.419 | 71.4107 | 134.441 | 94.9086 | 39.4899 | 116.387 |
| ENSMUSG00000022864 | 13_D16Er  | 541.271 | 0.6939   | 0.05559  | 0.308674 | 961.693 | 547.482 | 497.432 | 373.032 | 409.494 | 458.495 |
| ENSMUSG00000022865 | 13_Cxad   | 3772.87 | 0.47009  | 0.228745 | 0.619893 | 6772.3  | 3297.36 | 3076.63 | 2924.84 | 3270.8  | 3295.28 |
| ENSMUSG00000022867 | 9_Usp25   | 3858.94 | 1.0934   | 0.002686 | 0.040207 | 7461.97 | 4633.76 | 3669.21 | 2029.39 | 2728.24 | 2631.06 |
| ENSMUSG00000022868 | 5_Ahsg    | 0.45299 | -0.6074  | 0.85212  | NA       | 0       | 0       | 1.03416 | 0.82529 | 0.85848 | 0       |
| ENSMUSG00000022871 | 12_Fetub  | 177.69  | 0.14968  | 0.713907 | 0.911072 | 106.181 | 217.633 | 236.823 | 139.474 | 180.28  | 185.749 |
| ENSMUSG00000022876 | 17_Samsr  | 39.0574 | 1.52157  | 0.00423  | 0.055398 | 73.8208 | 69.1437 | 31.0248 | 26.4094 | 16.3111 | 17.6344 |
| ENSMUSG00000022877 | 8_Hrg     | 0.31162 | 0.16972  | 0.966824 | NA       | 1.01124 | 0       | 0       | 0       | 0.85848 | 0       |
| ENSMUSG00000022878 | 5_Adipoq  | 2.23645 | 1.12721  | 0.534373 | 0.838255 | 5.05622 | 1.1335  | 3.10248 | 4.12646 | 0       | 0       |
| ENSMUSG00000022881 | 14_Rfc4   | 372.666 | 0.50883  | 0.163889 | 0.542067 | 625.96  | 359.32  | 327.829 | 282.25  | 350.259 | 290.38  |
| ENSMUSG00000022883 | 10_Robo1  | 404.017 | -0.99059 | 0.010709 | 0.105674 | 352.924 | 157.557 | 300.941 | 562.024 | 599.217 | 451.441 |
| ENSMUSG00000022884 | 14_Eif4a2 | 9907.58 | 0.22421  | 0.627349 | 0.880806 | 18225.7 | 6667.26 | 7134.68 | 7539.87 | 10815.1 | 9062.91 |
| ENSMUSG00000022885 | 15_St6gal | 1056.02 | -0.33147 | 0.163722 | 0.541822 | 935.401 | 904.535 | 965.907 | 1100.94 | 1316.05 | 1113.32 |

|                    |            |         |          |          |          |         |         |         |         |         |         |
|--------------------|------------|---------|----------|----------|----------|---------|---------|---------|---------|---------|---------|
| ENSMUSG00000022887 | 8_Masp1    | 138.533 | -0.2317  | 0.533642 | 0.838255 | 94.0457 | 160.957 | 127.202 | 113.065 | 163.111 | 172.817 |
| ENSMUSG00000022889 | 7_Mrp139   | 542.496 | 0.0536   | 0.849489 | 0.956943 | 678.545 | 503.275 | 475.714 | 494.35  | 562.302 | 540.789 |
| ENSMUSG00000022890 | 13_Atp5j   | 3093.81 | 0.19525  | 0.647063 | 0.890168 | 5377.8  | 2312.35 | 2218.28 | 2611.23 | 3292.26 | 2750.97 |
| ENSMUSG00000022892 | 10_App     | 17353.4 | -0.07137 | 0.765675 | 0.930032 | 15434.6 | 16908.5 | 18429.8 | 19614.7 | 16158.3 | 17574.5 |
| ENSMUSG00000022893 | 14_Adamt   | 1751.39 | -0.89289 | 0.006269 | 0.072708 | 1567.43 | 1218.52 | 892.481 | 2441.21 | 2494.73 | 1893.94 |
| ENSMUSG00000022894 | 5_Adamts   | 756.901 | -0.43112 | 0.321239 | 0.702307 | 1028.44 | 444.333 | 461.236 | 991.176 | 964.928 | 651.298 |
| ENSMUSG00000022895 | 14_Ets2    | 2126.47 | 0.83516  | 0.001886 | 0.031059 | 2554.4  | 3046.86 | 2574.03 | 1373.29 | 1382.15 | 1828.1  |
| ENSMUSG00000022897 | 14_Dyrk1   | 1794.16 | 0.39873  | 0.19941  | 0.591308 | 2641.37 | 1781.87 | 1698.09 | 1311.39 | 1716.95 | 1615.31 |
| ENSMUSG00000022898 | 12_Dscr3   | 1495.26 | -0.12582 | 0.595787 | 0.867682 | 1279.22 | 1449.75 | 1561.58 | 1621.7  | 1583.89 | 1475.41 |
| ENSMUSG00000022899 | 8_Slc15a2  | 1321.03 | 0.29474  | 0.529574 | 0.836104 | 2446.2  | 808.188 | 1111.72 | 923.502 | 1229.34 | 1407.23 |
| ENSMUSG00000022900 | 14_Ildr1   | 1548.94 | 0.82663  | 0.00116  | 0.021904 | 1933.5  | 2090.18 | 1918.37 | 993.652 | 1044.77 | 1313.18 |
| ENSMUSG00000022901 | 13_Cd86    | 87.45   | 1.45056  | 0.00465  | 0.059319 | 198.204 | 128.086 | 57.913  | 42.9152 | 54.084  | 43.4982 |
| ENSMUSG00000022902 | 7_Stfa2    | 3.43794 | 0.97636  | 0.454352 | 0.795918 | 5.05622 | 5.66751 | 3.10248 | 1.65058 | 5.15086 | 0       |
| ENSMUSG00000022905 | 12_Kpna1   | 2307.11 | 0.37372  | 0.394835 | 0.755773 | 4288.69 | 1906.55 | 1617.43 | 1728.16 | 2316.17 | 1985.64 |
| ENSMUSG00000022906 | 15_Parp9   | 7261.39 | 1.55774  | 4.20E-05 | 0.001665 | 14754.1 | 10115.4 | 7651.76 | 2616.18 | 4593.71 | 3837.25 |
| ENSMUSG00000022911 | 10_Arl13b  | 367.747 | 0.35076  | 0.360637 | 0.733982 | 617.87  | 310.58  | 308.18  | 313.611 | 349.4   | 306.839 |
| ENSMUSG00000022912 | 8_Pros1    | 900.499 | -0.21725 | 0.599142 | 0.869111 | 1315.63 | 598.49  | 584.301 | 915.249 | 1122.89 | 866.438 |
| ENSMUSG00000022913 | 14_Psmg    | 405.747 | -0.04869 | 0.555863 | 0.959059 | 436.858 | 420.53  | 339.205 | 373.857 | 436.106 | 427.929 |
| ENSMUSG00000022914 | 15_Brwd1   | 3034.11 | 0.0277   | 0.930192 | 0.981773 | 4044.98 | 2554.92 | 2589.54 | 2579.86 | 3344.63 | 3090.73 |
| ENSMUSG00000022935 | 14_Grik1   | 29.3938 | -0.96362 | 0.223422 | 0.613683 | 43.4835 | 9.06802 | 7.23913 | 61.0716 | 34.3391 | 21.1613 |
| ENSMUSG00000022938 | 7_Fam3b    | 25.0803 | 0.58053  | 0.292387 | 0.676777 | 23.2586 | 36.2721 | 31.0248 | 18.9817 | 29.1882 | 11.7563 |
| ENSMUSG00000022940 | 16_Plgp    | 1131.66 | 0.13452  | 0.790038 | 0.937308 | 2168.11 | 674.434 | 710.469 | 971.369 | 1243.93 | 1021.62 |
| ENSMUSG00000022941 | 8_Ripply3  | 723.778 | 0.57979  | 0.030168 | 0.212453 | 959.671 | 745.845 | 896.618 | 570.277 | 654.159 | 516.101 |
| ENSMUSG00000022945 | 11_Chaf1l  | 239.842 | 1.10054  | 0.00883  | 0.091896 | 188.091 | 445.467 | 347.478 | 129.571 | 135.639 | 192.803 |
| ENSMUSG00000022946 | 8_Dopey2   | 899.179 | 0.61377  | 0.091284 | 0.411747 | 664.388 | 1328.47 | 1269.95 | 740.287 | 617.245 | 774.739 |
| ENSMUSG00000022947 | 7_Cbr3     | 235.96  | 0.2995   | 0.331419 | 0.711299 | 195.17  | 302.645 | 283.36  | 208.799 | 209.468 | 216.316 |
| ENSMUSG00000022948 | 14_Setd4   | 86.7586 | -0.18721 | 0.739181 | 0.921641 | 25.2811 | 106.549 | 111.689 | 95.7339 | 88.4231 | 92.8746 |
| ENSMUSG00000022949 | 9_Clic6    | 422.908 | -1.51293 | 0.000127 | 0.00402  | 302.362 | 156.423 | 199.593 | 833.545 | 571.746 | 473.778 |
| ENSMUSG00000022951 | 15_Rcan1   | 1770.74 | 0.07035  | 0.802837 | 0.942705 | 1494.62 | 2036.9  | 1910.1  | 1868.46 | 1434.52 | 1879.83 |
| ENSMUSG00000022952 | 16_Runx1   | 637.018 | 0.9778   | 0.003898 | 0.05235  | 1124.5  | 821.79  | 588.438 | 394.49  | 434.389 | 458.495 |
| ENSMUSG00000022956 | 10_Atp5o   | 2734.9  | -0.2567  | 0.478624 | 0.809227 | 1482.48 | 2991.31 | 3003.21 | 3192.23 | 2989.22 | 2750.97 |
| ENSMUSG00000022957 | 19_Itns1   | 1153    | -0.55329 | 0.021678 | 0.172257 | 842.367 | 929.472 | 1032.09 | 1456.64 | 1360.69 | 1296.72 |
| ENSMUSG00000022960 | 12_Donso   | 260.023 | 0.43484  | 0.217268 | 0.607835 | 397.419 | 269.774 | 229.584 | 190.643 | 266.986 | 205.735 |
| ENSMUSG00000022961 | 17_Son     | 10894.5 | 0.11294  | 0.720176 | 0.913102 | 14858.2 | 9849.01 | 9254.71 | 8990.73 | 11966.3 | 10447.8 |
| ENSMUSG00000022962 | 14_Gart    | 1306.99 | 0.29345  | 0.396615 | 0.757228 | 911.131 | 1826.07 | 1581.23 | 1135.6  | 1154.65 | 1233.23 |
| ENSMUSG00000022964 | 14_Tmem    | 4155.93 | 0.41219  | 0.088081 | 0.403046 | 5086.56 | 4809.45 | 4340.38 | 3154.27 | 3657.11 | 3887.8  |
| ENSMUSG00000022965 | 7_Ifngr2   | 1541.61 | 0.07321  | 0.75887  | 0.927759 | 1394.51 | 1748.99 | 1598.81 | 1474.8  | 1541.82 | 1490.7  |
| ENSMUSG00000022967 | 12_Ifnar1  | 1139.22 | -0.03168 | 0.887534 | 0.969456 | 1173.04 | 1136.9  | 1070.36 | 1193.37 | 1149.5  | 1112.14 |
| ENSMUSG00000022969 | 13_Ili10rb | 895.454 | -0.10308 | 0.675056 | 0.900711 | 968.772 | 850.127 | 771.485 | 973.02  | 878.222 | 931.097 |
| ENSMUSG00000022971 | 18_Ifnar2  | 489.773 | 0.4019   | 0.218126 | 0.608801 | 710.905 | 523.678 | 438.484 | 476.194 | 447.267 | 342.108 |
| ENSMUSG00000022972 | 9_111000   | 331.143 | -0.11021 | 0.722286 | 0.914131 | 238.654 | 392.192 | 324.727 | 325.165 | 341.674 | 364.445 |
| ENSMUSG00000022973 | 17_Synj1   | 1170.1  | 0.45506  | 0.12393  | 0.478659 | 1704.96 | 1224.18 | 1130.34 | 938.357 | 1115.16 | 907.585 |
| ENSMUSG00000022974 | 12_Paxbp   | 1076.18 | 0.31181  | 0.42     | 0.773473 | 1807.09 | 889.8   | 879.037 | 861.605 | 1082.54 | 936.975 |
| ENSMUSG00000022978 | 11_Mis18   | 189.906 | 0.48256  | 0.106247 | 0.442711 | 240.676 | 242.57  | 180.978 | 146.077 | 175.129 | 154.007 |
| ENSMUSG00000022982 | 9_Sod1     | 1823.45 | -0.57415 | 0.029933 | 0.211752 | 1223.61 | 1484.89 | 1687.75 | 2386.75 | 2146.19 | 2011.5  |
| ENSMUSG00000022983 | 15_Scaf4   | 678.564 | 0.32052  | 0.235232 | 0.627165 | 621.915 | 860.329 | 778.724 | 554.596 | 642.141 | 613.678 |
| ENSMUSG00000022986 | 5_Krt75    | 273.855 | 0.62003  | 0.295159 | 0.679579 | 97.0795 | 351.386 | 547.071 | 283.901 | 157.96  | 205.735 |
| ENSMUSG00000022987 | 11_Zfp64   | 65.1649 | -1.11394 | 0.01152  | 0.111711 | 54.6072 | 32.8716 | 36.1957 | 118.842 | 84.9892 | 63.4839 |
| ENSMUSG00000022991 | 4_Lalba    | 2.59632 | -1.03262 | 0.480228 | 0.81002  | 0.20249 | 0       | 3.10248 | 4.12646 | 5.15086 | 1.17563 |
| ENSMUSG00000022992 | 16_Kansl2  | 963.013 | 0.04541  | 0.845793 | 0.955207 | 972.817 | 1063.23 | 898.686 | 980.447 | 940.032 | 922.868 |
| ENSMUSG00000022993 | 6_493041   | 14.5578 | -0.7236  | 0.250904 | 0.642405 | 9.1012  | 12.4685 | 11.3758 | 11.5541 | 24.0374 | 18.81   |
| ENSMUSG00000022994 | 8_Adcy6    | 1129.98 | -0.30026 | 0.505457 | 0.825121 | 461.127 | 1124.43 | 1453    | 1412.08 | 1106.58 | 1222.65 |
| ENSMUSG00000022995 | 16_Enah    | 890.972 | -0.30572 | 0.413311 | 0.768469 | 1183.16 | 586.021 | 621.531 | 1006.86 | 1065.37 | 882.896 |
| ENSMUSG00000022996 | 14_Wnt1c   | 19.7706 | -0.81208 | 0.205986 | 0.59724  | 9.1012  | 10.2015 | 23.7857 | 35.4876 | 18.8865 | 21.1613 |
| ENSMUSG00000022997 | 9_Wnt1     | 0.41265 | -2.10335 | 0.599583 | NA       | 0       | 0       | 0       | 2.47588 | 0       | 0       |
| ENSMUSG00000022999 | 14_Lmbr1   | 1040.38 | 0.53949  | 0.235508 | 0.627524 | 544.049 | 1568.77 | 1585.37 | 984.574 | 758.894 | 800.603 |
| ENSMUSG00000023000 | 4_Dhh      | 9.60841 | 0.0809   | 0.926002 | 0.979921 | 4.04498 | 11.335  | 14.4783 | 15.6806 | 8.58477 | 3.52688 |
| ENSMUSG00000023004 | 8_Tuba1b   | 16579.6 | -0.08215 | 0.870045 | 0.963272 | 5673.08 | 22234.8 | 20415.4 | 17719   | 16056.1 | 17379.3 |
| ENSMUSG00000023007 | 15_Prp4C   | 455.825 | -0.27382 | 0.590855 | 0.865078 | 150.675 | 479.472 | 608.087 | 577.705 | 446.408 | 472.602 |
| ENSMUSG00000023008 | 18_Fmnl3   | 569.652 | -0.15267 | 0.672178 | 0.900129 | 350.902 | 664.233 | 603.95  | 720.48  | 575.18  | 503.169 |
| ENSMUSG00000023009 | 14_Nckap   | 80.6522 | -0.13424 | 0.870579 | 0.963272 | 6.06747 | 97.4812 | 127.202 | 110.589 | 53.2256 | 89.3477 |
| ENSMUSG00000023010 | 14_Tmbir   | 11222.8 | 0.60394  | 0.047727 | 0.280647 | 9803    | 16158.1 | 14653   | 8994.86 | 7976.97 | 9750.66 |
| ENSMUSG00000023011 | 7_Faim2    | 41.0144 | -1.23667 | 0.058549 | 0.317521 | 19.2136 | 30.6046 | 23.7857 | 108.939 | 41.2069 | 22.3369 |
| ENSMUSG00000023013 | 4_Aqp2     | 37.0031 | 0.036    | 0.962123 | 0.990106 | 5.05622 | 45.3401 | 62.0497 | 38.7887 | 34.3391 | 36.4445 |
| ENSMUSG00000023015 | 13_Racga   | 1503.94 | 0.62024  | 0.027846 | 0.201498 | 1598.78 | 2100.38 | 1767.38 | 974.67  | 1210.45 | 1371.96 |
| ENSMUSG00000023017 | 9_Asic1    | 147.659 | -0.03274 | 0.937794 | 0.985118 | 82.922  | 167.758 | 187.183 | 156.806 | 118.47  | 172.817 |
| ENSMUSG00000023018 | 4_Smarcd   | 375.751 | -0.06213 | 0.894502 | 0.971192 | 157.754 | 462.469 | 482.953 | 448.959 | 339.098 | 363.269 |
| ENSMUSG00000023019 | 12_Gpd1    | 99.783  | -1.71231 | 0.002431 | 0.037327 | 22.2474 | 34.0051 | 83.7671 | 216.227 | 120.187 | 122.265 |
| ENSMUSG00000023020 | 2_Cox14    | 551.912 | -0.21864 | 0.532327 | 0.837502 | 350.902 | 599.623 | 580.165 | 711.402 | 472.162 | 597.219 |
| ENSMUSG00000023021 | 15_Cers5   | 1233.32 | -0.2106  | 0.461095 | 0.799907 | 1433.94 | 947.608 | 1048.64 | 1256.09 | 1412.19 | 1301.42 |
| ENSMUSG00000023022 | 13_Lima1   | 5058.32 | 0.50415  | 0.032508 | 0.222863 | 5566.9  | 6245.6  | 5986.76 | 3780.66 | 4121.55 | 4648.43 |
| ENSMUSG00000023025 | 15_Larp4   | 2244.24 | 0.46911  | 0.292219 | 0.676777 | 4382.73 | 1775.07 | 1659.83 | 1676.99 | 2056.91 | 1913.92 |
| ENSMUSG00000023026 | 15_Dip2b   | 2515.92 | 0.62714  | 0.039187 | 0.248967 | 2336.99 | 3635.14 | 3190.39 | 1695.15 | 1932.43 | 2305.41 |
| ENSMUSG00000023027 | 12_Atf1    | 1087.9  | 0.20252  | 0.491136 | 0.815371 | 1499.68 | 998.616 | 993.829 | 997.778 | 982.956 | 1054.54 |
| ENSMUSG00000023030 | 16_Slc11e  | 1391.34 | -0.03757 | 0.895636 | 0.97156  | 1042.59 | 1610.71 | 1466.44 | 1331.2  | 1431.08 | 1466.01 |

|                    |            |         |          |          |          |         |         |         |         |         |         |
|--------------------|------------|---------|----------|----------|----------|---------|---------|---------|---------|---------|---------|
| ENSMUSG00000023031 | 7_Cela1    | 29.4173 | -0.67972 | 0.361784 | 0.734636 | 4.04498 | 20.4031 | 43.4348 | 38.7887 | 36.9145 | 32.9176 |
| ENSMUSG00000023032 | 12_Slc4a4  | 172.563 | -1.48875 | 0.000396 | 0.00967  | 100.113 | 88.4132 | 83.7671 | 361.478 | 255.826 | 145.778 |
| ENSMUSG00000023033 | 14_Scn8a   | 270.083 | -1.74053 | 2.88E-07 | 2.63E-05 | 107.192 | 124.685 | 141.68  | 490.224 | 459.285 | 297.434 |
| ENSMUSG00000023034 | 6_Nr4a1    | 103.549 | -0.29313 | 0.612487 | 0.874448 | 58.6522 | 137.154 | 83.7671 | 204.673 | 61.8103 | 75.2402 |
| ENSMUSG00000023036 | 14_Pcdhg   | 362.021 | -0.81102 | 0.096002 | 0.420219 | 121.349 | 345.718 | 321.624 | 575.229 | 294.458 | 513.749 |
| ENSMUSG00000023039 | 16_Krt7    | 2273.73 | 1.11853  | 0.041076 | 0.256269 | 962.705 | 3799.5  | 4578.23 | 1554.85 | 1108.29 | 1638.83 |
| ENSMUSG00000023041 | 6_Krt6b    | 80866.5 | 0.69559  | 0.089988 | 0.408797 | 52148.9 | 139196  | 108631  | 63146.4 | 54474.7 | 67601   |
| ENSMUSG00000023043 | 6_Krt18    | 488.765 | -1.29168 | 0.010771 | 0.106051 | 120.338 | 296.978 | 433.314 | 942.484 | 521.096 | 618.38  |
| ENSMUSG00000023044 | 1_Csad     | 631.18  | -0.46528 | 0.198441 | 0.590655 | 354.947 | 546.348 | 689.786 | 900.394 | 649.009 | 646.595 |
| ENSMUSG00000023045 | 12_Soat2   | 5.99979 | 1.59335  | 0.123763 | 0.478335 | 5.05622 | 17.0025 | 5.17081 | 3.30117 | 4.29238 | 1.17563 |
| ENSMUSG00000023046 | 6_Igfbp6   | 382.421 | -0.43875 | 0.47021  | 0.804531 | 109.214 | 300.378 | 564.652 | 669.312 | 261.835 | 389.133 |
| ENSMUSG00000023047 | 10_Amhr2   | 1.25602 | -1.34089 | 0.477697 | NA       | 0       | 1.1335  | 1.03416 | 2.47588 | 1.71695 | 1.17563 |
| ENSMUSG00000023048 | 13_Prr13   | 2187.14 | 0.56931  | 0.096969 | 0.422223 | 1825.3  | 3618.14 | 2396.15 | 1780.98 | 1635.4  | 1866.9  |
| ENSMUSG00000023050 | 8_Map3k1   | 176.845 | -0.80611 | 0.010053 | 0.101155 | 128.428 | 123.552 | 134.441 | 244.287 | 257.543 | 172.817 |
| ENSMUSG00000023051 | 10_Tarbp1  | 417.307 | 0.15287  | 0.786214 | 0.936317 | 126.406 | 620.026 | 571.891 | 465.465 | 326.221 | 393.835 |
| ENSMUSG00000023052 | 7_Npff     | 38.3583 | 0.11968  | 0.819165 | 0.948173 | 20.2249 | 40.8061 | 58.9472 | 42.9152 | 34.3391 | 32.9176 |
| ENSMUSG00000023055 | 9_Calcoc   | 1095.2  | -0.19766 | 0.602137 | 0.870033 | 615.848 | 1089.3  | 1355.79 | 1333.67 | 969.221 | 1207.37 |
| ENSMUSG00000023057 | 5_Fabp2    | 1.69315 | -1.96982 | 0.386448 | 0.751493 | 2.02249 | 0       | 0       | 0       | 3.43391 | 4.70251 |
| ENSMUSG00000023064 | 4_Sncg     | 26.1776 | -0.9643  | 0.131677 | 0.493519 | 9.1012  | 22.6701 | 21.7174 | 56.1199 | 27.4713 | 19.9857 |
| ENSMUSG00000023066 | 9_Rtnn     | 306.176 | 0.26347  | 0.380273 | 0.747938 | 411.576 | 306.046 | 284.394 | 247.588 | 306.476 | 280.975 |
| ENSMUSG00000023067 | 13_Cdkn1   | 2686.34 | 0.37027  | 0.351135 | 0.72788  | 1630.13 | 3859.58 | 3597.85 | 2411.5  | 2043.18 | 2575.8  |
| ENSMUSG00000023068 | 14_Nus1    | 1963.98 | 0.58905  | 0.20309  | 0.594091 | 4010.6  | 1678.72 | 1388.88 | 1296.53 | 1830.27 | 1578.87 |
| ENSMUSG00000023070 | 6_Rgn      | 10.3035 | -0.65959 | 0.419825 | 0.773473 | 13.1462 | 6.80102 | 4.13665 | 18.9817 | 12.8772 | 5.87814 |
| ENSMUSG00000023072 | 14_Cep89   | 358.88  | 0.12554  | 0.743629 | 0.92327  | 213.373 | 462.469 | 447.792 | 363.129 | 327.938 | 338.581 |
| ENSMUSG00000023074 | 11_Mospc   | 396.998 | 0.17522  | 0.745889 | 0.924259 | 801.917 | 223.3   | 237.857 | 320.213 | 428.38  | 370.323 |
| ENSMUSG00000023075 | 9_Akirin1  | 2996.06 | 0.2617   | 0.482681 | 0.811473 | 4713.41 | 2814.49 | 2273.09 | 2254.7  | 3162.63 | 2758.02 |
| ENSMUSG00000023078 | 6_Cxcl13   | 44.1804 | 1.26454  | 0.036116 | 0.237911 | 95.057  | 60.0757 | 32.059  | 14.03   | 40.3484 | 23.5126 |
| ENSMUSG00000023079 | 14_Gtf2irc | 852.431 | -0.02671 | 0.953383 | 0.988326 | 366.07  | 1063.23 | 1104.48 | 957.339 | 773.488 | 849.979 |
| ENSMUSG00000023083 | 7_H2-M1C   | 0.69327 | 1.69652  | 0.556341 | NA       | 0       | 2.26701 | 1.03416 | 0       | 0.85848 | 0       |
| ENSMUSG00000023084 | 11_Lrrc7   | 63.8635 | 0.05651  | 0.916799 | 0.976775 | 24.2699 | 77.0782 | 94.1087 | 67.674  | 60.0934 | 59.957  |
| ENSMUSG00000023087 | 15_Noct    | 415.481 | 0.97821  | 0.002372 | 0.03679  | 685.624 | 566.751 | 401.255 | 261.618 | 310.769 | 266.868 |
| ENSMUSG00000023088 | 16_Abcc1   | 740.358 | -0.07625 | 0.817022 | 0.94759  | 487.42  | 788.918 | 886.276 | 824.467 | 729.705 | 725.362 |
| ENSMUSG00000023089 | 12_Ndufa1  | 842.462 | -0.17389 | 0.605819 | 0.871748 | 1077.99 | 701.638 | 595.677 | 859.129 | 1013.86 | 806.481 |
| ENSMUSG00000023092 | 16_Fhl1    | 2085.38 | -0.51094 | 0.302184 | 0.685243 | 2922.5  | 793.452 | 1443.69 | 3053.58 | 2212.3  | 2086.74 |
| ENSMUSG00000023093 | 7_Gm725    | 0.14308 | -0.79206 | 0.84609  | NA       | 0       | 0       | 0       | 0       | 0.85848 | 0       |
| ENSMUSG00000023094 | 14_Msrb2   | 161.224 | -0.59445 | 0.051758 | 0.294902 | 117.304 | 123.552 | 144.783 | 228.606 | 180.28  | 172.817 |
| ENSMUSG00000023104 | 9_Rfc2     | 775.012 | 0.15081  | 0.740144 | 0.92195  | 363.037 | 1128.97 | 954.531 | 784.028 | 631.839 | 787.671 |
| ENSMUSG00000023106 | 15_Denr    | 1868.33 | 0.29113  | 0.427139 | 0.777757 | 2998.34 | 1561.97 | 1608.12 | 1450.04 | 1899.81 | 1691.73 |
| ENSMUSG00000023110 | 12_Prm15   | 704.071 | 0.13221  | 0.72468  | 0.915512 | 451.015 | 988.415 | 769.416 | 607.415 | 627.547 | 780.617 |
| ENSMUSG00000023118 | 15_Sympl   | 1374.78 | 0.33922  | 0.557665 | 0.848179 | 399.442 | 2143.45 | 2064.19 | 1380.71 | 992.399 | 1268.5  |
| ENSMUSG00000023120 | 9_Gm853    | 1.06991 | -3.4413  | 0.243216 | NA       | 0       | 0       | 0       | 0       | 1.71695 | 4.70251 |
| ENSMUSG00000023122 | 6_Sult1c2  | 3.14251 | 0.01621  | 0.990324 | 0.997381 | 5.05622 | 1.1335  | 3.10248 | 1.65058 | 0.85848 | 7.05377 |
| ENSMUSG00000023132 | 7_Gzma     | 148.361 | 4.71095  | 2.08E-16 | 1.24E-13 | 384.273 | 352.519 | 120.997 | 10.7288 | 14.5941 | 7.05377 |
| ENSMUSG00000023143 | 10_Nagpa   | 138.418 | 0.28106  | 0.650404 | 0.891567 | 36.4048 | 217.633 | 201.662 | 153.504 | 97.8664 | 123.441 |
| ENSMUSG00000023147 | 15_Wrb     | 220.689 | -0.69757 | 0.017474 | 0.148223 | 178.99  | 147.355 | 178.91  | 310.31  | 278.147 | 230.423 |
| ENSMUSG00000023150 | 14_Ivns1a  | 9101.27 | 0.22081  | 0.605655 | 0.871728 | 15851.3 | 6271.67 | 7266.02 | 6973.72 | 9211.46 | 9033.52 |
| ENSMUSG00000023151 | 9_Lrrc69   | 5.30433 | -1.30298 | 0.290235 | 0.675268 | 6.06747 | 0       | 3.10248 | 7.42763 | 12.8772 | 2.35126 |
| ENSMUSG00000023153 | 9_Tmem5    | 9.98421 | -0.87406 | 0.373323 | 0.744082 | 1.01124 | 5.66751 | 14.4783 | 19.807  | 6.00934 | 12.9319 |
| ENSMUSG00000023156 | 4_Rpp14    | 739.978 | 0.11616  | 0.741064 | 0.922566 | 1093.16 | 598.49  | 617.394 | 634.65  | 774.346 | 721.835 |
| ENSMUSG00000023165 | 13_Ssxb2   | 0.14308 | -0.79206 | 0.84609  | NA       | 0       | 0       | 0       | 0       | 0.85848 | 0       |
| ENSMUSG00000023169 | 14_Slc38e  | 897.969 | -1.12671 | 0.00153  | 0.026708 | 770.568 | 404.661 | 517.081 | 1451.69 | 1232.77 | 1011.04 |
| ENSMUSG00000023170 | 14_Gps2    | 685.607 | 0.36699  | 0.394051 | 0.755675 | 382.25  | 977.08  | 957.634 | 622.27  | 490.19  | 684.215 |
| ENSMUSG00000023175 | 15_Bsg     | 9037.53 | -0.50061 | 0.115569 | 0.462223 | 5447.57 | 8450.26 | 8557.69 | 12618.7 | 8967.65 | 10183.3 |
| ENSMUSG00000023176 | 8_Cprn2    | 0       | NA       | NA       | NA       | 0       | 0       | 0       | 0       | 0       | 0       |
| ENSMUSG00000023186 | 14_Vwa5e   | 5120.77 | 0.72729  | 0.047217 | 0.27864  | 9199.29 | 5584.77 | 4370.37 | 3344.08 | 4311.27 | 3914.84 |
| ENSMUSG00000023191 | 9_P3h3     | 547.985 | -0.83029 | 0.139328 | 0.506641 | 130.451 | 381.99  | 671.171 | 894.617 | 544.274 | 665.405 |
| ENSMUSG00000023192 | 12_Grm2    | 0.58501 | -1.14575 | 0.75298  | NA       | 0       | 0       | 1.03416 | 2.47588 | 0       | 0       |
| ENSMUSG00000023206 | 16_Ill15ra | 278.144 | 1.23398  | 0.000191 | 0.005553 | 354.947 | 512.343 | 304.043 | 183.215 | 157.96  | 156.359 |
| ENSMUSG00000023216 | 13_Epb42   | 2.5469  | -1.33197 | 0.389245 | 0.752914 | 1.01124 | 3.40051 | 0       | 1.65058 | 6.86782 | 2.35126 |
| ENSMUSG00000023224 | 12_Serpin  | 6245.64 | 0.72721  | 0.058572 | 0.317521 | 4372.62 | 10597.1 | 8392.22 | 4960.01 | 4529.32 | 4622.57 |
| ENSMUSG00000023232 | 17_Serinc  | 944.995 | 0.89382  | 0.158825 | 0.537239 | 247.755 | 1838.54 | 1599.85 | 731.209 | 510.794 | 741.821 |
| ENSMUSG00000023235 | 13_Ccl25   | 26.9166 | -0.66593 | 0.24733  | 0.638878 | 33.3711 | 10.2015 | 18.6149 | 32.1864 | 28.3297 | 38.7957 |
| ENSMUSG00000023236 | 7_Scg5     | 119.3   | -1.79442 | 0.000621 | 0.013746 | 87.9783 | 32.8716 | 39.2981 | 242.636 | 206.034 | 106.982 |
| ENSMUSG00000023243 | 8_Kcnk5    | 504.499 | 0.29684  | 0.491082 | 0.815371 | 296.295 | 648.364 | 723.913 | 510.856 | 327.938 | 519.627 |
| ENSMUSG00000023247 | 2_Guca2a   | 0.56424 | -1.00342 | 0.787021 | NA       | 0       | 0       | 1.03416 | 0       | 0       | 2.35126 |
| ENSMUSG00000023249 | 14_Parp3   | 391.551 | 0.17118  | 0.516452 | 0.830302 | 412.588 | 445.467 | 386.776 | 401.917 | 386.315 | 316.244 |
| ENSMUSG00000023259 | 16_Slc26a1 | 91.6407 | 0.23182  | 0.656726 | 0.894334 | 41.461  | 134.887 | 120.997 | 100.686 | 91.857  | 59.957  |
| ENSMUSG00000023262 | 12_Acy1    | 150.872 | -0.0205  | 0.973022 | 0.992972 | 39.4385 | 218.766 | 191.32  | 190.643 | 109.885 | 155.183 |
| ENSMUSG00000023266 | 11_Frs3    | 30.1703 | -0.73222 | 0.184763 | 0.571925 | 12.1349 | 24.9371 | 31.0248 | 48.6922 | 26.6128 | 37.6201 |
| ENSMUSG00000023267 | 10_Gabrr1  | 14.7235 | -1.79668 | 0.027654 | 0.200783 | 11.1237 | 4.53401 | 4.13665 | 37.1382 | 23.1789 | 8.22939 |
| ENSMUSG00000023272 | 3_Creld2   | 651.559 | 0.27601  | 0.506411 | 0.825658 | 385.284 | 1012.22 | 743.562 | 584.307 | 505.643 | 678.337 |
| ENSMUSG00000023274 | 14_Cd4     | 29.1797 | 1.46547  | 0.010694 | 0.105651 | 26.2924 | 70.2772 | 32.059  | 14.8553 | 16.3111 | 15.2832 |
| ENSMUSG00000023277 | 11_Twf2    | 124.087 | -0.19361 | 0.745613 | 0.924182 | 35.3936 | 162.091 | 149.953 | 177.438 | 83.2723 | 136.373 |
| ENSMUSG00000023279 | 7_Bmp15    | 30.6947 | -1.64043 | 0.009226 | 0.094746 | 28.3148 | 9.06802 | 7.23913 | 42.9152 | 56.6595 | 39.9713 |
| ENSMUSG00000023284 | 15_Zfp604  | 293.243 | 0.05496  | 0.902594 | 0.973635 | 491.465 | 181.36  | 223.379 | 247.588 | 306.476 | 309.19  |

|                    |           |         |          |          |          |         |         |         |         |         |         |
|--------------------|-----------|---------|----------|----------|----------|---------|---------|---------|---------|---------|---------|
| ENSMUSG00000023286 | 16_Ube2j  | 722.054 | 0.45714  | 0.119049 | 0.469314 | 1014.28 | 824.057 | 668.068 | 539.741 | 671.329 | 614.853 |
| ENSMUSG00000023307 | 13_March  | 1643.65 | 0.72338  | 0.061102 | 0.326108 | 3043.85 | 1669.65 | 1428.18 | 1012.63 | 1406.19 | 1301.42 |
| ENSMUSG00000023328 | 14_Ache   | 35.5139 | -1.29572 | 0.018145 | 0.152448 | 11.1237 | 24.9371 | 25.854  | 71.8004 | 42.9238 | 36.4445 |
| ENSMUSG00000023330 | 12_Dtwd1  | 157.625 | 0.25807  | 0.472177 | 0.80561  | 223.485 | 156.423 | 135.475 | 152.679 | 164.828 | 112.86  |
| ENSMUSG00000023333 | 7_Gcm1    | 0.73089 | -2.88699 | 0.388908 | NA       | 0       | 0       | 0       | 0       | 0.85848 | 3.52688 |
| ENSMUSG00000023336 | 5_Wfdc1   | 130.205 | -1.22113 | 0.013004 | 0.121454 | 49.551  | 57.8086 | 127.202 | 253.365 | 141.649 | 151.656 |
| ENSMUSG00000023345 | 15_Poc1a  | 74.0222 | 0.82479  | 0.108344 | 0.44768  | 40.4498 | 133.753 | 109.621 | 52.8187 | 46.3578 | 61.1326 |
| ENSMUSG00000023348 | 11_Trip6  | 432.379 | 0.04127  | 0.952393 | 0.988186 | 67.7534 | 552.016 | 695.991 | 532.314 | 315.92  | 430.28  |
| ENSMUSG00000023349 | 14_Clec4r | 59.9699 | 0.80743  | 0.117961 | 0.467263 | 72.8096 | 112.217 | 44.4689 | 49.5175 | 54.9425 | 25.8638 |
| ENSMUSG00000023353 | 13_Agap3  | 926.52  | 0.30201  | 0.62782  | 0.881031 | 234.609 | 1382.87 | 1451.96 | 992.827 | 543.416 | 953.434 |
| ENSMUSG00000023367 | 14_Tmem   | 2622.66 | 0.45042  | 0.040433 | 0.253718 | 3003.4  | 2877.96 | 3204.87 | 2262.95 | 2140.18 | 2246.62 |
| ENSMUSG00000023391 | 8_Dlx2    | 0.2751  | -1.54073 | 0.703687 | NA       | 0       | 0       | 0       | 1.65058 | 0       | 0       |
| ENSMUSG00000023393 | 15_Slc17e | 205.757 | 0.08827  | 0.83258  | 0.951799 | 121.349 | 210.832 | 304.043 | 229.431 | 172.554 | 196.33  |
| ENSMUSG00000023403 | 14_Stk31  | 0.82147 | 0.92012  | 0.738432 | NA       | 1.01124 | 2.26701 | 0       | 1.65058 | 0       | 0       |
| ENSMUSG00000023411 | 11_Nfatc4 | 313.492 | -0.72921 | 0.095642 | 0.419807 | 127.417 | 240.303 | 340.239 | 496.001 | 353.693 | 323.298 |
| ENSMUSG00000023439 | 11_Gnb3   | 57.4165 | -2.50295 | 0.0005   | 0.011626 | 9.1012  | 28.3376 | 14.4783 | 192.293 | 62.6688 | 37.6201 |
| ENSMUSG00000023443 | 13_Esx1   | 0.17236 | 1.1315   | 0.781553 | NA       | 0       | 0       | 1.03416 | 0       | 0       | 0       |
| ENSMUSG00000023452 | 18_Pisd   | 1005.9  | -0.0297  | 0.942674 | 0.986023 | 506.633 | 1229.85 | 1250.3  | 1113.32 | 903.118 | 1032.2  |
| ENSMUSG00000023456 | 14_Tpi1   | 5607.91 | -0.08866 | 0.851654 | 0.957649 | 2241.93 | 7406.31 | 6658.97 | 6936.58 | 4962.86 | 5440.81 |
| ENSMUSG00000023460 | 12_Rab12  | 1303.24 | -0.01848 | 0.959491 | 0.989708 | 1882.94 | 937.407 | 1064.15 | 1195.02 | 1461.99 | 1277.91 |
| ENSMUSG00000023467 | 16_Tulp2  | 3.59822 | 0.05801  | 0.968038 | 0.991244 | 0       | 0.06802 | 2.06832 | 4.12646 | 5.15086 | 1.17563 |
| ENSMUSG00000023473 | 11_Celsr3 | 27.7519 | -2.2559  | 0.00713  | 0.079078 | 9.1012  | 14.7355 | 5.17081 | 96.5592 | 29.1882 | 11.7563 |
| ENSMUSG00000023484 | 13_Prph   | 5.92706 | -0.85799 | 0.378038 | 0.746591 | 2.02249 | 3.40051 | 7.23913 | 11.5541 | 4.29238 | 7.05377 |
| ENSMUSG00000023495 | 12_Pcbp4  | 346.792 | -1.48155 | 0.023424 | 0.180504 | 43.4835 | 232.368 | 273.019 | 821.991 | 376.013 | 333.878 |
| ENSMUSG00000023505 | 13_Cdca3  | 341.964 | -0.03306 | 0.946558 | 0.986649 | 135.507 | 515.744 | 362.991 | 304.533 | 357.985 | 375.025 |
| ENSMUSG00000023571 | 4_Fam13c  | 69.9461 | -0.6     | 0.285698 | 0.671835 | 22.2474 | 57.8086 | 86.8696 | 113.89  | 60.0934 | 78.7671 |
| ENSMUSG00000023572 | 16_Ccndb  | 1008.61 | 0.09564  | 0.690136 | 0.905638 | 1063.83 | 1076.83 | 985.556 | 895.442 | 1085.97 | 944.029 |
| ENSMUSG00000023707 | 13_Ogfod  | 198.528 | 0.13295  | 0.78275  | 0.935592 | 87.9783 | 240.303 | 294.736 | 202.197 | 161.394 | 204.559 |
| ENSMUSG00000023723 | 17_Mrps2  | 629.329 | 0.02806  | 0.903323 | 0.973812 | 597.645 | 666.5   | 642.214 | 625.572 | 610.377 | 633.663 |
| ENSMUSG00000023755 | 9_Rheb1   | 67.2557 | 0.17388  | 0.644987 | 0.889294 | 77.8658 | 51.0076 | 84.8012 | 61.8969 | 60.9519 | 67.0108 |
| ENSMUSG00000023764 | 18_Sfi1   | 1193.62 | 0.17452  | 0.644353 | 0.889191 | 756.411 | 1266.12 | 1774.62 | 1051.42 | 1146.93 | 1166.22 |
| ENSMUSG00000023781 | 2_Hes7    | 1.96228 | -0.90832 | 0.633164 | 0.883454 | 1.01124 | 0       | 3.10248 | 1.65058 | 6.00934 | 0       |
| ENSMUSG00000023791 | 14_Pigx   | 480.321 | 0.2198   | 0.578732 | 0.858418 | 789.782 | 383.124 | 377.469 | 397.791 | 498.775 | 434.982 |
| ENSMUSG00000023800 | 14_Tiam2  | 187.267 | 0.08425  | 0.771067 | 0.932465 | 197.193 | 182.494 | 198.559 | 211.275 | 155.384 | 178.695 |
| ENSMUSG00000023805 | 16_Synj2  | 1312.85 | 0.5676   | 0.052081 | 0.29635  | 1202.37 | 1653.78 | 1847.01 | 968.893 | 1025.88 | 1179.15 |
| ENSMUSG00000023806 | 9_Rsph3b  | 446.292 | -0.27809 | 0.482839 | 0.811582 | 228.541 | 477.205 | 504.671 | 573.578 | 412.927 | 480.832 |
| ENSMUSG00000023809 | 9_Rps6ka  | 520.745 | -0.47698 | 0.222505 | 0.613029 | 253.822 | 481.739 | 570.857 | 700.673 | 501.351 | 616.029 |
| ENSMUSG00000023826 | 14_Park2  | 62.6529 | -0.56259 | 0.104417 | 0.439432 | 54.6072 | 46.4736 | 50.6739 | 80.8787 | 70.3951 | 72.8889 |
| ENSMUSG00000023827 | 8_Agpat4  | 141.63  | -0.85211 | 0.084094 | 0.391584 | 43.4835 | 106.549 | 153.056 | 217.052 | 167.403 | 162.237 |
| ENSMUSG00000023828 | 2_Slc22a3 | 1.92255 | 0.34538  | 0.828563 | 0.951064 | 2.02249 | 2.26701 | 2.06832 | 1.65058 | 0       | 3.52688 |
| ENSMUSG00000023830 | 13_Igf2r  | 1980.58 | 0.36769  | 0.261908 | 0.651129 | 1517.88 | 2604.79 | 2571.96 | 1545.77 | 1690.34 | 1952.72 |
| ENSMUSG00000023832 | 13_Acat2  | 1782.65 | 0.20842  | 0.432835 | 0.780986 | 1574.51 | 2202.4  | 1956.63 | 1510.29 | 1710.94 | 1741.1  |
| ENSMUSG00000023845 | 6_Lnpep   | 994.279 | 0.29135  | 0.49929  | 0.821154 | 1792.94 | 810.455 | 679.444 | 833.545 | 932.306 | 916.99  |
| ENSMUSG00000023852 | 13_Chd1   | 3645.52 | 0.48677  | 0.210645 | 0.602689 | 6425.45 | 3412.98 | 2925.64 | 2556.76 | 3378.11 | 3174.2  |
| ENSMUSG00000023861 | 17_Mpc1   | 1625.27 | 0.03306  | 0.92525  | 0.979484 | 2360.24 | 1184.51 | 1386.81 | 1640.68 | 1653.43 | 1525.96 |
| ENSMUSG00000023868 | 15_Pde10  | 94.4078 | -0.79644 | 0.027694 | 0.200891 | 77.8658 | 58.9422 | 70.323  | 151.854 | 109.885 | 97.5771 |
| ENSMUSG00000023873 | 12_17000  | 51.842  | 0.04172  | 0.908647 | 0.974731 | 55.6184 | 55.5416 | 46.5373 | 50.3428 | 48.9332 | 54.0789 |
| ENSMUSG00000023882 | 15_Zfp54  | 358.425 | 0.52347  | 0.319118 | 0.700329 | 778.658 | 251.638 | 237.857 | 241.811 | 363.136 | 277.448 |
| ENSMUSG00000023883 | 13_Phf10  | 1735.9  | 0.16873  | 0.645649 | 0.889456 | 2706.09 | 1403.28 | 1402.32 | 1466.54 | 1783.06 | 1654.11 |
| ENSMUSG00000023885 | 8_Thbs2   | 4322.11 | -0.08625 | 0.747878 | 0.924734 | 3425.08 | 4369.65 | 4784.03 | 3962.23 | 4704.45 | 4687.23 |
| ENSMUSG00000023886 | 9_Smoc2   | 1154.75 | -0.30205 | 0.266453 | 0.654635 | 1022.37 | 854.661 | 1225.48 | 1197.5  | 1244.79 | 1383.71 |
| ENSMUSG00000023892 | 7_Zfp51   | 536.111 | 0.51365  | 0.347379 | 0.724598 | 1206.41 | 335.517 | 349.547 | 350.749 | 515.945 | 458.495 |
| ENSMUSG00000023902 | 18_Zscan  | 1.20316 | -1.26675 | 0.552214 | NA       | 0       | 1.1335  | 1.03416 | 2.47588 | 2.57543 | 0       |
| ENSMUSG00000023903 | 7_Mmp25   | 8.95961 | 3.40688  | 0.001915 | 0.031447 | 6.06747 | 31.7381 | 11.3758 | 0.82529 | 2.57543 | 1.17563 |
| ENSMUSG00000023904 | 10_Hcfc1r | 1153.79 | -0.04519 | 0.930776 | 0.981773 | 395.397 | 1455.42 | 1556.41 | 1346.88 | 904.835 | 1263.8  |
| ENSMUSG00000023905 | 14_Tnfrsf | 398.127 | 0.63879  | 0.240177 | 0.631907 | 155.732 | 779.85  | 519.149 | 326.816 | 303.901 | 303.312 |
| ENSMUSG00000023906 | 2_Cldn6   | 0.36448 | 0.16972  | 0.966824 | NA       | 1.01124 | 0       | 0       | 0       | 0       | 1.17563 |
| ENSMUSG00000023908 | 7_Pkmyt1  | 71.1956 | 1.73252  | 0.021675 | 0.172257 | 14.1574 | 162.091 | 152.022 | 28.8852 | 30.0467 | 39.9713 |
| ENSMUSG00000023909 | 3_Paqr4   | 219.903 | -0.19006 | 0.632766 | 0.883314 | 127.417 | 238.036 | 251.301 | 293.804 | 226.638 | 182.222 |
| ENSMUSG00000023911 | 12_Flywcl | 32.2006 | -1.0774  | 0.099758 | 0.429504 | 10.1124 | 17.0025 | 35.1615 | 69.3246 | 36.9145 | 24.6882 |
| ENSMUSG00000023912 | 9_Slc25a2 | 246.187 | 0.1241   | 0.660934 | 0.895438 | 262.924 | 241.436 | 265.78  | 196.42  | 269.562 | 241.004 |
| ENSMUSG00000023913 | 17_Pla2g1 | 1221.33 | -0.02739 | 0.938547 | 0.985118 | 1736.31 | 1016.75 | 875.935 | 1126.52 | 1307.46 | 1264.98 |
| ENSMUSG00000023914 | 16_Mep1e  | 0       | NA       | NA       | NA       | 0       | 0       | 0       | 0       | 0       | 0       |
| ENSMUSG00000023915 | 4_Tnfrsf2 | 1619.53 | 0.71784  | 0.016282 | 0.140304 | 1577.54 | 2379.22 | 2085.9  | 1219.78 | 1040.47 | 1414.28 |
| ENSMUSG00000023918 | 12_Adgrf4 | 526.594 | 0.60432  | 0.037275 | 0.241871 | 706.86  | 674.434 | 524.32  | 345.797 | 456.71  | 451.441 |
| ENSMUSG00000023919 | 7_Cenpq   | 441.333 | 0.65476  | 0.168601 | 0.54995  | 941.468 | 346.852 | 330.932 | 310.31  | 375.154 | 343.283 |
| ENSMUSG00000023921 | 8_Mut     | 1429.88 | -0.18446 | 0.628899 | 0.881265 | 2008.33 | 920.404 | 1086.9  | 1421.15 | 1702.36 | 1440.14 |
| ENSMUSG00000023923 | 9_Tbc1d5  | 848.148 | 0.28159  | 0.253191 | 0.644241 | 968.772 | 867.13  | 955.565 | 675.089 | 782.931 | 839.398 |
| ENSMUSG00000023926 | 7_Rhag    | 5.23224 | 1.7386   | 0.084132 | 0.391593 | 9.1012  | 7.93452 | 7.23913 | 1.65058 | 4.29238 | 1.17563 |
| ENSMUSG00000023927 | 15_Satb1  | 539.173 | 0.33829  | 0.193944 | 0.583952 | 689.669 | 558.817 | 557.413 | 434.104 | 482.464 | 512.574 |
| ENSMUSG00000023930 | 13_Crisp2 | 9.7809  | 0.14312  | 0.877536 | 0.965537 | 22.2474 | 3.40051 | 5.17081 | 8.25292 | 13.7356 | 5.87814 |
| ENSMUSG00000023931 | 4_Ethb    | 15.5065 | 1.85432  | 0.026605 | 0.196428 | 38.4273 | 19.2695 | 15.5124 | 5.77705 | 12.8772 | 1.17563 |
| ENSMUSG00000023932 | 8_Cdc5l   | 1971.15 | 0.22113  | 0.458006 | 0.79295  | 2596.88 | 1923.55 | 1844.94 | 1498.73 | 1995.96 | 1966.83 |
| ENSMUSG00000023935 | 9_Spats1  | 3.73495 | -0.4236  | 0.739198 | 0.921641 | 0       | 3.40051 | 6.20497 | 4.12646 | 5.15086 | 3.52688 |
| ENSMUSG00000023938 | 7_Aars2   | 113.406 | 0.17252  | 0.796564 | 0.939832 | 22.2474 | 191.562 | 146.851 | 122.969 | 90.9986 | 105.807 |

|                    |            |         |          |          |          |          |         |         |         |         |         |
|--------------------|------------|---------|----------|----------|----------|----------|---------|---------|---------|---------|---------|
| ENSMUSG00000023939 | 7_Mrp14    | 459.283 | 0.05779  | 0.910476 | 0.974976 | 173.934  | 589.422 | 642.214 | 556.247 | 345.966 | 447.914 |
| ENSMUSG00000023940 | 14_Sgol1   | 233.341 | 0.63202  | 0.127316 | 0.485143 | 416.633  | 232.368 | 201.662 | 132.872 | 215.478 | 201.032 |
| ENSMUSG00000023942 | 15_Slc29e  | 694.989 | -0.1099  | 0.839225 | 0.953167 | 223.485  | 710.706 | 1071.39 | 807.961 | 564.019 | 792.373 |
| ENSMUSG00000023943 | 7_Sult1c1  | 54.0102 | -0.96798 | 0.096042 | 0.420286 | 66.7421  | 14.7355 | 27.9224 | 76.7522 | 62.6688 | 75.2402 |
| ENSMUSG00000023944 | 14_Hsp90   | 24304.3 | 0.35533  | 0.286621 | 0.672535 | 18691.8  | 33977.9 | 29176.8 | 18756.4 | 20255.8 | 24966.8 |
| ENSMUSG00000023945 | 6_Slc5a7   | 3.26514 | -0.82635 | 0.683093 | 0.902945 | 7.07871  | 0       | 0       | 9.07822 | 3.43391 | 0       |
| ENSMUSG00000023947 | 7_Nfkbie   | 138.749 | 0.79264  | 0.041257 | 0.256935 | 122.361  | 247.104 | 158.227 | 96.5592 | 91.857  | 116.387 |
| ENSMUSG00000023949 | 6_Tcte1    | 0.33708 | 1.97061  | 0.625968 | NA       | 2.02249  | 0       | 0       | 0       | 0       | 0       |
| ENSMUSG00000023951 | 16_Vegfa   | 987.447 | -0.19367 | 0.56741  | 0.852443 | 668.433  | 1058.69 | 1037.26 | 1283.33 | 1061.08 | 815.886 |
| ENSMUSG00000023952 | 13_Gtpbp   | 3684.68 | 0.82416  | 0.086158 | 0.397712 | 1824.28  | 6473.44 | 5830.6  | 2687.98 | 2497.31 | 2794.47 |
| ENSMUSG00000023953 | 8_Polh     | 441.497 | 0.33519  | 0.172686 | 0.556305 | 488.431  | 512.343 | 476.748 | 352.4   | 414.644 | 404.416 |
| ENSMUSG00000023959 | 8_Clic5    | 3367.26 | 0.8228   | 0.009686 | 0.098401 | 5584.09  | 3961.59 | 3361.03 | 2077.26 | 2807.22 | 2412.39 |
| ENSMUSG00000023960 | 13_Enpp5   | 3457.24 | -0.2028  | 0.586002 | 0.862122 | 4809.48  | 2331.62 | 2502.67 | 3485.21 | 3997.07 | 3617.41 |
| ENSMUSG00000023961 | 16_Enpp4   | 1173.4  | 0.65566  | 0.109407 | 0.449508 | 2269.23  | 1038.29 | 999     | 830.244 | 1020.73 | 882.896 |
| ENSMUSG00000023963 | 9_Cyp39a   | 1917.13 | 0.34596  | 0.441849 | 0.786851 | 3595.98  | 1317.13 | 1524.35 | 1412.9  | 1887.79 | 1764.62 |
| ENSMUSG00000023964 | 15_Calcr   | 1.38571 | -2.68529 | 0.265131 | NA       | 1.01124  | 0       | 0       | 4.95175 | 0       | 2.35126 |
| ENSMUSG00000023965 | 13_Fbxl17  | 583.405 | -0.06525 | 0.833479 | 0.952011 | 748.321  | 476.071 | 486.056 | 554.596 | 636.99  | 598.395 |
| ENSMUSG00000023966 | 8_Rsph9    | 46.8981 | -1.02343 | 0.049211 | 0.286891 | 16.1799  | 39.6726 | 37.2298 | 86.6557 | 55.801  | 45.8495 |
| ENSMUSG00000023967 | 9_Mrps18   | 481.602 | -0.08101 | 0.855326 | 0.958916 | 215.395  | 599.623 | 589.472 | 557.898 | 468.728 | 458.495 |
| ENSMUSG00000023968 | 15_Crip3   | 7.16378 | -1.08263 | 0.221817 | 0.612417 | 4.04498  | 6.80102 | 3.10248 | 14.03   | 10.3017 | 4.70251 |
| ENSMUSG00000023971 | 8_Rrp36    | 259.791 | 0.16105  | 0.711725 | 0.910709 | 132.473  | 337.784 | 352.649 | 256.666 | 224.062 | 255.111 |
| ENSMUSG00000023972 | 9_Ptk7     | 935.342 | 0.56876  | 0.349443 | 0.72637  | 256.856  | 1557.43 | 1537.8  | 820.341 | 583.764 | 855.857 |
| ENSMUSG00000023973 | 13_Cnpy3   | 565.772 | -0.15323 | 0.794754 | 0.9388   | 136.518  | 746.978 | 723.913 | 726.257 | 479.03  | 581.936 |
| ENSMUSG00000023977 | 14_Ubr2    | 3534.87 | 0.30134  | 0.203511 | 0.594896 | 3482.73  | 4195.09 | 4030.13 | 2916.58 | 3245.9  | 3338.78 |
| ENSMUSG00000023978 | 5_Prph2    | 614.197 | -2.71657 | 0.000157 | 0.004804 | 164.833  | 264.106 | 57.913  | 2058.28 | 847.317 | 292.731 |
| ENSMUSG00000023979 | 14_Guca1   | 356.001 | -1.20957 | 0.022552 | 0.177087 | 97.0795  | 294.711 | 253.37  | 781.552 | 387.173 | 322.122 |
| ENSMUSG00000023980 | 6_Taf8     | 528.773 | 0.09706  | 0.824113 | 0.949196 | 256.856  | 686.903 | 695.991 | 542.217 | 459.285 | 531.384 |
| ENSMUSG00000023982 | 7_Guca1a   | 817.999 | -0.42779 | 0.452498 | 0.794633 | 190.114  | 944.208 | 958.668 | 1122.4  | 824.996 | 867.613 |
| ENSMUSG00000023984 | 17_Gm20    | 42.7036 | 0.37289  | 0.355269 | 0.73051  | 43.4835  | 53.2746 | 47.5714 | 36.3129 | 30.9052 | 44.6739 |
| ENSMUSG00000023987 | 14_Pgc     | 0.42371 | -2.13816 | 0.587702 | NA       | 0        | 0       | 0       | 0.82529 | 1.71695 | 0       |
| ENSMUSG00000023988 | 8_Bysl     | 408.86  | 0.16992  | 0.692934 | 0.905638 | 214.384  | 597.356 | 487.09  | 404.393 | 340.815 | 409.118 |
| ENSMUSG00000023990 | 18_Tfeb    | 197.816 | 0.04772  | 0.941283 | 0.985902 | 41.461   | 275.441 | 286.463 | 247.588 | 140.79  | 195.154 |
| ENSMUSG00000023991 | 16_Foxp4   | 409.427 | 0.53758  | 0.443687 | 0.788342 | 71.7983  | 732.243 | 650.488 | 394.49  | 226.638 | 380.903 |
| ENSMUSG00000023992 | 14_Trem2   | 41.6259 | 0.05327  | 0.42634  | 0.986023 | 12.1349  | 88.4132 | 26.8882 | 61.0716 | 28.3297 | 32.9176 |
| ENSMUSG00000023993 | 6_Trem1    | 1.44341 | 0.10262  | 0.97175  | NA       | 0        | 4.53401 | 0       | 4.12646 | 0       | 0       |
| ENSMUSG00000023994 | 13_Nfya    | 1287.55 | 0.27143  | 0.247171 | 0.638878 | 1297.43  | 1568.77 | 1358.89 | 1150.46 | 1184.7  | 1165.05 |
| ENSMUSG00000023999 | 14_Kif6    | 35.1838 | -0.01293 | 0.975876 | 0.993701 | 40.4498  | 28.3376 | 36.1957 | 31.3611 | 39.4899 | 35.2688 |
| ENSMUSG00000024002 | 16_Brd4    | 1513.32 | 0.52655  | 0.049657 | 0.288242 | 1482.48  | 2073.18 | 1803.58 | 1120.75 | 1267.97 | 1331.99 |
| ENSMUSG00000024006 | 16_Stk38   | 4160.94 | 0.4809   | 0.09247  | 0.414166 | 5762.07  | 4244.97 | 4536.87 | 2839.01 | 3942.98 | 3639.74 |
| ENSMUSG00000024007 | 14_Ppil1   | 510.46  | 0.18696  | 0.174776 | 0.912533 | 191.125  | 765.114 | 674.273 | 510.031 | 393.182 | 529.033 |
| ENSMUSG00000024008 | 15_Cpne5   | 169.228 | 0.21791  | 0.697661 | 0.905638 | 53.5959  | 238.036 | 254.404 | 160.932 | 148.517 | 159.885 |
| ENSMUSG00000024011 | 16_Pi16    | 2077.7  | -0.32467 | 0.574547 | 0.85646  | 592.589  | 1863.48 | 3078.7  | 3209.56 | 1537.53 | 2184.32 |
| ENSMUSG00000024012 | 17_Mtch1   | 3723.05 | -0.16885 | 0.772503 | 0.932508 | 918.21   | 4532.88 | 5065.32 | 4897.28 | 3000.38 | 3924.25 |
| ENSMUSG00000024013 | 14_Fgd2    | 177.775 | 0.34127  | 0.486013 | 0.813544 | 82.922   | 250.504 | 262.677 | 169.185 | 126.196 | 175.169 |
| ENSMUSG00000024014 | 7_Pim1     | 2226.76 | 0.91048  | 0.003142 | 0.044874 | 2143.84  | 3535.4  | 3041.47 | 1520.19 | 1372.7  | 1746.98 |
| ENSMUSG00000024018 | 17_Ccdc1   | 266.557 | -0.28658 | 0.273638 | 0.660311 | 221.463  | 242.57  | 256.472 | 269.871 | 315.061 | 293.907 |
| ENSMUSG00000024019 | 17_Cmtr1   | 2373.23 | 0.80929  | 0.025319 | 0.190854 | 1817.21  | 3932.12 | 3316.56 | 1673.69 | 1683.47 | 1816.34 |
| ENSMUSG00000024026 | 12_Glo1    | 2269.28 | -0.11224 | 0.678291 | 0.901447 | 2662.61  | 2055.04 | 1825.3  | 2263.78 | 2375.41 | 2433.55 |
| ENSMUSG00000024028 | 7_Tff2     | 0.38486 | 0.16972  | 0.966824 | NA       | 0        | 1.1335  | 0       | 0       | 0       | 1.7563  |
| ENSMUSG00000024030 | 6_Abcg1    | 1059.18 | 1.04214  | 0.003636 | 0.049952 | 931.356  | 1861.21 | 1485.06 | 726.257 | 571.746 | 779.441 |
| ENSMUSG00000024032 | 6_Tff1     | 4.22078 | -0.51597 | 0.657685 | 0.894702 | 2.02249  | 2.26701 | 6.20497 | 9.90351 | 2.57543 | 2.35126 |
| ENSMUSG00000024033 | 9_Rsph1    | 55.3133 | -0.0047  | 0.992815 | 0.997822 | 23.2586  | 80.4787 | 62.0497 | 56.1199 | 52.3671 | 57.6058 |
| ENSMUSG00000024034 | 12_Tmprs   | 80.1511 | 0.54914  | 0.266215 | 0.654446 | 41.461   | 120.151 | 124.099 | 65.1981 | 61.8103 | 68.1864 |
| ENSMUSG00000024036 | 15_Slc37e  | 852.639 | 0.64428  | 0.211076 | 0.602834 | 363.037  | 1388.54 | 1368.2  | 718.83  | 545.991 | 731.241 |
| ENSMUSG00000024037 | 12_Wdr4    | 399.379 | -0.01196 | 0.978919 | 0.993796 | 181.013  | 529.346 | 482.953 | 448.959 | 342.532 | 411.47  |
| ENSMUSG00000024038 | 16_Ndufv   | 1080.97 | -0.44701 | 0.317909 | 0.698985 | 413.599  | 1144.84 | 1186.18 | 1383.19 | 1063.65 | 1294.37 |
| ENSMUSG00000024039 | 14_Cbs     | 19.7148 | -0.62634 | 0.400139 | 0.759536 | 4.04498  | 26.0706 | 16.5466 | 33.837  | 15.4526 | 22.3369 |
| ENSMUSG00000024041 | 8_Cryaa    | 10979.3 | -3.3346  | 7.74E-05 | 0.002667 | 188.091  | 1946.22 | 3806.75 | 33019.9 | 7230.95 | 19683.5 |
| ENSMUSG00000024042 | 6_Sik1     | 1300.34 | 0.67351  | 0.031834 | 0.220011 | 1420.8   | 1563.1  | 1810.82 | 1001.9  | 745.158 | 1260.27 |
| ENSMUSG00000024043 | 13_Arhgaj  | 190.359 | -0.9896  | 0.010811 | 0.106379 | 178.99   | 78.2117 | 125.134 | 259.967 | 263.552 | 236.301 |
| ENSMUSG00000024044 | 15_Epb41   | 307.7   | -0.89804 | 0.009699 | 0.098401 | 281.126  | 173.426 | 190.286 | 474.543 | 412.927 | 313.893 |
| ENSMUSG00000024045 | 5_Akap8    | 2335.55 | 0.16542  | 0.558859 | 0.848321 | 3095.42  | 2120.78 | 2191.39 | 2015.36 | 2286.12 | 2304.23 |
| ENSMUSG00000024048 | 14_Myl12i  | 6556.17 | 0.29425  | 0.278839 | 0.666002 | 5799.49  | 8078.48 | 7789.3  | 6140.18 | 5224.69 | 6304.89 |
| ENSMUSG00000024049 | 14_Myom    | 360.046 | -0.76842 | 0.130517 | 0.491293 | 420.678  | 102.015 | 276.121 | 495.175 | 385.456 | 480.832 |
| ENSMUSG00000024050 | 15_Wiz     | 708.887 | 0.45006  | 0.425038 | 0.776698 | 231.575  | 1093.83 | 1130.34 | 664.36  | 480.747 | 652.473 |
| ENSMUSG00000024052 | 17_Lpin2   | 5469.36 | 0.54844  | 0.019319 | 0.159425 | 6217.13  | 7128.6  | 6143.95 | 4036.5  | 4639.21 | 4650.78 |
| ENSMUSG00000024053 | 10_Emiliin | 349.546 | -0.20103 | 0.633042 | 0.883434 | 177.979  | 409.195 | 388.845 | 477.019 | 315.061 | 329.176 |
| ENSMUSG00000024054 | 13_Smchc   | 2242.48 | 0.71273  | 0.111452 | 0.453007 | 4584.98  | 1999.5  | 1771.52 | 1312.21 | 1998.53 | 1788.13 |
| ENSMUSG00000024055 | 14_Cyp4f   | 427.149 | -0.11418 | 0.7974   | 0.940307 | 191.125  | 489.673 | 550.174 | 508.38  | 412.069 | 411.47  |
| ENSMUSG00000024056 | 9_Ndc80    | 308.642 | 0.66458  | 0.069022 | 0.349404 | 501.577  | 341.184 | 292.668 | 184.04  | 299.608 | 232.774 |
| ENSMUSG00000024059 | 9_Clip4    | 3614.3  | 0.70969  | 0.004531 | 0.058059 | 4951.05  | 4325.45 | 4180.08 | 2520.44 | 2565.13 | 3143.63 |
| ENSMUSG00000024063 | 12_Lbh     | 1075.69 | -0.72821 | 0.006924 | 0.077502 | 804.95   | 780.984 | 843.876 | 1629.95 | 1229.34 | 1165.05 |
| ENSMUSG00000024064 | 13_Galnt1  | 16.309  | -2.37056 | 0.000664 | 0.014545 | 0.056622 | 6.80102 | 4.13665 | 38.7887 | 26.6128 | 16.4588 |
| ENSMUSG00000024065 | 7_Ehd3     | 415.221 | -0.86234 | 0.004695 | 0.059678 | 256.856  | 268.64  | 358.854 | 611.542 | 554.576 | 440.86  |
| ENSMUSG00000024066 | 8_Xdh      | 4729.22 | 2.07427  | 4.78E-08 | 5.21E-06 | 5280.72  | 11085.7 | 6563.82 | 1430.23 | 2036.31 | 1978.58 |

|                    |            |         |          |          |          |         |         |         |         |         |         |
|--------------------|------------|---------|----------|----------|----------|---------|---------|---------|---------|---------|---------|
| ENSMUSG00000024067 | 13_Dpy30   | 986.824 | -0.09532 | 0.754396 | 0.926508 | 1218.55 | 870.53  | 773.553 | 916.9   | 1150.36 | 991.054 |
| ENSMUSG00000024068 | 6_Spast    | 1192.92 | 0.46899  | 0.292439 | 0.676777 | 2311.7  | 927.205 | 916.267 | 850.051 | 1117.74 | 1034.55 |
| ENSMUSG00000024069 | 12_Slc30a2 | 311.704 | 0.06367  | 0.808982 | 0.945066 | 333.711 | 320.781 | 300.941 | 313.611 | 266.128 | 335.054 |
| ENSMUSG00000024070 | 15_Prkd3   | 1602.82 | -0.05159 | 0.892761 | 0.970997 | 2346.09 | 1082.5  | 1293.74 | 1442.61 | 1876.63 | 1575.34 |
| ENSMUSG00000024072 | 8_Yipf4    | 1311.89 | 0.52238  | 0.342242 | 0.720296 | 3015.53 | 839.926 | 784.929 | 956.514 | 1219.9  | 1054.54 |
| ENSMUSG00000024073 | 14_Birc6   | 3631.92 | 0.18424  | 0.534786 | 0.838344 | 4959.14 | 3564.87 | 3066.29 | 3141.06 | 3530.92 | 3529.23 |
| ENSMUSG00000024074 | 7_Crim1    | 5022.23 | 0.32404  | 0.16595  | 0.545533 | 5744.88 | 5495.22 | 5511.05 | 4432.65 | 3979.04 | 4970.55 |
| ENSMUSG00000024076 | 9_Vit      | 425.446 | -0.77711 | 0.028173 | 0.202852 | 327.643 | 277.708 | 335.068 | 651.981 | 344.249 | 616.029 |
| ENSMUSG00000024077 | 15_Strn    | 2686.53 | 0.46551  | 0.219982 | 0.611263 | 4559.7  | 2495.97 | 2292.74 | 1776.03 | 2547.1  | 2447.66 |
| ENSMUSG00000024078 | 6_Ttc27    | 424.162 | 0.33703  | 0.178883 | 0.564267 | 480.341 | 468.137 | 471.578 | 330.117 | 388.032 | 406.767 |
| ENSMUSG00000024079 | 4_Eif2ak2  | 4925.5  | 1.4155   | 0.002049 | 0.032985 | 11774.9 | 5532.63 | 4187.32 | 2021.14 | 3360.08 | 2676.9  |
| ENSMUSG00000024081 | 8_Cebpz    | 1024.55 | 0.23147  | 0.54978  | 0.843939 | 1652.37 | 872.797 | 794.236 | 770.823 | 1041.33 | 1015.74 |
| ENSMUSG00000024082 | 15_Ndufa7  | 456.782 | -0.05528 | 0.830072 | 0.951209 | 507.645 | 409.195 | 427.109 | 433.278 | 497.917 | 465.549 |
| ENSMUSG00000024083 | 15_Pja2    | 3046.88 | -0.12501 | 0.73266  | 0.919789 | 4319.02 | 2129.85 | 2295.84 | 3045.33 | 3374.67 | 3116.59 |
| ENSMUSG00000024084 | 7_Qpct     | 333.064 | -0.76354 | 0.123558 | 0.478085 | 411.576 | 121.285 | 207.866 | 538.916 | 396.616 | 322.122 |
| ENSMUSG00000024085 | 13_Man2a   | 1073.88 | 0.68112  | 0.100494 | 0.431493 | 2097.32 | 1015.62 | 855.252 | 741.938 | 912.561 | 820.588 |
| ENSMUSG00000024087 | 3_Cyp11b1  | 279.808 | 0.2429   | 0.654353 | 0.893223 | 563.263 | 168.892 | 177.876 | 284.726 | 303.042 | 181.047 |
| ENSMUSG00000024091 | 8_Vapa     | 2769.35 | 0.50496  | 0.259265 | 0.64893  | 5453.64 | 2202.4  | 2091.07 | 1931.18 | 2545.38 | 2392.4  |
| ENSMUSG00000024095 | 15_Hnrnp1  | 1221.59 | 0.35027  | 0.377214 | 0.746335 | 2080.13 | 1065.49 | 961.77  | 920.201 | 1279.13 | 1022.8  |
| ENSMUSG00000024096 | 16_Ralbp1  | 5126.93 | 0.67191  | 0.012661 | 0.119238 | 5549.71 | 7315.63 | 6033.3  | 3797.17 | 3491.43 | 4574.37 |
| ENSMUSG00000024097 | 10_Srsf7   | 2590.11 | 0.4028   | 0.288753 | 0.673672 | 4372.62 | 2376.96 | 2098.31 | 1876.71 | 2547.1  | 2268.96 |
| ENSMUSG00000024098 | 5_Twsg1    | 4991.45 | 0.37893  | 0.256189 | 0.647683 | 7903.89 | 4405.93 | 4619.6  | 4106.65 | 4410    | 4502.65 |
| ENSMUSG00000024099 | 14_Ndufv1  | 1951.17 | 0.09346  | 0.813723 | 0.946804 | 3138.9  | 1488.29 | 1415.77 | 1815.64 | 2050.9  | 1797.53 |
| ENSMUSG00000024101 | 14_Wash    | 429.779 | 0.07273  | 0.88649  | 0.969051 | 162.81  | 564.484 | 594.643 | 495.175 | 334.806 | 426.753 |
| ENSMUSG00000024104 | 11_Fam21   | 1590.04 | 0.034    | 0.883121 | 0.967903 | 1644.28 | 1578.97 | 1602.95 | 1417.85 | 1703.22 | 1592.98 |
| ENSMUSG00000024105 | 2_Themis   | 3.48361 | 0.66219  | 0.619518 | 0.877704 | 5.05622 | 6.80102 | 1.03416 | 0.82529 | 6.00934 | 1.17563 |
| ENSMUSG00000024109 | 18_Nrxn1   | 155.618 | -0.43977 | 0.42902  | 0.779158 | 242.699 | 64.6097 | 88.9379 | 180.739 | 230.93  | 125.792 |
| ENSMUSG00000024112 | 16_Cacna   | 25.6596 | -1.39904 | 0.10665  | 0.443856 | 2.02249 | 26.0706 | 14.4783 | 65.1981 | 30.9052 | 15.2832 |
| ENSMUSG00000024114 | 14_Prss4   | 27.0215 | -0.19316 | 0.696724 | 0.905638 | 16.1799 | 30.6046 | 28.9565 | 26.4094 | 31.7636 | 28.2151 |
| ENSMUSG00000024118 | 13_16000   | 103.521 | 0.28957  | 0.42362  | 0.775388 | 83.9333 | 117.884 | 139.612 | 94.9086 | 78.9799 | 105.807 |
| ENSMUSG00000024120 | 12_Lrpprc  | 1091.38 | 0.09957  | 0.692646 | 0.905638 | 1303.49 | 1093.83 | 989.693 | 1013.46 | 1097.99 | 1049.84 |
| ENSMUSG00000024121 | 13_Atp6v1  | 2366.08 | 0.13249  | 0.717025 | 0.912443 | 1518.89 | 3071.79 | 2833.6  | 2671.47 | 2013.99 | 2086.74 |
| ENSMUSG00000024122 | 16_Pdpk1   | 2848.76 | 0.37422  | 0.243425 | 0.634745 | 4336.22 | 2686.4  | 2625.74 | 2220.04 | 2724.81 | 2499.38 |
| ENSMUSG00000024124 | 9_Prss30   | 4.75505 | 1.34725  | 0.254068 | 0.645047 | 1.01124 | 11.335  | 8.27329 | 3.30117 | 3.43391 | 1.17563 |
| ENSMUSG00000024127 | 14_Prepl   | 867.901 | -0.09832 | 0.736987 | 0.920922 | 1060.8  | 673.301 | 780.792 | 886.364 | 940.891 | 865.262 |
| ENSMUSG00000024128 | 13_Sbp     | 0.48016 | 1.00965  | 0.794176 | NA       | 2.02249 | 0       | 0       | 0       | 0.85848 | 0       |
| ENSMUSG00000024130 | 15_Abca3   | 2320.28 | 0.23524  | 0.627264 | 0.880806 | 970.795 | 3265.62 | 3290.7  | 2158.14 | 1853.45 | 2383    |
| ENSMUSG00000024131 | 7_Slc3a1   | 8.39859 | 0.35861  | 0.674135 | 0.900436 | 0.88995 | 6.80102 | 13.4441 | 3.30117 | 12.8772 | 5.87814 |
| ENSMUSG00000024132 | 5_Eci1     | 716.073 | -0.32903 | 0.299014 | 0.682038 | 459.105 | 680.102 | 765.28  | 902.87  | 710.819 | 778.266 |
| ENSMUSG00000024134 | 11_Six2    | 93.9241 | 0.63629  | 0.168133 | 0.549084 | 155.732 | 74.8112 | 111.689 | 60.2463 | 54.084  | 106.982 |
| ENSMUSG00000024135 | 9_Srbd1    | 557.887 | 0.28355  | 0.313486 | 0.694953 | 717.983 | 592.822 | 526.388 | 433.278 | 521.954 | 554.896 |
| ENSMUSG00000024136 | 14_Dnase   | 69.0636 | -0.191   | 0.684461 | 0.903547 | 34.3823 | 68.0102 | 91.0062 | 75.9269 | 59.2349 | 85.8208 |
| ENSMUSG00000024137 | 8_E4f1     | 248.461 | 0.26538  | 0.688752 | 0.90542  | 49.551  | 366.121 | 398.152 | 274.822 | 171.695 | 230.423 |
| ENSMUSG00000024140 | 9_Epas1    | 10783.8 | 0.33438  | 0.232971 | 0.624787 | 9753.45 | 12673.7 | 13656.1 | 8739.02 | 8740.15 | 11140.2 |
| ENSMUSG00000024142 | 14_Mlst8   | 541.51  | -0.09538 | 0.816247 | 0.947479 | 274.047 | 614.359 | 682.547 | 614.843 | 491.907 | 571.355 |
| ENSMUSG00000024143 | 14_Rhoq    | 2172.73 | 0.15852  | 0.715325 | 0.911362 | 3772.95 | 1480.35 | 1622.6  | 2020.32 | 2327.33 | 1812.82 |
| ENSMUSG00000024145 | 6_Pigf     | 527.837 | 0.33562  | 0.377309 | 0.746353 | 870.681 | 476.071 | 419.87  | 403.568 | 503.068 | 493.764 |
| ENSMUSG00000024146 | 9_Cript    | 1288.61 | 0.31648  | 0.488085 | 0.814112 | 2428    | 904.535 | 955.565 | 1067.1  | 1338.37 | 1038.08 |
| ENSMUSG00000024150 | 11_Mcdf2   | 1244.54 | -0.05197 | 0.81869  | 0.948003 | 1252.93 | 1203.78 | 1209.97 | 1342.75 | 1286.86 | 1170.93 |
| ENSMUSG00000024151 | 13_Msh2    | 1712.86 | 0.42659  | 0.213313 | 0.604576 | 2700.02 | 1627.71 | 1564.69 | 1197.5  | 1581.31 | 1605.91 |
| ENSMUSG00000024154 | 10_Gtf2a1  | 0.14308 | -0.79206 | 0.84609  | NA       | 0       | 0       | 0       | 0       | 0.85848 | 0       |
| ENSMUSG00000024155 | 7_Meio     | 10.77   | 0.68943  | 0.34958  | 0.726477 | 21.2361 | 10.2015 | 8.27329 | 6.60234 | 7.72629 | 10.5807 |
| ENSMUSG00000024158 | 17_Hagh    | 415.141 | -0.29998 | 0.474513 | 0.806964 | 192.136 | 411.462 | 512.944 | 510.031 | 416.361 | 447.914 |
| ENSMUSG00000024160 | 16_Spsb3   | 333.773 | 0.23704  | 0.7271   | 0.916484 | 63.7084 | 532.746 | 487.09  | 422.55  | 212.044 | 284.502 |
| ENSMUSG00000024163 | 17_Mapk8   | 1026.04 | -0.31222 | 0.525086 | 0.833294 | 347.868 | 1114.23 | 1284.43 | 1291.58 | 1054.21 | 1063.94 |
| ENSMUSG00000024164 | 15_C3      | 1665.03 | 1.42032  | 0.006915 | 0.07745  | 936.412 | 4225.7  | 2110.72 | 760.094 | 983.815 | 973.42  |
| ENSMUSG00000024165 | 8_Hn1l     | 1638.06 | 0.6184   | 0.024935 | 0.18879  | 1982.04 | 2183.13 | 1786    | 1032.44 | 1410.48 | 1434.27 |
| ENSMUSG00000024168 | 7_Tmem2    | 312.06  | -0.70842 | 0.107439 | 0.446173 | 132.473 | 230.101 | 348.512 | 496.001 | 363.136 | 302.136 |
| ENSMUSG00000024169 | 15_Ift140  | 510.643 | 0.02546  | 0.941809 | 0.986006 | 326.632 | 574.686 | 644.283 | 519.934 | 502.209 | 496.115 |
| ENSMUSG00000024170 | 15_Telo2   | 310.176 | -0.14376 | 0.784355 | 0.935807 | 100.113 | 393.326 | 390.913 | 373.857 | 280.722 | 322.122 |
| ENSMUSG00000024172 | 10_St6gal  | 4.5734  | -0.50192 | 0.69864  | 0.905638 | 9.1012  | 2.26701 | 0       | 8.25292 | 4.29238 | 3.52688 |
| ENSMUSG00000024173 | 10_Tpsab   | 62.1379 | -0.73701 | 0.238214 | 0.630377 | 18.2024 | 68.0102 | 53.7764 | 121.318 | 38.6315 | 72.8889 |
| ENSMUSG00000024174 | 8_Pot1b    | 188.901 | 0.15124  | 0.713241 | 0.910879 | 288.205 | 139.421 | 168.568 | 136.173 | 222.346 | 178.695 |
| ENSMUSG00000024175 | 1_Tekt4    | 1.29996 | 0.98061  | 0.633944 | NA       | 2.02249 | 1.1335  | 2.06832 | 0       | 2.57543 | 0       |
| ENSMUSG00000024176 | 10_Sox8    | 14.4504 | -1.36453 | 0.084165 | 0.391616 | 4.04498 | 7.93452 | 12.4099 | 37.1382 | 14.5941 | 10.5807 |
| ENSMUSG00000024177 | 8_Nme4     | 28.898  | -0.65407 | 0.182435 | 0.568486 | 18.2024 | 20.4031 | 28.9565 | 39.614  | 40.3484 | 25.8638 |
| ENSMUSG00000024180 | 13_Tmem    | 68.63   | -1.0232  | 0.079485 | 0.378916 | 19.2136 | 46.4736 | 70.323  | 141.125 | 74.6875 | 59.957  |
| ENSMUSG00000024181 | 8_Mrpl28   | 443.008 | -0.01414 | 0.980262 | 0.993796 | 119.327 | 596.223 | 607.053 | 490.224 | 382.022 | 463.197 |
| ENSMUSG00000024182 | 16_Axin1   | 1101.66 | 0.06986  | 0.871481 | 0.963578 | 531.915 | 1509.83 | 1343.38 | 1119.92 | 1000.98 | 1103.91 |
| ENSMUSG00000024184 | 15_Pdia2   | 0.28063 | -1.56014 | 0.700051 | NA       | 0       | 0       | 0       | 0.82529 | 0.85848 | 0       |
| ENSMUSG00000024186 | 15_Rgs11   | 229.924 | -1.19261 | 0.002748 | 0.040971 | 81.9108 | 140.554 | 197.525 | 351.575 | 308.193 | 299.785 |
| ENSMUSG00000024187 | 14_Fam21   | 1170.54 | 0.12246  | 0.817708 | 0.948003 | 408.543 | 1482.62 | 1769.45 | 1299.01 | 864.486 | 1199.14 |
| ENSMUSG00000024188 | 15_Luc7l   | 1557.5  | 0.09165  | 0.786227 | 0.936317 | 2193.39 | 1267.26 | 1359.92 | 1260.22 | 1691.2  | 1572.99 |
| ENSMUSG00000024190 | 6_Dusp1    | 1156.28 | 0.53151  | 0.067914 | 0.346018 | 1329.79 | 1600.51 | 1170.67 | 1127.35 | 792.374 | 916.99  |
| ENSMUSG00000024191 | 14_Bnip1   | 432.294 | 0.13772  | 0.658146 | 0.894702 | 334.722 | 544.081 | 479.851 | 373.857 | 408.635 | 452.617 |

|                    |            |         |          |          |          |         |         |         |         |         |         |
|--------------------|------------|---------|----------|----------|----------|---------|---------|---------|---------|---------|---------|
| ENSMUSG00000024193 | 7_Ph1      | 514.527 | -0.24979 | 0.640544 | 0.887258 | 160.788 | 535.013 | 714.606 | 691.595 | 445.55  | 539.613 |
| ENSMUSG00000024194 | 15_Cuta    | 472.564 | 0.11193  | 0.808709 | 0.945066 | 216.406 | 612.092 | 644.283 | 524.886 | 376.871 | 460.846 |
| ENSMUSG00000024197 | 9_Plin3    | 1346.46 | 0.20235  | 0.510251 | 0.827179 | 1105.29 | 1435.01 | 1781.86 | 1385.67 | 1063.65 | 1307.3  |
| ENSMUSG00000024201 | 12_Kdm4l   | 484.538 | 0.15526  | 0.791114 | 0.937373 | 139.552 | 641.563 | 750.801 | 602.463 | 351.976 | 420.875 |
| ENSMUSG00000024206 | 14_Rfx2    | 198.164 | 0.70294  | 0.28836  | 0.673254 | 44.4948 | 392.192 | 299.907 | 160.932 | 133.922 | 157.534 |
| ENSMUSG00000024207 | 8_Acsbg2   | 2.94614 | -0.46827 | 0.698898 | 0.905638 | 1.01124 | 2.26701 | 4.13665 | 3.30117 | 3.43391 | 3.52688 |
| ENSMUSG00000024208 | 15_Uqcc2   | 657.59  | -0.05985 | 0.883853 | 0.967903 | 336.744 | 762.847 | 832.5   | 764.221 | 624.971 | 624.258 |
| ENSMUSG00000024209 | 9_170006   | 8.42044 | -0.20884 | 0.78545  | 0.936103 | 4.04498 | 9.06802 | 10.3416 | 9.07822 | 8.58477 | 9.40502 |
| ENSMUSG00000024210 | 2_Ip6k3    | 42.4831 | -1.72143 | 0.008884 | 0.092287 | 15.1687 | 7.93452 | 36.1957 | 100.686 | 54.9425 | 39.9713 |
| ENSMUSG00000024211 | 15_Grm8    | 39.6847 | -1.04061 | 0.065319 | 0.338669 | 44.4948 | 14.7355 | 18.6149 | 69.3246 | 49.7917 | 41.147  |
| ENSMUSG00000024212 | 8_Milt1    | 781.424 | 0.24171  | 0.696075 | 0.905638 | 188.091 | 1220.78 | 1131.37 | 828.594 | 529.68  | 790.022 |
| ENSMUSG00000024213 | 13_Nudt3   | 1548.92 | -0.00183 | 0.996536 | 0.998321 | 798.883 | 1864.61 | 1980.42 | 1816.47 | 1231.91 | 1601.21 |
| ENSMUSG00000024215 | 13_Spdef   | 8.82776 | 0.24367  | 0.758046 | 0.927759 | 4.04498 | 10.2015 | 14.4783 | 7.42763 | 8.58477 | 8.22939 |
| ENSMUSG00000024217 | 9_Snrpc    | 549.431 | 0.33551  | 0.184068 | 0.570805 | 654.275 | 656.298 | 528.457 | 465.465 | 493.624 | 498.466 |
| ENSMUSG00000024218 | 12_Taf11   | 464.843 | 0.10951  | 0.677613 | 0.901447 | 452.026 | 522.545 | 472.612 | 381.285 | 473.879 | 486.71  |
| ENSMUSG00000024219 | 15_Anks1   | 572.166 | 0.29251  | 0.590838 | 0.865078 | 201.238 | 813.855 | 874.901 | 613.192 | 394.899 | 534.911 |
| ENSMUSG00000024220 | 13_Zfp52   | 322.371 | -0.09151 | 0.883323 | 0.967903 | 75.8433 | 393.326 | 467.441 | 464.64  | 234.364 | 298.609 |
| ENSMUSG00000024222 | 16_Fkbp5   | 875.123 | 1.1329   | 0.000265 | 0.007178 | 1138.66 | 1407.81 | 1058.98 | 470.417 | 473.021 | 701.85  |
| ENSMUSG00000024225 | 4_Clps     | 0 NA    | NA       | NA       | 0        | 0       | 0       | 0       | 0       | 0       | 0       |
| ENSMUSG00000024227 | 14_Pdzph   | 75.1353 | -1.71222 | 0.06467  | 0.336949 | 82.922  | 20.4031 | 2.06832 | 170.836 | 119.328 | 55.2545 |
| ENSMUSG00000024228 | 12_Nudt11  | 300.428 | 0.00736  | 0.983829 | 0.994713 | 427.756 | 236.902 | 238.891 | 282.25  | 341.674 | 275.097 |
| ENSMUSG00000024231 | 14_Cul2    | 1103.22 | 0.61202  | 0.1796   | 0.565241 | 2251.03 | 960.077 | 790.099 | 751.841 | 988.107 | 878.194 |
| ENSMUSG00000024232 | 1_Bambi    | 332.278 | -0.55226 | 0.075002 | 0.366546 | 239.665 | 300.378 | 268.882 | 475.368 | 406.06  | 303.312 |
| ENSMUSG00000024233 | 10_Lyz1    | 8.50238 | -0.29891 | 0.69829  | 0.905638 | 11.1237 | 4.53401 | 7.23913 | 9.90351 | 11.1602 | 7.05377 |
| ENSMUSG00000024234 | 6_Mtpap    | 621.706 | 0.52871  | 0.219925 | 0.611263 | 1170.01 | 528.212 | 504.671 | 400.267 | 599.217 | 527.857 |
| ENSMUSG00000024235 | 10_Map3k   | 505.577 | 0.70869  | 0.02335  | 0.180489 | 795.849 | 592.822 | 493.295 | 348.273 | 435.248 | 367.972 |
| ENSMUSG00000024236 | 17_Svil    | 1828.58 | -0.08409 | 0.726203 | 0.915969 | 1534.06 | 1860.08 | 1931.81 | 1879.19 | 1859.46 | 1906.87 |
| ENSMUSG00000024238 | 13_Zeb1    | 660.939 | -0.47099 | 0.223314 | 0.613683 | 822.142 | 378.59  | 461.236 | 887.189 | 754.601 | 661.878 |
| ENSMUSG00000024240 | 13_Epc1    | 996.596 | 0.04853  | 0.856594 | 0.959059 | 1217.54 | 957.81  | 864.559 | 923.502 | 1021.59 | 994.581 |
| ENSMUSG00000024241 | 6_Sos1     | 1199.9  | 0.53409  | 0.193052 | 0.583012 | 2242.94 | 978.213 | 1037.26 | 890.49  | 1110.01 | 940.502 |
| ENSMUSG00000024242 | 14_Map4k   | 2136.56 | 0.10868  | 0.733716 | 0.919947 | 2986.2  | 1881.61 | 1782.89 | 1847    | 2170.23 | 2151.4  |
| ENSMUSG00000024245 | 4_Tmem1    | 76.0368 | -1.36405 | 0.001574 | 0.027271 | 56.6297 | 31.7381 | 39.2981 | 146.902 | 97.0079 | 84.6452 |
| ENSMUSG00000024246 | 8_Thumpc   | 96.1086 | -0.10595 | 0.754321 | 0.926508 | 108.203 | 81.6122 | 87.9037 | 116.366 | 84.9892 | 97.5771 |
| ENSMUSG00000024247 | 14_Pkdc    | 232.137 | -0.88837 | 0.138267 | 0.50469  | 54.6072 | 174.559 | 259.575 | 475.368 | 220.629 | 208.086 |
| ENSMUSG00000024248 | 13_Cox7a   | 4707.59 | -0.40921 | 0.103215 | 0.436784 | 3677.9  | 3741.69 | 4713.71 | 5811.71 | 5200.65 | 5099.87 |
| ENSMUSG00000024251 | 9_Thada    | 710.054 | 0.33001  | 0.174001 | 0.557641 | 815.063 | 802.52  | 754.938 | 557.898 | 673.904 | 656     |
| ENSMUSG00000024253 | 8_Dync2li  | 339.01  | -0.43575 | 0.087692 | 0.401776 | 277.081 | 269.774 | 317.488 | 365.605 | 391.466 | 412.645 |
| ENSMUSG00000024254 | 15_Abcg8   | 14.871  | -2.89091 | 7.66E-05 | 0.002645 | 3.03373 | 3.40051 | 4.13665 | 28.8852 | 18.028  | 31.742  |
| ENSMUSG00000024256 | 6_Adcyap   | 1.27388 | -0.59177 | 0.811402 | NA       | 3.03373 | 0       | 0       | 0       | 3.43391 | 1.17563 |
| ENSMUSG00000024258 | 3_Polr2d   | 438.375 | -0.34502 | 0.438271 | 0.785475 | 177.979 | 501.008 | 479.851 | 556.247 | 447.267 | 467.9   |
| ENSMUSG00000024259 | 8_Slc25a4  | 1096.72 | 0.45387  | 0.373716 | 0.74451  | 2334.96 | 753.779 | 714.606 | 810.437 | 1063.65 | 902.882 |
| ENSMUSG00000024260 | 13_Sap13   | 1126.93 | 0.21332  | 0.553525 | 0.84601  | 732.141 | 1491.69 | 1406.46 | 1022.54 | 977.805 | 1130.95 |
| ENSMUSG00000024261 | 5_Syt4     | 784.222 | -1.21553 | 0.017554 | 0.148679 | 842.367 | 258.439 | 315.419 | 1182.64 | 1334.07 | 772.387 |
| ENSMUSG00000024268 | 15_Celf4   | 67.5212 | -0.2203  | 0.724924 | 0.915555 | 117.304 | 43.0731 | 26.8882 | 96.5592 | 78.9799 | 42.3226 |
| ENSMUSG00000024269 | 11_Tpgs2   | 238.602 | -0.40143 | 0.175405 | 0.558833 | 246.744 | 176.826 | 193.388 | 286.376 | 288.448 | 239.828 |
| ENSMUSG00000024270 | 11_Slc39a1 | 1919.2  | 0.8292   | 0.008073 | 0.0864   | 3199.58 | 2187.66 | 1980.42 | 1190.9  | 1413.05 | 1543.6  |
| ENSMUSG00000024271 | 7_Elp2     | 1851.05 | -0.06482 | 0.782332 | 0.935592 | 1818.22 | 1730.86 | 1879.07 | 1681.95 | 2020    | 1976.23 |
| ENSMUSG00000024273 | 7_270006   | 239.204 | 0.01515  | 0.952632 | 0.988194 | 233.597 | 233.502 | 254.404 | 240.985 | 244.666 | 228.072 |
| ENSMUSG00000024274 | 8_Zscan3   | 22.7875 | -0.19246 | 0.720193 | 0.913102 | 23.2586 | 12.4685 | 27.9224 | 21.4576 | 25.7543 | 25.8638 |
| ENSMUSG00000024276 | 6_Zfp397   | 1448.59 | 0.3652   | 0.494146 | 0.816886 | 3075.19 | 879.598 | 937.985 | 1032.44 | 1571.87 | 1194.44 |
| ENSMUSG00000024277 | 14_Mapre   | 1781.95 | 0.03383  | 0.884581 | 0.968114 | 1913.27 | 1644.71 | 1850.12 | 1730.64 | 1663.73 | 1889.23 |
| ENSMUSG00000024283 | 14_Wac     | 3498.71 | 0.44925  | 0.267836 | 0.65577  | 6278.82 | 3061.59 | 2776.72 | 2506.41 | 3461.38 | 2907.33 |
| ENSMUSG00000024286 | 7_Ccny     | 2227.51 | 0.19798  | 0.602673 | 0.870033 | 3581.83 | 1767.13 | 1791.17 | 1822.25 | 2291.28 | 2111.43 |
| ENSMUSG00000024287 | 7_Thoc1    | 1119.36 | 0.41751  | 0.415603 | 0.770073 | 2340.02 | 801.387 | 699.093 | 774.95  | 1155.51 | 945.205 |
| ENSMUSG00000024290 | 8_Rock1    | 2443.84 | 0.64466  | 0.209049 | 0.600677 | 5496.11 | 1695.72 | 1750.84 | 1573.01 | 2256.94 | 1890.41 |
| ENSMUSG00000024292 | 14_Cyp4f   | 3.14165 | -1.74775 | 0.238134 | 0.630377 | 0       | 2.26701 | 2.06832 | 6.60234 | 0.85848 | 7.05377 |
| ENSMUSG00000024293 | 15_Esco1   | 1339.89 | 0.69264  | 0.195459 | 0.586716 | 3135.87 | 956.676 | 873.867 | 855.828 | 1241.36 | 975.771 |
| ENSMUSG00000024294 | 13_Mib1    | 3040.93 | 0.13967  | 0.743092 | 0.923215 | 5225.1  | 2082.24 | 2256.54 | 2740.8  | 3098.24 | 2842.67 |
| ENSMUSG00000024298 | 14_Zfp87   | 972.991 | 0.09378  | 0.821469 | 0.948384 | 1605.86 | 699.371 | 708.401 | 848.401 | 1031.89 | 944.029 |
| ENSMUSG00000024299 | 16_Adamt   | 484.932 | -1.00197 | 0.056394 | 0.310591 | 122.361 | 340.051 | 506.739 | 855.828 | 539.124 | 545.491 |
| ENSMUSG00000024300 | 16_Myo1f   | 108.783 | 1.37437  | 0.03824  | 0.245561 | 44.4948 | 281.109 | 145.817 | 91.6075 | 53.2256 | 36.4445 |
| ENSMUSG00000024301 | 9_Kifc5b   | 53.722  | 0.54478  | 0.438435 | 0.785475 | 11.1237 | 86.1462 | 94.1087 | 48.6922 | 44.6408 | 37.6201 |
| ENSMUSG00000024302 | 15_Dtna    | 543.697 | -1.03966 | 0.013576 | 0.124474 | 541.016 | 225.567 | 300.941 | 831.895 | 817.27  | 545.491 |
| ENSMUSG00000024304 | 14_Cdh2    | 470.46  | -1.76641 | 9.92E-05 | 0.003295 | 333.711 | 132.62  | 174.773 | 662.71  | 986.39  | 532.559 |
| ENSMUSG00000024306 | 12_Ccdc1   | 0.33349 | -1.76186 | 0.662172 | NA       | 0       | 0       | 0       | 0.82529 | 0       | 1.17563 |
| ENSMUSG00000024308 | 14_Tapbp   | 5405.77 | 1.42197  | 5.52E-05 | 0.002052 | 5066.33 | 10541.6 | 8011.65 | 2898.43 | 2670.72 | 3245.91 |
| ENSMUSG00000024309 | 14_Pfdn6   | 491.814 | -0.05612 | 0.905286 | 0.974391 | 199.215 | 642.696 | 604.985 | 547.994 | 448.125 | 507.871 |
| ENSMUSG00000024312 | 9_Wdr46    | 449.994 | 0.40761  | 0.496525 | 0.818867 | 124.383 | 759.447 | 655.658 | 429.152 | 311.627 | 419.699 |
| ENSMUSG00000024317 | 14_Rnf13i  | 504.465 | 0.79892  | 0.153791 | 0.529271 | 1245.85 | 387.658 | 288.531 | 351.575 | 427.522 | 325.649 |
| ENSMUSG00000024319 | 17_Vps52   | 1070.98 | 0.26268  | 0.569565 | 0.853511 | 490.453 | 1506.43 | 1507.81 | 1004.38 | 892.816 | 1023.97 |
| ENSMUSG00000024325 | 8_Ring1    | 292.6   | 0.08803  | 0.887541 | 0.969456 | 67.7534 | 380.857 | 456.065 | 349.099 | 223.204 | 278.624 |
| ENSMUSG00000024327 | 15_Slc39a1 | 1520.9  | 0.01676  | 0.976742 | 0.993796 | 416.633 | 2134.39 | 2038.33 | 1854.43 | 1170.96 | 1510.68 |
| ENSMUSG00000024330 | 16_Col11i  | 108.882 | -0.05568 | 0.919871 | 0.977296 | 38.4273 | 114.484 | 167.534 | 139.474 | 87.5647 | 105.807 |
| ENSMUSG00000024331 | 11_Dsc2    | 38090.2 | 1.05377  | 0.008735 | 0.091236 | 75438.8 | 43240.9 | 35561.7 | 17722.3 | 26373.3 | 30204.2 |
| ENSMUSG00000024334 | 8_H2-Oa    | 2.29208 | 1.12441  | 0.439189 | 0.785475 | 2.02249 | 3.40051 | 4.13665 | 2.47588 | 1.71695 | 0       |

|                    |            |         |          |          |          |         |         |         |         |         |         |
|--------------------|------------|---------|----------|----------|----------|---------|---------|---------|---------|---------|---------|
| ENSMUSG00000024335 | 19_Brd2    | 4554.8  | 0.27976  | 0.311691 | 0.693456 | 3969.13 | 6056.31 | 4959.84 | 4236.23 | 3923.24 | 4184.06 |
| ENSMUSG00000024338 | 14_Psmb1   | 3416.16 | 1.74883  | 0.000784 | 0.016308 | 1816.19 | 8268.9  | 5711.67 | 1651.41 | 1386.44 | 1662.34 |
| ENSMUSG00000024339 | 12_Tap2    | 1492.19 | 1.95276  | 0.003099 | 0.044409 | 426.745 | 3993.33 | 2695.02 | 651.156 | 485.039 | 701.85  |
| ENSMUSG00000024340 | 14_Btnl2   | 0.90765 | 3.38453  | 0.190174 | NA       | 1.01124 | 3.40051 | 1.03416 | 0       | 0       | 0       |
| ENSMUSG00000024346 | 5_Pfdn1    | 1702.07 | -0.03791 | 0.866185 | 0.962501 | 1633.16 | 1773.93 | 1631.91 | 1614.27 | 1761.59 | 1797.53 |
| ENSMUSG00000024347 | 16_Psd2    | 22.3519 | -0.37906 | 0.598067 | 0.868621 | 4.04498 | 30.6046 | 23.7857 | 26.4094 | 25.7543 | 23.5126 |
| ENSMUSG00000024349 | 9_Tmem1    | 277.082 | 1.08498  | 0.016018 | 0.138862 | 203.26  | 603.024 | 323.693 | 185.691 | 162.252 | 184.574 |
| ENSMUSG00000024350 | 5_Dnajc1f  | 525.108 | -0.89777 | 0.002872 | 0.042089 | 424.723 | 287.91  | 387.811 | 765.046 | 709.102 | 576.058 |
| ENSMUSG00000024352 | 11_Spata1  | 55.0776 | -0.34082 | 0.358308 | 0.732631 | 55.6184 | 49.8741 | 40.3323 | 66.8487 | 56.6595 | 61.1326 |
| ENSMUSG00000024353 | 4_Mzb1     | 0.69327 | 1.69652  | 0.556341 | NA       | 0       | 2.26701 | 1.03416 | 0       | 0.85848 | 0       |
| ENSMUSG00000024354 | 11_Slc23a3 | 35.5779 | -0.07152 | 0.879447 | 0.966645 | 41.461  | 39.6726 | 22.7516 | 29.7105 | 35.1976 | 44.6739 |
| ENSMUSG00000024357 | 9_Sil1     | 525.05  | 0.15072  | 0.69104  | 0.905638 | 330.677 | 694.837 | 631.873 | 539.741 | 411.21  | 541.964 |
| ENSMUSG00000024359 | 8_Hspa9    | 5520.16 | 0.07577  | 0.814567 | 0.947066 | 7625.79 | 4918.27 | 4451.03 | 4734.7  | 5962.12 | 5429.05 |
| ENSMUSG00000024360 | 7_Etf1     | 4787.46 | 0.40464  | 0.293666 | 0.678007 | 8221.42 | 4328.85 | 3812.95 | 3519.87 | 4621.18 | 4220.5  |
| ENSMUSG00000024365 | 9_Cyp21a   | 1.38953 | 0.13503  | 0.946619 | NA       | 0       | 2.26701 | 2.06832 | 1.65058 | 0       | 2.35126 |
| ENSMUSG00000024366 | 7_Gfra3    | 27.5798 | -1.0516  | 0.156323 | 0.533738 | 4.04498 | 14.7355 | 35.1615 | 47.0417 | 38.6315 | 25.8638 |
| ENSMUSG00000024369 | 10_Nelfe   | 650.472 | 0.15672  | 0.762565 | 0.929057 | 232.586 | 986.148 | 838.705 | 660.234 | 559.727 | 625.434 |
| ENSMUSG00000024370 | 16_Cdc23   | 1120.57 | -0.06315 | 0.792958 | 0.938313 | 1194.28 | 1023.55 | 1070.36 | 1087.74 | 1257.67 | 1089.81 |
| ENSMUSG00000024371 | 14_C2      | 1342.52 | -0.21234 | 0.527226 | 0.834617 | 866.636 | 1427.08 | 1438.52 | 1588.69 | 1585.61 | 1148.59 |
| ENSMUSG00000024376 | 6_Epb41k1  | 1457.01 | 0.36603  | 0.171099 | 0.553349 | 1682.71 | 1618.64 | 1620.53 | 1025.84 | 1308.32 | 1485.99 |
| ENSMUSG00000024378 | 9_Stard4   | 2943.93 | 0.28607  | 0.434054 | 0.782396 | 4762.96 | 2478.97 | 2462.34 | 2361.99 | 2761.72 | 2835.61 |
| ENSMUSG00000024379 | 3_Tslp     | 99.09   | 0.47712  | 0.271866 | 0.658633 | 170.9   | 82.7457 | 92.0404 | 62.7222 | 94.4325 | 91.699  |
| ENSMUSG00000024381 | 15_Bin1    | 283.633 | -0.8693  | 0.015621 | 0.13624  | 171.912 | 202.897 | 227.516 | 509.205 | 289.307 | 300.961 |
| ENSMUSG00000024382 | 13_Ercc3   | 1002.94 | 0.21975  | 0.466214 | 0.803268 | 784.726 | 1224.18 | 1228.58 | 864.081 | 929.731 | 986.352 |
| ENSMUSG00000024383 | 8_Map3k2   | 1399.23 | 0.19701  | 0.67289  | 0.90042  | 2588.79 | 889.8   | 1005.21 | 1270.12 | 1461.13 | 1180.33 |
| ENSMUSG00000024384 | 3_Lws1     | 1490.49 | 0.32223  | 0.418445 | 0.77222  | 2560.47 | 1220.78 | 1187.22 | 1133.13 | 1416.49 | 1424.86 |
| ENSMUSG00000024386 | 8_Proc     | 1.02082 | 1.06769  | 0.634873 | NA       | 2.02249 | 0       | 2.06832 | 0       | 0.85848 | 1.17563 |
| ENSMUSG00000024387 | 13_Csnk2   | 1609.43 | 0.33909  | 0.398933 | 0.759197 | 955.626 | 2358.82 | 2078.66 | 1445.09 | 1255.95 | 1562.41 |
| ENSMUSG00000024388 | 10_Myo7b   | 5.31021 | -1.42405 | 0.225387 | 0.615493 | 0       | 5.66751 | 3.10248 | 12.3794 | 6.00934 | 4.70251 |
| ENSMUSG00000024391 | 7_Apom     | 3.42289 | -0.48313 | 0.665891 | 0.897065 | 2.02249 | 4.53401 | 2.06832 | 4.95175 | 3.43391 | 3.52688 |
| ENSMUSG00000024392 | 17_Bag6    | 1931.18 | 0.3948   | 0.471652 | 0.805188 | 646.185 | 2916.5  | 3018.72 | 1802.44 | 1423.35 | 1779.9  |
| ENSMUSG00000024393 | 14_Prrc2a  | 3601.76 | 0.46289  | 0.477995 | 0.808634 | 751.355 | 6086.91 | 5685.82 | 3606.53 | 2353.94 | 3125.99 |
| ENSMUSG00000024395 | 7_Lims2    | 56.3611 | -1.05122 | 0.072152 | 0.358547 | 12.1349 | 45.3401 | 52.7422 | 99.0351 | 58.3764 | 70.5377 |
| ENSMUSG00000024397 | 14_Aif1    | 239.08  | 1.1625   | 0.002019 | 0.03279  | 251.8   | 464.736 | 275.087 | 121.318 | 173.412 | 148.129 |
| ENSMUSG00000024399 | 5_Ltb      | 49.797  | 1.03121  | 0.132489 | 0.494849 | 16.1799 | 112.217 | 72.3913 | 44.5658 | 24.0374 | 29.3907 |
| ENSMUSG00000024400 | 15_Wdr33   | 1013.31 | 0.27063  | 0.229367 | 0.620605 | 1077.99 | 1155.04 | 1091.04 | 873.159 | 928.014 | 954.61  |
| ENSMUSG00000024401 | 12_Tnf     | 219.793 | 0.74118  | 0.114683 | 0.460265 | 152.698 | 450.001 | 222.345 | 132.872 | 165.686 | 195.154 |
| ENSMUSG00000024402 | 5_Lta      | 11.6164 | 0.25894  | 0.695068 | 0.905638 | 12.1349 | 13.602  | 12.4099 | 9.30751 | 14.5941 | 7.05377 |
| ENSMUSG00000024403 | 16_Atp6v   | 50.8679 | -0.75915 | 0.074072 | 0.363916 | 50.5622 | 32.8716 | 29.9907 | 76.7522 | 60.9519 | 54.0789 |
| ENSMUSG00000024404 | 6_Riok3    | 3231.74 | 0.44591  | 0.178306 | 0.563623 | 5122.96 | 3131.87 | 2926.68 | 2431.31 | 2996.08 | 2781.54 |
| ENSMUSG00000024409 | 8_Psors1c  | 2.98816 | -0.13984 | 0.90366  | 0.973878 | 2.02249 | 3.40051 | 3.10248 | 3.30117 | 2.57543 | 3.52688 |
| ENSMUSG00000024410 | 14_31100   | 720.598 | 0.3305   | 0.335157 | 0.713739 | 540.004 | 997.483 | 870.764 | 538.091 | 673.046 | 704.201 |
| ENSMUSG00000024411 | 9_Aqp4     | 242.757 | -0.91403 | 0.099758 | 0.429504 | 317.531 | 85.0127 | 102.382 | 408.52  | 305.618 | 237.477 |
| ENSMUSG00000024413 | 13_Npc1    | 1414.6  | 0.37621  | 0.160763 | 0.539243 | 1482.48 | 1778.47 | 1532.63 | 1019.24 | 1272.26 | 1402.52 |
| ENSMUSG00000024414 | 13_Mrpl27  | 647.005 | -0.06838 | 0.851443 | 0.957649 | 385.284 | 780.984 | 729.084 | 751.016 | 626.688 | 608.975 |
| ENSMUSG00000024420 | 8_Zfp521   | 343.194 | -0.32779 | 0.358904 | 0.732887 | 374.16  | 202.897 | 336.103 | 454.736 | 369.145 | 322.122 |
| ENSMUSG00000024421 | 16_Lama3   | 10886.6 | 0.73207  | 0.021679 | 0.172257 | 10738.4 | 15939.3 | 14094.6 | 6426.55 | 7908.29 | 10212.7 |
| ENSMUSG00000024422 | 14_Dhx16   | 940.388 | 0.38844  | 0.399622 | 0.759207 | 454.049 | 1428.21 | 1316.49 | 856.653 | 722.838 | 864.086 |
| ENSMUSG00000024423 | 5_Impact   | 1098.31 | -0.40816 | 0.274119 | 0.66065  | 1381.36 | 667.633 | 782.86  | 1223.08 | 1434.52 | 1100.39 |
| ENSMUSG00000024424 | 14_Ttc39c  | 87.3065 | -0.00825 | 0.980344 | 0.993796 | 74.8321 | 100.882 | 85.8354 | 95.7339 | 90.1401 | 76.4158 |
| ENSMUSG00000024425 | 3_Ndfip1   | 2493.32 | -0.06613 | 0.86134  | 0.960565 | 3668.79 | 1773.93 | 1865.63 | 2294.31 | 2781.47 | 2575.8  |
| ENSMUSG00000024426 | 17_Atat1   | 333.902 | -0.12542 | 0.704669 | 0.908152 | 222.474 | 349.119 | 386.776 | 325.165 | 387.173 | 332.703 |
| ENSMUSG00000024427 | 6_Spry4    | 114.626 | -0.2828  | 0.357269 | 0.731867 | 100.113 | 96.3477 | 113.758 | 138.649 | 110.744 | 128.143 |
| ENSMUSG00000024429 | 9_Gnl1     | 796.33  | 0.22877  | 0.677304 | 0.901447 | 260.901 | 1151.64 | 1165.5  | 815.389 | 576.897 | 807.656 |
| ENSMUSG00000024430 | 13_Cabyr   | 15.712  | 0.41305  | 0.602107 | 0.870033 | 10.1124 | 17.0025 | 26.8882 | 6.60234 | 26.6128 | 7.05377 |
| ENSMUSG00000024431 | 14_Nr3c1   | 3069.31 | 0.33087  | 0.440746 | 0.786476 | 5612.41 | 2233    | 2413.73 | 2618.65 | 3017.55 | 2520.55 |
| ENSMUSG00000024436 | 16_Mrps1   | 659.052 | 0.20428  | 0.613108 | 0.875262 | 384.273 | 960.077 | 772.519 | 572.753 | 564.019 | 700.674 |
| ENSMUSG00000024440 | 12_Pcdh1   | 28.8152 | -1.52638 | 0.004088 | 0.053916 | 13.1462 | 19.2695 | 12.4099 | 49.5175 | 51.5086 | 27.0394 |
| ENSMUSG00000024442 | 5_061000   | 726.477 | -0.07584 | 0.840217 | 0.95317  | 405.509 | 814.989 | 901.789 | 761.745 | 727.13  | 747.699 |
| ENSMUSG00000024446 | 13_Rpp21   | 160.615 | 0.00681  | 0.989492 | 0.997255 | 62.6971 | 207.431 | 213.037 | 203.847 | 126.196 | 150.48  |
| ENSMUSG00000024451 | 8_Arap3    | 124.21  | -0.6552  | 0.081536 | 0.384779 | 65.7309 | 100.882 | 123.065 | 179.914 | 141.649 | 134.022 |
| ENSMUSG00000024454 | 15_Hdac3   | 1387.43 | 0.00688  | 0.982149 | 0.993958 | 991.019 | 1654.91 | 1526.42 | 1292.41 | 1461.99 | 1397.82 |
| ENSMUSG00000024456 | 16_Diap1   | 5015.11 | 0.58589  | 0.030848 | 0.2154   | 5027.91 | 7036.79 | 5994    | 3641.19 | 3852.84 | 4537.92 |
| ENSMUSG00000024457 | 16_Trim2f  | 2485.65 | 0.61561  | 0.014855 | 0.132144 | 2745.53 | 3244.09 | 3034.23 | 1672.87 | 2064.64 | 2152.57 |
| ENSMUSG00000024459 | 18_H2-Mf   | 23.3955 | -0.18686 | 0.771728 | 0.932465 | 8.08995 | 34.0051 | 23.7857 | 32.1864 | 22.3204 | 19.9857 |
| ENSMUSG00000024462 | 17_Gabbr   | 667.782 | -0.71434 | 0.023773 | 0.182537 | 624.949 | 375.189 | 517.081 | 831.895 | 935.74  | 721.835 |
| ENSMUSG00000024471 | 12_Myot    | 305.172 | -0.03339 | 0.961532 | 0.990106 | 650.23  | 85.0127 | 169.602 | 441.531 | 206.034 | 278.624 |
| ENSMUSG00000024472 | 9_Dcp2     | 1930.74 | 0.68499  | 0.073661 | 0.363249 | 3554.52 | 1946.22 | 1641.21 | 1310.56 | 1702.36 | 1429.56 |
| ENSMUSG00000024474 | 5_Ik       | 3514.38 | -0.08523 | 0.726019 | 0.91596  | 3711.27 | 3360.84 | 3159.36 | 3175.73 | 3780.73 | 3898.38 |
| ENSMUSG00000024477 | 3_Pggt1b   | 737.862 | 0.41073  | 0.312083 | 0.693828 | 1324.73 | 600.757 | 600.848 | 574.403 | 661.027 | 665.405 |
| ENSMUSG00000024479 | 2_Mal2     | 32826.7 | 0.62672  | 0.173089 | 0.556848 | 68021.3 | 27056.7 | 24462.1 | 21087.9 | 28402.7 | 27929.4 |
| ENSMUSG00000024480 | 7_Ap3s1    | 1223.57 | 0.65672  | 0.194858 | 0.585542 | 2719.24 | 957.81  | 814.919 | 813.738 | 1146.93 | 888.775 |
| ENSMUSG00000024481 | 4_Lvrn     | 90.4503 | -0.16622 | 0.696216 | 0.905638 | 126.406 | 60.0757 | 69.2888 | 112.24  | 93.574  | 81.1183 |
| ENSMUSG00000024483 | 18_Ankhd   | 4507.07 | 0.31728  | 0.29437  | 0.678843 | 6095.78 | 4621.29 | 4284.53 | 3152.62 | 4390.25 | 4497.95 |
| ENSMUSG00000024485 | 15_Slc4a5  | 4.65349 | -0.39372 | 0.773387 | 0.932641 | 0       | 6.80102 | 5.17081 | 2.47588 | 1.71695 | 11.7563 |

|                    |           |         |          |          |          |         |         |         |         |         |         |
|--------------------|-----------|---------|----------|----------|----------|---------|---------|---------|---------|---------|---------|
| ENSMUSG00000024486 | 5_Hbegf   | 2642.19 | 0.40202  | 0.106214 | 0.442704 | 2599.91 | 3400.51 | 3023.89 | 2427.18 | 2265.52 | 2136.12 |
| ENSMUSG00000024487 | 4_Yipf5   | 1354.32 | 0.49096  | 0.222755 | 0.613522 | 2479.57 | 1204.91 | 1063.12 | 1057.2  | 1220.75 | 1100.39 |
| ENSMUSG00000024491 | 15_Rbm2   | 1390.32 | 0.5798   | 0.17362  | 0.557035 | 2642.38 | 1304.66 | 1050.71 | 890.49  | 1253.38 | 1200.32 |
| ENSMUSG00000024493 | 8_Lars    | 2321.02 | 0.21417  | 0.412971 | 0.768294 | 2751.6  | 2586.65 | 2140.71 | 1899    | 2422.62 | 2125.54 |
| ENSMUSG00000024498 | 15_Tcerg  | 1672.66 | 0.71288  | 0.082665 | 0.387853 | 3165.19 | 1702.52 | 1365.09 | 966.417 | 1435.37 | 1401.35 |
| ENSMUSG00000024500 | 18_Ppp2r  | 116.234 | -1.18958 | 0.01592  | 0.138355 | 111.237 | 47.6071 | 53.7764 | 222.829 | 159.677 | 102.28  |
| ENSMUSG00000024501 | 19_Dpysl  | 1732.63 | -0.98504 | 0.001446 | 0.025691 | 1400.57 | 856.928 | 1231.69 | 2576.56 | 2338.49 | 1991.51 |
| ENSMUSG00000024502 | 9_Jakmip  | 35.0647 | -2.25474 | 5.29E-05 | 0.001972 | 19.2136 | 6.80102 | 10.3416 | 68.4993 | 64.3858 | 41.147  |
| ENSMUSG00000024505 | 15_Htdw2  | 68.5366 | -0.00169 | 0.99698  | 0.998589 | 103.147 | 45.3401 | 56.8789 | 61.8969 | 78.1214 | 65.8352 |
| ENSMUSG00000024507 | 6_Hsd17b  | 1400.6  | -0.22101 | 0.315165 | 0.696604 | 1265.07 | 1321.66 | 1293.74 | 1441.79 | 1517.79 | 1563.59 |
| ENSMUSG00000024511 | 15_Rab27  | 4767.93 | 0.34225  | 0.493604 | 0.816268 | 9679.63 | 3140.94 | 3171.77 | 3467.05 | 4774.85 | 4373.34 |
| ENSMUSG00000024512 | 3_Dynap   | 93.573  | 1.25107  | 0.118234 | 0.468022 | 62.6971 | 300.378 | 32.059  | 50.3428 | 26.6128 | 89.3477 |
| ENSMUSG00000024513 | 16_Mbd2   | 3663.05 | 0.36192  | 0.207559 | 0.599079 | 5162.4  | 3904.92 | 3292.77 | 2992.51 | 3239.89 | 3385.81 |
| ENSMUSG00000024515 | 13_Smad   | 1945.38 | 0.60711  | 0.036692 | 0.239792 | 2995.31 | 2136.65 | 1914.23 | 1473.15 | 1610.5  | 1542.42 |
| ENSMUSG00000024516 | 12_Sec11  | 846.938 | 0.19228  | 0.521437 | 0.831998 | 1143.72 | 816.122 | 749.767 | 691.595 | 851.609 | 828.818 |
| ENSMUSG00000024517 | 16_Grp    | 1.1272  | -2.3296  | 0.282988 | NA       | 1.01124 | 0       | 0       | 0.82529 | 2.57543 | 2.35126 |
| ENSMUSG00000024518 | 3_Rax     | 47.4421 | -1.07924 | 0.115742 | 0.462806 | 7.07871 | 31.7381 | 52.7422 | 92.4327 | 48.9332 | 51.7276 |
| ENSMUSG00000024519 | 5_Cplx4   | 87.4204 | -2.22445 | 0.001535 | 0.026752 | 50.5622 | 30.6046 | 11.3758 | 223.654 | 164.828 | 43.4982 |
| ENSMUSG00000024521 | 7_Pmaip1  | 55.2428 | 2.30536  | 3.01E-05 | 0.00126  | 143.597 | 88.4132 | 43.4348 | 16.5058 | 17.1695 | 22.3369 |
| ENSMUSG00000024524 | 16_Gnal   | 235.636 | 0.15433  | 0.71263  | 0.910879 | 390.34  | 170.025 | 184.081 | 201.371 | 235.223 | 232.774 |
| ENSMUSG00000024525 | 6_Impa2   | 172.409 | -0.08744 | 0.82971  | 0.951112 | 100.113 | 189.295 | 212.003 | 183.215 | 138.215 | 211.613 |
| ENSMUSG00000024526 | 8_Cidea   | 165.732 | 0.05903  | 0.902731 | 0.973718 | 72.8096 | 252.771 | 182.012 | 156.806 | 175.988 | 154.007 |
| ENSMUSG00000024527 | 9_Afg3l2  | 1165.63 | -0.01476 | 0.959471 | 0.989708 | 887.873 | 1314.86 | 1276.16 | 1041.52 | 1200.15 | 1273.2  |
| ENSMUSG00000024528 | 7_Srfbp1  | 205.96  | -0.13639 | 0.63582  | 0.884739 | 170.9   | 227.834 | 190.286 | 209.624 | 236.081 | 201.032 |
| ENSMUSG00000024529 | 13_Lox    | 851.506 | 0.54823  | 0.163037 | 0.541016 | 1452.15 | 989.548 | 592.575 | 721.306 | 737.432 | 616.029 |
| ENSMUSG00000024530 | 7_Slmo1   | 26.6895 | -1.0575  | 0.075467 | 0.367954 | 29.3261 | 7.93452 | 14.4783 | 35.4876 | 31.7636 | 41.147  |
| ENSMUSG00000024533 | 15_Spire1 | 488.716 | -0.19974 | 0.550782 | 0.844636 | 613.825 | 404.661 | 346.444 | 562.024 | 546.85  | 458.495 |
| ENSMUSG00000024534 | 15_Sncai  | 124.498 | -1.12055 | 0.000544 | 0.012418 | 90.0007 | 65.7432 | 79.6304 | 188.992 | 176.846 | 145.778 |
| ENSMUSG00000024535 | 15_Snx24  | 197.034 | -0.47516 | 0.21595  | 0.607397 | 236.631 | 123.552 | 134.441 | 222.004 | 270.42  | 195.154 |
| ENSMUSG00000024537 | 4_Psmg2   | 438.902 | 0.33582  | 0.274782 | 0.661232 | 633.039 | 405.794 | 430.211 | 359.002 | 410.352 | 395.011 |
| ENSMUSG00000024538 | 7_Ppic    | 750.128 | -0.36318 | 0.246232 | 0.637806 | 870.681 | 523.678 | 573.96  | 793.931 | 866.203 | 872.316 |
| ENSMUSG00000024539 | 17_Ptpn2  | 809.266 | 0.44531  | 0.298328 | 0.681298 | 1481.47 | 711.84  | 606.019 | 543.868 | 794.091 | 718.309 |
| ENSMUSG00000024542 | 8_Cep192  | 882.097 | 0.48636  | 0.159393 | 0.537367 | 1395.52 | 879.598 | 812.851 | 592.56  | 858.477 | 753.577 |
| ENSMUSG00000024544 | 8_Ldlrad4 | 174.548 | -0.52552 | 0.090912 | 0.410906 | 129.439 | 131.486 | 168.568 | 242.636 | 190.582 | 184.574 |
| ENSMUSG00000024548 | 11_Setbp  | 866.67  | 0.17795  | 0.560509 | 0.848965 | 1199.34 | 719.774 | 840.773 | 795.582 | 808.685 | 835.871 |
| ENSMUSG00000024552 | 15_Slc14a | 0.96284 | -3.31587 | 0.38563  | NA       | 0       | 0       | 0       | 5.77705 | 0       | 0       |
| ENSMUSG00000024553 | 7_Gair1   | 0.36448 | 0.16972  | 0.966824 | NA       | 1.01124 | 0       | 0       | 0       | 0       | 1.17563 |
| ENSMUSG00000024556 | 3_Me2     | 447.341 | 0.08886  | 0.731209 | 0.91894  | 508.656 | 470.404 | 404.357 | 410.17  | 469.587 | 420.875 |
| ENSMUSG00000024558 | 12_Mapk4  | 168.353 | -1.43521 | 0.000146 | 0.004537 | 91.012  | 68.0102 | 113.758 | 304.533 | 254.109 | 178.695 |
| ENSMUSG00000024560 | 6_Cxnc1   | 579.926 | 0.14495  | 0.816895 | 0.947571 | 131.462 | 810.455 | 885.242 | 654.457 | 407.777 | 590.165 |
| ENSMUSG00000024561 | 8_Mbd1    | 932.302 | 0.43235  | 0.062144 | 0.329195 | 992.031 | 1124.43 | 1096.21 | 770.823 | 770.912 | 839.398 |
| ENSMUSG00000024563 | 15_Smad   | 1664.99 | 0.27503  | 0.424425 | 0.776068 | 2515.98 | 1521.16 | 1432.31 | 1261.87 | 1734.98 | 1523.61 |
| ENSMUSG00000024565 | 8_Sall3   | 2.86976 | -0.40099 | 0.772007 | 0.932508 | 2.02249 | 3.40051 | 2.06832 | 0.82529 | 7.72629 | 1.17563 |
| ENSMUSG00000024566 | 8_Atp9b   | 1416.64 | 0.24012  | 0.340658 | 0.719259 | 1316.64 | 1656.05 | 1629.84 | 1211.53 | 1267.97 | 1417.81 |
| ENSMUSG00000024570 | 6_Rbfa    | 203.654 | 0.10349  | 0.854623 | 0.9585   | 61.6859 | 300.378 | 270.95  | 226.13  | 169.978 | 192.803 |
| ENSMUSG00000024571 | 14_Gm16   | 1145.6  | 0.22267  | 0.565392 | 0.85123  | 686.635 | 1525.69 | 1489.19 | 1086.91 | 936.598 | 1148.59 |
| ENSMUSG00000024575 | 15_Pde6a  | 412.19  | -2.54302 | 0.000686 | 0.014807 | 196.181 | 137.154 | 28.9565 | 1235.46 | 679.055 | 196.33  |
| ENSMUSG00000024576 | 14_Csnk1  | 11004.1 | 0.56433  | 0.181254 | 0.567796 | 21210.8 | 9513.49 | 8663.17 | 7609.2  | 9501.62 | 9526.11 |
| ENSMUSG00000024579 | 7_Pcyox1  | 39.8026 | -0.28568 | 0.521374 | 0.831998 | 26.2924 | 31.7381 | 49.6398 | 46.2164 | 43.7823 | 41.147  |
| ENSMUSG00000024580 | 7_Grpel2  | 1695.18 | 0.19292  | 0.509646 | 0.827179 | 2207.55 | 1687.79 | 1529.52 | 1331.2  | 1798.51 | 1616.49 |
| ENSMUSG00000024581 | 12_Napg   | 946.353 | 0.29926  | 0.330671 | 0.710725 | 1363.16 | 927.205 | 841.807 | 773.299 | 875.647 | 897.004 |
| ENSMUSG00000024583 | 2_Txn1    | 2120.01 | 0.52559  | 0.262368 | 0.651483 | 4288.69 | 1671.92 | 1545.04 | 1360.08 | 1996.82 | 1857.49 |
| ENSMUSG00000024587 | 9_Nars    | 3665.87 | 0.35506  | 0.155183 | 0.53175  | 4505.09 | 4388.92 | 3449.96 | 3051.93 | 3238.18 | 3361.12 |
| ENSMUSG00000024588 | 8_Fech    | 1915.22 | -0.04844 | 0.836777 | 0.952966 | 2081.14 | 1720.66 | 1847.01 | 1872.59 | 1906.68 | 2063.23 |
| ENSMUSG00000024589 | 15_Nedd4  | 1092.48 | 0.38139  | 0.128949 | 0.487604 | 1163.94 | 1305.8  | 1237.89 | 829.419 | 937.457 | 1080.4  |
| ENSMUSG00000024590 | 8_Lmnb1   | 3420.91 | 0.7608   | 0.006579 | 0.074895 | 4822.62 | 4096.48 | 3987.73 | 2119.35 | 2400.3  | 3098.95 |
| ENSMUSG00000024592 | 15_C3300  | 630.946 | 0.53167  | 0.265314 | 0.653969 | 1293.38 | 436.399 | 507.773 | 431.628 | 599.217 | 517.276 |
| ENSMUSG00000024593 | 15_Megf1  | 106.582 | -1.31355 | 0.016639 | 0.142536 | 97.0795 | 29.4711 | 56.8789 | 140.3   | 224.062 | 91.699  |
| ENSMUSG00000024594 | 8_Prrc1   | 1161.78 | 0.19189  | 0.477417 | 0.808503 | 992.031 | 1364.74 | 1359.92 | 1072.05 | 1021.59 | 1160.34 |
| ENSMUSG00000024597 | 10_Slc12a | 12860.2 | 0.4511   | 0.287089 | 0.672979 | 23837.1 | 10591.5 | 10134.8 | 8773.68 | 12191.2 | 11632.8 |
| ENSMUSG00000024598 | 8_Fbn2    | 227.111 | -1.15995 | 0.000457 | 0.010925 | 132.473 | 122.418 | 166.5   | 397.791 | 269.562 | 273.921 |
| ENSMUSG00000024600 | 8_Slc27a  | 100.643 | -1.1358  | 0.000891 | 0.017941 | 68.7646 | 63.4762 | 56.8789 | 162.583 | 141.649 | 110.509 |
| ENSMUSG00000024601 | 8_Isoc1   | 2249.49 | 0.51651  | 0.199013 | 0.590962 | 4152.17 | 1937.16 | 1854.25 | 1655.54 | 2006.26 | 1891.59 |
| ENSMUSG00000024603 | 7_Dctn4   | 1890.88 | 0.26462  | 0.356585 | 0.731393 | 2556.43 | 1908.82 | 1726.02 | 1526.79 | 1895.52 | 1731.7  |
| ENSMUSG00000024604 | 7_Rbm22   | 940.617 | 0.32426  | 0.202303 | 0.593327 | 978.885 | 1172.04 | 986.59  | 733.685 | 891.958 | 880.545 |
| ENSMUSG00000024608 | 10_Rps14  | 9193.79 | -0.40445 | 0.475179 | 0.806964 | 2189.34 | 10398.8 | 11152.4 | 12680.6 | 8595.93 | 10145.7 |
| ENSMUSG00000024610 | 14_Cd74   | 2313.27 | 1.6648   | 0.003074 | 0.044151 | 1044.62 | 5301.39 | 4205.94 | 1436.83 | 918.57  | 972.244 |
| ENSMUSG00000024613 | 16_Tcof1  | 546.615 | 0.72595  | 0.237871 | 0.630377 | 157.754 | 1024.69 | 861.457 | 444.007 | 303.901 | 487.886 |
| ENSMUSG00000024614 | 6_Tmx3    | 2716.77 | 0.66132  | 0.234856 | 0.626451 | 6521.51 | 1690.05 | 1774.62 | 1733.11 | 2488.72 | 2092.62 |
| ENSMUSG00000024617 | 16_Camk   | 39.1886 | -1.108   | 0.093835 | 0.417048 | 31.3486 | 9.06802 | 34.1273 | 89.1316 | 42.0654 | 29.3907 |
| ENSMUSG00000024620 | 11_Pdgfrt | 890.775 | -0.50476 | 0.251706 | 0.642943 | 371.127 | 741.311 | 1097.25 | 1248.67 | 911.703 | 974.595 |
| ENSMUSG00000024621 | 15_Csf1r  | 649.491 | -0.27293 | 0.554408 | 0.846156 | 271.013 | 821.79  | 672.205 | 897.918 | 589.774 | 644.244 |
| ENSMUSG00000024622 | 7_Hmgxb   | 683.389 | 0.22792  | 0.612126 | 0.874367 | 330.677 | 980.48  | 900.755 | 688.294 | 560.585 | 639.542 |
| ENSMUSG00000024639 | 5_Gnaq    | 2438.32 | 0.39195  | 0.23849  | 0.630522 | 3834.64 | 2245.47 | 2222.41 | 1995.56 | 2323.9  | 2007.97 |
| ENSMUSG00000024640 | 9_Psat1   | 2793.89 | 0.52371  | 0.03576  | 0.236192 | 3006.43 | 3772.3  | 3107.66 | 2070.66 | 2398.58 | 2407.69 |

|                    |           |         |          |          |          |         |         |         |         |         |         |
|--------------------|-----------|---------|----------|----------|----------|---------|---------|---------|---------|---------|---------|
| ENSMUSG00000024642 | 16_Tle4   | 1423.54 | 0.32493  | 0.268884 | 0.656292 | 2000.24 | 1490.56 | 1258.57 | 1170.26 | 1336.65 | 1284.96 |
| ENSMUSG00000024644 | 16_Cndp2  | 1590.09 | 0.39824  | 0.341525 | 0.719594 | 904.052 | 2480.1  | 2040.4  | 1386.49 | 1261.1  | 1468.36 |
| ENSMUSG00000024645 | 4_Timm21  | 360.573 | -0.17122 | 0.621871 | 0.878215 | 469.217 | 259.572 | 288.531 | 337.545 | 411.21  | 397.362 |
| ENSMUSG00000024646 | 13_Cyb5a  | 3001.17 | -0.35692 | 0.169456 | 0.550908 | 3119.69 | 2239.8  | 2535.76 | 3238.45 | 3559.25 | 3314.09 |
| ENSMUSG00000024647 | 14_Cbln2  | 52.2439 | -2.20699 | 0.000356 | 0.008979 | 35.3936 | 6.80102 | 13.4441 | 90.7822 | 104.734 | 62.3083 |
| ENSMUSG00000024650 | 4_Slc22a2 | 0.2751  | -1.54073 | 0.703687 | NA       | 0       | 0       | 0       | 1.65058 | 0       | 0       |
| ENSMUSG00000024653 | 2_Scgb1a  | 0.3683  | 0.16972  | 0.966824 | NA       | 0       | 0       | 1.03416 | 0       | 0       | 1.17563 |
| ENSMUSG00000024654 | 8_Asrgl1  | 254.946 | -0.73147 | 0.048332 | 0.282907 | 241.687 | 120.151 | 213.037 | 367.255 | 303.042 | 284.502 |
| ENSMUSG00000024659 | 14_Anxa1  | 34634.4 | 0.46829  | 0.170919 | 0.553078 | 55821.7 | 34817.8 | 29980.3 | 24906.5 | 32038.4 | 30241.9 |
| ENSMUSG00000024660 | 8_Incenp  | 602.101 | 0.42044  | 0.350373 | 0.727131 | 312.474 | 970.278 | 784.929 | 479.495 | 498.775 | 566.653 |
| ENSMUSG00000024661 | 6_Fth1    | 19802.4 | -0.26633 | 0.314699 | 0.696039 | 15976.6 | 20178.6 | 17784.5 | 21870.2 | 24732.7 | 18271.6 |
| ENSMUSG00000024663 | 17_Rab3il | 258.469 | -0.34319 | 0.445274 | 0.788998 | 114.271 | 268.64  | 300.941 | 371.382 | 236.94  | 258.638 |
| ENSMUSG00000024664 | 7_Fads3   | 407.545 | -0.67772 | 0.056649 | 0.31121  | 209.328 | 358.187 | 373.332 | 600.813 | 418.078 | 485.534 |
| ENSMUSG00000024665 | 7_Fads2   | 1498.68 | -0.10985 | 0.825466 | 0.949822 | 523.825 | 1777.33 | 2023.85 | 1558.98 | 1442.24 | 1665.86 |
| ENSMUSG00000024666 | 5_Tmem1   | 180.119 | -0.41629 | 0.208483 | 0.599947 | 117.304 | 159.824 | 186.149 | 231.082 | 211.185 | 175.169 |
| ENSMUSG00000024667 | 11_Tmem   | 203.534 | -0.39199 | 0.204541 | 0.595444 | 132.473 | 197.23  | 198.559 | 228.606 | 229.213 | 235.126 |
| ENSMUSG00000024668 | 7_Sdhaf2  | 994.805 | 0.16795  | 0.504221 | 0.824514 | 1204.39 | 1002.02 | 951.429 | 873.985 | 1003.56 | 933.448 |
| ENSMUSG00000024669 | 7_Cd5     | 26.3249 | 0.38716  | 0.577205 | 0.857342 | 7.07871 | 44.2066 | 38.264  | 23.1082 | 20.6034 | 24.6882 |
| ENSMUSG00000024670 | 16_Cd6    | 4.52957 | 3.70623  | 0.034927 | 0.232643 | 0       | 15.869  | 9.30745 | 0.82529 | 0       | 1.17563 |
| ENSMUSG00000024672 | 11_Ms4a7  | 117.691 | 0.85534  | 0.031206 | 0.217379 | 194.159 | 166.625 | 94.1087 | 94.9086 | 76.4045 | 79.9427 |
| ENSMUSG00000024673 | 9_Ms4a1   | 5.51459 | 0.60289  | 0.597731 | 0.868406 | 11.1237 | 7.93452 | 1.03416 | 4.95175 | 6.86782 | 1.17563 |
| ENSMUSG00000024675 | 19_Ms4a4  | 479.903 | 5.84474  | 6.91E-18 | 5.45E-15 | 1322.71 | 1098.36 | 409.528 | 7.42763 | 34.3391 | 7.05377 |
| ENSMUSG00000024677 | 13_Ms4a6  | 347.662 | 2.46139  | 1.12E-08 | 1.52E-06 | 784.726 | 668.767 | 312.317 | 107.288 | 127.055 | 85.8208 |
| ENSMUSG00000024678 | 6_Ms4a4c  | 95.2863 | 2.12824  | 5.36E-06 | 0.000316 | 238.654 | 133.753 | 93.0745 | 39.614  | 36.056  | 30.5663 |
| ENSMUSG00000024679 | 10_Ms4a6  | 419.018 | 3.66035  | 5.88E-14 | 2.27E-11 | 931.356 | 1058.69 | 340.239 | 70.1499 | 67.8197 | 45.8495 |
| ENSMUSG00000024680 | 12_Ms4a2  | 7.15759 | 0.5986   | 0.582237 | 0.860399 | 19.2136 | 5.66751 | 1.03416 | 5.77705 | 7.72629 | 3.52688 |
| ENSMUSG00000024681 | 11_Ms4a3  | 0.19594 | -0.79206 | 0.84609  | NA       | 0       | 0       | 0       | 0       | 0       | 1.17563 |
| ENSMUSG00000024682 | 3_Gif     | 0.17236 | 1.1315   | 0.781553 | NA       | 0       | 0       | 1.03416 | 0       | 0       | 0       |
| ENSMUSG00000024683 | 5_Mrpl16  | 476.286 | 0.1099   | 0.648616 | 0.891102 | 517.757 | 477.205 | 488.124 | 422.55  | 484.181 | 467.9   |
| ENSMUSG00000024687 | 10_Osbp   | 2015.65 | 0.20517  | 0.389087 | 0.752914 | 2018.44 | 2364.49 | 2093.14 | 1693.5  | 1950.46 | 1973.88 |
| ENSMUSG00000024691 | 13_Fam17  | 3938.46 | 0.68458  | 0.130914 | 0.492205 | 7993.89 | 3492.32 | 3080.77 | 2224.16 | 3599.59 | 3240.03 |
| ENSMUSG00000024695 | 15_Zfp91  | 5578.65 | 0.46573  | 0.27866  | 0.665799 | 10627.2 | 4442.2  | 4344.51 | 4126.46 | 5162.02 | 4769.52 |
| ENSMUSG00000024696 | 8_Lpxn    | 60.5589 | 0.99105  | 0.042551 | 0.261774 | 47.5285 | 126.952 | 67.2205 | 36.3129 | 39.4899 | 45.8495 |
| ENSMUSG00000024697 | 3_Gna14   | 878.534 | 0.39103  | 0.149715 | 0.523169 | 1213.49 | 886.399 | 890.413 | 722.131 | 764.045 | 794.724 |
| ENSMUSG00000024712 | 9_Rfk     | 1183.56 | 0.06525  | 0.876814 | 0.965114 | 1962.83 | 848.994 | 819.056 | 1166.96 | 1220.75 | 1082.75 |
| ENSMUSG00000024713 | 15_Pcsk5  | 177.037 | -0.30551 | 0.269886 | 0.656835 | 153.709 | 149.622 | 171.671 | 208.799 | 178.563 | 199.857 |
| ENSMUSG00000024725 | 12_Ostf1  | 4381.84 | 0.25694  | 0.314514 | 0.695926 | 3891.27 | 5139.3  | 5282.5  | 3950.67 | 3958.44 | 4068.85 |
| ENSMUSG00000024726 | 9_Carnmt  | 1157    | 0.7456   | 0.181372 | 0.567796 | 2858.79 | 746.978 | 742.528 | 761.745 | 922.004 | 909.936 |
| ENSMUSG00000024727 | 8_Trpm6   | 1825.35 | 0.7823   | 0.006844 | 0.076966 | 2684.85 | 2287.41 | 1952.5  | 1096.81 | 1369.27 | 1561.23 |
| ENSMUSG00000024729 | 7_170001  | 0.16854 | 1.1315   | 0.781553 | NA       | 1.01124 | 0       | 0       | 0       | 0       | 0       |
| ENSMUSG00000024730 | 7_Ms4a8a  | 66.0928 | 0.75909  | 0.055844 | 0.309039 | 90.0007 | 98.6148 | 61.0155 | 59.421  | 46.3578 | 41.147  |
| ENSMUSG00000024731 | 15_Ms4a1  | 29.8282 | 0.56335  | 0.434974 | 0.783106 | 7.07871 | 51.0076 | 48.6056 | 22.2829 | 20.6034 | 29.3907 |
| ENSMUSG00000024732 | 7_Ccdc86  | 216.553 | 0.73455  | 0.073126 | 0.361623 | 160.788 | 392.192 | 258.54  | 158.456 | 145.941 | 183.398 |
| ENSMUSG00000024734 | 8_Zp1     | 0.13755 | -0.79206 | 0.84609  | NA       | 0       | 0       | 0       | 0.82529 | 0       | 0       |
| ENSMUSG00000024735 | 13_Prpf19 | 3234.42 | -0.0042  | 0.991733 | 0.997512 | 1652.37 | 4074.94 | 3961.87 | 3235.97 | 3035.57 | 3445.77 |
| ENSMUSG00000024736 | 14_Tmem   | 311.932 | 0.26603  | 0.720773 | 0.913373 | 40.4498 | 484.006 | 497.432 | 366.43  | 181.139 | 302.136 |
| ENSMUSG00000024737 | 2_Slc15a2 | 114.909 | 2.56505  | 1.85E-05 | 0.000862 | 93.0345 | 352.519 | 144.783 | 44.5658 | 36.9145 | 17.6344 |
| ENSMUSG00000024738 | 5_Pga5    | 0       | NA       | NA       | NA       | 0       | 0       | 0       | 0       | 0       | 0       |
| ENSMUSG00000024740 | 9_Ddb1    | 10310   | 0.11855  | 0.748168 | 0.924769 | 6375.9  | 13416.1 | 12407.9 | 8635.03 | 9823.55 | 11201.4 |
| ENSMUSG00000024742 | 15_Fen1   | 544.62  | 0.80509  | 0.051162 | 0.29274  | 392.363 | 979.347 | 706.332 | 358.177 | 345.966 | 485.534 |
| ENSMUSG00000024743 | 14_Syt7   | 281.57  | -0.30453 | 0.40594  | 0.764314 | 163.822 | 253.905 | 338.171 | 337.545 | 273.854 | 322.122 |
| ENSMUSG00000024747 | 3_Aldh1a1 | 272.122 | -0.96502 | 0.014187 | 0.128176 | 263.935 | 111.083 | 177.876 | 378.809 | 377.73  | 323.298 |
| ENSMUSG00000024749 | 8_Tmc1    | 1.47913 | -0.84478 | 0.625807 | NA       | 2.02249 | 1.1335  | 0       | 1.65058 | 1.71695 | 2.35126 |
| ENSMUSG00000024750 | 10_Zfand1 | 6954.44 | 0.84124  | 0.079407 | 0.378752 | 15607.5 | 5789.93 | 5381.78 | 4033.2  | 5993.03 | 4921.18 |
| ENSMUSG00000024754 | 12_Tmem   | 1937.2  | 0.57919  | 0.026261 | 0.194831 | 2436.09 | 2415.49 | 2110.72 | 1287.46 | 1649.99 | 1723.47 |
| ENSMUSG00000024757 | 7_Slc22a1 | 0.17236 | 1.1315   | 0.781553 | NA       | 0       | 0       | 1.03416 | 0       | 0       | 0       |
| ENSMUSG00000024758 | 14_Rtn3   | 5968.93 | 0.07555  | 0.84199  | 0.953593 | 9267.04 | 4513.61 | 4594.78 | 5370.18 | 6376.77 | 5691.21 |
| ENSMUSG00000024759 | 13_Atl3   | 5327.29 | 0.47347  | 0.29342  | 0.677859 | 10460.3 | 4051.14 | 4069.43 | 3773.24 | 5024.67 | 4584.95 |
| ENSMUSG00000024764 | 9_Naa40   | 917.05  | 0.20327  | 0.519682 | 0.831665 | 687.646 | 1174.31 | 1082.77 | 784.853 | 894.533 | 878.194 |
| ENSMUSG00000024766 | 14_Lipo1  | 1034.97 | 0.72768  | 0.180682 | 0.567066 | 2475.53 | 684.636 | 711.503 | 645.379 | 926.297 | 766.509 |
| ENSMUSG00000024767 | 11_Otub1  | 1137.26 | 0.15231  | 0.758131 | 0.927759 | 451.015 | 1593.71 | 1547.11 | 1207.4  | 903.976 | 1120.37 |
| ENSMUSG00000024768 | 5_Lipf    | 0.44746 | -0.57987 | 0.8834   | NA       | 0       | 0       | 1.03416 | 1.65058 | 0       | 0       |
| ENSMUSG00000024769 | 7_Cdc42b  | 1449.17 | 0.626    | 0.238458 | 0.630522 | 580.454 | 2272.67 | 2423.04 | 1242.07 | 885.948 | 1290.84 |
| ENSMUSG00000024770 | 14_Lipn   | 3.39658 | 0.72114  | 0.534035 | 0.838255 | 5.05622 | 3.40051 | 4.13665 | 0.82529 | 3.43391 | 3.52688 |
| ENSMUSG00000024771 | 6_Lipk    | 195.281 | 0.44943  | 0.293472 | 0.677859 | 348.879 | 148.489 | 178.91  | 142.776 | 197.45  | 155.183 |
| ENSMUSG00000024772 | 9_Ehd1    | 1824.48 | 0.41205  | 0.405663 | 0.764167 | 774.613 | 2919.9  | 2555.41 | 1720.73 | 1363.26 | 1612.96 |
| ENSMUSG00000024773 | 14_Atg2a  | 703.024 | 0.6747   | 0.35617  | 0.731176 | 99.1019 | 1286.53 | 1207.9  | 651.156 | 432.672 | 540.789 |
| ENSMUSG00000024774 | 15_Ankrd1 | 1397    | 0.35658  | 0.311096 | 0.693311 | 2138.78 | 1327.33 | 1239.96 | 953.213 | 1444.82 | 1277.91 |
| ENSMUSG00000024776 | 17_Stamb  | 246.041 | 0.24209  | 0.419881 | 0.773473 | 290.227 | 266.373 | 243.028 | 177.438 | 255.826 | 243.355 |
| ENSMUSG00000024777 | 9_Ppp2r5l | 2796.21 | 0.41439  | 0.408519 | 0.766014 | 1137.65 | 4312.98 | 4134.58 | 2405.73 | 2201.13 | 2585.21 |
| ENSMUSG00000024778 | 12_Fas    | 143     | 0.96765  | 0.031598 | 0.218957 | 305.396 | 138.287 | 124.099 | 104.812 | 99.5833 | 85.8208 |
| ENSMUSG00000024780 | 6_Cdc37l1 | 1043.01 | 0.16977  | 0.678061 | 0.901447 | 1730.24 | 792.319 | 790.099 | 826.118 | 1089.41 | 1029.85 |
| ENSMUSG00000024781 | 15_Lipa   | 1686.16 | -0.25878 | 0.432035 | 0.780354 | 2107.43 | 1262.72 | 1235.82 | 1784.28 | 2030.3  | 1696.43 |
| ENSMUSG00000024782 | 7_Ak3     | 3792.23 | 0.2105   | 0.549329 | 0.843853 | 5820.72 | 3167.01 | 3217.28 | 3132.81 | 3908.65 | 3506.9  |
| ENSMUSG00000024784 | 13_Gpha2  | 559.392 | 0.62555  | 0.368006 | 0.740043 | 109.214 | 952.142 | 975.214 | 628.873 | 306.476 | 384.43  |

|                    |           |         |          |          |          |         |         |         |         |         |         |
|--------------------|-----------|---------|----------|----------|----------|---------|---------|---------|---------|---------|---------|
| ENSMUSG00000024785 | 6_Rcl1    | 314.567 | 0.17351  | 0.677502 | 0.901447 | 177.979 | 451.134 | 371.264 | 299.581 | 252.392 | 335.054 |
| ENSMUSG00000024786 | 9_170012  | 28.3581 | 0.52844  | 0.307325 | 0.690215 | 22.2474 | 44.2066 | 34.1273 | 28.8852 | 17.1695 | 23.5126 |
| ENSMUSG00000024787 | 13_Snx15  | 315.66  | 0.10581  | 0.796229 | 0.939697 | 183.035 | 429.598 | 369.196 | 352.4   | 244.666 | 315.068 |
| ENSMUSG00000024789 | 12_Jak2   | 3168    | 1.07475  | 0.005366 | 0.065019 | 6415.33 | 3594.34 | 2879.11 | 1735.59 | 2301.58 | 2082.04 |
| ENSMUSG00000024790 | 7_Sac3d1  | 158.402 | 0.33761  | 0.516164 | 0.830171 | 67.7534 | 218.766 | 244.062 | 162.583 | 105.593 | 151.656 |
| ENSMUSG00000024791 | 10_Cdca5  | 135.08  | 0.68302  | 0.066023 | 0.340788 | 130.451 | 218.766 | 149.953 | 80.8787 | 108.168 | 122.265 |
| ENSMUSG00000024792 | 8_Zfp1    | 327.714 | 0.42831  | 0.510523 | 0.827179 | 71.7983 | 536.147 | 520.183 | 344.147 | 218.912 | 275.097 |
| ENSMUSG00000024793 | 14_Tnfrsf | 23.2687 | -1.01161 | 0.132469 | 0.494849 | 5.05622 | 21.5366 | 19.6491 | 27.2346 | 21.4619 | 44.6739 |
| ENSMUSG00000024795 | 10_Kif20b | 622.82  | 0.58352  | 0.194073 | 0.584173 | 1210.46 | 537.28  | 493.295 | 368.906 | 602.651 | 524.33  |
| ENSMUSG00000024797 | 12_Vps51  | 587.024 | 0.3809   | 0.467602 | 0.803736 | 227.53  | 854.661 | 910.062 | 577.705 | 404.343 | 547.843 |
| ENSMUSG00000024798 | 15_Htr7   | 14.6615 | 1.88009  | 0.032033 | 0.220741 | 26.2924 | 31.7381 | 11.3758 | 2.47588 | 13.7356 | 2.35126 |
| ENSMUSG00000024799 | 14_Tm7sf  | 637.55  | 0.1798   | 0.725067 | 0.915633 | 238.654 | 871.664 | 921.438 | 655.282 | 511.652 | 626.61  |
| ENSMUSG00000024800 | 7_Rpp30   | 246.893 | 0.35082  | 0.456988 | 0.797169 | 461.127 | 210.832 | 158.227 | 178.263 | 260.119 | 212.789 |
| ENSMUSG00000024803 | 8_Ankrd1  | 9.79999 | 0.03206  | 0.962861 | 0.990106 | 11.1237 | 11.335  | 7.23913 | 9.07822 | 9.44325 | 10.5807 |
| ENSMUSG00000024805 | 15_Pcgf5  | 462.1   | 1.17199  | 0.001144 | 0.021709 | 883.828 | 593.956 | 442.621 | 259.967 | 325.363 | 266.868 |
| ENSMUSG00000024806 | 3_Mlana   | 1213.27 | -1.77356 | 1.35E-06 | 0.000102 | 463.15  | 438.666 | 745.63  | 2357.86 | 1892.94 | 1381.36 |
| ENSMUSG00000024807 | 17_Syvn1  | 755.534 | 0.62592  | 0.257116 | 0.648419 | 274.047 | 1320.53 | 1156.19 | 661.059 | 484.181 | 637.19  |
| ENSMUSG00000024810 | 16_Il33   | 1104.26 | 0.18028  | 0.962949 | 0.896048 | 1881.93 | 853.528 | 783.894 | 1041.52 | 1043.05 | 1021.62 |
| ENSMUSG00000024811 | 11_Tnks2  | 7020.6  | 0.39873  | 0.315569 | 0.696629 | 12387.7 | 5852.28 | 5713.74 | 5298.38 | 6792.27 | 6079.17 |
| ENSMUSG00000024812 | 9_Tjp2    | 5573.11 | 0.60565  | 0.053563 | 0.301028 | 4858.02 | 8281.37 | 7038.5  | 3942.42 | 4307.84 | 5010.53 |
| ENSMUSG00000024816 | 12_Frmd8  | 731.855 | 0.44105  | 0.267582 | 0.655756 | 454.049 | 1087.03 | 987.624 | 662.71  | 564.878 | 634.839 |
| ENSMUSG00000024817 | 13_Uhrf2  | 1178.5  | 0.39157  | 0.316242 | 0.69714  | 2003.28 | 1046.22 | 962.804 | 864.081 | 1225.91 | 968.717 |
| ENSMUSG00000024818 | 14_Slc25a | 208.418 | 0.04884  | 0.917449 | 0.976775 | 92.0232 | 272.041 | 271.984 | 236.859 | 187.148 | 190.452 |
| ENSMUSG00000024824 | 6_Rad9a   | 258.261 | 0.42178  | 0.358602 | 0.73267  | 138.54  | 413.729 | 335.068 | 250.889 | 178.563 | 232.774 |
| ENSMUSG00000024826 | 14_Dpf2   | 1547.08 | 0.07692  | 0.851042 | 0.957519 | 801.917 | 1949.62 | 2013.51 | 1557.33 | 1438.81 | 1521.26 |
| ENSMUSG00000024827 | 9_Gldc    | 2186.68 | 0.02321  | 0.945898 | 0.986649 | 1572.48 | 2164.99 | 2874.97 | 2089.64 | 1813.96 | 2604.02 |
| ENSMUSG00000024829 | 12_Mrpl21 | 494.029 | 0.19368  | 0.417818 | 0.771473 | 493.487 | 556.55  | 531.559 | 485.272 | 444.691 | 452.617 |
| ENSMUSG00000024830 | 16_Rps6k  | 330.703 | 0.3518   | 0.559806 | 0.848761 | 88.9895 | 540.681 | 482.953 | 347.448 | 245.524 | 278.624 |
| ENSMUSG00000024831 | 13_Ighmb  | 111.809 | 0.43991  | 0.39479  | 0.755773 | 49.551  | 171.159 | 165.466 | 99.0351 | 79.8384 | 105.807 |
| ENSMUSG00000024833 | 14_Pola2  | 263.376 | 0.74869  | 0.106623 | 0.443847 | 145.619 | 437.532 | 407.46  | 175.787 | 194.016 | 219.842 |
| ENSMUSG00000024835 | 14_Coro1l | 3397.86 | 0.26274  | 0.611804 | 0.874367 | 1250.91 | 5244.72 | 4623.74 | 3408.46 | 2669.86 | 3189.48 |
| ENSMUSG00000024841 | 7_Eif1ad  | 739.721 | 0.22631  | 0.384351 | 0.75056  | 734.163 | 892.067 | 766.314 | 597.512 | 687.64  | 760.631 |
| ENSMUSG00000024842 | 7_Cabp4   | 33.0551 | -2.13319 | 0.00545  | 0.06566  | 11.1237 | 11.335  | 14.4783 | 108.113 | 40.3484 | 12.9319 |
| ENSMUSG00000024843 | 15_Chka   | 597.178 | -0.36238 | 0.248863 | 0.640276 | 676.522 | 409.195 | 481.919 | 646.204 | 752.026 | 617.205 |
| ENSMUSG00000024844 | 14_Banf1  | 1168.01 | 0.10531  | 0.83001  | 0.951209 | 463.15  | 1641.31 | 1527.46 | 1179.34 | 949.476 | 1247.34 |
| ENSMUSG00000024846 | 5_Cst6    | 212.972 | -0.08142 | 0.89015  | 0.97035  | 54.6072 | 267.507 | 298.873 | 257.491 | 175.988 | 223.369 |
| ENSMUSG00000024847 | 14_Aip    | 467.88  | -0.0146  | 0.981239 | 0.993854 | 105.169 | 623.427 | 668.068 | 601.638 | 352.834 | 456.144 |
| ENSMUSG00000024851 | 13_Pitpnn | 459.553 | -0.02485 | 0.968363 | 0.99129  | 106.181 | 686.903 | 573.96  | 651.981 | 369.145 | 369.147 |
| ENSMUSG00000024853 | 9_Sf3b2   | 4004.84 | 0.23337  | 0.521445 | 0.831998 | 2551.37 | 5359.2  | 5073.6  | 3641.19 | 3479.41 | 3924.25 |
| ENSMUSG00000024854 | 3_Pold4   | 288.959 | 0.04293  | 0.947282 | 0.986649 | 57.6409 | 437.532 | 384.708 | 349.099 | 212.044 | 292.731 |
| ENSMUSG00000024855 | 9_Pacs1   | 744.771 | 0.16629  | 0.656746 | 0.894334 | 464.161 | 920.404 | 978.317 | 705.625 | 620.679 | 779.441 |
| ENSMUSG00000024856 | 10_Cdk2a  | 538.304 | 0.36228  | 0.565116 | 0.851057 | 130.451 | 855.795 | 830.432 | 571.102 | 336.523 | 505.52  |
| ENSMUSG00000024857 | 16_Cabp2  | 0.55573 | -2.53048 | 0.482371 | NA       | 0       | 0       | 0       | 2.47588 | 0.85848 | 0       |
| ENSMUSG00000024858 | 13_Adrbk  | 2068.45 | 0.38233  | 0.469914 | 0.804531 | 752.366 | 3249.75 | 3020.79 | 1987.3  | 1541.82 | 1858.67 |
| ENSMUSG00000024862 | 16_Klc2   | 364.607 | -0.13852 | 0.830038 | 0.951209 | 68.7646 | 443.2   | 529.491 | 477.019 | 295.316 | 373.85  |
| ENSMUSG00000024866 | 9_Acy3    | 106.059 | -0.21452 | 0.678314 | 0.901447 | 37.416  | 114.484 | 142.714 | 119.667 | 102.159 | 119.914 |
| ENSMUSG00000024867 | 14_Pip5k1 | 381.879 | -1.7652  | 1.30E-06 | 9.95E-05 | 225.507 | 123.552 | 171.671 | 743.588 | 552.001 | 474.954 |
| ENSMUSG00000024868 | 8_Dkk1    | 22.6825 | -1.94873 | 0.003228 | 0.045839 | 17.1912 | 3.40051 | 7.23913 | 42.0899 | 30.9052 | 35.2688 |
| ENSMUSG00000024869 | 9_Nudt8   | 230.004 | 0.01683  | 0.976866 | 0.993796 | 61.6859 | 277.708 | 354.717 | 236.034 | 220.629 | 229.247 |
| ENSMUSG00000024870 | 5_Rab1b   | 2105.21 | 0.11692  | 0.833755 | 0.952011 | 635.061 | 2966.38 | 2970.11 | 2406.55 | 1631.11 | 2022.08 |
| ENSMUSG00000024871 | 10_Doc2g  | 36.938  | 0.65592  | 0.257469 | 0.648651 | 19.2136 | 54.4081 | 62.0497 | 37.1382 | 20.6034 | 28.2151 |
| ENSMUSG00000024873 | 6_Cnih2   | 15.3187 | -0.97554 | 0.17648  | 0.560405 | 10.1124 | 15.869  | 5.17081 | 14.03   | 32.6221 | 14.1075 |
| ENSMUSG00000024875 | 4_Yif1a   | 741.215 | 0.18638  | 0.73235  | 0.919789 | 238.654 | 1064.36 | 1064.15 | 764.221 | 594.066 | 721.835 |
| ENSMUSG00000024878 | 8_Cbwd1   | 325.781 | 0.41248  | 0.333357 | 0.712065 | 582.477 | 281.109 | 252.335 | 223.654 | 327.08  | 288.029 |
| ENSMUSG00000024883 | 6_Rin1    | 1008.94 | 0.93352  | 0.040481 | 0.253838 | 620.904 | 1976.83 | 1375.43 | 589.259 | 676.48  | 814.71  |
| ENSMUSG00000024885 | 8_Aldh3b  | 240.261 | -0.02634 | 0.963183 | 0.990106 | 67.7534 | 296.978 | 349.547 | 274.822 | 200.884 | 251.584 |
| ENSMUSG00000024887 | 9_Asah2   | 558.375 | 0.75593  | 0.08123  | 0.383853 | 1133.6  | 536.147 | 434.348 | 364.779 | 468.728 | 412.645 |
| ENSMUSG00000024889 | 3_Rce1    | 316.106 | 0.05295  | 0.903201 | 0.973742 | 159.777 | 393.326 | 412.63  | 336.719 | 253.251 | 340.932 |
| ENSMUSG00000024891 | 5_Slc29a2 | 75.5238 | 0.65301  | 0.355061 | 0.73032  | 17.1912 | 146.222 | 113.758 | 83.3545 | 42.0654 | 50.552  |
| ENSMUSG00000024892 | 15_Pcx    | 1272.85 | 0.491    | 0.43598  | 0.78413  | 306.407 | 2047.11 | 2108.66 | 1196.67 | 793.233 | 1185.03 |
| ENSMUSG00000024896 | 8_Minpp1  | 542.786 | 0.44022  | 0.139223 | 0.506471 | 782.703 | 600.757 | 491.227 | 461.338 | 438.682 | 482.007 |
| ENSMUSG00000024897 | 8_Apba1   | 95.3917 | -0.77978 | 0.01647  | 0.141577 | 70.7871 | 63.4762 | 76.528  | 137.824 | 116.753 | 106.982 |
| ENSMUSG00000024899 | 6_Papss2  | 2070.48 | -0.18076 | 0.589056 | 0.863829 | 2653.51 | 1503.02 | 1666.03 | 1908.08 | 2474.99 | 2217.23 |
| ENSMUSG00000024900 | 4_Cpt1a   | 2571.75 | -0.06464 | 0.789653 | 0.937308 | 2196.42 | 2544.71 | 2801.54 | 2769.68 | 2614.06 | 2504.09 |
| ENSMUSG00000024901 | 14_Peli3  | 96.3815 | -0.70722 | 0.175672 | 0.559171 | 33.3711 | 99.7483 | 86.8696 | 172.486 | 95.2909 | 90.5233 |
| ENSMUSG00000024902 | 4_Mrpl11  | 433.265 | -0.24293 | 0.409459 | 0.766569 | 307.418 | 437.532 | 445.724 | 501.778 | 418.078 | 489.061 |
| ENSMUSG00000024903 | 10_Lao1   | 0.46955 | -0.60795 | 0.850453 | NA       | 0       | 1.1335  | 0       | 0.82529 | 0.85848 | 0       |
| ENSMUSG00000024905 | 15_Mtl5   | 3.35478 | -0.14985 | 0.903185 | 0.973742 | 1.01124 | 2.26701 | 6.20497 | 1.65058 | 4.29238 | 4.70251 |
| ENSMUSG00000024906 | 9_Mus81   | 216.264 | -0.13552 | 0.834753 | 0.952109 | 39.4385 | 269.774 | 309.214 | 262.443 | 186.29  | 230.423 |
| ENSMUSG00000024907 | 6_Gal     | 0.64191 | 0.29808  | 0.908164 | NA       | 0       | 1.1335  | 1.03416 | 0.82529 | 0.85848 | 0       |
| ENSMUSG00000024908 | 14_Ppp6r  | 3740.92 | 0.36916  | 0.263926 | 0.652958 | 5794.43 | 3535.4  | 3320.69 | 2893.48 | 3374.67 | 3526.88 |
| ENSMUSG00000024909 | 14_Efemp  | 376.575 | -0.53302 | 0.392651 | 0.75466  | 67.7534 | 395.593 | 460.202 | 569.452 | 382.022 | 384.43  |
| ENSMUSG00000024910 | 4_Ctsw    | 14.9927 | 3.50378  | 0.000204 | 0.005909 | 10.1124 | 51.0076 | 21.7174 | 1.65058 | 4.29238 | 1.17563 |
| ENSMUSG00000024911 | 5_Fibp    | 506.011 | -0.0481  | 0.918765 | 0.977109 | 203.26  | 624.56  | 664.966 | 500.952 | 494.483 | 547.843 |
| ENSMUSG00000024912 | 5_Fosl1   | 33.0978 | 1.17873  | 0.056411 | 0.310591 | 20.2249 | 80.4787 | 37.2298 | 18.9817 | 24.0374 | 17.6344 |

|                    |            |         |          |          |          |         |         |         |         |         |         |
|--------------------|------------|---------|----------|----------|----------|---------|---------|---------|---------|---------|---------|
| ENSMUSG00000024913 | 16_Lrp5    | 932.087 | 0.36683  | 0.570377 | 0.853915 | 196.181 | 1453.15 | 1500.57 | 930.104 | 637.848 | 874.667 |
| ENSMUSG00000024914 | 16_Drap1   | 1313.03 | -0.09943 | 0.870701 | 0.963322 | 295.283 | 1750.13 | 1758.07 | 1667.09 | 980.381 | 1427.21 |
| ENSMUSG00000024921 | 16_Smarc   | 3064.43 | -0.00057 | 0.998609 | 0.999359 | 4213.86 | 2347.48 | 2629.87 | 2925.66 | 3134.3  | 3135.4  |
| ENSMUSG00000024922 | 1_Ovol1    | 722.992 | 0.79533  | 0.07987  | 0.380122 | 423.711 | 1164.11 | 1164.47 | 639.602 | 424.088 | 521.979 |
| ENSMUSG00000024924 | 14_Vldlr   | 831.909 | -0.16732 | 0.710412 | 0.910155 | 1275.18 | 404.661 | 671.171 | 933.406 | 878.222 | 828.818 |
| ENSMUSG00000024925 | 10_Rnase   | 60.9596 | 0.62276  | 0.365658 | 0.738988 | 14.1574 | 104.282 | 103.416 | 59.421  | 38.6315 | 45.8495 |
| ENSMUSG00000024926 | 9_Kat5     | 692.378 | -0.05054 | 0.869015 | 0.962942 | 490.453 | 756.046 | 794.236 | 699.023 | 664.461 | 750.051 |
| ENSMUSG00000024927 | 7_Rela     | 950.776 | 0.44426  | 0.441531 | 0.786839 | 286.182 | 1531.36 | 1470.58 | 886.364 | 669.612 | 860.56  |
| ENSMUSG00000024935 | 10_Slc1a1  | 3644.4  | 0.36598  | 0.181611 | 0.567796 | 4497    | 4369.65 | 3445.83 | 2687.98 | 3627.07 | 3238.85 |
| ENSMUSG00000024936 | 7_Kcnk7    | 27.6088 | 0.54181  | 0.430546 | 0.780048 | 10.1124 | 48.7406 | 39.2981 | 26.4094 | 12.8772 | 28.2151 |
| ENSMUSG00000024937 | 14_Ehbp1   | 800.327 | 0.4357   | 0.260392 | 0.649568 | 517.757 | 1192.45 | 1050.71 | 728.733 | 606.943 | 705.377 |
| ENSMUSG00000024939 | 6_Fam89t   | 169.764 | -0.10313 | 0.917384 | 0.976775 | 2.02249 | 235.769 | 253.37  | 215.401 | 145.083 | 166.939 |
| ENSMUSG00000024940 | 10_Ltbp3   | 1410.41 | -0.73212 | 0.156939 | 0.534368 | 391.352 | 1141.44 | 1647.42 | 2191.98 | 1439.67 | 1650.58 |
| ENSMUSG00000024941 | 8_Scyl1    | 887.353 | 0.01677  | 0.978305 | 0.993796 | 203.26  | 1246.85 | 1227.55 | 1124.05 | 652.443 | 869.965 |
| ENSMUSG00000024942 | 16_Capn1   | 7587.35 | 0.5953   | 0.287759 | 0.673109 | 2617.1  | 12461.7 | 12313.8 | 5975.12 | 4826.36 | 7330.04 |
| ENSMUSG00000024943 | 8_Smc5     | 1097.72 | 0.44408  | 0.289828 | 0.674932 | 2016.42 | 869.397 | 910.062 | 792.281 | 1067.09 | 931.097 |
| ENSMUSG00000024944 | 5_Arl2     | 476.097 | -0.60185 | 0.272091 | 0.658686 | 119.327 | 459.069 | 556.379 | 713.878 | 473.021 | 534.911 |
| ENSMUSG00000024947 | 16_Men1    | 484.693 | 0.11404  | 0.828897 | 0.951083 | 173.934 | 654.031 | 683.581 | 527.362 | 351.976 | 517.276 |
| ENSMUSG00000024948 | 14_Map4k   | 665.46  | -0.2423  | 0.604829 | 0.871119 | 265.957 | 632.495 | 930.745 | 779.076 | 666.178 | 718.309 |
| ENSMUSG00000024949 | 17_Sf1     | 2664.01 | 0.18014  | 0.495619 | 0.818151 | 2314.74 | 3252.02 | 2923.57 | 2306.69 | 2554.83 | 2632.23 |
| ENSMUSG00000024952 | 12_Rps6k   | 1449.82 | 0.69911  | 0.156842 | 0.534279 | 702.815 | 2616.12 | 2064.19 | 1144.68 | 888.524 | 1282.61 |
| ENSMUSG00000024953 | 16_Prdx5   | 6869.37 | 0.14467  | 0.791983 | 0.937626 | 2215.64 | 9833.14 | 9591.85 | 7907.13 | 4947.4  | 6721.06 |
| ENSMUSG00000024955 | 13_Esrra   | 598.653 | 0.55222  | 0.497252 | 0.819208 | 50.5622 | 1016.75 | 1068.29 | 637.951 | 321.07  | 497.291 |
| ENSMUSG00000024957 | 8_Kcnk4    | 19.2597 | 0.93125  | 0.210484 | 0.602604 | 8.08995 | 28.3376 | 39.2981 | 16.5058 | 6.86782 | 16.4588 |
| ENSMUSG00000024958 | 12_Gpr13   | 353.824 | -0.14101 | 0.820476 | 0.948338 | 75.8433 | 448.867 | 485.022 | 455.561 | 275.571 | 382.079 |
| ENSMUSG00000024959 | 13_Bad     | 350.805 | -0.10604 | 0.865583 | 0.962186 | 72.8096 | 423.93  | 517.081 | 423.375 | 286.731 | 380.903 |
| ENSMUSG00000024960 | 8_Plcb3    | 2519.65 | 0.63845  | 0.240663 | 0.631907 | 954.615 | 4265.37 | 3984.62 | 1876.71 | 1605.35 | 2431.2  |
| ENSMUSG00000024962 | 13_Vegfb   | 333.52  | -0.73419 | 0.066669 | 0.342409 | 149.664 | 283.376 | 318.522 | 529.012 | 340.815 | 379.728 |
| ENSMUSG00000024963 | 11_Dnajc4  | 303.725 | 0.10386  | 0.858408 | 0.959189 | 81.9108 | 432.998 | 429.177 | 330.117 | 260.119 | 288.029 |
| ENSMUSG00000024965 | 8_Fermt3   | 1077.6  | 0.6174   | 0.332678 | 0.711855 | 259.89  | 1776.2  | 1878.04 | 881.412 | 647.292 | 1022.8  |
| ENSMUSG00000024966 | 8_Stip1    | 2610.65 | 0.06036  | 0.839159 | 0.953167 | 2022.49 | 3279.22 | 2693.99 | 2338.05 | 2523.92 | 2806.22 |
| ENSMUSG00000024968 | 13_Rcor2   | 90.4325 | -0.31209 | 0.565809 | 0.851562 | 27.3036 | 104.282 | 110.655 | 105.637 | 103.017 | 91.699  |
| ENSMUSG00000024969 | 15_Mark2   | 3042.64 | 0.52962  | 0.211642 | 0.602834 | 1771.7  | 4475.07 | 4537.9  | 2393.35 | 2182.25 | 2895.57 |
| ENSMUSG00000024970 | 4_Al8461a  | 223.312 | -0.11575 | 0.839938 | 0.95317  | 60.6747 | 286.776 | 295.77  | 278.949 | 193.157 | 224.545 |
| ENSMUSG00000024972 | 16_Lgals1  | 81.9808 | 0.8849   | 0.020321 | 0.164559 | 135.507 | 90.6802 | 93.0745 | 51.9934 | 71.2536 | 49.3764 |
| ENSMUSG00000024973 | 16_Hrasls  | 0.96055 | -0.84074 | 0.682207 | NA       | 1.01124 | 0       | 1.03416 | 0.82529 | 1.71695 | 1.17563 |
| ENSMUSG00000024974 | 10_Smc3    | 3106.61 | 0.27927  | 0.503    | 0.823747 | 5329.26 | 2501.64 | 2387.88 | 2158.14 | 3207.27 | 3055.46 |
| ENSMUSG00000024975 | 12_Pdcd4   | 3694.76 | 0.29964  | 0.493936 | 0.816694 | 6720.73 | 2444.97 | 3065.25 | 2886.87 | 3499.15 | 3551.57 |
| ENSMUSG00000024976 | 13_Shoc2   | 2874.43 | 0.418    | 0.297869 | 0.681147 | 5096.67 | 2567.38 | 2199.66 | 2134.21 | 2776.31 | 2472.35 |
| ENSMUSG00000024978 | 10_Gpam    | 575.865 | -0.74807 | 0.018632 | 0.155304 | 337.756 | 406.928 | 545.003 | 848.401 | 679.914 | 637.19  |
| ENSMUSG00000024979 | 13_Tectb   | 0.33349 | -1.76186 | 0.662172 | NA       | 0       | 0       | 0       | 0.82529 | 0       | 1.17563 |
| ENSMUSG00000024981 | 5_Acsf5    | 4701.2  | 0.50272  | 0.107754 | 0.446399 | 6816.8  | 5358.07 | 4361.06 | 3084.94 | 4294.1  | 4292.22 |
| ENSMUSG00000024982 | 9_Zdhhc6   | 966.925 | 0.28932  | 0.288151 | 0.673216 | 1248.89 | 1041.69 | 899.721 | 774.95  | 891.099 | 945.205 |
| ENSMUSG00000024983 | 9_Vti1a    | 955.366 | 0.20036  | 0.396685 | 0.757228 | 999.109 | 1014.49 | 1050.71 | 824.467 | 855.902 | 987.527 |
| ENSMUSG00000024985 | 12_Tcf7l2  | 375.664 | 0.47109  | 0.125659 | 0.482199 | 551.128 | 352.519 | 405.391 | 326.816 | 280.722 | 337.405 |
| ENSMUSG00000024986 | 11_Hhex    | 25.4924 | 0.85723  | 0.173366 | 0.556848 | 41.461  | 41.9396 | 15.5124 | 21.4576 | 23.1789 | 9.40502 |
| ENSMUSG00000024987 | 5_Cyp26a   | 84.4595 | -0.97577 | 0.012601 | 0.118891 | 74.8321 | 40.8061 | 54.8106 | 112.24  | 93.574  | 130.495 |
| ENSMUSG00000024989 | 14_Cep55   | 303.899 | 0.68076  | 0.059032 | 0.318669 | 472.251 | 388.791 | 261.643 | 180.739 | 269.562 | 250.409 |
| ENSMUSG00000024990 | 12_Rbp4    | 24.5283 | -0.82067 | 0.146435 | 0.517615 | 20.2249 | 10.2015 | 22.7516 | 42.9152 | 24.0374 | 27.0394 |
| ENSMUSG00000024991 | 7_Eif3a    | 9186.55 | 0.29766  | 0.342582 | 0.720325 | 12983.4 | 9119.03 | 8289.84 | 6698.07 | 8733.29 | 9295.69 |
| ENSMUSG00000024992 | 12_Pde6c   | 12.7289 | -3.25604 | 0.000401 | 0.009774 | 5.05622 | 0       | 2.06832 | 32.1864 | 20.6034 | 16.4588 |
| ENSMUSG00000024993 | 15_Fam4c   | 915.577 | 0.27081  | 0.538686 | 0.839843 | 1660.46 | 694.837 | 648.419 | 786.504 | 942.608 | 760.631 |
| ENSMUSG00000024997 | 17_Prdx3   | 1866.93 | 0.17145  | 0.534672 | 0.838255 | 2298.56 | 2073.18 | 1561.58 | 1685.25 | 1900.67 | 1682.32 |
| ENSMUSG00000024998 | 17_Plce1   | 1367.8  | -0.18192 | 0.486613 | 0.81371  | 1444.06 | 1053.02 | 1347.51 | 1392.27 | 1421.64 | 1548.3  |
| ENSMUSG00000024999 | 7_Noc3l    | 659.13  | 0.23649  | 0.506452 | 0.825658 | 981.918 | 621.16  | 535.696 | 482.796 | 671.329 | 661.878 |
| ENSMUSG00000025001 | 11_Hells   | 918.361 | 1.44235  | 0.006228 | 0.072371 | 2443.17 | 875.064 | 709.435 | 340.02  | 551.142 | 591.341 |
| ENSMUSG00000025002 | 5_Cyp2c5   | 0.42924 | -2.15458 | 0.590406 | NA       | 0       | 0       | 0       | 0       | 2.57543 | 0       |
| ENSMUSG00000025003 | 6_Cyp2c3   | 0.19594 | -0.79206 | 0.84609  | NA       | 0       | 0       | 0       | 0       | 0       | 1.17563 |
| ENSMUSG00000025006 | 15_Sorbs1  | 1379.66 | -0.05153 | 0.848895 | 0.956469 | 1074.95 | 1433.88 | 1556.41 | 1456.64 | 1373.56 | 1382.54 |
| ENSMUSG00000025007 | 13_Aldh1f1 | 435.427 | 0.36671  | 0.430484 | 0.780048 | 217.418 | 729.976 | 524.32  | 410.17  | 389.749 | 340.932 |
| ENSMUSG00000025008 | 15_Tctn3   | 300.279 | 0.17751  | 0.487371 | 0.814019 | 323.598 | 318.514 | 314.385 | 278.124 | 310.769 | 256.287 |
| ENSMUSG00000025010 | 13_Ccnj    | 185.727 | 0.28502  | 0.356344 | 0.731228 | 247.755 | 202.897 | 161.329 | 170.836 | 162.252 | 169.29  |
| ENSMUSG00000025013 | 14_Tll2    | 16.2977 | -1.01039 | 0.197748 | 0.589909 | 6.06747 | 4.53401 | 21.7174 | 26.4094 | 12.0187 | 27.0394 |
| ENSMUSG00000025014 | 12_Dntt    | 0.37783 | 2.11394  | 0.599927 | NA       | 0       | 2.26701 | 0       | 0       | 0       | 0       |
| ENSMUSG00000025016 | 10_Tm9sf   | 8428.84 | 0.38594  | 0.420094 | 0.773473 | 16888.8 | 6021.17 | 5738.56 | 6268.92 | 8042.21 | 7613.37 |
| ENSMUSG00000025017 | 9_Pik3ap1  | 83.5282 | 2.18569  | 0.000148 | 0.004578 | 55.6184 | 218.766 | 136.509 | 38.7887 | 19.745  | 31.742  |
| ENSMUSG00000025019 | 15_Lcor    | 460.842 | 0.5608   | 0.165405 | 0.545104 | 841.355 | 419.396 | 386.776 | 311.961 | 381.164 | 424.402 |
| ENSMUSG00000025020 | 11_Slit1   | 10.1915 | -0.08748 | 0.929374 | 0.981572 | 2.02249 | 10.2015 | 17.5807 | 20.6323 | 6.00934 | 4.70251 |
| ENSMUSG00000025024 | 6_Smndc1   | 1059.69 | 0.4755   | 0.267688 | 0.65577  | 1994.17 | 915.87  | 788.031 | 757.618 | 988.965 | 913.463 |
| ENSMUSG00000025025 | 13_Mxi1    | 1153.16 | 0.29323  | 0.302384 | 0.685243 | 1567.43 | 1030.35 | 1212.04 | 1114.14 | 1012.14 | 982.825 |
| ENSMUSG00000025026 | 14_Add3    | 2889.76 | 0.15489  | 0.55586  | 0.846956 | 3569.69 | 2529.98 | 3034.23 | 2810.12 | 2543.67 | 2850.9  |
| ENSMUSG00000025027 | 17_Xpnp    | 1857.11 | 0.24478  | 0.570913 | 0.854275 | 950.57  | 2644.46 | 2447.86 | 1756.22 | 1517.79 | 1825.75 |
| ENSMUSG00000025034 | 8_Trim8    | 804.704 | 0.46034  | 0.330336 | 0.710498 | 411.576 | 1189.04 | 1195.49 | 825.292 | 497.917 | 708.904 |
| ENSMUSG00000025035 | 8_Arl3     | 483.018 | -0.31851 | 0.223994 | 0.613717 | 458.094 | 393.326 | 438.484 | 615.668 | 498.775 | 493.764 |
| ENSMUSG00000025036 | 6_Sfxn2    | 312.945 | 0.35644  | 0.145031 | 0.515151 | 351.913 | 367.255 | 335.068 | 269.871 | 277.288 | 276.273 |

|                    |            |         |          |          |          |         |         |         |         |         |         |
|--------------------|------------|---------|----------|----------|----------|---------|---------|---------|---------|---------|---------|
| ENSMUSG00000025037 | 6_Maoa     | 750.475 | -0.30515 | 0.466179 | 0.803268 | 1056.75 | 456.802 | 500.534 | 725.432 | 1002.7  | 760.631 |
| ENSMUSG00000025038 | 7_Efhc2    | 27.002  | -0.69244 | 0.350039 | 0.726886 | 42.4723 | 9.06802 | 10.3416 | 23.9335 | 51.5086 | 24.6882 |
| ENSMUSG00000025040 | 13_Fundc   | 1218.27 | 0.1178   | 0.78667  | 0.936507 | 2091.25 | 861.462 | 851.115 | 1086.08 | 1326.35 | 1093.33 |
| ENSMUSG00000025041 | 16_Nt5c2   | 3498.22 | 0.29929  | 0.240597 | 0.631907 | 4353.41 | 3822.17 | 3403.43 | 2748.22 | 3329.17 | 3332.9  |
| ENSMUSG00000025044 | 15_Msr1    | 171.022 | 2.80991  | 1.39E-07 | 1.36E-05 | 356.969 | 410.328 | 131.339 | 47.867  | 54.9425 | 24.6882 |
| ENSMUSG00000025047 | 8_Pdcd11   | 783.059 | 0.2428   | 0.557908 | 0.848187 | 437.869 | 1155.04 | 953.497 | 694.071 | 658.452 | 799.427 |
| ENSMUSG00000025049 | 5_Taf5     | 160.576 | 0.48346  | 0.2845   | 0.670663 | 304.385 | 128.086 | 129.27  | 133.697 | 152.809 | 115.212 |
| ENSMUSG00000025050 | 7_Pcgrf6   | 286.461 | 0.35292  | 0.372961 | 0.743949 | 477.307 | 252.771 | 233.721 | 207.974 | 291.882 | 255.111 |
| ENSMUSG00000025056 | 4_Nr0b1    | 0.14308 | -0.79206 | 0.84609  | NA       | 0       | 0       | 0       | 0       | 0.85848 | 0       |
| ENSMUSG00000025058 | 4_543042   | 25.8228 | 3.2823   | 5.75E-06 | 0.000334 | 66.7421 | 54.4081 | 19.6491 | 5.77705 | 6.00934 | 2.35126 |
| ENSMUSG00000025059 | 16_Gk      | 6569.65 | 0.99783  | 0.023195 | 0.179694 | 13975.4 | 6759.08 | 5530.7  | 3186.45 | 5137.98 | 4828.3  |
| ENSMUSG00000025060 | 14_Slk     | 12287.6 | 0.58369  | 0.096667 | 0.421851 | 20539.4 | 12469.7 | 11210.3 | 7917.85 | 10943   | 10645.3 |
| ENSMUSG00000025064 | 14_Col17i  | 40265.9 | 0.94225  | 0.057379 | 0.31353  | 20973.2 | 73031.6 | 64895.7 | 23666.1 | 22983.1 | 36045.9 |
| ENSMUSG00000025066 | 9_Sfr1     | 4219.98 | 0.68659  | 0.090808 | 0.410541 | 8030.29 | 3946.86 | 3639.21 | 2588.12 | 3314.58 | 3800.8  |
| ENSMUSG00000025068 | 7_Gsto1    | 121418  | 0.15819  | 0.496912 | 0.819194 | 132619  | 125599  | 125985  | 101809  | 127254  | 115241  |
| ENSMUSG00000025069 | 14_Gsto2   | 27.6172 | -0.54471 | 0.267547 | 0.655756 | 18.2024 | 19.2695 | 29.9907 | 30.5358 | 39.4899 | 28.2151 |
| ENSMUSG00000025075 | 14_Habp2   | 0.80303 | -1.69849 | 0.476073 | NA       | 0       | 1.1335  | 0       | 1.65058 | 0.85848 | 1.17563 |
| ENSMUSG00000025076 | 9_Casp7    | 1071.73 | 0.83864  | 0.000652 | 0.014325 | 1283.27 | 1543.83 | 1296.84 | 715.528 | 759.752 | 831.169 |
| ENSMUSG00000025077 | 13_Dclre1  | 634.864 | 0.29809  | 0.255779 | 0.647211 | 793.827 | 674.434 | 631.873 | 524.061 | 544.274 | 640.717 |
| ENSMUSG00000025078 | 8_Nhlrc2   | 874.497 | 0.47371  | 0.056407 | 0.310591 | 1076.98 | 1060.96 | 912.13  | 655.282 | 756.318 | 785.319 |
| ENSMUSG00000025081 | 13_Tdrd1   | 2.79794 | 0.42887  | 0.739824 | 0.921762 | 3.03373 | 5.66751 | 1.03416 | 3.30117 | 2.57543 | 1.17563 |
| ENSMUSG00000025082 | 8_Vwa2     | 7.89952 | 0.10423  | 0.897268 | 0.97156  | 4.04498 | 9.06802 | 11.3758 | 5.77705 | 7.72629 | 9.40502 |
| ENSMUSG00000025083 | 17_Afap1l  | 1053.3  | 0.51107  | 0.101897 | 0.434078 | 965.738 | 1437.28 | 1310.28 | 789.805 | 746.875 | 1069.82 |
| ENSMUSG00000025085 | 16_Ablim1  | 13894   | 0.35831  | 0.124363 | 0.479263 | 15945.3 | 15404.3 | 15481.4 | 10778.3 | 12229   | 13525.6 |
| ENSMUSG00000025086 | 12_Trub1   | 310.577 | 0.16057  | 0.585392 | 0.861855 | 397.419 | 290.177 | 295.77  | 259.967 | 326.221 | 293.907 |
| ENSMUSG00000025089 | 15_Gfra1   | 821.795 | -0.72925 | 0.010904 | 0.107054 | 751.355 | 584.887 | 519.149 | 1129    | 1048.2  | 898.18  |
| ENSMUSG00000025090 | 8_Ccdc17   | 0.36448 | 0.16972  | 0.966824 | NA       | 1.01124 | 0       | 0       | 0       | 0       | 1.17563 |
| ENSMUSG00000025091 | 3_Pnliprp2 | 15.3376 | -0.19761 | 0.739208 | 0.921641 | 18.2024 | 9.06802 | 15.5124 | 17.3311 | 15.4526 | 16.4588 |
| ENSMUSG00000025092 | 6_Hspa12   | 164.926 | -1.16877 | 0.016083 | 0.139212 | 154.72  | 58.9422 | 91.0062 | 312.786 | 227.496 | 144.602 |
| ENSMUSG00000025094 | 7_Slc18a2  | 138.393 | -0.24568 | 0.65071  | 0.891718 | 228.541 | 63.4762 | 87.9037 | 150.203 | 189.723 | 110.509 |
| ENSMUSG00000025102 | 14_31100   | 149.523 | -0.17793 | 0.652205 | 0.892215 | 84.9445 | 155.29  | 180.978 | 183.215 | 152.809 | 139.9   |
| ENSMUSG00000025103 | 7_Btbd1    | 3288.51 | 0.07072  | 0.861463 | 0.960565 | 5306    | 2319.15 | 2481.99 | 2923.19 | 3593.58 | 3107.18 |
| ENSMUSG00000025104 | 13_Hdgfrf  | 2083.54 | 0.40857  | 0.374889 | 0.744881 | 4081.38 | 1505.29 | 1542.97 | 1554.03 | 1997.68 | 1819.87 |
| ENSMUSG00000025105 | 8_Bnc1     | 2707.37 | 0.51665  | 0.04544  | 0.272611 | 3043.85 | 3306.43 | 3210.04 | 1938.61 | 2089.53 | 2655.74 |
| ENSMUSG00000025127 | 15_Gcgr    | 0.17236 | 1.1315   | 0.781553 | NA       | 0       | 0       | 1.03416 | 0       | 0       | 0       |
| ENSMUSG00000025128 | 7_Bhlhe2i  | 21.5121 | 0.6935   | 0.319288 | 0.700381 | 49.551  | 15.869  | 14.4783 | 22.2829 | 16.3111 | 10.5807 |
| ENSMUSG00000025129 | 2_Ppp1r2   | 0.2751  | -1.54073 | 0.703687 | NA       | 0       | 0       | 0       | 1.65058 | 0       | 0       |
| ENSMUSG00000025130 | 11_P4hb    | 9928.24 | 0.2948   | 0.293075 | 0.677602 | 8688.61 | 13115.8 | 11012.8 | 8243.02 | 8677.49 | 9831.78 |
| ENSMUSG00000025132 | 13_Arhgdi  | 3563.41 | 0.16685  | 0.764816 | 0.929966 | 1073.94 | 5083.76 | 5150.12 | 3845.86 | 2753.99 | 3472.8  |
| ENSMUSG00000025133 | 9_Ints4    | 1269.11 | 0.07242  | 0.752958 | 0.925804 | 1354.06 | 1244.59 | 1304.08 | 1138.08 | 1319.48 | 1254.39 |
| ENSMUSG00000025134 | 2_Alyref   | 844.829 | 0.27986  | 0.283611 | 0.670589 | 767.534 | 1020.15 | 991.761 | 746.064 | 732.281 | 811.183 |
| ENSMUSG00000025135 | 12_Anapc   | 493.175 | -0.16954 | 0.659418 | 0.89481  | 292.25  | 498.741 | 601.882 | 651.981 | 418.078 | 496.115 |
| ENSMUSG00000025137 | 15_Pcyt2   | 991.303 | 0.13816  | 0.80679  | 0.944059 | 287.193 | 1376.07 | 1453    | 1041.52 | 787.223 | 1002.81 |
| ENSMUSG00000025138 | 14_Sirt7   | 580.583 | 0.32561  | 0.487432 | 0.814019 | 271.013 | 808.188 | 858.354 | 566.976 | 446.408 | 532.559 |
| ENSMUSG00000025139 | 13_Tollip  | 2207.55 | 0.04599  | 0.834729 | 0.952109 | 2191.37 | 2371.29 | 2165.53 | 2215.08 | 2080.09 | 2221.94 |
| ENSMUSG00000025140 | 15_Pycr1   | 53.8769 | -0.50575 | 0.190777 | 0.579483 | 33.3711 | 47.6071 | 52.7422 | 65.1981 | 64.3858 | 59.957  |
| ENSMUSG00000025141 | 2_Myadml   | 4.60712 | -0.7132  | 0.533808 | 0.838255 | 2.02249 | 2.26701 | 6.20497 | 10.7288 | 1.71695 | 4.70251 |
| ENSMUSG00000025142 | 17_Aspsc   | 595.579 | 0.16519  | 0.797929 | 0.940387 | 124.383 | 829.724 | 934.882 | 692.42  | 407.777 | 584.287 |
| ENSMUSG00000025144 | 17_Stra13  | 302.311 | -0.24516 | 0.640218 | 0.887258 | 97.0795 | 353.653 | 379.537 | 405.219 | 283.297 | 295.083 |
| ENSMUSG00000025145 | 13_Lrrc45  | 463.975 | 0.34863  | 0.606317 | 0.871807 | 84.9445 | 692.57  | 781.826 | 481.971 | 309.91  | 432.631 |
| ENSMUSG00000025147 | 6_Mob2     | 642.147 | -0.13847 | 0.716418 | 0.912108 | 350.902 | 710.706 | 772.519 | 714.703 | 597.5   | 706.552 |
| ENSMUSG00000025150 | 10_Cbr2    | 16037.3 | 0.18151  | 0.76875  | 0.931306 | 3808.35 | 18853.6 | 28472.5 | 15744.1 | 12155.2 | 17190   |
| ENSMUSG00000025151 | 16_Magec   | 2760.83 | -0.95367 | 0.01356  | 0.124461 | 1092.14 | 2022.17 | 2526.46 | 4261.81 | 3512.89 | 3149.51 |
| ENSMUSG00000025153 | 9_Fasn     | 3864.28 | 0.76734  | 0.229238 | 0.620586 | 941.468 | 6918.9  | 6744.8  | 3080.82 | 2220.88 | 3278.83 |
| ENSMUSG00000025154 | 14_Arhgaj  | 432.251 | 0.17699  | 0.478185 | 0.80884  | 413.599 | 507.809 | 455.031 | 406.869 | 416.361 | 393.835 |
| ENSMUSG00000025155 | 15_Dus1l   | 486.751 | 0.33527  | 0.42259  | 0.774546 | 272.025 | 690.303 | 667.034 | 457.212 | 418.937 | 414.997 |
| ENSMUSG00000025156 | 16_Gps1    | 1735.54 | -0.15409 | 0.75839  | 0.927759 | 592.589 | 2231.87 | 2104.52 | 2021.14 | 1617.37 | 1845.74 |
| ENSMUSG00000025157 | 7_Zdhhc1   | 486.09  | 0.02362  | 0.942922 | 0.98609  | 330.677 | 603.024 | 536.73  | 493.525 | 476.455 | 476.129 |
| ENSMUSG00000025158 | 7_Rfng     | 429.578 | 0.32535  | 0.601694 | 0.870033 | 103.147 | 689.17  | 641.18  | 434.929 | 298.75  | 410.294 |
| ENSMUSG00000025159 | 8_Mms19    | 1218.28 | 0.24174  | 0.473479 | 0.806641 | 853.49  | 1526.83 | 1580.2  | 1080.31 | 1187.27 | 1081.58 |
| ENSMUSG00000025161 | 16_Slc16e  | 104.923 | 0.2646   | 0.73328  | 0.919942 | 24.2699 | 223.3   | 96.177  | 164.233 | 36.9145 | 84.6452 |
| ENSMUSG00000025162 | 17_Csnk1   | 3218.58 | 0.14457  | 0.686146 | 0.904398 | 2033.61 | 4128.22 | 3977.39 | 3127.86 | 2846.71 | 3197.71 |
| ENSMUSG00000025163 | 6_Cd7      | 6.92931 | 2.40585  | 0.02576  | 0.192347 | 5.05622 | 22.6701 | 7.23913 | 0.82529 | 3.43391 | 2.35126 |
| ENSMUSG00000025165 | 12_Sectm   | 63.8002 | 6.3806   | 1.69E-11 | 4.00E-09 | 58.6522 | 204.031 | 115.826 | 0       | 4.29238 | 0       |
| ENSMUSG00000025169 | 6_Ogfod3   | 162.161 | -0.35533 | 0.393806 | 0.755289 | 75.8433 | 184.761 | 166.5   | 196.42  | 174.271 | 175.169 |
| ENSMUSG00000025170 | 13_Rab4c   | 66.0706 | 0.1292   | 0.785212 | 0.936054 | 102.136 | 37.4056 | 67.2205 | 63.5475 | 53.2256 | 72.8889 |
| ENSMUSG00000025171 | 1_Ubtd1    | 331.593 | 0.60655  | 0.414862 | 0.76951  | 46.5172 | 570.152 | 584.301 | 351.575 | 185.431 | 251.584 |
| ENSMUSG00000025172 | 2_Ankrd2   | 0.79771 | 0.8404   | 0.765252 | NA       | 0       | 0       | 3.10248 | 0.82529 | 0.85848 | 0       |
| ENSMUSG00000025173 | 13_Wdr4f   | 1282.55 | 0.18851  | 0.39628  | 0.757228 | 1398.55 | 1391.94 | 1308.21 | 1154.58 | 1249.94 | 1192.09 |
| ENSMUSG00000025175 | 12_Fn3k    | 90.3049 | -1.55629 | 0.000492 | 0.011534 | 58.6522 | 24.9371 | 53.7764 | 167.534 | 128.772 | 108.158 |
| ENSMUSG00000025176 | 14_Hoga1   | 23.4418 | 0.41029  | 0.396179 | 0.757159 | 23.2586 | 24.9371 | 32.059  | 19.807  | 20.6034 | 19.9857 |
| ENSMUSG00000025178 | 8_Pi4k2a   | 1337.84 | 0.43032  | 0.288799 | 0.673672 | 800.906 | 1983.63 | 1823.23 | 1202.45 | 1013    | 1203.84 |
| ENSMUSG00000025184 | 10_R3hcc   | 724.928 | 0.09116  | 0.777097 | 0.933844 | 1005.18 | 638.162 | 599.814 | 641.252 | 715.111 | 750.051 |
| ENSMUSG00000025185 | 14_Loxl4   | 72.7158 | -0.29024 | 0.509969 | 0.827179 | 40.4498 | 66.8767 | 88.9379 | 93.258  | 60.9519 | 85.8208 |
| ENSMUSG00000025188 | 15_Hps1    | 186.777 | 0.33489  | 0.623114 | 0.878909 | 34.3823 | 298.111 | 292.668 | 198.07  | 130.489 | 166.939 |

|                    |           |         |          |          |          |         |         |         |         |         |         |
|--------------------|-----------|---------|----------|----------|----------|---------|---------|---------|---------|---------|---------|
| ENSMUSG00000025189 | 8_Cnnm1   | 49.4043 | -0.29506 | 0.531082 | 0.8369   | 29.3261 | 43.0731 | 61.0155 | 62.7222 | 62.6688 | 37.6201 |
| ENSMUSG00000025190 | 13_Got1   | 622.194 | -0.85085 | 0.013568 | 0.124465 | 316.519 | 493.074 | 522.252 | 1001.9  | 657.593 | 741.821 |
| ENSMUSG00000025192 | 13_Entpd  | 161.064 | 0.57248  | 0.038332 | 0.245786 | 201.238 | 190.428 | 186.149 | 120.493 | 139.932 | 128.143 |
| ENSMUSG00000025193 | 14_Cutc   | 479.59  | 0.49618  | 0.112099 | 0.454211 | 710.905 | 513.477 | 459.168 | 338.37  | 442.974 | 412.645 |
| ENSMUSG00000025194 | 5_Abcc2   | 7.15049 | -0.81507 | 0.40772  | 0.765046 | 9.1012  | 3.40051 | 3.10248 | 6.60234 | 17.1695 | 3.52688 |
| ENSMUSG00000025195 | 8_Dnmmbp  | 700.295 | 0.25954  | 0.521371 | 0.831998 | 404.498 | 914.737 | 970.044 | 618.144 | 576.038 | 718.309 |
| ENSMUSG00000025196 | 4_Cpn1    | 36.694  | 1.45161  | 0.11075  | 0.452172 | 4.04498 | 119.018 | 38.264  | 21.4576 | 19.745  | 17.6344 |
| ENSMUSG00000025197 | 8_Cyp2c4  | 4.40104 | 0.09079  | 0.94212  | 0.986006 | 9.1012  | 4.53401 | 0       | 4.95175 | 4.29238 | 3.52688 |
| ENSMUSG00000025198 | 16_Erlin1 | 2965.69 | 0.57575  | 0.095904 | 0.420188 | 4865.1  | 3206.68 | 2577.13 | 1978.23 | 2612.35 | 2554.64 |
| ENSMUSG00000025199 | 16_Chuk   | 1962.73 | 0.53316  | 0.226553 | 0.617339 | 3791.15 | 1697.99 | 1474.71 | 1306.44 | 1930.71 | 1575.34 |
| ENSMUSG00000025200 | 6_Cwf19l1 | 259.841 | 0.43046  | 0.144969 | 0.515056 | 286.182 | 340.051 | 268.882 | 188.992 | 260.977 | 213.964 |
| ENSMUSG00000025202 | 7_Scd3    | 30.2637 | -0.10031 | 0.854303 | 0.958493 | 19.2136 | 38.5391 | 29.9907 | 19.807  | 44.6408 | 29.3907 |
| ENSMUSG00000025203 | 5_Scd2    | 37211   | 0.20201  | 0.444243 | 0.788683 | 43436   | 36667.7 | 39331.2 | 29761.7 | 32789.5 | 41279.8 |
| ENSMUSG00000025204 | 10_Ndufb1 | 1520.51 | -0.36761 | 0.350684 | 0.727465 | 722.028 | 1603.91 | 1657.76 | 1915.5  | 1529.81 | 1694.08 |
| ENSMUSG00000025207 | 15_Sema4  | 84.2269 | -1.48697 | 0.010141 | 0.101733 | 16.1799 | 47.6071 | 69.2888 | 177.438 | 109.027 | 85.8208 |
| ENSMUSG00000025208 | 8_Mrpl43  | 468.763 | -0.02323 | 0.936347 | 0.98432  | 356.969 | 516.877 | 521.217 | 496.826 | 438.682 | 482.007 |
| ENSMUSG00000025209 | 4_Peo1    | 320.148 | -0.2643  | 0.489838 | 0.814424 | 167.867 | 337.784 | 367.127 | 357.352 | 322.787 | 367.972 |
| ENSMUSG00000025212 | 16_Sfnx3  | 1189.34 | 0.02478  | 0.929653 | 0.981693 | 936.412 | 1232.12 | 1430.25 | 1226.38 | 1143.49 | 1167.4  |
| ENSMUSG00000025213 | 11_Kazalc | 72.8848 | -1.20059 | 0.043309 | 0.264304 | 18.2024 | 30.6046 | 83.7671 | 127.095 | 82.4138 | 95.2259 |
| ENSMUSG00000025216 | 9_Lbx1    | 0.16854 | 1.1315   | 0.781553 | NA       | 1.01124 | 0       | 0       | 0       | 0       | 0       |
| ENSMUSG00000025217 | 14_Btrc   | 529.256 | -0.44261 | 0.103048 | 0.436784 | 433.824 | 404.661 | 507.773 | 704.8   | 564.878 | 559.599 |
| ENSMUSG00000025218 | 6_Poll    | 145.599 | 0.08015  | 0.905604 | 0.974391 | 26.2924 | 198.363 | 224.413 | 179.088 | 118.47  | 126.968 |
| ENSMUSG00000025219 | 13_Fgf8   | 0       | NA       | NA       | NA       | 0       | 0       | 0       | 0       | 0       | 0       |
| ENSMUSG00000025220 | 7_Mgea5   | 6661.12 | 0.34728  | 0.349704 | 0.726477 | 11033.7 | 5820.54 | 5522.42 | 5073.07 | 6020.5  | 6496.52 |
| ENSMUSG00000025221 | 15_Kcnip2 | 31.0646 | -0.04614 | 0.919412 | 0.977244 | 22.2474 | 37.4056 | 32.059  | 30.5358 | 30.0467 | 34.0932 |
| ENSMUSG00000025223 | 14_Ldb1   | 1705.08 | 0.02688  | 0.94572  | 0.986649 | 943.491 | 1972.3  | 2247.23 | 1902.3  | 1485.17 | 1679.97 |
| ENSMUSG00000025224 | 14_Gbf1   | 2181.22 | 0.31638  | 0.398201 | 0.758766 | 1407.65 | 3036.65 | 2813.95 | 1721.56 | 1947.88 | 2159.63 |
| ENSMUSG00000025225 | 14_Nfkb2  | 529.036 | 0.6226   | 0.291776 | 0.676701 | 169.889 | 949.875 | 804.578 | 467.941 | 298.75  | 483.183 |
| ENSMUSG00000025226 | 11_Fbxl1f | 12.4681 | 0.31208  | 0.721498 | 0.913923 | 3.03373 | 14.7355 | 23.7857 | 18.1564 | 6.86782 | 8.22939 |
| ENSMUSG00000025227 | 14_Tmem   | 149.886 | 0.31568  | 0.623719 | 0.879262 | 38.4273 | 249.371 | 210.969 | 176.613 | 87.5647 | 136.373 |
| ENSMUSG00000025228 | 4_Actr1a  | 5178.32 | 0.33111  | 0.336341 | 0.714638 | 3652.61 | 6939.3  | 6717.91 | 4548.19 | 4191.94 | 5019.93 |
| ENSMUSG00000025229 | 15_Pitx3  | 1.01152 | -3.36066 | 0.173826 | NA       | 0       | 0       | 0       | 0.82529 | 1.71695 | 3.52688 |
| ENSMUSG00000025231 | 16_Sufu   | 612.679 | 0.1089   | 0.799782 | 0.941067 | 305.396 | 851.261 | 750.801 | 562.849 | 580.33  | 625.434 |
| ENSMUSG00000025232 | 7_Hexa    | 1437.06 | -0.74873 | 0.00981  | 0.099234 | 805.962 | 1139.17 | 1272.02 | 1845.35 | 1855.17 | 1704.66 |
| ENSMUSG00000025234 | 11_Arih1  | 3559.5  | 0.57368  | 0.157853 | 0.536009 | 6610.5  | 3301.89 | 2861.52 | 2378.49 | 3291.4  | 2913.21 |
| ENSMUSG00000025235 | 7_Bbs4    | 404.523 | -0.30334 | 0.378885 | 0.74711  | 487.42  | 275.441 | 323.693 | 478.67  | 492.766 | 369.147 |
| ENSMUSG00000025236 | 10_Adpqk  | 392.913 | 0.2826   | 0.246478 | 0.638208 | 425.734 | 464.736 | 403.323 | 344.147 | 356.268 | 363.269 |
| ENSMUSG00000025237 | 15_Parp6  | 551.732 | -0.09769 | 0.697897 | 0.905638 | 459.105 | 561.084 | 579.13  | 564.5   | 584.623 | 561.95  |
| ENSMUSG00000025239 | 2_Limd1   | 1677.7  | 0.33062  | 0.224884 | 0.614734 | 1523.95 | 2082.24 | 2001.1  | 1589.51 | 1302.31 | 1567.11 |
| ENSMUSG00000025240 | 8_Sacm1l  | 2903.87 | 0.42022  | 0.378713 | 0.746999 | 5829.82 | 2060.71 | 2080.73 | 2064.88 | 2853.58 | 2533.48 |
| ENSMUSG00000025241 | 15_Fyco1  | 3023.45 | 0.09427  | 0.678399 | 0.901447 | 3420.03 | 2950.51 | 2995.97 | 3042.85 | 2806.36 | 2924.96 |
| ENSMUSG00000025243 | 14_Slc6a2 | 19.6745 | 0.61467  | 0.299085 | 0.682038 | 18.2024 | 20.4031 | 33.0932 | 20.6323 | 16.3111 | 9.40502 |
| ENSMUSG00000025245 | 13_Lztf1  | 911.98  | 0.30176  | 0.542849 | 0.84123  | 1809.12 | 563.351 | 648.419 | 711.402 | 946.042 | 793.549 |
| ENSMUSG00000025246 | 17_Tbl1x  | 3835.12 | 0.48998  | 0.119548 | 0.470397 | 5879.37 | 3835.77 | 3725.05 | 2692.93 | 3423.61 | 3453.99 |
| ENSMUSG00000025255 | 18_Zfhx4  | 1004.18 | -0.72341 | 0.094156 | 0.417342 | 1236.75 | 467.003 | 568.789 | 1352.65 | 1287.72 | 1112.14 |
| ENSMUSG00000025257 | 5_Ribc1   | 54.9978 | 0.13299  | 0.769924 | 0.931929 | 39.4385 | 68.0102 | 65.1522 | 35.4876 | 67.8197 | 54.0789 |
| ENSMUSG00000025260 | 10_Hsd17  | 887.498 | -0.1373  | 0.628587 | 0.881265 | 659.331 | 895.467 | 981.419 | 999.429 | 932.306 | 857.033 |
| ENSMUSG00000025261 | 17_Huwe   | 13665.4 | 0.23748  | 0.317935 | 0.698985 | 14377.9 | 15343.1 | 14641.7 | 10821.2 | 13553.6 | 13255.2 |
| ENSMUSG00000025262 | 8_Fam12f  | 476.94  | 0.11069  | 0.797524 | 0.94033  | 799.894 | 329.849 | 355.752 | 393.664 | 522.812 | 459.67  |
| ENSMUSG00000025264 | 12_Tsr2   | 583.965 | -0.17124 | 0.52114  | 0.831998 | 653.264 | 494.207 | 500.534 | 602.463 | 658.452 | 594.868 |
| ENSMUSG00000025265 | 14_Fgd1   | 120.298 | -0.67624 | 0.19724  | 0.589613 | 38.4273 | 115.617 | 124.099 | 202.197 | 135.639 | 105.807 |
| ENSMUSG00000025266 | 11_Gnl3l  | 1272.05 | -0.21151 | 0.505183 | 0.825063 | 1571.47 | 912.47  | 1052.78 | 1279.2  | 1480.87 | 1335.51 |
| ENSMUSG00000025268 | 15_Magec  | 625.558 | -0.987   | 0.001726 | 0.028991 | 315.508 | 463.603 | 479.851 | 994.477 | 745.158 | 754.753 |
| ENSMUSG00000025269 | 16_Apex2  | 138.496 | 0.12827  | 0.678112 | 0.901447 | 131.462 | 155.29  | 146.851 | 109.764 | 134.781 | 152.832 |
| ENSMUSG00000025270 | 13_Alas2  | 123.269 | -0.26424 | 0.476343 | 0.807493 | 74.8321 | 124.685 | 136.509 | 142.776 | 115.036 | 145.778 |
| ENSMUSG00000025271 | 13_Pfkfb1 | 52.0406 | 0.09226  | 0.807398 | 0.944389 | 61.6859 | 48.7406 | 50.6739 | 44.5658 | 58.3764 | 48.2007 |
| ENSMUSG00000025272 | 16_Tro    | 123.228 | -1.79386 | 3.03E-06 | 0.000199 | 53.5959 | 52.1411 | 59.9814 | 251.714 | 191.44  | 130.495 |
| ENSMUSG00000025277 | 13_Abhd6  | 282.74  | -0.26841 | 0.371275 | 0.742208 | 203.26  | 278.842 | 287.497 | 338.37  | 268.703 | 319.771 |
| ENSMUSG00000025278 | 8_Flnb    | 4687.02 | 0.64328  | 0.16575  | 0.545533 | 2418.9  | 8007.06 | 6718.95 | 3310.25 | 3479.41 | 4187.59 |
| ENSMUSG00000025279 | 7_Dnase1  | 36.6831 | 1.54551  | 0.005188 | 0.063658 | 30.3373 | 87.2797 | 46.5373 | 21.4576 | 18.028  | 16.4588 |
| ENSMUSG00000025280 | 7_Polr3a  | 485.462 | 0.19531  | 0.530402 | 0.836542 | 385.284 | 648.364 | 521.217 | 418.423 | 461.002 | 478.481 |
| ENSMUSG00000025283 | 15_Sat1   | 7866.75 | 0.6973   | 0.056135 | 0.310255 | 13643.7 | 8739.31 | 6812.02 | 4964.13 | 7226.66 | 5814.66 |
| ENSMUSG00000025287 | 15_Acot9  | 2243.12 | 0.72148  | 0.076215 | 0.369832 | 4337.23 | 2229.6  | 1810.82 | 1445.09 | 1919.55 | 1716.42 |
| ENSMUSG00000025288 | 1_493343  | 0       | NA       | NA       | NA       | 0       | 0       | 0       | 0       | 0       | 0       |
| ENSMUSG00000025289 | 15_Prdx4  | 511.153 | -0.20929 | 0.543431 | 0.841326 | 650.23  | 375.189 | 397.118 | 597.512 | 587.198 | 459.67  |
| ENSMUSG00000025290 | 16_Rps24  | 25121.1 | -0.14743 | 0.660071 | 0.895103 | 32613.6 | 19684.4 | 19217.8 | 22895.3 | 30802.2 | 25513.5 |
| ENSMUSG00000025314 | 16_Ptprij | 2635.06 | 0.44984  | 0.0675   | 0.344717 | 3353.29 | 3070.66 | 2703.3  | 2073.13 | 2147.05 | 2462.94 |
| ENSMUSG00000025316 | 16_Banp   | 297.886 | 0.07787  | 0.856858 | 0.959059 | 152.698 | 422.797 | 342.307 | 264.094 | 283.297 | 322.122 |
| ENSMUSG00000025317 | 7_Car5a   | 1.03971 | -1.05244 | 0.634018 | NA       | 1.01124 | 0       | 1.03416 | 2.47588 | 1.71695 | 0       |
| ENSMUSG00000025318 | 13_Jph3   | 3.03502 | 0.19206  | 0.896823 | 0.97156  | 2.02249 | 6.80102 | 1.03416 | 5.77705 | 2.57543 | 0       |
| ENSMUSG00000025321 | 14_Irgb8  | 845.375 | -1.15933 | 0.067438 | 0.3445   | 1103.27 | 199.497 | 265.78  | 1384.84 | 1310.04 | 808.832 |
| ENSMUSG00000025323 | 9_Sp4     | 275.96  | -0.30119 | 0.541303 | 0.84046  | 427.756 | 149.622 | 164.432 | 382.11  | 297.892 | 233.95  |
| ENSMUSG00000025324 | 7_Atp10a  | 256.188 | 2.54474  | 1.86E-11 | 4.31E-09 | 300.34  | 610.958 | 401.255 | 81.7039 | 74.6875 | 68.1864 |
| ENSMUSG00000025326 | 11_Ube3a  | 2834.53 | 0.47453  | 0.391452 | 0.754323 | 6481.06 | 1685.52 | 1722.91 | 2154.01 | 2675.87 | 2287.77 |
| ENSMUSG00000025328 | 9_Padi3   | 5.30361 | 1.13069  | 0.29613  | 0.67995  | 4.04498 | 12.4685 | 5.17081 | 0.82529 | 3.43391 | 5.87814 |

|                    |           |         |          |          |          |         |         |         |         |         |         |
|--------------------|-----------|---------|----------|----------|----------|---------|---------|---------|---------|---------|---------|
| ENSMUSG00000025329 | 3_Padi1   | 279.757 | 1.61931  | 0.008576 | 0.089954 | 100.113 | 608.691 | 557.413 | 139.474 | 104.734 | 168.115 |
| ENSMUSG00000025330 | 6_Padi4   | 1242.39 | 0.40835  | 0.429194 | 0.779159 | 491.465 | 1775.07 | 1984.56 | 1054.72 | 898.825 | 1249.69 |
| ENSMUSG00000025332 | 14_Kdm5c  | 2785.14 | 0.4121   | 0.271179 | 0.657711 | 1839.45 | 4199.63 | 3501.67 | 2280.28 | 2331.62 | 2558.17 |
| ENSMUSG00000025333 | 10_Gpr14  | 102.311 | -1.41645 | 0.000369 | 0.009262 | 72.8096 | 39.6726 | 54.8106 | 176.613 | 157.101 | 112.86  |
| ENSMUSG00000025337 | 10_Sbds   | 1848.7  | 0.0762   | 0.736397 | 0.920922 | 2014.4  | 1904.28 | 1773.59 | 1718.26 | 1783.06 | 1898.64 |
| ENSMUSG00000025340 | 14_Rabge  | 1647.1  | 0.29216  | 0.226871 | 0.617599 | 2028.56 | 1769.4  | 1642.25 | 1544.95 | 1525.51 | 1371.96 |
| ENSMUSG00000025347 | 3_Mettl7b | 0.37783 | 2.11394  | 0.599927 | NA       | 0       | 2.26701 | 0       | 0       | 0       | 0       |
| ENSMUSG00000025348 | 8_Iltga7  | 197.651 | -1.28058 | 0.01614  | 0.139521 | 42.4723 | 123.552 | 179.944 | 359.827 | 243.807 | 236.301 |
| ENSMUSG00000025350 | 15_Rdh5   | 560.277 | -1.96003 | 1.74E-05 | 0.000827 | 169.889 | 182.494 | 335.068 | 1350.18 | 727.988 | 596.043 |
| ENSMUSG00000025351 | 13_Cd63   | 3370.74 | -0.91947 | 0.001243 | 0.023041 | 2762.72 | 2068.64 | 2163.47 | 4862.62 | 4786.01 | 3580.96 |
| ENSMUSG00000025352 | 6_Gdf11   | 148.728 | -1.57627 | 2.79E-07 | 2.57E-05 | 87.9783 | 65.7432 | 70.323  | 230.257 | 233.506 | 204.559 |
| ENSMUSG00000025353 | 4_Ormdl2  | 1220.25 | 0.4262   | 0.25952  | 0.649203 | 2088.22 | 1139.17 | 970.044 | 950.737 | 1134.05 | 1039.25 |
| ENSMUSG00000025354 | 5_Dnajc14 | 1985.8  | -0.0312  | 0.91791  | 0.976941 | 1408.66 | 2304.41 | 2180.01 | 2045.07 | 1885.22 | 2091.44 |
| ENSMUSG00000025355 | 6_Mmp19   | 243.345 | 0.81553  | 0.047273 | 0.278879 | 268.991 | 467.003 | 195.457 | 189.817 | 187.148 | 151.656 |
| ENSMUSG00000025357 | 7_Dgka    | 5943.95 | 0.52466  | 0.075632 | 0.368449 | 5691.28 | 8264.37 | 7082.97 | 3979.56 | 5008.35 | 5637.14 |
| ENSMUSG00000025358 | 15_Cdk2   | 1064.46 | -0.19204 | 0.509497 | 0.827179 | 753.377 | 1079.09 | 1148.95 | 1095.99 | 1243.07 | 1066.29 |
| ENSMUSG00000025359 | 9_Pmel    | 10338.8 | -1.88972 | 1.85E-05 | 0.000862 | 2509.91 | 3721.29 | 6951.63 | 20298.1 | 15641.5 | 12910.7 |
| ENSMUSG00000025362 | 5_Rps26   | 4603.47 | -0.03618 | 0.956267 | 0.988881 | 830.232 | 5983.76 | 6823.4  | 6248.29 | 3438.2  | 4296.92 |
| ENSMUSG00000025364 | 12_Pa2g4  | 3408.5  | 0.35662  | 0.199234 | 0.5911   | 3657.67 | 4345.85 | 3478.92 | 2425.53 | 3059.61 | 3483.39 |
| ENSMUSG00000025366 | 7_Esy1    | 784.508 | 0.44991  | 0.369531 | 0.741029 | 325.621 | 1203.78 | 1188.25 | 698.197 | 616.386 | 674.81  |
| ENSMUSG00000025369 | 14_Smarc  | 2501.56 | -0.11914 | 0.70449  | 0.908152 | 1650.35 | 2696.6  | 2848.08 | 2581.51 | 2566.5  | 2706.3  |
| ENSMUSG00000025370 | 6_Cdh9    | 12.9813 | 0.23418  | 0.790026 | 0.937308 | 28.3148 | 2.26701 | 11.3758 | 12.3794 | 9.44325 | 14.1075 |
| ENSMUSG00000025371 | 12_Chmp1  | 513.517 | 0.01913  | 0.971334 | 0.992398 | 173.934 | 725.442 | 651.522 | 609.891 | 398.333 | 521.979 |
| ENSMUSG00000025372 | 16_Baiap2 | 1603    | 0.64043  | 0.263694 | 0.652737 | 541.016 | 2518.64 | 2799.48 | 1314.69 | 941.749 | 1502.45 |
| ENSMUSG00000025373 | 13_Rnf41  | 383.676 | -0.16157 | 0.680046 | 0.902184 | 216.406 | 398.993 | 471.578 | 493.525 | 379.447 | 342.108 |
| ENSMUSG00000025374 | 13_Nabp2  | 658.456 | 0.06193  | 0.88935  | 0.97021  | 309.441 | 871.664 | 836.637 | 632.174 | 564.878 | 735.943 |
| ENSMUSG00000025375 | 15_Aatk   | 144.064 | -1.05064 | 0.065278 | 0.338553 | 33.3711 | 94.0807 | 154.09  | 269.871 | 142.507 | 170.466 |
| ENSMUSG00000025377 | 14_Enthd4 | 230.643 | 0.21356  | 0.748672 | 0.924799 | 43.4835 | 371.789 | 327.829 | 237.684 | 169.12  | 233.95  |
| ENSMUSG00000025380 | 2_Fscn2   | 25.5091 | -0.46221 | 0.556176 | 0.847214 | 10.1124 | 32.8716 | 21.7174 | 56.9452 | 23.1789 | 8.22939 |
| ENSMUSG00000025381 | 2_Cnpy2   | 945.862 | -0.57488 | 0.094063 | 0.417315 | 492.476 | 841.059 | 946.258 | 1253.62 | 1050.78 | 1090.98 |
| ENSMUSG00000025383 | 1_Il23a   | 2.00404 | -0.91298 | 0.558039 | 0.848187 | 1.01124 | 1.1335  | 2.06832 | 5.77705 | 0.85848 | 1.17563 |
| ENSMUSG00000025384 | 15_Faap1  | 378.715 | 0.55537  | 0.445994 | 0.789738 | 55.6184 | 669.9   | 626.702 | 375.508 | 218.912 | 325.649 |
| ENSMUSG00000025386 | 2_Pde6g   | 260.336 | -2.38773 | 0.000985 | 0.01938  | 50.5622 | 162.091 | 38.264  | 855.003 | 305.618 | 150.48  |
| ENSMUSG00000025389 | 7_Mip     | 1010.2  | -4.44942 | 7.24E-17 | 4.82E-14 | 37.416  | 87.2797 | 140.646 | 2680.55 | 1142.63 | 1972.7  |
| ENSMUSG00000025393 | 12_Atp5b  | 16211.7 | -0.02569 | 0.911226 | 0.975173 | 14221.1 | 17497.9 | 16483.5 | 16507.5 | 16556.6 | 16003.8 |
| ENSMUSG00000025395 | 14_Prim1  | 795.248 | 0.57401  | 0.128872 | 0.487533 | 1371.25 | 799.12  | 683.581 | 507.555 | 733.998 | 675.986 |
| ENSMUSG00000025400 | 10_Tac2   | 0.9739  | -3.33781 | 0.263135 | NA       | 0       | 0       | 0       | 4.12646 | 1.71695 | 0       |
| ENSMUSG00000025401 | 8_Myo1a   | 2.31776 | 2.60114  | 0.172117 | 0.555258 | 0       | 5.66751 | 6.20497 | 0       | 0.85848 | 1.17563 |
| ENSMUSG00000025402 | 12_Nab2   | 569.769 | 0.2462   | 0.630733 | 0.88212  | 234.609 | 728.842 | 891.447 | 646.204 | 393.182 | 524.33  |
| ENSMUSG00000025403 | 4_Shmt2   | 608.508 | 0.67353  | 0.201405 | 0.59266  | 248.766 | 1056.42 | 939.019 | 537.265 | 405.201 | 464.373 |
| ENSMUSG00000025404 | 15_R3hdn  | 1809.36 | 0.33522  | 0.153097 | 0.528133 | 2210.58 | 1947.36 | 1897.69 | 1653.06 | 1475.72 | 1671.74 |
| ENSMUSG00000025407 | 6_Gli1    | 88.265  | -1.04336 | 0.091418 | 0.412116 | 20.2249 | 45.3401 | 107.553 | 165.058 | 105.593 | 85.8208 |
| ENSMUSG00000025408 | 15_Ddit3  | 212.59  | -0.04349 | 0.904237 | 0.97407  | 138.54  | 217.633 | 271.984 | 231.082 | 190.582 | 225.721 |
| ENSMUSG00000025409 | 14_Mbd6   | 716.113 | 0.22582  | 0.690308 | 0.905638 | 214.384 | 1056.42 | 1045.54 | 791.455 | 606.943 | 581.936 |
| ENSMUSG00000025410 | 9_Dctn2   | 2383.93 | 0.03269  | 0.945887 | 0.986649 | 960.682 | 2998.12 | 3274.16 | 2743.27 | 1979.65 | 2347.73 |
| ENSMUSG00000025413 | 13_Ttc4   | 732.048 | -0.05839 | 0.821079 | 0.948338 | 601.69  | 788.918 | 761.143 | 703.974 | 770.054 | 766.509 |
| ENSMUSG00000025417 | 7_Pip4k2c | 1917.77 | -0.08694 | 0.784262 | 0.935807 | 1299.45 | 2174.06 | 2106.59 | 2123.48 | 1740.99 | 2062.05 |
| ENSMUSG00000025418 | 7_Bsnd    | 1.4715  | -3.91142 | 0.141287 | NA       | 0       | 0       | 0       | 4.12646 | 0       | 4.70251 |
| ENSMUSG00000025420 | 13_Katnal | 26.2679 | -1.46334 | 0.006619 | 0.075105 | 13.1462 | 11.335  | 17.5807 | 46.2164 | 44.6408 | 24.6882 |
| ENSMUSG00000025421 | 14_Hdh2d  | 718.925 | -0.34503 | 0.146687 | 0.518186 | 603.713 | 683.502 | 613.258 | 850.051 | 812.978 | 750.051 |
| ENSMUSG00000025422 | 8_Agap2   | 23.1654 | -0.7867  | 0.289032 | 0.674033 | 10.1124 | 21.5366 | 19.6491 | 51.9934 | 27.4713 | 8.22939 |
| ENSMUSG00000025423 | 15_Plas2  | 1042.36 | 0.04448  | 0.914614 | 0.97608  | 1694.85 | 736.777 | 743.562 | 996.128 | 1121.17 | 961.664 |
| ENSMUSG00000025425 | 17_Sts8ia | 7.20599 | -1.15162 | 0.248658 | 0.640068 | 7.07871 | 1.1335  | 5.17081 | 17.3311 | 4.29238 | 8.22939 |
| ENSMUSG00000025427 | 14_Rnf16i | 20.4771 | -1.68332 | 0.022492 | 0.176699 | 8.08995 | 4.53401 | 16.5466 | 53.644  | 18.8865 | 21.1613 |
| ENSMUSG00000025428 | 15_Atp5a1 | 12698.7 | -0.06913 | 0.757536 | 0.927689 | 11399.8 | 12708.8 | 13074.9 | 13461.3 | 12252.2 | 13295.2 |
| ENSMUSG00000025429 | 8_Pstpip2 | 277.714 | 0.25148  | 0.415488 | 0.770028 | 265.957 | 329.849 | 309.214 | 203.022 | 245.524 | 312.717 |
| ENSMUSG00000025431 | 4_Crisp1  | 134.492 | 1.98796  | 0.00086  | 0.01749  | 396.408 | 146.222 | 101.348 | 48.6922 | 34.3391 | 79.9427 |
| ENSMUSG00000025432 | 11_Avil   | 22.827  | -0.30539 | 0.587835 | 0.86306  | 11.1237 | 30.6046 | 19.6491 | 23.1082 | 26.6128 | 25.8638 |
| ENSMUSG00000025433 | 7_Crisp3  | 0       | NA       | NA       | NA       | 0       | 0       | 0       | 0       | 0       | 0       |
| ENSMUSG00000025436 | 11_Xrcc6t | 61.3718 | -0.36384 | 0.441796 | 0.786851 | 30.3373 | 53.2746 | 77.5621 | 85.8304 | 60.0934 | 61.1326 |
| ENSMUSG00000025437 | 15_Usp33  | 1436.25 | 0.22907  | 0.549838 | 0.843939 | 2335.97 | 1175.44 | 1138.61 | 1207.4  | 1509.2  | 1250.87 |
| ENSMUSG00000025439 | 5_Clns1a  | 1115.68 | 0.13219  | 0.622895 | 0.878814 | 1390.46 | 1094.96 | 1014.51 | 962.291 | 1099.71 | 1132.13 |
| ENSMUSG00000025451 | 15_Paip1  | 1634.92 | 0.52151  | 0.308845 | 0.691472 | 3555.54 | 1091.56 | 1134.48 | 1128.17 | 1560.71 | 1339.04 |
| ENSMUSG00000025453 | 16_Nnt    | 817.541 | -0.41333 | 0.176217 | 0.55998  | 921.244 | 569.018 | 613.258 | 949.912 | 947.759 | 904.058 |
| ENSMUSG00000025461 | 10_Cd163  | 5.20126 | 1.31629  | 0.376289 | 0.745684 | 0       | 19.2695 | 3.10248 | 1.65058 | 6.00934 | 1.17563 |
| ENSMUSG00000025464 | 14_Paox   | 225.508 | 0.40914  | 0.266885 | 0.654888 | 164.833 | 330.983 | 276.121 | 211.275 | 169.978 | 199.857 |
| ENSMUSG00000025465 | 12_Echs1  | 1874.6  | -0.11862 | 0.601407 | 0.870033 | 1698.89 | 1755.8  | 1938.02 | 2039.3  | 1853.45 | 1962.12 |
| ENSMUSG00000025466 | 18_Fuom   | 330.963 | -0.18847 | 0.59163  | 0.865408 | 223.485 | 327.582 | 377.469 | 442.357 | 324.504 | 290.38  |
| ENSMUSG00000025467 | 8_Prap1   | 8.15247 | 0.14135  | 0.886834 | 0.969051 | 1.01124 | 11.335  | 13.4441 | 11.5541 | 6.86782 | 4.70251 |
| ENSMUSG00000025468 | 14_Caly   | 3.22141 | -1.09054 | 0.468224 | 0.804041 | 1.01124 | 0       | 5.17081 | 9.07822 | 1.71695 | 2.35126 |
| ENSMUSG00000025470 | 10_Zfp511 | 172.962 | 0.21456  | 0.493549 | 0.816268 | 141.574 | 202.897 | 213.037 | 166.709 | 153.667 | 159.885 |
| ENSMUSG00000025473 | 16_Adamt  | 200.721 | 2.6902   | 0.000147 | 0.004565 | 68.7646 | 703.905 | 269.916 | 51.1681 | 41.2069 | 69.362  |
| ENSMUSG00000025474 | 8_Tubgcp  | 657.024 | 0.25865  | 0.511481 | 0.827179 | 392.363 | 887.533 | 867.662 | 668.487 | 570.029 | 556.072 |
| ENSMUSG00000025475 | 17_Adgr4  | 6.02499 | -2.91595 | 0.012011 | 0.114925 | 2.02249 | 2.26701 | 0       | 15.6806 | 10.3017 | 5.87814 |
| ENSMUSG00000025477 | 13_Inpp5e | 932.829 | 0.08044  | 0.747668 | 0.924734 | 823.153 | 1081.36 | 972.112 | 917.725 | 886.807 | 915.814 |

|                    |           |         |          |          |          |         |         |         |         |         |         |
|--------------------|-----------|---------|----------|----------|----------|---------|---------|---------|---------|---------|---------|
| ENSMUSG00000025478 | 15_Dpysl4 | 31.0223 | -1.51341 | 0.013022 | 0.121454 | 15.1687 | 13.602  | 19.6491 | 79.2281 | 32.6221 | 25.8638 |
| ENSMUSG00000025479 | 8_Cyp2e1  | 8.84201 | -0.53812 | 0.553858 | 0.846091 | 8.08995 | 1.1335  | 12.4099 | 13.2047 | 11.1602 | 7.05377 |
| ENSMUSG00000025480 | 4_Syce1   | 8.5899  | -2.55912 | 0.008994 | 0.092943 | 2.02249 | 3.40051 | 2.06832 | 4.95175 | 21.4619 | 17.6344 |
| ENSMUSG00000025481 | 11_Urah   | 3466.31 | 0.95942  | 0.007088 | 0.07881  | 3343.17 | 6599.25 | 3792.27 | 2098.72 | 2482.72 | 2481.75 |
| ENSMUSG00000025482 | 11_Odf3   | 4.96744 | -2.59043 | 0.04161  | 0.258392 | 0       | 1.1335  | 3.10248 | 11.5541 | 3.43391 | 10.5807 |
| ENSMUSG00000025484 | 8_Bet1l   | 417.085 | -0.252   | 0.61091  | 0.874284 | 150.675 | 484.006 | 507.773 | 562.849 | 375.154 | 422.05  |
| ENSMUSG00000025485 | 12_Ric8   | 929.355 | 0.20693  | 0.617666 | 0.87739  | 506.633 | 1266.12 | 1215.14 | 975.496 | 789.799 | 822.939 |
| ENSMUSG00000025486 | 16_Sirt3  | 176.337 | -0.8043  | 0.122906 | 0.477042 | 46.5172 | 162.091 | 176.842 | 273.997 | 194.016 | 204.559 |
| ENSMUSG00000025487 | 14_Psmd7  | 1785.88 | 0.1053   | 0.707535 | 0.90956  | 1431.92 | 2184.26 | 1936.98 | 1734.76 | 1634.54 | 1792.83 |
| ENSMUSG00000025488 | 8_Cox8b   | 162.206 | -1.8013  | 0.002746 | 0.040968 | 29.3261 | 65.7432 | 122.031 | 416.773 | 166.545 | 172.817 |
| ENSMUSG00000025489 | 4>Ifitm5  | 6.81499 | -0.40901 | 0.725842 | 0.915914 | 0       | 12.4685 | 5.17081 | 10.7288 | 4.29238 | 8.22939 |
| ENSMUSG00000025491 | 14>Ifitm1 | 15431.1 | 0.33262  | 0.45185  | 0.794139 | 7870.51 | 24653.7 | 19082.3 | 13468.8 | 14532.3 | 12978.9 |
| ENSMUSG00000025492 | 6>Ifitm3  | 7838.43 | 2.22951  | 1.33E-05 | 0.000669 | 4797.34 | 21398.3 | 12569.2 | 2855.51 | 2625.22 | 2785.06 |
| ENSMUSG00000025494 | 7_Sigirr  | 94.0036 | 0.11378  | 0.850508 | 0.957445 | 26.2924 | 117.884 | 148.919 | 91.6075 | 74.6875 | 104.631 |
| ENSMUSG00000025495 | 14_Ptdssz | 855.943 | 0.05611  | 0.858315 | 0.959189 | 610.792 | 940.807 | 1066.22 | 831.069 | 834.44  | 852.33  |
| ENSMUSG00000025496 | 4_Drd4    | 5.1612  | -3.1035  | 0.055577 | 0.308674 | 0       | 2.26701 | 1.03416 | 16.5058 | 11.1602 | 0       |
| ENSMUSG00000025497 | 14_Cdh5   | 0.32647 | 0.16972  | 0.966824 | NA       | 0       | 1.1335  | 0       | 0.82529 | 0       | 0       |
| ENSMUSG00000025498 | 14_Irf7   | 7689.07 | 2.10365  | 1.56E-07 | 1.51E-05 | 6600.39 | 17262.1 | 13564.1 | 2963.62 | 2873.32 | 2870.88 |
| ENSMUSG00000025499 | 17_Hras   | 1651.84 | 0.113    | 0.806576 | 0.944049 | 722.028 | 2257.94 | 2169.67 | 1728.99 | 1437.09 | 1595.33 |
| ENSMUSG00000025500 | 11_Lmntd  | 71.6649 | 0.58989  | 0.316154 | 0.697034 | 25.2811 | 111.083 | 122.031 | 55.2946 | 57.518  | 58.7814 |
| ENSMUSG00000025503 | 4_Taldo1  | 4111.91 | 0.29965  | 0.561527 | 0.84958  | 1566.42 | 5958.82 | 6087.07 | 4159.47 | 2966.04 | 3933.65 |
| ENSMUSG00000025504 | 12_Eps8l2 | 6533.37 | 0.77169  | 0.166292 | 0.545745 | 2344.06 | 11296.5 | 11080   | 4981.46 | 3973.89 | 5524.28 |
| ENSMUSG00000025505 | 16_Tmem   | 325.224 | -0.27367 | 0.302184 | 0.685243 | 257.867 | 293.577 | 331.966 | 372.207 | 334.806 | 360.918 |
| ENSMUSG00000025507 | 13_Pidd1  | 68.8875 | 0.75185  | 0.191145 | 0.580196 | 28.3148 | 109.95  | 120.997 | 42.9152 | 52.3671 | 58.7814 |
| ENSMUSG00000025508 | 13_Rplp2  | 3751.43 | 0.05049  | 0.927909 | 0.980746 | 1107.31 | 5006.68 | 5337.31 | 4303.9  | 2865.6  | 3887.8  |
| ENSMUSG00000025509 | 15_Pnpla2 | 553.355 | 0.25304  | 0.654529 | 0.893223 | 180.001 | 787.785 | 837.671 | 663.535 | 391.466 | 459.67  |
| ENSMUSG00000025510 | 13_Cd151  | 3102.44 | -0.24952 | 0.545334 | 0.84237  | 1472.37 | 3457.18 | 3575.1  | 3955.63 | 2844.99 | 3309.39 |
| ENSMUSG00000025511 | 14_Tspan  | 403.756 | -0.39116 | 0.449734 | 0.792751 | 138.54  | 397.86  | 511.91  | 629.698 | 377.73  | 366.796 |
| ENSMUSG00000025512 | 14_Chid1  | 790.3   | -0.2038  | 0.594608 | 0.866686 | 409.554 | 921.538 | 872.832 | 873.985 | 832.723 | 831.169 |
| ENSMUSG00000025515 | 15_Muc2   | 7.56023 | 0.13915  | 0.898947 | 0.97035  | 1.01124 | 13.602  | 9.30745 | 10.7288 | 6.00934 | 4.70251 |
| ENSMUSG00000025521 | 14_Tmem   | 415.869 | 0.19057  | 0.450411 | 0.79295  | 396.408 | 443.2   | 490.193 | 393.664 | 370.862 | 400.889 |
| ENSMUSG00000025525 | 12_Apool  | 560.661 | 0.41812  | 0.389052 | 0.752914 | 1119.45 | 422.797 | 381.606 | 382.11  | 566.595 | 491.412 |
| ENSMUSG00000025527 | 9_Satl1   | 0.55573 | -2.53048 | 0.482371 | NA       | 0       | 0       | 0       | 2.47588 | 0.85848 | 0       |
| ENSMUSG00000025529 | 14_Zfp717 | 46.0528 | 0.28526  | 0.611345 | 0.874284 | 86.967  | 29.4711 | 35.1615 | 29.7105 | 51.5086 | 43.4982 |
| ENSMUSG00000025531 | 14_Chm    | 875.723 | 0.56559  | 0.265951 | 0.654446 | 1923.39 | 626.827 | 585.335 | 644.553 | 792.374 | 681.864 |
| ENSMUSG00000025532 | 13_Crcp   | 630.024 | -0.01268 | 0.957343 | 0.98909  | 573.376 | 652.898 | 655.658 | 660.234 | 617.245 | 620.731 |
| ENSMUSG00000025533 | 15_Asl    | 404.79  | -0.23976 | 0.662281 | 0.895681 | 111.237 | 501.008 | 501.568 | 484.447 | 383.739 | 446.739 |
| ENSMUSG00000025534 | 17_Gusb   | 463.271 | -0.11048 | 0.691193 | 0.905638 | 357.98  | 514.61  | 464.339 | 505.079 | 475.596 | 462.022 |
| ENSMUSG00000025537 | 12_Phkg1  | 39.7418 | -0.21678 | 0.700014 | 0.905844 | 46.5172 | 20.4031 | 43.4348 | 66.8487 | 28.3297 | 32.9176 |
| ENSMUSG00000025538 | 15_Sumf2  | 166.154 | -0.00628 | 0.981427 | 0.993854 | 155.732 | 168.892 | 172.705 | 162.583 | 166.545 | 170.466 |
| ENSMUSG00000025544 | 13_Tm9sf  | 6505.25 | 0.59353  | 0.206094 | 0.597435 | 13563.8 | 5276.46 | 4634.08 | 4392.21 | 5960.41 | 5204.5  |
| ENSMUSG00000025545 | 9_Clybl   | 164.798 | -1.0103  | 0.0058   | 0.0686   | 139.552 | 72.5442 | 115.826 | 227.781 | 243.807 | 189.276 |
| ENSMUSG00000025551 | 13_Fgf14  | 70.4514 | -0.16216 | 0.820826 | 0.948338 | 148.653 | 24.9371 | 25.854  | 72.6257 | 91.857  | 58.7814 |
| ENSMUSG00000025555 | 14_Farp1  | 352.4   | -0.55752 | 0.070516 | 0.354584 | 219.44  | 284.509 | 351.615 | 463.814 | 390.607 | 404.416 |
| ENSMUSG00000025557 | 9_Slc15a1 | 64.172  | 0.29263  | 0.428072 | 0.778631 | 67.7534 | 80.4787 | 64.118  | 56.1199 | 69.5366 | 47.0251 |
| ENSMUSG00000025558 | 15_Dock9  | 4464.4  | 0.4131   | 0.074959 | 0.366509 | 4974.31 | 5048.62 | 5274.22 | 3429.09 | 3840.83 | 4219.33 |
| ENSMUSG00000025571 | 13_Tnrc6  | 924.626 | -0.20623 | 0.48584  | 0.813523 | 658.32  | 892.067 | 1025.89 | 1102.59 | 968.362 | 900.531 |
| ENSMUSG00000025572 | 17_Tmc6   | 738.925 | 0.60335  | 0.325884 | 0.70689  | 209.328 | 1119.9  | 1344.41 | 670.137 | 413.786 | 675.986 |
| ENSMUSG00000025573 | 4_603046  | 0.34472 | 1.99863  | 0.620844 | NA       | 0       | 0       | 2.06832 | 0       | 0       | 0       |
| ENSMUSG00000025574 | 13_Tk1    | 423.965 | 0.66068  | 0.245439 | 0.636848 | 143.597 | 693.704 | 720.811 | 326.816 | 285.014 | 373.85  |
| ENSMUSG00000025575 | 14_Cant1  | 1263.51 | 0.25168  | 0.598567 | 0.868885 | 574.387 | 1851.01 | 1694.99 | 1314.69 | 883.373 | 1262.62 |
| ENSMUSG00000025576 | 17_Rbfox1 | 11.4117 | -2.82958 | 0.000553 | 0.012582 | 2.02249 | 3.40051 | 3.10248 | 26.4094 | 20.6034 | 12.9319 |
| ENSMUSG00000025577 | 7_Cbx2    | 162.749 | 0.49498  | 0.275654 | 0.662134 | 92.0232 | 227.834 | 251.301 | 144.426 | 111.602 | 149.305 |
| ENSMUSG00000025578 | 9_Cbx8    | 99.3031 | 0.1085   | 0.789469 | 0.937308 | 67.7534 | 131.486 | 109.621 | 80.8787 | 84.9892 | 121.09  |
| ENSMUSG00000025579 | 14_Gaa    | 890.516 | -0.39026 | 0.579669 | 0.859144 | 111.237 | 973.679 | 1227.55 | 1277.55 | 686.782 | 1066.29 |
| ENSMUSG00000025580 | 15_Eif4a3 | 1489.16 | 0.14596  | 0.698329 | 0.905638 | 912.142 | 2019.9  | 1761.18 | 1335.32 | 1304.03 | 1602.38 |
| ENSMUSG00000025582 | 4_Nptx1   | 17.9763 | -0.86255 | 0.334411 | 0.713252 | 15.1687 | 18.136  | 5.17081 | 51.1681 | 11.1602 | 7.05377 |
| ENSMUSG00000025583 | 15_Rptor  | 724.488 | 0.23592  | 0.653817 | 0.893223 | 264.946 | 1062.09 | 1023.82 | 764.221 | 528.822 | 703.025 |
| ENSMUSG00000025584 | 17_Pde8a  | 391.634 | 0.42656  | 0.135171 | 0.499246 | 548.094 | 423.93  | 375.401 | 344.147 | 340.815 | 317.42  |
| ENSMUSG00000025586 | 16_Cpeb1  | 510.775 | -0.19205 | 0.584902 | 0.861527 | 669.444 | 338.917 | 421.938 | 522.41  | 582.906 | 529.033 |
| ENSMUSG00000025588 | 3_Nat1    | 10.8061 | -0.05787 | 0.952042 | 0.988    | 24.2699 | 2.26701 | 5.17081 | 15.6806 | 6.86782 | 10.5807 |
| ENSMUSG00000025591 | 5_Tma16   | 297.816 | 0.23251  | 0.463596 | 0.801273 | 408.543 | 309.446 | 247.165 | 250.064 | 291.882 | 279.799 |
| ENSMUSG00000025592 | 17_Dach2  | 36.8106 | -0.73632 | 0.203003 | 0.594033 | 46.5172 | 11.335  | 24.8199 | 51.9934 | 40.3484 | 45.8495 |
| ENSMUSG00000025597 | 13_Klhl4  | 47.9269 | -0.66038 | 0.290563 | 0.675578 | 68.7646 | 14.7355 | 27.9224 | 64.3728 | 72.9705 | 38.7957 |
| ENSMUSG00000025602 | 13_Zfp207 | 186.841 | 0.22389  | 0.507996 | 0.826498 | 256.856 | 181.36  | 165.466 | 141.125 | 194.016 | 182.222 |
| ENSMUSG00000025607 | 15_Copg2  | 5669.09 | 0.23457  | 0.49938  | 0.821154 | 8575.35 | 4897.87 | 4913.3  | 4318.75 | 5763.81 | 5545.44 |
| ENSMUSG00000025608 | 9_Podxl   | 921.551 | -0.76269 | 0.006094 | 0.071246 | 779.669 | 564.484 | 706.332 | 1312.21 | 1142.63 | 1023.97 |
| ENSMUSG00000025609 | 15_Mkin1  | 3206.57 | 0.35934  | 0.402792 | 0.761322 | 5854.09 | 2554.92 | 2402.36 | 2340.53 | 3197.83 | 2889.69 |
| ENSMUSG00000025610 | 7_Map3k7  | 15.439  | -0.05048 | 0.950783 | 0.987571 | 32.3598 | 6.80102 | 6.20497 | 18.1564 | 10.3017 | 18.81   |
| ENSMUSG00000025612 | 5_Bach1   | 1583.41 | 0.86107  | 0.005225 | 0.063841 | 2645.42 | 1892.95 | 1588.47 | 1011.81 | 1152.08 | 1209.72 |
| ENSMUSG00000025613 | 13_Cct8   | 5285.41 | 0.29661  | 0.431815 | 0.780264 | 8445.91 | 4967.01 | 4067.36 | 3809.55 | 5532.03 | 4890.61 |
| ENSMUSG00000025616 | 14_Usp16  | 1166.06 | 0.15396  | 0.682111 | 0.902515 | 1819.23 | 939.674 | 925.575 | 959.815 | 1251.66 | 1100.39 |
| ENSMUSG00000025626 | 16_Phfb   | 1013.62 | 0.62482  | 0.212243 | 0.603454 | 2196.42 | 795.719 | 697.025 | 644.553 | 993.258 | 754.753 |
| ENSMUSG00000025630 | 8_Hprt    | 1848.32 | 0.44358  | 0.308095 | 0.690547 | 3493.85 | 1534.76 | 1361.99 | 1338.62 | 1773.61 | 1587.1  |
| ENSMUSG00000025645 | 8_Ccdc51  | 1194.36 | 0.17256  | 0.687351 | 0.904573 | 604.724 | 1606.17 | 1586.4  | 1239.59 | 1033.61 | 1095.69 |

|                    |           |         |          |          |          |         |         |         |         |         |         |
|--------------------|-----------|---------|----------|----------|----------|---------|---------|---------|---------|---------|---------|
| ENSMUSG00000025646 | 8_Atrip   | 137.357 | 0.34523  | 0.366023 | 0.739295 | 96.0682 | 179.093 | 186.149 | 134.523 | 110.744 | 117.563 |
| ENSMUSG00000025647 | 16_Shisa  | 4872.67 | 1.24952  | 0.000134 | 0.004189 | 4636.56 | 8778.98 | 7164.67 | 2842.31 | 2778.03 | 3035.47 |
| ENSMUSG00000025648 | 17_Pfkfb4 | 1100.11 | 0.52714  | 0.313705 | 0.695171 | 430.79  | 1751.26 | 1714.64 | 968.068 | 768.337 | 967.542 |
| ENSMUSG00000025650 | 12_Col7a  | 1044.29 | 0.93302  | 0.18634  | 0.573401 | 183.035 | 1865.75 | 2063.15 | 670.963 | 594.066 | 888.775 |
| ENSMUSG00000025651 | 14_Uqrcr  | 3158.71 | 0.09028  | 0.863692 | 0.961581 | 1058.77 | 4283.51 | 4430.35 | 3421.66 | 2626.08 | 3131.87 |
| ENSMUSG00000025656 | 17_Arhgel | 438.695 | -0.46905 | 0.271314 | 0.657711 | 580.454 | 226.701 | 296.804 | 567.801 | 534.831 | 425.577 |
| ENSMUSG00000025658 | 16_Cnksr  | 38.7468 | -0.82534 | 0.167924 | 0.548893 | 51.5735 | 13.602  | 18.6149 | 50.3428 | 58.3764 | 39.9713 |
| ENSMUSG00000025665 | 16_Rps6k  | 217.169 | 0.40823  | 0.409409 | 0.766558 | 434.835 | 140.554 | 167.534 | 161.757 | 213.761 | 184.574 |
| ENSMUSG00000025666 | 16_Tmem   | 596.648 | -0.55581 | 0.389884 | 0.753305 | 1025.4  | 151.889 | 271.984 | 799.708 | 788.94  | 541.964 |
| ENSMUSG00000025701 | 12_Alox5  | 37.1352 | -0.6667  | 0.276649 | 0.663239 | 10.1124 | 30.6046 | 45.5031 | 60.2463 | 35.1976 | 41.147  |
| ENSMUSG00000025702 | 15_March  | 2704.46 | 0.00353  | 0.98818  | 0.996838 | 3093.4  | 2473.3  | 2556.45 | 2688.8  | 2708.49 | 2706.3  |
| ENSMUSG00000025716 | 14_Myo3a  | 0.87072 | 3.33349  | 0.19168  | NA       | 2.02249 | 1.1335  | 2.06832 | 0       | 0       | 0       |
| ENSMUSG00000025722 | 16_Wdr7   | 415.341 | 0.16935  | 0.601864 | 0.870033 | 309.441 | 546.348 | 463.304 | 367.255 | 387.173 | 418.524 |
| ENSMUSG00000025723 | 12_Nmb    | 18.322  | -0.43799 | 0.454276 | 0.795918 | 12.1349 | 18.136  | 16.5466 | 29.7105 | 14.5941 | 18.81   |
| ENSMUSG00000025724 | 12_Sec11  | 1387.52 | 0.04141  | 0.878531 | 0.966155 | 1646.31 | 1316    | 1259.61 | 1168.61 | 1456.84 | 1477.76 |
| ENSMUSG00000025726 | 11_Slc28  | 0.81576 | -0.43649 | 0.874471 | NA       | 0       | 0       | 2.06832 | 1.65058 | 0       | 1.17563 |
| ENSMUSG00000025727 | 8_A93001  | 2.33032 | 0.18547  | 0.902208 | 0.973635 | 0       | 2.26701 | 5.17081 | 2.47588 | 1.71695 | 2.35126 |
| ENSMUSG00000025728 | 14_Plqq   | 1985.45 | 0.42765  | 0.243457 | 0.634745 | 1346.98 | 2958.44 | 2527.49 | 1768.6  | 1605.35 | 1705.84 |
| ENSMUSG00000025730 | 14_Rab40  | 814.433 | 0.22795  | 0.645055 | 0.889294 | 329.666 | 1123.3  | 1183.08 | 843.449 | 655.876 | 751.226 |
| ENSMUSG00000025731 | 15_06100  | 286.211 | -0.22276 | 0.621326 | 0.878215 | 131.462 | 286.776 | 374.366 | 378.809 | 247.241 | 298.609 |
| ENSMUSG00000025732 | 5_Fam19   | 49.2918 | -0.51926 | 0.462234 | 0.799907 | 9.1012  | 45.3401 | 67.2205 | 87.481  | 36.056  | 50.552  |
| ENSMUSG00000025733 | 17_Rhot2  | 741.421 | 0.08952  | 0.835508 | 0.952513 | 367.082 | 928.339 | 997.966 | 796.407 | 640.424 | 718.309 |
| ENSMUSG00000025735 | 13_Rhbdl  | 9.4361  | -1.23403 | 0.15745  | 0.535192 | 4.04498 | 5.66751 | 7.23913 | 23.9335 | 5.15086 | 10.5807 |
| ENSMUSG00000025736 | 14_Jmjd8  | 966.963 | -0.16813 | 0.729192 | 0.917707 | 360.003 | 1118.77 | 1253.4  | 1185.12 | 859.335 | 1025.15 |
| ENSMUSG00000025737 | 16_Wdr24  | 358.46  | 0.17465  | 0.792172 | 0.937777 | 64.7196 | 545.215 | 530.525 | 364.779 | 289.307 | 356.215 |
| ENSMUSG00000025738 | 7_Fbx16   | 39.607  | -1.58143 | 0.008974 | 0.09284  | 16.1799 | 11.335  | 32.059  | 91.6075 | 52.3671 | 34.0932 |
| ENSMUSG00000025739 | 13_Gng1   | 19.7602 | -1.14194 | 0.094508 | 0.418039 | 6.06747 | 12.4685 | 18.6149 | 42.0899 | 24.0374 | 15.2832 |
| ENSMUSG00000025742 | 5_Prps2   | 1411.4  | 0.33162  | 0.489702 | 0.814396 | 2776.88 | 997.483 | 944.189 | 1091.04 | 1417.35 | 1241.46 |
| ENSMUSG00000025743 | 14_Sdc3   | 1562.28 | -0.37474 | 0.333458 | 0.712065 | 795.849 | 1658.31 | 1627.77 | 2172.99 | 1623.38 | 1495.4  |
| ENSMUSG00000025745 | 11_Hadha  | 3308.17 | 0.06254  | 0.819512 | 0.948338 | 2614.07 | 3811.97 | 3713.67 | 3127.03 | 3290.54 | 3291.76 |
| ENSMUSG00000025746 | 11_Ilf6   | 56.2029 | 5.52627  | 1.93E-10 | 3.55E-08 | 134.495 | 158.69  | 37.2298 | 1.65058 | 5.15086 | 0       |
| ENSMUSG00000025747 | 12_Tyms   | 460.434 | 0.44064  | 0.108203 | 0.44731  | 598.657 | 519.144 | 472.612 | 334.243 | 433.531 | 404.416 |
| ENSMUSG00000025754 | 11_Agbl1  | 3.70311 | -1.38712 | 0.271099 | 0.657711 | 4.04498 | 0       | 2.06832 | 7.42763 | 5.15086 | 3.52688 |
| ENSMUSG00000025757 | 12_Hspa4  | 1041.25 | 0.29163  | 0.462147 | 0.799907 | 1743.39 | 909.069 | 785.963 | 870.683 | 1104.86 | 833.52  |
| ENSMUSG00000025758 | 10_Plk4   | 337.149 | 0.69789  | 0.103023 | 0.436784 | 659.331 | 321.915 | 269.916 | 212.925 | 279.005 | 279.799 |
| ENSMUSG00000025759 | 11_Mfsd8  | 523.32  | 0.38279  | 0.374706 | 0.744881 | 969.783 | 405.794 | 401.255 | 424.2   | 472.162 | 466.724 |
| ENSMUSG00000025762 | 14_Larp1t | 599.96  | 0.76882  | 0.045207 | 0.27168  | 1109.34 | 608.691 | 550.174 | 359.827 | 507.36  | 464.373 |
| ENSMUSG00000025764 | 14_Jade1  | 1207.25 | 0.25708  | 0.479062 | 0.809393 | 1907.21 | 895.467 | 1140.68 | 1111.67 | 1073.95 | 1114.5  |
| ENSMUSG00000025766 | 14_D3Ert  | 338.293 | 0.07896  | 0.884332 | 0.967903 | 664.388 | 196.096 | 182.012 | 292.153 | 368.287 | 326.825 |
| ENSMUSG00000025776 | 13_Crispl | 123.463 | -0.63818 | 0.223766 | 0.613717 | 170.9   | 45.3401 | 73.4255 | 158.456 | 165.686 | 126.968 |
| ENSMUSG00000025777 | 8_Gdap1   | 22.196  | -0.04089 | 0.965739 | 0.990781 | 54.6072 | 7.93452 | 3.10248 | 3.21864 | 18.8865 | 16.4588 |
| ENSMUSG00000025779 | 10_Ly96   | 158.897 | 0.63564  | 0.220055 | 0.611263 | 338.767 | 130.353 | 110.655 | 88.3063 | 144.224 | 141.075 |
| ENSMUSG00000025780 | 7_Ilih5   | 1721.07 | -0.18998 | 0.664299 | 0.896403 | 2617.1  | 890.933 | 1315.45 | 1732.29 | 1917.84 | 1852.79 |
| ENSMUSG00000025781 | 14_Atp5c  | 4720.98 | 0.00273  | 0.9935   | 0.998043 | 6594.32 | 3899.25 | 3682.65 | 4374.87 | 5166.31 | 4608.46 |
| ENSMUSG00000025782 | 12_Taf3   | 234.625 | 0.03441  | 0.893815 | 0.971063 | 248.766 | 235.769 | 227.516 | 231.082 | 218.912 | 245.706 |
| ENSMUSG00000025784 | 4_Clec3b  | 359.942 | -0.5073  | 0.417088 | 0.770766 | 81.9108 | 286.776 | 523.286 | 593.385 | 268.703 | 405.592 |
| ENSMUSG00000025785 | 4_Exosc7  | 641.845 | -0.07572 | 0.829712 | 0.951112 | 393.374 | 751.512 | 730.118 | 642.903 | 607.802 | 725.362 |
| ENSMUSG00000025786 | 15_Zdhnc  | 2999.73 | 0.23899  | 0.346235 | 0.723461 | 2902.27 | 3579.6  | 3260.71 | 2378.49 | 2875.9  | 3001.38 |
| ENSMUSG00000025787 | 5_Tgm4    | 9.63961 | -1.64316 | 0.069243 | 0.350212 | 1.01124 | 9.06802 | 4.13665 | 16.5058 | 18.8865 | 8.22939 |
| ENSMUSG00000025789 | 9_St8sia2 | 15.1342 | -2.15043 | 0.001612 | 0.027807 | 0.88995 | 2.26701 | 6.20497 | 27.2346 | 22.3204 | 24.6882 |
| ENSMUSG00000025790 | 14_Slco3  | 2269.39 | 0.32465  | 0.179272 | 0.564516 | 2691.93 | 2374.69 | 2503.71 | 1907.25 | 1856.89 | 2281.89 |
| ENSMUSG00000025791 | 18_Pgm2   | 819.296 | -0.1966  | 0.452232 | 0.794408 | 652.253 | 820.656 | 818.022 | 975.496 | 805.251 | 844.101 |
| ENSMUSG00000025792 | 9_Slc25a1 | 411.016 | 0.59864  | 0.401149 | 0.76028  | 65.7309 | 727.709 | 691.854 | 380.46  | 242.949 | 357.391 |
| ENSMUSG00000025793 | 15_Hgs    | 1033.24 | 0.57771  | 0.314935 | 0.696385 | 326.632 | 1790.93 | 1594.68 | 903.695 | 697.083 | 886.423 |
| ENSMUSG00000025794 | 8_Rpl14   | 11534.9 | -0.00125 | 0.996488 | 0.998321 | 8709.85 | 12839.2 | 13040.8 | 10918.6 | 11365.4 | 12335.9 |
| ENSMUSG00000025795 | 7_Rassf3  | 1596.48 | -0.13358 | 0.571442 | 0.854477 | 1586.64 | 1340.93 | 1640.18 | 1645.63 | 1716.1  | 1649.41 |
| ENSMUSG00000025804 | 4_Ccr1    | 101.878 | 2.10332  | 6.24E-05 | 0.002263 | 223.485 | 204.031 | 68.2547 | 29.7105 | 44.6408 | 41.147  |
| ENSMUSG00000025809 | 15_Iltgb1 | 9270.53 | 0.16596  | 0.664877 | 0.89688  | 14903.7 | 7628.47 | 6877.17 | 8177    | 9647.56 | 8389.28 |
| ENSMUSG00000025810 | 8_Nrp1    | 1335.76 | -0.70791 | 0.101602 | 0.43384  | 1641.25 | 622.293 | 779.758 | 1745.49 | 1839.72 | 1386.07 |
| ENSMUSG00000025812 | 17_Pard3  | 3927.22 | 0.40944  | 0.10399  | 0.438148 | 4307.9  | 4590.69 | 4543.07 | 2942.99 | 3213.28 | 3965.39 |
| ENSMUSG00000025813 | 13_Homei  | 4601.17 | 0.0787   | 0.749475 | 0.925082 | 5092.63 | 4631.49 | 4455.17 | 3955.63 | 4372.22 | 5099.87 |
| ENSMUSG00000025815 | 13_Dhtkd  | 113.246 | -0.58126 | 0.103333 | 0.436784 | 118.316 | 68.0102 | 85.8354 | 148.553 | 136.498 | 122.265 |
| ENSMUSG00000025816 | 15_Sec61  | 517.377 | -0.03161 | 0.911832 | 0.975343 | 598.657 | 444.333 | 492.261 | 491.049 | 611.236 | 466.724 |
| ENSMUSG00000025817 | 12_Nudt5  | 942.035 | 0.26231  | 0.421439 | 0.77414  | 1377.31 | 914.737 | 790.099 | 760.92  | 939.174 | 869.965 |
| ENSMUSG00000025821 | 9_Zfp282  | 1030.24 | 0.48672  | 0.211808 | 0.602983 | 668.433 | 1530.23 | 1408.53 | 884.713 | 753.743 | 935.8   |
| ENSMUSG00000025823 | 9_Pdia4   | 3253.04 | 0.55372  | 0.053323 | 0.30007  | 3504.97 | 4497.74 | 3606.12 | 2098.72 | 2763.44 | 3047.23 |
| ENSMUSG00000025825 | 12_Iscu   | 707.441 | -0.50411 | 0.147693 | 0.519979 | 375.172 | 633.628 | 746.665 | 902.045 | 801.818 | 785.319 |
| ENSMUSG00000025854 | 15_Fam2l  | 64.2838 | -0.51272 | 0.427188 | 0.777757 | 14.1574 | 96.3477 | 48.6056 | 89.1316 | 57.518  | 79.9427 |
| ENSMUSG00000025855 | 15_Prkar1 | 139.941 | -1.59366 | 0.000496 | 0.011585 | 41.461  | 60.0757 | 107.553 | 264.094 | 207.751 | 158.71  |
| ENSMUSG00000025856 | 15_Pdgfa  | 454.178 | -0.4974  | 0.109888 | 0.450198 | 300.34  | 383.124 | 446.758 | 642.077 | 469.587 | 483.183 |
| ENSMUSG00000025857 | 10_Dnaaf  | 289.937 | 0.5157   | 0.192951 | 0.583012 | 192.136 | 462.469 | 369.196 | 238.509 | 238.657 | 238.652 |
| ENSMUSG00000025858 | 12_Get4   | 904.414 | 0.15752  | 0.693212 | 0.905638 | 522.813 | 1148.24 | 1190.32 | 987.05  | 724.555 | 853.506 |
| ENSMUSG00000025860 | 14_Xiap   | 3896.11 | 0.49536  | 0.321435 | 0.702424 | 8263.89 | 2628.59 | 2782.93 | 2808.47 | 3850.77 | 3042.52 |
| ENSMUSG00000025862 | 14_Stag2  | 4401.39 | 0.33839  | 0.490269 | 0.814631 | 8808.95 | 2849.63 | 3086.97 | 3365.54 | 4538.77 | 3758.48 |
| ENSMUSG00000025867 | 8_Cplx2   | 282.205 | -1.0519  | 0.008674 | 0.090756 | 157.754 | 146.222 | 247.165 | 529.838 | 334.806 | 277.448 |

|                    |            |         |          |          |          |         |         |         |         |         |         |
|--------------------|------------|---------|----------|----------|----------|---------|---------|---------|---------|---------|---------|
| ENSMUSG00000025868 | 6_Higd2a   | 691.218 | -0.28415 | 0.477503 | 0.80857  | 341.801 | 672.167 | 856.286 | 843.449 | 708.244 | 725.362 |
| ENSMUSG00000025869 | 11_Nop16   | 424.596 | 0.0171   | 0.957574 | 0.98909  | 307.418 | 540.681 | 433.314 | 418.423 | 397.475 | 450.265 |
| ENSMUSG00000025870 | 10_Arl10   | 100.677 | -0.50929 | 0.295625 | 0.679579 | 37.416  | 106.549 | 105.484 | 144.426 | 96.1494 | 114.036 |
| ENSMUSG00000025871 | 18_48334   | 2151.28 | 0.01099  | 0.959132 | 0.98967  | 2204.51 | 2096.98 | 2176.91 | 2163.92 | 2131.6  | 2133.76 |
| ENSMUSG00000025872 | 5_Thoc3    | 654.099 | 0.0028   | 0.992698 | 0.997763 | 471.24  | 742.444 | 750.801 | 684.993 | 656.735 | 618.38  |
| ENSMUSG00000025873 | 15_Faf2    | 2105.05 | 0.15344  | 0.513085 | 0.828304 | 2059.9  | 2381.49 | 2208.97 | 1858.56 | 1945.31 | 2176.09 |
| ENSMUSG00000025875 | 14_Tspan   | 488.744 | -0.00633 | 0.989857 | 0.997265 | 187.08  | 588.288 | 687.717 | 557.072 | 400.909 | 511.398 |
| ENSMUSG00000025876 | 15_Unc5a   | 886.407 | 1.14076  | 0.14582  | 0.516385 | 107.192 | 1680.98 | 1870.8  | 665.186 | 347.683 | 646.595 |
| ENSMUSG00000025877 | 14_Hk3     | 51.6292 | 3.09503  | 0.000334 | 0.008523 | 15.1687 | 187.028 | 75.4938 | 15.6806 | 12.8772 | 3.52688 |
| ENSMUSG00000025878 | 16_Uimc1   | 1599.19 | 0.26299  | 0.337575 | 0.71586  | 1411.7  | 1878.21 | 1944.22 | 1502.86 | 1577.88 | 1280.26 |
| ENSMUSG00000025880 | 11_Smad1   | 205.824 | 0.19684  | 0.602175 | 0.870033 | 158.765 | 290.177 | 210.969 | 245.112 | 157.101 | 172.817 |
| ENSMUSG00000025885 | 18_Myo5b   | 2516.35 | 0.28305  | 0.439906 | 0.785475 | 1681.7  | 3411.84 | 3193.49 | 2116.05 | 2025.15 | 2669.85 |
| ENSMUSG00000025887 | 5_Casp1    | 549.485 | 1.98996  | 0.000229 | 0.00642  | 1652.37 | 578.086 | 403.323 | 192.293 | 249.817 | 221.018 |
| ENSMUSG00000025888 | 5_Casp1    | 474.08  | 2.37388  | 4.30E-06 | 0.000262 | 1398.55 | 570.152 | 415.733 | 113.065 | 200.025 | 146.953 |
| ENSMUSG00000025889 | 13_Snca    | 104.489 | -1.50865 | 0.000427 | 0.010301 | 67.7534 | 37.4056 | 57.913  | 203.847 | 155.384 | 104.631 |
| ENSMUSG00000025892 | 15_Gria4   | 63.9936 | -1.5034  | 0.063742 | 0.333786 | 76.8546 | 4.53401 | 18.6149 | 110.589 | 109.885 | 63.4839 |
| ENSMUSG00000025893 | 7_Kbtbd3   | 138.932 | 0.23175  | 0.699415 | 0.905839 | 301.351 | 68.0102 | 80.6646 | 105.637 | 145.083 | 132.846 |
| ENSMUSG00000025894 | 10_Aasdh   | 603.083 | 0.40422  | 0.47036  | 0.804531 | 1346.98 | 346.852 | 367.127 | 453.086 | 609.519 | 494.939 |
| ENSMUSG00000025898 | 5_Cwf19l2  | 849.142 | 0.51646  | 0.285844 | 0.671835 | 1776.76 | 617.759 | 603.95  | 638.776 | 776.922 | 680.689 |
| ENSMUSG00000025899 | 13_Alkbh5  | 347.926 | 0.36576  | 0.452878 | 0.795059 | 684.612 | 217.633 | 273.019 | 268.22  | 353.693 | 290.38  |
| ENSMUSG00000025900 | 10_Rp1     | 332.753 | -1.68225 | 0.054726 | 0.305587 | 362.025 | 89.5467 | 22.7516 | 787.329 | 604.368 | 130.495 |
| ENSMUSG00000025902 | 13_Sox17   | 27.985  | 0.06513  | 0.893267 | 0.971054 | 37.416  | 21.5366 | 26.8882 | 24.7588 | 32.6221 | 24.6882 |
| ENSMUSG00000025903 | 14_Lypla1  | 2521.82 | 0.66551  | 0.161539 | 0.540065 | 5471.84 | 1845.34 | 1962.84 | 1872.59 | 2084.38 | 1893.94 |
| ENSMUSG00000025905 | 13_Oprk1   | 5.62465 | -1.42576 | 0.265459 | 0.654114 | 8.08995 | 0       | 1.03416 | 9.07822 | 12.0187 | 3.52688 |
| ENSMUSG00000025907 | 13_Rb1cc   | 2733.44 | 0.61676  | 0.210356 | 0.602436 | 5961.29 | 2083.38 | 1882.17 | 1902.3  | 2438.93 | 2132.59 |
| ENSMUSG00000025909 | 16_Sntg1   | 33.7348 | -0.89521 | 0.119453 | 0.47027  | 38.4273 | 15.869  | 16.5466 | 47.867  | 56.6595 | 27.0394 |
| ENSMUSG00000025911 | 14_Adhfe1  | 149.171 | -0.81112 | 0.055707 | 0.308674 | 146.63  | 63.4762 | 114.792 | 238.509 | 181.139 | 150.48  |
| ENSMUSG00000025912 | 16_Mybl1   | 170.426 | 0.37023  | 0.513665 | 0.828304 | 329.666 | 137.154 | 109.621 | 78.4028 | 226.638 | 141.075 |
| ENSMUSG00000025915 | 14_Sgk3    | 3676.81 | 0.43867  | 0.364398 | 0.737732 | 7507.48 | 2543.58 | 2643.32 | 2600.5  | 3487.13 | 3278.83 |
| ENSMUSG00000025916 | 10_Ppp1r1  | 5.95805 | -0.76111 | 0.531021 | 0.8369   | 11.1237 | 1.1335  | 1.03416 | 12.3794 | 7.72629 | 2.35126 |
| ENSMUSG00000025917 | 9_Cops5    | 2040.63 | 0.23266  | 0.471323 | 0.804898 | 2969.01 | 1922.42 | 1722.91 | 1693.5  | 2074.94 | 1861.02 |
| ENSMUSG00000025920 | 19_Stau2   | 801.157 | 0.09524  | 0.816558 | 0.947571 | 1316.64 | 595.089 | 570.857 | 731.209 | 807.827 | 785.319 |
| ENSMUSG00000025921 | 7_Rdh10    | 1577.43 | -0.64105 | 0.136583 | 0.501691 | 1981.03 | 803.654 | 913.165 | 2228.29 | 2005.4  | 1533.02 |
| ENSMUSG00000025925 | 14_Terf1   | 648.231 | 0.84461  | 0.093871 | 0.417104 | 1494.62 | 533.88  | 469.509 | 360.653 | 532.256 | 498.466 |
| ENSMUSG00000025927 | 13_Tfap2l  | 1862.23 | -0.07898 | 0.841888 | 0.953593 | 2796.09 | 1185.64 | 1451.96 | 1877.54 | 2064.64 | 1797.53 |
| ENSMUSG00000025930 | 6_Msc      | 6.04091 | -1.97665 | 0.037385 | 0.242169 | 3.03373 | 2.26701 | 2.06832 | 12.3794 | 9.44325 | 7.05377 |
| ENSMUSG00000025931 | 15_Paqr8   | 1430.73 | 0.57857  | 0.09871  | 0.426922 | 2444.18 | 1284.26 | 1412.66 | 1070.4  | 1112.59 | 1260.27 |
| ENSMUSG00000025932 | 14_Eya1    | 297.31  | -1.21587 | 0.022403 | 0.176153 | 323.598 | 83.8792 | 129.27  | 498.477 | 442.974 | 305.663 |
| ENSMUSG00000025933 | 15_Tmem    | 116.595 | -0.75824 | 0.094331 | 0.41765  | 139.552 | 62.3427 | 57.913  | 132.872 | 171.695 | 135.197 |
| ENSMUSG00000025934 | 15_Gsta3   | 5903.56 | -0.28462 | 0.293371 | 0.677859 | 6354.66 | 4505.67 | 5108.76 | 5830.69 | 7157.98 | 6463.6  |
| ENSMUSG00000025935 | 10_Tram1   | 2843.12 | 0.31169  | 0.429713 | 0.779572 | 4880.27 | 2393.96 | 2172.77 | 2310.82 | 2746.27 | 2554.64 |
| ENSMUSG00000025937 | 6_Lactb2   | 759.298 | 0.30315  | 0.499181 | 0.821139 | 1402.6  | 552.016 | 561.55  | 581.831 | 770.054 | 687.742 |
| ENSMUSG00000025938 | 16_Slco5a  | 51.7431 | 0.61271  | 0.353043 | 0.729327 | 124.383 | 27.2041 | 36.1957 | 57.7705 | 34.3391 | 30.5663 |
| ENSMUSG00000025939 | 17_Ube2v   | 875.841 | 0.2562   | 0.614484 | 0.875923 | 1756.53 | 555.416 | 548.106 | 713.053 | 882.514 | 799.427 |
| ENSMUSG00000025940 | 6_Tmem7    | 477.336 | 0.32368  | 0.462593 | 0.800035 | 876.749 | 347.985 | 367.127 | 391.189 | 473.021 | 407.943 |
| ENSMUSG00000025945 | 11_Crygf   | 203.322 | -3.48834 | NA       | NA       | 6.06747 | 44.2066 | 49.6398 | 950.737 | 76.4045 | 92.8746 |
| ENSMUSG00000025946 | 13_Pth2r   | 0.47657 | -2.28567 | 0.465885 | NA       | 0       | 0       | 0       | 0.82529 | 0.85848 | 1.17563 |
| ENSMUSG00000025949 | 15_Pikfyv  | 1199.6  | 0.25672  | 0.547791 | 0.843822 | 2106.42 | 940.807 | 870.764 | 931.755 | 1266.25 | 1081.58 |
| ENSMUSG00000025950 | 16_Idh1    | 2910.45 | 0.16442  | 0.674557 | 0.900436 | 4736.67 | 2244.34 | 2247.23 | 2498.16 | 3066.48 | 2669.85 |
| ENSMUSG00000025952 | 15_Crygc   | 1307.58 | -3.99389 | 3.00E-05 | 0.00126  | 18.2024 | 194.962 | 250.267 | 6001.53 | 485.898 | 894.653 |
| ENSMUSG00000025955 | 13_Akr1cl  | 5.25164 | 0.16822  | 0.861422 | 0.960565 | 9.1012  | 3.40051 | 4.13665 | 3.30117 | 6.86782 | 4.70251 |
| ENSMUSG00000025956 | 10_Mettl2  | 445.497 | 0.09965  | 0.754139 | 0.926508 | 606.747 | 403.527 | 372.298 | 403.568 | 473.021 | 413.821 |
| ENSMUSG00000025958 | 14_Creb1   | 1983.83 | 0.4306   | 0.337118 | 0.715592 | 3836.66 | 1503.02 | 1493.33 | 1492.13 | 1927.28 | 1650.58 |
| ENSMUSG00000025959 | 13_Klf7    | 785.047 | 0.34108  | 0.191247 | 0.580244 | 1014.28 | 869.397 | 748.733 | 690.77  | 732.281 | 654.825 |
| ENSMUSG00000025961 | 1_493340   | 6.21217 | 0.15065  | 0.879369 | 0.96662  | 9.1012  | 1.1335  | 9.30745 | 4.12646 | 7.72629 | 5.87814 |
| ENSMUSG00000025962 | 15_Fastkc  | 458.416 | 0.21217  | 0.621437 | 0.878215 | 780.681 | 371.789 | 323.693 | 371.382 | 518.52  | 384.43  |
| ENSMUSG00000025963 | 5_Mdh1b    | 1.21544 | 3.81513  | 0.102048 | NA       | 2.02249 | 1.1335  | 4.13665 | 0       | 0       | 0       |
| ENSMUSG00000025964 | 15_Adam1   | 73.5008 | -0.9228  | 0.048554 | 0.283824 | 74.8321 | 34.0051 | 43.4348 | 84.1798 | 130.489 | 74.0646 |
| ENSMUSG00000025967 | 16_Eef1b1  | 9593.98 | -0.19467 | 0.378688 | 0.746999 | 8905.02 | 8806.18 | 9131.65 | 9367.07 | 10794.5 | 10559.5 |
| ENSMUSG00000025968 | 16_Ndufs1  | 2304.1  | -0.03021 | 0.931278 | 0.981849 | 3235.98 | 1897.48 | 1706.37 | 2117.7  | 2628.66 | 2238.4  |
| ENSMUSG00000025969 | 15_Nrp2    | 1271.11 | -0.6645  | 0.03296  | 0.224321 | 1259    | 856.928 | 834.568 | 1755.4  | 1631.11 | 1289.66 |
| ENSMUSG00000025971 | 6_943001   | 340.639 | 0.52867  | 0.218047 | 0.608715 | 633.039 | 281.109 | 292.668 | 217.877 | 319.353 | 299.785 |
| ENSMUSG00000025977 | 15_Boll    | 0.8427  | 3.28753  | 0.406676 | NA       | 5.05622 | 0       | 0       | 0       | 0       | 0       |
| ENSMUSG00000025978 | 14_Rftn2   | 145.442 | -0.97553 | 0.00193  | 0.031635 | 114.271 | 82.7457 | 97.2112 | 214.576 | 195.733 | 168.115 |
| ENSMUSG00000025979 | 13_MobA    | 2091.43 | 0.57911  | 0.262711 | 0.652095 | 4649.7  | 1503.02 | 1364.06 | 1405.47 | 1961.62 | 1664.69 |
| ENSMUSG00000025980 | 14_Hspd1   | 4337.03 | 0.48423  | 0.21132  | 0.602834 | 7386.13 | 4421.79 | 3366.2  | 2843.13 | 4133.57 | 3871.34 |
| ENSMUSG00000025981 | 13_Coq10   | 2005.25 | 0.98859  | 0.048127 | 0.282287 | 4825.66 | 1488.29 | 1685.68 | 1105.89 | 1515.21 | 1410.75 |
| ENSMUSG00000025982 | 13_Sf3b1   | 12200.4 | 0.50466  | 0.225574 | 0.615711 | 22420.3 | 10302.4 | 10215.4 | 7839.45 | 11914.8 | 10510.1 |
| ENSMUSG00000025983 | 11_Ccdc1   | 11.6781 | 0.73534  | 0.301461 | 0.684667 | 15.1687 | 9.06802 | 19.6491 | 7.42763 | 12.8772 | 5.87814 |
| ENSMUSG00000025986 | 6_Slc39a1  | 1517.65 | 0.31863  | 0.391726 | 0.754323 | 2486.65 | 1369.27 | 1197.56 | 1191.72 | 1449.97 | 1410.75 |
| ENSMUSG00000025991 | 8_Cps1     | 96.3843 | -0.05224 | 0.883872 | 0.967903 | 103.147 | 68.0102 | 112.724 | 95.7339 | 108.168 | 90.5233 |
| ENSMUSG00000025993 | 10_Slc40a1 | 124.905 | -0.89413 | 0.035336 | 0.234733 | 136.518 | 63.4762 | 62.0497 | 169.185 | 166.545 | 151.656 |
| ENSMUSG00000025995 | 16_Wdr7e   | 878.732 | 0.36313  | 0.362144 | 0.734798 | 1484.51 | 786.651 | 694.957 | 623.921 | 932.306 | 750.051 |
| ENSMUSG00000025997 | 13_Ikzf2   | 6158.73 | 0.75869  | 0.066815 | 0.342875 | 12079.3 | 5704.92 | 5440.72 | 3581.77 | 4754.25 | 5391.43 |
| ENSMUSG00000026000 | 16_Lancl1  | 2816.37 | 0.127    | 0.5758   | 0.856895 | 2705.08 | 2909.7  | 3205.9  | 2612.88 | 2745.41 | 2719.23 |

|                    |            |         |          |          |          |         |         |         |         |         |         |
|--------------------|------------|---------|----------|----------|----------|---------|---------|---------|---------|---------|---------|
| ENSMUSG00000026003 | 5_Acadl    | 3117.77 | 0.63977  | 0.028442 | 0.204279 | 4641.61 | 3824.44 | 2927.71 | 2204.36 | 2633.81 | 2474.7  |
| ENSMUSG00000026004 | 15_Kansl1  | 1366.38 | 0.56668  | 0.244316 | 0.636183 | 2879.01 | 1029.22 | 985.556 | 877.286 | 1277.41 | 1149.76 |
| ENSMUSG00000026005 | 15_Rpe     | 1120.41 | 0.66475  | 0.164012 | 0.542147 | 2394.63 | 888.666 | 838.705 | 704.8   | 1000.98 | 894.653 |
| ENSMUSG00000026009 | 14_Icos    | 18.4777 | 2.93053  | 2.74E-05 | 0.001177 | 33.3711 | 43.0731 | 21.7174 | 6.60234 | 2.57543 | 3.52688 |
| ENSMUSG00000026011 | 13_Ctla4   | 9.23811 | 3.79404  | 0.000685 | 0.014807 | 18.2024 | 28.3376 | 5.17081 | 0.82529 | 1.71695 | 1.17563 |
| ENSMUSG00000026012 | 2_Cd28     | 17.0694 | 1.82057  | 0.013603 | 0.124652 | 42.4723 | 27.2041 | 10.3416 | 8.25292 | 9.44325 | 4.70251 |
| ENSMUSG00000026014 | 15_Raph1   | 1082.79 | 0.66637  | 0.067654 | 0.3452   | 1938.56 | 1051.89 | 994.863 | 742.763 | 902.259 | 866.438 |
| ENSMUSG00000026017 | 13_Carf    | 313.462 | -0.00894 | 0.985149 | 0.995165 | 532.926 | 165.491 | 238.891 | 276.473 | 364.853 | 302.136 |
| ENSMUSG00000026018 | 12_Ica1l   | 10.7475 | -1.38219 | 0.047434 | 0.279537 | 7.07871 | 4.53401 | 6.20497 | 17.3311 | 12.8772 | 16.4588 |
| ENSMUSG00000026019 | 15_Wdr12   | 551.692 | 0.1131   | 0.717092 | 0.912443 | 705.849 | 572.419 | 441.587 | 457.212 | 605.226 | 527.857 |
| ENSMUSG00000026020 | 9_Nop58    | 2279.91 | 0.52507  | 0.253562 | 0.644802 | 4489.92 | 2010.83 | 1569.86 | 1444.26 | 2184.82 | 1979.76 |
| ENSMUSG00000026021 | 15_Sumo    | 3848.94 | 0.44971  | 0.329553 | 0.710053 | 7662.2  | 2907.43 | 2762.25 | 2853.04 | 3565.25 | 3343.49 |
| ENSMUSG00000026023 | 16_Cdk15   | 59.9707 | -1.56591 | 0.000479 | 0.011332 | 36.4048 | 19.2695 | 35.1615 | 106.463 | 97.8664 | 64.6595 |
| ENSMUSG00000026024 | 14_Als2    | 592.676 | -0.04463 | 0.85754  | 0.959059 | 548.094 | 650.631 | 552.242 | 626.397 | 624.971 | 553.721 |
| ENSMUSG00000026027 | 13_Stradt  | 446.692 | 0.03277  | 0.926634 | 0.980091 | 635.061 | 369.522 | 350.581 | 387.887 | 505.643 | 431.455 |
| ENSMUSG00000026028 | 12_Trak2   | 1301.43 | -0.23435 | 0.400921 | 0.76011  | 1472.37 | 1034.89 | 1080.7  | 1466.54 | 1480.87 | 1273.2  |
| ENSMUSG00000026029 | 14_Casp8   | 1219.62 | 0.52442  | 0.071745 | 0.357652 | 1672.6  | 1481.49 | 1162.4  | 838.497 | 1134.05 | 1028.67 |
| ENSMUSG00000026031 | 15_Cflar   | 2947.55 | 0.39683  | 0.158683 | 0.537239 | 4199.7  | 3081.99 | 2769.48 | 2491.56 | 2678.45 | 2464.12 |
| ENSMUSG00000026032 | 8_Ndufb3   | 1130.81 | -0.24432 | 0.27964  | 0.666619 | 1102.26 | 972.545 | 1031.06 | 1228.86 | 1253.38 | 1196.79 |
| ENSMUSG00000026034 | 17_Clk1    | 5059.89 | 0.25824  | 0.557662 | 0.848179 | 9032.43 | 3768.9  | 3733.32 | 4186.71 | 5702    | 3936    |
| ENSMUSG00000026035 | 15_Ppil3   | 382.217 | 0.11461  | 0.785119 | 0.936054 | 616.859 | 323.048 | 252.335 | 356.526 | 431.814 | 312.717 |
| ENSMUSG00000026036 | 17_Nif31l  | 644.671 | 0.00913  | 0.97106  | 0.99228  | 627.983 | 669.9   | 642.214 | 558.723 | 720.262 | 648.947 |
| ENSMUSG00000026037 | 14_Orc2    | 1239    | 0.38496  | 0.426529 | 0.777537 | 2462.38 | 893.2   | 854.217 | 850.876 | 1257.67 | 1115.67 |
| ENSMUSG00000026039 | 9_Sgol2a   | 330.929 | 0.62793  | 0.137966 | 0.503967 | 613.825 | 326.449 | 264.745 | 205.498 | 254.109 | 320.946 |
| ENSMUSG00000026042 | 16_Col5a1  | 5125.65 | -0.24872 | 0.304492 | 0.687401 | 4860.04 | 4171.29 | 5022.92 | 5015.3  | 5642.77 | 6041.55 |
| ENSMUSG00000026043 | 18_Col3a1  | 9595.38 | 0.50173  | 0.044716 | 0.26957  | 13096.6 | 10217.4 | 10427.5 | 8209.18 | 7309.93 | 8311.69 |
| ENSMUSG00000026047 | 13_Kdelc1  | 387.045 | 0.03899  | 0.917307 | 0.976775 | 576.409 | 289.043 | 311.283 | 361.478 | 426.663 | 357.391 |
| ENSMUSG00000026048 | 16_Ercc5   | 1006.14 | 0.10847  | 0.696172 | 0.905638 | 1195.29 | 1005.42 | 930.745 | 794.757 | 1049.06 | 1061.59 |
| ENSMUSG00000026049 | 11_Tex30   | 140.563 | 0.74362  | 0.145224 | 0.515328 | 291.238 | 154.156 | 82.7329 | 95.7339 | 131.347 | 88.1721 |
| ENSMUSG00000026051 | 8_150001   | 278.077 | -1.25618 | 0.005139 | 0.063273 | 130.451 | 106.549 | 255.438 | 505.079 | 392.324 | 278.624 |
| ENSMUSG00000026058 | 11_Khdrb1  | 10.3651 | -1.00306 | 0.214264 | 0.605026 | 9.1012  | 2.26701 | 9.30745 | 20.6323 | 10.3017 | 10.5807 |
| ENSMUSG00000026062 | 12_Slc9a2  | 19.43   | 0.5385   | 0.311325 | 0.693321 | 24.2699 | 27.2041 | 17.5807 | 17.3311 | 13.7356 | 16.4588 |
| ENSMUSG00000026064 | 15_Ptp4a1  | 2502.24 | 0.54122  | 0.276187 | 0.662803 | 5329.26 | 1914.49 | 1654.66 | 1724.04 | 2440.65 | 1950.37 |
| ENSMUSG00000026065 | 8_Slc9a4   | 8.46152 | 0.82911  | 0.346232 | 0.732461 | 8.08995 | 20.4031 | 4.13665 | 7.42763 | 6.00934 | 4.70251 |
| ENSMUSG00000026068 | 11_I118rap | 53.5827 | 2.78629  | 3.34E-08 | 3.86E-06 | 108.203 | 117.884 | 54.8106 | 16.5058 | 11.1602 | 12.9319 |
| ENSMUSG00000026069 | 15_I11r1l  | 48.5999 | 0.13804  | 0.759157 | 0.92777  | 60.6747 | 49.8741 | 42.4006 | 65.1981 | 33.4806 | 39.9713 |
| ENSMUSG00000026070 | 15_I118r1  | 377.662 | 1.29165  | 0.00163  | 0.028037 | 733.152 | 573.552 | 301.975 | 179.088 | 248.958 | 229.247 |
| ENSMUSG00000026072 | 12_I11r1   | 630.117 | -0.21764 | 0.518869 | 0.831665 | 780.681 | 536.147 | 431.245 | 632.174 | 782.073 | 618.38  |
| ENSMUSG00000026073 | 13_I11r2   | 182.704 | -0.08009 | 0.793414 | 0.938313 | 148.653 | 209.698 | 174.773 | 170.01  | 212.044 | 181.047 |
| ENSMUSG00000026074 | 14_Map4k   | 4208    | 0.35278  | 0.223173 | 0.613683 | 3762.84 | 5797.87 | 4598.92 | 3416.71 | 3501.73 | 4169.95 |
| ENSMUSG00000026077 | 15_Npas2   | 211.955 | -0.11508 | 0.742089 | 0.922751 | 144.608 | 259.572 | 206.832 | 242.636 | 233.506 | 184.574 |
| ENSMUSG00000026078 | 10_Pdcl3   | 1249.36 | -0.17789 | 0.477145 | 0.808121 | 1009.22 | 1287.66 | 1220.31 | 1307.26 | 1245.65 | 1426.04 |
| ENSMUSG00000026080 | 13_Chst1l  | 417.829 | -0.25653 | 0.318405 | 0.699506 | 370.115 | 353.653 | 418.835 | 481.145 | 476.455 | 406.767 |
| ENSMUSG00000026082 | 11_Rev1    | 538.432 | -0.16163 | 0.645049 | 0.889294 | 703.826 | 351.386 | 469.509 | 543.042 | 613.811 | 549.018 |
| ENSMUSG00000026083 | 12_Eif5b   | 5208.73 | 0.39059  | 0.305759 | 0.688654 | 8759.4  | 4821.92 | 4146.99 | 3691.53 | 4857.26 | 4975.26 |
| ENSMUSG00000026085 | 11_Lyg1    | 0       | NA       | NA       | NA       | 0       | 0       | 0       | 0       | 0       | 0       |
| ENSMUSG00000026087 | 11_Mrpl3C  | 1251.45 | 0.21819  | 0.351766 | 0.728508 | 1359.11 | 1422.55 | 1256.51 | 1218.96 | 1195.86 | 1055.71 |
| ENSMUSG00000026088 | 15_Mitd1   | 1593.17 | 1.28106  | 0.003186 | 0.045461 | 3624.3  | 1744.46 | 1403.36 | 746.89  | 1097.13 | 942.854 |
| ENSMUSG00000026090 | 16_20103   | 427.727 | 0.48349  | 0.260344 | 0.649568 | 251.8   | 604.157 | 640.146 | 368.08  | 291.882 | 410.294 |
| ENSMUSG00000026094 | 14_Stk17l  | 704.153 | 0.37028  | 0.446488 | 0.790161 | 1405.63 | 508.943 | 467.441 | 560.374 | 719.404 | 563.126 |
| ENSMUSG00000026095 | 15_Asnsl   | 1421.78 | 0.18658  | 0.648883 | 0.89122  | 2394.63 | 1075.69 | 1070.36 | 1222.26 | 1507.49 | 1260.27 |
| ENSMUSG00000026096 | 14_Osgep   | 249.296 | -0.13016 | 0.793542 | 0.938313 | 426.745 | 139.421 | 147.885 | 277.298 | 257.543 | 246.882 |
| ENSMUSG00000026097 | 9_Ormdl1   | 587.187 | 0.38028  | 0.47647  | 0.807609 | 1254.95 | 366.121 | 371.264 | 460.513 | 612.953 | 457.319 |
| ENSMUSG00000026098 | 13_Pms1    | 144.796 | 0.31826  | 0.542959 | 0.84123  | 289.216 | 100.882 | 92.0404 | 125.444 | 155.384 | 105.807 |
| ENSMUSG00000026100 | 6_Mstn     | 8.7148  | 0.02221  | 0.986331 | 0.995865 | 24.2699 | 0       | 2.06832 | 13.2047 | 6.86782 | 5.87814 |
| ENSMUSG00000026102 | 9_Inpp1    | 991.822 | 0.77757  | 0.016579 | 0.142155 | 1691.81 | 1088.16 | 978.317 | 667.662 | 785.506 | 739.47  |
| ENSMUSG00000026103 | 14_Gls     | 6782.01 | 0.37344  | 0.434452 | 0.782925 | 13374.7 | 4590.69 | 4999.14 | 4806.5  | 6992.3  | 5928.69 |
| ENSMUSG00000026104 | 14_Stat1   | 10977.4 | 2.37486  | 1.66E-12 | 5.23E-10 | 22812.7 | 19210.6 | 13194.9 | 2776.28 | 4152.45 | 3717.34 |
| ENSMUSG00000026107 | 11_Nabp1   | 2747.79 | 0.76167  | 0.125397 | 0.481826 | 6233.31 | 2184.26 | 1952.5  | 1687.72 | 2331.62 | 2097.32 |
| ENSMUSG00000026109 | 14_Tmeff1  | 28.1801 | -0.16263 | 0.789022 | 0.937308 | 46.5172 | 13.602  | 19.6491 | 28.8852 | 36.9145 | 23.5126 |
| ENSMUSG00000026110 | 15_Mgat4   | 3596.01 | 0.64227  | 0.035735 | 0.236192 | 5716.56 | 3753.03 | 3680.58 | 2461.02 | 2995.23 | 2969.64 |
| ENSMUSG00000026111 | 15_Unc50   | 1027.3  | -0.00733 | 0.978363 | 0.993796 | 1209.45 | 871.664 | 992.795 | 943.309 | 1133.19 | 1013.39 |
| ENSMUSG00000026112 | 7_Coa5     | 2716.27 | 0.34442  | 0.326949 | 0.708314 | 4375.65 | 2458.57 | 2282.39 | 2229.11 | 2405.45 | 2546.41 |
| ENSMUSG00000026113 | 17_Inpp4e  | 472.632 | 0.35656  | 0.176327 | 0.560022 | 613.825 | 460.202 | 518.115 | 401.092 | 436.965 | 405.592 |
| ENSMUSG00000026114 | 14_Cnga3   | 2.15071 | 1.43125  | 0.331713 | 0.711299 | 3.03373 | 3.40051 | 3.10248 | 1.65058 | 1.71695 | 0       |
| ENSMUSG00000026116 | 11_Tmem    | 2259.45 | 0.61788  | 0.025881 | 0.192998 | 3034.74 | 2663.73 | 2508.88 | 1444.26 | 1792.5  | 2112.6  |
| ENSMUSG00000026117 | 10_Zap70   | 6.66932 | 0.93591  | 0.386669 | 0.751493 | 1.01124 | 18.136  | 7.23913 | 4.95175 | 5.15086 | 3.52688 |
| ENSMUSG00000026121 | 13_Sema1   | 561.525 | 0.7933   | 0.123671 | 0.478085 | 255.845 | 971.412 | 909.028 | 406.869 | 332.231 | 493.764 |
| ENSMUSG00000026123 | 11_Plekht  | 4297.68 | 0.17053  | 0.46966  | 0.804531 | 4051.04 | 5084.89 | 4518.25 | 3899.51 | 4068.32 | 4164.07 |
| ENSMUSG00000026124 | 4_Cfc1     | 3.30506 | -0.40526 | 0.770649 | 0.932375 | 2.02249 | 3.40051 | 3.10248 | 6.60234 | 0       | 4.70251 |
| ENSMUSG00000026125 | 9_Prss39   | 0.18892 | 1.1315   | 0.781553 | NA       | 0       | 1.1335  | 0       | 0       | 0       | 0       |
| ENSMUSG00000026126 | 15_Ptpn1l  | 154.991 | 0.44324  | 0.34596  | 0.72323  | 78.8771 | 234.635 | 222.345 | 120.493 | 131.347 | 142.251 |
| ENSMUSG00000026127 | 13_Imp4    | 962.678 | 0.18633  | 0.424041 | 0.775611 | 939.446 | 1090.43 | 1044.5  | 863.256 | 942.608 | 895.828 |
| ENSMUSG00000026131 | 17_Dst     | 14610.5 | 0.50029  | 0.408245 | 0.282739 | 16960.6 | 16760   | 17634.5 | 10437.5 | 11553.4 | 14316.8 |
| ENSMUSG00000026134 | 11_Prim2   | 301.702 | 0.54289  | 0.059409 | 0.319785 | 333.711 | 401.26  | 338.171 | 200.546 | 266.128 | 270.394 |

|                    |           |         |          |          |          |         |         |         |         |         |         |
|--------------------|-----------|---------|----------|----------|----------|---------|---------|---------|---------|---------|---------|
| ENSMUSG00000026135 | 17_Zfp14  | 371.542 | -0.03912 | 0.899511 | 0.972372 | 265.957 | 426.197 | 407.46  | 385.412 | 356.268 | 387.957 |
| ENSMUSG00000026141 | 13_Col19  | 2.75447 | -2.13761 | 0.220135 | 0.611357 | 2.02249 | 0       | 1.03416 | 6.60234 | 6.86782 | 0       |
| ENSMUSG00000026142 | 15_Rhbdd  | 1387.48 | 0.43595  | 0.097774 | 0.424331 | 1867.77 | 1509.83 | 1408.53 | 1065.45 | 1181.26 | 1292.01 |
| ENSMUSG00000026147 | 16_Col9a  | 117.28  | -1.09692 | 0.014288 | 0.12869  | 74.8321 | 52.1411 | 97.2112 | 233.558 | 110.744 | 135.197 |
| ENSMUSG00000026149 | 2_Tm4sf2  | 1.31054 | 1.8373   | 0.38733  | NA       | 4.04498 | 1.1335  | 1.03416 | 1.65058 | 0       | 0       |
| ENSMUSG00000026150 | 14_Mff    | 2249.22 | -0.01709 | 0.963528 | 0.990106 | 3319.92 | 1720.66 | 1667.07 | 2115.22 | 2585.73 | 2086.74 |
| ENSMUSG00000026153 | 15_Fam1   | 3086.22 | 0.39804  | 0.345177 | 0.722149 | 5662.97 | 2573.05 | 2291.7  | 2371.89 | 2986.64 | 2631.06 |
| ENSMUSG00000026154 | 4_Sdhaf4  | 382.091 | -0.24351 | 0.440342 | 0.786071 | 451.015 | 269.774 | 328.863 | 402.743 | 449.842 | 390.308 |
| ENSMUSG00000026155 | 13_Smap   | 1632.85 | 0.57414  | 0.081916 | 0.386044 | 2636.31 | 1739.93 | 1484.02 | 1139.73 | 1367.55 | 1429.56 |
| ENSMUSG00000026156 | 8_B3gat2  | 80.1761 | 0.41176  | 0.377754 | 0.746591 | 142.585 | 75.9447 | 55.8447 | 56.1199 | 72.9705 | 77.5914 |
| ENSMUSG00000026158 | 11_Ogfrl1 | 1335.8  | 0.33678  | 0.508064 | 0.826498 | 2719.24 | 884.132 | 869.73  | 1227.21 | 1378.71 | 935.8   |
| ENSMUSG00000026159 | 13_Agfg1  | 2923.16 | 0.79644  | 0.034294 | 0.229568 | 5487.01 | 3018.52 | 2624.7  | 1822.25 | 2385.71 | 2200.78 |
| ENSMUSG00000026162 | 7_Nhej1   | 61.3926 | -0.10861 | 0.038315 | 0.942928 | 36.4048 | 77.0782 | 64.118  | 65.1981 | 73.829  | 51.7276 |
| ENSMUSG00000026163 | 17_Sphka  | 1909.61 | 0.15617  | 0.618732 | 0.87757  | 2571.59 | 1568.77 | 1897.69 | 1530.92 | 1833.71 | 2055    |
| ENSMUSG00000026166 | 14_Ccl20  | 1.02527 | 1.31756  | 0.614333 | NA       | 0       | 3.40051 | 1.03416 | 0       | 1.71695 | 0       |
| ENSMUSG00000026167 | 14_Wnt1C  | 195.356 | 0.45827  | 0.242129 | 0.633507 | 131.462 | 257.305 | 289.565 | 161.757 | 154.526 | 177.52  |
| ENSMUSG00000026170 | 6_Cyp27a  | 304.522 | 0.1108   | 0.775639 | 0.93365  | 182.024 | 346.852 | 419.87  | 313.611 | 275.571 | 289.204 |
| ENSMUSG00000026171 | 12_Rnf25  | 480.157 | -0.12765 | 0.780475 | 0.935491 | 198.204 | 599.623 | 579.13  | 538.916 | 471.304 | 493.764 |
| ENSMUSG00000026172 | 12_Bcs1l  | 298.801 | 0.12496  | 0.690034 | 0.905638 | 229.552 | 369.522 | 336.103 | 264.919 | 285.873 | 306.839 |
| ENSMUSG00000026173 | 15_Plcd4  | 22.7925 | -1.21684 | 0.130388 | 0.491137 | 22.2474 | 3.40051 | 15.5124 | 42.0899 | 42.9238 | 10.5807 |
| ENSMUSG00000026174 | 9_Rqcd1   | 1178.57 | 0.38692  | 0.165873 | 0.545533 | 1532.04 | 1281.99 | 1192.39 | 841.798 | 1049.92 | 1173.28 |
| ENSMUSG00000026175 | 12_Vil1   | 5.68696 | -1.63608 | 0.134525 | 0.498485 | 3.03373 | 1.1335  | 4.13665 | 16.5058 | 3.43391 | 5.87814 |
| ENSMUSG00000026176 | 13_Ctdsp  | 2239.67 | 0.05796  | 0.876886 | 0.965114 | 1334.84 | 2666    | 2853.25 | 2445.34 | 1917.84 | 2220.76 |
| ENSMUSG00000026177 | 11_Slc11  | 82.8183 | 0.2015   | 0.686412 | 0.9044   | 53.5959 | 136.02  | 76.528  | 109.764 | 57.518  | 63.4839 |
| ENSMUSG00000026179 | 14_Pnk2   | 367.825 | -0.54682 | 0.344911 | 0.722149 | 83.9333 | 368.388 | 444.689 | 567.801 | 368.287 | 373.85  |
| ENSMUSG00000026180 | 8_Cxcr2   | 20.0959 | 2.4058   | 0.003381 | 0.047338 | 23.2586 | 68.0102 | 10.3416 | 8.25292 | 6.00934 | 4.70251 |
| ENSMUSG00000026181 | 11_Ppm1f  | 793.951 | -0.46028 | 0.193082 | 0.583012 | 440.903 | 741.311 | 823.193 | 1112.49 | 827.572 | 818.237 |
| ENSMUSG00000026182 | 6_Tnp1    | 0       | NA       | NA       | NA       | 0       | 0       | 0       | 0       | 0       | 0       |
| ENSMUSG00000026185 | 8_Igfbp5  | 30019.5 | -0.22936 | 0.368559 | 0.740739 | 29829.7 | 22638.3 | 30446.8 | 33676.9 | 30713.7 | 32811.8 |
| ENSMUSG00000026187 | 8_Xrcc5   | 1058.06 | 0.11886  | 0.736138 | 0.92073  | 1550.24 | 854.661 | 899.721 | 859.129 | 1151.22 | 1033.38 |
| ENSMUSG00000026188 | 11_Tmem   | 15.684  | -1.32216 | 0.084883 | 0.393608 | 18.2024 | 3.40051 | 5.17081 | 18.1564 | 29.1882 | 19.9857 |
| ENSMUSG00000026189 | 13_Pecr   | 109.668 | -0.47442 | 0.15405  | 0.529491 | 71.7983 | 95.2142 | 108.587 | 138.649 | 126.196 | 117.563 |
| ENSMUSG00000026192 | 13_Atic   | 1135.12 | 0.4206   | 0.122796 | 0.476934 | 1173.04 | 1471.29 | 1253.4  | 864.081 | 897.967 | 1150.94 |
| ENSMUSG00000026193 | 15_Fn1    | 6011.27 | -0.21103 | 0.549008 | 0.843853 | 3768.91 | 5930.49 | 7017.82 | 5051.61 | 7612.97 | 6685.8  |
| ENSMUSG00000026196 | 7_Bard1   | 130.026 | 1.13853  | 0.000738 | 0.015663 | 216.406 | 165.491 | 154.09  | 66.8487 | 83.2723 | 94.0502 |
| ENSMUSG00000026197 | 12_Zfand  | 338.256 | 0.11445  | 0.858422 | 0.959189 | 70.7871 | 469.27  | 515.012 | 390.363 | 245.524 | 338.581 |
| ENSMUSG00000026198 | 15_Abcb6  | 195.479 | -0.14763 | 0.699701 | 0.905844 | 110.226 | 221.033 | 225.447 | 223.654 | 200.884 | 191.627 |
| ENSMUSG00000026199 | 17_Ankzf  | 511.09  | 0.17469  | 0.477885 | 0.808634 | 480.341 | 588.288 | 557.413 | 477.019 | 475.596 | 487.886 |
| ENSMUSG00000026200 | 13_Glb1l  | 341.758 | -0.77561 | 0.011587 | 0.112151 | 286.182 | 218.766 | 251.301 | 400.267 | 533.114 | 360.918 |
| ENSMUSG00000026201 | 12_Stk16  | 722.873 | 0.00422  | 0.9912   | 0.997512 | 406.52  | 875.064 | 890.413 | 774.124 | 692.791 | 698.323 |
| ENSMUSG00000026202 | 13_Tuba4  | 1811.06 | 0.34299  | 0.524964 | 0.833195 | 641.129 | 3049.12 | 2385.81 | 1731.46 | 1308.32 | 1750.51 |
| ENSMUSG00000026203 | 16_Dnajb  | 1112.14 | -0.10596 | 0.785032 | 0.936054 | 615.848 | 1326.2  | 1272.02 | 1304.79 | 934.881 | 1219.13 |
| ENSMUSG00000026204 | 15_Ptpn   | 74.2968 | -2.29971 | 0.00157  | 0.027243 | 31.3486 | 30.6046 | 13.4441 | 102.336 | 238.657 | 29.3907 |
| ENSMUSG00000026205 | 8_Slc23a  | 66.3103 | 0.57657  | 0.185979 | 0.573178 | 49.551  | 85.0127 | 103.416 | 42.0899 | 56.6595 | 61.1326 |
| ENSMUSG00000026207 | 16_Speg   | 215.611 | -1.14705 | 0.004767 | 0.060084 | 90.0007 | 121.285 | 191.32  | 379.634 | 270.42  | 241.004 |
| ENSMUSG00000026208 | 9_Des     | 413.655 | -1.00087 | 0.077637 | 0.374013 | 153.709 | 200.63  | 472.612 | 836.846 | 264.411 | 553.721 |
| ENSMUSG00000026209 | 15_Dnpep  | 1214.67 | 0.32501  | 0.562357 | 0.850204 | 386.295 | 1846.48 | 1820.12 | 1298.18 | 885.948 | 1051.01 |
| ENSMUSG00000026211 | 17_Obsl1  | 163.068 | -0.63466 | 0.272042 | 0.658686 | 40.4498 | 149.622 | 193.388 | 272.346 | 145.083 | 177.52  |
| ENSMUSG00000026213 | 15_Stk11i | 417.966 | 0.3109   | 0.501142 | 0.822414 | 203.26  | 604.157 | 581.199 | 425.026 | 316.778 | 377.377 |
| ENSMUSG00000026219 | 14_Trip12 | 9501.4  | 0.61952  | 0.105393 | 0.440822 | 17005.1 | 9388.8  | 8137.82 | 6014.73 | 8567.6  | 7894.34 |
| ENSMUSG00000026220 | 6_Slc16a1 | 4.06454 | 0.14152  | 0.906077 | 0.974391 | 5.05622 | 6.80102 | 1.03416 | 7.42763 | 1.71695 | 2.35126 |
| ENSMUSG00000026222 | 16_Sp100  | 7973.56 | 1.67992  | 1.53E-05 | 0.000755 | 16496.4 | 11652.4 | 8312.59 | 2623.6  | 4712.18 | 4044.16 |
| ENSMUSG00000026223 | 15_Iitm2c | 3050.75 | -0.51897 | 0.304427 | 0.687389 | 925.289 | 3169.27 | 3429.28 | 4460.71 | 2982.35 | 3337.61 |
| ENSMUSG00000026224 | 11_49334  | 0.62706 | 0.22967  | 0.938749 | NA       | 1.01124 | 0       | 1.03416 | 0       | 1.71695 | 0       |
| ENSMUSG00000026227 | 11_28104  | 2.74512 | -0.70801 | 0.629383 | 0.881466 | 3.03373 | 2.26701 | 1.03416 | 4.12646 | 6.00934 | 0       |
| ENSMUSG00000026228 | 6_Htr2b   | 10.6715 | 0.26613  | 0.764498 | 0.929893 | 12.1349 | 12.4685 | 10.3416 | 1.65058 | 18.028  | 9.40502 |
| ENSMUSG00000026229 | 17_Psmd   | 3890.73 | 0.15687  | 0.587567 | 0.862925 | 5019.82 | 3862.98 | 3423.07 | 3110.53 | 4033.12 | 3894.85 |
| ENSMUSG00000026234 | 12_Ncl    | 12645.8 | 0.55042  | 0.16882  | 0.550027 | 23044.2 | 11906.3 | 10136.9 | 8350.31 | 11070.9 | 11366   |
| ENSMUSG00000026235 | 14_Epha4  | 2456.66 | 0.39041  | 0.183446 | 0.570202 | 3537.33 | 2562.85 | 2260.68 | 1923.76 | 2202.85 | 2252.5  |
| ENSMUSG00000026237 | 3_Nmur1   | 0.14308 | -0.79206 | 0.84609  | NA       | 0       | 0       | 0       | 0       | 0.85848 | 0       |
| ENSMUSG00000026238 | 14_Ptma   | 12867.5 | 0.30608  | 0.208116 | 0.599354 | 15470   | 14711.7 | 12499.9 | 10964   | 10881.2 | 12678   |
| ENSMUSG00000026239 | 14_Pde6d  | 291.076 | -0.31523 | 0.23138  | 0.622696 | 253.822 | 251.638 | 273.019 | 319.388 | 360.56  | 288.029 |
| ENSMUSG00000026240 | 12_Cops7  | 316.312 | 0.06223  | 0.872337 | 0.963879 | 186.069 | 432.998 | 350.581 | 319.388 | 309.052 | 299.785 |
| ENSMUSG00000026241 | 5_Nppc    | 4.53453 | 1.53117  | 0.159316 | 0.537367 | 8.08995 | 5.66751 | 6.20497 | 0.82529 | 1.71695 | 4.70251 |
| ENSMUSG00000026245 | 16_Farsb  | 1100.86 | 0.24921  | 0.448221 | 0.791834 | 1581.59 | 1098.36 | 906.96  | 855.003 | 1126.32 | 1036.9  |
| ENSMUSG00000026246 | 12_Alpl2  | 0.14308 | -0.79206 | 0.84609  | NA       | 0       | 0       | 0       | 0       | 0.85848 | 0       |
| ENSMUSG00000026247 | 13_Ecel1  | 0.31162 | 0.16972  | 0.966824 | NA       | 1.01124 | 0       | 0       | 0       | 0.85848 | 0       |
| ENSMUSG00000026248 | 9_Mrpl44  | 371.575 | 0.31168  | 0.33424  | 0.712974 | 297.306 | 527.079 | 410.562 | 336.719 | 335.665 | 322.122 |
| ENSMUSG00000026249 | 10_Serpin | 1467.54 | -0.60864 | 0.052973 | 0.299004 | 1279.22 | 1130.1  | 1078.63 | 2230.77 | 1806.24 | 1280.26 |
| ENSMUSG00000026251 | 13_Chrrd  | 0.47463 | 1.00958  | 0.794968 | NA       | 2.02249 | 0       | 0       | 0.82529 | 0       | 0       |
| ENSMUSG00000026253 | 14_Chrrg  | 1.25751 | -2.51628 | 0.234563 | NA       | 0       | 0       | 1.03416 | 3.30117 | 0.85848 | 2.35126 |
| ENSMUSG00000026254 | 17_Eif4e2 | 1502.87 | -0.04953 | 0.858418 | 0.959189 | 1157.87 | 1750.13 | 1523.32 | 1463.24 | 1546.12 | 1576.52 |
| ENSMUSG00000026255 | 15_Efh1d  | 106.105 | -0.57594 | 0.205021 | 0.596418 | 126.406 | 44.2066 | 84.8012 | 143.601 | 114.177 | 123.441 |
| ENSMUSG00000026258 | 5_311007  | 0.13755 | -0.79206 | 0.84609  | NA       | 0       | 0       | 0       | 0.82529 | 0       | 0       |
| ENSMUSG00000026259 | 14_Ngef   | 735.779 | 0.5219   | 0.305266 | 0.688169 | 322.587 | 1124.43 | 1155.16 | 610.716 | 467.011 | 734.767 |

|                    |            |         |          |          |          |         |         |         |         |         |         |
|--------------------|------------|---------|----------|----------|----------|---------|---------|---------|---------|---------|---------|
| ENSMUSG00000026260 | 12_Ndufa   | 1401.16 | -0.00604 | 0.981013 | 0.993796 | 1194.28 | 1523.43 | 1476.78 | 1295.71 | 1387.3  | 1529.49 |
| ENSMUSG00000026269 | 14_Rnpep   | 1167.8  | 0.65839  | 0.256693 | 0.648295 | 377.194 | 2027.84 | 1884.24 | 1062.15 | 703.093 | 952.259 |
| ENSMUSG00000026270 | 11_Capn1   | 232.917 | 0.13622  | 0.787375 | 0.936722 | 95.057  | 316.247 | 320.59  | 273.172 | 181.997 | 210.437 |
| ENSMUSG00000026271 | 15_Gpr35   | 44.6972 | 2.424    | 7.42E-05 | 0.002585 | 55.6184 | 130.353 | 40.3323 | 11.5541 | 19.745  | 10.5807 |
| ENSMUSG00000026272 | 6_Agxt     | 2.34112 | 1.06     | 0.42878  | 0.779125 | 3.03373 | 3.40051 | 3.10248 | 2.47588 | 0.85848 | 1.17563 |
| ENSMUSG00000026273 | 13_Mterf4  | 1183.97 | -0.35875 | 0.281953 | 0.668558 | 1406.64 | 888.666 | 816.988 | 1128.17 | 1471.43 | 1391.94 |
| ENSMUSG00000026274 | 11_Pask    | 312.017 | 0.70109  | 0.02901  | 0.207071 | 283.148 | 411.462 | 464.339 | 209.624 | 247.241 | 256.287 |
| ENSMUSG00000026275 | 13_Ppp1r   | 1289.67 | 0.30945  | 0.293698 | 0.678007 | 1825.3  | 1305.8  | 1151.02 | 1090.21 | 1160.66 | 1205.02 |
| ENSMUSG00000026276 | 17_Sept2   | 5889.13 | 0.28029  | 0.504712 | 0.824604 | 10429   | 4537.41 | 4411.73 | 4758.64 | 6007.62 | 5190.4  |
| ENSMUSG00000026277 | 13_Stk25   | 3975.87 | 0.40578  | 0.294709 | 0.679115 | 2478.56 | 5715.12 | 5400.39 | 3178.2  | 3405.58 | 3677.36 |
| ENSMUSG00000026278 | 14_Bok     | 736.127 | 0.12937  | 0.792978 | 0.938313 | 290.227 | 1033.75 | 983.488 | 782.377 | 621.537 | 705.377 |
| ENSMUSG00000026279 | 14_Thap4   | 606.059 | 0.02453  | 0.956571 | 0.988881 | 275.058 | 804.787 | 753.904 | 656.933 | 520.237 | 625.434 |
| ENSMUSG00000026280 | 17_Atg4b   | 1035.47 | -0.0699  | 0.821239 | 0.948338 | 708.882 | 1152.77 | 1169.64 | 1050.6  | 1048.2  | 1082.75 |
| ENSMUSG00000026281 | 15_Dtymk   | 666.667 | 0.06078  | 0.795195 | 0.939047 | 705.849 | 673.301 | 662.898 | 606.59  | 695.366 | 656     |
| ENSMUSG00000026283 | 13_Ing5    | 547.308 | -0.11528 | 0.617366 | 0.877328 | 517.757 | 550.882 | 507.773 | 568.626 | 567.453 | 571.355 |
| ENSMUSG00000026285 | 7_Pdc1     | 4.58376 | 1.77637  | 0.203782 | 0.594896 | 1.01124 | 17.0025 | 3.10248 | 0.82529 | 0.85848 | 4.70251 |
| ENSMUSG00000026288 | 15_Inpp5c  | 120.525 | 0.78693  | 0.080035 | 0.380697 | 82.922  | 231.235 | 143.748 | 89.9569 | 82.4138 | 92.8746 |
| ENSMUSG00000026289 | 15_Atg16l  | 842.704 | -0.04249 | 0.889731 | 0.97035  | 596.634 | 904.535 | 989.693 | 836.846 | 823.279 | 905.233 |
| ENSMUSG00000026295 | 12_Spp2    | 0.39188 | -1.97195 | 0.623385 | NA       | 0       | 0       | 0       | 0       | 0       | 2.35126 |
| ENSMUSG00000026301 | 15_Iqca    | 4.36435 | -1.9903  | 0.090118 | 0.409131 | 1.01124 | 2.26701 | 2.06832 | 9.90351 | 8.58477 | 2.35126 |
| ENSMUSG00000026303 | 6_Mlph     | 1739.44 | -0.8917  | 0.014415 | 0.129516 | 829.22  | 1152.77 | 1673.27 | 2763.9  | 2007.12 | 2010.32 |
| ENSMUSG00000026304 | 13_Rab17   | 146.341 | -0.44677 | 0.32945  | 0.710007 | 60.6747 | 137.154 | 173.739 | 181.564 | 135.639 | 189.276 |
| ENSMUSG00000026305 | 15_Lrrfip1 | 4145.66 | 0.32185  | 0.180583 | 0.566911 | 4286.66 | 4999.88 | 4531.7  | 3270.63 | 3773.86 | 4011.24 |
| ENSMUSG00000026307 | 12_Scly    | 500.493 | 0.23874  | 0.59608  | 0.867938 | 266.969 | 717.507 | 641.18  | 585.958 | 352.834 | 438.509 |
| ENSMUSG00000026308 | 8_Klhl30   | 42.6159 | -1.68278 | 0.004076 | 0.053903 | 9.1012  | 24.9371 | 26.8882 | 99.0351 | 46.3578 | 49.3764 |
| ENSMUSG00000026309 | 14_Ilkap   | 1120.32 | -0.0369  | 0.87829  | 0.966108 | 979.896 | 1128.97 | 1208.93 | 1092.69 | 1113.44 | 1197.96 |
| ENSMUSG00000026311 | 16_Asb1    | 292.995 | -0.53866 | 0.044528 | 0.268903 | 250.789 | 222.167 | 244.062 | 387.062 | 349.4   | 304.488 |
| ENSMUSG00000026312 | 17_Cdh7    | 3.55388 | -0.65313 | 0.588689 | 0.863656 | 6.06747 | 1.1335  | 1.03416 | 4.95175 | 3.43391 | 4.70251 |
| ENSMUSG00000026313 | 15_Hdac4   | 804.749 | 0.28736  | 0.361081 | 0.734102 | 673.489 | 981.614 | 999     | 865.732 | 600.934 | 707.728 |
| ENSMUSG00000026315 | 13_Serpin  | 3293.72 | 0.63056  | 0.051426 | 0.293762 | 5200.83 | 3622.68 | 3183.15 | 2105.32 | 3006.39 | 2643.99 |
| ENSMUSG00000026317 | 7_Cln8     | 480.801 | 0.05416  | 0.851301 | 0.957649 | 410.565 | 566.751 | 492.261 | 529.012 | 398.333 | 487.886 |
| ENSMUSG00000026319 | 13_23100   | 3085.67 | 0.57303  | 0.163778 | 0.541869 | 5720.61 | 2797.49 | 2553.34 | 1950.17 | 2934.27 | 2558.17 |
| ENSMUSG00000026321 | 7_Tnfrsf1  | 210.265 | 0.85787  | 0.02857  | 0.204862 | 389.329 | 240.303 | 183.047 | 126.27  | 154.526 | 168.115 |
| ENSMUSG00000026322 | 8_Htr4     | 4.23872 | -1.33241 | 0.275305 | 0.661664 | 2.02249 | 0       | 5.17081 | 4.95175 | 8.58477 | 4.70251 |
| ENSMUSG00000026327 | 8_Serpinb  | 4533.67 | 0.56757  | 0.165761 | 0.545533 | 8350.86 | 4374.19 | 3517.18 | 2938.04 | 4250.32 | 3771.41 |
| ENSMUSG00000026333 | 14_Gin1    | 190.274 | -0.01005 | 0.97874  | 0.993796 | 274.047 | 150.756 | 143.748 | 172.486 | 194.874 | 205.735 |
| ENSMUSG00000026335 | 16_Pam     | 4490.93 | -0.39625 | 0.16025  | 0.538686 | 4837.79 | 3111.47 | 3684.72 | 5270.32 | 5135.41 | 4905.89 |
| ENSMUSG00000026339 | 18_Ccdc9   | 979.255 | 0.13492  | 0.584145 | 0.860923 | 1013.27 | 1113.1  | 948.326 | 841.798 | 928.014 | 1031.03 |
| ENSMUSG00000026341 | 16_Actr3   | 12516.9 | 0.66875  | 0.093058 | 0.415515 | 23433.6 | 12479.9 | 10187.5 | 7921.98 | 10738.7 | 10339.6 |
| ENSMUSG00000026342 | 10_Slc35f  | 2124.88 | 0.18047  | 0.602664 | 0.870033 | 3153.06 | 1898.62 | 1720.84 | 1679.47 | 2156.49 | 2140.82 |
| ENSMUSG00000026343 | 6_Gpr39    | 201.765 | 0.76943  | 0.026695 | 0.196614 | 171.912 | 313.98  | 277.155 | 151.029 | 142.507 | 154.007 |
| ENSMUSG00000026344 | 9_Lypd1    | 93.1718 | -1.09245 | 0.004801 | 0.060349 | 47.5285 | 57.8086 | 73.4255 | 154.33  | 133.064 | 92.8746 |
| ENSMUSG00000026347 | 13_Tmem    | 10.3371 | -2.47493 | 0.002969 | 0.043072 | 4.04498 | 3.40051 | 2.06832 | 24.7588 | 17.1695 | 10.5807 |
| ENSMUSG00000026348 | 7_Acmsd    | 0.38486 | 0.16972  | 0.966824 | NA       | 0       | 1.1335  | 0       | 0       | 0       | 1.17563 |
| ENSMUSG00000026349 | 14_Ccnt2   | 2039.23 | 0.42044  | 0.266061 | 0.654446 | 3498.91 | 1794.34 | 1709.47 | 1551.55 | 1934.15 | 1746.98 |
| ENSMUSG00000026353 | 9_Ubxn4    | 2533.95 | 0.18121  | 0.767093 | 0.852278 | 3575.76 | 2370.15 | 2132.44 | 2087.99 | 2536.8  | 2500.56 |
| ENSMUSG00000026354 | 8_Lct      | 2.97516 | 0.52463  | 0.70472  | 0.908152 | 4.04498 | 3.40051 | 3.10248 | 4.95175 | 0       | 2.35126 |
| ENSMUSG00000026355 | 11_Mcm6    | 1689.73 | 1.22905  | 3.07E-05 | 0.00128  | 2241.93 | 2718.14 | 2145.89 | 788.979 | 1030.17 | 1213.25 |
| ENSMUSG00000026356 | 15_Dars    | 1755.85 | 0.46235  | 0.238492 | 0.630522 | 3068.12 | 1590.3  | 1445.76 | 1193.37 | 1655.14 | 1582.4  |
| ENSMUSG00000026357 | 3_Rgs18    | 16.6537 | 0.79166  | 0.286349 | 0.672361 | 40.4498 | 13.602  | 9.30745 | 15.6806 | 10.3017 | 10.5807 |
| ENSMUSG00000026358 | 13_Rgs1    | 30.6969 | 3.45947  | 5.01E-07 | 4.27E-05 | 70.7871 | 72.5442 | 25.854  | 5.77705 | 6.86782 | 2.35126 |
| ENSMUSG00000026360 | 9_Rgs2     | 319.866 | -0.19186 | 0.600349 | 0.869697 | 392.363 | 308.313 | 195.457 | 385.412 | 351.976 | 285.678 |
| ENSMUSG00000026361 | 8_Cdc73    | 1364.67 | 0.43977  | 0.341813 | 0.719718 | 2702.04 | 974.812 | 1036.23 | 1039.87 | 1322.91 | 1112.14 |
| ENSMUSG00000026365 | 15_Cfh     | 2268.81 | -0.28126 | 0.623944 | 0.879293 | 4087.45 | 974.812 | 1082.77 | 2853.04 | 2675.01 | 1939.79 |
| ENSMUSG00000026374 | 14_Tsn     | 1719.31 | -0.0515  | 0.879958 | 0.966708 | 2351.14 | 1390.81 | 1323.73 | 1533.39 | 1952.18 | 1764.62 |
| ENSMUSG00000026377 | 12_Nlfi    | 1112.31 | 0.22766  | 0.544631 | 0.842093 | 1728.22 | 1020.15 | 851.115 | 830.244 | 1200.15 | 1043.96 |
| ENSMUSG00000026380 | 10_Tfcp2l  | 813.833 | 0.74119  | 0.159431 | 0.537367 | 1399.56 | 521.411 | 1133.44 | 419.249 | 388.89  | 1020.44 |
| ENSMUSG00000026383 | 14_Epb41   | 1901.43 | 0.42898  | 0.278407 | 0.665542 | 3367.44 | 1539.3  | 1639.15 | 1404.65 | 1739.27 | 1718.77 |
| ENSMUSG00000026384 | 13_Ptpn4   | 994.056 | 0.46794  | 0.361862 | 0.734636 | 2143.84 | 674.434 | 643.248 | 788.979 | 920.287 | 793.549 |
| ENSMUSG00000026385 | 16_Dbi     | 3320.64 | -0.37407 | 0.113773 | 0.457664 | 2515.98 | 3105.8  | 3055.95 | 3640.36 | 3829.67 | 3776.12 |
| ENSMUSG00000026387 | 15_Sctr    | 1.90986 | -2.18445 | 0.225115 | 0.615041 | 2.02249 | 0       | 0       | 2.47588 | 3.43391 | 3.52688 |
| ENSMUSG00000026388 | 15_31100   | 65.8014 | 0.06833  | 0.866688 | 0.962691 | 87.9783 | 51.0076 | 63.0839 | 55.2946 | 79.8384 | 57.6058 |
| ENSMUSG00000026389 | 16_Steap3  | 1086.04 | 0.35838  | 0.257247 | 0.648571 | 919.221 | 1177.71 | 1563.65 | 1014.28 | 823.279 | 1018.09 |
| ENSMUSG00000026393 | 10_Nek7    | 2160.76 | 0.11727  | 0.793681 | 0.938336 | 3812.39 | 1441.82 | 1491.26 | 1969.97 | 2264.66 | 1984.46 |
| ENSMUSG00000026395 | 16_Ptpnc   | 507.892 | 2.60482  | 1.06E-08 | 1.46E-06 | 1195.29 | 982.747 | 439.519 | 135.348 | 186.29  | 108.158 |
| ENSMUSG00000026398 | 14_Nr5a2   | 7.93879 | 0.12492  | 0.888576 | 0.969793 | 16.1799 | 4.53401 | 4.13665 | 6.60234 | 10.3017 | 5.87814 |
| ENSMUSG00000026399 | 12_Cd55    | 498.002 | 0.24511  | 0.628818 | 0.881265 | 976.862 | 299.245 | 344.376 | 386.237 | 545.133 | 436.158 |
| ENSMUSG00000026401 | 15_Cd55b   | 0.16854 | 1.1315   | 0.781553 | NA       | 1.01124 | 0       | 0       | 0       | 0       | 0       |
| ENSMUSG00000026404 | 12_Ddx59   | 242.299 | -0.21208 | 0.421495 | 0.77414  | 212.361 | 232.368 | 228.55  | 241.811 | 250.675 | 288.029 |
| ENSMUSG00000026405 | 14_C4bp    | 1.00616 | 2.36056  | 0.36952  | NA       | 4.04498 | 1.1335  | 0       | 0       | 0.85848 | 0       |
| ENSMUSG00000026407 | 17_Cacna   | 120.619 | -1.11401 | 0.062265 | 0.329734 | 101.124 | 26.0706 | 101.348 | 244.287 | 90.9986 | 159.885 |
| ENSMUSG00000026409 | 14_Pfkfb2  | 2094.8  | 0.07765  | 0.763473 | 0.929511 | 2530.13 | 1940.56 | 1982.49 | 1856.08 | 2141.04 | 2118.48 |
| ENSMUSG00000026411 | 17_Tmem    | 605.594 | -0.64026 | 0.179165 | 0.564484 | 201.238 | 564.484 | 654.624 | 918.55  | 629.264 | 665.405 |
| ENSMUSG00000026413 | 12_Pkp1    | 21125.4 | 0.74171  | 0.073435 | 0.362634 | 14574.1 | 36319.7 | 28423.9 | 13112.2 | 14278.2 | 20044.5 |
| ENSMUSG00000026414 | 13_Tnnt2   | 107.969 | 0.04096  | 0.909303 | 0.974731 | 82.922  | 108.816 | 136.509 | 89.1316 | 108.168 | 122.265 |

|                    |            |         |          |          |          |         |         |         |         |         |         |
|--------------------|------------|---------|----------|----------|----------|---------|---------|---------|---------|---------|---------|
| ENSMUSG00000026415 | 11_Fcamr   | 80.333  | 0.72203  | 0.134773 | 0.498606 | 50.5622 | 124.685 | 125.134 | 55.2946 | 78.1214 | 48.2007 |
| ENSMUSG00000026417 | 13_Pigr    | 861.813 | 0.61543  | 0.023787 | 0.182564 | 1049.67 | 1072.29 | 1006.24 | 538.916 | 744.3   | 759.456 |
| ENSMUSG00000026418 | 16_Tnni1   | 19.5151 | -1.08254 | 0.113529 | 0.457438 | 6.06747 | 15.869  | 15.5124 | 24.7588 | 13.7356 | 41.147  |
| ENSMUSG00000026420 | 16_Il24    | 8.35779 | 6.58977  | 1.75E-05 | 0.00083  | 9.1012  | 31.7381 | 9.30745 | 0       | 0       | 0       |
| ENSMUSG00000026421 | 14_Csrp1   | 3580.25 | 0.00216  | 0.995085 | 0.998125 | 2212.6  | 4430.86 | 4105.62 | 3804.6  | 3554.95 | 3372.88 |
| ENSMUSG00000026424 | 8_Gpr37l1  | 16.8881 | -0.50993 | 0.446933 | 0.790514 | 17.1912 | 11.335  | 13.4441 | 17.3311 | 32.6221 | 9.40502 |
| ENSMUSG00000026425 | 15_Srgap1  | 2308.52 | 0.35965  | 0.094656 | 0.41805  | 2613.06 | 2600.26 | 2570.93 | 1943.56 | 2070.65 | 2052.65 |
| ENSMUSG00000026426 | 10_Arl8a   | 615.02  | -0.05067 | 0.893752 | 0.971063 | 354.947 | 752.646 | 705.298 | 718.83  | 549.425 | 608.975 |
| ENSMUSG00000026427 | 16_Elf2d   | 801.902 | 0.26371  | 0.325792 | 0.706779 | 700.792 | 953.276 | 971.078 | 740.287 | 728.847 | 717.133 |
| ENSMUSG00000026429 | 8_Ube2t    | 78.5039 | 0.57481  | 0.16904  | 0.550386 | 111.237 | 89.5467 | 80.6646 | 38.7887 | 75.546  | 75.2402 |
| ENSMUSG00000026430 | 15_Rassf1  | 1299.95 | 0.49281  | 0.040532 | 0.253896 | 1383.38 | 1616.38 | 1559.52 | 975.496 | 1115.16 | 1149.76 |
| ENSMUSG00000026433 | 12_Rab29   | 302.895 | -0.00276 | 0.991874 | 0.997512 | 263.935 | 330.983 | 313.351 | 320.213 | 318.495 | 270.394 |
| ENSMUSG00000026434 | 13_Nucks   | 3853.24 | 0.38881  | 0.380154 | 0.747885 | 7323.43 | 2871.16 | 2913.23 | 2909.98 | 3615.91 | 3485.74 |
| ENSMUSG00000026435 | 15_Slc45a1 | 67.813  | 0.72745  | 0.064209 | 0.335617 | 63.7084 | 87.2797 | 102.382 | 51.1681 | 41.2069 | 61.1326 |
| ENSMUSG00000026436 | 15_Elk4    | 1321.14 | 0.48829  | 0.089709 | 0.408235 | 1885.97 | 1403.28 | 1338.21 | 934.231 | 1190.71 | 1174.45 |
| ENSMUSG00000026437 | 11_Cdk18   | 121.133 | 0.29712  | 0.652891 | 0.892622 | 25.2811 | 189.295 | 186.149 | 117.192 | 90.1401 | 118.738 |
| ENSMUSG00000026439 | 14_Rbbp5   | 876.125 | 0.13309  | 0.647881 | 0.890586 | 1081.02 | 898.868 | 769.416 | 689.946 | 945.183 | 872.316 |
| ENSMUSG00000026442 | 14_Nfasc   | 226.546 | -0.94408 | 0.054825 | 0.305878 | 107.192 | 180.227 | 177.876 | 488.573 | 245.524 | 159.885 |
| ENSMUSG00000026443 | 3_Lrrn2    | 40.9173 | -1.3471  | 0.026335 | 0.195295 | 7.07871 | 27.2041 | 35.1615 | 70.9751 | 59.2349 | 45.8495 |
| ENSMUSG00000026447 | 16_Pik3c2  | 504.028 | 0.4216   | 0.191126 | 0.580196 | 411.576 | 591.689 | 728.05  | 404.393 | 424.088 | 464.373 |
| ENSMUSG00000026450 | 14_Chit1   | 956.6   | 0.14542  | 0.810118 | 0.945475 | 228.541 | 1283.13 | 1502.64 | 894.617 | 794.95  | 1035.73 |
| ENSMUSG00000026452 | 15_Syt2    | 10.1489 | -0.18881 | 0.809707 | 0.94521  | 9.1012  | 11.335  | 8.27329 | 13.2047 | 15.4526 | 3.52688 |
| ENSMUSG00000026455 | 14_Klhl12  | 866.394 | -0.03964 | 0.896755 | 0.97156  | 1105.29 | 741.311 | 716.674 | 785.678 | 960.636 | 888.775 |
| ENSMUSG00000026456 | 18_Cyb5r   | 919.515 | 0.17755  | 0.458372 | 0.798202 | 884.839 | 988.415 | 1054.84 | 811.262 | 915.995 | 861.735 |
| ENSMUSG00000026457 | 18_Adipor  | 6507.53 | 0.14686  | 0.61797  | 0.877535 | 5096.67 | 7698.75 | 7720.02 | 6585.01 | 5469.36 | 6475.36 |
| ENSMUSG00000026458 | 13_Ppfia4  | 175.131 | 0.04367  | 0.938062 | 0.985118 | 56.6297 | 214.232 | 262.677 | 222.004 | 145.941 | 149.305 |
| ENSMUSG00000026459 | 5_Myog     | 9.31219 | -0.73028 | 0.360243 | 0.733776 | 11.1237 | 6.80102 | 3.10248 | 15.6806 | 8.58477 | 10.5807 |
| ENSMUSG00000026463 | 17_Atp2b1  | 701.447 | -0.75667 | 0.007859 | 0.084743 | 613.825 | 419.396 | 531.559 | 973.845 | 876.505 | 793.549 |
| ENSMUSG00000026466 | 16_Tor1ai  | 3093.27 | 1.01015  | 0.001101 | 0.021078 | 5380.83 | 3907.18 | 3113.86 | 1900.65 | 2144.48 | 2112.6  |
| ENSMUSG00000026468 | 14_Lhx4    | 4.85018 | -1.88493 | 0.129962 | 0.490077 | 3.03373 | 1.1335  | 2.06832 | 15.6806 | 6.00934 | 1.17563 |
| ENSMUSG00000026469 | 14_Xpr1    | 2940.54 | 0.37306  | 0.345569 | 0.722648 | 5159.37 | 2382.62 | 2413.73 | 2343.01 | 2796.92 | 2547.59 |
| ENSMUSG00000026470 | 14_Stxb    | 1555.71 | 0.07317  | 0.774261 | 0.933044 | 1326.75 | 1703.65 | 1754.97 | 1511.94 | 1443.96 | 1592.98 |
| ENSMUSG00000026471 | 14_Mr1     | 5063.48 | 0.37871  | 0.328044 | 0.709062 | 8708.84 | 4368.52 | 4095.28 | 3825.23 | 4915.64 | 4467.39 |
| ENSMUSG00000026473 | 15_Gli1    | 20932.6 | 0.05521  | 0.820413 | 0.948338 | 20133.9 | 20013.1 | 23851.9 | 19464.5 | 19213.6 | 22918.9 |
| ENSMUSG00000026475 | 7_Rgs16    | 62.3626 | 0.81369  | 0.084299 | 0.391892 | 46.5172 | 98.6148 | 93.0745 | 44.5658 | 32.6221 | 58.7814 |
| ENSMUSG00000026478 | 14_Lamc1   | 2183.37 | -0.02179 | 0.943284 | 0.98635  | 1561.36 | 2442.7  | 2496.47 | 2085.51 | 2059.49 | 2454.71 |
| ENSMUSG00000026479 | 13_Lamc2   | 2513.98 | 1.21474  | 0.007117 | 0.078995 | 2080.13 | 5662.98 | 2798.44 | 1315.52 | 1248.23 | 1978.58 |
| ENSMUSG00000026480 | 12_Ncf2    | 202.151 | 0.25779  | 0.489615 | 0.814396 | 154.72  | 311.713 | 194.422 | 203.022 | 178.563 | 170.466 |
| ENSMUSG00000026482 | 13_Rgl1    | 708.108 | -0.53968 | 0.034985 | 0.232834 | 628.994 | 497.608 | 604.985 | 908.647 | 830.147 | 778.266 |
| ENSMUSG00000026483 | 13_Fam13   | 5945.75 | -0.84109 | 0.004939 | 0.061695 | 5234.2  | 3193.08 | 4352.79 | 8082.09 | 7998.43 | 6813.94 |
| ENSMUSG00000026484 | 13_Rnf2    | 1355.78 | 0.31225  | 0.506162 | 0.825494 | 2621.15 | 970.278 | 914.199 | 1096.81 | 1327.21 | 1205.02 |
| ENSMUSG00000026489 | 13_Adck3   | 338.316 | -0.6849  | 0.168753 | 0.549971 | 192.136 | 164.358 | 421.938 | 600.813 | 262.694 | 387.957 |
| ENSMUSG00000026490 | 17_Cdc42   | 2032.44 | -0.44969 | 0.210209 | 0.602314 | 2493.73 | 1213.98 | 1446.79 | 2367.76 | 2458.68 | 2213.71 |
| ENSMUSG00000026491 | 13_Ahctf1  | 2604.23 | 0.39245  | 0.293752 | 0.678007 | 4339.25 | 2262.47 | 2266.88 | 1872.59 | 2582.3  | 2301.88 |
| ENSMUSG00000026492 | 11_Tfb2m   | 574.322 | 0.18596  | 0.692855 | 0.905638 | 1057.76 | 393.326 | 382.64  | 476.194 | 616.386 | 519.627 |
| ENSMUSG00000026494 | 12_Klf2bb  | 114.222 | -1.45428 | 8.86E-05 | 0.003007 | 70.7871 | 43.0731 | 69.2888 | 202.197 | 155.384 | 144.602 |
| ENSMUSG00000026495 | 8_Efcab2   | 155.487 | -0.1862  | 0.704385 | 0.908152 | 251.8   | 88.4132 | 96.177  | 180.739 | 179.422 | 136.373 |
| ENSMUSG00000026496 | 11_Parp1   | 1264.65 | 0.11697  | 0.737234 | 0.920922 | 826.187 | 1514.36 | 1607.09 | 1184.29 | 1135.77 | 1320.23 |
| ENSMUSG00000026497 | 7_Mixl1    | 0.18892 | 1.1315   | 0.781553 | NA       | 0       | 1.1335  | 0       | 0       | 0       | 0       |
| ENSMUSG00000026499 | 5_Acbd3    | 1950.35 | 0.44476  | 0.212187 | 0.603396 | 3205.64 | 1912.22 | 1627.77 | 1428.58 | 1785.63 | 1742.28 |
| ENSMUSG00000026500 | 6_Cox20    | 853.012 | 0.26493  | 0.626542 | 0.880521 | 1794.96 | 476.071 | 522.252 | 741.113 | 897.108 | 686.567 |
| ENSMUSG00000026502 | 13_Desl2   | 885.871 | 0.3487   | 0.422531 | 0.774546 | 1629.11 | 702.772 | 645.317 | 746.064 | 884.231 | 707.728 |
| ENSMUSG00000026504 | 17_Sdcca   | 220.961 | -0.18852 | 0.468906 | 0.804382 | 212.361 | 199.497 | 207.866 | 253.365 | 225.779 | 226.896 |
| ENSMUSG00000026509 | 15_Capn2   | 7899.19 | 0.29741  | 0.274446 | 0.660991 | 7714.78 | 10042.8 | 8373.61 | 5955.31 | 7189.74 | 8118.89 |
| ENSMUSG00000026510 | 10_Trp53l  | 1351.97 | 0.21421  | 0.519891 | 0.831665 | 965.738 | 1718.39 | 1672.24 | 1208.23 | 1152.93 | 1394.29 |
| ENSMUSG00000026511 | 7_Srp9     | 1520.36 | 0.09923  | 0.793882 | 0.938336 | 2347.1  | 1267.26 | 1103.45 | 1338.62 | 1671.45 | 1394.29 |
| ENSMUSG00000026514 | 13_Cnih3   | 0.70434 | -2.87023 | 0.38272  | NA       | 0       | 0       | 0       | 1.65058 | 2.57543 | 0       |
| ENSMUSG00000026516 | 8_Nvl      | 1316.76 | 0.36766  | 0.189563 | 0.578028 | 1783.83 | 1353.4  | 1313.39 | 983.748 | 1257.67 | 1208.55 |
| ENSMUSG00000026519 | 16_Tmem    | 1246.43 | 0.29759  | 0.533945 | 0.838255 | 542.027 | 1785.27 | 1796.34 | 1119.1  | 1015.58 | 1220.3  |
| ENSMUSG00000026520 | 8_Pyrc2    | 304.372 | 0.01818  | 0.970899 | 0.992187 | 122.361 | 394.459 | 402.289 | 382.936 | 254.968 | 269.219 |
| ENSMUSG00000026525 | 9_Opn3     | 13.6282 | 0.152    | 0.826622 | 0.950396 | 18.2024 | 13.602  | 11.3758 | 21.4576 | 7.72629 | 9.40502 |
| ENSMUSG00000026526 | 14_Fh1     | 1106.06 | -0.38541 | 0.090451 | 0.409937 | 986.974 | 923.805 | 966.941 | 1342.75 | 1228.48 | 1187.38 |
| ENSMUSG00000026527 | 13_Rgs7    | 10.7678 | -1.27686 | 0.163565 | 0.541822 | 11.1237 | 6.80102 | 1.03416 | 22.2829 | 16.3111 | 7.05377 |
| ENSMUSG00000026532 | 7_Spta1    | 25.1775 | -1.57271 | 0.009969 | 0.100487 | 13.1462 | 13.602  | 11.3758 | 25.5841 | 62.6688 | 24.6882 |
| ENSMUSG00000026535 | 9_Iffl202b | 16726.9 | 1.58092  | 0.002532 | 0.038683 | 45009.5 | 18131.5 | 12076.9 | 5753.11 | 9965.2  | 9425.01 |
| ENSMUSG00000026536 | 9_Mnda     | 828.546 | 2.52981  | 6.67E-08 | 7.14E-06 | 2018.44 | 1492.82 | 725.981 | 155.98  | 306.476 | 271.57  |
| ENSMUSG00000026544 | 6_Dusp23   | 24.3012 | -0.55492 | 0.328933 | 0.709775 | 13.1462 | 19.2695 | 26.8882 | 37.9634 | 30.9052 | 17.6344 |
| ENSMUSG00000026546 | 16_Cfap4   | 33.0766 | -0.1216  | 0.81533  | 0.947085 | 32.3598 | 19.2695 | 43.4348 | 46.2164 | 26.6128 | 30.5663 |
| ENSMUSG00000026547 | 15_Tagln2  | 3806.51 | 0.81869  | 0.073993 | 0.363734 | 2199.46 | 7270.29 | 5105.66 | 2779.58 | 2352.23 | 3131.87 |
| ENSMUSG00000026548 | 4_Slamf9   | 82.718  | 1.10107  | 0.008857 | 0.092117 | 80.8995 | 158.69  | 99.2795 | 64.3728 | 47.2162 | 45.8495 |
| ENSMUSG00000026553 | 17_Copa    | 6443.1  | 0.24176  | 0.367559 | 0.739818 | 6002.75 | 7946.99 | 6995.07 | 5007.05 | 6156.14 | 6550.6  |
| ENSMUSG00000026554 | 15_Dcaf8   | 2873.77 | -0.05799 | 0.805501 | 0.943315 | 2488.67 | 2838.29 | 3121.1  | 2965.28 | 2869.03 | 2960.23 |
| ENSMUSG00000026556 | 15_Vangl2  | 385.69  | 0.10304  | 0.71842  | 0.912653 | 315.508 | 420.53  | 462.27  | 368.08  | 356.268 | 391.484 |
| ENSMUSG00000026558 | 13_Uck2    | 843.875 | 0.2512   | 0.448574 | 0.791834 | 611.803 | 1133.5  | 1006.24 | 776.6   | 726.272 | 808.832 |
| ENSMUSG00000026563 | 13_Tada1   | 474.851 | 0.25283  | 0.27965  | 0.666619 | 522.813 | 535.013 | 491.227 | 428.327 | 434.389 | 437.334 |

|                    |           |         |          |          |          |         |         |         |         |         |         |
|--------------------|-----------|---------|----------|----------|----------|---------|---------|---------|---------|---------|---------|
| ENSMUSG00000026564 | 9_Dusp27  | 19.7473 | -1.61852 | 0.01309  | 0.121884 | 14.1574 | 3.40051 | 11.3758 | 35.4876 | 22.3204 | 31.742  |
| ENSMUSG00000026565 | 18_Pou2f  | 1127.82 | 0.30499  | 0.384122 | 0.750377 | 1765.63 | 918.137 | 1055.88 | 935.882 | 1120.31 | 971.069 |
| ENSMUSG00000026566 | 15_Mpz1   | 700.633 | -0.46343 | 0.067197 | 0.343982 | 503.6   | 637.029 | 626.702 | 851.702 | 770.054 | 814.71  |
| ENSMUSG00000026567 | 16_Adcy1  | 2.40956 | -1.88262 | 0.243052 | 0.634644 | 1.01124 | 0       | 2.06832 | 2.47588 | 7.72629 | 1.17563 |
| ENSMUSG00000026568 | 6_Mpc2    | 1604.84 | 0.34267  | 0.464404 | 0.801754 | 3115.64 | 1132.37 | 1135.51 | 1268.47 | 1625.1  | 1351.97 |
| ENSMUSG00000026571 | 12_Dcaf6  | 963.826 | -0.08129 | 0.798578 | 0.940596 | 1252.93 | 737.91  | 819.056 | 937.532 | 1077.39 | 958.137 |
| ENSMUSG00000026572 | 11_Tbx19  | 0.53496 | -2.43802 | 0.508122 | NA       | 0       | 0       | 0       | 0       | 0.85848 | 2.35126 |
| ENSMUSG00000026573 | 7_Xcl1    | 7.61514 | 3.14756  | 0.003047 | 0.043874 | 15.1687 | 12.4685 | 13.4441 | 0       | 3.43391 | 1.17563 |
| ENSMUSG00000026574 | 5_Dpt     | 3105.8  | -0.39527 | 0.251563 | 0.642734 | 3637.45 | 1763.73 | 2647.45 | 3571.04 | 3468.25 | 3546.87 |
| ENSMUSG00000026575 | 15_Nme7   | 459.359 | 0.14416  | 0.707316 | 0.909346 | 714.95  | 383.124 | 348.512 | 369.731 | 469.587 | 470.251 |
| ENSMUSG00000026576 | 12_Atp1b  | 2106.43 | -1.05377 | 0.010866 | 0.106798 | 2117.55 | 818.389 | 1172.74 | 3221.12 | 2868.17 | 2440.6  |
| ENSMUSG00000026577 | 13_Blzf1  | 1227.44 | 0.3106   | 0.437128 | 0.784974 | 2056.87 | 1066.63 | 953.497 | 878.111 | 1299.73 | 1109.79 |
| ENSMUSG00000026578 | 6_Ccdc18  | 451.248 | 0.06882  | 0.83263  | 0.952011 | 614.837 | 381.99  | 388.845 | 382.11  | 463.578 | 476.129 |
| ENSMUSG00000026579 | 8_F5      | 339.838 | -1.20353 | 0.002853 | 0.041991 | 284.16  | 117.884 | 215.106 | 561.199 | 451.559 | 409.118 |
| ENSMUSG00000026580 | 16_Selp   | 88.5211 | 2.27982  | 5.21E-07 | 4.39E-05 | 118.316 | 213.099 | 108.587 | 22.2829 | 30.0467 | 38.7957 |
| ENSMUSG00000026581 | 14_Sell   | 177.103 | 4.60691  | 2.80E-15 | 1.35E-12 | 390.34  | 494.207 | 136.509 | 11.5541 | 20.6034 | 9.40502 |
| ENSMUSG00000026582 | 6_Se1     | 38.6748 | 2.47329  | 2.37E-05 | 0.001037 | 53.5959 | 90.6802 | 51.7081 | 5.77705 | 10.3017 | 19.9857 |
| ENSMUSG00000026584 | 14_Scyl3  | 800.177 | 0.22932  | 0.357586 | 0.713194 | 931.356 | 890.933 | 768.382 | 665.186 | 765.761 | 779.441 |
| ENSMUSG00000026585 | 13_Kifap3 | 1117.72 | 0.12641  | 0.772182 | 0.932508 | 1921.36 | 723.175 | 855.252 | 962.291 | 1183.84 | 1060.42 |
| ENSMUSG00000026586 | 16_Prrx1  | 1390.5  | -0.09209 | 0.860996 | 0.960565 | 2533.17 | 654.031 | 851.115 | 1534.22 | 1471.43 | 1299.07 |
| ENSMUSG00000026587 | 15_Astn1  | 293.151 | -1.51404 | 0.000958 | 0.018932 | 216.406 | 79.3452 | 160.295 | 553.771 | 448.125 | 300.961 |
| ENSMUSG00000026589 | 14_Sec16  | 139.74  | -0.53392 | 0.070457 | 0.354524 | 100.113 | 112.217 | 130.304 | 170.01  | 168.261 | 157.534 |
| ENSMUSG00000026592 | 13_Tex35  | 0.95863 | 0.57527  | 0.85795  | NA       | 0       | 3.40051 | 0       | 0       | 0       | 2.35126 |
| ENSMUSG00000026594 | 14_Ralgs  | 2612.68 | 0.45216  | 0.202924 | 0.594033 | 4273.52 | 2389.42 | 2393.05 | 1813.99 | 2405.45 | 2400.63 |
| ENSMUSG00000026596 | 13_Abl1   | 1376.61 | 0.52923  | 0.028488 | 0.204442 | 1647.32 | 1727.46 | 1503.67 | 1046.47 | 1075.67 | 1259.1  |
| ENSMUSG00000026600 | 12_Soat1  | 460.339 | -0.35304 | 0.297011 | 0.806531 | 525.847 | 406.928 | 280.258 | 535.615 | 553.718 | 459.67  |
| ENSMUSG00000026601 | 13_Axdnd  | 21.7227 | 0.28223  | 0.651909 | 0.892215 | 36.4048 | 23.8036 | 11.3758 | 15.6806 | 26.6128 | 16.4588 |
| ENSMUSG00000026602 | 9_Nphs2   | 2.55368 | -0.57244 | 0.70761  | 0.90959  | 3.03373 | 0       | 3.10248 | 0.82529 | 6.00934 | 2.35126 |
| ENSMUSG00000026603 | 13_Smyd2  | 508.834 | -0.43589 | 0.295577 | 0.679579 | 218.429 | 539.547 | 539.832 | 636.3   | 532.256 | 586.638 |
| ENSMUSG00000026604 | 17_Ptpn1  | 1472.74 | 0.01722  | 0.947406 | 0.986649 | 1252.93 | 1469.02 | 1722.91 | 1558.15 | 1469.71 | 1363.73 |
| ENSMUSG00000026605 | 14_Cenpf  | 1161.69 | 0.30152  | 0.364795 | 0.738098 | 1705.97 | 1096.1  | 1045.54 | 839.322 | 1167.53 | 1115.67 |
| ENSMUSG00000026608 | 12_Kctd3  | 871.14  | 0.31916  | 0.240126 | 0.631907 | 780.681 | 1079.09 | 1041.4  | 762.57  | 723.696 | 839.398 |
| ENSMUSG00000026609 | 15_Ush2a  | 174.497 | -0.3524  | 0.475268 | 0.806964 | 72.8096 | 196.096 | 191.32  | 278.949 | 159.677 | 148.129 |
| ENSMUSG00000026610 | 13_Esrrg  | 67.8969 | -0.83614 | 0.206377 | 0.597842 | 96.0682 | 18.136  | 32.059  | 122.143 | 88.4231 | 50.552  |
| ENSMUSG00000026611 | 17_Spata1 | 5.13874 | -0.53891 | 0.563433 | 0.85076  | 5.05622 | 3.40051 | 4.13665 | 4.95175 | 8.58477 | 4.70251 |
| ENSMUSG00000026614 | 6_Slc30a1 | 5.61873 | -1.16819 | 0.303214 | 0.685929 | 4.04498 | 2.26701 | 4.13665 | 5.77705 | 16.3111 | 1.17563 |
| ENSMUSG00000026615 | 14_Eprs   | 4255.17 | 0.16704  | 0.53984  | 0.84046  | 5173.53 | 4373.05 | 3956.7  | 3320.98 | 4340.46 | 4366.28 |
| ENSMUSG00000026616 | 14_Cr2    | 13.3543 | -1.25001 | 0.150682 | 0.524129 | 18.2024 | 2.26701 | 3.10248 | 16.5058 | 18.8865 | 21.1613 |
| ENSMUSG00000026617 | 15_Bpnt1  | 567.693 | 0.09106  | 0.711304 | 0.910557 | 595.623 | 572.419 | 588.438 | 569.452 | 484.181 | 596.043 |
| ENSMUSG00000026618 | 11_Iars2  | 2059.65 | -0.00638 | 0.977813 | 0.993796 | 1897.09 | 2220.53 | 2047.64 | 1948.52 | 2112.71 | 2131.41 |
| ENSMUSG00000026620 | 11_Mark1  | 74.5432 | -0.33776 | 0.360333 | 0.733804 | 62.6971 | 69.1437 | 66.1863 | 96.5592 | 92.7155 | 59.957  |
| ENSMUSG00000026621 | 13_Marc1  | 2.33519 | -0.25707 | 0.86491  | 0.962077 | 2.02249 | 2.26701 | 2.06832 | 4.2664  | 0       | 3.52688 |
| ENSMUSG00000026622 | 15_Nek2   | 267.446 | 0.51424  | 0.111234 | 0.453007 | 244.721 | 401.26  | 297.839 | 193.944 | 231.789 | 235.126 |
| ENSMUSG00000026623 | 16_Lpgat1 | 1805.32 | 0.15705  | 0.677412 | 0.901447 | 2861.82 | 1457.68 | 1390.95 | 1730.64 | 1844.87 | 1545.95 |
| ENSMUSG00000026626 | 11_Ppp2r1 | 2379.82 | 0.52962  | 0.087688 | 0.401776 | 3639.47 | 2637.66 | 2158.3  | 1790.88 | 2172.81 | 1879.83 |
| ENSMUSG00000026627 | 7_Tmem2   | 141.836 | -0.80225 | 0.012674 | 0.119297 | 118.316 | 90.6802 | 101.348 | 192.293 | 202.601 | 145.778 |
| ENSMUSG00000026628 | 13_Atf3   | 242.661 | 1.96587  | 1.42E-06 | 0.000107 | 252.811 | 584.887 | 321.624 | 95.7339 | 102.159 | 98.7527 |
| ENSMUSG00000026630 | 9_Batf3   | 3.06242 | -0.14901 | 0.913535 | 0.975947 | 1.01124 | 6.80102 | 1.03416 | 5.77705 | 2.57543 | 1.17563 |
| ENSMUSG00000026632 | 17_Tatdn1 | 168.144 | -0.41705 | 0.157999 | 0.53609  | 160.788 | 121.285 | 149.953 | 188.992 | 210.327 | 177.52  |
| ENSMUSG00000026634 | 16_Angel2 | 1155.13 | -0.0539  | 0.838486 | 0.952966 | 1358.1  | 1015.62 | 1026.92 | 1152.93 | 1256.81 | 1120.37 |
| ENSMUSG00000026637 | 13_Traf5  | 867.663 | 0.45826  | 0.136601 | 0.501691 | 753.377 | 1127.84 | 1131.37 | 645.379 | 694.508 | 853.506 |
| ENSMUSG00000026638 | 15_Irf6   | 21097.5 | 0.66137  | 0.063497 | 0.332802 | 36001.3 | 23031.6 | 18517.7 | 13240.2 | 17210.7 | 18583.1 |
| ENSMUSG00000026639 | 18_Lamb3  | 1570.82 | 1.36781  | 0.032868 | 0.224034 | 473.262 | 3748.49 | 2570.93 | 859.129 | 642.141 | 1130.95 |
| ENSMUSG00000026640 | 12_Plxna2 | 1304.58 | -0.62235 | 0.009692 | 0.098401 | 1076.98 | 898.868 | 1106.55 | 1615.1  | 1621.66 | 1508.33 |
| ENSMUSG00000026641 | 13_Usf1   | 959.682 | 0.39579  | 0.474948 | 0.806964 | 317.531 | 1515.49 | 1438.52 | 888.84  | 693.649 | 904.058 |
| ENSMUSG00000026643 | 16_Nmt2   | 834.626 | 0.07493  | 0.865018 | 0.962077 | 1413.72 | 553.149 | 601.882 | 720.48  | 942.608 | 775.914 |
| ENSMUSG00000026644 | 6_Acbd7   | 2.24648 | -0.54825 | 0.729348 | 0.917707 | 0       | 4.53401 | 1.03416 | 3.30117 | 3.43391 | 1.17563 |
| ENSMUSG00000026646 | 16_Suv39  | 137.196 | 0.42868  | 0.364934 | 0.738128 | 259.89  | 121.285 | 91.0062 | 100.686 | 133.922 | 116.387 |
| ENSMUSG00000026648 | 18_Dclre1 | 264.25  | 0.38937  | 0.275644 | 0.662134 | 410.565 | 262.973 | 225.447 | 197.245 | 263.552 | 225.721 |
| ENSMUSG00000026649 | 14_Cfap1  | 24.6745 | 0.18925  | 0.757326 | 0.927624 | 10.1124 | 30.6046 | 38.264  | 25.5841 | 22.3204 | 21.1613 |
| ENSMUSG00000026650 | 15_Meig1  | 0.56126 | -2.54391 | 0.473253 | NA       | 0       | 0       | 0       | 1.65058 | 1.71695 | 0       |
| ENSMUSG00000026655 | 14_Fam11  | 3072.21 | 0.50625  | 0.177245 | 0.561638 | 5361.62 | 2941.44 | 2514.05 | 2250.57 | 2746.27 | 2619.3  |
| ENSMUSG00000026656 | 15_Fcgr2l | 481.878 | 0.89682  | 0.021557 | 0.171919 | 678.545 | 828.591 | 374.366 | 357.352 | 382.022 | 270.394 |
| ENSMUSG00000026657 | 16_Frmd4  | 992.808 | -0.093   | 0.719314 | 0.913031 | 1079    | 819.523 | 983.488 | 1025.01 | 940.032 | 1109.79 |
| ENSMUSG00000026659 | 13_Dusp1  | 385.359 | 0.11453  | 0.74645  | 0.924339 | 552.139 | 323.048 | 326.795 | 339.195 | 442.974 | 328     |
| ENSMUSG00000026662 | 13_Sephs  | 1319.15 | 0.11135  | 0.668846 | 0.898323 | 1636.19 | 1237.79 | 1235.82 | 1215.66 | 1264.54 | 1324.93 |
| ENSMUSG00000026663 | 6_Atf6    | 1954.32 | 0.30475  | 0.252747 | 0.64424  | 2598.9  | 2026.7  | 1854.25 | 1659.66 | 1872.34 | 1714.07 |
| ENSMUSG00000026664 | 7_Phyh    | 2761.38 | 0.26079  | 0.458529 | 0.798202 | 4291.72 | 2399.63 | 2339.27 | 2182.9  | 2766.01 | 2588.73 |
| ENSMUSG00000026667 | 14_Uhmk1  | 5804.45 | 0.18088  | 0.646839 | 0.890016 | 9592.66 | 4476.2  | 4434.48 | 4933.6  | 5851.38 | 5538.38 |
| ENSMUSG00000026668 | 10_Ucma   | 0.64699 | 1.60576  | 0.583061 | NA       | 2.02249 | 0       | 1.03416 | 0.82529 | 0       | 0       |
| ENSMUSG00000026669 | 14_Mcm1l  | 245.159 | 1.33958  | 0.000779 | 0.016295 | 235.62  | 443.2   | 375.401 | 95.7339 | 171.695 | 149.305 |
| ENSMUSG00000026670 | 15_Uap1   | 2148.42 | 0.36117  | 0.182838 | 0.569231 | 2736.43 | 2478.97 | 2032.13 | 1605.19 | 2015.7  | 2022.08 |
| ENSMUSG00000026672 | 11_Optrn  | 869.415 | -0.43812 | 0.076697 | 0.371237 | 685.624 | 749.245 | 780.792 | 1092.69 | 1027.6  | 880.545 |
| ENSMUSG00000026674 | 9_Ddr2    | 4086.77 | -0.13597 | 0.749013 | 0.924897 | 6351.63 | 2515.24 | 2816.02 | 4326.18 | 4623.76 | 3887.8  |
| ENSMUSG00000026675 | 12_Hsd17  | 905.664 | 0.24193  | 0.380685 | 0.748055 | 1151.81 | 990.682 | 801.475 | 755.143 | 837.874 | 897.004 |

|                    |            |         |          |          |          |         |         |         |         |         |         |
|--------------------|------------|---------|----------|----------|----------|---------|---------|---------|---------|---------|---------|
| ENSMUSG00000026676 | 7_Ccdc3    | 767.764 | -0.0842  | 0.80291  | 0.942705 | 601.69  | 648.364 | 985.556 | 730.384 | 673.046 | 967.542 |
| ENSMUSG00000026678 | 10_Rgs5    | 3233.52 | -0.51053 | 0.323259 | 0.703484 | 4880.27 | 1362.47 | 1759.11 | 4514.35 | 3944.7  | 2940.25 |
| ENSMUSG00000026679 | 3_Enkur    | 18.2837 | -0.7117  | 0.273014 | 0.659357 | 23.2586 | 6.80102 | 11.3758 | 26.4094 | 17.1695 | 24.6882 |
| ENSMUSG00000026683 | 14_Nuf2    | 380.316 | 0.55568  | 0.188434 | 0.576303 | 687.646 | 354.786 | 315.419 | 230.257 | 384.598 | 309.19  |
| ENSMUSG00000026686 | 14_Lmx1a   | 21.014  | -0.44065 | 0.58094  | 0.859684 | 35.3936 | 3.40051 | 14.4783 | 24.7588 | 16.3111 | 31.742  |
| ENSMUSG00000026687 | 14_Aldh9a1 | 876.285 | -0.24118 | 0.300545 | 0.683516 | 830.232 | 757.18  | 822.158 | 1013.46 | 885.948 | 948.732 |
| ENSMUSG00000026688 | 5_Mgst3    | 1551.26 | -0.07015 | 0.904817 | 0.974255 | 384.273 | 1913.35 | 2243.1  | 1831.32 | 1260.24 | 1675.27 |
| ENSMUSG00000026691 | 10_Fmo3    | 9.51327 | -0.34517 | 0.687977 | 0.904812 | 11.1237 | 3.40051 | 10.3416 | 8.25292 | 5.15086 | 18.81   |
| ENSMUSG00000026692 | 12_Fmo4    | 4.32495 | 0.59142  | 0.669698 | 0.898731 | 5.05622 | 3.40051 | 7.23913 | 9.07822 | 0       | 1.17563 |
| ENSMUSG00000026694 | 19_Mettl1  | 262.017 | 0.18959  | 0.605757 | 0.871731 | 170.9   | 340.051 | 326.795 | 254.19  | 230.93  | 249.233 |
| ENSMUSG00000026696 | 15_Vamp4   | 1141    | 0.27934  | 0.53352  | 0.838182 | 2110.47 | 844.46  | 798.373 | 994.477 | 1149.5  | 948.732 |
| ENSMUSG00000026697 | 10_Myoc    | 4496.84 | -0.55901 | 0.212504 | 0.603702 | 2069.01 | 2892.7  | 5947.46 | 6514.03 | 4569.67 | 4988.19 |
| ENSMUSG00000026698 | 8_Pigc     | 2351.56 | 0.24592  | 0.442236 | 0.787297 | 3073.17 | 2389.42 | 2191.39 | 1571.36 | 2404.59 | 2479.4  |
| ENSMUSG00000026700 | 4_Tnfrsf4  | 2.24774 | 1.37248  | 0.39264  | 0.75466  | 3.03373 | 5.66751 | 1.03416 | 0       | 2.57543 | 1.17563 |
| ENSMUSG00000026701 | 15_Prdx6   | 18266.7 | 0.45626  | 0.071116 | 0.356233 | 18698.9 | 22174.7 | 22519.9 | 13377.2 | 15547.9 | 17281.7 |
| ENSMUSG00000026705 | 16_Klhl20  | 597.961 | 0.15992  | 0.573671 | 0.855744 | 771.579 | 581.487 | 539.832 | 507.555 | 588.915 | 598.395 |
| ENSMUSG00000026707 | 16_Nsun6   | 421.457 | 0.31751  | 0.379942 | 0.747815 | 641.129 | 368.388 | 392.981 | 269.678 | 408.635 | 427.929 |
| ENSMUSG00000026708 | 16_Cenpl   | 269.81  | 0.88394  | 0.036579 | 0.239348 | 535.959 | 283.376 | 230.618 | 162.583 | 233.506 | 172.817 |
| ENSMUSG00000026709 | 10_Dars2   | 564.748 | 0.11382  | 0.684241 | 0.903532 | 699.781 | 530.479 | 530.525 | 473.718 | 593.208 | 560.774 |
| ENSMUSG00000026712 | 3_Mrc1     | 530.607 | -0.27734 | 0.52099  | 0.831998 | 771.579 | 350.252 | 317.488 | 605.765 | 663.603 | 474.954 |
| ENSMUSG00000026715 | 12_Serpin  | 56.1002 | -0.633   | 0.313621 | 0.695074 | 12.1349 | 47.6071 | 72.3913 | 79.2281 | 74.6875 | 50.552  |
| ENSMUSG00000026718 | 17_Stam    | 818.259 | 0.36945  | 0.384914 | 0.750802 | 1499.68 | 657.432 | 610.155 | 675.089 | 770.054 | 697.147 |
| ENSMUSG00000026721 | 15_Rabga   | 2547.2  | 0.55059  | 0.295247 | 0.679579 | 5670.05 | 1526.83 | 1885.28 | 1704.23 | 2386.57 | 2110.25 |
| ENSMUSG00000026723 | 10_Trdmt   | 294.906 | -0.00995 | 0.981942 | 0.993958 | 481.352 | 200.63  | 199.593 | 282.25  | 330.514 | 275.097 |
| ENSMUSG00000026725 | 17_Tnn     | 219.257 | -0.15628 | 0.790897 | 0.937373 | 181.013 | 124.685 | 316.453 | 93.258  | 402.626 | 197.505 |
| ENSMUSG00000026726 | 10_Cubn    | 93.7254 | -1.10554 | 0.007462 | 0.081676 | 59.6634 | 41.9396 | 76.528  | 143.601 | 90.1401 | 150.48  |
| ENSMUSG00000026727 | 10_Rsu1    | 1054.61 | -0.32305 | 0.162949 | 0.541016 | 985.963 | 906.802 | 918.335 | 1110.02 | 1269.69 | 1136.83 |
| ENSMUSG00000026728 | 9_Vim      | 5084.44 | -0.58249 | 0.105188 | 0.440731 | 4297.79 | 4132.75 | 3785.03 | 5071.42 | 8879.23 | 4340.42 |
| ENSMUSG00000026729 | 9_493056   | 6.59475 | -5.08088 | 0.000943 | 0.018725 | 1.01124 | 0       | 0       | 18.9817 | 4.29238 | 15.2832 |
| ENSMUSG00000026730 | 12_Pter    | 270.981 | 0.01409  | 0.971536 | 0.992434 | 407.531 | 187.028 | 222.345 | 275.648 | 297.033 | 236.301 |
| ENSMUSG00000026735 | 2_Ptf1a    | 0.18892 | 1.1315   | 0.781553 | NA       | 0       | 1.1335  | 0       | 0       | 0       | 0       |
| ENSMUSG00000026736 | 1_493042   | 4.49832 | -0.91531 | 0.376954 | 0.746094 | 5.05622 | 1.1335  | 3.10248 | 4.95175 | 6.86782 | 5.87814 |
| ENSMUSG00000026737 | 12_Pip4k2  | 356.847 | -0.06614 | 0.850733 | 0.957445 | 488.431 | 285.643 | 271.984 | 385.412 | 386.315 | 323.298 |
| ENSMUSG00000026739 | 13_Bmi1    | 1290.69 | 0.38984  | 0.42138  | 0.77414  | 2611.03 | 956.676 | 824.227 | 1043.17 | 1212.17 | 1096.86 |
| ENSMUSG00000026740 | 12_Dnajc1  | 1025.56 | 0.1038   | 0.748413 | 0.924799 | 1421.81 | 968.011 | 797.339 | 912.773 | 1057.64 | 995.757 |
| ENSMUSG00000026743 | 16_Mllt10  | 1196.64 | 0.32488  | 0.206498 | 0.597842 | 1522.93 | 1280.86 | 1188.25 | 949.912 | 1092.84 | 1145.06 |
| ENSMUSG00000026748 | 13_Plxdc2  | 2668.41 | 0.197    | 0.524043 | 0.832756 | 3790.14 | 2386.02 | 2374.43 | 2308.34 | 2511.05 | 2640.46 |
| ENSMUSG00000026749 | 11_Nek6    | 334.036 | -1.01283 | 0.000283 | 0.007553 | 221.463 | 216.499 | 226.481 | 522.41  | 444.691 | 372.674 |
| ENSMUSG00000026750 | 6_Psmb7    | 3166.3  | -0.03367 | 0.892276 | 0.970752 | 3318.9  | 3290.56 | 2778.79 | 2955.37 | 3621.06 | 3033.12 |
| ENSMUSG00000026751 | 14_Nr5a1   | 0.55019 | 2.66232  | 0.46328  | NA       | 0       | 2.26701 | 1.03416 | 0       | 0       | 0       |
| ENSMUSG00000026753 | 5_Ppp6c    | 2022.01 | 0.40993  | 0.381045 | 0.748449 | 3994.42 | 1508.69 | 1418.87 | 1514.41 | 2015.7  | 1679.97 |
| ENSMUSG00000026754 | 16_Golga   | 1515.52 | 0.30631  | 0.412238 | 0.76771  | 2450.25 | 1367    | 1209.97 | 1141.38 | 1547.83 | 1376.66 |
| ENSMUSG00000026755 | 14_Arpc5l  | 2216.83 | 0.28735  | 0.452063 | 0.794408 | 3655.65 | 1888.42 | 1766.35 | 1710.01 | 2243.2  | 2037.36 |
| ENSMUSG00000026761 | 12_Orc4    | 1176.96 | 0.63803  | 0.220931 | 0.611852 | 2668.67 | 844.46  | 785.963 | 789.805 | 1100.57 | 872.316 |
| ENSMUSG00000026764 | 15_Kif5c   | 220.62  | -1.24203 | 0.036419 | 0.239    | 236.631 | 72.5442 | 83.7671 | 270.696 | 163.969 | 496.115 |
| ENSMUSG00000026765 | 12_Lypd6l  | 288.488 | 0.36088  | 0.202519 | 0.593685 | 377.194 | 282.242 | 313.351 | 223.654 | 265.269 | 269.219 |
| ENSMUSG00000026766 | 16_Mmad    | 2244.17 | 0.09801  | 0.752101 | 0.925804 | 2950.81 | 2201.26 | 1808.75 | 1828.85 | 2348.79 | 2326.57 |
| ENSMUSG00000026767 | 12_Fam11   | 2516.36 | 0.59204  | 0.134435 | 0.498485 | 4583.97 | 2455.17 | 2037.3  | 1648.11 | 2258.65 | 2114.95 |
| ENSMUSG00000026768 | 10_Igta8   | 242.474 | -0.67889 | 0.144008 | 0.513665 | 300.34  | 111.083 | 147.885 | 271.521 | 388.89  | 235.126 |
| ENSMUSG00000026770 | 5_Ill2ra   | 48.7801 | 2.12018  | 5.54E-05 | 0.002057 | 101.124 | 98.6148 | 38.264  | 18.1564 | 18.8865 | 17.6344 |
| ENSMUSG00000026771 | 14_Spopl   | 547.92  | 0.45961  | 0.33171  | 0.711299 | 1094.17 | 394.459 | 414.699 | 401.917 | 552.001 | 430.28  |
| ENSMUSG00000026773 | 19_Pfkfb3  | 1975.62 | 0.84966  | 0.000652 | 0.014325 | 2262.15 | 2710.21 | 2650.56 | 1249.49 | 1425.93 | 1555.36 |
| ENSMUSG00000026774 | 11_49314   | 0.30991 | 0.16972  | 0.966824 | NA       | 0       | 0       | 1.03416 | 0.82529 | 0       | 0       |
| ENSMUSG00000026775 | 9_Yme11l   | 3742.16 | 0.57559  | 0.263173 | 0.652524 | 8268.94 | 2678.47 | 2489.23 | 2482.48 | 3593.58 | 2940.25 |
| ENSMUSG00000026778 | 13_Prkcq   | 512.359 | -0.62435 | 0.053538 | 0.300988 | 509.667 | 317.381 | 382.64  | 713.053 | 644.716 | 506.696 |
| ENSMUSG00000026779 | 6_Mastl    | 350.259 | 0.79018  | 0.052582 | 0.297932 | 653.264 | 361.587 | 316.453 | 188.992 | 307.335 | 273.921 |
| ENSMUSG00000026781 | 15_Acbd5   | 1406.28 | 0.32141  | 0.46204  | 0.799907 | 2598.9  | 1036.02 | 1051.74 | 1148.81 | 1325.49 | 1276.73 |
| ENSMUSG00000026782 | 15_Abi2    | 421.137 | -0.20878 | 0.657552 | 0.894702 | 667.421 | 224.434 | 280.258 | 467.941 | 508.218 | 378.552 |
| ENSMUSG00000026784 | 14_Pdss1   | 176.358 | 0.79853  | 0.073898 | 0.363567 | 350.902 | 180.227 | 140.646 | 103.162 | 156.243 | 126.968 |
| ENSMUSG00000026785 | 14_Pkn3    | 135.594 | 0.57139  | 0.279908 | 0.666992 | 60.6747 | 183.627 | 241.994 | 122.143 | 87.5647 | 117.563 |
| ENSMUSG00000026786 | 14_Apbb1   | 106.214 | 1.29757  | 0.007735 | 0.083918 | 251.8   | 102.015 | 99.2795 | 73.451  | 56.6595 | 54.0789 |
| ENSMUSG00000026787 | 3_Gad2     | 13.3113 | -1.55928 | 0.333461 | 0.712065 | 20.2249 | 0       | 0       | 40.4393 | 18.028  | 1.17563 |
| ENSMUSG00000026788 | 13_Zbtb43  | 788.651 | 0.2802   | 0.241502 | 0.632942 | 835.288 | 862.596 | 896.618 | 666.836 | 678.197 | 792.373 |
| ENSMUSG00000026790 | 19_Odf2    | 1149.85 | 0.19424  | 0.587467 | 0.862925 | 757.422 | 1466.75 | 1457.13 | 963.941 | 1046.48 | 1207.37 |
| ENSMUSG00000026791 | 14_Slc2a1  | 102.84  | -0.23284 | 0.72447  | 0.915486 | 20.2249 | 116.751 | 146.851 | 152.679 | 84.1307 | 96.4015 |
| ENSMUSG00000026792 | 16_Lrsam   | 326.984 | -0.20557 | 0.638739 | 0.886454 | 144.608 | 370.655 | 396.084 | 387.062 | 320.212 | 343.283 |
| ENSMUSG00000026796 | 16_Fam11   | 10559.9 | 0.57893  | 0.331735 | 0.711299 | 3050.92 | 17869.7 | 17031.6 | 9220.17 | 6469.48 | 9717.74 |
| ENSMUSG00000026797 | 15_Stxbp   | 364.083 | -0.97593 | 0.015491 | 0.13558  | 211.35  | 272.041 | 253.37  | 713.878 | 435.248 | 298.609 |
| ENSMUSG00000026798 | 10_Coq4    | 199.735 | -0.03696 | 0.939706 | 0.985498 | 78.8771 | 258.439 | 254.404 | 224.48  | 190.582 | 191.627 |
| ENSMUSG00000026799 | 15_Med27   | 233.213 | 0.13109  | 0.79151  | 0.937536 | 97.0795 | 323.048 | 311.283 | 236.859 | 179.422 | 251.584 |
| ENSMUSG00000026803 | 17_Ttf1    | 612.094 | 0.12312  | 0.609537 | 0.873257 | 666.41  | 632.495 | 615.326 | 529.838 | 598.358 | 630.137 |
| ENSMUSG00000026805 | 14_Barhl1  | 1.38251 | -1.52711 | 0.483208 | NA       | 0       | 1.1335  | 1.03416 | 4.95175 | 0       | 1.17563 |
| ENSMUSG00000026806 | 15_Ddx31   | 300.343 | 0.28819  | 0.357581 | 0.731944 | 292.25  | 389.925 | 308.18  | 212.925 | 279.005 | 319.771 |
| ENSMUSG00000026807 | 8_Ak8      | 1.69646 | -0.47398 | 0.80294  | 0.942705 | 0       | 2.26701 | 2.06832 | 4.12646 | 1.71695 | 0       |
| ENSMUSG00000026809 | 15_17000   | 0.92806 | -0.69646 | 0.764613 | NA       | 0       | 1.1335  | 1.03416 | 0.82529 | 2.57543 | 0       |

|                    |            |         |          |          |          |         |         |         |         |         |         |
|--------------------|------------|---------|----------|----------|----------|---------|---------|---------|---------|---------|---------|
| ENSMUSG00000026810 | 12_Dpm2    | 593.893 | -0.04347 | 0.932209 | 0.982317 | 203.26  | 760.58  | 791.134 | 651.981 | 558.01  | 598.395 |
| ENSMUSG00000026811 | 18_Stf6gal | 294.518 | -1.41798 | 0.001206 | 0.022599 | 97.0795 | 136.02  | 248.199 | 546.344 | 369.145 | 370.323 |
| ENSMUSG00000026812 | 16_Tsc1    | 1033.63 | -0.00856 | 0.973898 | 0.993378 | 875.738 | 1075.69 | 1140.68 | 1142.2  | 1029.31 | 938.151 |
| ENSMUSG00000026814 | 16_Eng     | 489.062 | 0.02007  | 0.971775 | 0.992434 | 148.653 | 613.225 | 715.64  | 629.698 | 354.551 | 472.602 |
| ENSMUSG00000026815 | 14_Gfi1b   | 0.17236 | 1.1315   | 0.781553 | NA       | 0       | 0       | 1.03416 | 0       | 0       | 0       |
| ENSMUSG00000026816 | 14_Gtf3c5  | 482.504 | 0.12658  | 0.771819 | 0.932465 | 242.699 | 676.701 | 591.54  | 429.152 | 422.371 | 532.559 |
| ENSMUSG00000026817 | 14_Ak1     | 532.628 | -0.6779  | 0.144712 | 0.514774 | 204.271 | 474.938 | 550.174 | 873.159 | 448.983 | 644.244 |
| ENSMUSG00000026818 | 5_Cel      | 0.3409  | 1.98467  | 0.623395 | NA       | 1.01124 | 0       | 1.03416 | 0       | 0       | 0       |
| ENSMUSG00000026819 | 15_Slc25a  | 423.71  | -0.04219 | 0.933115 | 0.982803 | 168.878 | 566.751 | 517.081 | 548.819 | 311.627 | 429.104 |
| ENSMUSG00000026820 | 5_Ptges2   | 303.487 | -0.02294 | 0.966809 | 0.991132 | 94.0457 | 395.593 | 413.665 | 356.526 | 237.798 | 323.298 |
| ENSMUSG00000026821 | 15_Ralgd1  | 941.86  | 0.36663  | 0.510434 | 0.827179 | 318.542 | 1529.1  | 1335.1  | 947.436 | 618.103 | 902.882 |
| ENSMUSG00000026822 | 14_Lcn2    | 372.79  | 2.59662  | 7.32E-05 | 0.002553 | 279.103 | 1348.87 | 291.634 | 75.9269 | 155.384 | 85.8208 |
| ENSMUSG00000026824 | 11_Kcnj3   | 73.8633 | -1.25153 | 0.052065 | 0.29635  | 91.012  | 19.2695 | 20.6832 | 126.27  | 101.3   | 84.6452 |
| ENSMUSG00000026825 | 17_Dnm1    | 476.783 | -0.95821 | 0.043152 | 0.263718 | 151.687 | 323.048 | 497.432 | 788.154 | 499.634 | 600.746 |
| ENSMUSG00000026826 | 13_Nr4a2   | 468.472 | 0.33675  | 0.279132 | 0.666376 | 677.534 | 428.464 | 462.27  | 382.936 | 403.484 | 456.144 |
| ENSMUSG00000026827 | 12_Gpd2    | 4035.76 | 0.6071   | 0.056504 | 0.310808 | 6018.93 | 4758.45 | 3839.84 | 2513.02 | 3322.31 | 3762.01 |
| ENSMUSG00000026828 | 11_Galnt5  | 65.1118 | -0.59822 | 0.14162  | 0.510149 | 68.7646 | 40.8061 | 45.5031 | 80.0534 | 62.6688 | 92.8746 |
| ENSMUSG00000026829 | 9_Gbgt1    | 49.508  | -1.49963 | 0.006757 | 0.076176 | 11.1237 | 29.4711 | 37.2298 | 96.5592 | 72.1121 | 50.552  |
| ENSMUSG00000026830 | 9_Ermn     | 150.488 | -1.51726 | 0.033307 | 0.22549  | 173.934 | 20.4031 | 39.2981 | 292.979 | 212.902 | 163.412 |
| ENSMUSG00000026831 | 16_17000   | 27.3166 | 0.20182  | 0.678207 | 0.901447 | 35.3936 | 31.7381 | 20.6832 | 29.7105 | 24.0374 | 22.3369 |
| ENSMUSG00000026832 | 12_Cytip   | 63.8054 | 2.18898  | 4.66E-05 | 0.001807 | 136.518 | 129.219 | 48.6056 | 29.7105 | 22.3204 | 16.4588 |
| ENSMUSG00000026833 | 18_Olfm1   | 467.657 | -0.93868 | 0.000687 | 0.014817 | 312.474 | 299.245 | 350.581 | 707.276 | 624.971 | 511.398 |
| ENSMUSG00000026834 | 13_Acvr1c  | 0.50203 | -0.79092 | 0.80375  | NA       | 1.01124 | 0       | 0       | 0.82529 | 0       | 1.17563 |
| ENSMUSG00000026836 | 15_Acvr1   | 612.799 | 0.06194  | 0.796333 | 0.939751 | 670.455 | 606.424 | 600.848 | 554.596 | 637.848 | 606.624 |
| ENSMUSG00000026837 | 15_Col5a1  | 1975.6  | -0.63599 | 0.096636 | 0.421823 | 957.648 | 1424.81 | 2258.61 | 2295.14 | 2266.38 | 2651.04 |
| ENSMUSG00000026839 | 16_Upp2    | 67.4445 | -0.46483 | 0.226458 | 0.617339 | 43.4835 | 52.1411 | 74.4596 | 85.8304 | 74.6875 | 74.0646 |
| ENSMUSG00000026840 | 14_Lamc3   | 90.0025 | -0.98683 | 0.081214 | 0.383853 | 30.3373 | 46.4736 | 104.45  | 173.311 | 109.027 | 76.4158 |
| ENSMUSG00000026841 | 7_Fibcd1   | 6.43358 | -2.09751 | 0.046782 | 0.277206 | 1.01124 | 1.1335  | 5.17081 | 16.5058 | 7.72629 | 7.05377 |
| ENSMUSG00000026842 | 16_Abl1    | 1575.29 | 0.06693  | 0.873278 | 0.963908 | 811.018 | 1847.61 | 2176.91 | 1680.3  | 1332.36 | 1603.56 |
| ENSMUSG00000026843 | 15_Fubp3   | 1266.34 | 0.29637  | 0.2423   | 0.633507 | 1267.09 | 1581.24 | 1339.24 | 1065.45 | 1076.53 | 1268.5  |
| ENSMUSG00000026848 | 14_Tor1b   | 1244.34 | 0.00137  | 0.995582 | 0.998321 | 1082.03 | 1252.52 | 1400.25 | 1187.6  | 1296.3  | 1247.34 |
| ENSMUSG00000026849 | 18_Tor1a   | 472.476 | -0.00253 | 0.994856 | 0.998079 | 259.89  | 581.487 | 574.994 | 511.681 | 441.257 | 465.549 |
| ENSMUSG00000026851 | 9_BC005f   | 1043.98 | -0.17888 | 0.562858 | 0.85076  | 697.759 | 1172.04 | 1068.29 | 1100.94 | 1042.19 | 1182.68 |
| ENSMUSG00000026853 | 15_Crat    | 693.196 | -0.34318 | 0.440369 | 0.786071 | 284.16  | 710.706 | 838.705 | 893.792 | 687.64  | 744.172 |
| ENSMUSG00000026854 | 16_Usp20   | 503.091 | 0.08644  | 0.881319 | 0.967415 | 134.495 | 674.434 | 745.63  | 534.789 | 428.38  | 500.817 |
| ENSMUSG00000026856 | 14_Dolpp   | 419.058 | 0.54289  | 0.310028 | 0.692089 | 164.833 | 711.84  | 614.292 | 364.779 | 272.996 | 385.606 |
| ENSMUSG00000026857 | 9_Ntmt1    | 162.761 | 0.06578  | 0.917398 | 0.976775 | 37.416  | 233.502 | 228.55  | 190.643 | 112.46  | 173.993 |
| ENSMUSG00000026858 | 18_Fam7c   | 473.927 | -0.26095 | 0.647794 | 0.890537 | 122.361 | 549.749 | 621.531 | 619.795 | 394.041 | 536.086 |
| ENSMUSG00000026860 | 16_Sh3gl1  | 825.236 | 0.15077  | 0.823846 | 0.949196 | 138.54  | 1168.64 | 1297.87 | 965.592 | 618.962 | 761.807 |
| ENSMUSG00000026864 | 13_Hspa5   | 14131.2 | 0.59056  | 0.139021 | 0.506146 | 25115.3 | 14880.6 | 10954.9 | 8621.83 | 12905.5 | 12308.8 |
| ENSMUSG00000026866 | 16_Kynu    | 19.9494 | -1.05914 | 0.116844 | 0.46475  | 20.2249 | 11.335  | 7.23913 | 40.4393 | 14.5941 | 25.8638 |
| ENSMUSG00000026867 | 18_Gapvc   | 3176.19 | 0.3047   | 0.22246  | 0.613004 | 3838.68 | 3408.44 | 3283.46 | 2438.74 | 2980.63 | 3107.18 |
| ENSMUSG00000026869 | 12_Psmd4   | 1370.6  | 0.12547  | 0.669943 | 0.898766 | 1790.91 | 1294.46 | 1204.8  | 1131.48 | 1405.33 | 1396.65 |
| ENSMUSG00000026870 | 19_Cutal   | 77.7592 | -0.02318 | 0.954049 | 0.988507 | 101.124 | 55.5416 | 74.4596 | 87.481  | 60.9519 | 86.9965 |
| ENSMUSG00000026872 | 16_Zeb2    | 863.051 | -0.45601 | 0.303809 | 0.686401 | 1199.34 | 489.673 | 494.329 | 1094.34 | 1098.85 | 801.778 |
| ENSMUSG00000026873 | 9_Phfi9    | 145.886 | 0.592    | 0.165253 | 0.544809 | 96.0682 | 209.698 | 220.276 | 114.716 | 97.0079 | 137.548 |
| ENSMUSG00000026874 | 10_Hc      | 25.3389 | 0.03781  | 0.945172 | 0.986649 | 29.3261 | 22.6701 | 24.8199 | 13.2047 | 32.6221 | 29.3907 |
| ENSMUSG00000026875 | 14_Traf1   | 76.7659 | 1.47774  | 0.003547 | 0.048997 | 69.7759 | 184.761 | 84.8012 | 50.3428 | 40.3484 | 30.5663 |
| ENSMUSG00000026878 | 16_Rab14   | 5729.65 | 0.54807  | 0.218242 | 0.609026 | 11349.2 | 4665.5  | 4400.36 | 3889.6  | 5367.2  | 4706.04 |
| ENSMUSG00000026879 | 14_Gsn     | 18525.6 | 0.45626  | 0.37468  | 0.744881 | 7683.43 | 28548.4 | 28060.9 | 17492.9 | 11631.5 | 17736.7 |
| ENSMUSG00000026880 | 11_Stom    | 7841.16 | 1.024    | 0.002833 | 0.041763 | 8545.01 | 14649.4 | 8343.62 | 4345.16 | 5501.98 | 5661.82 |
| ENSMUSG00000026883 | 17_Dab2ip  | 1130.54 | 0.20781  | 0.693375 | 0.905638 | 432.813 | 1616.38 | 1586.4  | 1351    | 750.309 | 1046.31 |
| ENSMUSG00000026885 | 13_Ttll11  | 13.5536 | -1.03348 | 0.174235 | 0.557874 | 3.03373 | 12.4685 | 11.3758 | 27.2346 | 15.4526 | 11.7563 |
| ENSMUSG00000026887 | 9_Mrrf     | 482.803 | -0.1041  | 0.693671 | 0.905638 | 531.915 | 415.996 | 447.792 | 462.989 | 486.756 | 551.369 |
| ENSMUSG00000026888 | 14_Grb14   | 86.665  | -0.82333 | 0.168866 | 0.550027 | 121.349 | 24.9371 | 41.3665 | 127.095 | 115.894 | 89.3477 |
| ENSMUSG00000026889 | 12_Rbm1i   | 1014.35 | 0.35286  | 0.330432 | 0.710498 | 1651.36 | 856.928 | 904.891 | 797.232 | 988.107 | 887.599 |
| ENSMUSG00000026890 | 19_Lhx6    | 10.5391 | 0.48681  | 0.534186 | 0.838255 | 8.08995 | 20.4031 | 8.27329 | 4.95175 | 8.58477 | 12.9319 |
| ENSMUSG00000026893 | 4_Gca      | 171.315 | 0.25299  | 0.611301 | 0.874284 | 320.564 | 136.02  | 102.382 | 155.98  | 187.148 | 125.792 |
| ENSMUSG00000026894 | 4_Morn5    | 1.32398 | -3.77654 | 0.094368 | NA       | 0       | 0       | 0       | 2.47588 | 4.29238 | 1.17563 |
| ENSMUSG00000026895 | 7_Ndufa8   | 1047.07 | 0.14459  | 0.796081 | 0.939697 | 321.576 | 1495.09 | 1481.95 | 1211.53 | 781.214 | 991.054 |
| ENSMUSG00000026896 | 14>Ifih1   | 5865.08 | 1.98314  | 2.73E-06 | 0.000183 | 14095.7 | 8027.47 | 5962.98 | 1692.67 | 2978.06 | 2433.55 |
| ENSMUSG00000026904 | 17_Slc4a1  | 49.8076 | -1.33038 | 0.114898 | 0.460602 | 67.7534 | 7.93452 | 9.30745 | 103.987 | 78.1214 | 31.742  |
| ENSMUSG00000026914 | 15_Psmd7   | 1984.3  | 0.55632  | 0.12856  | 0.487117 | 3352.27 | 2086.78 | 1647.42 | 1332.02 | 1841.43 | 1645.88 |
| ENSMUSG00000026915 | 16_Strbp   | 1282.94 | 0.13793  | 0.752043 | 0.925804 | 2210.58 | 894.334 | 927.643 | 1086.08 | 1423.35 | 1155.64 |
| ENSMUSG00000026917 | 15_Wdr5    | 1125.25 | 0.12956  | 0.662231 | 0.895681 | 886.861 | 1393.08 | 1247.2  | 973.845 | 1071.38 | 1179.15 |
| ENSMUSG00000026918 | 16_Brd3    | 1436.73 | 0.25206  | 0.374824 | 0.744881 | 1281.25 | 1686.65 | 1717.74 | 1433.53 | 1083.4  | 1417.81 |
| ENSMUSG00000026921 | 18_Egfl7   | 246.846 | -0.60092 | 0.217736 | 0.608427 | 90.0007 | 240.303 | 258.54  | 408.52  | 262.694 | 221.018 |
| ENSMUSG00000026922 | 13_Agpat1  | 458.73  | 0.31861  | 0.587715 | 0.862958 | 129.439 | 732.243 | 666     | 481.145 | 348.542 | 395.011 |
| ENSMUSG00000026923 | 15_Notch1  | 1894.13 | 0.75235  | 0.1226   | 0.476387 | 913.154 | 3112.6  | 3105.59 | 1445.09 | 1213.03 | 1575.34 |
| ENSMUSG00000026924 | 17_Sec16   | 2909.72 | 0.47486  | 0.117817 | 0.466823 | 2434.07 | 3997.86 | 3720.91 | 2278.63 | 2393.43 | 2633.41 |
| ENSMUSG00000026925 | 16_Inpp5e  | 567.436 | -0.06845 | 0.838029 | 0.952966 | 370.115 | 650.631 | 641.18  | 585.132 | 526.246 | 631.312 |
| ENSMUSG00000026926 | 14_Pmpc1   | 1975.26 | 0.13725  | 0.541056 | 0.84046  | 2119.57 | 2155.92 | 1931.81 | 1778.51 | 1921.27 | 1944.49 |
| ENSMUSG00000026927 | 17_Sdcca   | 1189    | -0.01737 | 0.954437 | 0.98871  | 845.4   | 1381.74 | 1318.56 | 1240.41 | 1145.21 | 1202.67 |
| ENSMUSG00000026928 | 14_Card9   | 12.9476 | 0.95667  | 0.29178  | 0.676701 | 3.03373 | 32.8716 | 15.5124 | 13.2047 | 6.00934 | 7.05377 |
| ENSMUSG00000026930 | 15_Gpsm1   | 463.376 | 0.0025   | 0.996176 | 0.998321 | 167.867 | 570.152 | 653.59  | 595.861 | 418.937 | 373.85  |

|                    |           |         |          |          |          |         |         |         |         |         |         |
|--------------------|-----------|---------|----------|----------|----------|---------|---------|---------|---------|---------|---------|
| ENSMUSG00000026931 | 10_17000  | 0.14308 | -0.79206 | 0.84609  | NA       | 0       | 0       | 0       | 0       | 0.85848 | 0       |
| ENSMUSG00000026932 | 14_Nacc2  | 827.823 | -0.60062 | 0.025487 | 0.191321 | 663.376 | 570.152 | 740.46  | 1140.55 | 958.919 | 893.477 |
| ENSMUSG00000026933 | 17_Camsi  | 1203.7  | 0.20986  | 0.466972 | 0.803613 | 976.862 | 1510.96 | 1385.78 | 1119.1  | 1176.11 | 1053.36 |
| ENSMUSG00000026934 | 15_Lhx3   | 0.83082 | -3.10906 | 0.330544 | NA       | 0       | 0       | 0       | 4.12646 | 0.85848 | 0       |
| ENSMUSG00000026937 | 12_Lcn5   | 0.2751  | -1.54073 | 0.703687 | NA       | 0       | 0       | 0       | 1.65058 | 0       | 0       |
| ENSMUSG00000026938 | 10_Fcna   | 38.81   | -0.49596 | 0.307903 | 0.690547 | 22.2474 | 35.1386 | 39.2981 | 59.421  | 30.9052 | 45.8495 |
| ENSMUSG00000026939 | 12_Tmem   | 266.747 | -0.717   | 0.109401 | 0.449508 | 97.0795 | 219.9   | 288.531 | 381.285 | 292.741 | 320.946 |
| ENSMUSG00000026940 | 3_Ccdc18  | 6.0078  | -1.99613 | 0.060183 | 0.322852 | 3.03373 | 0       | 4.13665 | 12.3794 | 9.44325 | 7.05377 |
| ENSMUSG00000026941 | 16_Mamd   | 51.2829 | 0.32887  | 0.561262 | 0.849438 | 43.4835 | 31.7381 | 96.177  | 65.1981 | 33.4806 | 37.6201 |
| ENSMUSG00000026942 | 13_Traf2  | 578.919 | 0.3716   | 0.463303 | 0.800559 | 237.642 | 918.137 | 803.544 | 568.626 | 431.814 | 513.749 |
| ENSMUSG00000026943 | 12_Lcn12  | 0.75908 | -0.32394 | 0.894007 | NA       | 1.01124 | 0       | 1.03416 | 1.65058 | 0.85848 | 0       |
| ENSMUSG00000026944 | 18_Abca2  | 1080.46 | -0.34313 | 0.59361  | 0.866332 | 185.058 | 1209.45 | 1463.34 | 1515.24 | 965.787 | 1143.89 |
| ENSMUSG00000026946 | 9_Nmi     | 2422.01 | 1.32166  | 0.000108 | 0.003528 | 4216.89 | 3753.03 | 2409.6  | 1122.4  | 1672.31 | 1357.85 |
| ENSMUSG00000026950 | 16_Neb    | 1056.85 | -0.478   | 0.496505 | 0.818867 | 1921.36 | 206.298 | 522.252 | 1656.36 | 821.562 | 1213.25 |
| ENSMUSG00000026955 | 13_Sapcd  | 57.4799 | 0.28349  | 0.564555 | 0.850965 | 31.3486 | 66.8767 | 91.0062 | 46.2164 | 50.6501 | 58.7814 |
| ENSMUSG00000026956 | 15_Uap1l  | 537.131 | -0.40501 | 0.467989 | 0.804041 | 138.54  | 603.024 | 645.317 | 775.775 | 509.935 | 550.194 |
| ENSMUSG00000026958 | 13_Dpp7   | 550.186 | -0.55049 | 0.156819 | 0.534279 | 249.777 | 518.011 | 571.891 | 715.528 | 649.867 | 596.043 |
| ENSMUSG00000026959 | 13_Grin1  | 81.696  | -0.06365 | 0.899437 | 0.972372 | 34.3823 | 103.149 | 102.382 | 101.511 | 74.6875 | 74.0646 |
| ENSMUSG00000026960 | 6_Arl6ip6 | 425.459 | 0.65877  | 0.115512 | 0.462102 | 822.142 | 379.723 | 360.922 | 298.756 | 382.022 | 309.19  |
| ENSMUSG00000026961 | 6_Lrrc26  | 243.879 | 0.55296  | 0.454259 | 0.795918 | 37.416  | 392.192 | 440.553 | 249.238 | 119.328 | 224.545 |
| ENSMUSG00000026963 | 4_Tmem2   | 0.91849 | 2.09392  | 0.427247 | NA       | 0       | 2.26701 | 2.06832 | 0       | 0       | 1.17563 |
| ENSMUSG00000026965 | 12_Anapc  | 2063.5  | 0.21032  | 0.689903 | 0.905638 | 722.028 | 2907.43 | 3011.48 | 1932.83 | 1618.23 | 2189.02 |
| ENSMUSG00000026966 | 6_Ssna1   | 608.909 | 0.03145  | 0.946523 | 0.986649 | 257.867 | 748.112 | 840.773 | 669.312 | 533.114 | 604.273 |
| ENSMUSG00000026969 | 3_Fam16f  | 16.7301 | 7.59526  | NA       | NA       | 97.0795 | 2.26701 | 1.03416 | 0       | 0       | 0       |
| ENSMUSG00000026970 | 16_Rbms1  | 5999.32 | 0.54725  | 0.086655 | 0.399057 | 9500.64 | 6575.45 | 5294.91 | 4490.42 | 5156.87 | 4977.61 |
| ENSMUSG00000026971 | 15_Iitgb6 | 634.77  | 1.09036  | 0.00171  | 0.02892  | 1128.55 | 876.198 | 586.37  | 380.46  | 369.145 | 467.9   |
| ENSMUSG00000026972 | 15_Arrdc1 | 839.067 | 0.51938  | 0.386999 | 0.751882 | 225.507 | 1363.6  | 1376.47 | 732.034 | 658.452 | 678.337 |
| ENSMUSG00000026974 | 11_Zmynx  | 575.076 | 0.37786  | 0.120207 | 0.471199 | 683.601 | 680.102 | 586.37  | 491.049 | 529.68  | 479.656 |
| ENSMUSG00000026975 | 10_Dph7   | 269.042 | -0.24574 | 0.416534 | 0.770435 | 188.091 | 277.708 | 273.019 | 316.087 | 280.722 | 278.624 |
| ENSMUSG00000026976 | 15_Pax8   | 1.54322 | 0.4261   | 0.788872 | NA       | 2.02249 | 1.1335  | 2.06832 | 0.82529 | 0.85848 | 2.35126 |
| ENSMUSG00000026977 | 17_March  | 3697.66 | 0.69236  | 0.126185 | 0.483384 | 7722.87 | 3058.19 | 2923.57 | 2357.03 | 3165.2  | 2959.06 |
| ENSMUSG00000026979 | 16_Psd4   | 1383.24 | 0.61703  | 0.111457 | 0.453007 | 936.412 | 2211.46 | 1875.97 | 982.098 | 1123.75 | 1169.75 |
| ENSMUSG00000026980 | 15_Ly75   | 355.861 | 1.76417  | 7.37E-08 | 7.79E-06 | 689.669 | 530.479 | 429.177 | 133.697 | 182.856 | 169.29  |
| ENSMUSG00000026981 | 15_Ill1rn | 585.022 | 0.88524  | 0.008152 | 0.086764 | 843.378 | 903.402 | 530.525 | 349.924 | 477.313 | 405.592 |
| ENSMUSG00000026983 | 10_Ill1f5 | 83.2137 | -0.75725 | 0.056228 | 0.310378 | 59.6634 | 58.9422 | 67.2205 | 90.7822 | 145.083 | 77.5914 |
| ENSMUSG00000026984 | 4_Ill1f6  | 97.2163 | -0.1317  | 0.787272 | 0.936722 | 116.293 | 102.015 | 59.9814 | 55.2946 | 145.083 | 104.631 |
| ENSMUSG00000026985 | 1_Ill1f8  | 63.7922 | -0.05731 | 0.913306 | 0.975897 | 92.0232 | 61.2092 | 34.1273 | 37.9634 | 79.8384 | 77.5914 |
| ENSMUSG00000026986 | 14_Hnmt   | 179.898 | -0.46521 | 0.419408 | 0.773352 | 295.283 | 69.1437 | 88.9379 | 231.907 | 228.355 | 165.764 |
| ENSMUSG00000026987 | 16_Baz2b  | 1771.79 | 0.24053  | 0.39493  | 0.755773 | 2415.86 | 1699.12 | 1642.25 | 1530.92 | 1682.61 | 1659.99 |
| ENSMUSG00000026988 | 15_Wdsul  | 646.182 | 0.10287  | 0.72989  | 0.918281 | 496.521 | 710.706 | 800.441 | 624.746 | 608.66  | 636.015 |
| ENSMUSG00000026989 | 5_Dapl1   | 12040.1 | -0.33511 | 0.203641 | 0.594896 | 8909.06 | 10480.4 | 12554.7 | 14444.3 | 12391.3 | 13460.9 |
| ENSMUSG00000026991 | 20_Pkp4   | 5005.75 | -0.2859  | 0.209751 | 0.601596 | 4373.63 | 4378.72 | 4781.96 | 6027.94 | 5241.86 | 5230.37 |
| ENSMUSG00000026994 | 9_Gaint3  | 2429.23 | 0.74434  | 0.060499 | 0.324045 | 4642.62 | 2361.09 | 2123.13 | 1495.43 | 2060.34 | 1892.76 |
| ENSMUSG00000026999 | 14_Nup35  | 477.676 | 0.19374  | 0.529283 | 0.83607  | 620.904 | 482.872 | 425.04  | 361.478 | 499.634 | 476.129 |
| ENSMUSG00000027001 | 10_Dusp1  | 249.092 | -0.13866 | 0.677776 | 0.901447 | 317.531 | 196.096 | 197.525 | 236.034 | 278.147 | 269.219 |
| ENSMUSG00000027002 | 13_Nckap  | 12081.4 | 0.52852  | 0.175378 | 0.558833 | 21610.3 | 11093.6 | 10105.8 | 8128.3  | 10955.9 | 10594.8 |
| ENSMUSG00000027004 | 3_Frzb    | 30.812  | -0.44885 | 0.473092 | 0.806456 | 47.5285 | 18.136  | 12.4099 | 43.7405 | 26.6128 | 36.4445 |
| ENSMUSG00000027006 | 13_Dnajc1 | 2666.99 | 0.0573   | 0.888975 | 0.970015 | 4336.22 | 1890.68 | 1932.85 | 2505.59 | 2881.91 | 2454.71 |
| ENSMUSG00000027007 | 16_Ssfa2  | 3348.07 | 0.25606  | 0.266142 | 0.654446 | 4062.17 | 3456.05 | 3414.8  | 2977.65 | 3045.88 | 3131.87 |
| ENSMUSG00000027009 | 18_Iitga4 | 292.009 | 0.56351  | 0.268772 | 0.656292 | 605.735 | 247.104 | 192.354 | 300.406 | 239.515 | 166.939 |
| ENSMUSG00000027010 | 16_Slc25a | 1000.6  | -0.26782 | 0.297609 | 0.680939 | 939.446 | 860.329 | 924.54  | 1280.03 | 1038.76 | 960.488 |
| ENSMUSG00000027011 | 14_Ube2e  | 989.85  | 0.22867  | 0.623771 | 0.879263 | 1846.53 | 731.109 | 626.702 | 887.189 | 1006.99 | 840.574 |
| ENSMUSG00000027012 | 15_Dync1  | 4503.69 | 0.41748  | 0.263561 | 0.652524 | 7579.28 | 4091.95 | 3780.89 | 3205.44 | 4191.08 | 4173.48 |
| ENSMUSG00000027014 | 14_Cwc22  | 1117.92 | 0.26291  | 0.402566 | 0.761286 | 1551.25 | 1099.5  | 1007.27 | 829.419 | 1067.95 | 1152.12 |
| ENSMUSG00000027015 | 4_Cybrd1  | 178.068 | -0.79307 | 0.100179 | 0.430564 | 172.923 | 53.2746 | 164.432 | 219.528 | 204.318 | 253.936 |
| ENSMUSG00000027016 | 17_Zfp38l | 53.9873 | -1.57665 | 0.004803 | 0.060349 | 43.4835 | 19.2695 | 18.6149 | 119.667 | 74.6875 | 48.2007 |
| ENSMUSG00000027018 | 11_Hat1   | 1353.36 | 0.84002  | 0.062031 | 0.329054 | 2850.7  | 1321.66 | 1037.26 | 763.395 | 1144.35 | 1002.81 |
| ENSMUSG00000027022 | 13_Xirp2  | 577.835 | 0.08306  | 0.911388 | 0.975173 | 1346.98 | 116.751 | 319.556 | 756.793 | 370.862 | 556.072 |
| ENSMUSG00000027030 | 15_Stk39  | 543.154 | 0.55774  | 0.161108 | 0.539453 | 990.008 | 498.741 | 451.929 | 464.64  | 473.879 | 379.728 |
| ENSMUSG00000027035 | 10_Cers6  | 912.588 | 0.4415   | 0.251011 | 0.642467 | 1589.68 | 802.52  | 761.143 | 711.402 | 861.911 | 748.875 |
| ENSMUSG00000027048 | 15_Abcb1  | 0.58079 | -1.00254 | 0.785266 | NA       | 0       | 1.1335  | 0       | 0       | 0       | 2.35126 |
| ENSMUSG00000027067 | 16_Ssrp1  | 3531.73 | 0.13822  | 0.658987 | 0.89471  | 2746.54 | 4574.82 | 3780.89 | 2841.48 | 3481.12 | 3765.54 |
| ENSMUSG00000027068 | 6_Dhrs9   | 5.30823 | 1.552    | 0.154316 | 0.529912 | 6.06747 | 14.7355 | 3.10248 | 2.47588 | 4.29238 | 1.17563 |
| ENSMUSG00000027070 | 14_Lrp2   | 278.445 | -1.82719 | 2.31E-05 | 0.001021 | 161.799 | 65.7432 | 139.612 | 529.838 | 451.559 | 322.122 |
| ENSMUSG00000027071 | 14_P2rx3  | 7.74454 | 0.1285   | 0.912385 | 0.975453 | 12.1349 | 6.80102 | 5.17081 | 8.25292 | 0       | 14.1075 |
| ENSMUSG00000027072 | 13_Prg3   | 0.16854 | 1.1315   | 0.781553 | NA       | 1.01124 | 0       | 0       | 0       | 0       | 0       |
| ENSMUSG00000027073 | 5_Prg2    | 0       | NA       | NA       | NA       | 0       | 0       | 0       | 0       | 0       | 0       |
| ENSMUSG00000027074 | 14_Slc43a | 339.686 | 0.51464  | 0.128018 | 0.486371 | 542.027 | 295.844 | 360.922 | 293.804 | 270.42  | 275.097 |
| ENSMUSG00000027075 | 16_Slc43a | 75.4483 | -0.51645 | 0.151768 | 0.525744 | 57.6409 | 49.8741 | 78.5963 | 91.6075 | 83.2723 | 91.699  |
| ENSMUSG00000027076 | 10_Timm1  | 124.073 | -0.24463 | 0.568895 | 0.89471  | 36.4048 | 171.159 | 133.407 | 151.029 | 131.347 | 121.09  |
| ENSMUSG00000027077 | 7_Smtnl1  | 34.8601 | -1.22617 | 0.062904 | 0.331093 | 20.2249 | 10.2015 | 32.059  | 69.3246 | 19.745  | 57.6058 |
| ENSMUSG00000027078 | 14_Ube2k  | 2924.59 | 1.9627   | 9.72E-12 | 2.51E-09 | 4447.45 | 5769.53 | 3747.8  | 1074.53 | 1280.85 | 1227.36 |
| ENSMUSG00000027079 | 15_Clp1   | 452.252 | 0.08704  | 0.743981 | 0.923348 | 495.51  | 502.142 | 400.221 | 410.996 | 488.473 | 416.172 |
| ENSMUSG00000027080 | 6_Med19   | 1010.91 | 0.44703  | 0.244628 | 0.6364   | 1748.44 | 923.805 | 826.295 | 733.685 | 896.25  | 936.975 |
| ENSMUSG00000027082 | 15_Tfpi   | 429.442 | -0.69933 | 0.147345 | 0.519469 | 559.218 | 174.559 | 248.199 | 562.024 | 612.953 | 419.699 |

|                    |            |         |          |          |          |         |         |         |         |         |         |
|--------------------|------------|---------|----------|----------|----------|---------|---------|---------|---------|---------|---------|
| ENSMUSG00000027086 | 16_Fastkc  | 294.721 | 0.08481  | 0.833381 | 0.952011 | 447.981 | 222.167 | 239.925 | 235.208 | 359.702 | 263.341 |
| ENSMUSG00000027087 | 11_Itgav   | 4404.22 | 0.27736  | 0.454089 | 0.795918 | 7171.74 | 3723.56 | 3583.37 | 3582.59 | 4361.06 | 4003.01 |
| ENSMUSG00000027088 | 10_Phosp   | 531.681 | 0.3365   | 0.481994 | 0.81105  | 1033.49 | 412.595 | 334.034 | 423.375 | 533.973 | 452.617 |
| ENSMUSG00000027091 | 14_Zc3h1   | 2542.39 | 0.42464  | 0.339805 | 0.718567 | 4798.35 | 2038.04 | 1904.93 | 1685.25 | 2451.81 | 2375.94 |
| ENSMUSG00000027099 | 9_Mtx2     | 1198.48 | 0.38326  | 0.381611 | 0.748966 | 2234.85 | 974.812 | 860.422 | 910.297 | 1182.98 | 1027.5  |
| ENSMUSG00000027102 | 4_Hoxd8    | 19.8265 | 0.25769  | 0.674446 | 0.900436 | 34.3823 | 13.602  | 16.5466 | 13.2047 | 18.8865 | 22.3369 |
| ENSMUSG00000027104 | 18_Atf2    | 1378.51 | 0.27008  | 0.48707  | 0.814019 | 2300.58 | 1067.76 | 1153.09 | 1174.39 | 1398.46 | 1176.8  |
| ENSMUSG00000027107 | 3_Chra1    | 26.0624 | -1.18081 | 0.037492 | 0.242459 | 25.2811 | 7.93452 | 14.4783 | 39.614  | 32.6221 | 36.4445 |
| ENSMUSG00000027108 | 15_Ola1    | 1889.4  | 0.53751  | 0.189738 | 0.578028 | 3468.57 | 1652.65 | 1590.54 | 1209.05 | 1733.27 | 1682.32 |
| ENSMUSG00000027109 | 16_Sp3     | 3298.98 | 0.53892  | 0.245874 | 0.637596 | 6716.68 | 2549.25 | 2458.2  | 2273.68 | 3149.75 | 2646.34 |
| ENSMUSG00000027111 | 15_Igta6   | 8422.09 | 1.09498  | 0.000711 | 0.015207 | 13388.9 | 12357.4 | 8672.48 | 4134.71 | 5580.1  | 6398.94 |
| ENSMUSG00000027115 | 14_Kif18a  | 165.449 | 0.48559  | 0.333729 | 0.712323 | 334.722 | 122.418 | 122.031 | 128.746 | 174.271 | 110.509 |
| ENSMUSG00000027122 | 15_Arl14e  | 797.849 | 0.25666  | 0.526079 | 0.833849 | 1364.17 | 643.83  | 597.745 | 675.089 | 782.073 | 724.187 |
| ENSMUSG00000027130 | 15_Slc12e  | 2871.69 | 0.29829  | 0.321953 | 0.702839 | 4106.66 | 2506.17 | 2889.45 | 2394.17 | 2730.82 | 2602.84 |
| ENSMUSG00000027131 | 3_Emc4     | 1106.65 | -0.02131 | 0.929715 | 0.981693 | 1150.8  | 1147.1  | 997.966 | 1164.49 | 1174.4  | 1005.16 |
| ENSMUSG00000027132 | 3_Katnbl1  | 961.001 | 0.5142   | 0.348536 | 0.725753 | 2200.47 | 607.558 | 583.267 | 721.306 | 883.373 | 770.036 |
| ENSMUSG00000027133 | 3_Nop10    | 600.927 | -0.59865 | 0.019986 | 0.163064 | 21.689  | 473.804 | 538.798 | 755.968 | 754.601 | 660.703 |
| ENSMUSG00000027134 | 4_Lpcat4   | 2041.72 | 0.58589  | 0.330715 | 0.710725 | 562.252 | 3428.85 | 3361.03 | 1814.82 | 1346.95 | 1736.4  |
| ENSMUSG00000027157 | 10_49304   | 0.19594 | -0.79206 | 0.84609  | NA       | 0       | 0       | 0       | 0       | 0       | 1.17563 |
| ENSMUSG00000027160 | 16_Ccdc3   | 211.982 | 0.22982  | 0.515888 | 0.829903 | 313.486 | 206.298 | 166.5   | 181.564 | 198.308 | 205.735 |
| ENSMUSG00000027162 | 7_Lin7c    | 3308.4  | 0.19087  | 0.681892 | 0.902515 | 6124.1  | 2151.39 | 2305.15 | 2761.43 | 3427.04 | 3081.32 |
| ENSMUSG00000027163 | 13_Comm    | 381.605 | 0.09344  | 0.870171 | 0.963272 | 109.214 | 523.678 | 549.14  | 444.007 | 316.778 | 346.81  |
| ENSMUSG00000027164 | 8_Traf6    | 1334.6  | 0.52729  | 0.070076 | 0.353191 | 1986.08 | 1446.35 | 1294.77 | 994.477 | 1153.79 | 1132.13 |
| ENSMUSG00000027165 | 16_B2301   | 576.495 | -0.34912 | 0.402155 | 0.760864 | 813.04  | 337.784 | 370.23  | 640.427 | 666.178 | 631.312 |
| ENSMUSG00000027166 | 14_Dnajc2  | 562.001 | 0.1707   | 0.543687 | 0.841422 | 697.759 | 564.484 | 523.286 | 458.863 | 600.934 | 526.681 |
| ENSMUSG00000027167 | 11_Elpa4   | 462.801 | 0.26676  | 0.542359 | 0.84107  | 835.288 | 336.65  | 344.376 | 447.308 | 414.644 | 398.538 |
| ENSMUSG00000027168 | 21_Pax6    | 15007.5 | 0.33809  | 0.221878 | 0.612417 | 20322   | 14455.6 | 15495.9 | 11498.8 | 14027.5 | 14245.1 |
| ENSMUSG00000027170 | 12_Eif3m   | 3391.77 | 0.0971   | 0.79083  | 0.937373 | 5143.19 | 2746.48 | 2627.8  | 2939.69 | 3695.74 | 3197.71 |
| ENSMUSG00000027171 | 10_Prrg4   | 380.866 | 1.02919  | 0.005699 | 0.067682 | 677.534 | 518.011 | 338.171 | 207.974 | 301.325 | 242.179 |
| ENSMUSG00000027173 | 7_Depdc7   | 121.196 | 0.1846   | 0.650148 | 0.891567 | 186.069 | 105.416 | 95.1429 | 90.7822 | 132.205 | 117.563 |
| ENSMUSG00000027175 | 10_Tcp11   | 225.349 | -0.21717 | 0.537334 | 0.839407 | 286.182 | 160.957 | 177.876 | 213.751 | 265.269 | 248.057 |
| ENSMUSG00000027176 | 8_Cstf3    | 743.234 | 0.50895  | 0.214561 | 0.605282 | 1334.84 | 703.905 | 580.165 | 511.681 | 746.875 | 581.936 |
| ENSMUSG00000027177 | 14_Hipk3   | 5633.2  | 0.38197  | 0.32049  | 0.701497 | 9760.53 | 4504.54 | 4858.49 | 4560.57 | 5113.95 | 5001.12 |
| ENSMUSG00000027180 | 12_Fbxo3   | 2819.88 | 0.32237  | 0.390044 | 0.753323 | 4694.2  | 2288.54 | 2417.87 | 2246.45 | 2632.95 | 2639.28 |
| ENSMUSG00000027184 | 14_Caprin  | 8659.51 | 0.52983  | 0.169686 | 0.551248 | 15342.6 | 8188.42 | 7164.67 | 5832.34 | 7834.46 | 7594.56 |
| ENSMUSG00000027185 | 14_Nat10   | 527.562 | 0.06192  | 0.851918 | 0.957883 | 375.172 | 620.026 | 621.531 | 442.357 | 585.481 | 520.803 |
| ENSMUSG00000027186 | 14_Elf5    | 327.995 | 0.14106  | 0.660756 | 0.895438 | 311.463 | 369.522 | 350.581 | 225.305 | 331.372 | 379.728 |
| ENSMUSG00000027187 | 10_Cat     | 1188.49 | 0.07835  | 0.775958 | 0.933817 | 1469.34 | 981.614 | 1211    | 1125.7  | 1151.22 | 1192.09 |
| ENSMUSG00000027188 | 8_Pamr1    | 135.425 | -0.97513 | 0.016155 | 0.13955  | 87.9783 | 56.6751 | 129.27  | 197.245 | 189.723 | 151.656 |
| ENSMUSG00000027189 | 16_Trim4   | 3894    | 0.02001  | 0.95754  | 0.98909  | 5869.26 | 2889.3  | 3004.24 | 3415.06 | 4234.87 | 3951.29 |
| ENSMUSG00000027193 | 12_Api5    | 3926.96 | 0.49304  | 0.265658 | 0.65435  | 7599.5  | 3279.22 | 2895.65 | 2696.23 | 3765.28 | 3325.85 |
| ENSMUSG00000027194 | 16_Ttc17   | 987.38  | 0.18807  | 0.444397 | 0.788716 | 1082.03 | 1048.49 | 1023.82 | 828.594 | 886.807 | 1054.54 |
| ENSMUSG00000027195 | 10_Hsd17   | 4885.73 | 0.258    | 0.541515 | 0.84046  | 8546.03 | 3929.85 | 3488.23 | 3772.41 | 5101.07 | 4476.79 |
| ENSMUSG00000027198 | 16_Ext2    | 1263.45 | 0.01353  | 0.973832 | 0.993369 | 652.253 | 1542.7  | 1613.29 | 1392.27 | 1079.96 | 1300.24 |
| ENSMUSG00000027199 | 16_Gatm    | 244.071 | 0.44573  | 0.197599 | 0.58977  | 363.037 | 268.64  | 213.037 | 201.371 | 245.524 | 172.817 |
| ENSMUSG00000027200 | 17_Semat   | 942.329 | -0.08497 | 0.758854 | 0.927759 | 1031.47 | 931.739 | 780.792 | 894.617 | 1138.34 | 877.018 |
| ENSMUSG00000027201 | 16_Myef2   | 1011.11 | -0.19857 | 0.67502  | 0.900711 | 1632.15 | 570.152 | 622.565 | 1039.04 | 1283.42 | 919.341 |
| ENSMUSG00000027202 | 12_Slc12e  | 1.19381 | -1.26798 | 0.55546  | NA       | 1.01124 | 1.1335  | 0       | 3.30117 | 1.71695 | 0       |
| ENSMUSG00000027203 | 15_Dut     | 520.941 | 0.07656  | 0.779382 | 0.93466  | 638.095 | 482.872 | 482.953 | 463.814 | 515.945 | 541.964 |
| ENSMUSG00000027204 | 13_Fbn1    | 2581.08 | -0.4979  | 0.032474 | 0.222766 | 2269.23 | 1945.09 | 2205.87 | 3261.56 | 2906.8  | 2897.92 |
| ENSMUSG00000027206 | 13_Cops2   | 2973.85 | 0.44469  | 0.375785 | 0.745495 | 6250.5  | 2110.58 | 1924.57 | 2243.97 | 2944.58 | 2368.89 |
| ENSMUSG00000027207 | 15_Galk2   | 556.702 | 0.06858  | 0.771014 | 0.932465 | 598.657 | 549.749 | 561.55  | 543.042 | 573.463 | 513.749 |
| ENSMUSG00000027208 | 14_Fgf7    | 114.304 | 0.49388  | 0.307475 | 0.690366 | 219.44  | 103.149 | 78.5963 | 116.366 | 91.857  | 76.4158 |
| ENSMUSG00000027209 | 17_Fam2c   | 0.42924 | -2.15458 | 0.590406 | NA       | 0       | 0       | 0       | 0       | 2.57543 | 0       |
| ENSMUSG00000027210 | 20_Meis2   | 2178.03 | 0.60095  | 0.081187 | 0.383853 | 3679.92 | 2120.78 | 2074.53 | 1491.3  | 1795.93 | 1905.69 |
| ENSMUSG00000027215 | 13_Cd82    | 4345.2  | 0.23288  | 0.583867 | 0.860815 | 2280.36 | 5865.88 | 5939.19 | 4165.25 | 3442.49 | 4378.04 |
| ENSMUSG00000027217 | 13_Tspan   | 259.248 | -1.25143 | 0.000281 | 0.007519 | 122.361 | 138.287 | 199.593 | 444.833 | 336.523 | 313.893 |
| ENSMUSG00000027219 | 13_Slc28a1 | 68.0554 | 3.33438  | 4.76E-09 | 7.12E-07 | 124.383 | 185.894 | 61.0155 | 14.03   | 7.72629 | 15.2832 |
| ENSMUSG00000027220 | 2_Syt13    | 26.7401 | -1.95581 | 0.001622 | 0.027948 | 11.1237 | 14.7355 | 7.23913 | 65.1981 | 38.6315 | 23.5126 |
| ENSMUSG00000027221 | 5_Chst1    | 42.2479 | -1.18334 | 0.03343  | 0.22597  | 13.1462 | 27.2041 | 37.2298 | 81.7039 | 37.773  | 56.4301 |
| ENSMUSG00000027222 | 16_Pex16   | 277.369 | 0.2068   | 0.755913 | 0.927148 | 55.6184 | 371.789 | 464.339 | 336.719 | 188.865 | 246.882 |
| ENSMUSG00000027223 | 15_Mapk8   | 226.351 | -1.02147 | 0.028402 | 0.204161 | 76.8546 | 157.557 | 214.071 | 407.694 | 273.854 | 228.072 |
| ENSMUSG00000027224 | 14_Duoxa   | 600.715 | 0.67766  | 0.067391 | 0.344463 | 448.992 | 912.47  | 856.286 | 491.049 | 392.324 | 503.169 |
| ENSMUSG00000027225 | 7_Duoxa2   | 9.57671 | 2.85687  | 0.006079 | 0.071164 | 6.06747 | 31.7381 | 12.4099 | 0.82529 | 1.71695 | 4.70251 |
| ENSMUSG00000027227 | 7_Sord     | 1298.75 | -0.06378 | 0.808853 | 0.945066 | 1387.43 | 1020.15 | 1402.32 | 1335.32 | 1311.75 | 1335.51 |
| ENSMUSG00000027229 | 5_493340   | 0.48016 | 1.00965  | 0.794176 | NA       | 2.02249 | 0       | 0       | 0       | 0.85848 | 0       |
| ENSMUSG00000027230 | 9_Creb3l1  | 117.949 | -0.57255 | 0.155228 | 0.531779 | 60.6747 | 99.7483 | 124.099 | 159.281 | 109.885 | 154.007 |
| ENSMUSG00000027233 | 4_Pat12    | 2.15141 | -0.4499  | 0.767177 | 0.930552 | 1.01124 | 2.26701 | 2.06832 | 0.82529 | 0.85848 | 5.87814 |
| ENSMUSG00000027236 | 8_Eif3j1   | 508.715 | 0.22675  | 0.633085 | 0.883434 | 952.592 | 379.723 | 313.351 | 415.947 | 513.369 | 477.305 |
| ENSMUSG00000027238 | 16_Frmd5   | 24.3656 | -1.93155 | 0.014039 | 0.127503 | 14.1574 | 9.06802 | 7.23913 | 75.1016 | 30.0467 | 10.5807 |
| ENSMUSG00000027239 | 14_Mdk     | 487.386 | -1.26762 | 0.026894 | 0.1976   | 94.0457 | 319.648 | 444.689 | 1000.25 | 587.198 | 478.481 |
| ENSMUSG00000027242 | 14_Wdr76   | 404.062 | 0.43474  | 0.209783 | 0.601596 | 645.174 | 370.655 | 377.469 | 308.659 | 380.305 | 342.108 |
| ENSMUSG00000027243 | 8_Harbi1   | 293.492 | -0.07271 | 0.822443 | 0.948763 | 374.16  | 233.502 | 250.267 | 265.744 | 311.627 | 325.649 |
| ENSMUSG00000027244 | 14_Atg13   | 1105.74 | 0.07268  | 0.783604 | 0.935592 | 960.682 | 1127.84 | 1312.35 | 1175.22 | 993.258 | 1065.12 |
| ENSMUSG00000027245 | 11_Hypk    | 473.574 | -0.06307 | 0.820516 | 0.948338 | 549.106 | 454.535 | 385.742 | 468.766 | 460.144 | 523.154 |

|                    |           |         |          |          |          |         |         |         |         |         |         |
|--------------------|-----------|---------|----------|----------|----------|---------|---------|---------|---------|---------|---------|
| ENSMUSG00000027246 | 12_Ell3   | 95.5391 | 0.28638  | 0.453018 | 0.795144 | 88.9895 | 105.416 | 119.963 | 72.6257 | 68.6782 | 117.563 |
| ENSMUSG00000027247 | 16_Arhga  | 3454.29 | 0.19601  | 0.55026  | 0.84423  | 2455.3  | 4436.53 | 4173.88 | 3044.5  | 3105.11 | 3510.42 |
| ENSMUSG00000027248 | 13_Pdia3  | 15757.7 | 0.79508  | 0.084852 | 0.393568 | 33483.3 | 14803.5 | 11692.2 | 8743.15 | 13295.2 | 12528.7 |
| ENSMUSG00000027249 | 15_F2     | 0.44917 | -0.60728 | 0.852512 | NA       | 1.01124 | 0       | 0       | 0.82529 | 0.85848 | 0       |
| ENSMUSG00000027253 | 15_Lrp4   | 1393.79 | 0.26617  | 0.372723 | 0.743644 | 1128.55 | 1590.3  | 1847.01 | 1199.15 | 1242.22 | 1355.5  |
| ENSMUSG00000027254 | 13_Map1e  | 434.62  | -1.14061 | 0.001724 | 0.028985 | 209.328 | 231.235 | 373.332 | 689.119 | 643.858 | 460.846 |
| ENSMUSG00000027255 | 14_Arfga  | 2268.46 | -0.02954 | 0.941928 | 0.986006 | 1162.93 | 2888.17 | 2684.68 | 2374.37 | 2051.76 | 2448.83 |
| ENSMUSG00000027257 | 13_Pacsir | 418.759 | -0.04241 | 0.9499   | 0.987438 | 77.8658 | 563.351 | 596.711 | 598.337 | 260.119 | 416.172 |
| ENSMUSG00000027259 | 15_Adal   | 540.011 | -0.10308 | 0.812647 | 0.946314 | 842.367 | 329.849 | 389.879 | 515.808 | 660.169 | 501.993 |
| ENSMUSG00000027261 | 2_Hao1    | 0.84652 | 3.29582  | 0.299067 | NA       | 4.04498 | 0       | 1.03416 | 0       | 0       | 0       |
| ENSMUSG00000027263 | 12_Tubgc  | 920.068 | 0.3917   | 0.24066  | 0.631907 | 1411.7  | 860.329 | 860.422 | 680.041 | 910.844 | 797.076 |
| ENSMUSG00000027270 | 14_Lampf  | 10.9841 | -2.42123 | 0.021337 | 0.170397 | 7.07871 | 2.26701 | 1.03416 | 30.5358 | 21.4619 | 3.52688 |
| ENSMUSG00000027272 | 5_Ubr1    | 1465.04 | 0.18174  | 0.674329 | 0.900436 | 2523.05 | 1043.96 | 1104.48 | 1184.29 | 1657.72 | 1276.73 |
| ENSMUSG00000027273 | 13_Snap2  | 211.238 | -1.50006 | 0.129778 | 0.489895 | 262.924 | 57.8086 | 10.3416 | 595.861 | 287.59  | 52.9033 |
| ENSMUSG00000027274 | 16_Mkks   | 715.075 | 0.0398   | 0.922498 | 0.978183 | 1135.63 | 480.605 | 558.447 | 648.68  | 795.808 | 671.283 |
| ENSMUSG00000027276 | 7_Jag1    | 3907.08 | 0.72183  | 0.009756 | 0.098746 | 5245.32 | 5181.24 | 4166.64 | 2415.63 | 2973.76 | 3459.87 |
| ENSMUSG00000027281 | 16_Slx4ip | 578.156 | 0.49136  | 0.230229 | 0.621278 | 1049.67 | 493.074 | 483.988 | 396.966 | 527.963 | 517.276 |
| ENSMUSG00000027282 | 17_Mtch2  | 3060.73 | 0.21948  | 0.546534 | 0.842968 | 4750.83 | 2629.73 | 2498.53 | 2377.67 | 3248.48 | 2859.13 |
| ENSMUSG00000027284 | 16_Cdan1  | 429.801 | -0.28883 | 0.392634 | 0.75466  | 258.879 | 453.401 | 448.826 | 521.585 | 467.011 | 429.104 |
| ENSMUSG00000027285 | 13_Haus2  | 597.832 | 0.3454   | 0.429826 | 0.779664 | 1097.2  | 481.739 | 428.143 | 477.844 | 600.075 | 501.993 |
| ENSMUSG00000027286 | 16_Lrrc57 | 371.503 | 0.2209   | 0.531221 | 0.8369   | 565.286 | 321.915 | 312.317 | 138.563 | 370.004 | 340.932 |
| ENSMUSG00000027287 | 14_Snap2  | 1528.91 | 0.47166  | 0.27386  | 0.660339 | 2891.15 | 1238.92 | 1199.63 | 1074.53 | 1452.54 | 1316.7  |
| ENSMUSG00000027288 | 16_Zfp10f | 4807.05 | -0.24317 | 0.332909 | 0.711944 | 5178.58 | 3831.24 | 4198.7  | 5257.94 | 5295.94 | 5079.89 |
| ENSMUSG00000027291 | 15_Vps39  | 1003.6  | -0.05273 | 0.850393 | 0.957445 | 779.669 | 1008.82 | 1167.57 | 1060.5  | 1051.63 | 953.434 |
| ENSMUSG00000027293 | 15_Ehd4   | 2170.6  | 0.84013  | 0.000931 | 0.018561 | 2522.04 | 3283.76 | 2550.24 | 1473.15 | 1609.64 | 1584.75 |
| ENSMUSG00000027296 | 7_Itpka   | 9.585   | 0.95551  | 0.34003  | 0.718781 | 2.02249 | 22.6701 | 13.4441 | 11.5541 | 4.29238 | 3.52688 |
| ENSMUSG00000027297 | 14_Ltk    | 37.9512 | 1.12728  | 0.089702 | 0.408235 | 14.1574 | 73.6777 | 68.2547 | 17.3311 | 24.8958 | 29.3907 |
| ENSMUSG00000027298 | 17_Tyro3  | 967.126 | 0.38542  | 0.456703 | 0.797055 | 372.138 | 1561.97 | 1352.68 | 926.803 | 748.592 | 840.574 |
| ENSMUSG00000027300 | 9_Ubox5   | 186.131 | 0.15141  | 0.58607  | 0.862148 | 170.9   | 201.764 | 215.106 | 172.486 | 183.714 | 172.817 |
| ENSMUSG00000027301 | 7_Oxt     | 0.332   | 0.16972  | 0.966824 | NA       | 0       | 1.1335  | 0       | 0       | 0.85848 | 0       |
| ENSMUSG00000027303 | 17_Ptpra  | 2302.8  | 0.11772  | 0.601359 | 0.870033 | 2606.99 | 2274.94 | 2308.25 | 2229.94 | 2262.95 | 2133.76 |
| ENSMUSG00000027304 | 9_Rtf1    | 1682.78 | 0.23491  | 0.398875 | 0.759197 | 2151.93 | 1744.46 | 1561.58 | 1315.52 | 1607.93 | 1715.24 |
| ENSMUSG00000027305 | 9_Ndufaf1 | 379.376 | 0.27109  | 0.541327 | 0.84046  | 677.534 | 264.106 | 303.009 | 302.882 | 407.777 | 320.946 |
| ENSMUSG00000027306 | 15_Nusap  | 768.55  | 0.1758   | 0.63154  | 0.882609 | 1158.89 | 664.233 | 622.565 | 579.355 | 823.279 | 762.982 |
| ENSMUSG00000027309 | 18_49304  | 668.232 | -0.52659 | 0.059036 | 0.318669 | 623.938 | 477.205 | 541.901 | 803.835 | 897.108 | 665.405 |
| ENSMUSG00000027312 | 14_Atrn   | 2148.03 | -0.02709 | 0.903536 | 0.973878 | 2248    | 2049.37 | 2085.9  | 2043.42 | 2183.11 | 2278.37 |
| ENSMUSG00000027313 | 3_Chac1   | 892.932 | 1.05139  | 0.050659 | 0.291317 | 396.408 | 1810.2  | 1407.49 | 719.655 | 493.624 | 530.208 |
| ENSMUSG00000027314 | 6_Dll4    | 40.5784 | -0.39339 | 0.485435 | 0.813186 | 16.1799 | 37.4056 | 51.7081 | 60.2463 | 30.9052 | 47.0251 |
| ENSMUSG00000027315 | 13_Spint1 | 4191.47 | 0.60012  | 0.144015 | 0.513665 | 2654.52 | 6585.65 | 5912.3  | 2981.78 | 3020.98 | 3993.61 |
| ENSMUSG00000027316 | 15_Gfra4  | 5.68597 | -0.43516 | 0.65174  | 0.892215 | 7.07871 | 1.1335  | 6.20497 | 5.77705 | 6.86782 | 7.05377 |
| ENSMUSG00000027317 | 8_Ppp1r1  | 10.1188 | -0.08696 | 0.902455 | 0.973635 | 9.1012  | 10.2015 | 10.3416 | 14.03   | 11.1602 | 5.87814 |
| ENSMUSG00000027318 | 17_Adam   | 55.2691 | -0.81142 | 0.128899 | 0.487533 | 27.3036 | 23.8036 | 69.2888 | 70.9751 | 84.9892 | 55.2545 |
| ENSMUSG00000027322 | 11_Siglec | 147.912 | 2.39596  | 5.77E-06 | 0.000334 | 114.271 | 316.247 | 315.419 | 67.674  | 29.1882 | 44.6739 |
| ENSMUSG00000027323 | 10_Rad51  | 361.763 | 1.0618   | 0.001649 | 0.028203 | 607.758 | 485.139 | 374.366 | 182.39  | 266.986 | 253.936 |
| ENSMUSG00000027324 | 1_Rpusd2  | 59.7555 | 0.33347  | 0.4036   | 0.762018 | 52.5847 | 71.4107 | 75.4938 | 46.2164 | 44.6408 | 68.1864 |
| ENSMUSG00000027326 | 13_Casc5  | 429.222 | 0.79114  | 0.115925 | 0.463221 | 951.581 | 364.988 | 315.419 | 226.955 | 396.616 | 319.771 |
| ENSMUSG00000027327 | 16_17000  | 285.151 | 0.13852  | 0.809736 | 0.94521  | 82.922  | 374.056 | 439.519 | 291.328 | 219.77  | 303.312 |
| ENSMUSG00000027329 | 9_Spef1   | 82.3253 | -0.22801 | 0.551575 | 0.845088 | 50.5622 | 83.8792 | 93.0745 | 81.7039 | 91.857  | 92.8746 |
| ENSMUSG00000027330 | 16_Cdc25  | 525.168 | 0.37161  | 0.321599 | 0.72605  | 347.868 | 734.51  | 694.957 | 473.718 | 412.069 | 487.886 |
| ENSMUSG00000027331 | 15_Knstrn | 468.258 | 0.01419  | 0.95974  | 0.989708 | 407.531 | 541.814 | 462.27  | 395.315 | 506.501 | 496.115 |
| ENSMUSG00000027332 | 11_lvd    | 968.127 | -0.21071 | 0.541485 | 0.84046  | 598.657 | 955.543 | 1138.61 | 1194.2  | 904.835 | 1016.92 |
| ENSMUSG00000027333 | 18_Smox   | 1775.8  | 0.75129  | 0.208148 | 0.599354 | 541.016 | 3435.65 | 2707.43 | 1537.52 | 1067.09 | 1366.08 |
| ENSMUSG00000027335 | 9_Adra1d  | 1.33518 | -1.47582 | 0.484195 | NA       | 0       | 1.1335  | 1.03416 | 4.12646 | 1.71695 | 0       |
| ENSMUSG00000027338 | 16_Prmd   | 9.2015  | 0.19743  | 0.857526 | 0.959059 | 10.1124 | 7.93452 | 11.3758 | 14.03   | 0       | 11.7563 |
| ENSMUSG00000027339 | 15_Rassf  | 392.471 | -0.25684 | 0.308135 | 0.690547 | 362.025 | 350.252 | 360.922 | 475.368 | 420.654 | 385.606 |
| ENSMUSG00000027340 | 15_Slc23e | 996.883 | -0.24545 | 0.4327   | 0.780874 | 1148.77 | 728.842 | 859.388 | 1099.29 | 1245.65 | 899.355 |
| ENSMUSG00000027341 | 10_Tmem   | 732.873 | 0.25305  | 0.48216  | 0.811069 | 1147.76 | 624.56  | 618.429 | 593.385 | 738.29  | 674.81  |
| ENSMUSG00000027342 | 14_Pcna   | 3042.97 | 0.77704  | 0.022212 | 0.175288 | 5253.41 | 3346.1  | 2929.78 | 1864.34 | 2496.45 | 2367.71 |
| ENSMUSG00000027344 | 13_Fsip1  | 1.16751 | -1.17204 | 0.546345 | NA       | 1.01124 | 1.1335  | 0       | 1.65058 | 0.85848 | 2.35126 |
| ENSMUSG00000027345 | 6_492150  | 0.19594 | -0.79206 | 0.84609  | NA       | 0       | 0       | 0       | 0       | 0       | 1.17563 |
| ENSMUSG00000027346 | 15_Gpcpd  | 5176.15 | 0.55158  | 0.228613 | 0.61986  | 10397.6 | 4107.81 | 3955.67 | 3320.98 | 4906.2  | 4368.63 |
| ENSMUSG00000027347 | 18_Rasgr  | 349.602 | 0.49493  | 0.207786 | 0.599235 | 453.037 | 498.741 | 275.087 | 197.245 | 363.136 | 310.366 |
| ENSMUSG00000027349 | 5_Fam98t  | 998.324 | 0.33088  | 0.329866 | 0.710286 | 1511.81 | 960.077 | 864.559 | 749.365 | 882.514 | 1021.62 |
| ENSMUSG00000027350 | 8_Chgb    | 53.5224 | -2.05348 | 0.006022 | 0.070671 | 32.3598 | 24.9371 | 5.17081 | 150.203 | 75.546  | 32.9176 |
| ENSMUSG00000027351 | 14_Spred  | 3241.88 | 0.66139  | 0.167637 | 0.548852 | 7032.19 | 2477.84 | 2406.49 | 2174.65 | 2741.98 | 2618.12 |
| ENSMUSG00000027353 | 14_Mcm8   | 210.623 | 0.53516  | 0.15137  | 0.525101 | 353.936 | 198.363 | 195.457 | 159.281 | 199.167 | 157.534 |
| ENSMUSG00000027356 | 8_Fermt1  | 2201.81 | 0.31573  | 0.245911 | 0.637596 | 2243.95 | 2656.93 | 2424.07 | 1566.4  | 2118.72 | 2200.78 |
| ENSMUSG00000027357 | 16_Crls1  | 507.065 | 0.21527  | 0.622016 | 0.878215 | 898.996 | 354.786 | 380.571 | 455.561 | 502.209 | 450.265 |
| ENSMUSG00000027358 | 6_Bmp2    | 206.852 | -1.31438 | 0.000485 | 0.011409 | 159.777 | 90.6802 | 105.484 | 369.731 | 285.014 | 230.423 |
| ENSMUSG00000027359 | 16_Slc27e | 0.17236 | 1.1315   | 0.781553 | NA       | 0       | 0       | 1.03416 | 0       | 0       | 0       |
| ENSMUSG00000027360 | 5_Hdc     | 62.9691 | 2.63837  | 2.98E-05 | 0.001259 | 47.5285 | 200.63  | 77.5621 | 23.9335 | 12.8772 | 15.2832 |
| ENSMUSG00000027361 | 15_Gabpt  | 519.073 | 0.48595  | 0.130958 | 0.492205 | 790.793 | 542.948 | 482.953 | 370.556 | 459.285 | 467.9   |
| ENSMUSG00000027363 | 15_Usp8   | 2604.45 | 0.45407  | 0.157402 | 0.535192 | 4037.9  | 2627.46 | 2367.2  | 1934.49 | 2299    | 2360.66 |
| ENSMUSG00000027364 | 12_Usp50  | 185.764 | -0.2499  | 0.758388 | 0.927759 | 12.1349 | 256.172 | 240.96  | 267.395 | 154.526 | 183.398 |
| ENSMUSG00000027365 | 14_Trpm7  | 2603.01 | 0.40617  | 0.447339 | 0.790779 | 5671.06 | 1583.5  | 1646.39 | 1926.23 | 2532.51 | 2258.38 |

|                    |            |         |          |          |          |         |         |         |         |         |         |
|--------------------|------------|---------|----------|----------|----------|---------|---------|---------|---------|---------|---------|
| ENSMUSG00000027366 | 12_Sppl2   | 4979.81 | 1.08031  | 0.013021 | 0.121454 | 10971   | 5269.66 | 4044.61 | 2701.18 | 3679.43 | 3212.99 |
| ENSMUSG00000027367 | 16_Stard7  | 1880.48 | -0.11169 | 0.732943 | 0.919789 | 2479.57 | 1490.56 | 1453    | 1884.97 | 2138.47 | 1836.33 |
| ENSMUSG00000027368 | 6_Dusp2    | 30.0761 | 1.04659  | 0.085782 | 0.396669 | 18.2024 | 62.3427 | 41.3665 | 26.4094 | 18.028  | 14.1075 |
| ENSMUSG00000027371 | 10_Fahd2   | 242.192 | -0.42679 | 0.246286 | 0.637806 | 129.439 | 227.834 | 262.677 | 297.931 | 247.241 | 288.029 |
| ENSMUSG00000027374 | 12_Mrps5   | 591.024 | 0.12188  | 0.649906 | 0.891567 | 536.971 | 676.701 | 633.941 | 558.723 | 497.917 | 641.893 |
| ENSMUSG00000027375 | 14_Mal     | 95612.5 | 0.42112  | 0.191189 | 0.580226 | 143147  | 96234.4 | 89024.8 | 65713.1 | 89264.4 | 90291.7 |
| ENSMUSG00000027376 | 15_Prom2   | 1516.78 | 0.43321  | 0.279302 | 0.666376 | 956.637 | 2106.05 | 2165.53 | 1137.25 | 1178.69 | 1556.53 |
| ENSMUSG00000027377 | 2_Mail     | 7426.69 | 0.77055  | 0.022648 | 0.17728  | 6335.45 | 12476.5 | 9280.57 | 5044.19 | 5464.21 | 5959.26 |
| ENSMUSG00000027378 | 16_Nphp1   | 462.019 | -0.30535 | 0.250437 | 0.642128 | 356.969 | 451.134 | 432.28  | 541.392 | 536.548 | 453.792 |
| ENSMUSG00000027379 | 13_Bub1    | 333.193 | 0.8503   | 0.083719 | 0.390586 | 720.006 | 330.983 | 234.755 | 169.185 | 296.175 | 248.057 |
| ENSMUSG00000027380 | 10_Acox1   | 0.44917 | -0.60728 | 0.852512 | NA       | 1.01124 | 0       | 0       | 0.82529 | 0.85848 | 0       |
| ENSMUSG00000027381 | 16_Bcl2l1  | 555.519 | 0.65154  | 0.016913 | 0.144456 | 811.018 | 622.293 | 602.916 | 426.676 | 403.484 | 466.724 |
| ENSMUSG00000027384 | 6_Ndufaf5  | 159.512 | -0.0626  | 0.889473 | 0.970235 | 247.755 | 120.151 | 100.314 | 155.98  | 200.025 | 132.846 |
| ENSMUSG00000027386 | 9_Fbln7    | 148.152 | -0.79837 | 0.021412 | 0.170925 | 129.439 | 91.8137 | 103.416 | 237.684 | 172.554 | 154.007 |
| ENSMUSG00000027387 | 11_Zc3h8   | 64.688  | 0.05447  | 0.903463 | 0.973878 | 99.1019 | 51.0076 | 47.5714 | 56.1199 | 75.546  | 58.7814 |
| ENSMUSG00000027394 | 13_Ttl     | 566.558 | -0.33559 | 0.205992 | 0.59724  | 504.611 | 467.003 | 531.559 | 741.113 | 596.642 | 558.423 |
| ENSMUSG00000027395 | 15_Polr1b  | 322.89  | 0.47009  | 0.160945 | 0.539325 | 268.991 | 456.802 | 399.186 | 225.305 | 288.448 | 298.609 |
| ENSMUSG00000027397 | 14_Slc20a5 | 1320.43 | 0.30273  | 0.307088 | 0.689943 | 1324.73 | 1699.12 | 1351.65 | 949.086 | 1438.81 | 1159.17 |
| ENSMUSG00000027398 | 13_Ilt1b   | 169.205 | 2.52436  | 2.39E-06 | 0.000165 | 172.923 | 522.545 | 169.602 | 61.0716 | 42.0654 | 47.0251 |
| ENSMUSG00000027399 | 1_Ilt1a    | 1160.27 | 0.7697   | 0.061431 | 0.327219 | 2082.15 | 1314.86 | 990.727 | 581.006 | 1100.57 | 892.302 |
| ENSMUSG00000027400 | 11_Pdyn    | 71.1725 | -0.68944 | 0.139171 | 0.50645  | 53.5959 | 36.2721 | 73.4255 | 113.89  | 55.801  | 94.0502 |
| ENSMUSG00000027401 | 9_Tgm3     | 11.8864 | -0.12561 | 0.882871 | 0.967903 | 8.08995 | 17.0025 | 9.30745 | 15.6806 | 18.8865 | 2.35126 |
| ENSMUSG00000027403 | 12_Tgm6    | 0.2751  | -1.54073 | 0.703687 | NA       | 0       | 0       | 0       | 1.65058 | 0       | 0       |
| ENSMUSG00000027404 | 15_Snrpb   | 1962.44 | 0.31684  | 0.519846 | 0.831665 | 835.288 | 2983.38 | 2712.61 | 1932.01 | 1413.91 | 1897.46 |
| ENSMUSG00000027405 | 16_Nop56   | 1790.81 | 0.25617  | 0.367276 | 0.739757 | 1769.68 | 2296.48 | 1781.86 | 1326.24 | 1816.54 | 1754.04 |
| ENSMUSG00000027406 | 12_Idh3b   | 1775.23 | -0.29664 | 0.302674 | 0.685338 | 1193.27 | 1741.06 | 1845.98 | 2050.85 | 1920.41 | 1899.81 |
| ENSMUSG00000027408 | 7_Cpxm1    | 527.305 | -0.82789 | 0.128165 | 0.486444 | 136.518 | 347.985 | 655.658 | 833.545 | 571.746 | 618.38  |
| ENSMUSG00000027409 | 5_170002   | 0.14308 | -0.79206 | 0.84609  | NA       | 0       | 0       | 0       | 0       | 0.85848 | 0       |
| ENSMUSG00000027411 | 17_Vps16   | 1092.35 | 0.0559   | 0.900181 | 0.972744 | 500.566 | 1406.68 | 1433.35 | 1095.99 | 957.202 | 1160.34 |
| ENSMUSG00000027412 | 12_Lpin3   | 441.07  | 0.47881  | 0.349438 | 0.72637  | 184.046 | 707.306 | 649.453 | 385.412 | 309.91  | 410.294 |
| ENSMUSG00000027416 | 2_Otor     | 21.2656 | -1.05449 | 0.126639 | 0.483956 | 26.2924 | 7.93452 | 7.23913 | 33.837  | 33.4806 | 18.81   |
| ENSMUSG00000027419 | 9_Pcsk2    | 67.3351 | -0.18879 | 0.673532 | 0.900436 | 41.461  | 54.4081 | 93.0745 | 86.6557 | 66.1027 | 62.3083 |
| ENSMUSG00000027420 | 13_Bfsp1   | 612.554 | -1.98824 | 0.001672 | 0.02845  | 114.271 | 308.313 | 317.488 | 1896.52 | 399.192 | 639.542 |
| ENSMUSG00000027422 | 15_Rrbp1   | 6473.29 | 0.39489  | 0.344065 | 0.721706 | 3830.59 | 9690.32 | 8540.11 | 4843.64 | 5075.32 | 6859.79 |
| ENSMUSG00000027423 | 15_Snx5    | 3816.43 | 0.49626  | 0.240427 | 0.631907 | 7154.55 | 3401.64 | 2842.91 | 2687.98 | 3596.16 | 3215.34 |
| ENSMUSG00000027424 | 11_Mgme    | 230.046 | -0.09811 | 0.703377 | 0.907691 | 214.384 | 231.235 | 221.311 | 240.16  | 249.817 | 223.369 |
| ENSMUSG00000027425 | 18_Csrp2l  | 908.868 | -0.10535 | 0.756992 | 0.927615 | 564.274 | 988.415 | 1074.49 | 977.146 | 882.514 | 966.366 |
| ENSMUSG00000027427 | 13_Polr3f  | 724.394 | 0.20063  | 0.651012 | 0.891804 | 1293.38 | 536.147 | 494.329 | 609.891 | 723.696 | 688.918 |
| ENSMUSG00000027428 | 9_Rbbp9    | 720.281 | 0.03933  | 0.927913 | 0.980746 | 1202.37 | 486.273 | 501.568 | 694.896 | 782.931 | 653.649 |
| ENSMUSG00000027429 | 16_Sec23   | 2232.6  | 0.39036  | 0.120941 | 0.472812 | 2426.99 | 2802.02 | 2369.26 | 1663.79 | 2093.83 | 2039.71 |
| ENSMUSG00000027430 | 12_Dtd1    | 280.289 | -0.28344 | 0.305512 | 0.688432 | 220.451 | 276.575 | 261.643 | 340.02  | 273.854 | 309.19  |
| ENSMUSG00000027433 | 5_Xrn2     | 3318.34 | 0.63357  | 0.083369 | 0.390032 | 5715.55 | 3462.85 | 2927.71 | 2052.5  | 2888.78 | 2862.65 |
| ENSMUSG00000027435 | 8_Cd93     | 265.175 | -0.10129 | 0.747364 | 0.924734 | 308.43  | 272.041 | 187.183 | 273.997 | 279.005 | 270.394 |
| ENSMUSG00000027438 | 14_Napb    | 233.956 | -0.91253 | 0.055705 | 0.308674 | 264.946 | 115.617 | 106.519 | 358.177 | 356.268 | 202.208 |
| ENSMUSG00000027439 | 9_Gzf1     | 725.147 | -0.13061 | 0.712882 | 0.910879 | 999.109 | 532.746 | 545.003 | 727.083 | 799.242 | 747.699 |
| ENSMUSG00000027447 | 6_Cst3     | 6775.12 | -0.92317 | 0.032773 | 0.223702 | 2486.65 | 5554.16 | 5995.03 | 11956   | 7621.56 | 7037.31 |
| ENSMUSG00000027452 | 11_Acss1   | 398.499 | 0.00653  | 0.981374 | 0.993854 | 389.329 | 338.917 | 469.509 | 375.508 | 376.871 | 440.86  |
| ENSMUSG00000027454 | 10_Gins1   | 132.132 | 0.9038   | 0.006604 | 0.074982 | 208.316 | 166.625 | 141.68  | 80.0534 | 105.593 | 90.5233 |
| ENSMUSG00000027455 | 16_Nsfl1c  | 1677.03 | -0.1435  | 0.696968 | 0.905638 | 932.367 | 2002.9  | 1845.98 | 1858.56 | 1635.4  | 1786.95 |
| ENSMUSG00000027456 | 8_Sdcbp2   | 531.94  | 0.84977  | 0.08529  | 0.395075 | 284.16  | 1113.1  | 655.658 | 406.044 | 381.164 | 351.513 |
| ENSMUSG00000027457 | 15_Snph    | 30.4931 | -1.83527 | 0.002613 | 0.039502 | 11.1237 | 13.602  | 15.5124 | 72.6257 | 48.9332 | 21.1613 |
| ENSMUSG00000027459 | 16_Fam1    | 300.483 | 0.58652  | 0.333568 | 0.712065 | 85.9558 | 523.678 | 472.612 | 268.22  | 191.44  | 260.989 |
| ENSMUSG00000027460 | 7_Angpt4   | 28.0503 | -0.97529 | 0.172423 | 0.555871 | 4.04498 | 24.9371 | 27.9224 | 52.8187 | 29.1882 | 29.3907 |
| ENSMUSG00000027463 | 14_Slc52a5 | 452.629 | 0.94308  | 0.029565 | 0.209737 | 289.216 | 801.387 | 695.991 | 327.641 | 274.713 | 326.825 |
| ENSMUSG00000027465 | 13_Tbc1d   | 1780.19 | 0.19424  | 0.517375 | 0.831117 | 1375.29 | 2189.93 | 2134.51 | 1758.7  | 1561.57 | 1661.16 |
| ENSMUSG00000027466 | 15_Rbck1   | 1110.46 | 0.44226  | 0.504111 | 0.824491 | 237.642 | 1882.75 | 1717.74 | 1237.94 | 634.414 | 952.259 |
| ENSMUSG00000027469 | 16_Tpx2    | 787.343 | 0.51521  | 0.084932 | 0.393731 | 992.031 | 978.213 | 808.714 | 489.398 | 727.988 | 727.714 |
| ENSMUSG00000027470 | 9_Mylk2    | 46.0112 | -1.00224 | 0.06893  | 0.349081 | 26.2924 | 17.0025 | 48.6056 | 87.481  | 43.7823 | 52.9033 |
| ENSMUSG00000027472 | 14_Pdrg1   | 895.472 | -0.34873 | 0.234614 | 0.626192 | 594.612 | 818.389 | 950.394 | 1047.3  | 954.626 | 1007.51 |
| ENSMUSG00000027474 | 12_Ccm2l   | 26.6874 | -0.58502 | 0.345972 | 0.72323  | 11.1237 | 13.602  | 39.2981 | 35.4876 | 30.0467 | 30.5663 |
| ENSMUSG00000027475 | 9_Kif3b    | 1365.28 | -0.06724 | 0.758988 | 0.927759 | 1328.78 | 1326.2  | 1345.44 | 1346.88 | 1455.98 | 1388.42 |
| ENSMUSG00000027478 | 15_Dnmt3   | 67.6476 | 0.05403  | 0.881586 | 0.967646 | 66.7421 | 68.0102 | 72.3913 | 80.0534 | 66.9612 | 51.7276 |
| ENSMUSG00000027479 | 14_Mapre   | 5901.24 | 0.07512  | 0.835983 | 0.952513 | 8895.92 | 4734.64 | 4533.76 | 5202.64 | 6177.6  | 5862.86 |
| ENSMUSG00000027480 | 12_Sun5    | 0.28616 | -1.57932 | 0.696464 | NA       | 0       | 0       | 0       | 0       | 1.71695 | 0       |
| ENSMUSG00000027481 | 2_Bpifb2   | 0.62535 | 0.25948  | 0.930855 | NA       | 0       | 0       | 2.06832 | 0.82529 | 0.85848 | 0       |
| ENSMUSG00000027484 | 2_Bpifa5   | 0.58781 | -2.5686  | 0.518601 | NA       | 0       | 0       | 0       | 0       | 0       | 3.52688 |
| ENSMUSG00000027485 | 15_Bpifb1  | 109.282 | 2.33884  | 0.000402 | 0.009782 | 45.506  | 347.985 | 154.09  | 37.9634 | 36.056  | 34.0932 |
| ENSMUSG00000027487 | 11_Cdk5r   | 200.351 | -0.038   | 0.894981 | 0.971421 | 186.069 | 181.36  | 225.447 | 177.438 | 215.478 | 216.316 |
| ENSMUSG00000027488 | 12_Snta1   | 89.1356 | -1.45162 | 0.03236  | 0.2222   | 12.1349 | 45.3401 | 85.8354 | 206.323 | 97.0079 | 88.1721 |
| ENSMUSG00000027489 | 15_Necab   | 6.30262 | -1.542   | 0.15854  | 0.536972 | 0       | 4.53401 | 5.17081 | 12.3794 | 5.15086 | 10.5807 |
| ENSMUSG00000027490 | 17_E2f1    | 155.759 | 0.82354  | 0.11052  | 0.451399 | 72.8096 | 260.706 | 263.711 | 118.017 | 106.451 | 112.86  |
| ENSMUSG00000027495 | 4_Fam21c   | 1106.39 | 0.00192  | 0.994138 | 0.998043 | 1271.13 | 932.873 | 1116.89 | 1048.95 | 1070.52 | 1197.96 |
| ENSMUSG00000027496 | 15_Aurka   | 232.442 | 0.61568  | 0.129891 | 0.490076 | 168.878 | 371.789 | 303.009 | 141.95  | 188.006 | 221.018 |
| ENSMUSG00000027498 | 14_Cstf1   | 655.865 | 0.14661  | 0.713019 | 0.910879 | 369.104 | 841.059 | 857.32  | 604.114 | 582.906 | 680.689 |
| ENSMUSG00000027499 | 12_Pkia    | 575.629 | -0.23473 | 0.725629 | 0.915844 | 1154.84 | 159.824 | 271.984 | 778.251 | 588.057 | 500.817 |

|                    |           |         |          |          |          |         |         |         |         |         |         |
|--------------------|-----------|---------|----------|----------|----------|---------|---------|---------|---------|---------|---------|
| ENSMUSG00000027500 | 10_Stmn2  | 61.1872 | -1.37112 | 0.048241 | 0.282739 | 47.5285 | 37.4056 | 17.5807 | 58.5958 | 174.271 | 31.742  |
| ENSMUSG00000027502 | 11_Rtfdc1 | 3928.09 | 0.1161   | 0.81867  | 0.948003 | 1440.01 | 5521.29 | 5296.98 | 4024.95 | 3236.46 | 4048.86 |
| ENSMUSG00000027505 | 2_Fam20f  | 3.56616 | 0.77811  | 0.537398 | 0.839407 | 8.08995 | 1.1335  | 4.13665 | 2.47588 | 0.85848 | 4.70251 |
| ENSMUSG00000027506 | 15_Tpd52  | 7593.49 | 0.45845  | 0.200906 | 0.592148 | 12765.9 | 6822.55 | 6781    | 5635.1  | 6647.19 | 6909.16 |
| ENSMUSG00000027508 | 15_Pag1   | 600.083 | -0.17035 | 0.628518 | 0.881265 | 793.827 | 406.928 | 493.295 | 679.216 | 655.876 | 571.355 |
| ENSMUSG00000027509 | 11_Rae1   | 727.367 | 0.18672  | 0.588786 | 0.863695 | 489.442 | 898.868 | 934.882 | 661.059 | 681.631 | 698.323 |
| ENSMUSG00000027510 | 17_Rbm3i  | 36.0479 | 0.3504   | 0.623106 | 0.878909 | 12.1349 | 55.5416 | 53.7764 | 54.4693 | 18.028  | 22.3369 |
| ENSMUSG00000027513 | 11_Pck1   | 0.19594 | -0.79206 | 0.84609  | NA       | 0       | 0       | 0       | 0       | 0       | 1.17563 |
| ENSMUSG00000027514 | 14_Zbp1   | 3936.22 | 2.90472  | 1.32E-14 | 5.58E-12 | 4737.68 | 10178.9 | 5918.51 | 785.678 | 1039.62 | 956.961 |
| ENSMUSG00000027519 | 10_Rab22  | 1938.48 | 0.34477  | 0.147966 | 0.52067  | 2291.48 | 2294.21 | 1921.47 | 1630.78 | 1829.41 | 1663.51 |
| ENSMUSG00000027520 | 15_Zdbf2  | 49.9941 | -0.12119 | 0.848436 | 0.956201 | 95.057  | 23.8036 | 24.8199 | 53.644  | 62.6688 | 39.9713 |
| ENSMUSG00000027522 | 15_Stx16  | 1271.25 | 0.11239  | 0.664116 | 0.896403 | 1567.43 | 1150.51 | 1244.1  | 1180.99 | 1255.95 | 1228.53 |
| ENSMUSG00000027523 | 19_Gnas   | 9845.53 | -0.41229 | 0.385485 | 0.750802 | 3404.86 | 10575.6 | 11364.4 | 13112.2 | 10258.8 | 10357.3 |
| ENSMUSG00000027524 | 9_Edn3    | 1695.18 | -0.74894 | 0.076575 | 0.371165 | 1924.4  | 709.573 | 1160.33 | 2328.98 | 2319.6  | 1728.17 |
| ENSMUSG00000027525 | 17_Phactr | 8.33595 | -1.71934 | 0.059846 | 0.321741 | 3.03373 | 5.66751 | 3.10248 | 20.6323 | 12.8772 | 4.70251 |
| ENSMUSG00000027528 | 12_Fabp9  | 0       | NA       | NA       | NA       | 0       | 0       | 0       | 0       | 0       | 0       |
| ENSMUSG00000027530 | 15_Fabp1  | 15.9081 | -2.23139 | 0.022588 | 0.177237 | 11.1237 | 5.66751 | 0       | 36.3129 | 31.7636 | 10.5807 |
| ENSMUSG00000027531 | 16_Impa1  | 1104.99 | 0.21831  | 0.527352 | 0.834617 | 1689.79 | 972.545 | 902.823 | 983.748 | 1068.8  | 1012.22 |
| ENSMUSG00000027533 | 10_Fabp5  | 6885.42 | 1.19241  | 0.016037 | 0.138959 | 4742.74 | 16572.9 | 7422.18 | 5099.48 | 3193.53 | 4281.64 |
| ENSMUSG00000027534 | 16_Snx16  | 347.819 | 0.67329  | 0.202964 | 0.594033 | 785.737 | 277.708 | 219.242 | 254.19  | 331.372 | 218.667 |
| ENSMUSG00000027536 | 6_Chmp4i  | 5233.4  | 0.43087  | 0.143942 | 0.513617 | 7632.87 | 5224.31 | 5169.77 | 3889.6  | 4610.88 | 4872.98 |
| ENSMUSG00000027540 | 13_Ptpn1  | 3118.13 | 0.73741  | 0.044792 | 0.269937 | 2444.18 | 4629.23 | 4620.63 | 2328.15 | 1879.21 | 2807.4  |
| ENSMUSG00000027544 | 16_Nfatc2 | 909.415 | 0.48393  | 0.210392 | 0.602439 | 628.994 | 1393.08 | 1159.3  | 703.974 | 654.159 | 916.99  |
| ENSMUSG00000027546 | 15_Atp9a  | 1522.96 | -0.06787 | 0.905763 | 0.974391 | 404.498 | 1923.55 | 2133.48 | 1840.4  | 1218.18 | 1617.66 |
| ENSMUSG00000027547 | 17_Sall4  | 1.10359 | -1.08008 | 0.632245 | NA       | 1.01124 | 1.1335  | 0       | 3.30117 | 0       | 1.17563 |
| ENSMUSG00000027550 | 14_Lrrcc1 | 820.895 | 0.38022  | 0.478269 | 0.80884  | 1761.59 | 480.605 | 542.935 | 581.006 | 800.959 | 758.28  |
| ENSMUSG00000027551 | 15_Zfp64  | 212.229 | 0.49277  | 0.364122 | 0.737516 | 91.012  | 317.381 | 336.103 | 234.383 | 119.328 | 175.169 |
| ENSMUSG00000027552 | 14_E2f5   | 187.64  | 0.05893  | 0.909651 | 0.974731 | 340.789 | 92.9472 | 140.646 | 184.865 | 213.761 | 152.832 |
| ENSMUSG00000027555 | 8_Car13   | 1106.43 | 1.05787  | 0.004761 | 0.060084 | 2121.59 | 1378.34 | 984.522 | 614.018 | 833.581 | 706.552 |
| ENSMUSG00000027556 | 15_Car1   | 0.14308 | -0.79206 | 0.84609  | NA       | 0       | 0       | 0       | 0       | 0.85848 | 0       |
| ENSMUSG00000027559 | 5_Car3    | 1916.44 | -1.50774 | 0.002594 | 0.039382 | 1753.5  | 507.809 | 730.118 | 3614.78 | 2582.3  | 2310.11 |
| ENSMUSG00000027560 | 4_Dok5    | 11.8863 | -1.04517 | 0.129051 | 0.487788 | 10.1124 | 9.06802 | 4.13665 | 18.9817 | 13.7356 | 15.2832 |
| ENSMUSG00000027562 | 12_Car2   | 166.099 | -1.73425 | 9.39E-05 | 0.003148 | 84.9445 | 54.4081 | 91.0062 | 384.586 | 211.185 | 170.466 |
| ENSMUSG00000027566 | 14_Psma7  | 2770.91 | 0.07965  | 0.807902 | 0.94466  | 1886.98 | 3497.99 | 3157.3  | 2725.94 | 2587.45 | 2769.78 |
| ENSMUSG00000027568 | 9_Ntsr1   | 1.73663 | -4.1702  | 0.047105 | 0.278169 | 0       | 0       | 0       | 4.95175 | 4.29238 | 1.17563 |
| ENSMUSG00000027569 | 15_Mrgbp  | 570.749 | 0.29671  | 0.236667 | 0.6287   | 547.083 | 651.764 | 688.752 | 500.952 | 502.209 | 533.735 |
| ENSMUSG00000027570 | 15_Col9a1 | 255.133 | -1.14677 | 0.005264 | 0.064185 | 146.63  | 128.086 | 201.662 | 519.109 | 256.685 | 278.624 |
| ENSMUSG00000027573 | 11_Gid8   | 2040.36 | 0.16604  | 0.441811 | 0.786851 | 2130.69 | 2178.59 | 2163.47 | 1865.99 | 1908.39 | 1995.04 |
| ENSMUSG00000027574 | 15_Nkain1 | 7.66641 | -2.64105 | 0.014393 | 0.129432 | 0       | 2.26701 | 4.13665 | 9.90351 | 21.4619 | 8.22939 |
| ENSMUSG00000027575 | 19_Arfgap | 878.849 | -0.05764 | 0.893828 | 0.971063 | 407.531 | 1068.89 | 1107.59 | 961.466 | 812.978 | 914.638 |
| ENSMUSG00000027577 | 14_Chrrna | 22.4719 | -1.52111 | 0.028823 | 0.206048 | 9.1012  | 12.4685 | 13.4441 | 61.8969 | 21.4619 | 16.4588 |
| ENSMUSG00000027579 | 6_Srms    | 6.3482  | -2.04025 | 0.08044  | 0.381681 | 0       | 3.40051 | 4.13665 | 18.9817 | 6.86782 | 4.70251 |
| ENSMUSG00000027580 | 17_Helz2  | 2540.73 | 2.26255  | 6.40E-06 | 0.000365 | 1591.7  | 6566.38 | 4457.24 | 777.425 | 954.626 | 897.004 |
| ENSMUSG00000027581 | 12_Stmn3  | 62.4136 | -2.33061 | 5.56E-07 | 4.64E-05 | 18.2024 | 18.136  | 25.854  | 144.426 | 96.1494 | 71.7133 |
| ENSMUSG00000027582 | 16_Zgap   | 686.157 | -0.27869 | 0.535229 | 0.83862  | 274.047 | 766.248 | 820.09  | 783.202 | 705.668 | 767.685 |
| ENSMUSG00000027583 | 13_Zbtb4f | 68.904  | -0.49156 | 0.185708 | 0.573178 | 66.7421 | 56.6751 | 48.6056 | 98.2098 | 73.829  | 69.362  |
| ENSMUSG00000027584 | 16_Opr1   | 5.58832 | -2.13552 | 0.050843 | 0.291799 | 4.04498 | 1.1335  | 1.03416 | 14.03   | 8.58477 | 4.70251 |
| ENSMUSG00000027589 | 14_Pcmdt  | 1297.09 | 0.1761   | 0.686336 | 0.904398 | 2267.21 | 894.334 | 966.941 | 1325.42 | 1279.99 | 1048.66 |
| ENSMUSG00000027593 | 15_Raly   | 2858.41 | 0.05676  | 0.882227 | 0.967828 | 1628.1  | 3691.82 | 3424.11 | 2984.26 | 2523.06 | 2899.1  |
| ENSMUSG00000027596 | 10_a      | 1.60543 | 0.15173  | 0.940681 | NA       | 5.05622 | 0       | 0       | 0.82529 | 2.57543 | 1.17563 |
| ENSMUSG00000027597 | 15_Ahcy   | 65.8697 | 0.08457  | 0.892422 | 0.970752 | 126.406 | 53.2746 | 23.7857 | 59.421  | 84.1307 | 48.2007 |
| ENSMUSG00000027598 | 16_Itch   | 2902.3  | 0.5021   | 0.209587 | 0.601527 | 5218.02 | 2570.78 | 2417.87 | 1940.26 | 2733.39 | 2533.48 |
| ENSMUSG00000027599 | 9_Armc1   | 1007.07 | 0.21571  | 0.620087 | 0.877704 | 1784.85 | 748.112 | 713.571 | 845.099 | 1036.18 | 914.638 |
| ENSMUSG00000027601 | 13_Mtfr1  | 1673.66 | 0.32107  | 0.287606 | 0.673035 | 2405.75 | 1650.38 | 1521.25 | 1393.09 | 1643.12 | 1428.39 |
| ENSMUSG00000027602 | 9_Map1lc1 | 861.39  | -0.29726 | 0.638675 | 0.886454 | 166.855 | 932.873 | 1219.28 | 1257.75 | 713.394 | 878.194 |
| ENSMUSG00000027603 | 15_Ggt7   | 36.4212 | -0.72728 | 0.238276 | 0.630377 | 12.1349 | 37.4056 | 33.0932 | 66.0234 | 46.3578 | 23.5126 |
| ENSMUSG00000027605 | 18_Acss2  | 1841.8  | 0.23425  | 0.361263 | 0.734288 | 1770.69 | 2270.41 | 1931.81 | 1492.95 | 1796.79 | 1788.13 |
| ENSMUSG00000027606 | 12_Dnajc1 | 0.67821 | 0.08307  | 0.977472 | NA       | 0       | 0       | 2.06832 | 0.82529 | 0       | 1.17563 |
| ENSMUSG00000027610 | 17_Gss    | 805.681 | 0.03644  | 0.920264 | 0.977317 | 490.453 | 1032.62 | 924.54  | 764.221 | 764.045 | 858.208 |
| ENSMUSG00000027611 | 12_Procr  | 432.364 | 0.55875  | 0.122218 | 0.475542 | 343.823 | 717.507 | 483.988 | 363.129 | 323.646 | 362.093 |
| ENSMUSG00000027612 | 7_Mmp24   | 5.48029 | -1.74081 | 0.128245 | 0.486444 | 2.02249 | 5.66751 | 0       | 10.7288 | 8.58477 | 5.87814 |
| ENSMUSG00000027613 | 15_Eif6   | 2051.92 | 0.56225  | 0.306036 | 0.688731 | 742.253 | 3695.22 | 2902.89 | 1797.49 | 1344.37 | 1829.28 |
| ENSMUSG00000027615 | 14_Hps3   | 998.318 | 0.09993  | 0.783684 | 0.935592 | 1500.69 | 861.462 | 736.323 | 876.46  | 1043.91 | 971.069 |
| ENSMUSG00000027618 | 17_Nfs1   | 975.784 | -0.03387 | 0.906879 | 0.974391 | 742.253 | 1025.82 | 1125.17 | 1091.86 | 931.448 | 938.151 |
| ENSMUSG00000027620 | 16_Rbm3i  | 6880.2  | 0.34693  | 0.43466  | 0.783019 | 12833.7 | 5028.22 | 5248.37 | 5119.29 | 7052.39 | 5999.23 |
| ENSMUSG00000027624 | 17_Epb41  | 6335.99 | 0.4669   | 0.222045 | 0.612533 | 4143.07 | 9159.84 | 8754.18 | 5012.83 | 4904.48 | 6041.55 |
| ENSMUSG00000027628 | 10_Aar2   | 573.237 | 0.02942  | 0.937763 | 0.985118 | 344.834 | 714.107 | 678.41  | 630.523 | 479.03  | 592.516 |
| ENSMUSG00000027630 | 13_Tbl1xr | 1877.98 | 0.4632   | 0.252306 | 0.643955 | 3434.19 | 1533.63 | 1562.62 | 1429.41 | 1645.7  | 1662.34 |
| ENSMUSG00000027634 | 15_Ndr3   | 1383.1  | -0.51095 | 0.029109 | 0.207519 | 1253.94 | 1045.09 | 1123.1  | 1668.74 | 1659.44 | 1548.3  |
| ENSMUSG00000027635 | 15_Dsn1   | 159.911 | 0.60216  | 0.056633 | 0.31121  | 221.463 | 202.897 | 154.09  | 113.89  | 142.507 | 124.617 |
| ENSMUSG00000027636 | 11_Sla2   | 10.8959 | 0.42684  | 0.5593   | 0.848394 | 6.06747 | 17.0025 | 14.4783 | 11.5541 | 6.86782 | 9.40502 |
| ENSMUSG00000027637 | 3_111000  | 897.405 | 0.17563  | 0.521734 | 0.831998 | 1053.72 | 988.415 | 813.885 | 746.89  | 982.098 | 799.427 |
| ENSMUSG00000027639 | 16_Samhc  | 9760.81 | 2.85516  | 8.45E-16 | 4.44E-13 | 18552.3 | 21494.6 | 11406.8 | 1854.43 | 2760.86 | 2495.86 |
| ENSMUSG00000027641 | 13_Rbl1   | 1743.43 | 1.30674  | 0.001681 | 0.028552 | 3783.07 | 2004.03 | 1661.9  | 733.685 | 1156.37 | 1121.55 |
| ENSMUSG00000027642 | 15_Rpn2   | 4386.5  | 0.41537  | 0.173497 | 0.556949 | 3599.02 | 6123.18 | 5318.69 | 3527.3  | 3771.29 | 3979.5  |

|                    |           |         |          |          |          |         |         |         |         |         |         |
|--------------------|-----------|---------|----------|----------|----------|---------|---------|---------|---------|---------|---------|
| ENSMUSG00000027643 | 9_Ghrh    | 0.14308 | -0.79206 | 0.84609  | NA       | 0       | 0       | 0       | 0       | 0.85848 | 0       |
| ENSMUSG00000027646 | 15_Src    | 1981.25 | 0.4957   | 0.408404 | 0.766    | 563.263 | 3215.75 | 3175.91 | 1819.77 | 1203.58 | 1909.22 |
| ENSMUSG00000027649 | 15_Ctnnbl | 563.052 | -0.10959 | 0.823946 | 0.949196 | 218.429 | 686.903 | 719.776 | 689.944 | 437.823 | 625.434 |
| ENSMUSG00000027650 | 12_Tti1   | 725.825 | 0.24757  | 0.35706  | 0.731675 | 656.298 | 847.86  | 859.388 | 612.367 | 639.565 | 739.47  |
| ENSMUSG00000027651 | 16_Rprd1l | 1233.2  | 0.21214  | 0.38328  | 0.749884 | 1280.24 | 1399.88 | 1290.63 | 1001.08 | 1171.82 | 1255.57 |
| ENSMUSG00000027652 | 15_Ralga  | 2993.72 | 0.40959  | 0.208807 | 0.600293 | 4546.55 | 2931.24 | 2769.48 | 2130.9  | 2880.19 | 2703.94 |
| ENSMUSG00000027654 | 2_Fam83c  | 82.9194 | 0.79697  | 0.071113 | 0.356233 | 57.6409 | 136.02  | 122.031 | 56.1199 | 57.518  | 68.1864 |
| ENSMUSG00000027655 | 14_Dhx35  | 330.689 | 0.03269  | 0.932206 | 0.982317 | 192.136 | 408.061 | 403.323 | 357.352 | 308.193 | 315.068 |
| ENSMUSG00000027656 | 7_Wisp2   | 244.049 | 0.72751  | 0.026984 | 0.197824 | 257.867 | 306.046 | 349.547 | 235.208 | 163.969 | 151.656 |
| ENSMUSG00000027660 | 16_Skil   | 1562.54 | 0.3931   | 0.252533 | 0.643959 | 2489.68 | 1453.15 | 1379.57 | 1341.93 | 1502.33 | 1208.55 |
| ENSMUSG00000027661 | 4_Slc2a1f | 142.424 | -0.993   | 0.004464 | 0.057422 | 69.7759 | 95.2142 | 120.997 | 201.371 | 202.601 | 164.588 |
| ENSMUSG00000027663 | 12_Zmat3  | 538.101 | -0.18317 | 0.502831 | 0.82368  | 604.724 | 427.331 | 479.851 | 591.735 | 579.472 | 545.491 |
| ENSMUSG00000027665 | 13_Pik3ca | 2417.32 | 0.21292  | 0.59257  | 0.865979 | 4031.83 | 1960.96 | 1793.24 | 2046.73 | 2503.32 | 2167.86 |
| ENSMUSG00000027667 | 13_Zfp63f | 453.499 | -0.07144 | 0.84288  | 0.953771 | 619.893 | 361.587 | 345.41  | 441.531 | 552.859 | 399.713 |
| ENSMUSG00000027668 | 13_Mfn1   | 1701.44 | 0.18846  | 0.575541 | 0.856733 | 2490.69 | 1509.83 | 1436.45 | 1360.08 | 1750.43 | 1661.16 |
| ENSMUSG00000027669 | 4_Gnb4    | 574.867 | -0.07716 | 0.857638 | 0.959059 | 898.996 | 375.189 | 404.357 | 651.981 | 637.848 | 480.832 |
| ENSMUSG00000027670 | 4_Ocstam  | 2.34003 | 1.65375  | 0.429854 | 0.779664 | 0       | 4.53401 | 6.20497 | 3.30117 | 0       | 0       |
| ENSMUSG00000027671 | 14_Actl6a | 1081.29 | 0.20917  | 0.432907 | 0.781034 | 1049.67 | 1351.14 | 1077.6  | 879.762 | 1023.3  | 1106.27 |
| ENSMUSG00000027673 | 12_Ndufb1 | 1380.61 | -0.00034 | 0.999193 | 0.999484 | 1923.39 | 1070.03 | 1147.92 | 1357.61 | 1531.52 | 1253.22 |
| ENSMUSG00000027674 | 16_Pex5l  | 189.164 | -1.68949 | 0.000481 | 0.011348 | 132.473 | 66.8767 | 69.2888 | 444.833 | 236.94  | 184.574 |
| ENSMUSG00000027676 | 11_Ccdc3  | 109.171 | -0.9235  | 0.078915 | 0.37734  | 134.495 | 53.2746 | 38.264  | 132.047 | 169.978 | 126.968 |
| ENSMUSG00000027677 | 17_Ttc14  | 2583.71 | 0.35346  | 0.499159 | 0.821139 | 5387.91 | 1635.64 | 1672.24 | 1823.9  | 2802.93 | 2179.61 |
| ENSMUSG00000027678 | 17_Ncoa3  | 2529.93 | 0.54196  | 0.045341 | 0.272296 | 2418.9  | 3201.01 | 3378.61 | 1938.61 | 1958.19 | 2284.24 |
| ENSMUSG00000027679 | 13_Dnajc  | 634.823 | 0.29096  | 0.52918  | 0.836038 | 1188.21 | 467.003 | 440.553 | 498.477 | 673.904 | 540.789 |
| ENSMUSG00000027680 | 15_Fxr1   | 2002.69 | 0.25546  | 0.549993 | 0.844063 | 3545.42 | 1607.31 | 1385.78 | 1655.54 | 2045.75 | 1776.37 |
| ENSMUSG00000027684 | 16_Mecor  | 279.322 | -0.20678 | 0.640297 | 0.887258 | 414.61  | 145.088 | 218.208 | 325.99  | 300.467 | 271.57  |
| ENSMUSG00000027690 | 13_Slc2a2 | 34.9006 | 0.03069  | 0.965333 | 0.990727 | 66.7421 | 7.93452 | 31.0248 | 33.0117 | 37.773  | 32.9176 |
| ENSMUSG00000027692 | 16_Tnik   | 472.562 | 0.53911  | 0.094862 | 0.418184 | 730.118 | 532.746 | 416.767 | 416.773 | 376.871 | 362.093 |
| ENSMUSG00000027695 | 16_Pld1   | 680.183 | 0.36541  | 0.238019 | 0.630377 | 1002.14 | 595.089 | 700.127 | 594.21  | 582.906 | 606.624 |
| ENSMUSG00000027698 | 14_Nceh1  | 458.483 | -0.47793 | 0.247146 | 0.638878 | 595.623 | 268.64  | 285.429 | 566.151 | 600.075 | 434.982 |
| ENSMUSG00000027699 | 19_Ect2   | 576.079 | 0.8918   | 0.024371 | 0.185732 | 1103.27 | 621.16  | 521.217 | 310.31  | 445.55  | 454.968 |
| ENSMUSG00000027702 | 7_Lrrc34  | 1.04906 | -1.04587 | 0.678465 | NA       | 0       | 0       | 2.06832 | 1.65058 | 2.57543 | 0       |
| ENSMUSG00000027706 | 8_Sec62   | 4539.03 | 0.13555  | 0.746964 | 0.924665 | 7720.85 | 3131.87 | 3403.43 | 4121.51 | 4616.03 | 4240.49 |
| ENSMUSG00000027708 | 14_Dcun1  | 1698.79 | 0.45344  | 0.382987 | 0.749884 | 3663.74 | 1148.24 | 1078.63 | 1217.31 | 1661.15 | 1423.69 |
| ENSMUSG00000027709 | 9_Mccc1   | 821.069 | -0.27346 | 0.27729  | 0.663857 | 842.367 | 661.966 | 725.981 | 845.925 | 964.928 | 885.248 |
| ENSMUSG00000027710 | 14_Acad9  | 1306.8  | 0.24216  | 0.37035  | 0.741633 | 1681.7  | 1235.52 | 1330.97 | 1065.45 | 1219.9  | 1307.3  |
| ENSMUSG00000027712 | 13_Anxa5  | 5131.92 | -0.06004 | 0.786182 | 0.936317 | 4844.87 | 5317.26 | 4913.3  | 4906.36 | 5454.76 | 5354.98 |
| ENSMUSG00000027713 | 6_181006  | 5.24043 | -1.45259 | 0.149977 | 0.523171 | 3.03373 | 3.40051 | 2.06832 | 8.25292 | 11.1602 | 3.52688 |
| ENSMUSG00000027714 | 11_Exosc  | 954.295 | 0.28487  | 0.492199 | 0.815612 | 1645.29 | 737.91  | 761.143 | 698.197 | 970.937 | 912.287 |
| ENSMUSG00000027715 | 9_Ccna2   | 1191.68 | 0.71873  | 0.061405 | 0.327177 | 2064.96 | 1353.4  | 1028.99 | 659.409 | 1094.56 | 948.732 |
| ENSMUSG00000027716 | 13_Trpc3  | 29.0889 | -0.99145 | 0.093925 | 0.417236 | 29.3261 | 14.7355 | 14.4783 | 46.2164 | 49.7917 | 19.9857 |
| ENSMUSG00000027718 | 8_Il21    | 1.052   | 3.60428  | 0.217766 | NA       | 4.04498 | 2.26701 | 0       | 0       | 0       | 0       |
| ENSMUSG00000027719 | 15_Adad1  | 0.92978 | -0.7073  | 0.79511  | NA       | 1.01124 | 1.1335  | 0       | 0       | 3.43391 | 0       |
| ENSMUSG00000027720 | 7_Il2     | 1.95756 | 1.79984  | 0.407227 | 0.764774 | 6.06747 | 0       | 3.10248 | 0       | 2.57543 | 0       |
| ENSMUSG00000027722 | 14_Spata1 | 379.65  | 0.30184  | 0.425827 | 0.777537 | 599.668 | 341.184 | 316.453 | 266.569 | 374.296 | 379.728 |
| ENSMUSG00000027737 | 10_Slc7a1 | 513.397 | -0.58658 | 0.181518 | 0.567796 | 664.388 | 285.643 | 281.292 | 636.3   | 723.696 | 489.061 |
| ENSMUSG00000027739 | 9_Rab33b  | 604.956 | 0.18742  | 0.619027 | 0.877642 | 964.727 | 504.409 | 463.304 | 552.121 | 582.047 | 563.126 |
| ENSMUSG00000027742 | 13_Cog6   | 1131.61 | 0.09402  | 0.722934 | 0.914307 | 1363.16 | 1028.09 | 1113.79 | 968.068 | 1163.24 | 1153.29 |
| ENSMUSG00000027744 | 4_Stoml3  | 0.36448 | 0.16972  | 0.966824 | NA       | 1.01124 | 0       | 0       | 0       | 0       | 1.17563 |
| ENSMUSG00000027746 | 13_Ufm1   | 1876.17 | 0.24669  | 0.52868  | 0.835695 | 3104.52 | 1530.23 | 1473.68 | 1492.95 | 1974.5  | 1681.15 |
| ENSMUSG00000027748 | 11_Trpc4  | 8.61963 | -1.80939 | 0.027606 | 0.200518 | 6.06747 | 2.26701 | 3.10248 | 16.5058 | 12.0187 | 11.7563 |
| ENSMUSG00000027750 | 16_Postn  | 6470.43 | -0.3793  | 0.339165 | 0.71774  | 8717.94 | 3700.89 | 4455.17 | 6848.28 | 8024.18 | 7076.1  |
| ENSMUSG00000027751 | 13_Supt2l | 1935.09 | 0.36807  | 0.215907 | 0.607397 | 2762.72 | 1839.68 | 1939.05 | 1458.29 | 1806.24 | 1804.59 |
| ENSMUSG00000027752 | 15_Exosc  | 434.266 | 0.23574  | 0.392126 | 0.754488 | 555.173 | 439.799 | 413.665 | 361.478 | 405.201 | 430.28  |
| ENSMUSG00000027761 | 4_Aadac   | 85.2645 | 0.80866  | 0.121707 | 0.474283 | 159.777 | 91.8137 | 74.4596 | 55.2946 | 96.1494 | 34.0932 |
| ENSMUSG00000027762 | 6_Sucnr1  | 0.61982 | 0.2847   | 0.936624 | NA       | 0       | 0       | 2.06832 | 1.65058 | 0       | 0       |
| ENSMUSG00000027763 | 13_Mbnl1  | 4033.68 | 0.59537  | 0.161611 | 0.540144 | 7933.21 | 3373.3  | 3256.57 | 3094.85 | 3549.8  | 2994.32 |
| ENSMUSG00000027765 | 6_P2ry1   | 511.393 | 0.532    | 0.15928  | 0.537367 | 891.917 | 487.406 | 434.348 | 366.43  | 453.276 | 434.982 |
| ENSMUSG00000027770 | 5_Dhx36   | 1842.83 | 0.46481  | 0.347486 | 0.724652 | 3864.98 | 1312.6  | 1233.75 | 1391.44 | 1756.44 | 1497.75 |
| ENSMUSG00000027774 | 16_Gfm1   | 863.796 | 0.18899  | 0.521169 | 0.831998 | 1132.59 | 863.729 | 764.245 | 689.119 | 871.354 | 861.735 |
| ENSMUSG00000027775 | 9_Mfsd1   | 1919    | 0.4548   | 0.223931 | 0.613717 | 3277.44 | 1705.92 | 1673.27 | 1367.51 | 1726.4  | 1763.44 |
| ENSMUSG00000027776 | 12_Il12a  | 1.45749 | -1.61636 | 0.367903 | NA       | 0       | 1.1335  | 1.03416 | 1.65058 | 2.57543 | 2.35126 |
| ENSMUSG00000027777 | 15_Schip1 | 227.023 | -0.74478 | 0.047031 | 0.277829 | 237.642 | 136.02  | 135.475 | 292.153 | 333.948 | 226.896 |
| ENSMUSG00000027778 | 15_Ift80  | 642.76  | -0.3761  | 0.334662 | 0.713699 | 841.355 | 368.388 | 468.475 | 710.577 | 803.534 | 664.23  |
| ENSMUSG00000027782 | 10_Kpna4  | 3112.58 | 0.63809  | 0.154606 | 0.530594 | 6352.64 | 2634.26 | 2382.71 | 2086.34 | 2820.1  | 2399.46 |
| ENSMUSG00000027784 | 10_Ppm1l  | 1142.79 | -0.22005 | 0.429216 | 0.779159 | 1301.47 | 922.671 | 943.155 | 1156.23 | 1334.07 | 1199.14 |
| ENSMUSG00000027787 | 14_Nmd3   | 1150.3  | 0.46831  | 0.336041 | 0.714362 | 2336.99 | 907.936 | 761.143 | 797.232 | 1193.28 | 905.233 |
| ENSMUSG00000027788 | 6_Otol1   | 0.16854 | 1.1315   | 0.781553 | NA       | 1.01124 | 0       | 0       | 0       | 0       | 0       |
| ENSMUSG00000027790 | 14_Sis    | 0.28063 | -1.56014 | 0.700051 | NA       | 0       | 0       | 0       | 0.82529 | 0.85848 | 0       |
| ENSMUSG00000027792 | 11_Bche   | 127.913 | -0.87749 | 0.181944 | 0.567819 | 192.136 | 31.7381 | 46.5373 | 189.817 | 180.28  | 126.968 |
| ENSMUSG00000027793 | 6_Ccna1   | 9.86443 | 0.25073  | 0.747622 | 0.924734 | 6.06747 | 17.0025 | 9.30745 | 13.2047 | 7.72629 | 5.87814 |
| ENSMUSG00000027796 | 2_Smad9   | 127.784 | -1.10629 | 0.015953 | 0.138476 | 123.372 | 44.2066 | 75.4938 | 213.751 | 169.978 | 139.9   |
| ENSMUSG00000027797 | 15_Dcl1   | 407.442 | -0.52467 | 0.285945 | 0.617868 | 585.51  | 202.897 | 214.071 | 533.139 | 543.416 | 365.62  |
| ENSMUSG00000027799 | 12_Nbea   | 1723.24 | 0.13514  | 0.68621  | 0.904398 | 2513.95 | 1462.22 | 1435.42 | 1579.61 | 1778.76 | 1569.46 |
| ENSMUSG00000027800 | 14_Tm4sf  | 501.988 | 0.08644  | 0.748602 | 0.924799 | 572.364 | 539.547 | 439.519 | 537.265 | 485.898 | 437.334 |

|                    |           |         |          |          |          |         |         |         |         |         |         |
|--------------------|-----------|---------|----------|----------|----------|---------|---------|---------|---------|---------|---------|
| ENSMUSG00000027801 | 7_Tm4sf4  | 0       | NA       | NA       | NA       | 0       | 0       | 0       | 0       | 0       | 0       |
| ENSMUSG00000027803 | 14_Wwtr1  | 1790.75 | 0.21863  | 0.458582 | 0.798202 | 2494.74 | 1678.72 | 1605.02 | 1716.61 | 1651.71 | 1597.68 |
| ENSMUSG00000027804 | 13_Ppid   | 1341.71 | 0.43667  | 0.341566 | 0.719594 | 2554.4  | 1102.9  | 972.112 | 829.419 | 1332.36 | 1259.1  |
| ENSMUSG00000027805 | 16_Pfn2   | 1136.28 | -0.95638 | 0.05787  | 0.315319 | 1408.66 | 421.663 | 488.124 | 1552.37 | 1678.32 | 1268.5  |
| ENSMUSG00000027806 | 9_Tsc22d  | 882.611 | 0.48445  | 0.228011 | 0.619245 | 1594.73 | 793.452 | 700.127 | 723.781 | 827.572 | 656     |
| ENSMUSG00000027808 | 8_Serp1   | 4600.39 | 0.56308  | 0.205449 | 0.59724  | 9141.65 | 4014.87 | 3304.15 | 3228.54 | 4200.53 | 3712.63 |
| ENSMUSG00000027809 | 14_Etfdh  | 1145.92 | 0.03863  | 0.916469 | 0.976775 | 1700.91 | 895.467 | 887.311 | 1038.22 | 1292.01 | 1061.59 |
| ENSMUSG00000027810 | 14_Eif2a  | 1397.05 | 0.37985  | 0.398839 | 0.759197 | 2628.22 | 1081.36 | 1030.02 | 1007.68 | 1472.29 | 1162.7  |
| ENSMUSG00000027811 | 9_493057  | 78.6631 | 0.09102  | 0.081927 | 0.948151 | 114.271 | 66.8767 | 62.0497 | 71.8004 | 74.6875 | 82.2939 |
| ENSMUSG00000027820 | 12_Mme    | 678.217 | -0.57365 | 0.277939 | 0.665135 | 1011.24 | 239.169 | 384.708 | 810.437 | 763.186 | 860.56  |
| ENSMUSG00000027822 | 16_Slc33e | 1069.25 | 0.295    | 0.508005 | 0.826498 | 1965.86 | 751.512 | 816.988 | 825.292 | 1076.53 | 979.298 |
| ENSMUSG00000027823 | 9_Gmps    | 1855.86 | 0.4378   | 0.353855 | 0.729719 | 3685.99 | 1438.42 | 1281.33 | 1266.82 | 1831.99 | 1630.6  |
| ENSMUSG00000027824 | 4_Vmn2r1  | 0       | NA       | NA       | NA       | 0       | 0       | 0       | 0       | 0       | 0       |
| ENSMUSG00000027827 | 16_Kcnab  | 203.807 | -0.5047  | 0.395217 | 0.755988 | 323.598 | 70.2772 | 111.689 | 311.961 | 248.958 | 156.359 |
| ENSMUSG00000027828 | 12_Ssr3   | 6429.92 | 0.49462  | 0.278794 | 0.665987 | 12762.9 | 5269.66 | 4531.7  | 4455.75 | 6018.78 | 5540.73 |
| ENSMUSG00000027829 | 15_Ccn1l  | 2480.2  | 0.54995  | 0.151882 | 0.525932 | 4417.12 | 2200.13 | 2224.48 | 1729.81 | 2352.23 | 1957.42 |
| ENSMUSG00000027831 | 9_Veph1   | 154.098 | -1.45316 | 0.002239 | 0.055289 | 129.439 | 46.4736 | 71.3571 | 251.714 | 270.42  | 155.183 |
| ENSMUSG00000027832 | 5_Ptx3    | 94.9075 | 2.47915  | 3.21E-06 | 0.000208 | 172.923 | 242.57  | 67.2205 | 28.0599 | 25.7543 | 32.9176 |
| ENSMUSG00000027833 | 16_Shox2  | 41.5432 | -0.15603 | 0.766728 | 0.930427 | 65.7309 | 27.2041 | 24.8199 | 39.614  | 47.2162 | 44.6739 |
| ENSMUSG00000027834 | 15_Serpin | 181.693 | 0.20855  | 0.677788 | 0.901447 | 334.722 | 124.685 | 125.134 | 172.486 | 212.044 | 121.09  |
| ENSMUSG00000027835 | 11_Pdcd1  | 2288.1  | 0.79585  | 0.124617 | 0.480134 | 5336.34 | 1818.14 | 1556.41 | 1310.56 | 2048.33 | 1658.81 |
| ENSMUSG00000027840 | 5_Wnt2b   | 291.849 | -1.05103 | 0.006725 | 0.075958 | 219.44  | 117.884 | 232.686 | 441.531 | 442.116 | 297.434 |
| ENSMUSG00000027843 | 13_Ptpn2  | 124.124 | 0.66333  | 0.072385 | 0.359497 | 199.215 | 147.355 | 109.621 | 82.5292 | 97.8664 | 108.158 |
| ENSMUSG00000027845 | 15_Dclre1 | 358.432 | 0.32839  | 0.255567 | 0.646771 | 462.139 | 395.593 | 339.205 | 270.696 | 350.259 | 332.703 |
| ENSMUSG00000027848 | 12_Olfml3 | 2253.9  | -0.55236 | 0.086667 | 0.399057 | 1306.53 | 1866.88 | 2309.28 | 2572.44 | 2404.59 | 3063.69 |
| ENSMUSG00000027849 | 18_Syt6   | 23.6551 | -1.31293 | 0.018445 | 0.154116 | 21.2361 | 9.06802 | 10.3416 | 34.6623 | 36.056  | 30.5663 |
| ENSMUSG00000027852 | 14_Nras   | 3127.35 | 0.48497  | 0.119016 | 0.469314 | 4829.7  | 3248.62 | 2865.66 | 2384.27 | 2680.17 | 2755.67 |
| ENSMUSG00000027854 | 12_Sike1  | 1525.99 | -0.12326 | 0.711483 | 0.910709 | 2022.49 | 1166.37 | 1193.42 | 1444.26 | 1715.24 | 1614.14 |
| ENSMUSG00000027855 | 12_Sycp1  | 30.4636 | 0.92121  | 0.081952 | 0.386108 | 58.6522 | 23.8036 | 37.2298 | 22.2829 | 23.1789 | 17.6344 |
| ENSMUSG00000027857 | 10_Tshb   | 0.83551 | -1.79683 | 0.508189 | NA       | 1.01124 | 0       | 0       | 1.65058 | 0       | 2.35126 |
| ENSMUSG00000027858 | 13_Tspan  | 62.4025 | -0.99953 | 0.04287  | 0.262546 | 64.7196 | 24.9371 | 35.1615 | 87.481  | 102.159 | 59.957  |
| ENSMUSG00000027859 | 10_Ngf    | 67.2067 | 0.6891   | 0.332771 | 0.711855 | 16.1799 | 145.088 | 87.9037 | 69.3246 | 50.6501 | 34.0932 |
| ENSMUSG00000027860 | 15_Vangl  | 909.851 | 0.50381  | 0.111509 | 0.453007 | 774.613 | 1242.32 | 1184.11 | 675.914 | 703.951 | 878.194 |
| ENSMUSG00000027861 | 13_Casq2  | 51.7025 | -0.33727 | 0.352281 | 0.728686 | 50.5622 | 41.9396 | 44.4689 | 56.9452 | 57.518  | 58.7814 |
| ENSMUSG00000027863 | 8_Cd2     | 11.7293 | 2.77942  | 0.004235 | 0.055414 | 7.07871 | 38.5391 | 15.5124 | 1.65058 | 1.71695 | 5.87814 |
| ENSMUSG00000027864 | 9_Ptgrn   | 5226.71 | 0.26291  | 0.347318 | 0.724598 | 4409.03 | 6553.91 | 6141.89 | 4670.33 | 4432.32 | 5152.78 |
| ENSMUSG00000027865 | 10_Gdap2  | 582.14  | 0.32675  | 0.284436 | 0.670663 | 811.018 | 610.958 | 521.217 | 448.959 | 575.18  | 525.506 |
| ENSMUSG00000027867 | 10_Spag1  | 3.38233 | 0.79163  | 0.509578 | 0.827179 | 5.05622 | 6.80102 | 1.03416 | 2.47588 | 2.57543 | 2.35126 |
| ENSMUSG00000027868 | 11_Tbx15  | 142.667 | -0.09457 | 0.890001 | 0.97035  | 289.216 | 41.9396 | 82.7329 | 210.45  | 95.2909 | 136.373 |
| ENSMUSG00000027869 | 14_Hsd3b  | 0.19594 | -0.79206 | 0.84609  | NA       | 0       | 0       | 0       | 0       | 0       | 1.17563 |
| ENSMUSG00000027870 | 8_Hao2    | 0.30609 | 0.16972  | 0.966824 | NA       | 1.01124 | 0       | 0       | 0.82529 | 0       | 0       |
| ENSMUSG00000027871 | 16_Hsd3b  | 0       | NA       | NA       | NA       | 0       | 0       | 0       | 0       | 0       | 0       |
| ENSMUSG00000027875 | 12_Hmgcs  | 342.759 | -2.20827 | 2.20E-09 | 3.53E-07 | 109.214 | 95.2142 | 161.329 | 725.432 | 438.682 | 526.681 |
| ENSMUSG00000027876 | 4_Reg4    | 0.9213  | -3.22147 | 0.30542  | NA       | 0       | 0       | 0       | 0.82529 | 0       | 4.70251 |
| ENSMUSG00000027878 | 11_Notch  | 3152.49 | 0.19215  | 0.507562 | 0.826413 | 2504.85 | 3895.85 | 3685.75 | 3061.01 | 2740.26 | 3027.24 |
| ENSMUSG00000027879 | 9_Sec22b  | 1498.14 | 0.11383  | 0.578264 | 0.927759 | 2263.16 | 1284.26 | 1124.13 | 1271.78 | 1681.76 | 1363.73 |
| ENSMUSG00000027880 | 6_Slc25a8 | 0.30991 | 0.16972  | 0.966824 | NA       | 0       | 0       | 1.03416 | 0.82529 | 0       | 0       |
| ENSMUSG00000027881 | 14_Prpf38 | 3041.21 | 0.22397  | 0.506391 | 0.825658 | 4383.74 | 2872.3  | 2574.03 | 2228.29 | 3155.76 | 3033.12 |
| ENSMUSG00000027882 | 18_Stxbp  | 2410.27 | 0.68151  | 0.112948 | 0.455953 | 4779.14 | 2217.13 | 1911.13 | 1495.43 | 2130.74 | 1928.03 |
| ENSMUSG00000027883 | 15_Gpsm   | 1197.6  | 0.33434  | 0.211677 | 0.602834 | 1351.02 | 1469.02 | 1187.22 | 897.918 | 1216.46 | 1063.94 |
| ENSMUSG00000027884 | 16_Clcc1  | 1191.1  | 0.28089  | 0.282555 | 0.669423 | 1540.13 | 1203.78 | 1175.84 | 980.447 | 1114.3  | 1132.13 |
| ENSMUSG00000027886 | 7_170001  | 0.2751  | -1.54073 | 0.703687 | NA       | 0       | 0       | 0       | 1.65058 | 0       | 0       |
| ENSMUSG00000027887 | 11_Sypl2  | 52.5045 | -0.88051 | 0.148116 | 0.520689 | 50.5622 | 14.7355 | 45.5031 | 105.637 | 38.6315 | 59.957  |
| ENSMUSG00000027889 | 17_Ampd   | 420.28  | -0.0741  | 0.891106 | 0.970606 | 127.417 | 553.149 | 548.106 | 493.525 | 410.352 | 389.133 |
| ENSMUSG00000027890 | 17_Gstm4  | 236.325 | -0.35972 | 0.339029 | 0.717664 | 129.439 | 216.499 | 275.087 | 279.774 | 232.647 | 284.502 |
| ENSMUSG00000027893 | 14_Ahcy11 | 3575.74 | 0.14073  | 0.678973 | 0.901795 | 5280.72 | 2996.98 | 2972.18 | 3190.58 | 3738.67 | 3275.3  |
| ENSMUSG00000027894 | 14_Slc6a1 | 837.089 | -1.56921 | 2.84E-05 | 0.001214 | 318.542 | 344.585 | 602.916 | 1496.26 | 1277.41 | 982.825 |
| ENSMUSG00000027895 | 9_Kcnc4   | 36.9592 | -1.23915 | 0.023299 | 0.180338 | 20.2249 | 15.869  | 29.9907 | 80.0534 | 40.3484 | 35.2688 |
| ENSMUSG00000027896 | 15_Slc16a | 174.648 | -1.09533 | 0.023401 | 0.180504 | 184.046 | 71.4107 | 78.5963 | 236.034 | 307.335 | 170.466 |
| ENSMUSG00000027900 | 15_Dram2  | 1905.82 | 0.6527   | 0.206587 | 0.597892 | 4315.99 | 1390.81 | 1282.36 | 1317.99 | 1789.92 | 1337.86 |
| ENSMUSG00000027901 | 12_Dennd  | 1518.45 | 0.66521  | 0.056627 | 0.31121  | 2326.87 | 1870.28 | 1389.91 | 850.876 | 1401.89 | 1270.85 |
| ENSMUSG00000027902 | 8_Chil6   | 0.93697 | 0.24493  | 0.914072 | NA       | 1.01124 | 0       | 2.06832 | 0.82529 | 1.71695 | 0       |
| ENSMUSG00000027905 | 15_Ddx20  | 552.545 | 0.32048  | 0.410182 | 0.76693  | 904.052 | 493.074 | 443.655 | 392.839 | 572.604 | 509.047 |
| ENSMUSG00000027907 | 4_S100a1  | 26292.5 | 0.31375  | 0.294927 | 0.679437 | 21706.4 | 36579.3 | 29135.4 | 21866.9 | 23995.3 | 24471.9 |
| ENSMUSG00000027908 | 2_Tchhl1  | 2.62082 | -3.68183 | 0.038797 | 0.247394 | 1.01124 | 0       | 0       | 1.65058 | 6.00934 | 7.05377 |
| ENSMUSG00000027912 | 8_Lce1m   | 0.16854 | 1.1315   | 0.781553 | NA       | 1.01124 | 0       | 0       | 0       | 0       | 0       |
| ENSMUSG00000027913 | 5_Crc1    | 27.4655 | -0.51301 | 0.397032 | 0.757787 | 9.1012  | 22.6701 | 36.1957 | 38.7887 | 27.4713 | 30.5663 |
| ENSMUSG00000027925 | 2_Spr2j-f | 0       | NA       | NA       | NA       | 0       | 0       | 0       | 0       | 0       | 0       |
| ENSMUSG00000027927 | 5_Lelp1   | 0.19594 | -0.79206 | 0.84609  | NA       | 0       | 0       | 0       | 0       | 0       | 1.17563 |
| ENSMUSG00000027931 | 12_Npr1   | 186.384 | -0.8271  | 0.041213 | 0.25685  | 94.0457 | 143.955 | 165.466 | 332.593 | 200.025 | 182.222 |
| ENSMUSG00000027932 | 14_Slc27e | 99.5175 | 0.59999  | 0.361298 | 0.734288 | 25.2811 | 207.431 | 127.202 | 85.0051 | 78.1214 | 74.0646 |
| ENSMUSG00000027933 | 11_Ints3  | 1352.26 | 0.25991  | 0.560832 | 0.849084 | 671.466 | 2004.03 | 1745.66 | 1088.56 | 1190.71 | 1413.1  |
| ENSMUSG00000027935 | 14_Rab13  | 252.837 | -0.34089 | 0.367902 | 0.739987 | 136.518 | 253.905 | 279.224 | 321.039 | 284.156 | 242.179 |
| ENSMUSG00000027936 | 18_Crtc2  | 635.31  | 0.10497  | 0.809587 | 0.94521  | 313.486 | 826.324 | 835.603 | 695.721 | 539.982 | 600.746 |
| ENSMUSG00000027937 | 15_Jtb    | 599.314 | 0.09149  | 0.798653 | 0.940596 | 888.884 | 484.006 | 481.919 | 536.44  | 643.858 | 560.774 |

|                    |           |         |          |          |          |         |         |         |         |         |         |
|--------------------|-----------|---------|----------|----------|----------|---------|---------|---------|---------|---------|---------|
| ENSMUSG00000027938 | 11_Creb3  | 11.6397 | -0.28792 | 0.717182 | 0.91249  | 7.07871 | 9.06802 | 15.5124 | 21.4576 | 12.0187 | 4.70251 |
| ENSMUSG00000027939 | 11_Nup21  | 33.1449 | 0.07934  | 0.864305 | 0.96183  | 22.2474 | 39.6726 | 40.3323 | 30.5358 | 34.3391 | 31.742  |
| ENSMUSG00000027940 | 18_Tpm3   | 2165.23 | 0.47447  | 0.084346 | 0.391892 | 2286.42 | 3040.05 | 2227.58 | 1615.1  | 1803.66 | 2018.55 |
| ENSMUSG00000027942 | 16_49334  | 1291.87 | -0.01726 | 0.952015 | 0.988    | 1608.89 | 1101.76 | 1141.71 | 1232.16 | 1431.08 | 1235.58 |
| ENSMUSG00000027944 | 13_Hax1   | 840.119 | -0.21524 | 0.468645 | 0.804253 | 572.364 | 924.938 | 835.603 | 892.141 | 915.136 | 900.531 |
| ENSMUSG00000027947 | 11_Il6ra  | 186.685 | 1.27625  | 0.000788 | 0.016366 | 194.159 | 377.456 | 221.311 | 119.667 | 97.0079 | 110.509 |
| ENSMUSG00000027950 | 7_Chnb2   | 88.4286 | 0.1033   | 0.834812 | 0.952109 | 40.4498 | 102.015 | 132.373 | 94.9086 | 73.829  | 86.9965 |
| ENSMUSG00000027951 | 16_Adar   | 3807.26 | 1.21277  | 0.002281 | 0.035732 | 2851.71 | 7125.2  | 5981.59 | 2092.12 | 2456.96 | 2335.97 |
| ENSMUSG00000027952 | 16_Pmvk   | 1043.34 | 0.08153  | 0.890295 | 0.97041  | 261.912 | 1462.22 | 1494.36 | 1119.1  | 836.157 | 1086.28 |
| ENSMUSG00000027953 | 13_Slc50a | 660.606 | 0.16052  | 0.698759 | 0.905638 | 353.936 | 869.397 | 868.696 | 656.107 | 557.152 | 658.352 |
| ENSMUSG00000027954 | 9_Efna1   | 799.36  | 0.17444  | 0.690817 | 0.905638 | 402.475 | 1128.97 | 1011.41 | 747.715 | 643.858 | 861.735 |
| ENSMUSG00000027955 | 16_Fam15  | 1551.08 | -0.01498 | 0.970451 | 0.99208  | 2423.95 | 1050.76 | 1154.12 | 1396.39 | 1680.04 | 1601.21 |
| ENSMUSG00000027956 | 11_Tmem   | 172.948 | 0.32328  | 0.306338 | 0.689061 | 219.44  | 154.156 | 202.696 | 130.396 | 160.535 | 170.466 |
| ENSMUSG00000027957 | 13_Slc35e | 2238.71 | 0.68798  | 0.11148  | 0.453007 | 4523.3  | 1852.14 | 1912.16 | 1455.82 | 1910.11 | 1778.72 |
| ENSMUSG00000027959 | 13_Sass6  | 204.343 | 0.94435  | 0.019604 | 0.160862 | 391.352 | 223.3   | 192.354 | 129.571 | 174.271 | 115.212 |
| ENSMUSG00000027961 | 7_Lrrc39  | 51.6079 | -0.35671 | 0.566928 | 0.852155 | 87.9783 | 24.9371 | 22.7516 | 73.451  | 42.9238 | 57.6058 |
| ENSMUSG00000027962 | 14_Vcam1  | 1811.69 | 0.73859  | 0.059296 | 0.319375 | 3495.87 | 1611.84 | 1688.79 | 1237.94 | 1428.51 | 1407.23 |
| ENSMUSG00000027963 | 14_Extl2  | 546.916 | -0.34621 | 0.320148 | 0.701293 | 671.466 | 337.784 | 435.382 | 622.27  | 623.254 | 591.341 |
| ENSMUSG00000027965 | 15_Olfm3  | 24.1129 | -1.43536 | 0.060606 | 0.324419 | 27.3036 | 3.40051 | 8.27329 | 40.4393 | 42.9238 | 22.3369 |
| ENSMUSG00000027966 | 19_Col11a | 464.815 | -0.42431 | 0.286292 | 0.672319 | 578.432 | 236.902 | 375.401 | 531.488 | 594.066 | 472.602 |
| ENSMUSG00000027967 | 8_Neurog  | 0.19594 | -0.79206 | 0.84609  | NA       | 0       | 0       | 0       | 0       | 0       | 1.17563 |
| ENSMUSG00000027968 | 11_Larp7  | 712.758 | 0.25099  | 0.43876  | 0.785475 | 1034.5  | 641.563 | 647.385 | 565.325 | 685.923 | 701.85  |
| ENSMUSG00000027971 | 16_Ndst4  | 1.59908 | -4.05067 | 0.058438 | NA       | 0       | 0       | 0       | 4.12646 | 4.29238 | 1.17563 |
| ENSMUSG00000027977 | 15_Ndst3  | 37.0415 | -0.80146 | 0.133646 | 0.497275 | 39.4385 | 14.7355 | 26.8882 | 53.644  | 55.801  | 31.742  |
| ENSMUSG00000027978 | 9_Prss12  | 70.5936 | -0.85539 | 0.046177 | 0.274979 | 30.3373 | 54.4081 | 66.1863 | 107.288 | 80.6968 | 84.6452 |
| ENSMUSG00000027981 | 14_Rnpc3  | 563.047 | 0.23731  | 0.66014  | 0.895103 | 1157.87 | 374.056 | 295.77  | 485.272 | 600.934 | 464.373 |
| ENSMUSG00000027983 | 13_Cyp2u  | 51.2074 | -1.44212 | 0.002639 | 0.039678 | 28.3148 | 19.2695 | 35.1615 | 99.0351 | 77.2629 | 48.2007 |
| ENSMUSG00000027984 | 8_Hadh    | 1627.81 | -0.05225 | 0.827216 | 0.950636 | 1581.59 | 1476.95 | 1736.36 | 1782.63 | 1502.33 | 1687.03 |
| ENSMUSG00000027985 | 14_Lef1   | 36.7493 | -1.20908 | 0.007525 | 0.0821   | 24.2699 | 22.6701 | 19.6491 | 63.5475 | 38.6315 | 51.7276 |
| ENSMUSG00000027993 | 16_Trim2  | 6538.57 | 0.41856  | 0.254555 | 0.645757 | 10991.2 | 5600.64 | 5849.22 | 4820.53 | 5920.06 | 6049.78 |
| ENSMUSG00000027994 | 14_Ccdc1  | 187.738 | 0.60282  | 0.046066 | 0.274749 | 189.103 | 260.706 | 229.584 | 135.348 | 168.261 | 143.427 |
| ENSMUSG00000027995 | 10_Tlr2   | 620.518 | 0.96131  | 0.004721 | 0.059874 | 968.772 | 812.722 | 677.376 | 342.496 | 356.268 | 565.477 |
| ENSMUSG00000027996 | 13_Sfrp2  | 592.234 | -0.12353 | 0.773474 | 0.932641 | 652.253 | 290.177 | 758.04  | 727.908 | 490.19  | 634.839 |
| ENSMUSG00000027997 | 9_Casp6   | 449.303 | 0.03824  | 0.873395 | 0.963908 | 475.285 | 425.064 | 465.373 | 428.327 | 464.436 | 437.334 |
| ENSMUSG00000027998 | 11_Plrg1  | 1188.86 | -0.0564  | 0.799712 | 0.941049 | 1120.46 | 1202.65 | 1173.77 | 1162.84 | 1250.8  | 1222.65 |
| ENSMUSG00000027999 | 15_Pla2g  | 290.058 | -0.50865 | 0.060973 | 0.325579 | 222.474 | 217.633 | 278.189 | 359.827 | 323.646 | 338.581 |
| ENSMUSG00000028003 | 6_Lrat    | 641.545 | -1.63616 | 0.012771 | 0.119948 | 671.466 | 100.882 | 164.432 | 1243.72 | 956.343 | 712.43  |
| ENSMUSG00000028004 | 12_Npy2r  | 0.44364 | -0.57976 | 0.883757 | NA       | 1.01124 | 0       | 0       | 1.65058 | 0       | 0       |
| ENSMUSG00000028005 | 13_Gucy1  | 140.796 | -1.03214 | 0.039372 | 0.249589 | 159.777 | 55.5416 | 62.0497 | 231.907 | 189.723 | 145.778 |
| ENSMUSG00000028007 | 13_Snx7   | 354.643 | 0.00956  | 0.978134 | 0.993796 | 493.487 | 303.779 | 269.916 | 313.611 | 370.862 | 376.201 |
| ENSMUSG00000028008 | 10_Asic5  | 0.14308 | -0.79206 | 0.84609  | NA       | 0       | 0       | 0       | 0       | 0.85848 | 0       |
| ENSMUSG00000028009 | 7_170006  | 0.34472 | 1.99863  | 0.620844 | NA       | 0       | 0       | 2.06832 | 0       | 0       | 0       |
| ENSMUSG00000028010 | 16_Gar1   | 338.328 | 0.53459  | 0.056274 | 0.310529 | 414.61  | 448.867 | 337.137 | 271.521 | 249.817 | 308.014 |
| ENSMUSG00000028011 | 16_Tdo2   | 40.2191 | 0.3236   | 0.618428 | 0.87757  | 84.9445 | 18.136  | 31.0248 | 28.8852 | 48.9332 | 29.3907 |
| ENSMUSG00000028012 | 15_Rrh    | 147.891 | -1.7779  | 4.98E-05 | 0.001884 | 94.0457 | 44.2066 | 62.0497 | 292.979 | 241.232 | 152.832 |
| ENSMUSG00000028013 | 16_Ppa2   | 710.351 | -0.07849 | 0.808032 | 0.944747 | 915.176 | 597.356 | 560.516 | 660.234 | 838.732 | 690.094 |
| ENSMUSG00000028015 | 3_Ctso    | 2354.57 | 0.32597  | 0.43965  | 0.785475 | 4268.46 | 1795.47 | 1794.27 | 1980.7  | 2208.86 | 2079.69 |
| ENSMUSG00000028016 | 9_Ints12  | 543.474 | 0.22358  | 0.505912 | 0.82532  | 785.737 | 537.28  | 433.314 | 440.706 | 547.708 | 516.101 |
| ENSMUSG00000028017 | 7_Egf     | 100.503 | -0.32522 | 0.372183 | 0.743196 | 104.158 | 66.8767 | 96.177  | 89.9569 | 114.177 | 131.67  |
| ENSMUSG00000028018 | 15_Gstcd  | 268.149 | 0.54091  | 0.075664 | 0.368501 | 398.43  | 292.444 | 262.677 | 213.751 | 233.506 | 208.086 |
| ENSMUSG00000028019 | 9_Pdgfc   | 202.891 | -0.20566 | 0.647743 | 0.890537 | 307.418 | 109.95  | 147.885 | 223.654 | 230.93  | 197.505 |
| ENSMUSG00000028020 | 16_Glrb   | 288.925 | -0.69072 | 0.237146 | 0.629461 | 439.891 | 91.8137 | 131.339 | 378.809 | 396.616 | 295.083 |
| ENSMUSG00000028023 | 16_Pitx2  | 372.069 | -0.64741 | 0.085809 | 0.396669 | 358.992 | 201.764 | 309.214 | 603.289 | 401.767 | 357.391 |
| ENSMUSG00000028024 | 14_Enpep  | 1252.09 | -0.03795 | 0.89968  | 0.972485 | 1504.73 | 1130.1  | 1071.39 | 1081.96 | 1188.99 | 1535.37 |
| ENSMUSG00000028028 | 11_Alpk1  | 2010.05 | 0.56212  | 0.068473 | 0.348045 | 2946.77 | 2090.18 | 2153.12 | 1287.46 | 1929.86 | 1652.93 |
| ENSMUSG00000028029 | 10_Aimp1  | 1266.8  | -0.16455 | 0.493631 | 0.816268 | 1232.71 | 1230.98 | 1120    | 1181.82 | 1423.35 | 1411.93 |
| ENSMUSG00000028030 | 12_Tbck   | 677.974 | 0.44383  | 0.186351 | 0.573401 | 1052.71 | 633.628 | 657.727 | 479.495 | 644.716 | 599.57  |
| ENSMUSG00000028031 | 6_Dkk2    | 2256.33 | -0.23657 | 0.569998 | 0.853843 | 3313.85 | 1291.06 | 1610.19 | 2455.24 | 2585.73 | 2281.89 |
| ENSMUSG00000028032 | 13_Papss  | 2732.37 | 0.15378  | 0.617288 | 0.877328 | 2099.34 | 3223.68 | 3310.35 | 2584.82 | 2256.94 | 2919.08 |
| ENSMUSG00000028033 | 16_Kcnq5  | 115.5   | -1.29349 | 0.004282 | 0.055902 | 99.1019 | 52.1411 | 49.6398 | 207.974 | 175.988 | 108.158 |
| ENSMUSG00000028034 | 15_Fubp1  | 3899.12 | 0.50827  | 0.20254  | 0.593685 | 7024.1  | 3631.74 | 3080.77 | 2692.93 | 3641.66 | 3323.5  |
| ENSMUSG00000028035 | 13_Dnajb  | 1487.82 | 0.42974  | 0.362839 | 0.735692 | 2981.15 | 1076.83 | 1065.19 | 1093.51 | 1418.2  | 1292.01 |
| ENSMUSG00000028036 | 6_Ptgef   | 219.041 | -0.15641 | 0.76499  | 0.929992 | 376.183 | 95.2142 | 149.953 | 240.985 | 221.487 | 230.423 |
| ENSMUSG00000028037 | 13_Irf4   | 16744.1 | 2.57729  | 2.78E-07 | 2.57E-05 | 49137.4 | 22044.4 | 14865   | 3375.45 | 6423.12 | 4619.04 |
| ENSMUSG00000028039 | 11_Efna3  | 423.98  | 0.0843   | 0.864227 | 0.96183  | 191.125 | 447.734 | 670.137 | 459.688 | 297.892 | 477.305 |
| ENSMUSG00000028040 | 7_Efna4   | 256.128 | 0.19824  | 0.714907 | 0.911309 | 91.012  | 354.786 | 375.401 | 289.678 | 183.714 | 242.179 |
| ENSMUSG00000028041 | 17_Adam   | 1596.82 | 0.51185  | 0.392861 | 0.754813 | 441.914 | 2480.1  | 2709.5  | 1493.78 | 1073.1  | 1382.54 |
| ENSMUSG00000028042 | 15_Zbtb7  | 1508.33 | 0.45856  | 0.346633 | 0.724086 | 687.646 | 2350.89 | 2199.66 | 1442.61 | 1020.73 | 1348.45 |
| ENSMUSG00000028044 | 6_Cks1b   | 265.008 | 0.19602  | 0.593616 | 0.866332 | 182.024 | 376.323 | 290.599 | 238.509 | 227.496 | 275.097 |
| ENSMUSG00000028047 | 11_Thbs3  | 193.04  | -0.14668 | 0.791898 | 0.937626 | 57.6409 | 224.434 | 267.848 | 247.588 | 191.44  | 169.29  |
| ENSMUSG00000028048 | 11_Gba    | 1493.72 | 0.54865  | 0.182417 | 0.568486 | 923.266 | 2424.56 | 1975.25 | 1081.96 | 1205.3  | 1351.97 |
| ENSMUSG00000028049 | 15_Scam   | 526.848 | 0.31522  | 0.495847 | 0.818294 | 253.822 | 771.915 | 727.016 | 547.994 | 420.654 | 439.685 |
| ENSMUSG00000028051 | 10_Hcn3   | 9.76168 | -1.24458 | 0.296487 | 0.68005  | 0       | 11.335  | 6.20497 | 28.0599 | 9.44325 | 3.52688 |
| ENSMUSG00000028053 | 13_Ash1l  | 3435.5  | 0.21972  | 0.498158 | 0.820079 | 5018.81 | 3177.21 | 2893.58 | 2843.96 | 3425.32 | 3254.14 |
| ENSMUSG00000028057 | 14_Rit1   | 1281    | -0.13902 | 0.706253 | 0.908737 | 711.916 | 1496.22 | 1449.89 | 1301.49 | 1285.14 | 1441.32 |

|                    |           |         |          |          |          |         |         |         |         |         |         |
|--------------------|-----------|---------|----------|----------|----------|---------|---------|---------|---------|---------|---------|
| ENSMUSG00000028059 | 14_Arhgei | 797.256 | 0.01748  | 0.958993 | 0.989586 | 533.937 | 940.807 | 931.78  | 911.123 | 709.96  | 755.929 |
| ENSMUSG00000028060 | 14_28104  | 1860.74 | 0.29166  | 0.352111 | 0.728508 | 2612.04 | 1802.27 | 1730.15 | 1407.95 | 1990.81 | 1621.19 |
| ENSMUSG00000028062 | 15_Lamto  | 894.052 | -0.06709 | 0.909264 | 0.974731 | 224.496 | 1206.05 | 1189.29 | 1007.68 | 679.914 | 1056.89 |
| ENSMUSG00000028063 | 15_Lmna   | 1492.2  | 0.57719  | 0.267687 | 0.65577  | 622.927 | 2406.43 | 2331    | 1366.68 | 908.269 | 1317.88 |
| ENSMUSG00000028064 | 17_Sema4  | 2315.02 | 0.70342  | 0.144883 | 0.514974 | 1133.6  | 3845.98 | 3625.77 | 1790.88 | 1480.01 | 2013.85 |
| ENSMUSG00000028066 | 15_Pmf1   | 301.857 | 0.51845  | 0.265179 | 0.653914 | 156.743 | 482.872 | 427.109 | 284.726 | 216.336 | 243.355 |
| ENSMUSG00000028068 | 14_Iqgap3 | 401.704 | 0.97337  | 0.096314 | 0.420839 | 138.54  | 792.319 | 666     | 228.606 | 275.571 | 309.19  |
| ENSMUSG00000028069 | 16_Gpatcl | 385.587 | 0.01853  | 0.960596 | 0.989899 | 241.687 | 494.207 | 428.143 | 351.575 | 338.24  | 459.67  |
| ENSMUSG00000028070 | 7_Apoa1b  | 1275.79 | -0.09409 | 0.784354 | 0.935807 | 783.714 | 1446.35 | 1472.65 | 1384.02 | 1211.31 | 1356.67 |
| ENSMUSG00000028071 | 12_Sh2d2  | 15.6732 | 2.65873  | 0.005521 | 0.066141 | 3.03373 | 43.0731 | 35.1615 | 4.95175 | 4.29238 | 3.52688 |
| ENSMUSG00000028072 | 6_Ntrk1   | 1.79919 | 0.60115  | 0.747365 | 0.924734 | 0       | 4.53401 | 2.06832 | 2.47588 | 1.71695 | 0       |
| ENSMUSG00000028073 | 15_Pear1  | 178.708 | -0.43181 | 0.455235 | 0.796225 | 51.5735 | 174.559 | 230.618 | 301.232 | 170.837 | 143.427 |
| ENSMUSG00000028076 | 12_Cd1d1  | 41.9964 | -0.73814 | 0.188194 | 0.576077 | 44.4948 | 15.869  | 34.1273 | 77.5775 | 44.6408 | 35.2688 |
| ENSMUSG00000028078 | 14_Dclk2  | 107.142 | -1.18774 | 0.001109 | 0.021196 | 58.6522 | 61.2092 | 76.528  | 169.185 | 169.12  | 108.158 |
| ENSMUSG00000028080 | 15_Lrba   | 2713.46 | 0.27612  | 0.311409 | 0.693321 | 3547.45 | 2642.2  | 2727.08 | 2128.43 | 2693.9  | 2541.71 |
| ENSMUSG00000028081 | 6_Rps3a1  | 20712.1 | -0.33443 | 0.167312 | 0.548157 | 20345.2 | 17129.5 | 17491.8 | 21571.5 | 25847.9 | 21886.7 |
| ENSMUSG00000028082 | 13_Sh3d1  | 4625.13 | 0.44229  | 0.096529 | 0.42146  | 6367.81 | 4859.33 | 4758.18 | 3525.65 | 3955.86 | 4283.99 |
| ENSMUSG00000028085 | 12_Gatb   | 291.624 | 0.0496   | 0.866386 | 0.962585 | 241.687 | 366.121 | 282.326 | 287.202 | 286.731 | 285.678 |
| ENSMUSG00000028086 | 14_Fbxw7  | 791.46  | 0.31162  | 0.349675 | 0.726477 | 1187.2  | 799.12  | 643.248 | 643.728 | 725.413 | 750.051 |
| ENSMUSG00000028088 | 14_Fmo5   | 851.037 | 0.14684  | 0.677385 | 0.901447 | 1263.04 | 622.293 | 797.339 | 758.444 | 842.166 | 822.939 |
| ENSMUSG00000028089 | 5_Chd1f   | 494.006 | 0.1036   | 0.713289 | 0.910879 | 406.52  | 570.152 | 558.447 | 437.405 | 482.464 | 509.047 |
| ENSMUSG00000028093 | 15_Acp6   | 446.692 | -0.17127 | 0.594513 | 0.866686 | 292.25  | 454.535 | 513.978 | 467.941 | 485.898 | 465.549 |
| ENSMUSG00000028096 | 13_Gpr89  | 694.592 | -0.03638 | 0.879804 | 0.966669 | 697.759 | 715.24  | 644.283 | 636.3   | 726.272 | 747.699 |
| ENSMUSG00000028098 | 13_Rnf11  | 1636.61 | 0.64751  | 0.113607 | 0.457438 | 3105.53 | 1525.69 | 1361.99 | 1029.96 | 1413.91 | 1382.54 |
| ENSMUSG00000028099 | 8_Polr3c  | 613.681 | 0.16256  | 0.650085 | 0.891567 | 405.509 | 842.193 | 697.025 | 582.656 | 533.973 | 620.731 |
| ENSMUSG00000028100 | 11_Nudt11 | 77.6083 | -0.16626 | 0.787258 | 0.936722 | 19.2136 | 89.5467 | 110.655 | 87.481  | 63.5273 | 95.2259 |
| ENSMUSG00000028101 | 18_Pias3  | 823.177 | 0.11978  | 0.760978 | 0.928372 | 460.116 | 1041.69 | 1070.36 | 811.262 | 782.073 | 773.563 |
| ENSMUSG00000028102 | 15_Pex11  | 534.278 | -0.21737 | 0.371587 | 0.742488 | 454.049 | 489.673 | 538.798 | 594.21  | 584.623 | 544.316 |
| ENSMUSG00000028104 | 14_Polr3g | 280.637 | -0.23951 | 0.416051 | 0.770267 | 316.519 | 218.766 | 236.823 | 327.641 | 290.165 | 293.907 |
| ENSMUSG00000028106 | 13_Rprd2  | 1356.95 | 0.453    | 0.091556 | 0.412313 | 1840.46 | 1507.56 | 1356.82 | 1060.5  | 1287.72 | 1088.63 |
| ENSMUSG00000028107 | 14_Tars2  | 467.58  | 0.14216  | 0.711759 | 0.910709 | 275.058 | 593.956 | 602.916 | 432.453 | 456.71  | 444.387 |
| ENSMUSG00000028108 | 15_Ecm1   | 1903.92 | 0.99984  | 0.08268  | 0.387853 | 669.444 | 3890.18 | 3055.95 | 1469.02 | 1172.68 | 1166.22 |
| ENSMUSG00000028111 | 4_Ctsk    | 1429.62 | -0.5965  | 0.006091 | 0.071246 | 1103.27 | 1157.31 | 1154.12 | 1710.01 | 1740.13 | 1712.89 |
| ENSMUSG00000028114 | 16_Mettl1 | 602.391 | 0.50321  | 0.205323 | 0.597098 | 1080.01 | 549.749 | 489.158 | 429.977 | 530.539 | 534.911 |
| ENSMUSG00000028115 | 16_Bnpl   | 1703.87 | 0.35597  | 0.399521 | 0.759197 | 961.693 | 2435.9  | 2341.34 | 1477.27 | 1257.67 | 1749.33 |
| ENSMUSG00000028116 | 13_Myo22  | 56.6772 | -0.8752  | 0.099866 | 0.429647 | 61.6859 | 27.2041 | 31.0248 | 106.463 | 45.4993 | 68.1864 |
| ENSMUSG00000028121 | 8_Bcar3   | 474.621 | 0.46012  | 0.251261 | 0.642531 | 299.328 | 733.376 | 616.36  | 410.17  | 360.56  | 427.929 |
| ENSMUSG00000028124 | 15_Gclm   | 1674.26 | 0.1401   | 0.628986 | 0.88129  | 2220.69 | 1405.54 | 1640.18 | 1648.11 | 1615.65 | 1515.38 |
| ENSMUSG00000028125 | 14_Abca4  | 1450.42 | -1.75578 | 5.01E-06 | 0.000297 | 603.713 | 565.618 | 819.056 | 3075.04 | 2238.91 | 1400.17 |
| ENSMUSG00000028126 | 16_Pip5k1 | 1221.55 | 0.51936  | 0.030154 | 0.212437 | 1339.9  | 1618.64 | 1358.89 | 968.893 | 1050.78 | 992.23  |
| ENSMUSG00000028127 | 10_Abcd3  | 5844.66 | 0.24667  | 0.521924 | 0.832103 | 9410.64 | 4702.9  | 4915.37 | 4193.31 | 5867.69 | 5978.07 |
| ENSMUSG00000028128 | 13_F3     | 4341.8  | 0.83809  | 0.04102  | 0.256105 | 8499.51 | 3595.47 | 4610.29 | 2524.57 | 2997.8  | 3823.14 |
| ENSMUSG00000028132 | 15_Tmem   | 464.845 | -1.31309 | 0.023595 | 0.181497 | 520.791 | 108.816 | 170.637 | 771.648 | 733.998 | 483.183 |
| ENSMUSG00000028133 | 17_Rwdd3  | 172.651 | 0.03444  | 0.931037 | 0.981773 | 248.766 | 107.683 | 167.534 | 187.341 | 158.818 | 165.764 |
| ENSMUSG00000028134 | 11_Ptbp2  | 664.691 | 0.23852  | 0.618965 | 0.577639 | 1250.91 | 465.87  | 441.587 | 494.35  | 719.404 | 616.029 |
| ENSMUSG00000028136 | 15_Snx27  | 1898.78 | 0.40253  | 0.180904 | 0.867284 | 2722.27 | 1937.16 | 1826.33 | 1394.74 | 1866.33 | 1645.88 |
| ENSMUSG00000028137 | 9_Celf3   | 37.2459 | -0.40387 | 0.556701 | 0.847577 | 13.1462 | 43.0731 | 40.3323 | 70.9751 | 39.4899 | 16.4588 |
| ENSMUSG00000028138 | 8_Adh5    | 1668.34 | -0.24967 | 0.284075 | 0.670663 | 1686.76 | 1403.28 | 1482.99 | 1869.29 | 1824.26 | 1743.46 |
| ENSMUSG00000028139 | 5_Rliad1  | 3.31958 | -1.52341 | 0.253687 | 0.644954 | 4.04498 | 0       | 1.03416 | 4.12646 | 6.00934 | 4.70251 |
| ENSMUSG00000028140 | 12_Mrpl9  | 1723.65 | 0.42478  | 0.056898 | 0.312074 | 1945.63 | 2084.51 | 1896.65 | 1402.17 | 1537.53 | 1475.41 |
| ENSMUSG00000028141 | 10_Oaz3   | 11.6166 | 2.04801  | 0.02185  | 0.173305 | 6.06747 | 30.6046 | 19.6491 | 3.30117 | 7.72629 | 2.35126 |
| ENSMUSG00000028145 | 9_Them4   | 122.645 | 0.04329  | 0.919971 | 0.977296 | 193.148 | 98.6148 | 81.6988 | 124.619 | 129.63  | 108.158 |
| ENSMUSG00000028148 | 11_Them4  | 1.9283  | -0.82277 | 0.602561 | 0.870033 | 3.03373 | 1.1335  | 0       | 2.47588 | 2.57543 | 2.35126 |
| ENSMUSG00000028149 | 12_Rap1g  | 1135.62 | 0.06685  | 0.818539 | 0.948003 | 1472.37 | 1034.89 | 978.317 | 1015.93 | 1181.26 | 1130.95 |
| ENSMUSG00000028150 | 14_Rorc   | 336.827 | 0.03911  | 0.897819 | 0.971722 | 280.115 | 328.716 | 415.733 | 363.129 | 351.117 | 282.151 |
| ENSMUSG00000028152 | 10_Tspan  | 1627.12 | 0.09896  | 0.677964 | 0.901447 | 1886.98 | 1544.96 | 1616.39 | 1544.95 | 1511.78 | 1657.64 |
| ENSMUSG00000028156 | 12_Eif4e  | 2264.56 | 0.24798  | 0.5314   | 0.836945 | 3771.94 | 1958.69 | 1645.35 | 1814.82 | 2333.34 | 2063.23 |
| ENSMUSG00000028158 | 14_Mtpt   | 534.029 | 0.01481  | 0.958273 | 0.989314 | 628.994 | 452.268 | 528.457 | 484.447 | 502.209 | 607.8   |
| ENSMUSG00000028159 | 14_Dapp1  | 960.549 | 0.48099  | 0.12493  | 0.480594 | 1388.44 | 1096.1  | 872.832 | 657.758 | 900.542 | 847.628 |
| ENSMUSG00000028161 | 17_Ppp3c  | 4451.21 | 0.48232  | 0.181267 | 0.567796 | 7596.47 | 3932.12 | 4036.33 | 3378.75 | 3765.28 | 3998.31 |
| ENSMUSG00000028163 | 17_Nfkb1  | 2120.48 | 0.58344  | 0.048051 | 0.28222  | 1923.39 | 3109.2  | 2597.81 | 1644.81 | 1601.92 | 1845.74 |
| ENSMUSG00000028164 | 15_Manba  | 465.072 | -0.44825 | 0.055567 | 0.308674 | 403.486 | 378.59  | 398.152 | 549.645 | 537.407 | 523.154 |
| ENSMUSG00000028165 | 9_Cisd2   | 1069.75 | 0.14565  | 0.721722 | 0.913923 | 1775.75 | 773.049 | 822.158 | 925.153 | 1125.46 | 996.932 |
| ENSMUSG00000028167 | 15_Bdh2   | 314.975 | -1.65105 | 8.62E-06 | 0.000463 | 181.013 | 96.3477 | 178.91  | 565.325 | 475.596 | 392.66  |
| ENSMUSG00000028172 | 5_Tacr3   | 388.228 | -1.22233 | 0.020799 | 0.166951 | 427.756 | 105.416 | 165.466 | 524.886 | 634.414 | 471.427 |
| ENSMUSG00000028173 | 10_Wls    | 6541.4  | 0.05338  | 0.894583 | 0.971192 | 10377.4 | 4793.58 | 4816.09 | 5618.59 | 7495.36 | 6147.36 |
| ENSMUSG00000028174 | 12_Rpe65  | 1043.19 | -2.019   | 0.003805 | 0.051497 | 906.075 | 99.7483 | 232.686 | 2244.8  | 1546.12 | 1229.71 |
| ENSMUSG00000028175 | 15_Depdc  | 166.442 | 0.83926  | 0.126949 | 0.484276 | 401.464 | 131.486 | 107.553 | 101.511 | 139.073 | 117.563 |
| ENSMUSG00000028176 | 11_Lrrc7  | 41.4549 | -1.17048 | 0.051892 | 0.295467 | 47.5285 | 10.2015 | 18.6149 | 60.2463 | 59.2349 | 52.9033 |
| ENSMUSG00000028179 | 12_Cth    | 257.393 | 0.09531  | 0.707721 | 0.909597 | 284.16  | 266.373 | 247.165 | 252.539 | 247.241 | 246.882 |
| ENSMUSG00000028180 | 18_Zranb3 | 2584.31 | 0.36655  | 0.456306 | 0.79672  | 5225.1  | 1846.48 | 1660.86 | 1940.26 | 2599.47 | 2233.69 |
| ENSMUSG00000028182 | 14_Lrriq3 | 37.8888 | -0.12196 | 0.834802 | 0.952109 | 61.6859 | 15.869  | 31.0248 | 38.7887 | 31.7636 | 48.2007 |
| ENSMUSG00000028184 | 12_Adgrl2 | 1974.91 | 0.46572  | 0.041076 | 0.256269 | 2214.63 | 2346.35 | 2311.35 | 1546.6  | 1616.51 | 1813.99 |
| ENSMUSG00000028185 | 12_Dnase  | 13.1997 | -4.16333 | 0.000296 | 0.00782  | 2.02249 | 1.1335  | 1.03416 | 52.8187 | 16.3111 | 5.87814 |
| ENSMUSG00000028186 | 14_Uox    | 0.50203 | -0.79092 | 0.80375  | NA       | 1.01124 | 0       | 0       | 0.82529 | 0       | 1.17563 |

|                    |               |         |          |          |          |         |         |         |         |         |         |
|--------------------|---------------|---------|----------|----------|----------|---------|---------|---------|---------|---------|---------|
| ENSMUSG00000028187 | 10_Rpf1       | 773.891 | 0.42402  | 0.31283  | 0.694375 | 1400.57 | 648.364 | 611.189 | 532.314 | 731.422 | 719.484 |
| ENSMUSG00000028188 | 13_Spata      | 127.015 | -0.56656 | 0.326342 | 0.707722 | 189.103 | 73.6777 | 44.4689 | 183.215 | 171.695 | 99.9284 |
| ENSMUSG00000028189 | 12_Ctbs       | 282.745 | 0.12807  | 0.736605 | 0.920922 | 429.779 | 225.567 | 230.618 | 281.425 | 302.184 | 226.896 |
| ENSMUSG00000028191 | 11_Bcl10      | 1169.52 | 0.48251  | 0.068938 | 0.349081 | 1276.19 | 1538.16 | 1275.12 | 829.419 | 996.692 | 1101.56 |
| ENSMUSG00000028194 | 15_Ddah1      | 1272.65 | 0.06024  | 0.83455  | 0.952109 | 1480.46 | 1370.41 | 1046.57 | 1039.87 | 1370.13 | 1328.46 |
| ENSMUSG00000028195 | 4_Cyr61       | 1415.79 | 0.05626  | 0.875514 | 0.964617 | 1039.56 | 1834.01 | 1457.13 | 1823.9  | 1169.25 | 1170.93 |
| ENSMUSG00000028197 | 4_Col24a      | 114.842 | -0.97171 | 0.01527  | 0.134732 | 98.0907 | 45.3401 | 88.9379 | 157.631 | 135.639 | 163.412 |
| ENSMUSG00000028199 | 18_Cryz       | 395.465 | -0.69115 | 0.032618 | 0.223181 | 383.262 | 273.174 | 251.301 | 551.295 | 521.096 | 392.66  |
| ENSMUSG00000028207 | 18_Asph       | 8458.72 | 0.41093  | 0.311402 | 0.693321 | 15173.7 | 6717.14 | 7074.7  | 6194.64 | 7618.98 | 7973.11 |
| ENSMUSG00000028211 | 11_Trp53i     | 960.335 | 0.61405  | 0.24989  | 0.64154  | 2209.57 | 604.157 | 671.171 | 662.71  | 858.477 | 755.929 |
| ENSMUSG00000028212 | 16_Ccne2      | 269.028 | 1.02043  | 0.058259 | 0.316643 | 679.556 | 214.232 | 187.183 | 154.33  | 183.714 | 195.154 |
| ENSMUSG00000028214 | 13_Gem        | 147.131 | -0.02843 | 0.937921 | 0.985118 | 193.148 | 141.688 | 102.382 | 162.583 | 153.667 | 129.319 |
| ENSMUSG00000028217 | 11_Cdh17      | 9.97936 | -0.61052 | 0.46568  | 0.80298  | 14.1574 | 2.26701 | 7.23913 | 16.5058 | 10.3017 | 9.40502 |
| ENSMUSG00000028218 | 19_Fam9c      | 637.696 | 0.08744  | 0.847183 | 0.955658 | 1103.27 | 460.202 | 407.46  | 543.868 | 717.687 | 593.692 |
| ENSMUSG00000028221 | 3_Tmem5       | 714.636 | 0.00462  | 0.990709 | 0.997381 | 1105.29 | 489.673 | 552.242 | 678.39  | 780.356 | 681.864 |
| ENSMUSG00000028222 | 2_Calb1       | 29.1095 | -1.43882 | 0.185476 | 0.572873 | 40.4498 | 4.53401 | 2.06832 | 28.0599 | 90.1401 | 9.40502 |
| ENSMUSG00000028223 | 8_Decr1       | 953.121 | -0.31228 | 0.439855 | 0.785475 | 1328.78 | 552.016 | 670.137 | 1012.63 | 1141.77 | 1013.39 |
| ENSMUSG00000028224 | 14_Nbn        | 834.018 | 0.34104  | 0.421066 | 0.77414  | 1478.44 | 675.568 | 642.214 | 594.21  | 863.628 | 750.051 |
| ENSMUSG00000028226 | 15_Mmp1a      | 68.6416 | -1.01047 | 0.042576 | 0.261774 | 76.8546 | 31.7381 | 27.9224 | 88.3063 | 104.734 | 82.2939 |
| ENSMUSG00000028228 | 5_Cpne3       | 7759.24 | 0.61194  | 0.14339  | 0.512597 | 14996.8 | 6768.15 | 6376.64 | 5122.59 | 6753.64 | 6537.67 |
| ENSMUSG00000028229 | 11_Rmdn       | 354.938 | 0.38588  | 0.466218 | 0.803268 | 746.298 | 222.167 | 237.857 | 268.22  | 381.164 | 273.921 |
| ENSMUSG00000028232 | 13_Tmem       | 880.273 | 0.67009  | 0.191842 | 0.580886 | 1983.05 | 643.83  | 616.36  | 574.403 | 823.279 | 640.717 |
| ENSMUSG00000028233 | 6_Tgs1        | 1329.33 | 0.50945  | 0.245547 | 0.637031 | 2547.32 | 1130.1  | 1007.27 | 888.015 | 1281.71 | 1121.55 |
| ENSMUSG00000028234 | 6_Rps20       | 11507.1 | -0.07208 | 0.743766 | 0.923278 | 11389.6 | 10633.4 | 11636.4 | 12481.7 | 11840.1 | 11061.5 |
| ENSMUSG00000028238 | 6_Atp6v0c     | 25.8205 | 1.12927  | NA       | NA       | 1.01124 | 104.282 | 1.03416 | 22.2829 | 5.15086 | 21.1613 |
| ENSMUSG00000028243 | 5_Ubxn2b      | 360.452 | 0.0125   | 0.977965 | 0.993796 | 604.724 | 251.638 | 229.584 | 328.466 | 412.069 | 336.23  |
| ENSMUSG00000028245 | 15_Nsmaf      | 1122.4  | 0.19097  | 0.516447 | 0.830302 | 1519.9  | 1030.35 | 1039.33 | 958.164 | 1152.08 | 1034.55 |
| ENSMUSG00000028246 | 13_Faxc       | 75.6005 | -1.44797 | 0.000922 | 0.018528 | 57.6409 | 35.1386 | 28.9565 | 126.27  | 124.479 | 81.1183 |
| ENSMUSG00000028247 | 2_Coq3        | 247.17  | 0.00149  | 0.995996 | 0.998321 | 304.385 | 213.099 | 224.413 | 245.112 | 264.411 | 231.599 |
| ENSMUSG00000028248 | 15_Pnir       | 3500.83 | -0.07645 | 0.822928 | 0.948912 | 4732.62 | 2573.05 | 2918.4  | 3164.17 | 4076.91 | 3539.82 |
| ENSMUSG00000028249 | 15_Sdcbp      | 7384.57 | 0.29686  | 0.461903 | 0.799907 | 12783.1 | 6220.66 | 5421.07 | 6260.67 | 7386.34 | 6235.53 |
| ENSMUSG00000028251 | 5_Tstd3       | 705.613 | 0.37908  | 0.401796 | 0.760434 | 1344.95 | 537.28  | 510.876 | 531.488 | 650.726 | 658.352 |
| ENSMUSG00000028252 | 20_Ccnc       | 697.47  | 0.53165  | 0.288217 | 0.673216 | 1484.51 | 535.013 | 453.997 | 483.621 | 661.027 | 566.653 |
| ENSMUSG00000028255 | 6_Clca1       | 4.60691 | 0.21948  | 0.832597 | 0.951799 | 6.06747 | 6.80102 | 2.06832 | 6.60234 | 2.57543 | 3.52688 |
| ENSMUSG00000028256 | 16_Odf2l      | 593.215 | 0.50103  | 0.208441 | 0.599924 | 1027.42 | 541.814 | 516.047 | 367.255 | 568.312 | 538.438 |
| ENSMUSG00000028259 | 13_Fhl5       | 2.63817 | -1.487   | 0.309735 | 0.692089 | 3.03373 | 1.1335  | 0       | 3.30117 | 6.00934 | 2.35126 |
| ENSMUSG00000028261 | 13_Ndufal     | 411.232 | 0.40692  | 0.422331 | 0.774546 | 836.299 | 309.446 | 260.609 | 270.696 | 422.371 | 367.972 |
| ENSMUSG00000028262 | 13_Clca3e     | 28.5285 | 0.81137  | 0.220066 | 0.611263 | 54.6072 | 40.8061 | 13.4441 | 11.5541 | 24.8958 | 25.8638 |
| ENSMUSG00000028264 | 16_Spaca      | 180.804 | 0.41688  | 0.328258 | 0.709227 | 327.643 | 139.421 | 153.056 | 156.806 | 156.243 | 151.656 |
| ENSMUSG00000028266 | 17_Lmo4       | 3010.06 | 0.39432  | 0.172008 | 0.555165 | 4368.58 | 2870.03 | 3017.68 | 2460.2  | 2614.06 | 2729.81 |
| ENSMUSG00000028268 | 14_Gbp3       | 4009.68 | 2.89664  | 1.22E-12 | 3.91E-10 | 9487.49 | 7246.48 | 4475.85 | 648.68  | 1237.92 | 961.664 |
| ENSMUSG00000028270 | 12_Gbp2       | 8198.64 | 2.36025  | 1.29E-11 | 3.23E-09 | 15734   | 16150.1 | 9288.84 | 2094.59 | 3190.96 | 2733.33 |
| ENSMUSG00000028271 | 9_Gtf2b       | 939.722 | 0.19086  | 0.538196 | 0.839833 | 1311.58 | 846.727 | 846.978 | 808.787 | 977.805 | 846.452 |
| ENSMUSG00000028273 | 15_Pdlmt      | 9474.57 | 0.48714  | 0.141675 | 0.510149 | 15092.8 | 9497.62 | 8586.64 | 6764.1  | 8354.7  | 8551.52 |
| ENSMUSG00000028274 | 17_Rngt       | 541.248 | 0.48855  | 0.30293  | 0.685667 | 1097.2  | 403.527 | 395.05  | 385.412 | 458.427 | 507.871 |
| ENSMUSG00000028277 | 13_Ube2j      | 2185.32 | 0.33486  | 0.361888 | 0.734636 | 3601.04 | 1858.94 | 1853.22 | 1747.14 | 2092.97 | 1958.6  |
| ENSMUSG00000028278 | 14_Rragd      | 1074.26 | -1.23014 | 0.014054 | 0.127579 | 1103.27 | 304.912 | 518.115 | 1748.79 | 1656    | 1114.5  |
| ENSMUSG00000028280 | 9_Gabrr1      | 14.7445 | -2.89572 | 0.000964 | 0.01904  | 5.05622 | 3.40051 | 2.06832 | 46.2164 | 22.3204 | 9.40502 |
| ENSMUSG00000028282 | 12_Casp8      | 713.58  | 0.6078   | 0.183678 | 0.570718 | 1461.25 | 561.084 | 562.584 | 481.971 | 623.254 | 591.341 |
| ENSMUSG00000028284 | 13_Map3k      | 2641.49 | 0.24464  | 0.450874 | 0.79295  | 3905.43 | 2408.69 | 2280.33 | 2182.07 | 2534.22 | 2538.18 |
| ENSMUSG00000028287 | 4_170000      | 0.7154  | -2.88643 | 0.46663  | NA       | 0       | 0       | 0       | 0       | 4.29238 | 0       |
| ENSMUSG00000028289 | 12_Epha7      | 67.2711 | -0.25377 | 0.613683 | 0.875588 | 103.147 | 38.5391 | 42.4006 | 74.2763 | 84.1307 | 61.1326 |
| ENSMUSG00000028291 | 7_Akirin2     | 1116.64 | 0.47298  | 0.281764 | 0.668384 | 2091.25 | 910.203 | 892.481 | 703.974 | 1110.87 | 991.054 |
| ENSMUSG00000028292 | 14_Rars2      | 1073.55 | 0.26336  | 0.465056 | 0.802138 | 1643.27 | 961.21  | 909.028 | 773.299 | 1111.73 | 1042.78 |
| ENSMUSG00000028293 | 14_Slc35e     | 3844.95 | 0.42783  | 0.317868 | 0.698985 | 7149.5  | 3080.86 | 3002.17 | 2705.31 | 3715.49 | 3416.37 |
| ENSMUSG00000028294 | 15_17000      | 27.4274 | -0.23947 | 0.671675 | 0.899892 | 12.1349 | 27.2041 | 36.1957 | 24.7588 | 36.056  | 28.2151 |
| ENSMUSG00000028295 | 14_Smimf      | 520.392 | 0.13668  | 0.786008 | 0.936317 | 979.896 | 287.91  | 367.127 | 432.453 | 581.189 | 473.778 |
| ENSMUSG00000028300 | 14_31100      | 305.678 | 0.13952  | 0.749515 | 0.925082 | 524.836 | 223.3   | 213.037 | 305.358 | 271.279 | 296.258 |
| ENSMUSG00000028307 | 9_Aldob       | 0.61982 | 0.2847   | 0.936624 | NA       | 0       | 0       | 2.06832 | 1.65058 | 0       | 0       |
| ENSMUSG00000028309 | 14_Rnf20      | 2005.69 | 0.15406  | 0.604615 | 0.871119 | 2562.49 | 1953.03 | 1822.19 | 1521.84 | 2129.02 | 2045.59 |
| ENSMUSG00000028310 | 2_Ppp3r2      | 0.37783 | 2.11394  | 0.599927 | NA       | 0       | 2.26701 | 0       | 0       | 0       | 0       |
| ENSMUSG00000028312 | 19_Smc2       | 845.083 | 0.81194  | 0.08839  | 0.404249 | 1761.59 | 863.729 | 604.985 | 430.803 | 799.242 | 610.151 |
| ENSMUSG00000028318 | 14_Polr1e     | 198.019 | -0.17487 | 0.624895 | 0.879812 | 122.361 | 227.834 | 207.866 | 191.468 | 203.459 | 235.126 |
| ENSMUSG00000028322 | 11_Exosc      | 356.962 | 0.43602  | 0.268747 | 0.656292 | 613.825 | 329.849 | 287.497 | 255.015 | 319.353 | 336.23  |
| ENSMUSG00000028327 | 14_Stra6l     | 18.9427 | 0.30447  | 0.640965 | 0.887523 | 9.1012  | 35.1386 | 18.6149 | 15.6806 | 16.3111 | 18.81   |
| ENSMUSG00000028328 | 13_Tmod       | 220.548 | -1.33459 | 0.008223 | 0.087355 | 203.26  | 54.4081 | 117.894 | 392.014 | 306.476 | 249.233 |
| ENSMUSG00000028329 | 13_Xpa        | 358.7   | -0.06096 | 0.872069 | 0.963879 | 520.791 | 257.305 | 275.087 | 340.846 | 394.899 | 363.269 |
| ENSMUSG00000028330 | 8_Ncbp1       | 1447.38 | 0.17195  | 0.495058 | 0.817604 | 1718.1  | 1499.62 | 1382.67 | 1208.23 | 1473.15 | 1402.52 |
| ENSMUSG00000028331 | 12_58304      | 50.6845 | -0.25361 | 0.575051 | 0.856664 | 37.416  | 49.8741 | 51.7081 | 79.2281 | 41.2069 | 44.6739 |
| ENSMUSG00000028332 | 13_Hemgi      | 6.42429 | -0.53914 | 0.553344 | 0.845971 | 9.1012  | 3.40051 | 3.10248 | 4.95175 | 8.58477 | 9.40502 |
| ENSMUSG00000028333 | 10_An timer32 | 3822.68 | 0.29753  | 0.377185 | 0.746335 | 5461.73 | 3986.53 | 3197.63 | 2664.04 | 3599.59 | 4026.53 |
| ENSMUSG00000028334 | 10_Nans       | 1187.63 | 0.27825  | 0.553187 | 0.845971 | 535.959 | 1736.53 | 1632.94 | 1072.88 | 958.919 | 1188.56 |
| ENSMUSG00000028337 | 14_Coro2i     | 2197.41 | 0.53846  | 0.131084 | 0.492423 | 1643.27 | 3318.9  | 2846.01 | 1593.64 | 1713.52 | 2069.1  |
| ENSMUSG00000028339 | 17_Col15i     | 219.76  | -0.35408 | 0.248641 | 0.640068 | 147.642 | 200.63  | 230.618 | 253.365 | 242.949 | 243.355 |
| ENSMUSG00000028341 | 9_Nr4a3       | 170.87  | -0.60849 | 0.223822 | 0.613717 | 235.62  | 80.4787 | 89.9721 | 240.985 | 220.629 | 157.534 |

|                    |            |         |          |          |          |          |         |         |         |         |         |
|--------------------|------------|---------|----------|----------|----------|----------|---------|---------|---------|---------|---------|
| ENSMUSG00000028343 | 10_Erp44   | 1989.24 | 0.68937  | 0.127705 | 0.48592  | 4077.34  | 1861.21 | 1428.18 | 1226.38 | 1648.28 | 1694.08 |
| ENSMUSG00000028344 | 12_Invs    | 251.19  | -0.46404 | 0.155439 | 0.532161 | 273.036  | 157.557 | 202.696 | 294.629 | 306.476 | 272.746 |
| ENSMUSG00000028345 | 15_Tex10   | 926.84  | 0.44494  | 0.244252 | 0.636183 | 1547.2   | 881.865 | 776.655 | 615.668 | 933.164 | 806.481 |
| ENSMUSG00000028347 | 14_Tmeff   | 734.116 | 0.2813   | 0.510058 | 0.827179 | 1311.58  | 531.613 | 572.925 | 609.066 | 676.48  | 703.025 |
| ENSMUSG00000028348 | 7_Murc     | 57.0697 | 0.17173  | 0.745605 | 0.924182 | 97.0795  | 29.4711 | 54.8106 | 67.674  | 46.3578 | 47.0251 |
| ENSMUSG00000028351 | 5_Brinp1   | 36.4785 | -0.9806  | 0.097357 | 0.423413 | 41.461   | 12.4685 | 19.6491 | 68.4993 | 40.3484 | 36.4445 |
| ENSMUSG00000028354 | 13_Fmn2    | 112.704 | -1.84487 | 0.000324 | 0.008361 | 70.7871  | 21.5366 | 54.8106 | 211.275 | 202.601 | 115.212 |
| ENSMUSG00000028356 | 4_Ambp     | 0.37783 | 2.11394  | 0.599927 | NA       | 0        | 2.26701 | 0       | 0       | 0       | 0       |
| ENSMUSG00000028358 | 15_Zfp61f  | 807.46  | -0.54656 | 0.038868 | 0.247704 | 561.241  | 627.961 | 779.758 | 995.303 | 930.589 | 949.907 |
| ENSMUSG00000028360 | 9_Slc44a2  | 12.2408 | -0.68128 | 0.317002 | 0.698196 | 12.1349  | 4.53401 | 11.3758 | 14.03   | 13.7356 | 17.6344 |
| ENSMUSG00000028362 | 2_Tnfsf8   | 35.1685 | 2.43151  | 6.73E-06 | 0.000381 | 60.6747  | 79.3452 | 38.264  | 9.90351 | 14.5941 | 8.22939 |
| ENSMUSG00000028364 | 15_Tnc     | 1446.42 | 1.29148  | 0.005686 | 0.067564 | 1283.27  | 3116    | 1762.21 | 513.332 | 1188.99 | 814.71  |
| ENSMUSG00000028367 | 5_Txn1     | 6518.48 | 0.61161  | 0.014898 | 0.132462 | 8653.22  | 8438.93 | 6547.28 | 4974.04 | 5081.33 | 5416.12 |
| ENSMUSG00000028369 | 15_Svep1   | 928.484 | -1.1956  | 1.42E-05 | 0.000707 | 511.69   | 501.008 | 680.478 | 1373.29 | 1354.68 | 1149.76 |
| ENSMUSG00000028370 | 7_Pappa    | 97.9823 | -0.88239 | 0.098979 | 0.427379 | 117.304  | 41.9396 | 47.5714 | 151.854 | 152.809 | 76.4158 |
| ENSMUSG00000028373 | 16_Astn2   | 119.31  | -1.06923 | 0.007073 | 0.07881  | 72.8096  | 61.2092 | 97.2112 | 214.576 | 153.667 | 116.387 |
| ENSMUSG00000028378 | 6_Ptgr1    | 11661.9 | -0.02259 | 0.919268 | 0.977244 | 11553.5  | 10843.1 | 12314.8 | 11313.9 | 11431.5 | 10514.6 |
| ENSMUSG00000028381 | 8_Ucgc     | 1074.19 | 0.02008  | 0.964436 | 0.990546 | 1769.68  | 834.258 | 641.18  | 1148.81 | 1225.91 | 825.291 |
| ENSMUSG00000028382 | 15_Ptbp3   | 10286.1 | 0.88249  | 0.044117 | 0.267332 | 22027.9  | 9644.98 | 8339.48 | 6092.31 | 7959.8  | 7652.16 |
| ENSMUSG00000028383 | 17_Hsdl2   | 2638.61 | 0.23752  | 0.560421 | 0.848965 | 4541.5   | 2068.64 | 1955.6  | 2233.24 | 2514.48 | 2518.19 |
| ENSMUSG00000028385 | 14_Snx30   | 414.751 | -0.35067 | 0.238287 | 0.630377 | 445.959  | 335.517 | 312.317 | 533.964 | 416.361 | 444.387 |
| ENSMUSG00000028386 | 1_Slc46a2  | 169.818 | -0.14338 | 0.171593 | 0.911863 | 93.0345  | 191.562 | 199.593 | 178.263 | 164.828 | 191.627 |
| ENSMUSG00000028389 | 10_Zfp37   | 213.381 | -0.28285 | 0.622323 | 0.878365 | 380.228  | 103.149 | 94.1087 | 217.877 | 272.137 | 212.789 |
| ENSMUSG00000028391 | 16_Wdr31   | 123.676 | -0.06382 | 0.840615 | 0.953262 | 100.113  | 121.285 | 141.68  | 136.173 | 128.772 | 114.036 |
| ENSMUSG00000028392 | 15_Bspry   | 1959.61 | 0.51713  | 0.258616 | 0.64893  | 982.929  | 3070.66 | 2867.73 | 1558.98 | 1509.2  | 1768.14 |
| ENSMUSG00000028393 | 10_Alal    | 1740.7  | 0.04611  | 0.944235 | 0.986451 | 334.722  | 2191.06 | 2779.83 | 2172.17 | 1138.34 | 1828.1  |
| ENSMUSG00000028394 | 9_Pole3    | 1270.73 | 0.02866  | 0.911624 | 0.975181 | 1483.5   | 1266.12 | 1100.35 | 1171.09 | 1338.37 | 1264.98 |
| ENSMUSG00000028396 | 5_231000   | 32.0364 | -0.73191 | 0.460141 | 0.799551 | 60.6747  | 1.1335  | 10.3416 | 55.2946 | 28.3297 | 36.4445 |
| ENSMUSG00000028397 | 13_Kdm4c   | 887.147 | 0.0664   | 0.851392 | 0.957649 | 1306.53  | 710.706 | 705.298 | 812.913 | 937.457 | 849.979 |
| ENSMUSG00000028398 | 8_Tmem2    | 321.798 | 0.12539  | 0.657155 | 0.894515 | 406.52   | 293.577 | 307.146 | 323.515 | 297.892 | 302.136 |
| ENSMUSG00000028399 | 17_Ptprd   | 714.359 | -0.71984 | 0.093486 | 0.416139 | 851.468  | 346.852 | 420.904 | 912.773 | 1059.36 | 694.796 |
| ENSMUSG00000028402 | 17_Mpdz    | 827.014 | -0.73652 | 0.034563 | 0.230661 | 837.31   | 423.93  | 599.814 | 1115.8  | 1089.41 | 895.828 |
| ENSMUSG00000028403 | 15_Zdhhc   | 1588.24 | 0.54192  | 0.224932 | 0.614734 | 3121.71  | 1333    | 1194.46 | 1095.16 | 1549.55 | 1235.58 |
| ENSMUSG00000028405 | 9_Aco1     | 1677.98 | 0.08248  | 0.746375 | 0.924339 | 1477.43  | 1768.26 | 1931.81 | 1546.6  | 1552.13 | 1791.66 |
| ENSMUSG00000028409 | 11_Smu1    | 2424.29 | 0.20084  | 0.520645 | 0.831998 | 3410.93  | 2217.13 | 2150.02 | 1971.62 | 2505.89 | 2290.12 |
| ENSMUSG00000028410 | 13_Dnaja   | 3702.95 | 0.45919  | 0.313991 | 0.695539 | 7117.14  | 3303.03 | 2441.66 | 2489.08 | 3659.69 | 3207.11 |
| ENSMUSG00000028411 | 15_Aptx    | 729.3   | -0.13937 | 0.551725 | 0.845088 | 634.05   | 737.91  | 710.469 | 751.841 | 782.073 | 759.456 |
| ENSMUSG00000028412 | 17_Slc44a2 | 2884.46 | 0.2514   | 0.505537 | 0.825174 | 4673.97  | 2336.15 | 2395.12 | 2258    | 2954.88 | 2688.66 |
| ENSMUSG00000028413 | 13_B4galt  | 3335.36 | 0.44044  | 0.066693 | 0.342409 | 4027.79  | 4000.13 | 3493.4  | 2522.09 | 2895.64 | 3073.09 |
| ENSMUSG00000028414 | 16_Fktn    | 855.233 | -0.15361 | 0.688508 | 0.905237 | 1213.49  | 547.482 | 668.068 | 835.196 | 988.965 | 878.194 |
| ENSMUSG00000028416 | 11_Bag1    | 2574.78 | 0.17287  | 0.549347 | 0.843853 | 3486.77  | 2422.3  | 2277.22 | 2304.22 | 2432.92 | 2525.25 |
| ENSMUSG00000028417 | 3_Tal2     | 3.73368 | -1.02641 | 0.373941 | 0.744532 | 0.404498 | 2.26701 | 1.03416 | 6.60234 | 2.57543 | 5.87814 |
| ENSMUSG00000028419 | 5_Chmp5    | 3048.42 | 0.31802  | 0.376514 | 0.745802 | 4949.03  | 2680.73 | 2519.22 | 2521.27 | 2881.05 | 2739.21 |
| ENSMUSG00000028420 | 13_Tmem    | 193.837 | -0.25756 | 0.415425 | 0.770028 | 217.418  | 164.358 | 147.885 | 236.859 | 183.714 | 212.789 |
| ENSMUSG00000028423 | 15_Nfx1    | 2077.88 | 0.17512  | 0.444381 | 0.788716 | 2265.19  | 2164.99 | 2181.05 | 1756.22 | 2057.77 | 2042.07 |
| ENSMUSG00000028426 | 10_Rad23   | 4112.88 | 0.65275  | 0.082335 | 0.387193 | 7385.12  | 4243.83 | 3454.1  | 2700.36 | 3484.56 | 3409.32 |
| ENSMUSG00000028427 | 13_Aqp7    | 3.32529 | -1.05624 | 0.368627 | 0.740758 | 1.01124  | 3.40051 | 2.06832 | 3.30117 | 4.29238 | 5.87814 |
| ENSMUSG00000028430 | 14_Nol6    | 740.915 | 0.49467  | 0.344419 | 0.721883 | 289.216  | 1210.58 | 1100.35 | 632.174 | 534.831 | 678.337 |
| ENSMUSG00000028431 | 11_Ikbkap  | 798.523 | 0.05898  | 0.804258 | 0.942928 | 839.333  | 836.525 | 768.382 | 709.751 | 800.101 | 837.047 |
| ENSMUSG00000028433 | 14_Ubap2   | 1416.14 | 0.57131  | 0.094755 | 0.41805  | 1118.44  | 2140.05 | 1820.12 | 1076.18 | 1046.48 | 1295.54 |
| ENSMUSG00000028434 | 12_Epb41   | 2116.95 | 0.34609  | 0.190613 | 0.579187 | 2816.32  | 2104.91 | 2187.25 | 1692.67 | 1874.91 | 2025.61 |
| ENSMUSG00000028435 | 8_Aqp3     | 23127.2 | 0.62183  | 0.095855 | 0.420106 | 17013.2  | 33959.7 | 33133.5 | 16771.6 | 15594.2 | 22291.1 |
| ENSMUSG00000028436 | 8_Dcaf12   | 2335.38 | 0.35496  | 0.131775 | 0.493664 | 2519.01  | 2795.22 | 2549.21 | 1827.2  | 2125.59 | 2196.07 |
| ENSMUSG00000028437 | 14_Ubap1   | 1293.02 | 0.35221  | 0.146292 | 0.517317 | 1377.31  | 1637.91 | 1335.1  | 1074.53 | 1197.58 | 1135.66 |
| ENSMUSG00000028438 | 16_Kif24   | 204.034 | 0.98683  | 0.001787 | 0.02977  | 218.429  | 336.65  | 258.54  | 123.794 | 143.366 | 143.427 |
| ENSMUSG00000028439 | 14_Fam2    | 166.47  | -0.85856 | 0.023063 | 0.179232 | 80.8995  | 133.753 | 140.646 | 271.521 | 176.846 | 195.154 |
| ENSMUSG00000028441 | 12_11100   | 2.35007 | -0.25999 | 0.844447 | 0.954449 | 1.01124  | 2.26701 | 3.10248 | 2.47588 | 1.71695 | 3.52688 |
| ENSMUSG00000028443 | 6_Nudt2    | 650.347 | -0.11247 | 0.637193 | 0.885525 | 596.634  | 623.427 | 654.624 | 632.999 | 658.452 | 735.943 |
| ENSMUSG00000028444 | 17_Cntfr   | 82.6872 | -0.57617 | 0.369852 | 0.741242 | 22.2474  | 48.7406 | 128.236 | 138.649 | 71.2536 | 86.9965 |
| ENSMUSG00000028445 | 7_Enho     | 48.3748 | -1.48109 | 0.105573 | 0.441012 | 1.01124  | 24.9371 | 50.6739 | 115.541 | 46.3578 | 51.7276 |
| ENSMUSG00000028447 | 11_Dctn3   | 557.858 | 0.04938  | 0.902793 | 0.937325 | 314.497  | 720.908 | 667.034 | 656.933 | 457.568 | 530.208 |
| ENSMUSG00000028451 | 12_17000   | 4.78664 | -0.54276 | 0.676243 | 0.901105 | 0.404498 | 4.53401 | 3.10248 | 0       | 11.1602 | 5.87814 |
| ENSMUSG00000028452 | 7_Vcp      | 9698.58 | 0.07171  | 0.788962 | 0.937308 | 8740.18  | 11115.1 | 9963.11 | 7809.74 | 10179   | 10384.3 |
| ENSMUSG00000028453 | 10_Fancg   | 192.327 | 0.34655  | 0.297597 | 0.680939 | 157.754  | 228.968 | 259.575 | 174.962 | 184.573 | 148.129 |
| ENSMUSG00000028454 | 16_Pigo    | 341.884 | 0.34609  | 0.527892 | 0.835125 | 119.327  | 494.207 | 534.662 | 354.05  | 248.1   | 300.961 |
| ENSMUSG00000028455 | 15_Stoml2  | 898.676 | -0.0022  | 0.995882 | 0.998321 | 433.824  | 1186.78 | 1073.46 | 897.918 | 839.59  | 960.488 |
| ENSMUSG00000028456 | 17_Unc13   | 1019.86 | -0.47926 | 0.044452 | 0.268708 | 838.322  | 853.528 | 864.559 | 1293.23 | 1217.32 | 1052.19 |
| ENSMUSG00000028457 | 18_Atp8b1  | 52.0368 | -0.29465 | 0.422834 | 0.774712 | 50.5622  | 45.3401 | 44.4689 | 57.7705 | 63.5273 | 50.552  |
| ENSMUSG00000028458 | 12_Tesk1   | 468.8   | 0.1235   | 0.868354 | 0.962942 | 57.6409  | 690.303 | 718.742 | 632.999 | 300.467 | 412.645 |
| ENSMUSG00000028459 | 11_Cd72    | 237.859 | 0.6115   | 0.031488 | 0.218285 | 240.676  | 335.517 | 286.463 | 184.865 | 188.006 | 191.627 |
| ENSMUSG00000028460 | 6_Sit1     | 1.01209 | 2.37767  | 0.293517 | NA       | 1.01124  | 1.1335  | 3.10248 | 0.82529 | 0       | 0       |
| ENSMUSG00000028461 | 12_Ccdc1   | 219.446 | -0.60131 | 0.152653 | 0.527082 | 93.0345  | 226.701 | 203.73  | 301.232 | 272.137 | 219.842 |
| ENSMUSG00000028463 | 14_Car9    | 121.02  | -1.41065 | 0.000467 | 0.011105 | 46.5172  | 72.5442 | 79.6304 | 235.208 | 138.215 | 154.007 |
| ENSMUSG00000028464 | 16_Tpm2    | 3071.73 | 0.08567  | 0.823139 | 0.949015 | 1856.64  | 3966.13 | 3666.1  | 3479.43 | 2405.45 | 3056.63 |
| ENSMUSG00000028465 | 16_Tln1    | 3286.88 | 0.17767  | 0.744657 | 0.923721 | 1028.44  | 4600.89 | 4837.81 | 3344.08 | 2761.72 | 3148.33 |

|                    |           |         |          |          |          |         |         |         |         |         |         |
|--------------------|-----------|---------|----------|----------|----------|---------|---------|---------|---------|---------|---------|
| ENSMUSG00000028466 | 15_Creb3  | 1429.17 | 0.02627  | 0.947532 | 0.986685 | 758.433 | 1892.95 | 1675.34 | 1438.48 | 1387.3  | 1422.51 |
| ENSMUSG00000028467 | 15_Gba2   | 271.96  | -0.48936 | 0.334883 | 0.713724 | 92.0232 | 242.57  | 344.376 | 406.044 | 257.543 | 289.204 |
| ENSMUSG00000028468 | 15_Rgp1   | 1824.09 | 0.19991  | 0.66565  | 0.897    | 816.074 | 2531.11 | 2503.71 | 1813.99 | 1522.08 | 1757.56 |
| ENSMUSG00000028469 | 15_Npr2   | 637.986 | -1.12852 | 0.002975 | 0.043086 | 280.115 | 341.184 | 580.165 | 1047.3  | 836.157 | 742.997 |
| ENSMUSG00000028470 | 10_Hint2  | 383.174 | -0.39845 | 0.394191 | 0.755773 | 141.574 | 415.996 | 434.348 | 491.874 | 370.862 | 444.387 |
| ENSMUSG00000028475 | 8_543041  | 16.2973 | -1.22206 | 0.044144 | 0.267332 | 12.1349 | 6.80102 | 10.3416 | 18.1564 | 29.1882 | 21.1613 |
| ENSMUSG00000028476 | 13_Reck   | 710.199 | -0.47618 | 0.211008 | 0.602834 | 749.332 | 362.721 | 670.137 | 958.164 | 873.071 | 647.771 |
| ENSMUSG00000028478 | 18_Clta   | 4127.06 | 0.00689  | 0.980178 | 0.993796 | 3206.66 | 4626.96 | 4577.2  | 4297.3  | 3786.74 | 4267.53 |
| ENSMUSG00000028479 | 18_Gne    | 2074.91 | 0.60084  | 0.07146  | 0.356746 | 1653.38 | 3042.32 | 2806.71 | 1580.43 | 1544.4  | 1822.22 |
| ENSMUSG00000028480 | 14_Glipr2 | 139.997 | 1.23271  | 0.006547 | 0.074724 | 221.463 | 260.706 | 107.553 | 108.113 | 79.8384 | 62.3083 |
| ENSMUSG00000028483 | 13_Snapc  | 504.049 | 0.33645  | 0.453952 | 0.7959   | 929.334 | 357.053 | 401.255 | 402.743 | 536.548 | 397.362 |
| ENSMUSG00000028484 | 16_Psip1  | 1399.99 | 0.32356  | 0.507687 | 0.826427 | 2794.07 | 941.941 | 932.814 | 1117.45 | 1358.11 | 1255.57 |
| ENSMUSG00000028487 | 16_Bnc2   | 142.228 | -0.31222 | 0.300271 | 0.683516 | 136.518 | 108.816 | 135.475 | 160.107 | 172.554 | 139.9   |
| ENSMUSG00000028488 | 15_Sh3glz | 1881.07 | 0.11068  | 0.670078 | 0.988766 | 2329.91 | 1696.85 | 1832.53 | 1724.86 | 1848.3  | 1853.97 |
| ENSMUSG00000028492 | 13_Saxo1  | 0.19594 | -0.79206 | 0.84609  | NA       | 0       | 0       | 0       | 0       | 0       | 1.17563 |
| ENSMUSG00000028494 | 12_Plin2  | 624.404 | -0.04371 | 0.918261 | 0.977109 | 318.542 | 898.868 | 627.736 | 717.179 | 588.057 | 596.043 |
| ENSMUSG00000028495 | 14_Rps6   | 15312.4 | -0.28898 | 0.28975  | 0.674932 | 10671.7 | 15194.6 | 15485.5 | 16084.9 | 17085.5 | 17352.3 |
| ENSMUSG00000028496 | 17_Mlit3  | 916.933 | 0.65108  | 0.127993 | 0.486371 | 1827.32 | 790.052 | 743.562 | 647.029 | 727.13  | 766.509 |
| ENSMUSG00000028497 | 12_Hacd4  | 1925.63 | 0.49231  | 0.277231 | 0.663807 | 3802.28 | 1524.56 | 1426.11 | 1365.86 | 1843.15 | 1591.8  |
| ENSMUSG00000028514 | 15_Usp24  | 4927.15 | 0.53785  | 0.080503 | 0.381879 | 7399.27 | 5283.26 | 4822.3  | 3292.92 | 4277.79 | 4487.37 |
| ENSMUSG00000028517 | 8_Ppap2b  | 2360.78 | -0.40208 | 0.112516 | 0.45505  | 2041.7  | 1744.46 | 2315.49 | 2904.2  | 2523.06 | 2635.76 |
| ENSMUSG00000028518 | 8_Prkaa2  | 892.162 | 0.31885  | 0.497157 | 0.819208 | 1694.85 | 529.346 | 746.665 | 709.751 | 867.062 | 805.305 |
| ENSMUSG00000028519 | 16_Dab1   | 180.124 | -1.47821 | 2.35E-05 | 0.001031 | 118.316 | 63.4762 | 103.416 | 269.871 | 276.43  | 249.233 |
| ENSMUSG00000028520 | 12_49215  | 0.6729  | 1.65149  | 0.512816 | NA       | 1.01124 | 1.1335  | 1.03416 | 0       | 0.85848 | 0       |
| ENSMUSG00000028521 | 17_Slc35c | 449.036 | 0.28918  | 0.287909 | 0.673109 | 560.229 | 485.139 | 436.416 | 371.382 | 460.144 | 380.903 |
| ENSMUSG00000028522 | 16_Mier1  | 2171.16 | 0.52778  | 0.263452 | 0.652524 | 4503.07 | 1643.58 | 1545.04 | 1705.05 | 1947.88 | 1682.32 |
| ENSMUSG00000028523 | 13_Tctex1 | 0       | NA       | NA       | NA       | 0       | 0       | 0       | 0       | 0       | 0       |
| ENSMUSG00000028524 | 21_Sgip1  | 340.851 | -0.83287 | 0.027531 | 0.200226 | 350.902 | 173.426 | 210.969 | 460.513 | 491.907 | 357.391 |
| ENSMUSG00000028525 | 16_Pde4b  | 878.472 | 0.14336  | 0.582141 | 0.860399 | 1083.04 | 880.732 | 802.509 | 885.539 | 807.827 | 811.183 |
| ENSMUSG00000028527 | 18_Aka    | 250.542 | -0.24534 | 0.441469 | 0.786882 | 271.013 | 250.504 | 166.5   | 291.328 | 265.269 | 258.638 |
| ENSMUSG00000028528 | 16_Dnajcf | 373.173 | -0.36028 | 0.316557 | 0.697656 | 422.7   | 227.834 | 329.898 | 520.759 | 363.994 | 373.85  |
| ENSMUSG00000028530 | 14_Jak1   | 7875.55 | 0.45441  | 0.108508 | 0.448253 | 10772.8 | 8782.38 | 7761.38 | 5491.5  | 6990.58 | 7454.66 |
| ENSMUSG00000028532 | 12_Cachd  | 771.646 | -0.24036 | 0.327885 | 0.709013 | 642.14  | 691.437 | 789.065 | 892.966 | 798.384 | 815.886 |
| ENSMUSG00000028536 | 12_26105  | 301.373 | 0.36     | 0.217231 | 0.607835 | 266.969 | 397.86  | 351.615 | 254.19  | 269.562 | 268.043 |
| ENSMUSG00000028538 | 12_St3gal | 134.595 | -0.70176 | 0.138605 | 0.505497 | 53.5959 | 114.484 | 139.612 | 230.257 | 126.196 | 143.427 |
| ENSMUSG00000028539 | 14_Artn   | 216.336 | 0.63518  | 0.139046 | 0.506146 | 137.529 | 299.245 | 352.649 | 149.378 | 160.535 | 198.681 |
| ENSMUSG00000028540 | 6_Dph2    | 167.105 | 0.4888   | 0.155108 | 0.53175  | 142.585 | 235.769 | 206.832 | 122.143 | 133.064 | 162.237 |
| ENSMUSG00000028541 | 14_B4galt | 120.216 | -0.86076 | 0.157973 | 0.53609  | 23.2586 | 98.6148 | 134.441 | 211.275 | 127.913 | 125.792 |
| ENSMUSG00000028542 | 17_Slc6a5 | 836.155 | -0.00959 | 0.986642 | 0.996006 | 243.71  | 1026.95 | 1229.62 | 1116.62 | 624.113 | 775.914 |
| ENSMUSG00000028544 | 14_Slc5a5 | 166.895 | 0.87485  | 0.003196 | 0.045526 | 187.08  | 227.834 | 232.686 | 107.288 | 112.46  | 134.022 |
| ENSMUSG00000028545 | 13_Bend5  | 81.5881 | -0.18765 | 0.653845 | 0.893223 | 99.1019 | 55.5416 | 74.4596 | 95.7339 | 104.734 | 59.957  |
| ENSMUSG00000028546 | 17_Elavl4 | 4.31988 | -2.42609 | 0.168683 | 0.54995  | 0.44498 | 0       | 0       | 18.9817 | 1.71695 | 1.17563 |
| ENSMUSG00000028549 | 17_Irgb3b | 308.75  | 0.23766  | 0.675796 | 0.900949 | 645.174 | 145.088 | 212.003 | 240.16  | 350.259 | 259.814 |
| ENSMUSG00000028550 | 15_Atg4c  | 580.249 | 0.29141  | 0.491051 | 0.815371 | 1022.37 | 471.537 | 421.938 | 466.29  | 591.491 | 507.871 |
| ENSMUSG00000028551 | 14_Cdkn2  | 277.455 | 0.05577  | 0.832163 | 0.951799 | 247.755 | 295.844 | 305.078 | 278.949 | 277.288 | 259.814 |
| ENSMUSG00000028552 | 13_Eps15  | 2833.88 | 0.41531  | 0.315528 | 0.696629 | 5126    | 2303.28 | 2287.57 | 2105.32 | 2851    | 2330.09 |
| ENSMUSG00000028553 | 12_Angptl | 0.3409  | 1.98467  | 0.623395 | NA       | 1.01124 | 0       | 1.03416 | 0       | 0       | 0       |
| ENSMUSG00000028555 | 15_Ttc39c | 155.671 | 1.20664  | 0.007558 | 0.082361 | 137.529 | 341.184 | 172.705 | 80.0534 | 84.9892 | 117.563 |
| ENSMUSG00000028556 | 15_Dock7  | 3115.52 | 0.14689  | 0.65786  | 0.894702 | 4451.5  | 2582.12 | 2788.1  | 2531.17 | 3318.87 | 3021.36 |
| ENSMUSG00000028557 | 10_Rnf11  | 2675.11 | 0.43489  | 0.36208  | 0.734755 | 5449.6  | 1928.09 | 1848.05 | 2130.9  | 2473.27 | 2220.76 |
| ENSMUSG00000028558 | 14_Calr4  | 13.4339 | -0.26018 | 0.68323  | 0.902945 | 16.1799 | 10.2015 | 10.3416 | 12.3794 | 19.745  | 11.7563 |
| ENSMUSG00000028559 | 17_Osblp1 | 4586.11 | 0.37644  | 0.189814 | 0.578028 | 6388.03 | 4845.72 | 4309.35 | 3528.12 | 4494.13 | 3951.29 |
| ENSMUSG00000028560 | 11_Usp1   | 2095.48 | 0.70991  | 0.12573  | 0.482199 | 4455.54 | 1786.4  | 1560.55 | 1331.2  | 1806.24 | 1632.95 |
| ENSMUSG00000028563 | 16_Tm2d1  | 450.116 | 0.50442  | 0.343354 | 0.721148 | 996.076 | 300.378 | 287.497 | 333.418 | 431.814 | 351.513 |
| ENSMUSG00000028565 | 18_Nfia   | 926.818 | 0.25107  | 0.534647 | 0.838255 | 1567.43 | 650.631 | 803.544 | 779.076 | 922.004 | 838.223 |
| ENSMUSG00000028567 | 8_Txndc1  | 2060.59 | 0.20357  | 0.392073 | 0.754469 | 2418.9  | 2137.79 | 2060.05 | 1766.13 | 1899.81 | 2080.86 |
| ENSMUSG00000028568 | 16_Btf3l4 | 2831.97 | 0.25321  | 0.567442 | 0.852443 | 5157.35 | 1996.1  | 2085.9  | 2262.95 | 2814.95 | 2674.55 |
| ENSMUSG00000028571 | 15_Cyp2j1 | 13.2923 | -1.71593 | 0.033872 | 0.227747 | 12.1349 | 1.1335  | 5.17081 | 20.6323 | 17.1695 | 23.5126 |
| ENSMUSG00000028572 | 13_Hook1  | 2255.47 | 0.53536  | 0.250248 | 0.641949 | 4601.16 | 1779.6  | 1626.74 | 1554.85 | 2080.09 | 1890.41 |
| ENSMUSG00000028573 | 18_Fggy   | 130.636 | -0.02065 | 0.945601 | 0.986649 | 109.214 | 139.421 | 140.646 | 127.095 | 141.649 | 125.792 |
| ENSMUSG00000028575 | 11_Eqtn   | 1.45021 | 4.06323  | 0.127453 | NA       | 3.03373 | 5.66751 | 0       | 0       | 0       | 0       |
| ENSMUSG00000028576 | 12_Ift74  | 372.691 | 0.17817  | 0.728744 | 0.917597 | 704.837 | 285.643 | 196.491 | 292.979 | 435.248 | 320.946 |
| ENSMUSG00000028577 | 13_Plaa   | 1518.92 | 0.56716  | 0.203663 | 0.594896 | 3009.46 | 1287.66 | 1143.78 | 1003.56 | 1395.88 | 1273.2  |
| ENSMUSG00000028578 | 8_Caap1   | 247.198 | 0.69209  | 0.133589 | 0.497275 | 514.723 | 211.965 | 189.252 | 171.661 | 195.733 | 199.857 |
| ENSMUSG00000028580 | 15_Pum1   | 1934.51 | 0.38192  | 0.10027  | 0.430811 | 2087.21 | 2332.75 | 2146.92 | 1555.68 | 1651.71 | 1832.8  |
| ENSMUSG00000028581 | 17_Laptm  | 288.397 | 1.36393  | 0.01879  | 0.156404 | 169.889 | 720.908 | 355.752 | 249.238 | 106.451 | 128.143 |
| ENSMUSG00000028582 | 14_Cc2d1  | 981.435 | 0.33905  | 0.41891  | 0.772667 | 550.117 | 1334.13 | 1404.39 | 873.985 | 753.743 | 972.244 |
| ENSMUSG00000028583 | 14_Pdpn   | 4224.56 | 0.29302  | 0.274133 | 0.66065  | 5218.02 | 5021.42 | 3716.78 | 3494.29 | 3945.56 | 3951.29 |
| ENSMUSG00000028584 | 3_Lrrc38  | 20.0467 | -2.23971 | 0.00039  | 0.009566 | 7.07871 | 5.66751 | 8.27329 | 47.867  | 23.1789 | 28.2151 |
| ENSMUSG00000028587 | 18_Orc1   | 120.235 | 1.25815  | 0.000147 | 0.004565 | 137.529 | 172.292 | 198.559 | 63.5475 | 69.5366 | 79.9427 |
| ENSMUSG00000028591 | 11_Prame  | 24.8899 | -0.11372 | 0.847247 | 0.955658 | 35.3936 | 12.4685 | 23.7857 | 18.9817 | 35.1976 | 23.5126 |
| ENSMUSG00000028597 | 11_Gpx7   | 99.9794 | -0.78931 | 0.029979 | 0.211809 | 51.5735 | 80.4787 | 87.9037 | 137.824 | 111.602 | 130.495 |
| ENSMUSG00000028599 | 10_Tnfrsf | 257.158 | 0.8201   | 0.124794 | 0.480498 | 139.552 | 575.819 | 269.916 | 234.383 | 152.809 | 170.466 |
| ENSMUSG00000028600 | 15_Podn   | 221.169 | -0.92216 | 0.090169 | 0.409254 | 63.7084 | 137.154 | 257.506 | 366.43  | 187.148 | 315.068 |
| ENSMUSG00000028601 | 18_Echdc  | 168.463 | -0.59114 | 0.093319 | 0.415917 | 103.147 | 120.151 | 179.944 | 226.13  | 176.846 | 204.559 |

|                    |           |         |          |          |          |         |         |         |         |         |         |
|--------------------|-----------|---------|----------|----------|----------|---------|---------|---------|---------|---------|---------|
| ENSMUSG00000028602 | 12_Tnfrsf | 4.59309 | 0.26839  | 0.804941 | 0.942951 | 3.03373 | 9.06802 | 3.10248 | 7.42763 | 2.57543 | 2.35126 |
| ENSMUSG00000028603 | 15_Scp2   | 5634.12 | 0.00303  | 0.989761 | 0.997265 | 6397.13 | 5172.17 | 5350.75 | 5501.4  | 5862.54 | 5520.75 |
| ENSMUSG00000028607 | 16_Cpt2   | 400.027 | -0.12793 | 0.664076 | 0.896403 | 288.205 | 430.731 | 428.143 | 421.724 | 416.361 | 414.997 |
| ENSMUSG00000028608 | 15_O6100  | 831.96  | -0.2073  | 0.399998 | 0.759436 | 669.444 | 817.256 | 830.432 | 902.87  | 919.429 | 852.33  |
| ENSMUSG00000028609 | 6_Magoh   | 1110.61 | 0.19418  | 0.573043 | 0.855421 | 1655.41 | 971.412 | 928.677 | 901.219 | 1151.22 | 1055.71 |
| ENSMUSG00000028610 | 16_Dmrtb  | 3.17406 | 0.73627  | 0.564057 | 0.850768 | 2.02249 | 7.93452 | 2.06832 | 4.12646 | 1.71695 | 1.17563 |
| ENSMUSG00000028613 | 14_Lrp8   | 304.356 | -0.70015 | 0.046103 | 0.274777 | 288.205 | 228.968 | 178.91  | 462.989 | 383.739 | 283.326 |
| ENSMUSG00000028614 | 14_Ndc1   | 516.038 | 0.58573  | 0.088693 | 0.404886 | 834.277 | 552.016 | 471.578 | 340.02  | 461.002 | 437.334 |
| ENSMUSG00000028617 | 10_Lrrc42 | 853.842 | -0.13809 | 0.551594 | 0.845088 | 745.287 | 871.664 | 822.158 | 882.238 | 898.825 | 902.882 |
| ENSMUSG00000028618 | 11_Tmem   | 7748.56 | 0.12384  | 0.734237 | 0.920078 | 11942.8 | 6141.32 | 6158.43 | 6804.54 | 7955.51 | 7488.75 |
| ENSMUSG00000028619 | 15_Tcean  | 605.133 | 0.33263  | 0.192957 | 0.583012 | 776.636 | 621.16  | 625.668 | 502.603 | 545.133 | 559.599 |
| ENSMUSG00000028621 | 17_Cyb5rl | 230.86  | -0.05322 | 0.894497 | 0.971192 | 129.439 | 261.839 | 288.531 | 254.19  | 194.874 | 256.287 |
| ENSMUSG00000028622 | 11_Mrpl37 | 649.868 | 0.13592  | 0.691112 | 0.905638 | 439.891 | 834.258 | 767.348 | 577.705 | 649.867 | 630.137 |
| ENSMUSG00000028626 | 5_Col9a2  | 88.3641 | -1.31469 | 0.048801 | 0.284981 | 15.1687 | 39.6726 | 97.2112 | 186.516 | 76.4045 | 115.212 |
| ENSMUSG00000028629 | 9_Exo5    | 299.736 | 0.19054  | 0.444886 | 0.788998 | 338.767 | 321.915 | 297.839 | 273.997 | 288.448 | 277.448 |
| ENSMUSG00000028630 | 8_Dyrk2   | 416.227 | 0.27719  | 0.442602 | 0.787544 | 305.396 | 531.613 | 531.559 | 466.29  | 313.344 | 349.161 |
| ENSMUSG00000028631 | 7_Kcnq4   | 339.472 | -1.10104 | 0.039598 | 0.250108 | 75.8433 | 236.902 | 335.068 | 584.307 | 434.389 | 370.323 |
| ENSMUSG00000028633 | 7_Ctps    | 842.813 | 0.56773  | 0.063766 | 0.333807 | 1009.22 | 1190.18 | 820.09  | 538.091 | 778.639 | 720.66  |
| ENSMUSG00000028634 | 16_Hivep3 | 244.697 | 0.28064  | 0.483389 | 0.811892 | 154.72  | 293.577 | 356.786 | 194.769 | 212.044 | 256.287 |
| ENSMUSG00000028635 | 7_Edn2    | 8.56611 | 0.94941  | 0.371475 | 0.742436 | 5.05622 | 22.6701 | 6.20497 | 10.7288 | 0.85848 | 5.87814 |
| ENSMUSG00000028636 | 14_Ppcs   | 283.284 | 0.14426  | 0.604714 | 0.871119 | 341.801 | 284.509 | 265.78  | 238.509 | 289.307 | 279.799 |
| ENSMUSG00000028637 | 15_Ccdc3  | 11.4759 | -0.71948 | 0.297774 | 0.68102  | 11.1237 | 4.53401 | 10.3416 | 16.5058 | 14.5941 | 11.7563 |
| ENSMUSG00000028639 | 14_Ybx1   | 6735.68 | -0.08495 | 0.783996 | 0.935592 | 4621.39 | 8033.14 | 6957.84 | 6738.51 | 6630.88 | 7432.32 |
| ENSMUSG00000028640 | 11_Tfap2c | 660.168 | 0.31006  | 0.264133 | 0.652958 | 645.174 | 775.316 | 771.485 | 566.151 | 502.209 | 700.674 |
| ENSMUSG00000028641 | 16_P3h1   | 300.738 | -0.94708 | 0.014495 | 0.129878 | 116.293 | 231.235 | 268.882 | 397.791 | 394.041 | 396.187 |
| ENSMUSG00000028642 | 6_A93053  | 3.09431 | -0.29393 | 0.801823 | 0.942266 | 3.03373 | 1.1335  | 4.13665 | 3.30117 | 3.43391 | 3.52688 |
| ENSMUSG00000028643 | 10_Ccdc2  | 399.104 | -0.00894 | 0.974519 | 0.99352  | 363.037 | 421.663 | 409.528 | 457.212 | 416.361 | 326.825 |
| ENSMUSG00000028644 | 16_Ermap  | 50.4803 | -2.05038 | 0.002078 | 0.033327 | 35.3936 | 7.93452 | 15.5124 | 110.589 | 97.0079 | 36.4445 |
| ENSMUSG00000028645 | 10_Slc2a1 | 4136.2  | -0.63327 | 0.21911  | 0.610369 | 1207.43 | 4029.6  | 4491.36 | 6755.84 | 4908.37 | 4234.61 |
| ENSMUSG00000028646 | 16_Rragc  | 1886.02 | 0.28755  | 0.634718 | 0.750802 | 2858.79 | 1784.13 | 1577.1  | 1627.48 | 1825.12 | 1643.53 |
| ENSMUSG00000028647 | 13_Mycbp  | 645.037 | 0.46965  | 0.282749 | 0.669522 | 1213.49 | 584.887 | 448.826 | 469.591 | 613.811 | 539.613 |
| ENSMUSG00000028648 | 13_Ndufs1 | 837.067 | -0.3673  | 0.380706 | 0.748055 | 361.014 | 918.137 | 914.199 | 959.815 | 868.779 | 1000.46 |
| ENSMUSG00000028649 | 17_Macf1  | 6750.76 | -0.33405 | 0.162719 | 0.540894 | 6629.72 | 6001.9  | 5286.63 | 7704.1  | 7882.54 | 6999.69 |
| ENSMUSG00000028651 | 12_Ppie   | 642.197 | 0.05854  | 0.852473 | 0.957929 | 466.184 | 744.711 | 754.938 | 686.643 | 571.746 | 628.961 |
| ENSMUSG00000028653 | 16_Trit1  | 388.335 | 0.21358  | 0.49062  | 0.815035 | 515.735 | 374.056 | 360.922 | 294.629 | 393.182 | 391.484 |
| ENSMUSG00000028654 | 13_Mycl   | 1268.74 | 0.29919  | 0.382234 | 0.749425 | 922.255 | 1566.5  | 1710.5  | 1077.01 | 1024.16 | 1312    |
| ENSMUSG00000028655 | 11_Mfsd2  | 122.774 | 0.44013  | 0.054536 | 0.79295  | 45.506  | 238.036 | 140.646 | 122.969 | 78.9799 | 110.509 |
| ENSMUSG00000028656 | 14_Cap1   | 9879.41 | 0.27516  | 0.299585 | 0.68264  | 9128.5  | 12434.5 | 10892.8 | 7841.1  | 9199.44 | 9780.05 |
| ENSMUSG00000028657 | 14_Ppt1   | 2724.57 | -0.03257 | 0.929925 | 0.981773 | 3971.16 | 2010.83 | 2099.35 | 2494.86 | 3156.62 | 2614.6  |
| ENSMUSG00000028661 | 8_Epha8   | 3.8651  | -2.59695 | 0.076954 | 0.371973 | 0       | 3.40051 | 0       | 9.07822 | 6.00934 | 4.70251 |
| ENSMUSG00000028664 | 14_Ephb2  | 238.301 | -0.0501  | 0.909842 | 0.974731 | 111.237 | 317.381 | 274.053 | 258.317 | 226.638 | 242.179 |
| ENSMUSG00000028668 | 5_Tceb3   | 2837.84 | 0.34806  | 0.163098 | 0.541016 | 3003.4  | 3434.51 | 3097.31 | 2125.13 | 2650.98 | 2715.7  |
| ENSMUSG00000028669 | 15_Pittd1 | 576.447 | -0.27553 | 0.250293 | 0.641949 | 472.251 | 561.084 | 531.559 | 642.077 | 630.981 | 620.731 |
| ENSMUSG00000028670 | 14_Lypla2 | 666.141 | 0.49735  | 0.450636 | 0.79295  | 136.518 | 1065.49 | 1137.58 | 651.156 | 442.974 | 563.126 |
| ENSMUSG00000028671 | 16_Gale   | 630.792 | 0.8027   | 0.264867 | 0.653546 | 101.124 | 1220.78 | 1083.8  | 551.295 | 343.391 | 484.359 |
| ENSMUSG00000028672 | 13_Hmgcl  | 506.25  | -0.13308 | 0.771657 | 0.932465 | 213.373 | 587.155 | 648.419 | 615.668 | 475.596 | 497.291 |
| ENSMUSG00000028673 | 10_Fuca1  | 1532.15 | -0.32377 | 0.417322 | 0.770967 | 723.04  | 1663.98 | 1696.02 | 1899.82 | 1564.15 | 1645.88 |
| ENSMUSG00000028675 | 12_Pnrc2  | 2790.52 | 0.40719  | 0.369346 | 0.740977 | 5417.24 | 2106.05 | 2021.79 | 2133.38 | 2688.75 | 2375.94 |
| ENSMUSG00000028676 | 17_Srsf10 | 2930.91 | 0.5512   | 0.260843 | 0.649878 | 6162.52 | 2299.88 | 1989.73 | 1883.32 | 2845.85 | 2404.16 |
| ENSMUSG00000028677 | 18_Rnf22l | 969.556 | 0.14151  | 0.778461 | 0.934544 | 383.262 | 1261.59 | 1406.46 | 1103.42 | 727.988 | 934.624 |
| ENSMUSG00000028678 | 13_Kif2c  | 327.318 | 0.49103  | 0.197161 | 0.58958  | 259.89  | 473.804 | 413.665 | 193.118 | 323.646 | 299.785 |
| ENSMUSG00000028680 | 14_Plk3   | 135.584 | 1.30771  | 0.045712 | 0.273765 | 43.4835 | 296.978 | 238.891 | 89.1316 | 49.7917 | 95.2259 |
| ENSMUSG00000028681 | 11_Ptch2  | 22.9281 | -0.99201 | 0.285441 | 0.671644 | 1.01124 | 19.2695 | 25.854  | 53.644  | 15.4526 | 22.3369 |
| ENSMUSG00000028683 | 14_Eif2b3 | 444.704 | -0.05077 | 0.844046 | 0.954374 | 467.195 | 455.668 | 387.811 | 414.297 | 495.341 | 447.914 |
| ENSMUSG00000028684 | 14_Urod   | 690.263 | -0.32771 | 0.51114  | 0.827179 | 231.575 | 757.18  | 848.012 | 915.249 | 652.443 | 737.119 |
| ENSMUSG00000028687 | 17_Mutyh  | 30.7817 | 0.33379  | 0.581257 | 0.859883 | 12.1349 | 46.4736 | 44.4689 | 30.5358 | 24.0374 | 27.0394 |
| ENSMUSG00000028688 | 13_Toe1   | 356.499 | -0.03336 | 0.92341  | 0.978561 | 232.586 | 443.2   | 381.606 | 396.14  | 333.948 | 351.513 |
| ENSMUSG00000028689 | 14_Ccdc1  | 119.725 | -0.00273 | 0.993534 | 0.998043 | 92.0232 | 117.884 | 148.919 | 112.24  | 126.196 | 121.09  |
| ENSMUSG00000028690 | 4_Mmach   | 275.935 | 0.02511  | 0.932078 | 0.982317 | 331.688 | 241.436 | 261.643 | 237.684 | 302.184 | 280.975 |
| ENSMUSG00000028691 | 12_Prdx1  | 10561.4 | 0.04965  | 0.903073 | 0.973742 | 16888.8 | 7877.85 | 7462.51 | 9266.38 | 12133.7 | 9738.9  |
| ENSMUSG00000028692 | 15_Akr1a  | 7550.28 | 0.12789  | 0.6545   | 0.893223 | 5897.58 | 9006.81 | 8750.04 | 7604.24 | 7127.93 | 6915.04 |
| ENSMUSG00000028693 | 15_Nasp   | 1898.67 | 0.55549  | 0.153512 | 0.528722 | 3355.31 | 1822.67 | 1600.88 | 1208.23 | 1660.29 | 1744.63 |
| ENSMUSG00000028696 | 12_Ipp    | 459.522 | 0.28254  | 0.499307 | 0.821154 | 768.546 | 397.86  | 346.444 | 308.659 | 484.181 | 451.441 |
| ENSMUSG00000028698 | 13_Pik3r3 | 2298.99 | -0.04253 | 0.906713 | 0.974391 | 3285.53 | 1803.4  | 1706.37 | 2168.87 | 2691.33 | 2138.47 |
| ENSMUSG00000028699 | 9_Tspan1  | 1085.08 | 0.13827  | 0.58163  | 0.860142 | 1025.4  | 1271.79 | 1113.79 | 925.153 | 1073.95 | 1100.39 |
| ENSMUSG00000028700 | 14_Pomg   | 780.979 | -0.31054 | 0.436283 | 0.784268 | 381.239 | 828.591 | 882.14  | 1005.21 | 765.761 | 822.939 |
| ENSMUSG00000028701 | 4_Lurap1  | 220.709 | -1.27508 | 0.000648 | 0.014276 | 183.035 | 98.6148 | 105.484 | 358.177 | 316.778 | 262.165 |
| ENSMUSG00000028702 | 15_Rad54  | 172.189 | 0.93448  | 0.006328 | 0.073196 | 232.586 | 264.106 | 180.978 | 95.7339 | 111.602 | 148.129 |
| ENSMUSG00000028703 | 14_Lrrc41 | 1096.81 | 0.21076  | 0.645353 | 0.869294 | 511.69  | 1605.04 | 1413.7  | 1075.36 | 878.222 | 1096.86 |
| ENSMUSG00000028706 | 14_Nsun4  | 248.029 | -0.04015 | 0.882381 | 0.987828 | 250.789 | 213.099 | 269.916 | 267.395 | 250.675 | 236.301 |
| ENSMUSG00000028707 | 15_Dmbx   | 1.63385 | -0.31369 | 0.855058 | NA       | 0       | 3.40051 | 1.03416 | 2.47588 | 1.71695 | 1.17563 |
| ENSMUSG00000028708 | 16_Mknk1  | 432.864 | 0.12144  | 0.718263 | 0.912538 | 298.317 | 522.545 | 532.593 | 434.929 | 413.786 | 395.011 |
| ENSMUSG00000028709 | 3_Mob3c   | 304.084 | 0.25807  | 0.332375 | 0.711799 | 362.025 | 338.917 | 292.668 | 255.015 | 299.608 | 276.273 |
| ENSMUSG00000028710 | 16_Atpaf1 | 746.013 | 0.25514  | 0.544523 | 0.842093 | 1294.39 | 567.885 | 572.925 | 573.578 | 766.62  | 700.674 |
| ENSMUSG00000028713 | 17_Cyp4b  | 135.566 | -0.30361 | 0.429574 | 0.779482 | 86.967  | 107.683 | 169.602 | 172.486 | 148.517 | 128.143 |

|                    |           |         |          |          |          |         |         |         |         |         |         |
|--------------------|-----------|---------|----------|----------|----------|---------|---------|---------|---------|---------|---------|
| ENSMUSG00000028716 | 15_Pdzk1  | 3676.63 | 0.0829   | 0.8833   | 0.967903 | 1042.59 | 5284.39 | 5019.82 | 4016.7  | 2911.95 | 3784.35 |
| ENSMUSG00000028717 | 12_Tal1   | 29.7027 | -0.22834 | 0.60602  | 0.871767 | 28.3148 | 24.9371 | 28.9565 | 35.4876 | 33.4806 | 27.0394 |
| ENSMUSG00000028718 | 16_Stil   | 215.518 | 0.7813   | 0.022925 | 0.178556 | 336.744 | 277.708 | 202.696 | 127.92  | 171.695 | 176.344 |
| ENSMUSG00000028719 | 8_Cmpk1   | 4825.59 | 0.80515  | 0.111754 | 0.453024 | 11184.4 | 3874.31 | 3355.85 | 2800.22 | 3921.52 | 3817.26 |
| ENSMUSG00000028729 | 15_Ebna1  | 1249.78 | -0.10838 | 0.73255  | 0.919789 | 843.378 | 1437.28 | 1327.86 | 1253.62 | 1197.58 | 1438.97 |
| ENSMUSG00000028730 | 14_Cfap5  | 2.29002 | -2.46043 | 0.125724 | 0.482199 | 1.01124 | 1.1335  | 0       | 4.95175 | 4.29238 | 2.35126 |
| ENSMUSG00000028736 | 13_Pax7   | 2.4572  | -0.04604 | 0.98099  | 0.993796 | 1.01124 | 1.1335  | 5.17081 | 7.42763 | 0       | 0       |
| ENSMUSG00000028737 | 15_Aldh4  | 271.18  | -0.37036 | 0.400586 | 0.75972  | 127.417 | 238.036 | 344.376 | 382.936 | 249.817 | 284.502 |
| ENSMUSG00000028741 | 13_Mrto4  | 455.915 | 0.27027  | 0.450678 | 0.79295  | 316.519 | 649.497 | 529.491 | 407.694 | 382.022 | 450.265 |
| ENSMUSG00000028743 | 7_Akr7a5  | 119.985 | -0.42869 | 0.527149 | 0.834617 | 19.2136 | 121.285 | 166.5   | 185.691 | 107.31  | 119.914 |
| ENSMUSG00000028744 | 15_Pqlc2  | 96.9926 | -0.1892  | 0.709438 | 0.909942 | 38.4273 | 130.353 | 103.416 | 127.92  | 90.1401 | 91.699  |
| ENSMUSG00000028745 | 18_Capzb  | 5686.24 | -0.00477 | 0.98955  | 0.997255 | 3367.44 | 7101.4  | 6561.75 | 5650.78 | 5258.17 | 6177.92 |
| ENSMUSG00000028747 | 10_Htr6   | 0.82129 | -0.44577 | 0.853002 | NA       | 0       | 0       | 2.06832 | 0.82529 | 0.85848 | 1.17563 |
| ENSMUSG00000028749 | 7_Pla2g2f | 132.548 | 0.21615  | 0.697784 | 0.905638 | 48.5397 | 168.892 | 209.935 | 141.95  | 88.4231 | 137.548 |
| ENSMUSG00000028750 | 12_Pla2g2 | 1.12251 | -3.54158 | 0.210425 | NA       | 0       | 0       | 0       | 3.30117 | 3.43391 | 0       |
| ENSMUSG00000028751 | 13_Pla2g2 | 35.5465 | -1.48003 | 0.046735 | 0.27712  | 4.04498 | 19.2695 | 33.0932 | 85.0051 | 37.773  | 34.0932 |
| ENSMUSG00000028753 | 12_Vwa5t  | 2.76637 | -3.7777  | 0.026661 | 0.196614 | 0       | 0       | 1.03416 | 7.42763 | 3.43391 | 4.70251 |
| ENSMUSG00000028755 | 3_Cda     | 342.783 | 0.72383  | 0.214632 | 0.605384 | 114.271 | 640.429 | 526.388 | 287.202 | 208.61  | 279.799 |
| ENSMUSG00000028756 | 12_Pink1  | 1596.78 | -0.51663 | 0.252338 | 0.643955 | 662.365 | 1465.62 | 1813.92 | 2521.27 | 1442.24 | 1675.27 |
| ENSMUSG00000028757 | 4_Ddst    | 3039.16 | 0.20711  | 0.651925 | 0.892215 | 1381.36 | 4346.98 | 4042.54 | 2907.5  | 2518.77 | 3037.82 |
| ENSMUSG00000028758 | 12_Kif17  | 11      | 0.18234  | 0.844359 | 0.954449 | 2.02249 | 12.4685 | 20.6832 | 6.60234 | 17.1695 | 7.05377 |
| ENSMUSG00000028759 | 13_Hp1bp  | 4344.84 | 0.26181  | 0.235623 | 0.627628 | 4986.45 | 4665.5  | 4561.69 | 3737.75 | 3942.98 | 4174.65 |
| ENSMUSG00000028760 | 16_Eif4g3 | 2178.97 | 0.21402  | 0.418015 | 0.7717   | 1872.82 | 2620.66 | 2527.49 | 2051.68 | 1946.17 | 2055    |
| ENSMUSG00000028763 | 17_Hspg2  | 1443.52 | -0.25736 | 0.71494  | 0.911309 | 195.17  | 1608.44 | 2141.75 | 1937.79 | 999.267 | 1778.72 |
| ENSMUSG00000028766 | 10_Alpl   | 4965.32 | 0.14931  | 0.752942 | 0.925804 | 2081.14 | 7024.32 | 6560.72 | 4904.71 | 4202.24 | 5018.76 |
| ENSMUSG00000028771 | 13_Ptpn1  | 717.699 | 0.55009  | 0.100628 | 0.431747 | 1149.78 | 780.984 | 627.736 | 517.458 | 631.839 | 598.395 |
| ENSMUSG00000028772 | 19_Zcchc  | 653.043 | -0.22182 | 0.378049 | 0.746591 | 522.813 | 632.495 | 653.59  | 740.287 | 660.169 | 708.904 |
| ENSMUSG00000028773 | 8_Fabp3   | 303.129 | -1.90086 | 5.47E-07 | 4.58E-05 | 130.451 | 85.0127 | 168.568 | 604.114 | 421.512 | 409.118 |
| ENSMUSG00000028776 | 8_Tinagl  | 482.155 | 0.13381  | 0.818603 | 0.948003 | 141.574 | 752.646 | 619.463 | 604.939 | 341.674 | 432.631 |
| ENSMUSG00000028777 | 8_Gnat3   | 0.16854 | 1.1315   | 0.781553 | NA       | 1.01124 | 0       | 0       | 0       | 0       | 0       |
| ENSMUSG00000028778 | 15_Hcrr1  | 0.30991 | 0.16972  | 0.966824 | NA       | 0       | 0       | 1.03416 | 0.82529 | 0       | 0       |
| ENSMUSG00000028779 | 16_Pef1   | 1078.29 | 0.06748  | 0.895187 | 0.971421 | 393.374 | 1438.42 | 1478.85 | 1245.37 | 853.326 | 1060.42 |
| ENSMUSG00000028780 | 13_Sema3  | 2131.27 | -0.40342 | 0.389662 | 0.7531   | 3193.51 | 1033.75 | 1278.22 | 2428.01 | 2606.34 | 2247.8  |
| ENSMUSG00000028782 | 14_Adgrb1 | 48.4165 | -0.79995 | 0.252933 | 0.644241 | 6.06747 | 44.2066 | 55.8447 | 74.2763 | 58.3764 | 51.7276 |
| ENSMUSG00000028784 | 13_Spodc  | 0.3409  | 1.98467  | 0.623395 | NA       | 1.01124 | 0       | 1.03416 | 0       | 0       | 0       |
| ENSMUSG00000028785 | 12_Hpca   | 11.7643 | -1.602   | 0.073159 | 0.361688 | 10.1124 | 1.1335  | 6.20497 | 30.5358 | 12.0187 | 10.5807 |
| ENSMUSG00000028786 | 15_Tmem   | 71.6692 | 0.57043  | 0.357562 | 0.731944 | 25.2811 | 117.884 | 113.758 | 67.674  | 36.056  | 69.362  |
| ENSMUSG00000028788 | 14_Ptp4a  | 9493.31 | 0.30444  | 0.443511 | 0.788265 | 16210.2 | 8085.28 | 7178.12 | 7354.18 | 9539.4  | 8592.66 |
| ENSMUSG00000028789 | 16_Azin2  | 152.029 | -0.89681 | 0.173595 | 0.557035 | 27.3036 | 117.884 | 173.739 | 319.388 | 143.366 | 130.495 |
| ENSMUSG00000028790 | 13_Khdrb1 | 3040.31 | 0.64776  | 0.10312  | 0.436784 | 5653.87 | 2885.9  | 2594.71 | 1905.6  | 2553.11 | 2648.69 |
| ENSMUSG00000028792 | 14_Ak2    | 1536.17 | 0.18171  | 0.570092 | 0.853848 | 1119.45 | 1983.63 | 1795.3  | 1408.77 | 1370.99 | 1538.9  |
| ENSMUSG00000028793 | 15_Rnf19l | 1348.16 | 1.07697  | 0.001123 | 0.02137  | 1271.13 | 2409.83 | 1806.68 | 839.322 | 834.44  | 927.57  |
| ENSMUSG00000028794 | 13_A3galt | 9.89258 | -0.68051 | 0.399197 | 0.759197 | 4.04498 | 14.7355 | 4.13665 | 13.2047 | 10.3017 | 12.9319 |
| ENSMUSG00000028795 | 15_Ccdc2  | 110.727 | -0.33653 | 0.406647 | 0.764332 | 71.7983 | 89.5467 | 132.373 | 159.281 | 96.1494 | 115.212 |
| ENSMUSG00000028796 | 17_Phc2   | 1272.34 | 0.30864  | 0.620269 | 0.877737 | 297.306 | 2099.25 | 1827.36 | 1375.76 | 946.9   | 1087.46 |
| ENSMUSG00000028797 | 20_Tmem   | 2058.41 | -0.05006 | 0.844536 | 0.954472 | 1675.63 | 2118.52 | 2274.12 | 2186.2  | 2036.31 | 2059.7  |
| ENSMUSG00000028798 | 16_Eif3i  | 2548.38 | -0.14669 | 0.755316 | 0.92689  | 999.109 | 3152.27 | 3105.59 | 3064.31 | 2260.37 | 2708.65 |
| ENSMUSG00000028799 | 15_Zfp36  | 580.639 | 0.28348  | 0.443569 | 0.788265 | 386.295 | 741.311 | 784.929 | 569.452 | 448.125 | 553.721 |
| ENSMUSG00000028800 | 15_Hdac1  | 1384.94 | -0.08    | 0.820969 | 0.948338 | 831.243 | 1717.26 | 1491.26 | 1379.89 | 1389.87 | 1500.1  |
| ENSMUSG00000028801 | 14_Stpg1  | 10.2871 | -0.4607  | 0.665317 | 0.89688  | 0       | 14.7355 | 11.3758 | 15.6806 | 12.8772 | 7.05377 |
| ENSMUSG00000028803 | 18_Nipal3 | 1473.18 | -0.19272 | 0.588125 | 0.863131 | 865.625 | 1471.29 | 1788.07 | 1760.35 | 1443.1  | 1510.68 |
| ENSMUSG00000028804 | 18_Csmd2  | 26.8806 | -2.3066  | 9.49E-05 | 0.003178 | 14.1574 | 5.66751 | 7.23913 | 56.1199 | 46.3578 | 31.742  |
| ENSMUSG00000028807 | 2_Zbtb8a  | 454.587 | 0.27025  | 0.467929 | 0.804041 | 297.306 | 581.487 | 612.224 | 388.713 | 384.598 | 463.197 |
| ENSMUSG00000028809 | 16_Srrm1  | 4032.67 | 0.44495  | 0.07436  | 0.36492  | 5019.82 | 4621.29 | 4307.28 | 2955.37 | 3446.79 | 3845.48 |
| ENSMUSG00000028811 | 11_Yars   | 937.066 | 0.2248   | 0.566383 | 0.851909 | 562.252 | 1395.34 | 1072.43 | 902.045 | 843.883 | 846.452 |
| ENSMUSG00000028813 | 2_CK137f  | 0.42924 | -2.15458 | 0.590406 | NA       | 0       | 0       | 0       | 0       | 2.57543 | 0       |
| ENSMUSG00000028820 | 13_Sfpq   | 5349.14 | 0.29631  | 0.426809 | 0.777557 | 8370.07 | 4936.41 | 4382.78 | 3612.3  | 5423    | 5370.27 |
| ENSMUSG00000028821 | 8_Syf2    | 1604.67 | -0.14032 | 0.555617 | 0.846817 | 1343.94 | 1618.64 | 1617.43 | 1672.04 | 1611.36 | 1764.62 |
| ENSMUSG00000028822 | 11_Tmem   | 1913.36 | -0.24509 | 0.313168 | 0.694578 | 1524.96 | 1801.14 | 1927.68 | 2184.55 | 1963.34 | 2078.51 |
| ENSMUSG00000028825 | 7_Rhd     | 1.33097 | -1.36936 | 0.499644 | NA       | 0       | 2.26701 | 0       | 1.65058 | 1.71695 | 2.35126 |
| ENSMUSG00000028826 | 14_Tmem   | 1358.09 | 0.1901   | 0.485317 | 0.813146 | 1759.57 | 1194.71 | 1387.84 | 1237.11 | 1303.17 | 1266.15 |
| ENSMUSG00000028830 | 14_AU04C  | 939.411 | 0.37271  | 0.4261   | 0.777537 | 447.981 | 1416.88 | 1315.45 | 897.093 | 677.338 | 881.721 |
| ENSMUSG00000028832 | 11_Stmn1  | 1115.04 | 0.04413  | 0.863947 | 0.96174  | 1089.11 | 1115.37 | 1191.35 | 913.599 | 1154.65 | 1226.18 |
| ENSMUSG00000028833 | 13_Ncdn   | 326.179 | -0.08762 | 0.895676 | 0.97156  | 56.6297 | 422.797 | 469.509 | 431.628 | 243.807 | 332.703 |
| ENSMUSG00000028834 | 13_Trim6  | 96.5079 | -1.68193 | 0.000174 | 0.005185 | 61.6859 | 27.2041 | 48.6056 | 194.769 | 133.922 | 112.86  |
| ENSMUSG00000028836 | 14_Slc30a | 6.04846 | -0.54262 | 0.547371 | 0.843648 | 4.04498 | 5.66751 | 5.17081 | 11.5541 | 5.15086 | 4.70251 |
| ENSMUSG00000028837 | 8_Psmb2   | 2085.94 | 0.33795  | 0.380715 | 0.748055 | 1315.63 | 3120.53 | 2551.28 | 1826.37 | 1680.9  | 2020.9  |
| ENSMUSG00000028838 | 11_Extl1  | 25.0319 | -1.4022  | 0.020236 | 0.164323 | 12.1349 | 13.602  | 15.5124 | 54.4693 | 18.028  | 36.4445 |
| ENSMUSG00000028840 | 10_Zfp59  | 121.673 | 0.19912  | 0.757774 | 0.927714 | 26.2924 | 200.63  | 163.398 | 118.017 | 115.894 | 105.807 |
| ENSMUSG00000028841 | 14_Cnksr  | 1284.1  | 0.7951   | 0.153918 | 0.529412 | 460.116 | 2187.66 | 2239.99 | 969.719 | 817.27  | 1029.85 |
| ENSMUSG00000028842 | 15_Ago3   | 815.137 | -0.11284 | 0.757966 | 0.927759 | 1141.69 | 579.22  | 628.77  | 779.076 | 952.051 | 810.008 |
| ENSMUSG00000028843 | 8_Sh3bgrl | 3471.69 | 0.36502  | 0.543046 | 0.84123  | 922.255 | 5611.97 | 5191.49 | 3363.07 | 2359.09 | 3382.28 |
| ENSMUSG00000028845 | 15_Tekt2  | 66.0331 | -0.92993 | 0.060822 | 0.325068 | 20.2249 | 65.7432 | 50.6739 | 94.0833 | 86.7062 | 78.7671 |
| ENSMUSG00000028847 | 8_Trappc2 | 1299.23 | -0.20644 | 0.481525 | 0.810876 | 890.906 | 1363.6  | 1365.09 | 1435.18 | 1425.07 | 1315.53 |
| ENSMUSG00000028848 | 13_Gpn2   | 171.726 | 0.16263  | 0.788941 | 0.937308 | 46.5172 | 275.441 | 222.345 | 198.07  | 121.045 | 166.939 |

|                    |            |         |          |          |          |         |         |         |         |         |         |
|--------------------|------------|---------|----------|----------|----------|---------|---------|---------|---------|---------|---------|
| ENSMUSG00000028849 | 17_Map7c   | 841.974 | 0.12089  | 0.796896 | 0.939968 | 370.115 | 1227.58 | 1034.16 | 917.725 | 691.074 | 811.183 |
| ENSMUSG00000028850 | 2_Gpatch:  | 37.793  | 0.11031  | 0.880391 | 0.966824 | 6.06747 | 58.9422 | 52.7422 | 33.837  | 35.1976 | 39.9713 |
| ENSMUSG00000028851 | 6_Nudc     | 1176.15 | 0.02015  | 0.958945 | 0.989586 | 643.151 | 1497.36 | 1412.66 | 1198.32 | 1075.67 | 1229.71 |
| ENSMUSG00000028854 | 9_Slc9a1   | 921.077 | 0.76823  | 0.185946 | 0.573178 | 304.385 | 1683.25 | 1494.36 | 707.276 | 545.991 | 791.198 |
| ENSMUSG00000028857 | 16_Tmem    | 806.955 | -0.10434 | 0.853314 | 0.958298 | 219.44  | 1029.22 | 1084.84 | 998.604 | 690.215 | 819.413 |
| ENSMUSG00000028859 | 14_Csf3r   | 91.6067 | 2.19147  | 0.000236 | 0.006579 | 72.8096 | 291.31  | 86.8696 | 30.5358 | 35.1976 | 32.9176 |
| ENSMUSG00000028860 | 13_Sytl1   | 2552.22 | 0.40575  | 0.549536 | 0.843939 | 476.296 | 3817.64 | 4432.42 | 2621.13 | 1513.49 | 2452.36 |
| ENSMUSG00000028861 | 13_Mrps1   | 362.288 | 0.01179  | 0.969847 | 0.991928 | 420.678 | 359.32  | 311.283 | 289.678 | 441.257 | 351.513 |
| ENSMUSG00000028862 | 6_Map3k    | 692.063 | 0.79564  | 0.168723 | 0.549971 | 243.71  | 1343.2  | 1047.61 | 495.175 | 394.899 | 627.785 |
| ENSMUSG00000028863 | 13_Meaf6   | 434.373 | -0.14651 | 0.571424 | 0.854477 | 405.509 | 362.721 | 468.475 | 444.007 | 444.691 | 480.832 |
| ENSMUSG00000028864 | 7_Hgf      | 78.1693 | -1.0871  | 0.062371 | 0.329792 | 91.012  | 24.9371 | 34.1273 | 104.812 | 145.941 | 68.1864 |
| ENSMUSG00000028865 | 13_Cd164   | 12.8182 | 0.15482  | 0.867772 | 0.962942 | 2.02249 | 13.602  | 24.8199 | 14.8553 | 5.15086 | 16.4588 |
| ENSMUSG00000028868 | 13_Wasf2   | 3682.35 | 0.56896  | 0.029195 | 0.207881 | 3563.63 | 4928.47 | 4705.44 | 2930.61 | 2845.85 | 3120.12 |
| ENSMUSG00000028869 | 13_Gnl2    | 1328.71 | 0.10074  | 0.691692 | 0.905638 | 1443.05 | 1393.08 | 1288.57 | 1096.81 | 1289.43 | 1461.31 |
| ENSMUSG00000028871 | 7_Rspo1    | 40.6915 | -0.85725 | 0.074119 | 0.364046 | 26.2924 | 29.4711 | 31.0248 | 67.674  | 30.9052 | 58.7814 |
| ENSMUSG00000028873 | 16_Cdca8   | 339.981 | 0.66995  | 0.055941 | 0.309377 | 303.373 | 513.477 | 435.382 | 203.022 | 269.562 | 315.068 |
| ENSMUSG00000028874 | 14_Fgr     | 64.5708 | 4.02309  | 9.07E-07 | 7.11E-05 | 66.7421 | 223.3   | 75.4938 | 10.7288 | 11.1602 | 0       |
| ENSMUSG00000028876 | 7_Epha10   | 4.93026 | -3.07347 | 0.018551 | 0.154857 | 2.02249 | 1.1335  | 0       | 14.8553 | 6.86782 | 4.70251 |
| ENSMUSG00000028878 | 11_Fam7f   | 1436.37 | 0.25659  | 0.312932 | 0.694375 | 1833.39 | 1360.2  | 1497.47 | 1320.47 | 1268.83 | 1337.86 |
| ENSMUSG00000028879 | 4_Stx12    | 3129.79 | 0.37606  | 0.303463 | 0.686187 | 5171.5  | 2831.49 | 2602.98 | 2370.24 | 2944.58 | 2857.95 |
| ENSMUSG00000028882 | 17_Ppp1ri  | 642.431 | -0.10129 | 0.72138  | 0.913875 | 480.341 | 731.109 | 648.419 | 657.758 | 673.904 | 663.054 |
| ENSMUSG00000028883 | 17_Sema4   | 350.668 | -0.04098 | 0.935933 | 0.984134 | 631.016 | 182.494 | 223.379 | 329.292 | 386.315 | 351.513 |
| ENSMUSG00000028884 | 14_Rpa2    | 433.329 | 0.36998  | 0.251401 | 0.642532 | 338.767 | 576.953 | 550.174 | 392.839 | 357.985 | 383.255 |
| ENSMUSG00000028885 | 8_Smpd3l   | 249.415 | 0.69878  | 0.095573 | 0.419718 | 166.855 | 383.124 | 376.435 | 212.925 | 204.318 | 152.832 |
| ENSMUSG00000028886 | 15_Eya3    | 1259.05 | 0.23253  | 0.393796 | 0.755289 | 1106.3  | 1583.5  | 1390.95 | 1125.7  | 1081.68 | 1266.15 |
| ENSMUSG00000028889 | 17_Yrdc    | 469.44  | 0.27949  | 0.269218 | 0.656292 | 560.229 | 518.011 | 466.407 | 437.405 | 448.983 | 385.606 |
| ENSMUSG00000028890 | 13_Mtf1    | 544.887 | 0.29188  | 0.241197 | 0.632564 | 538.993 | 663.099 | 597.745 | 514.157 | 494.483 | 460.846 |
| ENSMUSG00000028893 | 8_Sesn2    | 302.378 | 0.60484  | 0.245327 | 0.636653 | 128.428 | 535.013 | 431.245 | 267.395 | 211.185 | 241.004 |
| ENSMUSG00000028894 | 18_Inpp5t  | 615.454 | -0.01516 | 0.953808 | 0.988507 | 515.735 | 668.767 | 652.556 | 645.379 | 641.282 | 569.004 |
| ENSMUSG00000028896 | 13_Rcc1    | 434.359 | 0.33824  | 0.382467 | 0.749501 | 280.115 | 651.764 | 523.286 | 379.634 | 352.834 | 418.524 |
| ENSMUSG00000028898 | 15_Tmau1   | 676.006 | -0.25601 | 0.437483 | 0.785066 | 411.576 | 692.57  | 744.596 | 772.474 | 717.687 | 717.133 |
| ENSMUSG00000028899 | 11_Taf12   | 530.111 | 0.21393  | 0.422103 | 0.774546 | 639.106 | 596.223 | 472.612 | 461.338 | 508.218 | 503.169 |
| ENSMUSG00000028901 | 13_Gmeb    | 498.838 | 0.25112  | 0.340534 | 0.719259 | 462.139 | 589.422 | 574.994 | 421.724 | 494.483 | 450.265 |
| ENSMUSG00000028902 | 4_SF3a3    | 1455.04 | 0.06345  | 0.797601 | 0.940351 | 1445.07 | 1619.78 | 1396.12 | 1240.41 | 1535.82 | 1493.05 |
| ENSMUSG00000028906 | 15_Epb41   | 3928.29 | 0.05132  | 0.824533 | 0.949196 | 3546.43 | 4273.31 | 4174.91 | 4001.84 | 3761.85 | 3811.39 |
| ENSMUSG00000028907 | 7_Utp11l   | 955.685 | 0.24852  | 0.472852 | 0.806205 | 1451.14 | 839.926 | 822.158 | 764.221 | 985.532 | 871.14  |
| ENSMUSG00000028909 | 17_Ptpru   | 213.848 | -0.39936 | 0.525657 | 0.833685 | 52.5847 | 180.227 | 320.59  | 354.05  | 151.092 | 224.545 |
| ENSMUSG00000028910 | 12_Mecr    | 275.424 | 0.01687  | 0.974453 | 0.99352  | 93.0345 | 362.721 | 375.401 | 283.901 | 241.232 | 296.258 |
| ENSMUSG00000028911 | 16_Srsf4   | 788.585 | 0.2557   | 0.526131 | 0.833849 | 448.992 | 1047.36 | 1078.63 | 760.92  | 667.895 | 727.714 |
| ENSMUSG00000028914 | 13_Casp9   | 823.127 | 0.10139  | 0.781767 | 0.935592 | 521.802 | 957.81  | 1076.56 | 874.81  | 682.489 | 825.291 |
| ENSMUSG00000028917 | 14_Plekhra | 594.987 | -0.02582 | 0.96438  | 0.990546 | 159.777 | 768.515 | 840.773 | 710.577 | 640.144 | 630.137 |
| ENSMUSG00000028919 | 11_Arhgef  | 381.945 | 0.25103  | 0.690394 | 0.905638 | 92.0232 | 473.804 | 679.444 | 403.568 | 258.402 | 384.43  |
| ENSMUSG00000028920 | 9_Fbxo42   | 833.461 | 0.34339  | 0.275135 | 0.661359 | 659.331 | 1071.16 | 1066.22 | 800.534 | 668.754 | 734.767 |
| ENSMUSG00000028923 | 14_Necap1  | 2156.33 | 0.27114  | 0.568748 | 0.852874 | 963.716 | 3075.19 | 3036.3  | 2249.75 | 1606.21 | 2006.8  |
| ENSMUSG00000028926 | 15_Cdk14   | 321.618 | -0.72756 | 0.122401 | 0.475964 | 413.599 | 136.02  | 176.842 | 437.405 | 415.503 | 350.337 |
| ENSMUSG00000028927 | 6_Padi2    | 66.4275 | -1.45759 | 0.004326 | 0.056181 | 32.3598 | 18.136  | 55.8447 | 125.444 | 92.7155 | 74.0646 |
| ENSMUSG00000028931 | 11_Kcnab   | 63.0944 | -0.84028 | 0.284286 | 0.670663 | 14.1574 | 80.4787 | 41.3665 | 161.757 | 54.9425 | 25.8638 |
| ENSMUSG00000028932 | 7_Psmc2    | 3056.4  | 0.25544  | 0.30983  | 0.692089 | 3299.69 | 3638.54 | 3040.43 | 2393.35 | 3048.45 | 2917.91 |
| ENSMUSG00000028933 | 14_Xrcc2   | 153.607 | 0.22502  | 0.525893 | 0.833782 | 225.507 | 132.62  | 138.578 | 141.95  | 153.667 | 129.319 |
| ENSMUSG00000028936 | 15_Rpl22   | 8053.42 | -0.30142 | 0.168207 | 0.549222 | 7523.66 | 6952.91 | 7168.81 | 8358.56 | 9335.94 | 8980.62 |
| ENSMUSG00000028937 | 14_Acot7   | 160.339 | -0.64341 | 0.242972 | 0.634644 | 41.461  | 180.227 | 154.09  | 250.064 | 175.129 | 161.061 |
| ENSMUSG00000028940 | 2_Hes2     | 9.85125 | -1.16191 | 0.116207 | 0.463637 | 4.04498 | 9.06802 | 5.17081 | 13.2047 | 11.1602 | 16.4588 |
| ENSMUSG00000028943 | 17_Espn    | 37.3934 | -0.47522 | 0.531525 | 0.836945 | 5.05622 | 35.1386 | 53.7764 | 62.7222 | 30.0467 | 37.6201 |
| ENSMUSG00000028944 | 14_Prkg1   | 589.013 | -0.19108 | 0.526847 | 0.834409 | 678.545 | 414.862 | 556.379 | 598.337 | 614.67  | 671.283 |
| ENSMUSG00000028945 | 9_Rheb     | 2423.99 | 0.50753  | 0.259945 | 0.649568 | 4795.32 | 2006.3  | 1736.36 | 1790.06 | 2297.28 | 1918.62 |
| ENSMUSG00000028946 | 6_Hes3     | 0.30991 | 0.16972  | 0.966824 | NA       | 0       | 0       | 1.03416 | 0.82529 | 0       | 0       |
| ENSMUSG00000028948 | 16_Nol9    | 585.917 | 0.45145  | 0.117382 | 0.466248 | 584.499 | 763.981 | 681.512 | 440.706 | 446.408 | 598.395 |
| ENSMUSG00000028949 | 13_Smarc4  | 133.331 | -1.31178 | 0.013972 | 0.12705  | 41.461  | 61.2092 | 127.202 | 276.473 | 172.554 | 121.09  |
| ENSMUSG00000028950 | 3_Tas1r1   | 6.9612  | 0.06749  | 0.942703 | 0.986023 | 3.03373 | 9.06802 | 9.30745 | 10.7288 | 2.57543 | 7.05377 |
| ENSMUSG00000028952 | 12_Zbtb4f  | 214.667 | 0.13514  | 0.838358 | 0.952966 | 43.4835 | 341.184 | 289.565 | 256.666 | 140.79  | 216.316 |
| ENSMUSG00000028953 | 10_Abcb2   | 1400.82 | 0.06413  | 0.869583 | 0.963129 | 788.771 | 1879.35 | 1627.77 | 1258.57 | 1350.38 | 1500.1  |
| ENSMUSG00000028954 | 11_Nub1    | 3143.89 | 0.47497  | 0.056344 | 0.310591 | 3139.91 | 4149.75 | 3680.58 | 2574.91 | 2521.35 | 2796.82 |
| ENSMUSG00000028955 | 3_Vamp3    | 5912.33 | 0.4696   | 0.149426 | 0.522751 | 9237.72 | 6078.98 | 5281.46 | 4279.97 | 5266.76 | 5329.12 |
| ENSMUSG00000028957 | 12_Per3    | 2679.55 | 0.55829  | 0.039344 | 0.249504 | 2927.55 | 2788.42 | 3858.46 | 2059.93 | 2042.32 | 2400.63 |
| ENSMUSG00000028958 | 14_Tmub1   | 103.014 | -0.00566 | 0.991213 | 0.997512 | 44.4948 | 136.02  | 128.236 | 139.474 | 87.5647 | 82.2939 |
| ENSMUSG00000028959 | 14_Fastk   | 587.378 | -0.04419 | 0.941925 | 0.986006 | 140.563 | 779.85  | 814.919 | 787.329 | 467.87  | 533.735 |
| ENSMUSG00000028960 | 18_Ube4b   | 1545.32 | 0.25713  | 0.26473  | 0.653546 | 1550.24 | 1781.87 | 1715.67 | 1342.75 | 1381.29 | 1500.1  |
| ENSMUSG00000028961 | 15_Pgd     | 3520.87 | 0.55783  | 0.151743 | 0.525744 | 2345.08 | 5538.3  | 4696.13 | 2598.85 | 2693.9  | 3252.96 |
| ENSMUSG00000028962 | 14_Slc4a2  | 1349.26 | 0.17856  | 0.745369 | 0.924182 | 432.813 | 1954.16 | 1911.13 | 1544.12 | 1044.77 | 1208.55 |
| ENSMUSG00000028963 | 1_Uts2     | 0.81935 | 2.02444  | 0.454612 | NA       | 2.02249 | 0       | 2.06832 | 0.82529 | 0       | 0       |
| ENSMUSG00000028964 | 14_Park7   | 2090.46 | -0.25478 | 0.590756 | 0.865078 | 768.546 | 2361.09 | 2589.54 | 2480    | 1999.39 | 2344.2  |
| ENSMUSG00000028965 | 13_Tnfrsf1 | 18.2778 | 2.37891  | 0.00321  | 0.045697 | 13.1462 | 62.3427 | 16.5466 | 6.60234 | 5.15086 | 5.87814 |
| ENSMUSG00000028967 | 10_Erff1   | 2401.2  | 0.68421  | 0.011701 | 0.11285  | 3485.76 | 2943.71 | 2450.96 | 1672.04 | 2024.29 | 1830.45 |
| ENSMUSG00000028969 | 10_Cdk5    | 585.039 | -0.15434 | 0.713888 | 0.911072 | 274.047 | 655.165 | 732.186 | 628.873 | 576.897 | 643.068 |
| ENSMUSG00000028970 | 9_Abcb1b   | 72.7527 | 0.16012  | 0.748628 | 0.924799 | 122.361 | 65.7432 | 42.4006 | 85.8304 | 66.1027 | 54.0789 |

|                    |           |         |          |          |          |         |         |         |         |         |         |
|--------------------|-----------|---------|----------|----------|----------|---------|---------|---------|---------|---------|---------|
| ENSMUSG00000028971 | 4_Cort    | 12.3035 | -0.52476 | 0.556341 | 0.84739  | 1.01124 | 17.0025 | 12.4099 | 16.5058 | 16.3111 | 10.5807 |
| ENSMUSG00000028972 | 11_Car6   | 426.779 | -1.34144 | 0.000125 | 0.00396  | 241.687 | 214.232 | 268.882 | 837.672 | 550.284 | 447.914 |
| ENSMUSG00000028973 | 18_Abcb8  | 500.189 | 0.05654  | 0.92543  | 0.979614 | 120.338 | 674.434 | 735.289 | 577.705 | 394.899 | 498.466 |
| ENSMUSG00000028974 | 13_Dffa   | 873.549 | 0.20117  | 0.547413 | 0.843648 | 613.825 | 1133.5  | 1055.88 | 847.575 | 764.045 | 826.466 |
| ENSMUSG00000028975 | 16_Pex14  | 434.81  | 0.40976  | 0.506416 | 0.825658 | 114.271 | 729.976 | 644.283 | 453.911 | 277.288 | 389.133 |
| ENSMUSG00000028976 | 10_Slc2a5 | 1.57081 | 0.45967  | 0.814142 | NA       | 2.02249 | 3.40051 | 0       | 1.65058 | 0       | 2.35126 |
| ENSMUSG00000028977 | 16_Cas21  | 691.663 | 0.7545   | 0.103395 | 0.436784 | 392.363 | 1122.17 | 1091.04 | 603.289 | 389.749 | 551.369 |
| ENSMUSG00000028978 | 12_Nos3   | 55.7539 | 0.03896  | 0.956508 | 0.988881 | 10.1124 | 74.8112 | 84.8012 | 76.7522 | 48.0747 | 39.9713 |
| ENSMUSG00000028979 | 17_Masp2  | 42.0559 | 0.01976  | 0.976444 | 0.993796 | 12.1349 | 38.5391 | 76.528  | 52.8187 | 42.9238 | 29.3907 |
| ENSMUSG00000028980 | 14_H6pd   | 626.81  | -0.01391 | 0.974227 | 0.99348  | 304.385 | 783.251 | 783.894 | 720.48  | 543.416 | 625.434 |
| ENSMUSG00000028982 | 9_Slc25a3 | 99.0111 | -0.82675 | 0.012604 | 0.118891 | 68.7646 | 69.1437 | 76.528  | 150.203 | 123.621 | 105.807 |
| ENSMUSG00000028986 | 12_Klhl7  | 849.308 | 0.15648  | 0.735252 | 0.920512 | 1536.08 | 515.744 | 633.941 | 736.986 | 861.911 | 811.183 |
| ENSMUSG00000028988 | 13_Ctnnb1 | 610.794 | -0.07643 | 0.821981 | 0.9485   | 404.498 | 634.762 | 744.596 | 683.342 | 535.69  | 661.878 |
| ENSMUSG00000028989 | 3_Angptl7 | 5928.63 | -0.14647 | 0.600521 | 0.869763 | 5386.9  | 4715.37 | 6781    | 6072.5  | 5545.76 | 7070.23 |
| ENSMUSG00000028990 | 13_Lzic   | 539.004 | 0.10173  | 0.679094 | 0.901886 | 517.757 | 564.484 | 591.54  | 471.242 | 539.982 | 549.018 |
| ENSMUSG00000028991 | 15_Mtor   | 1675.25 | 0.20657  | 0.596863 | 0.868228 | 1005.18 | 2289.68 | 2090.04 | 1568.06 | 1328.06 | 1770.5  |
| ENSMUSG00000028992 | 12_Nmna1  | 116.382 | -0.16129 | 0.630676 | 0.882112 | 81.9108 | 126.952 | 120.997 | 131.221 | 118.47  | 118.738 |
| ENSMUSG00000028995 | 14_Fam17  | 1199.76 | 0.94255  | 0.004937 | 0.061695 | 2048.78 | 1526.83 | 1159.3  | 688.294 | 970.079 | 805.305 |
| ENSMUSG00000028996 | 9_Rbp7    | 6.35934 | -0.02475 | 0.981553 | 0.993877 | 9.1012  | 3.40051 | 6.20497 | 0.82529 | 6.86782 | 11.7563 |
| ENSMUSG00000028998 | 6_Tomm7   | 1445.75 | -0.16596 | 0.464345 | 0.801754 | 1433.94 | 1266.12 | 1387.84 | 1459.94 | 1592.47 | 1534.19 |
| ENSMUSG00000028999 | 15_Rint1  | 464.442 | 0.21563  | 0.404011 | 0.762463 | 565.286 | 461.336 | 470.544 | 398.616 | 465.295 | 425.577 |
| ENSMUSG00000029001 | 15_Fbxo4  | 138.693 | -1.23854 | 0.014604 | 0.130648 | 39.4385 | 77.0782 | 131.339 | 262.443 | 172.554 | 149.305 |
| ENSMUSG00000029003 | 11_Mad2l1 | 155.358 | -0.08958 | 0.858239 | 0.959189 | 60.6747 | 226.701 | 164.432 | 178.263 | 143.366 | 158.71  |
| ENSMUSG00000029004 | 15_Kmt2e  | 3797.11 | 0.31893  | 0.291905 | 0.676701 | 5515.33 | 3446.98 | 3682.65 | 3100.62 | 3450.22 | 3586.84 |
| ENSMUSG00000029005 | 4_Drxin   | 4.55879 | -0.66764 | 0.599413 | 0.86924  | 0       | 3.40051 | 7.23913 | 5.77705 | 8.58477 | 2.35126 |
| ENSMUSG00000029007 | 8_Agtrap  | 862.008 | -0.30017 | 0.216127 | 0.607397 | 704.837 | 779.85  | 833.534 | 1037.39 | 919.429 | 897.004 |
| ENSMUSG00000029009 | 17_Mthfr  | 1010.01 | 0.42648  | 0.412827 | 0.768146 | 410.565 | 1747.86 | 1316.49 | 1060.5  | 754.601 | 770.036 |
| ENSMUSG00000029012 | 11_Orc5   | 580.728 | 0.22495  | 0.622869 | 0.878814 | 1056.75 | 386.524 | 434.348 | 480.32  | 623.254 | 503.169 |
| ENSMUSG00000029014 | 14_Dnajc2 | 1140.31 | 0.38845  | 0.354091 | 0.729818 | 2040.69 | 1004.28 | 833.534 | 816.214 | 1112.59 | 1034.55 |
| ENSMUSG00000029015 | 9_Slc26a5 | 0.61262 | -1.18916 | 0.687899 | NA       | 0       | 1.1335  | 0       | 0.82529 | 1.71695 | 0       |
| ENSMUSG00000029016 | 13_Clcna6 | 398.521 | -0.57547 | 0.091748 | 0.412959 | 235.62  | 330.983 | 394.016 | 581.006 | 462.719 | 386.782 |
| ENSMUSG00000029017 | 13_Pmpcd  | 1118.6  | -0.04055 | 0.876578 | 0.965114 | 1293.38 | 1058.69 | 956.599 | 1086.91 | 1225.05 | 1090.98 |
| ENSMUSG00000029019 | 8_Nppb    | 20.8069 | 3.09082  | 0.00018  | 0.005314 | 14.1574 | 74.8112 | 22.7516 | 4.12646 | 4.29238 | 4.70251 |
| ENSMUSG00000029020 | 13_Mfn2   | 2338.69 | -0.09733 | 0.777075 | 0.933844 | 1415.74 | 2734.01 | 2629.87 | 2446.99 | 2340.21 | 2465.29 |
| ENSMUSG00000029022 | 18_Miip   | 244.961 | 0.12628  | 0.798762 | 0.940596 | 103.147 | 318.514 | 345.41  | 267.395 | 183.714 | 251.584 |
| ENSMUSG00000029026 | 16_Trp73  | 64.8537 | 0.72313  | 0.197198 | 0.589588 | 31.3486 | 91.8137 | 118.929 | 43.7405 | 38.6315 | 64.6595 |
| ENSMUSG00000029027 | 8_Dffb    | 104.968 | 0.0904   | 0.777533 | 0.934225 | 118.316 | 91.8137 | 114.792 | 113.065 | 101.3   | 90.5233 |
| ENSMUSG00000029028 | 14_Lrrc47 | 894.063 | 0.24191  | 0.518085 | 0.83141  | 571.353 | 1238.92 | 1096.21 | 788.154 | 746.875 | 922.868 |
| ENSMUSG00000029029 | 14_Wrap7  | 180.215 | 0.10246  | 0.86214  | 0.96084  | 48.5397 | 266.373 | 245.096 | 200.546 | 159.677 | 161.061 |
| ENSMUSG00000029030 | 14_Tprgl  | 2108.49 | -0.19205 | 0.42166  | 0.77436  | 1843.5  | 1883.88 | 2177.94 | 2447.82 | 2202.85 | 2094.97 |
| ENSMUSG00000029032 | 12_Arhgef | 628.478 | 0.65066  | 0.304596 | 0.687401 | 160.788 | 1049.62 | 1093.11 | 551.295 | 349.4   | 566.653 |
| ENSMUSG00000029033 | 16_Acap3  | 573.448 | 0.17952  | 0.768002 | 0.931032 | 136.518 | 813.855 | 876.969 | 606.59  | 473.021 | 533.735 |
| ENSMUSG00000029034 | 9_Cpsf3l  | 808.977 | 0.16189  | 0.711628 | 0.910709 | 399.442 | 1085.9  | 1077.6  | 743.588 | 686.782 | 860.56  |
| ENSMUSG00000029036 | 18_Atda3  | 606.228 | 0.20995  | 0.694441 | 0.905638 | 207.305 | 919.271 | 824.227 | 547.169 | 502.209 | 637.19  |
| ENSMUSG00000029038 | 9_Ssu72   | 1677.31 | -0.00673 | 0.975959 | 0.993727 | 1591.7  | 1776.2  | 1652.59 | 1713.31 | 1722.96 | 1607.08 |
| ENSMUSG00000029044 | 9_A93058  | 0.13755 | -0.79206 | 0.84609  | NA       | 0       | 0       | 0       | 0.82529 | 0       | 0       |
| ENSMUSG00000029047 | 13_Pex10  | 200.074 | -0.00155 | 0.99695  | 0.998589 | 113.259 | 233.502 | 253.37  | 236.859 | 177.705 | 185.749 |
| ENSMUSG00000029048 | 3_Rer1    | 3459.88 | 0.23942  | 0.419416 | 0.773352 | 4764.98 | 3408.44 | 3065.25 | 2798.57 | 3427.9  | 3294.11 |
| ENSMUSG00000029049 | 14_Morn1  | 34.1763 | -0.2799  | 0.59352  | 0.866332 | 20.2249 | 23.8036 | 48.6056 | 45.3911 | 31.7636 | 35.2688 |
| ENSMUSG00000029050 | 15_Ski    | 1693.04 | 0.14486  | 0.538173 | 0.839833 | 1786.87 | 1720.66 | 1826.33 | 1759.52 | 1431.94 | 1632.95 |
| ENSMUSG00000029053 | 16_Prkc2  | 450.759 | -0.23333 | 0.518215 | 0.831479 | 270.002 | 488.54  | 485.022 | 590.909 | 451.559 | 418.524 |
| ENSMUSG00000029054 | 8_Gabrd   | 5.40279 | -2.36108 | 0.028718 | 0.205576 | 2.02249 | 2.26701 | 1.03416 | 14.03   | 6.00934 | 7.05377 |
| ENSMUSG00000029055 | 17_Plch2  | 1495.09 | 0.61541  | 0.259    | 0.64893  | 544.049 | 2339.55 | 2544.04 | 1183.47 | 1021.59 | 1337.86 |
| ENSMUSG00000029056 | 13_Pank4  | 422.601 | -0.04857 | 0.909854 | 0.974731 | 201.238 | 494.207 | 551.208 | 440.706 | 443.833 | 404.416 |
| ENSMUSG00000029059 | 9_Fam21c  | 156.039 | -0.81185 | 0.126746 | 0.484087 | 43.4835 | 113.35  | 183.047 | 247.588 | 166.545 | 182.222 |
| ENSMUSG00000029060 | 17_Mib2   | 336.528 | 0.22638  | 0.741589 | 0.922751 | 63.7084 | 438.666 | 586.37  | 434.104 | 209.468 | 286.853 |
| ENSMUSG00000029061 | 2_Mmp23   | 98.3309 | -0.38137 | 0.473718 | 0.806769 | 36.4048 | 79.3452 | 140.646 | 138.649 | 105.593 | 89.3477 |
| ENSMUSG00000029062 | 14_Cdk11  | 1969.61 | 0.06555  | 0.802881 | 0.942705 | 1793.95 | 2199    | 2049.71 | 1641.51 | 1931.57 | 2201.95 |
| ENSMUSG00000029063 | 16_Nadk   | 2118.77 | 0.15166  | 0.6421   | 0.888256 | 1498.66 | 2785.02 | 2406.49 | 1932.01 | 1981.36 | 2109.08 |
| ENSMUSG00000029064 | 15_Gnb1   | 11494.7 | -0.03498 | 0.883763 | 0.967903 | 10135.7 | 12643.1 | 11287.9 | 12527.1 | 11436.6 | 10938   |
| ENSMUSG00000029066 | 12_Mrpl2c | 623.088 | -0.0406  | 0.87174  | 0.963734 | 606.747 | 669.9   | 566.721 | 620.62  | 699.659 | 574.882 |
| ENSMUSG00000029068 | 16_Ccnl2  | 2777.18 | 0.33214  | 0.169517 | 0.550908 | 2972.05 | 3161.34 | 3153.16 | 2200.23 | 2809.8  | 2366.54 |
| ENSMUSG00000029070 | 9_Mxra8   | 1040.56 | -0.53368 | 0.137508 | 0.503084 | 563.263 | 813.855 | 1173.77 | 1393.92 | 1110.01 | 1188.56 |
| ENSMUSG00000029071 | 16_Dvl1   | 871.367 | 0.16074  | 0.755283 | 0.92689  | 314.497 | 1196.98 | 1248.23 | 922.677 | 732.281 | 813.534 |
| ENSMUSG00000029072 | 3_Tas1r3  | 29.3686 | -0.08875 | 0.886755 | 0.969051 | 10.1124 | 31.7381 | 43.4348 | 27.2346 | 24.8958 | 38.7957 |
| ENSMUSG00000029073 | 9_Cptp    | 431.386 | 0.15074  | 0.64192  | 0.888237 | 313.486 | 529.346 | 519.149 | 435.754 | 402.626 | 387.957 |
| ENSMUSG00000029074 | 14_Tlll10 | 126.951 | 0.7177   | 0.153435 | 0.528563 | 72.8096 | 180.227 | 220.276 | 73.451  | 83.2723 | 131.67  |
| ENSMUSG00000029075 | 6_Tnfrsf4 | 18.4718 | 1.14173  | 0.141671 | 0.510149 | 6.06747 | 46.4736 | 23.7857 | 10.7288 | 12.0187 | 11.7563 |
| ENSMUSG00000029076 | 14_Sdf4   | 4935.6  | -0.26329 | 0.336926 | 0.715288 | 3464.52 | 5014.62 | 4980.52 | 5598.78 | 5240.14 | 5315.01 |
| ENSMUSG00000029082 | 17_Bst1   | 144.662 | 0.36802  | 0.432445 | 0.780769 | 164.833 | 215.366 | 108.587 | 144.426 | 67.197  | 166.939 |
| ENSMUSG00000029084 | 5_Cd38    | 136.196 | 0.38458  | 0.354629 | 0.729885 | 227.53  | 131.486 | 103.416 | 96.5592 | 125.338 | 132.846 |
| ENSMUSG00000029086 | 15_Prom1  | 6721.53 | 0.25198  | 0.477824 | 0.808634 | 10082.1 | 5895.35 | 5943.33 | 4728.93 | 7201.76 | 6477.71 |
| ENSMUSG00000029088 | 16_Kcnip4 | 101.317 | -0.64242 | 0.287165 | 0.672979 | 147.642 | 32.8716 | 56.8789 | 142.776 | 153.667 | 74.0646 |
| ENSMUSG00000029089 | 8_Pacrgl  | 245.326 | 0.04232  | 0.905946 | 0.974391 | 347.868 | 196.096 | 202.696 | 219.528 | 272.996 | 232.774 |
| ENSMUSG00000029090 | 12_Adgra1 | 619.581 | -1.06967 | 6.10E-05 | 0.002232 | 436.858 | 336.65  | 426.075 | 908.647 | 853.326 | 755.929 |

|                    |           |         |          |          |          |         |         |         |         |         |         |
|--------------------|-----------|---------|----------|----------|----------|---------|---------|---------|---------|---------|---------|
| ENSMUSG00000029092 | 9_D5Ert   | 2.67841 | 2.33931  | 0.113654 | 0.457475 | 5.05622 | 2.26701 | 6.20497 | 0.82529 | 1.71695 | 0       |
| ENSMUSG00000029093 | 14_Sorcs  | 156.37  | -0.05594 | 0.913    | 0.975712 | 59.6634 | 192.695 | 207.866 | 198.07  | 136.498 | 143.427 |
| ENSMUSG00000029094 | 11_Afap1  | 1301.9  | 0.19311  | 0.511387 | 0.827179 | 1025.4  | 1635.64 | 1505.74 | 1208.23 | 1176.11 | 1260.27 |
| ENSMUSG00000029095 | 17_Ablim  | 74.316  | -0.28364 | 0.520107 | 0.831665 | 43.4835 | 65.7432 | 92.0404 | 105.637 | 66.1027 | 72.8889 |
| ENSMUSG00000029096 | 15_Htra3  | 484.553 | -0.42741 | 0.455759 | 0.796332 | 135.507 | 446.6   | 657.727 | 649.505 | 340.815 | 677.162 |
| ENSMUSG00000029097 | 10_Trmt4  | 138.775 | 0.41569  | 0.320385 | 0.701457 | 87.9783 | 214.232 | 173.739 | 107.288 | 123.621 | 125.792 |
| ENSMUSG00000029098 | 16_Acox3  | 912.227 | 0.16535  | 0.626201 | 0.880327 | 618.882 | 1138.04 | 1136.54 | 881.412 | 824.996 | 873.491 |
| ENSMUSG00000029101 | 14_Rgs12  | 2848.77 | 0.57844  | 0.143347 | 0.512551 | 1887.99 | 4319.78 | 4029.09 | 2227.46 | 1947.88 | 2680.43 |
| ENSMUSG00000029102 | 9_Hgf     | 32.0399 | 1.60074  | 0.083141 | 0.389385 | 3.03373 | 79.3452 | 62.0497 | 14.8553 | 9.44325 | 23.5126 |
| ENSMUSG00000029103 | 16_Lrpap  | 1636.33 | -0.43046 | 0.259371 | 0.649102 | 814.052 | 1544.96 | 1823.23 | 2196.93 | 1667.16 | 1771.67 |
| ENSMUSG00000029104 | 15_Htt    | 2513.42 | 0.40235  | 0.181891 | 0.567819 | 2100.35 | 3473.05 | 3011.48 | 1998.03 | 2161.65 | 2335.97 |
| ENSMUSG00000029106 | 14_Add1   | 8210.85 | 0.38471  | 0.141073 | 0.509354 | 7715.79 | 10180   | 10001.4 | 6556.12 | 6879.83 | 7931.96 |
| ENSMUSG00000029108 | 15_Pcdh7  | 1752.89 | 0.38166  | 0.231401 | 0.622696 | 2489.68 | 2078.84 | 1381.64 | 1424.45 | 1596.77 | 1545.95 |
| ENSMUSG00000029110 | 13_Rnf4   | 2771.03 | 0.23948  | 0.323092 | 0.703475 | 3137.89 | 3159.07 | 2704.33 | 2254.7  | 2705.06 | 2665.15 |
| ENSMUSG00000029111 | 7_Nelfa   | 446.269 | 0.29425  | 0.483525 | 0.811892 | 249.777 | 632.495 | 592.575 | 399.442 | 355.409 | 447.914 |
| ENSMUSG00000029119 | 9_Man2b   | 822.488 | 0.1348   | 0.831971 | 0.951799 | 178.99  | 1089.3  | 1314.42 | 948.261 | 565.736 | 838.223 |
| ENSMUSG00000029120 | 10_Ppp2r  | 95.4204 | 0.0372   | 0.915894 | 0.976702 | 98.0907 | 82.7457 | 108.587 | 89.1316 | 76.4045 | 117.563 |
| ENSMUSG00000029121 | 15_Crmp1  | 16.6729 | -1.71458 | 0.019598 | 0.160862 | 4.04498 | 10.2015 | 9.30745 | 42.0899 | 21.4619 | 12.9319 |
| ENSMUSG00000029122 | 11_Evc    | 286.861 | -1.1868  | 0.005649 | 0.067222 | 107.192 | 158.69  | 259.575 | 519.934 | 344.249 | 331.527 |
| ENSMUSG00000029123 | 8_Stk32b  | 4.05355 | -1.57611 | 0.248573 | 0.640068 | 5.05622 | 0       | 1.03416 | 10.7288 | 5.15086 | 2.35126 |
| ENSMUSG00000029125 | 14_Stx18  | 426.133 | 0.13106  | 0.631162 | 0.882337 | 383.262 | 503.275 | 449.86  | 358.177 | 437.823 | 424.402 |
| ENSMUSG00000029126 | 7_Nsg1    | 132.043 | -0.71307 | 0.055619 | 0.308674 | 114.271 | 81.6122 | 104.45  | 221.178 | 139.073 | 131.67  |
| ENSMUSG00000029127 | 15_Zbtb4  | 127.473 | -0.10481 | 0.757303 | 0.927624 | 90.0007 | 145.088 | 133.407 | 122.969 | 128.772 | 144.602 |
| ENSMUSG00000029128 | 12_Rab28  | 1238.03 | 0.22663  | 0.58961  | 0.864455 | 2155.97 | 921.538 | 927.643 | 1116.62 | 1254.23 | 1052.19 |
| ENSMUSG00000029130 | 12_Rnf32  | 43.2549 | -0.40351 | 0.436446 | 0.784317 | 60.6747 | 28.3376 | 22.7516 | 51.9934 | 55.801  | 39.9713 |
| ENSMUSG00000029131 | 14_Dnajb  | 4676.63 | 0.54754  | 0.184937 | 0.572171 | 8738.16 | 4314.11 | 3608.19 | 3157.57 | 4135.28 | 4106.47 |
| ENSMUSG00000029134 | 14_Plb1   | 18.2097 | 0.06145  | 0.920867 | 0.97747  | 11.1237 | 15.869  | 28.9565 | 20.6323 | 19.745  | 12.9319 |
| ENSMUSG00000029135 | 10_Fosl2  | 9390.78 | 0.73106  | 0.001714 | 0.028968 | 10902.2 | 12974.1 | 11284.8 | 6806.19 | 6769.95 | 7607.49 |
| ENSMUSG00000029136 | 9_Rbks    | 98.1093 | 0.02373  | 0.940953 | 0.985839 | 82.922  | 103.149 | 110.655 | 100.686 | 90.1401 | 101.104 |
| ENSMUSG00000029138 | 4_493054  | 2.29186 | 2.61277  | 0.123654 | 0.478085 | 1.01124 | 4.53401 | 6.20497 | 0.82529 | 0       | 1.17563 |
| ENSMUSG00000029141 | 16_Slc4a1 | 591.66  | 0.1693   | 0.562136 | 0.850167 | 790.793 | 531.613 | 556.379 | 520.759 | 583.764 | 566.653 |
| ENSMUSG00000029145 | 12_Eif2b4 | 469.977 | 0.00237  | 0.996421 | 0.998321 | 153.709 | 660.832 | 596.711 | 510.031 | 441.257 | 457.319 |
| ENSMUSG00000029146 | 14_Snx17  | 1379.44 | -0.05282 | 0.875641 | 0.964617 | 875.738 | 1567.63 | 1619.5  | 1498.73 | 1401.89 | 1313.18 |
| ENSMUSG00000029147 | 10_Ppm1   | 1703.98 | 0.25371  | 0.535693 | 0.83864  | 993.042 | 2563.98 | 2003.17 | 1362.56 | 1489.46 | 1811.64 |
| ENSMUSG00000029148 | 15_Nrbp1  | 2653.06 | -0.00953 | 0.977191 | 0.993796 | 1718.1  | 3180.61 | 3034.23 | 2590.59 | 2578.01 | 2816.8  |
| ENSMUSG00000029149 | 14_Krtcap | 167.083 | 0.82182  | 0.142921 | 0.511661 | 66.7421 | 312.847 | 260.609 | 115.541 | 102.159 | 144.602 |
| ENSMUSG00000029151 | 14_Slc30a | 2.2397  | -1.17787 | 0.440822 | 0.786476 | 3.03373 | 0       | 1.03416 | 4.12646 | 1.71695 | 3.52688 |
| ENSMUSG00000029152 | 13_Ociad  | 4036.84 | 0.09362  | 0.786806 | 0.936514 | 5884.43 | 3363.1  | 3255.54 | 3409.28 | 4323.29 | 3985.38 |
| ENSMUSG00000029153 | 11_Ociad  | 2097.06 | -0.80942 | 0.032646 | 0.223271 | 2217.66 | 975.946 | 1377.5  | 2813.42 | 2872.46 | 2325.39 |
| ENSMUSG00000029154 | 13_Cwh4   | 5108.59 | 0.75704  | 0.011935 | 0.114456 | 7814.9  | 6296.61 | 5144.95 | 3145.19 | 3855.42 | 4394.5  |
| ENSMUSG00000029155 | 16_Spata  | 2.00561 | -2.28097 | 0.217658 | 0.608427 | 2.02249 | 0       | 0       | 1.65058 | 6.00934 | 2.35126 |
| ENSMUSG00000029156 | 11_Sgcb   | 943.834 | 0.3082   | 0.340013 | 0.718781 | 1407.65 | 884.132 | 840.773 | 758.444 | 899.684 | 872.316 |
| ENSMUSG00000029158 | 9_Yipf7   | 19.47   | -0.30126 | 0.725322 | 0.915812 | 39.4385 | 4.53401 | 8.27329 | 30.5358 | 12.8772 | 21.1613 |
| ENSMUSG00000029161 | 7_Cgref1  | 44.3014 | -1.03051 | 0.038717 | 0.247192 | 14.1574 | 34.0051 | 39.2981 | 66.0234 | 52.3671 | 59.957  |
| ENSMUSG00000029162 | 15_Khk    | 168.865 | -0.37716 | 0.5587   | 0.848273 | 33.3711 | 165.491 | 241.994 | 258.317 | 136.498 | 177.52  |
| ENSMUSG00000029163 | 9_Emilin1 | 232.94  | -0.75888 | 0.29385  | 0.678127 | 22.2474 | 231.235 | 265.78  | 378.809 | 219.77  | 279.799 |
| ENSMUSG00000029165 | 16_Agbl5  | 272.866 | 0.2462   | 0.528056 | 0.835198 | 173.934 | 343.451 | 371.264 | 281.425 | 256.685 | 210.437 |
| ENSMUSG00000029166 | 14_Mapre  | 378.188 | -0.58292 | 0.084791 | 0.393496 | 206.294 | 333.25  | 369.196 | 505.904 | 452.417 | 402.065 |
| ENSMUSG00000029167 | 13_Pparg  | 356.366 | -1.19996 | 0.011226 | 0.109659 | 355.958 | 114.484 | 177.876 | 677.844 | 614.67  | 397.362 |
| ENSMUSG00000029168 | 14_Dpysl  | 31.7496 | -1.72463 | 0.005454 | 0.06566  | 7.07871 | 12.4685 | 24.8199 | 64.3728 | 52.3671 | 29.3907 |
| ENSMUSG00000029169 | 11_Dhx15  | 5365.63 | 0.45903  | 0.278434 | 0.665542 | 9972.89 | 4507.94 | 4155.26 | 3704.74 | 5091.63 | 4761.29 |
| ENSMUSG00000029171 | 12_Pgm1   | 657.89  | 0.59298  | 0.029947 | 0.211752 | 763.489 | 932.873 | 677.376 | 474.543 | 570.029 | 529.033 |
| ENSMUSG00000029173 | 12_Sepse  | 707.893 | 0.22236  | 0.547818 | 0.843822 | 1117.42 | 587.155 | 582.233 | 576.054 | 720.262 | 664.23  |
| ENSMUSG00000029174 | 18_Tbc1d  | 754.231 | -0.2879  | 0.227754 | 0.618838 | 681.579 | 656.298 | 700.127 | 892.141 | 849.892 | 745.348 |
| ENSMUSG00000029175 | 17_Slc35f | 1069.25 | 0.49912  | 0.13894  | 0.505974 | 846.412 | 1648.11 | 1262.71 | 889.665 | 829.289 | 939.327 |
| ENSMUSG00000029176 | 13_Anapc  | 1354.72 | 0.01946  | 0.956462 | 0.988881 | 1942.6  | 1083.63 | 1065.19 | 1165.31 | 1547.83 | 1323.76 |
| ENSMUSG00000029177 | 9_Cenpa   | 386.893 | 0.49905  | 0.13186  | 0.493664 | 332.699 | 575.819 | 450.894 | 271.521 | 345.966 | 344.459 |
| ENSMUSG00000029178 | 14_Klf3   | 11540.1 | 0.90895  | 0.007993 | 0.085762 | 21346.4 | 12038.9 | 11793.6 | 7402.87 | 7888.54 | 8770.18 |
| ENSMUSG00000029179 | 14_Zcchc  | 347.476 | 0.20349  | 0.486766 | 0.813764 | 462.139 | 316.247 | 337.137 | 304.533 | 326.221 | 338.581 |
| ENSMUSG00000029182 | 10_17000  | 1.51843 | -2.82301 | 0.167484 | NA       | 0       | 1.1335  | 0       | 1.65058 | 5.15086 | 1.17563 |
| ENSMUSG00000029185 | 14_Fam1   | 730.518 | -0.48023 | 0.063046 | 0.33148  | 715.961 | 533.88  | 580.165 | 858.304 | 863.628 | 831.169 |
| ENSMUSG00000029186 | 12_Pi4k2  | 528.018 | 0.29997  | 0.481647 | 0.810876 | 940.457 | 412.595 | 395.05  | 453.086 | 533.114 | 433.807 |
| ENSMUSG00000029188 | 14_Slc34a | 6755.35 | 0.52571  | 0.030552 | 0.214025 | 7987.82 | 8241.7  | 7687.96 | 4869.22 | 5394.67 | 6350.74 |
| ENSMUSG00000029189 | 10_Sel1i3 | 865.996 | 0.39311  | 0.153358 | 0.528463 | 898.996 | 940.807 | 1109.66 | 613.192 | 832.723 | 800.603 |
| ENSMUSG00000029190 | 19_D5Ert  | 2522.1  | 0.22206  | 0.476729 | 0.807811 | 3615.2  | 2282.87 | 2249.3  | 2166.39 | 2552.25 | 2266.61 |
| ENSMUSG00000029191 | 16_Rfc1   | 2401.49 | 0.30487  | 0.290541 | 0.675578 | 3287.56 | 2376.96 | 2297.91 | 1848.65 | 2237.19 | 2360.66 |
| ENSMUSG00000029192 | 17_Tbc1d  | 2842.06 | 0.1327   | 0.575567 | 0.856733 | 2669.69 | 3291.69 | 2956.67 | 2541.08 | 2826.96 | 2766.25 |
| ENSMUSG00000029193 | 7_Cckar   | 4.67729 | -2.9873  | 0.01977  | 0.161763 | 2.02249 | 1.1335  | 0       | 9.90351 | 10.3017 | 4.70251 |
| ENSMUSG00000029195 | 10_Klb    | 5.07547 | 0.12952  | 0.891393 | 0.970606 | 6.06747 | 4.53401 | 5.17081 | 2.47588 | 5.15086 | 7.05377 |
| ENSMUSG00000029196 | 9_Tada2b  | 542.942 | 0.11746  | 0.633051 | 0.883434 | 607.758 | 559.95  | 527.422 | 564.5   | 480.747 | 517.276 |
| ENSMUSG00000029198 | 3_Grpel1  | 1409.86 | -0.09366 | 0.73593  | 0.920596 | 1068.89 | 1615.24 | 1408.53 | 1501.21 | 1466.28 | 1399    |
| ENSMUSG00000029199 | 11_Lias   | 543.624 | 0.12312  | 0.642405 | 0.888341 | 667.421 | 493.074 | 539.832 | 507.555 | 545.991 | 507.871 |
| ENSMUSG00000029201 | 14_Ugdh   | 2386.3  | 0.37564  | 0.265434 | 0.654114 | 3778.01 | 2125.32 | 2182.08 | 1900.65 | 2165.08 | 2166.68 |
| ENSMUSG00000029202 | 12_Pds5a  | 4312.89 | 0.45508  | 0.272532 | 0.659019 | 7850.29 | 3706.55 | 3405.49 | 2919.06 | 4084.63 | 3911.31 |
| ENSMUSG00000029203 | 16_Ube2k  | 2103.61 | 0.29486  | 0.461323 | 0.799907 | 3580.82 | 1687.79 | 1684.65 | 1575.48 | 2117.86 | 1975.05 |

|                    |           |         |          |          |          |         |         |         |         |         |         |
|--------------------|-----------|---------|----------|----------|----------|---------|---------|---------|---------|---------|---------|
| ENSMUSG00000029204 | 7_Rhoh    | 31.3028 | 0.44086  | 0.426935 | 0.777623 | 37.416  | 53.2746 | 17.5807 | 31.3611 | 22.3204 | 25.8638 |
| ENSMUSG00000029205 | 12_Chrna  | 0.74613 | 1.69605  | 0.548416 | NA       | 0       | 2.26701 | 1.03416 | 0       | 0       | 1.17563 |
| ENSMUSG00000029206 | 13_Nsun7  | 3.93453 | -2.24739 | 0.084339 | 0.391892 | 3.03373 | 0       | 1.03416 | 7.42763 | 8.58477 | 3.52688 |
| ENSMUSG00000029207 | 16_Apbb2  | 316.573 | -0.24037 | 0.435768 | 0.783834 | 344.834 | 232.368 | 293.702 | 400.267 | 329.655 | 298.609 |
| ENSMUSG00000029208 | 16_Guf1   | 995.714 | 0.02969  | 0.950655 | 0.987571 | 1739.34 | 604.157 | 674.273 | 815.389 | 1237.07 | 904.058 |
| ENSMUSG00000029209 | 15_Gnpdε  | 466.944 | 0.02553  | 0.956326 | 0.988881 | 802.928 | 272.041 | 338.171 | 442.357 | 528.822 | 417.348 |
| ENSMUSG00000029211 | 11_Gabra  | 24.0307 | -0.88637 | 0.183402 | 0.570202 | 31.3486 | 5.66751 | 13.4441 | 30.5358 | 32.6221 | 30.5663 |
| ENSMUSG00000029212 | 11_Gabrb  | 54.4643 | -1.17937 | 0.064228 | 0.335617 | 64.7196 | 13.602  | 21.7174 | 85.8304 | 92.7155 | 48.2007 |
| ENSMUSG00000029213 | 11_Comm   | 1096.28 | 0.2674   | 0.508671 | 0.827066 | 1873.84 | 886.399 | 832.5   | 941.659 | 1126.32 | 916.99  |
| ENSMUSG00000029217 | 16_Tec    | 157.345 | -0.45382 | 0.142657 | 0.511466 | 144.608 | 126.952 | 127.202 | 197.245 | 203.459 | 144.602 |
| ENSMUSG00000029219 | 10_Slc10ε | 0.47104 | -2.2721  | 0.552052 | NA       | 0       | 0       | 0       | 1.65058 | 0       | 1.17563 |
| ENSMUSG00000029221 | 15_Slc30ε | 1559.74 | -0.1043  | 0.756873 | 0.927594 | 2080.13 | 1187.91 | 1242.03 | 1491.3  | 1831.13 | 1525.96 |
| ENSMUSG00000029223 | 12_Uchl1  | 55.1745 | -2.13673 | 2.94E-05 | 0.001247 | 13.1462 | 19.2695 | 28.9565 | 124.619 | 59.2349 | 85.8208 |
| ENSMUSG00000029227 | 15_Fip1l1 | 1761.89 | 0.34363  | 0.285811 | 0.671835 | 2634.29 | 1668.52 | 1609.16 | 1343.58 | 1716.95 | 1598.85 |
| ENSMUSG00000029228 | 15_Lnx1   | 350.349 | 0.53863  | 0.229798 | 0.620993 | 195.17  | 555.416 | 494.329 | 278.949 | 245.524 | 332.703 |
| ENSMUSG00000029229 | 8_Chic2   | 1126.71 | 0.49021  | 0.231041 | 0.622473 | 2079.12 | 966.878 | 902.823 | 847.575 | 1042.19 | 921.692 |
| ENSMUSG00000029231 | 15_Pdgfra | 1759.75 | -0.28219 | 0.341039 | 0.719594 | 2056.87 | 1300.13 | 1407.49 | 1974.92 | 1983.94 | 1835.16 |
| ENSMUSG00000029233 | 15_Srd5a  | 547.166 | 0.01253  | 0.957427 | 0.98909  | 571.353 | 536.147 | 540.866 | 545.518 | 514.228 | 574.882 |
| ENSMUSG00000029234 | 13_Tmem   | 1508.21 | 0.28646  | 0.468243 | 0.804041 | 2560.47 | 1275.19 | 1136.54 | 1234.64 | 1474    | 1368.43 |
| ENSMUSG00000029235 | 14_Pdcl2  | 0.47508 | -0.61882 | 0.873279 | NA       | 0       | 1.1335  | 0       | 0       | 1.71695 | 0       |
| ENSMUSG00000029236 | 4_Nmu     | 8.09275 | -1.02017 | 0.194973 | 0.585764 | 5.05622 | 6.80102 | 4.13665 | 10.7288 | 7.72629 | 14.1075 |
| ENSMUSG00000029238 | 11_Clock  | 5587.65 | 0.00044  | 0.999099 | 0.999484 | 8480.29 | 4441.06 | 3843.98 | 4847.77 | 6300.36 | 5612.45 |
| ENSMUSG00000029245 | 16_Epha5  | 152.755 | -1.32936 | 0.013511 | 0.12414  | 159.777 | 43.0731 | 57.913  | 222.829 | 260.119 | 172.817 |
| ENSMUSG00000029246 | 14_Ppat   | 417.69  | 0.61014  | 0.119726 | 0.470491 | 760.456 | 385.391 | 368.162 | 288.027 | 372.579 | 331.527 |
| ENSMUSG00000029247 | 17_Paics  | 4107.23 | 0.08533  | 0.810571 | 0.945675 | 6116.01 | 3325.7  | 3244.16 | 3704.74 | 4455.5  | 3797.28 |
| ENSMUSG00000029249 | 15_Rest   | 1356.23 | 0.4051   | 0.193966 | 0.583952 | 2054.85 | 1247.99 | 1333.03 | 1088.56 | 1172.68 | 1240.29 |
| ENSMUSG00000029250 | 5_Polr2b  | 2599.2  | 0.10448  | 0.751847 | 0.925804 | 3635.42 | 2269.27 | 2174.84 | 2092.94 | 2772.88 | 2649.87 |
| ENSMUSG00000029253 | 12_Cenpc  | 537.448 | 0.35719  | 0.427943 | 0.77856  | 988.997 | 431.865 | 389.879 | 366.43  | 563.161 | 484.359 |
| ENSMUSG00000029254 | 16_Stap1  | 24.3173 | 1.20117  | 0.047461 | 0.279537 | 47.5285 | 38.5391 | 15.5124 | 11.5541 | 16.3111 | 16.4588 |
| ENSMUSG00000029255 | 8_Gnhr    | 2.65428 | 0.17975  | 0.905231 | 0.974391 | 5.05622 | 3.40051 | 0       | 0.82529 | 4.29238 | 2.35126 |
| ENSMUSG00000029263 | 15_Pigg   | 885.114 | 0.43971  | 0.181611 | 0.567796 | 1383.38 | 860.329 | 812.851 | 663.535 | 782.931 | 807.656 |
| ENSMUSG00000029265 | 4_Dr1     | 1035.34 | 0.69679  | 0.135192 | 0.499246 | 2222.72 | 843.326 | 775.621 | 719.655 | 830.147 | 820.588 |
| ENSMUSG00000029267 | 17_Mtf2   | 1005.54 | 0.45834  | 0.31775  | 0.698985 | 1979.01 | 800.253 | 712.537 | 801.359 | 982.956 | 757.104 |
| ENSMUSG00000029269 | 11_Sult1b | 12.1282 | 0.31243  | 0.694005 | 0.905638 | 26.2924 | 5.66751 | 8.27329 | 9.07822 | 12.8772 | 10.5807 |
| ENSMUSG00000029270 | 10_Fam6c  | 430.793 | 0.22212  | 0.660763 | 0.895438 | 845.4   | 273.174 | 273.019 | 377.159 | 451.559 | 364.445 |
| ENSMUSG00000029275 | 17_Gfi1   | 2.39864 | 0.49747  | 0.742004 | 0.922751 | 1.01124 | 3.40051 | 4.13665 | 4.12646 | 1.71695 | 0       |
| ENSMUSG00000029276 | 13_Glmn   | 312.845 | 0.27173  | 0.621964 | 0.878215 | 660.343 | 179.093 | 187.183 | 283.901 | 318.495 | 248.057 |
| ENSMUSG00000029279 | 15_Brdt   | 47.4456 | 0.64991  | 0.196234 | 0.588086 | 91.012  | 38.5391 | 44.4689 | 42.0899 | 40.3484 | 28.2151 |
| ENSMUSG00000029280 | 13_Smr3a  | 0.2751  | -1.54073 | 0.703687 | NA       | 0       | 0       | 0       | 1.65058 | 0       | 0       |
| ENSMUSG00000029282 | 3_Amnt    | 0.28616 | -1.57932 | 0.696464 | NA       | 0       | 0       | 0       | 0       | 1.71695 | 0       |
| ENSMUSG00000029283 | 17_Cdc7   | 263.585 | 0.49301  | 0.153221 | 0.528352 | 384.273 | 272.041 | 267.848 | 160.107 | 251.534 | 245.706 |
| ENSMUSG00000029286 | 12_Enam   | 0.13755 | -0.79206 | 0.84609  | NA       | 0       | 0       | 0       | 0.82529 | 0       | 0       |
| ENSMUSG00000029287 | 14_Tgfb3  | 2381.8  | -0.19376 | 0.515243 | 0.82969  | 2751.6  | 1667.38 | 2247.23 | 2562.53 | 2699.05 | 2363.01 |
| ENSMUSG00000029290 | 12_Zfp32f | 1542.53 | 0.43295  | 0.221265 | 0.612045 | 2449.23 | 1527.96 | 1339.24 | 1039.87 | 1451.68 | 1447.2  |
| ENSMUSG00000029291 | 11_Rufy3  | 828.306 | 0.06728  | 0.618897 | 0.947571 | 1062.82 | 758.313 | 721.845 | 884.713 | 802.676 | 739.47  |
| ENSMUSG00000029298 | 15_Gbp9   | 3042.53 | 3.06135  | 3.62E-12 | 1.08E-09 | 8315.46 | 4836.66 | 3150.06 | 472.893 | 824.138 | 656     |
| ENSMUSG00000029299 | 14_Abcg3  | 6.2584  | 0.57307  | 0.50949  | 0.827179 | 8.08995 | 10.2015 | 4.13665 | 4.95175 | 4.29238 | 5.87814 |
| ENSMUSG00000029304 | 14_Spp1   | 1470.2  | -1.21917 | 0.000186 | 0.00546  | 1095.18 | 792.319 | 763.211 | 2294.31 | 2360.81 | 1515.38 |
| ENSMUSG00000029306 | 8_Ibsp    | 2.07306 | -3.31045 | 0.132609 | 0.495086 | 0       | 1.1335  | 0       | 6.60234 | 0       | 4.70251 |
| ENSMUSG00000029307 | 7_Dmp1    | 0.8907  | -0.51569 | 0.828523 | NA       | 0       | 1.1335  | 1.03416 | 0.82529 | 0       | 2.35126 |
| ENSMUSG00000029309 | 7_Spard1  | 5271.04 | -1.04612 | 0.000828 | 0.016997 | 4278.57 | 2458.57 | 3581.3  | 7498.61 | 7458.45 | 6350.74 |
| ENSMUSG00000029310 | 13_Nudt9  | 662.905 | -0.00282 | 0.994215 | 0.998043 | 365.059 | 817.256 | 804.578 | 695.721 | 612.953 | 681.864 |
| ENSMUSG00000029311 | 16_Hsd17  | 1630.46 | -0.65835 | 0.022201 | 0.175284 | 1534.06 | 1009.95 | 1250.3  | 2156.49 | 2073.22 | 1758.74 |
| ENSMUSG00000029312 | 12_Klhl8  | 331.586 | -0.37409 | 0.188405 | 0.576303 | 243.71  | 311.713 | 311.283 | 426.676 | 330.514 | 365.62  |
| ENSMUSG00000029313 | 18_Aff1   | 2989.79 | 0.2676   | 0.228552 | 0.61986  | 3085.31 | 3452.65 | 3260.71 | 2582.34 | 2716.22 | 2841.49 |
| ENSMUSG00000029314 | 14_Agpat1 | 200.107 | 1.16247  | 0.000158 | 0.004805 | 313.486 | 301.512 | 215.106 | 127.095 | 127.055 | 116.387 |
| ENSMUSG00000029319 | 8_Coq2    | 914.548 | 0.25138  | 0.322009 | 0.702839 | 850.456 | 1038.29 | 1093.11 | 814.564 | 791.516 | 899.355 |
| ENSMUSG00000029320 | 11_17000  | 2.91852 | 0.53584  | 0.658667 | 0.894702 | 5.05622 | 2.26701 | 3.10248 | 2.47588 | 3.43391 | 1.17563 |
| ENSMUSG00000029321 | 1_Slc10af | 51.8821 | 2.12689  | 1.83E-06 | 0.000131 | 103.147 | 66.8767 | 83.7671 | 23.1082 | 21.4619 | 12.9319 |
| ENSMUSG00000029322 | 12_Plac8  | 12010.3 | 0.68018  | 0.017516 | 0.148434 | 13368.7 | 17912.7 | 13089.4 | 7877.42 | 10773   | 9040.58 |
| ENSMUSG00000029326 | 12_Enoph  | 403.721 | 0.56597  | 0.020438 | 0.164813 | 472.251 | 510.076 | 463.304 | 335.069 | 303.042 | 338.581 |
| ENSMUSG00000029328 | 15_Hnnp   | 4017.88 | 0.43664  | 0.280747 | 0.667117 | 7190.96 | 3367.64 | 3305.18 | 2914.11 | 4017.67 | 3311.74 |
| ENSMUSG00000029330 | 8_Cds1    | 1745.63 | 0.47221  | 0.038652 | 0.246922 | 1895.07 | 2203.53 | 1987.66 | 1426.11 | 1431.94 | 1529.49 |
| ENSMUSG00000029333 | 14_Rasge  | 1118.84 | 0.75395  | 0.009076 | 0.093555 | 1721.14 | 1312.6  | 1179.98 | 721.306 | 861.052 | 916.99  |
| ENSMUSG00000029334 | 14_Prkg2  | 29.7223 | 0.53581  | 0.447308 | 0.790779 | 72.8096 | 18.136  | 14.4783 | 25.5841 | 21.4619 | 25.8638 |
| ENSMUSG00000029335 | 5_Bmp3    | 651.735 | -0.24607 | 0.564429 | 0.850963 | 973.828 | 400.127 | 414.699 | 684.993 | 721.979 | 714.782 |
| ENSMUSG00000029337 | 2_Fgf5    | 0.69454 | 3.00678  | 0.371611 | NA       | 3.03373 | 1.1335  | 0       | 0       | 0       | 0       |
| ENSMUSG00000029338 | 13_Antxr2 | 433.231 | -0.37107 | 0.363489 | 0.736408 | 581.465 | 231.235 | 320.59  | 523.235 | 477.313 | 465.549 |
| ENSMUSG00000029343 | 17_Crybb1 | 445.541 | -3.62569 | 1.83E-05 | 0.000856 | 9.1012  | 82.7457 | 108.587 | 1649.76 | 212.902 | 610.151 |
| ENSMUSG00000029344 | 14_Tpst2  | 187.168 | 0.14276  | 0.282226 | 0.91732  | 113.259 | 240.303 | 235.789 | 207.974 | 139.932 | 185.749 |
| ENSMUSG00000029345 | 13_Tfip11 | 621.399 | 0.42904  | 0.441413 | 0.78682  | 209.328 | 971.412 | 958.668 | 591.735 | 422.371 | 574.882 |
| ENSMUSG00000029346 | 12_Srrd   | 117.405 | 0.00162  | 0.997124 | 0.998621 | 65.7309 | 145.088 | 141.68  | 146.077 | 82.4138 | 123.441 |
| ENSMUSG00000029348 | 11_Aspdh  | 31.3158 | -1.78979 | 0.00035  | 0.008886 | 12.1349 | 12.4685 | 17.5807 | 62.7222 | 39.4899 | 43.4982 |
| ENSMUSG00000029352 | 14_Crybb2 | 390.43  | -3.36182 | 0.00017  | 0.005099 | 7.07871 | 95.2142 | 105.484 | 145.82  | 160.535 | 518.452 |
| ENSMUSG00000029359 | 13_Tesc   | 4.3367  | 0.47606  | 0.673012 | 0.90043  | 1.01124 | 9.06802 | 5.17081 | 4.12646 | 4.29238 | 2.35126 |

|                    |            |         |          |          |          |         |         |         |         |         |         |
|--------------------|------------|---------|----------|----------|----------|---------|---------|---------|---------|---------|---------|
| ENSMUSG00000029361 | 18_Nos1    | 110.573 | -1.51611 | 0.00039  | 0.009566 | 75.8433 | 31.7381 | 64.118  | 195.594 | 156.243 | 139.9   |
| ENSMUSG00000029363 | 14_Rfc5    | 735.208 | 0.55537  | 0.028105 | 0.202638 | 810.007 | 921.538 | 893.516 | 527.362 | 672.187 | 586.638 |
| ENSMUSG00000029364 | 15_Wsb2    | 2024.92 | 0.05437  | 0.90176  | 0.973437 | 959.671 | 2713.61 | 2516.12 | 2271.2  | 1699.78 | 1989.16 |
| ENSMUSG00000029366 | 10_Dck     | 908.7   | 1.1235   | 0.001876 | 0.030954 | 1709    | 1080.23 | 947.292 | 434.929 | 622.396 | 658.352 |
| ENSMUSG00000029368 | 10_Alb     | 0.78499 | -0.28323 | 0.906767 | NA       | 0       | 1.1335  | 1.03416 | 0.82529 | 1.71695 | 0       |
| ENSMUSG00000029370 | 10_Rassf   | 191.95  | 0.22816  | 0.586739 | 0.862567 | 313.486 | 147.355 | 160.295 | 141.95  | 214.619 | 173.993 |
| ENSMUSG00000029371 | 7_Cxcl5    | 70.5979 | 2.51453  | 0.00026  | 0.007091 | 121.349 | 202.897 | 36.1957 | 9.90351 | 30.9052 | 22.3369 |
| ENSMUSG00000029372 | 7_Pbbp     | 38.2053 | 3.32175  | 0.001228 | 0.0229   | 50.5622 | 138.287 | 19.6491 | 14.8553 | 0       | 5.87814 |
| ENSMUSG00000029373 | 7_Pf4      | 40.5064 | -0.74584 | 0.142624 | 0.511466 | 22.2474 | 30.6046 | 38.264  | 61.8969 | 61.8103 | 28.2151 |
| ENSMUSG00000029375 | 6_Cxcl15   | 0       | NA       | NA       | NA       | 0       | 0       | 0       | 0       | 0       | 0       |
| ENSMUSG00000029376 | 8_Mthfd2l  | 311.7   | 0.13746  | 0.76525  | 0.929992 | 549.106 | 201.764 | 228.55  | 255.015 | 334.806 | 300.961 |
| ENSMUSG00000029377 | 5_Ereg     | 715.214 | 0.89685  | 0.054832 | 0.305878 | 1596.75 | 668.767 | 526.388 | 497.651 | 550.284 | 451.441 |
| ENSMUSG00000029378 | 5_Areg     | 142.381 | 1.62702  | 0.000121 | 0.00387  | 229.552 | 295.844 | 119.963 | 67.674  | 69.5366 | 71.7133 |
| ENSMUSG00000029379 | 10_Cxcl3   | 6.18716 | 4.29892  | 0.007916 | 0.08514  | 6.06747 | 28.3376 | 1.03416 | 0.82529 | 0.85848 | 0       |
| ENSMUSG00000029380 | 11_Cxcl1   | 129.705 | 1.96012  | 0.003648 | 0.05004  | 278.092 | 260.706 | 79.6304 | 18.9817 | 42.0654 | 98.7527 |
| ENSMUSG00000029381 | 15_Shroo   | 438.516 | 0.70059  | 0.20891  | 0.600477 | 165.844 | 847.86  | 615.326 | 400.267 | 286.731 | 315.068 |
| ENSMUSG00000029384 | 5_201010   | 1.61154 | -1.13445 | 0.631456 | NA       | 3.03373 | 0       | 0       | 5.77705 | 0.85848 | 0       |
| ENSMUSG00000029385 | 14_Ccng2   | 1275.28 | 0.77031  | 0.051642 | 0.294431 | 2412.83 | 1370.41 | 1040.37 | 820.341 | 1104.86 | 902.882 |
| ENSMUSG00000029387 | 10_Gtf2h3  | 538.558 | 0.13352  | 0.697848 | 0.905638 | 367.082 | 691.437 | 631.873 | 514.982 | 468.728 | 557.248 |
| ENSMUSG00000029388 | 14_Eif2b1  | 652.539 | 0.09965  | 0.718272 | 0.912538 | 540.004 | 743.578 | 741.494 | 585.132 | 626.688 | 678.337 |
| ENSMUSG00000029389 | 17_Ddx55   | 320.667 | 0.09205  | 0.725577 | 0.915844 | 330.677 | 329.849 | 331.966 | 267.395 | 340.815 | 323.298 |
| ENSMUSG00000029390 | 13_Tmed3   | 7562.54 | 0.40302  | 0.337964 | 0.716073 | 13790.3 | 6343.08 | 5702.37 | 5400.71 | 7021.48 | 7117.25 |
| ENSMUSG00000029392 | 12_Rilpl1  | 237.243 | -0.66256 | 0.052805 | 0.298513 | 151.687 | 182.494 | 217.174 | 377.159 | 238.657 | 256.287 |
| ENSMUSG00000029394 | 11_Cdk2a   | 1749.17 | 0.21749  | 0.450675 | 0.79295  | 1422.82 | 2197.86 | 2021.79 | 1715.78 | 1501.48 | 1635.3  |
| ENSMUSG00000029397 | 15_Rchy1   | 1445.56 | 0.25813  | 0.439901 | 0.785475 | 2183.28 | 1301.26 | 1238.93 | 1218.96 | 1435.37 | 1295.54 |
| ENSMUSG00000029401 | 8_Rilpl2   | 111.769 | -0.30039 | 0.542049 | 0.840912 | 45.506  | 140.554 | 114.792 | 158.456 | 109.027 | 102.28  |
| ENSMUSG00000029402 | 8_Snrnp3l  | 163.154 | -0.00159 | 0.997604 | 0.998756 | 58.6522 | 240.303 | 190.286 | 170.01  | 133.922 | 185.749 |
| ENSMUSG00000029403 | 14_Cdkl2   | 463.692 | 0.3402   | 0.449157 | 0.792216 | 863.603 | 338.917 | 351.615 | 350.749 | 457.568 | 419.699 |
| ENSMUSG00000029404 | 15_Arl6ip4 | 415.479 | -0.07442 | 0.89445  | 0.971192 | 120.338 | 529.346 | 564.652 | 481.971 | 322.787 | 473.778 |
| ENSMUSG00000029405 | 16_G3bp2   | 4626.58 | 0.6116   | 0.154067 | 0.529491 | 9162.88 | 4021.67 | 3593.71 | 3242.57 | 3960.15 | 3778.47 |
| ENSMUSG00000029406 | 15_Pitpnn  | 431.677 | -0.23436 | 0.601711 | 0.870033 | 188.091 | 448.867 | 553.276 | 556.247 | 399.192 | 444.387 |
| ENSMUSG00000029407 | 10_Uso1    | 3880.01 | 0.42423  | 0.193119 | 0.583021 | 5937.02 | 4040.94 | 3361.03 | 2853.86 | 3616.76 | 3470.45 |
| ENSMUSG00000029408 | 13_Abcb9   | 269.208 | 0.48071  | 0.341137 | 0.719594 | 131.462 | 361.587 | 447.792 | 254.19  | 154.526 | 265.692 |
| ENSMUSG00000029410 | 11_Ppef2   | 44.3483 | -2.12225 | 0.000449 | 0.010751 | 17.1912 | 19.2695 | 13.4441 | 115.541 | 71.2536 | 29.3907 |
| ENSMUSG00000029413 | 14_Naaa    | 807.349 | 0.45164  | 0.12628  | 0.483427 | 748.321 | 1046.22 | 1003.14 | 660.234 | 582.047 | 804.129 |
| ENSMUSG00000029414 | 11_Kntc1   | 357.226 | 0.94472  | 0.005428 | 0.065459 | 537.982 | 514.61  | 357.82  | 184.865 | 295.316 | 252.76  |
| ENSMUSG00000029415 | 4_Sdad1    | 1013.88 | 0.30956  | 0.282588 | 0.669423 | 1301.47 | 1117.63 | 947.292 | 738.637 | 1000.13 | 978.122 |
| ENSMUSG00000029416 | 17_Slc15a  | 463.61  | -0.06629 | 0.841711 | 0.953593 | 305.396 | 530.479 | 523.286 | 514.982 | 458.427 | 449.09  |
| ENSMUSG00000029417 | 9_Cxcl9    | 876.226 | 6.64069  | 4.28E-21 | 5.71E-18 | 2513.95 | 1789.8  | 901.789 | 4.95175 | 38.6315 | 8.22939 |
| ENSMUSG00000029419 | 8_Gm996    | 9.93414 | -5.69245 | 0.001432 | 0.025522 | 0       | 0       | 1.03416 | 53.644  | 2.57543 | 2.35126 |
| ENSMUSG00000029420 | 12_Rimbp   | 275.052 | 0.32646  | 0.39935  | 0.759197 | 189.103 | 316.247 | 412.63  | 256.666 | 201.742 | 275.921 |
| ENSMUSG00000029422 | 14_Rsrc2   | 2695.81 | 0.23188  | 0.540643 | 0.84046  | 4366.55 | 2145.72 | 2223.45 | 2155.66 | 2739.4  | 2544.06 |
| ENSMUSG00000029423 | 10_Piwi1   | 0.65846 | 0.36026  | 0.903114 | NA       | 0       | 2.26701 | 0       | 0.82529 | 0.85848 | 0       |
| ENSMUSG00000029426 | 8_Scarb2   | 5676.28 | 0.44441  | 0.221011 | 0.611852 | 9573.45 | 5064.49 | 4992.93 | 4219.72 | 5221.26 | 4985.84 |
| ENSMUSG00000029427 | 11_Zcchc1  | 642.607 | 0.35427  | 0.149036 | 0.522715 | 713.938 | 737.91  | 711.503 | 503.428 | 629.264 | 559.599 |
| ENSMUSG00000029428 | 13_Stx2    | 274.216 | -0.17622 | 0.585934 | 0.862122 | 184.046 | 272.041 | 316.453 | 277.298 | 303.901 | 291.556 |
| ENSMUSG00000029430 | 13_Ran     | 4699.93 | 0.51977  | 0.061732 | 0.328016 | 6697.47 | 5480.49 | 4434.48 | 3552.06 | 4093.22 | 3941.88 |
| ENSMUSG00000029431 | 5_B3gnt4   | 1.86758 | 0.51913  | 0.818984 | 0.948154 | 0       | 3.40051 | 3.10248 | 0       | 0       | 4.70251 |
| ENSMUSG00000029432 | 12_Gbas    | 1267.87 | -0.26166 | 0.326352 | 0.707722 | 1345.97 | 1000.88 | 1112.76 | 1549.9  | 1273.98 | 1323.76 |
| ENSMUSG00000029433 | 14_Diablo  | 923.547 | 0.11915  | 0.611579 | 0.784367 | 998.098 | 924.938 | 961.77  | 804.66  | 947.759 | 904.058 |
| ENSMUSG00000029434 | 12_Vps33   | 1293.1  | 0.20487  | 0.413897 | 0.768871 | 1202.37 | 1464.49 | 1487.12 | 1133.95 | 1146.93 | 1323.76 |
| ENSMUSG00000029436 | 9_Mmp17    | 10.5814 | -0.74978 | 0.342582 | 0.720325 | 3.03373 | 13.602  | 7.23913 | 17.3311 | 12.8772 | 9.40502 |
| ENSMUSG00000029437 | 12_Il31    | 0       | NA       | NA       | NA       | 0       | 0       | 0       | 0       | 0       | 0       |
| ENSMUSG00000029438 | 9_Bcl7a    | 1000.75 | 0.31369  | 0.335589 | 0.713919 | 767.534 | 1181.11 | 1378.54 | 862.431 | 824.996 | 989.879 |
| ENSMUSG00000029439 | 14_Sfswa1  | 1202.43 | 0.1591   | 0.616692 | 0.877103 | 869.67  | 1479.22 | 1457.13 | 1086.08 | 1128.04 | 1194.44 |
| ENSMUSG00000029440 | 15_Psmd5   | 348.207 | 0.07784  | 0.827745 | 0.950974 | 237.642 | 410.328 | 425.04  | 404.393 | 285.014 | 326.825 |
| ENSMUSG00000029442 | 18_Wdr6f   | 71.4338 | -1.01446 | 0.013834 | 0.126103 | 31.3486 | 48.7406 | 62.0497 | 108.113 | 99.5833 | 78.7671 |
| ENSMUSG00000029446 | 14_Psph    | 294.812 | 0.1623   | 0.577373 | 0.85743  | 244.721 | 363.854 | 325.761 | 284.726 | 274.713 | 275.097 |
| ENSMUSG00000029449 | 11_Rhof    | 32.4805 | -0.02866 | 0.967577 | 0.991241 | 10.1124 | 45.3401 | 41.3665 | 47.0417 | 36.9145 | 14.1075 |
| ENSMUSG00000029451 | 14_Gm13    | 0.7043  | 1.73793  | 0.616215 | NA       | 0       | 3.40051 | 0       | 0.82529 | 0       | 0       |
| ENSMUSG00000029452 | 18_Tmem    | 135.751 | -0.16329 | 0.655861 | 0.893821 | 98.0907 | 111.083 | 174.773 | 132.047 | 133.922 | 164.588 |
| ENSMUSG00000029454 | 15_Mapk8   | 807.792 | 0.07574  | 0.767736 | 0.930788 | 786.748 | 861.462 | 838.705 | 669.312 | 891.099 | 799.427 |
| ENSMUSG00000029455 | 14_Aldh2   | 2718.18 | -0.42808 | 0.374604 | 0.744881 | 957.648 | 2642.2  | 3353.79 | 3727.85 | 2479.28 | 3148.33 |
| ENSMUSG00000029456 | 12_Acad1   | 329.365 | 0.02306  | 0.961997 | 0.990106 | 134.495 | 367.255 | 494.329 | 331.768 | 326.221 | 322.122 |
| ENSMUSG00000029458 | 18_Brap    | 1422.13 | 0.32315  | 0.297256 | 0.680822 | 1108.32 | 1803.4  | 1830.47 | 1211.53 | 1248.23 | 1330.81 |
| ENSMUSG00000029461 | 15_Fam1f   | 1557.7  | -0.21252 | 0.41418  | 0.768913 | 1656.42 | 1261.59 | 1411.63 | 1638.21 | 1859.46 | 1518.91 |
| ENSMUSG00000029462 | 18_Vps29   | 1376.14 | -0.03149 | 0.920272 | 0.977317 | 1773.72 | 1209.45 | 1100.35 | 1361.73 | 1592.47 | 1219.13 |
| ENSMUSG00000029463 | 5_Fam21f   | 144.423 | -0.62818 | 0.044709 | 0.26957  | 120.338 | 107.683 | 112.724 | 194.769 | 192.299 | 138.724 |
| ENSMUSG00000029464 | 10_Gpn3    | 285.155 | -0.0951  | 0.737013 | 0.920922 | 260.901 | 265.24  | 300.941 | 324.34  | 242.091 | 317.42  |
| ENSMUSG00000029465 | 14_Arpc3   | 3600.7  | 0.27555  | 0.470075 | 0.804531 | 2210.58 | 5053.16 | 4566.86 | 3226.07 | 3021.84 | 3525.71 |
| ENSMUSG00000029466 | 11_Anapc   | 1105.9  | 0.16354  | 0.662267 | 0.895681 | 672.477 | 1457.68 | 1375.43 | 1051.42 | 970.937 | 1107.44 |
| ENSMUSG00000029467 | 15_Atp2a2  | 9657.54 | 0.69749  | 0.008808 | 0.091872 | 12527.3 | 13311.9 | 10003.4 | 6343.2  | 7799.26 | 7960.18 |
| ENSMUSG00000029468 | 17_P2rx7   | 451.982 | 0.20202  | 0.486221 | 0.81371  | 404.498 | 474.938 | 570.857 | 376.333 | 400.909 | 484.359 |
| ENSMUSG00000029469 | 14_lft81   | 499.355 | -0.10421 | 0.798982 | 0.940596 | 752.366 | 372.922 | 318.522 | 465.465 | 564.878 | 521.979 |
| ENSMUSG00000029470 | 15_P2rx4   | 540.021 | -0.08339 | 0.801534 | 0.942169 | 357.98  | 605.291 | 610.155 | 617.319 | 494.483 | 554.896 |

|                    |           |         |          |          |          |         |         |         |         |         |         |
|--------------------|-----------|---------|----------|----------|----------|---------|---------|---------|---------|---------|---------|
| ENSMUSG00000029471 | 13_Camk1  | 609.819 | -0.1351  | 0.602628 | 0.870033 | 495.51  | 580.353 | 668.068 | 626.397 | 658.452 | 630.137 |
| ENSMUSG00000029472 | 13_Anapc  | 5319.49 | -0.01724 | 0.947374 | 0.986649 | 4325.09 | 5344.47 | 6193.59 | 5230.7  | 5495.11 | 5327.95 |
| ENSMUSG00000029474 | 7_Rnf34   | 973.389 | 0.02892  | 0.905569 | 0.974391 | 1101.25 | 929.472 | 918.335 | 906.171 | 952.909 | 1032.2  |
| ENSMUSG00000029475 | 17_Kdm2l  | 762.997 | 0.40205  | 0.105124 | 0.440631 | 754.388 | 888.666 | 962.804 | 663.535 | 636.131 | 672.459 |
| ENSMUSG00000029477 | 16_Morn3  | 1.34071 | -1.48383 | 0.475784 | NA       | 0       | 1.1335  | 1.03416 | 3.30117 | 2.57543 | 0       |
| ENSMUSG00000029478 | 16_Ncor2  | 962.094 | 0.29261  | 0.668331 | 0.898206 | 162.81  | 1411.21 | 1603.98 | 981.273 | 661.027 | 952.259 |
| ENSMUSG00000029480 | 13_Dhx37  | 273.614 | 0.40141  | 0.42374  | 0.775388 | 116.293 | 437.532 | 380.571 | 241.811 | 219.77  | 245.706 |
| ENSMUSG00000029482 | 4_Aacs    | 1642.45 | 0.44532  | 0.388518 | 0.752641 | 680.567 | 2749.88 | 2251.37 | 1469.02 | 1066.23 | 1637.65 |
| ENSMUSG00000029484 | 12_Anxa3  | 1176.29 | 0.22954  | 0.353612 | 0.729438 | 1428.89 | 1234.38 | 1145.85 | 1046.47 | 1176.97 | 1025.15 |
| ENSMUSG00000029486 | 13_Mrpl1  | 399.336 | 0.46188  | 0.364835 | 0.738098 | 844.389 | 291.31  | 252.335 | 299.581 | 376.871 | 331.527 |
| ENSMUSG00000029490 | 3_Mfsd7a  | 226.795 | 0.29283  | 0.430276 | 0.780048 | 158.765 | 281.109 | 309.214 | 171.661 | 215.478 | 224.545 |
| ENSMUSG00000029491 | 7_Pde6b   | 497.231 | -2.4539  | 0.000467 | 0.011105 | 220.451 | 191.562 | 48.6056 | 1403.82 | 888.524 | 230.423 |
| ENSMUSG00000029499 | 11_Pxmp2  | 45.8873 | -0.8549  | 0.066993 | 0.343341 | 30.3373 | 31.7381 | 36.1957 | 86.6557 | 48.0747 | 42.3226 |
| ENSMUSG00000029500 | 16_Pgam1  | 397.743 | -0.23586 | 0.672933 | 0.90042  | 110.226 | 545.215 | 440.553 | 475.368 | 333.089 | 482.007 |
| ENSMUSG00000029501 | 14_Ankle2 | 1392.5  | 0.35932  | 0.246695 | 0.638314 | 2042.71 | 1374.94 | 1277.19 | 1074.53 | 1341.8  | 1243.81 |
| ENSMUSG00000029502 | 14_Golga  | 2167.26 | 0.20727  | 0.369583 | 0.741046 | 2351.14 | 2383.76 | 2232.75 | 1813.99 | 2042.32 | 2179.61 |
| ENSMUSG00000029503 | 16_P2rx2  | 3.18129 | -0.02883 | 0.980945 | 0.993796 | 2.02249 | 3.40051 | 4.13665 | 5.77705 | 2.57543 | 1.17563 |
| ENSMUSG00000029504 | 5_Ddx51   | 476.916 | 0.17935  | 0.525959 | 0.833782 | 410.565 | 567.885 | 540.866 | 420.074 | 418.937 | 503.169 |
| ENSMUSG00000029505 | 17_Ep400  | 2343.29 | 0.49648  | 0.062603 | 0.330345 | 2335.97 | 3089.93 | 2801.54 | 1669.57 | 2046.61 | 2116.13 |
| ENSMUSG00000029507 | 16_Pus1   | 260.817 | 0.59125  | 0.35241  | 0.728866 | 62.6971 | 447.734 | 430.211 | 222.829 | 186.29  | 215.14  |
| ENSMUSG00000029510 | 15_Gpc2   | 423.631 | 0.45037  | 0.255085 | 0.646116 | 307.418 | 525.945 | 633.941 | 262.443 | 370.004 | 442.036 |
| ENSMUSG00000029512 | 11_Ulk1   | 862.257 | 0.0973   | 0.815254 | 0.947066 | 460.116 | 1037.16 | 1176.88 | 969.719 | 731.422 | 798.251 |
| ENSMUSG00000029513 | 14_Prkab1 | 2010.63 | 0.27242  | 0.464591 | 0.801934 | 1274.17 | 2851.89 | 2473.71 | 1820.59 | 1721.25 | 1922.15 |
| ENSMUSG00000029516 | 19_Cit    | 312.637 | -0.44074 | 0.274822 | 0.661235 | 151.687 | 282.242 | 361.957 | 421.724 | 309.052 | 349.161 |
| ENSMUSG00000029517 | 13_Ankrd1 | 0.3409  | 1.98467  | 0.623395 | NA       | 1.01124 | 0       | 1.03416 | 0       | 0       | 0       |
| ENSMUSG00000029518 | 15_Rab35  | 1465.51 | 0.13506  | 0.65555  | 0.893662 | 1112.37 | 1847.61 | 1642.25 | 1405.47 | 1313.47 | 1471.89 |
| ENSMUSG00000029521 | 7_Chek2   | 260.152 | 0.4092   | 0.280664 | 0.667117 | 379.217 | 269.774 | 240.96  | 147.727 | 257.543 | 265.692 |
| ENSMUSG00000029522 | 12_Pla2g1 | 0.57232 | -2.56648 | 0.518957 | NA       | 0       | 0       | 0       | 0       | 3.43391 | 0       |
| ENSMUSG00000029524 | 16_Sirt4  | 121.174 | -0.42004 | 0.281894 | 0.668558 | 66.7421 | 111.083 | 133.407 | 164.233 | 130.489 | 121.09  |
| ENSMUSG00000029526 | 5_170012  | 1.70707 | 0.01511  | 0.992671 | 0.997763 | 2.02249 | 1.1335  | 2.06832 | 3.30117 | 1.71695 | 0       |
| ENSMUSG00000029528 | 17_Pxn    | 1384.75 | 0.12661  | 0.765814 | 0.930135 | 704.837 | 1766    | 1865.63 | 1415.38 | 1152.93 | 1403.7  |
| ENSMUSG00000029530 | 15_Ccr9   | 112.215 | 0.81587  | 0.037053 | 0.241012 | 200.226 | 120.151 | 108.587 | 70.9751 | 78.1214 | 95.2259 |
| ENSMUSG00000029534 | 17_St7    | 359.69  | -0.07027 | 0.860045 | 0.94376  | 410.565 | 316.247 | 325.761 | 315.262 | 412.927 | 377.377 |
| ENSMUSG00000029535 | 4_Trip1   | 736.176 | -0.18174 | 0.561834 | 0.849933 | 481.352 | 802.52  | 785.963 | 794.757 | 790.657 | 761.807 |
| ENSMUSG00000029536 | 8_Gatc    | 564.507 | 0.01656  | 0.959213 | 0.989695 | 766.523 | 469.27  | 467.441 | 574.403 | 589.774 | 519.627 |
| ENSMUSG00000029538 | 13_Srsf9  | 811.751 | 0.18814  | 0.584546 | 0.861237 | 578.432 | 1070.03 | 945.224 | 748.54  | 652.443 | 875.843 |
| ENSMUSG00000029541 | 12_Cyp2w1 | 0.81427 | 0.86512  | 0.719303 | NA       | 0       | 1.1335  | 2.06832 | 0.82529 | 0.85848 | 0       |
| ENSMUSG00000029544 | 16_Cabp1  | 35.852  | -1.43143 | 0.011668 | 0.1127   | 12.1349 | 20.4031 | 25.854  | 80.8787 | 42.9238 | 32.9176 |
| ENSMUSG00000029545 | 13_Acads  | 206.322 | 0.04118  | 0.952648 | 0.988194 | 32.3598 | 281.109 | 314.385 | 241.811 | 151.95  | 216.316 |
| ENSMUSG00000029547 | 10_Ints1  | 447.36  | 0.78337  | 0.298965 | 0.682038 | 59.6634 | 885.266 | 752.87  | 402.743 | 230.93  | 352.688 |
| ENSMUSG00000029550 | 11_Sppl3  | 221.43  | 0.44545  | 0.092224 | 0.413496 | 2117.55 | 2883.63 | 2683.65 | 1879.19 | 1708.37 | 2056.17 |
| ENSMUSG00000029551 | 13_Psmg1  | 175.97  | 0.23352  | 0.745858 | 0.924259 | 26.2924 | 311.713 | 232.686 | 209.624 | 126.196 | 149.305 |
| ENSMUSG00000029552 | 19_Tes    | 494.461 | 0.29112  | 0.360755 | 0.733982 | 451.015 | 694.837 | 487.09  | 527.362 | 391.466 | 414.997 |
| ENSMUSG00000029553 | 10_Tfec   | 32.6071 | -0.59162 | 0.227653 | 0.618748 | 29.3261 | 28.3376 | 20.6832 | 45.3911 | 47.2162 | 24.6882 |
| ENSMUSG00000029554 | 15_Mad1l  | 527.256 | 0.35154  | 0.563706 | 0.85076  | 134.495 | 848.994 | 790.099 | 510.856 | 379.447 | 499.642 |
| ENSMUSG00000029556 | 12_Hnf1a  | 0.36128 | 2.05714  | 0.610196 | NA       | 0       | 1.1335  | 1.03416 | 0       | 0       | 0       |
| ENSMUSG00000029557 | 7_Ftsj2   | 87.926  | -0.11628 | 0.828008 | 0.950974 | 31.3486 | 111.083 | 110.655 | 80.0534 | 81.5553 | 112.86  |
| ENSMUSG00000029559 | 15_22100  | 330.332 | -0.38835 | 0.339641 | 0.71831  | 155.732 | 313.98  | 388.845 | 416.773 | 343.391 | 363.269 |
| ENSMUSG00000029560 | 12_Snx8   | 1186.54 | 0.25037  | 0.679879 | 0.902118 | 300.34  | 1729.73 | 1837.71 | 1258.57 | 817.27  | 1175.63 |
| ENSMUSG00000029561 | 17_Oasl2  | 14033.9 | 2.14778  | 3.30E-11 | 7.42E-09 | 24289.1 | 25677.2 | 18733.8 | 3743.53 | 6425.7  | 5333.82 |
| ENSMUSG00000029563 | 16_Foxp2  | 370.434 | -0.54895 | 0.291729 | 0.676701 | 541.016 | 146.222 | 215.106 | 477.844 | 507.36  | 335.054 |
| ENSMUSG00000029564 | 12_49305  | 0.34472 | 1.99863  | 0.620844 | NA       | 0       | 0       | 2.06832 | 0       | 0       | 0       |
| ENSMUSG00000029569 | 9_Tmem1   | 1371.17 | 0.64776  | 0.162532 | 0.540887 | 2880.02 | 1155.04 | 986.59  | 950.737 | 1190.71 | 1063.94 |
| ENSMUSG00000029570 | 5_Lfng    | 278.973 | 0.55189  | 0.294818 | 0.679276 | 133.484 | 388.791 | 472.612 | 248.413 | 142.507 | 288.029 |
| ENSMUSG00000029571 | 14_Tmem   | 2643.84 | 0.03363  | 0.936036 | 0.984172 | 4324.08 | 1895.22 | 1804.61 | 2660.74 | 2810.65 | 2367.71 |
| ENSMUSG00000029575 | 17_Mmab   | 342.34  | -0.21649 | 0.575062 | 0.85664  | 184.046 | 351.386 | 414.699 | 387.062 | 325.363 | 391.484 |
| ENSMUSG00000029576 | 17_Radil  | 43.4012 | -0.26494 | 0.686931 | 0.904498 | 12.1349 | 45.3401 | 61.0155 | 72.6257 | 35.1976 | 34.0932 |
| ENSMUSG00000029577 | 13_Ube3b  | 1330.36 | 0.27582  | 0.610786 | 0.874284 | 455.06  | 1936.02 | 1980.42 | 1368.33 | 950.334 | 1292.01 |
| ENSMUSG00000029578 | 15_Wipi2  | 1693.12 | 0.13404  | 0.643517 | 0.889028 | 1322.71 | 1955.29 | 2037.3  | 1700.1  | 1531.52 | 1611.79 |
| ENSMUSG00000029580 | 14_Actb   | 31572.2 | 0.6365   | 0.100898 | 0.432264 | 21272.5 | 50813.8 | 43191.8 | 25215.2 | 22159   | 26780.8 |
| ENSMUSG00000029581 | 14_Fscn1  | 367.997 | 0.79406  | 0.191842 | 0.580886 | 119.327 | 776.449 | 504.671 | 322.689 | 199.167 | 285.678 |
| ENSMUSG00000029586 | 9_Spdye4  | 0       | NA       | NA       | NA       | 0       | 0       | 0       | 0       | 0       | 0       |
| ENSMUSG00000029587 | 16_Zfp12  | 584.918 | -0.05738 | 0.812967 | 0.946432 | 617.87  | 513.477 | 588.438 | 618.144 | 583.764 | 587.814 |
| ENSMUSG00000029591 | 14_Ung    | 157.901 | 1.08078  | 0.010545 | 0.104648 | 117.304 | 276.575 | 249.233 | 95.7339 | 90.9986 | 117.563 |
| ENSMUSG00000029592 | 11_Usp30  | 468.271 | 0.03128  | 0.951631 | 0.988    | 167.867 | 612.092 | 640.146 | 519.109 | 374.296 | 496.115 |
| ENSMUSG00000029594 | 12_Rbm1l  | 307.978 | 0.45158  | 0.408699 | 0.766014 | 116.293 | 514.61  | 436.416 | 270.696 | 198.308 | 311.541 |
| ENSMUSG00000029595 | 9_Lhx5    | 1.28148 | -0.52059 | 0.762075 | NA       | 1.01124 | 1.1335  | 1.03416 | 2.47588 | 0.85848 | 1.17563 |
| ENSMUSG00000029596 | 13_Sds1   | 11.7974 | -0.48913 | 0.547341 | 0.843648 | 4.04498 | 6.80102 | 18.6149 | 19.807  | 8.58477 | 12.9319 |
| ENSMUSG00000029597 | 14_Sds    | 0.95866 | -3.29387 | 0.186154 | NA       | 0       | 0       | 0       | 0.82529 | 2.57543 | 2.35126 |
| ENSMUSG00000029598 | 12_Plbd2  | 600.12  | -0.03411 | 0.951886 | 0.988    | 171.912 | 734.51  | 872.832 | 761.745 | 514.228 | 545.491 |
| ENSMUSG00000029599 | 13_Ddx54  | 675.228 | 0.50164  | 0.416127 | 0.770319 | 176.968 | 1153.91 | 1043.47 | 601.638 | 424.088 | 651.298 |
| ENSMUSG00000029600 | 10_Rita1  | 84.6827 | 0.1168   | 0.876053 | 0.964907 | 13.1462 | 105.416 | 145.817 | 113.89  | 46.3578 | 83.4696 |
| ENSMUSG00000029601 | 11_Iqcd   | 16.1806 | 0.04776  | 0.94941  | 0.987335 | 4.04498 | 22.6701 | 22.7516 | 20.6323 | 12.8772 | 14.1075 |
| ENSMUSG00000029602 | 13_Rasal1 | 66.2189 | 1.23169  | 0.086957 | 0.399438 | 18.2024 | 104.282 | 156.158 | 51.9934 | 23.1789 | 43.4982 |
| ENSMUSG00000029603 | 15_Dtx1   | 54.29   | -1.36876 | 0.011314 | 0.110328 | 18.2024 | 29.4711 | 43.4348 | 121.318 | 59.2349 | 54.0789 |

|                    |           |         |          |          |          |         |         |         |         |         |         |
|--------------------|-----------|---------|----------|----------|----------|---------|---------|---------|---------|---------|---------|
| ENSMUSG00000029607 | 14_Anrkdi | 12.0749 | -0.03795 | 0.954564 | 0.988723 | 10.1124 | 7.93452 | 17.5807 | 11.5541 | 11.1602 | 14.1075 |
| ENSMUSG00000029608 | 10_Rph3a  | 27.5287 | -1.86031 | 0.049925 | 0.289307 | 17.1912 | 11.335  | 7.23913 | 93.258  | 32.6221 | 3.52688 |
| ENSMUSG00000029610 | 13_Aimp2  | 255.401 | 0.32601  | 0.483352 | 0.811892 | 123.372 | 366.121 | 362.991 | 240.16  | 203.459 | 236.301 |
| ENSMUSG00000029613 | 15_Eif2ak | 1126.78 | 0.29886  | 0.228786 | 0.619893 | 1253.94 | 1325.06 | 1149.99 | 877.286 | 1083.4  | 1071    |
| ENSMUSG00000029614 | 13_Rpl6   | 17908.7 | -0.22481 | 0.512811 | 0.828304 | 10300.5 | 19336.4 | 19911.7 | 19459.6 | 18680.5 | 19763.5 |
| ENSMUSG00000029616 | 9_Erp29   | 1666.2  | 0.00472  | 0.9908   | 0.997381 | 854.501 | 2113.98 | 2038.33 | 1688.55 | 1484.31 | 1817.52 |
| ENSMUSG00000029617 | 10_Ccz1   | 1122.02 | 0.58399  | 0.111098 | 0.453007 | 1948.67 | 1149.37 | 940.053 | 813.738 | 1004.42 | 875.843 |
| ENSMUSG00000029618 | 13_Ocm    | 184.397 | 0.25742  | 0.373134 | 0.744037 | 176.968 | 218.766 | 206.832 | 151.854 | 189.723 | 162.237 |
| ENSMUSG00000029621 | 14_Arpc1i | 2662.75 | 0.07737  | 0.84254  | 0.953741 | 1491.59 | 3508.19 | 3202.8  | 2774.63 | 2378.84 | 2620.47 |
| ENSMUSG00000029622 | 16_Arpc1i | 2222.03 | 0.5659   | 0.239931 | 0.631907 | 1093.16 | 3470.79 | 3393.08 | 2094.59 | 1357.25 | 1923.33 |
| ENSMUSG00000029623 | 14_Pdap1  | 1306.38 | 0.0549   | 0.873914 | 0.964108 | 854.501 | 1658.31 | 1480.92 | 1305.61 | 1143.49 | 1395.47 |
| ENSMUSG00000029624 | 10_Ptcd1  | 349.87  | 0.29603  | 0.61398  | 0.875715 | 103.147 | 544.081 | 509.842 | 394.49  | 245.524 | 302.136 |
| ENSMUSG00000029625 | 16_Cpsf4  | 395.796 | 0.14522  | 0.738939 | 0.921641 | 198.204 | 523.678 | 525.354 | 409.345 | 340.815 | 377.377 |
| ENSMUSG00000029627 | 12_Zksca  | 201.777 | -0.02314 | 0.93703  | 0.984799 | 160.788 | 215.366 | 224.413 | 197.245 | 209.468 | 203.384 |
| ENSMUSG00000029629 | 16_Phfl4  | 3245.8  | 0.25002  | 0.490889 | 0.815233 | 5115.89 | 2741.94 | 2720.88 | 2513.84 | 3166.92 | 3215.34 |
| ENSMUSG00000029632 | 7_Ndufa4  | 10727.2 | 0.33522  | 0.321725 | 0.702705 | 16152.6 | 11145.7 | 8605.26 | 8550.85 | 11025.4 | 8883.04 |
| ENSMUSG00000029634 | 15_Rnf6   | 2046.52 | 0.25121  | 0.344337 | 0.721813 | 2670.7  | 2072.04 | 1929.75 | 1721.56 | 1945.31 | 1939.79 |
| ENSMUSG00000029635 | 15_Cdk8   | 1200.86 | 0.39703  | 0.276718 | 0.663312 | 1967.88 | 1072.29 | 1054.84 | 880.587 | 1195    | 1034.55 |
| ENSMUSG00000029636 | 10_Wasf3  | 338.284 | -0.69616 | 0.066908 | 0.34321  | 367.082 | 177.96  | 229.584 | 491.049 | 417.22  | 346.81  |
| ENSMUSG00000029638 | 17_Glcc1  | 58.5701 | 0.07662  | 0.873803 | 0.964047 | 94.0457 | 49.8741 | 36.1957 | 53.644  | 50.6501 | 67.0108 |
| ENSMUSG00000029640 | 17_Usp12  | 2029.48 | 0.31601  | 0.226597 | 0.617339 | 2685.86 | 2127.58 | 1939.05 | 1727.34 | 1900.67 | 1796.36 |
| ENSMUSG00000029641 | 8_Ras11i  | 10.9726 | -0.79457 | 0.252179 | 0.643929 | 7.07871 | 5.66751 | 11.3758 | 15.6806 | 15.4526 | 10.5807 |
| ENSMUSG00000029642 | 11_Polr1d | 2873.81 | 0.08302  | 0.738923 | 0.921641 | 2520.02 | 3121.67 | 3227.62 | 2572.44 | 2865.6  | 2935.54 |
| ENSMUSG00000029647 | 15_Pan3   | 1980.49 | 0.39116  | 0.271915 | 0.658633 | 3124.74 | 1800    | 1817.02 | 1351    | 1998.53 | 1791.66 |
| ENSMUSG00000029648 | 13_Flt1   | 524.749 | -0.22911 | 0.467438 | 0.803613 | 591.578 | 361.587 | 496.398 | 646.204 | 555.435 | 497.291 |
| ENSMUSG00000029649 | 10_Pomp   | 2743.46 | 0.01915  | 0.309946 | 0.981773 | 2627.21 | 2900.63 | 2757.07 | 2581.51 | 2785.76 | 2808.57 |
| ENSMUSG00000029650 | 10_Slc46e | 190.461 | 0.18217  | 0.583972 | 0.860815 | 249.777 | 159.824 | 197.525 | 198.07  | 145.941 | 191.627 |
| ENSMUSG00000029651 | 16_Mtus2  | 422.451 | 0.32276  | 0.194167 | 0.584278 | 422.7   | 473.804 | 511.91  | 369.731 | 367.428 | 389.133 |
| ENSMUSG00000029655 | 17_N4bp2  | 1897.08 | 0.39649  | 0.406484 | 0.764314 | 3777    | 1408.94 | 1282.36 | 1407.95 | 1923.85 | 1582.4  |
| ENSMUSG00000029656 | 13_C8b    | 0.17236 | 1.1315   | 0.781553 | NA       | 0       | 0       | 1.03416 | 0       | 0       | 0       |
| ENSMUSG00000029657 | 15_Hsph1  | 1277.39 | -0.13693 | 0.64161  | 0.888021 | 1470.35 | 1240.05 | 940.053 | 1212.35 | 1486.02 | 1315.53 |
| ENSMUSG00000029658 | 17_Wdr9e  | 2.75017 | 0.93077  | 0.483539 | 0.811892 | 1.01124 | 5.66751 | 4.13665 | 2.47588 | 0.85848 | 2.35126 |
| ENSMUSG00000029659 | 17_Meda   | 603.695 | -0.04193 | 0.926497 | 0.980037 | 1009.22 | 351.386 | 424.006 | 626.397 | 619.82  | 591.341 |
| ENSMUSG00000029660 | 10_Tex26  | 4.69465 | -0.99344 | 0.347769 | 0.725068 | 2.02249 | 1.1335  | 6.20497 | 6.60234 | 5.15086 | 7.05377 |
| ENSMUSG00000029661 | 16_Col1a  | 26583.5 | -0.23896 | 0.43157  | 0.780264 | 21841.9 | 19923.6 | 31395.1 | 25612.1 | 27903.9 | 32824.7 |
| ENSMUSG00000029663 | 10_Gngt1  | 252.499 | -1.85035 | 0.053206 | 0.299737 | 274.047 | 47.6071 | 7.23913 | 583.482 | 462.719 | 139.9   |
| ENSMUSG00000029664 | 10_Tfpi2  | 14.5988 | 0.39044  | 0.591266 | 0.865241 | 25.2811 | 19.2695 | 5.17081 | 12.3794 | 13.7356 | 11.7563 |
| ENSMUSG00000029669 | 14_Tspan  | 375.327 | 0.27857  | 0.597787 | 0.868406 | 760.456 | 215.366 | 258.54  | 330.117 | 411.21  | 276.273 |
| ENSMUSG00000029670 | 12_Ing3   | 308.172 | 0.07684  | 0.837984 | 0.952966 | 457.082 | 234.635 | 257.506 | 334.243 | 311.627 | 253.936 |
| ENSMUSG00000029671 | 15_Wnt1f  | 302.066 | -1.95017 | 2.93E-07 | 2.65E-05 | 125.394 | 95.2142 | 152.022 | 651.156 | 442.974 | 345.635 |
| ENSMUSG00000029672 | 16_Fam3c  | 646.688 | -0.74835 | 0.057155 | 0.312899 | 732.141 | 354.786 | 360.922 | 865.732 | 889.382 | 677.162 |
| ENSMUSG00000029673 | 17_Auts2  | 1347.16 | 0.63618  | 0.15401  | 0.135199 | 1447.09 | 1700.25 | 1770.48 | 1015.11 | 929.731 | 1220.3  |
| ENSMUSG00000029674 | 13_Limk1  | 189.897 | 0.02762  | 0.95784  | 0.98922  | 67.7534 | 243.703 | 263.711 | 195.594 | 160.535 | 208.086 |
| ENSMUSG00000029675 | 12_Eln    | 895.519 | -0.94153 | 0.03386  | 0.227747 | 343.823 | 607.558 | 888.345 | 1433.53 | 785.506 | 1314.35 |
| ENSMUSG00000029676 | 15_Pot1a  | 1080.51 | 0.19306  | 0.597426 | 0.868406 | 1673.61 | 923.805 | 860.422 | 865.732 | 1101.43 | 1058.07 |
| ENSMUSG00000029679 | 7_Hyal6   | 0.17236 | 1.1315   | 0.781553 | NA       | 0       | 0       | 1.03416 | 0       | 0       | 0       |
| ENSMUSG00000029681 | 12_Bcl7b  | 435.072 | -0.04107 | 0.93062  | 0.981773 | 181.013 | 569.018 | 536.73  | 495.175 | 370.004 | 458.495 |
| ENSMUSG00000029683 | 7_Lmod2   | 86.9322 | -0.03735 | 0.963267 | 0.990106 | 197.193 | 12.4685 | 47.5714 | 99.8604 | 57.518  | 106.982 |
| ENSMUSG00000029684 | 14_Was1   | 2006.67 | 0.56085  | 0.1803   | 0.566642 | 3832.62 | 1643.58 | 1699.13 | 1386.49 | 1700.64 | 1777.55 |
| ENSMUSG00000029685 | 15_Asb15  | 6.67002 | -1.15649 | 0.269242 | 0.656292 | 8.08995 | 1.1335  | 3.10248 | 14.8553 | 3.43391 | 9.40502 |
| ENSMUSG00000029686 | 15_Cul1   | 5817.64 | 0.30442  | 0.425027 | 0.776698 | 9412.66 | 5385.27 | 4489.3  | 4142.97 | 6000.75 | 5474.9  |
| ENSMUSG00000029687 | 16_Ezh2   | 906.09  | 0.52888  | 0.150708 | 0.524129 | 1432.93 | 956.676 | 821.124 | 528.187 | 900.542 | 797.076 |
| ENSMUSG00000029695 | 13_Aass   | 254.408 | -1.44982 | 0.003249 | 0.046093 | 230.564 | 63.4762 | 114.792 | 376.333 | 421.512 | 319.771 |
| ENSMUSG00000029697 | 6_Fezf1   | 0       | NA       | NA       | NA       | 0       | 0       | 0       | 0       | 0       | 0       |
| ENSMUSG00000029699 | 13_Ssc4d  | 47.3488 | -0.0342  | 0.94132  | 0.985902 | 29.3261 | 64.6097 | 46.5373 | 55.2946 | 37.773  | 50.552  |
| ENSMUSG00000029700 | 11_Slc13e | 6.13992 | 1.06353  | 0.309884 | 0.692089 | 17.1912 | 5.66751 | 2.06832 | 4.95175 | 3.43391 | 3.52688 |
| ENSMUSG00000029701 | 15_Rbm2i  | 1021.35 | 0.21389  | 0.352611 | 0.728926 | 1046.64 | 1131.24 | 1112.76 | 872.334 | 984.673 | 980.474 |
| ENSMUSG00000029703 | 10_Lrwd1  | 244.856 | 0.34891  | 0.559835 | 0.848761 | 67.7534 | 381.99  | 373.332 | 249.238 | 182.856 | 213.964 |
| ENSMUSG00000029705 | 17_Cux1   | 4255.9  | 0.30728  | 0.227034 | 0.617753 | 4180.48 | 5014.62 | 4926.75 | 3284.66 | 3864.86 | 4264    |
| ENSMUSG00000029706 | 15_Pax4   | 0.17236 | 1.1315   | 0.781553 | NA       | 0       | 0       | 1.03416 | 0       | 0       | 0       |
| ENSMUSG00000029707 | 6_Fscn3   | 0.67821 | 0.08307  | 0.977472 | NA       | 0       | 0       | 2.06832 | 0.82529 | 0       | 1.17563 |
| ENSMUSG00000029708 | 9_Gcc1    | 664.584 | 0.17883  | 0.43724  | 0.784976 | 700.792 | 691.437 | 724.947 | 656.933 | 591.491 | 621.907 |
| ENSMUSG00000029710 | 15_Ephb4  | 824.842 | 0.01607  | 0.973437 | 0.993027 | 340.789 | 928.339 | 1219.28 | 954.863 | 691.074 | 814.71  |
| ENSMUSG00000029712 | 14_Actl6b | 2.05712 | -2.33749 | 0.22336  | 0.613683 | 2.02249 | 0       | 0       | 7.42763 | 1.71695 | 1.17563 |
| ENSMUSG00000029713 | 15_Gnb2   | 3204.41 | 0.36941  | 0.618273 | 0.877535 | 395.397 | 5074.69 | 5367.3  | 3505.84 | 1999.39 | 2883.82 |
| ENSMUSG00000029714 | 11_Gigyf1 | 620.984 | -0.00018 | 0.999713 | 0.999741 | 262.924 | 699.371 | 900.755 | 802.184 | 511.652 | 549.018 |
| ENSMUSG00000029715 | 5_Pop7    | 111.711 | 0.40034  | 0.517873 | 0.831239 | 32.3598 | 196.096 | 153.056 | 122.143 | 77.2629 | 89.3477 |
| ENSMUSG00000029716 | 13_Tfr2   | 7.64398 | -2.17385 | 0.025057 | 0.189294 | 5.05622 | 1.1335  | 2.06832 | 18.9817 | 6.86782 | 11.7563 |
| ENSMUSG00000029718 | 14_Pcolce | 3030.36 | -0.30682 | 0.562274 | 0.850204 | 904.052 | 3060.46 | 4163.53 | 3807.9  | 2765.15 | 3481.03 |
| ENSMUSG00000029720 | 9_Gm206   | 292.545 | 0.306    | 0.623488 | 0.879151 | 76.8546 | 307.179 | 586.37  | 259.967 | 272.137 | 252.76  |
| ENSMUSG00000029722 | 15_Agfg2  | 1639.89 | 0.39493  | 0.22982  | 0.620993 | 1315.63 | 2026.7  | 2246.2  | 1380.71 | 1201.87 | 1668.22 |
| ENSMUSG00000029723 | 16_Tsc22  | 1594.66 | 0.57376  | 0.379348 | 0.747316 | 349.891 | 2661.46 | 2711.57 | 1430.23 | 941.749 | 1473.06 |
| ENSMUSG00000029725 | 10_Ppp1r  | 44.6459 | 0.1272   | 0.859773 | 0.960099 | 9.1012  | 78.2117 | 52.7422 | 60.2463 | 33.4806 | 34.0932 |
| ENSMUSG00000029726 | 16_Mepce  | 826.101 | 0.01899  | 0.96815  | 0.991244 | 345.846 | 1060.96 | 1087.94 | 963.116 | 668.754 | 829.993 |
| ENSMUSG00000029727 | 7_Cyp3a1  | 773.027 | 0.62338  | 0.159819 | 0.538152 | 1499.68 | 614.359 | 698.059 | 439.881 | 690.215 | 695.972 |

|                    |           |         |          |          |          |         |         |         |         |         |         |
|--------------------|-----------|---------|----------|----------|----------|---------|---------|---------|---------|---------|---------|
| ENSMUSG00000029729 | 12_Zkscai | 1717.25 | 0.26286  | 0.497636 | 0.819569 | 2860.81 | 1363.6  | 1395.08 | 1384.84 | 1625.1  | 1674.09 |
| ENSMUSG00000029730 | 16_Mcm7   | 1108.28 | 0.76408  | 0.075365 | 0.36756  | 705.849 | 1855.54 | 1623.63 | 701.499 | 748.592 | 1014.57 |
| ENSMUSG00000029735 | 17_Tpk1   | 182.463 | 0.02355  | 0.953681 | 0.988458 | 279.103 | 124.685 | 147.885 | 168.36  | 194.874 | 179.871 |
| ENSMUSG00000029736 | 15_Nobox  | 1.40609 | -2.68531 | 0.263418 | NA       | 0       | 1.1335  | 0       | 4.95175 | 0       | 2.35126 |
| ENSMUSG00000029752 | 12_Asn5   | 319.587 | 0.9548   | 0.011703 | 0.11285  | 457.082 | 504.409 | 304.043 | 206.323 | 289.307 | 156.359 |
| ENSMUSG00000029754 | 13_Dlx6   | 0.52982 | 2.61357  | 0.388937 | NA       | 1.01124 | 1.1335  | 1.03416 | 0       | 0       | 0       |
| ENSMUSG00000029755 | 10_Dlx5   | 8.07863 | 1.22666  | 0.145694 | 0.516044 | 10.1124 | 10.2015 | 13.4441 | 1.65058 | 6.00934 | 7.05377 |
| ENSMUSG00000029757 | 16_Dync1  | 117.62  | -1.79473 | 4.88E-06 | 0.000291 | 67.7534 | 34.0051 | 55.8447 | 207.974 | 148.517 | 191.627 |
| ENSMUSG00000029759 | 9_Pon3    | 1735.6  | 0.36382  | 0.378348 | 0.746641 | 3099.46 | 1347.73 | 1412.66 | 1451.69 | 1741.85 | 1360.2  |
| ENSMUSG00000029761 | 16_Cald1  | 2430.57 | -0.88486 | 0.061477 | 0.327248 | 2930.59 | 920.404 | 1272.02 | 3314.37 | 3554.95 | 2591.08 |
| ENSMUSG00000029762 | 6_Akr1b8  | 388.39  | 1.28092  | 0.025585 | 0.1917   | 225.507 | 1079.09 | 346.444 | 200.546 | 250.675 | 228.072 |
| ENSMUSG00000029763 | 17_Exoc4  | 1556.81 | 0.094    | 0.681367 | 0.902515 | 1621.02 | 1731.99 | 1469.54 | 1459.12 | 1533.24 | 1525.96 |
| ENSMUSG00000029765 | 12_Plxna4 | 385.371 | -1.43055 | 0.000152 | 0.004665 | 260.901 | 124.685 | 239.925 | 621.445 | 591.491 | 473.778 |
| ENSMUSG00000029767 | 16_Calu   | 6902.98 | -0.11401 | 0.729176 | 0.917707 | 9171.99 | 5438.55 | 5280.43 | 6842.5  | 7829.31 | 6855.09 |
| ENSMUSG00000029769 | 16_Ccdc1  | 218.65  | -1.45397 | 0.000258 | 0.007066 | 87.9783 | 97.4812 | 165.466 | 414.297 | 292.741 | 253.936 |
| ENSMUSG00000029771 | 12_Irf5   | 498.202 | 1.15718  | 0.004308 | 0.056066 | 369.104 | 904.535 | 790.099 | 277.298 | 310.769 | 337.405 |
| ENSMUSG00000029772 | 17_Ahcy12 | 1801.75 | -0.81654 | 0.16539  | 0.141942 | 1786.87 | 1026.95 | 1101.38 | 2423.06 | 2577.15 | 1895.11 |
| ENSMUSG00000029775 | 14_Klhdc1 | 1961.18 | 0.02933  | 0.900548 | 0.973058 | 2228.78 | 1872.55 | 1841.84 | 1898.17 | 1953.04 | 1972.7  |
| ENSMUSG00000029776 | 11_Hibad1 | 2448.25 | 0.17684  | 0.626688 | 0.880584 | 3818.46 | 1915.62 | 2060.05 | 2114.4  | 2463.83 | 2317.16 |
| ENSMUSG00000029777 | 10_Gars   | 2117.27 | 0.45085  | 0.073795 | 0.363567 | 2417.89 | 2772.55 | 2145.89 | 1623.35 | 1926.42 | 1817.52 |
| ENSMUSG00000029778 | 12_Adcya  | 127.587 | -0.40255 | 0.262905 | 0.65235  | 117.304 | 81.6122 | 130.304 | 116.366 | 145.941 | 173.993 |
| ENSMUSG00000029780 | 14_Nt5c3  | 1497.03 | 1.50783  | 0.001636 | 0.028107 | 3707.22 | 1690.05 | 1248.23 | 629.698 | 1043.91 | 663.054 |
| ENSMUSG00000029781 | 7_Fkbp9   | 4182.77 | -0.59187 | 0.019654 | 0.161119 | 3580.82 | 2743.08 | 3685.75 | 5187.79 | 5010.93 | 4888.26 |
| ENSMUSG00000029782 | 18_Tmem   | 1044.63 | 0.41806  | 0.247847 | 0.639365 | 1709    | 962.344 | 913.165 | 743.588 | 980.381 | 959.312 |
| ENSMUSG00000029784 | 12_Ssmer  | 2.04609 | -0.45128 | 0.747541 | 0.924734 | 2.02249 | 1.1335  | 2.06832 | 3.30117 | 2.57543 | 1.17563 |
| ENSMUSG00000029787 | 10_Av19   | 1350.35 | 0.46139  | 0.287847 | 0.673109 | 2583.73 | 1096.1  | 1013.48 | 1090.21 | 1249.94 | 1068.65 |
| ENSMUSG00000029788 | 13_Cpa5   | 0.35746 | 2.04359  | 0.612655 | NA       | 1.01124 | 1.1335  | 0       | 0       | 0       | 0       |
| ENSMUSG00000029790 | 16_Cep41  | 310.023 | 0.42895  | 0.214231 | 0.605026 | 463.15  | 342.318 | 261.643 | 217.052 | 296.175 | 279.799 |
| ENSMUSG00000029797 | 12_Sspo   | 20.7708 | -0.16543 | 0.82907  | 0.951083 | 6.06747 | 11.335  | 41.3665 | 25.5841 | 21.4619 | 18.81   |
| ENSMUSG00000029798 | 11_Herc6  | 4044.57 | 2.36333  | 1.78E-06 | 0.000129 | 11325.9 | 5435.15 | 3557.52 | 898.743 | 1761.59 | 1288.49 |
| ENSMUSG00000029802 | 13_Abcg2  | 610.159 | -0.29673 | 0.514906 | 0.82938  | 917.199 | 301.512 | 424.006 | 654.457 | 725.413 | 638.366 |
| ENSMUSG00000029804 | 16_Herc3  | 1164.94 | 0.08735  | 0.77509  | 0.93336  | 1542.15 | 1022.42 | 1036.23 | 1214.83 | 1205.3  | 968.717 |
| ENSMUSG00000029810 | 15_Tmem   | 3567.04 | 0.156    | 0.702202 | 0.907074 | 1910.24 | 4608.82 | 4760.25 | 3645.32 | 3204.69 | 3272.95 |
| ENSMUSG00000029811 | 14_Aoc1   | 50.5798 | 2.1005   | 1.80E-05 | 0.000845 | 78.8771 | 70.2772 | 96.177  | 10.7288 | 18.028  | 29.3907 |
| ENSMUSG00000029814 | 10_lgf2bp | 17.2931 | 0.33017  | 0.583003 | 0.860399 | 11.1237 | 27.2041 | 19.6491 | 15.6806 | 17.1695 | 12.9319 |
| ENSMUSG00000029815 | 12_Malsu  | 302.171 | 0.06531  | 0.837368 | 0.952966 | 387.307 | 292.444 | 247.165 | 254.19  | 335.665 | 296.258 |
| ENSMUSG00000029816 | 10_Gpnm1  | 8027.56 | -1.44699 | 3.37E-06 | 0.000214 | 3771.94 | 3839.17 | 5314.56 | 13817.9 | 12338.9 | 9082.9  |
| ENSMUSG00000029817 | 11_Tra2a  | 2843.58 | 0.50336  | 0.202316 | 0.953327 | 5052.18 | 2571.92 | 2379.61 | 1880.02 | 2627.8  | 2549.94 |
| ENSMUSG00000029819 | 6_Npy     | 2141.26 | 0.02208  | 0.945006 | 0.986649 | 1513.83 | 2541.31 | 2417.87 | 2304.22 | 1822.55 | 2247.8  |
| ENSMUSG00000029821 | 15_Dfna5  | 253.618 | -0.36694 | 0.486145 | 0.813668 | 405.509 | 112.217 | 146.851 | 309.485 | 321.929 | 225.721 |
| ENSMUSG00000029822 | 15_Osbpl1 | 2563.64 | 0.51966  | 0.037129 | 0.241376 | 2946.77 | 3377.84 | 2736.39 | 1863.51 | 2184.82 | 2272.49 |
| ENSMUSG00000029823 | 16_Luc7l2 | 6302.6  | 0.4218   | 0.329846 | 0.710286 | 11696.1 | 4851.39 | 5104.62 | 4289.04 | 6305.51 | 5568.95 |
| ENSMUSG00000029826 | 14_Zc3ha  | 4119.44 | 1.19708  | 7.78E-05 | 0.00267  | 7175.79 | 5483.89 | 4550.31 | 2107.8  | 2764.3  | 2634.58 |
| ENSMUSG00000029828 | 4_492150  | 8.6713  | -1.09539 | 0.228469 | 0.619809 | 10.1124 | 3.40051 | 3.10248 | 20.6323 | 7.72629 | 7.05377 |
| ENSMUSG00000029829 | 4_Tmem2   | 1.86478 | -0.73073 | 0.714612 | 0.911226 | 0       | 1.1335  | 3.10248 | 5.77705 | 0       | 1.17563 |
| ENSMUSG00000029830 | 15_Svopl  | 12.7803 | -0.71278 | 0.428949 | 0.779158 | 21.2361 | 5.66751 | 2.06832 | 20.6323 | 9.44325 | 17.6344 |
| ENSMUSG00000029831 | 7_Npvf    | 41.701  | -1.49734 | 0.001034 | 0.020024 | 19.2136 | 22.6701 | 23.7857 | 79.2281 | 61.8103 | 43.4982 |
| ENSMUSG00000029832 | 16_Nfe2l3 | 1972.64 | 0.62957  | 0.170624 | 0.552625 | 4016.66 | 1572.17 | 1599.85 | 1166.14 | 1683.47 | 1797.53 |
| ENSMUSG00000029833 | 17_Trim24 | 1024.28 | 0.66611  | 0.063253 | 0.332024 | 1811.14 | 1013.35 | 945.224 | 708.926 | 868.779 | 798.251 |
| ENSMUSG00000029836 | 15_Cbx3   | 3679.13 | 0.513    | 0.291043 | 0.67624  | 7749.17 | 2622.93 | 2607.12 | 2726.77 | 3381.54 | 2987.27 |
| ENSMUSG00000029838 | 11_Ptn    | 1924.95 | -1.22894 | 0.001766 | 0.029475 | 1613.95 | 697.104 | 1142.75 | 2815.07 | 3150.61 | 2130.24 |
| ENSMUSG00000029840 | 8_Mtpn    | 5180.22 | 0.61264  | 0.20623  | 0.597529 | 11128.7 | 3995.6  | 3667.14 | 3462.1  | 4690.72 | 4137.03 |
| ENSMUSG00000029843 | 4_Slc13a4 | 400.783 | -1.17114 | 0.001271 | 0.023465 | 233.597 | 179.093 | 326.795 | 703.149 | 495.341 | 466.724 |
| ENSMUSG00000029844 | 9_Hoxa1   | 0.28616 | -1.57932 | 0.696464 | NA       | 0       | 0       | 0       | 0       | 1.71695 | 0       |
| ENSMUSG00000029847 | 13_20101  | 463.976 | 0.73375  | 0.091836 | 0.413078 | 289.216 | 793.452 | 655.658 | 289.678 | 350.259 | 405.592 |
| ENSMUSG00000029851 | 5_Tcaf2   | 1102.68 | 0.51919  | 0.061967 | 0.32886  | 1456.19 | 1280.86 | 1159.3  | 740.287 | 933.164 | 1046.31 |
| ENSMUSG00000029859 | 6_Epha1   | 2763.87 | 0.58912  | 0.240353 | 0.631907 | 1237.76 | 4452.4  | 4271.09 | 2077.26 | 1833.71 | 2711    |
| ENSMUSG00000029860 | 16_Zyx    | 1145.62 | 0.55685  | 0.350903 | 0.727659 | 326.632 | 1936.02 | 1829.43 | 1048.95 | 745.158 | 987.527 |
| ENSMUSG00000029861 | 17_Fam13c | 8.46842 | -3.46    | 0.002392 | 0.0369   | 1.01124 | 2.26701 | 1.03416 | 28.0599 | 13.7356 | 4.70251 |
| ENSMUSG00000029862 | 15_Clc1   | 29.7287 | -0.76173 | 0.173954 | 0.557641 | 27.3036 | 19.2695 | 19.6491 | 57.7705 | 21.4619 | 32.9176 |
| ENSMUSG00000029863 | 13_Casp2  | 1914.98 | 0.67796  | 0.007241 | 0.080018 | 2648.45 | 2332.75 | 2089.01 | 1309.74 | 1571.01 | 1538.9  |
| ENSMUSG00000029864 | 7_Gstk1   | 481.017 | -0.28337 | 0.261688 | 0.650954 | 401.464 | 409.195 | 491.227 | 528.187 | 552.859 | 503.169 |
| ENSMUSG00000029866 | 13_Kel    | 0.14308 | -0.79206 | 0.84609  | NA       | 0       | 0       | 0       | 0       | 0.85848 | 0       |
| ENSMUSG00000029868 | 12_Trpv6  | 71.5225 | -0.43805 | 0.421305 | 0.77414  | 28.3148 | 45.3401 | 108.587 | 80.8787 | 88.4231 | 77.5914 |
| ENSMUSG00000029869 | 7_Ephb6   | 445.29  | 0.17682  | 0.76539  | 0.929992 | 118.316 | 618.893 | 680.478 | 474.543 | 333.948 | 445.563 |
| ENSMUSG00000029875 | 4_Ccdc18  | 1.59355 | -4.0461  | 0.05965  | NA       | 0       | 0       | 0       | 4.95175 | 3.43391 | 1.17563 |
| ENSMUSG00000029878 | 5_Dbph2   | 17.1588 | -1.08192 | 0.133509 | 0.497269 | 19.2136 | 3.40051 | 10.3416 | 21.4576 | 30.9052 | 17.6344 |
| ENSMUSG00000029910 | 14_Mad2l  | 539.377 | 0.50983  | 0.232446 | 0.624408 | 1000.12 | 473.804 | 427.109 | 368.906 | 544.274 | 422.05  |
| ENSMUSG00000029911 | 14_Ssbp1  | 728.607 | 0.05799  | 0.893154 | 0.971054 | 1193.27 | 531.613 | 504.671 | 576.054 | 843.024 | 723.011 |
| ENSMUSG00000029913 | 14_Prdm5  | 100.493 | -0.9903  | 0.101044 | 0.101733 | 84.9445 | 48.7406 | 68.2547 | 157.631 | 139.932 | 103.455 |
| ENSMUSG00000029915 | 14_Clec5e | 56.72   | 1.15895  | 0.049565 | 0.287892 | 130.451 | 74.8112 | 29.9907 | 37.1382 | 42.0654 | 25.8638 |
| ENSMUSG00000029916 | 11_Agk    | 291.6   | -0.29686 | 0.254886 | 0.645986 | 257.867 | 258.439 | 268.882 | 293.804 | 361.419 | 309.19  |
| ENSMUSG00000029917 | 5_C1300   | 0.88156 | 2.03122  | 0.452042 | NA       | 1.01124 | 0       | 3.10248 | 0       | 0       | 1.17563 |
| ENSMUSG00000029918 | 9_Mrps33  | 899.56  | -0.35107 | 0.210326 | 0.602436 | 981.918 | 694.837 | 694.957 | 946.61  | 1055.07 | 1023.97 |
| ENSMUSG00000029919 | 5_Hpgds   | 2938.67 | 0.1585   | 0.697431 | 0.905638 | 4809.48 | 2144.59 | 2345.48 | 2236.54 | 3190.96 | 2904.98 |

|                    |            |         |          |          |          |         |         |         |         |         |         |
|--------------------|------------|---------|----------|----------|----------|---------|---------|---------|---------|---------|---------|
| ENSMUSG00000029920 | 9_Smarca   | 978.924 | 0.47752  | 0.298268 | 0.681298 | 1938.56 | 800.253 | 679.444 | 713.053 | 913.42  | 828.818 |
| ENSMUSG00000029922 | 15_Mkrm1   | 4823.69 | 0.25224  | 0.282288 | 0.668986 | 4912.62 | 5755.93 | 5064.29 | 4013.4  | 4652.09 | 4543.8  |
| ENSMUSG00000029923 | 4_Rab19    | 256.606 | 0.6811   | 0.016078 | 0.139212 | 289.216 | 364.988 | 293.702 | 182.39  | 187.148 | 222.194 |
| ENSMUSG00000029924 | 12_Slc37e  | 1381.13 | 0.18652  | 0.428364 | 0.778836 | 1387.43 | 1560.83 | 1462.3  | 1171.09 | 1314.33 | 1390.77 |
| ENSMUSG00000029925 | 13_Tbxas   | 86.6642 | -0.38706 | 0.332764 | 0.711855 | 69.7759 | 81.6122 | 74.4596 | 127.095 | 104.734 | 62.3083 |
| ENSMUSG00000029992 | 14_Gfpt1   | 6084.97 | 0.51895  | 0.082005 | 0.386149 | 8815.02 | 6899.63 | 5788.2  | 4143.79 | 5501.12 | 5362.04 |
| ENSMUSG00000029993 | 16_Nfu1    | 648.475 | 0.05736  | 0.801238 | 0.941972 | 674.5   | 675.568 | 633.941 | 621.445 | 635.273 | 650.122 |
| ENSMUSG00000029994 | 17_Anxa4   | 2645.66 | 0.47465  | 0.082426 | 0.38729  | 3688.01 | 2968.64 | 2574.03 | 1977.4  | 2329.91 | 2335.97 |
| ENSMUSG00000029998 | 17_Pcyox   | 2729.18 | -0.00379 | 0.988103 | 0.996838 | 3185.42 | 2431.36 | 2559.55 | 2556.76 | 2698.19 | 2943.77 |
| ENSMUSG00000029999 | 14_Tgfa    | 821.035 | 0.9298   | 0.002881 | 0.042182 | 820.119 | 1388.54 | 1021.75 | 574.403 | 515.945 | 605.448 |
| ENSMUSG00000030000 | 10_Add2    | 151.877 | -1.86584 | 7.89E-09 | 1.15E-06 | 62.6971 | 61.2092 | 72.3913 | 287.202 | 223.204 | 204.559 |
| ENSMUSG00000030001 | 4_Figla    | 0.4821  | -2.30304 | 0.543942 | NA       | 0       | 0       | 0       | 0       | 1.71695 | 1.17563 |
| ENSMUSG00000030002 | 15_Dusp1   | 3866.5  | 0.37262  | 0.281671 | 0.668256 | 6045.22 | 3612.47 | 3431.35 | 2806.82 | 3923.24 | 3379.93 |
| ENSMUSG00000030004 | 6_Nat8     | 6.83855 | -0.73604 | 0.514288 | 0.828999 | 5.05622 | 0       | 10.3416 | 13.2047 | 7.72629 | 4.70251 |
| ENSMUSG00000030007 | 8_Cct7     | 4007.76 | 0.09806  | 0.767048 | 0.93046  | 2706.09 | 5044.09 | 4681.65 | 3906.93 | 3709.48 | 3998.31 |
| ENSMUSG00000030008 | 9_Pradc1   | 152.441 | 0.01032  | 0.975772 | 0.993653 | 108.203 | 167.758 | 183.047 | 157.631 | 141.649 | 156.359 |
| ENSMUSG00000030016 | 14_Zfp63f  | 3230.41 | 0.34543  | 0.508048 | 0.826498 | 6737.92 | 2066.38 | 2041.43 | 2277.81 | 3370.38 | 2888.52 |
| ENSMUSG00000030017 | 2_Reg3g    | 73.5948 | 1.32761  | 0.000664 | 0.014546 | 134.495 | 98.6148 | 82.7329 | 37.1382 | 49.7917 | 38.7957 |
| ENSMUSG00000030019 | 6_Fbxl14   | 597.713 | 0.43864  | 0.14003  | 0.507286 | 873.715 | 630.228 | 559.481 | 514.157 | 477.313 | 531.384 |
| ENSMUSG00000030020 | 13_Prickle | 1710.5  | 0.18213  | 0.540334 | 0.84046  | 2355.19 | 1510.96 | 1588.47 | 1503.68 | 1607.07 | 1697.61 |
| ENSMUSG00000030022 | 14_Adam1   | 228.26  | 0.16118  | 0.639562 | 0.887027 | 307.418 | 226.701 | 189.252 | 245.112 | 231.789 | 169.29  |
| ENSMUSG00000030029 | 14_Lrig1   | 4654.84 | 0.13446  | 0.743378 | 0.923259 | 2548.34 | 5838.67 | 6227.72 | 4562.22 | 3663.98 | 5088.12 |
| ENSMUSG00000030030 | 5_170000   | 21.0326 | -0.40201 | 0.532483 | 0.837502 | 7.07871 | 21.5366 | 25.854  | 31.3611 | 18.028  | 22.3369 |
| ENSMUSG00000030031 | 14_Kbtbd1  | 95.8647 | 0.43593  | 0.462396 | 0.799907 | 211.35  | 74.8112 | 44.4689 | 69.3246 | 95.2909 | 79.9427 |
| ENSMUSG00000030032 | 12_Wdr54   | 148.969 | -0.12634 | 0.779933 | 0.935056 | 69.7759 | 173.426 | 184.081 | 153.504 | 129.63  | 183.398 |
| ENSMUSG00000030034 | 11_Ino80t  | 138.742 | -0.11791 | 0.848878 | 0.956469 | 34.3823 | 174.559 | 190.286 | 169.185 | 93.574  | 170.466 |
| ENSMUSG00000030035 | 14_Wbp1    | 578.085 | -0.38401 | 0.492292 | 0.815688 | 151.687 | 608.691 | 744.596 | 835.196 | 541.699 | 586.638 |
| ENSMUSG00000030036 | 8_Mogs     | 621.543 | 0.41971  | 0.409173 | 0.766366 | 261.912 | 1029.22 | 842.842 | 560.374 | 431.814 | 603.097 |
| ENSMUSG00000030037 | 9_Mrpl53   | 236.285 | 0.34461  | 0.170465 | 0.552537 | 258.879 | 267.507 | 266.814 | 209.624 | 210.327 | 204.559 |
| ENSMUSG00000030041 | 9_M1ap     | 4.67487 | 0.47984  | 0.648441 | 0.890982 | 2.02249 | 9.06802 | 5.17081 | 2.47588 | 3.43391 | 5.87814 |
| ENSMUSG00000030042 | 15_Pole4   | 1861.03 | 0.05008  | 0.901796 | 0.973437 | 2988.23 | 1318.26 | 1373.37 | 1691.02 | 2026.01 | 1769.32 |
| ENSMUSG00000030043 | 11_Tacr1   | 418.751 | -1.8356  | 1.74E-08 | 2.14E-06 | 205.283 | 130.353 | 214.071 | 732.86  | 664.461 | 565.477 |
| ENSMUSG00000030045 | 10_Mrpl1f  | 582.65  | 0.04633  | 0.854545 | 0.958493 | 638.095 | 547.482 | 590.506 | 533.139 | 644.716 | 541.964 |
| ENSMUSG00000030046 | 6_Bmp10    | 2.09508 | 4.59942  | 0.017293 | 0.146973 | 6.06747 | 3.40051 | 3.10248 | 0       | 0       | 0       |
| ENSMUSG00000030047 | 14_Arhgaj  | 219.869 | 0.69936  | 0.065091 | 0.337891 | 177.979 | 370.655 | 267.848 | 182.39  | 141.649 | 178.695 |
| ENSMUSG00000030048 | 5_Gkn3     | 7.13386 | -1.64657 | 0.23854  | 0.630554 | 0       | 0       | 10.3416 | 16.5058 | 7.72629 | 8.22939 |
| ENSMUSG00000030050 | 4_Gkn1     | 363.797 | -0.08398 | 0.808314 | 0.944822 | 259.89  | 412.595 | 386.776 | 302.057 | 347.683 | 473.778 |
| ENSMUSG00000030051 | 10_Aplf    | 196.703 | 0.20747  | 0.475484 | 0.807043 | 245.732 | 209.698 | 176.842 | 177.438 | 177.705 | 192.803 |
| ENSMUSG00000030054 | 4_Gp9      | 0.30991 | 0.16972  | 0.966824 | NA       | 0       | 0       | 1.03416 | 0.82529 | 0       | 0       |
| ENSMUSG00000030055 | 16_Rab43   | 42.5105 | -0.08721 | 0.923516 | 0.978604 | 4.04498 | 44.2066 | 75.4938 | 76.7522 | 14.5941 | 39.9713 |
| ENSMUSG00000030056 | 8_Isy1     | 807.02  | -0.03367 | 0.893811 | 0.971063 | 856.524 | 807.054 | 729.084 | 715.528 | 894.533 | 839.398 |
| ENSMUSG00000030057 | 15_Cnbp    | 8916.99 | 0.18893  | 0.609808 | 0.873429 | 14199.9 | 7312.23 | 6987.83 | 7921.16 | 8951.34 | 8129.47 |
| ENSMUSG00000030058 | 17_Copg1   | 2947.84 | 0.13224  | 0.732132 | 0.919789 | 1689.79 | 4026.2  | 3532.7  | 2829.93 | 2731.67 | 2876.76 |
| ENSMUSG00000030059 | 15_Tmf1    | 2002.81 | 0.31107  | 0.411558 | 0.767412 | 3331.04 | 1660.58 | 1661.9  | 1587.04 | 1978.79 | 1797.53 |
| ENSMUSG00000030060 | 14_Hmce    | 278.35  | -0.21336 | 0.548582 | 0.843853 | 175.957 | 326.449 | 270.95  | 246.762 | 309.052 | 340.932 |
| ENSMUSG00000030061 | 16_Uba3    | 2595.82 | 0.57053  | 0.198047 | 0.590191 | 5109.82 | 2264.74 | 1932.85 | 1725.69 | 2471.56 | 2070.28 |
| ENSMUSG00000030062 | 7_Rpn1     | 4704.02 | 0.19178  | 0.474222 | 0.806964 | 4124.87 | 5862.48 | 5061.19 | 4060.44 | 4300.97 | 4814.2  |
| ENSMUSG00000030064 | 16_Frmd4   | 2657.3  | 0.327    | 0.175669 | 0.559171 | 2988.23 | 3051.39 | 2831.53 | 2028.57 | 2505.89 | 2538.18 |
| ENSMUSG00000030067 | 17_Foxp1   | 2953.28 | 0.63466  | 0.02941  | 0.209006 | 4489.92 | 3003.78 | 3283.46 | 2143.28 | 2159.93 | 2639.28 |
| ENSMUSG00000030068 | 4_Gm206    | 1.27388 | -0.59177 | 0.811402 | NA       | 3.03373 | 0       | 0       | 0       | 3.43391 | 1.17563 |
| ENSMUSG00000030069 | 15_Prok2   | 1.49478 | 4.10408  | 0.138461 | NA       | 0       | 7.93452 | 1.03416 | 0       | 0       | 0       |
| ENSMUSG00000030074 | 9_Gxylt2   | 297.415 | -1.01925 | 0.024252 | 0.185316 | 305.396 | 99.7483 | 184.081 | 332.593 | 442.974 | 419.699 |
| ENSMUSG00000030075 | 10_Cntn3   | 33.7683 | -1.5773  | 0.008343 | 0.088442 | 28.3148 | 9.06802 | 13.4441 | 67.674  | 52.3671 | 31.742  |
| ENSMUSG00000030077 | 11_Ch1     | 5818.28 | 0.73853  | 0.115088 | 0.461151 | 12368.5 | 4638.29 | 4820.23 | 3238.45 | 4698.44 | 5145.72 |
| ENSMUSG00000030079 | 15_Ruvbl   | 802.453 | 0.06724  | 0.854089 | 0.958493 | 503.6   | 1063.23 | 896.618 | 775.775 | 699.659 | 875.843 |
| ENSMUSG00000030082 | 14_Sec61   | 3800.43 | 0.44056  | 0.197918 | 0.590112 | 2819.35 | 5555.3  | 4754.04 | 3208.74 | 2971.19 | 3493.97 |
| ENSMUSG00000030083 | 11_Abtb1   | 430.618 | 0.24038  | 0.631721 | 0.88279  | 175.957 | 589.422 | 633.941 | 452.26  | 325.363 | 406.767 |
| ENSMUSG00000030084 | 11_Plxna1  | 1824.09 | 0.35609  | 0.499735 | 0.821504 | 667.421 | 2807.69 | 2669.17 | 1785.11 | 1337.51 | 1677.62 |
| ENSMUSG00000030086 | 16_Chchd   | 141.121 | -0.17375 | 0.778803 | 0.934571 | 31.3486 | 196.096 | 170.637 | 184.04  | 127.055 | 137.548 |
| ENSMUSG00000030087 | 11_Klf15   | 95.3407 | -0.73683 | 0.137002 | 0.502293 | 56.6297 | 44.2066 | 113.758 | 166.709 | 97.8664 | 92.8746 |
| ENSMUSG00000030088 | 15_Aldh1l  | 498.736 | 0.20149  | 0.722373 | 0.914131 | 151.687 | 767.381 | 681.512 | 519.109 | 364.853 | 507.871 |
| ENSMUSG00000030089 | 15_Slc41e  | 103.908 | -0.92169 | 0.080186 | 0.381206 | 28.3148 | 96.3477 | 91.0062 | 180.739 | 114.177 | 112.86  |
| ENSMUSG00000030091 | 17_Nup21   | 131.788 | 0.12888  | 0.788751 | 0.937308 | 59.6634 | 187.028 | 166.5   | 141.95  | 113.319 | 122.265 |
| ENSMUSG00000030092 | 14_Cntn6   | 18.3826 | -1.13281 | 0.059934 | 0.322098 | 17.1912 | 6.80102 | 10.3416 | 23.9335 | 21.4619 | 30.5663 |
| ENSMUSG00000030093 | 7_Wnt7a    | 10.1753 | -3.11172 | 0.000581 | 0.013047 | 1.01124 | 1.1335  | 4.13665 | 18.1564 | 15.4526 | 21.1613 |
| ENSMUSG00000030094 | 8_Xpc      | 813.502 | -0.17031 | 0.599007 | 0.869086 | 534.948 | 830.858 | 930.745 | 883.888 | 758.894 | 941.678 |
| ENSMUSG00000030095 | 10_Tmem    | 2626.47 | 0.51867  | 0.103213 | 0.436784 | 2233.84 | 3785.9  | 3260.71 | 2014.54 | 1944.45 | 2519.37 |
| ENSMUSG00000030096 | 8_Slc6a6   | 14328.6 | 0.10353  | 0.7204   | 0.913102 | 12686.1 | 13980.6 | 17861   | 16122.9 | 11540.5 | 13780.7 |
| ENSMUSG00000030098 | 15_Grip2   | 22.1819 | -1.92853 | 0.003776 | 0.05123  | 4.04498 | 12.4685 | 11.3758 | 52.8187 | 30.0467 | 22.3369 |
| ENSMUSG00000030101 | 15_Sumf1   | 1134.65 | 0.16395  | 0.571989 | 0.854806 | 1522.93 | 1079.09 | 994.863 | 1010.98 | 1080.82 | 1119.2  |
| ENSMUSG00000030102 | 10_Itp1    | 1565.99 | -1.04753 | 0.000618 | 0.013697 | 1199.34 | 786.651 | 1077.6  | 2454.42 | 2123.87 | 1754.04 |
| ENSMUSG00000030103 | 11_Bhlhe   | 4132.67 | 0.61313  | 0.053247 | 0.299737 | 3492.84 | 5611.97 | 5962.98 | 2985.91 | 2927.41 | 3814.91 |
| ENSMUSG00000030104 | 9_Edem1    | 1924.27 | 0.63755  | 0.052433 | 0.297283 | 3081.26 | 2219.4  | 1727.05 | 1273.43 | 1626.81 | 1617.66 |
| ENSMUSG00000030105 | 8_Arl8b    | 3954.87 | 0.64286  | 0.170079 | 0.5518   | 8247.71 | 3301.89 | 2915.3  | 2396.65 | 3561.82 | 3305.87 |
| ENSMUSG00000030107 | 10_Usp18   | 3217.81 | 2.20621  | 4.72E-11 | 9.86E-09 | 4345.32 | 6861.09 | 4662    | 929.279 | 1440.52 | 1068.65 |

|                    |            |         |          |          |          |         |         |         |         |         |         |
|--------------------|------------|---------|----------|----------|----------|---------|---------|---------|---------|---------|---------|
| ENSMUSG00000030108 | 14_Slc6a1  | 500.38  | -1.99111 | 1.79E-05 | 0.00084  | 107.192 | 188.161 | 308.18  | 1090.21 | 649.009 | 659.527 |
| ENSMUSG00000030109 | 15_Slc6a1  | 61.1726 | -1.49846 | 0.024451 | 0.186095 | 8.08995 | 36.2721 | 51.7081 | 136.173 | 58.3764 | 76.4158 |
| ENSMUSG00000030110 | 13_Ret     | 264.13  | 0.09617  | 0.774759 | 0.933172 | 224.496 | 276.575 | 317.488 | 287.202 | 186.29  | 292.731 |
| ENSMUSG00000030111 | 9_A2m      | 29625.1 | -0.68611 | 0.014221 | 0.128337 | 25108.2 | 19547.3 | 23475.5 | 29138.6 | 41079.8 | 39401.2 |
| ENSMUSG00000030114 | 8_Klrg1    | 6.94665 | 2.83566  | 0.065549 | 0.339553 | 14.1574 | 21.5366 | 1.03416 | 4.95175 | 0       | 0       |
| ENSMUSG00000030116 | 14_Mfp5    | 567.168 | -0.34174 | 0.277166 | 0.663807 | 625.96  | 389.925 | 485.022 | 743.588 | 577.755 | 580.76  |
| ENSMUSG00000030117 | 5_Gdf3     | 1.25049 | 1.4676   | 0.496633 | NA       | 0       | 3.40051 | 2.06832 | 0       | 0.85848 | 1.17563 |
| ENSMUSG00000030120 | 14_Mlf2    | 1636.87 | 0.02518  | 0.959388 | 0.989708 | 646.185 | 2160.46 | 2146.92 | 1931.18 | 1235.35 | 1701.13 |
| ENSMUSG00000030122 | 12_Ptms    | 1860.98 | -0.362   | 0.414613 | 0.769167 | 785.737 | 1937.16 | 2163.47 | 2595.54 | 1665.45 | 2018.55 |
| ENSMUSG00000030123 | 15_Plxnd1  | 367.39  | -0.62875 | 0.313766 | 0.695217 | 73.8208 | 317.381 | 474.68  | 646.204 | 321.929 | 370.323 |
| ENSMUSG00000030124 | 2_Lag3     | 27.3929 | 0.67783  | 0.28387  | 0.670589 | 12.1349 | 47.6071 | 41.3665 | 23.1082 | 15.4526 | 24.6882 |
| ENSMUSG00000030125 | 11_Lrrc23  | 15.52   | -1.79684 | 0.018828 | 0.15649  | 9.1012  | 4.53401 | 7.23913 | 30.5358 | 33.4806 | 8.22939 |
| ENSMUSG00000030126 | 17_Tmcc1   | 1007.42 | 0.15381  | 0.005963 | 0.818407 | 1076.98 | 1043.96 | 1062.08 | 888.84  | 989.824 | 982.825 |
| ENSMUSG00000030127 | 15_Cops7   | 1875.6  | 0.27079  | 0.506083 | 0.825443 | 1068.89 | 2556.05 | 2528.52 | 1911.38 | 1481.73 | 1707.01 |
| ENSMUSG00000030131 | 8_Mug2     | 0.49501 | 1.08006  | 0.734751 | NA       | 1.01124 | 1.1335  | 0       | 0.82529 | 0       | 0       |
| ENSMUSG00000030134 | 11_Rasge   | 20.3806 | -0.83554 | 0.133769 | 0.497275 | 21.2361 | 10.2015 | 12.4099 | 29.7105 | 24.0374 | 24.6882 |
| ENSMUSG00000030137 | 8_Tuba8    | 49.1468 | 0.40281  | 0.518904 | 0.831665 | 20.2249 | 92.9472 | 54.8106 | 55.2946 | 25.7543 | 45.8495 |
| ENSMUSG00000030138 | 8_Bms1     | 1402.51 | 0.29863  | 0.203818 | 0.594896 | 1591.7  | 1589.17 | 1460.24 | 1129.83 | 1298.02 | 1346.09 |
| ENSMUSG00000030142 | 10_Clec4e  | 46.9138 | 5.90492  | 4.10E-11 | 9.00E-09 | 101.124 | 141.688 | 34.1273 | 1.65058 | 1.71695 | 1.17563 |
| ENSMUSG00000030143 | 7_Gm888    | 53.9213 | -1.13927 | 0.03293  | 0.224247 | 40.4498 | 19.2695 | 41.3665 | 113.065 | 63.5273 | 45.8495 |
| ENSMUSG00000030144 | 4_Clec4d   | 30.953  | 2.33714  | 0.006565 | 0.074783 | 43.4835 | 103.149 | 8.27329 | 11.5541 | 5.15086 | 14.1075 |
| ENSMUSG00000030145 | 14_Zfp24f  | 123.987 | -0.27298 | 0.505424 | 0.825121 | 165.844 | 73.6777 | 97.2112 | 127.095 | 151.95  | 128.143 |
| ENSMUSG00000030147 | 12_Clec4i  | 8.90716 | 0.78098  | 0.382705 | 0.749501 | 19.2136 | 10.2015 | 4.13665 | 3.30117 | 6.00934 | 10.5807 |
| ENSMUSG00000030148 | 15_Clec4e  | 63.3326 | 1.31425  | 0.011488 | 0.111516 | 129.439 | 75.9447 | 66.1863 | 47.867  | 42.9238 | 17.6344 |
| ENSMUSG00000030149 | 15_Klrk1   | 101.358 | 4.53662  | 1.02E-07 | 1.03E-05 | 308.43  | 200.63  | 74.4596 | 6.60234 | 18.028  | 0       |
| ENSMUSG00000030154 | 10_Klr1b1f | 5.87767 | 6.08376  | 6.18E-05 | 0.002251 | 11.1237 | 15.869  | 8.27329 | 0       | 0       | 0       |
| ENSMUSG00000030155 | 7_Clec2e   | 2.0153  | 1.04418  | 0.646326 | 0.889779 | 8.08995 | 0       | 0       | 1.65058 | 0       | 2.35126 |
| ENSMUSG00000030156 | 5_Cd69     | 45.654  | 3.7814   | 3.43E-10 | 6.19E-08 | 127.417 | 79.3452 | 48.6056 | 4.95175 | 7.72629 | 5.87814 |
| ENSMUSG00000030157 | 15_Clec2d  | 1551.19 | 1.61346  | 0.002805 | 0.041483 | 4348.35 | 1464.49 | 1201.7  | 536.44  | 974.371 | 781.793 |
| ENSMUSG00000030158 | 12_Clec1f  | 0.67798 | 2.97576  | 0.379561 | NA       | 3.03373 | 0       | 1.03416 | 0       | 0       | 0       |
| ENSMUSG00000030159 | 15_Clec1t  | 4.58809 | -0.0483  | 0.962751 | 0.990106 | 7.07871 | 2.26701 | 4.13665 | 2.47588 | 6.86782 | 4.70251 |
| ENSMUSG00000030161 | 8_Gabara   | 1235.77 | -0.99838 | 0.000754 | 0.015902 | 653.264 | 804.787 | 1015.55 | 1861.86 | 1600.2  | 1478.94 |
| ENSMUSG00000030162 | 14_Olr1    | 1.49266 | 1.31745  | 0.507704 | NA       | 1.01124 | 3.40051 | 2.06832 | 2.47588 | 0       | 0       |
| ENSMUSG00000030165 | 16_Klrd1   | 16.9572 | 3.74598  | 0.000113 | 0.003648 | 50.5622 | 35.1386 | 9.30745 | 3.30117 | 3.43391 | 0       |
| ENSMUSG00000030166 | 14_Rad52   | 253.599 | 0.20623  | 0.511247 | 0.827179 | 321.576 | 235.769 | 257.506 | 188.992 | 275.571 | 242.179 |
| ENSMUSG00000030167 | 15_Klrc1   | 12.4496 | 3.37255  | 0.000375 | 0.009333 | 33.3711 | 18.136  | 16.5466 | 0       | 4.29238 | 2.35126 |
| ENSMUSG00000030168 | 13_Adipor  | 2425.68 | -0.02475 | 0.908089 | 0.974731 | 2468.45 | 2400.76 | 2345.48 | 2440.39 | 2491.3  | 2407.69 |
| ENSMUSG00000030170 | 14_Wnt5b   | 135.952 | -0.89653 | 0.071132 | 0.356233 | 46.5172 | 89.5467 | 148.919 | 201.371 | 123.621 | 205.735 |
| ENSMUSG00000030172 | 15_Erc1    | 1432.18 | 0.27058  | 0.292013 | 0.676701 | 1379.34 | 1758.06 | 1560.55 | 1174.39 | 1268.83 | 1451.9  |
| ENSMUSG00000030173 | 15_Klra5   | 1.51434 | 2.04093  | 0.294027 | NA       | 3.03373 | 2.26701 | 2.06832 | 0       | 1.71695 | 0       |
| ENSMUSG00000030177 | 14_Ccdc7   | 341.888 | 0.17399  | 0.564898 | 0.850965 | 457.082 | 309.446 | 320.59  | 290.503 | 333.948 | 339.756 |
| ENSMUSG00000030180 | 15_Kdm5c   | 2905.22 | 0.29997  | 0.428035 | 0.778631 | 4801.39 | 2405.29 | 2411.66 | 2281.11 | 2932.56 | 2599.31 |
| ENSMUSG00000030187 | 15_Klra2   | 59.0725 | 4.19053  | 1.06E-08 | 1.46E-06 | 180.001 | 112.217 | 43.4348 | 1.65058 | 7.72629 | 9.40502 |
| ENSMUSG00000030188 | 12_Magor   | 286.48  | 0.23992  | 0.596031 | 0.867938 | 510.678 | 201.764 | 218.208 | 227.781 | 315.92  | 244.531 |
| ENSMUSG00000030189 | 15_Ybx3    | 7294.42 | 0.47132  | 0.052355 | 0.29703  | 9444.01 | 7939.05 | 8042.67 | 5829.04 | 5694.28 | 6817.47 |
| ENSMUSG00000030199 | 16_Etv6    | 1690.97 | 0.58025  | 0.022698 | 0.177586 | 1967.88 | 2138.92 | 1972.15 | 1140.55 | 1383.86 | 1542.42 |
| ENSMUSG00000030200 | 13_Bcl2l1  | 48.2679 | 0.34616  | 0.42816  | 0.77871  | 54.6072 | 52.1411 | 54.8106 | 28.0599 | 41.2069 | 58.7814 |
| ENSMUSG00000030201 | 15_Lrp6    | 2955.68 | -0.13811 | 0.67684  | 0.901447 | 3877.11 | 2050.51 | 2515.08 | 3037.08 | 3160.05 | 3094.25 |
| ENSMUSG00000030203 | 17_Dusp1   | 1757.96 | 0.52108  | 0.09569  | 0.419807 | 2647.44 | 1725.19 | 1842.88 | 1187.6  | 1492.89 | 1651.76 |
| ENSMUSG00000030204 | 10_Ddx47   | 1225.27 | 0.34535  | 0.151353 | 0.525101 | 1206.41 | 1479.22 | 1428.18 | 1035.74 | 1135.77 | 1066.29 |
| ENSMUSG00000030205 | 15_Gprc5   | 0.19594 | -0.79206 | 0.84609  | NA       | 0       | 0       | 0       | 0       | 0       | 1.17563 |
| ENSMUSG00000030206 | 13_Gsg1    | 10.1282 | -0.19064 | 0.777966 | 0.934486 | 11.1237 | 7.93452 | 9.30745 | 12.3794 | 9.44325 | 10.5807 |
| ENSMUSG00000030207 | 15_Fam2c   | 543.443 | 0.42131  | 0.209128 | 0.600804 | 448.992 | 740.177 | 677.376 | 497.651 | 367.428 | 529.033 |
| ENSMUSG00000030208 | 15_Emp1    | 157689  | 0.70228  | 0.047466 | 0.279537 | 275259  | 164624  | 146102  | 98118.2 | 129382  | 132646  |
| ENSMUSG00000030209 | 14_Grin2t  | 29.7814 | -1.81753 | 0.002267 | 0.035604 | 19.2136 | 6.80102 | 13.4441 | 65.1981 | 44.6408 | 29.3907 |
| ENSMUSG00000030213 | 12_Alf7ip  | 2242.36 | 0.40623  | 0.113793 | 0.457664 | 3028.68 | 2227.33 | 2411.66 | 1838.75 | 1953.89 | 1993.86 |
| ENSMUSG00000030214 | 6_Plbd1    | 1016    | 0.26006  | 0.327786 | 0.708977 | 1154.84 | 1060.96 | 1105.52 | 757.618 | 946.042 | 1071    |
| ENSMUSG00000030216 | 12_Wbp1    | 1177.22 | 0.30434  | 0.206191 | 0.597516 | 1187.2  | 1436.15 | 1279.26 | 1032.44 | 994.975 | 1133.31 |
| ENSMUSG00000030217 | 2_Art4     | 981.081 | 0.03118  | 0.916138 | 0.976756 | 834.277 | 951.009 | 1189.29 | 809.612 | 966.645 | 1135.66 |
| ENSMUSG00000030218 | 2_Mgp      | 2073.08 | 0.08929  | 0.815219 | 0.947066 | 1256.98 | 2651.26 | 2503.71 | 2432.96 | 1738.42 | 1855.14 |
| ENSMUSG00000030219 | 13_Erp27   | 18.6139 | 0.03812  | 0.949481 | 0.987335 | 29.3261 | 14.7355 | 12.4099 | 20.6323 | 14.5941 | 19.9857 |
| ENSMUSG00000030220 | 13_Arhgdi  | 5347.61 | 0.18377  | 0.563871 | 0.850768 | 4036.89 | 6582.25 | 6443.86 | 4274.19 | 5047.84 | 5700.62 |
| ENSMUSG00000030222 | 13_Rerg    | 607.069 | 0.07941  | 0.785218 | 0.936054 | 679.556 | 482.872 | 708.401 | 579.355 | 537.407 | 654.825 |
| ENSMUSG00000030223 | 14_Ptpro   | 70.6971 | 0.74443  | 0.098699 | 0.426922 | 98.0907 | 111.083 | 56.8789 | 71.8004 | 46.3578 | 39.9713 |
| ENSMUSG00000030224 | 10_Strap   | 2809.61 | 0.31064  | 0.397732 | 0.758456 | 4522.28 | 2588.92 | 2221.38 | 2150.71 | 2802.07 | 2572.27 |
| ENSMUSG00000030225 | 11_Dera    | 596.247 | 0.42518  | 0.073063 | 0.361416 | 679.556 | 712.973 | 657.727 | 522.41  | 468.728 | 536.086 |
| ENSMUSG00000030226 | 12_Lmo3    | 2.05803 | -1.54005 | 0.400567 | 0.75972  | 0       | 0       | 3.10248 | 1.65058 | 1.71695 | 5.87814 |
| ENSMUSG00000030228 | 15_Pik3c2  | 1.44345 | -2.74693 | 0.240233 | NA       | 0       | 1.1335  | 0       | 4.95175 | 2.57543 | 0       |
| ENSMUSG00000030231 | 10_Plekhf  | 1583.48 | 0.039    | 0.862841 | 0.961065 | 1552.26 | 1550.63 | 1711.54 | 1473.97 | 1592.47 | 1620.02 |
| ENSMUSG00000030232 | 17_Aebp2   | 2711.73 | 0.48739  | 0.147124 | 0.519094 | 4333.18 | 2860.96 | 2302.04 | 2006.29 | 2371.97 | 2395.93 |
| ENSMUSG00000030235 | 17_Slco1c  | 76.5415 | -1.39285 | 0.007428 | 0.081461 | 73.8208 | 22.6701 | 29.9907 | 131.221 | 100.442 | 101.104 |
| ENSMUSG00000030236 | 10_Slco1t  | 1.34391 | -2.64735 | 0.197569 | NA       | 1.01124 | 0       | 0       | 3.30117 | 2.57543 | 1.17563 |
| ENSMUSG00000030237 | 14_Slco1e  | 367.516 | -0.98841 | 0.142502 | 0.511466 | 527.87  | 71.4107 | 139.612 | 534.789 | 606.943 | 324.473 |
| ENSMUSG00000030243 | 16_Recql   | 898.522 | 0.22665  | 0.494834 | 0.817604 | 1288.33 | 811.588 | 806.646 | 673.439 | 930.589 | 880.545 |
| ENSMUSG00000030244 | 7_Gys2     | 3.4978  | 1.14216  | 0.427582 | 0.77823  | 3.03373 | 0       | 11.3758 | 1.65058 | 2.57543 | 2.35126 |

|                    |            |         |          |          |          |         |         |         |         |         |         |
|--------------------|------------|---------|----------|----------|----------|---------|---------|---------|---------|---------|---------|
| ENSMUSG00000030245 | 10_Golt1b  | 1129.54 | 0.48663  | 0.130447 | 0.491137 | 1744.4  | 1228.72 | 981.419 | 852.527 | 983.815 | 986.352 |
| ENSMUSG00000030246 | 11_Ldhd    | 1401.01 | -1.34618 | 0.00068  | 0.014754 | 520.791 | 745.845 | 1106.55 | 2660.74 | 1742.71 | 1629.42 |
| ENSMUSG00000030247 | 9_Kcnj8    | 72.4823 | -0.87412 | 0.075544 | 0.368126 | 46.5172 | 28.3376 | 78.5963 | 122.969 | 73.829  | 84.6452 |
| ENSMUSG00000030249 | 15_Abcc9   | 390.742 | -0.26077 | 0.507151 | 0.825942 | 532.926 | 234.635 | 298.873 | 477.844 | 395.758 | 404.416 |
| ENSMUSG00000030254 | 16_Rad18   | 345.321 | 0.92726  | 0.01331  | 0.123205 | 651.241 | 388.791 | 317.488 | 214.576 | 231.789 | 268.043 |
| ENSMUSG00000030255 | 13_Sspn    | 810.592 | -0.82709 | 0.067523 | 0.344734 | 925.289 | 300.378 | 527.422 | 1182.64 | 1082.54 | 845.276 |
| ENSMUSG00000030256 | 11_Bhlhe4  | 965.289 | -0.15611 | 0.744836 | 0.923721 | 1525.97 | 413.729 | 799.407 | 987.05  | 1031.03 | 1034.55 |
| ENSMUSG00000030257 | 16_Srgap3  | 1307.35 | -0.22506 | 0.375847 | 0.745495 | 1280.24 | 1005.42 | 1330.97 | 1382.36 | 1473.15 | 1371.96 |
| ENSMUSG00000030259 | 12_Rassf6  | 628.585 | -0.9034  | 0.023089 | 0.179251 | 625.96  | 273.174 | 414.699 | 1003.56 | 786.365 | 667.757 |
| ENSMUSG00000030263 | 13_Lrrmp   | 58.9153 | 0.58375  | 0.204328 | 0.595303 | 53.5959 | 91.8137 | 67.2205 | 59.421  | 53.2256 | 28.2151 |
| ENSMUSG00000030264 | 14_Thumt1  | 1188.14 | 0.27503  | 0.523824 | 0.832707 | 2097.32 | 907.936 | 897.652 | 858.304 | 1241.36 | 1126.25 |
| ENSMUSG00000030265 | 14_Kras    | 1986.08 | 0.52251  | 0.213683 | 0.604733 | 3778.01 | 1665.12 | 1582.27 | 1441.79 | 1778.76 | 1670.57 |
| ENSMUSG00000030268 | 17_Bcat1   | 172.62  | -1.61355 | 4.26E-05 | 0.001673 | 100.113 | 70.2772 | 84.8012 | 368.906 | 222.346 | 189.276 |
| ENSMUSG00000030269 | 14_Mtmt1   | 604.776 | 0.24063  | 0.342317 | 0.720325 | 612.814 | 673.301 | 679.444 | 632.174 | 503.068 | 527.857 |
| ENSMUSG00000030270 | 11_Cpne9   | 2.60714 | -0.49448 | 0.728151 | 0.917291 | 2.02249 | 4.53401 | 0       | 3.30117 | 3.43391 | 2.35126 |
| ENSMUSG00000030271 | 14_Ogg1    | 124.254 | 0.10871  | 0.799602 | 0.940982 | 71.7983 | 138.287 | 176.842 | 138.649 | 104.734 | 115.212 |
| ENSMUSG00000030272 | 15_Camk1   | 501.54  | -0.6773  | 0.009098 | 0.093728 | 346.857 | 369.522 | 441.587 | 647.855 | 634.414 | 569.004 |
| ENSMUSG00000030275 | 6_Etnk1    | 6855.01 | 0.41071  | 0.302617 | 0.685316 | 12138   | 5925.95 | 5408.66 | 5323.96 | 6739.9  | 5593.64 |
| ENSMUSG00000030276 | 19_Ttll3   | 65.1273 | -0.09228 | 0.876374 | 0.965114 | 19.2136 | 75.9447 | 94.1087 | 82.5292 | 56.6595 | 62.3083 |
| ENSMUSG00000030278 | 11_Cidec   | 0.13755 | -0.79206 | 0.84609  | NA       | 0       | 0       | 0       | 0.82529 | 0       | 0       |
| ENSMUSG00000030279 | 15_C2cd5   | 1195.31 | 0.1524   | 0.548638 | 0.843853 | 1464.28 | 1139.17 | 1171.71 | 1095.99 | 1215.6  | 1085.1  |
| ENSMUSG00000030281 | 16_Il17rc  | 658.181 | 0.77465  | 0.186871 | 0.573937 | 217.418 | 1166.37 | 1108.62 | 608.24  | 382.881 | 465.549 |
| ENSMUSG00000030282 | 14_Cmas    | 4746.48 | 0.49483  | 0.134275 | 0.498302 | 7595.46 | 4609.96 | 4452.07 | 3406.81 | 4275.22 | 4139.39 |
| ENSMUSG00000030283 | 7_St8sia1  | 152.182 | -1.22812 | 0.013462 | 0.123825 | 150.675 | 64.6097 | 57.913  | 276.473 | 222.346 | 141.075 |
| ENSMUSG00000030284 | 11_Credl1  | 204.756 | -0.42194 | 0.390869 | 0.753993 | 74.8321 | 182.494 | 267.848 | 277.298 | 199.167 | 226.896 |
| ENSMUSG00000030286 | 6_Emc3     | 1562.21 | -0.10721 | 0.683322 | 0.902945 | 1734.28 | 1446.35 | 1332    | 1487.18 | 1834.57 | 1538.9  |
| ENSMUSG00000030287 | 15_ltrp2   | 3018.98 | 0.66039  | 0.043573 | 0.265204 | 2780.92 | 4476.2  | 3836.74 | 1899.82 | 2223.46 | 2896.75 |
| ENSMUSG00000030291 | 12_Med21   | 953.202 | 0.36959  | 0.394922 | 0.755773 | 1765.63 | 791.185 | 667.034 | 802.184 | 912.561 | 780.617 |
| ENSMUSG00000030298 | 10_Sec13   | 1542.38 | 0.03918  | 0.925847 | 0.979816 | 765.512 | 2028.97 | 1895.62 | 1629.95 | 1384.72 | 1549.48 |
| ENSMUSG00000030301 | 17_Ccdc9   | 1132.51 | 0.1535   | 0.497217 | 0.819208 | 1256.98 | 1138.04 | 1183.08 | 1124.87 | 1029.31 | 1062.77 |
| ENSMUSG00000030302 | 16_Atp2b1  | 86.2502 | -1.55739 | 0.002263 | 0.035602 | 52.5847 | 23.8036 | 54.8106 | 196.42  | 97.0079 | 92.8746 |
| ENSMUSG00000030303 | 15_Far2    | 98.1992 | 0.90371  | 0.125549 | 0.482199 | 250.789 | 68.0102 | 65.1522 | 66.8487 | 77.2629 | 61.1326 |
| ENSMUSG00000030304 | 11_Ergic2  | 2140.97 | 0.36561  | 0.409591 | 0.766592 | 3968.12 | 1750.13 | 1514.01 | 1530.09 | 2207.14 | 1876.3  |
| ENSMUSG00000030306 | 14_Tmtc1   | 519.876 | -0.37698 | 0.382221 | 0.749425 | 683.601 | 261.839 | 411.596 | 727.908 | 573.463 | 460.846 |
| ENSMUSG00000030307 | 8_Slc6a11  | 33.8077 | -3.46974 | 8.52E-05 | 0.002903 | 10.1124 | 5.66751 | 1.03416 | 108.939 | 61.8103 | 15.2832 |
| ENSMUSG00000030309 | 16_Caprin  | 278.684 | -0.3337  | 0.386076 | 0.751493 | 364.048 | 180.227 | 195.457 | 301.232 | 353.693 | 277.448 |
| ENSMUSG00000030310 | 10_Slc6a1  | 63.4705 | -2.05369 | 0.011877 | 0.113958 | 36.4048 | 28.3376 | 9.30745 | 212.1   | 74.6875 | 19.9857 |
| ENSMUSG00000030313 | 15_Dennd1  | 193.874 | -0.75138 | 0.124038 | 0.478862 | 236.631 | 74.8112 | 122.031 | 284.726 | 268.703 | 176.344 |
| ENSMUSG00000030314 | 16_Atg7    | 747.791 | 0.29388  | 0.383145 | 0.749884 | 533.937 | 971.412 | 965.907 | 688.294 | 665.32  | 661.878 |
| ENSMUSG00000030315 | 15_Vgll4   | 1008.54 | 0.09989  | 0.829252 | 0.951083 | 459.105 | 1252.52 | 1418.87 | 1176.04 | 811.261 | 933.448 |
| ENSMUSG00000030316 | 13_Tamm    | 203.859 | 0.00938  | 0.976412 | 0.993796 | 152.698 | 243.703 | 217.174 | 198.07  | 194.016 | 217.491 |
| ENSMUSG00000030317 | 8_Timp4    | 4.18173 | 0.21266  | 0.83963  | 0.95317  | 5.05622 | 2.26701 | 6.20497 | 5.77705 | 3.43391 | 2.35126 |
| ENSMUSG00000030319 | 8_Cand2    | 330.55  | -0.318   | 0.220975 | 0.611852 | 273.036 | 278.842 | 330.932 | 389.538 | 347.683 | 363.269 |
| ENSMUSG00000030321 | 15_Efcab1  | 43.072  | -1.20747 | 0.003294 | 0.046503 | 22.2474 | 23.8036 | 32.059  | 65.1981 | 57.518  | 57.6058 |
| ENSMUSG00000030322 | 12_Mbd4    | 223.201 | 0.27093  | 0.387321 | 0.752114 | 290.227 | 238.036 | 203.73  | 165.884 | 221.487 | 219.842 |
| ENSMUSG00000030323 | 13_lft122  | 530.778 | -0.01368 | 0.970372 | 0.99208  | 317.531 | 607.558 | 659.795 | 574.403 | 479.889 | 545.491 |
| ENSMUSG00000030324 | 8_Rho      | 4825.32 | -2.79781 | 3.85E-05 | 0.001546 | 1485.52 | 1728.59 | 426.075 | 15332.3 | 7409.51 | 2569.92 |
| ENSMUSG00000030325 | 16_Klrb1c  | 6.08488 | 3.64004  | 0.004181 | 0.054923 | 11.1237 | 12.4685 | 10.3416 | 0       | 2.57543 | 0       |
| ENSMUSG00000030327 | 8_Necap1   | 587.259 | -0.06382 | 0.818259 | 0.948003 | 695.736 | 533.88  | 493.295 | 603.289 | 641.282 | 556.072 |
| ENSMUSG00000030329 | 11_Piapn   | 468.392 | -1.21969 | 0.011411 | 0.111025 | 138.54  | 277.708 | 428.143 | 911.948 | 529.68  | 524.33  |
| ENSMUSG00000030330 | 15_Ing4    | 1037.39 | 0.02126  | 0.945325 | 0.986649 | 737.197 | 1141.44 | 1256.51 | 994.477 | 1041.33 | 1053.36 |
| ENSMUSG00000030335 | 6_Mrpl51   | 943.305 | 0.27041  | 0.238636 | 0.630712 | 1027.42 | 1055.29 | 1011.41 | 786.504 | 883.373 | 895.828 |
| ENSMUSG00000030336 | 14_Cd27    | 28.1941 | 0.12728  | 0.838201 | 0.952966 | 12.1349 | 41.9396 | 34.1273 | 16.5058 | 29.1882 | 35.2688 |
| ENSMUSG00000030337 | 16_Vamp1   | 642.396 | -0.22159 | 0.360146 | 0.733776 | 635.061 | 536.147 | 608.087 | 651.981 | 727.13  | 695.972 |
| ENSMUSG00000030339 | 7_Ltbr     | 905.122 | 0.38706  | 0.561448 | 0.849571 | 187.08  | 1521.16 | 1369.23 | 948.261 | 505.643 | 899.355 |
| ENSMUSG00000030340 | 16_Scnn1   | 212.574 | 0.60835  | 0.210618 | 0.602689 | 109.214 | 330.983 | 329.898 | 168.36  | 134.781 | 202.208 |
| ENSMUSG00000030341 | 17_Tnfrsf1 | 2149.11 | 0.62349  | 0.205902 | 0.59724  | 981.918 | 3793.83 | 3043.54 | 1771.08 | 1512.64 | 1791.66 |
| ENSMUSG00000030342 | 8_Cd9      | 8046.98 | 0.18564  | 0.469201 | 0.804529 | 7264.78 | 8827.72 | 9599.09 | 6897.79 | 7363.16 | 8329.32 |
| ENSMUSG00000030344 | 11_Akap3   | 0.48398 | 1.0269   | 0.748454 | NA       | 1.01124 | 0       | 1.03416 | 0       | 0.85848 | 0       |
| ENSMUSG00000030345 | 16_Dyrk4   | 2.05842 | 0.09294  | 0.950132 | 0.987438 | 1.01124 | 1.1335  | 4.13665 | 0.82529 | 1.71695 | 3.52688 |
| ENSMUSG00000030346 | 16_Rad51   | 142.573 | 0.97958  | 0.012923 | 0.121066 | 241.687 | 189.295 | 136.509 | 69.3246 | 121.045 | 97.5771 |
| ENSMUSG00000030347 | 6_D6Wsu    | 504.179 | 0.21518  | 0.549841 | 0.843939 | 740.231 | 502.142 | 382.64  | 387.887 | 544.274 | 467.9   |
| ENSMUSG00000030350 | 8_Prmt8    | 2.90498 | -3.85687 | 0.031426 | 0.218285 | 0       | 1.1335  | 0       | 8.25292 | 6.86782 | 1.17563 |
| ENSMUSG00000030351 | 5_Tspan1   | 140.854 | -0.48619 | 0.272821 | 0.659357 | 72.8096 | 145.088 | 134.441 | 233.558 | 119.328 | 139.9   |
| ENSMUSG00000030352 | 14_Tspan   | 1237.01 | 0.01463  | 0.975416 | 0.993623 | 502.588 | 1696.85 | 1530.56 | 1365.03 | 1090.27 | 1236.76 |
| ENSMUSG00000030353 | 15_Tead4   | 67.87   | 1.21076  | 0.026409 | 0.195676 | 46.5172 | 165.491 | 72.3913 | 42.0899 | 36.056  | 44.6739 |
| ENSMUSG00000030357 | 10_Fkbp4   | 2348.56 | -0.01189 | 0.977569 | 0.993796 | 1153.83 | 2964.11 | 2898.75 | 2545.2  | 1995.96 | 2533.48 |
| ENSMUSG00000030359 | 14_Pzp     | 1.65144 | 2.24165  | 0.256514 | NA       | 5.05622 | 1.1335  | 2.06832 | 1.65058 | 0       | 0       |
| ENSMUSG00000030361 | 16_Klrb1a  | 4.23563 | 0.76468  | 0.56491  | 0.850965 | 6.06747 | 9.06802 | 1.03416 | 4.95175 | 4.29238 | 0       |
| ENSMUSG00000030364 | 6_Clec2h   | 1.39506 | 0.13026  | 0.942801 | NA       | 0       | 2.26701 | 2.06832 | 0.82529 | 0.85848 | 2.35126 |
| ENSMUSG00000030365 | 11_Clec2i  | 9.781   | 1.17014  | 0.244404 | 0.636257 | 19.2136 | 11.335  | 10.3416 | 5.77705 | 12.0187 | 0       |
| ENSMUSG00000030366 | 10_Ceaca   | 0.8907  | -0.51569 | 0.828523 | NA       | 0       | 1.1335  | 1.03416 | 0.82529 | 0       | 2.35126 |
| ENSMUSG00000030374 | 15_Strn4   | 1682.97 | 0.27439  | 0.564998 | 0.851006 | 757.422 | 2390.56 | 2379.61 | 1625.83 | 1213.89 | 1730.52 |
| ENSMUSG00000030376 | 7_Slc8a2   | 17.1068 | -1.14073 | 0.118469 | 0.4687   | 4.04498 | 14.7355 | 13.4441 | 37.9634 | 17.1695 | 15.2832 |
| ENSMUSG00000030378 | 14_Sult2a  | 0.13755 | -0.79206 | 0.84609  | NA       | 0       | 0       | 0       | 0.82529 | 0       | 0       |

|                    |            |         |          |          |          |         |         |         |         |         |         |
|--------------------|------------|---------|----------|----------|----------|---------|---------|---------|---------|---------|---------|
| ENSMUSG00000030380 | 16_Mzf1    | 24.1548 | -0.99125 | 0.04509  | 0.271165 | 16.1799 | 14.7355 | 17.5807 | 27.2346 | 38.6315 | 30.5663 |
| ENSMUSG00000030382 | 14_Slc27e  | 1.38655 | -0.65641 | 0.746327 | NA       | 0       | 2.26701 | 1.03416 | 3.30117 | 1.71695 | 0       |
| ENSMUSG00000030386 | 17_Zfp600  | 391.724 | 0.09292  | 0.855952 | 0.959059 | 744.276 | 224.434 | 244.062 | 349.099 | 382.881 | 405.592 |
| ENSMUSG00000030393 | 8_Zik1     | 114.188 | 0.03987  | 0.936946 | 0.98477  | 201.238 | 83.8792 | 62.0497 | 102.336 | 122.762 | 112.86  |
| ENSMUSG00000030397 | 9_Mark4    | 233.06  | 0.3894   | 0.4577   | 0.79795  | 91.012  | 364.988 | 337.137 | 226.13  | 186.29  | 192.803 |
| ENSMUSG00000030399 | 1_Ckm      | 696.49  | -1.54157 | 0.040461 | 0.253802 | 128.428 | 176.826 | 763.211 | 1888.27 | 363.994 | 858.208 |
| ENSMUSG00000030400 | 17_Ercc2   | 391.126 | 0.19066  | 0.766059 | 0.930238 | 80.8995 | 570.152 | 599.814 | 410.996 | 300.467 | 384.43  |
| ENSMUSG00000030401 | 15_Rtn2    | 82.4121 | -1.13174 | 0.034732 | 0.23165  | 46.5172 | 34.0051 | 74.4596 | 184.04  | 66.1027 | 89.3477 |
| ENSMUSG00000030402 | 5_Ppm1n    | 14.4132 | -2.65534 | 0.015518 | 0.135744 | 4.04498 | 7.93452 | 0       | 51.9934 | 15.4526 | 7.05377 |
| ENSMUSG00000030403 | 9_Vasp     | 2535.89 | 0.49273  | 0.202103 | 0.593308 | 1665.52 | 3847.11 | 3381.71 | 2163.92 | 1842.29 | 2314.81 |
| ENSMUSG00000030406 | 7_Gipr     | 2.11761 | 0.94997  | 0.538268 | 0.839833 | 4.04498 | 3.40051 | 1.03416 | 1.65058 | 2.57543 | 0       |
| ENSMUSG00000030407 | 2_Qpctl    | 205.601 | 0.19233  | 0.563653 | 0.85076  | 165.844 | 282.242 | 209.935 | 173.311 | 209.468 | 192.803 |
| ENSMUSG00000030409 | 15_Dmpkl   | 324.996 | -0.81878 | 0.098789 | 0.426922 | 108.203 | 208.565 | 388.845 | 520.759 | 357.985 | 365.62  |
| ENSMUSG00000030410 | 16_Dmwd    | 141.185 | -0.5394  | 0.406068 | 0.764314 | 26.2924 | 149.622 | 169.602 | 243.461 | 138.215 | 119.914 |
| ENSMUSG00000030411 | 15_Nova2   | 26.7626 | -0.76028 | 0.177975 | 0.56309  | 15.1687 | 27.2041 | 17.5807 | 36.3129 | 45.4993 | 18.81   |
| ENSMUSG00000030413 | 7_Pglyrp1  | 7352.92 | 0.06419  | 0.89128  | 0.970606 | 3010.47 | 10097.2 | 9441.89 | 7131.35 | 7332.25 | 7104.32 |
| ENSMUSG00000030417 | 15_Pdc5    | 1097.89 | 0.15699  | 0.685357 | 0.90411  | 1771.7  | 868.263 | 832.5   | 957.339 | 1087.69 | 1069.82 |
| ENSMUSG00000030421 | 9_Uri1     | 1337.84 | 0.41953  | 0.331448 | 0.711299 | 2520.02 | 1030.35 | 1042.43 | 1034.09 | 1245.65 | 1154.47 |
| ENSMUSG00000030423 | 7_Pop4     | 331.863 | 0.17509  | 0.52368  | 0.832707 | 411.576 | 317.381 | 326.795 | 285.551 | 334.806 | 315.068 |
| ENSMUSG00000030427 | 17_Llra6   | 51.0371 | 1.97222  | 0.000284 | 0.007553 | 57.6409 | 136.02  | 50.6739 | 23.1082 | 22.3204 | 16.4588 |
| ENSMUSG00000030428 | 16_Ttyh1   | 174.708 | -1.05831 | 0.007726 | 0.083881 | 128.428 | 117.884 | 94.1087 | 333.418 | 218.053 | 156.359 |
| ENSMUSG00000030431 | 8_Tmem2    | 74.0555 | 0.37509  | 0.396445 | 0.757228 | 46.5172 | 114.484 | 89.9721 | 60.2463 | 66.1027 | 67.0108 |
| ENSMUSG00000030432 | 12_Rpl28   | 7420.07 | -0.10735 | 0.870247 | 0.963272 | 1218.55 | 10198.1 | 10015.9 | 8597.07 | 6338.99 | 8151.8  |
| ENSMUSG00000030433 | 14_Sbk2    | 7.83779 | -0.98598 | 0.221377 | 0.612255 | 6.06747 | 3.40051 | 6.20497 | 11.5541 | 6.86782 | 12.9319 |
| ENSMUSG00000030435 | 15_U2af2   | 2680.39 | 0.2501   | 0.619459 | 0.877704 | 1029.45 | 3958.19 | 3748.84 | 2467.62 | 2226.03 | 2652.22 |
| ENSMUSG00000030443 | 16_Zfp58k  | 40.2733 | -0.452   | 0.414204 | 0.768913 | 58.6522 | 20.4031 | 22.7516 | 37.1382 | 49.7917 | 52.9033 |
| ENSMUSG00000030446 | 17_Zfp27k  | 77.7125 | 0.24618  | 0.645219 | 0.889294 | 150.675 | 45.3401 | 56.8789 | 66.8487 | 80.6968 | 65.8352 |
| ENSMUSG00000030447 | 15_Cyfp1   | 5318.63 | 0.51819  | 0.031466 | 0.218285 | 6213.09 | 6654.8  | 5922.64 | 3835.13 | 4423.73 | 4862.4  |
| ENSMUSG00000030450 | 11_Oca2    | 700.968 | -1.48212 | 0.000249 | 0.00691  | 483.375 | 218.766 | 406.425 | 1299.84 | 1025.02 | 772.387 |
| ENSMUSG00000030451 | 15_Herc2   | 2903.63 | 0.10509  | 0.644991 | 0.889294 | 270.13  | 3104.66 | 3213.14 | 2746.57 | 2763.44 | 2883.82 |
| ENSMUSG00000030452 | 16_Nipa2   | 994.84  | 0.57453  | 0.222283 | 0.612807 | 2027.54 | 842.193 | 701.162 | 630.523 | 952.909 | 814.71  |
| ENSMUSG00000030465 | 18_Psd3    | 751.03  | -0.13036 | 0.759869 | 0.928029 | 1163.94 | 456.802 | 530.525 | 831.895 | 803.534 | 719.484 |
| ENSMUSG00000030468 | 15_Siglec6 | 53.7396 | 0.40729  | 0.320864 | 0.701885 | 42.4723 | 69.1437 | 72.3913 | 43.7405 | 52.3671 | 42.3226 |
| ENSMUSG00000030469 | 10_Zfp71k  | 444.035 | 0.15313  | 0.737344 | 0.920922 | 789.782 | 302.645 | 310.248 | 401.917 | 479.889 | 379.728 |
| ENSMUSG00000030470 | 14_Csrp3   | 35.578  | -0.812   | 0.240062 | 0.631907 | 32.3598 | 5.66751 | 39.2981 | 60.2463 | 30.0467 | 45.8495 |
| ENSMUSG00000030471 | 17_Zdhhc   | 1038.12 | 0.44644  | 0.219306 | 0.610641 | 1706.98 | 1014.49 | 870.764 | 740.287 | 1002.7  | 893.477 |
| ENSMUSG00000030472 | 9_Ceacan   | 0.30609 | 0.16972  | 0.966824 | NA       | 1.01124 | 0       | 0       | 8.2529  | 0       | 0       |
| ENSMUSG00000030474 | 9_Siglece  | 15.9903 | -0.05779 | 0.927886 | 0.980746 | 8.08995 | 19.2695 | 19.6491 | 11.5541 | 19.745  | 17.6344 |
| ENSMUSG00000030483 | 14_Cyp2b   | 3.16073 | 0.63561  | 0.602717 | 0.870033 | 2.02249 | 2.26701 | 7.23913 | 1.65058 | 3.43391 | 2.35126 |
| ENSMUSG00000030484 | 5_Lypd5    | 6.47521 | 5.21396  | 0.00188  | 0.030979 | 3.03373 | 29.4711 | 5.17081 | 0       | 0       | 1.17563 |
| ENSMUSG00000030486 | 9_Zfp108   | 84.8275 | -0.94744 | 0.010541 | 0.104648 | 75.8433 | 53.2746 | 44.4689 | 101.511 | 111.602 | 122.265 |
| ENSMUSG00000030491 | 16_Tdrd1   | 4.31397 | 0.8317   | 0.565503 | 0.851323 | 13.1462 | 3.40051 | 0       | 4.95175 | 0.85848 | 3.52688 |
| ENSMUSG00000030492 | 16_Slc7a5  | 0.4821  | -2.30304 | 0.543942 | NA       | 0       | 0       | 0       | 0       | 1.71695 | 1.17563 |
| ENSMUSG00000030493 | 13_Faap2   | 92.9814 | 0.56082  | 0.158029 | 0.53609  | 81.9108 | 158.69  | 92.0404 | 77.5775 | 71.2536 | 76.4158 |
| ENSMUSG00000030494 | 13_Rhpn2   | 2912.07 | 0.51024  | 0.023408 | 0.180504 | 3591.94 | 3454.92 | 3218.31 | 2254.7  | 2553.11 | 2399.46 |
| ENSMUSG00000030495 | 12_Slc7a1  | 42.687  | -2.31237 | 0.000265 | 0.007176 | 12.1349 | 9.06802 | 21.7174 | 123.794 | 41.2069 | 48.2007 |
| ENSMUSG00000030498 | 14_Gas2    | 193.2   | 0.38953  | 0.438884 | 0.785475 | 382.25  | 105.416 | 169.602 | 174.962 | 168.261 | 158.71  |
| ENSMUSG00000030499 | 9_Kctd15   | 635.81  | -0.25354 | 0.597394 | 0.868406 | 249.777 | 688.036 | 802.509 | 826.943 | 511.652 | 735.943 |
| ENSMUSG00000030500 | 5_Slc17a5  | 6.82872 | -1.76407 | 0.260392 | 0.649568 | 7.07871 | 2.26701 | 0       | 24.7588 | 6.86782 | 0       |
| ENSMUSG00000030505 | 16_Prrnt3  | 515.98  | 0.2172   | 0.51233  | 0.828077 | 749.332 | 489.673 | 425.04  | 430.803 | 510.794 | 490.237 |
| ENSMUSG00000030507 | 6_Dbx1     | 1.05582 | 3.60913  | 0.135674 | NA       | 3.03373 | 2.26701 | 1.03416 | 0       | 0       | 0       |
| ENSMUSG00000030509 | 16_Asb7    | 493.964 | 0.23022  | 0.479287 | 0.809535 | 716.972 | 453.401 | 429.177 | 448.959 | 421.512 | 493.764 |
| ENSMUSG00000030510 | 10_Cers3   | 1655.98 | 0.85286  | 0.005421 | 0.065452 | 2663.62 | 2124.18 | 1607.09 | 1043.17 | 1296.3  | 1201.49 |
| ENSMUSG00000030512 | 13_Snrpa   | 583.69  | 0.6111   | 0.061321 | 0.326929 | 841.355 | 741.311 | 533.627 | 363.129 | 534.831 | 487.886 |
| ENSMUSG00000030513 | 14_Pcsk6   | 892.461 | 0.19033  | 0.611186 | 0.874284 | 638.095 | 936.273 | 1279.26 | 959.815 | 626.688 | 914.638 |
| ENSMUSG00000030515 | 9_Tarsl2   | 316.742 | 0.05384  | 0.895931 | 0.97156  | 504.611 | 210.832 | 252.335 | 298.756 | 327.08  | 306.839 |
| ENSMUSG00000030516 | 17_Tjp1    | 9207.69 | 0.58966  | 0.079464 | 0.378916 | 14840   | 9715.25 | 8635.25 | 5880.21 | 8283.44 | 7891.99 |
| ENSMUSG00000030518 | 17_Fam11   | 7.84074 | -0.29718 | 0.690024 | 0.905638 | 7.07871 | 6.80102 | 7.23913 | 8.25292 | 9.44325 | 8.22939 |
| ENSMUSG00000030519 | 14_Apba2   | 21.7196 | -1.98281 | 0.050537 | 0.291294 | 0       | 5.66751 | 20.6832 | 51.9934 | 34.3391 | 17.6344 |
| ENSMUSG00000030521 | 11_Mphos   | 664.481 | 0.27849  | 0.494983 | 0.817604 | 1126.53 | 573.552 | 485.022 | 511.681 | 689.357 | 600.746 |
| ENSMUSG00000030522 | 14_Mttr1   | 1545.93 | 0.27293  | 0.374861 | 0.744881 | 2231.82 | 1479.22 | 1364.06 | 1332.85 | 1498.04 | 1369.61 |
| ENSMUSG00000030523 | 18_Trpm1   | 6123.41 | -1.78438 | 1.68E-06 | 0.000124 | 2955.87 | 1826.07 | 3484.09 | 12069.1 | 9268.12 | 7137.24 |
| ENSMUSG00000030525 | 7_Chra7    | 21.5141 | -1.89802 | 0.000495 | 0.011571 | 11.1237 | 6.80102 | 9.30745 | 36.3129 | 32.6221 | 32.9176 |
| ENSMUSG00000030527 | 15_Crtc3   | 372.625 | -0.09321 | 0.833783 | 0.952011 | 177.979 | 426.197 | 477.783 | 475.368 | 311.627 | 366.796 |
| ENSMUSG00000030528 | 12_Blm     | 290.248 | 0.833    | 0.039885 | 0.251097 | 542.027 | 318.514 | 254.404 | 157.631 | 223.204 | 245.706 |
| ENSMUSG00000030530 | 15_Furin   | 1059.5  | 0.73942  | 0.231684 | 0.622974 | 311.463 | 2043.71 | 1620.53 | 984.574 | 540.84  | 855.857 |
| ENSMUSG00000030532 | 6_Hddc3    | 577.418 | -0.68564 | 0.084026 | 0.391521 | 240.676 | 516.877 | 570.857 | 790.63  | 663.603 | 681.864 |
| ENSMUSG00000030533 | 15_Unc45   | 807.24  | 0.47535  | 0.500726 | 0.822198 | 127.417 | 1414.61 | 1275.12 | 770.823 | 503.068 | 752.402 |
| ENSMUSG00000030534 | 13_Vps33   | 515.165 | 0.1207   | 0.676415 | 0.901229 | 430.79  | 555.416 | 623.599 | 440.706 | 486.756 | 553.721 |
| ENSMUSG00000030536 | 10_Iqgap1  | 16011.4 | 0.67563  | 0.02283  | 0.17814  | 17661.4 | 21595.5 | 19822.8 | 9394.3  | 12379.2 | 15215   |
| ENSMUSG00000030538 | 15_Cib1    | 567.172 | 0.03628  | 0.942094 | 0.986006 | 210.339 | 727.709 | 784.929 | 580.181 | 507.36  | 592.516 |
| ENSMUSG00000030539 | 13_Sema4   | 1406.19 | 0.86091  | 0.129125 | 0.487961 | 509.667 | 2554.92 | 2376.5  | 979.622 | 794.95  | 1221.48 |
| ENSMUSG00000030541 | 16_Ihdh2   | 970.83  | -0.4406  | 0.32936  | 0.709971 | 385.284 | 910.203 | 1175.84 | 1346.88 | 945.183 | 1061.59 |
| ENSMUSG00000030543 | 10_Mesp2   | 46.9757 | 0.84257  | 0.078693 | 0.376795 | 42.4723 | 47.6071 | 91.0062 | 39.614  | 31.7636 | 29.3907 |
| ENSMUSG00000030544 | 5_Mesp1    | 4.36881 | -0.83165 | 0.527751 | 0.835066 | 0       | 1.1335  | 8.27329 | 5.77705 | 5.15086 | 5.87814 |

|                    |            |         |          |          |          |         |         |         |         |         |         |
|--------------------|------------|---------|----------|----------|----------|---------|---------|---------|---------|---------|---------|
| ENSMUSG00000030545 | 9_Pex11a   | 527.075 | 0.03434  | 0.884213 | 0.967903 | 554.162 | 497.608 | 548.106 | 529.838 | 501.351 | 531.384 |
| ENSMUSG00000030546 | 14_Plin1   | 0.28063 | -1.56014 | 0.700051 | NA       | 0       | 0       | 0       | 0.82529 | 0.85848 | 0       |
| ENSMUSG00000030549 | 6_Rhcg     | 1.04308 | 3.59436  | 0.137996 | NA       | 2.02249 | 1.1335  | 3.10248 | 0       | 0       | 0       |
| ENSMUSG00000030551 | 13_Nr2f2   | 1333.48 | 0.7519   | 0.089959 | 0.408797 | 2816.32 | 1081.36 | 1122.07 | 945.785 | 1007.85 | 1027.5  |
| ENSMUSG00000030553 | 2_Pgpep1   | 1.82618 | 0.46709  | 0.755963 | 0.927148 | 1.01124 | 2.26701 | 3.10248 | 0.82529 | 2.57543 | 1.17563 |
| ENSMUSG00000030554 | 15_Synm    | 472.537 | -0.79397 | 0.024648 | 0.187186 | 482.364 | 250.504 | 304.043 | 678.39  | 548.567 | 571.355 |
| ENSMUSG00000030555 | 15_Ttc23   | 364.39  | -0.0483  | 0.842506 | 0.953741 | 373.149 | 337.784 | 364.025 | 383.761 | 372.579 | 355.04  |
| ENSMUSG00000030556 | 12_Lrrc28  | 494.225 | 0.25962  | 0.286598 | 0.672535 | 512.701 | 584.887 | 518.115 | 420.074 | 468.728 | 460.846 |
| ENSMUSG00000030557 | 16_Mef2a   | 3061.74 | 0.52313  | 0.172137 | 0.555258 | 5514.32 | 2635.39 | 2682.62 | 2341.35 | 2652.69 | 2544.06 |
| ENSMUSG00000030559 | 7_Rab38    | 794.451 | -0.69521 | 0.03026  | 0.212974 | 804.95  | 464.736 | 550.174 | 990.351 | 1065.37 | 891.126 |
| ENSMUSG00000030560 | 16_Ctsc    | 2089.45 | 0.87909  | 0.017405 | 0.147709 | 3827.56 | 2475.57 | 1818.06 | 1276.73 | 1740.99 | 1397.82 |
| ENSMUSG00000030562 | 16_NoX4    | 111.711 | -0.03039 | 0.960226 | 0.989875 | 221.463 | 53.2746 | 56.8789 | 138.649 | 114.177 | 85.8208 |
| ENSMUSG00000030577 | 13_Cd22    | 7.31953 | 0.76161  | 0.480957 | 0.810618 | 1.01124 | 20.4031 | 6.20497 | 4.95175 | 4.29238 | 7.05377 |
| ENSMUSG00000030579 | 9_Tyrobp   | 213.691 | 0.98037  | 0.096971 | 0.422223 | 96.0682 | 510.076 | 245.096 | 193.118 | 129.63  | 108.158 |
| ENSMUSG00000030583 | 16_Sipa1l  | 1391.45 | 0.03717  | 0.941378 | 0.985902 | 536.971 | 1702.52 | 1988.69 | 1626.65 | 1017.3  | 1476.59 |
| ENSMUSG00000030584 | 13_Dpf1    | 5.72649 | -0.29007 | 0.793188 | 0.938313 | 2.02249 | 11.335  | 2.06832 | 5.77705 | 2.57543 | 10.5807 |
| ENSMUSG00000030587 | 4_Z20000   | 550.903 | 0.40901  | 0.49985  | 0.821537 | 153.709 | 844.46  | 887.311 | 575.229 | 335.665 | 509.047 |
| ENSMUSG00000030588 | 11_Yif1b   | 249.652 | -0.30548 | 0.64307  | 0.888694 | 41.461  | 317.381 | 311.283 | 356.526 | 223.204 | 248.057 |
| ENSMUSG00000030589 | 15_Rasgrl  | 37.2653 | 0.94776  | 0.072947 | 0.361065 | 35.3936 | 77.0782 | 35.1615 | 30.5358 | 26.6128 | 18.81   |
| ENSMUSG00000030590 | 14_Fam9f   | 104.088 | -0.01416 | 0.979666 | 0.993796 | 34.3823 | 121.285 | 155.124 | 118.017 | 87.5647 | 108.158 |
| ENSMUSG00000030591 | 16_Psmdf   | 2390.29 | 0.10387  | 0.701517 | 0.906664 | 1964.85 | 2817.89 | 2646.42 | 2210.96 | 2474.99 | 2226.64 |
| ENSMUSG00000030592 | 16_Ryr1    | 279.895 | -0.8353  | 0.104879 | 0.440391 | 246.744 | 99.7483 | 256.472 | 500.127 | 187.148 | 389.133 |
| ENSMUSG00000030595 | 15_Nfkbib  | 223.234 | 0.26275  | 0.684582 | 0.903638 | 47.5285 | 347.985 | 335.068 | 230.257 | 162.252 | 216.316 |
| ENSMUSG00000030598 | 15_Fbxo1   | 40.347  | -0.56545 | 0.167879 | 0.548893 | 25.2811 | 36.2721 | 36.1957 | 48.6922 | 49.7917 | 45.8495 |
| ENSMUSG00000030600 | 15_Lfrn1   | 38.9183 | -0.04805 | 0.26246  | 0.979999 | 22.2474 | 56.6751 | 36.1957 | 51.9934 | 33.4806 | 32.9176 |
| ENSMUSG00000030602 | 12_Pak4    | 2260.09 | 0.54909  | 0.251414 | 0.642532 | 1066.86 | 3664.61 | 3323.8  | 1960.89 | 1578.74 | 1965.65 |
| ENSMUSG00000030603 | 15_Psmc4   | 1828.83 | 0.20187  | 0.631177 | 0.882337 | 967.761 | 2631.99 | 2269.98 | 1681.95 | 1555.56 | 1865.72 |
| ENSMUSG00000030604 | 9_Zfp626   | 491.271 | 0.39087  | 0.408256 | 0.765806 | 962.705 | 364.988 | 344.376 | 359.827 | 480.747 | 434.982 |
| ENSMUSG00000030605 | 15_Mfge8   | 1497.06 | 0.37884  | 0.538688 | 0.839843 | 382.25  | 2231.87 | 2463.37 | 1468.2  | 936.598 | 1500.1  |
| ENSMUSG00000030606 | 8_Hapln3   | 28.0624 | -1.49228 | 0.043191 | 0.263772 | 4.04498 | 9.06802 | 31.0248 | 52.8187 | 32.6221 | 38.7957 |
| ENSMUSG00000030607 | 7_Acan     | 4.07037 | -1.21743 | 0.254928 | 0.645986 | 2.02249 | 2.26701 | 3.10248 | 5.77705 | 7.72629 | 3.52688 |
| ENSMUSG00000030609 | 18_Aen     | 540.94  | 0.13637  | 0.704313 | 0.908152 | 358.992 | 745.845 | 594.643 | 499.302 | 479.03  | 567.828 |
| ENSMUSG00000030610 | 13_Det1    | 252.526 | 0.05318  | 0.905752 | 0.974391 | 120.338 | 316.247 | 335.068 | 277.298 | 214.619 | 251.584 |
| ENSMUSG00000030611 | 10_Mrps1   | 158.266 | -0.2044  | 0.73226  | 0.919789 | 41.461  | 196.096 | 203.73  | 211.275 | 112.46  | 184.574 |
| ENSMUSG00000030612 | 6_Mrpl46   | 397.51  | -0.14874 | 0.694615 | 0.905638 | 218.429 | 468.137 | 444.689 | 387.062 | 444.691 | 422.05  |
| ENSMUSG00000030613 | 13_Ccdc9   | 1223.56 | 0.20367  | 0.616937 | 0.877219 | 2056.87 | 914.737 | 957.634 | 1043.17 | 1301.45 | 1067.47 |
| ENSMUSG00000030614 | 7_Tmem1    | 539.561 | 0.17881  | 0.660242 | 0.895103 | 895.962 | 408.061 | 414.699 | 459.688 | 564.019 | 494.939 |
| ENSMUSG00000030615 | 11_Tmem    | 409.329 | 0.22339  | 0.596113 | 0.867938 | 705.849 | 301.512 | 315.419 | 361.478 | 415.503 | 356.215 |
| ENSMUSG00000030616 | 14_Sytl2   | 603.319 | -1.58338 | 0.000215 | 0.006107 | 444.948 | 170.025 | 290.599 | 970.544 | 1061.94 | 681.864 |
| ENSMUSG00000030617 | 12_Ccdc8   | 0.66355 | 1.64305  | 0.572404 | NA       | 2.02249 | 1.1335  | 0       | 0.82529 | 0       | 0       |
| ENSMUSG00000030619 | 8_Eed      | 1058.8  | 0.52073  | 0.252511 | 0.643959 | 2101.37 | 858.062 | 783.894 | 720.48  | 996.692 | 892.302 |
| ENSMUSG00000030621 | 17_Me3     | 465.146 | -0.44244 | 0.066566 | 0.34237  | 387.307 | 393.326 | 402.289 | 544.693 | 491.907 | 571.355 |
| ENSMUSG00000030629 | 14_Zfandf  | 2829.49 | 0.44592  | 0.351586 | 0.728508 | 5757.01 | 2095.85 | 1936.98 | 2105.32 | 2741.12 | 2340.68 |
| ENSMUSG00000030630 | 15_Fah     | 882.018 | -0.22612 | 0.590557 | 0.865007 | 396.408 | 1019.02 | 1023.82 | 958.164 | 927.155 | 967.542 |
| ENSMUSG00000030636 | 15_17000   | 0.49501 | 1.08006  | 0.734751 | NA       | 1.01124 | 1.1335  | 0       | 0.82529 | 0       | 0       |
| ENSMUSG00000030638 | 13_Sh3glx  | 35.7324 | -0.5233  | 0.24021  | 0.631907 | 34.3823 | 22.6701 | 31.0248 | 47.0417 | 46.3578 | 32.9176 |
| ENSMUSG00000030641 | 9_Ddias    | 172.49  | 0.91469  | 0.117655 | 0.466589 | 418.655 | 138.287 | 118.929 | 66.8487 | 138.215 | 154.007 |
| ENSMUSG00000030643 | 13_Rab3c   | 171.017 | -0.43308 | 0.240666 | 0.631907 | 203.26  | 113.35  | 119.963 | 185.691 | 227.496 | 176.344 |
| ENSMUSG00000030647 | 8_Ndufc2   | 521.623 | 0.27195  | 0.546872 | 0.843339 | 947.536 | 368.388 | 396.084 | 541.392 | 491.907 | 384.43  |
| ENSMUSG00000030649 | 17_Anapc   | 446.32  | -0.06998 | 0.812148 | 0.946162 | 332.699 | 503.275 | 470.544 | 463.814 | 423.229 | 484.359 |
| ENSMUSG00000030650 | 17_Tmc5    | 3.71728 | 0.63354  | 0.657563 | 0.894702 | 3.03373 | 1.1335  | 9.30745 | 4.12646 | 0       | 4.70251 |
| ENSMUSG00000030651 | 4_Art2b    | 2.53152 | 2.24471  | 0.155462 | 0.532161 | 7.07871 | 4.53401 | 1.03416 | 0.82529 | 1.71695 | 0       |
| ENSMUSG00000030652 | 10_Coq7    | 245.297 | -0.25323 | 0.437684 | 0.785322 | 170.9   | 213.099 | 287.497 | 291.328 | 242.091 | 266.868 |
| ENSMUSG00000030653 | 16_Pde2a   | 161.155 | -0.55857 | 0.227854 | 0.618996 | 62.6971 | 159.824 | 168.568 | 221.178 | 144.224 | 210.437 |
| ENSMUSG00000030654 | 9_Arl6ip1  | 6605.16 | -0.09001 | 0.791295 | 0.937442 | 8993    | 5220.91 | 4983.62 | 6831.77 | 7460.16 | 6141.48 |
| ENSMUSG00000030655 | 14_Smg1    | 5549.11 | 0.38886  | 0.298227 | 0.681298 | 9309.52 | 5188.04 | 4379.67 | 4231.27 | 5322.56 | 4863.57 |
| ENSMUSG00000030657 | 11_Xylt1   | 303.808 | -0.00202 | 0.994617 | 0.998043 | 291.238 | 349.119 | 270.95  | 367.255 | 283.297 | 260.989 |
| ENSMUSG00000030659 | 14_Nucb2   | 621.418 | 0.16778  | 0.675515 | 0.900812 | 998.098 | 544.081 | 430.211 | 500.952 | 666.178 | 588.99  |
| ENSMUSG00000030660 | 9_Pik3c2e  | 1326.03 | 0.35679  | 0.466702 | 0.803611 | 2670.7  | 924.938 | 871.798 | 1078.66 | 1333.21 | 1076.88 |
| ENSMUSG00000030662 | 9_Ipo5     | 5568.13 | 0.29979  | 0.24885  | 0.640276 | 6576.12 | 5987.16 | 5869.9  | 4086.85 | 5228.12 | 5660.65 |
| ENSMUSG00000030663 | 12_11100   | 2346.19 | 0.09667  | 0.714483 | 0.911174 | 2928.56 | 2277.21 | 2068.32 | 2191.98 | 2280.97 | 2330.09 |
| ENSMUSG00000030666 | 11_Calcb   | 2.11186 | 2.47707  | 0.129967 | 0.490077 | 3.03373 | 4.53401 | 3.10248 | 0.82529 | 0       | 1.17563 |
| ENSMUSG00000030669 | 13_Calca   | 1.78223 | 1.05276  | 0.529572 | 0.836104 | 2.02249 | 1.1335  | 4.13665 | 0.82529 | 2.57543 | 0       |
| ENSMUSG00000030670 | 15_Cyp2r   | 30.9463 | 0.6047   | 0.270309 | 0.657126 | 56.6297 | 30.6046 | 24.8199 | 18.9817 | 33.4806 | 21.1613 |
| ENSMUSG00000030671 | 8_Pde3b    | 99.2733 | 0.00877  | 0.985633 | 0.995304 | 167.867 | 63.4762 | 67.2205 | 85.0051 | 113.319 | 98.7527 |
| ENSMUSG00000030672 | 12_Mylp1f  | 1061.31 | -1.78084 | 0.001371 | 0.024684 | 486.409 | 128.766 | 730.118 | 2664.87 | 872.213 | 1395.47 |
| ENSMUSG00000030674 | 5_Qprt     | 6.04911 | -0.36951 | 0.698162 | 0.905638 | 2.02249 | 5.66751 | 8.27329 | 9.07822 | 7.72629 | 3.52688 |
| ENSMUSG00000030677 | 8_Kif22    | 272.142 | 0.57792  | 0.235808 | 0.627831 | 144.608 | 479.472 | 353.683 | 160.107 | 248.1   | 246.882 |
| ENSMUSG00000030678 | 7_Maz      | 1310.51 | -0.14957 | 0.708067 | 0.909748 | 654.275 | 1513.23 | 1560.55 | 1458.29 | 1276.56 | 1400.17 |
| ENSMUSG00000030680 | 5_Pagri1a  | 79.4657 | -0.48415 | 0.785782 | 0.936221 | 0       | 73.6777 | 125.134 | 191.468 | 39.4899 | 47.0251 |
| ENSMUSG00000030681 | 18_Mvp     | 2677.82 | 0.94998  | 0.160796 | 0.539243 | 567.308 | 5469.15 | 4550.31 | 1975.75 | 1340.08 | 2164.33 |
| ENSMUSG00000030682 | 4_Cdipt    | 1119.98 | 0.32096  | 0.468374 | 0.804054 | 576.409 | 1517.76 | 1638.11 | 1131.48 | 853.326 | 1002.81 |
| ENSMUSG00000030683 | 11_Seiz6l2 | 25.0276 | -1.39765 | 0.039255 | 0.249212 | 5.05622 | 13.602  | 22.7516 | 54.4693 | 24.8958 | 29.3907 |
| ENSMUSG00000030685 | 5_Kctd13   | 131     | -0.00858 | 0.987769 | 0.996742 | 42.4723 | 175.693 | 173.739 | 155.155 | 97.8664 | 141.075 |
| ENSMUSG00000030688 | 14_Stard1  | 1308.69 | 0.27227  | 0.63353  | 0.88353  | 389.329 | 1866.88 | 2039.37 | 1413.73 | 977.805 | 1165.05 |

|                    |            |         |          |          |          |         |         |         |         |         |         |
|--------------------|------------|---------|----------|----------|----------|---------|---------|---------|---------|---------|---------|
| ENSMUSG00000030689 | 15_Ino80e  | 455.974 | 0.13254  | 0.749719 | 0.925082 | 247.755 | 576.953 | 606.019 | 461.338 | 370.004 | 473.778 |
| ENSMUSG00000030691 | 14_Fchsd   | 758.487 | 0.19272  | 0.544901 | 0.842106 | 1050.68 | 778.716 | 597.745 | 656.933 | 761.469 | 705.377 |
| ENSMUSG00000030693 | 10_Klk10   | 114.318 | 1.17326  | 0.011569 | 0.112061 | 87.9783 | 239.169 | 147.885 | 55.2946 | 72.1121 | 83.4696 |
| ENSMUSG00000030695 | 13_Aldoa   | 10308.8 | -0.16347 | 0.764595 | 0.929893 | 3025.64 | 13165.6 | 12984.9 | 13741.9 | 8605.37 | 10329.1 |
| ENSMUSG00000030697 | 7_Ppp4c    | 1291.55 | 0.14132  | 0.708724 | 0.909864 | 767.534 | 1746.73 | 1550.21 | 1198.32 | 1279.13 | 1207.37 |
| ENSMUSG00000030699 | 16_Tbx6    | 15.0957 | 0.11267  | 0.891307 | 0.970606 | 3.03373 | 18.136  | 25.854  | 17.3311 | 8.58477 | 17.6344 |
| ENSMUSG00000030701 | 16_Plekht  | 411.934 | -1.76715 | 4.76E-05 | 0.001833 | 251.8   | 120.151 | 189.252 | 902.87  | 585.481 | 422.05  |
| ENSMUSG00000030703 | 8_Gdpd3    | 112.468 | 0.31934  | 0.376066 | 0.745684 | 87.9783 | 154.156 | 132.373 | 91.6075 | 97.0079 | 111.685 |
| ENSMUSG00000030704 | 14_Rab6a   | 3614.62 | 0.47849  | 0.271269 | 0.657711 | 6969.5  | 2858.69 | 2797.41 | 2659.92 | 3256.2  | 3145.98 |
| ENSMUSG00000030706 | 16_Mrpl4f  | 724.12  | -0.3202  | 0.163628 | 0.541822 | 671.466 | 616.626 | 644.283 | 807.961 | 837.874 | 766.509 |
| ENSMUSG00000030707 | 15_Coro1i  | 164.175 | 1.7718   | 0.007133 | 0.079078 | 54.6072 | 437.532 | 269.916 | 94.0833 | 58.3764 | 70.5377 |
| ENSMUSG00000030708 | 13_Dnajb   | 7.59189 | 0.3619   | 0.694501 | 0.905638 | 2.02249 | 9.06802 | 14.4783 | 6.60234 | 5.15086 | 8.22939 |
| ENSMUSG00000030711 | 15_Sult1a  | 276.039 | -0.33842 | 0.439242 | 0.785475 | 394.385 | 150.756 | 186.149 | 345.797 | 287.59  | 291.556 |
| ENSMUSG00000030713 | 6_Klk7     | 0.33902 | -1.78366 | 0.658108 | NA       | 0       | 0       | 0       | 0       | 0.85848 | 1.17563 |
| ENSMUSG00000030714 | 14_Ccdc1   | 139.039 | 0.16074  | 0.77337  | 0.932641 | 44.4948 | 199.497 | 196.491 | 138.649 | 130.489 | 124.617 |
| ENSMUSG00000030717 | 9_Nupr1    | 1397.02 | -0.58084 | 0.146436 | 0.517615 | 621.915 | 1456.55 | 1280.29 | 1908.9  | 1348.67 | 1765.79 |
| ENSMUSG00000030718 | 8_Ppme1    | 793.419 | 0.13729  | 0.587593 | 0.862925 | 704.837 | 928.339 | 860.422 | 772.474 | 740.866 | 753.577 |
| ENSMUSG00000030720 | 16_Cln3    | 303.371 | 0.0985   | 0.84713  | 0.955658 | 117.304 | 411.462 | 412.63  | 363.954 | 251.534 | 263.341 |
| ENSMUSG00000030722 | 7_Nfatc2it | 202.098 | 0.53063  | 0.111216 | 0.453007 | 310.452 | 219.9   | 186.149 | 151.854 | 181.997 | 162.237 |
| ENSMUSG00000030724 | 7_Cd19     | 2.52877 | 0.84189  | 0.57753  | 0.857517 | 0       | 5.66751 | 4.13665 | 2.47588 | 1.71695 | 1.17563 |
| ENSMUSG00000030725 | 3_Lipt2    | 80.3445 | 0.21258  | 0.669282 | 0.898502 | 141.574 | 72.5442 | 44.4689 | 67.674  | 74.6875 | 81.1183 |
| ENSMUSG00000030726 | 15_Pold3   | 865.387 | 0.49927  | 0.03939  | 0.249611 | 1062.82 | 1032.62 | 945.224 | 638.776 | 754.601 | 758.28  |
| ENSMUSG00000030727 | 12_Rabep   | 275.599 | 0.25644  | 0.71029  | 0.910065 | 48.5397 | 406.928 | 444.689 | 320.213 | 173.412 | 259.814 |
| ENSMUSG00000030729 | 16_Pgm2l   | 150.662 | 0.23547  | 0.668273 | 0.898206 | 302.362 | 73.6777 | 112.724 | 147.727 | 151.092 | 116.387 |
| ENSMUSG00000030730 | 12_Atp2a   | 1998.03 | -1.14366 | 0.038992 | 0.248183 | 1253.94 | 617.759 | 1863.56 | 4519.3  | 1330.64 | 2402.98 |
| ENSMUSG00000030731 | 13_Atp3    | 40.0628 | -0.96056 | 0.125357 | 0.481826 | 10.1124 | 26.0706 | 45.5031 | 75.9269 | 36.9145 | 45.8495 |
| ENSMUSG00000030732 | 12_Chrdl2  | 1.03698 | -2.16368 | 0.34228  | NA       | 1.01124 | 0       | 0       | 0.82529 | 0.85848 | 3.52688 |
| ENSMUSG00000030733 | 10_Sh2b1   | 760.1   | 0.03931  | 0.945828 | 0.986649 | 202.249 | 986.148 | 1123.1  | 885.539 | 646.433 | 717.133 |
| ENSMUSG00000030735 | 5_Gm975    | 34.0809 | 0.37133  | 0.587234 | 0.862925 | 65.7309 | 34.0051 | 15.5124 | 14.03   | 44.6408 | 30.5663 |
| ENSMUSG00000030737 | 16_Slco2t  | 132.362 | -0.32807 | 0.379844 | 0.747815 | 116.293 | 83.8792 | 152.022 | 179.914 | 133.922 | 128.143 |
| ENSMUSG00000030738 | 11_Eif3c   | 6856.16 | 0.19577  | 0.428827 | 0.779125 | 6689.38 | 8092.08 | 7180.18 | 5583.93 | 6644.61 | 6946.78 |
| ENSMUSG00000030739 | 17_Myh14   | 4488.89 | 0.79183  | 0.221506 | 0.612307 | 1101.25 | 8157.82 | 7813.09 | 3448.9  | 2286.98 | 4125.28 |
| ENSMUSG00000030741 | 15_Spns1   | 303.675 | -0.00179 | 0.997488 | 0.998756 | 85.9558 | 405.794 | 418.835 | 359.827 | 250.675 | 300.961 |
| ENSMUSG00000030742 | 7_Lat      | 12.2516 | 0.73966  | 0.36984  | 0.741242 | 4.04498 | 19.2695 | 22.7516 | 13.2047 | 6.00934 | 8.22939 |
| ENSMUSG00000030744 | 12_Rps3    | 16034.1 | -0.27467 | 0.356219 | 0.731176 | 10513.9 | 15759.1 | 17264.3 | 18280.2 | 16601.2 | 17786.1 |
| ENSMUSG00000030745 | 9_Ilt21r   | 25.8739 | 1.87177  | 0.00957  | 0.097435 | 28.3148 | 58.9422 | 35.1615 | 10.7288 | 19.745  | 2.35126 |
| ENSMUSG00000030747 | 4_Dgat2    | 881.557 | 0.31803  | 0.475105 | 0.806964 | 453.037 | 1261.59 | 1220.31 | 793.931 | 657.593 | 902.882 |
| ENSMUSG00000030748 | 9_Ilt4ra   | 346.389 | 0.68632  | 0.24601  | 0.637758 | 119.327 | 695.971 | 466.407 | 263.268 | 198.308 | 335.054 |
| ENSMUSG00000030750 | 13_Nsmcx   | 622.963 | -0.0318  | 0.89224  | 0.970752 | 612.814 | 625.694 | 610.155 | 658.583 | 653.301 | 577.233 |
| ENSMUSG00000030751 | 17_Psma    | 3243.39 | 0.40412  | 0.284038 | 0.670663 | 5432.4  | 3054.79 | 2596.78 | 2371.89 | 3247.62 | 2756.85 |
| ENSMUSG00000030752 | 8_Kdm8     | 52.6174 | -0.58819 | 0.312665 | 0.694201 | 13.1462 | 51.0076 | 62.0497 | 68.4993 | 57.518  | 63.4839 |
| ENSMUSG00000030753 | 15_Prkrir  | 2748.86 | 0.02601  | 0.947021 | 0.986649 | 4265.43 | 2045.97 | 2009.38 | 2468.45 | 3058.75 | 2645.16 |
| ENSMUSG00000030754 | 8_Copb1    | 4821.63 | 0.35518  | 0.366579 | 0.739458 | 8150.63 | 4290.31 | 3795.37 | 3408.46 | 4964.57 | 4320.43 |
| ENSMUSG00000030757 | 13_Zksca   | 160.045 | -1.35053 | 0.008108 | 0.086619 | 154.72  | 45.3401 | 70.323  | 276.473 | 242.949 | 170.466 |
| ENSMUSG00000030759 | 16_Far1    | 4814.06 | 0.59594  | 0.218372 | 0.609256 | 10159   | 3675.95 | 3548.21 | 4293.82 | 4515.59 | 4041.81 |
| ENSMUSG00000030760 | 14_Acer3   | 6026.13 | 0.80729  | 0.116217 | 0.463637 | 14263.6 | 4446.73 | 4297.98 | 3718.77 | 4808.33 | 4621.39 |
| ENSMUSG00000030761 | 15_Myo7a   | 575.429 | -1.3478  | 0.00117  | 0.022052 | 203.26  | 286.776 | 483.988 | 1023.36 | 812.119 | 643.068 |
| ENSMUSG00000030762 | 11_Aqp8    | 2.30293 | 0.25087  | 0.854409 | 0.958493 | 2.02249 | 4.53401 | 1.03416 | 2.47588 | 2.57543 | 1.17563 |
| ENSMUSG00000030763 | 7_Lcmt1    | 515.337 | -0.11523 | 0.644591 | 0.889294 | 554.162 | 440.933 | 489.158 | 543.868 | 544.274 | 519.627 |
| ENSMUSG00000030766 | 15_Arhga1  | 1129.48 | 0.28206  | 0.260207 | 0.649568 | 1182.14 | 1388.54 | 1147.92 | 910.297 | 1104    | 1043.96 |
| ENSMUSG00000030768 | 12_Disp1   | 278.967 | -0.32188 | 0.511178 | 0.827179 | 102.136 | 279.975 | 361.957 | 370.556 | 265.269 | 293.907 |
| ENSMUSG00000030769 | 15_Slc5a1  | 0.32647 | 0.16972  | 0.966824 | NA       | 0       | 1.1335  | 0       | 0.82529 | 0       | 0       |
| ENSMUSG00000030770 | 14_Parva   | 4636.98 | -0.12787 | 0.597055 | 0.868362 | 4772.06 | 4081.74 | 4440.69 | 4246.13 | 5186.06 | 5095.17 |
| ENSMUSG00000030771 | 15_Micalc  | 18.2379 | 0.17155  | 0.775708 | 0.93365  | 13.1462 | 24.9371 | 19.6491 | 11.5541 | 15.4526 | 24.6882 |
| ENSMUSG00000030772 | 5_Dkk3     | 15688   | -0.44255 | 0.09891  | 0.427232 | 14972.5 | 10970   | 13959.1 | 20406.2 | 16261.3 | 17559.2 |
| ENSMUSG00000030774 | 13_Pak1    | 2595.12 | 0.3633   | 0.285616 | 0.671835 | 3590.93 | 2812.22 | 2356.85 | 1594.46 | 2561.7  | 2654.57 |
| ENSMUSG00000030775 | 9_Trat1    | 0.74973 | -0.30649 | 0.927883 | NA       | 2.02249 | 0       | 0       | 2.47588 | 0       | 0       |
| ENSMUSG00000030779 | 15_Rbbp6   | 2505.77 | 0.29598  | 0.372916 | 0.743945 | 3802.28 | 2362.22 | 2121.07 | 2021.97 | 2434.64 | 2292.47 |
| ENSMUSG00000030780 | 15_BC017   | 464.09  | -0.0967  | 0.812702 | 0.946314 | 235.62  | 549.749 | 560.516 | 535.615 | 461.002 | 442.036 |
| ENSMUSG00000030781 | 13_Slc5a2  | 0.68774 | -2.83311 | 0.475143 | NA       | 0       | 0       | 0       | 4.12646 | 0       | 0       |
| ENSMUSG00000030782 | 15_Tgfb1i  | 263.928 | -0.88474 | 0.024963 | 0.18892  | 118.316 | 173.426 | 264.745 | 409.345 | 316.778 | 300.961 |
| ENSMUSG00000030785 | 8_Cox6a2   | 57.6087 | -1.50833 | 0.079799 | 0.379919 | 7.07871 | 12.4685 | 70.323  | 145.251 | 31.7636 | 78.7671 |
| ENSMUSG00000030786 | 18_Ilgam   | 6244.37 | 0.70577  | 0.013765 | 0.125808 | 6576.12 | 9402.41 | 7247.4  | 3982.04 | 5241.86 | 5016.4  |
| ENSMUSG00000030787 | 3_Lyve1    | 121.932 | 0.63367  | 0.157169 | 0.534837 | 235.62  | 97.4812 | 111.689 | 108.939 | 84.9892 | 92.8746 |
| ENSMUSG00000030788 | 15_Rnf14   | 1380.63 | 0.3266   | 0.430718 | 0.780048 | 2465.41 | 1066.63 | 1076.56 | 1171.92 | 1322.91 | 1180.33 |
| ENSMUSG00000030789 | 9_Iltgax   | 114.53  | 1.7175   | 0.014194 | 0.128179 | 61.6859 | 389.925 | 75.4938 | 65.1981 | 45.4993 | 49.3764 |
| ENSMUSG00000030790 | 14_Adm     | 104.175 | 1.26204  | 0.033946 | 0.228059 | 58.6522 | 282.242 | 100.314 | 67.674  | 51.5086 | 64.6595 |
| ENSMUSG00000030792 | 7_Dkk1     | 75.9028 | 0.39156  | 0.480075 | 0.809998 | 32.3598 | 137.154 | 88.9379 | 68.4993 | 53.2256 | 75.2402 |
| ENSMUSG00000030793 | 4_Pycard   | 1222.24 | 0.28286  | 0.514364 | 0.829045 | 654.275 | 1847.61 | 1523.32 | 1271.78 | 934.881 | 1101.56 |
| ENSMUSG00000030795 | 18_Fus     | 9755.92 | 0.33138  | 0.239206 | 0.630969 | 13070.3 | 10007.7 | 9536    | 7220.48 | 9520.51 | 9180.48 |
| ENSMUSG00000030796 | 15_Tead2   | 117.523 | -1.10601 | 0.022967 | 0.178725 | 42.4723 | 63.4762 | 117.894 | 212.1   | 152.809 | 116.387 |
| ENSMUSG00000030798 | 13_Cd37    | 50.8592 | 1.18419  | 0.110063 | 0.450628 | 13.1462 | 120.151 | 78.5963 | 38.7887 | 18.028  | 36.4445 |
| ENSMUSG00000030800 | 10_Prss8   | 1212.04 | 0.40881  | 0.474755 | 0.806964 | 371.127 | 1888.42 | 1888.38 | 1154.58 | 848.175 | 1121.55 |
| ENSMUSG00000030801 | 10_Kat8    | 361.056 | -0.1123  | 0.71122  | 0.910557 | 259.89  | 381.99  | 399.186 | 389.538 | 344.249 | 391.484 |
| ENSMUSG00000030802 | 14_Bckdk   | 1001.13 | 0.07053  | 0.89206  | 0.970752 | 346.857 | 1331.87 | 1398.19 | 1102.59 | 832.723 | 994.581 |

|                    |           |         |          |          |          |         |         |         |         |         |         |
|--------------------|-----------|---------|----------|----------|----------|---------|---------|---------|---------|---------|---------|
| ENSMUSG00000030805 | 14_Stx4a  | 1137.98 | 0.0962   | 0.839467 | 0.95317  | 476.296 | 1542.7  | 1508.84 | 1214.83 | 946.042 | 1139.18 |
| ENSMUSG00000030806 | 6_Stx1b   | 153.565 | -1.52969 | 0.000975 | 0.019239 | 61.6859 | 68.0102 | 107.553 | 327.641 | 228.355 | 128.143 |
| ENSMUSG00000030811 | 14_Fbx11  | 626.279 | 0.22523  | 0.659213 | 0.894805 | 237.642 | 914.737 | 872.832 | 573.578 | 509.935 | 648.947 |
| ENSMUSG00000030814 | 17_Bcl7c  | 536.103 | -0.13714 | 0.759662 | 0.927999 | 244.721 | 599.623 | 687.717 | 680.041 | 447.267 | 557.248 |
| ENSMUSG00000030815 | 11_Phkg2  | 466.822 | 0.05486  | 0.865679 | 0.962186 | 326.632 | 570.152 | 530.525 | 478.67  | 444.691 | 450.265 |
| ENSMUSG00000030816 | 8_Rnf40   | 1184.39 | 0.28897  | 0.592864 | 0.866044 | 395.397 | 1776.2  | 1736.36 | 1171.09 | 969.221 | 1058.07 |
| ENSMUSG00000030822 | 15_Prr14  | 545.898 | 0.09346  | 0.822273 | 0.948667 | 294.272 | 691.437 | 705.298 | 628.047 | 479.03  | 477.305 |
| ENSMUSG00000030823 | 6_913001  | 116.288 | 0.04123  | 0.901403 | 0.973382 | 92.0232 | 136.02  | 126.168 | 127.92  | 113.319 | 102.28  |
| ENSMUSG00000030824 | 15_Nucb1  | 2901.28 | 0.14778  | 0.793046 | 0.938313 | 861.58  | 4105.55 | 4182.15 | 3140.24 | 2136.75 | 2981.39 |
| ENSMUSG00000030825 | 17_Hsd17  | 1.1953  | 0.59878  | 0.734116 | NA       | 1.01124 | 2.26701 | 1.03416 | 0.82529 | 0.85848 | 1.17563 |
| ENSMUSG00000030826 | 17_Bcat2  | 427.553 | -0.03144 | 0.95579  | 0.988811 | 121.349 | 537.28  | 610.155 | 515.808 | 343.391 | 437.334 |
| ENSMUSG00000030827 | 4_Fgf21   | 7.05906 | 0.02737  | 0.978414 | 0.993796 | 1.01124 | 9.06802 | 11.3758 | 10.7288 | 4.29238 | 5.87814 |
| ENSMUSG00000030830 | 18_Igfbp3 | 76.5045 | 2.95371  | 6.25E-06 | 0.000359 | 46.5172 | 262.973 | 97.2112 | 18.1564 | 18.8865 | 15.2832 |
| ENSMUSG00000030834 | 5_Abccc6  | 21.4918 | -1.38654 | 0.07827  | 0.375394 | 4.04498 | 6.80102 | 24.8199 | 47.0417 | 18.028  | 28.2151 |
| ENSMUSG00000030835 | 6_Nomo1   | 1106.75 | -0.14255 | 0.78032  | 0.93537  | 376.183 | 1397.61 | 1382.67 | 1341.93 | 928.872 | 1213.25 |
| ENSMUSG00000030838 | 17_Ush1c  | 3.16395 | -2.33916 | 0.137331 | 0.502861 | 0       | 0       | 3.10248 | 7.42763 | 2.57543 | 5.87814 |
| ENSMUSG00000030839 | 10_Sergei | 279.837 | 0.07159  | 0.892309 | 0.970752 | 101.124 | 357.053 | 402.289 | 335.894 | 214.619 | 268.043 |
| ENSMUSG00000030842 | 11_Lamto  | 1333.55 | -0.06944 | 0.893076 | 0.971037 | 455.06  | 1752.4  | 1697.06 | 1612.62 | 1094.56 | 1389.59 |
| ENSMUSG00000030844 | 11_Rgs10  | 1496.92 | -0.14367 | 0.570643 | 0.853945 | 1590.69 | 1310.33 | 1366.13 | 1382.36 | 1736.7  | 1595.33 |
| ENSMUSG00000030846 | 15_Tial1  | 1802.66 | 0.35043  | 0.392385 | 0.754651 | 3150.03 | 1512.09 | 1399.22 | 1293.23 | 1822.55 | 1638.83 |
| ENSMUSG00000030847 | 8_Bag3    | 1229.61 | 0.41148  | 0.1602   | 0.938686 | 1067.87 | 1561.97 | 1581.23 | 962.291 | 1021.59 | 1182.68 |
| ENSMUSG00000030849 | 17_Fgfr2  | 3240.38 | -0.04308 | 0.847321 | 0.955658 | 3378.57 | 2966.38 | 3230.72 | 3144.36 | 3277.67 | 3444.59 |
| ENSMUSG00000030850 | 15_Ate1   | 1511.47 | -0.01148 | 0.974904 | 0.993623 | 2187.32 | 1121.03 | 1207.9  | 1365.03 | 1742.71 | 1444.85 |
| ENSMUSG00000030852 | 15_Tacc2  | 935.519 | -0.37415 | 0.235322 | 0.627307 | 593.6   | 921.538 | 929.711 | 1210.7  | 906.552 | 1051.01 |
| ENSMUSG00000030854 | 15_Ptpn5  | 1.48929 | 0.66689  | 0.741064 | NA       | 0       | 4.53401 | 1.03416 | 1.65058 | 1.71695 | 0       |
| ENSMUSG00000030858 | 10_17000  | 0.49883 | 1.09243  | 0.73138  | NA       | 0       | 1.1335  | 1.03416 | 0.82529 | 0       | 0       |
| ENSMUSG00000030859 | 7_Fam24   | 0       | NA       | NA       | NA       | 0       | 0       | 0       | 0       | 0       | 0       |
| ENSMUSG00000030861 | 14_Acads  | 1872.27 | -0.07095 | 0.85677  | 0.959059 | 2825.42 | 1317.13 | 1336.14 | 1990.61 | 2030.3  | 1734.05 |
| ENSMUSG00000030862 | 12_Cpxm1  | 3104.24 | -0.53334 | 0.045905 | 0.274322 | 2034.62 | 2618.39 | 2957.7  | 3509.97 | 3772.15 | 3732.62 |
| ENSMUSG00000030865 | 4_Chp2    | 33.3263 | -1.17959 | 0.034468 | 0.230241 | 28.3148 | 9.06802 | 23.7857 | 59.421  | 42.9238 | 36.4445 |
| ENSMUSG00000030866 | 8_Ern2    | 4.38134 | -0.51305 | 0.631109 | 0.882337 | 1.01124 | 5.66751 | 4.13665 | 4.12646 | 4.29238 | 7.05377 |
| ENSMUSG00000030867 | 7_Plk1    | 222.578 | 0.67765  | 0.191309 | 0.580286 | 100.113 | 410.328 | 311.283 | 152.679 | 168.261 | 192.803 |
| ENSMUSG00000030868 | 6_Dctn5   | 1317.71 | -0.02823 | 0.90373  | 0.973878 | 1335.85 | 1322.8  | 1255.47 | 1199.15 | 1356.39 | 1436.62 |
| ENSMUSG00000030869 | 11_Ndufal | 995.782 | 0.28697  | 0.505978 | 0.825349 | 1770.69 | 775.316 | 737.357 | 760.92  | 1062.79 | 867.613 |
| ENSMUSG00000030870 | 12_Ubfgd1 | 1037.17 | 0.09448  | 0.740846 | 0.922404 | 1341.92 | 949.875 | 921.438 | 940.008 | 1083.4  | 986.352 |
| ENSMUSG00000030871 | 11_Ears2  | 192.666 | 0.24059  | 0.470009 | 0.804531 | 155.732 | 242.57  | 227.516 | 166.709 | 155.384 | 208.086 |
| ENSMUSG00000030872 | 11_Gga2   | 1184.75 | -0.35843 | 0.223965 | 0.613717 | 821.13  | 968.011 | 1325.8  | 1337.8  | 1301.45 | 1354.32 |
| ENSMUSG00000030873 | 9_Scnn1b  | 32.2594 | -0.19384 | 0.708833 | 0.909864 | 18.2024 | 35.1386 | 37.2298 | 46.2164 | 30.9052 | 25.8638 |
| ENSMUSG00000030876 | 6_Mettl9  | 1586.63 | 0.43112  | 0.322821 | 0.703332 | 2994.29 | 1283.13 | 1188.25 | 1155.41 | 1534.96 | 1363.73 |
| ENSMUSG00000030877 | 10_49334  | 9.89862 | -0.79381 | 0.37561  | 0.745495 | 15.1687 | 3.40051 | 3.10248 | 8.25292 | 18.8865 | 10.5807 |
| ENSMUSG00000030878 | 10_Cdr2   | 646.644 | -0.65991 | 0.018416 | 0.154024 | 535.959 | 474.938 | 493.295 | 954.863 | 768.337 | 652.473 |
| ENSMUSG00000030879 | 9_Mrpl17  | 860.878 | 0.07762  | 0.82035  | 0.948338 | 582.477 | 1114.23 | 955.565 | 914.424 | 748.592 | 849.979 |
| ENSMUSG00000030880 | 13_Polr3e | 511.774 | 0.10119  | 0.747985 | 0.924734 | 380.228 | 588.288 | 620.497 | 481.145 | 454.993 | 545.491 |
| ENSMUSG00000030881 | 14_Arfip2 | 806.488 | -0.26432 | 0.472531 | 0.805818 | 440.903 | 859.195 | 898.686 | 983.748 | 881.656 | 774.739 |
| ENSMUSG00000030882 | 17_Dnhd1  | 148.052 | -0.2768  | 0.438992 | 0.785475 | 91.012  | 162.091 | 148.919 | 162.583 | 180.28  | 143.427 |
| ENSMUSG00000030884 | 11_Uqcrd  | 4486.72 | -0.02887 | 0.922969 | 0.978443 | 5724.65 | 3842.57 | 3758.14 | 4158.65 | 5054.71 | 4381.56 |
| ENSMUSG00000030887 | 3_Pdzd9   | 8.32639 | 0.12527  | 0.903846 | 0.973891 | 17.1912 | 7.93452 | 1.03416 | 8.25292 | 12.0187 | 3.52688 |
| ENSMUSG00000030888 | 13_Rrp8   | 468.901 | 0.15021  | 0.547621 | 0.843809 | 511.69  | 523.678 | 444.689 | 425.851 | 480.747 | 426.753 |
| ENSMUSG00000030889 | 13_Vwa3   | 2.72794 | -1.08008 | 0.397383 | 0.758041 | 1.01124 | 1.1335  | 3.10248 | 3.30117 | 4.29238 | 3.52688 |
| ENSMUSG00000030890 | 15_Ilk    | 1404.47 | -0.53338 | 0.131335 | 0.492768 | 728.096 | 1200.38 | 1515.05 | 1746.32 | 1729.83 | 1507.15 |
| ENSMUSG00000030894 | 4_Tpp1    | 2481.49 | -0.06516 | 0.777746 | 0.934351 | 2167.1  | 2602.52 | 2506.81 | 2455.24 | 2581.44 | 2575.8  |
| ENSMUSG00000030895 | 8_Hpx     | 12.4188 | -0.71635 | 0.419239 | 0.773191 | 1.01124 | 17.0025 | 10.3416 | 19.807  | 14.5941 | 11.7563 |
| ENSMUSG00000030897 | 4_Cnga4   | 2.00701 | -0.46695 | 0.811626 | 0.946092 | 5.05622 | 0       | 0       | 4.95175 | 0.85848 | 1.17563 |
| ENSMUSG00000030898 | 14_Cckbr  | 2.59671 | -0.24078 | 0.894518 | 0.971192 | 6.06747 | 0       | 1.03416 | 4.95175 | 0       | 3.52688 |
| ENSMUSG00000030905 | 5_Crym    | 27.812  | -0.02038 | 0.973233 | 0.993027 | 22.2474 | 35.1386 | 25.854  | 27.2346 | 44.6408 | 11.7563 |
| ENSMUSG00000030909 | 5_Anks4b  | 0.16854 | 1.1315   | 0.781553 | NA       | 1.01124 | 0       | 0       | 0       | 0       | 0       |
| ENSMUSG00000030911 | 6_Zp2     | 0.13755 | -0.79206 | 0.84609  | NA       | 0       | 0       | 0       | 0.82529 | 0       | 0       |
| ENSMUSG00000030917 | 12_Tmem   | 783.066 | 0.33041  | 0.14556  | 0.515783 | 873.715 | 871.664 | 871.798 | 736.161 | 667.895 | 677.162 |
| ENSMUSG00000030921 | 16_Trim3  | 6915.02 | 2.42593  | 4.85E-07 | 4.18E-05 | 18988.1 | 9735.66 | 6256.68 | 1450.04 | 2832.97 | 2226.64 |
| ENSMUSG00000030922 | 11_Lyrm1  | 99.0336 | 0.13389  | 0.727812 | 0.917064 | 136.518 | 98.6148 | 75.4938 | 75.9269 | 103.017 | 104.631 |
| ENSMUSG00000030924 | 15_26100  | 109.046 | 0.45666  | 0.215153 | 0.60626  | 166.855 | 100.882 | 110.655 | 79.2281 | 107.31  | 89.3477 |
| ENSMUSG00000030929 | 16_Eri2   | 251.649 | 0.54366  | 0.24026  | 0.631907 | 485.397 | 231.235 | 178.91  | 170.836 | 260.119 | 183.398 |
| ENSMUSG00000030930 | 13_Chst1  | 1827.27 | 0.55325  | 0.072605 | 0.359974 | 1628.1  | 2337.28 | 2554.38 | 1342.75 | 1352.96 | 1748.16 |
| ENSMUSG00000030934 | 8_Oat     | 11762   | -0.03238 | 0.903102 | 0.973742 | 9344.91 | 13148.6 | 12396.5 | 11115   | 11755.1 | 12812   |
| ENSMUSG00000030935 | 15_Acsm2  | 15.231  | 0.40458  | 0.540886 | 0.84046  | 21.2361 | 7.93452 | 22.7516 | 9.90351 | 15.4526 | 14.1075 |
| ENSMUSG00000030942 | 7_Thump   | 1164.27 | 0.24178  | 0.507979 | 0.826498 | 1814.17 | 1017.89 | 952.463 | 882.238 | 1185.56 | 1133.31 |
| ENSMUSG00000030945 | 16_Acsm2  | 27.8772 | -0.13511 | 0.794797 | 0.9388   | 38.4273 | 19.2695 | 21.7174 | 23.9335 | 27.4713 | 36.4445 |
| ENSMUSG00000030946 | 12_Lhpp   | 240.347 | 0.24838  | 0.564333 | 0.850892 | 133.484 | 330.983 | 318.522 | 240.16  | 180.28  | 238.652 |
| ENSMUSG00000030954 | 9_Gp2     | 759.266 | -0.19214 | 0.573278 | 0.855525 | 844.389 | 507.809 | 773.553 | 807.136 | 638.707 | 984     |
| ENSMUSG00000030956 | 15_Fam5   | 1232.56 | 0.35346  | 0.353952 | 0.729719 | 798.883 | 1699.12 | 1650.52 | 1231.34 | 928.014 | 1087.46 |
| ENSMUSG00000030960 | 16_Mettl1 | 439.449 | 0.2983   | 0.564757 | 0.850965 | 892.929 | 266.373 | 294.736 | 340.846 | 464.436 | 377.377 |
| ENSMUSG00000030963 | 5_Umod    | 0.68944 | 2.99651  | 0.450864 | NA       | 0       | 0       | 4.13665 | 0       | 0       | 0       |
| ENSMUSG00000030965 | 18_Fam1   | 971.413 | 0.25456  | 0.145519 | 0.770028 | 1358.1  | 888.666 | 923.506 | 736.986 | 957.202 | 964.015 |
| ENSMUSG00000030966 | 12_Trim2  | 1344.32 | 1.55489  | 1.71E-06 | 0.000125 | 2441.14 | 2067.51 | 1508.84 | 537.265 | 784.648 | 726.538 |
| ENSMUSG00000030967 | 13_Zranb  | 1774.26 | 0.12372  | 0.771774 | 0.932465 | 3025.64 | 1246.85 | 1278.22 | 1575.48 | 1862.9  | 1656.46 |

|                    |            |         |          |          |          |         |         |         |         |         |         |
|--------------------|------------|---------|----------|----------|----------|---------|---------|---------|---------|---------|---------|
| ENSMUSG00000030968 | 2_Pdilt    | 23.5431 | 0.27525  | 0.573599 | 0.85571  | 28.3148 | 27.2041 | 21.7174 | 17.3311 | 23.1789 | 23.5126 |
| ENSMUSG00000030970 | 16_Ctbp2   | 945.743 | 0.10407  | 0.697779 | 0.905638 | 822.142 | 1091.56 | 1025.89 | 992.001 | 803.534 | 939.327 |
| ENSMUSG00000030972 | 5_Acsm5    | 16.7077 | -0.60232 | 0.370872 | 0.741935 | 17.1912 | 6.80102 | 15.5124 | 18.1564 | 12.0187 | 30.5663 |
| ENSMUSG00000030976 | 2_Tex36    | 0.19594 | -0.79206 | 0.84609  | NA       | 0       | 0       | 0       | 0       | 0       | 1.17563 |
| ENSMUSG00000030978 | 9_Rrm1     | 2550.7  | 0.55606  | 0.099866 | 0.429647 | 3867    | 2753.28 | 2488.19 | 1511.11 | 2450.95 | 2233.69 |
| ENSMUSG00000030979 | 12_Uros    | 375.538 | -0.24202 | 0.32919  | 0.709946 | 344.834 | 327.582 | 359.888 | 379.634 | 440.399 | 400.889 |
| ENSMUSG00000030980 | 16_Knop1   | 1951.67 | 0.29798  | 0.273731 | 0.660339 | 2449.23 | 2164.99 | 1842.88 | 1480.57 | 1820.83 | 1951.54 |
| ENSMUSG00000030981 | 9_Mmp21    | 0.47845 | 1.02683  | 0.749277 | NA       | 1.01124 | 0       | 1.03416 | 0.82529 | 0       | 0       |
| ENSMUSG00000030982 | 17_90306   | 1246    | 0.20649  | 0.519542 | 0.831665 | 905.064 | 1589.17 | 1510.91 | 1128.17 | 1152.93 | 1189.74 |
| ENSMUSG00000030983 | 4_Bccip    | 1041.32 | 0.0509   | 0.835868 | 0.952513 | 1171.02 | 1043.96 | 963.839 | 926.803 | 1074.81 | 1067.47 |
| ENSMUSG00000030986 | 12_Dhx32   | 1587.25 | -0.0738  | 0.845528 | 0.955057 | 872.704 | 1994.97 | 1772.55 | 1696.8  | 1586.47 | 1600.03 |
| ENSMUSG00000030987 | 4_Stim1    | 1996.32 | -0.27398 | 0.449483 | 0.792657 | 1087.09 | 2109.45 | 2225.52 | 2262.95 | 1948.74 | 2344.2  |
| ENSMUSG00000030990 | 17_Pgap2   | 1704.31 | 0.6077   | 0.015207 | 0.134454 | 2129.68 | 2176.33 | 1867.7  | 1167.79 | 1401.89 | 1482.47 |
| ENSMUSG00000030994 | 15_D7Ert   | 162.165 | 0.07348  | 0.813305 | 0.946572 | 202.249 | 160.957 | 135.475 | 148.553 | 158.818 | 166.939 |
| ENSMUSG00000030996 | 7_Art1     | 58.6371 | -1.11036 | 0.101536 | 0.433709 | 59.6634 | 10.2015 | 41.3665 | 122.969 | 41.2069 | 76.4158 |
| ENSMUSG00000031004 | 7_Mki67    | 4339.99 | 0.44422  | 0.211315 | 0.602834 | 6207.02 | 4726.71 | 4074.6  | 2439.56 | 4288.09 | 4303.97 |
| ENSMUSG00000031007 | 2_Atp6ap   | 7531.94 | 0.54512  | 0.198731 | 0.590735 | 14465.9 | 6297.74 | 6050.88 | 5210.07 | 6879.83 | 6287.26 |
| ENSMUSG00000031010 | 17_Usp9x   | 6470.94 | 0.29574  | 0.519868 | 0.831665 | 12144   | 4588.42 | 4663.03 | 4822.18 | 6862.67 | 5745.29 |
| ENSMUSG00000031012 | 17_Cask    | 1526.08 | 0.20589  | 0.524756 | 0.833095 | 2214.63 | 1353.4  | 1336.14 | 1271.78 | 1539.25 | 1441.32 |
| ENSMUSG00000031015 | 7_Swap7    | 563.044 | -0.02437 | 0.931385 | 0.98189  | 665.399 | 462.469 | 547.071 | 630.523 | 552.001 | 520.803 |
| ENSMUSG00000031016 | 8_Wee1     | 390.001 | 0.81999  | 0.043814 | 0.266078 | 752.366 | 337.784 | 403.323 | 225.305 | 307.335 | 313.893 |
| ENSMUSG00000031021 | 13_Tmem    | 1491.32 | 0.36722  | 0.238158 | 0.630377 | 2190.36 | 1555.17 | 1294.77 | 1213.18 | 1435.37 | 1259.1  |
| ENSMUSG00000031022 | 14_BC051   | 1.48805 | -0.68892 | 0.777896 | NA       | 0       | 3.40051 | 0       | 0.82529 | 0       | 4.70251 |
| ENSMUSG00000031023 | 5_Akip1    | 462.246 | 0.11819  | 0.667675 | 0.898113 | 550.117 | 495.341 | 398.152 | 419.249 | 485.039 | 425.577 |
| ENSMUSG00000031024 | 12_St5     | 774.354 | -0.78115 | 0.20244  | 0.164323 | 392.363 | 571.285 | 745.63  | 1076.18 | 968.362 | 892.302 |
| ENSMUSG00000031026 | 14_Trim6   | 17.9727 | 0.73642  | 0.199473 | 0.591392 | 20.2249 | 22.6701 | 24.8199 | 18.1564 | 13.7356 | 8.22939 |
| ENSMUSG00000031027 | 15_Stk33   | 15.225  | -1.74993 | 0.010409 | 0.103786 | 8.08995 | 3.40051 | 9.30745 | 28.0599 | 15.4526 | 27.0394 |
| ENSMUSG00000031028 | 13_Tub     | 118.844 | -2.40989 | 2.12E-05 | 0.000955 | 46.5172 | 39.6726 | 26.8882 | 340.846 | 176.846 | 82.2939 |
| ENSMUSG00000031029 | 6_Eif3f    | 3447.84 | -0.13173 | 0.682023 | 0.902515 | 2506.54 | 3753.03 | 3912.23 | 3537.2  | 3733.52 | 3544.52 |
| ENSMUSG00000031059 | 9_Ndufb1   | 1700.62 | -0.54893 | 0.080395 | 0.381576 | 995.064 | 1463.35 | 1684.65 | 2295.96 | 1898.95 | 1865.72 |
| ENSMUSG00000031060 | 16_Rbm1    | 1044.53 | 0.19054  | 0.653191 | 0.892929 | 550.117 | 1391.94 | 1398.19 | 1020.89 | 832.723 | 1073.35 |
| ENSMUSG00000031065 | 14_Cdk16   | 2090.93 | -0.00439 | 0.990631 | 0.997381 | 1190.23 | 2591.19 | 2481.99 | 2184.55 | 1987.37 | 2110.25 |
| ENSMUSG00000031066 | 10_Usp11   | 548.785 | -1.06051 | 0.000483 | 0.011375 | 375.172 | 272.041 | 419.87  | 812.913 | 774.346 | 638.366 |
| ENSMUSG00000031068 | 7_Glrx3    | 3776.15 | 0.12889  | 0.732368 | 0.919789 | 5875.33 | 2983.38 | 2975.28 | 3127.03 | 4117.26 | 3578.61 |
| ENSMUSG00000031070 | 15_Mrgprf  | 80.0276 | -0.81855 | 0.240687 | 0.631907 | 10.1124 | 74.8112 | 88.9379 | 138.649 | 71.2536 | 96.4015 |
| ENSMUSG00000031072 | 13_Oraov   | 489.3   | 0.09658  | 0.801983 | 0.942326 | 290.227 | 664.233 | 562.584 | 462.164 | 436.965 | 519.627 |
| ENSMUSG00000031073 | 5_Fgf15    | 0.50203 | -0.79092 | 0.80375  | NA       | 1.01124 | 0       | 0       | 0.82529 | 0       | 1.17563 |
| ENSMUSG00000031074 | 14_Fgf3    | 0       | NA       | NA       | NA       | 0       | 0       | 0       | 0       | 0       | 0       |
| ENSMUSG00000031075 | 17_Ano1    | 313.426 | -0.91151 | 0.008372 | 0.088562 | 199.215 | 158.69  | 294.736 | 460.513 | 379.447 | 387.957 |
| ENSMUSG00000031077 | 7_Fadd     | 437.97  | 0.04716  | 0.872208 | 0.963879 | 349.891 | 529.346 | 456.065 | 411.821 | 406.918 | 473.778 |
| ENSMUSG00000031078 | 5_Cttn     | 5740.04 | 0.24409  | 0.523069 | 0.832475 | 3530.25 | 7986.66 | 7156.4  | 4905.54 | 4872.72 | 5988.65 |
| ENSMUSG00000031079 | 12_Zfp30   | 49.3479 | -0.61926 | 0.32827  | 0.709227 | 77.8658 | 18.136  | 20.6832 | 67.674  | 63.5273 | 48.2007 |
| ENSMUSG00000031085 | 15_Gm49    | 0       | NA       | NA       | NA       | 0       | 0       | 0       | 0       | 0       | 0       |
| ENSMUSG00000031089 | 7_Slc6a1   | 12980.9 | 0.8951   | 0.050643 | 0.291317 | 27491.7 | 13539.7 | 9618.74 | 6742.64 | 11280.4 | 9212.22 |
| ENSMUSG00000031090 | 14_Nadsy   | 131.612 | -0.19192 | 0.712    | 0.910719 | 44.4948 | 147.355 | 176.842 | 142.776 | 134.781 | 143.427 |
| ENSMUSG00000031093 | 14_Dock1   | 1235.61 | 0.35668  | 0.474735 | 0.806964 | 2395.64 | 927.205 | 839.739 | 731.209 | 1424.21 | 1095.69 |
| ENSMUSG00000031095 | 15_Cul4b   | 1373.59 | 0.6259   | 0.225748 | 0.615896 | 3069.13 | 1059.83 | 871.798 | 882.238 | 1272.26 | 1086.28 |
| ENSMUSG00000031097 | 14_Tnni2   | 993.787 | -0.91013 | 0.056155 | 0.310268 | 494.498 | 618.893 | 957.634 | 2001.33 | 674.763 | 1215.6  |
| ENSMUSG00000031098 | 17_Syt8    | 2156.15 | 0.70843  | 0.213087 | 0.604264 | 720.006 | 3670.28 | 3635.08 | 1533.39 | 1455.98 | 1922.15 |
| ENSMUSG00000031099 | 16_Smarc   | 177.868 | -0.63431 | 0.269795 | 0.656796 | 266.969 | 85.0127 | 66.1863 | 240.16  | 258.402 | 150.48  |
| ENSMUSG00000031101 | 6_Sash3    | 48.4756 | 1.32347  | 0.022168 | 0.175102 | 42.4723 | 121.285 | 44.4689 | 35.4876 | 28.3297 | 18.81   |
| ENSMUSG00000031103 | 12_Elfa    | 375.706 | 0.7054   | 0.025329 | 0.190854 | 348.879 | 587.155 | 461.236 | 281.425 | 268.703 | 306.839 |
| ENSMUSG00000031104 | 2_Rab33a   | 2.33523 | -0.28178 | 0.831487 | 0.951683 | 2.02249 | 1.1335  | 3.10248 | 1.65058 | 2.57543 | 3.52688 |
| ENSMUSG00000031105 | 16_Slc25   | 122.009 | -0.04132 | 0.919625 | 0.977244 | 177.979 | 91.8137 | 91.0062 | 118.017 | 145.083 | 108.158 |
| ENSMUSG00000031107 | 6_Rbm2     | 164.123 | 0.22502  | 0.490808 | 0.815177 | 218.429 | 177.96  | 134.441 | 154.33  | 159.677 | 139.9   |
| ENSMUSG00000031109 | 16_Enox2   | 499.114 | 0.02689  | 0.940977 | 0.985839 | 715.961 | 375.189 | 419.87  | 417.598 | 551.142 | 514.925 |
| ENSMUSG00000031111 | 16_lgsf1   | 14.1838 | -0.9197  | 0.16364  | 0.541822 | 15.1687 | 7.93452 | 6.20497 | 14.03   | 20.6034 | 21.1613 |
| ENSMUSG00000031112 | 10_Stk26   | 1212.92 | 0.58816  | 0.25123  | 0.642531 | 2681.82 | 774.182 | 914.199 | 814.564 | 1091.12 | 1001.63 |
| ENSMUSG00000031119 | 4_Gpc4     | 699.695 | -0.60192 | 0.032481 | 0.222766 | 648.208 | 454.535 | 564.652 | 811.262 | 949.476 | 770.036 |
| ENSMUSG00000031125 | 2_383040   | 6.43912 | -0.46581 | 0.726462 | 0.916094 | 15.1687 | 0       | 1.03416 | 7.42763 | 10.3017 | 4.70251 |
| ENSMUSG00000031129 | 9_Slc9a9   | 200.781 | -0.052   | 0.853569 | 0.958434 | 203.26  | 179.093 | 208.901 | 177.438 | 223.204 | 212.789 |
| ENSMUSG00000031131 | 11_Vgll1   | 22.2315 | 0.27059  | 0.652468 | 0.892452 | 35.3936 | 17.0025 | 20.6832 | 17.3311 | 30.0467 | 12.9319 |
| ENSMUSG00000031132 | 1_Cd40lg   | 1.74168 | 1.41619  | 0.375459 | 0.745495 | 2.02249 | 4.53401 | 1.03416 | 0.82529 | 0.85848 | 1.17563 |
| ENSMUSG00000031133 | 12_Arhge1  | 462.223 | -0.3574  | 0.452211 | 0.794408 | 703.826 | 247.104 | 264.745 | 487.748 | 604.368 | 465.549 |
| ENSMUSG00000031134 | 16_Rbm2    | 1009.91 | -0.1808  | 0.579541 | 0.85903  | 1252.93 | 834.258 | 752.87  | 935.882 | 1252.52 | 1031.03 |
| ENSMUSG00000031137 | 17_Fgf13   | 40.1647 | -0.88607 | 0.180132 | 0.566296 | 50.5622 | 11.335  | 22.7516 | 64.3728 | 66.1027 | 25.8638 |
| ENSMUSG00000031138 | 4_F9       | 0.70156 | 1.59337  | 0.644125 | NA       | 3.03373 | 0       | 0       | 0       | 0       | 1.17563 |
| ENSMUSG00000031139 | 14_Mcf2    | 2.66301 | -1.46535 | 0.269039 | 0.656292 | 2.02249 | 1.1335  | 1.03416 | 2.47588 | 3.43391 | 5.87814 |
| ENSMUSG00000031142 | 17_Cacna   | 92.0574 | -2.61974 | 0.000251 | 0.006928 | 27.3036 | 41.9396 | 8.27329 | 283.075 | 136.498 | 55.2545 |
| ENSMUSG00000031143 | 4_Ccdc22   | 321.496 | 0.10377  | 0.82263  | 0.948827 | 144.608 | 419.396 | 435.382 | 345.797 | 300.467 | 283.326 |
| ENSMUSG00000031144 | 15_Syp     | 190.204 | -2.24429 | 6.60E-05 | 0.00236  | 74.8321 | 72.5442 | 51.7081 | 552.121 | 271.279 | 118.738 |
| ENSMUSG00000031145 | 15_Prickle | 278.8   | 0.56514  | 0.152168 | 0.526432 | 194.159 | 368.388 | 435.382 | 205.498 | 206.034 | 263.341 |
| ENSMUSG00000031146 | 6_Plp2     | 5290.78 | 0.29112  | 0.305947 | 0.688731 | 4391.83 | 6744.34 | 6332.17 | 4539.93 | 4716.47 | 5019.93 |
| ENSMUSG00000031147 | 8_Magix    | 17.2255 | -1.20084 | 0.083688 | 0.390586 | 7.07871 | 4.53401 | 19.6491 | 22.2829 | 27.4713 | 22.3369 |
| ENSMUSG00000031148 | 14_Gpkov   | 1414.91 | 0.32892  | 0.209296 | 0.60089  | 1866.76 | 1500.76 | 1358.89 | 1176.04 | 1322.05 | 1264.98 |

|                    |           |         |          |          |          |         |         |         |         |         |         |
|--------------------|-----------|---------|----------|----------|----------|---------|---------|---------|---------|---------|---------|
| ENSMUSG00000031149 | 7_Praf2   | 222.029 | -0.46387 | 0.095678 | 0.419807 | 163.822 | 187.028 | 208.901 | 236.034 | 260.119 | 276.273 |
| ENSMUSG00000031150 | 12_Ccdc1  | 808.285 | 0.48589  | 0.134477 | 0.498485 | 666.41  | 1111.97 | 1050.71 | 612.367 | 624.113 | 784.144 |
| ENSMUSG00000031153 | 16_Gripa  | 693.164 | 0.20725  | 0.549076 | 0.843853 | 479.33  | 940.807 | 808.714 | 695.721 | 607.802 | 626.61  |
| ENSMUSG00000031154 | 15_Otud5  | 1870.37 | 0.64538  | 0.007403 | 0.08138  | 2049.79 | 2576.45 | 2219.31 | 1393.09 | 1461.13 | 1522.44 |
| ENSMUSG00000031155 | 14_Pim2   | 84.6186 | 0.09628  | 0.771385 | 0.932465 | 85.9558 | 80.4787 | 96.177  | 91.6075 | 84.1307 | 69.362  |
| ENSMUSG00000031156 | 17_Slc35  | 477.745 | 0.29344  | 0.391462 | 0.754323 | 342.812 | 635.895 | 599.814 | 396.966 | 439.54  | 451.441 |
| ENSMUSG00000031157 | 10_Pqbp1  | 569.545 | -0.23155 | 0.566595 | 0.85205  | 276.07  | 637.029 | 658.761 | 615.668 | 563.161 | 666.581 |
| ENSMUSG00000031158 | 11_Timm1  | 461.474 | -0.09899 | 0.830806 | 0.951387 | 194.159 | 532.746 | 610.155 | 539.741 | 411.21  | 480.832 |
| ENSMUSG00000031161 | 15_Hdac6  | 434.201 | -0.067   | 0.885122 | 0.968635 | 180.001 | 536.147 | 556.379 | 481.971 | 418.078 | 432.631 |
| ENSMUSG00000031162 | 14_Gata1  | 0.85057 | 0.66814  | 0.810169 | NA       | 0       | 0       | 3.10248 | 0.82529 | 0       | 1.17563 |
| ENSMUSG00000031165 | 6_Was     | 36.585  | 1.31158  | 0.049514 | 0.287808 | 20.2249 | 95.2142 | 41.3665 | 29.7105 | 18.8865 | 14.1075 |
| ENSMUSG00000031166 | 13_Wdr13  | 1723.72 | 0.10972  | 0.680374 | 0.902274 | 2141.82 | 1608.44 | 1617.43 | 1557.33 | 1820.83 | 1596.5  |
| ENSMUSG00000031167 | 16_Rbm3   | 9776.93 | 0.38196  | 0.208208 | 0.599354 | 14555.9 | 9810.47 | 8824.5  | 7967.37 | 8822.57 | 8680.84 |
| ENSMUSG00000031168 | 14_Ebp    | 943.54  | 0.30391  | 0.382401 | 0.749501 | 669.444 | 1274.06 | 1184.11 | 738.637 | 875.647 | 919.341 |
| ENSMUSG00000031169 | 13_Porc   | 381.854 | 0.14681  | 0.749755 | 0.925082 | 173.934 | 482.872 | 547.071 | 376.333 | 338.24  | 372.674 |
| ENSMUSG00000031170 | 14_Slc38  | 0.46955 | -0.60795 | 0.850453 | NA       | 0       | 1.1335  | 0       | 0.82529 | 0.85848 | 0       |
| ENSMUSG00000031171 | 11_Ftsj1  | 397.662 | -0.00319 | 0.990903 | 0.997381 | 317.531 | 443.2   | 431.245 | 406.044 | 412.927 | 375.025 |
| ENSMUSG00000031173 | 13_Otc    | 0.17236 | 1.1315   | 0.781553 | NA       | 0       | 0       | 1.03416 | 0       | 0       | 0       |
| ENSMUSG00000031174 | 17_Rpgr   | 265.737 | 0.41053  | 0.367104 | 0.739612 | 508.656 | 199.497 | 201.662 | 222.004 | 249.817 | 212.789 |
| ENSMUSG00000031176 | 8_Dynl1   | 6111.47 | 0.32521  | 0.516633 | 0.830464 | 12420.1 | 3865.24 | 4106.66 | 4656.3  | 6066.86 | 5553.67 |
| ENSMUSG00000031189 | 12_Aff2   | 26.8161 | -0.92214 | 0.069955 | 0.352888 | 23.2586 | 12.4685 | 19.6491 | 27.2346 | 39.4899 | 38.7957 |
| ENSMUSG00000031196 | 13_F8     | 106.499 | 0.07255  | 0.895433 | 0.971528 | 204.271 | 60.0757 | 63.0839 | 93.258  | 121.904 | 96.4015 |
| ENSMUSG00000031197 | 11_Vbp1   | 1676.76 | 0.58174  | 0.294395 | 0.678843 | 3946.89 | 1098.36 | 985.556 | 1190.9  | 1509.2  | 1329.64 |
| ENSMUSG00000031198 | 4_Fundc2  | 1906.49 | 0.20986  | 0.644471 | 0.889283 | 3488.79 | 1278.59 | 1367.16 | 1590.34 | 1956.47 | 1757.56 |
| ENSMUSG00000031200 | 16_Mtcp1  | 162.468 | 0.14606  | 0.782082 | 0.935592 | 307.418 | 104.282 | 100.314 | 128.746 | 200.025 | 134.022 |
| ENSMUSG00000031201 | 17_Brcc3  | 864.019 | 0.34792  | 0.480165 | 0.810012 | 1729.23 | 590.555 | 583.267 | 689.119 | 906.552 | 685.391 |
| ENSMUSG00000031202 | 5_Rab39b  | 28.1055 | -0.75032 | 0.311893 | 0.693638 | 42.4723 | 9.06802 | 11.3758 | 51.1681 | 36.9145 | 17.6344 |
| ENSMUSG00000031204 | 2_Asb12   | 9.67943 | -0.73074 | 0.424858 | 0.776696 | 15.1687 | 4.53401 | 2.06832 | 16.5058 | 6.86782 | 12.9319 |
| ENSMUSG00000031207 | 16_Msn    | 2130.32 | 0.27447  | 0.400923 | 0.76011  | 2808.23 | 2476.7  | 1712.57 | 1895.7  | 2320.46 | 1568.29 |
| ENSMUSG00000031209 | 14_Heph   | 652.939 | -0.79271 | 0.05154  | 0.293947 | 726.073 | 285.643 | 421.938 | 860.78  | 891.958 | 731.241 |
| ENSMUSG00000031210 | 10_Gprt1  | 177.126 | -1.70647 | 0.00048  | 0.011336 | 132.473 | 45.3401 | 71.3571 | 321.864 | 314.203 | 177.52  |
| ENSMUSG00000031214 | 13_Ophn1  | 918.878 | 0.35799  | 0.344559 | 0.721929 | 1517.88 | 761.714 | 816.988 | 660.234 | 887.665 | 868.789 |
| ENSMUSG00000031216 | 13_StarD  | 525.174 | -0.32802 | 0.211586 | 0.602834 | 422.7   | 454.535 | 520.183 | 661.059 | 549.425 | 543.14  |
| ENSMUSG00000031217 | 8_Efnb1   | 957.244 | 0.20818  | 0.717846 | 0.912538 | 279.103 | 1415.75 | 1383.71 | 954.863 | 669.612 | 1040.43 |
| ENSMUSG00000031220 | 14_Awat2  | 10.6757 | -0.72824 | 0.306337 | 0.689061 | 9.1012  | 6.80102 | 8.27329 | 10.7288 | 19.745  | 9.40502 |
| ENSMUSG00000031221 | 7_Igbbp1  | 1600.35 | -0.05628 | 0.810127 | 0.945475 | 1740.35 | 1474.69 | 1492.3  | 1568.06 | 1716.1  | 1610.61 |
| ENSMUSG00000031224 | 6_Magee2  | 108.57  | 0.23743  | 0.546475 | 0.842968 | 153.709 | 89.5467 | 108.587 | 78.4028 | 91.857  | 129.319 |
| ENSMUSG00000031226 | 13_Pbdc1  | 663.741 | 0.36576  | 0.393023 | 0.755029 | 1163.94 | 609.825 | 468.475 | 471.242 | 721.121 | 547.843 |
| ENSMUSG00000031227 | 8_Magee1  | 150.762 | -1.21504 | 0.000378 | 0.009365 | 99.1019 | 79.3452 | 94.1087 | 246.762 | 230.072 | 155.183 |
| ENSMUSG00000031229 | 16_Atr    | 4120.86 | 0.25518  | 0.607352 | 0.872213 | 8134.45 | 2604.79 | 2713.64 | 3235.15 | 4224.57 | 3812.56 |
| ENSMUSG00000031230 | 3_Fgf16   | 18.5412 | 1.45684  | 0.037402 | 0.242169 | 37.416  | 26.0706 | 17.5807 | 8.25292 | 4.29238 | 17.6344 |
| ENSMUSG00000031231 | 4_Cox7b   | 3048.19 | 0.00769  | 0.979943 | 0.993796 | 4030.82 | 2529.98 | 2608.16 | 3210.39 | 3118.85 | 2790.94 |
| ENSMUSG00000031232 | 16_Magt1  | 3452.33 | 0.48538  | 0.275431 | 0.661874 | 6718.71 | 2819.02 | 2545.07 | 2402.43 | 3190.96 | 3037.82 |
| ENSMUSG00000031239 | 5_Iitm2a  | 1094.35 | -0.51393 | 0.247253 | 0.638878 | 1491.59 | 514.61  | 698.059 | 1352.65 | 1341.8  | 1167.4  |
| ENSMUSG00000031241 | 17_Tbx22  | 52.1422 | -1.19548 | 0.153932 | 0.529412 | 77.8658 | 6.80102 | 10.3416 | 85.8304 | 84.9892 | 47.0251 |
| ENSMUSG00000031242 | 7_261000  | 1227.27 | 0.60879  | 0.199253 | 0.5911   | 2572.61 | 1022.42 | 852.149 | 825.292 | 1117.74 | 973.42  |
| ENSMUSG00000031245 | 8_Hmgn5   | 2031.92 | 0.03095  | 0.943074 | 0.986189 | 3393.74 | 1389.67 | 1377.5  | 1792.54 | 2129.02 | 2109.08 |
| ENSMUSG00000031246 | 14_Sh3bg  | 1345.13 | 0.0831   | 0.887917 | 0.969745 | 2814.29 | 626.827 | 710.469 | 1417.03 | 1481.73 | 1020.44 |
| ENSMUSG00000031250 | 8_Tnmd    | 1046.11 | -0.41917 | 0.39326  | 0.755098 | 1585.63 | 454.535 | 645.317 | 1230.51 | 1301.45 | 1059.24 |
| ENSMUSG00000031253 | 15_Srpx2  | 466.228 | -1.50512 | 2.52E-07 | 2.36E-05 | 212.361 | 243.703 | 273.019 | 797.232 | 709.102 | 561.95  |
| ENSMUSG00000031255 | 14_Sytl4  | 182.704 | -0.05953 | 0.85065  | 0.957445 | 223.485 | 162.091 | 150.988 | 165.884 | 197.45  | 196.33  |
| ENSMUSG00000031256 | 11_Cstf2  | 1126.86 | 0.4644   | 0.191523 | 0.580631 | 1859.68 | 1085.9  | 974.18  | 816.214 | 1013    | 1012.22 |
| ENSMUSG00000031257 | 14_Nox1   | 3.8233  | -0.29025 | 0.833179 | 0.952011 | 5.05622 | 0       | 5.17081 | 0.82529 | 6.00934 | 5.87814 |
| ENSMUSG00000031258 | 4_Xkrx    | 26.0878 | -0.15489 | 0.738111 | 0.921501 | 26.2924 | 24.9371 | 22.7516 | 23.1082 | 30.0467 | 29.3907 |
| ENSMUSG00000031262 | 12_Cenpi  | 147.723 | 0.90309  | 0.035479 | 0.235118 | 279.103 | 168.892 | 129.27  | 73.451  | 122.762 | 112.86  |
| ENSMUSG00000031264 | 13_Btk    | 40.1006 | 1.47238  | 0.001795 | 0.029863 | 58.6522 | 73.6777 | 44.4689 | 14.8553 | 26.6128 | 22.3369 |
| ENSMUSG00000031266 | 6_Gla     | 210.541 | 0.00231  | 0.994161 | 0.998043 | 250.789 | 223.3   | 158.227 | 213.751 | 223.204 | 193.979 |
| ENSMUSG00000031273 | 16_Col4a  | 97.4508 | -1.16134 | 0.002581 | 0.039219 | 55.6184 | 47.6071 | 77.5621 | 155.155 | 147.658 | 101.104 |
| ENSMUSG00000031274 | 16_Col4a  | 1885.8  | -0.81992 | 0.002382 | 0.036818 | 1217.54 | 1241.19 | 1632.94 | 2669    | 2180.53 | 2373.59 |
| ENSMUSG00000031278 | 12_Acs14  | 1502.5  | 0.47116  | 0.348314 | 0.725587 | 3129.8  | 1091.56 | 1015.55 | 969.719 | 1537.53 | 1270.85 |
| ENSMUSG00000031283 | 15_Chrd1  | 384.06  | -1.26234 | 0.022623 | 0.17728  | 418.655 | 89.5467 | 169.602 | 519.109 | 661.886 | 445.563 |
| ENSMUSG00000031284 | 16_Pak3   | 129.884 | -0.68003 | 0.294599 | 0.679002 | 208.316 | 36.2721 | 54.8106 | 150.203 | 208.61  | 121.09  |
| ENSMUSG00000031285 | 14_Dcx    | 3.00256 | 0.09206  | 0.951608 | 0.988    | 7.07871 | 2.26701 | 0       | 5.77705 | 1.71695 | 1.17563 |
| ENSMUSG00000031286 | 6_Glt28d2 | 496.527 | 0.3469   | 0.375741 | 0.745495 | 817.085 | 455.668 | 395.05  | 372.207 | 538.265 | 400.889 |
| ENSMUSG00000031289 | 21_I13ra2 | 21.1948 | 0.44262  | 0.50347  | 0.824284 | 42.4723 | 20.4031 | 10.3416 | 14.8553 | 21.4619 | 17.6344 |
| ENSMUSG00000031290 | 14_Lrch2  | 213.062 | 0.0353   | 0.947163 | 0.986649 | 394.385 | 133.753 | 118.929 | 216.227 | 257.543 | 157.534 |
| ENSMUSG00000031292 | 14_Cdk15  | 364.696 | 0.2886   | 0.498593 | 0.820561 | 643.151 | 311.713 | 248.199 | 327.641 | 336.523 | 320.946 |
| ENSMUSG00000031293 | 13_Rs1    | 416.59  | -1.92973 | 0.01705  | 0.145332 | 355.958 | 133.753 | 29.9907 | 1038.22 | 751.167 | 190.452 |
| ENSMUSG00000031294 | 9_D63002  | 1.00827 | 2.37274  | 0.285567 | NA       | 2.02249 | 1.1335  | 2.06832 | 0.82529 | 0       | 0       |
| ENSMUSG00000031295 | 13_Phka2  | 425.852 | -0.00598 | 0.981473 | 0.993854 | 375.172 | 485.139 | 414.699 | 417.598 | 427.522 | 434.982 |
| ENSMUSG00000031297 | 14_Slc7a  | 75.1106 | -1.23148 | 0.005808 | 0.068645 | 59.6634 | 29.4711 | 45.5031 | 115.541 | 128.772 | 71.7133 |
| ENSMUSG00000031298 | 15_Adgrg1 | 118.62  | 0.6971   | 0.095764 | 0.41981  | 211.35  | 117.884 | 110.655 | 66.8487 | 103.876 | 101.104 |
| ENSMUSG00000031299 | 10_Pdha1  | 3823.26 | 0.0754   | 0.840215 | 0.95317  | 5896.57 | 2781.62 | 3091.11 | 3727.02 | 3884.61 | 3558.63 |
| ENSMUSG00000031302 | 16_Nlgn3  | 104.229 | -1.19612 | 0.001306 | 0.023983 | 73.8208 | 53.2746 | 63.0839 | 177.438 | 151.95  | 105.807 |
| ENSMUSG00000031303 | 8_Map3k1  | 28.9947 | -0.47084 | 0.429508 | 0.779482 | 39.4385 | 17.0025 | 16.5466 | 29.7105 | 48.9332 | 22.3369 |

|                    |            |         |          |          |          |         |         |         |         |         |         |
|--------------------|------------|---------|----------|----------|----------|---------|---------|---------|---------|---------|---------|
| ENSMUSG00000031304 | 18_Il2rg   | 167.162 | 2.28391  | 2.40E-06 | 0.000165 | 209.328 | 444.333 | 178.91  | 51.9934 | 77.2629 | 41.147  |
| ENSMUSG00000031309 | 15_Rps6k   | 5565.9  | 0.62705  | 0.180559 | 0.566911 | 11635.4 | 4408.19 | 4226.62 | 3520.7  | 5105.36 | 4499.13 |
| ENSMUSG00000031310 | 16_Zmym    | 1156.78 | -0.30559 | 0.358371 | 0.732631 | 685.624 | 1167.51 | 1251.34 | 1318.82 | 1354.68 | 1162.7  |
| ENSMUSG00000031311 | 17_Nono    | 6099.06 | 0.22727  | 0.352882 | 0.729233 | 7371.97 | 6379.35 | 5983.66 | 5077.2  | 5664.23 | 6117.97 |
| ENSMUSG00000031312 | 5_Iltgb1bp | 62.2385 | -1.00784 | 0.10961  | 0.449911 | 66.7421 | 14.7355 | 42.4006 | 123.794 | 44.6408 | 81.1183 |
| ENSMUSG00000031314 | 17_Taf1    | 2589.72 | 0.19207  | 0.623691 | 0.879262 | 4167.34 | 2076.58 | 2041.43 | 1957.59 | 2786.62 | 2508.79 |
| ENSMUSG00000031320 | 9_Rps4x    | 29362.1 | -0.28715 | 0.264202 | 0.652958 | 30390.9 | 24246.8 | 24711.3 | 29301.2 | 36724.8 | 30797.9 |
| ENSMUSG00000031323 | 8_Dmrtc1   | 27.3854 | -0.28725 | 0.598364 | 0.868735 | 27.3036 | 14.7355 | 32.059  | 41.2646 | 26.6128 | 22.3369 |
| ENSMUSG00000031326 | 2_Cdx4     | 0.16854 | 1.1315   | 0.781553 | NA       | 1.01124 | 0       | 0       | 0       | 0       | 0       |
| ENSMUSG00000031327 | 10_Chic1   | 182.733 | -0.46625 | 0.407763 | 0.765046 | 294.272 | 64.6097 | 101.348 | 219.528 | 221.487 | 195.154 |
| ENSMUSG00000031328 | 15_Flna    | 10741   | -0.292   | 0.519329 | 0.831665 | 4198.69 | 12275.8 | 12498.9 | 11358.5 | 13411.1 | 10702.9 |
| ENSMUSG00000031329 | 4_Tsx      | 3.45241 | -0.03949 | 0.978264 | 0.993796 | 9.1012  | 0       | 1.03416 | 3.30117 | 2.57543 | 4.70251 |
| ENSMUSG00000031330 | 8_Zcchc1   | 0.62324 | 0.22022  | 0.950888 | NA       | 2.02249 | 0       | 0       | 0       | 1.71695 | 0       |
| ENSMUSG00000031333 | 7_Abc7     | 1360.44 | 0.53881  | 0.283716 | 0.670589 | 2955.87 | 928.339 | 950.394 | 1027.49 | 1209.59 | 1090.98 |
| ENSMUSG00000031337 | 16_Mtm1    | 310.828 | 0.30329  | 0.530657 | 0.836639 | 602.702 | 215.366 | 212.003 | 264.094 | 313.344 | 257.462 |
| ENSMUSG00000031340 | 8_Gabre    | 138.298 | -0.2939  | 0.353247 | 0.729327 | 143.597 | 100.882 | 128.236 | 141.95  | 171.695 | 143.427 |
| ENSMUSG00000031342 | 17_Gpm6l   | 2114.1  | -0.11444 | 0.815129 | 0.947066 | 3614.19 | 1177.71 | 1298.91 | 1994.73 | 2647.54 | 1951.54 |
| ENSMUSG00000031343 | 13_Gabra   | 109.382 | -0.98693 | 0.120971 | 0.472812 | 146.63  | 22.6701 | 50.6739 | 167.534 | 157.101 | 111.685 |
| ENSMUSG00000031344 | 11_Gabrq   | 40.6965 | -1.46623 | 0.025977 | 0.19363  | 41.461  | 5.66751 | 17.5807 | 62.7222 | 62.6688 | 54.0789 |
| ENSMUSG00000031347 | 12_Cetn2   | 1360.82 | 0.19155  | 0.669523 | 0.898674 | 2440.13 | 927.205 | 985.556 | 1101.77 | 1427.65 | 1282.61 |
| ENSMUSG00000031349 | 4_Nsdhl    | 2979.51 | 0.3893   | 0.188938 | 0.577337 | 3878.12 | 3399.38 | 2859.46 | 2001.33 | 2954.88 | 2783.89 |
| ENSMUSG00000031351 | 15_Zfp18t  | 12358.8 | 0.61889  | 0.073301 | 0.362183 | 20652.6 | 12482.1 | 11773.9 | 7839.45 | 10829.7 | 10574.8 |
| ENSMUSG00000031352 | 10_Hccs    | 355.855 | 0.45819  | 0.308184 | 0.690547 | 683.601 | 281.109 | 270.95  | 282.25  | 346.825 | 270.394 |
| ENSMUSG00000031353 | 13_Rbbp7   | 4416.88 | 0.27182  | 0.490764 | 0.815177 | 7418.49 | 3679.35 | 3397.22 | 3424.14 | 4515.59 | 4066.5  |
| ENSMUSG00000031354 | 16_Amelx   | 0.33349 | -1.76186 | 0.662172 | NA       | 0       | 0       | 0.82529 | 0       | 1.17563 | 0       |
| ENSMUSG00000031355 | 16_Arhga1  | 117.861 | -0.88713 | 0.066084 | 0.340793 | 133.484 | 70.2772 | 44.4689 | 178.263 | 163.111 | 117.563 |
| ENSMUSG00000031357 | 3_Syap1    | 1595.66 | 0.44077  | 0.34969  | 0.726477 | 3195.53 | 1160.71 | 1156.19 | 1152.93 | 1549.55 | 1359.03 |
| ENSMUSG00000031358 | 17_Msl3    | 883.721 | 0.24068  | 0.540727 | 0.84046  | 1465.29 | 682.369 | 723.913 | 709.751 | 894.533 | 826.466 |
| ENSMUSG00000031360 | 14_Ctps2   | 459.783 | -0.36731 | 0.310439 | 0.692536 | 571.353 | 299.245 | 334.034 | 491.874 | 596.642 | 465.549 |
| ENSMUSG00000031362 | 17_Xlr4c   | 1325.96 | 0.22171  | 0.668047 | 0.898206 | 2620.13 | 858.062 | 804.578 | 946.61  | 1482.59 | 1243.81 |
| ENSMUSG00000031364 | 2_Grpr     | 0.90765 | -0.65948 | 0.809352 | NA       | 1.01124 | 1.1335  | 0       | 3.30117 | 0       | 0       |
| ENSMUSG00000031365 | 13_Zfp27t  | 518.428 | 0.04334  | 0.904048 | 0.973988 | 753.377 | 401.26  | 424.006 | 572.753 | 493.624 | 465.549 |
| ENSMUSG00000031367 | 15_Ap1s2   | 369.029 | -0.22234 | 0.711026 | 0.910557 | 699.781 | 158.69  | 163.398 | 387.887 | 467.011 | 337.405 |
| ENSMUSG00000031370 | 12_Zrsr2   | 1076.71 | 0.26851  | 0.517495 | 0.831157 | 1864.73 | 824.057 | 840.773 | 824.467 | 1061.08 | 1045.13 |
| ENSMUSG00000031371 | 14_Haus7   | 680.864 | -0.03147 | 0.930218 | 0.981773 | 411.576 | 810.455 | 798.373 | 626.397 | 727.13  | 711.255 |
| ENSMUSG00000031372 | 7_Trex2    | 495.206 | 0.43889  | 0.447957 | 0.791469 | 150.675 | 763.981 | 795.27  | 470.417 | 347.683 | 443.212 |
| ENSMUSG00000031373 | 4_Car5b    | 1872.45 | 0.18282  | 0.580208 | 0.859399 | 2628.22 | 1849.88 | 1494.36 | 1452.51 | 1885.22 | 1924.5  |
| ENSMUSG00000031374 | 13_Zfp92   | 60.2391 | 0.1488   | 0.698947 | 0.905638 | 82.922  | 52.1411 | 54.8106 | 56.1199 | 56.6595 | 58.7814 |
| ENSMUSG00000031375 | 17_Bgn     | 10090.1 | -0.36641 | 0.185204 | 0.572285 | 6879.5  | 9086.16 | 10481.2 | 10768.4 | 11683   | 11642.2 |
| ENSMUSG00000031376 | 15_Atp2b   | 17.6448 | -2.51729 | 0.000103 | 0.003383 | 6.06747 | 4.53401 | 5.17081 | 36.3129 | 32.6221 | 21.1613 |
| ENSMUSG00000031377 | 11_Bmx     | 48.6086 | 0.2835   | 0.566116 | 0.85179  | 82.922  | 30.6046 | 46.5373 | 48.6922 | 42.9238 | 39.9713 |
| ENSMUSG00000031378 | 14_Abcd1   | 272.958 | -0.01707 | 0.971878 | 0.992434 | 112.248 | 363.854 | 338.171 | 330.117 | 242.949 | 250.409 |
| ENSMUSG00000031379 | 13_Pir     | 1560.1  | 0.33818  | 0.368981 | 0.740777 | 2529.12 | 1249.12 | 1447.83 | 1108.37 | 1581.31 | 1444.85 |
| ENSMUSG00000031380 | 10_Figf    | 169.537 | 0.19115  | 0.591579 | 0.865407 | 240.676 | 138.287 | 163.398 | 156.806 | 182.856 | 135.197 |
| ENSMUSG00000031381 | 15_Piga    | 9175.33 | 0.87705  | 0.024894 | 0.188557 | 17298.3 | 10027   | 8318.1  | 4813.11 | 7763.21 | 6831.57 |
| ENSMUSG00000031382 | 14_Asb11   | 667.512 | 0.57764  | 0.052277 | 0.296722 | 987.986 | 729.976 | 680.478 | 524.061 | 614.67  | 467.9   |
| ENSMUSG00000031383 | 8_Dusp9    | 5.69275 | 0.2307   | 0.831259 | 0.951683 | 3.03373 | 7.93452 | 7.23913 | 2.47588 | 1.71695 | 11.7563 |
| ENSMUSG00000031385 | 14_Plxnb3  | 13.4435 | -0.55975 | 0.399097 | 0.759197 | 7.07871 | 7.93452 | 17.5807 | 17.3311 | 15.4526 | 15.2832 |
| ENSMUSG00000031386 | 14_Hcfc1   | 2493.93 | 0.35007  | 0.307638 | 0.690462 | 1779.79 | 3542.2  | 3063.19 | 2142.46 | 2115.29 | 2320.69 |
| ENSMUSG00000031387 | 14_Renbp   | 283.462 | -1.15187 | 0.006508 | 0.074526 | 101.124 | 188.161 | 238.891 | 464.64  | 425.805 | 282.151 |
| ENSMUSG00000031388 | 14_Naa10   | 435.708 | 0.19135  | 0.70639  | 0.90883  | 165.844 | 641.563 | 586.37  | 428.327 | 366.57  | 425.577 |
| ENSMUSG00000031389 | 17_Arhga1  | 144.733 | 0.66652  | 0.181454 | 0.567796 | 75.8433 | 258.439 | 198.559 | 129.571 | 88.4231 | 117.563 |
| ENSMUSG00000031390 | 8_Avpr2    | 8.18439 | 0.18929  | 0.837386 | 0.952966 | 2.02249 | 15.869  | 8.27329 | 4.95175 | 8.58477 | 9.40502 |
| ENSMUSG00000031391 | 18_L1carr  | 2209.92 | 0.85716  | 0.058709 | 0.317795 | 1281.25 | 3692.95 | 3568.89 | 1313.87 | 1520.36 | 1882.18 |
| ENSMUSG00000031392 | 18_Irak1   | 1879.68 | 0.08589  | 0.704362 | 0.908152 | 1770.69 | 2026.7  | 2009.38 | 1796.66 | 1783.06 | 1891.59 |
| ENSMUSG00000031393 | 16_Mecp2   | 1524.24 | -0.20057 | 0.503781 | 0.824384 | 1826.31 | 1178.84 | 1250.3  | 1733.94 | 1700.64 | 1455.43 |
| ENSMUSG00000031394 | 11_Opn1r   | 6.978   | -3.62484 | 0.011755 | 0.113285 | 2.02249 | 1.1335  | 0       | 27.2346 | 10.3017 | 1.17563 |
| ENSMUSG00000031397 | 11_Tktl1   | 1.87649 | 0.8959   | 0.569507 | 0.853497 | 5.05622 | 1.1335  | 1.03416 | 0.82529 | 0.85848 | 2.35126 |
| ENSMUSG00000031398 | 13_Plxna3  | 487.588 | 0.33574  | 0.510534 | 0.827179 | 191.125 | 690.303 | 750.801 | 422.55  | 405.201 | 465.549 |
| ENSMUSG00000031399 | 15_Fam3a   | 505.577 | -0.15014 | 0.672836 | 0.90042  | 306.407 | 533.88  | 597.745 | 599.162 | 469.587 | 526.681 |
| ENSMUSG00000031400 | 10_G6pdx   | 6734.78 | 0.25188  | 0.492035 | 0.815612 | 4504.08 | 8881    | 8578.37 | 5033.46 | 6278.04 | 7133.71 |
| ENSMUSG00000031402 | 12_Mpp1    | 845.597 | 0.38461  | 0.162503 | 0.540887 | 1084.05 | 1000.88 | 788.031 | 657.758 | 819.846 | 723.011 |
| ENSMUSG00000031403 | 14_Dkc1    | 1176.25 | 0.35227  | 0.349251 | 0.726231 | 1944.62 | 1110.83 | 901.789 | 910.297 | 1127.18 | 1062.77 |
| ENSMUSG00000031409 | 1_Tceal6   | 106.228 | -2.06048 | 0.000185 | 0.005454 | 54.6072 | 13.602  | 54.8106 | 223.654 | 129.63  | 161.061 |
| ENSMUSG00000031410 | 14_Nxf7    | 0.75166 | -2.95526 | 0.27464  | NA       | 0       | 0       | 0       | 2.47588 | 0.85848 | 1.17563 |
| ENSMUSG00000031422 | 16_Morf4l  | 6313.3  | 0.428    | 0.225606 | 0.615711 | 10398.6 | 6004.16 | 5325.93 | 4839.51 | 5853.1  | 5458.44 |
| ENSMUSG00000031424 | 16_Kir3dl  | 0.18892 | 1.1315   | 0.781553 | NA       | 0       | 1.1335  | 0       | 0       | 0       | 0       |
| ENSMUSG00000031425 | 15_Plp1    | 577.142 | -0.84257 | 0.059329 | 0.319458 | 654.275 | 236.902 | 348.512 | 834.371 | 832.723 | 556.072 |
| ENSMUSG00000031428 | 11_Zcchc   | 141.711 | -1.36686 | 0.01041  | 0.103786 | 103.147 | 35.1386 | 99.2795 | 272.346 | 227.496 | 112.86  |
| ENSMUSG00000031429 | 14_Psmd7   | 695.213 | 0.0986   | 0.751377 | 0.925569 | 896.974 | 661.966 | 597.745 | 550.47  | 775.205 | 688.918 |
| ENSMUSG00000031430 | 8_Vsig1    | 0.42371 | -2.13816 | 0.587702 | NA       | 0       | 0       | 0       | 0.82529 | 1.71695 | 0       |
| ENSMUSG00000031431 | 13_Tsc22   | 1833.33 | 0.57048  | 0.11482  | 0.460559 | 3138.9  | 1541.56 | 1892.52 | 1352.65 | 1387.3  | 1687.03 |
| ENSMUSG00000031432 | 3_Prps1    | 456.925 | 0.168    | 0.658454 | 0.894702 | 706.86  | 425.064 | 318.522 | 407.694 | 469.587 | 413.821 |
| ENSMUSG00000031433 | 15_Rbm4    | 225.12  | 0.57539  | 0.270518 | 0.657357 | 482.364 | 156.423 | 169.602 | 173.311 | 232.647 | 136.373 |
| ENSMUSG00000031434 | 15_Morc4   | 158.458 | 0.17656  | 0.701187 | 0.90644  | 275.058 | 114.484 | 114.792 | 127.095 | 179.422 | 139.9   |

|                    |            |         |          |          |          |         |         |         |         |         |         |
|--------------------|------------|---------|----------|----------|----------|---------|---------|---------|---------|---------|---------|
| ENSMUSG00000031438 | 11_Rnf12i  | 133.877 | 0.65964  | 0.186646 | 0.573937 | 281.126 | 113.35  | 97.2112 | 80.8787 | 120.187 | 110.509 |
| ENSMUSG00000031441 | 15_Atp11i  | 2792.09 | -0.22165 | 0.379114 | 0.74711  | 2333.95 | 2546.98 | 2853.25 | 3395.25 | 2679.31 | 2943.77 |
| ENSMUSG00000031442 | 20_Mcf2l   | 139.438 | -1.23245 | 0.003452 | 0.04804  | 68.7646 | 73.6777 | 107.553 | 280.599 | 170.837 | 135.197 |
| ENSMUSG00000031443 | 7_F7       | 3.62914 | 2.74674  | 0.092305 | 0.413751 | 1.01124 | 15.869  | 2.06832 | 1.65058 | 0       | 1.17563 |
| ENSMUSG00000031444 | 16_F10     | 9.42506 | 4.94968  | 0.003352 | 0.047023 | 2.02249 | 48.7406 | 4.13665 | 1.65058 | 0       | 0       |
| ENSMUSG00000031445 | 4_Proz     | 4.87462 | -0.86806 | 0.405841 | 0.764253 | 4.04498 | 1.1335  | 5.17081 | 9.90351 | 4.29238 | 4.70251 |
| ENSMUSG00000031446 | 14_Cul4a   | 2050.23 | 0.16686  | 0.449939 | 0.79287  | 2190.36 | 2217.13 | 2098.31 | 1810.69 | 1983.94 | 2000.92 |
| ENSMUSG00000031447 | 6_Lamp1    | 10302.1 | 0.19743  | 0.354746 | 0.730039 | 11445.3 | 10828.4 | 10743.9 | 9349.74 | 9513.64 | 9931.7  |
| ENSMUSG00000031448 | 12_Adprhl  | 8.95962 | -1.86028 | 0.049297 | 0.287199 | 4.04498 | 3.40051 | 4.13665 | 22.2829 | 3.43391 | 16.4588 |
| ENSMUSG00000031450 | 7_Grk1     | 439.489 | -2.4259  | 0.003871 | 0.052144 | 244.721 | 147.355 | 21.7174 | 1313.04 | 753.743 | 156.359 |
| ENSMUSG00000031451 | 5_Gas6     | 4169.92 | -0.13846 | 0.788599 | 0.937308 | 1426.87 | 4694.97 | 5788.2  | 5324.79 | 3377.25 | 4407.43 |
| ENSMUSG00000031452 | 14_17000   | 0       | NA       | NA       | NA       | 0       | 0       | 0       | 0       | 0       | 0       |
| ENSMUSG00000031453 | 15_Rasa3   | 619.818 | 0.56195  | 0.062658 | 0.330345 | 549.106 | 860.329 | 807.68  | 526.537 | 453.276 | 521.979 |
| ENSMUSG00000031458 | 7_Coprs    | 97.3868 | -0.70229 | 0.028169 | 0.202852 | 68.7646 | 80.4787 | 73.4255 | 137.824 | 113.319 | 110.509 |
| ENSMUSG00000031461 | 4_Myom2    | 36.5394 | 0.11895  | 0.80952  | 0.94521  | 56.6297 | 29.4711 | 27.9224 | 40.4393 | 28.3297 | 36.4445 |
| ENSMUSG00000031465 | 6_Angpt2   | 202.243 | -1.13334 | 0.00093  | 0.018561 | 143.597 | 128.086 | 108.587 | 354.05  | 268.703 | 210.437 |
| ENSMUSG00000031467 | 10_Agpatf  | 514.704 | -0.21659 | 0.611415 | 0.874285 | 762.478 | 364.988 | 300.941 | 557.898 | 616.386 | 485.534 |
| ENSMUSG00000031478 | 16_Nek3    | 124.773 | -0.02151 | 0.940133 | 0.985498 | 133.484 | 119.018 | 118.929 | 125.444 | 123.621 | 128.143 |
| ENSMUSG00000031479 | 8_Vps36    | 1610.1  | 0.11523  | 0.669799 | 0.898766 | 2050.8  | 1449.75 | 1522.29 | 1475.62 | 1585.61 | 1576.52 |
| ENSMUSG00000031480 | 15_Thsd1   | 77.8675 | -0.58014 | 0.08526  | 0.395042 | 59.6634 | 65.7432 | 62.0497 | 108.939 | 84.9892 | 85.8208 |
| ENSMUSG00000031481 | 7_Tpte     | 0.30609 | 0.16972  | 0.966824 | NA       | 1.01124 | 0       | 0       | 0.82529 | 0       | 0       |
| ENSMUSG00000031482 | 8_Slc25a1  | 389.482 | 0.04817  | 0.867534 | 0.962942 | 490.453 | 355.92  | 341.273 | 365.605 | 376.871 | 406.767 |
| ENSMUSG00000031483 | 7_Erlin2   | 4408.86 | 0.29929  | 0.238136 | 0.630377 | 5615.44 | 4735.78 | 4242.13 | 3595.8  | 4094.08 | 4169.95 |
| ENSMUSG00000031485 | 14_Prosc   | 895.361 | 0.00788  | 0.974959 | 0.993623 | 790.793 | 1000.88 | 901.789 | 819.515 | 946.9   | 912.287 |
| ENSMUSG00000031486 | 14_Adgra1  | 669.843 | -0.83227 | 0.0432   | 0.263772 | 268.991 | 480.605 | 695.991 | 1011.81 | 765.761 | 795.9   |
| ENSMUSG00000031487 | 4_Brf2     | 87.8531 | -0.15158 | 0.774672 | 0.933172 | 31.3486 | 109.95  | 108.587 | 109.764 | 78.1214 | 89.3477 |
| ENSMUSG00000031488 | 13_Rab11   | 4453.18 | 0.48042  | 0.107736 | 0.446399 | 4014.64 | 6030.24 | 5518.29 | 3376.27 | 3368.66 | 4410.96 |
| ENSMUSG00000031489 | 14_Adrb3   | 2.16643 | 2.33853  | 0.190858 | 0.579627 | 4.04498 | 4.53401 | 2.06832 | 0       | 0       | 2.35126 |
| ENSMUSG00000031490 | 5_Eif4ebp  | 386.98  | 0.50144  | 0.386437 | 0.751493 | 126.406 | 668.767 | 565.686 | 402.743 | 254.968 | 303.312 |
| ENSMUSG00000031491 | 9_Chra6    | 32.606  | -2.90594 | 7.16E-05 | 0.002523 | 13.1462 | 6.80102 | 3.10248 | 85.0051 | 65.2443 | 22.3369 |
| ENSMUSG00000031492 | 12_Chmb    | 290.605 | -2.12914 | 6.31E-06 | 0.000361 | 173.934 | 63.4762 | 86.8696 | 550.47  | 550.284 | 318.595 |
| ENSMUSG00000031493 | 9_Ggn      | 3.62985 | -0.34705 | 0.768952 | 0.931306 | 1.01124 | 3.40051 | 5.17081 | 5.77705 | 1.71695 | 4.70251 |
| ENSMUSG00000031494 | 6_Cd209a   | 26.305  | 0.45321  | 0.471097 | 0.804868 | 46.5172 | 29.4711 | 15.5124 | 30.5358 | 24.0374 | 11.7563 |
| ENSMUSG00000031495 | 7_Cd209d   | 11.5965 | -0.72394 | 0.292091 | 0.676701 | 10.1124 | 6.80102 | 9.30745 | 19.807  | 9.44325 | 14.1075 |
| ENSMUSG00000031497 | 8_Tnfrsf13 | 6.46448 | 0.91212  | 0.291986 | 0.676701 | 9.1012  | 10.2015 | 6.20497 | 5.77705 | 5.15086 | 2.35126 |
| ENSMUSG00000031502 | 9_Col4a1   | 2337.91 | -1.1309  | 0.052151 | 0.296552 | 550.117 | 1771.67 | 2075.56 | 3857.42 | 1431.08 | 4341.59 |
| ENSMUSG00000031503 | 13_Col4a1  | 1443.48 | -1.01905 | 0.094106 | 0.417342 | 276.07  | 1252.52 | 1333.03 | 2289.36 | 984.673 | 2525.25 |
| ENSMUSG00000031504 | 5_Rab20    | 61.125  | 0.2013   | 0.644313 | 0.889191 | 39.4385 | 89.5467 | 67.2205 | 54.4693 | 54.9425 | 61.1326 |
| ENSMUSG00000031505 | 10_Carkd   | 659.58  | -0.04235 | 0.931431 | 0.98189  | 253.822 | 825.19  | 870.764 | 759.269 | 534.831 | 713.606 |
| ENSMUSG00000031506 | 11_Ptpn7   | 25.1036 | 1.24436  | 0.062323 | 0.329792 | 22.2474 | 62.3427 | 21.7174 | 20.6323 | 15.4526 | 8.22939 |
| ENSMUSG00000031508 | 15_Ankrd1  | 694.829 | -0.17895 | 0.476355 | 0.807493 | 609.78  | 631.361 | 714.606 | 767.522 | 793.233 | 652.473 |
| ENSMUSG00000031510 | 5_170012   | 0.14308 | -0.79206 | 0.84609  | NA       | 0       | 0       | 0       | 0       | 0.85848 | 0       |
| ENSMUSG00000031511 | 14_Arhgef  | 1308.06 | 0.1558   | 0.629988 | 0.881724 | 926.3   | 1635.64 | 1573.99 | 1230.51 | 1199.29 | 1282.61 |
| ENSMUSG00000031512 | 14_Tex29   | 0.68562 | 2.99032  | 0.375842 | NA       | 1.01124 | 0       | 3.10248 | 0       | 0       | 0       |
| ENSMUSG00000031513 | 8_Leprotl1 | 792.577 | 0.25104  | 0.322395 | 0.703193 | 1005.18 | 785.518 | 793.202 | 703.974 | 733.998 | 733.592 |
| ENSMUSG00000031516 | 11_Dctn6   | 1099.94 | -0.01981 | 0.930472 | 0.981773 | 1055.74 | 1119.9  | 1101.38 | 1027.49 | 1151.22 | 1143.89 |
| ENSMUSG00000031517 | 7_Gpm6a    | 915.779 | -1.22392 | 0.039498 | 0.249924 | 1077.99 | 204.031 | 365.059 | 1530.09 | 1431.08 | 886.423 |
| ENSMUSG00000031518 | 6_Spat4    | 0.53496 | -2.43802 | 0.508122 | NA       | 0       | 0       | 0       | 0       | 0.85848 | 2.35126 |
| ENSMUSG00000031519 | 2_Asb5     | 41.2827 | -0.62013 | 0.387872 | 0.752312 | 65.7309 | 9.06802 | 22.7516 | 72.6257 | 35.1976 | 42.3226 |
| ENSMUSG00000031520 | 5_Vegfc    | 87.7495 | -0.56105 | 0.224543 | 0.614155 | 111.237 | 48.7406 | 52.7422 | 106.463 | 126.196 | 81.1183 |
| ENSMUSG00000031521 | 4_Aga      | 507.237 | -0.06944 | 0.832592 | 0.951799 | 668.433 | 370.655 | 445.724 | 502.603 | 521.096 | 534.911 |
| ENSMUSG00000031523 | 16_Dlc1    | 557.871 | -0.72498 | 0.033226 | 0.225284 | 490.453 | 279.975 | 491.227 | 784.028 | 690.215 | 611.326 |
| ENSMUSG00000031527 | 6_Eri1     | 839.786 | 0.7566   | 0.088796 | 0.40525  | 1724.17 | 759.447 | 681.512 | 505.079 | 757.177 | 611.326 |
| ENSMUSG00000031529 | 4_Tnks     | 1103.85 | 0.30897  | 0.206597 | 0.597892 | 1380.35 | 1191.31 | 1093.11 | 946.61  | 1033.61 | 978.122 |
| ENSMUSG00000031530 | 6_Dusp4    | 89.2856 | -1.07439 | 0.008446 | 0.089017 | 74.8321 | 54.4081 | 43.4348 | 153.504 | 120.187 | 89.3477 |
| ENSMUSG00000031532 | 5_Saraf    | 1652.1  | -0.19694 | 0.410937 | 0.767001 | 1345.97 | 1683.25 | 1589.51 | 1828.02 | 1711.8  | 1754.04 |
| ENSMUSG00000031533 | 3_Mrps31   | 299.171 | -0.15571 | 0.58713  | 0.862925 | 328.654 | 252.771 | 267.848 | 304.533 | 361.419 | 279.799 |
| ENSMUSG00000031534 | 14_Smim1   | 645.152 | -0.06265 | 0.864255 | 0.96183  | 907.086 | 479.472 | 506.739 | 573.578 | 769.195 | 634.839 |
| ENSMUSG00000031535 | 6_Dkk4     | 0.18892 | 1.1315   | 0.781553 | NA       | 0       | 1.1335  | 0       | 0       | 0       | 0       |
| ENSMUSG00000031536 | 5_Polb     | 1881.68 | 0.08632  | 0.801834 | 0.942266 | 2657.55 | 1733.13 | 1423.01 | 1547.42 | 2062.06 | 1866.9  |
| ENSMUSG00000031537 | 15_Ikbbk   | 1759.94 | 0.42871  | 0.110761 | 0.452172 | 1619    | 2274.94 | 2164.5  | 1445.91 | 1438.81 | 1616.49 |
| ENSMUSG00000031538 | 5_Plat     | 3126.49 | 0.74838  | 0.019145 | 0.158137 | 2837.55 | 5166.51 | 3755.04 | 2303.39 | 2221.74 | 2474.7  |
| ENSMUSG00000031539 | 5_Ap3m2    | 404.637 | -0.58082 | 0.042662 | 0.262016 | 270.002 | 342.318 | 360.922 | 532.314 | 510.794 | 411.47  |
| ENSMUSG00000031540 | 13_Kat6a   | 4491.1  | 0.51496  | 0.035323 | 0.234733 | 5219.03 | 5616.51 | 5016.72 | 3178.2  | 3829.67 | 4086.48 |
| ENSMUSG00000031543 | 18_Ank1    | 53.4113 | -0.82562 | 0.184614 | 0.571884 | 59.6634 | 24.9371 | 31.0248 | 120.493 | 32.6221 | 51.7276 |
| ENSMUSG00000031545 | 5_Gpat4    | 1486.06 | -0.02856 | 0.930897 | 0.981773 | 980.907 | 1827.21 | 1606.05 | 1413.73 | 1527.23 | 1561.23 |
| ENSMUSG00000031546 | 5_Gins4    | 507.678 | -0.09022 | 0.740034 | 0.921878 | 417.644 | 540.681 | 517.081 | 458.037 | 568.312 | 544.316 |
| ENSMUSG00000031548 | 7_Sfrp1    | 9623.69 | 0.25463  | 0.383648 | 0.749992 | 13188.6 | 9312.86 | 8910.34 | 7652.94 | 8938.46 | 9738.9  |
| ENSMUSG00000031549 | 15_Ido2    | 1.00318 | 1.29371  | 0.566885 | NA       | 0       | 2.26701 | 2.06832 | 0.82529 | 0.85848 | 0       |
| ENSMUSG00000031551 | 12_Iso1    | 11.4037 | 3.50684  | 9.28E-05 | 0.003123 | 18.2024 | 27.2041 | 17.5807 | 0.82529 | 3.43391 | 1.17563 |
| ENSMUSG00000031553 | 15_Adam1   | 1.55596 | 0.4312   | 0.806722 | NA       | 3.03373 | 2.26701 | 0       | 0.82529 | 0.85848 | 2.35126 |
| ENSMUSG00000031554 | 17_Adam1   | 7.0927  | -0.24051 | 0.810057 | 0.945475 | 13.1462 | 2.26701 | 4.13665 | 6.60234 | 12.8772 | 3.52688 |
| ENSMUSG00000031555 | 13_Adam1   | 1910.02 | 0.38653  | 0.234822 | 0.626451 | 2958.9  | 1866.88 | 1667.07 | 1562.28 | 1656.86 | 1748.16 |
| ENSMUSG00000031556 | 5_Tm2d2    | 738.957 | -0.2751  | 0.418784 | 0.772648 | 441.914 | 728.842 | 835.603 | 900.394 | 754.601 | 772.387 |
| ENSMUSG00000031557 | 15_Plekhg  | 3299.07 | 0.73679  | 0.015316 | 0.134932 | 5270.61 | 3828.97 | 3271.05 | 2148.24 | 2630.37 | 2645.16 |

|                    |           |         |          |          |          |         |         |         |         |         |         |
|--------------------|-----------|---------|----------|----------|----------|---------|---------|---------|---------|---------|---------|
| ENSMUSG00000031558 | 15_Slit2  | 944.258 | -1.57347 | 1.77E-05 | 0.000839 | 681.579 | 361.587 | 381.606 | 1575.48 | 1514.35 | 1150.94 |
| ENSMUSG00000031561 | 15_Tenm   | 797.924 | -1.42539 | 1.11E-05 | 0.000571 | 515.735 | 295.844 | 487.09  | 1237.94 | 1197.58 | 1053.36 |
| ENSMUSG00000031562 | 15_Dctd   | 266.533 | 0.08911  | 0.814147 | 0.946916 | 176.968 | 364.988 | 282.326 | 207.974 | 282.439 | 284.502 |
| ENSMUSG00000031563 | 7_Wwc2    | 1492.23 | 0.12136  | 0.585712 | 0.862122 | 1637.2  | 1482.62 | 1545.04 | 1487.18 | 1384.72 | 1416.63 |
| ENSMUSG00000031565 | 17_Fgfr1  | 1406.76 | -0.78313 | 0.024443 | 0.186095 | 743.265 | 945.341 | 1413.7  | 2102.02 | 1604.49 | 1631.77 |
| ENSMUSG00000031568 | 16_Rwdd   | 663.215 | 0.22006  | 0.522604 | 0.832206 | 987.986 | 609.825 | 542.935 | 534.789 | 630.122 | 673.635 |
| ENSMUSG00000031570 | 16_Ppabd  | 325.865 | -0.012   | 0.962388 | 0.990106 | 303.373 | 321.915 | 348.512 | 352.4   | 324.504 | 304.488 |
| ENSMUSG00000031574 | 7_Star    | 73.5926 | -0.02739 | 0.94185  | 0.986006 | 82.922  | 62.3427 | 73.4255 | 60.2463 | 94.4325 | 68.1864 |
| ENSMUSG00000031575 | 17_Ash2l  | 1393.87 | 0.28515  | 0.256053 | 0.647527 | 1744.4  | 1448.62 | 1400.25 | 1134.78 | 1334.93 | 1300.24 |
| ENSMUSG00000031576 | 15_Kcnu1  | 29.0877 | -0.39117 | 0.394852 | 0.755773 | 22.2474 | 27.2041 | 25.854  | 28.8852 | 29.1882 | 41.147  |
| ENSMUSG00000031577 | 9_Tti2    | 268.948 | 0.26262  | 0.367233 | 0.739757 | 279.103 | 318.514 | 282.326 | 196.42  | 279.863 | 257.462 |
| ENSMUSG00000031578 | 4_Mak16   | 649.591 | 0.28355  | 0.399912 | 0.759355 | 936.412 | 652.898 | 550.174 | 475.368 | 680.772 | 601.921 |
| ENSMUSG00000031583 | 12_Wrn    | 542.185 | 0.56998  | 0.162117 | 0.540795 | 1017.31 | 480.605 | 445.724 | 408.52  | 473.021 | 427.929 |
| ENSMUSG00000031584 | 16_Gsr    | 838.624 | 0.16246  | 0.52231  | 0.832206 | 907.086 | 958.943 | 791.134 | 695.721 | 833.581 | 845.276 |
| ENSMUSG00000031585 | 13_Gtf2e2 | 991.626 | 0.26846  | 0.556175 | 0.847214 | 1808.1  | 742.444 | 700.127 | 703.974 | 1072.24 | 922.868 |
| ENSMUSG00000031586 | 16_Rbpm   | 631.502 | -0.12992 | 0.632492 | 0.883233 | 688.657 | 565.618 | 555.345 | 699.848 | 721.121 | 558.423 |
| ENSMUSG00000031590 | 7_Frg1    | 1446.22 | 0.48683  | 0.24073  | 0.631907 | 2669.69 | 1283.13 | 1110.69 | 1024.19 | 1248.23 | 1341.39 |
| ENSMUSG00000031591 | 14_Asah1  | 1783.25 | 0.2412   | 0.572609 | 0.855337 | 3156.09 | 1316    | 1323.73 | 1498.73 | 1831.99 | 1572.99 |
| ENSMUSG00000031592 | 9_Pcm1    | 3861.64 | 0.2873   | 0.558676 | 0.848273 | 7616.69 | 2545.85 | 2571.96 | 2941.34 | 4017.67 | 3476.33 |
| ENSMUSG00000031594 | 9_Fgl1    | 1.09726 | -0.13557 | 0.958425 | NA       | 2.02249 | 0       | 1.03416 | 0       | 0       | 3.52688 |
| ENSMUSG00000031595 | 9_Pdgfrl  | 455.159 | -0.39812 | 0.280413 | 0.667117 | 255.845 | 401.26  | 521.217 | 601.638 | 426.663 | 524.33  |
| ENSMUSG00000031596 | 15_Slc7a2 | 1628.49 | -1.21883 | 0.00149  | 0.026215 | 1424.84 | 642.696 | 868.696 | 2453.59 | 2524.78 | 1856.32 |
| ENSMUSG00000031600 | 10_Vps37  | 1378.13 | 0.37599  | 0.423804 | 0.775423 | 2691.93 | 999.75  | 978.317 | 1040.69 | 1425.93 | 1132.13 |
| ENSMUSG00000031601 | 16_Cnot7  | 1358.31 | 0.50225  | 0.296224 | 0.679985 | 2809.24 | 965.744 | 1002.1  | 1011.81 | 1313.47 | 1047.48 |
| ENSMUSG00000031603 | 14_Fgf20  | 0.13755 | -0.79206 | 0.84609  | NA       | 0       | 0       | 0       | 0.82529 | 0       | 0       |
| ENSMUSG00000031604 | 10_Msmo   | 5438.98 | 0.1913   | 0.613585 | 0.875588 | 8635.02 | 4702.9  | 4059.08 | 4423.57 | 5779.27 | 5034.04 |
| ENSMUSG00000031605 | 7_Kihl2   | 1131.91 | 0.18434  | 0.432715 | 0.780874 | 1205.4  | 1099.5  | 1307.18 | 1064.63 | 1006.14 | 1108.62 |
| ENSMUSG00000031608 | 13_Galnt7 | 4619.11 | 0.68183  | 0.06332  | 0.332277 | 8082.88 | 4826.46 | 4162.5  | 2789.49 | 3792.75 | 4060.62 |
| ENSMUSG00000031609 | 3_Sap30   | 237.908 | 0.87462  | 0.035424 | 0.235045 | 448.992 | 270.907 | 203.73  | 130.396 | 211.185 | 162.237 |
| ENSMUSG00000031610 | 3_Scrg1   | 13.49   | -1.23583 | 0.091959 | 0.41316  | 8.08995 | 7.93452 | 8.27329 | 26.4094 | 23.1789 | 7.05377 |
| ENSMUSG00000031613 | 8_Hpgd    | 262.253 | 0.04029  | 0.946431 | 0.986649 | 521.802 | 91.8137 | 184.081 | 264.919 | 300.467 | 210.437 |
| ENSMUSG00000031616 | 7_Ednra   | 302.945 | -0.54923 | 0.079694 | 0.379599 | 313.486 | 192.695 | 231.652 | 375.508 | 375.154 | 329.176 |
| ENSMUSG00000031617 | 16_Tmem   | 522.756 | -0.39832 | 0.374415 | 0.744881 | 754.388 | 281.109 | 317.488 | 558.723 | 668.754 | 556.072 |
| ENSMUSG00000031618 | 13_Nr3c2  | 211.119 | -0.6608  | 0.150071 | 0.523213 | 264.946 | 85.0127 | 140.646 | 270.696 | 264.411 | 204.004 |
| ENSMUSG00000031620 | 15_17000  | 0.19594 | -0.79206 | 0.84609  | NA       | 0       | 0       | 0       | 0       | 0       | 1.17563 |
| ENSMUSG00000031622 | 15_Sin3b  | 2259.81 | 0.09532  | 0.858246 | 0.959189 | 739.22  | 3331.37 | 2932.88 | 2503.94 | 1902.38 | 2149.05 |
| ENSMUSG00000031626 | 16_Sorbs  | 2788.95 | 0.48701  | 0.202802 | 0.594033 | 4846.89 | 2101.51 | 2817.06 | 2103.67 | 2406.31 | 2458.24 |
| ENSMUSG00000031627 | 7_Irf2    | 1451.34 | 0.90535  | 0.000525 | 0.012055 | 1825.3  | 2171.79 | 1679.48 | 950.737 | 939.174 | 1141.53 |
| ENSMUSG00000031628 | 8_Casp3   | 398.765 | 0.47497  | 0.236691 | 0.6287   | 688.657 | 406.928 | 295.77  | 283.075 | 385.456 | 332.703 |
| ENSMUSG00000031629 | 13_Cenpu  | 129.156 | 1.08848  | 0.000995 | 0.019516 | 203.26  | 180.227 | 143.748 | 74.2763 | 97.0079 | 76.4158 |
| ENSMUSG00000031631 | 15_Cfap9  | 1010.44 | 0.18183  | 0.654597 | 0.893223 | 1669.56 | 745.845 | 806.646 | 869.033 | 1116.88 | 854.681 |
| ENSMUSG00000031633 | 4_Slc25a4 | 5894.31 | -0.50922 | 0.061899 | 0.328702 | 5630.61 | 4136.15 | 4827.47 | 8054.03 | 6339.85 | 6377.78 |
| ENSMUSG00000031634 | 12_Ufsp2  | 829.163 | 0.13531  | 0.690758 | 0.905638 | 1199.34 | 710.706 | 693.922 | 713.053 | 899.684 | 758.28  |
| ENSMUSG00000031635 | 13_Anxa1  | 1.07237 | 3.62932  | 0.209791 | NA       | 3.03373 | 3.40051 | 0       | 0       | 0       | 0       |
| ENSMUSG00000031636 | 6_Pdlm3   | 115.541 | -0.96892 | 0.025501 | 0.191321 | 109.214 | 45.3401 | 79.6304 | 184.865 | 120.187 | 154.007 |
| ENSMUSG00000031637 | 13_Lrp2bt | 12.7655 | -0.03285 | 0.972618 | 0.992715 | 24.2699 | 2.26701 | 11.3758 | 24.7588 | 6.86782 | 7.05377 |
| ENSMUSG00000031639 | 11_Tlr3   | 2351.75 | 2.02169  | 2.82E-05 | 0.001206 | 6517.47 | 2700    | 2104.52 | 703.974 | 1091.12 | 993.406 |
| ENSMUSG00000031640 | 9_Klkb1   | 0.50562 | 2.55291  | 0.52315  | NA       | 3.03373 | 0       | 0       | 0       | 0       | 0       |
| ENSMUSG00000031641 | 13_Cbr4   | 527.859 | 0.16039  | 0.658521 | 0.894702 | 803.939 | 434.132 | 433.314 | 453.086 | 557.152 | 485.534 |
| ENSMUSG00000031642 | 8_Sh3rf1  | 1135.07 | 0.29763  | 0.224416 | 0.614062 | 1321.7  | 1162.97 | 1269.95 | 987.875 | 922.863 | 1145.06 |
| ENSMUSG00000031644 | 18_Nek1   | 890.236 | 0.32202  | 0.483976 | 0.812154 | 1695.86 | 631.361 | 640.146 | 705.625 | 871.354 | 797.076 |
| ENSMUSG00000031647 | 10_Mfap3  | 8290    | 0.35754  | 0.39159  | 0.754323 | 14882.5 | 6114.11 | 6939.22 | 6183.92 | 7825.88 | 7794.41 |
| ENSMUSG00000031652 | 10_N4bp1  | 2414.29 | 0.84483  | 0.000321 | 0.008299 | 3112.61 | 3333.63 | 2858.42 | 1573.01 | 1778.76 | 1829.28 |
| ENSMUSG00000031654 | 15_Cbln1  | 724.845 | 0.66187  | 0.010948 | 0.107421 | 802.928 | 1016.75 | 844.91  | 572.753 | 503.926 | 607.8   |
| ENSMUSG00000031657 | 16_Heatrc | 1034.35 | 0.04186  | 0.895799 | 0.97156  | 1336.87 | 956.676 | 854.217 | 816.214 | 1154.65 | 1087.46 |
| ENSMUSG00000031659 | 12_Adcy7  | 744.559 | -0.11906 | 0.611565 | 0.874367 | 773.602 | 680.102 | 687.717 | 740.287 | 802.676 | 782.968 |
| ENSMUSG00000031660 | 13_Brd7   | 1518.97 | 0.22771  | 0.433316 | 0.781609 | 2018.44 | 1550.63 | 1346.48 | 1213.18 | 1523.8  | 1461.31 |
| ENSMUSG00000031661 | 11_Nkd1   | 192.218 | -1.7849  | 1.70E-05 | 0.000813 | 56.6297 | 72.5442 | 130.304 | 340.02  | 311.627 | 242.179 |
| ENSMUSG00000031662 | 7_Snx20   | 14.8065 | 1.01311  | 0.229767 | 0.620993 | 7.07871 | 40.8061 | 11.3758 | 7.42763 | 6.86782 | 15.2832 |
| ENSMUSG00000031665 | 6_Sall1   | 24.4237 | -2.19318 | 0.002138 | 0.034017 | 9.1012  | 7.93452 | 9.30745 | 21.4576 | 76.4045 | 22.3369 |
| ENSMUSG00000031666 | 14_Rbl2   | 1230.68 | 0.03233  | 0.918751 | 0.977109 | 1666.53 | 948.742 | 1117.93 | 1189.25 | 1241.36 | 1220.3  |
| ENSMUSG00000031667 | 15_Aktip  | 2825.46 | -0.11217 | 0.713118 | 0.910879 | 3496.88 | 2245.47 | 2404.43 | 2541.9  | 3276.81 | 2987.27 |
| ENSMUSG00000031668 | 14_Eif2ak | 748.433 | -0.05255 | 0.824167 | 0.949196 | 767.534 | 719.774 | 716.674 | 712.227 | 740.866 | 833.52  |
| ENSMUSG00000031669 | 9_Gins3   | 153.033 | 0.49876  | 0.173328 | 0.556848 | 239.665 | 150.756 | 146.851 | 100.686 | 135.639 | 144.602 |
| ENSMUSG00000031671 | 10_Setd6  | 276.225 | 0.17942  | 0.488429 | 0.814112 | 301.351 | 287.91  | 290.599 | 230.257 | 272.137 | 275.097 |
| ENSMUSG00000031672 | 7_Got2    | 3149.98 | 0.26155  | 0.483311 | 0.811892 | 1999.23 | 4517.01 | 3788.13 | 3037.9  | 2633.81 | 2923.79 |
| ENSMUSG00000031673 | 5_Cdh11   | 1454.18 | -0.66845 | 0.059126 | 0.318855 | 1587.65 | 790.052 | 991.761 | 1780.16 | 1971.92 | 1603.56 |
| ENSMUSG00000031681 | 14_Smad7  | 573.162 | 0.54107  | 0.058585 | 0.317521 | 832.254 | 661.966 | 543.969 | 472.067 | 467.87  | 460.846 |
| ENSMUSG00000031682 | 4_170001  | 0.64699 | 1.60576  | 0.583061 | NA       | 2.02249 | 0       | 1.03416 | 0.82529 | 0       | 0       |
| ENSMUSG00000031683 | 16_Lsm6   | 1006.69 | -0.01089 | 0.973042 | 0.992972 | 1328.78 | 839.926 | 839.739 | 864.906 | 1135.77 | 1031.03 |
| ENSMUSG00000031684 | 10_Slc10a | 977.459 | 0.26159  | 0.276218 | 0.662803 | 1090.12 | 1065.49 | 1041.4  | 788.979 | 897.108 | 981.649 |
| ENSMUSG00000031688 | 4_Pou4f2  | 1.04902 | -0.96597 | 0.716133 | NA       | 0       | 1.1335  | 1.03416 | 4.12646 | 0       | 0       |
| ENSMUSG00000031691 | 13_Tnpo2  | 2151.8  | 0.23366  | 0.54233  | 0.84107  | 1292.37 | 2960.71 | 2723.98 | 1948.52 | 1862.04 | 2123.18 |
| ENSMUSG00000031696 | 8_Vps35   | 6572.13 | 0.47246  | 0.344681 | 0.72201  | 13832.8 | 4616.76 | 4466.54 | 4480.51 | 6434.28 | 5601.87 |
| ENSMUSG00000031697 | 11_Orc6   | 482.325 | 0.3788   | 0.290613 | 0.675603 | 774.613 | 455.668 | 405.391 | 371.382 | 460.144 | 426.753 |

|                    |            |         |          |          |          |         |         |         |         |         |         |
|--------------------|------------|---------|----------|----------|----------|---------|---------|---------|---------|---------|---------|
| ENSMUSG00000031698 | 14_Mylk3   | 4.50549 | -2.48825 | 0.078576 | 0.37634  | 3.03373 | 0       | 1.03416 | 13.2047 | 8.58477 | 1.17563 |
| ENSMUSG00000031700 | 11_Gpt2    | 385.918 | 0.16959  | 0.525911 | 0.833782 | 407.531 | 460.202 | 357.82  | 328.466 | 370.004 | 391.484 |
| ENSMUSG00000031701 | 5_Dnaja2   | 4688.92 | 0.55996  | 0.173374 | 0.556848 | 8865.58 | 4167.89 | 3729.19 | 3288.79 | 4074.33 | 4007.72 |
| ENSMUSG00000031703 | 7_ltfg1    | 3062.74 | 0.14687  | 0.752784 | 0.925804 | 5573.98 | 2013.1  | 2068.32 | 2604.62 | 3367.81 | 2748.62 |
| ENSMUSG00000031706 | 6_Rfx1     | 192.281 | 0.57221  | 0.318051 | 0.698985 | 64.7196 | 289.043 | 336.103 | 170.836 | 142.507 | 150.48  |
| ENSMUSG00000031708 | 15_Tecr    | 3204.84 | 0.22804  | 0.698549 | 0.905638 | 849.445 | 4646.23 | 4877.11 | 2950.42 | 2461.25 | 3444.59 |
| ENSMUSG00000031709 | 15_Tbc1d   | 146.955 | -0.27668 | 0.454301 | 0.795918 | 135.507 | 165.491 | 98.2453 | 184.865 | 177.705 | 119.914 |
| ENSMUSG00000031710 | 3_Ucp1     | 0.83973 | 2.05996  | 0.383024 | NA       | 1.01124 | 1.1335  | 2.06832 | 0.82529 | 0       | 0       |
| ENSMUSG00000031711 | 6_Zfp330   | 726.1   | 0.12827  | 0.598475 | 0.868823 | 853.49  | 701.638 | 719.776 | 668.487 | 712.536 | 700.674 |
| ENSMUSG00000031712 | 8_Il15     | 122.627 | 1.34363  | 0.000582 | 0.013055 | 251.8   | 140.554 | 135.475 | 74.2763 | 67.8197 | 65.8352 |
| ENSMUSG00000031714 | 8_Gab1     | 1548.93 | 0.33772  | 0.140587 | 0.50834  | 1726.19 | 1736.53 | 1724.98 | 1285.81 | 1311.75 | 1508.33 |
| ENSMUSG00000031715 | 14_Smarc   | 3821.57 | 0.7121   | 0.162652 | 0.540894 | 8627.94 | 3075.19 | 2534.73 | 2227.46 | 3346.34 | 3117.76 |
| ENSMUSG00000031722 | 9_Hp       | 28.4177 | 3.51201  | 1.94E-05 | 0.000898 | 18.2024 | 107.683 | 31.0248 | 5.77705 | 4.29238 | 3.52688 |
| ENSMUSG00000031723 | 8_Txn14b   | 177.682 | -0.21636 | 0.435094 | 0.783187 | 151.687 | 182.494 | 159.261 | 202.197 | 190.582 | 179.871 |
| ENSMUSG00000031725 | 8_Ces1f    | 0.14308 | -0.79206 | 0.84609  | NA       | 0       | 0       | 0       | 0       | 0.85848 | 0       |
| ENSMUSG00000031727 | 7_Pmfbp1   | 2.32717 | -3.52363 | 0.05695  | 0.312074 | 0       | 0       | 1.03416 | 6.60234 | 5.15086 | 1.17563 |
| ENSMUSG00000031728 | 9_Zfp821   | 199.458 | 0.0457   | 0.918387 | 0.977109 | 96.0682 | 259.572 | 252.335 | 212.925 | 175.988 | 199.857 |
| ENSMUSG00000031729 | 5_Ist1     | 4034.83 | 0.24919  | 0.31212  | 0.693828 | 4583.97 | 4496.61 | 4066.32 | 3148.49 | 3912.94 | 4000.66 |
| ENSMUSG00000031730 | 17_Dhodh   | 143.716 | 0.15961  | 0.596206 | 0.868001 | 134.495 | 148.489 | 171.671 | 132.047 | 122.762 | 152.832 |
| ENSMUSG00000031731 | 16_Ap1g1   | 4620.43 | 0.43251  | 0.213704 | 0.604733 | 7202.08 | 4662.1  | 4059.08 | 3054.41 | 4373.94 | 4370.98 |
| ENSMUSG00000031732 | 12_Phlpp2  | 960.398 | 0.24509  | 0.337284 | 0.715855 | 1124.5  | 1098.36 | 902.823 | 866.557 | 968.362 | 801.778 |
| ENSMUSG00000031734 | 12_Irx3    | 73.8227 | 0.07124  | 0.848197 | 0.956061 | 75.8433 | 65.7432 | 84.8012 | 62.7222 | 60.9519 | 92.8746 |
| ENSMUSG00000031736 | 10_Crnde   | 83.0395 | 0.55244  | 0.128217 | 0.486444 | 91.012  | 99.7483 | 105.484 | 51.1681 | 84.9892 | 65.8352 |
| ENSMUSG00000031737 | 10_Irx5    | 114.707 | 0.66723  | 0.028208 | 0.203019 | 125.394 | 141.688 | 155.124 | 91.6075 | 81.5553 | 92.8746 |
| ENSMUSG00000031738 | 14_Irx6    | 16.0359 | -0.44234 | 0.575348 | 0.856733 | 3.03373 | 18.136  | 19.6491 | 23.9335 | 10.3017 | 21.1613 |
| ENSMUSG00000031740 | 7_Mmp2     | 3494.47 | -0.32777 | 0.425733 | 0.777525 | 1590.69 | 3437.91 | 4269.02 | 3829.36 | 3597.02 | 4242.84 |
| ENSMUSG00000031748 | 15_Gnao1   | 554.469 | -1.47447 | 8.03E-05 | 0.002746 | 346.857 | 211.965 | 321.624 | 1042.34 | 845.6   | 558.423 |
| ENSMUSG00000031749 | 12_St3gal  | 724.608 | -0.00376 | 0.991509 | 0.997512 | 490.453 | 768.515 | 912.13  | 860.78  | 588.057 | 727.714 |
| ENSMUSG00000031750 | 15_Il34    | 99.8767 | -0.59414 | 0.370269 | 0.741564 | 18.2024 | 75.9447 | 144.783 | 156.806 | 114.177 | 89.3477 |
| ENSMUSG00000031751 | 13_Amfr    | 3997.25 | -0.04512 | 0.849689 | 0.957053 | 3465.53 | 4170.16 | 4168.71 | 4331.96 | 3806.49 | 4040.63 |
| ENSMUSG00000031753 | 16_Cog4    | 1592.4  | -0.04005 | 0.912834 | 0.975693 | 927.311 | 2014.23 | 1769.45 | 1569.71 | 1579.6  | 1694.08 |
| ENSMUSG00000031754 | 9_Nudt21   | 1183.04 | 0.33704  | 0.42366  | 0.775388 | 2122.6  | 936.273 | 902.823 | 937.532 | 1195    | 1003.99 |
| ENSMUSG00000031755 | 5_Bbs2     | 451.87  | -0.40481 | 0.091956 | 0.41316  | 386.295 | 374.056 | 406.425 | 549.645 | 502.209 | 492.588 |
| ENSMUSG00000031756 | 4_Cenpn    | 100.61  | 0.2979   | 0.437203 | 0.784976 | 126.406 | 100.882 | 105.484 | 61.8969 | 118.47  | 90.5233 |
| ENSMUSG00000031757 | 6_Mt4      | 0.90726 | -0.47659 | 0.860703 | NA       | 0       | 2.26701 | 0       | 0.82529 | 0       | 2.35126 |
| ENSMUSG00000031758 | 9_Cdy12    | 154.773 | 0.58277  | 0.052896 | 0.298829 | 218.429 | 180.227 | 158.227 | 120.493 | 131.347 | 119.914 |
| ENSMUSG00000031760 | 8_Mt3      | 52.3144 | -2.00262 | 0.001812 | 0.030052 | 14.1574 | 11.335  | 37.2298 | 127.92  | 83.2723 | 39.9713 |
| ENSMUSG00000031762 | 6_Mt2      | 3377.83 | 0.93369  | 0.092447 | 0.414166 | 1456.19 | 6978.98 | 4867.8  | 3100.62 | 1682.61 | 2180.79 |
| ENSMUSG00000031765 | 7_Mt1      | 1137.12 | 0.04341  | 0.937523 | 0.985078 | 387.307 | 1722.92 | 1352.68 | 1547.42 | 787.223 | 1025.15 |
| ENSMUSG00000031766 | 3_Slc12a3  | 0.37783 | 2.11394  | 0.599927 | NA       | 0       | 2.26701 | 0       | 0       | 0       | 0       |
| ENSMUSG00000031767 | 13_Nudt17  | 556.045 | -0.0298  | 0.92258  | 0.97821  | 703.826 | 456.802 | 490.193 | 515.808 | 633.556 | 536.086 |
| ENSMUSG00000031770 | 15_Herpu   | 1311.32 | 0.16225  | 0.544801 | 0.842093 | 1123.49 | 1501.89 | 1529.52 | 1289.11 | 1127.18 | 1296.72 |
| ENSMUSG00000031772 | 17_Cntnab1 | 116.668 | -1.85913 | 9.54E-06 | 0.000498 | 65.7309 | 30.6046 | 54.8106 | 203.022 | 209.468 | 136.373 |
| ENSMUSG00000031774 | 7_Fam19c   | 807.191 | 0.12772  | 0.625387 | 0.879829 | 714.95  | 977.08  | 836.637 | 749.365 | 746.875 | 818.237 |
| ENSMUSG00000031775 | 4_Plip     | 1196.62 | 0.32342  | 0.471449 | 0.804922 | 590.567 | 1649.25 | 1750.84 | 1135.6  | 946.042 | 1107.44 |
| ENSMUSG00000031776 | 16_Arl2bp  | 2051.72 | 0.00163  | 0.993995 | 0.998043 | 2119.57 | 1966.63 | 2072.46 | 2078.09 | 2062.06 | 2011.5  |
| ENSMUSG00000031778 | 12_Cx3cl1  | 714.001 | 0.33153  | 0.513797 | 0.82844  | 313.486 | 966.878 | 1106.55 | 677.565 | 441.257 | 778.266 |
| ENSMUSG00000031779 | 3_Ccl22    | 9.97112 | 2.29872  | 0.00872  | 0.091136 | 9.1012  | 28.3376 | 12.4099 | 2.47588 | 5.15086 | 2.35126 |
| ENSMUSG00000031780 | 1_Ccl17    | 6.03633 | 0.43619  | 0.686358 | 0.904398 | 3.03373 | 15.869  | 2.06832 | 7.42763 | 4.29238 | 3.52688 |
| ENSMUSG00000031781 | 13_Ciapi   | 927.692 | 0.08464  | 0.838594 | 0.952966 | 478.319 | 1235.52 | 1151.02 | 963.116 | 835.298 | 902.882 |
| ENSMUSG00000031782 | 14_Coq9    | 638.785 | -0.33267 | 0.396388 | 0.757228 | 319.553 | 656.298 | 720.811 | 836.021 | 659.31  | 640.717 |
| ENSMUSG00000031783 | 9_Polr2c   | 755.71  | -0.08286 | 0.840417 | 0.953235 | 378.205 | 905.669 | 918.335 | 866.557 | 691.932 | 773.563 |
| ENSMUSG00000031785 | 15_Adgrg1  | 438.382 | 0.43578  | 0.413448 | 0.768578 | 172.923 | 672.167 | 667.034 | 344.147 | 297.892 | 476.129 |
| ENSMUSG00000031786 | 6_Drc7     | 0.57232 | -2.56648 | 0.518957 | NA       | 0       | 0       | 0       | 0       | 3.43391 | 0       |
| ENSMUSG00000031787 | 7_Katnb1   | 218.284 | 0.38942  | 0.537152 | 0.839323 | 53.5959 | 335.517 | 353.683 | 229.431 | 149.375 | 188.1   |
| ENSMUSG00000031788 | 13_Kifc3   | 1119.75 | 0.4956   | 0.431874 | 0.780264 | 285.171 | 1759.2  | 1886.31 | 1163.66 | 628.405 | 995.757 |
| ENSMUSG00000031789 | 16_Cngb1   | 136.351 | -2.29313 | 0.001303 | 0.023983 | 69.7759 | 55.5416 | 13.4441 | 416.773 | 180.28  | 82.2939 |
| ENSMUSG00000031790 | 7_Mmp15    | 489.552 | 0.66186  | 0.243404 | 0.634745 | 169.889 | 778.716 | 851.115 | 401.917 | 303.042 | 432.631 |
| ENSMUSG00000031791 | 7_Tmem3    | 444.452 | -0.77663 | 0.058924 | 0.318562 | 296.295 | 234.635 | 451.929 | 769.998 | 387.173 | 526.681 |
| ENSMUSG00000031792 | 14_Usb1    | 409.799 | 0.3364   | 0.460844 | 0.799907 | 209.328 | 620.026 | 542.935 | 429.152 | 308.193 | 349.161 |
| ENSMUSG00000031796 | 6_Cfap20   | 689.429 | 0.01348  | 0.955168 | 0.98876  | 750.343 | 692.57  | 634.975 | 649.505 | 720.262 | 688.918 |
| ENSMUSG00000031799 | 9_Tpm4     | 8320.7  | 0.66234  | 0.094463 | 0.41802  | 15314.3 | 8559.08 | 6719.98 | 5170.46 | 7382.9  | 6777.49 |
| ENSMUSG00000031802 | 8_Phxr4    | 0.30609 | 0.16972  | 0.966824 | NA       | 1.01124 | 0       | 0       | 0.82529 | 0       | 0       |
| ENSMUSG00000031803 | 7_B3gnt3   | 63.747  | 1.08242  | 0.027155 | 0.198655 | 68.7646 | 109.95  | 80.6646 | 20.6323 | 47.2162 | 55.2545 |
| ENSMUSG00000031805 | 17_Jak3    | 328.516 | 0.84293  | 0.204921 | 0.596228 | 74.8321 | 593.956 | 596.711 | 248.413 | 178.563 | 278.624 |
| ENSMUSG00000031807 | 10_Pgls    | 422.745 | 0.31473  | 0.686009 | 0.904398 | 44.4948 | 632.495 | 729.084 | 499.302 | 236.081 | 395.011 |
| ENSMUSG00000031808 | 6_Slc27a1  | 328.652 | -0.00315 | 0.996304 | 0.998321 | 62.6971 | 386.524 | 535.696 | 443.182 | 192.299 | 351.513 |
| ENSMUSG00000031809 | 10_17000   | 0       | NA       | NA       | NA       | 0       | 0       | 0       | 0       | 0       | 0       |
| ENSMUSG00000031812 | 16_Map1h   | 3055.66 | 0.07598  | 0.824281 | 0.949196 | 2000.24 | 3782.5  | 3625.77 | 3235.15 | 2726.52 | 2963.76 |
| ENSMUSG00000031813 | 7_Mvb12a   | 547.551 | 0.4274   | 0.5231   | 0.832475 | 110.226 | 890.933 | 883.174 | 613.192 | 343.391 | 444.387 |
| ENSMUSG00000031816 | 14_Mthfsc  | 569.869 | 0.03621  | 0.942484 | 0.986023 | 211.35  | 715.24  | 804.578 | 621.445 | 498.775 | 567.828 |
| ENSMUSG00000031818 | 12_Cox4i1  | 3363.18 | -0.35771 | 0.520202 | 0.831728 | 870.681 | 3872.05 | 4102.52 | 4739.65 | 3057.9  | 3536.29 |
| ENSMUSG00000031819 | 13_Emc8    | 899.333 | -0.4468  | 0.087437 | 0.401116 | 635.061 | 779.85  | 868.696 | 1091.04 | 982.098 | 1039.25 |
| ENSMUSG00000031820 | 8_Babam1   | 757.103 | 0.25088  | 0.597647 | 0.868406 | 335.733 | 1124.43 | 1008.31 | 784.028 | 612.953 | 677.162 |
| ENSMUSG00000031821 | 11_Gins2   | 527.995 | 0.46209  | 0.321639 | 0.702605 | 274.047 | 744.711 | 816.988 | 557.898 | 373.437 | 400.889 |

|                    |           |         |          |          |          |         |         |         |         |         |         |
|--------------------|-----------|---------|----------|----------|----------|---------|---------|---------|---------|---------|---------|
| ENSMUSG00000031822 | 18_Gse1   | 250.227 | 0.29334  | 0.62925  | 0.881466 | 70.7871 | 354.786 | 401.255 | 289.678 | 157.96  | 226.896 |
| ENSMUSG00000031823 | 13_Zdhhc  | 355.728 | 0.02647  | 0.964943 | 0.990655 | 86.967  | 513.477 | 476.748 | 437.405 | 317.636 | 302.136 |
| ENSMUSG00000031824 | 14_64305  | 1456.13 | 0.1236   | 0.78064  | 0.935516 | 684.612 | 1994.97 | 1875.97 | 1502.03 | 1260.24 | 1418.98 |
| ENSMUSG00000031825 | 16_Crispl | 1138.79 | -0.84178 | 0.007858 | 0.084743 | 628.994 | 732.243 | 1085.87 | 1554.85 | 1470.57 | 1360.2  |
| ENSMUSG00000031826 | 19_Usp10  | 1622.95 | 0.38203  | 0.216777 | 0.607835 | 1342.93 | 2075.44 | 2091.07 | 1257.75 | 1346.95 | 1623.54 |
| ENSMUSG00000031827 | 12_Cotl1  | 2322    | 0.4508   | 0.445115 | 0.788998 | 678.545 | 3654.41 | 3712.64 | 2282.76 | 1453.4  | 2150.22 |
| ENSMUSG00000031828 | 8_Klhl36  | 81.3209 | 0.02075  | 0.97843  | 0.993796 | 10.1124 | 116.751 | 118.929 | 110.589 | 48.0747 | 83.4696 |
| ENSMUSG00000031831 | 6_Dnaaf1  | 3.27805 | 0.84266  | 0.546466 | 0.842968 | 4.04498 | 4.53401 | 4.13665 | 5.77705 | 0       | 1.17563 |
| ENSMUSG00000031832 | 14_Taf1c  | 170.845 | 0.60042  | 0.445318 | 0.788998 | 19.2136 | 268.64  | 329.898 | 182.39  | 94.4325 | 130.495 |
| ENSMUSG00000031833 | 9_Mast3   | 212.98  | 0.18709  | 0.725707 | 0.915876 | 76.8546 | 278.842 | 324.727 | 229.431 | 171.695 | 196.33  |
| ENSMUSG00000031834 | 15_Pik3r2 | 787.021 | 0.12407  | 0.837553 | 0.952966 | 205.283 | 999.75  | 1257.54 | 931.755 | 523.671 | 804.129 |
| ENSMUSG00000031835 | 15_Mbtps  | 3494    | -0.00324 | 0.991573 | 0.997512 | 2502.83 | 3802.9  | 4164.57 | 3708.04 | 3160.05 | 3625.64 |
| ENSMUSG00000031837 | 13_Necab  | 164.748 | -1.74905 | 0.001915 | 0.031447 | 30.3373 | 70.2772 | 126.168 | 373.857 | 120.327 | 177.52  |
| ENSMUSG00000031838 | 7_lfi30   | 535.558 | 0.15302  | 0.744741 | 0.923721 | 237.642 | 744.711 | 709.435 | 506.73  | 435.248 | 579.585 |
| ENSMUSG00000031839 | 6_Hsbp1   | 2319.15 | -0.15795 | 0.473217 | 0.806475 | 2334.96 | 2158.19 | 2083.84 | 2422.23 | 2503.32 | 2412.39 |
| ENSMUSG00000031840 | 12_Rab3a  | 168.68  | -0.84904 | 0.03732  | 0.242069 | 83.9333 | 136.02  | 141.68  | 304.533 | 174.271 | 171.642 |
| ENSMUSG00000031841 | 18_Cdh13  | 293.876 | -0.13716 | 0.691629 | 0.905638 | 187.08  | 319.648 | 333     | 317.738 | 269.562 | 336.23  |
| ENSMUSG00000031842 | 13_Pde4c  | 7.68131 | -1.03757 | 0.27645  | 0.662853 | 1.01124 | 7.93452 | 6.20497 | 14.03   | 5.15086 | 11.7563 |
| ENSMUSG00000031843 | 1_Mphosp  | 770.501 | 0.2196   | 0.513615 | 0.828304 | 1038.55 | 819.523 | 628.77  | 545.518 | 824.138 | 766.509 |
| ENSMUSG00000031844 | 7_Hsd17b  | 2413.98 | 0.50862  | 0.050407 | 0.290796 | 2433.05 | 3012.85 | 3059.05 | 1877.54 | 1827.7  | 2273.66 |
| ENSMUSG00000031845 | 15_Bco1   | 149.627 | 0.01979  | 0.945137 | 0.986649 | 145.619 | 142.821 | 163.398 | 132.872 | 161.394 | 151.656 |
| ENSMUSG00000031847 | 7_170003  | 45.3522 | 0.41992  | 0.271347 | 0.657711 | 47.5285 | 54.4081 | 53.7764 | 42.0899 | 34.3391 | 39.9713 |
| ENSMUSG00000031848 | 14_Lsm4   | 250.957 | 0.24171  | 0.722257 | 0.914131 | 45.506  | 376.323 | 394.016 | 276.473 | 166.545 | 246.882 |
| ENSMUSG00000031849 | 8_Comp    | 55.3364 | -0.64041 | 0.364599 | 0.737967 | 8.08995 | 43.0731 | 78.5963 | 78.4028 | 49.7917 | 74.0646 |
| ENSMUSG00000031851 | 15_Ntpcr  | 335.301 | -0.00842 | 0.976509 | 0.993796 | 277.081 | 337.784 | 387.811 | 314.436 | 318.495 | 376.201 |
| ENSMUSG00000031853 | 4_BC021f  | 183.561 | 0.0081   | 0.977613 | 0.993796 | 159.777 | 183.627 | 208.901 | 198.895 | 169.12  | 181.047 |
| ENSMUSG00000031858 | 15_Mau2   | 2128.68 | 0.15081  | 0.681106 | 0.902515 | 1309.56 | 2706.8  | 2703.3  | 2144.93 | 1900.67 | 2006.8  |
| ENSMUSG00000031860 | 17_Pbx4   | 7.22151 | -1.6303  | 0.103323 | 0.436784 | 1.01124 | 3.40051 | 6.20497 | 18.1564 | 5.15086 | 9.40502 |
| ENSMUSG00000031861 | 15_Lpar2  | 382.471 | 0.56945  | 0.038156 | 0.245473 | 413.599 | 452.268 | 504.671 | 313.611 | 262.694 | 347.986 |
| ENSMUSG00000031862 | 10_Atp13  | 759.905 | 0.70275  | 0.244785 | 0.6364   | 215.395 | 1412.34 | 1196.52 | 599.162 | 508.218 | 627.785 |
| ENSMUSG00000031864 | 15_Ints10 | 1560.17 | 0.31426  | 0.198544 | 0.590735 | 1835.41 | 1659.45 | 1692.92 | 1205.75 | 1447.39 | 1520.09 |
| ENSMUSG00000031865 | 15_Dctn1  | 1791.46 | 0.30102  | 0.621377 | 0.878215 | 455.06  | 2703.4  | 2774.66 | 1942.74 | 1207.02 | 1665.86 |
| ENSMUSG00000031870 | 16_Pgr    | 7.756   | -0.58789 | 0.504582 | 0.824602 | 10.1124 | 2.26701 | 6.20497 | 14.03   | 6.86782 | 7.05377 |
| ENSMUSG00000031871 | 8_Cdh5    | 272.546 | -0.5658  | 0.073862 | 0.363567 | 185.058 | 236.902 | 237.857 | 400.267 | 314.203 | 260.989 |
| ENSMUSG00000031872 | 13_Bean1  | 7.42977 | -1.00944 | 0.223589 | 0.613683 | 4.04498 | 4.53401 | 6.20497 | 13.2047 | 6.00934 | 10.5807 |
| ENSMUSG00000031875 | 6_Cmtm3   | 421.157 | -0.48606 | 0.105288 | 0.440813 | 339.778 | 326.449 | 386.776 | 612.367 | 461.861 | 399.713 |
| ENSMUSG00000031876 | 16_Cmtm1  | 0.13755 | -0.79206 | 0.84609  | NA       | 0       | 0       | 0       | 0.82529 | 0       | 0       |
| ENSMUSG00000031877 | 8_Ces2g   | 4193.32 | 0.48832  | 0.086869 | 0.399375 | 4743.75 | 4954.54 | 4989.83 | 2675.6  | 3536.93 | 4259.3  |
| ENSMUSG00000031878 | 17_Nae1   | 1782.22 | 0.50558  | 0.312637 | 0.694201 | 3769.92 | 1323.93 | 1179.98 | 1170.26 | 1690.34 | 1558.88 |
| ENSMUSG00000031879 | 13_Fam9f  | 249.038 | 0.0961   | 0.861077 | 0.960565 | 84.9445 | 371.789 | 315.419 | 302.057 | 183.714 | 236.301 |
| ENSMUSG00000031880 | 6_Rrad    | 17.141  | -0.89263 | 0.191359 | 0.580335 | 5.05622 | 12.4685 | 18.6149 | 31.3611 | 18.8865 | 16.4588 |
| ENSMUSG00000031881 | 5_Cdh16   | 0.34472 | 1.99863  | 0.620844 | NA       | 0       | 0       | 2.06832 | 0       | 0       | 0       |
| ENSMUSG00000031883 | 12_Car7   | 15.2257 | -0.5052  | 0.489669 | 0.814396 | 6.06747 | 9.06802 | 22.7516 | 22.2829 | 20.6034 | 10.5807 |
| ENSMUSG00000031884 | 9_Ces2d-1 | 4.71294 | -2.07807 | 0.077675 | 0.37409  | 0       | 3.40051 | 2.06832 | 8.25292 | 5.15086 | 9.40502 |
| ENSMUSG00000031885 | 13_Cbfb   | 1996.57 | 0.68287  | 0.104806 | 0.440197 | 3961.04 | 1735.39 | 1684.65 | 1314.69 | 1613.08 | 1670.57 |
| ENSMUSG00000031886 | 13_Ces2e  | 358.618 | 0.17737  | 0.531492 | 0.836945 | 366.07  | 349.119 | 426.075 | 297.931 | 311.627 | 400.889 |
| ENSMUSG00000031887 | 13_Tradd  | 339.352 | 0.38373  | 0.480937 | 0.810618 | 124.383 | 498.741 | 529.491 | 314.436 | 225.779 | 343.283 |
| ENSMUSG00000031889 | 9_D23002  | 516.922 | 0.11193  | 0.637429 | 0.885628 | 499.555 | 537.28  | 573.96  | 487.748 | 492.766 | 510.222 |
| ENSMUSG00000031891 | 5_Hsd11b  | 0.97943 | -3.34563 | 0.256873 | NA       | 0       | 0       | 0       | 3.30117 | 2.57543 | 0       |
| ENSMUSG00000031893 | 6_Tsnaxif | 1.0671  | -2.25043 | 0.301583 | NA       | 0       | 0       | 1.03416 | 2.47588 | 1.71695 | 1.17563 |
| ENSMUSG00000031896 | 6_Ctrl    | 4.19636 | 1.7155   | 0.13649  | 0.501691 | 3.03373 | 6.80102 | 9.30745 | 1.65058 | 0.85848 | 3.52688 |
| ENSMUSG00000031897 | 8_Psmb1f  | 842.471 | 1.87586  | 0.009009 | 0.093028 | 182.024 | 2175.19 | 1615.36 | 487.748 | 252.392 | 342.108 |
| ENSMUSG00000031898 | 8_Dpep3   | 1.13861 | 1.55775  | 0.487353 | NA       | 1.01124 | 0       | 4.13665 | 0.82529 | 0.85848 | 0       |
| ENSMUSG00000031901 | 12_Dus2   | 251.185 | -0.2524  | 0.500028 | 0.821674 | 139.552 | 260.706 | 287.497 | 261.618 | 253.251 | 304.488 |
| ENSMUSG00000031902 | 9_Nfatc3  | 2422.32 | 0.53436  | 0.140358 | 0.507727 | 4150.15 | 2256.8  | 2190.35 | 1681.95 | 2157.35 | 2097.32 |
| ENSMUSG00000031903 | 6_Pla2g1f | 313.278 | -0.185   | 0.603306 | 0.870656 | 193.148 | 319.648 | 367.127 | 387.062 | 308.193 | 304.488 |
| ENSMUSG00000031904 | 4_Slc7a6  | 247.359 | -0.78089 | 0.010721 | 0.105734 | 211.35  | 162.091 | 172.705 | 301.232 | 373.437 | 263.341 |
| ENSMUSG00000031906 | 8_Smpd3   | 16.9294 | -1.69055 | 0.045868 | 0.274321 | 3.03373 | 3.40051 | 17.5807 | 41.2646 | 16.3111 | 19.9857 |
| ENSMUSG00000031907 | 8_Zfp90   | 259.616 | -0.18057 | 0.510855 | 0.827179 | 282.137 | 238.036 | 209.935 | 273.172 | 278.147 | 276.273 |
| ENSMUSG00000031910 | 14_Has3   | 99.9488 | -0.14551 | 0.773836 | 0.932886 | 60.6747 | 154.156 | 70.323  | 90.7822 | 148.517 | 75.2402 |
| ENSMUSG00000031913 | 9_Vps4a   | 1224.5  | 0.06513  | 0.795252 | 0.939051 | 1094.17 | 1361.34 | 1300.98 | 1086.08 | 1300.59 | 1203.84 |
| ENSMUSG00000031916 | 17_Cog8   | 746.324 | 0.09955  | 0.736987 | 0.920922 | 571.353 | 901.135 | 843.876 | 692.42  | 752.026 | 717.133 |
| ENSMUSG00000031917 | 11_Nip7   | 623.159 | 0.01619  | 0.949376 | 0.987335 | 689.669 | 660.832 | 529.491 | 611.542 | 626.688 | 620.731 |
| ENSMUSG00000031918 | 16_Mtmr2  | 1617.72 | 0.40021  | 0.282206 | 0.668883 | 2696.99 | 1493.96 | 1330.97 | 1219.78 | 1607.93 | 1356.67 |
| ENSMUSG00000031921 | 17_Terf2  | 545.765 | 0.07817  | 0.734733 | 0.9203   | 553.151 | 556.55  | 571.891 | 546.344 | 508.218 | 538.438 |
| ENSMUSG00000031922 | 12_Cep57  | 994.615 | 0.36313  | 0.415949 | 0.770237 | 1857.66 | 754.913 | 744.596 | 710.577 | 982.956 | 916.99  |
| ENSMUSG00000031924 | 3_Cyb5b   | 4802.24 | 0.15364  | 0.559135 | 0.848338 | 6062.41 | 4702.9  | 4407.6  | 4199.91 | 4829.79 | 4610.81 |
| ENSMUSG00000031925 | 16_Maml2  | 1162.81 | 0.28329  | 0.402986 | 0.761523 | 1743.39 | 957.81  | 1128.27 | 897.093 | 1122.89 | 1127.43 |
| ENSMUSG00000031927 | 9_170001  | 0.16854 | 1.1315   | 0.781553 | NA       | 1.01124 | 0       | 0       | 0       | 0       | 0       |
| ENSMUSG00000031928 | 14_Mre11  | 877.933 | 0.35106  | 0.259807 | 0.649568 | 1229.67 | 856.928 | 865.593 | 614.843 | 835.298 | 865.262 |
| ENSMUSG00000031930 | 10_Wwp2   | 1561.42 | 0.29551  | 0.534959 | 0.838467 | 696.747 | 2278.34 | 2187.25 | 1486.35 | 1172.68 | 1547.13 |
| ENSMUSG00000031931 | 3_Ankrd4f | 574.712 | 0.46501  | 0.276802 | 0.663317 | 1060.8  | 489.673 | 448.826 | 386.237 | 521.954 | 540.789 |
| ENSMUSG00000031932 | 14_Gpr83  | 6.11971 | -1.32453 | 0.185984 | 0.573178 | 6.06747 | 3.40051 | 1.03416 | 6.60234 | 13.7356 | 5.87814 |
| ENSMUSG00000031933 | 17_Izum0  | 0.19594 | -0.79206 | 0.84609  | NA       | 0       | 0       | 0       | 0       | 0       | 1.17563 |
| ENSMUSG00000031934 | 13_Panx1  | 334.622 | 0.5301   | 0.08317  | 0.389417 | 352.924 | 489.673 | 343.342 | 245.112 | 259.26  | 317.42  |

|                    |            |         |          |          |          |         |         |         |         |         |         |
|--------------------|------------|---------|----------|----------|----------|---------|---------|---------|---------|---------|---------|
| ENSMUSG00000031935 | 8_Med17    | 836.982 | 0.19344  | 0.519181 | 0.831665 | 1117.42 | 835.392 | 725.981 | 675.914 | 852.468 | 814.71  |
| ENSMUSG00000031936 | 9_Heph1    | 280.766 | 0.40633  | 0.214024 | 0.604946 | 381.239 | 309.446 | 268.882 | 185.691 | 248.958 | 290.38  |
| ENSMUSG00000031937 | 6_Vstm5    | 171.815 | 0.28578  | 0.343538 | 0.721446 | 150.675 | 199.497 | 216.14  | 151.029 | 153.667 | 159.885 |
| ENSMUSG00000031938 | 14_49314   | 1182.89 | -0.07845 | 0.844726 | 0.954625 | 1776.76 | 788.918 | 886.276 | 1037.39 | 1351.24 | 1256.75 |
| ENSMUSG00000031939 | 15_Taf1d   | 517.314 | 0.76545  | 0.137204 | 0.502606 | 1173.04 | 392.192 | 388.845 | 280.599 | 473.021 | 396.187 |
| ENSMUSG00000031948 | 13_Kars    | 2004.33 | 0.57131  | 0.109188 | 0.449508 | 1511.81 | 3196.48 | 2479.92 | 1486.35 | 1585.61 | 1765.79 |
| ENSMUSG00000031949 | 17_Adat1   | 160.119 | -0.22512 | 0.530056 | 0.836496 | 96.0682 | 172.292 | 174.773 | 169.185 | 180.28  | 168.115 |
| ENSMUSG00000031950 | 7_Gabara   | 2622.37 | 0.02608  | 0.927773 | 0.980746 | 3356.32 | 2387.16 | 2194.49 | 2416.46 | 2675.87 | 2703.94 |
| ENSMUSG00000031951 | 7_Tmem2    | 144.285 | -0.44019 | 0.116955 | 0.465083 | 121.349 | 130.353 | 115.826 | 174.962 | 165.686 | 157.534 |
| ENSMUSG00000031952 | 4_Chst5    | 337.505 | -1.26042 | 7.28E-05 | 0.002545 | 230.564 | 148.489 | 217.174 | 554.596 | 440.399 | 433.807 |
| ENSMUSG00000031953 | 1_Tmem1    | 202.481 | 0.21112  | 0.504556 | 0.824602 | 277.081 | 189.295 | 185.115 | 176.613 | 184.573 | 202.208 |
| ENSMUSG00000031954 | 5_Cfdp1    | 2195.37 | -0.06414 | 0.8043   | 0.942928 | 2456.31 | 2084.51 | 1898.72 | 1978.23 | 2456.1  | 2298.35 |
| ENSMUSG00000031955 | 9_Bcar1    | 555.07  | 0.08562  | 0.896266 | 0.97156  | 109.214 | 795.719 | 809.748 | 679.216 | 363.994 | 572.531 |
| ENSMUSG00000031958 | 16_Ldhd    | 146.687 | -0.58594 | 0.209193 | 0.60089  | 65.7309 | 117.884 | 168.568 | 243.461 | 152.809 | 131.67  |
| ENSMUSG00000031959 | 14_Wdr5    | 551.496 | 0.1237   | 0.641281 | 0.887777 | 477.307 | 610.958 | 637.044 | 494.35  | 539.124 | 550.194 |
| ENSMUSG00000031960 | 14_Aars    | 1999.25 | 0.34552  | 0.43733  | 0.785012 | 1016.3  | 3153.41 | 2543    | 1867.64 | 1607.07 | 1808.12 |
| ENSMUSG00000031962 | 5_Cdh15    | 3.02912 | -1.76239 | 0.281203 | 0.667804 | 0       | 0       | 4.13665 | 8.25292 | 3.43391 | 2.35126 |
| ENSMUSG00000031963 | 7_Bmper    | 247.978 | -0.58628 | 0.095285 | 0.419012 | 272.025 | 140.554 | 182.012 | 287.202 | 313.344 | 292.731 |
| ENSMUSG00000031965 | 14_Tbx20   | 328.684 | -1.13575 | 0.102594 | 0.436081 | 443.936 | 47.6071 | 125.134 | 479.495 | 550.284 | 325.649 |
| ENSMUSG00000031966 | 6_Glb1l3   | 1.99131 | -1.44406 | 0.390252 | 0.753473 | 1.01124 | 2.26701 | 0       | 5.77705 | 1.71695 | 1.17563 |
| ENSMUSG00000031967 | 15_Afg3l1  | 1074.6  | 0.24944  | 0.557667 | 0.848179 | 571.353 | 1517.76 | 1412.66 | 964.767 | 874.788 | 1106.27 |
| ENSMUSG00000031969 | 15_Acad8   | 824.746 | -0.26778 | 0.302612 | 0.685316 | 638.095 | 746.978 | 860.422 | 911.123 | 947.759 | 844.101 |
| ENSMUSG00000031970 | 16_Dbndd   | 41.8018 | -0.44056 | 0.386528 | 0.751493 | 21.2361 | 28.3376 | 56.8789 | 53.644  | 47.2162 | 43.4982 |
| ENSMUSG00000031971 | 15_Ccsap   | 37.558  | -0.29205 | 0.545466 | 0.84237  | 40.4498 | 37.4056 | 23.7857 | 51.1681 | 45.4993 | 27.0394 |
| ENSMUSG00000031972 | 4_Acta1    | 823.664 | -1.2675  | 0.050726 | 0.29136  | 242.699 | 316.247 | 891.447 | 2103.67 | 485.039 | 902.882 |
| ENSMUSG00000031974 | 8_Abcbb10  | 296.879 | 0.1827   | 0.479472 | 0.809556 | 278.092 | 328.716 | 340.239 | 278.949 | 279.005 | 276.273 |
| ENSMUSG00000031976 | 14_Urb2    | 614.673 | 0.56731  | 0.062973 | 0.331259 | 599.668 | 922.671 | 679.444 | 429.152 | 502.209 | 554.896 |
| ENSMUSG00000031979 | 17_Cog2    | 786.434 | 0.14618  | 0.667087 | 0.897768 | 545.061 | 977.08  | 956.599 | 786.504 | 651.584 | 801.778 |
| ENSMUSG00000031980 | 9_Agt      | 3.8009  | -0.47164 | 0.691673 | 0.905638 | 2.02249 | 4.53401 | 3.10248 | 9.07822 | 1.71695 | 2.35126 |
| ENSMUSG00000031981 | 7_Capn9    | 1.31568 | -0.64502 | 0.755275 | NA       | 3.03373 | 0       | 0       | 1.65058 | 0.85848 | 2.35126 |
| ENSMUSG00000031982 | 4_Arv1     | 58.9951 | 0.1349   | 0.720233 | 0.913102 | 76.8546 | 57.8086 | 50.6739 | 60.2463 | 56.6595 | 51.7276 |
| ENSMUSG00000031983 | 6_231002   | 2324.31 | 0.44382  | 0.201023 | 0.592148 | 1717.09 | 3365.37 | 2954.6  | 2015.36 | 1734.98 | 2158.45 |
| ENSMUSG00000031984 | 7_281000   | 383.326 | 0.27303  | 0.269144 | 0.656292 | 442.925 | 415.996 | 399.186 | 333.418 | 332.231 | 376.201 |
| ENSMUSG00000031985 | 9_Gnpat    | 955.727 | -0.01118 | 0.962574 | 0.990106 | 855.513 | 975.946 | 1024.85 | 1011.81 | 946.9   | 919.341 |
| ENSMUSG00000031986 | 5_Sprtn    | 269.358 | 0.03192  | 0.938013 | 0.985118 | 147.642 | 346.852 | 322.658 | 298.756 | 227.496 | 272.746 |
| ENSMUSG00000031987 | 5_Egln1    | 1379.79 | 0.17777  | 0.472124 | 0.80561  | 1588.66 | 1300.13 | 1504.71 | 1209.05 | 1243.07 | 1433.09 |
| ENSMUSG00000031988 | 9_Vps26b   | 1680.03 | 0.03018  | 0.906634 | 0.974391 | 1998.22 | 1546.1  | 1548.14 | 1532.57 | 1705.79 | 1749.33 |
| ENSMUSG00000031990 | 14_Jam3    | 332.93  | -1.37204 | 0.00011  | 0.003572 | 227.53  | 132.62  | 196.491 | 599.162 | 454.993 | 386.782 |
| ENSMUSG00000031993 | 6_Snx19    | 1235.48 | 0.03457  | 0.879714 | 0.966669 | 1182.14 | 1333    | 1235.82 | 1164.49 | 1287.72 | 1209.72 |
| ENSMUSG00000031994 | 13_Adamt   | 13.7771 | 0.59236  | 0.35614  | 0.731176 | 22.2474 | 17.0025 | 10.3416 | 11.5541 | 8.58477 | 12.9319 |
| ENSMUSG00000031995 | 8_St14     | 2679.93 | 0.91394  | 0.152671 | 0.527082 | 716.972 | 5287.79 | 4499.64 | 1958.42 | 1293.72 | 2323.04 |
| ENSMUSG00000031996 | 16_Aplp2   | 15640.9 | -0.16896 | 0.439558 | 0.785475 | 14702.5 | 13919.4 | 15555.9 | 16350.7 | 15957.4 | 17359.3 |
| ENSMUSG00000031997 | 8_Trpc6    | 6.79776 | 0.16475  | 0.865651 | 0.962186 | 11.1237 | 2.26701 | 8.27329 | 9.90351 | 6.86782 | 2.35126 |
| ENSMUSG00000032000 | 17_Birc3   | 1058.19 | 0.66186  | 0.026803 | 0.19716  | 1137.65 | 1635.64 | 1116.89 | 702.324 | 880.797 | 875.843 |
| ENSMUSG00000032002 | 9_Dcun1d   | 1334.26 | 0.53139  | 0.256545 | 0.648111 | 2706.09 | 1139.17 | 886.276 | 921.852 | 1203.58 | 1148.59 |
| ENSMUSG00000032006 | 14_Pdgd    | 264.875 | -0.47672 | 0.455581 | 0.796332 | 460.116 | 78.2117 | 126.168 | 377.159 | 334.806 | 212.789 |
| ENSMUSG00000032009 | 7_Sesn3    | 868.912 | -0.63213 | 0.010647 | 0.105362 | 750.343 | 608.691 | 685.649 | 1086.08 | 1115.16 | 967.542 |
| ENSMUSG00000032010 | 14_Usps2   | 434.833 | 0.00625  | 0.981837 | 0.993958 | 364.048 | 453.401 | 490.193 | 479.495 | 419.795 | 402.065 |
| ENSMUSG00000032011 | 4_Thy1     | 511.163 | 0.37146  | 0.398821 | 0.759197 | 291.238 | 745.845 | 692.888 | 548.819 | 339.098 | 449.09  |
| ENSMUSG00000032012 | 7_Pvrl1    | 2339.33 | 0.53196  | 0.257251 | 0.648571 | 1183.16 | 3754.16 | 3359.99 | 1963.37 | 1516.93 | 2258.38 |
| ENSMUSG00000032013 | 5_Trim29   | 15081.6 | 0.37437  | 0.511367 | 0.827179 | 4643.63 | 23408   | 23030.8 | 13408.5 | 10362.7 | 15635.9 |
| ENSMUSG00000032014 | 5_Oaf      | 253.839 | -0.52845 | 0.341456 | 0.719594 | 64.7196 | 266.373 | 292.668 | 377.159 | 244.666 | 277.448 |
| ENSMUSG00000032015 | 15_Pou2f1  | 144.803 | 0.03176  | 0.915365 | 0.976514 | 153.709 | 126.952 | 158.227 | 148.553 | 126.196 | 155.183 |
| ENSMUSG00000032017 | 14_Grik4   | 5.79997 | -2.50848 | 0.022905 | 0.178488 | 2.02249 | 1.1335  | 2.06832 | 14.03   | 12.0187 | 3.52688 |
| ENSMUSG00000032018 | 13_Sc5d    | 4325.81 | 0.45175  | 0.190478 | 0.57898  | 6854.21 | 4405.93 | 3732.29 | 2984.26 | 3916.37 | 4061.79 |
| ENSMUSG00000032020 | 15_Ubash   | 79.7219 | 0.08008  | 0.819647 | 0.948338 | 79.8883 | 92.9472 | 73.4255 | 90.7822 | 78.9799 | 62.3083 |
| ENSMUSG00000032021 | 13_Crtam   | 4.39759 | 1.20958  | 0.304437 | 0.687389 | 9.1012  | 1.1335  | 8.27329 | 4.12646 | 2.57543 | 1.17563 |
| ENSMUSG00000032023 | 7_493142   | 3.28026 | -0.65015 | 0.62539  | 0.879829 | 0       | 5.66751 | 2.06832 | 4.12646 | 4.29238 | 3.52688 |
| ENSMUSG00000032024 | 10_Clmp    | 700.748 | -0.95703 | 0.004768 | 0.060084 | 647.196 | 345.718 | 436.416 | 938.357 | 1013.86 | 822.939 |
| ENSMUSG00000032026 | 6_Rexo2    | 852.581 | 0.04108  | 0.867786 | 0.962942 | 975.851 | 846.727 | 771.485 | 801.359 | 874.788 | 845.276 |
| ENSMUSG00000032028 | 15_Nxpe2   | 4.13898 | -1.92347 | 0.108875 | 0.448862 | 3.03373 | 0       | 2.06832 | 4.95175 | 7.72629 | 7.05377 |
| ENSMUSG00000032030 | 16_Cul5    | 1229.56 | 0.38407  | 0.416871 | 0.770621 | 2441.14 | 852.394 | 883.174 | 998.604 | 1189.85 | 1012.22 |
| ENSMUSG00000032033 | 11_Barx2   | 422.105 | 1.08335  | 0.008575 | 0.089954 | 360.003 | 817.256 | 542.935 | 215.401 | 245.524 | 351.513 |
| ENSMUSG00000032034 | 5_Kcnj5    | 5.16755 | -2.35312 | 0.198034 | 0.590191 | 5.05622 | 0       | 0       | 16.5058 | 9.44325 | 0       |
| ENSMUSG00000032035 | 15_Ets1    | 507.464 | 0.0692   | 0.790154 | 0.937308 | 573.376 | 522.545 | 463.304 | 547.994 | 488.473 | 449.09  |
| ENSMUSG00000032036 | 15_Kirrel3 | 31.2502 | -2.30287 | 1.44E-05 | 0.000714 | 10.1124 | 10.2015 | 11.3758 | 70.9751 | 47.2162 | 37.6201 |
| ENSMUSG00000032038 | 6_St3gal4  | 709.623 | 0.18076  | 0.461555 | 0.799907 | 708.882 | 807.054 | 746.665 | 699.848 | 703.951 | 591.341 |
| ENSMUSG00000032040 | 15_Dcps    | 720.793 | 0.02426  | 0.94216  | 0.986006 | 480.341 | 887.533 | 812.851 | 672.613 | 755.46  | 715.957 |
| ENSMUSG00000032041 | 15_Tirap   | 1419.7  | 0.61936  | 0.013439 | 0.123675 | 1850.58 | 1785.27 | 1523.32 | 990.351 | 1158.94 | 1209.72 |
| ENSMUSG00000032042 | 11_Srpr    | 4571.07 | 0.04416  | 0.842328 | 0.953733 | 4478.8  | 4900.13 | 4544.11 | 4199.09 | 4708.75 | 4595.53 |
| ENSMUSG00000032044 | 4_Rpusd4   | 279.149 | 0.24526  | 0.441338 | 0.78682  | 216.406 | 346.852 | 345.41  | 264.919 | 253.251 | 248.057 |
| ENSMUSG00000032046 | 15_Abhd1   | 2801.07 | 0.33091  | 0.13349  | 0.497269 | 2954.86 | 3232.75 | 3174.88 | 2410.68 | 2417.47 | 2615.77 |
| ENSMUSG00000032047 | 5_Acat1    | 1985.74 | -0.42478 | 0.112282 | 0.454742 | 2020.47 | 1436.15 | 1629.84 | 2227.46 | 2474.99 | 2125.54 |
| ENSMUSG00000032050 | 16_Rdx     | 5011.19 | 0.33623  | 0.388158 | 0.572363 | 8627.94 | 4155.42 | 3993.93 | 4043.11 | 4641.79 | 4604.93 |
| ENSMUSG00000032051 | 8_Fdx1     | 408.753 | -0.24041 | 0.32994  | 0.710342 | 350.902 | 389.925 | 383.674 | 422.55  | 479.889 | 425.577 |

|                    |           |         |          |          |          |         |         |         |         |         |         |
|--------------------|-----------|---------|----------|----------|----------|---------|---------|---------|---------|---------|---------|
| ENSMUSG00000032053 | 7_Pou2af  | 4.45852 | 1.37781  | 0.2079   | 0.599354 | 7.07871 | 10.2015 | 2.06832 | 2.47588 | 2.57543 | 2.35126 |
| ENSMUSG00000032056 | 9_Btg4    | 0       | NA       | NA       | NA       | 0       | 0       | 0       | 0       | 0       | 0       |
| ENSMUSG00000032057 | 8_483342  | 0.44917 | -0.60728 | 0.852512 | NA       | 1.01124 | 0       | 0       | 0.82529 | 0.85848 | 0       |
| ENSMUSG00000032058 | 14_Ppp2r  | 2028.37 | 0.49608  | 0.05062  | 0.291317 | 2544.29 | 2409.83 | 2166.57 | 1428.58 | 1778.76 | 1842.21 |
| ENSMUSG00000032059 | 13_Alg9   | 594.165 | 0.15912  | 0.604419 | 0.871119 | 474.274 | 777.583 | 628.77  | 542.217 | 520.237 | 621.907 |
| ENSMUSG00000032060 | 9_Cryab   | 5988.59 | -1.96195 | 0.000932 | 0.018561 | 862.591 | 2638.79 | 3837.77 | 13174.1 | 4477.82 | 10940.4 |
| ENSMUSG00000032062 | 1_231003  | 370.775 | 0.01486  | 0.961232 | 0.990106 | 481.352 | 311.713 | 324.727 | 357.352 | 367.428 | 382.079 |
| ENSMUSG00000032064 | 17_Dixdc1 | 232.331 | -0.57669 | 0.277079 | 0.663718 | 333.711 | 86.1462 | 139.612 | 305.358 | 321.07  | 208.086 |
| ENSMUSG00000032065 | 5_Tex12   | 0.90024 | 0.77607  | 0.778202 | NA       | 0       | 3.40051 | 0       | 0.82529 | 0       | 1.17563 |
| ENSMUSG00000032066 | 9_Bco2    | 58.9546 | -0.39413 | 0.320499 | 0.701497 | 41.461  | 43.0731 | 68.2547 | 71.8004 | 60.9519 | 68.1864 |
| ENSMUSG00000032067 | 5_Pts     | 1235.53 | -0.12143 | 0.782756 | 0.935592 | 1948.67 | 731.109 | 870.764 | 1137.25 | 1498.04 | 1227.36 |
| ENSMUSG00000032068 | 14_Plet1  | 30276.8 | 0.27515  | 0.399716 | 0.759207 | 25056.6 | 43093.5 | 31315.4 | 22211.9 | 29281.8 | 30701.5 |
| ENSMUSG00000032076 | 18_Cadm1  | 4291.09 | -0.51027 | 0.092772 | 0.414922 | 4689.14 | 3008.32 | 2922.54 | 5116.81 | 5150.86 | 4858.87 |
| ENSMUSG00000032077 | 4_Bud13   | 227.35  | 0.27169  | 0.479563 | 0.809595 | 156.743 | 327.582 | 261.643 | 170.01  | 209.468 | 238.652 |
| ENSMUSG00000032078 | 16_Zpr1   | 646.131 | 0.13777  | 0.681821 | 0.902515 | 459.105 | 825.19  | 746.665 | 533.964 | 678.197 | 633.663 |
| ENSMUSG00000032081 | 9_Apoc3   | 0       | NA       | NA       | NA       | 0       | 0       | 0       | 0       | 0       | 0       |
| ENSMUSG00000032083 | 8_Apoa1   | 0.36128 | 2.05714  | 0.610196 | NA       | 0       | 1.1335  | 1.03416 | 0       | 0       | 0       |
| ENSMUSG00000032085 | 4_Tagln   | 1679.44 | -1.58893 | 6.14E-05 | 0.00224  | 516.746 | 759.447 | 1237.89 | 2674.77 | 2808.08 | 2079.69 |
| ENSMUSG00000032086 | 12_Bace1  | 1097.12 | -0.48207 | 0.121122 | 0.473191 | 1128.55 | 666.5   | 951.429 | 1343.58 | 1354.68 | 1138.01 |
| ENSMUSG00000032087 | 9_Dscaml  | 14.8022 | -2.39821 | 0.046532 | 0.276197 | 1.01124 | 10.2015 | 3.10248 | 55.2946 | 18.028  | 1.17563 |
| ENSMUSG00000032089 | 12_Il10ra | 180.699 | 1.99207  | 4.72E-05 | 0.001821 | 142.585 | 463.603 | 260.609 | 82.5292 | 77.2629 | 57.6058 |
| ENSMUSG00000032091 | 14_Tmprs  | 3615.78 | 0.78343  | 0.082526 | 0.387448 | 1995.19 | 6392.96 | 5334.21 | 2679.72 | 2565.13 | 2727.46 |
| ENSMUSG00000032092 | 4_Mpzl2   | 7712.67 | 0.93957  | 0.008644 | 0.090537 | 13905.6 | 8794.85 | 7715.88 | 4089.32 | 5343.16 | 6427.16 |
| ENSMUSG00000032093 | 6_Cd3e    | 5.56316 | 1.79608  | 0.086325 | 0.398033 | 3.03373 | 13.602  | 9.30745 | 1.65058 | 3.43391 | 2.35126 |
| ENSMUSG00000032094 | 7_Cd3d    | 5.25232 | 4.06566  | 0.013825 | 0.126103 | 2.02249 | 22.6701 | 5.17081 | 1.65058 | 0       | 0       |
| ENSMUSG00000032096 | 15_Arcn1  | 6743.75 | 0.38278  | 0.31419  | 0.695638 | 11435.2 | 6141.32 | 5322.83 | 5060.69 | 6416.26 | 6086.23 |
| ENSMUSG00000032097 | 9_Ddx6    | 6810.38 | 0.38874  | 0.30796  | 0.690547 | 11731.4 | 5779.73 | 5655.83 | 5315.71 | 6233.4  | 6146.18 |
| ENSMUSG00000032101 | 6_Ddx25   | 11.5679 | -2.8572  | 0.001087 | 0.020854 | 4.04498 | 3.40051 | 1.03416 | 28.8852 | 21.4619 | 10.5807 |
| ENSMUSG00000032103 | 10_Pus3   | 228.618 | 0.00957  | 0.984305 | 0.994848 | 395.397 | 141.688 | 150.988 | 202.197 | 281.58  | 199.857 |
| ENSMUSG00000032105 | 4_Pdzd3   | 4.88775 | 0.48537  | 0.633525 | 0.88353  | 2.02249 | 6.80102 | 8.27329 | 4.95175 | 2.57543 | 4.70251 |
| ENSMUSG00000032109 | 14_Nlr1   | 456.472 | 0.81828  | 0.244848 | 0.6364   | 79.8883 | 940.807 | 727.016 | 344.147 | 279.005 | 367.972 |
| ENSMUSG00000032110 | 4_Acrv1   | 0.16854 | 1.1315   | 0.781553 | NA       | 1.01124 | 0       | 0       | 0       | 0       | 0       |
| ENSMUSG00000032112 | 9_Trappc1 | 933.46  | -0.06004 | 0.804889 | 0.942951 | 812.029 | 949.875 | 980.385 | 911.123 | 1023.3  | 924.043 |
| ENSMUSG00000032113 | 15_Chek1  | 308.214 | 1.18774  | 0.020275 | 0.164416 | 733.152 | 299.245 | 252.335 | 118.017 | 213.761 | 232.774 |
| ENSMUSG00000032114 | 8_Slc37a4 | 206.806 | -0.30248 | 0.455044 | 0.796201 | 104.158 | 197.23  | 254.404 | 245.937 | 227.496 | 211.613 |
| ENSMUSG00000032115 | 13_Hyout1 | 2327.97 | 0.44398  | 0.281991 | 0.668558 | 1398.55 | 3726.96 | 2924.61 | 1780.16 | 1901.53 | 2236.04 |
| ENSMUSG00000032116 | 17_Stt3a  | 4589.52 | 0.23206  | 0.522547 | 0.832206 | 6956.35 | 4346.98 | 3569.93 | 3341.61 | 4825.5  | 4496.78 |
| ENSMUSG00000032118 | 15_Fez1   | 208.245 | -1.52436 | 1.41E-05 | 0.000701 | 115.282 | 86.1462 | 120.997 | 369.731 | 333.948 | 223.369 |
| ENSMUSG00000032119 | 4_Hinfp   | 276.375 | 0.37255  | 0.258062 | 0.648822 | 215.395 | 371.789 | 348.512 | 238.509 | 239.515 | 244.531 |
| ENSMUSG00000032120 | 10_C2cd2  | 218.621 | -0.69134 | 0.220051 | 0.611263 | 62.6971 | 233.502 | 205.798 | 416.773 | 206.034 | 186.925 |
| ENSMUSG00000032121 | 8_Tmem2   | 324.272 | -0.38276 | 0.186896 | 0.573937 | 342.812 | 233.502 | 267.848 | 362.303 | 347.683 | 391.484 |
| ENSMUSG00000032122 | 14_Slc37e | 163.722 | -0.235   | 0.522623 | 0.832206 | 108.203 | 202.897 | 140.646 | 194.769 | 188.865 | 146.953 |
| ENSMUSG00000032123 | 4_Dpagt1  | 540.413 | 0.22796  | 0.568246 | 0.852443 | 316.519 | 769.648 | 662.898 | 467.941 | 476.455 | 549.018 |
| ENSMUSG00000032125 | 19_Robo4  | 88.3895 | -0.33718 | 0.452225 | 0.794408 | 42.4723 | 78.2117 | 113.758 | 109.764 | 94.4325 | 91.699  |
| ENSMUSG00000032126 | 15_Hmbs   | 544.481 | 0.13898  | 0.682169 | 0.902515 | 373.149 | 681.235 | 657.727 | 527.362 | 480.747 | 546.667 |
| ENSMUSG00000032127 | 8_Vps11   | 1141.97 | 0.08131  | 0.850671 | 0.957445 | 551.128 | 1513.23 | 1458.17 | 1151.28 | 1025.88 | 1152.12 |
| ENSMUSG00000032128 | 14_Robo3  | 12.3704 | -0.92889 | 0.216724 | 0.607835 | 4.04498 | 11.335  | 10.3416 | 25.5841 | 11.1602 | 11.7563 |
| ENSMUSG00000032131 | 15_Abcb4  | 82.0108 | -1.22615 | 0.026153 | 0.194332 | 22.2474 | 74.8112 | 50.6739 | 166.709 | 104.734 | 72.8889 |
| ENSMUSG00000032134 | 6_Muc16   | 7.38094 | 0.03267  | 0.970739 | 0.992167 | 6.06747 | 6.80102 | 9.30745 | 6.60234 | 2.57543 | 12.9319 |
| ENSMUSG00000032135 | 14_Mcam   | 294.153 | -0.46411 | 0.211432 | 0.602834 | 156.743 | 295.844 | 289.565 | 396.14  | 346.825 | 279.799 |
| ENSMUSG00000032171 | 6_Pin1    | 556.85  | -0.15779 | 0.744322 | 0.923571 | 220.451 | 708.439 | 650.488 | 684.993 | 439.54  | 637.19  |
| ENSMUSG00000032172 | 7_Olfm2   | 37.8041 | -0.34869 | 0.579296 | 0.858815 | 9.1012  | 44.2066 | 46.5373 | 45.3911 | 36.9145 | 44.6739 |
| ENSMUSG00000032174 | 4_Icam5   | 2.59839 | 1.66927  | 0.291824 | 0.676701 | 0       | 5.66751 | 6.20497 | 0.87529 | 1.71695 | 1.17563 |
| ENSMUSG00000032175 | 10_Tyk2   | 713.793 | 0.42659  | 0.387554 | 0.752117 | 308.43  | 1055.29 | 1092.07 | 676.74  | 536.548 | 613.678 |
| ENSMUSG00000032177 | 16_Pde4a  | 239.103 | -0.13223 | 0.745579 | 0.924182 | 124.383 | 293.577 | 266.814 | 279.774 | 245.524 | 224.545 |
| ENSMUSG00000032178 | 13_Ilf3   | 1617.83 | 0.22538  | 0.434684 | 0.783019 | 1313.61 | 1896.35 | 2021.79 | 1401.35 | 1490.32 | 1583.57 |
| ENSMUSG00000032179 | 7_Bmp5    | 15.2665 | -0.76155 | 0.332229 | 0.711572 | 21.2361 | 2.26701 | 10.3416 | 21.4576 | 16.3111 | 19.9857 |
| ENSMUSG00000032180 | 10_Tmed1  | 310.224 | -0.62745 | 0.21263  | 0.612307 | 92.0232 | 275.441 | 364.025 | 440.706 | 295.316 | 393.835 |
| ENSMUSG00000032181 | 6_Scg3    | 20.5661 | -1.61877 | 0.041693 | 0.258544 | 16.1799 | 9.06802 | 5.17081 | 48.6922 | 36.056  | 8.22939 |
| ENSMUSG00000032182 | 14_Yipf2  | 692.9   | 0.01917  | 0.960639 | 0.989899 | 385.284 | 825.19  | 882.14  | 720.48  | 641.282 | 703.025 |
| ENSMUSG00000032184 | 4_Lysmd2  | 147.406 | 0.23674  | 0.536112 | 0.838659 | 226.519 | 113.35  | 138.578 | 144.426 | 141.649 | 119.914 |
| ENSMUSG00000032185 | 14_Carm1  | 604.061 | -0.0101  | 0.984123 | 0.994805 | 211.35  | 825.19  | 769.416 | 618.969 | 575.18  | 624.258 |
| ENSMUSG00000032186 | 14_Tmod1  | 165.725 | -0.89778 | 0.122122 | 0.475275 | 214.384 | 53.2746 | 79.6304 | 291.328 | 224.062 | 131.67  |
| ENSMUSG00000032187 | 16_Smarc  | 2426.45 | 0.53935  | 0.317973 | 0.698985 | 900.007 | 4108.95 | 3615.43 | 2037.65 | 1605.35 | 2291.3  |
| ENSMUSG00000032191 | 5_Bcl2l10 | 0.75719 | -2.96484 | 0.263722 | NA       | 0       | 0       | 0       | 1.65058 | 1.71695 | 1.17563 |
| ENSMUSG00000032192 | 8_Gnb5    | 245.025 | -1.09449 | 0.026613 | 0.196428 | 71.7983 | 204.031 | 193.388 | 474.543 | 271.279 | 255.111 |
| ENSMUSG00000032193 | 8_Ldlr    | 6904.8  | 0.61238  | 0.094165 | 0.417342 | 5088.58 | 10500.8 | 9456.37 | 5298.38 | 4732.78 | 6351.92 |
| ENSMUSG00000032194 | 8_Kank2   | 719.307 | -0.78318 | 0.006972 | 0.077887 | 549.106 | 461.336 | 576.028 | 1054.72 | 956.343 | 718.309 |
| ENSMUSG00000032198 | 8_Dock6   | 675.562 | 0.26659  | 0.628299 | 0.881165 | 218.429 | 970.278 | 1024.85 | 707.276 | 549.425 | 583.111 |
| ENSMUSG00000032199 | 12_Polr2n | 4096.27 | -0.05985 | 0.826175 | 0.950197 | 4991.5  | 3500.26 | 3542    | 4197.44 | 4122.41 | 4224.03 |
| ENSMUSG00000032202 | 11_Rab27  | 2016.58 | -0.06269 | 0.853338 | 0.958298 | 2739.46 | 1508.69 | 1670.17 | 2059.1  | 2290.42 | 1831.63 |
| ENSMUSG00000032204 | 13_Aqp9   | 5.90923 | 0.00662  | 0.994202 | 0.998043 | 7.07871 | 5.66751 | 5.17081 | 6.60234 | 8.58477 | 2.35126 |
| ENSMUSG00000032207 | 9_Lipc    | 12.5128 | -1.92978 | 0.008521 | 0.089671 | 6.06747 | 2.26701 | 7.23913 | 23.9335 | 21.4619 | 14.1075 |
| ENSMUSG00000032212 | 9_Sltm    | 2127.7  | 0.15032  | 0.62832  | 0.881165 | 2695.98 | 2209.2  | 1809.78 | 1564.75 | 2236.33 | 2250.15 |
| ENSMUSG00000032215 | 15_Rsl24c | 901.929 | 0.18562  | 0.522754 | 0.832206 | 1190.23 | 927.205 | 762.177 | 806.311 | 907.41  | 818.237 |

|                    |            |         |          |          |          |         |         |         |         |         |         |
|--------------------|------------|---------|----------|----------|----------|---------|---------|---------|---------|---------|---------|
| ENSMUSG00000032216 | 14_Nedd4   | 17860.1 | -0.10533 | 0.719764 | 0.913031 | 22142.2 | 14052   | 15430.7 | 17209.8 | 19713.2 | 18612.5 |
| ENSMUSG00000032217 | 12_Rnf11   | 1292.09 | 0.52291  | 0.038559 | 0.246603 | 1732.26 | 1461.09 | 1377.5  | 951.562 | 1120.31 | 1109.79 |
| ENSMUSG00000032218 | 6_Ccnb2    | 354.281 | 0.48455  | 0.156182 | 0.533493 | 287.193 | 505.542 | 446.758 | 248.413 | 303.901 | 333.878 |
| ENSMUSG00000032220 | 9_Myo1e    | 2911.76 | 0.59583  | 0.055654 | 0.308674 | 2828.45 | 4023.94 | 3660.93 | 1807.39 | 2311.88 | 2837.97 |
| ENSMUSG00000032221 | 14_Mns1    | 40.3525 | -0.21006 | 0.663449 | 0.896273 | 43.4835 | 27.2041 | 41.3665 | 27.2346 | 55.801  | 47.0251 |
| ENSMUSG00000032224 | 14_Fam8    | 50.5595 | -0.34145 | 0.423713 | 0.775388 | 58.6522 | 44.2066 | 31.0248 | 52.8187 | 66.1027 | 50.552  |
| ENSMUSG00000032226 | 5_Gcnt3    | 5.02    | 0.45062  | 0.69354  | 0.905638 | 13.1462 | 1.1335  | 3.10248 | 5.77705 | 3.43391 | 3.52688 |
| ENSMUSG00000032228 | 16_Tcf12   | 3222.66 | 0.1887   | 0.579024 | 0.858589 | 4797.34 | 2762.35 | 2739.49 | 2680.55 | 3367.81 | 2988.45 |
| ENSMUSG00000032231 | 14_Anxa2   | 61180.5 | 0.24458  | 0.564202 | 0.850768 | 32058.5 | 89921.9 | 77082.3 | 54078.1 | 52852.1 | 61090.3 |
| ENSMUSG00000032232 | 14_Cgnl1   | 4856.74 | -0.2649  | 0.285892 | 0.671835 | 3821.49 | 4461.47 | 4953.63 | 5734.96 | 5232.42 | 4936.46 |
| ENSMUSG00000032235 | 15_Ice2    | 504.253 | 0.21684  | 0.6196   | 0.877704 | 878.771 | 372.922 | 374.366 | 387.062 | 546.85  | 465.549 |
| ENSMUSG00000032238 | 17_Rora    | 3028.56 | 0.13406  | 0.748514 | 0.924799 | 5133.08 | 2050.51 | 2323.76 | 2854.69 | 2942    | 2867.36 |
| ENSMUSG00000032239 | 8_Rp9      | 625.613 | -0.15299 | 0.600577 | 0.869763 | 447.981 | 644.963 | 684.615 | 696.547 | 622.396 | 657.176 |
| ENSMUSG00000032243 | 8_Iitga11  | 303.284 | -0.31503 | 0.534679 | 0.838255 | 108.203 | 299.245 | 403.323 | 316.912 | 265.269 | 426.753 |
| ENSMUSG00000032244 | 8_Fem1b    | 2678.84 | 0.23479  | 0.538034 | 0.839833 | 4357.45 | 2256.8  | 2074.53 | 2140.81 | 2698.19 | 2545.23 |
| ENSMUSG00000032245 | 12_Clnb    | 719.705 | -0.02004 | 0.954535 | 0.988723 | 454.049 | 770.782 | 919.37  | 770.823 | 669.612 | 733.592 |
| ENSMUSG00000032246 | 12_Calm1   | 159.171 | -1.26953 | 0.006218 | 0.072341 | 129.439 | 54.4081 | 96.177  | 292.153 | 242.949 | 139.9   |
| ENSMUSG00000032249 | 14_Anp32   | 8409.13 | -0.10582 | 0.692143 | 0.905638 | 9645.25 | 7229.48 | 7427.35 | 7790.76 | 8646.58 | 9715.39 |
| ENSMUSG00000032251 | 12_Irak1b  | 92.4155 | -0.63575 | 0.233626 | 0.625443 | 123.372 | 29.4711 | 64.118  | 113.89  | 120.187 | 103.455 |
| ENSMUSG00000032252 | 14_Glce    | 1442.98 | 0.1552   | 0.658228 | 0.894702 | 2150.92 | 1152.77 | 1257.54 | 1176.04 | 1462.84 | 1457.78 |
| ENSMUSG00000032253 | 13_Phip    | 3672.31 | 0.74596  | 0.133011 | 0.496157 | 8309.39 | 2823.56 | 2670.21 | 2286.06 | 3145.46 | 2799.17 |
| ENSMUSG00000032254 | 9_Kif23    | 1191.31 | 0.41519  | 0.200513 | 0.592148 | 1545.18 | 1311.46 | 1227.55 | 706.45  | 1180.41 | 1176.8  |
| ENSMUSG00000032257 | 5_Ank11    | 954.835 | 0.52055  | 0.25801  | 0.648822 | 481.352 | 1603.91 | 1290.63 | 773.299 | 789.799 | 790.022 |
| ENSMUSG00000032258 | 15_Lca5    | 184.483 | -0.29493 | 0.387769 | 0.752312 | 222.474 | 147.355 | 127.202 | 203.847 | 212.044 | 193.979 |
| ENSMUSG00000032259 | 7_Drd2     | 7.46148 | -4.35146 | 0.000753 | 0.015902 | 1.01124 | 0       | 1.03416 | 19.807  | 11.1602 | 11.7563 |
| ENSMUSG00000032261 | 16_Sh3bg   | 2649.31 | 0.04465  | 0.896493 | 0.97156  | 3785.09 | 2171.79 | 2113.83 | 2309.17 | 2867.31 | 2648.69 |
| ENSMUSG00000032262 | 13_Elov14  | 239.083 | -1.3262  | 0.04234  | 0.261021 | 287.193 | 55.5416 | 66.1863 | 419.249 | 401.767 | 204.559 |
| ENSMUSG00000032263 | 14_Bckdh   | 471.431 | -0.10611 | 0.726556 | 0.916094 | 572.364 | 362.721 | 427.109 | 459.688 | 539.982 | 466.724 |
| ENSMUSG00000032264 | 8_Zw10     | 674.551 | 0.26785  | 0.310039 | 0.692089 | 728.096 | 778.716 | 704.264 | 525.711 | 716.828 | 593.692 |
| ENSMUSG00000032265 | 14_Fam4f   | 3057.61 | 1.00348  | 0.009534 | 0.097183 | 6088.7  | 3354.04 | 2797.41 | 1715.78 | 2380.56 | 2009.15 |
| ENSMUSG00000032267 | 7_Usp28    | 654.519 | 0.30463  | 0.268859 | 0.656292 | 855.513 | 613.225 | 701.162 | 529.838 | 639.565 | 587.814 |
| ENSMUSG00000032268 | 13_Tmprs   | 4.57279 | -2.10143 | 0.144459 | 0.514298 | 0       | 0       | 5.17081 | 11.5541 | 6.00934 | 4.70251 |
| ENSMUSG00000032269 | 7_Htr3a    | 54.6876 | -2.22253 | 2.36E-06 | 0.000164 | 20.2249 | 17.0025 | 20.6832 | 127.92  | 63.5273 | 78.7671 |
| ENSMUSG00000032271 | 13_Nnmt    | 30.1623 | 0.20212  | 0.6942   | 0.905638 | 33.3711 | 39.6726 | 23.7857 | 18.1564 | 37.773  | 28.2151 |
| ENSMUSG00000032274 | 8_Cyp19a   | 0.16854 | 1.1315   | 0.781553 | NA       | 1.01124 | 0       | 0       | 0       | 0       | 0       |
| ENSMUSG00000032278 | 11_Paqr5   | 3540.21 | 0.47362  | 0.086907 | 0.399375 | 3723.4  | 4205.3  | 4418.97 | 2585.64 | 2655.27 | 3652.68 |
| ENSMUSG00000032279 | 10_Ildh3a  | 1815.14 | 0.12526  | 0.679716 | 0.902041 | 2497.77 | 1634.51 | 1549.17 | 1684.42 | 1765.03 | 1759.91 |
| ENSMUSG00000032280 | 16_Tle3    | 1761.61 | 0.46734  | 0.231324 | 0.622696 | 1129.56 | 2637.66 | 2366.16 | 1492.13 | 1310.04 | 1634.12 |
| ENSMUSG00000032281 | 11_Acsbg   | 310.61  | 0.41151  | 0.401998 | 0.76065  | 139.552 | 457.935 | 466.407 | 292.153 | 226.638 | 280.975 |
| ENSMUSG00000032285 | 15_Dnaj1a  | 1302.7  | 0.18287  | 0.546051 | 0.842635 | 1752.49 | 1144.84 | 1257.54 | 1081.96 | 1170.96 | 1408.4  |
| ENSMUSG00000032288 | 9_Imp3     | 502.07  | -0.13019 | 0.585807 | 0.862122 | 500.566 | 456.802 | 480.885 | 557.072 | 492.766 | 524.33  |
| ENSMUSG00000032289 | 15_Thsd4   | 620.789 | -0.39558 | 0.158973 | 0.537367 | 498.543 | 491.94  | 618.429 | 831.895 | 667.895 | 616.029 |
| ENSMUSG00000032290 | 6_Ptpn9    | 1972.88 | 0.38371  | 0.189783 | 0.578028 | 2715.19 | 2110.58 | 1874.93 | 1417.03 | 1839.72 | 1879.83 |
| ENSMUSG00000032291 | 8_Crabp1   | 31.3395 | -0.04904 | 0.944189 | 0.986451 | 7.07871 | 43.0731 | 42.4006 | 42.9152 | 23.1789 | 29.3907 |
| ENSMUSG00000032292 | 8_Nr2e3    | 146.014 | -2.74471 | 1.57E-05 | 0.000765 | 49.551  | 49.8741 | 14.4783 | 438.23  | 214.619 | 109.333 |
| ENSMUSG00000032293 | 7_Ireb2    | 2475.14 | 0.55289  | 0.268688 | 0.656292 | 5350.49 | 1728.59 | 1751.87 | 1705.05 | 2290.42 | 2024.43 |
| ENSMUSG00000032294 | 16_Pkm     | 14320.7 | 0.44146  | 0.45674  | 0.797055 | 4107.67 | 25214.8 | 20162   | 14658.8 | 9442.39 | 12338.2 |
| ENSMUSG00000032295 | 15_Man2c   | 1012.75 | 0.30315  | 0.570543 | 0.853943 | 354.947 | 1407.81 | 1593.64 | 1034.09 | 798.384 | 887.599 |
| ENSMUSG00000032297 | 11_Celf6   | 5.35138 | -1.71224 | 0.12121  | 0.473321 | 2.02249 | 4.53401 | 1.03416 | 14.03   | 3.43391 | 7.05377 |
| ENSMUSG00000032298 | 13_Neil1   | 143.399 | -0.05613 | 0.901524 | 0.973437 | 66.7421 | 158.69  | 196.491 | 142.776 | 151.092 | 144.602 |
| ENSMUSG00000032299 | 9_Comm1d   | 353.854 | -0.11896 | 0.835057 | 0.952327 | 95.057  | 442.066 | 480.885 | 451.435 | 324.504 | 329.176 |
| ENSMUSG00000032300 | 6_170001   | 281.257 | 0.77337  | 0.187809 | 0.57551  | 98.0907 | 538.414 | 428.143 | 230.257 | 152.809 | 239.828 |
| ENSMUSG00000032301 | 13_Psma4   | 3606.68 | 0.30633  | 0.407049 | 0.764774 | 5729.71 | 3465.12 | 2769.48 | 2705.31 | 3729.22 | 3241.21 |
| ENSMUSG00000032303 | 6_Chra3a   | 2.31718 | 0.04799  | 0.979398 | 0.993796 | 0.66747 | 0       | 1.03416 | 1.65058 | 5.15086 | 0       |
| ENSMUSG00000032305 | 14_Fam2f   | 826.46  | -0.00575 | 0.98081  | 0.993796 | 749.332 | 860.329 | 864.559 | 801.359 | 793.233 | 889.95  |
| ENSMUSG00000032306 | 14_Mpi     | 382.871 | -0.19824 | 0.557173 | 0.848061 | 235.62  | 411.462 | 422.972 | 409.345 | 427.522 | 390.308 |
| ENSMUSG00000032307 | 16_Ube2q   | 3037.55 | 0.64634  | 0.193898 | 0.583952 | 6647.92 | 2366.75 | 2105.55 | 1851.13 | 2656.99 | 2596.96 |
| ENSMUSG00000032308 | 8_Ulk3     | 644.999 | 0.40148  | 0.175149 | 0.558565 | 557.196 | 787.785 | 857.32  | 530.663 | 524.529 | 612.502 |
| ENSMUSG00000032309 | 15_Fbxo2   | 624.89  | 0.0211   | 0.943979 | 0.986451 | 803.939 | 522.545 | 561.55  | 562.849 | 641.282 | 657.176 |
| ENSMUSG00000032311 | 17_Nrg4    | 38.9557 | 0.02073  | 0.962005 | 0.990106 | 34.3823 | 43.0731 | 40.3323 | 29.7105 | 49.7917 | 36.4445 |
| ENSMUSG00000032312 | 6_Csk      | 2246.02 | 0.48988  | 0.392234 | 0.754612 | 717.983 | 3597.74 | 3555.45 | 1997.21 | 1419.92 | 2187.84 |
| ENSMUSG00000032313 | 11_AI118f  | 7.73341 | -0.82887 | 0.39979  | 0.759207 | 6.06747 | 4.53401 | 6.20497 | 21.4576 | 3.43391 | 4.70251 |
| ENSMUSG00000032314 | 14_Etfa    | 2993.2  | 0.34033  | 0.384235 | 0.750464 | 5116.9  | 2482.37 | 2434.42 | 2295.14 | 2984.07 | 2646.34 |
| ENSMUSG00000032315 | 5_Cyp1a1   | 3.00077 | -1.68156 | 0.350397 | 0.727131 | 0       | 2.26701 | 2.06832 | 1.65058 | 12.0187 | 0       |
| ENSMUSG00000032316 | 7_Clk3     | 759.317 | 0.17969  | 0.647178 | 0.890168 | 435.846 | 971.412 | 1012.44 | 689.119 | 709.96  | 737.119 |
| ENSMUSG00000032318 | 12_Isl2    | 0       | NA       | NA       | NA       | 0       | 0       | 0       | 0       | 0       | 0       |
| ENSMUSG00000032320 | 7_Rcn2     | 1463.96 | -0.10064 | 0.822978 | 0.948912 | 2386.54 | 860.329 | 991.761 | 1440.96 | 1685.19 | 1418.98 |
| ENSMUSG00000032322 | 14_Pstpip  | 109.253 | 1.28725  | 0.043463 | 0.264705 | 39.4385 | 278.842 | 146.851 | 73.451  | 55.801  | 61.1326 |
| ENSMUSG00000032323 | 13_Cyp11   | 7.84058 | 0.77616  | 0.402265 | 0.76099  | 7.07871 | 13.602  | 9.30745 | 10.7288 | 5.15086 | 1.17563 |
| ENSMUSG00000032324 | 10_Tspan   | 1620.83 | -0.87047 | 0.00492  | 0.061639 | 1439    | 914.737 | 1084.84 | 2411.5  | 2125.59 | 1749.33 |
| ENSMUSG00000032327 | 14_Stra6   | 323.245 | -1.65271 | 0.007407 | 0.08138  | 49.551  | 138.287 | 280.258 | 755.143 | 358.843 | 357.391 |
| ENSMUSG00000032328 | 12_Tmem    | 5069.09 | 0.52461  | 0.322995 | 0.703441 | 11409.9 | 3249.75 | 3282.43 | 3834.31 | 4723.34 | 3914.84 |
| ENSMUSG00000032329 | 3_Hmg20i   | 1174.12 | -0.03378 | 0.876685 | 0.965114 | 1159.9  | 1150.51 | 1170.67 | 1173.57 | 1193.28 | 1196.79 |
| ENSMUSG00000032330 | 6_Cox7a2   | 2402.51 | -0.36679 | 0.175005 | 0.558498 | 1656.42 | 2393.96 | 2246.2  | 2780.41 | 2772.88 | 2565.22 |
| ENSMUSG00000032332 | 17_Col12a1 | 11463.9 | -0.52288 | 0.122942 | 0.477042 | 11782   | 6716    | 9728.36 | 10548.9 | 15824.3 | 14183.9 |

|                    |            |         |          |          |          |         |         |         |         |         |         |
|--------------------|------------|---------|----------|----------|----------|---------|---------|---------|---------|---------|---------|
| ENSMUSG00000032333 | 5_Stom1    | 277.695 | 0.19733  | 0.739076 | 0.921641 | 80.8995 | 370.655 | 438.484 | 323.515 | 184.573 | 268.043 |
| ENSMUSG00000032334 | 9_Lox1     | 538.624 | -0.83356 | 0.058005 | 0.31576  | 196.181 | 409.195 | 556.379 | 837.672 | 565.736 | 666.581 |
| ENSMUSG00000032336 | 17_Nptrn   | 4871.79 | 0.46543  | 0.238766 | 0.630726 | 8769.51 | 4138.42 | 4044.61 | 3670.08 | 4486.4  | 4121.75 |
| ENSMUSG00000032338 | 8_Hcn4     | 5.55034 | -2.12246 | 0.048282 | 0.282739 | 3.03373 | 1.1335  | 2.06832 | 12.3794 | 11.1602 | 3.52688 |
| ENSMUSG00000032340 | 7_Neo1     | 2030.68 | -0.25771 | 0.284456 | 0.670663 | 2028.56 | 1631.11 | 1889.41 | 2061.58 | 2303.29 | 2270.14 |
| ENSMUSG00000032342 | 13_Mto1    | 297.105 | 0.00713  | 0.980284 | 0.993796 | 311.463 | 315.114 | 266.814 | 241.811 | 338.24  | 309.19  |
| ENSMUSG00000032343 | 15_Impg1   | 70.5203 | -2.14932 | 0.009182 | 0.094481 | 43.4835 | 27.2041 | 7.23913 | 203.847 | 120.187 | 21.1613 |
| ENSMUSG00000032344 | 17_Mb21c   | 300.226 | 1.26357  | 0.000768 | 0.016103 | 591.578 | 355.92  | 323.693 | 137.824 | 185.431 | 206.91  |
| ENSMUSG00000032346 | 7_Ooep     | 37.4951 | -0.51349 | 0.243259 | 0.634745 | 39.4385 | 27.2041 | 25.854  | 47.0417 | 36.056  | 49.3764 |
| ENSMUSG00000032348 | 5_Gsta4    | 95510.1 | -0.09055 | 0.742968 | 0.923215 | 78897.3 | 96613   | 102030  | 80115.3 | 104641  | 110764  |
| ENSMUSG00000032349 | 13_Elov15  | 2302.69 | 0.46231  | 0.24674  | 0.638314 | 4086.44 | 1879.35 | 2039.37 | 1572.18 | 2060.34 | 2178.44 |
| ENSMUSG00000032350 | 8_Gclc     | 1784.03 | 0.26922  | 0.40739  | 0.764844 | 2577.66 | 1568.77 | 1703.26 | 1337.8  | 1809.67 | 1707.01 |
| ENSMUSG00000032352 | 15_Lrrc1   | 929.014 | 0.33969  | 0.197401 | 0.589685 | 1231.7  | 924.938 | 956.599 | 788.154 | 789.799 | 882.896 |
| ENSMUSG00000032353 | 8_Tmed3    | 1949.02 | -0.08788 | 0.786121 | 0.936317 | 1260.01 | 2212.6  | 2196.56 | 1951.82 | 2034.59 | 2038.54 |
| ENSMUSG00000032355 | 16_Mlip    | 28.358  | -0.48318 | 0.532094 | 0.837483 | 53.5959 | 7.93452 | 9.30745 | 35.4876 | 30.9052 | 32.9176 |
| ENSMUSG00000032356 | 12_Rasgr1  | 4352.99 | 0.11501  | 0.701437 | 0.906628 | 3602.05 | 4345.85 | 5631.01 | 3553.71 | 4308.7  | 4676.65 |
| ENSMUSG00000032357 | 12_Tinag   | 8.76705 | 0.02761  | 0.977909 | 0.993796 | 19.2136 | 1.1335  | 6.20497 | 10.7288 | 9.44325 | 5.87814 |
| ENSMUSG00000032358 | 12_Fam8c   | 1297.47 | 0.48909  | 0.163051 | 0.541016 | 2020.47 | 1413.48 | 1111.72 | 836.021 | 1231.06 | 1172.1  |
| ENSMUSG00000032359 | 14_Ctsh    | 3103    | 0.11597  | 0.592169 | 0.865686 | 3255.2  | 3346.1  | 3081.8  | 2952.07 | 3070.77 | 2912.03 |
| ENSMUSG00000032360 | 16_Hcrrt2  | 0.50054 | 1.08003  | 0.733943 | NA       | 1.01124 | 1.1335  | 0       | 0       | 0.85848 | 0       |
| ENSMUSG00000032363 | 15_Adam1   | 24.3171 | -0.25106 | 0.697078 | 0.905638 | 7.07871 | 30.6046 | 28.9565 | 27.2346 | 21.4619 | 30.5663 |
| ENSMUSG00000032366 | 15_Tpm1    | 3472.7  | -0.90771 | 0.00772  | 0.083871 | 3150.03 | 1619.78 | 2474.75 | 5087.1  | 4480.39 | 4024.17 |
| ENSMUSG00000032368 | 14_Zic1    | 468.351 | -1.02134 | 0.053101 | 0.299403 | 550.117 | 139.421 | 237.857 | 788.979 | 625.83  | 467.9   |
| ENSMUSG00000032369 | 13_Plsr1   | 1343.12 | 0.67553  | 0.034135 | 0.22886  | 1641.25 | 1936.02 | 1378.54 | 775.775 | 1271.4  | 1055.71 |
| ENSMUSG00000032370 | 7_Lactb    | 289.059 | 0.09577  | 0.79186  | 0.937626 | 424.723 | 227.834 | 243.028 | 250.889 | 279.863 | 308.014 |
| ENSMUSG00000032372 | 14_Plsr2   | 121.705 | 0.872    | 0.088638 | 0.404847 | 273.036 | 100.882 | 98.2453 | 106.463 | 66.9612 | 84.6452 |
| ENSMUSG00000032373 | 14_Car12   | 906.595 | -0.14097 | 0.658999 | 0.89471  | 1128.55 | 710.706 | 747.699 | 1105.89 | 834.44  | 912.287 |
| ENSMUSG00000032374 | 14_Plod2   | 272.064 | -0.57955 | 0.295078 | 0.679514 | 421.689 | 128.086 | 104.45  | 292.979 | 344.249 | 340.932 |
| ENSMUSG00000032375 | 15_Aph1b   | 379.136 | -0.23785 | 0.587532 | 0.862925 | 555.173 | 193.829 | 294.736 | 420.899 | 438.682 | 371.498 |
| ENSMUSG00000032376 | 12_Usr3    | 1290.95 | 0.45761  | 0.140173 | 0.507375 | 1942.6  | 1301.26 | 1237.89 | 947.436 | 1207.88 | 1108.62 |
| ENSMUSG00000032377 | 8_Plsr4    | 1903.11 | 0.66568  | 0.108608 | 0.448453 | 3689.02 | 1568.77 | 1745.66 | 1231.34 | 1682.61 | 1501.28 |
| ENSMUSG00000032380 | 8_Dap1c    | 114.375 | 0.62616  | 0.057752 | 0.314874 | 155.732 | 136.02  | 124.099 | 80.0534 | 79.8384 | 110.509 |
| ENSMUSG00000032381 | 5_Fam96a   | 888.893 | 0.02179  | 0.940866 | 0.985839 | 1131.58 | 824.057 | 731.152 | 837.672 | 958.919 | 849.979 |
| ENSMUSG00000032382 | 14_Snr1    | 3375.27 | -0.05149 | 0.820303 | 0.948338 | 3386.66 | 3490.06 | 3068.36 | 3202.96 | 3588.43 | 3515.13 |
| ENSMUSG00000032383 | 6_Ppib     | 3676.8  | 0.02466  | 0.935899 | 0.984134 | 2640.36 | 4427.46 | 4057.02 | 3835.96 | 3349.78 | 3750.25 |
| ENSMUSG00000032384 | 15_Csnk1   | 1196.27 | 0.5293   | 0.083627 | 0.390586 | 1837.43 | 1260.46 | 1141.71 | 882.238 | 1035.32 | 1020.44 |
| ENSMUSG00000032386 | 15_Trip4   | 1152.01 | 0.32677  | 0.400244 | 0.759569 | 1948.67 | 1006.55 | 890.413 | 924.327 | 1135.77 | 1006.34 |
| ENSMUSG00000032387 | 14_Rbp1    | 134.13  | -1.0314  | 0.00733  | 0.80791  | 83.9333 | 64.6097 | 115.826 | 229.431 | 151.092 | 159.885 |
| ENSMUSG00000032388 | 6_Spg21    | 3562.63 | 0.19575  | 0.461478 | 0.799907 | 4560.71 | 3559.2  | 3291.74 | 3023.87 | 3518.04 | 3422.25 |
| ENSMUSG00000032392 | 10_Parp1   | 269.642 | -0.12588 | 0.660727 | 0.895438 | 239.665 | 245.97  | 287.497 | 255.015 | 255.826 | 333.878 |
| ENSMUSG00000032393 | 14_Dpp8    | 3686.66 | 0.20535  | 0.598309 | 0.868728 | 5927.91 | 3021.92 | 2895.65 | 2735.02 | 3913.8  | 3625.64 |
| ENSMUSG00000032394 | 5_Igdc3    | 2.14927 | -4.47828 | 0.026593 | 0.196428 | 0       | 0       | 0       | 7.42763 | 4.29238 | 1.17563 |
| ENSMUSG00000032396 | 17_Dis3l   | 563.42  | 0.35818  | 0.158014 | 0.53609  | 611.803 | 702.772 | 584.301 | 443.182 | 517.662 | 520.803 |
| ENSMUSG00000032397 | 6_Tipin    | 717.304 | 0.59121  | 0.156398 | 0.533889 | 1333.83 | 688.036 | 564.652 | 449.784 | 655.018 | 612.502 |
| ENSMUSG00000032398 | 6_Snapc5   | 636.073 | -0.20994 | 0.583059 | 0.860399 | 879.783 | 440.933 | 448.826 | 631.349 | 788.94  | 626.61  |
| ENSMUSG00000032399 | 7_Rpl4     | 33284.8 | -0.26125 | 0.340588 | 0.719259 | 23498.3 | 33068.8 | 34271.1 | 34084.6 | 36541.9 | 38244.3 |
| ENSMUSG00000032400 | 17_Zw1ch   | 308.909 | 1.07116  | 0.0026   | 0.039405 | 558.207 | 370.655 | 326.795 | 159.281 | 238.657 | 199.857 |
| ENSMUSG00000032401 | 15_Lclt    | 146.106 | -4.49969 | 1.15E-11 | 2.94E-09 | 5.05622 | 12.4685 | 19.6491 | 520.759 | 158.818 | 159.885 |
| ENSMUSG00000032402 | 12_Smad3   | 2147.3  | 0.18992  | 0.51364  | 0.828304 | 1730.24 | 2575.32 | 2559.55 | 1939.44 | 1852.59 | 2226.64 |
| ENSMUSG00000032403 | 8_230000   | 107.229 | -0.02623 | 0.95805  | 0.989261 | 185.058 | 72.5442 | 61.0155 | 108.113 | 107.31  | 109.333 |
| ENSMUSG00000032405 | 9_Pias1    | 1425.22 | 0.33264  | 0.197369 | 0.589685 | 1872.82 | 1472.42 | 1420.94 | 1171.92 | 1321.2  | 1292.01 |
| ENSMUSG00000032407 | 13_U2sur1  | 2468.36 | 0.53161  | 0.256759 | 0.648367 | 4968.24 | 1941.69 | 1843.91 | 1513.59 | 2243.2  | 2299.53 |
| ENSMUSG00000032409 | 14_Atr     | 1052.6  | 0.37042  | 0.436631 | 0.784325 | 2080.13 | 775.316 | 705.298 | 788.979 | 979.522 | 986.352 |
| ENSMUSG00000032410 | 13_Xrn1    | 2135.49 | 0.58905  | 0.128974 | 0.847604 | 3918.57 | 2006.3  | 1771.52 | 1575.48 | 1874.06 | 1667.04 |
| ENSMUSG00000032411 | 15_Tfdp2   | 843.712 | -0.0556  | 0.877766 | 0.965654 | 1157.87 | 538.414 | 785.963 | 911.948 | 862.769 | 805.305 |
| ENSMUSG00000032412 | 8_Atp1b3   | 11957.3 | 0.17651  | 0.622858 | 0.878814 | 18373.3 | 10130.1 | 9559.79 | 9794.57 | 12409.3 | 11476.5 |
| ENSMUSG00000032413 | 12_Rasa2   | 1259.15 | 0.50664  | 0.263526 | 0.652524 | 2499.8  | 969.145 | 964.873 | 890.49  | 1166.67 | 1063.94 |
| ENSMUSG00000032415 | 14_Ube2c   | 31.7837 | -0.02883 | 0.955284 | 0.98876  | 43.4835 | 22.6701 | 27.9224 | 21.4576 | 35.1976 | 39.9713 |
| ENSMUSG00000032417 | 10_Rwdd2   | 10.8642 | -0.6608  | 0.377309 | 0.746353 | 12.1349 | 9.06802 | 4.13665 | 11.5541 | 18.8865 | 9.40502 |
| ENSMUSG00000032418 | 15_Me1     | 692.242 | -0.4545  | 0.192313 | 0.581906 | 810.007 | 438.666 | 503.637 | 850.051 | 873.93  | 677.162 |
| ENSMUSG00000032419 | 8_Tbx18    | 21.3967 | 0.37746  | 0.592845 | 0.866044 | 46.5172 | 14.7355 | 11.3758 | 23.9335 | 18.8865 | 12.9319 |
| ENSMUSG00000032420 | 7_Nt5e     | 1442.79 | 0.99026  | 0.001326 | 0.024228 | 2485.64 | 1641.31 | 1630.87 | 830.244 | 1048.2  | 1020.44 |
| ENSMUSG00000032422 | 17_Snr14   | 1345.14 | 0.2772   | 0.515984 | 0.829959 | 2380.47 | 1059.83 | 981.419 | 1023.36 | 1366.7  | 1259.1  |
| ENSMUSG00000032423 | 12_Syncr1  | 4346.23 | 0.56617  | 0.228879 | 0.620047 | 8914.12 | 3620.41 | 3030.09 | 2783.71 | 4052.87 | 3676.19 |
| ENSMUSG00000032425 | 15_Zfp94a  | 566.811 | 0.36302  | 0.355574 | 0.730079 | 969.783 | 447.734 | 495.363 | 442.357 | 491.907 | 553.721 |
| ENSMUSG00000032431 | 6_Crtap    | 984.516 | -0.35487 | 0.225992 | 0.613668 | 638.095 | 998.616 | 955.565 | 1084.43 | 1110.01 | 1120.37 |
| ENSMUSG00000032434 | 8_Cmtm6    | 3048.28 | 0.64538  | 0.007241 | 0.080018 | 3771.94 | 4155.42 | 3229.69 | 2374.37 | 2423.48 | 2334.8  |
| ENSMUSG00000032435 | 8_Dync1li  | 1162.95 | 0.42868  | 0.104931 | 0.4404   | 1576.53 | 1280.86 | 1145.85 | 916.075 | 1047.34 | 1011.04 |
| ENSMUSG00000032436 | 16_Cmtm1   | 160.723 | 0.13273  | 0.821065 | 0.948338 | 47.5285 | 235.769 | 221.311 | 195.594 | 144.224 | 119.914 |
| ENSMUSG00000032437 | 9_Stt3b    | 2945.59 | 0.30266  | 0.34719  | 0.724592 | 4394.87 | 2783.88 | 2581.27 | 2346.31 | 2766.87 | 2800.35 |
| ENSMUSG00000032440 | 12_Tgfr2   | 2359.83 | 0.25183  | 0.35343  | 0.729327 | 3149.01 | 2213.73 | 2333.07 | 2281.93 | 2123.87 | 2057.35 |
| ENSMUSG00000032446 | 14_Eomes   | 10.198  | 2.89192  | 0.001076 | 0.020703 | 23.2586 | 21.5366 | 9.30745 | 2.47588 | 3.43391 | 1.17563 |
| ENSMUSG00000032449 | 13_Slc25a1 | 1992.26 | 0.047    | 0.91247  | 0.975485 | 3308.79 | 1306.93 | 1458.17 | 1757.87 | 2093.83 | 2027.96 |
| ENSMUSG00000032452 | 12_Clstrn2 | 172.836 | -0.74459 | 0.066232 | 0.341158 | 181.013 | 78.2117 | 128.236 | 257.491 | 195.733 | 196.33  |
| ENSMUSG00000032454 | 9_Rbp2     | 3580.44 | 0.18586  | 0.582702 | 0.860399 | 2466.42 | 4716.51 | 4249.37 | 3059.36 | 3425.32 | 3565.68 |

|                    |            |         |          |           |          |          |         |         |         |         |         |
|--------------------|------------|---------|----------|-----------|----------|----------|---------|---------|---------|---------|---------|
| ENSMUSG00000032456 | 13_Nmna1   | 205.443 | 0.26823  | 0.38207   | 0.749425 | 181.013  | 214.232 | 278.189 | 185.691 | 185.431 | 188.1   |
| ENSMUSG00000032458 | 6_Copb2    | 6276.44 | 0.30601  | 0.330903  | 0.710842 | 8970.75  | 6294.34 | 5553.45 | 4639.79 | 6199.92 | 6000.4  |
| ENSMUSG00000032459 | 9_Mrps22   | 307.92  | 0.27094  | 0.480342  | 0.810093 | 483.375  | 312.847 | 214.071 | 278.124 | 300.467 | 258.638 |
| ENSMUSG00000032462 | 14_Pik3ct  | 1710.61 | 0.40618  | 0.159965  | 0.538225 | 2451.26  | 1790.93 | 1607.09 | 1336.15 | 1558.14 | 1520.09 |
| ENSMUSG00000032463 | 10_Faim    | 356.6   | -0.11733 | 0.6369    | 0.88546  | 336.744  | 364.988 | 324.727 | 352.4   | 397.475 | 363.269 |
| ENSMUSG00000032468 | 11_Armc8   | 1633.38 | 0.33601  | 0.314159  | 0.695638 | 2477.55  | 1624.31 | 1366.13 | 1257.75 | 1574.45 | 1500.1  |
| ENSMUSG00000032469 | 12_Dbr1    | 381.221 | 0.46406  | 0.109434  | 0.449508 | 532.926  | 410.328 | 382.64  | 283.901 | 355.409 | 322.122 |
| ENSMUSG00000032470 | 16_Mras    | 411.075 | -1.0201  | 0.00109   | 0.020875 | 246.744  | 250.504 | 317.488 | 694.071 | 485.039 | 472.602 |
| ENSMUSG00000032475 | 15_Nck1    | 1707.89 | 0.5055   | 0.260892  | 0.649906 | 3336.1   | 1363.6  | 1312.35 | 1139.73 | 1667.16 | 1428.39 |
| ENSMUSG00000032477 | 13_Cdc25   | 376.34  | 0.47436  | 0.078908  | 0.37734  | 453.037  | 488.54  | 371.264 | 288.852 | 323.646 | 332.703 |
| ENSMUSG00000032478 | 14_Nme6    | 201.631 | -0.10819 | 0.813835  | 0.946855 | 85.9558  | 248.237 | 248.199 | 215.401 | 208.61  | 203.384 |
| ENSMUSG00000032479 | 15_Map4    | 7235.79 | 0.18326  | 0.46225   | 0.799907 | 6420.39  | 8559.08 | 8104.72 | 6575.1  | 6741.62 | 7013.8  |
| ENSMUSG00000032480 | 17_Dhx30   | 938.979 | 0.10132  | 0.81504   | 0.947066 | 458.094  | 1164.11 | 1293.74 | 973.02  | 836.157 | 908.76  |
| ENSMUSG00000032481 | 16_Smarc   | 2151.34 | 0.4445   | 0.128031  | 0.486371 | 2928.56  | 2340.68 | 2170.71 | 1449.21 | 1942.73 | 2076.16 |
| ENSMUSG00000032482 | 9_Cspg5    | 304.644 | -2.08759 | 1.47E-06  | 0.00011  | 141.574  | 79.3452 | 127.202 | 714.703 | 455.851 | 309.19  |
| ENSMUSG00000032484 | 8_Ngp      | 3.17681 | 4.17291  | 0.101869  | 0.434078 | 18.2024  | 0       | 0       | 0       | 0.85848 | 0       |
| ENSMUSG00000032485 | 14_Scap    | 1082.72 | 0.34733  | 0.554623  | 0.846341 | 306.407  | 1804.54 | 1526.42 | 1091.86 | 766.62  | 1000.46 |
| ENSMUSG00000032487 | 8_Ptgs2    | 250.793 | 1.31327  | 0.005218  | 0.063833 | 413.599  | 495.341 | 164.432 | 170.01  | 148.517 | 112.86  |
| ENSMUSG00000032489 | 17_Kif9    | 69.0965 | 0.10203  | 0.766924  | 0.930427 | 67.7534  | 83.8792 | 63.0839 | 69.3246 | 63.5273 | 67.0108 |
| ENSMUSG00000032491 | 14_Nradd   | 186.077 | 0.16834  | 0.741763  | 0.922751 | 73.8208  | 259.572 | 257.506 | 202.197 | 149.375 | 173.993 |
| ENSMUSG00000032492 | 14_Pth1r   | 112.841 | -1.10482 | 0.037191  | 0.241562 | 30.3373  | 77.0782 | 107.553 | 203.022 | 103.876 | 155.183 |
| ENSMUSG00000032493 | 8_Prss44   | 0 NA    | NA       | NA        | NA       | 0        | 0       | 0       | 0       | 0       | 0       |
| ENSMUSG00000032494 | 12_Tdgf1   | 1.68711 | 1.51971  | 0.377967  | 0.746591 | 1.01124  | 4.53401 | 2.06832 | 1.65058 | 0.85848 | 0       |
| ENSMUSG00000032495 | 8_Lrrc2    | 17.8545 | -0.1788  | 0.813964  | 0.946894 | 22.2474  | 15.869  | 12.4099 | 33.0117 | 18.8865 | 4.70251 |
| ENSMUSG00000032496 | 7_Ltf      | 635.296 | 0.93311  | 0.037449  | 0.242273 | 417.644  | 1185.64 | 898.686 | 391.189 | 558.869 | 359.742 |
| ENSMUSG00000032497 | 15_Lrrfip2 | 1624.03 | 0.12622  | 0.660762  | 0.895438 | 1577.54  | 1974.56 | 1532.63 | 1244.54 | 1617.37 | 1797.53 |
| ENSMUSG00000032498 | 9_Mlh1     | 535.947 | 0.00585  | 0.980562  | 0.993796 | 529.892  | 525.945 | 555.345 | 502.603 | 584.623 | 517.276 |
| ENSMUSG00000032500 | 10_Dcll3   | 27.4807 | 0.66874  | 0.194681  | 0.585293 | 22.2474  | 37.4056 | 41.3665 | 15.6806 | 22.3204 | 25.8638 |
| ENSMUSG00000032501 | 8_Trib1    | 2959.19 | 0.62381  | 0.161197  | 0.139781 | 2975.08  | 3950.26 | 3841.91 | 2292.66 | 2158.21 | 2537    |
| ENSMUSG00000032502 | 8_Stac     | 167.515 | -2.23235 | 0.489E-06 | 0.000291 | 49.551   | 29.4711 | 97.2112 | 338.37  | 272.996 | 217.491 |
| ENSMUSG00000032503 | 17_Arpp2   | 13.1907 | -0.81345 | 0.383742  | 0.749994 | 21.2361  | 1.1335  | 6.20497 | 21.4576 | 10.3017 | 18.81   |
| ENSMUSG00000032504 | 15_Pdc6d   | 7152.74 | 0.70029  | 0.020109  | 0.163682 | 10810.2  | 8415.13 | 7340.48 | 4352.59 | 5942.38 | 6055.66 |
| ENSMUSG00000032507 | 15_Fbxl2   | 50.2298 | -1.26684 | 0.004285  | 0.055902 | 34.3823  | 29.4711 | 24.8199 | 95.7339 | 65.2443 | 51.7276 |
| ENSMUSG00000032508 | 8_Myd88    | 1028.07 | 0.88344  | 0.036021  | 0.237513 | 670.455  | 1860.08 | 1469.54 | 676.74  | 703.951 | 787.671 |
| ENSMUSG00000032511 | 17_Scn5a   | 3.88106 | -1.4065  | 0.216127  | 0.607397 | 1.01124  | 2.26701 | 3.10248 | 3.30117 | 7.72629 | 5.87814 |
| ENSMUSG00000032512 | 6_Wdr48    | 1437.15 | 0.10367  | 0.678581  | 0.90155  | 1702.94  | 1335.27 | 1428.18 | 1372.46 | 1492.03 | 1292.01 |
| ENSMUSG00000032513 | 7_Gorasp   | 767.143 | 0.26545  | 0.536572  | 0.838957 | 420.678  | 929.472 | 1162.4  | 764.221 | 576.038 | 750.051 |
| ENSMUSG00000032514 | 11_Ttc21e  | 9.70221 | -0.49    | 0.511293  | 0.827179 | 6.06747  | 6.80102 | 11.3758 | 8.25292 | 16.3111 | 9.40502 |
| ENSMUSG00000032515 | 7_Csmp1    | 375.376 | 1.10735  | 0.071979  | 0.357998 | 125.394  | 758.313 | 654.624 | 300.406 | 163.111 | 250.409 |
| ENSMUSG00000032517 | 15_Mobp    | 35.6117 | 0.25749  | 0.705688  | 0.908466 | 77.8658  | 13.602  | 24.8199 | 30.5358 | 38.6315 | 28.2151 |
| ENSMUSG00000032518 | 5_Rpsa     | 18940.4 | -0.12635 | 0.797299  | 0.940251 | 6727.81  | 23039.6 | 24567.5 | 22065   | 17877.8 | 19364.9 |
| ENSMUSG00000032519 | 11_Slc25e1 | 223.259 | 0.09086  | 0.867833  | 0.962942 | 76.8546  | 293.577 | 320.59  | 273.997 | 169.978 | 204.559 |
| ENSMUSG00000032523 | 10_Hhatl   | 27.8981 | -1.25108 | 0.096068  | 0.420286 | 6.06747  | 12.4685 | 31.0248 | 66.0234 | 18.8865 | 32.9176 |
| ENSMUSG00000032525 | 14_Nktr    | 4580.33 | 0.32398  | 0.256983  | 0.648401 | 6193.87  | 4710.84 | 4372.44 | 3435.69 | 4543.92 | 4225.21 |
| ENSMUSG00000032526 | 10_Deb1    | 241.726 | -0.35447 | 0.268273  | 0.656133 | 274.047  | 171.159 | 191.32  | 282.25  | 285.873 | 245.706 |
| ENSMUSG00000032527 | 13_Pccb    | 733.63  | -0.64053 | 0.050586  | 0.291317 | 410.565  | 583.754 | 725.981 | 1018.41 | 787.223 | 875.843 |
| ENSMUSG00000032528 | 4_Vipr1    | 84.3598 | 0.11288  | 0.828664  | 0.951064 | 48.5397  | 72.5442 | 141.68  | 90.7822 | 51.5086 | 101.104 |
| ENSMUSG00000032530 | 13_Lyzl4   | 0.34472 | 1.99863  | 0.620844  | NA       | 0        | 0       | 2.06832 | 0       | 0       | 0       |
| ENSMUSG00000032531 | 15_Amotl1  | 2385.76 | 0.35335  | 0.190108  | 0.578279 | 2372.38  | 2991.31 | 2666.07 | 2468.45 | 1813.1  | 2003.27 |
| ENSMUSG00000032532 | 6_Cck      | 17.7212 | -1.26704 | 0.092433  | 0.414166 | 7.07871  | 4.53401 | 19.6491 | 34.6623 | 27.4713 | 12.9319 |
| ENSMUSG00000032534 | 16_Cep63   | 752.561 | -0.29652 | 0.315153  | 0.696604 | 830.232  | 536.147 | 659.795 | 737.811 | 901.401 | 849.979 |
| ENSMUSG00000032536 | 9_Trak1    | 1123.03 | 0.26287  | 0.456481  | 0.796866 | 761.467  | 1411.21 | 1502.64 | 1104.24 | 932.306 | 1026.32 |
| ENSMUSG00000032537 | 14_Ephb1   | 78.2571 | -1.28127 | 0.002557  | 0.038963 | 33.7111  | 35.1386 | 68.2547 | 118.842 | 98.7249 | 115.212 |
| ENSMUSG00000032540 | 15_Abhd5   | 1766.1  | 0.17082  | 0.540551  | 0.84046  | 2324.85  | 1675.32 | 1611.22 | 1538.34 | 1750.43 | 1696.43 |
| ENSMUSG00000032547 | 12_Ryk     | 1778.79 | 0.07159  | 0.766919  | 0.930427 | 2062.94  | 1677.58 | 1728.08 | 1639.03 | 1834.57 | 1730.52 |
| ENSMUSG00000032548 | 14_Slco2e1 | 716.87  | 1.34795  | 0.003739  | 0.050854 | 472.251  | 1622.04 | 993.829 | 374.683 | 416.361 | 422.05  |
| ENSMUSG00000032549 | 7_Rab6b    | 48.6611 | -1.5803  | 0.008866  | 0.092162 | 37.416   | 19.2695 | 16.5466 | 125.444 | 49.7917 | 43.4982 |
| ENSMUSG00000032551 | 6_111005   | 381.286 | 0.43293  | 0.383376  | 0.749884 | 779.669  | 268.64  | 265.78  | 274.822 | 383.739 | 315.068 |
| ENSMUSG00000032553 | 14_Srprb   | 664.793 | -0.03899 | 0.912297  | 0.975453 | 416.633  | 788.918 | 762.177 | 772.474 | 617.245 | 631.312 |
| ENSMUSG00000032554 | 15_Trf     | 3544.42 | -2.07645 | 1.17E-08  | 1.57E-06 | 1339.9   | 1021.29 | 1714.64 | 7747.02 | 5107.94 | 4335.72 |
| ENSMUSG00000032555 | 9_Topbp1   | 1723.86 | 0.7895   | 0.01165   | 0.112587 | 2693.95  | 1987.03 | 1870.8  | 974.67  | 1371.85 | 1444.85 |
| ENSMUSG00000032556 | 10_Bfsp2   | 323.163 | -2.58979 | 1.62E-05  | 0.000787 | 43.4835  | 83.8792 | 148.919 | 984.574 | 290.165 | 387.957 |
| ENSMUSG00000032557 | 11_Uba5    | 1068.41 | -0.04181 | 0.875058  | 0.964429 | 1243.83  | 1022.42 | 892.481 | 1020.06 | 1160.66 | 1071    |
| ENSMUSG00000032558 | 18_Nphp3   | 215.58  | -0.54567 | 0.046944  | 0.277804 | 184.404  | 162.091 | 179.944 | 278.124 | 263.552 | 225.721 |
| ENSMUSG00000032560 | 13_Dnajc1  | 2818.98 | 0.48611  | 0.111416  | 0.453007 | 14145.09 | 3138.67 | 2584.37 | 1996.38 | 2593.46 | 2455.89 |
| ENSMUSG00000032561 | 14_Acpp    | 2052.69 | 0.47651  | 0.13538   | 0.499408 | 2921.48  | 2288.54 | 1955.6  | 1303.96 | 2011.41 | 1835.16 |
| ENSMUSG00000032562 | 13_Gnai2   | 5247.48 | 0.03298  | 0.94852   | 0.986924 | 1854.62  | 7093.46 | 6974.39 | 5928.9  | 4349.04 | 5284.45 |
| ENSMUSG00000032563 | 15_Mrpl3   | 778.713 | 0.0618   | 0.838632  | 0.952966 | 988.997  | 767.381 | 629.804 | 684.993 | 872.213 | 728.889 |
| ENSMUSG00000032564 | 15_Cpne4   | 6.19567 | -2.65167 | 0.055136  | 0.307084 | 5.05622  | 0       | 0       | 14.8553 | 13.7356 | 3.52688 |
| ENSMUSG00000032565 | 8_Nudt16   | 143.778 | -0.05304 | 0.865382  | 0.962167 | 152.698  | 117.884 | 153.056 | 157.631 | 157.96  | 123.441 |
| ENSMUSG00000032567 | 14_Aste1   | 110.604 | 0.16064  | 0.599742  | 0.869281 | 121.349  | 123.552 | 105.484 | 96.5592 | 116.753 | 99.9284 |
| ENSMUSG00000032570 | 16_Atp2c1  | 2862.11 | 0.21954  | 0.548448  | 0.843853 | 4469.7   | 2511.84 | 2256.54 | 2229.11 | 2882.77 | 2822.68 |
| ENSMUSG00000032571 | 13_Pik3r4  | 644.995 | 0.2706   | 0.460128  | 0.799551 | 419.666  | 852.394 | 843.876 | 554.596 | 575.18  | 624.258 |
| ENSMUSG00000032572 | 7_Col6a4   | 29.5361 | 0.54213  | 0.291374  | 0.765558 | 21.2361  | 46.4736 | 37.2298 | 22.2829 | 20.6034 | 29.3907 |
| ENSMUSG00000032575 | 16_Manf    | 1828.25 | 0.26536  | 0.351594  | 0.728508 | 2218.67  | 2199    | 1569.86 | 1433.53 | 1755.59 | 1792.83 |

|                    |           |         |          |          |          |         |         |         |         |         |         |
|--------------------|-----------|---------|----------|----------|----------|---------|---------|---------|---------|---------|---------|
| ENSMUSG00000032577 | 16_Mapkε  | 2858.43 | 0.32311  | 0.416425 | 0.770435 | 1718.1  | 4014.87 | 3798.48 | 2319.9  | 2353.09 | 2946.12 |
| ENSMUSG00000032578 | 7_Cish    | 485.923 | 0.49928  | 0.310138 | 0.692131 | 224.496 | 803.654 | 679.444 | 445.658 | 329.655 | 432.631 |
| ENSMUSG00000032579 | 14_Hemk   | 290.778 | -0.23746 | 0.521003 | 0.831998 | 171.912 | 273.174 | 355.752 | 360.653 | 279.863 | 303.312 |
| ENSMUSG00000032580 | 12_Rbm5   | 4560.48 | 0.13467  | 0.608963 | 0.872658 | 5488.02 | 4407.06 | 4424.14 | 3706.39 | 4804.04 | 4533.22 |
| ENSMUSG00000032582 | 14_Rbm6   | 2371.16 | 0.32041  | 0.39793  | 0.758476 | 3832.62 | 2099.25 | 1968.01 | 1638.21 | 2414.04 | 2274.84 |
| ENSMUSG00000032583 | 7_Mon1a   | 183.378 | 0.34266  | 0.654713 | 0.893223 | 20.2249 | 323.048 | 271.984 | 198.07  | 127.055 | 159.885 |
| ENSMUSG00000032584 | 12_Mst1r  | 1544.16 | 0.99996  | 0.077599 | 0.374013 | 566.297 | 2972.04 | 2638.15 | 963.941 | 906.552 | 1217.95 |
| ENSMUSG00000032586 | 9_Traip   | 104.099 | 0.43012  | 0.324876 | 0.705459 | 62.6971 | 155.29  | 140.646 | 83.3545 | 94.4325 | 88.1721 |
| ENSMUSG00000032589 | 14_Bsn    | 51.7543 | -0.39784 | 0.581103 | 0.859802 | 13.1462 | 60.0757 | 61.0155 | 108.939 | 30.9052 | 36.4445 |
| ENSMUSG00000032590 | 14_Apeh   | 1093.14 | 0.2771   | 0.558694 | 0.848273 | 483.375 | 1608.44 | 1501.6  | 989.526 | 891.958 | 1083.93 |
| ENSMUSG00000032591 | 15_Mst1   | 210.1   | 0.87382  | 0.151333 | 0.525101 | 65.7309 | 377.456 | 372.298 | 147.727 | 121.045 | 176.344 |
| ENSMUSG00000032593 | 5_Amigo3  | 138.663 | 1.16219  | 0.04772  | 0.280647 | 54.6072 | 310.58  | 209.935 | 88.3063 | 81.5553 | 86.9965 |
| ENSMUSG00000032594 | 11_Ip6k1  | 3087.54 | 0.28312  | 0.462038 | 0.799907 | 1901.14 | 4042.07 | 4225.58 | 3165    | 2511.05 | 2680.43 |
| ENSMUSG00000032595 | 10_Cdhr4  | 18.0156 | -0.53484 | 0.380399 | 0.747938 | 10.1124 | 12.4685 | 21.7174 | 23.9335 | 25.7543 | 14.1075 |
| ENSMUSG00000032596 | 14_Uba7   | 3424.8  | 1.67107  | 0.00163  | 0.028037 | 1692.82 | 7841.57 | 6103.62 | 1502.86 | 1528.09 | 1879.83 |
| ENSMUSG00000032598 | 8_Nckipsc | 225.045 | 0.29725  | 0.587954 | 0.863131 | 77.8658 | 349.119 | 317.488 | 211.275 | 169.978 | 224.545 |
| ENSMUSG00000032599 | 12_Ip6k2  | 639.685 | -0.06571 | 0.781693 | 0.935592 | 656.298 | 601.89  | 617.394 | 705.625 | 645.575 | 611.326 |
| ENSMUSG00000032601 | 13_Prkar2 | 1909.38 | 0.23152  | 0.429644 | 0.779527 | 2640.36 | 1745.59 | 1800.48 | 1609.32 | 1805.38 | 1855.14 |
| ENSMUSG00000032602 | 6_Slc25a2 | 413.09  | -0.14456 | 0.558963 | 0.848321 | 415.621 | 393.326 | 368.162 | 398.616 | 458.427 | 444.387 |
| ENSMUSG00000032604 | 14_Qars   | 4168.56 | 0.14844  | 0.675505 | 0.900812 | 2668.67 | 5293.46 | 5186.32 | 3684.11 | 3920.66 | 4258.12 |
| ENSMUSG00000032606 | 7_Nicn1   | 480.304 | -0.44745 | 0.098556 | 0.426764 | 456.071 | 342.318 | 420.904 | 563.675 | 599.217 | 499.642 |
| ENSMUSG00000032607 | 12_Amt    | 405.324 | -0.57094 | 0.036563 | 0.239348 | 278.092 | 321.915 | 378.503 | 521.585 | 449.842 | 482.007 |
| ENSMUSG00000032609 | 12_Klhdc4 | 308.286 | -1.22189 | 0.020382 | 0.164765 | 72.8096 | 182.494 | 299.907 | 567.801 | 384.598 | 342.108 |
| ENSMUSG00000032611 | 9_170010  | 7.22578 | -0.83134 | 0.333271 | 0.712065 | 8.08995 | 2.26701 | 5.17081 | 11.5541 | 6.86782 | 9.40502 |
| ENSMUSG00000032612 | 14_Usp4   | 3270.46 | 0.21147  | 0.4317   | 0.780264 | 2836.54 | 3980.86 | 3711.61 | 2769.68 | 3025.27 | 3298.81 |
| ENSMUSG00000032615 | 14_Nt5m   | 183.206 | 0.02251  | 0.959538 | 0.989708 | 88.9895 | 233.502 | 231.652 | 203.022 | 175.129 | 166.939 |
| ENSMUSG00000032621 | 7_Srek1   | 1681.22 | 0.03145  | 0.930553 | 0.981773 | 2463.39 | 1309.2  | 1325.8  | 1446.74 | 1810.53 | 1731.7  |
| ENSMUSG00000032623 | 9_Oas1d   | 0.36128 | 2.05714  | 0.610196 | NA       | 0       | 1.1335  | 1.03416 | 0       | 0       | 0       |
| ENSMUSG00000032624 | 15_Eml4   | 879.229 | -0.06359 | 0.823944 | 0.949196 | 1068.89 | 761.714 | 748.733 | 812.088 | 965.787 | 918.165 |
| ENSMUSG00000032625 | 14_Thsd7  | 149.837 | -1.4696  | 0.003276 | 0.046345 | 136.518 | 40.8061 | 61.0155 | 262.443 | 217.195 | 181.047 |
| ENSMUSG00000032633 | 12_Flcn   | 720.626 | -0.46007 | 0.258935 | 0.64893  | 330.677 | 677.835 | 811.817 | 998.604 | 770.054 | 734.767 |
| ENSMUSG00000032637 | 15_Atnx2l | 1566.91 | 0.33398  | 0.353609 | 0.729438 | 1048.66 | 2175.19 | 2018.68 | 1310.56 | 1451.68 | 1396.65 |
| ENSMUSG00000032640 | 10_Chys1  | 614.115 | 0.03532  | 0.806066 | 0.97156  | 751.355 | 563.351 | 550.174 | 614.843 | 620.679 | 584.287 |
| ENSMUSG00000032641 | 17_Gpr19  | 88.5448 | -0.47414 | 0.255863 | 0.647236 | 49.551  | 75.9447 | 97.2112 | 127.095 | 103.876 | 77.5914 |
| ENSMUSG00000032643 | 12_Fhl3   | 78.8263 | -0.13432 | 0.771578 | 0.932465 | 43.4835 | 96.3477 | 85.8354 | 108.113 | 59.2349 | 79.9427 |
| ENSMUSG00000032648 | 14_Pygm   | 722.638 | -1.17405 | 0.007091 | 0.07881  | 399.442 | 298.111 | 633.941 | 1465.72 | 748.592 | 790.022 |
| ENSMUSG00000032649 | 14_Colgal | 718.512 | -0.99445 | 0.009893 | 0.099856 | 659.331 | 274.308 | 506.739 | 901.219 | 998.409 | 971.069 |
| ENSMUSG00000032652 | 13_Crebl2 | 803.407 | -0.39064 | 0.232649 | 0.624408 | 918.21  | 507.809 | 659.795 | 1006.03 | 896.25  | 832.345 |
| ENSMUSG00000032656 | 14_March  | 254.956 | 0.47471  | 0.314086 | 0.695638 | 128.428 | 388.791 | 372.298 | 209.624 | 183.714 | 246.882 |
| ENSMUSG00000032657 | 15_Fam18  | 130.266 | -0.30002 | 0.581495 | 0.860015 | 41.461  | 126.952 | 182.012 | 175.787 | 120.187 | 135.197 |
| ENSMUSG00000032661 | 9_Oas3    | 4166.33 | 2.06657  | 1.16E-10 | 2.24E-08 | 5249.37 | 8640.69 | 6289.77 | 1336.15 | 1591.62 | 1890.41 |
| ENSMUSG00000032666 | 16_17000  | 1389.95 | -0.03292 | 0.91964  | 0.977244 | 1859.68 | 1032.62 | 1229.62 | 1294.88 | 1421.64 | 1501.28 |
| ENSMUSG00000032667 | 17_Pon2   | 4062.7  | 0.15596  | 0.66972  | 0.898731 | 6325.33 | 3201.01 | 3319.66 | 3481.91 | 4051.15 | 3997.13 |
| ENSMUSG00000032673 | 5_Prorsd1 | 252.554 | 0.06762  | 0.870344 | 0.963272 | 402.475 | 183.627 | 189.252 | 234.383 | 279.863 | 225.721 |
| ENSMUSG00000032679 | 12_Cd59a  | 519.163 | -1.31151 | 0.002861 | 0.042039 | 476.296 | 181.36  | 236.823 | 805.485 | 841.307 | 573.706 |
| ENSMUSG00000032680 | 11_68204  | 5.90648 | 0.47614  | 0.619621 | 0.877704 | 3.03373 | 10.2015 | 7.23913 | 3.30117 | 3.43391 | 8.22939 |
| ENSMUSG00000032688 | 7_Malt1   | 996.333 | 0.45129  | 0.266944 | 0.654888 | 1713.05 | 954.409 | 784.929 | 614.843 | 963.211 | 947.556 |
| ENSMUSG00000032690 | 16_Oas2   | 7726.17 | 2.27572  | 1.04E-09 | 1.73E-07 | 9225.58 | 17561.4 | 11635.4 | 1931.18 | 3227.87 | 2775.66 |
| ENSMUSG00000032691 | 14_Nlrp3  | 27.6499 | 2.08355  | 0.000886 | 0.017885 | 22.2474 | 74.8112 | 37.2298 | 10.7288 | 10.3017 | 10.5807 |
| ENSMUSG00000032698 | 15_Lmo2   | 390.404 | 0.26927  | 0.468733 | 0.804273 | 605.735 | 346.852 | 327.829 | 369.731 | 407.777 | 284.502 |
| ENSMUSG00000032702 | 16_Kank1  | 1478.38 | 0.30401  | 0.306833 | 0.689727 | 1210.46 | 1905.42 | 1784.96 | 1421.15 | 1201.01 | 1347.27 |
| ENSMUSG00000032705 | 8_Exd2    | 520.312 | 0.19981  | 0.470247 | 0.804531 | 670.455 | 476.071 | 522.252 | 464.64  | 519.379 | 469.076 |
| ENSMUSG00000032712 | 16_28104  | 2260.67 | 1.33015  | 0.005637 | 0.067123 | 5578.02 | 2262.47 | 1863.56 | 959.815 | 1448.25 | 1451.9  |
| ENSMUSG00000032714 | 6_Syde1   | 325.981 | -0.7482  | 0.047547 | 0.279921 | 170.9   | 221.033 | 338.171 | 502.603 | 384.598 | 338.581 |
| ENSMUSG00000032715 | 9_Trib3   | 68.7953 | -0.48196 | 0.268141 | 0.656133 | 36.4048 | 52.1411 | 83.7671 | 89.1316 | 77.2629 | 74.0646 |
| ENSMUSG00000032717 | 14_Mdfi   | 189.216 | 0.47898  | 0.526688 | 0.834252 | 27.3036 | 364.988 | 268.882 | 230.257 | 100.442 | 143.427 |
| ENSMUSG00000032718 | 4_Mansc1  | 58.6725 | -0.9338  | 0.017621 | 0.149034 | 43.4835 | 36.2721 | 41.3665 | 98.2098 | 70.3951 | 62.3083 |
| ENSMUSG00000032719 | 4_Sbspon  | 125.151 | -1.44403 | 0.005142 | 0.063273 | 96.0682 | 23.8036 | 81.6988 | 193.118 | 184.573 | 171.642 |
| ENSMUSG00000032724 | 5_Abtb2   | 431.472 | 0.75293  | 0.105084 | 0.440631 | 258.879 | 717.507 | 648.419 | 399.442 | 228.355 | 336.23  |
| ENSMUSG00000032725 | 9_Folr2   | 164.505 | -0.05001 | 0.886781 | 0.969051 | 114.271 | 160.957 | 209.935 | 179.914 | 169.12  | 152.832 |
| ENSMUSG00000032726 | 12_Bmp8a  | 1.87053 | -2.1683  | 0.272368 | 0.658804 | 1.01124 | 0       | 1.03416 | 6.60234 | 2.57543 | 0       |
| ENSMUSG00000032727 | 13_Mier3  | 942.814 | 0.43294  | 0.270653 | 0.657593 | 1663.5  | 844.46  | 741.494 | 730.384 | 835.298 | 841.75  |
| ENSMUSG00000032733 | 5_Snx33   | 1229.68 | 0.1349   | 0.712976 | 0.910879 | 774.613 | 1472.42 | 1614.33 | 1232.16 | 1020.73 | 1263.8  |
| ENSMUSG00000032735 | 14_Ablimc | 110.256 | -1.31174 | 0.004214 | 0.055239 | 50.5622 | 46.4736 | 93.0745 | 189.817 | 182.856 | 98.7527 |
| ENSMUSG00000032737 | 12_Inpp1  | 1007.07 | -0.10509 | 0.811443 | 0.946092 | 456.071 | 1088.16 | 1367.16 | 1176.87 | 966.645 | 987.527 |
| ENSMUSG00000032739 | 16_Pram1  | 24.0868 | -0.25707 | 0.672129 | 0.900129 | 12.1349 | 26.0706 | 27.9224 | 39.614  | 22.3204 | 16.4588 |
| ENSMUSG00000032740 | 16_Ccdc8  | 305.686 | -0.41954 | 0.468779 | 0.804273 | 516.746 | 141.688 | 126.168 | 334.243 | 437.823 | 277.448 |
| ENSMUSG00000032741 | 9_Tpcn1   | 1986.38 | 0.02539  | 0.953488 | 0.988375 | 939.446 | 2414.36 | 2657.8  | 2045.9  | 1724.68 | 2136.12 |
| ENSMUSG00000032743 | 15_D430C  | 520.48  | -0.07107 | 0.843674 | 0.954244 | 311.463 | 610.958 | 600.848 | 583.482 | 517.662 | 498.466 |
| ENSMUSG00000032744 | 4_Heyl    | 125.379 | -1.41351 | 0.003585 | 0.049474 | 38.4273 | 52.1411 | 114.792 | 220.353 | 172.554 | 154.007 |
| ENSMUSG00000032745 | 17_Gbbp1  | 3104.73 | 0.49271  | 0.330385 | 0.710498 | 6633.76 | 2181.99 | 2073.49 | 2123.48 | 3008.1  | 2607.54 |
| ENSMUSG00000032750 | 13_Gab3   | 15.5109 | -0.69812 | 0.369712 | 0.741135 | 23.2586 | 9.06802 | 3.10248 | 16.5058 | 22.3204 | 18.81   |
| ENSMUSG00000032754 | 14_Slc8b1 | 1837.67 | 0.44972  | 0.411219 | 0.767001 | 646.185 | 2917.64 | 2801.54 | 1629.95 | 1228.48 | 1802.24 |
| ENSMUSG00000032757 | 6_Bet1    | 592.235 | 0.25472  | 0.593228 | 0.866332 | 1134.62 | 377.456 | 420.904 | 528.187 | 550.284 | 541.964 |
| ENSMUSG00000032763 | 10_Ilvbl  | 291.378 | -0.37241 | 0.406443 | 0.764314 | 118.316 | 312.847 | 330.932 | 375.508 | 285.014 | 325.649 |

|                    |           |         |          |          |          |         |         |         |         |         |         |
|--------------------|-----------|---------|----------|----------|----------|---------|---------|---------|---------|---------|---------|
| ENSMUSG00000032766 | 9_Gng11   | 421.943 | -0.63106 | 0.263502 | 0.652524 | 648.208 | 148.489 | 196.491 | 508.38  | 588.057 | 442.036 |
| ENSMUSG00000032769 | 4_Trpa1   | 2.52117 | -1.97644 | 0.204541 | 0.595444 | 2.02249 | 0       | 1.03416 | 6.60234 | 4.29238 | 1.17563 |
| ENSMUSG00000032773 | 9_Chrm1   | 33.3633 | -0.86458 | 0.190113 | 0.578279 | 8.08995 | 22.6701 | 40.3323 | 63.5475 | 32.6221 | 32.9176 |
| ENSMUSG00000032776 | 9_Mctp2   | 1977.04 | 0.90761  | 0.030585 | 0.214081 | 3945.88 | 1947.36 | 1843.91 | 973.845 | 1519.5  | 1631.77 |
| ENSMUSG00000032777 | 9_Gtf3c1  | 2108.01 | 0.12215  | 0.778371 | 0.934544 | 1021.36 | 2882.5  | 2687.79 | 1989.78 | 1883.5  | 2183.14 |
| ENSMUSG00000032782 | 19_Cntrot | 228.692 | 0.35514  | 0.413261 | 0.768469 | 130.451 | 289.043 | 350.581 | 213.751 | 170.837 | 217.491 |
| ENSMUSG00000032783 | 8_Troap   | 53.048  | 0.46816  | 0.453722 | 0.795734 | 17.1912 | 82.7457 | 84.8012 | 49.5175 | 33.4806 | 50.552  |
| ENSMUSG00000032786 | 14_Alas1  | 727.227 | -0.05372 | 0.878611 | 0.966155 | 448.992 | 783.251 | 909.028 | 787.329 | 730.564 | 704.201 |
| ENSMUSG00000032788 | 14_Pdxk   | 5395.47 | 0.43524  | 0.259162 | 0.64893  | 3492.84 | 7614.87 | 7501.81 | 4196.61 | 4221.13 | 5345.58 |
| ENSMUSG00000032796 | 7_Lama1   | 86.6689 | -0.9926  | 0.05483  | 0.305878 | 26.2924 | 55.5416 | 92.0404 | 126.27  | 85.8477 | 134.022 |
| ENSMUSG00000032802 | 8_Srxn1   | 815.841 | 0.02935  | 0.914457 | 0.976048 | 663.376 | 962.344 | 846.978 | 789.805 | 850.751 | 781.793 |
| ENSMUSG00000032803 | 14_Cdv3   | 5496.66 | 0.26943  | 0.469099 | 0.804529 | 8836.25 | 4935.27 | 4253.51 | 4243.65 | 5368.06 | 5343.23 |
| ENSMUSG00000032806 | 13_Slc10a | 590.457 | 0.13511  | 0.606093 | 0.871767 | 517.757 | 688.036 | 648.419 | 532.314 | 564.878 | 591.341 |
| ENSMUSG00000032807 | 5_Alox12t | 34.6282 | 2.25829  | 0.001284 | 0.02369  | 16.1799 | 99.7483 | 55.8447 | 10.7288 | 11.1602 | 14.1075 |
| ENSMUSG00000032812 | 16_Arap1  | 2560.19 | 0.36465  | 0.515596 | 0.829821 | 804.95  | 4061.34 | 3779.86 | 2472.58 | 1872.34 | 2370.07 |
| ENSMUSG00000032815 | 15_Fanca  | 486.581 | 1.13802  | 0.020475 | 0.165037 | 256.856 | 953.276 | 797.339 | 313.611 | 292.741 | 305.663 |
| ENSMUSG00000032816 | 14_Igdc4  | 317.347 | -1.20339 | 0.000763 | 0.016074 | 242.699 | 125.819 | 207.866 | 481.145 | 473.879 | 372.674 |
| ENSMUSG00000032818 | 15_Loxhd  | 0.86844 | -3.13495 | 0.234256 | NA       | 0       | 0       | 0       | 0.82529 | 0.85848 | 3.52688 |
| ENSMUSG00000032826 | 16_Ank2   | 1410.74 | -0.57333 | 0.027195 | 0.19878  | 1282.26 | 1075.69 | 1044.5  | 1872.59 | 1728.11 | 1461.31 |
| ENSMUSG00000032827 | 15_Ppp1r1 | 679.659 | -1.3472  | 0.003868 | 0.052144 | 617.87  | 213.099 | 319.556 | 1107.54 | 1139.2  | 680.689 |
| ENSMUSG00000032834 | 10_Pwp2   | 511.37  | 0.36803  | 0.386259 | 0.572435 | 282.137 | 765.114 | 681.512 | 439.056 | 417.22  | 483.183 |
| ENSMUSG00000032839 | 13_Trpc1  | 109.648 | -0.71451 | 0.164837 | 0.543748 | 136.518 | 58.9422 | 53.7764 | 183.215 | 140.79  | 84.6452 |
| ENSMUSG00000032840 | 7_241013  | 475.505 | -0.50425 | 0.118574 | 0.4687   | 296.295 | 429.598 | 453.997 | 662.71  | 456.71  | 553.721 |
| ENSMUSG00000032841 | 15_Prr5l  | 124.235 | -0.29389 | 0.414309 | 0.768913 | 149.664 | 82.7457 | 102.382 | 148.553 | 133.922 | 128.143 |
| ENSMUSG00000032842 | 15_Abcc1  | 133.73  | -0.09906 | 0.881308 | 0.967415 | 25.2811 | 181.36  | 180.978 | 185.691 | 115.036 | 114.036 |
| ENSMUSG00000032845 | 15_Alpk2  | 26.0264 | -0.24182 | 0.686956 | 0.904498 | 34.3823 | 24.9371 | 12.4099 | 41.2646 | 23.1789 | 19.9857 |
| ENSMUSG00000032846 | 9_Zswim6  | 594.029 | 0.35852  | 0.17484  | 0.558368 | 755.4   | 582.62  | 663.932 | 463.814 | 539.982 | 558.423 |
| ENSMUSG00000032849 | 13_Abcc4  | 2619.91 | 0.37973  | 0.135373 | 0.499408 | 2910.36 | 2874.56 | 3102.48 | 1977.4  | 2175.38 | 2679.26 |
| ENSMUSG00000032850 | 16_Rnft2  | 105.326 | -1.35788 | 0.002118 | 0.033783 | 39.4385 | 78.2117 | 59.9814 | 207.974 | 106.451 | 139.9   |
| ENSMUSG00000032852 | 3_Rspo4   | 1.79286 | -0.62996 | 0.6694   | 0.89858  | 1.01124 | 1.1335  | 2.06832 | 2.47588 | 1.71695 | 2.35126 |
| ENSMUSG00000032854 | 12_Ugt8a  | 8.67312 | -0.34908 | 0.675309 | 0.900812 | 11.1237 | 4.53401 | 7.23913 | 5.77705 | 16.3111 | 7.05377 |
| ENSMUSG00000032855 | 5_Pkd1    | 1620.74 | -0.56323 | 0.281963 | 0.668558 | 474.274 | 1414.61 | 2036.26 | 2472.58 | 1617.37 | 1709.36 |
| ENSMUSG00000032860 | 4_P2ry2   | 2229.31 | 0.67643  | 0.119032 | 0.469314 | 1302.48 | 3864.11 | 3061.12 | 1705.88 | 1584.75 | 1857.49 |
| ENSMUSG00000032864 | 4_Rag2    | 0.19594 | -0.79206 | 0.84609  | NA       | 0       | 0       | 0       | 0       | 0       | 1.17563 |
| ENSMUSG00000032867 | 8_Fbxw8   | 1571.41 | 0.16167  | 0.765145 | 0.929992 | 517.757 | 2171.79 | 2288.6  | 1669.57 | 1179.55 | 1601.21 |
| ENSMUSG00000032869 | 15_Psmf1  | 819.434 | 0.10716  | 0.705631 | 0.90846  | 649.219 | 964.611 | 935.916 | 811.262 | 772.629 | 782.968 |
| ENSMUSG00000032870 | 8_Smap2   | 676.759 | 0.27605  | 0.314646 | 0.696039 | 645.174 | 893.2   | 685.649 | 560.374 | 650.726 | 625.434 |
| ENSMUSG00000032872 | 16_Cyb5r  | 1261.54 | 0.54371  | 0.213785 | 0.604774 | 2437.1  | 1077.96 | 974.18  | 823.642 | 1170.1  | 1086.28 |
| ENSMUSG00000032875 | 7_Arhgef1 | 2362.45 | 0.39424  | 0.488537 | 0.814112 | 741.242 | 3636.28 | 3672.31 | 2377.67 | 1577.02 | 2170.21 |
| ENSMUSG00000032878 | 16_Ccdc8  | 30.2235 | -0.42039 | 0.544276 | 0.841882 | 49.551  | 13.602  | 14.4783 | 52.8187 | 30.9052 | 19.9857 |
| ENSMUSG00000032883 | 15_Acsl3  | 2037.78 | -0.07313 | 0.867479 | 0.962942 | 3303.74 | 1331.87 | 1322.69 | 1931.18 | 2344.5  | 1992.69 |
| ENSMUSG00000032889 | 6_Gm668   | 41.2618 | -0.04438 | 0.928193 | 0.980863 | 22.2474 | 53.2746 | 46.5373 | 50.3428 | 35.1976 | 39.9713 |
| ENSMUSG00000032890 | 17_Rims3  | 40.3402 | -1.26119 | 0.014089 | 0.127604 | 14.1574 | 29.4711 | 27.9224 | 76.7522 | 54.9425 | 38.7957 |
| ENSMUSG00000032892 | 14_Rangr  | 256.95  | 0.14776  | 0.615006 | 0.876237 | 221.463 | 298.111 | 290.599 | 211.275 | 259.26  | 260.989 |
| ENSMUSG00000032897 | 17_Nfyc   | 874.534 | 0.09128  | 0.731172 | 0.91894  | 752.366 | 1036.02 | 918.335 | 899.569 | 780.356 | 860.56  |
| ENSMUSG00000032898 | 9_Fbxo21  | 433.377 | -0.45373 | 0.191723 | 0.580886 | 241.687 | 396.726 | 459.168 | 568.626 | 466.153 | 467.9   |
| ENSMUSG00000032899 | 14_Styk1  | 136.32  | 1.12895  | 0.014934 | 0.132647 | 277.081 | 181.36  | 102.382 | 69.3246 | 77.2629 | 110.509 |
| ENSMUSG00000032902 | 1_Slc16a1 | 981.867 | -0.65873 | 0.107619 | 0.446368 | 1149.78 | 630.228 | 504.671 | 1442.61 | 1242.22 | 921.692 |
| ENSMUSG00000032905 | 4_Atg12   | 1782.99 | 0.23544  | 0.545003 | 0.842106 | 2966.99 | 1394.21 | 1423.01 | 1519.36 | 1647.42 | 1746.98 |
| ENSMUSG00000032908 | 9_Sgpp2   | 7.87002 | -0.5907  | 0.442226 | 0.787297 | 7.07871 | 4.53401 | 7.23913 | 11.5541 | 8.58477 | 8.22939 |
| ENSMUSG00000032911 | 5_Cspg4   | 89.569  | -0.55963 | 0.393568 | 0.755289 | 15.1687 | 88.4132 | 113.758 | 134.523 | 83.2723 | 102.28  |
| ENSMUSG00000032913 | 13_Lrig2  | 928.492 | 0.16839  | 0.643213 | 0.888749 | 1434.96 | 751.512 | 761.143 | 788.154 | 932.306 | 902.882 |
| ENSMUSG00000032915 | 6_Adgre4  | 10.0567 | 1.75355  | 0.038734 | 0.247192 | 21.2361 | 18.136  | 7.23913 | 2.47588 | 7.72629 | 3.52688 |
| ENSMUSG00000032925 | 16_Itgbl1 | 1998.82 | -0.20819 | 0.63021  | 0.881745 | 3046.88 | 1113.1  | 1404.39 | 2185.37 | 2214.01 | 2029.13 |
| ENSMUSG00000032932 | 14_Hspa1  | 1304.66 | 0.14869  | 0.735938 | 0.920596 | 2265.19 | 979.347 | 870.764 | 1039.87 | 1389.02 | 1283.79 |
| ENSMUSG00000032936 | 13_Camk   | 13.0544 | -2.39286 | 0.026086 | 0.194113 | 6.06747 | 3.40051 | 3.10248 | 53.644  | 8.58477 | 3.52688 |
| ENSMUSG00000032939 | 13_Nup93  | 1038.56 | 0.52754  | 0.108931 | 0.448862 | 907.086 | 1537.03 | 1234.79 | 680.866 | 922.863 | 948.732 |
| ENSMUSG00000032940 | 16_Rbm1   | 47.377  | -1.35913 | 0.045963 | 0.274322 | 55.6184 | 14.7355 | 9.30745 | 75.9269 | 78.1214 | 50.552  |
| ENSMUSG00000032942 | 14_Ucp3   | 79.7172 | -0.34465 | 0.367853 | 0.739973 | 54.6072 | 73.6777 | 82.7329 | 113.065 | 78.9799 | 75.2402 |
| ENSMUSG00000032946 | 16_Rasgr  | 47.1816 | -0.08105 | 0.829213 | 0.951083 | 41.461  | 48.7406 | 47.5714 | 51.1681 | 50.6501 | 43.4982 |
| ENSMUSG00000032952 | 11_Ap4b1  | 680.463 | 0.07446  | 0.749179 | 0.924897 | 712.927 | 675.568 | 705.298 | 613.192 | 683.348 | 692.445 |
| ENSMUSG00000032959 | 12_Pebp1  | 4408.01 | -0.14977 | 0.653755 | 0.893223 | 2708.11 | 4773.18 | 5057.05 | 4804.03 | 4358.49 | 4747.19 |
| ENSMUSG00000032965 | 10_Ift57  | 290.813 | -0.51524 | 0.158997 | 0.537367 | 339.778 | 175.693 | 202.696 | 321.039 | 390.607 | 315.068 |
| ENSMUSG00000032966 | 14_Fkbp1  | 1035.69 | -0.64298 | 0.019961 | 0.162943 | 957.648 | 731.109 | 737.357 | 1380.71 | 1328.06 | 1079.23 |
| ENSMUSG00000032968 | 4_Inha    | 36.8712 | -0.84159 | 0.178783 | 0.564266 | 13.1462 | 23.8036 | 42.4006 | 75.9269 | 28.3297 | 37.6201 |
| ENSMUSG00000032977 | 8_Fam207  | 502.076 | 0.08568  | 0.873803 | 0.964047 | 170.9   | 691.437 | 688.752 | 607.415 | 374.296 | 479.656 |
| ENSMUSG00000032985 | 15_57305  | 1.33395 | -3.76735 | 0.168302 | NA       | 0       | 0       | 0       | 3.30117 | 0       | 4.70251 |
| ENSMUSG00000032988 | 3_Slc16a1 | 86.6973 | -2.30513 | 0.001645 | 0.028186 | 10.1124 | 22.6701 | 54.8106 | 275.648 | 65.2443 | 91.699  |
| ENSMUSG00000032997 | 16_Chpf   | 208.527 | -0.30744 | 0.674614 | 0.900436 | 27.3036 | 181.36  | 350.581 | 317.738 | 161.394 | 212.789 |
| ENSMUSG00000032998 | 16_Foxj3  | 1404.5  | 0.34081  | 0.348231 | 0.725587 | 2280.36 | 1263.86 | 1164.47 | 1087.74 | 1363.26 | 1267.33 |
| ENSMUSG00000032999 | 9_Nlrp4f  | 1.76866 | -0.66237 | 0.684397 | 0.903547 | 3.03373 | 0       | 1.03416 | 2.47588 | 1.71695 | 2.35126 |
| ENSMUSG00000033004 | 14_Mycbp  | 7430.52 | 0.33127  | 0.220265 | 0.611424 | 10002.2 | 7822.3  | 7014.72 | 6054.34 | 6525.28 | 7164.28 |
| ENSMUSG00000033006 | 9_Sox10   | 137.284 | -1.27022 | 0.032004 | 0.220721 | 31.3486 | 73.6777 | 136.509 | 302.057 | 129.63  | 150.48  |
| ENSMUSG00000033007 | 15_Asic4  | 4.99182 | -3.06    | 0.024998 | 0.189013 | 0       | 2.26701 | 1.03416 | 14.8553 | 9.44325 | 2.35126 |
| ENSMUSG00000033009 | 15_Ogfod  | 870.551 | 0.15384  | 0.557388 | 0.848091 | 1057.76 | 811.588 | 881.106 | 735.335 | 881.656 | 855.857 |

|                    |           |         |          |          |          |         |         |         |         |         |         |
|--------------------|-----------|---------|----------|----------|----------|---------|---------|---------|---------|---------|---------|
| ENSMUSG00000033014 | 12_Trim3  | 1996.93 | 0.42915  | 0.335044 | 0.713724 | 3810.37 | 1598.24 | 1466.44 | 1397.22 | 1892.94 | 1816.34 |
| ENSMUSG00000033016 | 15_Nfatc1 | 197.879 | 0.36104  | 0.212819 | 0.604036 | 208.316 | 262.973 | 196.491 | 185.691 | 165.686 | 168.115 |
| ENSMUSG00000033020 | 6_Polr2f  | 478.816 | 0.10097  | 0.889059 | 0.970015 | 68.7646 | 709.573 | 708.401 | 600.813 | 270.42  | 514.925 |
| ENSMUSG00000033021 | 16_Gmpp   | 575.335 | 0.20251  | 0.708724 | 0.909864 | 190.114 | 863.729 | 793.202 | 588.433 | 459.285 | 557.248 |
| ENSMUSG00000033022 | 7_Cdo1    | 5289.12 | -0.26136 | 0.421026 | 0.77414  | 6469.94 | 3453.78 | 4509.98 | 5547.62 | 5891.73 | 5861.68 |
| ENSMUSG00000033024 | 16_Klra9  | 2.08999 | 3.52871  | 0.05043  | 0.290796 | 4.04498 | 4.53401 | 3.10248 | 0       | 0.85848 | 0       |
| ENSMUSG00000033027 | 15_Klrc3  | 1.29232 | 0.98009  | 0.690828 | NA       | 4.04498 | 1.1335  | 0       | 0       | 2.57543 | 0       |
| ENSMUSG00000033029 | 12_17000  | 73.3153 | -0.0897  | 0.854062 | 0.958493 | 32.3598 | 80.4787 | 100.314 | 77.5775 | 70.3951 | 78.7671 |
| ENSMUSG00000033031 | 13_C3300  | 481.723 | 0.9344   | 0.053831 | 0.302008 | 1060.8  | 470.404 | 366.093 | 231.907 | 415.503 | 345.635 |
| ENSMUSG00000033032 | 15_Afap1l | 207.669 | 0.03499  | 0.906825 | 0.974391 | 189.103 | 202.897 | 238.891 | 242.636 | 191.44  | 181.047 |
| ENSMUSG00000033033 | 10_Calhm  | 119.736 | 0.11298  | 0.768814 | 0.931306 | 85.9558 | 142.821 | 144.783 | 145.251 | 96.1494 | 103.455 |
| ENSMUSG00000033036 | 9_Gm787   | 287.236 | -0.03993 | 0.885212 | 0.968635 | 306.407 | 299.245 | 244.062 | 258.317 | 316.778 | 298.609 |
| ENSMUSG00000033039 | 9_Micall1 | 2958.97 | 0.6522   | 0.064158 | 0.335456 | 2297.55 | 4337.92 | 4214.21 | 2173.82 | 2044.03 | 2686.31 |
| ENSMUSG00000033044 | 12_Dhrs7l | 20.9089 | -0.91307 | 0.301155 | 0.684432 | 19.2136 | 5.66751 | 18.6149 | 54.4693 | 5.15086 | 22.3369 |
| ENSMUSG00000033047 | 4_Eif3l   | 2990.75 | 0.16214  | 0.566808 | 0.852155 | 2458.33 | 3641.94 | 3375.5  | 2528.7  | 2858.73 | 3081.32 |
| ENSMUSG00000033053 | 3_170002  | 0       | NA       | NA       | NA       | 0       | 0       | 0       | 0       | 0       | 0       |
| ENSMUSG00000033054 | 7_Npat    | 760.932 | 0.51912  | 0.213552 | 0.604733 | 1425.85 | 642.696 | 620.497 | 563.675 | 716.828 | 596.043 |
| ENSMUSG00000033055 | 10_Ankrd1 | 272.025 | 0.10462  | 0.837046 | 0.952966 | 104.158 | 379.723 | 361.957 | 307.009 | 230.072 | 249.233 |
| ENSMUSG00000033059 | 7_Pygb    | 2213.57 | -0.23812 | 0.522515 | 0.832206 | 1161.92 | 2386.02 | 2546.11 | 2457.72 | 2319.6  | 2410.04 |
| ENSMUSG00000033060 | 15_Lmo7   | 11530.4 | 0.55942  | 0.036408 | 0.239    | 15471   | 13213.2 | 12529.9 | 7945.09 | 9063.8  | 10959.2 |
| ENSMUSG00000033061 | 15_Resp1  | 2.31588 | -1.83746 | 0.378851 | 0.74711  | 3.03373 | 0       | 0       | 7.42763 | 3.43391 | 0       |
| ENSMUSG00000033063 | 7_Cntnap1 | 6.9936  | -1.39429 | 0.095747 | 0.41981  | 5.05622 | 3.40051 | 3.10248 | 11.5541 | 9.44325 | 9.40502 |
| ENSMUSG00000033065 | 13_Pfkm   | 1507.64 | -0.59842 | 0.134789 | 0.498606 | 789.782 | 1045.09 | 1763.25 | 2244.8  | 1414.77 | 1788.13 |
| ENSMUSG00000033066 | 15_Gas7   | 683.151 | -0.68273 | 0.01069  | 0.105651 | 559.218 | 518.011 | 496.398 | 1002.73 | 766.62  | 755.929 |
| ENSMUSG00000033068 | 16_Entpd1 | 231.771 | 0.09726  | 0.853992 | 0.958493 | 83.9333 | 377.456 | 257.506 | 233.558 | 207.751 | 230.423 |
| ENSMUSG00000033075 | 17_Senp1  | 1505.79 | 0.30582  | 0.256446 | 0.648048 | 1727.21 | 1733.13 | 1533.66 | 1078.66 | 1484.31 | 1477.76 |
| ENSMUSG00000033080 | 9_Vsx1    | 6.02659 | -1.56983 | 0.331486 | 0.711299 | 9.1012  | 0       | 0       | 18.1564 | 7.72629 | 1.17563 |
| ENSMUSG00000033082 | 10_Clec1  | 64.3366 | -0.26282 | 0.622592 | 0.878673 | 104.158 | 32.8716 | 38.264  | 73.451  | 64.3858 | 72.8889 |
| ENSMUSG00000033083 | 16_Tbc1d  | 351.119 | 0.15923  | 0.695228 | 0.905638 | 570.342 | 235.769 | 305.078 | 309.485 | 345.108 | 340.932 |
| ENSMUSG00000033088 | 18_Triobp | 1231.57 | 0.51665  | 0.364353 | 0.737727 | 408.543 | 1989.3  | 1951.46 | 1170.26 | 749.45  | 1120.37 |
| ENSMUSG00000033096 | 7_Apmap   | 1115    | -0.07772 | 0.790522 | 0.937373 | 1374.28 | 958.943 | 921.438 | 1032.44 | 1219.04 | 1183.86 |
| ENSMUSG00000033099 | 9_Nol12   | 417.687 | 0.13876  | 0.811452 | 0.946092 | 117.304 | 655.165 | 540.866 | 437.405 | 313.344 | 442.036 |
| ENSMUSG00000033102 | 14_Cdc14  | 695.038 | 0.15312  | 0.694069 | 0.905638 | 1100.23 | 567.885 | 527.422 | 571.102 | 764.045 | 639.542 |
| ENSMUSG00000033105 | 12_Lss    | 3301.24 | 0.32046  | 0.32219  | 0.702839 | 2471.48 | 4365.12 | 4162.5  | 2734.19 | 2899.94 | 3174.2  |
| ENSMUSG00000033106 | 5_Slc7a6c | 301.045 | 0.23661  | 0.458647 | 0.798236 | 412.588 | 302.645 | 261.643 | 238.509 | 309.91  | 280.975 |
| ENSMUSG00000033107 | 5_Rnf125  | 16.666  | -0.2686  | 0.672025 | 0.900129 | 21.2361 | 17.0025 | 7.23913 | 19.807  | 20.6034 | 14.1075 |
| ENSMUSG00000033111 | 15_38304  | 1568.33 | 0.3245   | 0.500704 | 0.822198 | 3089.35 | 1105.17 | 1037.26 | 1228.86 | 1585.61 | 1363.73 |
| ENSMUSG00000033114 | 10_Slc35c | 163.779 | 0.29048  | 0.412651 | 0.768002 | 243.71  | 150.756 | 145.817 | 128.746 | 150.233 | 163.412 |
| ENSMUSG00000033124 | 15_Atg9a  | 635.411 | 0.43796  | 0.38121  | 0.748604 | 268.991 | 990.682 | 933.848 | 606.59  | 483.323 | 529.033 |
| ENSMUSG00000033126 | 4_Ybey    | 127.124 | 0.06377  | 0.828327 | 0.951064 | 126.406 | 122.418 | 140.646 | 115.541 | 120.187 | 137.548 |
| ENSMUSG00000033128 | 8_Gga1    | 887.307 | 0.45327  | 0.493029 | 0.816206 | 180.001 | 1393.08 | 1503.67 | 902.87  | 568.312 | 775.914 |
| ENSMUSG00000033147 | 16_Slc22e | 481.785 | 0.44295  | 0.06655  | 0.34237  | 540.004 | 605.291 | 520.183 | 398.616 | 406.918 | 419.699 |
| ENSMUSG00000033149 | 16_Phldb1 | 1143.67 | -0.04267 | 0.90431  | 0.974088 | 1617.99 | 907.936 | 854.217 | 1061.33 | 1282.56 | 1138.01 |
| ENSMUSG00000033152 | 13_Podxl2 | 532.495 | -1.53677 | 0.013054 | 0.121616 | 83.9333 | 233.502 | 501.568 | 1190.9  | 563.161 | 621.907 |
| ENSMUSG00000033157 | 16_Abhd1  | 189.959 | -0.01743 | 0.9672   | 0.991132 | 299.328 | 131.486 | 135.475 | 186.516 | 200.025 | 186.925 |
| ENSMUSG00000033159 | 14_Cnppd  | 925.162 | 0.16171  | 0.634221 | 0.883719 | 626.971 | 1167.51 | 1136.54 | 906.996 | 833.581 | 879.37  |
| ENSMUSG00000033161 | 10_Atp1a1 | 14239.3 | 0.09811  | 0.806243 | 0.943865 | 7699.61 | 18723.2 | 17747.2 | 13653.6 | 12699.5 | 14912.8 |
| ENSMUSG00000033166 | 10_Dis3   | 660.249 | 0.39478  | 0.317976 | 0.698985 | 1111.36 | 590.555 | 548.106 | 466.29  | 709.102 | 536.086 |
| ENSMUSG00000033170 | 14_Card1l | 256.591 | 0.43623  | 0.508883 | 0.827179 | 62.6971 | 405.794 | 416.767 | 272.346 | 124.479 | 257.462 |
| ENSMUSG00000033174 | 17_Mgll   | 5528.09 | -1.21663 | 0.003007 | 0.043522 | 2055.86 | 3388.04 | 4534.8  | 10552.2 | 6654.91 | 5982.77 |
| ENSMUSG00000033177 | 13_Tmprs  | 4.6454  | -1.5107  | 0.174371 | 0.557899 | 5.05622 | 1.1335  | 1.03416 | 9.07822 | 6.86782 | 4.70251 |
| ENSMUSG00000033182 | 12_Kbtbd1 | 7.02454 | -0.61554 | 0.469756 | 0.804531 | 9.1012  | 3.40051 | 4.13665 | 10.7288 | 7.72629 | 7.05377 |
| ENSMUSG00000033184 | 14_Tmed1  | 3695.12 | 0.54843  | 0.2329   | 0.624695 | 7560.06 | 2914.24 | 2692.96 | 2759.78 | 3335.18 | 2908.5  |
| ENSMUSG00000033186 | 8_Mzt1    | 938.365 | 0.45625  | 0.335686 | 0.713986 | 1906.2  | 657.432 | 692.888 | 829.419 | 822.421 | 721.835 |
| ENSMUSG00000033187 | 7_BC016f  | 143.757 | 0.66243  | 0.094746 | 0.41805  | 247.755 | 141.688 | 138.578 | 91.6075 | 103.017 | 139.9   |
| ENSMUSG00000033191 | 14_Tie1   | 174.988 | -0.59463 | 0.253739 | 0.644954 | 63.7084 | 130.353 | 224.413 | 294.629 | 173.412 | 163.412 |
| ENSMUSG00000033192 | 4_Lpcat2  | 250.131 | 0.28917  | 0.334973 | 0.713724 | 327.643 | 269.774 | 227.516 | 211.275 | 209.468 | 255.111 |
| ENSMUSG00000033196 | 17_Myh2   | 1454.9  | -0.87751 | 0.09058  | 0.409997 | 1169    | 454.535 | 1453    | 2496.51 | 1037.9  | 2118.48 |
| ENSMUSG00000033200 | 16_Tpsg1  | 2.12949 | 0.34989  | 0.847384 | 0.955658 | 5.05622 | 0       | 2.06832 | 3.30117 | 0       | 2.35126 |
| ENSMUSG00000033207 | 6_Mamdc   | 456.814 | -0.69063 | 0.069189 | 0.350044 | 498.543 | 231.235 | 318.522 | 483.621 | 657.593 | 551.369 |
| ENSMUSG00000033208 | 7_S100b   | 843.135 | -1.86958 | 1.91E-07 | 1.80E-05 | 407.531 | 258.439 | 420.904 | 1674.52 | 1326.35 | 971.069 |
| ENSMUSG00000033209 | 17_Ttc28  | 486.598 | -0.62636 | 0.153212 | 0.528352 | 229.552 | 330.983 | 587.404 | 774.95  | 497.058 | 499.642 |
| ENSMUSG00000033213 | 16_AA467  | 544.505 | 0.61949  | 0.180704 | 0.567066 | 962.705 | 646.097 | 370.23  | 302.057 | 612.094 | 373.85  |
| ENSMUSG00000033214 | 9_Slitrk5 | 14.8682 | -0.08306 | 0.917621 | 0.976775 | 24.2699 | 3.40051 | 15.5124 | 19.807  | 8.58477 | 17.6344 |
| ENSMUSG00000033216 | 9_Eefsec  | 314.942 | 0.20242  | 0.70077  | 0.906172 | 114.271 | 450.001 | 446.758 | 309.485 | 244.666 | 324.473 |
| ENSMUSG00000033219 | 8_Gm975   | 0.92683 | -3.22973 | 0.303548 | NA       | 0       | 0       | 0       | 0       | 0.85848 | 4.70251 |
| ENSMUSG00000033220 | 6_Rac2    | 108.774 | 2.28938  | 3.36E-05 | 0.001372 | 76.8546 | 304.912 | 160.295 | 46.2164 | 32.6221 | 31.742  |
| ENSMUSG00000033222 | 16_Ttf2   | 297.779 | 0.43009  | 0.18041  | 0.566659 | 276.07  | 417.129 | 331.966 | 211.275 | 248.1   | 302.136 |
| ENSMUSG00000033227 | 7_Wnt6    | 58.8513 | -0.31951 | 0.382702 | 0.749501 | 53.5959 | 60.0757 | 43.4348 | 58.5958 | 70.3951 | 67.0108 |
| ENSMUSG00000033228 | 7_Scaf11  | 3538.17 | 0.49098  | 0.160769 | 0.539243 | 5837.91 | 3439.05 | 3126.27 | 2517.97 | 3279.38 | 3028.42 |
| ENSMUSG00000033233 | 17_Trim4f | 129.901 | 0.07277  | 0.869482 | 0.963129 | 77.8658 | 116.751 | 204.764 | 128.746 | 109.027 | 142.251 |
| ENSMUSG00000033237 | 18_Arid2  | 1947.4  | 0.3061   | 0.353471 | 0.729327 | 2952.83 | 1718.39 | 1788.07 | 1548.25 | 1799.37 | 1877.48 |
| ENSMUSG00000033249 | 10_Hsf4   | 40.6675 | -0.94726 | 0.182649 | 0.568949 | 6.06747 | 34.0051 | 43.4348 | 82.5292 | 40.3484 | 37.6201 |
| ENSMUSG00000033253 | 18_Szt2   | 659.616 | 0.22609  | 0.700661 | 0.906172 | 175.957 | 956.676 | 1001.07 | 687.469 | 532.256 | 604.273 |
| ENSMUSG00000033255 | 8_Gm513   | 0.61771 | 0.23492  | 0.937546 | NA       | 2.02249 | 0       | 0       | 0.82529 | 0.85848 | 0       |

|                    |           |         |          |          |          |         |         |         |         |         |         |
|--------------------|-----------|---------|----------|----------|----------|---------|---------|---------|---------|---------|---------|
| ENSMUSG00000033256 | 14_Shf    | 55.0237 | 0.13509  | 0.825928 | 0.950165 | 16.1799 | 78.2117 | 78.5963 | 63.5475 | 48.9332 | 44.6739 |
| ENSMUSG00000033257 | 14_Ttl4   | 1219.44 | 0.36434  | 0.212087 | 0.603396 | 1553.27 | 1339.8  | 1224.45 | 826.943 | 1235.35 | 1136.83 |
| ENSMUSG00000033268 | 8_Duox1   | 399.47  | 1.12901  | 0.012971 | 0.121238 | 254.834 | 693.704 | 695.991 | 229.431 | 217.195 | 305.663 |
| ENSMUSG00000033272 | 12_Slc35e | 1431.79 | 0.09639  | 0.824498 | 0.949196 | 693.714 | 1964.36 | 1780.83 | 1440.14 | 1232.77 | 1478.94 |
| ENSMUSG00000033276 | 18_Stk36  | 57.0352 | -0.2183  | 0.646713 | 0.889998 | 29.3261 | 57.8086 | 71.3571 | 72.6257 | 65.2443 | 45.8495 |
| ENSMUSG00000033278 | 9_Ptpm    | 532.524 | -1.16323 | 4.81E-05 | 0.001842 | 338.767 | 286.776 | 360.922 | 793.106 | 820.704 | 594.868 |
| ENSMUSG00000033282 | 13_Rpgrip | 628.87  | 0.28655  | 0.551358 | 0.845045 | 1203.38 | 413.729 | 456.065 | 461.338 | 666.178 | 572.531 |
| ENSMUSG00000033285 | 15_Wdr3   | 891.167 | 0.19836  | 0.518911 | 0.831665 | 1159.9  | 941.941 | 754.938 | 680.041 | 933.164 | 877.018 |
| ENSMUSG00000033287 | 15_Kctd17 | 433.375 | -0.00589 | 0.991933 | 0.997512 | 116.293 | 521.411 | 659.795 | 491.049 | 339.098 | 472.602 |
| ENSMUSG00000033294 | 11_Noc4l  | 390.536 | 0.94287  | 0.060274 | 0.323186 | 203.26  | 788.918 | 549.14  | 259.967 | 229.213 | 312.717 |
| ENSMUSG00000033295 | 13_Ptpf   | 7163.12 | 0.58331  | 0.289739 | 0.674932 | 2580.7  | 11310.1 | 11884.6 | 5659.86 | 4547.35 | 6996.16 |
| ENSMUSG00000033306 | 14_Lpp    | 3735.68 | 0.31079  | 0.443598 | 0.788265 | 6394.1  | 3015.12 | 3000.1  | 2690.45 | 3924.96 | 3389.34 |
| ENSMUSG00000033307 | 6_Mif     | 853.051 | 0.39574  | 0.607352 | 0.872213 | 97.0795 | 1322.8  | 1488.16 | 1013.46 | 454.993 | 741.821 |
| ENSMUSG00000033308 | 16_Dpyd   | 312.522 | 0.19471  | 0.56011  | 0.848816 | 437.869 | 236.902 | 325.761 | 295.455 | 287.59  | 291.556 |
| ENSMUSG00000033313 | 11_Fbxl8  | 51.328  | 0.59516  | 0.283437 | 0.670337 | 24.2699 | 79.3452 | 81.6988 | 46.2164 | 31.7636 | 44.6739 |
| ENSMUSG00000033316 | 14_Galnt5 | 2.23566 | -0.16053 | 0.918553 | 0.977109 | 3.03373 | 1.1335  | 2.06832 | 2.47588 | 0       | 4.70251 |
| ENSMUSG00000033318 | 6_Gstt2   | 269.724 | -0.26726 | 0.659659 | 0.894966 | 67.7534 | 279.975 | 386.776 | 392.839 | 188.865 | 302.136 |
| ENSMUSG00000033319 | 5_Fem1c   | 2635.62 | 0.76007  | 0.076652 | 0.371177 | 5365.66 | 2356.55 | 2220.34 | 1595.29 | 2189.12 | 2086.74 |
| ENSMUSG00000033323 | 13_Ctdp1  | 324.318 | 0.16406  | 0.665212 | 0.89688  | 203.26  | 409.195 | 415.733 | 312.786 | 268.703 | 336.23  |
| ENSMUSG00000033326 | 15_Kdm4   | 1446.08 | 0.22612  | 0.598954 | 0.869086 | 742.253 | 2009.7  | 1925.61 | 1354.3  | 1191.57 | 1453.08 |
| ENSMUSG00000033327 | 16_Tnxb   | 755.558 | 0.12253  | 0.860434 | 0.960437 | 153.709 | 686.903 | 1522.29 | 1010.16 | 436.106 | 724.187 |
| ENSMUSG00000033335 | 17_Dnm2   | 2722.53 | 0.49179  | 0.30097  | 0.684178 | 1284.28 | 4273.31 | 3988.76 | 2347.96 | 1923.85 | 2517.02 |
| ENSMUSG00000033342 | 13_Lppr5  | 7.70818 | -0.47496 | 0.685032 | 0.903819 | 16.1799 | 1.1335  | 2.06832 | 17.3311 | 6.00934 | 3.52688 |
| ENSMUSG00000033350 | 7_Chst2   | 173.68  | -1.30167 | 0.000226 | 0.006342 | 118.316 | 75.9447 | 106.519 | 269.045 | 284.156 | 188.1   |
| ENSMUSG00000033352 | 11_Map2k  | 2455.89 | 0.32381  | 0.313554 | 0.695015 | 3556.55 | 2444.97 | 2189.32 | 1795.01 | 2498.17 | 2251.33 |
| ENSMUSG00000033355 | 5_Rtp4    | 3745.29 | 1.68277  | 2.41E-06 | 0.000165 | 7745.12 | 5242.45 | 4146.99 | 1415.38 | 2173.66 | 1748.16 |
| ENSMUSG00000033356 | 3_Pus7l   | 111.257 | 0.58541  | 0.054936 | 0.306161 | 132.473 | 145.088 | 123.065 | 80.8787 | 97.8664 | 88.1721 |
| ENSMUSG00000033361 | 13_Prrg3  | 394.914 | -1.18955 | 0.011485 | 0.111516 | 370.115 | 109.95  | 241.994 | 627.222 | 573.463 | 446.739 |
| ENSMUSG00000033364 | 12_Uspp3  | 943.646 | 0.44276  | 0.247906 | 0.639422 | 1627.09 | 809.321 | 825.261 | 676.74  | 868.779 | 854.681 |
| ENSMUSG00000033365 | 14_Ipo13  | 729.654 | -0.01153 | 0.984405 | 0.994848 | 186.069 | 983.881 | 1010.38 | 890.49  | 560.585 | 746.524 |
| ENSMUSG00000033368 | 8_Trim69  | 2.46535 | 0.32504  | 0.829414 | 0.951112 | 4.04498 | 0       | 4.13665 | 0.82529 | 3.43391 | 2.35126 |
| ENSMUSG00000033373 | 16_Fntb   | 310.28  | 0.32374  | 0.470401 | 0.804531 | 159.777 | 438.666 | 436.416 | 287.202 | 238.657 | 300.961 |
| ENSMUSG00000033377 | 14_Palmd  | 853.588 | -0.39539 | 0.178697 | 0.564262 | 875.738 | 614.359 | 721.845 | 844.274 | 1149.5  | 915.814 |
| ENSMUSG00000033379 | 13_Atp6v  | 1967.45 | -0.01753 | 0.963009 | 0.990106 | 1115.4  | 2305.54 | 2445.79 | 2200.23 | 1895.52 | 1842.21 |
| ENSMUSG00000033382 | 13_Trapp  | 2060.03 | 0.42314  | 0.325025 | 0.705557 | 3809.36 | 1716.12 | 1554.34 | 1474.8  | 2093.83 | 1711.71 |
| ENSMUSG00000033383 | 6_Rtp1    | 0.13755 | -0.79206 | 0.84609  | NA       | 0       | 0       | 0       | 0.82529 | 0       | 0       |
| ENSMUSG00000033386 | 10_Frrs1  | 321.732 | -0.12061 | 0.662567 | 0.895858 | 361.014 | 287.91  | 276.121 | 346.623 | 355.409 | 303.312 |
| ENSMUSG00000033389 | 16_Arhga  | 109.823 | -0.95208 | 0.007211 | 0.079785 | 77.8658 | 55.5416 | 91.0062 | 166.709 | 127.913 | 139.9   |
| ENSMUSG00000033392 | 15_Clasp  | 1304.68 | 0.07666  | 0.832035 | 0.951799 | 1943.61 | 1037.16 | 1037.26 | 1275.9  | 1407.9  | 1126.25 |
| ENSMUSG00000033396 | 13_Spg11  | 1142.2  | 0.23265  | 0.348744 | 0.725874 | 1085.07 | 1304.66 | 1312.35 | 949.912 | 1080.82 | 1120.37 |
| ENSMUSG00000033400 | 14_Agl    | 999.325 | -0.52001 | 0.194175 | 0.584278 | 1269.11 | 564.484 | 629.804 | 1266.82 | 1259.39 | 1006.34 |
| ENSMUSG00000033405 | 3_Nudt15  | 97.7601 | 0.04082  | 0.901168 | 0.973382 | 88.9895 | 88.4132 | 119.963 | 102.336 | 89.2816 | 97.5771 |
| ENSMUSG00000033409 | 13_Syce1  | 2.30442 | -0.20438 | 0.878495 | 0.966155 | 2.02249 | 3.40051 | 1.03416 | 3.30117 | 1.71695 | 2.35126 |
| ENSMUSG00000033411 | 16_Ctdspl | 1057.92 | 0.42409  | 0.358314 | 0.732631 | 2088.22 | 794.586 | 753.904 | 812.913 | 972.654 | 925.219 |
| ENSMUSG00000033416 | 14_Gucd1  | 885.832 | 0.07142  | 0.831651 | 0.95176  | 612.814 | 1049.62 | 1061.05 | 991.176 | 759.752 | 840.574 |
| ENSMUSG00000033417 | 15_Cacul  | 1473.47 | 0.538    | 0.22329  | 0.613683 | 2891.15 | 1208.31 | 1135.51 | 1003.56 | 1322.05 | 1280.26 |
| ENSMUSG00000033419 | 15_Snap9  | 93.9101 | -1.46301 | 0.027149 | 0.198655 | 100.113 | 26.0706 | 23.7857 | 203.022 | 139.932 | 70.5377 |
| ENSMUSG00000033420 | 12_Antxr1 | 9264.12 | 0.08093  | 0.774772 | 0.933172 | 11745.6 | 8010.47 | 8815.19 | 7910.43 | 9326.49 | 9776.52 |
| ENSMUSG00000033423 | 16_Eri3   | 556.003 | -0.1326  | 0.745424 | 0.924182 | 279.103 | 650.631 | 661.863 | 657.758 | 517.662 | 569.004 |
| ENSMUSG00000033427 | 13_Upb1   | 126.518 | 0.01679  | 0.962581 | 0.990106 | 107.192 | 108.816 | 165.466 | 132.047 | 102.159 | 143.427 |
| ENSMUSG00000033429 | 10_Mcee   | 372.96  | -0.54684 | 0.094061 | 0.417315 | 347.868 | 217.633 | 343.342 | 439.881 | 381.164 | 507.871 |
| ENSMUSG00000033430 | 9_Terf2ip | 510.041 | -0.08047 | 0.800883 | 0.941902 | 659.331 | 385.391 | 442.621 | 524.061 | 546.85  | 501.993 |
| ENSMUSG00000033434 | 15_Gtpbp  | 107.936 | 0.59268  | 0.476196 | 0.807493 | 10.1124 | 163.224 | 216.14  | 123.794 | 53.2256 | 81.1183 |
| ENSMUSG00000033436 | 12_Armcx  | 691.748 | -0.92642 | 0.012247 | 0.116427 | 647.196 | 303.779 | 479.851 | 1027.49 | 928.014 | 764.158 |
| ENSMUSG00000033439 | 12_Trmt1  | 193.162 | 0.31126  | 0.475446 | 0.807043 | 320.564 | 193.829 | 127.202 | 132.872 | 203.459 | 181.047 |
| ENSMUSG00000033444 | 13_Specc  | 2005.95 | -0.29338 | 0.211233 | 0.602834 | 1613.95 | 1790.93 | 2003.17 | 2207.66 | 2183.97 | 2236.04 |
| ENSMUSG00000033446 | 7_Lpar6   | 1224.56 | 0.42209  | 0.315058 | 0.696567 | 2176.2  | 987.281 | 1043.47 | 778.251 | 1192.42 | 1169.75 |
| ENSMUSG00000033450 | 7_Tagap   | 112.393 | 0.89546  | 0.020434 | 0.164813 | 107.192 | 206.298 | 125.134 | 77.5775 | 74.6875 | 83.4696 |
| ENSMUSG00000033453 | 7_Adamts  | 121.361 | -0.51053 | 0.126669 | 0.483956 | 112.248 | 96.3477 | 92.0404 | 174.962 | 137.356 | 115.212 |
| ENSMUSG00000033454 | 6_Zbtb1   | 961.972 | 0.29093  | 0.475349 | 0.806972 | 1668.55 | 770.782 | 736.323 | 770.823 | 904.835 | 920.517 |
| ENSMUSG00000033458 | 17_Fan1   | 185.421 | -0.04426 | 0.866798 | 0.962751 | 186.069 | 174.559 | 187.183 | 193.944 | 189.723 | 181.047 |
| ENSMUSG00000033460 | 14_Armcx  | 288.112 | -0.74915 | 0.104525 | 0.439595 | 357.98  | 133.753 | 153.056 | 388.713 | 409.494 | 285.678 |
| ENSMUSG00000033467 | 12_Crlf2  | 54.8266 | 0.44693  | 0.328724 | 0.709501 | 37.416  | 85.0127 | 67.2205 | 44.5658 | 39.4899 | 55.2545 |
| ENSMUSG00000033470 | 11_Cysltr | 4.49882 | 2.74038  | 0.092627 | 0.414656 | 11.1237 | 12.4685 | 0       | 0.82529 | 2.57543 | 0       |
| ENSMUSG00000033475 | 15_Tomm   | 703.263 | 0.00397  | 0.991557 | 0.997512 | 424.723 | 867.13  | 821.124 | 832.72  | 615.528 | 658.352 |
| ENSMUSG00000033478 | 4_Fam16c  | 700.641 | 0.17121  | 0.462398 | 0.799907 | 803.939 | 714.107 | 708.401 | 672.613 | 646.433 | 658.352 |
| ENSMUSG00000033486 | 14_Catsp  | 100.214 | 0.15663  | 0.648472 | 0.890982 | 128.428 | 108.816 | 79.6304 | 93.258  | 93.574  | 97.5771 |
| ENSMUSG00000033487 | 14_Fndc3  | 8323.04 | 1.11267  | 0.003329 | 0.046846 | 16136.4 | 10108.6 | 7902.03 | 3965.53 | 6141.54 | 5684.16 |
| ENSMUSG00000033488 | 11_BC02f  | 83.9772 | -0.1302  | 0.716064 | 0.911938 | 67.7534 | 98.6148 | 74.4596 | 103.162 | 76.4045 | 83.4696 |
| ENSMUSG00000033491 | 13_Prss3f | 27.7417 | -0.29341 | 0.6074   | 0.872213 | 29.3261 | 12.4685 | 33.0932 | 34.6623 | 36.9145 | 19.9857 |
| ENSMUSG00000033498 | 14_Strc   | 0.51538 | 1.15053  | 0.76193  | NA       | 0       | 2.26701 | 0       | 0.82529 | 0       | 0       |
| ENSMUSG00000033499 | 13_Larp4f | 4622.97 | 0.46751  | 0.138664 | 0.505595 | 6978.6  | 4772.05 | 4345.55 | 3212.86 | 4230.57 | 4198.17 |
| ENSMUSG00000033501 | 4_Crygs   | 2810.22 | -4.03993 | 3.36E-08 | 3.86E-06 | 61.6859 | 387.658 | 517.081 | 9309.3  | 2171.09 | 4414.48 |
| ENSMUSG00000033502 | 14_Cdc14  | 477.219 | -0.1261  | 0.788927 | 0.937308 | 784.726 | 259.572 | 324.727 | 480.32  | 564.878 | 449.09  |
| ENSMUSG00000033508 | 7_Asprv1  | 55754.8 | 0.34647  | 0.519453 | 0.831665 | 19017.5 | 82830.7 | 85405.2 | 53891.6 | 43437.2 | 49946.5 |

|                    |           |         |          |          |          |         |         |         |         |         |         |
|--------------------|-----------|---------|----------|----------|----------|---------|---------|---------|---------|---------|---------|
| ENSMUSG00000033510 | 14_Otud7  | 1.21568 | -2.45161 | 0.262259 | NA       | 0       | 1.1335  | 0       | 4.12646 | 0.85848 | 1.17563 |
| ENSMUSG00000033520 | 2_Idi2    | 0.50944 | 2.5636   | 0.489603 | NA       | 2.02249 | 0       | 1.03416 | 0       | 0       | 0       |
| ENSMUSG00000033526 | 16_Ppic5h | 2085.16 | 0.16814  | 0.554712 | 0.846397 | 1662.49 | 2423.43 | 2533.7  | 1926.23 | 1919.55 | 2045.59 |
| ENSMUSG00000033530 | 7_Ttc7b   | 468.795 | -0.25195 | 0.329062 | 0.709876 | 368.093 | 456.802 | 459.168 | 542.217 | 483.323 | 503.169 |
| ENSMUSG00000033533 | 13_Acsm1  | 2066.72 | 0.1157   | 0.683147 | 0.902945 | 1832.37 | 2010.83 | 2605.05 | 1707.53 | 2032.02 | 2212.53 |
| ENSMUSG00000033538 | 13_Casp4  | 262.556 | 2.35256  | 1.80E-07 | 1.72E-05 | 613.825 | 487.406 | 216.14  | 74.2763 | 97.8664 | 85.8208 |
| ENSMUSG00000033540 | 18_Idua   | 250.476 | -0.34399 | 0.231335 | 0.622696 | 182.024 | 232.368 | 248.199 | 291.328 | 296.175 | 252.76  |
| ENSMUSG00000033542 | 13_Arhge1 | 4641.99 | 0.2708   | 0.354507 | 0.729885 | 4107.67 | 5908.95 | 5212.17 | 3467.05 | 4298.39 | 4857.69 |
| ENSMUSG00000033543 | 17_Gtf2a2 | 982.234 | 0.44872  | 0.389744 | 0.753164 | 2106.42 | 648.364 | 646.351 | 673.439 | 982.956 | 835.871 |
| ENSMUSG00000033544 | 6_Angpt1  | 358.669 | -0.41758 | 0.310035 | 0.692089 | 455.06  | 172.292 | 293.702 | 412.646 | 388.032 | 430.28  |
| ENSMUSG00000033545 | 14_Znrf1  | 636.516 | 0.17763  | 0.621521 | 0.878215 | 411.576 | 851.261 | 764.245 | 569.452 | 611.236 | 611.326 |
| ENSMUSG00000033554 | 17_Dph5   | 203.358 | 0.10486  | 0.707869 | 0.909652 | 186.069 | 240.303 | 205.798 | 188.992 | 189.723 | 209.262 |
| ENSMUSG00000033557 | 17_Fam2f  | 3535.28 | 0.28049  | 0.296622 | 0.680154 | 4729.59 | 3487.79 | 3415.84 | 2979.31 | 3200.4  | 3398.74 |
| ENSMUSG00000033565 | 16_Rbfox2 | 2253.66 | 0.25874  | 0.240172 | 0.631907 | 2540.25 | 2403.03 | 2422.01 | 1950.17 | 2036.31 | 2170.21 |
| ENSMUSG00000033569 | 17_Adgrb1 | 14.8994 | -1.60302 | 0.044455 | 0.268708 | 10.1124 | 9.06802 | 3.10248 | 37.9634 | 19.745  | 9.40502 |
| ENSMUSG00000033576 | 11_Apol6  | 112.413 | 3.10153  | 1.35E-11 | 3.33E-09 | 138.54  | 283.376 | 182.012 | 28.0599 | 15.4526 | 27.0394 |
| ENSMUSG00000033577 | 18_Myo6   | 6820.99 | 0.31401  | 0.39951  | 0.059197 | 11064   | 5356.93 | 6259.78 | 5087.93 | 6330.41 | 6826.87 |
| ENSMUSG00000033578 | 7_Tmem3   | 66.3163 | -1.23278 | 0.008814 | 0.091872 | 57.6409 | 24.9371 | 36.1957 | 110.589 | 103.876 | 64.6595 |
| ENSMUSG00000033579 | 16_Fa2h   | 8.38884 | -1.386   | 0.099716 | 0.429504 | 2.02249 | 6.80102 | 5.17081 | 15.6806 | 7.72629 | 12.9319 |
| ENSMUSG00000033581 | 16_Igf2bp | 56.0565 | -0.15264 | 0.711834 | 0.910709 | 46.5172 | 62.3427 | 50.6739 | 78.4028 | 45.4993 | 52.9033 |
| ENSMUSG00000033585 | 4_Ndn     | 930.243 | -0.10179 | 0.653522 | 0.893223 | 945.513 | 887.533 | 859.388 | 1004.38 | 951.192 | 933.448 |
| ENSMUSG00000033589 | 3_Reep4   | 1391.72 | 0.72619  | 0.144749 | 0.514801 | 650.23  | 2355.42 | 2198.63 | 1104.24 | 856.76  | 1185.03 |
| ENSMUSG00000033590 | 7_Myo5c   | 103.395 | -0.23291 | 0.467843 | 0.804041 | 110.226 | 81.6122 | 93.0745 | 113.065 | 101.3   | 121.09  |
| ENSMUSG00000033594 | 10_Spata2 | 114.834 | -0.02953 | 0.961731 | 0.990106 | 27.3036 | 145.088 | 168.568 | 108.113 | 104.734 | 135.197 |
| ENSMUSG00000033595 | 6_Lgi3    | 19.54   | -1.57033 | 0.053712 | 0.301478 | 2.02249 | 6.80102 | 20.6832 | 37.9634 | 18.028  | 31.742  |
| ENSMUSG00000033596 | 4_Rfwd3   | 2219.91 | 0.45729  | 0.1548   | 0.531049 | 3295.65 | 2369.02 | 2041.43 | 1493.78 | 2077.51 | 2042.07 |
| ENSMUSG00000033597 | 8_Caskin1 | 43.8982 | -1.78394 | 0.01881  | 0.156415 | 3.03373 | 17.0025 | 39.2981 | 97.3845 | 54.9425 | 51.7276 |
| ENSMUSG00000033610 | 15_Pank1  | 692.317 | 0.18798  | 0.55947  | 0.848504 | 995.064 | 596.223 | 620.497 | 600.813 | 665.32  | 675.986 |
| ENSMUSG00000033615 | 9_Cplx1   | 16.0375 | -1.18241 | 0.146252 | 0.517317 | 10.1124 | 10.2015 | 9.30745 | 40.4393 | 21.4619 | 4.70251 |
| ENSMUSG00000033618 | 6_Map3k1  | 103.687 | 0.3845   | 0.205528 | 0.59724  | 125.394 | 122.418 | 104.45  | 87.481  | 91.857  | 90.5233 |
| ENSMUSG00000033623 | 13_Pcgf3  | 1792.23 | 0.4917   | 0.066226 | 0.341158 | 2470.47 | 1999.5  | 1813.92 | 1317.99 | 1598.48 | 1553    |
| ENSMUSG00000033624 | 10_Pdpr   | 662.268 | -0.09866 | 0.754382 | 0.926508 | 842.367 | 531.613 | 545.003 | 732.034 | 715.97  | 606.624 |
| ENSMUSG00000033628 | 15_Pik3ca | 1011.8  | 0.30783  | 0.196721 | 0.588974 | 1246.86 | 1063.23 | 1047.61 | 870.683 | 893.675 | 948.732 |
| ENSMUSG00000033629 | 5_Hacd3   | 1463.53 | -0.32326 | 0.38044  | 0.747938 | 1936.53 | 969.145 | 994.863 | 1573.01 | 1681.76 | 1625.89 |
| ENSMUSG00000033632 | 15_AW55   | 439.38  | 0.15464  | 0.691475 | 0.905638 | 686.635 | 315.114 | 386.776 | 359.827 | 476.455 | 411.47  |
| ENSMUSG00000033633 | 13_Clec1f | 93.5884 | -1.42035 | 0.011142 | 0.109016 | 24.2699 | 52.1411 | 76.528  | 216.227 | 103.017 | 89.3477 |
| ENSMUSG00000033634 | 7_Cmi2    | 1.09981 | -1.15829 | 0.598527 | NA       | 2.02249 | 0       | 0       | 0.82529 | 2.57543 | 1.17563 |
| ENSMUSG00000033644 | 4_Piwi2   | 18.0025 | 0.37751  | 0.53051  | 0.83656  | 27.3036 | 21.5366 | 12.4099 | 18.1564 | 18.028  | 10.5807 |
| ENSMUSG00000033653 | 17_Vps8   | 873.625 | -0.0176  | 0.946464 | 0.986649 | 711.916 | 962.344 | 930.745 | 840.973 | 911.703 | 884.072 |
| ENSMUSG00000033658 | 16_Ddx19  | 912.06  | 0.15331  | 0.535386 | 0.83864  | 938.435 | 1031.49 | 911.096 | 771.648 | 853.326 | 966.366 |
| ENSMUSG00000033669 | 7_Zfp7    | 814.659 | 0.36922  | 0.175762 | 0.559175 | 745.287 | 980.48  | 1028.99 | 679.216 | 672.187 | 781.793 |
| ENSMUSG00000033671 | 17_Cep35  | 3014.52 | 0.38301  | 0.249776 | 0.641438 | 4624.42 | 2995.85 | 2616.43 | 2211.78 | 2821.81 | 2816.8  |
| ENSMUSG00000033676 | 13_Gabrb  | 176.662 | -1.60092 | 0.004283 | 0.055902 | 155.732 | 40.8061 | 66.1863 | 345.797 | 292.741 | 158.71  |
| ENSMUSG00000033684 | 14_Qsox1  | 1156.15 | 0.20726  | 0.676551 | 0.901308 | 456.071 | 1776.2  | 1485.06 | 1143.86 | 1003.56 | 1072.17 |
| ENSMUSG00000033685 | 12_Ucp2   | 8050.93 | 0.36793  | 0.513111 | 0.828304 | 2515.98 | 12333.6 | 12366.5 | 7970.67 | 5775.83 | 7342.97 |
| ENSMUSG00000033688 | 9_130001  | 0.81194 | -0.44301 | 0.85413  | NA       | 1.01124 | 0       | 1.03416 | 1.65058 | 0       | 1.17563 |
| ENSMUSG00000033697 | 15_Arhga1 | 262.258 | 0.10012  | 0.842766 | 0.953771 | 103.147 | 360.454 | 350.581 | 292.979 | 207.751 | 258.638 |
| ENSMUSG00000033701 | 13_Acbd6  | 323.218 | 0.27455  | 0.369492 | 0.741029 | 448.992 | 310.58  | 301.975 | 270.696 | 320.212 | 286.853 |
| ENSMUSG00000033703 | 8_Fuk     | 301.348 | 0.3437   | 0.466397 | 0.803496 | 141.574 | 425.064 | 444.689 | 288.027 | 239.515 | 269.219 |
| ENSMUSG00000033705 | 16_Stard5 | 345.596 | -0.76686 | 0.023387 | 0.180504 | 275.058 | 206.298 | 286.463 | 525.711 | 466.153 | 313.893 |
| ENSMUSG00000033706 | 13_Smyd4  | 329.35  | 0.17556  | 0.699181 | 0.905739 | 159.777 | 497.608 | 390.913 | 340.02  | 283.297 | 304.488 |
| ENSMUSG00000033707 | 8_Lrrc24  | 84.136  | -0.4751  | 0.271176 | 0.657711 | 45.506  | 77.0782 | 88.9379 | 130.396 | 84.1307 | 78.7671 |
| ENSMUSG00000033712 | 5_Ccar2   | 981.177 | 0.20035  | 0.651283 | 0.891939 | 474.274 | 1405.54 | 1267.88 | 937.532 | 850.751 | 951.083 |
| ENSMUSG00000033713 | 11_Foxn3  | 485.461 | 0.36947  | 0.144342 | 0.514298 | 616.859 | 516.877 | 507.773 | 414.297 | 404.343 | 452.617 |
| ENSMUSG00000033715 | 14_Akr1c1 | 117.617 | 0.11122  | 0.850166 | 0.957445 | 241.687 | 64.6097 | 59.9814 | 97.3845 | 124.479 | 117.563 |
| ENSMUSG00000033717 | 5_Adra2a  | 79.861  | 0.80106  | 0.027472 | 0.200033 | 75.8433 | 121.285 | 107.553 | 58.5958 | 61.8103 | 54.0789 |
| ENSMUSG00000033720 | 12_Sfxn5  | 121.546 | -1.1166  | 0.002224 | 0.035145 | 57.6409 | 85.0127 | 87.9037 | 191.468 | 180.28  | 126.968 |
| ENSMUSG00000033721 | 16_Vav3   | 691.041 | 0.48227  | 0.226797 | 0.617599 | 1229.67 | 606.424 | 580.165 | 484.447 | 663.603 | 581.936 |
| ENSMUSG00000033722 | 9_BC034C  | 378.15  | -1.2279  | 0.00526  | 0.064184 | 142.585 | 209.698 | 326.795 | 742.763 | 466.153 | 380.903 |
| ENSMUSG00000033726 | 8_Emx1    | 0.36128 | 2.05714  | 0.610196 | NA       | 0       | 1.1335  | 1.03416 | 0       | 0       | 0       |
| ENSMUSG00000033728 | 14_Lrrc14 | 322.815 | 0.0125   | 0.978876 | 0.993796 | 140.563 | 385.391 | 446.758 | 366.43  | 262.694 | 335.054 |
| ENSMUSG00000033730 | 3_Egr3    | 2.08073 | -0.98352 | 0.492065 | 0.815612 | 2.02249 | 1.1335  | 1.03416 | 1.65058 | 4.29238 | 2.35126 |
| ENSMUSG00000033732 | 9_Sf3b3   | 3574.2  | 0.52703  | 0.092183 | 0.413496 | 3368.45 | 5132.5  | 4158.36 | 2295.96 | 3075.92 | 3414.02 |
| ENSMUSG00000033735 | 9_Spr     | 332.218 | -0.32519 | 0.528881 | 0.835785 | 110.226 | 354.786 | 419.87  | 443.182 | 277.288 | 387.957 |
| ENSMUSG00000033737 | 14_Fndc3  | 8.81916 | -1.24997 | 0.1954   | 0.586641 | 11.1237 | 3.40051 | 1.03416 | 14.03   | 6.86782 | 16.4588 |
| ENSMUSG00000033739 | 8_Fkbp1   | 121.623 | 0.02497  | 0.938584 | 0.985118 | 95.057  | 131.486 | 141.68  | 122.143 | 125.338 | 114.036 |
| ENSMUSG00000033740 | 17_St18   | 6.54346 | -0.93792 | 0.403727 | 0.762092 | 9.1012  | 3.40051 | 1.03416 | 16.5058 | 6.86782 | 2.35126 |
| ENSMUSG00000033751 | 5_Gadd45  | 146.492 | -0.33507 | 0.508699 | 0.827066 | 48.5397 | 177.96  | 162.363 | 168.36  | 166.545 | 155.183 |
| ENSMUSG00000033752 | 7_Mnd1    | 120.788 | 0.02416  | 0.946184 | 0.986649 | 155.732 | 87.2797 | 122.031 | 107.288 | 121.904 | 130.495 |
| ENSMUSG00000033760 | 16_Rbm4l  | 870.57  | 0.1017   | 0.783307 | 0.935592 | 1300.46 | 669.9   | 733.221 | 718.83  | 989.824 | 811.183 |
| ENSMUSG00000033762 | 7_Recql4  | 73.6984 | 0.84233  | 0.214121 | 0.605026 | 18.2024 | 140.554 | 125.134 | 57.7705 | 42.9238 | 57.6058 |
| ENSMUSG00000033763 | 14_Mtss1l | 303.381 | -1.42692 | 0.000951 | 0.018866 | 97.0795 | 158.69  | 237.857 | 586.783 | 364.853 | 375.025 |
| ENSMUSG00000033765 | 4_Calm4   | 6.76078 | -0.94118 | 0.280588 | 0.667117 | 3.03373 | 5.66751 | 5.17081 | 4.95175 | 11.1602 | 10.5807 |
| ENSMUSG00000033767 | 14_D930C  | 1546.28 | 0.7205   | 0.032773 | 0.223702 | 1600.8  | 2068.64 | 2103.48 | 831.895 | 1137.48 | 1535.37 |
| ENSMUSG00000033768 | 16_Nrxn2  | 42.817  | -1.88036 | 0.002342 | 0.036424 | 10.1124 | 17.0025 | 27.9224 | 103.162 | 66.9612 | 31.742  |

|                    |           |         |          |          |          |         |         |         |         |         |         |
|--------------------|-----------|---------|----------|----------|----------|---------|---------|---------|---------|---------|---------|
| ENSMUSG00000033769 | 16_Exoc6  | 1046.46 | 0.3444   | 0.171011 | 0.553274 | 1303.49 | 1128.97 | 1079.66 | 817.865 | 1003.56 | 945.205 |
| ENSMUSG00000033770 | 13_Clnk   | 9.96943 | -2.40525 | 0.020717 | 0.166446 | 0       | 2.26701 | 7.23913 | 25.5841 | 9.44325 | 15.2832 |
| ENSMUSG00000033773 | 14_Rpap2  | 260.885 | 0.11337  | 0.719071 | 0.913017 | 348.879 | 249.371 | 215.106 | 246.762 | 261.835 | 243.355 |
| ENSMUSG00000033774 | 4_Npbw1   | 1.8699  | 1.55228  | 0.36021  | 0.733776 | 2.02249 | 1.1335  | 5.17081 | 0       | 1.71695 | 1.17563 |
| ENSMUSG00000033777 | 3_Tlr13   | 124.338 | 1.96959  | 3.63E-05 | 0.001472 | 260.901 | 238.036 | 95.1429 | 52.8187 | 40.3484 | 58.7814 |
| ENSMUSG00000033781 | 6_Asb13   | 1294.55 | 0.96859  | 0.003277 | 0.046345 | 2322.83 | 1493.96 | 1323.73 | 811.262 | 985.532 | 829.993 |
| ENSMUSG00000033788 | 15_Dysf   | 167.891 | -0.61818 | 0.215004 | 0.606021 | 58.6522 | 138.287 | 200.627 | 264.094 | 171.695 | 173.993 |
| ENSMUSG00000033790 | 11_Tubgc  | 759.374 | 0.15843  | 0.66174  | 0.895681 | 1141.69 | 691.437 | 569.823 | 632.174 | 808.685 | 712.43  |
| ENSMUSG00000033792 | 12_Atp7a  | 441.841 | -0.08513 | 0.815613 | 0.947273 | 605.735 | 357.053 | 323.693 | 426.676 | 541.699 | 396.187 |
| ENSMUSG00000033793 | 12_Atp6v  | 2107.28 | 0.33093  | 0.41035  | 0.767001 | 3657.67 | 1770.53 | 1615.36 | 1634.9  | 2091.25 | 1873.95 |
| ENSMUSG00000033794 | 6_Lpcat2t | 0.19594 | -0.79206 | 0.84609  | NA       | 0       | 0       | 0       | 0       | 0       | 1.17563 |
| ENSMUSG00000033799 | 9_Fam20f  | 1977.19 | 0.7739   | 0.105139 | 0.440631 | 4339.25 | 1665.12 | 1480.92 | 1178.52 | 1729.83 | 1469.53 |
| ENSMUSG00000033805 | 12_Ephx4  | 14.2227 | 0.13542  | 0.838202 | 0.952966 | 16.1799 | 19.2695 | 9.30745 | 9.07822 | 19.745  | 11.7563 |
| ENSMUSG00000033808 | 16_Tmem   | 3729.2  | 0.38241  | 0.30813  | 0.690547 | 6274.77 | 3300.76 | 3085.94 | 2777.11 | 3534.35 | 3402.27 |
| ENSMUSG00000033809 | 14_Alg3   | 258.712 | 0.637    | 0.175258 | 0.558673 | 138.54  | 406.928 | 399.186 | 202.197 | 169.12  | 236.301 |
| ENSMUSG00000033813 | 15_Tcea1  | 3181.87 | 0.56373  | 0.260704 | 0.649812 | 6922.98 | 2344.08 | 2120.03 | 2241.49 | 2916.25 | 2546.41 |
| ENSMUSG00000033819 | 15_Ppp1r  | 354.519 | 0.30023  | 0.64433  | 0.889191 | 76.8546 | 493.074 | 603.95  | 387.887 | 232.647 | 332.703 |
| ENSMUSG00000033825 | 9_Tpsb2   | 58.5816 | -1.18483 | 0.061504 | 0.327248 | 14.1574 | 38.5391 | 54.8106 | 132.872 | 42.9238 | 68.1864 |
| ENSMUSG00000033826 | 9_Dnah8   | 66.2462 | -0.98571 | 0.011869 | 0.113942 | 47.5285 | 51.0076 | 35.1615 | 102.336 | 94.4325 | 67.0108 |
| ENSMUSG00000033831 | 5_Fgb     | 0.2751  | -1.54073 | 0.703687 | NA       | 0       | 0       | 0       | 1.65058 | 0       | 0       |
| ENSMUSG00000033845 | 15_Mrpl1f | 608.276 | 0.03004  | 0.924454 | 0.979059 | 813.04  | 538.414 | 492.261 | 558.723 | 655.876 | 591.341 |
| ENSMUSG00000033847 | 15_Pla2g  | 66.7158 | 2.4611   | 3.66E-05 | 0.001479 | 190.114 | 77.0782 | 71.3571 | 9.90351 | 28.3297 | 23.5126 |
| ENSMUSG00000033849 | 3_B3galt2 | 201.069 | -0.12451 | 0.82252  | 0.948763 | 365.059 | 82.7457 | 129.27  | 216.227 | 221.487 | 191.627 |
| ENSMUSG00000033852 | 16_Gm28   | 158.843 | 0.23662  | 0.631324 | 0.882449 | 74.8321 | 230.101 | 210.969 | 181.564 | 145.083 | 110.509 |
| ENSMUSG00000033854 | 9_Kcnk10  | 5.91055 | -2.51002 | 0.103651 | 0.437303 | 2.02249 | 2.26701 | 1.03416 | 0       | 26.6128 | 3.52688 |
| ENSMUSG00000033855 | 15_Ston1  | 332.033 | -1.15299 | 9.76E-05 | 0.003254 | 186.069 | 185.894 | 246.13  | 532.314 | 432.672 | 409.118 |
| ENSMUSG00000033857 | 12_Engas  | 287.419 | 0.83627  | 0.138909 | 0.505969 | 108.203 | 474.938 | 522.252 | 229.431 | 163.969 | 225.721 |
| ENSMUSG00000033860 | 13_Fgg    | 1.09063 | 0.68296  | 0.788809 | NA       | 3.03373 | 0       | 1.03416 | 2.47588 | 0       | 0       |
| ENSMUSG00000033862 | 6_Cdk10   | 517.406 | 0.05123  | 0.92519  | 0.979484 | 157.754 | 674.434 | 747.699 | 538.916 | 482.464 | 503.169 |
| ENSMUSG00000033863 | 1_Klf9    | 657.96  | -0.27772 | 0.463398 | 0.801036 | 862.591 | 393.326 | 528.457 | 828.594 | 667.037 | 667.757 |
| ENSMUSG00000033871 | 14_Pparg  | 70.8277 | -0.57884 | 0.319166 | 0.700329 | 19.2136 | 88.4132 | 63.0839 | 112.24  | 73.829  | 68.1864 |
| ENSMUSG00000033880 | 11_Lgals3 | 4251.84 | 2.0968   | 6.75E-05 | 0.002407 | 2322.83 | 10634.5 | 7720.02 | 1876.71 | 1434.52 | 1522.44 |
| ENSMUSG00000033882 | 15_Rbm4f  | 39.4136 | -0.00491 | 0.993768 | 0.998043 | 76.8546 | 20.4031 | 20.6832 | 37.1382 | 43.7823 | 37.6201 |
| ENSMUSG00000033883 | 11_D3Ertc | 540.825 | -0.04929 | 0.913506 | 0.975947 | 898.996 | 361.587 | 334.034 | 505.904 | 609.519 | 534.911 |
| ENSMUSG00000033885 | 14_Pxk    | 1493.16 | 0.92261  | 0.000208 | 0.00598  | 1879.9  | 2102.65 | 1882.17 | 888.015 | 1134.05 | 1072.17 |
| ENSMUSG00000033898 | 16_Cfhr2  | 2.83635 | 1.53285  | 0.26644  | 0.654635 | 5.05622 | 5.66751 | 2.06832 | 1.65058 | 2.57543 | 0       |
| ENSMUSG00000033900 | 13_Map9   | 306.31  | -0.1565  | 0.717842 | 0.912538 | 471.24  | 208.565 | 189.252 | 335.069 | 333.948 | 299.785 |
| ENSMUSG00000033902 | 11_Mapkt  | 637.331 | -0.17241 | 0.665479 | 0.896927 | 319.553 | 716.374 | 762.177 | 720.48  | 667.037 | 638.366 |
| ENSMUSG00000033904 | 15_Ccp11  | 462.22  | -0.09239 | 0.793516 | 0.938313 | 632.028 | 326.449 | 383.674 | 464.64  | 515.086 | 451.441 |
| ENSMUSG00000033906 | 5_Zdhhc1  | 370.956 | 0.32055  | 0.510587 | 0.827179 | 730.118 | 236.902 | 268.882 | 323.515 | 357.126 | 309.19  |
| ENSMUSG00000033909 | 17_Usp36  | 587.53  | 0.16761  | 0.70512  | 0.908152 | 286.182 | 822.923 | 755.972 | 615.668 | 514.228 | 530.208 |
| ENSMUSG00000033910 | 13_Gucy1  | 253.895 | -0.98313 | 0.046216 | 0.275076 | 285.171 | 107.683 | 118.929 | 447.308 | 337.381 | 226.896 |
| ENSMUSG00000033916 | 4_Chmp2i  | 5203.57 | 0.09336  | 0.758872 | 0.927759 | 3842.73 | 6152.65 | 6120.17 | 4781.74 | 4818.63 | 5505.47 |
| ENSMUSG00000033917 | 14_Gde1   | 837.629 | -0.39925 | 0.10148  | 0.433589 | 644.163 | 745.845 | 777.689 | 973.02  | 1000.98 | 884.072 |
| ENSMUSG00000033918 | 15_Parl   | 1093.42 | 0.12744  | 0.640547 | 0.887258 | 1334.84 | 1062.09 | 1027.96 | 904.52  | 1181.26 | 1049.84 |
| ENSMUSG00000033931 | 8_Rbm34   | 556.014 | 0.50213  | 0.245083 | 0.6364   | 1051.69 | 479.472 | 424.006 | 383.761 | 502.209 | 494.939 |
| ENSMUSG00000033933 | 13_Vhl    | 715.03  | -0.08882 | 0.76457  | 0.929893 | 885.85  | 621.16  | 571.891 | 768.347 | 689.357 | 753.577 |
| ENSMUSG00000033938 | 5_Ndufb7  | 531.022 | 0.16451  | 0.827194 | 0.950636 | 62.6971 | 762.847 | 858.354 | 699.023 | 327.08  | 476.129 |
| ENSMUSG00000033940 | 8_Brk1    | 2728.69 | -0.22391 | 0.449082 | 0.792164 | 1840.46 | 2761.21 | 2950.46 | 2994.99 | 2766.01 | 3058.98 |
| ENSMUSG00000033943 | 15_Mga    | 2642.61 | 0.02397  | 0.955444 | 0.98876  | 4375.65 | 1821.54 | 1796.34 | 2410.68 | 2895.64 | 2555.81 |
| ENSMUSG00000033948 | 3_Zswim5  | 55.9746 | -1.10891 | 0.005028 | 0.062498 | 34.3823 | 32.8716 | 39.2981 | 95.7339 | 71.2536 | 62.3083 |
| ENSMUSG00000033949 | 11_Trim3f | 120.319 | 0.42393  | 0.334986 | 0.713724 | 213.373 | 114.484 | 85.8354 | 115.541 | 102.159 | 90.5233 |
| ENSMUSG00000033952 | 14_Aspm   | 554.698 | 0.3628   | 0.251446 | 0.642532 | 775.624 | 555.416 | 540.866 | 382.936 | 553.718 | 519.627 |
| ENSMUSG00000033953 | 10_Ppp3r  | 3036.76 | 0.62857  | 0.216477 | 0.607835 | 6797.58 | 2223.93 | 2042.47 | 2085.51 | 2725.66 | 2345.38 |
| ENSMUSG00000033955 | 12_Tnks1  | 4196.62 | 0.55985  | 0.348281 | 0.725587 | 1203.38 | 7035.65 | 6763.42 | 3570.21 | 2625.22 | 3981.85 |
| ENSMUSG00000033960 | 5_943002  | 1256.08 | -1.16867 | 0.001018 | 0.019859 | 1015.29 | 529.346 | 775.621 | 2025.27 | 1813.1  | 1377.84 |
| ENSMUSG00000033961 | 15_Zfp44f | 201.42  | -0.18418 | 0.52633  | 0.83399  | 155.732 | 205.164 | 204.764 | 196.42  | 217.195 | 229.247 |
| ENSMUSG00000033964 | 12_Zbtb4  | 1082.55 | 0.30346  | 0.523769 | 0.832707 | 2102.38 | 783.251 | 702.196 | 888.84  | 1072.24 | 946.38  |
| ENSMUSG00000033965 | 10_Slc16e | 1329.28 | 0.07233  | 0.746426 | 0.924339 | 1282.26 | 1437.28 | 1368.2  | 1276.73 | 1275.7  | 1335.51 |
| ENSMUSG00000033966 | 7_Cdk14   | 3.47272 | 0.30373  | 0.819605 | 0.948338 | 5.05622 | 4.53401 | 2.06832 | 6.60234 | 2.57543 | 0       |
| ENSMUSG00000033967 | 4_Rnf225  | 357.84  | 1.35631  | 6.98E-07 | 5.71E-05 | 481.352 | 580.353 | 481.919 | 174.962 | 208.61  | 219.842 |
| ENSMUSG00000033970 | 15_Rfc3   | 477.134 | 0.74638  | 0.004936 | 0.061695 | 552.139 | 665.366 | 576.028 | 308.659 | 391.466 | 369.147 |
| ENSMUSG00000033972 | 9_Zfp944  | 259.336 | 0.55162  | 0.332043 | 0.711439 | 604.724 | 159.824 | 160.295 | 179.914 | 245.524 | 205.735 |
| ENSMUSG00000033981 | 14_Gria2  | 75.9336 | -1.51709 | 0.027187 | 0.19878  | 80.8995 | 21.5366 | 15.5124 | 136.999 | 144.224 | 56.4301 |
| ENSMUSG00000033983 | 13_Coil   | 155.609 | 0.01928  | 0.943922 | 0.986451 | 153.709 | 153.023 | 163.398 | 160.107 | 158.818 | 144.602 |
| ENSMUSG00000033985 | 17_Tesk2  | 104.003 | -0.4387  | 0.161502 | 0.540065 | 87.9783 | 87.2797 | 89.9721 | 124.619 | 133.064 | 101.104 |
| ENSMUSG00000033987 | 15_Dnah1  | 38.6216 | 0.66294  | 0.260679 | 0.649812 | 17.1912 | 68.0102 | 56.8789 | 33.0117 | 24.8958 | 31.742  |
| ENSMUSG00000033991 | 8_Ttc37   | 1527.3  | 0.35209  | 0.247318 | 0.638878 | 2054.85 | 1738.79 | 1344.41 | 1101.77 | 1523.8  | 1400.17 |
| ENSMUSG00000033998 | 15_Kcnk1  | 858.238 | 0.57584  | 0.022376 | 0.176153 | 1123.49 | 1065.49 | 892.481 | 650.33  | 668.754 | 748.875 |
| ENSMUSG00000034000 | 18_Neu4   | 0.16854 | 1.1315   | 0.781553 | NA       | 1.01124 | 0       | 0       | 0       | 0       | 0       |
| ENSMUSG00000034006 | 16_Pqlc1  | 1633.9  | 0.50333  | 0.297724 | 0.680996 | 758.433 | 2655.8  | 2334.1  | 1540.82 | 1143.49 | 1370.78 |
| ENSMUSG00000034007 | 9_Scaper  | 1082.43 | 0.2545   | 0.530144 | 0.836516 | 1833.39 | 851.261 | 848.012 | 826.943 | 1062.79 | 1072.17 |
| ENSMUSG00000034009 | 14_Rxpf1  | 55.0876 | 0.7315   | 0.163576 | 0.541822 | 95.057  | 65.7432 | 45.5031 | 23.9335 | 62.6688 | 37.6201 |
| ENSMUSG00000034021 | 15_Pds5b  | 1291.31 | 0.07879  | 0.854845 | 0.958687 | 2175.19 | 869.397 | 934.882 | 1118.27 | 1358.11 | 1292.01 |
| ENSMUSG00000034022 | 7_Cpsf1   | 868.042 | 0.308    | 0.608741 | 0.872658 | 219.44  | 1330.73 | 1330.97 | 845.925 | 687.64  | 793.549 |

|                    |           |         |          |          |          |         |         |         |         |         |         |
|--------------------|-----------|---------|----------|----------|----------|---------|---------|---------|---------|---------|---------|
| ENSMUSG00000034023 | 16_Fancd  | 287.544 | 0.65795  | 0.022951 | 0.178686 | 371.127 | 345.718 | 339.205 | 185.691 | 269.562 | 213.964 |
| ENSMUSG00000034024 | 7_Cct2    | 4476.44 | 0.34607  | 0.141188 | 0.509656 | 5267.57 | 5023.68 | 4740.6  | 3502.54 | 4020.25 | 4303.97 |
| ENSMUSG00000034028 | 15_Cd226  | 10.7949 | 2.79665  | 0.001943 | 0.031773 | 28.3148 | 18.136  | 10.3416 | 1.65058 | 5.15086 | 1.17563 |
| ENSMUSG00000034031 | 5_Ccdc18  | 0.14308 | -0.79206 | 0.84609  | NA       | 0       | 0       | 0       | 0       | 0.85848 | 0       |
| ENSMUSG00000034032 | 15_Rpap1  | 446.902 | 0.2732   | 0.62456  | 0.879732 | 138.54  | 683.502 | 645.317 | 412.646 | 382.881 | 418.524 |
| ENSMUSG00000034035 | 18_Ccdc1  | 210.608 | 0.22596  | 0.526884 | 0.834409 | 175.957 | 204.031 | 300.941 | 153.504 | 212.902 | 216.316 |
| ENSMUSG00000034037 | 14_Fgd5   | 125.726 | -0.24271 | 0.425031 | 0.776698 | 104.158 | 113.35  | 128.236 | 153.504 | 130.489 | 124.617 |
| ENSMUSG00000034040 | 16_Wbscr  | 39.3073 | -1.18146 | 0.024128 | 0.184534 | 22.2474 | 15.869  | 34.1273 | 53.644  | 74.6875 | 35.2688 |
| ENSMUSG00000034041 | 4_Lyl1    | 23.0467 | 0.55198  | 0.533    | 0.837668 | 4.04498 | 45.3401 | 33.0932 | 33.837  | 13.7356 | 8.22939 |
| ENSMUSG00000034042 | 16_Gbbp1  | 2486.57 | 0.40225  | 0.11278  | 0.45592  | 3315.87 | 2605.92 | 2570.93 | 1979.88 | 2235.47 | 2211.36 |
| ENSMUSG00000034055 | 16_Phka1  | 422.049 | -0.54612 | 0.132175 | 0.49421  | 479.33  | 232.368 | 317.488 | 486.922 | 558.869 | 457.319 |
| ENSMUSG00000034057 | 7_Myrlf   | 5.3582  | -0.14899 | 0.897037 | 0.97156  | 3.03373 | 11.335  | 1.03416 | 4.95175 | 9.44325 | 2.35126 |
| ENSMUSG00000034059 | 13_Ypel4  | 38.7214 | -0.63287 | 0.145114 | 0.515151 | 34.3823 | 21.5366 | 35.1615 | 51.1681 | 48.9332 | 41.147  |
| ENSMUSG00000034063 | 8_A93059  | 19.4842 | -0.76301 | 0.286778 | 0.672541 | 28.3148 | 5.66751 | 9.30745 | 24.7588 | 30.0467 | 18.81   |
| ENSMUSG00000034064 | 14_Poglut | 854.937 | -0.11812 | 0.733119 | 0.919861 | 1153.83 | 634.762 | 671.171 | 830.244 | 996.692 | 842.925 |
| ENSMUSG00000034066 | 13_Farp2  | 312.058 | -0.14312 | 0.627297 | 0.880806 | 299.328 | 286.776 | 303.009 | 290.503 | 282.439 | 410.294 |
| ENSMUSG00000034071 | 14_Zfp55  | 84.7885 | -0.54053 | 0.139642 | 0.507179 | 76.8546 | 55.5416 | 74.4596 | 78.4028 | 104.734 | 118.738 |
| ENSMUSG00000034075 | 10_Zdhhc  | 9706.59 | 0.53695  | 0.036779 | 0.240032 | 11071.1 | 12509.3 | 10895.9 | 6840.85 | 7639.59 | 9282.76 |
| ENSMUSG00000034083 | 16_Ccdc1  | 619.935 | 0.25357  | 0.492495 | 0.815769 | 997.087 | 514.61  | 510.876 | 542.217 | 562.302 | 592.516 |
| ENSMUSG00000034087 | 13_Nlrp4b | 0       | NA       | NA       | NA       | 0       | 0       | 0       | 0       | 0       | 0       |
| ENSMUSG00000034088 | 15_Hdlbp  | 13112.4 | 0.25717  | 0.350284 | 0.727131 | 12019.7 | 16166   | 14647.9 | 9934.87 | 12618.8 | 13286.9 |
| ENSMUSG00000034098 | 14_Fstl5  | 8.54502 | -2.35108 | 0.041694 | 0.258544 | 5.05622 | 3.40051 | 0       | 26.4094 | 12.8772 | 3.52688 |
| ENSMUSG00000034101 | 14_Ctnnd  | 17718.6 | 0.38564  | 0.138797 | 0.505773 | 19918.5 | 21606.8 | 18692.5 | 12825.9 | 15369.3 | 17898.9 |
| ENSMUSG00000034105 | 8_Tldc1   | 312.518 | 0.02762  | 0.950719 | 0.987571 | 145.619 | 396.726 | 404.357 | 344.147 | 283.297 | 300.961 |
| ENSMUSG00000034107 | 10_Ano7   | 3.21504 | 1.27599  | 0.284433 | 0.670663 | 6.06747 | 3.40051 | 4.13665 | 2.47588 | 0.85848 | 2.35126 |
| ENSMUSG00000034108 | 5_Ccs     | 438.933 | -0.17097 | 0.780992 | 0.935516 | 92.0232 | 566.751 | 580.165 | 527.362 | 370.004 | 497.291 |
| ENSMUSG00000034109 | 15_Golimv | 2634.22 | 0.10123  | 0.764765 | 0.929966 | 3834.64 | 2081.11 | 2263.78 | 2374.37 | 2619.21 | 2632.23 |
| ENSMUSG00000034110 | 8_Kctd7   | 187.635 | -0.07618 | 0.781736 | 0.935592 | 169.889 | 172.292 | 205.798 | 197.245 | 185.431 | 195.154 |
| ENSMUSG00000034111 | 5_Tmed8   | 611.234 | -0.15055 | 0.706685 | 0.908936 | 889.895 | 391.059 | 457.099 | 635.475 | 723.696 | 570.179 |
| ENSMUSG00000034112 | 8_Atp2c2  | 180.418 | 0.86143  | 0.2235   | 0.613683 | 34.3823 | 352.519 | 311.283 | 141.125 | 92.7155 | 150.48  |
| ENSMUSG00000034115 | 9_Scn11a  | 0.17236 | 1.1315   | 0.781553 | NA       | 0       | 0       | 1.03416 | 0       | 0       | 0       |
| ENSMUSG00000034116 | 17_Vav1   | 75.9944 | 1.36506  | 0.026649 | 0.196614 | 39.4385 | 205.164 | 83.7671 | 34.6623 | 41.2069 | 51.7276 |
| ENSMUSG00000034117 | 3_Ptgrd2  | 0.39188 | -1.97195 | 0.623385 | NA       | 0       | 0       | 0       | 0       | 0       | 2.35126 |
| ENSMUSG00000034118 | 15_Tpst1  | 504.119 | 0.25161  | 0.312159 | 0.693828 | 599.668 | 563.351 | 480.885 | 456.387 | 463.578 | 460.846 |
| ENSMUSG00000034120 | 18_Srsf2  | 5974.25 | 0.55231  | 0.137956 | 0.503967 | 10278.3 | 5653.91 | 5379.71 | 3868.15 | 5683.12 | 4982.31 |
| ENSMUSG00000034121 | 12_Mks1   | 221.043 | 0.13765  | 0.719913 | 0.913031 | 139.552 | 258.439 | 296.804 | 230.257 | 183.714 | 217.491 |
| ENSMUSG00000034126 | 4_Pomt2   | 417.259 | -0.36189 | 0.184688 | 0.571911 | 297.306 | 403.527 | 395.05  | 483.621 | 477.313 | 446.739 |
| ENSMUSG00000034127 | 14_Tspan  | 62.519  | 0.84354  | 0.176825 | 0.561026 | 155.732 | 39.6726 | 45.5031 | 61.0716 | 34.3391 | 38.7957 |
| ENSMUSG00000034135 | 14_Sik3   | 1255.93 | 0.45287  | 0.278939 | 0.666149 | 735.175 | 1942.82 | 1676.38 | 1107.54 | 916.853 | 1156.82 |
| ENSMUSG00000034145 | 14_Tmem   | 13.8072 | -1.56281 | 0.067251 | 0.344156 | 9.1012  | 6.80102 | 5.17081 | 40.4393 | 15.4526 | 5.87814 |
| ENSMUSG00000034152 | 5_Exoc3   | 1934.14 | 0.01041  | 0.964666 | 0.99063  | 2091.25 | 1967.76 | 1764.28 | 1791.71 | 2050.04 | 1939.79 |
| ENSMUSG00000034154 | 15_Ino80  | 1188.68 | 0.42534  | 0.093364 | 0.145917 | 1495.63 | 1267.26 | 1324.76 | 876.46  | 1113.44 | 1054.54 |
| ENSMUSG00000034156 | 16_Bzrap  | 233.63  | -1.06825 | 0.034121 | 0.22886  | 62.6971 | 156.423 | 233.721 | 388.713 | 313.344 | 246.882 |
| ENSMUSG00000034157 | 12_Cipc   | 1666.14 | 0.40393  | 0.096213 | 0.420504 | 2044.74 | 1720.66 | 1927.68 | 1414.55 | 1309.18 | 1580.04 |
| ENSMUSG00000034158 | 9_Lrrc58  | 2084.07 | -0.11326 | 0.809663 | 0.94521  | 3479.69 | 1164.11 | 1363.02 | 2092.12 | 2471.56 | 1933.91 |
| ENSMUSG00000034159 | 12_Z3100  | 5513.24 | 0.69274  | 0.044675 | 0.26957  | 4236.1  | 8306.31 | 7893.76 | 4194.96 | 4149.02 | 4299.27 |
| ENSMUSG00000034160 | 13_Ogt    | 7335.63 | -0.22504 | 0.576542 | 0.856937 | 10388.5 | 4532.88 | 5372.47 | 6958.04 | 9560    | 7201.9  |
| ENSMUSG00000034161 | 7_Scx     | 37.4231 | -1.80725 | 0.00311  | 0.044526 | 7.07871 | 18.136  | 24.8199 | 88.3063 | 40.3484 | 45.8495 |
| ENSMUSG00000034163 | 10_Zfc3h1 | 2132.62 | 0.24845  | 0.570528 | 0.853943 | 3731.49 | 1705.92 | 1509.88 | 1545.77 | 2425.2  | 1877.48 |
| ENSMUSG00000034164 | 17_Emid1  | 9.65951 | -0.33043 | 0.673754 | 0.900436 | 3.03373 | 10.2015 | 12.4099 | 9.07822 | 10.3017 | 12.9319 |
| ENSMUSG00000034165 | 16_Ccnd3  | 804.68  | 0.11236  | 0.837985 | 0.952966 | 267.98  | 1158.44 | 1081.73 | 993.652 | 569.17  | 757.104 |
| ENSMUSG00000034168 | 6_Irf2bp1 | 1038.35 | 0.64487  | 0.016855 | 0.144025 | 1512.82 | 1181.11 | 1105.52 | 788.154 | 753.743 | 888.775 |
| ENSMUSG00000034171 | 13_Faah   | 90.3392 | -0.21598 | 0.627705 | 0.880942 | 48.5397 | 102.015 | 100.314 | 119.667 | 70.3951 | 101.104 |
| ENSMUSG00000034173 | 13_Zbed5  | 30.9306 | -0.24132 | 0.592378 | 0.865791 | 30.3373 | 23.8036 | 31.0248 | 40.4393 | 31.7636 | 28.2151 |
| ENSMUSG00000034175 | 13_Rhbdd  | 126.207 | 0.1262   | 0.827964 | 0.950974 | 41.461  | 155.29  | 198.559 | 160.107 | 90.1401 | 111.685 |
| ENSMUSG00000034177 | 15_Rnf43  | 502.828 | 0.52844  | 0.081174 | 0.383853 | 465.172 | 609.825 | 706.332 | 356.526 | 411.21  | 467.9   |
| ENSMUSG00000034187 | 18_Nsf    | 1182.97 | 0.07868  | 0.765588 | 0.929992 | 999.109 | 1386.27 | 1260.64 | 1220.61 | 1146.07 | 1085.1  |
| ENSMUSG00000034189 | 4_Hsd1l   | 871.241 | 0.15156  | 0.601432 | 0.870033 | 699.781 | 1042.82 | 1008.31 | 864.081 | 746.016 | 866.438 |
| ENSMUSG00000034190 | 8_Chmp7   | 818.461 | -0.19787 | 0.432672 | 0.780874 | 649.219 | 792.319 | 845.944 | 883.888 | 898.825 | 840.574 |
| ENSMUSG00000034192 | 5_Lsm3    | 557.482 | -0.08917 | 0.756337 | 0.927332 | 646.185 | 547.482 | 427.109 | 541.392 | 617.245 | 565.477 |
| ENSMUSG00000034194 | 16_R3hcc  | 316.728 | -0.37946 | 0.460489 | 0.799755 | 98.0907 | 353.653 | 374.366 | 416.773 | 314.203 | 343.283 |
| ENSMUSG00000034201 | 13_Gas2l  | 337.387 | 0.42772  | 0.399098 | 0.759197 | 153.709 | 511.21  | 496.398 | 375.508 | 220.629 | 266.868 |
| ENSMUSG00000034203 | 8_Chchd4  | 422.923 | 0.03149  | 0.896774 | 0.97156  | 425.734 | 428.464 | 428.143 | 382.11  | 427.522 | 445.563 |
| ENSMUSG00000034205 | 16_Loxl2  | 781.474 | -0.93838 | 0.000809 | 0.016631 | 624.949 | 423.93  | 558.447 | 1006.03 | 969.221 | 1106.27 |
| ENSMUSG00000034206 | 15_Polq   | 121.312 | 0.67526  | 0.097261 | 0.423164 | 203.26  | 155.29  | 88.9379 | 86.6557 | 96.1494 | 97.5771 |
| ENSMUSG00000034209 | 4_Ras10e  | 2.6037  | -0.23099 | 0.875655 | 0.964617 | 3.03373 | 1.1335  | 3.10248 | 5.77705 | 2.57543 | 0       |
| ENSMUSG00000034210 | 13_Efcab  | 1981.98 | 0.28264  | 0.395753 | 0.756762 | 3017.55 | 1827.21 | 1681.55 | 1647.28 | 1874.91 | 1843.38 |
| ENSMUSG00000034211 | 14_Mrps1  | 686.369 | 0.1092   | 0.680766 | 0.902479 | 837.31  | 680.102 | 619.463 | 614.018 | 703.093 | 664.23  |
| ENSMUSG00000034212 | 13_Ankmj  | 11.2629 | 0.30011  | 0.663597 | 0.896273 | 7.07871 | 15.869  | 14.4783 | 9.90351 | 12.0187 | 8.22939 |
| ENSMUSG00000034216 | 12_Vps18  | 183.285 | 0.15659  | 0.828293 | 0.951064 | 27.3036 | 285.643 | 266.814 | 229.431 | 114.177 | 176.344 |
| ENSMUSG00000034218 | 15_Atm    | 1017.23 | 0.51539  | 0.159342 | 0.537367 | 1731.25 | 1054.16 | 805.612 | 815.389 | 892.816 | 804.129 |
| ENSMUSG00000034219 | 15_Sept1  | 0.14308 | -0.79206 | 0.84609  | NA       | 0       | 0       | 0       | 0       | 0.85848 | 0       |
| ENSMUSG00000034220 | 7_Gpc1    | 617.157 | -0.14293 | 0.796528 | 0.939832 | 176.968 | 763.981 | 819.056 | 803.835 | 534.831 | 604.273 |
| ENSMUSG00000034224 | 14_Slc38e | 188.763 | -1.38759 | 0.004102 | 0.053997 | 66.7421 | 74.8112 | 171.671 | 374.683 | 228.355 | 216.316 |
| ENSMUSG00000034226 | 7_Rhov    | 553.664 | 0.4492   | 0.429553 | 0.779482 | 181.013 | 898.868 | 837.671 | 533.964 | 361.419 | 509.047 |

|                    |           |         |          |          |          |         |         |         |         |         |         |
|--------------------|-----------|---------|----------|----------|----------|---------|---------|---------|---------|---------|---------|
| ENSMUSG00000034227 | 7_Foxj1   | 8.96846 | -1.74532 | 0.115844 | 0.463001 | 3.03373 | 0       | 9.30745 | 11.5541 | 24.0374 | 5.87814 |
| ENSMUSG00000034235 | 16_Usp54  | 2585.96 | 0.2393   | 0.336886 | 0.715288 | 2465.41 | 2938.04 | 2995.97 | 2135.86 | 2347.08 | 2633.41 |
| ENSMUSG00000034243 | 16_Golgb  | 5054.82 | 0.03588  | 0.880387 | 0.966824 | 4637.57 | 5489.55 | 5225.62 | 4522.6  | 5018.66 | 5434.93 |
| ENSMUSG00000034245 | 10_Hdac1  | 483.714 | -0.79995 | 0.050246 | 0.290196 | 198.204 | 381.99  | 478.817 | 750.191 | 519.379 | 573.706 |
| ENSMUSG00000034247 | 9_Plekha  | 1044.41 | 0.21942  | 0.660054 | 0.895103 | 411.576 | 1448.62 | 1510.91 | 1029.14 | 838.732 | 1027.5  |
| ENSMUSG00000034248 | 7_Slc25a3 | 1026.02 | 0.36585  | 0.172373 | 0.555812 | 1364.17 | 1066.63 | 1035.2  | 795.582 | 965.787 | 928.746 |
| ENSMUSG00000034252 | 14_Senp6  | 2503.61 | 0.32713  | 0.461914 | 0.799907 | 4640.6  | 1889.55 | 1828.4  | 1858.56 | 2549.68 | 2254.85 |
| ENSMUSG00000034254 | 17_Agpat  | 616.113 | 0.1078   | 0.856523 | 0.959059 | 160.788 | 880.732 | 875.935 | 721.306 | 439.54  | 618.38  |
| ENSMUSG00000034255 | 17_Arhga1 | 2587.78 | 0.67891  | 0.224926 | 0.614734 | 930.345 | 4102.15 | 4524.46 | 2138.33 | 1508.34 | 2323.04 |
| ENSMUSG00000034258 | 3_Mfsd7c  | 147.08  | -1.8352  | 3.70E-06 | 0.000231 | 80.8995 | 40.8061 | 71.3571 | 271.521 | 240.374 | 177.52  |
| ENSMUSG00000034259 | 7_Exosc4  | 161.903 | -0.02839 | 0.948615 | 0.986924 | 90.0007 | 204.031 | 187.183 | 217.052 | 126.196 | 146.953 |
| ENSMUSG00000034263 | 12_Vwa9   | 656.621 | 0.18511  | 0.43577  | 0.783834 | 657.309 | 734.51  | 704.264 | 571.102 | 654.159 | 618.38  |
| ENSMUSG00000034265 | 7_Zdhhc1  | 68.3169 | -0.32219 | 0.393674 | 0.755289 | 44.4948 | 62.3427 | 75.4938 | 79.2281 | 78.9799 | 69.362  |
| ENSMUSG00000034266 | 5_Batf    | 15.0252 | 0.78892  | 0.300561 | 0.683516 | 5.05622 | 27.2041 | 24.8199 | 11.5541 | 8.58477 | 12.9319 |
| ENSMUSG00000034269 | 12_Setd5  | 3783.92 | 0.25529  | 0.308054 | 0.690547 | 4662.85 | 3968.39 | 3721.95 | 3056.06 | 3632.22 | 3662.08 |
| ENSMUSG00000034271 | 15_Jdp2   | 2081.94 | 0.2149   | 0.695183 | 0.905638 | 675.511 | 2777.08 | 3257.61 | 2228.29 | 1571.01 | 1982.11 |
| ENSMUSG00000034274 | 11_Thoc5  | 927.731 | 0.19859  | 0.602058 | 0.870033 | 573.376 | 1246.85 | 1154.12 | 821.166 | 778.639 | 992.23  |
| ENSMUSG00000034275 | 17_Igfbp3 | 21.1728 | 0.16404  | 0.815656 | 0.947273 | 7.07871 | 27.2041 | 33.0932 | 25.5841 | 22.3204 | 11.7563 |
| ENSMUSG00000034278 | 3_Dnajc1  | 279.55  | 0.12447  | 0.756563 | 0.927542 | 158.765 | 360.454 | 355.752 | 288.852 | 248.958 | 264.516 |
| ENSMUSG00000034282 | 3_Evpl    | 13744.3 | 0.94954  | 0.21085  | 0.602834 | 1844.51 | 25867.7 | 26620.4 | 10539   | 5932.08 | 11662.2 |
| ENSMUSG00000034285 | 15_Nipn1  | 189.886 | -0.8187  | 0.025483 | 0.191321 | 122.361 | 112.217 | 177.876 | 258.317 | 291.024 | 177.52  |
| ENSMUSG00000034290 | 9_Nek9    | 3560.35 | -0.02504 | 0.908599 | 0.974731 | 3646.55 | 3342.7  | 3598.88 | 3438.17 | 3663.12 | 3672.66 |
| ENSMUSG00000034292 | 13_Traf3  | 252.096 | 0.07442  | 0.82417  | 0.949196 | 176.968 | 285.643 | 313.351 | 255.015 | 242.949 | 238.652 |
| ENSMUSG00000034295 | 9_Fhod3   | 145.919 | -1.35235 | 0.000807 | 0.016631 | 103.147 | 66.8767 | 76.528  | 236.859 | 259.26  | 132.846 |
| ENSMUSG00000034297 | 14_Med1   | 3411.84 | 0.54563  | 0.229843 | 0.620993 | 6845.11 | 2830.36 | 2472.68 | 2352.91 | 3197.83 | 2772.13 |
| ENSMUSG00000034300 | 16_Fam5c  | 992.389 | 0.17952  | 0.446059 | 0.789738 | 953.603 | 1107.43 | 1101.38 | 983.748 | 909.986 | 898.18  |
| ENSMUSG00000034303 | 6_Ccdc15  | 51.7617 | 0.29747  | 0.578527 | 0.858334 | 85.9558 | 44.2066 | 41.3665 | 46.2164 | 66.9612 | 25.8638 |
| ENSMUSG00000034308 | 13_Sdr42  | 2500.61 | 0.29822  | 0.316537 | 0.697656 | 2227.77 | 2883.63 | 3162.47 | 1951.82 | 2042.32 | 2735.69 |
| ENSMUSG00000034310 | 8_Tmem1   | 266.652 | -1.41228 | 0.000224 | 0.006304 | 134.495 | 113.35  | 189.252 | 482.796 | 415.503 | 264.516 |
| ENSMUSG00000034311 | 3_Kif4    | 446.539 | 0.53242  | 0.104746 | 0.440155 | 573.376 | 578.086 | 432.28  | 264.094 | 425.805 | 405.592 |
| ENSMUSG00000034312 | 13_Iqsec1 | 887.669 | -0.62278 | 0.045461 | 0.272639 | 534.948 | 692.57  | 869.73  | 1249.49 | 1016.44 | 962.839 |
| ENSMUSG00000034317 | 14_Trim5  | 441.044 | 1.08945  | 0.042728 | 0.262175 | 1100.23 | 374.056 | 325.761 | 191.468 | 350.259 | 304.488 |
| ENSMUSG00000034320 | 14_Slc26a | 792.409 | 0.22199  | 0.50991  | 0.827179 | 1188.21 | 649.497 | 721.845 | 702.324 | 755.46  | 737.119 |
| ENSMUSG00000034321 | 13_Exosc  | 273.31  | 0.33504  | 0.257671 | 0.648651 | 366.07  | 274.308 | 274.053 | 208.799 | 262.694 | 253.936 |
| ENSMUSG00000034324 | 16_Tmem   | 487.863 | -0.77883 | 0.016666 | 0.142691 | 358.992 | 259.572 | 459.168 | 689.119 | 576.038 | 584.287 |
| ENSMUSG00000034327 | 17_Kctd9  | 1444.93 | 0.58865  | 0.116181 | 0.463637 | 2509.91 | 1425.95 | 1270.98 | 926.803 | 1342.66 | 1193.26 |
| ENSMUSG00000034329 | 16_Brip1  | 237.783 | 1.01457  | 0.023283 | 0.180294 | 474.274 | 245.97  | 233.721 | 98.2098 | 192.299 | 182.222 |
| ENSMUSG00000034330 | 9_Plcg2   | 407.077 | 0.84326  | 0.064644 | 0.336949 | 251.8   | 705.039 | 611.189 | 230.257 | 273.854 | 370.323 |
| ENSMUSG00000034333 | 15_Zbed4  | 708.75  | 0.24818  | 0.296322 | 0.680027 | 839.333 | 754.913 | 714.606 | 659.409 | 667.037 | 617.205 |
| ENSMUSG00000034334 | 7_Fam15   | 89.8786 | 0.57847  | 0.110938 | 0.45277  | 140.563 | 97.4812 | 84.8012 | 67.674  | 74.6875 | 74.0646 |
| ENSMUSG00000034336 | 3_Ina     | 11.3291 | -1.82064 | 0.078769 | 0.376952 | 5.05622 | 9.06802 | 1.03416 | 33.837  | 15.4526 | 3.52688 |
| ENSMUSG00000034339 | 8_Gm568   | 0.98578 | 2.32817  | 0.462323 | NA       | 5.05622 | 0       | 0       | 0       | 0.85848 | 0       |
| ENSMUSG00000034341 | 17_Wbp2   | 2272.19 | 0.05984  | 0.899895 | 0.972657 | 944.502 | 2924.44 | 3089.04 | 2479.18 | 1829.41 | 2366.54 |
| ENSMUSG00000034342 | 9_Cbl     | 3583.23 | 0.49156  | 0.111494 | 0.453007 | 5245.32 | 3729.22 | 3588.54 | 2361.99 | 3302.56 | 3271.77 |
| ENSMUSG00000034343 | 14_Ube2f  | 2074.48 | 0.33984  | 0.233995 | 0.625983 | 2867.89 | 2052.77 | 2032.13 | 1596.12 | 1989.95 | 1908.04 |
| ENSMUSG00000034345 | 14_Gtf2h  | 907.474 | -0.30456 | 0.174285 | 0.557874 | 822.142 | 774.182 | 839.739 | 1024.19 | 982.956 | 1001.63 |
| ENSMUSG00000034349 | 14_Smc4   | 2261.99 | 0.83533  | 0.111452 | 0.453007 | 5321.17 | 1882.75 | 1493.33 | 1186.77 | 1976.21 | 1711.71 |
| ENSMUSG00000034353 | 14_Ramp   | 71.0054 | -0.88569 | 0.070391 | 0.354472 | 43.4835 | 44.2066 | 62.0497 | 145.251 | 55.801  | 75.2402 |
| ENSMUSG00000034354 | 17_Mttr3  | 2780.88 | 0.13061  | 0.668695 | 0.898323 | 2064.96 | 3449.25 | 3205.9  | 2719.34 | 2500.74 | 2745.09 |
| ENSMUSG00000034359 | 16_Skint2 | 2.31796 | 2.77995  | 0.161521 | 0.540065 | 2.02249 | 10.2015 | 0       | 0.82529 | 0.85848 | 0       |
| ENSMUSG00000034361 | 9_Cpne2   | 156.633 | -0.00196 | 0.995978 | 0.998321 | 96.0682 | 194.962 | 178.91  | 182.39  | 151.092 | 136.373 |
| ENSMUSG00000034362 | 7_Csta1   | 4805.44 | 0.50645  | 0.211447 | 0.602834 | 8757.38 | 4152.02 | 4011.51 | 3349.86 | 4719.91 | 3841.95 |
| ENSMUSG00000034371 | 8_Tkfc    | 184.357 | 0.10009  | 0.857052 | 0.959059 | 58.6522 | 243.703 | 269.916 | 188.167 | 149.375 | 196.33  |
| ENSMUSG00000034377 | 10_Tulp4  | 4832.22 | 0.44846  | 0.094013 | 0.417315 | 6791.52 | 4951.14 | 4988.8  | 3809.55 | 4087.21 | 4365.11 |
| ENSMUSG00000034379 | 8_Wdr5b   | 178.85  | 0.07809  | 0.838394 | 0.952966 | 258.879 | 143.955 | 147.885 | 137.824 | 190.582 | 193.979 |
| ENSMUSG00000034382 | 14_Al661  | 14822.6 | 0.69758  | 0.239532 | 0.631327 | 4500.04 | 26291.6 | 24222.1 | 11871.8 | 8719.55 | 13330.4 |
| ENSMUSG00000034384 | 11_Barhl2 | 2.56738 | 0.90493  | 0.63874  | 0.886454 | 0       | 9.06802 | 1.03416 | 4.12646 | 0       | 1.17563 |
| ENSMUSG00000034387 | 12_Ssu2   | 2.86827 | -1.57234 | 0.241365 | 0.632811 | 1.01124 | 2.26701 | 1.03416 | 4.12646 | 1.71695 | 7.05377 |
| ENSMUSG00000034390 | 15_Cmip   | 1319.16 | 0.62515  | 0.020711 | 0.166446 | 1293.38 | 1869.15 | 1639.15 | 1022.54 | 991.541 | 1099.21 |
| ENSMUSG00000034391 | 10_Fbxo1  | 1.57696 | -0.94035 | 0.601681 | NA       | 0       | 2.26701 | 1.03416 | 4.12646 | 0.85848 | 1.17563 |
| ENSMUSG00000034394 | 14_Lif    | 140.815 | 1.15758  | 0.015415 | 0.135255 | 112.248 | 299.245 | 171.671 | 58.5958 | 96.1494 | 106.982 |
| ENSMUSG00000034401 | 16_Spatat | 501.639 | 0.28461  | 0.502984 | 0.823747 | 884.839 | 383.124 | 384.708 | 392.839 | 498.775 | 465.549 |
| ENSMUSG00000034402 | 2_Kcnn5   | 9.76351 | -1.34521 | 0.113827 | 0.457685 | 7.07871 | 2.26701 | 7.23913 | 19.807  | 16.3111 | 5.87814 |
| ENSMUSG00000034403 | 16_Pja1   | 2440.43 | 0.07402  | 0.770321 | 0.932319 | 2213.61 | 2563.98 | 2731.22 | 2463.5  | 2069.79 | 2600.49 |
| ENSMUSG00000034412 | 13_Tbc1d  | 1127.2  | 0.36442  | 0.588298 | 0.863301 | 201.238 | 1771.67 | 1833.57 | 1098.46 | 796.667 | 1061.59 |
| ENSMUSG00000034413 | 14_Neur1  | 46.8625 | 0.12894  | 0.813207 | 0.946572 | 21.2361 | 66.8767 | 58.9472 | 57.7705 | 35.1976 | 41.147  |
| ENSMUSG00000034416 | 18_Pkd1l2 | 2.56151 | -0.1323  | 0.91976  | 0.977296 | 2.02249 | 2.26701 | 3.10248 | 1.65058 | 5.15086 | 1.17563 |
| ENSMUSG00000034422 | 14_Parp1  | 8511.5  | 1.87244  | 1.27E-07 | 1.26E-05 | 17399.5 | 12975.2 | 9738.7  | 2723.46 | 4457.21 | 3774.94 |
| ENSMUSG00000034424 | 5_Gcsh    | 2040.41 | 0.168    | 0.643062 | 0.888694 | 3051.94 | 1768.26 | 1656.73 | 1517.71 | 2182.25 | 2065.58 |
| ENSMUSG00000034427 | 16_Myo15  | 8.66741 | 0.50233  | 0.63787  | 0.885931 | 1.01124 | 6.80102 | 22.7516 | 10.7288 | 6.00934 | 4.70251 |
| ENSMUSG00000034429 | 14_Zfp701 | 194.455 | 0.10268  | 0.832206 | 0.951799 | 81.9108 | 249.371 | 273.019 | 195.594 | 194.016 | 172.817 |
| ENSMUSG00000034430 | 16_Zxdc   | 726.923 | 0.19806  | 0.393271 | 0.755098 | 743.265 | 835.392 | 751.835 | 686.643 | 691.932 | 652.473 |
| ENSMUSG00000034432 | 11_Cops8  | 1040.9  | 0.05676  | 0.829823 | 0.951112 | 864.614 | 1157.31 | 1162.4  | 1080.31 | 970.937 | 1009.86 |
| ENSMUSG00000034435 | 5_Tmem3   | 981.488 | 0.83481  | 0.015076 | 0.133565 | 1713.05 | 1046.22 | 1013.48 | 602.463 | 669.612 | 844.101 |
| ENSMUSG00000034438 | 16_Gbp8   | 703.717 | 2.53112  | 3.96E-08 | 4.49E-06 | 1772.71 | 1148.24 | 678.41  | 132.047 | 268.703 | 222.194 |

|                    |           |         |          |          |          |         |         |         |         |         |         |
|--------------------|-----------|---------|----------|----------|----------|---------|---------|---------|---------|---------|---------|
| ENSMUSG00000034442 | 10_Trmt5  | 337.402 | 0.23807  | 0.524741 | 0.833095 | 510.678 | 310.58  | 274.053 | 241.811 | 363.994 | 323.298 |
| ENSMUSG00000034445 | 7_Cyb561  | 244.908 | 0.1202   | 0.756338 | 0.927332 | 150.675 | 323.048 | 291.634 | 248.413 | 201.742 | 253.936 |
| ENSMUSG00000034449 | 7_Dhrs11  | 120.926 | -0.12841 | 0.751651 | 0.925804 | 66.7421 | 150.756 | 129.27  | 131.221 | 115.894 | 131.67  |
| ENSMUSG00000034450 | 7_Gulo    | 20.0601 | -2.64042 | 0.000212 | 0.006057 | 7.07871 | 2.26701 | 7.23913 | 51.1681 | 32.6221 | 19.9857 |
| ENSMUSG00000034452 | 7_Slc24a1 | 492.264 | -2.31495 | 5.12E-05 | 0.001924 | 272.025 | 140.554 | 81.6988 | 1315.52 | 741.724 | 402.065 |
| ENSMUSG00000034453 | 7_Polr3b  | 1004.59 | 0.26845  | 0.275959 | 0.662593 | 1153.83 | 1077.96 | 1061.05 | 793.931 | 929.731 | 1011.04 |
| ENSMUSG00000034456 | 15_Uroc1  | 3.99091 | 1.07844  | 0.339088 | 0.717664 | 5.05622 | 9.06802 | 2.06832 | 1.65058 | 2.57543 | 3.52688 |
| ENSMUSG00000034457 | 10_Eda2r  | 57.7213 | 0.49429  | 0.437753 | 0.785364 | 133.484 | 44.2066 | 24.8199 | 53.644  | 45.4993 | 44.6739 |
| ENSMUSG00000034459 | 8_lfit1   | 12536.5 | 2.30054  | 4.21E-08 | 4.68E-06 | 29542.5 | 18915.9 | 14068.7 | 2919.88 | 5911.47 | 3860.76 |
| ENSMUSG00000034460 | 9_Six4    | 61.7805 | 0.00687  | 0.989382 | 0.997255 | 105.169 | 34.0051 | 46.5373 | 61.8969 | 67.8197 | 55.2545 |
| ENSMUSG00000034462 | 9_Pkd2    | 1713.62 | -0.46893 | 0.210788 | 0.602834 | 2103.39 | 921.538 | 1287.53 | 1999.68 | 2069.79 | 1899.81 |
| ENSMUSG00000034463 | 3_Scara3  | 961.197 | -0.30353 | 0.323356 | 0.703607 | 670.455 | 873.931 | 1037.26 | 1265.17 | 956.343 | 964.015 |
| ENSMUSG00000034467 | 6_Dynlrb2 | 2.78959 | -3.79828 | 0.049537 | 0.287828 | 0       | 0       | 1.03416 | 1.65058 | 12.8772 | 1.17563 |
| ENSMUSG00000034471 | 12_Caskir | 386.138 | 0.00723  | 0.991577 | 0.997512 | 61.6859 | 536.147 | 563.618 | 500.952 | 297.033 | 357.391 |
| ENSMUSG00000034472 | 13_Rasd2  | 11.5838 | 0.514    | 0.505027 | 0.824886 | 8.08995 | 10.2015 | 22.7516 | 14.8553 | 7.72629 | 5.87814 |
| ENSMUSG00000034473 | 13_Sec22  | 776.471 | 0.06157  | 0.852567 | 0.957929 | 1072.93 | 683.502 | 622.565 | 679.216 | 857.619 | 742.997 |
| ENSMUSG00000034480 | 18_Diap2  | 418.339 | 0.53548  | 0.295435 | 0.679579 | 900.007 | 304.912 | 280.258 | 285.551 | 407.777 | 331.527 |
| ENSMUSG00000034484 | 7_Snx2    | 3787.6  | 0.70609  | 0.055281 | 0.307691 | 6709.61 | 4078.34 | 3301.04 | 2341.35 | 3275.09 | 3020.19 |
| ENSMUSG00000034485 | 9_Uaca    | 10390.6 | 0.32376  | 0.359312 | 0.733085 | 7203.09 | 13746   | 13705.7 | 9193.76 | 8095.44 | 10399.6 |
| ENSMUSG00000034486 | 8_Gbx2    | 1.64637 | 1.1189   | 0.588787 | NA       | 0       | 5.66751 | 1.03416 | 0.82529 | 0       | 2.35126 |
| ENSMUSG00000034487 | 3_Kdelc2  | 794.082 | 0.11298  | 0.782224 | 0.935592 | 1305.52 | 569.018 | 600.848 | 750.191 | 824.138 | 714.782 |
| ENSMUSG00000034488 | 14_Edil3  | 134.396 | -0.68605 | 0.266587 | 0.654687 | 207.305 | 39.6726 | 62.0497 | 193.944 | 181.139 | 122.265 |
| ENSMUSG00000034493 | 1_493055  | 2.2189  | -0.59144 | 0.700137 | 0.905893 | 0       | 2.26701 | 3.10248 | 2.47588 | 4.29238 | 1.17563 |
| ENSMUSG00000034501 | 6_Pcnx14  | 369.588 | -0.18277 | 0.555476 | 0.846743 | 433.824 | 269.774 | 335.068 | 416.773 | 412.927 | 349.161 |
| ENSMUSG00000034509 | 8_Mad21l  | 418.971 | 0.60268  | 0.197503 | 0.58977  | 212.361 | 689.17  | 614.292 | 349.924 | 314.203 | 333.878 |
| ENSMUSG00000034518 | 13_Hmgx1  | 655.873 | 0.16681  | 0.513302 | 0.828304 | 788.771 | 642.696 | 649.453 | 561.199 | 642.999 | 650.122 |
| ENSMUSG00000034520 | 14_Gjc1   | 108.598 | -0.54698 | 0.154071 | 0.529491 | 122.361 | 66.8767 | 75.4938 | 124.619 | 149.375 | 112.86  |
| ENSMUSG00000034522 | 9_Zfp395  | 598.446 | 0.03027  | 0.919605 | 0.977244 | 479.33  | 597.356 | 737.357 | 632.174 | 510.794 | 633.663 |
| ENSMUSG00000034525 | 6_Ice1    | 1566.83 | -0.01122 | 0.959609 | 0.989708 | 1485.52 | 1597.11 | 1599.85 | 1601.89 | 1616.51 | 1500.1  |
| ENSMUSG00000034528 | 15_Hsd17  | 3.07477 | 0.37214  | 0.763616 | 0.929545 | 3.03373 | 2.26701 | 5.17081 | 1.65058 | 5.15086 | 1.17563 |
| ENSMUSG00000034532 | 8_Fbxo16  | 10.6858 | -1.50636 | 0.05563  | 0.308674 | 7.07871 | 4.53401 | 5.17081 | 23.1082 | 17.1695 | 7.05377 |
| ENSMUSG00000034533 | 9_Scn10a  | 0.37783 | 2.11394  | 0.599927 | NA       | 0       | 2.26701 | 0       | 0       | 0       | 0       |
| ENSMUSG00000034538 | 7_Zfp418  | 93.543  | -0.01865 | 0.970357 | 0.99208  | 153.709 | 66.8767 | 57.913  | 66.0234 | 103.876 | 112.86  |
| ENSMUSG00000034543 | 14_Morc2  | 972.963 | -0.01328 | 0.955583 | 0.988774 | 916.187 | 1045.09 | 944.189 | 892.966 | 1044.77 | 994.581 |
| ENSMUSG00000034544 | 17_Rsrc1  | 806.624 | 0.14556  | 0.642457 | 0.888342 | 1126.53 | 699.371 | 715.64  | 712.227 | 779.497 | 806.481 |
| ENSMUSG00000034551 | 12_Hdx    | 20.0313 | -0.92232 | 0.210989 | 0.602834 | 28.3148 | 7.93452 | 5.17081 | 21.4576 | 32.6221 | 24.6882 |
| ENSMUSG00000034552 | 8_Zswim2  | 0.16854 | 1.1315   | 0.781553 | NA       | 1.01124 | 0       | 0       | 0       | 0       | 0       |
| ENSMUSG00000034557 | 14_Zfyve5 | 1655.19 | 0.34158  | 0.365058 | 0.738154 | 2790.02 | 1419.15 | 1341.31 | 1363.38 | 1506.63 | 1510.68 |
| ENSMUSG00000034560 | 5_A23004  | 1312.91 | 0.64277  | 0.164916 | 0.543905 | 2755.64 | 1081.36 | 964.873 | 963.116 | 1155.51 | 956.961 |
| ENSMUSG00000034563 | 16_Ccpg1  | 1999.42 | -0.28317 | 0.352095 | 0.728508 | 2387.55 | 1473.55 | 1550.21 | 2186.2  | 2231.18 | 2167.86 |
| ENSMUSG00000034566 | 10_Atp5h  | 4114.67 | -0.30892 | 0.158807 | 0.537239 | 3499.92 | 3799.5  | 3728.15 | 4399.63 | 4816.91 | 4443.87 |
| ENSMUSG00000034570 | 12_Inpp5j | 15.7379 | -0.2239  | 0.763773 | 0.929545 | 4.04498 | 14.7355 | 24.8199 | 20.6323 | 13.7356 | 16.4588 |
| ENSMUSG00000034573 | 14_Ptpn11 | 9892.8  | 0.47469  | 0.093816 | 0.417048 | 9099.18 | 12711.1 | 12706.7 | 7457.34 | 7829.31 | 9553.15 |
| ENSMUSG00000034574 | 9_Daam1   | 3428.39 | 0.28653  | 0.375486 | 0.745495 | 5076.45 | 3229.35 | 2997    | 2698.71 | 3190.1  | 3378.75 |
| ENSMUSG00000034575 | 11_Papd7  | 915.362 | 0.81731  | 0.004079 | 0.053903 | 922.255 | 1422.55 | 1159.3  | 684.167 | 667.895 | 636.015 |
| ENSMUSG00000034579 | 17_Pla2g1 | 13.3479 | -0.48857 | 0.514775 | 0.829322 | 3.03373 | 17.0025 | 13.4441 | 16.5058 | 17.1695 | 12.9319 |
| ENSMUSG00000034584 | 3_Exp5    | 2186.51 | 0.11816  | 0.701032 | 0.906307 | 2786.99 | 2028.97 | 2011.44 | 1645.63 | 2173.66 | 2472.35 |
| ENSMUSG00000034586 | 14_Hid1   | 97.5731 | -1.71754 | 0.002063 | 0.033111 | 21.2361 | 41.9396 | 73.4255 | 226.13  | 100.442 | 122.265 |
| ENSMUSG00000034591 | 5_Slc41a2 | 85.7026 | -0.28854 | 0.444103 | 0.788515 | 100.113 | 72.5442 | 58.9472 | 91.6075 | 109.885 | 81.1183 |
| ENSMUSG00000034593 | 16_Myo5a  | 1904.27 | -0.96234 | 0.103419 | 0.123625 | 1886.98 | 926.072 | 1062.08 | 2887.7  | 2780.61 | 1882.18 |
| ENSMUSG00000034595 | 17_Ppp1r  | 435.2   | 0.63581  | 0.182871 | 0.569232 | 219.44  | 780.984 | 588.438 | 357.352 | 319.353 | 345.635 |
| ENSMUSG00000034601 | 16_27000  | 378.032 | 0.52084  | 0.062356 | 0.329792 | 514.723 | 397.86  | 424.006 | 278.124 | 353.693 | 299.785 |
| ENSMUSG00000034602 | 13_Mon2   | 2067.83 | 0.34656  | 0.121248 | 0.473336 | 2455.3  | 2290.81 | 2198.63 | 1728.16 | 1835.42 | 1898.64 |
| ENSMUSG00000034607 | 6_Pof1b   | 5442.17 | 0.88795  | 0.083864 | 0.391054 | 12299.5 | 4430.86 | 3767.45 | 3056.88 | 4421.16 | 3977.15 |
| ENSMUSG00000034610 | 14_Zcchc  | 1906.65 | 1.14702  | 0.009237 | 0.094767 | 4383.74 | 1836.27 | 1660.86 | 1072.05 | 1207.88 | 1279.08 |
| ENSMUSG00000034612 | 7_Chst11  | 437.335 | -0.94933 | 0.008232 | 0.087401 | 419.666 | 209.698 | 265.78  | 613.192 | 607.802 | 507.871 |
| ENSMUSG00000034613 | 12_Ppm1f  | 834.529 | -0.40568 | 0.169267 | 0.550793 | 895.962 | 607.558 | 650.488 | 1042.34 | 985.532 | 825.291 |
| ENSMUSG00000034614 | 14_Pik3ip | 393.912 | 0.09683  | 0.759537 | 0.927999 | 332.699 | 383.124 | 505.705 | 453.086 | 327.938 | 360.918 |
| ENSMUSG00000034616 | 16_Ssh3   | 1117.78 | 0.72378  | 0.15842  | 0.536775 | 489.442 | 1899.75 | 1788.07 | 885.539 | 692.791 | 951.083 |
| ENSMUSG00000034617 | 6_Mtrr    | 311.274 | 0.05322  | 0.835995 | 0.952513 | 302.362 | 300.378 | 348.512 | 311.135 | 321.929 | 283.326 |
| ENSMUSG00000034620 | 17_Tmem   | 767.664 | 0.20364  | 0.628322 | 0.881165 | 1320.69 | 586.021 | 558.447 | 659.409 | 798.384 | 683.04  |
| ENSMUSG00000034621 | 14_Gpatcl | 1697.52 | 0.07901  | 0.733126 | 0.919861 | 1582.6  | 1780.73 | 1868.73 | 1583.74 | 1737.56 | 1631.77 |
| ENSMUSG00000034623 | 14_Prss5f | 0       | NA       | NA       | NA       | 0       | 0       | 0       | 0       | 0       | 0       |
| ENSMUSG00000034634 | 7_Ly6d    | 41.053  | 3.07548  | 0.000981 | 0.019332 | 11.1237 | 179.093 | 29.9907 | 11.5541 | 5.15086 | 9.40502 |
| ENSMUSG00000034636 | 9_Zyg11b  | 2253.99 | 0.03612  | 0.932797 | 0.982615 | 3743.63 | 1538.16 | 1564.69 | 2047.55 | 2452.67 | 2177.26 |
| ENSMUSG00000034639 | 7_Setmar  | 104.401 | -0.50726 | 0.156482 | 0.534072 | 112.248 | 64.6097 | 81.6988 | 116.366 | 133.922 | 117.563 |
| ENSMUSG00000034640 | 9_Tiparp  | 2466.9  | 0.81861  | 0.093675 | 0.416648 | 5524.43 | 2120.78 | 1800.48 | 1418.68 | 2208.86 | 1728.17 |
| ENSMUSG00000034641 | 2_Cd300k  | 39.5254 | 0.74347  | 0.08292  | 0.388665 | 52.5847 | 51.0076 | 44.4689 | 22.2829 | 29.1882 | 37.6201 |
| ENSMUSG00000034645 | 13_Zyg11  | 1.11061 | 0.9831   | 0.659154 | NA       | 1.01124 | 2.26701 | 1.03416 | 0       | 0       | 2.35126 |
| ENSMUSG00000034647 | 14_Ankrd1 | 1514.79 | 0.43019  | 0.355093 | 0.73032  | 3008.45 | 995.216 | 1213.07 | 1197.5  | 1358.97 | 1315.53 |
| ENSMUSG00000034648 | 9_Lrrn1   | 156.948 | -1.48516 | 0.006496 | 0.074489 | 129.439 | 27.2041 | 91.0062 | 274.822 | 224.062 | 195.154 |
| ENSMUSG00000034652 | 12_Cd300  | 52.126  | 0.99756  | 0.027963 | 0.202092 | 64.7196 | 97.4812 | 46.5373 | 36.3129 | 39.4899 | 28.2151 |
| ENSMUSG00000034653 | 11_Ythdc1 | 531.472 | 0.55499  | 0.17016  | 0.551962 | 966.75  | 503.275 | 427.109 | 356.526 | 479.03  | 456.144 |
| ENSMUSG00000034656 | 16_Cacna  | 79.9616 | -0.7064  | 0.113365 | 0.456885 | 40.4498 | 49.8741 | 92.0404 | 120.493 | 87.5647 | 89.3477 |
| ENSMUSG00000034659 | 14_Tmem   | 1316.32 | 0.09555  | 0.873282 | 0.963908 | 327.643 | 1854.41 | 1897.69 | 1482.23 | 967.504 | 1368.43 |

|                    |            |         |          |          |          |          |         |         |         |         |         |
|--------------------|------------|---------|----------|----------|----------|----------|---------|---------|---------|---------|---------|
| ENSMUSG00000034663 | 13_Bmp2l   | 1156.28 | 0.72214  | 0.024827 | 0.188346 | 1906.2   | 1227.58 | 1185.15 | 738.637 | 934.881 | 945.205 |
| ENSMUSG00000034664 | 13_Iitga2b | 96.0589 | -0.08647 | 0.888885 | 0.970015 | 22.2474  | 128.086 | 129.27  | 105.637 | 84.1307 | 106.982 |
| ENSMUSG00000034667 | 7_Xpot     | 2478.54 | 0.41282  | 0.18173  | 0.567796 | 3696.1   | 2494.84 | 2301.01 | 1853.61 | 2263.8  | 2261.91 |
| ENSMUSG00000034673 | 14_Pbx2    | 713.754 | -0.10904 | 0.687517 | 0.904573 | 560.229  | 705.039 | 795.27  | 788.154 | 710.819 | 723.011 |
| ENSMUSG00000034674 | 18_Tdg     | 1164.23 | 0.46919  | 0.058492 | 0.317521 | 1391.47  | 1401.01 | 1262.71 | 846.75  | 1001.84 | 1081.58 |
| ENSMUSG00000034675 | 17_Dbn1    | 160.329 | -1.29453 | 0.000572 | 0.01289  | 63.7084  | 94.0807 | 120.997 | 277.298 | 206.034 | 199.857 |
| ENSMUSG00000034677 | 9_Gpr142   | 0.13755 | -0.79206 | 0.84609  | NA       | 0        | 0       | 0       | 0.82529 | 0       | 0       |
| ENSMUSG00000034681 | 16_Rnps1   | 1300.2  | 0.33498  | 0.149406 | 0.522751 | 1356.08  | 1572.17 | 1423.01 | 1089.39 | 1142.63 | 1217.95 |
| ENSMUSG00000034683 | 12_Ppp1r   | 0.7298  | -1.59306 | 0.566687 | NA       | 1.01124  | 0       | 0       | 1.65058 | 1.71695 | 0       |
| ENSMUSG00000034684 | 12_Sema    | 1738.63 | 0.60156  | 0.302387 | 0.685243 | 533.937  | 2972.04 | 2781.89 | 1501.21 | 1110.87 | 1531.84 |
| ENSMUSG00000034685 | 4_Fam17    | 177.663 | 0.35071  | 0.632404 | 0.883233 | 29.3261  | 251.638 | 316.453 | 193.118 | 84.9892 | 190.452 |
| ENSMUSG00000034686 | 7_Prr7     | 0.81558 | -3.05589 | 0.242859 | NA       | 0        | 0       | 0       | 0.82529 | 1.71695 | 2.35126 |
| ENSMUSG00000034687 | 8_Fras1    | 857.041 | -0.92563 | 6.82E-05 | 0.002428 | 556.184  | 605.291 | 612.224 | 1112.49 | 1193.28 | 1062.77 |
| ENSMUSG00000034690 | 12_Nlrp4c  | 0.14308 | -0.79206 | 0.84609  | NA       | 0        | 0       | 0       | 0       | 0.85848 | 0       |
| ENSMUSG00000034701 | 9_Neurod   | 41.797  | -1.76524 | 0.056405 | 0.310591 | 31.3486  | 22.6701 | 3.10248 | 130.396 | 51.5086 | 11.7563 |
| ENSMUSG00000034706 | 16_Dnaic   | 7.81374 | -0.97922 | 0.33154  | 0.711299 | 1.01124  | 3.40051 | 11.3758 | 15.6806 | 6.00934 | 9.40502 |
| ENSMUSG00000034707 | 6_Gns      | 8988.85 | -0.05808 | 0.804973 | 0.942951 | 7649.05  | 9495.35 | 9279.53 | 8966.8  | 9386.59 | 9155.79 |
| ENSMUSG00000034708 | 11_Grn     | 3165.81 | 0.71458  | 0.165918 | 0.545533 | 1362.15  | 5494.09 | 4946.39 | 2672.3  | 1945.31 | 2574.62 |
| ENSMUSG00000034709 | 8_Ppp1r2   | 772.744 | -0.03673 | 0.883596 | 0.967903 | 709.894  | 845.593 | 733.221 | 828.594 | 696.225 | 822.939 |
| ENSMUSG00000034714 | 9_Ttyh2    | 110.525 | -0.45295 | 0.328765 | 0.709501 | 44.4948  | 104.282 | 131.339 | 144.426 | 121.045 | 117.563 |
| ENSMUSG00000034723 | 11_Tmx4    | 1356.09 | -0.74241 | 0.141507 | 0.510149 | 1830.35  | 524.812 | 688.752 | 1809.04 | 1918.7  | 1364.9  |
| ENSMUSG00000034724 | 17_Cnot6l  | 2172.3  | 0.88461  | 0.054884 | 0.305974 | 4813.52  | 1836.27 | 1804.61 | 1289.93 | 1778.76 | 1510.68 |
| ENSMUSG00000034729 | 16_Mrps1   | 900.536 | 0.19668  | 0.423005 | 0.774831 | 1033.49  | 972.545 | 879.037 | 758.444 | 843.883 | 915.814 |
| ENSMUSG00000034730 | 16_Adgrb   | 21.0333 | -0.83641 | 0.384629 | 0.750802 | 1.01124  | 23.8036 | 20.6832 | 49.5175 | 20.6034 | 10.5807 |
| ENSMUSG00000034731 | 9_Dgkh     | 193.622 | 0.06198  | 0.831365 | 0.951683 | 199.215  | 223.3   | 170.637 | 188.167 | 169.978 | 210.437 |
| ENSMUSG00000034732 | 4_Pabpc5   | 3.55288 | -1.66121 | 0.217669 | 0.608427 | 0.404498 | 0       | 1.03416 | 4.12646 | 8.58477 | 3.52688 |
| ENSMUSG00000034738 | 8_Nostrin  | 97.869  | -0.05308 | 0.886906 | 0.969068 | 128.428  | 77.0782 | 82.7329 | 94.9086 | 115.894 | 88.1721 |
| ENSMUSG00000034739 | 17_Mfrp    | 2660.38 | -1.5685  | 0.0008   | 0.016567 | 683.601  | 1191.31 | 2150.02 | 5132.49 | 3645.95 | 3158.91 |
| ENSMUSG00000034744 | 13_Nagk    | 1234.17 | -0.04446 | 0.906899 | 0.974391 | 688.657  | 1501.89 | 1455.07 | 1351.83 | 1133.19 | 1274.38 |
| ENSMUSG00000034748 | 16_Sirt6   | 168.149 | 0.2618   | 0.713251 | 0.910879 | 25.2811  | 242.57  | 282.326 | 183.215 | 126.196 | 149.305 |
| ENSMUSG00000034751 | 15_Mast4   | 5502.48 | 0.70893  | 0.023322 | 0.180434 | 5814.65  | 7428.98 | 7239.13 | 3292.09 | 3813.35 | 5426.7  |
| ENSMUSG00000034755 | 18_Pcdh1   | 19.207  | -0.91075 | 0.273102 | 0.659475 | 30.3373  | 3.40051 | 6.20497 | 25.5841 | 30.9052 | 18.81   |
| ENSMUSG00000034757 | 12_Tmub    | 712.703 | 0.12081  | 0.783439 | 0.935592 | 352.924  | 929.472 | 945.224 | 748.54  | 560.585 | 739.47  |
| ENSMUSG00000034758 | 12_Tle6    | 58.3279 | -0.14115 | 0.788188 | 0.937091 | 23.2586  | 66.8767 | 76.528  | 71.8004 | 60.9519 | 50.552  |
| ENSMUSG00000034761 | 15_Map4k   | 3570.29 | 0.44388  | 0.255823 | 0.647228 | 6248.48  | 3074.06 | 3022.85 | 2494.86 | 3299.13 | 3282.35 |
| ENSMUSG00000034762 | 9_Glis1    | 16.2192 | -0.87194 | 0.36466  | 0.738004 | 1.01124  | 17.0025 | 16.5466 | 39.614  | 13.7356 | 9.40502 |
| ENSMUSG00000034765 | 6_Dusp5    | 1727.45 | 0.68261  | 0.031474 | 0.218285 | 1471.36  | 2626.33 | 2288.6  | 1332.85 | 1373.56 | 1272.03 |
| ENSMUSG00000034768 | 4_Asb16    | 29.1055 | -0.1661  | 0.731153 | 0.91894  | 23.2586  | 23.8036 | 35.1615 | 36.3129 | 23.1789 | 32.9176 |
| ENSMUSG00000034771 | 15_Tle2    | 124.967 | -0.49312 | 0.387179 | 0.752114 | 38.4273  | 108.816 | 164.432 | 211.275 | 121.045 | 105.807 |
| ENSMUSG00000034773 | 16_BC03C   | 58.7456 | 0.32703  | 0.594772 | 0.866787 | 20.2249  | 81.6122 | 94.1087 | 47.0417 | 37.773  | 71.7133 |
| ENSMUSG00000034774 | 6_Dsg1c    | 7.93462 | -0.64672 | 0.488633 | 0.814132 | 12.1349  | 1.1335  | 5.17081 | 7.42763 | 11.1602 | 10.5807 |
| ENSMUSG00000034777 | 2_Vax2     | 4.53483 | -2.43167 | 0.051514 | 0.293895 | 0        | 2.26701 | 2.06832 | 9.90351 | 9.44325 | 3.52688 |
| ENSMUSG00000034780 | 6_B3galt1  | 39.1213 | -0.25282 | 0.773435 | 0.932641 | 77.8658  | 3.40051 | 25.854  | 58.5958 | 45.4993 | 23.5126 |
| ENSMUSG00000034781 | 5_Gna11    | 1144.92 | -0.1213  | 0.812958 | 0.946432 | 389.329  | 1373.81 | 1527.46 | 1407.12 | 982.098 | 1189.74 |
| ENSMUSG00000034783 | 7_Cd207    | 3.75621 | -0.36227 | 0.766043 | 0.930238 | 2.02249  | 6.80102 | 1.03416 | 1.65058 | 5.15086 | 5.87814 |
| ENSMUSG00000034785 | 14_Dio1    | 0.59607 | -1.18871 | 0.690318 | NA       | 0        | 0       | 1.03416 | 0.82529 | 1.71695 | 0       |
| ENSMUSG00000034786 | 17_Gpsm    | 57.2476 | -0.35922 | 0.383266 | 0.749884 | 39.4385  | 66.8767 | 44.4689 | 77.5775 | 57.518  | 57.6058 |
| ENSMUSG00000034789 | 7_Rab24    | 578.105 | 0.16097  | 0.651082 | 0.891804 | 374.16   | 729.976 | 727.016 | 547.994 | 554.576 | 534.911 |
| ENSMUSG00000034792 | 8_Gna15    | 745.946 | 0.46555  | 0.377714 | 0.746591 | 284.16   | 1183.38 | 1128.27 | 643.728 | 533.114 | 703.025 |
| ENSMUSG00000034793 | 15_G6pc3   | 499.88  | -0.01681 | 0.974888 | 0.93623  | 162.81   | 605.291 | 722.879 | 570.277 | 417.22  | 520.803 |
| ENSMUSG00000034795 | 14_Ccdc1   | 80.8693 | 0.93641  | 0.111619 | 0.453007 | 203.26   | 66.8767 | 48.6056 | 61.0716 | 58.3764 | 47.0251 |
| ENSMUSG00000034796 | 14_Cpne7   | 312.595 | -1.03855 | 0.057793 | 0.315    | 68.7646  | 192.695 | 352.649 | 421.724 | 400.05  | 439.685 |
| ENSMUSG00000034799 | 16_Unc13   | 155.184 | -0.53516 | 0.123601 | 0.478085 | 88.9895  | 138.287 | 153.056 | 167.534 | 206.893 | 176.344 |
| ENSMUSG00000034800 | 15_Zfp66   | 175.156 | -0.103   | 0.738662 | 0.921641 | 199.215  | 171.159 | 136.509 | 178.263 | 200.025 | 165.764 |
| ENSMUSG00000034801 | 13_Sos2    | 1542.62 | 0.46228  | 0.230715 | 0.622298 | 2717.21  | 1312.6  | 1333.03 | 1157.06 | 1428.51 | 1307.3  |
| ENSMUSG00000034807 | 8_Colgal   | 1412.06 | 0.01236  | 0.965187 | 0.990727 | 1090.12  | 1541.56 | 1622.6  | 1418.68 | 1304.03 | 1495.4  |
| ENSMUSG00000034810 | 7_Scn7a    | 514.776 | -0.14213 | 0.812406 | 0.946225 | 959.671  | 187.028 | 321.624 | 523.235 | 718.545 | 378.552 |
| ENSMUSG00000034813 | 16_Grip1   | 156.819 | 0.32679  | 0.265239 | 0.653966 | 146.63   | 196.096 | 180.978 | 138.649 | 143.366 | 135.197 |
| ENSMUSG00000034818 | 16_Celf5   | 33.1386 | -0.29942 | 0.579095 | 0.858589 | 36.4048  | 27.2041 | 25.854  | 53.644  | 36.9145 | 18.81   |
| ENSMUSG00000034820 | 3_Cpsf7    | 1750.38 | 0.21126  | 0.383557 | 0.7499   | 2046.76  | 1894.08 | 1693.96 | 1470.67 | 1742.71 | 1654.11 |
| ENSMUSG00000034825 | 13_Nrip3   | 16.6759 | -0.12218 | 0.856213 | 0.959059 | 24.2699  | 12.4685 | 11.3758 | 23.1082 | 20.6034 | 8.22939 |
| ENSMUSG00000034826 | 14_Nup54   | 783.358 | 0.49899  | 0.080787 | 0.382701 | 1113.38  | 880.732 | 758.04  | 575.229 | 675.621 | 697.147 |
| ENSMUSG00000034829 | 7_Nxn1     | 42.145  | -2.92902 | 0.000149 | 0.004593 | 16.1799  | 9.06802 | 4.13665 | 127.095 | 76.4045 | 19.9857 |
| ENSMUSG00000034832 | 15_Tet3    | 3897.48 | 0.55694  | 0.027588 | 0.200518 | 4325.09  | 4697.24 | 4898.82 | 3146.01 | 2695.62 | 3622.11 |
| ENSMUSG00000034833 | 9_Tespa1   | 7.2029  | 2.53212  | 0.005362 | 0.065016 | 13.1462  | 12.4685 | 11.3758 | 2.47588 | 2.57543 | 1.17563 |
| ENSMUSG00000034837 | 12_Gnat1   | 1682.28 | -2.92038 | 2.56E-05 | 0.001113 | 296.295  | 715.24  | 166.5   | 5386.68 | 2648.4  | 880.545 |
| ENSMUSG00000034839 | 5_Larp6    | 43.7124 | -0.4982  | 0.347488 | 0.724652 | 21.2361  | 31.7381 | 55.8447 | 70.1499 | 38.6315 | 44.6739 |
| ENSMUSG00000034842 | 16_Art3    | 343.984 | -0.0065  | 0.984374 | 0.994848 | 453.037  | 278.842 | 297.839 | 400.267 | 327.08  | 306.839 |
| ENSMUSG00000034845 | 5_Plvap    | 212.256 | -0.27702 | 0.597935 | 0.868549 | 70.7871  | 266.373 | 238.891 | 299.581 | 186.29  | 211.613 |
| ENSMUSG00000034848 | 17_Ttc21t  | 292.229 | -0.1877  | 0.594072 | 0.86664  | 385.284  | 211.965 | 222.345 | 303.708 | 327.938 | 302.136 |
| ENSMUSG00000034850 | 15_Tmem    | 3941.79 | 0.24523  | 0.25304  | 0.644241 | 4362.51  | 4351.52 | 4113.89 | 3489.34 | 3672.56 | 3660.91 |
| ENSMUSG00000034853 | 16_Acot1   | 537.958 | 0.28746  | 0.493594 | 0.816268 | 304.385  | 830.858 | 639.112 | 531.488 | 448.125 | 473.778 |
| ENSMUSG00000034854 | 8_Mfsd12   | 219.413 | 0.1184   | 0.846752 | 0.955607 | 55.6184  | 306.046 | 323.693 | 266.569 | 158.818 | 205.735 |
| ENSMUSG00000034855 | 13_Cxcl1c  | 1467.56 | 7.27185  | 4.39E-75 | 7.60E-71 | 3219.8   | 3160.21 | 2368.23 | 10.7288 | 24.0374 | 22.3369 |
| ENSMUSG00000034858 | 15_Fam2    | 796.462 | 0.14289  | 0.56694  | 0.852155 | 917.199  | 725.442 | 864.559 | 726.257 | 740.007 | 805.305 |

|                    |           |         |          |          |          |         |         |         |         |         |         |
|--------------------|-----------|---------|----------|----------|----------|---------|---------|---------|---------|---------|---------|
| ENSMUSG00000034863 | 7_Ano8    | 138.925 | -0.02604 | 0.953917 | 0.988507 | 69.7759 | 140.554 | 202.696 | 148.553 | 126.196 | 145.778 |
| ENSMUSG00000034867 | 16_Ankrd1 | 581.634 | 0.05126  | 0.867968 | 0.962942 | 429.779 | 729.976 | 616.36  | 576.054 | 567.453 | 570.179 |
| ENSMUSG00000034868 | 8_Myl12b  | 6719.13 | 0.11012  | 0.765566 | 0.929992 | 4166.33 | 8204.29 | 8555.62 | 6646.08 | 5477.08 | 7265.38 |
| ENSMUSG00000034871 | 2_Fam15c  | 0       | NA       | NA       | NA       | 0       | 0       | 0       | 0       | 0       | 0       |
| ENSMUSG00000034872 | 5_Gipc3   | 1.23862 | -0.43691 | 0.840373 | NA       | 1.01124 | 0       | 2.06832 | 0.82529 | 0       | 3.52688 |
| ENSMUSG00000034875 | 5_Nudt19  | 709.419 | 0.11776  | 0.77152  | 0.932465 | 1155.85 | 497.608 | 561.55  | 683.342 | 737.432 | 620.731 |
| ENSMUSG00000034880 | 6_Mrpl34  | 80.4141 | 0.05578  | 0.896872 | 0.97156  | 56.6297 | 81.6122 | 107.553 | 93.258  | 54.084  | 89.3477 |
| ENSMUSG00000034881 | 7_Tbxa2r  | 7.73284 | -0.81513 | 0.436585 | 0.784325 | 1.01124 | 4.53401 | 11.3758 | 16.5058 | 9.44325 | 3.52688 |
| ENSMUSG00000034883 | 8_Lrr1    | 38.0849 | 1.588    | 0.007276 | 0.080244 | 100.113 | 34.0051 | 37.2298 | 14.8553 | 22.3204 | 19.9857 |
| ENSMUSG00000034889 | 7_Cactin  | 289.578 | 0.60468  | 0.351714 | 0.728508 | 70.7871 | 520.278 | 457.099 | 262.443 | 158.818 | 268.043 |
| ENSMUSG00000034891 | 13_Sncb   | 22.2338 | -2.53456 | 0.034996 | 0.232834 | 1.01124 | 13.602  | 5.17081 | 85.8304 | 26.6128 | 1.17563 |
| ENSMUSG00000034892 | 8_Rps29   | 5415.32 | -0.16447 | 0.768958 | 0.931306 | 1578.55 | 6484.77 | 7257.75 | 7573.71 | 4030.55 | 5566.6  |
| ENSMUSG00000034893 | 7_Cog3    | 1286.52 | 0.15243  | 0.534497 | 0.838255 | 1536.08 | 1340.93 | 1186.18 | 1186.77 | 1246.51 | 1222.65 |
| ENSMUSG00000034898 | 15_Filip1 | 191.158 | -1.14176 | 0.00058  | 0.013045 | 120.338 | 87.2797 | 149.953 | 284.726 | 260.119 | 244.531 |
| ENSMUSG00000034902 | 17_Pip5k1 | 638.981 | 0.03362  | 0.955139 | 0.98876  | 160.788 | 824.057 | 954.531 | 774.95  | 485.898 | 633.663 |
| ENSMUSG00000034903 | 18_Cobll1 | 1733.39 | 0.45481  | 0.093219 | 0.415917 | 2347.1  | 1871.41 | 1794.27 | 1247.02 | 1589.9  | 1550.65 |
| ENSMUSG00000034906 | 15_Ncaph  | 329.447 | 0.89244  | 0.00618  | 0.071961 | 378.205 | 482.872 | 422.972 | 167.534 | 242.949 | 282.151 |
| ENSMUSG00000034908 | 15_Sidt2  | 4308.02 | 0.67709  | 0.200912 | 0.592148 | 1678.67 | 7810.97 | 6412.84 | 3384.52 | 3204.69 | 3356.42 |
| ENSMUSG00000034910 | 5_Pygo1   | 275.718 | -0.97205 | 0.033346 | 0.225665 | 303.373 | 102.015 | 153.056 | 403.568 | 385.456 | 306.839 |
| ENSMUSG00000034911 | 7_Ushbp1  | 69.5901 | -0.58445 | 0.286442 | 0.672397 | 20.2249 | 60.0757 | 86.8696 | 93.258  | 80.6968 | 76.4158 |
| ENSMUSG00000034912 | 16_Mdga2  | 7.56994 | -0.79156 | 0.359306 | 0.733085 | 8.08995 | 3.40051 | 5.17081 | 7.42763 | 15.4526 | 5.87814 |
| ENSMUSG00000034917 | 7_Tjp3    | 2283.99 | 0.42557  | 0.89503  | 0.814396 | 570.342 | 3791.57 | 3493.4  | 2067.36 | 1535.82 | 2245.45 |
| ENSMUSG00000034918 | 8_Cdhr2   | 0       | NA       | NA       | NA       | 0       | 0       | 0       | 0       | 0       | 0       |
| ENSMUSG00000034919 | 2_Ttc22   | 1388.73 | 0.66609  | 0.17322  | 0.556848 | 664.388 | 2489.17 | 1957.67 | 1080.31 | 932.306 | 1208.55 |
| ENSMUSG00000034923 | 9_Ly6g6f  | 4.63154 | -0.46716 | 0.671216 | 0.899694 | 1.01124 | 4.53401 | 6.20497 | 9.07822 | 3.43391 | 3.52688 |
| ENSMUSG00000034926 | 3_Dhcr24  | 13555.4 | 0.43669  | 0.412995 | 0.768294 | 5048.13 | 21321.2 | 20405   | 12074.9 | 8994.26 | 13489.2 |
| ENSMUSG00000034928 | 16_Rnf44  | 1837.85 | 0.56784  | 0.141524 | 0.510149 | 1279.22 | 2611.59 | 2693.99 | 1668.74 | 1173.54 | 1600.03 |
| ENSMUSG00000034930 | 15_Rtkn   | 740.347 | 0.41985  | 0.486458 | 0.81371  | 207.305 | 1126.7  | 1207.9  | 682.517 | 455.851 | 761.807 |
| ENSMUSG00000034931 | 15_Dhx8   | 1386.9  | 0.43893  | 0.240911 | 0.632003 | 948.547 | 2116.25 | 1723.95 | 1047.3  | 1180.41 | 1304.95 |
| ENSMUSG00000034932 | 4_Mrpl54  | 339.65  | -0.10649 | 0.851502 | 0.957649 | 90.0007 | 425.064 | 466.407 | 389.538 | 314.203 | 352.688 |
| ENSMUSG00000034936 | 2_Arl4d   | 174.519 | 0.50401  | 0.341595 | 0.719594 | 93.0345 | 345.718 | 175.807 | 182.39  | 150.233 | 99.9284 |
| ENSMUSG00000034940 | 15_Synrg  | 1575.21 | 0.24923  | 0.253021 | 0.644241 | 1717.09 | 1743.33 | 1672.24 | 1386.49 | 1450.83 | 1481.29 |
| ENSMUSG00000034947 | 13_Tmem   | 495.42  | 1.36817  | 0.000264 | 0.007156 | 497.532 | 1020.15 | 624.634 | 273.172 | 236.081 | 320.946 |
| ENSMUSG00000034949 | 18_Zfr2   | 104.968 | -0.41778 | 0.402855 | 0.761359 | 43.4835 | 80.4787 | 145.817 | 141.95  | 119.328 | 98.7527 |
| ENSMUSG00000034951 | 10_Cog7   | 832.691 | 0.26235  | 0.395033 | 0.755773 | 651.241 | 1003.15 | 1070.36 | 813.738 | 709.96  | 747.699 |
| ENSMUSG00000034957 | 10_Cebpα  | 392.622 | 0.17434  | 0.578202 | 0.858146 | 362.025 | 485.139 | 401.255 | 316.087 | 324.504 | 466.724 |
| ENSMUSG00000034958 | 11_Atcay  | 16.1346 | -1.66307 | 0.033228 | 0.225284 | 6.06747 | 9.06802 | 8.27329 | 44.5658 | 20.6034 | 8.22939 |
| ENSMUSG00000034959 | 7_503141  | 17.3061 | 1.4377   | 0.024158 | 0.18468  | 19.2136 | 36.2721 | 20.6832 | 13.2047 | 8.58477 | 5.87814 |
| ENSMUSG00000034968 | 3_Lbx2    | 1.34773 | -2.64738 | 0.197291 | NA       | 0       | 0       | 1.03416 | 3.30117 | 2.57543 | 1.17563 |
| ENSMUSG00000034973 | 16_Dopey  | 1517.6  | 0.20574  | 0.571826 | 0.854795 | 2362.27 | 1278.59 | 1235.82 | 1226.38 | 1575.31 | 1427.21 |
| ENSMUSG00000034974 | 12_Dapk3  | 280.131 | 0.30474  | 0.670109 | 0.898766 | 43.4835 | 450.001 | 435.382 | 311.135 | 165.686 | 275.097 |
| ENSMUSG00000034981 | 9_Parm1   | 4039.77 | 0.44889  | 0.067057 | 0.343568 | 5356.56 | 4539.68 | 4093.21 | 3369.67 | 3310.29 | 3569.21 |
| ENSMUSG00000034987 | 3_Hrh2    | 5.60196 | 2.11705  | 0.07679  | 0.371481 | 4.04498 | 19.2695 | 4.13665 | 4.12646 | 0.85848 | 1.17563 |
| ENSMUSG00000034990 | 14_Otoa   | 1.86188 | -3.12354 | 0.111596 | 0.453007 | 0       | 1.1335  | 0       | 3.30117 | 0.85848 | 5.87814 |
| ENSMUSG00000034993 | 7_Vat1    | 4126.59 | -0.14286 | 0.757592 | 0.927689 | 1660.46 | 4756.18 | 5350.75 | 4729.75 | 3710.34 | 4552.03 |
| ENSMUSG00000034994 | 9_Eef2    | 29117.9 | 0.24519  | 0.690886 | 0.905638 | 6887.59 | 41722   | 46149.5 | 30114.9 | 20259.2 | 29574.1 |
| ENSMUSG00000034997 | 4_Htr2a   | 19.5319 | -0.40192 | 0.452935 | 0.795078 | 19.2136 | 15.869  | 15.5124 | 20.6323 | 28.3297 | 17.6344 |
| ENSMUSG00000034998 | 18_Foxn2  | 963.105 | 0.53319  | 0.174674 | 0.55808  | 1749.45 | 867.13  | 800.441 | 706.45  | 840.449 | 814.71  |
| ENSMUSG00000035000 | 8_Dpp4    | 895.735 | -0.48044 | 0.296985 | 0.680531 | 1256.98 | 427.331 | 559.481 | 1080.31 | 1193.28 | 857.033 |
| ENSMUSG00000035004 | 2_Igfb6   | 85.0407 | 1.33488  | 0.010136 | 0.101733 | 161.799 | 154.156 | 49.6398 | 51.9934 | 51.5086 | 41.147  |
| ENSMUSG00000035007 | 5_Rundc1  | 399.124 | 0.0374   | 0.919944 | 0.977296 | 239.665 | 463.603 | 509.842 | 404.393 | 406.918 | 370.323 |
| ENSMUSG00000035011 | 15_Zbtb7c | 2540.74 | 0.80965  | 0.003879 | 0.052221 | 2930.59 | 3525.19 | 3250.37 | 1946.04 | 1449.11 | 2143.17 |
| ENSMUSG00000035020 | 11_Epgn   | 768.327 | 0.39947  | 0.356068 | 0.731176 | 1420.8  | 690.303 | 510.876 | 655.282 | 679.055 | 653.649 |
| ENSMUSG00000035021 | 13_Baz1a  | 2476.05 | 0.58125  | 0.061917 | 0.328702 | 3321.94 | 3173.81 | 2408.56 | 1487.18 | 2298.14 | 2166.68 |
| ENSMUSG00000035024 | 15_Ncapd  | 803.529 | 0.34444  | 0.200303 | 0.592148 | 1037.54 | 841.059 | 818.022 | 608.24  | 758.035 | 758.28  |
| ENSMUSG00000035027 | 17_Map2k  | 838.24  | 0.40155  | 0.552104 | 0.845186 | 158.765 | 1314.86 | 1388.88 | 897.093 | 515.086 | 754.753 |
| ENSMUSG00000035031 | 15_C8a    | 1.62348 | -0.32997 | 0.856412 | NA       | 1.01124 | 1.1335  | 2.06832 | 0.82529 | 0       | 4.70251 |
| ENSMUSG00000035032 | 11_Nek11  | 1.56785 | 0.24966  | 0.902142 | NA       | 1.01124 | 0       | 4.13665 | 0.82529 | 3.43391 | 0       |
| ENSMUSG00000035033 | 15_Tbr1   | 1.29569 | 1.80181  | 0.411749 | NA       | 5.05622 | 0       | 1.03416 | 0.82529 | 0.85848 | 0       |
| ENSMUSG00000035041 | 8_Creb3l3 | 7.78469 | -0.64812 | 0.422381 | 0.774546 | 3.03373 | 9.06802 | 6.20497 | 10.7288 | 9.44325 | 8.22939 |
| ENSMUSG00000035042 | 2_Ccl5    | 98.117  | 6.28717  | 1.94E-21 | 2.80E-18 | 155.732 | 265.24  | 160.295 | 1.65058 | 3.43391 | 2.35126 |
| ENSMUSG00000035045 | 17_Zc3h1  | 119.527 | -0.15191 | 0.737338 | 0.920922 | 184.046 | 74.8112 | 80.6646 | 114.716 | 134.781 | 128.143 |
| ENSMUSG00000035047 | 9_Kri1    | 436.257 | 0.29072  | 0.576266 | 0.856895 | 163.822 | 627.961 | 648.419 | 397.791 | 343.391 | 436.158 |
| ENSMUSG00000035048 | 13_Anapc  | 678.379 | -0.48879 | 0.30124  | 0.684432 | 234.609 | 683.502 | 775.621 | 874.81  | 667.037 | 834.696 |
| ENSMUSG00000035049 | 3_Rrp12   | 363.306 | 0.81924  | 0.13275  | 0.495506 | 153.709 | 715.24  | 522.252 | 236.034 | 225.779 | 326.825 |
| ENSMUSG00000035051 | 14_Dhx57  | 598.173 | 0.18313  | 0.423143 | 0.774868 | 618.882 | 657.432 | 631.873 | 548.819 | 557.152 | 574.882 |
| ENSMUSG00000035062 | 13_Zc4h2  | 106.751 | -0.43234 | 0.394727 | 0.755773 | 157.754 | 60.0757 | 54.8106 | 136.999 | 135.639 | 95.2259 |
| ENSMUSG00000035064 | 16_Eef2k  | 1724.64 | 0.41144  | 0.186547 | 0.573874 | 1430.91 | 2073.18 | 2402.36 | 1400.52 | 1363.26 | 1677.62 |
| ENSMUSG00000035067 | 9_Xkr6    | 230.34  | 0.23242  | 0.54866  | 0.843853 | 355.958 | 193.829 | 196.491 | 165.058 | 243.807 | 226.896 |
| ENSMUSG00000035069 | 3_Oma1    | 424.379 | 0.2265   | 0.415205 | 0.77001  | 408.543 | 495.341 | 468.475 | 344.147 | 366.57  | 463.197 |
| ENSMUSG00000035078 | 5_Mtmr9   | 908.503 | 0.15622  | 0.528957 | 0.835785 | 864.614 | 1084.76 | 923.506 | 802.184 | 873.071 | 902.882 |
| ENSMUSG00000035085 | 5_170002  | 21.1211 | 1.97312  | 0.098228 | 0.425558 | 0       | 32.8716 | 68.2547 | 14.03   | 6.86782 | 4.70251 |
| ENSMUSG00000035086 | 13_Becn1  | 2329.65 | 0.1528   | 0.496462 | 0.818867 | 2617.1  | 2416.63 | 2324.8  | 2078.91 | 2284.41 | 2256.03 |
| ENSMUSG00000035093 | 16_Secist | 2169.92 | 0.33869  | 0.308721 | 0.691472 | 3380.59 | 1984.76 | 1904.93 | 1854.43 | 2020.85 | 1873.95 |
| ENSMUSG00000035095 | 11_Fam1f  | 62.1853 | 1.44631  | 0.010524 | 0.104564 | 47.5285 | 165.491 | 59.9814 | 31.3611 | 33.4806 | 35.2688 |

|                    |           |         |          |          |          |         |         |         |         |         |         |
|--------------------|-----------|---------|----------|----------|----------|---------|---------|---------|---------|---------|---------|
| ENSMUSG00000035104 | 14_Eva1a  | 508.068 | 0.17579  | 0.525466 | 0.833487 | 645.174 | 454.535 | 517.081 | 506.73  | 446.408 | 478.481 |
| ENSMUSG00000035105 | 5_Egln3   | 12733.3 | 0.11153  | 0.698272 | 0.905638 | 15883.6 | 11582.1 | 12209.3 | 10011.6 | 12798.2 | 13914.7 |
| ENSMUSG00000035107 | 13_Dcbld  | 520.078 | -0.81919 | 0.020073 | 0.163466 | 512.701 | 255.038 | 360.922 | 697.372 | 703.093 | 591.341 |
| ENSMUSG00000035109 | 14_Shc4   | 35.4204 | -0.82499 | 0.161976 | 0.540792 | 45.506  | 11.335  | 19.6491 | 49.5175 | 39.4899 | 47.0251 |
| ENSMUSG00000035112 | 17_Wnk4   | 1110.27 | 0.53444  | 0.39563  | 0.756611 | 264.946 | 1845.34 | 1830.47 | 889.665 | 764.903 | 1066.29 |
| ENSMUSG00000035121 | 5_Neil2   | 26.8296 | -1.7631  | 0.000928 | 0.018561 | 14.1574 | 9.06802 | 13.4441 | 51.9934 | 42.9238 | 29.3907 |
| ENSMUSG00000035125 | 10_Gcfc2  | 184.087 | 0.34688  | 0.45342  | 0.795539 | 334.722 | 165.491 | 117.894 | 132.047 | 176.846 | 177.52  |
| ENSMUSG00000035126 | 19_Wdr7E  | 177.024 | -0.03807 | 0.920034 | 0.977303 | 247.755 | 132.62  | 143.748 | 177.438 | 207.751 | 152.832 |
| ENSMUSG00000035131 | 14_Brinp3 | 1.96541 | 0.24481  | 0.868507 | 0.962942 | 2.02249 | 3.40051 | 1.03416 | 3.30117 | 0.85848 | 1.17563 |
| ENSMUSG00000035133 | 8_Arhgap  | 3127.67 | 0.55743  | 0.309725 | 0.692089 | 7203.09 | 2078.84 | 1891.48 | 2145.76 | 3099.1  | 2347.73 |
| ENSMUSG00000035139 | 14_Secist | 531.125 | 0.37217  | 0.176584 | 0.560574 | 505.622 | 674.434 | 617.394 | 412.646 | 455.851 | 520.803 |
| ENSMUSG00000035142 | 18_Nubpl  | 277.529 | -0.03403 | 0.9176   | 0.976775 | 361.014 | 216.499 | 245.096 | 255.841 | 311.627 | 275.097 |
| ENSMUSG00000035148 | 4_Gpr33   | 0.88346 | 3.3513   | 0.276131 | NA       | 3.03373 | 2.26701 | 0       | 0       | 0       | 0       |
| ENSMUSG00000035150 | 15_Eif2s3 | 6920.46 | 0.2535   | 0.483248 | 0.811892 | 10985.1 | 6092.58 | 5502.77 | 5621.07 | 6768.23 | 6552.95 |
| ENSMUSG00000035151 | 12_Elmod  | 724.324 | 0.53503  | 0.256828 | 0.648401 | 1489.56 | 554.283 | 527.422 | 538.916 | 677.338 | 558.423 |
| ENSMUSG00000035152 | 14_Ap2b1  | 7208.35 | 0.33321  | 0.253737 | 0.644954 | 6596.35 | 8979.61 | 8534.94 | 5111.04 | 6611.13 | 7417.04 |
| ENSMUSG00000035158 | 15_Mitf   | 1287.44 | -1.55315 | 0.003795 | 0.05145  | 1150.8  | 301.512 | 510.876 | 2215.08 | 2362.53 | 1183.86 |
| ENSMUSG00000035161 | 6_Ints6   | 720.262 | 0.39312  | 0.339972 | 0.718781 | 1282.26 | 571.285 | 599.814 | 576.879 | 730.564 | 560.774 |
| ENSMUSG00000035164 | 7_Zc3h12  | 1105.56 | 0.27277  | 0.414048 | 0.768871 | 1612.93 | 1115.37 | 900.755 | 844.274 | 1103.14 | 1056.89 |
| ENSMUSG00000035165 | 13_Kcne3  | 12.2279 | -0.07962 | 0.908362 | 0.974731 | 14.1574 | 7.93452 | 13.4441 | 15.6806 | 6.86782 | 15.2832 |
| ENSMUSG00000035168 | 16_Tanc1  | 2809.35 | 0.29169  | 0.202141 | 0.593308 | 3066.09 | 3084.26 | 3126.27 | 2388.4  | 2384.85 | 2806.22 |
| ENSMUSG00000035171 | 9_111005  | 1492.92 | 0.59851  | 0.184668 | 0.571911 | 3001.37 | 1252.52 | 1140.68 | 996.953 | 1426.79 | 1139.18 |
| ENSMUSG00000035172 | 15_Plekhf | 582.779 | 0.69794  | 0.355776 | 0.731089 | 83.9333 | 951.009 | 1128.27 | 604.939 | 252.392 | 476.129 |
| ENSMUSG00000035173 | 14_Ccdc1  | 1739.91 | 0.14702  | 0.670645 | 0.899276 | 2612.04 | 1407.81 | 1465.41 | 1577.96 | 1722.1  | 1654.11 |
| ENSMUSG00000035177 | 7_Nlrp2   | 0.19594 | -0.79206 | 0.84609  | NA       | 0       | 0       | 0       | 0       | 0       | 1.17563 |
| ENSMUSG00000035179 | 3_Ppp1r3  | 4.98718 | -0.65594 | 0.541047 | 0.84046  | 1.01124 | 3.40051 | 7.23913 | 4.12646 | 9.44325 | 4.70251 |
| ENSMUSG00000035181 | 5_Heat5e  | 958.821 | 0.08406  | 0.722597 | 0.914147 | 904.052 | 1080.23 | 976.248 | 979.622 | 913.42  | 899.355 |
| ENSMUSG00000035183 | 14_Slc24e | 1743.77 | -1.51573 | 0.00104  | 0.020126 | 1453.16 | 448.867 | 808.714 | 2797.74 | 2895.64 | 2058.52 |
| ENSMUSG00000035184 | 15_Fam1i  | 419.383 | 0.23768  | 0.352009 | 0.728508 | 424.723 | 432.998 | 503.637 | 400.267 | 350.259 | 404.416 |
| ENSMUSG00000035186 | 6_Ubd     | 44.3617 | 9.00074  | 7.15E-12 | 1.77E-09 | 84.9445 | 132.62  | 48.6056 | 0       | 0       | 0       |
| ENSMUSG00000035187 | 10_Nkx6-1 | 0.16854 | 1.1315   | 0.781553 | NA       | 1.01124 | 0       | 0       | 0       | 0       | 0       |
| ENSMUSG00000035189 | 16_Ano4   | 265.462 | 0.10212  | 0.817965 | 0.948003 | 429.779 | 170.025 | 224.413 | 189.817 | 291.882 | 286.853 |
| ENSMUSG00000035198 | 9_Tubg1   | 530.076 | 0.25867  | 0.65393  | 0.893223 | 158.765 | 762.847 | 810.783 | 527.362 | 362.277 | 558.423 |
| ENSMUSG00000035199 | 6_Arl6ip5 | 2539.27 | 0.31771  | 0.195941 | 0.587578 | 3002.38 | 2862.09 | 2588.51 | 1962.55 | 2453.53 | 2366.54 |
| ENSMUSG00000035200 | 6_Chnb4   | 97.3672 | -1.6108  | 6.87E-05 | 0.002442 | 40.4498 | 38.5391 | 65.1522 | 188.167 | 129.63  | 122.265 |
| ENSMUSG00000035202 | 7_Lars2   | 12940.8 | 0.23059  | 0.50676  | 0.825849 | 8793.78 | 14920.3 | 18204.3 | 11479   | 12245.3 | 12002   |
| ENSMUSG00000035203 | 15_Epn1   | 1297.72 | 0.26163  | 0.69055  | 0.905638 | 251.8   | 2048.24 | 1945.26 | 1411.25 | 895.391 | 1234.41 |
| ENSMUSG00000035206 | 9_Sppl2b  | 289.626 | 0.53086  | 0.471342 | 0.804898 | 40.4498 | 447.734 | 538.798 | 282.25  | 173.412 | 255.111 |
| ENSMUSG00000035208 | 15_Slfn8  | 1455.88 | 3.13298  | 2.47E-12 | 7.63E-10 | 3875.09 | 2588.92 | 1377.5  | 234.383 | 385.456 | 273.921 |
| ENSMUSG00000035211 | 8_Xrra1   | 5.04485 | -0.63744 | 0.603949 | 0.871008 | 0       | 6.80102 | 5.17081 | 9.07822 | 6.86782 | 2.35126 |
| ENSMUSG00000035212 | 14_Leprot | 2019.94 | 0.03986  | 0.86054  | 0.960445 | 2214.63 | 2016.5  | 1912.16 | 1976.58 | 1921.27 | 2078.51 |
| ENSMUSG00000035215 | 8_Lsm7    | 20.5026 | 1.01952  | 0.670996 | 0.899608 | 59.6634 | 22.6701 | 0       | 0       | 17.1695 | 23.5126 |
| ENSMUSG00000035226 | 5_Rims4   | 9.62115 | -3.05679 | 0.002946 | 0.042853 | 3.03373 | 0       | 3.10248 | 23.9335 | 20.6034 | 7.05377 |
| ENSMUSG00000035227 | 6_Spcs2   | 2837.98 | 0.15397  | 0.60671  | 0.871949 | 3812.39 | 2762.35 | 2393.05 | 2449.47 | 2986.64 | 2624    |
| ENSMUSG00000035228 | 14_Ccdc1  | 11.5421 | -0.57389 | 0.523757 | 0.832707 | 2.02249 | 11.335  | 14.4783 | 19.807  | 5.15086 | 16.4588 |
| ENSMUSG00000035232 | 8_Pdk3    | 261.114 | 0.2242   | 0.600248 | 0.869697 | 436.858 | 223.3   | 184.081 | 249.238 | 281.58  | 191.627 |
| ENSMUSG00000035234 | 18_Fam1i  | 228.656 | 0.39443  | 0.335489 | 0.713826 | 388.318 | 171.159 | 219.242 | 165.884 | 195.733 | 231.599 |
| ENSMUSG00000035235 | 12_Trim1  | 597.262 | 0.28203  | 0.510997 | 0.827179 | 1052.71 | 499.875 | 413.665 | 470.417 | 615.528 | 531.384 |
| ENSMUSG00000035236 | 17_Scai   | 718.192 | 0.19168  | 0.705509 | 0.908371 | 1407.65 | 440.933 | 448.826 | 647.029 | 745.158 | 619.556 |
| ENSMUSG00000035237 | 7_Lcat    | 20.2711 | -0.27184 | 0.63599  | 0.884833 | 12.1349 | 21.5366 | 21.7174 | 27.2346 | 24.8958 | 14.1075 |
| ENSMUSG00000035239 | 6_Neu3    | 292.09  | 0.48677  | 0.086004 | 0.397211 | 363.037 | 338.917 | 320.59  | 199.721 | 279.863 | 250.409 |
| ENSMUSG00000035242 | 15_Oaz1   | 4608.13 | 0.04532  | 0.922246 | 0.978156 | 2028.56 | 5831.87 | 6181.18 | 5386.68 | 3629.64 | 4590.83 |
| ENSMUSG00000035245 | 12_Eogt   | 2055.58 | -0.00148 | 0.995828 | 0.998321 | 2536.2  | 1845.34 | 1781.86 | 1824.72 | 2280.97 | 2064.4  |
| ENSMUSG00000035246 | 16_Pcyt1t | 94.1061 | -0.71275 | 0.052789 | 0.298513 | 86.967  | 54.4081 | 72.3913 | 135.348 | 94.4325 | 121.09  |
| ENSMUSG00000035247 | 15_Hectd1 | 7717.86 | 0.24144  | 0.45009  | 0.79295  | 10857.7 | 7202.28 | 7026.09 | 5662.33 | 7744.32 | 7814.4  |
| ENSMUSG00000035248 | 8_Zcchc6  | 3030.15 | 0.53591  | 0.046475 | 0.27605  | 4214.87 | 3437.91 | 3106.62 | 2146.59 | 2686.17 | 2588.73 |
| ENSMUSG00000035258 | 15_Abi3bp | 2516.32 | 0.20157  | 0.615017 | 0.876237 | 4175.43 | 1675.32 | 2224.48 | 2272.86 | 2366.82 | 2383    |
| ENSMUSG00000035262 | 4_Amh     | 1.92888 | -2.15955 | 0.301997 | 0.685243 | 1.01124 | 1.1335  | 0       | 8.25292 | 0       | 1.17563 |
| ENSMUSG00000035266 | 16_Helq   | 227.333 | 0.21126  | 0.412454 | 0.767948 | 240.676 | 249.371 | 241.994 | 206.323 | 225.779 | 199.857 |
| ENSMUSG00000035268 | 14_Pkip   | 252.477 | 0.20568  | 0.504571 | 0.824602 | 271.013 | 243.703 | 296.804 | 292.153 | 194.874 | 216.316 |
| ENSMUSG00000035270 | 15_Impg2  | 98.2697 | -1.65333 | 0.026508 | 0.196074 | 88.9895 | 41.9396 | 11.3758 | 233.558 | 159.677 | 54.0789 |
| ENSMUSG00000035273 | 14_Hpse   | 896.515 | 0.12735  | 0.659385 | 0.89481  | 1143.72 | 869.397 | 795.27  | 836.021 | 975.23  | 759.456 |
| ENSMUSG00000035274 | 13_Tpbg   | 219.349 | 0.96386  | 0.003127 | 0.044731 | 372.138 | 264.106 | 233.721 | 162.583 | 133.064 | 150.48  |
| ENSMUSG00000035275 | 14_Raver  | 1792.54 | 0.03061  | 0.903202 | 0.973742 | 2093.28 | 1543.83 | 1797.37 | 1758.7  | 1795.08 | 1766.97 |
| ENSMUSG00000035277 | 15_Arx    | 3.72445 | -2.15888 | 0.175324 | 0.558781 | 3.03373 | 0       | 1.03416 | 1.65058 | 15.4526 | 1.17563 |
| ENSMUSG00000035278 | 8_Plekhj1 | 309.993 | 0.1973   | 0.653798 | 0.893223 | 161.799 | 439.799 | 391.947 | 318.563 | 238.657 | 309.19  |
| ENSMUSG00000035279 | 7_Ssc5d   | 209.813 | -0.64413 | 0.253285 | 0.644381 | 59.6634 | 133.753 | 297.839 | 308.659 | 221.487 | 237.477 |
| ENSMUSG00000035283 | 4_Adrb1   | 209.578 | 0.9447   | 0.002239 | 0.035289 | 266.969 | 286.776 | 273.019 | 132.047 | 117.611 | 181.047 |
| ENSMUSG00000035284 | 9_Vps13c  | 2324.31 | 0.12302  | 0.683655 | 0.903102 | 3047.89 | 2127.58 | 2094.18 | 1837.93 | 2432.92 | 2405.33 |
| ENSMUSG00000035285 | 5_Nat14   | 57.3104 | -1.17869 | 0.004826 | 0.060584 | 23.2586 | 43.0731 | 39.2981 | 91.6075 | 77.2629 | 69.362  |
| ENSMUSG00000035293 | 13_G2e3   | 621.76  | 0.66527  | 0.180082 | 0.566243 | 1354.06 | 470.404 | 463.304 | 387.062 | 585.481 | 470.251 |
| ENSMUSG00000035295 | 10_Wdr3E  | 11.1813 | -0.96097 | 0.22809  | 0.619358 | 2.02249 | 13.602  | 7.23913 | 14.03   | 13.7356 | 16.4588 |
| ENSMUSG00000035296 | 13_Sgcg   | 71.7278 | -0.994   | 0.067636 | 0.3452   | 74.8321 | 19.2695 | 49.6398 | 125.444 | 82.4138 | 78.7671 |
| ENSMUSG00000035297 | 14_Cops4  | 2180.09 | 0.15868  | 0.585095 | 0.861716 | 2809.24 | 2075.44 | 2014.55 | 1709.18 | 2278.4  | 2193.72 |
| ENSMUSG00000035298 | 8_Klhl35  | 4.89773 | -0.79651 | 0.514697 | 0.829322 | 0       | 5.66751 | 5.17081 | 10.7288 | 4.29238 | 3.52688 |

|                    |            |         |          |          |          |         |         |         |         |         |         |
|--------------------|------------|---------|----------|----------|----------|---------|---------|---------|---------|---------|---------|
| ENSMUSG00000035299 | 16_Mid1    | 226.342 | -0.32528 | 0.43535  | 0.783322 | 120.338 | 270.907 | 212.003 | 326.816 | 225.779 | 202.208 |
| ENSMUSG00000035305 | 5_Ror1     | 188.292 | -0.59058 | 0.159072 | 0.537367 | 215.395 | 90.6802 | 144.783 | 269.045 | 233.506 | 176.344 |
| ENSMUSG00000035310 | 15_Lin54   | 687.184 | 0.78044  | 0.046884 | 0.277621 | 1303.49 | 723.175 | 579.13  | 434.929 | 567.453 | 514.925 |
| ENSMUSG00000035311 | 16_Gnpt1   | 2952.51 | 0.23043  | 0.388818 | 0.752716 | 3468.57 | 3009.45 | 3084.9  | 2184.55 | 2959.17 | 3008.43 |
| ENSMUSG00000035314 | 8_Gdpd5    | 310.16  | 0.30534  | 0.652481 | 0.892452 | 58.6522 | 484.006 | 486.056 | 367.255 | 205.176 | 259.814 |
| ENSMUSG00000035325 | 16_Sec31   | 2805.49 | 0.39851  | 0.162017 | 0.540795 | 2436.09 | 3724.69 | 3410.66 | 2305.87 | 2331.62 | 2624    |
| ENSMUSG00000035329 | 7_Fbxo33   | 509.964 | 0.10661  | 0.806111 | 0.943774 | 854.501 | 420.53  | 311.283 | 464.64  | 537.407 | 471.427 |
| ENSMUSG00000035337 | 3_Uchl4    | 5.55857 | 0.02265  | 0.979532 | 0.993796 | 5.05622 | 4.53401 | 7.23913 | 4.95175 | 6.86782 | 4.70251 |
| ENSMUSG00000035342 | 1_Lzts2    | 592.337 | 0.16152  | 0.804518 | 0.942951 | 125.394 | 758.313 | 992.795 | 757.618 | 402.626 | 517.276 |
| ENSMUSG00000035349 | 5_Mia2     | 14.749  | -0.10896 | 0.876834 | 0.965114 | 24.2699 | 7.93452 | 10.3416 | 11.5541 | 21.4619 | 12.9319 |
| ENSMUSG00000035351 | 15_Nup37   | 310.141 | 0.36886  | 0.289609 | 0.674807 | 482.364 | 287.91  | 278.189 | 236.859 | 291.024 | 284.502 |
| ENSMUSG00000035352 | 3_Ccl12    | 92.7294 | 2.21823  | 2.92E-07 | 2.65E-05 | 205.283 | 155.29  | 97.2112 | 26.4094 | 36.9145 | 35.2688 |
| ENSMUSG00000035354 | 8_Uvrag    | 930.42  | 0.0689   | 0.772579 | 0.932508 | 1031.47 | 918.137 | 907.994 | 829.419 | 940.891 | 954.61  |
| ENSMUSG00000035355 | 15_Kcnh4   | 3.34453 | 1.65301  | 0.264767 | 0.653546 | 0       | 7.93452 | 7.23913 | 0.82529 | 1.71695 | 2.35126 |
| ENSMUSG00000035356 | 16_Nfkbiz  | 2639    | 0.65969  | 0.010259 | 0.102695 | 3109.58 | 3668.02 | 2918.4  | 1772.73 | 2185.68 | 2179.61 |
| ENSMUSG00000035357 | 16_Pdzr1   | 418.531 | -0.8278  | 0.015739 | 0.137061 | 401.464 | 222.167 | 281.292 | 599.162 | 558.01  | 449.09  |
| ENSMUSG00000035364 | 1_493052   | 5.2115  | 0.7344   | 0.515798 | 0.829903 | 7.07871 | 11.335  | 1.03416 | 1.65058 | 4.29238 | 5.87814 |
| ENSMUSG00000035365 | 15_Parpb1  | 121.832 | 0.74949  | 0.067433 | 0.3445   | 218.429 | 116.751 | 123.065 | 71.8004 | 111.602 | 89.3477 |
| ENSMUSG00000035367 | 8_Rmi1     | 716.01  | 0.50778  | 0.272276 | 0.658804 | 1432.93 | 579.22  | 509.842 | 500.127 | 656.735 | 617.205 |
| ENSMUSG00000035370 | 7_Adat3    | 62.426  | 0.12321  | 0.874111 | 0.964203 | 7.07871 | 107.683 | 80.6646 | 76.7522 | 50.6501 | 51.7276 |
| ENSMUSG00000035372 | 1_181005   | 246.01  | -0.12989 | 0.785187 | 0.936054 | 101.124 | 317.381 | 286.463 | 297.105 | 209.468 | 264.516 |
| ENSMUSG00000035373 | 2_Ccl7     | 508.371 | 5.43824  | 2.08E-26 | 6.01E-23 | 900.007 | 1351.14 | 730.118 | 9.07822 | 35.1976 | 24.6882 |
| ENSMUSG00000035376 | 9_Hacd2    | 2999.13 | 0.37101  | 0.296107 | 0.67995  | 4882.29 | 2671.67 | 2593.68 | 2353.73 | 2626.08 | 2867.36 |
| ENSMUSG00000035378 | 17_Shq1    | 188.563 | 0.26295  | 0.380368 | 0.747938 | 211.35  | 197.23  | 207.866 | 155.98  | 148.517 | 210.437 |
| ENSMUSG00000035382 | 8_Pcsk7    | 821.593 | 0.19976  | 0.701678 | 0.906669 | 297.306 | 1283.13 | 1054.84 | 840.973 | 664.461 | 788.846 |
| ENSMUSG00000035383 | 7_Pmch     | 1.26198 | 0.24878  | 0.933961 | NA       | 4.04498 | 0       | 0       | 0       | 0       | 3.52688 |
| ENSMUSG00000035385 | 5_Ccl2     | 620.827 | 4.34958  | 1.10E-08 | 1.50E-06 | 1295.4  | 1414.61 | 839.739 | 10.7288 | 25.7543 | 138.724 |
| ENSMUSG00000035390 | 16_Brsk1   | 47.3415 | -1.60729 | 0.00717  | 0.079407 | 10.1124 | 27.2041 | 33.0932 | 110.589 | 58.3764 | 44.6739 |
| ENSMUSG00000035392 | 17_Dennd   | 416.769 | -0.39471 | 0.289554 | 0.674773 | 231.575 | 402.394 | 446.758 | 581.006 | 453.276 | 385.606 |
| ENSMUSG00000035394 | 11_Cfap5   | 3.92554 | 0.57826  | 0.614335 | 0.875923 | 1.01124 | 7.93452 | 5.17081 | 2.47588 | 3.43391 | 3.52688 |
| ENSMUSG00000035397 | 8_Klf16    | 457.897 | 0.28777  | 0.469699 | 0.804531 | 284.16  | 646.097 | 580.165 | 478.67  | 346.825 | 411.47  |
| ENSMUSG00000035399 | 12_Oser1   | 1856.88 | 0.3427   | 0.219027 | 0.610235 | 2527.1  | 1965.49 | 1736.36 | 1465.72 | 1760.74 | 1685.85 |
| ENSMUSG00000035401 | 9_221001   | 1133.14 | 0.12487  | 0.661101 | 0.895458 | 1441.02 | 1081.36 | 1023.82 | 940.008 | 1199.29 | 1113.32 |
| ENSMUSG00000035403 | 10_Crb2    | 197.737 | -2.20083 | 3.34E-06 | 0.000214 | 38.4273 | 70.2772 | 103.416 | 455.561 | 282.439 | 236.301 |
| ENSMUSG00000035407 | 8_Kank4    | 130.562 | -1.34887 | 0.000212 | 0.006055 | 80.8995 | 49.8741 | 89.9721 | 197.245 | 204.318 | 161.061 |
| ENSMUSG00000035413 | 8_Tmem9    | 573.211 | -1.39781 | 0.000868 | 0.017584 | 230.564 | 260.706 | 455.031 | 1162.01 | 721.979 | 608.975 |
| ENSMUSG00000035429 | 13_Ptprh   | 325.094 | 0.4385   | 0.327679 | 0.708848 | 182.024 | 508.943 | 431.245 | 229.431 | 262.694 | 336.23  |
| ENSMUSG00000035431 | 4_Sstr1    | 1.63432 | -1.07305 | 0.654449 | NA       | 0       | 0       | 3.10248 | 0.82529 | 0       | 5.87814 |
| ENSMUSG00000035435 | 15_Abca1   | 0.30991 | 0.16972  | 0.966824 | NA       | 0       | 0       | 1.03416 | 0.82529 | 0       | 0       |
| ENSMUSG00000035437 | 15_Rabga   | 3220.47 | 0.19476  | 0.597341 | 0.868406 | 5023.86 | 2498.24 | 2790.17 | 2553.45 | 3324.02 | 3133.05 |
| ENSMUSG00000035439 | 13_Haus8   | 139.379 | 0.02041  | 0.960056 | 0.989875 | 80.8995 | 177.96  | 162.363 | 154.33  | 118.47  | 142.251 |
| ENSMUSG00000035441 | 14_Myo1c   | 2032    | 0.07687  | 0.802968 | 0.942705 | 1499.68 | 2352.02 | 2406.49 | 1792.54 | 1939.3  | 2201.95 |
| ENSMUSG00000035443 | 9_Thyn1    | 241.968 | -0.22618 | 0.411097 | 0.767001 | 234.609 | 218.766 | 216.14  | 289.678 | 270.42  | 222.194 |
| ENSMUSG00000035448 | 8_Ccr3     | 0.99936 | 1.27598  | 0.532417 | NA       | 1.01124 | 2.26701 | 1.03416 | 0.82529 | 0.85848 | 0       |
| ENSMUSG00000035451 | 6_Foxa1    | 58.2454 | 1.53756  | 0.005825 | 0.068802 | 137.529 | 70.2772 | 51.7081 | 16.5058 | 33.4806 | 39.9713 |
| ENSMUSG00000035454 | 1_Samt3    | 1.0444  | -0.00195 | 0.999308 | NA       | 2.02249 | 0       | 1.03416 | 0       | 0.85848 | 2.35126 |
| ENSMUSG00000035455 | 12_Fign1   | 369.275 | 0.89598  | 0.040901 | 0.255474 | 722.028 | 392.192 | 326.795 | 174.137 | 334.806 | 265.692 |
| ENSMUSG00000035456 | 8_Prdm8    | 34.0557 | -0.67571 | 0.290385 | 0.675436 | 35.3936 | 11.335  | 32.059  | 56.9452 | 49.7917 | 18.81   |
| ENSMUSG00000035458 | 14_Tnni3   | 13.6704 | -0.74316 | 0.265933 | 0.654446 | 6.06747 | 11.335  | 13.4441 | 23.1082 | 16.3111 | 11.7563 |
| ENSMUSG00000035459 | 15_Stab2   | 9.71605 | -1.73195 | 0.032887 | 0.224046 | 6.06747 | 1.1335  | 6.20497 | 16.5058 | 15.4526 | 12.9319 |
| ENSMUSG00000035469 | 17_Rcbtb1  | 754.384 | 0.06946  | 0.82727  | 0.950636 | 1030.46 | 633.628 | 653.59  | 755.143 | 788.082 | 665.405 |
| ENSMUSG00000035472 | 13_Slc25a1 | 33.4263 | -0.92283 | 0.127744 | 0.48592  | 39.4385 | 9.06802 | 20.6832 | 49.5175 | 48.9332 | 32.9176 |
| ENSMUSG00000035473 | 10_Galm    | 714.445 | -0.36828 | 0.139923 | 0.507212 | 653.264 | 538.414 | 679.444 | 784.853 | 843.024 | 787.671 |
| ENSMUSG00000035476 | 9_Tab3     | 711.55  | 0.4477   | 0.352069 | 0.728508 | 1410.69 | 597.356 | 455.031 | 474.543 | 716.828 | 614.853 |
| ENSMUSG00000035478 | 14_Mbd3    | 698.35  | 0.19791  | 0.798011 | 0.940387 | 69.7759 | 1064.36 | 1104.48 | 870.683 | 441.257 | 639.542 |
| ENSMUSG00000035486 | 14_Plk5    | 129.559 | -1.37863 | 0.042809 | 0.262546 | 18.2024 | 62.3427 | 135.475 | 296.28  | 132.205 | 132.846 |
| ENSMUSG00000035493 | 9_Tgfb1    | 26751.7 | 0.89081  | 0.038298 | 0.245746 | 18583.6 | 50133.7 | 35556.5 | 14850.3 | 17739.6 | 23646.6 |
| ENSMUSG00000035495 | 15_Tstd2   | 904.085 | 0.35988  | 0.148395 | 0.521353 | 1113.38 | 1043.96 | 891.447 | 736.986 | 849.892 | 788.846 |
| ENSMUSG00000035498 | 9_Cdcp1    | 4252.31 | 0.74872  | 0.012483 | 0.118011 | 4720.49 | 6187.79 | 5086.01 | 2425.53 | 3321.45 | 3772.59 |
| ENSMUSG00000035504 | 16_Reep6   | 204.708 | -0.9623  | 0.173003 | 0.556705 | 29.3261 | 197.23  | 190.286 | 474.543 | 182.856 | 154.007 |
| ENSMUSG00000035505 | 14_Cox18   | 286.831 | 0.88878  | 0.002474 | 0.037947 | 317.531 | 457.935 | 342.307 | 212.1   | 198.308 | 192.803 |
| ENSMUSG00000035506 | 16_Slc12a1 | 8.08222 | -0.64958 | 0.457022 | 0.797169 | 7.07871 | 6.80102 | 5.17081 | 17.3311 | 8.58477 | 3.52688 |
| ENSMUSG00000035509 | 17_Fbxl21  | 38.5073 | -0.46654 | 0.331219 | 0.711255 | 41.461  | 20.4031 | 35.1615 | 42.0899 | 56.6595 | 35.2688 |
| ENSMUSG00000035513 | 19_Ntnq2   | 80.4215 | -1.06112 | 0.093409 | 0.415963 | 13.1462 | 66.8767 | 76.528  | 150.203 | 97.0079 | 78.7671 |
| ENSMUSG00000035517 | 17_Tdrd7   | 3351.76 | 0.56315  | 0.015489 | 0.13558  | 3645.54 | 4461.47 | 3886.38 | 2770.51 | 2619.21 | 2727.46 |
| ENSMUSG00000035521 | 13_Gnptg   | 692.369 | 0.02818  | 0.926818 | 0.980127 | 511.69  | 761.714 | 824.227 | 758.444 | 642.141 | 656     |
| ENSMUSG00000035528 | 4_Npffr2   | 0       | NA       | NA       | NA       | 0       | 0       | 0       | 0       | 0       | 0       |
| ENSMUSG00000035529 | 9_Prdm4    | 782.532 | 0.21289  | 0.393148 | 0.755029 | 828.209 | 927.205 | 765.28  | 674.264 | 798.384 | 701.85  |
| ENSMUSG00000035530 | 13_Eif1    | 7925.41 | -0.00151 | 0.996039 | 0.998321 | 10289.4 | 6895.1  | 6579.34 | 7534.92 | 8953.06 | 7300.65 |
| ENSMUSG00000035539 | 13_Ccdc1   | 3.37382 | -3.10309 | 0.061229 | 0.326542 | 1.01124 | 1.1335  | 0       | 14.03   | 1.71695 | 2.35126 |
| ENSMUSG00000035540 | 12_Gc      | 1.27109 | -0.36123 | 0.881285 | NA       | 0       | 3.40051 | 0       | 1.65058 | 2.57543 | 0       |
| ENSMUSG00000035545 | 13_Leng8   | 2887.77 | -0.02625 | 0.944192 | 0.986451 | 1660.46 | 3097.86 | 3826.4  | 3004.06 | 3020.98 | 2716.88 |
| ENSMUSG00000035547 | 14_Capn5   | 8548.97 | 0.59212  | 0.22187  | 0.612417 | 3962.06 | 13670   | 13205.2 | 6810.31 | 5945.81 | 7700.36 |
| ENSMUSG00000035551 | 6_Igfbp1   | 0.17236 | 1.1315   | 0.781553 | NA       | 0       | 0       | 1.03416 | 0       | 0       | 0       |
| ENSMUSG00000035557 | 9_Krt17    | 1888.89 | 3.30098  | 5.22E-05 | 0.001961 | 307.418 | 7164.87 | 2817.06 | 449.784 | 208.61  | 385.606 |

|                    |           |         |          |          |          |         |         |         |         |         |         |
|--------------------|-----------|---------|----------|----------|----------|---------|---------|---------|---------|---------|---------|
| ENSMUSG00000035559 | 8_Mpv17l  | 192.204 | -0.17706 | 0.76091  | 0.928372 | 51.5735 | 232.368 | 257.506 | 264.094 | 163.111 | 184.574 |
| ENSMUSG00000035560 | 4_Wdr20r  | 0.28616 | -1.57932 | 0.696464 | NA       | 0       | 0       | 0       | 0       | 1.71695 | 0       |
| ENSMUSG00000035561 | 5_Aldh1b  | 32.4496 | 0.61769  | 0.261562 | 0.650732 | 22.2474 | 48.7406 | 46.5373 | 19.807  | 19.745  | 37.6201 |
| ENSMUSG00000035566 | 6_Pcdh17  | 22.5453 | -0.24584 | 0.69412  | 0.905638 | 28.3148 | 19.2695 | 14.4783 | 40.4393 | 16.3111 | 16.4588 |
| ENSMUSG00000035569 | 16_Ankrd  | 3563.56 | 0.3195   | 0.308835 | 0.691472 | 2773.84 | 4616.76 | 4478.95 | 3162.52 | 2864.74 | 3484.56 |
| ENSMUSG00000035572 | 16_Dcaf1l | 908.554 | 0.36285  | 0.296184 | 0.679985 | 1432.93 | 854.661 | 778.724 | 691.595 | 838.732 | 854.681 |
| ENSMUSG00000035575 | 11_Utp6   | 1469.02 | 0.00657  | 0.983251 | 0.994651 | 1913.27 | 1306.93 | 1196.52 | 1244.54 | 1559.85 | 1592.98 |
| ENSMUSG00000035576 | 13_L3mbt  | 2.68142 | 0.66088  | 0.66574  | 0.897    | 3.03373 | 5.66751 | 1.03416 | 1.65058 | 0       | 4.70251 |
| ENSMUSG00000035578 | 15_Iqcg   | 9.26372 | -1.46633 | 0.068454 | 0.348045 | 8.08995 | 4.53401 | 2.06832 | 11.5541 | 12.8772 | 16.4588 |
| ENSMUSG00000035580 | 10_Kcnh8  | 1.63858 | -1.88862 | 0.294411 | NA       | 1.01124 | 0       | 1.03416 | 0.82529 | 3.43391 | 3.52688 |
| ENSMUSG00000035582 | 13_Gdpc4  | 1.17725 | 1.57999  | 0.458515 | NA       | 1.01124 | 2.26701 | 2.06832 | 0       | 1.71695 | 0       |
| ENSMUSG00000035585 | 16_Tsen3  | 1005.43 | 0.10087  | 0.844327 | 0.954449 | 401.464 | 1316    | 1404.39 | 1270.12 | 682.489 | 958.137 |
| ENSMUSG00000035592 | 2_Krt33a  | 3.91708 | 0.22892  | 0.839099 | 0.953167 | 3.03373 | 2.26701 | 7.23913 | 1.65058 | 3.43391 | 5.87814 |
| ENSMUSG00000035594 | 9_Chra5   | 5.2557  | -1.74886 | 0.149547 | 0.523069 | 6.06747 | 1.1335  | 0       | 10.7288 | 7.72629 | 5.87814 |
| ENSMUSG00000035595 | 6_160000  | 98.7984 | -0.21787 | 0.618732 | 0.87757  | 50.5622 | 133.753 | 89.9721 | 103.987 | 109.885 | 104.631 |
| ENSMUSG00000035596 | 14_Mboat  | 920.231 | 0.20077  | 0.434646 | 0.783019 | 831.243 | 1111.97 | 1009.34 | 807.136 | 889.382 | 872.316 |
| ENSMUSG00000035597 | 18_Prf3e  | 1706.39 | 0.46286  | 0.367443 | 0.739818 | 3653.63 | 1160.71 | 1118.96 | 1239.59 | 1704.08 | 1361.38 |
| ENSMUSG00000035601 | 9_Trmt10l | 224.387 | -0.25978 | 0.342403 | 0.720325 | 224.496 | 181.36  | 206.832 | 233.558 | 266.128 | 233.95  |
| ENSMUSG00000035606 | 8_Ky      | 49.5695 | -1.04681 | 0.074858 | 0.366219 | 33.3711 | 18.136  | 45.5031 | 110.589 | 36.9145 | 52.9033 |
| ENSMUSG00000035614 | 10_Fam17  | 886.22  | 0.33937  | 0.455156 | 0.796225 | 1671.59 | 605.291 | 692.888 | 686.643 | 888.524 | 772.387 |
| ENSMUSG00000035615 | 12_Frmpd  | 250.804 | -0.04972 | 0.911463 | 0.975173 | 127.417 | 295.844 | 316.453 | 335.069 | 204.318 | 225.721 |
| ENSMUSG00000035620 | 14_Ric8b  | 474.896 | -0.27112 | 0.381592 | 0.748966 | 547.083 | 385.391 | 358.854 | 508.38  | 592.349 | 457.319 |
| ENSMUSG00000035621 | 13_Midn   | 2030.46 | 0.84816  | 0.045946 | 0.274322 | 1367.2  | 3225.95 | 3238.99 | 1757.87 | 1090.27 | 1502.45 |
| ENSMUSG00000035623 | 14_Rsf1   | 1612.84 | 0.11315  | 0.771115 | 0.932465 | 2566.54 | 1228.72 | 1232.72 | 1393.92 | 1699.78 | 1555.36 |
| ENSMUSG00000035629 | 17_17000  | 1166.19 | 0.16111  | 0.669257 | 0.898502 | 700.792 | 1488.29 | 1504.71 | 1133.95 | 1017.3  | 1152.12 |
| ENSMUSG00000035632 | 16_Cnot3  | 811.148 | 0.24812  | 0.616999 | 0.877219 | 325.621 | 1181.11 | 1135.51 | 759.269 | 663.603 | 801.778 |
| ENSMUSG00000035637 | 14_Grhp   | 156.236 | 0.12626  | 0.834622 | 0.952109 | 46.5172 | 190.428 | 252.335 | 198.07  | 99.5833 | 150.48  |
| ENSMUSG00000035638 | 14_Muc2C  | 4054.22 | 0.79564  | 0.018148 | 0.152448 | 3601.04 | 6429.23 | 5403.49 | 2377.67 | 3179.8  | 3334.08 |
| ENSMUSG00000035640 | 18_Cbarp  | 257.135 | 0.2325   | 0.758506 | 0.927759 | 30.3373 | 313.98  | 489.158 | 292.979 | 177.705 | 238.652 |
| ENSMUSG00000035642 | 16_Aamd   | 241.344 | -0.62349 | 0.056943 | 0.312074 | 181.013 | 157.557 | 231.652 | 338.37  | 309.052 | 230.423 |
| ENSMUSG00000035649 | 17_Zcchc  | 1612.1  | 0.21137  | 0.560151 | 0.848816 | 2455.3  | 1370.41 | 1364.06 | 1222.26 | 1771.04 | 1489.52 |
| ENSMUSG00000035653 | 16_Lrfn5  | 6.94712 | -1.16024 | 0.284966 | 0.671115 | 5.05622 | 7.93452 | 0       | 9.07822 | 13.7356 | 5.87814 |
| ENSMUSG00000035666 | 16_Gtf3c4 | 1320.37 | 0.03062  | 0.901251 | 0.973382 | 1521.92 | 1264.99 | 1216.17 | 1237.11 | 1395.88 | 1286.14 |
| ENSMUSG00000035671 | 5_Zswim4  | 854.907 | 0.79492  | 0.2326   | 0.624408 | 182.024 | 1599.37 | 1472.65 | 744.414 | 509.077 | 621.907 |
| ENSMUSG00000035673 | 9_Sbno2   | 1269.15 | 1.19749  | 0.10573  | 0.441402 | 195.17  | 3019.65 | 2087.97 | 876.46  | 610.377 | 825.291 |
| ENSMUSG00000035674 | 13_Ndufa  | 887.519 | -0.42025 | 0.343662 | 0.721499 | 339.778 | 965.744 | 972.112 | 1046.47 | 973.513 | 1027.5  |
| ENSMUSG00000035678 | 7_Tnfrsf9 | 11.971  | -0.65777 | 0.380549 | 0.747982 | 3.03373 | 13.602  | 11.3758 | 14.03   | 18.028  | 11.7563 |
| ENSMUSG00000035681 | 6_Kcnc2   | 162.096 | 0.72466  | 0.070463 | 0.354524 | 296.295 | 142.821 | 166.5   | 128.746 | 103.017 | 135.197 |
| ENSMUSG00000035683 | 13_Melk   | 648.503 | 0.60289  | 0.023595 | 0.181497 | 791.804 | 821.79  | 732.186 | 423.375 | 552.859 | 569.004 |
| ENSMUSG00000035686 | 8_Thrsp   | 50.9891 | -1.69285 | 0.00137  | 0.024684 | 21.2361 | 17.0025 | 34.1273 | 113.89  | 73.829  | 45.8495 |
| ENSMUSG00000035692 | 6_Isg15   | 6317.87 | 2.10641  | 0.000371 | 0.00927  | 2489.68 | 16575.2 | 11698.4 | 2296.79 | 2475.85 | 2371.24 |
| ENSMUSG00000035694 | 15_Caps2  | 11.1485 | -0.48322 | 0.613841 | 0.875588 | 11.1237 | 1.1335  | 15.5124 | 4.95175 | 18.8865 | 15.2832 |
| ENSMUSG00000035696 | 15_Rnf38  | 1967.63 | 0.45207  | 0.136627 | 0.501691 | 2930.59 | 1932.62 | 1956.63 | 1441.79 | 1738.42 | 1805.76 |
| ENSMUSG00000035697 | 14_Hmha   | 134.356 | 1.05912  | 0.156662 | 0.534279 | 24.2699 | 323.048 | 197.525 | 117.192 | 61.8103 | 82.2939 |
| ENSMUSG00000035699 | 7_Slc51a  | 2.6948  | 0.14887  | 0.908257 | 0.974731 | 1.01124 | 2.26701 | 5.17081 | 2.47588 | 1.71695 | 3.52688 |
| ENSMUSG00000035704 | 17_Alg8   | 281.014 | 0.45614  | 0.18311  | 0.569669 | 349.891 | 345.718 | 279.224 | 161.757 | 275.571 | 273.921 |
| ENSMUSG00000035711 | 4_Dok3    | 24.2137 | 1.33237  | 0.144494 | 0.514317 | 5.05622 | 68.0102 | 31.0248 | 23.1082 | 5.15086 | 12.9319 |
| ENSMUSG00000035713 | 15_Usp35  | 67.8359 | -0.51462 | 0.258901 | 0.64893  | 29.3261 | 70.2772 | 68.2547 | 89.9569 | 79.8384 | 69.362  |
| ENSMUSG00000035722 | 15_Abca7  | 702.66  | 0.85434  | 0.193051 | 0.583012 | 162.81  | 1267.26 | 1284.43 | 551.295 | 381.164 | 569.004 |
| ENSMUSG00000035725 | 13_Prkr   | 1620.24 | 1.13018  | 0.0026   | 0.039405 | 3236.99 | 1902.02 | 1533.66 | 850.876 | 1137.48 | 1060.42 |
| ENSMUSG00000035726 | 7_Supt16  | 2330.39 | 0.25206  | 0.444602 | 0.788998 | 3368.45 | 2274.94 | 1956.63 | 1752.92 | 2320.46 | 2308.93 |
| ENSMUSG00000035735 | 10_Dagla  | 235.635 | 0.30566  | 0.634461 | 0.883842 | 52.5847 | 363.854 | 365.059 | 222.004 | 162.252 | 248.057 |
| ENSMUSG00000035745 | 8_Grin3b  | 5.71549 | -0.73849 | 0.464123 | 0.80165  | 1.01124 | 4.53401 | 7.23913 | 5.77705 | 5.15086 | 10.5807 |
| ENSMUSG00000035754 | 7_Wdr18   | 406.793 | 0.1847   | 0.773257 | 0.932641 | 85.9558 | 607.558 | 604.985 | 464.64  | 297.892 | 379.728 |
| ENSMUSG00000035757 | 16_Selo   | 534.407 | -0.12532 | 0.71971  | 0.913031 | 326.632 | 579.22  | 627.736 | 543.868 | 517.662 | 611.326 |
| ENSMUSG00000035759 | 3_Bbs10   | 109.222 | -0.26307 | 0.555153 | 0.846508 | 154.72  | 62.3427 | 80.6646 | 104.812 | 139.932 | 112.86  |
| ENSMUSG00000035762 | 10_Tmem   | 427.814 | 0.38399  | 0.382639 | 0.749501 | 786.748 | 334.383 | 331.966 | 309.485 | 438.682 | 365.62  |
| ENSMUSG00000035764 | 5_Fbxo45  | 895.173 | 0.19905  | 0.584257 | 0.861016 | 1379.34 | 786.651 | 704.264 | 717.179 | 915.995 | 867.613 |
| ENSMUSG00000035765 | 9_Dym     | 479.566 | 0.17955  | 0.439376 | 0.785475 | 513.712 | 504.409 | 509.842 | 433.278 | 454.134 | 462.022 |
| ENSMUSG00000035769 | 8_Xylb    | 45.6973 | -0.51698 | 0.230881 | 0.622309 | 30.3373 | 35.1386 | 47.5714 | 61.0716 | 60.0934 | 39.9713 |
| ENSMUSG00000035770 | 7_Dync1li | 3588.32 | 0.028    | 0.921544 | 0.977953 | 4594.08 | 3123.93 | 3151.09 | 3357.29 | 3562.68 | 3740.85 |
| ENSMUSG00000035772 | 11_Mrps2  | 540.403 | 0.47187  | 0.079899 | 0.380156 | 714.95  | 605.291 | 563.618 | 396.14  | 503.926 | 458.495 |
| ENSMUSG00000035773 | 5_Kiss1r  | 22.809  | -0.02131 | 0.972275 | 0.9926   | 11.1237 | 23.8036 | 33.0932 | 31.3611 | 16.3111 | 21.1613 |
| ENSMUSG00000035775 | 2_Krt20   | 31.8822 | -0.34592 | 0.439748 | 0.785475 | 24.2699 | 34.0051 | 25.854  | 31.3611 | 33.4806 | 42.3226 |
| ENSMUSG00000035776 | 14_Cd99l  | 2597.61 | -0.25062 | 0.250396 | 0.642119 | 2238.89 | 2473.3  | 2405.46 | 2786.19 | 2800.35 | 2881.46 |
| ENSMUSG00000035778 | 17_Ggta1  | 4472.31 | 0.9155   | 0.002769 | 0.0411   | 7247.59 | 5719.66 | 4568.93 | 2579.04 | 3236.46 | 3482.21 |
| ENSMUSG00000035781 | 13_R3hdn  | 2597.57 | 0.23534  | 0.568668 | 0.85283  | 1419.79 | 3643.08 | 3364.13 | 2504.76 | 2117.86 | 2535.83 |
| ENSMUSG00000035783 | 8_Acta2   | 3344.7  | -1.79647 | 2.57E-05 | 0.001114 | 877.76  | 1250.25 | 2357.89 | 5948.71 | 5354.32 | 4279.29 |
| ENSMUSG00000035785 | 5_Cmtm2l  | 0.41265 | -2.10335 | 0.599583 | NA       | 0       | 0       | 0       | 2.47588 | 0       | 0       |
| ENSMUSG00000035790 | 15_Cep19  | 361.029 | 0.17268  | 0.538219 | 0.839833 | 460.116 | 338.917 | 348.512 | 312.786 | 351.976 | 353.864 |
| ENSMUSG00000035798 | 13_Zdhhc  | 496.521 | -0.35644 | 0.368839 | 0.740777 | 656.298 | 291.31  | 358.854 | 584.307 | 618.103 | 470.251 |
| ENSMUSG00000035799 | 5_Twist1  | 236.983 | 0.08545  | 0.870274 | 0.963272 | 448.992 | 123.552 | 159.261 | 206.323 | 249.817 | 233.95  |
| ENSMUSG00000035805 | 12_Mlc1   | 110.558 | -2.15375 | 1.04E-05 | 0.000536 | 37.416  | 30.6046 | 53.7764 | 199.721 | 248.958 | 92.8746 |
| ENSMUSG00000035818 | 13_Plekhs | 4812.8  | 0.3227   | 0.255158 | 0.646206 | 5821.73 | 5429.48 | 4795.41 | 3529.78 | 5285.64 | 4014.77 |
| ENSMUSG00000035824 | 6_Tk2     | 701.053 | -0.23763 | 0.353474 | 0.729327 | 545.061 | 667.633 | 717.708 | 784.853 | 724.555 | 766.509 |

|                    |           |         |          |          |          |         |         |         |         |         |         |
|--------------------|-----------|---------|----------|----------|----------|---------|---------|---------|---------|---------|---------|
| ENSMUSG00000035828 | 10_Pim3   | 442.629 | 0.14678  | 0.754899 | 0.926746 | 217.418 | 580.353 | 597.745 | 538.916 | 300.467 | 420.875 |
| ENSMUSG00000035829 | 13_Ppp1r  | 222.651 | -0.23606 | 0.486606 | 0.81371  | 146.63  | 219.9   | 247.165 | 281.425 | 219.77  | 221.018 |
| ENSMUSG00000035831 | 2_Krt25   | 7.15982 | -2.03867 | 0.0553   | 0.307702 | 5.05622 | 3.40051 | 0       | 14.03   | 14.5941 | 5.87814 |
| ENSMUSG00000035834 | 11_Polr3g | 1122.77 | -0.17386 | 0.665079 | 0.89688  | 1627.09 | 700.505 | 837.671 | 1015.93 | 1273.98 | 1281.43 |
| ENSMUSG00000035835 | 14_Lppr3  | 67.2379 | -0.19638 | 0.772994 | 0.93264  | 13.1462 | 85.0127 | 89.9721 | 99.0351 | 48.0747 | 68.1864 |
| ENSMUSG00000035836 | 2_Ugt2b1  | 0.53364 | 2.62307  | 0.473724 | NA       | 0       | 1.1335  | 2.06832 | 0       | 0       | 0       |
| ENSMUSG00000035840 | 6_Lysmd3  | 668.973 | 0.56258  | 0.246256 | 0.637806 | 1411.7  | 461.336 | 520.183 | 482.796 | 614.67  | 523.154 |
| ENSMUSG00000035842 | 9_Ddx11   | 137.279 | 0.46436  | 0.229517 | 0.620805 | 110.226 | 176.826 | 190.286 | 84.1798 | 130.489 | 131.67  |
| ENSMUSG00000035845 | 17_Alg12  | 296.287 | 0.16012  | 0.684819 | 0.903813 | 174.945 | 401.26  | 361.957 | 271.521 | 263.552 | 304.488 |
| ENSMUSG00000035847 | 15_Ids    | 3386.19 | 0.15736  | 0.667478 | 0.898016 | 5241.28 | 2652.4  | 2818.09 | 2799.39 | 3474.26 | 3331.73 |
| ENSMUSG00000035849 | 14_Krt222 | 34.43   | -1.27628 | 0.034738 | 0.23165  | 36.4048 | 13.602  | 10.3416 | 58.5958 | 52.3671 | 35.2688 |
| ENSMUSG00000035851 | 14_Ythdc  | 3048.72 | 0.48129  | 0.264954 | 0.653546 | 5799.49 | 2460.83 | 2397.19 | 2107.8  | 2796.06 | 2730.98 |
| ENSMUSG00000035852 | 10_Misp   | 460.622 | 2.1041   | 0.00936  | 0.018607 | 162.81  | 1283.13 | 796.304 | 201.371 | 139.073 | 181.047 |
| ENSMUSG00000035860 | 8_Cdhr3   | 2.40571 | -1.85454 | 0.235724 | 0.627794 | 2.02249 | 1.1335  | 0       | 4.95175 | 5.15086 | 1.17563 |
| ENSMUSG00000035861 | 6_Tmprss  | 12672.5 | 0.78083  | 0.068015 | 0.346429 | 25102.1 | 13141.8 | 9817.3  | 7062.85 | 10434.8 | 10476   |
| ENSMUSG00000035863 | 13_Palm   | 455.772 | -0.1419  | 0.827966 | 0.950974 | 85.9558 | 532.746 | 681.512 | 621.445 | 335.665 | 477.305 |
| ENSMUSG00000035864 | 14_Syt1   | 246.906 | -1.87199 | 0.001834 | 0.030316 | 167.867 | 96.3477 | 53.7764 | 628.047 | 383.739 | 151.656 |
| ENSMUSG00000035868 | 8_311005  | 230.091 | 0.4656   | 0.427015 | 0.777688 | 521.802 | 160.957 | 117.894 | 153.504 | 252.392 | 173.993 |
| ENSMUSG00000035873 | 7_Pawr    | 967.334 | 0.6057   | 0.107896 | 0.446545 | 1728.22 | 935.14  | 838.705 | 666.011 | 790.657 | 845.276 |
| ENSMUSG00000035875 | 14_AI182  | 11.6371 | 1.01536  | 0.195808 | 0.587355 | 28.3148 | 9.06802 | 9.30745 | 5.77705 | 10.3017 | 7.05377 |
| ENSMUSG00000035877 | 17_Zhx3   | 1176.28 | -0.18682 | 0.439381 | 0.785475 | 115.81  | 1105.17 | 1043.47 | 1099.29 | 1340.08 | 1317.88 |
| ENSMUSG00000035878 | 13_Hykk   | 108.004 | -0.58482 | 0.16547  | 0.545215 | 121.349 | 49.8741 | 87.9037 | 137.824 | 138.215 | 112.86  |
| ENSMUSG00000035885 | 4_Cox8a   | 2235.39 | -0.48155 | 0.182345 | 0.56841  | 1153.83 | 2205.8  | 2237.93 | 3062.66 | 2357.38 | 2394.75 |
| ENSMUSG00000035890 | 8_Rnf126  | 436.454 | 0.68318  | 0.314429 | 0.695926 | 96.0682 | 808.188 | 709.435 | 397.791 | 205.176 | 402.065 |
| ENSMUSG00000035891 | 4_Cerk    | 1060.85 | 0.00036  | 0.999196 | 0.999484 | 650.23  | 1217.38 | 1315.45 | 1105.07 | 1013    | 1063.94 |
| ENSMUSG00000035896 | 4_Rnase1  | 12.8618 | -2.08465 | 0.003064 | 0.044043 | 7.07871 | 4.53401 | 3.10248 | 24.7588 | 18.8865 | 18.81   |
| ENSMUSG00000035898 | 13_Uba6   | 1683.08 | 0.63522  | 0.202081 | 0.593308 | 3663.74 | 1279.72 | 1199.63 | 1056.37 | 1610.5  | 1288.49 |
| ENSMUSG00000035900 | 18_Gramc  | 1511.68 | 0.42472  | 0.325617 | 0.706576 | 829.22  | 2280.61 | 2087.97 | 1340.27 | 1108.29 | 1423.69 |
| ENSMUSG00000035901 | 14_Dennd  | 1523.2  | -0.61459 | 0.018808 | 0.156415 | 1225.63 | 1141.44 | 1244.1  | 2092.12 | 1926.42 | 1509.51 |
| ENSMUSG00000035910 | 15_Dcdc2  | 120.683 | -1.53354 | 0.001224 | 0.022846 | 103.147 | 32.8716 | 49.6398 | 186.516 | 180.28  | 171.642 |
| ENSMUSG00000035914 | 10_Cd276  | 705.709 | 0.69034  | 0.070438 | 0.354524 | 515.735 | 1168.64 | 929.711 | 505.904 | 497.058 | 617.205 |
| ENSMUSG00000035916 | 7_Ptpqr   | 3.51798 | -0.65946 | 0.657658 | 0.894702 | 7.07871 | 1.1335  | 0       | 7.42763 | 4.29238 | 1.17563 |
| ENSMUSG00000035919 | 16_Bbs9   | 261.042 | -0.52079 | 0.081319 | 0.384171 | 258.879 | 187.028 | 197.525 | 331.768 | 325.363 | 265.692 |
| ENSMUSG00000035923 | 3_Myf6    | 35.2798 | -0.47384 | 0.504604 | 0.824602 | 52.5847 | 9.06802 | 26.8882 | 64.3728 | 22.3204 | 36.4445 |
| ENSMUSG00000035929 | 11_H2-Q4  | 2000.68 | 2.72318  | 4.58E-11 | 9.69E-09 | 1813.16 | 4867.26 | 3744.7  | 534.789 | 470.445 | 573.706 |
| ENSMUSG00000035930 | 8_Chst4   | 0.94459 | 3.4426   | 0.370547 | NA       | 0       | 5.66751 | 0       | 0       | 0       | 0       |
| ENSMUSG00000035932 | 5_Olfr750 | 0.31162 | 0.16972  | 0.966824 | NA       | 1.01124 | 0       | 0       | 0       | 0.85848 | 0       |
| ENSMUSG00000035933 | 4_Cog5    | 842.152 | -0.01106 | 0.969664 | 0.991889 | 1053.72 | 714.107 | 748.733 | 768.347 | 916.853 | 851.155 |
| ENSMUSG00000035934 | 15_Pknx   | 86.4646 | -1.21406 | 0.002326 | 0.036297 | 50.5622 | 38.5391 | 67.2205 | 151.029 | 115.036 | 96.4015 |
| ENSMUSG00000035936 | 6_Aldh5a  | 396.574 | -0.30796 | 0.319779 | 0.701104 | 461.127 | 283.376 | 318.522 | 432.453 | 448.983 | 434.982 |
| ENSMUSG00000035941 | 15_Ibt1   | 1408.96 | 0.2653   | 0.442859 | 0.787616 | 2175.19 | 1184.51 | 1254.44 | 1146.33 | 1336.65 | 1356.67 |
| ENSMUSG00000035944 | 17_Ttc38  | 418.137 | -0.00861 | 0.98065  | 0.993796 | 275.058 | 417.129 | 558.447 | 439.056 | 379.447 | 439.685 |
| ENSMUSG00000035946 | 7_Gsx2    | 58.7351 | -1.51064 | 0.00167  | 0.028449 | 41.461  | 15.869  | 34.1273 | 100.686 | 94.4325 | 65.8352 |
| ENSMUSG00000035948 | 12_Acss3  | 32.53   | -1.12031 | 0.039166 | 0.248922 | 29.3261 | 13.602  | 18.6149 | 62.7222 | 40.3484 | 30.5663 |
| ENSMUSG00000035949 | 15_Fbxw2  | 1618.26 | 0.12476  | 0.655634 | 0.893662 | 2094.29 | 1510.96 | 1459.2  | 1444.26 | 1674.89 | 1525.96 |
| ENSMUSG00000035951 | 1_Asc13   | 0.2751  | -1.54073 | 0.703687 | NA       | 0       | 0       | 0       | 1.65058 | 0       | 0       |
| ENSMUSG00000035953 | 13_Tmem   | 913.141 | 0.08267  | 0.753675 | 0.926096 | 764.501 | 1012.22 | 1041.4  | 888.015 | 916.853 | 855.857 |
| ENSMUSG00000035954 | 9_Dock4   | 194.466 | -0.50756 | 0.217033 | 0.607835 | 243.71  | 121.285 | 116.86  | 261.618 | 235.223 | 188.1   |
| ENSMUSG00000035958 | 2_Tdp2    | 402.487 | 0.72046  | 0.177381 | 0.561826 | 926.3   | 300.378 | 276.121 | 241.811 | 394.041 | 276.273 |
| ENSMUSG00000035960 | 13_Apex1  | 699.29  | 0.08816  | 0.77166  | 0.932465 | 523.825 | 813.855 | 824.227 | 666.011 | 641.282 | 726.538 |
| ENSMUSG00000035963 | 8_Odf3l2  | 0.13755 | -0.79206 | 0.84609  | NA       | 0       | 0       | 0       | 0.82529 | 0       | 0       |
| ENSMUSG00000035964 | 7_Tmem5   | 10.748  | -2.36741 | 0.007842 | 0.084743 | 2.02249 | 2.26701 | 6.20497 | 30.5358 | 12.8772 | 10.5807 |
| ENSMUSG00000035967 | 15_Ddx26  | 759.036 | -0.04794 | 0.915448 | 0.976514 | 1207.43 | 419.396 | 612.224 | 615.668 | 917.712 | 781.793 |
| ENSMUSG00000035969 | 15_Rusc2  | 243.744 | -0.37451 | 0.551201 | 0.844955 | 53.5959 | 261.839 | 321.624 | 408.52  | 201.742 | 215.14  |
| ENSMUSG00000035983 | 4_Gm700   | 6.60016 | 0.11477  | 0.909229 | 0.974731 | 11.1237 | 3.40051 | 6.20497 | 8.25292 | 9.44325 | 1.17563 |
| ENSMUSG00000035984 | 14_Nme5   | 22.7498 | -0.56758 | 0.280767 | 0.667117 | 23.2586 | 20.4031 | 11.3758 | 26.4094 | 29.1882 | 25.8638 |
| ENSMUSG00000035992 | 15_Fnip1  | 1135.6  | 0.24721  | 0.625048 | 0.879812 | 2263.16 | 700.505 | 734.255 | 1016.76 | 1166.67 | 932.273 |
| ENSMUSG00000036002 | 12_Fam2   | 1915.99 | 0.49392  | 0.288305 | 0.673216 | 924.277 | 2898.37 | 2899.79 | 1610.15 | 1464.56 | 1698.78 |
| ENSMUSG00000036006 | 19_Fam6f  | 92.3307 | -0.60157 | 0.078441 | 0.376005 | 75.8433 | 79.3452 | 65.1522 | 104.812 | 134.781 | 94.0502 |
| ENSMUSG00000036009 | 16_Mettl2 | 127.001 | -0.21004 | 0.56983  | 0.853687 | 160.788 | 91.8137 | 100.314 | 119.667 | 133.064 | 156.359 |
| ENSMUSG00000036019 | 8_Tmtc2   | 733.952 | 0.28342  | 0.389345 | 0.752914 | 1102.26 | 669.9   | 645.317 | 670.963 | 703.951 | 611.326 |
| ENSMUSG00000036022 | 15_Fam12  | 396.587 | 0.38558  | 0.356898 | 0.731517 | 697.759 | 299.245 | 350.581 | 280.599 | 397.475 | 353.864 |
| ENSMUSG00000036023 | 5_Parp2   | 572.932 | 0.11709  | 0.640184 | 0.887258 | 639.106 | 557.683 | 591.54  | 490.224 | 601.792 | 557.248 |
| ENSMUSG00000036026 | 15_Tmem   | 948.059 | 0.25758  | 0.643904 | 0.889191 | 296.295 | 1364.74 | 1436.45 | 963.116 | 723.696 | 904.058 |
| ENSMUSG00000036027 | 11_18100  | 0.13755 | -0.79206 | 0.84609  | NA       | 0       | 0       | 0       | 0.82529 | 0       | 0       |
| ENSMUSG00000036030 | 9_Prtg    | 61.5684 | -1.556   | 0.001569 | 0.027243 | 45.506  | 19.2695 | 28.9565 | 100.686 | 115.036 | 59.957  |
| ENSMUSG00000036036 | 15_Zfp57  | 51.7715 | -0.9054  | 0.020321 | 0.164559 | 44.4948 | 29.4711 | 34.1273 | 70.1499 | 71.2536 | 61.1326 |
| ENSMUSG00000036040 | 14_Adamt  | 41.022  | -1.08997 | 0.084108 | 0.391584 | 8.08995 | 27.2041 | 43.4348 | 71.8004 | 40.3484 | 55.2545 |
| ENSMUSG00000036046 | 14_50314  | 1674.76 | -0.19177 | 0.492163 | 0.815612 | 1220.57 | 1733.13 | 1737.39 | 1952.64 | 1663.73 | 1741.1  |
| ENSMUSG00000036052 | 14_Dnajb1 | 165.719 | -0.54951 | 0.099654 | 0.429481 | 102.136 | 139.421 | 162.363 | 223.654 | 197.45  | 169.29  |
| ENSMUSG00000036053 | 16_Fmnl2  | 821.183 | 0.10457  | 0.82171  | 0.948384 | 1472.37 | 573.552 | 506.739 | 773.299 | 827.572 | 773.563 |
| ENSMUSG00000036054 | 15_Supp2  | 680.757 | 0.01891  | 0.955456 | 0.98876  | 444.948 | 775.316 | 835.603 | 700.673 | 679.055 | 648.947 |
| ENSMUSG00000036057 | 11_Ptpn2  | 916.463 | 0.3258   | 0.587544 | 0.862925 | 239.665 | 1354.54 | 1464.37 | 913.599 | 866.169 | 866.438 |
| ENSMUSG00000036061 | 9_Smug1   | 566.377 | 0.06815  | 0.804093 | 0.942928 | 666.41  | 584.887 | 488.124 | 523.235 | 620.679 | 514.925 |
| ENSMUSG00000036062 | 13_Phf24  | 80.892  | -0.21159 | 0.548206 | 0.843853 | 57.6409 | 82.7457 | 84.8012 | 92.4327 | 90.1401 | 77.5914 |

|                    |            |         |          |          |          |         |         |         |         |         |         |
|--------------------|------------|---------|----------|----------|----------|---------|---------|---------|---------|---------|---------|
| ENSMUSG00000036067 | 12_Slc2af  | 23.737  | 3.21039  | 0.000159 | 0.004824 | 11.1237 | 65.7432 | 51.7081 | 7.42763 | 1.71695 | 4.70251 |
| ENSMUSG00000036073 | 17_Galt    | 217.085 | -0.13953 | 0.811502 | 0.946092 | 58.6522 | 278.842 | 282.326 | 264.919 | 157.96  | 259.814 |
| ENSMUSG00000036078 | 16_Sigma   | 958.856 | 0.39768  | 0.295694 | 0.679579 | 662.365 | 1414.61 | 1193.42 | 837.672 | 670.471 | 974.595 |
| ENSMUSG00000036083 | 14_Slc17f  | 1.5963  | -1.08409 | 0.568455 | NA       | 3.03373 | 0       | 0       | 2.47588 | 1.71695 | 2.35126 |
| ENSMUSG00000036086 | 16_Zranb   | 422.619 | 0.22062  | 0.397715 | 0.758456 | 502.588 | 442.066 | 419.87  | 349.924 | 430.955 | 390.308 |
| ENSMUSG00000036087 | 18_Slain2  | 2102.35 | 0.40491  | 0.264382 | 0.653062 | 3522.16 | 1863.48 | 1800.48 | 1670.39 | 1867.19 | 1890.41 |
| ENSMUSG00000036091 | 8_Hyal3    | 25.6071 | -0.12015 | 0.846871 | 0.955658 | 9.1012  | 30.6046 | 34.1273 | 28.0599 | 31.7636 | 19.9857 |
| ENSMUSG00000036093 | 7_Arl5a    | 2089.63 | 0.30746  | 0.517882 | 0.831239 | 4070.26 | 1479.22 | 1384.74 | 1690.2  | 2085.24 | 1828.1  |
| ENSMUSG00000036095 | 10_Dgkb    | 19.4012 | -1.26509 | 0.097443 | 0.423427 | 23.2586 | 6.80102 | 4.13665 | 37.9634 | 26.6128 | 17.6344 |
| ENSMUSG00000036097 | 7_Fam17f   | 1535.59 | 0.47173  | 0.235861 | 0.627876 | 2765.75 | 1333    | 1254.44 | 1172.74 | 1450.83 | 1236.76 |
| ENSMUSG00000036098 | 15_Myrf    | 163.816 | -1.83837 | 2.00E-05 | 0.000923 | 46.5172 | 69.1437 | 99.2795 | 351.575 | 209.468 | 206.91  |
| ENSMUSG00000036099 | 16_Vezt    | 975.492 | 0.13129  | 0.574948 | 0.85664  | 1098.21 | 1012.22 | 949.36  | 949.912 | 970.937 | 872.316 |
| ENSMUSG00000036103 | 8_Colec1   | 1411.3  | -0.64089 | 0.105833 | 0.441726 | 1676.64 | 732.243 | 899.721 | 1853.61 | 1865.47 | 1440.14 |
| ENSMUSG00000036104 | 11_Rab3g   | 2411.32 | 0.26684  | 0.341602 | 0.719594 | 3288.57 | 2228.47 | 2383.74 | 2030.22 | 2284.41 | 2252.5  |
| ENSMUSG00000036106 | 15_Prr5    | 34.2727 | -0.18267 | 0.748003 | 0.924734 | 13.1462 | 39.6726 | 43.4348 | 34.6623 | 30.0467 | 44.6739 |
| ENSMUSG00000036109 | 17_Mbnl3   | 755.757 | 0.74661  | 0.086842 | 0.399375 | 1537.09 | 634.762 | 669.103 | 457.212 | 643.858 | 592.516 |
| ENSMUSG00000036110 | 14_Slc17f  | 0.95502 | -0.83094 | 0.685828 | NA       | 1.01124 | 0       | 1.03416 | 1.65058 | 0.85848 | 1.17563 |
| ENSMUSG00000036111 | 7_Lmo1     | 64.2965 | -1.69018 | 0.001727 | 0.028991 | 22.2474 | 21.5366 | 47.5714 | 146.902 | 87.5647 | 59.957  |
| ENSMUSG00000036112 | 14_Metap   | 4604.53 | 0.20938  | 0.529963 | 0.836496 | 6806.69 | 4209.83 | 3797.44 | 3764.16 | 4581.69 | 4467.39 |
| ENSMUSG00000036114 | 3_Rpp25f   | 159.489 | 0.03119  | 0.953174 | 0.988326 | 55.6184 | 224.434 | 203.73  | 178.263 | 137.356 | 157.534 |
| ENSMUSG00000036117 | 2_Il5      | 4.35578 | 1.85725  | 0.154471 | 0.530234 | 16.1799 | 1.1335  | 3.10248 | 1.65058 | 1.71695 | 2.35126 |
| ENSMUSG00000036120 | 9_Rfxank   | 184.281 | -0.31686 | 0.532989 | 0.837668 | 60.6747 | 219.9   | 212.003 | 227.781 | 194.874 | 190.452 |
| ENSMUSG00000036123 | 6_Slc9a3   | 0.96625 | 1.23731  | 0.592518 | NA       | 1.01124 | 0       | 3.10248 | 0.82529 | 0.85848 | 0       |
| ENSMUSG00000036131 | 12_Frmd7   | 9.64265 | 0.19064  | 0.785575 | 0.936103 | 10.1124 | 12.4685 | 8.27329 | 10.7288 | 6.86782 | 9.40502 |
| ENSMUSG00000036136 | 8_Fam11f   | 720.313 | 0.71904  | 0.00965  | 0.098192 | 1067.87 | 785.518 | 834.568 | 497.651 | 520.237 | 616.029 |
| ENSMUSG00000036138 | 16_Acaa1   | 889.165 | 0.26506  | 0.630568 | 0.882045 | 288.205 | 1334.13 | 1289.6  | 912.773 | 666.178 | 844.101 |
| ENSMUSG00000036144 | 6_Meox2    | 67.3672 | 0.19696  | 0.742997 | 0.923215 | 138.54  | 32.8716 | 44.4689 | 75.1016 | 62.6688 | 50.552  |
| ENSMUSG00000036151 | 15_Tm6sf   | 10.5324 | -0.42923 | 0.612298 | 0.874367 | 2.02249 | 14.7355 | 10.3416 | 11.5541 | 16.3111 | 8.22939 |
| ENSMUSG00000036155 | 13_Mgat5   | 1355.09 | 0.07508  | 0.743982 | 0.923348 | 1516.87 | 1323.93 | 1329.93 | 1297.36 | 1283.42 | 1379.01 |
| ENSMUSG00000036158 | 12_Prickle | 436.471 | 0.2741   | 0.371326 | 0.742224 | 584.499 | 375.189 | 473.646 | 448.134 | 349.4   | 387.957 |
| ENSMUSG00000036160 | 13_Surf6   | 545.799 | 0.06473  | 0.842208 | 0.953707 | 381.239 | 639.296 | 653.59  | 531.488 | 501.351 | 567.828 |
| ENSMUSG00000036167 | 15_Pphln   | 1565.92 | 0.19075  | 0.539243 | 0.84017  | 2165.07 | 1470.15 | 1372.33 | 1247.02 | 1585.61 | 1555.36 |
| ENSMUSG00000036168 | 15_Ccdc3   | 20.5724 | 0.56061  | 0.43612  | 0.784221 | 48.5397 | 13.602  | 11.3758 | 14.03   | 20.6034 | 15.2832 |
| ENSMUSG00000036169 | 5_Sostdc1  | 123.892 | -1.14821 | 0.03253  | 0.22288  | 139.552 | 40.8061 | 50.6739 | 210.45  | 172.554 | 129.319 |
| ENSMUSG00000036172 | 17_Cd200   | 4.22485 | 0.17661  | 0.872817 | 0.963879 | 9.1012  | 2.26701 | 2.06832 | 4.95175 | 3.43391 | 3.52688 |
| ENSMUSG00000036180 | 14_Gatad   | 1342.61 | 0.51864  | 0.304906 | 0.687535 | 574.387 | 2230.73 | 1939.05 | 1208.23 | 909.986 | 1193.26 |
| ENSMUSG00000036181 | 2_Hist1h1  | 580.385 | -0.23728 | 0.510556 | 0.827179 | 376.183 | 542.948 | 679.444 | 805.485 | 524.529 | 553.721 |
| ENSMUSG00000036185 | 9_Sapcd1   | 24.3974 | -1.03839 | 0.133103 | 0.496394 | 5.05622 | 17.0025 | 25.854  | 39.614  | 18.8865 | 39.9713 |
| ENSMUSG00000036186 | 5_Fam69f   | 53.9525 | -1.57761 | 0.020171 | 0.164034 | 9.1012  | 21.5366 | 50.6739 | 130.396 | 53.2256 | 58.7814 |
| ENSMUSG00000036188 | 3_Ankmy2   | 858.263 | -0.00145 | 0.996153 | 0.998321 | 1106.3  | 689.17  | 777.689 | 823.642 | 849.892 | 902.882 |
| ENSMUSG00000036192 | 15_Rorb    | 59.6937 | -1.64661 | 0.026018 | 0.193856 | 60.6747 | 13.602  | 12.4099 | 132.872 | 102.159 | 36.4445 |
| ENSMUSG00000036196 | 15_Slc26f  | 20.0091 | -0.75213 | 0.177257 | 0.561638 | 10.1124 | 19.2695 | 15.5124 | 31.3611 | 21.4619 | 22.3369 |
| ENSMUSG00000036197 | 15_Gxylt1  | 896.305 | 0.17235  | 0.620184 | 0.877704 | 1355.07 | 776.449 | 717.708 | 830.244 | 873.071 | 825.291 |
| ENSMUSG00000036198 | 12_Arhga1  | 1.32033 | -1.53247 | 0.462332 | NA       | 1.01124 | 0       | 1.03416 | 3.30117 | 2.57543 | 0       |
| ENSMUSG00000036199 | 8_Ndufa1   | 685.418 | -0.43493 | 0.563148 | 0.85076  | 71.7983 | 785.518 | 891.447 | 1197.5  | 454.993 | 711.255 |
| ENSMUSG00000036202 | 15_Rif1    | 1990.39 | 0.75525  | 0.115267 | 0.461441 | 4361.5  | 1569.9  | 1567.79 | 1172.74 | 1744.43 | 1525.96 |
| ENSMUSG00000036206 | 12_Sh3bp   | 745.894 | 0.53568  | 0.288694 | 0.673672 | 320.564 | 1262.72 | 1065.19 | 651.156 | 527.963 | 647.771 |
| ENSMUSG00000036208 | 13_BC02f   | 371.676 | 0.32717  | 0.350963 | 0.727696 | 543.038 | 349.119 | 348.512 | 250.889 | 394.041 | 344.459 |
| ENSMUSG00000036211 | 3_Hist1h1  | 0.37783 | 2.11394  | 0.599927 | NA       | 0       | 2.26701 | 0       | 0       | 0       | 0       |
| ENSMUSG00000036214 | 13_Znrtd1  | 198.803 | 0.13673  | 0.781509 | 0.935592 | 350.902 | 122.418 | 150.988 | 132.872 | 214.619 | 221.018 |
| ENSMUSG00000036216 | 5_Leap2    | 0       | NA       | NA       | NA       | 0       | 0       | 0       | 0       | 0       | 0       |
| ENSMUSG00000036218 | 15_Pdzrn   | 33.7454 | -0.61761 | 0.244807 | 0.6364   | 20.2249 | 19.2695 | 40.3323 | 51.9934 | 28.3297 | 42.3226 |
| ENSMUSG00000036223 | 15_Ska1    | 45.7953 | 0.57556  | 0.163691 | 0.541822 | 62.6971 | 46.4736 | 54.8106 | 28.8852 | 36.056  | 45.8495 |
| ENSMUSG00000036225 | 14_Kctd1   | 450.836 | -0.0394  | 0.869232 | 0.96311  | 442.925 | 422.797 | 468.475 | 472.893 | 465.295 | 432.631 |
| ENSMUSG00000036231 | 5_Agr3     | 1.54095 | -3.9662  | 0.068432 | NA       | 0       | 0       | 0       | 1.65058 | 1.71695 | 5.87814 |
| ENSMUSG00000036241 | 3_Ube2r2   | 3671.45 | 0.18835  | 0.447782 | 0.79124  | 4467.68 | 3594.34 | 3670.24 | 3174.9  | 3759.27 | 3362.3  |
| ENSMUSG00000036242 | 14_36324   | 238.811 | -0.94741 | 0.021008 | 0.16832  | 233.597 | 96.3477 | 159.261 | 363.954 | 321.07  | 258.638 |
| ENSMUSG00000036246 | 14_Gmip    | 259.501 | 0.46075  | 0.294269 | 0.678823 | 144.608 | 403.527 | 353.683 | 220.353 | 200.884 | 233.95  |
| ENSMUSG00000036249 | 16_Rbm4    | 974.951 | 1.17874  | 0.002832 | 0.041763 | 1997.21 | 1087.03 | 973.146 | 481.145 | 746.875 | 564.301 |
| ENSMUSG00000036251 | 16_Trpm8   | 0.50562 | 2.55291  | 0.52315  | NA       | 3.03373 | 0       | 0       | 0       | 0       | 0       |
| ENSMUSG00000036256 | 13_lgfbp7  | 3035.06 | -1.16126 | 4.89E-05 | 0.001862 | 2109.46 | 1495.09 | 2021.79 | 4870.88 | 3685.44 | 4027.7  |
| ENSMUSG00000036257 | 14_Pnplat  | 2133.55 | 0.32346  | 0.502176 | 0.823019 | 4210.82 | 1407.81 | 1496.43 | 1700.93 | 2151.34 | 1833.98 |
| ENSMUSG00000036264 | 9_Fstl4    | 101.513 | -1.85121 | 7.77E-07 | 6.24E-05 | 44.4948 | 31.7381 | 55.8447 | 185.691 | 150.233 | 141.075 |
| ENSMUSG00000036270 | 16_Edc4    | 742.989 | 0.22823  | 0.683943 | 0.903353 | 223.485 | 1067.76 | 1113.79 | 755.968 | 632.698 | 664.23  |
| ENSMUSG00000036273 | 15_Lrrk2   | 206.583 | -0.89724 | 0.025648 | 0.191868 | 214.384 | 98.6148 | 119.963 | 297.931 | 287.59  | 221.018 |
| ENSMUSG00000036275 | 13_95300   | 4445.27 | 0.20301  | 0.425924 | 0.777537 | 5654.88 | 4386.66 | 4230.75 | 3933.34 | 4190.23 | 4275.76 |
| ENSMUSG00000036278 | 6_Macrod   | 133.993 | -0.36505 | 0.359046 | 0.732887 | 74.8321 | 138.287 | 138.578 | 190.643 | 128.772 | 132.846 |
| ENSMUSG00000036281 | 13_Snapc   | 410.047 | 0.03799  | 0.938235 | 0.985118 | 157.754 | 539.547 | 549.14  | 407.694 | 392.324 | 413.821 |
| ENSMUSG00000036282 | 14_Naa30   | 886.36  | 0.6599   | 0.174636 | 0.55808  | 1934.51 | 690.303 | 631.873 | 614.018 | 750.309 | 697.147 |
| ENSMUSG00000036285 | 10_Noal    | 190.061 | 0.15696  | 0.617637 | 0.877739 | 234.609 | 185.894 | 180.978 | 174.962 | 214.619 | 149.305 |
| ENSMUSG00000036291 | 5_Ap5m1    | 457.398 | 0.24178  | 0.573461 | 0.855676 | 802.928 | 358.187 | 325.761 | 410.996 | 464.436 | 382.079 |
| ENSMUSG00000036292 | 13_Gramc   | 317.215 | 0.57694  | 0.204052 | 0.595198 | 630.005 | 265.24  | 244.062 | 216.227 | 296.175 | 251.584 |
| ENSMUSG00000036295 | 4_Lrrn3    | 32.9578 | -1.50222 | 0.004673 | 0.059525 | 22.2474 | 18.136  | 11.3758 | 54.4693 | 60.9519 | 30.5663 |
| ENSMUSG00000036298 | 10_Slc2a1  | 103.961 | -0.68139 | 0.289452 | 0.674773 | 161.799 | 24.9371 | 52.7422 | 144.426 | 139.932 | 99.9284 |
| ENSMUSG00000036299 | 4_BC0311   | 989.778 | -0.04452 | 0.873315 | 0.963908 | 1215.52 | 878.465 | 829.398 | 1008.51 | 999.267 | 1007.51 |

|                    |           |         |          |          |          |         |         |         |         |         |         |
|--------------------|-----------|---------|----------|----------|----------|---------|---------|---------|---------|---------|---------|
| ENSMUSG00000036304 | 13_Zdhhc  | 19.3782 | 0.03146  | 0.955437 | 0.98876  | 16.1799 | 23.8036 | 18.6149 | 12.3794 | 20.6034 | 24.6882 |
| ENSMUSG00000036306 | 11_Lzts1  | 44.8275 | 0.23277  | 0.693482 | 0.905638 | 18.2024 | 56.6751 | 70.323  | 44.5658 | 27.4713 | 51.7276 |
| ENSMUSG00000036309 | 14_Skp1a  | 6162.28 | 0.28165  | 0.537731 | 0.839833 | 11487.7 | 4556.68 | 4241.1  | 4633.19 | 6434.28 | 5620.68 |
| ENSMUSG00000036315 | 13_Znrd1  | 544.02  | -0.11661 | 0.758946 | 0.927759 | 298.317 | 650.631 | 617.394 | 607.415 | 533.114 | 557.248 |
| ENSMUSG00000036323 | 14_Srp72  | 4381.17 | 0.47936  | 0.190364 | 0.578737 | 7350.74 | 4239.3  | 3716.78 | 3023.87 | 3809.92 | 4146.44 |
| ENSMUSG00000036327 | 18_Qsox2  | 1307.75 | 0.55333  | 0.036145 | 0.237923 | 1294.39 | 1739.93 | 1631.91 | 998.604 | 1009.57 | 1172.1  |
| ENSMUSG00000036330 | 12_Slc18a | 40.0152 | 0.56787  | 0.181051 | 0.567335 | 39.4385 | 49.8741 | 53.7764 | 25.5841 | 32.6221 | 38.7957 |
| ENSMUSG00000036333 | 10_Kidins | 4398.83 | -0.04674 | 0.852046 | 0.957902 | 5003.64 | 3849.38 | 4129.41 | 4094.28 | 4644.36 | 4671.94 |
| ENSMUSG00000036334 | 12_Igsf10 | 768.907 | 0.52953  | 0.147639 | 0.519959 | 1309.56 | 647.23  | 768.382 | 557.072 | 702.234 | 628.961 |
| ENSMUSG00000036339 | 17_Tmem   | 906.013 | 0.12917  | 0.682036 | 0.902515 | 1253.94 | 768.515 | 816.988 | 786.504 | 946.042 | 864.086 |
| ENSMUSG00000036352 | 16_Ubac1  | 607.187 | -0.03337 | 0.918062 | 0.977004 | 406.52  | 709.573 | 684.615 | 627.222 | 612.094 | 603.097 |
| ENSMUSG00000036353 | 13_P2ry1  | 24.7022 | -0.03165 | 0.95746  | 0.98909  | 40.4498 | 20.4031 | 12.4099 | 23.1082 | 28.3297 | 23.5126 |
| ENSMUSG00000036356 | 14_Csgalr | 427.306 | 0.30996  | 0.400635 | 0.759729 | 681.579 | 318.514 | 418.835 | 382.936 | 384.598 | 377.377 |
| ENSMUSG00000036357 | 5_Gpr101  | 0.16854 | 1.1315   | 0.781553 | NA       | 1.01124 | 0       | 0       | 0       | 0       | 0       |
| ENSMUSG00000036362 | 2_P2ry13  | 40.7885 | 0.53759  | 0.22546  | 0.615593 | 45.506  | 62.3427 | 37.2298 | 40.4393 | 27.4713 | 31.742  |
| ENSMUSG00000036368 | 7_Rmdn2   | 88.6302 | -0.44987 | 0.420544 | 0.773868 | 139.552 | 38.5391 | 46.5373 | 88.3063 | 123.621 | 95.2259 |
| ENSMUSG00000036371 | 6_Serp1   | 7924.57 | 0.49623  | 0.203703 | 0.594896 | 14252.5 | 7156.94 | 6412.84 | 5845.55 | 6876.4  | 7003.21 |
| ENSMUSG00000036372 | 14_Tmem   | 871.888 | -0.43628 | 0.271007 | 0.567711 | 398.43  | 963.477 | 861.457 | 1073.71 | 931.448 | 1002.81 |
| ENSMUSG00000036376 | 2_Abt1    | 190.2   | -0.02406 | 0.944159 | 0.986451 | 130.451 | 238.036 | 197.525 | 198.895 | 181.139 | 195.154 |
| ENSMUSG00000036377 | 18_C530C  | 20.0998 | -1.00721 | 0.064901 | 0.337359 | 10.1124 | 11.335  | 18.6149 | 28.0599 | 26.6128 | 25.8638 |
| ENSMUSG00000036381 | 13_P2ry14 | 202.104 | 0.78457  | 0.018981 | 0.157128 | 315.508 | 250.504 | 201.662 | 157.631 | 167.403 | 119.914 |
| ENSMUSG00000036390 | 8_Gadd45  | 526.54  | 0.18187  | 0.459831 | 0.799333 | 547.083 | 606.424 | 525.354 | 495.175 | 454.993 | 530.208 |
| ENSMUSG00000036391 | 16_Sec24  | 790.689 | 0.54575  | 0.133827 | 0.497275 | 1339.9  | 760.58  | 714.606 | 529.838 | 686.782 | 712.43  |
| ENSMUSG00000036395 | 14_Glb1l2 | 424.056 | -0.09911 | 0.73085  | 0.91894  | 503.6   | 377.456 | 347.478 | 431.628 | 473.879 | 410.294 |
| ENSMUSG00000036398 | 13_Ppp1r  | 1250.33 | -0.02279 | 0.953242 | 0.988326 | 686.635 | 1648.11 | 1386.81 | 1329.55 | 1171.82 | 1279.08 |
| ENSMUSG00000036402 | 13_Gng12  | 4823.08 | 0.45322  | 0.215788 | 0.607357 | 8204.23 | 4337.92 | 4181.12 | 3590.85 | 4407.42 | 4216.98 |
| ENSMUSG00000036403 | 15_Cep13  | 276.99  | -0.17145 | 0.589956 | 0.864564 | 336.744 | 227.834 | 217.174 | 314.436 | 304.759 | 260.989 |
| ENSMUSG00000036411 | 9_953007  | 33.3237 | -1.27225 | 0.011831 | 0.113769 | 28.3148 | 14.7355 | 15.5124 | 51.1681 | 54.9425 | 35.2688 |
| ENSMUSG00000036412 | 5_Arsi    | 66.7705 | -0.86759 | 0.097133 | 0.422716 | 19.2136 | 66.8767 | 55.8447 | 92.4327 | 68.6782 | 97.5771 |
| ENSMUSG00000036422 | 10_Pcdh8  | 16.0369 | 0.20531  | 0.76898  | 0.931306 | 8.08995 | 27.2041 | 16.5466 | 18.9817 | 17.1695 | 8.22939 |
| ENSMUSG00000036427 | 5_Gpi1    | 5383.52 | 0.05759  | 0.908124 | 0.974731 | 1995.19 | 7393.84 | 7084.01 | 5910.74 | 4589.42 | 5327.95 |
| ENSMUSG00000036430 | 7_Tbcc    | 170.106 | 0.15206  | 0.621271 | 0.878215 | 145.619 | 193.829 | 197.525 | 160.107 | 142.507 | 181.047 |
| ENSMUSG00000036432 | 8_Siah2   | 125.777 | 0.20118  | 0.558147 | 0.848273 | 111.237 | 162.091 | 130.304 | 133.697 | 92.7155 | 124.617 |
| ENSMUSG00000036435 | 13_Exoc1  | 1249.26 | 0.31305  | 0.259524 | 0.649203 | 1581.59 | 1357.94 | 1213.07 | 921.852 | 1261.96 | 1159.17 |
| ENSMUSG00000036437 | 5_Npy1r   | 64.3262 | -0.38379 | 0.360815 | 0.733982 | 80.8995 | 43.0731 | 43.4348 | 74.2763 | 77.2629 | 67.0108 |
| ENSMUSG00000036438 | 12_Calm2  | 7002.21 | -0.07488 | 0.848202 | 0.956061 | 10566.5 | 4981.75 | 4913.3  | 7101.64 | 7734.88 | 6715.19 |
| ENSMUSG00000036442 | 7_Thap11  | 419.744 | -0.07958 | 0.752219 | 0.925804 | 387.307 | 423.93  | 413.665 | 429.152 | 476.455 | 387.957 |
| ENSMUSG00000036446 | 4_Lum     | 14552.2 | -0.41635 | 0.366885 | 0.739587 | 21215.9 | 6711.47 | 9472.92 | 16166.7 | 18359.4 | 15386.6 |
| ENSMUSG00000036449 | 6_Lcn8    | 1.01722 | -0.9244  | 0.68294  | NA       | 0       | 0       | 2.06832 | 0.82529 | 0.85848 | 2.35126 |
| ENSMUSG00000036450 | 4_Hif1an  | 2116.19 | -0.05396 | 0.816649 | 0.947571 | 1855.63 | 2096.98 | 2277.22 | 2120.18 | 2161.65 | 2185.49 |
| ENSMUSG00000036452 | 17_Arhgaj | 737.512 | 0.70386  | 0.005526 | 0.066141 | 986.974 | 915.87  | 838.705 | 489.398 | 608.66  | 585.463 |
| ENSMUSG00000036459 | 15_Wtip   | 271.927 | -0.51731 | 0.342124 | 0.720134 | 75.8433 | 268.64  | 326.795 | 421.724 | 266.986 | 271.57  |
| ENSMUSG00000036461 | 15_Elf1   | 4136.28 | 0.77456  | 0.030671 | 0.214509 | 7297.14 | 4427.46 | 3937.05 | 2404.9  | 3253.63 | 3497.49 |
| ENSMUSG00000036466 | 17_Megf1  | 180.645 | -0.46733 | 0.208071 | 0.599354 | 195.17  | 109.95  | 149.953 | 251.714 | 217.195 | 159.885 |
| ENSMUSG00000036469 | 16_March  | 82.0187 | 1.00183  | 0.086342 | 0.398033 | 184.046 | 91.8137 | 52.7422 | 72.6257 | 62.6688 | 28.2151 |
| ENSMUSG00000036473 | 15_Tbc1d  | 311.04  | -0.98647 | 0.005188 | 0.036358 | 244.721 | 175.693 | 205.798 | 539.741 | 405.201 | 295.083 |
| ENSMUSG00000036478 | 7_Btg1    | 1842.51 | 0.5561   | 0.133488 | 0.497269 | 3264.3  | 1768.26 | 1547.11 | 1427.76 | 1504.05 | 1543.6  |
| ENSMUSG00000036480 | 9_Prss56  | 0.13755 | -0.79206 | 0.84609  | NA       | 0       | 0       | 0       | 0.82529 | 0       | 0       |
| ENSMUSG00000036492 | 12_Rnf39  | 1201.88 | 0.59443  | 0.022394 | 0.176153 | 1180.12 | 1590.3  | 1567.79 | 932.58  | 984.673 | 955.785 |
| ENSMUSG00000036499 | 8_Eea1    | 2283.22 | 0.38711  | 0.337372 | 0.71586  | 4054.08 | 1985.9  | 1722.91 | 1767.78 | 2056.05 | 2112.6  |
| ENSMUSG00000036501 | 6_Fam13t  | 1543.57 | 0.07328  | 0.832733 | 0.951804 | 2185.3  | 1263.86 | 1298.91 | 1237.94 | 1743.57 | 1531.84 |
| ENSMUSG00000036502 | 14_Tmem   | 45.6179 | -1.27598 | 0.014615 | 0.130648 | 39.4385 | 13.602  | 26.8882 | 65.1981 | 81.5553 | 47.0251 |
| ENSMUSG00000036503 | 13_Rnf13  | 4020.08 | 0.12285  | 0.796138 | 0.939697 | 7414.44 | 2483.5  | 2675.38 | 3741.88 | 4167.91 | 3637.39 |
| ENSMUSG00000036504 | 6_Phpt1   | 552.217 | -0.84591 | 0.122961 | 0.477042 | 119.327 | 555.416 | 509.842 | 812.088 | 588.915 | 727.714 |
| ENSMUSG00000036510 | 17_Cdh8   | 8.08602 | -1.53809 | 0.107776 | 0.446399 | 7.07871 | 2.26701 | 3.10248 | 9.90351 | 21.4619 | 4.70251 |
| ENSMUSG00000036513 | 15_Comm   | 619.715 | 0.06831  | 0.778463 | 0.934544 | 641.129 | 680.102 | 582.233 | 599.162 | 649.009 | 566.653 |
| ENSMUSG00000036521 | 5_Scgb2b  | 51.623  | 0.08105  | 0.906149 | 0.974391 | 109.214 | 14.7355 | 35.1615 | 49.5175 | 54.084  | 47.0251 |
| ENSMUSG00000036523 | 16_Greb1  | 116.52  | -1.28443 | 0.00248  | 0.037985 | 56.6297 | 47.6071 | 99.2795 | 207.148 | 157.96  | 130.495 |
| ENSMUSG00000036526 | 8_Card11  | 10.8125 | 1.63457  | 0.201987 | 0.593308 | 0       | 30.6046 | 18.6149 | 10.7288 | 2.57543 | 2.35126 |
| ENSMUSG00000036528 | 14_Ppflbp | 2745.9  | 0.13831  | 0.63672  | 0.885362 | 2223.73 | 3133    | 3275.19 | 2344.66 | 2471.56 | 3027.24 |
| ENSMUSG00000036529 | 17_Sbf1   | 1961.65 | 0.41007  | 0.515901 | 0.829903 | 436.858 | 3121.67 | 3157.3  | 1836.28 | 1460.27 | 1757.56 |
| ENSMUSG00000036533 | 8_Cdc42e  | 631.121 | 0.45341  | 0.163025 | 0.541016 | 984.952 | 632.495 | 570.857 | 496.826 | 563.161 | 538.438 |
| ENSMUSG00000036534 | 5_Slc38a7 | 296.006 | 0.11187  | 0.80381  | 0.942928 | 140.563 | 402.394 | 379.537 | 294.629 | 253.251 | 305.663 |
| ENSMUSG00000036537 | 6_Rnf113  | 73.3862 | -0.21914 | 0.601784 | 0.870033 | 42.4723 | 92.9472 | 68.2547 | 87.481  | 70.3951 | 78.7671 |
| ENSMUSG00000036545 | 8_Adamts  | 618.942 | -0.29815 | 0.384843 | 0.750802 | 396.408 | 521.411 | 747.699 | 722.956 | 588.057 | 737.119 |
| ENSMUSG00000036550 | 15_Cnot1  | 5860.3  | 0.37387  | 0.183819 | 0.570805 | 7711.75 | 6375.95 | 5758.21 | 4156.17 | 5729.48 | 5430.22 |
| ENSMUSG00000036551 | 6_Akap14  | 0       | NA       | NA       | NA       | 0       | 0       | 0       | 0       | 0       | 0       |
| ENSMUSG00000036552 | 16_Erman  | 646.993 | 0.00144  | 0.996046 | 0.998321 | 707.871 | 608.691 | 625.668 | 579.355 | 807.827 | 552.545 |
| ENSMUSG00000036553 | 16_Sh3tc  | 131.754 | 0.34599  | 0.576704 | 0.857002 | 36.4048 | 244.837 | 161.329 | 133.697 | 97.8664 | 116.387 |
| ENSMUSG00000036555 | 14_Iqce   | 244.771 | -0.5455  | 0.266225 | 0.654446 | 81.9108 | 252.771 | 262.677 | 363.129 | 250.675 | 257.462 |
| ENSMUSG00000036557 | 8_170001  | 2.06313 | -3.33315 | 0.080268 | 0.381339 | 0       | 0       | 1.03416 | 3.30117 | 6.86782 | 1.17563 |
| ENSMUSG00000036560 | 14_Lgi4   | 253.21  | -0.83055 | 0.104903 | 0.440391 | 100.113 | 155.29  | 291.634 | 487.748 | 266.986 | 217.491 |
| ENSMUSG00000036561 | 7_Ppp6r2  | 552.312 | 0.02512  | 0.963502 | 0.990106 | 168.878 | 299.976 | 772.519 | 571.928 | 449.842 | 620.731 |
| ENSMUSG00000036564 | 16_Ndrq4  | 321.969 | -0.42514 | 0.259965 | 0.649568 | 195.17  | 295.844 | 334.034 | 492.7   | 333.089 | 280.975 |
| ENSMUSG00000036565 | 7_Ttyh3   | 389.554 | -0.7121  | 0.184782 | 0.571925 | 104.158 | 343.451 | 438.484 | 628.873 | 357.985 | 464.373 |

|                    |            |         |          |          |          |         |         |         |         |         |         |
|--------------------|------------|---------|----------|----------|----------|---------|---------|---------|---------|---------|---------|
| ENSMUSG00000036568 | 6_Gltscr1l | 692.342 | 0.19226  | 0.430161 | 0.780048 | 791.804 | 673.301 | 749.767 | 659.409 | 593.208 | 686.567 |
| ENSMUSG00000036570 | 14_Fxyd1   | 325.015 | -1.40079 | 0.014456 | 0.129599 | 63.7084 | 171.159 | 300.941 | 690.77  | 361.419 | 362.093 |
| ENSMUSG00000036572 | 16_Upf3b   | 974.638 | 0.15181  | 0.713913 | 0.911072 | 1616.98 | 734.51  | 725.981 | 793.931 | 1078.25 | 898.18  |
| ENSMUSG00000036578 | 7_Fxyd7    | 4.96169 | -1.59821 | 0.174957 | 0.558498 | 0       | 2.26701 | 5.17081 | 9.90351 | 7.72629 | 4.70251 |
| ENSMUSG00000036580 | 15_Spg20   | 701.149 | -0.48727 | 0.058368 | 0.317136 | 667.421 | 582.62  | 501.568 | 863.256 | 794.95  | 797.076 |
| ENSMUSG00000036585 | 15_Fgf1    | 677.506 | -1.46153 | 0.001242 | 0.023041 | 561.241 | 191.562 | 329.898 | 1242.89 | 962.353 | 777.09  |
| ENSMUSG00000036586 | 6_Griffin  | 116.39  | -3.48479 | 9.36E-05 | 0.003145 | 2.02249 | 17.0025 | 38.264  | 400.267 | 51.5086 | 189.276 |
| ENSMUSG00000036587 | 13_Fut7    | 1.65058 | 4.24885  | 0.100477 | NA       | 0       | 6.80102 | 3.10248 | 0       | 0       | 0       |
| ENSMUSG00000036591 | 15_Arhga1  | 1756.21 | 0.09479  | 0.693974 | 0.905638 | 1964.85 | 1754.66 | 1721.88 | 1505.33 | 1816.54 | 1774.02 |
| ENSMUSG00000036594 | 14_H2-Aa   | 1033.36 | 1.32934  | 0.000221 | 0.00624  | 1061.81 | 1989.3  | 1384.74 | 727.083 | 562.302 | 474.954 |
| ENSMUSG00000036596 | 6_Cpz      | 222.877 | -0.74136 | 0.217115 | 0.607835 | 45.506  | 153.023 | 301.975 | 274.822 | 260.977 | 300.961 |
| ENSMUSG00000036598 | 3_Ccdc11   | 39.3406 | -1.76151 | 0.000333 | 0.008517 | 13.1462 | 14.7355 | 25.854  | 74.2763 | 48.0747 | 59.957  |
| ENSMUSG00000036599 | 10_Chst1i  | 140.233 | -0.19949 | 0.73585  | 0.920596 | 37.416  | 172.292 | 182.012 | 182.39  | 103.876 | 163.412 |
| ENSMUSG00000036602 | 13_Alx1    | 22.9335 | -1.01918 | 0.120151 | 0.471162 | 26.2924 | 5.66751 | 13.4441 | 34.6623 | 35.1976 | 22.3369 |
| ENSMUSG00000036606 | 16_Plxnb2  | 14586.4 | 0.70815  | 0.223357 | 0.613683 | 4666.89 | 26352.8 | 23268.6 | 11676.2 | 8745.31 | 12808.5 |
| ENSMUSG00000036611 | 5_Eepd1    | 69.0908 | -1.04078 | 0.006451 | 0.07412  | 53.5959 | 38.5391 | 43.4348 | 114.716 | 77.2629 | 86.9965 |
| ENSMUSG00000036613 | 7_Tssc1    | 349.595 | 0.24287  | 0.601157 | 0.870033 | 165.844 | 519.144 | 451.929 | 340.846 | 272.996 | 346.81  |
| ENSMUSG00000036615 | 5_Rfxap    | 227.066 | 0.06996  | 0.792462 | 0.938025 | 244.721 | 214.232 | 238.891 | 240.985 | 215.478 | 208.086 |
| ENSMUSG00000036617 | 16_Etl4    | 3322.11 | 0.22146  | 0.341994 | 0.719948 | 3998.46 | 3337.03 | 3394.12 | 2926.49 | 3172.93 | 3103.66 |
| ENSMUSG00000036620 | 14_Mgat4   | 652.632 | -0.24809 | 0.581445 | 0.860015 | 268.991 | 742.444 | 778.724 | 813.738 | 633.556 | 678.337 |
| ENSMUSG00000036622 | 15_Atp13i  | 538.008 | 0.3848   | 0.573084 | 0.855421 | 103.147 | 777.583 | 947.292 | 578.53  | 303.042 | 518.452 |
| ENSMUSG00000036632 | 9_Alg5     | 553.003 | -0.19564 | 0.447192 | 0.79068  | 543.038 | 515.744 | 488.124 | 546.344 | 681.631 | 543.14  |
| ENSMUSG00000036634 | 15_Mag     | 12.2482 | -0.74434 | 0.251127 | 0.642467 | 7.07871 | 9.06802 | 11.3758 | 18.9817 | 12.8772 | 14.1075 |
| ENSMUSG00000036636 | 9_Clcu7    | 960.625 | 0.21076  | 0.649364 | 0.891567 | 432.813 | 1386.27 | 1273.05 | 956.514 | 808.685 | 906.409 |
| ENSMUSG00000036639 | 12_Nudt1   | 241.85  | -0.2169  | 0.620309 | 0.877737 | 110.226 | 312.847 | 248.199 | 276.473 | 231.789 | 271.57  |
| ENSMUSG00000036641 | 8_Ccdc14   | 75.7776 | -1.18911 | 0.007275 | 0.080244 | 65.7309 | 28.3376 | 44.4689 | 106.463 | 126.196 | 83.4696 |
| ENSMUSG00000036644 | 15_Tbc1d   | 1128.18 | -0.13734 | 0.768153 | 0.931118 | 453.037 | 1335.27 | 1435.42 | 1347.7  | 1026.74 | 1170.93 |
| ENSMUSG00000036646 | 13_Man1t   | 2475.66 | 0.07984  | 0.802246 | 0.942368 | 1725.18 | 2999.25 | 2908.06 | 2362.81 | 2342.78 | 2515.84 |
| ENSMUSG00000036655 | 7_Colec1   | 5.29361 | 0.50577  | 0.681876 | 0.902515 | 0       | 12.4685 | 6.20497 | 4.95175 | 3.43391 | 4.70251 |
| ENSMUSG00000036661 | 13_Dennd   | 151.875 | -0.44772 | 0.388785 | 0.752716 | 48.5397 | 165.491 | 171.671 | 220.353 | 147.658 | 157.534 |
| ENSMUSG00000036667 | 14_Tcaf1   | 849.37  | -0.62758 | 0.096957 | 0.422223 | 982.929 | 445.467 | 573.96  | 1094.34 | 1082.54 | 916.99  |
| ENSMUSG00000036672 | 4_Cenpt    | 219.264 | 0.24577  | 0.65521  | 0.893521 | 73.8208 | 351.386 | 288.531 | 200.546 | 180.28  | 221.018 |
| ENSMUSG00000036676 | 14_Tmtc3   | 1992.01 | 0.80359  | 0.103342 | 0.436784 | 4491.95 | 1602.77 | 1503.67 | 1104.24 | 1683.47 | 1565.94 |
| ENSMUSG00000036678 | 7_Aaas     | 316.551 | 0.40732  | 0.39178  | 0.754323 | 147.642 | 488.54  | 446.758 | 274.822 | 265.269 | 276.273 |
| ENSMUSG00000036686 | 16_Cc2d1   | 688.132 | 0.63934  | 0.332544 | 0.711855 | 148.653 | 1200.38 | 1165.5  | 636.3   | 407.777 | 570.179 |
| ENSMUSG00000036687 | 13_Tmem    | 1290.84 | 0.51115  | 0.341411 | 0.719594 | 473.262 | 1988.16 | 2090.04 | 1121.57 | 902.259 | 1169.75 |
| ENSMUSG00000036693 | 12_Nop14   | 628.183 | 0.26301  | 0.332771 | 0.711855 | 755.4   | 710.706 | 589.472 | 487.748 | 612.094 | 613.678 |
| ENSMUSG00000036698 | 10_Ago2    | 2553.25 | 0.4016   | 0.375791 | 0.368706 | 3036.77 | 2838.29 | 2843.94 | 2042.6  | 2377.12 | 2180.79 |
| ENSMUSG00000036699 | 12_Zcchc   | 15.0632 | -1.36428 | 0.027368 | 0.199732 | 9.1012  | 9.06802 | 7.23913 | 23.9335 | 25.7543 | 15.2832 |
| ENSMUSG00000036707 | 16_Cab39   | 8459.78 | 0.65151  | 0.071965 | 0.357998 | 15109   | 8328.98 | 7576.27 | 5861.23 | 7079.86 | 6803.36 |
| ENSMUSG00000036712 | 14_Cyld    | 2770.6  | 0.59161  | 0.128685 | 0.487117 | 5063.3  | 2562.85 | 2366.16 | 1880.02 | 2455.24 | 2296    |
| ENSMUSG00000036718 | 17_Micall2 | 205.132 | 0.05535  | 0.920567 | 0.977466 | 66.7421 | 245.97  | 314.385 | 186.516 | 169.12  | 248.057 |
| ENSMUSG00000036721 | 13_Zscan   | 175.645 | -0.09911 | 0.789215 | 0.937308 | 234.609 | 142.821 | 131.339 | 156.806 | 215.478 | 172.817 |
| ENSMUSG00000036731 | 7_Cysrt1   | 814.541 | 0.28561  | 0.679235 | 0.902005 | 133.484 | 1298.99 | 1252.37 | 937.532 | 579.472 | 685.391 |
| ENSMUSG00000036733 | 15_Rbm4i   | 426.429 | 0.48923  | 0.479486 | 0.809556 | 74.8321 | 773.049 | 646.351 | 426.676 | 275.571 | 362.093 |
| ENSMUSG00000036737 | 12_Oxsr1   | 1967.27 | 0.25641  | 0.364538 | 0.737928 | 2551.37 | 2009.7  | 1863.56 | 1496.26 | 1999.39 | 1883.36 |
| ENSMUSG00000036743 | 3_Psma8    | 3.72475 | -0.19685 | 0.857023 | 0.959059 | 6.06747 | 2.26701 | 2.06832 | 4.12646 | 4.29238 | 3.52688 |
| ENSMUSG00000036744 | 11_Olfir70 | 0.61411 | -2.65929 | 0.354083 | NA       | 0       | 0       | 0       | 1.65058 | 0.85848 | 1.17563 |
| ENSMUSG00000036745 | 15_Ttlr7   | 253.969 | 0.07549  | 0.881979 | 0.967808 | 472.251 | 145.088 | 164.432 | 250.064 | 272.137 | 219.842 |
| ENSMUSG00000036748 | 15_Cuedc   | 543.471 | -0.51775 | 0.356226 | 0.731176 | 131.462 | 550.882 | 658.761 | 788.979 | 528.822 | 601.921 |
| ENSMUSG00000036751 | 6_Cox6b1   | 3118.58 | -0.15734 | 0.529427 | 0.836104 | 2464.4  | 3210.08 | 3171.77 | 3436.52 | 3155.76 | 3272.95 |
| ENSMUSG00000036752 | 4_Tubb4b   | 10134.3 | 0.34459  | 0.494944 | 0.817604 | 4030.82 | 15711.5 | 14274.5 | 9029.52 | 7724.58 | 10035.2 |
| ENSMUSG00000036764 | 11_Dnajc   | 66.1483 | -1.42406 | 0.001032 | 0.020024 | 44.4948 | 24.9371 | 38.264  | 127.92  | 78.9799 | 82.2939 |
| ENSMUSG00000036766 | 12_Dner    | 59.6024 | -0.77899 | 0.083881 | 0.391054 | 50.5622 | 30.6046 | 50.6739 | 96.5592 | 79.8384 | 49.3764 |
| ENSMUSG00000036768 | 5_Kif15    | 484.886 | 0.69236  | 0.093573 | 0.416339 | 883.828 | 518.011 | 395.05  | 269.871 | 436.965 | 405.592 |
| ENSMUSG00000036769 | 14_Wdr44   | 1017.75 | 0.96851  | 0.035633 | 0.235627 | 2264.18 | 947.608 | 829.398 | 554.596 | 833.581 | 677.162 |
| ENSMUSG00000036770 | 11_49334   | 2.55442 | 4.8777   | 0.011823 | 0.113752 | 2.02249 | 10.2015 | 3.10248 | 0       | 0       | 0       |
| ENSMUSG00000036775 | 12_Dcrr2   | 421.492 | -0.133   | 0.592297 | 0.865791 | 373.149 | 405.794 | 427.109 | 404.393 | 454.134 | 464.373 |
| ENSMUSG00000036777 | 7_Anln     | 1506.12 | 0.63991  | 0.058657 | 0.317744 | 2271.25 | 1805.67 | 1427.14 | 866.557 | 1419.92 | 1246.17 |
| ENSMUSG00000036779 | 12_Papd5   | 1262.7  | 0.4396   | 0.211444 | 0.602834 | 2077.1  | 1087.03 | 1196.52 | 990.351 | 1171.82 | 1053.36 |
| ENSMUSG00000036781 | 15_Rps27   | 1789.81 | 0.14044  | 0.692549 | 0.905638 | 2696.99 | 1493.96 | 1439.55 | 1587.04 | 1921.27 | 1600.03 |
| ENSMUSG00000036782 | 13_Klhl13  | 230.187 | -0.91431 | 0.049377 | 0.287305 | 266.969 | 90.6802 | 120.997 | 312.786 | 332.231 | 257.462 |
| ENSMUSG00000036790 | 5_Slitrk2  | 59.5836 | -1.18454 | 0.06938  | 0.350602 | 72.8096 | 13.602  | 22.7516 | 100.686 | 93.574  | 54.0789 |
| ENSMUSG00000036792 | 12_Mbd5    | 692.367 | 0.19609  | 0.541362 | 0.84046  | 997.087 | 596.223 | 624.634 | 626.397 | 686.782 | 623.083 |
| ENSMUSG00000036800 | 7_Fam13f   | 5.33359 | -3.22925 | 0.020384 | 0.164765 | 3.03373 | 0       | 0       | 15.6806 | 8.58477 | 4.70251 |
| ENSMUSG00000036805 | 13_Noxa1   | 0.14308 | -0.79206 | 0.84609  | NA       | 0       | 0       | 0       | 0       | 0.85848 | 0       |
| ENSMUSG00000036810 | 16_Cnep1   | 874.126 | 0.32822  | 0.440475 | 0.7861   | 1576.53 | 677.835 | 664.966 | 727.083 | 876.505 | 721.835 |
| ENSMUSG00000036813 | 11_Entpd1  | 0       | NA       | NA       | NA       | 0       | 0       | 0       | 0       | 0       | 0       |
| ENSMUSG00000036814 | 12_Slc6a2  | 460.234 | 0.1288   | 0.639046 | 0.886641 | 531.915 | 489.673 | 420.904 | 508.38  | 393.182 | 417.348 |
| ENSMUSG00000036815 | 16_Dpp1c   | 2.86972 | -1.62144 | 0.267451 | 0.556594 | 2.02249 | 2.26701 | 0       | 6.60234 | 5.15086 | 1.17563 |
| ENSMUSG00000036817 | 14_Sun1    | 3459.51 | 0.35685  | 0.21805  | 0.608715 | 2941.71 | 4387.79 | 4325.9  | 2903.38 | 2818.38 | 3379.93 |
| ENSMUSG00000036819 | 14_Jmj4d   | 521.24  | 0.31718  | 0.198166 | 0.590345 | 551.128 | 622.293 | 561.55  | 425.026 | 503.068 | 464.373 |
| ENSMUSG00000036820 | 11_Amdhc   | 121.177 | -0.27018 | 0.750034 | 0.925182 | 6.06747 | 140.554 | 183.047 | 168.36  | 105.593 | 123.441 |
| ENSMUSG00000036822 | 6_Topors   | 1307.66 | 0.23046  | 0.495054 | 0.817604 | 1959.79 | 1066.63 | 1208.93 | 1086.91 | 1273.98 | 1249.69 |
| ENSMUSG00000036825 | 12_Ssx2ip  | 1105.77 | 0.37371  | 0.231067 | 0.622473 | 1641.25 | 1056.42 | 1046.57 | 850.051 | 1019.87 | 1020.44 |

|                    |            |         |          |          |          |         |         |         |         |         |         |
|--------------------|------------|---------|----------|----------|----------|---------|---------|---------|---------|---------|---------|
| ENSMUSG00000036826 | 14_Igflr1  | 3.58136 | 0.43991  | 0.861169 | 0.960565 | 0       | 0       | 12.4099 | 9.07822 | 0       | 0       |
| ENSMUSG00000036832 | 5_Lpar3    | 9.93227 | 2.06437  | 0.037446 | 0.242273 | 23.2586 | 10.2015 | 14.4783 | 5.77705 | 0       | 5.87814 |
| ENSMUSG00000036833 | 16_Pnpla1  | 276.89  | 0.27568  | 0.518987 | 0.831665 | 153.709 | 393.326 | 362.991 | 287.202 | 226.638 | 237.477 |
| ENSMUSG00000036834 | 16_Plch1   | 219.787 | -1.45146 | 0.000748 | 0.015826 | 172.923 | 72.5442 | 107.553 | 373.857 | 361.419 | 230.423 |
| ENSMUSG00000036835 | 6_Psenen   | 1615.64 | 0.06634  | 0.867837 | 0.962942 | 884.839 | 1994.97 | 2078.66 | 1746.32 | 1389.02 | 1600.03 |
| ENSMUSG00000036840 | 4_Siah1a   | 908.088 | 0.44226  | 0.213579 | 0.604733 | 1517.88 | 802.52  | 818.022 | 774.124 | 758.894 | 777.09  |
| ENSMUSG00000036845 | 12_Lin37   | 184.139 | 0.31035  | 0.563287 | 0.85076  | 70.7871 | 259.572 | 281.292 | 190.643 | 126.196 | 176.344 |
| ENSMUSG00000036850 | 4_Mrpl41   | 449.713 | -0.19619 | 0.438582 | 0.785475 | 369.104 | 438.666 | 449.86  | 505.904 | 451.559 | 483.183 |
| ENSMUSG00000036853 | 5_Mcoln3   | 68.0441 | -1.74427 | 0.000129 | 0.004059 | 43.4835 | 19.2695 | 31.0248 | 121.318 | 116.753 | 76.4158 |
| ENSMUSG00000036854 | 14_Hspb6   | 345.219 | -0.44427 | 0.35457  | 0.729885 | 403.486 | 155.29  | 318.522 | 558.723 | 243.807 | 391.484 |
| ENSMUSG00000036855 | 3_Gjd4     | 0.41818 | -2.121   | 0.592183 | NA       | 0       | 0       | 0       | 1.65058 | 0.85848 | 0       |
| ENSMUSG00000036856 | 4_Wnt4     | 2706.55 | 0.53847  | 0.324033 | 0.70455  | 981.918 | 4595.22 | 4040.47 | 2391.7  | 1743.57 | 2486.45 |
| ENSMUSG00000036858 | 8_Ptcr4    | 1.20272 | 2.65162  | 0.204797 | NA       | 2.02249 | 2.26701 | 2.06832 | 0       | 0.85848 | 0       |
| ENSMUSG00000036860 | 14_Mrpl5t  | 178.182 | -0.04636 | 0.898356 | 0.97174  | 120.338 | 205.164 | 200.627 | 214.576 | 148.517 | 179.871 |
| ENSMUSG00000036862 | 14_Dchs1   | 323.211 | -1.07683 | 0.037597 | 0.242849 | 76.8546 | 223.3   | 323.693 | 522.41  | 421.512 | 371.498 |
| ENSMUSG00000036863 | 11_Syde2   | 206.929 | -0.53839 | 0.152209 | 0.526432 | 240.676 | 113.35  | 152.022 | 257.491 | 233.506 | 244.531 |
| ENSMUSG00000036864 | 14_Proser  | 150.409 | 0.33143  | 0.519654 | 0.831665 | 61.6859 | 219.9   | 221.311 | 139.474 | 120.187 | 139.9   |
| ENSMUSG00000036867 | 7_Smad6    | 131.931 | 0.06194  | 0.867798 | 0.962942 | 103.147 | 145.088 | 156.158 | 162.583 | 95.2909 | 129.319 |
| ENSMUSG00000036872 | 16_Abcc1   | 19.1578 | -0.23978 | 0.673545 | 0.900436 | 15.1687 | 13.602  | 23.7857 | 23.1082 | 14.5941 | 24.6882 |
| ENSMUSG00000036873 | 13_24100   | 376.532 | 0.05052  | 0.872586 | 0.963879 | 497.532 | 342.318 | 309.214 | 335.894 | 376.871 | 397.362 |
| ENSMUSG00000036875 | 15_Dna2    | 125.835 | 1.07974  | 0.000675 | 0.014713 | 180.001 | 176.826 | 155.124 | 67.674  | 78.9799 | 96.4015 |
| ENSMUSG00000036879 | 15_Phkb    | 2580.59 | 0.12222  | 0.759586 | 0.927999 | 4180.48 | 1762.6  | 2126.24 | 2262.95 | 2670.72 | 2480.57 |
| ENSMUSG00000036880 | 9_Acaa2    | 1906.46 | -0.16519 | 0.661921 | 0.895681 | 1094.17 | 1891.82 | 2406.49 | 2388.4  | 1716.95 | 1940.96 |
| ENSMUSG00000036882 | 6_Arhgap1  | 59.2569 | 0.09896  | 0.879211 | 0.966582 | 15.1687 | 61.2092 | 107.553 | 66.0234 | 51.5086 | 54.0789 |
| ENSMUSG00000036885 | 14_Arhgel  | 181.457 | 0.24806  | 0.585305 | 0.861846 | 315.508 | 124.685 | 150.988 | 177.438 | 193.157 | 126.968 |
| ENSMUSG00000036887 | 5_C1qa     | 337.653 | 0.81098  | 0.144447 | 0.514298 | 141.574 | 625.694 | 523.286 | 321.039 | 176.846 | 237.477 |
| ENSMUSG00000036890 | 13_Gtdc1   | 399.917 | 0.08318  | 0.826926 | 0.950636 | 614.837 | 317.381 | 301.975 | 368.906 | 415.503 | 380.903 |
| ENSMUSG00000036893 | 16_Ehmt1   | 1203.82 | 0.34037  | 0.247526 | 0.638878 | 1017.31 | 1525.69 | 1492.3  | 992.001 | 1003.56 | 1192.09 |
| ENSMUSG00000036894 | 3_Rap2b    | 1304.96 | 0.61397  | 0.089881 | 0.408696 | 2300.58 | 1301.26 | 1133.44 | 977.146 | 1008.71 | 1108.62 |
| ENSMUSG00000036896 | 5_C1qc     | 317.828 | 0.9004   | 0.079122 | 0.377705 | 187.08  | 590.555 | 464.339 | 318.563 | 144.224 | 202.208 |
| ENSMUSG00000036898 | 16_Zfp151  | 366.521 | -0.02676 | 0.952718 | 0.988194 | 610.792 | 231.235 | 247.165 | 349.099 | 394.041 | 366.796 |
| ENSMUSG00000036899 | 10_Trpv5   | 2.43524 | -1.27003 | 0.376327 | 0.745684 | 2.02249 | 1.1335  | 1.03416 | 1.65058 | 1.71695 | 7.05377 |
| ENSMUSG00000036902 | 9_Neto2    | 133.499 | 0.11918  | 0.811348 | 0.946092 | 231.575 | 121.285 | 64.118  | 124.619 | 134.781 | 124.617 |
| ENSMUSG00000036904 | 5_Fzd8     | 124.584 | -0.26608 | 0.41163  | 0.767412 | 107.192 | 116.751 | 115.826 | 168.36  | 125.338 | 114.036 |
| ENSMUSG00000036905 | 8_C1qb     | 356.985 | 0.92485  | 0.102568 | 0.436076 | 143.597 | 684.636 | 574.994 | 327.641 | 211.185 | 199.857 |
| ENSMUSG00000036907 | 9_C1ql2    | 2.94465 | -1.25527 | 0.324442 | 0.705087 | 1.01124 | 1.1335  | 3.10248 | 5.77705 | 4.29238 | 2.35126 |
| ENSMUSG00000036908 | 16_Unc93   | 1088.82 | 0.8566   | 0.108795 | 0.448862 | 452.026 | 2013.1  | 1743.6  | 861.605 | 636.131 | 826.466 |
| ENSMUSG00000036912 | 17_Piwil4  | 17.6245 | 2.31701  | 0.000161 | 0.00489  | 32.3598 | 34.0051 | 21.7174 | 5.77705 | 6.00934 | 5.87814 |
| ENSMUSG00000036913 | 14_Trim6i  | 15.4549 | -2.31251 | 0.008427 | 0.088932 | 8.08995 | 2.26701 | 5.17081 | 51.1681 | 15.4526 | 10.5807 |
| ENSMUSG00000036915 | 16_Kirrel2 | 8.75699 | -2.03076 | 0.029456 | 0.20922  | 5.05622 | 0       | 5.17081 | 16.5058 | 12.8772 | 12.9319 |
| ENSMUSG00000036916 | 13_Zfp281  | 459.715 | 0.40918  | 0.359992 | 0.733629 | 874.726 | 346.852 | 351.615 | 348.273 | 420.654 | 416.172 |
| ENSMUSG00000036918 | 15_Ttc7    | 1935.1  | 0.60322  | 0.262782 | 0.652179 | 751.355 | 3077.46 | 3172.81 | 1780.98 | 1159.8  | 1668.22 |
| ENSMUSG00000036923 | 12_Stox1   | 14.8426 | -1.89166 | 0.003672 | 0.050278 | 9.1012  | 4.53401 | 5.17081 | 19.807  | 25.7543 | 24.6882 |
| ENSMUSG00000036925 | 7_Muc12    | 1.33754 | -1.5324  | 0.522881 | NA       | 2.02249 | 0       | 0       | 2.47588 | 0       | 3.52688 |
| ENSMUSG00000036928 | 14_Stag3   | 412.536 | 0.5261   | 0.109809 | 0.450058 | 482.364 | 469.27  | 508.807 | 230.257 | 409.494 | 375.025 |
| ENSMUSG00000036931 | 14_Nfkbid  | 15.367  | 1.08968  | 0.189654 | 0.578028 | 6.06747 | 34.0051 | 22.7516 | 15.6806 | 4.29238 | 9.40502 |
| ENSMUSG00000036932 | 14_Aifm1   | 1010.41 | -0.0382  | 0.888026 | 0.969752 | 1155.85 | 960.077 | 874.901 | 878.111 | 1114.3  | 1079.23 |
| ENSMUSG00000036934 | 8_492152   | 324.773 | 0.30686  | 0.371071 | 0.742177 | 497.532 | 278.842 | 300.941 | 274.822 | 297.892 | 298.609 |
| ENSMUSG00000036940 | 15_Kdm1i   | 1886.93 | 0.37006  | 0.134626 | 0.498606 | 2146.87 | 2274.94 | 1960.77 | 1422.8  | 1763.31 | 1752.86 |
| ENSMUSG00000036941 | 2_Elac1    | 562.239 | -0.00377 | 0.989638 | 0.997255 | 698.77  | 471.537 | 513.978 | 516.633 | 603.509 | 569.004 |
| ENSMUSG00000036943 | 8_Rab8b    | 1071.02 | 0.45727  | 0.26699  | 0.654888 | 1930.47 | 1031.49 | 755.972 | 812.913 | 992.399 | 902.882 |
| ENSMUSG00000036944 | 5_Tmem7    | 43.4212 | 1.09624  | 0.06627  | 0.34125  | 70.7871 | 80.4787 | 25.854  | 16.5058 | 25.7543 | 41.147  |
| ENSMUSG00000036948 | 17_BC037   | 406.608 | 0.28801  | 0.546075 | 0.842635 | 180.001 | 589.422 | 571.891 | 387.062 | 346.825 | 364.445 |
| ENSMUSG00000036949 | 16_Slc39a1 | 292.995 | -1.66743 | 0.000997 | 0.019524 | 234.609 | 71.4107 | 114.792 | 505.079 | 541.699 | 290.38  |
| ENSMUSG00000036951 | 2_C13007   | 1.00787 | -0.92447 | 0.683225 | NA       | 1.01124 | 0       | 1.03416 | 1.65058 | 0       | 2.35126 |
| ENSMUSG00000036955 | 15_Kif1bp  | 792.576 | -0.0971  | 0.68165  | 0.902515 | 824.164 | 693.704 | 779.758 | 795.582 | 849.892 | 812.359 |
| ENSMUSG00000036957 | 7_Lrn3     | 24.9247 | -0.30978 | 0.580236 | 0.859399 | 17.1912 | 27.2041 | 22.7516 | 38.7887 | 28.3297 | 15.2832 |
| ENSMUSG00000036959 | 15_Bcor1i  | 351.175 | 0.00375  | 0.993792 | 0.998043 | 144.608 | 452.268 | 458.134 | 404.393 | 286.731 | 360.918 |
| ENSMUSG00000036960 | 10_Clca2   | 1479.82 | 2.07092  | 5.60E-09 | 8.30E-07 | 2367.32 | 2964.11 | 1839.77 | 397.791 | 597.5   | 712.43  |
| ENSMUSG00000036962 | 12_Cfap2i  | 1.83317 | -0.07861 | 0.962011 | 0.990106 | 1.01124 | 2.26701 | 2.06832 | 3.30117 | 0       | 2.35126 |
| ENSMUSG00000036964 | 14_Trim1i  | 14.0614 | 0.26373  | 0.774719 | 0.933172 | 9.1012  | 23.8036 | 13.4441 | 23.1082 | 13.7356 | 1.17563 |
| ENSMUSG00000036966 | 15_Spyrd1  | 1203.93 | 0.03124  | 0.953098 | 0.988326 | 394.385 | 1640.18 | 1616.39 | 1289.93 | 968.362 | 1314.35 |
| ENSMUSG00000036968 | 15_Cnpy4   | 551.19  | -0.51293 | 0.027379 | 0.199732 | 436.858 | 452.268 | 473.646 | 642.903 | 671.329 | 630.137 |
| ENSMUSG00000036972 | 14_Zic4    | 218.518 | -1.25543 | 0.008995 | 0.092943 | 214.384 | 69.1437 | 103.416 | 341.671 | 348.542 | 233.95  |
| ENSMUSG00000036975 | 5_Tmem1    | 156.162 | -0.39811 | 0.214296 | 0.605026 | 101.124 | 157.557 | 145.817 | 177.438 | 184.573 | 170.466 |
| ENSMUSG00000036977 | 7_Anapc1   | 344.616 | 0.2164   | 0.661819 | 0.895681 | 646.185 | 243.703 | 221.311 | 266.569 | 407.777 | 282.151 |
| ENSMUSG00000036980 | 13_Taf6    | 697.799 | 0.03153  | 0.941737 | 0.986006 | 334.722 | 918.137 | 863.525 | 718.004 | 635.273 | 717.133 |
| ENSMUSG00000036983 | 6_Tfb1m    | 246.666 | -0.11743 | 0.735273 | 0.920512 | 318.542 | 179.093 | 212.003 | 222.004 | 285.014 | 263.341 |
| ENSMUSG00000036985 | 12_Zdhhc   | 3239.18 | 0.47614  | 0.048272 | 0.282739 | 3500.93 | 4125.95 | 3679.55 | 2412.33 | 2796.06 | 2920.26 |
| ENSMUSG00000036986 | 16_Pml     | 1481.85 | 1.54695  | 0.000558 | 0.012642 | 1001.13 | 3213.48 | 2409.6  | 731.209 | 769.195 | 766.509 |
| ENSMUSG00000036989 | 15_Trim3   | 300.147 | -0.92887 | 0.041588 | 0.258381 | 100.113 | 225.567 | 294.736 | 491.049 | 361.419 | 328     |
| ENSMUSG00000036990 | 13_Otud4   | 3751.39 | 0.61387  | 0.135371 | 0.499408 | 7127.25 | 3390.31 | 3095.25 | 2448.64 | 3364.37 | 3082.5  |
| ENSMUSG00000036992 | 10_Nxt1    | 289.823 | -0.01526 | 0.963666 | 0.990106 | 206.294 | 363.854 | 294.736 | 253.365 | 305.618 | 315.068 |
| ENSMUSG00000036995 | 7_Asap3    | 350.768 | 0.97529  | 0.03319  | 0.225223 | 214.384 | 646.097 | 534.662 | 270.696 | 196.591 | 242.179 |
| ENSMUSG00000037001 | 10_Zfp39   | 178.892 | 0.11069  | 0.709223 | 0.909909 | 223.485 | 172.292 | 161.329 | 164.233 | 176.846 | 175.169 |

|                    |           |         |          |          |          |         |         |         |         |         |         |
|--------------------|-----------|---------|----------|----------|----------|---------|---------|---------|---------|---------|---------|
| ENSMUSG00000037003 | 15_Tns2   | 1036.85 | -0.2113  | 0.722361 | 0.914131 | 254.834 | 1045.09 | 1583.3  | 1367.51 | 824.138 | 1146.24 |
| ENSMUSG00000037005 | 16_Xpnp   | 116.624 | -0.25794 | 0.413458 | 0.768578 | 88.9895 | 106.549 | 123.065 | 131.221 | 115.894 | 134.022 |
| ENSMUSG00000037007 | 17_Zfp11  | 561.612 | 0.2233   | 0.535801 | 0.83864  | 854.501 | 476.071 | 483.988 | 427.501 | 546.85  | 580.76  |
| ENSMUSG00000037010 | 7_Apln    | 49.6469 | -0.26081 | 0.523118 | 0.832475 | 53.5959 | 40.8061 | 41.3665 | 66.0234 | 54.9425 | 41.147  |
| ENSMUSG00000037012 | 18_Hk1    | 1462.89 | -0.016   | 0.971852 | 0.992434 | 641.129 | 1892.95 | 1830.47 | 1698.45 | 1321.2  | 1393.12 |
| ENSMUSG00000037013 | 15_Ss18   | 1886.69 | 0.24316  | 0.388068 | 0.752356 | 2550.36 | 1768.26 | 1817.02 | 1576.31 | 1816.54 | 1791.66 |
| ENSMUSG00000037014 | 4_Sstr4   | 27.5502 | -2.32691 | 0.001666 | 0.028406 | 2.02249 | 7.93452 | 17.5807 | 66.8487 | 40.3484 | 30.5663 |
| ENSMUSG00000037016 | 11_Frem2  | 1394.88 | 0.40466  | 0.230024 | 0.621014 | 1335.85 | 1531.36 | 1899.75 | 878.936 | 1159.8  | 1563.59 |
| ENSMUSG00000037017 | 15_Zscan  | 604.829 | -0.22037 | 0.36991  | 0.741274 | 546.072 | 530.479 | 599.814 | 632.999 | 717.687 | 601.921 |
| ENSMUSG00000037020 | 16_Wdr6   | 72.6702 | 0.847    | 0.174219 | 0.557874 | 23.2586 | 124.685 | 132.373 | 53.644  | 51.5086 | 50.552  |
| ENSMUSG00000037022 | 2_Mmaa    | 441.089 | -0.13583 | 0.611184 | 0.874284 | 372.138 | 404.661 | 483.988 | 418.423 | 474.738 | 492.588 |
| ENSMUSG00000037025 | 11_Foxa2  | 0.37783 | 2.11394  | 0.599927 | NA       | 0       | 2.26701 | 0       | 0       | 0       | 0       |
| ENSMUSG00000037029 | 7_Zfp146  | 710.227 | -0.21948 | 0.368891 | 0.740777 | 670.455 | 706.172 | 592.575 | 748.54  | 824.138 | 719.484 |
| ENSMUSG00000037031 | 9_Tspan1  | 437.444 | -0.22425 | 0.435245 | 0.783215 | 327.643 | 420.53  | 462.27  | 496.001 | 410.352 | 507.871 |
| ENSMUSG00000037032 | 15_Apbb1  | 256.637 | -1.32696 | 0.015805 | 0.137426 | 56.6297 | 150.756 | 231.652 | 535.615 | 293.599 | 271.57  |
| ENSMUSG00000037033 | 9_Clca3b  | 393.374 | -0.37164 | 0.188314 | 0.576158 | 317.531 | 375.189 | 336.103 | 359.002 | 492.766 | 479.656 |
| ENSMUSG00000037034 | 15_Pax1   | 0       | NA       | NA       | NA       | 0       | 0       | 0       | 0       | 0       | 0       |
| ENSMUSG00000037035 | 5_Inhbb   | 112.289 | 0.41589  | 0.24397  | 0.635775 | 122.361 | 138.287 | 124.099 | 105.637 | 66.9612 | 116.387 |
| ENSMUSG00000037049 | 8_Smpd1   | 1234.62 | -0.72163 | 0.107915 | 0.446545 | 440.903 | 1084.76 | 1270.98 | 1924.58 | 1370.99 | 1315.53 |
| ENSMUSG00000037053 | 6_Azgp1   | 0       | NA       | NA       | NA       | 0       | 0       | 0       | 0       | 0       | 0       |
| ENSMUSG00000037058 | 14_Paip2  | 4095.05 | 0.39999  | 0.361336 | 0.734288 | 7749.17 | 3261.09 | 2967.01 | 3269.81 | 3964.45 | 3358.77 |
| ENSMUSG00000037060 | 2_Prkcdb  | 973.861 | 0.11327  | 0.763953 | 0.929699 | 595.623 | 1240.05 | 1200.66 | 1048.95 | 791.516 | 966.366 |
| ENSMUSG00000037062 | 13_Sh3glt | 6542.8  | 0.58159  | 0.178109 | 0.563206 | 12834.7 | 5531.49 | 5165.64 | 4393.86 | 5825.62 | 5505.47 |
| ENSMUSG00000037070 | 8_Rbm1    | 1440.12 | 0.20636  | 0.375823 | 0.745495 | 1464.28 | 1660.58 | 1503.67 | 1287.46 | 1273.98 | 1450.72 |
| ENSMUSG00000037071 | 2_Scd1    | 2253.02 | 0.03855  | 0.868991 | 0.962942 | 2530.13 | 2045.97 | 2273.09 | 2192.8  | 2261.23 | 2214.88 |
| ENSMUSG00000037072 | 15_Sep15  | 5399.83 | 0.10055  | 0.818173 | 0.948003 | 9288.28 | 3793.83 | 3681.62 | 4971.56 | 5888.29 | 4775.4  |
| ENSMUSG00000037075 | 6_Rnf139  | 1824.2  | 0.66136  | 0.150631 | 0.524129 | 3831.6  | 1508.69 | 1365.09 | 1280.03 | 1611.36 | 1348.45 |
| ENSMUSG00000037085 | 7_Trmt12  | 163.046 | -0.03616 | 0.898536 | 0.971789 | 148.653 | 159.824 | 174.773 | 163.408 | 181.139 | 150.48  |
| ENSMUSG00000037086 | 3_Prr32   | 24.2685 | -0.82989 | 0.12866  | 0.487117 | 16.1799 | 10.2015 | 25.854  | 28.0599 | 30.0467 | 35.2688 |
| ENSMUSG00000037089 | 9_Slc35b  | 692.873 | -0.29415 | 0.543866 | 0.841539 | 251.8   | 795.719 | 820.09  | 917.725 | 620.679 | 751.226 |
| ENSMUSG00000037095 | 7_Lrg1    | 28.0406 | 1.00473  | 0.105133 | 0.440631 | 16.1799 | 49.8741 | 46.5373 | 26.4094 | 16.3111 | 12.9319 |
| ENSMUSG00000037098 | 17_Rab11  | 510.172 | -0.16625 | 0.726124 | 0.91596  | 203.26  | 571.285 | 668.068 | 646.204 | 467.87  | 504.344 |
| ENSMUSG00000037101 | 16_Ttc29  | 0.33708 | 1.97061  | 0.625968 | NA       | 2.02249 | 0       | 0       | 0       | 0       | 0       |
| ENSMUSG00000037103 | 7_Dcaf15  | 329.247 | 0.65807  | 0.32525  | 0.705958 | 67.7534 | 552.016 | 589.472 | 289.678 | 212.044 | 264.516 |
| ENSMUSG00000037104 | 8_Socs5   | 757.526 | 0.22675  | 0.351826 | 0.728508 | 908.097 | 787.785 | 754.938 | 668.487 | 745.158 | 680.689 |
| ENSMUSG00000037106 | 8_Fer1l6  | 5.62782 | -0.34267 | 0.699827 | 0.905844 | 5.05622 | 5.66751 | 4.13665 | 4.12646 | 7.72629 | 7.05377 |
| ENSMUSG00000037108 | 13_Zcwpv  | 456.299 | 0.00778  | 0.97946  | 0.993796 | 480.341 | 408.061 | 483.988 | 350.749 | 550.284 | 464.373 |
| ENSMUSG00000037110 | 19_Ralgap | 257.043 | -0.15511 | 0.57636  | 0.856895 | 283.148 | 207.431 | 238.891 | 264.919 | 270.42  | 277.448 |
| ENSMUSG00000037111 | 9_Setd7   | 6257.87 | 0.05     | 0.874319 | 0.964209 | 8405.46 | 4706.3  | 5986.76 | 5784.47 | 6086.6  | 6577.64 |
| ENSMUSG00000037112 | 16_Sik2   | 767.347 | 0.36644  | 0.137508 | 0.503084 | 788.771 | 829.724 | 974.18  | 629.698 | 692.791 | 688.918 |
| ENSMUSG00000037119 | 3_D15Ert  | 4072.99 | 0.27283  | 0.461871 | 0.799907 | 6566.01 | 3409.58 | 3395.15 | 3184.8  | 4185.08 | 3697.35 |
| ENSMUSG00000037124 | 6_Trim58  | 2.13583 | 4.62324  | 0.015568 | 0.136046 | 0.44498 | 5.66751 | 3.10248 | 0       | 0       | 0       |
| ENSMUSG00000037126 | 15_Psd    | 45.4424 | -0.95695 | 0.243279 | 0.634745 | 7.07871 | 47.6071 | 38.264  | 123.794 | 30.0467 | 25.8638 |
| ENSMUSG00000037129 | 7_Tmprss  | 1589.55 | 0.49978  | 0.18182  | 0.567796 | 1095.18 | 2333.88 | 2157.26 | 1255.27 | 1183.84 | 1511.86 |
| ENSMUSG00000037134 | 16_Prmt1  | 503.957 | -0.05352 | 0.873713 | 0.964047 | 674.5   | 417.129 | 391.947 | 448.959 | 556.293 | 534.911 |
| ENSMUSG00000037138 | 16_Aff3   | 440.933 | 0.14796  | 0.576364 | 0.856895 | 478.319 | 410.328 | 501.568 | 438.23  | 365.711 | 451.441 |
| ENSMUSG00000037139 | 15_Myom   | 72.4913 | -0.44524 | 0.307039 | 0.689923 | 60.6747 | 53.2746 | 70.323  | 120.493 | 54.9425 | 75.2402 |
| ENSMUSG00000037140 | 6_Tas2r1  | 0.13755 | -0.79206 | 0.84609  | NA       | 0       | 0       | 0       | 0.82529 | 0       | 0       |
| ENSMUSG00000037143 | 17_Cfap6  | 7.68007 | -1.76741 | 0.058248 | 0.316643 | 6.06747 | 3.40051 | 1.03416 | 16.5058 | 12.0187 | 7.05377 |
| ENSMUSG00000037145 | 14_22104  | 12.4325 | 7.16731  | 7.41E-07 | 6.00E-05 | 40.4498 | 23.8036 | 10.3416 | 0       | 0       | 0       |
| ENSMUSG00000037148 | 7_Arhgap  | 1492.29 | 0.32185  | 0.207699 | 0.599203 | 1522.93 | 1683.25 | 1767.38 | 1213.18 | 1219.9  | 1547.13 |
| ENSMUSG00000037149 | 9_Ddx1    | 3212.49 | 0.1465   | 0.683094 | 0.902945 | 4804.42 | 2879.1  | 2442.69 | 2597.2  | 3472.54 | 3078.97 |
| ENSMUSG00000037151 | 7_Lrrc20  | 322.454 | 0.24972  | 0.567627 | 0.852443 | 167.867 | 447.734 | 435.382 | 317.738 | 262.694 | 303.312 |
| ENSMUSG00000037152 | 11_Ndufc  | 581.919 | 0.11088  | 0.775282 | 0.933494 | 911.131 | 411.462 | 490.193 | 595.861 | 582.407 | 500.817 |
| ENSMUSG00000037157 | 8_Ii22ra1 | 143.547 | 1.05116  | 0.050207 | 0.290147 | 72.8096 | 285.643 | 222.345 | 95.7339 | 69.5366 | 115.212 |
| ENSMUSG00000037159 | 11_Wee2   | 0.18892 | 1.1315   | 0.781553 | NA       | 0       | 1.1335  | 0       | 0       | 0       | 0       |
| ENSMUSG00000037161 | 14_Mgarp  | 33412.2 | 0.37136  | 0.118674 | 0.4687   | 35319.7 | 37893   | 39853.5 | 29785.6 | 25600.6 | 32020.6 |
| ENSMUSG00000037166 | 4_Ppp1r1  | 4.89859 | -0.44502 | 0.655744 | 0.893742 | 5.05622 | 2.26701 | 5.17081 | 9.07822 | 4.29238 | 3.52688 |
| ENSMUSG00000037167 | 5_Spaca5  | 0.16854 | 1.1315   | 0.781553 | NA       | 1.01124 | 0       | 0       | 0       | 0       | 0       |
| ENSMUSG00000037169 | 14_Mycn   | 11.26   | -2.09376 | 0.00521  | 0.06379  | 4.04498 | 5.66751 | 3.10248 | 13.2047 | 18.028  | 23.5126 |
| ENSMUSG00000037171 | 6_Nodal   | 0.17236 | 1.1315   | 0.781553 | NA       | 0       | 0       | 1.03416 | 0       | 0       | 0       |
| ENSMUSG00000037172 | 14_E3300  | 509.925 | -0.48476 | 0.20651  | 0.597842 | 622.927 | 290.177 | 361.957 | 559.548 | 697.083 | 527.857 |
| ENSMUSG00000037174 | 18_Elf2   | 1833.31 | 0.25255  | 0.327011 | 0.708327 | 2355.19 | 1862.35 | 1762.21 | 1575.48 | 1670.6  | 1774.02 |
| ENSMUSG00000037185 | 8_Krt80   | 4156.12 | 0.5978   | 0.25775  | 0.648651 | 1622.04 | 6853.16 | 6540.04 | 3508.32 | 2742.83 | 3670.31 |
| ENSMUSG00000037188 | 7_Grhl3   | 1940.65 | 0.65497  | 0.163715 | 0.541822 | 992.031 | 3229.35 | 2899.79 | 1380.71 | 1350.38 | 1791.66 |
| ENSMUSG00000037190 | 12_Cyb56  | 167.222 | 0.05488  | 0.907228 | 0.974519 | 80.8995 | 225.567 | 204.764 | 187.341 | 120.187 | 184.574 |
| ENSMUSG00000037196 | 6_Pacrg   | 14.6705 | -0.25498 | 0.685433 | 0.904142 | 12.1349 | 14.7355 | 13.4441 | 23.9335 | 12.0187 | 11.7563 |
| ENSMUSG00000037197 | 11_Rbm1   | 1395.99 | 0.29709  | 0.315212 | 0.696604 | 1828.33 | 1520.03 | 1268.92 | 1015.11 | 1359.83 | 1383.71 |
| ENSMUSG00000037202 | 5_Prf1    | 16.8277 | 6.62669  | 2.65E-06 | 0.000179 | 16.1799 | 61.2092 | 22.7516 | 0.82529 | 0       | 0       |
| ENSMUSG00000037204 | 6_Atg101  | 262.963 | 0.20592  | 0.724785 | 0.915512 | 78.8771 | 364.988 | 401.255 | 288.852 | 173.412 | 270.394 |
| ENSMUSG00000037206 | 14_Islr   | 1472.32 | -1.20429 | 0.006966 | 0.077867 | 518.768 | 775.316 | 1379.57 | 2754.83 | 1783.06 | 1622.37 |
| ENSMUSG00000037210 | 16_Fam1   | 961.163 | 0.3074   | 0.301215 | 0.684432 | 802.928 | 1246.85 | 1139.65 | 763.395 | 884.231 | 929.922 |
| ENSMUSG00000037211 | 12_Spry1  | 744.964 | 0.10572  | 0.753197 | 0.925837 | 572.364 | 787.785 | 956.599 | 845.925 | 560.585 | 746.524 |
| ENSMUSG00000037214 | 11_Thap1  | 97.8967 | 0.02233  | 0.947362 | 0.986649 | 77.8658 | 119.018 | 99.2795 | 92.4327 | 104.734 | 94.0502 |
| ENSMUSG00000037216 | 5_Lipt1   | 122.872 | 0.30117  | 0.328747 | 0.709501 | 144.608 | 134.887 | 127.202 | 91.6075 | 120.187 | 118.738 |

|                    |            |         |          |          |          |         |         |         |         |         |         |
|--------------------|------------|---------|----------|----------|----------|---------|---------|---------|---------|---------|---------|
| ENSMUSG00000037217 | 15_Syn1    | 17.2091 | -1.18566 | 0.107864 | 0.446545 | 14.1574 | 11.335  | 6.20497 | 42.0899 | 18.8865 | 10.5807 |
| ENSMUSG00000037221 | 13_Mospc   | 237.365 | 0.19272  | 0.823347 | 0.949085 | 12.1349 | 351.386 | 396.084 | 259.967 | 155.384 | 249.233 |
| ENSMUSG00000037224 | 15_Zfyve2  | 22.5363 | -1.64404 | 0.053907 | 0.302083 | 5.05622 | 11.335  | 16.5466 | 57.7705 | 38.6315 | 5.87814 |
| ENSMUSG00000037225 | 13_Fgf2    | 412.478 | 0.00508  | 0.991921 | 0.997512 | 744.276 | 223.3   | 271.984 | 426.676 | 452.417 | 356.215 |
| ENSMUSG00000037234 | 16_Hook3   | 4338.84 | 0.23924  | 0.58014  | 0.859399 | 7731.97 | 3067.26 | 3293.8  | 3451.37 | 4211.69 | 4276.93 |
| ENSMUSG00000037235 | 13_Mxd4    | 1632.9  | -0.5505  | 0.160714 | 0.539243 | 777.647 | 1382.87 | 1814.95 | 2357.86 | 1722.96 | 1741.1  |
| ENSMUSG00000037236 | 14_Matr3   | 6231.73 | 0.33287  | 0.500718 | 0.822198 | 12552.6 | 4152.02 | 4137.68 | 4752.86 | 6332.13 | 5463.14 |
| ENSMUSG00000037239 | 7_Sprd3    | 73.6344 | -0.63156 | 0.071257 | 0.356437 | 59.6634 | 61.2092 | 52.7422 | 103.987 | 90.1401 | 74.0646 |
| ENSMUSG00000037242 | 8_Clic4    | 4336.51 | 1.05476  | 0.000106 | 0.003465 | 6624.66 | 6246.73 | 4693.03 | 2720.99 | 3121.42 | 2612.25 |
| ENSMUSG00000037243 | 17_Zfp697  | 440.429 | 0.40966  | 0.418855 | 0.772648 | 180.001 | 706.172 | 621.531 | 353.225 | 385.456 | 396.187 |
| ENSMUSG00000037247 | 3_Pldi     | 0       | NA       | NA       | NA       | 0       | 0       | 0       | 0       | 0       | 0       |
| ENSMUSG00000037251 | 4_Pomk     | 347.178 | -0.42003 | 0.108536 | 0.448262 | 324.609 | 279.975 | 286.463 | 444.007 | 368.287 | 379.728 |
| ENSMUSG00000037253 | 8_Mex3c    | 2377.81 | 0.42304  | 0.268836 | 0.656292 | 4050.03 | 2367.89 | 1753.94 | 1940.26 | 2233.76 | 1920.98 |
| ENSMUSG00000037254 | 18_Itih2   | 122.389 | -0.77801 | 0.043466 | 0.264705 | 127.417 | 61.2092 | 81.6988 | 155.98  | 162.252 | 145.778 |
| ENSMUSG00000037257 | 7_Aagab    | 2166.78 | -0.10406 | 0.732648 | 0.919789 | 1545.18 | 2344.08 | 2376.5  | 2087.99 | 2053.48 | 2593.43 |
| ENSMUSG00000037259 | 15_Dzank   | 179.803 | -0.79342 | 0.093252 | 0.415917 | 208.316 | 73.6777 | 112.724 | 279.774 | 242.091 | 162.237 |
| ENSMUSG00000037260 | 7_Hgsnat   | 609.751 | -0.53035 | 0.040547 | 0.253896 | 550.117 | 442.066 | 504.671 | 803.009 | 697.942 | 660.703 |
| ENSMUSG00000037262 | 7_Kin      | 307.811 | 0.23792  | 0.478951 | 0.809393 | 448.992 | 294.711 | 255.438 | 258.317 | 288.448 | 300.961 |
| ENSMUSG00000037263 | 13_Aldh3t  | 4.58253 | 0.69139  | 0.479905 | 0.809948 | 7.07871 | 5.66751 | 4.13665 | 2.47588 | 3.43391 | 4.70251 |
| ENSMUSG00000037266 | 18_Rsrp1   | 6629.09 | 0.47226  | 0.224357 | 0.614062 | 11715.3 | 5836.41 | 5561.72 | 4882.43 | 6434.28 | 5344.4  |
| ENSMUSG00000037270 | 17_49324   | 2722.94 | 0.04565  | 0.909782 | 0.974731 | 4329.14 | 2108.32 | 1860.46 | 2417.28 | 2973.76 | 2648.69 |
| ENSMUSG00000037275 | 14_Gemin   | 709.518 | 0.43928  | 0.223412 | 0.613683 | 524.836 | 1081.36 | 843.876 | 518.284 | 619.82  | 668.932 |
| ENSMUSG00000037278 | 9_Tmem9    | 407.724 | -0.07567 | 0.787115 | 0.936715 | 317.531 | 457.935 | 415.733 | 401.092 | 424.946 | 429.104 |
| ENSMUSG00000037279 | 13_Ovol2   | 151.878 | 0.37009  | 0.274234 | 0.660739 | 125.394 | 181.36  | 206.832 | 118.842 | 133.064 | 145.778 |
| ENSMUSG00000037280 | 12_Galnt6  | 22.6953 | 1.12383  | 0.056079 | 0.310046 | 18.2024 | 46.4736 | 28.9565 | 16.5058 | 15.4526 | 10.5807 |
| ENSMUSG00000037286 | 15_Stag1   | 1756.91 | 0.32934  | 0.442513 | 0.787485 | 3209.69 | 1369.27 | 1290.63 | 1437.66 | 1702.36 | 1531.84 |
| ENSMUSG00000037287 | 14_Tbcel   | 797.164 | -0.32031 | 0.26954  | 0.656453 | 877.76  | 566.751 | 682.547 | 923.502 | 917.712 | 814.71  |
| ENSMUSG00000037295 | 7_Ldlrap1  | 2404.12 | 0.35271  | 0.461659 | 0.799907 | 1081.02 | 3706.55 | 3302.08 | 2225.81 | 1765.03 | 2344.2  |
| ENSMUSG00000037296 | 6_Lsm1     | 349.516 | -0.03727 | 0.885844 | 0.968986 | 382.25  | 328.716 | 323.693 | 322.689 | 358.843 | 380.903 |
| ENSMUSG00000037300 | 17_Ttc13   | 842.178 | 0.29424  | 0.238153 | 0.630377 | 924.277 | 921.538 | 936.95  | 649.505 | 774.346 | 846.452 |
| ENSMUSG00000037306 | 13_Man1c   | 549.666 | -1.34918 | 8.48E-06 | 0.000457 | 263.935 | 293.577 | 372.298 | 950.737 | 729.705 | 687.742 |
| ENSMUSG00000037313 | 16_Tacc3   | 577.02  | 0.58807  | 0.055818 | 0.308996 | 615.848 | 807.054 | 655.658 | 354.876 | 477.313 | 551.369 |
| ENSMUSG00000037315 | 14_Jade3   | 501.471 | 0.35283  | 0.385514 | 0.750802 | 863.603 | 454.535 | 369.196 | 380.46  | 501.351 | 439.685 |
| ENSMUSG00000037316 | 8_Bag4     | 572.162 | 0.32748  | 0.349914 | 0.783106 | 1022.37 | 455.668 | 432.28  | 473.718 | 543.416 | 505.52  |
| ENSMUSG00000037318 | 10_Traf3ij | 27.1601 | 0.71408  | 0.230958 | 0.622374 | 22.2474 | 55.5416 | 23.7857 | 19.807  | 27.4713 | 14.1075 |
| ENSMUSG00000037321 | 17_Tap1    | 3138.5  | 2.50202  | 4.34E-08 | 4.79E-06 | 2432.04 | 8106.81 | 5466.58 | 829.419 | 980.381 | 1015.74 |
| ENSMUSG00000037325 | 10_Bbs7    | 391.654 | 0.00567  | 0.989075 | 0.997242 | 615.848 | 269.774 | 291.634 | 395.315 | 435.248 | 342.108 |
| ENSMUSG00000037326 | 9_Capn15   | 691.095 | 0.69544  | 0.36705  | 0.739612 | 77.8658 | 1210.58 | 1275.12 | 640.427 | 379.447 | 563.126 |
| ENSMUSG00000037331 | 15_Larp1   | 4620.81 | 0.56332  | 0.102242 | 0.434904 | 3550.48 | 6967.64 | 6016.75 | 3377.1  | 3647.67 | 4165.25 |
| ENSMUSG00000037336 | 14_Mfsd2   | 49.0223 | 0.08384  | 0.832442 | 0.951799 | 44.4948 | 55.5416 | 51.7081 | 55.2946 | 50.6501 | 36.4445 |
| ENSMUSG00000037337 | 10_Map4h   | 33.2097 | 0.82779  | 0.205579 | 0.59724  | 12.1349 | 66.8767 | 48.6056 | 25.5841 | 24.8958 | 21.1613 |
| ENSMUSG00000037339 | 17_Fam5c   | 486.732 | 0.32163  | 0.286529 | 0.672511 | 398.43  | 608.691 | 615.326 | 454.736 | 412.927 | 430.28  |
| ENSMUSG00000037341 | 13_Slc9a7  | 64.8929 | -0.65883 | 0.058004 | 0.31576  | 50.5622 | 51.0076 | 49.6398 | 85.8304 | 84.1307 | 68.1864 |
| ENSMUSG00000037343 | 7_Taf2     | 872.769 | 0.30649  | 0.366745 | 0.739461 | 1332.82 | 765.114 | 797.339 | 701.499 | 885.09  | 754.753 |
| ENSMUSG00000037344 | 13_Slc12e  | 190.475 | 0.14851  | 0.824538 | 0.949196 | 36.4048 | 258.439 | 306.112 | 235.208 | 146.8   | 159.885 |
| ENSMUSG00000037346 | 4_Hrh4     | 0.14308 | -0.79206 | 0.84609  | NA       | 0       | 0       | 0       | 0       | 0.85848 | 0       |
| ENSMUSG00000037347 | 7_Chst7    | 13.9011 | 0.07668  | 0.905759 | 0.974391 | 14.1574 | 7.93452 | 20.6832 | 15.6806 | 12.0187 | 12.9319 |
| ENSMUSG00000037348 | 15_Paqr7   | 110.086 | -0.9179  | 0.043206 | 0.263772 | 43.4835 | 71.4107 | 113.758 | 176.613 | 114.177 | 141.075 |
| ENSMUSG00000037349 | 15_Nudt22  | 266.006 | -0.04595 | 0.948836 | 0.986976 | 35.3936 | 344.585 | 405.391 | 330.117 | 194.874 | 285.678 |
| ENSMUSG00000037351 | 9_Actr1b   | 1530.12 | -0.05577 | 0.893031 | 0.971037 | 757.422 | 1896.35 | 1848.05 | 1728.16 | 1381.29 | 1569.46 |
| ENSMUSG00000037353 | 8_Letmd1   | 322.453 | -0.10016 | 0.746838 | 0.924576 | 241.687 | 326.449 | 366.093 | 368.08  | 350.259 | 282.151 |
| ENSMUSG00000037355 | 14_Uvssa   | 961.156 | 0.19696  | 0.604742 | 0.871119 | 1515.86 | 686.903 | 876.969 | 785.678 | 978.664 | 922.868 |
| ENSMUSG00000037358 | 6_493057   | 28.5908 | -0.18614 | 0.75461  | 0.926523 | 46.5172 | 19.2695 | 14.4783 | 30.5358 | 36.056  | 24.6882 |
| ENSMUSG00000037361 | 7_SF3b6    | 3284.18 | 0.07734  | 0.825621 | 0.949938 | 4780.15 | 2797.49 | 2538.87 | 2874.49 | 3665.7  | 3048.4  |
| ENSMUSG00000037362 | 8_Nov      | 308.409 | -0.20901 | 0.633653 | 0.883567 | 452.026 | 162.091 | 244.062 | 379.634 | 298.75  | 313.893 |
| ENSMUSG00000037363 | 8_Letm2    | 91.791  | -0.25907 | 0.477932 | 0.808634 | 83.9333 | 61.2092 | 105.484 | 92.4327 | 112.46  | 95.2259 |
| ENSMUSG00000037364 | 11_Srrt    | 1990.49 | 0.23124  | 0.590278 | 0.864793 | 1028.44 | 2790.68 | 2629.87 | 1757.05 | 1665.45 | 2071.46 |
| ENSMUSG00000037366 | 14_Pafah2  | 272.695 | -0.08857 | 0.786822 | 0.936514 | 195.17  | 282.242 | 315.419 | 291.328 | 236.94  | 315.068 |
| ENSMUSG00000037369 | 16_Kdm6a   | 2163.11 | 0.52956  | 0.194605 | 0.585164 | 4027.79 | 1840.81 | 1798.41 | 1563.93 | 2014.85 | 1732.88 |
| ENSMUSG00000037370 | 13_Enpp1   | 310.873 | -0.02806 | 0.930147 | 0.981773 | 394.385 | 239.169 | 289.565 | 281.425 | 315.061 | 345.635 |
| ENSMUSG00000037373 | 12_Ctbp1   | 1629.91 | 0.22193  | 0.535596 | 0.83864  | 1104.28 | 2107.18 | 2053.84 | 1751.27 | 1285.14 | 1477.76 |
| ENSMUSG00000037375 | 16_Hhat    | 81.9912 | 0.08078  | 0.81777  | 0.948003 | 63.7084 | 95.2142 | 94.1087 | 79.2281 | 83.2723 | 76.4158 |
| ENSMUSG00000037376 | 14_Trmt6   | 769.123 | 0.4353   | 0.229246 | 0.620586 | 1263.04 | 703.905 | 685.649 | 547.994 | 732.281 | 681.864 |
| ENSMUSG00000037379 | 7_Spon2    | 1220.09 | -0.17229 | 0.776777 | 0.933844 | 268.991 | 1524.56 | 1648.45 | 1468.2  | 944.325 | 1466.01 |
| ENSMUSG00000037386 | 15_Rims2   | 49.4576 | -1.92016 | 0.000834 | 0.017065 | 28.3148 | 20.4031 | 13.4441 | 118.842 | 78.1214 | 37.6201 |
| ENSMUSG00000037390 | 12_Muc3    | 0.68945 | 1.68806  | 0.558726 | NA       | 1.01124 | 2.26701 | 0       | 0       | 0.85848 | 0       |
| ENSMUSG00000037393 | 2_Nmur2    | 2.85193 | -2.857   | 0.077956 | 0.374649 | 2.02249 | 0       | 0       | 5.77705 | 3.43391 | 5.87814 |
| ENSMUSG00000037395 | 15_Rcor3   | 887.456 | 0.30628  | 0.374606 | 0.744881 | 1383.38 | 762.847 | 797.339 | 725.432 | 797.525 | 858.208 |
| ENSMUSG00000037400 | 16_Atp11i  | 5396.1  | 0.65434  | 0.161626 | 0.540144 | 11416.9 | 4244.97 | 4135.61 | 3453.02 | 4592.85 | 4533.22 |
| ENSMUSG00000037405 | 7_Icam1    | 393.858 | 0.88073  | 0.16524  | 0.141897 | 347.868 | 649.497 | 533.627 | 250.889 | 230.93  | 350.337 |
| ENSMUSG00000037406 | 6_Htra4    | 7.42669 | 0.99361  | 0.321421 | 0.702424 | 3.03373 | 11.335  | 15.5124 | 5.77705 | 7.72629 | 1.17563 |
| ENSMUSG00000037408 | 10_Cnnm4   | 299.175 | 0.51918  | 0.220569 | 0.611594 | 199.215 | 436.399 | 421.938 | 319.388 | 188.865 | 229.247 |
| ENSMUSG00000037410 | 13_Tbc1d   | 1766.15 | 0.40104  | 0.171909 | 0.555059 | 1483.5  | 2403.03 | 2143.82 | 1503.68 | 1593.25 | 1523.61 |
| ENSMUSG00000037411 | 10_Serpin  | 602.084 | -0.00733 | 0.982498 | 0.994254 | 442.925 | 758.313 | 600.848 | 732.034 | 530.539 | 547.843 |
| ENSMUSG00000037415 | 5_Ranbp1   | 1372.14 | 0.34259  | 0.294317 | 0.678843 | 1027.42 | 1797.74 | 1777.72 | 1209.05 | 1128.9  | 1292.01 |

|                    |           |         |          |          |          |         |         |         |         |         |         |
|--------------------|-----------|---------|----------|----------|----------|---------|---------|---------|---------|---------|---------|
| ENSMUSG00000037416 | 12_Dmx1   | 1803.01 | 0.29694  | 0.557975 | 0.848187 | 3654.64 | 1187.91 | 1121.03 | 1421.15 | 1838    | 1595.33 |
| ENSMUSG00000037418 | 5_Best1   | 0.90765 | 3.38453  | 0.190174 | NA       | 1.01124 | 3.40051 | 1.03416 | 0       | 0       | 0       |
| ENSMUSG00000037419 | 8_Endod1  | 4043.47 | 0.50957  | 0.028831 | 0.206048 | 4771.05 | 4969.28 | 4509.98 | 2973.53 | 3431.33 | 3605.65 |
| ENSMUSG00000037426 | 17_Depdc  | 496.72  | 0.11943  | 0.649412 | 0.891567 | 434.835 | 580.353 | 536.73  | 490.224 | 454.993 | 483.183 |
| ENSMUSG00000037428 | 14_Vgf    | 8.35809 | -0.3674  | 0.789207 | 0.937308 | 1.01124 | 15.869  | 5.17081 | 5.77705 | 22.3204 | 0       |
| ENSMUSG00000037432 | 15_Fer1l5 | 34.9112 | -0.42964 | 0.312667 | 0.694201 | 28.3148 | 34.0051 | 26.8882 | 33.837  | 42.9238 | 43.4982 |
| ENSMUSG00000037434 | 7_Slc30a1 | 920.96  | 0.46228  | 0.258834 | 0.64893  | 1697.88 | 779.85  | 723.913 | 765.046 | 785.506 | 773.563 |
| ENSMUSG00000037437 | 18_Adam3  | 4.58886 | 1.20879  | 0.230192 | 0.621275 | 6.06747 | 9.06802 | 4.13665 | 2.47588 | 3.43391 | 2.35126 |
| ENSMUSG00000037440 | 7_Vnn1    | 834.462 | 1.01918  | 0.000371 | 0.00927  | 1355.07 | 1102.9  | 894.55  | 507.555 | 590.632 | 556.072 |
| ENSMUSG00000037443 | 13_Cep85  | 329.44  | 0.06608  | 0.836887 | 0.952966 | 236.631 | 400.127 | 374.366 | 316.087 | 329.655 | 319.771 |
| ENSMUSG00000037446 | 13_Tulp1  | 112.751 | -2.55721 | 0.000359 | 0.009031 | 24.2699 | 56.6751 | 17.5807 | 373.032 | 148.517 | 56.4301 |
| ENSMUSG00000037447 | 16_Arid5a | 206.462 | 0.99767  | 0.089591 | 0.408021 | 83.9333 | 452.268 | 289.565 | 177.438 | 135.639 | 99.9284 |
| ENSMUSG00000037451 | 7_Slc22a2 | 0.18892 | 1.1315   | 0.781553 | NA       | 0       | 1.1335  | 0       | 0       | 0       | 0       |
| ENSMUSG00000037455 | 16_Slc18t | 425.541 | -0.04706 | 0.861584 | 0.960565 | 493.487 | 363.854 | 398.152 | 409.345 | 436.965 | 451.441 |
| ENSMUSG00000037458 | 14_Azin1  | 4021.62 | 0.58667  | 0.194598 | 0.585164 | 8119.28 | 3280.36 | 3084.9  | 2648.36 | 3753.26 | 3243.56 |
| ENSMUSG00000037461 | 10_Ints7  | 791.209 | 0.39659  | 0.142197 | 0.510967 | 736.186 | 1060.96 | 900.755 | 671.788 | 672.187 | 705.377 |
| ENSMUSG00000037463 | 14_Fbxo2  | 174.652 | -1.41326 | 0.000268 | 0.007249 | 61.6859 | 96.3477 | 128.236 | 265.744 | 290.165 | 205.735 |
| ENSMUSG00000037465 | 9_Klf10   | 908.621 | 1.28162  | 1.67E-05 | 0.000803 | 1349    | 1554.03 | 959.702 | 521.585 | 512.511 | 554.896 |
| ENSMUSG00000037466 | 13_49304  | 151.029 | 0.69561  | 0.211155 | 0.602834 | 58.6522 | 273.174 | 228.55  | 128.746 | 103.017 | 114.036 |
| ENSMUSG00000037469 | 9_Pap1    | 0.14308 | -0.79206 | 0.84609  | NA       | 0       | 0       | 0       | 0       | 0.85848 | 0       |
| ENSMUSG00000037470 | 14_Ugtg1  | 2848.61 | 0.42132  | 0.127204 | 0.48493  | 3367.44 | 3504.79 | 2912.2  | 1931.18 | 2619.21 | 2756.85 |
| ENSMUSG00000037474 | 13_Dtl    | 634.862 | 1.09692  | 0.006023 | 0.070671 | 1259    | 672.167 | 663.932 | 292.153 | 425.805 | 496.115 |
| ENSMUSG00000037475 | 15_Thoc2  | 3058.09 | 0.48771  | 0.327686 | 0.708848 | 6430.5  | 2151.39 | 2128.3  | 2036.82 | 2976.34 | 2625.18 |
| ENSMUSG00000037482 | 2_Erv3    | 0.8287  | 2.03096  | 0.459582 | NA       | 1.01124 | 0       | 3.10248 | 0       | 0.85848 | 0       |
| ENSMUSG00000037486 | 17_Asx12  | 1677.62 | 0.42112  | 0.285423 | 0.671644 | 2928.56 | 1449.75 | 1383.71 | 1200.8  | 1634.54 | 1468.36 |
| ENSMUSG00000037487 | 6_Ubr5    | 6653.19 | 0.33919  | 0.283191 | 0.630377 | 9100.19 | 6972.18 | 6222.55 | 5002.1  | 6502.96 | 6119.14 |
| ENSMUSG00000037490 | 5_Slc2a12 | 438.769 | 0.22112  | 0.460395 | 0.799755 | 551.128 | 357.053 | 508.807 | 439.056 | 399.192 | 377.377 |
| ENSMUSG00000037492 | 15_Zmat4  | 12.7356 | -1.0165  | 0.242109 | 0.633507 | 12.1349 | 10.2015 | 3.10248 | 31.3611 | 13.7356 | 5.87814 |
| ENSMUSG00000037493 | 6_Cib2    | 422.219 | -0.17482 | 0.676579 | 0.901308 | 210.339 | 417.129 | 562.584 | 493.525 | 388.89  | 460.846 |
| ENSMUSG00000037499 | 9_Nenf    | 420.78  | -0.67955 | 0.202115 | 0.953308 | 113.259 | 377.456 | 479.851 | 661.884 | 404.343 | 487.886 |
| ENSMUSG00000037503 | 12_Fam1f  | 4222.18 | 0.06821  | 0.753591 | 0.926096 | 4273.52 | 4425.2  | 4266.95 | 4119.86 | 3900.06 | 4347.47 |
| ENSMUSG00000037509 | 18_Arhge1 | 3573.63 | 0.58839  | 0.259096 | 0.64893  | 1466.3  | 5734.39 | 5676.51 | 2828.28 | 2296.43 | 3439.89 |
| ENSMUSG00000037514 | 17_Pank2  | 1246.83 | 0.16726  | 0.555246 | 0.846508 | 1616.98 | 1140.3  | 1199.63 | 1048.12 | 1310.89 | 1165.05 |
| ENSMUSG00000037519 | 16_Ppfia1 | 1928.63 | 0.19523  | 0.455242 | 0.796225 | 1693.83 | 2250    | 2232.75 | 1745.49 | 1694.63 | 1955.07 |
| ENSMUSG00000037523 | 13_Mavs   | 1605.81 | 0.3188   | 0.453662 | 0.79571  | 852.479 | 2272.67 | 2222.41 | 1376.59 | 1384.72 | 1525.96 |
| ENSMUSG00000037525 | 4_Bcdin3c | 95.4518 | -0.01489 | 0.977327 | 0.993796 | 35.3936 | 121.285 | 128.236 | 99.0351 | 84.1307 | 104.631 |
| ENSMUSG00000037526 | 6_Atg14   | 505.389 | 0.08594  | 0.712332 | 0.910879 | 505.622 | 539.547 | 516.047 | 490.224 | 473.021 | 507.871 |
| ENSMUSG00000037529 | 13_Prss4f | 1.94912 | -1.32443 | 0.469342 | 0.804531 | 0       | 3.40051 | 0       | 1.65058 | 4.29238 | 2.35126 |
| ENSMUSG00000037531 | 8_Mrp147  | 373.032 | 0.08864  | 0.825264 | 0.949753 | 566.297 | 328.716 | 258.54  | 327.641 | 448.983 | 308.014 |
| ENSMUSG00000037533 | 17_Rapge  | 1724.67 | 0.49849  | 0.137497 | 0.503084 | 2805.19 | 1666.25 | 1587.44 | 1285.81 | 1534.96 | 1468.36 |
| ENSMUSG00000037535 | 5_170002  | 0       | NA       | NA       | NA       | 0       | 0       | 0       | 0       | 0       | 0       |
| ENSMUSG00000037536 | 13_Fbxo3  | 1139.37 | 0.46165  | 0.174299 | 0.557874 | 853.49  | 1632.24 | 1474.71 | 891.316 | 999.267 | 985.176 |
| ENSMUSG00000037541 | 19_Shank  | 46.805  | -1.00565 | 0.040785 | 0.254913 | 35.3936 | 26.0706 | 32.059  | 95.7339 | 48.0747 | 43.4982 |
| ENSMUSG00000037542 | 13_Aldh8: | 1.08321 | -1.13496 | 0.659463 | NA       | 2.02249 | 0       | 0       | 3.30117 | 0       | 1.17563 |
| ENSMUSG00000037544 | 13_Dlgap1 | 394.954 | 0.52122  | 0.835592 | 0.390546 | 389.329 | 531.613 | 475.714 | 266.569 | 382.022 | 324.473 |
| ENSMUSG00000037548 | 14_H2-DN  | 65.1831 | 1.45608  | 0.015366 | 0.135136 | 30.3373 | 151.889 | 104.45  | 38.7887 | 29.1882 | 36.4445 |
| ENSMUSG00000037552 | 17_Plekhg | 549.372 | 0.27732  | 0.632023 | 0.88307  | 156.743 | 790.052 | 859.388 | 573.578 | 453.276 | 463.197 |
| ENSMUSG00000037553 | 14_Zdhhc  | 908.547 | 0.41883  | 0.328704 | 0.709501 | 512.701 | 1425.95 | 1179.98 | 846.75  | 665.32  | 820.588 |
| ENSMUSG00000037563 | 12_Rps16  | 7810.65 | -0.18825 | 0.632598 | 0.883233 | 4049.02 | 8611.22 | 9245.4  | 9908.46 | 7588.08 | 7461.71 |
| ENSMUSG00000037568 | 14_Vash2  | 13.3369 | -1.37973 | 0.041198 | 0.25685  | 0.06747 | 7.93452 | 8.27329 | 27.2346 | 12.8772 | 17.6344 |
| ENSMUSG00000037570 | 15_Mcrs1  | 706.72  | 0.18734  | 0.79537  | 0.939126 | 94.0457 | 1088.16 | 1075.53 | 850.051 | 495.341 | 637.19  |
| ENSMUSG00000037572 | 16_Wdhd   | 503.161 | 0.84606  | 0.015016 | 0.133171 | 844.389 | 563.351 | 531.559 | 269.045 | 389.749 | 420.875 |
| ENSMUSG00000037573 | 5_Tob1    | 465.991 | -0.11623 | 0.726567 | 0.916094 | 578.432 | 389.925 | 373.332 | 588.433 | 402.626 | 463.197 |
| ENSMUSG00000037577 | 12_Ephx3  | 916.591 | 0.58265  | 0.075739 | 0.368706 | 820.119 | 1384.01 | 1093.11 | 660.234 | 653.301 | 888.775 |
| ENSMUSG00000037578 | 4_Pkd21l  | 0.13755 | -0.79206 | 0.84609  | NA       | 0       | 0       | 0       | 0.82529 | 0       | 0       |
| ENSMUSG00000037579 | 6_Kcnh3   | 13.1162 | 0.55481  | 0.486625 | 0.81371  | 4.04498 | 15.869  | 26.8882 | 11.5541 | 8.58477 | 11.7563 |
| ENSMUSG00000037580 | 9_Gch1    | 297.73  | 1.12787  | 0.000278 | 0.007472 | 367.082 | 506.676 | 351.615 | 158.456 | 199.167 | 203.384 |
| ENSMUSG00000037593 | 11_BC03C  | 41.4718 | -1.05245 | 0.094774 | 0.41805  | 36.4048 | 27.2041 | 17.5807 | 77.5775 | 71.2536 | 18.81   |
| ENSMUSG00000037594 | 10_BC02c  | 214.913 | -0.06904 | 0.872622 | 0.963879 | 107.192 | 259.572 | 262.677 | 250.064 | 185.431 | 224.545 |
| ENSMUSG00000037600 | 16_Kdf1   | 224.296 | 0.79811  | 0.147993 | 0.52067  | 95.057  | 380.857 | 378.503 | 195.594 | 115.894 | 179.871 |
| ENSMUSG00000037601 | 11_Nme1   | 1003.5  | 0.08608  | 0.782489 | 0.935592 | 746.298 | 1302.39 | 1051.74 | 917.725 | 1003.56 | 999.284 |
| ENSMUSG00000037605 | 16_Adgr13 | 158.124 | -1.05683 | 0.005104 | 0.062982 | 136.518 | 81.6122 | 89.9721 | 240.16  | 242.949 | 157.534 |
| ENSMUSG00000037606 | 17_Osbpl1 | 2662.66 | 0.25873  | 0.604648 | 0.871119 | 1067.87 | 3815.37 | 3819.16 | 2702.01 | 1993.38 | 2578.15 |
| ENSMUSG00000037608 | 15_Bclaf1 | 4079.28 | 0.37531  | 0.38876  | 0.752716 | 7549.95 | 3131.87 | 3138.68 | 2912.46 | 4047.72 | 3695    |
| ENSMUSG00000037610 | 15_Kcnmt  | 1.88305 | -3.19255 | 0.123102 | 0.477375 | 1.01124 | 0       | 0       | 8.25292 | 0.85848 | 1.17563 |
| ENSMUSG00000037613 | 15_Tnfrsf | 177.8   | 1.38096  | 0.000603 | 0.013398 | 193.148 | 383.124 | 194.422 | 89.1316 | 95.2909 | 111.685 |
| ENSMUSG00000037617 | 11_Spag1  | 220.954 | 0.25022  | 0.351183 | 0.72789  | 258.879 | 234.635 | 226.481 | 182.39  | 212.902 | 210.437 |
| ENSMUSG00000037621 | 8_Atoh8   | 38.6878 | -0.96208 | 0.140143 | 0.507371 | 7.07871 | 41.9396 | 29.9907 | 66.0234 | 50.6501 | 36.4445 |
| ENSMUSG00000037622 | 14_Wdte1  | 1915.77 | 0.3953   | 0.522442 | 0.832206 | 476.296 | 3051.39 | 3002.17 | 1930.36 | 1243.93 | 1790.48 |
| ENSMUSG00000037624 | 15_Kcnk2  | 31.7503 | -0.89262 | 0.087531 | 0.401487 | 34.3823 | 12.4685 | 19.6491 | 39.614  | 42.0654 | 42.3226 |
| ENSMUSG00000037625 | 7_Cldn11  | 34.5948 | -0.53164 | 0.399566 | 0.759197 | 53.5959 | 14.7355 | 16.5466 | 49.5175 | 43.7823 | 29.3907 |
| ENSMUSG00000037627 | 15_Rgs22  | 5.58032 | -2.83403 | 0.026716 | 0.196688 | 2.02249 | 0       | 2.06832 | 10.7288 | 16.3111 | 2.35126 |
| ENSMUSG00000037628 | 9_Cdkn3   | 160.048 | 0.21444  | 0.56513  | 0.851057 | 239.665 | 139.421 | 136.509 | 126.27  | 169.12  | 149.305 |
| ENSMUSG00000037636 | 6_Slc25a4 | 92.7844 | -0.03588 | 0.913027 | 0.975712 | 88.9895 | 80.4787 | 105.484 | 88.3063 | 106.451 | 86.9965 |
| ENSMUSG00000037638 | 5_Zbtb42  | 427.407 | 0.62456  | 0.219183 | 0.610472 | 202.249 | 691.437 | 661.863 | 404.393 | 241.232 | 363.269 |

|                    |           |         |          |          |          |         |         |         |         |         |         |
|--------------------|-----------|---------|----------|----------|----------|---------|---------|---------|---------|---------|---------|
| ENSMUSG00000037640 | 15_Zfp60  | 595.163 | 0.05104  | 0.920704 | 0.977466 | 1119.45 | 323.048 | 374.366 | 533.139 | 615.528 | 605.448 |
| ENSMUSG00000037643 | 14_Prkc1  | 7947.7  | 0.45346  | 0.181777 | 0.567796 | 12656.7 | 7708.95 | 7193.63 | 5584.75 | 7189.74 | 7352.38 |
| ENSMUSG00000037646 | 9_Vps13b  | 1906.78 | 0.21085  | 0.549761 | 0.843939 | 2909.35 | 1595.97 | 1631.91 | 1518.54 | 1834.57 | 1950.37 |
| ENSMUSG00000037649 | 9_H2-DM   | 130.183 | 0.74767  | 0.223093 | 0.613683 | 42.4723 | 228.968 | 218.208 | 123.794 | 71.2536 | 96.4015 |
| ENSMUSG00000037652 | 15_Phc3   | 2035.85 | 0.13141  | 0.709104 | 0.909883 | 3073.17 | 1614.11 | 1698.09 | 1863.51 | 2075.8  | 1890.41 |
| ENSMUSG00000037653 | 7_Kctd8   | 12.8574 | -1.25376 | 0.170787 | 0.552959 | 17.1912 | 4.53401 | 1.03416 | 23.1082 | 17.1695 | 14.1075 |
| ENSMUSG00000037656 | 8_Slc20a2 | 1232.32 | -0.61561 | 0.03905  | 0.248459 | 796.861 | 1017.89 | 1105.52 | 1827.2  | 1298.02 | 1348.45 |
| ENSMUSG00000037660 | 4_Gdf7    | 1.14073 | 0.72715  | 0.733048 | NA       | 0       | 2.26701 | 2.06832 | 1.65058 | 0.85848 | 0       |
| ENSMUSG00000037661 | 14_Gpr16  | 703.677 | 0.72848  | 0.008069 | 0.0864   | 970.795 | 869.397 | 792.168 | 437.405 | 546.85  | 605.448 |
| ENSMUSG00000037664 | 12_Cdkn1  | 306.631 | -0.19329 | 0.689434 | 0.905638 | 476.296 | 133.753 | 248.199 | 347.448 | 342.532 | 291.556 |
| ENSMUSG00000037669 | 14_Ldah   | 787.516 | 0.04258  | 0.856399 | 0.959059 | 876.749 | 746.978 | 773.553 | 792.281 | 753.743 | 781.793 |
| ENSMUSG00000037674 | 15_Rfx7   | 1628.87 | 0.49868  | 0.222192 | 0.612654 | 3005.42 | 1279.72 | 1437.48 | 1188.42 | 1484.31 | 1377.84 |
| ENSMUSG00000037679 | 8_Inf2    | 323.894 | 0.40298  | 0.485528 | 0.813263 | 100.113 | 535.013 | 471.578 | 332.593 | 248.958 | 255.111 |
| ENSMUSG00000037681 | 13_Esyt3  | 833.736 | 0.70971  | 0.020222 | 0.03279  | 987.986 | 1063.23 | 1052.78 | 604.114 | 620.679 | 673.635 |
| ENSMUSG00000037683 | 14_Armc3  | 7.17623 | 0.8364   | 0.307328 | 0.690215 | 6.06747 | 11.335  | 10.3416 | 5.77705 | 6.00934 | 3.52688 |
| ENSMUSG00000037685 | 15_Atp8a  | 2599.5  | 0.32037  | 0.357447 | 0.731944 | 4050.03 | 2328.21 | 2282.39 | 1954.29 | 2613.2  | 2368.89 |
| ENSMUSG00000037686 | 5_Aspg    | 8.62167 | 0.05711  | 0.940139 | 0.985498 | 6.06747 | 6.80102 | 13.4441 | 7.42763 | 8.58477 | 9.40502 |
| ENSMUSG00000037692 | 14_Ahd1   | 476.859 | 0.35849  | 0.536914 | 0.839104 | 148.653 | 644.963 | 813.885 | 519.934 | 321.07  | 412.645 |
| ENSMUSG00000037697 | 18_Ddhd1  | 1134.95 | -0.22654 | 0.390843 | 0.753993 | 1230.68 | 956.676 | 950.394 | 1094.34 | 1290.29 | 1287.31 |
| ENSMUSG00000037703 | 14_Lzts3  | 329.099 | -0.51812 | 0.181529 | 0.567796 | 172.923 | 272.041 | 367.127 | 481.971 | 331.372 | 349.161 |
| ENSMUSG00000037705 | 13_Tecta  | 0.99765 | -2.13885 | 0.498844 | NA       | 0       | 0       | 1.03416 | 4.95175 | 0       | 0       |
| ENSMUSG00000037706 | 16_Cd81   | 2679.21 | -0.57492 | 0.106292 | 0.442791 | 1373.27 | 2420.03 | 2664    | 3824.4  | 2940.28 | 2853.25 |
| ENSMUSG00000037708 | 16_Spag6  | 7.73273 | -0.41896 | 0.601762 | 0.870033 | 8.08995 | 4.53401 | 7.23913 | 6.60234 | 12.8772 | 7.05377 |
| ENSMUSG00000037709 | 13_Fam13  | 683.881 | -1.11712 | 0.010709 | 0.105674 | 698.77  | 261.839 | 334.034 | 1015.93 | 1025.02 | 767.685 |
| ENSMUSG00000037710 | 8_Cisd1   | 574.294 | -0.26223 | 0.361734 | 0.734636 | 402.475 | 553.149 | 611.189 | 649.505 | 595.783 | 633.663 |
| ENSMUSG00000037712 | 15_Fermt2 | 924.212 | -0.84489 | 0.029079 | 0.207476 | 987.986 | 463.603 | 531.559 | 1270.12 | 1309.18 | 982.825 |
| ENSMUSG00000037716 | 14_Ccdc3  | 18.9545 | -2.40086 | 0.000111 | 0.003603 | 5.05622 | 9.06802 | 4.13665 | 35.4876 | 31.7636 | 28.2151 |
| ENSMUSG00000037720 | 16_Tmem   | 1845.32 | 0.39731  | 0.388765 | 0.752716 | 3624.3  | 1343.2  | 1325.8  | 1452.51 | 1704.94 | 1621.19 |
| ENSMUSG00000037722 | 7_Gnptat  | 487.812 | 0.50449  | 0.357613 | 0.731944 | 1103.27 | 320.781 | 292.668 | 393.664 | 466.153 | 350.337 |
| ENSMUSG00000037725 | 7_Ckap2   | 409.532 | 0.38547  | 0.262927 | 0.56235  | 601.69  | 409.195 | 380.571 | 269.871 | 413.786 | 382.079 |
| ENSMUSG00000037727 | 6_Avp     | 0.28063 | -1.56014 | 0.700051 | NA       | 0       | 0       | 0       | 0.82529 | 0.85848 | 0       |
| ENSMUSG00000037730 | 13_Mynn   | 753.716 | 0.22247  | 0.540739 | 0.84046  | 1189.22 | 633.628 | 612.224 | 689.944 | 736.573 | 660.703 |
| ENSMUSG00000037731 | 5_Themis  | 187.024 | 2.70599  | 1.95E-10 | 3.57E-08 | 235.62  | 493.074 | 244.062 | 44.5658 | 47.2162 | 57.6058 |
| ENSMUSG00000037735 | 7_281003  | 70.2616 | 0.08715  | 0.801053 | 0.941902 | 83.9333 | 65.7432 | 67.2205 | 61.0716 | 69.5366 | 74.0646 |
| ENSMUSG00000037736 | 18_Limch  | 413.114 | -1.22376 | 0.008417 | 0.088874 | 376.183 | 113.35  | 253.37  | 678.39  | 545.991 | 511.398 |
| ENSMUSG00000037737 | 6_Acrtt3  | 0.33902 | -1.78366 | 0.658108 | NA       | 0       | 0       | 0       | 0       | 0.85848 | 1.17563 |
| ENSMUSG00000037738 | 9_Nek5    | 27.6471 | 0.07192  | 0.913895 | 0.976044 | 52.5847 | 12.4685 | 19.6491 | 18.9817 | 25.7543 | 36.4445 |
| ENSMUSG00000037740 | 8_Mrps26  | 446.363 | -0.21644 | 0.610593 | 0.874214 | 206.294 | 562.217 | 470.544 | 529.012 | 438.682 | 471.427 |
| ENSMUSG00000037742 | 14_Eef1a  | 147705  | -0.21064 | 0.370808 | 0.741935 | 119948  | 145589  | 145287  | 148910  | 162052  | 164444  |
| ENSMUSG00000037747 | 9_Phyhpl  | 170.703 | 0.09912  | 0.814332 | 0.947022 | 253.822 | 102.015 | 173.739 | 146.077 | 195.733 | 152.832 |
| ENSMUSG00000037750 | 16_Fam2i  | 273.834 | 0.29767  | 0.285157 | 0.671308 | 250.789 | 340.051 | 315.419 | 255.015 | 248.958 | 232.774 |
| ENSMUSG00000037752 | 4_Xkr8    | 103.819 | -0.09462 | 0.776595 | 0.933844 | 85.9558 | 96.3477 | 118.929 | 120.493 | 91.857  | 109.333 |
| ENSMUSG00000037754 | 13_Ppp1r  | 92.5627 | -0.63168 | 0.053426 | 0.300551 | 71.7983 | 75.9447 | 70.323  | 132.872 | 102.159 | 102.28  |
| ENSMUSG00000037759 | 5_Ptger2  | 24.1129 | -0.29909 | 0.5784   | 0.858251 | 32.3598 | 17.0025 | 15.5124 | 30.5358 | 25.7543 | 23.5126 |
| ENSMUSG00000037761 | 16_Acrt5  | 142.883 | 0.15369  | 0.791495 | 0.937536 | 41.461  | 207.431 | 202.696 | 152.679 | 120.187 | 132.846 |
| ENSMUSG00000037762 | 6_Slc16a5 | 601.809 | -0.66328 | 0.028282 | 0.203464 | 566.297 | 388.791 | 442.621 | 850.876 | 748.592 | 613.678 |
| ENSMUSG00000037771 | 11_Slc32a | 4.91276 | -3.64867 | 0.032058 | 0.22083  | 0       | 2.26701 | 0       | 22.2829 | 2.57543 | 2.35126 |
| ENSMUSG00000037772 | 12_Mrpl23 | 717.844 | -0.26664 | 0.566063 | 0.85179  | 272.025 | 833.125 | 850.081 | 840.148 | 722.838 | 788.846 |
| ENSMUSG00000037773 | 14_Pced1  | 221.449 | -0.12972 | 0.661496 | 0.895681 | 170.9   | 217.633 | 246.13  | 250.889 | 219.77  | 223.369 |
| ENSMUSG00000037784 | 14_Dzip1l | 120.072 | -0.70236 | 0.035062 | 0.233115 | 99.1019 | 89.5467 | 85.8354 | 185.691 | 135.639 | 124.617 |
| ENSMUSG00000037787 | 13_Apopt  | 368.956 | -0.29174 | 0.258395 | 0.64893  | 341.801 | 295.844 | 357.82  | 419.249 | 427.522 | 371.498 |
| ENSMUSG00000037788 | 14_Vopp1  | 2397.31 | 0.32038  | 0.328033 | 0.709062 | 3620.25 | 2272.67 | 2094.18 | 1923.76 | 2387.42 | 2085.56 |
| ENSMUSG00000037791 | 15_Phf12  | 914.967 | 0.19953  | 0.484122 | 0.812163 | 749.332 | 1075.69 | 1109.66 | 911.123 | 829.289 | 814.71  |
| ENSMUSG00000037795 | 14_N4bp2  | 848.247 | 0.10297  | 0.789347 | 0.937308 | 1316.64 | 580.353 | 738.391 | 779.901 | 897.108 | 777.09  |
| ENSMUSG00000037797 | 14_Adh4   | 0.14308 | -0.79206 | 0.84609  | NA       | 0       | 0       | 0       | 0       | 0.85848 | 0       |
| ENSMUSG00000037801 | 13_Iqch   | 4.90417 | -0.5977  | 0.534084 | 0.838255 | 2.02249 | 4.53401 | 5.17081 | 4.95175 | 6.86782 | 5.87814 |
| ENSMUSG00000037805 | 12_Rpl10i | 8844.43 | -0.21757 | 0.593907 | 0.866475 | 4185.54 | 9969.16 | 10381.9 | 10581.1 | 9293.87 | 8654.97 |
| ENSMUSG00000037808 | 12_Fam7f  | 1071.15 | 0.67754  | 0.142153 | 0.510922 | 2263.16 | 853.528 | 837.671 | 736.986 | 931.448 | 804.129 |
| ENSMUSG00000037813 | 13_D6300  | 75.9675 | -1.29881 | 0.026521 | 0.196083 | 15.1687 | 45.3401 | 71.3571 | 149.378 | 87.5647 | 86.9965 |
| ENSMUSG00000037815 | 6_Ctnna1  | 16226.3 | 0.44089  | 0.070589 | 0.354849 | 17904.1 | 19974.6 | 18180.6 | 11891.6 | 14028.4 | 15378.4 |
| ENSMUSG00000037816 | 10_Fbxw1  | 283.659 | 1.32498  | 0.001335 | 0.024325 | 227.53  | 582.62  | 406.425 | 151.854 | 175.988 | 157.534 |
| ENSMUSG00000037818 | 16_31100  | 223.171 | 0.07476  | 0.85531  | 0.958916 | 346.857 | 162.091 | 177.876 | 197.245 | 260.977 | 193.979 |
| ENSMUSG00000037820 | 15_Tgm2   | 20571.8 | 0.58373  | 0.295433 | 0.679579 | 7108.04 | 38117.4 | 28807.6 | 15015.4 | 15084.3 | 19297.9 |
| ENSMUSG00000037822 | 12_Snim1  | 2493.82 | -0.14781 | 0.673637 | 0.900436 | 3353.29 | 1657.18 | 2087.97 | 2714.39 | 2737.68 | 2412.39 |
| ENSMUSG00000037824 | 5_Tspan1  | 2185.89 | 0.13946  | 0.691521 | 0.905638 | 1439    | 2889.3  | 2546.11 | 2139.98 | 1854.31 | 2246.62 |
| ENSMUSG00000037826 | 5_Ppm1k   | 435.374 | 0.75397  | 0.096742 | 0.42186  | 913.154 | 360.454 | 366.093 | 273.997 | 371.721 | 326.825 |
| ENSMUSG00000037833 | 13_Sh2d4  | 8.63343 | -0.55499 | 0.521077 | 0.831998 | 11.1237 | 3.40051 | 6.20497 | 7.42763 | 6.00934 | 17.6344 |
| ENSMUSG00000037843 | 6_Vstm2l  | 1.57696 | -4.03021 | 0.080879 | NA       | 0       | 0       | 0       | 7.42763 | 0.85848 | 1.17563 |
| ENSMUSG00000037845 | 14_Fdxac1 | 237.258 | 0.35245  | 0.231596 | 0.62293  | 307.418 | 251.638 | 238.891 | 174.962 | 224.921 | 225.721 |
| ENSMUSG00000037846 | 18_Rtkn2  | 61.6483 | 0.58632  | 0.172012 | 0.555165 | 93.0345 | 72.5442 | 56.8789 | 63.5475 | 49.7917 | 34.0932 |
| ENSMUSG00000037847 | 13_Nmrk1  | 190.443 | -0.09167 | 0.767747 | 0.930788 | 225.507 | 149.622 | 177.876 | 180.739 | 213.761 | 195.154 |
| ENSMUSG00000037849 | 7_Gm495   | 74.1713 | 6.91254  | 4.54E-14 | 1.79E-11 | 192.136 | 167.758 | 81.6988 | 0       | 3.43391 | 0       |
| ENSMUSG00000037851 | 12_lars   | 1830.91 | 0.45681  | 0.070011 | 0.35307  | 2137.77 | 2346.35 | 1870.8  | 1363.38 | 1625.96 | 1641.18 |
| ENSMUSG00000037852 | 7_Cpe     | 5576.04 | 0.10803  | 0.717409 | 0.912533 | 7498.38 | 4718.77 | 5136.68 | 4900.59 | 5605.85 | 5595.99 |
| ENSMUSG00000037855 | 15_Zfp36f | 242.701 | -0.80771 | 0.052802 | 0.298513 | 242.699 | 134.887 | 152.022 | 432.453 | 279.005 | 215.14  |

|                    |            |         |          |          |          |         |         |         |         |         |         |
|--------------------|------------|---------|----------|----------|----------|---------|---------|---------|---------|---------|---------|
| ENSMUSG00000037857 | 16_Nufip2  | 1946.12 | 0.62266  | 0.157235 | 0.534958 | 3877.11 | 1665.12 | 1536.76 | 1303.14 | 1838    | 1456.6  |
| ENSMUSG00000037860 | 15_Aim2    | 87.0284 | 2.32643  | 1.49E-06 | 0.000111 | 229.552 | 119.018 | 86.8696 | 31.3611 | 28.3297 | 27.0394 |
| ENSMUSG00000037868 | 15_Egr2    | 26.8059 | 0.87642  | 0.101428 | 0.433589 | 34.3823 | 45.3401 | 24.8199 | 23.9335 | 20.6034 | 11.7563 |
| ENSMUSG00000037872 | 5_Ackr1    | 94.5527 | 0.96749  | 0.025343 | 0.190875 | 92.0232 | 181.36  | 102.382 | 82.5292 | 54.9425 | 54.0789 |
| ENSMUSG00000037876 | 16_Jmjd1   | 4056.98 | 0.33016  | 0.371862 | 0.742781 | 6672.19 | 3536.53 | 3348.62 | 3141.89 | 3965.31 | 3677.36 |
| ENSMUSG00000037884 | 6_170001   | 6.17698 | -1.19765 | 0.293452 | 0.677859 | 9.1012  | 0       | 2.06832 | 9.07822 | 8.58477 | 8.22939 |
| ENSMUSG00000037885 | 18_Stk35   | 19534.9 | 0.40645  | 0.124907 | 0.480594 | 18619   | 22417.3 | 25769.2 | 15860.5 | 15742.8 | 18800.6 |
| ENSMUSG00000037887 | 11_Dusp8   | 104.006 | -1.03652 | 0.004413 | 0.05697  | 50.5622 | 71.4107 | 82.7329 | 166.709 | 124.479 | 128.143 |
| ENSMUSG00000037890 | 13_Wdr1    | 309.908 | -0.21638 | 0.45853  | 0.798202 | 341.801 | 236.902 | 281.292 | 307.009 | 369.145 | 323.298 |
| ENSMUSG00000037892 | 13_Pcdh1   | 466.785 | -0.47122 | 0.123594 | 0.478085 | 496.521 | 316.247 | 360.922 | 589.259 | 554.576 | 483.183 |
| ENSMUSG00000037894 | 13_H2afz   | 4885.3  | 0.48862  | 0.221419 | 0.612274 | 8793.78 | 4586.15 | 3734.36 | 3722.07 | 4676.98 | 3798.45 |
| ENSMUSG00000037896 | 17_Rcor1   | 1708.17 | 0.36187  | 0.140047 | 0.507286 | 2076.08 | 1906.55 | 1780.83 | 1308.09 | 1572.73 | 1604.73 |
| ENSMUSG00000037902 | 18_Sirpa   | 1457.59 | 0.20285  | 0.521734 | 0.831998 | 1086.08 | 1924.69 | 1669.14 | 1426.11 | 1281.71 | 1357.85 |
| ENSMUSG00000037904 | 14_Ankrd1  | 77.6941 | 0.21293  | 0.750373 | 0.925182 | 18.2024 | 113.35  | 118.929 | 101.511 | 60.0934 | 54.0789 |
| ENSMUSG00000037905 | 13_Bri3bp  | 219.651 | -0.41947 | 0.149236 | 0.522746 | 203.26  | 198.363 | 162.363 | 288.852 | 224.062 | 241.004 |
| ENSMUSG00000037907 | 16_Ankrd1  | 103.444 | 0.02856  | 0.963061 | 0.990106 | 26.2924 | 125.819 | 161.329 | 117.192 | 80.6968 | 109.333 |
| ENSMUSG00000037913 | 11_Tmem    | 2.83974 | 1.74286  | 0.232617 | 0.624408 | 3.03373 | 7.93452 | 2.06832 | 1.65058 | 0       | 2.35126 |
| ENSMUSG00000037916 | 13_Ndufv   | 1727.78 | -0.09347 | 0.865211 | 0.962159 | 506.633 | 2218.27 | 2290.67 | 2097.07 | 1371.85 | 1882.18 |
| ENSMUSG00000037921 | 14_Ddx60   | 10567.5 | 1.7533   | 0.000391 | 0.009566 | 28048.9 | 11535.7 | 9315.73 | 3338.31 | 6327.83 | 4838.88 |
| ENSMUSG00000037922 | 13_Bank1   | 20.1549 | 0.16292  | 0.771013 | 0.932465 | 21.2361 | 14.7355 | 27.9224 | 15.6806 | 24.8958 | 16.4588 |
| ENSMUSG00000037926 | 15_Ssh2    | 1230.34 | 0.54315  | 0.052947 | 0.299004 | 1771.7  | 1363.6  | 1242.03 | 883.888 | 1031.03 | 1089.81 |
| ENSMUSG00000037933 | 15_Bicd2   | 1717.28 | 0.30441  | 0.204097 | 0.59523  | 1699.9  | 2081.11 | 1912.16 | 1527.62 | 1440.52 | 1642.35 |
| ENSMUSG00000037935 | 16_Smarc   | 1925.76 | -0.1208  | 0.585793 | 0.862122 | 1823.27 | 1905.42 | 1806.68 | 1878.37 | 2042.32 | 2098.5  |
| ENSMUSG00000037936 | 15_Scarb1  | 774.153 | 0.00943  | 0.983702 | 0.994713 | 339.778 | 952.142 | 1038.3  | 911.123 | 655.876 | 747.699 |
| ENSMUSG00000037938 | 4_Schhd5   | 176.981 | 0.20077  | 0.674354 | 0.900436 | 84.9445 | 235.769 | 247.165 | 191.468 | 126.196 | 176.344 |
| ENSMUSG00000037940 | 15_Inpp4k  | 168.984 | 0.2811   | 0.462576 | 0.800035 | 270.002 | 137.154 | 148.919 | 162.583 | 145.941 | 149.305 |
| ENSMUSG00000037942 | 5_Crp      | 0.37783 | 2.11394  | 0.599927 | NA       | 0       | 2.26701 | 0       | 0       | 0       | 0       |
| ENSMUSG00000037944 | 8_Ccr7     | 14.6173 | 4.92192  | 6.57E-06 | 0.000374 | 26.2924 | 43.0731 | 15.5124 | 1.65058 | 0       | 1.17563 |
| ENSMUSG00000037946 | 11_Fgd3    | 2517.19 | 0.44375  | 0.292545 | 0.676822 | 1423.83 | 3971.79 | 3308.28 | 2049.2  | 2055.19 | 2294.83 |
| ENSMUSG00000037949 | 7_Ano10    | 1560.29 | 0.09832  | 0.719577 | 0.913031 | 1259    | 1781.87 | 1799.44 | 1452.51 | 1500.62 | 1568.29 |
| ENSMUSG00000037953 | 7_A4gnt    | 0.19594 | -0.79206 | 0.84609  | NA       | 0       | 0       | 0       | 0       | 0       | 1.17563 |
| ENSMUSG00000037957 | 14_Wdr2c   | 779.055 | 0.25313  | 0.309072 | 0.691532 | 892.929 | 862.596 | 785.963 | 623.096 | 772.629 | 737.119 |
| ENSMUSG00000037958 | 13_Ccdc5   | 936.734 | 0.08784  | 0.786627 | 0.936507 | 1267.09 | 867.13  | 761.143 | 757.618 | 965.787 | 1001.63 |
| ENSMUSG00000037960 | 10_11100   | 373.493 | 0.15799  | 0.78624  | 0.936317 | 114.271 | 582.62  | 485.022 | 460.513 | 244.666 | 353.864 |
| ENSMUSG00000037962 | 7_Fam107   | 26.573  | -1.48123 | 0.004745 | 0.060065 | 11.1237 | 11.335  | 19.6491 | 41.2646 | 45.4993 | 30.5663 |
| ENSMUSG00000037965 | 14_Zc3h7   | 4711.87 | 0.72365  | 0.060007 | 0.322098 | 8514.68 | 4813.99 | 4279.36 | 2680.55 | 4251.18 | 3731.44 |
| ENSMUSG00000037966 | 15_Nin1j   | 263.835 | -0.05957 | 0.923419 | 0.978561 | 61.6859 | 354.786 | 358.854 | 359.827 | 197.45  | 250.409 |
| ENSMUSG00000037971 | 10_11100   | 555.46  | -0.05296 | 0.870328 | 0.963272 | 724.051 | 419.396 | 492.261 | 537.265 | 628.405 | 531.384 |
| ENSMUSG00000037972 | 6_Snn      | 1115.93 | -0.17365 | 0.442677 | 0.787598 | 1046.64 | 1059.83 | 1040.37 | 1269.3  | 1164.95 | 1114.5  |
| ENSMUSG00000037973 | 6_Ccdc12   | 11.8343 | -0.29423 | 0.647763 | 0.890537 | 11.1237 | 11.335  | 9.30745 | 9.90351 | 12.8772 | 16.4588 |
| ENSMUSG00000037974 | 15_Muc5a   | 1065.54 | 0.65756  | 0.170338 | 0.552331 | 624.949 | 1507.56 | 1779.79 | 679.216 | 615.528 | 1186.21 |
| ENSMUSG00000037977 | 6_643057   | 53.9428 | -1.19372 | 0.001747 | 0.029216 | 28.3148 | 32.8716 | 37.2298 | 80.0534 | 65.2443 | 79.9427 |
| ENSMUSG00000037979 | 13_Ccdc9   | 38.5874 | -0.9393  | 0.130668 | 0.491649 | 14.1574 | 38.5391 | 26.8882 | 84.1798 | 26.6128 | 41.147  |
| ENSMUSG00000037982 | 15_Gm97    | 0.17236 | 1.1315   | 0.781553 | NA       | 0       | 0       | 1.03416 | 0       | 0       | 0       |
| ENSMUSG00000037984 | 9_Neurod1  | 0.13755 | -0.79206 | 0.84609  | NA       | 0       | 0       | 0       | 0.82529 | 0       | 0       |
| ENSMUSG00000037989 | 15_Wnk2    | 826.303 | 0.85988  | 0.134487 | 0.498485 | 297.306 | 1479.22 | 1419.9  | 604.939 | 436.965 | 719.484 |
| ENSMUSG00000037990 | 18_Sh3rf3  | 109.239 | -0.83337 | 0.011677 | 0.112729 | 77.8658 | 66.8767 | 91.0062 | 151.029 | 151.092 | 117.563 |
| ENSMUSG00000037991 | 9_Rmi2     | 57.2683 | 1.00632  | 0.035065 | 0.233115 | 81.9108 | 82.7457 | 64.118  | 20.6323 | 37.773  | 56.4301 |
| ENSMUSG00000037992 | 15_Rara    | 190.228 | 0.15852  | 0.803646 | 0.942928 | 42.4723 | 285.643 | 274.053 | 226.955 | 147.658 | 164.588 |
| ENSMUSG00000037993 | 7_Dhx38    | 667.397 | 0.49646  | 0.407721 | 0.765046 | 191.125 | 1169.77 | 982.453 | 612.367 | 423.229 | 625.434 |
| ENSMUSG00000037994 | 14_Slc9b2  | 47.6768 | -1.14622 | 0.008946 | 0.092657 | 29.3261 | 20.4031 | 39.2981 | 74.2763 | 68.6782 | 54.0789 |
| ENSMUSG00000037995 | 15_Igfbp3  | 269.015 | 0.43311  | 0.496737 | 0.81906  | 66.7421 | 427.331 | 433.314 | 293.804 | 164.828 | 228.072 |
| ENSMUSG00000037996 | 17_Slc24a1 | 31.8968 | -0.58725 | 0.360575 | 0.733982 | 43.4835 | 23.8036 | 9.30745 | 43.7405 | 46.3578 | 24.6882 |
| ENSMUSG00000037997 | 12_Par1    | 989.249 | 1.37668  | 4.22E-05 | 0.001669 | 1894.06 | 1395.34 | 995.898 | 518.284 | 605.226 | 526.681 |
| ENSMUSG00000037999 | 13_Arap2   | 4072.4  | 0.64909  | 0.136451 | 0.501691 | 8221.42 | 3495.72 | 3202.8  | 2752.35 | 3487.99 | 3274.12 |
| ENSMUSG00000038000 | 9_Acd      | 262.68  | 0.16203  | 0.779192 | 0.93466  | 79.8883 | 372.922 | 379.537 | 308.659 | 181.139 | 253.936 |
| ENSMUSG00000038002 | 8_Cramp1   | 991.996 | 0.26059  | 0.329702 | 0.710109 | 966.75  | 1178.84 | 1098.28 | 751.016 | 1000.13 | 956.961 |
| ENSMUSG00000038005 | 14_27000   | 783.334 | 0.53608  | 0.225681 | 0.615811 | 1522.93 | 673.301 | 585.335 | 550.47  | 755.46  | 612.502 |
| ENSMUSG00000038007 | 14_Acer2   | 313.876 | 0.06042  | 0.865384 | 0.962167 | 455.06  | 265.24  | 240.96  | 301.232 | 324.504 | 296.258 |
| ENSMUSG00000038009 | 7_Dnajc2   | 0.14308 | -0.79206 | 0.84609  | NA       | 0       | 0       | 0       | 0       | 0.85848 | 0       |
| ENSMUSG00000038010 | 8_Ccdc13   | 111.409 | 0.19772  | 0.673914 | 0.900436 | 195.17  | 77.0782 | 84.8012 | 94.9086 | 123.621 | 92.8746 |
| ENSMUSG00000038011 | 15_Dnah1   | 10.5798 | -0.65308 | 0.42525  | 0.776848 | 5.05622 | 12.4685 | 7.23913 | 20.6323 | 5.15086 | 12.9319 |
| ENSMUSG00000038013 | 14_Wipf2   | 1067.91 | 0.45415  | 0.045203 | 0.27168  | 1182.14 | 1313.73 | 1207.9  | 902.87  | 866.203 | 934.624 |
| ENSMUSG00000038014 | 7_Fam12f   | 8365.44 | 0.7097   | 0.006545 | 0.074724 | 12356.4 | 9701.65 | 9089.25 | 5783.65 | 6642.89 | 6618.78 |
| ENSMUSG00000038020 | 5_Rapgef1  | 3142.63 | 0.80003  | 0.068709 | 0.348694 | 1879.9  | 4936.41 | 5160.47 | 2150.71 | 1989.09 | 2739.21 |
| ENSMUSG00000038022 | 11_Fam11   | 145.94  | -0.4737  | 0.168304 | 0.549333 | 96.0682 | 124.685 | 145.817 | 195.594 | 134.781 | 178.695 |
| ENSMUSG00000038023 | 12_Atp6v1  | 1242.44 | -0.06239 | 0.797939 | 0.940387 | 1073.94 | 1342.07 | 1230.65 | 1190.9  | 1275.7  | 1341.39 |
| ENSMUSG00000038024 | 17_Dennd1  | 3542.53 | 0.49472  | 0.197339 | 0.589685 | 6057.35 | 3290.56 | 3083.87 | 2236.54 | 3338.62 | 3248.26 |
| ENSMUSG00000038025 | 7_Phf2     | 1035.81 | 0.18325  | 0.65105  | 0.891804 | 591.578 | 1385.14 | 1327.86 | 1080.31 | 800.101 | 1029.85 |
| ENSMUSG00000038026 | 12_Kcnj9   | 19.3505 | -0.78662 | 0.481837 | 0.811016 | 12.1349 | 19.2695 | 11.3758 | 55.2946 | 18.028  | 0       |
| ENSMUSG00000038028 | 9_Tigar    | 260.046 | 0.05888  | 0.836983 | 0.952966 | 223.485 | 295.844 | 277.155 | 284.726 | 249.817 | 229.247 |
| ENSMUSG00000038034 | 15_Igfbp3  | 511.545 | 0.26989  | 0.695275 | 0.905638 | 91.012  | 784.384 | 802.509 | 640.427 | 325.363 | 425.577 |
| ENSMUSG00000038037 | 4_Socs1    | 92.1669 | 3.10063  | 9.81E-09 | 1.41E-06 | 79.8883 | 267.507 | 147.885 | 22.2829 | 15.4526 | 19.9857 |
| ENSMUSG00000038039 | 13_Gcc2    | 1637.92 | 0.64189  | 0.120873 | 0.472756 | 3156.09 | 1467.89 | 1365.09 | 1096.81 | 1473.15 | 1268.5  |
| ENSMUSG00000038042 | 9_Ptpdc1   | 223.569 | -0.40468 | 0.212178 | 0.603396 | 236.631 | 146.222 | 194.422 | 287.202 | 252.392 | 224.545 |

|                    |           |         |          |          |          |         |         |         |         |         |         |
|--------------------|-----------|---------|----------|----------|----------|---------|---------|---------|---------|---------|---------|
| ENSMUSG00000038044 | 8_Cct81l  | 0.42371 | -2.13816 | 0.587702 | NA       | 0       | 0       | 0       | 0.82529 | 1.71695 | 0       |
| ENSMUSG00000038045 | 14_Sult6b | 16.261  | 0.84768  | 0.187361 | 0.574659 | 28.3148 | 18.136  | 16.5466 | 12.3794 | 16.3111 | 5.87814 |
| ENSMUSG00000038046 | 4_Rnmt1l  | 130.771 | -0.16074 | 0.665384 | 0.89688  | 78.8771 | 141.688 | 149.953 | 129.571 | 139.932 | 144.602 |
| ENSMUSG00000038047 | 18_Haus6  | 507.485 | 0.72231  | 0.126219 | 0.483409 | 1079    | 444.333 | 372.298 | 309.485 | 441.257 | 398.538 |
| ENSMUSG00000038055 | 12_Dexi   | 183.987 | 0.0056   | 0.989361 | 0.997255 | 98.0907 | 213.099 | 241.994 | 205.498 | 166.545 | 178.695 |
| ENSMUSG00000038056 | 15_Kmt2c  | 3503.95 | 0.12095  | 0.695426 | 0.905638 | 4853.97 | 3003.78 | 3094.21 | 3096.5  | 3518.9  | 3456.35 |
| ENSMUSG00000038057 | 4_Dbil5   | 6.82519 | -0.16511 | 0.84324  | 0.953879 | 4.04498 | 9.06802 | 6.20497 | 8.25292 | 5.15086 | 8.22939 |
| ENSMUSG00000038058 | 14_Nod1   | 791.046 | 0.55988  | 0.209881 | 0.601672 | 435.846 | 1192.45 | 1199.63 | 689.944 | 525.388 | 703.025 |
| ENSMUSG00000038059 | 6_Smim3   | 194.594 | 0.65578  | 0.169901 | 0.551739 | 152.698 | 391.059 | 170.637 | 189.817 | 108.168 | 155.183 |
| ENSMUSG00000038060 | 15_Dlec1  | 32.3692 | -0.22768 | 0.776738 | 0.933844 | 5.05622 | 19.2695 | 65.1522 | 42.0899 | 30.9052 | 31.742  |
| ENSMUSG00000038064 | 6_Cldn22  | 12.0778 | -2.25005 | 0.003079 | 0.044197 | 5.05622 | 2.26701 | 5.17081 | 24.7588 | 12.8772 | 22.3369 |
| ENSMUSG00000038065 | 13_Mturn  | 634.208 | -1.04701 | 0.00276  | 0.04102  | 477.307 | 289.043 | 474.68  | 1058.85 | 825.855 | 679.513 |
| ENSMUSG00000038067 | 2_Csf3    | 12.492  | 3.29824  | 0.000925 | 0.018546 | 11.1237 | 44.2066 | 12.4099 | 1.65058 | 0.85848 | 4.70251 |
| ENSMUSG00000038068 | 14_Rnf14  | 2107.57 | 0.41819  | 0.098335 | 0.425912 | 2695.98 | 2400.76 | 2135.54 | 1601.89 | 1839.72 | 1971.53 |
| ENSMUSG00000038069 | 5_Cdkn2a  | 628.648 | 0.28988  | 0.38929  | 0.752914 | 954.615 | 588.288 | 531.559 | 530.663 | 555.435 | 611.326 |
| ENSMUSG00000038070 | 15_Cntln  | 709.645 | 0.09149  | 0.839766 | 0.95317  | 1241.81 | 459.069 | 495.363 | 637.951 | 738.29  | 685.391 |
| ENSMUSG00000038071 | 3_Npy6r   | 0.16854 | 1.1315   | 0.781553 | NA       | 1.01124 | 0       | 0       | 0       | 0       | 0       |
| ENSMUSG00000038072 | 14_Galnt1 | 796.784 | -0.17099 | 0.474498 | 0.806964 | 808.995 | 675.568 | 764.245 | 823.642 | 887.665 | 820.588 |
| ENSMUSG00000038074 | 16_Fkbp1  | 562.119 | -0.35011 | 0.367643 | 0.739818 | 754.388 | 355.92  | 372.298 | 629.698 | 667.895 | 592.516 |
| ENSMUSG00000038077 | 7_Kcna6   | 72.2946 | -0.90453 | 0.019031 | 0.157285 | 57.6409 | 40.8061 | 52.7422 | 114.716 | 96.1494 | 71.7133 |
| ENSMUSG00000038079 | 14_Tmem   | 299.384 | -0.79725 | 0.007087 | 0.07881  | 254.834 | 175.693 | 225.447 | 425.851 | 347.683 | 366.796 |
| ENSMUSG00000038080 | 16_Kdm1l  | 1426.92 | 0.7414   | 0.049971 | 0.289476 | 2616.09 | 1310.33 | 1430.25 | 864.081 | 1126.32 | 1214.42 |
| ENSMUSG00000038084 | 16_Opa1   | 1739.7  | 0.22244  | 0.489343 | 0.814396 | 2524.07 | 1617.51 | 1478.85 | 1439.31 | 1725.54 | 1652.93 |
| ENSMUSG00000038085 | 13_Cnbd2  | 53.7943 | -0.32528 | 0.448693 | 0.791834 | 48.5397 | 45.3401 | 49.6398 | 85.0051 | 47.2162 | 47.0251 |
| ENSMUSG00000038086 | 3_Hspb2   | 43.0061 | -1.22204 | 0.015798 | 0.137426 | 17.1912 | 28.3376 | 32.059  | 86.6557 | 42.0654 | 51.7276 |
| ENSMUSG00000038092 | 6_Hsd3b5  | 0.18892 | 1.1315   | 0.781553 | NA       | 0       | 1.1335  | 0       | 0       | 0       | 0       |
| ENSMUSG00000038094 | 15_Atp13i | 553.154 | 0.64567  | 0.057916 | 0.315474 | 902.03  | 522.545 | 599.814 | 352.4   | 482.464 | 459.67  |
| ENSMUSG00000038095 | 15_Sbno1  | 3858.81 | 0.27076  | 0.42617  | 0.777537 | 5841.96 | 3401.64 | 3415.84 | 3023.05 | 4021.11 | 3449.29 |
| ENSMUSG00000038102 | 15_Trapp1 | 1443.48 | 0.36678  | 0.15194  | 0.526026 | 1801.03 | 1640.18 | 1436.45 | 1100.11 | 1345.23 | 1337.86 |
| ENSMUSG00000038112 | 15_AW55   | 195.313 | 0.36002  | 0.426391 | 0.777537 | 365.059 | 150.756 | 142.714 | 170.01  | 171.695 | 171.642 |
| ENSMUSG00000038115 | 16_Ano2   | 26.2707 | -1.80608 | 0.003612 | 0.049697 | 9.1012  | 15.869  | 10.3416 | 51.9934 | 51.5086 | 18.81   |
| ENSMUSG00000038116 | 16_Phf20  | 923.452 | -0.16542 | 0.600281 | 0.869697 | 1154.84 | 678.968 | 777.689 | 914.424 | 1050.78 | 964.015 |
| ENSMUSG00000038119 | 14_Cdon   | 2207.36 | -0.70394 | 0.022086 | 0.174614 | 2059.9  | 1208.31 | 1769.45 | 2832.4  | 2866.45 | 2507.61 |
| ENSMUSG00000038121 | 6_Fam21l  | 1066.69 | -0.08907 | 0.836929 | 0.952966 | 1701.92 | 673.301 | 725.981 | 1077.01 | 1206.16 | 1015.74 |
| ENSMUSG00000038122 | 8_Tbc1d3  | 567.342 | 0.22573  | 0.610959 | 0.874284 | 1010.23 | 403.527 | 420.904 | 438.23  | 578.613 | 552.545 |
| ENSMUSG00000038126 | 17_Mphos  | 399.262 | -0.16782 | 0.604201 | 0.871111 | 503.6   | 315.114 | 309.214 | 390.363 | 435.248 | 442.036 |
| ENSMUSG00000038127 | 14_Ccdc5  | 3186.32 | 0.20176  | 0.642293 | 0.888256 | 5590.16 | 2228.47 | 2407.53 | 2581.51 | 3460.52 | 2849.72 |
| ENSMUSG00000038128 | 6_Camk4   | 286.299 | -0.76768 | 0.140295 | 0.507604 | 382.25  | 105.416 | 147.885 | 403.568 | 400.05  | 278.624 |
| ENSMUSG00000038132 | 5_Rbm24   | 178.726 | -0.94774 | 0.162745 | 0.540894 | 262.924 | 30.6046 | 72.3913 | 236.034 | 222.346 | 248.057 |
| ENSMUSG00000038135 | 4_Crygn   | 25.0746 | -1.40271 | 0.094654 | 0.41805  | 2.02249 | 11.335  | 27.9224 | 51.1681 | 18.028  | 39.9713 |
| ENSMUSG00000038141 | 9_Tmem1   | 2852.43 | 0.04048  | 0.868978 | 0.962942 | 2785.98 | 2649    | 3242.1  | 2522.92 | 3007.24 | 2907.33 |
| ENSMUSG00000038143 | 14_Stox2  | 553.305 | -0.43967 | 0.253377 | 0.64452  | 678.545 | 296.978 | 433.314 | 647.855 | 708.244 | 554.896 |
| ENSMUSG00000038145 | 16_Snrk   | 2804.19 | 0.75543  | 0.000523 | 0.012034 | 3431.15 | 3622.68 | 3512.01 | 2067.36 | 1999.39 | 2192.55 |
| ENSMUSG00000038146 | 7_Notch3  | 4218.3  | 0.84073  | 0.14507  | 0.515151 | 1530.01 | 7459.58 | 7251.54 | 3040.38 | 2107.56 | 3920.72 |
| ENSMUSG00000038147 | 13_Cd84   | 75.1574 | 1.20094  | 0.022412 | 0.176153 | 108.203 | 159.824 | 46.5373 | 55.2946 | 44.6408 | 36.4445 |
| ENSMUSG00000038150 | 7_Ormdl3  | 1186.91 | -0.38042 | 0.37056  | 0.741633 | 524.836 | 1196.98 | 1372.33 | 1609.32 | 1117.74 | 1300.24 |
| ENSMUSG00000038151 | 12_Prdm1  | 1646.62 | 0.76442  | 0.009495 | 0.096894 | 2627.21 | 1875.95 | 1715.67 | 1142.2  | 1360.69 | 1157.99 |
| ENSMUSG00000038152 | 4_503343  | 23.1907 | 0.46316  | 0.432503 | 0.780793 | 13.1462 | 27.2041 | 40.3323 | 17.3311 | 22.3204 | 18.81   |
| ENSMUSG00000038155 | 10_Gstp2  | 132.726 | -0.60837 | 0.199631 | 0.59166  | 59.6634 | 114.484 | 141.68  | 122.004 | 156.243 | 102.28  |
| ENSMUSG00000038156 | 15_Spon1  | 5738.85 | -0.70726 | 0.023419 | 0.180504 | 5504.2  | 3168.14 | 4406.56 | 7642.21 | 7358.86 | 6353.09 |
| ENSMUSG00000038160 | 6_Atg5    | 1229.85 | 0.3124   | 0.387214 | 0.752114 | 1985.07 | 1083.63 | 1018.65 | 1020.06 | 1201.87 | 1069.82 |
| ENSMUSG00000038167 | 6_Plekhtg | 1062.5  | 0.69792  | 0.272971 | 0.659357 | 257.867 | 1866.88 | 1819.09 | 903.695 | 638.707 | 888.775 |
| ENSMUSG00000038168 | 5_P3h2    | 1743.68 | 0.42757  | 0.116153 | 0.463637 | 1970.92 | 1922.42 | 2106.59 | 1178.52 | 1558.99 | 1724.65 |
| ENSMUSG00000038170 | 15_Pde4d  | 1544.91 | -0.63151 | 0.062694 | 0.33039  | 1456.19 | 909.069 | 1270.98 | 2424.71 | 1533.24 | 1675.27 |
| ENSMUSG00000038172 | 14_Ttc39t | 3361.81 | 0.69512  | 0.070651 | 0.355    | 6218.14 | 3129.6  | 3121.1  | 2088.81 | 2826.96 | 2786.24 |
| ENSMUSG00000038173 | 14_Enpp6  | 7.72285 | -0.17218 | 0.844064 | 0.954374 | 10.1124 | 3.40051 | 8.27329 | 13.2047 | 4.29238 | 7.05377 |
| ENSMUSG00000038174 | 14_Fam12  | 1086.7  | 0.37482  | 0.481348 | 0.810805 | 2330.92 | 608.691 | 741.494 | 871.509 | 1057.64 | 909.936 |
| ENSMUSG00000038175 | 9_Mylip   | 1733.56 | 0.00988  | 0.964792 | 0.99063  | 1849.57 | 1679.85 | 1688.79 | 1646.46 | 1733.27 | 1803.41 |
| ENSMUSG00000038178 | 16_Slc43e | 553.906 | 0.27745  | 0.513974 | 0.828648 | 324.609 | 801.387 | 694.957 | 543.042 | 375.154 | 584.287 |
| ENSMUSG00000038179 | 13_Slamf1 | 39.2133 | 3.90445  | 2.27E-09 | 3.59E-07 | 72.8096 | 106.549 | 41.3665 | 3.30117 | 7.72629 | 3.52688 |
| ENSMUSG00000038180 | 11_Spag4  | 7.46738 | -1.20366 | 0.323762 | 0.704137 | 0       | 1.1335  | 12.4099 | 11.5541 | 10.3017 | 9.40502 |
| ENSMUSG00000038181 | 16_Chp2   | 445.332 | -0.03693 | 0.947335 | 0.986649 | 128.428 | 569.018 | 621.531 | 514.157 | 367.428 | 471.427 |
| ENSMUSG00000038187 | 14_Btbd1l | 921.195 | 0.12119  | 0.758635 | 0.927759 | 1450.12 | 791.185 | 638.078 | 750.191 | 982.956 | 914.638 |
| ENSMUSG00000038188 | 17_Scarf1 | 40.9858 | 0.2284   | 0.763754 | 0.929545 | 8.08995 | 65.7432 | 58.9472 | 56.9452 | 19.745  | 36.4445 |
| ENSMUSG00000038192 | 5_Cer1    | 0.9569  | 1.25383  | 0.629071 | NA       | 2.02249 | 0       | 2.06832 | 1.65058 | 0       | 0       |
| ENSMUSG00000038193 | 3_Hand2   | 0.14308 | -0.79206 | 0.84609  | NA       | 0       | 0       | 0       | 0       | 0.85848 | 0       |
| ENSMUSG00000038195 | 6_Rilp    | 37.8614 | -0.24573 | 0.620183 | 0.877704 | 21.2361 | 34.0051 | 48.6056 | 45.3911 | 30.9052 | 47.0251 |
| ENSMUSG00000038199 | 12_49314  | 1.17155 | -0.206   | 0.924594 | NA       | 1.01124 | 2.26701 | 0       | 0       | 2.57543 | 1.17563 |
| ENSMUSG00000038201 | 9_Kcna7   | 43.8887 | 0.12096  | 0.857761 | 0.959059 | 81.9108 | 17.0025 | 38.264  | 66.8487 | 24.0374 | 35.2688 |
| ENSMUSG00000038204 | 13_Asb10  | 29.2235 | -2.32481 | 0.000299 | 0.007891 | 12.1349 | 4.53401 | 12.4099 | 75.9269 | 29.1882 | 41.147  |
| ENSMUSG00000038205 | 12_Prkab1 | 648.299 | -0.35889 | 0.25401  | 0.645047 | 746.298 | 438.666 | 519.149 | 779.076 | 717.687 | 688.918 |
| ENSMUSG00000038206 | 12_Fbxo8  | 541.516 | 0.22383  | 0.604732 | 0.871119 | 946.525 | 426.197 | 377.469 | 441.531 | 568.312 | 489.061 |
| ENSMUSG00000038208 | 13_Pgap3  | 176.385 | 0.07833  | 0.895084 | 0.971421 | 50.5622 | 232.368 | 260.609 | 204.673 | 118.47  | 191.627 |
| ENSMUSG00000038209 | 12_Itn1   | 2.91385 | -0.03948 | 0.975685 | 0.993623 | 1.01124 | 5.66751 | 2.06832 | 4.12646 | 3.43391 | 1.17563 |
| ENSMUSG00000038210 | 10_Hoxa1  | 0.72255 | 3.05804  | 0.351905 | NA       | 0       | 2.26701 | 2.06832 | 0       | 0       | 0       |

|                    |           |         |          |          |          |         |         |         |         |         |         |
|--------------------|-----------|---------|----------|----------|----------|---------|---------|---------|---------|---------|---------|
| ENSMUSG00000038212 | 15_Hiati1 | 2442.79 | 0.60477  | 0.123543 | 0.478085 | 4535.43 | 2210.33 | 2096.25 | 1694.33 | 2068.93 | 2051.47 |
| ENSMUSG00000038213 | 7_Tapbpl  | 833.433 | 1.40656  | 0.001563 | 0.027189 | 581.465 | 1766    | 1283.39 | 456.387 | 394.899 | 518.452 |
| ENSMUSG00000038214 | 14_Bend3  | 249.234 | 0.327    | 0.234228 | 0.626114 | 241.687 | 294.711 | 295.77  | 240.16  | 200.884 | 222.194 |
| ENSMUSG00000038215 | 14_Cep44  | 169.237 | -0.1009  | 0.739153 | 0.921641 | 186.069 | 155.29  | 148.919 | 180.739 | 197.45  | 146.953 |
| ENSMUSG00000038217 | 13_Tlcd2  | 225.419 | -0.25789 | 0.393798 | 0.755289 | 166.855 | 219.9   | 229.584 | 281.425 | 236.081 | 218.667 |
| ENSMUSG00000038224 | 12_Serpin | 7.63499 | -0.05986 | 0.942652 | 0.986023 | 4.04498 | 11.335  | 7.23913 | 9.90351 | 8.58477 | 4.70251 |
| ENSMUSG00000038225 | 14_Primg  | 359.942 | 0.50781  | 0.187622 | 0.575037 | 623.938 | 323.048 | 320.59  | 249.238 | 312.486 | 330.351 |
| ENSMUSG00000038227 | 15_Hoxa9  | 0.69836 | 3.01466  | 0.275678 | NA       | 2.02249 | 1.1335  | 1.03416 | 0       | 0       | 0       |
| ENSMUSG00000038233 | 8_Fam19f  | 144.894 | -1.27577 | 0.002045 | 0.032982 | 85.9558 | 53.2746 | 114.792 | 264.094 | 172.554 | 178.695 |
| ENSMUSG00000038235 | 4_F11r    | 8698.9  | 0.59632  | 0.035467 | 0.235118 | 8454    | 12564.9 | 10395.4 | 6249.11 | 6659.21 | 7870.83 |
| ENSMUSG00000038236 | 8_Hoxa7   | 0.18892 | 1.1315   | 0.781553 | NA       | 0       | 1.1335  | 0       | 0       | 0       | 0       |
| ENSMUSG00000038239 | 10_Hrc    | 199.719 | -1.15469 | 0.025719 | 0.192205 | 147.642 | 61.2092 | 162.363 | 387.887 | 147.658 | 291.556 |
| ENSMUSG00000038240 | 13_Pdss2  | 93.5151 | -0.18088 | 0.6308   | 0.882143 | 109.214 | 82.7457 | 71.3571 | 115.541 | 108.168 | 74.0646 |
| ENSMUSG00000038241 | 16_Cep25  | 508.992 | -0.0112  | 0.982085 | 0.993958 | 197.193 | 629.094 | 694.957 | 635.475 | 425.805 | 471.427 |
| ENSMUSG00000038242 | 12_Aox4   | 11.8924 | 0.03989  | 0.959735 | 0.989708 | 17.1912 | 12.4685 | 6.20497 | 6.60234 | 7.72629 | 21.1613 |
| ENSMUSG00000038244 | 13_Mical2 | 433.249 | -0.1412  | 0.642919 | 0.888626 | 331.688 | 460.202 | 444.689 | 548.819 | 402.626 | 411.47  |
| ENSMUSG00000038246 | 6_Fam50l  | 0.13755 | -0.79206 | 0.84609  | NA       | 0       | 0       | 0       | 0.82529 | 0       | 0       |
| ENSMUSG00000038248 | 8_Sobp    | 84.1332 | -1.17461 | 0.003895 | 0.05235  | 72.8096 | 40.8061 | 41.3665 | 129.571 | 126.196 | 94.0502 |
| ENSMUSG00000038250 | 8_Usp38   | 1089.08 | 0.4438   | 0.235985 | 0.628015 | 1851.59 | 1025.82 | 888.345 | 832.72  | 1041.33 | 894.653 |
| ENSMUSG00000038252 | 13_Ncapd  | 692.868 | 0.61442  | 0.21806  | 0.608715 | 318.542 | 1138.04 | 1057.95 | 482.796 | 494.483 | 665.405 |
| ENSMUSG00000038253 | 6_Hoxa5   | 1.26129 | 3.86247  | 0.162227 | NA       | 3.03373 | 4.53401 | 0       | 0       | 0       | 0       |
| ENSMUSG00000038255 | 6_Neurod  | 0.86182 | -1.89656 | 0.485117 | NA       | 1.01124 | 0       | 0       | 3.30117 | 0.85848 | 0       |
| ENSMUSG00000038256 | 15_Bcl9   | 724.172 | 0.42636  | 0.2236   | 0.613683 | 527.87  | 1045.09 | 918.335 | 645.379 | 560.585 | 647.771 |
| ENSMUSG00000038257 | 8_Glra3   | 0.59225 | -1.1886  | 0.690885 | NA       | 1.01124 | 0       | 0       | 0.82529 | 1.71695 | 0       |
| ENSMUSG00000038259 | 4_Gdf5    | 0.36128 | 2.05714  | 0.610196 | NA       | 0       | 1.1335  | 1.03416 | 0       | 0       | 0       |
| ENSMUSG00000038260 | 9_Trpm4   | 593.477 | 0.46677  | 0.475589 | 0.807141 | 125.394 | 902.268 | 1038.3  | 541.392 | 388.032 | 565.477 |
| ENSMUSG00000038264 | 7_Sema7a  | 146.918 | -0.63752 | 0.220553 | 0.611594 | 45.506  | 175.693 | 124.099 | 203.022 | 199.167 | 134.022 |
| ENSMUSG00000038267 | 14_Slc22a | 810.55  | -0.00132 | 0.996142 | 0.998321 | 729.107 | 799.12  | 901.789 | 688.294 | 800.959 | 944.029 |
| ENSMUSG00000038268 | 4_Ovca2   | 367.344 | -0.24054 | 0.378183 | 0.746633 | 376.183 | 357.053 | 277.155 | 379.634 | 415.503 | 398.538 |
| ENSMUSG00000038271 | 17_Iffa1  | 160.58  | -1.08387 | 0.009736 | 0.098653 | 62.6971 | 96.3477 | 149.953 | 261.618 | 209.468 | 183.398 |
| ENSMUSG00000038274 | 11_Fau    | 2270.87 | -0.03853 | 0.935716 | 0.984134 | 948.547 | 2638.79 | 3134.54 | 2920.71 | 1958.19 | 2024.43 |
| ENSMUSG00000038276 | 12_Asic3  | 8.2063  | -3.06839 | 0.002551 | 0.038903 | 1.01124 | 1.1335  | 3.10248 | 23.1082 | 10.3017 | 10.5807 |
| ENSMUSG00000038279 | 10_Nop2   | 628.702 | 0.61874  | 0.227884 | 0.618996 | 266.969 | 1119.9  | 897.652 | 494.35  | 458.427 | 534.911 |
| ENSMUSG00000038280 | 12_Ostm1  | 962.114 | 0.13698  | 0.724377 | 0.915464 | 1547.2  | 745.845 | 730.118 | 906.171 | 967.504 | 875.843 |
| ENSMUSG00000038286 | 10_Bphl   | 513.935 | -0.37226 | 0.166134 | 0.545562 | 374.16  | 445.467 | 524.32  | 565.325 | 579.472 | 594.868 |
| ENSMUSG00000038290 | 15_Smg6   | 1087.78 | 0.03101  | 0.903077 | 0.973742 | 923.266 | 1152.77 | 1222.38 | 1021.71 | 1110.87 | 1095.69 |
| ENSMUSG00000038291 | 16_Snx25  | 1439.26 | 0.14596  | 0.186555 | 0.87757  | 1868.78 | 1221.92 | 1444.72 | 1243.72 | 1305.74 | 1550.65 |
| ENSMUSG00000038292 | 12_Ccdc1  | 8.58189 | 0.49335  | 0.599585 | 0.869276 | 2.02249 | 15.869  | 12.4099 | 9.07822 | 8.58477 | 3.52688 |
| ENSMUSG00000038295 | 14_Atg9b  | 324.972 | 0.53909  | 0.21283  | 0.604036 | 189.103 | 495.341 | 470.544 | 230.257 | 282.439 | 282.151 |
| ENSMUSG00000038296 | 14_Galnt1 | 3175.66 | 0.53913  | 0.269145 | 0.656292 | 1472.37 | 4791.32 | 5022.92 | 2803.52 | 2061.2  | 2902.63 |
| ENSMUSG00000038298 | 14_Pdzk1  | 4.82514 | 0.50044  | 0.593234 | 0.866332 | 6.06747 | 6.80102 | 4.13665 | 4.12646 | 4.29238 | 3.52688 |
| ENSMUSG00000038299 | 15_Wdr3f  | 1844.44 | 0.5564   | 0.139188 | 0.50645  | 3181.37 | 1734.26 | 1671.21 | 1171.09 | 1577.02 | 1731.7  |
| ENSMUSG00000038301 | 15_Snx10  | 769.731 | 0.87679  | 0.049694 | 0.288242 | 1626.08 | 779.85  | 584.301 | 551.295 | 630.122 | 446.739 |
| ENSMUSG00000038302 | 14_Lace1  | 319.947 | 0.04711  | 0.858225 | 0.959189 | 338.767 | 292.444 | 344.376 | 298.756 | 350.259 | 295.083 |
| ENSMUSG00000038304 | 14_Cd16c  | 10.0052 | 0.60127  | 0.838075 | 0.839833 | 27.3036 | 6.80102 | 2.06832 | 9.07822 | 7.72629 | 7.05377 |
| ENSMUSG00000038305 | 14_Spats  | 702.288 | 1.31938  | 5.64E-08 | 6.11E-06 | 1067.87 | 1032.62 | 907.994 | 389.538 | 430.097 | 385.606 |
| ENSMUSG00000038311 | 13_24100  | 1.01596 | -2.18189 | 0.392763 | NA       | 1.01124 | 0       | 0       | 1.65058 | 3.43391 | 0       |
| ENSMUSG00000038312 | 10_Edem   | 623.785 | 0.21369  | 0.599589 | 0.869276 | 349.891 | 873.931 | 785.963 | 598.337 | 527.963 | 606.624 |
| ENSMUSG00000038319 | 14_Kcnh2  | 39.5007 | -1.92967 | 0.002567 | 0.039049 | 5.05622 | 22.6701 | 21.7174 | 90.7822 | 40.3484 | 56.4301 |
| ENSMUSG00000038323 | 3_170006  | 169.253 | 0.50573  | 0.411207 | 0.767001 | 404.498 | 95.2142 | 96.177  | 132.047 | 179.422 | 108.158 |
| ENSMUSG00000038324 | 13_Trpc4i | 2615.87 | 0.20081  | 0.518731 | 0.831665 | 1944.62 | 3307.56 | 3140.75 | 2426.36 | 2334.2  | 2541.71 |
| ENSMUSG00000038327 | 8_Serpinb | 0.89492 | 3.36821  | 0.272271 | NA       | 0       | 2.26701 | 3.10248 | 0       | 0       | 0       |
| ENSMUSG00000038331 | 15_Satb2  | 20.0062 | 0.65746  | 0.232497 | 0.624408 | 29.3261 | 21.5366 | 22.7516 | 13.2047 | 21.4619 | 11.7563 |
| ENSMUSG00000038332 | 12_Sesn1  | 1888.5  | -0.17179 | 0.562317 | 0.850204 | 2209.57 | 1398.74 | 1719.81 | 1764.48 | 2051.76 | 2186.67 |
| ENSMUSG00000038335 | 13_Tsr1   | 970.099 | 0.34564  | 0.21351  | 0.604733 | 1273.16 | 1077.96 | 905.926 | 744.414 | 928.014 | 891.126 |
| ENSMUSG00000038342 | 15_Mlxp   | 1528.44 | 0.43455  | 0.174178 | 0.557874 | 1201.36 | 2040.31 | 2029.02 | 1203.28 | 1321.2  | 1375.48 |
| ENSMUSG00000038344 | 14_Txlng  | 491.814 | 0.38121  | 0.475894 | 0.807493 | 1041.58 | 316.247 | 311.283 | 337.545 | 524.529 | 419.699 |
| ENSMUSG00000038346 | 18_Zfp38a | 1235.24 | 0.32271  | 0.333516 | 0.712065 | 901.019 | 1702.52 | 1515.05 | 1048.12 | 1122.03 | 1122.72 |
| ENSMUSG00000038347 | 14_Tcte2  | 138.617 | 0.19442  | 0.625743 | 0.880039 | 88.9895 | 165.491 | 189.252 | 109.764 | 134.781 | 143.427 |
| ENSMUSG00000038349 | 10_Plcl1  | 83.2637 | -0.98477 | 0.031065 | 0.216653 | 81.9108 | 35.1386 | 50.6739 | 132.047 | 121.045 | 78.7671 |
| ENSMUSG00000038351 | 15_Sgsm2  | 540.13  | -0.34613 | 0.523896 | 0.832707 | 149.664 | 556.55  | 720.811 | 684.993 | 515.086 | 613.678 |
| ENSMUSG00000038352 | 15_Arl5c  | 121.459 | 0.05018  | 0.879769 | 0.966669 | 107.192 | 151.889 | 111.689 | 102.336 | 132.205 | 123.441 |
| ENSMUSG00000038354 | 13_Ankrd1 | 1442.73 | 0.38528  | 0.394398 | 0.755773 | 729.107 | 2049.37 | 2124.17 | 1251.97 | 1062.79 | 1438.97 |
| ENSMUSG00000038357 | 10_Camp   | 8.74892 | 1.01123  | 0.177057 | 0.56149  | 9.1012  | 14.7355 | 11.3758 | 7.42763 | 5.15086 | 4.70251 |
| ENSMUSG00000038365 | 7_Fbxo25  | 358.623 | -0.09261 | 0.719905 | 0.913031 | 334.722 | 350.252 | 356.786 | 415.947 | 364.853 | 329.176 |
| ENSMUSG00000038366 | 15_Lasp1  | 3506.32 | 0.37906  | 0.286662 | 0.672535 | 2428    | 4936.41 | 4528.59 | 3146.01 | 2747.13 | 3251.79 |
| ENSMUSG00000038368 | 16_Focad  | 837.478 | 0.31034  | 0.229655 | 0.620986 | 789.782 | 1064.36 | 927.643 | 712.227 | 785.506 | 745.348 |
| ENSMUSG00000038369 | 14_Ncoa6  | 1857.27 | 0.3906   | 0.118231 | 0.468022 | 2060.92 | 2246.6  | 2013.51 | 1372.46 | 1652.57 | 1797.53 |
| ENSMUSG00000038370 | 6_Pcp41l  | 130.191 | -1.2733  | 0.000409 | 0.009925 | 66.7421 | 64.6097 | 97.2112 | 223.654 | 150.233 | 178.695 |
| ENSMUSG00000038371 | 15_Sbf2   | 1740.34 | 0.07828  | 0.73136  | 0.919034 | 1945.63 | 1746.73 | 1670.17 | 1631.6  | 1744.43 | 1703.48 |
| ENSMUSG00000038372 | 13_Gmdd   | 654.036 | 0.36113  | 0.137051 | 0.502349 | 790.793 | 731.109 | 684.615 | 542.217 | 624.113 | 551.369 |
| ENSMUSG00000038374 | 10_Rbm8i  | 1321.4  | 0.21917  | 0.426651 | 0.777557 | 1656.42 | 1425.95 | 1182.05 | 1062.98 | 1271.4  | 1329.64 |
| ENSMUSG00000038375 | 15_Trp53i | 6264.91 | 0.39725  | 0.084182 | 0.391616 | 7764.33 | 6966.51 | 6635.18 | 5060.69 | 5768.97 | 5393.78 |
| ENSMUSG00000038379 | 15_Ttk    | 281.529 | 0.64868  | 0.137081 | 0.502349 | 506.633 | 323.048 | 201.662 | 170.836 | 282.439 | 204.559 |
| ENSMUSG00000038383 | 16_Pigu   | 808.7   | 0.18987  | 0.452286 | 0.794422 | 852.479 | 928.339 | 804.578 | 654.457 | 825.855 | 786.495 |

|                    |           |         |          |          |          |         |         |         |         |         |         |
|--------------------|-----------|---------|----------|----------|----------|---------|---------|---------|---------|---------|---------|
| ENSMUSG00000038384 | 16_Setd1l | 751.404 | 0.53171  | 0.12666  | 0.483956 | 565.286 | 1079.09 | 1020.72 | 661.059 | 558.01  | 624.258 |
| ENSMUSG00000038387 | 8_Rras    | 487.708 | -0.20773 | 0.680735 | 0.902479 | 168.878 | 541.814 | 647.385 | 607.415 | 435.248 | 525.506 |
| ENSMUSG00000038388 | 14_Mpp6   | 917.082 | 0.18823  | 0.643723 | 0.889171 | 1522.93 | 753.779 | 653.59  | 746.064 | 963.211 | 862.911 |
| ENSMUSG00000038390 | 11_Gpr16  | 124.011 | -1.25525 | 0.041366 | 0.257433 | 22.2474 | 71.4107 | 126.168 | 253.365 | 145.083 | 125.792 |
| ENSMUSG00000038393 | 14_Txnip  | 14782.8 | 0.07516  | 0.751019 | 0.925449 | 15557   | 14073.6 | 15872.3 | 12660.8 | 15139.2 | 15393.7 |
| ENSMUSG00000038398 | 7_Upf3a   | 419.198 | -0.16794 | 0.58013  | 0.859399 | 289.216 | 457.935 | 437.45  | 433.278 | 444.691 | 452.617 |
| ENSMUSG00000038400 | 15_Pmepi  | 625.152 | 0.22918  | 0.430932 | 0.780048 | 797.872 | 599.623 | 626.702 | 684.167 | 497.058 | 545.491 |
| ENSMUSG00000038402 | 2_Foxf2   | 60.791  | -1.08457 | 0.051457 | 0.293762 | 63.7084 | 14.7355 | 38.264  | 100.686 | 72.1121 | 75.2402 |
| ENSMUSG00000038403 | 10_Hfe2   | 60.7755 | -0.52381 | 0.489061 | 0.814393 | 110.226 | 11.335  | 27.9224 | 99.8604 | 50.6501 | 64.6595 |
| ENSMUSG00000038406 | 15_Scaf1  | 893.202 | 0.30526  | 0.607253 | 0.872213 | 241.687 | 1304.66 | 1415.77 | 927.629 | 642.999 | 826.466 |
| ENSMUSG00000038408 | 13_17000  | 3.14148 | -2.91781 | 0.072971 | 0.361065 | 0       | 2.26701 | 0       | 5.77705 | 2.57543 | 8.22939 |
| ENSMUSG00000038412 | 7_Higd1a  | 1037.83 | -0.04736 | 0.862459 | 0.960948 | 1196.3  | 1008.82 | 857.32  | 971.369 | 1182.12 | 1011.04 |
| ENSMUSG00000038415 | 9_Foxq1   | 733.96  | 0.59324  | 0.109789 | 0.450058 | 1165.96 | 750.379 | 731.152 | 462.989 | 496.2   | 797.076 |
| ENSMUSG00000038416 | 14_Cdc4   | 1167.91 | 0.02263  | 0.939583 | 0.958484 | 1495.63 | 1017.89 | 1017.61 | 1049.77 | 1310.89 | 1115.67 |
| ENSMUSG00000038417 | 3_Fig4    | 369.224 | -0.20145 | 0.454417 | 0.795918 | 404.498 | 321.915 | 304.043 | 394.49  | 409.494 | 380.903 |
| ENSMUSG00000038418 | 7_Egr1    | 751.198 | 1.26121  | 0.004859 | 0.060919 | 871.693 | 1006.55 | 1302.01 | 621.445 | 212.902 | 492.588 |
| ENSMUSG00000038421 | 13_Fclra  | 3.44151 | 1.81218  | 0.13971  | 0.507179 | 3.03373 | 7.93452 | 5.17081 | 2.47588 | 0.85848 | 1.17563 |
| ENSMUSG00000038422 | 2_Hdhd3   | 259.017 | 0.09347  | 0.888035 | 0.969752 | 49.551  | 376.323 | 376.435 | 316.087 | 179.422 | 256.287 |
| ENSMUSG00000038425 | 17_Poli   | 139.111 | 0.14401  | 0.673558 | 0.900436 | 167.867 | 112.217 | 158.227 | 128.746 | 157.101 | 110.509 |
| ENSMUSG00000038429 | 10_Usp5   | 1931.59 | 0.27349  | 0.542936 | 0.84123  | 929.334 | 2823.56 | 2589.54 | 1701.75 | 1639.69 | 1905.69 |
| ENSMUSG00000038437 | 11_Mltt6  | 1217.65 | -0.24024 | 0.552099 | 0.845186 | 604.724 | 1266.12 | 1478.85 | 1548.25 | 1151.22 | 1256.75 |
| ENSMUSG00000038446 | 7_Cdc40   | 933.853 | 0.27704  | 0.411041 | 0.767001 | 1418.78 | 889.8   | 761.143 | 844.274 | 888.524 | 800.603 |
| ENSMUSG00000038451 | 13_Spsb2  | 145.744 | 0.0419   | 0.94744  | 0.986649 | 32.3598 | 196.096 | 215.106 | 149.378 | 109.885 | 171.642 |
| ENSMUSG00000038453 | 15_Srcin1 | 768.769 | 0.42543  | 0.382173 | 0.749425 | 336.744 | 1157.31 | 1149.99 | 703.149 | 612.953 | 652.473 |
| ENSMUSG00000038456 | 9_Denn2   | 297.486 | -1.15837 | 0.0015   | 0.026343 | 139.552 | 167.758 | 245.096 | 523.235 | 355.409 | 353.864 |
| ENSMUSG00000038457 | 16_Tmem   | 19.1727 | -0.20517 | 0.790069 | 0.937308 | 5.05622 | 22.6701 | 25.854  | 33.837  | 11.1602 | 16.4588 |
| ENSMUSG00000038459 | 9_Abhd17  | 1264.1  | 0.48072  | 0.074051 | 0.363915 | 1732.26 | 1450.88 | 1234.79 | 976.321 | 1037.04 | 1153.29 |
| ENSMUSG00000038462 | 3_Uqcrf1  | 1416.36 | -0.05718 | 0.803805 | 0.942928 | 1509.79 | 1303.53 | 1351.65 | 1441.79 | 1510.06 | 1381.36 |
| ENSMUSG00000038463 | 8_Olfml2b | 283.523 | -0.40088 | 0.339496 | 0.718177 | 162.81  | 206.298 | 364.025 | 400.267 | 242.091 | 325.649 |
| ENSMUSG00000038467 | 15_Chmp   | 4272.91 | 0.50044  | 0.094988 | 0.418422 | 3685.99 | 6215    | 5119.1  | 3360.59 | 3606.46 | 3650.32 |
| ENSMUSG00000038473 | 14_Nos1a  | 101.419 | -0.47082 | 0.263794 | 0.652821 | 49.551  | 90.6802 | 114.792 | 125.444 | 98.7249 | 129.319 |
| ENSMUSG00000038481 | 12_Cdk19  | 1418.52 | 0.28097  | 0.415683 | 0.770073 | 2221.7  | 1250.25 | 1196.52 | 1251.14 | 1310.04 | 1281.43 |
| ENSMUSG00000038482 | 10_Tfdp1  | 1452.45 | 0.29002  | 0.423631 | 0.775388 | 969.783 | 2038.04 | 1786    | 1206.58 | 1267.11 | 1447.2  |
| ENSMUSG00000038485 | 5_Socs7   | 1517.61 | -0.13948 | 0.552644 | 0.845655 | 1297.43 | 1515.49 | 1520.22 | 1691.85 | 1532.38 | 1548.3  |
| ENSMUSG00000038486 | 9_Sv2a    | 386.308 | -1.75669 | 0.000167 | 0.005026 | 102.136 | 180.227 | 247.165 | 870.683 | 529.68  | 387.957 |
| ENSMUSG00000038489 | 8_Polr2l  | 136.683 | -0.13991 | 0.706504 | 0.90886  | 85.9558 | 131.486 | 172.705 | 137.824 | 141.649 | 150.48  |
| ENSMUSG00000038495 | 14_Otud7l | 2901.19 | 0.38916  | 0.093345 | 0.415917 | 3560.59 | 3304.16 | 3005.27 | 2446.99 | 2400.3  | 2689.84 |
| ENSMUSG00000038496 | 16_Slc19a | 24.6169 | -0.53048 | 0.335934 | 0.714302 | 31.3486 | 12.4685 | 16.5466 | 29.7105 | 31.7636 | 25.8638 |
| ENSMUSG00000038497 | 6_Tmco3   | 473.86  | -0.50627 | 0.140939 | 0.509084 | 261.912 | 434.132 | 478.817 | 634.65  | 489.332 | 544.316 |
| ENSMUSG00000038500 | 15_Prr3   | 189.76  | -0.24764 | 0.56781  | 0.852443 | 90.0007 | 207.431 | 223.379 | 249.238 | 186.29  | 182.222 |
| ENSMUSG00000038502 | 15_Ptov1  | 624.82  | -0.07678 | 0.920144 | 0.977317 | 60.6747 | 763.981 | 1000.03 | 872.334 | 455.851 | 596.043 |
| ENSMUSG00000038503 | 14_Mesdc  | 1346.09 | -0.21723 | 0.358756 | 0.732812 | 1128.55 | 1292.19 | 1314.42 | 1555.68 | 1430.22 | 1355.5  |
| ENSMUSG00000038506 | 13_Dcun1  | 547.473 | -0.19538 | 0.431017 | 0.780048 | 453.037 | 514.61  | 563.618 | 570.277 | 574.321 | 608.975 |
| ENSMUSG00000038507 | 6_Parp12  | 6739.33 | 1.7027   | 1.12E-07 | 1.12E-05 | 12126.8 | 11208.1 | 7597.98 | 2541.9  | 3712.91 | 3248.26 |
| ENSMUSG00000038508 | 7_Gdf15   | 0.96986 | -0.77022 | 0.379294 | NA       | 0       | 1.1335  | 1.03416 | 2.47588 | 0       | 1.17563 |
| ENSMUSG00000038510 | 12_Rpf2   | 434.566 | 0.45325  | 0.380387 | 0.747938 | 905.064 | 351.386 | 250.267 | 297.105 | 443.833 | 359.742 |
| ENSMUSG00000038515 | 9_Grtp1   | 56.4518 | -0.63096 | 0.189285 | 0.577749 | 35.3936 | 40.8061 | 56.8789 | 103.162 | 47.2162 | 55.2545 |
| ENSMUSG00000038517 | 15_Tbkbp  | 91.0876 | -0.25372 | 0.63479  | 0.884141 | 32.3598 | 94.0807 | 123.065 | 125.444 | 89.2816 | 82.2939 |
| ENSMUSG00000038518 | 15_Jarid2 | 2372.98 | 0.63206  | 0.008928 | 0.092529 | 2988.23 | 2817.89 | 2847.05 | 1721.56 | 1724.68 | 2138.47 |
| ENSMUSG00000038520 | 14_Tbcl1d | 505.955 | -0.06671 | 0.917282 | 0.976775 | 96.0682 | 637.029 | 749.767 | 611.542 | 414.644 | 526.681 |
| ENSMUSG00000038521 | 17_C1s1   | 3689.19 | 0.37084  | 0.248093 | 0.639619 | 5584.09 | 3756.43 | 3141.78 | 3150.14 | 3506.02 | 2996.68 |
| ENSMUSG00000038522 | 6_Al3173f | 7.19128 | -2.08359 | 0.043581 | 0.265204 | 6.06747 | 0       | 2.06832 | 11.5541 | 12.8772 | 10.5807 |
| ENSMUSG00000038523 | 10_17000  | 0.83933 | -1.79678 | 0.507673 | NA       | 0       | 0       | 1.03416 | 1.65058 | 0       | 2.35126 |
| ENSMUSG00000038524 | 13_Fchsd  | 290.756 | 0.51306  | 0.38624  | 0.751493 | 90.0007 | 459.069 | 476.748 | 288.027 | 180.28  | 250.409 |
| ENSMUSG00000038525 | 16_Armc1  | 671.653 | 0.29636  | 0.443353 | 0.788071 | 1115.4  | 566.751 | 538.798 | 522.41  | 657.593 | 628.961 |
| ENSMUSG00000038526 | 14_Car14  | 845.666 | -1.58306 | 9.86E-05 | 0.003282 | 528.881 | 251.638 | 489.158 | 1601.07 | 1298.02 | 905.233 |
| ENSMUSG00000038527 | 9_C1rl    | 143.758 | -0.55305 | 0.162263 | 0.540795 | 70.7871 | 139.421 | 139.612 | 202.197 | 145.941 | 164.588 |
| ENSMUSG00000038528 | 14_BC02f  | 3.91535 | 0.8077   | 0.483652 | 0.811981 | 7.07871 | 6.80102 | 1.03416 | 2.47588 | 2.57543 | 3.52688 |
| ENSMUSG00000038530 | 11_Rgs4   | 62.3707 | -1.05605 | 0.109213 | 0.449508 | 83.9333 | 14.7355 | 22.7516 | 105.637 | 78.9799 | 68.1864 |
| ENSMUSG00000038533 | 15_Cbfa2l | 956.103 | 0.31084  | 0.242786 | 0.634333 | 1271.13 | 954.409 | 950.394 | 803.009 | 897.108 | 860.56  |
| ENSMUSG00000038534 | 17_Osbpl1 | 341.105 | 0.43807  | 0.517562 | 0.831186 | 66.7421 | 591.689 | 519.149 | 360.653 | 208.61  | 299.785 |
| ENSMUSG00000038535 | 17_Zfp28k | 964.631 | 0.34367  | 0.445627 | 0.789443 | 1808.1  | 714.107 | 714.606 | 727.083 | 991.541 | 832.345 |
| ENSMUSG00000038537 | 1_Mc3r    | 0       | NA       | NA       | NA       | 0       | 0       | 0       | 0       | 0       | 0       |
| ENSMUSG00000038538 | 17_Ubn2   | 2079.13 | 0.40979  | 0.363074 | 0.735825 | 3943.85 | 1550.63 | 1622.6  | 1397.22 | 2081.81 | 1878.65 |
| ENSMUSG00000038539 | 14_Atf5   | 806.285 | 0.10037  | 0.786893 | 0.936514 | 514.723 | 1057.56 | 930.745 | 864.081 | 633.556 | 837.047 |
| ENSMUSG00000038540 | 14_Tmrc3  | 148.472 | -0.78324 | 0.04486  | 0.270252 | 148.653 | 65.7432 | 112.724 | 180.739 | 194.874 | 188.1   |
| ENSMUSG00000038541 | 7_Srd5a2  | 11.1953 | -5.85154 | 0.000174 | 0.005185 | 0       | 1.1335  | 0       | 21.4576 | 3.43391 | 41.147  |
| ENSMUSG00000038542 | 14_Pcid2  | 410.894 | 0.20507  | 0.541376 | 0.84046  | 291.238 | 519.144 | 509.842 | 373.032 | 379.447 | 392.66  |
| ENSMUSG00000038543 | 13_BC02f  | 61.2269 | 0.32862  | 0.476071 | 0.807493 | 88.9895 | 79.3452 | 36.1957 | 49.5175 | 59.2349 | 54.0789 |
| ENSMUSG00000038544 | 14_Inip   | 640.159 | 0.43949  | 0.124898 | 0.480594 | 908.097 | 703.905 | 598.78  | 530.663 | 575.18  | 524.33  |
| ENSMUSG00000038545 | 13_Cul7   | 446.749 | -0.50237 | 0.396324 | 0.757228 | 105.169 | 401.26  | 602.916 | 705.625 | 381.164 | 484.359 |
| ENSMUSG00000038546 | 8_Ranbp9  | 1479.81 | 0.49387  | 0.20195  | 0.593308 | 2582.72 | 1415.75 | 1193.42 | 1058.85 | 1443.1  | 1185.03 |
| ENSMUSG00000038550 | 10_Ciart  | 145.696 | 0.94407  | 0.011963 | 0.114592 | 126.406 | 199.497 | 249.233 | 104.812 | 88.4231 | 105.807 |
| ENSMUSG00000038552 | 14_Fndc4  | 219.874 | -1.27793 | 7.97E-05 | 0.002731 | 104.158 | 130.353 | 150.988 | 365.605 | 314.203 | 253.936 |
| ENSMUSG00000038555 | 7_Reep2   | 51.2965 | -1.54282 | 0.008205 | 0.087218 | 13.1462 | 29.4711 | 36.1957 | 122.969 | 47.2162 | 58.7814 |

|                    |           |         |          |          |          |         |         |         |         |         |         |
|--------------------|-----------|---------|----------|----------|----------|---------|---------|---------|---------|---------|---------|
| ENSMUSG00000038560 | 7_Sp6     | 373.743 | 0.32929  | 0.214221 | 0.605026 | 392.363 | 418.263 | 437.45  | 309.485 | 300.467 | 384.43  |
| ENSMUSG00000038563 | 13_Eftud1 | 630.148 | 0.38517  | 0.186922 | 0.573937 | 680.567 | 741.311 | 718.742 | 425.026 | 545.133 | 670.108 |
| ENSMUSG00000038564 | 10_lft172 | 744.095 | -0.28917 | 0.448608 | 0.791834 | 388.318 | 714.107 | 906.96  | 867.382 | 755.46  | 832.345 |
| ENSMUSG00000038567 | 5_Cyp24a  | 1597.31 | 0.39098  | 0.262611 | 0.651941 | 1995.19 | 1283.13 | 2158.3  | 1055.55 | 1375.28 | 1716.42 |
| ENSMUSG00000038569 | 13_Rad9b  | 230.384 | 0.24884  | 0.463676 | 0.801277 | 324.609 | 194.962 | 230.618 | 174.962 | 223.204 | 233.95  |
| ENSMUSG00000038570 | 14_Saxo2  | 24.9376 | -0.16098 | 0.793889 | 0.938336 | 41.461  | 14.7355 | 14.4783 | 28.0599 | 30.9052 | 19.9857 |
| ENSMUSG00000038572 | 7_Bpifb5  | 17.6864 | -1.17481 | 0.086277 | 0.398033 | 6.06747 | 7.93452 | 18.6149 | 35.4876 | 18.028  | 19.9857 |
| ENSMUSG00000038576 | 15_Susd4  | 1234.78 | 0.79688  | 0.031896 | 0.220151 | 943.491 | 2057.31 | 1701.2  | 825.292 | 855.043 | 1026.32 |
| ENSMUSG00000038578 | 15_Susd1  | 279.211 | 0.61939  | 0.033052 | 0.224793 | 337.756 | 366.121 | 310.248 | 184.04  | 213.761 | 263.341 |
| ENSMUSG00000038580 | 12_Sct    | 3.60895 | 5.37896  | 0.003982 | 0.052983 | 1.01124 | 11.335  | 9.30745 | 0       | 0       | 0       |
| ENSMUSG00000038582 | 15_Pptc7  | 1255.34 | 0.33709  | 0.213337 | 0.604576 | 1723.16 | 1235.52 | 1245.13 | 1100.94 | 1105.72 | 1121.55 |
| ENSMUSG00000038583 | 12_Pln    | 45.1388 | -0.60342 | 0.440807 | 0.786476 | 81.9108 | 7.93452 | 17.5807 | 70.9751 | 48.9332 | 43.4982 |
| ENSMUSG00000038587 | 8_Akap12  | 984.221 | -1.04092 | 0.001205 | 0.022599 | 652.253 | 469.27  | 809.748 | 1533.39 | 1202.73 | 1237.94 |
| ENSMUSG00000038591 | 3_Colec1c | 3.99004 | 0.87525  | 0.470045 | 0.804531 | 8.08995 | 1.1335  | 6.20497 | 4.12646 | 0.85848 | 3.52688 |
| ENSMUSG00000038593 | 18_Tctn1  | 426.742 | 0.12594  | 0.781859 | 0.935592 | 201.238 | 561.084 | 573.96  | 479.495 | 361.419 | 383.255 |
| ENSMUSG00000038594 | 8_Cep85l  | 52.1829 | -0.22264 | 0.732406 | 0.919789 | 99.1019 | 21.5366 | 23.7857 | 56.9452 | 63.5273 | 48.2007 |
| ENSMUSG00000038598 | 9_Al4818i | 1.04695 | -1.07762 | 0.677131 | NA       | 2.02249 | 0       | 0       | 0.82529 | 3.43391 | 0       |
| ENSMUSG00000038599 | 14_Capn8  | 1.45362 | 1.24807  | 0.492291 | NA       | 4.04498 | 1.1335  | 1.03416 | 1.65058 | 0.85848 | 0       |
| ENSMUSG00000038600 | 12_Atp6v  | 12.5757 | -0.00528 | 0.994365 | 0.998043 | 16.1799 | 10.2015 | 11.3758 | 22.2829 | 6.00934 | 9.40502 |
| ENSMUSG00000038602 | 7_Slc35f1 | 82.152  | -0.95733 | 0.091825 | 0.413078 | 103.147 | 26.0706 | 38.264  | 115.541 | 128.772 | 81.1183 |
| ENSMUSG00000038604 | 8_Fam65a  | 226.321 | -0.69152 | 0.216147 | 0.607397 | 56.6297 | 194.962 | 267.848 | 368.08  | 222.346 | 248.057 |
| ENSMUSG00000038605 | 11_Samd   | 745.605 | 0.30594  | 0.285199 | 0.671308 | 632.028 | 877.331 | 963.839 | 643.728 | 693.649 | 663.054 |
| ENSMUSG00000038607 | 12_Gng1c  | 489.514 | 0.18404  | 0.679893 | 0.902118 | 865.625 | 335.517 | 360.922 | 462.164 | 510.794 | 402.065 |
| ENSMUSG00000038608 | 15_Dock1  | 215.097 | 0.28951  | 0.438458 | 0.785475 | 305.396 | 251.638 | 153.056 | 195.594 | 221.487 | 163.412 |
| ENSMUSG00000038611 | 16_Phrf1  | 1141.35 | 0.20359  | 0.674003 | 0.900436 | 472.251 | 1646.98 | 1546.07 | 1091.86 | 952.909 | 1138.01 |
| ENSMUSG00000038612 | 16_Mcl1   | 7124.84 | 0.7023   | 0.073747 | 0.363557 | 13455.6 | 7066.26 | 5954.7  | 4692.61 | 6157.86 | 5422    |
| ENSMUSG00000038615 | 17_Nfe2l1 | 4848.52 | -0.0433  | 0.898329 | 0.97174  | 3116.66 | 5622.17 | 5588.61 | 5431.25 | 4298.39 | 5034.04 |
| ENSMUSG00000038618 | 11_Rassf  | 2397.85 | 0.5911   | 0.220344 | 0.611544 | 1147.76 | 3793.83 | 3705.4  | 2159.79 | 1554.7  | 2025.61 |
| ENSMUSG00000038619 | 12_Ensa   | 2538.33 | -0.2385  | 0.271917 | 0.658633 | 2339.01 | 2271.54 | 2376.5  | 2701.18 | 2883.62 | 2658.09 |
| ENSMUSG00000038622 | 7_Med30   | 367.038 | 0.22534  | 0.595024 | 0.86708  | 632.028 | 299.245 | 255.438 | 307.009 | 351.117 | 357.391 |
| ENSMUSG00000038623 | 9_Tm6sf1  | 74.7312 | -0.28887 | 0.41967  | 0.773473 | 71.7983 | 71.4107 | 58.9472 | 82.5292 | 97.8664 | 65.8352 |
| ENSMUSG00000038624 | 11_Nepn   | 0.38486 | 0.16972  | 0.966824 | NA       | 0       | 1.1335  | 0       | 0       | 0       | 1.17563 |
| ENSMUSG00000038628 | 8_Polr3k  | 893.764 | 0.24068  | 0.582536 | 0.860399 | 1601.81 | 677.835 | 624.634 | 741.113 | 904.835 | 812.359 |
| ENSMUSG00000038630 | 8_Zkscan  | 51.7158 | -1.85371 | 0.000407 | 0.009903 | 30.3373 | 21.5366 | 15.5124 | 100.686 | 98.7249 | 43.4982 |
| ENSMUSG00000038633 | 5_Degs1   | 2690.69 | -0.3791  | 0.258457 | 0.64893  | 3268.34 | 1796.6  | 1952.5  | 2971.88 | 3273.37 | 2881.46 |
| ENSMUSG00000038637 | 14_Lrrc56 | 75.4246 | 0.43446  | 0.410525 | 0.767001 | 34.3823 | 98.6148 | 127.202 | 59.421  | 72.9705 | 59.957  |
| ENSMUSG00000038642 | 10_Ctss   | 1970.73 | 1.93     | 2.59E-08 | 3.04E-06 | 3393.74 | 3994.46 | 1978.35 | 857.479 | 813.836 | 786.495 |
| ENSMUSG00000038644 | 14_Pold1  | 223.246 | 1.11825  | 0.159879 | 0.538192 | 26.2924 | 464.736 | 426.075 | 185.691 | 94.4325 | 142.251 |
| ENSMUSG00000038646 | 13_Fam1c  | 918.931 | 0.26879  | 0.55346  | 0.84601  | 1706.98 | 655.165 | 650.488 | 743.588 | 875.647 | 881.721 |
| ENSMUSG00000038648 | 5_Creb3l2 | 1456.07 | -0.3959  | 0.119998 | 0.470919 | 1422.82 | 1085.9  | 1263.75 | 1559.8  | 1808.81 | 1595.33 |
| ENSMUSG00000038650 | 14_Rnh1   | 5815.79 | 0.55819  | 0.366322 | 0.739399 | 1502.71 | 10191.3 | 9087.18 | 5431.25 | 3604.74 | 5077.54 |
| ENSMUSG00000038656 | 5_Cyp3a1  | 0       | NA       | NA       | NA       | 0       | 0       | 0       | 0       | 0       | 0       |
| ENSMUSG00000038658 | 15_Ric1   | 1113.41 | 0.12357  | 0.700046 | 0.905844 | 1571.47 | 947.608 | 963.839 | 985.399 | 1111.73 | 1100.39 |
| ENSMUSG00000038663 | 7_Fsd2    | 70.781  | -0.82413 | 0.222077 | 0.612533 | 90.0007 | 12.4685 | 50.6739 | 128.746 | 55.801  | 86.9965 |
| ENSMUSG00000038664 | 15_Herc1  | 2737.84 | -0.0651  | 0.801343 | 0.942008 | 3172.27 | 2493.71 | 2362.02 | 2588.94 | 2936.85 | 2873.23 |
| ENSMUSG00000038665 | 15_Dgki   | 26.7873 | -1.1935  | 0.038504 | 0.246339 | 18.2024 | 7.93452 | 22.7516 | 39.614  | 46.3578 | 25.8638 |
| ENSMUSG00000038668 | 14_Lpar1  | 814.376 | -0.06596 | 0.84051  | 0.953262 | 1074.95 | 588.288 | 723.913 | 878.111 | 821.562 | 799.427 |
| ENSMUSG00000038670 | 10_Mybp   | 107.137 | -1.1492  | 0.062761 | 0.330645 | 77.8658 | 21.5366 | 100.314 | 236.859 | 100.442 | 105.807 |
| ENSMUSG00000038671 | 15_Arrfp1 | 973.255 | 0.03261  | 0.89677  | 0.97156  | 861.58  | 1050.76 | 1040.37 | 865.732 | 1024.16 | 996.932 |
| ENSMUSG00000038677 | 13_Scub   | 47.1139 | -2.08145 | 0.000805 | 0.016631 | 6.06747 | 15.869  | 32.059  | 86.6557 | 51.5086 | 90.5233 |
| ENSMUSG00000038679 | 16_Trps1  | 930.456 | 0.43839  | 0.326583 | 0.707918 | 1796.98 | 664.233 | 750.801 | 708.101 | 836.157 | 826.466 |
| ENSMUSG00000038683 | 15_Pak1i  | 1266.84 | 0.28125  | 0.360002 | 0.733629 | 1774.73 | 1270.66 | 1124.13 | 974.67  | 1244.79 | 1212.07 |
| ENSMUSG00000038685 | 18_Rtel1  | 632.973 | 0.21823  | 0.579469 | 0.858997 | 374.16  | 768.515 | 899.721 | 554.596 | 631.839 | 569.004 |
| ENSMUSG00000038690 | 15_Atp5j2 | 2169.55 | -0.45008 | 0.331627 | 0.711299 | 755.4   | 2378.09 | 2368.23 | 2635.16 | 2439.79 | 2440.6  |
| ENSMUSG00000038692 | 8_Hoxb4   | 1.83186 | 4.39735  | 0.042621 | 0.261953 | 2.02249 | 7.93452 | 1.03416 | 0       | 0       | 0       |
| ENSMUSG00000038695 | 12_Josd2  | 222.005 | 0.15704  | 0.809013 | 0.945066 | 45.506  | 295.844 | 360.922 | 240.16  | 167.403 | 222.194 |
| ENSMUSG00000038696 | 14_Mapk   | 3370.07 | 0.42221  | 0.052276 | 0.296722 | 3958.01 | 3883.38 | 3737.46 | 2749.05 | 2866.45 | 3026.07 |
| ENSMUSG00000038697 | 14_Taf5l  | 918.346 | 0.31047  | 0.399229 | 0.759197 | 608.769 | 1321.66 | 1120    | 849.226 | 745.158 | 865.262 |
| ENSMUSG00000038702 | 6_Dsel    | 501.183 | 0.24271  | 0.663524 | 0.896273 | 1066.86 | 273.174 | 289.565 | 428.327 | 504.784 | 444.387 |
| ENSMUSG00000038704 | 10_Aspdh  | 0.99383 | -2.13881 | 0.499332 | NA       | 1.01124 | 0       | 0       | 4.95175 | 0       | 0       |
| ENSMUSG00000038705 | 13_Gmeb   | 663.481 | 0.25337  | 0.391    | 0.754161 | 537.982 | 826.324 | 800.441 | 580.187 | 594.066 | 641.893 |
| ENSMUSG00000038708 | 9_Golga4  | 9320.66 | 0.24957  | 0.295664 | 0.679579 | 10665.6 | 9583.77 | 10124.4 | 7647.16 | 8285.16 | 9617.81 |
| ENSMUSG00000038709 | 14_Txndc  | 0.17236 | 1.1315   | 0.781553 | NA       | 0       | 0       | 1.03416 | 0       | 0       | 0       |
| ENSMUSG00000038712 | 16_Fam6c  | 1690.41 | 0.16843  | 0.626808 | 0.880676 | 1130.57 | 2141.19 | 2095.21 | 1667.09 | 1431.94 | 1676.45 |
| ENSMUSG00000038717 | 7_Atp5l   | 2944.2  | -0.06305 | 0.820543 | 0.948338 | 3513.06 | 2458.57 | 2668.14 | 3283.84 | 3068.2  | 2673.38 |
| ENSMUSG00000038718 | 15_Pbx3   | 966.771 | 0.08809  | 0.758042 | 0.927759 | 1260.01 | 892.067 | 836.637 | 934.231 | 947.759 | 929.922 |
| ENSMUSG00000038721 | 8_Hoxb7   | 0.55019 | 2.66232  | 0.46328  | NA       | 0       | 2.26701 | 1.03416 | 0       | 0       | 0       |
| ENSMUSG00000038722 | 17_Bud31  | 1338.29 | 0.20453  | 0.583827 | 0.860815 | 2115.52 | 1122.17 | 1061.05 | 1068.75 | 1366.7  | 1295.54 |
| ENSMUSG00000038725 | 11_Pkhd1  | 34.4381 | -1.08313 | 0.07576  | 0.368706 | 34.3823 | 6.80102 | 24.8199 | 38.7887 | 48.9332 | 52.9033 |
| ENSMUSG00000038729 | 20_Akap2  | 798.312 | -0.09876 | 0.790309 | 0.937373 | 1140.68 | 557.683 | 614.292 | 809.612 | 771.771 | 895.828 |
| ENSMUSG00000038732 | 14_Mboat  | 1902.15 | 0.47238  | 0.071061 | 0.356233 | 2395.64 | 2353.15 | 1883.21 | 1404.65 | 1601.06 | 1775.2  |
| ENSMUSG00000038733 | 13_Wdr2f  | 10097.5 | 0.61323  | 0.101873 | 0.434078 | 18040.6 | 9502.15 | 9092.35 | 6637    | 8940.18 | 8372.82 |
| ENSMUSG00000038736 | 9_Nudcd1  | 725.413 | 0.59682  | 0.181509 | 0.567796 | 1425.85 | 691.437 | 502.603 | 481.971 | 649.867 | 600.746 |
| ENSMUSG00000038738 | 15_Shank  | 246.426 | 0.60683  | 0.205635 | 0.59724  | 129.439 | 329.849 | 433.314 | 227.781 | 166.545 | 191.627 |
| ENSMUSG00000038740 | 9_Mvb12t  | 367.967 | -0.90199 | 0.057084 | 0.31271  | 118.316 | 283.376 | 368.162 | 628.873 | 403.484 | 405.592 |

|                    |           |         |          |          |          |         |         |         |         |         |         |
|--------------------|-----------|---------|----------|----------|----------|---------|---------|---------|---------|---------|---------|
| ENSMUSG00000038742 | 6_Angptl6 | 10.7544 | -1.02983 | 0.235947 | 0.628008 | 2.02249 | 5.66751 | 13.4441 | 15.6806 | 7.72629 | 19.9857 |
| ENSMUSG00000038745 | 15_Nlrp6  | 25.2301 | 0.75137  | 0.202428 | 0.593555 | 18.2024 | 34.0051 | 42.4006 | 15.6806 | 12.8772 | 28.2151 |
| ENSMUSG00000038751 | 5_Ptk6    | 10.5192 | 1.99124  | 0.012925 | 0.121066 | 10.1124 | 26.0706 | 14.4783 | 4.95175 | 5.15086 | 2.35126 |
| ENSMUSG00000038754 | 4_Elovl3  | 0.28063 | -1.56014 | 0.700051 | NA       | 0       | 0       | 0       | 0.82529 | 0.85848 | 0       |
| ENSMUSG00000038756 | 13_Tll6   | 0.4547  | -0.61836 | 0.875203 | NA       | 1.01124 | 0       | 0       | 0       | 1.71695 | 0       |
| ENSMUSG00000038759 | 15_Nup20  | 2262.16 | 0.38585  | 0.143148 | 0.511944 | 2773.84 | 2668.27 | 2246.2  | 1644.81 | 2117.86 | 2122.01 |
| ENSMUSG00000038760 | 13_Trhr   | 1.12886 | 1.53267  | 0.616281 | NA       | 5.05622 | 0       | 0       | 0       | 1.71695 | 0       |
| ENSMUSG00000038762 | 15_Abcf1  | 1828.05 | 0.31024  | 0.486687 | 0.81371  | 920.232 | 2596.86 | 2554.38 | 1525.97 | 1462.84 | 1908.04 |
| ENSMUSG00000038763 | 11_Alphk3 | 41.4448 | -0.82796 | 0.214498 | 0.605201 | 18.2024 | 22.6701 | 48.6056 | 71.8004 | 18.028  | 69.362  |
| ENSMUSG00000038764 | 14_Ptpn3  | 2290.64 | 0.29314  | 0.272679 | 0.659209 | 2920.47 | 2303.28 | 2343.41 | 1753.75 | 2141.04 | 2281.89 |
| ENSMUSG00000038765 | 13_Lmx1t  | 351.729 | -1.15274 | 0.024537 | 0.186673 | 90.0007 | 201.764 | 362.991 | 585.132 | 393.182 | 477.305 |
| ENSMUSG00000038766 | 16_Gabpt  | 3985.06 | 0.10087  | 0.71533  | 0.911362 | 5057.23 | 3644.21 | 3671.27 | 3436.52 | 4172.2  | 3928.95 |
| ENSMUSG00000038768 | 8_913040  | 0.50203 | -0.79092 | 0.80375  | NA       | 1.01124 | 0       | 0       | 0.82529 | 0       | 1.17563 |
| ENSMUSG00000038773 | 10_Kdm3l  | 2985.37 | 0.44357  | 0.083944 | 0.391242 | 2842.61 | 3960.46 | 3519.25 | 2469.27 | 2565.99 | 2554.64 |
| ENSMUSG00000038774 | 8_Asccl3  | 2252.81 | 1.32672  | 0.001718 | 0.028968 | 5019.82 | 2685.27 | 1958.7  | 1012.63 | 1450.83 | 1389.59 |
| ENSMUSG00000038775 | 14_Vill   | 63.6474 | -0.5904  | 0.297529 | 0.680939 | 16.1799 | 69.1437 | 67.2205 | 82.5292 | 70.3951 | 76.4158 |
| ENSMUSG00000038776 | 12_Ephx1  | 3956.2  | -0.14439 | 0.658749 | 0.89471  | 2610.02 | 3808.57 | 4856.42 | 3963.05 | 3900.06 | 4599.06 |
| ENSMUSG00000038777 | 19_Semat  | 63.6892 | -1.423   | 0.021632 | 0.172199 | 11.1237 | 31.7381 | 61.0155 | 127.92  | 70.3951 | 79.9427 |
| ENSMUSG00000038780 | 14_Smurf  | 1634.87 | 0.44299  | 0.253129 | 0.644241 | 1054.73 | 2384.89 | 2212.07 | 1416.2  | 1203.58 | 1537.72 |
| ENSMUSG00000038781 | 6_Stap2   | 1783.44 | 0.28221  | 0.522518 | 0.832206 | 879.783 | 2469.9  | 2522.32 | 1561.45 | 1581.31 | 1685.85 |
| ENSMUSG00000038782 | 5_170002  | 5.97141 | 0.04412  | 0.962494 | 0.990106 | 2.02249 | 7.93452 | 8.27329 | 7.42763 | 4.29238 | 5.87814 |
| ENSMUSG00000038784 | 13_Cnot4  | 741.953 | 0.45134  | 0.158866 | 0.537239 | 1109.34 | 736.777 | 724.947 | 524.886 | 727.988 | 627.785 |
| ENSMUSG00000038791 | 14_Scgb3  | 0.17236 | 1.1315   | 0.781553 | NA       | 0       | 0       | 1.03416 | 0       | 0       | 0       |
| ENSMUSG00000038792 | 3_493140  | 0.16854 | 1.1315   | 0.781553 | NA       | 1.01124 | 0       | 0       | 0       | 0       | 0       |
| ENSMUSG00000038793 | 8_Lefty1  | 49.1122 | -0.10969 | 0.798552 | 0.940596 | 44.4948 | 34.0051 | 63.0839 | 56.9452 | 42.0654 | 54.0789 |
| ENSMUSG00000038797 | 13_Zscan  | 25.5821 | -0.51258 | 0.365118 | 0.738154 | 13.1462 | 15.869  | 34.1273 | 31.3611 | 24.8958 | 34.0932 |
| ENSMUSG00000038801 | 6_Scgb1c  | 14.2796 | -2.26968 | 0.010968 | 0.107497 | 1.01124 | 3.40051 | 10.3416 | 38.7887 | 18.028  | 14.1075 |
| ENSMUSG00000038803 | 7_Ost4    | 1558.32 | -0.28996 | 0.287405 | 0.673019 | 1162.93 | 1397.61 | 1646.39 | 1913.03 | 1599.34 | 1630.6  |
| ENSMUSG00000038805 | 10_Six3   | 187.548 | -1.17519 | 0.011979 | 0.114687 | 178.99  | 55.5416 | 110.655 | 303.708 | 250.675 | 225.721 |
| ENSMUSG00000038806 | 7_Sde2    | 1157.77 | 0.38865  | 0.138732 | 0.505643 | 1466.3  | 1319.4  | 1152.06 | 927.629 | 931.448 | 1149.76 |
| ENSMUSG00000038807 | 17_Rap1g  | 288.826 | -0.04188 | 0.912352 | 0.975453 | 180.001 | 330.983 | 343.342 | 360.653 | 278.147 | 239.828 |
| ENSMUSG00000038811 | 13_Gngt2  | 51.3354 | 0.2055   | 0.733761 | 0.919947 | 21.2361 | 97.4812 | 46.5373 | 61.8969 | 42.0654 | 38.7957 |
| ENSMUSG00000038812 | 16_Trmt1  | 421.972 | -0.01053 | 0.980208 | 0.993796 | 207.305 | 523.678 | 530.525 | 461.338 | 406.918 | 402.065 |
| ENSMUSG00000038816 | 14_Ctnnal | 1966.07 | -0.16639 | 0.59157  | 0.865407 | 2456.31 | 1470.15 | 1631.91 | 2053.33 | 2222.6  | 1962.12 |
| ENSMUSG00000038822 | 15_Hace1  | 1834.3  | 0.23604  | 0.555061 | 0.846508 | 3060.03 | 1395.34 | 1496.43 | 1403    | 1862.9  | 1788.13 |
| ENSMUSG00000038827 | 11_Fam2l  | 559.857 | 0.23058  | 0.464312 | 0.801754 | 782.703 | 490.807 | 539.832 | 455.561 | 581.189 | 509.047 |
| ENSMUSG00000038828 | 13_Tmem   | 1136.25 | 0.28751  | 0.602403 | 0.870033 | 366.07  | 1742.19 | 1639.15 | 1171.09 | 877.363 | 1021.62 |
| ENSMUSG00000038831 | 16_Ralgps | 336.213 | -0.32025 | 0.273264 | 0.659592 | 339.778 | 248.237 | 309.214 | 434.104 | 348.542 | 337.405 |
| ENSMUSG00000038836 | 15_Agbl3  | 200.851 | -0.06354 | 0.897737 | 0.971717 | 335.733 | 106.549 | 146.851 | 166.709 | 254.109 | 195.154 |
| ENSMUSG00000038838 | 15_Vars2  | 308.206 | 0.20052  | 0.734648 | 0.920289 | 87.9783 | 437.532 | 463.304 | 341.671 | 206.034 | 312.717 |
| ENSMUSG00000038840 | 7_Birc7   | 14.1448 | -3.38348 | 0.001506 | 0.026383 | 2.02249 | 3.40051 | 2.06832 | 60.2463 | 7.72629 | 9.40502 |
| ENSMUSG00000038843 | 17_Gcnt1  | 50.2406 | 0.89135  | 0.048378 | 0.283082 | 82.922  | 72.5442 | 40.3323 | 29.7105 | 39.4899 | 36.4445 |
| ENSMUSG00000038844 | 8_Kif16b  | 1346.45 | 0.13575  | 0.580574 | 0.859533 | 1589.68 | 1274.06 | 1365.09 | 1192.55 | 1287.72 | 1369.61 |
| ENSMUSG00000038845 | 11_Phb    | 1844.85 | -0.13876 | 0.778778 | 0.934571 | 656.298 | 2396.23 | 2216.21 | 2126.78 | 1658.58 | 2015.03 |
| ENSMUSG00000038848 | 14_Ythdf1 | 1219.31 | 0.25952  | 0.303521 | 0.686198 | 1433.94 | 1376.07 | 1175.84 | 978.797 | 1196.72 | 1154.47 |
| ENSMUSG00000038855 | 10_Itpkb  | 939.727 | -0.43987 | 0.116482 | 0.464061 | 669.444 | 785.518 | 937.985 | 1242.89 | 1004.42 | 998.108 |
| ENSMUSG00000038859 | 7_Baiap2l | 858.591 | 0.39295  | 0.126269 | 0.483427 | 920.232 | 1019.02 | 984.522 | 669.312 | 688.499 | 869.965 |
| ENSMUSG00000038860 | 15_Garnl3 | 138.383 | -0.45855 | 0.19672  | 0.588974 | 93.0345 | 112.217 | 144.783 | 159.281 | 194.016 | 126.968 |
| ENSMUSG00000038861 | 14_Pi4kb  | 1255.07 | 0.04456  | 0.910538 | 0.974982 | 674.5   | 1616.38 | 1532.63 | 1190.9  | 1262.82 | 1253.22 |
| ENSMUSG00000038866 | 15_Zcchc  | 1625.94 | 1.16574  | 0.000214 | 0.006102 | 2685.86 | 2344.08 | 1717.74 | 806.311 | 1162.38 | 1039.25 |
| ENSMUSG00000038871 | 5_Bpgm    | 500.31  | -0.54778 | 0.02616  | 0.194332 | 380.228 | 396.726 | 442.621 | 630.523 | 599.217 | 552.545 |
| ENSMUSG00000038872 | 9_Zfhx3   | 747.778 | -0.08982 | 0.7495   | 0.925082 | 872.704 | 597.356 | 703.23  | 827.768 | 697.942 | 787.671 |
| ENSMUSG00000038876 | 11_Rnf14l | 1197.8  | 0.09545  | 0.779684 | 0.934866 | 1733.27 | 973.679 | 1005.21 | 1096.81 | 1286.86 | 1090.98 |
| ENSMUSG00000038879 | 7_Nipal2  | 1907.14 | 0.58866  | 0.090593 | 0.409997 | 3158.12 | 2025.57 | 1688.79 | 1258.57 | 1680.04 | 1631.77 |
| ENSMUSG00000038880 | 13_Mrps3  | 265.301 | 0.07496  | 0.890433 | 0.970415 | 84.9445 | 372.922 | 358.854 | 289.678 | 232.647 | 252.76  |
| ENSMUSG00000038884 | 14_A2300  | 487.937 | 0.7756   | 0.026399 | 0.195676 | 420.678 | 776.449 | 651.522 | 410.996 | 371.721 | 296.258 |
| ENSMUSG00000038886 | 10_Man2e  | 1767.21 | -0.77806 | 0.026486 | 0.195992 | 908.097 | 1367    | 1630.87 | 2824.15 | 1920.41 | 1952.72 |
| ENSMUSG00000038888 | 8_Ctut1   | 245.088 | 0.29285  | 0.303198 | 0.685929 | 227.53  | 303.779 | 278.189 | 221.178 | 200.025 | 239.828 |
| ENSMUSG00000038893 | 12_Fam1l  | 176.649 | -0.40312 | 0.322011 | 0.702839 | 93.0345 | 147.355 | 216.14  | 238.509 | 180.28  | 184.574 |
| ENSMUSG00000038894 | 6_Irs2    | 220.515 | 0.19861  | 0.802301 | 0.942368 | 20.2249 | 355.92  | 330.932 | 264.919 | 134.781 | 216.316 |
| ENSMUSG00000038895 | 15_Zfp65l | 78.3663 | -0.17686 | 0.801089 | 0.941902 | 12.1349 | 104.282 | 104.45  | 108.939 | 68.6782 | 71.7133 |
| ENSMUSG00000038900 | 17_Rpl12  | 12248.8 | -0.24144 | 0.421473 | 0.77414  | 8001.98 | 12399.4 | 13277.6 | 13413.5 | 13067.7 | 13332.8 |
| ENSMUSG00000038902 | 14_Pogz   | 1156.91 | 0.06179  | 0.797703 | 0.940387 | 1049.67 | 1167.51 | 1327.86 | 1129.83 | 1129.76 | 1136.83 |
| ENSMUSG00000038903 | 13_Ccdc6  | 287.207 | 0.18313  | 0.650333 | 0.891567 | 465.172 | 225.567 | 225.447 | 245.112 | 315.061 | 246.882 |
| ENSMUSG00000038909 | 16_Kat7   | 1537.7  | 0.28414  | 0.250835 | 0.642405 | 1591.7  | 1843.08 | 1630.87 | 1208.23 | 1453.4  | 1498.93 |
| ENSMUSG00000038910 | 6_Plcl2   | 70.0397 | 0.21571  | 0.632486 | 0.883233 | 101.124 | 80.4787 | 44.4689 | 79.2281 | 64.3858 | 50.552  |
| ENSMUSG00000038914 | 15_Dido1  | 1952.68 | 0.08232  | 0.732532 | 0.919789 | 1741.36 | 2222.8  | 2061.08 | 1853.61 | 1922.13 | 1915.1  |
| ENSMUSG00000038916 | 6_Soga3   | 7.51427 | -2.58718 | 0.019673 | 0.161119 | 2.02249 | 4.53401 | 0       | 20.6323 | 12.0187 | 5.87814 |
| ENSMUSG00000038917 | 3_393040  | 6.02283 | 0.04528  | 0.960781 | 0.989899 | 3.03373 | 10.2015 | 5.17081 | 4.12646 | 7.72629 | 5.87814 |
| ENSMUSG00000038925 | 12_E3300  | 3.55281 | -3.16869 | 0.042879 | 0.262546 | 0       | 1.1335  | 1.03416 | 11.5541 | 1.71695 | 5.87814 |
| ENSMUSG00000038930 | 11_Rcccl1 | 137.475 | 0.35595  | 0.247673 | 0.63901  | 129.439 | 159.824 | 173.739 | 128.746 | 107.31  | 125.792 |
| ENSMUSG00000038932 | 13_Tcfl5  | 10.0288 | 0.86535  | 0.305542 | 0.688432 | 23.2586 | 10.2015 | 5.17081 | 4.95175 | 6.00934 | 10.5807 |
| ENSMUSG00000038936 | 13_Sccpd  | 484.773 | -0.67884 | 0.184014 | 0.570805 | 673.489 | 189.295 | 255.438 | 580.181 | 708.244 | 501.993 |
| ENSMUSG00000038943 | 16_Prc1   | 1195.24 | 0.5119   | 0.110166 | 0.450628 | 1637.2  | 1411.21 | 1166.53 | 719.655 | 1152.93 | 1083.93 |
| ENSMUSG00000038949 | 8_Cnst    | 1183.84 | 0.15374  | 0.507583 | 0.826413 | 1318.66 | 1151.64 | 1269.95 | 1138.08 | 1049.06 | 1175.63 |

|                    |            |         |          |          |          |         |         |         |         |         |         |
|--------------------|------------|---------|----------|----------|----------|---------|---------|---------|---------|---------|---------|
| ENSMUSG00000038954 | 14_Supt3   | 229.485 | 0.01119  | 0.967237 | 0.991132 | 238.654 | 230.101 | 222.345 | 201.371 | 257.543 | 226.896 |
| ENSMUSG00000038957 | 13_Edc3    | 837.093 | 0.20718  | 0.530782 | 0.836686 | 593.6   | 1080.23 | 1017.61 | 795.582 | 753.743 | 781.793 |
| ENSMUSG00000038963 | 15_Slco4e  | 558.63  | 0.60424  | 0.25652  | 0.648111 | 219.44  | 788.918 | 1013.48 | 469.591 | 398.333 | 462.022 |
| ENSMUSG00000038965 | 15_Ube2k   | 3515.4  | 0.41804  | 0.12662  | 0.483956 | 4835.77 | 3832.37 | 3395.15 | 2669.82 | 3222.72 | 3136.58 |
| ENSMUSG00000038967 | 13_Pdk2    | 1364.65 | -0.61371 | 0.195549 | 0.586883 | 471.24  | 1164.11 | 1600.88 | 2034.35 | 1366.7  | 1550.65 |
| ENSMUSG00000038970 | 7_Lmtk2    | 1525.35 | 0.62047  | 0.015124 | 0.133857 | 1543.16 | 2110.58 | 1891.48 | 1189.25 | 1185.56 | 1232.06 |
| ENSMUSG00000038973 | 2_Cldnd2   | 0       | NA       | NA       | NA       | 0       | 0       | 0       | 0       | 0       | 0       |
| ENSMUSG00000038975 | 14_Rabgg   | 1082.86 | 0.05011  | 0.846343 | 0.955568 | 1282.26 | 1071.16 | 951.429 | 994.477 | 1118.6  | 1079.23 |
| ENSMUSG00000038976 | 12_Ppp1r   | 1544.21 | 0.30311  | 0.514626 | 0.829322 | 735.175 | 2191.06 | 2191.39 | 1611.8  | 1116.88 | 1418.98 |
| ENSMUSG00000038980 | 1_Rbbp8n   | 82.8567 | 0.75189  | 0.266988 | 0.654888 | 21.2361 | 141.688 | 148.919 | 67.674  | 41.2069 | 76.4158 |
| ENSMUSG00000038982 | 9_Bloc1sf  | 401.178 | -0.0988  | 0.689431 | 0.905638 | 399.442 | 364.988 | 398.152 | 441.531 | 423.229 | 379.728 |
| ENSMUSG00000038984 | 3_Tspyl5   | 40.7012 | -1.13028 | 0.056228 | 0.310378 | 46.5172 | 11.335  | 18.6149 | 64.3728 | 57.518  | 45.8495 |
| ENSMUSG00000038987 | 8_170001   | 12.7696 | 0.62123  | 0.515217 | 0.82969  | 1.01124 | 23.8036 | 21.7174 | 11.5541 | 10.3017 | 8.22939 |
| ENSMUSG00000038990 | 14_Cablet  | 532.71  | 0.24859  | 0.467336 | 0.803613 | 375.172 | 715.24  | 645.317 | 485.272 | 507.36  | 467.9   |
| ENSMUSG00000038991 | 16_Txndc   | 2767.35 | -0.02056 | 0.951662 | 0.988    | 1748.44 | 3316.63 | 3177.98 | 2867.07 | 2659.56 | 2834.44 |
| ENSMUSG00000038994 | 6_Hils1    | 0.46955 | -0.60795 | 0.850453 | NA       | 0       | 1.1335  | 0       | 0.82529 | 0.85848 | 0       |
| ENSMUSG00000038997 | 4_Asb17    | 3.54811 | 1.10261  | 0.367648 | 0.739818 | 8.08995 | 1.1335  | 5.17081 | 1.65058 | 1.71695 | 3.52688 |
| ENSMUSG00000039000 | 8_Ube3c    | 2450.37 | 0.27924  | 0.308981 | 0.691532 | 3247.11 | 2476.7  | 2336.17 | 1948.52 | 2343.64 | 2350.08 |
| ENSMUSG00000039001 | 12_Rps21   | 3042.01 | -0.15758 | 0.600548 | 0.869763 | 2255.07 | 2887.03 | 3486.16 | 3735.27 | 2753.14 | 3135.4  |
| ENSMUSG00000039004 | 5_Bmp6     | 62.639  | -0.84494 | 0.060891 | 0.325238 | 30.3373 | 46.4736 | 57.913  | 88.3063 | 98.7249 | 54.0789 |
| ENSMUSG00000039005 | 13_Tlr4    | 757.192 | 0.88799  | 0.075775 | 0.368706 | 1766.64 | 656.298 | 526.388 | 464.64  | 618.962 | 510.222 |
| ENSMUSG00000039007 | 9_Cpq      | 1902.39 | -0.43609 | 0.209789 | 0.601596 | 2306.65 | 1254.79 | 1289.6  | 2196.1  | 2365.1  | 2002.09 |
| ENSMUSG00000039013 | 16_Siglec1 | 3.62072 | -0.97223 | 0.397683 | 0.758456 | 3.03373 | 2.26701 | 2.06832 | 8.25292 | 2.57543 | 3.52688 |
| ENSMUSG00000039016 | 4_Timm8t   | 710.928 | -0.4634  | 0.060819 | 0.325068 | 567.308 | 573.552 | 652.556 | 906.996 | 810.402 | 754.753 |
| ENSMUSG00000039018 | 14_Mtg1    | 228.208 | -0.14106 | 0.675688 | 0.900882 | 148.653 | 261.839 | 240.96  | 238.509 | 252.392 | 226.896 |
| ENSMUSG00000039021 | 15_Ttc16   | 4.44598 | 0.44955  | 0.709776 | 0.910052 | 5.05622 | 1.1335  | 9.30745 | 7.42763 | 2.57543 | 1.17563 |
| ENSMUSG00000039031 | 15_Arhgaj  | 1151.71 | 0.16899  | 0.696074 | 0.905638 | 1981.03 | 835.392 | 840.773 | 968.068 | 1296.3  | 988.703 |
| ENSMUSG00000039032 | 2_Tsga13   | 0.89663 | -0.72792 | 0.755442 | NA       | 1.01124 | 0       | 1.03416 | 2.47588 | 0.85848 | 0       |
| ENSMUSG00000039033 | 11_Tasp1   | 277.043 | -0.11473 | 0.738817 | 0.921641 | 362.025 | 208.565 | 227.516 | 283.901 | 322.787 | 257.462 |
| ENSMUSG00000039037 | 5_St6gain  | 9.21958 | -1.77653 | 0.068897 | 0.349081 | 6.06747 | 3.40051 | 3.10248 | 28.0599 | 11.1602 | 3.52688 |
| ENSMUSG00000039041 | 15_Adrm1   | 857.253 | 0.4813   | 0.330867 | 0.710842 | 426.745 | 1345.47 | 1224.45 | 767.522 | 476.455 | 902.882 |
| ENSMUSG00000039043 | 5_Arpin    | 521.626 | -0.23485 | 0.376603 | 0.745893 | 404.498 | 474.938 | 558.447 | 565.325 | 575.18  | 551.369 |
| ENSMUSG00000039046 | 15_Usp6n   | 2435.21 | 0.46349  | 0.080298 | 0.381339 | 3362.39 | 2675.07 | 2431.31 | 1892.4  | 2032.87 | 2217.23 |
| ENSMUSG00000039047 | 17_Plgk    | 1414.61 | -0.03069 | 0.898431 | 0.97174  | 1587.65 | 1342.07 | 1268.92 | 1465.72 | 1398.46 | 1424.86 |
| ENSMUSG00000039048 | 14_Foxrec  | 764.212 | 0.18793  | 0.501518 | 0.822575 | 638.095 | 936.273 | 867.662 | 700.673 | 757.177 | 685.391 |
| ENSMUSG00000039050 | 8_Osbpl2   | 2182.65 | 0.24491  | 0.253143 | 0.644241 | 2388.56 | 2313.48 | 2400.29 | 2019.49 | 1959.04 | 2015.03 |
| ENSMUSG00000039055 | 4_Eme1     | 60.4694 | 0.83129  | 0.139709 | 0.507179 | 29.3261 | 112.217 | 91.0062 | 42.0899 | 54.084  | 34.0932 |
| ENSMUSG00000039057 | 9_Myo16    | 28.3459 | -2.0787  | 0.000193 | 0.005612 | 10.1124 | 9.06802 | 13.4441 | 45.3911 | 62.6688 | 29.3907 |
| ENSMUSG00000039058 | 11_Ak5     | 51.1614 | -1.73841 | 6.58E-05 | 0.00236  | 24.2699 | 26.0706 | 20.6832 | 96.5592 | 84.1307 | 55.2545 |
| ENSMUSG00000039059 | 11_Hrh3    | 2.2002  | -0.59624 | 0.66705  | 0.897768 | 2.02249 | 2.26701 | 1.03416 | 4.12646 | 2.57543 | 1.17563 |
| ENSMUSG00000039062 | 15_Anep    | 1357.45 | 0.46273  | 0.216343 | 0.607638 | 999.109 | 1575.57 | 2144.85 | 1049.77 | 997.55  | 1377.84 |
| ENSMUSG00000039063 | 5_Echdc3   | 686.669 | -0.02852 | 0.943567 | 0.986405 | 366.07  | 784.384 | 889.379 | 789.805 | 624.971 | 665.405 |
| ENSMUSG00000039065 | 10_Fam1i   | 328.567 | -0.18631 | 0.507122 | 0.825942 | 246.744 | 345.718 | 329.898 | 344.972 | 363.136 | 340.932 |
| ENSMUSG00000039067 | 4_Psmd7    | 2124.18 | 0.17221  | 0.51561  | 0.829821 | 1958.78 | 2631.99 | 2161.4  | 1844.53 | 1904.1  | 2244.27 |
| ENSMUSG00000039068 | 16_Zzz3    | 1917.85 | -0.08685 | 0.803576 | 0.942928 | 2655.53 | 1416.88 | 1507.81 | 1802.44 | 2147.05 | 1977.41 |
| ENSMUSG00000039069 | 19_Mtg2    | 261.492 | -0.25549 | 0.585969 | 0.862122 | 105.169 | 294.711 | 315.419 | 327.641 | 230.93  | 295.083 |
| ENSMUSG00000039070 | 5_Cpa4     | 2.05931 | -3.33314 | 0.080376 | 0.381576 | 1.01124 | 0       | 0       | 3.30117 | 6.86782 | 1.17563 |
| ENSMUSG00000039079 | 1_Thrh2    | 0       | NA       | NA       | NA       | 0       | 0       | 0       | 0       | 0       | 0       |
| ENSMUSG00000039081 | 9_Zfp503   | 184.796 | 0.07425  | 0.872172 | 0.963879 | 316.519 | 114.484 | 137.543 | 198.07  | 171.695 | 170.466 |
| ENSMUSG00000039084 | 8_Chad     | 219.369 | -0.71526 | 0.1885   | 0.576303 | 66.7421 | 132.62  | 298.873 | 321.039 | 230.072 | 266.868 |
| ENSMUSG00000039086 | 9_Ss18l1   | 227.189 | 0.3044   | 0.249098 | 0.640512 | 274.047 | 226.701 | 252.335 | 206.323 | 199.167 | 204.559 |
| ENSMUSG00000039087 | 16_Rreb1   | 2144.31 | 0.61836  | 0.053243 | 0.299737 | 1862.71 | 3079.73 | 2848.08 | 1658.84 | 1450.83 | 1965.65 |
| ENSMUSG00000039089 | 14_L3mbt   | 457.016 | 0.08918  | 0.796233 | 0.939697 | 651.241 | 396.726 | 365.059 | 392.014 | 442.116 | 494.939 |
| ENSMUSG00000039092 | 9_Sptlc3   | 1.17344 | -1.31519 | 0.5919   | NA       | 2.02249 | 0       | 0       | 3.30117 | 1.71695 | 0       |
| ENSMUSG00000039095 | 8_En2      | 1.26177 | -0.4198  | 0.867108 | NA       | 1.01124 | 2.26701 | 0       | 0       | 4.29238 | 0       |
| ENSMUSG00000039096 | 10_Rsad1   | 205.537 | 0.11721  | 0.713039 | 0.910879 | 229.552 | 157.557 | 254.404 | 207.148 | 190.582 | 193.979 |
| ENSMUSG00000039097 | 5_Rln1     | 0.64744 | 0.29286  | 0.92144  | NA       | 0       | 1.1335  | 1.03416 | 0       | 1.71695 | 0       |
| ENSMUSG00000039099 | 7_Wdr93    | 14.3071 | -0.32555 | 0.599721 | 0.869281 | 13.1462 | 11.335  | 13.4441 | 9.90351 | 18.028  | 19.9857 |
| ENSMUSG00000039100 | 9_March6   | 3774.65 | 0.27709  | 0.460769 | 0.799907 | 6197.92 | 3053.66 | 3156.26 | 3034.6  | 3700.89 | 3504.55 |
| ENSMUSG00000039103 | 12_Nexn    | 274.566 | -0.38116 | 0.605573 | 0.871683 | 561.241 | 60.0757 | 94.1087 | 336.719 | 333.089 | 262.165 |
| ENSMUSG00000039105 | 6_Atp6v1f  | 2357    | 0.25186  | 0.485114 | 0.812961 | 3774.98 | 1974.56 | 1936.98 | 2146.59 | 2172.81 | 2136.12 |
| ENSMUSG00000039106 | 6_Htr5a    | 0.88728 | -0.71646 | 0.825033 | NA       | 2.02249 | 0       | 0       | 3.30117 | 0       | 0       |
| ENSMUSG00000039108 | 14_Lsm14   | 754.06  | 0.34413  | 0.146271 | 0.517317 | 770.568 | 920.404 | 839.739 | 661.059 | 650.726 | 681.864 |
| ENSMUSG00000039109 | 15_F13a1   | 324.61  | 0.02985  | 0.944623 | 0.986649 | 505.622 | 218.766 | 259.575 | 414.297 | 279.005 | 270.394 |
| ENSMUSG00000039110 | 14_Mycbp   | 186.082 | 0.11168  | 0.793304 | 0.938313 | 99.1019 | 224.434 | 256.472 | 176.613 | 190.582 | 169.29  |
| ENSMUSG00000039114 | 15_Nrn1    | 31.6377 | -0.56189 | 0.255432 | 0.646523 | 25.2811 | 22.6701 | 28.9565 | 39.614  | 49.7917 | 23.5126 |
| ENSMUSG00000039115 | 13_Igta9   | 446.542 | -0.95702 | 0.000738 | 0.015663 | 304.385 | 253.905 | 352.649 | 665.186 | 571.746 | 531.384 |
| ENSMUSG00000039116 | 4_Adgrg6   | 491.262 | -0.15559 | 0.734222 | 0.920078 | 782.703 | 261.839 | 349.547 | 477.844 | 512.511 | 563.126 |
| ENSMUSG00000039117 | 15_Taf4a   | 718.599 | 0.4995   | 0.06069  | 0.324766 | 962.705 | 821.79  | 740.46  | 521.585 | 626.688 | 638.366 |
| ENSMUSG00000039126 | 9_Prune2   | 435.338 | -1.34813 | 0.000883 | 0.017848 | 363.037 | 167.758 | 205.798 | 670.963 | 736.573 | 467.9   |
| ENSMUSG00000039128 | 13_Cdc12   | 1768.44 | 0.1089   | 0.684659 | 0.90367  | 2212.6  | 1709.32 | 1583.3  | 1567.23 | 1786.49 | 1751.69 |
| ENSMUSG00000039130 | 18_Zc3hc   | 309.287 | -0.00803 | 0.982778 | 0.994363 | 186.069 | 352.519 | 386.776 | 328.466 | 283.297 | 318.595 |
| ENSMUSG00000039131 | 15_Gipc2   | 66.8277 | 0.95485  | 0.032872 | 0.224034 | 114.271 | 91.8137 | 57.913  | 35.4876 | 40.3484 | 61.1326 |
| ENSMUSG00000039137 | 18_Whrn    | 134.412 | -0.92904 | 0.0575   | 0.313898 | 46.5172 | 91.8137 | 139.612 | 234.383 | 164.828 | 129.319 |
| ENSMUSG00000039145 | 16_Camk    | 5241.17 | 0.60123  | 0.031382 | 0.218078 | 7710.74 | 5564.37 | 5677.55 | 3656.05 | 4191.08 | 4647.26 |

|                    |            |         |          |          |          |         |         |         |         |         |         |
|--------------------|------------|---------|----------|----------|----------|---------|---------|---------|---------|---------|---------|
| ENSMUSG00000039146 | 5_Ilf44l   | 3653.51 | 2.85392  | 1.76E-09 | 2.88E-07 | 9883.9  | 5839.81 | 3533.73 | 589.259 | 1249.08 | 825.291 |
| ENSMUSG00000039148 | 4_Sart1    | 909.532 | 0.23309  | 0.691552 | 0.905638 | 245.732 | 1387.41 | 1315.45 | 910.297 | 682.489 | 915.814 |
| ENSMUSG00000039153 | 16_Runx2   | 285.834 | 1.09218  | 0.000596 | 0.013274 | 481.352 | 327.582 | 357.82  | 156.806 | 175.129 | 216.316 |
| ENSMUSG00000039154 | 6_Shd      | 9.9102  | -1.74794 | 0.026686 | 0.196614 | 5.05622 | 3.40051 | 5.17081 | 22.2829 | 9.44325 | 14.1075 |
| ENSMUSG00000039155 | 15_Cdh26   | 25.9958 | -1.46712 | 0.004523 | 0.05803  | 11.1237 | 18.136  | 12.4099 | 44.5658 | 40.3484 | 29.3907 |
| ENSMUSG00000039156 | 19_Stim2   | 799.127 | 0.51884  | 0.123973 | 0.478719 | 1293.38 | 811.588 | 718.742 | 586.783 | 717.687 | 666.581 |
| ENSMUSG00000039157 | 12_Fam1c   | 1819.63 | 0.4993   | 0.193848 | 0.583952 | 1200.35 | 2681.87 | 2511.98 | 1571.36 | 1316.9  | 1635.3  |
| ENSMUSG00000039158 | 11_Akna    | 120.431 | 0.13836  | 0.804889 | 0.942951 | 46.5172 | 193.829 | 138.578 | 160.107 | 91.857  | 91.699  |
| ENSMUSG00000039159 | 16_Ube2h   | 3369.84 | 0.34483  | 0.139739 | 0.507179 | 4241.16 | 3563.73 | 3506.84 | 2922.36 | 2915.39 | 3069.56 |
| ENSMUSG00000039163 | 9_Cmc1     | 563.187 | 0.0898   | 0.810252 | 0.945557 | 852.479 | 462.469 | 427.109 | 501.778 | 621.537 | 513.749 |
| ENSMUSG00000039164 | 2_Naif1    | 127.41  | 0.1146   | 0.782526 | 0.935592 | 76.8546 | 155.29  | 165.466 | 146.902 | 104.734 | 115.212 |
| ENSMUSG00000039166 | 15_Akap7   | 444.884 | 0.22721  | 0.164494 | 0.875923 | 802.928 | 301.512 | 335.068 | 410.996 | 456.71  | 362.093 |
| ENSMUSG00000039167 | 11_Adgrl4  | 155.491 | 0.05741  | 0.896163 | 0.97156  | 251.8   | 100.882 | 123.065 | 166.709 | 158.818 | 131.67  |
| ENSMUSG00000039168 | 15_Dap     | 3018.88 | 0.14817  | 0.672789 | 0.90042  | 1990.13 | 4147.49 | 3383.78 | 2709.43 | 2881.05 | 3001.38 |
| ENSMUSG00000039176 | 17_Polg    | 757.58  | -0.03564 | 0.92917  | 0.981476 | 392.363 | 958.943 | 893.516 | 758.444 | 767.478 | 774.739 |
| ENSMUSG00000039178 | 9_Tbc1d1   | 534.519 | 0.08074  | 0.859707 | 0.960099 | 935.401 | 369.522 | 343.342 | 482.796 | 562.302 | 513.749 |
| ENSMUSG00000039179 | 13_Tekt5   | 33.6148 | 0.51191  | 0.278431 | 0.665542 | 27.3036 | 52.1411 | 39.2981 | 32.1864 | 24.8958 | 25.8638 |
| ENSMUSG00000039182 | 5_AW209    | 332.96  | -0.21228 | 0.400204 | 0.759569 | 337.756 | 300.378 | 287.497 | 360.653 | 371.721 | 339.756 |
| ENSMUSG00000039183 | 5_Nubp2    | 421.358 | 0.20708  | 0.70342  | 0.907691 | 142.585 | 604.157 | 608.087 | 476.194 | 337.381 | 359.742 |
| ENSMUSG00000039187 | 16_Fanci   | 341.259 | 1.00663  | 0.00151  | 0.026393 | 475.285 | 521.411 | 370.23  | 176.613 | 261.835 | 242.179 |
| ENSMUSG00000039191 | 12_Rbpj    | 1514.96 | 0.40999  | 0.210615 | 0.602689 | 2370.36 | 1438.42 | 1377.5  | 1222.26 | 1413.91 | 1267.33 |
| ENSMUSG00000039193 | 7_Nlrc4    | 10.7975 | 0.23382  | 0.765481 | 0.929992 | 13.1462 | 10.2015 | 11.3758 | 3.30117 | 10.3017 | 16.4588 |
| ENSMUSG00000039194 | 15_Rlbp1   | 1057.93 | -2.28741 | 7.19E-08 | 7.65E-06 | 487.42  | 213.099 | 378.503 | 2400.78 | 1589.9  | 1277.91 |
| ENSMUSG00000039195 | 4_111000   | 250.506 | -0.08402 | 0.868369 | 0.962942 | 88.9895 | 301.512 | 339.205 | 267.395 | 234.364 | 271.57  |
| ENSMUSG00000039196 | 2_Orm1     | 0.83591 | 2.05376  | 0.384731 | NA       | 2.02249 | 1.1335  | 1.03416 | 0.82529 | 0       | 0       |
| ENSMUSG00000039197 | 9_Adk      | 856.509 | -0.51117 | 0.119158 | 0.469536 | 957.648 | 554.283 | 607.053 | 1044.82 | 1078.25 | 897.004 |
| ENSMUSG00000039199 | 5_Zdhhc1   | 156.215 | -0.3709  | 0.540627 | 0.84046  | 39.4385 | 156.423 | 213.037 | 251.714 | 126.196 | 150.48  |
| ENSMUSG00000039200 | 15_Atf7ip  | 4.61074 | 1.61568  | 0.207186 | 0.598798 | 15.1687 | 4.53401 | 1.03416 | 0.82529 | 2.57543 | 3.52688 |
| ENSMUSG00000039201 | 9_Tbc1d2   | 196.082 | 0.3976   | 0.50713  | 0.825942 | 55.6184 | 307.179 | 306.112 | 196.42  | 144.224 | 166.939 |
| ENSMUSG00000039202 | 12_Abhd2   | 2943.21 | -0.02188 | 0.929022 | 0.981421 | 2763.73 | 3248.62 | 2750.87 | 3297.87 | 2915.39 | 2682.78 |
| ENSMUSG00000039205 | 16_Ciz1    | 982.159 | 0.36813  | 0.470403 | 0.804531 | 384.273 | 1394.21 | 1541.93 | 879.762 | 786.365 | 906.409 |
| ENSMUSG00000039206 | 13_Daglb   | 324.207 | -0.13998 | 0.761272 | 0.928449 | 146.63  | 369.522 | 409.528 | 434.929 | 269.562 | 315.068 |
| ENSMUSG00000039208 | 15_Metrl   | 766.815 | 0.43484  | 0.330498 | 0.710498 | 424.723 | 1186.78 | 1033.13 | 768.347 | 501.351 | 686.567 |
| ENSMUSG00000039209 | 12_Rpl39l  | 110.737 | -0.4236  | 0.290848 | 0.759569 | 127.417 | 87.2797 | 69.2888 | 162.583 | 116.753 | 101.104 |
| ENSMUSG00000039210 | 16_Gpatcl  | 668.596 | 0.27427  | 0.251719 | 0.642943 | 783.714 | 746.978 | 664.966 | 581.006 | 600.075 | 634.839 |
| ENSMUSG00000039217 | 12_Ii18    | 1227.73 | 0.34918  | 0.475007 | 0.806964 | 2422.94 | 854.661 | 849.047 | 869.858 | 1330.64 | 1039.25 |
| ENSMUSG00000039218 | 16_Srrm2   | 10597.2 | 0.30756  | 0.291971 | 0.676701 | 9014.23 | 12925.3 | 13228   | 8132.43 | 10603   | 9680.12 |
| ENSMUSG00000039219 | 17_Arid4b  | 2104.89 | 0.35772  | 0.430873 | 0.780048 | 3992.39 | 1551.77 | 1549.17 | 1515.24 | 2090.39 | 1930.38 |
| ENSMUSG00000039220 | 16_Ppp1r   | 1028.75 | 0.25401  | 0.512312 | 0.828077 | 612.814 | 1391.94 | 1352.68 | 984.574 | 909.986 | 920.517 |
| ENSMUSG00000039221 | 10_Rpl22l  | 1816.34 | 0.4423   | 0.422379 | 0.774546 | 4042.95 | 1108.57 | 1126.2  | 1275.08 | 1933.29 | 1411.93 |
| ENSMUSG00000039224 | 1_D1Pas1   | 1.49478 | 4.10408  | 0.138461 | NA       | 0       | 7.93452 | 1.03416 | 0       | 0       | 0       |
| ENSMUSG00000039230 | 14_Tbcd    | 2125.14 | 0.27733  | 0.453532 | 0.795643 | 1364.17 | 2859.83 | 2762.25 | 1857.73 | 1771.9  | 2134.94 |
| ENSMUSG00000039231 | 18_Suv39   | 430.109 | 0.38925  | 0.134154 | 0.498065 | 445.959 | 541.814 | 475.714 | 340.02  | 410.352 | 366.796 |
| ENSMUSG00000039232 | 11_Stx11   | 138.594 | 0.95059  | 0.0074   | 0.08138  | 217.418 | 190.428 | 139.612 | 77.5775 | 90.1401 | 116.387 |
| ENSMUSG00000039233 | 12_Tbce    | 837.259 | 0.07617  | 0.842679 | 0.953741 | 1267.09 | 680.102 | 630.839 | 710.577 | 987.249 | 747.699 |
| ENSMUSG00000039234 | 11_Sec24   | 574.341 | 0.00528  | 0.983541 | 0.9947   | 494.498 | 651.764 | 580.165 | 571.102 | 588.915 | 559.599 |
| ENSMUSG00000039236 | 18_Isg20   | 196.761 | 2.59301  | 7.40E-06 | 0.000413 | 112.248 | 578.086 | 322.658 | 68.4993 | 53.2256 | 45.8495 |
| ENSMUSG00000039238 | 6_Zfp750   | 5354.56 | 0.86805  | 0.004768 | 0.060084 | 5498.14 | 7928.85 | 7328.07 | 3004.06 | 3805.63 | 4562.61 |
| ENSMUSG00000039239 | 14_Tgfb2   | 1068.69 | -0.88213 | 0.056388 | 0.310591 | 1233.72 | 374.056 | 647.385 | 1485.53 | 1472.29 | 1199.14 |
| ENSMUSG00000039242 | 9_B3galnt  | 1193.49 | 0.20643  | 0.519799 | 0.831665 | 1697.88 | 1090.43 | 1047.61 | 953.213 | 1217.32 | 1154.47 |
| ENSMUSG00000039244 | 10_E1303   | 283.539 | 0.3308   | 0.519444 | 0.831665 | 116.293 | 448.867 | 382.64  | 282.25  | 204.318 | 266.868 |
| ENSMUSG00000039246 | 8_Lyplal1  | 143.986 | -0.39434 | 0.287898 | 0.673109 | 171.912 | 90.6802 | 110.655 | 184.04  | 159.677 | 146.953 |
| ENSMUSG00000039252 | 11_Lgi2    | 1618.77 | -0.63736 | 0.262224 | 0.194636 | 1552.26 | 1004.28 | 1244.1  | 2037.65 | 2082.67 | 1791.66 |
| ENSMUSG00000039253 | 7_Fn3krp   | 571.041 | 0.28529  | 0.278677 | 0.665799 | 664.388 | 647.23  | 569.823 | 445.658 | 512.511 | 586.638 |
| ENSMUSG00000039254 | 16_Pomt1   | 285.184 | 0.12025  | 0.756196 | 0.927332 | 170.9   | 385.391 | 335.068 | 289.678 | 254.968 | 275.097 |
| ENSMUSG00000039257 | 11_Vstm2   | 18.1213 | -1.95602 | 0.001771 | 0.029524 | 4.04498 | 7.93452 | 10.3416 | 33.837  | 23.1789 | 29.3907 |
| ENSMUSG00000039262 | 16_Prrc2b  | 3977.93 | 0.06311  | 0.838134 | 0.952966 | 2891.15 | 4429.73 | 4874    | 4202.39 | 3547.23 | 3923.07 |
| ENSMUSG00000039263 | 16_Npepl   | 503.949 | -0.31764 | 0.555264 | 0.846508 | 142.585 | 576.953 | 626.702 | 658.583 | 481.606 | 537.262 |
| ENSMUSG00000039264 | 9_Gimap3   | 32.6937 | 2.71937  | 4.64E-05 | 0.001805 | 42.4723 | 95.2142 | 33.0932 | 11.5541 | 10.3017 | 3.52688 |
| ENSMUSG00000039269 | 5_230000   | 0.95611 | -2.01688 | 0.532104 | NA       | 0       | 0       | 1.03416 | 0       | 0       | 4.70251 |
| ENSMUSG00000039270 | 9_Megf9    | 3867.48 | 0.31056  | 0.499697 | 0.821504 | 7318.38 | 2693.2  | 2834.64 | 2868.72 | 3907.79 | 3582.14 |
| ENSMUSG00000039275 | 9_Foxk2    | 1448.23 | 0.17731  | 0.480681 | 0.810547 | 1310.57 | 1730.86 | 1569.86 | 1327.07 | 1310.89 | 1440.14 |
| ENSMUSG00000039278 | 10_Pcsk1   | 0.41818 | -2.121   | 0.592183 | NA       | 0       | 0       | 0       | 1.65058 | 0.85848 | 0       |
| ENSMUSG00000039285 | 12_Azi2    | 3024.86 | 0.9406   | 0.025492 | 0.191321 | 6290.95 | 3148.87 | 2492.33 | 1747.14 | 2427.77 | 2042.07 |
| ENSMUSG00000039286 | 12_Fndc3   | 1623.38 | -0.15783 | 0.620183 | 0.877704 | 2075.07 | 1182.24 | 1346.48 | 1712.48 | 1704.08 | 1719.94 |
| ENSMUSG00000039294 | 14_BC017   | 737.205 | 0.53955  | 0.091845 | 0.413078 | 619.893 | 1117.63 | 883.174 | 607.415 | 615.528 | 579.585 |
| ENSMUSG00000039298 | 16_Cdk5r   | 738.665 | 0.10289  | 0.667885 | 0.898206 | 720.006 | 786.651 | 788.031 | 645.379 | 725.413 | 766.509 |
| ENSMUSG00000039304 | 11_Tnfrsf1 | 3410.74 | 2.37549  | 3.82E-08 | 4.35E-06 | 9105.24 | 4456.93 | 3595.78 | 902.87  | 1366.7  | 1036.9  |
| ENSMUSG00000039307 | 16_Hexdc   | 384.431 | -0.17166 | 0.71763  | 0.912533 | 154.72  | 394.459 | 535.696 | 462.164 | 365.711 | 393.835 |
| ENSMUSG00000039308 | 5_Ndst2    | 808.523 | 0.31953  | 0.43967  | 0.785475 | 457.082 | 1169.77 | 1066.22 | 673.439 | 691.074 | 793.549 |
| ENSMUSG00000039313 | 14_AF52g   | 57.8945 | -1.22096 | 0.041924 | 0.259289 | 62.6971 | 11.335  | 29.9907 | 69.3246 | 85.8477 | 88.1721 |
| ENSMUSG00000039315 | 15_Clnk    | 4.97035 | -0.36799 | 0.72924  | 0.917707 | 1.01124 | 7.93452 | 4.13665 | 7.42763 | 3.43391 | 5.87814 |
| ENSMUSG00000039316 | 14_Rftn1   | 107.089 | -0.45096 | 0.202312 | 0.593327 | 66.7421 | 108.816 | 96.177  | 141.95  | 112.46  | 116.387 |
| ENSMUSG00000039318 | 12_Rab3g   | 1100.08 | 0.34436  | 0.173148 | 0.556848 | 1071.92 | 1292.19 | 1327.86 | 871.509 | 990.682 | 1046.31 |
| ENSMUSG00000039321 | 1_Uts2r    | 6.15423 | -0.73478 | 0.411104 | 0.767001 | 5.05622 | 6.80102 | 2.06832 | 9.07822 | 6.86782 | 7.05377 |

|                    |           |         |          |          |          |         |         |         |         |         |         |
|--------------------|-----------|---------|----------|----------|----------|---------|---------|---------|---------|---------|---------|
| ENSMUSG00000039323 | 18_Igfbp2 | 6440.71 | -0.7563  | 0.181372 | 0.567796 | 1444.06 | 5362.6  | 7563.86 | 10177.5 | 5866.83 | 8229.39 |
| ENSMUSG00000039328 | 9_Rnf122  | 77.6842 | 0.36123  | 0.487391 | 0.814019 | 39.4385 | 122.418 | 100.314 | 85.0051 | 47.2162 | 71.7133 |
| ENSMUSG00000039330 | 4_Tsga10  | 0.30991 | 0.16972  | 0.966824 | NA       | 0       | 0       | 1.03416 | 0.82529 | 0       | 0       |
| ENSMUSG00000039339 | 3_201000  | 1.03589 | -1.05881 | 0.675264 | NA       | 2.02249 | 0       | 0       | 2.47588 | 1.71695 | 0       |
| ENSMUSG00000039345 | 15_Mettl2 | 74.7938 | -0.35528 | 0.587374 | 0.862925 | 15.1687 | 80.4787 | 101.348 | 111.414 | 59.2349 | 81.1183 |
| ENSMUSG00000039347 | 7_Atp6v0  | 484.581 | -1.22245 | 0.000304 | 0.00798  | 289.216 | 234.635 | 348.512 | 870.683 | 641.282 | 523.154 |
| ENSMUSG00000039349 | 5_C13007  | 266.914 | -0.90587 | 0.00199  | 0.032434 | 178.99  | 164.358 | 214.071 | 405.219 | 329.655 | 309.19  |
| ENSMUSG00000039354 | 16_Smarc  | 636.789 | 0.35864  | 0.301502 | 0.684667 | 459.105 | 869.397 | 818.022 | 528.187 | 528.822 | 617.205 |
| ENSMUSG00000039356 | 15_Exosc  | 543.517 | 0.06222  | 0.807574 | 0.944403 | 494.498 | 618.893 | 552.242 | 485.272 | 549.425 | 560.774 |
| ENSMUSG00000039357 | 1_Fut11   | 611.55  | 0.07869  | 0.837482 | 0.952966 | 946.525 | 447.734 | 490.193 | 543.042 | 638.707 | 603.097 |
| ENSMUSG00000039358 | 3_Drd5    | 0       | NA       | NA       | NA       | 0       | 0       | 0       | 0       | 0       | 0       |
| ENSMUSG00000039361 | 9_Picalm  | 4765.75 | 0.66905  | 0.145632 | 0.515931 | 9918.28 | 4113.48 | 3522.35 | 3046.15 | 4366.21 | 3627.99 |
| ENSMUSG00000039364 | 13_Sectm  | 310.972 | 2.00226  | 4.09E-08 | 4.57E-06 | 385.284 | 656.298 | 450.894 | 98.2098 | 117.611 | 157.534 |
| ENSMUSG00000039367 | 9_Sec24c  | 3827.14 | 0.29306  | 0.378066 | 0.746591 | 2822.38 | 5294.59 | 4526.53 | 3105.58 | 3436.48 | 3777.29 |
| ENSMUSG00000039372 | 5_March4  | 16.7092 | 0.03962  | 0.945962 | 0.986649 | 12.1349 | 18.136  | 20.6832 | 21.4576 | 13.7356 | 14.1075 |
| ENSMUSG00000039375 | 16_Wdr17  | 80.8607 | -1.5908  | 0.041472 | 0.257905 | 76.8546 | 31.7381 | 12.4099 | 208.799 | 123.621 | 31.742  |
| ENSMUSG00000039376 | 13_Synpo  | 52.3819 | -0.77008 | 0.085521 | 0.395978 | 41.461  | 26.0706 | 48.6056 | 85.8304 | 52.3671 | 59.957  |
| ENSMUSG00000039377 | 7_Hlx     | 8.86294 | 0.23085  | 0.762714 | 0.929057 | 6.06747 | 12.4685 | 10.3416 | 11.5541 | 6.86782 | 5.87814 |
| ENSMUSG00000039382 | 11_Wdr4E  | 338.608 | -0.16424 | 0.693002 | 0.905638 | 181.013 | 361.587 | 415.733 | 458.863 | 297.033 | 317.42  |
| ENSMUSG00000039384 | 8_Dusp10  | 137.381 | 0.05594  | 0.872365 | 0.963879 | 114.271 | 150.756 | 155.124 | 161.757 | 101.3   | 141.075 |
| ENSMUSG00000039385 | 4_Cdh6    | 51.5376 | -1.9092  | 0.000246 | 0.006844 | 22.2474 | 17.0025 | 25.854  | 78.4028 | 121.045 | 44.6739 |
| ENSMUSG00000039391 | 11_Ccdc8  | 2.68206 | 0.13344  | 0.930987 | 0.981773 | 0       | 1.1335  | 7.23913 | 2.47588 | 1.71695 | 3.52688 |
| ENSMUSG00000039395 | 8_Mreg    | 3009.74 | 0.27548  | 0.256051 | 0.647527 | 3280.48 | 3213.48 | 3394.12 | 2357.86 | 2748.84 | 3063.69 |
| ENSMUSG00000039396 | 10_Neil3  | 110.565 | 0.6998   | 0.093314 | 0.415917 | 189.103 | 116.751 | 104.45  | 58.5958 | 100.442 | 94.0502 |
| ENSMUSG00000039405 | 6_Prss23  | 4851.94 | 0.09505  | 0.6772   | 0.901447 | 5386.9  | 4838.92 | 4808.85 | 4418.62 | 4571.39 | 5086.94 |
| ENSMUSG00000039410 | 16_Prdm1  | 154.721 | -1.27462 | 0.000387 | 0.009526 | 86.967  | 78.2117 | 106.519 | 279.774 | 214.619 | 162.237 |
| ENSMUSG00000039414 | 9_Heat5t  | 1022.49 | 0.17005  | 0.567204 | 0.85233  | 803.939 | 1207.18 | 1236.86 | 874.81  | 984.673 | 1027.5  |
| ENSMUSG00000039419 | 16_Cntna1 | 126.705 | -1.43537 | 0.005413 | 0.065404 | 106.181 | 31.7381 | 67.2205 | 246.762 | 183.714 | 124.617 |
| ENSMUSG00000039427 | 14_Alg1   | 287.623 | -0.09818 | 0.859768 | 0.960099 | 82.922  | 353.653 | 397.118 | 346.623 | 273.854 | 271.57  |
| ENSMUSG00000039428 | 10_Tmem   | 1302.92 | 0.37344  | 0.307581 | 0.960424 | 2145.86 | 1131.24 | 1134.48 | 980.447 | 1231.06 | 1194.44 |
| ENSMUSG00000039431 | 16_Mtmr7  | 159.663 | -1.04584 | 0.01457  | 0.130419 | 140.563 | 63.4762 | 108.587 | 259.967 | 236.081 | 149.305 |
| ENSMUSG00000039438 | 6_Ttc36   | 397.085 | -0.5439  | 0.228411 | 0.619749 | 145.619 | 395.593 | 428.143 | 458.863 | 424.088 | 530.208 |
| ENSMUSG00000039449 | 14_Prpf18 | 1678.22 | 0.14391  | 0.665392 | 0.89688  | 2442.16 | 1429.35 | 1413.7  | 1469.02 | 1591.62 | 1723.47 |
| ENSMUSG00000039450 | 11_Dcxr   | 522.376 | 0.09548  | 0.874683 | 0.964407 | 129.439 | 652.898 | 836.637 | 560.374 | 390.607 | 564.301 |
| ENSMUSG00000039452 | 5_Snx22   | 78.7761 | -1.2769  | 0.024101 | 0.184402 | 15.1687 | 60.0757 | 63.0839 | 136.999 | 115.036 | 82.2939 |
| ENSMUSG00000039456 | 9_Morc3   | 1925.48 | 0.83916  | 0.034032 | 0.228521 | 3720.37 | 2007.43 | 1682.58 | 1110.02 | 1586.47 | 1446.02 |
| ENSMUSG00000039457 | 3_Ppl     | 37105.7 | 0.62676  | 0.064338 | 0.336093 | 30157.3 | 54528.3 | 50438.1 | 26255   | 26652.3 | 34603.4 |
| ENSMUSG00000039458 | 14_Mtmr1  | 1088.23 | 0.28447  | 0.209418 | 0.601141 | 1163.94 | 1209.45 | 1212.04 | 911.948 | 1032.75 | 999.284 |
| ENSMUSG00000039461 | 12_Tcta   | 876.515 | -0.44507 | 0.087727 | 0.401776 | 632.028 | 725.442 | 869.73  | 995.303 | 1049.06 | 987.527 |
| ENSMUSG00000039462 | 4_Col10a  | 91.4519 | -0.99487 | 0.0166   | 0.142265 | 63.7084 | 44.2066 | 75.4938 | 165.884 | 103.017 | 96.4015 |
| ENSMUSG00000039463 | 15_Slc9a6 | 860.834 | 0.18518  | 0.657905 | 0.894702 | 457.082 | 1160.71 | 1130.34 | 864.906 | 721.979 | 829.993 |
| ENSMUSG00000039470 | 15_Zdhhc  | 324.914 | -1.07964 | 0.045511 | 0.272844 | 391.352 | 105.416 | 129.27  | 507.555 | 477.313 | 338.581 |
| ENSMUSG00000039473 | 7_Ubn1    | 2312.14 | 0.17734  | 0.417097 | 0.770766 | 2334.96 | 2514.11 | 2513.01 | 2091.29 | 2182.25 | 2237.22 |
| ENSMUSG00000039474 | 13_Wfs1   | 2192.85 | 0.68847  | 0.207505 | 0.599079 | 830.232 | 3729.22 | 3559.58 | 1738.07 | 1323.77 | 1976.23 |
| ENSMUSG00000039476 | 13_Prrx2  | 50.9575 | -0.52359 | 0.49871  | 0.820675 | 7.07871 | 54.4081 | 64.118  | 103.162 | 33.4806 | 43.4982 |
| ENSMUSG00000039477 | 16_Tnrc1  | 1634.36 | 0.54927  | 0.337873 | 0.716055 | 550.117 | 2454.03 | 2821.19 | 1583.74 | 945.183 | 1451.9  |
| ENSMUSG00000039478 | 15_Micu3  | 147.002 | -0.02397 | 0.967701 | 0.991244 | 292.25  | 73.6777 | 71.3571 | 154.33  | 162.252 | 128.143 |
| ENSMUSG00000039480 | 13_Nt5dc  | 978.404 | 0.57761  | 0.193384 | 0.583211 | 1941.59 | 829.724 | 743.562 | 659.409 | 879.08  | 817.061 |
| ENSMUSG00000039481 | 5_Nrtn    | 0.48227 | 1.03727  | 0.788557 | NA       | 0       | 0       | 2.06832 | 0.82529 | 0       | 0       |
| ENSMUSG00000039483 | 10_Asb6   | 256.05  | 0.28511  | 0.66052  | 0.895394 | 55.6184 | 392.192 | 396.084 | 284.726 | 172.554 | 235.126 |
| ENSMUSG00000039485 | 7_Tspyl4  | 458.483 | -1.43114 | 0.000302 | 0.007945 | 340.789 | 165.491 | 237.857 | 830.244 | 694.508 | 482.007 |
| ENSMUSG00000039488 | 15_Cntn5  | 6.29407 | -0.07693 | 0.933624 | 0.98311  | 4.04498 | 11.335  | 3.10248 | 8.25292 | 5.15086 | 5.87814 |
| ENSMUSG00000039492 | 7_Ccdc27  | 2.60226 | -3.69681 | 0.04307  | 0.263494 | 0       | 0       | 1.03416 | 8.25292 | 5.15086 | 1.17563 |
| ENSMUSG00000039496 | 8_Cdnf    | 138.982 | -0.48977 | 0.193032 | 0.583012 | 160.788 | 80.4787 | 105.484 | 165.058 | 175.129 | 146.953 |
| ENSMUSG00000039497 | 7_Dse     | 684.311 | -0.31577 | 0.421443 | 0.77414  | 906.075 | 456.802 | 466.407 | 858.304 | 829.289 | 588.99  |
| ENSMUSG00000039501 | 14_Znfx1  | 2981.8  | 1.69131  | 7.26E-05 | 0.002541 | 2213.61 | 6443.96 | 5003.27 | 1428.58 | 1362.4  | 1438.97 |
| ENSMUSG00000039508 | 5_Fam26c  | 0.46955 | -0.60795 | 0.850453 | NA       | 0       | 1.1335  | 0       | 0.82529 | 0.85848 | 0       |
| ENSMUSG00000039509 | 7_Nup133  | 623.811 | 0.40633  | 0.139732 | 0.507179 | 587.533 | 831.991 | 713.571 | 500.952 | 524.529 | 584.287 |
| ENSMUSG00000039512 | 11_Uhrf1t | 682.226 | 0.29516  | 0.359944 | 0.733629 | 514.723 | 886.399 | 854.217 | 614.843 | 577.755 | 645.42  |
| ENSMUSG00000039515 | 11_Ppp2r  | 2608.11 | 0.03172  | 0.94804  | 0.986859 | 1006.19 | 3554.67 | 3349.65 | 2868.72 | 2291.28 | 2578.15 |
| ENSMUSG00000039518 | 7_Cdsn    | 11.9201 | 0.80407  | 0.400115 | 0.759536 | 2.02249 | 21.5366 | 21.7174 | 4.95175 | 6.00934 | 15.2832 |
| ENSMUSG00000039519 | 6_Cyp7b1  | 146.835 | 0.95693  | 0.050686 | 0.29136  | 311.463 | 167.758 | 102.382 | 87.481  | 129.63  | 82.2939 |
| ENSMUSG00000039521 | 12_Foxp3  | 8.00548 | 2.26398  | 0.017394 | 0.14769  | 5.05622 | 19.2695 | 15.5124 | 4.12646 | 1.71695 | 2.35126 |
| ENSMUSG00000039523 | 16_Cep1c  | 622.141 | 0.13641  | 0.708789 | 0.909864 | 400.453 | 776.449 | 777.689 | 628.047 | 504.784 | 645.42  |
| ENSMUSG00000039529 | 8_Atp8b1  | 810.908 | 0.86199  | 0.021483 | 0.171406 | 1524.96 | 813.855 | 799.407 | 472.067 | 612.094 | 643.068 |
| ENSMUSG00000039530 | 16_Tusc3  | 1195.06 | -0.19447 | 0.563156 | 0.85076  | 1545.18 | 876.198 | 922.472 | 1244.54 | 1412.19 | 1169.75 |
| ENSMUSG00000039531 | 7_Zufsp   | 530.721 | 1.3352   | 0.008091 | 0.086543 | 1359.11 | 540.681 | 380.571 | 259.967 | 334.806 | 309.19  |
| ENSMUSG00000039533 | 8_Mmd2    | 19.8935 | -1.75696 | 0.013291 | 0.123205 | 10.1124 | 7.93452 | 9.30745 | 56.1199 | 20.6034 | 15.2832 |
| ENSMUSG00000039536 | 16_Stau1  | 1799.66 | 0.17783  | 0.472686 | 0.806002 | 1782.82 | 2110.58 | 1837.71 | 1480.57 | 1780.48 | 1805.76 |
| ENSMUSG00000039539 | 13_Sgcz   | 0.14308 | -0.79206 | 0.84609  | NA       | 0       | 0       | 0       | 0       | 0.85848 | 0       |
| ENSMUSG00000039542 | 15_Ncam   | 764.835 | -1.58957 | 1.83E-06 | 0.000131 | 439.891 | 261.839 | 442.621 | 1286.63 | 1188.13 | 969.893 |
| ENSMUSG00000039543 | 15_Cfap7l | 8.30286 | -0.85024 | 0.285166 | 0.671308 | 5.05622 | 3.40051 | 9.30745 | 13.2047 | 9.44325 | 9.40502 |
| ENSMUSG00000039546 | 9_Ajap1   | 14.5086 | -2.03688 | 0.005122 | 0.063162 | 3.03373 | 6.80102 | 7.23913 | 28.8852 | 12.8772 | 28.2151 |
| ENSMUSG00000039552 | 13_Rsph4  | 1.27388 | -0.59177 | 0.811402 | NA       | 3.03373 | 0       | 0       | 0       | 3.43391 | 1.17563 |
| ENSMUSG00000039556 | 16_Ppp1r  | 83.7359 | -0.33111 | 0.421079 | 0.77414  | 55.6184 | 65.7432 | 101.348 | 118.842 | 83.2723 | 77.5914 |

|                    |            |         |          |          |          |         |         |         |         |         |         |
|--------------------|------------|---------|----------|----------|----------|---------|---------|---------|---------|---------|---------|
| ENSMUSG00000039563 | 6_221040   | 2.98583 | -0.50072 | 0.675375 | 0.900812 | 3.03373 | 2.26701 | 2.06832 | 4.12646 | 1.71695 | 4.70251 |
| ENSMUSG00000039568 | 6_Ubald1   | 673.992 | 0.23226  | 0.638162 | 0.886203 | 282.137 | 854.661 | 1047.61 | 677.565 | 514.228 | 667.757 |
| ENSMUSG00000039577 | 17_Nphp4   | 53.3471 | -0.60422 | 0.43634  | 0.78429  | 5.05622 | 60.0757 | 62.0497 | 94.9086 | 49.7917 | 48.2007 |
| ENSMUSG00000039578 | 16_Ccser   | 136.977 | 0.39447  | 0.283844 | 0.670589 | 216.406 | 119.018 | 131.339 | 122.143 | 123.621 | 109.333 |
| ENSMUSG00000039579 | 15_Grin3e  | 74.5026 | -0.15102 | 0.760561 | 0.92827  | 116.293 | 38.5391 | 56.8789 | 73.451  | 90.1401 | 71.7133 |
| ENSMUSG00000039585 | 15_Myo9a   | 1470.15 | -0.12083 | 0.801081 | 0.941902 | 2492.72 | 859.195 | 873.867 | 1505.33 | 1717.81 | 1371.96 |
| ENSMUSG00000039599 | 15_Fam14   | 651.911 | -0.04307 | 0.853235 | 0.958298 | 657.309 | 615.492 | 653.59  | 618.969 | 693.649 | 672.459 |
| ENSMUSG00000039601 | 15_Rcan2   | 229.479 | -0.87079 | 0.148106 | 0.520689 | 308.43  | 51.0076 | 127.202 | 360.653 | 294.458 | 235.126 |
| ENSMUSG00000039607 | 15_Rbms1   | 365.453 | -0.16255 | 0.767668 | 0.930788 | 664.388 | 164.358 | 205.798 | 370.556 | 436.106 | 351.513 |
| ENSMUSG00000039611 | 2_Tmem2    | 399.919 | -0.36994 | 0.268018 | 0.656064 | 248.766 | 363.854 | 434.348 | 524.886 | 400.909 | 426.753 |
| ENSMUSG00000039615 | 8_Stub1    | 855.159 | -0.03868 | 0.946506 | 0.986649 | 217.418 | 1136.9  | 1176.88 | 944.96  | 777.78  | 877.018 |
| ENSMUSG00000039616 | 9_Mocos    | 479.385 | 0.57618  | 0.1791   | 0.564484 | 281.126 | 753.779 | 686.683 | 393.664 | 342.532 | 418.524 |
| ENSMUSG00000039620 | 16_64305   | 111.342 | 0.26832  | 0.439818 | 0.785475 | 157.754 | 99.7483 | 107.553 | 103.987 | 107.31  | 91.699  |
| ENSMUSG00000039621 | 13_Prex1   | 208.485 | -0.14167 | 0.762857 | 0.929082 | 92.0232 | 252.771 | 250.267 | 280.599 | 187.148 | 188.1   |
| ENSMUSG00000039623 | 13_Ap5z1   | 211.172 | 0.48585  | 0.389354 | 0.752914 | 72.8096 | 311.713 | 354.717 | 196.42  | 146.8   | 184.574 |
| ENSMUSG00000039628 | 8_Hs3st6   | 2.34454 | -0.25623 | 0.851978 | 0.957888 | 1.01124 | 2.26701 | 3.10248 | 3.30117 | 0.85848 | 3.52688 |
| ENSMUSG00000039629 | 14_Strip2  | 32.6881 | -0.90518 | 0.121644 | 0.47416  | 34.3823 | 22.6701 | 11.3758 | 58.5958 | 42.0654 | 27.0394 |
| ENSMUSG00000039630 | 9_Hnrmpu   | 7046.49 | 0.65329  | 0.215759 | 0.607357 | 16184   | 5124.57 | 4536.87 | 4304.72 | 6202.5  | 5926.34 |
| ENSMUSG00000039632 | 12_Ccdc1   | 1.66291 | -0.50562 | 0.80228  | NA       | 3.03373 | 1.1335  | 0       | 4.95175 | 0.85848 | 0       |
| ENSMUSG00000039633 | 6_Lonrf1   | 542.117 | 0.3674   | 0.289509 | 0.674773 | 839.333 | 423.93  | 568.789 | 481.971 | 447.267 | 491.412 |
| ENSMUSG00000039634 | 12_Zfp181  | 76.5772 | -0.91286 | 0.154726 | 0.530899 | 98.0907 | 13.602  | 47.5714 | 108.113 | 113.319 | 78.7671 |
| ENSMUSG00000039637 | 14_Coro7   | 675.242 | 0.41068  | 0.497553 | 0.819569 | 174.945 | 1046.22 | 1091.04 | 648.68  | 503.926 | 586.638 |
| ENSMUSG00000039639 | 6_Kcne1    | 14.8566 | -0.7369  | 0.339077 | 0.717664 | 4.04498 | 15.869  | 13.4441 | 18.9817 | 8.58477 | 28.2151 |
| ENSMUSG00000039640 | 7_Mrpl12   | 521.689 | 0.02635  | 0.961797 | 0.990106 | 167.867 | 732.243 | 679.444 | 667.662 | 400.909 | 482.007 |
| ENSMUSG00000039646 | 5_Vasn     | 904.464 | 0.24359  | 0.67264  | 0.90042  | 286.182 | 1252.52 | 1403.36 | 1114.14 | 582.906 | 787.671 |
| ENSMUSG00000039648 | 14_Ccbl1   | 455.921 | 0.06805  | 0.900984 | 0.973382 | 149.664 | 554.283 | 695.991 | 449.784 | 348.542 | 537.262 |
| ENSMUSG00000039652 | 16_Cpeb3   | 361.772 | 0.20418  | 0.561013 | 0.849283 | 490.453 | 249.371 | 421.938 | 354.05  | 315.061 | 339.756 |
| ENSMUSG00000039653 | 9_Baat     | 0.9699  | -0.84802 | 0.748632 | NA       | 0       | 0       | 2.06832 | 0       | 2.57543 | 1.17563 |
| ENSMUSG00000039656 | 16_Rxrb    | 563.696 | 0.24412  | 0.674677 | 0.900436 | 168.878 | 732.243 | 932.814 | 651.981 | 396.616 | 499.642 |
| ENSMUSG00000039660 | 16_D2Ws    | 366.258 | 0.09943  | 0.86234  | 0.960913 | 104.158 | 537.28  | 495.363 | 423.375 | 308.193 | 329.176 |
| ENSMUSG00000039661 | 14_Dusp2   | 13.126  | -1.73508 | 0.072078 | 0.358283 | 1.01124 | 9.06802 | 8.27329 | 39.614  | 13.7356 | 7.05377 |
| ENSMUSG00000039662 | 16_Icmt    | 1634.29 | -0.0103  | 0.977383 | 0.993796 | 1019.33 | 1930.36 | 1935.95 | 1964.2  | 1408.76 | 1547.13 |
| ENSMUSG00000039670 | 2_Oxld1    | 47.9069 | -0.0796  | 0.876717 | 0.965114 | 29.3261 | 48.7406 | 62.0497 | 71.8004 | 43.7823 | 31.742  |
| ENSMUSG00000039671 | 18_Zmync   | 1257.02 | -0.02586 | 0.930858 | 0.981773 | 906.075 | 1425.95 | 1405.43 | 1319.64 | 1213.03 | 1272.03 |
| ENSMUSG00000039672 | 12_Kcne2   | 18.2995 | -2.3818  | 0.001204 | 0.022599 | 11.1237 | 3.40051 | 3.10248 | 33.0117 | 40.3484 | 18.81   |
| ENSMUSG00000039676 | 3_Capsl    | 101.823 | -0.00275 | 0.995132 | 0.998125 | 156.743 | 64.6097 | 83.7671 | 89.9569 | 125.338 | 90.5233 |
| ENSMUSG00000039678 | 12_Tbc1d   | 649.512 | 0.01748  | 0.965762 | 0.990781 | 339.778 | 828.591 | 792.168 | 703.974 | 600.075 | 632.488 |
| ENSMUSG00000039680 | 9_Mrps6    | 439.426 | -0.31274 | 0.258711 | 0.64893  | 461.127 | 381.99  | 333     | 492.7   | 524.529 | 443.212 |
| ENSMUSG00000039682 | 12_Lap3    | 778.268 | 1.04043  | 0.001113 | 0.021212 | 927.311 | 1398.74 | 815.953 | 507.555 | 481.606 | 538.438 |
| ENSMUSG00000039683 | 16_Sdk1    | 164.48  | -1.65382 | 0.000106 | 0.003473 | 56.6297 | 63.4762 | 117.894 | 325.165 | 199.167 | 224.545 |
| ENSMUSG00000039684 | 8_Gm542    | 14.3234 | 0.02962  | 0.971104 | 0.99228  | 9.1012  | 27.2041 | 7.23913 | 6.60234 | 24.0374 | 11.7563 |
| ENSMUSG00000039686 | 14_Zer1    | 599.015 | -0.14916 | 0.764133 | 0.929787 | 223.485 | 649.497 | 831.466 | 774.124 | 570.029 | 545.491 |
| ENSMUSG00000039691 | 10_Tspan   | 868.156 | -1.93322 | 0.000294 | 0.007787 | 157.754 | 303.779 | 619.463 | 1940.26 | 1200.15 | 987.527 |
| ENSMUSG00000039693 | 11_Msant   | 178.264 | 0.17985  | 0.575903 | 0.856895 | 149.664 | 213.099 | 205.798 | 193.944 | 164.828 | 142.251 |
| ENSMUSG00000039697 | 15_Ncoa7   | 394.937 | 1.47342  | 0.000527 | 0.012083 | 912.142 | 435.265 | 395.05  | 213.751 | 242.949 | 170.466 |
| ENSMUSG00000039699 | 13_Batf2   | 360.355 | 2.61414  | 2.71E-05 | 0.001164 | 145.619 | 1055.29 | 657.727 | 88.3063 | 117.611 | 97.5771 |
| ENSMUSG00000039701 | 11_Usp53   | 2119.99 | 0.57989  | 0.152668 | 0.527082 | 3991.38 | 1861.21 | 1768.42 | 1487.18 | 1870.62 | 1741.1  |
| ENSMUSG00000039703 | 15_Nploc   | 1534.81 | 0.29392  | 0.396695 | 0.757228 | 1063.83 | 2132.12 | 1875.97 | 1369.16 | 1322.91 | 1444.85 |
| ENSMUSG00000039704 | 6_Lmbd2    | 652.488 | 0.33358  | 0.476042 | 0.807493 | 1245.85 | 480.605 | 456.065 | 468.766 | 646.433 | 617.205 |
| ENSMUSG00000039706 | 11_Ldb2    | 147.399 | -0.96777 | 0.032174 | 0.122177 | 150.675 | 53.2746 | 95.1429 | 231.082 | 193.157 | 161.061 |
| ENSMUSG00000039713 | 16_Plekhg  | 366.775 | 0.04398  | 0.950638 | 0.987571 | 52.5847 | 476.071 | 588.438 | 415.122 | 246.383 | 422.05  |
| ENSMUSG00000039714 | 8_Cplx3    | 45.9467 | -2.75813 | 0.003466 | 0.048186 | 11.1237 | 20.4031 | 4.13665 | 170.836 | 60.9519 | 8.22939 |
| ENSMUSG00000039715 | 8_Wdr34    | 210.367 | 0.12126  | 0.818838 | 0.948111 | 77.8658 | 279.975 | 299.907 | 247.588 | 160.535 | 196.33  |
| ENSMUSG00000039716 | 12_Dock3   | 69.1663 | -1.63141 | 0.000987 | 0.019402 | 47.5285 | 23.8036 | 29.9907 | 137.824 | 115.894 | 59.957  |
| ENSMUSG00000039717 | 15_Raly1   | 3.60794 | -1.01204 | 0.521695 | 0.831998 | 6.06747 | 1.1335  | 0       | 11.5541 | 1.71695 | 1.17563 |
| ENSMUSG00000039720 | 6_Got11i   | 0.13755 | -0.79206 | 0.84609  | NA       | 0       | 0       | 0       | 0.82529 | 0       | 0       |
| ENSMUSG00000039725 | 6_Trp53rk  | 291.869 | 0.0113   | 0.97421  | 0.99348  | 190.114 | 334.383 | 354.717 | 312.786 | 274.713 | 284.502 |
| ENSMUSG00000039728 | 14_Slc6a1  | 6.15587 | -1.08508 | 0.328704 | 0.709501 | 3.03373 | 7.93452 | 1.03416 | 14.8553 | 7.72629 | 2.35126 |
| ENSMUSG00000039735 | 15_Fnbp1   | 3233.64 | 0.3216   | 0.434816 | 0.783106 | 5693.31 | 2527.71 | 2556.45 | 2442.04 | 3170.36 | 3011.96 |
| ENSMUSG00000039737 | 11_Prkrp1  | 272.864 | 0.08125  | 0.810563 | 0.945675 | 203.26  | 325.315 | 313.351 | 319.388 | 226.638 | 249.233 |
| ENSMUSG00000039738 | 16_Slx4    | 427.692 | 0.0861   | 0.826421 | 0.950291 | 251.8   | 584.887 | 485.022 | 472.893 | 400.05  | 371.498 |
| ENSMUSG00000039740 | 6_Alg2     | 803.014 | -0.3559  | 0.186984 | 0.573937 | 848.434 | 615.492 | 649.453 | 905.346 | 952.909 | 846.452 |
| ENSMUSG00000039741 | 15_Bahcc   | 217.258 | -0.0157  | 0.975521 | 0.993623 | 88.9895 | 234.635 | 324.727 | 281.425 | 165.686 | 208.086 |
| ENSMUSG00000039742 | 15_Fam7c   | 0.14308 | -0.79206 | 0.84609  | NA       | 0       | 0       | 0       | 0       | 0.85848 | 0       |
| ENSMUSG00000039745 | 7_Htatip2  | 286.281 | 0.22519  | 0.41196  | 0.767522 | 270.002 | 353.653 | 301.975 | 243.461 | 265.269 | 283.326 |
| ENSMUSG00000039747 | 11_Orai2   | 224.447 | 0.05324  | 0.879914 | 0.966708 | 152.698 | 256.172 | 277.155 | 250.064 | 206.034 | 204.559 |
| ENSMUSG00000039748 | 11_Exo1    | 141.064 | 1.19867  | 0.000311 | 0.008105 | 188.091 | 223.3   | 177.876 | 65.1981 | 97.8664 | 94.0502 |
| ENSMUSG00000039753 | 16_Fbxl5   | 1863.64 | 0.19853  | 0.61995  | 0.877704 | 3110.59 | 1506.43 | 1357.85 | 1603.54 | 1905.82 | 1697.61 |
| ENSMUSG00000039754 | 10_Alkhh4  | 122.614 | 0.2439   | 0.57327  | 0.855525 | 75.8433 | 168.892 | 154.09  | 125.444 | 83.2723 | 128.143 |
| ENSMUSG00000039756 | 12_Dnttip1 | 1356.67 | 0.30936  | 0.474401 | 0.806964 | 2423.95 | 1131.24 | 949.36  | 997.778 | 1404.47 | 1233.23 |
| ENSMUSG00000039759 | 10_Thap3   | 165.386 | -0.05384 | 0.940473 | 0.98555  | 24.2699 | 170.025 | 292.668 | 220.353 | 122.762 | 162.237 |
| ENSMUSG00000039760 | 8_Il22ra2  | 0.36128 | 2.05714  | 0.610196 | NA       | 0       | 1.1335  | 1.03416 | 0       | 0       | 0       |
| ENSMUSG00000039763 | 9_Dnajc2f  | 134.432 | -0.16565 | 0.171699 | 0.910709 | 204.271 | 82.7457 | 93.0745 | 137.824 | 160.535 | 128.143 |
| ENSMUSG00000039765 | 15_Cc2d2   | 790.918 | -0.38014 | 0.161261 | 0.539756 | 794.838 | 569.018 | 698.059 | 877.286 | 978.664 | 827.642 |
| ENSMUSG00000039768 | 16_Dnajc1  | 1348.88 | 0.12069  | 0.759666 | 0.927999 | 758.433 | 1771.67 | 1685.68 | 1236.29 | 1210.45 | 1430.74 |

|                    |            |         |          |          |          |         |         |         |         |         |         |
|--------------------|------------|---------|----------|----------|----------|---------|---------|---------|---------|---------|---------|
| ENSMUSG00000039770 | 5_Ypel5    | 2120.09 | 0.46391  | 0.262359 | 0.651483 | 3910.48 | 1806.8  | 1656.73 | 1566.4  | 2000.25 | 1779.9  |
| ENSMUSG00000039771 | 13_Polr2j  | 521.834 | 0.02259  | 0.967521 | 0.991241 | 154.72  | 733.376 | 689.786 | 591.735 | 433.531 | 527.857 |
| ENSMUSG00000039774 | 12_Galnt1  | 289.349 | 0.54945  | 0.049818 | 0.288779 | 284.16  | 396.726 | 350.581 | 239.335 | 226.638 | 238.652 |
| ENSMUSG00000039781 | 14_Cep13   | 99.3765 | 0.25341  | 0.730517 | 0.918737 | 14.1574 | 151.889 | 158.227 | 105.637 | 65.2443 | 101.104 |
| ENSMUSG00000039782 | 14_Cpeb2   | 3095.69 | 0.67637  | 0.074726 | 0.365986 | 5735.78 | 2821.29 | 2867.73 | 2093.77 | 2570.28 | 2485.28 |
| ENSMUSG00000039783 | 15_Kmo     | 25.5954 | 1.46835  | 0.008127 | 0.086709 | 36.4048 | 49.8741 | 26.8882 | 18.9817 | 12.0187 | 9.40502 |
| ENSMUSG00000039787 | 13_Cercai  | 237.862 | -0.47131 | 0.33102  | 0.710917 | 96.0682 | 170.025 | 331.966 | 312.786 | 241.232 | 275.097 |
| ENSMUSG00000039789 | 7_Zfp597   | 381.017 | 0.20337  | 0.653457 | 0.893222 | 680.567 | 292.444 | 250.267 | 306.183 | 386.315 | 370.323 |
| ENSMUSG00000039795 | 14_Zfand   | 705.023 | 0.04349  | 0.876598 | 0.965114 | 853.49  | 607.558 | 685.649 | 614.018 | 764.045 | 705.377 |
| ENSMUSG00000039801 | 6_241008   | 382.172 | -0.4715  | 0.153878 | 0.529412 | 413.599 | 250.504 | 296.804 | 459.688 | 505.643 | 366.796 |
| ENSMUSG00000039804 | 15_Ncoa5   | 840.669 | -0.14846 | 0.635158 | 0.884141 | 575.398 | 941.941 | 874.901 | 821.166 | 830.147 | 1000.46 |
| ENSMUSG00000039809 | 10_Gabbr   | 8.83173 | -2.15615 | 0.085749 | 0.396669 | 3.03373 | 6.80102 | 0       | 31.3611 | 9.44325 | 2.35126 |
| ENSMUSG00000039810 | 11_Zc3h1   | 236.445 | 0.19127  | 0.15814  | 0.876599 | 149.664 | 303.779 | 303.009 | 241.811 | 201.742 | 218.667 |
| ENSMUSG00000039813 | 14_Tbc1d   | 809.038 | 0.69602  | 0.248443 | 0.63995  | 236.631 | 1469.02 | 1295.8  | 640.427 | 489.332 | 723.011 |
| ENSMUSG00000039814 | 15_Xkr5    | 15.6684 | 0.32462  | 0.61191  | 0.874367 | 20.2249 | 9.06802 | 22.7516 | 14.03   | 10.3017 | 17.6344 |
| ENSMUSG00000039824 | 3_Myl6b    | 47.3393 | -0.5642  | 0.411795 | 0.767412 | 11.1237 | 37.4056 | 66.1863 | 89.1316 | 34.3391 | 45.8495 |
| ENSMUSG00000039826 | 13_Trub2   | 462.529 | -0.01335 | 0.957602 | 0.98909  | 413.599 | 468.137 | 499.5   | 495.175 | 434.389 | 464.373 |
| ENSMUSG00000039828 | 6_Wdr70    | 261.584 | 0.64193  | 0.02692  | 0.1976   | 272.025 | 361.587 | 322.658 | 175.787 | 212.902 | 224.545 |
| ENSMUSG00000039830 | 8_Olig2    | 1.14414 | 1.54828  | 0.54267  | NA       | 1.01124 | 0       | 4.13665 | 0       | 1.71695 | 0       |
| ENSMUSG00000039831 | 16_Arhga1  | 1041.85 | -0.59036 | 0.173401 | 0.556848 | 1345.97 | 529.346 | 619.463 | 1288.28 | 1440.52 | 1027.5  |
| ENSMUSG00000039834 | 17_Zfp33f  | 347.22  | 0.29363  | 0.650297 | 0.891567 | 70.7871 | 566.751 | 509.842 | 335.894 | 275.571 | 324.473 |
| ENSMUSG00000039835 | 15_Nhsl1   | 2008.18 | 0.28563  | 0.258606 | 0.64893  | 1885.97 | 2364.49 | 2368.23 | 1761.17 | 1680.04 | 1989.16 |
| ENSMUSG00000039838 | 11_Slc45e  | 1.31143 | -2.58681 | 0.275988 | NA       | 0       | 1.1335  | 0       | 3.30117 | 3.43391 | 0       |
| ENSMUSG00000039840 | 7_Epg5     | 833.763 | 0.21105  | 0.375886 | 0.745495 | 798.883 | 955.543 | 929.711 | 801.359 | 762.328 | 754.753 |
| ENSMUSG00000039841 | 14_Zfp80f  | 772.759 | 0.80518  | 0.102998 | 0.436784 | 1728.22 | 629.094 | 591.54  | 447.308 | 712.536 | 527.857 |
| ENSMUSG00000039842 | 15_Mcph1   | 216.088 | 0.83598  | 0.009322 | 0.09531  | 316.519 | 283.376 | 230.618 | 121.318 | 164.828 | 179.871 |
| ENSMUSG00000039844 | 19_Rapge   | 1475.62 | -0.09623 | 0.816386 | 0.947542 | 726.073 | 1746.73 | 1806.68 | 1740.54 | 1351.24 | 1482.47 |
| ENSMUSG00000039849 | 5_Pcif1    | 1047.41 | 0.03803  | 0.943381 | 0.986388 | 342.812 | 1346.6  | 1494.36 | 1244.54 | 853.326 | 1002.81 |
| ENSMUSG00000039850 | 16_Endov   | 514.215 | -0.16568 | 0.759809 | 0.928029 | 154.72  | 608.691 | 690.82  | 623.096 | 428.38  | 579.585 |
| ENSMUSG00000039851 | 11_49324   | 75.8765 | -1.78797 | 0.000163 | 0.004918 | 49.551  | 22.6701 | 29.9907 | 144.426 | 132.205 | 76.4158 |
| ENSMUSG00000039852 | 16_Rere    | 2597.76 | 0.26572  | 0.349121 | 0.726134 | 2209.57 | 2917.64 | 3381.71 | 2481.65 | 2143.62 | 2452.36 |
| ENSMUSG00000039853 | 18_Trim1   | 269.349 | 0.96318  | 0.006757 | 0.076176 | 237.642 | 448.867 | 381.606 | 157.631 | 194.016 | 196.33  |
| ENSMUSG00000039860 | 19_Srrm3   | 13.5998 | -2.76253 | 0.002377 | 0.036818 | 5.05622 | 3.40051 | 2.06832 | 46.2164 | 15.4526 | 9.40502 |
| ENSMUSG00000039865 | 8_Slc44a3  | 32.6773 | 0.14308  | 0.762237 | 0.929045 | 47.5285 | 27.2041 | 27.9224 | 27.2346 | 30.9052 | 35.2688 |
| ENSMUSG00000039873 | 4_Neur12   | 7.47321 | -1.8966  | 0.064911 | 0.337359 | 2.02249 | 3.40051 | 4.13665 | 23.9335 | 4.29238 | 7.05377 |
| ENSMUSG00000039878 | 12_Slc39e  | 0.13755 | -0.79206 | 0.84609  | NA       | 0       | 0       | 0       | 0.82529 | 0       | 0       |
| ENSMUSG00000039879 | 8_Heca     | 1624.46 | 0.64079  | 0.069308 | 0.35044  | 2868.9  | 1531.36 | 1537.8  | 1243.72 | 1289.43 | 1275.56 |
| ENSMUSG00000039883 | 5_Lrrc17   | 196.509 | -0.20546 | 0.576547 | 0.856937 | 197.193 | 114.484 | 235.789 | 217.877 | 210.327 | 203.384 |
| ENSMUSG00000039886 | 8_Tmem1    | 326.295 | 0.05661  | 0.910022 | 0.974782 | 123.372 | 459.069 | 415.733 | 327.641 | 291.024 | 340.932 |
| ENSMUSG00000039887 | 11_Alg14   | 506.119 | -0.17478 | 0.550122 | 0.844147 | 593.6   | 417.129 | 415.733 | 510.031 | 592.349 | 507.871 |
| ENSMUSG00000039891 | 6_Txlnb    | 210.927 | 0.0341   | 0.960424 | 0.989875 | 462.139 | 61.2092 | 116.86  | 284.726 | 163.111 | 177.52  |
| ENSMUSG00000039899 | 5_Fgl2     | 1005.55 | 0.88765  | 0.031944 | 0.220389 | 1929.45 | 1199.25 | 788.031 | 674.264 | 875.647 | 566.653 |
| ENSMUSG00000039901 | 9_913001   | 594.476 | 0.26598  | 0.270164 | 0.656957 | 668.433 | 651.764 | 626.702 | 505.079 | 517.662 | 597.219 |
| ENSMUSG00000039903 | 16_Eva1c   | 65.615  | 0.03359  | 0.945854 | 0.986649 | 35.3936 | 100.882 | 63.0839 | 52.8187 | 81.5553 | 59.957  |
| ENSMUSG00000039904 | 7_Gpr37    | 69.9836 | -1.55261 | 0.001033 | 0.020024 | 36.4048 | 38.5391 | 32.059  | 161.757 | 84.1307 | 67.0108 |
| ENSMUSG00000039908 | 14_Slc26a5 | 102.201 | -0.25326 | 0.538278 | 0.938833 | 68.7646 | 87.2797 | 124.099 | 136.999 | 118.47  | 77.5914 |
| ENSMUSG00000039910 | 9_Cited2   | 1055.19 | 0.35977  | 0.368806 | 0.740777 | 1845.52 | 944.208 | 768.382 | 899.569 | 940.032 | 933.448 |
| ENSMUSG00000039911 | 13_Spsb1   | 198.533 | -0.535   | 0.135374 | 0.499408 | 127.417 | 145.088 | 214.071 | 290.503 | 206.034 | 208.086 |
| ENSMUSG00000039913 | 12_Pak7    | 30.1887 | -1.97394 | 0.003818 | 0.051553 | 20.2249 | 12.4685 | 4.13665 | 56.9452 | 62.6688 | 24.6882 |
| ENSMUSG00000039914 | 5_Coq10a   | 349.61  | -0.784   | 0.00876  | 0.091441 | 223.485 | 225.567 | 321.624 | 488.573 | 416.361 | 422.05  |
| ENSMUSG00000039917 | 10_Rhbdd   | 530.924 | 0.21209  | 0.433602 | 0.781899 | 464.161 | 593.956 | 651.522 | 496.826 | 474.738 | 504.344 |
| ENSMUSG00000039929 | 14_Urb1    | 318.53  | 0.34219  | 0.349207 | 0.726227 | 224.496 | 411.462 | 432.28  | 276.473 | 245.524 | 320.946 |
| ENSMUSG00000039934 | 12_Gsap    | 182.931 | 0.92276  | 0.009282 | 0.0951   | 296.295 | 262.973 | 159.261 | 122.143 | 128.772 | 128.143 |
| ENSMUSG00000039936 | 18_Pik3cc  | 112.523 | 1.25241  | 0.043401 | 0.264492 | 45.5172 | 272.041 | 157.193 | 89.9569 | 50.6501 | 58.7814 |
| ENSMUSG00000039942 | 15_Ptger4  | 74.2542 | 1.10758  | 0.00322  | 0.045766 | 121.349 | 105.416 | 77.5621 | 41.2646 | 54.084  | 45.8495 |
| ENSMUSG00000039943 | 16_Plcb4   | 1660.25 | -0.9843  | 0.030912 | 0.215763 | 1850.58 | 656.298 | 837.671 | 2287.71 | 2604.62 | 1724.65 |
| ENSMUSG00000039952 | 15_Dag1    | 4273.97 | 0.06642  | 0.827849 | 0.950974 | 3114.63 | 4979.48 | 5022.92 | 4289.87 | 3814.21 | 4422.71 |
| ENSMUSG00000039953 | 13_Clstn1  | 3498.37 | -0.31827 | 0.483879 | 0.812102 | 1432.93 | 3576.2  | 4333.14 | 4701.69 | 3091.38 | 3854.88 |
| ENSMUSG00000039954 | 8_Stk32a   | 12.3154 | -1.24155 | 0.098107 | 0.42532  | 10.1124 | 6.80102 | 5.17081 | 26.4094 | 17.1695 | 8.22939 |
| ENSMUSG00000039956 | 8_Mrap     | 6.06149 | -0.48437 | 0.646735 | 0.889998 | 1.01124 | 6.80102 | 7.23913 | 4.95175 | 3.43391 | 12.9319 |
| ENSMUSG00000039958 | 17_Mettl2  | 125.528 | -0.04208 | 0.927825 | 0.980746 | 199.215 | 72.5442 | 99.2795 | 119.667 | 151.95  | 110.509 |
| ENSMUSG00000039959 | 12_Hip1    | 444.425 | -0.7285  | 0.005457 | 0.06566  | 334.722 | 317.381 | 351.615 | 638.776 | 496.2   | 527.857 |
| ENSMUSG00000039960 | 5_Rhou     | 604.629 | 0.24954  | 0.398407 | 0.758992 | 535.959 | 826.324 | 608.087 | 547.994 | 513.369 | 596.043 |
| ENSMUSG00000039963 | 18_Ccdc4   | 3.89395 | -0.62461 | 0.619941 | 0.877704 | 5.05622 | 0       | 4.13665 | 4.95175 | 6.86782 | 2.35126 |
| ENSMUSG00000039967 | 14_Zfp29f  | 1581.92 | 0.39961  | 0.387634 | 0.752189 | 3115.64 | 1128.97 | 1154.12 | 1283.33 | 1486.88 | 1322.58 |
| ENSMUSG00000039968 | 9_Rsbn1f   | 1108.64 | 0.67539  | 0.123851 | 0.478461 | 2240.92 | 901.135 | 948.326 | 727.083 | 994.975 | 839.398 |
| ENSMUSG00000039976 | 3_Tbc1d1   | 485.006 | -1.29035 | 0.002627 | 0.039611 | 154.72  | 285.643 | 404.357 | 864.081 | 649.867 | 551.369 |
| ENSMUSG00000039977 | 16_Ccdc6   | 5.19876 | -1.48508 | 0.268229 | 0.656133 | 2.02249 | 0       | 6.20497 | 13.2047 | 8.58477 | 1.17563 |
| ENSMUSG00000039981 | 5_Zc3h12   | 21.6934 | 2.56517  | 0.000131 | 0.004106 | 26.2924 | 61.2092 | 23.7857 | 4.95175 | 6.86782 | 7.05377 |
| ENSMUSG00000039982 | 7_Dtx4     | 632.834 | -0.86529 | 0.000345 | 0.008789 | 450.004 | 464.736 | 431.245 | 871.509 | 844.741 | 734.767 |
| ENSMUSG00000039983 | 13_Ccdc3   | 617.856 | 0.86776  | 0.001342 | 0.024346 | 729.107 | 964.611 | 701.162 | 428.327 | 439.54  | 444.387 |
| ENSMUSG00000039985 | 14_Fam6c   | 478.977 | 0.55945  | 0.162403 | 0.540887 | 880.794 | 421.663 | 409.528 | 353.225 | 430.097 | 378.552 |
| ENSMUSG00000039987 | 15_Phtf2   | 438.903 | 0.04378  | 0.919607 | 0.977244 | 729.107 | 310.58  | 296.804 | 393.664 | 463.578 | 439.685 |
| ENSMUSG00000039988 | 14_Ankrd   | 2064.61 | 0.56347  | 0.220576 | 0.611594 | 4203.74 | 1642.45 | 1541.93 | 1429.41 | 1941.87 | 1628.24 |
| ENSMUSG00000039989 | 7_Cbx4     | 720.527 | 0.80536  | 0.01788  | 0.150711 | 692.702 | 990.682 | 1066.22 | 618.144 | 382.881 | 572.531 |

|                    |           |         |          |          |          |         |         |         |         |         |         |
|--------------------|-----------|---------|----------|----------|----------|---------|---------|---------|---------|---------|---------|
| ENSMUSG00000039990 | 15_Edrf1  | 933.608 | 0.3347   | 0.271185 | 0.657711 | 1337.88 | 957.81  | 828.363 | 745.239 | 876.505 | 855.857 |
| ENSMUSG00000039994 | 15_Timele | 309.624 | 1.48196  | 0.001143 | 0.021707 | 223.485 | 654.031 | 490.193 | 143.601 | 144.224 | 202.208 |
| ENSMUSG00000039997 | 16_lfi203 | 9867.75 | 2.38892  | 1.92E-06 | 0.000137 | 27892.1 | 13010.3 | 8812.09 | 2026.92 | 4220.27 | 3244.73 |
| ENSMUSG00000040003 | 17_Magi2  | 180.16  | -0.83534 | 0.071385 | 0.35673  | 196.181 | 66.8767 | 125.134 | 263.268 | 256.685 | 172.817 |
| ENSMUSG00000040006 | 13_Ginm1  | 1384.52 | 0.15866  | 0.694898 | 0.905638 | 2291.48 | 1039.42 | 1050.71 | 1202.45 | 1475.72 | 1247.34 |
| ENSMUSG00000040007 | 8_Bahd1   | 352.032 | 0.40381  | 0.323883 | 0.704312 | 209.328 | 505.542 | 488.124 | 299.581 | 291.024 | 318.595 |
| ENSMUSG00000040009 | 5_Gnaz    | 45.6079 | -1.41909 | 0.004474 | 0.057496 | 30.3373 | 20.4031 | 23.7857 | 99.8604 | 46.3578 | 52.9033 |
| ENSMUSG00000040010 | 10_Slc7a2 | 1587.56 | 0.36815  | 0.393675 | 0.755289 | 873.715 | 2502.77 | 1990.76 | 1566.4  | 1204.44 | 1387.24 |
| ENSMUSG00000040016 | 16_Ptger3 | 36.0934 | -0.69141 | 0.267362 | 0.655567 | 52.5847 | 13.602  | 16.5466 | 41.2646 | 54.9425 | 37.6201 |
| ENSMUSG00000040017 | 7_Saa4    | 0.37783 | 2.11394  | 0.599927 | NA       | 0       | 2.26701 | 0       | 0       | 0       | 0       |
| ENSMUSG00000040018 | 9_Cox15   | 849.333 | 0.48162  | 0.039414 | 0.249676 | 918.21  | 1065.49 | 985.556 | 694.071 | 688.499 | 744.172 |
| ENSMUSG00000040021 | 12_Lats1  | 1886.02 | 0.27026  | 0.455702 | 0.796332 | 3002.38 | 1567.63 | 1616.39 | 1591.99 | 1934.15 | 1603.56 |
| ENSMUSG00000040022 | 14_Rab11  | 695.105 | 0.15977  | 0.7142   | 0.91112  | 1208.44 | 452.268 | 539.832 | 641.252 | 702.234 | 626.61  |
| ENSMUSG00000040025 | 17_Ythdf2 | 1748.48 | 0.66195  | 0.062474 | 0.329935 | 2941.71 | 1863.48 | 1622.6  | 1048.12 | 1516.07 | 1498.93 |
| ENSMUSG00000040026 | 7_Saa3    | 950.211 | 4.04428  | 0.004974 | 0.061948 | 339.778 | 4489.81 | 546.037 | 269.045 | 15.4526 | 41.147  |
| ENSMUSG00000040028 | 9_Elav1   | 1557.61 | 0.4006   | 0.180312 | 0.566642 | 2147.88 | 1777.33 | 1391.98 | 1132.3  | 1465.42 | 1430.74 |
| ENSMUSG00000040029 | 14_Ipo8   | 2039.3  | 0.37012  | 0.257109 | 0.648419 | 3118.68 | 1917.89 | 1861.49 | 1548.25 | 1882.64 | 1906.87 |
| ENSMUSG00000040033 | 15_Stat2  | 4269.2  | 2.1561   | 4.32E-11 | 9.25E-09 | 5422.29 | 9225.58 | 6273.22 | 1289.93 | 1741.85 | 1662.34 |
| ENSMUSG00000040034 | 15_Nup43  | 340.005 | 0.28671  | 0.348962 | 0.726065 | 418.655 | 387.658 | 314.385 | 240.16  | 338.24  | 340.932 |
| ENSMUSG00000040035 | 14_Disp2  | 17.1273 | -2.3496  | 0.004979 | 0.061948 | 9.1012  | 6.80102 | 1.03416 | 44.5658 | 28.3297 | 12.9319 |
| ENSMUSG00000040037 | 13_Negr1  | 99.3201 | -1.029   | 0.1468   | 0.518374 | 140.563 | 18.136  | 37.2298 | 153.504 | 166.545 | 79.9427 |
| ENSMUSG00000040040 | 16_lft88  | 509.815 | 0.34549  | 0.40533  | 0.763962 | 885.85  | 429.598 | 396.084 | 365.605 | 527.963 | 453.792 |
| ENSMUSG00000040043 | 15_Rbms3  | 1735.44 | -0.02058 | 0.934804 | 0.983652 | 1465.29 | 1779.6  | 1924.57 | 1856.91 | 1742.71 | 1643.53 |
| ENSMUSG00000040044 | 11_Orc3   | 1288.74 | 0.23464  | 0.582907 | 0.860399 | 2246.98 | 955.543 | 977.283 | 1025.01 | 1400.18 | 1127.43 |
| ENSMUSG00000040046 | 12_Tph1   | 5.7001  | 0.20724  | 0.851571 | 0.957649 | 1.01124 | 9.06802 | 8.27329 | 8.25292 | 1.71695 | 5.87814 |
| ENSMUSG00000040048 | 14_Ndufb  | 1210.66 | -0.28836 | 0.27943  | 0.666588 | 881.805 | 1233.25 | 1155.16 | 1263.52 | 1319.48 | 1410.75 |
| ENSMUSG00000040054 | 15_Baz2a  | 4696.61 | 0.51103  | 0.136872 | 0.502096 | 3535.31 | 6617.39 | 6406.63 | 3577.64 | 3671.71 | 4370.98 |
| ENSMUSG00000040055 | 8_Gjb6    | 261.194 | -0.36409 | 0.314527 | 0.695926 | 316.519 | 172.292 | 196.491 | 325.165 | 313.344 | 243.355 |
| ENSMUSG00000040061 | 17_Plcb2  | 38.9151 | 0.63261  | 0.296438 | 0.680027 | 19.2136 | 81.6122 | 41.3665 | 37.9634 | 27.4713 | 25.8638 |
| ENSMUSG00000040084 | 9_Bub1b   | 549.117 | 0.34292  | 0.242004 | 0.633507 | 507.645 | 711.84  | 622.565 | 400.267 | 524.529 | 527.857 |
| ENSMUSG00000040086 | 13_Tnni3b | 0.13755 | -0.79206 | 0.84609  | NA       | 0       | 0       | 0       | 0.82529 | 0       | 0       |
| ENSMUSG00000040093 | 15_Bmf    | 234.603 | -0.20112 | 0.513019 | 0.828304 | 186.069 | 205.164 | 263.711 | 290.503 | 222.346 | 239.828 |
| ENSMUSG00000040097 | 15_Flywcl | 309.538 | -0.62464 | 0.285693 | 0.671835 | 67.7534 | 296.978 | 366.093 | 491.874 | 293.599 | 340.932 |
| ENSMUSG00000040102 | 10_Klhl42 | 510.562 | 0.15147  | 0.621341 | 0.878215 | 692.702 | 434.132 | 485.022 | 452.26  | 521.954 | 477.305 |
| ENSMUSG00000040105 | 3_Ppapdc  | 507.056 | 0.48232  | 0.28585  | 0.671835 | 990.008 | 376.323 | 406.425 | 377.984 | 406.06  | 485.534 |
| ENSMUSG00000040111 | 14_Gramc  | 640.63  | -1.3552  | 7.32E-06 | 0.00041  | 360.003 | 338.917 | 381.606 | 1129.83 | 937.457 | 695.972 |
| ENSMUSG00000040112 | 9_Mrps35  | 515.869 | -0.13823 | 0.613618 | 0.875588 | 443.936 | 522.545 | 506.739 | 445.658 | 570.887 | 605.448 |
| ENSMUSG00000040113 | 14_Mettl1 | 1.1726  | -0.36541 | 0.883298 | NA       | 3.03373 | 0       | 0       | 1.65058 | 0       | 2.35126 |
| ENSMUSG00000040118 | 15_Cacna  | 619.404 | -0.71526 | 0.245907 | 0.637596 | 946.525 | 153.023 | 307.146 | 813.738 | 911.703 | 584.287 |
| ENSMUSG00000040121 | 5_Rep15   | 15.3227 | -0.2685  | 0.694164 | 0.905638 | 24.2699 | 10.2015 | 7.23913 | 19.807  | 16.3111 | 14.1075 |
| ENSMUSG00000040123 | 16_Zmym   | 2229.35 | 0.38597  | 0.394458 | 0.755773 | 4230.04 | 1576.7  | 1770.48 | 1582.09 | 2298.14 | 1918.62 |
| ENSMUSG00000040124 | 5_Gorab   | 427.64  | 0.3074   | 0.409535 | 0.766592 | 689.669 | 391.059 | 338.171 | 341.671 | 413.786 | 391.484 |
| ENSMUSG00000040125 | 4_Gpr26   | 5.87649 | -1.29361 | 0.431699 | 0.780264 | 9.1012  | 1.1335  | 0       | 18.1564 | 6.86782 | 0       |
| ENSMUSG00000040127 | 13_Sdr9c  | 810.986 | 0.92629  | 0.001156 | 0.021851 | 1095.18 | 1233.25 | 859.388 | 499.302 | 545.133 | 633.663 |
| ENSMUSG00000040128 | 9_Pnrc1   | 634.89  | 0.58485  | 0.2239   | 0.613717 | 1346.98 | 501.008 | 437.45  | 491.874 | 538.265 | 493.764 |
| ENSMUSG00000040132 | 6_Svs2    | 0.16854 | 1.1315   | 0.781553 | NA       | 1.01124 | 0       | 0       | 0       | 0       | 0       |
| ENSMUSG00000040133 | 2_Gpr176  | 19.4829 | -0.02997 | 0.956723 | 0.988891 | 16.1799 | 17.0025 | 24.8199 | 25.5841 | 18.028  | 15.2832 |
| ENSMUSG00000040134 | 8_Rdh7    | 9.11173 | 0.25043  | 0.752606 | 0.925804 | 5.05622 | 10.2015 | 14.4783 | 11.5541 | 5.15086 | 8.22939 |
| ENSMUSG00000040136 | 9_Abcc8   | 18.3037 | -2.46615 | 0.003828 | 0.05165  | 1.01124 | 3.40051 | 12.4099 | 46.2164 | 19.745  | 27.0394 |
| ENSMUSG00000040138 | 7_Ndp     | 12.2705 | -1.46211 | 0.131208 | 0.492611 | 13.1462 | 3.40051 | 3.10248 | 26.4094 | 24.0374 | 3.52688 |
| ENSMUSG00000040139 | 14_94300  | 202.923 | -0.0015  | 0.995489 | 0.998321 | 187.08  | 206.298 | 215.106 | 193.944 | 212.902 | 202.208 |
| ENSMUSG00000040140 | 14_Tdrd6  | 5.58936 | -0.74044 | 0.41674  | 0.770621 | 6.06747 | 3.40051 | 3.10248 | 9.07822 | 6.00934 | 5.87814 |
| ENSMUSG00000040146 | 8_Rgl3    | 81.6591 | -0.25695 | 0.525484 | 0.833487 | 50.5622 | 72.5442 | 100.314 | 104.812 | 84.1307 | 77.5914 |
| ENSMUSG00000040147 | 14_Maob   | 164.037 | -0.58959 | 0.261866 | 0.651129 | 235.62  | 71.4107 | 85.8354 | 184.865 | 248.958 | 157.534 |
| ENSMUSG00000040151 | 9_Hs2st1  | 909.397 | -0.23216 | 0.522408 | 0.832206 | 1225.63 | 649.497 | 633.941 | 983.748 | 1043.05 | 920.517 |
| ENSMUSG00000040152 | 8_Thbs1   | 3476.66 | -0.56936 | 0.048286 | 0.282739 | 2632.27 | 2820.16 | 2946.33 | 4397.16 | 4934.53 | 3129.52 |
| ENSMUSG00000040154 | 11_Wfdc5  | 49.9988 | 1.16786  | 0.010489 | 0.104338 | 41.461  | 90.6802 | 75.4938 | 29.7105 | 30.9052 | 31.742  |
| ENSMUSG00000040158 | 12_Tax1b  | 2395.14 | 0.18184  | 0.564921 | 0.850965 | 1748.44 | 3042.32 | 2847.05 | 2329.8  | 2130.74 | 2272.49 |
| ENSMUSG00000040163 | 14_17000  | 0.16854 | 1.1315   | 0.781553 | NA       | 1.01124 | 0       | 0       | 0       | 0       | 0       |
| ENSMUSG00000040164 | 3_Kcns1   | 51.58   | -1.18506 | 0.00202  | 0.03279  | 25.2811 | 36.2721 | 33.0932 | 70.1499 | 72.9705 | 71.7133 |
| ENSMUSG00000040165 | 13_Cd209  | 7.77601 | -0.14916 | 0.84662  | 0.955568 | 8.08995 | 5.66751 | 8.27329 | 5.77705 | 9.44325 | 9.40502 |
| ENSMUSG00000040167 | 15_Ikzf5  | 610.981 | 0.35191  | 0.272315 | 0.658804 | 924.277 | 562.217 | 568.789 | 557.898 | 523.671 | 529.033 |
| ENSMUSG00000040170 | 13_Fmo2   | 983.777 | 0.47198  | 0.358569 | 0.73267  | 1956.76 | 472.671 | 1000.03 | 770.823 | 703.093 | 999.284 |
| ENSMUSG00000040174 | 14_Alkbh3 | 439.895 | -0.13822 | 0.65021  | 0.891567 | 309.441 | 507.809 | 439.519 | 455.561 | 475.596 | 451.441 |
| ENSMUSG00000040177 | 9_231005  | 207.516 | 0.14928  | 0.598273 | 0.868728 | 249.777 | 217.633 | 187.183 | 201.371 | 184.573 | 204.559 |
| ENSMUSG00000040181 | 14_Fmo1   | 711.266 | 0.01069  | 0.978983 | 0.993796 | 1053.72 | 398.993 | 688.752 | 688.294 | 725.413 | 712.43  |
| ENSMUSG00000040183 | 13_Ankrd1 | 161.85  | -0.10001 | 0.802017 | 0.942326 | 216.406 | 91.8137 | 160.295 | 163.408 | 173.412 | 165.764 |
| ENSMUSG00000040187 | 15_Arntf2 | 366.384 | 1.26022  | 4.90E-05 | 0.001862 | 504.611 | 604.157 | 441.587 | 169.185 | 228.355 | 250.409 |
| ENSMUSG00000040188 | 9_Scamps  | 2564.65 | 0.39513  | 0.282827 | 0.669522 | 1760.58 | 3749.63 | 3230.72 | 2090.47 | 2005.4  | 2551.11 |
| ENSMUSG00000040189 | 15_Ccdc1  | 39.7392 | -1.00389 | 0.059959 | 0.322098 | 13.1462 | 24.9371 | 41.3665 | 52.8187 | 62.6688 | 43.982  |
| ENSMUSG00000040195 | 11_Tmem   | 587.929 | 0.65079  | 0.051017 | 0.292507 | 965.738 | 608.691 | 580.165 | 387.887 | 480.747 | 504.344 |
| ENSMUSG00000040197 | 4_Cd209e  | 2.79816 | 0.82952  | 0.625198 | 0.879829 | 4.04498 | 6.80102 | 0       | 1.65058 | 4.29238 | 0       |
| ENSMUSG00000040204 | 6_281041  | 557.862 | 0.74015  | 0.063067 | 0.33148  | 1004.17 | 618.893 | 470.544 | 318.563 | 517.662 | 417.348 |
| ENSMUSG00000040205 | 8_Cuzd1   | 0.18892 | 1.1315   | 0.781553 | NA       | 0       | 1.1335  | 0       | 0       | 0       | 0       |
| ENSMUSG00000040209 | 12_Zfp704 | 1710.22 | -0.53609 | 0.088596 | 0.404762 | 1842.49 | 1050.76 | 1294.77 | 1926.23 | 2168.51 | 1978.58 |

|                    |           |         |          |          |          |         |         |         |         |         |         |
|--------------------|-----------|---------|----------|----------|----------|---------|---------|---------|---------|---------|---------|
| ENSMUSG00000040212 | 11_Emp3   | 378.676 | -0.77715 | 0.189848 | 0.578028 | 71.7983 | 381.99  | 383.674 | 618.969 | 411.21  | 404.416 |
| ENSMUSG00000040213 | 13_Ccbl2  | 507.63  | -0.10443 | 0.720654 | 0.913289 | 617.87  | 420.53  | 429.177 | 498.477 | 545.991 | 533.735 |
| ENSMUSG00000040219 | 4_Ttc12   | 266.554 | -0.71947 | 0.005201 | 0.063732 | 183.035 | 217.633 | 203.73  | 327.641 | 332.231 | 335.054 |
| ENSMUSG00000040220 | 9_Gas8    | 247.835 | -0.07863 | 0.882115 | 0.967828 | 83.9333 | 320.781 | 318.522 | 267.395 | 196.591 | 299.785 |
| ENSMUSG00000040225 | 15_Prrc2c | 6144.04 | 0.42204  | 0.125737 | 0.482199 | 7990.85 | 6990.31 | 6127.41 | 4290.69 | 5558.64 | 5906.35 |
| ENSMUSG00000040229 | 11_Gpr34  | 36.7677 | -0.89111 | 0.236751 | 0.6287   | 55.6184 | 11.335  | 10.3416 | 60.2463 | 58.3764 | 24.6882 |
| ENSMUSG00000040231 | 14_Syngr  | 3.48608 | 0.71691  | 0.635205 | 0.884141 | 0       | 7.93452 | 5.17081 | 5.77705 | 0.85848 | 1.17563 |
| ENSMUSG00000040234 | 16_Tm7sf  | 1457.37 | -0.09707 | 0.682772 | 0.902945 | 1429.9  | 1296.73 | 1498.5  | 1652.24 | 1407.9  | 1458.95 |
| ENSMUSG00000040236 | 3_Trappc  | 449.914 | -0.01741 | 0.942603 | 0.986023 | 423.711 | 477.205 | 440.553 | 429.152 | 451.559 | 477.305 |
| ENSMUSG00000040242 | 14_Fgfr1c | 2733.98 | 0.32518  | 0.392533 | 0.75466  | 4575.88 | 2349.75 | 2196.56 | 2141.63 | 2685.32 | 2454.71 |
| ENSMUSG00000040247 | 5_Tbc1d1  | 19.9138 | 0.9163   | 0.266031 | 0.654446 | 5.05622 | 45.3401 | 27.9224 | 21.4576 | 10.3017 | 9.40502 |
| ENSMUSG00000040249 | 15_Lrp1   | 5869.99 | 0.04837  | 0.940463 | 0.98555  | 1108.32 | 7623.94 | 9173.01 | 7007.56 | 4578.26 | 5728.83 |
| ENSMUSG00000040250 | 14_Asun   | 1414.15 | 0.26036  | 0.44668  | 0.790339 | 2109.46 | 1268.39 | 1246.16 | 1062.15 | 1480.87 | 1317.88 |
| ENSMUSG00000040253 | 15_Gbp7   | 5131.79 | 2.66909  | 6.38E-11 | 1.29E-08 | 13209.9 | 8000.26 | 5397.29 | 1162.01 | 1718.67 | 1302.6  |
| ENSMUSG00000040254 | 11_Sema   | 1290.63 | 0.1195   | 0.806982 | 0.944157 | 2396.65 | 722.041 | 913.165 | 1116.62 | 1223.33 | 1371.96 |
| ENSMUSG00000040258 | 6_Nxph4   | 52.0228 | -0.6548  | 0.310099 | 0.692131 | 13.1462 | 41.9396 | 66.1863 | 87.481  | 35.1976 | 68.1864 |
| ENSMUSG00000040260 | 7_Daam2   | 349.684 | -1.10078 | 0.006099 | 0.015012 | 162.81  | 222.167 | 282.326 | 529.012 | 442.116 | 459.67  |
| ENSMUSG00000040263 | 16_Klhdcc | 403.588 | 0.30562  | 0.541214 | 0.84046  | 167.867 | 578.086 | 592.575 | 374.683 | 303.901 | 404.416 |
| ENSMUSG00000040264 | 10_Gbp2t  | 10753.5 | 3.07848  | 1.41E-10 | 2.65E-08 | 30624.5 | 17416.3 | 9650.8  | 1585.39 | 2969.47 | 2274.84 |
| ENSMUSG00000040265 | 16_Dnm3   | 106.667 | -0.029   | 0.949479 | 0.987335 | 151.687 | 94.0807 | 71.3571 | 127.095 | 128.772 | 67.0108 |
| ENSMUSG00000040268 | 16_Plekha | 2673.05 | 0.04647  | 0.902064 | 0.973635 | 4065.2  | 2090.18 | 1992.83 | 2401.6  | 2992.65 | 2495.86 |
| ENSMUSG00000040269 | 5_Mrps28  | 232.802 | -0.0596  | 0.817357 | 0.947736 | 213.373 | 238.036 | 232.686 | 249.238 | 228.355 | 235.126 |
| ENSMUSG00000040270 | 16_Bach2  | 129.506 | 0.33909  | 0.31112  | 0.693311 | 183.035 | 121.285 | 129.27  | 103.162 | 113.319 | 126.968 |
| ENSMUSG00000040272 | 14_Accs   | 187.306 | -0.48087 | 0.144793 | 0.514854 | 120.338 | 145.088 | 203.73  | 226.955 | 213.761 | 213.964 |
| ENSMUSG00000040274 | 11_Cdk6   | 1366.04 | 0.75529  | 0.012174 | 0.11604  | 2067.99 | 1686.65 | 1391.98 | 823.642 | 1109.15 | 1116.85 |
| ENSMUSG00000040276 | 14_Pacsir | 101.696 | -2.35545 | 0.000531 | 0.012173 | 13.1462 | 34.0051 | 52.7422 | 312.786 | 130.489 | 67.0108 |
| ENSMUSG00000040280 | 9_Ndufa4l | 65.6354 | 0.3135   | 0.642266 | 0.888256 | 17.1912 | 99.7483 | 101.348 | 80.0534 | 34.3391 | 61.1326 |
| ENSMUSG00000040282 | 13_BC05z  | 395.875 | 0.43374  | 0.131944 | 0.493664 | 452.026 | 478.338 | 434.348 | 266.569 | 398.333 | 345.635 |
| ENSMUSG00000040283 | 14_Btnl9  | 24.376  | -1.08499 | 0.071003 | 0.356208 | 27.3036 | 9.06802 | 10.3416 | 29.7105 | 36.9145 | 32.9176 |
| ENSMUSG00000040287 | 9_Stac3   | 56.1936 | -0.67996 | 0.177205 | 0.561638 | 28.3148 | 32.8716 | 68.2547 | 80.8787 | 48.0747 | 78.7671 |
| ENSMUSG00000040289 | 8_Hey1    | 91.812  | -1.16849 | 0.002304 | 0.036057 | 73.8208 | 43.0731 | 52.7422 | 142.776 | 137.356 | 101.104 |
| ENSMUSG00000040296 | 15_Ddx58  | 5892.5  | 1.61182  | 7.81E-07 | 6.24E-05 | 10860.8 | 8953.54 | 6824.43 | 2204.36 | 3360.08 | 3151.86 |
| ENSMUSG00000040297 | 12_Suco   | 5426.51 | 0.45526  | 0.345145 | 0.722149 | 11103.5 | 3954.79 | 3768.48 | 3772.41 | 4875.29 | 5084.59 |
| ENSMUSG00000040298 | 5_Btbd16  | 1.06797 | -1.06151 | 0.684378 | NA       | 2.02249 | 0       | 0       | 0       | 0.85848 | 3.52688 |
| ENSMUSG00000040302 | 17_Rbm4i  | 195.223 | 0.34578  | 0.499797 | 0.821528 | 397.419 | 134.887 | 123.065 | 163.408 | 178.563 | 173.993 |
| ENSMUSG00000040310 | 12_Alx4   | 261.858 | -0.75622 | 0.046509 | 0.276157 | 181.013 | 140.554 | 262.677 | 420.899 | 262.694 | 303.312 |
| ENSMUSG00000040312 | 14_Ctchr  | 250     | 0.63119  | 0.242224 | 0.633507 | 100.113 | 406.928 | 404.357 | 184.04  | 168.261 | 236.301 |
| ENSMUSG00000040314 | 1_Ctsg    | 0.17236 | 1.1315   | 0.781553 | NA       | 0       | 0       | 1.03416 | 0       | 0       | 0       |
| ENSMUSG00000040321 | 3_Zfp770  | 348.017 | 0.35215  | 0.503078 | 0.82377  | 726.073 | 248.237 | 196.491 | 299.581 | 339.098 | 278.624 |
| ENSMUSG00000040322 | 10_Slc25e | 3253.21 | 0.82175  | 0.051841 | 0.295278 | 6656.01 | 3188.54 | 2621.6  | 1998.03 | 2609.77 | 2445.31 |
| ENSMUSG00000040325 | 16_Vprbp  | 1276.22 | 0.27867  | 0.303425 | 0.686187 | 1656.42 | 1342.07 | 1198.59 | 1026.66 | 1247.37 | 1186.21 |
| ENSMUSG00000040327 | 16_Cul9   | 215.444 | -0.65234 | 0.30471  | 0.687401 | 42.4723 | 190.428 | 269.916 | 393.664 | 184.573 | 211.613 |
| ENSMUSG00000040328 | 14_Olfr56 | 370.895 | 3.63243  | 1.12E-10 | 2.18E-08 | 1129.56 | 598.49  | 330.932 | 26.4094 | 72.9705 | 67.0108 |
| ENSMUSG00000040329 | 14_Ilf7   | 29.1075 | 2.82153  | 8.83E-05 | 0.003002 | 91.012  | 37.4056 | 24.8199 | 11.5541 | 5.15086 | 4.70251 |
| ENSMUSG00000040331 | 15_Nsmce  | 1355.48 | 0.21078  | 0.5436   | 0.841422 | 2052.83 | 1187.91 | 1122.07 | 1119.1  | 1390.73 | 1260.27 |
| ENSMUSG00000040339 | 10_Fam1c  | 3439.62 | 0.5849   | 0.101699 | 0.433915 | 5892.52 | 3485.52 | 3004.24 | 2380.14 | 3100.82 | 2774.48 |
| ENSMUSG00000040340 | 13_17000  | 2.62543 | -1.50145 | 0.292238 | 0.676777 | 2.02249 | 0       | 2.06832 | 3.30117 | 6.00934 | 2.35126 |
| ENSMUSG00000040345 | 9_Arhgap1 | 33.9154 | 1.39069  | 0.034287 | 0.229568 | 17.1912 | 83.8792 | 46.5373 | 20.6323 | 22.3204 | 12.9319 |
| ENSMUSG00000040350 | 15_Trim7  | 640.935 | 0.28581  | 0.32962  | 0.710108 | 574.387 | 745.845 | 792.168 | 473.718 | 625.83  | 633.663 |
| ENSMUSG00000040351 | 11_Ankib1 | 1534.95 | 0.54784  | 0.094362 | 0.417677 | 2457.32 | 1592.57 | 1418.87 | 1127.35 | 1415.63 | 1197.96 |
| ENSMUSG00000040354 | 14_Mars   | 1259.34 | 0.40652  | 0.280574 | 0.667117 | 840.344 | 1948.49 | 1518.15 | 1137.25 | 1017.3  | 1094.51 |
| ENSMUSG00000040356 | 16_Skiv2l | 945.674 | 0.57156  | 0.323446 | 0.703628 | 292.25  | 1642.45 | 1457.13 | 821.166 | 649.867 | 811.183 |
| ENSMUSG00000040359 | 14_Ufl1   | 1597.03 | 0.36627  | 0.342772 | 0.720325 | 2712.16 | 1391.94 | 1291.67 | 1181.82 | 1531.52 | 1473.06 |
| ENSMUSG00000040363 | 14_Bcor   | 1037.36 | 0.23146  | 0.453866 | 0.7959   | 795.849 | 1235.52 | 1329.93 | 1007.68 | 900.542 | 954.61  |
| ENSMUSG00000040364 | 6_Sec1    | 4.32251 | -1.65146 | 0.244639 | 0.6364   | 0       | 1.1335  | 5.17081 | 10.7288 | 7.72629 | 1.17563 |
| ENSMUSG00000040365 | 14_Trim4  | 1100.15 | 0.28599  | 0.381318 | 0.74873  | 820.119 | 1424.81 | 1381.64 | 1049.77 | 887.665 | 1036.9  |
| ENSMUSG00000040367 | 2_Lrrd1   | 1.76695 | -0.65178 | 0.692427 | 0.905638 | 2.02249 | 0       | 2.06832 | 3.30117 | 0.85848 | 2.35126 |
| ENSMUSG00000040370 | 13_Lyrm5  | 682.599 | 0.0676   | 0.896069 | 0.97156  | 1287.31 | 374.056 | 434.348 | 632.174 | 797.525 | 570.179 |
| ENSMUSG00000040372 | 2_Gpr63   | 9.01501 | -0.29828 | 0.687911 | 0.904794 | 11.1237 | 7.93452 | 5.17081 | 11.5541 | 7.72629 | 10.5807 |
| ENSMUSG00000040373 | 12_Cacng  | 18.0843 | -2.81476 | 0.000311 | 0.008105 | 8.08995 | 2.26701 | 3.10248 | 44.5658 | 35.1976 | 15.2832 |
| ENSMUSG00000040374 | 13_Pex2   | 1050.31 | 0.16779  | 0.687586 | 0.904573 | 1765.63 | 783.251 | 784.929 | 851.702 | 1141.77 | 974.595 |
| ENSMUSG00000040380 | 13_Cbln3  | 99.4254 | 0.35727  | 0.242291 | 0.633507 | 117.304 | 114.484 | 103.416 | 86.6557 | 93.574  | 81.1183 |
| ENSMUSG00000040383 | 16_Aqr    | 1674.52 | 0.52994  | 0.04491  | 0.270459 | 2057.88 | 2010.83 | 1866.66 | 1113.32 | 1433.66 | 1564.76 |
| ENSMUSG00000040385 | 6_Ppp1ca  | 5003.99 | 0.16424  | 0.645795 | 0.889468 | 3170.25 | 6514.24 | 6181.18 | 4818.06 | 4500.14 | 4840.06 |
| ENSMUSG00000040387 | 16_Klhl32 | 16.4894 | -0.29137 | 0.691407 | 0.905638 | 23.2586 | 7.93452 | 13.4441 | 20.6323 | 26.6128 | 7.05377 |
| ENSMUSG00000040389 | 15_Wdr47  | 1023.38 | 0.08922  | 0.784494 | 0.935909 | 1446.08 | 860.329 | 858.354 | 935.056 | 1003.56 | 1036.9  |
| ENSMUSG00000040390 | 13_Map3k  | 140.49  | -0.0275  | 0.967761 | 0.991244 | 27.3036 | 181.36  | 208.901 | 199.721 | 89.2816 | 136.373 |
| ENSMUSG00000040396 | 12_Abhd1  | 1415.45 | 0.34863  | 0.386512 | 0.751493 | 2463.39 | 1221.92 | 1071.39 | 1073.71 | 1353.82 | 1308.47 |
| ENSMUSG00000040405 | 13_Havcr  | 1.5712  | 3.08401  | 0.125322 | NA       | 3.03373 | 4.53401 | 1.03416 | 0.82529 | 0       | 0       |
| ENSMUSG00000040407 | 17_Akap9  | 4213.58 | 0.32314  | 0.327286 | 0.708691 | 6367.81 | 4042.07 | 3640.25 | 3243.4  | 3848.55 | 4139.39 |
| ENSMUSG00000040410 | 14_Fbxl4  | 508.579 | -0.17177 | 0.567355 | 0.852443 | 616.859 | 413.729 | 404.357 | 552.946 | 545.133 | 518.452 |
| ENSMUSG00000040412 | 16_53304  | 8.05008 | -0.71895 | 0.369377 | 0.740977 | 3.03373 | 9.06802 | 6.20497 | 8.25292 | 11.1602 | 10.5807 |
| ENSMUSG00000040413 | 15_Timd2  | 77.8138 | 0.53721  | 0.247265 | 0.638878 | 108.203 | 111.083 | 56.8789 | 39.614  | 74.6875 | 76.4158 |
| ENSMUSG00000040414 | 7_Slc25a2 | 274.153 | 0.1802   | 0.735978 | 0.920596 | 100.113 | 380.857 | 392.981 | 324.34  | 210.327 | 236.301 |
| ENSMUSG00000040415 | 15_Dtx3   | 871.521 | -0.88727 | 0.042099 | 0.260031 | 308.43  | 629.094 | 897.652 | 1346.88 | 1052.49 | 994.581 |

|                    |           |         |          |          |          |         |         |         |         |         |         |
|--------------------|-----------|---------|----------|----------|----------|---------|---------|---------|---------|---------|---------|
| ENSMUSG00000040420 | 14_Cdh18  | 2.68782 | -2.77768 | 0.097995 | 0.424972 | 2.02249 | 0       | 0       | 6.60234 | 5.15086 | 2.35126 |
| ENSMUSG00000040423 | 10_Rc3h1  | 1713.88 | 0.45829  | 0.244751 | 0.6364   | 3048.9  | 1539.3  | 1363.02 | 1266    | 1530.66 | 1535.37 |
| ENSMUSG00000040424 | 15_Hipk4  | 29.8304 | 0.07174  | 0.897268 | 0.97156  | 14.1574 | 37.4056 | 40.3323 | 28.0599 | 34.3391 | 24.6882 |
| ENSMUSG00000040428 | 17_Plekha | 118.648 | 1.37602  | 0.013324 | 0.12327  | 69.7759 | 209.698 | 234.755 | 99.0351 | 48.0747 | 50.552  |
| ENSMUSG00000040429 | 6_Mterf1a | 122.086 | 0.30088  | 0.510544 | 0.827179 | 213.373 | 87.2797 | 103.416 | 85.0051 | 127.055 | 116.387 |
| ENSMUSG00000040430 | 18_Pitpnc | 1763.08 | 0.56662  | 0.062848 | 0.330899 | 2771.82 | 1729.73 | 1812.89 | 1388.14 | 1367.55 | 1508.33 |
| ENSMUSG00000040432 | 4_Ltb4r2  | 139.069 | 0.80874  | 0.054869 | 0.305974 | 113.259 | 248.237 | 169.602 | 112.24  | 74.6875 | 116.387 |
| ENSMUSG00000040433 | 16_Zbtb3f | 2042.67 | 0.3974   | 0.176301 | 0.560022 | 2889.13 | 1963.23 | 2113.83 | 1506.16 | 1815.68 | 1968    |
| ENSMUSG00000040434 | 16_Gylt1l | 207.829 | 0.33814  | 0.486963 | 0.813937 | 94.0457 | 298.111 | 304.043 | 172.486 | 172.554 | 205.735 |
| ENSMUSG00000040435 | 10_Ppp1r  | 698.111 | 0.47318  | 0.368342 | 0.740614 | 271.013 | 1184.51 | 979.351 | 657.758 | 508.218 | 587.814 |
| ENSMUSG00000040441 | 8_Slc26a1 | 3.56276 | -0.02758 | 0.983534 | 0.9947   | 0       | 3.40051 | 7.23913 | 4.95175 | 3.43391 | 2.35126 |
| ENSMUSG00000040446 | 3_Rprd1a  | 1002.64 | 0.1139   | 0.787651 | 0.936803 | 1674.62 | 683.502 | 768.382 | 891.316 | 1105.72 | 892.302 |
| ENSMUSG00000040447 | 15_Spns2  | 3296.26 | 0.27382  | 0.558499 | 0.848273 | 1481.47 | 4642.83 | 4700.26 | 3346.56 | 2686.17 | 2920.26 |
| ENSMUSG00000040451 | 17_Sgms   | 1914.23 | 0.46532  | 0.100625 | 0.431747 | 2694.97 | 2164.99 | 1800.48 | 1478.92 | 1555.56 | 1790.48 |
| ENSMUSG00000040452 | 8_Cdh12   | 3.74448 | -2.12205 | 0.125847 | 0.482311 | 0       | 1.1335  | 3.10248 | 10.7288 | 5.15086 | 2.35126 |
| ENSMUSG00000040455 | 17_Usp45  | 1604.04 | 0.48886  | 0.284637 | 0.670794 | 3159.13 | 1229.85 | 1230.65 | 1132.3  | 1619.09 | 1253.22 |
| ENSMUSG00000040459 | 10_Arglu1 | 2023.56 | 0.01705  | 0.962347 | 0.990106 | 2928.56 | 1542.7  | 1635.01 | 1700.93 | 2250.93 | 2083.21 |
| ENSMUSG00000040462 | 12_Os9    | 2355.38 | 0.2222   | 0.65617  | 0.894041 | 940.457 | 3357.44 | 3311.39 | 2386.75 | 1765.03 | 2371.24 |
| ENSMUSG00000040463 | 16_Mybbp  | 1890.62 | 0.56249  | 0.254996 | 0.645986 | 871.693 | 3367.64 | 2524.39 | 1408.77 | 1379.57 | 1791.66 |
| ENSMUSG00000040464 | 15_Gtpbp  | 495.039 | 0.17574  | 0.666573 | 0.897452 | 825.175 | 358.187 | 391.947 | 442.357 | 498.775 | 453.792 |
| ENSMUSG00000040466 | 15_Blvr   | 350.337 | 0.18871  | 0.733867 | 0.919947 | 117.304 | 452.268 | 550.174 | 402.743 | 251.534 | 328     |
| ENSMUSG00000040467 | 1_492152  | 2.33096 | 0.089    | 0.954192 | 0.988514 | 5.05622 | 0       | 2.06832 | 2.47588 | 0.85848 | 3.52688 |
| ENSMUSG00000040471 | 17_Ggt6   | 58.8625 | 0.28802  | 0.624003 | 0.879305 | 20.2249 | 97.4812 | 76.528  | 55.2946 | 47.2162 | 56.4301 |
| ENSMUSG00000040472 | 14_Rabgg  | 560.13  | 0.11437  | 0.839303 | 0.953167 | 160.788 | 788.918 | 797.339 | 572.753 | 479.03  | 561.95  |
| ENSMUSG00000040473 | 15_Cfap6l | 111.468 | -0.06009 | 0.909394 | 0.974731 | 194.159 | 79.3452 | 53.7764 | 95.7339 | 127.055 | 118.738 |
| ENSMUSG00000040478 | 14_Prdm1  | 2.76    | -2.14073 | 0.220213 | 0.611377 | 2.02249 | 0       | 1.03416 | 5.77705 | 7.72629 | 0       |
| ENSMUSG00000040479 | 11_Dgkz   | 1201.06 | 0.20418  | 0.747894 | 0.924734 | 251.8   | 1756.93 | 1849.08 | 1308.09 | 917.712 | 1122.72 |
| ENSMUSG00000040481 | 16_Bptf   | 2732.87 | 0.09278  | 0.695502 | 0.905638 | 2959.91 | 2719.27 | 2782.93 | 2380.14 | 2959.17 | 2595.79 |
| ENSMUSG00000040482 | 15_Dxo    | 178.309 | 0.28005  | 0.764579 | 0.900436 | 36.4048 | 285.643 | 264.745 | 203.847 | 119.328 | 159.885 |
| ENSMUSG00000040483 | 15_Xaf1   | 2705.32 | 1.6996   | 1.25E-08 | 1.65E-06 | 4908.58 | 4159.96 | 3342.41 | 1063.8  | 1507.49 | 1249.69 |
| ENSMUSG00000040485 | 5_Lrrc52  | 1.42417 | -3.86637 | 0.073207 | NA       | 0       | 0       | 0       | 3.30117 | 1.71695 | 3.52688 |
| ENSMUSG00000040488 | 16_Ltbp4  | 1126.69 | 0.37876  | 0.628784 | 0.881265 | 117.304 | 1493.96 | 2210    | 1292.41 | 618.962 | 1027.5  |
| ENSMUSG00000040489 | 5_Sox30   | 7.68985 | 0.53047  | 0.59206  | 0.865686 | 8.08995 | 9.06802 | 10.3416 | 14.03   | 3.43391 | 1.17563 |
| ENSMUSG00000040490 | 4_Lrnf    | 1.95078 | -0.78232 | 0.616108 | 0.87673  | 0       | 2.26701 | 2.06832 | 3.30117 | 1.71695 | 2.35126 |
| ENSMUSG00000040495 | 4_Chrm4   | 30.5363 | -1.75364 | 0.016312 | 0.140498 | 5.05622 | 7.93452 | 28.9565 | 62.7222 | 51.5086 | 27.0394 |
| ENSMUSG00000040498 | 6_lgsf23  | 1.26152 | 1.50432  | 0.497242 | NA       | 0       | 4.53401 | 1.03416 | 0.82529 | 0       | 1.17563 |
| ENSMUSG00000040502 | 5_March9  | 221.21  | 0.054    | 0.87665  | 0.965114 | 154.72  | 249.371 | 271.984 | 237.684 | 185.431 | 228.072 |
| ENSMUSG00000040505 | 13_Abcg5  | 40.3617 | -2.3119  | 3.18E-05 | 0.001311 | 18.2024 | 6.80102 | 15.5124 | 72.6257 | 86.7062 | 42.3226 |
| ENSMUSG00000040506 | 16_Ambra  | 1000.91 | 0.05618  | 0.889576 | 0.970273 | 530.903 | 1306.93 | 1223.41 | 983.748 | 908.269 | 1052.19 |
| ENSMUSG00000040511 | 13_Pvr    | 267.743 | 0.40934  | 0.136608 | 0.501691 | 331.688 | 326.449 | 258.54  | 245.112 | 228.355 | 216.316 |
| ENSMUSG00000040520 | 7_Manea   | 735.514 | 0.54728  | 0.284542 | 0.670663 | 1608.89 | 515.744 | 495.363 | 526.537 | 679.914 | 586.638 |
| ENSMUSG00000040521 | 11_Tsfn   | 195.566 | 0.1668   | 0.630006 | 0.881724 | 143.597 | 262.973 | 214.071 | 188.167 | 168.261 | 196.33  |
| ENSMUSG00000040522 | 5_Tlr8    | 36.1476 | 1.38579  | 0.007382 | 0.08126  | 71.7983 | 53.2746 | 32.059  | 25.5841 | 18.8865 | 15.2832 |
| ENSMUSG00000040524 | 9_Zfp609  | 957.01  | 0.02917  | 0.912336 | 0.975453 | 779.669 | 1067.76 | 1052.78 | 969.719 | 924.58  | 947.556 |
| ENSMUSG00000040525 | 13_Cblc   | 899.805 | 0.64252  | 0.36306  | 0.735825 | 147.642 | 1597.11 | 1546.07 | 825.292 | 527.963 | 754.753 |
| ENSMUSG00000040528 | 15_Milr1  | 154.476 | 0.58792  | 0.145884 | 0.516401 | 252.811 | 177.96  | 126.168 | 126.27  | 151.95  | 91.699  |
| ENSMUSG00000040532 | 14_Abhd1  | 555.793 | 0.31525  | 0.52588  | 0.833782 | 227.53  | 788.918 | 832.5   | 529.012 | 461.861 | 494.939 |
| ENSMUSG00000040536 | 15_Necab  | 115.369 | -1.2542  | 0.025836 | 0.192744 | 124.383 | 26.0706 | 53.7764 | 184.865 | 137.356 | 165.764 |
| ENSMUSG00000040537 | 17_Adam   | 233.822 | -0.87916 | 0.060002 | 0.322098 | 270.002 | 89.5467 | 134.441 | 365.605 | 285.873 | 257.462 |
| ENSMUSG00000040543 | 16_Pitpnr | 711.367 | 0.14109  | 0.690628 | 0.905638 | 493.487 | 723.175 | 1021.75 | 726.257 | 627.547 | 675.986 |
| ENSMUSG00000040548 | 15_Tex2   | 2469.83 | 0.04699  | 0.834043 | 0.952109 | 2321.82 | 2681.87 | 2526.46 | 2429.66 | 2353.94 | 2505.26 |
| ENSMUSG00000040549 | 16_Ckap5  | 2741.96 | 0.2517   | 0.508592 | 0.827066 | 4418.13 | 2357.69 | 2165.53 | 2045.9  | 2815.8  | 2648.69 |
| ENSMUSG00000040550 | 16_Otud6l | 1130.59 | -0.07613 | 0.835786 | 0.952513 | 1612.93 | 867.13  | 822.158 | 1080.31 | 1310.04 | 1090.98 |
| ENSMUSG00000040552 | 8_C3ar1   | 209.734 | 1.86308  | 3.43E-06 | 0.000217 | 358.992 | 428.464 | 199.593 | 103.162 | 72.9705 | 95.2259 |
| ENSMUSG00000040554 | 10_Aipl1  | 69.2201 | -2.12977 | 0.001361 | 0.024653 | 33.3711 | 30.6046 | 13.4441 | 204.673 | 94.4325 | 38.7957 |
| ENSMUSG00000040557 | 14_Wbscr  | 439.792 | -0.18301 | 0.568251 | 0.852443 | 294.272 | 429.598 | 511.91  | 481.145 | 429.238 | 492.588 |
| ENSMUSG00000040560 | 9_Wdr7    | 592.214 | 0.11268  | 0.695115 | 0.905638 | 765.512 | 529.346 | 551.208 | 584.307 | 600.934 | 521.979 |
| ENSMUSG00000040562 | 12_Gstm2  | 1893.53 | -0.50696 | 0.111073 | 0.453007 | 1090.12 | 1669.65 | 1932.85 | 2047.55 | 2228.61 | 2392.4  |
| ENSMUSG00000040563 | 13_Lppr2  | 102.901 | -0.30611 | 0.532676 | 0.837668 | 41.461  | 107.683 | 127.202 | 139.474 | 109.885 | 91.699  |
| ENSMUSG00000040564 | 13_Apoc1  | 1079.98 | -0.18825 | 0.663985 | 0.896403 | 483.375 | 1373.81 | 1171.71 | 1043.99 | 1099.71 | 1307.3  |
| ENSMUSG00000040565 | 7_Btaf1   | 2125.97 | 0.41718  | 0.269326 | 0.656292 | 3599.02 | 1904.28 | 1790.13 | 1518.54 | 2044.03 | 1899.81 |
| ENSMUSG00000040569 | 13_Slc26a | 1622.45 | -0.37815 | 0.519505 | 0.831665 | 2764.74 | 480.605 | 987.624 | 1923.76 | 2032.02 | 1545.95 |
| ENSMUSG00000040570 | 14_Rundc  | 17.2305 | -0.69651 | 0.449726 | 0.792751 | 29.3261 | 9.06802 | 1.03416 | 22.2829 | 24.0374 | 17.6344 |
| ENSMUSG00000040583 | 8_Cyp2b1  | 0.16854 | 1.1315   | 0.781553 | NA       | 1.01124 | 0       | 0       | 0       | 0       | 0       |
| ENSMUSG00000040584 | 8_Abcb1a  | 265.351 | -0.6479  | 0.112415 | 0.4549   | 303.373 | 134.887 | 182.012 | 368.906 | 353.693 | 249.233 |
| ENSMUSG00000040586 | 8_Ofd1    | 633.562 | 0.25131  | 0.564003 | 0.850768 | 1129.56 | 438.666 | 497.432 | 524.886 | 642.999 | 567.828 |
| ENSMUSG00000040591 | 18_11100  | 295.465 | -0.67404 | 0.022646 | 0.17728  | 178.99  | 243.703 | 260.609 | 364.779 | 393.182 | 331.527 |
| ENSMUSG00000040592 | 11_Cd79b  | 36.0925 | -0.01811 | 0.975561 | 0.993623 | 13.1462 | 51.0076 | 43.4348 | 37.1382 | 28.3297 | 43.4982 |
| ENSMUSG00000040594 | 18_Ranbp  | 171.627 | 0.01688  | 0.962146 | 0.990106 | 231.575 | 128.086 | 158.227 | 165.884 | 193.157 | 152.832 |
| ENSMUSG00000040596 | 15_Pogk   | 1223.98 | -0.15624 | 0.625548 | 0.87994  | 1575.52 | 931.739 | 965.907 | 1290.76 | 1322.05 | 1257.92 |
| ENSMUSG00000040599 | 13_Mis12  | 965.069 | 0.43499  | 0.29375  | 0.678007 | 1721.14 | 861.462 | 745.63  | 658.583 | 970.079 | 833.52  |
| ENSMUSG00000040600 | 9_Eps8l3  | 19.055  | -0.81066 | 0.204864 | 0.596162 | 17.1912 | 5.66751 | 18.6149 | 22.2829 | 31.7636 | 18.81   |
| ENSMUSG00000040605 | 6_Bace2   | 2053.82 | -0.29553 | 0.213839 | 0.604774 | 1973.95 | 1702.52 | 1856.32 | 2280.28 | 2459.54 | 2050.29 |
| ENSMUSG00000040606 | 13_Kazn   | 1585.59 | 0.43604  | 0.090779 | 0.41052  | 1496.64 | 1962.09 | 2011.44 | 1360.91 | 1292.87 | 1389.59 |
| ENSMUSG00000040610 | 7_Tlx3    | 0       | NA       | NA       | NA       | 0       | 0       | 0       | 0       | 0       | 0       |

|                    |           |         |          |          |          |         |         |         |         |         |         |
|--------------------|-----------|---------|----------|----------|----------|---------|---------|---------|---------|---------|---------|
| ENSMUSG00000040612 | 13_Ildr2  | 656.146 | -1.54815 | 0.001842 | 0.030411 | 547.083 | 139.421 | 316.453 | 1056.37 | 1072.24 | 805.305 |
| ENSMUSG00000040613 | 14_Apobe  | 1262.02 | 1.4209   | 8.42E-06 | 0.000455 | 2268.22 | 1838.54 | 1406.46 | 586.783 | 826.713 | 645.42  |
| ENSMUSG00000040614 | 14_Nlrp9c | 0.18892 | 1.1315   | 0.781553 | NA       | 0       | 1.1335  | 0       | 0       | 0       | 0       |
| ENSMUSG00000040616 | 3_Tmem5   | 912.807 | 0.07511  | 0.898588 | 0.971789 | 242.699 | 1266.12 | 1300.98 | 1099.29 | 660.169 | 907.585 |
| ENSMUSG00000040618 | 6_Pck2    | 344.397 | -0.31884 | 0.487465 | 0.814019 | 145.619 | 336.65  | 437.45  | 477.844 | 340.815 | 328     |
| ENSMUSG00000040620 | 15_Dhx33  | 732.202 | 0.03105  | 0.906152 | 0.974391 | 798.883 | 733.376 | 687.717 | 605.765 | 800.959 | 766.509 |
| ENSMUSG00000040621 | 14_Gemin  | 133.892 | -0.17948 | 0.564698 | 0.850965 | 134.495 | 112.217 | 130.304 | 164.233 | 143.366 | 118.738 |
| ENSMUSG00000040624 | 17_Plekha | 5016.3  | 0.59074  | 0.079062 | 0.377521 | 7794.67 | 5372.8  | 4919.51 | 3017.27 | 4191.08 | 4802.44 |
| ENSMUSG00000040627 | 14_Aicda  | 0.18892 | 1.1315   | 0.781553 | NA       | 0       | 1.1335  | 0       | 0       | 0       | 0       |
| ENSMUSG00000040629 | 8_Mael    | 2.21314 | 0.27364  | 0.852144 | 0.957929 | 3.03373 | 2.26701 | 2.06832 | 2.47588 | 3.43391 | 0       |
| ENSMUSG00000040631 | 7_Dok4    | 544.742 | 0.51607  | 0.322905 | 0.703332 | 220.451 | 824.057 | 879.037 | 523.235 | 372.579 | 449.09  |
| ENSMUSG00000040632 | 15_Nrl    | 246.382 | -2.42851 | 0.000591 | 0.013179 | 123.372 | 79.3452 | 28.9565 | 722.956 | 415.503 | 108.158 |
| ENSMUSG00000040640 | 9_Erc2    | 50.1872 | -0.85844 | 0.108343 | 0.44768  | 58.6522 | 21.5366 | 26.8882 | 77.5775 | 72.9705 | 43.4982 |
| ENSMUSG00000040648 | 14_Ppip5l | 1131.89 | 0.62365  | 0.117473 | 0.466305 | 2066.98 | 1089.3  | 961.77  | 696.547 | 991.541 | 985.176 |
| ENSMUSG00000040649 | 15_Rimkl1 | 413.011 | -0.06126 | 0.877548 | 0.965537 | 623.938 | 298.111 | 290.599 | 429.152 | 441.257 | 395.011 |
| ENSMUSG00000040651 | 8_Fam20l  | 1993.88 | 0.50567  | 0.322192 | 0.702839 | 4296.78 | 1255.92 | 1466.44 | 1373.29 | 1904.96 | 1665.86 |
| ENSMUSG00000040652 | 15_Oaz2   | 1188.15 | -0.55574 | 0.037038 | 0.241012 | 832.254 | 949.875 | 1104.48 | 1576.31 | 1413.91 | 1252.04 |
| ENSMUSG00000040653 | 5_Ppp1r1  | 1187.55 | 0.52599  | 0.179891 | 0.565745 | 2104.4  | 1155.04 | 945.224 | 804.66  | 1037.9  | 1078.05 |
| ENSMUSG00000040658 | 6_Dnph1   | 142.881 | 0.26433  | 0.374389 | 0.744881 | 131.462 | 168.892 | 167.534 | 136.999 | 121.904 | 130.495 |
| ENSMUSG00000040659 | 3_Efh2    | 2616.27 | 0.37943  | 0.431344 | 0.780082 | 1179.11 | 4150.89 | 3545.11 | 2520.44 | 1882.64 | 2419.44 |
| ENSMUSG00000040660 | 6_Cyp2b9  | 0.37783 | 2.11394  | 0.599927 | NA       | 0       | 2.26701 | 0       | 0       | 0       | 0       |
| ENSMUSG00000040661 | 6_Rad54l  | 986.053 | 0.18544  | 0.425255 | 0.776848 | 1095.18 | 1063.23 | 989.693 | 870.683 | 995.833 | 901.707 |
| ENSMUSG00000040663 | 8_Clc1    | 273.883 | 0.62153  | 0.185178 | 0.572285 | 142.585 | 464.736 | 388.845 | 221.178 | 224.921 | 201.032 |
| ENSMUSG00000040666 | 17_Sh3bg  | 134.974 | -0.87692 | 0.183005 | 0.569443 | 196.181 | 26.0706 | 63.0839 | 210.45  | 145.941 | 168.115 |
| ENSMUSG00000040667 | 11_Nup88  | 1377.89 | 0.2678   | 0.382139 | 0.749425 | 1868.78 | 1401.01 | 1246.16 | 1015.93 | 1419.92 | 1315.53 |
| ENSMUSG00000040669 | 14_Phc1   | 823.693 | 0.30781  | 0.435201 | 0.783215 | 488.431 | 1124.43 | 1121.03 | 749.365 | 751.167 | 707.728 |
| ENSMUSG00000040675 | 17_Mthfd1 | 254.368 | 1.09099  | 0.000186 | 0.00546  | 283.148 | 406.928 | 348.512 | 153.504 | 164.828 | 169.29  |
| ENSMUSG00000040680 | 8_Kremen  | 3.59373 | 0.00039  | 0.999741 | 0.999741 | 2.02249 | 6.80102 | 2.06832 | 6.60234 | 1.71695 | 2.35126 |
| ENSMUSG00000040681 | 14_Hmgn   | 7776.69 | 0.18876  | 0.640398 | 0.887258 | 12962.1 | 6005.3  | 5886.45 | 6130.27 | 7853.35 | 7822.63 |
| ENSMUSG00000040687 | 16_Madd   | 1175.64 | 0.30285  | 0.469873 | 0.804531 | 645.174 | 1727.46 | 1523.32 | 1150.46 | 975.23  | 1032.2  |
| ENSMUSG00000040688 | 16_Tbl3   | 465.96  | 0.45669  | 0.491684 | 0.815538 | 91.012  | 825.19  | 701.162 | 418.423 | 339.098 | 420.875 |
| ENSMUSG00000040690 | 15_Col16a | 1133.33 | -0.25411 | 0.669574 | 0.898674 | 273.036 | 1072.29 | 1756.01 | 1402.17 | 937.457 | 1359.03 |
| ENSMUSG00000040693 | 7_Slco4c1 | 204.895 | 1.355    | 0.020395 | 0.164775 | 572.364 | 130.353 | 180.978 | 85.8304 | 139.932 | 119.914 |
| ENSMUSG00000040694 | 3_Apobec  | 346.714 | 0.37574  | 0.205822 | 0.59724  | 448.992 | 386.524 | 339.205 | 344.972 | 245.524 | 315.068 |
| ENSMUSG00000040697 | 10_Dnajc  | 806.576 | 0.23355  | 0.449991 | 0.792881 | 619.893 | 1019.02 | 976.248 | 729.558 | 708.244 | 786.495 |
| ENSMUSG00000040699 | 13_Limd2  | 206.924 | 0.04493  | 0.916893 | 0.976775 | 108.203 | 274.308 | 248.199 | 239.335 | 184.573 | 186.925 |
| ENSMUSG00000040701 | 15_Ap1g2  | 634.804 | 0.60406  | 0.292484 | 0.676777 | 208.316 | 1097.23 | 991.761 | 476.194 | 427.522 | 607.8   |
| ENSMUSG00000040703 | 11_Cyp2s  | 812.689 | 1.01478  | 0.032536 | 0.22288  | 475.285 | 1489.42 | 1296.84 | 466.29  | 455.851 | 692.445 |
| ENSMUSG00000040705 | 1_A93001  | 1.49266 | -0.89269 | 0.677872 | NA       | 1.01124 | 1.1335  | 1.03416 | 5.77705 | 0       | 0       |
| ENSMUSG00000040706 | 4_Agmat   | 1.45213 | 2.89436  | 0.218014 | NA       | 0       | 3.40051 | 4.13665 | 0       | 0       | 1.17563 |
| ENSMUSG00000040710 | 10_St8sia | 230.458 | 0.30186  | 0.604463 | 0.871119 | 501.577 | 132.62  | 129.27  | 197.245 | 260.977 | 161.061 |
| ENSMUSG00000040711 | 7_Sh3pxd  | 580.993 | -0.39971 | 0.229755 | 0.620993 | 344.834 | 606.424 | 552.242 | 741.938 | 664.461 | 576.058 |
| ENSMUSG00000040712 | 16_Camta  | 431.042 | -0.0254  | 0.965291 | 0.990727 | 115.282 | 544.081 | 622.565 | 557.072 | 363.994 | 383.255 |
| ENSMUSG00000040713 | 12_Creg1  | 897.25  | -0.35142 | 0.281376 | 0.667998 | 1077.99 | 612.092 | 675.307 | 1028.31 | 1029.31 | 960.488 |
| ENSMUSG00000040714 | 13_Klc3   | 325.621 | 0.61516  | 0.474349 | 0.806964 | 24.2699 | 561.084 | 596.711 | 369.731 | 124.479 | 277.448 |
| ENSMUSG00000040715 | 12_Rsc1a  | 340.67  | -0.24293 | 0.680159 | 0.9022   | 76.8546 | 437.532 | 421.938 | 363.954 | 395.758 | 347.986 |
| ENSMUSG00000040717 | 5_Ii17rd  | 325.06  | -0.85313 | 0.009149 | 0.094196 | 265.957 | 162.091 | 266.814 | 456.387 | 424.088 | 375.025 |
| ENSMUSG00000040720 | 15_11100  | 1647.88 | 0.19027  | 0.500366 | 0.821996 | 2150.92 | 1569.9  | 1548.14 | 1351.83 | 1704.08 | 1562.41 |
| ENSMUSG00000040721 | 9_Zfhx2   | 203.238 | 0.26471  | 0.580118 | 0.859399 | 99.1019 | 245.97  | 320.59  | 224.48  | 158.818 | 170.466 |
| ENSMUSG00000040722 | 6_Scampt  | 288.895 | -1.44974 | 0.000474 | 0.011241 | 123.372 | 155.29  | 186.149 | 632.174 | 355.409 | 280.975 |
| ENSMUSG00000040723 | 14_Rcsd1  | 152.485 | -0.57877 | 0.066823 | 0.342875 | 118.316 | 113.35  | 135.475 | 222.829 | 167.403 | 157.534 |
| ENSMUSG00000040724 | 5_Kcna2   | 413.023 | -1.59213 | 0.000952 | 0.018866 | 342.812 | 108.816 | 165.466 | 726.257 | 683.348 | 451.441 |
| ENSMUSG00000040725 | 13_Hnrnp  | 3866.24 | 0.37477  | 0.22403  | 0.613719 | 3197.55 | 5203.91 | 4695.09 | 3221.94 | 3015.83 | 3863.11 |
| ENSMUSG00000040726 | 9_Hesx1   | 0       | NA       | NA       | NA       | 0       | 0       | 0       | 0       | 0       | 0       |
| ENSMUSG00000040728 | 15_Esrp1  | 6447    | 0.55584  | 0.03864  | 0.246922 | 7350.74 | 7957.19 | 7712.78 | 4214.77 | 5220.4  | 6226.12 |
| ENSMUSG00000040729 | 6_Cep126  | 117.919 | 0.15912  | 0.730427 | 0.91869  | 198.204 | 85.0127 | 89.9721 | 92.4327 | 140.79  | 101.104 |
| ENSMUSG00000040731 | 13_Eif4h  | 6599.17 | 0.22532  | 0.45824  | 0.798202 | 5107.8  | 8324.45 | 7908.23 | 6458.74 | 5519.15 | 6276.68 |
| ENSMUSG00000040732 | 18_Erg    | 744.335 | -0.77715 | 0.001362 | 0.024653 | 581.465 | 510.076 | 554.311 | 1014.28 | 951.192 | 854.681 |
| ENSMUSG00000040734 | 14_Ppp1r  | 1060.66 | 0.91783  | 0.177514 | 0.562065 | 217.418 | 2036.9  | 1906.99 | 817.865 | 547.708 | 837.047 |
| ENSMUSG00000040738 | 10_Ints8  | 1315.56 | 0.58545  | 0.200753 | 0.592148 | 2670.7  | 1032.62 | 1033.13 | 855.828 | 1201.87 | 1099.21 |
| ENSMUSG00000040740 | 7_Slc25a2 | 36.7028 | -1.98526 | 0.000955 | 0.018901 | 6.06747 | 13.602  | 24.8199 | 79.2281 | 50.6501 | 45.8495 |
| ENSMUSG00000040746 | 15_Rnf16  | 1134.99 | -0.08144 | 0.77966  | 0.934866 | 824.164 | 1177.71 | 1307.18 | 1199.15 | 1155.51 | 1146.24 |
| ENSMUSG00000040747 | 9_Cd53    | 287.584 | 2.2819   | 9.40E-06 | 0.000492 | 651.241 | 586.021 | 194.422 | 123.794 | 103.017 | 67.0108 |
| ENSMUSG00000040749 | 11_Siah1t | 126.119 | 0.34356  | 0.341843 | 0.719718 | 187.08  | 130.353 | 105.484 | 98.2098 | 113.319 | 122.265 |
| ENSMUSG00000040751 | 12_Lat2   | 52.376  | 1.40625  | 0.016355 | 0.140796 | 68.7646 | 124.685 | 35.1615 | 37.9634 | 30.0467 | 17.6344 |
| ENSMUSG00000040752 | 15_Myh6   | 4.5633  | -2.05154 | 0.123064 | 0.477333 | 0       | 1.1335  | 4.13665 | 6.60234 | 2.57543 | 12.9319 |
| ENSMUSG00000040759 | 8_Cmtm5   | 16.3022 | -1.51203 | 0.030048 | 0.21212  | 3.03373 | 7.93452 | 14.4783 | 28.8852 | 22.3204 | 21.1613 |
| ENSMUSG00000040760 | 10_App1   | 2006.78 | 0.3156   | 0.488531 | 0.814112 | 3806.32 | 1450.88 | 1418.87 | 1630.78 | 1985.66 | 1748.16 |
| ENSMUSG00000040761 | 16_Spen   | 1850    | 0.45577  | 0.305644 | 0.688573 | 967.761 | 2769.15 | 2682.62 | 1674.52 | 1349.53 | 1656.46 |
| ENSMUSG00000040767 | 10_Snrnp  | 143.307 | -0.19304 | 0.699998 | 0.905844 | 55.6184 | 167.758 | 177.876 | 176.613 | 115.036 | 166.939 |
| ENSMUSG00000040770 | 5_Ii25    | 3.52962 | -1.23477 | 0.342838 | 0.720325 | 1.01124 | 2.26701 | 3.10248 | 10.7288 | 1.71695 | 2.35126 |
| ENSMUSG00000040771 | 13_Oard1  | 707.799 | -0.05505 | 0.847117 | 0.955658 | 835.288 | 604.157 | 643.248 | 626.397 | 814.695 | 723.011 |
| ENSMUSG00000040774 | 15_Cept1  | 2067.22 | 0.80243  | 0.101959 | 0.434128 | 4653.75 | 1743.33 | 1486.09 | 1248.67 | 1833.71 | 1437.79 |
| ENSMUSG00000040775 | 5_Gm977   | 0.67798 | 2.97576  | 0.379561 | NA       | 3.03373 | 0       | 1.03416 | 0       | 0       | 0       |
| ENSMUSG00000040782 | 12_Rfwd2  | 2785.92 | 0.45921  | 0.332423 | 0.711812 | 5617.46 | 2136.65 | 1922.51 | 1950.17 | 2690.47 | 2398.28 |

|                    |            |         |          |          |          |         |         |         |         |         |         |
|--------------------|------------|---------|----------|----------|----------|---------|---------|---------|---------|---------|---------|
| ENSMUSG00000040785 | 17_Ttc3    | 4143.5  | -0.16536 | 0.642728 | 0.888504 | 5658.92 | 2756.68 | 3303.11 | 4319.58 | 4583.41 | 4239.31 |
| ENSMUSG00000040794 | 5_C1qtnf4  | 2.14008 | -0.11338 | 0.960197 | 0.989875 | 0       | 0       | 6.20497 | 5.77705 | 0.85848 | 0       |
| ENSMUSG00000040795 | 12_Iqcc    | 194.23  | -0.43329 | 0.151564 | 0.525642 | 128.428 | 181.36  | 186.149 | 216.227 | 227.496 | 225.721 |
| ENSMUSG00000040797 | 16_Iqsec3  | 46.7937 | -2.5034  | 0.002062 | 0.033111 | 21.2361 | 14.7355 | 6.20497 | 131.221 | 94.4325 | 12.9319 |
| ENSMUSG00000040808 | 4_S100g    | 0.28616 | -1.57932 | 0.696464 | NA       | 0       | 0       | 0       | 0       | 1.71695 | 0       |
| ENSMUSG00000040809 | 10_Chil3   | 15.1953 | 7.45427  | 1.33E-06 | 0.000101 | 29.3261 | 56.6751 | 5.17081 | 0       | 0       | 0       |
| ENSMUSG00000040811 | 15_Eml2    | 801.543 | 0.05831  | 0.925766 | 0.979816 | 173.934 | 1109.7  | 1169.64 | 914.424 | 588.057 | 853.506 |
| ENSMUSG00000040812 | 14_Agbl2   | 51.0025 | -1.13351 | 0.024839 | 0.188346 | 48.5397 | 19.2695 | 27.9224 | 59.421  | 94.4325 | 56.4301 |
| ENSMUSG00000040813 | 15_Tex26   | 677.82  | -0.13755 | 0.823319 | 0.949085 | 145.619 | 884.132 | 906.96  | 874.81  | 538.265 | 717.133 |
| ENSMUSG00000040818 | 9_Dennd6   | 1541.74 | 0.41578  | 0.318957 | 0.700275 | 2840.59 | 1174.31 | 1272.02 | 1224.73 | 1372.7  | 1366.08 |
| ENSMUSG00000040820 | 15_Hlcs    | 395.414 | -0.05757 | 0.837946 | 0.952966 | 328.654 | 384.257 | 449.86  | 454.736 | 371.721 | 383.255 |
| ENSMUSG00000040822 | 6_170012   | 779.427 | 0.15071  | 0.524321 | 0.833013 | 767.534 | 861.462 | 831.466 | 697.372 | 799.242 | 719.484 |
| ENSMUSG00000040824 | 3_Snrpd2   | 1019.66 | -0.12978 | 0.612655 | 0.94521  | 309.441 | 1449.75 | 1162.4  | 1170.26 | 883.373 | 1142.71 |
| ENSMUSG00000040828 | 9_Catsper  | 16.5288 | -1.18412 | 0.055556 | 0.308674 | 10.1124 | 5.66751 | 14.4783 | 21.4576 | 27.4713 | 19.9857 |
| ENSMUSG00000040829 | 14_Zmync   | 53.5985 | 1.07518  | 0.033244 | 0.225284 | 35.3936 | 104.282 | 78.5963 | 34.6623 | 36.9145 | 31.742  |
| ENSMUSG00000040836 | 15_Gpr16   | 198.537 | -0.07065 | 0.811352 | 0.946092 | 235.62  | 176.826 | 168.568 | 211.275 | 202.601 | 196.33  |
| ENSMUSG00000040838 | 9_Gm116    | 0.35746 | 2.04359  | 0.612655 | NA       | 1.01124 | 1.1335  | 0       | 0       | 0       | 0       |
| ENSMUSG00000040841 | 5_Six5     | 175.188 | -0.5333  | 0.287842 | 0.673109 | 58.6522 | 162.091 | 208.901 | 253.365 | 168.261 | 199.857 |
| ENSMUSG00000040842 | 17_Szrd1   | 1578.67 | 0.08825  | 0.810741 | 0.94579  | 998.098 | 1990.43 | 1892.52 | 1810.69 | 1295.44 | 1484.82 |
| ENSMUSG00000040843 | 10_Tipr1   | 969.995 | 0.27243  | 0.468796 | 0.804273 | 1577.54 | 826.324 | 779.758 | 769.998 | 921.146 | 945.205 |
| ENSMUSG00000040848 | 11_Sft2d2  | 4921.6  | 0.06057  | 0.776068 | 0.933817 | 4895.43 | 5120.03 | 5059.12 | 4667.03 | 4840.95 | 4947.04 |
| ENSMUSG00000040850 | 17_Psme-   | 4068.31 | 0.65337  | 0.127826 | 0.486126 | 7959.5  | 3737.16 | 3225.55 | 2547.68 | 3802.19 | 3137.75 |
| ENSMUSG00000040852 | 5_Plekhh2  | 354.145 | -1.40022 | 0.000325 | 0.008375 | 265.957 | 121.285 | 196.491 | 566.151 | 571.746 | 403.24  |
| ENSMUSG00000040855 | 15_Reps2   | 2175.6  | 0.54722  | 0.240765 | 0.631907 | 4478.8  | 1568.77 | 1702.23 | 1544.12 | 1953.89 | 1805.76 |
| ENSMUSG00000040856 | 17_Dlk1    | 17.6168 | -0.91119 | 0.173607 | 0.557035 | 8.08995 | 6.80102 | 21.7174 | 27.2346 | 17.1695 | 24.6882 |
| ENSMUSG00000040857 | 15_Erf     | 893.055 | 0.60446  | 0.299366 | 0.682414 | 293.261 | 1440.68 | 1498.5  | 891.316 | 515.086 | 719.484 |
| ENSMUSG00000040859 | 14_Bsdc1   | 990.358 | -0.07046 | 0.857277 | 0.959059 | 534.948 | 1200.38 | 1163.43 | 1155.41 | 903.976 | 984     |
| ENSMUSG00000040860 | 16_Crocc   | 203.804 | -0.52417 | 0.467376 | 0.803613 | 28.3148 | 209.698 | 263.711 | 390.363 | 148.517 | 182.222 |
| ENSMUSG00000040865 | 15_Ino80c  | 1979.15 | 0.64409  | 0.07082  | 0.355391 | 3465.53 | 1931.49 | 1843.91 | 1334.5  | 1637.12 | 1662.34 |
| ENSMUSG00000040867 | 11_Begair  | 26.4597 | -0.04725 | 0.938348 | 0.985118 | 13.1462 | 23.8036 | 41.3665 | 31.3611 | 32.6221 | 16.4588 |
| ENSMUSG00000040875 | 12_Osbpl1  | 222.652 | 0.18215  | 0.727059 | 0.916484 | 88.9895 | 276.575 | 344.376 | 207.974 | 160.535 | 257.462 |
| ENSMUSG00000040877 | 15_Wdr2f   | 93.9493 | -0.11533 | 0.789581 | 0.937308 | 49.551  | 105.416 | 115.826 | 112.24  | 90.1401 | 90.5233 |
| ENSMUSG00000040883 | 15_Tmem    | 587.383 | -0.20297 | 0.75715  | 0.927624 | 104.158 | 727.709 | 806.646 | 828.594 | 444.691 | 612.502 |
| ENSMUSG00000040888 | 9_Gfer     | 261.286 | 0.09631  | 0.799266 | 0.940835 | 159.777 | 329.849 | 320.59  | 273.997 | 237.798 | 245.706 |
| ENSMUSG00000040891 | 6_Foxa3    | 3.99492 | 1.40791  | 0.251162 | 0.642467 | 5.05622 | 11.335  | 1.03416 | 2.47588 | 1.71695 | 2.35126 |
| ENSMUSG00000040896 | 16_Kcnd3   | 75.9304 | -1.09072 | 0.025752 | 0.192347 | 75.8433 | 28.3376 | 41.3665 | 122.969 | 114.177 | 72.8889 |
| ENSMUSG00000040899 | 13_Ccr6    | 2.84723 | -0.01422 | 0.992124 | 0.997533 | 0       | 2.26701 | 6.20497 | 1.65058 | 3.43391 | 3.52688 |
| ENSMUSG00000040904 | 10_Gm21-   | 27.3871 | 0.51895  | 0.55857  | 0.848273 | 9.1012  | 60.0757 | 27.9224 | 48.6922 | 10.3017 | 8.22939 |
| ENSMUSG00000040907 | 15_Atp1a1  | 379.074 | -2.03871 | 0.002967 | 0.043072 | 47.5285 | 245.97  | 152.022 | 1134.78 | 447.267 | 246.882 |
| ENSMUSG00000040913 | 10_Fbxw4   | 418.499 | 0.23756  | 0.668374 | 0.898206 | 136.518 | 634.762 | 587.404 | 426.676 | 304.759 | 420.875 |
| ENSMUSG00000040918 | 12_Slc19a1 | 3143.94 | 0.43358  | 0.144069 | 0.513753 | 4486.89 | 3071.79 | 3279.33 | 2229.11 | 2785.76 | 3010.78 |
| ENSMUSG00000040919 | 13_49305   | 0.39188 | -1.97195 | 0.623385 | NA       | 0       | 0       | 0       | 0       | 0       | 2.35126 |
| ENSMUSG00000040928 | 15_S100p   | 863.726 | -0.07549 | 0.852501 | 0.957929 | 1293.38 | 557.683 | 672.205 | 776.6   | 1052.49 | 829.993 |
| ENSMUSG00000040929 | 16_Rfx3    | 214.076 | 0.09327  | 0.83429  | 0.952109 | 363.037 | 140.554 | 159.261 | 199.721 | 223.204 | 198.681 |
| ENSMUSG00000040935 | 12_Padi6   | 0.76971 | -0.01831 | 0.995711 | NA       | 0       | 2.26701 | 0       | 0       | 0       | 2.35126 |
| ENSMUSG00000040936 | 14_Ulk4    | 40.4026 | 0.39106  | 0.386611 | 0.751493 | 39.4385 | 60.0757 | 38.264  | 44.5658 | 28.3297 | 31.742  |
| ENSMUSG00000040938 | 16_Slc16a1 | 478.397 | 0.67601  | 0.333993 | 0.712536 | 93.0345 | 650.631 | 1021.75 | 453.086 | 249.817 | 402.065 |
| ENSMUSG00000040940 | 18_Arhgef1 | 1292    | 0.59884  | 0.344504 | 0.721901 | 305.396 | 2130.99 | 2232.75 | 1141.38 | 848.175 | 1093.33 |
| ENSMUSG00000040943 | 12_Tet2    | 1813.04 | 0.38807  | 0.193211 | 0.583199 | 2608    | 1892.95 | 1665    | 1384.02 | 1635.4  | 1692.9  |
| ENSMUSG00000040945 | 13_Rcc2    | 1627.3  | 0.61922  | 0.271318 | 0.657711 | 572.364 | 2737.41 | 2604.02 | 1471.5  | 947.759 | 1430.74 |
| ENSMUSG00000040950 | 13_Mgl2    | 82.5916 | -1.10903 | 0.002381 | 0.036818 | 51.5735 | 48.7406 | 56.8789 | 140.3   | 109.885 | 88.1721 |
| ENSMUSG00000040952 | 16_Rps19   | 7629.6  | -0.24702 | 0.62091  | 0.878215 | 2514.96 | 8682.63 | 9736.63 | 9141.76 | 7558.03 | 8143.57 |
| ENSMUSG00000040957 | 14_Cable1  | 135.842 | 0.24254  | 0.437078 | 0.784966 | 117.304 | 162.091 | 162.363 | 129.571 | 116.753 | 126.968 |
| ENSMUSG00000040963 | 15_Asgr2   | 2.33458 | -0.2944  | 0.84718  | 0.955658 | 1.01124 | 2.26701 | 3.10248 | 2.47588 | 5.15086 | 0       |
| ENSMUSG00000040964 | 16_Arhgef1 | 435.309 | 0.4668   | 0.42843  | 0.778874 | 136.518 | 760.58  | 618.429 | 467.115 | 272.996 | 356.215 |
| ENSMUSG00000040966 | 9_Slc22a2  | 2.51392 | -1.96346 | 0.221054 | 0.611852 | 1.01124 | 0       | 2.06832 | 8.25292 | 2.57543 | 1.17563 |
| ENSMUSG00000040969 | 14_Arhgef1 | 2.05095 | 0.92172  | 0.627298 | 0.880806 | 7.07871 | 0       | 1.03416 | 2.47588 | 1.71695 | 0       |
| ENSMUSG00000040972 | 8_Igsf21   | 1.591   | -2.89871 | 0.149524 | NA       | 0       | 0       | 1.03416 | 4.12646 | 0.85848 | 3.52688 |
| ENSMUSG00000040978 | 4_Gm119    | 125.352 | 0.45493  | 0.125047 | 0.480936 | 150.675 | 129.219 | 155.124 | 113.065 | 106.451 | 97.5771 |
| ENSMUSG00000040985 | 13_Sun3    | 11.9047 | -0.19172 | 0.780722 | 0.935516 | 17.1912 | 7.93452 | 8.27329 | 14.03   | 14.5941 | 9.40502 |
| ENSMUSG00000040987 | 14_Mill2   | 343.275 | 0.15518  | 0.584428 | 0.861195 | 322.587 | 332.116 | 430.211 | 287.202 | 344.249 | 343.283 |
| ENSMUSG00000040990 | 17_Sh3kb   | 363.581 | -0.47085 | 0.234603 | 0.626192 | 460.116 | 226.701 | 227.516 | 457.212 | 458.427 | 351.513 |
| ENSMUSG00000040997 | 13_Abhd4   | 3145.64 | -0.07882 | 0.840055 | 0.95317  | 1642.26 | 3824.44 | 3712.64 | 3291.27 | 3097.38 | 3305.87 |
| ENSMUSG00000040998 | 18_Npnt    | 2075.95 | -2.05431 | 1.33E-07 | 1.31E-05 | 1184.17 | 529.346 | 703.23  | 4036.5  | 3179.8  | 2822.68 |
| ENSMUSG00000041000 | 8_Trim62   | 108.819 | 0.29932  | 0.46498  | 0.802138 | 74.8321 | 167.758 | 117.894 | 110.589 | 90.1401 | 91.699  |
| ENSMUSG00000041009 | 8_Iqcf4    | 0.50756 | -0.81123 | 0.79835  | NA       | 1.01124 | 0       | 0       | 0       | 0.85848 | 1.17563 |
| ENSMUSG00000041012 | 3_Cmtm8    | 27.5783 | -0.84778 | 0.103752 | 0.437571 | 14.1574 | 18.136  | 26.8882 | 46.2164 | 28.3297 | 31.742  |
| ENSMUSG00000041014 | 17_Nrg3    | 0.91827 | 0.2736   | 0.931921 | NA       | 3.03373 | 0       | 0       | 2.47588 | 0       | 0       |
| ENSMUSG00000041020 | 14_Map7c   | 23.7105 | -1.10228 | 0.170209 | 0.552019 | 34.3823 | 4.53401 | 6.20497 | 42.0899 | 29.1882 | 25.8638 |
| ENSMUSG00000041025 | 15_Iffo2   | 2446.41 | 0.52027  | 0.121594 | 0.47416  | 1878.89 | 3610.21 | 3159.36 | 1889.09 | 2016.56 | 2124.36 |
| ENSMUSG00000041028 | 15_Ghitm   | 6843.49 | 0.1391   | 0.709872 | 0.910052 | 10804.1 | 5360.34 | 5354.89 | 6366.31 | 6946.8  | 6228.48 |
| ENSMUSG00000041035 | 8_Dpcd     | 657.219 | 0.05214  | 0.90568  | 0.974391 | 319.553 | 896.601 | 791.134 | 663.535 | 536.548 | 735.943 |
| ENSMUSG00000041037 | 8_Irgq     | 663.041 | 0.1874   | 0.523295 | 0.83254  | 534.948 | 800.253 | 782.86  | 566.151 | 630.981 | 663.054 |
| ENSMUSG00000041040 | 12_Fam11   | 446.751 | 0.32223  | 0.462634 | 0.800035 | 820.119 | 328.716 | 340.239 | 401.092 | 368.287 | 422.05  |
| ENSMUSG00000041044 | 9_Lrit1    | 66.1842 | -2.17503 | 0.020569 | 0.165641 | 49.551  | 20.4031 | 2.06832 | 193.944 | 106.451 | 24.6882 |

|                    |           |         |          |          |          |         |         |         |         |         |         |
|--------------------|-----------|---------|----------|----------|----------|---------|---------|---------|---------|---------|---------|
| ENSMUSG00000041046 | 7_Ramp3   | 23.7099 | -0.75783 | 0.30478  | 0.687401 | 5.05622 | 28.3376 | 19.6491 | 47.0417 | 16.3111 | 25.8638 |
| ENSMUSG00000041057 | 9_Wdr43   | 1678.5  | 0.59703  | 0.109828 | 0.450058 | 2894.18 | 1826.07 | 1342.34 | 1121.57 | 1484.31 | 1402.52 |
| ENSMUSG00000041058 | 15_Wwp1   | 1477.68 | 0.23573  | 0.626888 | 0.880676 | 2846.65 | 900.001 | 1047.61 | 1254.44 | 1510.06 | 1307.3  |
| ENSMUSG00000041062 | 6_MslnI   | 0.30609 | 0.16972  | 0.966824 | NA       | 1.01124 | 0       | 0       | 0.82529 | 0       | 0       |
| ENSMUSG00000041064 | 13_Pif1   | 67.9963 | 0.62011  | 0.151235 | 0.525101 | 50.5622 | 111.083 | 85.8354 | 60.2463 | 53.2256 | 47.0251 |
| ENSMUSG00000041068 | 6_493059  | 1.0726  | -2.23045 | 0.39086  | NA       | 0       | 1.1335  | 0       | 4.12646 | 0       | 1.17563 |
| ENSMUSG00000041073 | 10_Nacad  | 20.3886 | -1.98312 | 0.015947 | 0.138476 | 1.01124 | 12.4685 | 11.3758 | 52.8187 | 22.3204 | 22.3369 |
| ENSMUSG00000041075 | 8_Fzd7    | 878.496 | 0.01256  | 0.969715 | 0.991889 | 1203.38 | 656.298 | 786.997 | 897.093 | 817.27  | 909.936 |
| ENSMUSG00000041078 | 6_Grid1   | 108.403 | -2.01041 | 1.55E-08 | 1.94E-06 | 42.4723 | 35.1386 | 51.7081 | 203.847 | 169.12  | 148.129 |
| ENSMUSG00000041079 | 11_Rwddz  | 116.463 | -0.00216 | 0.994704 | 0.998043 | 137.529 | 115.617 | 96.177  | 116.366 | 129.63  | 103.455 |
| ENSMUSG00000041084 | 8_Ostc    | 1841.93 | 0.16171  | 0.60272  | 0.870033 | 2554.4  | 1785.27 | 1495.4  | 1637.38 | 1869.76 | 1709.36 |
| ENSMUSG00000041096 | 13_Tspyl2 | 525.913 | -0.70116 | 0.00335  | 0.047023 | 415.621 | 366.121 | 419.87  | 642.903 | 667.895 | 643.068 |
| ENSMUSG00000041112 | 5_Elmo1   | 143.373 | -0.42494 | 0.242468 | 0.633788 | 136.518 | 136.02  | 95.1429 | 206.323 | 163.969 | 122.265 |
| ENSMUSG00000041115 | 16_Iqsec2 | 470.345 | 0.00743  | 0.986283 | 0.995865 | 231.575 | 544.081 | 639.112 | 524.886 | 408.635 | 473.778 |
| ENSMUSG00000041117 | 8_Cdc8    | 186.61  | -1.30178 | 0.008568 | 0.089954 | 61.6859 | 80.4787 | 180.978 | 357.352 | 214.619 | 224.545 |
| ENSMUSG00000041119 | 11_Pde9a  | 740.225 | 0.07984  | 0.82911  | 0.951083 | 468.206 | 870.53  | 943.155 | 629.698 | 673.904 | 855.857 |
| ENSMUSG00000041120 | 6_Nbl1    | 1743.26 | -0.97547 | 0.050733 | 0.29136  | 549.106 | 1107.43 | 1869.76 | 3254.95 | 1757.3  | 1920.98 |
| ENSMUSG00000041124 | 10_Msant  | 963.502 | 0.23006  | 0.596715 | 0.868228 | 1725.18 | 697.104 | 698.059 | 858.304 | 928.872 | 873.491 |
| ENSMUSG00000041126 | 16_H2afv  | 844.276 | -0.31877 | 0.394944 | 0.755773 | 447.981 | 821.79  | 984.522 | 1058.85 | 837.874 | 914.638 |
| ENSMUSG00000041130 | 9_Zfp598  | 851.953 | 0.42352  | 0.387545 | 0.752117 | 376.183 | 1237.79 | 1314.42 | 799.708 | 611.236 | 772.387 |
| ENSMUSG00000041132 | 11_N4bp2  | 491.103 | 0.16734  | 0.667468 | 0.898016 | 772.591 | 377.456 | 408.494 | 397.791 | 549.425 | 440.86  |
| ENSMUSG00000041133 | 11_Smc1a  | 3767.42 | 0.13693  | 0.617579 | 0.87739  | 4193.63 | 4065.87 | 3578.2  | 2857.99 | 3741.24 | 4167.6  |
| ENSMUSG00000041134 | 15_Cyyr1  | 209.598 | 0.38984  | 0.467137 | 0.803613 | 438.88  | 157.557 | 116.86  | 195.594 | 201.742 | 146.953 |
| ENSMUSG00000041135 | 15_Ripk2  | 635.781 | 0.52731  | 0.149637 | 0.523169 | 1074.95 | 614.359 | 562.584 | 439.056 | 592.349 | 531.384 |
| ENSMUSG00000041141 | 7_Pnmal1  | 6.68015 | -2.46235 | 0.056488 | 0.130808 | 3.03373 | 0       | 3.10248 | 25.5841 | 6.00934 | 2.35126 |
| ENSMUSG00000041143 | 16_Tmcof  | 459.424 | 0.55132  | 0.278424 | 0.665542 | 200.226 | 765.114 | 673.239 | 428.327 | 309.91  | 379.728 |
| ENSMUSG00000041144 | 10_Dnah7  | 163.293 | -0.98537 | 0.035622 | 0.235627 | 174.945 | 68.0102 | 85.8354 | 229.431 | 268.703 | 152.832 |
| ENSMUSG00000041147 | 10_Brca2  | 352.135 | 0.74804  | 0.047138 | 0.278269 | 639.106 | 325.315 | 359.888 | 240.16  | 307.335 | 241.004 |
| ENSMUSG00000041153 | 9_Osgin1  | 563.981 | 0.09813  | 0.82872  | 0.951064 | 966.75  | 431.865 | 350.581 | 439.881 | 594.066 | 600.746 |
| ENSMUSG00000041161 | 8_Otud3   | 127.207 | 0.3209   | 0.552193 | 0.84523  | 50.5622 | 189.295 | 184.081 | 132.047 | 84.9892 | 122.265 |
| ENSMUSG00000041164 | 15_Zmiz2  | 1088.36 | 0.529    | 0.406677 | 0.764332 | 270.002 | 1812.47 | 1774.62 | 1097.64 | 594.925 | 980.474 |
| ENSMUSG00000041165 | 6_Spem1   | 1.17724 | 2.62021  | 0.388957 | NA       | 0       | 0       | 6.20497 | 0       | 0.85848 | 0       |
| ENSMUSG00000041168 | 9_Lonp1   | 983.327 | -0.04195 | 0.93621  | 0.984295 | 331.688 | 1279.72 | 1295.8  | 1195.02 | 785.506 | 1012.22 |
| ENSMUSG00000041180 | 13_Hectd1 | 450.806 | 0.46895  | 0.31548  | 0.696629 | 882.816 | 326.449 | 360.922 | 308.659 | 462.719 | 363.269 |
| ENSMUSG00000041187 | 16_Prkd2  | 679.794 | 0.58046  | 0.278419 | 0.665542 | 262.924 | 1123.3  | 1057.95 | 565.325 | 443.833 | 625.434 |
| ENSMUSG00000041189 | 9_Chrrb1  | 219.31  | -0.94971 | 0.000911 | 0.018321 | 161.799 | 123.552 | 163.398 | 309.485 | 279.005 | 278.624 |
| ENSMUSG00000041193 | 15_Pla2gf | 969.056 | -1.77257 | 3.95E-07 | 3.52E-05 | 467.195 | 320.781 | 528.457 | 1916.33 | 1425.93 | 1155.64 |
| ENSMUSG00000041199 | 2_Rpusd1  | 102.666 | 0.25707  | 0.70868  | 0.909864 | 20.2249 | 164.358 | 150.988 | 127.92  | 77.2629 | 75.2402 |
| ENSMUSG00000041202 | 12_Pla2gf | 28.9665 | -0.20601 | 0.721838 | 0.913923 | 27.3036 | 21.5366 | 32.059  | 51.9934 | 19.745  | 21.1613 |
| ENSMUSG00000041203 | 8_231003  | 856.969 | -0.04053 | 0.886658 | 0.969051 | 661.354 | 938.54  | 934.882 | 908.647 | 774.346 | 924.043 |
| ENSMUSG00000041205 | 7_Map6d1  | 13.5392 | -1.72138 | 0.010479 | 0.104292 | 5.05622 | 4.53401 | 9.30745 | 19.807  | 24.8958 | 17.6344 |
| ENSMUSG00000041215 | 15_Yeats1 | 860.513 | 0.2062   | 0.431732 | 0.780264 | 769.557 | 981.614 | 1014.51 | 731.209 | 845.6   | 820.588 |
| ENSMUSG00000041216 | 15_Clvs1  | 46.4198 | -1.1706  | 0.015004 | 0.133135 | 36.4048 | 15.869  | 33.0932 | 48.6922 | 70.3951 | 74.0646 |
| ENSMUSG00000041219 | 14_Arhga1 | 397.853 | 0.91185  | 0.006233 | 0.072378 | 659.331 | 487.406 | 411.596 | 217.052 | 310.769 | 300.961 |
| ENSMUSG00000041220 | 10_Elov16 | 5485.47 | 0.16433  | 0.633099 | 0.883434 | 8109.17 | 4442.2  | 4840.91 | 4404.59 | 5532.88 | 5583.06 |
| ENSMUSG00000041225 | 16_Arhga1 | 2258.07 | 0.51228  | 0.283337 | 0.670331 | 4642.62 | 1639.05 | 1682.58 | 1516.06 | 2143.62 | 1924.5  |
| ENSMUSG00000041229 | 15_Phf8   | 1094.63 | 0.48405  | 0.095675 | 0.419807 | 1440.01 | 1287.66 | 1101.38 | 732.034 | 926.297 | 1080.4  |
| ENSMUSG00000041231 | 15_Ublcp1 | 1045.5  | 0.09734  | 0.763677 | 0.929545 | 1461.25 | 931.739 | 849.047 | 917.725 | 1061.08 | 1052.19 |
| ENSMUSG00000041235 | 11_Chd7   | 434.741 | -0.30984 | 0.246969 | 0.63881  | 353.936 | 429.598 | 381.606 | 551.295 | 455.851 | 436.158 |
| ENSMUSG00000041236 | 7_Vps41   | 2795.27 | 0.22386  | 0.532435 | 0.837502 | 4338.24 | 2390.56 | 2306.18 | 2269.55 | 2935.99 | 2531.13 |
| ENSMUSG00000041238 | 15_Rbbp8  | 811.822 | 0.66807  | 0.149213 | 0.522746 | 1691.81 | 680.102 | 617.394 | 509.205 | 721.121 | 651.298 |
| ENSMUSG00000041241 | 12_Mul1   | 477.714 | -0.04712 | 0.924338 | 0.978996 | 183.035 | 593.956 | 632.907 | 585.132 | 397.475 | 473.778 |
| ENSMUSG00000041245 | 13_Wnk3   | 32.5555 | -0.97252 | 0.159625 | 0.537707 | 41.461  | 7.93452 | 16.5466 | 56.9452 | 48.9332 | 23.5126 |
| ENSMUSG00000041247 | 7_Lamp3   | 4.02345 | -5.38099 | 0.001937 | 0.031718 | 0       | 0       | 0       | 13.2047 | 8.58477 | 2.35126 |
| ENSMUSG00000041248 | 8_Kcnj1   | 6.74966 | -1.38879 | 0.260238 | 0.649568 | 10.1124 | 0       | 1.03416 | 14.03   | 9.44325 | 5.87814 |
| ENSMUSG00000041258 | 16_Zfp23f | 851.705 | 0.36797  | 0.180945 | 0.567286 | 764.501 | 1096.1  | 1018.65 | 767.522 | 691.074 | 772.387 |
| ENSMUSG00000041261 | 9_Car8    | 85.4426 | -1.14657 | 0.037669 | 0.243112 | 97.0795 | 26.0706 | 36.1957 | 145.251 | 98.7249 | 109.333 |
| ENSMUSG00000041263 | 14_Rusc1  | 290.879 | 0.21189  | 0.619217 | 0.877704 | 160.788 | 394.459 | 381.606 | 320.213 | 237.798 | 250.409 |
| ENSMUSG00000041264 | 16_Uspl1  | 874.061 | 0.01584  | 0.951575 | 0.988    | 1027.42 | 802.52  | 806.646 | 827.768 | 951.192 | 828.818 |
| ENSMUSG00000041268 | 16_Dmxi2  | 957.964 | -1.37003 | 0.004215 | 0.055239 | 907.086 | 309.446 | 386.776 | 1616.75 | 1536.67 | 991.054 |
| ENSMUSG00000041272 | 11_Tox    | 650.879 | 0.55806  | 0.289882 | 0.674932 | 450.004 | 909.069 | 965.907 | 364.779 | 296.175 | 919.341 |
| ENSMUSG00000041278 | 10_Ttc1   | 1022.48 | 0.24101  | 0.455418 | 0.796293 | 1486.53 | 963.477 | 872.832 | 837.672 | 1013.86 | 960.488 |
| ENSMUSG00000041287 | 5_Sox15   | 599.479 | 0.24978  | 0.680759 | 0.902479 | 155.732 | 774.182 | 1023.82 | 613.192 | 419.795 | 610.151 |
| ENSMUSG00000041293 | 5_Adgrf1  | 3610.59 | 0.44329  | 0.072461 | 0.359569 | 4243.18 | 4416.13 | 3823.3  | 2629.38 | 3275.09 | 3276.47 |
| ENSMUSG00000041297 | 7_Cdk13   | 1639.18 | 0.34494  | 0.324939 | 0.705459 | 2573.62 | 1498.49 | 1430.25 | 1203.28 | 1597.63 | 1531.84 |
| ENSMUSG00000041298 | 15_Katnal | 192.358 | -0.55751 | 0.075107 | 0.366817 | 154.72  | 130.353 | 182.012 | 226.955 | 266.128 | 193.979 |
| ENSMUSG00000041301 | 15_Cftr   | 72.7625 | 0.0498   | 0.921717 | 0.977953 | 117.304 | 49.8741 | 54.8106 | 50.3428 | 99.5833 | 64.6595 |
| ENSMUSG00000041303 | 7_Gtf3c3  | 998.266 | 0.39579  | 0.330286 | 0.710498 | 1768.67 | 875.064 | 759.075 | 741.113 | 935.74  | 909.936 |
| ENSMUSG00000041308 | 5_Sntb2   | 850.989 | 0.0599   | 0.829229 | 0.951083 | 1074.95 | 771.915 | 759.075 | 840.148 | 862.769 | 797.076 |
| ENSMUSG00000041309 | 17_Nkx6-1 | 0.18892 | 1.1315   | 0.781553 | NA       | 0       | 1.1335  | 0       | 0       | 0       | 0       |
| ENSMUSG00000041313 | 14_Slc7a1 | 3628.2  | 0.70293  | 0.011175 | 0.109214 | 3652.61 | 5088.29 | 4743.7  | 2492.38 | 2619.21 | 3173.02 |
| ENSMUSG00000041319 | 13_Thoc6  | 232.104 | 0.36201  | 0.481203 | 0.810775 | 94.0457 | 347.985 | 341.273 | 221.178 | 177.705 | 210.437 |
| ENSMUSG00000041323 | 5_Ak7     | 118.231 | 1.64159  | 1.44E-07 | 1.41E-05 | 200.226 | 174.559 | 162.363 | 52.8187 | 61.8103 | 57.6058 |
| ENSMUSG00000041324 | 13_Inhba  | 21.1417 | -0.63354 | 0.408973 | 0.766156 | 3.03373 | 26.0706 | 20.6832 | 31.3611 | 16.3111 | 29.3907 |
| ENSMUSG00000041328 | 15_Pcf11  | 1915.06 | 0.21126  | 0.6222   | 0.878263 | 3331.04 | 1372.67 | 1461.27 | 1552.37 | 2089.53 | 1683.5  |

|                    |           |         |          |          |          |         |         |         |         |         |         |
|--------------------|-----------|---------|----------|----------|----------|---------|---------|---------|---------|---------|---------|
| ENSMUSG00000041329 | 13_Atp1b  | 790.565 | -2.05826 | 2.49E-08 | 2.93E-06 | 321.576 | 286.776 | 310.248 | 1774.38 | 1243.93 | 806.481 |
| ENSMUSG00000041341 | 9_Atg2b   | 1202.71 | 0.21208  | 0.415833 | 0.770103 | 1062.82 | 1465.62 | 1344.41 | 1078.66 | 1099.71 | 1165.05 |
| ENSMUSG00000041343 | 18_Ankrd  | 107.82  | -0.02502 | 0.94609  | 0.986649 | 124.383 | 109.95  | 85.8354 | 100.686 | 84.9892 | 141.075 |
| ENSMUSG00000041346 | 11_Wrapf  | 156.501 | 0.42348  | 0.460119 | 0.799551 | 53.5959 | 265.24  | 219.242 | 162.583 | 109.027 | 129.319 |
| ENSMUSG00000041347 | 5_Bdkrb1  | 2.7947  | 2.44519  | 0.159318 | 0.567367 | 2.02249 | 10.2015 | 2.06832 | 2.47588 | 0       | 0       |
| ENSMUSG00000041351 | 16_Rap1g  | 1153.76 | 0.15694  | 0.800792 | 0.941902 | 264.946 | 1636.78 | 1747.73 | 1330.37 | 812.978 | 1129.78 |
| ENSMUSG00000041353 | 12_Tmem   | 498.15  | 0.09938  | 0.813656 | 0.94679  | 819.108 | 372.922 | 353.683 | 410.17  | 545.133 | 487.886 |
| ENSMUSG00000041354 | 15_Rgl2   | 733.832 | 0.29847  | 0.633543 | 0.88353  | 170.9   | 1085.9  | 1171.71 | 792.281 | 516.803 | 665.405 |
| ENSMUSG00000041355 | 15_Ssr2   | 1914.18 | 0.04372  | 0.923205 | 0.978561 | 847.423 | 2734.01 | 2248.27 | 1943.56 | 1755.59 | 1956.24 |
| ENSMUSG00000041358 | 1_Nutm1   | 5.11784 | 1.7612   | 0.098606 | 0.426876 | 8.08995 | 10.2015 | 5.17081 | 0.82529 | 1.71695 | 4.70251 |
| ENSMUSG00000041360 | 7_Pum3    | 1283.36 | 0.21002  | 0.416054 | 0.770267 | 1435.97 | 1469.02 | 1224.45 | 1020.06 | 1232.77 | 1317.88 |
| ENSMUSG00000041361 | 13_Myzap  | 335.313 | 0.33524  | 0.241751 | 0.63325  | 419.666 | 397.86  | 305.078 | 330.117 | 287.59  | 271.57  |
| ENSMUSG00000041362 | 16_Shtn1  | 1114.05 | 0.34611  | 0.268816 | 0.656292 | 1580.57 | 1165.24 | 994.863 | 814.564 | 1021.59 | 1107.44 |
| ENSMUSG00000041372 | 9_B4galnt | 4.5364  | 1.25491  | 0.242634 | 0.634029 | 3.03373 | 9.06802 | 7.23913 | 4.12646 | 2.57543 | 1.17563 |
| ENSMUSG00000041375 | 18_Ccdc9  | 766.06  | 0.10417  | 0.820853 | 0.948338 | 344.834 | 1003.15 | 1033.13 | 760.92  | 626.688 | 827.642 |
| ENSMUSG00000041377 | 12_Ninj2  | 1.17554 | 1.60364  | 0.461325 | NA       | 0       | 2.26701 | 3.10248 | 0.82529 | 0.85848 | 0       |
| ENSMUSG00000041378 | 1_Cldn5   | 133.06  | -1.65846 | 0.007085 | 0.07881  | 17.1912 | 61.2092 | 113.758 | 260.792 | 181.997 | 163.412 |
| ENSMUSG00000041380 | 13_Htr2c  | 0.72256 | -1.55767 | 0.649882 | NA       | 0       | 0       | 1.03416 | 3.30117 | 0       | 0       |
| ENSMUSG00000041390 | 18_Mdfic  | 1194.21 | 0.08113  | 0.856945 | 0.959059 | 2072.04 | 743.578 | 867.662 | 1215.66 | 1225.91 | 1040.43 |
| ENSMUSG00000041396 | 13_Mettl1 | 135.281 | -0.0634  | 0.883975 | 0.967903 | 208.316 | 97.4812 | 91.0062 | 124.619 | 156.243 | 134.022 |
| ENSMUSG00000041406 | 14_BC05f  | 223.702 | 0.5237   | 0.13496  | 0.498709 | 355.958 | 226.701 | 208.901 | 162.583 | 212.902 | 175.169 |
| ENSMUSG00000041408 | 16_Wapl   | 4064.68 | 0.53232  | 0.233485 | 0.625443 | 7908.94 | 3449.25 | 3060.08 | 2558.41 | 3888.04 | 3523.36 |
| ENSMUSG00000041415 | 9_Dicer1  | 2106.16 | 0.17642  | 0.464414 | 0.801754 | 2498.78 | 2177.46 | 2027.99 | 1842.05 | 2114.43 | 1976.23 |
| ENSMUSG00000041417 | 15_Pik3r1 | 3311.16 | 0.08901  | 0.821741 | 0.948384 | 5307.01 | 2308.95 | 2623.67 | 3024.7  | 3384.97 | 3217.69 |
| ENSMUSG00000041420 | 18_Meis3  | 106.93  | -0.35166 | 0.527978 | 0.83515  | 31.3486 | 98.6148 | 152.022 | 132.872 | 115.036 | 111.685 |
| ENSMUSG00000041423 | 16_Paqr6  | 115.69  | -0.91214 | 0.053129 | 0.299465 | 52.5847 | 61.2092 | 127.202 | 199.721 | 138.215 | 115.212 |
| ENSMUSG00000041426 | 12_Hibch  | 492.975 | 0.00549  | 0.990045 | 0.997351 | 816.074 | 324.182 | 341.273 | 441.531 | 533.973 | 500.817 |
| ENSMUSG00000041429 | 2_Nthl1   | 84.1852 | -0.19626 | 0.774197 | 0.933044 | 13.1462 | 117.884 | 104.45  | 89.9569 | 83.2723 | 96.4015 |
| ENSMUSG00000041431 | 16_Ccnb1  | 778.751 | 0.35184  | 0.259168 | 0.64893  | 980.907 | 902.268 | 736.323 | 511.681 | 811.261 | 730.065 |
| ENSMUSG00000041438 | 7_Cirh1a  | 687.78  | 0.19704  | 0.473007 | 0.806392 | 751.355 | 821.79  | 630.839 | 546.344 | 716.828 | 659.527 |
| ENSMUSG00000041439 | 15_Mfsd6  | 3462.27 | 0.70666  | 0.020254 | 0.164323 | 5334.31 | 4034.14 | 3512.01 | 2149.89 | 2754.85 | 2988.45 |
| ENSMUSG00000041440 | 18_Gk5    | 693.55  | 0.42209  | 0.229886 | 0.620993 | 1122.48 | 607.558 | 652.556 | 520.759 | 639.565 | 618.38  |
| ENSMUSG00000041444 | 14_Arhgaj | 5357    | 0.58788  | 0.01899  | 0.157128 | 6622.64 | 6914.37 | 5763.38 | 3694.83 | 4447.77 | 4698.98 |
| ENSMUSG00000041445 | 8_Mmrn2   | 156.574 | -0.23278 | 0.467216 | 0.803613 | 120.338 | 171.159 | 140.646 | 195.594 | 145.941 | 165.764 |
| ENSMUSG00000041453 | 12_Rpl21  | 12339   | -0.45769 | 0.087733 | 0.401776 | 8593.55 | 11197.9 | 11402.7 | 12418.2 | 15799.4 | 14622.5 |
| ENSMUSG00000041459 | 15_Tardb1 | 6540.15 | 0.31779  | 0.368728 | 0.740777 | 10349.1 | 5865.88 | 5557.58 | 5057.39 | 6625.73 | 5785.26 |
| ENSMUSG00000041460 | 14_Cacna  | 120.963 | -2.63043 | 9.27E-05 | 0.003123 | 41.461  | 43.0731 | 16.5466 | 382.11  | 180.28  | 62.3083 |
| ENSMUSG00000041468 | 7_Gpr12   | 0.87288 | -1.91747 | 0.468862 | NA       | 1.01124 | 0       | 0       | 1.65058 | 2.57543 | 0       |
| ENSMUSG00000041471 | 8_Fam35e  | 209.608 | 0.32826  | 0.427647 | 0.778267 | 364.048 | 162.091 | 173.739 | 179.088 | 190.582 | 188.1   |
| ENSMUSG00000041476 | 12_Smpx   | 198.458 | -0.26783 | 0.750005 | 0.925182 | 441.914 | 23.8036 | 74.4596 | 296.28  | 157.96  | 196.33  |
| ENSMUSG00000041477 | 14_Dcp1b  | 274.565 | 0.10164  | 0.081112 | 0.909748 | 244.721 | 304.912 | 303.009 | 273.172 | 242.949 | 278.624 |
| ENSMUSG00000041479 | 13_Syt15  | 51.7146 | -0.6567  | 0.081104 | 0.38368  | 41.461  | 41.9396 | 37.2298 | 73.451  | 60.9519 | 55.2545 |
| ENSMUSG00000041481 | 16_Serpin | 345.598 | 3.54799  | 9.94E-13 | 3.25E-10 | 386.295 | 1057.56 | 466.407 | 37.1382 | 72.1121 | 54.0789 |
| ENSMUSG00000041482 | 16_Plezo2 | 379.787 | -0.63785 | 0.030694 | 0.214588 | 329.666 | 224.434 | 337.137 | 473.718 | 444.691 | 469.076 |
| ENSMUSG00000041483 | 14_Zfp287 | 602.295 | 0.55634  | 0.254721 | 0.645853 | 1255.97 | 502.142 | 392.981 | 477.844 | 576.897 | 407.943 |
| ENSMUSG00000041488 | 15_Stx3   | 1441.48 | 0.28083  | 0.348856 | 0.725931 | 2012.38 | 1503.02 | 1228.58 | 1239.59 | 1406.19 | 1259.1  |
| ENSMUSG00000041491 | 7_Cep78   | 195.474 | 0.16892  | 0.564016 | 0.850768 | 242.699 | 183.627 | 194.422 | 174.962 | 204.318 | 172.817 |
| ENSMUSG00000041498 | 13_Kif14  | 220.856 | 0.5454   | 0.119701 | 0.470491 | 282.137 | 275.441 | 228.55  | 122.143 | 224.062 | 192.803 |
| ENSMUSG00000041505 | 15_Gm34l  | 0.19594 | -0.79206 | 0.84609  | NA       | 0       | 0       | 0       | 0       | 0       | 1.17563 |
| ENSMUSG00000041506 | 14_Rrp9   | 186.914 | 0.45401  | 0.493187 | 0.816235 | 40.4498 | 328.716 | 279.224 | 196.42  | 126.196 | 150.48  |
| ENSMUSG00000041515 | 9_Irf8    | 200.288 | 1.66213  | 0.000173 | 0.005162 | 175.957 | 471.537 | 265.78  | 107.288 | 82.4138 | 98.7527 |
| ENSMUSG00000041523 | 2_Upk2    | 6.5814  | 1.4436   | 0.173304 | 0.556848 | 2.02249 | 13.602  | 13.4441 | 4.95175 | 4.29238 | 1.17563 |
| ENSMUSG00000041528 | 15_Rnf12  | 815.514 | 0.07304  | 0.896985 | 0.97156  | 230.564 | 1118.77 | 1159.3  | 911.123 | 727.988 | 745.348 |
| ENSMUSG00000041530 | 16_Ago1   | 1674.38 | -0.22591 | 0.31587  | 0.69679  | 1596.75 | 1435.01 | 1598.81 | 1741.37 | 1892.08 | 1782.25 |
| ENSMUSG00000041534 | 8_Rbp3    | 533.388 | -2.636   | 2.23E-05 | 0.000989 | 183.035 | 189.295 | 71.3571 | 1660.49 | 775.205 | 320.946 |
| ENSMUSG00000041538 | 15_H2-Ot  | 5.85723 | 0.68888  | 0.479374 | 0.809556 | 6.06747 | 12.4685 | 3.10248 | 2.47588 | 5.15086 | 5.87814 |
| ENSMUSG00000041540 | 16_Sox5   | 50.8546 | -1.16338 | 0.041895 | 0.259289 | 51.5735 | 13.602  | 28.9565 | 93.258  | 69.5366 | 48.2007 |
| ENSMUSG00000041544 | 11_Ptchd2 | 2.02441 | -0.88185 | 0.601042 | 0.87     | 0       | 2.26701 | 2.06832 | 5.77705 | 0.85848 | 1.17563 |
| ENSMUSG00000041548 | 4_Hspb8   | 739.809 | -0.74776 | 0.014022 | 0.127414 | 552.139 | 452.268 | 652.556 | 1114.97 | 894.533 | 772.387 |
| ENSMUSG00000041552 | 7_Ptchd1  | 13.9955 | -0.22853 | 0.776582 | 0.933844 | 22.2474 | 9.06802 | 7.23913 | 21.4576 | 5.15086 | 18.81   |
| ENSMUSG00000041556 | 8_Fbxo2   | 15.5876 | -1.5671  | 0.034284 | 0.229568 | 3.03373 | 12.4685 | 8.27329 | 35.4876 | 15.4526 | 18.81   |
| ENSMUSG00000041559 | 7_Fmod    | 5493.46 | -0.59051 | 0.116403 | 0.463991 | 3740.59 | 2927.84 | 6485.23 | 6942.36 | 5855.67 | 7009.09 |
| ENSMUSG00000041560 | 12_Gltscr | 1613.42 | 0.20838  | 0.6561   | 0.894016 | 708.882 | 2152.52 | 2327.9  | 1571.36 | 1359.83 | 1560.06 |
| ENSMUSG00000041565 | 16_L3mbt  | 0.33349 | -1.76186 | 0.662172 | NA       | 0       | 0       | 0       | 0.82529 | 0       | 1.17563 |
| ENSMUSG00000041566 | 3_Tssk1   | 5.90973 | -1.63788 | 0.100025 | 0.430013 | 1.01124 | 4.53401 | 3.10248 | 9.90351 | 5.15086 | 11.7563 |
| ENSMUSG00000041570 | 14_Cams2  | 2476.75 | 0.19785  | 0.542893 | 0.84123  | 3611.15 | 2250    | 2077.63 | 2123.48 | 2499.88 | 2298.35 |
| ENSMUSG00000041571 | 9_Sepw1   | 1919.59 | 0.01504  | 0.975188 | 0.993623 | 805.962 | 2388.29 | 2594.71 | 2425.53 | 1471.43 | 1831.63 |
| ENSMUSG00000041577 | 5_Prelp   | 2373.56 | -0.56217 | 0.128615 | 0.487117 | 1277.2  | 1683.25 | 2790.17 | 3107.23 | 2605.48 | 2778.01 |
| ENSMUSG00000041578 | 15_Crx    | 166.663 | -2.22984 | 0.002038 | 0.032958 | 100.113 | 61.2092 | 14.4783 | 429.977 | 301.325 | 92.8746 |
| ENSMUSG00000041583 | 8_Obox6   | 0.41265 | -2.10335 | 0.599583 | NA       | 0       | 0       | 0       | 2.47588 | 0       | 0       |
| ENSMUSG00000041592 | 16_Sdk2   | 97.3368 | -1.60309 | 0.000283 | 0.007552 | 34.3823 | 44.2066 | 66.1863 | 203.847 | 120.187 | 115.212 |
| ENSMUSG00000041594 | 17_Tmtc4  | 366.676 | 0.06244  | 0.837839 | 0.952966 | 474.274 | 330.983 | 318.522 | 331.768 | 400.05  | 344.459 |
| ENSMUSG00000041598 | 7_Cdc42e  | 2321.97 | 0.18906  | 0.712745 | 0.910879 | 885.85  | 3173.81 | 3362.06 | 2444.52 | 1650.85 | 2414.74 |
| ENSMUSG00000041605 | 16_57305  | 658.434 | 0.59877  | 0.207671 | 0.592023 | 323.598 | 1072.29 | 983.488 | 484.447 | 491.907 | 594.868 |
| ENSMUSG00000041607 | 16_Mbp    | 3580.6  | 0.51143  | 0.07261  | 0.359974 | 3199.58 | 4896.73 | 4529.63 | 2791.14 | 2888.78 | 3177.72 |

|                    |           |         |          |          |          |         |         |         |         |         |         |
|--------------------|-----------|---------|----------|----------|----------|---------|---------|---------|---------|---------|---------|
| ENSMUSG00000041608 | 7_Entpd3  | 181.782 | 0.62666  | 0.123399 | 0.478085 | 137.529 | 232.368 | 291.634 | 122.143 | 123.621 | 183.398 |
| ENSMUSG00000041609 | 16_Ccdc6  | 617.117 | -0.4427  | 0.415679 | 0.770073 | 185.058 | 683.502 | 701.162 | 997.778 | 494.483 | 640.717 |
| ENSMUSG00000041616 | 9_Nppa    | 0.73089 | -2.88699 | 0.388908 | NA       | 0       | 0       | 0       | 0       | 0.85848 | 3.52688 |
| ENSMUSG00000041617 | 10_Ccdc7  | 45.6496 | -1.38389 | 0.006632 | 0.075192 | 17.1912 | 22.6701 | 36.1957 | 89.9569 | 64.3858 | 43.4982 |
| ENSMUSG00000041620 | 8_Mmp1b   | 0.88728 | 3.35639  | 0.187202 | NA       | 2.02249 | 2.26701 | 1.03416 | 0       | 0       | 0       |
| ENSMUSG00000041623 | 17_D11W   | 214.454 | 0.07134  | 0.862372 | 0.960913 | 119.327 | 287.91  | 252.335 | 233.558 | 204.318 | 189.276 |
| ENSMUSG00000041624 | 9_Gucy1a  | 17.1421 | -1.02602 | 0.201061 | 0.592148 | 22.2474 | 2.26701 | 9.30745 | 29.7105 | 24.0374 | 15.2832 |
| ENSMUSG00000041625 | 14_Ggact  | 285.33  | -0.64959 | 0.027704 | 0.200891 | 226.519 | 194.962 | 245.096 | 419.249 | 309.91  | 316.244 |
| ENSMUSG00000041629 | 7_Fam104  | 423.989 | -0.01171 | 0.965788 | 0.990781 | 343.823 | 480.605 | 442.621 | 427.501 | 434.389 | 414.997 |
| ENSMUSG00000041632 | 5_Mrps27  | 266.258 | 0.16297  | 0.628902 | 0.881265 | 194.159 | 346.852 | 303.009 | 270.696 | 230.072 | 252.76  |
| ENSMUSG00000041633 | 14_Kctd11 | 309.986 | -0.35384 | 0.569404 | 0.853418 | 572.364 | 117.884 | 126.168 | 373.857 | 386.315 | 283.326 |
| ENSMUSG00000041638 | 18_Gcn1l  | 1412.54 | 0.46278  | 0.450777 | 0.79295  | 362.025 | 2197.86 | 2351.68 | 1353.48 | 932.306 | 1277.91 |
| ENSMUSG00000041642 | 18_Kif21b | 208.245 | -1.02158 | 0.049361 | 0.287305 | 70.7871 | 148.489 | 193.388 | 434.104 | 236.94  | 165.764 |
| ENSMUSG00000041644 | 14_Slc5a1 | 0.33902 | -1.78366 | 0.658108 | NA       | 0       | 0       | 0       | 0       | 0.85848 | 1.17563 |
| ENSMUSG00000041645 | 13_Ddx24  | 2163.95 | 0.43464  | 0.238009 | 0.630377 | 1481.47 | 3213.48 | 2767.42 | 1747.14 | 1720.39 | 2053.82 |
| ENSMUSG00000041649 | 13_Klf8   | 28.1945 | 0.4032   | 0.540944 | 0.84046  | 59.6634 | 14.7355 | 21.7174 | 16.5058 | 28.3297 | 28.2151 |
| ENSMUSG00000041650 | 15_Pcca   | 566.96  | -0.65089 | 0.029338 | 0.208723 | 500.566 | 340.051 | 482.953 | 693.246 | 779.497 | 605.448 |
| ENSMUSG00000041653 | 4_Pnpla3  | 64.3847 | -1.92074 | 1.55E-05 | 0.000761 | 32.3598 | 21.5366 | 26.8882 | 123.794 | 115.894 | 65.8352 |
| ENSMUSG00000041654 | 15_Slc39e | 395.455 | 0.66871  | 0.024326 | 0.185556 | 384.273 | 586.021 | 486.056 | 279.774 | 303.901 | 332.703 |
| ENSMUSG00000041658 | 12_Rragb  | 82.1644 | -1.30109 | 0.042364 | 0.261021 | 96.0682 | 19.2695 | 26.8882 | 123.794 | 149.375 | 77.5914 |
| ENSMUSG00000041660 | 8_Bbox1   | 17.3989 | -1.03313 | 0.104653 | 0.439977 | 18.2024 | 5.66751 | 10.3416 | 24.7588 | 26.6128 | 18.81   |
| ENSMUSG00000041669 | 15_Prima  | 7.81077 | -1.26392 | 0.152086 | 0.526427 | 2.02249 | 5.66751 | 6.20497 | 17.3311 | 8.58477 | 7.05377 |
| ENSMUSG00000041670 | 15_Rims1  | 21.2522 | -0.99904 | 0.216741 | 0.607835 | 24.2699 | 9.06802 | 9.30745 | 50.3428 | 27.4713 | 7.05377 |
| ENSMUSG00000041671 | 13_Pyroxc | 1363.18 | 0.49688  | 0.109824 | 0.450058 | 2076.08 | 1404.41 | 1306.15 | 980.447 | 1242.22 | 1169.75 |
| ENSMUSG00000041673 | 11_Lrrc18 | 17.8502 | -1.20186 | 0.057473 | 0.313849 | 18.2024 | 7.93452 | 6.20497 | 22.2829 | 26.6128 | 25.8638 |
| ENSMUSG00000041679 | 8_Lrrc29  | 18.8587 | -0.2622  | 0.692715 | 0.905638 | 6.06747 | 23.8036 | 21.7174 | 25.5841 | 17.1695 | 18.81   |
| ENSMUSG00000041681 | 2_lapp    | 0.70156 | 1.59337  | 0.644125 | NA       | 3.03373 | 0       | 0       | 0       | 0       | 1.17563 |
| ENSMUSG00000041684 | 11_Bivm   | 514.57  | 0.31315  | 0.504229 | 0.824514 | 986.974 | 360.454 | 362.991 | 411.821 | 499.634 | 465.549 |
| ENSMUSG00000041685 | 15_Fcho2  | 4542.5  | 0.78301  | 0.096786 | 0.421931 | 9999.18 | 3539.93 | 3698.16 | 2816.72 | 3865.72 | 3335.26 |
| ENSMUSG00000041688 | 16_Amot   | 266.247 | -0.38464 | 0.470177 | 0.804531 | 423.711 | 108.816 | 160.295 | 360.653 | 293.599 | 250.409 |
| ENSMUSG00000041695 | 2_Kcnj2   | 249.743 | 0.26925  | 0.621647 | 0.878215 | 513.712 | 128.086 | 176.842 | 212.925 | 200.025 | 266.868 |
| ENSMUSG00000041696 | 13_Ras11  | 89.065  | -1.28223 | 0.00026  | 0.007091 | 49.551  | 43.0731 | 63.0839 | 143.601 | 121.045 | 114.036 |
| ENSMUSG00000041697 | 8_Cox6a1  | 1248.24 | -0.24078 | 0.5987   | 0.869005 | 500.566 | 1459.95 | 1472.65 | 1587.86 | 1188.13 | 1280.26 |
| ENSMUSG00000041700 | 9_Lhfp1   | 57.558  | 0.61776  | 0.17253  | 0.556112 | 105.169 | 53.2746 | 50.6739 | 47.867  | 47.2162 | 41.147  |
| ENSMUSG00000041702 | 6_Btbd7   | 1341.75 | 0.23558  | 0.348581 | 0.725753 | 1675.63 | 1379.47 | 1297.87 | 1149.63 | 1291.15 | 1256.75 |
| ENSMUSG00000041703 | 7_Zic5    | 71.2928 | -0.74434 | 0.162179 | 0.540795 | 86.967  | 30.6046 | 42.4006 | 108.113 | 105.593 | 54.0789 |
| ENSMUSG00000041707 | 7_181001  | 5.74071 | -0.18466 | 0.841574 | 0.953593 | 3.03373 | 9.06802 | 4.13665 | 5.77705 | 7.72629 | 4.70251 |
| ENSMUSG00000041708 | 12_Mppec  | 10.3227 | -0.20357 | 0.764957 | 0.929992 | 8.08995 | 11.335  | 9.30745 | 8.25292 | 12.0187 | 12.9319 |
| ENSMUSG00000041710 | 4_Trpc5   | 0.28063 | -1.56014 | 0.700051 | NA       | 0       | 0       | 0       | 0.82529 | 0.85848 | 0       |
| ENSMUSG00000041712 | 6_Ubr7    | 1153.69 | 0.17413  | 0.532488 | 0.837502 | 1516.87 | 1102.9  | 1049.67 | 1014.28 | 1116.88 | 1121.55 |
| ENSMUSG00000041716 | 7_Gm206   | 274.224 | 0.21436  | 0.567121 | 0.852278 | 415.621 | 276.575 | 191.32  | 244.287 | 250.675 | 266.868 |
| ENSMUSG00000041718 | 15_Alg13  | 204.631 | 0.50008  | 0.230764 | 0.622309 | 365.059 | 181.36  | 172.705 | 140.3   | 202.601 | 165.764 |
| ENSMUSG00000041720 | 12_Pi4ka  | 1711.64 | -0.09923 | 0.734069 | 0.92     | 1217.54 | 1845.34 | 1895.62 | 1799.14 | 1704.08 | 1808.12 |
| ENSMUSG00000041722 | 7_Khdc1c  | 9.54286 | 0.88857  | 0.225887 | 0.616179 | 11.1237 | 15.869  | 10.3416 | 5.77705 | 9.44325 | 4.70251 |
| ENSMUSG00000041729 | 15_Coro2l | 270.336 | -1.75001 | 3.67E-05 | 0.001479 | 88.9895 | 99.7483 | 183.047 | 562.849 | 360.56  | 326.825 |
| ENSMUSG00000041730 | 13_Prrxl1 | 0.38486 | 0.16972  | 0.966824 | NA       | 0       | 1.1335  | 0       | 0       | 0       | 1.17563 |
| ENSMUSG00000041731 | 13_Pgm5   | 198.5   | -1.41688 | 7.12E-05 | 0.002518 | 131.462 | 77.0782 | 115.826 | 354.876 | 247.241 | 264.516 |
| ENSMUSG00000041733 | 10_Coq5   | 481.74  | -0.05782 | 0.859711 | 0.960099 | 332.699 | 599.623 | 483.988 | 481.971 | 458.427 | 533.735 |
| ENSMUSG00000041734 | 15_Kirrel | 893.672 | -1.02683 | 0.000262 | 0.007121 | 563.263 | 512.343 | 689.786 | 1388.14 | 1169.25 | 1039.25 |
| ENSMUSG00000041735 | 7_Gm131   | 0.18892 | 1.1315   | 0.781553 | NA       | 0       | 1.1335  | 0       | 0       | 0       | 0       |
| ENSMUSG00000041736 | 6_Tspo    | 1980.98 | 0.576    | 0.361469 | 0.734288 | 489.442 | 3441.31 | 3183.15 | 1996.38 | 1219.04 | 1556.53 |
| ENSMUSG00000041737 | 7_Tmem4   | 549.175 | 0.27656  | 0.43194  | 0.780264 | 411.576 | 818.389 | 574.994 | 441.531 | 503.068 | 545.491 |
| ENSMUSG00000041740 | 16_Rnf10  | 6173.18 | 0.20306  | 0.615399 | 0.876344 | 3401.83 | 8396.99 | 8021.99 | 5972.64 | 5258.17 | 5987.47 |
| ENSMUSG00000041741 | 10_Pde3a  | 279.323 | -0.6725  | 0.22657  | 0.617339 | 412.588 | 103.149 | 130.304 | 355.701 | 402.626 | 271.57  |
| ENSMUSG00000041747 | 2_Utp15   | 599.979 | 0.34599  | 0.182032 | 0.567902 | 763.489 | 668.767 | 582.233 | 491.049 | 538.265 | 556.072 |
| ENSMUSG00000041750 | 13_Cd1d2  | 3.79837 | 0.72749  | 0.65041  | 0.891567 | 0       | 10.2015 | 4.13665 | 3.30117 | 5.15086 | 0       |
| ENSMUSG00000041754 | 5_Trem3   | 2.917   | 2.47326  | 0.083709 | 0.390586 | 5.05622 | 6.80102 | 3.10248 | 0.82529 | 1.71695 | 0       |
| ENSMUSG00000041757 | 15_Plekha | 5109.66 | 0.35163  | 0.351831 | 0.728508 | 3285.53 | 6525.58 | 7376.67 | 4452.45 | 4046    | 4971.73 |
| ENSMUSG00000041762 | 16_Gpr15  | 226.606 | 0.31432  | 0.409648 | 0.766592 | 363.037 | 172.292 | 218.208 | 199.721 | 220.629 | 185.749 |
| ENSMUSG00000041763 | 14_Tpp2   | 1992.69 | 0.65704  | 0.146097 | 0.517049 | 4045.99 | 1783    | 1487.12 | 1221.43 | 1817.4  | 1601.21 |
| ENSMUSG00000041765 | 5_Ubac2   | 592.359 | 0.10819  | 0.760539 | 0.92827  | 389.329 | 736.777 | 717.708 | 631.349 | 497.058 | 581.936 |
| ENSMUSG00000041769 | 13_Ppp2r  | 762.438 | 0.34903  | 0.283038 | 0.669757 | 1161.92 | 689.17  | 711.503 | 653.632 | 717.687 | 640.717 |
| ENSMUSG00000041771 | 13_Slc24e | 74.6998 | -1.43365 | 0.002143 | 0.034049 | 25.2811 | 31.7381 | 64.118  | 124.619 | 110.744 | 91.699  |
| ENSMUSG00000041773 | 7_Enc1    | 1132.86 | 0.33382  | 0.151047 | 0.524609 | 1342.93 | 1287.66 | 1159.3  | 944.134 | 1034.46 | 1028.67 |
| ENSMUSG00000041774 | 14_Ydjc   | 54.7954 | -0.15411 | 0.743983 | 0.923348 | 27.3036 | 60.0757 | 68.2547 | 61.8969 | 48.9332 | 62.3083 |
| ENSMUSG00000041775 | 7_Mapk1ij | 263.563 | -0.38655 | 0.158303 | 0.536589 | 214.384 | 221.033 | 250.267 | 299.581 | 333.948 | 262.165 |
| ENSMUSG00000041777 | 11_Cir1   | 1132.03 | 0.24147  | 0.530469 | 0.83656  | 1873.84 | 907.936 | 897.652 | 977.971 | 1069.66 | 1065.12 |
| ENSMUSG00000041779 | 5_Tram2   | 390.368 | -0.25032 | 0.360983 | 0.734102 | 297.306 | 391.059 | 381.606 | 396.966 | 466.153 | 409.118 |
| ENSMUSG00000041781 | 8_Cpsf2   | 1592.32 | 0.54145  | 0.119719 | 0.470491 | 2624.18 | 1618.64 | 1419.9  | 1083.61 | 1425.07 | 1382.54 |
| ENSMUSG00000041782 | 14_Lad1   | 4069.55 | 0.49079  | 0.366092 | 0.739349 | 1464.28 | 6954.04 | 5847.15 | 3464.58 | 2790.05 | 3897.21 |
| ENSMUSG00000041789 | 7_270004  | 12.5013 | -1.56266 | 0.018402 | 0.153995 | 5.05622 | 5.66751 | 8.27329 | 19.807  | 19.745  | 16.4588 |
| ENSMUSG00000041794 | 12_Myrip  | 127.329 | -1.86751 | 0.000157 | 0.004794 | 72.8096 | 28.3376 | 63.0839 | 292.979 | 165.686 | 141.075 |
| ENSMUSG00000041797 | 7_Abca9   | 545.888 | -0.45443 | 0.362524 | 0.735398 | 799.894 | 207.431 | 374.366 | 692.42  | 618.103 | 583.111 |
| ENSMUSG00000041798 | 15_Gck    | 7.1301  | -1.56834 | 0.091538 | 0.412313 | 2.02249 | 5.66751 | 3.10248 | 11.5541 | 5.15086 | 15.2832 |
| ENSMUSG00000041801 | 5_Phlda3  | 1446.27 | 0.4056   | 0.424369 | 0.776047 | 596.634 | 2390.56 | 1957.67 | 1403    | 1031.89 | 1297.89 |

|                    |           |         |          |          |          |         |         |         |         |         |         |
|--------------------|-----------|---------|----------|----------|----------|---------|---------|---------|---------|---------|---------|
| ENSMUSG00000041805 | 3_Pramel  | 0.51538 | 1.15053  | 0.76193  | NA       | 0       | 2.26701 | 0       | 0.82529 | 0       | 0       |
| ENSMUSG00000041809 | 5_Efhc1   | 64.3151 | -0.63402 | 0.152168 | 0.526432 | 63.7084 | 28.3376 | 58.9472 | 66.8487 | 89.2816 | 78.7671 |
| ENSMUSG00000041815 | 13_Poldip | 2451.52 | 0.32971  | 0.392343 | 0.754651 | 1501.7  | 3429.98 | 3259.68 | 2112.75 | 2074.94 | 2330.09 |
| ENSMUSG00000041817 | 13_Fam1f  | 7736.27 | 0.30454  | 0.489777 | 0.8144   | 14206   | 5133.63 | 6309.42 | 6082.4  | 7188.03 | 7498.15 |
| ENSMUSG00000041827 | 15_Oasl1  | 6595.33 | 1.46617  | 0.005884 | 0.069357 | 3050.92 | 14474.8 | 11529.9 | 3250    | 3653.68 | 3612.7  |
| ENSMUSG00000041828 | 15_Abca8  | 1091.31 | -0.52457 | 0.331805 | 0.711299 | 1607.88 | 325.315 | 751.835 | 1330.37 | 1339.22 | 1193.26 |
| ENSMUSG00000041831 | 15_Sytl3  | 148.294 | -0.13852 | 0.742449 | 0.922965 | 76.8546 | 167.758 | 178.91  | 161.757 | 130.489 | 173.993 |
| ENSMUSG00000041836 | 9_Ptpre   | 555.358 | 0.51097  | 0.109701 | 0.450058 | 496.521 | 802.52  | 658.761 | 452.26  | 387.173 | 534.911 |
| ENSMUSG00000041837 | 3_Pdcd7   | 559.292 | 0.25608  | 0.306304 | 0.689061 | 657.309 | 601.89  | 566.721 | 470.417 | 492.766 | 566.653 |
| ENSMUSG00000041840 | 7_Haus1   | 324.381 | 0.02452  | 0.942885 | 0.98609  | 448.992 | 266.373 | 265.78  | 286.376 | 342.532 | 336.23  |
| ENSMUSG00000041841 | 7_Rpl37   | 5682.54 | -0.30806 | 0.582469 | 0.860399 | 1460.24 | 6753.41 | 7020.92 | 7651.29 | 4958.56 | 6250.81 |
| ENSMUSG00000041842 | 15_Fhdc1  | 2144.58 | 0.26504  | 0.399355 | 0.759197 | 1637.2  | 2819.02 | 2566.79 | 1903.12 | 1821.69 | 2119.66 |
| ENSMUSG00000041845 | 10_Rhod   | 1869.45 | 0.09941  | 0.842652 | 0.953741 | 685.624 | 2584.39 | 2531.63 | 1839.58 | 1765.03 | 1810.47 |
| ENSMUSG00000041846 | 14_Smek   | 1881.9  | 0.65978  | 0.119074 | 0.469314 | 3683.96 | 1731.99 | 1498.5  | 1215.66 | 1670.6  | 1490.7  |
| ENSMUSG00000041849 | 7_Card6   | 288.553 | 0.01769  | 0.946216 | 0.986649 | 308.43  | 277.708 | 284.394 | 257.491 | 285.873 | 317.42  |
| ENSMUSG00000041852 | 14_Tcf20  | 6600.02 | 0.37441  | 0.108799 | 0.448862 | 7304.22 | 7885.78 | 7164.67 | 5092.88 | 5988.74 | 6163.82 |
| ENSMUSG00000041859 | 10_Mcm3   | 1003.45 | 1.14269  | 0.01408  | 0.127604 | 639.106 | 1979.1  | 1525.39 | 496.826 | 592.671 | 798.251 |
| ENSMUSG00000041870 | 16_Ankrd  | 3276.24 | 0.3862   | 0.277609 | 0.664438 | 2290.47 | 4574.82 | 4271.09 | 2790.31 | 2556.54 | 3174.2  |
| ENSMUSG00000041872 | 9_Ilf17f  | 0.87836 | 3.34396  | 0.287879 | NA       | 0       | 1.1335  | 4.13665 | 0       | 0       | 0       |
| ENSMUSG00000041879 | 13_Ipo9   | 1815.59 | 0.11554  | 0.644763 | 0.889294 | 1612.93 | 2161.59 | 1890.45 | 1692.67 | 1805.38 | 1730.52 |
| ENSMUSG00000041881 | 13_Ndufa  | 522.443 | -0.22132 | 0.693399 | 0.905638 | 163.822 | 617.759 | 666     | 823.642 | 393.182 | 470.251 |
| ENSMUSG00000041886 | 6_Macc1   | 1248.21 | 0.81059  | 0.130914 | 0.492205 | 3014.52 | 921.538 | 833.534 | 714.703 | 1032.75 | 972.244 |
| ENSMUSG00000041889 | 7_Shisa4  | 85.784  | -1.44471 | 0.001366 | 0.024684 | 31.3486 | 41.9396 | 65.1522 | 170.836 | 109.027 | 96.4015 |
| ENSMUSG00000041890 | 17_Git2   | 1207.53 | 0.33947  | 0.305358 | 0.688273 | 893.94  | 1625.44 | 1527.46 | 1062.15 | 995.833 | 1140.36 |
| ENSMUSG00000041891 | 15_Lman1  | 2853.07 | 0.09487  | 0.743202 | 0.923215 | 3788.12 | 2563.98 | 2488.19 | 2661.57 | 2789.19 | 2827.38 |
| ENSMUSG00000041895 | 15_Wip1   | 956.838 | -0.12377 | 0.60866  | 0.872658 | 875.738 | 956.676 | 915.233 | 1113.32 | 903.118 | 976.947 |
| ENSMUSG00000041907 | 9_Gpr45   | 5.25939 | -2.31689 | 0.030583 | 0.214081 | 1.01124 | 1.1335  | 3.10248 | 6.60234 | 10.3017 | 9.40502 |
| ENSMUSG00000041911 | 3_Dlx1    | 0.84908 | 2.06626  | 0.449927 | NA       | 0       | 1.1335  | 3.10248 | 0       | 0.85848 | 0       |
| ENSMUSG00000041912 | 12_Tdrkh  | 101.097 | -1.04668 | 0.02867  | 0.205406 | 108.203 | 43.0731 | 46.5373 | 143.601 | 160.535 | 104.631 |
| ENSMUSG00000041915 | 8_Ammec   | 1729.67 | 0.22809  | 0.376683 | 0.74591  | 2166.09 | 1803.4  | 1628.8  | 1469.02 | 1730.69 | 1580.04 |
| ENSMUSG00000041920 | 14_Slc16a | 332.849 | 0.15339  | 0.603921 | 0.871008 | 319.553 | 404.661 | 327.829 | 380.46  | 282.439 | 282.151 |
| ENSMUSG00000041921 | 16_Metap  | 642.46  | -0.33677 | 0.215296 | 0.606405 | 646.185 | 474.938 | 582.233 | 671.788 | 800.101 | 679.513 |
| ENSMUSG00000041923 | 15_Nol4   | 25.5115 | -1.45519 | 0.01039  | 0.103713 | 12.1349 | 11.335  | 17.5807 | 46.2164 | 44.6408 | 21.1613 |
| ENSMUSG00000041926 | 15_Rnpep  | 3221.69 | 0.85337  | 0.013518 | 0.12414  | 2750.58 | 5465.75 | 4226.62 | 1999.68 | 2395.15 | 2492.33 |
| ENSMUSG00000041930 | 7_Fam22i  | 14.4602 | -2.00477 | 0.019328 | 0.159425 | 2.02249 | 11.335  | 4.13665 | 39.614  | 12.0187 | 17.6344 |
| ENSMUSG00000041935 | 9_AW549   | 2723.33 | 0.32215  | 0.51213  | 0.827907 | 5445.55 | 1730.86 | 1901.82 | 2143.28 | 2743.69 | 2374.77 |
| ENSMUSG00000041936 | 15_Agrn   | 3469.31 | 0.66878  | 0.140065 | 0.507286 | 1830.35 | 5358.07 | 5589.64 | 2758.13 | 2488.72 | 2790.94 |
| ENSMUSG00000041939 | 14_Mvk    | 635.863 | 0.49636  | 0.431024 | 0.780048 | 159.777 | 1019.02 | 1053.81 | 651.981 | 376.871 | 553.721 |
| ENSMUSG00000041945 | 12_Mfsd9  | 106.503 | 0.35057  | 0.303777 | 0.686401 | 139.552 | 116.751 | 101.348 | 79.2281 | 89.2816 | 112.86  |
| ENSMUSG00000041949 | 5_Tango6  | 107.587 | -0.11524 | 0.789675 | 0.937308 | 54.6072 | 116.751 | 138.578 | 113.065 | 107.31  | 115.212 |
| ENSMUSG00000041954 | 18_Tnfrsf | 89.5681 | 0.17224  | 0.786318 | 0.936345 | 22.2474 | 140.554 | 122.031 | 101.511 | 65.2443 | 85.8208 |
| ENSMUSG00000041957 | 15_Pkp2   | 152.153 | -0.48588 | 0.149753 | 0.523169 | 158.765 | 97.4812 | 124.099 | 184.865 | 194.874 | 152.832 |
| ENSMUSG00000041958 | 10_Pigs   | 808.633 | 0.19318  | 0.689238 | 0.905638 | 349.891 | 1160.71 | 1077.6  | 878.936 | 605.226 | 779.441 |
| ENSMUSG00000041959 | 14_S100a  | 17836.6 | 0.00932  | 0.972391 | 0.9926   | 14792.5 | 21189.7 | 17700.7 | 16253.3 | 19490   | 17593.3 |
| ENSMUSG00000041961 | 14_Znrf3  | 457.772 | 0.18204  | 0.558285 | 0.798202 | 535.959 | 474.938 | 448.826 | 434.929 | 414.644 | 437.334 |
| ENSMUSG00000041966 | 18_Dcaf1  | 634.636 | 0.26249  | 0.551674 | 0.845088 | 1134.62 | 480.605 | 461.236 | 479.495 | 668.754 | 583.111 |
| ENSMUSG00000041974 | 9_Spdr    | 316.983 | 0.38808  | 0.201128 | 0.592148 | 427.756 | 361.587 | 288.531 | 235.208 | 299.608 | 289.204 |
| ENSMUSG00000041975 | 17_Mettl8 | 222.217 | 0.01413  | 0.96346  | 0.990106 | 268.991 | 196.096 | 204.764 | 193.118 | 257.543 | 212.789 |
| ENSMUSG00000041977 | 17_Arhgei | 1509.88 | 0.07928  | 0.82197  | 0.9485   | 981.918 | 1840.81 | 1831.5  | 1654.71 | 1271.4  | 1478.94 |
| ENSMUSG00000041984 | 2_Rptn    | 0.3409  | 1.98467  | 0.623395 | NA       | 1.01124 | 0       | 1.03416 | 0       | 0       | 0       |
| ENSMUSG00000041986 | 15_Elmod  | 63.6951 | -1.75216 | 0.000927 | 0.018561 | 48.5397 | 17.0025 | 21.7174 | 122.143 | 66.9612 | 105.807 |
| ENSMUSG00000041991 | 18_Hmr    | 0.14308 | -0.79206 | 0.84609  | NA       | 0       | 0       | 0       | 0       | 0.85848 | 0       |
| ENSMUSG00000041992 | 8_Rapgef  | 1168.1  | 0.14194  | 0.578721 | 0.858418 | 1414.73 | 1070.03 | 1191.35 | 1036.57 | 1110.87 | 1185.03 |
| ENSMUSG00000041995 | 7_Zbed3   | 225.537 | -0.01275 | 0.963512 | 0.990106 | 193.148 | 232.368 | 248.199 | 243.461 | 210.327 | 225.721 |
| ENSMUSG00000041997 | 16_Tlk1   | 1737.26 | 0.32969  | 0.420764 | 0.77399  | 3062.05 | 1414.61 | 1327.86 | 1355.13 | 1679.18 | 1584.75 |
| ENSMUSG00000042002 | 11_Foxn4  | 0       | NA       | NA       | NA       | 0       | 0       | 0       | 0       | 0       | 0       |
| ENSMUSG00000042010 | 16_Acacb  | 238.573 | -0.84153 | 0.089854 | 0.408696 | 82.922  | 162.091 | 267.848 | 422.55  | 242.091 | 253.936 |
| ENSMUSG00000042015 | 16_Wdr41  | 852.584 | 0.0046   | 0.984133 | 0.994805 | 912.142 | 825.19  | 824.227 | 804.66  | 859.335 | 889.95  |
| ENSMUSG00000042029 | 6_Ncapg2  | 735.099 | 0.9092   | 0.033062 | 0.224793 | 1537.09 | 714.107 | 626.702 | 429.977 | 576.038 | 526.681 |
| ENSMUSG00000042031 | 4_Lce3b   | 10.6155 | -0.60963 | 0.402618 | 0.761286 | 7.07871 | 7.93452 | 10.3416 | 19.807  | 10.3017 | 8.22939 |
| ENSMUSG00000042032 | 13_Mat2b  | 2142.78 | 0.29921  | 0.405494 | 0.764096 | 3447.33 | 1836.27 | 1808.75 | 1738.07 | 2050.04 | 1976.23 |
| ENSMUSG00000042035 | 11_Igsf3  | 3574.22 | 0.69619  | 0.033251 | 0.225284 | 3151.04 | 5504.29 | 4605.12 | 2454.42 | 2490.44 | 3240.03 |
| ENSMUSG00000042041 | 6_201000  | 1.89032 | -0.78271 | 0.617923 | 0.877535 | 2.02249 | 1.1335  | 1.03416 | 0.82529 | 5.15086 | 1.17563 |
| ENSMUSG00000042042 | 14_Csgalr | 716.826 | 0.14245  | 0.770781 | 0.932384 | 1349    | 442.066 | 465.373 | 656.107 | 738.29  | 650.122 |
| ENSMUSG00000042043 | 5_Tbca    | 1963.33 | -0.02321 | 0.954056 | 0.988507 | 2984.18 | 1458.82 | 1399.22 | 1564.75 | 2107.56 | 2265.43 |
| ENSMUSG00000042045 | 5_Sln     | 40.0951 | -1.42316 | 0.019267 | 0.159068 | 31.3486 | 7.93452 | 25.854  | 76.7522 | 35.1976 | 63.4839 |
| ENSMUSG00000042046 | 15_Dstyk  | 1903.5  | 0.00065  | 0.998141 | 0.999063 | 2370.36 | 1602.77 | 1738.43 | 1783.46 | 2009.69 | 1916.27 |
| ENSMUSG00000042050 | 7_Wdr60   | 375.758 | -0.04231 | 0.8715   | 0.963578 | 425.734 | 333.25  | 351.615 | 366.43  | 396.616 | 380.903 |
| ENSMUSG00000042055 | 13_Wdr11  | 1548.35 | 0.34693  | 0.152341 | 0.526685 | 1691.81 | 1824.94 | 1683.61 | 1214.83 | 1338.37 | 1536.55 |
| ENSMUSG00000042063 | 11_Zfp38f | 812.003 | 0.23325  | 0.654076 | 0.896403 | 1678.67 | 486.273 | 467.441 | 669.312 | 847.317 | 723.011 |
| ENSMUSG00000042064 | 13_Myo3b  | 1.70366 | 1.5394   | 0.389314 | 0.752914 | 1.01124 | 5.66751 | 1.03416 | 1.65058 | 0.85848 | 0       |
| ENSMUSG00000042066 | 15_Tmcc2  | 131.134 | -1.06459 | 0.00395  | 0.052641 | 72.8096 | 80.4787 | 101.348 | 234.383 | 139.073 | 158.71  |
| ENSMUSG00000042073 | 14_Abhd1  | 404.662 | -1.3573  | 0.000233 | 0.006493 | 194.159 | 170.025 | 317.488 | 683.342 | 600.934 | 462.022 |
| ENSMUSG00000042078 | 14_Svop   | 10.4262 | -3.76132 | 0.001607 | 0.027753 | 1.01124 | 3.40051 | 0       | 39.614  | 10.3017 | 8.22939 |
| ENSMUSG00000042079 | 13_Hnmp1  | 12819.5 | 0.44007  | 0.104803 | 0.440197 | 16826.1 | 14674.3 | 12778.1 | 9051.81 | 11513   | 12073.7 |

|                    |            |         |          |          |          |         |         |         |         |         |         |
|--------------------|------------|---------|----------|----------|----------|---------|---------|---------|---------|---------|---------|
| ENSMUSG00000042082 | 6_Arsb     | 1102.16 | -0.27607 | 0.43825  | 0.785475 | 614.837 | 1142.57 | 1233.75 | 1273.43 | 1083.4  | 1264.98 |
| ENSMUSG00000042092 | 5_Lce1c    | 0       | NA       | NA       | NA       | 0       | 0       | 0       | 0       | 0       | 0       |
| ENSMUSG00000042096 | 15_Dao     | 0.13755 | -0.79206 | 0.84609  | NA       | 0       | 0       | 0       | 0.82529 | 0       | 0       |
| ENSMUSG00000042097 | 17_Zfp23f  | 67.5708 | -0.11634 | 0.752968 | 0.925804 | 69.7759 | 56.6751 | 68.2547 | 64.3728 | 87.5647 | 58.7814 |
| ENSMUSG00000042099 | 15_Kank3   | 154.07  | -0.188   | 0.66663  | 0.897452 | 83.9333 | 140.554 | 207.866 | 208.799 | 143.366 | 139.9   |
| ENSMUSG00000042102 | 6_Dmgdh    | 68.0527 | -1.18892 | 0.004461 | 0.057422 | 53.5959 | 30.6046 | 40.3323 | 98.2098 | 115.036 | 70.5377 |
| ENSMUSG00000042104 | 18_Uggt2   | 329.486 | -0.70601 | 0.169504 | 0.550908 | 453.037 | 133.753 | 164.432 | 406.869 | 488.473 | 330.351 |
| ENSMUSG00000042105 | 18_Inpp5f  | 1234.82 | 0.33485  | 0.369357 | 0.740977 | 2031.59 | 969.145 | 1131.37 | 966.417 | 1128.9  | 1181.51 |
| ENSMUSG00000042106 | 5_Fam21f   | 100.518 | 0.40341  | 0.167116 | 0.803613 | 39.4385 | 166.625 | 137.543 | 105.637 | 70.3951 | 83.4696 |
| ENSMUSG00000042109 | 7_Csdc2    | 108.391 | -1.46851 | 0.002922 | 0.042651 | 31.3486 | 56.6751 | 84.8012 | 226.13  | 137.356 | 114.036 |
| ENSMUSG00000042111 | 9_Ccdc11   | 514.823 | -0.19767 | 0.434068 | 0.782396 | 504.611 | 446.6   | 487.09  | 519.109 | 510.794 | 620.731 |
| ENSMUSG00000042115 | 4_Klhdc8a  | 445.373 | -0.06629 | 0.88675  | 0.969051 | 192.136 | 586.021 | 527.422 | 533.139 | 369.145 | 464.373 |
| ENSMUSG00000042116 | 3_Vwa1     | 141.964 | 0.25087  | 0.645836 | 0.889468 | 52.5847 | 185.894 | 224.413 | 151.854 | 103.017 | 134.022 |
| ENSMUSG00000042118 | 7_Bhmt2    | 14.5872 | -1.90396 | 0.041292 | 0.257061 | 10.1124 | 0       | 8.27329 | 24.7588 | 32.6221 | 11.7563 |
| ENSMUSG00000042121 | 16_Ssh1    | 606.203 | -0.00223 | 0.995068 | 0.998125 | 370.115 | 750.379 | 697.025 | 651.981 | 606.943 | 560.774 |
| ENSMUSG00000042129 | 8_Rassf4   | 224.262 | 0.1263   | 0.728817 | 0.917597 | 246.744 | 283.376 | 172.705 | 257.491 | 230.072 | 155.183 |
| ENSMUSG00000042138 | 16_Ppig    | 2864.47 | 0.46487  | 0.315882 | 0.69679  | 5722.63 | 2242.07 | 2001.1  | 2056.63 | 2555.69 | 2608.72 |
| ENSMUSG00000042133 | 6_Msantd   | 386.337 | 0.20317  | 0.569251 | 0.853308 | 562.252 | 326.449 | 351.615 | 289.678 | 431.814 | 356.215 |
| ENSMUSG00000042148 | 8_Cox10    | 208.876 | 0.09327  | 0.847379 | 0.955658 | 88.9895 | 289.043 | 268.882 | 211.275 | 171.695 | 223.369 |
| ENSMUSG00000042155 | 3_Kihl23   | 250.648 | -0.55751 | 0.225609 | 0.615711 | 330.677 | 112.217 | 165.466 | 307.834 | 340.815 | 246.882 |
| ENSMUSG00000042156 | 15_Dzip1   | 506.039 | -0.62432 | 0.073938 | 0.363567 | 522.813 | 266.373 | 405.391 | 631.349 | 673.046 | 537.262 |
| ENSMUSG00000042157 | 2_Sprp2i   | 0       | NA       | NA       | NA       | 0       | 0       | 0       | 0       | 0       | 0       |
| ENSMUSG00000042165 | 8_Gm977f   | 116.445 | -0.46825 | 0.795135 | 0.93904  | 134.495 | 99.7483 | 58.9472 | 99.8604 | 305.618 | 0       |
| ENSMUSG00000042167 | 5_Papd4    | 712.118 | 0.57816  | 0.217289 | 0.607835 | 1443.05 | 586.021 | 529.491 | 434.929 | 667.895 | 611.326 |
| ENSMUSG00000042178 | 6_Armc5    | 194.853 | 0.42328  | 0.510826 | 0.827179 | 44.4948 | 313.98  | 311.283 | 186.516 | 136.498 | 176.344 |
| ENSMUSG00000042179 | 5_Pnliprp  | 3.05335 | -0.90976 | 0.504538 | 0.824602 | 1.01124 | 1.1335  | 4.13665 | 4.12646 | 0.85848 | 7.05377 |
| ENSMUSG00000042182 | 16_Bend6   | 23.9074 | -0.60244 | 0.260273 | 0.649568 | 23.2586 | 20.4031 | 13.4441 | 38.7887 | 24.0374 | 23.5126 |
| ENSMUSG00000042184 | 11_17000   | 0.39188 | -1.97195 | 0.623385 | NA       | 0       | 0       | 0       | 0       | 0       | 2.35126 |
| ENSMUSG00000042185 | 13_Nfrkb   | 689.494 | 0.30997  | 0.359659 | 0.733629 | 502.588 | 972.545 | 814.919 | 634.65  | 600.934 | 611.326 |
| ENSMUSG00000042189 | 5_Tekt3    | 0.13755 | -0.79206 | 0.84609  | NA       | 0       | 0       | 0       | 0.82529 | 0       | 0       |
| ENSMUSG00000042190 | 12_Cmklr   | 133.7   | -0.04303 | 0.91878  | 0.977109 | 73.8208 | 188.161 | 133.407 | 144.426 | 133.064 | 129.319 |
| ENSMUSG00000042195 | 8_Slc35f2  | 740.615 | 0.18265  | 0.533093 | 0.837738 | 820.119 | 786.651 | 754.938 | 523.235 | 732.281 | 826.466 |
| ENSMUSG00000042197 | 13_Zfp45f  | 958.256 | 0.21219  | 0.615135 | 0.876237 | 1643.27 | 728.842 | 713.571 | 770.823 | 1043.05 | 849.979 |
| ENSMUSG00000042198 | 12_Chchd   | 484.078 | 0.0684   | 0.865473 | 0.962186 | 770.568 | 357.053 | 358.854 | 427.501 | 520.237 | 470.251 |
| ENSMUSG00000042200 | 3_Cdrtd    | 2.26564 | -1.19113 | 0.446939 | 0.790514 | 2.02249 | 0       | 2.06832 | 0.82529 | 5.15086 | 3.52688 |
| ENSMUSG00000042202 | 15_Slc35e  | 721.932 | 0.08394  | 0.807084 | 0.944212 | 1030.46 | 586.021 | 612.224 | 636.3   | 803.534 | 663.054 |
| ENSMUSG00000042203 | 7_Tbc1d2   | 552.137 | 0.2771   | 0.491757 | 0.815581 | 336.744 | 735.643 | 742.528 | 527.362 | 399.192 | 571.355 |
| ENSMUSG00000042207 | 17_Kdm5l   | 4119.48 | 0.43555  | 0.101801 | 0.434051 | 4936.89 | 4888.8  | 4383.81 | 2804.34 | 3875.17 | 3827.84 |
| ENSMUSG00000042208 | 15_06100   | 271.109 | 0.12264  | 0.793545 | 0.938313 | 481.352 | 181.36  | 185.115 | 246.762 | 300.467 | 231.599 |
| ENSMUSG00000042210 | 16_Abhd1   | 97.1501 | -0.66278 | 0.279207 | 0.666376 | 20.2249 | 91.8137 | 113.758 | 157.631 | 90.1401 | 109.333 |
| ENSMUSG00000042211 | 6_Fbxo38   | 1830.43 | 0.28537  | 0.217211 | 0.607835 | 2056.87 | 2067.51 | 1908.03 | 1488.83 | 1736.7  | 1724.65 |
| ENSMUSG00000042212 | 3_Sprp2d   | 2.23007 | 0.48056  | 0.033168 | 0.225161 | 1.01124 | 11.335  | 1.03416 | 0       | 0       | 0       |
| ENSMUSG00000042213 | 15_Zfand4  | 53.7855 | 0.80691  | 0.071275 | 0.356437 | 100.113 | 53.2746 | 51.7081 | 35.4876 | 38.6315 | 43.4982 |
| ENSMUSG00000042215 | 8_Bag2     | 1101.93 | 0.33561  | 0.18943  | 0.578024 | 1269.11 | 1131.24 | 1287.53 | 858.304 | 939.174 | 1126.25 |
| ENSMUSG00000042216 | 13_Sgsmf   | 356.464 | 0.39291  | 0.426317 | 0.777537 | 153.709 | 512.343 | 548.106 | 312.786 | 285.014 | 326.825 |
| ENSMUSG00000042225 | 3_Ammec    | 396.949 | 0.6714   | 0.158765 | 0.573239 | 848.434 | 310.58  | 304.043 | 304.533 | 342.532 | 271.57  |
| ENSMUSG00000042228 | 14_Lyn     | 1267.77 | 0.71333  | 0.00836  | 0.088492 | 1714.06 | 1704.79 | 1306.15 | 865.732 | 1085.97 | 929.922 |
| ENSMUSG00000042229 | 9_Rabif    | 895.095 | 0.09396  | 0.733506 | 0.919947 | 1099.22 | 920.404 | 752.87  | 799.708 | 891.958 | 906.409 |
| ENSMUSG00000042240 | 13_Crybb3  | 5485.52 | -3.60728 | 7.19E-05 | 0.002528 | 58.6522 | 929.472 | 1507.81 | 19453.8 | 2960.89 | 8002.5  |
| ENSMUSG00000042244 | 4_Pglyrp3  | 1.3772  | 1.87756  | 0.30549  | NA       | 1.01124 | 4.53401 | 1.03416 | 0.82529 | 0.85848 | 0       |
| ENSMUSG00000042246 | 4_Tmc7     | 82.8723 | 0.56985  | 0.133163 | 0.496514 | 113.259 | 111.083 | 72.3913 | 62.7222 | 56.6595 | 81.1183 |
| ENSMUSG00000042249 | 11_Adrbkf  | 163.79  | -0.42863 | 0.167103 | 0.54768  | 155.732 | 138.287 | 125.134 | 226.13  | 171.695 | 165.764 |
| ENSMUSG00000042250 | 13_Pglyrp  | 18.6903 | 0.58326  | 0.298392 | 0.681353 | 20.2249 | 29.4711 | 17.5807 | 11.5541 | 18.028  | 15.2832 |
| ENSMUSG00000042251 | 12_Prn20c  | 643.223 | 0.06853  | 0.78062  | 0.935516 | 671.466 | 597.356 | 706.332 | 572.753 | 650.726 | 660.703 |
| ENSMUSG00000042254 | 14_Cilp    | 227.432 | -0.52695 | 0.149085 | 0.522715 | 214.384 | 154.156 | 190.286 | 330.942 | 178.563 | 296.258 |
| ENSMUSG00000042256 | 4_Ptchd4   | 11.744  | -1.45105 | 0.060015 | 0.322098 | 8.08995 | 3.40051 | 7.23913 | 8.25292 | 22.3204 | 21.1613 |
| ENSMUSG00000042258 | 13_Is1     | 8.61341 | -1.33023 | 0.212705 | 0.603937 | 9.1012  | 5.66751 | 0       | 18.1564 | 12.8772 | 5.87814 |
| ENSMUSG00000042262 | 4_Ccr8     | 1.82678 | 3.31195  | 0.164095 | 0.54223  | 0       | 9.06802 | 1.03416 | 0       | 0.85848 | 0       |
| ENSMUSG00000042265 | 13_Trem1   | 12.2198 | 3.14614  | 0.001315 | 0.024054 | 9.1012  | 46.4736 | 10.3416 | 2.47588 | 2.57543 | 2.35126 |
| ENSMUSG00000042268 | 10_Slc26a5 | 10.1075 | -0.55598 | 0.449498 | 0.792657 | 6.06747 | 11.335  | 7.23913 | 8.25292 | 17.1695 | 10.5807 |
| ENSMUSG00000042269 | 15_Fam9f   | 0.61411 | -2.65929 | 0.354083 | NA       | 0       | 0       | 0       | 1.65058 | 0.85848 | 1.17563 |
| ENSMUSG00000042271 | 13_Nxt2    | 692.422 | 0.33917  | 0.491469 | 0.815538 | 1390.46 | 461.336 | 468.475 | 597.512 | 684.206 | 552.545 |
| ENSMUSG00000042272 | 17_Sestd   | 528.41  | 0.11692  | 0.754448 | 0.926508 | 804.95  | 443.2   | 401.255 | 474.543 | 578.613 | 467.9   |
| ENSMUSG00000042275 | 8_Pelo     | 159.845 | 0.30538  | 0.487716 | 0.814019 | 87.9783 | 230.101 | 212.003 | 139.474 | 129.63  | 159.885 |
| ENSMUSG00000042279 | 13_H1foo   | 0.42371 | -2.13816 | 0.587702 | NA       | 0       | 0       | 0       | 0.82529 | 1.71695 | 0       |
| ENSMUSG00000042282 | 4_Gucy2f   | 263.207 | -1.48483 | 0.013106 | 0.121973 | 275.058 | 57.8086 | 82.7329 | 462.164 | 436.965 | 264.516 |
| ENSMUSG00000042284 | 9_Iltga1   | 277.301 | -0.23211 | 0.603827 | 0.871008 | 420.678 | 176.826 | 167.534 | 280.599 | 344.249 | 273.921 |
| ENSMUSG00000042286 | 13_Stab1   | 374.956 | -0.50439 | 0.379054 | 0.74711  | 92.0232 | 385.391 | 452.963 | 586.783 | 330.514 | 402.065 |
| ENSMUSG00000042289 | 11_Hsd3b   | 310.395 | -0.3013  | 0.406535 | 0.764314 | 181.013 | 307.179 | 346.444 | 404.393 | 327.08  | 296.258 |
| ENSMUSG00000042292 | 16_Mkl1    | 349.482 | 0.56227  | 0.309844 | 0.692089 | 125.394 | 550.882 | 573.96  | 308.659 | 233.506 | 304.488 |
| ENSMUSG00000042293 | 7_Gm561f   | 45.1167 | -0.18121 | 0.830348 | 0.95122  | 4.04498 | 45.3401 | 77.5621 | 74.2763 | 28.3297 | 41.147  |
| ENSMUSG00000042298 | 18_Ttc19   | 574.012 | 0.17274  | 0.671274 | 0.899702 | 951.581 | 417.129 | 456.065 | 480.32  | 582.906 | 556.072 |
| ENSMUSG00000042302 | 14_Ehbp1   | 1148.85 | 0.03113  | 0.938433 | 0.985118 | 1794.96 | 741.311 | 947.292 | 1034.92 | 1263.68 | 1110.97 |
| ENSMUSG00000042303 | 16_Sgsmf   | 241.03  | 0.23489  | 0.692549 | 0.905638 | 65.7309 | 347.985 | 368.162 | 244.287 | 183.714 | 236.301 |
| ENSMUSG00000042305 | 12_Tmem    | 1618.65 | 0.51052  | 0.105427 | 0.440822 | 2486.65 | 1713.86 | 1505.74 | 1193.37 | 1523.8  | 1288.49 |

|                    |           |         |          |          |          |         |         |         |         |         |         |
|--------------------|-----------|---------|----------|----------|----------|---------|---------|---------|---------|---------|---------|
| ENSMUSG00000042306 | 11_S100a  | 13139.6 | 0.09983  | 0.739887 | 0.921762 | 9917.27 | 16381.4 | 14483.4 | 11528.5 | 13174.2 | 13352.8 |
| ENSMUSG00000042308 | 14_Setd1  | 880.898 | 0.21579  | 0.667322 | 0.898016 | 351.913 | 1250.25 | 1237.89 | 934.231 | 657.593 | 853.506 |
| ENSMUSG00000042312 | 9_S100a1  | 266.098 | -0.89016 | 0.012944 | 0.121152 | 125.394 | 189.295 | 245.096 | 378.809 | 360.56  | 297.434 |
| ENSMUSG00000042320 | 16_Prox2  | 58.759  | -0.24996 | 0.480824 | 0.810618 | 55.6184 | 47.6071 | 57.913  | 66.8487 | 66.9612 | 57.6058 |
| ENSMUSG00000042323 | 16_Pbrm1  | 2932.41 | 0.42123  | 0.303031 | 0.685806 | 5294.88 | 2390.56 | 2386.84 | 2149.06 | 2814.95 | 2558.17 |
| ENSMUSG00000042328 | 13_Hps4   | 300.206 | 0.18438  | 0.635566 | 0.884456 | 187.08  | 338.917 | 432.28  | 308.659 | 272.137 | 262.165 |
| ENSMUSG00000042331 | 13_Specc  | 2532.59 | 0.40419  | 0.105944 | 0.442084 | 2644.4  | 3291.69 | 2718.81 | 1984.83 | 2172.81 | 2383    |
| ENSMUSG00000042333 | 14_Tnfrsf | 92.1979 | 0.88766  | 0.105035 | 0.440631 | 42.4723 | 167.758 | 148.919 | 72.6257 | 53.2256 | 68.1864 |
| ENSMUSG00000042340 | 6_Ctf1    | 163.302 | -0.55598 | 0.074637 | 0.365658 | 159.777 | 104.282 | 132.373 | 187.341 | 200.884 | 195.154 |
| ENSMUSG00000042345 | 14_Ubash  | 1.49819 | 1.29025  | 0.463576 | NA       | 1.01124 | 3.40051 | 2.06832 | 1.65058 | 0.85848 | 0       |
| ENSMUSG00000042348 | 9_Arl15   | 838.526 | 0.38934  | 0.370525 | 0.741633 | 1569.45 | 600.757 | 682.547 | 679.216 | 750.309 | 748.875 |
| ENSMUSG00000042349 | 13_Ikbe   | 503.694 | 0.50349  | 0.269295 | 0.656292 | 266.969 | 843.326 | 661.863 | 363.954 | 436.965 | 449.09  |
| ENSMUSG00000042350 | 13_Arel1  | 1875.04 | 0.63415  | 0.008345 | 0.088442 | 2165.07 | 2601.39 | 2075.56 | 1438.48 | 1504.91 | 1464.83 |
| ENSMUSG00000042351 | 8_Grap2   | 153.388 | 1.02515  | 0.026684 | 0.196614 | 94.0457 | 258.439 | 264.745 | 98.2098 | 107.31  | 97.5771 |
| ENSMUSG00000042353 | 9_Frem3   | 119.302 | -2.04975 | 1.81E-07 | 1.73E-05 | 63.7084 | 34.0051 | 41.3665 | 234.383 | 164.828 | 177.52  |
| ENSMUSG00000042354 | 6_Gnl3    | 862.712 | 0.53268  | 0.180875 | 0.567284 | 1495.63 | 885.266 | 679.444 | 537.265 | 821.562 | 757.104 |
| ENSMUSG00000042357 | 2_Gjb5    | 425.63  | 0.32964  | 0.544555 | 0.842093 | 151.687 | 654.031 | 616.36  | 377.984 | 298.75  | 454.968 |
| ENSMUSG00000042359 | 18_Osbpl1 | 1219.58 | 0.1091   | 0.71769  | 0.912533 | 1578.55 | 965.744 | 1252.37 | 1049.77 | 1241.36 | 1229.71 |
| ENSMUSG00000042360 | 12_49304  | 1.20232 | -0.3031  | 0.863786 | NA       | 1.01124 | 1.1335  | 1.03416 | 0.82529 | 0.85848 | 2.35126 |
| ENSMUSG00000042363 | 14_Lgals1 | 2673.09 | 0.56923  | 0.144409 | 0.514298 | 4841.84 | 2673.93 | 2065.22 | 1969.97 | 2347.93 | 2139.64 |
| ENSMUSG00000042364 | 10_Snx18  | 562.571 | -0.14253 | 0.620072 | 0.877704 | 633.039 | 454.535 | 517.081 | 655.282 | 614.67  | 500.817 |
| ENSMUSG00000042367 | 12_Gjb3   | 885.45  | 0.40061  | 0.420763 | 0.77399  | 377.194 | 1336.4  | 1309.25 | 823.642 | 632.698 | 833.52  |
| ENSMUSG00000042369 | 8_Rbm45   | 576.208 | 0.28562  | 0.365098 | 0.738154 | 818.097 | 542.948 | 537.764 | 439.881 | 555.435 | 563.126 |
| ENSMUSG00000042371 | 12_Slc5a1 | 10.7121 | 0.11231  | 0.905225 | 0.974391 | 1.01124 | 14.7355 | 17.5807 | 8.25292 | 8.58477 | 14.1075 |
| ENSMUSG00000042377 | 8_Fam83c  | 2004.07 | 0.7119   | 0.202208 | 0.593313 | 734.163 | 3428.85 | 3303.11 | 1623.35 | 1140.92 | 1794.01 |
| ENSMUSG00000042379 | 8_Esm1    | 57.7064 | 0.10983  | 0.827224 | 0.950636 | 87.9783 | 57.8086 | 34.1273 | 75.9269 | 48.0747 | 42.3226 |
| ENSMUSG00000042380 | 8_Smim12  | 157.173 | -0.38396 | 0.408591 | 0.766014 | 64.7196 | 168.892 | 175.807 | 222.829 | 157.96  | 152.832 |
| ENSMUSG00000042385 | 14_Gzmk   | 1.58945 | 4.19859  | 0.042665 | NA       | 3.03373 | 3.40051 | 3.10248 | 0       | 0       | 0       |
| ENSMUSG00000042386 | 7_Tex13   | 0.33349 | -1.76186 | 0.662172 | NA       | 0       | 0       | 0       | 0.82529 | 0       | 1.17563 |
| ENSMUSG00000042388 | 14_Dlgap3 | 4.49079 | -0.14186 | 0.912198 | 0.975453 | 0       | 5.66751 | 7.23913 | 8.25292 | 3.43391 | 2.35126 |
| ENSMUSG00000042389 | 13_Tsen2  | 168.428 | -0.17821 | 0.604229 | 0.871111 | 111.237 | 163.224 | 199.593 | 168.36  | 177.705 | 190.452 |
| ENSMUSG00000042390 | 9_Gatad2  | 1666.26 | 0.34235  | 0.258286 | 0.64893  | 2423.95 | 1597.11 | 1567.79 | 1325.42 | 1566.72 | 1516.56 |
| ENSMUSG00000042396 | 9_Rbm7    | 1464.09 | 0.27669  | 0.454782 | 0.79605  | 2366.31 | 1321.66 | 1124.13 | 1258.57 | 1446.53 | 1267.33 |
| ENSMUSG00000042401 | 6_Crtac1  | 7.96728 | -1.83549 | 0.30623  | 0.21426  | 0.44498 | 2.26701 | 4.13665 | 17.3311 | 9.44325 | 10.5807 |
| ENSMUSG00000042404 | 16_Dennd  | 202.625 | -0.34337 | 0.439944 | 0.785475 | 96.0682 | 207.431 | 232.686 | 302.057 | 190.582 | 186.925 |
| ENSMUSG00000042406 | 7_Atf4    | 3963.8  | 0.15979  | 0.514877 | 0.82938  | 3729.47 | 4835.52 | 3984.62 | 3925.92 | 3673.42 | 3633.87 |
| ENSMUSG00000042408 | 13_Zmym   | 757.879 | -0.00178 | 0.996534 | 0.998321 | 1150.8  | 476.071 | 645.317 | 695.721 | 915.136 | 664.23  |
| ENSMUSG00000042410 | 15_Aggs   | 2987.61 | 0.51176  | 0.204249 | 0.595277 | 5471.84 | 2616.12 | 2447.86 | 2092.94 | 2753.99 | 2542.88 |
| ENSMUSG00000042414 | 7_Prdm14  | 0.32647 | 0.16972  | 0.966824 | NA       | 0       | 1.1335  | 0       | 0.82529 | 0       | 0       |
| ENSMUSG00000042417 | 4_Ccno    | 1.53475 | -0.33909 | 0.865414 | NA       | 2.02249 | 0       | 2.06832 | 0.82529 | 4.29238 | 0       |
| ENSMUSG00000042419 | 8_Nfkbil1 | 79.7527 | 0.02898  | 0.966269 | 0.990843 | 16.1799 | 94.0807 | 131.339 | 86.6557 | 51.5086 | 98.7527 |
| ENSMUSG00000042423 | 8_Fbrs    | 975.623 | 0.52531  | 0.257568 | 0.648651 | 483.375 | 1491.69 | 1478.85 | 795.582 | 723.696 | 880.545 |
| ENSMUSG00000042425 | 17_Frmpd  | 7.55153 | 0.59193  | 0.510986 | 0.827179 | 12.1349 | 5.66751 | 9.30745 | 8.25292 | 1.71695 | 8.22939 |
| ENSMUSG00000042426 | 5_Dhx29   | 1039.72 | 0.23442  | 0.406389 | 0.764314 | 1275.18 | 1133.5  | 962.804 | 793.931 | 966.645 | 1106.27 |
| ENSMUSG00000042428 | 6_Mgat3   | 2616.31 | 0.37855  | 0.153793 | 0.529271 | 2464.4  | 2966.38 | 3441.69 | 2177.12 | 2145.33 | 2502.91 |
| ENSMUSG00000042429 | 8_Adora1  | 226.487 | -1.20141 | 0.001457 | 0.025802 | 112.248 | 115.617 | 184.081 | 414.297 | 266.986 | 265.692 |
| ENSMUSG00000042433 | 2_Pih1h3t | 0       | NA       | NA       | NA       | 0       | 0       | 0       | 0       | 0       | 0       |
| ENSMUSG00000042436 | 12_Mfap4  | 2882.7  | -0.97902 | 0.059006 | 0.318669 | 711.916 | 1956.43 | 3153.16 | 4423.57 | 3179.8  | 3871.34 |
| ENSMUSG00000042439 | 12_Zfp53  | 494.748 | 0.23023  | 0.492558 | 0.815769 | 380.228 | 588.288 | 633.941 | 520.759 | 369.145 | 476.129 |
| ENSMUSG00000042444 | 9_Fam63t  | 2751.53 | 0.23044  | 0.607093 | 0.872213 | 5018.81 | 1970.03 | 1923.54 | 2388.4  | 2863.02 | 2345.38 |
| ENSMUSG00000042446 | 16_Zmym   | 1677.83 | 0.08367  | 0.830165 | 0.95122  | 2641.37 | 1286.53 | 1251.34 | 1440.14 | 1808.81 | 1638.83 |
| ENSMUSG00000042447 | 13_Mios   | 606.865 | 0.11726  | 0.787774 | 0.936803 | 1041.58 | 431.865 | 420.904 | 533.964 | 621.537 | 591.341 |
| ENSMUSG00000042448 | 5_Hoxd1   | 0.16854 | 1.1315   | 0.781553 | NA       | 1.01124 | 0       | 0       | 0       | 0       | 0       |
| ENSMUSG00000042451 | 12_Mybp1  | 3.42968 | 0.02736  | 0.980961 | 0.993796 | 0.44498 | 1.1335  | 5.17081 | 4.12646 | 2.57543 | 3.52688 |
| ENSMUSG00000042453 | 14_Reln   | 3480.07 | -1.47817 | 3.39E-05 | 0.001375 | 2006.31 | 1262.72 | 2246.2  | 6066.72 | 5510.56 | 3787.87 |
| ENSMUSG00000042459 | 8_Bpifa2  | 1.4203  | -0.14275 | 0.953075 | NA       | 0.44498 | 0       | 0       | 3.30117 | 0       | 1.17563 |
| ENSMUSG00000042460 | 5_C1galt1 | 362.291 | 0.55676  | 0.322794 | 0.703332 | 840.344 | 244.837 | 208.901 | 311.135 | 332.231 | 236.301 |
| ENSMUSG00000042462 | 4_Dctpp1  | 181.385 | 0.08032  | 0.904823 | 0.974255 | 34.3823 | 266.373 | 258.54  | 198.07  | 119.328 | 211.613 |
| ENSMUSG00000042472 | 10_Zfp41c | 813.151 | 0.19063  | 0.460188 | 0.799553 | 862.591 | 923.805 | 813.885 | 643.728 | 850.751 | 784.144 |
| ENSMUSG00000042473 | 8_Tbc1d8  | 622.042 | 0.3745   | 0.416765 | 0.770621 | 1198.32 | 430.731 | 477.783 | 482.796 | 611.236 | 531.384 |
| ENSMUSG00000042474 | 6_Fcmr    | 3.71042 | 4.40044  | 0.045958 | 0.274322 | 0       | 20.4031 | 1.03416 | 0.82529 | 0       | 0       |
| ENSMUSG00000042476 | 12_Abcb4  | 31.5206 | -1.03992 | 0.118105 | 0.467727 | 40.4498 | 6.80102 | 14.4783 | 46.2164 | 41.2069 | 39.9713 |
| ENSMUSG00000042477 | 7_Tfap2e  | 15.7668 | 0.5726   | 0.386565 | 0.751493 | 14.1574 | 20.4031 | 21.7174 | 5.77705 | 13.7356 | 18.81   |
| ENSMUSG00000042485 | 6_Mustn1  | 94.7885 | -0.99345 | 0.021329 | 0.170397 | 59.6634 | 49.8741 | 80.6646 | 179.914 | 89.2816 | 109.333 |
| ENSMUSG00000042487 | 5_Leo1    | 552.703 | -0.08523 | 0.753629 | 0.926096 | 456.071 | 625.694 | 527.422 | 514.982 | 598.358 | 593.692 |
| ENSMUSG00000042489 | 15_Clsn   | 232.475 | 1.00965  | 0.006542 | 0.074724 | 274.047 | 385.391 | 271.984 | 103.987 | 163.111 | 196.33  |
| ENSMUSG00000042492 | 12_Tbc1d  | 844.497 | 0.20409  | 0.689371 | 0.905638 | 322.587 | 1261.59 | 1128.27 | 848.401 | 645.575 | 860.56  |
| ENSMUSG00000042496 | 17_Prdm1  | 204.705 | 0.12149  | 0.697432 | 0.905638 | 161.799 | 239.169 | 238.891 | 181.564 | 194.016 | 212.789 |
| ENSMUSG00000042498 | 16_D3300  | 3.24526 | -1.435   | 0.284328 | 0.670663 | 3.03373 | 2.26701 | 0       | 4.95175 | 6.86782 | 2.35126 |
| ENSMUSG00000042499 | 13_Hoxd1  | 0.71874 | 3.04967  | 0.267382 | NA       | 1.01124 | 2.26701 | 1.03416 | 0       | 0       | 0       |
| ENSMUSG00000042500 | 11_Ago4   | 356.75  | -0.00794 | 0.979488 | 0.993796 | 457.082 | 281.109 | 328.863 | 344.147 | 364.853 | 364.445 |
| ENSMUSG00000042501 | 12_Cpa6   | 7.39732 | -1.54193 | 0.099332 | 0.428519 | 7.07871 | 1.1335  | 3.10248 | 14.8553 | 11.1602 | 7.05377 |
| ENSMUSG00000042502 | 10_Cd2bp  | 1704.81 | 0.07567  | 0.81729  | 0.948003 | 1153.83 | 2023.3  | 2071.43 | 1616.75 | 1625.96 | 1737.58 |
| ENSMUSG00000042505 | 6_Sdhaf3  | 161.66  | 0.09361  | 0.828739 | 0.951064 | 266.969 | 116.751 | 116.86  | 155.155 | 161.394 | 152.832 |
| ENSMUSG00000042506 | 15_Usp22  | 2627.85 | 0.277    | 0.306072 | 0.688731 | 2338    | 3040.05 | 3259.68 | 2231.59 | 2243.2  | 2654.57 |

|                    |           |         |          |          |          |         |         |         |         |         |         |
|--------------------|-----------|---------|----------|----------|----------|---------|---------|---------|---------|---------|---------|
| ENSMUSG00000042507 | 14_Elmsa  | 1303.24 | 0.71     | 0.007883 | 0.084891 | 1325.74 | 1773.93 | 1752.9  | 985.399 | 902.259 | 1079.23 |
| ENSMUSG00000042508 | 16_Dmtf1  | 1463.05 | 0.27753  | 0.45935  | 0.798898 | 2358.22 | 1246.85 | 1204.8  | 1127.35 | 1534.96 | 1306.12 |
| ENSMUSG00000042510 | 7_AA986f  | 4651.73 | 0.72566  | 0.040083 | 0.251888 | 3639.47 | 6887.16 | 6865.8  | 3272.28 | 3181.52 | 4064.15 |
| ENSMUSG00000042514 | 11_Klhl14 | 92.6208 | -1.38843 | 0.006863 | 0.076966 | 83.9333 | 27.2041 | 42.4006 | 148.553 | 163.111 | 90.5233 |
| ENSMUSG00000042515 | 13_Mum1   | 82.2456 | -0.98191 | 0.11447  | 0.459698 | 100.113 | 18.136  | 47.5714 | 122.969 | 136.498 | 68.1864 |
| ENSMUSG00000042520 | 16_Ubp2   | 4359.78 | 0.34615  | 0.20377  | 0.594896 | 4183.52 | 5660.71 | 4796.44 | 3259.08 | 3999.64 | 4259.3  |
| ENSMUSG00000042523 | 12_Dnal1  | 471.492 | -0.17312 | 0.660848 | 0.895438 | 674.5   | 312.847 | 342.307 | 489.398 | 563.161 | 446.739 |
| ENSMUSG00000042524 | 13_Sun2   | 1419.45 | 0.1182   | 0.816951 | 0.947571 | 575.398 | 1662.85 | 2194.49 | 1662.14 | 964.07  | 1457.78 |
| ENSMUSG00000042529 | 14_Kcnj12 | 24.3707 | -1.72975 | 0.029974 | 0.211809 | 7.07871 | 10.2015 | 16.5466 | 55.2946 | 7.72629 | 49.3764 |
| ENSMUSG00000042532 | 14_Golga  | 2.96845 | -2.94013 | 0.074607 | 0.365615 | 2.02249 | 0       | 0       | 7.42763 | 6.00934 | 2.35126 |
| ENSMUSG00000042535 | 8_Gtpbp1  | 1493.47 | 0.39668  | 0.468118 | 0.804041 | 514.723 | 2379.22 | 2198.63 | 1426.11 | 1039.62 | 1402.52 |
| ENSMUSG00000042540 | 12_Acot5  | 0.61218 | 0.25783  | 0.942771 | NA       | 2.02249 | 0       | 0       | 1.65058 | 0       | 0       |
| ENSMUSG00000042541 | 10_Shfm1  | 2265.74 | 0.03215  | 0.887847 | 0.96973  | 2213.61 | 2384.89 | 2274.12 | 2182.07 | 2092.11 | 2447.66 |
| ENSMUSG00000042548 | 13_Asxl1  | 1758.65 | 0.11359  | 0.619779 | 0.877704 | 1718.1  | 1934.89 | 1830.47 | 1562.28 | 1765.03 | 1741.1  |
| ENSMUSG00000042557 | 14_Sin3a  | 1645.41 | 0.19843  | 0.40125  | 0.760305 | 1872.82 | 1754.66 | 1647.42 | 1375.76 | 1618.23 | 1603.56 |
| ENSMUSG00000042558 | 16_Adprhl | 438.716 | 0.16022  | 0.810396 | 0.945662 | 80.8995 | 591.689 | 716.674 | 524.061 | 322.787 | 396.187 |
| ENSMUSG00000042564 | 12_Fam2   | 52.6526 | -0.584   | 0.155791 | 0.532939 | 53.5959 | 41.9396 | 31.0248 | 65.1981 | 71.2536 | 52.9033 |
| ENSMUSG00000042567 | 19_Nek10  | 1.40098 | -0.04043 | 0.981753 | NA       | 1.01124 | 1.1335  | 2.06832 | 2.47588 | 1.71695 | 0       |
| ENSMUSG00000042569 | 13_Dhrs7l | 334.986 | -0.07616 | 0.854469 | 0.958493 | 169.889 | 388.791 | 419.87  | 377.984 | 303.042 | 350.337 |
| ENSMUSG00000042570 | 12_Mier2  | 358.672 | 0.39615  | 0.553973 | 0.846091 | 67.7534 | 554.283 | 600.848 | 347.448 | 258.402 | 323.298 |
| ENSMUSG00000042572 | 14_Ube2q  | 2032.51 | 0.10508  | 0.630043 | 0.881724 | 2145.86 | 2130.99 | 2042.47 | 1872.59 | 1969.35 | 2033.84 |
| ENSMUSG00000042579 | 2_463240  | 264.16  | -0.04121 | 0.917401 | 0.976775 | 391.352 | 188.161 | 201.662 | 266.569 | 305.618 | 231.599 |
| ENSMUSG00000042581 | 14_Thsd7  | 12.5008 | -0.46908 | 0.474567 | 0.806964 | 9.1012  | 6.80102 | 15.5124 | 14.03   | 15.4526 | 14.1075 |
| ENSMUSG00000042589 | 18_Cux2   | 154.096 | -0.14286 | 0.752747 | 0.925804 | 95.057  | 140.554 | 203.73  | 206.323 | 97.8664 | 181.047 |
| ENSMUSG00000042590 | 16_Ipo11  | 896.27  | 0.17623  | 0.658148 | 0.894702 | 1473.38 | 703.905 | 675.307 | 746.064 | 903.118 | 875.843 |
| ENSMUSG00000042594 | 16_Sh2b3  | 690.158 | 0.27909  | 0.3494   | 0.72637  | 579.443 | 821.79  | 868.696 | 635.475 | 544.274 | 691.269 |
| ENSMUSG00000042595 | 7_Fam19f  | 450.138 | 0.48763  | 0.373518 | 0.744203 | 1014.28 | 266.373 | 295.77  | 357.352 | 424.946 | 342.108 |
| ENSMUSG00000042599 | 8_Kdm7a   | 2937.93 | 0.86719  | 0.057242 | 0.313179 | 6472.97 | 2552.65 | 2359.96 | 1790.88 | 2271.53 | 2179.61 |
| ENSMUSG00000042604 | 5_Kcna4   | 4.15058 | -0.68825 | 0.570543 | 0.853943 | 5.05622 | 4.53401 | 0       | 5.77705 | 6.00934 | 3.52688 |
| ENSMUSG00000042605 | 15_Atnx2  | 1016.1  | 0.17493  | 0.426528 | 0.777537 | 1047.65 | 1098.36 | 1086.9  | 949.912 | 961.494 | 952.259 |
| ENSMUSG00000042606 | 9_Hirip3  | 403.563 | 0.07709  | 0.832704 | 0.951804 | 258.879 | 525.945 | 458.134 | 356.526 | 375.154 | 446.739 |
| ENSMUSG00000042607 | 15_Asb4   | 5.45328 | 0.23481  | 0.842149 | 0.953702 | 12.1349 | 2.26701 | 3.10248 | 4.95175 | 0.85848 | 9.40502 |
| ENSMUSG00000042608 | 15_Stk40  | 730.826 | 0.66105  | 0.193594 | 0.583577 | 326.632 | 1295.59 | 1064.15 | 670.137 | 497.058 | 531.384 |
| ENSMUSG00000042613 | 9_Pbxip1  | 2699.32 | -0.47031 | 0.193417 | 0.583211 | 1411.7  | 2448.37 | 2929.78 | 3652.74 | 2905.94 | 2847.37 |
| ENSMUSG00000042616 | 7_Oscp1   | 102.07  | -0.44813 | 0.171425 | 0.553993 | 74.8321 | 85.0127 | 99.2795 | 134.523 | 104.734 | 114.036 |
| ENSMUSG00000042622 | 13_Maff   | 399.613 | 0.33974  | 0.374093 | 0.74475  | 267.98  | 519.144 | 552.242 | 393.664 | 288.448 | 376.201 |
| ENSMUSG00000042625 | 16_Safb2  | 1246.66 | 0.15561  | 0.707798 | 0.909629 | 652.253 | 1601.64 | 1687.75 | 1231.34 | 1134.91 | 1172.1  |
| ENSMUSG00000042626 | 13_Shc1   | 1833.01 | -0.10231 | 0.760366 | 0.928266 | 1143.72 | 2161.59 | 1999.03 | 1976.58 | 1830.27 | 1886.88 |
| ENSMUSG00000042628 | 7_Zfyve1  | 718.916 | 0.12043  | 0.72136  | 0.913875 | 492.476 | 831.991 | 922.472 | 745.239 | 665.32  | 656     |
| ENSMUSG00000042631 | 7_Xkr7    | 0.91871 | -0.69751 | 0.760188 | NA       | 1.01124 | 1.1335  | 0       | 1.65058 | 1.71695 | 0       |
| ENSMUSG00000042632 | 16_Pla2gf | 176.91  | 0.19319  | 0.774252 | 0.933044 | 36.4048 | 265.24  | 264.745 | 235.208 | 117.611 | 142.251 |
| ENSMUSG00000042638 | 14_Gucy2  | 3.44286 | -1.20994 | 0.296394 | 0.680027 | 3.03373 | 1.1335  | 2.06832 | 6.60234 | 4.29238 | 3.52688 |
| ENSMUSG00000042641 | 18_Rgs11  | 4.01859 | -1.21127 | 0.425936 | 0.777537 | 0       | 0       | 7.23913 | 4.12646 | 6.86782 | 5.87814 |
| ENSMUSG00000042642 | 13_Flad1  | 490.968 | -0.16746 | 0.765468 | 0.929992 | 147.642 | 580.353 | 659.795 | 720.48  | 437.823 | 399.713 |
| ENSMUSG00000042644 | 8_Iltpr3  | 5328.63 | 0.78007  | 0.213925 | 0.604865 | 1440.01 | 9326.46 | 9438.79 | 3649.44 | 2954.88 | 5162.18 |
| ENSMUSG00000042647 | 13_Acad1  | 142.108 | -0.38682 | 0.426765 | 0.777557 | 55.6184 | 124.685 | 189.252 | 184.04  | 135.639 | 163.412 |
| ENSMUSG00000042650 | 3_Alkbh5  | 2088.43 | 0.27294  | 0.335201 | 0.713739 | 2875.98 | 2015.37 | 1964.91 | 2006.29 | 1896.38 | 1771.67 |
| ENSMUSG00000042655 | 4_Fam15f  | 0.30609 | 0.16972  | 0.966824 | NA       | 1.01124 | 0       | 0       | 0.85259 | 0       | 0       |
| ENSMUSG00000042659 | 14_Arrdc4 | 3699.18 | 0.50771  | 0.092048 | 0.413309 | 5007.68 | 4467.13 | 3555.45 | 2440.39 | 3676    | 3048.4  |
| ENSMUSG00000042660 | 7_Wdr55   | 263.282 | 0.53258  | 0.149162 | 0.522746 | 197.193 | 408.061 | 328.863 | 231.082 | 192.299 | 222.194 |
| ENSMUSG00000042662 | 16_Dusp1  | 25.8369 | -1.78488 | 0.028559 | 0.204862 | 3.03373 | 7.93452 | 23.7857 | 39.614  | 17.1695 | 63.4839 |
| ENSMUSG00000042670 | 5_Impnp1l | 1083.98 | 0.21043  | 0.672912 | 0.90042  | 2101.37 | 712.973 | 674.273 | 904.52  | 1185.56 | 925.219 |
| ENSMUSG00000042671 | 12_Rgs8   | 37.287  | -2.49343 | 0.000777 | 0.01626  | 15.1687 | 12.4685 | 6.20497 | 124.619 | 42.9238 | 22.3369 |
| ENSMUSG00000042672 | 15_Dcst1  | 39.7669 | -0.23767 | 0.569282 | 0.853308 | 30.3373 | 41.9396 | 37.2298 | 35.4876 | 48.9332 | 44.6739 |
| ENSMUSG00000042675 | 15_Ypel3  | 675.697 | 0.00044  | 0.999193 | 0.999484 | 336.744 | 754.913 | 935.916 | 817.039 | 570.029 | 639.542 |
| ENSMUSG00000042677 | 7_Zc3h12  | 449.972 | 0.70538  | 0.265275 | 0.653966 | 116.293 | 894.334 | 662.898 | 363.954 | 275.571 | 386.782 |
| ENSMUSG00000042678 | 16_Myo1f  | 4.36858 | -0.36885 | 0.730596 | 0.918769 | 3.03373 | 1.1335  | 7.23913 | 4.95175 | 5.15086 | 4.70251 |
| ENSMUSG00000042680 | 7_Garem   | 564.886 | 0.36126  | 0.161662 | 0.540161 | 624.949 | 635.895 | 644.283 | 425.851 | 489.332 | 569.004 |
| ENSMUSG00000042682 | 8_Selk    | 1840.17 | -0.18073 | 0.446067 | 0.789738 | 1881.93 | 1700.25 | 1592.61 | 1889.09 | 1845.73 | 2131.41 |
| ENSMUSG00000042684 | 8_Npl     | 55.9042 | -0.43702 | 0.313197 | 0.694578 | 42.4723 | 54.4081 | 45.5031 | 75.1016 | 40.3484 | 77.5914 |
| ENSMUSG00000042686 | 5_Jph1    | 85.417  | -0.06754 | 0.915046 | 0.976372 | 164.833 | 29.4711 | 55.8447 | 112.24  | 67.8197 | 82.2939 |
| ENSMUSG00000042688 | 16_MapkE  | 3226.55 | 0.51007  | 0.045808 | 0.274057 | 4047    | 4190.56 | 3135.58 | 2494.86 | 2759.15 | 2732.16 |
| ENSMUSG00000042694 | 17_Obfc1  | 462.924 | 0.06098  | 0.855949 | 0.959059 | 322.587 | 569.018 | 526.388 | 408.52  | 436.106 | 514.925 |
| ENSMUSG00000042699 | 11_Dhx9   | 5488.17 | 0.48547  | 0.248341 | 0.639857 | 10150.9 | 4808.32 | 4249.37 | 3638.71 | 5150    | 4931.76 |
| ENSMUSG00000042700 | 15_Sipa1l | 2271.81 | 0.20701  | 0.552735 | 0.845686 | 1535.07 | 3043.46 | 2725.02 | 2056.63 | 1945.31 | 2325.39 |
| ENSMUSG00000042705 | 8_Commd   | 402.372 | -0.04457 | 0.87486  | 0.964429 | 442.925 | 368.388 | 377.469 | 395.315 | 483.323 | 346.81  |
| ENSMUSG00000042707 | 6_Dnal1   | 7.43267 | -1.52027 | 0.152343 | 0.526685 | 3.03373 | 3.40051 | 5.17081 | 6.60234 | 24.0374 | 2.35126 |
| ENSMUSG00000042708 | 12_Shcbp  | 1.64469 | 0.8742   | 0.700683 | NA       | 3.03373 | 3.40051 | 0       | 0       | 3.43391 | 0       |
| ENSMUSG00000042709 | 14_Atpaf2 | 312.011 | 0.11654  | 0.754399 | 0.926508 | 196.181 | 379.723 | 398.152 | 333.418 | 282.439 | 282.151 |
| ENSMUSG00000042712 | 10_Wbp5   | 1186.04 | -0.20426 | 0.627268 | 0.880806 | 1776.76 | 723.175 | 806.646 | 1326.24 | 1338.37 | 1145.06 |
| ENSMUSG00000042717 | 5_Ppp1r3i | 125.014 | 0.59659  | 0.523465 | 0.832707 | 397.419 | 14.7355 | 39.2981 | 127.095 | 79.8384 | 91.699  |
| ENSMUSG00000042719 | 17_Naa25  | 1897.54 | 1.12991  | 0.000344 | 0.008764 | 2956.88 | 2948.24 | 1909.06 | 974.67  | 1290.29 | 1306.12 |
| ENSMUSG00000042724 | 7_Map3kE  | 1211.09 | 0.71171  | 0.052895 | 0.298829 | 915.176 | 1836.27 | 1760.14 | 940.833 | 776.063 | 1038.08 |
| ENSMUSG00000042726 | 14_Trafd1 | 4392.18 | 1.32621  | 0.005969 | 0.070165 | 2521.03 | 9552.03 | 6766.52 | 2499.81 | 2292.13 | 2721.58 |
| ENSMUSG00000042729 | 9_Wdr74   | 384.35  | 0.07666  | 0.857712 | 0.959059 | 192.136 | 518.011 | 473.646 | 375.508 | 358.843 | 387.957 |

|                    |           |         |          |          |          |         |         |         |         |         |         |
|--------------------|-----------|---------|----------|----------|----------|---------|---------|---------|---------|---------|---------|
| ENSMUSG00000042734 | 5_Ttc9    | 1495.12 | 0.19437  | 0.479862 | 0.809948 | 1239.79 | 1831.74 | 1715.67 | 1382.36 | 1391.59 | 1409.58 |
| ENSMUSG00000042737 | 9_Dpm3    | 64.7792 | 0.16667  | 0.834773 | 0.952109 | 9.1012  | 82.7457 | 113.758 | 92.4327 | 28.3297 | 62.3083 |
| ENSMUSG00000042742 | 7_B63000  | 672.648 | 0.65237  | 0.193337 | 0.583211 | 1501.7  | 494.207 | 470.544 | 499.302 | 552.859 | 517.276 |
| ENSMUSG00000042743 | 13_Sgtb   | 95.737  | -0.91965 | 0.051013 | 0.292507 | 105.169 | 52.1411 | 41.3665 | 156.806 | 120.187 | 98.7527 |
| ENSMUSG00000042744 | 16_Gm15   | 984.892 | 0.21102  | 0.624244 | 0.879492 | 510.678 | 1334.13 | 1325.8  | 1058.02 | 818.987 | 861.735 |
| ENSMUSG00000042745 | 9_Id1     | 619.966 | 0.72379  | 0.044168 | 0.267381 | 558.207 | 1012.22 | 746.665 | 572.753 | 359.702 | 470.251 |
| ENSMUSG00000042747 | 12_Krtcap | 533.876 | -0.09869 | 0.779319 | 0.93466  | 321.576 | 637.029 | 588.438 | 536.44  | 564.878 | 554.896 |
| ENSMUSG00000042750 | 7_Bex2    | 31.2881 | -1.84589 | 0.001022 | 0.019916 | 19.2136 | 10.2015 | 11.3758 | 69.3246 | 31.7636 | 45.8495 |
| ENSMUSG00000042751 | 14_Nmnal  | 119.893 | -0.63714 | 0.128705 | 0.487117 | 87.9783 | 75.9447 | 117.894 | 205.498 | 135.639 | 96.4015 |
| ENSMUSG00000042757 | 15_Tmem   | 70.4128 | -1.65574 | 0.000641 | 0.014164 | 20.2249 | 36.2721 | 45.5031 | 151.029 | 91.857  | 77.5914 |
| ENSMUSG00000042759 | 12_Apobr  | 56.1402 | 1.32582  | 0.028821 | 0.206048 | 29.3261 | 137.154 | 74.4596 | 40.4393 | 24.8958 | 30.5663 |
| ENSMUSG00000042761 | 14_Mrap2  | 2.10124 | 1.79338  | 0.276066 | 0.662758 | 1.01124 | 5.66751 | 3.10248 | 1.65058 | 0       | 1.17563 |
| ENSMUSG00000042763 | 9_Maneal  | 32.1974 | -0.85616 | 0.060711 | 0.324779 | 22.2474 | 26.0706 | 20.6832 | 49.5175 | 42.9238 | 31.742  |
| ENSMUSG00000042766 | 17_Trim4  | 41.6326 | -0.38721 | 0.572056 | 0.854806 | 7.07871 | 46.4736 | 54.8106 | 54.4693 | 44.6408 | 42.3226 |
| ENSMUSG00000042770 | 8_Hebp1   | 284.101 | -0.56891 | 0.075545 | 0.368126 | 174.945 | 241.436 | 269.916 | 358.177 | 281.58  | 378.552 |
| ENSMUSG00000042772 | 15_Smg7   | 2259.11 | 0.59394  | 0.020307 | 0.164559 | 2933.62 | 2794.08 | 2425.11 | 1540.82 | 1988.23 | 1872.78 |
| ENSMUSG00000042784 | 9_Muc1    | 1873.12 | 0.91536  | 0.02283  | 0.17814  | 1328.78 | 3148.87 | 2866.7  | 1117.45 | 1243.93 | 1533.02 |
| ENSMUSG00000042787 | 13_Exog   | 208.234 | 0.46236  | 0.128681 | 0.487117 | 195.17  | 259.572 | 268.882 | 156.806 | 169.12  | 199.857 |
| ENSMUSG00000042788 | 12_Fam1f  | 3.58238 | -2.06337 | 0.115956 | 0.463237 | 1.01124 | 0       | 3.10248 | 4.95175 | 7.72629 | 4.70251 |
| ENSMUSG00000042790 | 15_Rnf21  | 756.482 | 0.12683  | 0.662535 | 0.895858 | 914.165 | 775.316 | 679.444 | 586.783 | 828.43  | 754.753 |
| ENSMUSG00000042793 | 13_Lgr6   | 20.7152 | -1.49697 | 0.011342 | 0.11048  | 14.1574 | 6.80102 | 11.3758 | 20.6323 | 36.056  | 35.2688 |
| ENSMUSG00000042797 | 9_Aqp11   | 48.2992 | -1.37711 | 0.001735 | 0.02903  | 34.3823 | 19.2695 | 26.8882 | 85.0051 | 67.8197 | 56.4301 |
| ENSMUSG00000042800 | 5_170001  | 5.16843 | -0.51788 | 0.574453 | 0.856411 | 3.03373 | 5.66751 | 4.13665 | 6.60234 | 6.86782 | 4.70251 |
| ENSMUSG00000042804 | 13_Gpr15  | 343.316 | -0.35241 | 0.383371 | 0.749884 | 178.99  | 281.109 | 444.689 | 421.724 | 344.249 | 389.133 |
| ENSMUSG00000042807 | 15_Hecw2  | 116.381 | -0.5416  | 0.319456 | 0.700662 | 171.912 | 43.0731 | 69.2888 | 140.3   | 159.677 | 114.036 |
| ENSMUSG00000042808 | 7_Gpx2    | 60.3529 | 0.79635  | 0.214435 | 0.605122 | 19.2136 | 115.617 | 95.1429 | 40.4393 | 54.084  | 37.6201 |
| ENSMUSG00000042810 | 14_Krba1  | 1114.47 | 0.0694   | 0.834198 | 0.952109 | 771.579 | 1200.38 | 1451.96 | 1171.92 | 1016.44 | 1074.52 |
| ENSMUSG00000042812 | 5_Foxf1   | 10.465  | 1.79245  | 0.033129 | 0.225101 | 17.1912 | 21.5366 | 10.3416 | 8.25292 | 4.29238 | 1.17563 |
| ENSMUSG00000042814 | 7_Mcts2   | 144.8   | -0.20248 | 0.519959 | 0.831665 | 157.754 | 133.753 | 112.724 | 170.01  | 160.535 | 134.022 |
| ENSMUSG00000042816 | 3_Gpr151  | 1.21975 | -1.27622 | 0.621925 | NA       | 0       | 1.1335  | 1.03416 | 0       | 5.15086 | 0       |
| ENSMUSG00000042817 | 15_Flt3   | 8.86904 | 2.17568  | 0.035504 | 0.235128 | 11.1237 | 19.2695 | 13.4441 | 1.65058 | 7.72629 | 0       |
| ENSMUSG00000042821 | 7_Snai1   | 28.124  | -0.13983 | 0.848376 | 0.956195 | 8.08995 | 23.8036 | 48.6056 | 42.9152 | 30.0467 | 15.2832 |
| ENSMUSG00000042826 | 13_Fgf11  | 111.314 | -0.76064 | 0.045704 | 0.273765 | 96.0682 | 57.8086 | 94.1087 | 160.107 | 152.809 | 106.982 |
| ENSMUSG00000042828 | 12_Trim7  | 77.896  | 0.47814  | 0.318715 | 0.699834 | 60.6747 | 82.7457 | 128.236 | 66.0234 | 40.3484 | 89.3477 |
| ENSMUSG00000042831 | 13_Alkbh5 | 189.704 | -0.28254 | 0.561341 | 0.849483 | 72.8096 | 216.499 | 224.413 | 252.539 | 167.403 | 204.559 |
| ENSMUSG00000042834 | 14_Nrep   | 1090.19 | -1.63315 | 0.00028  | 0.00751  | 844.389 | 261.839 | 488.124 | 1787.58 | 1574.45 | 1584.75 |
| ENSMUSG00000042842 | 10_Serpin | 292.745 | 1.18179  | 0.00262  | 0.039533 | 605.735 | 330.983 | 282.326 | 163.408 | 200.025 | 173.993 |
| ENSMUSG00000042845 | 7_Wfdc12  | 2.67653 | 0.13766  | 0.931156 | 0.981779 | 0       | 1.1335  | 7.23913 | 3.30117 | 0.85848 | 3.52688 |
| ENSMUSG00000042846 | 8_Lrrtm3  | 13.3348 | 0.27966  | 0.699299 | 0.905769 | 16.1799 | 10.2015 | 17.5807 | 20.6323 | 6.00934 | 9.40502 |
| ENSMUSG00000042849 | 10_Olfr14 | 0.68562 | 2.99032  | 0.375842 | NA       | 1.01124 | 0       | 3.10248 | 0       | 0       | 0       |
| ENSMUSG00000042851 | 17_Zc3h6  | 465.302 | 0.27074  | 0.515436 | 0.829821 | 810.007 | 361.587 | 354.717 | 386.237 | 448.983 | 430.28  |
| ENSMUSG00000042854 | 9_Trp53rk | 46.8658 | -0.33326 | 0.400472 | 0.75972  | 35.3936 | 37.4056 | 51.7081 | 56.1199 | 52.3671 | 48.2007 |
| ENSMUSG00000042857 | 2_Gm977   | 113.178 | 0.06899  | 0.843933 | 0.954374 | 143.597 | 83.8792 | 119.963 | 102.336 | 117.611 | 111.685 |
| ENSMUSG00000042870 | 14_Tom1   | 721.553 | -0.25587 | 0.628441 | 0.881262 | 222.474 | 791.185 | 959.702 | 958.99  | 661.027 | 735.943 |
| ENSMUSG00000042873 | 11_Lhfp4  | 38.482  | -1.36595 | 0.014306 | 0.128717 | 16.1799 | 23.8036 | 24.8199 | 88.3063 | 47.2162 | 30.5663 |
| ENSMUSG00000042895 | 5_Abra    | 22.9926 | -0.63759 | 0.310837 | 0.69305  | 29.3261 | 7.93452 | 16.5466 | 33.837  | 19.745  | 30.5663 |
| ENSMUSG00000042901 | 10_Aida   | 3382.48 | 1.19321  | 0.003452 | 0.04804  | 7262.76 | 3886.78 | 2970.11 | 1712.48 | 2310.16 | 2152.57 |
| ENSMUSG00000042903 | 8_Foxo4   | 1003.78 | 0.01199  | 0.966621 | 0.991087 | 794.838 | 1041.69 | 1187.22 | 1043.17 | 885.948 | 1069.82 |
| ENSMUSG00000042918 | 15_Mams1  | 33.3752 | -0.54203 | 0.318087 | 0.698985 | 25.2811 | 15.869  | 40.3323 | 52.8187 | 28.3297 | 37.6201 |
| ENSMUSG00000042942 | 15_Greb1  | 51.021  | -1.0262  | 0.057345 | 0.313447 | 54.6072 | 31.7381 | 14.4783 | 70.9751 | 75.546  | 58.7814 |
| ENSMUSG00000042961 | 13_Egfln  | 263.421 | -0.95126 | 0.000738 | 0.015663 | 189.103 | 168.892 | 180.978 | 406.869 | 331.372 | 303.312 |
| ENSMUSG00000042976 | 5_993003  | 18.787  | -0.25164 | 0.663284 | 0.896128 | 11.1237 | 23.8036 | 16.5466 | 22.2829 | 15.4526 | 23.5126 |
| ENSMUSG00000042978 | 10_Sbk1   | 199.649 | -0.02287 | 0.961944 | 0.990106 | 90.0007 | 221.033 | 283.36  | 254.19  | 168.261 | 181.047 |
| ENSMUSG00000042985 | 7_Upk3b   | 137.446 | -0.93207 | 0.043649 | 0.263555 | 58.6522 | 77.0782 | 147.885 | 233.558 | 138.215 | 169.29  |
| ENSMUSG00000042988 | 10_Notum  | 58.1109 | -1.49211 | 0.024992 | 0.189013 | 7.07871 | 31.7381 | 52.7422 | 118.842 | 71.2536 | 67.0108 |
| ENSMUSG00000042992 | 15_Borcs2 | 253.536 | 0.43365  | 0.228772 | 0.619893 | 193.148 | 346.852 | 334.034 | 235.208 | 176.846 | 235.126 |
| ENSMUSG00000042993 | 6_Ilnk    | 0.48398 | 1.0269   | 0.748454 | NA       | 1.01124 | 0       | 1.03416 | 0       | 0.85848 | 0       |
| ENSMUSG00000042997 | 13_Nhlrc3 | 1011.43 | 0.2642   | 0.258542 | 0.64893  | 1149.78 | 1084.76 | 1076.56 | 831.069 | 971.796 | 954.61  |
| ENSMUSG00000043003 | 13_Rasef  | 1299.11 | 0.24477  | 0.570621 | 0.853945 | 2282.38 | 936.273 | 1008.31 | 983.748 | 1381.29 | 1202.67 |
| ENSMUSG00000043004 | 13_Gng2   | 236.247 | -0.42672 | 0.295575 | 0.679579 | 302.362 | 170.025 | 132.373 | 288.027 | 301.325 | 223.369 |
| ENSMUSG00000043008 | 8_Klhl6   | 44.8229 | 0.23463  | 0.567488 | 0.852443 | 51.5735 | 57.8086 | 36.1957 | 45.3911 | 40.3484 | 37.6201 |
| ENSMUSG00000043013 | 10_Oneuc  | 0.30609 | 0.16972  | 0.966824 | NA       | 1.01124 | 0       | 0       | 0.82529 | 0       | 0       |
| ENSMUSG00000043015 | 15_Tmem   | 557.095 | 0.52968  | 0.062625 | 0.330345 | 794.838 | 620.026 | 559.481 | 403.568 | 475.596 | 489.061 |
| ENSMUSG00000043017 | 9_Ptgir   | 93.5208 | 0.19959  | 0.564008 | 0.850768 | 79.8883 | 116.751 | 103.416 | 98.2098 | 74.6875 | 88.1721 |
| ENSMUSG00000043019 | 12_Edem1  | 1903.36 | 0.2835   | 0.48921  | 0.814396 | 3285.53 | 1544.96 | 1438.52 | 1437.66 | 1846.58 | 1866.9  |
| ENSMUSG00000043020 | 13_Wdr63  | 3.90093 | -0.05818 | 0.955215 | 0.98876  | 5.05622 | 2.26701 | 4.13665 | 4.12646 | 4.29238 | 3.52688 |
| ENSMUSG00000043029 | 2_Trpv3   | 50.2752 | 1.02297  | 0.008122 | 0.086709 | 78.8771 | 63.4762 | 59.9814 | 33.0117 | 36.9145 | 29.3907 |
| ENSMUSG00000043036 | 13_Ccdc6  | 6.03195 | -1.29913 | 0.169989 | 0.5518   | 5.05622 | 3.40051 | 2.06832 | 12.3794 | 8.58477 | 4.70251 |
| ENSMUSG00000043050 | 7_Tnp2    | 0       | NA       | NA       | NA       | 0       | 0       | 0       | 0       | 0       | 0       |
| ENSMUSG00000043051 | 17_Disc1  | 3.54275 | 0.58798  | 0.663173 | 0.896048 | 3.03373 | 6.80102 | 3.10248 | 6.60234 | 1.71695 | 0       |
| ENSMUSG00000043059 | 16_Zfp511 | 294.181 | 0.49462  | 0.392512 | 0.75466  | 99.1019 | 479.472 | 453.997 | 321.864 | 193.157 | 217.491 |
| ENSMUSG00000043061 | 9_Tmem1   | 786.084 | -0.01646 | 0.955304 | 0.98876  | 995.064 | 674.434 | 675.307 | 788.979 | 845.6   | 737.119 |
| ENSMUSG00000043065 | 12_Spice1 | 586.975 | 0.49205  | 0.07514  | 0.366877 | 722.028 | 641.563 | 693.922 | 423.375 | 447.267 | 593.692 |
| ENSMUSG00000043067 | 15_Dpy19  | 1185.92 | -0.20968 | 0.528476 | 0.835633 | 1499.68 | 986.148 | 813.885 | 1261.05 | 1383.86 | 1170.93 |
| ENSMUSG00000043068 | 5_Fam89c  | 35.8396 | 0.64131  | 0.262072 | 0.651254 | 24.2699 | 74.8112 | 32.059  | 32.1864 | 22.3204 | 29.3907 |

|                    |            |         |          |          |          |         |         |         |         |         |         |
|--------------------|------------|---------|----------|----------|----------|---------|---------|---------|---------|---------|---------|
| ENSMUSG00000043073 | 9_Usp17k   | 0.68392 | 1.68811  | 0.559594 | NA       | 1.01124 | 2.26701 | 0       | 0.82529 | 0       | 0       |
| ENSMUSG00000043079 | 17_Synpo   | 752.05  | 0.14197  | 0.604108 | 0.871111 | 625.96  | 868.263 | 872.832 | 713.878 | 682.489 | 748.875 |
| ENSMUSG00000043085 | 14_Tmem    | 8.13234 | -1.14893 | 0.249787 | 0.641438 | 1.01124 | 10.2015 | 4.13665 | 18.9817 | 8.58477 | 5.87814 |
| ENSMUSG00000043088 | 16_Il17re  | 863.935 | 0.49391  | 0.207462 | 0.599079 | 555.173 | 1228.72 | 1247.2  | 674.264 | 676.48  | 801.778 |
| ENSMUSG00000043090 | 18_Zfp86f  | 728.778 | -0.14366 | 0.700485 | 0.906172 | 1021.36 | 508.943 | 547.071 | 682.517 | 853.326 | 759.456 |
| ENSMUSG00000043091 | 8_Tuba1c   | 3971.52 | 0.61936  | 0.208202 | 0.599354 | 1860.69 | 7500.39 | 5072.56 | 3017.27 | 3120.56 | 3257.66 |
| ENSMUSG00000043099 | 4_Hic1     | 31.4312 | -1.00712 | 0.087696 | 0.401776 | 9.1012  | 20.4031 | 33.0932 | 45.3911 | 30.0467 | 50.552  |
| ENSMUSG00000043102 | 2_Qrpf     | 6.10345 | 0.10741  | 0.918708 | 0.977109 | 1.01124 | 4.53401 | 13.4441 | 6.60234 | 5.15086 | 5.87814 |
| ENSMUSG00000043122 | 6_A53001   | 0       | NA       | NA       | NA       | 0       | 0       | 0       | 0       | 0       | 0       |
| ENSMUSG00000043126 | 4_D83003   | 2.61622 | 0.60038  | 0.64637  | 0.889779 | 3.03373 | 3.40051 | 3.10248 | 4.12646 | 0.85848 | 1.17563 |
| ENSMUSG00000043131 | 14_Mob1e   | 7621.1  | 0.36488  | 0.358331 | 0.732631 | 13289.8 | 6514.24 | 5935.05 | 5790.25 | 7388.05 | 6809.24 |
| ENSMUSG00000043140 | 9_Tmem1    | 377.064 | -0.11841 | 0.673749 | 0.900436 | 288.205 | 418.263 | 378.503 | 389.538 | 394.041 | 393.835 |
| ENSMUSG00000043144 | 5_Aqp6     | 0.48016 | 1.00965  | 0.794176 | NA       | 2.02249 | 0       | 0       | 0       | 0.85848 | 0       |
| ENSMUSG00000043153 | 5_Ispd     | 105.749 | 0.0351   | 0.939044 | 0.985171 | 162.81  | 73.6777 | 84.8012 | 108.113 | 132.205 | 72.8889 |
| ENSMUSG00000043154 | 15_Ppp2r   | 1525.03 | 0.26694  | 0.573487 | 0.855676 | 2911.37 | 1022.42 | 1063.12 | 1167.79 | 1532.38 | 1453.08 |
| ENSMUSG00000043155 | 4_Hpd1     | 2.62904 | -0.9379  | 0.484981 | 0.812961 | 1.01124 | 3.40051 | 1.03416 | 1.65058 | 5.15086 | 3.52688 |
| ENSMUSG00000043157 | 7_Arl11    | 27.2286 | -0.22936 | 0.629621 | 0.881526 | 19.2136 | 27.2041 | 28.9565 | 34.6623 | 27.4713 | 25.8638 |
| ENSMUSG00000043162 | 7_Pyurf    | 439.432 | -0.52843 | 0.162831 | 0.540938 | 528.881 | 251.638 | 298.873 | 492.7   | 587.198 | 477.305 |
| ENSMUSG00000043164 | 3_Tmem2    | 0.17236 | 1.1315   | 0.781553 | NA       | 0       | 0       | 1.03416 | 0       | 0       | 0       |
| ENSMUSG00000043165 | 7_Lor      | 0.99765 | 1.32248  | 0.608162 | NA       | 0       | 2.26701 | 2.06832 | 1.65058 | 0       | 0       |
| ENSMUSG00000043183 | 18_Simc1   | 203.214 | 0.10914  | 0.706571 | 0.90886  | 224.496 | 194.962 | 213.037 | 163.408 | 222.346 | 201.032 |
| ENSMUSG00000043190 | 13_Rfesd   | 291.571 | 0.22447  | 0.620881 | 0.878215 | 527.87  | 211.965 | 202.696 | 261.618 | 290.165 | 255.111 |
| ENSMUSG00000043192 | 3_Gm184l   | 127.675 | -0.10997 | 0.888269 | 0.969763 | 11.1237 | 183.627 | 173.739 | 156.806 | 96.1494 | 144.602 |
| ENSMUSG00000043207 | 10_Zmpst   | 2086.08 | 0.31303  | 0.433377 | 0.781638 | 3588.91 | 1768.26 | 1577.1  | 1622.52 | 1991.67 | 1968    |
| ENSMUSG00000043219 | 9_Hoxa6    | 0.18892 | 1.1315   | 0.781553 | NA       | 0       | 1.1335  | 0       | 0       | 0       | 0       |
| ENSMUSG00000043230 | 2_Fam12c   | 3.37757 | -1.50488 | 0.265502 | 0.654114 | 3.03373 | 1.1335  | 1.03416 | 0.82529 | 6.00934 | 8.22939 |
| ENSMUSG00000043241 | 14_Upf2    | 1773.82 | 0.333    | 0.406216 | 0.764314 | 3048.9  | 1492.82 | 1390.95 | 1307.26 | 1786.49 | 1616.49 |
| ENSMUSG00000043243 | 15_Fam12   | 61.1455 | 0.0892   | 0.829773 | 0.951112 | 40.4498 | 79.3452 | 69.2888 | 55.2946 | 56.6595 | 65.8352 |
| ENSMUSG00000043251 | 5_Exoc3l   | 12.9449 | -1.41793 | 0.101471 | 0.433589 | 1.01124 | 5.66751 | 14.4783 | 23.1082 | 14.5941 | 18.81   |
| ENSMUSG00000043252 | 8_Tmem6    | 1951.28 | 0.06954  | 0.878601 | 0.966155 | 3407.89 | 1184.51 | 1402.32 | 1764.48 | 2079.23 | 1869.25 |
| ENSMUSG00000043257 | 15_Pigv    | 472.939 | 0.20928  | 0.548626 | 0.843853 | 325.621 | 583.754 | 612.224 | 463.814 | 394.899 | 457.319 |
| ENSMUSG00000043259 | 14_Fam12   | 76.0533 | -1.16205 | 0.018502 | 0.154524 | 54.6072 | 30.6046 | 55.8447 | 156.806 | 96.1494 | 62.3083 |
| ENSMUSG00000043262 | 14_Uevld   | 1082.06 | 0.30329  | 0.437423 | 0.785066 | 1806.08 | 932.873 | 846.978 | 817.039 | 1097.13 | 992.23  |
| ENSMUSG00000043263 | 13_Pyhin1  | 1284.83 | 1.65409  | 0.001059 | 0.020445 | 3334.07 | 1557.43 | 958.668 | 455.561 | 818.987 | 584.287 |
| ENSMUSG00000043279 | 9_Trim56   | 3216.66 | 0.64799  | 0.007005 | 0.078155 | 4329.14 | 3902.65 | 3549.24 | 2282.76 | 2565.13 | 2671.03 |
| ENSMUSG00000043282 | 3_Teddm    | 3.52116 | 1.14992  | 0.33534  | 0.713739 | 7.07871 | 2.26701 | 5.17081 | 0.82529 | 3.43391 | 2.35126 |
| ENSMUSG00000043284 | 12_Tmem    | 407.324 | 0.22399  | 0.501306 | 0.822545 | 302.362 | 529.346 | 485.022 | 405.219 | 330.514 | 391.484 |
| ENSMUSG00000043286 | 11_Pnpla   | 10.2542 | -1.27989 | 0.110327 | 0.451009 | 6.06747 | 3.40051 | 8.27329 | 8.25292 | 12.0187 | 23.5126 |
| ENSMUSG00000043289 | 12_Mei4    | 5.82774 | -1.28129 | 0.280327 | 0.667117 | 8.08995 | 0       | 2.06832 | 12.3794 | 7.72629 | 4.70251 |
| ENSMUSG00000043290 | 6_Zfp784   | 155.706 | -0.29831 | 0.343076 | 0.720651 | 112.248 | 137.154 | 169.602 | 181.564 | 159.677 | 173.993 |
| ENSMUSG00000043298 | 8_Smco3    | 36.2159 | -2.73533 | 1.80E-06 | 0.00013  | 8.08995 | 6.80102 | 13.4441 | 90.7822 | 42.9238 | 55.2545 |
| ENSMUSG00000043300 | 2_B3galnt  | 110.326 | -0.48162 | 0.20217  | 0.593308 | 122.361 | 68.0102 | 85.8354 | 154.33  | 115.036 | 116.387 |
| ENSMUSG00000043301 | 15_Kcnj6   | 1.16282 | -2.38399 | 0.335506 | NA       | 0       | 1.1335  | 0       | 4.12646 | 1.71695 | 0       |
| ENSMUSG00000043311 | 7_D17H6f   | 207.689 | 0.11291  | 0.802147 | 0.942368 | 100.113 | 276.575 | 270.95  | 220.353 | 188.865 | 189.276 |
| ENSMUSG00000043313 | 6_Pcdhb1   | 96.5029 | -0.27034 | 0.614383 | 0.875923 | 157.754 | 49.8741 | 54.8106 | 103.162 | 128.772 | 84.6452 |
| ENSMUSG00000043323 | 16_Fbrs1   | 647.73  | 0.3874   | 0.372491 | 0.743353 | 360.003 | 881.865 | 960.736 | 643.728 | 459.285 | 580.76  |
| ENSMUSG00000043333 | 12_Rhbdl2  | 289.144 | 0.23514  | 0.403677 | 0.76208  | 274.047 | 350.252 | 313.351 | 233.558 | 262.694 | 300.961 |
| ENSMUSG00000043336 | 14_Filip1l | 1108.24 | 0.43745  | 0.233634 | 0.625443 | 1810.13 | 1064.36 | 950.394 | 778.251 | 1134.05 | 912.287 |
| ENSMUSG00000043342 | 9_Hoxd9    | 0.92425 | -0.70679 | 0.761372 | NA       | 1.01124 | 1.1335  | 0       | 0.82529 | 2.57543 | 0       |
| ENSMUSG00000043346 | 8_Gm674    | 445.238 | 0.28226  | 0.428331 | 0.778836 | 674.5   | 376.323 | 414.699 | 325.99  | 424.946 | 454.968 |
| ENSMUSG00000043366 | 13_Olfr78  | 1.63577 | -1.14248 | 0.552774 | NA       | 1.01124 | 0       | 2.06832 | 3.30117 | 3.43391 | 0       |
| ENSMUSG00000043372 | 12_Hexim   | 41.4368 | -0.52908 | 0.245004 | 0.6364   | 21.2361 | 35.1386 | 45.5031 | 52.8187 | 48.0747 | 45.8495 |
| ENSMUSG00000043383 | 4_Olfr134  | 0.28063 | -1.56014 | 0.700051 | NA       | 0       | 0       | 0       | 0.82529 | 0.85848 | 0       |
| ENSMUSG00000043384 | 15_Gpras   | 1812.27 | -0.84169 | 0.029876 | 0.211636 | 1915.3  | 856.928 | 1122.07 | 2421.41 | 2647.54 | 1910.4  |
| ENSMUSG00000043385 | 3_Olfr267  | 0.13755 | -0.79206 | 0.84609  | NA       | 0       | 0       | 0       | 0.82529 | 0       | 0       |
| ENSMUSG00000043388 | 8_Tmem1    | 11.8832 | -2.3664  | 0.013304 | 0.123205 | 4.04498 | 4.53401 | 3.10248 | 35.4876 | 20.6034 | 3.52688 |
| ENSMUSG00000043391 | 9_251000   | 4260.75 | 0.43362  | 0.242629 | 0.634029 | 7326.47 | 3680.48 | 3681.62 | 3453.85 | 3524.91 | 3897.21 |
| ENSMUSG00000043398 | 4_Gpr135   | 2.22039 | -1.10968 | 0.463998 | 0.801564 | 0       | 1.1335  | 3.10248 | 3.30117 | 3.43391 | 2.35126 |
| ENSMUSG00000043410 | 16_Hfm1    | 2.39364 | -4.63076 | 0.046169 | 0.274979 | 0       | 0       | 0       | 5.77705 | 8.58477 | 0       |
| ENSMUSG00000043411 | 15_Usp48   | 2223.68 | -0.07954 | 0.728744 | 0.917597 | 2369.35 | 2049.37 | 2068.32 | 2176.3  | 2387.42 | 2291.3  |
| ENSMUSG00000043415 | 5_Otud1    | 515.317 | 0.82922  | 0.058114 | 0.316154 | 1090.12 | 445.467 | 442.621 | 376.333 | 349.4   | 387.957 |
| ENSMUSG00000043418 | 3_Lrit2    | 65.5427 | -2.78872 | 0.000305 | 0.00798  | 34.3823 | 9.06802 | 6.20497 | 198.895 | 104.734 | 39.9713 |
| ENSMUSG00000043421 | 8_Hilpda   | 91.973  | -0.20475 | 0.580389 | 0.859474 | 72.8096 | 114.484 | 69.2888 | 108.939 | 87.5647 | 98.7527 |
| ENSMUSG00000043424 | 10_Eif3j2  | 1759.49 | 0.64248  | 0.220196 | 0.611377 | 4011.61 | 1296.73 | 1126.2  | 1116.62 | 1531.52 | 1474.24 |
| ENSMUSG00000043430 | 5_Psap1l   | 1459.77 | 0.66079  | 0.149357 | 0.522751 | 822.142 | 2426.83 | 2115.89 | 1122.4  | 878.222 | 1393.12 |
| ENSMUSG00000043432 | 7_Leng9    | 185.181 | -0.05374 | 0.894619 | 0.971192 | 102.136 | 206.298 | 236.823 | 204.673 | 164.828 | 196.33  |
| ENSMUSG00000043439 | 5_E13001   | 652.599 | 0.42475  | 0.352649 | 0.728926 | 326.632 | 944.208 | 973.146 | 595.861 | 486.756 | 588.99  |
| ENSMUSG00000043441 | 5_Gpr149   | 2.9022  | -1.67386 | 0.240987 | 0.632109 | 3.03373 | 1.1335  | 0       | 6.60234 | 4.29238 | 2.35126 |
| ENSMUSG00000043445 | 6_Pgp      | 63.4068 | 0.21083  | 0.645309 | 0.889294 | 37.416  | 86.1462 | 80.6646 | 68.4993 | 48.9332 | 58.7814 |
| ENSMUSG00000043448 | 13_Gjc2    | 3.76002 | -1.02118 | 0.417311 | 0.770967 | 0       | 2.26701 | 5.17081 | 4.95175 | 4.29238 | 5.87814 |
| ENSMUSG00000043456 | 16_Zfp53f  | 83.7864 | -0.88247 | 0.036643 | 0.239649 | 72.8096 | 43.0731 | 61.0155 | 148.553 | 96.1494 | 81.1183 |
| ENSMUSG00000043458 | 5_Pcdhb1   | 48.3595 | -0.6854  | 0.185594 | 0.572974 | 52.5847 | 21.5366 | 37.2298 | 67.674  | 74.6875 | 36.4445 |
| ENSMUSG00000043460 | 6_Elfn2    | 5.49101 | -1.49627 | 0.281447 | 0.667999 | 1.01124 | 5.66751 | 2.06832 | 17.3311 | 6.86782 | 0       |
| ENSMUSG00000043461 | 13_Sptsst  | 257.255 | 0.58554  | 0.192018 | 0.581115 | 504.611 | 185.894 | 235.789 | 217.052 | 221.487 | 178.695 |
| ENSMUSG00000043463 | 6_Rab9b    | 9.51884 | -1.03624 | 0.223544 | 0.613683 | 11.1237 | 4.53401 | 3.10248 | 11.5541 | 19.745  | 7.05377 |

|                    |           |         |          |          |          |         |         |         |         |         |         |
|--------------------|-----------|---------|----------|----------|----------|---------|---------|---------|---------|---------|---------|
| ENSMUSG00000043467 | 19_Zbtb3i | 601.026 | -0.14604 | 0.734841 | 0.92037  | 933.379 | 361.587 | 416.767 | 611.542 | 673.904 | 608.975 |
| ENSMUSG00000043468 | 4_Adam3l  | 1.2078  | 3.80725  | 0.103032 | NA       | 4.04498 | 1.1335  | 2.06832 | 0       | 0       | 0       |
| ENSMUSG00000043485 | 2_Krt34   | 3.24942 | 0.87084  | 0.507018 | 0.825942 | 2.02249 | 4.53401 | 6.20497 | 3.30117 | 3.43391 | 0       |
| ENSMUSG00000043487 | 3_Acot6   | 103.311 | -0.63895 | 0.1855   | 0.572873 | 134.495 | 61.2092 | 46.5373 | 107.288 | 143.366 | 126.968 |
| ENSMUSG00000043496 | 7_Tril    | 64.9136 | -0.85156 | 0.041894 | 0.259289 | 59.6634 | 30.6046 | 48.6056 | 88.3063 | 95.2909 | 67.0108 |
| ENSMUSG00000043501 | 4_Lgals2  | 0.41818 | -2.121   | 0.592183 | NA       | 0       | 0       | 0       | 1.65058 | 0.85848 | 0       |
| ENSMUSG00000043505 | 8_Gimap5  | 19.5504 | 0.74279  | 0.162755 | 0.540894 | 18.2024 | 28.3376 | 26.8882 | 14.8553 | 13.7356 | 15.2832 |
| ENSMUSG00000043510 | 12_Hscb   | 202.498 | 0.17892  | 0.645058 | 0.889294 | 316.519 | 147.355 | 180.978 | 177.438 | 194.016 | 198.681 |
| ENSMUSG00000043518 | 7_Rai2    | 47.3545 | -0.69768 | 0.077855 | 0.374333 | 40.4498 | 32.8716 | 35.1615 | 70.1499 | 54.9425 | 50.552  |
| ENSMUSG00000043531 | 15_Sorcs  | 287.914 | -1.3731  | 0.004311 | 0.056066 | 268.991 | 82.7457 | 129.27  | 472.067 | 446.408 | 328     |
| ENSMUSG00000043535 | 13_Setx   | 2261.02 | 0.37948  | 0.328163 | 0.709173 | 3915.54 | 1879.35 | 1874.93 | 1755.4  | 2115.29 | 2025.61 |
| ENSMUSG00000043541 | 16_Casc1  | 13.2502 | -0.26745 | 0.685489 | 0.904146 | 8.08995 | 14.7355 | 13.4441 | 20.6323 | 12.0187 | 10.5807 |
| ENSMUSG00000043542 | 12_Zc2hc  | 483.193 | 0.47047  | 0.340712 | 0.719259 | 995.064 | 319.648 | 369.196 | 412.646 | 468.728 | 333.878 |
| ENSMUSG00000043549 | 13_Fam9c  | 0.16854 | 1.1315   | 0.781553 | NA       | 1.01124 | 0       | 0       | 0       | 0       | 0       |
| ENSMUSG00000043556 | 9_Fbxl7   | 10.1964 | -1.92735 | 0.012027 | 0.115012 | 2.02249 | 4.53401 | 6.20497 | 16.5058 | 15.4526 | 16.4588 |
| ENSMUSG00000043557 | 15_Mdga1  | 55.2701 | -1.11431 | 0.03701  | 0.240966 | 18.2024 | 34.0051 | 52.7422 | 108.113 | 60.9519 | 57.6058 |
| ENSMUSG00000043572 | 7_Pars2   | 115.062 | 0.22351  | 0.555123 | 0.846508 | 79.8883 | 133.753 | 158.227 | 100.686 | 107.31  | 110.509 |
| ENSMUSG00000043583 | 1_493047  | 0.5534  | 1.07975  | 0.266619 | NA       | 1.01124 | 1.1335  | 0       | 0       | 0       | 1.17563 |
| ENSMUSG00000043587 | 15_Pxylp1 | 537.779 | 0.3624   | 0.18609  | 0.573178 | 608.769 | 527.079 | 678.41  | 422.55  | 445.55  | 544.316 |
| ENSMUSG00000043592 | 15_Unc5c  | 12.5323 | 0.75227  | 0.302521 | 0.685316 | 8.08995 | 19.2695 | 19.6491 | 4.95175 | 10.3017 | 12.9319 |
| ENSMUSG00000043602 | 5_Zfp3    | 125.746 | -0.56134 | 0.077795 | 0.374151 | 123.372 | 85.0127 | 96.177  | 140.3   | 157.96  | 151.656 |
| ENSMUSG00000043613 | 7_Mmp3    | 4917.79 | 1.01854  | 0.004712 | 0.059811 | 6903.77 | 8674.7  | 4176.98 | 2876.14 | 3796.19 | 3078.97 |
| ENSMUSG00000043614 | 13_Vps37  | 20.6128 | -0.24209 | 0.699309 | 0.905769 | 7.07871 | 23.8036 | 25.854  | 22.2829 | 22.3204 | 22.3369 |
| ENSMUSG00000043621 | 13_Ubxn1  | 3.91241 | -1.14005 | 0.290917 | 0.676037 | 3.03373 | 2.26701 | 2.06832 | 7.42763 | 5.15086 | 3.52688 |
| ENSMUSG00000043629 | 12_17000  | 235.304 | -0.16764 | 0.782625 | 0.935592 | 442.925 | 78.2117 | 143.748 | 295.455 | 248.1   | 203.384 |
| ENSMUSG00000043631 | 7_Ecm2    | 485.221 | -0.19596 | 0.704855 | 0.908152 | 806.973 | 197.23  | 352.649 | 536.44  | 566.595 | 451.441 |
| ENSMUSG00000043633 | 6_Fam22   | 47.376  | 0.36577  | 0.422052 | 0.774546 | 35.3936 | 57.8086 | 67.2205 | 50.3428 | 42.9238 | 30.5663 |
| ENSMUSG00000043635 | 12_Adamt  | 30.7019 | -1.84827 | 0.001257 | 0.023266 | 17.1912 | 14.7355 | 8.27329 | 58.5958 | 58.3764 | 27.0394 |
| ENSMUSG00000043639 | 14_Rbm2l  | 699.575 | -1.36307 | 7.74E-06 | 0.000423 | 362.025 | 333.25  | 479.851 | 1119.92 | 1087.69 | 814.71  |
| ENSMUSG00000043644 | 4_061000  | 14.7071 | -0.40221 | 0.51743  | 0.831128 | 9.1012  | 12.4685 | 16.5466 | 22.2829 | 13.7356 | 14.1075 |
| ENSMUSG00000043648 | 7_Pld6    | 4.36512 | -0.3429  | 0.789257 | 0.937308 | 1.01124 | 2.26701 | 8.27329 | 9.07822 | 0.85848 | 4.70251 |
| ENSMUSG00000043659 | 11_Npsr1  | 204.834 | -1.67271 | 0.000677 | 0.014724 | 155.732 | 47.6071 | 89.9721 | 336.719 | 380.305 | 218.667 |
| ENSMUSG00000043664 | 6_Tmem2   | 11.7781 | 0.80432  | 0.236325 | 0.628499 | 10.1124 | 21.5366 | 13.4441 | 9.07822 | 9.44325 | 7.05377 |
| ENSMUSG00000043668 | 13_Tox3   | 28.8621 | -1.38933 | 0.014652 | 0.130878 | 25.2811 | 7.93452 | 14.4783 | 51.1681 | 34.3391 | 39.9713 |
| ENSMUSG00000043670 | 4_Diras1  | 10.0304 | -2.44978 | 0.028054 | 0.202526 | 4.04498 | 1.1335  | 4.13665 | 39.614  | 7.72629 | 3.52688 |
| ENSMUSG00000043671 | 14_Dpy19  | 447.858 | -0.61432 | 0.017216 | 0.146467 | 389.329 | 323.048 | 349.547 | 577.705 | 563.161 | 484.359 |
| ENSMUSG00000043673 | 10_Kcns3  | 15.3073 | -1.16497 | 0.064117 | 0.335355 | 11.1237 | 9.06802 | 8.27329 | 26.4094 | 24.0374 | 12.9319 |
| ENSMUSG00000043681 | 5_Fam25c  | 229.904 | 0.05938  | 0.929665 | 0.981693 | 46.5172 | 291.31  | 366.093 | 289.678 | 133.064 | 252.76  |
| ENSMUSG00000043683 | 3_Fem1a   | 868.688 | 0.12347  | 0.728104 | 0.917291 | 577.421 | 1092.7  | 1047.61 | 958.164 | 716.828 | 819.413 |
| ENSMUSG00000043687 | 15_11900  | 15.7377 | -1.60128 | 0.038737 | 0.247192 | 2.02249 | 9.06802 | 12.4099 | 35.4876 | 15.4526 | 19.9857 |
| ENSMUSG00000043702 | 9_Pde12   | 650.987 | 0.60221  | 0.118639 | 0.4687   | 1158.89 | 663.099 | 532.593 | 438.23  | 582.906 | 530.208 |
| ENSMUSG00000043705 | 6_Capn13  | 384.467 | 0.8389   | 0.002341 | 0.036424 | 414.61  | 524.812 | 539.832 | 250.064 | 272.996 | 304.488 |
| ENSMUSG00000043716 | 13_Rpl7   | 28367.2 | -0.31379 | 0.183209 | 0.569874 | 27376.4 | 23791.1 | 24715.4 | 29157.6 | 35030.2 | 30132.5 |
| ENSMUSG00000043719 | 14_Col6a1 | 115.133 | -0.21233 | 0.66268  | 0.895941 | 79.8883 | 60.0757 | 179.944 | 138.649 | 106.451 | 125.792 |
| ENSMUSG00000043727 | 5_F83004  | 0.31162 | 0.16972  | 0.966824 | NA       | 1.01124 | 0       | 0       | 0       | 0.85848 | 0       |
| ENSMUSG00000043733 | 14_Ptpn1  | 4604.75 | 0.02485  | 0.919332 | 0.977244 | 3928.68 | 5074.69 | 4929.85 | 4520.95 | 4417.72 | 4756.59 |
| ENSMUSG00000043740 | 14_B4303  | 41.9928 | 4.30296  | 7.81E-07 | 6.24E-05 | 42.4723 | 145.088 | 52.7422 | 9.07822 | 2.57543 | 0       |
| ENSMUSG00000043747 | 12_15204  | 0       | NA       | NA       | NA       | 0       | 0       | 0       | 0       | 0       | 0       |
| ENSMUSG00000043753 | 2_Dmrta1  | 7.39879 | -0.36233 | 0.753127 | 0.925817 | 17.1912 | 1.1335  | 1.03416 | 9.07822 | 7.72629 | 8.22939 |
| ENSMUSG00000043760 | 16_Pkhd1  | 16.9074 | -1.22161 | 0.033144 | 0.225101 | 12.1349 | 7.93452 | 10.3416 | 27.2346 | 21.4619 | 22.3369 |
| ENSMUSG00000043773 | 4_170004  | 72.646  | -1.09153 | 0.008922 | 0.092529 | 63.7084 | 35.1386 | 40.3323 | 90.7822 | 123.621 | 82.2939 |
| ENSMUSG00000043782 | 8_Ccdc64  | 511.213 | 0.4788   | 0.428899 | 0.779154 | 141.574 | 813.855 | 830.432 | 494.35  | 326.221 | 460.846 |
| ENSMUSG00000043789 | 7_Vwce    | 1.39865 | -0.79911 | 0.662344 | NA       | 2.02249 | 0       | 1.03416 | 3.30117 | 0.85848 | 1.17563 |
| ENSMUSG00000043795 | 8_Prr33   | 165.699 | -0.52947 | 0.165545 | 0.54523  | 119.327 | 94.0807 | 193.388 | 218.702 | 179.422 | 189.276 |
| ENSMUSG00000043807 | 6_Ly6g5b  | 8.93666 | 0.11692  | 0.886753 | 0.969051 | 3.03373 | 13.602  | 11.3758 | 8.25292 | 10.3017 | 7.05377 |
| ENSMUSG00000043811 | 5_Rtn4r   | 12.5624 | 0.00922  | 0.992498 | 0.997676 | 1.01124 | 20.4031 | 16.5466 | 21.4576 | 7.72629 | 8.22939 |
| ENSMUSG00000043822 | 18_Adamt  | 457.454 | 0.08677  | 0.864874 | 0.962077 | 175.957 | 529.346 | 708.401 | 516.633 | 370.004 | 444.387 |
| ENSMUSG00000043831 | 11_Lysmd  | 309.216 | -0.04405 | 0.868844 | 0.962942 | 263.935 | 335.517 | 314.385 | 319.388 | 330.514 | 291.556 |
| ENSMUSG00000043832 | 13_Clec4e | 108.885 | 2.73093  | 2.97E-08 | 3.45E-06 | 273.036 | 202.897 | 92.0404 | 28.8852 | 31.7636 | 24.6882 |
| ENSMUSG00000043843 | 16_Tmem   | 7.28773 | -2.03531 | 0.068268 | 0.347454 | 2.02249 | 5.66751 | 1.03416 | 20.6323 | 12.0187 | 2.35126 |
| ENSMUSG00000043850 | 15_Clrn1  | 11.4695 | -2.14505 | 0.009025 | 0.093084 | 5.05622 | 3.40051 | 4.13665 | 21.4576 | 7.72629 | 27.0394 |
| ENSMUSG00000043857 | 16_Mgat5  | 16.2217 | 0.24297  | 0.808943 | 0.945066 | 1.01124 | 23.8036 | 27.9224 | 20.6323 | 5.15086 | 18.81   |
| ENSMUSG00000043865 | 3_Tas2r1  | 0.68392 | 1.68811  | 0.559594 | NA       | 1.01124 | 2.26701 | 0       | 0.82529 | 0       | 0       |
| ENSMUSG00000043866 | 10_Taf10  | 1084.25 | -0.03767 | 0.888565 | 0.969793 | 855.513 | 1207.18 | 1147.92 | 1133.13 | 1114.3  | 1047.48 |
| ENSMUSG00000043872 | 14_Zmym   | 383.57  | 0.3692   | 0.354406 | 0.729885 | 653.264 | 347.985 | 295.77  | 289.678 | 382.022 | 332.703 |
| ENSMUSG00000043873 | 11_Chil5  | 1.77332 | 0.53679  | 0.749732 | 0.925082 | 1.01124 | 2.26701 | 3.10248 | 0.82529 | 3.43391 | 0       |
| ENSMUSG00000043881 | 8_Kbtbd7  | 467.816 | 0.27429  | 0.568836 | 0.852874 | 905.064 | 299.245 | 331.966 | 402.743 | 435.248 | 432.631 |
| ENSMUSG00000043885 | 13_Slc36e | 1008.85 | -0.27612 | 0.45682  | 0.797055 | 1347.99 | 634.762 | 754.938 | 1158.71 | 1128.04 | 1028.67 |
| ENSMUSG00000043895 | 5_S1pr2   | 215.718 | -0.01008 | 0.979997 | 0.993796 | 126.406 | 291.31  | 227.516 | 255.841 | 195.733 | 197.505 |
| ENSMUSG00000043897 | 12_Vmn2r  | 1.72173 | -0.5872  | 0.76118  | 0.92841  | 0       | 0       | 4.13665 | 3.30117 | 1.71695 | 1.17563 |
| ENSMUSG00000043903 | 3_Gm22    | 38.2879 | -0.59491 | 0.280332 | 0.667117 | 17.1912 | 21.5366 | 52.7422 | 50.3428 | 42.0654 | 45.8495 |
| ENSMUSG00000043909 | 16_Trp53l | 1922.58 | 0.03862  | 0.866018 | 0.96244  | 1956.76 | 2011.97 | 1875.97 | 1718.26 | 1972.78 | 1999.74 |
| ENSMUSG00000043911 | 4_Olfr922 | 0.2751  | -1.54073 | 0.703687 | NA       | 0       | 0       | 0       | 1.65058 | 0       | 0       |
| ENSMUSG00000043913 | 14_Ccdc6  | 36.8717 | -1.27244 | 0.021596 | 0.172151 | 22.2474 | 14.7355 | 27.9224 | 72.6257 | 56.6595 | 27.0394 |
| ENSMUSG00000043923 | 7_Ccdc84  | 90.6922 | 0.03972  | 0.922326 | 0.978174 | 56.6297 | 119.018 | 100.314 | 78.4028 | 100.442 | 89.3477 |

|                    |           |         |          |          |          |         |         |         |         |         |         |
|--------------------|-----------|---------|----------|----------|----------|---------|---------|---------|---------|---------|---------|
| ENSMUSG00000043924 | 16_Ncmaj  | 30.0448 | -0.74323 | 0.327505 | 0.708848 | 4.04498 | 28.3376 | 35.1615 | 56.9452 | 24.0374 | 31.742  |
| ENSMUSG00000043929 | 16_Klhl15 | 305.471 | 0.33318  | 0.534595 | 0.838255 | 646.185 | 200.63  | 174.773 | 257.491 | 270.42  | 283.326 |
| ENSMUSG00000043931 | 10_Gimap  | 8.63253 | 3.30625  | 0.000726 | 0.015465 | 17.1912 | 20.4031 | 9.30745 | 0.82529 | 1.71695 | 2.35126 |
| ENSMUSG00000043932 | 5_Klri2   | 8.44144 | 6.60838  | 3.86E-06 | 0.000236 | 21.2361 | 17.0025 | 12.4099 | 0       | 0       | 0       |
| ENSMUSG00000043939 | 14_A5300  | 18.5165 | 4.56657  | 1.62E-06 | 0.00012  | 28.3148 | 58.9422 | 19.6491 | 2.47588 | 1.71695 | 0       |
| ENSMUSG00000043940 | 14_Wdfy3  | 2870.81 | 0.30081  | 0.216818 | 0.607835 | 2724.29 | 3372.17 | 3410.66 | 2693.75 | 2423.48 | 2600.49 |
| ENSMUSG00000043943 | 14_Naalar | 186.935 | -0.65597 | 0.219314 | 0.610641 | 273.036 | 81.6122 | 80.6646 | 238.509 | 232.647 | 215.14  |
| ENSMUSG00000043945 | 4_Adam6   | 0       | NA       | NA       | NA       | 0       | 0       | 0       | 0       | 0       | 0       |
| ENSMUSG00000043953 | 12_Ccrl2  | 366.182 | 1.72763  | 2.06E-05 | 0.000939 | 341.801 | 795.719 | 550.174 | 141.125 | 206.034 | 162.237 |
| ENSMUSG00000043962 | 16_Thrap  | 4688.7  | 0.28323  | 0.217681 | 0.608427 | 5176.56 | 5301.39 | 4963.98 | 3892.9  | 4107.81 | 4689.58 |
| ENSMUSG00000043964 | 14_Orai3  | 639.39  | -0.18211 | 0.650138 | 0.891567 | 324.609 | 661.966 | 810.783 | 739.462 | 612.953 | 686.567 |
| ENSMUSG00000043969 | 4_Emx2    | 849.651 | 0.2674   | 0.484562 | 0.812793 | 1380.35 | 655.165 | 748.733 | 656.933 | 858.477 | 798.251 |
| ENSMUSG00000043972 | 7_Opn5    | 0.45299 | -0.6074  | 0.85212  | NA       | 0       | 0       | 1.03416 | 0.82529 | 0.85848 | 0       |
| ENSMUSG00000043986 | 5_Spata3  | 0.55722 | 1.09192  | 0.723275 | NA       | 0       | 1.1335  | 1.03416 | 0       | 0       | 1.17563 |
| ENSMUSG00000043987 | 17_Cep16  | 783.412 | 0.22677  | 0.608669 | 0.872658 | 388.318 | 1042.82 | 1103.45 | 755.143 | 630.122 | 780.617 |
| ENSMUSG00000043991 | 3_Pura    | 2451.36 | 0.18755  | 0.70474  | 0.908152 | 4734.65 | 1467.89 | 1628.8  | 2217.56 | 2541.95 | 2117.31 |
| ENSMUSG00000043998 | 10_Mgat2  | 1054.65 | 0.36222  | 0.35644  | 0.73127  | 1816.19 | 910.203 | 832.5   | 815.389 | 1019.01 | 934.624 |
| ENSMUSG00000043999 | 6_Gpr75   | 5.94408 | -1.8902  | 0.07836  | 0.375718 | 1.01124 | 5.66751 | 1.03416 | 14.03   | 6.86782 | 7.05377 |
| ENSMUSG00000044005 | 13_Gls2   | 19.8384 | 0.1887   | 0.759996 | 0.928029 | 12.1349 | 21.5366 | 29.9907 | 25.5841 | 18.028  | 11.7563 |
| ENSMUSG00000044006 | 8_Clip2   | 59.5454 | -0.78924 | 0.214435 | 0.605122 | 19.2136 | 22.6701 | 88.9379 | 75.9269 | 63.5273 | 86.9965 |
| ENSMUSG00000044014 | 8_Npy5r   | 0.18892 | 1.1315   | 0.781553 | NA       | 0       | 1.1335  | 0       | 0       | 0       | 0       |
| ENSMUSG00000044017 | 16_Adgrd  | 144.741 | 0.23302  | 0.538744 | 0.839843 | 152.698 | 121.285 | 195.457 | 177.438 | 109.885 | 111.685 |
| ENSMUSG00000044018 | 3_Mrpl50  | 714.457 | 0.08331  | 0.84068  | 0.953262 | 1160.91 | 539.547 | 504.671 | 618.144 | 799.242 | 664.23  |
| ENSMUSG00000044022 | 5_Pcdhb2  | 42.3086 | -0.37962 | 0.491804 | 0.815581 | 63.7084 | 21.5366 | 24.8199 | 47.867  | 39.4899 | 56.4301 |
| ENSMUSG00000044024 | 15_Rell2  | 8.39804 | -1.42575 | 0.14009  | 0.507286 | 1.01124 | 3.40051 | 9.30745 | 10.7288 | 18.8865 | 7.05377 |
| ENSMUSG00000044026 | 2_Slc35g1 | 683.484 | -0.93575 | 0.620139 | 0.163849 | 711.916 | 304.912 | 390.913 | 908.647 | 1034.46 | 750.051 |
| ENSMUSG00000044030 | 4_Irf2bp1 | 315.671 | 0.18077  | 0.713222 | 0.910879 | 133.484 | 413.729 | 459.168 | 344.147 | 247.241 | 296.258 |
| ENSMUSG00000044033 | 16_Ccdc1  | 902.737 | -0.5392  | 0.136506 | 0.501691 | 1020.35 | 536.147 | 651.522 | 1176.04 | 1194.14 | 838.223 |
| ENSMUSG00000044034 | 11_Npb    | 0.80452 | -3.0413  | 0.339074 | NA       | 0       | 0       | 2.47588 | 0       | 2.35126 | 0       |
| ENSMUSG00000044037 | 15_Als2cl | 2541.57 | 0.71937  | 0.117656 | 0.466589 | 1337.88 | 4131.62 | 4017.72 | 1805.74 | 1815.68 | 2140.82 |
| ENSMUSG00000044041 | 4_Krt13   | 13333.9 | 0.98018  | 0.066664 | 0.342409 | 5451.62 | 25200   | 22439.2 | 9345.61 | 8249.96 | 9316.85 |
| ENSMUSG00000044042 | 18_Fmn1   | 952.009 | 0.01473  | 0.966621 | 0.991087 | 1363.16 | 739.044 | 768.382 | 929.279 | 1051.63 | 860.56  |
| ENSMUSG00000044043 | 4_Podhb1  | 129.039 | -0.79149 | 0.093359 | 0.415917 | 155.732 | 52.1411 | 75.4938 | 163.408 | 182.856 | 144.602 |
| ENSMUSG00000044052 | 3_Ccr10   | 6.17053 | -0.31346 | 0.816133 | 0.947479 | 0       | 11.335  | 5.17081 | 9.07822 | 0.85848 | 10.5807 |
| ENSMUSG00000044055 | 5_Otos    | 0.95502 | -0.83094 | 0.685828 | NA       | 1.01124 | 0       | 1.03416 | 1.65058 | 0.85848 | 1.17563 |
| ENSMUSG00000044056 | 3_Efcab9  | 1.60411 | 0.19835  | 0.922126 | NA       | 1.01124 | 0       | 4.13665 | 3.30117 | 0       | 1.17563 |
| ENSMUSG00000044060 | 17_A8300  | 151.889 | -0.34057 | 0.40935  | 0.766531 | 202.249 | 83.8792 | 115.826 | 170.836 | 175.129 | 163.412 |
| ENSMUSG00000044066 | 14_Cep68  | 564.79  | 0.10741  | 0.702623 | 0.907214 | 713.938 | 544.081 | 499.5   | 541.392 | 585.481 | 504.344 |
| ENSMUSG00000044067 | 6_Gpr22   | 3.96394 | -1.24006 | 0.524572 | 0.833095 | 7.07871 | 0       | 0       | 11.5541 | 5.15086 | 0       |
| ENSMUSG00000044068 | 6_Zrsr1   | 479.183 | -0.4792  | 0.147848 | 0.520378 | 543.038 | 308.313 | 349.547 | 579.355 | 584.623 | 510.222 |
| ENSMUSG00000044071 | 7_Fam19c  | 4.16569 | -0.42853 | 0.747489 | 0.924734 | 5.05622 | 5.66751 | 0       | 2.47588 | 9.44325 | 2.35126 |
| ENSMUSG00000044072 | 14_Eml6   | 69.0031 | -0.91473 | 0.013249 | 0.123042 | 49.551  | 48.7406 | 45.5031 | 107.288 | 93.574  | 69.362  |
| ENSMUSG00000044080 | 9_S100a1  | 995.779 | -1.33576 | 0.000236 | 0.006579 | 429.779 | 482.872 | 782.86  | 1784.28 | 1316.9  | 1177.98 |
| ENSMUSG00000044083 | 11_Efcab1 | 2.57442 | 0.63878  | 0.642024 | 0.888256 | 3.03373 | 3.40051 | 3.10248 | 2.47588 | 3.43391 | 0       |
| ENSMUSG00000044084 | 2_493340  | 0.13755 | -0.79206 | 0.84609  | NA       | 0       | 0       | 0       | 0.82529 | 0       | 0       |
| ENSMUSG00000044086 | 8_Lmod3   | 35.4717 | -1.11516 | 0.075364 | 0.36756  | 33.3711 | 6.80102 | 26.8882 | 63.5475 | 35.1976 | 47.0251 |
| ENSMUSG00000044092 | 8_C13005  | 10.1664 | 0.95496  | 0.406468 | 0.764314 | 0       | 23.8036 | 16.5466 | 9.07822 | 6.86782 | 4.70251 |
| ENSMUSG00000044098 | 14_Rsbn1  | 948.517 | 0.52898  | 0.30041  | 0.683516 | 2063.95 | 643.83  | 653.59  | 693.246 | 900.542 | 735.943 |
| ENSMUSG00000044103 | 4_Il1f9   | 605.589 | 0.71074  | 0.068467 | 0.348045 | 833.265 | 913.603 | 508.807 | 343.322 | 630.122 | 404.416 |
| ENSMUSG00000044117 | 12_29000  | 17.3767 | -2.85927 | 0.00049  | 0.0115   | 4.04498 | 4.53401 | 4.13665 | 49.5175 | 32.6221 | 9.40502 |
| ENSMUSG00000044120 | 3_Olfr683 | 2.09386 | 0.6443   | 0.723006 | 0.914332 | 0       | 4.53401 | 3.10248 | 0       | 2.57543 | 2.35126 |
| ENSMUSG00000044122 | 14_Proca  | 161.093 | 0.03411  | 0.900975 | 0.973382 | 167.867 | 156.423 | 164.432 | 148.553 | 158.818 | 170.466 |
| ENSMUSG00000044134 | 9_Fam10c  | 153.482 | 0.14449  | 0.798923 | 0.940596 | 48.5397 | 184.761 | 250.267 | 163.408 | 130.489 | 143.427 |
| ENSMUSG00000044139 | 12_Prss5c | 12.6075 | -0.4109  | 0.547115 | 0.843639 | 8.08995 | 6.80102 | 17.5807 | 16.5058 | 13.7356 | 12.9319 |
| ENSMUSG00000044145 | 2_181002  | 4.70946 | -0.30083 | 0.757051 | 0.927615 | 5.05622 | 4.53401 | 3.10248 | 7.42763 | 3.43391 | 4.70251 |
| ENSMUSG00000044147 | 7_Arf6    | 4780.71 | 0.87909  | 0.027444 | 0.199922 | 9530.98 | 4897.87 | 4152.16 | 2853.86 | 3489.71 | 3759.66 |
| ENSMUSG00000044148 | 6_181003  | 1268.03 | 0.23426  | 0.500993 | 0.822403 | 1953.72 | 1109.7  | 1048.64 | 1075.36 | 1243.93 | 1176.8  |
| ENSMUSG00000044149 | 6_Nkrf    | 239.548 | 0.66967  | 0.183437 | 0.570202 | 510.678 | 205.164 | 166.5   | 136.999 | 227.496 | 190.452 |
| ENSMUSG00000044150 | 12_A8300  | 262.369 | 0.70207  | 0.186778 | 0.573937 | 603.713 | 199.497 | 171.671 | 175.787 | 237.798 | 185.749 |
| ENSMUSG00000044155 | 11_Lsm8   | 851.367 | 0.34222  | 0.292363 | 0.676777 | 1273.16 | 812.722 | 769.416 | 648.68  | 800.101 | 804.129 |
| ENSMUSG00000044156 | 14_Hepac  | 5.97421 | -0.69348 | 0.42877  | 0.779125 | 6.06747 | 4.53401 | 3.10248 | 9.07822 | 6.00934 | 7.05377 |
| ENSMUSG00000044162 | 11_Tnlp3  | 25.5233 | 0.65557  | 0.259765 | 0.649568 | 35.3936 | 41.9396 | 16.5466 | 16.5058 | 27.4713 | 15.2832 |
| ENSMUSG00000044164 | 2_Rnf182  | 21.0403 | -0.85624 | 0.140873 | 0.508951 | 19.2136 | 9.06802 | 16.5466 | 35.4876 | 18.8865 | 27.0394 |
| ENSMUSG00000044165 | 12_Bcl2l1 | 153.339 | -0.21869 | 0.563819 | 0.850768 | 177.979 | 106.549 | 140.646 | 130.396 | 216.336 | 148.129 |
| ENSMUSG00000044167 | 6_Foxo1   | 1843.54 | 0.52151  | 0.118687 | 0.4687   | 2936.65 | 1840.81 | 1741.53 | 1264.35 | 1542.68 | 1735.23 |
| ENSMUSG00000044170 | 4_Olfr138 | 0.8701  | 2.00725  | 0.537776 | NA       | 4.04498 | 0       | 0       | 0       | 0       | 1.17563 |
| ENSMUSG00000044172 | 6_Ptx4    | 20.2917 | -0.25991 | 0.698039 | 0.905638 | 11.1237 | 10.2015 | 34.1273 | 28.0599 | 20.6034 | 17.6344 |
| ENSMUSG00000044176 | 11_Spink1 | 0.88394 | -1.92912 | 0.554189 | NA       | 1.01124 | 0       | 0       | 0       | 4.29238 | 0       |
| ENSMUSG00000044177 | 4_Wfikkn1 | 215.718 | -1.61268 | 0.00018  | 0.005317 | 72.8096 | 82.7457 | 163.398 | 416.773 | 276.43  | 282.151 |
| ENSMUSG00000044186 | 10_Nkx2-4 | 0.30991 | 0.16972  | 0.966824 | NA       | 0       | 0       | 1.03416 | 0.82529 | 0       | 0       |
| ENSMUSG00000044197 | 8_Gpr146  | 476.522 | -0.98533 | 0.001044 | 0.020188 | 291.238 | 312.847 | 355.752 | 792.281 | 580.33  | 526.681 |
| ENSMUSG00000044199 | 5_S1pr4   | 22.2449 | 0.5174   | 0.476092 | 0.807493 | 6.06747 | 38.5391 | 34.1273 | 22.2829 | 17.1695 | 15.2832 |
| ENSMUSG00000044201 | 9_Cdc25c  | 155.486 | 0.05045  | 0.870456 | 0.963272 | 180.001 | 148.489 | 145.817 | 125.444 | 167.403 | 165.764 |
| ENSMUSG00000044206 | 3_Vsig4   | 5.04315 | 1.1252   | 0.397962 | 0.758476 | 13.1462 | 5.66751 | 2.06832 | 1.65058 | 7.72629 | 0       |
| ENSMUSG00000044216 | 6_Kcnj4   | 0.332   | 0.16972  | 0.966824 | NA       | 0       | 1.1335  | 0       | 0       | 0.85848 | 0       |

|                    |            |         |          |          |          |         |         |         |         |         |         |
|--------------------|------------|---------|----------|----------|----------|---------|---------|---------|---------|---------|---------|
| ENSMUSG00000044217 | 16_Aqp5    | 51869.1 | 0.65145  | 0.279833 | 0.666905 | 15650   | 85479.7 | 89024.8 | 46634   | 27152.8 | 47273.2 |
| ENSMUSG00000044221 | 14_Grsf1   | 1599.83 | 0.32195  | 0.444058 | 0.788515 | 2860.81 | 1217.38 | 1254.44 | 1259.4  | 1607.93 | 1399    |
| ENSMUSG00000044222 | 3_Defb13   | 0.17236 | 1.1315   | 0.781553 | NA       | 0       | 0       | 1.03416 | 0       | 0       | 0       |
| ENSMUSG00000044224 | 16_Dnajc3  | 1204.35 | 0.22205  | 0.554211 | 0.846134 | 1931.48 | 968.011 | 990.727 | 981.273 | 1146.07 | 1208.55 |
| ENSMUSG00000044229 | 8_Nxpe4    | 55.9422 | -0.24523 | 0.556757 | 0.847577 | 64.7196 | 35.1386 | 53.7764 | 61.0716 | 70.3951 | 50.552  |
| ENSMUSG00000044231 | 2_Nhlrc1   | 69.4519 | -0.44486 | 0.292713 | 0.677035 | 76.8546 | 39.6726 | 59.9814 | 75.1016 | 100.442 | 64.6595 |
| ENSMUSG00000044244 | 18_Il20rb  | 1630.12 | 0.24793  | 0.487198 | 0.814019 | 1094.17 | 1982.5  | 2232.75 | 1363.38 | 1449.11 | 1658.81 |
| ENSMUSG00000044248 | 3_Vmn1r4   | 0.13755 | -0.79206 | 0.84609  | NA       | 0       | 0       | 0       | 0.82529 | 0       | 0       |
| ENSMUSG00000044250 | 7_Pced1b   | 109.724 | 0.5121   | 0.284228 | 0.670663 | 57.6409 | 160.957 | 168.568 | 100.686 | 85.8477 | 84.6452 |
| ENSMUSG00000044252 | 17_Osblp1  | 1053.77 | 0.10773  | 0.713233 | 0.910879 | 1393.49 | 938.54  | 947.292 | 1009.33 | 1091.12 | 942.854 |
| ENSMUSG00000044254 | 6_Pcsk9    | 25.1369 | -0.85106 | 0.205676 | 0.59724  | 8.08995 | 13.602  | 32.059  | 42.9152 | 18.8865 | 35.2688 |
| ENSMUSG00000044258 | 9_Ctla2a   | 159.665 | 0.17708  | 0.702425 | 0.907094 | 230.564 | 188.161 | 89.9721 | 152.679 | 193.157 | 103.455 |
| ENSMUSG00000044279 | 15_Crb3    | 499.167 | 0.7613   | 0.125793 | 0.48231  | 255.845 | 862.596 | 765.28  | 439.881 | 266.986 | 404.416 |
| ENSMUSG00000044287 | 6_Nrn1l    | 0.58501 | -1.14575 | 0.75298  | NA       | 0       | 0       | 1.03416 | 2.47588 | 0       | 0       |
| ENSMUSG00000044288 | 6_Cnr1     | 25.5918 | -0.83222 | 0.173272 | 0.556848 | 28.3148 | 13.602  | 13.4441 | 46.2164 | 34.3391 | 17.6344 |
| ENSMUSG00000044294 | 7_Krt84    | 3.73899 | -0.13872 | 0.917423 | 0.976775 | 0       | 4.53401 | 6.20497 | 2.47588 | 6.86782 | 2.35126 |
| ENSMUSG00000044296 | 10_Zfp87c  | 50.1372 | -0.44465 | 0.238173 | 0.630377 | 40.4498 | 49.8741 | 37.2298 | 61.8969 | 54.9425 | 56.4301 |
| ENSMUSG00000044303 | 6_Cdkn2a   | 2.07049 | 0.49966  | 0.791536 | 0.937536 | 0       | 1.1335  | 6.20497 | 1.65058 | 3.43391 | 0       |
| ENSMUSG00000044308 | 17_Ubr3    | 3092.55 | 0.30133  | 0.412351 | 0.767838 | 5051.17 | 2633.13 | 2558.52 | 2486.61 | 2938.57 | 2887.34 |
| ENSMUSG00000044309 | 7_Apol7c   | 10.528  | 0.83175  | 0.364913 | 0.738128 | 28.3148 | 9.06802 | 3.10248 | 9.07822 | 7.72629 | 5.87814 |
| ENSMUSG00000044313 | 13_Mab21   | 61.8547 | 0.38219  | 0.479111 | 0.809393 | 40.4498 | 115.617 | 53.7764 | 35.4876 | 54.084  | 71.7133 |
| ENSMUSG00000044317 | 7_Gpr4     | 31.7623 | -1.14023 | 0.019666 | 0.161119 | 16.1799 | 24.9371 | 18.6149 | 41.2646 | 56.6595 | 32.9176 |
| ENSMUSG00000044320 | 14_17000   | 12.0716 | -0.29112 | 0.706266 | 0.908737 | 4.04498 | 18.136  | 10.3416 | 9.07822 | 12.0187 | 18.81   |
| ENSMUSG00000044322 | 6_Dsc1     | 36.671  | 0.57615  | 0.267009 | 0.654888 | 69.7759 | 32.8716 | 28.9565 | 26.4094 | 32.6221 | 29.3907 |
| ENSMUSG00000044328 | 13_Trp53i  | 43.9277 | -0.67519 | 0.431703 | 0.780264 | 3.03373 | 38.5391 | 59.9814 | 83.3545 | 25.7543 | 52.9033 |
| ENSMUSG00000044337 | 5_Ackr3    | 996.214 | -0.46163 | 0.141562 | 0.510149 | 639.106 | 930.606 | 945.224 | 1410.42 | 1036.18 | 1015.74 |
| ENSMUSG00000044338 | 9_Aplnr    | 44.8264 | -0.03423 | 0.938581 | 0.985118 | 48.5397 | 52.1411 | 32.059  | 49.5175 | 32.6221 | 54.0789 |
| ENSMUSG00000044339 | 12_Alkbh3  | 25.4226 | -0.05959 | 0.914517 | 0.976048 | 12.1349 | 29.4711 | 33.0932 | 25.5841 | 24.0374 | 28.2151 |
| ENSMUSG00000044340 | 7_Phlp1    | 1402.09 | 0.39101  | 0.097961 | 0.424972 | 1409.67 | 1628.84 | 1734.29 | 1219.78 | 1185.56 | 1234.41 |
| ENSMUSG00000044345 | 9_Marvelc  | 868.336 | -0.27237 | 0.320853 | 0.701885 | 643.151 | 766.248 | 950.394 | 938.357 | 944.325 | 967.542 |
| ENSMUSG00000044348 | 14_Slc25a3 | 111.431 | -0.01924 | 0.966986 | 0.991132 | 182.024 | 69.1437 | 80.6646 | 115.541 | 101.3   | 119.914 |
| ENSMUSG00000044349 | 15_Snhg1   | 171.63  | -1.61099 | 0.05278  | 0.298513 | 182.024 | 54.4081 | 17.5807 | 467.115 | 236.94  | 71.7133 |
| ENSMUSG00000044350 | 14_Lacc1   | 147.752 | 0.80712  | 0.027694 | 0.200891 | 248.766 | 187.028 | 128.236 | 100.686 | 112.46  | 109.333 |
| ENSMUSG00000044352 | 6_Sowah2   | 44.6651 | -0.34549 | 0.500888 | 0.822326 | 64.7196 | 27.2041 | 25.854  | 45.3911 | 47.2162 | 57.6058 |
| ENSMUSG00000044359 | 1_P2ry4    | 15.1095 | 0.30951  | 0.631064 | 0.882337 | 8.08995 | 21.5366 | 20.6832 | 14.8553 | 13.7356 | 11.7563 |
| ENSMUSG00000044361 | 15_BC02a   | 2.30122 | 0.26023  | 0.850812 | 0.957445 | 1.01124 | 4.53401 | 2.06832 | 3.30117 | 1.71695 | 1.17563 |
| ENSMUSG00000044362 | 7_Ccdc89   | 49.8019 | 0.38312  | 0.353099 | 0.729327 | 71.7983 | 45.3401 | 51.7081 | 45.3911 | 35.1976 | 49.3764 |
| ENSMUSG00000044364 | 5_Tmem7    | 4.84407 | -1.29729 | 0.223653 | 0.613683 | 1.01124 | 2.26701 | 5.17081 | 9.90351 | 6.00934 | 4.70251 |
| ENSMUSG00000044365 | 15_Cxxc4   | 103     | -0.89657 | 0.131598 | 0.493329 | 135.507 | 32.8716 | 47.5714 | 176.613 | 140.79  | 84.6452 |
| ENSMUSG00000044367 | 7_Slc16a1  | 443.3   | 0.47863  | 0.217173 | 0.607835 | 300.34  | 646.097 | 601.882 | 327.641 | 347.683 | 436.158 |
| ENSMUSG00000044375 | 7_BC027c   | 93.9924 | -2.40165 | 0.001338 | 0.024325 | 26.2924 | 54.4081 | 9.30745 | 297.105 | 122.762 | 54.0789 |
| ENSMUSG00000044378 | 12_Slc15e1 | 1.21189 | -2.47207 | 0.244368 | NA       | 1.01124 | 0       | 0       | 1.65058 | 3.43391 | 1.17563 |
| ENSMUSG00000044387 | 5_241008   | 0.64191 | 0.29808  | 0.908164 | NA       | 0       | 1.1335  | 1.03416 | 0.82529 | 0.85848 | 0       |
| ENSMUSG00000044390 | 4_Tigd3    | 11.6094 | -0.27409 | 0.750679 | 0.9253   | 2.02249 | 19.2695 | 10.3416 | 16.5058 | 8.58477 | 12.9319 |
| ENSMUSG00000044393 | 15_Dsg2    | 1776.32 | 0.58067  | 0.06695  | 0.343312 | 2751.6  | 1733.13 | 1901.82 | 1189.25 | 1436.23 | 1645.88 |
| ENSMUSG00000044405 | 4_Adig     | 0.78094 | -1.68624 | 0.545772 | NA       | 0       | 0       | 1.03416 | 2.47588 | 0       | 1.17563 |
| ENSMUSG00000044408 | 6_Sptssa   | 1413.91 | 0.14591  | 0.768234 | 0.931118 | 2695.98 | 811.588 | 948.326 | 1303.96 | 1401.03 | 1322.58 |
| ENSMUSG00000044424 | 3_Gm949    | 2093.85 | 0.28369  | 0.680807 | 0.902479 | 5184.65 | 836.525 | 875.935 | 1435.18 | 2572    | 1658.81 |
| ENSMUSG00000044429 | 8_Cryga    | 163.511 | -3.18259 | 0.001899 | 0.031235 | 3.03373 | 38.5391 | 55.8447 | 745.239 | 54.9425 | 83.4696 |
| ENSMUSG00000044430 | 11_Klk12   | 0.36128 | 2.05714  | 0.610196 | NA       | 0       | 1.1335  | 1.03416 | 0       | 0       | 0       |
| ENSMUSG00000044433 | 15_Cams1   | 752.941 | 0.39046  | 0.51018  | 0.827179 | 210.339 | 1105.17 | 1247.2  | 746.064 | 530.539 | 678.337 |
| ENSMUSG00000044441 | 2_Olfr144  | 0.42371 | -2.13816 | 0.587702 | NA       | 0       | 0       | 0       | 0.82529 | 1.71695 | 0       |
| ENSMUSG00000044442 | 11_N6aml   | 486.872 | -0.19287 | 0.493155 | 0.816235 | 552.139 | 414.862 | 396.084 | 491.049 | 567.453 | 499.642 |
| ENSMUSG00000044447 | 4_Dock5    | 998.485 | -0.63841 | 0.011453 | 0.111368 | 903.041 | 678.968 | 761.143 | 1223.08 | 1239.64 | 1185.03 |
| ENSMUSG00000044452 | 10_Zfp501  | 894.599 | 0.23158  | 0.332165 | 0.711524 | 961.693 | 974.812 | 961.77  | 735.335 | 827.572 | 906.409 |
| ENSMUSG00000044453 | 5_Ffar1    | 0.7092  | 1.61504  | 0.571289 | NA       | 1.01124 | 0       | 2.06832 | 0       | 0       | 1.17563 |
| ENSMUSG00000044456 | 16_Rin3    | 56.2979 | -0.27679 | 0.686156 | 0.904398 | 10.1124 | 83.8792 | 58.9472 | 78.4028 | 52.3671 | 54.0789 |
| ENSMUSG00000044461 | 5_Shisa2   | 674.813 | -0.39735 | 0.335108 | 0.713739 | 846.412 | 332.116 | 568.789 | 925.153 | 703.951 | 672.459 |
| ENSMUSG00000044465 | 18_Fam1f   | 1382.44 | 0.66031  | 0.031105 | 0.21685  | 1210.46 | 2040.31 | 1829.43 | 1036.57 | 1051.63 | 1126.25 |
| ENSMUSG00000044468 | 14_Fam4f   | 294.216 | -0.65191 | 0.050221 | 0.290147 | 293.261 | 190.428 | 202.696 | 421.724 | 292.741 | 364.445 |
| ENSMUSG00000044469 | 7_Tnfaip8  | 30.2945 | 0.38752  | 0.473809 | 0.806769 | 18.2024 | 36.2721 | 48.6056 | 31.3611 | 21.4619 | 25.8638 |
| ENSMUSG00000044471 | 11_Lincpi1 | 2.77928 | -0.66656 | 0.600905 | 0.87     | 1.01124 | 3.40051 | 2.06832 | 4.95175 | 1.71695 | 3.52688 |
| ENSMUSG00000044475 | 13_Asccl1  | 688.516 | 0.05425  | 0.854154 | 0.958493 | 538.993 | 725.442 | 839.739 | 643.728 | 637.848 | 745.348 |
| ENSMUSG00000044477 | 10_Zfand1  | 1071.47 | 0.07324  | 0.811637 | 0.946092 | 840.344 | 1283.13 | 1172.74 | 1218.13 | 879.939 | 1034.55 |
| ENSMUSG00000044496 | 6_251003   | 804.358 | 0.60969  | 0.162106 | 0.540795 | 506.633 | 1243.45 | 1165.5  | 783.202 | 458.427 | 668.932 |
| ENSMUSG00000044499 | 11_Hs3stf  | 17.1471 | -1.47091 | 0.024323 | 0.185556 | 15.1687 | 7.93452 | 4.13665 | 27.2346 | 24.8958 | 23.5126 |
| ENSMUSG00000044501 | 17_Zfp75f  | 275.699 | 0.78636  | 0.202088 | 0.593308 | 730.118 | 146.222 | 170.637 | 188.992 | 217.195 | 201.032 |
| ENSMUSG00000044502 | 16_Bod1    | 942.668 | -0.30199 | 0.329693 | 0.710109 | 597.645 | 1012.22 | 923.506 | 1091.86 | 1013.86 | 1016.92 |
| ENSMUSG00000044505 | 5_Lingo4   | 3.92338 | -0.08401 | 0.943687 | 0.986414 | 6.06747 | 3.40051 | 2.06832 | 8.25292 | 2.57543 | 1.17563 |
| ENSMUSG00000044518 | 3_Foxe3    | 0.60858 | -2.64656 | 0.451247 | NA       | 0       | 0       | 0       | 2.47588 | 0       | 1.17563 |
| ENSMUSG00000044519 | 8_Zfp488   | 2.50654 | -1.4419  | 0.482479 | 0.811473 | 4.04498 | 0       | 0       | 4.12646 | 6.86782 | 0       |
| ENSMUSG00000044522 | 8_A73002   | 12.5819 | -0.41843 | 0.546526 | 0.842968 | 13.1462 | 4.53401 | 14.4783 | 14.8553 | 12.0187 | 16.4588 |
| ENSMUSG00000044528 | 5_Tram1l1  | 30.5153 | -1.58304 | 0.003057 | 0.043987 | 22.2474 | 7.93452 | 15.5124 | 53.644  | 43.7823 | 39.9713 |
| ENSMUSG00000044533 | 15_Rps2    | 6607.62 | 0.10592  | 0.814074 | 0.946895 | 2984.18 | 8696.23 | 8870    | 6974.55 | 5871.12 | 6249.64 |
| ENSMUSG00000044534 | 7_Ackr2    | 9.59617 | 0.50106  | 0.492873 | 0.816105 | 10.1124 | 7.93452 | 15.5124 | 7.42763 | 6.00934 | 10.5807 |

|                    |           |         |          |          |          |         |         |         |         |         |         |
|--------------------|-----------|---------|----------|----------|----------|---------|---------|---------|---------|---------|---------|
| ENSMUSG00000044542 | 3_Prop1   | 0.19594 | -0.79206 | 0.84609  | NA       | 0       | 0       | 0       | 0       | 0       | 1.17563 |
| ENSMUSG00000044544 | 3_492151  | 0.33902 | -1.78366 | 0.658108 | NA       | 0       | 0       | 0       | 0       | 0.85848 | 1.17563 |
| ENSMUSG00000044548 | 11_Dact1  | 177.683 | -0.36759 | 0.36997  | 0.741299 | 228.541 | 95.2142 | 141.68  | 221.178 | 204.318 | 175.169 |
| ENSMUSG00000044550 | 11_Tceal3 | 187.276 | -1.85436 | 5.06E-07 | 4.28E-05 | 66.7421 | 70.2772 | 106.519 | 367.255 | 282.439 | 230.423 |
| ENSMUSG00000044551 | 13_99300  | 41.436  | -0.57287 | 0.21138  | 0.602834 | 30.3373 | 43.0731 | 26.8882 | 65.1981 | 45.4993 | 37.6201 |
| ENSMUSG00000044556 | 3_Tex38   | 2.85847 | -0.77371 | 0.530083 | 0.836496 | 1.01124 | 2.26701 | 3.10248 | 4.12646 | 4.29238 | 2.35126 |
| ENSMUSG00000044562 | 10_Rasip1 | 56.4334 | -0.18449 | 0.76013  | 0.928108 | 19.2136 | 57.8086 | 81.6988 | 88.3063 | 48.0747 | 43.4982 |
| ENSMUSG00000044566 | 15_Cage1  | 136.192 | 0.1962   | 0.52517  | 0.833294 | 167.867 | 131.486 | 136.509 | 113.065 | 123.621 | 144.602 |
| ENSMUSG00000044573 | 14_Acp1   | 1373.68 | 0.24976  | 0.39662  | 0.757228 | 1926.42 | 1274.06 | 1276.16 | 1190.9  | 1295.44 | 1279.08 |
| ENSMUSG00000044576 | 6_Gareml  | 0.63637 | 0.32817  | 0.912305 | NA       | 0       | 1.1335  | 1.03416 | 1.65058 | 0       | 0       |
| ENSMUSG00000044581 | 7_493241  | 0.13755 | -0.79206 | 0.84609  | NA       | 0       | 0       | 0       | 0.82529 | 0       | 0       |
| ENSMUSG00000044583 | 13_Tlr7   | 95.4467 | 1.78299  | 0.00111  | 0.021196 | 257.867 | 114.484 | 71.3571 | 51.9934 | 33.4806 | 43.4982 |
| ENSMUSG00000044594 | 14_Serpin | 834.614 | 1.27321  | 0.010501 | 0.104392 | 1992.15 | 871.664 | 678.41  | 354.05  | 689.357 | 422.05  |
| ENSMUSG00000044595 | 10_Dnd1   | 13.4211 | 0.29919  | 0.686155 | 0.904398 | 23.2586 | 4.53401 | 16.5466 | 11.5541 | 12.8772 | 11.7563 |
| ENSMUSG00000044600 | 14_Smim1  | 2702.68 | -0.17441 | 0.446177 | 0.789854 | 2703.06 | 2369.02 | 2546.11 | 2646.71 | 2936.85 | 3014.31 |
| ENSMUSG00000044617 | 7_Zbtb39  | 460.242 | 0.15518  | 0.659961 | 0.895103 | 315.508 | 648.364 | 491.227 | 439.056 | 424.088 | 443.212 |
| ENSMUSG00000044626 | 12_Liph   | 1433.76 | 0.24284  | 0.324889 | 0.705459 | 1606.87 | 1585.77 | 1469.54 | 1126.52 | 1433.66 | 1380.19 |
| ENSMUSG00000044627 | 11_Swi5   | 3115.47 | -0.04156 | 0.850833 | 0.957445 | 3211.71 | 2969.78 | 3030.09 | 2959.5  | 3292.26 | 3229.45 |
| ENSMUSG00000044628 | 4_Rnf208  | 132.147 | 0.3746   | 0.611267 | 0.874284 | 21.2361 | 227.834 | 198.559 | 142.776 | 66.1027 | 136.373 |
| ENSMUSG00000044629 | 5_Cnrip1  | 124.568 | -1.10947 | 0.004289 | 0.055909 | 112.248 | 62.3427 | 62.0497 | 198.895 | 161.394 | 150.48  |
| ENSMUSG00000044633 | 3_B53004  | 0.88219 | 2.12202  | 0.434831 | NA       | 0       | 3.40051 | 1.03416 | 0       | 0.85848 | 0       |
| ENSMUSG00000044636 | 5_Csrnp2  | 134.364 | 0.04062  | 0.893588 | 0.971063 | 139.552 | 140.554 | 128.236 | 113.89  | 128.772 | 155.183 |
| ENSMUSG00000044641 | 7_Pard6b  | 1141.22 | 0.58     | 0.027238 | 0.199012 | 1185.18 | 1495.09 | 1423.01 | 1040.69 | 885.09  | 818.237 |
| ENSMUSG00000044645 | 7_Gm733   | 298.749 | -0.54588 | 0.092859 | 0.414981 | 231.575 | 295.844 | 201.662 | 319.388 | 439.54  | 304.488 |
| ENSMUSG00000044646 | 14_Zbtb7c | 504.404 | 0.25088  | 0.582964 | 0.860399 | 249.777 | 620.026 | 774.587 | 478.67  | 383.739 | 519.627 |
| ENSMUSG00000044647 | 16_Csrnp  | 59.7107 | -0.9881  | 0.133728 | 0.497275 | 76.8546 | 21.5366 | 21.7174 | 127.92  | 64.3858 | 45.8495 |
| ENSMUSG00000044664 | 7_Prss42  | 0.51138 | -0.81111 | 0.797958 | NA       | 0       | 0       | 1.03416 | 0       | 0.85848 | 1.17563 |
| ENSMUSG00000044667 | 12_Lppr4  | 101.082 | -1.18928 | 0.01685  | 0.144025 | 105.169 | 35.1386 | 44.4689 | 154.33  | 154.526 | 112.86  |
| ENSMUSG00000044674 | 6_Fzd1    | 781.782 | 0.01154  | 0.96598  | 0.990781 | 777.647 | 736.777 | 840.773 | 925.978 | 751.167 | 658.352 |
| ENSMUSG00000044676 | 9_Zfp612  | 182.793 | -0.50867 | 0.113002 | 0.455953 | 135.507 | 125.819 | 191.32  | 199.721 | 238.657 | 205.735 |
| ENSMUSG00000044678 | 11_Ly6k   | 6.92066 | 0.81663  | 0.344153 | 0.721706 | 5.05622 | 7.93452 | 13.4441 | 5.77705 | 3.43391 | 5.87814 |
| ENSMUSG00000044681 | 18_Cnpy1  | 3.46027 | 0.27189  | 0.827263 | 0.950636 | 8.08995 | 1.1335  | 2.06832 | 1.65058 | 4.29238 | 3.52688 |
| ENSMUSG00000044689 | 5_Gm137   | 1.47826 | -1.6721  | 0.413209 | NA       | 0       | 1.1335  | 1.03416 | 4.12646 | 2.57543 | 0       |
| ENSMUSG00000044700 | 15_Tmem   | 350.18  | -0.2576  | 0.62342  | 0.879151 | 114.271 | 402.394 | 440.553 | 490.224 | 315.061 | 338.581 |
| ENSMUSG00000044701 | 5_Ii27    | 5.41534 | 5.96509  | 0.000841 | 0.017193 | 1.01124 | 17.0025 | 14.4783 | 0       | 0       | 0       |
| ENSMUSG00000044702 | 13_Palb2  | 110.485 | 0.61279  | 0.044624 | 0.269391 | 151.687 | 128.086 | 120.997 | 85.0051 | 90.1401 | 86.9965 |
| ENSMUSG00000044703 | 5_Phfi1a  | 400.032 | 3.14728  | 3.46E-10 | 6.19E-08 | 864.614 | 837.659 | 455.031 | 55.2946 | 138.215 | 49.3764 |
| ENSMUSG00000044707 | 7_Ccnj1   | 176.259 | 0.34669  | 0.276873 | 0.663317 | 167.867 | 196.096 | 227.516 | 140.3   | 136.498 | 189.276 |
| ENSMUSG00000044708 | 5_Kcnj10  | 30.997  | -2.0781  | 0.000612 | 0.013585 | 20.2249 | 10.2015 | 5.17081 | 64.3728 | 47.2162 | 38.7957 |
| ENSMUSG00000044709 | 5_Gemin7  | 491.839 | -0.08943 | 0.780987 | 0.935516 | 332.699 | 507.809 | 589.472 | 523.235 | 509.935 | 487.886 |
| ENSMUSG00000044712 | 15_Slc38e | 257.917 | 0.27192  | 0.399783 | 0.759207 | 357.98  | 216.499 | 271.984 | 226.955 | 260.119 | 213.964 |
| ENSMUSG00000044715 | 6_Gskip   | 776.403 | 0.1479   | 0.638869 | 0.886563 | 1043.6  | 758.313 | 646.351 | 621.445 | 819.846 | 768.861 |
| ENSMUSG00000044716 | 12_Dok7   | 7.55368 | -0.72895 | 0.467277 | 0.803613 | 1.01124 | 6.80102 | 9.30745 | 15.6806 | 4.29238 | 8.22939 |
| ENSMUSG00000044719 | 4_E23002  | 3.0648  | 0.02611  | 0.983203 | 0.994651 | 6.06747 | 1.1335  | 2.06832 | 2.47588 | 4.29238 | 2.35126 |
| ENSMUSG00000044724 | 8_Gpr152  | 18.5994 | -2.96179 | 0.000261 | 0.007091 | 4.04498 | 5.66751 | 3.10248 | 56.1199 | 30.9052 | 11.7563 |
| ENSMUSG00000044726 | 7_Erich5  | 6951.46 | 0.31378  | 0.309356 | 0.691812 | 9625.02 | 6716    | 6771.69 | 5037.58 | 6144.98 | 7413.51 |
| ENSMUSG00000044734 | 15_Serpin | 3839.82 | 0.50931  | 0.136463 | 0.501691 | 5405.1  | 4972.68 | 3154.19 | 2532    | 3876.02 | 3098.95 |
| ENSMUSG00000044737 | 6_Klk14   | 0.97899 | 1.24665  | 0.542562 | NA       | 2.02249 | 1.1335  | 1.03416 | 0.82529 | 0.85848 | 0       |
| ENSMUSG00000044743 | 3_Defb10  | 1.33504 | -3.78605 | 0.111652 | NA       | 0       | 0       | 0       | 0.82529 | 6.00934 | 1.17563 |
| ENSMUSG00000044748 | 8_Defb1   | 1733.54 | 0.35333  | 0.441302 | 0.78682  | 3242.05 | 1304.66 | 1287.53 | 1224.73 | 1944.45 | 1397.82 |
| ENSMUSG00000044749 | 13_Abca6  | 57.3369 | -0.42433 | 0.452467 | 0.794633 | 71.7983 | 19.2695 | 55.8447 | 89.1316 | 60.9519 | 47.0251 |
| ENSMUSG00000044763 | 8_Trmt10c | 460.224 | 0.35245  | 0.459128 | 0.798708 | 900.007 | 340.051 | 308.18  | 359.002 | 412.069 | 442.036 |
| ENSMUSG00000044768 | 16_D1Ertk | 348.097 | 0.61307  | 0.140455 | 0.507972 | 638.095 | 358.187 | 266.814 | 277.298 | 323.646 | 224.545 |
| ENSMUSG00000044770 | 14_Scm14  | 26.1554 | -0.2262  | 0.645714 | 0.889456 | 31.3486 | 19.2695 | 21.7174 | 33.837  | 24.8958 | 25.8638 |
| ENSMUSG00000044783 | 16_Hjurp  | 2337.2  | 0.30929  | 0.258949 | 0.64893  | 2065.97 | 2834.89 | 2859.46 | 1864.34 | 2248.35 | 2150.22 |
| ENSMUSG00000044786 | 5_Zfp36   | 1914.38 | 1.08555  | 0.000514 | 0.011845 | 2057.88 | 3426.58 | 2322.73 | 1203.28 | 1120.31 | 1355.5  |
| ENSMUSG00000044787 | 7_Spata3  | 0.64744 | 0.29286  | 0.92144  | NA       | 0       | 1.1335  | 1.03416 | 0       | 1.71695 | 0       |
| ENSMUSG00000044788 | 10_Fads6  | 151.423 | -1.7107  | 9.11E-07 | 7.11E-05 | 67.7534 | 61.2092 | 83.7671 | 285.551 | 229.213 | 181.047 |
| ENSMUSG00000044791 | 16_Setd2  | 3068.88 | 0.37723  | 0.290733 | 0.675792 | 4953.07 | 2692.07 | 2758.11 | 2253.87 | 3019.26 | 2736.86 |
| ENSMUSG00000044792 | 6_Isca1   | 1236.79 | -0.31314 | 0.168681 | 0.54995  | 1175.07 | 1059.83 | 1074.49 | 1446.74 | 1353.82 | 1310.83 |
| ENSMUSG00000044795 | 12_Cyb5d  | 199.77  | -0.45986 | 0.08691  | 0.399375 | 167.867 | 163.224 | 173.739 | 247.588 | 236.94  | 209.262 |
| ENSMUSG00000044798 | 5_Olfr923 | 0.17236 | 1.1315   | 0.781553 | NA       | 0       | 0       | 1.03416 | 0       | 0       | 0       |
| ENSMUSG00000044807 | 13_Zfp354 | 321.264 | -0.71527 | 0.200354 | 0.592148 | 456.071 | 99.7483 | 173.739 | 419.249 | 469.587 | 309.19  |
| ENSMUSG00000044811 | 13_AF251  | 62.8972 | 1.4199   | 0.025354 | 0.190875 | 38.4273 | 183.627 | 52.7422 | 33.837  | 33.4806 | 35.2688 |
| ENSMUSG00000044813 | 15_Shb    | 548.56  | 0.27666  | 0.519732 | 0.831665 | 304.385 | 817.256 | 681.512 | 575.229 | 408.635 | 504.344 |
| ENSMUSG00000044814 | 5_Olfr543 | 1.02123 | 0.21539  | 0.923673 | NA       | 0       | 2.26701 | 1.03416 | 1.65058 | 0       | 1.17563 |
| ENSMUSG00000044816 | 10_D6300  | 8.04772 | -0.00606 | 0.994191 | 0.998043 | 13.1462 | 4.53401 | 6.20497 | 5.77705 | 6.86782 | 11.7563 |
| ENSMUSG00000044820 | 6_AY074E  | 2.38718 | 2.46191  | 0.245583 | 0.637031 | 0       | 6.80102 | 5.17081 | 0       | 0       | 2.35126 |
| ENSMUSG00000044824 | 5_Olfr545 | 0.47508 | -0.61882 | 0.873279 | NA       | 0       | 1.1335  | 0       | 0       | 1.71695 | 0       |
| ENSMUSG00000044827 | 10_Tlr1   | 342.543 | 0.87869  | 0.014782 | 0.131656 | 605.735 | 405.794 | 319.556 | 200.546 | 275.571 | 248.057 |
| ENSMUSG00000044835 | 15_Ankrd1 | 34.6148 | -1.65542 | 0.05734  | 0.313447 | 36.4048 | 1.1335  | 12.4099 | 61.0716 | 66.1027 | 30.5663 |
| ENSMUSG00000044847 | 13_Lsm11  | 221.026 | -0.0106  | 0.967995 | 0.991244 | 208.316 | 217.633 | 234.755 | 209.624 | 239.515 | 216.316 |
| ENSMUSG00000044854 | 7_L70005  | 4.8729  | 0.41054  | 0.6665   | 0.897452 | 7.07871 | 4.53401 | 5.17081 | 4.95175 | 5.15086 | 2.35126 |
| ENSMUSG00000044857 | 7_Lem2    | 687.651 | 0.12598  | 0.834636 | 0.952109 | 168.878 | 987.281 | 996.932 | 793.106 | 533.114 | 646.595 |
| ENSMUSG00000044860 | 9_Gm112   | 1.84611 | 0.99919  | 0.495825 | 0.818294 | 2.02249 | 2.26701 | 3.10248 | 1.65058 | 0.85848 | 1.17563 |

|                    |           |         |          |          |          |         |         |         |         |         |         |
|--------------------|-----------|---------|----------|----------|----------|---------|---------|---------|---------|---------|---------|
| ENSMUSG00000044864 | 16_Ankrd! | 2203.18 | 0.45552  | 0.082162 | 0.386678 | 2128.67 | 3029.85 | 2486.12 | 1836.28 | 1900.67 | 1837.51 |
| ENSMUSG00000044876 | 14_Zfp44  | 137.245 | -0.21825 | 0.566668 | 0.85205  | 88.9895 | 134.887 | 157.193 | 181.564 | 146.8   | 114.036 |
| ENSMUSG00000044881 | 6_Coa4    | 244.847 | 0.10907  | 0.685926 | 0.904398 | 274.047 | 248.237 | 239.925 | 210.45  | 260.119 | 236.301 |
| ENSMUSG00000044894 | 14_Uqcrq  | 433.93  | 0.03454  | 0.928349 | 0.980968 | 296.295 | 504.409 | 517.081 | 580.181 | 349.4   | 356.215 |
| ENSMUSG00000044903 | 14_Psg22  | 0.16854 | 1.1315   | 0.781553 | NA       | 1.01124 | 0       | 0       | 0       | 0       | 0       |
| ENSMUSG00000044906 | 4_493050  | 38.7734 | -0.19384 | 0.745845 | 0.924259 | 65.7309 | 27.2041 | 15.5124 | 40.4393 | 43.7823 | 39.9713 |
| ENSMUSG00000044912 | 9_Syt16   | 251.836 | 0.96461  | 0.001638 | 0.028113 | 411.576 | 306.046 | 281.292 | 152.679 | 185.431 | 173.993 |
| ENSMUSG00000044916 | 10_17000  | 23.3263 | -0.61665 | 0.343754 | 0.72155  | 6.06747 | 19.2695 | 29.9907 | 33.0117 | 25.7543 | 25.8638 |
| ENSMUSG00000044921 | 4_Rassf9  | 341.912 | 0.02099  | 0.950086 | 0.987438 | 453.037 | 277.708 | 301.975 | 282.25  | 348.542 | 387.957 |
| ENSMUSG00000044927 | 6_H1fx    | 5.91241 | -0.07749 | 0.94871  | 0.986962 | 0       | 7.93452 | 9.30745 | 7.42763 | 2.57543 | 8.22939 |
| ENSMUSG00000044933 | 2_Sstr3   | 0.53684 | 1.02757  | 0.740993 | NA       | 1.01124 | 0       | 1.03416 | 0       | 0       | 1.17563 |
| ENSMUSG00000044934 | 12_Zfp36  | 682.788 | 0.51542  | 0.253995 | 0.645047 | 1357.09 | 512.343 | 540.866 | 514.157 | 623.254 | 549.018 |
| ENSMUSG00000044937 | 14_Ttc41  | 79.8395 | 0.0591   | 0.881256 | 0.967415 | 98.0907 | 52.1411 | 94.1087 | 75.1016 | 86.7062 | 72.8889 |
| ENSMUSG00000044938 | 8_Klhl31  | 53.6388 | -0.12682 | 0.888569 | 0.969793 | 117.304 | 3.40051 | 33.0932 | 78.4028 | 43.7823 | 45.8495 |
| ENSMUSG00000044948 | 16_Cfap4  | 737.285 | 0.78134  | 0.073664 | 0.363249 | 446.97  | 1285.39 | 1064.15 | 523.235 | 486.756 | 617.205 |
| ENSMUSG00000044949 | 4_Ubtd2   | 110.72  | -0.34826 | 0.327594 | 0.708848 | 70.7871 | 112.217 | 109.621 | 141.95  | 122.762 | 106.982 |
| ENSMUSG00000044950 | 7_Pwvp2   | 804.989 | 0.41929  | 0.243219 | 0.634745 | 1302.48 | 712.973 | 747.699 | 566.976 | 770.912 | 728.889 |
| ENSMUSG00000044951 | 13_Mylk4  | 553.13  | -0.14195 | 0.847795 | 0.955789 | 1175.07 | 98.6148 | 304.043 | 785.678 | 427.522 | 527.857 |
| ENSMUSG00000044952 | 5_Kctd21  | 147.024 | 0.12065  | 0.683266 | 0.902945 | 133.484 | 158.69  | 167.534 | 134.523 | 156.243 | 131.67  |
| ENSMUSG00000044957 | 3_Pp2d1   | 15.2416 | -0.53159 | 0.474802 | 0.806964 | 21.2361 | 4.53401 | 11.3758 | 10.7288 | 18.8865 | 24.6882 |
| ENSMUSG00000044966 | 4_Fbxo48  | 23.1193 | 1.02454  | 0.074289 | 0.364776 | 44.4948 | 23.8036 | 24.8199 | 12.3794 | 21.4619 | 11.7563 |
| ENSMUSG00000044968 | 16_Napep  | 192.882 | -0.87428 | 0.023664 | 0.181867 | 197.193 | 121.285 | 89.9721 | 266.569 | 250.675 | 231.599 |
| ENSMUSG00000044976 | 16_Wdr72  | 46.7421 | -0.96731 | 0.043649 | 0.265355 | 45.506  | 19.2695 | 29.9907 | 51.9934 | 77.2629 | 56.4301 |
| ENSMUSG00000044982 | 6_Sft2d3  | 136.56  | 0.1765   | 0.734384 | 0.920129 | 263.935 | 82.7457 | 87.9037 | 127.095 | 133.064 | 124.617 |
| ENSMUSG00000044986 | 8_Tst     | 417.475 | -0.77674 | 0.197544 | 0.58977  | 77.8658 | 347.985 | 497.432 | 659.409 | 406.06  | 516.101 |
| ENSMUSG00000044991 | 10_11100  | 146.49  | -0.47674 | 0.127003 | 0.484378 | 95.057  | 137.154 | 135.475 | 169.185 | 175.129 | 166.939 |
| ENSMUSG00000044994 | 7_Olfr142 | 0.18892 | 1.1315   | 0.781553 | NA       | 0       | 1.1335  | 0       | 0       | 0       | 0       |
| ENSMUSG00000045004 | 3_Spata2  | 0.33902 | -1.78366 | 0.658108 | NA       | 0       | 0       | 0       | 0       | 0.85848 | 1.17563 |
| ENSMUSG00000045005 | 9_Fzd5    | 935.741 | 0.30127  | 0.238132 | 0.630377 | 1120.46 | 1087.03 | 891.447 | 826.118 | 770.054 | 919.341 |
| ENSMUSG00000045007 | 9_Tubg2   | 54.1371 | -0.66692 | 0.181003 | 0.567286 | 19.2136 | 58.9422 | 47.5714 | 72.6257 | 61.8103 | 64.6595 |
| ENSMUSG00000045008 | 1_903061  | 2.32843 | -0.76844 | 0.580435 | 0.859474 | 3.03373 | 1.1335  | 1.03416 | 3.30117 | 4.29238 | 1.17563 |
| ENSMUSG00000045009 | 9_Prrt3   | 6.38707 | -1.03358 | 0.291629 | 0.676701 | 2.02249 | 2.26701 | 8.27329 | 12.3794 | 5.15086 | 8.22939 |
| ENSMUSG00000045019 | 4_Acer1   | 7.26789 | 1.06727  | 0.322498 | 0.703281 | 12.1349 | 9.06802 | 8.27329 | 8.25292 | 0       | 5.87814 |
| ENSMUSG00000045027 | 6_Prsc22  | 2081.59 | 0.75038  | 0.31143  | 0.693321 | 276.07  | 3876.58 | 3680.58 | 1854.43 | 1224.19 | 1577.69 |
| ENSMUSG00000045031 | 18_Cetn4  | 94.4431 | 0.47123  | 0.419939 | 0.773473 | 213.373 | 57.8086 | 57.913  | 70.1499 | 90.9986 | 76.4158 |
| ENSMUSG00000045034 | 12_Ankrd! | 0.61982 | 0.2847   | 0.936624 | NA       | 0       | 0       | 2.06832 | 1.65058 | 0       | 0       |
| ENSMUSG00000045036 | 14_Tmem   | 4.55777 | -1.79156 | 0.160482 | 0.539022 | 5.05622 | 0       | 1.03416 | 7.42763 | 10.3017 | 3.52688 |
| ENSMUSG00000045038 | 14_Prkc   | 483.529 | 0.4854   | 0.105438 | 0.440822 | 688.657 | 572.419 | 431.245 | 425.851 | 378.588 | 404.416 |
| ENSMUSG00000045039 | 9_Megf8   | 949.237 | -0.23562 | 0.671397 | 0.899797 | 268.991 | 1054.16 | 1292.7  | 1322.12 | 818.129 | 939.327 |
| ENSMUSG00000045045 | 7_Lrfr4   | 70.3382 | 0.48085  | 0.533428 | 0.838113 | 11.1237 | 120.151 | 114.792 | 92.4327 | 41.2069 | 42.3226 |
| ENSMUSG00000045052 | 2_Prlhr   | 0.18892 | 1.1315   | 0.781553 | NA       | 0       | 1.1335  | 0       | 0       | 0       | 0       |
| ENSMUSG00000045053 | 1_Kcng3   | 100.299 | 0.17688  | 0.674391 | 0.900436 | 132.473 | 85.0127 | 101.348 | 57.7705 | 106.451 | 118.738 |
| ENSMUSG00000045062 | 4_Pcdhb7  | 41.6997 | -0.90255 | 0.033633 | 0.226782 | 35.3936 | 26.0706 | 25.854  | 62.7222 | 56.6595 | 43.4982 |
| ENSMUSG00000045064 | 4_Zc2hc1  | 109.573 | -0.8594  | 0.050634 | 0.291317 | 84.9445 | 44.2066 | 104.45  | 179.088 | 133.064 | 111.685 |
| ENSMUSG00000045065 | 7_993002  | 0.36128 | 2.05714  | 0.610196 | NA       | 0       | 1.1335  | 1.03416 | 0       | 0       | 0       |
| ENSMUSG00000045071 | 13_E1303  | 663.567 | -0.11706 | 0.61238  | 0.874367 | 615.848 | 651.764 | 642.214 | 648.68  | 702.234 | 720.66  |
| ENSMUSG00000045075 | 3_Gm979   | 1.06328 | -2.2504  | 0.301977 | NA       | 1.01124 | 0       | 0       | 2.47588 | 1.71695 | 1.17563 |
| ENSMUSG00000045078 | 12_Rnf21  | 1070.81 | 0.20277  | 0.374709 | 0.744881 | 1052.71 | 1207.18 | 1177.91 | 983.748 | 986.39  | 1016.92 |
| ENSMUSG00000045083 | 14_Lingo2 | 2.3762  | -1.23076 | 0.364719 | 0.738036 | 1.01124 | 2.26701 | 1.03416 | 3.30117 | 4.29238 | 2.35126 |
| ENSMUSG00000045087 | 8_S1pr5   | 390.082 | 0.45472  | 0.146667 | 0.518186 | 533.937 | 418.263 | 400.221 | 269.045 | 309.91  | 409.118 |
| ENSMUSG00000045091 | 4_Aqp12   | 0.17236 | 1.1315   | 0.781553 | NA       | 0       | 0       | 1.03416 | 0       | 0       | 0       |
| ENSMUSG00000045092 | 8_S1pr1   | 164.017 | -0.19656 | 0.625264 | 0.879829 | 204.271 | 132.62  | 122.031 | 188.167 | 220.629 | 116.387 |
| ENSMUSG00000045094 | 7_Arhgef3 | 1203.4  | -0.11573 | 0.808519 | 0.944999 | 457.082 | 1499.62 | 1508.84 | 1299.01 | 1120.31 | 1335.51 |
| ENSMUSG00000045095 | 16_Magi1  | 370.931 | -0.31183 | 0.216996 | 0.607835 | 360.003 | 294.711 | 338.171 | 425.026 | 400.909 | 406.767 |
| ENSMUSG00000045098 | 18_Suv42  | 1872.42 | 0.18731  | 0.52051  | 0.831998 | 2570.58 | 1687.79 | 1722.91 | 1730.64 | 1796.79 | 1725.82 |
| ENSMUSG00000045100 | 11_Slc25  | 86.8908 | -0.06788 | 0.84582  | 0.955207 | 84.9445 | 97.4812 | 72.3913 | 107.288 | 78.1214 | 81.1183 |
| ENSMUSG00000045102 | 11_Poln   | 5.22216 | -1.72393 | 0.111696 | 0.453024 | 5.05622 | 1.1335  | 1.03416 | 10.7288 | 5.15086 | 8.22939 |
| ENSMUSG00000045103 | 17_Dmd    | 545.87  | -0.22744 | 0.665972 | 0.897104 | 924.277 | 238.036 | 346.444 | 656.107 | 641.282 | 469.076 |
| ENSMUSG00000045106 | 12_Ccdc7  | 37.8651 | -0.46752 | 0.402729 | 0.761286 | 53.5959 | 14.7355 | 26.8882 | 47.0417 | 43.7823 | 41.147  |
| ENSMUSG00000045107 | 4_Saysd1  | 110.327 | 0.11466  | 0.77429  | 0.933044 | 69.7759 | 136.02  | 138.578 | 122.143 | 97.8664 | 97.5771 |
| ENSMUSG00000045111 | 5-Taar6   | 0.18892 | 1.1315   | 0.781553 | NA       | 0       | 1.1335  | 0       | 0       | 0       | 0       |
| ENSMUSG00000045114 | 10_Prrt2  | 59.9917 | -2.7398  | 1.05E-05 | 0.00054  | 13.1462 | 5.66751 | 27.9224 | 154.33  | 69.5366 | 89.3477 |
| ENSMUSG00000045128 | 8_Rpl18a  | 10814.5 | -0.1654  | 0.769521 | 0.93157  | 2935.64 | 13191.7 | 14458.6 | 14479.8 | 8817.42 | 11003.9 |
| ENSMUSG00000045136 | 5_Tubb2b  | 981.077 | 0.21601  | 0.537365 | 0.839407 | 662.365 | 1361.34 | 1139.65 | 897.093 | 912.561 | 913.463 |
| ENSMUSG00000045140 | 8_Pigw    | 157.19  | 0.36667  | 0.434637 | 0.783019 | 298.317 | 119.018 | 113.758 | 128.746 | 152.809 | 130.495 |
| ENSMUSG00000045160 | 14_Bola3  | 383.757 | -0.20418 | 0.468103 | 0.804041 | 426.745 | 307.179 | 336.103 | 435.754 | 424.088 | 372.674 |
| ENSMUSG00000045165 | 6_Al4676  | 279.406 | 0.14131  | 0.669031 | 0.898433 | 202.249 | 340.051 | 337.137 | 283.075 | 254.109 | 259.814 |
| ENSMUSG00000045174 | 10_Amer3  | 0.69327 | -2.84872 | 0.397281 | NA       | 0       | 0       | 0       | 3.30117 | 0.85848 | 0       |
| ENSMUSG00000045176 | 3_Borcs6  | 131.58  | -0.21158 | 0.656316 | 0.894153 | 53.5959 | 154.156 | 158.227 | 157.631 | 123.621 | 142.251 |
| ENSMUSG00000045179 | 9_Sox3    | 0.86884 | 0.69729  | 0.744954 | NA       | 1.01124 | 1.1335  | 1.03416 | 0       | 0.85848 | 1.17563 |
| ENSMUSG00000045180 | 13_Shroo  | 923.278 | 0.35437  | 0.223136 | 0.613683 | 1264.06 | 969.145 | 874.901 | 694.071 | 903.976 | 833.52  |
| ENSMUSG00000045193 | 13_Cirbp  | 1291.9  | -0.38551 | 0.274606 | 0.660991 | 767.534 | 1156.17 | 1437.48 | 1810.69 | 1262.82 | 1316.7  |
| ENSMUSG00000045201 | 5_Lrrc3b  | 10.545  | -1.37947 | 0.101709 | 0.433915 | 11.1237 | 1.1335  | 5.17081 | 16.5058 | 12.8772 | 16.4588 |
| ENSMUSG00000045205 | 16_Dpy19  | 1208.14 | 0.33624  | 0.492406 | 0.815769 | 2417.89 | 768.515 | 858.354 | 975.496 | 1197.58 | 1031.03 |
| ENSMUSG00000045210 | 8_Vcpip1  | 1612.01 | 0.77188  | 0.10104  | 0.43246  | 3509.02 | 1297.86 | 1292.7  | 971.369 | 1398.46 | 1202.67 |

|                    |            |         |          |          |          |         |         |         |         |         |         |
|--------------------|------------|---------|----------|----------|----------|---------|---------|---------|---------|---------|---------|
| ENSMUSG00000045211 | 4_Nudt18   | 789.751 | 0.20961  | 0.559202 | 0.848338 | 530.903 | 1012.22 | 997.966 | 792.281 | 619.82  | 785.319 |
| ENSMUSG00000045215 | 16_Asx13   | 18.3042 | -1.31516 | 0.034458 | 0.230241 | 15.1687 | 10.2015 | 6.20497 | 29.7105 | 30.9052 | 17.6344 |
| ENSMUSG00000045216 | 7_Hs6st1   | 2480.24 | 0.46481  | 0.234573 | 0.626192 | 1593.72 | 3845.98 | 3189.35 | 1955.12 | 1962.48 | 2334.8  |
| ENSMUSG00000045231 | 4_BC1061   | 22.2843 | -0.41593 | 0.511979 | 0.827773 | 26.2924 | 12.4685 | 18.6149 | 18.9817 | 42.0654 | 15.2832 |
| ENSMUSG00000045232 | 4_Rln3     | 0.38486 | 0.16972  | 0.966824 | NA       | 0       | 1.1335  | 0       | 0       | 0       | 1.17563 |
| ENSMUSG00000045237 | 5_111001   | 355.175 | -0.42363 | 0.077305 | 0.373034 | 294.272 | 301.512 | 314.385 | 401.092 | 409.494 | 410.294 |
| ENSMUSG00000045246 | 11_Kcng4   | 19.1096 | -1.07107 | 0.105105 | 0.440631 | 11.1237 | 12.4685 | 13.4441 | 42.0899 | 12.0187 | 23.5126 |
| ENSMUSG00000045248 | 5_Med26    | 184.922 | 0.41979  | 0.281616 | 0.668217 | 126.406 | 257.305 | 251.301 | 175.787 | 136.498 | 162.237 |
| ENSMUSG00000045251 | 13_Zfp68f  | 114.439 | 0.08886  | 0.822073 | 0.9485   | 72.8096 | 129.219 | 152.022 | 124.619 | 102.159 | 105.807 |
| ENSMUSG00000045252 | 11_Zfp57c  | 216.381 | 0.14492  | 0.809435 | 0.94521  | 61.6859 | 291.31  | 328.863 | 275.648 | 146.8   | 193.979 |
| ENSMUSG00000045257 | 9_Morn2    | 159.772 | -0.32837 | 0.315768 | 0.696716 | 147.642 | 137.154 | 139.612 | 151.854 | 151.95  | 230.423 |
| ENSMUSG00000045259 | 4_Klhdc9   | 6.60121 | -1.44345 | 0.216217 | 0.607424 | 0       | 4.53401 | 6.20497 | 18.1564 | 6.00934 | 4.70251 |
| ENSMUSG00000045267 | 3_Tas2r1f  | 0.14308 | -0.79206 | 0.84609  | NA       | 0       | 0       | 0       | 0       | 0.85848 | 0       |
| ENSMUSG00000045268 | 13_Zfp69f  | 99.3684 | -0.58195 | 0.257997 | 0.648822 | 33.3711 | 79.3452 | 126.168 | 138.649 | 108.168 | 110.509 |
| ENSMUSG00000045273 | 8_Cenph    | 110.243 | 1.01817  | 0.037059 | 0.241012 | 229.552 | 128.086 | 84.8012 | 49.5175 | 78.9799 | 90.5233 |
| ENSMUSG00000045275 | 15_Lca5l   | 32.0428 | -0.19648 | 0.706202 | 0.908737 | 46.5172 | 19.2695 | 23.7857 | 34.6623 | 38.6315 | 29.3907 |
| ENSMUSG00000045281 | 5_Gpr20    | 4.40074 | -1.61479 | 0.162154 | 0.540795 | 1.01124 | 3.40051 | 2.06832 | 2.47588 | 6.86782 | 10.5807 |
| ENSMUSG00000045282 | 7_Tmem8    | 44.5871 | -0.20196 | 0.683949 | 0.903353 | 22.2474 | 47.6071 | 54.8106 | 59.421  | 44.6408 | 38.7957 |
| ENSMUSG00000045284 | 9_Dcaf12l  | 94.6465 | -0.40377 | 0.424014 | 0.775611 | 130.451 | 37.4056 | 76.528  | 127.92  | 103.876 | 91.699  |
| ENSMUSG00000045287 | 6_Rtn4rl1  | 175.03  | -1.50469 | 0.002332 | 0.036324 | 52.5847 | 81.6122 | 139.612 | 384.586 | 206.034 | 185.749 |
| ENSMUSG00000045288 | 10_Ush1g   | 0.33349 | -1.76186 | 0.662172 | NA       | 0       | 0       | 0       | 0.82529 | 0       | 1.17563 |
| ENSMUSG00000045294 | 11_Insig1  | 6076.14 | -0.0039  | 0.988883 | 0.997196 | 7653.1  | 5121.17 | 5429.35 | 5925.6  | 6316.67 | 6010.99 |
| ENSMUSG00000045302 | 13_Preb    | 917.261 | -0.01389 | 0.974483 | 0.99352  | 423.711 | 1161.84 | 1153.09 | 917.725 | 890.241 | 956.961 |
| ENSMUSG00000045312 | 11_Lhfp12  | 1862.49 | -0.89759 | 0.000764 | 0.016074 | 1515.86 | 1152.77 | 1234.79 | 2645.89 | 2524.78 | 2100.85 |
| ENSMUSG00000045314 | 5_Sowaht   | 516.443 | 0.57103  | 0.025628 | 0.191868 | 567.308 | 710.706 | 573.96  | 400.267 | 413.786 | 432.631 |
| ENSMUSG00000045316 | 4_Fahd1    | 123.075 | -0.0797  | 0.847761 | 0.955789 | 182.024 | 82.7457 | 94.1087 | 120.493 | 135.639 | 123.441 |
| ENSMUSG00000045318 | 6_Adra2c   | 32.7769 | -2.17072 | 0.001644 | 0.028186 | 4.04498 | 7.93452 | 23.7857 | 72.6257 | 50.6501 | 37.6201 |
| ENSMUSG00000045319 | 13_Proser  | 1078.7  | 0.58539  | 0.054337 | 0.303801 | 1001.13 | 1347.73 | 1534.7  | 926.803 | 714.253 | 947.556 |
| ENSMUSG00000045322 | 10_Tlr9    | 32.7582 | 3.08114  | 0.000179 | 0.005314 | 10.1124 | 107.683 | 57.913  | 6.60234 | 6.00934 | 8.22939 |
| ENSMUSG00000045326 | 13_Fndc7   | 5.40747 | -1.05158 | 0.290137 | 0.675131 | 2.02249 | 2.26701 | 6.20497 | 8.25292 | 4.29238 | 9.40502 |
| ENSMUSG00000045328 | 11_Cenpe   | 859.776 | 0.81788  | 0.026905 | 0.1976   | 1519.9  | 1012.22 | 759.075 | 487.748 | 701.376 | 678.337 |
| ENSMUSG00000045333 | 15_Zfp42c  | 79.9688 | -1.01638 | 0.045552 | 0.272999 | 30.3373 | 51.0076 | 77.5621 | 158.456 | 78.9799 | 83.4696 |
| ENSMUSG00000045337 | 4_Defb11   | 2.05013 | -1.60096 | 0.383374 | 0.749884 | 2.02249 | 0       | 1.03416 | 4.95175 | 4.29238 | 0       |
| ENSMUSG00000045348 | 15_Nyap1   | 292.281 | 0.41826  | 0.385236 | 0.750802 | 141.574 | 423.93  | 437.45  | 250.064 | 200.884 | 299.785 |
| ENSMUSG00000045349 | 15_Sh2d5   | 119.943 | 2.17351  | 0.000331 | 0.008499 | 57.6409 | 341.184 | 190.286 | 42.0899 | 43.7823 | 44.6739 |
| ENSMUSG00000045350 | 14_Fam1f   | 2.25516 | -0.6185  | 0.694324 | 0.905638 | 0       | 2.26701 | 3.10248 | 4.95175 | 0.85848 | 2.35126 |
| ENSMUSG00000045362 | 7_Tnfrsf2f | 19.7118 | 0.2772   | 0.605001 | 0.871274 | 23.2586 | 24.9371 | 16.5466 | 19.807  | 13.7356 | 19.9857 |
| ENSMUSG00000045364 | 2_Ilfne    | 0.18892 | 1.1315   | 0.781553 | NA       | 0       | 1.1335  | 0       | 0       | 0       | 0       |
| ENSMUSG00000045374 | 18_Wdr81   | 378.582 | 0.31199  | 0.637811 | 0.885931 | 74.8321 | 616.626 | 566.721 | 414.297 | 259.26  | 339.756 |
| ENSMUSG00000045377 | 5_Tmem8    | 38.4921 | -0.90678 | 0.077233 | 0.372992 | 16.1799 | 24.9371 | 39.2981 | 65.1981 | 39.4899 | 45.8495 |
| ENSMUSG00000045378 | 4_Pxt1     | 0.80663 | 0.84943  | 0.72447  | NA       | 2.02249 | 1.1335  | 0       | 0.82529 | 0.85848 | 0       |
| ENSMUSG00000045381 | 5_Olfra433 | 1.21927 | 2.66953  | 0.210581 | NA       | 2.02249 | 3.40051 | 1.03416 | 0       | 0.85848 | 0       |
| ENSMUSG00000045382 | 6_Cxcr4    | 36.3579 | 1.04479  | 0.065593 | 0.339682 | 38.4273 | 80.4787 | 27.9224 | 24.7588 | 17.1695 | 29.3907 |
| ENSMUSG00000045394 | 8_Epcam    | 2823.85 | 0.63878  | 0.015369 | 0.135136 | 3401.83 | 3729.22 | 3185.22 | 1926.23 | 2067.21 | 2633.41 |
| ENSMUSG00000045404 | 15_Kcnk1   | 36.9292 | -0.38365 | 0.95342  | 0.756144 | 24.2699 | 44.2066 | 27.9224 | 42.9152 | 44.6408 | 37.6201 |
| ENSMUSG00000045409 | 16_Trim3f  | 723.534 | -0.13373 | 0.576537 | 0.856937 | 755.4   | 650.631 | 663.932 | 715.528 | 800.959 | 754.753 |
| ENSMUSG00000045410 | 17_Akr1e1  | 687.55  | -0.12628 | 0.731389 | 0.919034 | 961.693 | 498.741 | 511.91  | 676.74  | 806.11  | 670.108 |
| ENSMUSG00000045411 | 16_24100   | 866.83  | 0.05928  | 0.80404  | 0.942928 | 795.849 | 963.477 | 894.55  | 812.913 | 852.468 | 881.721 |
| ENSMUSG00000045414 | 7_119000   | 662.611 | -0.00395 | 0.993605 | 0.998043 | 1170.01 | 354.786 | 460.202 | 593.385 | 790.657 | 606.624 |
| ENSMUSG00000045427 | 13_Hnrrpl  | 2787.81 | 0.38404  | 0.330074 | 0.71038  | 4839.82 | 2467.64 | 2162.43 | 2092.12 | 2700.77 | 2464.12 |
| ENSMUSG00000045435 | 9_Tmem6    | 344.826 | -0.01133 | 0.97636  | 0.993796 | 513.712 | 265.24  | 251.301 | 326.816 | 367.428 | 344.459 |
| ENSMUSG00000045438 | 12_Cox19   | 290.447 | -0.19374 | 0.51509  | 0.8296   | 220.451 | 310.58  | 282.326 | 355.701 | 296.175 | 277.448 |
| ENSMUSG00000045440 | 3_Insm2    | 0.14308 | -0.79206 | 0.84609  | NA       | 0       | 0       | 0       | 0       | 0.85848 | 0       |
| ENSMUSG00000045441 | 5_Gprn3    | 31.5882 | -0.96232 | 0.10722  | 0.445477 | 37.416  | 11.335  | 15.5124 | 49.5175 | 46.3578 | 29.3907 |
| ENSMUSG00000045455 | 7_Gm979    | 202.407 | 0.25904  | 0.524718 | 0.833095 | 329.666 | 162.091 | 169.602 | 148.553 | 212.902 | 191.627 |
| ENSMUSG00000045466 | 18_Zfp95f  | 159.461 | -0.47872 | 0.16998  | 0.5518   | 95.057  | 140.554 | 164.432 | 207.974 | 188.865 | 159.885 |
| ENSMUSG00000045467 | 13_Ttl113  | 34.0208 | -0.22319 | 0.679731 | 0.902041 | 17.1912 | 27.2041 | 49.6398 | 30.5358 | 36.056  | 43.4982 |
| ENSMUSG00000045475 | 5_Lce3c    | 2.80536 | 1.31565  | 0.386563 | 0.751493 | 0       | 6.80102 | 5.17081 | 1.65058 | 0.85848 | 2.35126 |
| ENSMUSG00000045482 | 15_Trrap   | 2267.81 | 0.28587  | 0.497121 | 0.819208 | 1214.5  | 3139.8  | 3121.1  | 2182.9  | 1859.46 | 2089.09 |
| ENSMUSG00000045493 | 4_Bhlhe2c  | 1.42304 | 0.05567  | 0.981752 | NA       | 1.01124 | 3.40051 | 0       | 4.12646 | 0       | 0       |
| ENSMUSG00000045498 | 1_Pcdhb3   | 17.7514 | -0.89079 | 0.176905 | 0.561138 | 19.2136 | 4.53401 | 13.4441 | 27.2346 | 19.745  | 22.3369 |
| ENSMUSG00000045502 | 6_Hcar2    | 666.84  | 0.94486  | 0.003362 | 0.04712  | 692.702 | 1083.63 | 856.286 | 388.713 | 418.937 | 560.774 |
| ENSMUSG00000045503 | 16_Sys1    | 487.507 | 0.29636  | 0.486271 | 0.81371  | 272.025 | 649.497 | 690.82  | 505.904 | 368.287 | 438.509 |
| ENSMUSG00000045506 | 3_A93000   | 0.84355 | 2.06627  | 0.450721 | NA       | 0       | 1.1335  | 3.10248 | 0.82529 | 0       | 0       |
| ENSMUSG00000045515 | 3_Pou3f3   | 393.629 | -0.66145 | 0.102637 | 0.436157 | 459.105 | 182.494 | 273.019 | 467.115 | 526.246 | 453.792 |
| ENSMUSG00000045518 | 8_Onecut1  | 1.21927 | -0.43442 | 0.839179 | NA       | 2.02249 | 1.1335  | 0       | 3.30117 | 0.85848 | 0       |
| ENSMUSG00000045519 | 14_Zfp56f  | 337.883 | 0.34794  | 0.469553 | 0.804531 | 659.331 | 261.839 | 214.071 | 284.726 | 332.231 | 275.097 |
| ENSMUSG00000045521 | 6_Tssk2    | 1.65719 | 0.76528  | 0.620209 | NA       | 2.02249 | 1.1335  | 3.10248 | 1.65058 | 0.85848 | 1.17563 |
| ENSMUSG00000045532 | 5_C1ql1    | 10.9517 | -2.54282 | 0.018172 | 0.152577 | 2.02249 | 5.66751 | 2.06832 | 41.2646 | 11.1602 | 3.52688 |
| ENSMUSG00000045534 | 4_Kcna5    | 15.3923 | -0.9743  | 0.186676 | 0.573937 | 18.2024 | 6.80102 | 6.20497 | 31.3611 | 18.028  | 11.7563 |
| ENSMUSG00000045538 | 6_Ddx28    | 160.66  | 0.17239  | 0.663098 | 0.896048 | 98.0907 | 213.099 | 199.593 | 143.601 | 148.517 | 161.061 |
| ENSMUSG00000045539 | 3_Spr3     | 0.56675 | 2.70271  | 0.498103 | NA       | 0       | 3.40051 | 0       | 0       | 0       | 0       |
| ENSMUSG00000045545 | 8_Krt14    | 17726.1 | 2.28573  | 0.003383 | 0.047338 | 2917.44 | 58955.8 | 26383.5 | 6922.55 | 4246.89 | 6930.33 |
| ENSMUSG00000045551 | 7_Fpr1     | 10.846  | 4.0014   | 5.25E-05 | 0.001963 | 17.1912 | 28.3376 | 15.5124 | 0.82529 | 0.85848 | 2.35126 |
| ENSMUSG00000045555 | 3_Mettl24  | 8.56593 | -1.14636 | 0.145398 | 0.515494 | 3.03373 | 5.66751 | 7.23913 | 10.7288 | 9.44325 | 15.2832 |

|                    |            |         |          |          |          |         |         |         |         |         |         |
|--------------------|------------|---------|----------|----------|----------|---------|---------|---------|---------|---------|---------|
| ENSMUSG00000045573 | 9_Penk     | 1181.23 | -1.03819 | 0.00551  | 0.066141 | 545.061 | 651.764 | 1124.13 | 1863.51 | 1367.55 | 1535.37 |
| ENSMUSG00000045575 | 1_Vmn1r2   | 0       | NA       | NA       | NA       | 0       | 0       | 0       | 0       | 0       | 0       |
| ENSMUSG00000045576 | 16_St7l    | 413.481 | -0.00472 | 0.990304 | 0.997381 | 602.702 | 302.645 | 333     | 354.05  | 509.935 | 378.552 |
| ENSMUSG00000045589 | 7_Frrs1l   | 11.9012 | -1.06112 | 0.345247 | 0.722149 | 14.1574 | 9.06802 | 0       | 28.8852 | 14.5941 | 4.70251 |
| ENSMUSG00000045591 | 5_Olig3    | 0.13755 | -0.79206 | 0.84609  | NA       | 0       | 0       | 0       | 0.82529 | 0       | 0       |
| ENSMUSG00000045594 | 9_Glb1     | 453.761 | -0.23975 | 0.48947  | 0.814396 | 270.002 | 498.741 | 479.851 | 534.789 | 439.54  | 499.642 |
| ENSMUSG00000045598 | 10_Zfp55c  | 256.308 | 0.094    | 0.789795 | 0.937308 | 169.889 | 301.512 | 322.658 | 240.985 | 252.392 | 250.409 |
| ENSMUSG00000045608 | 6_Dbx2     | 259.628 | 0.2996   | 0.281408 | 0.667998 | 318.542 | 255.038 | 285.429 | 204.673 | 237.798 | 256.287 |
| ENSMUSG00000045613 | 9_Chrm2    | 87.492  | -1.75506 | 0.001406 | 0.025097 | 68.7646 | 15.869  | 35.1615 | 134.523 | 164.828 | 105.807 |
| ENSMUSG00000045620 | 6_Odf3l1   | 1.25198 | -2.50982 | 0.307083 | NA       | 0       | 0       | 1.03416 | 4.12646 | 0       | 2.35126 |
| ENSMUSG00000045624 | 15_Esf1    | 764.359 | 0.27199  | 0.592073 | 0.865686 | 1519.9  | 541.814 | 446.758 | 589.259 | 811.261 | 677.162 |
| ENSMUSG00000045625 | 4_Plgz     | 59.8291 | 0.17244  | 0.739576 | 0.92176  | 27.3036 | 79.3452 | 83.7671 | 67.674  | 51.5086 | 49.3764 |
| ENSMUSG00000045629 | 7_Sh3tc2   | 1160.61 | 0.29893  | 0.520115 | 0.831665 | 533.937 | 1688.92 | 1618.46 | 1067.1  | 934.881 | 1120.37 |
| ENSMUSG00000045631 | 9_Tmprss   | 0.89474 | -3.20874 | 0.202839 | NA       | 0       | 0       | 0       | 2.47588 | 1.71695 | 1.17563 |
| ENSMUSG00000045636 | 16_Mtus1   | 5669    | 0.13596  | 0.6613   | 0.895541 | 7775.46 | 4903.53 | 5128.41 | 4656.3  | 5674.53 | 5875.79 |
| ENSMUSG00000045639 | 14_Zfp62f  | 561.524 | -0.0535  | 0.833598 | 0.952011 | 497.532 | 535.013 | 620.497 | 556.247 | 539.124 | 620.731 |
| ENSMUSG00000045648 | 15_Vwc2l   | 3.69354 | -0.79564 | 0.624747 | 0.879812 | 8.08995 | 0       | 0       | 7.42763 | 4.29238 | 2.35126 |
| ENSMUSG00000045655 | 9_Fam21f   | 0       | NA       | NA       | NA       | 0       | 0       | 0       | 0       | 0       | 0       |
| ENSMUSG00000045657 | 3_Pcdhb1   | 31.4705 | -0.56042 | 0.266219 | 0.654446 | 34.3823 | 14.7355 | 26.8882 | 34.6623 | 33.4806 | 44.6739 |
| ENSMUSG00000045658 | 16_Pid1    | 2493.16 | 0.42821  | 0.23551  | 0.627524 | 4167.34 | 2205.8  | 2207.93 | 1888.27 | 2173.66 | 2315.99 |
| ENSMUSG00000045659 | 17_Plekha  | 2323.76 | 0.44172  | 0.249424 | 0.640937 | 1488.55 | 3313.23 | 3228.65 | 2152.36 | 1842.29 | 1917.45 |
| ENSMUSG00000045662 | 16_Henml   | 2.34238 | 1.50565  | 0.330469 | 0.710498 | 6.06747 | 2.26701 | 2.06832 | 2.47588 | 0       | 1.17563 |
| ENSMUSG00000045664 | 4_Cdc42e   | 125.63  | -0.00926 | 0.979636 | 0.993796 | 91.012  | 133.753 | 150.988 | 147.727 | 102.159 | 128.143 |
| ENSMUSG00000045665 | 4_Mfsd5    | 829.628 | 0.49385  | 0.358971 | 0.732887 | 314.497 | 1327.33 | 1268.92 | 755.143 | 525.388 | 786.495 |
| ENSMUSG00000045667 | 14_Smtnlz  | 44.2946 | -0.28068 | 0.649352 | 0.891567 | 60.6747 | 14.7355 | 44.4689 | 68.4993 | 29.1882 | 48.2007 |
| ENSMUSG00000045671 | 17_Spred3  | 866.354 | 0.24552  | 0.324907 | 0.705459 | 1002.14 | 895.467 | 921.438 | 737.811 | 734.856 | 906.409 |
| ENSMUSG00000045672 | 15_Col27f  | 280.724 | -0.90091 | 0.049048 | 0.286234 | 103.147 | 181.36  | 303.009 | 455.561 | 294.458 | 346.81  |
| ENSMUSG00000045679 | 13_Pqlc3   | 1999.68 | 0.42672  | 0.290067 | 0.675059 | 3593.96 | 1642.45 | 1643.28 | 1532.57 | 1915.26 | 1670.57 |
| ENSMUSG00000045680 | 7_Tcf21    | 2.72452 | -1.1429  | 0.430675 | 0.780048 | 3.03373 | 0       | 2.06832 | 5.77705 | 4.29238 | 1.17563 |
| ENSMUSG00000045689 | 3_Pcdhb4   | 17.7095 | -1.10846 | 0.059289 | 0.319375 | 14.1574 | 11.335  | 8.27329 | 31.3611 | 22.3204 | 18.81   |
| ENSMUSG00000045690 | 8_Wdr89    | 157.745 | -0.0266  | 0.929355 | 0.981572 | 167.867 | 158.69  | 142.714 | 184.04  | 157.96  | 135.197 |
| ENSMUSG00000045691 | 13_Thtpa   | 446.331 | -0.28686 | 0.393067 | 0.755029 | 275.058 | 418.263 | 512.944 | 447.308 | 504.784 | 519.627 |
| ENSMUSG00000045693 | 7_Nlrp4e   | 0.19594 | -0.79206 | 0.84609  | NA       | 0       | 0       | 0       | 0       | 0       | 1.17563 |
| ENSMUSG00000045699 | 3_Gm214    | 1.27595 | -0.50901 | 0.790993 | NA       | 1.01124 | 1.1335  | 1.03416 | 3.30117 | 0       | 1.17563 |
| ENSMUSG00000045709 | 10_Smkr-j  | 0.47104 | -2.2721  | 0.552052 | NA       | 0       | 0       | 0       | 1.65058 | 0       | 1.17563 |
| ENSMUSG00000045725 | 5_Prr15    | 32.1338 | 0.29505  | 0.507664 | 0.826427 | 42.4723 | 28.3376 | 35.1615 | 25.5841 | 28.3297 | 32.9176 |
| ENSMUSG00000045730 | 3_Adrb2    | 1161.22 | 0.4581   | 0.09496  | 0.418401 | 1359.11 | 1344.33 | 1327.86 | 805.485 | 934.881 | 1195.61 |
| ENSMUSG00000045731 | 5_Pnoc     | 0.59778 | -1.19591 | 0.741298 | NA       | 1.01124 | 0       | 0       | 0       | 2.57543 | 0       |
| ENSMUSG00000045733 | 7_Spm      | 34.5824 | -1.35056 | 0.006538 | 0.074724 | 26.2924 | 12.4685 | 19.6491 | 61.8969 | 47.2162 | 39.9713 |
| ENSMUSG00000045744 | 10_Bricd5  | 0.96284 | -3.31587 | 0.38563  | NA       | 0       | 0       | 0       | 5.77705 | 0       | 0       |
| ENSMUSG00000045746 | 3_B23031   | 4.75343 | 0.28159  | 0.777812 | 0.934366 | 7.07871 | 3.40051 | 5.17081 | 2.47588 | 6.86782 | 3.52688 |
| ENSMUSG00000045751 | 16_Mms2    | 296.644 | 1.20954  | 0.000287 | 0.007637 | 498.543 | 398.993 | 344.376 | 135.348 | 186.29  | 216.316 |
| ENSMUSG00000045752 | 12_Tssc4   | 254.597 | 0.05195  | 0.938087 | 0.985118 | 46.5172 | 366.121 | 365.059 | 329.292 | 194.874 | 225.721 |
| ENSMUSG00000045757 | 6_Zfp764   | 186.928 | -0.20247 | 0.516781 | 0.830564 | 133.484 | 179.093 | 208.901 | 192.293 | 200.884 | 206.91  |
| ENSMUSG00000045761 | 15_Fam1i   | 69.3662 | 0.32197  | 0.597702 | 0.868406 | 22.474  | 95.2142 | 113.758 | 70.9751 | 44.6408 | 69.362  |
| ENSMUSG00000045763 | 7_Basp1    | 236.421 | -1.01922 | 0.030383 | 0.213389 | 263.935 | 104.282 | 100.314 | 387.887 | 276.43  | 285.678 |
| ENSMUSG00000045767 | 8_B23021   | 2372.08 | 0.10745  | 0.79438  | 0.93866  | 3909.47 | 1591.44 | 1880.11 | 2189.5  | 2528.21 | 2133.76 |
| ENSMUSG00000045775 | 15_Slc16a  | 6.7724  | -1.32185 | 0.162444 | 0.540887 | 3.03373 | 2.26701 | 6.20497 | 10.7288 | 4.29238 | 14.1075 |
| ENSMUSG00000045776 | 2_Lrtm1    | 53.5219 | -1.26607 | 0.159591 | 0.537697 | 58.6522 | 30.6046 | 5.17081 | 143.601 | 67.8197 | 15.2832 |
| ENSMUSG00000045777 | 14_lfitm1C | 117.31  | -0.13678 | 0.732385 | 0.919789 | 67.7534 | 114.484 | 153.056 | 124.619 | 119.328 | 124.617 |
| ENSMUSG00000045790 | 9_Ccdc14   | 196.621 | -1.02496 | 0.001721 | 0.028978 | 132.473 | 104.282 | 152.022 | 319.388 | 244.666 | 226.896 |
| ENSMUSG00000045795 | 9_Whamn    | 416.326 | 0.88861  | 0.002204 | 0.034862 | 447.981 | 660.832 | 512.944 | 279.774 | 279.005 | 317.42  |
| ENSMUSG00000045802 | 13_Hsf3    | 1.77609 | -1.9939  | 0.2607   | 0.649812 | 1.01124 | 1.1335  | 0       | 4.12646 | 0.85848 | 3.52688 |
| ENSMUSG00000045817 | 8_Zfp36l2  | 3742.02 | 0.86251  | 0.03028  | 0.212974 | 7402.31 | 3902.65 | 3180.05 | 2248.1  | 2849.29 | 2869.71 |
| ENSMUSG00000045822 | 4_Zswim3   | 76.2303 | -0.2211  | 0.535869 | 0.83864  | 54.6072 | 79.3452 | 77.5621 | 88.3063 | 85.8477 | 71.7133 |
| ENSMUSG00000045826 | 8_Ptprcap  | 7.12549 | 1.03673  | 0.329497 | 0.710021 | 3.03373 | 22.6701 | 3.10248 | 4.95175 | 4.29238 | 4.70251 |
| ENSMUSG00000045827 | 10_Serpin  | 1099.55 | 1.12302  | 0.005865 | 0.069219 | 2272.27 | 1368.14 | 881.106 | 684.993 | 770.054 | 620.731 |
| ENSMUSG00000045838 | 8_A43010   | 731.975 | 0.07526  | 0.832435 | 0.951799 | 471.24  | 862.596 | 919.37  | 756.793 | 622.396 | 759.456 |
| ENSMUSG00000045854 | 4_Lyrm2    | 331.384 | -0.20463 | 0.618551 | 0.87757  | 479.33  | 219.9   | 224.413 | 322.689 | 406.918 | 335.054 |
| ENSMUSG00000045867 | 9_Cradd    | 146.553 | -0.00387 | 0.989543 | 0.997255 | 134.495 | 138.287 | 166.5   | 160.932 | 145.083 | 134.022 |
| ENSMUSG00000045868 | 12_Gvin1   | 28.7788 | 8.37889  | 5.01E-10 | 8.69E-08 | 96.0682 | 36.2721 | 40.3323 | 0       | 0       | 0       |
| ENSMUSG00000045871 | 4_Slitrk6  | 404.731 | 0.70602  | 0.165976 | 0.545533 | 893.94  | 355.92  | 255.438 | 240.985 | 349.4   | 332.703 |
| ENSMUSG00000045875 | 12_Adra1i  | 55.4267 | -1.39915 | 0.013129 | 0.122119 | 24.2699 | 38.5391 | 28.9565 | 95.7339 | 113.319 | 31.742  |
| ENSMUSG00000045876 | 4_Pcdhb8   | 38.377  | -1.12681 | 0.072588 | 0.359974 | 44.4948 | 10.2015 | 17.5807 | 65.1981 | 57.518  | 35.2688 |
| ENSMUSG00000045877 | 2_493341   | 35.3083 | 0.06216  | 0.884209 | 0.967903 | 30.3373 | 41.9396 | 36.1957 | 38.7887 | 35.1976 | 29.3907 |
| ENSMUSG00000045886 | 6_Gm980    | 102.165 | 0.18507  | 0.750316 | 0.925182 | 40.4498 | 123.552 | 162.363 | 144.426 | 66.9612 | 75.2402 |
| ENSMUSG00000045896 | 14_Paip2t  | 2823.28 | 0.05819  | 0.872731 | 0.963879 | 4210.82 | 2161.59 | 2267.92 | 2434.61 | 2948.01 | 2916.73 |
| ENSMUSG00000045903 | 8_Npas4    | 4.09051 | -0.45936 | 0.682997 | 0.902945 | 3.03373 | 1.1335  | 6.20497 | 4.95175 | 6.86782 | 2.35126 |
| ENSMUSG00000045912 | 8_C2cd4c   | 6.25225 | 0.21248  | 0.821754 | 0.948384 | 2.02249 | 6.80102 | 11.3758 | 6.60234 | 6.00934 | 4.70251 |
| ENSMUSG00000045915 | 15_Ccdc4   | 2.27583 | -0.65726 | 0.687754 | 0.904725 | 3.03373 | 1.1335  | 1.03416 | 0       | 2.57543 | 5.87814 |
| ENSMUSG00000045917 | 17_63304   | 230.458 | -0.22797 | 0.526626 | 0.834229 | 157.754 | 244.837 | 234.755 | 323.515 | 223.204 | 198.681 |
| ENSMUSG00000045928 | 2_493344   | 0.3683  | 0.16972  | 0.966824 | NA       | 0       | 0       | 1.03416 | 0       | 0       | 1.17563 |
| ENSMUSG00000045929 | 8_Gm207    | 1.11272 | 0.68544  | 0.753353 | NA       | 3.03373 | 1.1335  | 0       | 1.65058 | 0.85848 | 0       |
| ENSMUSG00000045930 | 2_Clec14a  | 265.413 | -0.73079 | 0.109304 | 0.449508 | 311.463 | 140.554 | 146.851 | 450.61  | 309.052 | 233.95  |
| ENSMUSG00000045932 | 12_lfit2   | 4480.68 | 3.4603   | 6.07E-12 | 1.73E-09 | 14240.3 | 5878.35 | 4526.53 | 596.686 | 1037.9  | 604.273 |

|                    |           |         |          |          |          |         |         |         |         |         |         |
|--------------------|-----------|---------|----------|----------|----------|---------|---------|---------|---------|---------|---------|
| ENSMUSG00000045934 | 15_Mtmr1  | 450.377 | 0.04986  | 0.868602 | 0.962942 | 347.868 | 468.137 | 558.447 | 456.387 | 412.927 | 458.495 |
| ENSMUSG00000045942 | 12_BC045  | 7.80791 | -1.10591 | 0.222324 | 0.612824 | 3.03373 | 6.80102 | 5.17081 | 8.25292 | 18.8865 | 4.70251 |
| ENSMUSG00000045948 | 8_Mrps12  | 54.9193 | 0.30553  | 0.657756 | 0.894702 | 11.1237 | 87.2797 | 83.7671 | 50.3428 | 42.9238 | 54.0789 |
| ENSMUSG00000045954 | 7_Sdpr    | 350.037 | -0.69509 | 0.111088 | 0.453007 | 406.52  | 143.955 | 251.301 | 513.332 | 398.333 | 386.782 |
| ENSMUSG00000045962 | 16_Wnk1   | 9323.47 | 0.28751  | 0.391982 | 0.754378 | 13914.7 | 8675.83 | 8157.47 | 6880.46 | 9481.02 | 8831.32 |
| ENSMUSG00000045967 | 11_Gpr15  | 34.2989 | -1.59223 | 0.003296 | 0.046503 | 22.2474 | 13.602  | 15.5124 | 63.5475 | 62.6688 | 28.2151 |
| ENSMUSG00000045968 | 7_Teddm3  | 19.7123 | 0.03344  | 0.950171 | 0.987438 | 18.2024 | 26.0706 | 15.5124 | 18.9817 | 17.1695 | 22.3369 |
| ENSMUSG00000045969 | 7_Inlg1   | 606.557 | 0.12405  | 0.621652 | 0.878215 | 680.567 | 591.689 | 625.668 | 650.33  | 527.963 | 563.126 |
| ENSMUSG00000045973 | 18_Slc25a | 1475.07 | 0.07405  | 0.753065 | 0.925806 | 1684.73 | 1433.88 | 1419.9  | 1366.68 | 1466.28 | 1478.94 |
| ENSMUSG00000045975 | 7_C2cd2   | 2458.51 | 0.40437  | 0.162537 | 0.540887 | 3458.46 | 2444.97 | 2498.53 | 1800.79 | 2199.42 | 2348.9  |
| ENSMUSG00000045980 | 13_Tmem   | 201.117 | 0.34681  | 0.563498 | 0.85076  | 59.6634 | 337.784 | 278.189 | 219.528 | 130.489 | 181.047 |
| ENSMUSG00000045983 | 15_Eif4g1 | 8865.23 | 0.43904  | 0.196606 | 0.588849 | 6824.89 | 12669.2 | 11117.2 | 6514.03 | 7297.05 | 8769.01 |
| ENSMUSG00000045981 | 18_Onecu  | 5.72802 | -0.27942 | 0.783364 | 0.935592 | 8.08995 | 1.1335  | 6.20497 | 3.30117 | 5.58477 | 7.05377 |
| ENSMUSG00000045994 | 16_B3gat  | 47.2422 | -2.31214 | 0.000186 | 0.00546  | 22.2474 | 18.136  | 7.23913 | 129.571 | 59.2349 | 47.0251 |
| ENSMUSG00000045996 | 12_Polr2k | 482.23  | 0.26753  | 0.576212 | 0.856895 | 920.232 | 357.053 | 303.009 | 389.538 | 485.039 | 438.509 |
| ENSMUSG00000046005 | 3_D83004  | 0.30609 | 0.16972  | 0.966824 | NA       | 1.01124 | 0       | 0       | 0.82529 | 0       | 0       |
| ENSMUSG00000046006 | 5_Gapt    | 43.2757 | 0.29072  | 0.466853 | 0.803613 | 48.5397 | 45.3401 | 48.6056 | 35.4876 | 33.4806 | 48.2007 |
| ENSMUSG00000046008 | 7_Pnlip   | 0.95502 | -0.83094 | 0.685828 | NA       | 1.01124 | 0       | 1.03416 | 1.65058 | 0.85848 | 1.17563 |
| ENSMUSG00000046010 | 7_Zfp830  | 264.908 | 0.10909  | 0.682998 | 0.902945 | 292.25  | 277.708 | 254.404 | 246.762 | 232.647 | 285.678 |
| ENSMUSG00000046020 | 13_Pofut1 | 1410.41 | -0.12603 | 0.618738 | 0.87757  | 1149.78 | 1359.07 | 1537.8  | 1553.2  | 1413.05 | 1449.55 |
| ENSMUSG00000046027 | 16_Stard5 | 319.182 | 0.7551   | 0.011056 | 0.108297 | 489.442 | 357.053 | 355.752 | 207.148 | 254.109 | 251.584 |
| ENSMUSG00000046031 | 6_Fam26f  | 38.2897 | 3.79526  | 9.47E-11 | 1.89E-08 | 85.9558 | 77.0782 | 51.7081 | 5.77705 | 6.86782 | 2.35126 |
| ENSMUSG00000046032 | 16_Snx12  | 1825.17 | 0.17172  | 0.532261 | 0.837502 | 2292.49 | 1783    | 1724.98 | 1478.1  | 1744.43 | 1928.03 |
| ENSMUSG00000046034 | 7_Otulin  | 483.942 | -0.07391 | 0.809616 | 0.94521  | 356.969 | 576.953 | 480.885 | 534.789 | 443.833 | 510.222 |
| ENSMUSG00000046049 | 8_Rp11i   | 104.208 | -2.95547 | 0.000207 | 0.005971 | 22.2474 | 44.2066 | 5.17081 | 354.05  | 140.79  | 58.7814 |
| ENSMUSG00000046056 | 14_Sbsn   | 148.176 | 0.35074  | 0.526987 | 0.834496 | 56.6297 | 275.441 | 166.5   | 141.125 | 136.498 | 112.86  |
| ENSMUSG00000046058 | 7_Eid2    | 81.7429 | -0.51363 | 0.119918 | 0.47082  | 76.8546 | 60.0757 | 65.1522 | 102.336 | 97.8664 | 88.1721 |
| ENSMUSG00000046062 | 5_Ppp1r1  | 3072.32 | 0.63897  | 0.0372   | 0.241562 | 4927.79 | 3342.7  | 2954.6  | 2240.67 | 2466.4  | 2501.74 |
| ENSMUSG00000046070 | 8_Igfals  | 1.70225 | -2.99704 | 0.191145 | 0.580196 | 0       | 0       | 1.03416 | 3.30117 | 0       | 5.87814 |
| ENSMUSG00000046079 | 16_Lrrc8d | 562.655 | -0.57248 | 0.019575 | 0.160857 | 425.734 | 474.938 | 457.099 | 731.209 | 675.621 | 611.326 |
| ENSMUSG00000046080 | 17_Clec9e | 19.6261 | 0.43938  | 0.505886 | 0.82532  | 38.4273 | 15.869  | 13.4441 | 11.5541 | 23.1789 | 15.2832 |
| ENSMUSG00000046085 | 7_493142  | 0.95502 | -0.83094 | 0.685828 | NA       | 1.01124 | 0       | 1.03416 | 1.65058 | 0.85848 | 1.17563 |
| ENSMUSG00000046088 | 8_Gm980   | 0.13755 | -0.79206 | 0.84609  | NA       | 0       | 0       | 0       | 0.82529 | 0       | 0       |
| ENSMUSG00000046093 | 9_Hpcal4  | 17.7614 | -2.20859 | 0.007522 | 0.0821   | 6.06747 | 6.80102 | 6.20497 | 56.9452 | 22.3204 | 8.22939 |
| ENSMUSG00000046095 | 5_Krt32   | 2.15944 | 0.86603  | 0.536024 | 0.838659 | 4.04498 | 2.26701 | 2.06832 | 0.82529 | 2.57543 | 1.17563 |
| ENSMUSG00000046096 | 6_BC0303  | 756.519 | 0.19422  | 0.690596 | 0.905638 | 1439    | 467.003 | 516.047 | 712.227 | 782.931 | 621.907 |
| ENSMUSG00000046101 | 16_Mcmdi  | 2.21824 | 0.41028  | 0.765922 | 0.930201 | 2.02249 | 4.53401 | 1.03416 | 1.65058 | 1.71695 | 2.35126 |
| ENSMUSG00000046108 | 3_Ill17c  | 0.86563 | 2.09414  | 0.34601  | NA       | 0       | 2.26701 | 2.06832 | 0       | 0.85848 | 0       |
| ENSMUSG00000046110 | 15_Serinc | 23.5781 | -0.45202 | 0.488571 | 0.814112 | 31.3486 | 19.2695 | 9.30745 | 38.7887 | 27.4713 | 15.2832 |
| ENSMUSG00000046111 | 16_Cep29  | 919.763 | 0.43835  | 0.25499  | 0.645986 | 1564.39 | 819.523 | 791.134 | 628.047 | 903.118 | 812.359 |
| ENSMUSG00000046119 | 2_111000  | 0       | NA       | NA       | NA       | 0       | 0       | 0       | 0       | 0       | 0       |
| ENSMUSG00000046133 | 3_C13007  | 0.52091 | 1.15042  | 0.761139 | NA       | 0       | 2.26701 | 0       | 0       | 0.85848 | 0       |
| ENSMUSG00000046138 | 14_99300  | 1651.41 | 0.33779  | 0.427763 | 0.778396 | 2977.1  | 1272.92 | 1281.33 | 1224.73 | 1653.43 | 1498.93 |
| ENSMUSG00000046139 | 7_Patl1   | 798.633 | 0.28883  | 0.257613 | 0.648651 | 1008.21 | 871.664 | 754.938 | 695.721 | 728.847 | 732.416 |
| ENSMUSG00000046152 | 16_Fut10  | 93.8877 | -0.19694 | 0.596538 | 0.868228 | 102.136 | 87.2797 | 73.4255 | 127.92  | 96.1494 | 76.4158 |
| ENSMUSG00000046157 | 13_Tmem   | 568.106 | 0.69651  | 0.501087 | 0.292593 | 513.712 | 932.873 | 661.863 | 543.868 | 387.173 | 369.147 |
| ENSMUSG00000046159 | 15_Chrc3  | 54.9577 | -0.67452 | 0.119951 | 0.470842 | 45.506  | 29.4711 | 51.7081 | 70.9751 | 49.7917 | 82.2939 |
| ENSMUSG00000046160 | 6_Olig1   | 0.62706 | 0.22967  | 0.938749 | NA       | 1.01124 | 0       | 1.03416 | 0       | 1.71695 | 0       |
| ENSMUSG00000046167 | 5_Gldn    | 99.0043 | -0.76453 | 0.162726 | 0.540894 | 123.372 | 41.9396 | 54.8106 | 105.637 | 187.148 | 81.1183 |
| ENSMUSG00000046168 | 8_Kcnrg   | 12.2083 | -0.38645 | 0.567728 | 0.852443 | 9.1012  | 11.335  | 11.3758 | 9.07822 | 20.6034 | 11.7563 |
| ENSMUSG00000046169 | 9_Adamts  | 80.5419 | 0.04506  | 0.934769 | 0.983652 | 150.675 | 52.1411 | 42.4006 | 70.9751 | 82.4138 | 84.6452 |
| ENSMUSG00000046178 | 3_Nxph1   | 5.08038 | -0.57071 | 0.650471 | 0.891567 | 9.1012  | 1.1335  | 2.06832 | 4.12646 | 12.8772 | 1.17563 |
| ENSMUSG00000046179 | 17_E2f8   | 219.408 | 1.53942  | 4.25E-05 | 0.001673 | 296.295 | 428.464 | 254.404 | 80.0534 | 127.913 | 129.319 |
| ENSMUSG00000046180 | 11_49305  | 0.16854 | 1.1315   | 0.781553 | NA       | 1.01124 | 0       | 0       | 0       | 0       | 0       |
| ENSMUSG00000046182 | 8_Gsg1l   | 70.7124 | -1.501   | 0.004091 | 0.053916 | 27.3036 | 19.2695 | 64.118  | 123.794 | 100.442 | 89.3477 |
| ENSMUSG00000046185 | 10_Zfp84  | 389.787 | 0.00285  | 0.990813 | 0.997381 | 371.127 | 397.86  | 401.255 | 358.177 | 390.607 | 419.699 |
| ENSMUSG00000046186 | 8_Cd109   | 3737.86 | 0.87808  | 0.038428 | 0.246215 | 7610.62 | 3422.05 | 3491.33 | 2011.24 | 2661.28 | 3230.63 |
| ENSMUSG00000046191 | 7_Pcdhb2  | 113.586 | -0.43378 | 0.303655 | 0.68632  | 142.585 | 88.4132 | 58.9472 | 137.824 | 137.356 | 116.387 |
| ENSMUSG00000046192 | 4_Iqub    | 2.2925  | 2.11283  | 0.283358 | 0.670331 | 10.1124 | 1.1335  | 0       | 1.65058 | 0.85848 | 0       |
| ENSMUSG00000046196 | 4_Ttc39d  | 0.84738 | 0.94773  | 0.733637 | NA       | 0       | 3.40051 | 0       | 0.82529 | 0.85848 | 0       |
| ENSMUSG00000046201 | 8_Scaf8   | 1709.33 | 0.16813  | 0.532508 | 0.837502 | 2127.66 | 1659.45 | 1639.15 | 1402.17 | 1789.92 | 1637.65 |
| ENSMUSG00000046204 | 13_Pnma3  | 8.25662 | -0.64858 | 0.510266 | 0.827179 | 7.07871 | 11.335  | 1.03416 | 9.07822 | 16.3111 | 4.70251 |
| ENSMUSG00000046207 | 14_Pik3r6 | 28.5729 | -0.04711 | 0.943755 | 0.986418 | 15.1687 | 49.8741 | 19.6491 | 45.3911 | 24.8958 | 16.4588 |
| ENSMUSG00000046213 | 9_Cym     | 0.13755 | -0.79206 | 0.84609  | NA       | 0       | 0       | 0       | 0.82529 | 0       | 0       |
| ENSMUSG00000046215 | 3_Rprml   | 1.25049 | -1.332   | 0.493072 | NA       | 0       | 1.1335  | 1.03416 | 3.30117 | 0.85848 | 1.17563 |
| ENSMUSG00000046223 | 10_Plaur  | 52.5859 | 2.21426  | 0.000794 | 0.016477 | 36.4048 | 163.224 | 59.9814 | 24.7588 | 11.1602 | 19.9857 |
| ENSMUSG00000046229 | 9_Scand1  | 7.60948 | 0.36887  | 0.689239 | 0.905638 | 2.02249 | 12.4685 | 11.3758 | 9.07822 | 6.00934 | 4.70251 |
| ENSMUSG00000046230 | 9_Vps13a  | 2060.41 | 0.62707  | 0.184041 | 0.570805 | 4319.02 | 1595.97 | 1588.47 | 1281.68 | 1709.23 | 1868.07 |
| ENSMUSG00000046240 | 7_Hepaca  | 9.32231 | -1.26496 | 0.266282 | 0.654493 | 5.05622 | 0       | 11.3758 | 9.90351 | 24.8958 | 4.70251 |
| ENSMUSG00000046245 | 13_Pilra  | 26.8881 | 0.92413  | 0.155971 | 0.53318  | 19.2136 | 64.6097 | 21.7174 | 16.5058 | 14.5941 | 24.6882 |
| ENSMUSG00000046259 | 2_Sprr2h  | 3.36739 | 5.27765  | 0.023709 | 0.182133 | 0       | 18.136  | 2.06832 | 0       | 0       | 0       |
| ENSMUSG00000046262 | 14_C8797  | 0       | NA       | NA       | NA       | 0       | 0       | 0       | 0       | 0       | 0       |
| ENSMUSG00000046269 | 16_Usf27  | 94.8066 | 0.0896   | 0.844921 | 0.954783 | 138.54  | 102.015 | 52.7422 | 77.5775 | 113.319 | 84.6452 |
| ENSMUSG00000046272 | 2_Olfr144 | 0.28063 | -1.56014 | 0.700051 | NA       | 0       | 0       | 0       | 0.82529 | 0.85848 | 0       |
| ENSMUSG00000046275 | 2_Tusc5   | 22.4896 | -0.11404 | 0.843411 | 0.95401  | 12.1349 | 23.8036 | 28.9565 | 30.5358 | 17.1695 | 22.3369 |

|                    |           |         |          |          |          |         |         |         |         |         |         |
|--------------------|-----------|---------|----------|----------|----------|---------|---------|---------|---------|---------|---------|
| ENSMUSG00000046280 | 9_She     | 107.312 | -0.59874 | 0.151627 | 0.525674 | 119.327 | 63.4762 | 73.4255 | 155.155 | 140.79  | 91.699  |
| ENSMUSG00000046287 | 7_Pnma3   | 5.81097 | -0.68315 | 0.549171 | 0.843853 | 4.04498 | 1.1335  | 8.27329 | 9.07822 | 11.1602 | 1.17563 |
| ENSMUSG00000046295 | 13_Ankle1 | 59.1685 | 0.2475   | 0.650497 | 0.891567 | 26.2924 | 79.3452 | 86.8696 | 47.867  | 42.9238 | 71.7133 |
| ENSMUSG00000046311 | 13_Zfp62  | 1244.8  | 0.46247  | 0.383733 | 0.749994 | 2723.28 | 773.049 | 831.466 | 906.171 | 1260.24 | 974.595 |
| ENSMUSG00000046312 | 4_Al4641: | 406.728 | -0.34729 | 0.189814 | 0.578028 | 311.463 | 345.718 | 416.767 | 448.134 | 451.559 | 466.724 |
| ENSMUSG00000046314 | 15_Stxbp1 | 288.246 | -0.51026 | 0.362039 | 0.734755 | 445.959 | 100.882 | 166.5   | 358.177 | 405.201 | 252.76  |
| ENSMUSG00000046317 | 14_BC107  | 0.30991 | 0.16972  | 0.966824 | NA       | 0       | 0       | 1.03416 | 0.82529 | 0       | 0       |
| ENSMUSG00000046318 | 15_Ccbe1  | 133.226 | -0.43001 | 0.329029 | 0.709876 | 181.013 | 85.0127 | 74.4596 | 151.029 | 169.12  | 138.724 |
| ENSMUSG00000046321 | 8_Hs3st2  | 3.67111 | -2.05594 | 0.125636 | 0.482199 | 0       | 1.1335  | 3.10248 | 4.95175 | 3.43391 | 9.40502 |
| ENSMUSG00000046324 | 12_Errmp1 | 7309.57 | 0.53346  | 0.150965 | 0.524535 | 12383.7 | 7003.91 | 6549.35 | 4595.23 | 6575.93 | 6749.28 |
| ENSMUSG00000046329 | 14_Slc25e | 558.245 | -1.38597 | 9.06E-05 | 0.003069 | 228.541 | 313.98  | 384.708 | 1041.52 | 740.007 | 640.717 |
| ENSMUSG00000046330 | 9_Rpl37a  | 7976.72 | -0.33798 | 0.534833 | 0.838344 | 2123.61 | 9230.11 | 9786.27 | 10392.9 | 7566.62 | 8760.78 |
| ENSMUSG00000046337 | 17_Fam11: | 17.5389 | -0.49379 | 0.378913 | 0.74711  | 10.1124 | 18.136  | 15.5124 | 22.2829 | 18.028  | 21.1613 |
| ENSMUSG00000046338 | 4_Gpat2   | 30.9041 | -0.17138 | 0.790834 | 0.937373 | 9.1012  | 31.7381 | 46.5373 | 33.0117 | 40.3484 | 24.6882 |
| ENSMUSG00000046345 | 4_Smco1   | 12.0575 | -0.92555 | 0.310534 | 0.692659 | 17.1912 | 5.66751 | 2.06832 | 25.5841 | 7.72629 | 14.1075 |
| ENSMUSG00000046351 | 10_Zfp32: | 744.577 | 0.22081  | 0.662118 | 0.895681 | 1462.26 | 481.739 | 460.202 | 598.337 | 788.94  | 675.986 |
| ENSMUSG00000046352 | 7_Gjb2    | 2838.53 | 0.82465  | 0.006171 | 0.071898 | 4051.04 | 4047.74 | 2786.03 | 1683.6  | 2179.67 | 2283.07 |
| ENSMUSG00000046354 | 3_Defb14  | 16.101  | -1.20664 | 0.090732 | 0.410413 | 16.1799 | 7.93452 | 5.17081 | 27.2346 | 28.3297 | 11.7563 |
| ENSMUSG00000046364 | 14_Rpl27: | 11129.5 | -0.25762 | 0.294621 | 0.679002 | 9130.53 | 10712.7 | 10572.2 | 10846.8 | 13673.8 | 11840.9 |
| ENSMUSG00000046367 | 10_Mgat4  | 0.89492 | -0.69043 | 0.831007 | NA       | 0       | 0       | 2.06832 | 3.30117 | 0       | 0       |
| ENSMUSG00000046378 | 11_Asphd  | 2.30359 | -2.5093  | 0.229257 | 0.620586 | 0       | 0       | 2.06832 | 6.60234 | 5.15086 | 0       |
| ENSMUSG00000046380 | 3_Jrk     | 234.165 | 0.0232   | 0.95747  | 0.98909  | 114.271 | 311.713 | 282.326 | 240.16  | 224.921 | 231.599 |
| ENSMUSG00000046387 | 5_Pcdhb1  | 209.984 | -0.32989 | 0.296307 | 0.680027 | 229.552 | 165.491 | 163.398 | 247.588 | 257.543 | 196.33  |
| ENSMUSG00000046402 | 10_Rbp1   | 1752.9  | -0.42139 | 0.447046 | 0.790584 | 476.296 | 2339.55 | 1680.51 | 2598.85 | 1543.54 | 1878.65 |
| ENSMUSG00000046404 | 5_Yod1    | 581.567 | 0.59192  | 0.202051 | 0.593308 | 1182.14 | 450.001 | 465.373 | 375.508 | 552.001 | 464.373 |
| ENSMUSG00000046408 | 13_17000  | 1.408   | -0.79952 | 0.651993 | NA       | 1.01124 | 0       | 2.06832 | 2.47588 | 1.71695 | 1.17563 |
| ENSMUSG00000046410 | 9_Kcnk6   | 907.02  | 0.90442  | 0.000785 | 0.016315 | 1253.94 | 1276.32 | 1016.58 | 536.44  | 691.074 | 667.757 |
| ENSMUSG00000046413 | 12_Irx3os | 10.2411 | 0.31331  | 0.692659 | 0.905638 | 4.04498 | 11.335  | 18.6149 | 7.42763 | 9.44325 | 10.5807 |
| ENSMUSG00000046417 | 14_Lrrc75 | 125.476 | -0.15378 | 0.592114 | 0.865686 | 112.248 | 120.151 | 124.099 | 140.3   | 127.913 | 128.143 |
| ENSMUSG00000046432 | 12_Ngfra: | 636.318 | -0.91625 | 0.012325 | 0.116927 | 278.092 | 471.537 | 572.925 | 978.797 | 738.29  | 778.266 |
| ENSMUSG00000046434 | 15_Hnmp:  | 10138.9 | 0.15295  | 0.608955 | 0.872658 | 13297.9 | 10166.4 | 8562.86 | 8077.96 | 10356.7 | 10371.4 |
| ENSMUSG00000046435 | 7_Gm130   | 0.16854 | 1.1315   | 0.781553 | NA       | 1.01124 | 0       | 0       | 0       | 0       | 0       |
| ENSMUSG00000046441 | 5_Cmtr2   | 217.907 | 0.03735  | 0.960071 | 0.974391 | 285.171 | 193.829 | 183.047 | 209.624 | 220.629 | 215.14  |
| ENSMUSG00000046442 | 4_Ppm1e   | 79.2099 | -1.33124 | 0.030144 | 0.212437 | 78.8771 | 29.4711 | 26.8882 | 166.709 | 122.762 | 50.552  |
| ENSMUSG00000046447 | 3_Camk2:  | 382.24  | -0.79149 | 0.104399 | 0.439432 | 479.33  | 134.887 | 225.447 | 510.856 | 518.52  | 424.402 |
| ENSMUSG00000046449 | 15_C7737  | 56.5942 | -0.22731 | 0.625369 | 0.879829 | 77.8658 | 36.2721 | 42.4006 | 68.4993 | 68.6782 | 45.8495 |
| ENSMUSG00000046450 | 2_Olfr71  | 0.30991 | 0.16972  | 0.966824 | NA       | 0       | 0       | 1.03416 | 0.82529 | 0       | 0       |
| ENSMUSG00000046456 | 14_Tmem   | 3.03633 | 0.53507  | 0.66251  | 0.895858 | 1.01124 | 5.66751 | 4.13665 | 2.47588 | 2.57543 | 2.35126 |
| ENSMUSG00000046460 | 14_Sh2d7  | 0.50436 | 1.09238  | 0.730574 | NA       | 0       | 1.1335  | 1.03416 | 0       | 0.85848 | 0       |
| ENSMUSG00000046470 | 5_Sox18   | 36.8771 | -0.793   | 0.23426  | 0.626114 | 7.07871 | 29.4711 | 44.4689 | 59.421  | 32.6221 | 48.2007 |
| ENSMUSG00000046480 | 5_Scn4b   | 106.904 | -0.72759 | 0.182051 | 0.567902 | 129.439 | 38.5391 | 73.4255 | 193.944 | 84.9892 | 121.09  |
| ENSMUSG00000046490 | 7_Rnf222  | 60.2263 | 0.54781  | 0.193814 | 0.583952 | 44.4948 | 89.5467 | 80.6646 | 49.5175 | 48.9332 | 48.2007 |
| ENSMUSG00000046491 | 10_C1qtnl | 120.376 | -0.57552 | 0.296098 | 0.67995  | 34.3823 | 109.95  | 145.817 | 184.04  | 108.168 | 139.9   |
| ENSMUSG00000046500 | 8_Fam19:  | 2.30384 | -0.7209  | 0.651953 | 0.892215 | 4.04498 | 1.1335  | 0       | 0.82529 | 4.29238 | 3.52688 |
| ENSMUSG00000046516 | 10_Cox17  | 463.391 | 0.17191  | 0.488247 | 0.814112 | 545.061 | 448.867 | 478.817 | 419.249 | 449.842 | 438.509 |
| ENSMUSG00000046519 | 15_Golph: | 1032.8  | 0.18787  | 0.628663 | 0.881265 | 1668.55 | 887.533 | 743.562 | 867.382 | 1029.31 | 1000.46 |
| ENSMUSG00000046523 | 4_Kctd4   | 75.6315 | -1.27653 | 0.07337  | 0.362418 | 97.0795 | 14.7355 | 20.6832 | 104.812 | 145.941 | 70.5377 |
| ENSMUSG00000046532 | 7_Ar      | 139.15  | 0.20927  | 0.693606 | 0.905638 | 263.935 | 64.6097 | 118.929 | 116.366 | 138.215 | 132.846 |
| ENSMUSG00000046541 | 9_Zfp526  | 224.793 | 0.20794  | 0.633563 | 0.88353  | 123.372 | 279.975 | 319.556 | 232.732 | 167.403 | 225.721 |
| ENSMUSG00000046546 | 3_Fam43:  | 200.316 | 0.34043  | 0.269664 | 0.65657  | 255.845 | 231.235 | 184.081 | 177.438 | 151.092 | 202.208 |
| ENSMUSG00000046550 | 8_Spin2c  | 40.6103 | -0.59219 | 0.217127 | 0.607835 | 48.5397 | 23.8036 | 24.8199 | 48.6922 | 56.6595 | 41.147  |
| ENSMUSG00000046556 | 6_Zfp319  | 268.828 | 0.22578  | 0.65436  | 0.893223 | 108.203 | 403.527 | 357.82  | 264.919 | 216.336 | 262.165 |
| ENSMUSG00000046561 | 9_Arsj    | 69.9048 | -0.79583 | 0.062658 | 0.330345 | 73.8208 | 41.9396 | 37.2298 | 75.1016 | 86.7062 | 104.631 |
| ENSMUSG00000046562 | 5_Unc119  | 2472    | 0.14854  | 0.703274 | 0.90765  | 1421.81 | 3258.82 | 3116.96 | 2555.11 | 2099.83 | 2379.47 |
| ENSMUSG00000046567 | 9_493043  | 130.65  | 0.2741   | 0.523797 | 0.832707 | 208.316 | 89.5467 | 131.339 | 120.493 | 142.507 | 91.699  |
| ENSMUSG00000046572 | 10_Zfp51: | 344.533 | -0.08506 | 0.74451  | 0.923606 | 384.273 | 310.58  | 308.18  | 362.303 | 346.825 | 355.04  |
| ENSMUSG00000046573 | 6_Lyrm4   | 151.134 | 0.04912  | 0.908087 | 0.974731 | 233.597 | 129.219 | 98.2453 | 130.396 | 174.271 | 141.075 |
| ENSMUSG00000046574 | 7_Prr12   | 371.92  | 0.17362  | 0.799328 | 0.940835 | 67.7534 | 511.21  | 603.95  | 470.417 | 236.081 | 342.108 |
| ENSMUSG00000046585 | 8_Cfap58  | 1.44853 | -1.72095 | 0.46412  | NA       | 2.02249 | 0       | 0       | 4.95175 | 1.71695 | 0       |
| ENSMUSG00000046589 | 6_Lrrc8e  | 546.306 | 0.56744  | 0.042488 | 0.261623 | 557.196 | 698.238 | 701.162 | 387.062 | 418.078 | 516.101 |
| ENSMUSG00000046591 | 10_Ticrr  | 181.671 | 1.35367  | 7.24E-05 | 0.00254  | 262.924 | 281.109 | 238.891 | 70.9751 | 115.036 | 121.09  |
| ENSMUSG00000046593 | 3_Tmem2   | 228.987 | 0.67802  | 0.018877 | 0.156645 | 319.553 | 274.308 | 251.301 | 184.865 | 151.092 | 192.803 |
| ENSMUSG00000046598 | 14_Bdh1   | 480.893 | 0.28644  | 0.441104 | 0.786737 | 320.564 | 660.832 | 603.95  | 429.152 | 379.447 | 491.412 |
| ENSMUSG00000046603 | 15_Tcaim  | 261.217 | -0.19634 | 0.553595 | 0.846015 | 327.643 | 205.164 | 197.525 | 275.648 | 294.458 | 266.868 |
| ENSMUSG00000046605 | 14_B3gntl | 1197.25 | 0.08832  | 0.836668 | 0.952966 | 587.533 | 1479.22 | 1635.01 | 1222.26 | 1088.55 | 1170.93 |
| ENSMUSG00000046607 | 6_Hrk     | 5.07545 | -0.34396 | 0.766966 | 0.930427 | 5.05622 | 0       | 8.27329 | 5.77705 | 4.29238 | 7.05377 |
| ENSMUSG00000046610 | 14_Oacyl  | 18.2568 | 0.73204  | 0.216232 | 0.607424 | 32.3598 | 20.4031 | 15.5124 | 15.6806 | 10.3017 | 15.2832 |
| ENSMUSG00000046613 | 18_Vwa5t  | 4.96098 | -0.2965  | 0.841998 | 0.953593 | 0       | 12.4685 | 1.03416 | 9.07822 | 6.00934 | 1.17563 |
| ENSMUSG00000046618 | 7_Olfml2a | 1328.55 | -0.77702 | 0.012765 | 0.119948 | 1112.37 | 729.976 | 1095.18 | 2002.98 | 1540.11 | 1490.7  |
| ENSMUSG00000046623 | 8_Gjb4    | 372.392 | 0.58221  | 0.375886 | 0.745495 | 87.9783 | 758.313 | 493.295 | 321.039 | 216.336 | 357.391 |
| ENSMUSG00000046634 | 12_Pkd11: | 1.53458 | -1.8146  | 0.452886 | NA       | 2.02249 | 0       | 0       | 0       | 6.00934 | 1.17563 |
| ENSMUSG00000046637 | 2_Ttc34   | 1.86882 | -0.16174 | 0.930293 | 0.981773 | 0       | 2.26701 | 3.10248 | 4.12646 | 1.71695 | 0       |
| ENSMUSG00000046652 | 3_Tas2r1: | 0.4878  | 1.03731  | 0.787764 | NA       | 0       | 0       | 2.06832 | 0       | 0.85848 | 0       |
| ENSMUSG00000046658 | 16_Zfp31: | 278.671 | -0.19734 | 0.518405 | 0.831538 | 201.238 | 256.172 | 321.624 | 305.358 | 299.608 | 288.029 |
| ENSMUSG00000046667 | 14_Rbm1:  | 229.206 | -0.01741 | 0.972537 | 0.992691 | 387.307 | 147.355 | 148.919 | 212.1   | 318.495 | 161.061 |

|                    |            |         |          |          |          |         |         |         |         |         |         |
|--------------------|------------|---------|----------|----------|----------|---------|---------|---------|---------|---------|---------|
| ENSMUSG00000046668 | 8_Cxhc5    | 401.339 | -0.21329 | 0.575569 | 0.856733 | 528.881 | 247.104 | 339.205 | 505.079 | 419.795 | 367.972 |
| ENSMUSG00000046671 | 18_Mtfr1l  | 839.782 | -0.38796 | 0.105309 | 0.440813 | 717.983 | 664.233 | 800.441 | 1001.9  | 938.315 | 915.814 |
| ENSMUSG00000046675 | 6_Tmem2    | 309.386 | 0.26149  | 0.49612  | 0.818589 | 504.611 | 265.24  | 241.994 | 268.22  | 285.873 | 290.38  |
| ENSMUSG00000046679 | 16_C8743   | 389.033 | -0.21237 | 0.390387 | 0.753566 | 365.059 | 349.119 | 367.127 | 383.761 | 454.134 | 414.997 |
| ENSMUSG00000046687 | 5_Gm542    | 23.4732 | -0.04175 | 0.950115 | 0.987438 | 12.1349 | 15.869  | 41.3665 | 32.1864 | 14.5941 | 24.6882 |
| ENSMUSG00000046688 | 14_Tifa    | 577.131 | 0.91996  | 0.028717 | 0.205576 | 1200.35 | 553.149 | 511.91  | 359.002 | 461.002 | 377.377 |
| ENSMUSG00000046691 | 13_Chtf8   | 2034    | 0.18163  | 0.628298 | 0.881165 | 1228.66 | 2659.2  | 2597.81 | 1922.11 | 1797.65 | 1998.57 |
| ENSMUSG00000046694 | 6_Fam46l   | 1226.85 | 0.50565  | 0.315753 | 0.696716 | 520.791 | 2027.84 | 1770.48 | 1116.62 | 869.637 | 1055.71 |
| ENSMUSG00000046699 | 14_Slitrk4 | 1.86486 | -1.35114 | 0.410058 | 0.76693  | 1.01124 | 1.1335  | 1.03416 | 0.82529 | 6.00934 | 1.17563 |
| ENSMUSG00000046707 | 8_Csnk2a   | 558.488 | 0.33989  | 0.219666 | 0.610945 | 647.196 | 698.238 | 526.388 | 424.2   | 539.982 | 514.925 |
| ENSMUSG00000046709 | 16_Mapk1   | 37.8228 | -2.28014 | 3.85E-05 | 0.001546 | 16.1799 | 10.2015 | 12.4099 | 91.6075 | 60.0934 | 36.4445 |
| ENSMUSG00000046711 | 15_Hmga    | 930.94  | 0.67434  | 0.15534  | 0.53206  | 475.285 | 1555.17 | 1403.36 | 708.926 | 603.509 | 839.398 |
| ENSMUSG00000046714 | 7_Foxc2    | 34.1407 | 0.06333  | 0.913773 | 0.975975 | 61.6859 | 17.0025 | 25.854  | 32.1864 | 35.1976 | 32.9176 |
| ENSMUSG00000046718 | 7_Bst2     | 1707.66 | 2.80512  | 3.54E-13 | 1.23E-10 | 1815.18 | 4358.32 | 2790.17 | 445.658 | 427.522 | 409.118 |
| ENSMUSG00000046719 | 7_Nxph3    | 18.744  | -1.70433 | 0.043872 | 0.266127 | 4.04498 | 9.06802 | 13.4441 | 37.9634 | 42.0654 | 5.87814 |
| ENSMUSG00000046722 | 14_Cdc42   | 4346.26 | 0.43017  | 0.226662 | 0.617418 | 3067.1  | 6290.94 | 5610.33 | 3642.84 | 3389.27 | 4077.08 |
| ENSMUSG00000046727 | 12_Kytlm   | 113.452 | -1.12509 | 0.005945 | 0.069933 | 54.6072 | 62.3427 | 97.2112 | 204.673 | 140.79  | 121.09  |
| ENSMUSG00000046731 | 4_Kctd11   | 1193.27 | 0.66988  | 0.09311  | 0.415638 | 797.872 | 1869.15 | 1729.12 | 889.665 | 808.685 | 1065.12 |
| ENSMUSG00000046733 | 7_Gprc5a   | 1990.38 | 0.54748  | 0.224182 | 0.613921 | 1056.75 | 3015.12 | 3018.72 | 1533.39 | 1430.22 | 1888.06 |
| ENSMUSG00000046743 | 6_Fat4     | 1256.77 | -0.90253 | 0.001918 | 0.031462 | 872.704 | 674.434 | 1080.7  | 1719.08 | 1624.24 | 1569.46 |
| ENSMUSG00000046748 | 7_Tmem4    | 1.29211 | -0.34042 | 0.891976 | NA       | 0       | 3.40051 | 0       | 0.82529 | 0       | 3.52688 |
| ENSMUSG00000046750 | 16_BC08e   | 32.5021 | -0.60183 | 0.239561 | 0.631327 | 15.1687 | 24.9371 | 37.2298 | 36.3129 | 34.3391 | 47.0251 |
| ENSMUSG00000046753 | 9_Ccdc66   | 470.376 | 0.07041  | 0.870589 | 0.963272 | 779.669 | 303.779 | 361.957 | 415.122 | 518.52  | 443.212 |
| ENSMUSG00000046756 | 10_Mrps7   | 624.552 | 0.00303  | 0.994296 | 0.998043 | 314.497 | 821.79  | 739.426 | 676.74  | 527.105 | 667.757 |
| ENSMUSG00000046761 | 12_Fam8c   | 3030.32 | 0.84575  | 0.158249 | 0.536511 | 938.435 | 5540.56 | 5202.87 | 2434.61 | 1613.08 | 2452.36 |
| ENSMUSG00000046768 | 13_Rhoj    | 861.444 | -0.64708 | 0.102849 | 0.436754 | 912.142 | 470.404 | 631.873 | 1435.18 | 944.325 | 774.739 |
| ENSMUSG00000046774 | 16_80304   | 0.13755 | -0.79206 | 0.84609  | NA       | 0       | 0       | 0       | 0.82529 | 0       | 0       |
| ENSMUSG00000046782 | 14_49215   | 8.97632 | 1.18375  | 0.192538 | 0.582282 | 24.2699 | 5.66751 | 7.23913 | 3.30117 | 5.15086 | 8.22939 |
| ENSMUSG00000046785 | 8_Epm2ai   | 1906.83 | 0.05511  | 0.90663  | 0.974391 | 3382.61 | 1206.05 | 1240.99 | 1713.31 | 2161.65 | 1736.4  |
| ENSMUSG00000046791 | 7_241001   | 218.524 | 0.3591   | 0.322785 | 0.703332 | 156.743 | 292.444 | 287.497 | 191.468 | 172.554 | 210.437 |
| ENSMUSG00000046792 | 7_Zfp787   | 146.675 | -0.23084 | 0.612314 | 0.874367 | 67.7534 | 167.758 | 169.602 | 198.895 | 127.913 | 148.129 |
| ENSMUSG00000046793 | 8_Gpr61    | 2.64712 | -3.70896 | 0.03074  | 0.214821 | 1.01124 | 0       | 0       | 3.30117 | 6.86782 | 4.70251 |
| ENSMUSG00000046794 | 8_Ppp1r3l  | 234.701 | -0.15208 | 0.668238 | 0.898206 | 298.317 | 208.565 | 160.295 | 249.238 | 279.005 | 212.789 |
| ENSMUSG00000046798 | 14_Cldn1   | 735.751 | 0.14236  | 0.720334 | 0.913102 | 1198.32 | 563.351 | 554.311 | 684.167 | 757.177 | 657.176 |
| ENSMUSG00000046804 | 13_Phgr1   | 0       | NA       | NA       | NA       | 0       | 0       | 0       | 0       | 0       | 0       |
| ENSMUSG00000046805 | 9_Mpeg1    | 2545.93 | 3.42676  | 6.98E-17 | 4.82E-14 | 5015.77 | 6484.77 | 2475.78 | 456.387 | 467.87  | 375.025 |
| ENSMUSG00000046806 | 13_31100   | 128.706 | 0.24344  | 0.459067 | 0.798708 | 107.192 | 153.023 | 158.227 | 112.24  | 109.885 | 131.67  |
| ENSMUSG00000046807 | 9_Lrrc75b  | 59.5142 | -1.97038 | 4.38E-05 | 0.001713 | 17.1912 | 18.136  | 37.2298 | 120.493 | 74.6875 | 89.3477 |
| ENSMUSG00000046811 | 3_Gltpd2   | 0.61816 | -1.19629 | 0.738511 | NA       | 0       | 1.1335  | 0       | 0       | 2.57543 | 0       |
| ENSMUSG00000046814 | 3_Gchfr    | 73.0541 | -0.67653 | 0.35446  | 0.729885 | 8.08995 | 75.9447 | 84.8012 | 124.619 | 66.1027 | 78.7671 |
| ENSMUSG00000046818 | 7_Ddit4l   | 170.689 | -1.16952 | 0.015267 | 0.134732 | 170.9   | 51.0076 | 93.0745 | 281.425 | 213.761 | 213.964 |
| ENSMUSG00000046822 | 12_Slc39e  | 485.672 | -0.02384 | 0.967443 | 0.991226 | 137.529 | 582.62  | 724.947 | 649.505 | 346.825 | 472.602 |
| ENSMUSG00000046826 | 7_Fam18i   | 125.076 | 0.04155  | 0.89952  | 0.972372 | 97.0795 | 131.486 | 152.022 | 123.794 | 116.753 | 129.319 |
| ENSMUSG00000046828 | 3_Mettl21  | 5.24758 | 1.11388  | 0.411927 | 0.767522 | 19.2136 | 1.1335  | 1.03416 | 1.65058 | 2.57543 | 5.87814 |
| ENSMUSG00000046834 | 6_Krt1     | 97.5014 | 0.05374  | 0.869414 | 0.963129 | 93.0345 | 96.3477 | 108.587 | 81.7039 | 112.46  | 92.8746 |
| ENSMUSG00000046836 | 13_Brox    | 2731.18 | 0.45856  | 0.177931 | 0.563052 | 4419.14 | 2704.54 | 2360.99 | 2079.74 | 2487.87 | 2334.8  |
| ENSMUSG00000046841 | 4_Ckap4    | 4142.35 | 0.5968   | 0.031622 | 0.218957 | 4241.16 | 5647.11 | 5072.56 | 3115.48 | 2866.45 | 3911.31 |
| ENSMUSG00000046844 | 6_Vat1f    | 1388.37 | -1.80975 | 3.68E-06 | 0.00023  | 821.13  | 384.257 | 643.248 | 2465.15 | 2445.8  | 1570.64 |
| ENSMUSG00000046845 | 1_Ilf1f0   | 0.57377 | 1.14946  | 0.753929 | NA       | 0       | 2.26701 | 0       | 0       | 0       | 1.17563 |
| ENSMUSG00000046854 | 16_Pip5kl  | 3.40841 | -1.50236 | 0.382616 | 0.749501 | 0       | 2.26701 | 3.10248 | 11.5541 | 0       | 3.52688 |
| ENSMUSG00000046856 | 13_Gpr1    | 17.0609 | 0.40086  | 0.511398 | 0.827179 | 25.2811 | 10.2015 | 22.7516 | 14.03   | 17.1695 | 12.9319 |
| ENSMUSG00000046861 | 9_Hectd3   | 864.938 | 0.08153  | 0.847759 | 0.955789 | 434.835 | 1092.7  | 1140.68 | 908.647 | 745.158 | 867.613 |
| ENSMUSG00000046862 | 14_Prame   | 929.952 | 0.42246  | 0.156624 | 0.534279 | 1305.52 | 1004.28 | 885.242 | 661.059 | 852.468 | 871.14  |
| ENSMUSG00000046865 | 6_Fbi      | 959.358 | 0.55825  | 0.223098 | 0.613683 | 508.656 | 1534.76 | 1384.74 | 889.665 | 631.839 | 806.481 |
| ENSMUSG00000046873 | 18_Mbtps   | 819.282 | 0.51422  | 0.259217 | 0.64893  | 1634.17 | 618.893 | 638.078 | 590.084 | 763.186 | 671.283 |
| ENSMUSG00000046876 | 15_Atnx1   | 711.244 | 0.35914  | 0.263143 | 0.652524 | 1072.93 | 640.429 | 684.615 | 626.397 | 667.037 | 576.058 |
| ENSMUSG00000046879 | 6_Irgm1    | 9311.05 | 2.39537  | 1.02E-09 | 1.72E-07 | 20266.3 | 16188.7 | 10488.5 | 2051.68 | 3934.4  | 2936.72 |
| ENSMUSG00000046897 | 16_Zfp74f  | 2305.64 | -0.04439 | 0.86084  | 0.960565 | 1919.34 | 2261.34 | 2629.87 | 2381.79 | 2297.28 | 2344.2  |
| ENSMUSG00000046908 | 5_Ltb4r1   | 147.369 | 0.98083  | 0.036792 | 0.240032 | 103.147 | 301.512 | 182.012 | 81.7039 | 93.574  | 122.265 |
| ENSMUSG00000046909 | 9_Tefm     | 175.793 | -0.02948 | 0.940912 | 0.985839 | 259.89  | 145.088 | 116.86  | 173.311 | 178.563 | 181.047 |
| ENSMUSG00000046916 | 8_Myct1    | 22.3294 | -0.21765 | 0.664688 | 0.896698 | 23.2586 | 18.136  | 20.6832 | 24.7588 | 28.3297 | 18.81   |
| ENSMUSG00000046924 | 3_Vmn1r1   | 0.30609 | 0.16972  | 0.966824 | NA       | 1.01124 | 0       | 0       | 0.82529 | 0       | 0       |
| ENSMUSG00000046934 | 4_Csl      | 2.81286 | -0.75132 | 0.563153 | 0.85076  | 2.02249 | 2.26701 | 2.06832 | 2.47588 | 6.86782 | 1.17563 |
| ENSMUSG00000046942 | 17_Maget   | 0       | NA       | NA       | NA       | 0       | 0       | 0       | 0       | 0       | 0       |
| ENSMUSG00000046947 | 12_Adck2   | 419.122 | -0.02297 | 0.955256 | 0.98876  | 217.418 | 482.872 | 547.071 | 398.616 | 413.786 | 454.968 |
| ENSMUSG00000046949 | 15_Nqo2    | 839.787 | 0.07755  | 0.863438 | 0.961572 | 1435.97 | 506.676 | 644.283 | 736.986 | 949.476 | 765.334 |
| ENSMUSG00000046957 | 4_Spz1     | 0       | NA       | NA       | NA       | 0       | 0       | 0       | 0       | 0       | 0       |
| ENSMUSG00000046959 | 16_Slc26e  | 14.0688 | -1.22889 | 0.178374 | 0.563632 | 1.01124 | 5.66751 | 18.6149 | 25.5841 | 20.6034 | 12.9319 |
| ENSMUSG00000046961 | 7_Gpr156   | 57.1838 | -1.40751 | 0.003915 | 0.052444 | 21.2361 | 29.4711 | 43.4348 | 90.7822 | 106.451 | 51.7276 |
| ENSMUSG00000046962 | 15_Zbtb2   | 562.854 | 0.31982  | 0.200794 | 0.592148 | 559.218 | 660.832 | 654.624 | 483.621 | 472.162 | 546.667 |
| ENSMUSG00000046971 | 7_Pla2g4f  | 48.8077 | 0.93567  | 0.091135 | 0.411377 | 30.3373 | 90.6802 | 71.3571 | 43.7405 | 21.4619 | 35.2688 |
| ENSMUSG00000046974 | 6_BC053    | 2.19215 | -0.10381 | 0.939345 | 0.98532  | 2.02249 | 1.1335  | 3.10248 | 1.65058 | 1.71695 | 3.52688 |
| ENSMUSG00000046982 | 10_Tshz2   | 749.649 | 0.03504  | 0.905267 | 0.974391 | 667.421 | 694.837 | 914.199 | 883.063 | 654.159 | 684.215 |
| ENSMUSG00000046985 | 11_Tapt1   | 1355.87 | 0.1763   | 0.619467 | 0.877704 | 2081.14 | 1106.3  | 1128.27 | 1214.83 | 1376.14 | 1228.53 |
| ENSMUSG00000046991 | 9_Wdr27    | 7.96154 | -1.12486 | 0.171742 | 0.554706 | 4.04498 | 7.93452 | 3.10248 | 13.2047 | 7.72629 | 11.7563 |

|                    |           |         |          |          |          |         |         |         |         |         |         |
|--------------------|-----------|---------|----------|----------|----------|---------|---------|---------|---------|---------|---------|
| ENSMUSG00000046994 | 9_Mars2   | 243.126 | 0.51656  | 0.170454 | 0.552537 | 414.61  | 227.834 | 216.14  | 189.817 | 225.779 | 184.574 |
| ENSMUSG00000046997 | 5_Spsb4   | 14.1778 | -0.93607 | 0.141937 | 0.510781 | 13.1462 | 5.66751 | 10.3416 | 22.2829 | 17.1695 | 16.4588 |
| ENSMUSG00000046999 | 2_111003  | 18.8582 | 0.19538  | 0.775309 | 0.933494 | 36.4048 | 14.7355 | 9.30745 | 22.2829 | 16.3111 | 14.1075 |
| ENSMUSG00000047003 | 14_Zfp41  | 189.422 | -0.1632  | 0.658095 | 0.894702 | 113.259 | 211.965 | 210.969 | 174.962 | 213.761 | 211.613 |
| ENSMUSG00000047013 | 15_Fbxo4  | 12.6149 | -1.1012  | 0.11869  | 0.4687   | 7.07871 | 4.53401 | 12.4099 | 13.2047 | 23.1789 | 15.2832 |
| ENSMUSG00000047021 | 14_Ccdc1  | 0.16854 | 1.1315   | 0.781553 | NA       | 1.01124 | 0       | 0       | 0       | 0       | 0       |
| ENSMUSG00000047022 | 18_Mipol1 | 122.723 | 0.27058  | 0.578801 | 0.858447 | 227.53  | 72.5442 | 102.382 | 108.113 | 117.611 | 108.158 |
| ENSMUSG00000047025 | 4_Ccer1   | 0       | NA       | NA       | NA       | 0       | 0       | 0       | 0       | 0       | 0       |
| ENSMUSG00000047030 | 15_Spata1 | 526.333 | 0.36483  | 0.368811 | 0.740777 | 327.643 | 757.18  | 692.888 | 534.789 | 371.721 | 473.778 |
| ENSMUSG00000047033 | 2_Pcdhb1  | 40.1385 | -0.89487 | 0.113607 | 0.457438 | 41.461  | 17.0025 | 25.854  | 54.4693 | 73.829  | 28.2151 |
| ENSMUSG00000047034 | 9_Ankrd3  | 22.7367 | -3.02282 | 0.000375 | 0.009333 | 3.03373 | 7.93452 | 4.13665 | 80.0534 | 28.3297 | 12.9319 |
| ENSMUSG00000047036 | 7_Zfp445  | 1527.22 | 0.18415  | 0.629536 | 0.881513 | 2453.28 | 1218.52 | 1201.7  | 1275.08 | 1567.58 | 1447.2  |
| ENSMUSG00000047037 | 5_Nipa1   | 184.978 | -0.38807 | 0.390212 | 0.753473 | 251.8   | 86.1462 | 142.714 | 226.13  | 223.204 | 179.871 |
| ENSMUSG00000047040 | 9_Prr15l  | 113.068 | 0.33606  | 0.415526 | 0.770028 | 76.8546 | 128.086 | 173.739 | 115.541 | 90.1401 | 94.0502 |
| ENSMUSG00000047044 | 7_D03005  | 329.573 | 0.28296  | 0.570033 | 0.853843 | 641.129 | 228.968 | 215.106 | 240.16  | 351.117 | 300.961 |
| ENSMUSG00000047045 | 17_Tmem   | 1890.56 | -0.11206 | 0.629363 | 0.881466 | 1648.33 | 1845.34 | 1957.67 | 1948.52 | 1873.2  | 2070.28 |
| ENSMUSG00000047048 | 3_Olfr432 | 0.3409  | 1.98467  | 0.623395 | NA       | 1.01124 | 0       | 1.03416 | 0       | 0       | 0       |
| ENSMUSG00000047053 | 5_Teddm1  | 0       | NA       | NA       | NA       | 0       | 0       | 0       | 0       | 0       | 0       |
| ENSMUSG00000047061 | 6_Gm981   | 1.97837 | 0.97826  | 0.58176  | 0.860188 | 0       | 6.80102 | 1.03416 | 0.82529 | 0.85848 | 2.35126 |
| ENSMUSG00000047067 | 7_Dusp28  | 188.703 | 0.22827  | 0.419487 | 0.773401 | 197.193 | 217.633 | 196.491 | 187.341 | 185.431 | 148.129 |
| ENSMUSG00000047084 | 8_Ngrn    | 615.579 | -0.0465  | 0.841044 | 0.953262 | 577.421 | 618.893 | 620.497 | 599.988 | 620.679 | 656     |
| ENSMUSG00000047085 | 14_Lrrc4b | 21.2787 | -1.62678 | 0.01837  | 0.153867 | 10.1124 | 5.66751 | 15.5124 | 46.2164 | 36.056  | 14.1075 |
| ENSMUSG00000047090 | 13_Tmem   | 312.549 | -0.22533 | 0.455676 | 0.796332 | 259.89  | 259.572 | 345.41  | 395.315 | 327.08  | 288.029 |
| ENSMUSG00000047094 | 8_Ofcc1   | 31.9423 | -0.06168 | 0.890504 | 0.970431 | 33.3711 | 26.0706 | 34.1273 | 25.5841 | 36.056  | 36.4445 |
| ENSMUSG00000047098 | 17_Rnf31  | 669.795 | 1.12176  | 0.051474 | 0.293765 | 241.687 | 1378.34 | 1133.44 | 417.598 | 388.032 | 459.67  |
| ENSMUSG00000047104 | 5_Pbp2    | 52.5539 | 1.14919  | 0.00682  | 0.076782 | 61.6859 | 92.9472 | 63.0839 | 30.5358 | 41.2069 | 25.8638 |
| ENSMUSG00000047108 | 4_Dnajb7  | 4.88975 | -0.20143 | 0.84422  | 0.954449 | 7.07871 | 2.26701 | 4.13665 | 2.47588 | 5.15086 | 8.22939 |
| ENSMUSG00000047115 | 15_Fam22  | 75.804  | 0.19106  | 0.616724 | 0.877103 | 108.203 | 66.8767 | 67.2205 | 63.5475 | 77.2629 | 71.7133 |
| ENSMUSG00000047117 | 12_Ankdd  | 534.07  | 0.6955   | 0.003415 | 0.047731 | 655.286 | 709.573 | 616.36  | 402.743 | 417.22  | 403.24  |
| ENSMUSG00000047123 | 8_Ticam1  | 309.255 | 0.15835  | 0.790366 | 0.937373 | 86.967  | 451.134 | 440.553 | 344.147 | 200.025 | 332.703 |
| ENSMUSG00000047126 | 17_Cltc   | 11754.1 | 0.3292   | 0.411282 | 0.767001 | 20068.1 | 10176.6 | 9023.06 | 8455.12 | 12095.1 | 10706.4 |
| ENSMUSG00000047139 | 8_Cd24a   | 10153.8 | 0.63     | 0.132286 | 0.494519 | 19669.7 | 9096.36 | 8242.27 | 6580.06 | 8882.66 | 8451.59 |
| ENSMUSG00000047141 | 4_Zfp654  | 919.93  | 0.73168  | 0.16765  | 0.548852 | 2165.07 | 656.298 | 623.599 | 623.096 | 828.43  | 623.083 |
| ENSMUSG00000047143 | 3_Dmrta2  | 498.498 | 0.78481  | 0.104071 | 0.127592 | 792.816 | 563.351 | 535.696 | 301.232 | 360.56  | 437.334 |
| ENSMUSG00000047146 | 15_Tet1   | 145.751 | -0.79972 | 0.189883 | 0.578028 | 210.339 | 35.1386 | 73.4255 | 207.974 | 175.988 | 171.642 |
| ENSMUSG00000047150 | 8_170000  | 34.8232 | 0.26871  | 0.530834 | 0.836691 | 33.3711 | 35.1386 | 45.5031 | 32.1864 | 27.4713 | 35.2688 |
| ENSMUSG00000047153 | 3_Khnyn   | 2282.83 | 0.76606  | 0.00442  | 0.057025 | 2309.68 | 3229.35 | 3085.94 | 1563.1  | 1684.33 | 1824.57 |
| ENSMUSG00000047155 | 13_Cyp4x  | 0.79601 | -0.20677 | 0.940554 | NA       | 0       | 2.26701 | 0       | 1.65058 | 0.85848 | 0       |
| ENSMUSG00000047161 | 12_Chst9  | 1026.85 | 0.56639  | 0.266925 | 0.654888 | 2260.13 | 655.165 | 762.177 | 755.143 | 922.004 | 806.481 |
| ENSMUSG00000047180 | 8_Neur13  | 97.1138 | 1.75571  | 9.11E-06 | 0.00048  | 155.732 | 190.428 | 103.416 | 50.3428 | 36.9145 | 45.8495 |
| ENSMUSG00000047181 | 12_Samd1  | 369.937 | -1.27657 | 0.032346 | 0.222191 | 63.7084 | 219.9   | 365.059 | 740.287 | 430.955 | 399.713 |
| ENSMUSG00000047182 | 6_Irs3    | 17.6503 | -1.18399 | 0.155054 | 0.531712 | 1.01124 | 17.0025 | 14.4783 | 32.1864 | 18.8865 | 22.3369 |
| ENSMUSG00000047187 | 9_Rab2a   | 5180.73 | 0.4039   | 0.353358 | 0.729327 | 9756.49 | 4018.27 | 3928.78 | 3934.99 | 5038.4  | 4407.43 |
| ENSMUSG00000047193 | 15_Dync2  | 876.786 | -0.35583 | 0.389668 | 0.7531   | 1211.47 | 504.409 | 591.54  | 871.509 | 1127.18 | 954.61  |
| ENSMUSG00000047205 | 12_Dusp1  | 108.471 | -1.02332 | 0.007749 | 0.084017 | 61.6859 | 86.1462 | 67.2205 | 192.293 | 136.498 | 106.982 |
| ENSMUSG00000047213 | 14_Ythdf3 | 3066.9  | 0.73146  | 0.113054 | 0.456056 | 6572.08 | 2370.15 | 2541.97 | 1963.37 | 2594.32 | 2359.49 |
| ENSMUSG00000047215 | 14_Rpl9   | 14816.5 | -0.4337  | 0.249332 | 0.640811 | 7115.12 | 15280.8 | 15422.5 | 15763.9 | 18082.1 | 17234.7 |
| ENSMUSG00000047216 | 8_Cdh19   | 147.204 | -0.49113 | 0.43426  | 0.78266  | 248.766 | 39.6726 | 78.5963 | 170.836 | 194.874 | 150.48  |
| ENSMUSG00000047220 | 5_Ccdc36  | 6.8691  | 0.46244  | 0.595599 | 0.867627 | 8.08995 | 3.40051 | 12.4099 | 6.60234 | 6.00934 | 4.70251 |
| ENSMUSG00000047221 | 5_Fam18t  | 135.047 | -0.04702 | 0.89153  | 0.970634 | 172.923 | 116.751 | 108.587 | 119.667 | 144.224 | 148.129 |
| ENSMUSG00000047222 | 6_Rnase2  | 1.47994 | 0.67482  | 0.74336  | NA       | 1.01124 | 4.53401 | 0       | 2.47588 | 0.85848 | 0       |
| ENSMUSG00000047225 | 6_Olfr684 | 0.50944 | 2.5636   | 0.489603 | NA       | 2.02249 | 0       | 1.03416 | 0       | 0       | 0       |
| ENSMUSG00000047227 | 4_Gm527   | 57.7919 | 0.38669  | 0.498354 | 0.820324 | 121.349 | 41.9396 | 33.0932 | 50.3428 | 50.6501 | 49.3764 |
| ENSMUSG00000047228 | 9_BC048t  | 8.19291 | 0.46135  | 0.609996 | 0.873625 | 8.08995 | 7.93452 | 12.4099 | 1.65058 | 12.0187 | 7.05377 |
| ENSMUSG00000047230 | 6_Cldn2   | 417.712 | -1.04866 | 0.000546 | 0.012439 | 328.654 | 210.832 | 277.155 | 630.523 | 547.708 | 511.398 |
| ENSMUSG00000047237 | 13_Fbxw2  | 0       | NA       | NA       | NA       | 0       | 0       | 0       | 0       | 0       | 0       |
| ENSMUSG00000047238 | 4_Mageh1  | 204.406 | -0.84447 | 0.016504 | 0.141795 | 203.26  | 112.217 | 123.065 | 275.648 | 261.835 | 250.409 |
| ENSMUSG00000047242 | 14_Taf9b  | 785.411 | 0.3822   | 0.376813 | 0.745967 | 1444.06 | 659.699 | 562.584 | 586.783 | 756.318 | 703.025 |
| ENSMUSG00000047246 | 6_Hist1h2 | 77.8747 | -0.32346 | 0.439079 | 0.785475 | 92.0232 | 44.2066 | 71.3571 | 92.4327 | 97.8664 | 69.362  |
| ENSMUSG00000047248 | 19_C2cd3  | 776.2   | 0.4204   | 0.109915 | 0.450202 | 744.276 | 986.148 | 934.882 | 613.192 | 662.744 | 715.957 |
| ENSMUSG00000047250 | 13_Ptgs1  | 890.141 | 0.80331  | 0.012788 | 0.119977 | 895.962 | 1444.08 | 1054.84 | 533.964 | 649.009 | 762.982 |
| ENSMUSG00000047257 | 13_Prss4t | 0.55722 | 1.09192  | 0.723275 | NA       | 0       | 1.1335  | 1.03416 | 0       | 0       | 1.17563 |
| ENSMUSG00000047259 | 2_Mc4r    | 1.40146 | -1.59862 | 0.453216 | NA       | 2.02249 | 0       | 0       | 0.82529 | 0.85848 | 4.70251 |
| ENSMUSG00000047260 | 4_Emc6    | 437.453 | -0.03575 | 0.893269 | 0.971054 | 500.566 | 426.197 | 369.196 | 422.55  | 452.417 | 453.792 |
| ENSMUSG00000047261 | 9_Gap43   | 67.0922 | -0.64347 | 0.086679 | 0.399057 | 54.6072 | 49.8741 | 52.7422 | 103.987 | 66.1027 | 75.2402 |
| ENSMUSG00000047264 | 7_Zfp358  | 171.506 | -0.25759 | 0.590124 | 0.864738 | 70.7871 | 176.826 | 221.311 | 232.732 | 163.969 | 163.412 |
| ENSMUSG00000047281 | 3_Sfn     | 10750.3 | 0.81866  | 0.288266 | 0.673216 | 1341.92 | 21772.3 | 18049.2 | 9531.3  | 4616.03 | 9191.06 |
| ENSMUSG00000047284 | 14_Neur14 | 730.656 | -0.00803 | 0.988148 | 0.996838 | 227.53  | 881.865 | 1076.56 | 820.341 | 636.99  | 740.646 |
| ENSMUSG00000047293 | 6_Gpr15   | 1.11313 | 3.67873  | 0.214568 | NA       | 1.01124 | 5.66751 | 0       | 0       | 0       | 0       |
| ENSMUSG00000047298 | 3_Kcnv2   | 121.975 | -2.13029 | 0.004612 | 0.059017 | 82.922  | 40.8061 | 12.4099 | 340.02  | 195.733 | 59.957  |
| ENSMUSG00000047307 | 2_Pcdhb1  | 43.397  | -0.83558 | 0.097598 | 0.423879 | 45.506  | 15.869  | 32.059  | 62.7222 | 58.3764 | 45.8495 |
| ENSMUSG00000047324 | 5_493142  | 0.16854 | 1.1315   | 0.781553 | NA       | 1.01124 | 0       | 0       | 0       | 0       | 0       |
| ENSMUSG00000047330 | 8_Kcne4   | 222.263 | -0.52602 | 0.124756 | 0.480458 | 223.485 | 136.02  | 187.183 | 302.057 | 275.571 | 209.262 |
| ENSMUSG00000047342 | 16_Zfp28t | 75.617  | -1.15632 | 0.006389 | 0.073752 | 54.6072 | 38.5391 | 47.5714 | 130.396 | 116.753 | 65.8352 |
| ENSMUSG00000047343 | 4_Mettl21 | 1.95691 | 1.15013  | 0.619426 | 0.877704 | 8.08995 | 0       | 0       | 2.47588 | 0       | 1.17563 |

|                    |            |         |          |          |          |         |         |         |         |         |         |
|--------------------|------------|---------|----------|----------|----------|---------|---------|---------|---------|---------|---------|
| ENSMUSG00000047344 | 9_LancI3   | 11.2959 | 0.3801   | 0.578029 | 0.858061 | 13.1462 | 14.7355 | 10.3416 | 5.77705 | 12.0187 | 11.7563 |
| ENSMUSG00000047352 | 5_Olfr976  | 0.13755 | -0.79206 | 0.84609  | NA       | 0       | 0       | 0       | 0.82529 | 0       | 0       |
| ENSMUSG00000047361 | 15_Gm97    | 148.979 | -0.67828 | 0.10251  | 0.435937 | 136.518 | 62.3427 | 144.783 | 208.799 | 176.846 | 164.588 |
| ENSMUSG00000047363 | 4_Cstad    | 7.64648 | -1.5819  | 0.081977 | 0.386122 | 4.04498 | 2.26701 | 5.17081 | 18.9817 | 6.00934 | 9.40502 |
| ENSMUSG00000047368 | 3_Abhd17   | 1036.5  | 0.83399  | 0.05122  | 0.292853 | 2159.01 | 963.477 | 861.457 | 671.788 | 824.996 | 738.294 |
| ENSMUSG00000047369 | 14_Dnah1   | 0.64744 | 0.29286  | 0.92144  | NA       | 0       | 1.1335  | 1.03416 | 0       | 1.71695 | 0       |
| ENSMUSG00000047370 | 4_Gm736    | 1.47571 | 1.56215  | 0.507602 | NA       | 0       | 3.40051 | 3.10248 | 0       | 0       | 2.35126 |
| ENSMUSG00000047371 | 7_Zfp768   | 265.372 | 0.07574  | 0.84025  | 0.95317  | 163.822 | 326.449 | 326.795 | 272.346 | 230.072 | 272.746 |
| ENSMUSG00000047379 | 6_B4gat1   | 452.084 | -0.01801 | 0.944902 | 0.986649 | 416.633 | 516.877 | 414.699 | 478.67  | 463.578 | 422.05  |
| ENSMUSG00000047388 | 10_Atmin   | 1877.9  | 0.45015  | 0.076145 | 0.369597 | 1873.84 | 2293.08 | 2338.24 | 1492.13 | 1493.75 | 1776.37 |
| ENSMUSG00000047390 | 6_Defb9    | 42.0845 | -1.3184  | 0.044524 | 0.268903 | 47.5285 | 10.2015 | 14.4783 | 67.674  | 73.829  | 38.7957 |
| ENSMUSG00000047394 | 7_Odf3b    | 1.0671  | -2.25043 | 0.301583 | NA       | 0       | 0       | 1.03416 | 2.47588 | 1.71695 | 1.17563 |
| ENSMUSG00000047407 | 17_Tgfr1   | 901.316 | 0.49811  | 0.111921 | 0.453596 | 972.817 | 1243.45 | 949.36  | 563.675 | 767.478 | 911.112 |
| ENSMUSG00000047409 | 13_Ctcdspl | 1204.86 | 0.34663  | 0.216947 | 0.607835 | 1077.99 | 1373.81 | 1594.68 | 1046.47 | 973.513 | 1162.7  |
| ENSMUSG00000047412 | 15_Zbtb44  | 854.171 | 0.37422  | 0.36738  | 0.739795 | 1525.97 | 644.963 | 721.845 | 640.427 | 824.138 | 767.685 |
| ENSMUSG00000047414 | 6_Flrt2    | 1421.17 | 0.3395   | 0.445054 | 0.788998 | 2654.52 | 1033.75 | 1074.49 | 1151.28 | 1439.67 | 1173.28 |
| ENSMUSG00000047415 | 11_Gpr68   | 263.933 | 0.06289  | 0.875393 | 0.964617 | 156.743 | 303.779 | 348.512 | 286.376 | 206.034 | 282.151 |
| ENSMUSG00000047417 | 17_Rexo1   | 329.678 | 0.41978  | 0.52958  | 0.836104 | 68.7646 | 496.474 | 566.721 | 349.099 | 194.874 | 302.136 |
| ENSMUSG00000047419 | 5_Cmya5    | 501.813 | -0.29383 | 0.673269 | 0.900436 | 937.423 | 99.7483 | 315.419 | 798.883 | 400.909 | 458.495 |
| ENSMUSG00000047420 | 8_Fam18c   | 67.9613 | -0.8985  | 0.064746 | 0.337006 | 72.8096 | 26.0706 | 43.4348 | 89.9569 | 107.31  | 68.1864 |
| ENSMUSG00000047423 | 9_Al8371f  | 422.239 | 0.26797  | 0.680841 | 0.902479 | 91.012  | 618.893 | 674.273 | 515.808 | 290.165 | 343.283 |
| ENSMUSG00000047428 | 14_Dlk2    | 47.513  | 1.67457  | 0.026948 | 0.197727 | 14.1574 | 119.018 | 83.7671 | 26.4094 | 11.1602 | 30.5663 |
| ENSMUSG00000047434 | 13_Xxylt1  | 474.215 | -0.16025 | 0.571614 | 0.85466  | 395.397 | 414.862 | 533.627 | 571.102 | 463.578 | 466.724 |
| ENSMUSG00000047441 | 3_Antxrl   | 0.16854 | 1.1315   | 0.781553 | NA       | 1.01124 | 0       | 0       | 0       | 0       | 0       |
| ENSMUSG00000047443 | 18_Fam11c  | 275.155 | 0.74727  | 0.098761 | 0.426922 | 168.878 | 435.265 | 430.211 | 198.895 | 161.394 | 256.287 |
| ENSMUSG00000047446 | 18_Arl4a   | 707.067 | -0.54761 | 0.311615 | 0.693376 | 1093.16 | 299.245 | 330.932 | 875.635 | 980.381 | 663.054 |
| ENSMUSG00000047454 | 11_Gphn    | 1064.56 | 0.41286  | 0.142432 | 0.511466 | 1410.69 | 1189.04 | 1047.61 | 761.745 | 1031.89 | 946.38  |
| ENSMUSG00000047459 | 14_Dynlrb  | 1759.6  | -0.18044 | 0.488803 | 0.814186 | 1355.07 | 1872.55 | 1721.88 | 1954.29 | 1890.37 | 1763.44 |
| ENSMUSG00000047462 | 8_A53009   | 4.07137 | 0.32942  | 0.771766 | 0.932465 | 8.08995 | 4.53401 | 1.03416 | 4.12646 | 4.29238 | 2.35126 |
| ENSMUSG00000047466 | 9_803046   | 478.859 | 0.21003  | 0.498413 | 0.820342 | 669.444 | 468.137 | 403.323 | 452.26  | 443.833 | 436.158 |
| ENSMUSG00000047473 | 14_Zfp30   | 88.5405 | -0.74568 | 0.07662  | 0.371177 | 75.8433 | 43.0731 | 79.6304 | 142.776 | 106.451 | 83.4696 |
| ENSMUSG00000047485 | 6_Klhl34   | 4.52933 | -2.45022 | 0.056332 | 0.310591 | 0       | 1.1335  | 3.10248 | 8.25292 | 11.1602 | 3.52688 |
| ENSMUSG00000047490 | 1_493241   | 16.778  | -2.40747 | 0.000513 | 0.011833 | 3.03373 | 7.93452 | 5.17081 | 38.7887 | 25.7543 | 19.9857 |
| ENSMUSG00000047495 | 15_Dlgap1  | 5.2162  | -3.81376 | 0.006589 | 0.074964 | 1.01124 | 0       | 1.03416 | 16.5058 | 6.86782 | 5.87814 |
| ENSMUSG00000047496 | 6_Rnf152   | 5548.37 | 0.63945  | 0.168058 | 0.548978 | 11474.6 | 4438.8  | 4361.06 | 3312.72 | 4959.42 | 4743.66 |
| ENSMUSG00000047497 | 9_Adamts   | 41.4893 | -0.88728 | 0.031367 | 0.218078 | 28.3148 | 23.8036 | 35.1615 | 49.5175 | 59.2349 | 52.9033 |
| ENSMUSG00000047501 | 3_Cldn4    | 4253.51 | 0.68132  | 0.227544 | 0.618748 | 1540.13 | 7024.32 | 7154.33 | 3424.96 | 2317.89 | 4059.44 |
| ENSMUSG00000047502 | 14_Mroh7   | 66.8967 | -1.11728 | 0.032785 | 0.223702 | 18.2024 | 47.6071 | 61.0155 | 118.842 | 78.1214 | 77.5914 |
| ENSMUSG00000047507 | 12_Baiap3  | 48.0048 | -0.32706 | 0.632229 | 0.883216 | 11.1237 | 32.8716 | 83.7671 | 62.7222 | 44.6408 | 52.9033 |
| ENSMUSG00000047508 | 8_Mbd3l2   | 0.33708 | 1.97061  | 0.625968 | NA       | 2.02249 | 0       | 0       | 0       | 0       | 0       |
| ENSMUSG00000047511 | 3_Olfr139  | 1.33688 | 1.8344   | 0.457624 | NA       | 0       | 1.1335  | 5.17081 | 0       | 1.71695 | 0       |
| ENSMUSG00000047514 | 6_Tspyl1   | 1155.46 | 0.16829  | 0.634444 | 0.883842 | 1761.59 | 892.067 | 1014.51 | 1054.72 | 1140.06 | 1069.82 |
| ENSMUSG00000047515 | 8_BC0497   | 26.841  | 0.39203  | 0.439908 | 0.785475 | 32.3598 | 31.7381 | 26.8882 | 15.6806 | 21.4619 | 32.9176 |
| ENSMUSG00000047517 | 9_Dmbt1    | 4.63991 | -0.6905  | 0.520038 | 0.831665 | 1.01124 | 3.40051 | 6.20497 | 3.30117 | 6.86782 | 7.05377 |
| ENSMUSG00000047518 | 3_Slfn1    | 0.18892 | 1.1315   | 0.781553 | NA       | 0       | 1.1335  | 0       | 0       | 0       | 0       |
| ENSMUSG00000047528 | 13_Als2cr  | 156.594 | 0.05495  | 0.898217 | 0.97174  | 247.755 | 108.816 | 122.031 | 132.872 | 181.139 | 146.953 |
| ENSMUSG00000047534 | 16_Mis18l  | 223.46  | 0.76385  | 0.152521 | 0.526986 | 511.69  | 176.826 | 155.124 | 119.667 | 203.459 | 173.993 |
| ENSMUSG00000047539 | 9_Fbxo28   | 1251.58 | 0.28928  | 0.282419 | 0.669207 | 1629.11 | 1347.73 | 1153.09 | 1059.68 | 1224.19 | 1095.69 |
| ENSMUSG00000047547 | 14_Cltb    | 3207    | 0.16896  | 0.616524 | 0.877103 | 2270.24 | 4060.21 | 3853.29 | 3287.96 | 2529.07 | 3241.21 |
| ENSMUSG00000047554 | 13_Tmem    | 1601.02 | 0.47402  | 0.24156  | 0.632942 | 2883.06 | 1445.22 | 1256.51 | 1112.49 | 1431.08 | 1477.76 |
| ENSMUSG00000047557 | 2_Lxn      | 936.491 | 0.56592  | 0.025025 | 0.189136 | 1131.58 | 1220.78 | 1001.07 | 668.487 | 816.412 | 780.617 |
| ENSMUSG00000047562 | 2_Mmp10    | 33.3039 | 1.04773  | 0.090964 | 0.410991 | 45.506  | 62.3427 | 26.8882 | 9.90351 | 35.1976 | 19.9857 |
| ENSMUSG00000047565 | 4_Acot10   | 4.34883 | 0.3464   | 0.757168 | 0.927624 | 7.07871 | 4.53401 | 3.10248 | 2.47588 | 7.72629 | 1.17563 |
| ENSMUSG00000047583 | 9_Tywi3    | 115.449 | -0.40245 | 0.178736 | 0.564262 | 110.226 | 92.9472 | 95.1429 | 125.444 | 140.79  | 128.143 |
| ENSMUSG00000047586 | 3_Nccrp1   | 3933.33 | 0.80784  | 0.240014 | 0.631907 | 748.321 | 7567.27 | 6704.47 | 3402.68 | 2135.89 | 3041.35 |
| ENSMUSG00000047591 | 4_Mafa     | 0.13755 | -0.79206 | 0.84609  | NA       | 0       | 0       | 0       | 0.82529 | 0       | 0       |
| ENSMUSG00000047592 | 17_Nxpe5   | 44.9039 | 0.28751  | 0.478007 | 0.808634 | 51.5735 | 41.9396 | 54.8106 | 48.6922 | 39.4899 | 32.9176 |
| ENSMUSG00000047603 | 9_Zfp235   | 201.554 | -0.37195 | 0.219903 | 0.611263 | 170.9   | 163.224 | 193.388 | 236.034 | 263.552 | 182.222 |
| ENSMUSG00000047604 | 2_Frat2    | 54.0797 | 0.643    | 0.133476 | 0.497269 | 88.9895 | 63.4762 | 45.5031 | 44.5658 | 45.4993 | 36.4445 |
| ENSMUSG00000047606 | 3_Ankrd3   | 6.61463 | 0.1199   | 0.902174 | 0.973635 | 11.1237 | 1.1335  | 8.27329 | 5.77705 | 5.15086 | 8.22939 |
| ENSMUSG00000047613 | 10_A4300   | 415.385 | -0.06615 | 0.855194 | 0.958892 | 262.924 | 453.401 | 501.568 | 510.856 | 380.305 | 383.255 |
| ENSMUSG00000047617 | 11_BC02f   | 351.561 | -0.28226 | 0.549786 | 0.843939 | 136.518 | 372.922 | 442.621 | 457.212 | 357.985 | 342.108 |
| ENSMUSG00000047619 | 4_Ddi1     | 0.28063 | -1.56014 | 0.700051 | NA       | 0       | 0       | 0       | 0.82529 | 0.85848 | 0       |
| ENSMUSG00000047631 | 2_Apof     | 2.43264 | 1.23351  | 0.492107 | 0.815612 | 6.06747 | 1.1335  | 3.10248 | 0       | 4.29238 | 0       |
| ENSMUSG00000047632 | 10_Fgfbp1  | 216.217 | 0.596    | 0.25737  | 0.648651 | 474.274 | 141.688 | 164.432 | 151.854 | 151.092 | 213.964 |
| ENSMUSG00000047635 | 6_281000   | 216.235 | -0.16577 | 0.615637 | 0.876419 | 271.013 | 165.491 | 174.773 | 217.052 | 238.657 | 230.423 |
| ENSMUSG00000047638 | 15_Nr1h4   | 26.368  | -1.0602  | 0.040394 | 0.253661 | 23.2586 | 13.602  | 14.4783 | 42.9152 | 36.9145 | 27.0394 |
| ENSMUSG00000047641 | 7_Krt83    | 1.85652 | 0.40272  | 0.829478 | 0.951112 | 4.04498 | 2.26701 | 0       | 2.47588 | 0       | 2.35126 |
| ENSMUSG00000047642 | 14_D9300   | 0.74231 | 1.68767  | 0.550761 | NA       | 1.01124 | 2.26701 | 0       | 0       | 0       | 1.17563 |
| ENSMUSG00000047648 | 13_Fbxo3   | 446.371 | 0.29446  | 0.523637 | 0.832707 | 842.367 | 329.849 | 303.009 | 403.568 | 423.229 | 376.201 |
| ENSMUSG00000047649 | 8_Cd3eap   | 301.962 | 0.1284   | 0.739237 | 0.921641 | 184.046 | 400.127 | 361.957 | 277.298 | 262.694 | 325.649 |
| ENSMUSG00000047654 | 6_Tssk6    | 2.47085 | 0.45266  | 0.802752 | 0.942705 | 0       | 2.26701 | 6.20497 | 1.65058 | 0       | 4.70251 |
| ENSMUSG00000047656 | 8_Trpt1    | 92.1062 | -0.26071 | 0.580726 | 0.859611 | 38.4273 | 106.549 | 106.519 | 103.162 | 90.9986 | 106.982 |
| ENSMUSG00000047658 | 6_Gal3st3  | 8.51451 | -2.3045  | 0.014756 | 0.131656 | 1.01124 | 5.66751 | 2.06832 | 21.4576 | 10.3017 | 10.5807 |
| ENSMUSG00000047669 | 7_Msl3l2   | 145.981 | 0.62363  | 0.077759 | 0.374151 | 217.418 | 164.358 | 148.919 | 85.8304 | 125.338 | 134.022 |

|                    |           |         |          |          |          |         |         |         |         |         |         |
|--------------------|-----------|---------|----------|----------|----------|---------|---------|---------|---------|---------|---------|
| ENSMUSG00000047671 | 8_Tctex1c | 1.73175 | -1.14333 | 0.478581 | 0.809227 | 1.01124 | 1.1335  | 1.03416 | 1.65058 | 0.85848 | 4.70251 |
| ENSMUSG00000047675 | 15_Rps8   | 12194.6 | -0.13012 | 0.787507 | 0.936795 | 4592.06 | 14301.4 | 16041.9 | 14474   | 10631.4 | 13127.1 |
| ENSMUSG00000047678 | 1_Gpr82   | 2.0259  | 0.07765  | 0.965914 | 0.990781 | 4.04498 | 2.26701 | 0       | 4.12646 | 1.71695 | 0       |
| ENSMUSG00000047686 | 9_Zcchc5  | 31.2095 | -0.98752 | 0.05727  | 0.313232 | 19.2136 | 12.4685 | 31.0248 | 37.1382 | 49.7917 | 37.6201 |
| ENSMUSG00000047692 | 5_493053  | 1.14946 | -0.22808 | 0.897475 | NA       | 1.01124 | 1.1335  | 1.03416 | 0.82529 | 1.71695 | 1.17563 |
| ENSMUSG00000047694 | 12_Yipf6  | 1762.76 | 0.30989  | 0.500712 | 0.822198 | 3340.14 | 1342.07 | 1171.71 | 1367.51 | 1750.43 | 1604.73 |
| ENSMUSG00000047696 | 16_Ccdc1  | 2.36052 | -0.75076 | 0.597621 | 0.868406 | 3.03373 | 1.1335  | 1.03416 | 0.82529 | 3.43391 | 4.70251 |
| ENSMUSG00000047710 | 7_Champ   | 762.667 | 0.3032   | 0.211828 | 0.602983 | 855.513 | 854.661 | 816.988 | 600.813 | 707.385 | 740.646 |
| ENSMUSG00000047712 | 7_Ust     | 190.215 | -0.24784 | 0.478802 | 0.809366 | 230.564 | 121.285 | 169.602 | 204.673 | 200.025 | 215.14  |
| ENSMUSG00000047714 | 14_Ppp1r  | 3347.17 | 0.61922  | 0.205525 | 0.59724  | 7301.18 | 2501.64 | 2360.99 | 2366.11 | 2865.6  | 2687.49 |
| ENSMUSG00000047719 | 2_Ubiad1  | 377.252 | -0.01248 | 0.972074 | 0.992569 | 234.609 | 459.069 | 433.314 | 392.839 | 354.551 | 389.133 |
| ENSMUSG00000047721 | 8_Bola2   | 147.179 | 0.00532  | 0.993816 | 0.998043 | 25.2811 | 193.829 | 223.379 | 195.594 | 113.319 | 131.67  |
| ENSMUSG00000047728 | 12_BC02f  | 11.2824 | 0.42897  | 0.522781 | 0.832206 | 14.1574 | 12.4685 | 12.4099 | 990351  | 12.8772 | 5.87814 |
| ENSMUSG00000047730 | 17_Fcgbp  | 582.021 | 0.9874   | 0.13795  | 0.503967 | 137.529 | 1150.51 | 1033.13 | 356.526 | 303.042 | 511.398 |
| ENSMUSG00000047731 | 17_Wbp1l  | 1634.52 | 0.35695  | 0.430912 | 0.780048 | 810.007 | 2514.11 | 2183.12 | 1572.18 | 1249.94 | 1477.76 |
| ENSMUSG00000047733 | 10_BC04f  | 0.55573 | -2.53048 | 0.482371 | NA       | 0       | 0       | 0       | 2.47588 | 0.85848 | 0       |
| ENSMUSG00000047735 | 14_Samd1  | 14301   | 1.62439  | 0.00313  | 0.044745 | 40317.3 | 14174.5 | 10299.2 | 4747.91 | 9222.62 | 7044.36 |
| ENSMUSG00000047746 | 14_Fbxo4  | 42.2287 | -0.39245 | 0.619083 | 0.87765  | 77.8658 | 6.80102 | 24.8199 | 70.9751 | 31.7636 | 41.147  |
| ENSMUSG00000047747 | 9_Rnf150  | 350.346 | -1.11715 | 0.006507 | 0.074526 | 321.576 | 171.159 | 170.637 | 532.314 | 576.038 | 330.351 |
| ENSMUSG00000047749 | 2_Zc3hav  | 155.428 | -0.56361 | 0.122048 | 0.475201 | 169.889 | 89.5467 | 116.86  | 192.293 | 201.742 | 162.237 |
| ENSMUSG00000047751 | 9_Utf1    | 0       | NA       | NA       | NA       | 0       | 0       | 0       | 0       | 0       | 0       |
| ENSMUSG00000047757 | 16_Fancb  | 93.2693 | 0.57754  | 0.239382 | 0.631143 | 181.013 | 78.2117 | 75.4938 | 52.8187 | 81.5553 | 90.5233 |
| ENSMUSG00000047759 | 6_Hs3st3e | 164.827 | -0.7718  | 0.132347 | 0.49464  | 210.339 | 55.5416 | 99.2795 | 227.781 | 223.204 | 172.817 |
| ENSMUSG00000047766 | 15_Lrrc49 | 269.6   | -0.1746  | 0.526146 | 0.833849 | 272.025 | 249.371 | 238.891 | 326.816 | 282.439 | 248.057 |
| ENSMUSG00000047767 | 16_Atg16l | 96.0647 | -0.67827 | 0.20969  | 0.601596 | 29.3261 | 72.5442 | 119.963 | 147.727 | 111.602 | 95.2259 |
| ENSMUSG00000047773 | 12_Anknf  | 11.9857 | -1.95366 | 0.004369 | 0.056489 | 5.05622 | 4.53401 | 5.17081 | 20.6323 | 18.8865 | 17.6344 |
| ENSMUSG00000047777 | 9_Phf13   | 480.659 | 0.11584  | 0.665179 | 0.89688  | 430.79  | 552.016 | 517.081 | 499.302 | 408.635 | 476.129 |
| ENSMUSG00000047786 | 12_Lix1   | 97.2636 | -1.73605 | 0.000104 | 0.003419 | 61.6859 | 27.2041 | 45.5031 | 163.408 | 104.734 | 181.047 |
| ENSMUSG00000047787 | 7_Flt1    | 81.2736 | -1.50006 | 0.000704 | 0.015096 | 33.3711 | 35.1386 | 58.9472 | 165.058 | 98.7249 | 96.4015 |
| ENSMUSG00000047789 | 4_Slc38a5 | 510.814 | 0.1211   | 0.733865 | 0.919947 | 733.152 | 414.862 | 448.826 | 467.115 | 590.632 | 410.294 |
| ENSMUSG00000047793 | 13_Sned1  | 5126.52 | -0.33815 | 0.205763 | 0.59724  | 3960.03 | 4196.23 | 5429.35 | 5848.02 | 6184.47 | 5141.02 |
| ENSMUSG00000047794 | 5_Olfr685 | 1.79498 | 0.73836  | 0.709895 | 0.910052 | 0       | 5.66751 | 1.03416 | 0       | 1.71695 | 2.35126 |
| ENSMUSG00000047797 | 14_Gjb1   | 5.58782 | 0.24827  | 0.823177 | 0.949015 | 1.01124 | 6.80102 | 10.3416 | 6.60234 | 1.71695 | 7.05377 |
| ENSMUSG00000047798 | 15_Cd30C  | 62.3327 | 4.17429  | 1.12E-10 | 2.18E-08 | 69.7759 | 214.232 | 70.323  | 6.60234 | 6.00934 | 7.05377 |
| ENSMUSG00000047804 | 15_Akap1  | 883.878 | 0.37911  | 0.285869 | 0.671835 | 1419.79 | 861.462 | 716.674 | 699.023 | 842.166 | 764.158 |
| ENSMUSG00000047810 | 8_Ccdc88  | 76.1654 | 1.61487  | 0.013333 | 0.123291 | 26.2924 | 173.426 | 144.783 | 40.4393 | 30.9052 | 41.147  |
| ENSMUSG00000047819 | 3_Tigd4   | 150.341 | 0.46103  | 0.571895 | 0.854795 | 426.745 | 29.4711 | 66.1863 | 153.504 | 103.876 | 122.265 |
| ENSMUSG00000047821 | 16_Trim1f | 1690.89 | 0.48233  | 0.072916 | 0.361065 | 1673.61 | 2362.22 | 1877    | 1290.76 | 1475.72 | 1466.01 |
| ENSMUSG00000047822 | 7_Gm648   | 0.50436 | 1.09238  | 0.730574 | NA       | 0       | 1.1335  | 1.03416 | 0       | 0.85848 | 0       |
| ENSMUSG00000047824 | 13_Pygo2  | 987.198 | 0.09024  | 0.788448 | 0.937273 | 660.343 | 1225.32 | 1168.6  | 921.026 | 948.617 | 999.284 |
| ENSMUSG00000047832 | 8_Cdca4   | 637.232 | 0.52932  | 0.097492 | 0.423534 | 545.061 | 945.341 | 768.382 | 577.705 | 479.03  | 507.871 |
| ENSMUSG00000047841 | 8_BC051f  | 1.06899 | -0.14491 | 0.947347 | NA       | 1.01124 | 0       | 2.06832 | 2.47588 | 0.85848 | 0       |
| ENSMUSG00000047842 | 6_Diras2  | 122.789 | -1.05638 | 0.018612 | 0.155216 | 93.0345 | 90.6802 | 55.8447 | 245.112 | 145.083 | 106.982 |
| ENSMUSG00000047843 | 16_Bri3   | 608.451 | -0.08189 | 0.734003 | 0.919985 | 553.151 | 603.024 | 617.394 | 667.662 | 573.463 | 636.015 |
| ENSMUSG00000047844 | 3_Bex4    | 84.288  | -1.53101 | 0.000993 | 0.019494 | 68.7646 | 23.8036 | 37.2298 | 134.523 | 126.196 | 115.212 |
| ENSMUSG00000047854 | 5_Stx19   | 323.663 | 0.34721  | 0.461913 | 0.799907 | 596.634 | 260.706 | 229.584 | 198.07  | 321.929 | 335.054 |
| ENSMUSG00000047861 | 2_Foxi1   | 0.13755 | -0.79206 | 0.84609  | NA       | 0       | 0       | 0       | 0.82529 | 0       | 0       |
| ENSMUSG00000047866 | 18_Lonp2  | 2681.36 | -0.0513  | 0.831133 | 0.951642 | 2753.62 | 2512.98 | 2634.01 | 2372.72 | 2825.25 | 2989.62 |
| ENSMUSG00000047867 | 11_Gimap  | 162.985 | 0.17092  | 0.614521 | 0.875923 | 221.463 | 139.421 | 157.193 | 170.836 | 159.677 | 129.319 |
| ENSMUSG00000047875 | 6_Gpr157  | 77.4318 | -0.10482 | 0.770354 | 0.932319 | 66.7421 | 74.8112 | 82.7329 | 91.6075 | 87.5647 | 61.1326 |
| ENSMUSG00000047878 | 12_A4galt | 220.29  | -0.08009 | 0.841612 | 0.953593 | 123.372 | 234.635 | 284.394 | 214.576 | 202.601 | 262.165 |
| ENSMUSG00000047879 | 16_Usp14  | 1827.85 | 0.70989  | 0.139661 | 0.507179 | 3870.03 | 1615.24 | 1320.62 | 1004.38 | 1704.94 | 1451.9  |
| ENSMUSG00000047880 | 14_Cxcr5  | 8.29553 | 1.54708  | 0.094022 | 0.417315 | 16.1799 | 15.869  | 5.17081 | 2.47588 | 7.72629 | 2.35126 |
| ENSMUSG00000047881 | 14_Rell1  | 1618.58 | 0.47782  | 0.065474 | 0.339266 | 1959.79 | 2098.11 | 1594.68 | 1218.96 | 1468    | 1371.96 |
| ENSMUSG00000047884 | 6_Klk9    | 7.4267  | 1.22552  | 0.140258 | 0.507574 | 7.07871 | 14.7355 | 9.30745 | 4.12646 | 3.43391 | 5.87814 |
| ENSMUSG00000047888 | 9_Tnrc6b  | 2342.47 | 0.18085  | 0.526394 | 0.834014 | 3124.74 | 2137.79 | 2204.83 | 2163.92 | 2400.3  | 2023.26 |
| ENSMUSG00000047894 | 1_Ang2    | 0.68392 | 1.68811  | 0.559594 | NA       | 1.01124 | 2.26701 | 0       | 0.82529 | 0       | 0       |
| ENSMUSG00000047898 | 6_Ccr4    | 3.87374 | 1.26067  | 0.297609 | 0.680939 | 4.04498 | 10.2015 | 2.06832 | 0.82529 | 2.57543 | 3.52688 |
| ENSMUSG00000047904 | 6_Sstr2   | 1.26304 | -2.52243 | 0.219702 | NA       | 0       | 0       | 1.03416 | 2.47588 | 1.71695 | 2.35126 |
| ENSMUSG00000047907 | 11_Tshz2  | 1960.36 | -0.24936 | 0.568436 | 0.85263  | 862.591 | 2045.97 | 2465.44 | 2090.47 | 1795.93 | 2501.74 |
| ENSMUSG00000047909 | 11_Ankrd1 | 713.978 | -0.0716  | 0.758383 | 0.927759 | 711.916 | 663.099 | 713.571 | 680.866 | 763.186 | 751.226 |
| ENSMUSG00000047910 | 6_Pcdh1b  | 162.544 | -0.53969 | 0.259997 | 0.649568 | 223.485 | 72.5442 | 101.348 | 212.1   | 200.025 | 165.764 |
| ENSMUSG00000047911 | 5_Npm2    | 4.53186 | -0.22149 | 0.840219 | 0.95317  | 6.06747 | 3.40051 | 3.10248 | 1.65058 | 9.44325 | 3.52688 |
| ENSMUSG00000047921 | 15_Trapp1 | 841.092 | 0.24132  | 0.66877  | 0.898323 | 259.89  | 1206.05 | 1267.88 | 837.672 | 599.217 | 875.843 |
| ENSMUSG00000047940 | 13_Stpg2  | 4.54708 | -0.28412 | 0.818467 | 0.948003 | 8.08995 | 0       | 4.13665 | 6.60234 | 2.57543 | 5.87814 |
| ENSMUSG00000047945 | 6_Marcksl | 1248.96 | 0.68885  | 0.020412 | 0.164777 | 1199.34 | 1925.82 | 1499.53 | 933.406 | 889.382 | 1046.31 |
| ENSMUSG00000047953 | 6_Gp5     | 0.6016  | -1.19598 | 0.74077  | NA       | 0       | 0       | 1.03416 | 0       | 2.57543 | 0       |
| ENSMUSG00000047959 | 4_Kcna3   | 3.1666  | 1.45093  | 0.377713 | 0.746591 | 4.04498 | 7.93452 | 2.06832 | 4.95175 | 0       | 0       |
| ENSMUSG00000047963 | 7_Stbd1   | 188.116 | -0.21292 | 0.517749 | 0.831239 | 208.316 | 136.02  | 177.876 | 176.613 | 188.865 | 241.004 |
| ENSMUSG00000047976 | 4_Kcna1   | 40.3925 | -1.12251 | 0.014943 | 0.132661 | 32.3598 | 17.0025 | 26.8882 | 54.4693 | 66.9612 | 44.6739 |
| ENSMUSG00000047977 | 3_Synb    | 0.94207 | -3.27249 | 0.280284 | NA       | 0       | 0       | 0       | 3.30117 | 0       | 2.35126 |
| ENSMUSG00000047986 | 12_Palm3  | 4.95102 | 0.24369  | 0.818127 | 0.948003 | 4.04498 | 6.80102 | 5.17081 | 5.77705 | 0.85848 | 7.05377 |
| ENSMUSG00000047988 | 1_493342  | 13.3828 | -0.21267 | 0.727978 | 0.917207 | 9.1012  | 13.602  | 14.4783 | 12.3794 | 15.4526 | 15.2832 |
| ENSMUSG00000047989 | 11_Ino80c | 793.082 | 0.33474  | 0.249797 | 0.641438 | 1103.27 | 816.122 | 734.255 | 641.252 | 697.083 | 766.509 |
| ENSMUSG00000047990 | 5_C2cd4a  | 0.13755 | -0.79206 | 0.84609  | NA       | 0       | 0       | 0       | 0.82529 | 0       | 0       |

|                    |           |         |          |          |          |         |         |         |         |         |         |
|--------------------|-----------|---------|----------|----------|----------|---------|---------|---------|---------|---------|---------|
| ENSMUSG00000047992 | 10_Fam6   | 26.5631 | -2.03897 | 0.002962 | 0.043052 | 9.1012  | 3.40051 | 18.6149 | 62.7222 | 32.6221 | 32.9176 |
| ENSMUSG00000047996 | 16_Prrg1  | 112.042 | -0.19433 | 0.762543 | 0.929057 | 219.44  | 46.4736 | 47.5714 | 120.493 | 144.224 | 94.0502 |
| ENSMUSG00000048000 | 15_Gigyf2 | 2739.05 | 0.09846  | 0.697463 | 0.905638 | 3168.23 | 2721.54 | 2607.12 | 2314.12 | 2672.44 | 2950.83 |
| ENSMUSG00000048001 | 7_Hes5    | 3.71603 | -1.72733 | 0.225367 | 0.615493 | 1.01124 | 0       | 4.13665 | 10.7288 | 1.71695 | 4.70251 |
| ENSMUSG00000048003 | 12_Catspr | 23.1557 | 1.04678  | 0.14076  | 0.508648 | 9.1012  | 41.9396 | 42.4006 | 14.03   | 10.3017 | 21.1613 |
| ENSMUSG00000048004 | 14_Tmem   | 2.12715 | -4.46156 | 0.043833 | 0.266097 | 0       | 0       | 0       | 10.7288 | 0.85848 | 1.17563 |
| ENSMUSG00000048007 | 4_Timm8   | 200.174 | 0.77938  | 0.144186 | 0.513959 | 450.004 | 198.363 | 110.655 | 158.456 | 164.828 | 118.738 |
| ENSMUSG00000048012 | 18_Zfp47  | 22.6843 | 0.02082  | 0.973313 | 0.993027 | 11.1237 | 18.136  | 39.2981 | 20.6323 | 25.7543 | 21.1613 |
| ENSMUSG00000048013 | 9_Krt35   | 0.13755 | -0.79206 | 0.84609  | NA       | 0       | 0       | 0       | 0.82529 | 0       | 0       |
| ENSMUSG00000048015 | 3_Neurod  | 31.069  | -1.46323 | 0.204458 | 0.595444 | 39.4385 | 10.2015 | 0       | 77.5775 | 49.7917 | 9.40502 |
| ENSMUSG00000048022 | 11_Tmem   | 14.3528 | -0.23363 | 0.747947 | 0.924734 | 22.2474 | 6.80102 | 10.3416 | 18.1564 | 8.58477 | 19.9857 |
| ENSMUSG00000048027 | 7_Rgmb    | 543.523 | 0.22775  | 0.422654 | 0.774546 | 461.127 | 640.429 | 657.727 | 545.518 | 479.03  | 477.305 |
| ENSMUSG00000048029 | 10_Eno4   | 4.64448 | 0.58397  | 0.609254 | 0.872923 | 6.06747 | 5.66751 | 5.17081 | 4.95175 | 6.00934 | 0       |
| ENSMUSG00000048031 | 15_Fcrl5  | 0.16854 | 1.1315   | 0.781553 | NA       | 1.01124 | 0       | 0       | 0       | 0       | 0       |
| ENSMUSG00000048038 | 6_493241  | 2.18136 | -4.4848  | 0.017075 | 0.145402 | 0       | 0       | 0       | 4.95175 | 3.43391 | 4.70251 |
| ENSMUSG00000048039 | 8_Isg202  | 828.483 | 0.2498   | 0.398453 | 0.758995 | 1089.11 | 877.331 | 733.221 | 642.077 | 780.356 | 848.803 |
| ENSMUSG00000048040 | 8_Arxes2  | 95.547  | -1.08161 | 0.025082 | 0.189403 | 103.147 | 35.1386 | 45.5031 | 141.125 | 129.63  | 118.738 |
| ENSMUSG00000048047 | 3_Zbtb33  | 1297.33 | 0.63308  | 0.229465 | 0.620763 | 2958.9  | 895.467 | 878.003 | 850.051 | 1219.9  | 981.649 |
| ENSMUSG00000048058 | 17_Ldlrad | 662.854 | -0.25214 | 0.496323 | 0.818845 | 886.861 | 429.598 | 498.466 | 646.204 | 758.894 | 757.104 |
| ENSMUSG00000048065 | 7_Cyb5r2  | 19.6997 | -0.15543 | 0.772793 | 0.932508 | 18.2024 | 20.4031 | 17.5807 | 25.5841 | 22.3204 | 14.1075 |
| ENSMUSG00000048070 | 4_Pirt    | 8.19695 | -3.07014 | 0.002356 | 0.036564 | 2.02249 | 1.1335  | 2.06832 | 23.9335 | 9.44325 | 10.5807 |
| ENSMUSG00000048076 | 14_Arf1   | 11478.8 | 0.37283  | 0.123449 | 0.478085 | 11340.1 | 14513.4 | 13007.7 | 9855.64 | 9477.59 | 10678.2 |
| ENSMUSG00000048078 | 16_Tenm   | 951.243 | -0.67284 | 0.033619 | 0.226782 | 550.117 | 801.387 | 849.047 | 1355.13 | 1201.87 | 949.907 |
| ENSMUSG00000048087 | 5_Gm473   | 1163.23 | 0.24133  | 0.536146 | 0.838659 | 684.612 | 1629.98 | 1466.44 | 1077.01 | 1045.62 | 1075.7  |
| ENSMUSG00000048096 | 7_Lmod1   | 126.724 | -1.41508 | 0.002651 | 0.039801 | 37.416  | 64.6097 | 105.484 | 239.335 | 166.545 | 146.953 |
| ENSMUSG00000048100 | 13_Taf13  | 1099.28 | 0.1198   | 0.783871 | 0.935592 | 1842.49 | 830.858 | 761.143 | 818.69  | 1267.97 | 1074.52 |
| ENSMUSG00000048106 | 5_463241  | 371.787 | -0.15673 | 0.721154 | 0.913771 | 581.465 | 231.235 | 241.994 | 406.869 | 390.607 | 378.552 |
| ENSMUSG00000048108 | 13_Tmem   | 161.8   | -1.54783 | 0.001451 | 0.025754 | 135.507 | 48.7406 | 63.0839 | 311.135 | 239.515 | 172.817 |
| ENSMUSG00000048109 | 10_Rbm1   | 364.406 | 0.51554  | 0.138875 | 0.505948 | 582.477 | 409.195 | 294.736 | 297.105 | 299.608 | 303.312 |
| ENSMUSG00000048118 | 17_Arid4a | 1294.51 | 0.44413  | 0.159321 | 0.537367 | 1985.07 | 1272.92 | 1218.24 | 990.351 | 1104.86 | 1195.61 |
| ENSMUSG00000048120 | 16_Entpd  | 905.559 | 0.25587  | 0.324913 | 0.705459 | 1111.36 | 1024.69 | 821.124 | 844.274 | 852.468 | 779.441 |
| ENSMUSG00000048126 | 16_Col6a  | 6040.99 | -0.61996 | 0.068721 | 0.348694 | 3635.42 | 4333.38 | 6318.73 | 5758.06 | 7570.05 | 8630.28 |
| ENSMUSG00000048138 | 9_Dmrt2   | 2.2974  | 0.25708  | 0.85256  | 0.957929 | 2.02249 | 4.53401 | 1.03416 | 3.30117 | 1.71695 | 1.17563 |
| ENSMUSG00000048142 | 9_Nat8l   | 182.407 | 1.45103  | 0.026435 | 0.19578  | 95.057  | 557.683 | 148.919 | 132.872 | 85.8477 | 74.0646 |
| ENSMUSG00000048148 | 16_Nwd1   | 166.799 | -1.50485 | 3.13E-05 | 0.001299 | 84.9445 | 72.5442 | 103.416 | 315.262 | 241.232 | 183.398 |
| ENSMUSG00000048153 | 5_Olf49   | 0.51138 | -0.81111 | 0.797958 | NA       | 0       | 0       | 1.03416 | 0       | 0.85848 | 1.17563 |
| ENSMUSG00000048154 | 16_Kmt2d  | 1945.06 | 0.44505  | 0.367727 | 0.739892 | 839.333 | 2955.04 | 2933.92 | 1890.74 | 1433.66 | 1617.66 |
| ENSMUSG00000048163 | 13_Selplg | 80.5648 | 2.40442  | 0.001506 | 0.026383 | 25.2811 | 269.774 | 111.689 | 37.1382 | 17.1695 | 22.3369 |
| ENSMUSG00000048170 | 14_Mcmb   | 1736.45 | 0.56502  | 0.028058 | 0.202526 | 2176.2  | 2201.26 | 1838.74 | 1198.32 | 1459.41 | 1544.77 |
| ENSMUSG00000048174 | 2_Tmem8   | 84.1044 | 0.04179  | 0.901369 | 0.973382 | 82.922  | 78.2117 | 95.1429 | 88.3063 | 91.857  | 68.1864 |
| ENSMUSG00000048175 | 13_Asb8   | 675.49  | 0.14156  | 0.553532 | 0.84601  | 689.669 | 761.714 | 674.273 | 593.385 | 656.735 | 677.162 |
| ENSMUSG00000048185 | 4_Gm707   | 0.14308 | -0.79206 | 0.84609  | NA       | 0       | 0       | 0       | 0       | 0.85848 | 0       |
| ENSMUSG00000048186 | 14_Bend7  | 122.486 | -0.29309 | 0.410617 | 0.767001 | 134.495 | 81.6122 | 113.758 | 140.3   | 110.744 | 154.007 |
| ENSMUSG00000048191 | 15_Muc6   | 8.10643 | 0.53061  | 0.484594 | 0.812793 | 7.07871 | 10.2015 | 11.3758 | 6.60234 | 5.15086 | 8.22939 |
| ENSMUSG00000048200 | 11_Cracr2 | 202.538 | -0.152   | 0.789131 | 0.937308 | 61.6859 | 213.099 | 300.941 | 273.997 | 156.243 | 209.262 |
| ENSMUSG00000048206 | 6_Dnajb8  | 0.55019 | -2.51397 | 0.52782  | NA       | 0       | 0       | 0       | 3.30117 | 0       | 0       |
| ENSMUSG00000048215 | 14_A6300  | 3.70181 | 0.20982  | 0.854152 | 0.958493 | 1.01124 | 6.80102 | 4.13665 | 3.30117 | 3.43391 | 3.52688 |
| ENSMUSG00000048216 | 13_Gpr85  | 9.04646 | -1.01684 | 0.235573 | 0.627591 | 8.08995 | 7.93452 | 2.06832 | 14.8553 | 15.4526 | 5.87814 |
| ENSMUSG00000048218 | 5_Amigo2  | 177.75  | -0.47418 | 0.158032 | 0.53609  | 186.069 | 115.617 | 144.783 | 238.509 | 205.176 | 176.344 |
| ENSMUSG00000048222 | 3_Mfap1b  | 1438.75 | -0.04234 | 0.884192 | 0.967903 | 1755.52 | 1306.93 | 1190.32 | 1279.2  | 1634.54 | 1466.01 |
| ENSMUSG00000048230 | 5_Fbxo43  | 1.81197 | 0.57679  | 0.772719 | 0.932508 | 1.01124 | 4.53401 | 1.03416 | 0       | 4.29238 | 0       |
| ENSMUSG00000048232 | 12_Fbxo1  | 230.409 | -0.78803 | 0.076741 | 0.371346 | 107.192 | 150.756 | 249.233 | 406.869 | 230.93  | 237.477 |
| ENSMUSG00000048234 | 13_Rnf14  | 1054.42 | 0.13551  | 0.625357 | 0.879829 | 1355.07 | 1024.69 | 931.78  | 935.882 | 1051.63 | 1027.5  |
| ENSMUSG00000048240 | 14_Gng7   | 186.524 | -1.0453  | 0.014069 | 0.127592 | 75.8433 | 119.018 | 170.637 | 334.243 | 217.195 | 202.208 |
| ENSMUSG00000048249 | 14_Crebrf | 1738.97 | 0.33907  | 0.487844 | 0.814112 | 3489.8  | 1145.97 | 1191.35 | 1563.93 | 1673.17 | 1369.61 |
| ENSMUSG00000048251 | 15_Bcl11t | 132.973 | 1.3971   | 0.001693 | 0.028723 | 279.103 | 148.489 | 149.953 | 61.8969 | 54.9425 | 103.455 |
| ENSMUSG00000048264 | 15_Dip2c  | 1110.92 | -0.01867 | 0.939752 | 0.985498 | 1266.08 | 995.216 | 1049.67 | 1068.75 | 1147.78 | 1138.01 |
| ENSMUSG00000048271 | 14_Rbm3   | 1708.79 | 0.27973  | 0.248035 | 0.639565 | 2149.91 | 1736.53 | 1735.32 | 1526.79 | 1586.47 | 1517.74 |
| ENSMUSG00000048277 | 15_Syngr  | 1317.68 | 0.66551  | 0.226509 | 0.617339 | 493.487 | 2366.75 | 1988.69 | 1073.71 | 798.384 | 1185.03 |
| ENSMUSG00000048279 | 17_Sacs   | 168.046 | -0.87671 | 0.130393 | 0.491137 | 229.552 | 68.0102 | 57.913  | 234.383 | 264.411 | 154.007 |
| ENSMUSG00000048280 | 17_Zfp73f | 403.62  | 0.55461  | 0.286894 | 0.67264  | 875.738 | 296.978 | 267.848 | 246.762 | 382.881 | 351.513 |
| ENSMUSG00000048281 | 8_Dleu7   | 2.36321 | -0.33528 | 0.80809  | 0.944751 | 3.03373 | 2.26701 | 1.03416 | 4.95175 | 1.71695 | 1.17563 |
| ENSMUSG00000048285 | 8_Frmd6   | 2998.99 | 0.40812  | 0.13869  | 0.505595 | 4125.88 | 3020.79 | 3113.86 | 2299.26 | 2525.64 | 2908.5  |
| ENSMUSG00000048292 | 2_Olf41   | 3.276   | 0.63102  | 0.592778 | 0.866044 | 3.03373 | 6.80102 | 2.06832 | 1.65058 | 2.57543 | 3.52688 |
| ENSMUSG00000048304 | 8_Slitrk3 | 15.8822 | -1.19574 | 0.121483 | 0.473959 | 20.2249 | 4.53401 | 4.13665 | 25.5841 | 23.1789 | 17.6344 |
| ENSMUSG00000048307 | 7_Ankr4d  | 1157.44 | -0.1503  | 0.532925 | 0.837668 | 1235.74 | 989.548 | 1066.22 | 1260.22 | 1185.56 | 1207.37 |
| ENSMUSG00000048310 | 8_Pskh1   | 667.764 | -0.02023 | 0.964068 | 0.990343 | 299.328 | 804.787 | 885.242 | 744.414 | 589.774 | 683.04  |
| ENSMUSG00000048312 | 7_Gm488   | 1.31696 | -2.59282 | 0.276738 | NA       | 0       | 1.1335  | 0       | 2.47588 | 4.29238 | 0       |
| ENSMUSG00000048327 | 6_Ckap2l  | 1316.27 | 0.54536  | 0.077149 | 0.372775 | 1838.44 | 1455.42 | 1391.98 | 800.534 | 1170.96 | 1240.29 |
| ENSMUSG00000048329 | 7_Mfsd6l  | 6.60126 | -0.03618 | 0.971733 | 0.992434 | 1.01124 | 12.4685 | 6.20497 | 5.77705 | 9.44325 | 4.70251 |
| ENSMUSG00000048330 | 14_Ric3   | 282.231 | -0.59138 | 0.178933 | 0.564267 | 354.947 | 154.156 | 166.5   | 365.605 | 401.767 | 250.409 |
| ENSMUSG00000048332 | 13_Lhfp   | 698.486 | -0.24801 | 0.543223 | 0.84123  | 991.019 | 451.134 | 473.646 | 891.316 | 734.856 | 648.947 |
| ENSMUSG00000048337 | 3_Npy4r   | 27.7421 | 0.30664  | 0.49019  | 0.814619 | 31.3486 | 31.7381 | 28.9565 | 23.1082 | 26.6128 | 24.6882 |
| ENSMUSG00000048347 | 5_Pcdh1b  | 71.0433 | -0.59038 | 0.304982 | 0.867618 | 108.203 | 32.8716 | 28.9565 | 89.1316 | 91.857  | 75.2402 |
| ENSMUSG00000048349 | 9_Pou4f1  | 9.25413 | 0.80526  | 0.333084 | 0.711957 | 18.2024 | 9.06802 | 8.27329 | 9.90351 | 7.72629 | 2.35126 |

|                    |           |         |          |          |          |         |         |         |         |         |         |
|--------------------|-----------|---------|----------|----------|----------|---------|---------|---------|---------|---------|---------|
| ENSMUSG00000048351 | 14_Coa7   | 285.486 | -0.20451 | 0.45983  | 0.799333 | 217.418 | 289.043 | 289.565 | 310.31  | 305.618 | 300.961 |
| ENSMUSG00000048355 | 2_Arxes1  | 20.999  | -1.25208 | 0.058672 | 0.317744 | 17.1912 | 3.40051 | 16.5466 | 34.6623 | 28.3297 | 25.8638 |
| ENSMUSG00000048368 | 8_Omd     | 382.056 | 0.05323  | 0.934726 | 0.983652 | 822.142 | 114.484 | 230.618 | 377.984 | 434.389 | 312.717 |
| ENSMUSG00000048371 | 7_Pdp2    | 441.757 | 0.441    | 0.131192 | 0.492611 | 437.869 | 553.149 | 534.662 | 342.496 | 326.221 | 456.144 |
| ENSMUSG00000048373 | 8_Fgfbp1  | 12164.6 | 0.01632  | 0.958464 | 0.989394 | 8621.87 | 15374.8 | 12703.6 | 11725.8 | 11646.1 | 12915.4 |
| ENSMUSG00000048376 | 5_F2r     | 621.62  | -0.37664 | 0.249278 | 0.640769 | 711.916 | 395.593 | 515.012 | 752.667 | 632.698 | 721.835 |
| ENSMUSG00000048379 | 8_Socs4   | 1494.62 | 0.50964  | 0.275699 | 0.662151 | 3052.95 | 1138.04 | 1076.56 | 1100.11 | 1350.38 | 1249.69 |
| ENSMUSG00000048385 | 8_Sort1   | 4.58443 | -1.77684 | 0.148388 | 0.521353 | 2.02249 | 1.1335  | 3.10248 | 13.2047 | 6.86782 | 1.17563 |
| ENSMUSG00000048387 | 7_Osr1    | 13.022  | -1.34659 | 0.042733 | 0.262175 | 11.1237 | 5.66751 | 5.17081 | 18.1564 | 18.028  | 19.9857 |
| ENSMUSG00000048388 | 3_Fam17   | 254.786 | -1.06797 | 0.06592  | 0.340562 | 320.564 | 74.8112 | 98.2453 | 397.791 | 397.475 | 239.828 |
| ENSMUSG00000048399 | 4_Tprg    | 1601.87 | 0.25369  | 0.287149 | 0.672979 | 1860.69 | 1768.26 | 1597.78 | 1320.47 | 1507.49 | 1556.53 |
| ENSMUSG00000048402 | 14_Gli2   | 200.628 | -0.25607 | 0.513464 | 0.828304 | 109.214 | 201.764 | 237.857 | 254.19  | 200.884 | 199.857 |
| ENSMUSG00000048410 | 16_Zfp40  | 473.127 | 0.25614  | 0.305706 | 0.688622 | 559.218 | 533.88  | 451.929 | 420.074 | 438.682 | 434.982 |
| ENSMUSG00000048416 | 15_Mif1   | 95.5316 | 0.51143  | 0.377078 | 0.746236 | 206.294 | 63.4762 | 67.2205 | 113.89  | 63.5273 | 58.7814 |
| ENSMUSG00000048424 | 15_Ranbp  | 3.54901 | -0.35593 | 0.751048 | 0.925449 | 4.04498 | 1.1335  | 4.13665 | 3.30117 | 5.15086 | 3.52688 |
| ENSMUSG00000048429 | 10_18100  | 1004.95 | -0.16329 | 0.560588 | 0.849011 | 1167.99 | 871.664 | 804.578 | 973.845 | 1128.9  | 1082.75 |
| ENSMUSG00000048439 | 15_Nup12  | 288.505 | 0.08933  | 0.756766 | 0.927593 | 309.441 | 272.041 | 310.248 | 227.781 | 285.873 | 325.649 |
| ENSMUSG00000048440 | 15_Cyp4f  | 208.947 | -0.05637 | 0.892298 | 0.970752 | 107.192 | 256.172 | 251.301 | 196.42  | 218.053 | 224.545 |
| ENSMUSG00000048442 | 15_Smim   | 53.461  | -0.16087 | 0.801829 | 0.942266 | 14.1574 | 70.2772 | 67.2205 | 80.8787 | 41.2069 | 47.0251 |
| ENSMUSG00000048445 | 6_Ccdc57  | 92.5924 | 0.01382  | 0.974967 | 0.993623 | 49.551  | 107.683 | 122.031 | 103.987 | 84.1307 | 88.1721 |
| ENSMUSG00000048450 | 10_Msx1   | 26.1322 | -0.36505 | 0.493138 | 0.816235 | 13.1462 | 31.7381 | 23.7857 | 33.837  | 24.8958 | 29.3907 |
| ENSMUSG00000048455 | 9_Spr1b   | 7.14278 | 6.36469  | 1.79E-05 | 0.00084  | 13.1462 | 20.4031 | 9.30745 | 0       | 0       | 0       |
| ENSMUSG00000048458 | 8_Fam21   | 216.279 | -0.16444 | 0.582842 | 0.860399 | 163.822 | 219.9   | 228.55  | 245.937 | 236.081 | 203.384 |
| ENSMUSG00000048473 | 15_Gm76   | 1.0563  | -1.07526 | 0.685469 | NA       | 1.01124 | 0       | 1.03416 | 0       | 4.29238 | 0       |
| ENSMUSG00000048478 | 6_Spata3  | 5.6726  | -1.16993 | 0.221961 | 0.612502 | 2.02249 | 2.26701 | 6.20497 | 9.07822 | 8.58477 | 5.87814 |
| ENSMUSG00000048480 | 5_Cxcr1   | 0.32647 | 0.16972  | 0.966824 | NA       | 0       | 1.1335  | 0       | 0.82529 | 0       | 0       |
| ENSMUSG00000048481 | 15_Mypor  | 40.8818 | -0.52708 | 0.378075 | 0.746591 | 13.1462 | 29.4711 | 57.913  | 59.421  | 39.4899 | 45.8495 |
| ENSMUSG00000048482 | 14_Bdnf   | 33.4165 | -1.26988 | 0.010078 | 0.101352 | 25.2811 | 15.869  | 17.5807 | 61.8969 | 35.1976 | 44.6739 |
| ENSMUSG00000048483 | 5_Zdhc2   | 0.2751  | -1.54073 | 0.703687 | NA       | 0       | 0       | 0       | 1.65058 | 0       | 0       |
| ENSMUSG00000048484 | 4_Gm746   | 1.47189 | 1.58759  | 0.436594 | NA       | 1.01124 | 3.40051 | 2.06832 | 0       | 0       | 2.35126 |
| ENSMUSG00000048485 | 12_Zbtb8  | 526.833 | 0.70236  | 0.020877 | 0.167423 | 542.027 | 724.308 | 690.82  | 362.303 | 344.249 | 497.291 |
| ENSMUSG00000048486 | 6_Fitm2   | 567.864 | 0.14058  | 0.548568 | 0.843853 | 580.454 | 589.422 | 616.36  | 530.663 | 514.228 | 576.058 |
| ENSMUSG00000048489 | 12_84304  | 5.44729 | 0.67249  | 0.461825 | 0.799907 | 5.05622 | 7.93452 | 7.23913 | 4.95175 | 5.15086 | 2.35126 |
| ENSMUSG00000048490 | 13_Nrip1  | 2244.42 | 0.59282  | 0.090978 | 0.410991 | 3831.6  | 2154.79 | 2110.72 | 1546.6  | 1846.58 | 1976.23 |
| ENSMUSG00000048495 | 16_Tyw5   | 154.9   | 0.28599  | 0.51032  | 0.827179 | 260.901 | 111.083 | 138.578 | 120.493 | 172.554 | 125.792 |
| ENSMUSG00000048497 | 11_Mmgt   | 397.969 | -0.12694 | 0.639924 | 0.887246 | 436.858 | 355.92  | 348.512 | 371.382 | 460.144 | 414.997 |
| ENSMUSG00000048498 | 7_Cd300e  | 9.11422 | 1.34154  | 0.08188  | 0.385978 | 8.08995 | 14.7355 | 16.5466 | 5.77705 | 6.00934 | 3.52688 |
| ENSMUSG00000048500 | 2_Deffb15 | 0.91151 | -0.73387 | 0.783506 | NA       | 0       | 0       | 2.06832 | 0.82529 | 2.57543 | 0       |
| ENSMUSG00000048502 | 14_Duxbl  | 17.9767 | -0.00881 | 0.998119 | 0.999063 | 0       | 0       | 53.7764 | 0       | 54.084  | 0       |
| ENSMUSG00000048503 | 6_Tmem1   | 229.127 | -1.37721 | 0.001819 | 0.030094 | 194.159 | 91.8137 | 96.177  | 404.393 | 364.853 | 223.369 |
| ENSMUSG00000048520 | 16_Fbxl1  | 4.0016  | -0.41144 | 0.728614 | 0.917597 | 7.07871 | 1.1335  | 2.06832 | 2.47588 | 7.72629 | 3.52688 |
| ENSMUSG00000048521 | 7_Cxcr6   | 15.7512 | 1.70022  | 0.005528 | 0.066141 | 25.2811 | 29.4711 | 17.5807 | 8.25292 | 6.86782 | 7.05377 |
| ENSMUSG00000048534 | 6_Amic1   | 93.3025 | 2.33305  | 3.76E-06 | 0.000233 | 128.428 | 255.038 | 83.7671 | 29.7105 | 33.4806 | 29.3907 |
| ENSMUSG00000048537 | 15_Phldb  | 566.163 | -0.42078 | 0.505346 | 0.825121 | 103.147 | 565.618 | 783.894 | 818.69  | 533.114 | 592.516 |
| ENSMUSG00000048540 | 8_Nhlh2   | 9.48893 | -0.84857 | 0.546064 | 0.842635 | 19.2136 | 1.1335  | 0       | 23.9335 | 10.3017 | 2.35126 |
| ENSMUSG00000048544 | 8_593042  | 0.63256 | 0.3162   | 0.915596 | NA       | 1.01124 | 1.1335  | 0       | 1.65058 | 0       | 0       |
| ENSMUSG00000048546 | 7_Tob2    | 843.801 | -0.03334 | 0.919579 | 0.977244 | 633.039 | 878.465 | 990.727 | 1031.62 | 660.169 | 868.789 |
| ENSMUSG00000048550 | 17_Thnsl  | 232.684 | 0.13316  | 0.740881 | 0.922404 | 372.138 | 166.625 | 191.32  | 211.275 | 236.081 | 218.667 |
| ENSMUSG00000048562 | 6_Sp8     | 0       | NA       | NA       | NA       | 0       | 0       | 0       | 0       | 0       | 0       |
| ENSMUSG00000048572 | 4_Tmem2   | 51.8245 | -0.86717 | 0.041743 | 0.258757 | 41.461  | 43.0731 | 25.854  | 77.5775 | 71.2536 | 51.7276 |
| ENSMUSG00000048578 | 11_Mlec   | 7706.18 | 0.16066  | 0.512635 | 0.828304 | 7080.73 | 8983.01 | 8340.51 | 6831.77 | 7054.96 | 7946.07 |
| ENSMUSG00000048581 | 12_E1303  | 143.649 | -0.22717 | 0.596758 | 0.868228 | 208.316 | 86.1462 | 102.382 | 155.155 | 147.658 | 162.237 |
| ENSMUSG00000048582 | 6_Gja3    | 37.6086 | -2.68436 | 0.002974 | 0.043086 | 2.02249 | 4.53401 | 23.7857 | 113.89  | 21.4619 | 59.957  |
| ENSMUSG00000048583 | 16_Igf2   | 604.568 | -0.7063  | 0.04185  | 0.259235 | 537.982 | 313.98  | 526.388 | 919.376 | 671.329 | 658.352 |
| ENSMUSG00000048602 | 8_Morc2b  | 0.6761  | 0.03867  | 0.98952  | NA       | 2.02249 | 0       | 0       | 0       | 0.85848 | 1.17563 |
| ENSMUSG00000048612 | 15_Myof   | 6773.46 | 0.49904  | 0.084849 | 0.393568 | 7564.11 | 8604.42 | 7631.08 | 4242    | 5874.56 | 6724.59 |
| ENSMUSG00000048616 | 4_Nog     | 45.344  | -0.63492 | 0.410921 | 0.767001 | 78.8771 | 9.06802 | 18.6149 | 75.9269 | 56.6595 | 32.9176 |
| ENSMUSG00000048617 | 16_Rtbdn  | 57.5969 | -2.38166 | 0.001729 | 0.028993 | 18.2024 | 28.3376 | 9.30745 | 189.817 | 76.4045 | 23.5126 |
| ENSMUSG00000048621 | 3_Gm637   | 10.5678 | 3.15463  | 0.001234 | 0.022943 | 27.3036 | 21.5366 | 8.27329 | 0.82529 | 4.29238 | 1.17563 |
| ENSMUSG00000048626 | 5_Klf17   | 0.83231 | -0.3884  | 0.871433 | NA       | 0       | 1.1335  | 1.03416 | 1.65058 | 0       | 1.17563 |
| ENSMUSG00000048636 | 7_A73004  | 23.6671 | -1.14573 | 0.054632 | 0.305255 | 8.08995 | 11.335  | 24.8199 | 34.6623 | 36.056  | 27.0394 |
| ENSMUSG00000048644 | 7_Ctnx1   | 33.6572 | -1.537   | 0.00263  | 0.039613 | 11.1237 | 14.7355 | 25.854  | 56.1199 | 41.2069 | 52.9033 |
| ENSMUSG00000048647 | 9_Exd1    | 75.9505 | -0.37905 | 0.319082 | 0.700329 | 77.8658 | 47.6071 | 72.3913 | 71.8004 | 97.8664 | 88.1721 |
| ENSMUSG00000048652 | 12_Samd   | 3.34754 | -0.21459 | 0.852301 | 0.957929 | 4.04498 | 1.1335  | 4.13665 | 4.12646 | 4.29238 | 2.35126 |
| ENSMUSG00000048655 | 17_Ccdc1  | 1.26088 | 0.98077  | 0.694479 | NA       | 5.05622 | 0       | 0       | 1.65058 | 0.85848 | 0       |
| ENSMUSG00000048661 | 14_Lemd   | 574.377 | 0.25727  | 0.544749 | 0.842093 | 988.997 | 445.467 | 441.587 | 412.646 | 580.33  | 577.233 |
| ENSMUSG00000048668 | 15_Rhno1  | 525.342 | 0.17851  | 0.611058 | 0.874284 | 360.003 | 683.502 | 629.804 | 437.405 | 487.615 | 553.721 |
| ENSMUSG00000048677 | 8_Tpcn2   | 568.599 | 0.57975  | 0.275116 | 0.661359 | 233.597 | 973.679 | 836.637 | 344.972 | 480.747 | 541.964 |
| ENSMUSG00000048693 | 3_Olfr435 | 0.2751  | -1.54073 | 0.703687 | NA       | 0       | 0       | 0       | 1.65058 | 0       | 0       |
| ENSMUSG00000048696 | 10_Mex3c  | 90.1175 | 0.27353  | 0.45679  | 0.797055 | 95.057  | 96.3477 | 104.45  | 101.511 | 57.518  | 85.8208 |
| ENSMUSG00000048699 | 4_473245  | 856.1   | 0.49582  | 0.29035  | 0.675436 | 441.914 | 1296.73 | 1266.85 | 566.151 | 893.675 | 671.283 |
| ENSMUSG00000048701 | 13_Ccdc6  | 1957.19 | 0.7797   | 0.002682 | 0.040188 | 2775.87 | 2489.17 | 2155.19 | 1258.57 | 1484.31 | 1580.04 |
| ENSMUSG00000048706 | 3_Lurap1l | 205.193 | -0.41152 | 0.242324 | 0.633507 | 238.654 | 131.486 | 158.227 | 248.413 | 249.817 | 204.559 |
| ENSMUSG00000048707 | 9_Tprn    | 815.096 | 0.20427  | 0.702417 | 0.907094 | 273.036 | 1235.52 | 1109.66 | 784.853 | 692.791 | 794.724 |
| ENSMUSG00000048720 | 7_Tbc1d1  | 312.555 | 0.05578  | 0.914045 | 0.976048 | 586.522 | 164.358 | 204.764 | 294.629 | 328.797 | 296.258 |

|                    |           |         |          |          |          |         |         |         |         |         |         |
|--------------------|-----------|---------|----------|----------|----------|---------|---------|---------|---------|---------|---------|
| ENSMUSG00000048721 | 2_Fndc9   | 34.0009 | 0.57957  | 0.24837  | 0.639857 | 40.4498 | 32.8716 | 48.6056 | 15.6806 | 33.4806 | 32.9176 |
| ENSMUSG00000048728 | 15_Zfp45- | 42.8955 | -1.04631 | 0.012289 | 0.116681 | 30.3373 | 22.6701 | 31.0248 | 61.0716 | 65.2443 | 47.0251 |
| ENSMUSG00000048731 | 14_Ggnbp  | 99.4321 | -0.69356 | 0.267731 | 0.65577  | 27.3036 | 85.0127 | 115.826 | 205.498 | 71.2536 | 91.699  |
| ENSMUSG00000048732 | 5_Kih11   | 176.412 | -0.23227 | 0.417124 | 0.770766 | 184.046 | 162.091 | 140.646 | 185.691 | 202.601 | 183.398 |
| ENSMUSG00000048747 | 14_E1301  | 12.2436 | -1.32921 | 0.048787 | 0.284981 | 10.1124 | 4.53401 | 6.20497 | 18.9817 | 17.1695 | 16.4588 |
| ENSMUSG00000048752 | 7_Prss50  | 2.50101 | -1.35837 | 0.354979 | 0.730259 | 0       | 1.1335  | 3.10248 | 4.12646 | 4.29238 | 2.35126 |
| ENSMUSG00000048755 | 8_Mcat    | 278.116 | 0.09809  | 0.81489  | 0.947066 | 149.664 | 361.587 | 351.615 | 302.882 | 236.081 | 266.868 |
| ENSMUSG00000048756 | 11_Foxo3  | 2519.15 | 0.31314  | 0.172305 | 0.555696 | 2593.84 | 2836.02 | 2944.26 | 2075.61 | 2280.97 | 2384.17 |
| ENSMUSG00000048758 | 13_Rpl29  | 2643.12 | -0.30484 | 0.481284 | 0.810775 | 1102.26 | 3040.05 | 2952.53 | 3053.58 | 2650.12 | 3060.16 |
| ENSMUSG00000048763 | 11_Hoxb3  | 1.07619 | 3.6327   | 0.132059 | NA       | 2.02249 | 3.40051 | 1.03416 | 0       | 0       | 0       |
| ENSMUSG00000048764 | 16_Tmprs  | 467.179 | 1.0254   | 0.043362 | 0.264441 | 1124.5  | 376.323 | 378.503 | 235.208 | 328.797 | 359.742 |
| ENSMUSG00000048766 | 6_Skint10 | 0.51708 | 2.58222  | 0.5182   | NA       | 0       | 0       | 3.10248 | 0       | 0       | 0       |
| ENSMUSG00000048772 | 15_Tmem   | 82.1302 | -0.01654 | 0.980617 | 0.993796 | 14.1574 | 109.95  | 120.997 | 88.3063 | 84.1307 | 75.2402 |
| ENSMUSG00000048776 | 8_Pthlh   | 679.3   | 2.10053  | 6.18E-11 | 1.26E-08 | 1006.19 | 1274.06 | 1023.82 | 222.829 | 210.327 | 338.581 |
| ENSMUSG00000048779 | 4_P2ry6   | 59.4027 | 1.14197  | 0.037702 | 0.243182 | 49.551  | 113.35  | 82.7329 | 60.2463 | 22.3204 | 28.2151 |
| ENSMUSG00000048782 | 15_Insc   | 47.7869 | -1.36911 | 0.010633 | 0.105356 | 18.2024 | 21.5366 | 40.3323 | 101.511 | 46.3578 | 58.7814 |
| ENSMUSG00000048787 | 12_Dcun1  | 447.534 | 0.56558  | 0.149821 | 0.523171 | 795.849 | 437.532 | 369.196 | 350.749 | 421.512 | 310.366 |
| ENSMUSG00000048794 | 14_Ccdc3  | 15.5826 | -1.11158 | 0.069554 | 0.351371 | 8.08995 | 11.335  | 10.3416 | 25.5841 | 24.0374 | 14.1075 |
| ENSMUSG00000048796 | 7_Cyb561  | 636.263 | 0.3379   | 0.264419 | 0.653062 | 536.971 | 868.263 | 725.981 | 524.886 | 544.274 | 617.205 |
| ENSMUSG00000048799 | 7_Cep12C  | 766.748 | 0.00536  | 0.984777 | 0.994992 | 944.502 | 637.029 | 722.879 | 811.262 | 738.29  | 746.524 |
| ENSMUSG00000048806 | 4_lfnb1   | 4.59283 | 4.70567  | 0.004199 | 0.055117 | 3.03373 | 6.80102 | 16.5466 | 0       | 0       | 1.17563 |
| ENSMUSG00000048807 | 2_Slc35e4 | 116.826 | 0.42511  | 0.522724 | 0.832206 | 29.3261 | 190.428 | 182.012 | 127.095 | 59.2349 | 112.86  |
| ENSMUSG00000048814 | 10_Lonrf2 | 166.356 | -1.18036 | 0.008049 | 0.086248 | 157.754 | 56.6751 | 91.0062 | 241.811 | 259.26  | 191.627 |
| ENSMUSG00000048824 | 7_Gm568   | 0       | NA       | NA       | NA       | 0       | 0       | 0       | 0       | 0       | 0       |
| ENSMUSG00000048826 | 6_Dact2   | 153.56  | -0.04798 | 0.938725 | 0.985147 | 37.416  | 175.693 | 239.925 | 187.341 | 108.168 | 172.817 |
| ENSMUSG00000048827 | 11_Pkd1l1 | 13.593  | -0.37474 | 0.568567 | 0.852752 | 7.07871 | 17.0025 | 11.3758 | 12.3794 | 13.7356 | 19.9857 |
| ENSMUSG00000048832 | 8_Vps37c  | 498.021 | 0.18342  | 0.690988 | 0.905638 | 228.541 | 702.772 | 657.727 | 510.031 | 412.927 | 476.129 |
| ENSMUSG00000048833 | 8_Slc39a5 | 1834.42 | 0.20693  | 0.39189  | 0.754331 | 2139.79 | 1985.9  | 1771.52 | 1556.5  | 1842.29 | 1710.54 |
| ENSMUSG00000048834 | 15_Vstm2  | 71.0011 | -1.35862 | 0.045921 | 0.274322 | 84.9445 | 15.869  | 18.6149 | 136.999 | 97.8664 | 71.7133 |
| ENSMUSG00000048852 | 13_Gm12   | 206.484 | 4.57568  | 2.51E-18 | 2.07E-15 | 648.208 | 327.582 | 213.037 | 12.3794 | 18.8865 | 18.81   |
| ENSMUSG00000048856 | 8_Slc25a4 | 26.9562 | -0.25618 | 0.704128 | 0.908143 | 7.07871 | 29.4711 | 37.2298 | 37.9634 | 20.6034 | 29.3907 |
| ENSMUSG00000048865 | 16_Arhgaj | 212.538 | 1.57171  | 1.55E-05 | 0.000761 | 285.171 | 438.666 | 230.618 | 117.192 | 101.3   | 102.28  |
| ENSMUSG00000048874 | 15_Phf3   | 2183.32 | 0.08768  | 0.788754 | 0.937308 | 3062.05 | 1768.26 | 1918.37 | 1881.67 | 2307.59 | 2161.98 |
| ENSMUSG00000048878 | 6_Hexim1  | 900.922 | 0.0973   | 0.68835  | 0.905165 | 1028.44 | 919.271 | 845.944 | 888.015 | 810.402 | 913.463 |
| ENSMUSG00000048895 | 13_Cdk5r  | 19.7243 | -0.64449 | 0.316987 | 0.698196 | 17.1912 | 14.7355 | 14.4783 | 40.4393 | 19.745  | 11.7563 |
| ENSMUSG00000048897 | 15_Zfp71f | 663.896 | 0.68018  | 0.109748 | 0.450058 | 409.554 | 1092.7  | 950.394 | 522.41  | 436.965 | 571.355 |
| ENSMUSG00000048899 | 8_Rimk1a  | 42.4933 | -1.72623 | 0.003917 | 0.052444 | 20.2249 | 6.80102 | 32.059  | 85.0051 | 62.6688 | 48.2007 |
| ENSMUSG00000048905 | 4_493053  | 3.15881 | 0.0333   | 0.978163 | 0.993796 | 1.01124 | 3.40051 | 5.17081 | 4.12646 | 1.71695 | 3.52688 |
| ENSMUSG00000048911 | 15_Rnf24  | 218.279 | -0.71151 | 0.036455 | 0.239144 | 221.463 | 129.219 | 145.817 | 274.822 | 296.175 | 242.179 |
| ENSMUSG00000048915 | 12_Efna5  | 874.957 | 0.14105  | 0.677306 | 0.901447 | 1289.34 | 758.313 | 705.298 | 839.322 | 831.006 | 826.466 |
| ENSMUSG00000048920 | 8_Fkrp    | 372.794 | -0.32229 | 0.291146 | 0.676297 | 251.8   | 352.519 | 389.879 | 463.814 | 383.739 | 395.011 |
| ENSMUSG00000048921 | 11_Zfp68f | 72.2497 | -0.16435 | 0.624627 | 0.879755 | 70.7871 | 62.3427 | 71.3571 | 72.6257 | 85.8477 | 70.5377 |
| ENSMUSG00000048922 | 18_Cdca2  | 202.041 | 0.68459  | 0.033877 | 0.227747 | 245.732 | 256.172 | 245.096 | 112.24  | 183.714 | 169.29  |
| ENSMUSG00000048924 | 13_Ccdc1  | 42.3005 | -0.45327 | 0.285602 | 0.671835 | 39.4385 | 31.7381 | 36.1957 | 53.644  | 57.518  | 35.2688 |
| ENSMUSG00000048930 | 12_Tada3  | 363.258 | 0.10669  | 0.828057 | 0.950974 | 148.653 | 472.671 | 508.807 | 394.49  | 289.307 | 365.62  |
| ENSMUSG00000048938 | 12_Nr1h5  | 1.8625  | -0.08432 | 0.95885  | 0.989586 | 2.02249 | 3.40051 | 0       | 0.82529 | 2.57543 | 2.35126 |
| ENSMUSG00000048939 | 13_Atp13i | 10.0964 | -0.94467 | 0.240445 | 0.631907 | 12.1349 | 2.26701 | 6.20497 | 10.7288 | 16.3111 | 12.9319 |
| ENSMUSG00000048960 | 13_Prex2  | 476.482 | -0.58182 | 0.268325 | 0.656167 | 709.894 | 184.761 | 250.267 | 586.783 | 627.547 | 499.642 |
| ENSMUSG00000048965 | 8_Mrgpre  | 93.5766 | -1.01668 | 0.015285 | 0.134801 | 47.5285 | 57.8086 | 80.6646 | 162.583 | 127.055 | 85.8208 |
| ENSMUSG00000048967 | 15_Yjefn3 | 0.60156 | -1.14619 | 0.750716 | NA       | 0       | 1.1335  | 0       | 2.47588 | 0       | 0       |
| ENSMUSG00000048970 | 9_C1galt1 | 498.721 | 0.41264  | 0.37908  | 0.74711  | 967.761 | 405.794 | 335.068 | 368.906 | 515.086 | 399.713 |
| ENSMUSG00000048978 | 13_Nrsn1  | 24.6958 | -1.23035 | 0.167813 | 0.548893 | 33.3711 | 6.80102 | 4.13665 | 57.7705 | 34.3391 | 11.7563 |
| ENSMUSG00000048981 | 1_Krt31   | 1.91916 | 0.3202   | 0.855169 | 0.958892 | 0       | 1.1335  | 5.17081 | 0.82529 | 0.85848 | 3.52688 |
| ENSMUSG00000048982 | 2_Gphb5   | 103.345 | 2.94685  | 4.18E-09 | 6.36E-07 | 165.844 | 210.832 | 171.671 | 9.07822 | 30.9052 | 31.742  |
| ENSMUSG00000048988 | 8_Elfn1   | 99.519  | -0.33739 | 0.588106 | 0.863131 | 23.2586 | 139.421 | 101.348 | 150.203 | 84.1307 | 98.7527 |
| ENSMUSG00000048992 | 8_Prss32  | 1368.58 | 0.44394  | 0.394508 | 0.755773 | 535.959 | 2194.46 | 2002.14 | 1270.95 | 938.315 | 1269.68 |
| ENSMUSG00000048997 | 17_Atnx7l | 69.6456 | -0.6554  | 0.290499 | 0.675578 | 14.1574 | 63.4762 | 84.8012 | 106.463 | 77.2629 | 71.7133 |
| ENSMUSG00000049001 | 5_Ndnf    | 365.172 | -0.60391 | 0.209023 | 0.600677 | 486.409 | 182.494 | 200.627 | 424.2   | 575.18  | 322.122 |
| ENSMUSG00000049008 | 4_BB0144  | 1.17133 | -1.16353 | 0.549066 | NA       | 0       | 1.1335  | 1.03416 | 1.65058 | 0.85848 | 2.35126 |
| ENSMUSG00000049013 | 3_Prss48  | 0.33902 | -1.78366 | 0.658108 | NA       | 0       | 0       | 0       | 0       | 0.85848 | 1.17563 |
| ENSMUSG00000049036 | 7_Tmem1   | 2.74113 | -3.7589  | 0.026588 | 0.196428 | 0       | 1.1335  | 0       | 5.77705 | 6.00934 | 3.52688 |
| ENSMUSG00000049037 | 8_Clec4a* | 116.905 | 2.4499   | 1.12E-06 | 8.63E-05 | 246.744 | 257.305 | 88.9379 | 29.7105 | 44.6408 | 34.0932 |
| ENSMUSG00000049038 | 2_Mterf2  | 133.731 | -0.1353  | 0.772552 | 0.932508 | 213.373 | 87.2797 | 81.6988 | 146.902 | 148.517 | 124.617 |
| ENSMUSG00000049044 | 16_Rappe  | 322.784 | -0.80695 | 0.019471 | 0.160377 | 322.587 | 190.428 | 191.32  | 466.29  | 395.758 | 370.323 |
| ENSMUSG00000049047 | 11_Armcx  | 650.292 | -0.69489 | 0.130932 | 0.492205 | 837.31  | 294.711 | 357.82  | 842.624 | 907.41  | 661.878 |
| ENSMUSG00000049076 | 9_Acap2   | 4490.65 | 0.58184  | 0.095923 | 0.420188 | 7607.59 | 4450.13 | 4094.25 | 3073.39 | 3756.7  | 3961.87 |
| ENSMUSG00000049086 | 8_Bmyc    | 69.9312 | -0.30319 | 0.42576  | 0.777525 | 50.5622 | 54.4081 | 82.7329 | 80.0534 | 69.5366 | 82.2939 |
| ENSMUSG00000049090 | 2_Zadh2   | 1452.88 | 0.05939  | 0.850985 | 0.957516 | 1991.14 | 1179.98 | 1277.19 | 1465.72 | 1478.3  | 1324.93 |
| ENSMUSG00000049091 | 6_Sephs2  | 371.89  | 0.19888  | 0.444985 | 0.788998 | 395.397 | 445.467 | 351.615 | 359.002 | 323.646 | 356.215 |
| ENSMUSG00000049092 | 10_Gpr13  | 16.2827 | -1.23951 | 0.081715 | 0.385306 | 18.2024 | 5.66751 | 5.17081 | 25.5841 | 26.6128 | 16.4588 |
| ENSMUSG00000049093 | 9_Il23r   | 9.0746  | 1.07512  | 0.167734 | 0.548893 | 16.1799 | 9.06802 | 11.3758 | 4.12646 | 4.29238 | 9.40502 |
| ENSMUSG00000049097 | 9_Ankrd3* | 5.61953 | -2.44963 | 0.021046 | 0.168464 | 2.02249 | 1.1335  | 2.06832 | 14.03   | 8.58477 | 5.87814 |
| ENSMUSG00000049100 | 15_Pcdh1  | 21.1657 | -0.73646 | 0.344234 | 0.721706 | 24.2699 | 20.4031 | 3.10248 | 40.4393 | 22.3204 | 16.4588 |
| ENSMUSG00000049103 | 13_Ccr2   | 360.038 | 2.65151  | 2.13E-06 | 0.000149 | 995.064 | 650.631 | 218.208 | 87.481  | 134.781 | 74.0646 |
| ENSMUSG00000049106 | 6_Dcaf5   | 1086.2  | 0.21585  | 0.464934 | 0.802138 | 880.794 | 1317.13 | 1304.08 | 1091.04 | 891.958 | 1032.2  |

|                    |           |         |          |          |          |         |         |         |         |         |         |
|--------------------|-----------|---------|----------|----------|----------|---------|---------|---------|---------|---------|---------|
| ENSMUSG00000049107 | 13_Ntf3   | 425.655 | 0.1351   | 0.600829 | 0.869983 | 422.7   | 465.87  | 447.792 | 351.575 | 418.078 | 447.914 |
| ENSMUSG00000049109 | 14_Them1  | 3.02891 | 0.89186  | 0.509961 | 0.827179 | 4.04498 | 6.80102 | 1.03416 | 0.82529 | 4.29238 | 1.17563 |
| ENSMUSG00000049112 | 9_Oxtr    | 83.3426 | -1.27849 | 0.003967 | 0.05283  | 55.6184 | 27.2041 | 63.0839 | 126.27  | 137.356 | 90.5233 |
| ENSMUSG00000049115 | 14_Agtr1a | 35.2111 | -0.58503 | 0.224378 | 0.614062 | 40.4498 | 18.136  | 25.854  | 44.5658 | 44.6408 | 37.6201 |
| ENSMUSG00000049119 | 14_Fam11  | 123.981 | -0.48358 | 0.154446 | 0.530234 | 83.9333 | 131.486 | 95.1429 | 162.583 | 139.073 | 131.67  |
| ENSMUSG00000049122 | 17_Frmd3  | 37.1452 | -1.5334  | 0.010277 | 0.102761 | 31.3486 | 12.4685 | 13.4441 | 70.9751 | 65.2443 | 29.3907 |
| ENSMUSG00000049123 | 9_Catspei | 4.10154 | -0.66623 | 0.54932  | 0.843853 | 4.04498 | 4.53401 | 1.03416 | 5.77705 | 6.86782 | 2.35126 |
| ENSMUSG00000049124 | 3_Gm818   | 347.807 | -0.27437 | 0.365067 | 0.738154 | 249.777 | 360.454 | 334.034 | 343.322 | 353.693 | 445.563 |
| ENSMUSG00000049128 | 7_Ivl     | 314.131 | 0.10819  | 0.76678  | 0.930427 | 225.507 | 452.268 | 299.907 | 269.045 | 293.599 | 344.459 |
| ENSMUSG00000049130 | 5_C5ar1   | 30.6301 | 0.93372  | 0.127714 | 0.48592  | 23.2586 | 71.4107 | 25.854  | 17.3311 | 18.8865 | 27.0394 |
| ENSMUSG00000049133 | 6_Flg2    | 0.19594 | -0.79206 | 0.84609  | NA       | 0       | 0       | 0       | 0       | 0       | 1.17563 |
| ENSMUSG00000049134 | 15_Nrap   | 223.121 | -0.6755  | 0.128847 | 0.487533 | 186.069 | 111.083 | 218.208 | 387.062 | 168.261 | 268.043 |
| ENSMUSG00000049148 | 8_Plcxd3  | 16.0138 | -1.45142 | 0.077733 | 0.374151 | 19.2136 | 2.26701 | 4.13665 | 25.5841 | 24.8958 | 19.9857 |
| ENSMUSG00000049152 | 11_Ugt3a  | 0.14308 | -0.79206 | 0.84609  | NA       | 0       | 0       | 0       | 0       | 0.85848 | 0       |
| ENSMUSG00000049154 | 11_Fam1f  | 0.42924 | -2.15458 | 0.590406 | NA       | 0       | 0       | 0       | 0       | 2.57543 | 0       |
| ENSMUSG00000049164 | 6_Zfp518  | 1309.81 | 0.36205  | 0.487663 | 0.814019 | 2772.83 | 820.656 | 826.295 | 1053.07 | 1267.97 | 1118.02 |
| ENSMUSG00000049173 | 7_Myoz3   | 6.13077 | -1.16085 | 0.325732 | 0.706738 | 4.04498 | 1.1335  | 6.20497 | 18.9817 | 17.1695 | 4.70251 |
| ENSMUSG00000049176 | 14_Frmpd  | 144.263 | -1.54426 | 0.001804 | 0.029985 | 123.372 | 38.5391 | 58.9472 | 268.22  | 206.034 | 170.466 |
| ENSMUSG00000049184 | 5_Purg    | 105.13  | -0.24359 | 0.55431  | 0.846134 | 139.552 | 62.3427 | 86.8696 | 114.716 | 126.196 | 101.104 |
| ENSMUSG00000049191 | 12_Rgag4  | 78.2099 | -0.85234 | 0.029099 | 0.207519 | 47.5285 | 61.2092 | 58.9472 | 125.444 | 105.593 | 70.5377 |
| ENSMUSG00000049214 | 13_Skint7 | 0.18892 | 1.1315   | 0.781553 | NA       | 0       | 1.1335  | 0       | 0       | 0       | 0       |
| ENSMUSG00000049225 | 14_Pdp1   | 489.037 | 0.36682  | 0.41803  | 0.7717   | 922.255 | 367.255 | 362.991 | 371.382 | 495.341 | 414.997 |
| ENSMUSG00000049230 | 8_Gm983   | 56.237  | -0.30818 | 0.540584 | 0.84046  | 76.8546 | 37.4056 | 36.1957 | 39.614  | 72.1121 | 75.2402 |
| ENSMUSG00000049232 | 3_Tigd2   | 479.775 | 0.6227   | 0.169294 | 0.550793 | 970.795 | 411.462 | 362.991 | 361.478 | 440.399 | 331.527 |
| ENSMUSG00000049233 | 6_Apoo-p  | 113.365 | -0.27991 | 0.569745 | 0.853687 | 80.8995 | 87.2797 | 138.578 | 61.8969 | 130.489 | 181.047 |
| ENSMUSG00000049241 | 5_Hcar1   | 259.677 | 0.3502   | 0.360652 | 0.733982 | 188.091 | 307.179 | 377.469 | 202.197 | 197.45  | 285.678 |
| ENSMUSG00000049252 | 17_Lrp1b  | 23.8149 | -1.71519 | 0.006861 | 0.076966 | 19.2136 | 7.93452 | 6.20497 | 46.2164 | 38.6315 | 24.6882 |
| ENSMUSG00000049265 | 7_Kcnk3   | 20.0412 | -1.3575  | 0.06496  | 0.337371 | 7.07871 | 11.335  | 15.5124 | 53.644  | 19.745  | 12.9319 |
| ENSMUSG00000049281 | 15_Scn3b  | 16.2015 | -0.72412 | 0.257603 | 0.648651 | 16.1799 | 11.335  | 9.30745 | 28.8852 | 19.745  | 11.7563 |
| ENSMUSG00000049285 | 4_Mblac1  | 44.3845 | -0.025   | 0.955244 | 0.98876  | 31.3486 | 39.6726 | 61.0155 | 40.4393 | 51.5086 | 42.3226 |
| ENSMUSG00000049287 | 5_Iba57   | 104.151 | -0.26797 | 0.579048 | 0.858589 | 40.4498 | 120.151 | 123.065 | 119.667 | 109.885 | 111.685 |
| ENSMUSG00000049288 | 4_Lix1l   | 1192.64 | -1.0831  | 0.008099 | 0.086572 | 1137.65 | 491.94  | 664.966 | 1854.43 | 1805.38 | 1201.49 |
| ENSMUSG00000049291 | 6_Prss38  | 3.14977 | -1.33184 | 0.357322 | 0.731867 | 3.03373 | 2.26701 | 0       | 2.47588 | 1.71695 | 9.40502 |
| ENSMUSG00000049295 | 16_Zfp21f | 494.74  | 0.1164   | 0.857562 | 0.959059 | 105.169 | 654.031 | 784.929 | 612.367 | 319.353 | 492.588 |
| ENSMUSG00000049299 | 14_Trappi | 831.558 | -0.38452 | 0.132936 | 0.495985 | 691.691 | 767.381 | 705.298 | 836.846 | 1091.12 | 897.004 |
| ENSMUSG00000049300 | 11_Prrmt6 | 243.719 | 0.23733  | 0.545921 | 0.84263  | 395.397 | 197.23  | 198.559 | 227.781 | 244.666 | 198.681 |
| ENSMUSG00000049303 | 10_Syt12  | 92.7363 | 0.04503  | 0.626409 | 0.980037 | 45.506  | 147.355 | 89.9721 | 89.1316 | 102.159 | 82.2939 |
| ENSMUSG00000049305 | 6_Ccdc71  | 764.403 | 0.09097  | 0.837783 | 0.952966 | 357.98  | 982.747 | 1024.85 | 793.931 | 662.744 | 764.158 |
| ENSMUSG00000049307 | 5_Fut4    | 271.164 | 1.06328  | 0.00068  | 0.014754 | 434.835 | 379.723 | 285.429 | 153.504 | 175.988 | 197.505 |
| ENSMUSG00000049313 | 8_Sort1   | 9918.93 | 0.73551  | 0.009344 | 0.095464 | 10673.7 | 13284.7 | 13222.8 | 6196.3  | 7075.57 | 9060.56 |
| ENSMUSG00000049321 | 17_Zfp2   | 207.063 | -0.24768 | 0.644045 | 0.889191 | 350.902 | 90.6802 | 126.168 | 189.817 | 243.807 | 241.004 |
| ENSMUSG00000049323 | 8_Smcr8   | 1253.68 | 0.2234   | 0.349944 | 0.726801 | 1307.54 | 1480.35 | 1263.75 | 1058.02 | 1225.05 | 1187.38 |
| ENSMUSG00000049327 | 17_Setd8  | 3376.48 | 0.31793  | 0.17501  | 0.558498 | 3798.23 | 3887.91 | 3554.41 | 2735.02 | 2935.13 | 3348.19 |
| ENSMUSG00000049336 | 16_Tenm2  | 232.435 | -1.80733 | 1.06E-08 | 1.46E-06 | 114.271 | 83.8792 | 111.689 | 432.453 | 331.372 | 320.946 |
| ENSMUSG00000049339 | 16_Fam1f  | 1535.08 | -0.10342 | 0.835314 | 0.952495 | 562.252 | 1805.67 | 2072.46 | 1880.84 | 1296.3  | 1592.98 |
| ENSMUSG00000049349 | 3_Gm510   | 1.27234 | 0.98502  | 0.632916 | NA       | 2.02249 | 0       | 3.10248 | 1.65058 | 0.85848 | 0       |
| ENSMUSG00000049350 | 6_Zg16    | 0.14308 | -0.79206 | 0.84609  | NA       | 0       | 0       | 0       | 0       | 0.85848 | 0       |
| ENSMUSG00000049353 | 17_Rd3    | 33.5035 | -1.68681 | 0.010147 | 0.101733 | 15.1687 | 19.2695 | 13.4441 | 80.8787 | 55.801  | 16.4588 |
| ENSMUSG00000049354 | 8_Dcaf7   | 3335.22 | 0.15469  | 0.505852 | 0.82532  | 3264.3  | 3771.16 | 3505.81 | 3019.74 | 2998.66 | 3451.64 |
| ENSMUSG00000049357 | 11_49334  | 17.9578 | 0.13205  | 0.83199  | 0.951799 | 29.3261 | 14.7355 | 12.4099 | 20.6323 | 18.8865 | 11.7563 |
| ENSMUSG00000049382 | 9_Krt8    | 1052.26 | 0.15985  | 0.779377 | 0.93466  | 327.643 | 1293.33 | 1710.5  | 1166.96 | 697.083 | 1118.02 |
| ENSMUSG00000049387 | 9_Cox7b2  | 0       | NA       | NA       | NA       | 0       | 0       | 0       | 0       | 0       | 0       |
| ENSMUSG00000049396 | 6_Gemin4  | 107.977 | 3.34693  | 1.66E-05 | 0.000801 | 335.733 | 97.4812 | 157.193 | 17.3311 | 37.773  | 2.35126 |
| ENSMUSG00000049401 | 10_Ogfr   | 1689.02 | 1.12873  | 0.02456  | 0.186763 | 842.367 | 3383.51 | 2728.12 | 1124.05 | 948.617 | 1107.44 |
| ENSMUSG00000049404 | 7_Rarres1 | 221.611 | 0.50781  | 0.064972 | 0.337371 | 232.586 | 275.441 | 273.019 | 184.865 | 199.167 | 164.588 |
| ENSMUSG00000049409 | 9_Prokr1  | 43.0622 | -0.15618 | 0.733362 | 0.919947 | 47.5285 | 28.3376 | 46.5373 | 55.2946 | 48.9332 | 31.742  |
| ENSMUSG00000049411 | 13_Tmem   | 157.97  | -0.29607 | 0.372268 | 0.74325  | 182.024 | 108.816 | 134.441 | 168.36  | 183.714 | 170.466 |
| ENSMUSG00000049420 | 8_Tmem2   | 58.6407 | -0.03692 | 0.940046 | 0.985498 | 93.0345 | 35.1386 | 45.5031 | 63.5475 | 65.2443 | 49.3764 |
| ENSMUSG00000049421 | 13_Zfp26f | 1848.16 | 0.31149  | 0.544719 | 0.842093 | 3785.09 | 1176.58 | 1178.94 | 1396.39 | 1949.6  | 1602.38 |
| ENSMUSG00000049422 | 6_Chchd1  | 236.064 | -0.98267 | 0.173721 | 0.557154 | 24.2699 | 163.224 | 288.531 | 457.212 | 229.213 | 253.936 |
| ENSMUSG00000049436 | 4_Upk1b   | 25291.7 | 0.27557  | 0.261023 | 0.650046 | 29129.9 | 27404.7 | 26564.5 | 19429   | 23820.2 | 25401.8 |
| ENSMUSG00000049439 | 13_Cyp20  | 257.783 | 0.0354   | 0.91878  | 0.977109 | 352.924 | 209.698 | 220.276 | 245.112 | 295.316 | 223.369 |
| ENSMUSG00000049470 | 13_Aff4   | 6280.64 | 0.16379  | 0.639458 | 0.886953 | 9496.6  | 5151.77 | 5261.81 | 5363.58 | 6539.02 | 5871.09 |
| ENSMUSG00000049482 | 15_Ctuf2  | 211.989 | 0.28457  | 0.665688 | 0.897    | 45.506  | 346.852 | 306.112 | 208.799 | 133.064 | 231.599 |
| ENSMUSG00000049488 | 14_Tmem   | 209.709 | 0.32073  | 0.425205 | 0.776848 | 351.913 | 168.892 | 177.876 | 170.01  | 212.044 | 177.52  |
| ENSMUSG00000049489 | 5_Fam58f  | 246.076 | -0.32947 | 0.370008 | 0.741299 | 133.484 | 269.774 | 251.301 | 283.075 | 279.005 | 259.814 |
| ENSMUSG00000049491 | 15_Slc36a | 0.3683  | 0.16972  | 0.966824 | NA       | 0       | 0       | 1.03416 | 0       | 0       | 1.17563 |
| ENSMUSG00000049493 | 13_Pls1   | 20.6473 | -0.71791 | 0.211562 | 0.602834 | 20.2249 | 7.93452 | 18.6149 | 25.5841 | 29.1882 | 22.3369 |
| ENSMUSG00000049502 | 16_Dtx3l  | 6104.16 | 1.80686  | 5.78E-07 | 4.79E-05 | 12916.6 | 9001.15 | 6565.89 | 2121.83 | 3149.75 | 2869.71 |
| ENSMUSG00000049504 | 12_Proser | 438.352 | 0.40679  | 0.102065 | 0.434382 | 506.633 | 501.008 | 491.227 | 382.936 | 335.665 | 412.645 |
| ENSMUSG00000049511 | 5_Htr1b   | 31.662  | -1.3551  | 0.066103 | 0.340793 | 34.3823 | 3.40051 | 15.5124 | 51.1681 | 54.9425 | 30.5663 |
| ENSMUSG00000049515 | 12_Espnl  | 13.7766 | 0.92373  | 0.171915 | 0.555059 | 9.1012  | 19.2695 | 25.854  | 9.90351 | 10.3017 | 8.22939 |
| ENSMUSG00000049516 | 8_Spty2d  | 1528.92 | 0.70357  | 0.041593 | 0.258381 | 2645.42 | 1575.57 | 1462.3  | 994.477 | 1237.12 | 1222.65 |
| ENSMUSG00000049517 | 7_Rps23   | 13310.6 | -0.2189  | 0.36145  | 0.734288 | 10555.4 | 12830.1 | 13522.7 | 14776   | 13949.4 | 14229.8 |
| ENSMUSG00000049521 | 1_Cdc42e  | 292.206 | 0.14589  | 0.841046 | 0.953262 | 40.4498 | 394.459 | 486.056 | 361.478 | 186.29  | 284.502 |

|                    |           |         |          |          |          |         |         |         |         |         |         |
|--------------------|-----------|---------|----------|----------|----------|---------|---------|---------|---------|---------|---------|
| ENSMUSG00000049526 | 7_Tmem2   | 19.8539 | -0.21732 | 0.72778  | 0.917064 | 28.3148 | 11.335  | 15.5124 | 19.807  | 30.0467 | 14.1075 |
| ENSMUSG00000049532 | 10_Sall2  | 161.827 | -1.4498  | 4.07E-05 | 0.001626 | 96.0682 | 68.0102 | 96.177  | 293.804 | 233.506 | 183.398 |
| ENSMUSG00000049536 | 5_Tceal1  | 186.721 | -0.70548 | 0.150063 | 0.523213 | 244.721 | 83.8792 | 97.2112 | 279.774 | 226.638 | 188.1   |
| ENSMUSG00000049537 | 10_Tecrl  | 1.11803 | -0.24632 | 0.910269 | NA       | 2.02249 | 0       | 1.03416 | 2.47588 | 0       | 1.17563 |
| ENSMUSG00000049538 | 14_Adamt  | 254.799 | -1.90965 | 8.90E-07 | 7.05E-05 | 141.574 | 66.8767 | 112.724 | 397.791 | 484.181 | 325.649 |
| ENSMUSG00000049539 | 2_Hist1h1 | 2.66907 | 2.10763  | 0.152943 | 0.527868 | 3.03373 | 5.66751 | 4.13665 | 0.82529 | 0       | 2.35126 |
| ENSMUSG00000049548 | 8_Krt82   | 0.18892 | 1.1315   | 0.781553 | NA       | 0       | 1.1335  | 0       | 0       | 0       | 0       |
| ENSMUSG00000049550 | 17_Clip1  | 2172.59 | 0.35396  | 0.126896 | 0.484181 | 2658.56 | 2427.96 | 2226.55 | 1895.7  | 1819.97 | 2006.8  |
| ENSMUSG00000049551 | 2_Fzd9    | 5.69174 | -2.4728  | 0.032209 | 0.221424 | 1.01124 | 0       | 4.13665 | 11.5541 | 6.86782 | 10.5807 |
| ENSMUSG00000049553 | 11_Polr1a | 1051    | -0.02107 | 0.954718 | 0.98876  | 607.758 | 1309.2  | 1213.07 | 992.827 | 1053.35 | 1129.78 |
| ENSMUSG00000049555 | 10_Tmie   | 265.748 | 0.39226  | 0.296946 | 0.680531 | 184.046 | 342.318 | 378.503 | 231.907 | 202.601 | 255.111 |
| ENSMUSG00000049556 | 4_Lingo1  | 14.4672 | -0.96564 | 0.277196 | 0.663807 | 2.02249 | 5.66751 | 21.7174 | 28.0599 | 12.8772 | 16.4588 |
| ENSMUSG00000049562 | 5_Ap5b1   | 66.6649 | 0.76777  | 0.366261 | 0.739399 | 8.08995 | 105.416 | 138.578 | 80.0534 | 23.1789 | 44.6739 |
| ENSMUSG00000049565 | 16_Aknad  | 133.547 | 0.58865  | 0.17267  | 0.556305 | 235.62  | 132.62  | 112.724 | 75.9269 | 124.479 | 119.914 |
| ENSMUSG00000049571 | 16_Cfap4i | 13.3891 | -0.71762 | 0.291104 | 0.67629  | 7.07871 | 6.80102 | 16.5466 | 19.807  | 17.1695 | 12.9319 |
| ENSMUSG00000049577 | 14_Zfpm1  | 45.3142 | 0.20824  | 0.803134 | 0.942836 | 4.04498 | 71.4107 | 70.323  | 53.644  | 26.6128 | 45.8495 |
| ENSMUSG00000049580 | 12_Tsku   | 312.672 | 0.08667  | 0.847175 | 0.955658 | 145.619 | 419.396 | 401.255 | 307.009 | 284.156 | 318.595 |
| ENSMUSG00000049583 | 14_Grm5   | 5.24302 | -2.73949 | 0.050059 | 0.289727 | 3.03373 | 0       | 1.03416 | 9.90351 | 16.3111 | 1.17563 |
| ENSMUSG00000049588 | 13_Ccdc6  | 79.7119 | 0.34272  | 0.399323 | 0.759197 | 71.7983 | 88.4132 | 107.553 | 96.5592 | 57.518  | 56.4301 |
| ENSMUSG00000049598 | 9_Vsig8   | 15.138  | 0.08356  | 0.914225 | 0.976048 | 4.04498 | 14.7355 | 27.9224 | 16.5058 | 11.1602 | 16.4588 |
| ENSMUSG00000049600 | 7_Zbtb45  | 99.6477 | 0.06058  | 0.906951 | 0.974391 | 40.4498 | 130.353 | 134.441 | 108.939 | 75.546  | 108.158 |
| ENSMUSG00000049606 | 16_Zfp64i | 1430.63 | 0.20005  | 0.651562 | 0.892215 | 2543.28 | 991.815 | 1053.81 | 1214.01 | 1554.7  | 1226.18 |
| ENSMUSG00000049608 | 8_Gpr55   | 3.76222 | 5.43896  | 0.001151 | 0.021817 | 6.06747 | 11.335  | 5.17081 | 0       | 0       | 0       |
| ENSMUSG00000049612 | 10_Omg    | 13.9137 | -1.71115 | 0.066967 | 0.343312 | 15.1687 | 2.26701 | 2.06832 | 30.5358 | 24.0374 | 9.40502 |
| ENSMUSG00000049620 | 8_Prss33  | 1.24499 | -1.3814  | 0.507472 | NA       | 0       | 0       | 2.06832 | 1.65058 | 2.57543 | 1.17563 |
| ENSMUSG00000049624 | 13_Slc17e | 897.713 | 0.23567  | 0.416452 | 0.770435 | 1207.43 | 807.054 | 897.652 | 753.492 | 809.544 | 911.112 |
| ENSMUSG00000049625 | 5_Tifab   | 115.248 | 1.69939  | 0.000125 | 0.00396  | 111.237 | 269.774 | 147.885 | 61.0716 | 49.7917 | 51.7276 |
| ENSMUSG00000049630 | 6_C1ql3   | 30.0488 | -1.61095 | 0.021624 | 0.172199 | 31.3486 | 6.80102 | 6.20497 | 52.8187 | 45.4993 | 37.6201 |
| ENSMUSG00000049641 | 12_Vgll2  | 8.07626 | 0.22884  | 0.791018 | 0.937373 | 11.1237 | 5.66751 | 9.30745 | 11.5541 | 2.57543 | 8.22939 |
| ENSMUSG00000049643 | 15_Z3100  | 343.683 | 0.29696  | 0.595294 | 0.867328 | 120.338 | 518.011 | 498.466 | 366.43  | 212.044 | 346.81  |
| ENSMUSG00000049649 | 8_Gpr3    | 1.55833 | -1.03324 | 0.566805 | NA       | 2.02249 | 0       | 1.03416 | 0.82529 | 4.29238 | 1.17563 |
| ENSMUSG00000049653 | 4_Spatc1  | 0.33349 | -1.76186 | 0.662172 | NA       | 0       | 0       | 0       | 0.82529 | 0       | 1.17563 |
| ENSMUSG00000049657 | 9_Zbtb5   | 787.321 | 0.41493  | 0.090308 | 0.409776 | 822.142 | 954.409 | 922.472 | 679.216 | 612.094 | 733.592 |
| ENSMUSG00000049658 | 13_Bdp1   | 1667.8  | 0.4063   | 0.341555 | 0.719594 | 3041.82 | 1467.89 | 1193.42 | 1179.34 | 1624.24 | 1500.1  |
| ENSMUSG00000049659 | 15_Aftph  | 4307.12 | 0.70163  | 0.042652 | 0.262016 | 7451.86 | 4557.82 | 3992.9  | 2782.06 | 3520.61 | 3537.46 |
| ENSMUSG00000049670 | 8_Morn4   | 108.397 | -1.85533 | 5.83E-05 | 0.002147 | 38.4273 | 36.2721 | 66.1863 | 249.238 | 135.639 | 124.617 |
| ENSMUSG00000049672 | 14_Zbtb14 | 673.984 | 0.2446   | 0.460545 | 0.799772 | 1001.13 | 558.817 | 632.907 | 656.107 | 600.075 | 594.868 |
| ENSMUSG00000049676 | 14_Catspr | 109.859 | 0.26601  | 0.447585 | 0.790972 | 115.282 | 129.219 | 115.826 | 91.6075 | 129.63  | 77.5914 |
| ENSMUSG00000049680 | 17_Urgcp  | 591.759 | 0.01113  | 0.978049 | 0.993796 | 313.486 | 710.706 | 758.04  | 633.825 | 531.397 | 603.097 |
| ENSMUSG00000049685 | 8_Cyp2g1  | 0.47104 | -2.2721  | 0.552052 | NA       | 0       | 0       | 0       | 1.65058 | 0       | 1.17563 |
| ENSMUSG00000049686 | 14_Orai1  | 122.353 | 0.27688  | 0.615141 | 0.876237 | 45.506  | 165.491 | 191.32  | 136.173 | 90.9986 | 104.631 |
| ENSMUSG00000049687 | 5_Fam10e  | 59.556  | -0.86928 | 0.027602 | 0.200518 | 33.3711 | 45.3401 | 47.5714 | 78.4028 | 60.9519 | 91.699  |
| ENSMUSG00000049690 | 15_Nckap  | 89.0093 | -1.0102  | 0.003213 | 0.045699 | 67.7534 | 58.9422 | 50.6739 | 126.27  | 130.489 | 99.9284 |
| ENSMUSG00000049691 | 8_Nkx3-2  | 0.34472 | 1.99863  | 0.620844 | NA       | 0       | 0       | 2.06832 | 0       | 0       | 0       |
| ENSMUSG00000049692 | 7_Tmem2   | 0.332   | 0.16972  | 0.966824 | NA       | 0       | 1.1335  | 0       | 0       | 0.85848 | 0       |
| ENSMUSG00000049699 | 4_Ucn2    | 23.6196 | 0.25232  | 0.642788 | 0.888516 | 18.2024 | 32.8716 | 25.854  | 14.03   | 24.8958 | 25.8638 |
| ENSMUSG00000049709 | 3_Nlrp10  | 50.2961 | 0.4608   | 0.385346 | 0.750802 | 80.8995 | 37.4056 | 55.8447 | 29.7105 | 30.9052 | 67.0108 |
| ENSMUSG00000049717 | 8_Lig4    | 286.215 | 0.11108  | 0.778108 | 0.934544 | 436.858 | 268.64  | 186.149 | 264.094 | 297.033 | 264.516 |
| ENSMUSG00000049719 | 14_Prss4f | 1.27807 | 1.52094  | 0.554483 | NA       | 0       | 5.66751 | 0       | 0.82529 | 0       | 1.17563 |
| ENSMUSG00000049721 | 14_Gal3st | 110.61  | 0.48801  | 0.383527 | 0.7499   | 41.461  | 159.824 | 186.149 | 99.0351 | 77.2629 | 99.9284 |
| ENSMUSG00000049723 | 14_Mmp1   | 318.114 | 1.87301  | 0.05695  | 0.312074 | 106.181 | 1348.87 | 44.4689 | 226.955 | 76.4045 | 105.807 |
| ENSMUSG00000049728 | 14_Zfp66f | 122.07  | 0.44225  | 0.162288 | 0.540795 | 117.304 | 160.957 | 143.748 | 113.065 | 92.7155 | 104.631 |
| ENSMUSG00000049734 | 9_Trex1   | 565.387 | 2.60655  | 0.007602 | 0.082788 | 18.2024 | 1700.25 | 1195.49 | 214.576 | 113.319 | 150.48  |
| ENSMUSG00000049739 | 10_Zfp64i | 1167.54 | 0.11424  | 0.79249  | 0.938025 | 579.443 | 1566.5  | 1495.4  | 1239.59 | 945.183 | 1179.15 |
| ENSMUSG00000049740 | 2_533041  | 0.17236 | 1.1315   | 0.781553 | NA       | 0       | 0       | 1.03416 | 0       | 0       | 0       |
| ENSMUSG00000049741 | 4_Rxfp4   | 0.17236 | 1.1315   | 0.781553 | NA       | 0       | 0       | 1.03416 | 0       | 0       | 0       |
| ENSMUSG00000049744 | 15_Arhgaj | 35.3928 | 1.64651  | 0.002331 | 0.036324 | 65.7309 | 64.6097 | 31.0248 | 19.807  | 20.6034 | 10.5807 |
| ENSMUSG00000049751 | 6_Rpl36al | 3728.42 | -0.17263 | 0.578046 | 0.858061 | 2450.25 | 4263.1  | 3803.65 | 3902.81 | 3844.26 | 4106.47 |
| ENSMUSG00000049755 | 14_Zfp67i | 637.503 | 0.31671  | 0.236616 | 0.6287   | 806.973 | 714.107 | 600.848 | 586.783 | 606.085 | 510.222 |
| ENSMUSG00000049760 | 5_241001  | 1192.61 | -0.48401 | 0.311146 | 0.693311 | 395.397 | 1257.05 | 1330.97 | 1560.63 | 1249.08 | 1362.55 |
| ENSMUSG00000049761 | 6_Pmis2   | 0       | NA       | NA       | NA       | 0       | 0       | 0       | 0       | 0       | 0       |
| ENSMUSG00000049764 | 7_Zfp280f | 499.482 | 0.39402  | 0.159286 | 0.537367 | 691.691 | 488.54  | 521.217 | 415.122 | 420.654 | 459.67  |
| ENSMUSG00000049775 | 16_Tmsb4  | 137514  | 0.01251  | 0.971792 | 0.992434 | 195187  | 106548  | 112594  | 116571  | 161190  | 132992  |
| ENSMUSG00000049791 | 3_Fzd4    | 609.104 | -0.42902 | 0.346587 | 0.724079 | 863.603 | 294.711 | 399.186 | 684.167 | 808.685 | 604.273 |
| ENSMUSG00000049792 | 6_Bag5    | 793.476 | 0.05155  | 0.821348 | 0.948357 | 826.187 | 787.785 | 808.714 | 781.552 | 734.856 | 821.764 |
| ENSMUSG00000049796 | 4_Crh     | 0.14308 | -0.79206 | 0.84609  | NA       | 0       | 0       | 0       | 0       | 0.85848 | 0       |
| ENSMUSG00000049799 | 13_Lrrc19 | 2.95124 | 0.64755  | 0.657068 | 0.894491 | 4.04498 | 5.66751 | 1.03416 | 0       | 3.43391 | 3.52688 |
| ENSMUSG00000049800 | 13_Sertac | 1508.62 | 0.5346   | 0.051167 | 0.29274  | 2195.41 | 1543.83 | 1615.36 | 1226.38 | 1165.81 | 1304.95 |
| ENSMUSG00000049804 | 9_Armcx4  | 429.869 | -1.37467 | 5.02E-05 | 0.001896 | 290.227 | 170.025 | 257.506 | 723.781 | 630.981 | 506.696 |
| ENSMUSG00000049807 | 16_Arhgaj | 1357.76 | 0.30608  | 0.493265 | 0.816268 | 687.646 | 1923.55 | 1892.52 | 1253.62 | 1007.85 | 1381.36 |
| ENSMUSG00000049809 | 2_Krtap9- | 0       | NA       | NA       | NA       | 0       | 0       | 0       | 0       | 0       | 0       |
| ENSMUSG00000049811 | 15_Fam1f  | 99.2739 | -1.32812 | 0.011293 | 0.110247 | 77.8658 | 58.9422 | 33.0932 | 197.245 | 157.96  | 70.5377 |
| ENSMUSG00000049823 | 9_Zbtb12  | 105.972 | -0.18113 | 0.663089 | 0.896048 | 60.6747 | 125.819 | 111.689 | 136.999 | 90.1401 | 110.509 |
| ENSMUSG00000049848 | 7_Ceacan  | 181.925 | 0.35163  | 0.397182 | 0.757823 | 117.304 | 260.706 | 233.721 | 131.221 | 151.092 | 197.505 |
| ENSMUSG00000049858 | 7_Suox    | 281.191 | -0.95541 | 0.003319 | 0.046751 | 139.552 | 230.101 | 204.764 | 421.724 | 357.126 | 333.878 |

|                    |             |         |          |          |          |         |         |         |         |         |         |
|--------------------|-------------|---------|----------|----------|----------|---------|---------|---------|---------|---------|---------|
| ENSMUSG00000049866 | 12_Arl4c    | 420.863 | 0.29654  | 0.213686 | 0.604733 | 466.184 | 486.273 | 439.519 | 388.713 | 368.287 | 376.201 |
| ENSMUSG00000049871 | 13_Nlrc3    | 49.1304 | -0.60961 | 0.184547 | 0.571778 | 32.3598 | 55.5416 | 28.9565 | 70.9751 | 44.6408 | 62.3083 |
| ENSMUSG00000049872 | 7_Fam26c    | 159.792 | -0.16226 | 0.697586 | 0.905638 | 229.552 | 113.35  | 109.621 | 182.39  | 186.29  | 137.548 |
| ENSMUSG00000049878 | 12_Rlf      | 1426.39 | 0.49204  | 0.233645 | 0.625443 | 2615.08 | 1177.71 | 1208.93 | 977.146 | 1383.86 | 1195.61 |
| ENSMUSG00000049882 | 9_Vcpkmt    | 350.461 | 0.89682  | 0.029497 | 0.209425 | 714.95  | 345.718 | 307.146 | 232.732 | 241.232 | 260.989 |
| ENSMUSG00000049892 | 7_Rasd1     | 13.2809 | 1.28668  | 0.105528 | 0.440983 | 6.06747 | 34.0051 | 16.5466 | 7.42763 | 8.58477 | 7.05377 |
| ENSMUSG00000049897 | 14_Stklid1  | 2.70034 | -1.48792 | 0.283845 | 0.670589 | 2.02249 | 2.26701 | 0       | 4.95175 | 3.43391 | 3.52688 |
| ENSMUSG00000049902 | 5_492151    | 0.16854 | 1.1315   | 0.781553 | NA       | 1.01124 | 0       | 0       | 0       | 0       | 0       |
| ENSMUSG00000049904 | 7_Tmem1     | 47.6649 | -0.49848 | 0.230108 | 0.621145 | 47.5285 | 44.2066 | 26.8882 | 56.9452 | 57.518  | 52.9033 |
| ENSMUSG00000049907 | 8_Rasl11t   | 473.03  | -0.45373 | 0.199106 | 0.591012 | 258.879 | 411.462 | 527.422 | 564.5   | 502.209 | 573.706 |
| ENSMUSG00000049908 | 6_Gja8      | 511.33  | -3.5826  | 5.95E-05 | 0.002185 | 12.1349 | 44.2066 | 179.944 | 1003.56 | 194.016 | 1634.12 |
| ENSMUSG00000049916 | 9_261031    | 7.13334 | 0.88559  | 0.297621 | 0.680939 | 6.06747 | 11.335  | 10.3416 | 6.60234 | 2.57543 | 5.87814 |
| ENSMUSG00000049922 | 8_Slc35c1   | 645.267 | 0.4558   | 0.295522 | 0.679579 | 364.048 | 979.347 | 895.584 | 538.091 | 454.993 | 639.542 |
| ENSMUSG00000049926 | 3_Olfir21   | 0.5224  | -0.79036 | 0.801697 | NA       | 0       | 1.1335  | 0       | 0.82529 | 0       | 1.17563 |
| ENSMUSG00000049928 | 15_Glp2r    | 14.7057 | -1.08306 | 0.197098 | 0.58958  | 11.1237 | 9.06802 | 8.27329 | 39.614  | 15.4526 | 4.70251 |
| ENSMUSG00000049929 | 7_Lpar4     | 51.2695 | -0.60734 | 0.343614 | 0.721499 | 81.9108 | 19.2695 | 20.6832 | 72.6257 | 66.1027 | 47.0251 |
| ENSMUSG00000049932 | 3_H2afx     | 270.608 | 0.50869  | 0.226809 | 0.617599 | 166.855 | 419.396 | 367.127 | 203.022 | 208.61  | 258.638 |
| ENSMUSG00000049939 | 6_Lrrc4     | 461.948 | 0.39604  | 0.131852 | 0.493664 | 529.892 | 520.278 | 524.32  | 420.899 | 333.089 | 443.212 |
| ENSMUSG00000049940 | 7_Pgrmc2    | 1202.23 | -0.0854  | 0.804933 | 0.942951 | 1644.28 | 911.336 | 944.189 | 1124.05 | 1382.15 | 1207.37 |
| ENSMUSG00000049946 | 7_BC030t    | 0.2751  | -1.54073 | 0.703687 | NA       | 0       | 0       | 0       | 1.65058 | 0       | 0       |
| ENSMUSG00000049950 | 6_Rpp38     | 163.066 | 0.09852  | 0.74415  | 0.923424 | 198.204 | 158.69  | 148.919 | 141.95  | 174.271 | 156.359 |
| ENSMUSG00000049957 | 14_Ccdc1    | 493.016 | 0.0631   | 0.787838 | 0.936803 | 503.6   | 515.744 | 492.261 | 480.32  | 506.501 | 459.67  |
| ENSMUSG00000049960 | 3_Mrps16    | 486.26  | -0.15548 | 0.71475  | 0.911309 | 224.496 | 599.623 | 556.379 | 539.741 | 517.662 | 479.656 |
| ENSMUSG00000049969 | 3_Plekhf2   | 2287.21 | 0.76482  | 0.043884 | 0.266127 | 4320.04 | 2195.6  | 2123.13 | 1469.02 | 1850.88 | 1764.62 |
| ENSMUSG00000049971 | 17_Glt1d1   | 1.83383 | -2.0087  | 0.28784  | 0.673109 | 0       | 2.26701 | 0       | 4.12646 | 3.43391 | 1.17563 |
| ENSMUSG00000049985 | 14_Ankrd1   | 7.67411 | -0.68176 | 0.436181 | 0.784248 | 10.1124 | 2.26701 | 5.17081 | 10.7288 | 6.00934 | 11.7563 |
| ENSMUSG00000049988 | 3_Lrrc25    | 19.6159 | 1.93119  | 0.029145 | 0.207695 | 6.06747 | 64.6097 | 22.7516 | 12.3794 | 6.00934 | 5.87814 |
| ENSMUSG00000049999 | 4_Ppp1r3i   | 99.124  | 0.41063  | 0.206905 | 0.598386 | 122.361 | 103.149 | 113.758 | 95.7339 | 70.3951 | 89.3477 |
| ENSMUSG00000050002 | 13_Idnk     | 296.626 | 0.24298  | 0.435474 | 0.783464 | 237.642 | 391.059 | 336.103 | 264.919 | 277.288 | 272.746 |
| ENSMUSG00000050010 | 8_Shisa3    | 77.066  | -0.57972 | 0.21337  | 0.604576 | 95.057  | 39.6726 | 50.6739 | 109.764 | 97.8664 | 69.362  |
| ENSMUSG00000050014 | 7_Apol10t   | 21.6227 | 2.50483  | 2.05E-05 | 0.000939 | 41.461  | 43.0731 | 25.854  | 6.60234 | 6.86782 | 5.87814 |
| ENSMUSG00000050017 | 11_Pitpnb   | 4103.55 | 0.3034   | 0.261454 | 0.650617 | 5552.74 | 4112.35 | 3934.98 | 3419.19 | 3750.69 | 3851.36 |
| ENSMUSG00000050022 | 16_Amz1     | 20.5583 | 0.30635  | 0.578421 | 0.858251 | 16.1799 | 27.2041 | 24.8199 | 22.2829 | 12.8772 | 19.9857 |
| ENSMUSG00000050023 | 3_Olfir117i | 0.16854 | 1.1315   | 0.781553 | NA       | 1.01124 | 0       | 0       | 0       | 0       | 0       |
| ENSMUSG00000050029 | 7_Rap2c     | 967.451 | 0.92211  | 0.036512 | 0.239259 | 2081.14 | 939.674 | 778.724 | 604.939 | 779.497 | 620.731 |
| ENSMUSG00000050035 | 6_Fhl4      | 8.54726 | -1.18135 | 0.144886 | 0.514974 | 9.1012  | 3.40051 | 3.10248 | 10.7288 | 12.0187 | 12.9319 |
| ENSMUSG00000050043 | 16_Tmx2     | 1622.11 | -0.28983 | 0.310869 | 0.69305  | 1844.51 | 1247.99 | 1286.5  | 1695.15 | 1912.69 | 1745.81 |
| ENSMUSG00000050050 | 16_Ccdc1    | 42.5329 | 0.23729  | 0.655618 | 0.893662 | 73.8208 | 35.1386 | 28.9565 | 28.0599 | 48.0747 | 41.147  |
| ENSMUSG00000050052 | 11_Tdrp     | 432.987 | 0.70633  | 0.004981 | 0.061948 | 489.442 | 593.956 | 527.422 | 311.961 | 345.966 | 329.176 |
| ENSMUSG00000050058 | 6_Prm3      | 0       | NA       | NA       | NA       | 0       | 0       | 0       | 0       | 0       | 0       |
| ENSMUSG00000050063 | 18_Klk6     | 1.1276  | 0.66492  | 0.760238 | NA       | 2.02249 | 1.1335  | 1.03416 | 0       | 2.57543 | 0       |
| ENSMUSG00000050064 | 14_Zfp69i   | 136.179 | -1.13052 | 0.006661 | 0.075428 | 128.428 | 64.6097 | 63.0839 | 225.305 | 173.412 | 162.237 |
| ENSMUSG00000050069 | 3_Grem2     | 77.3978 | -0.61099 | 0.240486 | 0.631907 | 105.169 | 35.1386 | 43.4348 | 112.24  | 97.8664 | 70.5377 |
| ENSMUSG00000050071 | 8_Bex1      | 46.7666 | -1.4329  | 0.002034 | 0.032925 | 28.3148 | 24.9371 | 22.7516 | 97.3845 | 56.6595 | 50.552  |
| ENSMUSG00000050074 | 12_Spinkf   | 15.4765 | 0.98474  | 0.162566 | 0.540887 | 33.3711 | 17.0025 | 11.3758 | 7.42763 | 15.4526 | 8.22939 |
| ENSMUSG00000050075 | 8_Gpr171    | 22.714  | 3.30283  | 7.61E-06 | 0.000419 | 50.5622 | 52.1411 | 20.6832 | 4.12646 | 1.71695 | 7.05377 |
| ENSMUSG00000050079 | 9_Rspry1    | 749.934 | 0.33197  | 0.401753 | 0.760434 | 1280.24 | 668.767 | 558.447 | 623.096 | 736.573 | 632.488 |
| ENSMUSG00000050088 | 9_160001    | 803.759 | 0.54673  | 0.211483 | 0.602834 | 1583.61 | 647.23  | 631.873 | 635.475 | 704.81  | 619.556 |
| ENSMUSG00000050097 | 6_Ces2b     | 187.961 | -0.20932 | 0.4766   | 0.807672 | 178.99  | 146.222 | 197.525 | 180.739 | 210.327 | 213.964 |
| ENSMUSG00000050100 | 13_Hmx2     | 0       | NA       | NA       | NA       | 0       | 0       | 0       | 0       | 0       | 0       |
| ENSMUSG00000050103 | 17_Agmo     | 144.577 | 0.54393  | 0.347226 | 0.724592 | 331.688 | 77.0782 | 105.484 | 96.5592 | 116.753 | 139.9   |
| ENSMUSG00000050105 | 5_Grrp1     | 8.60843 | 0.22035  | 0.821157 | 0.948338 | 1.01124 | 11.335  | 15.5124 | 10.7288 | 6.00934 | 7.05377 |
| ENSMUSG00000050106 | 17_Tmc8     | 44.5039 | 0.62428  | 0.380097 | 0.747885 | 13.1462 | 79.3452 | 69.2888 | 35.4876 | 18.028  | 51.7276 |
| ENSMUSG00000050107 | 2_Gsg2      | 47.5745 | 0.76365  | 0.1393   | 0.506641 | 57.6409 | 55.5416 | 66.1863 | 15.6806 | 48.0747 | 42.3226 |
| ENSMUSG00000050108 | 12_Bpifc    | 9.62226 | 0.62359  | 0.372438 | 0.743353 | 10.1124 | 11.335  | 13.4441 | 7.42763 | 6.00934 | 9.40502 |
| ENSMUSG00000050114 | 7_Prdx6b    | 0.13755 | -0.79206 | 0.84609  | NA       | 0       | 0       | 0       | 0.82529 | 0       | 0       |
| ENSMUSG00000050122 | 18_Vwa3t    | 8.23472 | -0.04913 | 0.947131 | 0.986649 | 9.1012  | 7.93452 | 7.23913 | 6.60234 | 10.3017 | 8.22939 |
| ENSMUSG00000050132 | 13_Sarm1    | 25.7601 | -2.92531 | 0.000503 | 0.011686 | 4.04498 | 6.80102 | 7.23913 | 85.0051 | 42.0654 | 9.40502 |
| ENSMUSG00000050138 | 7_Kcnk12    | 0       | NA       | NA       | NA       | 0       | 0       | 0       | 0       | 0       | 0       |
| ENSMUSG00000050141 | 13_Fam2f    | 5.96047 | -1.27623 | 0.166555 | 0.5464   | 3.03373 | 2.26701 | 5.17081 | 8.25292 | 11.1602 | 5.87814 |
| ENSMUSG00000050144 | 13_Slc25e   | 679.411 | 0.19686  | 0.533683 | 0.838255 | 514.723 | 858.062 | 804.578 | 700.673 | 590.632 | 607.8   |
| ENSMUSG00000050147 | 8_F2r13     | 11.8283 | -0.40675 | 0.520096 | 0.831665 | 10.1124 | 9.06802 | 11.3758 | 13.2047 | 15.4526 | 11.7563 |
| ENSMUSG00000050148 | 9_Ubqln2    | 545.628 | 0.31666  | 0.368432 | 0.740626 | 841.355 | 477.205 | 497.432 | 559.548 | 486.756 | 411.47  |
| ENSMUSG00000050150 | 16_Slc9b1   | 4.74607 | -1.03149 | 0.409773 | 0.766743 | 7.07871 | 2.26701 | 0       | 4.12646 | 10.3017 | 4.70251 |
| ENSMUSG00000050164 | 10_Mchr1    | 39.3716 | -1.31771 | 0.004937 | 0.061695 | 17.1912 | 23.8036 | 26.8882 | 66.0234 | 63.5273 | 38.7957 |
| ENSMUSG00000050174 | 15_Nudt6    | 53.9482 | 0.06909  | 0.879639 | 0.966669 | 31.3486 | 58.9422 | 75.4938 | 49.5175 | 56.6595 | 51.7276 |
| ENSMUSG00000050179 | 3_A93000    | 0.18892 | 1.1315   | 0.781553 | NA       | 0       | 1.1335  | 0       | 0       | 0       | 0       |
| ENSMUSG00000050188 | 8_Lsm10     | 140.963 | 0.17166  | 0.767251 | 0.930577 | 42.4723 | 192.695 | 213.037 | 159.281 | 121.904 | 116.387 |
| ENSMUSG00000050189 | 4_Etos1     | 0.46401 | -0.58035 | 0.881878 | NA       | 0       | 1.1335  | 0       | 1.65058 | 0       | 0       |
| ENSMUSG00000050192 | 8_Eif5a2    | 111.364 | -0.48714 | 0.453954 | 0.7959   | 194.159 | 38.5391 | 45.5031 | 145.251 | 155.384 | 89.3477 |
| ENSMUSG00000050195 | 8_Scd4      | 62.6256 | 0.15962  | 0.645348 | 0.889294 | 63.7084 | 61.2092 | 73.4255 | 57.7705 | 64.3858 | 55.2545 |
| ENSMUSG00000050199 | 13_Lgr4     | 1729.83 | 0.0687   | 0.856449 | 0.959059 | 2674.74 | 1262.72 | 1375.43 | 1609.32 | 1841.43 | 1615.31 |
| ENSMUSG00000050211 | 14_Pla2ga   | 29.2233 | -0.33981 | 0.497113 | 0.819208 | 26.2924 | 15.869  | 35.1615 | 30.5358 | 36.9145 | 30.5663 |
| ENSMUSG00000050212 | 4_Eva1b     | 24.6513 | -0.43883 | 0.571314 | 0.854448 | 4.04498 | 22.6701 | 36.1957 | 42.9152 | 19.745  | 22.3369 |
| ENSMUSG00000050213 | 6_Snip1     | 422.839 | 0.04136  | 0.868928 | 0.962942 | 477.307 | 418.263 | 390.913 | 405.219 | 410.352 | 434.982 |

|                    |            |         |          |          |          |         |         |         |         |         |         |
|--------------------|------------|---------|----------|----------|----------|---------|---------|---------|---------|---------|---------|
| ENSMUSG00000050217 | 13_Lgsn    | 419.098 | -3.98406 | 4.18E-07 | 3.70E-05 | 21.2361 | 60.0757 | 68.2547 | 1851.96 | 253.251 | 259.814 |
| ENSMUSG00000050222 | 10_Il17d   | 6.69548 | 0.44181  | 0.626293 | 0.880385 | 13.1462 | 6.80102 | 3.10248 | 5.77705 | 4.29238 | 7.05377 |
| ENSMUSG00000050229 | 3_Pigm     | 614.224 | 0.58406  | 0.217731 | 0.608427 | 1262.03 | 496.474 | 451.929 | 383.761 | 569.17  | 521.979 |
| ENSMUSG00000050232 | 6_Cxcr3    | 4.53531 | 1.58219  | 0.315493 | 0.696629 | 0       | 10.2015 | 10.3416 | 4.95175 | 1.71695 | 0       |
| ENSMUSG00000050234 | 7_Gja4     | 45.7959 | -0.54601 | 0.469697 | 0.804531 | 6.06747 | 38.5391 | 67.2205 | 80.0534 | 42.9238 | 39.9713 |
| ENSMUSG00000050240 | 14_Hic2    | 142.936 | 0.09218  | 0.847574 | 0.955787 | 71.7983 | 158.69  | 212.003 | 165.058 | 99.5833 | 150.48  |
| ENSMUSG00000050241 | 8_Klre1    | 4.63848 | 4.7403   | 0.004353 | 0.056381 | 18.2024 | 5.66751 | 3.10248 | 0       | 0.85848 | 0       |
| ENSMUSG00000050244 | 8_Heatr1   | 967.969 | 0.50557  | 0.100957 | 0.432302 | 1135.63 | 1306.93 | 964.873 | 605.765 | 943.466 | 851.155 |
| ENSMUSG00000050248 | 11_Evc2    | 198.471 | -0.77549 | 0.071665 | 0.357459 | 79.8883 | 148.489 | 210.969 | 293.804 | 247.241 | 210.437 |
| ENSMUSG00000050266 | 4_Olf690   | 0.31544 | 0.16972  | 0.966824 | NA       | 0       | 0       | 1.03416 | 0       | 0.85848 | 0       |
| ENSMUSG00000050270 | 12_Tmem    | 84.9112 | -0.7544  | 0.035749 | 0.236192 | 76.8546 | 46.4736 | 66.1863 | 113.89  | 107.31  | 98.7527 |
| ENSMUSG00000050271 | 12_D8Ertc  | 118.29  | 0.55065  | 0.39787  | 0.758469 | 31.3486 | 255.038 | 135.475 | 89.1316 | 95.2909 | 103.455 |
| ENSMUSG00000050272 | 9_Dscam    | 8.86803 | -2.18231 | 0.046648 | 0.276698 | 3.03373 | 5.66751 | 1.03416 | 31.3611 | 8.58477 | 3.52688 |
| ENSMUSG00000050276 | 6_Mrgprg   | 14.5333 | -0.34498 | 0.698613 | 0.905638 | 2.02249 | 15.869  | 20.6832 | 28.0599 | 11.1602 | 9.40502 |
| ENSMUSG00000050288 | 6_Fzd2     | 157.696 | -0.38763 | 0.338233 | 0.71638  | 78.8771 | 145.088 | 186.149 | 188.167 | 188.006 | 159.885 |
| ENSMUSG00000050295 | 3_Foxc1    | 1324.88 | 0.82739  | 0.047877 | 0.281389 | 2696.99 | 1203.78 | 1183.08 | 794.757 | 1026.74 | 1043.96 |
| ENSMUSG00000050296 | 14_Abca1   | 2.87203 | 1.02734  | 0.430888 | 0.780048 | 7.07871 | 3.40051 | 1.03416 | 1.65058 | 1.71695 | 2.35126 |
| ENSMUSG00000050299 | 7_Gm984    | 2272.35 | -0.08636 | 0.880194 | 0.96673  | 607.758 | 2832.62 | 3172.81 | 2858.81 | 1787.35 | 2374.77 |
| ENSMUSG00000050304 | 3_Slc25a2  | 2.39784 | 0.58123  | 0.70514  | 0.908152 | 3.03373 | 4.53401 | 1.03416 | 0       | 3.43391 | 2.35126 |
| ENSMUSG00000050310 | 8_Rictor   | 1758.73 | 0.38555  | 0.285203 | 0.671308 | 2906.32 | 1464.49 | 1606.05 | 1408.77 | 1643.12 | 1523.61 |
| ENSMUSG00000050312 | 11_Nsun3   | 506.536 | 0.6262   | 0.14228  | 0.51116  | 981.918 | 431.865 | 430.211 | 328.466 | 422.371 | 444.387 |
| ENSMUSG00000050315 | 13_Synpo   | 533.18  | -0.89628 | 0.062042 | 0.329054 | 618.882 | 171.159 | 327.829 | 707.276 | 752.026 | 621.907 |
| ENSMUSG00000050321 | 2_Neto1    | 2.70077 | -1.57338 | 0.296419 | 0.680027 | 3.03373 | 0       | 1.03416 | 4.95175 | 6.00934 | 1.17563 |
| ENSMUSG00000050323 | 14_Ndufa1  | 81.5855 | 0.17918  | 0.644329 | 0.889191 | 109.214 | 92.9472 | 57.913  | 83.3545 | 75.546  | 70.5377 |
| ENSMUSG00000050332 | 7_Amer1    | 1547.47 | 0.39687  | 0.205408 | 0.59724  | 2297.55 | 1495.09 | 1484.02 | 1137.25 | 1463.7  | 1407.23 |
| ENSMUSG00000050334 | 12_C130C   | 20.2935 | -1.08136 | 0.282914 | 0.669555 | 29.3261 | 5.66751 | 4.13665 | 39.614  | 39.4899 | 3.52688 |
| ENSMUSG00000050335 | 16_Lgals3  | 8682.35 | 0.31987  | 0.280798 | 0.667117 | 7023.09 | 11379.2 | 10520.5 | 7216.36 | 7919.45 | 8035.42 |
| ENSMUSG00000050345 | 8_493048   | 7.62226 | 0.26369  | 0.748086 | 0.924734 | 13.1462 | 5.66751 | 6.20497 | 7.42763 | 8.58477 | 4.70251 |
| ENSMUSG00000050350 | 7_Gpr18    | 6.90827 | 2.36875  | 0.031484 | 0.218285 | 7.07871 | 19.2695 | 8.27329 | 3.30117 | 0       | 3.52688 |
| ENSMUSG00000050357 | 8_Rltpr    | 5.44262 | 0.36671  | 0.737148 | 0.920922 | 1.01124 | 11.335  | 6.20497 | 6.60234 | 5.15086 | 2.35126 |
| ENSMUSG00000050359 | 7_Spr1a    | 137.688 | 2.93703  | 1.54E-08 | 1.94E-06 | 101.124 | 362.721 | 266.814 | 32.1864 | 29.1882 | 34.0932 |
| ENSMUSG00000050368 | 4_Hoxd10   | 1.06176 | 2.44546  | 0.348939 | NA       | 1.01124 | 4.53401 | 0       | 0.82529 | 0       | 0       |
| ENSMUSG00000050370 | 4_Ch25h    | 100.467 | 1.6979   | 1.26E-05 | 0.000639 | 169.889 | 154.156 | 137.543 | 58.5958 | 53.2256 | 29.3907 |
| ENSMUSG00000050373 | 13_Snx21   | 275.319 | -0.18617 | 0.64525  | 0.889294 | 139.552 | 300.378 | 333     | 321.039 | 278.147 | 279.799 |
| ENSMUSG00000050377 | 7_Il31ra   | 8.84672 | -1.28377 | 0.19595  | 0.587578 | 6.06747 | 0       | 9.30745 | 16.5058 | 9.44325 | 11.7563 |
| ENSMUSG00000050379 | 15_Sept6   | 219.449 | -0.49813 | 0.154125 | 0.529572 | 245.732 | 167.758 | 132.373 | 274.822 | 264.411 | 231.599 |
| ENSMUSG00000050382 | 14_Kif7    | 72.7162 | -0.39037 | 0.379325 | 0.747316 | 42.4723 | 65.7432 | 80.6646 | 107.288 | 56.6595 | 83.4696 |
| ENSMUSG00000050390 | 12_C7708   | 3026.95 | 0.77388  | 0.174534 | 0.55808  | 1087.09 | 5344.47 | 5028.09 | 2597.2  | 1589.04 | 2515.84 |
| ENSMUSG00000050394 | 14_Armcx   | 148.243 | -1.75445 | 4.04E-09 | 6.20E-07 | 67.7534 | 58.9422 | 76.528  | 233.558 | 225.779 | 226.896 |
| ENSMUSG00000050395 | 8_Tnfrsf15 | 11.6039 | 2.17642  | 0.006436 | 0.074085 | 28.3148 | 17.0025 | 11.3758 | 3.30117 | 2.57543 | 7.05377 |
| ENSMUSG00000050397 | 3_Foxl2    | 0.53364 | 2.62307  | 0.473724 | NA       | 0       | 1.1335  | 2.06832 | 0       | 0       | 0       |
| ENSMUSG00000050410 | 15_Tcf19   | 255.893 | 0.67288  | 0.129403 | 0.488846 | 147.642 | 396.726 | 399.186 | 184.865 | 200.025 | 206.91  |
| ENSMUSG00000050423 | 10_Ppp1r   | 1.73956 | -0.06674 | 0.968428 | 0.991298 | 3.03373 | 0       | 2.06832 | 3.30117 | 0.85848 | 1.17563 |
| ENSMUSG00000050424 | 9_Pnma5    | 40.6651 | 0.2482   | 0.628842 | 0.881265 | 23.2586 | 68.0102 | 41.3665 | 37.1382 | 37.773  | 36.4445 |
| ENSMUSG00000050425 | 2_Mrgprb   | 7.08935 | -1.42533 | 0.089348 | 0.407018 | 5.05622 | 3.40051 | 3.10248 | 10.7288 | 12.0187 | 8.22939 |
| ENSMUSG00000050428 | 7_Fbxo46   | 185.161 | 0.09541  | 0.796147 | 0.939697 | 136.518 | 245.97  | 191.32  | 196.42  | 137.356 | 203.384 |
| ENSMUSG00000050439 | 6_Enthd1   | 2.26811 | 1.90892  | 0.236455 | 0.628684 | 1.01124 | 4.53401 | 5.17081 | 0       | 1.71695 | 1.17563 |
| ENSMUSG00000050440 | 8_Hamp     | 0.18892 | 1.1315   | 0.781553 | NA       | 0       | 1.1335  | 0       | 0       | 0       | 0       |
| ENSMUSG00000050445 | 4_Cyp8b1   | 0       | NA       | NA       | NA       | 0       | 0       | 0       | 0       | 0       | 0       |
| ENSMUSG00000050447 | 15_Lypd6   | 701.663 | -0.31307 | 0.468604 | 0.804253 | 1016.3  | 396.726 | 464.339 | 731.209 | 893.675 | 707.728 |
| ENSMUSG00000050463 | 8_Krt78    | 1402.87 | 0.12556  | 0.813498 | 0.94667  | 508.656 | 1812.47 | 2070.39 | 1383.19 | 955.485 | 1687.03 |
| ENSMUSG00000050468 | 12_Astl    | 0.96072 | 1.26154  | 0.632792 | NA       | 1.01124 | 0       | 3.10248 | 1.65058 | 0       | 0       |
| ENSMUSG00000050471 | 16_Fam11   | 501.884 | -0.06142 | 0.830356 | 0.95122  | 591.578 | 456.802 | 425.04  | 448.134 | 566.595 | 523.154 |
| ENSMUSG00000050473 | 4_Slc35d3  | 0.28616 | -1.57932 | 0.696464 | NA       | 0       | 0       | 0       | 0       | 1.71695 | 0       |
| ENSMUSG00000050490 | 7_Gm839    | 9.50514 | -0.04888 | 0.966064 | 0.990808 | 6.06747 | 17.0025 | 5.17081 | 9.90351 | 18.8865 | 0       |
| ENSMUSG00000050493 | 8_Fam167   | 26.327  | -0.6811  | 0.195333 | 0.586541 | 13.1462 | 22.6701 | 24.8199 | 23.1082 | 37.773  | 36.4445 |
| ENSMUSG00000050503 | 8_Fbxl22   | 31.9578 | -0.62594 | 0.210653 | 0.602689 | 26.2924 | 19.2695 | 29.9907 | 37.9634 | 52.3671 | 25.8638 |
| ENSMUSG00000050505 | 7_Pcdh20   | 94.986  | -0.0363  | 0.950832 | 0.987571 | 170.9   | 31.7381 | 78.5963 | 89.1316 | 109.027 | 90.5233 |
| ENSMUSG00000050511 | 1_Oprd1    | 0.16854 | 1.1315   | 0.781553 | NA       | 1.01124 | 0       | 0       | 0       | 0       | 0       |
| ENSMUSG00000050520 | 4_Cldn8    | 118.52  | 0.77615  | 0.119068 | 0.469314 | 239.665 | 71.4107 | 137.543 | 71.8004 | 88.4231 | 102.28  |
| ENSMUSG00000050526 | 5_493340   | 0.69094 | 0.12901  | 0.959664 | NA       | 1.01124 | 1.1335  | 0       | 0.82529 | 0       | 1.17563 |
| ENSMUSG00000050530 | 14_Fam17   | 1355.14 | 0.15012  | 0.545441 | 0.84237  | 1462.26 | 1296.73 | 1517.11 | 1193.37 | 1203.58 | 1457.78 |
| ENSMUSG00000050534 | 8_Htr5b    | 45.5077 | -0.147   | 0.767627 | 0.930788 | 50.5622 | 23.8036 | 54.8106 | 34.6623 | 48.0747 | 61.1326 |
| ENSMUSG00000050538 | 7_B23021   | 24.516  | -1.2083  | 0.063722 | 0.333782 | 25.2811 | 4.53401 | 14.4783 | 39.614  | 32.6221 | 30.5663 |
| ENSMUSG00000050541 | 14_Adra1l  | 17.0365 | -1.36802 | 0.015397 | 0.135199 | 9.1012  | 10.2015 | 9.30745 | 27.2346 | 24.0374 | 22.3369 |
| ENSMUSG00000050545 | 8_Fam22f   | 33.1177 | 0.17221  | 0.740554 | 0.922262 | 54.6072 | 22.6701 | 27.9224 | 28.0599 | 36.056  | 29.3907 |
| ENSMUSG00000050549 | 8_573050   | 831.395 | 1.08935  | 0.021949 | 0.17393  | 1943.61 | 788.918 | 660.829 | 423.375 | 624.971 | 546.667 |
| ENSMUSG00000050552 | 8_Lamtor2  | 507.228 | -0.17384 | 0.778313 | 0.934544 | 106.181 | 629.094 | 694.957 | 654.457 | 424.946 | 533.735 |
| ENSMUSG00000050553 | 3_Gk2      | 0.45299 | -0.6074  | 0.85212  | NA       | 0       | 0       | 1.03416 | 0.82529 | 0.85848 | 0       |
| ENSMUSG00000050555 | 9_Hyls1    | 117.21  | 0.35689  | 0.394589 | 0.755773 | 197.193 | 108.816 | 88.9379 | 99.8604 | 116.753 | 91.699  |
| ENSMUSG00000050556 | 8_Kcnb1    | 72.7799 | -1.99519 | 0.004621 | 0.059057 | 20.2249 | 52.1411 | 15.5124 | 223.654 | 78.1214 | 47.0251 |
| ENSMUSG00000050558 | 13_Prokr2  | 49.6469 | 1.14869  | 0.009323 | 0.09531  | 86.967  | 72.5442 | 45.5031 | 27.2346 | 29.1882 | 36.4445 |
| ENSMUSG00000050565 | 16_Tor1ai  | 10486.3 | 1.1812   | 0.001153 | 0.021828 | 20588.9 | 12966.1 | 10107.9 | 5287.65 | 7240.39 | 6726.94 |
| ENSMUSG00000050567 | 16_Maml1   | 643.01  | 0.5511   | 0.052555 | 0.297873 | 613.825 | 861.462 | 818.022 | 587.608 | 470.445 | 506.696 |
| ENSMUSG00000050578 | 9_Mmp13    | 184.571 | 1.73867  | 0.012157 | 0.115941 | 222.474 | 523.678 | 105.484 | 76.7522 | 30.9052 | 148.129 |

|                    |            |         |          |          |          |         |         |         |         |         |         |
|--------------------|------------|---------|----------|----------|----------|---------|---------|---------|---------|---------|---------|
| ENSMUSG00000050587 | 14_Lrrc4c  | 98.8683 | -1.7825  | 0.000765 | 0.016074 | 72.8096 | 19.2695 | 41.3665 | 198.07  | 147.658 | 114.036 |
| ENSMUSG00000050592 | 8_Fam78e   | 41.0239 | 0.0456   | 0.928138 | 0.980863 | 32.3598 | 47.6071 | 45.5031 | 60.2463 | 36.9145 | 23.5126 |
| ENSMUSG00000050600 | 5_Zfp831   | 2.43793 | 2.03743  | 0.261391 | 0.650617 | 6.06747 | 5.66751 | 0       | 0       | 1.71695 | 1.17563 |
| ENSMUSG00000050605 | 17_Zfp61   | 138.946 | -0.43378 | 0.234419 | 0.626192 | 86.967  | 105.416 | 162.363 | 169.185 | 163.969 | 145.778 |
| ENSMUSG00000050608 | 11_Minos1  | 1487.06 | -0.2462  | 0.302274 | 0.685243 | 1483.5  | 1288.79 | 1309.25 | 1547.42 | 1774.47 | 1518.91 |
| ENSMUSG00000050612 | 5_Txndc2   | 0.94527 | -0.66765 | 0.807795 | NA       | 1.01124 | 1.1335  | 0       | 0       | 0       | 3.52688 |
| ENSMUSG00000050619 | 14_Zscan4  | 847.651 | 0.33745  | 0.302788 | 0.685435 | 1270.12 | 800.253 | 768.382 | 645.379 | 825.855 | 775.914 |
| ENSMUSG00000050621 | 6_Rps27r1  | 1200.84 | -0.66297 | 0.046955 | 0.277804 | 835.288 | 869.397 | 1084.84 | 1859.38 | 1529.81 | 1026.32 |
| ENSMUSG00000050623 | 4_Tex40    | 25.332  | -0.78142 | 0.145419 | 0.515494 | 13.1462 | 17.0025 | 25.854  | 28.0599 | 42.0654 | 25.8638 |
| ENSMUSG00000050625 | 4_Ccdc12   | 0.19594 | -0.79206 | 0.84609  | NA       | 0       | 0       | 0       | 0       | 0       | 1.17563 |
| ENSMUSG00000050627 | 13_Gpd1l   | 2919.64 | 0.11311  | 0.617731 | 0.87739  | 3240.03 | 2902.9  | 2958.74 | 2694.58 | 2699.05 | 3022.54 |
| ENSMUSG00000050628 | 6_Ubal2d   | 994.727 | 0.44617  | 0.332475 | 0.711837 | 524.836 | 1461.09 | 1456.1  | 987.05  | 625.83  | 913.463 |
| ENSMUSG00000050635 | 1_Spr2f    | 8.91482 | 3.08264  | 0.002157 | 0.034214 | 8.08995 | 28.3376 | 11.3758 | 2.47588 | 0.85848 | 2.35126 |
| ENSMUSG00000050640 | 16_Tmem    | 161.094 | -1.19151 | 0.001456 | 0.025802 | 100.113 | 82.7457 | 111.689 | 300.406 | 212.902 | 158.71  |
| ENSMUSG00000050663 | 7_Trhde    | 13.089  | -1.80229 | 0.054299 | 0.303788 | 13.1462 | 2.26701 | 2.06832 | 31.3611 | 21.4619 | 8.22939 |
| ENSMUSG00000050666 | 13_Vstm4   | 127.562 | -1.33389 | 0.005034 | 0.062525 | 99.1019 | 39.6726 | 78.5963 | 250.064 | 176.846 | 121.09  |
| ENSMUSG00000050668 | 9_Gpatch   | 832.397 | -0.21667 | 0.455287 | 0.756225 | 979.896 | 659.699 | 670.137 | 864.081 | 885.948 | 934.624 |
| ENSMUSG00000050671 | 12_Ism2    | 131.004 | -1.30413 | 0.039546 | 0.250054 | 20.2249 | 78.2117 | 128.236 | 270.696 | 128.772 | 159.885 |
| ENSMUSG00000050675 | 7_Gp1ba    | 13.9481 | -1.46958 | 0.047016 | 0.277829 | 3.03373 | 7.93452 | 11.3758 | 26.4094 | 23.1789 | 11.7563 |
| ENSMUSG00000050677 | 2_Ccdc96   | 11.766  | -0.07732 | 0.916573 | 0.976775 | 5.05622 | 18.136  | 11.3758 | 13.2047 | 14.5941 | 8.22939 |
| ENSMUSG00000050697 | 8_Prkaa1   | 1143.05 | 0.43709  | 0.266323 | 0.654501 | 2012.38 | 995.216 | 936.95  | 859.129 | 1098.85 | 955.785 |
| ENSMUSG00000050700 | 11_Emilin1 | 65.3272 | -1.94193 | 0.002925 | 0.042652 | 10.1124 | 18.136  | 52.7422 | 153.504 | 89.2816 | 68.1864 |
| ENSMUSG00000050702 | 5_493056   | 0.69094 | 0.12901  | 0.959664 | NA       | 1.01124 | 1.1335  | 0       | 0.82529 | 0       | 1.17563 |
| ENSMUSG00000050705 | 15_23100   | 245.893 | -0.12515 | 0.754544 | 0.926508 | 128.428 | 275.441 | 301.975 | 257.491 | 259.26  | 252.76  |
| ENSMUSG00000050708 | 14_Ftl1    | 6671.06 | -0.27765 | 0.69382  | 0.905638 | 852.479 | 8348.25 | 8892.76 | 10093.3 | 5413.56 | 6425.98 |
| ENSMUSG00000050711 | 7_Scg2     | 264.54  | -0.38242 | 0.345112 | 0.722149 | 333.711 | 148.489 | 206.832 | 283.901 | 367.428 | 246.882 |
| ENSMUSG00000050714 | 9_Zbtb26   | 299.401 | 0.17832  | 0.734671 | 0.920289 | 585.51  | 210.832 | 157.193 | 245.937 | 325.363 | 271.57  |
| ENSMUSG00000050721 | 8_Plekho2  | 414.244 | 0.18051  | 0.71709  | 0.912443 | 171.912 | 644.963 | 503.637 | 442.357 | 319.353 | 403.24  |
| ENSMUSG00000050730 | 16_Arhgaj  | 712.575 | 0.29805  | 0.470085 | 0.804531 | 1225.63 | 537.28  | 594.643 | 530.663 | 738.29  | 648.947 |
| ENSMUSG00000050732 | 9_Vamp8    | 2911.11 | -0.13199 | 0.752549 | 0.925804 | 1367.2  | 3634.01 | 3333.1  | 3316.85 | 2823.53 | 2991.97 |
| ENSMUSG00000050737 | 13_Ptges   | 1174.47 | 0.78498  | 0.024708 | 0.187559 | 975.851 | 1912.22 | 1570.89 | 917.725 | 733.139 | 936.975 |
| ENSMUSG00000050742 | 4_Olfir164 | 0.50562 | 2.55291  | 0.52315  | NA       | 3.03373 | 0       | 0       | 0       | 0       | 0       |
| ENSMUSG00000050747 | 14_Trim1f  | 15.5502 | 2.22283  | 0.006024 | 0.070671 | 8.08995 | 38.5391 | 29.9907 | 3.30117 | 5.15086 | 8.22939 |
| ENSMUSG00000050751 | 14_Pgbd5   | 7.96017 | -0.46732 | 0.60825  | 0.872658 | 4.04498 | 7.93452 | 8.27329 | 14.8553 | 10.3017 | 2.35126 |
| ENSMUSG00000050761 | 3_Gp1bb    | 55.2771 | 0.29458  | 0.535593 | 0.83864  | 32.3598 | 73.6777 | 76.528  | 46.2164 | 42.9238 | 59.957  |
| ENSMUSG00000050762 | 5_Prss27   | 3953.58 | 0.78429  | 0.248611 | 0.640068 | 785.737 | 7765.63 | 6456.27 | 3528.12 | 2201.99 | 2983.74 |
| ENSMUSG00000050765 | 2_Gm508    | 4.74299 | -0.15848 | 0.876085 | 0.964907 | 5.05622 | 2.26701 | 6.20497 | 7.42763 | 5.15086 | 2.35126 |
| ENSMUSG00000050777 | 7_Tmem3    | 81.0001 | -1.01489 | 0.063396 | 0.332472 | 23.2586 | 61.2092 | 76.528  | 150.203 | 67.8197 | 106.982 |
| ENSMUSG00000050783 | 4_Htr1f    | 0.28063 | -1.56014 | 0.700051 | NA       | 0       | 0       | 0       | 0.82529 | 0.85848 | 0       |
| ENSMUSG00000050786 | 8_Ccdc12   | 176.163 | -0.68195 | 0.09286  | 0.414981 | 196.181 | 91.8137 | 117.894 | 243.461 | 239.515 | 168.115 |
| ENSMUSG00000050796 | 4_B3galit6 | 137.845 | 0.01145  | 0.976931 | 0.993796 | 189.103 | 138.287 | 87.9037 | 160.107 | 127.055 | 124.617 |
| ENSMUSG00000050808 | 13_Muc1E   | 7174.49 | 0.62961  | 0.212502 | 0.603702 | 15897.8 | 5301.39 | 4947.43 | 4522.6  | 6009.34 | 6368.38 |
| ENSMUSG00000050812 | 18_Al314'  | 4191.7  | 0.45706  | 0.241833 | 0.633369 | 7375    | 3708.82 | 3466.51 | 2954.55 | 3932.68 | 3712.63 |
| ENSMUSG00000050821 | 13_Fam13c  | 46.7038 | -1.50652 | 0.00557  | 0.066557 | 15.1687 | 23.8036 | 34.1273 | 106.463 | 48.9332 | 51.7276 |
| ENSMUSG00000050822 | 11_Slc29a1 | 4.46471 | 0.11862  | 0.912033 | 0.975378 | 1.01124 | 6.80102 | 6.20497 | 4.95175 | 4.29238 | 3.52688 |
| ENSMUSG00000050824 | 11_Sstr5   | 0.28063 | -1.56014 | 0.700051 | NA       | 0       | 0       | 0       | 0.82529 | 0.85848 | 0       |
| ENSMUSG00000050830 | 17_Vwv2    | 19.0926 | -1.85382 | 0.00784  | 0.084743 | 12.1349 | 2.26701 | 10.3416 | 35.4876 | 34.3391 | 19.9857 |
| ENSMUSG00000050840 | 8_Cdh20    | 78.82   | -1.74439 | 2.58E-06 | 0.000175 | 41.461  | 37.4056 | 29.9907 | 127.095 | 138.215 | 98.7527 |
| ENSMUSG00000050844 | 5_170002   | 0.31162 | 0.16972  | 0.966824 | NA       | 1.01124 | 0       | 0       | 0       | 0.85848 | 0       |
| ENSMUSG00000050846 | 8_Zfp623   | 429.978 | 0.05872  | 0.806442 | 0.94399  | 415.621 | 471.537 | 429.177 | 425.851 | 421.512 | 416.172 |
| ENSMUSG00000050854 | 9_Tmem1    | 274.065 | 0.80621  | 0.025328 | 0.190854 | 224.496 | 454.535 | 367.127 | 198.07  | 189.723 | 210.437 |
| ENSMUSG00000050855 | 16_Zfp94f  | 41.0566 | -0.17088 | 0.746233 | 0.924339 | 58.6522 | 37.4056 | 19.6491 | 44.5658 | 34.3391 | 51.7276 |
| ENSMUSG00000050856 | 16_Atp5k   | 1063.06 | -0.3844  | 0.356136 | 0.731176 | 459.105 | 1151.64 | 1156.19 | 1275.08 | 1093.7  | 1242.64 |
| ENSMUSG00000050860 | 6_Phosph   | 122.468 | -0.30951 | 0.555623 | 0.846817 | 43.4835 | 121.285 | 163.398 | 160.107 | 99.5833 | 146.953 |
| ENSMUSG00000050866 | 7_Clrn3    | 0.72958 | 1.66023  | 0.558504 | NA       | 0       | 1.1335  | 2.06832 | 0       | 0       | 1.17563 |
| ENSMUSG00000050870 | 4_Mrgprb1  | 0       | NA       | NA       | NA       | 0       | 0       | 0       | 0       | 0       | 0       |
| ENSMUSG00000050875 | 11_A7300   | 317.046 | -1.3983  | 0.002102 | 0.033619 | 270.002 | 90.6802 | 162.363 | 511.681 | 512.511 | 355.04  |
| ENSMUSG00000050890 | 15_Pdik1l  | 709.142 | 0.43324  | 0.274578 | 0.660991 | 1242.82 | 646.097 | 555.345 | 519.109 | 660.169 | 631.312 |
| ENSMUSG00000050891 | 8_Tatdn1   | 304.866 | 0.27153  | 0.580539 | 0.859533 | 584.499 | 199.497 | 216.14  | 220.353 | 303.042 | 305.663 |
| ENSMUSG00000050896 | 12_Rtn4rl  | 1.22823 | -3.65917 | 0.105091 | NA       | 0       | 0       | 0       | 3.30117 | 1.71695 | 2.35126 |
| ENSMUSG00000050908 | 12_Tvp23   | 92.2721 | -0.77764 | 0.106739 | 0.444057 | 30.3373 | 82.7457 | 91.0062 | 131.221 | 99.5833 | 118.738 |
| ENSMUSG00000050910 | 5_Cdr2l    | 140.423 | -0.82548 | 0.073937 | 0.363567 | 50.5622 | 107.683 | 145.817 | 220.353 | 147.658 | 170.466 |
| ENSMUSG00000050912 | 15_Tmem    | 6690.66 | 0.38899  | 0.36929  | 0.740977 | 12489.9 | 5301.39 | 4970.18 | 4971.56 | 6355.31 | 6055.66 |
| ENSMUSG00000050914 | 15_Ankrd1  | 49.3664 | 1.02819  | 0.00984  | 0.099417 | 75.8433 | 56.6751 | 66.1863 | 37.9634 | 26.6128 | 32.9176 |
| ENSMUSG00000050919 | 8_Zfp366   | 15.4041 | -0.02439 | 0.97344  | 0.993027 | 5.05622 | 19.2695 | 21.7174 | 19.807  | 17.1695 | 9.40502 |
| ENSMUSG00000050921 | 12_P2ry1f  | 29.7624 | 3.14585  | 5.07E-05 | 0.00191  | 88.9895 | 57.8086 | 13.4441 | 4.95175 | 5.15086 | 8.22939 |
| ENSMUSG00000050926 | 5_Dcaf12l  | 5.11911 | -0.55651 | 0.598823 | 0.869073 | 4.04498 | 2.26701 | 6.20497 | 11.5541 | 4.29238 | 2.35126 |
| ENSMUSG00000050930 | 5_Map10    | 238.242 | 0.6421   | 0.061918 | 0.328702 | 385.284 | 252.771 | 232.686 | 158.456 | 186.29  | 213.964 |
| ENSMUSG00000050931 | 7_Sgms2    | 1198.26 | 0.41801  | 0.135174 | 0.499246 | 1679.68 | 1318.26 | 1113.79 | 971.369 | 1041.33 | 1065.12 |
| ENSMUSG00000050936 | 5_Hist2h2  | 52.2381 | -0.55526 | 0.149369 | 0.522751 | 36.4048 | 43.0731 | 47.5714 | 56.1199 | 73.829  | 56.4301 |
| ENSMUSG00000050944 | 14_Efcabf  | 23.782  | 1.14893  | 0.046963 | 0.277804 | 44.4948 | 27.2041 | 26.8882 | 12.3794 | 22.3204 | 9.40502 |
| ENSMUSG00000050945 | 7_Zfp438   | 113.684 | -0.06022 | 0.864796 | 0.962077 | 129.439 | 79.3452 | 125.134 | 113.065 | 130.489 | 104.631 |
| ENSMUSG00000050947 | 9_Amigo1   | 264.246 | -0.69981 | 0.020245 | 0.164323 | 177.979 | 179.093 | 247.165 | 369.731 | 308.193 | 303.312 |
| ENSMUSG00000050953 | 9_Gja1     | 15250   | -0.22154 | 0.548547 | 0.843853 | 20953   | 9907.95 | 11383   | 16193.1 | 17434   | 15628.8 |
| ENSMUSG00000050954 | 15_Zfp16f  | 324.636 | 0.10801  | 0.670023 | 0.898766 | 351.913 | 334.383 | 323.693 | 284.726 | 313.344 | 339.756 |

|                    |           |         |          |          |          |         |         |         |         |         |         |
|--------------------|-----------|---------|----------|----------|----------|---------|---------|---------|---------|---------|---------|
| ENSMUSG00000050957 | 4_Ins16   | 40.8397 | 0.86188  | 0.083406 | 0.390037 | 56.6297 | 65.7432 | 36.1957 | 38.7887 | 30.0467 | 17.6344 |
| ENSMUSG00000050961 | 4_AY358C  | 1.41696 | -0.83991 | 0.729606 | NA       | 3.03373 | 0       | 0       | 0       | 4.29238 | 1.17563 |
| ENSMUSG00000050963 | 6_Kcns2   | 0.88219 | -1.89692 | 0.482294 | NA       | 0       | 1.1335  | 0       | 3.30117 | 0.85848 | 0       |
| ENSMUSG00000050965 | 14_Prkca  | 1382.26 | 0.45051  | 0.09979  | 0.429531 | 1936.53 | 1513.23 | 1339.24 | 1101.77 | 1254.23 | 1148.59 |
| ENSMUSG00000050966 | 9_Lin28a  | 0.74613 | -2.94316 | 0.372922 | NA       | 0       | 0       | 0       | 3.30117 | 0       | 1.17563 |
| ENSMUSG00000050967 | 5_Creg2   | 118.754 | -1.20968 | 0.036018 | 0.237513 | 136.518 | 34.0051 | 44.4689 | 179.088 | 200.884 | 117.563 |
| ENSMUSG00000050973 | 11_Gdpgg  | 152.969 | 0.2946   | 0.374548 | 0.744881 | 129.439 | 208.565 | 167.534 | 136.999 | 123.621 | 151.656 |
| ENSMUSG00000050982 | 12_Apol1f | 0.14308 | -0.79206 | 0.84609  | NA       | 0       | 0       | 0       | 0       | 0.85848 | 0       |
| ENSMUSG00000050989 | 5_Sepn1   | 479.706 | -0.77846 | 0.024292 | 0.185459 | 258.879 | 328.716 | 472.612 | 713.053 | 579.472 | 525.506 |
| ENSMUSG00000050994 | 19_Adgb   | 23.4249 | -0.98157 | 0.145204 | 0.515328 | 25.2811 | 15.869  | 6.20497 | 28.8852 | 45.4993 | 18.81   |
| ENSMUSG00000051000 | 17_Fam1f  | 2031.01 | 0.7689   | 0.023507 | 0.180976 | 1754.51 | 3410.71 | 2514.05 | 1492.13 | 1354.68 | 1659.99 |
| ENSMUSG00000051007 | 14_Pddc1  | 567.892 | 0.11182  | 0.790578 | 0.937373 | 293.261 | 727.709 | 748.733 | 557.072 | 492.766 | 587.814 |
| ENSMUSG00000051008 | 5_493041  | 3.0614  | -1.29077 | 0.309552 | 0.692072 | 1.01124 | 2.26701 | 2.06832 | 6.60234 | 1.71695 | 4.70251 |
| ENSMUSG00000051022 | 7_Hs3st1  | 214.953 | -0.11023 | 0.778899 | 0.934571 | 136.518 | 262.973 | 221.311 | 273.172 | 233.506 | 162.237 |
| ENSMUSG00000051029 | 7_Serpinb | 5.26092 | 1.58639  | 0.1948   | 0.585542 | 17.1912 | 1.1335  | 5.17081 | 1.65058 | 1.71695 | 4.70251 |
| ENSMUSG00000051034 | 7_Zfp11   | 135.547 | 0.0915   | 0.782961 | 0.935592 | 168.878 | 131.486 | 118.929 | 107.288 | 146.8   | 139.9   |
| ENSMUSG00000051037 | 15_Zfp45f | 123.713 | 0.69409  | 0.218878 | 0.609939 | 284.16  | 102.015 | 72.3913 | 70.1499 | 112.46  | 101.104 |
| ENSMUSG00000051041 | 7_Olfml1  | 329.012 | -0.92689 | 0.007947 | 0.085365 | 294.272 | 157.557 | 228.55  | 458.037 | 474.738 | 360.918 |
| ENSMUSG00000051043 | 16_Gprc5  | 196.35  | -1.292   | 0.002857 | 0.042021 | 61.6859 | 128.086 | 152.022 | 351.575 | 224.921 | 259.814 |
| ENSMUSG00000051048 | 16_P4ha3  | 50.3894 | -0.3226  | 0.430254 | 0.780048 | 39.4385 | 46.4736 | 48.6056 | 72.6257 | 44.6408 | 50.552  |
| ENSMUSG00000051050 | 9_Spink14 | 0.16854 | 1.1315   | 0.781553 | NA       | 1.01124 | 0       | 0       | 0       | 0       | 0       |
| ENSMUSG00000051054 | 3_170001  | 2.30657 | -0.22007 | 0.88319  | 0.967903 | 0       | 2.26701 | 4.13665 | 1.65058 | 3.43391 | 2.35126 |
| ENSMUSG00000051056 | 4_Gja10   | 0.7298  | -1.59306 | 0.566687 | NA       | 1.01124 | 0       | 0       | 1.65058 | 1.71695 | 0       |
| ENSMUSG00000051062 | 6_Fbll1   | 0.60156 | -1.14619 | 0.750716 | NA       | 0       | 1.1335  | 0       | 2.47588 | 0       | 0       |
| ENSMUSG00000051065 | 8_Mb21d2  | 1007.7  | 0.27294  | 0.315641 | 0.6967   | 1293.38 | 1036.02 | 978.317 | 795.582 | 927.155 | 1015.74 |
| ENSMUSG00000051067 | 7_Lingo3  | 14.6348 | -3.07758 | 0.001233 | 0.022943 | 6.06747 | 0       | 3.10248 | 40.4393 | 11.1602 | 27.0394 |
| ENSMUSG00000051076 | 8_Vtcn1   | 51.4343 | 0.24178  | 0.554122 | 0.846091 | 58.6522 | 41.9396 | 66.1863 | 40.4393 | 43.7823 | 57.6058 |
| ENSMUSG00000051079 | 8_Rgs13   | 1.21123 | 0.43181  | 0.838875 | NA       | 2.02249 | 0       | 2.06832 | 0.82529 | 0       | 2.35126 |
| ENSMUSG00000051098 | 5_Mblac2  | 450.886 | 0.32874  | 0.50662  | 0.825822 | 892.929 | 257.305 | 355.752 | 390.363 | 429.238 | 379.728 |
| ENSMUSG00000051107 | 4_Gm154   | 134.587 | 0.11862  | 0.39312  | 0.953167 | 40.4498 | 170.025 | 209.935 | 153.504 | 99.5833 | 134.022 |
| ENSMUSG00000051111 | 15_Sv2c   | 60.2853 | -0.54601 | 0.252865 | 0.644241 | 76.8546 | 34.0051 | 36.1957 | 86.6557 | 70.3951 | 57.6058 |
| ENSMUSG00000051113 | 9_Fam71f  | 31.6714 | -0.71008 | 0.221865 | 0.612417 | 9.1012  | 36.2721 | 26.8882 | 42.9152 | 36.056  | 38.7957 |
| ENSMUSG00000051124 | 6_Gimap9  | 223.377 | 0.12557  | 0.748021 | 0.924734 | 336.744 | 192.695 | 169.602 | 170.836 | 244.666 | 225.721 |
| ENSMUSG00000051136 | 1_Ghsr    | 0.93253 | -0.72435 | 0.822857 | NA       | 0       | 0       | 2.06832 | 0       | 0       | 3.52688 |
| ENSMUSG00000051146 | 2_Camk2t  | 12.1352 | -0.81941 | 0.247505 | 0.638878 | 11.1237 | 10.2015 | 5.17081 | 21.4576 | 15.4526 | 9.40502 |
| ENSMUSG00000051147 | 9_Nat2    | 455.578 | 0.64802  | 0.150207 | 0.523423 | 916.187 | 405.794 | 346.444 | 288.027 | 404.343 | 372.674 |
| ENSMUSG00000051149 | 15_Adnp   | 170.003 | 0.68832  | 0.112492 | 0.45505  | 177.979 | 167.758 | 283.36  | 75.9269 | 165.686 | 149.305 |
| ENSMUSG00000051154 | 11_Comm   | 1206.23 | 0.25051  | 0.5484   | 0.843853 | 2090.24 | 860.329 | 981.419 | 1036.57 | 1254.23 | 1014.57 |
| ENSMUSG00000051159 | 16_Cited1 | 41.74   | -1.98145 | 0.001368 | 0.024684 | 7.07871 | 13.602  | 29.9907 | 94.9086 | 56.6595 | 48.2007 |
| ENSMUSG00000051166 | 9_Eml5    | 484.445 | -1.18329 | 0.025775 | 0.192378 | 532.926 | 164.358 | 191.32  | 784.028 | 806.11  | 427.929 |
| ENSMUSG00000051169 | 14_Rpusd  | 30.4553 | 0.15874  | 0.821171 | 0.948338 | 7.07871 | 52.1411 | 37.2298 | 31.3611 | 23.1789 | 31.742  |
| ENSMUSG00000051177 | 16_Plcb1  | 82.1856 | -0.71983 | 0.18181  | 0.567796 | 110.226 | 28.3376 | 47.5714 | 98.2098 | 115.894 | 92.8746 |
| ENSMUSG00000051184 | 6_Zfp524  | 140.52  | 0.30899  | 0.714224 | 0.91112  | 10.1124 | 228.968 | 227.516 | 171.661 | 75.546  | 129.319 |
| ENSMUSG00000051185 | 9_Fam17c  | 543.521 | 0.4478   | 0.385497 | 0.750802 | 1157.87 | 315.114 | 408.494 | 439.056 | 496.2   | 444.387 |
| ENSMUSG00000051207 | 6_Mrgprd  | 0.13755 | -0.79206 | 0.84609  | NA       | 0       | 0       | 0       | 0.82529 | 0       | 0       |
| ENSMUSG00000051212 | 7_Gpr183  | 27.1841 | 0.13167  | 0.786434 | 0.936419 | 24.2699 | 24.9371 | 36.1957 | 32.1864 | 23.1789 | 22.3369 |
| ENSMUSG00000051220 | 2_Ercc6l  | 273.107 | 0.93301  | 0.018433 | 0.154097 | 493.487 | 344.585 | 236.823 | 143.601 | 189.723 | 230.423 |
| ENSMUSG00000051223 | 14_Bzw1   | 10293.1 | 0.38332  | 0.36642  | 0.739408 | 18456.2 | 9298.12 | 7202.94 | 7230.39 | 10342.1 | 9228.68 |
| ENSMUSG00000051224 | 17_Tcean  | 174.158 | 0.42805  | 0.396154 | 0.757159 | 352.924 | 107.683 | 138.578 | 127.92  | 157.96  | 159.885 |
| ENSMUSG00000051225 | 9_Fam83c  | 12304.3 | 0.41505  | 0.172064 | 0.55523  | 10245.9 | 16578.6 | 15361.4 | 9869.67 | 9859.61 | 11910.3 |
| ENSMUSG00000051228 | 5_Nyx     | 8.44602 | -1.93806 | 0.063186 | 0.331775 | 3.03373 | 3.40051 | 4.13665 | 29.7105 | 6.86782 | 3.52688 |
| ENSMUSG00000051232 | 13_Tmem   | 361.683 | 0.09327  | 0.725838 | 0.915914 | 430.79  | 361.587 | 327.829 | 354.05  | 363.136 | 332.703 |
| ENSMUSG00000051234 | 6_Rnf7    | 1786.02 | -0.21276 | 0.475069 | 0.806964 | 2154.96 | 1367    | 1441.62 | 1952.64 | 1965.91 | 1833.98 |
| ENSMUSG00000051235 | 8_Gen1    | 140.375 | 0.85003  | 0.058472 | 0.317521 | 270.002 | 148.489 | 123.065 | 69.3246 | 127.913 | 103.455 |
| ENSMUSG00000051236 | 13_Msrb3  | 805.122 | -0.93939 | 0.022828 | 0.17814  | 848.434 | 335.517 | 471.578 | 1124.05 | 1162.38 | 888.775 |
| ENSMUSG00000051237 | 6_923010  | 1.04691 | 2.41727  | 0.343517 | NA       | 2.02249 | 3.40051 | 0       | 0       | 0.85848 | 0       |
| ENSMUSG00000051238 | 5_Swsap1  | 250.709 | -0.23745 | 0.438992 | 0.785475 | 173.934 | 264.106 | 252.335 | 252.539 | 272.137 | 289.204 |
| ENSMUSG00000051242 | 1_Pcdhb9  | 104.742 | -0.69833 | 0.118653 | 0.4687   | 126.406 | 52.1411 | 61.0155 | 143.601 | 134.781 | 110.509 |
| ENSMUSG00000051243 | 13_Islr2  | 76.8396 | -1.55561 | 0.012408 | 0.117485 | 10.1124 | 40.8061 | 66.1863 | 143.601 | 90.9986 | 109.333 |
| ENSMUSG00000051246 | 2_Msantd  | 3.15907 | -0.68373 | 0.572878 | 0.855421 | 2.02249 | 1.1335  | 4.13665 | 3.30117 | 6.00934 | 2.35126 |
| ENSMUSG00000051251 | 3_Nhlh1   | 1.33263 | 1.84108  | 0.38569  | NA       | 4.04498 | 2.26701 | 0       | 0.82529 | 0.85848 | 0       |
| ENSMUSG00000051255 | 5_Gm656   | 278.787 | 0.29994  | 0.474142 | 0.806964 | 469.217 | 210.832 | 243.028 | 236.034 | 309.052 | 204.559 |
| ENSMUSG00000051256 | 10_Jagn1  | 525.998 | -0.07479 | 0.784013 | 0.935592 | 420.678 | 572.419 | 543.969 | 491.049 | 558.869 | 569.004 |
| ENSMUSG00000051257 | 3_Trap1a  | 0.14308 | -0.79206 | 0.84609  | NA       | 0       | 0       | 0       | 0       | 0.85848 | 0       |
| ENSMUSG00000051262 | 9_Cml3    | 44.3498 | -1.43475 | 0.008636 | 0.090528 | 27.3036 | 12.4685 | 32.059  | 95.7339 | 51.5086 | 47.0251 |
| ENSMUSG00000051278 | 12_Zgrf1  | 294.179 | 0.75042  | 0.022632 | 0.17728  | 458.094 | 328.716 | 319.556 | 174.962 | 218.053 | 265.692 |
| ENSMUSG00000051279 | 2_Gdf6    | 5.83004 | -0.43973 | 0.630199 | 0.881745 | 3.03373 | 5.66751 | 6.20497 | 9.90351 | 4.29238 | 5.87814 |
| ENSMUSG00000051285 | 17_Pcmtd  | 3591.76 | 0.41194  | 0.439901 | 0.785475 | 7816.92 | 2112.85 | 2373.4  | 2724.29 | 3578.13 | 2944.95 |
| ENSMUSG00000051306 | 7_Usp42   | 477.177 | 0.69725  | 0.004746 | 0.060065 | 569.331 | 639.296 | 562.584 | 355.701 | 394.041 | 342.108 |
| ENSMUSG00000051314 | 11_Ffar2  | 3.98516 | 0.79004  | 0.536713 | 0.839034 | 4.04498 | 7.93452 | 3.10248 | 4.12646 | 0       | 4.70251 |
| ENSMUSG00000051316 | 8_Taf7    | 356.02  | 0.21258  | 0.559056 | 0.848321 | 545.061 | 310.58  | 290.599 | 289.678 | 332.231 | 367.972 |
| ENSMUSG00000051319 | 6_150001  | 147.335 | 0.31596  | 0.382692 | 0.749501 | 127.417 | 164.358 | 198.559 | 164.233 | 101.3   | 128.143 |
| ENSMUSG00000051323 | 16_Pcdh1  | 235.003 | -0.68102 | 0.163675 | 0.541822 | 303.373 | 111.083 | 127.202 | 299.581 | 366.57  | 202.208 |
| ENSMUSG00000051329 | 13_Nup16  | 908.834 | 0.43783  | 0.223663 | 0.613683 | 1389.45 | 949.875 | 797.339 | 560.374 | 873.071 | 882.896 |
| ENSMUSG00000051331 | 14_Cacna  | 140.225 | -1.04786 | 0.001431 | 0.025521 | 103.147 | 78.2117 | 93.0745 | 219.528 | 195.733 | 151.656 |

|                    |            |         |          |          |          |         |         |         |         |         |         |
|--------------------|------------|---------|----------|----------|----------|---------|---------|---------|---------|---------|---------|
| ENSMUSG00000051335 | 5_Gfod1    | 313.813 | 0.07503  | 0.783961 | 0.935592 | 284.16  | 345.718 | 336.103 | 338.37  | 266.986 | 311.541 |
| ENSMUSG00000051339 | 8_290002   | 3415.02 | 0.64902  | 0.039587 | 0.250108 | 3033.73 | 4745.98 | 4731.29 | 2310.82 | 2528.21 | 3140.1  |
| ENSMUSG00000051341 | 5_Zfp52    | 184.638 | 0.83022  | 0.137494 | 0.503084 | 451.015 | 122.418 | 135.475 | 108.113 | 157.96  | 132.846 |
| ENSMUSG00000051343 | 11_Rab11   | 353.533 | -0.46163 | 0.270095 | 0.656915 | 173.934 | 366.121 | 352.649 | 552.121 | 333.089 | 343.283 |
| ENSMUSG00000051344 | 13_Plekhr  | 897.153 | 0.37097  | 0.098785 | 0.426922 | 990.008 | 1063.23 | 982.453 | 800.534 | 764.903 | 781.793 |
| ENSMUSG00000051346 | 8_Spryd4   | 250.951 | 0.0714   | 0.791991 | 0.937626 | 230.564 | 249.371 | 291.634 | 236.859 | 260.977 | 236.301 |
| ENSMUSG00000051351 | 14_Zfp46   | 1036.73 | 0.41185  | 0.134909 | 0.498709 | 953.603 | 1363.6  | 1233.75 | 864.906 | 827.572 | 976.947 |
| ENSMUSG00000051354 | 13_Samd1   | 5.59475 | 3.45014  | 0.003332 | 0.046853 | 12.1349 | 11.335  | 7.23913 | 0.82529 | 0.85848 | 1.17563 |
| ENSMUSG00000051355 | 18_Comm    | 737.612 | -0.09189 | 0.698153 | 0.905638 | 774.613 | 656.298 | 711.503 | 763.395 | 789.799 | 730.065 |
| ENSMUSG00000051359 | 14_Ncald   | 309.889 | -1.98007 | 4.38E-07 | 3.82E-05 | 165.844 | 83.8792 | 126.168 | 612.367 | 512.511 | 358.566 |
| ENSMUSG00000051361 | 7_603049   | 0.14308 | -0.79206 | 0.84609  | NA       | 0       | 0       | 0       | 0       | 0.85848 | 0       |
| ENSMUSG00000051367 | 8_Six1     | 69.5867 | 0.66066  | 0.29562  | 0.679579 | 168.878 | 36.2721 | 50.6739 | 68.4993 | 53.2256 | 39.9713 |
| ENSMUSG00000051373 | 5_Ppapdc   | 33.9231 | -1.36494 | 0.049166 | 0.286725 | 6.06747 | 27.2041 | 23.7857 | 75.1016 | 23.1789 | 48.2007 |
| ENSMUSG00000051375 | 15_Pcdh1   | 2563.79 | 0.77187  | 0.139968 | 0.507267 | 1120.46 | 4698.37 | 3882.24 | 1859.38 | 1507.49 | 2314.81 |
| ENSMUSG00000051378 | 10_Kif18b  | 139.365 | 0.72921  | 0.172647 | 0.556305 | 62.6971 | 255.038 | 203.73  | 91.6075 | 96.1494 | 126.968 |
| ENSMUSG00000051379 | 12_Flirt3  | 183.16  | -0.79673 | 0.097376 | 0.423413 | 224.496 | 107.683 | 69.2888 | 241.811 | 255.826 | 199.857 |
| ENSMUSG00000051390 | 9_Zbtb22   | 608.44  | 0.22358  | 0.662053 | 0.895681 | 243.71  | 860.329 | 862.491 | 659.409 | 789.799 | 606.624 |
| ENSMUSG00000051391 | 9_Ywhag    | 3163.15 | 0.56602  | 0.024286 | 0.185459 | 3395.76 | 4348.12 | 3583.37 | 2540.25 | 2342.78 | 2768.6  |
| ENSMUSG00000051396 | 14_Hspa1   | 985.37  | 0.09997  | 0.696285 | 0.905638 | 1159.9  | 963.477 | 934.882 | 846.75  | 1026.74 | 980.474 |
| ENSMUSG00000051397 | 5_Tacstd2  | 12043.3 | 0.75043  | 0.005332 | 0.064787 | 12658.8 | 17183.9 | 15477.3 | 8262.83 | 8334.09 | 10343.2 |
| ENSMUSG00000051401 | 6_Kctd16   | 3.1654  | -2.36968 | 0.168069 | 0.548978 | 1.01124 | 0       | 2.06832 | 9.90351 | 6.00934 | 0       |
| ENSMUSG00000051403 | 8_Ppp1r3   | 871.437 | 0.17734  | 0.80831  | 0.944822 | 114.271 | 1259.32 | 1401.29 | 1095.99 | 557.152 | 800.603 |
| ENSMUSG00000051413 | 17_Plagl2  | 866.507 | 0.51754  | 0.039732 | 0.250591 | 938.435 | 1147.1  | 975.214 | 741.938 | 640.424 | 755.929 |
| ENSMUSG00000051427 | 14_Ccdc1   | 388.952 | -0.64724 | 0.058972 | 0.318624 | 225.507 | 276.575 | 407.46  | 549.645 | 439.54  | 434.982 |
| ENSMUSG00000051431 | 7_Gpr87    | 3512.95 | 0.52034  | 0.117436 | 0.466305 | 5434.43 | 3796.1  | 3188.32 | 2323.2  | 3369.52 | 2966.11 |
| ENSMUSG00000051435 | 11_Fhad1   | 133.062 | 0.17747  | 0.595771 | 0.867682 | 125.394 | 129.219 | 168.568 | 106.463 | 115.894 | 152.832 |
| ENSMUSG00000051439 | 6_Cd14     | 147.433 | 0.69939  | 0.098124 | 0.42532  | 103.147 | 256.172 | 188.217 | 121.318 | 97.0079 | 118.738 |
| ENSMUSG00000051444 | 9_Bbs12    | 137.371 | 0.02344  | 0.960457 | 0.989875 | 224.496 | 99.7483 | 91.0062 | 99.8604 | 165.686 | 143.427 |
| ENSMUSG00000051451 | 5_Crebzf   | 1086.77 | 0.43671  | 0.331419 | 0.711299 | 2107.43 | 770.782 | 871.798 | 927.629 | 1013    | 829.993 |
| ENSMUSG00000051452 | 8_Gm114    | 0.28616 | -1.57932 | 0.696464 | NA       | 0       | 0       | 0       | 0       | 1.71695 | 0       |
| ENSMUSG00000051455 | 13_Gm15    | 6.32251 | 0.90671  | 0.388583 | 0.752681 | 15.1687 | 4.53401 | 5.17081 | 3.30117 | 8.58477 | 1.17563 |
| ENSMUSG00000051456 | 4_Hspb3    | 7.34674 | -0.87141 | 0.344809 | 0.722142 | 8.08995 | 2.26701 | 5.17081 | 14.8553 | 4.29238 | 9.40502 |
| ENSMUSG00000051457 | 7_Spn      | 92.4498 | 1.55037  | 0.000597 | 0.013294 | 81.9108 | 208.565 | 123.065 | 44.5658 | 47.2162 | 49.3764 |
| ENSMUSG00000051469 | 14_Zfp19   | 1058.49 | 0.13762  | 0.775647 | 0.93365  | 1976.98 | 697.104 | 652.556 | 940.833 | 1065.37 | 1018.09 |
| ENSMUSG00000051481 | 5_Krtap31  | 0.13755 | -0.79206 | 0.84609  | NA       | 0       | 0       | 0       | 0.82529 | 0       | 0       |
| ENSMUSG00000051483 | 8_Cbr1     | 663.654 | -0.25631 | 0.476959 | 0.808043 | 372.138 | 647.23  | 795.27  | 732.86  | 699.659 | 734.767 |
| ENSMUSG00000051486 | 5_Pcdhb1   | 58.1658 | -0.84829 | 0.105721 | 0.441402 | 69.7759 | 23.8036 | 31.0248 | 85.0051 | 84.1307 | 55.2545 |
| ENSMUSG00000051490 | 2_Foxd4    | 0       | NA       | NA       | NA       | 0       | 0       | 0       | 0       | 0       | 0       |
| ENSMUSG00000051495 | 7_Irf2bp2  | 780.013 | 0.14643  | 0.593661 | 0.866332 | 923.266 | 808.188 | 727.016 | 814.564 | 614.67  | 792.373 |
| ENSMUSG00000051497 | 15_Kcnj1f  | 549.509 | 1.10774  | 0.015958 | 0.138476 | 1210.46 | 410.328 | 630.839 | 269.871 | 360.56  | 414.997 |
| ENSMUSG00000051498 | 6_Tlr6     | 233.929 | 0.65488  | 0.040571 | 0.253896 | 357.98  | 266.373 | 233.721 | 155.155 | 194.016 | 196.33  |
| ENSMUSG00000051499 | 7_Zfp786   | 14.6665 | -0.83152 | 0.192902 | 0.583012 | 10.1124 | 10.2015 | 11.3758 | 12.3794 | 27.4713 | 16.4588 |
| ENSMUSG00000051502 | 6_Ufsp1    | 50.6193 | -0.23784 | 0.646902 | 0.890016 | 25.2811 | 40.8061 | 73.4255 | 51.1681 | 69.5366 | 43.4982 |
| ENSMUSG00000051503 | 2_Gm658    | 2.0926  | 0.09459  | 0.95596  | 0.988869 | 1.01124 | 4.53401 | 1.03416 | 0.82529 | 5.15086 | 0       |
| ENSMUSG00000051504 | 18_Siglec1 | 38.5847 | -0.16643 | 0.731124 | 0.91894  | 48.5397 | 32.8716 | 27.9224 | 54.4693 | 39.4899 | 28.2151 |
| ENSMUSG00000051506 | 16_Wdfy4   | 62.2874 | 1.3755   | 0.0084   | 0.088746 | 44.4948 | 138.287 | 86.8696 | 36.3129 | 26.6128 | 41.147  |
| ENSMUSG00000051510 | 13_Mafg    | 984.384 | -0.06541 | 0.868195 | 0.962942 | 531.915 | 1152.77 | 1201.7  | 1150.46 | 871.354 | 998.108 |
| ENSMUSG00000051517 | 14_Arhgef  | 91.2663 | 0.49842  | 0.280806 | 0.667117 | 57.6409 | 156.423 | 106.519 | 61.8969 | 78.1214 | 86.9965 |
| ENSMUSG00000051518 | 7_Rps19b   | 220.978 | 0.07707  | 0.852936 | 0.958158 | 125.394 | 320.781 | 234.755 | 240.985 | 201.742 | 202.208 |
| ENSMUSG00000051527 | 10_Usp29   | 7.75222 | -1.16604 | 0.283411 | 0.670337 | 12.1349 | 1.1335  | 1.03416 | 14.8553 | 10.3017 | 7.05377 |
| ENSMUSG00000051550 | 10_Zfp57f  | 147.628 | -0.33845 | 0.48598  | 0.813544 | 58.6522 | 163.224 | 169.602 | 212.925 | 148.517 | 132.846 |
| ENSMUSG00000051557 | 15_Pusl1   | 123.072 | 0.00386  | 0.99392  | 0.998043 | 47.5285 | 160.957 | 161.329 | 131.221 | 111.602 | 125.792 |
| ENSMUSG00000051579 | 10_TcealF  | 969.505 | -0.24342 | 0.506694 | 0.825822 | 1303.49 | 638.162 | 721.845 | 977.146 | 1128.9  | 1047.48 |
| ENSMUSG00000051582 | 2_Otud6a   | 0.13755 | -0.79206 | 0.84609  | NA       | 0       | 0       | 0       | 0.82529 | 0       | 0       |
| ENSMUSG00000051586 | 14_Mical3  | 1557.66 | 0.00741  | 0.983276 | 0.994651 | 985.963 | 1767.13 | 1931.81 | 1602.72 | 1338.37 | 1719.94 |
| ENSMUSG00000051590 | 8_Map3k1   | 1.88988 | -0.29914 | 0.856824 | 0.959059 | 4.04498 | 0       | 1.03416 | 1.65058 | 3.43391 | 1.17563 |
| ENSMUSG00000051591 | 2_Olfr697  | 0       | NA       | NA       | NA       | 0       | 0       | 0       | 0       | 0       | 0       |
| ENSMUSG00000051596 | 13_Otop1   | 2.69418 | -0.25388 | 0.841186 | 0.953359 | 3.03373 | 1.1335  | 3.10248 | 2.47588 | 1.71695 | 4.70251 |
| ENSMUSG00000051599 | 4_Pcdhb2   | 9.51402 | -0.30811 | 0.760012 | 0.928029 | 18.2024 | 1.1335  | 6.20497 | 15.6806 | 11.1602 | 4.70251 |
| ENSMUSG00000051615 | 13_Rap2a   | 431.655 | -0.48532 | 0.186268 | 0.573401 | 509.667 | 268.64  | 300.941 | 559.548 | 540.84  | 410.294 |
| ENSMUSG00000051627 | 2_Hist1h1  | 5.8241  | 0.25805  | 0.765569 | 0.929992 | 5.05622 | 5.66751 | 8.27329 | 5.77705 | 4.29238 | 5.87814 |
| ENSMUSG00000051638 | 1_Gm985    | 0       | NA       | NA       | NA       | 0       | 0       | 0       | 0       | 0       | 0       |
| ENSMUSG00000051648 | 13_Kctd1f  | 2.1652  | -0.04724 | 0.973285 | 0.993027 | 1.01124 | 2.26701 | 3.10248 | 0.82529 | 3.43391 | 2.35126 |
| ENSMUSG00000051650 | 10_B3gntf  | 199.701 | -0.15884 | 0.806459 | 0.94399  | 41.461  | 301.512 | 223.379 | 289.678 | 149.375 | 192.803 |
| ENSMUSG00000051652 | 4_Lrrc3    | 71.0729 | -1.07277 | 0.013435 | 0.123675 | 31.3486 | 55.5416 | 50.6739 | 123.794 | 68.6782 | 96.4015 |
| ENSMUSG00000051663 | 4_Pcdhb1   | 0.78648 | -1.69846 | 0.478201 | NA       | 0       | 0       | 1.03416 | 1.65058 | 0.85848 | 1.17563 |
| ENSMUSG00000051669 | 5_AU021f   | 12.8421 | 0.00189  | 0.998026 | 0.999063 | 6.06747 | 19.2695 | 13.4441 | 21.4576 | 8.58477 | 8.22939 |
| ENSMUSG00000051671 | 6_Coa6     | 188.47  | 0.42252  | 0.420106 | 0.773473 | 398.43  | 128.086 | 120.997 | 152.679 | 174.271 | 156.359 |
| ENSMUSG00000051674 | 14_Dcun1   | 874.03  | 0.3081   | 0.405652 | 0.764167 | 1429.9  | 734.51  | 736.323 | 705.625 | 807.827 | 829.993 |
| ENSMUSG00000051675 | 13_Trim3f  | 371.303 | -0.38146 | 0.228191 | 0.619358 | 413.599 | 241.436 | 312.317 | 442.357 | 417.22  | 400.889 |
| ENSMUSG00000051678 | 4_Pcdhb6   | 15.0104 | -0.78955 | 0.313097 | 0.694534 | 14.1574 | 3.40051 | 15.5124 | 25.5841 | 23.1789 | 8.22939 |
| ENSMUSG00000051680 | 2_Olfr693  | 0.31544 | 0.16972  | 0.966824 | NA       | 0       | 0       | 1.03416 | 0       | 0.85848 | 0       |
| ENSMUSG00000051682 | 15_Tremf   | 4.57482 | 1.79981  | 0.126863 | 0.484181 | 6.06747 | 11.335  | 4.13665 | 2.47588 | 3.43391 | 0       |
| ENSMUSG00000051695 | 6_Pcbp1    | 3221.22 | 0.50877  | 0.07598  | 0.369092 | 2916.43 | 4437.66 | 3996    | 2739.15 | 2375.41 | 2862.65 |
| ENSMUSG00000051703 | 14_Tmem    | 7.78679 | -0.52312 | 0.630577 | 0.882045 | 0       | 6.80102 | 12.4099 | 11.5541 | 7.72629 | 8.22939 |

|                    |           |         |          |          |          |         |         |         |         |         |         |
|--------------------|-----------|---------|----------|----------|----------|---------|---------|---------|---------|---------|---------|
| ENSMUSG00000051705 | 12_Senp8  | 373.091 | 0.30652  | 0.479603 | 0.809595 | 672.477 | 275.441 | 289.565 | 301.232 | 345.966 | 353.864 |
| ENSMUSG00000051716 | 5_Apon    | 1.02145 | 1.31117  | 0.616238 | NA       | 1.01124 | 3.40051 | 0       | 0       | 1.71695 | 0       |
| ENSMUSG00000051721 | 4_BC0682  | 66.439  | -0.41112 | 0.263723 | 0.652737 | 46.5172 | 54.4081 | 70.323  | 75.9269 | 83.2723 | 68.1864 |
| ENSMUSG00000051726 | 6_Kcnf1   | 7.18755 | -0.81067 | 0.371677 | 0.742583 | 3.03373 | 3.40051 | 9.30745 | 12.3794 | 10.3017 | 4.70251 |
| ENSMUSG00000051727 | 14_Kctd14 | 107.069 | 0.39264  | 0.256274 | 0.647803 | 154.72  | 107.683 | 102.382 | 103.162 | 90.9986 | 83.4696 |
| ENSMUSG00000051728 | 5_493056  | 4.06035 | -1.25642 | 0.308744 | 0.691472 | 4.04498 | 0       | 3.10248 | 9.07822 | 3.43391 | 4.70251 |
| ENSMUSG00000051729 | 11_Gm50   | 0.64191 | 0.29808  | 0.908164 | NA       | 0       | 1.1335  | 1.03416 | 0.82529 | 0.85848 | 0       |
| ENSMUSG00000051730 | 15_Mettl5 | 315.609 | 0.43261  | 0.300839 | 0.683968 | 545.061 | 302.645 | 239.925 | 210.45  | 332.231 | 263.341 |
| ENSMUSG00000051735 | 6_Rini    | 35.387  | -0.0337  | 0.946655 | 0.986649 | 24.2699 | 51.0076 | 29.9907 | 46.2164 | 32.6221 | 28.2151 |
| ENSMUSG00000051736 | 8_Fam22c  | 93.1023 | -0.79832 | 0.103205 | 0.436784 | 111.237 | 43.0731 | 49.6398 | 124.619 | 144.224 | 85.8208 |
| ENSMUSG00000051747 | 14_Ttn    | 2559.94 | -0.3178  | 0.62609  | 0.880242 | 4703.3  | 595.089 | 1538.83 | 3540.5  | 2152.2  | 2829.74 |
| ENSMUSG00000051748 | 2_Wfdc21  | 0.14308 | -0.79206 | 0.84609  | NA       | 0       | 0       | 0       | 0       | 0.85848 | 0       |
| ENSMUSG00000051758 | 6_493054  | 0.19594 | -0.79206 | 0.84609  | NA       | 0       | 0       | 0       | 0       | 0       | 1.17563 |
| ENSMUSG00000051768 | 9_Xrcc1   | 379.648 | 0.07653  | 0.896832 | 0.97156  | 97.0795 | 515.744 | 556.379 | 398.616 | 315.061 | 395.011 |
| ENSMUSG00000051769 | 2_Wfdc15  | 0.37783 | 2.11394  | 0.599927 | NA       | 0       | 2.26701 | 0       | 0       | 0       | 0       |
| ENSMUSG00000051777 | 6_Iqj     | 0.78625 | 0.81424  | 0.772913 | NA       | 3.03373 | 0       | 0       | 0.82529 | 0.85848 | 0       |
| ENSMUSG00000051786 | 14_Tubgc  | 728.271 | 0.35892  | 0.430621 | 0.780048 | 355.958 | 1002.02 | 1097.25 | 646.204 | 586.34  | 681.864 |
| ENSMUSG00000051790 | 15_Nlgn2  | 552.339 | -0.37947 | 0.376303 | 0.745684 | 240.676 | 546.348 | 653.59  | 724.607 | 610.377 | 538.438 |
| ENSMUSG00000051804 | 3_Adam6l  | 1.19506 | 3.79201  | 0.174548 | NA       | 3.03373 | 0       | 4.13665 | 0       | 0       | 0       |
| ENSMUSG00000051811 | 14_Cox6b  | 101.978 | -1.20301 | 0.051735 | 0.294864 | 16.1799 | 66.8767 | 102.382 | 186.516 | 127.055 | 112.86  |
| ENSMUSG00000051817 | 8_Sox12   | 116.394 | -0.72899 | 0.1427   | 0.511466 | 39.4385 | 83.8792 | 139.612 | 161.757 | 150.233 | 123.441 |
| ENSMUSG00000051839 | 6_Gypa    | 2.6483  | 0.64361  | 0.655463 | 0.893662 | 3.03373 | 3.40051 | 3.10248 | 1.65058 | 0       | 4.70251 |
| ENSMUSG00000051851 | 5_Cxx1c   | 60.2783 | -1.25975 | 0.150859 | 0.524273 | 2.02249 | 37.4056 | 67.2205 | 134.523 | 65.2443 | 55.2545 |
| ENSMUSG00000051853 | 9_Arf3    | 4390.07 | 0.25078  | 0.4459   | 0.789732 | 3216.77 | 5789.93 | 5305.25 | 4091.8  | 3538.64 | 4398.02 |
| ENSMUSG00000051855 | 15_Mest   | 656.449 | -0.78407 | 0.027486 | 0.200033 | 670.455 | 340.051 | 436.416 | 866.557 | 915.136 | 710.079 |
| ENSMUSG00000051860 | 13_Samd1  | 35.5667 | -3.0359  | 0.000479 | 0.011332 | 13.1462 | 9.06802 | 1.03416 | 115.541 | 55.801  | 18.81   |
| ENSMUSG00000051864 | 9_Tbc1d2  | 660.573 | 0.26455  | 0.582672 | 0.860399 | 302.362 | 957.81  | 902.823 | 709.751 | 455.851 | 634.839 |
| ENSMUSG00000051879 | 3_Krt71   | 0.47104 | -2.2721  | 0.552052 | NA       | 0       | 0       | 0       | 1.65058 | 0       | 1.17563 |
| ENSMUSG00000051890 | 13_Klhdc1 | 159.403 | -0.00331 | 0.994686 | 0.998043 | 272.025 | 79.3452 | 126.168 | 180.739 | 147.658 | 150.48  |
| ENSMUSG00000051900 | 12_Abca1  | 19.1863 | 1.02419  | 0.09141  | 0.412116 | 38.4273 | 17.0025 | 21.7174 | 9.90351 | 16.3111 | 11.7563 |
| ENSMUSG00000051906 | 14_Cd209  | 16.9455 | -0.50384 | 0.437265 | 0.784976 | 8.08995 | 10.2015 | 23.7857 | 23.9335 | 18.028  | 17.6344 |
| ENSMUSG00000051910 | 13_Sox6   | 338.318 | -0.44575 | 0.152643 | 0.527082 | 358.992 | 234.635 | 265.78  | 450.61  | 364.853 | 355.04  |
| ENSMUSG00000051920 | 6_Rspo2   | 123.7   | -1.44626 | 0.005084 | 0.062837 | 113.259 | 36.2721 | 49.6398 | 197.245 | 222.346 | 123.441 |
| ENSMUSG00000051934 | 4_Spats2  | 281.125 | 0.05705  | 0.819889 | 0.948338 | 273.036 | 278.842 | 308.18  | 279.774 | 272.996 | 273.921 |
| ENSMUSG00000051940 | 2_503141  | 0       | NA       | NA       | NA       | 0       | 0       | 0       | 0       | 0       | 0       |
| ENSMUSG00000051950 | 10_B3glt  | 921.234 | -0.98238 | 0.020365 | 0.164765 | 960.682 | 391.059 | 505.705 | 1299.01 | 1432.8  | 938.151 |
| ENSMUSG00000051951 | 5_Xkr4    | 140.613 | -0.19473 | 0.734484 | 0.920189 | 224.496 | 123.552 | 45.5031 | 184.865 | 157.101 | 108.158 |
| ENSMUSG00000051956 | 4_Rnf133  | 0.19594 | -0.79206 | 0.84609  | NA       | 0       | 0       | 0       | 0       | 0       | 1.17563 |
| ENSMUSG00000051965 | 8_Nanos2  | 0.19594 | -0.79206 | 0.84609  | NA       | 0       | 0       | 0       | 0       | 0       | 1.17563 |
| ENSMUSG00000051969 | 7_Tlr11   | 6.44343 | 2.24995  | 0.015978 | 0.138581 | 11.1237 | 11.335  | 9.30745 | 1.65058 | 1.71695 | 3.52688 |
| ENSMUSG00000051977 | 14_Prdm5  | 290.743 | 0.38897  | 0.302269 | 0.685243 | 430.79  | 276.575 | 281.292 | 170.01  | 291.882 | 293.907 |
| ENSMUSG00000051978 | 8_Erich1  | 208.179 | 0.13491  | 0.654881 | 0.893282 | 230.564 | 214.232 | 208.901 | 235.208 | 157.96  | 202.208 |
| ENSMUSG00000051980 | 13_Casr   | 0.69881 | -2.85985 | 0.385416 | NA       | 0       | 0       | 0       | 2.47588 | 1.71695 | 0       |
| ENSMUSG00000051984 | 12_Sec31  | 14.7011 | -0.34003 | 0.593909 | 0.866475 | 11.1237 | 11.335  | 16.5466 | 23.9335 | 11.1602 | 14.1075 |
| ENSMUSG00000051985 | 12_Igfn1  | 369.632 | -2.0199  | 2.11E-06 | 0.000148 | 92.0232 | 121.285 | 225.447 | 691.595 | 630.122 | 457.319 |
| ENSMUSG00000051989 | 11_Snim1  | 450.425 | -0.47082 | 0.058585 | 0.317521 | 368.093 | 371.789 | 392.981 | 582.656 | 485.039 | 501.993 |
| ENSMUSG00000051998 | 14_Lax1   | 10.3178 | 1.42219  | 0.060283 | 0.323186 | 14.1574 | 22.6701 | 8.27329 | 5.77705 | 5.15086 | 5.87814 |
| ENSMUSG00000052013 | 14_Btla   | 12.1715 | 2.50164  | 0.003013 | 0.043535 | 31.3486 | 21.5366 | 9.30745 | 2.47588 | 6.00934 | 2.35126 |
| ENSMUSG00000052026 | 7_Slc6a7  | 17.7144 | -1.28694 | 0.048116 | 0.282287 | 5.05622 | 13.602  | 12.4099 | 35.4876 | 19.745  | 19.9857 |
| ENSMUSG00000052031 | 7_Tagap1  | 582.869 | 0.1676   | 0.515864 | 0.829903 | 599.668 | 623.427 | 626.702 | 461.338 | 601.792 | 584.287 |
| ENSMUSG00000052033 | 13_Pfdn4  | 616.674 | -0.01775 | 0.960291 | 0.989875 | 868.659 | 493.074 | 476.748 | 542.217 | 705.668 | 613.678 |
| ENSMUSG00000052040 | 10_Klf13  | 630.736 | 0.27632  | 0.353426 | 0.729327 | 530.903 | 818.389 | 723.913 | 640.427 | 528.822 | 541.964 |
| ENSMUSG00000052056 | 14_Zfp211 | 2231.48 | 0.72367  | 0.009204 | 0.094653 | 2486.65 | 3144.34 | 2707.43 | 1421.15 | 1613.08 | 2016.2  |
| ENSMUSG00000052062 | 14_Pard3l | 696.05  | -0.29005 | 0.358222 | 0.732631 | 822.142 | 480.605 | 576.028 | 727.908 | 830.147 | 739.47  |
| ENSMUSG00000052075 | 6_170002  | 0       | NA       | NA       | NA       | 0       | 0       | 0       | 0       | 0       | 0       |
| ENSMUSG00000052085 | 6_Dock8   | 373.095 | 0.29152  | 0.35725  | 0.731867 | 291.238 | 468.137 | 472.612 | 326.816 | 327.08  | 352.688 |
| ENSMUSG00000052087 | 13_Rgs14  | 14.4988 | 2.03408  | 0.024071 | 0.184339 | 4.04498 | 43.0731 | 22.7516 | 5.77705 | 4.29238 | 7.05377 |
| ENSMUSG00000052102 | 14_Gnpda  | 448.269 | -0.65564 | 0.007529 | 0.0821   | 355.958 | 313.98  | 374.366 | 561.199 | 546.85  | 537.262 |
| ENSMUSG00000052105 | 16_Mtcl1  | 416.066 | -0.0009  | 0.998514 | 0.999321 | 183.035 | 491.94  | 572.925 | 515.808 | 304.759 | 427.929 |
| ENSMUSG00000052117 | 5_D63003  | 53.2091 | -1.4835  | 0.00032  | 0.008299 | 27.3036 | 23.8036 | 33.0932 | 94.0833 | 79.8384 | 61.1326 |
| ENSMUSG00000052131 | 7_Akr1b7  | 3477.64 | 0.09652  | 0.705021 | 0.908152 | 3076.21 | 3967.26 | 3738.49 | 3071.74 | 3730.94 | 3281.18 |
| ENSMUSG00000052133 | 16_Sema4  | 85.2052 | -1.21351 | 0.03448  | 0.230241 | 18.2024 | 53.2746 | 82.7329 | 159.281 | 110.744 | 86.9965 |
| ENSMUSG00000052135 | 8_Foxo6   | 9.27866 | -1.33653 | 0.100807 | 0.432087 | 3.03373 | 4.53401 | 8.27329 | 19.807  | 9.44325 | 10.5807 |
| ENSMUSG00000052137 | 11_Rbm1   | 479.92  | 0.36526  | 0.424347 | 0.776047 | 914.165 | 370.655 | 336.103 | 375.508 | 470.445 | 412.645 |
| ENSMUSG00000052139 | 18_Bre    | 1597.04 | 0.3546   | 0.177174 | 0.561638 | 1726.19 | 1780.73 | 1869.76 | 1136.43 | 1579.6  | 1489.52 |
| ENSMUSG00000052142 | 15_Rasal1 | 26.1261 | 1.39084  | 0.048128 | 0.282287 | 14.1574 | 71.4107 | 27.9224 | 16.5058 | 10.3017 | 16.4588 |
| ENSMUSG00000052143 | 7_Gm986   | 146.451 | 0.2178   | 0.665004 | 0.89688  | 63.7084 | 214.232 | 194.422 | 122.969 | 117.611 | 165.764 |
| ENSMUSG00000052144 | 8_Ppp4r2  | 3091.29 | 0.51906  | 0.224584 | 0.614169 | 5897.58 | 2710.21 | 2316.52 | 2216.74 | 2908.52 | 2498.21 |
| ENSMUSG00000052146 | 15_Rps10  | 8266.33 | -0.36567 | 0.481544 | 0.810876 | 2369.35 | 9323.06 | 9980.69 | 10085.9 | 8900.69 | 8938.3  |
| ENSMUSG00000052151 | 11_Ppap2  | 2166.82 | 0.33134  | 0.511812 | 0.827625 | 869.67  | 3321.16 | 3052.84 | 1994.73 | 1599.34 | 2163.16 |
| ENSMUSG00000052155 | 5_Acvr2a  | 1078.2  | 0.62219  | 0.18916  | 0.577749 | 2280.36 | 787.785 | 853.183 | 739.462 | 966.645 | 841.75  |
| ENSMUSG00000052160 | 6_Pld4    | 186.048 | 1.35575  | 0.013287 | 0.123205 | 99.1019 | 443.2   | 260.609 | 131.221 | 89.2816 | 92.8746 |
| ENSMUSG00000052180 | 14_Serpin | 20.4252 | 0.14002  | 0.846066 | 0.955392 | 39.4385 | 13.602  | 11.3758 | 26.4094 | 22.3204 | 9.40502 |
| ENSMUSG00000052212 | 6_Cd177   | 8.06181 | 1.02185  | 0.235182 | 0.627128 | 4.04498 | 17.0025 | 11.3758 | 5.77705 | 4.29238 | 5.87814 |
| ENSMUSG00000052214 | 9_Opa3    | 954.352 | 0.12584  | 0.675945 | 0.900949 | 744.276 | 1185.64 | 1057.95 | 952.387 | 811.261 | 974.595 |

|                    |            |         |          |          |          |         |         |         |         |         |         |
|--------------------|------------|---------|----------|----------|----------|---------|---------|---------|---------|---------|---------|
| ENSMUSG00000052221 | 7_Ppp1r3i  | 21.3389 | -0.23397 | 0.684461 | 0.903547 | 24.2699 | 17.0025 | 17.5807 | 14.8553 | 34.3391 | 19.9857 |
| ENSMUSG00000052229 | 5_Gpr17    | 8.21131 | -0.07491 | 0.921683 | 0.977953 | 9.1012  | 5.66751 | 9.30745 | 10.7288 | 8.58477 | 5.87814 |
| ENSMUSG00000052234 | 2_Epx      | 0.79389 | 0.8241   | 0.732942 | NA       | 1.01124 | 0       | 2.06832 | 0.82529 | 0.85848 | 0       |
| ENSMUSG00000052236 | 7_Gm987    | 1.27407 | -2.51627 | 0.233254 | NA       | 0       | 1.1335  | 0       | 3.30117 | 0.85848 | 2.35126 |
| ENSMUSG00000052253 | 5_Zfp622   | 522.455 | 0.0666   | 0.781191 | 0.935516 | 536.971 | 570.152 | 496.398 | 483.621 | 527.963 | 519.627 |
| ENSMUSG00000052270 | 7_Fpr2     | 62.4549 | 4.40929  | 2.36E-09 | 3.69E-07 | 171.912 | 145.088 | 41.3665 | 6.60234 | 8.58477 | 1.17563 |
| ENSMUSG00000052271 | 7_Bhlha1f  | 10.9803 | -1.32592 | 0.064492 | 0.336509 | 9.1012  | 3.40051 | 6.20497 | 18.1564 | 13.7356 | 15.2832 |
| ENSMUSG00000052273 | 2_Dnah3    | 4.47402 | 1.67902  | 0.148739 | 0.522232 | 4.04498 | 11.335  | 5.17081 | 0.82529 | 4.29238 | 1.17563 |
| ENSMUSG00000052276 | 8_Ostn     | 6.26645 | 0.46122  | 0.634025 | 0.883719 | 13.1462 | 3.40051 | 5.17081 | 7.42763 | 2.57543 | 5.87814 |
| ENSMUSG00000052293 | 14_Taf9    | 33.8516 | -0.68745 | 0.287297 | 0.672979 | 43.4835 | 10.2015 | 23.7857 | 23.9335 | 42.9238 | 58.7814 |
| ENSMUSG00000052295 | 4_803042   | 9.97931 | 0.10228  | 0.897054 | 0.97156  | 17.1912 | 4.53401 | 9.30745 | 13.2047 | 8.58477 | 7.05377 |
| ENSMUSG00000052296 | 7_Ppp6r1   | 1977.68 | 0.35842  | 0.461152 | 0.799907 | 859.558 | 3033.25 | 2773.62 | 1972.45 | 1504.91 | 1722.29 |
| ENSMUSG00000052298 | 12_Cdc42   | 1022.84 | 0.01553  | 0.948412 | 0.986924 | 1134.62 | 1039.42 | 911.096 | 1033.27 | 1027.6  | 991.054 |
| ENSMUSG00000052299 | 8_Ltn1     | 1521.47 | 0.30807  | 0.401188 | 0.76028  | 2467.44 | 1309.2  | 1273.05 | 1190.07 | 1487.74 | 1401.35 |
| ENSMUSG00000052301 | 14_Doc2a   | 1.61177 | -2.94048 | 0.162506 | NA       | 0       | 0       | 1.03416 | 6.60234 | 0.85848 | 1.17563 |
| ENSMUSG00000052302 | 5_Tbc1d3   | 678.137 | 0.25118  | 0.347251 | 0.724592 | 712.927 | 632.495 | 865.593 | 585.958 | 668.754 | 603.097 |
| ENSMUSG00000052305 | 5_Hbb-bs   | 297.74  | -1.96398 | 0.00056  | 0.012656 | 55.6184 | 115.617 | 193.388 | 792.281 | 326.221 | 303.312 |
| ENSMUSG00000052310 | 9_Slc39a1  | 3142.69 | 0.36658  | 0.122409 | 0.475964 | 3270.36 | 4016    | 3333.1  | 2642.59 | 2751.42 | 2842.67 |
| ENSMUSG00000052316 | 9_Lrrc15   | 19.2652 | -0.64626 | 0.283682 | 0.670589 | 10.1124 | 23.8036 | 11.3758 | 29.7105 | 20.6034 | 19.9857 |
| ENSMUSG00000052331 | 14_Ankrd-  | 2252.21 | -0.25409 | 0.486024 | 0.813544 | 2992.27 | 1464.49 | 1706.37 | 2531.17 | 2656.99 | 2161.98 |
| ENSMUSG00000052336 | 6_Cx3cr1   | 171.694 | -0.84218 | 0.006415 | 0.073947 | 129.439 | 100.882 | 138.578 | 251.714 | 212.044 | 197.505 |
| ENSMUSG00000052337 | 15_Immt    | 2560.1  | -0.06287 | 0.805776 | 0.94351  | 2867.89 | 2413.23 | 2231.72 | 2342.18 | 2873.32 | 2632.23 |
| ENSMUSG00000052353 | 13_Cemip   | 777.546 | -0.65094 | 0.008026 | 0.086053 | 523.825 | 647.23  | 644.283 | 951.562 | 964.928 | 933.448 |
| ENSMUSG00000052363 | 7_Zdhhc1   | 0.47104 | -2.2721  | 0.552052 | NA       | 0       | 0       | 0       | 1.65058 | 0       | 1.17563 |
| ENSMUSG00000052364 | 4_B63001   | 121.345 | 0.26877  | 0.586282 | 0.862387 | 224.496 | 77.0782 | 96.177  | 93.258  | 134.781 | 102.28  |
| ENSMUSG00000052368 | 2_Gm987-   | 4.94266 | -1.07281 | 0.310774 | 0.69305  | 4.04498 | 2.26701 | 3.10248 | 2.47588 | 6.00934 | 11.7563 |
| ENSMUSG00000052369 | 7_Tmem1    | 950.867 | -0.46235 | 0.120063 | 0.471067 | 608.769 | 820.656 | 970.044 | 1199.98 | 1001.84 | 1103.91 |
| ENSMUSG00000052372 | 10_Il1rapl | 31.5693 | -1.14442 | 0.073511 | 0.362727 | 38.4273 | 9.06802 | 11.3758 | 45.3911 | 46.3578 | 38.7957 |
| ENSMUSG00000052373 | 14_Mpp3    | 32.7723 | -1.3262  | 0.019364 | 0.159577 | 9.1012  | 18.136  | 28.9565 | 61.0716 | 42.9238 | 36.4445 |
| ENSMUSG00000052374 | 14_Actn2   | 222.108 | -0.78545 | 0.112194 | 0.454489 | 158.765 | 112.217 | 218.208 | 415.947 | 134.781 | 292.731 |
| ENSMUSG00000052384 | 13_Nrros   | 133.221 | 1.36219  | 0.003917 | 0.052444 | 101.124 | 294.711 | 179.944 | 91.6075 | 66.1027 | 65.8352 |
| ENSMUSG00000052387 | 15_Trpm3   | 4513.48 | -0.34448 | 0.149999 | 0.523171 | 4442.4  | 3452.65 | 4036.33 | 5151.47 | 5029.82 | 4968.2  |
| ENSMUSG00000052392 | 4_Acot4    | 18.6885 | -0.01384 | 0.979137 | 0.993796 | 20.2249 | 14.7355 | 20.6832 | 18.1564 | 17.1695 | 21.1613 |
| ENSMUSG00000052395 | 15_Rft1    | 591.293 | -0.07058 | 0.758466 | 0.927759 | 570.342 | 578.086 | 582.233 | 602.463 | 632.698 | 581.936 |
| ENSMUSG00000052396 | 7_Mogat2   | 0.37783 | 2.11394  | 0.599927 | NA       | 0       | 2.26701 | 0       | 0       | 0       | 0       |
| ENSMUSG00000052397 | 8_Ezr      | 8990.76 | 0.45778  | 0.136277 | 0.501691 | 7880.63 | 11624.1 | 11710.8 | 7032.32 | 6578.51 | 9118.17 |
| ENSMUSG00000052406 | 14_Rexo4   | 802.782 | 0.08271  | 0.791182 | 0.937373 | 589.555 | 996.349 | 891.447 | 721.306 | 778.639 | 839.398 |
| ENSMUSG00000052407 | 16_Ccdc1   | 37.1919 | 0.09536  | 0.862737 | 0.961065 | 63.7084 | 19.2695 | 32.059  | 34.6623 | 33.4806 | 39.9713 |
| ENSMUSG00000052414 | 9_Gm280-   | 5.66751 | 6.03228  | 0.123369 | 0.478085 | 0       | 34.0051 | 0       | 0       | 0       | 0       |
| ENSMUSG00000052415 | 5_Tchh     | 50.511  | -0.03576 | 0.927663 | 0.980746 | 58.6522 | 47.6071 | 43.4348 | 61.0716 | 42.9238 | 49.3764 |
| ENSMUSG00000052419 | 7_261000   | 1423.07 | 0.03292  | 0.933771 | 0.98311  | 2231.82 | 1050.76 | 1035.2  | 1286.63 | 1553.84 | 1380.19 |
| ENSMUSG00000052423 | 14_B4galt  | 915.765 | 0.90998  | 0.037405 | 0.242169 | 553.151 | 1602.77 | 1430.25 | 642.903 | 609.519 | 656     |
| ENSMUSG00000052428 | 10_Tmco1   | 1876.2  | 0.16346  | 0.699979 | 0.905844 | 3234.97 | 1314.86 | 1397.15 | 1695.98 | 1908.39 | 1705.84 |
| ENSMUSG00000052429 | 17_Prmt1   | 171.35  | -0.13939 | 0.800807 | 0.941902 | 52.5847 | 206.298 | 230.618 | 196.42  | 203.459 | 138.724 |
| ENSMUSG00000052430 | 15_Bmpr1   | 33.6988 | -1.42462 | 0.038874 | 0.247704 | 38.4273 | 9.06802 | 7.23913 | 42.9152 | 57.518  | 47.0251 |
| ENSMUSG00000052435 | 6_Cebpe    | 0.36128 | 2.05714  | 0.610196 | NA       | 0       | 1.1335  | 1.03416 | 0       | 0       | 0       |
| ENSMUSG00000052446 | 16_Zfp96-  | 404.493 | 0.15346  | 0.743721 | 0.923278 | 723.04  | 289.043 | 265.78  | 323.515 | 467.011 | 358.566 |
| ENSMUSG00000052456 | 8_Asna1    | 1124.86 | -0.07338 | 0.907994 | 0.974731 | 215.395 | 1498.49 | 1575.03 | 1373.29 | 957.202 | 1129.78 |
| ENSMUSG00000052459 | 13_Atp6v-  | 6010.61 | 0.19456  | 0.576257 | 0.856895 | 9198.28 | 5079.23 | 4968.11 | 5131.67 | 5936.37 | 5750    |
| ENSMUSG00000052468 | 7_Pmp2     | 4.00688 | -0.6035  | 0.580717 | 0.859611 | 2.02249 | 2.26701 | 5.17081 | 4.95175 | 2.57543 | 7.05377 |
| ENSMUSG00000052469 | 8_Tcp10c   | 0.33708 | 1.97061  | 0.625968 | NA       | 2.02249 | 0       | 0       | 0       | 0       | 0       |
| ENSMUSG00000052477 | 15_C130C   | 156.151 | 2.45748  | 4.10E-10 | 7.25E-08 | 254.834 | 344.585 | 193.388 | 38.7887 | 61.8103 | 43.4982 |
| ENSMUSG00000052479 | 5_A33000   | 0.47508 | -0.61882 | 0.873279 | NA       | 0       | 1.1335  | 0       | 0       | 1.71695 | 0       |
| ENSMUSG00000052485 | 7_Tmem1    | 52.5671 | 0.84011  | 0.094603 | 0.41805  | 40.4498 | 100.882 | 61.0155 | 26.4094 | 45.4993 | 41.147  |
| ENSMUSG00000052488 | 6_Chrip    | 661.293 | 0.53714  | 0.333492 | 0.712065 | 230.564 | 1115.37 | 1003.14 | 609.066 | 442.974 | 566.653 |
| ENSMUSG00000052496 | 4_Pkdrej   | 16.2774 | -2.24959 | 0.000314 | 0.008172 | 5.05622 | 6.80102 | 5.17081 | 25.5841 | 29.1882 | 25.8638 |
| ENSMUSG00000052504 | 6_Epha3    | 61.3411 | -0.11921 | 0.821106 | 0.948338 | 102.136 | 32.8716 | 41.3665 | 66.0234 | 70.3951 | 55.2545 |
| ENSMUSG00000052512 | 15_Nav2    | 278.791 | 0.16309  | 0.672735 | 0.90042  | 178.99  | 338.917 | 366.093 | 311.135 | 260.119 | 217.491 |
| ENSMUSG00000052516 | 17_Robo2   | 357.166 | -1.35588 | 0.00088  | 0.017806 | 293.261 | 123.552 | 185.115 | 567.801 | 570.029 | 403.24  |
| ENSMUSG00000052525 | 14_Spdy4   | 43.7481 | 0.18498  | 0.754089 | 0.926508 | 80.8995 | 29.4711 | 28.9565 | 24.7588 | 45.4993 | 52.9033 |
| ENSMUSG00000052533 | 14_Nup18   | 1205.77 | 0.55369  | 0.21843  | 0.609256 | 638.095 | 1886.15 | 1778.76 | 956.514 | 878.222 | 1096.86 |
| ENSMUSG00000052534 | 15_Pbx1    | 4029.18 | 0.22034  | 0.491548 | 0.815538 | 5828.81 | 3485.52 | 3694.03 | 3312.72 | 3736.95 | 4117.05 |
| ENSMUSG00000052539 | 15_Magi3   | 2537.25 | 0.3522   | 0.350374 | 0.727131 | 4258.35 | 2023.3  | 2254.47 | 2025.27 | 2480.14 | 2181.97 |
| ENSMUSG00000052544 | 9_St6galn  | 49.1017 | -1.33838 | 0.002912 | 0.042534 | 36.4048 | 17.0025 | 29.9907 | 73.451  | 78.9799 | 58.7814 |
| ENSMUSG00000052549 | 4_Arl13a   | 1.15118 | -0.24547 | 0.910351 | NA       | 2.02249 | 1.1335  | 0       | 0       | 2.57543 | 1.17563 |
| ENSMUSG00000052551 | 15_Adar3a  | 7.87635 | -0.74683 | 0.420056 | 0.773473 | 10.1124 | 4.53401 | 3.10248 | 15.6806 | 10.3017 | 3.52688 |
| ENSMUSG00000052557 | 11_Gan     | 2194.09 | 0.33554  | 0.18691  | 0.573937 | 2155.97 | 2424.56 | 2763.28 | 1800.79 | 1850.88 | 2169.03 |
| ENSMUSG00000052560 | 15_Cpne8   | 2435.2  | 0.70488  | 0.071562 | 0.357046 | 4537.45 | 2345.22 | 2172.77 | 1499.56 | 2159.93 | 1896.29 |
| ENSMUSG00000052562 | 15_Slc22e  | 1.14907 | -3.54924 | 0.125921 | NA       | 0       | 0       | 0       | 1.65058 | 1.71695 | 3.52688 |
| ENSMUSG00000052563 | 13_D930C   | 778.007 | 0.32365  | 0.316069 | 0.696936 | 613.825 | 948.742 | 1032.09 | 589.259 | 752.884 | 731.241 |
| ENSMUSG00000052565 | 6_Hist1h1  | 1.9945  | 0.15857  | 0.914743 | 0.976108 | 1.01124 | 1.1335  | 4.13665 | 2.47588 | 0.85848 | 2.35126 |
| ENSMUSG00000052566 | 7_Hook2    | 902.325 | 0.86759  | 0.021938 | 0.173922 | 691.691 | 1293.33 | 1511.94 | 581.006 | 590.632 | 745.348 |
| ENSMUSG00000052572 | 15_Dlg2    | 1470.44 | 0.00978  | 0.980004 | 0.993796 | 2252.04 | 1028.09 | 1145.85 | 1280.85 | 1571.01 | 1544.77 |
| ENSMUSG00000052581 | 13_Lrrtm4  | 15.7205 | -2.04504 | 0.036184 | 0.238089 | 15.1687 | 0       | 3.10248 | 30.5358 | 23.1789 | 22.3369 |
| ENSMUSG00000052584 | 9_Serp2    | 7.68066 | -4.39639 | 0.002047 | 0.032985 | 0       | 0       | 2.06832 | 28.0599 | 7.72629 | 8.22939 |

|                    |           |         |          |          |          |         |         |         |         |         |         |
|--------------------|-----------|---------|----------|----------|----------|---------|---------|---------|---------|---------|---------|
| ENSMUSG00000052593 | 15_Adam   | 2728.37 | 0.38849  | 0.234166 | 0.626056 | 4114.75 | 2805.42 | 2359.96 | 2018.67 | 2419.19 | 2652.22 |
| ENSMUSG00000052595 | 6_A1cf    | 0       | NA       | NA       | NA       | 0       | 0       | 0       | 0       | 0       | 0       |
| ENSMUSG00000052605 | 11_Isoc2b | 49.1086 | -0.90808 | 0.118756 | 0.4687   | 13.1462 | 51.0076 | 38.264  | 59.421  | 44.6408 | 88.1721 |
| ENSMUSG00000052609 | 8_Plekhg  | 1740.44 | 0.13789  | 0.788358 | 0.93723  | 639.106 | 2253.4  | 2578.16 | 1820.59 | 1353.82 | 1797.53 |
| ENSMUSG00000052613 | 16_Pcdh1  | 53.8632 | -1.15255 | 0.174653 | 0.55808  | 74.8321 | 19.2695 | 6.20497 | 127.92  | 64.3858 | 30.5663 |
| ENSMUSG00000052616 | 10_Ccdc7  | 42.3895 | 0.3281   | 0.602584 | 0.870033 | 92.0232 | 21.5366 | 27.9224 | 34.6623 | 42.9238 | 35.2688 |
| ENSMUSG00000052631 | 14_Sh2d6  | 1.16237 | 1.60627  | 0.452004 | NA       | 2.02249 | 2.26701 | 1.03416 | 1.65058 | 0       | 0       |
| ENSMUSG00000052632 | 15_Asap2  | 829.5   | 0.32563  | 0.215857 | 0.607357 | 993.042 | 981.614 | 793.202 | 643.728 | 768.337 | 797.076 |
| ENSMUSG00000052656 | 12_Rnf10  | 1894.77 | 0.41549  | 0.377443 | 0.746447 | 3774.98 | 1322.8  | 1399.22 | 1391.44 | 1768.46 | 1711.71 |
| ENSMUSG00000052658 | 4_583045  | 7.39652 | -0.85274 | 0.309506 | 0.692058 | 4.04498 | 3.40051 | 8.27329 | 6.60234 | 10.3017 | 11.7563 |
| ENSMUSG00000052673 | 1_Gm988   | 0.55722 | 1.09192  | 0.723275 | NA       | 0       | 1.1335  | 1.03416 | 0       | 0       | 1.17563 |
| ENSMUSG00000052675 | 10_Zfp11  | 120.349 | -0.44605 | 0.125602 | 0.482199 | 103.147 | 106.549 | 96.177  | 145.251 | 141.649 | 129.319 |
| ENSMUSG00000052676 | 16_Zmat1  | 215.361 | -0.34719 | 0.519809 | 0.831665 | 353.936 | 89.5467 | 125.134 | 246.762 | 268.703 | 208.086 |
| ENSMUSG00000052681 | 7_Rap1b   | 4732.17 | 0.71034  | 0.12797  | 0.486371 | 10103.3 | 4209.83 | 3309.32 | 3188.1  | 4137.86 | 3444.59 |
| ENSMUSG00000052684 | 4_Jun     | 1189.29 | 0.95854  | 0.003715 | 0.050634 | 1127.54 | 2032.37 | 1551.24 | 797.232 | 705.668 | 921.692 |
| ENSMUSG00000052688 | 12_Rab7b  | 1841.83 | 0.37865  | 0.13984  | 0.507212 | 1976.98 | 2204.66 | 2064.19 | 1408.77 | 1508.34 | 1888.06 |
| ENSMUSG00000052698 | 14_Tln2   | 697.734 | -0.40973 | 0.276189 | 0.662803 | 377.194 | 625.694 | 795.27  | 970.544 | 687.64  | 730.065 |
| ENSMUSG00000052707 | 8_Tnrc6a  | 2924.86 | 0.00234  | 0.993108 | 0.997864 | 3540.37 | 2609.32 | 2631.94 | 2706.13 | 3239.89 | 2821.51 |
| ENSMUSG00000052712 | 16_BC004  | 1565.81 | -0.21172 | 0.357894 | 0.732226 | 1324.73 | 1566.5  | 1462.3  | 1743.84 | 1623.38 | 1674.09 |
| ENSMUSG00000052713 | 8_Zfp608  | 874.121 | 0.19629  | 0.449822 | 0.792824 | 1041.58 | 839.926 | 918.335 | 753.492 | 761.469 | 929.922 |
| ENSMUSG00000052726 | 15_Kcnt2  | 21.6724 | -0.35274 | 0.581436 | 0.860015 | 34.3823 | 11.335  | 11.3758 | 28.0599 | 24.8958 | 19.9857 |
| ENSMUSG00000052727 | 5_Map1b   | 1453.48 | -1.07764 | 0.004343 | 0.056318 | 1354.06 | 656.298 | 793.202 | 2078.09 | 2260.37 | 1578.87 |
| ENSMUSG00000052730 | 6_Gm511   | 0.19594 | -0.79206 | 0.84609  | NA       | 0       | 0       | 0       | 0       | 0       | 1.17563 |
| ENSMUSG00000052736 | 15_Klrc2  | 5.46848 | 2.67951  | 0.048577 | 0.283865 | 13.1462 | 10.2015 | 5.17081 | 0       | 4.29238 | 0       |
| ENSMUSG00000052738 | 14_Suc1g1 | 1510.39 | -0.04307 | 0.854074 | 0.958493 | 1356.08 | 1639.05 | 1468.51 | 1467.37 | 1583.03 | 1548.3  |
| ENSMUSG00000052748 | 14_Swt1   | 545.135 | 0.50463  | 0.280238 | 0.667117 | 1088.1  | 425.064 | 405.391 | 410.17  | 549.425 | 392.66  |
| ENSMUSG00000052749 | 8_Trim30l | 39.8841 | 3.56715  | 1.65E-08 | 2.06E-06 | 62.6971 | 115.617 | 42.4006 | 4.12646 | 8.58477 | 5.87814 |
| ENSMUSG00000052751 | 16_Repin  | 201.11  | -0.24624 | 0.414617 | 0.769167 | 165.844 | 172.292 | 214.071 | 255.841 | 203.459 | 195.154 |
| ENSMUSG00000052752 | 15_Traf7  | 1743.03 | 0.16247  | 0.752587 | 0.925804 | 627.983 | 2556.05 | 2339.27 | 1762    | 1416.49 | 1756.39 |
| ENSMUSG00000052759 | 7_Gpr25   | 0.34472 | 1.99863  | 0.620844 | NA       | 0       | 0       | 2.06832 | 0       | 0       | 0       |
| ENSMUSG00000052760 | 15_A6300  | 36.9107 | 0.88066  | 0.068156 | 0.347044 | 62.6971 | 51.0076 | 29.9907 | 30.5358 | 24.8958 | 22.3369 |
| ENSMUSG00000052763 | 7_Zfp212  | 409.486 | 0.17707  | 0.60831  | 0.872658 | 281.126 | 482.872 | 539.832 | 394.49  | 368.287 | 390.308 |
| ENSMUSG00000052769 | 7_Gm988   | 0.59054 | -1.17309 | 0.694727 | NA       | 0       | 0       | 1.03416 | 1.65058 | 0.85848 | 0       |
| ENSMUSG00000052776 | 10_Oas1a  | 3075.39 | 1.97503  | 1.54E-05 | 0.000759 | 2210.58 | 7362.1  | 5137.71 | 1118.27 | 1238.78 | 1384.89 |
| ENSMUSG00000052783 | 16_Grk4   | 47.9924 | -0.40504 | 0.464652 | 0.801934 | 72.8096 | 28.3376 | 22.7516 | 62.7222 | 56.6595 | 44.6739 |
| ENSMUSG00000052794 | 13_17000  | 230.556 | -0.02198 | 0.948766 | 0.986962 | 160.788 | 265.24  | 260.609 | 269.871 | 203.459 | 223.369 |
| ENSMUSG00000052798 | 12_Nup10  | 568.351 | 0.2645   | 0.325599 | 0.706576 | 549.106 | 723.175 | 588.438 | 469.591 | 510.794 | 569.004 |
| ENSMUSG00000052812 | 4_Atd2b   | 599.947 | 0.4054   | 0.275056 | 0.661359 | 978.885 | 572.419 | 499.5   | 420.074 | 578.613 | 550.194 |
| ENSMUSG00000052819 | 5_Best2   | 169.28  | -0.94207 | 0.068928 | 0.349081 | 55.6184 | 100.882 | 191.32  | 308.659 | 182.856 | 176.344 |
| ENSMUSG00000052821 | 3_Cysl1r1 | 116.077 | 0.08229  | 0.887512 | 0.969456 | 229.552 | 74.8112 | 53.7764 | 103.162 | 139.932 | 95.2259 |
| ENSMUSG00000052833 | 8_Sae1    | 2353.6  | 0.22767  | 0.404601 | 0.76316  | 2262.15 | 2811.09 | 2543    | 1811.52 | 2133.32 | 2560.52 |
| ENSMUSG00000052837 | 5_Junb    | 917.851 | 1.31147  | 0.056711 | 0.311361 | 253.822 | 1845.34 | 1826.33 | 739.462 | 256.685 | 585.463 |
| ENSMUSG00000052848 | 7_C13002  | 1.42091 | 0.61506  | 0.761098 | NA       | 2.02249 | 1.1335  | 2.06832 | 3.30117 | 0       | 0       |
| ENSMUSG00000052850 | 5_Tas2r1  | 0.14308 | -0.79206 | 0.84609  | NA       | 0       | 0       | 0       | 0       | 0.85848 | 0       |
| ENSMUSG00000052852 | 7_Reep1   | 277.035 | -1.52906 | 0.000448 | 0.010751 | 224.496 | 87.2797 | 115.826 | 476.194 | 429.238 | 329.176 |
| ENSMUSG00000052854 | 15_Nrk    | 66.3742 | -0.52163 | 0.373231 | 0.744082 | 103.147 | 27.2041 | 33.0932 | 73.451  | 97.8664 | 63.4839 |
| ENSMUSG00000052861 | 13_Dnah6  | 9.515   | -1.0909  | 0.157489 | 0.535192 | 5.05622 | 10.2015 | 3.10248 | 12.3794 | 14.5941 | 11.7563 |
| ENSMUSG00000052889 | 11_Prkcbl | 1047.38 | -0.77849 | 0.026974 | 0.197824 | 1041.58 | 502.142 | 770.45  | 1328.72 | 1419.92 | 1221.48 |
| ENSMUSG00000052906 | 6_Ubxn8   | 445.034 | 0.13998  | 0.712008 | 0.910719 | 693.714 | 361.587 | 344.376 | 387.887 | 465.295 | 417.348 |
| ENSMUSG00000052909 | 7_Gm989   | 17.6341 | 1.5253   | 0.034759 | 0.231698 | 47.5285 | 12.4685 | 18.6149 | 11.5541 | 8.58477 | 7.05377 |
| ENSMUSG00000052911 | 9_Lamb2   | 1187    | -0.25376 | 0.696159 | 0.905638 | 218.429 | 1123.3  | 1906.99 | 1630.78 | 1019.87 | 1222.65 |
| ENSMUSG00000052914 | 4_Cyp2j6  | 920.612 | 0.01291  | 0.973335 | 0.993027 | 1402.6  | 649.497 | 721.845 | 821.166 | 978.664 | 949.907 |
| ENSMUSG00000052915 | 14_Msl1   | 2577.62 | 0.18145  | 0.481398 | 0.810809 | 3202.61 | 2571.92 | 2443.72 | 2179.6  | 2572    | 2495.86 |
| ENSMUSG00000052917 | 14_Senp7  | 685.278 | 0.22778  | 0.608567 | 0.872658 | 1232.71 | 512.343 | 472.612 | 570.277 | 706.527 | 617.205 |
| ENSMUSG00000052920 | 14_Prkg1  | 468.836 | -0.53495 | 0.256997 | 0.648401 | 663.376 | 213.099 | 271.984 | 529.012 | 579.472 | 556.072 |
| ENSMUSG00000052921 | 13_Arhgef | 89.2694 | -0.60975 | 0.12991  | 0.490076 | 50.5622 | 77.0782 | 84.8012 | 134.523 | 109.885 | 78.7671 |
| ENSMUSG00000052926 | 15_Rnase  | 430.378 | 0.0453   | 0.916195 | 0.976756 | 212.361 | 528.212 | 570.857 | 434.929 | 378.588 | 457.319 |
| ENSMUSG00000052928 | 8_Ctlf    | 333.693 | 0.12159  | 0.770627 | 0.932375 | 197.193 | 429.598 | 416.767 | 414.297 | 260.977 | 283.326 |
| ENSMUSG00000052934 | 13_Fbxo3  | 244.037 | -0.1399  | 0.796652 | 0.939872 | 79.8883 | 266.373 | 350.581 | 330.117 | 219.77  | 217.491 |
| ENSMUSG00000052942 | 13_Glis3  | 302.897 | 0.75553  | 0.006712 | 0.075908 | 383.262 | 426.197 | 331.966 | 201.371 | 252.392 | 222.194 |
| ENSMUSG00000052949 | 14_Rnf15  | 109.382 | -1.08197 | 0.029944 | 0.211752 | 41.461  | 80.4787 | 88.9379 | 231.082 | 116.753 | 97.5771 |
| ENSMUSG00000052957 | 7_Gas1    | 2525.31 | 0.00819  | 0.985091 | 0.995165 | 4235.09 | 1582.37 | 1779.79 | 2440.39 | 2573.71 | 2540.53 |
| ENSMUSG00000052962 | 3_Mrpl35  | 605.547 | 0.12458  | 0.703516 | 0.907691 | 832.254 | 608.691 | 453.997 | 546.344 | 611.236 | 580.76  |
| ENSMUSG00000052974 | 8_Cyp2f2  | 3260.74 | 0.13801  | 0.76426  | 0.929808 | 1979.01 | 2669.4  | 5601.02 | 2982.61 | 2369.4  | 3963.04 |
| ENSMUSG00000052981 | 5_Ube2ql  | 16.6024 | -1.04993 | 0.109279 | 0.449508 | 14.1574 | 9.06802 | 9.30745 | 35.4876 | 16.3111 | 15.2832 |
| ENSMUSG00000052997 | 15_Uba2   | 2951.63 | 0.29265  | 0.246254 | 0.637806 | 3613.18 | 3253.15 | 2883.24 | 2324.85 | 2779.75 | 2855.6  |
| ENSMUSG00000053004 | 9_Hrh1    | 9.39153 | 0.14987  | 0.834711 | 0.952109 | 11.1237 | 11.335  | 7.23913 | 11.5541 | 6.86782 | 8.22939 |
| ENSMUSG00000053007 | 8_Creb5   | 207.55  | 0.84079  | 0.0334   | 0.225919 | 396.408 | 190.428 | 212.003 | 132.047 | 154.526 | 159.885 |
| ENSMUSG00000053012 | 17_Krccl  | 4133.94 | 0.56037  | 0.270445 | 0.657357 | 9037.49 | 2986.78 | 2756.04 | 2702.83 | 3685.44 | 3635.04 |
| ENSMUSG00000053024 | 14_Cntn2  | 7.77472 | -1.09776 | 0.250687 | 0.642255 | 1.01124 | 4.53401 | 9.30745 | 14.03   | 6.00934 | 11.7563 |
| ENSMUSG00000053025 | 13_Sv2b   | 583.002 | -1.97883 | 0.000191 | 0.005553 | 402.475 | 120.151 | 185.115 | 1304.79 | 930.589 | 554.896 |
| ENSMUSG00000053030 | 11_Spink2 | 5.26027 | 1.6514   | 0.109322 | 0.449508 | 12.1349 | 3.40051 | 8.27329 | 1.65058 | 2.57543 | 3.52688 |
| ENSMUSG00000053040 | 13_Aph1c  | 324.599 | -1.33318 | 0.001404 | 0.025091 | 277.081 | 131.486 | 144.783 | 553.771 | 503.068 | 337.405 |
| ENSMUSG00000053044 | 8_Cd8b1   | 4.32712 | 1.89212  | 0.105278 | 0.440813 | 5.05622 | 11.335  | 4.13665 | 0.82529 | 3.43391 | 1.17563 |
| ENSMUSG00000053046 | 14_Brsk2  | 23.1552 | -1.94482 | 0.014306 | 0.128717 | 5.05622 | 11.335  | 12.4099 | 75.1016 | 19.745  | 15.2832 |

|                    |            |         |          |          |          |         |         |         |         |         |         |
|--------------------|------------|---------|----------|----------|----------|---------|---------|---------|---------|---------|---------|
| ENSMUSG00000053054 | 13_Adh6a   | 104.785 | 2.03275  | 4.72E-10 | 8.26E-08 | 190.114 | 158.69  | 156.158 | 40.4393 | 38.6315 | 44.6739 |
| ENSMUSG00000053062 | 15_Jam2    | 574.591 | -0.93796 | 0.052996 | 0.299004 | 686.635 | 202.897 | 292.668 | 803.009 | 808.685 | 653.649 |
| ENSMUSG00000053063 | 11_Clec12  | 67.0486 | 1.36535  | 0.004388 | 0.056691 | 130.451 | 100.882 | 58.9472 | 48.6922 | 38.6315 | 24.6882 |
| ENSMUSG00000053070 | 4_923011   | 87.681  | 0.1066   | 0.833079 | 0.952011 | 157.754 | 60.0757 | 54.8106 | 77.5775 | 93.574  | 82.2939 |
| ENSMUSG00000053080 | 10_27000   | 358.677 | -0.67458 | 0.026458 | 0.19587  | 312.474 | 217.633 | 298.873 | 514.157 | 419.795 | 389.133 |
| ENSMUSG00000053091 | 16_Lins1   | 250.038 | -0.04115 | 0.879287 | 0.966591 | 228.541 | 273.174 | 237.857 | 232.732 | 279.863 | 248.057 |
| ENSMUSG00000053093 | 15_Myh7    | 23.0467 | -0.83891 | 0.306494 | 0.689322 | 19.2136 | 2.26701 | 27.9224 | 35.4876 | 14.5941 | 38.7957 |
| ENSMUSG00000053094 | 15_Tmem    | 3013.66 | 0.30952  | 0.16362  | 0.541822 | 3484.75 | 3240.68 | 3281.39 | 2500.64 | 2769.45 | 2805.05 |
| ENSMUSG00000053101 | 2_Gpr141   | 65.5583 | 4.1698   | 3.36E-11 | 7.47E-09 | 196.181 | 123.552 | 52.7422 | 5.77705 | 6.86782 | 8.22939 |
| ENSMUSG00000053110 | 13_Yap1    | 6171.65 | 0.26387  | 0.250915 | 0.642405 | 7402.31 | 6595.85 | 6204.97 | 5319.01 | 5617.87 | 5889.9  |
| ENSMUSG00000053111 | 12_Fank1   | 2.87076 | -0.43803 | 0.725339 | 0.915812 | 4.04498 | 2.26701 | 1.03416 | 4.95175 | 2.57543 | 2.35126 |
| ENSMUSG00000053113 | 3_Socs3    | 295.802 | 2.20829  | 0.000178 | 0.005298 | 154.72  | 898.868 | 405.391 | 96.5592 | 97.0079 | 122.265 |
| ENSMUSG00000053117 | 10_E3300   | 89.9937 | -1.00441 | 0.020591 | 0.167744 | 93.0345 | 41.9396 | 44.4689 | 127.92  | 115.036 | 117.563 |
| ENSMUSG00000053119 | 11_Chmp2   | 4774.32 | -0.04478 | 0.870205 | 0.963272 | 5803.53 | 4150.89 | 4145.95 | 4465.66 | 4980.02 | 5099.87 |
| ENSMUSG00000053128 | 14_Rnf26   | 369.078 | 0.17169  | 0.727386 | 0.916727 | 152.698 | 515.744 | 504.671 | 383.761 | 288.448 | 369.147 |
| ENSMUSG00000053134 | 13_Supt7l  | 409.519 | 0.23489  | 0.400328 | 0.759647 | 366.07  | 527.079 | 435.382 | 391.189 | 358.843 | 378.552 |
| ENSMUSG00000053137 | 6_Mapk11   | 1014.28 | 0.38243  | 0.81865  | 0.748381 | 535.959 | 1578.97 | 1328.9  | 820.341 | 873.93  | 947.556 |
| ENSMUSG00000053141 | 16_Ptptr   | 86.699  | -1.39025 | 0.007692 | 0.083611 | 75.8433 | 30.6046 | 37.2298 | 179.914 | 120.187 | 76.4158 |
| ENSMUSG00000053153 | 14_Spag1   | 2.43519 | -0.47215 | 0.783261 | 0.935592 | 2.02249 | 0       | 4.13665 | 3.30117 | 5.15086 | 0       |
| ENSMUSG00000053158 | 10_Fes     | 207.957 | 1.1158   | 0.084094 | 0.391584 | 60.6747 | 472.671 | 320.59  | 164.233 | 107.31  | 122.265 |
| ENSMUSG00000053161 | 16_Daw1    | 1.25071 | -0.41613 | 0.840985 | NA       | 1.01124 | 2.26701 | 0       | 1.65058 | 2.57543 | 0       |
| ENSMUSG00000053164 | 6_Gpr21    | 9.4892  | -0.70141 | 0.405167 | 0.763895 | 12.1349 | 3.40051 | 6.20497 | 18.1564 | 11.1602 | 5.87814 |
| ENSMUSG00000053166 | 14_Cdh22   | 26.5801 | -1.66313 | 0.003603 | 0.049619 | 7.07871 | 14.7355 | 16.5466 | 52.8187 | 28.3297 | 39.9713 |
| ENSMUSG00000053175 | 16_Bcl3    | 370.248 | 1.45417  | 0.020054 | 0.163392 | 118.316 | 888.666 | 620.497 | 189.817 | 181.997 | 222.194 |
| ENSMUSG00000053178 | 5_Mterf1b  | 33.4563 | 0.34294  | 0.568845 | 0.852874 | 64.7196 | 22.6701 | 24.8199 | 24.1576 | 41.2069 | 25.8638 |
| ENSMUSG00000053181 | 1_A83000   | 39.5447 | 0.32508  | 0.443229 | 0.787933 | 51.5735 | 46.4736 | 34.1273 | 38.7887 | 36.9145 | 29.3907 |
| ENSMUSG00000053182 | 10_Gm60    | 0.63958 | -1.30846 | 0.65661  | NA       | 1.01124 | 0       | 0       | 1.65058 | 0       | 1.17563 |
| ENSMUSG00000053184 | 15_Spaca   | 0.33349 | -1.76186 | 0.662172 | NA       | 0       | 0       | 0       | 0.82529 | 0       | 1.17563 |
| ENSMUSG00000053185 | 2_Gm989    | 0.16854 | 1.1315   | 0.781553 | NA       | 1.01124 | 0       | 0       | 0       | 0       | 0       |
| ENSMUSG00000053192 | 9_Mlit11   | 270.942 | 0.20597  | 0.614375 | 0.875923 | 448.992 | 198.363 | 223.379 | 268.22  | 260.977 | 225.721 |
| ENSMUSG00000053198 | 13_Prx     | 175.521 | -0.61702 | 0.268234 | 0.656133 | 45.506  | 177.96  | 192.354 | 278.949 | 159.677 | 198.681 |
| ENSMUSG00000053199 | 13_Arhgaj  | 459.727 | -1.28856 | 0.031307 | 0.217906 | 505.622 | 90.6802 | 204.764 | 649.505 | 861.052 | 446.739 |
| ENSMUSG00000053205 | 8_Styx     | 52.5946 | 0.49702  | 0.348221 | 0.725587 | 100.113 | 34.0051 | 50.6739 | 42.9152 | 54.9425 | 32.9176 |
| ENSMUSG00000053216 | 14_Btn2a2  | 0.18892 | 1.1315   | 0.781553 | NA       | 0       | 1.1335  | 0       | 0       | 0       | 0       |
| ENSMUSG00000053219 | 15_Raet11  | 27.8374 | -1.38012 | 0.005884 | 0.069357 | 20.2249 | 12.4685 | 13.4441 | 36.3129 | 35.1976 | 49.3764 |
| ENSMUSG00000053226 | 6_Dand5    | 49.4189 | -0.30523 | 0.453633 | 0.79571  | 39.4385 | 37.4056 | 55.8447 | 65.1981 | 48.0747 | 50.552  |
| ENSMUSG00000053228 | 12_Ceaca   | 0.30609 | 0.16972  | 0.966824 | NA       | 1.01124 | 0       | 0       | 0.82529 | 0       | 0       |
| ENSMUSG00000053251 | 5_Olfr212  | 0.78375 | -2.98975 | 0.450373 | NA       | 0       | 0       | 0       | 0       | 0       | 4.70251 |
| ENSMUSG00000053253 | 16_Ndfip2  | 1520.4  | 0.43539  | 0.165718 | 0.545533 | 2306.65 | 1574.44 | 1363.02 | 1169.44 | 1393.31 | 1315.53 |
| ENSMUSG00000053279 | 6_Aldh1a1  | 4521.4  | -0.38577 | 0.288137 | 0.673216 | 5580.05 | 2639.93 | 3540.97 | 4885.73 | 4652.95 | 5828.76 |
| ENSMUSG00000053286 | 11_Trmt1l  | 839.486 | 0.4767   | 0.101265 | 0.4333   | 1133.6  | 951.009 | 845.944 | 566.976 | 806.968 | 732.416 |
| ENSMUSG00000053289 | 7_Ddx10    | 768.41  | 0.36561  | 0.365754 | 0.739044 | 1307.54 | 700.505 | 587.404 | 523.235 | 741.724 | 750.051 |
| ENSMUSG00000053291 | 15_Rab4b   | 302.402 | 0.30776  | 0.548938 | 0.843853 | 120.338 | 439.799 | 443.655 | 316.087 | 242.949 | 251.584 |
| ENSMUSG00000053293 | 9_Pom12    | 747.071 | 0.60395  | 0.211582 | 0.602834 | 365.059 | 1219.65 | 1118.96 | 679.216 | 476.455 | 623.083 |
| ENSMUSG00000053297 | 14_Al854   | 39.0151 | -0.78156 | 0.092135 | 0.413496 | 25.2811 | 22.6701 | 38.264  | 62.7222 | 46.3578 | 38.7957 |
| ENSMUSG00000053303 | 14_Slc22a2 | 0.16854 | 1.1315   | 0.781553 | NA       | 1.01124 | 0       | 0       | 0       | 0       | 0       |
| ENSMUSG00000053310 | 11_Nrgn    | 2.01913 | 0.0532   | 0.980652 | 0.993796 | 0       | 0       | 6.20497 | 2.47588 | 3.43391 | 0       |
| ENSMUSG00000053317 | 11_Sec61   | 747.45  | 0.39156  | 0.13288  | 0.495885 | 927.311 | 877.331 | 740.46  | 729.558 | 606.943 | 603.097 |
| ENSMUSG00000053318 | 7_Slamf8   | 27.1786 | 2.57872  | 6.21E-05 | 0.002258 | 25.2811 | 78.2117 | 36.1957 | 7.42763 | 7.72629 | 8.22939 |
| ENSMUSG00000053329 | 6_D10Jhu   | 723.159 | 0.03226  | 0.938178 | 0.985118 | 419.666 | 785.518 | 988.658 | 899.569 | 533.114 | 712.43  |
| ENSMUSG00000053333 | 15_Dis3l2  | 522.284 | 0.37755  | 0.190109 | 0.578279 | 453.037 | 639.296 | 678.41  | 462.164 | 435.248 | 465.549 |
| ENSMUSG00000053334 | 6_Ficd     | 149.559 | -0.22572 | 0.57803  | 0.858061 | 85.9558 | 165.491 | 162.363 | 199.721 | 122.762 | 161.061 |
| ENSMUSG00000053338 | 9_Tarm1    | 6.29946 | 5.1748   | 0.000559 | 0.012642 | 10.1124 | 19.2695 | 7.23913 | 0       | 0       | 1.17563 |
| ENSMUSG00000053347 | 14_Zfp94   | 489.466 | 0.58607  | 0.302336 | 0.685243 | 1163.94 | 291.31  | 307.146 | 332.593 | 410.352 | 431.455 |
| ENSMUSG00000053358 | 2_Gm990    | 15.3719 | -0.61448 | 0.399534 | 0.759197 | 21.2361 | 5.66751 | 9.30745 | 10.7288 | 20.6034 | 24.6882 |
| ENSMUSG00000053360 | 4_F73003   | 0.61816 | -1.19629 | 0.738511 | NA       | 0       | 1.1335  | 0       | 0       | 2.57543 | 0       |
| ENSMUSG00000053367 | 15_Gm67    | 0.28616 | -1.57932 | 0.696464 | NA       | 0       | 0       | 0       | 0       | 1.71695 | 0       |
| ENSMUSG00000053368 | 13_Rxtp2   | 3.39285 | -1.55349 | 0.255331 | 0.646363 | 3.03373 | 0       | 2.06832 | 1.65058 | 7.72629 | 5.87814 |
| ENSMUSG00000053375 | 7_Atp6v1c  | 0.13755 | -0.79206 | 0.84609  | NA       | 0       | 0       | 0       | 0.82529 | 0       | 0       |
| ENSMUSG00000053388 | 10_Trim5   | 0       | NA       | NA       | NA       | 0       | 0       | 0       | 0       | 0       | 0       |
| ENSMUSG00000053390 | 15_Zfp95   | 537.491 | 0.19289  | 0.644152 | 0.889191 | 902.03  | 412.595 | 405.391 | 437.405 | 594.925 | 472.602 |
| ENSMUSG00000053395 | 15_Cacng   | 0.79372 | -1.7202  | 0.536801 | NA       | 1.01124 | 0       | 0       | 0       | 2.57543 | 1.17563 |
| ENSMUSG00000053398 | 11_Phgdh   | 1617.01 | 0.01588  | 0.978259 | 0.993796 | 424.723 | 2324.81 | 2128.3  | 1921.28 | 1237.07 | 1665.86 |
| ENSMUSG00000053399 | 8_Adamts   | 109.459 | -1.22851 | 0.010339 | 0.103321 | 63.7084 | 46.4736 | 85.8354 | 137.824 | 90.1401 | 232.774 |
| ENSMUSG00000053411 | 16_Cbx7    | 439.985 | -0.73903 | 0.10764  | 0.446368 | 159.777 | 343.451 | 486.056 | 697.372 | 484.181 | 469.076 |
| ENSMUSG00000053414 | 7_Hunk     | 661.051 | -1.0851  | 0.000109 | 0.003532 | 360.003 | 396.726 | 513.978 | 987.05  | 855.043 | 853.506 |
| ENSMUSG00000053420 | 5_Gm479    | 2.7247  | -0.69223 | 0.683073 | 0.902945 | 4.04498 | 2.26701 | 0       | 6.60234 | 3.43391 | 0       |
| ENSMUSG00000053436 | 14_Mapk1   | 2433.01 | 0.22982  | 0.359261 | 0.733085 | 2226.76 | 2922.17 | 2730.19 | 2087.99 | 2284.41 | 2346.55 |
| ENSMUSG00000053441 | 4_Adamts   | 2.06032 | -0.97441 | 0.536578 | 0.838957 | 3.03373 | 1.1335  | 0       | 4.12646 | 1.71695 | 2.35126 |
| ENSMUSG00000053453 | 8_Thoc7    | 1112.07 | 0.10152  | 0.78485  | 0.936054 | 1684.73 | 935.14  | 833.534 | 939.183 | 1227.62 | 1052.19 |
| ENSMUSG00000053460 | 8_Ggcx     | 558.775 | 0.04256  | 0.873367 | 0.963908 | 475.285 | 569.018 | 656.693 | 520.759 | 566.595 | 564.301 |
| ENSMUSG00000053461 | 9_Hhipl2   | 2.18729 | -1.65857 | 0.249105 | 0.640512 | 1.01124 | 1.1335  | 1.03416 | 3.30117 | 4.29238 | 2.35126 |
| ENSMUSG00000053465 | 5_Hs6st3   | 2.24801 | -3.46404 | 0.052756 | 0.298513 | 0       | 0       | 1.03416 | 4.95175 | 5.15086 | 2.35126 |
| ENSMUSG00000053469 | 13_Tg      | 12.7462 | -0.92138 | 0.219741 | 0.610947 | 7.07871 | 6.80102 | 12.4099 | 19.807  | 6.86782 | 23.5126 |
| ENSMUSG00000053470 | 13_Kdm3    | 2524.91 | 0.44216  | 0.217943 | 0.608715 | 4200.71 | 2254.54 | 2271.02 | 1861.03 | 2371.97 | 2190.19 |

|                    |            |         |          |          |          |         |         |         |         |         |         |
|--------------------|------------|---------|----------|----------|----------|---------|---------|---------|---------|---------|---------|
| ENSMUSG00000053475 | 5_Tnfaip6  | 71.4362 | 1.16121  | 0.001028 | 0.019976 | 114.271 | 81.6122 | 100.314 | 43.7405 | 46.3578 | 42.3226 |
| ENSMUSG00000053477 | 15_Tcf4    | 1902.14 | -0.38812 | 0.375242 | 0.745411 | 2691.93 | 944.208 | 1307.18 | 2297.61 | 2250.93 | 1920.98 |
| ENSMUSG00000053483 | 13_Usp21   | 477.559 | 0.05198  | 0.898211 | 0.97174  | 253.822 | 590.555 | 614.292 | 499.302 | 452.417 | 454.968 |
| ENSMUSG00000053490 | 7_Trim60   | 0.61771 | 0.23492  | 0.937546 | NA       | 2.02249 | 0       | 0       | 0.82529 | 0.85848 | 0       |
| ENSMUSG00000053510 | 12_Nrd1    | 5170.92 | 0.20062  | 0.536886 | 0.839104 | 7467.03 | 4613.36 | 4508.94 | 4139.67 | 5271.91 | 5024.63 |
| ENSMUSG00000053519 | 15_Kcnp1   | 5.92827 | -1.93271 | 0.107561 | 0.446362 | 3.03373 | 3.40051 | 1.03416 | 21.4576 | 4.29238 | 2.35126 |
| ENSMUSG00000053522 | 11_Lgals7  | 291.494 | 1.05485  | 0.207959 | 0.599354 | 24.2699 | 616.626 | 539.832 | 252.539 | 128.772 | 186.925 |
| ENSMUSG00000053536 | 6_Cstf2t   | 2293.86 | 0.42554  | 0.207558 | 0.599079 | 3687    | 2101.51 | 2100.38 | 1792.54 | 1998.53 | 2083.21 |
| ENSMUSG00000053550 | 13_Shisa7  | 9.7636  | -1.86798 | 0.078149 | 0.375228 | 0       | 2.26701 | 10.3416 | 16.5058 | 18.8865 | 10.5807 |
| ENSMUSG00000053552 | 14_Ebf4    | 72.3483 | -0.80929 | 0.102147 | 0.434609 | 26.2924 | 62.3427 | 69.2888 | 123.794 | 71.2536 | 81.1183 |
| ENSMUSG00000053553 | 11_31100   | 150.856 | 0.03775  | 0.932693 | 0.982615 | 75.8433 | 188.161 | 194.422 | 148.553 | 125.338 | 172.817 |
| ENSMUSG00000053559 | 12_Smag1   | 949.664 | 0.03887  | 0.948031 | 0.986859 | 229.552 | 1346.6  | 1311.32 | 1069.58 | 776.922 | 964.015 |
| ENSMUSG00000053560 | 4_Ier2     | 426.008 | 0.64476  | 0.179156 | 0.564484 | 240.676 | 647.23  | 671.171 | 437.405 | 229.213 | 330.351 |
| ENSMUSG00000053565 | 9_Eif3k    | 2263.53 | -0.1305  | 0.816571 | 0.947571 | 610.792 | 2938.04 | 2934.95 | 2744.92 | 1867.19 | 2485.28 |
| ENSMUSG00000053580 | 15_Tanc2   | 932.382 | 0.29302  | 0.326603 | 0.707918 | 1224.62 | 799.12  | 1055.88 | 738.637 | 815.553 | 960.488 |
| ENSMUSG00000053581 | 13_Zfand3  | 455.442 | -0.00771 | 0.978042 | 0.993796 | 372.138 | 532.746 | 458.134 | 496.826 | 437.823 | 434.982 |
| ENSMUSG00000053588 | 3_A73006   | 2.05224 | -1.57846 | 0.459501 | 0.798919 | 0       | 0       | 3.10248 | 5.77705 | 3.43391 | 0       |
| ENSMUSG00000053593 | 10_Fate1   | 0.14308 | -0.79206 | 0.84609  | NA       | 0       | 0       | 0       | 0       | 0.85848 | 0       |
| ENSMUSG00000053600 | 7_Zfp472   | 355.472 | 0.34847  | 0.471405 | 0.804922 | 678.545 | 258.439 | 257.506 | 241.811 | 402.626 | 293.907 |
| ENSMUSG00000053603 | 4_493044   | 1.48655 | 0.49151  | 0.762266 | NA       | 3.03373 | 1.1335  | 1.03416 | 0.82529 | 1.71695 | 1.17563 |
| ENSMUSG00000053604 | 5_Rpia     | 1034.58 | 0.3761   | 0.16106  | 0.539395 | 951.581 | 1320.53 | 1233.75 | 844.274 | 885.09  | 972.244 |
| ENSMUSG00000053615 | 1_Gm991    | 1.66887 | 1.49333  | 0.512208 | NA       | 0       | 2.26701 | 5.17081 | 0       | 2.57543 | 0       |
| ENSMUSG00000053617 | 11_Sh3px   | 5028.2  | 0.31837  | 0.315927 | 0.6968   | 3861.94 | 6322.68 | 6557.62 | 4525.08 | 4025.4  | 4876.5  |
| ENSMUSG00000053626 | 4_Tll1     | 106.001 | -0.25917 | 0.554103 | 0.846091 | 151.687 | 71.4107 | 66.1863 | 104.812 | 118.47  | 123.441 |
| ENSMUSG00000053640 | 2_Gm991    | 0.13755 | -0.79206 | 0.84609  | NA       | 0       | 0       | 0       | 0.82529 | 0       | 0       |
| ENSMUSG00000053641 | 8_Denn4    | 668.479 | -0.04625 | 0.907545 | 0.974731 | 1011.24 | 463.603 | 498.466 | 736.986 | 715.111 | 585.463 |
| ENSMUSG00000053644 | 13_Aldh7a2 | 691.005 | -0.71331 | 0.037161 | 0.241494 | 347.868 | 562.217 | 660.829 | 968.068 | 782.931 | 824.115 |
| ENSMUSG00000053646 | 13_Plxbn1  | 4583.04 | 0.63046  | 0.23367  | 0.625443 | 1771.7  | 7651.14 | 7283.6  | 3691.53 | 3145.46 | 3954.81 |
| ENSMUSG00000053647 | 4_Gper1    | 4.22439 | -0.20554 | 0.86072  | 0.960554 | 1.01124 | 5.66751 | 5.17081 | 8.25292 | 1.71695 | 3.52688 |
| ENSMUSG00000053654 | 7_Krt42    | 0.36128 | 2.05714  | 0.610196 | NA       | 0       | 1.1335  | 1.03416 | 0       | 0       | 0       |
| ENSMUSG00000053675 | 8_Tgm5     | 358.243 | 0.3923   | 0.230847 | 0.622309 | 282.137 | 482.872 | 455.031 | 285.551 | 328.797 | 315.068 |
| ENSMUSG00000053684 | 8_BC048a   | 121.175 | 0.66774  | 0.031235 | 0.217491 | 136.518 | 154.156 | 155.124 | 93.258  | 79.8384 | 108.158 |
| ENSMUSG00000053687 | 14_Dpep2   | 42.3677 | 0.93252  | 0.09799  | 0.424972 | 29.3261 | 95.2142 | 42.4006 | 33.837  | 24.0374 | 29.3907 |
| ENSMUSG00000053693 | 16_Mast1   | 30.0059 | -0.48623 | 0.350069 | 0.726886 | 19.2136 | 26.0706 | 29.9907 | 50.3428 | 30.9052 | 23.5126 |
| ENSMUSG00000053702 | 16_Nebl    | 4548.19 | 0.48914  | 0.306654 | 0.689415 | 9319.63 | 3190.81 | 3425.14 | 3138.59 | 4417.72 | 3797.28 |
| ENSMUSG00000053716 | 9_Dusp7    | 1180.02 | 0.82408  | 0.028358 | 0.203929 | 961.693 | 2033.5  | 1529.52 | 1025.01 | 694.508 | 835.871 |
| ENSMUSG00000053730 | 15_Tmem    | 112.473 | 0.65371  | 0.273974 | 0.660478 | 36.4048 | 187.028 | 189.252 | 98.2098 | 78.1214 | 85.8208 |
| ENSMUSG00000053742 | 8_Gm511    | 0.92973 | 0.30132  | 0.92485  | NA       | 0       | 0       | 3.10248 | 2.47588 | 0       | 0       |
| ENSMUSG00000053746 | 8_Pthr1    | 65.7316 | 0.72384  | 0.188013 | 0.575729 | 30.3373 | 122.418 | 93.0745 | 50.3428 | 52.3671 | 45.8495 |
| ENSMUSG00000053749 | 12_Gm99    | 2.34072 | -1.82492 | 0.261015 | 0.650046 | 2.02249 | 0       | 1.03416 | 6.60234 | 0.85848 | 3.52688 |
| ENSMUSG00000053754 | 13_Chd8    | 2788.94 | 0.25315  | 0.28771  | 0.673109 | 2975.08 | 3060.46 | 3063.19 | 2201.05 | 2742.83 | 2691.01 |
| ENSMUSG00000053765 | 4_Oas1f    | 3.70589 | -0.39658 | 0.739021 | 0.921641 | 1.01124 | 4.53401 | 4.13665 | 2.47588 | 7.72629 | 2.35126 |
| ENSMUSG00000053768 | 13_Chchd   | 1894.26 | 0.01475  | 0.961731 | 0.990106 | 2511.93 | 1711.59 | 1488.16 | 1815.64 | 1938.44 | 1899.81 |
| ENSMUSG00000053769 | 5_Lysmd1   | 197.467 | 0.10694  | 0.757016 | 0.927615 | 137.529 | 226.701 | 250.267 | 193.118 | 191.44  | 185.749 |
| ENSMUSG00000053773 | 4_Rdh8     | 13.3076 | -3.03978 | 0.003811 | 0.051539 | 2.02249 | 6.80102 | 0       | 39.614  | 23.1789 | 8.22939 |
| ENSMUSG00000053774 | 8_Ubxn7    | 1631.07 | 0.40361  | 0.383231 | 0.749884 | 3213.73 | 1173.18 | 1186.18 | 1270.12 | 1528.95 | 1414.28 |
| ENSMUSG00000053783 | 5_170001   | 0.332   | 0.16972  | 0.966824 | NA       | 0       | 1.1335  | 0       | 0       | 0.85848 | 0       |
| ENSMUSG00000053797 | 10_Krt16   | 4364.42 | 4.90736  | 7.99E-10 | 1.36E-07 | 1108.32 | 20179.8 | 4053.91 | 255.841 | 271.279 | 317.42  |
| ENSMUSG00000053799 | 6_Exoc6    | 545.486 | 0.00158  | 0.996461 | 0.998321 | 764.501 | 447.734 | 425.04  | 475.368 | 642.999 | 517.276 |
| ENSMUSG00000053801 | 16_Grwd1   | 219.168 | 0.75614  | 0.145419 | 0.515494 | 99.1019 | 400.127 | 326.795 | 172.486 | 142.507 | 173.993 |
| ENSMUSG00000053819 | 16_Camk2   | 1873.05 | 0.10926  | 0.784806 | 0.936054 | 3041.82 | 1342.07 | 1447.83 | 1709.18 | 1972.78 | 1724.65 |
| ENSMUSG00000053820 | 4_Bcl2a1c  | 0.50054 | 1.08003  | 0.733943 | NA       | 1.01124 | 1.1335  | 0       | 0       | 0.85848 | 0       |
| ENSMUSG00000053821 | 3_Gm992    | 0.13755 | -0.79206 | 0.84609  | NA       | 0       | 0       | 0       | 0.82529 | 0       | 0       |
| ENSMUSG00000053825 | 14_Ppfia2  | 426.998 | 0.10488  | 0.798223 | 0.940562 | 685.624 | 278.842 | 362.991 | 409.345 | 448.983 | 376.201 |
| ENSMUSG00000053830 | 3_Gm992    | 72.6277 | 0.23566  | 0.708022 | 0.909748 | 143.597 | 69.1437 | 22.7516 | 66.0234 | 56.6595 | 77.5914 |
| ENSMUSG00000053835 | 17_H2-T2   | 911.586 | 2.70512  | 3.95E-16 | 2.28E-13 | 1924.4  | 1574.44 | 1244.1  | 226.13  | 306.476 | 193.979 |
| ENSMUSG00000053838 | 14_Nudcd   | 2490.23 | 0.097    | 0.755619 | 0.927105 | 1824.28 | 3099    | 2798.44 | 2436.26 | 2180.53 | 2602.84 |
| ENSMUSG00000053841 | 15_Txlna   | 1361.99 | 0.12491  | 0.694321 | 0.905638 | 977.873 | 1679.85 | 1605.02 | 1278.38 | 1235.35 | 1395.47 |
| ENSMUSG00000053846 | 4_Lipg     | 151.389 | 1.46256  | 0.000281 | 0.007531 | 138.54  | 315.114 | 213.037 | 83.3545 | 80.6968 | 77.5914 |
| ENSMUSG00000053861 | 1_Gm992    | 0       | NA       | NA       | NA       | 0       | 0       | 0       | 0       | 0       | 0       |
| ENSMUSG00000053870 | 7_Fpgt     | 710.088 | 0.33606  | 0.459167 | 0.798708 | 1304.51 | 546.348 | 526.388 | 525.711 | 802.676 | 554.896 |
| ENSMUSG00000053877 | 12_Srcap   | 2243.2  | 0.13175  | 0.84446  | 0.954449 | 369.104 | 3474.19 | 3193.49 | 2401.6  | 1816.54 | 2204.3  |
| ENSMUSG00000053886 | 3_Sh2d4a   | 2135.47 | 0.19573  | 0.492991 | 0.816206 | 2683.84 | 2181.99 | 1974.21 | 1625    | 2245.78 | 2102.02 |
| ENSMUSG00000053897 | 15_Slc39a8 | 2876.43 | 0.23104  | 0.538621 | 0.839843 | 4627.45 | 2265.87 | 2425.11 | 2291.84 | 2757.43 | 2890.87 |
| ENSMUSG00000053898 | 12_Ech1    | 2210.55 | -0.28453 | 0.522477 | 0.832206 | 904.052 | 2398.49 | 2677.44 | 2752.35 | 2166.8  | 2364.19 |
| ENSMUSG00000053907 | 10_Mat2a   | 7757.7  | 0.0831   | 0.830645 | 0.9513   | 11896.3 | 6500.64 | 5546.21 | 6366.31 | 9123.03 | 7113.72 |
| ENSMUSG00000053914 | 9_Kdm4d    | 5.39791 | -1.24046 | 0.263445 | 0.652524 | 0       | 4.53401 | 5.17081 | 9.07822 | 7.72629 | 5.87814 |
| ENSMUSG00000053916 | 4_Nanp     | 7.61173 | 5.45977  | 0.162939 | 0.541016 | 44.4948 | 0       | 0       | 0       | 0       | 1.17563 |
| ENSMUSG00000053929 | 16_Cyhr1   | 1520    | -0.13266 | 0.789872 | 0.937308 | 552.139 | 1781.87 | 2016.62 | 1907.25 | 1290.29 | 1571.81 |
| ENSMUSG00000053930 | 13_Shisa6  | 25.0955 | -2.10989 | 0.000172 | 0.005147 | 12.1349 | 7.93452 | 8.27329 | 39.614  | 53.2256 | 29.3907 |
| ENSMUSG00000053931 | 11_Cnn3    | 6433.97 | -0.24027 | 0.266557 | 0.654687 | 6257.58 | 5720.79 | 5719.95 | 7156.11 | 6834.34 | 6915.04 |
| ENSMUSG00000053950 | 10_Adnp2   | 965.063 | 0.32096  | 0.190714 | 0.579393 | 1001.13 | 1107.43 | 1107.59 | 965.592 | 778.639 | 829.993 |
| ENSMUSG00000053957 | 5_Gm124    | 1.67016 | -2.98938 | 0.139734 | NA       | 0       | 0       | 1.03416 | 5.77705 | 0.85848 | 2.35126 |
| ENSMUSG00000053963 | 6_633040   | 35.2513 | -2.75683 | 2.82E-07 | 2.59E-05 | 10.1124 | 6.80102 | 10.3416 | 78.4028 | 63.5273 | 42.3226 |
| ENSMUSG00000053964 | 16_Lgals4  | 152.414 | -0.64096 | 0.203372 | 0.594815 | 50.5622 | 128.086 | 178.91  | 210.45  | 207.751 | 138.724 |

|                    |            |         |          |          |          |         |         |         |         |         |         |
|--------------------|------------|---------|----------|----------|----------|---------|---------|---------|---------|---------|---------|
| ENSMUSG00000053965 | 10_Pde5a   | 2780.34 | -0.13219 | 0.744437 | 0.923582 | 4189.59 | 1828.34 | 1941.12 | 2798.57 | 3219.29 | 2705.12 |
| ENSMUSG00000053977 | 13_Cd8a    | 5.85645 | 3.59739  | 0.006307 | 0.072995 | 8.08995 | 20.4031 | 4.13665 | 1.65058 | 0.85848 | 0       |
| ENSMUSG00000053980 | 4_Gm993    | 0.18892 | 1.1315   | 0.781553 | NA       | 0       | 1.1335  | 0       | 0       | 0       | 0       |
| ENSMUSG00000053985 | 9_Zfp14    | 32.0293 | -0.68392 | 0.18037  | 0.566642 | 30.3373 | 26.0706 | 17.5807 | 44.5658 | 48.9332 | 24.6882 |
| ENSMUSG00000054000 | 5_Tusc1    | 50.2049 | 0.33642  | 0.548953 | 0.843853 | 96.0682 | 28.3376 | 43.4348 | 32.1864 | 50.6501 | 50.552  |
| ENSMUSG00000054003 | 13_Tdrd9   | 12.3225 | -1.89153 | 0.02707  | 0.198365 | 10.1124 | 4.53401 | 1.03416 | 28.0599 | 13.7356 | 16.4588 |
| ENSMUSG00000054005 | 4_Mill1    | 2.49712 | 3.80001  | 0.072951 | 0.361065 | 5.05622 | 9.06802 | 0       | 0       | 0.85848 | 0       |
| ENSMUSG00000054008 | 8_Ndst1    | 2766.39 | 0.1941   | 0.601005 | 0.87     | 1706.98 | 3675.95 | 3473.75 | 2622.78 | 2379.7  | 2739.21 |
| ENSMUSG00000054013 | 5_Tmem1    | 3.63407 | -1.65371 | 0.19907  | 0.591007 | 2.02249 | 2.26701 | 1.03416 | 11.5541 | 2.57543 | 2.35126 |
| ENSMUSG00000054021 | 5_Sirt5    | 117.911 | -0.43591 | 0.217779 | 0.608427 | 69.7759 | 111.083 | 119.963 | 145.251 | 126.196 | 135.197 |
| ENSMUSG00000054027 | 7_Nt5dc3   | 488.677 | -0.1311  | 0.618273 | 0.877535 | 390.34  | 507.809 | 501.568 | 538.091 | 500.492 | 493.764 |
| ENSMUSG00000054034 | 10_Tceal5  | 66.6557 | -1.71444 | 2.94E-05 | 0.001247 | 43.4835 | 24.9371 | 24.8199 | 112.24  | 90.9986 | 103.455 |
| ENSMUSG00000054046 | 7_Klk13    | 16.3554 | 2.3626   | 0.011864 | 0.113942 | 18.2024 | 41.9396 | 21.7174 | 0       | 8.66782 | 9.40502 |
| ENSMUSG00000054051 | 6_Ercc6    | 698.019 | 0.1592   | 0.532037 | 0.837483 | 811.018 | 705.039 | 692.888 | 588.433 | 652.443 | 738.294 |
| ENSMUSG00000054052 | 5_Rdh19    | 53.0411 | 1.36764  | 0.000807 | 0.016631 | 71.7983 | 80.4787 | 76.528  | 21.4576 | 29.1882 | 38.7957 |
| ENSMUSG00000054057 | 2_A93000   | 40.0344 | -0.12173 | 0.770511 | 0.932375 | 43.4835 | 35.1386 | 36.1957 | 44.5658 | 32.6221 | 48.2007 |
| ENSMUSG00000054061 | 8_Gm993    | 2.14333 | -1.101   | 0.474706 | 0.806964 | 0.20249 | 0       | 2.06832 | 3.30117 | 4.29238 | 1.17563 |
| ENSMUSG00000054065 | 11_Pkp3    | 5059.56 | 0.97709  | 0.158717 | 0.537239 | 968.772 | 10219.7 | 8942.39 | 3604.05 | 2554.83 | 4067.67 |
| ENSMUSG00000054072 | 11_ligp1   | 4765.62 | 5.63248  | 4.10E-20 | 4.73E-17 | 17920.3 | 6429.23 | 3679.55 | 138.649 | 297.892 | 128.143 |
| ENSMUSG00000054074 | 9_Skida1   | 57.0868 | -1.12916 | 0.031834 | 0.220011 | 53.5959 | 26.0706 | 27.9224 | 99.0351 | 93.574  | 42.3226 |
| ENSMUSG00000054079 | 12_Utp18   | 696.297 | 0.591    | 0.207457 | 0.599079 | 1441.02 | 558.817 | 510.876 | 474.543 | 635.273 | 557.248 |
| ENSMUSG00000054083 | 7_Capn12   | 5.83349 | 0.28046  | 0.828566 | 0.951064 | 0       | 5.66751 | 13.4441 | 1.65058 | 6.00934 | 8.22939 |
| ENSMUSG00000054091 | 9_181003   | 1569.28 | 0.1839   | 0.401756 | 0.760434 | 1677.65 | 1711.59 | 1618.46 | 1527.62 | 1463.7  | 1416.63 |
| ENSMUSG00000054099 | 11_Slc25a8 | 302.43  | 0.28344  | 0.580973 | 0.859684 | 599.668 | 180.227 | 216.14  | 233.558 | 332.231 | 252.76  |
| ENSMUSG00000054115 | 11_Skp2    | 170.861 | 0.48118  | 0.185076 | 0.572285 | 266.969 | 181.36  | 148.919 | 122.969 | 167.403 | 137.548 |
| ENSMUSG00000054128 | 16_H2-T3   | 8.01758 | 2.22753  | 0.016983 | 0.144909 | 7.07871 | 17.0025 | 15.5124 | 4.12646 | 0.85848 | 3.52688 |
| ENSMUSG00000054135 | 2_A43011   | 33.0614 | 0.02136  | 0.9602   | 0.989875 | 34.3823 | 27.2041 | 38.264  | 33.837  | 31.7636 | 32.9176 |
| ENSMUSG00000054136 | 5_Adm2     | 0.88219 | 2.12202  | 0.434831 | NA       | 0       | 3.40051 | 1.03416 | 0       | 0.85848 | 0       |
| ENSMUSG00000054146 | 8_Krt15    | 29910.1 | 0.51872  | 0.271036 | 0.657711 | 14451.7 | 42754.6 | 48483.6 | 23984.6 | 21501.4 | 28284.4 |
| ENSMUSG00000054150 | 11_Syne3   | 725.029 | 0.40773  | 0.240473 | 0.631907 | 537.982 | 912.47  | 1030.02 | 684.167 | 545.991 | 639.542 |
| ENSMUSG00000054161 | 10_Fam83c  | 129.203 | 0.82413  | 0.076022 | 0.369104 | 80.8995 | 196.096 | 218.208 | 91.6075 | 75.546  | 112.86  |
| ENSMUSG00000054162 | 15_Spock   | 93.4319 | -0.84802 | 0.224438 | 0.614062 | 147.642 | 20.4031 | 32.059  | 136.173 | 127.913 | 96.4015 |
| ENSMUSG00000054169 | 7_Ceacan   | 2.75786 | -2.04855 | 0.163972 | 0.542133 | 0       | 2.26701 | 1.03416 | 6.60234 | 4.29238 | 2.35126 |
| ENSMUSG00000054178 | 1_Gm993    | 127.858 | 0.03518  | 0.946395 | 0.986649 | 234.609 | 77.0782 | 76.528  | 127.095 | 142.507 | 109.333 |
| ENSMUSG00000054191 | 7_Klf1     | 0.9336  | -0.69567 | 0.798276 | NA       | 0       | 1.1335  | 1.03416 | 0       | 3.43391 | 0       |
| ENSMUSG00000054196 | 6_Cthrc1   | 258.419 | -1.11142 | 0.002823 | 0.041684 | 217.418 | 106.549 | 166.5   | 361.478 | 403.484 | 295.083 |
| ENSMUSG00000054199 | 16_Gon4l   | 1273.65 | 0.15059  | 0.687361 | 0.904573 | 770.568 | 1679.85 | 1569.86 | 1225.56 | 1122.89 | 1273.2  |
| ENSMUSG00000054200 | 6_Ffar4    | 0.53364 | 2.62307  | 0.473724 | NA       | 0       | 1.1335  | 2.06832 | 0       | 0       | 0       |
| ENSMUSG00000054203 | 7_lfi205   | 557.619 | 3.42434  | 8.49E-09 | 1.23E-06 | 1583.61 | 1054.16 | 422.972 | 46.2164 | 158.818 | 79.9427 |
| ENSMUSG00000054204 | 6_Fam15c   | 2.75021 | -1.5869  | 0.274668 | 0.661047 | 1.01124 | 0       | 3.10248 | 6.60234 | 3.43391 | 2.35126 |
| ENSMUSG00000054206 | 2_Gzmm     | 25.5878 | -1.32257 | 0.034123 | 0.22886  | 8.08995 | 21.5366 | 14.4783 | 56.9452 | 26.6128 | 25.8638 |
| ENSMUSG00000054215 | 2_Spr2k    | 0       | NA       | NA       | NA       | 0       | 0       | 0       | 0       | 0       | 0       |
| ENSMUSG00000054226 | 13_Tprkb   | 755.43  | -0.68631 | 0.081521 | 0.384779 | 886.861 | 414.862 | 435.382 | 1034.09 | 944.325 | 817.061 |
| ENSMUSG00000054237 | 5_Fra10a   | 308.887 | 0.20506  | 0.634403 | 0.883842 | 536.971 | 226.701 | 228.55  | 268.22  | 301.325 | 291.556 |
| ENSMUSG00000054252 | 17_Fgfr3   | 1932.56 | 0.91805  | 0.047395 | 0.279504 | 1092.14 | 3279.22 | 3211.07 | 1393.09 | 1086.83 | 1533.02 |
| ENSMUSG00000054256 | 11_Msi1    | 174.113 | -1.91991 | 2.03E-06 | 0.000143 | 61.6859 | 66.8767 | 89.9721 | 392.014 | 237.798 | 196.33  |
| ENSMUSG00000054258 | 8_Gm508    | 0       | NA       | NA       | NA       | 0       | 0       | 0       | 0       | 0       | 0       |
| ENSMUSG00000054263 | 11_Lifr    | 3401.95 | 0.80872  | 0.050322 | 0.290537 | 6733.88 | 2958.44 | 3301.04 | 1918.8  | 2705.06 | 2794.47 |
| ENSMUSG00000054277 | 7_Arfgap3  | 1808.72 | 0.30788  | 0.387837 | 0.752312 | 1227.65 | 2484.64 | 2290.67 | 1599.42 | 1478.3  | 1771.67 |
| ENSMUSG00000054280 | 14_Prr14l  | 1420.31 | 0.34133  | 0.234121 | 0.626031 | 1973.95 | 1445.22 | 1343.38 | 1136.43 | 1387.3  | 1235.58 |
| ENSMUSG00000054293 | 10_A6300   | 25.9673 | 1.1691   | 0.052231 | 0.296722 | 57.6409 | 28.3376 | 21.7174 | 10.7288 | 19.745  | 17.6344 |
| ENSMUSG00000054302 | 15_Eapp    | 1126.34 | 0.10638  | 0.764658 | 0.929904 | 1674.62 | 948.742 | 880.071 | 992.827 | 1209.59 | 1052.19 |
| ENSMUSG00000054309 | 8_Cpsf3    | 1269.72 | 0.3019   | 0.284857 | 0.671071 | 1264.06 | 1554.03 | 1387.84 | 894.617 | 1242.22 | 1275.56 |
| ENSMUSG00000054312 | 6_Mrps21   | 622.613 | -0.33537 | 0.430135 | 0.780048 | 268.991 | 663.099 | 719.776 | 758.444 | 635.273 | 690.094 |
| ENSMUSG00000054320 | 14_Lrrc36  | 32.4278 | -0.07069 | 0.897619 | 0.97171  | 17.1912 | 35.1386 | 42.4006 | 21.4576 | 36.056  | 42.3226 |
| ENSMUSG00000054321 | 6_Taf4b    | 175.19  | 0.58712  | 0.186322 | 0.573401 | 326.632 | 171.159 | 133.407 | 128.746 | 175.988 | 115.212 |
| ENSMUSG00000054325 | 5_Lce3a    | 244.504 | 0.50384  | 0.237899 | 0.630377 | 174.945 | 296.978 | 388.845 | 271.521 | 185.431 | 149.305 |
| ENSMUSG00000054342 | 8_Kcnn4    | 68.7039 | 0.93248  | 0.160039 | 0.538369 | 22.2474 | 142.821 | 105.484 | 61.0716 | 30.0467 | 50.552  |
| ENSMUSG00000054360 | 3_Bsx      | 0.13755 | -0.79206 | 0.84609  | NA       | 0       | 0       | 0       | 0.82529 | 0       | 0       |
| ENSMUSG00000054362 | 9_Lexm     | 3.12205 | 1.73003  | 0.197132 | 0.58958  | 6.06747 | 2.26701 | 6.20497 | 2.47588 | 1.71695 | 0       |
| ENSMUSG00000054364 | 4_Rhob     | 1520.47 | 0.28118  | 0.266163 | 0.654446 | 1844.51 | 1503.02 | 1656.73 | 1484.7  | 1198.43 | 1435.44 |
| ENSMUSG00000054381 | 5_Zfp747   | 180.735 | 0.13644  | 0.716491 | 0.912108 | 130.451 | 197.23  | 239.925 | 182.39  | 132.205 | 202.208 |
| ENSMUSG00000054383 | 2_Pnma1    | 12.2237 | -0.02636 | 0.968249 | 0.991244 | 8.08995 | 14.7355 | 13.4441 | 13.2047 | 8.58477 | 15.2832 |
| ENSMUSG00000054385 | 14_Ceaca   | 8.74352 | 0.02281  | 0.978137 | 0.993796 | 11.1237 | 11.335  | 4.13665 | 7.42763 | 13.7356 | 4.70251 |
| ENSMUSG00000054387 | 13_Mdm4    | 3817.45 | 0.27028  | 0.476206 | 0.807493 | 6159.49 | 3093.33 | 3268.98 | 2861.29 | 4082.92 | 3438.71 |
| ENSMUSG00000054400 | 15_Ckif    | 151.423 | 0.25772  | 0.371174 | 0.742177 | 180.001 | 170.025 | 144.783 | 132.047 | 147.658 | 134.022 |
| ENSMUSG00000054404 | 12_Slfn5   | 1633.88 | 2.6106   | 3.27E-14 | 1.32E-11 | 3394.75 | 3165.87 | 1863.56 | 408.52  | 539.124 | 431.455 |
| ENSMUSG00000054405 | 14_Dnajc1  | 3612.36 | 0.00279  | 0.992442 | 0.997676 | 4576.89 | 3045.72 | 3224.52 | 3149.32 | 3755.84 | 3921.89 |
| ENSMUSG00000054408 | 9_Spcs3    | 2230.28 | 0.55517  | 0.240103 | 0.631907 | 4584.98 | 1756.93 | 1620.53 | 1492.13 | 2184.82 | 1742.28 |
| ENSMUSG00000054409 | 4_Tmem7    | 8.60101 | -2.3895  | 0.0175   | 0.148366 | 6.06747 | 1.1335  | 1.03416 | 14.8553 | 21.4619 | 7.05377 |
| ENSMUSG00000054414 | 4_Slc30a7  | 2446.92 | 0.30464  | 0.407162 | 0.764774 | 3964.08 | 2084.51 | 2064.19 | 1921.28 | 2478.42 | 2169.03 |
| ENSMUSG00000054423 | 13_Cadps   | 72.684  | -1.59223 | 0.015436 | 0.135294 | 57.6409 | 28.3376 | 22.7516 | 170.836 | 123.621 | 32.9176 |
| ENSMUSG00000054428 | 12_Atpif1  | 2546.35 | -0.23235 | 0.374312 | 0.744881 | 1998.22 | 2302.14 | 2725.02 | 3028.82 | 2572.86 | 2651.04 |
| ENSMUSG00000054434 | 14_Tmem    | 54.4505 | -0.42503 | 0.442402 | 0.787432 | 17.1912 | 64.6097 | 57.913  | 73.451  | 61.8103 | 51.7276 |
| ENSMUSG00000054435 | 16_Gimap   | 149.091 | 1.08313  | 0.022897 | 0.178488 | 325.621 | 173.426 | 108.587 | 79.2281 | 112.46  | 95.2259 |

|                    |           |         |          |          |          |         |         |         |         |         |         |
|--------------------|-----------|---------|----------|----------|----------|---------|---------|---------|---------|---------|---------|
| ENSMUSG00000054450 | 1_Gm994   | 0.14308 | -0.79206 | 0.84609  | NA       | 0       | 0       | 0       | 0       | 0.85848 | 0       |
| ENSMUSG00000054452 | 9_Aes     | 3397.11 | -0.09857 | 0.863888 | 0.961737 | 939.446 | 4021.67 | 4882.28 | 4413.66 | 2442.37 | 3683.24 |
| ENSMUSG00000054453 | 11_Sytl5  | 16.4978 | 0.17263  | 0.766936 | 0.930427 | 19.2136 | 14.7355 | 18.6149 | 13.2047 | 21.4619 | 11.7563 |
| ENSMUSG00000054455 | 4_Vapb    | 2062.31 | -0.0218  | 0.923271 | 0.978561 | 2007.32 | 2011.97 | 2121.07 | 2262.13 | 1959.9  | 2011.5  |
| ENSMUSG00000054459 | 6_Vsn1    | 1072.35 | 0.19926  | 0.549308 | 0.843853 | 1586.64 | 905.669 | 946.258 | 923.502 | 1019.87 | 1052.19 |
| ENSMUSG00000054469 | 13_Lclat1 | 744.34  | 0.15073  | 0.619292 | 0.877704 | 1001.13 | 642.696 | 705.298 | 628.873 | 716.828 | 771.212 |
| ENSMUSG00000054474 | 15_Thnsl2 | 261.116 | -0.20173 | 0.592003 | 0.865686 | 143.597 | 294.711 | 290.599 | 282.25  | 291.024 | 264.516 |
| ENSMUSG00000054477 | 14_Kcnn2  | 10.384  | -1.23981 | 0.208684 | 0.600293 | 10.1124 | 2.26701 | 6.20497 | 17.3311 | 24.0374 | 2.35126 |
| ENSMUSG00000054484 | 14_Tmem   | 384.178 | 0.42865  | 0.184297 | 0.571207 | 576.409 | 372.922 | 373.332 | 323.515 | 370.862 | 288.029 |
| ENSMUSG00000054499 | 9_Dedd2   | 687.034 | 0.38451  | 0.414891 | 0.76951  | 324.609 | 969.145 | 1040.37 | 613.192 | 504.784 | 670.108 |
| ENSMUSG00000054509 | 7_Parp4   | 2413.22 | 0.60421  | 0.031057 | 0.216653 | 3144.97 | 3030.99 | 2557.48 | 1511.11 | 2099.83 | 2134.94 |
| ENSMUSG00000054510 | 5_Gm144   | 0.51538 | 1.15053  | 0.76193  | NA       | 0       | 2.26701 | 0       | 0.82529 | 0       | 0       |
| ENSMUSG00000054517 | 9_Trim65  | 223.634 | 0.09542  | 0.724907 | 0.915555 | 237.642 | 225.567 | 229.584 | 187.341 | 230.072 | 231.599 |
| ENSMUSG00000054519 | 8_Zfp867  | 657.82  | 0.25866  | 0.529331 | 0.83607  | 1135.63 | 490.807 | 523.286 | 553.771 | 643.858 | 599.57  |
| ENSMUSG00000054520 | 15_Sh3bp  | 653.448 | 0.72974  | 0.111332 | 0.453007 | 365.059 | 1179.98 | 900.755 | 471.242 | 446.408 | 557.248 |
| ENSMUSG00000054537 | 8_Tmprss  | 6051.01 | 0.58515  | 0.168372 | 0.549451 | 11660.7 | 5243.58 | 4880.21 | 3906.11 | 5235.85 | 5379.67 |
| ENSMUSG00000054545 | 17_Ugt1a1 | 3142.69 | 0.52411  | 0.06353  | 0.332874 | 3640.48 | 3867.51 | 3613.36 | 1974.1  | 2688.75 | 3071.92 |
| ENSMUSG00000054555 | 11_Adam   | 38.5509 | -1.40859 | 0.002668 | 0.040021 | 26.2924 | 22.6701 | 14.4783 | 66.8487 | 57.518  | 43.4982 |
| ENSMUSG00000054568 | 7_Usp17k  | 0       | NA       | NA       | NA       | 0       | 0       | 0       | 0       | 0       | 0       |
| ENSMUSG00000054580 | 14_Pla2r1 | 336.704 | 0.14627  | 0.72284  | 0.914307 | 517.757 | 269.774 | 274.053 | 379.634 | 357.985 | 221.018 |
| ENSMUSG00000054582 | 4_Pabpc1  | 22.9417 | -1.13585 | 0.039109 | 0.24866  | 11.1237 | 10.2015 | 21.7174 | 35.4876 | 30.9052 | 28.2151 |
| ENSMUSG00000054589 | 1_Gm994   | 8.99193 | -0.36182 | 0.627695 | 0.880942 | 6.06747 | 11.335  | 6.20497 | 7.42763 | 11.1602 | 11.7563 |
| ENSMUSG00000054594 | 13_Oscar  | 0       | NA       | NA       | NA       | 0       | 0       | 0       | 0       | 0       | 0       |
| ENSMUSG00000054598 | 13_91302  | 17.7327 | 0.8705   | 0.114861 | 0.460559 | 20.2249 | 21.5366 | 26.8882 | 9.90351 | 13.7356 | 14.1075 |
| ENSMUSG00000054604 | 7_Cggbp1  | 3652.12 | 0.6706   | 0.128445 | 0.486878 | 7513.55 | 3066.13 | 2878.07 | 2561.71 | 3077.64 | 2815.63 |
| ENSMUSG00000054611 | 16_Kdm2a  | 4111.78 | 0.41201  | 0.075219 | 0.367057 | 4721.5  | 4978.34 | 4384.84 | 3189.75 | 3731.8  | 3664.43 |
| ENSMUSG00000054612 | 3_Mgmt    | 110.213 | 0.11527  | 0.85253  | 0.957929 | 27.3036 | 155.29  | 161.329 | 121.318 | 86.7062 | 109.333 |
| ENSMUSG00000054618 | 8_Gm995   | 0.62706 | 0.22967  | 0.938749 | NA       | 1.01124 | 0       | 1.03416 | 0       | 1.71695 | 0       |
| ENSMUSG00000054619 | 6_Mett17a | 1292    | 0.15915  | 0.59338  | 0.866332 | 1674.62 | 1070.03 | 1344.41 | 1222.26 | 1072.24 | 1368.43 |
| ENSMUSG00000054622 | 4_D73004  | 0.84337 | -0.4151  | 0.862469 | NA       | 0       | 1.1335  | 1.03416 | 0       | 1.71695 | 1.17563 |
| ENSMUSG00000054626 | 11_Xlr    | 32.9888 | 0.31874  | 0.638498 | 0.886331 | 73.8208 | 21.5366 | 14.4783 | 32.1864 | 30.0467 | 25.8638 |
| ENSMUSG00000054640 | 14_Slc8a1 | 86.5711 | -0.72156 | 0.033527 | 0.226356 | 69.7759 | 62.3427 | 64.118  | 100.686 | 129.63  | 92.8746 |
| ENSMUSG00000054641 | 10_Mmrn1  | 69.973  | -0.07469 | 0.901635 | 0.973437 | 124.383 | 28.3376 | 51.7081 | 54.4693 | 102.159 | 58.7814 |
| ENSMUSG00000054648 | 7_Zfp869  | 631.441 | 0.15385  | 0.178104 | 0.912538 | 1064.84 | 453.401 | 476.748 | 495.175 | 673.046 | 625.434 |
| ENSMUSG00000054659 | 13_Pm20a  | 30.771  | -0.99133 | 0.040653 | 0.254269 | 22.2474 | 15.869  | 23.7857 | 48.6922 | 44.6408 | 29.3907 |
| ENSMUSG00000054662 | 7_Ano9    | 538.635 | 0.59448  | 0.041382 | 0.25744  | 558.207 | 671.034 | 714.606 | 340.846 | 472.162 | 474.954 |
| ENSMUSG00000054667 | 7_Irs4    | 2.41093 | 2.85022  | 0.094691 | 0.41805  | 4.04498 | 5.66751 | 3.10248 | 1.65058 | 0       | 0       |
| ENSMUSG00000054672 | 12_58304  | 1.3477  | 0.25887  | 0.90215  | NA       | 0       | 3.40051 | 1.03416 | 2.47588 | 0       | 1.17563 |
| ENSMUSG00000054675 | 5_Tmem1   | 140.858 | -0.81666 | 0.119018 | 0.469314 | 45.506  | 94.0807 | 166.5   | 228.606 | 127.055 | 183.398 |
| ENSMUSG00000054676 | 15_16000  | 7064.76 | 0.25004  | 0.484095 | 0.812163 | 4709.36 | 9472.68 | 8844.15 | 5950.36 | 6096.05 | 7315.93 |
| ENSMUSG00000054679 | 8_Srsf12  | 27.2228 | -1.21767 | 0.020833 | 0.167144 | 23.2586 | 11.335  | 14.4783 | 47.867  | 33.4806 | 32.9176 |
| ENSMUSG00000054690 | 17_Emcn   | 436.382 | -0.76253 | 0.091907 | 0.413147 | 537.982 | 208.565 | 224.413 | 605.765 | 598.358 | 443.212 |
| ENSMUSG00000054693 | 14_Adam   | 4343.54 | 0.57783  | 0.170855 | 0.553078 | 8344.79 | 3845.98 | 3414.8  | 2907.5  | 3851.99 | 3696.17 |
| ENSMUSG00000054702 | 14_Ap1s3  | 941.628 | 0.98893  | 0.032429 | 0.222587 | 2127.66 | 852.394 | 776.655 | 519.109 | 729.705 | 644.244 |
| ENSMUSG00000054708 | 17_Ankrd  | 381.971 | -0.49202 | 0.254527 | 0.614155 | 171.912 | 338.917 | 441.587 | 436.58  | 436.106 | 466.724 |
| ENSMUSG00000054715 | 10_Zscan  | 291.423 | 0.11184  | 0.698597 | 0.905638 | 266.969 | 290.177 | 350.581 | 241.811 | 281.58  | 317.42  |
| ENSMUSG00000054716 | 4_Zfp771  | 37.4464 | -0.28822 | 0.709659 | 0.910052 | 5.05622 | 45.3401 | 50.6739 | 39.614  | 24.0374 | 59.957  |
| ENSMUSG00000054717 | 6_Hmgb2   | 3352.89 | 0.3699   | 0.28381  | 0.670589 | 5206.9  | 3201.01 | 2932.88 | 2371.06 | 3199.54 | 3205.94 |
| ENSMUSG00000054720 | 12_Lrrc8c | 327.658 | 0.06799  | 0.811898 | 0.946139 | 396.408 | 335.517 | 274.053 | 297.931 | 330.514 | 331.527 |
| ENSMUSG00000054723 | 5_Vmac    | 370.279 | -0.64845 | 0.016263 | 0.140285 | 255.845 | 276.575 | 333     | 493.525 | 430.097 | 432.631 |
| ENSMUSG00000054727 | 2_170001  | 0.14308 | -0.79206 | 0.84609  | NA       | 0       | 0       | 0       | 0       | 0.85848 | 0       |
| ENSMUSG00000054728 | 16_Phactr | 258.393 | -0.29142 | 0.375303 | 0.745448 | 217.418 | 276.575 | 203.73  | 357.352 | 269.562 | 225.721 |
| ENSMUSG00000054733 | 8_Msra    | 267.434 | 0.02058  | 0.947831 | 0.986859 | 207.305 | 279.975 | 320.59  | 275.648 | 228.355 | 292.731 |
| ENSMUSG00000054737 | 11_Zfp18k | 356.851 | 0.24257  | 0.637015 | 0.885525 | 698.77  | 250.504 | 210.969 | 269.045 | 402.626 | 309.19  |
| ENSMUSG00000054752 | 16_Fsd1l  | 142.218 | -0.36199 | 0.565562 | 0.851338 | 257.867 | 55.5416 | 59.9814 | 182.39  | 181.139 | 116.387 |
| ENSMUSG00000054753 | 9_AU018c  | 22.9211 | 1.1818   | 0.080779 | 0.382701 | 34.3823 | 44.2066 | 16.5466 | 5.77705 | 15.4526 | 21.1613 |
| ENSMUSG00000054758 | 4_Gm995   | 1.51908 | -2.81154 | 0.168946 | NA       | 1.01124 | 0       | 0       | 0.82529 | 2.57543 | 4.70251 |
| ENSMUSG00000054763 | 9_Defb42  | 0.47845 | 1.02683  | 0.749277 | NA       | 1.01124 | 0       | 1.03416 | 0.82529 | 0       | 0       |
| ENSMUSG00000054764 | 8_Mtnr1a  | 0.19594 | -0.79206 | 0.84609  | NA       | 0       | 0       | 0       | 0       | 0       | 1.17563 |
| ENSMUSG00000054766 | 13_Set    | 6360.09 | 0.36801  | 0.288681 | 0.673672 | 9915.25 | 6340.82 | 5244.23 | 4643.92 | 5810.17 | 6206.14 |
| ENSMUSG00000054770 | 16_Kctd1f | 361.522 | 0.22223  | 0.531179 | 0.8369   | 540.004 | 292.444 | 335.068 | 285.551 | 343.391 | 372.674 |
| ENSMUSG00000054792 | 15_Klhl18 | 713.37  | 0.15041  | 0.713075 | 0.910879 | 409.554 | 1008.82 | 833.534 | 814.564 | 600.075 | 613.678 |
| ENSMUSG00000054793 | 8_Cadm4   | 992.825 | 0.65714  | 0.231896 | 0.62335  | 370.115 | 1724.06 | 1551.24 | 902.045 | 611.236 | 798.251 |
| ENSMUSG00000054808 | 13_Actn4  | 44070.3 | 0.68933  | 0.225333 | 0.615493 | 14915.9 | 77815   | 70478.1 | 33817.2 | 27169.1 | 40226.5 |
| ENSMUSG00000054814 | 14_Usp46  | 2471.14 | 0.1966   | 0.560799 | 0.849084 | 3684.97 | 2060.71 | 2171.74 | 2056.63 | 2383.99 | 2468.82 |
| ENSMUSG00000054823 | 15_Vhsc   | 3071.72 | 0.53279  | 0.071978 | 0.357998 | 4525.32 | 3403.91 | 2968.04 | 2134.21 | 2669    | 2729.81 |
| ENSMUSG00000054836 | 12_Elp6   | 101.356 | 0.13852  | 0.748966 | 0.924897 | 56.6297 | 136.02  | 126.168 | 104.812 | 89.2816 | 95.2259 |
| ENSMUSG00000054843 | 8_Atnrl1  | 1422.37 | -0.48259 | 0.197336 | 0.589685 | 1736.31 | 807.054 | 1016.58 | 1765.3  | 1777.05 | 1431.91 |
| ENSMUSG00000054850 | 4_Smim1f  | 20.8061 | -1.99719 | 0.002428 | 0.037318 | 8.08995 | 3.40051 | 13.4441 | 45.3911 | 27.4713 | 27.0394 |
| ENSMUSG00000054855 | 13_Rnd1   | 38.4885 | 0.81512  | 0.125849 | 0.482311 | 28.3148 | 69.1437 | 49.6398 | 30.5358 | 18.028  | 35.2688 |
| ENSMUSG00000054863 | 8_Fam19e  | 73.4275 | -1.1352  | 0.002688 | 0.040207 | 42.4723 | 39.6726 | 55.8447 | 113.065 | 110.744 | 78.7671 |
| ENSMUSG00000054871 | 4_Tmem1   | 61.6124 | 0.26245  | 0.590748 | 0.865078 | 107.192 | 38.5391 | 55.8447 | 57.7705 | 60.9519 | 49.3764 |
| ENSMUSG00000054874 | 12_Pcnxl2 | 994.031 | 0.45038  | 0.535134 | 0.83862  | 139.552 | 1618.64 | 1685.68 | 1033.27 | 601.792 | 885.248 |
| ENSMUSG00000054885 | 11_49305  | 1.04269 | 0.01843  | 0.993449 | NA       | 1.01124 | 0       | 2.06832 | 0.82529 | 0       | 2.35126 |
| ENSMUSG00000054889 | 9_Dsp     | 92642.4 | 0.67024  | 0.037717 | 0.24319  | 90912.9 | 130669  | 119767  | 56967.5 | 65070.8 | 92466.7 |

|                    |           |         |          |          |          |         |         |         |         |         |         |
|--------------------|-----------|---------|----------|----------|----------|---------|---------|---------|---------|---------|---------|
| ENSMUSG00000054892 | 14_Txk    | 12.597  | 2.82575  | 0.000229 | 0.00642  | 17.1912 | 28.3376 | 20.6832 | 4.12646 | 1.71695 | 3.52688 |
| ENSMUSG00000054893 | 15_Zfp667 | 84.8645 | -0.2284  | 0.644014 | 0.889191 | 125.394 | 40.8061 | 68.2547 | 90.7822 | 109.885 | 74.0646 |
| ENSMUSG00000054894 | 5_Atp5s   | 218.971 | 0.13632  | 0.796875 | 0.939968 | 417.644 | 121.285 | 148.919 | 174.962 | 265.269 | 185.749 |
| ENSMUSG00000054901 | 5_Arhgef3 | 8.29443 | -0.8381  | 0.28286  | 0.669522 | 9.1012  | 4.53401 | 4.13665 | 9.07822 | 11.1602 | 11.7563 |
| ENSMUSG00000054905 | 2_Stfa3   | 278.407 | 0.63885  | 0.162107 | 0.540795 | 537.982 | 275.441 | 203.73  | 169.185 | 280.722 | 203.384 |
| ENSMUSG00000054920 | 12_Klhl5  | 402.159 | -0.18984 | 0.466742 | 0.803611 | 411.576 | 357.053 | 358.854 | 478.67  | 422.371 | 384.43  |
| ENSMUSG00000054931 | 6_Zkscan  | 89.4564 | -0.3879  | 0.24712  | 0.638878 | 87.9783 | 75.9447 | 68.2547 | 89.1316 | 97.8664 | 117.563 |
| ENSMUSG00000054932 | 6_Afp     | 0.33708 | 1.97061  | 0.625968 | NA       | 2.02249 | 0       | 0       | 0       | 0       | 0       |
| ENSMUSG00000054934 | 10_Kcnmt  | 9.18621 | -1.73636 | 0.037534 | 0.242551 | 6.06747 | 5.66751 | 1.03416 | 15.6806 | 13.7356 | 12.9319 |
| ENSMUSG00000054939 | 6_Zfp174  | 147.551 | -0.10717 | 0.766387 | 0.930427 | 192.136 | 117.884 | 115.826 | 130.396 | 156.243 | 172.817 |
| ENSMUSG00000054942 | 13_Fam72c | 331.768 | -0.95322 | 0.053876 | 0.302008 | 400.453 | 120.151 | 157.193 | 444.833 | 485.898 | 382.079 |
| ENSMUSG00000054944 | 7_533041  | 0.16854 | 1.1315   | 0.781553 | NA       | 1.01124 | 0       | 0       | 0       | 0       | 0       |
| ENSMUSG00000054945 | 3_Gm995   | 55.6397 | -0.15904 | 0.794275 | 0.9386   | 102.136 | 30.6046 | 24.8199 | 47.867  | 66.1027 | 62.3083 |
| ENSMUSG00000054951 | 2_913000  | 357.183 | 0.77135  | 0.027747 | 0.20112  | 615.848 | 377.456 | 357.82  | 219.528 | 296.175 | 276.273 |
| ENSMUSG00000054958 | 6_Nt5c1a  | 0.2751  | -1.54073 | 0.703687 | NA       | 0       | 0       | 0       | 1.65058 | 0       | 0       |
| ENSMUSG00000054966 | 13_Lmntd  | 4.19799 | -1.57816 | 0.166105 | 0.545562 | 1.01124 | 1.1335  | 4.13665 | 4.12646 | 7.72629 | 7.05377 |
| ENSMUSG00000054967 | 6_Zfp647  | 13.4064 | -0.93784 | 0.353471 | 0.729327 | 1.01124 | 9.06802 | 17.5807 | 33.837  | 6.00934 | 12.9319 |
| ENSMUSG00000054976 | 14_Nyap2  | 14.9769 | -1.73916 | 0.101816 | 0.434051 | 16.1799 | 4.53401 | 0       | 37.9634 | 20.6034 | 10.5807 |
| ENSMUSG00000054978 | 3_Kbtbd1  | 37.0418 | -0.01744 | 0.969617 | 0.991889 | 42.4723 | 40.8061 | 26.8882 | 33.837  | 30.0467 | 48.2007 |
| ENSMUSG00000054986 | 13_Sec14  | 0.44364 | -0.57976 | 0.883757 | NA       | 1.01124 | 0       | 0       | 1.65058 | 0       | 0       |
| ENSMUSG00000054988 | 9_Agr1b   | 1.10169 | 0.64603  | 0.767347 | NA       | 3.03373 | 0       | 1.03416 | 0.82529 | 1.71695 | 0       |
| ENSMUSG00000054994 | 2_AV320E  | 1.23564 | -1.38298 | 0.465141 | NA       | 1.01124 | 0       | 1.03416 | 2.47588 | 1.71695 | 1.17563 |
| ENSMUSG00000054999 | 2_Naaladl | 7.11212 | 0.23637  | 0.783928 | 0.935592 | 5.05622 | 6.80102 | 11.3758 | 9.90351 | 6.00934 | 3.52688 |
| ENSMUSG00000055003 | 14_Lrtm2  | 128.807 | -1.74489 | 0.000669 | 0.014628 | 53.5959 | 34.0051 | 89.9721 | 305.358 | 147.658 | 142.251 |
| ENSMUSG00000055013 | 14_Agap1  | 591.671 | -0.27676 | 0.346999 | 0.724502 | 424.723 | 539.547 | 641.18  | 732.034 | 590.632 | 621.907 |
| ENSMUSG00000055015 | 5_Gm996   | 0.68944 | 2.99651  | 0.450864 | NA       | 0       | 0       | 4.13665 | 0       | 0       | 0       |
| ENSMUSG00000055022 | 14_Cntn1  | 454.52  | -1.21328 | 0.018883 | 0.156645 | 481.352 | 142.821 | 197.525 | 780.727 | 697.942 | 426.753 |
| ENSMUSG00000055024 | 12_Ep300  | 3018.76 | 0.60145  | 0.0056   | 0.066816 | 3789.13 | 3651.01 | 3476.85 | 2320.72 | 2416.61 | 2458.24 |
| ENSMUSG00000055026 | 12_Gabrg  | 20.3382 | -3.39942 | 3.75E-06 | 0.002233 | 2.02249 | 2.26701 | 6.20497 | 39.614  | 24.8958 | 47.0251 |
| ENSMUSG00000055027 | 17_Smyd7  | 189.256 | -0.60993 | 0.310029 | 0.692089 | 272.025 | 52.1411 | 125.134 | 301.232 | 141.649 | 243.355 |
| ENSMUSG00000055030 | 1_Sprr2e  | 0.56675 | 2.70271  | 0.498103 | NA       | 0       | 3.40051 | 0       | 0       | 0       | 0       |
| ENSMUSG00000055041 | 7_Commnd  | 261.641 | 0.1694   | 0.714073 | 0.91112  | 123.372 | 357.053 | 350.581 | 266.569 | 207.751 | 264.516 |
| ENSMUSG00000055044 | 12_Pdlim1 | 5278    | 0.56382  | 0.103851 | 0.437773 | 4112.73 | 7813.24 | 6963.01 | 3702.26 | 4102.66 | 4974.08 |
| ENSMUSG00000055045 | 5_Gm111   | 0       | NA       | NA       | NA       | 0       | 0       | 0       | 0       | 0       | 0       |
| ENSMUSG00000055053 | 17_Nfic   | 1017.69 | -0.1615  | 0.713587 | 0.911072 | 526.858 | 965.744 | 1389.91 | 1412.9  | 804.393 | 1006.34 |
| ENSMUSG00000055065 | 6_Ddx17   | 10996.2 | -0.1134  | 0.615561 | 0.876383 | 11331   | 10041.7 | 10319.9 | 10646.3 | 12213.6 | 11424.8 |
| ENSMUSG00000055067 | 15_Smyd3  | 214.022 | -0.47262 | 0.127292 | 0.485143 | 185.058 | 158.69  | 194.422 | 293.804 | 255.826 | 196.33  |
| ENSMUSG00000055069 | 3_Rab39   | 8.47428 | 0.94297  | 0.233064 | 0.624922 | 17.1912 | 9.06802 | 7.23913 | 5.77705 | 6.86782 | 4.70251 |
| ENSMUSG00000055078 | 7_Gabra5  | 3.40767 | -0.28197 | 0.864802 | 0.962077 | 5.05622 | 0       | 4.13665 | 0       | 7.72629 | 3.52688 |
| ENSMUSG00000055102 | 15_Zfp815 | 0.76079 | -0.3439  | 0.902119 | NA       | 2.02249 | 0       | 0       | 0.82529 | 1.71695 | 0       |
| ENSMUSG00000055108 | 6_Phrx2   | 1.08282 | -0.98154 | 0.668297 | NA       | 1.01124 | 1.1335  | 0       | 0.82529 | 0       | 3.52688 |
| ENSMUSG00000055116 | 7_Arntl   | 719.987 | -0.95481 | 0.001112 | 0.021204 | 518.768 | 569.018 | 382.64  | 869.858 | 1079.11 | 900.531 |
| ENSMUSG00000055125 | 7_M5C10i  | 2.27263 | -1.75265 | 0.247368 | 0.638878 | 2.02249 | 0       | 1.03416 | 3.30117 | 2.57543 | 4.70251 |
| ENSMUSG00000055128 | 14_Cgrf1  | 466.854 | 0.11539  | 0.719443 | 0.913031 | 643.151 | 384.257 | 429.177 | 475.368 | 463.578 | 405.592 |
| ENSMUSG00000055137 | 6_Sugct   | 39.8479 | -0.64355 | 0.260194 | 0.649568 | 49.551  | 15.869  | 27.9224 | 47.0417 | 66.9612 | 31.742  |
| ENSMUSG00000055138 | 9_Gm486   | 0.16854 | 1.1315   | 0.781553 | NA       | 1.01124 | 0       | 0       | 0       | 0       | 0       |
| ENSMUSG00000055148 | 7_Klf2    | 97.9304 | 0.14491  | 0.746143 | 0.924339 | 140.563 | 79.3452 | 88.9379 | 133.697 | 81.5553 | 63.4839 |
| ENSMUSG00000055150 | 14_Zfp78  | 43.4181 | -0.14244 | 0.757323 | 0.927624 | 60.6747 | 35.1386 | 27.9224 | 44.5658 | 46.3578 | 45.8495 |
| ENSMUSG00000055170 | 3_lfng    | 8.58537 | 4.6406   | 0.000333 | 0.008517 | 13.1462 | 21.5366 | 14.4783 | 0       | 0       | 2.35126 |
| ENSMUSG00000055172 | 10_C1ra   | 2037.96 | 0.64992  | 0.014785 | 0.131656 | 2040.69 | 2874.56 | 2553.34 | 1575.48 | 1711.8  | 1471.89 |
| ENSMUSG00000055177 | 15_Cstl1  | 0.76079 | -0.3439  | 0.902119 | NA       | 2.02249 | 0       | 0       | 0.82529 | 1.71695 | 0       |
| ENSMUSG00000055184 | 4_Fam72c  | 48.9697 | 0.45931  | 0.379479 | 0.747395 | 79.8883 | 63.4762 | 26.8882 | 37.9634 | 51.5086 | 34.0932 |
| ENSMUSG00000055194 | 3_Actbl2  | 0.44364 | -0.57976 | 0.883757 | NA       | 1.01124 | 0       | 0       | 1.65058 | 0       | 0       |
| ENSMUSG00000055197 | 4_Fev     | 0.32647 | 0.16972  | 0.966824 | NA       | 0       | 1.1335  | 0       | 0.82529 | 0       | 0       |
| ENSMUSG00000055198 | 3_Gm128   | 0.19594 | -0.79206 | 0.84609  | NA       | 0       | 0       | 0       | 0       | 0       | 1.17563 |
| ENSMUSG00000055200 | 7_Sertad3 | 241.007 | 0.04959  | 0.909227 | 0.974731 | 124.383 | 319.648 | 291.634 | 281.425 | 200.884 | 228.072 |
| ENSMUSG00000055202 | 10_Zfp817 | 35.481  | -1.33782 | 0.014141 | 0.127895 | 33.3711 | 11.335  | 15.5124 | 47.0417 | 60.9519 | 44.6739 |
| ENSMUSG00000055204 | 14_Ankrd  | 4956.38 | 0.43272  | 0.166102 | 0.545562 | 7199.05 | 5186.91 | 4696.13 | 3362.24 | 4634.92 | 4659.01 |
| ENSMUSG00000055210 | 4_Foxd2   | 9.24111 | -1.08368 | 0.158459 | 0.536802 | 6.06747 | 3.40051 | 8.27329 | 16.5058 | 9.44325 | 11.7563 |
| ENSMUSG00000055214 | 15_Pld5   | 910.723 | -1.11094 | 0.005476 | 0.065844 | 796.861 | 349.119 | 583.267 | 1496.26 | 1297.16 | 941.678 |
| ENSMUSG00000055228 | 7_Zfp935  | 164.745 | 0.73362  | 0.185824 | 0.573178 | 394.385 | 111.083 | 111.689 | 118.017 | 132.205 | 121.09  |
| ENSMUSG00000055235 | 11_Wdr86  | 50.3124 | -1.3711  | 0.013402 | 0.123534 | 17.1912 | 22.6701 | 44.4689 | 96.5592 | 79.8384 | 41.147  |
| ENSMUSG00000055239 | 10_Kcmf1  | 2232.29 | 0.42394  | 0.16298  | 0.541016 | 3311.83 | 2250    | 2111.76 | 1686.9  | 2085.24 | 1948.02 |
| ENSMUSG00000055240 | 16_Zfp107 | 476.468 | 0.47647  | 0.300485 | 0.683516 | 905.064 | 354.786 | 403.323 | 297.105 | 508.218 | 390.308 |
| ENSMUSG00000055254 | 14_Ntrk2  | 2296.74 | -1.12853 | 0.000584 | 0.013091 | 1713.05 | 946.475 | 1665    | 3230.19 | 3129.15 | 3096.6  |
| ENSMUSG00000055271 | 4_933016  | 5.94274 | 0.02665  | 0.976956 | 0.993796 | 4.04498 | 7.93452 | 6.20497 | 8.25292 | 6.86782 | 2.35126 |
| ENSMUSG00000055296 | 14_Tmem   | 3519.44 | 0.20034  | 0.606564 | 0.871949 | 5746.9  | 2714.74 | 2828.43 | 2870.37 | 3678.57 | 3277.65 |
| ENSMUSG00000055301 | 8_Adh7    | 7330.58 | 0.41042  | 0.223152 | 0.613683 | 11326.9 | 6284.14 | 7487.33 | 5247.21 | 6534.73 | 7103.14 |
| ENSMUSG00000055302 | 5_Mrfap1  | 5334.62 | 0.18225  | 0.658074 | 0.894702 | 8983.89 | 3987.66 | 4041.5  | 4201.56 | 5375.78 | 5417.29 |
| ENSMUSG00000055305 | 15_Zfp93  | 171.635 | -0.31288 | 0.27007  | 0.656915 | 143.597 | 143.955 | 171.671 | 174.962 | 205.176 | 190.452 |
| ENSMUSG00000055312 | 2_Them7   | 13.5034 | -1.62185 | 0.016922 | 0.144458 | 9.1012  | 4.53401 | 6.20497 | 27.2346 | 16.3111 | 17.6344 |
| ENSMUSG00000055313 | 14_Pgbd1  | 62.6512 | -0.15557 | 0.712459 | 0.910879 | 84.9445 | 45.3401 | 47.5714 | 72.6257 | 67.8197 | 57.6058 |
| ENSMUSG00000055319 | 8_Sec23ip | 1286.21 | 0.4894   | 0.095124 | 0.418593 | 1864.73 | 1411.21 | 1230.65 | 930.104 | 1146.07 | 1134.48 |
| ENSMUSG00000055320 | 16_Tead1  | 3512.25 | 0.38386  | 0.210981 | 0.602834 | 5197.8  | 3480.99 | 3251.4  | 2742.45 | 3380.68 | 3020.19 |
| ENSMUSG00000055322 | 14_Tns1   | 3004.76 | -1.12421 | 0.005044 | 0.062555 | 1220.57 | 1667.38 | 2781.89 | 5210.07 | 3746.39 | 3402.27 |

|                    |           |         |          |          |          |         |         |         |         |         |         |
|--------------------|-----------|---------|----------|----------|----------|---------|---------|---------|---------|---------|---------|
| ENSMUSG00000055333 | 14_Fat2   | 2341.51 | 0.96935  | 0.022397 | 0.176153 | 1705.97 | 4323.18 | 3270.02 | 1172.74 | 1617.37 | 1959.77 |
| ENSMUSG00000055334 | 4_Snupn   | 304.65  | 0.00572  | 0.98451  | 0.994896 | 379.217 | 278.842 | 257.506 | 288.852 | 310.769 | 312.717 |
| ENSMUSG00000055341 | 9_Zfp457  | 33.8669 | 0.55417  | 0.272889 | 0.659357 | 59.6634 | 36.2721 | 24.8199 | 25.5841 | 27.4713 | 29.3907 |
| ENSMUSG00000055357 | 8_A93340  | 0.4547  | -0.61836 | 0.875203 | NA       | 1.01124 | 0       | 0       | 0       | 1.71695 | 0       |
| ENSMUSG00000055360 | 13_Prl2c5 | 0.3409  | 1.98467  | 0.623395 | NA       | 1.01124 | 0       | 1.03416 | 0       | 0       | 0       |
| ENSMUSG00000055368 | 13_Slc6a2 | 15.5881 | -1.13141 | 0.107613 | 0.446368 | 8.08995 | 4.53401 | 16.5466 | 24.7588 | 13.7356 | 25.8638 |
| ENSMUSG00000055370 | 3_Gm996   | 2.17708 | 0.75337  | 0.679963 | 0.902142 | 6.06747 | 0       | 2.06832 | 0       | 2.57543 | 2.35126 |
| ENSMUSG00000055371 | 17_Stam2  | 1983.23 | 0.29102  | 0.34421  | 0.721706 | 2802.16 | 1976.83 | 1768.42 | 1516.89 | 1902.38 | 1932.73 |
| ENSMUSG00000055373 | 8_Fut9    | 379.732 | 0.75273  | 0.202022 | 0.593308 | 968.772 | 208.565 | 252.335 | 255.841 | 301.325 | 291.556 |
| ENSMUSG00000055385 | 11_Rnf21  | 0.14308 | -0.79206 | 0.84609  | NA       | 0       | 0       | 0       | 0       | 0.85848 | 0       |
| ENSMUSG00000055401 | 14_Fbxo6  | 626.328 | 0.15088  | 0.785086 | 0.936054 | 200.226 | 901.135 | 875.935 | 726.257 | 471.304 | 583.111 |
| ENSMUSG00000055407 | 13_Map6   | 75.1234 | -0.61166 | 0.103379 | 0.436784 | 50.5622 | 55.5416 | 72.3913 | 112.24  | 82.4138 | 77.5914 |
| ENSMUSG00000055409 | 13_Nell1  | 14.7382 | -0.71148 | 0.241985 | 0.633507 | 14.1574 | 6.80102 | 12.4099 | 16.5058 | 19.745  | 18.81   |
| ENSMUSG00000055415 | 7_Atp10b  | 943.731 | 0.97508  | 0.000503 | 0.011686 | 1441.02 | 1170.91 | 1140.68 | 519.109 | 687.64  | 703.025 |
| ENSMUSG00000055416 | 5_Fam13f  | 0.18892 | 1.1315   | 0.781553 | NA       | 0       | 1.1335  | 0       | 0       | 0       | 0       |
| ENSMUSG00000055421 | 8_Pcdh9   | 68.9146 | -0.8838  | 0.11656  | 0.464143 | 74.8321 | 39.6726 | 31.0248 | 123.794 | 103.017 | 41.147  |
| ENSMUSG00000055430 | 4_Nap115  | 380.087 | -1.1136  | 0.047563 | 0.279924 | 459.105 | 117.884 | 143.748 | 592.56  | 608.66  | 358.566 |
| ENSMUSG00000055435 | 6_Maf     | 490.905 | -0.36065 | 0.441732 | 0.786851 | 741.242 | 273.174 | 275.087 | 634.65  | 522.812 | 498.466 |
| ENSMUSG00000055436 | 18_Srsf11 | 3966.76 | 0.35117  | 0.322679 | 0.703332 | 6348.59 | 3418.64 | 3574.06 | 2975.18 | 3917.23 | 3566.85 |
| ENSMUSG00000055447 | 18_Cd47   | 3517.39 | 1.11294  | 0.008697 | 0.090942 | 7793.66 | 3609.07 | 3029.06 | 2079.74 | 2476.71 | 2116.13 |
| ENSMUSG00000055456 | 1_Gm997   | 3.95028 | -1.84999 | 0.159202 | 0.537367 | 4.04498 | 0       | 1.03416 | 3.30117 | 9.44325 | 5.87814 |
| ENSMUSG00000055471 | 6_Alk     | 42.7235 | 0.17198  | 0.764041 | 0.92974  | 16.1799 | 55.5416 | 64.118  | 41.2646 | 36.9145 | 42.3226 |
| ENSMUSG00000055480 | 6_Zfp458  | 118.526 | 0.5866   | 0.317534 | 0.698985 | 281.126 | 69.1437 | 76.528  | 89.9569 | 103.876 | 90.5233 |
| ENSMUSG00000055485 | 6_Soga1   | 164.411 | -1.20257 | 0.012414 | 0.117485 | 44.4948 | 106.549 | 147.885 | 277.298 | 197.45  | 212.789 |
| ENSMUSG00000055489 | 7_Ano5    | 112.165 | -0.94713 | 0.228741 | 0.619893 | 177.979 | 12.4685 | 39.2981 | 155.98  | 180.28  | 106.982 |
| ENSMUSG00000055491 | 13_Pprc1  | 759.951 | 0.4882   | 0.291948 | 0.676701 | 374.16  | 1243.45 | 1044.5  | 629.698 | 641.282 | 626.61  |
| ENSMUSG00000055493 | 4_Epm2a   | 339.948 | -0.67498 | 0.151716 | 0.525744 | 437.869 | 142.821 | 204.764 | 486.097 | 428.38  | 339.756 |
| ENSMUSG00000055494 | 5_Gm141   | 6.47084 | -0.09042 | 0.929061 | 0.981421 | 3.03373 | 4.53401 | 11.3758 | 12.3794 | 5.15086 | 2.35126 |
| ENSMUSG00000055523 | 6_Gucy2g  | 7.74845 | 0.79943  | 0.407387 | 0.764844 | 4.04498 | 9.06802 | 16.5466 | 10.7288 | 2.57543 | 3.52688 |
| ENSMUSG00000055531 | 12_Cpsf6  | 2237.02 | 0.44979  | 0.307411 | 0.690311 | 4287.68 | 1730.86 | 1730.15 | 1629.95 | 2162.5  | 1881    |
| ENSMUSG00000055538 | 7_Zcchc2  | 770.854 | -0.42526 | 0.153596 | 0.528907 | 750.343 | 537.28  | 686.683 | 1068.75 | 815.553 | 766.509 |
| ENSMUSG00000055540 | 15_Epha6  | 1.12167 | -2.32207 | 0.275017 | NA       | 1.01124 | 0       | 0       | 1.65058 | 1.71695 | 2.35126 |
| ENSMUSG00000055541 | 17_Lair1  | 121.605 | 1.29347  | 0.005268 | 0.064192 | 246.744 | 184.761 | 86.8696 | 82.5292 | 65.2443 | 63.4839 |
| ENSMUSG00000055546 | 6_Timd4   | 36.0982 | 1.76429  | 0.004092 | 0.053916 | 75.8433 | 56.6751 | 35.1615 | 28.8852 | 9.44325 | 10.5807 |
| ENSMUSG00000055547 | 4_Apobec  | 0.33708 | 1.97061  | 0.625968 | NA       | 2.02249 | 0       | 0       | 0       | 0       | 0       |
| ENSMUSG00000055553 | 16_Kxd1   | 552.091 | 0.05426  | 0.893705 | 0.971063 | 304.385 | 655.165 | 728.05  | 631.349 | 470.445 | 523.154 |
| ENSMUSG00000055555 | 1_493050  | 1.20763 | -1.28971 | 0.602848 | NA       | 0       | 0       | 2.06832 | 1.65058 | 0       | 3.52688 |
| ENSMUSG00000055560 | 7_Zfp459  | 80.6717 | 0.20616  | 0.699674 | 0.905844 | 153.709 | 56.6751 | 48.6056 | 62.7222 | 72.9705 | 89.3477 |
| ENSMUSG00000055561 | 9_Spink5  | 2330.45 | 1.73571  | 2.15E-05 | 0.000959 | 4927.79 | 3790.43 | 2035.23 | 814.564 | 1219.04 | 1195.61 |
| ENSMUSG00000055567 | 16_Unc80  | 150.419 | -1.41794 | 0.02965  | 0.210254 | 155.732 | 36.2721 | 53.7764 | 340.02  | 221.487 | 95.2259 |
| ENSMUSG00000055602 | 16_Tcp10  | 9.1917  | 0.72676  | 0.384703 | 0.750802 | 5.05622 | 18.136  | 11.3758 | 10.7288 | 5.15086 | 4.70251 |
| ENSMUSG00000055612 | 15_Cdca7  | 1991.71 | 0.48841  | 0.071209 | 0.356413 | 2334.96 | 2301.01 | 2340.31 | 1318.82 | 1698.93 | 1956.24 |
| ENSMUSG00000055629 | 4_B4gaint | 15.4953 | -0.34576 | 0.654638 | 0.893223 | 5.05622 | 22.6701 | 13.4441 | 28.8852 | 11.1602 | 11.7563 |
| ENSMUSG00000055632 | 17_Hmcr1  | 102.278 | -0.46393 | 0.551908 | 0.845171 | 20.2249 | 45.3401 | 192.354 | 185.691 | 58.3764 | 111.685 |
| ENSMUSG00000055633 | 5_Zfp580  | 24.9623 | -1.84432 | 0.000588 | 0.013152 | 9.1012  | 7.93452 | 15.5124 | 42.9152 | 34.3391 | 39.9713 |
| ENSMUSG00000055639 | 16_Dach1  | 644.124 | -0.47678 | 0.295886 | 0.679814 | 916.187 | 324.182 | 375.401 | 721.306 | 816.412 | 711.255 |
| ENSMUSG00000055652 | 14_Klhl25 | 468.664 | -0.11189 | 0.825003 | 0.949606 | 162.81  | 607.558 | 581.199 | 508.38  | 420.654 | 531.384 |
| ENSMUSG00000055653 | 13_Gpc3   | 1514.57 | -0.16122 | 0.470478 | 0.804531 | 1469.34 | 1327.33 | 1493.33 | 1625    | 1573.59 | 1598.85 |
| ENSMUSG00000055660 | 8_Mettl4  | 214.231 | 0.22726  | 0.611363 | 0.874284 | 374.16  | 168.892 | 149.953 | 162.583 | 224.062 | 205.735 |
| ENSMUSG00000055670 | 13_Zzf1   | 1963.6  | 0.34163  | 0.215802 | 0.607357 | 1756.53 | 2595.72 | 2232.75 | 1586.21 | 1778.76 | 1831.63 |
| ENSMUSG00000055675 | 6_Kbtbd1  | 1152.79 | 0.29971  | 0.278614 | 0.665799 | 1515.86 | 1139.17 | 1161.36 | 949.086 | 1187.27 | 964.015 |
| ENSMUSG00000055681 | 14_Cope   | 1432.86 | 0.3596   | 0.592789 | 0.866044 | 266.969 | 2252.27 | 2312.39 | 1555.68 | 923.721 | 1286.14 |
| ENSMUSG00000055691 | 5_Gja6    | 1.65851 | -1.12841 | 0.502642 | NA       | 2.02249 | 0       | 1.03416 | 1.65058 | 1.71695 | 3.52688 |
| ENSMUSG00000055692 | 18_Tmem   | 50.3393 | -1.05514 | 0.167078 | 0.54768  | 4.04498 | 36.2721 | 57.913  | 92.4327 | 54.9425 | 56.4301 |
| ENSMUSG00000055704 | 4_Gm997   | 1.31147 | -2.60317 | 0.298701 | NA       | 0       | 0       | 1.03416 | 0.82529 | 6.00934 | 0       |
| ENSMUSG00000055707 | 12_Klhl26 | 374.343 | 0.0237   | 0.949037 | 0.987126 | 225.507 | 434.132 | 472.612 | 359.002 | 356.268 | 398.538 |
| ENSMUSG00000055717 | 13_Slain1 | 40.2201 | -1.12289 | 0.018912 | 0.156811 | 27.3036 | 27.2041 | 21.7174 | 72.6257 | 58.3764 | 34.0932 |
| ENSMUSG00000055720 | 9_Ubl7    | 647.079 | 0.01263  | 0.97041  | 0.99208  | 419.666 | 774.182 | 755.972 | 655.282 | 606.085 | 671.283 |
| ENSMUSG00000055723 | 5_Rras2   | 1673.54 | 0.3021   | 0.435004 | 0.783106 | 2803.17 | 1421.41 | 1319.59 | 1303.14 | 1658.58 | 1535.37 |
| ENSMUSG00000055725 | 11_Paqr3  | 84.4369 | 0.30291  | 0.503945 | 0.824438 | 50.5622 | 126.952 | 102.382 | 85.8304 | 60.9519 | 79.9427 |
| ENSMUSG00000055732 | 1_Gm997   | 0.69797 | -1.44861 | 0.616795 | NA       | 1.01124 | 0       | 0       | 0.82529 | 0       | 2.35126 |
| ENSMUSG00000055733 | 6_Nap113  | 94.9492 | -0.05417 | 0.92126  | 0.977767 | 172.923 | 46.4736 | 59.9814 | 99.0351 | 99.5833 | 91.699  |
| ENSMUSG00000055737 | 12_Ghr    | 3513.97 | 0.60388  | 0.178073 | 0.563195 | 7164.67 | 2717.01 | 2834.64 | 2449.47 | 2867.31 | 3050.75 |
| ENSMUSG00000055745 | 4_Ldoc1l  | 291.929 | -0.07611 | 0.861171 | 0.960565 | 140.563 | 363.854 | 348.512 | 352.4   | 265.269 | 280.975 |
| ENSMUSG00000055746 | 9_Magea2  | 0.31162 | 0.16972  | 0.966824 | NA       | 1.01124 | 0       | 0       | 0       | 0.85848 | 0       |
| ENSMUSG00000055748 | 12_Gsdm1  | 1.53026 | 1.8768   | 0.358585 | NA       | 4.04498 | 0       | 3.10248 | 0       | 0.85848 | 1.17563 |
| ENSMUSG00000055760 | 12_Gemin  | 140.593 | 0.60902  | 0.099935 | 0.429839 | 219.44  | 171.159 | 118.929 | 96.5592 | 130.489 | 106.982 |
| ENSMUSG00000055761 | 14_Nkain1 | 3.99328 | -2.28641 | 0.136628 | 0.501691 | 4.04498 | 0       | 0       | 11.5541 | 6.00934 | 2.35126 |
| ENSMUSG00000055762 | 15_Eef1d  | 2922.13 | 0.11438  | 0.810833 | 0.94579  | 1229.67 | 4102.15 | 3781.93 | 2990.86 | 2290.42 | 3137.75 |
| ENSMUSG00000055775 | 16_Myh8   | 107.146 | -0.31409 | 0.449049 | 0.792164 | 127.417 | 66.8767 | 92.0404 | 142.776 | 83.2723 | 130.495 |
| ENSMUSG00000055782 | 8_Abcd2   | 77.6885 | -0.46591 | 0.473791 | 0.806769 | 133.484 | 26.0706 | 36.1957 | 112.24  | 97.0079 | 61.1326 |
| ENSMUSG00000055795 | 5_Gm516   | 0.67101 | -1.33726 | 0.645655 | NA       | 0       | 1.1335  | 0       | 0       | 1.71695 | 1.17563 |
| ENSMUSG00000055799 | 13_Tcf711 | 394.822 | -0.14159 | 0.752822 | 0.925804 | 181.013 | 413.729 | 531.559 | 426.676 | 333.948 | 482.007 |
| ENSMUSG00000055805 | 14_Fmn1l  | 618.836 | 0.41375  | 0.448922 | 0.792044 | 220.451 | 927.205 | 973.146 | 492.7   | 444.691 | 654.825 |
| ENSMUSG00000055809 | 7_Dnaaf3  | 16.836  | -0.0934  | 0.890594 | 0.970469 | 7.07871 | 19.2695 | 22.7516 | 18.1564 | 23.1789 | 10.5807 |

|                    |           |         |          |          |          |         |         |         |         |         |         |
|--------------------|-----------|---------|----------|----------|----------|---------|---------|---------|---------|---------|---------|
| ENSMUSG00000055811 | 2_Cldn17  | 222.127 | 0.26909  | 0.377985 | 0.746591 | 287.193 | 213.099 | 227.516 | 196.42  | 173.412 | 235.126 |
| ENSMUSG00000055817 | 17_Mta3   | 1234.2  | 0.48258  | 0.128255 | 0.486444 | 995.064 | 1751.26 | 1569.86 | 1010.98 | 994.116 | 1083.93 |
| ENSMUSG00000055827 | 13_Gsdmi  | 0       | NA       | NA       | NA       | 0       | 0       | 0       | 0       | 0       | 0       |
| ENSMUSG00000055835 | 9_Zfp1    | 219.44  | -0.11702 | 0.657007 | 0.894491 | 208.316 | 219.9   | 203.73  | 246.762 | 227.496 | 210.437 |
| ENSMUSG00000055839 | 5_Tceb2   | 979.091 | 0.32577  | 0.585888 | 0.862122 | 291.238 | 1475.82 | 1500.57 | 1177.69 | 576.897 | 852.33  |
| ENSMUSG00000055850 | 12_Rnf18  | 1414.47 | -0.06974 | 0.755771 | 0.927112 | 1462.26 | 1336.4  | 1342.34 | 1456.64 | 1506.63 | 1382.54 |
| ENSMUSG00000055862 | 6_Izumo4  | 91.1456 | -0.60267 | 0.221894 | 0.612417 | 35.3936 | 68.0102 | 113.758 | 128.746 | 89.2816 | 111.685 |
| ENSMUSG00000055865 | 8_Fam19i  | 51.4959 | -1.73983 | 0.007423 | 0.081456 | 17.1912 | 41.9396 | 12.4099 | 125.444 | 75.546  | 36.4445 |
| ENSMUSG00000055866 | 9_Per2    | 614.767 | 0.84371  | 0.010653 | 0.105365 | 668.433 | 635.895 | 1064.15 | 464.64  | 382.881 | 472.602 |
| ENSMUSG00000055874 | 6_Foxi3   | 11.8779 | -2.31557 | 0.026884 | 0.1976   | 0       | 7.93452 | 4.13665 | 37.1382 | 10.3017 | 11.7563 |
| ENSMUSG00000055882 | 8_Abhd16  | 2.85039 | 0.68613  | 0.571214 | 0.854443 | 5.05622 | 3.40051 | 2.06832 | 1.65058 | 2.57543 | 2.35126 |
| ENSMUSG00000055884 | 7_Fancm   | 248.397 | 0.2676   | 0.488544 | 0.814112 | 387.307 | 194.962 | 231.652 | 183.215 | 268.703 | 224.545 |
| ENSMUSG00000055900 | 14_Tmem   | 283.463 | 0.24694  | 0.598085 | 0.868621 | 514.723 | 197.23  | 210.969 | 217.052 | 324.504 | 236.301 |
| ENSMUSG00000055912 | 8_Tmem1   | 104.801 | -0.8117  | 0.161354 | 0.539936 | 22.2474 | 98.6148 | 107.553 | 166.709 | 118.47  | 115.212 |
| ENSMUSG00000055917 | 14_Zfp27i | 638.168 | 0.33819  | 0.416912 | 0.770621 | 1127.54 | 540.681 | 469.509 | 496.001 | 630.981 | 564.301 |
| ENSMUSG00000055923 | 16_Aasdh  | 318.286 | -0.02035 | 0.942231 | 0.986012 | 349.891 | 283.376 | 314.385 | 269.871 | 334.806 | 357.391 |
| ENSMUSG00000055926 | 2_Gm141i  | 716.244 | 0.30413  | 0.378331 | 0.746641 | 508.656 | 944.208 | 921.438 | 609.891 | 604.368 | 708.904 |
| ENSMUSG00000055932 | 14_Fto    | 1259.48 | -0.18273 | 0.55091  | 0.844729 | 851.468 | 1266.12 | 1421.97 | 1421.15 | 1233.63 | 1362.55 |
| ENSMUSG00000055937 | 1_Krt28   | 0.77396 | -0.32929 | 0.921995 | NA       | 0       | 0       | 2.06832 | 0       | 2.57543 | 0       |
| ENSMUSG00000055943 | 5_Emc7    | 1267.37 | 0.06733  | 0.853787 | 0.958492 | 1882.94 | 1009.95 | 997.966 | 1217.31 | 1415.63 | 1080.4  |
| ENSMUSG00000055944 | 3_E13001  | 0.8601  | -1.87744 | 0.566974 | NA       | 0       | 0       | 1.03416 | 4.12646 | 0       | 0       |
| ENSMUSG00000055945 | 7_Prr18   | 15.537  | 0.25394  | 0.692046 | 0.905638 | 12.1349 | 27.2041 | 11.3758 | 14.03   | 12.0187 | 16.4588 |
| ENSMUSG00000055963 | 12_Triqk  | 157.574 | -0.1527  | 0.790926 | 0.937373 | 292.25  | 73.6777 | 81.6988 | 150.203 | 198.308 | 149.305 |
| ENSMUSG00000055972 | 5_281040  | 5.26538 | -0.32407 | 0.763477 | 0.929511 | 2.02249 | 7.93452 | 4.13665 | 9.90351 | 1.71695 | 5.87814 |
| ENSMUSG00000055976 | 5_Cldn23  | 1360.36 | 1.10417  | 4.29E-05 | 0.001685 | 2265.19 | 1726.32 | 1579.16 | 869.033 | 852.468 | 869.965 |
| ENSMUSG00000055978 | 4_Fut2    | 13.2688 | -0.74263 | 0.252235 | 0.643943 | 7.07871 | 13.602  | 9.30745 | 18.9817 | 18.8865 | 11.7563 |
| ENSMUSG00000055980 | 2_Irs1    | 153.544 | -0.99353 | 0.0511   | 0.292593 | 126.406 | 41.9396 | 139.612 | 259.142 | 206.034 | 148.129 |
| ENSMUSG00000055991 | 15_Zksca1 | 311.937 | -0.27125 | 0.391754 | 0.754323 | 218.429 | 306.046 | 323.693 | 390.363 | 281.58  | 351.513 |
| ENSMUSG00000055994 | 15_Nod2   | 140.109 | 1.99688  | 0.000124 | 0.003949 | 129.439 | 371.789 | 170.637 | 35.4876 | 59.2349 | 74.0646 |
| ENSMUSG00000056004 | 16_93301  | 33.3826 | -1.47391 | 0.006523 | 0.074648 | 27.3036 | 7.93452 | 17.5807 | 50.3428 | 48.9332 | 48.2007 |
| ENSMUSG00000056008 | 1_Gm115   | 0.33902 | -1.78366 | 0.658108 | NA       | 0       | 0       | 0       | 0       | 0.85848 | 1.17563 |
| ENSMUSG00000056014 | 15_A4300  | 258.361 | 0.24666  | 0.451363 | 0.793604 | 348.879 | 221.033 | 270.95  | 193.944 | 266.128 | 249.233 |
| ENSMUSG00000056018 | 14_Ccdc7  | 0.68374 | 0.06324  | 0.982824 | NA       | 0       | 0       | 2.06832 | 0       | 0.85848 | 1.17563 |
| ENSMUSG00000056019 | 12_Zfp70i | 218.211 | 0.18383  | 0.737305 | 0.920922 | 431.801 | 102.015 | 162.363 | 183.215 | 242.949 | 186.925 |
| ENSMUSG00000056025 | 12_Clca3i | 61.3747 | 1.64869  | 0.000128 | 0.004022 | 121.349 | 75.9447 | 81.6988 | 21.4576 | 36.056  | 31.742  |
| ENSMUSG00000056043 | 5_Rgs9bp  | 197.741 | -2.23898 | 0.007172 | 0.079407 | 131.462 | 64.6097 | 11.3758 | 562.849 | 337.381 | 78.7671 |
| ENSMUSG00000056050 | 12_Mia3   | 1798.59 | 0.36869  | 0.198306 | 0.590646 | 2530.13 | 1789.8  | 1761.18 | 1391.44 | 1631.96 | 1687.03 |
| ENSMUSG00000056054 | 9_S100a8  | 44.4405 | 2.17065  | 0.002279 | 0.035727 | 113.259 | 89.5467 | 15.5124 | 16.5058 | 18.8865 | 12.9319 |
| ENSMUSG00000056055 | 13_Sag    | 1119.14 | -2.47446 | 0.000128 | 0.004022 | 394.385 | 484.006 | 145.817 | 3298.69 | 1808.81 | 583.111 |
| ENSMUSG00000056069 | 8_Fam10i  | 172.406 | 0.02227  | 0.95164  | 0.988    | 209.328 | 198.363 | 113.758 | 165.058 | 197.45  | 150.48  |
| ENSMUSG00000056071 | 12_S100a  | 95.9335 | 1.65566  | 0.005922 | 0.069708 | 85.9558 | 277.708 | 73.4255 | 33.837  | 63.5273 | 41.147  |
| ENSMUSG00000056073 | 14_Grik2  | 34.92   | -0.86718 | 0.117074 | 0.465237 | 41.461  | 19.2695 | 13.4441 | 46.2164 | 51.5086 | 37.6201 |
| ENSMUSG00000056076 | 13_Eif3b  | 4036.71 | 0.48162  | 0.198501 | 0.590734 | 2737.44 | 6001.9  | 5373.5  | 3231.02 | 3067.34 | 3809.03 |
| ENSMUSG00000056078 | 5_Lipm    | 2682.4  | 0.71845  | 0.116758 | 0.464512 | 5652.86 | 2188.79 | 2168.64 | 1634.08 | 2335.06 | 2114.95 |
| ENSMUSG00000056089 | 5_Gm546i  | 5.02288 | -3.10354 | 0.020052 | 0.163392 | 0       | 0       | 3.10248 | 9.90351 | 7.72629 | 9.40502 |
| ENSMUSG00000056091 | 12_St3gal | 510.731 | -1.02182 | 0.002532 | 0.038683 | 397.419 | 267.507 | 346.444 | 828.594 | 727.13  | 497.291 |
| ENSMUSG00000056116 | 18_H2-T2  | 4265.48 | 1.71923  | 2.74E-06 | 0.000183 | 3947.9  | 8896.86 | 6786.17 | 2065.71 | 1902.38 | 1993.86 |
| ENSMUSG00000056121 | 15_Fez2   | 677.698 | -0.467   | 0.04609  | 0.274777 | 540.004 | 597.356 | 569.823 | 829.419 | 788.94  | 740.646 |
| ENSMUSG00000056124 | 5_B4galt6 | 236.735 | -0.78418 | 0.139914 | 0.507212 | 308.43  | 98.6148 | 114.792 | 336.719 | 372.579 | 189.276 |
| ENSMUSG00000056128 | 3_Gm999   | 27.655  | -1.67927 | 0.00134  | 0.024325 | 12.1349 | 19.2695 | 8.27329 | 45.3911 | 42.0654 | 38.7957 |
| ENSMUSG00000056130 | 9_Ticam2  | 14.652  | 0.79086  | 0.289044 | 0.674033 | 30.3373 | 7.93452 | 17.5807 | 10.7288 | 15.4526 | 5.87814 |
| ENSMUSG00000056131 | 13_Pgm3   | 287.279 | 0.08394  | 0.78393  | 0.935592 | 312.474 | 330.983 | 243.028 | 234.383 | 271.279 | 331.527 |
| ENSMUSG00000056133 | 4_Gm999   | 17.3507 | -0.12633 | 0.87719  | 0.965388 | 10.1124 | 17.0025 | 22.7516 | 34.6623 | 4.29238 | 15.2832 |
| ENSMUSG00000056144 | 13_Trim3i | 852.28  | 1.19008  | 0.000211 | 0.006055 | 1501.7  | 1118.77 | 934.882 | 431.628 | 612.953 | 513.749 |
| ENSMUSG00000056145 | 5_A15044i | 38.5772 | 1.94974  | 0.00744  | 0.081544 | 101.124 | 63.4762 | 19.6491 | 18.1564 | 23.1789 | 5.87814 |
| ENSMUSG00000056148 | 8_Rdh9    | 0.33708 | 1.97061  | 0.625968 | NA       | 2.02249 | 0       | 0       | 0       | 0       | 0       |
| ENSMUSG00000056153 | 14_Socs6  | 1295.89 | 0.53651  | 0.174458 | 0.558072 | 2369.35 | 1217.38 | 1015.55 | 1050.6  | 1112.59 | 1009.86 |
| ENSMUSG00000056155 | 5_Nanos3  | 1.08217 | -0.95294 | 0.704407 | NA       | 0       | 2.26701 | 0       | 1.65058 | 2.57543 | 0       |
| ENSMUSG00000056158 | 14_Car10  | 10.3877 | -1.99905 | 0.111594 | 0.453007 | 9.1012  | 3.40051 | 0       | 36.3129 | 11.1602 | 2.35126 |
| ENSMUSG00000056162 | 13_Cndp1  | 25.9832 | 0.19437  | 0.699049 | 0.90565  | 33.3711 | 28.3376 | 21.7174 | 23.9335 | 30.9052 | 17.6344 |
| ENSMUSG00000056167 | 6_Cnot10  | 960.818 | 0.20811  | 0.394984 | 0.755773 | 913.154 | 1119.9  | 1056.91 | 824.467 | 932.306 | 918.165 |
| ENSMUSG00000056174 | 8_Col8a2  | 3852.31 | -1.5625  | 3.67E-06 | 0.00023  | 1632.15 | 1639.05 | 2575.06 | 7232.86 | 5051.28 | 4983.49 |
| ENSMUSG00000056185 | 4_Snx32   | 127.044 | -1.35982 | 0.004661 | 0.059424 | 37.416  | 66.8767 | 109.621 | 226.955 | 189.723 | 131.67  |
| ENSMUSG00000056201 | 6_Cfl1    | 3210.43 | -0.0168  | 0.960765 | 0.989899 | 2228.78 | 4368.52 | 2978.39 | 3405.98 | 3403    | 2877.94 |
| ENSMUSG00000056203 | 4_Tas2r1i | 0.81918 | -0.48877 | 0.859522 | NA       | 2.02249 | 0       | 0       | 0       | 1.71695 | 1.17563 |
| ENSMUSG00000056204 | 7_Pgpep1  | 663.502 | -0.11079 | 0.808158 | 0.944767 | 294.272 | 736.777 | 883.174 | 821.166 | 552.001 | 693.62  |
| ENSMUSG00000056209 | 7_Npm3    | 412.698 | 0.29405  | 0.387353 | 0.752114 | 301.351 | 536.147 | 526.388 | 389.538 | 334.806 | 387.957 |
| ENSMUSG00000056211 | 13_R3hdi  | 1562.51 | 0.51872  | 0.114514 | 0.459698 | 2486.65 | 1569.9  | 1464.37 | 1100.11 | 1363.26 | 1390.77 |
| ENSMUSG00000056214 | 8_Pard6g  | 3001.53 | 0.80716  | 0.000507 | 0.011732 | 3989.36 | 3872.05 | 3597.85 | 2094.59 | 2040.6  | 2414.74 |
| ENSMUSG00000056215 | 12_Lrguk  | 4.53458 | -0.98363 | 0.51832  | 0.831479 | 9.1012  | 0       | 0       | 8.25292 | 5.15086 | 4.70251 |
| ENSMUSG00000056216 | 9_Cebpg   | 1781.27 | 0.59481  | 0.147505 | 0.519701 | 3391.71 | 1556.3  | 1481.95 | 1275.9  | 1615.65 | 1366.08 |
| ENSMUSG00000056220 | 14_Pla2ga | 2311.95 | 0.68775  | 0.095308 | 0.419012 | 4512.17 | 2235.27 | 1810.82 | 1576.31 | 1906.68 | 1830.45 |
| ENSMUSG00000056222 | 14_Spock  | 724.322 | -1.39522 | 0.001402 | 0.025091 | 570.342 | 211.965 | 414.699 | 1319.64 | 1031.03 | 798.251 |
| ENSMUSG00000056228 | 9_Cars2   | 163.215 | 0.04581  | 0.918997 | 0.97716  | 78.8771 | 211.965 | 206.832 | 179.914 | 157.101 | 144.602 |
| ENSMUSG00000056234 | 14_Ncoa4  | 8244.13 | 0.27802  | 0.422712 | 0.774571 | 12663.8 | 6652.53 | 7791.37 | 6393.54 | 7969.24 | 7994.27 |

|                    |           |         |          |          |          |         |         |         |         |         |         |
|--------------------|-----------|---------|----------|----------|----------|---------|---------|---------|---------|---------|---------|
| ENSMUSG00000056257 | 2_Gm544   | 1.58779 | 0.28696  | 0.88025  | NA       | 3.03373 | 2.26701 | 0       | 1.65058 | 2.57543 | 0       |
| ENSMUSG00000056258 | 8_Kcnq3   | 47.4216 | -1.23468 | 0.034279 | 0.229568 | 50.5622 | 12.4685 | 21.7174 | 67.674  | 81.5553 | 50.552  |
| ENSMUSG00000056260 | 15_Lrif1  | 771.261 | 0.56926  | 0.296637 | 0.680154 | 1772.71 | 504.409 | 487.09  | 506.73  | 674.763 | 681.864 |
| ENSMUSG00000056267 | 14_Cep70  | 388.811 | 0.24818  | 0.614861 | 0.876237 | 735.175 | 253.905 | 277.155 | 262.443 | 410.352 | 393.835 |
| ENSMUSG00000056268 | 15_Dennd  | 1781.86 | 0.69584  | 0.103663 | 0.437303 | 3550.48 | 1588.04 | 1471.61 | 1127.35 | 1577.02 | 1376.66 |
| ENSMUSG00000056271 | 13_Lman1  | 15.9566 | 0.44702  | 0.591364 | 0.865311 | 4.04498 | 18.136  | 33.0932 | 19.807  | 7.72629 | 12.9319 |
| ENSMUSG00000056290 | 15_Ms4a4  | 74.5626 | 5.25126  | 5.23E-15 | 2.30E-12 | 210.339 | 150.756 | 74.4596 | 1.65058 | 4.29238 | 5.87814 |
| ENSMUSG00000056293 | 12_Gsdm   | 1.41966 | 1.94351  | 0.505531 | NA       | 0       | 6.80102 | 0       | 0       | 1.71695 | 0       |
| ENSMUSG00000056296 | 16_Synpr  | 466.114 | -1.28115 | 0.022035 | 0.174288 | 487.42  | 105.416 | 222.345 | 813.738 | 724.555 | 443.212 |
| ENSMUSG00000056300 | 14_Gm13   | 6.08479 | -0.11863 | 0.91587  | 0.976702 | 12.1349 | 3.40051 | 2.06832 | 7.42763 | 10.3017 | 1.17563 |
| ENSMUSG00000056305 | 4_Usp39   | 555.95  | 0.14844  | 0.590456 | 0.864931 | 510.678 | 693.704 | 549.14  | 468.766 | 550.284 | 563.126 |
| ENSMUSG00000056306 | 5_Sertm1  | 1.0308  | -2.17437 | 0.38873  | NA       | 0       | 1.1335  | 0       | 2.47588 | 2.57543 | 0       |
| ENSMUSG00000056310 | 14_Tyw1   | 346.881 | 0.13269  | 0.777108 | 0.933844 | 153.709 | 423.93  | 510.876 | 337.545 | 310.769 | 344.459 |
| ENSMUSG00000056313 | 5_181001  | 1392.71 | 0.28973  | 0.293231 | 0.677859 | 1880.91 | 1407.81 | 1307.18 | 1190.07 | 1224.19 | 1346.09 |
| ENSMUSG00000056316 | 2_Gm999   | 0.13755 | -0.79206 | 0.84609  | NA       | 0       | 0       | 0       | 0.82529 | 0       | 0       |
| ENSMUSG00000056328 | 14_Myh1   | 2213.23 | -0.42838 | 0.421972 | 0.774546 | 2701.03 | 779.85  | 2180.01 | 3529.78 | 1416.49 | 2672.2  |
| ENSMUSG00000056342 | 16_Usp34  | 4753.58 | 0.19335  | 0.670612 | 0.899276 | 8591.53 | 3426.58 | 3196.59 | 3703.91 | 5068.45 | 4534.4  |
| ENSMUSG00000056366 | 4_Fabp3-i | 2.65849 | -1.11042 | 0.586886 | 0.86269  | 5.05622 | 0       | 0       | 6.60234 | 4.29238 | 0       |
| ENSMUSG00000056367 | 14_Actr3b | 39.3942 | -0.7346  | 0.147391 | 0.519469 | 40.4498 | 21.5366 | 26.8882 | 67.674  | 48.0747 | 31.742  |
| ENSMUSG00000056380 | 13_Gpr50  | 16.3422 | 2.4402   | 0.000351 | 0.008905 | 23.2586 | 39.6726 | 19.6491 | 4.12646 | 4.29238 | 7.05377 |
| ENSMUSG00000056383 | 10_Al987f | 434.617 | 0.41758  | 0.426237 | 0.777537 | 921.244 | 283.376 | 286.463 | 302.057 | 439.54  | 375.025 |
| ENSMUSG00000056394 | 17_Lig1   | 840.827 | 0.94516  | 0.012248 | 0.116427 | 688.657 | 1446.35 | 1185.15 | 462.164 | 585.481 | 677.162 |
| ENSMUSG00000056399 | 1_Prss34  | 0.13755 | -0.79206 | 0.84609  | NA       | 0       | 0       | 0       | 0.82529 | 0       | 0       |
| ENSMUSG00000056413 | 16_Adap1  | 684.602 | 0.78432  | 0.238035 | 0.630377 | 145.619 | 1276.32 | 1176.88 | 586.783 | 422.371 | 499.642 |
| ENSMUSG00000056418 | 3_BC043f  | 81.9518 | -1.75781 | 1.68E-05 | 0.000804 | 36.4048 | 27.2041 | 48.6056 | 156.806 | 122.762 | 99.9284 |
| ENSMUSG00000056423 | 7_Uts2b   | 0.68392 | 1.68811  | 0.559594 | NA       | 1.01124 | 2.26701 | 0       | 0.82529 | 0       | 0       |
| ENSMUSG00000056426 | 3_Nat3    | 4.65066 | -0.14776 | 0.909785 | 0.974731 | 11.1237 | 1.1335  | 1.03416 | 7.42763 | 6.00934 | 1.17563 |
| ENSMUSG00000056427 | 10_Slit3  | 488.068 | -0.37468 | 0.483498 | 0.811892 | 147.642 | 439.799 | 687.717 | 626.397 | 447.267 | 579.585 |
| ENSMUSG00000056429 | 4_Tgoln1  | 5080.35 | -0.08107 | 0.83819  | 0.952966 | 7706.69 | 3556.93 | 3549.24 | 5193.56 | 5690.84 | 4784.81 |
| ENSMUSG00000056436 | 4_Cyct    | 0.16854 | 1.1315   | 0.781553 | NA       | 1.01124 | 0       | 0       | 0       | 0       | 0       |
| ENSMUSG00000056458 | 16_Mok    | 81.4125 | -0.40757 | 0.443011 | 0.787788 | 32.3598 | 69.1437 | 108.587 | 127.095 | 67.8197 | 83.4696 |
| ENSMUSG00000056459 | 14_Zbtb2f | 155.634 | 0.16163  | 0.591144 | 0.865185 | 181.013 | 140.554 | 171.671 | 151.029 | 161.394 | 128.143 |
| ENSMUSG00000056476 | 13_Med12  | 368.361 | -0.23617 | 0.462422 | 0.799907 | 437.869 | 327.582 | 249.233 | 394.49  | 387.173 | 413.821 |
| ENSMUSG00000056481 | 6_Cd248   | 311.452 | -0.49748 | 0.356972 | 0.731582 | 100.113 | 241.436 | 433.314 | 460.513 | 261.835 | 371.498 |
| ENSMUSG00000056486 | 17_Chnl   | 239.555 | -0.90883 | 0.019365 | 0.159577 | 211.35  | 100.882 | 187.183 | 375.508 | 297.892 | 264.516 |
| ENSMUSG00000056487 | 8_Mettl7a | 0.64893 | -1.32054 | 0.604258 | NA       | 0       | 0       | 1.03416 | 0.82529 | 0.85848 | 1.17563 |
| ENSMUSG00000056492 | 5_Adgrf5  | 506.884 | -0.14764 | 0.658488 | 0.894702 | 648.208 | 371.789 | 422.972 | 562.849 | 573.463 | 462.022 |
| ENSMUSG00000056493 | 9_Foxk1   | 1653.69 | 0.57344  | 0.113    | 0.455953 | 1231.7  | 2265.87 | 2436.48 | 1354.3  | 1116.02 | 1517.74 |
| ENSMUSG00000056494 | 7_Cngb3   | 126.995 | 1.58608  | 0.006371 | 0.073636 | 363.037 | 126.952 | 81.6988 | 63.5475 | 73.829  | 52.9033 |
| ENSMUSG00000056498 | 13_Tmem   | 3908.69 | 0.55633  | 0.046281 | 0.275233 | 5355.55 | 4684.77 | 3918.44 | 2678.07 | 3162.63 | 3652.68 |
| ENSMUSG00000056501 | 3_Cebp    | 77.2973 | 1.46972  | 0.0022   | 0.03484  | 147.642 | 138.287 | 54.8106 | 42.0899 | 38.6315 | 42.3226 |
| ENSMUSG00000056508 | 5_170000  | 3.61664 | -0.935   | 0.567833 | 0.852443 | 0       | 3.40051 | 4.13665 | 10.7288 | 3.43391 | 0       |
| ENSMUSG00000056509 | 10_Gm99   | 0.13755 | -0.79206 | 0.84609  | NA       | 0       | 0       | 0       | 0.82529 | 0       | 0       |
| ENSMUSG00000056515 | 8_Rab31   | 1000.71 | 0.26525  | 0.365596 | 0.738988 | 993.042 | 1394.21 | 890.413 | 911.123 | 944.325 | 871.14  |
| ENSMUSG00000056529 | 7_Ptafr   | 164.59  | 1.81548  | 0.00059  | 0.013179 | 138.54  | 450.001 | 180.978 | 91.6075 | 74.6875 | 51.7276 |
| ENSMUSG00000056531 | 11_Ccdc1  | 126.065 | 0.50247  | 0.316874 | 0.698179 | 255.845 | 96.3477 | 91.0062 | 83.3545 | 119.328 | 110.509 |
| ENSMUSG00000056536 | 14_Pign   | 2709.26 | 0.47993  | 0.250905 | 0.642405 | 5021.84 | 2378.09 | 2067.29 | 1937.79 | 2596.89 | 2253.68 |
| ENSMUSG00000056537 | 11_Rlim   | 2745.57 | 0.49465  | 0.272365 | 0.658804 | 5418.25 | 2222.8  | 1993.86 | 1959.24 | 2557.4  | 2321.86 |
| ENSMUSG00000056553 | 14_Ptpm2  | 34.4774 | -1.80467 | 0.001482 | 0.026172 | 14.1574 | 10.2015 | 21.7174 | 80.8787 | 44.6408 | 35.2688 |
| ENSMUSG00000056564 | 6_Olfr324 | 0.17236 | 1.1315   | 0.781553 | NA       | 0       | 0       | 1.03416 | 0       | 0       | 0       |
| ENSMUSG00000056569 | 10_Mpz    | 169.851 | -0.97094 | 0.060335 | 0.323297 | 53.5959 | 95.2142 | 195.457 | 276.473 | 169.12  | 229.247 |
| ENSMUSG00000056592 | 14_Zfp65f | 87.029  | -0.50581 | 0.11096  | 0.452777 | 67.7534 | 73.6777 | 74.4596 | 112.24  | 95.2909 | 98.7527 |
| ENSMUSG00000056596 | 8_Trnp1   | 66.5223 | -1.92137 | 0.000169 | 0.005081 | 15.1687 | 23.8036 | 44.4689 | 138.649 | 93.574  | 83.4696 |
| ENSMUSG00000056598 | 16_Lrrc48 | 69.8338 | -0.52726 | 0.181672 | 0.567796 | 45.506  | 47.6071 | 78.5963 | 89.9569 | 83.2723 | 74.0646 |
| ENSMUSG00000056600 | 2_Olfr90  | 0.17236 | 1.1315   | 0.781553 | NA       | 0       | 0       | 1.03416 | 0       | 0       | 0       |
| ENSMUSG00000056602 | 11_Fry    | 459.585 | -1.17197 | 4.58E-05 | 0.001784 | 300.34  | 252.771 | 294.736 | 738.637 | 658.452 | 512.574 |
| ENSMUSG00000056605 | 6_Krt72   | 0.13755 | -0.79206 | 0.84609  | NA       | 0       | 0       | 0       | 0.82529 | 0       | 0       |
| ENSMUSG00000056606 | 2_Gm100   | 0.41818 | -2.121   | 0.592183 | NA       | 0       | 0       | 0       | 1.65058 | 0.85848 | 0       |
| ENSMUSG00000056608 | 13_Chdl   | 3179.47 | 0.40062  | 0.273615 | 0.660311 | 5263.53 | 2900.63 | 2689.85 | 2311.64 | 2981.49 | 2929.66 |
| ENSMUSG00000056612 | 6_Ppp1r1  | 2053.79 | 0.13008  | 0.762624 | 0.929057 | 1053.72 | 2718.14 | 2667.1  | 2124.3  | 1569.3  | 2190.19 |
| ENSMUSG00000056617 | 12_49314  | 0.3683  | 0.16972  | 0.966824 | NA       | 0       | 0       | 1.03416 | 0       | 0       | 1.17563 |
| ENSMUSG00000056629 | 15_Fkbp2  | 729.09  | -0.20551 | 0.713846 | 0.911072 | 191.125 | 943.074 | 897.652 | 855.828 | 662.744 | 824.115 |
| ENSMUSG00000056632 | 7_Dsg3    | 14824.8 | 1.00721  | 0.00319  | 0.045478 | 23601.4 | 21526.4 | 14269.4 | 7416.08 | 10191   | 11944.4 |
| ENSMUSG00000056643 | 5_Chst13  | 1.1864  | -0.15658 | 0.942588 | NA       | 0       | 3.40051 | 0       | 0.82529 | 1.71695 | 1.17563 |
| ENSMUSG00000056648 | 5_Hoxb8   | 0       | NA       | NA       | NA       | 0       | 0       | 0       | 0       | 0       | 0       |
| ENSMUSG00000056656 | 5_Apol8   | 14.4352 | 0.71659  | 0.284113 | 0.670663 | 14.1574 | 20.4031 | 19.6491 | 15.6806 | 12.0187 | 4.70251 |
| ENSMUSG00000056665 | 2_Them6   | 179.808 | 0.33114  | 0.58513  | 0.861716 | 56.6297 | 241.436 | 303.009 | 203.022 | 99.5833 | 175.169 |
| ENSMUSG00000056666 | 13_Retsat | 489.118 | -0.23704 | 0.40641  | 0.764314 | 353.936 | 465.87  | 527.422 | 510.031 | 564.878 | 512.574 |
| ENSMUSG00000056671 | 6_Prelid2 | 97.9918 | 0.51496  | 0.250676 | 0.642255 | 169.889 | 99.7483 | 76.528  | 81.7039 | 101.3   | 58.7814 |
| ENSMUSG00000056673 | 14_Kdm5c  | 3.60683 | -1.69935 | 0.282829 | 0.669522 | 4.04498 | 0       | 1.03416 | 1.65058 | 13.7356 | 1.17563 |
| ENSMUSG00000056679 | 13_Gpr17  | 51.4058 | -0.97431 | 0.053665 | 0.301407 | 57.6409 | 20.4031 | 25.854  | 70.9751 | 71.2536 | 62.3083 |
| ENSMUSG00000056692 | 12_D17W   | 3987.29 | 0.50777  | 0.151345 | 0.525101 | 2918.45 | 6035.9  | 5091.18 | 3433.22 | 2955.74 | 3489.26 |
| ENSMUSG00000056698 | 11_Elmod  | 371.231 | 0.05996  | 0.892394 | 0.970752 | 185.058 | 463.603 | 488.124 | 387.062 | 285.014 | 418.524 |
| ENSMUSG00000056699 | 7_Gm553   | 0.34472 | 1.99863  | 0.620844 | NA       | 0       | 0       | 2.06832 | 0       | 0       | 0       |
| ENSMUSG00000056706 | 2_Krtap7- | 0.58672 | -1.17297 | 0.695297 | NA       | 1.01124 | 0       | 0       | 1.65058 | 0.85848 | 0       |

|                    |           |         |          |          |          |         |         |         |         |         |         |
|--------------------|-----------|---------|----------|----------|----------|---------|---------|---------|---------|---------|---------|
| ENSMUSG00000056708 | 5_Ier5    | 2072.94 | 0.65655  | 0.017837 | 0.150421 | 2993.28 | 2569.65 | 2046.61 | 1464.89 | 1595.05 | 1768.14 |
| ENSMUSG00000056716 | 9_Gm542   | 0.16854 | 1.1315   | 0.781553 | NA       | 1.01124 | 0       | 0       | 0       | 0       | 0       |
| ENSMUSG00000056718 | 2_Gm131   | 12.5007 | -0.71223 | 0.276776 | 0.663317 | 10.1124 | 7.93452 | 10.3416 | 10.7288 | 20.6034 | 15.2832 |
| ENSMUSG00000056724 | 14_Nbeal  | 4596.69 | 0.99471  | 0.145375 | 0.515494 | 933.379 | 8649.76 | 8781.07 | 3053.58 | 2365.1  | 3797.28 |
| ENSMUSG00000056737 | 14_Capg   | 8367.81 | 0.46284  | 0.384141 | 0.750377 | 3081.26 | 13646.2 | 12368.6 | 7674.39 | 5921.77 | 7514.61 |
| ENSMUSG00000056738 | 11_A7300  | 0.41265 | -2.10335 | 0.599583 | NA       | 0       | 0       | 0       | 2.47588 | 0       | 0       |
| ENSMUSG00000056749 | 7_Nfil3   | 90.9627 | -0.66231 | 0.155141 | 0.53175  | 44.4948 | 114.484 | 52.7422 | 123.794 | 115.036 | 95.2259 |
| ENSMUSG00000056752 | 16_Dnah9  | 28.4443 | -1.02242 | 0.071917 | 0.357998 | 13.1462 | 23.8036 | 19.6491 | 37.9634 | 54.9425 | 21.1613 |
| ENSMUSG00000056753 | 3_C33001  | 24.802  | 0.11119  | 0.832931 | 0.951969 | 33.3711 | 15.869  | 27.9224 | 19.807  | 28.3297 | 23.5126 |
| ENSMUSG00000056755 | 13_Grm7   | 46.3415 | -1.56673 | 0.001309 | 0.023985 | 31.3486 | 19.2695 | 19.6491 | 77.5775 | 86.7062 | 43.4982 |
| ENSMUSG00000056758 | 14_Hmga   | 13.034  | 1.80881  | 0.020976 | 0.168139 | 10.1124 | 34.0051 | 16.5466 | 3.30117 | 6.00934 | 8.22939 |
| ENSMUSG00000056763 | 16_Cspp1  | 774.284 | 0.29466  | 0.455616 | 0.796332 | 1266.08 | 615.492 | 677.376 | 535.615 | 806.968 | 744.172 |
| ENSMUSG00000056770 | 15_Setd3  | 3240.98 | 0.17958  | 0.494722 | 0.817604 | 4027.79 | 3280.36 | 3018.72 | 2697.06 | 3100.82 | 3321.15 |
| ENSMUSG00000056771 | 7_Gm100   | 18.2988 | -0.32159 | 0.59775  | 0.868406 | 22.2474 | 7.93452 | 18.6149 | 23.9335 | 20.6034 | 16.4588 |
| ENSMUSG00000056797 | 6_Gm488   | 0.90325 | -1.91236 | 0.482903 | NA       | 0       | 0       | 1.03416 | 0       | 0.85848 | 3.52688 |
| ENSMUSG00000056812 | 13_St8sia | 7.56411 | -1.43223 | 0.260129 | 0.649568 | 11.1237 | 1.1335  | 0       | 18.9817 | 9.44325 | 4.70251 |
| ENSMUSG00000056815 | 1_Gm681   | 0       | NA       | NA       | NA       | 0       | 0       | 0       | 0       | 0       | 0       |
| ENSMUSG00000056820 | 6_Tsnax   | 1729.28 | -0.17711 | 0.458236 | 0.798202 | 1789.9  | 1461.09 | 1618.46 | 1711.66 | 1868.9  | 1925.68 |
| ENSMUSG00000056821 | 13_17000  | 1.63134 | 0.17003  | 0.933201 | NA       | 4.04498 | 1.1335  | 0       | 0       | 3.43391 | 1.17563 |
| ENSMUSG00000056824 | 15_Zfp66  | 0.47508 | -0.61882 | 0.873279 | NA       | 0       | 1.1335  | 0       | 0       | 1.71695 | 0       |
| ENSMUSG00000056829 | 3_Foxb2   | 0       | NA       | NA       | NA       | 0       | 0       | 0       | 0       | 0       | 0       |
| ENSMUSG00000056832 | 14_Ttc26  | 184.49  | 0.24469  | 0.548821 | 0.843853 | 298.317 | 154.156 | 147.885 | 156.806 | 205.176 | 144.602 |
| ENSMUSG00000056851 | 13_Pcbp2  | 6302.34 | 0.11684  | 0.592128 | 0.865686 | 6853.2  | 6650.26 | 6168.77 | 5847.2  | 6278.9  | 6015.69 |
| ENSMUSG00000056854 | 4_Pou3f4  | 1.90287 | -1.43447 | 0.461265 | 0.799907 | 2.02249 | 0       | 1.03416 | 0       | 6.00934 | 2.35126 |
| ENSMUSG00000056856 | 11_Jakmij | 4.64587 | -0.74603 | 0.521625 | 0.831998 | 2.02249 | 1.1335  | 7.23913 | 2.47588 | 10.3017 | 4.70251 |
| ENSMUSG00000056870 | 9_Gulp1   | 296.163 | -0.73541 | 0.2336   | 0.625443 | 453.037 | 78.2117 | 135.475 | 421.724 | 405.201 | 283.326 |
| ENSMUSG00000056880 | 12_Gad1   | 7.30602 | -0.96542 | 0.243732 | 0.635368 | 5.05622 | 6.80102 | 3.10248 | 12.3794 | 9.44325 | 7.05377 |
| ENSMUSG00000056888 | 11_Glipr1 | 76.5091 | 1.32209  | 0.005138 | 0.063273 | 145.619 | 121.285 | 61.0155 | 33.0117 | 55.801  | 42.3226 |
| ENSMUSG00000056895 | 4_Hist3h2 | 4.39358 | -1.3841  | 0.320235 | 0.701314 | 0       | 1.1335  | 6.20497 | 12.3794 | 4.29238 | 2.35126 |
| ENSMUSG00000056899 | 10_Immp2  | 34.7062 | -0.23992 | 0.611844 | 0.874367 | 45.506  | 24.9371 | 24.8199 | 36.3129 | 34.3391 | 42.3226 |
| ENSMUSG00000056900 | 13_Usp13  | 122.621 | -0.56533 | 0.30122  | 0.684432 | 169.889 | 40.8061 | 85.8354 | 186.516 | 111.602 | 141.075 |
| ENSMUSG00000056912 | 11_17000  | 0.31162 | 0.16972  | 0.966824 | NA       | 1.01124 | 0       | 0       | 0       | 0.85848 | 0       |
| ENSMUSG00000056917 | 12_Sipa1  | 142.288 | 0.13734  | 0.831421 | 0.951683 | 31.3486 | 214.232 | 201.662 | 161.757 | 101.3   | 143.427 |
| ENSMUSG00000056919 | 9_Cep162  | 568.662 | 0.37461  | 0.260769 | 0.649878 | 867.648 | 547.482 | 510.876 | 429.977 | 543.416 | 512.574 |
| ENSMUSG00000056938 | 16_Acbd4  | 419.23  | -0.20034 | 0.712674 | 0.910879 | 127.417 | 445.467 | 597.745 | 547.994 | 370.004 | 426.753 |
| ENSMUSG00000056941 | 17_Comm   | 829.558 | 0.16487  | 0.513268 | 0.828304 | 741.242 | 970.278 | 919.37  | 788.154 | 781.214 | 777.09  |
| ENSMUSG00000056946 | 2_Olfr512 | 0.13755 | -0.79206 | 0.84609  | NA       | 0       | 0       | 0       | 0.82529 | 0       | 0       |
| ENSMUSG00000056947 | 5_Mab21l  | 932.552 | -0.30543 | 0.219412 | 0.61072  | 812.029 | 775.316 | 915.233 | 1138.08 | 927.155 | 1027.5  |
| ENSMUSG00000056952 | 13_Tatdn  | 1507.4  | 0.04515  | 0.872556 | 0.963879 | 1189.22 | 1809.07 | 1594.68 | 1421.98 | 1448.25 | 1581.22 |
| ENSMUSG00000056962 | 11_Jmj6d  | 888.056 | 0.12276  | 0.752698 | 0.925804 | 504.611 | 1166.37 | 1106.55 | 824.467 | 838.732 | 887.599 |
| ENSMUSG00000056966 | 7_Gjc3    | 43.3663 | -1.0079  | 0.129671 | 0.489598 | 51.5735 | 6.80102 | 27.9224 | 68.4993 | 58.3764 | 47.0251 |
| ENSMUSG00000056973 | 6_Ces1d   | 7777.77 | -0.01756 | 0.944018 | 0.986451 | 8254.79 | 6696.74 | 8239.17 | 7189.95 | 7554.6  | 8731.39 |
| ENSMUSG00000056987 | 7_Fam71c  | 0.98263 | -0.8123  | 0.725334 | NA       | 1.01124 | 1.1335  | 0       | 0       | 2.57543 | 1.17563 |
| ENSMUSG00000056999 | 14_Ide    | 3158    | 0.35656  | 0.283892 | 0.670589 | 4728.58 | 3075.19 | 2834.64 | 2219.21 | 3027.85 | 3062.51 |
| ENSMUSG00000057000 | 12_Nxf3   | 0.28063 | -1.56014 | 0.700051 | NA       | 0       | 0       | 0       | 0.82529 | 0.85848 | 0       |
| ENSMUSG00000057003 | 12_Myh4   | 821.406 | -1.24096 | 0.117823 | 0.466823 | 918.21  | 57.8086 | 489.158 | 2013.71 | 738.29  | 711.255 |
| ENSMUSG00000057047 | 5_170001  | 0       | NA       | NA       | NA       | 0       | 0       | 0       | 0       | 0       | 0       |
| ENSMUSG00000057054 | 11_Inca1  | 25.6025 | -1.40022 | 0.015379 | 0.135145 | 8.08995 | 12.4685 | 21.7174 | 48.6922 | 30.9052 | 31.742  |
| ENSMUSG00000057058 | 16_Skap1  | 9.23581 | 1.57743  | 0.104089 | 0.438458 | 5.05622 | 27.2041 | 9.30745 | 7.42763 | 1.71695 | 4.70251 |
| ENSMUSG00000057060 | 7_Slc35f3 | 191.584 | -1.15146 | 0.000809 | 0.016631 | 136.518 | 79.3452 | 140.646 | 255.841 | 264.411 | 272.746 |
| ENSMUSG00000057068 | 15_Fam4i  | 5.10151 | 1.17434  | 0.222417 | 0.612981 | 9.1012  | 7.93452 | 4.13665 | 2.47588 | 3.43391 | 3.52688 |
| ENSMUSG00000057069 | 6_Ero1lb  | 198.718 | 0.24297  | 0.554315 | 0.846134 | 329.666 | 164.358 | 152.022 | 158.456 | 200.884 | 186.925 |
| ENSMUSG00000057072 | 11_Spata  | 0.48227 | 1.03727  | 0.788557 | NA       | 0       | 0       | 2.06832 | 0.82529 | 0       | 0       |
| ENSMUSG00000057074 | 6_Ces1g   | 1.49951 | -0.8126  | 0.638823 | NA       | 1.01124 | 2.26701 | 0       | 1.65058 | 1.71695 | 2.35126 |
| ENSMUSG00000057092 | 12_Fxyd3  | 5554    | 0.25526  | 0.419939 | 0.773473 | 4320.04 | 7693.08 | 6119.13 | 4553.14 | 5316.55 | 5322.07 |
| ENSMUSG00000057093 | 14_C030C  | 61.9267 | -0.18627 | 0.695013 | 0.905638 | 85.9558 | 34.0051 | 53.7764 | 56.9452 | 83.2723 | 57.6058 |
| ENSMUSG00000057098 | 14_Ebf1   | 189.413 | 0.1039   | 0.839825 | 0.95317  | 339.778 | 90.6802 | 158.227 | 209.624 | 188.865 | 149.305 |
| ENSMUSG00000057101 | 8_Zfp180  | 876.78  | 0.15584  | 0.513341 | 0.828304 | 846.412 | 1030.35 | 895.584 | 818.69  | 826.713 | 842.925 |
| ENSMUSG00000057103 | 10_Cml1   | 52.7807 | -1.21064 | 0.003267 | 0.046281 | 23.2586 | 37.4056 | 35.1615 | 84.1798 | 75.546  | 61.1326 |
| ENSMUSG00000057110 | 15_Cntrl  | 1106.55 | 0.37213  | 0.113588 | 0.457438 | 1323.72 | 1208.31 | 1213.07 | 872.334 | 1006.14 | 1015.74 |
| ENSMUSG00000057113 | 13_Npm1   | 6935.47 | 0.60928  | 0.169288 | 0.550793 | 13732.7 | 6634.39 | 4768.52 | 4646.4  | 6169.02 | 5661.82 |
| ENSMUSG00000057116 | 4_AF3662  | 1.0081  | 0.14165  | 0.949844 | NA       | 2.02249 | 1.1335  | 0       | 0       | 1.71695 | 1.17563 |
| ENSMUSG00000057123 | 14_Gja5   | 29.1143 | -0.14958 | 0.745635 | 0.924182 | 22.2474 | 28.3376 | 32.059  | 26.4094 | 29.1882 | 36.4445 |
| ENSMUSG00000057130 | 11_Txn14e | 492.283 | -0.02924 | 0.916402 | 0.976775 | 385.284 | 520.278 | 556.379 | 486.922 | 500.492 | 504.344 |
| ENSMUSG00000057132 | 15_Rpgrlp | 288.973 | -1.61866 | 0.005174 | 0.06358  | 191.125 | 156.423 | 78.5963 | 703.974 | 443.833 | 159.885 |
| ENSMUSG00000057133 | 14_Chd6   | 2879.8  | 0.0729   | 0.759932 | 0.928029 | 3266.32 | 2600.26 | 2990.8  | 2663.22 | 2899.08 | 2859.13 |
| ENSMUSG00000057134 | 4_Ado     | 586.394 | 0.42906  | 0.272316 | 0.658804 | 1032.48 | 503.275 | 482.953 | 480.32  | 518.52  | 500.817 |
| ENSMUSG00000057135 | 12_Scimp  | 45.2071 | 2.34137  | 4.42E-06 | 0.000268 | 64.7196 | 112.217 | 49.6398 | 16.5058 | 12.8772 | 15.2832 |
| ENSMUSG00000057137 | 9_Tmem1   | 547.088 | 0.85007  | 0.005201 | 0.063732 | 555.173 | 828.591 | 728.05  | 459.688 | 366.57  | 344.459 |
| ENSMUSG00000057143 | 14_Trim1  | 3486.94 | 0.93527  | 0.03848  | 0.246301 | 7708.72 | 3157.94 | 2870.83 | 1998.03 | 2751.42 | 2434.73 |
| ENSMUSG00000057147 | 13_Dph6   | 1180.37 | 0.25105  | 0.53989  | 0.84046  | 1971.93 | 898.868 | 977.283 | 831.895 | 1211.31 | 1190.91 |
| ENSMUSG00000057156 | 10_Home   | 228.455 | -0.0744  | 0.816434 | 0.947542 | 289.216 | 187.028 | 191.32  | 220.353 | 252.392 | 230.423 |
| ENSMUSG00000057160 | 2_Gm163   | 0.47463 | 1.00958  | 0.794968 | NA       | 2.02249 | 0       | 0       | 0.82529 | 0       | 0       |
| ENSMUSG00000057163 | 3_Prss2   | 0.706   | 3.02814  | 0.366206 | NA       | 0       | 1.1335  | 3.10248 | 0       | 0       | 0       |
| ENSMUSG00000057173 | 8_Rfx8    | 1.87334 | -3.16839 | 0.086547 | 0.398869 | 1.01124 | 0       | 0       | 4.12646 | 2.57543 | 3.52688 |

|                    |            |         |          |          |          |         |         |         |         |         |         |
|--------------------|------------|---------|----------|----------|----------|---------|---------|---------|---------|---------|---------|
| ENSMUSG00000057176 | 4_Gm166    | 122.468 | -0.17941 | 0.723117 | 0.914338 | 44.4948 | 143.955 | 156.158 | 126.27  | 119.328 | 144.602 |
| ENSMUSG00000057177 | 12_Gsk3a   | 1870.73 | 0.17318  | 0.694116 | 0.905638 | 908.097 | 2550.38 | 2490.26 | 1893.22 | 1546.12 | 1836.33 |
| ENSMUSG00000057181 | 15_57304   | 645.301 | 0.03373  | 0.942745 | 0.986023 | 1116.41 | 368.388 | 473.646 | 598.337 | 746.016 | 569.004 |
| ENSMUSG00000057182 | 14_Scn3a   | 9.40451 | -0.33316 | 0.657601 | 0.894702 | 12.1349 | 5.66751 | 7.23913 | 14.03   | 10.3017 | 7.05377 |
| ENSMUSG00000057191 | 13_AB124   | 49.0371 | 2.94478  | 9.96E-09 | 1.42E-06 | 68.7646 | 125.819 | 66.1863 | 13.2047 | 12.0187 | 8.22939 |
| ENSMUSG00000057193 | 7_Slc44a2  | 3070.45 | 0.37026  | 0.25246  | 0.643959 | 2381.48 | 4021.67 | 3983.59 | 2477.53 | 2504.18 | 3054.28 |
| ENSMUSG00000057219 | 11_Armc7   | 184.315 | -0.00744 | 0.987115 | 0.99641  | 81.9108 | 238.036 | 231.652 | 184.865 | 174.271 | 195.154 |
| ENSMUSG00000057228 | 5_Aadat    | 1.21189 | -2.47207 | 0.244368 | NA       | 1.01124 | 0       | 0       | 1.65058 | 3.43391 | 1.17563 |
| ENSMUSG00000057229 | 11_Atp5sl  | 287.646 | 0.05675  | 0.87508  | 0.964429 | 192.136 | 295.844 | 391.947 | 301.232 | 256.685 | 288.029 |
| ENSMUSG00000057230 | 13_Aak1    | 4056.81 | 0.30536  | 0.203881 | 0.594896 | 5101.73 | 4127.08 | 4224.55 | 3399.38 | 3747.25 | 3740.85 |
| ENSMUSG00000057234 | 9_Mettl15  | 184.623 | 0.08063  | 0.798925 | 0.940596 | 233.597 | 172.292 | 163.398 | 159.281 | 205.176 | 173.993 |
| ENSMUSG00000057236 | 10_Rbbp4   | 4930.38 | 0.05427  | 0.876733 | 0.965114 | 7145.45 | 3857.31 | 4066.32 | 4226.32 | 5345.74 | 4941.16 |
| ENSMUSG00000057246 | 14_BC051   | 11.9622 | -1.83328 | 0.008927 | 0.092529 | 5.05622 | 3.40051 | 7.23913 | 18.1564 | 21.4619 | 16.4588 |
| ENSMUSG00000057262 | 1_Gm100    | 1400.85 | 0.24949  | 0.743224 | 0.923215 | 3508.01 | 497.608 | 559.481 | 866.557 | 2236.33 | 737.119 |
| ENSMUSG00000057265 | 12_Ccdc1   | 32.3981 | -0.20986 | 0.710107 | 0.910052 | 47.5285 | 13.602  | 28.9565 | 37.1382 | 37.773  | 29.3907 |
| ENSMUSG00000057278 | 8_Snrpg    | 804.136 | -0.23939 | 0.404674 | 0.763215 | 572.364 | 877.331 | 763.211 | 811.262 | 927.155 | 873.491 |
| ENSMUSG00000057280 | 15_Musk    | 43.7001 | -0.81628 | 0.052283 | 0.296722 | 30.3373 | 26.0706 | 38.264  | 48.6922 | 50.6501 | 68.1864 |
| ENSMUSG00000057286 | 5_St6galn  | 3261.78 | 0.10092  | 0.7651   | 0.929992 | 2338    | 3373.3  | 4415.87 | 2765.55 | 3057.04 | 3620.93 |
| ENSMUSG00000057315 | 14_Arhgaj  | 287.233 | -0.65012 | 0.034793 | 0.23184  | 225.507 | 181.36  | 263.711 | 398.616 | 294.458 | 359.742 |
| ENSMUSG00000057321 | 2_Usp17k   | 1.07237 | 3.26932  | 0.209791 | NA       | 3.03373 | 3.40051 | 0       | 0       | 0       | 0       |
| ENSMUSG00000057322 | 12_Rpl38   | 4391.2  | -0.25195 | 0.500192 | 0.821788 | 2301.59 | 4891.07 | 4833.67 | 5115.99 | 4309.55 | 4895.31 |
| ENSMUSG00000057329 | 7_Bcl2     | 1135.52 | 0.29922  | 0.43119  | 0.780048 | 1886.98 | 879.598 | 991.761 | 938.357 | 1074.81 | 1041.61 |
| ENSMUSG00000057335 | 11_Cep17   | 396.052 | -0.18438 | 0.670821 | 0.899442 | 581.465 | 276.575 | 254.404 | 419.249 | 523.671 | 320.946 |
| ENSMUSG00000057337 | 13_Chst3   | 30.1583 | -1.54142 | 0.018096 | 0.152303 | 21.2361 | 15.869  | 9.30745 | 78.4028 | 32.6221 | 23.5126 |
| ENSMUSG00000057342 | 13_Sphk2   | 832.227 | 0.43298  | 0.47494  | 0.806964 | 227.53  | 1284.26 | 1356.82 | 852.527 | 524.529 | 747.699 |
| ENSMUSG00000057346 | 11_Apol9e  | 3034.99 | 1.82255  | 0.000388 | 0.009548 | 1616.98 | 6995.98 | 5583.44 | 1380.71 | 1280.85 | 1351.97 |
| ENSMUSG00000057363 | 12_Uxs1    | 855.187 | 0.05896  | 0.87231  | 0.963879 | 1277.2  | 723.175 | 617.394 | 773.299 | 874.788 | 865.262 |
| ENSMUSG00000057367 | 12_Birc2   | 1719.13 | 0.42301  | 0.318691 | 0.699834 | 3153.06 | 1437.28 | 1317.52 | 1199.15 | 1659.44 | 1548.3  |
| ENSMUSG00000057375 | 13_Yipf1   | 856.901 | -0.03606 | 0.89838  | 0.97174  | 648.208 | 969.145 | 921.438 | 881.412 | 865.345 | 855.857 |
| ENSMUSG00000057378 | 14_Ryr3    | 94.563  | -1.44428 | 0.000858 | 0.017475 | 56.6297 | 30.6046 | 65.1522 | 127.095 | 178.563 | 109.333 |
| ENSMUSG00000057388 | 9_Mrpl18   | 851.071 | 0.38436  | 0.170651 | 0.552625 | 1177.09 | 924.938 | 789.065 | 694.896 | 746.875 | 773.563 |
| ENSMUSG00000057396 | 6_Zfp759   | 225.17  | 0.37099  | 0.538211 | 0.839833 | 518.768 | 117.884 | 125.134 | 170.836 | 232.647 | 185.749 |
| ENSMUSG00000057402 | 5_Cldn34i  | 0.19594 | -0.79206 | 0.84609  | NA       | 0       | 0       | 0       | 0       | 0       | 1.17563 |
| ENSMUSG00000057406 | 16_Vhsc    | 1557.62 | 0.45824  | 0.105585 | 0.441012 | 2182.27 | 1683.25 | 1542.97 | 1124.05 | 1425.93 | 1387.24 |
| ENSMUSG00000057409 | 6_Zfp53    | 301.122 | 0.7454   | 0.19874  | 0.590735 | 718.995 | 245.97  | 166.5   | 146.077 | 276.43  | 252.76  |
| ENSMUSG00000057411 | 8_Fam17c   | 296.238 | -0.19788 | 0.771339 | 0.932465 | 46.5172 | 337.784 | 443.655 | 406.869 | 236.94  | 305.663 |
| ENSMUSG00000057421 | 12_Las1l   | 1712    | -0.04274 | 0.859909 | 0.960099 | 1655.41 | 1814.74 | 1589.51 | 1535.04 | 1782.2  | 1895.11 |
| ENSMUSG00000057440 | 7_Mpp7     | 2254.97 | 0.77978  | 0.095727 | 0.41981  | 4936.89 | 1834.01 | 1778.76 | 1391.44 | 1831.13 | 1757.56 |
| ENSMUSG00000057454 | 5_Lypd3    | 6772.2  | 0.80599  | 0.171555 | 0.554309 | 2246.98 | 12317.8 | 11283.7 | 5039.24 | 3524.05 | 6221.42 |
| ENSMUSG00000057455 | 12_Rit2    | 36.9967 | -1.30247 | 0.043325 | 0.26431  | 35.3936 | 7.93452 | 20.6832 | 76.7522 | 50.6501 | 30.5663 |
| ENSMUSG00000057457 | 11_Phex    | 23.4624 | -0.3572  | 0.655517 | 0.893662 | 45.506  | 7.93452 | 8.27329 | 38.7887 | 21.4619 | 18.81   |
| ENSMUSG00000057464 | 3_Olf1r141 | 0       | NA       | NA       | NA       | 0       | 0       | 0       | 0       | 0       | 0       |
| ENSMUSG00000057465 | 4_Saa2     | 13.2915 | 5.34879  | 0.000257 | 0.007042 | 9.1012  | 63.4762 | 5.17081 | 0.82529 | 0       | 1.17563 |
| ENSMUSG00000057469 | 7_E2f6     | 719.826 | -0.07053 | 0.793397 | 0.938313 | 843.378 | 618.893 | 644.283 | 697.372 | 783.789 | 731.241 |
| ENSMUSG00000057497 | 8_Fam13f   | 680.848 | 0.1995   | 0.604328 | 0.871119 | 1094.17 | 557.683 | 531.559 | 566.151 | 715.97  | 619.556 |
| ENSMUSG00000057506 | 4_Bloc1s2  | 521.157 | 0.16609  | 0.565272 | 0.851123 | 669.444 | 524.812 | 459.168 | 458.863 | 550.284 | 464.373 |
| ENSMUSG00000057522 | 15_Spop    | 3048.33 | 0.11056  | 0.698205 | 0.905638 | 4024.75 | 2707.94 | 2762.25 | 2789.49 | 2958.31 | 3047.23 |
| ENSMUSG00000057530 | 14_Ece1    | 3391.32 | 0.66037  | 0.135505 | 0.499764 | 1916.31 | 5521.29 | 5024.99 | 2722.64 | 2216.59 | 2946.12 |
| ENSMUSG00000057531 | 13_Dtnbp   | 582.207 | -0.25093 | 0.572362 | 0.855115 | 249.777 | 649.497 | 695.991 | 740.287 | 532.256 | 625.434 |
| ENSMUSG00000057534 | 13_Gm15    | 2.56533 | -1.45854 | 0.337502 | 0.71586  | 1.01124 | 0       | 3.10248 | 4.95175 | 5.15086 | 1.17563 |
| ENSMUSG00000057541 | 14_Pus7    | 500.096 | 0.44394  | 0.156112 | 0.533441 | 655.286 | 613.225 | 460.202 | 349.924 | 403.484 | 518.452 |
| ENSMUSG00000057551 | 8_Zfp317   | 369.333 | -0.31344 | 0.298321 | 0.681298 | 395.397 | 259.572 | 333     | 374.683 | 461.861 | 391.484 |
| ENSMUSG00000057554 | 13_Lgals8  | 2654.59 | 0.74042  | 0.036514 | 0.239259 | 4637.57 | 2927.84 | 2398.22 | 1734.76 | 2341.07 | 1888.06 |
| ENSMUSG00000057561 | 9_Eif1a    | 4078.22 | 0.50098  | 0.223358 | 0.613683 | 7499.39 | 3757.56 | 3080.77 | 2924.01 | 3892.33 | 3315.27 |
| ENSMUSG00000057572 | 15_Zbtb8c  | 685.317 | -0.0454  | 0.902376 | 0.973635 | 992.031 | 498.741 | 532.593 | 625.572 | 752.884 | 710.079 |
| ENSMUSG00000057594 | 12_Arl16   | 146.866 | -0.59073 | 0.069573 | 0.351371 | 121.349 | 88.4132 | 141.68  | 185.691 | 166.545 | 177.52  |
| ENSMUSG00000057596 | 13_Trim3f  | 230.639 | 4.49805  | 9.08E-12 | 2.42E-09 | 627.983 | 468.137 | 229.584 | 10.7288 | 40.3484 | 7.05377 |
| ENSMUSG00000057604 | 9_Lmcd1    | 71.9977 | -0.81918 | 0.063104 | 0.33148  | 51.5735 | 39.6726 | 65.1522 | 131.221 | 73.829  | 70.5377 |
| ENSMUSG00000057606 | 14_Colq    | 6.16296 | -2.26997 | 0.02223  | 0.175349 | 2.02249 | 2.26701 | 2.06832 | 14.03   | 6.00934 | 10.5807 |
| ENSMUSG00000057609 | 6_Lce1a1   | 0.18892 | 1.1315   | 0.781553 | NA       | 0       | 1.1335  | 0       | 0       | 0       | 0       |
| ENSMUSG00000057614 | 6_Gnai1    | 160.237 | -0.19159 | 0.694038 | 0.905638 | 249.777 | 75.9447 | 123.065 | 190.643 | 178.563 | 143.427 |
| ENSMUSG00000057637 | 13_Prdrm2  | 1540.35 | 0.25124  | 0.264226 | 0.652958 | 1537.09 | 1737.66 | 1747.73 | 1416.2  | 1395.03 | 1408.4  |
| ENSMUSG00000057649 | 5_Brd9     | 1029.42 | -0.0542  | 0.827519 | 0.950848 | 861.58  | 1085.9  | 1082.77 | 1006.03 | 1051.63 | 1088.63 |
| ENSMUSG00000057657 | 3_Rps18-i  | 2208.38 | -0.18637 | 0.791823 | 0.937626 | 285.171 | 2743.08 | 3169.71 | 3151.79 | 1874.91 | 2025.61 |
| ENSMUSG00000057666 | 18_Gapdr   | 5925.86 | 0.17773  | 0.781197 | 0.935516 | 1230.68 | 9167.77 | 8472.89 | 6802.88 | 4166.19 | 5714.73 |
| ENSMUSG00000057667 | 6_Bloc1s3  | 263.762 | 0.11145  | 0.671513 | 0.899842 | 303.373 | 260.706 | 257.506 | 236.034 | 259.26  | 265.692 |
| ENSMUSG00000057672 | 15_Pkn1    | 726.817 | 0.06816  | 0.906689 | 0.974391 | 192.136 | 1008.82 | 1031.06 | 788.154 | 577.755 | 762.982 |
| ENSMUSG00000057674 | 3_Gm119    | 0       | NA       | NA       | NA       | 0       | 0       | 0       | 0       | 0       | 0       |
| ENSMUSG00000057691 | 8_Zfp746   | 603.431 | 0.32788  | 0.326859 | 0.708208 | 589.555 | 699.371 | 670.137 | 545.518 | 530.539 | 585.463 |
| ENSMUSG00000057697 | 2_Vmn1r5   | 0.19594 | -0.79206 | 0.84609  | NA       | 0       | 0       | 0       | 0       | 0       | 1.17563 |
| ENSMUSG00000057706 | 6_Mex3b    | 21.7611 | -0.61764 | 0.281554 | 0.668161 | 23.2586 | 15.869  | 12.4099 | 36.3129 | 18.028  | 24.6882 |
| ENSMUSG00000057710 | 6_963004   | 0.19594 | -0.79206 | 0.84609  | NA       | 0       | 0       | 0       | 0       | 0       | 1.17563 |
| ENSMUSG00000057715 | 13_A8300   | 1.23587 | -0.4615  | 0.829158 | NA       | 2.02249 | 1.1335  | 0       | 0.82529 | 3.43391 | 0       |
| ENSMUSG00000057716 | 6_Tmem1    | 29.0844 | -0.84387 | 0.139432 | 0.506914 | 30.3373 | 13.602  | 18.6149 | 47.867  | 42.9238 | 21.1613 |
| ENSMUSG00000057719 | 10_Sh3rf2  | 666.248 | 0.29875  | 0.21381  | 0.604774 | 799.894 | 676.701 | 728.05  | 563.675 | 606.085 | 623.083 |

|                    |           |         |          |          |          |         |         |         |         |         |         |
|--------------------|-----------|---------|----------|----------|----------|---------|---------|---------|---------|---------|---------|
| ENSMUSG00000057722 | 17_Lepr   | 286.9   | 0.15928  | 0.772504 | 0.932508 | 581.465 | 151.889 | 174.773 | 278.949 | 303.901 | 230.423 |
| ENSMUSG00000057723 | 3_Krt33b  | 4.66255 | 0.59405  | 0.613658 | 0.875588 | 1.01124 | 3.40051 | 12.4099 | 2.47588 | 5.15086 | 3.52688 |
| ENSMUSG00000057729 | 12_Prt3   | 1.13099 | -2.30952 | 0.357436 | NA       | 0       | 1.1335  | 0       | 3.30117 | 0       | 2.35126 |
| ENSMUSG00000057738 | 13_Sptan  | 14988.2 | 0.06135  | 0.85318  | 0.958298 | 9975.93 | 17760.9 | 18183.7 | 14271.8 | 14029.2 | 15707.6 |
| ENSMUSG00000057751 | 14_Megf6  | 144.945 | -0.25195 | 0.654458 | 0.893223 | 40.4498 | 151.889 | 204.764 | 175.787 | 154.526 | 142.251 |
| ENSMUSG00000057762 | 4_Gm616   | 76.0824 | -0.18523 | 0.739196 | 0.921641 | 95.057  | 78.2117 | 40.3323 | 38.7887 | 125.338 | 78.7671 |
| ENSMUSG00000057766 | 13_Ankrd  | 471.498 | 0.23822  | 0.595718 | 0.867682 | 851.468 | 316.247 | 362.991 | 385.412 | 434.389 | 478.481 |
| ENSMUSG00000057777 | 4_Mab21l  | 203.483 | -1.10987 | 0.006467 | 0.074207 | 174.945 | 77.0782 | 134.441 | 344.972 | 256.685 | 232.774 |
| ENSMUSG00000057778 | 14_Cyb5d  | 263.773 | -0.1844  | 0.531526 | 0.836945 | 292.25  | 194.962 | 253.37  | 288.852 | 268.703 | 284.502 |
| ENSMUSG00000057788 | 13_Ddx49  | 518.096 | 0.15965  | 0.797995 | 0.940387 | 121.349 | 787.785 | 731.152 | 599.988 | 354.551 | 513.749 |
| ENSMUSG00000057789 | 13_Bak1   | 1259.37 | 0.84297  | 0.12211  | 0.475275 | 503.6   | 2493.71 | 1854.25 | 969.719 | 748.592 | 986.352 |
| ENSMUSG00000057816 | 7_170000  | 6.50107 | 0.3613   | 0.69219  | 0.905638 | 13.1462 | 4.53401 | 4.13665 | 4.12646 | 6.00934 | 7.05377 |
| ENSMUSG00000057835 | 7_Zfp119i | 223.556 | 0.64855  | 0.243227 | 0.634745 | 525.847 | 146.222 | 146.851 | 173.311 | 197.45  | 151.656 |
| ENSMUSG00000057836 | 12_Xlr3a  | 21.0028 | -0.38174 | 0.5921   | 0.865686 | 30.3373 | 19.2695 | 5.17081 | 19.807  | 32.6221 | 18.81   |
| ENSMUSG00000057841 | 5_Rpl32   | 13144.8 | -0.35628 | 0.306582 | 0.689379 | 7067.59 | 13597.5 | 13925   | 14629.1 | 14831   | 14818.8 |
| ENSMUSG00000057842 | 13_Zfp59i | 189.284 | 0.508    | 0.38682  | 0.751702 | 436.858 | 132.62  | 97.2112 | 123.794 | 188.865 | 156.359 |
| ENSMUSG00000057858 | 7_Fam20i  | 461.353 | 0.36432  | 0.41352  | 0.786597 | 867.648 | 369.522 | 320.59  | 401.917 | 405.201 | 403.24  |
| ENSMUSG00000057863 | 5_Rpl36   | 1210.25 | 0.06607  | 0.939921 | 0.985498 | 57.6409 | 1693.45 | 1962.84 | 1604.37 | 665.32  | 1277.91 |
| ENSMUSG00000057880 | 12_Abat   | 862.545 | -1.63495 | 3.13E-07 | 2.81E-05 | 474.274 | 320.781 | 465.373 | 1601.89 | 1230.2  | 1082.75 |
| ENSMUSG00000057894 | 10_Zfp32i | 536.415 | 0.01513  | 0.975619 | 0.993623 | 955.626 | 295.844 | 366.093 | 462.989 | 642.999 | 494.939 |
| ENSMUSG00000057895 | 11_Zfp10i | 150.184 | -0.20765 | 0.599536 | 0.869276 | 203.26  | 102.015 | 112.724 | 138.649 | 184.573 | 159.885 |
| ENSMUSG00000057897 | 14_Camk   | 72.3177 | -1.39666 | 0.009247 | 0.094811 | 45.506  | 30.6046 | 43.4348 | 181.564 | 66.9612 | 65.8352 |
| ENSMUSG00000057899 | 6_Adgrf2  | 38.2687 | 0.80267  | 0.071161 | 0.356279 | 48.5397 | 57.8086 | 39.2981 | 27.2346 | 21.4619 | 35.2688 |
| ENSMUSG00000057914 | 15_Cacnb  | 207.969 | -1.24908 | 0.008152 | 0.086764 | 187.08  | 75.9447 | 106.519 | 388.713 | 307.335 | 182.222 |
| ENSMUSG00000057924 | 4_Gm100   | 44.5629 | 0.52588  | 0.450538 | 0.79295  | 111.237 | 23.8036 | 22.7516 | 33.837  | 46.3578 | 29.3907 |
| ENSMUSG00000057933 | 10_Gsta2  | 1610.03 | -0.28259 | 0.354625 | 0.729885 | 1775.75 | 1040.56 | 1541.93 | 1710.83 | 1795.93 | 1795.18 |
| ENSMUSG00000057948 | 12_Unc13  | 98.4596 | 0.78377  | 0.253193 | 0.644241 | 21.2361 | 163.224 | 189.252 | 75.9269 | 63.5273 | 77.5914 |
| ENSMUSG00000057963 | 9_Itpk1   | 245.813 | -0.07346 | 0.904608 | 0.974255 | 59.6634 | 335.517 | 323.693 | 343.322 | 194.016 | 218.667 |
| ENSMUSG00000057967 | 12_Fgf18  | 26.0342 | -1.0059  | 0.138115 | 0.50424  | 17.1912 | 4.53401 | 29.9907 | 33.837  | 28.3297 | 42.3226 |
| ENSMUSG00000057969 | 15_Sema   | 568.624 | -1.07898 | 0.026161 | 0.194332 | 185.058 | 307.179 | 603.95  | 1006.86 | 610.377 | 698.323 |
| ENSMUSG00000057982 | 7_Zfp809  | 409.805 | 0.41087  | 0.32066  | 0.701616 | 738.208 | 341.184 | 323.693 | 316.912 | 370.862 | 367.972 |
| ENSMUSG00000058006 | 12_Mdn1   | 1696.85 | -0.02694 | 0.907692 | 0.974731 | 1622.04 | 1778.47 | 1642.25 | 1558.15 | 1733.27 | 1846.91 |
| ENSMUSG00000058013 | 11_Sept1  | 1236.79 | -0.1561  | 0.551233 | 0.844955 | 1137.65 | 1347.73 | 1024.85 | 1257.75 | 1455.98 | 1196.79 |
| ENSMUSG00000058017 | 6_Serp1nb | 0       | NA       | NA       | NA       | 0       | 0       | 0       | 0       | 0       | 0       |
| ENSMUSG00000058019 | 12_Ces5a  | 29.6311 | -1.5107  | 0.003746 | 0.050858 | 14.1574 | 12.4685 | 19.6491 | 59.421  | 40.3484 | 31.742  |
| ENSMUSG00000058022 | 13_Adtrp  | 1712.76 | 0.31917  | 0.239715 | 0.631622 | 2190.36 | 1654.91 | 1858.39 | 1355.13 | 1450.83 | 1766.97 |
| ENSMUSG00000058028 | 14_Zscan  | 0.47657 | -2.28567 | 0.465885 | NA       | 0       | 0       | 0       | 0.82529 | 0.85848 | 1.17563 |
| ENSMUSG00000058046 | 1_493343  | 5.59975 | 0.39852  | 0.655009 | 0.893373 | 7.07871 | 5.66751 | 6.20497 | 3.30117 | 4.29238 | 7.05377 |
| ENSMUSG00000058052 | 2_Defb35  | 0.32647 | 0.16972  | 0.966824 | NA       | 0       | 1.1335  | 0       | 0.82529 | 0       | 0       |
| ENSMUSG00000058056 | 15_Palld  | 875.514 | -0.07164 | 0.891501 | 0.970634 | 278.092 | 1072.29 | 1211    | 899.569 | 829.289 | 962.839 |
| ENSMUSG00000058057 | 4_Mettl7a | 1.18046 | 0.5574   | 0.770813 | NA       | 2.02249 | 1.1335  | 1.03416 | 0       | 1.71695 | 1.17563 |
| ENSMUSG00000058063 | 4_Trim31  | 0.13755 | -0.79206 | 0.84609  | NA       | 0       | 0       | 0       | 0.82529 | 0       | 0       |
| ENSMUSG00000058064 | 5_Gm100   | 132.465 | 0.23947  | 0.5982   | 0.868715 | 79.8883 | 211.965 | 138.578 | 93.258  | 147.658 | 123.441 |
| ENSMUSG00000058070 | 14_Eml1   | 284.351 | -0.78629 | 0.006127 | 0.071533 | 205.283 | 191.562 | 229.584 | 421.724 | 351.117 | 306.839 |
| ENSMUSG00000058076 | 12_Sdhc   | 1336.07 | -0.53032 | 0.100026 | 0.430013 | 771.579 | 1210.58 | 1297.87 | 1834.62 | 1475.72 | 1426.04 |
| ENSMUSG00000058093 | 12_Zfp72i | 521.896 | 0.6237   | 0.264903 | 0.653546 | 1242.82 | 334.383 | 321.624 | 364.779 | 461.002 | 406.767 |
| ENSMUSG00000058099 | 15_Nfam1  | 50.7423 | 0.91449  | 0.137824 | 0.503967 | 29.3261 | 121.285 | 48.6056 | 48.6922 | 28.3297 | 28.2151 |
| ENSMUSG00000058126 | 6_Tpm3-r  | 4351.19 | 0.60772  | 0.027913 | 0.201902 | 4208.8  | 6329.48 | 5224.58 | 3284.66 | 3344.63 | 3714.98 |
| ENSMUSG00000058135 | 12_Gstm1  | 1403.44 | -0.85989 | 0.058681 | 0.317744 | 485.397 | 958.943 | 1547.11 | 2036    | 1475.72 | 1917.45 |
| ENSMUSG00000058145 | 15_Adamt  | 84.0986 | 0.36042  | 0.392521 | 0.75466  | 58.6522 | 109.95  | 114.792 | 59.421  | 71.2536 | 90.5233 |
| ENSMUSG00000058147 | 1_Xlr3c   | 5.9719  | -1.46899 | 0.198717 | 0.590735 | 5.05622 | 4.53401 | 0       | 11.5541 | 11.1602 | 3.52688 |
| ENSMUSG00000058152 | 7_Chsgy   | 251.417 | -0.92654 | 0.005522 | 0.066141 | 224.496 | 123.552 | 171.671 | 311.961 | 338.24  | 338.581 |
| ENSMUSG00000058153 | 14_Seiz6l | 13.9903 | -2.77271 | 0.001474 | 0.026046 | 2.02249 | 6.80102 | 2.06832 | 42.0899 | 18.028  | 12.9319 |
| ENSMUSG00000058163 | 13_Gm54   | 1614.95 | 1.89433  | 2.68E-06 | 0.00018  | 3566.66 | 2484.64 | 1584.34 | 507.555 | 857.619 | 688.918 |
| ENSMUSG00000058173 | 11_Smco   | 401.597 | -0.07287 | 0.838505 | 0.952966 | 265.957 | 403.527 | 504.671 | 419.249 | 336.523 | 479.656 |
| ENSMUSG00000058174 | 7_Gm514   | 141.168 | -0.28389 | 0.414328 | 0.768913 | 100.113 | 114.484 | 167.534 | 172.486 | 153.667 | 138.724 |
| ENSMUSG00000058176 | 2_Gm540   | 0       | NA       | NA       | NA       | 0       | 0       | 0       | 0       | 0       | 0       |
| ENSMUSG00000058183 | 14_Mmel1  | 2.56175 | -1.29449 | 0.450794 | 0.79295  | 0       | 4.53401 | 0       | 2.47588 | 6.00934 | 2.35126 |
| ENSMUSG00000058186 | 13_Gm13   | 0.19594 | -0.79206 | 0.84609  | NA       | 0       | 0       | 0       | 0       | 0       | 1.17563 |
| ENSMUSG00000058192 | 15_Zfp84i | 224.902 | 0.15791  | 0.717661 | 0.912533 | 379.217 | 168.892 | 163.398 | 186.516 | 251.534 | 199.857 |
| ENSMUSG00000058207 | 6_Serpina | 0       | NA       | NA       | NA       | 0       | 0       | 0       | 0       | 0       | 0       |
| ENSMUSG00000058216 | 12_BC02i  | 5.19893 | 1.06816  | 0.403122 | 0.761613 | 1.01124 | 18.136  | 2.06832 | 2.47588 | 5.15086 | 2.35126 |
| ENSMUSG00000058230 | 12_Arhgaj | 2618.47 | 0.06434  | 0.77304  | 0.93264  | 2486.65 | 2770.28 | 2773.62 | 2442.04 | 2651.84 | 2586.38 |
| ENSMUSG00000058239 | 13_Usf2   | 960.817 | -0.14512 | 0.714266 | 0.91112  | 503.6   | 1077.96 | 1156.19 | 1156.23 | 861.052 | 1009.86 |
| ENSMUSG00000058240 | 13_Cryz1  | 950.574 | -0.02964 | 0.931653 | 0.982005 | 1325.74 | 720.908 | 775.621 | 887.189 | 1059.36 | 934.624 |
| ENSMUSG00000058246 | 6_Gm100   | 0.2751  | -1.54073 | 0.703687 | NA       | 0       | 0       | 0       | 1.65058 | 0       | 0       |
| ENSMUSG00000058248 | 12_Kcnh1  | 789.097 | 0.41255  | 0.160262 | 0.538686 | 705.849 | 1117.63 | 880.071 | 694.896 | 628.405 | 707.728 |
| ENSMUSG00000058252 | 6_Tcp11x  | 1.1836  | 3.77889  | 0.193803 | NA       | 6.06747 | 0       | 1.03416 | 0       | 0       | 0       |
| ENSMUSG00000058254 | 12_Tspan  | 1178.92 | -0.73564 | 0.01337  | 0.123438 | 1027.42 | 757.18  | 869.73  | 1762.82 | 1474.86 | 1181.51 |
| ENSMUSG00000058258 | 14_Idi1   | 5630.03 | 0.45918  | 0.309167 | 0.691657 | 10915.4 | 4714.24 | 3925.68 | 3865.67 | 5312.26 | 5046.97 |
| ENSMUSG00000058260 | 2_Serpina | 111.443 | 0.28586  | 0.498813 | 0.820689 | 92.0232 | 126.952 | 147.885 | 62.7222 | 103.876 | 135.197 |
| ENSMUSG00000058267 | 13_Mrps1  | 1103.55 | 0.00238  | 0.992046 | 0.997512 | 1244.84 | 1028.09 | 1040.37 | 1124.87 | 1085.11 | 1098.04 |
| ENSMUSG00000058287 | 5_Gm122   | 0.35746 | 2.04359  | 0.612655 | NA       | 1.01124 | 1.1335  | 0       | 0       | 0       | 0       |
| ENSMUSG00000058290 | 3_Espl1   | 173.441 | 0.52867  | 0.335273 | 0.713739 | 73.8208 | 291.31  | 249.233 | 109.764 | 120.187 | 196.33  |
| ENSMUSG00000058291 | 14_Zfp68  | 1463.03 | 0.59269  | 0.202057 | 0.593308 | 3013.51 | 1152.77 | 1111.72 | 957.339 | 1336.65 | 1206.19 |

|                    |           |         |          |          |          |         |         |         |         |         |         |
|--------------------|-----------|---------|----------|----------|----------|---------|---------|---------|---------|---------|---------|
| ENSMUSG00000058297 | 16_Spock  | 518.339 | -1.81518 | 1.33E-06 | 0.000101 | 189.103 | 197.23  | 301.975 | 1102.59 | 680.772 | 638.366 |
| ENSMUSG00000058298 | 7_Mcm9    | 300.65  | 0.22906  | 0.401147 | 0.76028  | 357.98  | 304.912 | 310.248 | 238.509 | 303.042 | 289.204 |
| ENSMUSG00000058301 | 6_Upf1    | 945.655 | 0.51833  | 0.327652 | 0.708848 | 357.98  | 1482.62 | 1500.57 | 764.221 | 696.225 | 872.316 |
| ENSMUSG00000058317 | 11_Ube2e  | 1014.69 | 0.15388  | 0.664366 | 0.896403 | 1542.15 | 825.19  | 838.705 | 888.015 | 1011.29 | 982.825 |
| ENSMUSG00000058318 | 15_Phf21i | 971.623 | 0.02377  | 0.91715  | 0.976775 | 977.873 | 949.875 | 1011.41 | 982.923 | 1013    | 894.653 |
| ENSMUSG00000058325 | 5_Dock1   | 5670.93 | 0.46275  | 0.059096 | 0.318855 | 6456.8  | 6756.81 | 6503.84 | 4119.86 | 4721.62 | 5466.67 |
| ENSMUSG00000058328 | 13_Xlr5a  | 0.89875 | 2.15443  | 0.507544 | NA       | 0       | 4.53401 | 0       | 0       | 0.85848 | 0       |
| ENSMUSG00000058331 | 14_Zfp85  | 137.219 | 0.67421  | 0.266104 | 0.654446 | 340.789 | 91.8137 | 73.4255 | 91.6075 | 121.045 | 104.631 |
| ENSMUSG00000058351 | 10_Smim4  | 65.1157 | -0.51947 | 0.300228 | 0.683516 | 59.6634 | 31.7381 | 69.2888 | 113.89  | 64.3858 | 51.7276 |
| ENSMUSG00000058354 | 6_Krt6a   | 117398  | 0.94176  | 0.03214  | 0.221131 | 74855.3 | 225600  | 162774  | 77216.8 | 69740.1 | 94199.5 |
| ENSMUSG00000058355 | 6_Abce1   | 3616.76 | 0.41399  | 0.356775 | 0.731487 | 6879.5  | 2991.31 | 2525.42 | 2498.99 | 3498.29 | 3307.04 |
| ENSMUSG00000058385 | 7_Hist1h2 | 1.82495 | -0.62013 | 0.731003 | 0.91894  | 1.01124 | 1.1335  | 2.06832 | 0       | 0.85848 | 5.87814 |
| ENSMUSG00000058388 | 14_Phtf1  | 854.543 | -0.02404 | 0.944359 | 0.986462 | 1192.26 | 675.568 | 674.273 | 787.329 | 944.325 | 853.506 |
| ENSMUSG00000058392 | 12_Rrp1b  | 360.547 | -0.00153 | 0.996249 | 0.998321 | 258.879 | 462.469 | 359.888 | 369.731 | 340.815 | 371.498 |
| ENSMUSG00000058396 | 7_Gpr182  | 24.6581 | -0.51039 | 0.357301 | 0.731867 | 11.1237 | 29.4711 | 20.6832 | 30.5358 | 32.6221 | 23.5126 |
| ENSMUSG00000058400 | 13_Qrfr   | 2.06181 | -1.59659 | 0.388018 | 0.752356 | 3.03373 | 0       | 0       | 4.95175 | 0.85848 | 3.52688 |
| ENSMUSG00000058402 | 13_Zfp42c | 110.159 | -0.22057 | 0.631193 | 0.882337 | 163.822 | 66.8767 | 74.4596 | 104.812 | 141.649 | 109.333 |
| ENSMUSG00000058407 | 12_Txndc  | 2357.84 | 0.36625  | 0.335013 | 0.713724 | 3961.04 | 2112.85 | 1892.52 | 1767.78 | 2317.89 | 2094.97 |
| ENSMUSG00000058420 | 7_Syt17   | 46.5971 | -1.69258 | 7.77E-05 | 0.00267  | 28.3148 | 17.0025 | 20.6832 | 80.8787 | 70.3951 | 62.3083 |
| ENSMUSG00000058427 | 10_Cxcl2  | 13.8898 | 3.0568   | 0.005297 | 0.064452 | 19.2136 | 48.7406 | 6.20497 | 3.30117 | 0       | 5.87814 |
| ENSMUSG00000058435 | 5_Btn1a   | 0.18892 | 1.1315   | 0.781553 | NA       | 0       | 1.1335  | 0       | 0       | 0       | 0       |
| ENSMUSG00000058440 | 14_Nrf1   | 650.115 | 0.04137  | 0.89449  | 0.971192 | 467.195 | 758.313 | 752.87  | 659.409 | 597.5   | 665.405 |
| ENSMUSG00000058441 | 7_Panx2   | 6.87014 | -0.51851 | 0.61719  | 0.877328 | 1.01124 | 5.66751 | 10.3416 | 14.03   | 4.29238 | 5.87814 |
| ENSMUSG00000058443 | 4_Rpl10-p | 13239.6 | -0.31654 | 0.298243 | 0.681298 | 8545.01 | 12705.4 | 14128.7 | 14840.4 | 16000.3 | 13217.6 |
| ENSMUSG00000058444 | 7_Map2k4  | 333.446 | 0.00869  | 0.97237  | 0.9926   | 313.486 | 340.051 | 349.547 | 320.213 | 317.636 | 359.742 |
| ENSMUSG00000058446 | 14_Znrf2  | 6054.54 | 0.44077  | 0.336143 | 0.714397 | 11940.8 | 4323.18 | 4652.69 | 4389.73 | 5548.34 | 5472.55 |
| ENSMUSG00000058447 | 8_Gm269   | 10.614  | -5.78211 | 0.001815 | 0.030052 | 0       | 1.1335  | 0       | 43.7405 | 0       | 18.81   |
| ENSMUSG00000058454 | 14_Dhcr7  | 1474.2  | 0.30404  | 0.474611 | 0.806964 | 811.018 | 2126.45 | 1949.39 | 1337.8  | 1104    | 1516.56 |
| ENSMUSG00000058470 | 10_Gm83   | 12.0189 | 2.59283  | 0.000862 | 0.017495 | 30.3373 | 17.0025 | 14.4783 | 2.47588 | 4.29238 | 3.52688 |
| ENSMUSG00000058486 | 11_Wdr91  | 334.251 | -0.42047 | 0.46402  | 0.801564 | 77.8658 | 379.723 | 400.221 | 453.911 | 330.514 | 363.269 |
| ENSMUSG00000058488 | 7_Kl      | 1.80389 | -3.11741 | 0.120156 | 0.471162 | 1.01124 | 0       | 0       | 6.60234 | 0.85848 | 2.35126 |
| ENSMUSG00000058498 | 12_Rnf20  | 45.8618 | -0.92595 | 0.215033 | 0.606021 | 12.1349 | 38.5391 | 44.4689 | 121.318 | 35.1976 | 23.5126 |
| ENSMUSG00000058499 | 9_Pip     | 0.72576 | 1.65146  | 0.50543  | NA       | 1.01124 | 1.1335  | 1.03416 | 0       | 0       | 1.17563 |
| ENSMUSG00000058503 | 11_Fam13  | 622.823 | 0.23511  | 0.578646 | 0.858418 | 1082.03 | 487.406 | 450.894 | 539.741 | 649.009 | 527.857 |
| ENSMUSG00000058546 | 8_Rpl23a  | 12732.9 | -0.44317 | 0.438631 | 0.785475 | 2888.11 | 14106.4 | 15383.2 | 17242   | 11947.4 | 14830.5 |
| ENSMUSG00000058550 | 14_Dppa4  | 0       | NA       | NA       | NA       | 0       | 0       | 0       | 0       | 0       | 0       |
| ENSMUSG00000058558 | 12_Rpl5   | 27977.8 | -0.15301 | 0.629647 | 0.881526 | 35355.1 | 21859.6 | 22271.7 | 25953.8 | 33064.2 | 29362.5 |
| ENSMUSG00000058568 | 6_Deffb50 | 0       | NA       | NA       | NA       | 0       | 0       | 0       | 0       | 0       | 0       |
| ENSMUSG00000058569 | 7_Tmed9   | 2949.86 | 0.32989  | 0.33282  | 0.711873 | 2169.12 | 4045.47 | 3642.32 | 2681.37 | 2240.62 | 2920.26 |
| ENSMUSG00000058571 | 10_Gpc6   | 1528.04 | -0.06779 | 0.85163  | 0.957649 | 2171.14 | 1038.29 | 1266.85 | 1540    | 1657.72 | 1494.22 |
| ENSMUSG00000058586 | 11_Serhl  | 769.163 | -0.24419 | 0.581227 | 0.859883 | 320.564 | 850.127 | 942.121 | 897.918 | 777.78  | 826.466 |
| ENSMUSG00000058587 | 7_Tmod3   | 7175.84 | 0.60734  | 0.078047 | 0.374843 | 12228   | 7103.66 | 6661.03 | 5001.27 | 5838.5  | 6222.6  |
| ENSMUSG00000058588 | 5_Vmn1r2  | 0.33902 | -1.78366 | 0.658108 | NA       | 0       | 0       | 0       | 0       | 0.85848 | 1.17563 |
| ENSMUSG00000058589 | 14_Anks1  | 1171.35 | 0.04244  | 0.868382 | 0.962942 | 1340.91 | 1119.9  | 1104.48 | 1010.98 | 1191.57 | 1260.27 |
| ENSMUSG00000058594 | 15_Fbxo1  | 1496.97 | -0.01809 | 0.935875 | 0.984134 | 1475.41 | 1504.16 | 1482.99 | 1385.67 | 1564.15 | 1569.46 |
| ENSMUSG00000058600 | 13_Rpl30  | 9243.53 | 0.02414  | 0.951601 | 0.988    | 14440.6 | 6717.14 | 6804.78 | 8143.99 | 10570.4 | 8784.29 |
| ENSMUSG00000058618 | 6_AY7611  | 0.28616 | -1.57932 | 0.696464 | NA       | 0       | 0       | 0       | 0       | 1.71695 | 0       |
| ENSMUSG00000058620 | 5_Adra2b  | 0.79007 | 0.81615  | 0.735594 | NA       | 2.02249 | 0       | 1.03416 | 0.82529 | 0.85848 | 0       |
| ENSMUSG00000058624 | 12_Gda    | 9388.63 | 1.08292  | 0.017582 | 0.148808 | 20985.3 | 9541.83 | 7739.66 | 4413.66 | 7265.29 | 6386.01 |
| ENSMUSG00000058626 | 16_Capn1  | 0.73533 | -1.60411 | 0.569874 | NA       | 1.01124 | 0       | 0       | 0.82529 | 2.57543 | 0       |
| ENSMUSG00000058638 | 13_Zfp11c | 1310.9  | -0.03412 | 0.92026  | 0.977317 | 1816.19 | 1030.35 | 1039.33 | 1188.42 | 1383.86 | 1407.23 |
| ENSMUSG00000058655 | 8_Eif4b   | 7636.41 | 0.21393  | 0.342773 | 0.720325 | 8400.41 | 7946.99 | 8256.75 | 6495.88 | 6995.73 | 7722.7  |
| ENSMUSG00000058656 | 12_Samd   | 240.418 | 0.23384  | 0.423013 | 0.774831 | 303.373 | 250.504 | 225.447 | 192.293 | 236.94  | 233.95  |
| ENSMUSG00000058665 | 8_En1     | 0       | NA       | NA       | NA       | 0       | 0       | 0       | 0       | 0       | 0       |
| ENSMUSG00000058672 | 6_Tubb2a  | 735.577 | -0.25445 | 0.627459 | 0.880881 | 223.485 | 982.747 | 806.646 | 896.268 | 777.78  | 726.538 |
| ENSMUSG00000058690 | 14_Ccser1 | 4725.8  | 0.38163  | 0.312567 | 0.694201 | 8015.12 | 3954.79 | 4071.49 | 3551.23 | 4454.64 | 4307.5  |
| ENSMUSG00000058704 | 7_Memo1   | 1156.69 | 0.75071  | 0.082155 | 0.386678 | 2363.28 | 1072.29 | 917.301 | 745.239 | 952.051 | 889.95  |
| ENSMUSG00000058706 | 5_O61003  | 1225.81 | 0.37058  | 0.298824 | 0.682038 | 1914.29 | 1094.96 | 1137.58 | 835.196 | 1233.63 | 1139.18 |
| ENSMUSG00000058709 | 11_Egln2  | 540.064 | 0.17858  | 0.783242 | 0.935592 | 111.237 | 756.046 | 853.183 | 653.632 | 385.456 | 480.832 |
| ENSMUSG00000058715 | 11_Fcer1g | 237.053 | 2.05391  | 6.11E-07 | 5.02E-05 | 377.194 | 532.746 | 236.823 | 113.065 | 88.4231 | 74.0646 |
| ENSMUSG00000058728 | 14_Cd30c  | 0.34472 | 1.99863  | 0.620844 | NA       | 0       | 0       | 2.06832 | 0       | 0       | 0       |
| ENSMUSG00000058729 | 13_Lin9   | 187.725 | 0.66417  | 0.103614 | 0.437303 | 348.879 | 180.227 | 161.329 | 128.746 | 161.394 | 145.778 |
| ENSMUSG00000058731 | 1_Vmn1r1  | 0.30991 | 0.16972  | 0.966824 | NA       | 0       | 0       | 1.03416 | 0.82529 | 0       | 0       |
| ENSMUSG00000058740 | 14_Kcnt1  | 14.8092 | -1.766   | 0.030403 | 0.213391 | 3.03373 | 9.06802 | 8.27329 | 38.7887 | 21.4619 | 8.22939 |
| ENSMUSG00000058741 | 4_Prr19   | 0.59225 | -1.1886  | 0.690885 | NA       | 1.01124 | 0       | 0       | 0.82529 | 1.71695 | 0       |
| ENSMUSG00000058743 | 5_Kcnj14  | 82.0029 | -2.49955 | 0.000317 | 0.008217 | 20.2249 | 37.4056 | 16.5466 | 258.317 | 121.904 | 37.6201 |
| ENSMUSG00000058748 | 8_Zfp958  | 223.899 | 0.52712  | 0.375507 | 0.745495 | 533.937 | 134.887 | 124.099 | 152.679 | 212.044 | 185.749 |
| ENSMUSG00000058755 | 3_Osm     | 12.5121 | 3.23573  | 0.001665 | 0.028406 | 6.06747 | 46.4736 | 15.5124 | 4.12646 | 1.71695 | 1.17563 |
| ENSMUSG00000058756 | 13_Thra   | 1874.58 | -0.31114 | 0.492499 | 0.815769 | 760.456 | 1966.63 | 2292.74 | 2495.68 | 1739.27 | 1992.69 |
| ENSMUSG00000058761 | 4_Rnf169  | 1205.27 | 0.44356  | 0.071966 | 0.357998 | 1448.1  | 1442.95 | 1276.16 | 898.743 | 1122.89 | 1042.78 |
| ENSMUSG00000058773 | 2_Hist1h1 | 0.53364 | 2.62307  | 0.473724 | NA       | 0       | 1.1335  | 2.06832 | 0       | 0       | 0       |
| ENSMUSG00000058793 | 14_Cds2   | 3502.15 | -0.33548 | 0.189178 | 0.577749 | 2685.86 | 3159.07 | 3445.83 | 4377.35 | 3807.35 | 3537.46 |
| ENSMUSG00000058794 | 12_Nfe2   | 2.62616 | 2.34446  | 0.200872 | 0.592148 | 1.01124 | 10.2015 | 2.06832 | 2.47588 | 0       | 0       |
| ENSMUSG00000058799 | 14_Nap1l  | 3693.61 | 0.27892  | 0.532109 | 0.837483 | 6755.11 | 2857.56 | 2535.76 | 2754.83 | 3719.78 | 3538.64 |
| ENSMUSG00000058806 | 14_Col13a | 71.4252 | -0.60819 | 0.179805 | 0.56568  | 51.5735 | 35.1386 | 82.7329 | 86.6557 | 67.8197 | 104.631 |

|                    |            |         |          |          |          |         |         |         |         |         |         |
|--------------------|------------|---------|----------|----------|----------|---------|---------|---------|---------|---------|---------|
| ENSMUSG00000058818 | 13_Pirb    | 220.79  | 2.09598  | 4.42E-05 | 0.001726 | 186.069 | 620.026 | 267.848 | 107.288 | 72.9705 | 70.5377 |
| ENSMUSG00000058831 | 13_Opn1s   | 76.4193 | -2.72053 | 0.00137  | 0.024684 | 22.2474 | 36.2721 | 2.06832 | 206.323 | 152.809 | 38.7957 |
| ENSMUSG00000058833 | 11_28104   | 172.114 | -0.06095 | 0.929977 | 0.981773 | 27.3036 | 228.968 | 249.233 | 219.528 | 121.904 | 185.749 |
| ENSMUSG00000058835 | 14_Abi1    | 4827.81 | 0.73431  | 0.067174 | 0.343967 | 9339.85 | 4691.57 | 4060.12 | 3068.44 | 4001.36 | 3805.51 |
| ENSMUSG00000058881 | 12_Zfp51f  | 560.646 | 0.10616  | 0.756675 | 0.927547 | 398.43  | 638.162 | 707.366 | 632.999 | 456.71  | 530.208 |
| ENSMUSG00000058883 | 14_Zfp70f  | 11.1736 | -3.28304 | 0.003929 | 0.05252  | 0       | 0       | 6.20497 | 25.5841 | 22.3204 | 12.9319 |
| ENSMUSG00000058886 | 8_Deaf1    | 379.785 | 0.19387  | 0.743067 | 0.923215 | 102.136 | 542.948 | 570.857 | 425.851 | 303.042 | 333.878 |
| ENSMUSG00000058897 | 17_Col25a  | 40.879  | -1.15862 | 0.023397 | 0.180504 | 38.4273 | 12.4685 | 24.8199 | 58.5958 | 59.2349 | 51.7276 |
| ENSMUSG00000058900 | 4_Rsl1     | 106.106 | 0.30832  | 0.600379 | 0.869697 | 226.519 | 75.9447 | 49.6398 | 80.0534 | 111.602 | 92.8746 |
| ENSMUSG00000058914 | 12_C1qtnl  | 71.58   | 0.18138  | 0.751688 | 0.925804 | 133.484 | 29.4711 | 65.1522 | 80.0534 | 56.6595 | 64.6595 |
| ENSMUSG00000058921 | 3_Slc10a4  | 31.6865 | 1.21338  | 0.037608 | 0.242849 | 62.6971 | 19.2695 | 50.6739 | 14.8553 | 21.4619 | 21.1613 |
| ENSMUSG00000058925 | 11_17000   | 0.41265 | -2.10335 | 0.599583 | NA       | 0       | 0       | 0       | 2.47588 | 0       | 0       |
| ENSMUSG00000058927 | 5_Gm100    | 2055.79 | 0.37669  | 0.354935 | 0.730256 | 3617.22 | 1898.62 | 1451.96 | 1584.56 | 1917.84 | 1864.55 |
| ENSMUSG00000058932 | 6_Gm217    | 104.478 | -0.60505 | 0.717054 | 0.912443 | 0       | 123.552 | 125.134 | 155.98  | 108.168 | 114.036 |
| ENSMUSG00000058952 | 12_Cfi     | 1.00405 | -0.9462  | 0.714666 | NA       | 2.02249 | 0       | 0       | 1.65058 | 0       | 2.35126 |
| ENSMUSG00000058966 | 13_Fam57   | 130.894 | -2.56077 | 7.61E-05 | 0.002639 | 26.2924 | 57.8086 | 29.9907 | 433.278 | 154.526 | 83.4696 |
| ENSMUSG00000058975 | 6_Kcnc1    | 63.5246 | -1.54873 | 0.007527 | 0.0821   | 32.3598 | 32.8716 | 32.059  | 175.787 | 57.518  | 50.552  |
| ENSMUSG00000058976 | 4_Uspl7k   | 0       | NA       | NA       | NA       | 0       | 0       | 0       | 0       | 0       | 0       |
| ENSMUSG00000058979 | 7_Cecr5    | 224.558 | -0.15584 | 0.7351   | 0.920451 | 94.0457 | 289.043 | 254.404 | 250.889 | 221.487 | 237.477 |
| ENSMUSG00000058997 | 7_Vwa8     | 1185.53 | -0.13304 | 0.542812 | 0.84123  | 1099.22 | 1141.44 | 1152.06 | 1226.38 | 1249.08 | 1244.99 |
| ENSMUSG00000059003 | 12_Grin2e  | 5.1844  | -2.3453  | 0.08357  | 0.390546 | 5.05622 | 0       | 0       | 10.7288 | 9.44325 | 5.87814 |
| ENSMUSG00000059005 | 13_Hnrnp   | 23622.5 | 0.4884   | 0.245058 | 0.6364   | 43616   | 21036.7 | 18096.8 | 15578.2 | 22429.4 | 20977.9 |
| ENSMUSG00000059013 | 12_Sh2d3   | 51.0413 | 0.39487  | 0.552394 | 0.845462 | 19.2136 | 81.6122 | 73.4255 | 74.2763 | 28.3297 | 29.3907 |
| ENSMUSG00000059022 | 14_Kcp     | 9.55374 | -0.90269 | 0.312477 | 0.694134 | 2.02249 | 4.53401 | 13.4441 | 18.1564 | 8.58477 | 10.5807 |
| ENSMUSG00000059040 | 4_Eno1b    | 5882.28 | 0.24633  | 0.672117 | 0.900129 | 1634.17 | 9369.54 | 8146.09 | 6124.49 | 4338.74 | 5680.63 |
| ENSMUSG00000059042 | 3_Klk1b9   | 0       | NA       | NA       | NA       | 0       | 0       | 0       | 0       | 0       | 0       |
| ENSMUSG00000059043 | 1_Olfr15   | 0       | NA       | NA       | NA       | 0       | 0       | 0       | 0       | 0       | 0       |
| ENSMUSG00000059049 | 14_Frem1   | 293.993 | -0.9203  | 0.015162 | 0.13412  | 285.171 | 140.554 | 184.081 | 453.086 | 387.173 | 313.893 |
| ENSMUSG00000059060 | 13_Rad51   | 23.1569 | -0.17473 | 0.758831 | 0.927759 | 30.3373 | 21.5366 | 13.4441 | 18.9817 | 33.4806 | 21.1613 |
| ENSMUSG00000059070 | 14_Rpl18   | 5518.46 | 0.12594  | 0.682817 | 0.961065 | 687.646 | 7917.52 | 8672.48 | 6740.99 | 3739.53 | 5352.63 |
| ENSMUSG00000059089 | 4_Fcgr4    | 134.764 | 3.26785  | 2.90E-12 | 8.82E-10 | 209.328 | 366.121 | 157.193 | 19.807  | 32.6221 | 23.5126 |
| ENSMUSG00000059108 | 3_lftm6    | 20.2099 | 2.85754  | 0.000302 | 0.007945 | 33.3711 | 52.1411 | 20.6832 | 0.82529 | 6.00934 | 8.22939 |
| ENSMUSG00000059119 | 8_Nap114   | 2914.16 | -0.06927 | 0.752179 | 0.925804 | 2687.89 | 3004.92 | 2839.81 | 2916.58 | 2959.17 | 3076.62 |
| ENSMUSG00000059128 | 3_lfln2    | 0       | NA       | NA       | NA       | 0       | 0       | 0       | 0       | 0       | 0       |
| ENSMUSG00000059142 | 15_Zfp94f  | 1060.49 | 0.90028  | 0.131101 | 0.492423 | 2849.69 | 644.963 | 648.419 | 666.836 | 855.902 | 697.147 |
| ENSMUSG00000059146 | 12_Ntrk3   | 353.298 | -0.59775 | 0.043387 | 0.264492 | 323.598 | 219.9   | 299.907 | 459.688 | 436.965 | 379.728 |
| ENSMUSG00000059149 | 17_Mfsd4   | 625.897 | 0.46859  | 0.148889 | 0.522452 | 968.772 | 589.422 | 621.531 | 459.688 | 575.18  | 540.789 |
| ENSMUSG00000059173 | 19_Pdel1a  | 113.909 | -0.0193  | 0.970765 | 0.992167 | 192.136 | 52.1411 | 95.1429 | 108.113 | 144.224 | 91.699  |
| ENSMUSG00000059182 | 7_Skap2    | 917.273 | 0.5934   | 0.032592 | 0.223087 | 1187.2  | 1206.05 | 916.267 | 623.096 | 756.318 | 814.71  |
| ENSMUSG00000059183 | 12_Mtfrnt  | 291.738 | 0.12967  | 0.622146 | 0.878259 | 310.452 | 306.046 | 297.839 | 241.811 | 303.901 | 290.38  |
| ENSMUSG00000059187 | 12_Fam1f   | 3.38136 | -2.49338 | 0.133646 | 0.497275 | 3.03373 | 0       | 0       | 5.77705 | 10.3017 | 1.17563 |
| ENSMUSG00000059201 | 12_Lep     | 0.33708 | 1.97061  | 0.625968 | NA       | 2.02249 | 0       | 0       | 0       | 0       | 0       |
| ENSMUSG00000059203 | 10_l11rapl | 2.32052 | 0.45869  | 0.811955 | 0.946139 | 7.07871 | 0       | 1.03416 | 4.95175 | 0.85848 | 0       |
| ENSMUSG00000059208 | 14_Hnrnp   | 3718.31 | 0.42238  | 0.149928 | 0.523171 | 5121.95 | 4142.95 | 3510.98 | 2603.8  | 3402.14 | 3528.06 |
| ENSMUSG00000059213 | 6_Ddn      | 1.83681 | -4.24006 | 0.037375 | 0.242169 | 0       | 0       | 0       | 5.77705 | 1.71695 | 3.52688 |
| ENSMUSG00000059244 | 6_Gm100    | 0.14308 | -0.79206 | 0.84609  | NA       | 0       | 0       | 0       | 0       | 0.85848 | 0       |
| ENSMUSG00000059246 | 4_Foxb1    | 0       | NA       | NA       | NA       | 0       | 0       | 0       | 0       | 0       | 0       |
| ENSMUSG00000059248 | 13_Sept9   | 1370.64 | 0.52811  | 0.278026 | 0.665222 | 626.971 | 2307.81 | 1921.47 | 1119.92 | 1002.7  | 1244.99 |
| ENSMUSG00000059256 | 6_Gzmd     | 0       | NA       | NA       | NA       | 0       | 0       | 0       | 0       | 0       | 0       |
| ENSMUSG00000059263 | 7_Uspl47   | 5378.5  | 0.24842  | 0.476525 | 0.807624 | 8225.46 | 4808.32 | 4487.23 | 4149.57 | 5445.32 | 5155.13 |
| ENSMUSG00000059273 | 7_Zc3h4    | 1056.39 | 0.0923   | 0.811179 | 0.946139 | 612.814 | 1309.2  | 1348.55 | 1097.64 | 875.647 | 1094.51 |
| ENSMUSG00000059278 | 9_Naa38    | 333.391 | -0.43245 | 0.404247 | 0.762742 | 104.158 | 387.658 | 359.888 | 481.971 | 365.711 | 300.961 |
| ENSMUSG00000059279 | 10_Olfr22  | 0.30991 | 0.16972  | 0.966824 | NA       | 0       | 0       | 1.03416 | 0.82529 | 0       | 0       |
| ENSMUSG00000059280 | 3_Vpreb2   | 0.51138 | -0.81111 | 0.797958 | NA       | 0       | 0       | 1.03416 | 0       | 0.85848 | 1.17563 |
| ENSMUSG00000059288 | 13_Cdyl    | 485.646 | 0.33999  | 0.189218 | 0.577749 | 580.454 | 574.686 | 472.612 | 390.363 | 458.427 | 437.334 |
| ENSMUSG00000059291 | 15_Rpl11   | 10910.5 | -0.16769 | 0.63259  | 0.883233 | 6332.41 | 11987.9 | 12511.3 | 12360.4 | 10634.8 | 11636.4 |
| ENSMUSG00000059301 | 5_Gm543    | 0.4821  | -2.30304 | 0.543942 | NA       | 0       | 0       | 0       | 0       | 1.71695 | 1.17563 |
| ENSMUSG00000059305 | 10_Vpreb   | 1.62599 | -0.99818 | 0.616187 | NA       | 1.01124 | 2.26701 | 0       | 4.12646 | 0       | 2.35126 |
| ENSMUSG00000059316 | 2_Slc27a4  | 1969.33 | 0.49451  | 0.38755  | 0.752117 | 618.882 | 3304.16 | 2987.69 | 1667.09 | 1338.37 | 1899.81 |
| ENSMUSG00000059323 | 13_Tonsl   | 809.139 | -0.23511 | 0.65367  | 0.893223 | 254.834 | 1005.42 | 970.044 | 1087.74 | 750.309 | 786.495 |
| ENSMUSG00000059325 | 14_Hopx    | 8055.17 | 0.33672  | 0.156732 | 0.534279 | 10251   | 8203.16 | 8518.39 | 6844.97 | 7149.4  | 7364.13 |
| ENSMUSG00000059326 | 6_Csf2ra   | 132.959 | 0.41854  | 0.367585 | 0.739818 | 71.7983 | 200.63  | 184.081 | 132.872 | 97.8664 | 110.509 |
| ENSMUSG00000059327 | 9_Eda      | 577.77  | 0.26588  | 0.36244  | 0.735314 | 676.522 | 579.22  | 636.009 | 464.64  | 450.7   | 659.527 |
| ENSMUSG00000059334 | 6_Zfp36l3  | 0.34472 | 1.99863  | 0.620844 | NA       | 0       | 0       | 2.06832 | 0       | 0       | 0       |
| ENSMUSG00000059336 | 14_Slc14e  | 496.599 | -1.72443 | 6.99E-06 | 0.000394 | 335.733 | 172.292 | 184.081 | 907.822 | 768.337 | 611.326 |
| ENSMUSG00000059343 | 4_Aldoat   | 12.9891 | -1.20636 | 0.27965  | 0.666619 | 9.1012  | 12.4685 | 2.06832 | 1.65058 | 42.0654 | 10.5807 |
| ENSMUSG00000059355 | 13_Wdr83   | 466.698 | -0.10837 | 0.804173 | 0.942928 | 212.361 | 599.623 | 535.696 | 519.109 | 436.106 | 497.291 |
| ENSMUSG00000059361 | 6_Nrsn2    | 3.33332 | -1.16242 | 0.370446 | 0.741633 | 4.04498 | 1.1335  | 1.03416 | 6.60234 | 6.00934 | 1.17563 |
| ENSMUSG00000059363 | 10_Fxn     | 141.995 | -0.11004 | 0.834299 | 0.952109 | 49.551  | 192.695 | 167.534 | 151.854 | 121.045 | 169.29  |
| ENSMUSG00000059395 | 4_Nkapl    | 26.0879 | 0.23051  | 0.739691 | 0.92176  | 46.5172 | 6.80102 | 31.0248 | 22.2829 | 24.0374 | 25.8638 |
| ENSMUSG00000059401 | 13_Mamlc   | 97.3417 | -1.44608 | 0.000269 | 0.007256 | 63.7084 | 35.1386 | 57.913  | 149.378 | 167.403 | 110.509 |
| ENSMUSG00000059406 | 7_Tmprss   | 1.42136 | -0.00138 | 0.999439 | NA       | 0       | 2.26701 | 2.06832 | 2.47588 | 1.71695 | 0       |
| ENSMUSG00000059408 | 2_Mrgprh   | 0.58079 | -1.00254 | 0.785266 | NA       | 0       | 1.1335  | 0       | 0       | 0       | 2.35126 |
| ENSMUSG00000059409 | 8_Ppp2r5i  | 970.571 | -0.01538 | 0.707319 | 0.99208  | 490.453 | 1218.52 | 1187.22 | 940.008 | 896.25  | 1090.98 |
| ENSMUSG00000059412 | 6_Fxyd2    | 15.6513 | -1.23603 | 0.196999 | 0.589398 | 5.05622 | 1.1335  | 21.7174 | 32.1864 | 10.3017 | 23.5126 |

|                    |            |         |          |          |          |         |         |         |         |         |         |
|--------------------|------------|---------|----------|----------|----------|---------|---------|---------|---------|---------|---------|
| ENSMUSG00000059423 | 13_Zfp93   | 457.167 | 0.30579  | 0.535467 | 0.83864  | 904.052 | 304.912 | 307.146 | 354.05  | 447.267 | 425.577 |
| ENSMUSG00000059430 | 14_Actg2   | 77.9706 | -1.1905  | 0.031838 | 0.220011 | 19.2136 | 38.5391 | 84.8012 | 109.764 | 116.753 | 98.7527 |
| ENSMUSG00000059434 | 8_Gckr     | 161.947 | -1.20348 | 0.008647 | 0.090537 | 140.563 | 53.2746 | 100.314 | 275.648 | 245.524 | 156.359 |
| ENSMUSG00000059436 | 12_Max     | 1448.82 | 0.4594   | 0.047735 | 0.280647 | 1793.95 | 1719.52 | 1519.18 | 1259.4  | 1164.09 | 1236.76 |
| ENSMUSG00000059439 | 15_Bcas3   | 573.183 | 0.06004  | 0.880056 | 0.966708 | 313.486 | 746.978 | 694.957 | 565.325 | 530.539 | 587.814 |
| ENSMUSG00000059447 | 13_Hadht   | 2996.8  | -0.02084 | 0.951984 | 0.988    | 4213.86 | 2417.76 | 2293.77 | 2797.74 | 3383.26 | 2874.41 |
| ENSMUSG00000059455 | 2_Plac811  | 0.17236 | 1.1315   | 0.781553 | NA       | 0       | 0       | 1.03416 | 0       | 0       | 0       |
| ENSMUSG00000059456 | 13_Ptk2b   | 973.567 | 0.48295  | 0.156851 | 0.534279 | 764.501 | 1465.62 | 1174.81 | 732.034 | 789.799 | 914.638 |
| ENSMUSG00000059474 | 13_Mbtd1   | 1287.51 | 0.29083  | 0.506986 | 0.825942 | 2318.78 | 1012.22 | 919.37  | 964.767 | 1358.97 | 1150.94 |
| ENSMUSG00000059475 | 13_Zfp42f  | 892.855 | 0.28406  | 0.489528 | 0.814396 | 1542.15 | 682.369 | 716.674 | 688.294 | 898.825 | 828.818 |
| ENSMUSG00000059479 | 7_B3gnt8   | 655.724 | 0.64717  | 0.29173  | 0.676701 | 182.024 | 1107.43 | 1111.72 | 597.512 | 385.456 | 550.194 |
| ENSMUSG00000059481 | 4_Plg      | 0.17236 | 1.1315   | 0.781553 | NA       | 0       | 0       | 1.03416 | 0       | 0       | 0       |
| ENSMUSG00000059482 | 15_26103   | 431.105 | 0.15945  | 0.725455 | 0.915844 | 767.534 | 287.91  | 309.214 | 410.17  | 443.833 | 367.972 |
| ENSMUSG00000059486 | 11_Kbtbd   | 1179.76 | 0.41419  | 0.259949 | 0.649568 | 1992.15 | 999.75  | 1051.74 | 933.406 | 1061.08 | 1040.43 |
| ENSMUSG00000059493 | 13_Nhs     | 392.181 | -1.02861 | 0.042577 | 0.261774 | 455.06  | 146.222 | 172.705 | 618.144 | 590.632 | 370.323 |
| ENSMUSG00000059495 | 13_Arhgel  | 10743.3 | 0.15387  | 0.501855 | 0.822726 | 12206.7 | 10662.9 | 11076.9 | 9380.27 | 10218.5 | 10914.5 |
| ENSMUSG00000059498 | 13_Fcgr3   | 193.451 | 0.48385  | 0.231396 | 0.622696 | 182.024 | 329.849 | 165.466 | 186.516 | 173.412 | 123.441 |
| ENSMUSG00000059518 | 14_Znhit1  | 356.474 | 0.20106  | 0.674678 | 0.900436 | 155.732 | 514.61  | 473.646 | 373.032 | 296.175 | 325.649 |
| ENSMUSG00000059534 | 8_Uqcr10   | 710.961 | -0.30992 | 0.597468 | 0.868406 | 172.923 | 799.12  | 932.814 | 1059.68 | 614.67  | 686.567 |
| ENSMUSG00000059540 | 15_Tcea2   | 87.146  | -0.86867 | 0.073264 | 0.362101 | 31.3486 | 55.5416 | 98.2453 | 125.444 | 115.894 | 96.4015 |
| ENSMUSG00000059547 | 3_Fbxw2f   | 0.70987 | -2.87998 | 0.781265 | NA       | 0       | 0       | 0       | 0.82529 | 3.43391 | 0       |
| ENSMUSG00000059552 | 13_Trp53   | 896.356 | 0.4251   | 0.370554 | 0.741633 | 417.644 | 1424.81 | 1239.96 | 753.492 | 691.074 | 851.155 |
| ENSMUSG00000059554 | 12_Ccdc2   | 217.977 | 0.11775  | 0.657904 | 0.894702 | 223.485 | 211.965 | 245.096 | 222.004 | 194.874 | 210.437 |
| ENSMUSG00000059555 | 6_Tor4a    | 674.07  | 0.02549  | 0.957656 | 0.98909  | 270.002 | 904.535 | 865.593 | 688.294 | 590.632 | 725.362 |
| ENSMUSG00000059562 | 14_Ccdc1   | 0.74468 | -1.60878 | 0.636852 | NA       | 0       | 0       | 1.03416 | 0       | 3.43391 | 0       |
| ENSMUSG00000059586 | 9_Nsmce2   | 532.996 | 0.24958  | 0.478946 | 0.809393 | 812.029 | 486.273 | 438.484 | 426.676 | 544.274 | 490.237 |
| ENSMUSG00000059588 | 13_Calcr1  | 588.251 | -0.23116 | 0.69592  | 0.905638 | 1092.14 | 210.832 | 320.59  | 737.811 | 602.651 | 565.477 |
| ENSMUSG00000059602 | 14_Syn3    | 124.235 | 0.22223  | 0.554029 | 0.846091 | 88.9895 | 140.554 | 171.671 | 113.89  | 102.159 | 128.143 |
| ENSMUSG00000059606 | 3_Rnase2   | 0 NA    | NA       | NA       | NA       | 0       | 0       | 0       | 0       | 0       | 0       |
| ENSMUSG00000059610 | 4_Olftr22  | 0.14308 | -0.79206 | 0.84609  | NA       | 0       | 0       | 0       | 0       | 0.85848 | 0       |
| ENSMUSG00000059625 | 6_Sohlh1   | 0.64893 | -1.32054 | 0.604258 | NA       | 0       | 0       | 1.03416 | 0.82529 | 0.85848 | 1.17563 |
| ENSMUSG00000059626 | 13_Rhox3   | 0 NA    | NA       | NA       | NA       | 0       | 0       | 0       | 0       | 0       | 0       |
| ENSMUSG00000059631 | 6_150003   | 0.33349 | -1.76186 | 0.662172 | NA       | 0       | 0       | 0       | 0.82529 | 0       | 1.17563 |
| ENSMUSG00000059639 | 2_Clec4a   | 0.32647 | 0.16972  | 0.966824 | NA       | 0       | 1.1335  | 0       | 0.82529 | 0       | 0       |
| ENSMUSG00000059645 | 6_Gm736    | 0 NA    | NA       | NA       | NA       | 0       | 0       | 0       | 0       | 0       | 0       |
| ENSMUSG00000059657 | 4_Stfa211  | 4.66444 | 1.35496  | 0.202172 | 0.593308 | 10.1124 | 5.66751 | 4.13665 | 1.65058 | 1.71695 | 4.70251 |
| ENSMUSG00000059668 | 5_Krt4     | 3860.53 | 0.27411  | 0.551948 | 0.845171 | 1843.5  | 4802.65 | 6032.26 | 3033.77 | 3402.14 | 4048.86 |
| ENSMUSG00000059669 | 7_Taf1b    | 615.903 | 0.18714  | 0.607216 | 0.872213 | 946.525 | 554.283 | 466.407 | 523.235 | 620.679 | 584.287 |
| ENSMUSG00000059674 | 6_Cdh24    | 40.165  | 0.3849   | 0.625073 | 0.879812 | 5.05622 | 61.2092 | 70.323  | 34.6623 | 40.3484 | 29.3907 |
| ENSMUSG00000059689 | 14_Zfp63   | 400.178 | -0.36938 | 0.2506   | 0.642255 | 244.721 | 385.391 | 417.801 | 482.796 | 441.257 | 429.104 |
| ENSMUSG00000059690 | 1_170002   | 0 NA    | NA       | NA       | NA       | 0       | 0       | 0       | 0       | 0       | 0       |
| ENSMUSG00000059708 | 12_Akap1   | 808.499 | 0.335    | 0.491618 | 0.815538 | 1592.71 | 545.215 | 567.755 | 590.084 | 840.449 | 714.782 |
| ENSMUSG00000059713 | 12_Rcan3   | 672.559 | -0.22751 | 0.333034 | 0.711957 | 621.915 | 606.424 | 630.839 | 784.853 | 717.687 | 673.635 |
| ENSMUSG00000059714 | 13_Flot1   | 504.264 | -0.19909 | 0.69773  | 0.905638 | 166.855 | 600.757 | 641.18  | 637.951 | 494.483 | 484.359 |
| ENSMUSG00000059734 | 6_Ndufs8   | 947.085 | -0.25328 | 0.675555 | 0.900812 | 204.271 | 1138.04 | 1250.3  | 1273.43 | 798.384 | 1018.09 |
| ENSMUSG00000059741 | 13_Myl3    | 16.3399 | 0.20419  | 0.790144 | 0.937308 | 6.06747 | 23.8036 | 22.7516 | 24.7588 | 7.72629 | 12.9319 |
| ENSMUSG00000059742 | 10_Kcnh7   | 27.4261 | 0.43288  | 0.516791 | 0.830564 | 58.6522 | 21.5366 | 14.4783 | 29.7105 | 24.8958 | 15.2832 |
| ENSMUSG00000059743 | 12_Fdps    | 6533.19 | 0.27117  | 0.508632 | 0.827066 | 3620.25 | 9374.07 | 8441.86 | 5554.22 | 5738.06 | 6470.66 |
| ENSMUSG00000059768 | 3_Olftr682 | 0.7867  | -0.29634 | 0.91643  | NA       | 1.01124 | 1.1335  | 0       | 0       | 2.57543 | 0       |
| ENSMUSG00000059772 | 12_Slx1b   | 198.25  | -0.14725 | 0.727452 | 0.916744 | 96.0682 | 236.902 | 231.652 | 219.528 | 204.318 | 201.032 |
| ENSMUSG00000059775 | 4_Rps26-j  | 25.7122 | -0.52409 | 0.606816 | 0.871953 | 0       | 26.0706 | 37.2298 | 21.4576 | 37.773  | 31.742  |
| ENSMUSG00000059791 | 14_Nrm     | 292.908 | 0.4963   | 0.183985 | 0.570805 | 216.406 | 448.867 | 362.991 | 232.732 | 215.478 | 280.975 |
| ENSMUSG00000059796 | 16_Eif4a1  | 16607.1 | 0.12332  | 0.629423 | 0.881466 | 16484.3 | 19440.7 | 16024.3 | 13515   | 17150.7 | 17027.8 |
| ENSMUSG00000059810 | 18_Rgs3    | 419.71  | -0.49082 | 0.293499 | 0.677859 | 153.709 | 425.064 | 468.475 | 602.463 | 442.974 | 425.577 |
| ENSMUSG00000059811 | 12_Atl2    | 3440.72 | 0.39527  | 0.331912 | 0.711299 | 6070.5  | 2911.97 | 2744.66 | 2378.49 | 3338.62 | 3200.06 |
| ENSMUSG00000059816 | 5_Fam15f   | 0.4878  | 1.03731  | 0.787764 | NA       | 0       | 0       | 2.06832 | 0       | 0.85848 | 0       |
| ENSMUSG00000059820 | 14_AU01f   | 971.662 | 0.50922  | 0.273158 | 0.659507 | 1967.88 | 718.641 | 737.357 | 698.197 | 824.996 | 882.896 |
| ENSMUSG00000059824 | 10_Dbp     | 1800.98 | 0.45661  | 0.317458 | 0.698985 | 984.952 | 2169.52 | 3096.28 | 1644.81 | 1182.12 | 1728.17 |
| ENSMUSG00000059830 | 2_Gm163    | 0 NA    | NA       | NA       | NA       | 0       | 0       | 0       | 0       | 0       | 0       |
| ENSMUSG00000059832 | 4_Kprp     | 88.5242 | -0.14083 | 0.719677 | 0.913031 | 62.6971 | 82.7457 | 107.553 | 102.336 | 106.451 | 69.362  |
| ENSMUSG00000059834 | 12_Sclt1   | 267.088 | 0.52686  | 0.322818 | 0.703332 | 582.477 | 216.499 | 146.851 | 191.468 | 239.515 | 225.721 |
| ENSMUSG00000059835 | 1_Rpl13-p  | 11.7994 | 0.33654  | 0.636727 | 0.885362 | 9.1012  | 13.602  | 16.5466 | 9.07822 | 6.00934 | 16.4588 |
| ENSMUSG00000059839 | 8_Zfp874f  | 261.889 | 0.31481  | 0.570317 | 0.853903 | 560.229 | 147.355 | 163.398 | 220.353 | 269.562 | 210.437 |
| ENSMUSG00000059842 | 12_Zfp34   | 50.7766 | 0.06337  | 0.926151 | 0.979994 | 10.1124 | 81.6122 | 64.118  | 49.5175 | 55.801  | 43.4982 |
| ENSMUSG00000059845 | 5_Gm115f   | 0.37783 | 2.11394  | 0.599927 | NA       | 0       | 2.26701 | 0       | 0       | 0       | 0       |
| ENSMUSG00000059851 | 15_Suv42   | 400.211 | 0.20402  | 0.726941 | 0.916433 | 113.259 | 537.28  | 634.975 | 451.435 | 311.627 | 352.688 |
| ENSMUSG00000059852 | 7_Kcng2    | 0.75166 | -2.95526 | 0.27464  | NA       | 0       | 0       | 0       | 2.47588 | 0.85848 | 1.17563 |
| ENSMUSG00000059854 | 7_Hydin    | 2.12912 | -1.01418 | 0.57423  | 0.856242 | 2.02249 | 2.26701 | 0       | 2.47588 | 6.00934 | 0       |
| ENSMUSG00000059857 | 15_Ntng1   | 143.228 | -1.17482 | 0.01452  | 0.130039 | 136.518 | 47.6071 | 79.6304 | 214.576 | 244.666 | 136.373 |
| ENSMUSG00000059864 | 1_Olftr139 | 0.51708 | 2.58222  | 0.5182   | NA       | 0       | 0       | 3.10248 | 0       | 0       | 0       |
| ENSMUSG00000059866 | 13_Tnip2   | 532.597 | 0.48603  | 0.165853 | 0.545533 | 406.52  | 812.722 | 645.317 | 404.393 | 479.889 | 446.739 |
| ENSMUSG00000059878 | 12_Zfp42f  | 708.734 | -0.00307 | 0.993144 | 0.997864 | 1026.41 | 544.081 | 553.276 | 683.342 | 743.441 | 701.85  |
| ENSMUSG00000059883 | 16_Irak4   | 643.971 | 0.72624  | 0.011797 | 0.113571 | 636.073 | 960.077 | 811.817 | 458.863 | 464.436 | 532.559 |
| ENSMUSG00000059887 | 5_Olftr150 | 0.19594 | -0.79206 | 0.84609  | NA       | 0       | 0       | 0       | 0       | 0       | 1.17563 |
| ENSMUSG00000059890 | 15_Ube4a   | 2464.06 | 0.29072  | 0.4222   | 0.774546 | 3900.37 | 2265.87 | 1968.01 | 1880.02 | 2442.37 | 2327.74 |

|                    |           |         |          |          |          |         |         |         |         |         |         |
|--------------------|-----------|---------|----------|----------|----------|---------|---------|---------|---------|---------|---------|
| ENSMUSG00000059891 | 13_Tsks   | 1.46869 | -0.06695 | 0.97363  | NA       | 0       | 2.26701 | 2.06832 | 3.30117 | 0       | 1.17563 |
| ENSMUSG00000059895 | 12_Ptp4a  | 280.881 | -0.73716 | 0.141941 | 0.510781 | 111.237 | 221.033 | 299.907 | 544.693 | 240.374 | 268.043 |
| ENSMUSG00000059897 | 4_Zfp930  | 275.921 | 0.38808  | 0.491619 | 0.815538 | 610.792 | 149.622 | 177.876 | 208.799 | 272.137 | 236.301 |
| ENSMUSG00000059898 | 8_Dsc3    | 32118.9 | 0.63061  | 0.155975 | 0.53318  | 63279.6 | 27027.2 | 26779.6 | 18351.2 | 26735.5 | 30540.5 |
| ENSMUSG00000059900 | 14_Tmem   | 864.239 | 0.29246  | 0.605037 | 0.871274 | 265.957 | 1336.4  | 1252.37 | 903.695 | 636.99  | 790.022 |
| ENSMUSG00000059901 | 12_Adamt  | 34.1678 | 0.71297  | 0.342493 | 0.720325 | 7.07871 | 61.2092 | 58.9472 | 23.9335 | 19.745  | 34.0932 |
| ENSMUSG00000059908 | 9_Mug1    | 0.16854 | 1.1315   | 0.781553 | NA       | 1.01124 | 0       | 0       | 0       | 0       | 0       |
| ENSMUSG00000059920 | 9_493045  | 1354.24 | 0.71253  | 0.103938 | 0.438035 | 2749.57 | 1269.52 | 1026.92 | 902.87  | 1198.43 | 978.122 |
| ENSMUSG00000059921 | 15_Unc5c  | 383.037 | -0.9283  | 0.089091 | 0.406168 | 477.307 | 104.282 | 209.935 | 491.049 | 611.236 | 404.416 |
| ENSMUSG00000059923 | 13_Grb2   | 1229.52 | 0.24221  | 0.299013 | 0.682038 | 1208.44 | 1418.01 | 1371.3  | 1183.47 | 1114.3  | 1081.58 |
| ENSMUSG00000059939 | 13_94300  | 472.339 | 0.04246  | 0.912831 | 0.975693 | 271.013 | 581.487 | 585.335 | 415.122 | 466.153 | 514.925 |
| ENSMUSG00000059956 | 14_Serpin | 0.67803 | -2.78772 | 0.408039 | NA       | 0       | 0       | 0       | 0       | 1.71695 | 2.35126 |
| ENSMUSG00000059970 | 6_Hspa2   | 151.845 | -0.00744 | 0.979193 | 0.993796 | 146.63  | 162.091 | 145.817 | 141.95  | 169.978 | 144.602 |
| ENSMUSG00000059974 | 10_Ntm    | 102.807 | -1.42656 | 0.000507 | 0.011732 | 80.8995 | 39.6726 | 46.5373 | 178.263 | 133.922 | 137.548 |
| ENSMUSG00000059975 | 14_Zfp74  | 218.814 | -0.3434  | 0.269192 | 0.656292 | 243.71  | 164.358 | 170.637 | 255.841 | 254.968 | 223.369 |
| ENSMUSG00000059981 | 11-Taok2  | 1340.12 | 0.08629  | 0.832468 | 0.951799 | 704.837 | 1739.93 | 1696.02 | 1388.14 | 1290.29 | 1221.48 |
| ENSMUSG00000059991 | 7_Nptx2   | 25.8904 | 0.78932  | 0.213858 | 0.604774 | 13.1462 | 53.2746 | 32.059  | 22.2829 | 14.5941 | 19.9857 |
| ENSMUSG00000059994 | 10_Fcrl1  | 1.08366 | -2.25053 | 0.299898 | NA       | 0       | 1.1335  | 0       | 2.47588 | 1.71695 | 1.17563 |
| ENSMUSG00000059995 | 12_Atxn7l | 1370.56 | 0.23519  | 0.540104 | 0.84046  | 849.445 | 1923.55 | 1673.27 | 1421.15 | 1097.99 | 1257.92 |
| ENSMUSG00000060002 | 14_Chpt1  | 657.392 | -0.28579 | 0.640437 | 0.887258 | 1225.63 | 218.766 | 333     | 776.6   | 796.667 | 593.692 |
| ENSMUSG00000060012 | 7_Kif13b  | 1682.59 | 0.46337  | 0.184158 | 0.570981 | 1271.13 | 2251.14 | 2328.93 | 1265.17 | 1298.02 | 1681.15 |
| ENSMUSG00000060019 | 5_Gm100   | 20.9917 | -0.05027 | 0.922739 | 0.978259 | 22.2474 | 14.7355 | 24.8199 | 19.807  | 23.1789 | 21.1613 |
| ENSMUSG00000060030 | 4_Olfr317 | 0.19594 | -0.79206 | 0.84609  | NA       | 0       | 0       | 0       | 0       | 0       | 1.17563 |
| ENSMUSG00000060032 | 6_H2afj   | 129.692 | -0.14064 | 0.688354 | 0.905165 | 92.0232 | 119.018 | 159.261 | 151.029 | 132.205 | 124.617 |
| ENSMUSG00000060034 | 5_Ctf2    | 4.93665 | -1.34889 | 0.178835 | 0.564266 | 3.03373 | 1.1335  | 4.13665 | 8.25292 | 6.00934 | 7.05377 |
| ENSMUSG00000060036 | 13_Rpl3   | 19935.3 | -0.34343 | 0.343924 | 0.721645 | 10342   | 20675.1 | 21703.9 | 23441.6 | 21170.9 | 22278.1 |
| ENSMUSG00000060038 | 14_Dhps   | 334.404 | -0.16991 | 0.656415 | 0.894164 | 181.013 | 379.723 | 383.674 | 379.634 | 339.098 | 343.283 |
| ENSMUSG00000060044 | 7_Tmem2   | 31.3427 | 0.27742  | 0.681664 | 0.902515 | 57.6409 | 35.1386 | 10.3416 | 23.1082 | 39.4899 | 22.3369 |
| ENSMUSG00000060063 | 9_Alox5a  | 96.1113 | 1.63147  | 0.00523  | 0.063857 | 87.9783 | 259.572 | 88.9379 | 68.4993 | 44.6408 | 27.0394 |
| ENSMUSG00000060073 | 9_Psma3   | 3765.89 | 0.41848  | 0.304807 | 0.687401 | 6753.09 | 3313.23 | 2858.42 | 2839.83 | 3709.48 | 3121.29 |
| ENSMUSG00000060090 | 16_Rp2    | 604.884 | 0.30493  | 0.545257 | 0.842348 | 1216.53 | 413.729 | 375.401 | 509.205 | 620.679 | 493.764 |
| ENSMUSG00000060093 | 6_Hist1h4 | 1.11313 | 3.67873  | 0.214568 | NA       | 1.01124 | 5.66751 | 0       | 0       | 0       | 0       |
| ENSMUSG00000060098 | 11_Prmt7  | 433.915 | 0.13692  | 0.753641 | 0.926096 | 228.541 | 586.021 | 549.14  | 509.205 | 339.098 | 391.484 |
| ENSMUSG00000060112 | 1_Olfr60  | 0.37783 | 2.11394  | 0.599927 | NA       | 0       | 2.26701 | 0       | 0       | 0       | 0       |
| ENSMUSG00000060121 | 15_Gemin  | 298.098 | 0.2807   | 0.442523 | 0.787485 | 452.026 | 275.441 | 253.37  | 217.052 | 316.778 | 273.921 |
| ENSMUSG00000060126 | 14_Tpt1   | 54938.2 | 0.0719   | 0.856257 | 0.959059 | 88255.3 | 39079.8 | 41585.7 | 50281.8 | 55641.3 | 54785.4 |
| ENSMUSG00000060131 | 11_Atp8b  | 41.8611 | 3.68267  | 1.49E-08 | 1.90E-06 | 96.0682 | 103.149 | 34.1273 | 7.42763 | 6.86782 | 3.52688 |
| ENSMUSG00000060143 | 6_Gm100   | 1290.54 | -0.33293 | 0.335472 | 0.713826 | 732.141 | 1377.21 | 1317.52 | 1280.85 | 1441.38 | 1594.15 |
| ENSMUSG00000060147 | 15_Serpin | 2037.55 | 0.06864  | 0.835881 | 0.952513 | 2875.98 | 1786.4  | 1595.71 | 2081.39 | 2070.65 | 1815.17 |
| ENSMUSG00000060149 | 6_BC002C  | 327.758 | 0.40038  | 0.465092 | 0.802138 | 712.927 | 216.499 | 189.252 | 234.383 | 321.929 | 291.556 |
| ENSMUSG00000060152 | 14_Pop5   | 432.655 | -0.17129 | 0.666074 | 0.897172 | 219.44  | 514.61  | 487.09  | 439.881 | 467.011 | 467.9   |
| ENSMUSG00000060166 | 5_Zdhxc8  | 305.752 | -0.07792 | 0.913672 | 0.975975 | 42.4723 | 366.121 | 483.988 | 429.152 | 209.468 | 303.312 |
| ENSMUSG00000060170 | 3_Olfr137 | 0.34472 | 1.99863  | 0.620844 | NA       | 0       | 0       | 2.06832 | 0       | 0       | 0       |
| ENSMUSG00000060176 | 3_Kif27   | 9.21563 | -0.38055 | 0.605938 | 0.871767 | 8.08995 | 4.53401 | 11.3758 | 10.7288 | 11.1602 | 9.40502 |
| ENSMUSG00000060180 | 12_Myh13  | 11.0177 | -0.8361  | 0.384371 | 0.75056  | 18.2024 | 2.26701 | 3.10248 | 15.6806 | 6.86782 | 19.9857 |
| ENSMUSG00000060181 | 5_Slc35e3 | 278.132 | -0.27859 | 0.355245 | 0.73051  | 312.474 | 225.567 | 216.14  | 313.611 | 327.08  | 273.921 |
| ENSMUSG00000060187 | 4_Lrrc10  | 0       | NA       | NA       | NA       | 0       | 0       | 0       | 0       | 0       | 0       |
| ENSMUSG00000060188 | 6_Cxcl17  | 157.395 | 1.18063  | 0.008821 | 0.091872 | 129.439 | 247.104 | 278.189 | 87.481  | 66.9612 | 135.197 |
| ENSMUSG00000060204 | 5_Gm586   | 0.62324 | 0.22022  | 0.950888 | NA       | 2.02249 | 0       | 0       | 0       | 1.71695 | 0       |
| ENSMUSG00000060206 | 11_Zfp463 | 1625.54 | -0.25971 | 0.253771 | 0.644954 | 1372.26 | 1476.95 | 1589.51 | 1725.69 | 1738.42 | 1850.44 |
| ENSMUSG00000060208 | 5_Defat17 | 0.33349 | -1.76186 | 0.662172 | NA       | 0       | 0       | 0       | 0.82529 | 0       | 1.17563 |
| ENSMUSG00000060212 | 13_Pcnx12 | 10.3043 | -0.83405 | 0.279674 | 0.666619 | 7.07871 | 7.93452 | 7.23913 | 20.6323 | 6.00934 | 12.9319 |
| ENSMUSG00000060216 | 15_Arrb2  | 212.974 | 0.43458  | 0.454423 | 0.795918 | 71.7983 | 388.791 | 274.053 | 228.606 | 147.658 | 166.939 |
| ENSMUSG00000060224 | 3_Pyroxid | 137.99  | -0.44211 | 0.236533 | 0.6287   | 82.922  | 111.083 | 157.193 | 186.516 | 146.8   | 143.427 |
| ENSMUSG00000060227 | 15_Casc4  | 848.473 | -0.34359 | 0.501367 | 0.822545 | 1376.3  | 385.391 | 481.919 | 952.387 | 1041.33 | 853.506 |
| ENSMUSG00000060240 | 12_Cend1  | 28.0122 | -1.93977 | 0.002004 | 0.032627 | 9.1012  | 11.335  | 14.4783 | 67.674  | 45.4993 | 19.9857 |
| ENSMUSG00000060244 | 1_Alyref2 | 57.0878 | -0.05675 | 0.907578 | 0.974731 | 34.3823 | 58.9422 | 74.4596 | 69.3246 | 36.056  | 69.362  |
| ENSMUSG00000060257 | 2_Scrt2   | 1.93253 | -1.30942 | 0.47428  | 0.806964 | 0       | 3.40051 | 0       | 4.12646 | 1.71695 | 2.35126 |
| ENSMUSG00000060260 | 12_Pwwp1  | 776.914 | 0.25431  | 0.663585 | 0.896273 | 226.519 | 1072.29 | 1236.86 | 836.846 | 514.228 | 774.739 |
| ENSMUSG00000060261 | 15_Gtf2i  | 2831.06 | -0.29639 | 0.247433 | 0.638878 | 2101.37 | 2620.66 | 2901.86 | 3207.91 | 3000.38 | 3154.21 |
| ENSMUSG00000060268 | 11_Gm16   | 5.35094 | 0.01313  | 0.990256 | 0.997381 | 1.01124 | 9.06802 | 6.20497 | 6.60234 | 6.86782 | 2.35126 |
| ENSMUSG00000060275 | 11_Nrg2   | 77.4065 | 0.45662  | 0.419695 | 0.773473 | 30.3373 | 122.418 | 115.826 | 63.5475 | 52.3671 | 79.9427 |
| ENSMUSG00000060279 | 13_Ap2a1  | 849.021 | 0.16928  | 0.755076 | 0.926832 | 283.148 | 1162.97 | 1250.3  | 948.261 | 633.556 | 815.886 |
| ENSMUSG00000060284 | 6_Sp7     | 15.9986 | -0.77485 | 0.244328 | 0.636183 | 11.1237 | 6.80102 | 17.5807 | 26.4094 | 22.3204 | 11.7563 |
| ENSMUSG00000060288 | 13_Ppih   | 321.521 | -0.08875 | 0.748079 | 0.924734 | 348.879 | 312.847 | 273.019 | 289.678 | 361.419 | 343.283 |
| ENSMUSG00000060301 | 5_261000  | 806.675 | 0.13987  | 0.797747 | 0.940387 | 1625.07 | 423.93  | 488.124 | 665.186 | 919.429 | 718.309 |
| ENSMUSG00000060314 | 12_Zfp947 | 114.422 | -0.18699 | 0.626486 | 0.880513 | 144.608 | 100.882 | 75.4938 | 103.987 | 141.649 | 119.914 |
| ENSMUSG00000060317 | 9_Acnat2  | 0.30991 | 0.16972  | 0.966824 | NA       | 0       | 0       | 1.03416 | 0.82529 | 0       | 0       |
| ENSMUSG00000060332 | 9_Tmc2    | 0.31162 | 0.16972  | 0.966824 | NA       | 1.01124 | 0       | 0       | 0       | 0.85848 | 0       |
| ENSMUSG00000060336 | 6_Zfp937  | 194.487 | 0.27947  | 0.590746 | 0.865078 | 385.284 | 129.219 | 125.134 | 140.3   | 209.468 | 177.52  |
| ENSMUSG00000060371 | 12_Caln1  | 13.5578 | -0.80601 | 0.420421 | 0.773807 | 20.2249 | 1.1335  | 8.27329 | 26.4094 | 20.6034 | 4.70251 |
| ENSMUSG00000060373 | 14_Hnrnp  | 5771.63 | 0.15658  | 0.618197 | 0.877535 | 8018.16 | 5345.6  | 4889.52 | 4704.99 | 5887.44 | 5784.09 |
| ENSMUSG00000060376 | 7_Bckdha  | 406.905 | -0.10433 | 0.895183 | 0.971421 | 35.3936 | 490.807 | 650.488 | 603.289 | 265.269 | 396.187 |
| ENSMUSG00000060380 | 2_C03001  | 95.839  | -0.36383 | 0.438747 | 0.785475 | 42.4723 | 86.1462 | 123.065 | 121.318 | 115.036 | 86.9965 |
| ENSMUSG00000060397 | 6_Zfp128  | 65.8188 | -0.779   | 0.112383 | 0.4549   | 75.8433 | 24.9371 | 44.4689 | 97.3845 | 74.6875 | 77.5914 |

|                    |           |         |          |          |          |         |         |         |         |         |         |
|--------------------|-----------|---------|----------|----------|----------|---------|---------|---------|---------|---------|---------|
| ENSMUSG00000060402 | 7_Chst8   | 5.87196 | -1.20756 | 0.276843 | 0.663317 | 0       | 3.40051 | 7.23913 | 6.60234 | 8.58477 | 9.40502 |
| ENSMUSG00000060407 | 6_Cyp2a1  | 0.3683  | 0.16972  | 0.966824 | NA       | 0       | 0       | 1.03416 | 0       | 0       | 1.17563 |
| ENSMUSG00000060416 | 2_Gm839   | 0.88346 | 3.3513   | 0.276131 | NA       | 3.03373 | 2.26701 | 0       | 0       | 0       | 0       |
| ENSMUSG00000060424 | 14_Pantr1 | 95.736  | -0.8877  | 0.089188 | 0.406504 | 121.349 | 39.6726 | 40.3323 | 117.192 | 134.781 | 121.09  |
| ENSMUSG00000060427 | 15_Zfp86f | 705.921 | 0.3321   | 0.473393 | 0.806573 | 1343.94 | 505.542 | 510.876 | 559.548 | 734.856 | 580.76  |
| ENSMUSG00000060429 | 11_Sntb1  | 445.586 | -1.16196 | 7.14E-05 | 0.002522 | 281.126 | 233.502 | 311.283 | 697.372 | 644.716 | 505.52  |
| ENSMUSG00000060441 | 14_Trim5  | 38.309  | 0.50245  | 0.270516 | 0.657357 | 30.3373 | 49.8741 | 54.8106 | 35.4876 | 33.4806 | 25.8638 |
| ENSMUSG00000060445 | 11_Sycp2  | 11.8998 | 0.86887  | 0.328764 | 0.709501 | 26.2924 | 13.602  | 6.20497 | 2.47588 | 14.5941 | 8.22939 |
| ENSMUSG00000060450 | 13_Rnf14  | 1969.01 | 0.05324  | 0.862761 | 0.961065 | 2667.66 | 1730.86 | 1617.43 | 1932.83 | 1992.53 | 1872.78 |
| ENSMUSG00000060459 | 13_Kng2   | 0.94459 | 3.4426   | 0.370547 | NA       | 0       | 5.66751 | 0       | 0       | 0       | 0       |
| ENSMUSG00000060461 | 5_Dppa5a  | 3.73595 | 1.28193  | 0.236813 | 0.62877  | 6.06747 | 5.66751 | 4.13665 | 2.47588 | 1.71695 | 2.35126 |
| ENSMUSG00000060470 | 6_Adgrg3  | 15.6489 | -0.28862 | 0.705962 | 0.908684 | 4.04498 | 12.4685 | 25.854  | 22.2829 | 16.3111 | 12.9319 |
| ENSMUSG00000060475 | 12_Wtap   | 2543.76 | 0.33172  | 0.396481 | 0.757228 | 4309.92 | 2113.98 | 2080.73 | 1930.36 | 2620.93 | 2206.65 |
| ENSMUSG00000060477 | 14_Irak2  | 2647.28 | 0.34444  | 0.258441 | 0.64893  | 2164.06 | 3494.59 | 3226.58 | 2225.81 | 2142.76 | 2629.88 |
| ENSMUSG00000060487 | 5_Samd5   | 71.248  | -1.39205 | 0.012532 | 0.118345 | 71.7983 | 17.0025 | 28.9565 | 107.288 | 110.744 | 91.699  |
| ENSMUSG00000060499 | 7_Rpl10l  | 0.14308 | -0.79206 | 0.84609  | NA       | 0       | 0       | 0       | 0       | 0.85848 | 0       |
| ENSMUSG00000060509 | 4_Xcr1    | 8.17358 | 2.31739  | 0.025423 | 0.19123  | 18.2024 | 11.335  | 11.3758 | 5.77705 | 0       | 2.35126 |
| ENSMUSG00000060510 | 13_Zfp26f | 1752.64 | 0.29282  | 0.520528 | 0.831998 | 3276.43 | 1204.91 | 1308.21 | 1398.87 | 1831.99 | 1495.4  |
| ENSMUSG00000060512 | 7_061004  | 67.0776 | 0.56843  | 0.16264  | 0.540894 | 60.6747 | 86.1462 | 93.0745 | 46.2164 | 44.6408 | 71.7133 |
| ENSMUSG00000060519 | 11_Tor3a  | 4273.09 | 1.218    | 3.14E-06 | 0.000205 | 5996.68 | 6838.42 | 5095.31 | 2269.55 | 2752.28 | 2686.31 |
| ENSMUSG00000060534 | 15_Dcc    | 2.17771 | -2.40454 | 0.146975 | 0.518795 | 1.01124 | 0       | 1.03416 | 5.77705 | 1.71695 | 3.52688 |
| ENSMUSG00000060538 | 14_Tmem   | 290.332 | 0.21057  | 0.615321 | 0.87633  | 163.822 | 357.053 | 413.665 | 302.057 | 232.647 | 272.746 |
| ENSMUSG00000060548 | 12_Tnfrsf | 554.807 | -1.16114 | 0.004683 | 0.059581 | 519.78  | 223.3   | 285.429 | 835.196 | 867.92  | 597.219 |
| ENSMUSG00000060550 | 15_H2-Q7  | 780.326 | 4.82364  | 3.91E-28 | 1.69E-24 | 849.445 | 2159.32 | 1512.98 | 51.9934 | 41.2069 | 67.0108 |
| ENSMUSG00000060556 | 3_Olfr141 | 0       | NA       | NA       | NA       | 0       | 0       | 0       | 0       | 0       | 0       |
| ENSMUSG00000060559 | 5_Gm100   | 11.5757 | -0.13449 | 0.863522 | 0.961572 | 21.2361 | 5.66751 | 6.20497 | 13.2047 | 13.7356 | 9.40502 |
| ENSMUSG00000060565 | 5_Gm559   | 0.28616 | -1.57932 | 0.696464 | NA       | 0       | 0       | 0       | 0       | 1.71695 | 0       |
| ENSMUSG00000060568 | 17_Fam7f  | 53.6055 | -0.43213 | 0.342652 | 0.720325 | 53.5959 | 32.8716 | 50.6739 | 70.1499 | 75.546  | 38.7957 |
| ENSMUSG00000060572 | 14_Mfap2  | 145.405 | -1.26974 | 0.045757 | 0.273939 | 22.2474 | 92.9472 | 140.646 | 289.678 | 127.055 | 199.857 |
| ENSMUSG00000060579 | 12_Fhit   | 44.3273 | -0.40751 | 0.32325  | 0.703484 | 41.461  | 27.2041 | 45.5031 | 51.9934 | 48.0747 | 51.7276 |
| ENSMUSG00000060586 | 10_H2-Eb  | 641.17  | 1.33643  | 0.016127 | 0.139521 | 298.317 | 1480.35 | 977.283 | 463.814 | 291.024 | 336.23  |
| ENSMUSG00000060591 | 8_Iiftm2  | 2864.07 | -0.03859 | 0.930754 | 0.981773 | 1306.53 | 3811.97 | 3358.96 | 3317.68 | 2424.34 | 2964.93 |
| ENSMUSG00000060594 | 5_Layn    | 84.4699 | -0.43905 | 0.212136 | 0.603396 | 73.8208 | 82.7457 | 58.9472 | 102.336 | 109.027 | 79.9427 |
| ENSMUSG00000060600 | 15_Eno3   | 843.225 | -1.102   | 0.036664 | 0.239698 | 473.262 | 332.116 | 802.509 | 1870.11 | 559.727 | 1021.62 |
| ENSMUSG00000060601 | 12_Nr1h2  | 709.201 | 0.31962  | 0.652148 | 0.892215 | 112.248 | 1107.43 | 1142.75 | 852.527 | 430.097 | 610.151 |
| ENSMUSG00000060613 | 10_Cyp2c  | 0       | NA       | NA       | NA       | 0       | 0       | 0       | 0       | 0       | 0       |
| ENSMUSG00000060621 | 4_Nkpd1   | 20.5869 | 0.00298  | 0.997034 | 0.998589 | 3.03373 | 35.1386 | 23.7857 | 25.5841 | 17.1695 | 18.81   |
| ENSMUSG00000060636 | 13_Rpl35i | 6940.27 | -0.49453 | 0.040565 | 0.253896 | 5084.54 | 6069.91 | 6132.58 | 7533.27 | 8896.4  | 7924.91 |
| ENSMUSG00000060639 | 5_Hist1h4 | 65.1873 | -0.35971 | 0.308008 | 0.690547 | 64.7196 | 48.7406 | 57.913  | 79.2281 | 74.6875 | 65.8352 |
| ENSMUSG00000060657 | 7_Mar1f   | 2574.35 | 0.37041  | 0.261414 | 0.650617 | 3934.75 | 2435.9  | 2338.24 | 1928.71 | 2532.51 | 2276.02 |
| ENSMUSG00000060671 | 12_Atp8b  | 484.558 | -0.56091 | 0.094907 | 0.418274 | 291.238 | 420.53  | 463.304 | 689.119 | 594.066 | 449.09  |
| ENSMUSG00000060675 | 13_Pla2g  | 2493.43 | 0.10071  | 0.733999 | 0.919985 | 1899.12 | 3096.73 | 2745.7  | 2556.76 | 2311.02 | 2351.26 |
| ENSMUSG00000060678 | 4_Hist1h4 | 0.2751  | -1.54073 | 0.703687 | NA       | 0       | 0       | 0       | 1.65058 | 0       | 0       |
| ENSMUSG00000060679 | 14_Mrps9  | 500.679 | 0.29375  | 0.244339 | 0.636183 | 622.927 | 537.28  | 494.329 | 460.513 | 457.568 | 431.455 |
| ENSMUSG00000060681 | 14_Slc9a6 | 1567.27 | 0.06807  | 0.868201 | 0.962942 | 2534.18 | 1087.03 | 1191.35 | 1376.59 | 1736.7  | 1477.76 |
| ENSMUSG00000060688 | 3_Olfr292 | 0.17236 | 1.1315   | 0.781553 | NA       | 0       | 0       | 1.03416 | 0       | 0       | 0       |
| ENSMUSG00000060699 | 1_Vmn1r3  | 0.14308 | -0.79206 | 0.84609  | NA       | 0       | 0       | 0       | 0       | 0.85848 | 0       |
| ENSMUSG00000060703 | 12_Cd302  | 351.615 | -0.36973 | 0.423604 | 0.775388 | 510.678 | 179.093 | 230.618 | 421.724 | 448.983 | 318.595 |
| ENSMUSG00000060708 | 4_Bloc1s4 | 140.258 | 0.3403   | 0.44869  | 0.791834 | 252.811 | 117.884 | 99.2795 | 110.589 | 130.489 | 130.495 |
| ENSMUSG00000060715 | 9_170001  | 0.14308 | -0.79206 | 0.84609  | NA       | 0       | 0       | 0       | 0       | 0.85848 | 0       |
| ENSMUSG00000060716 | 6_Plekhh1 | 1479.74 | 0.91597  | 0.00203  | 0.03289  | 1476.42 | 2280.61 | 2045.57 | 930.104 | 979.522 | 1166.22 |
| ENSMUSG00000060726 | 10_Tmsb1  | 0       | NA       | NA       | NA       | 0       | 0       | 0       | 0       | 0       | 0       |
| ENSMUSG00000060733 | 13_Ipmk   | 2332.45 | 0.43438  | 0.138507 | 0.505245 | 3394.75 | 2399.63 | 2248.27 | 1759.52 | 2150.48 | 2042.07 |
| ENSMUSG00000060735 | 4_Rxfp3   | 8.03892 | -2.25667 | 0.018607 | 0.155216 | 6.06747 | 1.1335  | 1.03416 | 12.3794 | 11.1602 | 16.4588 |
| ENSMUSG00000060739 | 7_Nsa2    | 3293.66 | 0.1419   | 0.691774 | 0.905638 | 5023.86 | 2737.41 | 2605.05 | 2830.75 | 3369.52 | 3195.36 |
| ENSMUSG00000060743 | 12_H3f3a  | 14937.3 | 0.09634  | 0.736579 | 0.920922 | 19791.1 | 13114.6 | 13401.7 | 14084.4 | 14911.7 | 14320.3 |
| ENSMUSG00000060747 | 3_Ifnl3   | 0.36128 | 2.05714  | 0.610196 | NA       | 0       | 1.1335  | 1.03416 | 0       | 0       | 0       |
| ENSMUSG00000060771 | 14_Tsga1  | 254.75  | 0.43072  | 0.41181  | 0.767412 | 541.016 | 191.562 | 144.783 | 212.925 | 217.195 | 221.018 |
| ENSMUSG00000060780 | 2_Lrrtm1  | 45.8292 | -1.34347 | 0.004791 | 0.060323 | 22.2474 | 19.2695 | 36.1957 | 86.6557 | 50.6501 | 59.957  |
| ENSMUSG00000060791 | 15_Gmfg   | 67.0673 | 0.58533  | 0.198636 | 0.590735 | 66.7421 | 112.217 | 63.0839 | 70.1499 | 54.9425 | 35.2688 |
| ENSMUSG00000060794 | 6_Tssk5   | 0.3683  | 0.16972  | 0.966824 | NA       | 0       | 0       | 1.03416 | 0       | 0       | 1.17563 |
| ENSMUSG00000060798 | 7_Intu    | 283.233 | 0.22465  | 0.558731 | 0.848273 | 456.071 | 240.303 | 219.242 | 259.967 | 268.703 | 255.111 |
| ENSMUSG00000060802 | 8_B2m     | 24440.5 | 2.48582  | 3.39E-13 | 1.20E-10 | 54790.2 | 41360.4 | 28279.1 | 6873.86 | 8573.61 | 6765.74 |
| ENSMUSG00000060803 | 5_Gstp1   | 2090.88 | -0.61107 | 0.223859 | 0.613717 | 616.859 | 2106.05 | 2241.03 | 3136.11 | 2153.92 | 2291.3  |
| ENSMUSG00000060807 | 7_Serpina | 0.73362 | -1.59314 | 0.566092 | NA       | 0       | 0       | 1.03416 | 1.65058 | 1.71695 | 0       |
| ENSMUSG00000060843 | 11_Ctnna  | 3.58274 | -0.99841 | 0.552483 | 0.845525 | 6.06747 | 1.1335  | 0       | 7.42763 | 6.86782 | 0       |
| ENSMUSG00000060860 | 8_Ube2s   | 958.639 | 0.15298  | 0.790671 | 0.937373 | 271.013 | 1525.69 | 1231.69 | 1062.15 | 744.3   | 916.99  |
| ENSMUSG00000060862 | 9_Zbtb40  | 331.833 | 0.61952  | 0.163946 | 0.542133 | 190.114 | 510.076 | 505.705 | 230.257 | 251.534 | 303.312 |
| ENSMUSG00000060878 | 2_Olfr142 | 5.46291 | -1.31086 | 0.193863 | 0.583952 | 2.02249 | 1.1335  | 6.20497 | 6.60234 | 8.58477 | 8.22939 |
| ENSMUSG00000060882 | 5_Kcnd2   | 3.18199 | -1.41462 | 0.299045 | 0.682038 | 4.04498 | 1.1335  | 0       | 5.77705 | 3.43391 | 4.70251 |
| ENSMUSG00000060890 | 11_Arr3   | 33.048  | -2.0271  | 0.015225 | 0.134475 | 21.2361 | 15.869  | 2.06832 | 81.7039 | 60.9519 | 16.4588 |
| ENSMUSG00000060904 | 14_Arl1   | 3760.06 | 0.31196  | 0.444961 | 0.788998 | 6594.32 | 2981.11 | 2919.44 | 2981.78 | 3747.25 | 3336.43 |
| ENSMUSG00000060913 | 6_Trim55  | 20.1554 | -0.55822 | 0.409957 | 0.766923 | 28.3148 | 11.335  | 9.30745 | 36.3129 | 18.028  | 17.6344 |
| ENSMUSG00000060923 | 5_Acyp2   | 82.5416 | -0.84784 | 0.042877 | 0.262546 | 82.922  | 46.4736 | 47.5714 | 130.396 | 105.593 | 82.2939 |
| ENSMUSG00000060924 | 14_Csmd   | 52.4268 | -0.54135 | 0.159403 | 0.537367 | 51.5735 | 35.1386 | 41.3665 | 69.3246 | 58.3764 | 58.7814 |

|                    |           |         |          |          |          |         |         |         |         |         |         |
|--------------------|-----------|---------|----------|----------|----------|---------|---------|---------|---------|---------|---------|
| ENSMUSG00000060935 | 5_Tmem2   | 360.593 | -0.01089 | 0.983672 | 0.994713 | 678.545 | 187.028 | 212.003 | 349.924 | 397.475 | 338.581 |
| ENSMUSG00000060938 | 14_Rpl26  | 8345.02 | -0.47128 | 0.220608 | 0.611594 | 3813.4  | 8491.07 | 8677.65 | 9833.36 | 9402.9  | 9851.76 |
| ENSMUSG00000060950 | 11_Trmt6  | 151.326 | 0.22793  | 0.70222  | 0.907074 | 43.4835 | 218.766 | 227.516 | 151.854 | 106.451 | 159.885 |
| ENSMUSG00000060961 | 14_Slc4a4 | 3053.98 | -1.18165 | 0.006635 | 0.075192 | 2945.75 | 1070.03 | 1590.54 | 4645.57 | 4760.25 | 3311.74 |
| ENSMUSG00000060962 | 12_Dmkn   | 47.4369 | 2.64726  | 2.20E-05 | 0.000978 | 48.5397 | 149.622 | 47.5714 | 14.03   | 15.4526 | 9.40502 |
| ENSMUSG00000060969 | 8_Irx1    | 30.826  | -0.20106 | 0.713697 | 0.911072 | 14.1574 | 30.6046 | 41.3665 | 39.614  | 27.4713 | 31.742  |
| ENSMUSG00000060981 | 6_Hist1h4 | 1.91556 | -0.83771 | 0.586465 | 0.86244  | 2.02249 | 0       | 2.06832 | 2.47588 | 2.57543 | 2.35126 |
| ENSMUSG00000060985 | 15_Tdrd5  | 2.75022 | -0.62648 | 0.655221 | 0.893521 | 2.02249 | 4.53401 | 0       | 3.30117 | 4.29238 | 2.35126 |
| ENSMUSG00000060988 | 12_Galnt1 | 15.1841 | -1.04548 | 0.284921 | 0.671099 | 23.2586 | 3.40051 | 3.10248 | 29.7105 | 25.7543 | 5.87814 |
| ENSMUSG00000060992 | 8_Copz1   | 2984.37 | 0.06282  | 0.824254 | 0.949196 | 2380.47 | 3516.13 | 3251.4  | 2581.51 | 3083.65 | 3093.08 |
| ENSMUSG00000061013 | 5_Mkx     | 216.007 | -0.01301 | 0.974099 | 0.99348  | 320.564 | 137.154 | 187.183 | 231.907 | 201.742 | 217.491 |
| ENSMUSG00000061024 | 8_Rrs1    | 389.299 | 0.50627  | 0.094783 | 0.41805  | 524.836 | 505.542 | 340.239 | 301.232 | 325.363 | 338.581 |
| ENSMUSG00000061028 | 6_Clasrp  | 290.394 | 0.08136  | 0.896378 | 0.97156  | 63.7084 | 396.726 | 435.382 | 317.738 | 236.081 | 292.731 |
| ENSMUSG00000061032 | 8_Rrp1    | 2723.28 | 0.03044  | 0.477721 | 0.986823 | 1159.9  | 3619.27 | 3476.85 | 2688.8  | 2326.47 | 3068.39 |
| ENSMUSG00000061039 | 3_Olfr920 | 30.9253 | 0.49407  | 0.501575 | 0.822579 | 76.8546 | 18.136  | 13.4441 | 19.807  | 32.6221 | 24.6882 |
| ENSMUSG00000061046 | 9_Haghl   | 147.659 | -0.45065 | 0.433847 | 0.782241 | 36.4048 | 151.889 | 186.149 | 202.197 | 136.498 | 172.817 |
| ENSMUSG00000061048 | 7_Cdh3    | 591.482 | 1.04324  | 0.081072 | 0.383655 | 229.552 | 1482.62 | 677.376 | 432.453 | 323.646 | 403.24  |
| ENSMUSG00000061062 | 4_Gm100   | 1137.31 | 0.58283  | 0.407514 | 0.764911 | 1646.31 | 1105.17 | 964.873 | 1025.84 | 1044.77 | 1036.9  |
| ENSMUSG00000061068 | 6_Mcpt4   | 97.8846 | -1.02292 | 0.017713 | 0.149596 | 77.8658 | 61.2092 | 54.8106 | 194.769 | 98.7249 | 99.9284 |
| ENSMUSG00000061079 | 13_Zfp14  | 627.962 | 0.46802  | 0.13043  | 0.491137 | 868.659 | 720.908 | 596.711 | 419.249 | 548.567 | 613.678 |
| ENSMUSG00000061080 | 11_Lsamf  | 738.695 | -0.56924 | 0.061512 | 0.327248 | 727.085 | 465.87  | 591.54  | 1020.06 | 848.175 | 779.441 |
| ENSMUSG00000061082 | 11_Plac1  | 0.17236 | 1.1315   | 0.781553 | NA       | 0       | 0       | 1.03416 | 0       | 0       | 0       |
| ENSMUSG00000061086 | 12_Myl4   | 20.9147 | -0.76128 | 0.200744 | 0.592148 | 12.1349 | 17.0025 | 17.5807 | 40.4393 | 17.1695 | 21.1613 |
| ENSMUSG00000061099 | 12_Gapdf  | 10.2004 | -0.63244 | 0.464657 | 0.801934 | 4.04498 | 4.53401 | 15.5124 | 13.2047 | 18.028  | 5.87814 |
| ENSMUSG00000061100 | 3_Retnl   | 139.491 | -0.95946 | 0.074919 | 0.366418 | 135.507 | 44.2066 | 104.45  | 285.551 | 116.753 | 150.48  |
| ENSMUSG00000061104 | 4_Gm100   | 464.537 | 0.08334  | 0.885225 | 0.968635 | 158.765 | 625.694 | 649.453 | 611.542 | 251.534 | 490.237 |
| ENSMUSG00000061111 | 8_Fam19f  | 734.026 | 0.03458  | 0.955765 | 0.988811 | 168.878 | 963.477 | 1096.21 | 940.833 | 508.218 | 726.538 |
| ENSMUSG00000061118 | 8_Dnajc3c | 232.461 | 0.02175  | 0.934357 | 0.983573 | 247.755 | 208.565 | 246.13  | 222.829 | 234.364 | 235.126 |
| ENSMUSG00000061119 | 6_Prcp    | 258.85  | -0.30516 | 0.240716 | 0.631907 | 224.496 | 221.033 | 249.233 | 308.659 | 268.703 | 280.975 |
| ENSMUSG00000061126 | 4_Cyp4f3f | 12.8727 | 0.38529  | 0.618974 | 0.877639 | 7.07871 | 15.869  | 20.6832 | 14.03   | 4.29238 | 15.2832 |
| ENSMUSG00000061130 | 12_Ppm1l  | 1885.88 | 0.12046  | 0.714017 | 0.91112  | 2703.06 | 1687.79 | 1502.64 | 1691.85 | 1856.03 | 1873.95 |
| ENSMUSG00000061132 | 13_Blnk   | 774.679 | 0.49717  | 0.041666 | 0.258544 | 810.007 | 970.278 | 940.053 | 602.463 | 638.707 | 686.567 |
| ENSMUSG00000061136 | 13_Prp4fC | 3647.99 | 0.6678   | 0.155713 | 0.532812 | 7752.2  | 2968.64 | 2711.57 | 2305.87 | 3214.14 | 2935.54 |
| ENSMUSG00000061143 | 15_Maml3  | 688.202 | 0.2277   | 0.466153 | 0.803268 | 586.522 | 746.978 | 893.516 | 697.372 | 506.501 | 698.323 |
| ENSMUSG00000061144 | 5_Spink1f | 0.41265 | -2.10335 | 0.599583 | NA       | 0       | 0       | 0       | 2.47588 | 0       | 0       |
| ENSMUSG00000061171 | 15_Slc38e | 117.448 | -1.73596 | 9.14E-05 | 0.003089 | 84.9445 | 36.2721 | 41.3665 | 191.468 | 206.034 | 144.602 |
| ENSMUSG00000061175 | 11_Fnip2  | 1626.75 | 0.345    | 0.136063 | 0.501288 | 1875.86 | 1916.75 | 1668.1  | 1369.16 | 1397.6  | 1533.02 |
| ENSMUSG00000061184 | 8_Tmprss  | 1.19124 | 3.78781  | 0.175301 | NA       | 4.04498 | 0       | 3.10248 | 0       | 0       | 0       |
| ENSMUSG00000061186 | 15_Sfmbt  | 36.6955 | -0.67783 | 0.242233 | 0.633507 | 42.4723 | 23.8036 | 18.6149 | 51.9934 | 60.9519 | 22.3369 |
| ENSMUSG00000061207 | 11_Stk19  | 379.607 | 0.52354  | 0.055738 | 0.308749 | 367.082 | 471.537 | 504.671 | 302.057 | 321.929 | 310.366 |
| ENSMUSG00000061232 | 15_H2-K1  | 6354.74 | 2.53081  | 1.35E-10 | 2.58E-08 | 6019.94 | 15340.8 | 11143.1 | 1847.83 | 1799.37 | 1977.41 |
| ENSMUSG00000061244 | 13_Exoc5  | 1673.3  | 0.65944  | 0.179668 | 0.565352 | 3648.57 | 1313.73 | 1185.15 | 1061.33 | 1527.23 | 1303.77 |
| ENSMUSG00000061259 | 11_Tmprs  | 4377.94 | 0.1796   | 0.639723 | 0.887038 | 6896.69 | 3648.75 | 3404.46 | 3285.49 | 4312.13 | 4720.15 |
| ENSMUSG00000061273 | 3_Mmgt1   | 1046.85 | 0.26493  | 0.605299 | 0.871517 | 2103.39 | 682.369 | 642.214 | 802.184 | 1115.16 | 935.8   |
| ENSMUSG00000061286 | 7_Exosc5  | 223.882 | 0.33001  | 0.55858  | 0.848273 | 78.8771 | 319.648 | 349.547 | 219.528 | 138.215 | 237.477 |
| ENSMUSG00000061288 | 13_Taok3  | 2313.61 | 0.70378  | 0.015633 | 0.136274 | 2269.23 | 3473.05 | 2858.42 | 1708.36 | 1578.74 | 1993.86 |
| ENSMUSG00000061298 | 14_Agbl4  | 0.58501 | -1.14575 | 0.75298  | NA       | 0       | 0       | 1.03416 | 2.47588 | 0       | 0       |
| ENSMUSG00000061306 | 15_Slc38e | 1656.56 | -0.19332 | 0.737788 | 0.921332 | 423.711 | 1975.7  | 2237.93 | 2217.56 | 1328.06 | 1756.39 |
| ENSMUSG00000061311 | 6_Rag1    | 2.37896 | -1.31621 | 0.435236 | 0.783215 | 4.04498 | 0       | 0       | 4.12646 | 2.57543 | 3.52688 |
| ENSMUSG00000061313 | 7_Ddhd2   | 494.473 | -0.61076 | 0.066045 | 0.340793 | 525.847 | 316.247 | 331.966 | 627.222 | 654.159 | 511.398 |
| ENSMUSG00000061315 | 13_Naca   | 12740.1 | -0.02612 | 0.917945 | 0.976941 | 14869.3 | 11798.6 | 11206.2 | 12124.4 | 13751.1 | 12690.9 |
| ENSMUSG00000061322 | 15_Dnaic  | 17.4364 | -1.56893 | 0.032966 | 0.224321 | 3.03373 | 6.80102 | 16.5466 | 34.6623 | 18.8865 | 24.6882 |
| ENSMUSG00000061353 | 11_Cxcl1f | 1035.36 | -0.41324 | 0.251139 | 0.642467 | 1227.65 | 688.036 | 748.733 | 1399.7  | 1231.06 | 916.99  |
| ENSMUSG00000061356 | 13_Nuggc  | 5.96651 | 0.08734  | 0.933124 | 0.982803 | 1.01124 | 11.335  | 6.20497 | 8.25292 | 4.29238 | 4.70251 |
| ENSMUSG00000061360 | 7_Phf5a   | 753.926 | 0.13047  | 0.658199 | 0.894702 | 593.6   | 957.81  | 812.851 | 732.034 | 725.413 | 701.85  |
| ENSMUSG00000061371 | 6_Zfp873  | 121.629 | 0.24463  | 0.666935 | 0.897703 | 252.811 | 72.5442 | 70.323  | 98.2098 | 134.781 | 101.104 |
| ENSMUSG00000061374 | 13_Fiz1   | 460.934 | 0.28353  | 0.308992 | 0.691532 | 406.52  | 581.487 | 530.525 | 410.17  | 439.54  | 397.362 |
| ENSMUSG00000061388 | 11_Csn1s  | 0.47845 | 1.02683  | 0.749277 | NA       | 1.01124 | 0       | 1.03416 | 0.82529 | 0       | 0       |
| ENSMUSG00000061393 | 13_Acvr2f | 19.1057 | -0.97172 | 0.309957 | 0.692089 | 1.01124 | 18.136  | 19.6491 | 43.7405 | 8.58477 | 23.5126 |
| ENSMUSG00000061397 | 7_Krt79   | 2.5689  | -0.85652 | 0.577145 | 0.857342 | 0       | 4.53401 | 1.03416 | 5.77705 | 1.71695 | 2.35126 |
| ENSMUSG00000061410 | 6_Zcchc1  | 736.48  | -0.05213 | 0.85025  | 0.957445 | 571.353 | 810.455 | 788.031 | 791.455 | 745.158 | 712.43  |
| ENSMUSG00000061411 | 12_Nol4f  | 125.973 | -1.31127 | 0.000324 | 0.008361 | 87.9783 | 56.6751 | 72.3913 | 226.955 | 151.95  | 159.885 |
| ENSMUSG00000061414 | 7_Cracr2e | 19.5658 | -1.74299 | 0.006221 | 0.072341 | 13.1462 | 3.40051 | 10.3416 | 36.3129 | 28.3297 | 25.8638 |
| ENSMUSG00000061436 | 15_Hipk2  | 1281.21 | -0.02745 | 0.913077 | 0.975712 | 1094.17 | 1362.47 | 1350.61 | 1403.82 | 1192.42 | 1283.79 |
| ENSMUSG00000061451 | 13_Tmem   | 13.1159 | -0.47232 | 0.572867 | 0.855421 | 2.02249 | 12.4685 | 18.6149 | 18.1564 | 18.028  | 9.40502 |
| ENSMUSG00000061455 | 13_Stx17  | 1638.44 | 0.21423  | 0.446544 | 0.79018  | 2181.25 | 1601.64 | 1496.43 | 1375.76 | 1600.2  | 1575.34 |
| ENSMUSG00000061458 | 8_Nol10   | 497.514 | 0.46471  | 0.152414 | 0.526826 | 751.355 | 531.613 | 447.792 | 363.954 | 473.021 | 417.348 |
| ENSMUSG00000061461 | 11_Snim2  | 762.528 | -0.11605 | 0.696678 | 0.905638 | 535.959 | 850.127 | 809.748 | 786.504 | 808.685 | 784.144 |
| ENSMUSG00000061462 | 15_Obscn  | 229.313 | -0.92909 | 0.119599 | 0.470419 | 86.967  | 94.0807 | 292.668 | 444.007 | 153.667 | 304.488 |
| ENSMUSG00000061474 | 11_Mrps3  | 274.181 | 0.00403  | 0.989902 | 0.997265 | 360.003 | 239.169 | 224.413 | 286.376 | 263.552 | 271.57  |
| ENSMUSG00000061477 | 3_Rps7    | 10988.5 | -0.40488 | 0.213016 | 0.604264 | 6305.11 | 10584.7 | 11480.2 | 13262.4 | 11823.8 | 12474.6 |
| ENSMUSG00000061479 | 15_Snrpa  | 542.605 | 0.4412   | 0.391634 | 0.754323 | 221.463 | 882.999 | 770.45  | 524.061 | 382.881 | 473.778 |
| ENSMUSG00000061482 | 6_Hist1h4 | 0.38486 | 0.16972  | 0.966824 | NA       | 0       | 1.1335  | 0       | 0       | 0       | 1.17563 |
| ENSMUSG00000061490 | 5_Ube2d4  | 0.99765 | 1.32248  | 0.608162 | NA       | 0       | 2.26701 | 2.06832 | 1.65058 | 0       | 0       |
| ENSMUSG00000061510 | 3_Gm101f  | 20.0068 | 0.50122  | 0.355397 | 0.730563 | 30.3373 | 20.4031 | 19.6491 | 20.6323 | 13.7356 | 15.2832 |

|                    |            |         |          |          |          |         |         |         |         |         |         |
|--------------------|------------|---------|----------|----------|----------|---------|---------|---------|---------|---------|---------|
| ENSMUSG00000061517 | 8_Sox21    | 231.721 | 0.74922  | 0.045778 | 0.273973 | 378.205 | 266.373 | 226.481 | 127.095 | 169.978 | 222.194 |
| ENSMUSG00000061518 | 10_Cox5b   | 1483.35 | -0.25645 | 0.450885 | 0.79295  | 883.828 | 1679.85 | 1492.3  | 1776.03 | 1617.37 | 1450.72 |
| ENSMUSG00000061524 | 8_Zic2     | 82.4945 | -1.27121 | 0.005509 | 0.066141 | 61.6859 | 30.6046 | 52.7422 | 160.107 | 109.885 | 79.9427 |
| ENSMUSG00000061527 | 6_Krt5     | 329485  | 0.60548  | 0.28949  | 0.674773 | 110640  | 544298  | 537945  | 260604  | 196169  | 327251  |
| ENSMUSG00000061531 | 8_Tmem2    | 5.78052 | -0.28812 | 0.791144 | 0.937373 | 8.08995 | 4.53401 | 3.10248 | 14.03   | 2.57543 | 2.35126 |
| ENSMUSG00000061533 | 15_Cep12   | 162.414 | -0.09288 | 0.794455 | 0.938665 | 215.395 | 137.154 | 118.929 | 158.456 | 181.139 | 163.412 |
| ENSMUSG00000061535 | 11_C1qtnl  | 415.326 | -0.28569 | 0.415256 | 0.770023 | 515.735 | 260.706 | 346.444 | 492.7   | 447.267 | 429.104 |
| ENSMUSG00000061536 | 12_Sec22   | 617.43  | 0.32174  | 0.186998 | 0.573937 | 688.657 | 647.23  | 721.845 | 577.705 | 491.907 | 577.233 |
| ENSMUSG00000061540 | 3_Orm2     | 0.16854 | 1.1315   | 0.781553 | NA       | 1.01124 | 0       | 0       | 0       | 0       | 0       |
| ENSMUSG00000061544 | 13_Zfp225  | 297.538 | 0.42382  | 0.473834 | 0.806769 | 693.714 | 166.625 | 162.363 | 237.684 | 285.014 | 239.828 |
| ENSMUSG00000061559 | 15_Wdr61   | 1410.76 | 0.1359   | 0.66746  | 0.898016 | 1971.93 | 1276.32 | 1183.08 | 1234.64 | 1465.42 | 1333.16 |
| ENSMUSG00000061561 | 4_Olfr373  | 0.19594 | -0.79206 | 0.84609  | NA       | 0       | 0       | 0       | 0       | 0       | 1.17563 |
| ENSMUSG00000061576 | 15_Dpp6    | 65.4056 | -1.77023 | 0.001191 | 0.022425 | 46.5172 | 24.9371 | 17.5807 | 142.776 | 103.017 | 57.6058 |
| ENSMUSG00000061577 | 11_Adgrg1  | 47.9471 | 2.14568  | 0.000332 | 0.008517 | 42.4723 | 136.02  | 55.8447 | 13.2047 | 15.4526 | 24.6882 |
| ENSMUSG00000061578 | 8_Ksr2     | 36.7165 | -0.82903 | 0.059167 | 0.318878 | 29.3261 | 28.3376 | 21.7174 | 56.1199 | 37.773  | 47.0251 |
| ENSMUSG00000061584 | 6_Lyg2     | 0.14308 | -0.79206 | 0.84609  | NA       | 0       | 0       | 0       | 0       | 0.85848 | 0       |
| ENSMUSG00000061589 | 14_Dot1l   | 674.436 | 0.39368  | 0.488195 | 0.814112 | 207.305 | 1055.29 | 1035.2  | 649.505 | 527.963 | 571.355 |
| ENSMUSG00000061601 | 15_Pclo    | 225.436 | -0.43409 | 0.258826 | 0.64893  | 266.969 | 132.62  | 175.807 | 305.358 | 266.128 | 205.735 |
| ENSMUSG00000061603 | 7_Akap6    | 105.3   | -0.82674 | 0.221577 | 0.612307 | 161.799 | 32.8716 | 33.0932 | 185.691 | 131.347 | 86.9965 |
| ENSMUSG00000061607 | 14_Mdc1    | 1087.49 | 0.30623  | 0.238949 | 0.630782 | 1092.14 | 1202.65 | 1312.35 | 821.991 | 1054.21 | 1041.61 |
| ENSMUSG00000061613 | 12_U2af1   | 1515.99 | 0.19673  | 0.541799 | 0.840676 | 1153.83 | 1985.9  | 1717.74 | 1204.1  | 1450.83 | 1583.57 |
| ENSMUSG00000061619 | 3_Vma21-   | 0.7154  | -2.88643 | 0.46663  | NA       | 0       | 0       | 0       | 0       | 4.29238 | 0       |
| ENSMUSG00000061633 | 3_170002   | 0.16854 | 1.1315   | 0.781553 | NA       | 1.01124 | 0       | 0       | 0       | 0       | 0       |
| ENSMUSG00000061650 | 6_Med9     | 368.824 | 0.28755  | 0.430441 | 0.780048 | 251.8   | 519.144 | 445.724 | 365.605 | 316.778 | 313.893 |
| ENSMUSG00000061665 | 6_Cd2ap    | 4665.3  | 0.55866  | 0.225001 | 0.614826 | 9488.51 | 3792.7  | 3391.02 | 3178.2  | 4368.79 | 3772.59 |
| ENSMUSG00000061666 | 6_Gdpd1    | 205.439 | -0.31112 | 0.373832 | 0.74451  | 248.766 | 168.892 | 132.373 | 238.509 | 217.195 | 226.896 |
| ENSMUSG00000061689 | 15_Dlgap4  | 673.488 | -0.05651 | 0.906195 | 0.974391 | 270.002 | 868.263 | 842.842 | 822.816 | 588.057 | 648.947 |
| ENSMUSG00000061702 | 10_Tmem    | 8.04204 | -1.48924 | 0.064739 | 0.337006 | 3.03373 | 3.40051 | 6.20497 | 12.3794 | 10.3017 | 12.9319 |
| ENSMUSG00000061707 | 5_Gm487    | 0 NA    | NA       | NA       | NA       | 0       | 0       | 0       | 0       | 0       | 0       |
| ENSMUSG00000061718 | 12_Ppp1r   | 79.0265 | -1.69226 | 0.001129 | 0.021472 | 19.2136 | 34.0051 | 58.9472 | 168.36  | 99.5833 | 94.0502 |
| ENSMUSG00000061723 | 17_Tnnt3   | 1204.34 | -1.11592 | 0.064966 | 0.337371 | 1344.95 | 240.303 | 695.991 | 2384.27 | 1008.71 | 1551.83 |
| ENSMUSG00000061731 | 9_Ext1     | 990.514 | 0.1101   | 0.641581 | 0.888021 | 963.716 | 1148.24 | 973.146 | 967.243 | 953.768 | 936.975 |
| ENSMUSG00000061740 | 7_Cyp2d2   | 196.818 | -1.04949 | 0.002139 | 0.034017 | 114.271 | 99.7483 | 170.637 | 297.931 | 254.968 | 243.355 |
| ENSMUSG00000061742 | 11_Slc22a5 | 0.28063 | -1.56014 | 0.700051 | NA       | 0       | 0       | 0       | 0.82529 | 0.85848 | 0       |
| ENSMUSG00000061751 | 15_Kalrn   | 1174.08 | 0.36757  | 0.193414 | 0.583211 | 1022.37 | 1531.36 | 1414.73 | 996.128 | 979.522 | 1100.39 |
| ENSMUSG00000061755 | 10_Bod1l   | 1993.97 | 0.10919  | 0.740636 | 0.922298 | 2835.53 | 1663.98 | 1708.43 | 1705.05 | 2098.12 | 1952.72 |
| ENSMUSG00000061758 | 13_Akr1b1  | 1591.95 | 0.05605  | 0.811316 | 0.946092 | 1537.09 | 1690.05 | 1641.21 | 1397.22 | 1619.09 | 1667.04 |
| ENSMUSG00000061759 | 15_Armt1   | 529.762 | 0.10456  | 0.707096 | 0.909198 | 652.253 | 513.477 | 480.885 | 450.61  | 551.142 | 530.208 |
| ENSMUSG00000061762 | 12_Tac1    | 15.6801 | 0.354    | 0.526242 | 0.833925 | 17.1912 | 18.136  | 17.5807 | 15.6806 | 13.7356 | 11.7563 |
| ENSMUSG00000061769 | 2_Klra6    | 0.16854 | 1.1315   | 0.781553 | NA       | 1.01124 | 0       | 0       | 0       | 0       | 0       |
| ENSMUSG00000061778 | 10_Mospc   | 749.181 | 0.3093   | 0.520075 | 0.831665 | 1459.23 | 533.88  | 494.329 | 594.21  | 769.195 | 644.244 |
| ENSMUSG00000061780 | 5_Cfd      | 1.07834 | -0.14109 | 0.955262 | NA       | 0       | 0       | 3.10248 | 1.65058 | 1.71695 | 0       |
| ENSMUSG00000061787 | 14_Rps17   | 12543.9 | -0.50157 | 0.148214 | 0.520927 | 6448.71 | 11938.1 | 12768.8 | 15604.6 | 14099.6 | 14403.8 |
| ENSMUSG00000061802 | 5_Armc4    | 0.35746 | 2.04359  | 0.612655 | NA       | 1.01124 | 1.1335  | 0       | 0       | 0       | 0       |
| ENSMUSG00000061808 | 3_Ttr      | 2334.47 | -2.23974 | 1.09E-06 | 8.42E-05 | 669.444 | 616.626 | 1161.36 | 6128.62 | 2747.98 | 2682.78 |
| ENSMUSG00000061815 | 11_Rufy4   | 5.09895 | -0.14565 | 0.907051 | 0.974438 | 1.01124 | 1.1335  | 12.4099 | 9.07822 | 3.43391 | 3.52688 |
| ENSMUSG00000061816 | 15_Myl1    | 1956.74 | -0.80237 | 0.243999 | 0.635775 | 2855.75 | 327.582 | 1095.18 | 3711.34 | 1462.84 | 2287.77 |
| ENSMUSG00000061825 | 9_Ces2c    | 4.51992 | 1.04826  | 0.468234 | 0.804041 | 2.02249 | 5.66751 | 10.3416 | 0       | 0.85848 | 8.22939 |
| ENSMUSG00000061838 | 7_Suc1g2   | 2535.64 | 0.1325   | 0.696897 | 0.905638 | 3740.59 | 2076.58 | 2138.65 | 2240.67 | 2590.88 | 2426.5  |
| ENSMUSG00000061859 | 16_Inadl   | 1813.46 | 0.2639   | 0.376285 | 0.745684 | 1525.97 | 2248.87 | 2161.4  | 1432.71 | 1587.32 | 1924.5  |
| ENSMUSG00000061877 | 12_BC04f   | 2.17328 | -3.38874 | 0.120275 | 0.471261 | 0       | 0       | 1.03416 | 4.95175 | 0       | 7.05377 |
| ENSMUSG00000061878 | 15_Sphk1   | 78.4306 | 1.29079  | 0.107691 | 0.446399 | 11.1237 | 204.031 | 118.929 | 53.644  | 33.4806 | 49.3764 |
| ENSMUSG00000061882 | 12_Ccdc6   | 118.25  | 0.04216  | 0.897565 | 0.97171  | 134.495 | 95.2142 | 130.304 | 115.541 | 130.489 | 103.455 |
| ENSMUSG00000061887 | 14_Ssbp3   | 183.09  | 0.16014  | 0.540331 | 0.84046  | 994.053 | 1141.44 | 1293.74 | 1069.58 | 900.542 | 1099.21 |
| ENSMUSG00000061894 | 15_Zscan   | 138.356 | -0.04786 | 0.871115 | 0.963578 | 117.304 | 147.355 | 143.748 | 138.649 | 150.233 | 132.846 |
| ENSMUSG00000061898 | 10_Rbak    | 463.375 | 0.02652  | 0.918645 | 0.977109 | 505.622 | 429.598 | 467.441 | 401.917 | 503.068 | 472.602 |
| ENSMUSG00000061904 | 12_Slc25a5 | 12.5029 | 0.03227  | 0.890317 | 0.97041  | 8281.08 | 7527.59 | 6965.08 | 6958.87 | 8064.53 | 7246.57 |
| ENSMUSG00000061911 | 14_Myt1l   | 8.56093 | -1.23794 | 0.385577 | 0.750802 | 13.1462 | 1.1335  | 1.03416 | 21.4576 | 14.5941 | 0       |
| ENSMUSG00000061928 | 6_Dsg1b    | 2119.85 | 0.41497  | 0.160875 | 0.539316 | 2719.24 | 2474.44 | 2073.49 | 1493.78 | 1699.78 | 2258.38 |
| ENSMUSG00000061937 | 7_Csn1s2   | 0 NA    | NA       | NA       | NA       | 0       | 0       | 0       | 0       | 0       | 0       |
| ENSMUSG00000061950 | 17_Ppp4r   | 1930.24 | 0.47279  | 0.083736 | 0.390586 | 1868.78 | 2736.28 | 2126.24 | 1520.19 | 1694.63 | 1635.3  |
| ENSMUSG00000061959 | 13_Ces1e   | 408.512 | 0.19459  | 0.510253 | 0.827179 | 464.161 | 347.985 | 495.363 | 330.942 | 381.164 | 431.455 |
| ENSMUSG00000061972 | 2_Olfr99   | 7.29852 | 1.76737  | 0.099506 | 0.429057 | 16.1799 | 10.2015 | 7.23913 | 0       | 4.29238 | 5.87814 |
| ENSMUSG00000061979 | 8_Wbscr1   | 237.09  | -0.03073 | 0.948567 | 0.986924 | 106.181 | 293.577 | 304.043 | 292.979 | 177.705 | 248.057 |
| ENSMUSG00000061981 | 14_Flot2   | 721.008 | -0.18529 | 0.696951 | 0.905638 | 286.182 | 895.467 | 842.842 | 932.58  | 609.519 | 759.456 |
| ENSMUSG00000061983 | 6_Rps12    | 9658.07 | -0.22659 | 0.738136 | 0.921501 | 1365.18 | 11759   | 13579.6 | 12437.2 | 8862.92 | 9944.64 |
| ENSMUSG00000062006 | 12_Rpl34   | 6647.22 | -0.35717 | 0.406651 | 0.764332 | 2727.33 | 7234.02 | 7524.56 | 8075.49 | 7267.01 | 7054.94 |
| ENSMUSG00000062007 | 12_Hsh2d   | 45.3594 | 2.48364  | 5.99E-05 | 0.002197 | 27.3036 | 115.617 | 87.9037 | 14.03   | 12.0187 | 15.2832 |
| ENSMUSG00000062012 | 13_Zfp13   | 47.0464 | -0.5691  | 0.417465 | 0.771067 | 8.08995 | 49.8741 | 55.8447 | 83.3545 | 36.9145 | 48.2007 |
| ENSMUSG00000062014 | 12_Gmfb    | 4994.01 | 0.5018   | 0.330978 | 0.710913 | 10878   | 3289.43 | 3394.12 | 3490.16 | 4852.97 | 4059.44 |
| ENSMUSG00000062017 | 14_Abca1   | 0.9896  | 2.33693  | 0.375573 | NA       | 4.04498 | 0       | 1.03416 | 0       | 0.85848 | 0       |
| ENSMUSG00000062028 | 8_Irgc1    | 0 NA    | NA       | NA       | NA       | 0       | 0       | 0       | 0       | 0       | 0       |
| ENSMUSG00000062031 | 12_Athl1   | 597.714 | -0.01934 | 0.967149 | 0.991132 | 247.755 | 729.976 | 803.544 | 678.39  | 539.982 | 586.638 |
| ENSMUSG00000062040 | 14_Zfp27   | 177.161 | -0.64825 | 0.027394 | 0.199732 | 149.664 | 113.35  | 150.988 | 226.13  | 220.629 | 202.208 |
| ENSMUSG00000062044 | 13_Lmtk3   | 23.1797 | -1.38661 | 0.071453 | 0.356746 | 3.03373 | 17.0025 | 18.6149 | 56.9452 | 22.3204 | 21.1613 |

|                    |           |         |          |          |          |         |         |         |         |         |         |
|--------------------|-----------|---------|----------|----------|----------|---------|---------|---------|---------|---------|---------|
| ENSMUSG00000062046 | 1_573046  | 0.28063 | -1.56014 | 0.700051 | NA       | 0       | 0       | 0       | 0.82529 | 0.85848 | 0       |
| ENSMUSG00000062054 | 6_lah1    | 472.605 | -0.17734 | 0.457996 | 0.798063 | 446.97  | 420.53  | 463.304 | 531.488 | 480.747 | 492.588 |
| ENSMUSG00000062064 | 6_Slc2a7  | 0.75017 | -1.59352 | 0.563543 | NA       | 0       | 1.1335  | 0       | 1.65058 | 1.71695 | 0       |
| ENSMUSG00000062070 | 12_Pgk1   | 3786.68 | 0.17481  | 0.551759 | 0.845088 | 3768.91 | 4798.12 | 3480.99 | 4341.04 | 3213.28 | 3117.76 |
| ENSMUSG00000062074 | 6_Wisp3   | 5.06163 | 0.28518  | 0.761371 | 0.928449 | 6.06747 | 3.40051 | 7.23913 | 4.12646 | 6.00934 | 3.52688 |
| ENSMUSG00000062075 | 13_Lmnbz  | 366.618 | 0.42038  | 0.485368 | 0.813153 | 104.158 | 562.217 | 592.575 | 348.273 | 229.213 | 363.269 |
| ENSMUSG00000062077 | 14_Trim5  | 14.7666 | -0.90198 | 0.359993 | 0.733629 | 1.01124 | 11.335  | 18.6149 | 35.4876 | 6.86782 | 15.2832 |
| ENSMUSG00000062078 | 14_Qk     | 3922.54 | 0.46636  | 0.261478 | 0.650617 | 7313.32 | 3224.82 | 3114.89 | 2981.78 | 3591.01 | 3309.39 |
| ENSMUSG00000062082 | 16_Cd200  | 45.8393 | 0.69426  | 0.198938 | 0.590917 | 79.8883 | 63.4762 | 26.8882 | 36.3129 | 43.7823 | 24.6882 |
| ENSMUSG00000062083 | 1_Rpl13a  | 8.45326 | -0.88542 | 0.361021 | 0.734102 | 4.04498 | 4.53401 | 9.30745 | 4.95175 | 23.1789 | 4.70251 |
| ENSMUSG00000062093 | 4_Gm101   | 30.0449 | -0.58663 | 0.288672 | 0.673672 | 25.2811 | 13.602  | 33.0932 | 25.5841 | 49.7917 | 32.9176 |
| ENSMUSG00000062098 | 11_Btbd3  | 3202.21 | 0.81904  | 0.003253 | 0.046111 | 5078.47 | 3700.89 | 3483.06 | 2147.41 | 2460.4  | 2343.03 |
| ENSMUSG00000062101 | 12_Zfp11  | 210.82  | 0.65347  | 0.211323 | 0.602834 | 473.262 | 141.688 | 158.227 | 145.251 | 185.431 | 161.061 |
| ENSMUSG00000062110 | 14_Scfd2  | 190.992 | 0.30203  | 0.264389 | 0.653062 | 227.53  | 210.832 | 194.422 | 164.233 | 181.997 | 166.939 |
| ENSMUSG00000062115 | 15_Rai1   | 466.629 | 0.15974  | 0.798789 | 0.940596 | 111.237 | 601.89  | 764.245 | 553.771 | 312.486 | 456.144 |
| ENSMUSG00000062116 | 8_Zfp954  | 321.33  | -0.05326 | 0.862074 | 0.96084  | 255.845 | 381.99  | 308.18  | 285.551 | 320.212 | 376.201 |
| ENSMUSG00000062127 | 11_Cttnbp | 1796.23 | 0.66439  | 0.013304 | 0.123205 | 2666.65 | 2064.11 | 1877    | 1397.22 | 1313.47 | 1458.95 |
| ENSMUSG00000062128 | 7_Olfr20  | 0.13755 | -0.79206 | 0.84609  | NA       | 0       | 0       | 0       | 0.82529 | 0       | 0       |
| ENSMUSG00000062151 | 13_Unc13  | 217.315 | -1.83745 | 0.000288 | 0.007645 | 165.844 | 48.7406 | 70.323  | 367.255 | 396.616 | 255.111 |
| ENSMUSG00000062154 | 13_Tex33  | 0.65064 | -1.33743 | 0.648446 | NA       | 1.01124 | 0       | 0       | 0       | 1.71695 | 1.17563 |
| ENSMUSG00000062157 | 6_Ifnlr1  | 624.789 | 0.41662  | 0.20084  | 0.592148 | 508.656 | 828.591 | 805.612 | 510.856 | 469.587 | 625.434 |
| ENSMUSG00000062162 | 2_Mageb1  | 0.19594 | -0.79206 | 0.84609  | NA       | 0       | 0       | 0       | 0       | 0       | 1.17563 |
| ENSMUSG00000062168 | 12_Ppef1  | 6.50276 | 0.44504  | 0.684426 | 0.903547 | 17.1912 | 1.1335  | 4.13665 | 4.12646 | 7.72629 | 4.70251 |
| ENSMUSG00000062169 | 12_Cnih4  | 1616.32 | 0.26553  | 0.475256 | 0.806964 | 2621.15 | 1361.34 | 1311.32 | 1343.58 | 1625.1  | 1435.44 |
| ENSMUSG00000062170 | 12_Fmr1n  | 0       | NA       | NA       | NA       | 0       | 0       | 0       | 0       | 0       | 0       |
| ENSMUSG00000062175 | 13_Tgif2  | 319.798 | 0.17325  | 0.585423 | 0.861855 | 254.834 | 354.786 | 407.46  | 341.671 | 266.128 | 293.907 |
| ENSMUSG00000062184 | 11_Hs6st  | 142.268 | -0.64552 | 0.28127  | 0.667852 | 219.44  | 41.9396 | 71.3571 | 163.408 | 203.459 | 154.007 |
| ENSMUSG00000062190 | 12_Lanc12 | 510.098 | 0.19845  | 0.562069 | 0.850139 | 741.242 | 467.003 | 427.109 | 423.375 | 556.293 | 445.563 |
| ENSMUSG00000062198 | 4_270009  | 322.178 | 0.31465  | 0.353807 | 0.729719 | 480.341 | 290.177 | 300.941 | 257.491 | 331.372 | 272.746 |
| ENSMUSG00000062200 | 12_Vmn2r  | 6.68374 | -2.39496 | 0.102257 | 0.116442 | 2.02249 | 3.40051 | 1.03416 | 10.7288 | 11.1602 | 11.7563 |
| ENSMUSG00000062202 | 13_Btbd9  | 906.306 | 0.27622  | 0.479096 | 0.809393 | 546.072 | 1300.13 | 1132.41 | 873.159 | 776.063 | 810.008 |
| ENSMUSG00000062203 | 14_Gsp11  | 3450.88 | 0.57911  | 0.181908 | 0.567819 | 6671.18 | 3153.41 | 2578.16 | 2199.4  | 3120.56 | 2982.57 |
| ENSMUSG00000062204 | 1_Olfr137 | 0       | NA       | NA       | NA       | 0       | 0       | 0       | 0       | 0       | 0       |
| ENSMUSG00000062209 | 15_ErbB4  | 138.361 | -0.79898 | 0.172803 | 0.556473 | 193.148 | 36.2721 | 73.4255 | 187.341 | 187.148 | 152.832 |
| ENSMUSG00000062210 | 13_Tnfaip | 2076.5  | 0.61529  | 0.095503 | 0.419517 | 3696.1  | 2004.03 | 1837.71 | 1429.41 | 1730.69 | 1761.09 |
| ENSMUSG00000062232 | 14_Rapge  | 1080.06 | 0.35304  | 0.124253 | 0.479256 | 1294.39 | 1227.58 | 1112.76 | 938.357 | 972.654 | 934.624 |
| ENSMUSG00000062234 | 14_Gak    | 3496.18 | 0.48987  | 0.125112 | 0.481081 | 2843.62 | 5107.56 | 4301.08 | 2759.78 | 2781.47 | 3183.6  |
| ENSMUSG00000062248 | 5_Cks2    | 532.519 | 0.50689  | 0.201585 | 0.59309  | 930.345 | 515.744 | 429.177 | 363.954 | 527.963 | 427.929 |
| ENSMUSG00000062252 | 8_Lhfp15  | 0.67821 | 0.08307  | 0.977472 | NA       | 0       | 0       | 2.06832 | 0.82529 | 0       | 1.17563 |
| ENSMUSG00000062257 | 12_Opcml  | 107.982 | -0.37546 | 0.548337 | 0.843853 | 190.114 | 32.8716 | 58.9472 | 132.872 | 129.63  | 103.455 |
| ENSMUSG00000062270 | 13_Morf4l | 10837.6 | 0.18289  | 0.623879 | 0.879273 | 17204.3 | 8800.52 | 8565.96 | 8984.13 | 10958.5 | 10512.5 |
| ENSMUSG00000062275 | 7_Fbxw24  | 1.80414 | -2.10536 | 0.270786 | 0.657638 | 2.02249 | 0       | 0       | 2.47588 | 5.15086 | 1.17563 |
| ENSMUSG00000062282 | 3_Gm101   | 0.28616 | -1.57932 | 0.696464 | NA       | 0       | 0       | 0       | 0       | 1.71695 | 0       |
| ENSMUSG00000062296 | 8_Trnk1   | 68.415  | -0.58005 | 0.167995 | 0.548943 | 65.7309 | 44.2066 | 54.8106 | 111.414 | 75.546  | 58.7814 |
| ENSMUSG00000062300 | 13_Pvrl2  | 1501.98 | 0.71933  | 0.141658 | 0.501149 | 742.253 | 2613.86 | 2250.34 | 1105.07 | 923.721 | 1376.66 |
| ENSMUSG00000062309 | 7_Rpp25   | 4.81368 | -0.61336 | 0.587687 | 0.862958 | 4.04498 | 1.1335  | 6.20497 | 9.90351 | 1.71695 | 5.87814 |
| ENSMUSG00000062310 | 7_Glrp1   | 0.86308 | 3.32091  | 0.29319  | NA       | 4.04498 | 1.1335  | 0       | 0       | 0       | 0       |
| ENSMUSG00000062312 | 5_ErbB2   | 2127.37 | 0.66784  | 0.253003 | 0.644241 | 659.331 | 3553.53 | 3620.6  | 1729.81 | 1334.07 | 1866.9  |
| ENSMUSG00000062328 | 7_Rpl17   | 18084.1 | -0.35223 | 0.133988 | 0.497556 | 16189   | 15335.2 | 16138.1 | 18353.7 | 22959.1 | 19529.5 |
| ENSMUSG00000062329 | 4_Cytl1   | 21.4702 | -1.11156 | 0.105252 | 0.440813 | 11.1237 | 9.06802 | 20.6832 | 50.3428 | 22.3204 | 15.2832 |
| ENSMUSG00000062345 | 10_Serpin | 332.676 | 3.37712  | 5.30E-15 | 2.30E-12 | 771.579 | 719.774 | 329.898 | 59.421  | 69.5366 | 45.8495 |
| ENSMUSG00000062352 | 12_Igfb1b | 478.103 | -0.39365 | 0.134555 | 0.498485 | 413.599 | 452.268 | 374.366 | 533.964 | 611.236 | 483.183 |
| ENSMUSG00000062369 | 2_Usp17l  | 0.18892 | 1.1315   | 0.781553 | NA       | 0       | 1.1335  | 0       | 0       | 0       | 0       |
| ENSMUSG00000062372 | 13_Otof   | 2.07607 | -2.28935 | 0.230898 | 0.622309 | 0       | 0       | 2.06832 | 2.47588 | 0.85848 | 7.05377 |
| ENSMUSG00000062373 | 7_Tmem6   | 2411.16 | 0.45777  | 0.295336 | 0.679579 | 4663.86 | 1853.28 | 1854.25 | 1926.23 | 2117.86 | 2051.47 |
| ENSMUSG00000062376 | 7_Borcs7  | 285.823 | 0.05871  | 0.868592 | 0.962942 | 408.543 | 223.3   | 243.028 | 271.521 | 309.91  | 258.638 |
| ENSMUSG00000062380 | 3_Tubb3   | 17.4782 | -0.40184 | 0.67727  | 0.901447 | 2.02249 | 35.1386 | 8.27329 | 28.8852 | 22.3204 | 8.22939 |
| ENSMUSG00000062382 | 7_Gm101   | 215.221 | -0.16501 | 0.682763 | 0.902945 | 128.428 | 235.769 | 245.096 | 264.919 | 258.402 | 158.71  |
| ENSMUSG00000062391 | 3_493243  | 1.13801 | -3.54081 | 0.215335 | NA       | 0       | 0       | 0       | 3.30117 | 0       | 3.52688 |
| ENSMUSG00000062393 | 13_Dgkk   | 11.1342 | -2.24318 | 0.003923 | 0.052479 | 3.03373 | 4.53401 | 4.13665 | 13.2047 | 26.6128 | 15.2832 |
| ENSMUSG00000062397 | 7_Zfp706  | 4365.93 | 0.35612  | 0.314526 | 0.695926 | 7054.44 | 3997.86 | 3653.69 | 3420.84 | 4142.15 | 3926.6  |
| ENSMUSG00000062410 | 14_Hsd3b  | 0.70434 | -2.87023 | 0.38272  | NA       | 0       | 0       | 0       | 1.65058 | 2.57543 | 0       |
| ENSMUSG00000062421 | 13_Arf2   | 2152.84 | 0.26575  | 0.278076 | 0.665222 | 2616.09 | 2363.35 | 2072.46 | 1919.63 | 2112.71 | 1832.8  |
| ENSMUSG00000062432 | 4_Cyp26c  | 1.60454 | 1.26056  | 0.601901 | NA       | 0       | 6.80102 | 0       | 1.65058 | 0       | 1.17563 |
| ENSMUSG00000062438 | 4_Adam1l  | 6.90519 | 0.57837  | 0.520733 | 0.831998 | 3.03373 | 13.602  | 8.27329 | 4.95175 | 6.86782 | 4.70251 |
| ENSMUSG00000062444 | 14_Ap3b2  | 48.7149 | -2.03642 | 0.00025  | 0.006922 | 10.1124 | 20.4031 | 26.8882 | 116.366 | 51.5086 | 67.0108 |
| ENSMUSG00000062456 | 3_Rpl9-ps | 2227.71 | 1.65934  | NA       | NA       | 8796.81 | 609.825 | 745.63  | 681.691 | 1715.24 | 817.061 |
| ENSMUSG00000062464 | 5_Cyp4f3  | 0.70983 | 1.73787  | 0.615365 | NA       | 0       | 3.40051 | 0       | 0       | 0.85848 | 0       |
| ENSMUSG00000062480 | 11_Acat3  | 38.2266 | -0.40709 | 0.406306 | 0.764314 | 25.2811 | 49.8741 | 23.7857 | 46.2164 | 48.9332 | 35.2688 |
| ENSMUSG00000062488 | 9_Iift3b  | 10585.6 | 1.74651  | 4.62E-06 | 0.000279 | 20345.2 | 16753.2 | 11832.9 | 3363.89 | 6667.79 | 4550.86 |
| ENSMUSG00000062496 | 9_493043  | 0.72194 | 1.64311  | 0.563319 | NA       | 2.02249 | 1.1335  | 0       | 0       | 0       | 1.17563 |
| ENSMUSG00000062510 | 12_Nsl1   | 123.86  | 0.58694  | 0.132025 | 0.493758 | 98.0907 | 181.36  | 166.5   | 77.5775 | 105.593 | 114.036 |
| ENSMUSG00000062511 | 6_493051  | 0       | NA       | NA       | NA       | 0       | 0       | 0       | 0       | 0       | 0       |
| ENSMUSG00000062515 | 3_Fabp4   | 87.9403 | -0.06777 | 0.87517  | 0.96445  | 109.214 | 77.0782 | 71.3571 | 124.619 | 58.3764 | 86.9965 |
| ENSMUSG00000062518 | 7_Zfp534  | 0.99599 | 0.36661  | 0.907416 | NA       | 0       | 3.40051 | 0       | 0       | 2.57543 | 0       |

|                    |            |         |          |          |          |         |         |         |         |         |         |
|--------------------|------------|---------|----------|----------|----------|---------|---------|---------|---------|---------|---------|
| ENSMUSG00000062519 | 13_Zfp39f  | 781.572 | 0.27301  | 0.461692 | 0.799907 | 1226.64 | 681.235 | 657.727 | 564.5   | 797.525 | 761.807 |
| ENSMUSG00000062524 | 4_Ncr1     | 28.1255 | 3.97621  | 2.47E-08 | 2.93E-06 | 78.8771 | 51.0076 | 28.9565 | 4.12646 | 3.43391 | 2.35126 |
| ENSMUSG00000062526 | 3_Mppe1    | 277.507 | -0.02555 | 0.937273 | 0.984983 | 197.193 | 312.847 | 315.419 | 312.786 | 266.986 | 259.814 |
| ENSMUSG00000062542 | 11_Syt9    | 291.931 | -1.16205 | 0.002475 | 0.037947 | 234.609 | 121.285 | 185.115 | 466.29  | 451.559 | 292.731 |
| ENSMUSG00000062545 | 4_Tlr12    | 9.50081 | -0.70585 | 0.39374  | 0.755289 | 3.03373 | 11.335  | 7.23913 | 6.60234 | 11.1602 | 17.6344 |
| ENSMUSG00000062546 | 4_Vlra8    | 0.28616 | -1.57932 | 0.696464 | NA       | 0       | 0       | 0       | 0       | 1.71695 | 0       |
| ENSMUSG00000062553 | 2_Olfr709  | 0       | NA       | NA       | NA       | 0       | 0       | 0       | 0       | 0       | 0       |
| ENSMUSG00000062556 | 3_Scgb1b   | 10.1467 | -0.10699 | 0.885434 | 0.968779 | 15.1687 | 5.66751 | 8.27329 | 9.07822 | 8.58477 | 14.1075 |
| ENSMUSG00000062561 | 3_Gm101    | 0.62324 | 0.22022  | 0.950888 | NA       | 2.02249 | 0       | 0       | 0       | 1.71695 | 0       |
| ENSMUSG00000062563 | 14_Cys1    | 145.921 | -0.61407 | 0.157473 | 0.535192 | 86.967  | 75.9447 | 183.047 | 192.293 | 178.563 | 158.71  |
| ENSMUSG00000062564 | 12_Tex28   | 0.13755 | -0.79206 | 0.84609  | NA       | 0       | 0       | 0       | 0.82529 | 0       | 0       |
| ENSMUSG00000062580 | 9_Timm17   | 998.856 | -0.14642 | 0.550371 | 0.84423  | 1070.91 | 898.868 | 874.901 | 1019.24 | 1122.89 | 1006.34 |
| ENSMUSG00000062585 | 11_Cnr2    | 13.3922 | 0.35666  | 0.616215 | 0.876811 | 11.1237 | 13.602  | 20.6832 | 16.5058 | 13.7356 | 4.70251 |
| ENSMUSG00000062590 | 13_Armc9   | 182.734 | -0.3891  | 0.196794 | 0.589091 | 140.563 | 172.292 | 162.363 | 234.383 | 216.336 | 170.466 |
| ENSMUSG00000062591 | 5_Tubb4a   | 67.8176 | -1.79215 | 0.00131  | 0.023985 | 13.1462 | 30.6046 | 47.5714 | 150.203 | 90.1401 | 75.2402 |
| ENSMUSG00000062593 | 15_Liirb4a | 302.036 | 2.66181  | 1.87E-09 | 3.03E-07 | 600.679 | 703.905 | 260.609 | 80.8787 | 94.4325 | 71.7133 |
| ENSMUSG00000062604 | 11_Srpk2   | 3420.02 | 0.44457  | 0.2345   | 0.626192 | 5846    | 2979.98 | 3002.17 | 2467.62 | 3072.49 | 3151.86 |
| ENSMUSG00000062609 | 13_Kcnj1f  | 373.115 | 1.41117  | 0.000257 | 0.007042 | 756.411 | 425.064 | 444.689 | 165.058 | 179.422 | 268.043 |
| ENSMUSG00000062619 | 5_231003   | 47.4556 | -0.28223 | 0.477748 | 0.808634 | 42.4723 | 40.8061 | 45.5031 | 61.8969 | 54.084  | 39.9713 |
| ENSMUSG00000062627 | 9_Mysm1    | 995.512 | 0.34422  | 0.426395 | 0.777537 | 1826.31 | 774.182 | 740.46  | 770.823 | 966.645 | 894.653 |
| ENSMUSG00000062646 | 12_Ganc    | 916.594 | -0.11847 | 0.612178 | 0.874367 | 964.727 | 835.392 | 836.637 | 921.026 | 968.362 | 973.42  |
| ENSMUSG00000062647 | 16_Rpl7a   | 13263.3 | -0.02881 | 0.957218 | 0.98909  | 4076.33 | 17686   | 17630.4 | 15237.4 | 11234.9 | 13714.9 |
| ENSMUSG00000062661 | 6_Ncs1     | 180.925 | -0.27354 | 0.502064 | 0.822991 | 93.0345 | 219.9   | 178.91  | 221.178 | 200.884 | 171.642 |
| ENSMUSG00000062683 | 11_Atp5g   | 386.466 | -0.40663 | 0.355903 | 0.731119 | 167.867 | 385.391 | 443.655 | 385.412 | 376.871 | 559.599 |
| ENSMUSG00000062687 | 5_Cks1brl  | 0.99599 | 0.36661  | 0.907416 | NA       | 0       | 3.40051 | 0       | 0       | 2.57543 | 0       |
| ENSMUSG00000062691 | 10_Cebpz   | 283.104 | -0.15383 | 0.644127 | 0.889191 | 352.924 | 215.366 | 235.789 | 282.25  | 344.249 | 268.043 |
| ENSMUSG00000062694 | 7_Cav3     | 27.4712 | -0.59634 | 0.461773 | 0.799907 | 3.03373 | 30.6046 | 32.059  | 47.867  | 17.1695 | 34.0932 |
| ENSMUSG00000062704 | 3_943000   | 2.9986  | -0.51574 | 0.678401 | 0.901447 | 4.04498 | 2.26701 | 1.03416 | 1.65058 | 4.29238 | 4.70251 |
| ENSMUSG00000062713 | 7_Sim2     | 5.17322 | 0.94946  | 0.410858 | 0.767001 | 1.01124 | 11.335  | 8.27329 | 4.95175 | 4.29238 | 1.17563 |
| ENSMUSG00000062727 | 4_Hist1h2  | 12.4222 | 0.27965  | 0.797913 | 0.940387 | 1.01124 | 20.4031 | 19.6491 | 23.9335 | 6.00934 | 3.52688 |
| ENSMUSG00000062729 | 11_Ppox    | 637.794 | -0.05254 | 0.891172 | 0.970606 | 354.947 | 689.17  | 834.568 | 665.186 | 651.584 | 631.312 |
| ENSMUSG00000062742 | 3_Gm523    | 13.1933 | 0.09921  | 0.909459 | 0.974731 | 3.03373 | 18.136  | 19.6491 | 13.2047 | 5.15086 | 19.9857 |
| ENSMUSG00000062743 | 9_Zfp677   | 195.683 | 0.52288  | 0.397311 | 0.757986 | 480.341 | 104.282 | 107.553 | 144.426 | 181.139 | 156.359 |
| ENSMUSG00000062753 | 13_Al413   | 375.484 | 0.11802  | 0.84498  | 0.954788 | 97.0795 | 507.809 | 567.755 | 462.989 | 279.863 | 337.405 |
| ENSMUSG00000062757 | 1_Olfr120  | 0.16854 | 1.1315   | 0.781553 | NA       | 1.01124 | 0       | 0       | 0       | 0       | 0       |
| ENSMUSG00000062760 | 10_18100   | 158.542 | -1.29075 | 0.006122 | 0.071522 | 60.6747 | 61.2092 | 154.09  | 273.997 | 202.601 | 198.681 |
| ENSMUSG00000062761 | 7_Zfp512   | 898.336 | 0.03774  | 0.869532 | 0.963129 | 983.941 | 867.13  | 879.037 | 864.081 | 898.825 | 897.004 |
| ENSMUSG00000062762 | 15_Ei24    | 2928.8  | 0.03813  | 0.910195 | 0.97482  | 4114.75 | 2375.82 | 2411.66 | 2503.94 | 3196.97 | 2969.64 |
| ENSMUSG00000062785 | 13_Kcnc3   | 48.4197 | -0.75965 | 0.201067 | 0.592148 | 14.1574 | 45.3401 | 48.6056 | 91.6075 | 43.7823 | 47.0251 |
| ENSMUSG00000062791 | 4_Gm382    | 0.16854 | 1.1315   | 0.781553 | NA       | 1.01124 | 0       | 0       | 0       | 0       | 0       |
| ENSMUSG00000062794 | 8_Zfp599   | 76.8216 | 0.2192   | 0.649608 | 0.891567 | 128.428 | 63.4762 | 55.8447 | 49.5175 | 88.4231 | 75.2402 |
| ENSMUSG00000062797 | 11_I7Rn6   | 566.325 | 0.37865  | 0.26786  | 0.65577  | 892.929 | 525.945 | 501.568 | 451.435 | 519.379 | 506.696 |
| ENSMUSG00000062814 | 9_Ssxa1    | 0.34472 | 1.99863  | 0.620844 | NA       | 0       | 0       | 2.06832 | 0       | 0       | 0       |
| ENSMUSG00000062818 | 6_Vmn1r5   | 0.16854 | 1.1315   | 0.781553 | NA       | 1.01124 | 0       | 0       | 0       | 0       | 0       |
| ENSMUSG00000062822 | 7_483342   | 752.085 | 0.03267  | 0.922663 | 0.978238 | 1039.56 | 592.822 | 649.453 | 730.384 | 839.59  | 660.703 |
| ENSMUSG00000062825 | 15_Actg1   | 77638.7 | 0.37578  | 0.295664 | 0.679579 | 52783.9 | 111687  | 98608.3 | 67076.5 | 63043.1 | 72632.6 |
| ENSMUSG00000062826 | 6_Ces2f    | 1397.36 | 0.67341  | 0.035862 | 0.236776 | 1344.95 | 2136.65 | 1671.21 | 845.925 | 1158.09 | 1227.36 |
| ENSMUSG00000062859 | 14_Tcp11   | 15.8628 | -2.71453 | 0.019913 | 0.162624 | 0       | 2.26701 | 10.3416 | 56.9452 | 19.745  | 5.87814 |
| ENSMUSG00000062861 | 7_Zfp28    | 102.669 | -0.6322  | 0.088986 | 0.405806 | 94.0457 | 53.2746 | 94.1087 | 119.667 | 137.356 | 117.563 |
| ENSMUSG00000062866 | 15_Phactr  | 2090.25 | -0.07739 | 0.836045 | 0.952513 | 2970.02 | 1357.94 | 1774.62 | 2238.19 | 2325.61 | 1875.13 |
| ENSMUSG00000062867 | 13_Impdh   | 2117.97 | 0.21076  | 0.534651 | 0.838255 | 1514.84 | 2809.95 | 2492.33 | 1668.74 | 2051.76 | 2170.21 |
| ENSMUSG00000062874 | 5_Gm497    | 1.37894 | -0.72256 | 0.730944 | NA       | 2.02249 | 1.1335  | 0       | 0.82529 | 4.29238 | 0       |
| ENSMUSG00000062901 | 2_Klhl24   | 960.989 | -0.15589 | 0.758397 | 0.927759 | 1649.34 | 452.268 | 625.668 | 1081.13 | 1081.68 | 875.843 |
| ENSMUSG00000062905 | 1_Vmn1r3   | 1.08383 | 3.64335  | 0.207017 | NA       | 0       | 3.40051 | 3.10248 | 0       | 0       | 0       |
| ENSMUSG00000062906 | 12_Hdac1   | 253.651 | 0.2566   | 0.659035 | 0.89471  | 74.8321 | 340.051 | 413.665 | 269.871 | 196.591 | 226.896 |
| ENSMUSG00000062908 | 12_Acadn   | 3717.43 | -0.00289 | 0.990774 | 0.997381 | 4258.35 | 3351.77 | 3530.63 | 3368.02 | 3856.28 | 3939.53 |
| ENSMUSG00000062929 | 7_Cfl2     | 1656.29 | 0.40263  | 0.416448 | 0.770435 | 3412.95 | 1092.7  | 1152.06 | 1346.88 | 1629.39 | 1303.77 |
| ENSMUSG00000062931 | 15_Zfp93f  | 282.16  | 0.02496  | 0.962557 | 0.990106 | 533.937 | 155.29  | 164.432 | 249.238 | 318.495 | 271.57  |
| ENSMUSG00000062937 | 7_Mtap     | 944.324 | 0.20586  | 0.498025 | 0.820015 | 1276.19 | 945.341 | 812.851 | 756.793 | 914.278 | 960.488 |
| ENSMUSG00000062939 | 11_Stat4   | 15.8062 | 1.4842   | 0.022099 | 0.174634 | 20.2249 | 28.3376 | 21.7174 | 10.7288 | 10.3017 | 3.52688 |
| ENSMUSG00000062944 | 4_913002   | 361.667 | 0.3789   | 0.203737 | 0.594896 | 482.364 | 395.593 | 348.512 | 261.618 | 356.268 | 325.649 |
| ENSMUSG00000062949 | 13_Atp11c  | 499.2   | 0.53909  | 0.332977 | 0.711944 | 1150.8  | 303.779 | 319.556 | 363.129 | 487.615 | 370.323 |
| ENSMUSG00000062960 | 10_Kdr     | 802.336 | -0.17819 | 0.566865 | 0.852155 | 976.862 | 618.893 | 662.898 | 891.316 | 924.58  | 739.47  |
| ENSMUSG00000062961 | 6_Ccdc17   | 11.3266 | -2.01133 | 0.042884 | 0.262546 | 9.1012  | 3.40051 | 1.03416 | 23.1082 | 26.6128 | 4.70251 |
| ENSMUSG00000062963 | 10_Ufc1    | 1195.71 | 0.12512  | 0.572988 | 0.855421 | 1297.43 | 1195.85 | 1249.27 | 1117.45 | 1182.12 | 1132.13 |
| ENSMUSG00000062980 | 15_Cped1   | 1460.62 | -0.51494 | 0.243305 | 0.634745 | 1986.08 | 686.903 | 934.882 | 1748.79 | 1810.53 | 1596.5  |
| ENSMUSG00000062981 | 4_Mrp42    | 1235.62 | -0.2612  | 0.242319 | 0.633507 | 1188.21 | 1106.3  | 1077.6  | 1302.31 | 1374.42 | 1364.9  |
| ENSMUSG00000062991 | 6_Nrg1     | 264.804 | 0.55587  | 0.118375 | 0.468474 | 217.418 | 413.729 | 314.385 | 182.39  | 225.779 | 235.126 |
| ENSMUSG00000062995 | 12_Ica1    | 49.5099 | -0.74588 | 0.077985 | 0.374649 | 45.506  | 28.3376 | 37.2298 | 66.8487 | 72.1121 | 47.0251 |
| ENSMUSG00000062997 | 6_Rpl35    | 3126.03 | -0.44428 | 0.595219 | 0.867292 | 146.63  | 3731.49 | 4067.36 | 4454.93 | 2669    | 3686.77 |
| ENSMUSG00000063011 | 6_Msln     | 9.85394 | -0.20546 | 0.774779 | 0.933172 | 6.06747 | 7.93452 | 13.4441 | 9.07822 | 12.0187 | 10.5807 |
| ENSMUSG00000063015 | 12_Ccni    | 3227.8  | 0.0478   | 0.902142 | 0.973635 | 5059.26 | 2329.35 | 2455.1  | 3182.33 | 3365.23 | 2975.51 |
| ENSMUSG00000063019 | 5_Manbal   | 282.792 | -0.01556 | 0.976532 | 0.993796 | 94.0457 | 378.59  | 371.264 | 312.786 | 243.807 | 296.258 |
| ENSMUSG00000063047 | 8_Zfp780f  | 381.304 | 0.22302  | 0.593826 | 0.866475 | 644.163 | 264.106 | 323.693 | 310.31  | 394.041 | 351.513 |
| ENSMUSG00000063049 | 4_Ing2     | 257.255 | 0.09366  | 0.797529 | 0.94033  | 364.048 | 196.096 | 236.823 | 291.328 | 250.675 | 204.559 |

|                    |           |         |          |          |          |         |         |         |         |         |         |
|--------------------|-----------|---------|----------|----------|----------|---------|---------|---------|---------|---------|---------|
| ENSMUSG00000063052 | 9_Lrrc40  | 577.079 | 0.29388  | 0.509835 | 0.827179 | 1063.83 | 426.197 | 416.767 | 472.893 | 563.161 | 519.627 |
| ENSMUSG00000063060 | 5_Sox7    | 494.085 | 0.70673  | 0.027827 | 0.201444 | 561.241 | 697.104 | 579.13  | 285.551 | 357.126 | 484.359 |
| ENSMUSG00000063063 | 12_Ctnna3 | 36.8733 | -2.69236 | 8.53E-08 | 8.86E-06 | 10.1124 | 11.335  | 8.27329 | 80.0534 | 51.5086 | 59.957  |
| ENSMUSG00000063065 | 13_Mapk3  | 2745.87 | -0.16569 | 0.760638 | 0.92827  | 790.793 | 3375.57 | 3598.88 | 3421.66 | 2408.03 | 2880.29 |
| ENSMUSG00000063077 | 14_Kif1b  | 5540.83 | 0.02233  | 0.935133 | 0.983879 | 6944.21 | 4849.13 | 4957.77 | 5582.28 | 5710.59 | 5200.98 |
| ENSMUSG00000063108 | 14_Zfp26  | 1114    | 0.36922  | 0.387957 | 0.752356 | 2027.54 | 887.533 | 852.149 | 845.925 | 1140.92 | 929.922 |
| ENSMUSG00000063129 | 1_Aldoat1 | 2.37151 | -0.24676 | 0.888228 | 0.969763 | 0       | 4.53401 | 2.06832 | 2.47588 | 5.15086 | 0       |
| ENSMUSG00000063130 | 3_Calm1   | 90455.1 | 0.08617  | 0.752247 | 0.925804 | 75694.7 | 97537.9 | 106234  | 80191.2 | 83366.7 | 99706.2 |
| ENSMUSG00000063137 | 3_Olfr177 | 0.19594 | -0.79206 | 0.84609  | NA       | 0       | 0       | 0       | 0       | 0       | 1.17563 |
| ENSMUSG00000063142 | 13_Kcnm3  | 65.9564 | -0.77206 | 0.149956 | 0.523171 | 79.8883 | 23.8036 | 42.4006 | 112.24  | 70.3951 | 67.0108 |
| ENSMUSG00000063145 | 10_Bbs5   | 168.327 | 0.25191  | 0.612234 | 0.874367 | 321.576 | 115.617 | 111.689 | 141.125 | 177.705 | 142.251 |
| ENSMUSG00000063146 | 11_Clip2  | 321.701 | -0.14214 | 0.814347 | 0.947022 | 76.8546 | 426.197 | 414.699 | 439.881 | 248.1   | 324.473 |
| ENSMUSG00000063160 | 12_Numbl  | 279.221 | -0.34048 | 0.444791 | 0.788998 | 126.406 | 258.439 | 354.717 | 374.683 | 314.203 | 246.882 |
| ENSMUSG00000063166 | 4_Gm544   | 0.93486 | 0.22503  | 0.943792 | NA       | 3.03373 | 0       | 0       | 0       | 2.57543 | 0       |
| ENSMUSG00000063172 | 13_Hspb1  | 263.452 | 0.13571  | 0.756636 | 0.927547 | 437.869 | 173.426 | 216.14  | 223.654 | 303.901 | 225.721 |
| ENSMUSG00000063177 | 6_Klf1b2  | 0.56675 | 2.70271  | 0.498103 | NA       | 0       | 3.40051 | 0       | 0       | 0       | 0       |
| ENSMUSG00000063179 | 12_Pstk   | 278.691 | 0.03304  | 0.939819 | 0.985498 | 455.06  | 182.494 | 207.866 | 235.208 | 308.193 | 283.326 |
| ENSMUSG00000063193 | 8_Cd300l  | 26.3507 | 1.18283  | 0.904516 | 0.418039 | 22.2474 | 70.2772 | 17.5807 | 22.2829 | 16.3111 | 9.40502 |
| ENSMUSG00000063200 | 3_Nol7    | 1534.02 | 0.42826  | 0.390432 | 0.753569 | 3198.57 | 1046.22 | 1035.2  | 1138.08 | 1461.13 | 1324.93 |
| ENSMUSG00000063229 | 14_Ldha   | 10881.8 | 0.2343   | 0.556728 | 0.847577 | 6214.1  | 15434.9 | 13641.6 | 10435.8 | 9099    | 10465.4 |
| ENSMUSG00000063232 | 16_Serpin | 0.14308 | -0.79206 | 0.84609  | NA       | 0       | 0       | 0       | 0       | 0.85848 | 0       |
| ENSMUSG00000063234 | 4_Gpr84   | 4.15704 | 2.60593  | 0.048514 | 0.283784 | 3.03373 | 11.335  | 7.23913 | 2.47588 | 0.85848 | 0       |
| ENSMUSG00000063236 | 5_111003  | 293.675 | 0.48454  | 0.220876 | 0.611852 | 193.148 | 414.862 | 419.87  | 277.298 | 233.506 | 223.369 |
| ENSMUSG00000063239 | 16_Grm4   | 138.905 | 0.69837  | 0.232285 | 0.624202 | 57.6409 | 197.23  | 260.609 | 117.192 | 64.3858 | 136.373 |
| ENSMUSG00000063245 | 11_Gm13   | 198.554 | 0.18032  | 0.678451 | 0.901447 | 305.396 | 182.494 | 144.783 | 124.619 | 241.232 | 192.803 |
| ENSMUSG00000063253 | 10_Scoc   | 744.189 | 0.14114  | 0.783703 | 0.935592 | 1451.14 | 460.202 | 430.211 | 666.011 | 767.478 | 690.094 |
| ENSMUSG00000063260 | 2_Syt10   | 0       | NA       | NA       | NA       | 0       | 0       | 0       | 0       | 0       | 0       |
| ENSMUSG00000063268 | 12_Parp1  | 1019.65 | 1.77365  | 0.001716 | 0.028968 | 442.925 | 2346.35 | 1944.22 | 500.952 | 380.305 | 503.169 |
| ENSMUSG00000063273 | 11_Naa15  | 4487.23 | 0.7073   | 0.160704 | 0.539243 | 10018.4 | 3526.33 | 3152.12 | 2567.48 | 4054.59 | 3604.47 |
| ENSMUSG00000063275 | 15_Hacd1  | 56.2582 | -0.82314 | 0.159656 | 0.537707 | 68.7646 | 15.869  | 37.2298 | 83.3545 | 84.1307 | 48.2007 |
| ENSMUSG00000063277 | 7_Gm101   | 0.34472 | 1.99863  | 0.620844 | NA       | 0       | 0       | 2.06832 | 0       | 0       | 0       |
| ENSMUSG00000063281 | 9_Zfp35   | 640.759 | 0.27368  | 0.491883 | 0.815612 | 1080.01 | 521.411 | 502.603 | 547.169 | 658.452 | 534.911 |
| ENSMUSG00000063296 | 4_Tmem1   | 38.2337 | -0.46777 | 0.455417 | 0.796293 | 60.6747 | 17.0025 | 18.6149 | 54.4693 | 48.0747 | 30.5663 |
| ENSMUSG00000063297 | 7_Luzp2   | 115.488 | -1.25424 | 0.080774 | 0.382701 | 152.698 | 26.0706 | 25.854  | 194.769 | 198.308 | 95.2259 |
| ENSMUSG00000063316 | 13_Rpl27  | 471.76  | -0.30262 | 0.403338 | 0.761674 | 294.272 | 451.134 | 522.252 | 444.833 | 671.329 | 446.739 |
| ENSMUSG00000063317 | 7_Usp31   | 1221.57 | 0.50698  | 0.121059 | 0.47305  | 1955.75 | 1246.85 | 1099.31 | 940.833 | 1066.23 | 1020.44 |
| ENSMUSG00000063320 | 11_11900  | 32.588  | -0.12478 | 0.826146 | 0.950197 | 53.5959 | 17.0025 | 22.7516 | 30.5358 | 35.1976 | 36.4445 |
| ENSMUSG00000063334 | 16_Krr1   | 1070.68 | 0.18075  | 0.613765 | 0.875588 | 1625.07 | 939.674 | 848.012 | 864.081 | 1109.15 | 1038.08 |
| ENSMUSG00000063354 | 6_Slc39a4 | 741.615 | 0.08956  | 0.868667 | 0.962942 | 235.62  | 924.938 | 1133.44 | 798.058 | 659.31  | 698.323 |
| ENSMUSG00000063358 | 15_Mapk1  | 5777.55 | 0.34648  | 0.34422  | 0.721706 | 9395.47 | 5248.12 | 4760.25 | 4310.5  | 5785.28 | 5165.71 |
| ENSMUSG00000063362 | 13_Alg11  | 717.598 | 0.20264  | 0.647212 | 0.890168 | 1265.07 | 592.822 | 445.724 | 613.192 | 724.555 | 664.23  |
| ENSMUSG00000063364 | 10_33000  | 25.4755 | 0.21641  | 0.735801 | 0.920596 | 47.5285 | 18.136  | 16.5466 | 34.6623 | 17.1695 | 18.81   |
| ENSMUSG00000063376 | 6_Ilna13  | 3.82657 | 1.1473   | 0.311975 | 0.693731 | 3.03373 | 5.66751 | 7.23913 | 4.12646 | 1.71695 | 1.17563 |
| ENSMUSG00000063382 | 5_Bcl9l   | 747.024 | 0.74861  | 0.356301 | 0.731228 | 69.7759 | 1269.52 | 1470.58 | 764.221 | 351.976 | 556.072 |
| ENSMUSG00000063383 | 5_Zfp947  | 84.566  | 0.8437   | 0.164151 | 0.542268 | 216.406 | 55.5416 | 53.7764 | 55.2946 | 65.2443 | 61.1326 |
| ENSMUSG00000063406 | 11_Tmed1  | 1387.48 | 0.96085  | 0.066683 | 0.342409 | 3454.41 | 1101.76 | 943.155 | 852.527 | 998.409 | 974.595 |
| ENSMUSG00000063409 | 12_Lrrc43 | 0.332   | 0.16972  | 0.966824 | NA       | 0       | 1.1335  | 0       | 0       | 0.85848 | 0       |
| ENSMUSG00000063410 | 7_Stk24   | 4920.48 | 0.47299  | 0.090529 | 0.409997 | 6767.25 | 5471.42 | 4920.54 | 3509.14 | 4124.98 | 4729.55 |
| ENSMUSG00000063415 | 12_Cyp26  | 1330.12 | 0.56028  | 0.142778 | 0.511466 | 1287.31 | 1193.58 | 2274.12 | 957.339 | 889.382 | 1379.01 |
| ENSMUSG00000063428 | 7_Ddo     | 62.0611 | -1.21372 | 0.017586 | 0.148808 | 53.5959 | 19.2695 | 39.2981 | 114.716 | 86.7062 | 58.7814 |
| ENSMUSG00000063430 | 9_Wscd2   | 42.5925 | -1.218   | 0.03984  | 0.251043 | 8.08995 | 30.6046 | 38.264  | 70.9751 | 52.3671 | 55.2545 |
| ENSMUSG00000063434 | 5_Sorcs3  | 50.944  | -1.98374 | 4.80E-05 | 0.001842 | 26.2924 | 14.7355 | 20.6832 | 100.686 | 92.7155 | 50.552  |
| ENSMUSG00000063439 | 7_B9d2    | 82.5517 | -0.24356 | 0.735444 | 0.920521 | 11.1237 | 114.484 | 101.348 | 110.017 | 70.3951 | 79.9427 |
| ENSMUSG00000063445 | 14_Nmral  | 180.965 | -0.03425 | 0.945031 | 0.986649 | 71.7983 | 217.633 | 247.165 | 214.576 | 157.101 | 177.52  |
| ENSMUSG00000063446 | 4_Lppr1   | 9.4172  | -1.68607 | 0.071538 | 0.357032 | 7.07871 | 1.1335  | 5.17081 | 13.2047 | 24.0374 | 5.87814 |
| ENSMUSG00000063447 | 7_Ube2d2  | 0       | NA       | NA       | NA       | 0       | 0       | 0       | 0       | 0       | 0       |
| ENSMUSG00000063450 | 14_Syne2  | 6593.78 | 0.20756  | 0.450624 | 0.79295  | 5631.62 | 7583.13 | 7986.83 | 5642.52 | 5859.96 | 6858.61 |
| ENSMUSG00000063455 | 16_D630C  | 97.9418 | -1.27046 | 0.000153 | 0.004692 | 63.7084 | 45.3401 | 63.0839 | 146.902 | 141.649 | 126.968 |
| ENSMUSG00000063457 | 14_Rps15  | 7348.42 | -0.16095 | 0.837293 | 0.952966 | 622.927 | 9427.34 | 10766.7 | 10787.4 | 4802.32 | 7683.9  |
| ENSMUSG00000063458 | 12_17001  | 33.1703 | -0.75544 | 0.073516 | 0.362727 | 25.2811 | 26.0706 | 22.7516 | 43.7405 | 41.2069 | 39.9713 |
| ENSMUSG00000063480 | 7_Nhp211  | 1958.45 | 0.13502  | 0.615432 | 0.876344 | 2508.9  | 1861.21 | 1779.79 | 1788.41 | 1916.12 | 1896.29 |
| ENSMUSG00000063488 | 5_Zkscan  | 387.625 | 0.27734  | 0.391317 | 0.754323 | 540.004 | 360.454 | 373.332 | 284.726 | 363.994 | 403.24  |
| ENSMUSG00000063506 | 13_Arhgaj | 195.059 | 0.37243  | 0.528746 | 0.835695 | 60.6747 | 317.381 | 282.326 | 207.974 | 124.479 | 177.52  |
| ENSMUSG00000063511 | 9_Snmp7l  | 3947.14 | -0.07872 | 0.840933 | 0.953262 | 2050.8  | 4507.94 | 4959.84 | 4084.37 | 3991.06 | 4088.83 |
| ENSMUSG00000063522 | 5_201010  | 10.0352 | 2.3126   | 0.007927 | 0.085206 | 7.07871 | 20.4031 | 22.7516 | 2.47588 | 5.15086 | 2.35126 |
| ENSMUSG00000063524 | 13_Eno1   | 4050.05 | 0.29358  | 0.558383 | 0.848273 | 1691.81 | 6256.94 | 5433.48 | 4290.69 | 2777.17 | 3850.18 |
| ENSMUSG00000063529 | 3_Stmnd1  | 8.05342 | -0.19507 | 0.846663 | 0.955568 | 17.1912 | 1.1335  | 4.13665 | 9.90351 | 7.72629 | 8.22939 |
| ENSMUSG00000063531 | 7_Sema3f  | 72.027  | -0.76988 | 0.128115 | 0.486444 | 87.9783 | 27.2041 | 44.4689 | 105.637 | 89.2816 | 77.5914 |
| ENSMUSG00000063535 | 6_Zfp773  | 11.8735 | -0.69406 | 0.288241 | 0.673216 | 12.1349 | 6.80102 | 8.27329 | 16.5058 | 14.5941 | 12.9319 |
| ENSMUSG00000063543 | 4_Gm561   | 10.0685 | 3.19664  | 0.015542 | 0.13589  | 1.01124 | 18.136  | 35.1615 | 0       | 2.57543 | 3.52688 |
| ENSMUSG00000063550 | 7_Nup98   | 1111.9  | 0.47516  | 0.144673 | 0.514741 | 1518.89 | 1333    | 1027.96 | 689.119 | 1103.14 | 999.284 |
| ENSMUSG00000063558 | 4_Aox1    | 356.718 | -0.56415 | 0.067732 | 0.345293 | 341.801 | 217.633 | 304.043 | 415.947 | 476.455 | 384.43  |
| ENSMUSG00000063564 | 13_Col23c | 1395.01 | -0.89243 | 0.004801 | 0.060349 | 854.501 | 868.263 | 1207.9  | 2224.99 | 1771.9  | 1442.5  |
| ENSMUSG00000063568 | 11_Jazf1  | 98.3129 | -0.22702 | 0.583421 | 0.860596 | 134.495 | 68.0102 | 69.2888 | 113.065 | 113.319 | 91.699  |
| ENSMUSG00000063576 | 11_Klhdc3 | 679.122 | 0.11914  | 0.810904 | 0.945809 | 264.946 | 900.001 | 956.599 | 737.811 | 551.142 | 664.23  |

|                    |           |         |          |          |          |         |         |         |         |         |         |
|--------------------|-----------|---------|----------|----------|----------|---------|---------|---------|---------|---------|---------|
| ENSMUSG00000063590 | 3_Slc22a2 | 0.94926 | 1.24948  | 0.694863 | NA       | 4.04498 | 0       | 0       | 1.65058 | 0       | 0       |
| ENSMUSG00000063594 | 5_Gng8    | 24.0863 | -1.71346 | 0.006855 | 0.076966 | 5.05622 | 10.2015 | 18.6149 | 47.867  | 36.9145 | 25.8638 |
| ENSMUSG00000063600 | 14_Egfm   | 4.96133 | -1.62848 | 0.123652 | 0.478085 | 3.03373 | 1.1335  | 3.10248 | 5.77705 | 12.0187 | 4.70251 |
| ENSMUSG00000063605 | 5_Ccdc10  | 66.0643 | -1.13701 | 0.040202 | 0.252542 | 15.1687 | 51.0076 | 57.913  | 118.842 | 74.6875 | 78.7671 |
| ENSMUSG00000063611 | 4_Gm101   | 13.459  | -0.51003 | 0.448712 | 0.791834 | 12.1349 | 6.80102 | 14.4783 | 17.3311 | 20.6034 | 9.40502 |
| ENSMUSG00000063623 | 2_C23006  | 2.10347 | -0.98713 | 0.601017 | 0.87     | 3.03373 | 1.1335  | 0       | 0       | 2.57543 | 5.87814 |
| ENSMUSG00000063626 | 5_Unc5d   | 8.11623 | -0.83965 | 0.400552 | 0.75972  | 12.1349 | 2.26701 | 3.10248 | 16.5058 | 11.1602 | 3.52688 |
| ENSMUSG00000063632 | 6_Sox11   | 50.4472 | -1.12892 | 0.034487 | 0.230241 | 51.5735 | 23.8036 | 19.6491 | 75.1016 | 86.7062 | 45.8495 |
| ENSMUSG00000063646 | 13_Jakmij | 214.662 | 0.5492   | 0.269628 | 0.65657  | 106.181 | 307.179 | 351.615 | 182.39  | 131.347 | 209.262 |
| ENSMUSG00000063651 | 11_Cnfn   | 75.9892 | 3.26215  | 0.000714 | 0.015241 | 4.04498 | 193.829 | 215.106 | 14.03   | 17.1695 | 11.7563 |
| ENSMUSG00000063652 | 10_Slc22e | 278.625 | 0.12939  | 0.608386 | 0.872658 | 302.362 | 269.774 | 300.941 | 260.792 | 259.26  | 278.624 |
| ENSMUSG00000063659 | 11_Zbtb18 | 1576.24 | 0.4842   | 0.159292 | 0.537367 | 2616.09 | 1427.08 | 1471.61 | 1276.73 | 1382.15 | 1283.79 |
| ENSMUSG00000063660 | 5_Olfr98  | 1.93738 | 3.3723   | 0.068799 | 0.348936 | 4.04498 | 2.26701 | 4.13665 | 0       | 0       | 1.17563 |
| ENSMUSG00000063663 | 11_Brwd3  | 1346.84 | 0.68134  | 0.143535 | 0.512904 | 2823.39 | 1198.11 | 955.565 | 840.973 | 1164.95 | 1098.04 |
| ENSMUSG00000063681 | 14_Crb1   | 260.929 | -1.94309 | 0.0007   | 0.015012 | 209.328 | 57.8086 | 55.8447 | 508.38  | 443.833 | 290.38  |
| ENSMUSG00000063683 | 12_Glyat  | 179.377 | 0.29436  | 0.541122 | 0.84046  | 334.722 | 109.95  | 147.885 | 135.348 | 170.837 | 177.52  |
| ENSMUSG00000063687 | 3_Podhb5  | 15.1277 | -0.44751 | 0.519427 | 0.831665 | 14.1574 | 4.53401 | 19.6491 | 15.6806 | 21.4619 | 15.2832 |
| ENSMUSG00000063694 | 5_Cycc    | 899.014 | 0.85521  | 0.098874 | 0.42718  | 2144.85 | 743.578 | 585.335 | 584.307 | 730.564 | 605.448 |
| ENSMUSG00000063696 | 6_Gm873   | 5886.13 | 0.42657  | 0.605741 | 0.871731 | 463.15  | 9020.42 | 10766.7 | 7355.83 | 3036.43 | 4674.3  |
| ENSMUSG00000063698 | 9_Sfxn4   | 78.6934 | -0.46892 | 0.251039 | 0.642467 | 96.0682 | 53.2746 | 48.6056 | 91.6075 | 94.4325 | 88.1721 |
| ENSMUSG00000063704 | 12_Mapk1  | 12.1442 | 0.27793  | 0.771439 | 0.932465 | 2.02249 | 9.06802 | 28.9565 | 13.2047 | 13.7356 | 5.87814 |
| ENSMUSG00000063713 | 7_Klk1b2c | 0       | NA       | NA       | NA       | 0       | 0       | 0       | 0       | 0       | 0       |
| ENSMUSG00000063727 | 3_Tnfrsf1 | 382.205 | 0.28543  | 0.402505 | 0.761277 | 540.004 | 380.857 | 338.171 | 304.533 | 297.033 | 432.631 |
| ENSMUSG00000063730 | 13_Hsd3b  | 0.35746 | 2.04359  | 0.612655 | NA       | 1.01124 | 1.1335  | 0       | 0       | 0       | 0       |
| ENSMUSG00000063757 | 3_463243  | 28.4152 | 0.21958  | 0.787802 | 0.936803 | 69.7759 | 12.4685 | 9.30745 | 29.7105 | 16.3111 | 32.9176 |
| ENSMUSG00000063760 | 9_Rnf217  | 761.896 | 0.60834  | 0.13037  | 0.491137 | 1430.91 | 691.437 | 638.078 | 542.217 | 664.461 | 604.273 |
| ENSMUSG00000063765 | 11_Chadl  | 17.4836 | 0.12519  | 0.86873  | 0.962942 | 5.05622 | 22.6701 | 26.8882 | 17.3311 | 9.44325 | 23.5126 |
| ENSMUSG00000063767 | 3_S100a7  | 1349.24 | 0.44936  | 0.072452 | 0.359569 | 1398.55 | 1566.5  | 1708.43 | 1133.13 | 1263.68 | 1025.15 |
| ENSMUSG00000063779 | 6_Chil4   | 0.42924 | -2.15458 | 0.590406 | NA       | 0       | 0       | 0       | 0       | 2.57543 | 0       |
| ENSMUSG00000063780 | 5_Olfr282 | 0       | NA       | NA       | NA       | 0       | 0       | 0       | 0       | 0       | 0       |
| ENSMUSG00000063785 | 12_Utp14i | 1149.84 | 0.28973  | 0.358676 | 0.732735 | 1581.59 | 1128.97 | 1083.8  | 807.136 | 1170.1  | 1127.43 |
| ENSMUSG00000063787 | 3_Chchd1  | 557.148 | -0.14335 | 0.57307  | 0.855421 | 601.69  | 519.144 | 467.441 | 557.898 | 588.915 | 607.8   |
| ENSMUSG00000063796 | 8_Slc22a2 | 198.033 | -2.02863 | 7.63E-06 | 0.000419 | 61.6859 | 53.2746 | 118.929 | 435.754 | 289.307 | 229.247 |
| ENSMUSG00000063800 | 5_Prfp38a | 1161.89 | 0.23774  | 0.465093 | 0.802138 | 1692.82 | 1079.09 | 1000.03 | 932.58  | 1154.65 | 1112.14 |
| ENSMUSG00000063801 | 7_Ap3s2   | 1330.1  | 0.08142  | 0.715402 | 0.911362 | 1437.99 | 1281.99 | 1382.67 | 1287.46 | 1271.4  | 1319.05 |
| ENSMUSG00000063802 | 5_Hspbp1  | 274.461 | 0.42226  | 0.563163 | 0.85076  | 43.4835 | 436.399 | 463.304 | 346.623 | 157.101 | 199.857 |
| ENSMUSG00000063804 | 7_Lin28b  | 3.80114 | 1.51947  | 0.200251 | 0.592148 | 9.1012  | 4.53401 | 3.10248 | 0.82529 | 1.71695 | 3.52688 |
| ENSMUSG00000063808 | 14_Gpatcl | 484.138 | 0.3239   | 0.233387 | 0.625423 | 485.397 | 609.825 | 519.149 | 399.442 | 394.899 | 496.115 |
| ENSMUSG00000063810 | 6_Alms1   | 554.154 | 0.28666  | 0.477918 | 0.808634 | 935.401 | 471.537 | 419.87  | 415.947 | 542.557 | 539.613 |
| ENSMUSG00000063820 | 11_Arl9   | 4.02951 | 0.80752  | 0.498757 | 0.820675 | 6.06747 | 1.1335  | 8.27329 | 4.95175 | 2.57543 | 1.17563 |
| ENSMUSG00000063821 | 5_Dupd1   | 4.24803 | -1.63508 | 0.212385 | 0.603702 | 4.04498 | 0       | 2.06832 | 8.25292 | 1.71695 | 9.40502 |
| ENSMUSG00000063838 | 6_170002  | 328.666 | 0.27897  | 0.523217 | 0.83254  | 177.979 | 427.331 | 475.714 | 322.689 | 243.807 | 324.473 |
| ENSMUSG00000063846 | 7_Gm217   | 0.14308 | -0.79206 | 0.84609  | NA       | 0       | 0       | 0       | 0       | 0.85848 | 0       |
| ENSMUSG00000063849 | 5_Ppcdc   | 283.905 | -0.13293 | 0.739146 | 0.921641 | 147.642 | 318.514 | 346.444 | 283.075 | 305.618 | 302.136 |
| ENSMUSG00000063851 | 12_Rnf18  | 88.8602 | 1.77267  | 0.004134 | 0.054335 | 47.5285 | 238.036 | 127.202 | 34.6623 | 57.518  | 28.2151 |
| ENSMUSG00000063856 | 7_Gpx1    | 3214.88 | 0.14665  | 0.786577 | 0.936507 | 1059.78 | 4401.39 | 4673.38 | 3708.86 | 2439.79 | 3006.08 |
| ENSMUSG00000063870 | 12_Chd4   | 6625.91 | 0.06149  | 0.843131 | 0.953858 | 4887.34 | 7889.18 | 7524.56 | 5701.94 | 6342.43 | 7409.98 |
| ENSMUSG00000063873 | 10_Slc24e | 315.599 | -1.61928 | 2.89E-05 | 0.001232 | 175.957 | 99.7483 | 189.252 | 557.072 | 527.105 | 344.459 |
| ENSMUSG00000063882 | 12_Uqcrh  | 3888.6  | -0.68424 | 0.002405 | 0.03703  | 3056.99 | 2905.17 | 2987.69 | 4341.86 | 5015.22 | 5024.63 |
| ENSMUSG00000063884 | 6_Ptcd3   | 1088.31 | 0.17085  | 0.654183 | 0.893223 | 1713.05 | 970.278 | 774.587 | 923.502 | 1140.92 | 1007.51 |
| ENSMUSG00000063887 | 13_Nlgn1  | 73.1595 | -0.96499 | 0.142701 | 0.511466 | 96.0682 | 22.6701 | 29.9907 | 113.89  | 130.489 | 45.8495 |
| ENSMUSG00000063888 | 6_Rpl71i  | 1958.85 | 0.04363  | 0.866478 | 0.962585 | 1665.52 | 2325.95 | 1974.21 | 2021.14 | 1872.34 | 1893.94 |
| ENSMUSG00000063889 | 16_Crem   | 232.845 | 0.44751  | 0.293422 | 0.677859 | 396.408 | 240.303 | 169.602 | 206.323 | 238.657 | 145.778 |
| ENSMUSG00000063894 | 14_Zksca1 | 1375.24 | 0.23873  | 0.599342 | 0.869209 | 2520.02 | 918.137 | 1027.96 | 1096.81 | 1438.81 | 1249.69 |
| ENSMUSG00000063895 | 6_Nupl1   | 1564.87 | 0.48481  | 0.205854 | 0.59724  | 2701.03 | 1370.41 | 1404.39 | 1054.72 | 1516.07 | 1342.57 |
| ENSMUSG00000063902 | 12_Gm79   | 770.829 | 0.05235  | 0.853084 | 0.958261 | 659.331 | 945.341 | 749.767 | 664.36  | 804.393 | 801.778 |
| ENSMUSG00000063903 | 5_Klk1    | 7.03155 | 6.34084  | 3.25E-05 | 0.001332 | 10.1124 | 23.8036 | 8.27329 | 0       | 0       | 0       |
| ENSMUSG00000063904 | 3_493053  | 1677.7  | 0.31313  | 0.568205 | 0.852443 | 547.083 | 2512.98 | 2517.15 | 1527.62 | 1292.01 | 1669.39 |
| ENSMUSG00000063919 | 10_Srrm4  | 66.8793 | -1.70908 | 0.001732 | 0.029006 | 50.5622 | 23.8036 | 19.6491 | 150.203 | 93.574  | 63.4839 |
| ENSMUSG00000063929 | 6_Cyp4a3  | 17.8168 | 0.74198  | 0.209259 | 0.60089  | 19.2136 | 22.6701 | 24.8199 | 7.42763 | 16.3111 | 16.4588 |
| ENSMUSG00000063931 | 14_Pepd   | 590.177 | 0.30022  | 0.459937 | 0.799438 | 357.98  | 770.782 | 825.261 | 568.626 | 422.371 | 596.043 |
| ENSMUSG00000063932 | 4_Poteg   | 0.14308 | -0.79206 | 0.84609  | NA       | 0       | 0       | 0       | 0       | 0.85848 | 0       |
| ENSMUSG00000063935 | 3_Zar1    | 0.13755 | -0.79206 | 0.84609  | NA       | 0       | 0       | 0       | 0.82529 | 0       | 0       |
| ENSMUSG00000063952 | 15_Brpf3  | 717.095 | 0.33291  | 0.376324 | 0.745684 | 474.274 | 879.598 | 1044.5  | 670.963 | 553.718 | 679.513 |
| ENSMUSG00000063953 | 2_Amd2    | 431.317 | 0.24642  | 0.519421 | 0.831665 | 689.669 | 387.658 | 326.795 | 355.701 | 450.7   | 377.377 |
| ENSMUSG00000063954 | 7_Hist2h2 | 22.1099 | -0.2738  | 0.825296 | 0.949753 | 3.03373 | 27.2041 | 29.9907 | 56.1199 | 16.3111 | 0       |
| ENSMUSG00000063971 | 6_170001  | 0.17236 | 1.1315   | 0.781553 | NA       | 0       | 0       | 1.03416 | 0       | 0       | 0       |
| ENSMUSG00000063972 | 13_Nr6a1  | 351.674 | 0.45626  | 0.183972 | 0.570805 | 521.802 | 368.388 | 329.898 | 224.48  | 333.948 | 331.527 |
| ENSMUSG00000063975 | 12_Slco1e | 145.592 | 1.04833  | 0.013367 | 0.123438 | 301.351 | 150.756 | 136.509 | 82.5292 | 101.3   | 101.104 |
| ENSMUSG00000064010 | 12_Dppa1  | 1.43114 | 1.5429   | 0.450306 | NA       | 3.03373 | 1.1335  | 2.06832 | 0       | 0       | 2.35126 |
| ENSMUSG00000064016 | 4_Gm648   | 0.54638 | 2.65324  | 0.465678 | NA       | 1.01124 | 2.26701 | 0       | 0       | 0       | 0       |
| ENSMUSG00000064023 | 4_Klk8    | 31.8147 | 0.154    | 0.807344 | 0.944389 | 10.1124 | 41.9396 | 48.6056 | 29.7105 | 33.4806 | 27.0394 |
| ENSMUSG00000064030 | 14_Pym1   | 364.77  | 0.38181  | 0.528422 | 0.835633 | 100.113 | 608.691 | 529.491 | 350.749 | 238.657 | 360.918 |
| ENSMUSG00000064036 | 15_Mro    | 5.10536 | -0.79416 | 0.511416 | 0.827179 | 8.08995 | 0       | 3.10248 | 9.90351 | 6.00934 | 3.52688 |
| ENSMUSG00000064037 | 13_Gpn1   | 555.604 | -0.16525 | 0.583193 | 0.860399 | 398.43  | 655.165 | 518.115 | 573.578 | 605.226 | 583.111 |

|                    |           |         |          |          |          |         |         |         |         |         |         |
|--------------------|-----------|---------|----------|----------|----------|---------|---------|---------|---------|---------|---------|
| ENSMUSG00000064039 | 3_Ccr11   | 0.49501 | 1.08006  | 0.734751 | NA       | 1.01124 | 1.1335  | 0       | 0.82529 | 0       | 0       |
| ENSMUSG00000064057 | 12_Scgb3  | 1.7727  | -0.06889 | 0.964655 | 0.99063  | 3.03373 | 1.1335  | 1.03416 | 0.82529 | 3.43391 | 1.17563 |
| ENSMUSG00000064061 | 13_Dzip3  | 423.918 | 0.17133  | 0.750123 | 0.925182 | 846.412 | 238.036 | 262.677 | 357.352 | 491.049 | 347.986 |
| ENSMUSG00000064063 | 5_BC048t  | 2.46817 | -1.34947 | 0.438384 | 0.785475 | 2.02249 | 1.1335  | 1.03416 | 0       | 9.44325 | 1.17563 |
| ENSMUSG00000064065 | 15_Ipcf1  | 16.0287 | 1.61416  | 0.013798 | 0.126045 | 34.3823 | 23.8036 | 14.4783 | 9.90351 | 7.72629 | 5.87814 |
| ENSMUSG00000064068 | 13_Mtx1   | 498.5   | 0.12853  | 0.771888 | 0.932483 | 238.654 | 693.704 | 629.804 | 485.272 | 440.399 | 503.169 |
| ENSMUSG00000064080 | 12_Fbln2  | 669.52  | -0.35455 | 0.429494 | 0.779482 | 287.193 | 614.359 | 861.457 | 862.431 | 595.783 | 795.9   |
| ENSMUSG00000064081 | 3_Gm897   | 0       | NA       | NA       | NA       | 0       | 0       | 0       | 0       | 0       | 0       |
| ENSMUSG00000064090 | 14_Vrk2   | 391.46  | 0.63087  | 0.15132  | 0.525101 | 761.467 | 312.847 | 352.649 | 243.461 | 369.145 | 309.19  |
| ENSMUSG00000064105 | 12_Cnnm1  | 119.995 | -0.32295 | 0.402698 | 0.761286 | 66.7421 | 115.617 | 137.543 | 140.3   | 121.045 | 138.724 |
| ENSMUSG00000064109 | 7_Hcst    | 5.14519 | 0.84196  | 0.503733 | 0.824384 | 1.01124 | 14.7355 | 4.13665 | 6.60234 | 0.85848 | 3.52688 |
| ENSMUSG00000064115 | 13_Cadm1  | 191.343 | -1.15522 | 0.050198 | 0.290147 | 225.507 | 45.3401 | 84.8012 | 282.25  | 327.938 | 182.222 |
| ENSMUSG00000064120 | 13_Mocs1  | 605.134 | 0.44171  | 0.332661 | 0.711855 | 309.441 | 872.797 | 909.028 | 577.705 | 438.682 | 523.154 |
| ENSMUSG00000064125 | 14_Prr36  | 22.7291 | -0.2049  | 0.752168 | 0.925804 | 7.07871 | 28.3376 | 27.9224 | 24.7588 | 18.8865 | 29.3907 |
| ENSMUSG00000064127 | 13_Med14  | 3522.01 | 0.57463  | 0.151883 | 0.525932 | 6338.48 | 3325.7  | 2978.39 | 2122.65 | 3192.68 | 3174.2  |
| ENSMUSG00000064128 | 6_Cenpj   | 455.814 | 0.92722  | 0.017904 | 0.150834 | 886.861 | 476.071 | 429.177 | 255.841 | 355.409 | 331.527 |
| ENSMUSG00000064137 | 6_Rhox8   | 0       | NA       | NA       | NA       | 0       | 0       | 0       | 0       | 0       | 0       |
| ENSMUSG00000064138 | 13_Fam17  | 785.269 | 0.5273   | 0.285627 | 0.671835 | 1668.55 | 521.411 | 591.54  | 604.939 | 718.545 | 606.624 |
| ENSMUSG00000064140 | 2_Trim38  | 2.28237 | -0.33778 | 0.874685 | 0.964407 | 6.06747 | 0       | 0       | 2.47588 | 5.15086 | 0       |
| ENSMUSG00000064141 | 14_Zfp69  | 35.6976 | -0.20028 | 0.652689 | 0.892525 | 26.2924 | 36.2721 | 37.2298 | 47.0417 | 30.9052 | 36.4445 |
| ENSMUSG00000064145 | 12_Arih2  | 1512.56 | 0.21595  | 0.322154 | 0.702839 | 1633.16 | 1656.05 | 1587.44 | 1351.83 | 1439.67 | 1407.23 |
| ENSMUSG00000064147 | 6_Rab44   | 87.6548 | -0.06757 | 0.908614 | 0.974731 | 28.3148 | 115.617 | 112.724 | 82.5292 | 60.9519 | 125.792 |
| ENSMUSG00000064158 | 4_Izumo1  | 4.4114  | 0.34148  | 0.736328 | 0.920901 | 3.03373 | 5.66751 | 6.20497 | 5.77705 | 3.43391 | 2.35126 |
| ENSMUSG00000064168 | 4_Hist1h2 | 0.65463 | 1.62138  | 0.64602  | NA       | 0       | 0       | 3.10248 | 0.82529 | 0       | 0       |
| ENSMUSG00000064177 | 8_Ghrl    | 11.7911 | -0.55408 | 0.401289 | 0.760305 | 7.07871 | 10.2015 | 11.3758 | 16.5058 | 10.3017 | 15.2832 |
| ENSMUSG00000064179 | 13_Tnnt1  | 41.117  | -1.39784 | 0.00537  | 0.065021 | 24.2699 | 12.4685 | 31.0248 | 75.9269 | 48.9332 | 54.0789 |
| ENSMUSG00000064181 | 5_Rab3ip  | 449.063 | 0.05687  | 0.821276 | 0.948338 | 408.543 | 465.87  | 499.5   | 468.766 | 424.946 | 426.753 |
| ENSMUSG00000064201 | 8_Krt2    | 0.19594 | -0.79206 | 0.84609  | NA       | 0       | 0       | 0       | 0       | 0       | 1.17563 |
| ENSMUSG00000064202 | 15_44304  | 32.6709 | -0.63687 | 0.149318 | 0.522751 | 26.2924 | 21.5366 | 28.9565 | 38.7887 | 46.3578 | 34.0932 |
| ENSMUSG00000064210 | 6_Ano6    | 1187.96 | -0.89682 | 0.000725 | 0.015456 | 829.22  | 751.512 | 910.062 | 1703.4  | 1647.42 | 1286.14 |
| ENSMUSG00000064215 | 13_Ilf127 | 2351.26 | -0.8714  | 0.007102 | 0.078878 | 1283.27 | 1431.61 | 2271.02 | 3150.14 | 2869.03 | 3102.48 |
| ENSMUSG00000064220 | 6_Hist2h2 | 5.09439 | -5.70243 | 0.03499  | 0.232834 | 0       | 0       | 0       | 0       | 0       | 30.5663 |
| ENSMUSG00000064224 | 10_Gsdmi  | 0.17236 | 1.1315   | 0.781553 | NA       | 0       | 0       | 1.03416 | 0       | 0       | 0       |
| ENSMUSG00000064225 | 6_Paqr9   | 71.621  | -0.79345 | 0.134471 | 0.498485 | 83.9333 | 35.1386 | 38.264  | 129.571 | 87.5647 | 55.2545 |
| ENSMUSG00000064232 | 2_Gm541   | 2.07686 | 1.11738  | 0.438457 | 0.785475 | 2.02249 | 2.26701 | 4.13665 | 0.82529 | 0.85848 | 2.35126 |
| ENSMUSG00000064246 | 10_Chil1  | 1544.73 | 1.29577  | 0.016682 | 0.142761 | 755.4   | 3741.69 | 2089.01 | 1048.95 | 855.043 | 778.266 |
| ENSMUSG00000064247 | 14_Plcxd1 | 51.7084 | -0.2122  | 0.715366 | 0.911362 | 17.1912 | 53.2746 | 73.4255 | 71.8004 | 46.3578 | 48.2007 |
| ENSMUSG00000064254 | 6_Ethe1   | 199.14  | 0.17341  | 0.738769 | 0.921641 | 79.8883 | 298.111 | 255.438 | 230.257 | 144.224 | 186.925 |
| ENSMUSG00000064262 | 7_Gimap8  | 92.8743 | 0.28432  | 0.457944 | 0.798063 | 131.462 | 82.7457 | 92.0404 | 84.1798 | 102.159 | 64.6595 |
| ENSMUSG00000064264 | 14_Zfp42t | 19.1151 | -0.31966 | 0.569799 | 0.853687 | 12.1349 | 21.5366 | 17.5807 | 27.2346 | 19.745  | 16.4588 |
| ENSMUSG00000064267 | 13_Hvcn1  | 159.246 | -0.85013 | 0.10889  | 0.448862 | 46.5172 | 176.826 | 117.894 | 281.425 | 158.818 | 173.993 |
| ENSMUSG00000064272 | 3_Gpbar1  | 0.7043  | 1.73793  | 0.616215 | NA       | 0       | 3.40051 | 0       | 0.82529 | 0       | 0       |
| ENSMUSG00000064280 | 13_Ccdc1  | 3.65364 | -0.34579 | 0.74713  | 0.924734 | 2.02249 | 4.53401 | 3.10248 | 4.12646 | 3.43391 | 4.70251 |
| ENSMUSG00000064284 | 12_Cdpf1  | 133.166 | -0.22541 | 0.642231 | 0.888256 | 58.6522 | 136.02  | 173.739 | 178.263 | 103.017 | 149.305 |
| ENSMUSG00000064288 | 4_Hist1h4 | 0.34472 | 1.99863  | 0.620844 | NA       | 0       | 0       | 2.06832 | 0       | 0       | 0       |
| ENSMUSG00000064289 | 15_Tank   | 1945.64 | 0.64577  | 0.141971 | 0.510781 | 3839.69 | 1680.98 | 1600.88 | 1135.6  | 1692.06 | 1724.65 |
| ENSMUSG00000064293 | 14_Cntn4  | 48.8086 | -1.85486 | 0.000819 | 0.016822 | 36.4048 | 12.4685 | 14.4783 | 91.6075 | 84.9892 | 52.9033 |
| ENSMUSG00000064294 | 12_Aox3   | 614.108 | -0.11167 | 0.770784 | 0.932384 | 823.153 | 346.852 | 600.848 | 619.795 | 675.621 | 618.38  |
| ENSMUSG00000064302 | 13_Clasp1 | 1675.36 | 0.10766  | 0.621767 | 0.878215 | 1691.81 | 1809.07 | 1712.57 | 1575.48 | 1607.93 | 1655.28 |
| ENSMUSG00000064307 | 12_Lrrc51 | 102.974 | -0.04745 | 0.915668 | 0.976615 | 50.5622 | 119.018 | 134.441 | 108.939 | 107.31  | 97.5771 |
| ENSMUSG00000064308 | 10_24101  | 1.14907 | -3.54924 | 0.125921 | NA       | 0       | 0       | 0       | 1.65058 | 1.71695 | 3.52688 |
| ENSMUSG00000064310 | 10_Zpld1  | 3.83836 | -0.06114 | 0.965356 | 0.990727 | 9.1012  | 1.1335  | 1.03416 | 0.82529 | 8.58477 | 2.35126 |
| ENSMUSG00000064317 | 4_Gm101   | 178.566 | -0.06859 | 0.914463 | 0.976048 | 36.4048 | 243.703 | 243.028 | 228.606 | 156.243 | 163.412 |
| ENSMUSG00000064325 | 3_Hhip    | 449.49  | -0.0651  | 0.878825 | 0.966267 | 668.433 | 235.769 | 413.665 | 437.405 | 499.634 | 442.036 |
| ENSMUSG00000064326 | 12_Siva1  | 138.431 | -0.01738 | 0.972249 | 0.9926   | 63.7084 | 174.559 | 174.773 | 193.118 | 102.159 | 122.265 |
| ENSMUSG00000064329 | 13_Scn1a  | 21.3202 | -0.71123 | 0.364094 | 0.737516 | 34.3823 | 7.93452 | 6.20497 | 28.0599 | 36.056  | 15.2832 |
| ENSMUSG00000064330 | 9_Pde6h   | 13.9199 | -2.8048  | 0.014227 | 0.128337 | 7.07871 | 3.40051 | 0       | 51.1681 | 17.1695 | 4.70251 |
| ENSMUSG00000064341 | 1_mt-Nd1  | 74746.8 | 0.08675  | 0.883307 | 0.967903 | 159139  | 36178   | 35664.1 | 68035.5 | 79177.3 | 70287.3 |
| ENSMUSG00000064345 | 1_mt-Nd2  | 49174.7 | 0.35302  | 0.571324 | 0.854448 | 118470  | 23065.7 | 23948.1 | 41559.2 | 45729.4 | 42275.6 |
| ENSMUSG00000064351 | 1_mt-Co1  | 291449  | 0.11386  | 0.838641 | 0.952966 | 601680  | 152153  | 155000  | 270844  | 310143  | 258873  |
| ENSMUSG00000064354 | 1_mt-Co2  | 139346  | 0.06914  | 0.902499 | 0.973635 | 285175  | 68219.9 | 74659.2 | 129890  | 149597  | 128536  |
| ENSMUSG00000064356 | 3_mt-Atp8 | 20480   | 0.411    | 0.522201 | 0.832206 | 51215.5 | 9187.04 | 9730.43 | 17379.8 | 18689.9 | 16677.5 |
| ENSMUSG00000064357 | 1_mt-Atp6 | 141231  | 0.22852  | 0.709459 | 0.909942 | 323106  | 65463.2 | 68609.4 | 128625  | 142311  | 119270  |
| ENSMUSG00000064358 | 1_mt-Co3  | 144052  | 0.03915  | 0.945517 | 0.986649 | 293623  | 68837.6 | 75557.9 | 138297  | 164549  | 123444  |
| ENSMUSG00000064360 | 1_mt-Nd3  | 9428.42 | 0.38253  | 0.575343 | 0.856733 | 24244.6 | 3730.36 | 4038.4  | 8133.26 | 9571.16 | 6852.73 |
| ENSMUSG00000064363 | 1_mt-Nd4  | 89548.4 | 0.08639  | 0.883363 | 0.967903 | 190070  | 42064.3 | 44551.7 | 86989.9 | 93927.7 | 79686.4 |
| ENSMUSG00000064367 | 1_mt-Nd5  | 63439.1 | -0.05547 | 0.92332  | 0.978561 | 126283  | 28479.3 | 31896.6 | 63724.1 | 69362.4 | 60889.3 |
| ENSMUSG00000064368 | 1_mt-Nd6  | 20033.5 | 0.10082  | 0.873765 | 0.964047 | 45001.4 | 7872.18 | 9326.07 | 20100.8 | 19278.8 | 18621.9 |
| ENSMUSG00000064370 | 1_mt-Cytb | 118366  | -0.06038 | 0.915614 | 0.976615 | 233152  | 55081.4 | 59435.3 | 113847  | 134133  | 114550  |
| ENSMUSG00000064373 | 11_Sepp1  | 5702.95 | -0.26958 | 0.517114 | 0.830929 | 8267.93 | 3334.77 | 3912.23 | 6841.67 | 6354.45 | 5506.64 |
| ENSMUSG00000065947 | 3_mt-Nd4l | 11396.1 | -0.20347 | 0.706966 | 0.909166 | 20584.9 | 5445.35 | 5750.97 | 11841.3 | 13018.8 | 11735.1 |
| ENSMUSG00000065952 | 13_C330c  | 35.3318 | -2.10452 | 7.58E-06 | 0.000418 | 12.1349 | 11.335  | 16.5466 | 60.2463 | 63.5273 | 48.2007 |
| ENSMUSG00000065954 | 10_Tacc1  | 2415.3  | 0.07945  | 0.737776 | 0.921332 | 2805.19 | 2227.33 | 2412.7  | 2328.15 | 2375.41 | 2343.03 |
| ENSMUSG00000065968 | 7_Ilfm7   | 1.16984 | -3.5987  | 0.126334 | NA       | 0       | 0       | 0       | 4.12646 | 1.71695 | 1.17563 |
| ENSMUSG00000065979 | 12_Cpped  | 1175.59 | 0.29105  | 0.193358 | 0.583211 | 1330.8  | 1297.86 | 1252.37 | 1028.31 | 1025.02 | 1119.2  |

|                    |            |         |          |          |          |         |         |         |         |         |         |
|--------------------|------------|---------|----------|----------|----------|---------|---------|---------|---------|---------|---------|
| ENSMUSG00000065987 | 12_Cd209   | 16.5682 | -0.74051 | 0.321175 | 0.702299 | 18.2024 | 5.66751 | 13.4441 | 34.6623 | 18.028  | 9.40502 |
| ENSMUSG00000065990 | 12_Aurkai  | 689.311 | -0.42981 | 0.420159 | 0.773489 | 193.148 | 759.447 | 809.748 | 973.845 | 669.612 | 730.065 |
| ENSMUSG00000065999 | 13_Gm13    | 0.92955 | -2.00542 | 0.374632 | NA       | 0       | 0       | 1.03416 | 1.65058 | 1.71695 | 1.17563 |
| ENSMUSG00000066000 | 12_26103   | 64.0079 | -0.22788 | 0.735815 | 0.920596 | 124.383 | 20.4031 | 32.059  | 77.5775 | 75.546  | 54.0789 |
| ENSMUSG00000066007 | 15_Zfp60l  | 0.35746 | 2.04359  | 0.612655 | NA       | 1.01124 | 1.1335  | 0       | 0       | 0       | 0       |
| ENSMUSG00000066009 | 8_Gm130    | 0.87392 | 2.0177   | 0.455692 | NA       | 3.03373 | 0       | 1.03416 | 0       | 0       | 1.17563 |
| ENSMUSG00000066026 | 14_Dhrs3   | 1605.67 | -0.16735 | 0.615147 | 0.876237 | 1081.02 | 1644.71 | 1811.85 | 1521.84 | 1484.31 | 2090.27 |
| ENSMUSG00000066036 | 14_Ubr4    | 5125.12 | 0.65937  | 0.175722 | 0.559175 | 2376.42 | 8887.8  | 7564.89 | 3965.53 | 3743.82 | 4212.27 |
| ENSMUSG00000066037 | 14_Hnrnp1  | 3501.49 | 0.16512  | 0.662951 | 0.896048 | 5539.6  | 2788.42 | 2776.72 | 2834.05 | 3682.01 | 3388.16 |
| ENSMUSG00000066042 | 4_Med18    | 73.9748 | 0.33727  | 0.358518 | 0.73267  | 77.8658 | 79.3452 | 89.9721 | 53.644  | 58.3764 | 84.6452 |
| ENSMUSG00000066043 | 13_Phactr  | 1702.56 | 0.49795  | 0.082519 | 0.387448 | 1679.68 | 2244.34 | 2055.91 | 1209.05 | 1322.91 | 1703.48 |
| ENSMUSG00000066057 | 6_Gm197    | 41.9751 | 0.16674  | 0.731025 | 0.91894  | 58.6522 | 31.7381 | 42.4006 | 25.5841 | 42.9238 | 50.552  |
| ENSMUSG00000066058 | 11_Cldn1f  | 192.056 | -1.77991 | 2.27E-05 | 0.001005 | 61.6859 | 66.8767 | 131.339 | 371.382 | 272.996 | 248.057 |
| ENSMUSG00000066060 | 5_Gm128    | 0.4821  | -2.30304 | 0.543942 | NA       | 0       | 0       | 0       | 0       | 1.71695 | 1.17563 |
| ENSMUSG00000066071 | 6_Cyp4a1   | 275.148 | -0.96439 | 0.00367  | 0.050278 | 227.53  | 146.222 | 185.115 | 346.623 | 302.184 | 443.212 |
| ENSMUSG00000066072 | 13_Cyp4a   | 2.71543 | -0.67585 | 0.617736 | 0.87739  | 1.01124 | 1.1335  | 4.13665 | 1.65058 | 6.00934 | 2.35126 |
| ENSMUSG00000066090 | 5_Ins15    | 3.22507 | -0.98516 | 0.422378 | 0.774546 | 1.01124 | 4.53401 | 1.03416 | 4.95175 | 4.29238 | 3.52688 |
| ENSMUSG00000066097 | 6_Cyp2j1   | 0.36128 | 2.05714  | 0.610196 | NA       | 0       | 1.1335  | 1.03416 | 0       | 0       | 0       |
| ENSMUSG00000066107 | 6_Gm126    | 51.8238 | 0.34644  | 0.36948  | 0.741029 | 59.6634 | 68.0102 | 46.5373 | 51.1681 | 42.0654 | 43.4982 |
| ENSMUSG00000066108 | 7_Muc5b    | 272.844 | 1.15135  | 0.016755 | 0.143312 | 167.867 | 482.872 | 477.783 | 151.029 | 136.498 | 221.018 |
| ENSMUSG00000066113 | 15_Adamt   | 461.087 | -0.2258  | 0.44392  | 0.788487 | 434.835 | 336.65  | 503.637 | 556.247 | 447.267 | 487.886 |
| ENSMUSG00000066129 | 14_Kndc1   | 123.734 | -0.72172 | 0.118615 | 0.4687   | 46.5172 | 109.95  | 124.099 | 175.787 | 170.837 | 115.212 |
| ENSMUSG00000066141 | 2_Gm112    | 0       | NA       | NA       | NA       | 0       | 0       | 0       | 0       | 0       | 0       |
| ENSMUSG00000066148 | 3_Prp4     | 833.89  | 0.31595  | 0.228232 | 0.619358 | 982.929 | 966.878 | 824.227 | 639.602 | 750.309 | 839.398 |
| ENSMUSG00000066149 | 11_Cdc26   | 747.763 | 0.09998  | 0.730183 | 0.918517 | 974.84  | 714.107 | 631.873 | 693.246 | 736.573 | 735.943 |
| ENSMUSG00000066150 | 12_Slc31a  | 3149.85 | 0.33678  | 0.364248 | 0.737599 | 5183.64 | 2706.8  | 2656.76 | 2366.94 | 3001.24 | 2983.74 |
| ENSMUSG00000066151 | 11_Fkbp1   | 1783.17 | 0.45556  | 0.195097 | 0.586033 | 1289.34 | 2500.51 | 2397.19 | 1393.09 | 1435.37 | 1683.5  |
| ENSMUSG00000066152 | 11_Slc31a  | 2696.5  | 0.42134  | 0.060341 | 0.323297 | 2850.7  | 3326.83 | 3084.9  | 2257.17 | 2309.3  | 2350.08 |
| ENSMUSG00000066153 | 2_Mup21    | 0.706   | 3.02814  | 0.366206 | NA       | 0       | 1.1335  | 3.10248 | 0       | 0       | 0       |
| ENSMUSG00000066170 | 6_E23000   | 6.29074 | -0.12362 | 0.89211  | 0.970752 | 4.04498 | 4.53401 | 9.30745 | 4.12646 | 5.15086 | 10.5807 |
| ENSMUSG00000066176 | 3_Gm125    | 1.48848 | -0.84372 | 0.606755 | NA       | 1.01124 | 1.1335  | 1.03416 | 0.82529 | 2.57543 | 2.35126 |
| ENSMUSG00000066178 | 2_603044   | 5.25058 | 0.18124  | 0.85773  | 0.959059 | 9.1012  | 2.26701 | 5.17081 | 3.30117 | 3.43391 | 8.22939 |
| ENSMUSG00000066189 | 9_Cacng3   | 5.19892 | -3.74053 | 0.022592 | 0.177237 | 0       | 2.26701 | 0       | 22.2829 | 4.29238 | 2.35126 |
| ENSMUSG00000066191 | 11_Anks6   | 116.93  | 0.10949  | 0.864223 | 0.96183  | 28.3148 | 174.559 | 161.329 | 146.077 | 77.2629 | 114.036 |
| ENSMUSG00000066196 | 11_Spag8   | 7.70273 | -0.49514 | 0.551731 | 0.845088 | 3.03373 | 9.06802 | 7.23913 | 11.5541 | 9.44325 | 5.87814 |
| ENSMUSG00000066197 | 4_Gpr139   | 1.08321 | -1.13496 | 0.659463 | NA       | 2.02249 | 0       | 0       | 3.30117 | 0       | 1.17563 |
| ENSMUSG00000066224 | 13_Arid3c  | 0.35746 | 2.04359  | 0.612655 | NA       | 1.01124 | 1.1335  | 0       | 0       | 0       | 0       |
| ENSMUSG00000066232 | 3_Ipo7     | 2947.65 | 0.6037   | 0.204206 | 0.595277 | 6146.34 | 2404.16 | 2115.89 | 1823.07 | 2729.96 | 2466.47 |
| ENSMUSG00000066233 | 5_Tmem4    | 124.664 | -0.29076 | 0.38534  | 0.750802 | 113.259 | 95.2142 | 128.236 | 163.408 | 137.356 | 110.509 |
| ENSMUSG00000066235 | 6_Pomgnt   | 102.674 | -0.63746 | 0.332153 | 0.711524 | 17.1912 | 89.5467 | 134.441 | 164.233 | 101.3   | 109.333 |
| ENSMUSG00000066258 | 13_Trim1   | 5.40335 | 1.49063  | 0.141461 | 0.510149 | 12.1349 | 3.40051 | 8.27329 | 1.65058 | 3.43391 | 3.52688 |
| ENSMUSG00000066272 | 4_Olf559   | 0.14308 | -0.79206 | 0.84609  | NA       | 0       | 0       | 0       | 0       | 0.85848 | 0       |
| ENSMUSG00000066278 | 6_Vps37b   | 851.705 | 0.80611  | 0.034435 | 0.230241 | 624.949 | 1442.95 | 1183.08 | 629.698 | 570.029 | 659.527 |
| ENSMUSG00000066279 | 2_Chrrna1  | 3.64493 | -0.17415 | 0.901754 | 0.973437 | 7.07871 | 0       | 3.10248 | 4.95175 | 0.85848 | 5.87814 |
| ENSMUSG00000066306 | 12_Numa    | 3675.14 | 0.34056  | 0.471924 | 0.805416 | 1677.65 | 5198.24 | 5444.86 | 3495.94 | 2689.61 | 3544.52 |
| ENSMUSG00000066319 | 6_Rtp3     | 10.762  | -0.68757 | 0.40549  | 0.764096 | 4.04498 | 14.7355 | 6.20497 | 15.6806 | 18.028  | 5.87814 |
| ENSMUSG00000066324 | 2_Impad1   | 2506.31 | 0.30799  | 0.532851 | 0.837668 | 5040.04 | 1592.57 | 1685.68 | 2106.15 | 2357.38 | 2256.03 |
| ENSMUSG00000066357 | 6_Wdr6     | 1008.6  | -0.76987 | 0.202597 | 0.593711 | 191.125 | 903.402 | 1142.75 | 1762.82 | 964.07  | 1087.46 |
| ENSMUSG00000066361 | 3_Serpina  | 19.5898 | -0.12976 | 0.80472  | 0.942951 | 16.1799 | 19.2695 | 20.6832 | 23.9335 | 16.3111 | 21.1613 |
| ENSMUSG00000066363 | 12_Serpina | 54.7316 | 3.25819  | 1.42E-08 | 1.83E-06 | 66.7421 | 163.224 | 67.2205 | 7.42763 | 12.0187 | 11.7563 |
| ENSMUSG00000066364 | 2_Serpina  | 0.56675 | 2.70271  | 0.498103 | NA       | 0       | 3.40051 | 0       | 0       | 0       | 0       |
| ENSMUSG00000066366 | 14_Serpina | 3.77464 | -0.45309 | 0.668487 | 0.898206 | 2.02249 | 3.40051 | 4.13665 | 4.95175 | 3.43391 | 4.70251 |
| ENSMUSG00000066368 | 1_Actl11   | 0.18892 | 1.1315   | 0.781553 | NA       | 0       | 1.1335  | 0       | 0       | 0       | 0       |
| ENSMUSG00000066383 | 6_Iqcf1    | 0.14308 | -0.79206 | 0.84609  | NA       | 0       | 0       | 0       | 0       | 0.85848 | 0       |
| ENSMUSG00000066392 | 11_Nrxn3   | 38.4726 | -1.59621 | 0.062106 | 0.329194 | 36.4048 | 15.869  | 5.17081 | 118.842 | 36.9145 | 17.6344 |
| ENSMUSG00000066406 | 14_Akap1   | 3777.92 | 0.48984  | 0.035467 | 0.235118 | 3998.46 | 4655.3  | 4585.47 | 2987.56 | 3037.29 | 3403.44 |
| ENSMUSG00000066407 | 3_Gm102    | 6.63351 | -0.57762 | 0.606712 | 0.871949 | 0       | 5.66751 | 10.3416 | 10.7288 | 6.00934 | 7.05377 |
| ENSMUSG00000066415 | 4_Msl2     | 1579.14 | 0.5613   | 0.190169 | 0.578345 | 3043.85 | 1376.07 | 1227.55 | 1116.62 | 1496.33 | 1214.42 |
| ENSMUSG00000066438 | 6_Plekhd1  | 16.1814 | -2.15573 | 0.002755 | 0.041008 | 5.05622 | 4.53401 | 8.27329 | 37.9634 | 28.3297 | 12.9319 |
| ENSMUSG00000066440 | 4_Zfyve2f  | 723.904 | 0.36434  | 0.361394 | 0.734288 | 435.846 | 1056.42 | 952.463 | 684.993 | 612.953 | 600.746 |
| ENSMUSG00000066441 | 14_Rdh11   | 840.405 | -0.15364 | 0.586359 | 0.862427 | 991.019 | 718.641 | 677.376 | 863.256 | 937.457 | 854.681 |
| ENSMUSG00000066442 | 16_Mthfs   | 109.309 | -0.27469 | 0.558881 | 0.848321 | 146.63  | 98.6148 | 51.7081 | 117.192 | 147.658 | 94.0502 |
| ENSMUSG00000066456 | 14_Hmgn    | 2562.26 | -0.0081  | 0.983383 | 0.994685 | 3890.26 | 1769.4  | 2005.24 | 2230.77 | 2744.55 | 2733.33 |
| ENSMUSG00000066487 | 3_Gm578    | 13.8021 | -0.04197 | 0.963208 | 0.990106 | 10.1124 | 6.80102 | 23.7857 | 2.47588 | 23.1789 | 16.4588 |
| ENSMUSG00000066510 | 4_Ankdd1   | 2.21886 | 0.92579  | 0.557799 | 0.848187 | 0       | 5.66751 | 3.10248 | 1.65058 | 1.71695 | 1.17563 |
| ENSMUSG00000066537 | 4_Vmn2r5   | 4.16698 | -0.75994 | 0.55094  | 0.844729 | 3.03373 | 0       | 6.20497 | 2.47588 | 8.58477 | 4.70251 |
| ENSMUSG00000066551 | 12_Hmgb    | 6611.03 | 0.18662  | 0.633964 | 0.883716 | 10823.3 | 5328.6  | 4961.91 | 5382.56 | 6703.85 | 6465.95 |
| ENSMUSG00000066568 | 12_Lsm14   | 3371.52 | 0.31623  | 0.347844 | 0.725133 | 5180.6  | 3084.26 | 2953.57 | 2613.7  | 3295.69 | 3101.31 |
| ENSMUSG00000066571 | 13_49314   | 1579.2  | 0.37526  | 0.087235 | 0.40055  | 1878.89 | 1719.52 | 1751.87 | 1385.67 | 1377.86 | 1361.38 |
| ENSMUSG00000066584 | 10_Scgb2   | 0.31162 | 0.16972  | 0.966824 | NA       | 1.01124 | 0       | 0       | 0       | 0.85848 | 0       |
| ENSMUSG00000066595 | 9_Mfsd7b   | 474.439 | 0.27989  | 0.486406 | 0.81371  | 801.917 | 412.595 | 346.444 | 427.501 | 467.87  | 390.308 |
| ENSMUSG00000066607 | 4_603041   | 72.2612 | -1.14092 | 0.026035 | 0.193898 | 25.2811 | 41.9396 | 68.2547 | 100.686 | 133.922 | 63.4839 |
| ENSMUSG00000066613 | 14_Zfp93   | 456.135 | 0.2272   | 0.687553 | 0.904573 | 959.671 | 236.902 | 279.224 | 340.02  | 514.228 | 406.767 |
| ENSMUSG00000066621 | 12_Tecpr   | 618.68  | -0.70499 | 0.207139 | 0.598763 | 147.642 | 532.746 | 731.152 | 1007.68 | 630.981 | 661.878 |
| ENSMUSG00000066629 | 1_Rpl36-p  | 1.16601 | 0.55068  | 0.805108 | NA       | 0       | 0       | 4.13665 | 0.82529 | 0.85848 | 1.17563 |

|                    |            |         |          |          |          |         |         |         |         |         |         |
|--------------------|------------|---------|----------|----------|----------|---------|---------|---------|---------|---------|---------|
| ENSMUSG00000066632 | 2_Pgk1-rs  | 2705.68 | 0.07429  | 0.830271 | 0.95122  | 2630.25 | 3193.08 | 2502.67 | 1761.17 | 3479.41 | 2667.5  |
| ENSMUSG00000066637 | 1_Ttc32    | 83.7014 | 0.22595  | 0.675092 | 0.900711 | 159.777 | 63.4762 | 47.5714 | 84.1798 | 88.4231 | 58.7814 |
| ENSMUSG00000066640 | 11_Fbxl1f  | 247.438 | -0.04503 | 0.905908 | 0.974391 | 147.642 | 257.305 | 325.761 | 256.666 | 229.213 | 268.043 |
| ENSMUSG00000066643 | 12_Wdr3f   | 686.655 | -0.45648 | 0.084421 | 0.392004 | 692.702 | 512.343 | 531.559 | 812.088 | 781.214 | 790.022 |
| ENSMUSG00000066647 | 5_Gm511    | 62.7735 | -0.27206 | 0.489727 | 0.814396 | 70.7871 | 43.0731 | 56.8789 | 75.1016 | 75.546  | 55.2545 |
| ENSMUSG00000066652 | 5_Lefty2   | 0.37783 | 2.11394  | 0.599927 | NA       | 0       | 2.26701 | 0       | 0       | 0       | 0       |
| ENSMUSG00000066677 | 11_Pydc3   | 81.0991 | 5.04591  | 8.56E-13 | 2.86E-10 | 239.665 | 170.025 | 63.0839 | 5.77705 | 6.86782 | 1.17563 |
| ENSMUSG00000066682 | 11_Pilrb2  | 11.3095 | 1.03406  | 0.174686 | 0.55808  | 8.08995 | 18.136  | 19.6491 | 10.7288 | 7.72629 | 3.52688 |
| ENSMUSG00000066684 | 10_Pilrb1  | 11.0718 | 1.70746  | 0.027825 | 0.201444 | 15.1687 | 19.2695 | 16.5466 | 2.47588 | 9.44325 | 3.52688 |
| ENSMUSG00000066687 | 4_Zbtb16   | 190.836 | 0.23665  | 0.441665 | 0.786846 | 209.328 | 198.363 | 210.969 | 148.553 | 157.96  | 219.842 |
| ENSMUSG00000066704 | 6_Cyp2b1   | 585.884 | -0.14898 | 0.70488  | 0.908152 | 728.096 | 369.522 | 568.789 | 427.501 | 649.009 | 772.387 |
| ENSMUSG00000066705 | 6_Fxyd6    | 586.851 | -1.17681 | 0.001018 | 0.019859 | 302.362 | 281.109 | 496.398 | 1005.21 | 727.13  | 708.904 |
| ENSMUSG00000066720 | 6_Cldn9    | 0.68374 | 0.06324  | 0.982824 | NA       | 0       | 0       | 2.06832 | 0       | 0.85848 | 1.17563 |
| ENSMUSG00000066721 | 3_Zfp575   | 2.02292 | -2.23918 | 0.262994 | 0.652423 | 0       | 1.1335  | 1.03416 | 8.25292 | 1.71695 | 0       |
| ENSMUSG00000066723 | 3_Vmn1r1   | 0.28616 | -1.57932 | 0.696464 | NA       | 0       | 0       | 0       | 0       | 1.71695 | 0       |
| ENSMUSG00000066724 | 2_Gm101    | 2584.6  | -0.06103 | 0.918654 | 0.977109 | 619.893 | 3467.39 | 3502.71 | 3320.98 | 2020.85 | 2575.8  |
| ENSMUSG00000066735 | 8_Vkorc1l  | 2237.98 | 0.41244  | 0.268701 | 0.656292 | 3749.69 | 1990.43 | 1926.64 | 1590.34 | 2044.03 | 2126.71 |
| ENSMUSG00000066755 | 2_Tnfsf18  | 20.5344 | 1.69546  | 0.015296 | 0.13483  | 38.4273 | 36.2721 | 19.6491 | 4.95175 | 18.028  | 5.87814 |
| ENSMUSG00000066756 | 5_Igfl3    | 0.13755 | -0.79206 | 0.84609  | NA       | 0       | 0       | 0       | 0.82529 | 0       | 0       |
| ENSMUSG00000066760 | 12_Psg16   | 64.9266 | -0.60384 | 0.131754 | 0.493664 | 66.7421 | 48.7406 | 39.2981 | 87.481  | 84.9892 | 62.3083 |
| ENSMUSG00000066797 | 6_Zfp648   | 0.73911 | -1.55797 | 0.6475   | NA       | 0       | 1.1335  | 0       | 3.30117 | 0       | 0       |
| ENSMUSG00000066798 | 3_Zbtb6    | 812.826 | 0.58913  | 0.269277 | 0.656292 | 1852.6  | 546.348 | 530.525 | 575.229 | 759.752 | 612.502 |
| ENSMUSG00000066800 | 11_Rnase   | 3142.69 | 0.77725  | 0.00752  | 0.0821   | 4684.08 | 3953.66 | 3270.02 | 1895.7  | 2600.33 | 2452.36 |
| ENSMUSG00000066829 | 6_Zfp810   | 405.503 | 0.13296  | 0.759116 | 0.92777  | 679.556 | 262.973 | 329.898 | 349.924 | 453.276 | 357.391 |
| ENSMUSG00000066838 | 6_Zfp772   | 243.156 | 0.23824  | 0.402675 | 0.761286 | 314.497 | 239.169 | 235.789 | 212.925 | 234.364 | 222.194 |
| ENSMUSG00000066839 | 11_Ecsit   | 266.684 | -0.12469 | 0.782157 | 0.935592 | 120.338 | 294.711 | 350.581 | 321.039 | 239.515 | 273.921 |
| ENSMUSG00000066842 | 18_Hmcn1   | 463.902 | -0.86245 | 0.018108 | 0.152334 | 441.914 | 207.431 | 338.171 | 653.632 | 602.651 | 539.613 |
| ENSMUSG00000066861 | 14_Oas1g   | 1074.56 | 2.16448  | 9.11E-07 | 7.11E-05 | 848.434 | 2562.85 | 1860.46 | 385.412 | 438.682 | 351.513 |
| ENSMUSG00000066867 | 8_Oas1e    | 30.7807 | 1.21772  | 0.052254 | 0.296722 | 19.2136 | 65.7432 | 44.4689 | 14.8553 | 27.4713 | 12.9319 |
| ENSMUSG00000066877 | 11_Nck2    | 701.955 | 0.45067  | 0.104705 | 0.44009  | 645.174 | 882.999 | 903.857 | 604.114 | 544.274 | 631.312 |
| ENSMUSG00000066878 | 4_Gm101i   | 3205.02 | 0.03447  | 0.89757  | 0.97171  | 3458.46 | 3459.45 | 2811.89 | 2645.06 | 3576.42 | 3278.83 |
| ENSMUSG00000066880 | 15_Zfp61i  | 843.462 | 0.34644  | 0.509767 | 0.827179 | 1766.64 | 552.016 | 513.978 | 630.523 | 881.656 | 715.957 |
| ENSMUSG00000066892 | 13_Fbxl12  | 206.071 | -0.0394  | 0.903778 | 0.973878 | 157.754 | 205.164 | 247.165 | 243.461 | 198.308 | 184.574 |
| ENSMUSG00000066894 | 14_Vsig1C  | 2140.27 | 0.51338  | 0.047915 | 0.281516 | 2350.13 | 2557.18 | 2643.32 | 1501.21 | 1719.53 | 2070.28 |
| ENSMUSG00000066897 | 5_Olfr872  | 0.28616 | -1.57932 | 0.696464 | NA       | 0       | 0       | 0       | 0       | 1.71695 | 0       |
| ENSMUSG00000066900 | 11_Suds3   | 2962.26 | -0.08965 | 0.787898 | 0.936811 | 1904.17 | 3433.38 | 3273.12 | 2920.71 | 2804.64 | 3437.54 |
| ENSMUSG00000066936 | 4_Gm101i   | 0       | NA       | NA       | NA       | 0       | 0       | 0       | 0       | 0       | 0       |
| ENSMUSG00000066944 | 1_492151   | 1.03356 | 1.08583  | 0.635139 | NA       | 3.03373 | 1.1335  | 0       | 0       | 0.85848 | 1.17563 |
| ENSMUSG00000066952 | 11_Myo1h   | 14.6684 | -0.58495 | 0.394716 | 0.755773 | 10.1124 | 14.7355 | 10.3416 | 23.9335 | 7.72629 | 21.1613 |
| ENSMUSG00000066964 | 2_Tmem2    | 18.766  | -0.25865 | 0.640767 | 0.887491 | 11.1237 | 22.6701 | 17.5807 | 20.6323 | 20.6034 | 19.9857 |
| ENSMUSG00000066975 | 12_Cryba1  | 1075.18 | -3.61636 | 5.78E-05 | 0.002133 | 11.1237 | 219.9   | 255.438 | 3851.64 | 616.386 | 1496.57 |
| ENSMUSG00000066979 | 5_Bub3     | 2034.58 | 0.16981  | 0.571222 | 0.854443 | 1558.33 | 2480.1  | 2424.07 | 1854.43 | 1841.43 | 2049.12 |
| ENSMUSG00000066983 | 6_Gm165    | 0.31162 | 0.16972  | 0.966824 | NA       | 1.01124 | 0       | 0       | 0       | 0.85848 | 0       |
| ENSMUSG00000067001 | 11_Serpin  | 39.3993 | 1.38369  | 0.03166  | 0.219129 | 105.169 | 32.8716 | 33.0932 | 22.2829 | 30.0467 | 12.9319 |
| ENSMUSG00000067006 | 12_Serpin  | 18661.5 | 0.7925   | 0.0745   | 0.365293 | 37870.1 | 18955.6 | 14159.7 | 9957.98 | 15791.7 | 15233.8 |
| ENSMUSG00000067028 | 11_Cntna1  | 3.56106 | -2.52642 | 0.086261 | 0.398033 | 0       | 1.1335  | 2.06832 | 12.3794 | 3.43391 | 2.35126 |
| ENSMUSG00000067038 | 5_Rps12-i  | 3825.41 | -0.19581 | 0.542172 | 0.84099  | 4710.38 | 2893.83 | 3094.21 | 3498.41 | 4739.65 | 4015.94 |
| ENSMUSG00000067049 | 7_Unc93a   | 28.2978 | -1.14581 | 0.025443 | 0.191301 | 12.1349 | 17.0025 | 23.7857 | 33.837  | 48.9332 | 34.0932 |
| ENSMUSG00000067071 | 8_Hes6     | 221.496 | -0.03257 | 0.955173 | 0.98876  | 63.7084 | 256.172 | 337.137 | 264.094 | 165.686 | 242.179 |
| ENSMUSG00000067081 | 12_Asb18   | 3.07499 | -0.66602 | 0.692619 | 0.905638 | 7.07871 | 0       | 0       | 4.95175 | 1.71695 | 4.70251 |
| ENSMUSG00000067085 | 1_Gm101i   | 63.8744 | -0.0909  | 0.932798 | 0.982615 | 0       | 77.0782 | 108.587 | 71.8004 | 76.4045 | 49.3764 |
| ENSMUSG00000067148 | 15_Polr1c  | 568.9   | 0.03314  | 0.939232 | 0.985262 | 271.013 | 748.112 | 707.366 | 609.066 | 528.822 | 549.018 |
| ENSMUSG00000067149 | 6_Jchain   | 23.9095 | -0.98194 | 0.079805 | 0.379919 | 15.1687 | 23.8036 | 9.30745 | 33.837  | 24.8958 | 36.4445 |
| ENSMUSG00000067150 | 5_Xpo5     | 1220.32 | 0.2527   | 0.380018 | 0.747872 | 1162.93 | 1564.23 | 1253.4  | 902.045 | 1209.59 | 1229.71 |
| ENSMUSG00000067158 | 9_Col4a4   | 1047.25 | -1.9807  | 9.57E-08 | 9.76E-06 | 585.51  | 281.109 | 403.323 | 2034.35 | 1447.39 | 1531.84 |
| ENSMUSG00000067173 | 3_Mrgpra1  | 0.2751  | -1.54073 | 0.703687 | NA       | 0       | 0       | 0       | 1.65058 | 0       | 0       |
| ENSMUSG00000067194 | 6_Eif1ax   | 2578.77 | 0.29064  | 0.53953  | 0.840325 | 4962.18 | 1772.8  | 1777.72 | 1943.56 | 2542.81 | 2473.52 |
| ENSMUSG00000067201 | 11_H2-ME   | 0.16854 | 1.1315   | 0.781553 | NA       | 1.01124 | 0       | 0       | 0       | 0       | 0       |
| ENSMUSG00000067206 | 3_Lrrc66   | 154.164 | 0.05939  | 0.866966 | 0.962814 | 123.372 | 185.894 | 162.363 | 138.649 | 121.904 | 192.803 |
| ENSMUSG00000067212 | 8_H2-T23   | 3607.37 | 1.93012  | 0.000215 | 0.006112 | 1966.87 | 8318.78 | 6859.59 | 1757.87 | 1201.01 | 1540.07 |
| ENSMUSG00000067215 | 5_Usp51    | 5.8861  | -0.68401 | 0.479156 | 0.809393 | 8.08995 | 3.40051 | 2.06832 | 10.7288 | 5.15086 | 5.87814 |
| ENSMUSG00000067219 | 9_Nipal1   | 22.5053 | 1.5514   | 0.013159 | 0.122329 | 49.551  | 31.7381 | 19.6491 | 10.7288 | 16.3111 | 7.05377 |
| ENSMUSG00000067220 | 12_Cnga1   | 171.577 | -2.01478 | 0.014906 | 0.132462 | 130.451 | 63.4762 | 10.3416 | 457.212 | 292.741 | 75.2402 |
| ENSMUSG00000067231 | 4_Cyp2c6   | 0.44917 | -0.60728 | 0.852512 | NA       | 1.01124 | 0       | 0       | 0.82529 | 0.85848 | 0       |
| ENSMUSG00000067235 | 14_H2-Q1   | 241.426 | 2.86403  | 7.03E-07 | 5.72E-05 | 149.664 | 608.691 | 515.012 | 68.4993 | 32.6221 | 74.0646 |
| ENSMUSG00000067242 | 11_Lgi1    | 355.59  | -1.26658 | 0.011406 | 0.111025 | 343.823 | 108.816 | 173.739 | 573.578 | 613.811 | 319.771 |
| ENSMUSG00000067261 | 4_Foxd3    | 4.1584  | -0.20487 | 0.842579 | 0.953741 | 3.03373 | 4.53401 | 4.13665 | 6.60234 | 4.29238 | 2.35126 |
| ENSMUSG00000067274 | 10_Rplp0   | 17753.8 | 0.05588  | 0.906096 | 0.974391 | 7273.88 | 22583.9 | 24435.2 | 19465.3 | 15341.8 | 17422.8 |
| ENSMUSG00000067276 | 5_Capn6    | 370.306 | -0.91887 | 0.020195 | 0.164156 | 367.082 | 155.29  | 246.13  | 552.121 | 485.039 | 416.172 |
| ENSMUSG00000067279 | 2_Ppp1r3i  | 10332.6 | -0.1333  | 0.658912 | 0.89471  | 12657.7 | 7860.84 | 9047.88 | 9480.96 | 11557.7 | 11390.7 |
| ENSMUSG00000067285 | 4_Gm162    | 10.6214 | 1.31288  | 0.208811 | 0.600293 | 35.3936 | 6.80102 | 3.10248 | 2.47588 | 7.72629 | 8.22939 |
| ENSMUSG00000067288 | 12_Rps28   | 4253.37 | -0.28696 | 0.586587 | 0.862544 | 1316.64 | 4631.49 | 5547.24 | 5813.36 | 3571.26 | 4640.2  |
| ENSMUSG00000067297 | 4_lfit1bl2 | 219.282 | 1.40089  | 1.13E-05 | 0.000578 | 378.205 | 334.383 | 241.994 | 122.143 | 129.63  | 109.333 |
| ENSMUSG00000067299 | 11_Cryg2   | 1284.44 | -3.87389 | 2.09E-05 | 0.000947 | 31.3486 | 219.9   | 240.96  | 5885.16 | 468.728 | 860.56  |
| ENSMUSG00000067336 | 6_Bmpr2    | 3072.3  | 0.38071  | 0.385138 | 0.750802 | 5804.54 | 2191.06 | 2430.28 | 2557.58 | 2860.45 | 2589.91 |

|                    |           |         |          |          |          |         |         |         |         |         |         |
|--------------------|-----------|---------|----------|----------|----------|---------|---------|---------|---------|---------|---------|
| ENSMUSG00000067338 | 6_Tuba3b  | 0       | NA       | NA       | NA       | 0       | 0       | 0       | 0       | 0       | 0       |
| ENSMUSG00000067341 | 5_H2-Eb2  | 0.16854 | 1.1315   | 0.781553 | NA       | 1.01124 | 0       | 0       | 0       | 0       | 0       |
| ENSMUSG00000067356 | 5_B43020  | 13.6406 | 0.24052  | 0.692201 | 0.905638 | 13.1462 | 12.4685 | 18.6149 | 13.2047 | 10.3017 | 14.1075 |
| ENSMUSG00000067360 | 12_Prame  | 0       | NA       | NA       | NA       | 0       | 0       | 0       | 0       | 0       | 0       |
| ENSMUSG00000067365 | 10_Tmem   | 639.1   | 0.37663  | 0.1893   | 0.577749 | 898.996 | 654.031 | 613.258 | 578.53  | 576.038 | 513.749 |
| ENSMUSG00000067367 | 9_Lyar    | 502.772 | 0.21535  | 0.427445 | 0.778144 | 597.645 | 581.487 | 441.587 | 438.23  | 494.483 | 463.197 |
| ENSMUSG00000067369 | 12_Trmt2l | 672.778 | -0.13519 | 0.696476 | 0.905638 | 889.895 | 491.94  | 541.901 | 640.427 | 812.978 | 659.527 |
| ENSMUSG00000067370 | 3_B3galt4 | 69.0288 | 0.01623  | 0.978424 | 0.993796 | 22.2474 | 92.9472 | 93.0745 | 83.3545 | 43.7823 | 78.7671 |
| ENSMUSG00000067377 | 12_Tspan  | 833.23  | -1.05045 | 0.033667 | 0.226863 | 963.716 | 295.844 | 368.162 | 1198.32 | 1273.98 | 899.355 |
| ENSMUSG00000067399 | 10_Trim4  | 7.87159 | -1.3629  | 0.264014 | 0.652958 | 12.1349 | 0       | 1.03416 | 11.5541 | 15.4526 | 7.05377 |
| ENSMUSG00000067424 | 12_Zfp56  | 145.469 | 0.17852  | 0.711123 | 0.910557 | 260.901 | 91.8137 | 110.655 | 133.697 | 160.535 | 115.212 |
| ENSMUSG00000067430 | 7_Zfp763  | 330.099 | 0.01069  | 0.98391  | 0.994713 | 623.938 | 196.096 | 173.739 | 301.232 | 339.957 | 345.635 |
| ENSMUSG00000067438 | 5_Hmx1    | 10.4063 | -1.28342 | 0.143729 | 0.513176 | 1.01124 | 6.80102 | 10.3416 | 14.8553 | 9.44325 | 19.9857 |
| ENSMUSG00000067455 | 5_Hist1h4 | 4.44109 | 2.04123  | 0.114708 | 0.460265 | 14.1574 | 2.26701 | 5.17081 | 2.47588 | 2.57543 | 0       |
| ENSMUSG00000067526 | 1_Olfr142 | 0.17236 | 1.1315   | 0.781553 | NA       | 0       | 0       | 1.03416 | 0       | 0       | 0       |
| ENSMUSG00000067543 | 8_Prb1    | 1085.09 | -1.63452 | 3.03E-05 | 0.001268 | 534.948 | 321.915 | 729.084 | 2005.46 | 1594.19 | 1324.93 |
| ENSMUSG00000067545 | 2_Olfr141 | 0.332   | 0.16972  | 0.966824 | NA       | 0       | 1.1335  | 0       | 0       | 0.85848 | 0       |
| ENSMUSG00000067567 | 12_Hdac8  | 191.872 | -0.30772 | 0.244551 | 0.6364   | 178.99  | 171.159 | 164.432 | 212.1   | 222.346 | 202.208 |
| ENSMUSG00000067578 | 3_Cbln4   | 0.41818 | -2.121   | 0.592183 | NA       | 0       | 0       | 0       | 1.65058 | 0.85848 | 0       |
| ENSMUSG00000067586 | 3_S1pr3   | 237.475 | -1.18243 | 2.34E-05 | 0.001031 | 150.675 | 124.685 | 160.295 | 356.526 | 308.193 | 324.473 |
| ENSMUSG00000067591 | 12_Klra3  | 11.6125 | 4.57857  | 6.34E-05 | 0.002294 | 30.3373 | 27.2041 | 9.30745 | 1.65058 | 0       | 1.17563 |
| ENSMUSG00000067594 | 5_Krt77   | 7.0912  | -0.10219 | 0.909151 | 0.974731 | 2.02249 | 10.2015 | 8.27329 | 5.77705 | 6.86782 | 9.40502 |
| ENSMUSG00000067596 | 3_Krt74   | 0.51538 | 1.15053  | 0.76193  | NA       | 0       | 2.26701 | 0       | 0.82529 | 0       | 0       |
| ENSMUSG00000067597 | 5_Dgat2l6 | 0.31544 | 0.16972  | 0.966824 | NA       | 0       | 0       | 1.03416 | 0       | 0.85848 | 0       |
| ENSMUSG00000067599 | 13_Klra7  | 5.85604 | 4.20655  | 0.002738 | 0.040885 | 19.2136 | 9.06802 | 5.17081 | 0.82529 | 0.85848 | 0       |
| ENSMUSG00000067604 | 8_Nms     | 0.56679 | -2.55638 | 0.475485 | NA       | 0       | 0       | 0       | 0.82529 | 2.57543 | 0       |
| ENSMUSG00000067608 | 4_Pcna-pi | 25.8797 | 0.28954  | 0.748309 | 0.924799 | 56.6297 | 11.335  | 17.5807 | 13.2047 | 50.6501 | 5.87814 |
| ENSMUSG00000067610 | 1_Klri1   | 4.6436  | 2.79444  | 0.067729 | 0.345293 | 20.2249 | 1.1335  | 3.10248 | 0.82529 | 2.57543 | 0       |
| ENSMUSG00000067613 | 5_543042  | 0.31544 | 0.16972  | 0.966824 | NA       | 0       | 0       | 1.03416 | 0       | 0.85848 | 0       |
| ENSMUSG00000067614 | 4_Krt86   | 0.89492 | 3.36821  | 0.272271 | NA       | 0       | 2.26701 | 3.10248 | 0       | 0       | 0       |
| ENSMUSG00000067615 | 3_Krt81   | 0.4821  | -2.30304 | 0.543942 | NA       | 0       | 0       | 0       | 0       | 1.71695 | 1.17563 |
| ENSMUSG00000067616 | 11_Klk11  | 270.107 | 1.01087  | 0.010634 | 0.105356 | 229.552 | 496.474 | 356.786 | 148.553 | 168.261 | 221.018 |
| ENSMUSG00000067627 | 2_Gm102   | 0       | NA       | NA       | NA       | 0       | 0       | 0       | 0       | 0       | 0       |
| ENSMUSG00000067629 | 10_Synga  | 247.39  | -0.92338 | 0.025205 | 0.190249 | 99.1019 | 163.224 | 250.267 | 367.255 | 317.636 | 286.853 |
| ENSMUSG00000067642 | 11_Adgrf3 | 0.66737 | 1.65149  | 0.513625 | NA       | 1.01124 | 1.1335  | 1.03416 | 0.82529 | 0       | 0       |
| ENSMUSG00000067649 | 3_Mageb1  | 0.16854 | 1.1315   | 0.781553 | NA       | 1.01124 | 0       | 0       | 0       | 0       | 0       |
| ENSMUSG00000067653 | 11_Ankrd1 | 397.267 | -0.63686 | 0.120875 | 0.472756 | 232.586 | 264.106 | 436.416 | 677.565 | 370.862 | 402.065 |
| ENSMUSG00000067684 | 1_Obp1a   | 0.7867  | -0.29634 | 0.91643  | NA       | 1.01124 | 1.1335  | 0       | 0       | 2.57543 | 0       |
| ENSMUSG00000067700 | 5_Gm586   | 1.51714 | -0.95589 | 0.633451 | NA       | 3.03373 | 0       | 0       | 0.82529 | 1.71695 | 3.52688 |
| ENSMUSG00000067702 | 5_Tuba3a  | 0.16854 | 1.1315   | 0.781553 | NA       | 1.01124 | 0       | 0       | 0       | 0       | 0       |
| ENSMUSG00000067713 | 6_Prkg1   | 1188.75 | -0.13271 | 0.666224 | 0.897234 | 805.962 | 1236.65 | 1359.92 | 1303.96 | 1223.33 | 1202.67 |
| ENSMUSG00000067714 | 13_Lpar5  | 269.466 | 0.72669  | 0.238705 | 0.630726 | 83.9333 | 510.076 | 413.665 | 204.673 | 139.932 | 264.516 |
| ENSMUSG00000067722 | 3_BC003   | 245.899 | 0.09215  | 0.748407 | 0.924799 | 298.317 | 227.834 | 234.755 | 211.275 | 248.1   | 255.111 |
| ENSMUSG00000067724 | 5_Gbx1    | 0.81598 | 0.84024  | 0.726871 | NA       | 1.01124 | 1.1335  | 1.03416 | 0       | 1.71695 | 0       |
| ENSMUSG00000067750 | 3_Khdc1a  | 17.0844 | 1.00461  | 0.151027 | 0.524609 | 37.416  | 21.5366 | 9.30745 | 11.5541 | 8.58477 | 14.1075 |
| ENSMUSG00000067764 | 11_Xlr5c  | 0.17236 | 1.1315   | 0.781553 | NA       | 0       | 0       | 1.03416 | 0       | 0       | 0       |
| ENSMUSG00000067768 | 12_Xlr4b  | 915.97  | 0.38296  | 0.484051 | 0.812163 | 1971.93 | 576.953 | 561.55  | 631.349 | 1031.03 | 723.011 |
| ENSMUSG00000067771 | 9_Gm146   | 6.26075 | 0.28811  | 0.794174 | 0.938544 | 1.01124 | 13.602  | 6.20497 | 4.95175 | 9.44325 | 2.35126 |
| ENSMUSG00000067780 | 3_Pi15    | 177.039 | 0.14398  | 0.794824 | 0.9388   | 352.924 | 105.416 | 99.2795 | 177.438 | 193.157 | 134.022 |
| ENSMUSG00000067786 | 16_Nnat   | 106.876 | -1.58097 | 0.002761 | 0.04102  | 38.4273 | 46.4736 | 75.4938 | 153.504 | 78.1214 | 249.233 |
| ENSMUSG00000067787 | 10_Blcap  | 864.227 | -0.20359 | 0.412074 | 0.767619 | 688.657 | 881.865 | 839.739 | 917.725 | 948.617 | 908.76  |
| ENSMUSG00000067795 | 13_49304  | 4.88985 | -4.62103 | 0.006941 | 0.077645 | 0       | 0       | 1.03416 | 6.60234 | 1.71695 | 19.9857 |
| ENSMUSG00000067813 | 3_Xkr9    | 2.94692 | 3.03549  | 0.067175 | 0.343967 | 10.1124 | 4.53401 | 1.03416 | 0.82529 | 0       | 1.17563 |
| ENSMUSG00000067818 | 6_Myl9    | 1285.32 | -1.73667 | 0.002267 | 0.035604 | 192.136 | 559.95  | 1027.96 | 2629.38 | 1622.52 | 1679.97 |
| ENSMUSG00000067825 | 11_Pex26  | 466.77  | -0.01846 | 0.963286 | 0.990106 | 249.777 | 541.814 | 599.814 | 491.049 | 423.229 | 494.939 |
| ENSMUSG00000067847 | 13_Romo   | 213.934 | -0.22604 | 0.6938   | 0.905638 | 66.7421 | 244.837 | 280.258 | 339.195 | 156.243 | 196.33  |
| ENSMUSG00000067848 | 12_49334  | 0       | NA       | NA       | NA       | 0       | 0       | 0       | 0       | 0       | 0       |
| ENSMUSG00000067851 | 11_Arfgef | 4710.46 | 0.61693  | 0.160592 | 0.539243 | 9395.47 | 4002.4  | 3709.54 | 3014.79 | 4170.48 | 3970.1  |
| ENSMUSG00000067860 | 11_Zic3   | 23.4097 | -0.95898 | 0.147638 | 0.519959 | 29.3261 | 9.06802 | 9.30745 | 42.0899 | 28.3297 | 22.3369 |
| ENSMUSG00000067872 | 2_Ccdc87  | 2.03017 | -0.35714 | 0.82444  | 0.949196 | 1.01124 | 3.40051 | 1.03416 | 3.30117 | 3.43391 | 0       |
| ENSMUSG00000067873 | 11_Htatsf | 1662.81 | -0.04744 | 0.906578 | 0.974391 | 2540.25 | 1094.96 | 1270.98 | 1445.91 | 1898.95 | 1725.82 |
| ENSMUSG00000067878 | 13_Mtap7  | 22.8531 | -0.80226 | 0.165896 | 0.545533 | 26.2924 | 9.06802 | 14.4783 | 25.5841 | 33.4806 | 28.2151 |
| ENSMUSG00000067879 | 3_311003  | 1.86464 | -0.22725 | 0.922198 | 0.978156 | 4.04498 | 1.1335  | 0       | 0       | 6.00934 | 0       |
| ENSMUSG00000067889 | 4_Sptbn2  | 5156.49 | 0.63399  | 0.264117 | 0.652958 | 1749.45 | 8656.56 | 8408.77 | 4260.16 | 3086.22 | 4777.75 |
| ENSMUSG00000067916 | 9_Gm131   | 1341.79 | 0.68947  | 0.238808 | 0.630726 | 3383.62 | 828.591 | 757.006 | 931.755 | 1124.6  | 1025.15 |
| ENSMUSG00000067919 | 8_Rex2    | 0.61218 | 0.25783  | 0.942771 | NA       | 2.02249 | 0       | 0       | 1.65058 | 0       | 0       |
| ENSMUSG00000067924 | 4_Cxx1b   | 156.934 | -0.46996 | 0.371092 | 0.742177 | 56.6297 | 143.955 | 194.422 | 260.792 | 136.498 | 149.305 |
| ENSMUSG00000067925 | 4_Cxx1a   | 244.541 | -0.45139 | 0.296112 | 0.67995  | 120.338 | 214.232 | 285.429 | 377.159 | 223.204 | 246.882 |
| ENSMUSG00000067928 | 6_Zfp760  | 404.537 | 0.34128  | 0.513026 | 0.828304 | 835.288 | 234.635 | 286.463 | 318.563 | 417.22  | 335.054 |
| ENSMUSG00000067929 | 3_Gm102   | 21.069  | 0.74501  | 0.297438 | 0.680939 | 50.5622 | 19.2695 | 9.30745 | 15.6806 | 16.3111 | 15.2832 |
| ENSMUSG00000067931 | 5_Zfp948  | 244.761 | 0.62718  | 0.24517  | 0.636532 | 555.173 | 166.625 | 169.602 | 168.36  | 239.515 | 169.29  |
| ENSMUSG00000067941 | 5_Gm716   | 0.35746 | 2.04359  | 0.612655 | NA       | 1.01124 | 1.1335  | 0       | 0       | 0       | 0       |
| ENSMUSG00000067942 | 5_Zfp160  | 546.775 | 0.60258  | 0.275763 | 0.662214 | 1278.21 | 336.65  | 362.991 | 365.605 | 502.209 | 434.982 |
| ENSMUSG00000067995 | 4_Gtf2f2  | 905.567 | 0.14287  | 0.69811  | 0.905638 | 1375.29 | 811.588 | 663.932 | 749.365 | 896.25  | 936.975 |
| ENSMUSG00000067998 | 11_Bpifb9 | 0       | NA       | NA       | NA       | 0       | 0       | 0       | 0       | 0       | 0       |

|                    |           |         |          |          |          |         |         |         |         |         |         |
|--------------------|-----------|---------|----------|----------|----------|---------|---------|---------|---------|---------|---------|
| ENSMUSG00000068009 | 11_Bpifb6 | 0.45299 | -0.6074  | 0.85212  | NA       | 0       | 0       | 1.03416 | 0.82529 | 0.85848 | 0       |
| ENSMUSG00000068011 | 4_Mkrn2o  | 70.0236 | -0.16136 | 0.698783 | 0.905638 | 41.461  | 79.3452 | 77.5621 | 80.8787 | 60.9519 | 79.9427 |
| ENSMUSG00000068015 | 6_Lrch1   | 621.074 | 0.54176  | 0.029279 | 0.208389 | 819.108 | 691.437 | 698.059 | 467.115 | 509.935 | 540.789 |
| ENSMUSG00000068036 | 14_Mlit4  | 9547.19 | 0.49801  | 0.039236 | 0.249187 | 11670.8 | 11290.8 | 10574.3 | 6885.41 | 7997.57 | 8864.23 |
| ENSMUSG00000068037 | 10_Mas1   | 2.26114 | -1.14399 | 0.514224 | 0.828974 | 2.02249 | 2.26701 | 0       | 4.12646 | 5.15086 | 0       |
| ENSMUSG00000068039 | 12_Tcp1   | 5516.97 | 0.28569  | 0.414354 | 0.768913 | 8432.77 | 5147.24 | 4604.09 | 4069.52 | 5694.28 | 5153.95 |
| ENSMUSG00000068040 | 10_Tm9sf  | 1711.1  | 0.20504  | 0.558728 | 0.848273 | 1177.09 | 2271.54 | 2048.67 | 1419.5  | 1504.05 | 1845.74 |
| ENSMUSG00000068074 | 2_Gm102   | 0.17236 | 1.1315   | 0.781553 | NA       | 0       | 0       | 1.03416 | 0       | 0       | 0       |
| ENSMUSG00000068079 | 5_Tcf15   | 1.27446 | 0.30643  | 0.869127 | NA       | 1.01124 | 2.26701 | 1.03416 | 2.47588 | 0.85848 | 0       |
| ENSMUSG00000068099 | 4_150000  | 7.32315 | -1.1305  | 0.231553 | 0.62293  | 2.02249 | 5.66751 | 6.20497 | 18.1564 | 6.00934 | 5.87814 |
| ENSMUSG00000068101 | 10_Cenpn  | 59.2485 | 0.69665  | 0.245265 | 0.636635 | 22.2474 | 108.816 | 88.9379 | 52.8187 | 40.3484 | 42.3226 |
| ENSMUSG00000068105 | 10_Tnfrsf | 1.10191 | -1.12966 | 0.600117 | NA       | 0       | 0       | 2.06832 | 1.65058 | 1.71695 | 1.17563 |
| ENSMUSG00000068113 | 6_Gm490   | 1.78777 | 0.55674  | 0.804478 | 0.942951 | 3.03373 | 3.40051 | 0       | 0       | 4.29238 | 0       |
| ENSMUSG00000068114 | 6_Ccdc13  | 198.556 | 0.20257  | 0.640994 | 0.887523 | 109.214 | 292.444 | 235.789 | 156.806 | 194.874 | 202.208 |
| ENSMUSG00000068115 | 13_Nin1   | 104.478 | -0.70209 | 0.033861 | 0.227747 | 78.8771 | 64.6097 | 95.1429 | 129.571 | 139.932 | 118.738 |
| ENSMUSG00000068117 | 9_Mei1    | 20.9347 | 1.01236  | 0.098664 | 0.426922 | 14.1574 | 43.0731 | 26.8882 | 15.6806 | 12.8772 | 12.9319 |
| ENSMUSG00000068122 | 10_Agrt2  | 658.135 | -0.12375 | 0.7971   | 0.940145 | 1114.39 | 360.454 | 414.699 | 632.174 | 709.96  | 717.133 |
| ENSMUSG00000068129 | 5_Cst7    | 5.6018  | 1.81802  | 0.06084  | 0.325068 | 12.1349 | 6.80102 | 7.23913 | 1.65058 | 3.43391 | 2.35126 |
| ENSMUSG00000068130 | 11_Zfp44i | 108.755 | 0.57205  | 0.354233 | 0.729885 | 262.924 | 58.9422 | 68.2547 | 82.5292 | 108.168 | 71.7133 |
| ENSMUSG00000068134 | 13_Zfp12i | 647.577 | 0.65535  | 0.260548 | 0.649703 | 1599.79 | 400.127 | 376.435 | 416.773 | 546.85  | 545.491 |
| ENSMUSG00000068151 | 7_A23000  | 0.2751  | -1.54073 | 0.703687 | NA       | 0       | 0       | 0       | 1.65058 | 0       | 0       |
| ENSMUSG00000068154 | 5_Insm1   | 8.89951 | -0.5136  | 0.582503 | 0.860399 | 12.1349 | 7.93452 | 2.06832 | 14.8553 | 12.8772 | 3.52688 |
| ENSMUSG00000068167 | 4_Csnka2  | 0       | NA       | NA       | NA       | 0       | 0       | 0       | 0       | 0       | 0       |
| ENSMUSG00000068184 | 6_Ndufaf2 | 139.883 | 0.11776  | 0.765452 | 0.929992 | 214.384 | 115.617 | 106.519 | 133.697 | 124.479 | 144.602 |
| ENSMUSG00000068196 | 4_Col8a1  | 1693.48 | -0.96135 | 0.036345 | 0.238872 | 1893.05 | 615.492 | 939.019 | 2720.16 | 2047.47 | 1945.66 |
| ENSMUSG00000068205 | 14_Macro  | 95.342  | -0.50972 | 0.279663 | 0.666619 | 129.439 | 46.4736 | 59.9814 | 118.842 | 115.036 | 102.28  |
| ENSMUSG00000068206 | 12_Pick1  | 429.033 | 0.12696  | 0.773552 | 0.932641 | 215.395 | 496.474 | 631.873 | 449.784 | 356.268 | 424.402 |
| ENSMUSG00000068220 | 5_Lgals1  | 1685.24 | -0.59387 | 0.286813 | 0.672541 | 392.363 | 1891.82 | 1745.66 | 2530.35 | 1770.18 | 1781.08 |
| ENSMUSG00000068227 | 8_Il2rb   | 47.2214 | 4.65675  | 1.37E-08 | 1.77E-06 | 29.3261 | 162.091 | 80.6646 | 2.47588 | 1.71695 | 7.05377 |
| ENSMUSG00000068231 | 4_Vmn1r4  | 3.75448 | -0.18706 | 0.857776 | 0.959059 | 0.44498 | 3.40051 | 3.10248 | 3.30117 | 5.15086 | 3.52688 |
| ENSMUSG00000068232 | 2_Vmn1r4  | 0.31162 | 0.16972  | 0.966824 | NA       | 1.01124 | 0       | 0       | 0       | 0.85848 | 0       |
| ENSMUSG00000068234 | 6_Vmn1r4  | 3.50865 | 0.46646  | 0.736958 | 0.920922 | 7.07871 | 0       | 5.17081 | 2.47588 | 5.15086 | 1.17563 |
| ENSMUSG00000068240 | 5_Gm118   | 1662.01 | -0.00656 | 0.99415  | 0.998043 | 65.7309 | 2452.9  | 2456.13 | 2328.15 | 959.777 | 1709.36 |
| ENSMUSG00000068245 | 14_Phf11i | 6116.35 | 1.97452  | 5.03E-07 | 4.27E-05 | 13873.3 | 9013.62 | 6367.33 | 1925.41 | 3134.3  | 2384.17 |
| ENSMUSG00000068246 | 5_Apol9b  | 2153.04 | 2.12473  | 1.57E-05 | 0.000765 | 1336.87 | 5117.77 | 4053.91 | 724.607 | 788.082 | 897.004 |
| ENSMUSG00000068250 | 13_Amn1   | 454.083 | 0.5016   | 0.320077 | 0.701224 | 940.457 | 300.378 | 355.752 | 289.678 | 477.313 | 360.918 |
| ENSMUSG00000068252 | 5_Apol7b  | 7.8389  | 1.54054  | 0.110402 | 0.451132 | 4.04498 | 23.8036 | 7.23913 | 4.12646 | 4.29238 | 3.52688 |
| ENSMUSG00000068259 | 2_Olfr461 | 0.65995 | -1.30838 | 0.653793 | NA       | 0       | 1.1335  | 0       | 1.65058 | 0       | 1.17563 |
| ENSMUSG00000068263 | 11_Efcc1  | 34.4432 | -0.94437 | 0.194543 | 0.585164 | 6.06747 | 17.0025 | 47.5714 | 57.7705 | 30.0467 | 48.2007 |
| ENSMUSG00000068264 | 11_Ap5s1  | 225.692 | -0.00658 | 0.990695 | 0.997381 | 66.7421 | 303.779 | 305.078 | 257.491 | 177.705 | 243.355 |
| ENSMUSG00000068267 | 5_Cenpb   | 2596.84 | -0.06826 | 0.88083  | 0.967183 | 1134.62 | 3032.12 | 3439.62 | 3072.56 | 2158.21 | 2743.92 |
| ENSMUSG00000068270 | 15_Shroo1 | 473.892 | 0.18815  | 0.479997 | 0.809966 | 586.522 | 445.467 | 481.919 | 406.869 | 455.851 | 466.724 |
| ENSMUSG00000068284 | 14_Gm60i  | 2823.82 | 0.30018  | 0.299046 | 0.682038 | 3940.82 | 2698.87 | 2709.5  | 2296.79 | 2534.22 | 2762.73 |
| ENSMUSG00000068289 | 5_Cma2    | 0.35746 | 2.04359  | 0.612655 | NA       | 1.01124 | 1.1335  | 0       | 0       | 0       | 0       |
| ENSMUSG00000068290 | 11_Ddrgrk | 942.814 | -0.22806 | 0.650333 | 0.891567 | 327.643 | 1068.89 | 1208.93 | 1227.21 | 806.11  | 1018.09 |
| ENSMUSG00000068299 | 11_17000  | 78.3039 | -0.66822 | 0.071895 | 0.357998 | 77.8658 | 49.8741 | 53.7764 | 107.288 | 98.7249 | 82.2939 |
| ENSMUSG00000068314 | 4_Gm689i  | 0.14308 | -0.79206 | 0.84609  | NA       | 0       | 0       | 0       | 0       | 0.85848 | 0       |
| ENSMUSG00000068323 | 12_Slc4a4 | 2574.65 | -1.64525 | 3.34E-06 | 0.000214 | 1344.95 | 861.462 | 1535.73 | 4798.25 | 3915.51 | 2991.97 |
| ENSMUSG00000068328 | 9_Aup1    | 1169.87 | 0.25546  | 0.608166 | 0.872658 | 462.139 | 1729.73 | 1627.77 | 1133.13 | 977.805 | 1088.63 |
| ENSMUSG00000068329 | 12_Htra2  | 493.775 | -0.05991 | 0.897707 | 0.971717 | 206.294 | 570.152 | 674.273 | 563.675 | 462.719 | 485.534 |
| ENSMUSG00000068335 | 6_Dok1    | 198.078 | 0.256    | 0.649508 | 0.891567 | 64.7196 | 258.439 | 323.693 | 198.895 | 151.092 | 191.627 |
| ENSMUSG00000068349 | 12_Gm1i   | 0       | NA       | NA       | NA       | 0       | 0       | 0       | 0       | 0       | 0       |
| ENSMUSG00000068373 | 14_D4300  | 19.9665 | -0.33725 | 0.621895 | 0.878215 | 28.3148 | 11.335  | 13.4441 | 34.6623 | 21.4619 | 10.5807 |
| ENSMUSG00000068391 | 8_Chracl  | 528.116 | -0.23255 | 0.582168 | 0.860399 | 254.834 | 537.28  | 664.966 | 680.041 | 479.03  | 552.545 |
| ENSMUSG00000068394 | 4_Cep152  | 234.531 | 0.42836  | 0.139865 | 0.507212 | 219.44  | 292.444 | 295.77  | 211.275 | 206.034 | 182.222 |
| ENSMUSG00000068407 | 2_Rnase1  | 0.18892 | 1.1315   | 0.781553 | NA       | 0       | 1.1335  | 0       | 0       | 0       | 0       |
| ENSMUSG00000068417 | 7_Pnp2    | 38.4696 | 0.16108  | 0.768453 | 0.931254 | 18.2024 | 62.3427 | 41.3665 | 36.3129 | 32.6221 | 39.9713 |
| ENSMUSG00000068428 | 6_Gmnc    | 0.42924 | -2.15458 | 0.590406 | NA       | 0       | 0       | 0       | 0       | 2.57543 | 0       |
| ENSMUSG00000068452 | 7_Duox2   | 86.7906 | 1.17406  | 0.018684 | 0.155671 | 56.6297 | 180.227 | 124.099 | 45.3911 | 62.6688 | 51.7276 |
| ENSMUSG00000068457 | 14_Uty    | 0.74468 | -1.60878 | 0.636852 | NA       | 0       | 0       | 1.03416 | 0       | 3.43391 | 0       |
| ENSMUSG00000068479 | 5_Mfap1a  | 2408.9  | 0.05285  | 0.890944 | 0.970606 | 3729.47 | 1762.6  | 1866.66 | 2079.74 | 2463.83 | 2551.11 |
| ENSMUSG00000068522 | 4_Aard    | 7.39903 | -1.54523 | 0.112397 | 0.4549   | 8.08995 | 1.1335  | 2.06832 | 14.03   | 12.0187 | 7.05377 |
| ENSMUSG00000068523 | 12_Gng5   | 3132.41 | 0.42193  | 0.310809 | 0.69305  | 5748.92 | 2692.07 | 2320.66 | 2593.07 | 2959.17 | 2480.57 |
| ENSMUSG00000068547 | 6_Clca4a  | 1264.5  | 0.09201  | 0.820174 | 0.948338 | 1930.47 | 957.81  | 1025.89 | 879.762 | 1505.77 | 1287.31 |
| ENSMUSG00000068551 | 12_Zfp46i | 885.234 | 0.21427  | 0.452112 | 0.794408 | 767.534 | 922.671 | 1162.4  | 880.587 | 762.328 | 815.886 |
| ENSMUSG00000068566 | 12_Myadr  | 1406.48 | 0.15766  | 0.470664 | 0.804708 | 1459.23 | 1542.7  | 1447.83 | 1309.74 | 1329.78 | 1349.62 |
| ENSMUSG00000068579 | 4_Rpl7a-p | 15.3768 | -0.83232 | 0.350512 | 0.727211 | 11.1237 | 4.53401 | 17.5807 | 9.90351 | 42.0654 | 7.05377 |
| ENSMUSG00000068580 | 11_Zfyve1 | 380.479 | -0.08737 | 0.867252 | 0.962942 | 129.439 | 463.603 | 513.978 | 472.067 | 319.353 | 384.43  |
| ENSMUSG00000068587 | 9_Mgam    | 10.2489 | -0.75077 | 0.360342 | 0.733804 | 14.1574 | 3.40051 | 5.17081 | 8.25292 | 12.8772 | 17.6344 |
| ENSMUSG00000068604 | 4_Gm822i  | 0.706   | 3.02814  | 0.366206 | NA       | 0       | 1.1335  | 3.10248 | 0       | 0       | 0       |
| ENSMUSG00000068606 | 5_Gm484   | 482.575 | 6.45029  | 5.85E-17 | 4.23E-14 | 2121.59 | 422.797 | 318.522 | 6.60234 | 18.8865 | 7.05377 |
| ENSMUSG00000068614 | 7_Actc1   | 20.675  | -1.11392 | 0.18662  | 0.573937 | 25.2811 | 3.40051 | 10.3416 | 37.9634 | 9.44325 | 37.6201 |
| ENSMUSG00000068615 | 4_Gjd2    | 15.6139 | -2.45237 | 0.00686  | 0.076966 | 11.1237 | 2.26701 | 1.03416 | 37.1382 | 29.1882 | 12.9319 |
| ENSMUSG00000068617 | 4_Efcab1  | 69.5911 | 0.18511  | 0.726102 | 0.91596  | 129.439 | 40.8061 | 51.7081 | 55.2946 | 72.1121 | 68.1864 |
| ENSMUSG00000068631 | 7_Gm767i  | 3.02549 | 0.90145  | 0.464169 | 0.80165  | 2.02249 | 6.80102 | 3.10248 | 2.47588 | 2.57543 | 1.17563 |

|                    |           |         |          |          |          |         |         |         |         |         |         |
|--------------------|-----------|---------|----------|----------|----------|---------|---------|---------|---------|---------|---------|
| ENSMUSG00000068663 | 13_Clec1f | 1043.64 | 0.28238  | 0.379517 | 0.747395 | 796.861 | 1396.48 | 1243.06 | 983.748 | 844.741 | 996.932 |
| ENSMUSG00000068686 | 12_Cd59b  | 53.3222 | -1.07663 | 0.007421 | 0.081456 | 39.4385 | 29.4711 | 34.1273 | 79.2281 | 82.4138 | 55.2545 |
| ENSMUSG00000068696 | 6_Gpr88   | 7.00861 | 0.39035  | 0.673836 | 0.900436 | 13.1462 | 2.26701 | 8.27329 | 4.12646 | 6.00934 | 8.22939 |
| ENSMUSG00000068697 | 6_Myo21   | 144.907 | -1.38486 | 0.030471 | 0.213629 | 119.327 | 27.2041 | 94.1087 | 357.352 | 102.159 | 169.29  |
| ENSMUSG00000068699 | 12_Flnc   | 290.64  | -1.06061 | 0.031864 | 0.220013 | 116.293 | 155.29  | 293.702 | 338.37  | 589.774 | 250.409 |
| ENSMUSG00000068706 | 2_Gm102   | 29.9947 | -0.36934 | 0.444324 | 0.788716 | 19.2136 | 28.3376 | 31.0248 | 26.4094 | 42.0654 | 32.9176 |
| ENSMUSG00000068732 | 5_Tmem1   | 1961.39 | 0.13117  | 0.714859 | 0.911309 | 2973.06 | 1618.64 | 1559.52 | 1656.36 | 2017.42 | 1943.31 |
| ENSMUSG00000068735 | 14_Trp53i | 440.571 | 0.41933  | 0.470786 | 0.804776 | 141.574 | 716.374 | 654.624 | 478.67  | 271.279 | 380.903 |
| ENSMUSG00000068739 | 13_Sars   | 1957.97 | 0.10484  | 0.792905 | 0.938313 | 1073.94 | 2617.26 | 2396.15 | 1971.62 | 1703.22 | 1985.64 |
| ENSMUSG00000068740 | 13_Celsr2 | 1126.45 | 0.51961  | 0.335012 | 0.713724 | 418.655 | 1818.14 | 1744.63 | 1006.86 | 741.724 | 1028.67 |
| ENSMUSG00000068742 | 11_Cry2   | 1126.89 | 0.30002  | 0.455794 | 0.796332 | 694.725 | 1344.33 | 1691.89 | 1144.68 | 824.138 | 1061.59 |
| ENSMUSG00000068744 | 12_Psrc1  | 96.5214 | 0.05515  | 0.899052 | 0.972109 | 53.5959 | 112.217 | 129.27  | 99.0351 | 81.5553 | 103.455 |
| ENSMUSG00000068745 | 6_Mybphl  | 5.09011 | -2.63793 | 0.846706 | 0.239792 | 1.01124 | 1.1335  | 2.06832 | 14.03   | 1.71695 | 10.5807 |
| ENSMUSG00000068747 | 14_Sort1  | 3525.61 | -0.52511 | 0.023109 | 0.179265 | 2833.51 | 2650.13 | 3189.35 | 4354.24 | 4138.72 | 3987.73 |
| ENSMUSG00000068748 | 7_Ptprz1  | 604.601 | -0.59577 | 0.220968 | 0.611852 | 782.703 | 270.907 | 390.913 | 633.825 | 1028.46 | 520.803 |
| ENSMUSG00000068749 | 9_Psma5   | 2420.29 | 0.484    | 0.086666 | 0.399057 | 3124.74 | 3070.66 | 2272.05 | 1723.21 | 2278.4  | 2052.65 |
| ENSMUSG00000068758 | 7_Il3ra   | 20.4995 | 0.59501  | 0.469158 | 0.804529 | 4.04498 | 32.8716 | 37.2298 | 24.7588 | 11.1602 | 12.9319 |
| ENSMUSG00000068762 | 11_Gstm6  | 35.6638 | -0.88347 | 0.089305 | 0.40693  | 26.2924 | 12.4685 | 36.1957 | 43.7405 | 41.2069 | 54.0789 |
| ENSMUSG00000068794 | 6_Col28a  | 53.8682 | -0.26434 | 0.501712 | 0.82269  | 59.6634 | 38.5391 | 48.6056 | 53.644  | 68.6782 | 54.0789 |
| ENSMUSG00000068798 | 10_Rap1a  | 2262.89 | 0.59038  | 0.243972 | 0.635775 | 4984.42 | 1666.25 | 1507.81 | 1526.79 | 2056.91 | 1835.16 |
| ENSMUSG00000068806 | 4_Olf125  | 0.13755 | -0.79206 | 0.84609  | NA       | 0       | 0       | 0       | 0.82529 | 0       | 0       |
| ENSMUSG00000068823 | 10_Csde1  | 9571.94 | 0.29217  | 0.495099 | 0.817604 | 17202.3 | 7447.11 | 6964.04 | 7417.73 | 9611.51 | 8788.99 |
| ENSMUSG00000068854 | 7_Hist2h2 | 221.626 | -1.04713 | 0.02339  | 0.180504 | 217.418 | 70.2772 | 145.817 | 301.232 | 352.834 | 242.179 |
| ENSMUSG00000068855 | 3_Hist2h2 | 0.58501 | -1.14575 | 0.75298  | NA       | 0       | 0       | 1.03416 | 2.47588 | 0       | 0       |
| ENSMUSG00000068856 | 3_Sf3b4   | 490.285 | 0.61858  | 0.044992 | 0.270672 | 431.801 | 722.041 | 627.736 | 382.11  | 388.89  | 389.133 |
| ENSMUSG00000068859 | 5_Sp9     | 0.526   | 2.60438  | 0.478686 | NA       | 2.02249 | 1.1335  | 0       | 0       | 0       | 0       |
| ENSMUSG00000068860 | 5_Gm128   | 25.1505 | -0.29325 | 0.656641 | 0.894332 | 13.1462 | 37.4056 | 17.5807 | 45.3911 | 19.745  | 17.6344 |
| ENSMUSG00000068874 | 13_Selent | 628.591 | -0.30581 | 0.561552 | 0.84958  | 201.238 | 630.228 | 855.252 | 839.322 | 523.671 | 721.835 |
| ENSMUSG00000068876 | 14_Cgn    | 2455.27 | 0.23794  | 0.548121 | 0.843853 | 1482.48 | 2994.71 | 3494.43 | 2063.23 | 2004.54 | 2692.19 |
| ENSMUSG00000068877 | 12_Selent | 59.839  | -0.30487 | 0.588897 | 0.863743 | 18.2024 | 69.1437 | 73.4255 | 77.5775 | 58.3764 | 62.3083 |
| ENSMUSG00000068879 | 4_Gm577   | 0.18892 | 1.1315   | 0.781553 | NA       | 0       | 1.1335  | 0       | 0       | 0       | 0       |
| ENSMUSG00000068882 | 13_Ssb    | 4448.51 | 0.49385  | 0.330726 | 0.710725 | 9478.39 | 3334.77 | 2794.3  | 2927.31 | 4175.63 | 3980.68 |
| ENSMUSG00000068885 | 4_Lce3f   | 14.7808 | 0.57744  | 0.345066 | 0.722149 | 13.1462 | 21.5366 | 18.6149 | 15.6806 | 10.3017 | 9.40502 |
| ENSMUSG00000068893 | 5_Spr2a2  | 26.4876 | 2.75538  | 0.012451 | 0.11777  | 11.1237 | 111.083 | 16.5466 | 10.7288 | 9.44325 | 0       |
| ENSMUSG00000068917 | 12_Clk2   | 820.586 | 0.15885  | 0.623838 | 0.879273 | 590.567 | 948.742 | 1057.95 | 738.637 | 816.412 | 771.212 |
| ENSMUSG00000068921 | 14_Dap3   | 786.232 | 0.05751  | 0.798894 | 0.940596 | 818.097 | 802.52  | 784.929 | 734.51  | 783.789 | 793.549 |
| ENSMUSG00000068922 | 14_Msto1  | 362.433 | 0.03412  | 0.947943 | 0.986859 | 125.394 | 468.137 | 506.739 | 405.219 | 308.193 | 360.918 |
| ENSMUSG00000068923 | 14_Syt11  | 194.015 | -1.40515 | 1.63E-05 | 0.000787 | 126.406 | 99.7483 | 93.0745 | 329.292 | 291.024 | 224.545 |
| ENSMUSG00000068957 | 1_493058  | 0.16854 | 1.1315   | 0.781553 | NA       | 1.01124 | 0       | 0       | 0       | 0       | 0       |
| ENSMUSG00000068959 | 6_Zfp619  | 74.1879 | -0.16107 | 0.741767 | 0.922751 | 115.282 | 55.5416 | 39.2981 | 80.8787 | 82.4138 | 71.7133 |
| ENSMUSG00000068962 | 7_Zfp114  | 43.3344 | -0.6367  | 0.097697 | 0.424103 | 32.3598 | 36.2721 | 33.0932 | 50.3428 | 51.5086 | 56.4301 |
| ENSMUSG00000068966 | 10_Zbtb3  | 505.045 | 0.36581  | 0.177771 | 0.562751 | 665.399 | 570.152 | 470.544 | 427.501 | 446.408 | 450.265 |
| ENSMUSG00000068999 | 12_Vmn2i  | 4.60678 | -2.52758 | 0.115224 | 0.461441 | 3.03373 | 0       | 1.03416 | 11.5541 | 12.0187 | 0       |
| ENSMUSG00000069020 | 9_Urm1    | 488.483 | 0.02656  | 0.955773 | 0.988811 | 203.26  | 633.628 | 642.214 | 571.102 | 406.918 | 473.778 |
| ENSMUSG00000069041 | 8_Slc25a2 | 10.4456 | 1.50371  | 0.054276 | 0.303788 | 22.2474 | 12.4685 | 11.3758 | 5.77705 | 2.57543 | 8.22939 |
| ENSMUSG00000069045 | 11_Ddx3y  | 2.9108  | -2.90513 | 0.150815 | 0.524223 | 1.01124 | 0       | 1.03416 | 0.82529 | 14.5941 | 0       |
| ENSMUSG00000069049 | 11_Eif2s3 | 5.81054 | -2.90317 | 0.082358 | 0.387193 | 2.02249 | 0       | 2.06832 | 3.30117 | 27.4713 | 0       |
| ENSMUSG00000069053 | 11_Uba1y  | 0.17236 | 1.1315   | 0.781553 | NA       | 0       | 0       | 1.03416 | 0       | 0       | 0       |
| ENSMUSG00000069072 | 9_Slc7a1a | 13.2839 | -1.20581 | 0.131472 | 0.493177 | 10.1124 | 7.93452 | 6.20497 | 34.6623 | 13.7356 | 7.05377 |
| ENSMUSG00000069085 | 5_Dytn    | 0.44746 | -0.57987 | 0.8834   | NA       | 0       | 0       | 1.03416 | 1.65058 | 0       | 0       |
| ENSMUSG00000069089 | 7_Cdk7    | 902.924 | -0.1444  | 0.663127 | 0.896048 | 1177.09 | 660.832 | 735.289 | 912.773 | 1031.03 | 900.531 |
| ENSMUSG00000069094 | 12_Pde7a  | 1510.54 | 0.49892  | 0.188479 | 0.576303 | 2575.64 | 1386.27 | 1345.44 | 1010.98 | 1515.21 | 1229.71 |
| ENSMUSG00000069114 | 8_Zbtb10  | 184.275 | -0.30784 | 0.559608 | 0.848564 | 295.283 | 71.4107 | 127.202 | 199.721 | 218.053 | 193.979 |
| ENSMUSG00000069117 | 3_Gm102   | 7988.13 | -0.35063 | 0.573048 | 0.855421 | 1494.62 | 9741.32 | 9830.74 | 10845.2 | 6831.76 | 9185.18 |
| ENSMUSG00000069132 | 3_Nxph2   | 0.47845 | 1.02683  | 0.749277 | NA       | 1.01124 | 0       | 1.03416 | 0.82529 | 0       | 0       |
| ENSMUSG00000069135 | 11_Fgfr1c | 662.544 | 0.16715  | 0.680431 | 0.90228  | 1098.21 | 496.474 | 507.773 | 562.849 | 683.348 | 626.61  |
| ENSMUSG00000069170 | 13_Adgrv  | 483.954 | -2.12527 | 4.22E-07 | 3.72E-05 | 251.8   | 117.884 | 171.671 | 982.098 | 865.345 | 514.925 |
| ENSMUSG00000069171 | 13_Nr2f1  | 163.794 | -1.17385 | 0.001593 | 0.027537 | 125.394 | 79.3452 | 97.2112 | 268.22  | 251.534 | 161.061 |
| ENSMUSG00000069184 | 2_Zfp72   | 78.3947 | 0.39583  | 0.469903 | 0.804531 | 162.81  | 57.8086 | 46.5373 | 63.5475 | 73.829  | 65.8352 |
| ENSMUSG00000069189 | 4_Zdhhc1  | 0.13755 | -0.79206 | 0.84609  | NA       | 0       | 0       | 0       | 0.82529 | 0       | 0       |
| ENSMUSG00000069206 | 13_Zfp87  | 162.898 | 0.27961  | 0.680967 | 0.902507 | 393.374 | 55.5416 | 86.8696 | 134.523 | 164.828 | 142.251 |
| ENSMUSG00000069208 | 8_Zfp825  | 274.79  | 0.47264  | 0.397859 | 0.758469 | 616.859 | 175.693 | 165.466 | 184.04  | 260.977 | 245.706 |
| ENSMUSG00000069227 | 4_Gprin1  | 14.3671 | -1.10647 | 0.091288 | 0.411747 | 8.08995 | 9.06802 | 10.3416 | 28.0599 | 18.8865 | 11.7563 |
| ENSMUSG00000069237 | 8_Fam8a   | 1906.28 | 0.45797  | 0.370145 | 0.741454 | 4064.19 | 1277.46 | 1277.19 | 1341.1  | 1857.74 | 1620.02 |
| ENSMUSG00000069248 | 11_Serpin | 0       | NA       | NA       | NA       | 0       | 0       | 0       | 0       | 0       | 0       |
| ENSMUSG00000069255 | 12_Dusp2  | 1140.61 | 0.36353  | 0.200866 | 0.592148 | 1577.54 | 1211.71 | 1061.05 | 906.171 | 1004.42 | 1082.75 |
| ENSMUSG00000069259 | 10_Prl6a1 | 4.39481 | 2.00292  | 0.083311 | 0.389864 | 7.07871 | 9.06802 | 5.17081 | 2.47588 | 2.57543 | 0       |
| ENSMUSG00000069265 | 2_Hist1h3 | 0       | NA       | NA       | NA       | 0       | 0       | 0       | 0       | 0       | 0       |
| ENSMUSG00000069266 | 5_Hist1h4 | 0       | NA       | NA       | NA       | 0       | 0       | 0       | 0       | 0       | 0       |
| ENSMUSG00000069267 | 2_Hist1h3 | 1.10719 | 0.71128  | 0.779818 | NA       | 3.03373 | 1.1335  | 0       | 2.47588 | 0       | 0       |
| ENSMUSG00000069268 | 4_Hist1h2 | 0       | NA       | NA       | NA       | 0       | 0       | 0       | 0       | 0       | 0       |
| ENSMUSG00000069272 | 5_Hist1h2 | 0       | NA       | NA       | NA       | 0       | 0       | 0       | 0       | 0       | 0       |
| ENSMUSG00000069273 | 2_Hist1h3 | 0.80874 | 0.89296  | 0.746549 | NA       | 0       | 1.1335  | 2.06832 | 1.65058 | 0       | 0       |
| ENSMUSG00000069280 | 1_Vmn1r2  | 0.59225 | -1.1886  | 0.690885 | NA       | 1.01124 | 0       | 0       | 0.82529 | 1.71695 | 0       |
| ENSMUSG00000069295 | 1_Vmn1r1  | 2.20483 | 1.89576  | 0.233093 | 0.624922 | 6.06747 | 2.26701 | 2.06832 | 1.65058 | 0       | 1.17563 |

|                    |           |         |          |          |          |         |         |         |         |         |         |
|--------------------|-----------|---------|----------|----------|----------|---------|---------|---------|---------|---------|---------|
| ENSMUSG00000069300 | 3_Hist1h2 | 0       | NA       | NA       | NA       | 0       | 0       | 0       | 0       | 0       | 0       |
| ENSMUSG00000069301 | 5_Hist1h2 | 0.37783 | 2.11394  | 0.599927 | NA       | 0       | 2.26701 | 0       | 0       | 0       | 0       |
| ENSMUSG00000069303 | 5_Hist1h2 | 15.5403 | 0.1541   | 0.918881 | 0.977142 | 35.3936 | 13.602  | 0       | 14.8553 | 0       | 29.3907 |
| ENSMUSG00000069305 | 3_Hist1h4 | 0.68562 | 2.99032  | 0.375842 | NA       | 1.01124 | 0       | 3.10248 | 0       | 0       | 0       |
| ENSMUSG00000069306 | 5_Hist1h4 | 0       | NA       | NA       | NA       | 0       | 0       | 0       | 0       | 0       | 0       |
| ENSMUSG00000069307 | 5_Hist1h2 | 14.4503 | 0.60723  | 0.863561 | 0.961572 | 0       | 19.2695 | 33.0932 | 0       | 34.3391 | 0       |
| ENSMUSG00000069308 | 7_Hist1h2 | 0.44917 | -0.60728 | 0.852512 | NA       | 1.01124 | 0       | 0       | 0.82529 | 0.85848 | 0       |
| ENSMUSG00000069310 | 3_Hist1h3 | 0       | NA       | NA       | NA       | 0       | 0       | 0       | 0       | 0       | 0       |
| ENSMUSG00000069372 | 2_Ctxn3   | 39.6804 | -0.69875 | 0.175862 | 0.559175 | 49.551  | 19.2695 | 21.7174 | 45.3911 | 48.0747 | 54.0789 |
| ENSMUSG00000069378 | 13_Prdfm6 | 25.4231 | 0.13078  | 0.829124 | 0.951083 | 39.4385 | 11.335  | 28.9565 | 31.3611 | 21.4619 | 19.9857 |
| ENSMUSG00000069379 | 2_Gm495   | 2.52459 | -0.41086 | 0.785264 | 0.936054 | 0       | 3.40051 | 3.10248 | 0.82529 | 4.29238 | 3.52688 |
| ENSMUSG00000069390 | 2_Olfr707 | 0       | NA       | NA       | NA       | 0       | 0       | 0       | 0       | 0       | 0       |
| ENSMUSG00000069439 | 2_Gm844   | 0.32647 | 0.16972  | 0.966824 | NA       | 0       | 1.1335  | 0       | 0.82529 | 0       | 0       |
| ENSMUSG00000069441 | 3_Dsg1a   | 20209.1 | 0.50901  | 0.267802 | 0.65577  | 40040.2 | 14838.7 | 16333.5 | 13188.2 | 16718.8 | 20135   |
| ENSMUSG00000069456 | 4_Rdh16   | 1383.81 | 0.9242   | 0.003524 | 0.048801 | 2205.52 | 1683.25 | 1548.14 | 718.004 | 1049.92 | 1098.04 |
| ENSMUSG00000069495 | 12_Epc2   | 1009.79 | 0.26652  | 0.469223 | 0.804529 | 1621.02 | 833.125 | 854.217 | 879.762 | 1024.16 | 846.452 |
| ENSMUSG00000069515 | 5_Lyz1    | 77.2842 | -0.18199 | 0.605307 | 0.871517 | 69.7759 | 82.7457 | 65.1522 | 87.481  | 92.7155 | 65.8352 |
| ENSMUSG00000069516 | 7_Lyz2    | 3336.03 | 0.52857  | 0.1645   | 0.543051 | 3262.27 | 5685.65 | 2873.93 | 3364.72 | 2675.87 | 2153.75 |
| ENSMUSG00000069520 | 5_Tmem1   | 710.771 | 0.17244  | 0.487689 | 0.814019 | 860.569 | 702.772 | 695.991 | 650.33  | 660.169 | 694.796 |
| ENSMUSG00000069539 | 11_Scyl2  | 1177.61 | 0.63334  | 0.071122 | 0.356233 | 1965.86 | 1275.19 | 1054.84 | 762.57  | 1071.38 | 935.8   |
| ENSMUSG00000069554 | 4_L830134 | 1.89664 | 2.25871  | 0.262389 | 0.651483 | 7.07871 | 2.26701 | 0       | 0       | 0.85848 | 1.17563 |
| ENSMUSG00000069565 | 12_Dazap  | 739.062 | 0.48312  | 0.103372 | 0.436784 | 640.118 | 962.344 | 982.453 | 577.705 | 618.103 | 653.649 |
| ENSMUSG00000069581 | 11_Tspea  | 12.8559 | 0.81858  | 0.234501 | 0.626192 | 8.08995 | 21.5366 | 19.6491 | 10.7288 | 7.72629 | 9.40502 |
| ENSMUSG00000069588 | 3_Gm117   | 0.32647 | 0.16972  | 0.966824 | NA       | 0       | 1.1335  | 0       | 0.82529 | 0       | 0       |
| ENSMUSG00000069601 | 13_Ank3   | 1419.53 | 0.05758  | 0.804766 | 0.942951 | 1317.65 | 1583.5  | 1442.66 | 1445.91 | 1368.41 | 1359.03 |
| ENSMUSG00000069607 | 4_Cd300ll | 89.3439 | -0.10567 | 0.775702 | 0.93365  | 65.7309 | 88.4132 | 104.45  | 108.113 | 95.2909 | 74.0646 |
| ENSMUSG00000069622 | 4_Gm102   | 1555.71 | 0.10932  | 0.698748 | 0.905638 | 1789.9  | 1692.32 | 1361.99 | 1377.41 | 1795.93 | 1316.7  |
| ENSMUSG00000069631 | 14_Strada | 308.779 | -0.08962 | 0.807514 | 0.944396 | 186.069 | 329.849 | 381.606 | 322.689 | 283.297 | 349.161 |
| ENSMUSG00000069633 | 12_Pex11  | 111.239 | 0.05102  | 0.924086 | 0.978909 | 39.4385 | 157.557 | 142.714 | 116.366 | 96.1494 | 115.212 |
| ENSMUSG00000069662 | 5_Marcks  | 2687.99 | 0.66608  | 0.193377 | 0.583211 | 6087.69 | 2119.65 | 1685.68 | 1850.31 | 2340.21 | 2044.42 |
| ENSMUSG00000069670 | 7_Nkain2  | 10.8999 | -1.01722 | 0.288811 | 0.673672 | 14.1574 | 3.40051 | 4.13665 | 25.5841 | 14.5941 | 3.52688 |
| ENSMUSG00000069678 | 10_Pcgf1  | 145.156 | -0.20421 | 0.632796 | 0.883314 | 72.8096 | 190.428 | 141.68  | 169.185 | 141.649 | 155.183 |
| ENSMUSG00000069706 | 3_Taar5   | 0       | NA       | NA       | NA       | 0       | 0       | 0       | 0       | 0       | 0       |
| ENSMUSG00000069707 | 1_Taar4   | 0.56042 | -1.00363 | 0.787433 | NA       | 1.01124 | 0       | 0       | 0       | 0       | 2.35126 |
| ENSMUSG00000069712 | 5_493044  | 0.59225 | -1.1886  | 0.690885 | NA       | 1.01124 | 0       | 0       | 0.82529 | 1.71695 | 0       |
| ENSMUSG00000069713 | 2_493340  | 15.471  | -0.96528 | 0.123224 | 0.477635 | 16.1799 | 7.93452 | 7.23913 | 22.2829 | 18.028  | 21.1613 |
| ENSMUSG00000069720 | 4_493057  | 0.16854 | 1.1315   | 0.781553 | NA       | 1.01124 | 0       | 0       | 0       | 0       | 0       |
| ENSMUSG00000069721 | 2_Krtap3- | 0.18892 | 1.1315   | 0.781553 | NA       | 0       | 1.1335  | 0       | 0       | 0       | 0       |
| ENSMUSG00000069727 | 5_Gm559   | 193.314 | 0.35006  | 0.556603 | 0.847577 | 433.824 | 91.8137 | 124.099 | 138.649 | 184.573 | 186.925 |
| ENSMUSG00000069729 | 13_Arid1b | 1659.99 | 0.3982   | 0.202885 | 0.594033 | 1392.48 | 2115.12 | 2155.19 | 1544.95 | 1180.41 | 1571.81 |
| ENSMUSG00000069733 | 11_Ube2u  | 0.13755 | -0.79206 | 0.84609  | NA       | 0       | 0       | 0       | 0.82529 | 0       | 0       |
| ENSMUSG00000069743 | 4_Zfp820  | 193.929 | 0.67463  | 0.280408 | 0.667117 | 500.566 | 102.015 | 112.724 | 139.474 | 166.545 | 142.251 |
| ENSMUSG00000069744 | 7_Psmb3   | 1750.73 | -0.11131 | 0.823598 | 0.949196 | 630.005 | 2311.21 | 2108.66 | 2192.8  | 1545.26 | 1716.42 |
| ENSMUSG00000069755 | 4_Zfp125  | 87.4957 | 0.85445  | 0.169513 | 0.550908 | 224.496 | 54.4081 | 58.9472 | 44.5658 | 75.546  | 67.0108 |
| ENSMUSG00000069763 | 3_Tmem1   | 243.255 | -0.42196 | 0.38541  | 0.750802 | 350.902 | 103.149 | 169.602 | 325.165 | 253.251 | 257.462 |
| ENSMUSG00000069769 | 13_Msi2   | 2823.99 | -0.05945 | 0.87267  | 0.963879 | 4103.63 | 1889.55 | 2304.11 | 3008.19 | 2860.45 | 2778.01 |
| ENSMUSG00000069785 | 4_Gm114   | 0.36128 | 2.05714  | 0.610196 | NA       | 0       | 1.1335  | 1.03416 | 0       | 0       | 0       |
| ENSMUSG00000069792 | 5_Wfdc17  | 89.9856 | 1.44962  | 0.002109 | 0.033699 | 192.136 | 126.952 | 76.528  | 56.1199 | 54.084  | 34.0932 |
| ENSMUSG00000069793 | 11_Slfn9  | 2155.56 | 2.2125   | 3.86E-06 | 0.000236 | 5828.81 | 2797.49 | 2011.44 | 500.127 | 899.684 | 895.828 |
| ENSMUSG00000069804 | 2_Gm102   | 10.1112 | 0.48639  | 0.531256 | 0.8369   | 8.08995 | 17.0025 | 10.3416 | 4.12646 | 12.8772 | 8.22939 |
| ENSMUSG00000069805 | 10_Fbp1   | 3.80354 | -0.38642 | 0.746799 | 0.924576 | 2.02249 | 6.80102 | 1.03416 | 2.47588 | 3.43391 | 7.05377 |
| ENSMUSG00000069806 | 5_Cacng7  | 145.44  | -1.65061 | 0.000232 | 0.006487 | 48.5397 | 72.5442 | 89.9721 | 325.99  | 186.29  | 149.305 |
| ENSMUSG00000069808 | 13_Fam5i  | 828.133 | 0.2361   | 0.33023  | 0.210498 | 906.075 | 931.739 | 849.047 | 676.74  | 775.205 | 829.993 |
| ENSMUSG00000069814 | 6_E13030  | 16.2511 | -1.33268 | 0.031191 | 0.217357 | 5.05622 | 12.4685 | 10.3416 | 24.7588 | 24.8958 | 19.9857 |
| ENSMUSG00000069825 | 11_Spata1 | 0.45299 | -0.6074  | 0.85212  | NA       | 0       | 0       | 1.03416 | 0.82529 | 0.85848 | 0       |
| ENSMUSG00000069830 | 10_Nlrp1a | 1.18046 | 0.5574   | 0.770813 | NA       | 2.02249 | 1.1335  | 1.03416 | 0       | 1.71695 | 1.17563 |
| ENSMUSG00000069833 | 12_Ahnak  | 60511.5 | 0.40104  | 0.121194 | 0.473321 | 78201.5 | 65234.2 | 63168.7 | 44269.5 | 55668.8 | 56526.5 |
| ENSMUSG00000069835 | 10_Sat2   | 93.9044 | -1.08826 | 0.003422 | 0.047736 | 61.6859 | 41.9396 | 76.528  | 136.173 | 133.064 | 114.036 |
| ENSMUSG00000069844 | 12_Sco1   | 349.148 | 0.47395  | 0.191585 | 0.580717 | 565.286 | 341.184 | 311.283 | 239.335 | 335.665 | 302.136 |
| ENSMUSG00000069855 | 9_Slc47a2 | 6.57625 | -0.75262 | 0.389648 | 0.7531   | 3.03373 | 3.40051 | 8.27329 | 8.25292 | 9.44325 | 7.05377 |
| ENSMUSG00000069867 | 2_Pabpn1  | 1.26559 | -3.71397 | 0.174027 | NA       | 0       | 0       | 0       | 3.30117 | 4.29238 | 0       |
| ENSMUSG00000069873 | 3_493043  | 1.82553 | 2.00903  | 0.298569 | 0.681667 | 3.03373 | 4.53401 | 1.03416 | 0       | 0       | 2.35126 |
| ENSMUSG00000069874 | 6_Irgm2   | 4098.1  | 3.09858  | 1.47E-15 | 7.51E-13 | 9450.08 | 7667.01 | 4900.89 | 595.861 | 1108.29 | 866.438 |
| ENSMUSG00000069892 | 9_993011  | 2827.22 | 2.15817  | 5.53E-06 | 0.000323 | 7650.06 | 3720.16 | 2488.19 | 761.745 | 1307.46 | 1035.73 |
| ENSMUSG00000069893 | 10_993011 | 631.303 | 1.92104  | 8.29E-08 | 8.66E-06 | 975.851 | 1286.53 | 734.255 | 203.847 | 332.231 | 255.111 |
| ENSMUSG00000069895 | 3_Atnx1l  | 1836.74 | 0.21186  | 0.341535 | 0.719594 | 2093.28 | 1975.7  | 1844.94 | 1673.69 | 1683.47 | 1749.33 |
| ENSMUSG00000069899 | 3_Gm121l  | 142.252 | 0.28816  | 0.354485 | 0.729885 | 142.585 | 189.295 | 137.543 | 138.649 | 118.47  | 126.968 |
| ENSMUSG00000069910 | 2_Spd1l   | 164.89  | 0.52719  | 0.113267 | 0.456704 | 195.17  | 223.3   | 165.466 | 103.162 | 158.818 | 143.427 |
| ENSMUSG00000069911 | 10_Fam115 | 20.0933 | -0.38916 | 0.646308 | 0.889779 | 38.4273 | 3.40051 | 10.3416 | 32.1864 | 19.745  | 16.4588 |
| ENSMUSG00000069917 | 7_Hba-a2  | 151.808 | -1.79827 | 0.000458 | 0.010931 | 40.4498 | 68.0102 | 95.1429 | 380.46  | 175.129 | 151.656 |
| ENSMUSG00000069919 | 7_Hba-a1  | 28.4547 | -1.74536 | 0.023123 | 0.179283 | 4.04498 | 11.335  | 23.7857 | 55.2946 | 16.3111 | 59.957  |
| ENSMUSG00000069920 | 10_B3gnf1 | 182.201 | -0.54605 | 0.049381 | 0.287305 | 143.597 | 141.688 | 159.261 | 239.335 | 209.468 | 199.857 |
| ENSMUSG00000069971 | 5_493340  | 0       | NA       | NA       | NA       | 0       | 0       | 0       | 0       | 0       | 0       |
| ENSMUSG00000070000 | 13_Fcho1  | 116.026 | 0.57439  | 0.414054 | 0.768871 | 21.2361 | 179.093 | 216.14  | 100.686 | 75.546  | 103.455 |
| ENSMUSG00000070002 | 6_Ell     | 719.302 | 0.37041  | 0.44406  | 0.788515 | 318.542 | 1050.76 | 1064.15 | 664.36  | 540.84  | 677.162 |

|                    |           |         |          |          |          |         |         |         |         |         |         |
|--------------------|-----------|---------|----------|----------|----------|---------|---------|---------|---------|---------|---------|
| ENSMUSG00000070003 | 6_Ssbp4   | 154.816 | 0.22155  | 0.768914 | 0.931306 | 19.2136 | 248.237 | 232.686 | 189.817 | 97.8664 | 141.075 |
| ENSMUSG00000070031 | 11_Sp140  | 1179.64 | 1.62008  | 5.76E-05 | 0.00213  | 2597.89 | 1636.78 | 1105.52 | 447.308 | 647.292 | 643.068 |
| ENSMUSG00000070034 | 13_Sp110  | 1307.62 | 2.06205  | 1.89E-07 | 1.79E-05 | 1624.06 | 2939.17 | 1766.35 | 331.768 | 609.519 | 574.882 |
| ENSMUSG00000070044 | 15_Fam14  | 221.322 | -0.37578 | 0.205965 | 0.59724  | 194.159 | 183.627 | 200.627 | 292.979 | 256.685 | 199.857 |
| ENSMUSG00000070047 | 12_Fat1   | 8012.75 | -0.15846 | 0.612148 | 0.874367 | 5263.53 | 8546.61 | 8909.3  | 7908.78 | 8328.94 | 9119.35 |
| ENSMUSG00000070056 | 5_Mfhas1  | 510.691 | 0.41173  | 0.104271 | 0.43912  | 506.633 | 634.762 | 608.087 | 461.338 | 430.097 | 423.226 |
| ENSMUSG00000070280 | 13_Slc22e | 3.41002 | -2.47648 | 0.068391 | 0.347935 | 1.01124 | 0       | 2.06832 | 4.95175 | 7.72629 | 4.70251 |
| ENSMUSG00000070283 | 4_Ndufaf3 | 266.235 | -0.17297 | 0.725602 | 0.915844 | 106.181 | 302.645 | 342.307 | 369.731 | 234.364 | 242.179 |
| ENSMUSG00000070284 | 10_Gmpp1  | 928.13  | 1.17975  | 0.037528 | 0.242551 | 368.093 | 2098.11 | 1397.15 | 544.693 | 517.662 | 643.068 |
| ENSMUSG00000070287 | 3_Slc35g2 | 45.7658 | -1.02428 | 0.128274 | 0.486444 | 59.6634 | 7.93452 | 22.7516 | 58.5958 | 70.3951 | 55.2545 |
| ENSMUSG00000070291 | 4_Ddx43   | 51.0348 | 0.74494  | 0.130375 | 0.491137 | 97.0795 | 40.8061 | 53.7764 | 29.7105 | 47.2162 | 37.6201 |
| ENSMUSG00000070304 | 11_Scn2b  | 78.9363 | -1.0127  | 0.012328 | 0.116927 | 45.506  | 47.6071 | 64.118  | 127.92  | 116.753 | 71.7133 |
| ENSMUSG00000070305 | 10_Mpz13  | 2725.81 | 0.40856  | 0.142455 | 0.511466 | 3737.56 | 2962.98 | 2626.77 | 2026.09 | 2493.88 | 2507.61 |
| ENSMUSG00000070311 | 2_Olfr894 | 0.17236 | 1.1315   | 0.781553 | NA       | 0       | 0       | 1.03416 | 0       | 0       | 0       |
| ENSMUSG00000070313 | 8_A63009  | 1.3878  | 4.00649  | 0.077242 | NA       | 2.02249 | 1.1335  | 5.17081 | 0       | 0       | 0       |
| ENSMUSG00000070319 | 5_Eif3g   | 1408.9  | 0.1551   | 0.70101  | 0.906307 | 779.669 | 1883.88 | 1790.13 | 1346.88 | 1182.12 | 1470.71 |
| ENSMUSG00000070323 | 11_Mmp2   | 58.4229 | 1.4842   | 0.012959 | 0.121192 | 160.788 | 51.0076 | 46.5373 | 28.8852 | 38.6315 | 24.6882 |
| ENSMUSG00000070327 | 13_Rnf21  | 11700.6 | 2.096    | 1.55E-09 | 2.55E-07 | 15151.5 | 25525.4 | 16218.8 | 3430.74 | 5356.04 | 4521.46 |
| ENSMUSG00000070330 | 2_Tmem2   | 0.33902 | -1.78366 | 0.658108 | NA       | 0       | 0       | 0       | 0       | 0.85848 | 1.17563 |
| ENSMUSG00000070331 | 13_Qrich2 | 1.74935 | -0.57927 | 0.731183 | 0.91894  | 0       | 1.1335  | 3.10248 | 1.65058 | 3.43391 | 1.17563 |
| ENSMUSG00000070336 | 3_Fbxo47  | 22.7272 | 0.15918  | 0.793774 | 0.938336 | 35.3936 | 26.0706 | 10.3416 | 19.807  | 18.8865 | 25.8638 |
| ENSMUSG00000070337 | 4_Gpr179  | 107.005 | -1.46078 | 0.001074 | 0.020693 | 34.3823 | 64.6097 | 72.3913 | 212.925 | 142.507 | 115.212 |
| ENSMUSG00000070342 | 3_Gm102   | 0.70218 | 3.02137  | 0.274084 | NA       | 1.01124 | 1.1335  | 2.06832 | 0       | 0       | 0       |
| ENSMUSG00000070345 | 3_Hsf5    | 5.14604 | 2.09088  | 0.056229 | 0.310378 | 6.06747 | 13.602  | 5.17081 | 1.65058 | 0.85848 | 3.52688 |
| ENSMUSG00000070348 | 4_Ccnd1   | 9667.27 | 0.5513   | 0.036844 | 0.240222 | 10374.4 | 11745.4 | 12356.2 | 6757.49 | 7449.86 | 9320.38 |
| ENSMUSG00000070354 | 13_Gm21   | 4.19108 | 0.67283  | 0.57213  | 0.854843 | 2.02249 | 11.335  | 2.06832 | 3.30117 | 1.71695 | 4.70251 |
| ENSMUSG00000070366 | 5_Ppapdc  | 0.99154 | 0.10902  | 0.961463 | NA       | 2.02249 | 0       | 1.03416 | 0       | 1.71695 | 1.17563 |
| ENSMUSG00000070368 | 9_Prok1   | 2.58404 | -4.74331 | 0.014436 | 0.129549 | 0       | 0       | 0       | 6.60234 | 7.72629 | 1.17563 |
| ENSMUSG00000070369 | 13_Itgad  | 0.31544 | 0.16972  | 0.966824 | NA       | 0       | 0       | 1.03416 | 0       | 0.85848 | 0       |
| ENSMUSG00000070371 | 11_Prss3f | 76.8936 | -0.23642 | 0.681422 | 0.902515 | 24.2699 | 75.9447 | 111.689 | 104.812 | 63.5273 | 81.1183 |
| ENSMUSG00000070372 | 11_Capza  | 6500.82 | 0.63142  | 0.122468 | 0.475979 | 12378.6 | 6225.2  | 5099.45 | 4443.37 | 5800.73 | 5057.55 |
| ENSMUSG00000070375 | 6_Olfr406 | 0.18892 | 1.1315   | 0.781553 | NA       | 0       | 1.1335  | 0       | 0       | 0       | 0       |
| ENSMUSG00000070385 | 12_Ampd   | 48.1265 | 0.00873  | 0.988953 | 0.997196 | 87.9783 | 23.8036 | 33.0932 | 74.2763 | 34.3391 | 35.2688 |
| ENSMUSG00000070388 | 3_Fbxo39  | 3.21904 | 1.70616  | 0.122663 | 0.603937 | 6.06747 | 5.66751 | 3.10248 | 3.30117 | 0       | 1.17563 |
| ENSMUSG00000070390 | 12_Nlrp1b | 19.2121 | 2.39132  | 0.001958 | 0.031964 | 24.2699 | 57.8086 | 14.4783 | 3.30117 | 6.00934 | 9.40502 |
| ENSMUSG00000070394 | 10_Tmem   | 495.259 | -0.44086 | 0.189721 | 0.578028 | 283.148 | 452.268 | 525.354 | 618.144 | 568.312 | 524.33  |
| ENSMUSG00000070407 | 5_Hs3st3t | 859.263 | 0.27163  | 0.361887 | 0.734636 | 1202.37 | 796.853 | 820.09  | 729.558 | 752.026 | 854.681 |
| ENSMUSG00000070419 | 11_Cyp3a  | 0.70156 | 1.59337  | 0.644125 | NA       | 3.03373 | 0       | 0       | 0       | 0       | 1.17563 |
| ENSMUSG00000070420 | 4_Zscan2  | 129.575 | 0.03487  | 0.952882 | 0.988279 | 38.4273 | 170.025 | 185.115 | 168.36  | 94.4325 | 121.09  |
| ENSMUSG00000070421 | 3_Olfr658 | 0.86308 | 3.32091  | 0.29319  | NA       | 4.04498 | 1.1335  | 0       | 0       | 0       | 0       |
| ENSMUSG00000070423 | 3_Olfr558 | 12.2763 | -1.1711  | 0.220715 | 0.611741 | 17.1912 | 3.40051 | 2.06832 | 17.3311 | 26.6128 | 7.05377 |
| ENSMUSG00000070424 | 11_Art5   | 31.1886 | -1.40442 | 0.027943 | 0.202035 | 11.1237 | 10.2015 | 29.9907 | 69.3246 | 30.0467 | 36.4445 |
| ENSMUSG00000070425 | 12_Xntrpc | 58.946  | 0.20334  | 0.696291 | 0.905638 | 30.3373 | 56.6751 | 102.382 | 59.421  | 56.6595 | 48.2007 |
| ENSMUSG00000070426 | 12_Rnf12  | 1055.3  | 0.09259  | 0.717963 | 0.912538 | 908.097 | 1233.25 | 1126.2  | 1001.9  | 1020.73 | 1041.61 |
| ENSMUSG00000070427 | 3_Ilf18bp | 596.469 | 3.82022  | 6.56E-20 | 7.11E-17 | 968.772 | 1668.52 | 705.298 | 75.1016 | 95.2909 | 65.8352 |
| ENSMUSG00000070436 | 11_Serpin | 1795.1  | -0.12298 | 0.673283 | 0.900436 | 1322.71 | 1857.81 | 1975.25 | 1925.41 | 1628.53 | 2060.88 |
| ENSMUSG00000070448 | 11_Vmn2r  | 0.16854 | 1.1315   | 0.781553 | NA       | 1.01124 | 0       | 0       | 0       | 0       | 0       |
| ENSMUSG00000070462 | 4_Mesdc1  | 275.884 | 0.5998   | 0.040424 | 0.253718 | 384.273 | 349.119 | 263.711 | 207.148 | 220.629 | 230.423 |
| ENSMUSG00000070469 | 11_Adamt  | 307.326 | -0.55138 | 0.053484 | 0.300779 | 280.115 | 218.766 | 249.233 | 414.297 | 370.004 | 311.541 |
| ENSMUSG00000070471 | 3_Erich6  | 4.27431 | 0.08173  | 0.951907 | 0.988    | 11.1237 | 0       | 2.06832 | 4.95175 | 5.15086 | 2.35126 |
| ENSMUSG00000070473 | 4_Cldn3   | 156.35  | 0.46503  | 0.603284 | 0.870656 | 8.08995 | 226.701 | 309.214 | 173.311 | 73.829  | 146.953 |
| ENSMUSG00000070476 | 10_Fam2   | 209.333 | -0.06278 | 0.856214 | 0.959059 | 281.126 | 166.625 | 166.5   | 207.974 | 229.213 | 204.559 |
| ENSMUSG00000070493 | 3_Chchd2  | 2165.49 | 0.09139  | 0.721871 | 0.913923 | 2571.59 | 2043.71 | 2086.94 | 2350.43 | 1926.42 | 2013.85 |
| ENSMUSG00000070495 | 11_Ctcf   | 0       | NA       | NA       | NA       | 0       | 0       | 0       | 0       | 0       | 0       |
| ENSMUSG00000070498 | 3_Tmem1   | 92.5579 | -1.54471 | 0.006139 | 0.071625 | 69.7759 | 17.0025 | 54.8106 | 193.944 | 98.7249 | 121.09  |
| ENSMUSG00000070501 | 13_BC09   | 220.938 | 2.50123  | 2.07E-05 | 0.00094  | 604.724 | 324.182 | 197.525 | 26.4094 | 98.7249 | 74.0646 |
| ENSMUSG00000070504 | 9_Fcrl6   | 0.55019 | 2.66232  | 0.46328  | NA       | 0       | 2.26701 | 1.03416 | 0       | 0       | 0       |
| ENSMUSG00000070509 | 15_Rgma   | 291.064 | 0.22088  | 0.678064 | 0.901447 | 107.192 | 428.464 | 404.357 | 317.738 | 211.185 | 277.448 |
| ENSMUSG00000070520 | 4_Ndnf2   | 305.824 | 0.13569  | 0.592391 | 0.865791 | 299.328 | 320.781 | 340.239 | 272.346 | 291.882 | 310.366 |
| ENSMUSG00000070524 | 1_Fcrlb   | 0.72255 | 3.05804  | 0.351905 | NA       | 0       | 2.26701 | 2.06832 | 0       | 0       | 0       |
| ENSMUSG00000070526 | 2_Peg12   | 9.25638 | -0.05096 | 0.94345  | 0.986388 | 10.1124 | 7.93452 | 9.30745 | 8.25292 | 12.8772 | 7.05377 |
| ENSMUSG00000070527 | 3_Mkrm3   | 31.0766 | -0.05878 | 0.901135 | 0.973382 | 33.3711 | 36.2721 | 21.7174 | 25.5841 | 37.773  | 31.742  |
| ENSMUSG00000070530 | 5_Wfdc16  | 0       | NA       | NA       | NA       | 0       | 0       | 0       | 0       | 0       | 0       |
| ENSMUSG00000070532 | 5_170008  | 3.26501 | -1.4914  | 0.248673 | 0.640068 | 3.03373 | 0       | 2.06832 | 4.95175 | 6.00934 | 3.52688 |
| ENSMUSG00000070533 | 11_Wfdc8  | 0.19594 | -0.79206 | 0.84609  | NA       | 0       | 0       | 0       | 0       | 0       | 1.17563 |
| ENSMUSG00000070544 | 6_Top1    | 3451.28 | 0.57599  | 0.205985 | 0.59724  | 6738.93 | 3087.66 | 2566.79 | 1955.12 | 3270.8  | 3088.37 |
| ENSMUSG00000070546 | 2_Mrgprb  | 0.13755 | -0.79206 | 0.84609  | NA       | 0       | 0       | 0       | 0.82529 | 0       | 0       |
| ENSMUSG00000070547 | 4_Mrgprb  | 17.7753 | -0.21373 | 0.782966 | 0.935592 | 33.3711 | 4.53401 | 11.3758 | 23.1082 | 15.4526 | 18.81   |
| ENSMUSG00000070551 | 3_Mrgprb  | 0       | NA       | NA       | NA       | 0       | 0       | 0       | 0       | 0       | 0       |
| ENSMUSG00000070552 | 2_Mrgprx  | 0.31162 | 0.16972  | 0.966824 | NA       | 1.01124 | 0       | 0       | 0       | 0.85848 | 0       |
| ENSMUSG00000070563 | 4_Spaca4  | 3.96813 | 1.85647  | 0.217726 | 0.608427 | 1.01124 | 2.26701 | 15.5124 | 3.30117 | 1.71695 | 0       |
| ENSMUSG00000070564 | 13_Ntn5   | 2.27172 | -0.60019 | 0.703149 | 0.90765  | 0       | 3.40051 | 2.06832 | 4.95175 | 0.85848 | 2.35126 |
| ENSMUSG00000070565 | 11_Rasal  | 2040.2  | 0.54762  | 0.09616  | 0.420381 | 3255.2  | 2175.19 | 1837.71 | 1435.18 | 1698.07 | 1839.86 |
| ENSMUSG00000070568 | 10_17000  | 0       | NA       | NA       | NA       | 0       | 0       | 0       | 0       | 0       | 0       |
| ENSMUSG00000070570 | 4_Slc17a7 | 154.612 | -2.62281 | 0.000167 | 0.005023 | 35.3936 | 74.8112 | 19.6491 | 506.73  | 201.742 | 89.3477 |

|                    |           |         |          |          |          |         |         |         |         |         |         |
|--------------------|-----------|---------|----------|----------|----------|---------|---------|---------|---------|---------|---------|
| ENSMUSG00000070574 | 1_231001  | 1.60776 | -1.06312 | 0.57582  | NA       | 0       | 0       | 3.10248 | 2.47588 | 1.71695 | 2.35126 |
| ENSMUSG00000070576 | 4_Mn1     | 121.886 | -0.15078 | 0.6774   | 0.901447 | 125.394 | 82.7457 | 138.578 | 146.902 | 133.064 | 104.631 |
| ENSMUSG00000070577 | 5_Gm572   | 0.55019 | -2.51397 | 0.52782  | NA       | 0       | 0       | 0       | 3.30117 | 0       | 0       |
| ENSMUSG00000070583 | 1_Fv1     | 97.0056 | -0.42625 | 0.25709  | 0.648419 | 94.0457 | 81.6122 | 72.3913 | 76.7522 | 127.913 | 129.319 |
| ENSMUSG00000070594 | 10_Gm47   | 4.8893  | -0.08173 | 0.952688 | 0.988194 | 13.1462 | 0       | 1.03416 | 4.12646 | 5.15086 | 5.87814 |
| ENSMUSG00000070601 | 4_Vmn2r8  | 0.80663 | 0.84943  | 0.72447  | NA       | 2.02249 | 1.1335  | 0       | 0.82529 | 0.85848 | 0       |
| ENSMUSG00000070604 | 5_Vsig10l | 853.187 | 0.60081  | 0.144103 | 0.513768 | 519.78  | 1316    | 1249.27 | 666.011 | 675.621 | 692.445 |
| ENSMUSG00000070605 | 4_Gm132   | 748.63  | 0.60484  | 0.276432 | 0.662853 | 1772.71 | 473.804 | 463.304 | 557.898 | 664.461 | 559.599 |
| ENSMUSG00000070617 | 2_Gm130   | 0.18892 | 1.1315   | 0.781553 | NA       | 0       | 1.1335  | 0       | 0       | 0       | 0       |
| ENSMUSG00000070618 | 10_BC08C  | 0.17236 | 1.1315   | 0.781553 | NA       | 0       | 0       | 1.03416 | 0       | 0       | 0       |
| ENSMUSG00000070632 | 4_Btbd8   | 22.4323 | 0.04779  | 0.938644 | 0.985121 | 39.4385 | 11.335  | 17.5807 | 23.9335 | 22.3204 | 19.9857 |
| ENSMUSG00000070637 | 2_Gm694   | 2.0688  | 0.0969   | 0.956326 | 0.988881 | 0       | 3.40051 | 3.10248 | 2.47588 | 3.43391 | 0       |
| ENSMUSG00000070639 | 5_Lrrc8b  | 3576.65 | 0.49745  | 0.150727 | 0.524129 | 5844.99 | 3391.44 | 3324.83 | 2475.88 | 3105.11 | 3317.62 |
| ENSMUSG00000070643 | 11_Sox13  | 621.73  | 0.35981  | 0.535711 | 0.83864  | 191.125 | 843.326 | 1062.08 | 590.909 | 406.918 | 636.015 |
| ENSMUSG00000070644 | 13_Etnk2  | 87.1767 | 0.14807  | 0.766385 | 0.930427 | 43.4835 | 104.282 | 127.202 | 100.686 | 59.2349 | 88.1721 |
| ENSMUSG00000070661 | 6_Rnf186  | 0.36128 | 2.05714  | 0.610196 | NA       | 0       | 1.1335  | 1.03416 | 0       | 0       | 0       |
| ENSMUSG00000070683 | 7_Lactbl1 | 12.4806 | -2.96572 | 0.001208 | 0.02262  | 3.03373 | 4.53401 | 1.03416 | 39.614  | 13.7356 | 12.9319 |
| ENSMUSG00000070686 | 10_C8741  | 0.19594 | -0.79206 | 0.84609  | NA       | 0       | 0       | 0       | 0       | 0       | 1.17563 |
| ENSMUSG00000070687 | 11_Htr1d  | 2.91683 | -0.78232 | 0.537071 | 0.839273 | 1.01124 | 3.40051 | 2.06832 | 5.77705 | 1.71695 | 3.52688 |
| ENSMUSG00000070690 | 7_583047  | 3.15564 | -0.73225 | 0.64841  | 0.890982 | 4.04498 | 0       | 3.10248 | 5.77705 | 6.00934 | 0       |
| ENSMUSG00000070691 | 10_Runx3  | 30.1484 | 2.30627  | 0.000834 | 0.017065 | 18.2024 | 82.7457 | 49.6398 | 14.03   | 6.86782 | 9.40502 |
| ENSMUSG00000070695 | 4_Cntnap1 | 3.25588 | -1.10899 | 0.431101 | 0.780048 | 5.05622 | 1.1335  | 0       | 4.12646 | 6.86782 | 2.35126 |
| ENSMUSG00000070697 | 4_Utp3    | 911.894 | 0.27801  | 0.37387  | 0.74451  | 1281.25 | 897.734 | 819.056 | 690.77  | 867.92  | 914.638 |
| ENSMUSG00000070699 | 4_Sars2   | 90.0774 | 0.3252   | 0.635138 | 0.884141 | 18.2024 | 155.29  | 127.202 | 100.686 | 62.6688 | 76.4158 |
| ENSMUSG00000070705 | 2_Eid2b   | 130.017 | -0.3671  | 0.391461 | 0.754323 | 175.957 | 86.1462 | 78.5963 | 164.233 | 149.375 | 125.792 |
| ENSMUSG00000070708 | 5_Gtsf1l  | 0       | NA       | NA       | NA       | 0       | 0       | 0       | 0       | 0       | 0       |
| ENSMUSG00000070709 | 12_17000  | 537.193 | 0.39701  | 0.410821 | 0.767001 | 1061.81 | 371.789 | 398.152 | 370.556 | 549.425 | 471.427 |
| ENSMUSG00000070713 | 4_Gm102   | 553.7   | 0.0061   | 0.98357  | 0.9947   | 690.68  | 540.681 | 433.314 | 562.849 | 569.17  | 525.506 |
| ENSMUSG00000070717 | 1_Gm103   | 1.71735 | -1.90355 | 0.346691 | 0.724121 | 0       | 1.1335  | 1.03416 | 0       | 3.43391 | 4.70251 |
| ENSMUSG00000070719 | 4_Pla2g4c | 0.44746 | -0.57987 | 0.8834   | NA       | 0       | 0       | 1.03416 | 1.65058 | 0       | 0       |
| ENSMUSG00000070720 | 3_Tmem2   | 43.608  | -0.7531  | 0.33638  | 0.714638 | 4.04498 | 39.6726 | 53.7764 | 75.1016 | 32.6221 | 56.4301 |
| ENSMUSG00000070730 | 11_Rmdn:  | 632.638 | 0.54155  | 0.036042 | 0.237515 | 819.108 | 786.651 | 644.283 | 553.771 | 474.738 | 517.276 |
| ENSMUSG00000070732 | 2_Rbm44   | 0.13755 | -0.79206 | 0.84609  | NA       | 0       | 0       | 0       | 0.82529 | 0       | 0       |
| ENSMUSG00000070733 | 13_Fryl   | 4510.02 | -0.00893 | 0.967629 | 0.991241 | 4271.5  | 4464.87 | 4751.97 | 4462.36 | 4752.53 | 4356.88 |
| ENSMUSG00000070737 | 10_Gm12   | 285.746 | -0.05831 | 0.818409 | 0.948003 | 296.295 | 256.172 | 287.497 | 296.28  | 299.608 | 278.624 |
| ENSMUSG00000070738 | 10_Dgkd   | 852.699 | -0.36133 | 0.161833 | 0.540542 | 623.938 | 782.117 | 833.534 | 1010.98 | 926.297 | 939.327 |
| ENSMUSG00000070777 | 4_Ceacan  | 0.33349 | -1.76186 | 0.662172 | NA       | 0       | 0       | 0       | 0.82529 | 0       | 1.17563 |
| ENSMUSG00000070778 | 5_Rpl7a-p | 8.10164 | -0.31132 | 0.760473 | 0.92827  | 1.01124 | 13.602  | 7.23913 | 6.60234 | 15.4526 | 4.70251 |
| ENSMUSG00000070780 | 11_Rbm4   | 961.628 | 0.90509  | 0.000681 | 0.014754 | 1384.39 | 1283.13 | 1093.11 | 640.427 | 597.5   | 771.212 |
| ENSMUSG00000070798 | 4_Psg25   | 0.18892 | 1.1315   | 0.781553 | NA       | 0       | 1.1335  | 0       | 0       | 0       | 0       |
| ENSMUSG00000070799 | 3_Psg26   | 0       | NA       | NA       | NA       | 0       | 0       | 0       | 0       | 0       | 0       |
| ENSMUSG00000070802 | 5_Pnmal2  | 272.182 | -1.50152 | 0.00126  | 0.023282 | 78.8771 | 130.353 | 217.174 | 546.344 | 360.56  | 299.785 |
| ENSMUSG00000070803 | 6_Cited4  | 163.03  | 0.2011   | 0.761719 | 0.92861  | 33.3711 | 256.172 | 233.721 | 195.594 | 115.894 | 143.427 |
| ENSMUSG00000070806 | 5_Zmynd1  | 4.93855 | -1.04525 | 0.308166 | 0.690547 | 1.01124 | 4.53401 | 4.13665 | 7.42763 | 4.29238 | 8.22939 |
| ENSMUSG00000070808 | 3_Gltscr1 | 194.201 | 0.5326   | 0.376412 | 0.745684 | 59.6634 | 323.048 | 306.112 | 149.378 | 123.621 | 203.384 |
| ENSMUSG00000070814 | 14_63304  | 287.613 | -0.09087 | 0.178622 | 0.912714 | 280.115 | 264.106 | 291.634 | 305.358 | 308.193 | 276.273 |
| ENSMUSG00000070822 | 4_Zscan1i | 52.9848 | -1.2442  | 0.002414 | 0.03713  | 36.4048 | 24.9371 | 33.0932 | 80.8787 | 84.9892 | 57.6058 |
| ENSMUSG00000070823 | 4_Gm104   | 0.13755 | -0.79206 | 0.84609  | NA       | 0       | 0       | 0       | 0.82529 | 0       | 0       |
| ENSMUSG00000070837 | 4_Aurkc   | 2.7139  | -0.25667 | 0.841865 | 0.953593 | 1.01124 | 3.40051 | 3.10248 | 3.30117 | 4.29238 | 1.17563 |
| ENSMUSG00000070844 | 10_Vmn2r  | 0.50562 | 2.55291  | 0.52315  | NA       | 3.03373 | 0       | 0       | 0       | 0       | 0       |
| ENSMUSG00000070847 | 11_Vmn2r  | 4.61437 | 1.22102  | 0.389987 | 0.753305 | 17.1912 | 1.1335  | 1.03416 | 0.82529 | 5.15086 | 2.35126 |
| ENSMUSG00000070858 | 11_Gm16   | 1.58266 | 0.34374  | 0.8822   | NA       | 0       | 2.26701 | 3.10248 | 4.12646 | 0       | 0       |
| ENSMUSG00000070866 | 4_Zfp804i | 5.95714 | -1.54897 | 0.412145 | 0.767619 | 9.1012  | 0       | 0       | 20.6323 | 6.00934 | 0       |
| ENSMUSG00000070867 | 4_Trabd2l | 116.37  | -1.40687 | 0.000252 | 0.006957 | 78.8771 | 40.8061 | 71.3571 | 197.245 | 157.101 | 152.832 |
| ENSMUSG00000070870 | 6_Cryge   | 450.498 | -3.59439 | 0.010585 | 0.104992 | 8.08995 | 71.4107 | 127.202 | 2143.28 | 129.63  | 223.369 |
| ENSMUSG00000070871 | 10_Ccnyl1 | 753.997 | 0.17082  | 0.637512 | 0.885672 | 1146.75 | 668.767 | 580.165 | 646.204 | 806.11  | 675.986 |
| ENSMUSG00000070873 | 5_Lilra5  | 26.709  | -0.56968 | 0.258903 | 0.64893  | 25.2811 | 24.9371 | 14.4783 | 38.7887 | 30.9052 | 25.8638 |
| ENSMUSG00000070877 | 4_Ldlrad1 | 0.332   | 0.16972  | 0.966824 | NA       | 0       | 1.1335  | 0       | 0       | 0.85848 | 0       |
| ENSMUSG00000070880 | 10_Gad1   | 45.7722 | -2.16289 | 0.003587 | 0.049474 | 28.3148 | 13.602  | 8.27329 | 124.619 | 79.8384 | 19.9857 |
| ENSMUSG00000070883 | 3_Ccdc17  | 84.5045 | 0.22488  | 0.659342 | 0.89481  | 154.72  | 64.6097 | 53.7764 | 61.8969 | 94.4325 | 77.5914 |
| ENSMUSG00000070890 | 3_Gm127   | 0.16854 | 1.1315   | 0.781553 | NA       | 1.01124 | 0       | 0       | 0       | 0       | 0       |
| ENSMUSG00000070891 | 2_Gm126   | 5.43705 | 0.95763  | 0.433612 | 0.781899 | 5.05622 | 13.602  | 3.10248 | 7.42763 | 3.43391 | 0       |
| ENSMUSG00000070900 | 1_Gm103   | 0.19594 | -0.79206 | 0.84609  | NA       | 0       | 0       | 0       | 0       | 0       | 1.17563 |
| ENSMUSG00000070902 | 5_Zfp352  | 0.13755 | -0.79206 | 0.84609  | NA       | 0       | 0       | 0       | 0.82529 | 0       | 0       |
| ENSMUSG00000070904 | 4>Ifna4   | 1.30586 | 3.90893  | 0.17801  | NA       | 0       | 6.80102 | 1.03416 | 0       | 0       | 0       |
| ENSMUSG00000070923 | 4_Klh9    | 1911.52 | 0.32448  | 0.485007 | 0.812961 | 3666.77 | 1326.2  | 1383.71 | 1537.52 | 1970.2  | 1584.75 |
| ENSMUSG00000070933 | 10_Speer  | 1.51601 | 2.0999   | 0.363485 | NA       | 4.04498 | 3.40051 | 0       | 1.65058 | 0       | 0       |
| ENSMUSG00000070934 | 6_Rrag    | 1190.9  | -0.08687 | 0.7444   | 0.923582 | 1362.15 | 1080.23 | 1022.79 | 1136.43 | 1365.84 | 1177.98 |
| ENSMUSG00000070939 | 9_Tgfbap  | 901.207 | -0.10645 | 0.698696 | 0.905638 | 685.624 | 968.011 | 950.394 | 974.67  | 873.93  | 954.61  |
| ENSMUSG00000070942 | 8_Ilrlr2  | 1389.71 | 0.84703  | 0.005172 | 0.06358  | 2014.4  | 1883.88 | 1460.24 | 770.823 | 1066.23 | 1142.71 |
| ENSMUSG00000070953 | 13_Rabep  | 352.701 | -0.20266 | 0.534359 | 0.838255 | 232.586 | 396.726 | 354.717 | 404.393 | 333.948 | 393.835 |
| ENSMUSG00000070972 | 13_Dnajc2 | 253.51  | 0.16157  | 0.682322 | 0.902647 | 402.475 | 214.232 | 186.149 | 215.401 | 252.392 | 250.409 |
| ENSMUSG00000070979 | 5_Actl7a  | 0.3683  | 0.16972  | 0.966824 | NA       | 0       | 0       | 1.03416 | 0       | 0       | 1.17563 |
| ENSMUSG00000070985 | 3_Acnat1  | 3.91477 | -1.8374  | 0.154213 | 0.529664 | 2.02249 | 0       | 3.10248 | 7.42763 | 8.58477 | 2.35126 |
| ENSMUSG00000070990 | 2_Foxe1   | 17.321  | 0.4744   | 0.563413 | 0.85076  | 3.03373 | 29.4711 | 27.9224 | 10.7288 | 16.3111 | 16.4588 |

|                    |            |         |          |          |          |         |         |         |         |         |         |
|--------------------|------------|---------|----------|----------|----------|---------|---------|---------|---------|---------|---------|
| ENSMUSG00000070999 | 2_Ccin     | 0.30991 | 0.16972  | 0.966824 | NA       | 0       | 0       | 1.03416 | 0.82529 | 0       | 0       |
| ENSMUSG00000071001 | 4_Hrct1    | 8.50763 | -1.23888 | 0.219613 | 0.610945 | 1.01124 | 10.2015 | 4.13665 | 21.4576 | 6.00934 | 8.22939 |
| ENSMUSG00000071005 | 7_Ccl19    | 37.2503 | 2.32907  | 0.002755 | 0.041008 | 14.1574 | 89.5467 | 82.7329 | 18.9817 | 5.15086 | 12.9319 |
| ENSMUSG00000071014 | 10_Ndufb1  | 598.308 | 0.49109  | 0.274918 | 0.661287 | 1181.13 | 460.202 | 456.065 | 482.796 | 528.822 | 480.832 |
| ENSMUSG00000071019 | 11_Sdr16i  | 0.37783 | 2.11394  | 0.599927 | NA       | 0       | 2.26701 | 0       | 0       | 0       | 0       |
| ENSMUSG00000071033 | 1_Gm103    | 1.10039 | -3.50809 | 0.339906 | NA       | 0       | 0       | 0       | 6.60234 | 0       | 0       |
| ENSMUSG00000071036 | 2_Gm103    | 4.76209 | 1.60451  | 0.181959 | 0.567819 | 8.08995 | 9.06802 | 4.13665 | 0       | 2.57543 | 4.70251 |
| ENSMUSG00000071037 | 5_Camkm    | 65.5967 | -0.04464 | 0.901223 | 0.973382 | 70.7871 | 66.8767 | 55.8447 | 55.2946 | 69.5366 | 75.2402 |
| ENSMUSG00000071042 | 11_Rasgr1  | 654.151 | -1.43285 | 0.001488 | 0.026215 | 557.196 | 199.497 | 304.043 | 1149.63 | 1013.86 | 700.674 |
| ENSMUSG00000071047 | 4_Ces1a    | 2.25687 | 0.69773  | 0.691696 | 0.905638 | 5.05622 | 3.40051 | 0       | 1.65058 | 3.43391 | 0       |
| ENSMUSG00000071052 | 3_Rpl7a-p  | 45.2464 | 0.30873  | 0.681054 | 0.902515 | 7.07871 | 88.4132 | 54.8106 | 37.9634 | 42.0654 | 41.147  |
| ENSMUSG00000071054 | 12_Safb    | 1607.2  | 0.05256  | 0.897946 | 0.97174  | 827.198 | 2058.44 | 2023.85 | 1489.65 | 1577.02 | 1667.04 |
| ENSMUSG00000071064 | 13_Zfp82i  | 434.93  | -0.40434 | 0.135353 | 0.499408 | 413.599 | 307.179 | 402.289 | 500.952 | 517.662 | 467.9   |
| ENSMUSG00000071068 | 6_Trem1    | 27.841  | 4.83386  | 1.13E-07 | 1.13E-05 | 22.2474 | 99.7483 | 39.2981 | 0.82529 | 2.57543 | 2.35126 |
| ENSMUSG00000071072 | 12_Ptges1  | 4019.64 | 0.70034  | 0.166902 | 0.547332 | 9027.38 | 3341.57 | 2560.58 | 2494.03 | 3541.22 | 3153.03 |
| ENSMUSG00000071073 | 4_Lrrc73   | 5.60407 | -1.82069 | 0.065992 | 0.340728 | 1.01124 | 2.26701 | 4.13665 | 9.07822 | 7.72629 | 9.40502 |
| ENSMUSG00000071074 | 9_Yipf3    | 784.902 | 0.23162  | 0.693196 | 0.905638 | 223.485 | 1183.38 | 1136.54 | 879.762 | 527.963 | 758.28  |
| ENSMUSG00000071076 | 5_Jund     | 555.469 | 0.1293   | 0.652006 | 0.982215 | 503.6   | 595.089 | 642.214 | 594.21  | 427.522 | 570.179 |
| ENSMUSG00000071078 | 5_Nr2c2a1  | 189.256 | 0.04322  | 0.937354 | 0.984983 | 60.6747 | 255.038 | 260.609 | 203.022 | 152.809 | 203.384 |
| ENSMUSG00000071083 | 1_Gm103    | 16.8065 | 0.45287  | 0.607648 | 0.872425 | 41.461  | 13.602  | 3.10248 | 9.90351 | 16.3111 | 16.4588 |
| ENSMUSG00000071089 | 2_Trim75   | 0.69327 | -2.84872 | 0.397281 | NA       | 0       | 0       | 0       | 3.30117 | 0.85848 | 0       |
| ENSMUSG00000071103 | 9_170002   | 129.297 | -0.21906 | 0.641696 | 0.888069 | 193.148 | 79.3452 | 85.8354 | 105.637 | 174.271 | 137.548 |
| ENSMUSG00000071104 | 9_Ccdc11   | 0.86844 | -3.13495 | 0.234256 | NA       | 0       | 0       | 0       | 0.82529 | 0.85848 | 3.52688 |
| ENSMUSG00000071112 | 11_Spx     | 12.3056 | 0.5976   | 0.347078 | 0.724581 | 11.1237 | 15.869  | 17.5807 | 10.7288 | 10.3017 | 8.22939 |
| ENSMUSG00000071113 | 3_Mboat4   | 3.08141 | -1.31327 | 0.330009 | 0.710342 | 3.03373 | 2.26701 | 0       | 2.47588 | 6.00934 | 4.70251 |
| ENSMUSG00000071138 | 4_Tex24    | 0.30991 | 0.16972  | 0.966824 | NA       | 0       | 0       | 1.03416 | 0.82529 | 0       | 0       |
| ENSMUSG00000071151 | 3_Gm479    | 3.31196 | -3.02487 | 0.065831 | 0.340203 | 0       | 2.26701 | 0       | 4.95175 | 10.3017 | 2.35126 |
| ENSMUSG00000071158 | 9_Gm156    | 0       | NA       | NA       | NA       | 0       | 0       | 0       | 0       | 0       | 0       |
| ENSMUSG00000071165 | 3_Gm604    | 0.28063 | -1.56014 | 0.700051 | NA       | 0       | 0       | 0       | 0.82529 | 0.85848 | 0       |
| ENSMUSG00000071172 | 12_Srsf3   | 8154.25 | 0.35359  | 0.382421 | 0.749501 | 14383.9 | 6867.89 | 6193.59 | 6261.49 | 7758.06 | 7460.53 |
| ENSMUSG00000071176 | 10_Arhgef1 | 519.501 | -0.3246  | 0.459027 | 0.798708 | 229.552 | 535.013 | 619.463 | 689.944 | 457.568 | 585.463 |
| ENSMUSG00000071177 | 4_Serpina  | 4.60288 | 1.30212  | 0.340399 | 0.719259 | 7.07871 | 12.4685 | 0       | 1.65058 | 1.71695 | 4.70251 |
| ENSMUSG00000071178 | 11_Serpin  | 18.4465 | 0.77783  | 0.214149 | 0.605026 | 22.2474 | 29.4711 | 18.6149 | 18.1564 | 16.3111 | 5.87814 |
| ENSMUSG00000071180 | 4_Smim1    | 1408.86 | 0.60703  | 0.220949 | 0.611852 | 3024.63 | 1185.64 | 892.481 | 930.104 | 1315.19 | 1105.09 |
| ENSMUSG00000071181 | 1_383040   | 11.0746 | -0.91129 | 0.191262 | 0.580244 | 9.1012  | 5.66751 | 8.27329 | 10.7288 | 19.745  | 12.9319 |
| ENSMUSG00000071192 | 5_Wfikkn   | 9.28847 | 1.29366  | 0.240626 | 0.631907 | 1.01124 | 14.7355 | 23.7857 | 7.42763 | 1.71695 | 7.05377 |
| ENSMUSG00000071202 | 4_Ccdc78   | 6.45481 | -1.08174 | 0.244943 | 0.6364   | 5.05622 | 1.1335  | 6.20497 | 11.5541 | 7.72629 | 7.05377 |
| ENSMUSG00000071203 | 6_Naip5    | 41.2709 | 1.86545  | 0.000223 | 0.006285 | 86.967  | 70.2772 | 37.2298 | 18.9817 | 18.8865 | 15.2832 |
| ENSMUSG00000071226 | 11_Cecr2   | 64.6168 | -1.45647 | 0.009925 | 0.100102 | 59.6634 | 15.869  | 27.9224 | 127.095 | 90.1401 | 67.0108 |
| ENSMUSG00000071229 | 3_Timm8a   | 0.3683  | 0.16972  | 0.966824 | NA       | 0       | 0       | 1.03416 | 0       | 0       | 1.17563 |
| ENSMUSG00000071234 | 2_Syndig1  | 1.06179 | -1.02022 | 0.643518 | NA       | 1.01124 | 1.1335  | 0       | 1.65058 | 2.57543 | 0       |
| ENSMUSG00000071252 | 5_221040   | 114.684 | 0.01475  | 0.978467 | 0.993796 | 215.395 | 71.4107 | 58.9472 | 122.143 | 116.753 | 103.455 |
| ENSMUSG00000071253 | 8_Slc25a1  | 645.974 | 0.16657  | 0.661669 | 0.895681 | 1032.48 | 512.343 | 504.671 | 590.909 | 624.113 | 611.326 |
| ENSMUSG00000071256 | 3_Zfp213   | 143.906 | -0.09557 | 0.870264 | 0.963272 | 40.4498 | 172.292 | 204.764 | 183.215 | 109.885 | 152.832 |
| ENSMUSG00000071262 | 9_Zfp957   | 1.22674 | -2.46605 | 0.239764 | NA       | 0       | 1.1335  | 0       | 2.47588 | 2.57543 | 1.17563 |
| ENSMUSG00000071265 | 9_170008   | 8.55213 | -1.06117 | 0.187273 | 0.574578 | 7.07871 | 2.26701 | 7.23913 | 10.7288 | 14.5941 | 9.40502 |
| ENSMUSG00000071266 | 13_Zfp94f  | 482.613 | 0.82115  | 0.148998 | 0.522715 | 1224.62 | 291.31  | 333     | 313.611 | 363.994 | 369.147 |
| ENSMUSG00000071267 | 11_Zfp94f  | 495.575 | 0.71578  | 0.212919 | 0.604089 | 1226.64 | 304.912 | 316.453 | 308.659 | 433.531 | 383.255 |
| ENSMUSG00000071273 | 3_Gm514    | 0.332   | 0.16972  | 0.966824 | NA       | 0       | 1.1335  | 0       | 0       | 0.85848 | 0       |
| ENSMUSG00000071280 | 1_Gm103    | 0       | NA       | NA       | NA       | 0       | 0       | 0       | 0       | 0       | 0       |
| ENSMUSG00000071281 | 10_Zfp65   | 471.516 | 0.58896  | 0.293052 | 0.677602 | 1095.18 | 273.174 | 330.932 | 319.388 | 473.021 | 337.405 |
| ENSMUSG00000071291 | 10_Zfp58   | 190.259 | 0.14213  | 0.804203 | 0.942928 | 393.374 | 102.015 | 103.416 | 179.088 | 202.601 | 161.061 |
| ENSMUSG00000071302 | 10_26100   | 454.6   | 0.2294   | 0.663809 | 0.896403 | 919.221 | 252.771 | 299.907 | 388.713 | 479.03  | 387.957 |
| ENSMUSG00000071311 | 1_Gpr31b   | 4.15706 | 2.4189   | 0.144424 | 0.514298 | 0       | 14.7355 | 6.20497 | 1.65058 | 0       | 2.35126 |
| ENSMUSG00000071317 | 3_Bves     | 164.78  | -0.10029 | 0.767413 | 0.930708 | 205.283 | 125.819 | 145.817 | 147.727 | 188.865 | 175.169 |
| ENSMUSG00000071322 | 12_Tcp10   | 1.11868 | 0.66573  | 0.827606 | NA       | 0       | 0       | 4.13665 | 0       | 2.57543 | 0       |
| ENSMUSG00000071324 | 11_Armc2   | 53.3792 | 0.19605  | 0.635222 | 0.884141 | 57.6409 | 46.4736 | 67.2205 | 55.2946 | 58.3764 | 35.2688 |
| ENSMUSG00000071335 | 4_G6300f   | 35.5091 | 0.55011  | 0.217972 | 0.608715 | 51.5735 | 39.6726 | 35.1615 | 22.2829 | 32.6221 | 31.742  |
| ENSMUSG00000071337 | 11_Tia1    | 1607.29 | 0.1501   | 0.704954 | 0.908152 | 2563.5  | 1215.12 | 1293.74 | 1280.85 | 1836.28 | 1454.25 |
| ENSMUSG00000071340 | 1_Trappc1  | 0.16854 | 1.1315   | 0.781553 | NA       | 1.01124 | 0       | 0       | 0       | 0       | 0       |
| ENSMUSG00000071341 | 4_Egr4     | 0.75567 | 3.11976  | 0.431825 | NA       | 0       | 4.53401 | 0       | 0       | 0       | 0       |
| ENSMUSG00000071342 | 4_Lsmem    | 6.9194  | 0.5703   | 0.534623 | 0.838255 | 12.1349 | 2.26701 | 10.3416 | 6.60234 | 4.29238 | 5.87814 |
| ENSMUSG00000071347 | 3_C1qtnf5  | 15.0204 | -0.44398 | 0.470129 | 0.804531 | 12.1349 | 15.869  | 10.3416 | 23.9335 | 13.7356 | 14.1075 |
| ENSMUSG00000071350 | 12_Setdb1  | 556.099 | 1.32393  | 0.004052 | 0.053721 | 1289.34 | 622.293 | 472.612 | 248.413 | 411.21  | 292.731 |
| ENSMUSG00000071359 | 13_Tbpl1   | 639.917 | 0.33015  | 0.392718 | 0.754704 | 1086.08 | 537.28  | 515.012 | 565.325 | 591.491 | 544.316 |
| ENSMUSG00000071361 | 1_Mcprt9   | 0.332   | 0.16972  | 0.966824 | NA       | 0       | 1.1335  | 0       | 0       | 0.85848 | 0       |
| ENSMUSG00000071362 | 2_Gm103    | 3.64046 | -0.1745  | 0.884093 | 0.967903 | 7.07871 | 1.1335  | 2.06832 | 5.77705 | 3.43391 | 2.35126 |
| ENSMUSG00000071369 | 10_Map3k   | 1874.74 | 0.01711  | 0.945883 | 0.986649 | 2119.57 | 1721.79 | 1815.99 | 1648.11 | 2043.18 | 1899.81 |
| ENSMUSG00000071379 | 1_Hpca11   | 796.034 | 0.3608   | 0.372198 | 0.743196 | 483.375 | 1099.5  | 1102.42 | 795.582 | 582.906 | 712.43  |
| ENSMUSG00000071392 | 4_Ect2l    | 2.6693  | 0.96052  | 0.44678  | 0.790435 | 4.04498 | 4.53401 | 2.06832 | 2.47588 | 1.71695 | 1.17563 |
| ENSMUSG00000071398 | 8_241000   | 1.21378 | -0.48555 | 0.815353 | NA       | 2.02249 | 0       | 1.03416 | 1.65058 | 2.57543 | 0       |
| ENSMUSG00000071415 | 6_Rpl23    | 18747.2 | -0.18668 | 0.460483 | 0.799755 | 20376.6 | 15864.5 | 16366.6 | 17984.8 | 21315.1 | 20575.8 |
| ENSMUSG00000071424 | 9_Grid2    | 7.7442  | -1.08967 | 0.175516 | 0.558981 | 5.05622 | 4.53401 | 5.17081 | 10.7288 | 6.86782 | 14.1075 |
| ENSMUSG00000071451 | 9_Psmg4    | 153.49  | 0.39832  | 0.163284 | 0.541302 | 193.148 | 158.69  | 171.671 | 139.474 | 122.762 | 135.197 |
| ENSMUSG00000071452 | 4_Gm113    | 0.81171 | 2.00692  | 0.546371 | NA       | 4.04498 | 0       | 0       | 0.82529 | 0       | 0       |

|                    |            |         |          |          |          |         |         |         |         |         |         |
|--------------------|------------|---------|----------|----------|----------|---------|---------|---------|---------|---------|---------|
| ENSMUSG00000071454 | 13_Dtnb    | 835.105 | 0.1199   | 0.776853 | 0.933844 | 440.903 | 1024.69 | 1143.78 | 873.159 | 659.31  | 868.789 |
| ENSMUSG00000071470 | 3_Ccnb1i   | 17.7034 | 0.674    | 0.340754 | 0.719259 | 41.461  | 11.335  | 12.4099 | 14.03   | 12.8772 | 14.1075 |
| ENSMUSG00000071477 | 10_Zfp77i  | 319.931 | 0.14222  | 0.773437 | 0.932641 | 132.473 | 422.797 | 451.929 | 358.177 | 253.251 | 300.961 |
| ENSMUSG00000071478 | 5_Hist1h2  | 0.28063 | -1.56014 | 0.700051 | NA       | 0       | 0       | 0       | 0.82529 | 0.85848 | 0       |
| ENSMUSG00000071489 | 1_Ptldr    | 3.15922 | 0.71658  | 0.554004 | 0.846091 | 3.03373 | 6.80102 | 2.06832 | 3.30117 | 2.57543 | 1.17563 |
| ENSMUSG00000071494 | 4_Olfr455  | 0.18892 | 1.1315   | 0.781553 | NA       | 0       | 1.1335  | 0       | 0       | 0       | 0       |
| ENSMUSG00000071497 | 3_Nutrf2-p | 734.653 | 0.12762  | 0.654086 | 0.893223 | 595.623 | 877.331 | 828.363 | 697.372 | 653.301 | 755.929 |
| ENSMUSG00000071506 | 3_Tmem1    | 135.955 | 0.48129  | 0.101482 | 0.433589 | 142.585 | 158.69  | 173.739 | 104.812 | 112.46  | 123.441 |
| ENSMUSG00000071528 | 3_Usmg5    | 1304.49 | 0.03609  | 0.934027 | 0.983311 | 2184.29 | 923.805 | 854.217 | 1213.18 | 1440.52 | 1210.9  |
| ENSMUSG00000071531 | 2_Gprn2    | 2.47208 | -0.05527 | 0.97615  | 0.993796 | 0       | 1.1335  | 6.20497 | 5.77705 | 1.71695 | 0       |
| ENSMUSG00000071533 | 11_Pcnp    | 2866.19 | 0.22958  | 0.570135 | 0.853848 | 4851.95 | 2311.21 | 2117.96 | 2346.31 | 2957.45 | 2612.25 |
| ENSMUSG00000071537 | 6_Klrg2    | 985.158 | 0.53438  | 0.179206 | 0.564512 | 646.185 | 1512.09 | 1338.21 | 720.48  | 741.724 | 952.259 |
| ENSMUSG00000071540 | 3_342540   | 59.3807 | -0.44664 | 0.502542 | 0.823386 | 65.7309 | 13.602  | 71.3571 | 103.162 | 37.773  | 64.6595 |
| ENSMUSG00000071547 | 3_Nt5dc2   | 500.277 | -0.69633 | 0.185528 | 0.572873 | 141.574 | 423.93  | 580.165 | 814.564 | 484.181 | 557.248 |
| ENSMUSG00000071550 | 13_Cfap4   | 1.98897 | 1.81943  | 0.257602 | 0.648651 | 5.05622 | 2.26701 | 2.06832 | 0.82529 | 1.71695 | 0       |
| ENSMUSG00000071551 | 12_Akr1c   | 0.72896 | -0.1552  | 0.964094 | NA       | 2.02249 | 0       | 0       | 0       | 0       | 2.35126 |
| ENSMUSG00000071552 | 4_Tigit    | 5.08827 | 2.49914  | 0.030083 | 0.212281 | 4.04498 | 14.7355 | 7.23913 | 2.47588 | 0.85848 | 1.17563 |
| ENSMUSG00000071553 | 10_Cpa2    | 12.4503 | -1.78294 | 0.009987 | 0.100617 | 7.07871 | 5.66751 | 4.13665 | 23.1082 | 20.6034 | 14.1075 |
| ENSMUSG00000071561 | 2_BC100f   | 22163.2 | 0.60361  | 0.193058 | 0.583012 | 43903.2 | 21301.9 | 14994.3 | 14324.6 | 23026.1 | 15428.9 |
| ENSMUSG00000071562 | 5_Stfa1    | 3.06283 | 1.99124  | 0.131841 | 0.493664 | 8.08995 | 4.53401 | 2.06832 | 1.65058 | 0.85848 | 1.17563 |
| ENSMUSG00000071567 | 6_A83003   | 27.9859 | -1.14372 | 0.061142 | 0.32618  | 28.3148 | 14.7355 | 9.30745 | 56.1199 | 30.0467 | 29.3907 |
| ENSMUSG00000071573 | 13_Rnls    | 90.5643 | -0.01062 | 0.975673 | 0.993623 | 111.237 | 80.4787 | 78.5963 | 80.8787 | 87.5647 | 104.631 |
| ENSMUSG00000071586 | 4_Gm103    | 2.58716 | -1.96419 | 0.211595 | 0.602834 | 0       | 1.1335  | 2.06832 | 8.25292 | 1.71695 | 2.35126 |
| ENSMUSG00000071591 | 2_Gm103    | 0.16854 | 1.1315   | 0.781553 | NA       | 1.01124 | 0       | 0       | 0       | 0       | 0       |
| ENSMUSG00000071604 | 4_Fam18f   | 234.35  | -2.05923 | 2.10E-08 | 2.54E-06 | 72.8096 | 80.4787 | 118.929 | 471.242 | 373.437 | 289.204 |
| ENSMUSG00000071613 | 11_Gm10    | 0.34472 | 1.99863  | 0.620844 | NA       | 0       | 0       | 2.06832 | 0       | 0       | 0       |
| ENSMUSG00000071632 | 10_25100   | 290.184 | -0.17561 | 0.532862 | 0.837668 | 231.575 | 267.507 | 318.522 | 325.99  | 282.439 | 315.068 |
| ENSMUSG00000071633 | 11_Gm49    | 1.52649 | -0.9555  | 0.633477 | NA       | 2.02249 | 0       | 1.03416 | 0       | 2.57543 | 3.52688 |
| ENSMUSG00000071636 | 6_Rimbp3   | 3.91284 | -1.19523 | 0.371804 | 0.742751 | 4.04498 | 0       | 3.10248 | 7.42763 | 7.72629 | 1.17563 |
| ENSMUSG00000071644 | 10_Eef1g   | 9009.06 | 0.01008  | 0.978366 | 0.993796 | 5185.66 | 11155.9 | 10780.1 | 8306.57 | 9150.51 | 9475.56 |
| ENSMUSG00000071645 | 5_Tut1     | 335.438 | 0.07735  | 0.857764 | 0.959059 | 166.855 | 446.6   | 419.87  | 308.659 | 316.778 | 353.864 |
| ENSMUSG00000071646 | 9_Mta2     | 3888.43 | 0.27996  | 0.272982 | 0.659357 | 3629.36 | 4818.52 | 4345.55 | 3221.12 | 3490.57 | 3825.49 |
| ENSMUSG00000071647 | 4_Eml3     | 1067.93 | 0.18997  | 0.692049 | 0.905638 | 448.992 | 1482.62 | 1482.99 | 1117.45 | 918.57  | 956.961 |
| ENSMUSG00000071648 | 3_Rom1     | 323.601 | -2.09523 | 0.000113 | 0.003648 | 92.0232 | 170.025 | 106.519 | 913.599 | 426.663 | 232.774 |
| ENSMUSG00000071649 | 5_B3gat3   | 421.535 | -0.16332 | 0.813876 | 0.946855 | 60.6747 | 508.943 | 623.599 | 580.181 | 340.815 | 414.997 |
| ENSMUSG00000071650 | 5_Ganab    | 4590.98 | 0.07478  | 0.794085 | 0.938503 | 3682.95 | 5411.34 | 5035.33 | 3866.49 | 4620.32 | 4929.41 |
| ENSMUSG00000071652 | 6_Ints5    | 437.127 | 0.30979  | 0.596367 | 0.868123 | 123.372 | 701.638 | 626.702 | 420.074 | 334.806 | 416.172 |
| ENSMUSG00000071653 | 9_181000   | 237.934 | -0.09517 | 0.782702 | 0.935592 | 178.99  | 245.97  | 265.78  | 314.436 | 224.921 | 197.505 |
| ENSMUSG00000071654 | 5_Uqcc3    | 265.808 | -0.22073 | 0.688402 | 0.905165 | 79.8883 | 332.116 | 324.727 | 368.906 | 222.346 | 266.868 |
| ENSMUSG00000071655 | 11_Ubxn1   | 1652.39 | -0.17421 | 0.703692 | 0.907783 | 663.376 | 2065.24 | 1929.75 | 1878.37 | 1562.43 | 1815.17 |
| ENSMUSG00000071656 | 6_Lrrn4cl  | 543.475 | -0.46698 | 0.253155 | 0.644241 | 656.298 | 258.439 | 453.997 | 738.637 | 600.934 | 552.545 |
| ENSMUSG00000071657 | 12_Bscl2   | 917.514 | 0.0275   | 0.952665 | 0.988194 | 393.374 | 1212.85 | 1172.74 | 1034.09 | 813.836 | 878.194 |
| ENSMUSG00000071658 | 4_Gng3     | 19.6823 | -1.72019 | 0.015591 | 0.136075 | 8.08995 | 11.335  | 8.27329 | 51.1681 | 27.4713 | 11.7563 |
| ENSMUSG00000071659 | 3_Hnrmpl   | 7185.08 | 0.26851  | 0.370882 | 0.741935 | 9799.97 | 7217.01 | 6537.97 | 5370.18 | 7003.46 | 7181.91 |
| ENSMUSG00000071660 | 10_Ttc9c   | 1648.02 | 0.38735  | 0.333837 | 0.712377 | 2904.29 | 1384.01 | 1315.45 | 1294.88 | 1632.82 | 1356.67 |
| ENSMUSG00000071661 | 6_Zbtb3    | 57.6412 | -0.21128 | 0.717161 | 0.912533 | 17.1912 | 77.0782 | 66.1863 | 75.1016 | 51.5086 | 58.7814 |
| ENSMUSG00000071662 | 3_Polr2g   | 755.433 | -0.29854 | 0.212467 | 0.603702 | 619.893 | 732.243 | 680.478 | 779.901 | 852.468 | 867.613 |
| ENSMUSG00000071665 | 10_Foxr2   | 1.00318 | -2.15567 | 0.412391 | NA       | 0       | 0       | 1.03416 | 4.12646 | 0.85848 | 0       |
| ENSMUSG00000071669 | 14_Snx29   | 416.265 | 0.09322  | 0.828841 | 0.951083 | 211.35  | 508.943 | 568.789 | 402.743 | 351.976 | 453.792 |
| ENSMUSG00000071679 | 4_Zcchc1i  | 2.42312 | 0.37403  | 0.846468 | 0.955568 | 7.07871 | 1.1335  | 0       | 0       | 5.15086 | 1.17563 |
| ENSMUSG00000071691 | 10_Gm96i   | 47.458  | -0.04679 | 0.904175 | 0.974064 | 55.6184 | 44.2066 | 40.3323 | 47.867  | 53.2256 | 43.4982 |
| ENSMUSG00000071708 | 11_Sms     | 504.631 | -0.06171 | 0.894158 | 0.971192 | 845.4   | 294.711 | 341.273 | 482.796 | 576.897 | 486.71  |
| ENSMUSG00000071711 | 11_Mpst    | 655.57  | 0.09167  | 0.850329 | 0.957445 | 273.036 | 780.984 | 975.214 | 721.306 | 524.529 | 658.352 |
| ENSMUSG00000071713 | 4_Csf2rb   | 181.427 | 1.9751   | 0.00019  | 0.005553 | 153.709 | 528.212 | 186.149 | 74.2763 | 81.5553 | 64.6595 |
| ENSMUSG00000071714 | 5_Csf2rb2  | 114.308 | 1.96994  | 0.000142 | 0.004433 | 123.372 | 289.043 | 133.407 | 28.0599 | 43.7823 | 68.1864 |
| ENSMUSG00000071715 | 11_Ncf4    | 72.8276 | 2.19087  | 0.002649 | 0.039796 | 22.2474 | 225.567 | 110.655 | 30.5358 | 19.745  | 28.2151 |
| ENSMUSG00000071716 | 4_Apol7e   | 8.92946 | 1.14277  | 0.373488 | 0.744203 | 25.2811 | 2.26701 | 9.30745 | 0       | 12.0187 | 4.70251 |
| ENSMUSG00000071719 | 2_Tmem2    | 8.55865 | -1.46081 | 0.071877 | 0.357998 | 3.03373 | 4.53401 | 6.20497 | 17.3311 | 12.0187 | 8.22939 |
| ENSMUSG00000071722 | 4_Spin4    | 86.6053 | 0.24836  | 0.571168 | 0.854443 | 132.473 | 73.6777 | 75.4938 | 54.4693 | 82.4138 | 101.104 |
| ENSMUSG00000071723 | 7_Gspt2    | 170.144 | -0.2677  | 0.524846 | 0.833133 | 233.597 | 105.416 | 124.099 | 160.107 | 228.355 | 169.29  |
| ENSMUSG00000071724 | 4_Smpd5    | 7.23171 | -0.41828 | 0.705091 | 0.908152 | 0       | 12.4685 | 6.20497 | 9.07822 | 8.58477 | 7.05377 |
| ENSMUSG00000071726 | 2_Gm594    | 12.5899 | -0.19385 | 0.803496 | 0.942928 | 3.03373 | 13.602  | 18.6149 | 10.7288 | 15.4526 | 14.1075 |
| ENSMUSG00000071748 | 2_Gm146i   | 835.32  | 0.63487  | 0.240811 | 0.631932 | 1947.66 | 537.28  | 563.618 | 586.783 | 773.488 | 603.097 |
| ENSMUSG00000071757 | 10_Zhx2    | 70.4434 | -0.64241 | 0.077275 | 0.372992 | 47.5285 | 56.6751 | 61.0155 | 103.987 | 74.6875 | 78.7671 |
| ENSMUSG00000071767 | 4_Rhox7a   | 0.19594 | -0.79206 | 0.84609  | NA       | 0       | 0       | 0       | 0       | 0       | 1.17563 |
| ENSMUSG00000071770 | 5_Rhox4e   | 1.95503 | -0.88793 | 0.681653 | 0.902515 | 0       | 0       | 4.13665 | 3.30117 | 4.29238 | 0       |
| ENSMUSG00000071771 | 4_Rhox4b   | 73.9667 | -0.43819 | 0.18402  | 0.570805 | 58.6522 | 66.8767 | 63.0839 | 82.5292 | 92.7155 | 79.9427 |
| ENSMUSG00000071815 | 6_Fthl17e  | 0       | NA       | NA       | NA       | 0       | 0       | 0       | 0       | 0       | 0       |
| ENSMUSG00000071816 | 5_Ssxb5    | 1.84466 | -0.23221 | 0.900065 | 0.972744 | 2.02249 | 0       | 3.10248 | 1.65058 | 4.29238 | 0       |
| ENSMUSG00000071847 | 12_Apcdd   | 327.681 | -0.68408 | 0.085784 | 0.396669 | 142.585 | 266.373 | 345.41  | 448.959 | 366.57  | 396.187 |
| ENSMUSG00000071855 | 4_Ccdc11   | 104.828 | 0.32441  | 0.484987 | 0.812961 | 191.125 | 73.6777 | 84.8012 | 91.6075 | 99.5833 | 88.1721 |
| ENSMUSG00000071856 | 10_Mcc     | 450.888 | -0.18834 | 0.53845  | 0.839843 | 521.802 | 414.862 | 327.829 | 439.056 | 537.407 | 464.373 |
| ENSMUSG00000071858 | 3_Gm94     | 80.4791 | 0.03805  | 0.940402 | 0.98555  | 117.304 | 86.1462 | 41.3665 | 67.674  | 111.602 | 58.7814 |
| ENSMUSG00000071860 | 1_290005   | 0.17236 | 1.1315   | 0.781553 | NA       | 0       | 0       | 1.03416 | 0       | 0       | 0       |
| ENSMUSG00000071862 | 2_Lrrtm2   | 53.0852 | -1.2264  | 0.050733 | 0.29136  | 62.6971 | 18.136  | 14.4783 | 93.258  | 74.6875 | 55.2545 |

|                    |           |         |          |          |          |         |         |         |         |         |         |
|--------------------|-----------|---------|----------|----------|----------|---------|---------|---------|---------|---------|---------|
| ENSMUSG00000071866 | 11_Ppia   | 30083.2 | -0.15393 | 0.488677 | 0.814132 | 27303.6 | 29447.3 | 28688.7 | 29726.2 | 34367.4 | 30966   |
| ENSMUSG00000071890 | 4_Mroh9   | 0.19594 | -0.79206 | 0.84609  | NA       | 0       | 0       | 0       | 0       | 0       | 1.17563 |
| ENSMUSG00000071893 | 6_Vmn1r4  | 7.73755 | -0.07584 | 0.941696 | 0.986006 | 17.1912 | 3.40051 | 2.06832 | 9.07822 | 11.1602 | 3.52688 |
| ENSMUSG00000071984 | 10_Fndc1  | 967.081 | -0.2372  | 0.495414 | 0.817969 | 731.13  | 688.036 | 1244.1  | 1201.63 | 938.315 | 999.284 |
| ENSMUSG00000072049 | 5_Vmn2r1  | 0.99171 | 2.34842  | 0.361619 | NA       | 2.02249 | 0       | 3.10248 | 0.82529 | 0       | 0       |
| ENSMUSG00000072066 | 6_672048  | 51.0786 | 0.23637  | 0.729381 | 0.917707 | 112.248 | 32.8716 | 20.6832 | 39.614  | 66.9612 | 34.0932 |
| ENSMUSG00000072082 | 6_Ccnf    | 240.324 | 0.62829  | 0.215261 | 0.606405 | 115.282 | 425.064 | 335.068 | 151.854 | 185.431 | 229.247 |
| ENSMUSG00000072100 | 4_Cldn34i | 0.18892 | 1.1315   | 0.781553 | NA       | 0       | 1.1335  | 0       | 0       | 0       | 0       |
| ENSMUSG00000072115 | 10_Ang    | 25.9127 | -0.76099 | 0.126835 | 0.484181 | 18.2024 | 13.602  | 25.854  | 35.4876 | 31.7636 | 30.5663 |
| ENSMUSG00000072188 | 4_Gm103i  | 0.17236 | 1.1315   | 0.781553 | NA       | 0       | 0       | 1.03416 | 0       | 0       | 0       |
| ENSMUSG00000072214 | 6_Sept5   | 2655.96 | 0.28709  | 0.625606 | 0.87994  | 744.276 | 3800.64 | 4213.17 | 2720.16 | 1786.49 | 2671.03 |
| ENSMUSG00000072235 | 5_Tuba1a  | 5455.66 | -0.62303 | 0.075219 | 0.367057 | 2719.24 | 4837.79 | 5330.07 | 7567.11 | 6045.39 | 6234.35 |
| ENSMUSG00000072244 | 9_Trim6   | 73.1685 | 2.39235  | 4.01E-08 | 4.51E-06 | 131.462 | 154.156 | 82.7329 | 19.807  | 21.4619 | 29.3907 |
| ENSMUSG00000072249 | 3_Fthl17f | 0.33708 | 1.97061  | 0.625968 | NA       | 2.02249 | 0       | 0       | 0       | 0       | 0       |
| ENSMUSG00000072258 | 10_Taf1a  | 311.477 | -0.09271 | 0.74599  | 0.924318 | 296.295 | 318.514 | 289.565 | 260.792 | 376.871 | 326.825 |
| ENSMUSG00000072259 | 3_Gm559i  | 0.14308 | -0.79206 | 0.84609  | NA       | 0       | 0       | 0       | 0       | 0.85848 | 0       |
| ENSMUSG00000072294 | 4_Klf12   | 41.0516 | -1.13065 | 0.020497 | 0.165135 | 17.1912 | 27.2041 | 33.0932 | 67.674  | 63.5273 | 37.6201 |
| ENSMUSG00000072419 | 4_Dppa2   | 0.61965 | -2.67071 | 0.351111 | NA       | 0       | 0       | 0       | 0.82529 | 1.71695 | 1.17563 |
| ENSMUSG00000072423 | 4_Psmb1i  | 0.83591 | 2.05376  | 0.384731 | NA       | 2.02249 | 1.1335  | 1.03416 | 0.82529 | 0       | 0       |
| ENSMUSG00000072437 | 3_Nanos1  | 26.8849 | 1.34438  | 0.042326 | 0.261021 | 70.7871 | 18.136  | 26.8882 | 14.8553 | 18.8865 | 11.7563 |
| ENSMUSG00000072476 | 6_Gm900i  | 1.12847 | -1.1454  | 0.711265 | NA       | 0       | 0       | 2.06832 | 0       | 0       | 4.70251 |
| ENSMUSG00000072479 | 10_Xlr5b  | 0       | NA       | NA       | NA       | 0       | 0       | 0       | 0       | 0       | 0       |
| ENSMUSG00000072487 | 10_Mroh5  | 0.18892 | 1.1315   | 0.781553 | NA       | 0       | 1.1335  | 0       | 0       | 0       | 0       |
| ENSMUSG00000072494 | 7_Ppp1r3i | 16.6688 | -0.25719 | 0.637145 | 0.885525 | 16.1799 | 15.869  | 13.4441 | 16.5058 | 18.028  | 19.9857 |
| ENSMUSG00000072501 | 4_Phf201i | 2261.69 | 0.50845  | 0.275567 | 0.662109 | 4570.82 | 1761.46 | 1636.04 | 1563.93 | 2174.52 | 1863.37 |
| ENSMUSG00000072553 | 10_Gm52i  | 14.9422 | -2.42591 | 0.003697 | 0.050426 | 1.01124 | 9.06802 | 4.13665 | 34.6623 | 13.7356 | 27.0394 |
| ENSMUSG00000072568 | 4_Fam84i  | 2016.66 | 0.58043  | 0.119233 | 0.469727 | 3609.13 | 1902.02 | 1739.46 | 1493.78 | 1660.29 | 1695.26 |
| ENSMUSG00000072571 | 2_Tmem2   | 12.3441 | -0.31124 | 0.684934 | 0.903819 | 3.03373 | 12.4685 | 17.5807 | 14.8553 | 12.0187 | 14.1075 |
| ENSMUSG00000072572 | 8_Slc39a2 | 14.0711 | 0.23481  | 0.700034 | 0.905844 | 10.1124 | 17.0025 | 18.6149 | 13.2047 | 13.7356 | 11.7563 |
| ENSMUSG00000072575 | 3_Eddm3i  | 1.48615 | -1.72279 | 0.381472 | NA       | 2.02249 | 0       | 0       | 1.65058 | 1.71695 | 3.52688 |
| ENSMUSG00000072582 | 9_Pthr2   | 501.388 | 0.06672  | 0.80896  | 0.945066 | 579.443 | 512.343 | 446.758 | 418.423 | 508.218 | 543.14  |
| ENSMUSG00000072591 | 10_59304  | 38.9759 | 0.07466  | 0.866124 | 0.962496 | 32.3598 | 39.6726 | 47.5714 | 30.5358 | 34.3391 | 49.3764 |
| ENSMUSG00000072596 | 4_Ear2    | 6.3223  | 0.63941  | 0.458392 | 0.798202 | 11.1237 | 6.80102 | 5.17081 | 4.12646 | 6.00934 | 4.70251 |
| ENSMUSG00000072601 | 4_Ear1    | 0       | NA       | NA       | NA       | 0       | 0       | 0       | 0       | 0       | 0       |
| ENSMUSG00000072612 | 2_Gm103i  | 1.1639  | 0.52744  | 0.804333 | NA       | 2.02249 | 0       | 2.06832 | 0       | 1.71695 | 1.17563 |
| ENSMUSG00000072613 | 12_17000  | 0.28063 | -1.56014 | 0.700051 | NA       | 0       | 0       | 0       | 0.82529 | 0.85848 | 0       |
| ENSMUSG00000072618 | 2_Gm103i  | 3.86635 | 0.04087  | 0.969453 | 0.991879 | 2.02249 | 4.53401 | 5.17081 | 2.47588 | 4.29238 | 4.70251 |
| ENSMUSG00000072620 | 3_Slfn2   | 5396.61 | 1.62847  | 4.62E-07 | 4.01E-05 | 8651.2  | 9426.21 | 6389.05 | 2025.27 | 3286.25 | 2601.66 |
| ENSMUSG00000072623 | 6_Zfp9    | 192.995 | -0.63975 | 0.178477 | 0.563752 | 257.867 | 83.8792 | 110.655 | 222.829 | 233.506 | 249.233 |
| ENSMUSG00000072624 | 2_Gm546i  | 1.4704  | -2.79541 | 0.189329 | NA       | 1.01124 | 0       | 0       | 5.77705 | 0.85848 | 1.17563 |
| ENSMUSG00000072625 | 1_Gdf2    | 0.28616 | -1.57932 | 0.696464 | NA       | 0       | 0       | 0       | 0       | 1.71695 | 0       |
| ENSMUSG00000072640 | 11_Lyrm9  | 436.749 | -0.51954 | 0.062796 | 0.330728 | 430.79  | 302.645 | 343.342 | 549.645 | 507.36  | 486.71  |
| ENSMUSG00000072647 | 5_Adam1i  | 92.1545 | -0.31006 | 0.311874 | 0.693638 | 83.9333 | 78.2117 | 84.8012 | 103.987 | 105.593 | 96.4015 |
| ENSMUSG00000072662 | 2_Mansc4  | 2.20533 | -2.38483 | 0.136273 | 0.501691 | 1.01124 | 1.1335  | 0       | 4.12646 | 3.43391 | 3.52688 |
| ENSMUSG00000072663 | 11_Spef2  | 8.58817 | -0.45934 | 0.59639  | 0.868123 | 14.1574 | 3.40051 | 4.13665 | 9.90351 | 12.8772 | 7.05377 |
| ENSMUSG00000072664 | 10_Ugt3a  | 0.13755 | -0.79206 | 0.84609  | NA       | 0       | 0       | 0       | 0.82529 | 0       | 0       |
| ENSMUSG00000072672 | 10_Duxbk  | 15.5846 | -0.13586 | 0.826596 | 0.950396 | 19.2136 | 17.0025 | 8.27329 | 17.3311 | 12.8772 | 18.81   |
| ENSMUSG00000072673 | 2_Gm103i  | 0.85798 | 3.31342  | 0.29496  | NA       | 1.01124 | 0       | 4.13665 | 0       | 0       | 0       |
| ENSMUSG00000072674 | 10_Plac9t | 94.4329 | -0.69532 | 0.686777 | 0.904498 | 0       | 61.2092 | 155.124 | 181.564 | 65.2443 | 103.455 |
| ENSMUSG00000072675 | 12_Duxbl  | 73.8576 | -0.59921 | 0.402475 | 0.761277 | 92.0232 | 74.8112 | 9.30745 | 94.9086 | 59.2349 | 112.86  |
| ENSMUSG00000072676 | 11_Tmem   | 181.053 | 0.27436  | 0.397137 | 0.757822 | 242.699 | 158.69  | 193.388 | 160.107 | 188.006 | 143.427 |
| ENSMUSG00000072679 | 10_D6Ert  | 0.73362 | -1.59314 | 0.566092 | NA       | 0       | 0       | 1.03416 | 1.65058 | 1.71695 | 0       |
| ENSMUSG00000072680 | 11_Tmem   | 600.347 | -0.00734 | 0.979796 | 0.993796 | 474.274 | 688.036 | 633.941 | 565.325 | 556.293 | 684.215 |
| ENSMUSG00000072693 | 2_Gm104i  | 34.6236 | 3.72351  | NA       | NA       | 193.148 | 0       | 0       | 0       | 14.5941 | 0       |
| ENSMUSG00000072694 | 7_150001  | 207.943 | -0.50945 | 0.111192 | 0.453007 | 208.316 | 134.887 | 171.671 | 275.648 | 245.524 | 211.613 |
| ENSMUSG00000072704 | 6_Smim1i  | 1839.52 | 0.50361  | 0.359698 | 0.733629 | 4222.96 | 1117.63 | 1131.37 | 1398.87 | 1660.29 | 1505.98 |
| ENSMUSG00000072707 | 2_Olfr31  | 0       | NA       | NA       | NA       | 0       | 0       | 0       | 0       | 0       | 0       |
| ENSMUSG00000072714 | 1_Rpl21-p | 167.653 | -0.65263 | 0.313306 | 0.69473  | 25.2811 | 187.028 | 178.91  | 236.859 | 167.403 | 210.437 |
| ENSMUSG00000072718 | 6_Klra10  | 0       | NA       | NA       | NA       | 0       | 0       | 0       | 0       | 0       | 0       |
| ENSMUSG00000072720 | 9_Myo18t  | 49.5648 | -1.06324 | 0.114851 | 0.460559 | 22.2474 | 18.136  | 55.8447 | 112.24  | 26.6128 | 62.3083 |
| ENSMUSG00000072738 | 3_Gm164i  | 0       | NA       | NA       | NA       | 0       | 0       | 0       | 0       | 0       | 0       |
| ENSMUSG00000072753 | 11_92300  | 15.2254 | -2.50927 | 0.004124 | 0.054254 | 9.1012  | 4.53401 | 0       | 23.9335 | 32.6221 | 21.1613 |
| ENSMUSG00000072761 | 10_Gm67   | 66.7705 | 0.48018  | 0.304043 | 0.68684  | 122.361 | 51.0076 | 59.9814 | 56.9452 | 60.9519 | 49.3764 |
| ENSMUSG00000072762 | 9_493052  | 224.729 | 0.49523  | 0.361077 | 0.734102 | 492.476 | 145.088 | 150.988 | 145.251 | 211.185 | 203.384 |
| ENSMUSG00000072763 | 2_543040  | 96.2215 | 0.23865  | 0.709512 | 0.909943 | 216.406 | 56.6751 | 39.2981 | 79.2281 | 98.7249 | 86.9965 |
| ENSMUSG00000072769 | 6_Gm104   | 23.2937 | -1.46783 | 0.04639  | 0.275675 | 25.2811 | 4.53401 | 7.23913 | 42.9152 | 38.6315 | 21.1613 |
| ENSMUSG00000072770 | 9_Acrbp   | 60.4939 | -0.30276 | 0.608717 | 0.872658 | 16.1799 | 66.8767 | 79.6304 | 73.451  | 70.3951 | 56.4301 |
| ENSMUSG00000072772 | 3_Grcc10  | 407.353 | -0.35764 | 0.481887 | 0.811016 | 143.597 | 417.129 | 510.876 | 617.319 | 374.296 | 380.903 |
| ENSMUSG00000072774 | 10_Zfp95i | 80.8791 | 0.29776  | 0.629789 | 0.881654 | 180.001 | 43.0731 | 44.4689 | 70.9751 | 83.2723 | 63.4839 |
| ENSMUSG00000072791 | 11_Abcb5  | 0.18892 | 1.1315   | 0.781553 | NA       | 0       | 1.1335  | 0       | 0       | 0       | 0       |
| ENSMUSG00000072812 | 4_Ahnak2  | 3988.11 | 0.31292  | 0.351665 | 0.728508 | 2869.91 | 5093.96 | 5292.84 | 3471.18 | 3309.43 | 3891.33 |
| ENSMUSG00000072814 | 10_Gm79i  | 0       | NA       | NA       | NA       | 0       | 0       | 0       | 0       | 0       | 0       |
| ENSMUSG00000072821 | 4_Gm635   | 0       | NA       | NA       | NA       | 0       | 0       | 0       | 0       | 0       | 0       |
| ENSMUSG00000072825 | 10_Cep17  | 2671.75 | 0.66233  | 0.261836 | 0.651129 | 821.13  | 4471.67 | 4530.66 | 2300.09 | 1561.57 | 2345.38 |
| ENSMUSG00000072845 | 3_Tmprss  | 45520.5 | 0.50234  | 0.262263 | 0.651448 | 88971.3 | 36650.7 | 34476.9 | 29841.7 | 41694.5 | 41487.9 |

|                    |           |         |          |          |          |         |         |         |         |         |         |
|--------------------|-----------|---------|----------|----------|----------|---------|---------|---------|---------|---------|---------|
| ENSMUSG00000072847 | 4_A53001  | 170.656 | 0.22246  | 0.6569   | 0.894474 | 323.598 | 95.2142 | 132.373 | 153.504 | 160.535 | 158.71  |
| ENSMUSG00000072849 | 10_Serpin | 0       | NA       | NA       | NA       | 0       | 0       | 0       | 0       | 0       | 0       |
| ENSMUSG00000072872 | 3_Rybp    | 1276.74 | 0.46914  | 0.190595 | 0.579187 | 2153.95 | 1189.04 | 1104.48 | 1020.89 | 1156.37 | 1035.73 |
| ENSMUSG00000072875 | 2_Gpr27   | 50.6448 | -0.36889 | 0.423247 | 0.774977 | 61.6859 | 27.2041 | 43.4348 | 45.3911 | 62.6688 | 63.4839 |
| ENSMUSG00000072889 | 9_Nfxl1   | 485.499 | 0.32264  | 0.234578 | 0.626192 | 647.196 | 499.875 | 471.578 | 425.026 | 447.267 | 422.05  |
| ENSMUSG00000072905 | 5_Gm201   | 0.28616 | -1.57932 | 0.696464 | NA       | 0       | 0       | 0       | 0       | 1.71695 | 0       |
| ENSMUSG00000072915 | 3_Gm122   | 246.077 | -0.32283 | 0.370777 | 0.741935 | 310.452 | 165.491 | 179.944 | 276.473 | 290.165 | 253.936 |
| ENSMUSG00000072919 | 3_Noxred  | 8.70359 | 0.1975   | 0.82204  | 0.9485   | 9.1012  | 15.869  | 3.10248 | 7.42763 | 12.0187 | 4.70251 |
| ENSMUSG00000072923 | 6_Gm104   | 0.53364 | 2.62307  | 0.473724 | NA       | 0       | 1.1335  | 2.06832 | 0       | 0       | 0       |
| ENSMUSG00000072941 | 5_Sod3    | 954.891 | -0.32956 | 0.454613 | 0.795965 | 408.543 | 1088.16 | 1042.43 | 1308.09 | 881.656 | 1000.46 |
| ENSMUSG00000072944 | 11_Nup62  | 25.0824 | -1.48093 | 0.010374 | 0.103609 | 22.2474 | 9.06802 | 8.27329 | 40.4393 | 35.1976 | 35.2688 |
| ENSMUSG00000072945 | 3_Ripply1 | 3.54837 | 0.09224  | 0.942052 | 0.986006 | 3.03373 | 6.80102 | 1.03416 | 1.65058 | 1.71695 | 7.05377 |
| ENSMUSG00000072946 | 12_Ptgr2  | 1527.86 | -0.04654 | 0.89424  | 0.971192 | 2156.98 | 1141.44 | 1211    | 1444.26 | 1631.11 | 1582.4  |
| ENSMUSG00000072949 | 5_Acot1   | 39.0033 | -1.13019 | 0.025582 | 0.1917   | 13.1462 | 29.4711 | 31.0248 | 58.5958 | 61.8103 | 39.9713 |
| ENSMUSG00000072952 | 6_Gm587   | 0.47657 | -2.28567 | 0.465885 | NA       | 0       | 0       | 0       | 0.82529 | 0.85848 | 1.17563 |
| ENSMUSG00000072955 | 13_Tmsb1  | 42.0666 | -0.60229 | 0.215832 | 0.607357 | 51.5735 | 23.8036 | 24.8199 | 58.5958 | 48.9332 | 44.6739 |
| ENSMUSG00000072963 | 2_Gm104   | 0.28063 | -1.56014 | 0.700051 | NA       | 0       | 0       | 0       | 0.82529 | 0.85848 | 0       |
| ENSMUSG00000072964 | 13_Bhlhb5 | 395.605 | -0.45278 | 0.385228 | 0.750802 | 605.735 | 155.29  | 240.96  | 451.435 | 532.256 | 387.957 |
| ENSMUSG00000072966 | 11_Gpras  | 314.392 | -1.37652 | 0.004767 | 0.060084 | 275.058 | 83.8792 | 165.466 | 502.603 | 544.274 | 315.068 |
| ENSMUSG00000072968 | 4_Gm177   | 0.17236 | 1.1315   | 0.781553 | NA       | 0       | 0       | 1.03416 | 0       | 0       | 0       |
| ENSMUSG00000072969 | 2_Armcx5  | 217.969 | -0.02083 | 0.963265 | 0.990106 | 356.969 | 134.887 | 157.193 | 200.546 | 248.958 | 209.262 |
| ENSMUSG00000072972 | 3_Adam4   | 16.2858 | 0.51857  | 0.524714 | 0.833095 | 34.3823 | 13.602  | 9.30745 | 4.12646 | 16.3111 | 19.9857 |
| ENSMUSG00000072974 | 4_Gm478   | 20.001  | 0.0564   | 0.922433 | 0.978174 | 28.3148 | 20.4031 | 12.4099 | 14.8553 | 24.0374 | 19.9857 |
| ENSMUSG00000072980 | 3_Olp5    | 96.4132 | 0.86825  | 0.065711 | 0.340069 | 199.215 | 91.8137 | 82.7329 | 58.5958 | 84.9892 | 61.1326 |
| ENSMUSG00000072982 | 1_923000  | 28.8103 | 0.619    | 0.362814 | 0.735692 | 58.6522 | 14.7355 | 31.0248 | 10.7288 | 28.3297 | 29.3907 |
| ENSMUSG00000073000 | 2_Gm104   | 4.09228 | -2.20166 | 0.100286 | 0.430811 | 1.01124 | 3.40051 | 0       | 4.95175 | 3.43391 | 11.7563 |
| ENSMUSG00000073002 | 9_Vamp5   | 110.561 | -1.03492 | 0.029888 | 0.211636 | 40.4498 | 63.4762 | 113.758 | 192.293 | 128.772 | 124.617 |
| ENSMUSG00000073007 | 10_Fam4f  | 0.61771 | 0.23492  | 0.937546 | NA       | 2.02249 | 0       | 0       | 0.82529 | 0.85848 | 0       |
| ENSMUSG00000073008 | 11_Gpr17  | 6.78981 | 3.75585  | 0.000867 | 0.017584 | 15.1687 | 11.335  | 11.3758 | 0.82529 | 0.85848 | 1.17563 |
| ENSMUSG00000073010 | 9_Gm512   | 22.0716 | -0.56594 | 0.322168 | 0.702839 | 28.3148 | 13.602  | 11.3758 | 28.0599 | 24.0374 | 27.0394 |
| ENSMUSG00000073012 | 2_Fnd3c2  | 1.32862 | 0.83937  | 0.691995 | NA       | 4.04498 | 0       | 1.03416 | 0       | 1.71695 | 1.17563 |
| ENSMUSG00000073016 | 3_Uprt    | 232.257 | 0.35305  | 0.381986 | 0.749425 | 395.397 | 193.829 | 192.354 | 189.817 | 235.223 | 186.925 |
| ENSMUSG00000073018 | 5_Gm107   | 6.78988 | 0.9112   | 0.302198 | 0.685243 | 9.1012  | 10.2015 | 7.23913 | 6.60234 | 1.71695 | 5.87814 |
| ENSMUSG00000073051 | 4_Gm148   | 0.28616 | -1.57932 | 0.696464 | NA       | 0       | 0       | 0       | 0       | 1.71695 | 0       |
| ENSMUSG00000073062 | 3_Zxdb    | 229.4   | 0.85081  | 0.038637 | 0.246922 | 455.06  | 199.497 | 230.618 | 161.757 | 151.95  | 177.52  |
| ENSMUSG00000073077 | 6_Gm717   | 31.5406 | 0.30371  | 0.674012 | 0.900436 | 69.7759 | 18.136  | 16.5466 | 15.6806 | 42.0654 | 27.0394 |
| ENSMUSG00000073079 | 5_Srp54a  | 1197.27 | 0.60089  | 0.289555 | 0.674773 | 2834.52 | 792.319 | 702.196 | 722.131 | 1155.51 | 976.947 |
| ENSMUSG00000073094 | 9_Smim9   | 0.17236 | 1.1315   | 0.781553 | NA       | 0       | 0       | 1.03416 | 0       | 0       | 0       |
| ENSMUSG00000073096 | 11_Lrrc61 | 370.048 | -0.0694  | 0.858446 | 0.959189 | 214.384 | 381.99  | 487.09  | 419.249 | 320.212 | 397.362 |
| ENSMUSG00000073102 | 7_Drc1    | 1.4286  | -0.03096 | 0.986459 | NA       | 1.01124 | 2.26701 | 1.03416 | 0.82529 | 3.43391 | 0       |
| ENSMUSG00000073103 | 2_Gm104   | 35.8402 | 0.33444  | 0.55336  | 0.845971 | 64.7196 | 30.6046 | 24.8199 | 37.1382 | 37.773  | 19.9857 |
| ENSMUSG00000073117 | 2_Gm734   | 0.56675 | 2.70271  | 0.498103 | NA       | 0       | 3.40051 | 0       | 0       | 0       | 0       |
| ENSMUSG00000073119 | 3_Speer4  | 1.08132 | 0.87787  | 0.777985 | NA       | 0       | 0       | 4.13665 | 0       | 0       | 2.35126 |
| ENSMUSG00000073125 | 10_Xlr3b  | 52.4756 | -0.66971 | 0.541718 | 0.840676 | 81.9108 | 39.6726 | 0       | 52.8187 | 109.885 | 30.5663 |
| ENSMUSG00000073130 | 8_Gm114   | 3.57806 | 0.43831  | 0.708236 | 0.909748 | 7.07871 | 1.1335  | 4.13665 | 2.47588 | 4.29238 | 2.35126 |
| ENSMUSG00000073131 | 12_Vma2   | 1217.71 | 0.53556  | 0.299201 | 0.862213 | 2676.76 | 841.059 | 805.612 | 884.713 | 1152.93 | 945.205 |
| ENSMUSG00000073139 | 9_BC023f  | 738.019 | -0.28392 | 0.267257 | 0.655404 | 766.523 | 622.293 | 608.087 | 778.251 | 878.222 | 774.739 |
| ENSMUSG00000073147 | 3_503142  | 257.168 | 0.02907  | 0.91466  | 0.97608  | 285.171 | 219.9   | 274.053 | 255.841 | 254.109 | 253.936 |
| ENSMUSG00000073154 | 10_93301  | 1.54283 | -1.76028 | 0.342048 | NA       | 1.01124 | 0       | 1.03416 | 1.65058 | 0.85848 | 4.70251 |
| ENSMUSG00000073155 | 12_18100  | 477.525 | -0.07073 | 0.783792 | 0.935592 | 471.24  | 445.467 | 480.885 | 561.199 | 436.106 | 470.251 |
| ENSMUSG00000073158 | 3_903062  | 12.3871 | 0.51959  | 0.458445 | 0.798202 | 21.2361 | 11.335  | 11.3758 | 9.90351 | 14.5941 | 5.87814 |
| ENSMUSG00000073164 | 11_24100  | 23.7625 | 0.6664   | 0.226859 | 0.617599 | 40.4498 | 26.0706 | 20.6832 | 18.9817 | 12.8772 | 23.5126 |
| ENSMUSG00000073176 | 4_Zfp449  | 108.209 | -0.53267 | 0.363034 | 0.735825 | 168.878 | 38.5391 | 57.913  | 135.348 | 154.526 | 94.0502 |
| ENSMUSG00000073184 | 3_Gm104   | 0.39188 | -1.97195 | 0.623385 | NA       | 0       | 0       | 0       | 0       | 0       | 2.35126 |
| ENSMUSG00000073197 | 8_573050  | 51.0322 | 0.697    | 0.209949 | 0.601767 | 112.248 | 39.6726 | 37.2298 | 36.3129 | 36.056  | 44.6739 |
| ENSMUSG00000073207 | 1_Ccdc16  | 4.81395 | -1.06105 | 0.406901 | 0.76467  | 3.03373 | 2.26701 | 4.13665 | 7.42763 | 12.0187 | 0       |
| ENSMUSG00000073208 | 12_Speer  | 1.02702 | -2.191   | 0.48605  | NA       | 1.01124 | 0       | 0       | 0       | 5.15086 | 0       |
| ENSMUSG00000073209 | 4_Klf14   | 0.67821 | 0.08307  | 0.977472 | NA       | 0       | 0       | 2.06832 | 0.82529 | 0       | 1.17563 |
| ENSMUSG00000073226 | 9_Gm104   | 0.52091 | 1.15042  | 0.761139 | NA       | 0       | 2.26701 | 0       | 0       | 0.85848 | 0       |
| ENSMUSG00000073234 | 3_Gm877   | 10.2412 | 0.7574   | 0.329186 | 0.709946 | 16.1799 | 11.335  | 11.3758 | 9.90351 | 10.3017 | 2.35126 |
| ENSMUSG00000073243 | 2_Gm9     | 1.17619 | 1.37814  | 0.596356 | NA       | 5.05622 | 0       | 0       | 0.82529 | 0       | 1.17563 |
| ENSMUSG00000073290 | 1_Gm104   | 0       | NA       | NA       | NA       | 0       | 0       | 0       | 0       | 0       | 0       |
| ENSMUSG00000073293 | 4_Nudt10  | 14.2937 | -0.83968 | 0.335504 | 0.713826 | 21.2361 | 1.1335  | 8.27329 | 20.6323 | 18.028  | 16.4588 |
| ENSMUSG00000073294 | 4_AU0227  | 0.13755 | -0.79206 | 0.84609  | NA       | 0       | 0       | 0       | 0.82529 | 0       | 0       |
| ENSMUSG00000073295 | 4_Nudt11  | 46.5232 | -0.20741 | 0.711118 | 0.910557 | 74.8321 | 32.8716 | 21.7174 | 39.614  | 58.3764 | 51.7276 |
| ENSMUSG00000073371 | 3_Gm659   | 62.3899 | -0.34982 | 0.472354 | 0.805673 | 25.2811 | 68.0102 | 71.3571 | 64.3728 | 71.2536 | 74.0646 |
| ENSMUSG00000073374 | 3_C03003  | 66.2693 | 0.17436  | 0.740248 | 0.922013 | 123.372 | 39.6726 | 47.5714 | 61.0716 | 60.0934 | 65.8352 |
| ENSMUSG00000073375 | 2_Lrrc30  | 22.3286 | -1.17515 | 0.145476 | 0.515589 | 26.2924 | 2.26701 | 12.4099 | 42.9152 | 17.1695 | 32.9176 |
| ENSMUSG00000073388 | 2_A33001  | 3.49627 | 1.53021  | 0.236169 | 0.628406 | 3.03373 | 2.26701 | 10.3416 | 3.30117 | 0.85848 | 1.17563 |
| ENSMUSG00000073399 | 9_Trim40  | 50.2962 | 1.93651  | 0.000149 | 0.004593 | 79.8883 | 100.882 | 58.9472 | 16.5058 | 32.6221 | 12.9319 |
| ENSMUSG00000073400 | 6_Trim10  | 1.54937 | -1.00033 | 0.610883 | NA       | 0       | 0       | 3.10248 | 3.30117 | 1.71695 | 1.17563 |
| ENSMUSG00000073402 | 11_Gm89   | 22.3541 | 2.7304   | 0.012635 | 0.119114 | 1.01124 | 68.0102 | 47.5714 | 9.07822 | 2.57543 | 5.87814 |
| ENSMUSG00000073407 | 1_Gm603   | 13.6838 | 1.5165   | 0.088041 | 0.402969 | 7.07871 | 38.5391 | 15.5124 | 6.60234 | 12.0187 | 2.35126 |
| ENSMUSG00000073408 | 2_Dpcr1   | 5.62178 | 0.31296  | 0.780823 | 0.935516 | 2.02249 | 2.26701 | 14.4783 | 6.60234 | 6.00934 | 2.35126 |
| ENSMUSG00000073409 | 12_H2-Q6  | 1277.28 | 3.74934  | 1.17E-27 | 4.06E-24 | 1860.69 | 3153.41 | 2119    | 140.3   | 206.893 | 183.398 |

|                    |           |         |          |          |          |         |         |         |         |         |         |
|--------------------|-----------|---------|----------|----------|----------|---------|---------|---------|---------|---------|---------|
| ENSMUSG00000073411 | 11_H2-D1  | 16950.3 | 1.99312  | 5.42E-06 | 0.000318 | 12910.6 | 39311   | 29062   | 7156.94 | 5934.65 | 7326.51 |
| ENSMUSG00000073412 | 6_Lst1    | 85.0773 | 1.27701  | 0.013009 | 0.121454 | 51.5735 | 172.292 | 137.543 | 56.1199 | 41.2069 | 51.7276 |
| ENSMUSG00000073413 | 9_Ly6g6d  | 3.77823 | -0.74026 | 0.584891 | 0.861527 | 0       | 2.26701 | 6.20497 | 6.60234 | 1.71695 | 5.87814 |
| ENSMUSG00000073414 | 8_G6b     | 20.8531 | -0.05798 | 0.924238 | 0.978951 | 15.1687 | 15.869  | 29.9907 | 12.3794 | 22.3204 | 29.3907 |
| ENSMUSG00000073418 | 4_C4b     | 2392.97 | 0.1839   | 0.65064  | 0.891692 | 1386.42 | 2812.22 | 3437.55 | 2640.11 | 2212.3  | 1869.25 |
| ENSMUSG00000073421 | 5_H2-Ab1  | 509.886 | 1.74378  | 2.67E-05 | 0.00115  | 452.026 | 1124.43 | 779.758 | 288.027 | 203.459 | 211.613 |
| ENSMUSG00000073422 | 10_H2-Ke  | 549.476 | -0.36233 | 0.463627 | 0.801273 | 182.024 | 660.832 | 599.814 | 686.643 | 537.407 | 630.137 |
| ENSMUSG00000073423 | 9_Zfp414  | 180.91  | 0.06564  | 0.9171   | 0.976775 | 42.4723 | 233.502 | 279.224 | 230.257 | 133.064 | 166.939 |
| ENSMUSG00000073424 | 9_Cyp4f1  | 126.881 | 0.01327  | 0.967996 | 0.991244 | 103.147 | 138.287 | 140.646 | 118.842 | 109.885 | 150.48  |
| ENSMUSG00000073427 | 3_Gm492   | 53.7066 | 0.23275  | 0.721584 | 0.913923 | 117.304 | 20.4031 | 36.1957 | 47.0417 | 47.2162 | 54.0789 |
| ENSMUSG00000073430 | 4_Gm105   | 2.48257 | -0.90915 | 0.527914 | 0.835125 | 3.03373 | 1.1335  | 1.03416 | 1.65058 | 6.86782 | 1.17563 |
| ENSMUSG00000073433 | 10_Arhgdi | 6.90763 | -1.99654 | 0.080243 | 0.381339 | 1.01124 | 0       | 7.23913 | 14.03   | 8.58477 | 10.5807 |
| ENSMUSG00000073434 | 11_Wdr9c  | 180.287 | 0.35574  | 0.558401 | 0.848273 | 48.5397 | 251.638 | 307.146 | 177.438 | 147.658 | 149.305 |
| ENSMUSG00000073435 | 10_Nme3   | 181.543 | -0.34213 | 0.411203 | 0.767001 | 91.012  | 185.894 | 203.73  | 252.539 | 178.563 | 177.52  |
| ENSMUSG00000073436 | 11_Eme2   | 404.259 | 0.15774  | 0.74907  | 0.924897 | 161.799 | 582.62  | 534.662 | 386.237 | 351.117 | 409.118 |
| ENSMUSG00000073448 | 1_Gm105   | 14.3213 | 0.19287  | 0.820639 | 0.948338 | 30.3373 | 7.93452 | 7.23913 | 6.60234 | 10.3017 | 23.5126 |
| ENSMUSG00000073457 | 4_Smok2t  | 0.68562 | 2.99032  | 0.375842 | NA       | 1.01124 | 0       | 3.10248 | 0       | 0       | 0       |
| ENSMUSG00000073460 | 4_Pnlcd1  | 10.4263 | -0.35714 | 0.620134 | 0.877704 | 6.06747 | 7.93452 | 13.4441 | 9.07822 | 15.4526 | 10.5807 |
| ENSMUSG00000073468 | 11_Sft2d1 | 554.392 | 0.54101  | 0.030015 | 0.211978 | 718.995 | 639.296 | 613.258 | 428.327 | 496.2   | 430.28  |
| ENSMUSG00000073471 | 2_Rsph3a  | 248.302 | -0.195   | 0.530628 | 0.836639 | 248.766 | 235.769 | 209.935 | 202.197 | 313.344 | 279.799 |
| ENSMUSG00000073478 | 6_D7300c  | 31.8431 | -0.67897 | 0.143656 | 0.513172 | 28.3148 | 21.5366 | 23.7857 | 44.5658 | 44.6408 | 28.2151 |
| ENSMUSG00000073481 | 9_Marc2   | 1215.82 | -0.20809 | 0.482532 | 0.811473 | 840.344 | 1363.6  | 1181.01 | 1231.34 | 1303.17 | 1375.48 |
| ENSMUSG00000073486 | 2_Gm105   | 0 NA    | NA       | NA       | NA       | 0       | 0       | 0       | 0       | 0       | 0       |
| ENSMUSG00000073489 | 5_lfi204  | 3095.69 | 3.42122  | 4.51E-12 | 1.30E-09 | 8551.08 | 5633.51 | 2803.61 | 321.864 | 727.988 | 536.086 |
| ENSMUSG00000073490 | 10_Al607t | 672.983 | 3.60583  | 1.14E-17 | 8.61E-15 | 1668.55 | 1376.07 | 686.683 | 80.0534 | 121.904 | 104.631 |
| ENSMUSG00000073491 | 10_Pydc4  | 20.5356 | 5.46195  | 1.68E-06 | 0.000124 | 58.6522 | 46.4736 | 15.5124 | 0       | 2.57543 | 0       |
| ENSMUSG00000073492 | 2_Gm105   | 1.24855 | 3.84815  | 0.087891 | NA       | 2.02249 | 3.40051 | 2.06832 | 0       | 0       | 0       |
| ENSMUSG00000073494 | 5_Sh2d1b  | 2.79682 | 5.00788  | 0.019517 | 0.160552 | 1.01124 | 14.7355 | 1.03416 | 0       | 0       | 0       |
| ENSMUSG00000073497 | 6_AA792f  | 2.79924 | -0.34078 | 0.77467  | 0.933172 | 2.02249 | 2.26701 | 3.10248 | 3.30117 | 2.57543 | 3.52688 |
| ENSMUSG00000073514 | 3_Dok6    | 1.84445 | -1.34245 | 0.41579  | 0.770103 | 2.02249 | 1.1335  | 0       | 3.30117 | 3.43391 | 1.17563 |
| ENSMUSG00000073530 | 11_Pappa  | 120.217 | -0.28406 | 0.3608   | 0.733982 | 116.293 | 97.4812 | 111.689 | 151.854 | 128.772 | 115.212 |
| ENSMUSG00000073535 | 5_Gm553   | 6.91512 | 0.58236  | 0.593292 | 0.866332 | 16.1799 | 4.53401 | 4.13665 | 9.90351 | 0.85848 | 5.87814 |
| ENSMUSG00000073542 | 2_Cep76   | 154.714 | 0.44078  | 0.321931 | 0.702839 | 282.137 | 130.353 | 122.031 | 118.017 | 160.535 | 115.212 |
| ENSMUSG00000073551 | 4_Spink1  | 0.42371 | -2.13816 | 0.587702 | NA       | 0       | 0       | 0       | 0.82529 | 1.71695 | 0       |
| ENSMUSG00000073555 | 1_Gm495   | 451.822 | 4.89729  | 9.21E-19 | 8.87E-16 | 1598.78 | 631.361 | 392.981 | 31.3611 | 31.7636 | 24.6882 |
| ENSMUSG00000073557 | 11_Ppp1r  | 1696.1  | -0.51724 | 0.039307 | 0.249452 | 1374.28 | 1224.18 | 1587.44 | 2146.59 | 1992.53 | 1851.61 |
| ENSMUSG00000073563 | 2_Csnk1g  | 1844.23 | 0.46569  | 0.308175 | 0.690547 | 3636.43 | 1373.81 | 1407.49 | 1291.58 | 1728.97 | 1627.07 |
| ENSMUSG00000073565 | 4_Prr16   | 51.9232 | 0.35458  | 0.461206 | 0.799907 | 88.9895 | 48.7406 | 37.2298 | 50.3428 | 49.7917 | 36.4445 |
| ENSMUSG00000073568 | 1_Arl14ep | 8.35163 | 0.13505  | 0.861616 | 0.960565 | 13.1462 | 7.93452 | 5.17081 | 9.07822 | 7.72629 | 7.05377 |
| ENSMUSG00000073590 | 3_322240  | 91.4896 | -0.06323 | 0.885881 | 0.968986 | 130.451 | 52.1411 | 85.8354 | 93.258  | 107.31  | 79.9427 |
| ENSMUSG00000073591 | 4_Pcdhb2  | 213.881 | -0.15948 | 0.668278 | 0.898206 | 287.193 | 147.355 | 171.671 | 250.889 | 227.496 | 198.681 |
| ENSMUSG00000073598 | 3_170006  | 17.8968 | 0.61632  | 0.282725 | 0.669522 | 17.1912 | 22.6701 | 24.8199 | 11.5541 | 11.1602 | 19.9857 |
| ENSMUSG00000073599 | 9_Ecscr   | 112.07  | 0.03917  | 0.925661 | 0.979799 | 66.7421 | 157.557 | 116.86  | 121.318 | 115.894 | 94.0502 |
| ENSMUSG00000073600 | 3_Prob1   | 62.6228 | -0.72441 | 0.090575 | 0.409997 | 43.4835 | 46.4736 | 51.7081 | 103.162 | 49.7917 | 81.1183 |
| ENSMUSG00000073602 | 10_Serpin | 0.332   | 0.16972  | 0.966824 | NA       | 0       | 1.1335  | 0       | 0       | 0.85848 | 0       |
| ENSMUSG00000073608 | 4_Gm608   | 0.78819 | -1.70906 | 0.475579 | NA       | 1.01124 | 0       | 0       | 0.82529 | 1.71695 | 1.17563 |
| ENSMUSG00000073609 | 9_D2hgdh  | 215.709 | -0.02157 | 0.964855 | 0.99063  | 86.967  | 260.706 | 294.736 | 249.238 | 186.29  | 216.316 |
| ENSMUSG00000073610 | 3_Gm105   | 0.92683 | -3.22973 | 0.303548 | NA       | 0       | 0       | 0       | 0       | 0.85848 | 4.70251 |
| ENSMUSG00000073616 | 10_Myeov  | 757.894 | -0.34192 | 0.178731 | 0.564262 | 580.454 | 688.036 | 737.357 | 888.015 | 879.939 | 773.563 |
| ENSMUSG00000073631 | 1_Gm105   | 12.6272 | 3.94417  | 3.17E-05 | 0.00131  | 18.2024 | 38.5391 | 14.4783 | 1.65058 | 1.71695 | 1.17563 |
| ENSMUSG00000073633 | 9_Fbxo36  | 122.391 | -0.1799  | 0.575439 | 0.856733 | 105.169 | 105.416 | 133.407 | 108.939 | 135.639 | 145.778 |
| ENSMUSG00000073639 | 5_Rab18   | 4101.84 | 0.56154  | 0.247371 | 0.638878 | 8732.09 | 3034.39 | 2903.93 | 2870.37 | 3700.89 | 3369.35 |
| ENSMUSG00000073640 | 2_Rpl27-p | 5454.23 | -0.06631 | 0.847056 | 0.964203 | 2613.06 | 6832.76 | 6541.07 | 5989.97 | 5111.37 | 5637.14 |
| ENSMUSG00000073643 | 11_Wdfy1  | 965.052 | 0.39278  | 0.237786 | 0.630377 | 1506.75 | 958.943 | 821.124 | 819.515 | 883.373 | 800.603 |
| ENSMUSG00000073650 | 8_Catip   | 6.03673 | -1.26014 | 0.180589 | 0.566911 | 3.03373 | 4.53401 | 3.10248 | 4.12646 | 12.0187 | 9.40502 |
| ENSMUSG00000073658 | 4_Crygb   | 3033.41 | -3.93036 | 2.60E-07 | 2.43E-05 | 124.383 | 426.197 | 569.823 | 12745   | 1923.85 | 2411.21 |
| ENSMUSG00000073664 | 11_Nbeal  | 1968.06 | 0.30268  | 0.564682 | 0.850965 | 4104.64 | 1164.11 | 1252.37 | 1540.82 | 1986.52 | 1759.91 |
| ENSMUSG00000073676 | 4_Hspe1   | 1649.75 | 0.26354  | 0.457972 | 0.798063 | 2549.35 | 1598.24 | 1252.37 | 1374.94 | 1651.71 | 1471.89 |
| ENSMUSG00000073678 | 4_Pgap1   | 911.078 | 0.22601  | 0.63843  | 0.886308 | 1706.98 | 539.547 | 700.127 | 689.119 | 957.202 | 873.491 |
| ENSMUSG00000073680 | 2_Tmem8   | 16.9965 | -0.2496  | 0.673604 | 0.900436 | 20.2249 | 17.0025 | 9.30745 | 14.8553 | 20.6034 | 19.9857 |
| ENSMUSG00000073684 | 11_Faap2  | 212.252 | -0.11125 | 0.839378 | 0.95317  | 65.7309 | 242.57  | 304.043 | 263.268 | 186.29  | 211.613 |
| ENSMUSG00000073699 | 3_Gm833   | 0.2751  | -1.54073 | 0.703687 | NA       | 0       | 0       | 0       | 1.65058 | 0       | 0       |
| ENSMUSG00000073700 | 3_Kihl21  | 903.329 | 0.05739  | 0.8706   | 0.963272 | 602.702 | 1070.03 | 1091.04 | 923.502 | 722.838 | 1009.86 |
| ENSMUSG00000073702 | 11_Rpl31  | 12626.4 | -0.52154 | 0.166245 | 0.545717 | 5811.62 | 12697.5 | 12597.1 | 15442   | 14309.1 | 14901.1 |
| ENSMUSG00000073705 | 10_Apitd1 | 132.801 | 0.37224  | 0.316019 | 0.696913 | 97.0795 | 177.96  | 174.773 | 121.318 | 121.045 | 104.631 |
| ENSMUSG00000073724 | 12_Prame  | 0.16854 | 1.1315   | 0.781553 | NA       | 1.01124 | 0       | 0       | 0       | 0       | 0       |
| ENSMUSG00000073725 | 8_Lmbrd1  | 1710.83 | -0.02262 | 0.947084 | 0.986649 | 2392.6  | 1291.06 | 1408.53 | 1735.59 | 1824.26 | 1612.96 |
| ENSMUSG00000073733 | 4_Rsg1    | 10.9748 | -0.54785 | 0.494711 | 0.817604 | 2.02249 | 11.335  | 13.4441 | 12.3794 | 13.7356 | 12.9319 |
| ENSMUSG00000073752 | 1_Gm105   | 0.14308 | -0.79206 | 0.84609  | NA       | 0       | 0       | 0       | 0       | 0.85848 | 0       |
| ENSMUSG00000073755 | 4_573040  | 436.743 | -0.67396 | 0.013969 | 0.12705  | 331.688 | 301.512 | 376.435 | 617.319 | 473.879 | 519.627 |
| ENSMUSG00000073758 | 10_Sh3d2  | 98.7858 | 0.06466  | 0.887353 | 0.969456 | 52.5847 | 106.549 | 143.748 | 95.7339 | 82.4138 | 111.685 |
| ENSMUSG00000073759 | 6_493340  | 0.39188 | -1.97195 | 0.623385 | NA       | 0       | 0       | 0       | 0       | 0       | 2.35126 |
| ENSMUSG00000073761 | 2_493342  | 1.03589 | -1.05881 | 0.675264 | NA       | 2.02249 | 0       | 0       | 2.47588 | 1.71695 | 0       |
| ENSMUSG00000073764 | 2_Gm128   | 0.8427  | 3.28753  | 0.406676 | NA       | 5.05622 | 0       | 0       | 0       | 0       | 0       |
| ENSMUSG00000073771 | 11_Btdb1  | 75.2444 | 0.22846  | 0.50951  | 0.827179 | 76.8546 | 88.4132 | 78.5963 | 64.3728 | 83.2723 | 59.957  |

|                    |            |         |          |          |          |         |         |         |         |         |         |
|--------------------|------------|---------|----------|----------|----------|---------|---------|---------|---------|---------|---------|
| ENSMUSG00000073774 | 2_Kncn     | 0.31162 | 0.16972  | 0.966824 | NA       | 1.01124 | 0       | 0       | 0       | 0.85848 | 0       |
| ENSMUSG00000073775 | 4_Kti12    | 200.214 | 0.38369  | 0.164039 | 0.542147 | 230.564 | 245.97  | 203.73  | 166.709 | 189.723 | 164.588 |
| ENSMUSG00000073789 | 1_Gm105    | 0       | NA       | NA       | NA       | 0       | 0       | 0       | 0       | 0       | 0       |
| ENSMUSG00000073791 | 11_Efcab   | 154.19  | 0.34413  | 0.510846 | 0.827179 | 311.463 | 117.884 | 87.9037 | 118.017 | 138.215 | 151.656 |
| ENSMUSG00000073792 | 11_Alg6    | 393.348 | 0.42844  | 0.306014 | 0.688731 | 708.882 | 292.444 | 352.649 | 325.165 | 381.164 | 299.785 |
| ENSMUSG00000073795 | 10_64305   | 2.72584 | -1.09084 | 0.399091 | 0.759197 | 3.03373 | 1.1335  | 1.03416 | 2.47588 | 5.15086 | 3.52688 |
| ENSMUSG00000073802 | 4_Cdkn2b   | 549.147 | 0.36101  | 0.189531 | 0.578028 | 694.725 | 555.416 | 601.882 | 401.092 | 515.086 | 526.681 |
| ENSMUSG00000073804 | 4_Nps      | 3.52606 | -0.008   | 0.994422 | 0.998043 | 3.03373 | 4.53401 | 3.10248 | 3.30117 | 6.00934 | 1.17563 |
| ENSMUSG00000073805 | 4_Fam19c   | 12.6085 | -0.73697 | 0.341253 | 0.719594 | 14.1574 | 10.2015 | 4.13665 | 14.03   | 24.8958 | 8.22939 |
| ENSMUSG00000073830 | 11_Mup14   | 0.7154  | -2.88643 | 0.46663  | NA       | 0       | 0       | 0       | 0       | 4.29238 | 0       |
| ENSMUSG00000073834 | 10_Mup11   | 0.13755 | -0.79206 | 0.84609  | NA       | 0       | 0       | 0       | 0.82529 | 0       | 0       |
| ENSMUSG00000073838 | 10_Tufm    | 848.207 | 0.18027  | 0.743651 | 0.92327  | 261.912 | 1296.73 | 1144.82 | 772.474 | 746.875 | 866.438 |
| ENSMUSG00000073856 | 10_Iqck    | 49.3163 | 0.47074  | 0.233146 | 0.624966 | 62.6971 | 62.3427 | 46.5373 | 36.3129 | 38.6315 | 49.3764 |
| ENSMUSG00000073867 | 2_AA4744   | 37.3516 | 0.99992  | 0.096855 | 0.422036 | 84.9445 | 40.8061 | 23.7857 | 22.2829 | 33.4806 | 18.81   |
| ENSMUSG00000073876 | 3_Gm133    | 6.67473 | -1.9445  | 0.069823 | 0.352427 | 4.04498 | 1.1335  | 3.10248 | 15.6806 | 13.7356 | 2.35126 |
| ENSMUSG00000073877 | 10_Gm13    | 7.96184 | -0.72685 | 0.541482 | 0.84046  | 0       | 5.66751 | 12.4099 | 18.9817 | 6.00934 | 4.70251 |
| ENSMUSG00000073888 | 12_Ccl27a  | 34.8641 | -0.25235 | 0.558504 | 0.848273 | 24.2699 | 35.1386 | 36.1957 | 37.9634 | 40.3484 | 35.2688 |
| ENSMUSG00000073889 | 10_Ill1ra1 | 1248.17 | -0.57804 | 0.170043 | 0.5518   | 560.229 | 1020.15 | 1424.04 | 1914.68 | 1237.92 | 1331.99 |
| ENSMUSG00000073899 | 1_Olfr153  | 0       | NA       | NA       | NA       | 0       | 0       | 0       | 0       | 0       | 0       |
| ENSMUSG00000073906 | 2_Olfr692  | 1.93611 | 2.30368  | 0.187451 | 0.574717 | 1.01124 | 3.40051 | 5.17081 | 0       | 0.85848 | 1.17563 |
| ENSMUSG00000073907 | 2_Olfr689  | 0.16854 | 1.1315   | 0.781553 | NA       | 1.01124 | 0       | 0       | 0       | 0       | 0       |
| ENSMUSG00000073910 | 10_Mob3t   | 521.434 | 0.07801  | 0.822687 | 0.948829 | 753.377 | 398.993 | 453.997 | 472.893 | 539.124 | 510.222 |
| ENSMUSG00000073940 | 3_Hbb-bt   | 41.1645 | -1.13464 | 0.115785 | 0.462875 | 29.3261 | 30.6046 | 17.5807 | 119.667 | 27.4713 | 22.3369 |
| ENSMUSG00000073954 | 3_Olfr594  | 0.13755 | -0.79206 | 0.84609  | NA       | 0       | 0       | 0       | 0.82529 | 0       | 0       |
| ENSMUSG00000073967 | 2_Olfr557  | 0.18892 | 1.1315   | 0.781553 | NA       | 0       | 1.1335  | 0       | 0       | 0       | 0       |
| ENSMUSG00000073968 | 3_Trim68   | 484.14  | 0.17795  | 0.48833  | 0.814112 | 467.195 | 553.149 | 521.217 | 407.694 | 452.417 | 503.169 |
| ENSMUSG00000073977 | 1_Olfr549  | 0.18892 | 1.1315   | 0.781553 | NA       | 0       | 1.1335  | 0       | 0       | 0       | 0       |
| ENSMUSG00000073982 | 10_Rhog    | 794.943 | 0.50452  | 0.341656 | 0.719594 | 298.317 | 1355.67 | 1143.78 | 698.197 | 622.396 | 651.298 |
| ENSMUSG00000073987 | 4_Ggh      | 706.407 | 0.00554  | 0.991615 | 0.997512 | 1337.88 | 381.99  | 403.323 | 682.517 | 783.789 | 648.947 |
| ENSMUSG00000073988 | 13_Ttpa    | 20.4451 | -1.32581 | 0.13692  | 0.502096 | 28.3148 | 4.53401 | 2.06832 | 30.5358 | 36.056  | 21.1613 |
| ENSMUSG00000073991 | 4_Cnbd1    | 0.13755 | -0.79206 | 0.84609  | NA       | 0       | 0       | 0       | 0.82529 | 0       | 0       |
| ENSMUSG00000073995 | 2_Gm106    | 9.14927 | -0.52794 | 0.496859 | 0.819184 | 7.07871 | 10.2015 | 5.17081 | 5.77705 | 13.7356 | 12.9319 |
| ENSMUSG00000073998 | 1_Olfr520  | 0.14308 | -0.79206 | 0.84609  | NA       | 0       | 0       | 0       | 0       | 0.85848 | 0       |
| ENSMUSG00000074001 | 2_Kihl40   | 15.9753 | -0.71809 | 0.357706 | 0.73201  | 14.1574 | 4.53401 | 17.5807 | 35.4876 | 11.1602 | 12.9319 |
| ENSMUSG00000074003 | 4_Gucy2d   | 0.28616 | -1.57932 | 0.696464 | NA       | 0       | 0       | 0       | 0       | 1.71695 | 0       |
| ENSMUSG00000074004 | 3_B3gnt6   | 30.8778 | 0.32757  | 0.492635 | 0.815788 | 32.3598 | 35.1386 | 35.1615 | 20.6323 | 23.1789 | 38.7957 |
| ENSMUSG00000074006 | 3_Omp      | 1203.28 | 0.35628  | 0.469042 | 0.804529 | 512.701 | 1708.19 | 1832.53 | 1189.25 | 904.835 | 1072.17 |
| ENSMUSG00000074028 | 3_Slc22a1  | 2.98878 | 0.22478  | 0.870114 | 0.963272 | 0       | 4.53401 | 5.17081 | 3.30117 | 2.57543 | 2.35126 |
| ENSMUSG00000074029 | 2_Gm106    | 0.19594 | -0.79206 | 0.84609  | NA       | 0       | 0       | 0       | 0       | 0       | 1.17563 |
| ENSMUSG00000074030 | 2_Exoc8    | 485.739 | 0.33784  | 0.243051 | 0.634644 | 670.455 | 482.872 | 473.646 | 396.14  | 470.445 | 420.875 |
| ENSMUSG00000074037 | 3_Mc1r     | 26.2004 | -2.10647 | 0.000647 | 0.014263 | 6.06747 | 11.335  | 12.4099 | 56.1199 | 48.9332 | 22.3369 |
| ENSMUSG00000074059 | 3_Fbxw18   | 6.41274 | -0.65604 | 0.510029 | 0.827179 | 2.02249 | 7.93452 | 5.17081 | 11.5541 | 9.44325 | 2.35126 |
| ENSMUSG00000074060 | 10_Fbxw1   | 3.01433 | -2.28328 | 0.114105 | 0.458694 | 2.02249 | 0       | 1.03416 | 4.95175 | 7.72629 | 2.35126 |
| ENSMUSG00000074062 | 5_Fbxw16   | 0.13755 | -0.79206 | 0.84609  | NA       | 0       | 0       | 0       | 0.82529 | 0       | 0       |
| ENSMUSG00000074063 | 9_Osgin1   | 428.207 | 0.33135  | 0.670373 | 0.89905  | 45.506  | 710.706 | 675.307 | 472.893 | 227.496 | 437.334 |
| ENSMUSG00000074064 | 6_Mlycd    | 255.317 | -0.26419 | 0.594653 | 0.866686 | 91.012  | 273.174 | 331.966 | 321.864 | 244.666 | 269.219 |
| ENSMUSG00000074067 | 9_Gm106    | 1.08366 | -2.25053 | 0.299898 | NA       | 0       | 1.1335  | 0       | 2.47588 | 1.71695 | 1.17563 |
| ENSMUSG00000074071 | 9_Fam16a   | 37.349  | 0.24404  | 0.577215 | 0.857342 | 29.3261 | 51.0076 | 41.3665 | 36.3129 | 34.3391 | 31.742  |
| ENSMUSG00000074088 | 6_Snrnp40  | 772.973 | 0.20163  | 0.504663 | 0.824602 | 630.005 | 1033.75 | 816.988 | 661.059 | 736.573 | 759.456 |
| ENSMUSG00000074093 | 3_Svip     | 1567.23 | 0.21894  | 0.618293 | 0.877535 | 2784.97 | 1068.89 | 1203.76 | 1287.46 | 1675.75 | 1382.54 |
| ENSMUSG00000074102 | 4_Rbm15l   | 950.026 | 0.23584  | 0.31296  | 0.694375 | 952.592 | 1127.84 | 1002.1  | 861.605 | 860.194 | 895.828 |
| ENSMUSG00000074109 | 4_Mrgprx2  | 4.7235  | -0.81755 | 0.535814 | 0.83864  | 9.1012  | 1.1335  | 0       | 8.25292 | 5.15086 | 4.70251 |
| ENSMUSG00000074115 | 3_Saa1     | 19.5998 | 2.36595  | 0.025409 | 0.191207 | 5.05622 | 86.1462 | 7.23913 | 5.77705 | 5.15086 | 8.22939 |
| ENSMUSG00000074121 | 2_Ntf5     | 58.256  | 0.49451  | 0.160687 | 0.539243 | 69.7759 | 62.3427 | 72.3913 | 52.8187 | 46.3578 | 45.8495 |
| ENSMUSG00000074123 | 1_742042   | 0.18892 | 1.1315   | 0.781553 | NA       | 0       | 1.1335  | 0       | 0       | 0       | 0       |
| ENSMUSG00000074129 | 12_Rpl13a  | 10796.6 | -0.16407 | 0.697397 | 0.905638 | 5067.35 | 12203.3 | 13279.7 | 13383.8 | 10038.2 | 10807.5 |
| ENSMUSG00000074141 | 12_Ili4i1  | 787.254 | 0.49045  | 0.321998 | 0.702839 | 351.913 | 1321.66 | 1085.87 | 708.101 | 549.425 | 706.552 |
| ENSMUSG00000074146 | 9_493057   | 5.41594 | -0.10783 | 0.911366 | 0.975173 | 7.07871 | 4.53401 | 4.13665 | 4.95175 | 9.44325 | 2.35126 |
| ENSMUSG00000074151 | 12_Nlrc5   | 1288.49 | 5.27609  | 6.76E-32 | 5.86E-28 | 1917.32 | 3612.47 | 2007.31 | 53.644  | 97.8664 | 42.3226 |
| ENSMUSG00000074156 | 4_Ces1h    | 11.5785 | -0.55624 | 0.481633 | 0.810876 | 18.2024 | 5.66751 | 4.13665 | 10.7288 | 15.4526 | 15.2832 |
| ENSMUSG00000074158 | 9_983014   | 152.97  | 0.23757  | 0.698514 | 0.905638 | 333.711 | 63.4762 | 99.2795 | 115.541 | 168.261 | 137.548 |
| ENSMUSG00000074165 | 10_Zfp78f  | 542.197 | 0.40933  | 0.460673 | 0.799907 | 1199.34 | 302.645 | 353.683 | 390.363 | 545.133 | 462.022 |
| ENSMUSG00000074166 | 7_AW146    | 396.445 | 0.29385  | 0.555274 | 0.846508 | 779.669 | 232.368 | 297.839 | 316.912 | 399.192 | 352.688 |
| ENSMUSG00000074170 | 5_Plekhf1  | 158.378 | -0.3307  | 0.466454 | 0.803515 | 65.7309 | 172.292 | 183.047 | 197.245 | 157.96  | 173.993 |
| ENSMUSG00000074171 | 1_Gm665    | 0.13755 | -0.79206 | 0.84609  | NA       | 0       | 0       | 0       | 0.82529 | 0       | 0       |
| ENSMUSG00000074178 | 2_Gm106    | 9.29392 | -0.85382 | 0.359959 | 0.733629 | 2.02249 | 3.40051 | 14.4783 | 17.3311 | 10.3017 | 8.22939 |
| ENSMUSG00000074179 | 11_Gm10    | 30.5555 | -0.66923 | 0.269361 | 0.656292 | 23.2586 | 9.06802 | 38.264  | 42.0899 | 28.3297 | 42.3226 |
| ENSMUSG00000074182 | 8_Znhit6   | 681.135 | -0.03278 | 0.908406 | 0.974731 | 815.063 | 564.484 | 640.146 | 616.493 | 687.64  | 762.982 |
| ENSMUSG00000074183 | 3_Gsta1    | 879.718 | -0.73224 | 0.002846 | 0.041928 | 682.59  | 574.686 | 725.981 | 1075.36 | 1135.77 | 1083.93 |
| ENSMUSG00000074194 | 3_Zfp791   | 144.404 | 0.05364  | 0.851228 | 0.957649 | 149.664 | 153.023 | 138.578 | 153.504 | 127.055 | 144.602 |
| ENSMUSG00000074195 | 3_Clca4b   | 179.679 | 0.24341  | 0.594128 | 0.866665 | 313.486 | 138.287 | 132.373 | 123.794 | 191.44  | 178.695 |
| ENSMUSG00000074199 | 7_Krtdd    | 7.34553 | 3.1079   | 0.00628  | 0.072784 | 17.1912 | 19.2695 | 3.10248 | 2.47588 | 0.85848 | 1.17563 |
| ENSMUSG00000074203 | 4_G4300f   | 2.28997 | 1.30321  | 0.423033 | 0.774831 | 0       | 4.53401 | 5.17081 | 0.82529 | 0.85848 | 2.35126 |
| ENSMUSG00000074207 | 10_Adh1    | 12359.1 | -0.02536 | 0.947319 | 0.986649 | 7008.93 | 13228   | 16514.5 | 12215.2 | 11181.7 | 14006.4 |
| ENSMUSG00000074211 | 4_Sdhaf1   | 133.771 | -0.25417 | 0.404457 | 0.76299  | 104.158 | 121.285 | 140.646 | 155.98  | 134.781 | 145.778 |

|                    |           |         |          |          |          |         |         |         |         |         |         |
|--------------------|-----------|---------|----------|----------|----------|---------|---------|---------|---------|---------|---------|
| ENSMUSG00000074212 | 7_Dnajb1  | 1105.79 | 0.00043  | 0.99911  | 0.999484 | 1696.87 | 805.921 | 814.919 | 1048.95 | 1182.98 | 1085.1  |
| ENSMUSG00000074213 | 2_Gm106   | 4.04657 | -1.21926 | 0.295331 | 0.679579 | 1.01124 | 1.1335  | 5.17081 | 7.42763 | 6.00934 | 3.52688 |
| ENSMUSG00000074215 | 2_Gm106   | 19.1909 | -0.11433 | 0.832274 | 0.951799 | 18.2024 | 23.8036 | 13.4441 | 21.4576 | 20.6034 | 17.6344 |
| ENSMUSG00000074217 | 8_221001  | 0.31544 | 0.16972  | 0.966824 | NA       | 0       | 0       | 1.03416 | 0       | 0.85848 | 0       |
| ENSMUSG00000074218 | 2_Cox7a1  | 72.4539 | -1.49001 | 0.021028 | 0.168401 | 22.2474 | 35.1386 | 56.8789 | 203.022 | 48.0747 | 69.362  |
| ENSMUSG00000074219 | 2_Gm106   | 28.5785 | -0.32681 | 0.540289 | 0.84046  | 15.1687 | 21.5366 | 39.2981 | 32.1864 | 29.1882 | 34.0932 |
| ENSMUSG00000074220 | 9_Zfp382  | 42.3394 | -1.09999 | 0.009697 | 0.098401 | 27.3036 | 19.2695 | 34.1273 | 60.2463 | 56.6595 | 56.4301 |
| ENSMUSG00000074221 | 11_Zfp56f | 483.272 | 0.12484  | 0.612365 | 0.874367 | 500.566 | 539.547 | 472.612 | 503.428 | 434.389 | 449.09  |
| ENSMUSG00000074224 | 2_493243  | 0.77945 | -0.26924 | 0.911436 | NA       | 0       | 1.1335  | 1.03416 | 1.65058 | 0.85848 | 0       |
| ENSMUSG00000074227 | 11_Spint2 | 5577.12 | 0.38874  | 0.418839 | 0.772648 | 2494.74 | 8412.86 | 8064.39 | 5021.9  | 4069.18 | 5399.66 |
| ENSMUSG00000074228 | 2_Gm106   | 1.08984 | -2.24871 | 0.391338 | NA       | 1.01124 | 0       | 0       | 0.82529 | 0       | 4.70251 |
| ENSMUSG00000074232 | 2_Gm106   | 4.54667 | -0.92033 | 0.388503 | 0.752641 | 5.05622 | 3.40051 | 1.03416 | 8.25292 | 6.00934 | 3.52688 |
| ENSMUSG00000074238 | 6_Ap1ar   | 2181.85 | 0.05458  | 0.81627  | 0.947479 | 2055.86 | 2347.48 | 2265.85 | 1930.36 | 2244.92 | 2246.62 |
| ENSMUSG00000074240 | 3_Cib3    | 0       | NA       | NA       | NA       | 0       | 0       | 0       | 0       | 0       | 0       |
| ENSMUSG00000074247 | 10_Dda1   | 631.567 | 0.30381  | 0.557382 | 0.848091 | 242.699 | 953.276 | 897.652 | 666.011 | 480.747 | 549.018 |
| ENSMUSG00000074254 | 4_Cyp2a4  | 0.74973 | -0.30649 | 0.927883 | NA       | 2.02249 | 0       | 0       | 2.47588 | 0       | 0       |
| ENSMUSG00000074256 | 3_Gm106   | 0.51326 | 2.57323  | 0.487037 | NA       | 1.01124 | 0       | 2.06832 | 0       | 0       | 0       |
| ENSMUSG00000074259 | 10_Gramc  | 427.501 | 0.37928  | 0.197486 | 0.58977  | 370.115 | 558.817 | 521.217 | 344.972 | 385.456 | 384.43  |
| ENSMUSG00000074261 | 2_Erich4  | 0       | NA       | NA       | NA       | 0       | 0       | 0       | 0       | 0       | 0       |
| ENSMUSG00000074264 | 12_Amy1   | 185.891 | -0.70278 | 0.201029 | 0.592148 | 254.834 | 71.4107 | 98.2453 | 257.491 | 287.59  | 145.778 |
| ENSMUSG00000074268 | 4_Amy2a   | 0.60709 | -1.17361 | 0.692296 | NA       | 0       | 1.1335  | 0       | 1.65058 | 0.85848 | 0       |
| ENSMUSG00000074269 | 10_Rec11  | 4.48423 | 1.32147  | 0.218737 | 0.609854 | 4.04498 | 6.80102 | 8.27329 | 0.82529 | 3.43391 | 3.52688 |
| ENSMUSG00000074272 | 10_Ceaca  | 15424.2 | 1.15013  | 0.000381 | 0.009422 | 20719.4 | 25119.6 | 17959.2 | 6802.06 | 10900.1 | 11045   |
| ENSMUSG00000074277 | 4_Phldb3  | 663.271 | 0.70073  | 0.386494 | 0.751493 | 61.6859 | 1141.44 | 1260.64 | 627.222 | 309.052 | 579.585 |
| ENSMUSG00000074282 | 10_Zfp94  | 81.8741 | -0.32522 | 0.316598 | 0.697659 | 74.8321 | 77.0782 | 66.1863 | 99.0351 | 82.4138 | 91.699  |
| ENSMUSG00000074283 | 5_Zfp109  | 92.6644 | 0.21872  | 0.477821 | 0.808634 | 93.0345 | 108.816 | 97.2112 | 86.6557 | 83.2723 | 86.9965 |
| ENSMUSG00000074300 | 4_BC030f  | 309.884 | 0.18544  | 0.591036 | 0.865185 | 460.116 | 266.373 | 262.677 | 283.901 | 297.033 | 289.204 |
| ENSMUSG00000074305 | 9_Peak1   | 869.244 | -0.66391 | 0.022739 | 0.17783  | 837.31  | 575.819 | 604.985 | 1072.05 | 1181.26 | 944.029 |
| ENSMUSG00000074336 | 4_Apoc4   | 0       | NA       | NA       | NA       | 0       | 0       | 0       | 0       | 0       | 0       |
| ENSMUSG00000074340 | 9_Ovgp1   | 39.5459 | -0.07265 | 0.916164 | 0.976756 | 72.8096 | 18.136  | 24.8199 | 37.1382 | 64.3858 | 19.9857 |
| ENSMUSG00000074342 | 3_l830077 | 43.4645 | 1.99772  | 2.01E-05 | 0.000924 | 62.6971 | 95.2142 | 50.6739 | 15.6806 | 18.8865 | 17.6344 |
| ENSMUSG00000074344 | 6_Tmigd3  | 0.74613 | -2.94316 | 0.372922 | NA       | 0       | 0       | 0       | 3.30117 | 0       | 1.17563 |
| ENSMUSG00000074345 | 3_Tnfaip8 | 54.256  | 1.22067  | 0.017377 | 0.147614 | 114.271 | 48.7406 | 65.1522 | 39.614  | 37.773  | 19.9857 |
| ENSMUSG00000074357 | 2_AA3864  | 13.0469 | 0.28382  | 0.697309 | 0.905638 | 8.08995 | 21.5366 | 13.4441 | 6.60234 | 18.028  | 10.5807 |
| ENSMUSG00000074358 | 9_Ccdc61  | 161.016 | 0.37865  | 0.428218 | 0.778733 | 76.8546 | 233.502 | 235.789 | 133.697 | 141.649 | 144.602 |
| ENSMUSG00000074359 | 2_Psg23   | 0.41265 | -2.10335 | 0.599583 | NA       | 0       | 0       | 0       | 2.47588 | 0       | 0       |
| ENSMUSG00000074361 | 9_C5ar2   | 6.19176 | 1.27694  | 0.25208  | 0.64377  | 10.1124 | 5.66751 | 10.3416 | 0       | 5.15086 | 5.87814 |
| ENSMUSG00000074364 | 5_Ehd2    | 3198.78 | 0.51588  | 0.116076 | 0.463608 | 2601.93 | 4468.27 | 4223.52 | 2409.85 | 2396.01 | 3093.08 |
| ENSMUSG00000074365 | 13_Crxos  | 3.91496 | -2.73836 | 0.091082 | 0.411243 | 3.03373 | 0       | 0       | 11.5541 | 7.72629 | 1.17563 |
| ENSMUSG00000074378 | 5_Bsph1   | 0.16854 | 1.1315   | 0.781553 | NA       | 1.01124 | 0       | 0       | 0       | 0       | 0       |
| ENSMUSG00000074384 | 3_Al4292  | 320.072 | 0.16014  | 0.660155 | 0.895103 | 471.24  | 260.706 | 281.292 | 249.238 | 351.117 | 306.839 |
| ENSMUSG00000074385 | 2_Gm106   | 1.6519  | -0.96808 | 0.621894 | NA       | 0       | 3.40051 | 0       | 3.30117 | 0.85848 | 2.35126 |
| ENSMUSG00000074388 | 3_Gm554   | 0.62706 | 0.22967  | 0.938749 | NA       | 1.01124 | 0       | 1.03416 | 0       | 1.71695 | 0       |
| ENSMUSG00000074403 | 2_Hist2h3 | 0       | NA       | NA       | NA       | 0       | 0       | 0       | 0       | 0       | 0       |
| ENSMUSG00000074404 | 5_Gm169   | 0.34472 | 1.99863  | 0.620844 | NA       | 0       | 0       | 2.06832 | 0       | 0       | 0       |
| ENSMUSG00000074405 | 6_Zfp865  | 153.125 | -0.03138 | 0.953563 | 0.988395 | 51.5735 | 172.292 | 230.618 | 173.311 | 141.649 | 149.305 |
| ENSMUSG00000074406 | 4_Zfp628  | 103.487 | 0.39026  | 0.636543 | 0.885319 | 9.1012  | 174.559 | 168.568 | 115.541 | 53.2256 | 99.9284 |
| ENSMUSG00000074417 | 9_Gm145   | 61.6729 | 2.64199  | 2.96E-09 | 4.59E-07 | 71.7983 | 130.353 | 116.86  | 15.6806 | 18.8865 | 16.4588 |
| ENSMUSG00000074419 | 11_Gm15   | 12.6143 | 1.78516  | 0.007673 | 0.083511 | 19.2136 | 23.8036 | 15.5124 | 4.95175 | 5.15086 | 7.05377 |
| ENSMUSG00000074433 | 4_Lce3e   | 0.36448 | 0.16972  | 0.966824 | NA       | 1.01124 | 0       | 0       | 0       | 0       | 1.17563 |
| ENSMUSG00000074435 | 10_Smcp   | 0.8767  | -1.91753 | 0.46831  | NA       | 0       | 0       | 1.03416 | 1.65058 | 2.57543 | 0       |
| ENSMUSG00000074437 | 5_Defar-s | 3.75658 | 0.05031  | 0.968042 | 0.991244 | 1.01124 | 1.1335  | 9.30745 | 4.12646 | 3.43391 | 3.52688 |
| ENSMUSG00000074445 | 4_Spr2a2  | 18.7987 | 1.75359  | 0.133805 | 0.497275 | 3.03373 | 75.9447 | 8.27329 | 13.2047 | 11.1602 | 1.17563 |
| ENSMUSG00000074449 | 3_Gm153   | 13.4912 | -0.07338 | 0.924961 | 0.979417 | 26.2924 | 6.80102 | 6.20497 | 14.03   | 11.1602 | 16.4588 |
| ENSMUSG00000074452 | 12_Pate2  | 4.30406 | -0.81046 | 0.456939 | 0.797169 | 6.06747 | 2.26701 | 1.03416 | 6.60234 | 5.15086 | 4.70251 |
| ENSMUSG00000074454 | 3_Defb33  | 0       | NA       | NA       | NA       | 0       | 0       | 0       | 0       | 0       | 0       |
| ENSMUSG00000074457 | 10_S100a  | 9834.41 | 0.18661  | 0.612145 | 0.874367 | 6062.41 | 12957.1 | 12389.3 | 9441.34 | 8652.59 | 9503.78 |
| ENSMUSG00000074461 | 2_Gm106   | 19.3198 | -0.99567 | 0.086833 | 0.399375 | 19.2136 | 7.93452 | 11.3758 | 23.1082 | 24.8958 | 29.3907 |
| ENSMUSG00000074469 | 6_Gm153   | 5.45837 | 0.04006  | 0.968639 | 0.991338 | 7.07871 | 1.1335  | 8.27329 | 5.77705 | 3.43391 | 7.05377 |
| ENSMUSG00000074472 | 9_Zfp872  | 1.55276 | 1.18489  | 0.466699 | NA       | 2.02249 | 3.40051 | 1.03416 | 0.82529 | 0.85848 | 1.17563 |
| ENSMUSG00000074476 | 5_Spc24   | 159.891 | 0.87487  | 0.010897 | 0.107044 | 185.058 | 268.64  | 167.534 | 110.589 | 128.772 | 98.7527 |
| ENSMUSG00000074480 | 4_Mex3a   | 140.974 | -0.17627 | 0.605454 | 0.871584 | 114.271 | 130.353 | 152.022 | 117.192 | 145.083 | 186.925 |
| ENSMUSG00000074483 | 2_Bglap   | 2.00897 | -0.15901 | 0.93672  | 0.984592 | 0       | 5.66751 | 0       | 0.82529 | 0.85848 | 4.70251 |
| ENSMUSG00000074486 | 2_Bglap2  | 1.11698 | -3.5349  | 0.213383 | NA       | 0       | 0       | 0       | 4.12646 | 2.57543 | 0       |
| ENSMUSG00000074489 | 9_Bglap3  | 115.016 | 1.46113  | 0.000536 | 0.012249 | 98.0907 | 233.502 | 174.773 | 60.2463 | 63.5273 | 59.957  |
| ENSMUSG00000074491 | 9_Clec4g  | 0.70218 | 3.02137  | 0.274084 | NA       | 1.01124 | 1.1335  | 2.06832 | 0       | 0       | 0       |
| ENSMUSG00000074497 | 4_A43007  | 1.5954  | 3.10437  | 0.12772  | NA       | 1.01124 | 5.66751 | 2.06832 | 0.82529 | 0       | 0       |
| ENSMUSG00000074500 | 11_Zfp55f | 54.6195 | 0.22674  | 0.68791  | 0.904794 | 104.158 | 36.2721 | 36.1957 | 37.9634 | 66.1027 | 47.0251 |
| ENSMUSG00000074505 | 4_Fat3    | 125.637 | -1.38357 | 0.009286 | 0.0951   | 118.316 | 28.3376 | 62.0497 | 193.944 | 207.751 | 143.427 |
| ENSMUSG00000074507 | 6_Gm143   | 0.37783 | 2.11394  | 0.599927 | NA       | 0       | 2.26701 | 0       | 0       | 0       | 0       |
| ENSMUSG00000074513 | 9_Arfip1  | 2642.69 | 0.60418  | 0.172848 | 0.556516 | 5283.75 | 2205.8  | 2074.53 | 1718.26 | 2388.28 | 2185.49 |
| ENSMUSG00000074516 | 5_Gm107   | 567.137 | 0.02873  | 0.962443 | 0.990106 | 143.597 | 717.507 | 857.32  | 723.781 | 375.154 | 585.463 |
| ENSMUSG00000074517 | 2_Gm107   | 1.76187 | -1.21157 | 0.461945 | 0.799907 | 0       | 1.1335  | 2.06832 | 3.30117 | 1.71695 | 2.35126 |
| ENSMUSG00000074519 | 11_Etohi1 | 269.488 | -0.16171 | 0.752873 | 0.925804 | 456.071 | 151.889 | 155.124 | 230.257 | 361.419 | 262.165 |
| ENSMUSG00000074521 | 9_Gm143   | 35.1621 | 0.10849  | 0.892862 | 0.970997 | 82.922  | 19.2695 | 7.23913 | 33.837  | 39.4899 | 28.2151 |

|                    |           |         |          |          |          |         |         |         |         |         |          |
|--------------------|-----------|---------|----------|----------|----------|---------|---------|---------|---------|---------|----------|
| ENSMUSG00000074527 | 11_Gm14:  | 413.934 | -0.03382 | 0.944766 | 0.986649 | 708.882 | 226.701 | 291.634 | 394.49  | 515.086 | 346.81   |
| ENSMUSG00000074529 | 10_C330c  | 5.97995 | 0.17213  | 0.843856 | 0.954374 | 6.06747 | 5.66751 | 7.23913 | 3.30117 | 7.72629 | 5.87814  |
| ENSMUSG00000074564 | 3_Gm107:  | 0       | NA       | NA       | NA       | 0       | 0       | 0       | 0       | 0       | 0        |
| ENSMUSG00000074569 | 4_Gcnt7   | 14.7872 | -1.16459 | 0.129901 | 0.490076 | 6.06747 | 4.53401 | 16.5466 | 13.2047 | 15.4526 | 32.9176  |
| ENSMUSG00000074570 | 13_Cass4  | 12.3483 | 0.33609  | 0.583699 | 0.860815 | 14.1574 | 14.7355 | 12.4099 | 10.7288 | 10.3017 | 11.7563  |
| ENSMUSG00000074575 | 4_Kcng1   | 8.56261 | -1.28263 | 0.150491 | 0.523939 | 4.04498 | 7.93452 | 3.10248 | 6.60234 | 21.4619 | 8.22939  |
| ENSMUSG00000074576 | 4_Mocs3   | 112.14  | 0.39904  | 0.254055 | 0.645047 | 99.1019 | 146.222 | 137.543 | 115.541 | 81.5553 | 92.8746  |
| ENSMUSG00000074577 | 9_Fam65c  | 175.337 | 0.34762  | 0.619584 | 0.877704 | 29.3261 | 251.638 | 308.18  | 183.215 | 124.479 | 155.183  |
| ENSMUSG00000074578 | 12_15000  | 694.372 | 0.88259  | 0.001573 | 0.027268 | 875.738 | 1074.56 | 750.801 | 439.056 | 519.379 | 506.696  |
| ENSMUSG00000074579 | 13_Lekr1  | 107.863 | 0.19616  | 0.711295 | 0.910557 | 207.305 | 77.0782 | 61.0155 | 85.0051 | 113.319 | 103.455  |
| ENSMUSG00000074582 | 10_Arfgef | 2497.5  | 0.12441  | 0.64553  | 0.8894   | 2049.79 | 2927.84 | 2837.74 | 2371.06 | 2292.13 | 2506.44  |
| ENSMUSG00000074591 | 7_Ankub1  | 2.13994 | -0.07152 | 0.969981 | 0.991939 | 3.03373 | 0       | 3.10248 | 0.82529 | 0       | 5.87814  |
| ENSMUSG00000074595 | 9_Wfdc6a  | 9.12051 | -1.78172 | 0.102917 | 0.436784 | 4.04498 | 0       | 8.27329 | 23.1082 | 14.5941 | 4.70251  |
| ENSMUSG00000074604 | 9_Mgst2   | 112.531 | 0.28766  | 0.373859 | 0.74451  | 139.552 | 111.083 | 119.963 | 90.7822 | 92.7155 | 121.09   |
| ENSMUSG00000074607 | 11_Tox2   | 25.6933 | -0.69677 | 0.163798 | 0.541869 | 24.2699 | 18.136  | 16.5466 | 39.614  | 30.9052 | 24.6882  |
| ENSMUSG00000074619 | 5_170003  | 2.28257 | -0.02351 | 0.989832 | 0.997265 | 0       | 6.80102 | 0       | 1.65058 | 1.71695 | 3.52688  |
| ENSMUSG00000074622 | 4_Mafb    | 659.22  | 0.69527  | 0.011626 | 0.112425 | 755.4   | 991.815 | 698.059 | 516.633 | 477.313 | 5.16.101 |
| ENSMUSG00000074623 | 4_Gm826   | 13.7819 | 0.45713  | 0.468326 | 0.804054 | 10.1124 | 19.2695 | 18.6149 | 11.5541 | 13.7356 | 9.40502  |
| ENSMUSG00000074625 | 10_Arhga1 | 337.913 | 0.6281   | 0.353133 | 0.729327 | 67.7534 | 612.092 | 551.208 | 311.135 | 204.318 | 280.975  |
| ENSMUSG00000074627 | 11_Mroh8  | 3.09686 | 0.37895  | 0.767701 | 0.930788 | 3.03373 | 3.40051 | 4.13665 | 0.82529 | 6.00934 | 1.17563  |
| ENSMUSG00000074628 | 9_Tlhc2   | 0.34472 | 1.99863  | 0.620844 | NA       | 0       | 0       | 2.06832 | 0       | 0       | 0        |
| ENSMUSG00000074629 | 2_493051  | 33.6477 | 0.07597  | 0.883346 | 0.967903 | 49.551  | 24.9371 | 28.9565 | 22.2829 | 42.0654 | 34.0932  |
| ENSMUSG00000074634 | 11_Gm71:  | 46.3638 | -0.08778 | 0.885664 | 0.968893 | 13.1462 | 56.6751 | 65.1522 | 55.2946 | 42.0654 | 45.8495  |
| ENSMUSG00000074635 | 2_311007  | 17.3333 | -0.66133 | 0.24652  | 0.638221 | 10.1124 | 13.602  | 16.5466 | 16.5058 | 24.8958 | 22.3369  |
| ENSMUSG00000074637 | 7_Sox2    | 26.9461 | -1.36002 | 0.073855 | 0.363567 | 14.1574 | 14.7355 | 16.5466 | 16.5058 | 83.2723 | 16.4588  |
| ENSMUSG00000074639 | 6_BC089f  | 16.6054 | 0.63697  | 0.378359 | 0.746641 | 8.08995 | 32.8716 | 19.6491 | 7.42763 | 16.3111 | 15.2832  |
| ENSMUSG00000074643 | 12_Cpne1  | 545.564 | 1.1738   | 0.000381 | 0.009422 | 591.578 | 880.732 | 796.304 | 429.152 | 287.59  | 288.029  |
| ENSMUSG00000074646 | 10_64305  | 22.323  | -0.68792 | 0.215309 | 0.606405 | 16.1799 | 10.2015 | 24.8199 | 23.9335 | 31.7636 | 27.0394  |
| ENSMUSG00000074647 | 3_Fam83c  | 282.408 | 0.51798  | 0.106365 | 0.44289  | 315.508 | 377.456 | 304.043 | 195.594 | 200.884 | 300.961  |
| ENSMUSG00000074649 | 6_BC029f  | 257.936 | -0.69132 | 0.080302 | 0.381339 | 137.529 | 170.025 | 284.394 | 395.315 | 265.269 | 295.083  |
| ENSMUSG00000074650 | 2_Gm107:  | 6.75625 | -0.82178 | 0.339482 | 0.718177 | 6.06747 | 4.53401 | 4.13665 | 9.07822 | 12.0187 | 4.70251  |
| ENSMUSG00000074651 | 2_Mcidas  | 2.77565 | 1.49683  | 0.320297 | 0.701353 | 5.05622 | 1.1335  | 6.20497 | 0.82529 | 3.43391 | 0        |
| ENSMUSG00000074652 | 3_Myh7b   | 9.47816 | -1.50411 | 0.128606 | 0.487117 | 1.01124 | 4.53401 | 9.30745 | 23.9335 | 5.15086 | 12.9319  |
| ENSMUSG00000074653 | 10_Lrrc31 | 53.7064 | -0.08896 | 0.813421 | 0.946643 | 56.6297 | 46.4736 | 52.7422 | 45.3911 | 57.518  | 63.4839  |
| ENSMUSG00000074656 | 12_Eif2s2 | 5109.04 | 0.44706  | 0.309051 | 0.691532 | 9718.06 | 4410.46 | 3554.41 | 3771.59 | 4934.53 | 4265.18  |
| ENSMUSG00000074657 | 4_Kif5a   | 59.2547 | -1.40759 | 0.003908 | 0.052444 | 30.3373 | 36.2721 | 31.0248 | 130.396 | 78.1214 | 49.3764  |
| ENSMUSG00000074665 | 10_Bpifb4 | 0.82317 | 2.03093  | 0.460429 | NA       | 1.01124 | 0       | 3.10248 | 0.82529 | 0       | 0        |
| ENSMUSG00000074671 | 6_Tspyl3  | 79.3017 | -0.9507  | 0.006303 | 0.072995 | 49.551  | 47.6071 | 65.1522 | 114.716 | 104.734 | 94.0502  |
| ENSMUSG00000074673 | 15_Ttll9  | 3.35699 | -5.09437 | 0.003718 | 0.050634 | 0       | 0       | 0       | 4.95175 | 3.43391 | 11.7563  |
| ENSMUSG00000074676 | 2_Foxs1   | 5.5632  | -0.15664 | 0.871461 | 0.963578 | 3.03373 | 5.66751 | 7.23913 | 9.07822 | 6.00934 | 2.35126  |
| ENSMUSG00000074677 | 11_Sirpb1 | 24.6938 | 3.67979  | 2.12E-05 | 0.000955 | 48.5397 | 66.8767 | 21.7174 | 0       | 5.15086 | 5.87814  |
| ENSMUSG00000074678 | 1_Defb25  | 0.16854 | 1.1315   | 0.781553 | NA       | 1.01124 | 0       | 0       | 0       | 0       | 0        |
| ENSMUSG00000074682 | 4_Zcchc3  | 189.057 | -0.24328 | 0.408816 | 0.766081 | 170.9   | 159.824 | 188.217 | 184.04  | 188.006 | 243.355  |
| ENSMUSG00000074698 | 10_Csnk2  | 3906.28 | 0.28338  | 0.451622 | 0.793898 | 6367.81 | 3296.23 | 3201.76 | 2957.02 | 3875.17 | 3739.67  |
| ENSMUSG00000074704 | 9_Rad21l  | 0.14308 | -0.79206 | 0.84609  | NA       | 0       | 0       | 0       | 0       | 0.85848 | 0        |
| ENSMUSG00000074715 | 2_Ccl28   | 85.2069 | -1.28651 | 0.022772 | 0.177925 | 87.9783 | 29.4711 | 31.0248 | 77.5775 | 169.978 | 115.212  |
| ENSMUSG00000074731 | 3_Zfp345  | 0.83402 | -0.41141 | 0.84885  | NA       | 1.01124 | 1.1335  | 0       | 0.82529 | 0.85848 | 1.17563  |
| ENSMUSG00000074733 | 14_Zfp95f | 603.434 | 0.07647  | 0.874979 | 0.964429 | 1088.1  | 361.587 | 408.494 | 520.759 | 709.102 | 532.559  |
| ENSMUSG00000074735 | 2_Gm219f  | 62.7612 | 0.58583  | 0.394659 | 0.755773 | 160.788 | 32.8716 | 32.059  | 42.0899 | 42.9238 | 65.8352  |
| ENSMUSG00000074736 | 10_Syndic | 4.67131 | -2.5469  | 0.068832 | 0.348948 | 4.04498 | 0       | 0       | 11.5541 | 7.72629 | 4.70251  |
| ENSMUSG00000074738 | 2_B93004  | 140.702 | -0.8207  | 0.143092 | 0.511849 | 34.3823 | 119.018 | 152.022 | 237.684 | 168.261 | 132.846  |
| ENSMUSG00000074739 | 2_Gm107:  | 0       | NA       | NA       | NA       | 0       | 0       | 0       | 0       | 0       | 0        |
| ENSMUSG00000074743 | 4_Thbd    | 1235.22 | -1.06528 | 0.007447 | 0.08157  | 1200.35 | 513.477 | 682.547 | 1932.01 | 1688.62 | 1394.29  |
| ENSMUSG00000074746 | 2_Pdzd8   | 1879.94 | 0.53812  | 0.230024 | 0.621014 | 3741.6  | 1437.28 | 1500.57 | 1325.42 | 1745.28 | 1529.49  |
| ENSMUSG00000074748 | 3_Atxn7l3 | 2278.07 | 0.02711  | 0.943622 | 0.986405 | 3508.01 | 1726.32 | 1663.97 | 2149.06 | 2432.07 | 2189.02  |
| ENSMUSG00000074749 | 10_Kiz    | 453.979 | 0.13043  | 0.737354 | 0.920922 | 721.017 | 332.116 | 370.23  | 448.959 | 441.257 | 410.294  |
| ENSMUSG00000074754 | 4_Gm561   | 108.114 | -0.4737  | 0.186136 | 0.57322  | 117.304 | 71.4107 | 82.7329 | 112.24  | 145.083 | 119.914  |
| ENSMUSG00000074758 | 9_Gm553:  | 1.08726 | -0.13278 | 0.950663 | NA       | 2.02249 | 1.1335  | 0       | 1.65058 | 1.71695 | 0        |
| ENSMUSG00000074766 | 10_Ism1   | 89.8207 | 0.30503  | 0.446413 | 0.790109 | 129.439 | 85.0127 | 83.7671 | 100.686 | 82.4138 | 57.6058  |
| ENSMUSG00000074768 | 5_Bhmt    | 32.0521 | -1.33952 | 0.064495 | 0.336509 | 33.3711 | 3.40051 | 17.5807 | 42.9152 | 60.9519 | 34.0932  |
| ENSMUSG00000074771 | 10_Ankef  | 3.85573 | -1.11951 | 0.332686 | 0.711855 | 4.04498 | 2.26701 | 1.03416 | 7.42763 | 6.00934 | 2.35126  |
| ENSMUSG00000074776 | 3_Gm107:  | 0.19594 | -0.79206 | 0.84609  | NA       | 0       | 0       | 0       | 0       | 0       | 1.17563  |
| ENSMUSG00000074780 | 1_Anapc1  | 0.17236 | 1.1315   | 0.781553 | NA       | 0       | 0       | 1.03416 | 0       | 0       | 0        |
| ENSMUSG00000074781 | 4_Ube2n   | 3789.44 | 0.38518  | 0.308977 | 0.691532 | 6350.61 | 3510.46 | 3015.62 | 2735.02 | 3568.69 | 3556.27  |
| ENSMUSG00000074783 | 10_AU01f  | 0.56424 | -1.00342 | 0.787021 | NA       | 0       | 0       | 1.03416 | 0       | 0       | 2.35126  |
| ENSMUSG00000074785 | 4_Plxnc1  | 343.495 | -0.72456 | 0.091908 | 0.413147 | 405.509 | 180.227 | 191.32  | 483.621 | 478.172 | 322.122  |
| ENSMUSG00000074793 | 10_Hspa1  | 106.063 | -0.65894 | 0.109342 | 0.449508 | 56.6297 | 70.2772 | 119.963 | 151.854 | 123.621 | 114.036  |
| ENSMUSG00000074794 | 9_Arrdc3  | 6059.45 | 0.71956  | 0.096425 | 0.421221 | 11985.3 | 5074.69 | 5559.65 | 3347.39 | 5108.8  | 5280.92  |
| ENSMUSG00000074796 | 10_Slc4a1 | 1774.06 | -1.60693 | 0.000782 | 0.016308 | 367.082 | 1170.91 | 1093.11 | 3400.2  | 2294.71 | 2318.34  |
| ENSMUSG00000074797 | 11_Itpa   | 627.512 | -0.15464 | 0.546138 | 0.842658 | 516.746 | 656.298 | 609.121 | 708.926 | 666.178 | 607.8    |
| ENSMUSG00000074802 | 10_Gas2l: | 347.381 | 0.03084  | 0.92895  | 0.981421 | 488.431 | 272.041 | 292.668 | 323.515 | 372.579 | 335.054  |
| ENSMUSG00000074807 | 2_Gm107:  | 14.8257 | -0.00248 | 0.997555 | 0.998756 | 31.3486 | 6.80102 | 6.20497 | 18.1564 | 11.1602 | 15.2832  |
| ENSMUSG00000074811 | 2_Hps6    | 96.7564 | 0.16617  | 0.783763 | 0.935592 | 30.3373 | 124.685 | 152.022 | 119.667 | 60.9519 | 92.8746  |
| ENSMUSG00000074812 | 10_Spdye  | 0.14308 | -0.79206 | 0.84609  | NA       | 0       | 0       | 0       | 0       | 0.85848 | 0        |
| ENSMUSG00000074817 | 2_Papalb  | 5.93538 | -1.67651 | 0.14456  | 0.514447 | 4.04498 | 4.53401 | 0       | 13.2047 | 10.3017 | 3.52688  |

|                    |            |         |          |          |          |         |         |         |         |         |         |
|--------------------|------------|---------|----------|----------|----------|---------|---------|---------|---------|---------|---------|
| ENSMUSG00000074818 | 12_Pdzd7   | 46.2607 | 0.27505  | 0.594474 | 0.866686 | 73.8208 | 26.0706 | 51.7081 | 40.4393 | 32.6221 | 52.9033 |
| ENSMUSG00000074824 | 3_Rslcan1  | 5.71437 | 0.05928  | 0.952361 | 0.988186 | 9.1012  | 2.26701 | 6.20497 | 5.77705 | 8.58477 | 2.35126 |
| ENSMUSG00000074825 | 4_Itprip1  | 140.175 | 0.66695  | 0.057196 | 0.313025 | 138.54  | 228.968 | 148.919 | 118.017 | 109.027 | 97.5771 |
| ENSMUSG00000074826 | 10_Gm10    | 18.208  | -0.2675  | 0.720308 | 0.913102 | 33.3711 | 7.93452 | 8.27329 | 19.807  | 25.7543 | 14.1075 |
| ENSMUSG00000074829 | 10_20103   | 913.877 | 0.75016  | 0.150376 | 0.52373  | 2136.76 | 635.895 | 666     | 576.879 | 794.091 | 673.635 |
| ENSMUSG00000074832 | 10_24101   | 0.36448 | 0.16972  | 0.966824 | NA       | 1.01124 | 0       | 0       | 0       | 0       | 1.17563 |
| ENSMUSG00000074847 | 2_Gm107    | 0.66737 | 1.65149  | 0.513625 | NA       | 1.01124 | 1.1335  | 1.03416 | 0.82529 | 0       | 0       |
| ENSMUSG00000074852 | 3_Hpse2    | 0.31162 | 0.16972  | 0.966824 | NA       | 1.01124 | 0       | 0       | 0       | 0.85848 | 0       |
| ENSMUSG00000074862 | 11_BC02f   | 44.8404 | -0.77424 | 0.051095 | 0.292593 | 39.4385 | 32.8716 | 26.8882 | 56.1199 | 54.9425 | 58.7814 |
| ENSMUSG00000074863 | 4_Platr25  | 5.13596 | -0.52666 | 0.58288  | 0.860399 | 4.04498 | 2.26701 | 6.20497 | 5.77705 | 4.29238 | 8.22939 |
| ENSMUSG00000074865 | 10_Zfp93a  | 76.297  | 0.53155  | 0.381207 | 0.748604 | 176.968 | 39.6726 | 53.7764 | 51.9934 | 69.5366 | 65.8352 |
| ENSMUSG00000074867 | 3_Zfp808   | 189.541 | 0.71788  | 0.211242 | 0.602834 | 451.015 | 102.015 | 154.09  | 113.065 | 175.988 | 141.075 |
| ENSMUSG00000074872 | 2_Ctxn2    | 0.56126 | -2.54391 | 0.473253 | NA       | 0       | 0       | 0       | 1.65058 | 1.71695 | 0       |
| ENSMUSG00000074873 | 3_Al6061f  | 112.104 | 0.26438  | 0.401627 | 0.760434 | 143.597 | 115.617 | 107.553 | 94.9086 | 100.442 | 110.509 |
| ENSMUSG00000074874 | 9_Ctla2b   | 38.1131 | 0.77769  | 0.238718 | 0.630726 | 92.0232 | 32.8716 | 19.6491 | 27.2346 | 36.9145 | 19.9857 |
| ENSMUSG00000074881 | 4_Mageb3   | 0.67119 | 1.66035  | 0.567496 | NA       | 0       | 1.1335  | 2.06832 | 0.82529 | 0       | 0       |
| ENSMUSG00000074884 | 12_Serf2   | 7110.05 | -0.07698 | 0.796473 | 0.939832 | 5116.9  | 7595.6  | 8048.88 | 8104.37 | 6556.19 | 7238.34 |
| ENSMUSG00000074886 | 10_Grk6    | 759.246 | 0.26753  | 0.55294  | 0.845776 | 378.205 | 1068.89 | 1041.4  | 810.437 | 582.906 | 673.635 |
| ENSMUSG00000074890 | 4_Lcmt2    | 160.017 | 0.07051  | 0.81623  | 0.947479 | 133.484 | 185.894 | 172.705 | 155.155 | 168.261 | 144.602 |
| ENSMUSG00000074892 | 9_B3galt5  | 1108.45 | 1.60751  | 1.38E-05 | 0.000694 | 1308.55 | 2308.95 | 1389.91 | 408.52  | 670.471 | 564.301 |
| ENSMUSG00000074895 | 10_Eif4e1  | 1.55676 | 2.14165  | 0.358669 | NA       | 2.02249 | 5.66751 | 0       | 1.65058 | 0       | 0       |
| ENSMUSG00000074896 | 3_Iff13    | 11617.2 | 3.06472  | 7.06E-16 | 3.95E-13 | 22072.4 | 24583.4 | 15606.5 | 1756.22 | 3536.93 | 2147.87 |
| ENSMUSG00000074899 | 4_Sptbn5   | 78.2025 | 0.04241  | 0.95407  | 0.988507 | 11.1237 | 88.4132 | 138.578 | 94.9086 | 60.9519 | 75.2402 |
| ENSMUSG00000074909 | 4_Ranbp6   | 827.193 | 0.14068  | 0.752777 | 0.925804 | 1447.09 | 591.689 | 563.618 | 714.703 | 915.995 | 730.065 |
| ENSMUSG00000074916 | 5_Chts14   | 151.759 | -0.25803 | 0.488949 | 0.814352 | 97.0795 | 177.96  | 139.612 | 174.962 | 130.489 | 190.452 |
| ENSMUSG00000074922 | 1_Fam12f   | 129.834 | -0.30621 | 0.448647 | 0.791834 | 71.7983 | 137.154 | 139.612 | 178.263 | 119.328 | 132.846 |
| ENSMUSG00000074923 | 10_Pak6    | 982.398 | 0.9941   | 0.037264 | 0.241871 | 531.915 | 1819.27 | 1572.96 | 635.475 | 581.189 | 753.577 |
| ENSMUSG00000074925 | 3_Ptar1    | 104.809 | -0.45186 | 0.146613 | 0.518137 | 91.012  | 82.7457 | 92.0404 | 135.348 | 121.904 | 105.807 |
| ENSMUSG00000074934 | 3_Grem1    | 597.152 | -1.60159 | 0.003935 | 0.052559 | 570.342 | 129.219 | 188.217 | 804.66  | 1072.24 | 818.237 |
| ENSMUSG00000074939 | 3_Chrm5    | 3.30536 | -3.0511  | 0.036338 | 0.238872 | 0       | 1.1335  | 1.03416 | 5.77705 | 6.00934 | 5.87814 |
| ENSMUSG00000074968 | 11_Ano3    | 42      | 0.54788  | 0.258627 | 0.64893  | 74.8321 | 40.8061 | 34.1273 | 37.9634 | 36.056  | 28.2151 |
| ENSMUSG00000074971 | 4_Fibin    | 766.439 | -0.11038 | 0.752648 | 0.925804 | 1026.41 | 525.945 | 658.761 | 855.828 | 700.517 | 831.169 |
| ENSMUSG00000074991 | 4_Gabrr3   | 1.11145 | -3.52791 | 0.220349 | NA       | 0       | 0       | 0       | 4.95175 | 1.71695 | 0       |
| ENSMUSG00000074994 | 4_Qser1    | 1744.3  | 0.47238  | 0.292378 | 0.676777 | 3360.36 | 1435.01 | 1286.5  | 1177.69 | 1736.7  | 1469.53 |
| ENSMUSG00000074997 | 3_Pin1rt1  | 0.85848 | -3.14809 | 0.426095 | NA       | 0       | 0       | 0       | 0       | 5.15086 | 0       |
| ENSMUSG00000075000 | 11_Nrbf2   | 407.051 | 0.4479   | 0.162434 | 0.540887 | 592.589 | 463.603 | 352.649 | 306.183 | 341.674 | 385.606 |
| ENSMUSG00000075010 | 4_AW112    | 325.546 | 3.61187  | 1.63E-11 | 3.92E-09 | 1034.5  | 516.877 | 254.404 | 45.3911 | 60.9519 | 41.147  |
| ENSMUSG00000075012 | 4_Fjx1     | 544.53  | 0.24336  | 0.358119 | 0.732547 | 636.073 | 511.21  | 623.599 | 547.169 | 441.257 | 507.871 |
| ENSMUSG00000075014 | 1_Gm108    | 53.1929 | 0.68927  | 0.254009 | 0.645047 | 115.282 | 22.6701 | 58.9472 | 37.9634 | 45.4993 | 38.7957 |
| ENSMUSG00000075015 | 3_Gm108    | 10.236  | -0.26979 | 0.743607 | 0.92327  | 17.1912 | 3.40051 | 7.23913 | 9.90351 | 15.4526 | 8.22939 |
| ENSMUSG00000075020 | 5_E53000   | 1.7695  | -1.31461 | 0.487299 | 0.814019 | 2.02249 | 0       | 1.03416 | 4.12646 | 3.43391 | 0       |
| ENSMUSG00000075023 | 11_Accs1   | 1.2227  | -3.65316 | 0.118606 | NA       | 0       | 0       | 0       | 4.12646 | 0.85848 | 2.35126 |
| ENSMUSG00000075024 | 2_Gm108    | 0.18892 | 1.1315   | 0.781553 | NA       | 0       | 1.1335  | 0       | 0       | 0       | 0       |
| ENSMUSG00000075025 | 10_Gm10    | 1.45405 | 1.24113  | 0.550934 | NA       | 1.01124 | 0       | 5.17081 | 0.82529 | 1.71695 | 0       |
| ENSMUSG00000075028 | 11_Prdr1   | 707.425 | -0.2378  | 0.521582 | 0.831998 | 399.442 | 700.505 | 848.012 | 891.316 | 679.914 | 725.362 |
| ENSMUSG00000075031 | 3_Hist1h2  | 0.87117 | -1.90782 | 0.471011 | NA       | 0       | 0       | 1.03416 | 2.47588 | 1.71695 | 0       |
| ENSMUSG00000075033 | 3_Nxpe3    | 62.2806 | -0.44165 | 0.279269 | 0.666376 | 62.6971 | 57.8086 | 38.264  | 85.8304 | 73.829  | 55.2545 |
| ENSMUSG00000075040 | 9_Zfp408   | 341.248 | 0.3292   | 0.413235 | 0.768469 | 212.361 | 507.809 | 419.87  | 259.142 | 316.778 | 331.527 |
| ENSMUSG00000075044 | 11_Slc22e1 | 6.5465  | 0.6848   | 0.477872 | 0.808634 | 11.1237 | 4.53401 | 8.27329 | 1.65058 | 4.29238 | 9.40502 |
| ENSMUSG00000075045 | 4_Gm498    | 0.13755 | -0.79206 | 0.84609  | NA       | 0       | 0       | 0       | 0.82529 | 0       | 0       |
| ENSMUSG00000075046 | 7_Duxf3    | 0.17236 | 1.1315   | 0.781553 | NA       | 0       | 0       | 1.03416 | 0       | 0       | 0       |
| ENSMUSG00000075053 | 2_Vdac3-f  | 46.2915 | -0.04286 | 0.939967 | 0.985498 | 66.7421 | 35.1386 | 35.1615 | 39.614  | 76.4045 | 24.6882 |
| ENSMUSG00000075054 | 4_Yae1d1   | 698.874 | 0.24935  | 0.537846 | 0.839833 | 1190.23 | 544.081 | 542.935 | 603.289 | 701.376 | 611.326 |
| ENSMUSG00000075081 | 4_Olfr124  | 0.13755 | -0.79206 | 0.84609  | NA       | 0       | 0       | 0       | 0.82529 | 0       | 0       |
| ENSMUSG00000075122 | 4_Cd80     | 127.067 | 2.95362  | 2.79E-11 | 6.36E-09 | 339.778 | 179.093 | 156.158 | 25.5841 | 30.0467 | 31.742  |
| ENSMUSG00000075184 | 2_F93001   | 0.17236 | 1.1315   | 0.781553 | NA       | 0       | 0       | 1.03416 | 0       | 0       | 0       |
| ENSMUSG00000075212 | 3_Olfr154  | 0       | NA       | NA       | NA       | 0       | 0       | 0       | 0       | 0       | 0       |
| ENSMUSG00000075214 | 1_Olfr100  | 0.18892 | 1.1315   | 0.781553 | NA       | 0       | 1.1335  | 0       | 0       | 0       | 0       |
| ENSMUSG00000075215 | 1_Olfr100  | 0       | NA       | NA       | NA       | 0       | 0       | 0       | 0       | 0       | 0       |
| ENSMUSG00000075217 | 1_483342   | 984.549 | 0.50569  | 0.244816 | 0.6364   | 1829.34 | 842.193 | 794.236 | 592.56  | 955.485 | 893.477 |
| ENSMUSG00000075224 | 8_Lrrc55   | 16.7414 | -0.28465 | 0.714441 | 0.91117  | 29.3261 | 3.40051 | 12.4099 | 18.1564 | 17.1695 | 19.9857 |
| ENSMUSG00000075225 | 11_Ccdc1   | 92.4312 | 0.29669  | 0.469729 | 0.804531 | 125.394 | 60.0757 | 119.963 | 74.2763 | 86.7062 | 88.1721 |
| ENSMUSG00000075227 | 6_Znhit2   | 93.404  | 0.3843   | 0.662236 | 0.895681 | 6.06747 | 154.156 | 157.193 | 124.619 | 45.4993 | 72.8889 |
| ENSMUSG00000075229 | 10_Ccdc5   | 319.578 | 0.09175  | 0.81206  | 0.946139 | 477.307 | 243.703 | 267.848 | 244.287 | 343.391 | 340.932 |
| ENSMUSG00000075232 | 4_Amd1     | 5182.13 | 0.31995  | 0.441616 | 0.786839 | 9092.1  | 4603.16 | 3567.86 | 4060.44 | 5219.54 | 4549.68 |
| ENSMUSG00000075249 | 12_Fsip2   | 0.4821  | -2.30304 | 0.543942 | NA       | 0       | 0       | 0       | 0       | 1.71695 | 1.17563 |
| ENSMUSG00000075254 | 11_Heg1    | 1388.9  | -0.10612 | 0.710052 | 0.910052 | 1677.65 | 1105.17 | 1230.65 | 1537.52 | 1410.48 | 1371.96 |
| ENSMUSG00000075256 | 9_Cerkl    | 55.7276 | -1.23101 | 0.079172 | 0.37784  | 60.6747 | 23.8036 | 15.5124 | 132.872 | 72.1121 | 29.3907 |
| ENSMUSG00000075266 | 4_Cenpw    | 45.0283 | 0.74568  | 0.156251 | 0.5336   | 93.0345 | 41.9396 | 34.1273 | 28.8852 | 36.9145 | 35.2688 |
| ENSMUSG00000075267 | 9_Dfnb59   | 1.48062 | -1.71862 | 0.393016 | NA       | 2.02249 | 0       | 0       | 2.47588 | 0.85848 | 3.52688 |
| ENSMUSG00000075269 | 4_Bex6     | 1.21756 | 2.67374  | 0.210209 | NA       | 1.01124 | 3.40051 | 2.06832 | 0.82529 | 0       | 0       |
| ENSMUSG00000075270 | 11_Pde11   | 2.7612  | -1.52855 | 0.356378 | 0.731228 | 1.01124 | 2.26701 | 1.03416 | 9.90351 | 0       | 2.35126 |
| ENSMUSG00000075271 | 4_Ttc30a-f | 170.317 | 0.36473  | 0.380769 | 0.748075 | 291.238 | 143.955 | 139.612 | 125.444 | 147.658 | 173.993 |
| ENSMUSG00000075272 | 4_Ttc30a-f | 7.22137 | 2.37166  | 0.031724 | 0.219488 | 4.04498 | 17.0025 | 15.5124 | 2.47588 | 4.29238 | 0       |
| ENSMUSG00000075273 | 4_Ttc30b   | 268.207 | 0.38821  | 0.366282 | 0.739399 | 483.375 | 206.298 | 222.345 | 196.42  | 260.977 | 239.828 |

|                    |           |         |          |          |          |         |         |         |         |         |         |
|--------------------|-----------|---------|----------|----------|----------|---------|---------|---------|---------|---------|---------|
| ENSMUSG00000075277 | 4_Hagl    | 0.44746 | -0.57987 | 0.8834   | NA       | 0       | 0       | 1.03416 | 1.65058 | 0       | 0       |
| ENSMUSG00000075284 | 10_Wipf1  | 408.091 | 0.37484  | 0.415332 | 0.770028 | 779.669 | 268.64  | 334.034 | 391.189 | 339.957 | 335.054 |
| ENSMUSG00000075286 | 3_Gm196   | 0.36128 | 2.05714  | 0.610196 | NA       | 0       | 1.1335  | 1.03416 | 0       | 0       | 0       |
| ENSMUSG00000075289 | 4_Carns1  | 47.0981 | -0.87651 | 0.083004 | 0.388952 | 18.2024 | 32.8716 | 48.6056 | 75.1016 | 45.4993 | 62.3083 |
| ENSMUSG00000075296 | 4_Aldh3b2 | 4521.6  | 0.9239   | 0.071053 | 0.356233 | 2074.06 | 8392.46 | 7299.11 | 3297.04 | 2591.74 | 3475.16 |
| ENSMUSG00000075297 | 10_H60b   | 10.1527 | -0.76718 | 0.414365 | 0.768913 | 14.1574 | 1.1335  | 7.23913 | 10.7288 | 20.6034 | 7.05377 |
| ENSMUSG00000075302 | 10_Erich2 | 13.2003 | 1.04907  | 0.119774 | 0.470572 | 16.1799 | 24.9371 | 12.4099 | 6.60234 | 12.0187 | 7.05377 |
| ENSMUSG00000075304 | 2_Sp5     | 1.80387 | -0.11935 | 0.958112 | 0.989261 | 0       | 0       | 5.17081 | 3.30117 | 0       | 2.35126 |
| ENSMUSG00000075307 | 3_Klhl41  | 320.583 | -0.14291 | 0.843167 | 0.953858 | 679.556 | 66.8767 | 167.534 | 397.791 | 234.364 | 377.377 |
| ENSMUSG00000075316 | 11_Scn9a  | 1.46429 | -0.89311 | 0.656277 | NA       | 3.03373 | 0       | 0       | 0.82529 | 2.57543 | 2.35126 |
| ENSMUSG00000075318 | 12_Scn2a  | 63.6762 | -1.35253 | 0.020702 | 0.166446 | 64.7196 | 14.7355 | 27.9224 | 121.318 | 78.1214 | 75.2402 |
| ENSMUSG00000075324 | 13_Fign   | 78.3178 | -1.10406 | 0.015114 | 0.133834 | 70.7871 | 34.0051 | 44.4689 | 128.746 | 120.187 | 71.7133 |
| ENSMUSG00000075325 | 3_Gm135   | 2.12463 | -1.10175 | 0.545926 | 0.84263  | 4.04498 | 0       | 0       | 4.95175 | 2.57543 | 1.17563 |
| ENSMUSG00000075327 | 9_Zbtb2   | 244.495 | 0.3683   | 0.208158 | 0.599354 | 323.598 | 277.708 | 225.447 | 230.257 | 207.751 | 202.208 |
| ENSMUSG00000075330 | 3_A93000  | 12.9689 | -2.99921 | 0.002401 | 0.037002 | 2.02249 | 6.80102 | 0       | 36.3129 | 19.745  | 12.9319 |
| ENSMUSG00000075334 | 2_Rprm    | 20.9593 | -0.90743 | 0.110175 | 0.450628 | 19.2136 | 7.93452 | 16.5466 | 30.5358 | 29.1882 | 22.3369 |
| ENSMUSG00000075370 | 10_Igll1  | 0.39188 | -1.97195 | 0.623385 | NA       | 0       | 0       | 0       | 0       | 0       | 2.35126 |
| ENSMUSG00000075376 | 10_Rc3h2  | 1651.79 | 0.53423  | 0.279482 | 0.666619 | 3514.07 | 1212.85 | 1135.51 | 1190.9  | 1583.03 | 1274.38 |
| ENSMUSG00000075394 | 4_Hoxc4   | 1.39929 | 1.90652  | 0.4377   | NA       | 1.01124 | 5.66751 | 0       | 0       | 1.71695 | 0       |
| ENSMUSG00000075402 | 1_Krt76   | 5.47724 | 0.95     | 0.462212 | 0.799907 | 0       | 11.335  | 10.3416 | 1.65058 | 6.00934 | 3.52688 |
| ENSMUSG00000075405 | 3_943009  | 0.2751  | -1.54073 | 0.703687 | NA       | 0       | 0       | 0       | 1.65058 | 0       | 0       |
| ENSMUSG00000075408 | 5_603040  | 1.44198 | 0.61425  | 0.796735 | NA       | 2.02249 | 0       | 3.10248 | 0       | 0       | 3.52688 |
| ENSMUSG00000075410 | 12_Gm11   | 59.0117 | -1.57534 | 0.002891 | 0.042305 | 17.1912 | 30.6046 | 41.3665 | 133.697 | 71.2536 | 59.957  |
| ENSMUSG00000075415 | 13_Fnbp1  | 2070.27 | -0.02983 | 0.91007  | 0.974782 | 1643.27 | 2202.4  | 2301.01 | 2148.24 | 2010.55 | 2116.13 |
| ENSMUSG00000075419 | 4_Dolk    | 243.29  | 0.02411  | 0.937755 | 0.985118 | 201.238 | 250.504 | 284.394 | 283.075 | 207.751 | 232.774 |
| ENSMUSG00000075420 | 6_Smim6   | 4.26494 | 0.45097  | 0.694021 | 0.905638 | 1.01124 | 4.53401 | 9.30745 | 4.95175 | 3.43391 | 2.35126 |
| ENSMUSG00000075425 | 10_Gm13   | 2.90069 | 0.95013  | 0.543736 | 0.841422 | 9.1012  | 2.26701 | 0       | 1.65058 | 0.85848 | 3.52688 |
| ENSMUSG00000075437 | 4_Gm116   | 0.46401 | -0.58035 | 0.881878 | NA       | 0       | 1.1335  | 0       | 1.65058 | 0       | 0       |
| ENSMUSG00000075467 | 4_Dnlz    | 490.38  | -0.03687 | 0.942279 | 0.986012 | 177.979 | 689.17  | 585.335 | 575.229 | 404.343 | 510.222 |
| ENSMUSG00000075470 | 1_Alg10b  | 1020.77 | 0.28198  | 0.457084 | 0.797195 | 1684.73 | 854.661 | 821.124 | 869.033 | 1012.14 | 882.896 |
| ENSMUSG00000075478 | 2_Slitrk1 | 2.54892 | -2.70373 | 0.211586 | 0.602834 | 2.02249 | 0       | 0       | 11.5541 | 1.71695 | 0       |
| ENSMUSG00000075480 | 1_Gm108   | 0.28616 | -1.57932 | 0.696464 | NA       | 0       | 0       | 0       | 0       | 1.71695 | 0       |
| ENSMUSG00000075486 | 9_Commd   | 534.915 | 0.00548  | 0.986617 | 0.996006 | 708.882 | 427.331 | 471.578 | 500.952 | 616.386 | 484.359 |
| ENSMUSG00000075502 | 1_Kbtbd6  | 28.2187 | 1.04556  | 0.051093 | 0.292593 | 57.6409 | 28.3376 | 27.9224 | 15.6806 | 19.745  | 19.9857 |
| ENSMUSG00000075510 | 3_Fam18i  | 0.47845 | 1.02683  | 0.749277 | NA       | 1.01124 | 0       | 1.03416 | 0.82529 | 0       | 0       |
| ENSMUSG00000075511 | 8_170000  | 193.752 | 0.14197  | 0.625937 | 0.880099 | 215.395 | 200.63  | 193.388 | 151.854 | 193.157 | 208.086 |
| ENSMUSG00000075517 | 3_Cyp2d3  | 0.19594 | -0.79206 | 0.84609  | NA       | 0       | 0       | 0       | 0       | 0       | 1.17563 |
| ENSMUSG00000075520 | 5_Malr1   | 1.21571 | -2.47209 | 0.244041 | NA       | 0       | 0       | 1.03416 | 1.65058 | 3.43391 | 1.17563 |
| ENSMUSG00000075524 | 2_493040  | 0       | NA       | NA       | NA       | 0       | 0       | 0       | 0       | 0       | 0       |
| ENSMUSG00000075528 | 13_Aarsd  | 333.856 | 0.178    | 0.713152 | 0.910879 | 141.574 | 465.87  | 456.065 | 352.4   | 303.901 | 283.326 |
| ENSMUSG00000075551 | 2_Cyp3a4  | 0       | NA       | NA       | NA       | 0       | 0       | 0       | 0       | 0       | 0       |
| ENSMUSG00000075553 | 1_Gm546   | 4.05639 | -0.94353 | 0.409838 | 0.766783 | 5.05622 | 1.1335  | 2.06832 | 2.47588 | 7.72629 | 5.87814 |
| ENSMUSG00000075569 | 9_Rsph10  | 42.1133 | -1.44915 | 0.003283 | 0.046393 | 20.2249 | 24.9371 | 22.7516 | 91.6075 | 43.7823 | 49.3764 |
| ENSMUSG00000075570 | 2_Krt26   | 0       | NA       | NA       | NA       | 0       | 0       | 0       | 0       | 0       | 0       |
| ENSMUSG00000075574 | 2_Defb48  | 0.17236 | 1.1315   | 0.781553 | NA       | 0       | 0       | 1.03416 | 0       | 0       | 0       |
| ENSMUSG00000075588 | 6_Hoxb2   | 0.18892 | 1.1315   | 0.781553 | NA       | 0       | 1.1335  | 0       | 0       | 0       | 0       |
| ENSMUSG00000075590 | 2_Nrbp2   | 1137.67 | -0.37762 | 0.233388 | 0.625423 | 705.849 | 1008.82 | 1254.44 | 1352.65 | 1316.9  | 1187.38 |
| ENSMUSG00000075591 | 2_Gm108   | 5.48809 | -0.25551 | 0.827564 | 0.950848 | 7.07871 | 7.93452 | 0       | 7.42763 | 3.43391 | 7.05377 |
| ENSMUSG00000075592 | 9_Nynrin  | 465.923 | -0.66463 | 0.240506 | 0.631907 | 108.203 | 414.862 | 558.447 | 728.733 | 451.559 | 533.735 |
| ENSMUSG00000075593 | 10_Gal3st | 315.576 | -0.56969 | 0.049701 | 0.288242 | 232.586 | 244.837 | 284.394 | 309.485 | 387.173 | 434.982 |
| ENSMUSG00000075595 | 9_Zfp652  | 1886.64 | 0.10796  | 0.712265 | 0.910879 | 2514.96 | 1588.04 | 1768.42 | 1777.68 | 1873.2  | 1797.53 |
| ENSMUSG00000075596 | 2_B13000  | 0.30991 | 0.16972  | 0.966824 | NA       | 0       | 0       | 1.03416 | 0.82529 | 0       | 0       |
| ENSMUSG00000075598 | 5_Smok3c  | 0       | NA       | NA       | NA       | 0       | 0       | 0       | 0       | 0       | 0       |
| ENSMUSG00000075600 | 2_Zc3h3   | 227.935 | 0.23991  | 0.695664 | 0.905638 | 58.6522 | 311.713 | 370.23  | 247.588 | 163.111 | 216.316 |
| ENSMUSG00000075602 | 10_Ly6a   | 22772.2 | 2.70427  | 2.08E-14 | 8.57E-12 | 38363.6 | 53382.3 | 26711.4 | 5149    | 7091.02 | 5935.74 |
| ENSMUSG00000075604 | 5_Cyp11b  | 0       | NA       | NA       | NA       | 0       | 0       | 0       | 0       | 0       | 0       |
| ENSMUSG00000075605 | 3_230000  | 30.2249 | 0.48078  | 0.416859 | 0.770621 | 18.2024 | 28.3376 | 58.9472 | 26.4094 | 18.8865 | 30.5663 |
| ENSMUSG00000075610 | 9_Tmem9   | 0.30609 | 0.16972  | 0.966824 | NA       | 1.01124 | 0       | 0       | 0.82529 | 0       | 0       |
| ENSMUSG00000075700 | 9_Selt    | 4863.68 | 0.57666  | 0.201023 | 0.592148 | 9829.29 | 4167.89 | 3471.68 | 3525.65 | 4431.46 | 3756.13 |
| ENSMUSG00000075701 | 9_Vimp    | 1555.3  | -0.06465 | 0.809601 | 0.94521  | 1822.26 | 1431.61 | 1307.18 | 1456.64 | 1616.51 | 1697.61 |
| ENSMUSG00000075702 | 9_Selm    | 258.195 | -1.01999 | 0.055685 | 0.308674 | 65.7309 | 181.36  | 264.745 | 472.893 | 298.75  | 265.692 |
| ENSMUSG00000075703 | 15_Ept1   | 1029.76 | 0.34352  | 0.331524 | 0.711299 | 1610.91 | 1030.35 | 813.885 | 788.154 | 992.399 | 942.854 |
| ENSMUSG00000075704 | 16_Txnrd3 | 127.655 | -0.34612 | 0.40746  | 0.764892 | 61.6859 | 124.685 | 150.988 | 151.854 | 135.639 | 141.075 |
| ENSMUSG00000075705 | 12_Msrb1  | 551.704 | -0.06636 | 0.887448 | 0.969456 | 231.575 | 766.248 | 619.463 | 654.457 | 495.341 | 543.14  |
| ENSMUSG00000075706 | 10_Gpx4   | 3314.52 | -0.72442 | 0.138101 | 0.50424  | 1028.44 | 2906.3  | 3563.72 | 5352.85 | 3453.65 | 3582.14 |
| ENSMUSG00000075707 | 5_Dio3    | 53.3681 | -1.95125 | 4.25E-05 | 0.001673 | 16.1799 | 23.8036 | 25.854  | 109.764 | 54.084  | 90.5233 |
| ENSMUSG00000076430 | 1_Hus1b   | 0.13755 | -0.79206 | 0.84609  | NA       | 0       | 0       | 0       | 0.82529 | 0       | 0       |
| ENSMUSG00000076431 | 4_Sox4    | 126.775 | -0.69906 | 0.073806 | 0.363567 | 70.7871 | 82.7457 | 136.509 | 187.341 | 143.366 | 139.9   |
| ENSMUSG00000076432 | 12_Ywhac  | 7231.27 | 0.3668   | 0.355319 | 0.730526 | 12498   | 6140.19 | 5798.54 | 5297.55 | 7329.68 | 6323.7  |
| ENSMUSG00000076433 | 4_BC1004  | 11.8522 | 0.32948  | 0.656538 | 0.894261 | 9.1012  | 20.4031 | 10.3416 | 9.07822 | 16.3111 | 5.87814 |
| ENSMUSG00000076434 | 9_Wfdc3   | 8.3705  | -0.44028 | 0.615551 | 0.876383 | 6.06747 | 11.335  | 4.13665 | 14.8553 | 10.3017 | 3.52688 |
| ENSMUSG00000076435 | 3_Acsf3   | 488.833 | -0.27013 | 0.374833 | 0.744881 | 398.43  | 358.187 | 572.925 | 557.898 | 527.105 | 518.452 |
| ENSMUSG00000076436 | 1_Oxct2a  | 0.17236 | 1.1315   | 0.781553 | NA       | 0       | 0       | 1.03416 | 0       | 0       | 0       |
| ENSMUSG00000076437 | 10_27000  | 261.257 | 0.16746  | 0.557579 | 0.848179 | 238.654 | 274.308 | 316.453 | 231.907 | 278.147 | 228.072 |
| ENSMUSG00000076438 | 5_Oxct2b  | 0.18892 | 1.1315   | 0.781553 | NA       | 0       | 1.1335  | 0       | 0       | 0       | 0       |

|                    |           |         |          |          |          |         |         |         |         |         |         |
|--------------------|-----------|---------|----------|----------|----------|---------|---------|---------|---------|---------|---------|
| ENSMUSG00000076439 | 12_Mog    | 0.8011  | 0.876    | 0.751596 | NA       | 2.02249 | 1.1335  | 0       | 1.65058 | 0       | 0       |
| ENSMUSG00000076441 | 9_Ass1    | 1152.66 | -0.12077 | 0.804033 | 0.942928 | 461.127 | 1497.36 | 1354.75 | 1203.28 | 891.099 | 1508.33 |
| ENSMUSG00000077450 | 12_Rab11  | 3147.55 | 0.12513  | 0.636394 | 0.885183 | 2624.18 | 3646.48 | 3581.3  | 3096.5  | 2857.87 | 3078.97 |
| ENSMUSG00000078091 | 1_Gm109   | 0.96837 | -3.32937 | 0.277611 | NA       | 0       | 0       | 0       | 4.95175 | 0.85848 | 0       |
| ENSMUSG00000078117 | 2_Gm164   | 1.56149 | 0.41455  | 0.83219  | NA       | 3.03373 | 2.26701 | 0       | 0       | 1.71695 | 2.35126 |
| ENSMUSG00000078126 | 3_Rpl23a  | 2254.78 | 0.82511  | NA       | NA       | 7930.18 | 375.189 | 342.307 | 743.588 | 3470.82 | 666.581 |
| ENSMUSG00000078127 | 2_Fam17c  | 0.13755 | -0.79206 | 0.84609  | NA       | 0       | 0       | 0       | 0.82529 | 0       | 0       |
| ENSMUSG00000078129 | 1_Actl10  | 0.13755 | -0.79206 | 0.84609  | NA       | 0       | 0       | 0       | 0.82529 | 0       | 0       |
| ENSMUSG00000078134 | 1_Gm123   | 13.526  | -0.77238 | 0.292852 | 0.677267 | 9.1012  | 11.335  | 9.30745 | 7.42763 | 14.5941 | 29.3907 |
| ENSMUSG00000078137 | 1_Ankrd6  | 1.04186 | -2.189   | 0.401725 | NA       | 0       | 1.1335  | 0       | 0.82529 | 4.29238 | 0       |
| ENSMUSG00000078139 | 3_AK157c  | 384.108 | -0.01259 | 0.978813 | 0.993796 | 663.376 | 222.167 | 261.643 | 377.159 | 424.088 | 356.215 |
| ENSMUSG00000078144 | 3_Capns2  | 461.617 | 0.20764  | 0.634185 | 0.883719 | 247.755 | 549.749 | 686.683 | 422.55  | 356.268 | 506.696 |
| ENSMUSG00000078153 | 3_Psme2t  | 337.132 | 0.99014  | 0.004698 | 0.059678 | 304.385 | 598.49  | 442.621 | 212.1   | 230.072 | 235.126 |
| ENSMUSG00000078154 | 3_Gm121   | 70.3727 | 0.44     | 0.252828 | 0.644241 | 66.7421 | 96.3477 | 79.6304 | 46.2164 | 59.2349 | 74.0646 |
| ENSMUSG00000078157 | 1_493144  | 0.76273 | -2.97394 | 0.270313 | NA       | 0       | 0       | 0       | 0.82529 | 2.57543 | 1.17563 |
| ENSMUSG00000078160 | 2_Gm165   | 31.2666 | -0.95494 | 0.164499 | 0.543051 | 38.4273 | 5.66751 | 19.6491 | 36.3129 | 55.801  | 31.742  |
| ENSMUSG00000078161 | 8_Erich3  | 8.20893 | -0.52874 | 0.544634 | 0.842093 | 4.04498 | 9.06802 | 7.23913 | 17.3311 | 6.86782 | 4.70251 |
| ENSMUSG00000078173 | 3_Lenep   | 124.974 | -7.50888 | 4.81E-05 | 0.001842 | 4.04498 | 0       | 0       | 595.036 | 43.7823 | 106.982 |
| ENSMUSG00000078179 | 1_Rnf148  | 0.18892 | 1.1315   | 0.781553 | NA       | 0       | 1.1335  | 0       | 0       | 0       | 0       |
| ENSMUSG00000078184 | 1_Rbm8a   | 8.63205 | -1.97454 | 0.099654 | 0.429481 | 0       | 2.26701 | 8.27329 | 9.07822 | 27.4713 | 4.70251 |
| ENSMUSG00000078185 | 2_Chml    | 203.232 | 0.00893  | 0.98716  | 0.99641  | 391.352 | 103.149 | 116.86  | 172.486 | 218.053 | 217.491 |
| ENSMUSG00000078193 | 2_Gm200   | 3186.19 | -0.28229 | 0.408888 | 0.766081 | 1839.45 | 3161.34 | 3625.77 | 3747.65 | 3317.16 | 3425.78 |
| ENSMUSG00000078201 | 5_Tmem2   | 54.1718 | 0.11973  | 0.837818 | 0.952966 | 34.3823 | 56.6751 | 78.5963 | 88.3063 | 41.2069 | 25.8638 |
| ENSMUSG00000078202 | 3_Nrap    | 1027.38 | 0.24685  | 0.302617 | 0.685316 | 1173.04 | 1125.57 | 1046.57 | 1023.36 | 848.175 | 947.556 |
| ENSMUSG00000078234 | 6_Klhdc7c | 443.604 | -0.30973 | 0.312791 | 0.694375 | 345.846 | 404.661 | 438.484 | 615.668 | 458.427 | 398.538 |
| ENSMUSG00000078235 | 3_Fam43t  | 2.297   | -0.68413 | 0.6685   | 0.898206 | 0       | 1.1335  | 4.13665 | 4.12646 | 0.85848 | 3.52688 |
| ENSMUSG00000078240 | 2_Gm355   | 13.2121 | -0.44016 | 0.647328 | 0.890179 | 16.1799 | 11.335  | 6.20497 | 3.30117 | 35.1976 | 7.05377 |
| ENSMUSG00000078249 | 5_Hmga1   | 1659.82 | 0.76216  | 0.181658 | 0.567796 | 620.904 | 2934.64 | 2709.5  | 1532.57 | 816.412 | 1344.92 |
| ENSMUSG00000078252 | 1_Krtap17 | 0.18892 | 1.1315   | 0.781553 | NA       | 0       | 1.1335  | 0       | 0       | 0       | 0       |
| ENSMUSG00000078302 | 4_Foxd1   | 10.4676 | -0.31562 | 0.68609  | 0.904398 | 16.1799 | 5.66751 | 6.20497 | 15.6806 | 12.0187 | 7.05377 |
| ENSMUSG00000078307 | 2_Al5934  | 14.7085 | -1.81173 | 0.039943 | 0.251375 | 15.1687 | 2.26701 | 2.06832 | 28.8852 | 25.7543 | 14.1075 |
| ENSMUSG00000078308 | 1_Gm729   | 21.9481 | -2.33199 | 0.037011 | 0.240966 | 13.1462 | 4.53401 | 4.13665 | 4.95175 | 97.8664 | 7.05377 |
| ENSMUSG00000078314 | 2_Gm147   | 1.43158 | -1.64957 | 0.359222 | NA       | 1.01124 | 0       | 1.03416 | 2.47588 | 1.71695 | 2.35126 |
| ENSMUSG00000078317 | 6_F8a     | 340.738 | 0.49551  | 0.095316 | 0.419012 | 501.577 | 334.383 | 359.888 | 286.376 | 272.996 | 289.204 |
| ENSMUSG00000078348 | 4_St3b5   | 224.959 | 0.1336   | 0.839062 | 0.953167 | 52.5847 | 318.514 | 335.068 | 292.979 | 120.187 | 230.423 |
| ENSMUSG00000078349 | 2_AW011   | 597.069 | 1.34171  | 6.49E-08 | 6.99E-06 | 790.793 | 957.81  | 820.09  | 335.894 | 322.787 | 355.04  |
| ENSMUSG00000078350 | 11_Smim1  | 196.363 | -1.25872 | 0.026047 | 0.193907 | 42.4723 | 140.554 | 164.432 | 419.249 | 184.573 | 226.896 |
| ENSMUSG00000078354 | 1_lfna2   | 0.51326 | 2.57323  | 0.487037 | NA       | 1.01124 | 0       | 2.06832 | 0       | 0       | 0       |
| ENSMUSG00000078365 | 5_Mos     | 0.85589 | -1.79656 | 0.505464 | NA       | 0       | 1.1335  | 0       | 1.65058 | 0       | 2.35126 |
| ENSMUSG00000078380 | 1_Gm609   | 3.69568 | 0.06282  | 0.957006 | 0.98909  | 6.06747 | 1.1335  | 4.13665 | 2.47588 | 6.00934 | 2.35126 |
| ENSMUSG00000078384 | 2_Gm109   | 0.13755 | -0.79206 | 0.84609  | NA       | 0       | 0       | 0       | 0.82529 | 0       | 0       |
| ENSMUSG00000078427 | 2_Samp    | 1380.83 | 0.32872  | 0.504634 | 0.824602 | 2717.21 | 1054.16 | 840.773 | 956.514 | 1366.7  | 1349.62 |
| ENSMUSG00000078429 | 8_Ctdsp2  | 6337.77 | 0.14295  | 0.677392 | 0.901447 | 4283.63 | 7496.99 | 8174.01 | 6691.47 | 5303.67 | 6076.82 |
| ENSMUSG00000078435 | 5_AU0411  | 179.997 | 0.32795  | 0.602387 | 0.870033 | 412.588 | 86.1462 | 102.382 | 141.125 | 215.478 | 122.265 |
| ENSMUSG00000078439 | 9_Smim2   | 133.005 | 0.00169  | 0.997488 | 0.998756 | 45.506  | 190.428 | 163.398 | 141.95  | 113.319 | 143.427 |
| ENSMUSG00000078440 | 9_Dohh    | 227.172 | 0.11059  | 0.856292 | 0.959059 | 62.6971 | 279.975 | 365.059 | 294.629 | 150.233 | 210.437 |
| ENSMUSG00000078441 | 10_Scam1  | 652.254 | 0.16021  | 0.798436 | 0.940596 | 146.63  | 983.881 | 934.882 | 748.54  | 463.578 | 636.015 |
| ENSMUSG00000078442 | 2_Ccdc10  | 0.42371 | -2.13816 | 0.587702 | NA       | 0       | 0       | 0       | 0.82529 | 1.71695 | 0       |
| ENSMUSG00000078444 | 3_Gm109   | 5.03619 | -1.37629 | 0.165217 | 0.544794 | 2.02249 | 2.26701 | 4.13665 | 9.90351 | 6.00934 | 5.87814 |
| ENSMUSG00000078451 | 4_Ppilb   | 38.2103 | -0.46773 | 0.421985 | 0.774546 | 55.6184 | 13.602  | 26.8882 | 44.5658 | 49.7917 | 38.7957 |
| ENSMUSG00000078452 | 10_Raet1b | 15.4273 | -1.61892 | 0.032334 | 0.222191 | 15.1687 | 2.26701 | 5.17081 | 24.7588 | 24.0374 | 21.1613 |
| ENSMUSG00000078453 | 2_Abracl  | 1199.17 | 0.69033  | 0.142877 | 0.511661 | 2524.07 | 1057.56 | 860.422 | 741.113 | 1116.02 | 895.828 |
| ENSMUSG00000078484 | 3_Klhl1   | 297.946 | -0.47909 | 0.344959 | 0.722149 | 97.0795 | 287.91  | 361.957 | 436.58  | 286.731 | 317.42  |
| ENSMUSG00000078485 | 2_Plekhn1 | 2723.48 | 0.71959  | 0.231193 | 0.62262  | 786.748 | 4663.23 | 4716.81 | 1976.58 | 1739.27 | 2458.24 |
| ENSMUSG00000078486 | 3_Perm1   | 808.947 | 0.47873  | 0.183998 | 0.570805 | 580.454 | 1098.36 | 1146.89 | 600.813 | 674.763 | 752.402 |
| ENSMUSG00000078487 | 8_Ankrd6  | 15.6012 | -0.75671 | 0.379447 | 0.747395 | 2.02249 | 7.93452 | 24.8199 | 23.9335 | 13.7356 | 21.1613 |
| ENSMUSG00000078490 | 9_Cfap74  | 49.5118 | -1.15139 | 0.00641  | 0.073941 | 32.3598 | 22.6701 | 37.2298 | 80.8787 | 68.6782 | 55.2545 |
| ENSMUSG00000078495 | 10_Gm13   | 612.539 | 0.71182  | 0.207366 | 0.599079 | 1499.68 | 369.522 | 412.63  | 392.839 | 527.963 | 472.602 |
| ENSMUSG00000078496 | 9_Gm131   | 99.9111 | -0.19151 | 0.787391 | 0.936722 | 210.339 | 37.4056 | 32.059  | 100.686 | 129.63  | 89.3477 |
| ENSMUSG00000078497 | 9_Gm131   | 4.49001 | -0.27848 | 0.860449 | 0.960437 | 12.1349 | 0       | 0       | 4.95175 | 5.15086 | 4.70251 |
| ENSMUSG00000078498 | 5_Gm131   | 0.30609 | 0.16972  | 0.966824 | NA       | 1.01124 | 0       | 0       | 0.82529 | 0       | 0       |
| ENSMUSG00000078500 | 3_Gm132   | 0.16854 | 1.1315   | 0.781553 | NA       | 1.01124 | 0       | 0       | 0       | 0       | 0       |
| ENSMUSG00000078502 | 10_Gm13   | 37.8074 | 0.75118  | 0.308142 | 0.690547 | 103.147 | 20.4031 | 18.6149 | 20.6323 | 33.4806 | 30.5663 |
| ENSMUSG00000078503 | 9_Gm132   | 1.00405 | -0.9462  | 0.714666 | NA       | 2.02249 | 0       | 0       | 1.65058 | 0       | 2.35126 |
| ENSMUSG00000078505 | 1_Gm436   | 0.19594 | -0.79206 | 0.84609  | NA       | 0       | 0       | 0       | 0       | 0       | 1.17563 |
| ENSMUSG00000078508 | 1_Gm131   | 0.14308 | -0.79206 | 0.84609  | NA       | 0       | 0       | 0       | 0       | 0.85848 | 0       |
| ENSMUSG00000078511 | 3_Praefc  | 0.33708 | 1.97061  | 0.625968 | NA       | 2.02249 | 0       | 0       | 0       | 0       | 0       |
| ENSMUSG00000078515 | 4_Ddi2    | 2926.81 | 0.31672  | 0.156844 | 0.534279 | 3539.36 | 3116    | 3084.9  | 2560.06 | 2629.51 | 2631.06 |
| ENSMUSG00000078517 | 11_Emc1   | 704.103 | -0.08945 | 0.73663  | 0.920922 | 555.173 | 739.044 | 752.87  | 724.607 | 754.601 | 698.323 |
| ENSMUSG00000078518 | 1_Gm130   | 11.0833 | 0.56772  | 0.438877 | 0.785475 | 6.06747 | 19.2695 | 14.4783 | 10.7288 | 7.72629 | 8.22939 |
| ENSMUSG00000078519 | 3_231002  | 4.08586 | -0.41158 | 0.708623 | 0.909864 | 6.06747 | 3.40051 | 1.03416 | 3.30117 | 6.00934 | 4.70251 |
| ENSMUSG00000078521 | 2_Aunip   | 24.1406 | 0.93413  | 0.082492 | 0.387448 | 29.3261 | 41.9396 | 23.7857 | 11.5541 | 20.6034 | 17.6344 |
| ENSMUSG00000078531 | 3_Gm831   | 1.3893  | 1.71828  | 0.356825 | NA       | 3.03373 | 2.26701 | 1.03416 | 0.82529 | 0       | 1.17563 |
| ENSMUSG00000078532 | 9_Nkain1  | 17.5042 | -1.56046 | 0.072336 | 0.359361 | 1.01124 | 10.2015 | 15.5124 | 39.614  | 25.7543 | 12.9319 |
| ENSMUSG00000078546 | 8_221040  | 183.349 | 0.84275  | 0.12271  | 0.476708 | 440.903 | 136.02  | 129.27  | 108.113 | 158.818 | 126.968 |

|                    |           |         |          |          |          |         |         |         |         |         |         |
|--------------------|-----------|---------|----------|----------|----------|---------|---------|---------|---------|---------|---------|
| ENSMUSG00000078552 | 10_Dcdc2  | 5.93492 | 0.42958  | 0.679346 | 0.902041 | 1.01124 | 9.06802 | 10.3416 | 3.30117 | 6.00934 | 5.87814 |
| ENSMUSG00000078554 | 2_Fam22f  | 0.17236 | 1.1315   | 0.781553 | NA       | 0       | 0       | 1.03416 | 0       | 0       | 0       |
| ENSMUSG00000078566 | 8_Bnip3   | 423.199 | -0.11838 | 0.776054 | 0.933817 | 644.163 | 275.441 | 297.839 | 483.621 | 426.663 | 411.47  |
| ENSMUSG00000078570 | 10_11100  | 115.44  | -0.4367  | 0.484923 | 0.812961 | 23.2586 | 132.62  | 138.578 | 170.01  | 104.734 | 123.441 |
| ENSMUSG00000078572 | 3_181004  | 97.7483 | -0.14767 | 0.769263 | 0.931453 | 44.4948 | 121.285 | 112.724 | 142.776 | 74.6875 | 90.5233 |
| ENSMUSG00000078576 | 1_Gm128   | 6.93034 | -0.44453 | 0.672753 | 0.90042  | 12.1349 | 1.1335  | 4.13665 | 5.77705 | 4.29238 | 14.1075 |
| ENSMUSG00000078578 | 9_Ube2d3  | 9985.72 | 0.72613  | 0.143669 | 0.513172 | 22420.3 | 7983.26 | 6937.16 | 6174.01 | 8666.33 | 7733.28 |
| ENSMUSG00000078580 | 3_E43001  | 90.644  | -0.30046 | 0.439648 | 0.785475 | 55.6184 | 82.7457 | 105.484 | 116.366 | 88.4231 | 95.2259 |
| ENSMUSG00000078584 | 9_AU022f  | 370.51  | -0.32574 | 0.189653 | 0.578028 | 340.789 | 326.449 | 319.556 | 450.61  | 400.05  | 385.606 |
| ENSMUSG00000078588 | 10_Ccdc2  | 60.8947 | -1.38535 | 0.030387 | 0.213389 | 39.4385 | 46.4736 | 15.5124 | 149.378 | 78.1214 | 36.4445 |
| ENSMUSG00000078591 | 1_Hs3st4  | 3.6857  | -2.1157  | 0.143484 | 0.512827 | 3.03373 | 1.1335  | 0       | 9.90351 | 6.86782 | 1.17563 |
| ENSMUSG00000078593 | 2_170004  | 0.56675 | 2.70271  | 0.498103 | NA       | 0       | 3.40051 | 0       | 0       | 0       | 0       |
| ENSMUSG00000078597 | 2_Cyp4a1  | 20519.8 | 0.23471  | 0.376186 | 0.745684 | 24569.2 | 20697.8 | 21288.2 | 15407.4 | 19819.7 | 21336.5 |
| ENSMUSG00000078598 | 11_Skint5 | 6.36345 | 1.1829   | 0.292042 | 0.676701 | 19.2136 | 1.1335  | 6.20497 | 4.12646 | 5.15086 | 2.35126 |
| ENSMUSG00000078599 | 9_Skint8  | 9.05833 | 0.37198  | 0.718036 | 0.912538 | 21.2361 | 1.1335  | 8.27329 | 4.95175 | 12.8772 | 5.87814 |
| ENSMUSG00000078601 | 4_Gm125   | 0.78648 | -1.69846 | 0.478201 | NA       | 0       | 0       | 1.03416 | 1.65058 | 0.85848 | 1.17563 |
| ENSMUSG00000078605 | 2_E03002  | 0.332   | 0.16972  | 0.966824 | NA       | 0       | 1.1335  | 0       | 0       | 0.85848 | 0       |
| ENSMUSG00000078606 | 8_Gm407   | 6539.81 | 2.95233  | 2.28E-09 | 3.59E-07 | 17941.5 | 11040.3 | 5767.52 | 974.67  | 2126.45 | 1388.42 |
| ENSMUSG00000078612 | 9_170002  | 6.78766 | 0.21608  | 0.808636 | 0.945066 | 10.1124 | 3.40051 | 8.27329 | 3.30117 | 8.58477 | 7.05377 |
| ENSMUSG00000078616 | 1_Trim30c | 172.972 | 3.41237  | 3.80E-07 | 3.40E-05 | 447.981 | 334.383 | 166.5   | 8.25292 | 58.3764 | 22.3369 |
| ENSMUSG00000078619 | 10_Smarc  | 2393.13 | 0.27172  | 0.50573  | 0.82532  | 1358.1  | 3100.13 | 3395.15 | 2040.95 | 1987.37 | 2477.05 |
| ENSMUSG00000078621 | 1_Hbb-bh  | 0.81918 | -0.48877 | 0.859522 | NA       | 2.02249 | 0       | 0       | 0       | 1.71695 | 1.17563 |
| ENSMUSG00000078622 | 8_Ccdc47  | 3018.95 | 0.00949  | 0.979097 | 0.993796 | 4454.53 | 2287.41 | 2344.44 | 2781.24 | 3160.05 | 3086.02 |
| ENSMUSG00000078624 | 2_Olfr613 | 1.52918 | -0.2908  | 0.871741 | NA       | 2.02249 | 1.1335  | 1.03416 | 4.12646 | 0.85848 | 0       |
| ENSMUSG00000078626 | 2_Gm127   | 0.13755 | -0.79206 | 0.84609  | NA       | 0       | 0       | 0       | 0.82529 | 0       | 0       |
| ENSMUSG00000078627 | 9_March1  | 0.67439 | 0.08323  | 0.974074 | NA       | 1.01124 | 0       | 1.03416 | 0.82529 | 0       | 1.17563 |
| ENSMUSG00000078630 | 7_Tomt    | 8.99698 | 0.48543  | 0.557842 | 0.848187 | 17.1912 | 6.80102 | 7.23913 | 4.12646 | 6.86782 | 11.7563 |
| ENSMUSG00000078632 | 3_Lrrc37a | 1.6056  | 1.45746  | 0.460348 | NA       | 5.05622 | 0       | 2.06832 | 1.65058 | 0.85848 | 0       |
| ENSMUSG00000078639 | 1_Gm126   | 47.6243 | 0.11728  | 0.858582 | 0.959215 | 79.8883 | 13.602  | 54.8106 | 33.837  | 37.773  | 65.8352 |
| ENSMUSG00000078640 | 9_Gm116   | 1.61199 | -1.84755 | 0.359303 | NA       | 1.01124 | 1.1335  | 0       | 4.95175 | 2.57543 | 0       |
| ENSMUSG00000078648 | 2_Gm175   | 3.15648 | 0.64074  | 0.582633 | 0.860399 | 6.06747 | 3.40051 | 2.06832 | 2.47588 | 2.57543 | 2.35126 |
| ENSMUSG00000078650 | 2_G6pc    | 0.14308 | -0.79206 | 0.84609  | NA       | 0       | 0       | 0       | 0       | 0.85848 | 0       |
| ENSMUSG00000078651 | 8_Aoc2    | 62.4143 | 0.42697  | 0.403105 | 0.761613 | 33.3711 | 102.015 | 79.6304 | 48.6922 | 66.1027 | 44.6739 |
| ENSMUSG00000078652 | 9_Psme3   | 2436.63 | 0.36356  | 0.178932 | 0.564267 | 3202.61 | 2656.93 | 2366.16 | 1830.5  | 2266.38 | 2297.18 |
| ENSMUSG00000078653 | 4_Cntd1   | 61.5427 | 0.0671   | 0.875019 | 0.964429 | 81.9108 | 47.6071 | 58.9472 | 43.7405 | 61.8103 | 75.2402 |
| ENSMUSG00000078656 | 11_Vps25  | 2666.89 | 0.01141  | 0.962614 | 0.990106 | 2313.73 | 2744.21 | 2974.25 | 2584.82 | 2584.02 | 2800.35 |
| ENSMUSG00000078657 | 6_Crn     | 45.5533 | 0.35166  | 0.432124 | 0.780433 | 50.5622 | 56.6751 | 45.5031 | 27.2346 | 36.9145 | 56.4301 |
| ENSMUSG00000078664 | 2_Sprr2a1 | 0       | NA       | NA       | NA       | 0       | 0       | 0       | 0       | 0       | 0       |
| ENSMUSG00000078670 | 3_Fam17a  | 353.906 | -0.72323 | 0.01728  | 0.146934 | 293.261 | 199.497 | 308.18  | 460.513 | 457.568 | 404.416 |
| ENSMUSG00000078671 | 10_Chd2   | 2511.37 | 0.10603  | 0.650097 | 0.891567 | 2918.45 | 2449.5  | 2442.69 | 2324.02 | 2474.13 | 2459.41 |
| ENSMUSG00000078676 | 9_Casc3   | 1253.92 | 0.14176  | 0.606077 | 0.871767 | 1028.44 | 1470.15 | 1447.83 | 1174.39 | 1149.5  | 1253.22 |
| ENSMUSG00000078680 | 3_Mup10   | 0.16854 | 1.1315   | 0.781553 | NA       | 1.01124 | 0       | 0       | 0       | 0       | 0       |
| ENSMUSG00000078681 | 10_Tm2d   | 422.323 | -0.0616  | 0.884081 | 0.967903 | 214.384 | 494.207 | 531.559 | 518.284 | 373.437 | 402.065 |
| ENSMUSG00000078683 | 9_Mup1    | 0.14308 | -0.79206 | 0.84609  | NA       | 0       | 0       | 0       | 0       | 0.85848 | 0       |
| ENSMUSG00000078686 | 11_Mup9   | 0.82682 | -0.465   | 0.866068 | NA       | 0       | 0       | 2.06832 | 0       | 1.71695 | 1.17563 |
| ENSMUSG00000078688 | 11_Mup2   | 0.14308 | -0.79206 | 0.84609  | NA       | 0       | 0       | 0       | 0       | 0.85848 | 0       |
| ENSMUSG00000078695 | 8_Cisd3   | 175.446 | -0.31447 | 0.540444 | 0.84046  | 57.6409 | 189.295 | 222.345 | 212.925 | 168.261 | 202.208 |
| ENSMUSG00000078706 | 4_Gm53    | 0       | NA       | NA       | NA       | 0       | 0       | 0       | 0       | 0       | 0       |
| ENSMUSG00000078713 | 8_Tomm5   | 513.947 | 0.00314  | 0.990938 | 0.997381 | 621.915 | 486.273 | 435.382 | 534.789 | 515.086 | 490.237 |
| ENSMUSG00000078716 | 9_Tmem8   | 128.923 | -0.32452 | 0.352624 | 0.728926 | 88.9895 | 107.683 | 146.851 | 164.233 | 127.055 | 138.724 |
| ENSMUSG00000078719 | 2_Msmp    | 1.69483 | -4.1336  | 0.103557 | 0.437218 | 0       | 0       | 0       | 3.30117 | 6.86782 | 0       |
| ENSMUSG00000078721 | 1_Fam20f  | 1.22296 | -2.4816  | 0.329085 | NA       | 1.01124 | 0       | 0       | 0       | 5.15086 | 1.17563 |
| ENSMUSG00000078722 | 2_Gm123   | 8.62129 | -0.27724 | 0.743352 | 0.923259 | 3.03373 | 9.06802 | 11.3758 | 6.60234 | 14.5941 | 7.05377 |
| ENSMUSG00000078735 | 3_Ill1ra2 | 7.44454 | 0.2464   | 0.875497 | 0.964617 | 0       | 4.53401 | 19.6491 | 9.90351 | 0       | 10.5807 |
| ENSMUSG00000078746 | 2_Fam20f  | 0       | NA       | NA       | NA       | 0       | 0       | 0       | 0       | 0       | 0       |
| ENSMUSG00000078747 | 9_Gm208   | 21.4262 | -0.47474 | 0.351015 | 0.727716 | 16.1799 | 18.136  | 19.6491 | 29.7105 | 24.8958 | 19.9857 |
| ENSMUSG00000078752 | 3_Scgb1b  | 0.59054 | -1.17309 | 0.694727 | NA       | 0       | 0       | 1.03416 | 1.65058 | 0.85848 | 0       |
| ENSMUSG00000078757 | 4_Scgb1b  | 0       | NA       | NA       | NA       | 0       | 0       | 0       | 0       | 0       | 0       |
| ENSMUSG00000078762 | 10_Haus5  | 120.539 | 0.27382  | 0.624876 | 0.879812 | 42.4723 | 174.559 | 178.91  | 130.396 | 87.5647 | 109.333 |
| ENSMUSG00000078763 | 2_Slfn1   | 471.412 | 3.60012  | 1.34E-20 | 1.66E-17 | 982.929 | 1031.49 | 598.78  | 54.4693 | 96.1494 | 64.6595 |
| ENSMUSG00000078765 | 10_U2af1l | 434.271 | -0.11644 | 0.765046 | 0.929992 | 232.586 | 511.21  | 506.739 | 491.874 | 444.691 | 418.524 |
| ENSMUSG00000078768 | 2_Zfp566  | 67.1139 | -0.22204 | 0.54509  | 0.842165 | 69.7759 | 47.6071 | 68.2547 | 75.9269 | 63.5273 | 77.5914 |
| ENSMUSG00000078771 | 10_Evi2a  | 105.063 | 1.83289  | 9.68E-05 | 0.003234 | 232.586 | 170.025 | 89.9721 | 47.0417 | 56.6595 | 34.0932 |
| ENSMUSG00000078772 | 2_Gm123   | 2.66695 | 0.8866   | 0.549254 | 0.843853 | 4.04498 | 1.1335  | 5.17081 | 3.30117 | 0       | 2.35126 |
| ENSMUSG00000078773 | 11_Rad54  | 190.321 | 0.79438  | 0.03876  | 0.247247 | 314.497 | 168.892 | 240.96  | 114.716 | 179.422 | 123.441 |
| ENSMUSG00000078776 | 9_953005  | 3.05249 | -1.67667 | 0.234776 | 0.626451 | 0       | 3.40051 | 1.03416 | 6.60234 | 2.57543 | 4.70251 |
| ENSMUSG00000078779 | 4_Zfp59   | 261.675 | 0.01807  | 0.969015 | 0.991665 | 445.959 | 182.494 | 161.329 | 229.431 | 291.024 | 259.814 |
| ENSMUSG00000078780 | 7_Gm515   | 12.9845 | 3.16997  | 0.000685 | 0.014807 | 35.3936 | 27.2041 | 7.23913 | 1.65058 | 1.71695 | 4.70251 |
| ENSMUSG00000078783 | 1_Gm973   | 1.90428 | 2.2832   | 0.182208 | 0.568186 | 5.05622 | 2.26701 | 2.06832 | 0       | 0.85848 | 1.17563 |
| ENSMUSG00000078784 | 8_181002  | 940.639 | 0.27593  | 0.616547 | 0.877103 | 1980.02 | 603.024 | 507.773 | 668.487 | 1031.03 | 853.506 |
| ENSMUSG00000078786 | 9_BC024f  | 503.36  | 0.16306  | 0.535374 | 0.83864  | 464.161 | 584.887 | 546.037 | 427.501 | 475.596 | 521.979 |
| ENSMUSG00000078787 | 8_Cyp214  | 2.14312 | -0.46859 | 0.757948 | 0.927759 | 2.02249 | 3.40051 | 0       | 1.65058 | 3.43391 | 2.35126 |
| ENSMUSG00000078789 | 9_Dph1    | 162.771 | 0.11186  | 0.85586  | 0.959059 | 45.506  | 182.494 | 279.224 | 189.817 | 105.593 | 173.993 |
| ENSMUSG00000078794 | 4_Dact3   | 101.584 | -1.4654  | 0.000212 | 0.006055 | 42.4723 | 43.0731 | 76.528  | 172.486 | 146.8   | 128.143 |
| ENSMUSG00000078796 | 3_Zfp541  | 1.26172 | 0.30062  | 0.886956 | NA       | 0       | 1.1335  | 3.10248 | 2.47588 | 0.85848 | 0       |

|                    |           |         |          |          |          |         |         |         |         |         |         |
|--------------------|-----------|---------|----------|----------|----------|---------|---------|---------|---------|---------|---------|
| ENSMUSG00000078799 | 5_Sult2a5 | 0.14308 | -0.79206 | 0.84609  | NA       | 0       | 0       | 0       | 0       | 0.85848 | 0       |
| ENSMUSG00000078808 | 4_Vmn1r5  | 0.17236 | 1.1315   | 0.781553 | NA       | 0       | 0       | 1.03416 | 0       | 0       | 0       |
| ENSMUSG00000078810 | 4_Gp6     | 0       | NA       | NA       | NA       | 0       | 0       | 0       | 0       | 0       | 0       |
| ENSMUSG00000078812 | 10_Eif5a  | 8859.13 | 0.30432  | 0.469842 | 0.804531 | 4846.89 | 13207.6 | 11315.8 | 8451.82 | 6898.72 | 8433.95 |
| ENSMUSG00000078813 | 3_Leng1   | 228.754 | 0.13054  | 0.686911 | 0.904498 | 171.912 | 275.441 | 269.916 | 218.702 | 202.601 | 233.95  |
| ENSMUSG00000078815 | 8_Cacng6  | 20.1136 | -0.57975 | 0.495619 | 0.818151 | 32.3598 | 4.53401 | 11.3758 | 37.9634 | 8.58477 | 25.8638 |
| ENSMUSG00000078816 | 9_Prkcq   | 17.0016 | -0.5603  | 0.377853 | 0.746591 | 7.07871 | 13.602  | 20.6832 | 24.7588 | 20.6034 | 15.2832 |
| ENSMUSG00000078817 | 4_Nlrp12  | 9.34296 | -0.43169 | 0.623016 | 0.878909 | 6.06747 | 15.869  | 2.06832 | 13.2047 | 9.44325 | 9.40502 |
| ENSMUSG00000078838 | 2_Gm173   | 0.92574 | -2.0054  | 0.375086 | NA       | 1.01124 | 0       | 0       | 1.65058 | 1.71695 | 1.17563 |
| ENSMUSG00000078851 | 4_Hist3h2 | 177.745 | -0.34588 | 0.382206 | 0.749425 | 221.463 | 106.549 | 141.68  | 212.925 | 227.496 | 156.359 |
| ENSMUSG00000078853 | 8_Igtp    | 5293.23 | 3.52176  | 2.88E-23 | 5.55E-20 | 10042.7 | 11985.7 | 7187.42 | 628.873 | 1098.85 | 815.886 |
| ENSMUSG00000078861 | 8_Zfp931  | 147.046 | -0.17837 | 0.764437 | 0.929893 | 277.081 | 73.6777 | 63.0839 | 159.281 | 175.129 | 134.022 |
| ENSMUSG00000078862 | 10_Gm14   | 331.112 | -0.3181  | 0.539029 | 0.84017  | 543.038 | 187.028 | 154.09  | 346.623 | 413.786 | 342.108 |
| ENSMUSG00000078864 | 10_Gm14   | 180.205 | -0.32408 | 0.532469 | 0.837502 | 278.092 | 97.4812 | 104.45  | 142.776 | 273.854 | 184.574 |
| ENSMUSG00000078865 | 8_Gm144   | 23.6325 | -0.14942 | 0.831529 | 0.951683 | 38.4273 | 22.6701 | 6.20497 | 32.1864 | 22.3204 | 19.9857 |
| ENSMUSG00000078866 | 10_Gm14   | 256.62  | -0.35539 | 0.502289 | 0.823128 | 415.621 | 120.151 | 139.612 | 246.762 | 355.409 | 262.165 |
| ENSMUSG00000078867 | 9_Gm144   | 141.3   | -0.60995 | 0.182813 | 0.569231 | 182.024 | 75.9447 | 77.5621 | 159.281 | 206.034 | 146.953 |
| ENSMUSG00000078868 | 3_Gm144   | 15.8912 | -0.29444 | 0.665661 | 0.897    | 22.2474 | 12.4685 | 8.27329 | 20.6323 | 22.3204 | 9.40502 |
| ENSMUSG00000078869 | 2_Gm144   | 32.3437 | 0.61022  | 0.335336 | 0.713739 | 68.7646 | 22.6701 | 25.854  | 18.1564 | 38.6315 | 19.9857 |
| ENSMUSG00000078870 | 9_Gm144   | 267.279 | 0.10657  | 0.870143 | 0.963272 | 549.106 | 70.2772 | 212.003 | 230.257 | 333.948 | 208.086 |
| ENSMUSG00000078872 | 9_Gm144   | 14.9308 | 0.54409  | 0.54144  | 0.84046  | 37.416  | 12.4685 | 3.10248 | 11.5541 | 8.58477 | 16.4588 |
| ENSMUSG00000078875 | 10_Gm14   | 50.5143 | -0.12205 | 0.803538 | 0.942928 | 60.6747 | 32.8716 | 51.7081 | 42.0899 | 78.1214 | 37.6201 |
| ENSMUSG00000078876 | 10_Gm14   | 1.01124 | 3.55033  | 0.34463  | NA       | 6.06747 | 0       | 0       | 0       | 0       | 0       |
| ENSMUSG00000078877 | 11_Gm14   | 278.847 | 0.06248  | 0.909667 | 0.974731 | 537.982 | 154.156 | 162.363 | 207.148 | 343.391 | 268.043 |
| ENSMUSG00000078878 | 9_Gm143   | 436.905 | 0.05496  | 0.93238  | 0.982413 | 965.738 | 159.824 | 209.935 | 367.255 | 469.587 | 449.09  |
| ENSMUSG00000078879 | 10_Gm14   | 13.9527 | 0.36354  | 0.726289 | 0.91601  | 40.4498 | 3.40051 | 3.10248 | 7.42763 | 12.8772 | 16.4588 |
| ENSMUSG00000078880 | 10_Gm14   | 24.0733 | -1.40076 | 0.023626 | 0.181651 | 19.2136 | 7.93452 | 12.4099 | 48.6922 | 19.745  | 36.4445 |
| ENSMUSG00000078881 | 10_Gm14   | 20.0933 | 1.04132  | 0.197639 | 0.589788 | 12.1349 | 23.8036 | 45.5031 | 11.5541 | 24.0374 | 3.52688 |
| ENSMUSG00000078886 | 12_Gm20   | 137.981 | 0.31723  | 0.691597 | 0.905638 | 366.07  | 61.2092 | 32.059  | 172.486 | 118.47  | 77.5914 |
| ENSMUSG00000078887 | 10_Gm67   | 215.82  | 0.27359  | 0.627354 | 0.880806 | 424.723 | 126.952 | 157.193 | 201.371 | 272.996 | 111.685 |
| ENSMUSG00000078889 | 11_Gm14   | 34.3367 | -8.46419 | 5.66E-09 | 8.32E-07 | 0       | 0       | 0       | 139.474 | 17.1695 | 49.3764 |
| ENSMUSG00000078891 | 4_Gm110   | 12.7598 | 0.24167  | 0.830552 | 0.951256 | 19.2136 | 7.93452 | 14.4783 | 6.60234 | 28.3297 | 0       |
| ENSMUSG00000078894 | 9_221041  | 175.842 | 0.19506  | 0.702376 | 0.907094 | 337.756 | 115.617 | 109.621 | 145.251 | 184.573 | 162.237 |
| ENSMUSG00000078896 | 11_Gm89   | 30.1042 | 0.43156  | 0.66929  | 0.898502 | 83.9333 | 1.1335  | 18.6149 | 29.7105 | 24.8958 | 22.3369 |
| ENSMUSG00000078897 | 10_Gm47   | 93.6265 | 0.16948  | 0.698468 | 0.905638 | 142.585 | 79.3452 | 75.4938 | 71.8004 | 118.47  | 74.0646 |
| ENSMUSG00000078898 | 9_Gm472   | 113.508 | 0.01709  | 0.978686 | 0.993796 | 232.586 | 49.8741 | 59.9814 | 79.2281 | 157.101 | 102.28  |
| ENSMUSG00000078899 | 9_Gm463   | 1171.29 | 0.00425  | 0.937993 | 0.998043 | 2240.92 | 540.681 | 737.357 | 1064.63 | 1409.62 | 1034.55 |
| ENSMUSG00000078901 | 8_Gm144   | 308.977 | 0.35251  | 0.607105 | 0.872213 | 739.22  | 157.557 | 142.714 | 141.125 | 405.201 | 268.043 |
| ENSMUSG00000078902 | 3_Gm144   | 28.498  | -0.27142 | 0.673994 | 0.900436 | 44.4948 | 9.06802 | 23.7857 | 24.7588 | 39.4899 | 29.3907 |
| ENSMUSG00000078903 | 10_Gm14   | 317.894 | -0.33858 | 0.48997  | 0.814523 | 472.251 | 171.159 | 198.559 | 236.034 | 424.946 | 404.416 |
| ENSMUSG00000078905 | 8_Gm143   | 5.78367 | -0.60952 | 0.613498 | 0.955588 | 9.1012  | 4.53401 | 0       | 3.30117 | 6.00934 | 11.7563 |
| ENSMUSG00000078906 | 9_Gm144   | 28.882  | 0.01213  | 0.988473 | 0.976983 | 59.6634 | 4.53401 | 22.7516 | 17.3311 | 45.4993 | 23.5126 |
| ENSMUSG00000078907 | 1_Fam18f  | 1.00046 | -3.35152 | 0.259606 | NA       | 0       | 0       | 0       | 2.47588 | 0       | 3.52688 |
| ENSMUSG00000078908 | 9_Mon1b   | 855.359 | 0.41393  | 0.178253 | 0.563556 | 703.826 | 1159.57 | 1068.29 | 741.113 | 679.914 | 779.441 |
| ENSMUSG00000078919 | 10_Dpm1   | 601.962 | 0.52641  | 0.335898 | 0.714302 | 1365.18 | 379.723 | 386.776 | 429.977 | 597.5   | 452.617 |
| ENSMUSG00000078920 | 2_Lfi47   | 5080.91 | 2.19286  | 4.53E-08 | 4.97E-06 | 10986.2 | 8706.44 | 5321.8  | 1293.23 | 2422.62 | 1755.21 |
| ENSMUSG00000078921 | 3_Tgtp2   | 2716.51 | 5.62405  | 1.51E-24 | 3.73E-21 | 8740.18 | 4265.37 | 2970.11 | 76.7522 | 181.997 | 64.6595 |
| ENSMUSG00000078922 | 9_Tgtp1   | 5249.89 | 5.64104  | 9.41E-24 | 2.04E-20 | 16688.6 | 8603.29 | 5588.61 | 91.6075 | 326.221 | 201.032 |
| ENSMUSG00000078923 | 10_Ube2v  | 2735.04 | 0.22657  | 0.543088 | 0.84123  | 1712.04 | 3768.9  | 3367.23 | 2593.07 | 2282.69 | 2686.31 |
| ENSMUSG00000078924 | 1_Gm121   | 0.64744 | 0.29286  | 0.92144  | NA       | 0       | 1.1335  | 1.03416 | 0       | 1.71695 | 0       |
| ENSMUSG00000078925 | 10_D0300  | 0.83933 | -1.79678 | 0.507673 | NA       | 0       | 0       | 1.03416 | 1.65058 | 0       | 2.35126 |
| ENSMUSG00000078926 | 8_Cdc20b  | 0.46955 | -0.60795 | 0.850453 | NA       | 0       | 1.1335  | 0       | 0.82529 | 0.85848 | 0       |
| ENSMUSG00000078931 | 4_Pdf     | 145.202 | 0.54761  | 0.35773  | 0.73201  | 345.846 | 91.8137 | 79.6304 | 125.444 | 126.196 | 102.28  |
| ENSMUSG00000078932 | 8_CN725c  | 0.14308 | -0.79206 | 0.84609  | NA       | 0       | 0       | 0       | 0       | 0.85848 | 0       |
| ENSMUSG00000078937 | 8_Cpt1b   | 66.974  | -0.59131 | 0.171389 | 0.553977 | 49.551  | 46.4736 | 64.118  | 99.0351 | 49.7917 | 92.8746 |
| ENSMUSG00000078941 | 9_Ak6     | 1462.96 | 0.02297  | 0.947085 | 0.986649 | 2070.02 | 1262.72 | 1091.04 | 1349.35 | 1626.81 | 1377.84 |
| ENSMUSG00000078942 | 10_Naip6  | 19.84   | 1.29068  | 0.057553 | 0.314086 | 36.4048 | 34.0051 | 14.4783 | 14.8553 | 14.5941 | 4.70251 |
| ENSMUSG00000078945 | 10_Naip2  | 152.779 | 1.25286  | 0.001486 | 0.026211 | 247.755 | 256.172 | 141.68  | 67.674  | 108.168 | 95.2259 |
| ENSMUSG00000078949 | 2_R3hdml  | 168.435 | -2.11235 | 0.152475 | 0.526932 | 3.03373 | 54.4081 | 132.373 | 409.345 | 22.3204 | 389.133 |
| ENSMUSG00000078952 | 9_Lincenc | 4.6991  | -1.82479 | 0.108941 | 0.448862 | 4.04498 | 1.1335  | 1.03416 | 10.7288 | 7.72629 | 3.52688 |
| ENSMUSG00000078954 | 9_Arhgapi | 128.225 | 1.83549  | 0.000689 | 0.01485  | 77.8658 | 319.648 | 203.73  | 55.2946 | 66.9612 | 45.8495 |
| ENSMUSG00000078958 | 9_Atp6ap  | 0.56126 | -2.54391 | 0.473253 | NA       | 0       | 0       | 0       | 1.65058 | 1.71695 | 0       |
| ENSMUSG00000078962 | 4_493241  | 0.19594 | -0.79206 | 0.84609  | NA       | 0       | 0       | 0       | 0       | 0       | 1.17563 |
| ENSMUSG00000078963 | 2_Hsbp1l  | 150.73  | 0.06105  | 0.867933 | 0.962942 | 209.328 | 106.549 | 145.817 | 153.504 | 152.809 | 136.373 |
| ENSMUSG00000078964 | 1_Ces1b   | 0.70434 | -2.87023 | 0.38272  | NA       | 0       | 0       | 0       | 1.65058 | 2.57543 | 0       |
| ENSMUSG00000078970 | 5_Wdr92   | 412.142 | -0.02209 | 0.933779 | 0.98311  | 476.296 | 386.524 | 364.025 | 392.014 | 437.823 | 416.172 |
| ENSMUSG00000078972 | 1_Gm155   | 0.14308 | -0.79206 | 0.84609  | NA       | 0       | 0       | 0       | 0       | 0.85848 | 0       |
| ENSMUSG00000078974 | 10_Sec61  | 1539.76 | 0.05132  | 0.881738 | 0.967751 | 2140.8  | 1416.88 | 1143.78 | 1365.86 | 1780.48 | 1390.77 |
| ENSMUSG00000078984 | 1_Gm110   | 0.13755 | -0.79206 | 0.84609  | NA       | 0       | 0       | 0       | 0.82529 | 0       | 0       |
| ENSMUSG00000078994 | 8_Zfp429  | 187.541 | 0.5569   | 0.256979 | 0.648401 | 390.34  | 130.353 | 148.919 | 137.824 | 148.517 | 169.29  |
| ENSMUSG00000078995 | 9_Zfp456  | 35.7473 | 0.3615   | 0.476796 | 0.807845 | 60.6747 | 32.8716 | 26.8882 | 24.7588 | 35.1976 | 34.0932 |
| ENSMUSG00000079003 | 1_Samd1   | 166.294 | 0.09457  | 0.865661 | 0.962186 | 54.6072 | 265.24  | 195.457 | 174.137 | 129.63  | 178.695 |
| ENSMUSG00000079008 | 2_Gm141   | 0.50562 | 2.55291  | 0.52315  | NA       | 3.03373 | 0       | 0       | 0       | 0       | 0       |
| ENSMUSG00000079009 | 8_Gm141   | 0.33708 | 1.97061  | 0.625968 | NA       | 2.02249 | 0       | 0       | 0       | 0       | 0       |
| ENSMUSG00000079011 | 9_Gm110   | 25.059  | 0.1375   | 0.811976 | 0.946139 | 16.1799 | 40.8061 | 21.7174 | 16.5058 | 25.7543 | 29.3907 |

|                    |            |         |          |          |          |         |         |         |         |         |         |
|--------------------|------------|---------|----------|----------|----------|---------|---------|---------|---------|---------|---------|
| ENSMUSG00000079012 | 11_Serpin  | 125.198 | 1.66497  | 0.03945  | 0.249814 | 21.2361 | 388.791 | 161.329 | 63.5475 | 79.8384 | 36.4445 |
| ENSMUSG00000079013 | 2_Serpina  | 0.17236 | 1.1315   | 0.781553 | NA       | 0       | 0       | 1.03416 | 0       | 0       | 0       |
| ENSMUSG00000079014 | 4_Serpina  | 131.102 | 1.62383  | 0.002864 | 0.042044 | 97.0795 | 359.32  | 137.543 | 71.8004 | 51.5086 | 69.362  |
| ENSMUSG00000079015 | 2_Serpina  | 0.75567 | 3.11976  | 0.431825 | NA       | 0       | 4.53401 | 0       | 0       | 0       | 0       |
| ENSMUSG00000079017 | 3_lfi27l2a | 4901.32 | 2.73697  | 1.55E-10 | 2.89E-08 | 4144.08 | 11863.2 | 9564.96 | 1418.68 | 1187.27 | 1229.71 |
| ENSMUSG00000079018 | 10_Ly6c1   | 1779.06 | 2.47892  | 1.85E-11 | 4.31E-09 | 2720.25 | 4246.1  | 2084.87 | 655.282 | 476.455 | 491.412 |
| ENSMUSG00000079019 | 2_InsI3    | 3.0011  | -0.632   | 0.754889 | 0.926746 | 7.07871 | 0       | 0       | 5.77705 | 5.15086 | 0       |
| ENSMUSG00000079020 | 9_Slc45a2  | 534.042 | 0.29141  | 0.42454  | 0.776197 | 355.958 | 674.434 | 733.221 | 522.41  | 464.436 | 453.792 |
| ENSMUSG00000079022 | 9_Col22a2  | 24.7583 | -0.71917 | 0.207239 | 0.598852 | 22.2474 | 9.06802 | 24.8199 | 37.1382 | 31.7636 | 23.5126 |
| ENSMUSG00000079025 | 8_Gsdmc    | 3.53212 | 5.34529  | 0.008165 | 0.086845 | 2.02249 | 18.136  | 1.03416 | 0       | 0       | 0       |
| ENSMUSG00000079029 | 2_Gm566    | 0.67798 | 2.97576  | 0.379561 | NA       | 3.03373 | 0       | 1.03416 | 0       | 0       | 0       |
| ENSMUSG00000079031 | 1_BB2874   | 0.33708 | 1.97061  | 0.625968 | NA       | 2.02249 | 0       | 0       | 0       | 0       | 0       |
| ENSMUSG00000079033 | 9_Mef2b    | 4.51375 | 0.09127  | 0.9279   | 0.980746 | 2.02249 | 6.80102 | 5.17081 | 4.95175 | 3.43391 | 4.70251 |
| ENSMUSG00000079034 | 2_Gm830    | 0.14308 | -0.79206 | 0.84609  | NA       | 0       | 0       | 0       | 0       | 0.85848 | 0       |
| ENSMUSG00000079036 | 10_Alkbh1  | 448.033 | 0.23022  | 0.432271 | 0.780619 | 592.589 | 450.001 | 408.494 | 374.683 | 462.719 | 399.713 |
| ENSMUSG00000079037 | 9_Prnp     | 1652.91 | -0.02218 | 0.935869 | 0.984134 | 1936.53 | 1508.69 | 1475.75 | 1872.59 | 1704.94 | 1418.98 |
| ENSMUSG00000079038 | 2_D13004   | 18.7955 | 0.11516  | 0.892085 | 0.970752 | 43.4835 | 7.93452 | 7.23913 | 14.03   | 28.3297 | 11.7563 |
| ENSMUSG00000079042 | 9_Apela    | 2.98285 | -2.2764  | 0.16555  | 0.54523  | 3.03373 | 0       | 0       | 9.07822 | 3.43391 | 2.35126 |
| ENSMUSG00000079043 | 2_Fastkdtf | 294.726 | 0.40449  | 0.286128 | 0.672208 | 489.442 | 268.64  | 249.233 | 235.208 | 291.882 | 233.95  |
| ENSMUSG00000079049 | 8_Serpinb  | 36.019  | -0.19179 | 0.665354 | 0.89688  | 33.3711 | 26.0706 | 41.3665 | 32.1864 | 45.4993 | 37.6201 |
| ENSMUSG00000079051 | 4_Gm140    | 2.25756 | -0.66412 | 0.677499 | 0.901447 | 2.02249 | 0       | 3.10248 | 0.82529 | 1.71695 | 5.87814 |
| ENSMUSG00000079053 | 3_Gm140    | 0.3409  | 1.98467  | 0.623395 | NA       | 1.01124 | 0       | 1.03416 | 0       | 0       | 0       |
| ENSMUSG00000079055 | 10_Slc8a3  | 71.0563 | -0.77607 | 0.146769 | 0.518371 | 65.7309 | 29.4711 | 62.0497 | 144.426 | 63.5273 | 61.1326 |
| ENSMUSG00000079056 | 12_Kcnpic  | 85.7391 | -1.77355 | 9.32E-07 | 7.24E-05 | 31.3486 | 40.8061 | 44.4689 | 151.029 | 133.922 | 112.86  |
| ENSMUSG00000079057 | 3_Cyp4v3   | 311.393 | -0.27442 | 0.488505 | 0.814112 | 431.801 | 200.63  | 213.037 | 343.322 | 356.268 | 323.298 |
| ENSMUSG00000079065 | 3_BC005t   | 295.082 | 0.18643  | 0.696086 | 0.905638 | 536.971 | 197.23  | 207.866 | 217.052 | 302.184 | 309.19  |
| ENSMUSG00000079069 | 1_843042   | 0.44364 | -0.57976 | 0.883757 | NA       | 1.01124 | 0       | 0       | 1.65058 | 0       | 0       |
| ENSMUSG00000079070 | 10_Gm39    | 0.99897 | -2.08082 | 0.35253  | NA       | 0       | 1.1335  | 0       | 1.65058 | 0.85848 | 2.35126 |
| ENSMUSG00000079071 | 2_Gm140    | 12.3922 | 4.29141  | 2.13E-05 | 0.000955 | 30.3373 | 27.2041 | 13.4441 | 1.65058 | 1.71695 | 0       |
| ENSMUSG00000079076 | 1_Gm308    | 3.40743 | 0.13279  | 0.915455 | 0.976514 | 5.05622 | 4.53401 | 1.03416 | 0.82529 | 4.29238 | 4.70251 |
| ENSMUSG00000079083 | 2_Jrkl     | 474.953 | 0.60054  | 0.254937 | 0.645986 | 1067.87 | 303.779 | 345.41  | 316.912 | 439.54  | 376.201 |
| ENSMUSG00000079084 | 9_Ccdc82   | 480.083 | 0.24134  | 0.603075 | 0.870473 | 880.794 | 343.451 | 336.103 | 379.634 | 531.397 | 409.118 |
| ENSMUSG00000079092 | 3_Prl2c2   | 2.07809 | 4.58165  | 0.142762 | 0.511466 | 0       | 12.4685 | 0       | 0       | 0       | 0       |
| ENSMUSG00000079103 | 2_Tgm7     | 0.56126 | -2.54391 | 0.473253 | NA       | 0       | 0       | 0       | 1.65058 | 1.71695 | 0       |
| ENSMUSG00000079104 | 4_Prps1l3  | 609.662 | 0.32084  | 0.467196 | 0.803613 | 1090.12 | 507.809 | 433.314 | 414.297 | 616.386 | 596.043 |
| ENSMUSG00000079105 | 3_C7       | 23.563  | -0.19937 | 0.789522 | 0.937308 | 42.4723 | 5.66751 | 17.5807 | 18.9817 | 34.3391 | 22.3369 |
| ENSMUSG00000079108 | 5_Srp54b   | 2253.39 | 0.13585  | 0.674056 | 0.900436 | 3210.7  | 2025.57 | 1841.84 | 2019.49 | 2310.16 | 2112.6  |
| ENSMUSG00000079109 | 11_Pms2    | 260.84  | 0.08192  | 0.760718 | 0.928303 | 302.362 | 253.905 | 248.199 | 232.732 | 260.977 | 266.868 |
| ENSMUSG00000079110 | 11_Capn3   | 35.3997 | -0.14447 | 0.761554 | 0.928515 | 29.3261 | 26.0706 | 45.5031 | 47.0417 | 29.1882 | 35.2688 |
| ENSMUSG00000079111 | 3_Kdelr2   | 1380.08 | 0.34645  | 0.134217 | 0.49819  | 1558.33 | 1600.51 | 1475.75 | 1191.72 | 1128.04 | 1326.11 |
| ENSMUSG00000079120 | 2_AY7611   | 0.70218 | 3.02137  | 0.274084 | NA       | 1.01124 | 1.1335  | 2.06832 | 0       | 0       | 0       |
| ENSMUSG00000079144 | 7_A13001   | 610.854 | 0.56491  | 0.064119 | 0.335355 | 878.771 | 749.245 | 558.447 | 429.152 | 500.492 | 549.018 |
| ENSMUSG00000079157 | 3_Fam15f   | 6.81261 | -1.96876 | 0.149902 | 0.523171 | 5.05622 | 2.26701 | 1.03416 | 23.9335 | 8.58477 | 0       |
| ENSMUSG00000079162 | 8_Trim43l  | 13.5119 | -1.50603 | 0.01888  | 0.156645 | 7.07871 | 7.93452 | 6.20497 | 23.1082 | 21.4619 | 15.2832 |
| ENSMUSG00000079163 | 3_Gm154f   | 0.14308 | -0.79206 | 0.84609  | NA       | 0       | 0       | 0       | 0       | 0.85848 | 0       |
| ENSMUSG00000079164 | 8_Tlr5     | 527.928 | 0.20869  | 0.520857 | 0.831998 | 485.397 | 703.905 | 508.807 | 375.508 | 574.321 | 519.627 |
| ENSMUSG00000079165 | 10_Sap25   | 40.9705 | -0.30578 | 0.674544 | 0.900436 | 14.1574 | 46.4736 | 49.6398 | 83.3545 | 36.9145 | 15.2832 |
| ENSMUSG00000079168 | 3_Cd209g   | 17.1434 | -0.24484 | 0.741132 | 0.922584 | 12.1349 | 10.2015 | 24.8199 | 33.0117 | 8.58477 | 14.1075 |
| ENSMUSG00000079173 | 11_Zan     | 21.2653 | -1.46623 | 0.067778 | 0.345423 | 8.08995 | 13.602  | 12.4099 | 65.1981 | 18.8865 | 9.40502 |
| ENSMUSG00000079177 | 2_Fam22f   | 9.40247 | 0.25015  | 0.766582 | 0.930427 | 13.1462 | 7.93452 | 9.30745 | 2.47588 | 9.44325 | 14.1075 |
| ENSMUSG00000079184 | 10_Mphos   | 735.229 | 0.07163  | 0.87836  | 0.966124 | 1301.47 | 461.336 | 497.432 | 623.096 | 802.676 | 725.362 |
| ENSMUSG00000079186 | 2_Gzmc     | 8.62471 | 1.65644  | 0.079051 | 0.377521 | 5.05622 | 23.8036 | 10.3416 | 4.95175 | 1.71695 | 5.87814 |
| ENSMUSG00000079197 | 10_Psme2   | 5326.94 | 0.60168  | 0.038326 | 0.245786 | 5092.63 | 7965.12 | 6208.07 | 3774.89 | 4559.37 | 4361.58 |
| ENSMUSG00000079215 | 8_Zfp664   | 2265.53 | -0.07443 | 0.800962 | 0.941902 | 2848.68 | 1863.48 | 1909.06 | 2245.62 | 2506.75 | 2219.59 |
| ENSMUSG00000079227 | 9_Ccr5     | 228.779 | 2.92995  | 9.39E-12 | 2.47E-09 | 531.915 | 460.202 | 221.311 | 45.3911 | 60.9519 | 52.9033 |
| ENSMUSG00000079235 | 10_Ccdc11  | 11.8229 | -1.77481 | 0.052147 | 0.296552 | 1.01124 | 7.93452 | 7.23913 | 33.0117 | 11.1602 | 10.5807 |
| ENSMUSG00000079242 | 2_C73003   | 17.378  | -0.4546  | 0.434039 | 0.782396 | 13.1462 | 10.2015 | 20.6832 | 21.4576 | 22.3204 | 16.4588 |
| ENSMUSG00000079243 | 2_Xirp1    | 27.0525 | -0.98033 | 0.136483 | 0.501691 | 10.1124 | 11.335  | 33.0932 | 48.6922 | 21.4619 | 37.6201 |
| ENSMUSG00000079244 | 3_Gm562    | 0.50562 | 2.55291  | 0.52315  | NA       | 3.03373 | 0       | 0       | 0       | 0       | 0       |
| ENSMUSG00000079247 | 2_Gm136f   | 0.31162 | 0.16972  | 0.966824 | NA       | 1.01124 | 0       | 0       | 0       | 0.85848 | 0       |
| ENSMUSG00000079259 | 2_Trim71   | 0.37783 | 2.11394  | 0.599927 | NA       | 0       | 2.26701 | 0       | 0       | 0       | 0       |
| ENSMUSG00000079260 | 2_Tmppe    | 394.504 | -0.01087 | 0.967312 | 0.99115  | 329.666 | 428.464 | 420.904 | 388.713 | 385.456 | 413.821 |
| ENSMUSG00000079261 | 2_Gm152    | 0.92574 | -2.0054  | 0.375086 | NA       | 1.01124 | 0       | 0       | 1.65058 | 1.71695 | 1.17563 |
| ENSMUSG00000079262 | 3_Slco1a1  | 4.36832 | 0.76665  | 0.489068 | 0.814393 | 10.1124 | 3.40051 | 3.10248 | 4.12646 | 4.29238 | 1.17563 |
| ENSMUSG00000079263 | 8_Gm661f   | 3.43664 | 1.90546  | 0.185881 | 0.573178 | 11.1237 | 1.1335  | 4.13665 | 1.65058 | 2.57543 | 0       |
| ENSMUSG00000079277 | 9_Hoxd3    | 0.14308 | -0.79206 | 0.84609  | NA       | 0       | 0       | 0       | 0       | 0.85848 | 0       |
| ENSMUSG00000079278 | 1_Tmem2    | 7.63012 | -0.54021 | 0.570993 | 0.854322 | 11.1237 | 2.26701 | 5.17081 | 13.2047 | 3.43391 | 10.5807 |
| ENSMUSG00000079283 | 2_231000   | 91.6009 | 0.15547  | 0.622065 | 0.878215 | 101.124 | 97.4812 | 91.0062 | 95.7339 | 77.2629 | 86.9965 |
| ENSMUSG00000079298 | 9_Klr1b    | 8.68902 | 1.58788  | 0.053842 | 0.302008 | 15.1687 | 13.602  | 10.3416 | 6.60234 | 1.71695 | 4.70251 |
| ENSMUSG00000079299 | 3_Klr1b    | 0.17236 | 1.1315   | 0.781553 | NA       | 0       | 0       | 1.03416 | 0       | 0       | 0       |
| ENSMUSG00000079304 | 5_493341   | 0.77945 | -0.26924 | 0.911436 | NA       | 0       | 1.1335  | 1.03416 | 1.65058 | 0.85848 | 0       |
| ENSMUSG00000079316 | 10_Rab9    | 1086.15 | 0.27395  | 0.501393 | 0.822545 | 1856.64 | 879.598 | 830.432 | 828.594 | 1098.85 | 1022.8  |
| ENSMUSG00000079317 | 10_Trapp1  | 294.295 | 0.07269  | 0.886708 | 0.969051 | 545.061 | 177.96  | 182.012 | 250.889 | 347.683 | 262.165 |
| ENSMUSG00000079323 | 9_Gm206    | 8.63694 | 0.79508  | 0.382054 | 0.749425 | 6.06747 | 10.2015 | 16.5466 | 1.65058 | 10.3017 | 7.05377 |
| ENSMUSG00000079324 | 11_49324   | 0       | NA       | NA       | NA       | 0       | 0       | 0       | 0       | 0       | 0       |

|                    |           |         |          |          |          |         |         |         |         |         |         |
|--------------------|-----------|---------|----------|----------|----------|---------|---------|---------|---------|---------|---------|
| ENSMUSG00000079330 | 8_Lemd1   | 101.121 | 0.30079  | 0.431098 | 0.780048 | 71.7983 | 134.887 | 128.236 | 84.1798 | 93.574  | 94.0502 |
| ENSMUSG00000079334 | 8_Nat6    | 253.2   | -0.07797 | 0.910407 | 0.974962 | 40.4498 | 326.449 | 372.298 | 354.876 | 179.422 | 245.706 |
| ENSMUSG00000079339 | 6_Ifit1b1 | 23309.4 | 1.26377  | 0.002806 | 0.041483 | 49256.7 | 27502.2 | 21978   | 9729.37 | 18146.5 | 13243.4 |
| ENSMUSG00000079343 | 3_C1s2    | 394.207 | 0.12057  | 0.635358 | 0.884238 | 426.745 | 411.462 | 394.016 | 355.701 | 425.805 | 351.513 |
| ENSMUSG00000079355 | 3_Ackr4   | 66.6802 | -1.51889 | 0.000489 | 0.011493 | 50.5622 | 24.9371 | 27.9224 | 113.065 | 101.3   | 82.2939 |
| ENSMUSG00000079362 | 5_Gbp6    | 3129.34 | 3.99867  | 8.25E-22 | 1.30E-18 | 8802.88 | 5521.29 | 3346.55 | 321.864 | 437.823 | 345.635 |
| ENSMUSG00000079363 | 7_Gbp4    | 6603.66 | 3.741    | 1.14E-19 | 1.17E-16 | 17224.5 | 12362   | 7278.43 | 703.974 | 1188.99 | 864.086 |
| ENSMUSG00000079364 | 3_Gm355   | 19.3998 | 0.43933  | 0.576816 | 0.857043 | 45.506  | 9.06802 | 12.4099 | 10.7288 | 25.7543 | 12.9319 |
| ENSMUSG00000079378 | 8_Gm827   | 0       | NA       | NA       | NA       | 0       | 0       | 0       | 0       | 0       | 0       |
| ENSMUSG00000079383 | 9_Gm329   | 1.51687 | 4.13479  | 0.218296 | NA       | 9.1012  | 0       | 0       | 0       | 0       | 0       |
| ENSMUSG00000079386 | 8_Gm317   | 2.43235 | -4.64806 | 0.124739 | 0.480458 | 0       | 0       | 0       | 0       | 14.5941 | 0       |
| ENSMUSG00000079387 | 10_Luzp4  | 0       | NA       | NA       | NA       | 0       | 0       | 0       | 0       | 0       | 0       |
| ENSMUSG00000079388 | 9_261004  | 0.48016 | 1.00965  | 0.794176 | NA       | 2.02249 | 0       | 0       | 0       | 0.85848 | 0       |
| ENSMUSG00000079389 | 10_Gm31   | 0.13755 | -0.79206 | 0.84609  | NA       | 0       | 0       | 0       | 0.82529 | 0       | 0       |
| ENSMUSG00000079391 | 10_Gm29   | 0.99383 | -2.13881 | 0.499332 | NA       | 1.01124 | 0       | 0       | 4.95175 | 0       | 0       |
| ENSMUSG00000079396 | 4_Gm341   | 9.69582 | 0.65755  | 0.66532  | 0.89688  | 25.2811 | 10.2015 | 0       | 0       | 8.58477 | 14.1075 |
| ENSMUSG00000079402 | 9_Gm302   | 4.59463 | 0.64549  | 0.5344   | 0.838255 | 9.1012  | 3.40051 | 4.13665 | 2.47588 | 2.57543 | 5.87814 |
| ENSMUSG00000079407 | 9_170011  | 0.41265 | -2.10335 | 0.599583 | NA       | 0       | 0       | 0       | 2.47588 | 0       | 0       |
| ENSMUSG00000079409 | 8_Gm579   | 0.51708 | 2.58222  | 0.5182   | NA       | 0       | 0       | 3.10248 | 0       | 0       | 0       |
| ENSMUSG00000079410 | 4_Gm289   | 22.2685 | 0.57667  | 0.463008 | 0.800559 | 47.5285 | 4.53401 | 27.9224 | 20.6323 | 18.8865 | 14.1075 |
| ENSMUSG00000079414 | 2_Gm111   | 4.12516 | -0.95186 | 0.401164 | 0.76028  | 4.04498 | 3.40051 | 1.03416 | 3.30117 | 9.44325 | 3.52688 |
| ENSMUSG00000079415 | 2_Cntf    | 289.402 | -1.2409  | 0.000119 | 0.00383  | 170.9   | 128.086 | 217.174 | 415.947 | 438.682 | 365.62  |
| ENSMUSG00000079418 | 3_Atg4a   | 477.449 | 0.04347  | 0.911979 | 0.975378 | 732.141 | 341.184 | 380.571 | 451.435 | 540.84  | 418.524 |
| ENSMUSG00000079419 | 4_Ms4a6c  | 457.071 | 3.05527  | 1.60E-11 | 3.91E-09 | 1176.08 | 875.064 | 397.118 | 103.162 | 109.885 | 81.1183 |
| ENSMUSG00000079426 | 12_Arpc4  | 2065.24 | 0.33118  | 0.196956 | 0.589374 | 1927.43 | 2667.13 | 2309.28 | 1759.52 | 1861.18 | 1866.9  |
| ENSMUSG00000079427 | 10_Mthfsl | 208.338 | 0.03765  | 0.896867 | 0.97156  | 252.811 | 185.894 | 194.422 | 217.877 | 199.167 | 199.857 |
| ENSMUSG00000079428 | 8_Tceal7  | 18.3084 | 0.22594  | 0.816921 | 0.947571 | 49.551  | 3.40051 | 6.20497 | 23.9335 | 10.3017 | 16.4588 |
| ENSMUSG00000079429 | 9_Mroh2a  | 75.1905 | 0.33912  | 0.3407   | 0.719259 | 94.0457 | 70.2772 | 87.9037 | 70.1499 | 74.6875 | 54.0789 |
| ENSMUSG00000079432 | 1_Gm150   | 1.23564 | -1.38298 | 0.465141 | NA       | 1.01124 | 0       | 1.03416 | 2.47588 | 1.71695 | 1.17563 |
| ENSMUSG00000079434 | 8_Neu2    | 55.7739 | 0.27162  | 0.563302 | 0.85076  | 33.3711 | 68.0102 | 81.6988 | 57.7705 | 42.0654 | 51.7276 |
| ENSMUSG00000079435 | 9_Rpl36a  | 6624.54 | -0.35748 | 0.103414 | 0.436784 | 5968.36 | 5784.27 | 5671.34 | 7031.49 | 7986.41 | 7305.35 |
| ENSMUSG00000079436 | 3_Kcnj13  | 732.406 | -1.91364 | 4.13E-06 | 0.000252 | 420.678 | 181.36  | 319.556 | 1306.44 | 1356.39 | 810.008 |
| ENSMUSG00000079440 | 2_Alpi    | 0.31544 | 0.16972  | 0.966824 | NA       | 0       | 0       | 1.03416 | 0       | 0.85848 | 0       |
| ENSMUSG00000079442 | 12_St6gal | 102.006 | -0.30484 | 0.491205 | 0.815371 | 54.6072 | 109.95  | 109.621 | 152.679 | 97.0079 | 88.1721 |
| ENSMUSG00000079444 | 9_Gm219   | 14.1292 | -2.19897 | 0.014094 | 0.127604 | 5.05622 | 10.2015 | 0       | 18.9817 | 22.3204 | 28.2151 |
| ENSMUSG00000079445 | 3_B3gnt7  | 324.436 | 0.55657  | 0.231562 | 0.62293  | 169.889 | 545.215 | 443.655 | 261.618 | 233.506 | 292.731 |
| ENSMUSG00000079450 | 11_Cldn3  | 1.54195 | -0.31291 | 0.873926 | NA       | 3.03373 | 1.1335  | 0       | 1.65058 | 3.43391 | 0       |
| ENSMUSG00000079451 | 9_Tmprss  | 19058.4 | 0.87183  | 0.022252 | 0.175369 | 35189.3 | 22404.8 | 16349.1 | 10439.9 | 15165.9 | 14801.2 |
| ENSMUSG00000079460 | 11_49334  | 0.28616 | -1.57932 | 0.696464 | NA       | 0       | 0       | 0       | 0       | 1.71695 | 0       |
| ENSMUSG00000079462 | 1_Gm157   | 0.91085 | 2.08095  | 0.430712 | NA       | 2.02249 | 2.26701 | 0       | 0       | 0       | 1.17563 |
| ENSMUSG00000079465 | 8_Col4a3  | 1174.97 | -2.23724 | 1.27E-08 | 1.67E-06 | 602.702 | 256.172 | 374.366 | 2255.52 | 1635.4  | 1925.68 |
| ENSMUSG00000079466 | 2_Prdr12  | 0       | NA       | NA       | NA       | 0       | 0       | 0       | 0       | 0       | 0       |
| ENSMUSG00000079469 | 10_Pigb   | 469.613 | 0.17642  | 0.566233 | 0.851799 | 635.061 | 403.527 | 456.065 | 395.315 | 483.323 | 444.387 |
| ENSMUSG00000079470 | 8_Utp14b  | 611.35  | -0.08356 | 0.830426 | 0.951238 | 909.109 | 434.132 | 437.45  | 583.482 | 645.575 | 658.352 |
| ENSMUSG00000079471 | 3_Gm732   | 5.85679 | 0.56148  | 0.543321 | 0.84123  | 6.06747 | 3.40051 | 11.3758 | 4.12646 | 4.29238 | 5.87814 |
| ENSMUSG00000079477 | 9_Rab7    | 6750.75 | 0.13488  | 0.524735 | 0.833095 | 7058.49 | 7264.62 | 6875.11 | 6424.9  | 6294.35 | 6587.04 |
| ENSMUSG00000079478 | 8_Sssca1  | 156.703 | -0.16178 | 0.714192 | 0.91112  | 83.9333 | 165.491 | 194.422 | 207.974 | 116.753 | 171.642 |
| ENSMUSG00000079480 | 3_Pln4    | 612.707 | -0.21296 | 0.512982 | 0.828304 | 682.59  | 555.416 | 464.339 | 489.398 | 739.149 | 745.348 |
| ENSMUSG00000079481 | 11_Nhs12  | 201.766 | -0.24681 | 0.55388  | 0.846091 | 270.002 | 122.418 | 161.329 | 226.13  | 266.128 | 164.588 |
| ENSMUSG00000079484 | 12_Phyhd  | 291.83  | -0.6101  | 0.074499 | 0.365293 | 164.833 | 235.769 | 292.668 | 413.471 | 315.061 | 329.176 |
| ENSMUSG00000079487 | 11_Med12  | 2273.93 | 0.25423  | 0.565271 | 0.851123 | 1122.48 | 3206.68 | 3092.14 | 1847    | 2110.99 | 2264.26 |
| ENSMUSG00000079492 | 2_Gm111   | 1337.73 | 2.69815  | 0.000386 | 0.009524 | 229.552 | 3729.22 | 2995.97 | 434.929 | 255.826 | 380.903 |
| ENSMUSG00000079494 | 2_Cml5    | 6.97964 | -2.77367 | 0.006433 | 0.074085 | 1.01124 | 2.26701 | 2.06832 | 13.2047 | 6.86782 | 16.4588 |
| ENSMUSG00000079495 | 2_Gm111   | 1.11698 | -3.5349  | 0.213383 | NA       | 0       | 0       | 0       | 4.12646 | 2.57543 | 0       |
| ENSMUSG00000079502 | 8_170010  | 2.69923 | 1.84569  | 0.266723 | 0.654888 | 2.02249 | 4.53401 | 6.20497 | 0       | 3.43391 | 0       |
| ENSMUSG00000079507 | 10_H2-Q1  | 299.602 | 2.29831  | 0.000498 | 0.011606 | 93.0345 | 774.182 | 626.702 | 117.192 | 80.6968 | 105.807 |
| ENSMUSG00000079508 | 8_Apoo    | 322.082 | 0.5871   | 0.385541 | 0.750802 | 851.468 | 194.962 | 113.758 | 277.298 | 279.863 | 215.14  |
| ENSMUSG00000079509 | 10_Zfx    | 1357.96 | 0.31513  | 0.456028 | 0.796585 | 2434.07 | 1004.28 | 1078.63 | 1129    | 1364.98 | 1136.83 |
| ENSMUSG00000079511 | 8_Ccdc14  | 97.5631 | -0.21811 | 0.604271 | 0.871111 | 54.6072 | 91.8137 | 124.099 | 110.589 | 86.7062 | 117.563 |
| ENSMUSG00000079523 | 8_Tmsb1   | 1893.79 | 0.33524  | 0.445106 | 0.788998 | 1003.15 | 3105.8  | 2229.65 | 1672.04 | 1571.01 | 1781.08 |
| ENSMUSG00000079531 | 1_Gm593   | 1.40609 | -2.68531 | 0.263418 | NA       | 0       | 1.1335  | 0       | 4.95175 | 0       | 2.35126 |
| ENSMUSG00000079532 | 1_Gm689   | 29.3966 | -0.21793 | 0.679633 | 0.902041 | 31.3486 | 27.2041 | 22.7516 | 17.3311 | 37.773  | 39.9713 |
| ENSMUSG00000079534 | 1_Gm564   | 1.47829 | -1.7245  | 0.462253 | NA       | 0       | 0       | 2.06832 | 1.65058 | 5.15086 | 0       |
| ENSMUSG00000079536 | 1_Gm688   | 19.6578 | -0.48409 | 0.582794 | 0.860399 | 2.02249 | 20.4031 | 26.8882 | 39.614  | 13.7356 | 15.2832 |
| ENSMUSG00000079537 | 3_C03004  | 1.85568 | -0.21394 | 0.893502 | 0.971063 | 2.02249 | 1.1335  | 2.06832 | 2.47588 | 3.43391 | 0       |
| ENSMUSG00000079547 | 3_H2-DM1  | 64.004  | 2.14189  | 1.15E-05 | 0.000586 | 99.1019 | 132.62  | 80.6646 | 21.4576 | 13.7356 | 36.4445 |
| ENSMUSG00000079550 | 9_Mpp4    | 126.689 | -2.09869 | 0.001762 | 0.029424 | 78.8771 | 46.4736 | 18.6149 | 363.129 | 174.271 | 78.7671 |
| ENSMUSG00000079553 | 10_Kifc1  | 142.761 | 0.94916  | 0.114226 | 0.459075 | 53.5959 | 292.444 | 218.208 | 108.113 | 67.8197 | 116.387 |
| ENSMUSG00000079554 | 2_Aox2    | 41.1488 | -0.96532 | 0.014272 | 0.128611 | 26.2924 | 29.4711 | 27.9224 | 53.644  | 56.6595 | 52.9033 |
| ENSMUSG00000079555 | 2_Haus3   | 316.938 | 0.61582  | 0.227606 | 0.618748 | 698.77  | 223.3   | 228.55  | 225.305 | 285.873 | 239.828 |
| ENSMUSG00000079557 | 10_March  | 807.455 | -0.30888 | 0.337792 | 0.715971 | 529.892 | 784.384 | 850.081 | 1076.18 | 790.657 | 813.534 |
| ENSMUSG00000079559 | 3_Gm684   | 52.6115 | -0.16859 | 0.654098 | 0.893223 | 48.5397 | 41.9396 | 57.913  | 50.3428 | 55.801  | 61.1326 |
| ENSMUSG00000079560 | 13_Hoxa3  | 0       | NA       | NA       | NA       | 0       | 0       | 0       | 0       | 0       | 0       |
| ENSMUSG00000079562 | 6_Maea    | 2151.76 | 0.31166  | 0.344827 | 0.722142 | 1574.51 | 2858.69 | 2716.74 | 2019.49 | 1781.34 | 1959.77 |
| ENSMUSG00000079563 | 9_Pglyrp2 | 2.28126 | 1.42352  | 0.395887 | 0.756854 | 0       | 7.93452 | 2.06832 | 1.65058 | 0.85848 | 1.17563 |

|                    |           |         |          |          |          |         |         |         |         |         |         |
|--------------------|-----------|---------|----------|----------|----------|---------|---------|---------|---------|---------|---------|
| ENSMUSG00000079564 | 2_Gm111   | 0.14308 | -0.79206 | 0.84609  | NA       | 0       | 0       | 0       | 0       | 0.85848 | 0       |
| ENSMUSG00000079566 | 1_Spin2d  | 4.73302 | 1.01149  | 0.308007 | 0.690547 | 8.08995 | 5.66751 | 5.17081 | 1.65058 | 4.29238 | 3.52688 |
| ENSMUSG00000079577 | 1_Gm146   | 0.66697 | -2.7655  | 0.413774 | NA       | 0       | 0       | 0       | 1.65058 | 0       | 2.35126 |
| ENSMUSG00000079578 | 1_Gm114   | 0.66697 | -2.7655  | 0.413774 | NA       | 0       | 0       | 0       | 1.65058 | 0       | 2.35126 |
| ENSMUSG00000079580 | 8_Tmem2   | 0.47657 | -2.28567 | 0.465885 | NA       | 0       | 0       | 0       | 0.82529 | 0.85848 | 1.17563 |
| ENSMUSG00000079588 | 3_Tmem1   | 91.0526 | 0.10041  | 0.904858 | 0.974255 | 217.418 | 12.4685 | 52.7422 | 136.173 | 55.801  | 71.7133 |
| ENSMUSG00000079592 | 9_C1qtnf  | 265.746 | -0.64127 | 0.485625 | 0.813346 | 7.07871 | 231.235 | 384.708 | 490.224 | 256.685 | 224.545 |
| ENSMUSG00000079594 | 2_BC117   | 10.7846 | 1.76297  | 0.103807 | 0.437695 | 27.3036 | 13.602  | 9.30745 | 2.47588 | 12.0187 | 0       |
| ENSMUSG00000079597 | 1_Gm548   | 3.32602 | 4.20994  | 0.041935 | 0.259289 | 4.04498 | 14.7355 | 0       | 0       | 0       | 1.17563 |
| ENSMUSG00000079598 | 3_Clec2l  | 71.5223 | -0.01669 | 0.981877 | 0.993958 | 11.1237 | 89.5467 | 112.724 | 98.2098 | 44.6408 | 72.8889 |
| ENSMUSG00000079604 | 9_Gm132   | 0.41265 | -2.10335 | 0.599583 | NA       | 0       | 0       | 0       | 2.47588 | 0       | 0       |
| ENSMUSG00000079605 | 4_Zbtb9   | 447.928 | 0.36492  | 0.223456 | 0.613683 | 537.982 | 521.411 | 452.963 | 297.105 | 426.663 | 451.441 |
| ENSMUSG00000079606 | 1_Gm595   | 0.16854 | 1.1315   | 0.781553 | NA       | 1.01124 | 0       | 0       | 0       | 0       | 0       |
| ENSMUSG00000079608 | 10_Stard  | 19.2005 | -0.76084 | 0.219693 | 0.610945 | 23.2586 | 7.93452 | 11.3758 | 18.9817 | 26.6128 | 27.0394 |
| ENSMUSG00000079610 | 8_Ankrd3  | 0.41265 | -2.10335 | 0.599583 | NA       | 0       | 0       | 0       | 2.47588 | 0       | 0       |
| ENSMUSG00000079614 | 3_Seh1l   | 1899.68 | 0.32868  | 0.45056  | 0.79295  | 3505.98 | 1362.47 | 1476.78 | 1525.14 | 1814.82 | 1712.89 |
| ENSMUSG00000079620 | 13_Muc4   | 72977.4 | 0.67873  | 0.066667 | 0.342409 | 63315   | 113621  | 92565.7 | 39439.1 | 57669.9 | 71253.6 |
| ENSMUSG00000079625 | 2_Tm4sf1  | 2.21564 | 3.61817  | 0.180372 | 0.566642 | 0       | 12.4685 | 0       | 0.82529 | 0       | 0       |
| ENSMUSG00000079626 | 2_Rhox7b  | 0.41265 | -2.10335 | 0.599583 | NA       | 0       | 0       | 0       | 2.47588 | 0       | 0       |
| ENSMUSG00000079628 | 3_Rhox4g  | 0       | NA       | NA       | NA       | 0       | 0       | 0       | 0       | 0       | 0       |
| ENSMUSG00000079630 | 2_Rhox4f  | 0.28616 | -1.57932 | 0.696464 | NA       | 0       | 0       | 0       | 0       | 1.71695 | 0       |
| ENSMUSG00000079633 | 3_Rhox4d  | 0.92973 | 0.30132  | 0.92485  | NA       | 0       | 0       | 3.10248 | 2.47588 | 0       | 0       |
| ENSMUSG00000079636 | 11_Rhox3  | 0.19594 | -0.79206 | 0.84609  | NA       | 0       | 0       | 0       | 0       | 0       | 1.17563 |
| ENSMUSG00000079637 | 10_Rhox2  | 0.33902 | -1.78366 | 0.658108 | NA       | 0       | 0       | 0       | 0       | 0       | 1.17563 |
| ENSMUSG00000079639 | 4_Rhox4a  | 3.82728 | 0.66178  | 0.637236 | 0.885525 | 6.06747 | 7.93452 | 0       | 0.82529 | 3.43391 | 4.70251 |
| ENSMUSG00000079641 | 3_Rpl39   | 13849.6 | -0.00805 | 0.984316 | 0.994848 | 21679.1 | 10067.8 | 9685.96 | 11866.1 | 16435.5 | 13363.4 |
| ENSMUSG00000079644 | 1_Gm111   | 0.59054 | -1.17309 | 0.694727 | NA       | 0       | 0       | 1.03416 | 1.65058 | 0.85848 | 0       |
| ENSMUSG00000079652 | 8_Fam71f  | 1.82281 | -2.05494 | 0.236303 | 0.628499 | 0       | 1.1335  | 1.03416 | 3.30117 | 4.29238 | 1.17563 |
| ENSMUSG00000079654 | 3_Prrt4   | 20.7634 | -1.11525 | 0.145883 | 0.516401 | 3.03373 | 12.4685 | 23.7857 | 31.3611 | 16.3111 | 37.6201 |
| ENSMUSG00000079657 | 10_Rab26  | 10.0092 | -1.49571 | 0.03894  | 0.247942 | 6.06747 | 3.40051 | 6.20497 | 15.6806 | 14.5941 | 14.1075 |
| ENSMUSG00000079658 | 9_Tceb1   | 1324.53 | 0.43487  | 0.376803 | 0.745967 | 2732.38 | 954.409 | 881.106 | 1013.46 | 1306.6  | 1059.24 |
| ENSMUSG00000079659 | 5_Tmem2   | 329.208 | 0.41371  | 0.339461 | 0.718177 | 587.533 | 272.041 | 268.882 | 282.25  | 349.4   | 215.14  |
| ENSMUSG00000079677 | 1_Fdx1l   | 208.753 | -0.15702 | 0.761954 | 0.928766 | 72.8096 | 240.303 | 279.224 | 263.268 | 179.422 | 217.491 |
| ENSMUSG00000079679 | 3_Vwde    | 5.28399 | -0.84141 | 0.48109  | 0.810738 | 6.06747 | 0       | 5.17081 | 2.47588 | 8.58477 | 9.40502 |
| ENSMUSG00000079681 | 2_Zglp1   | 4.0296  | -0.54216 | 0.632357 | 0.883233 | 1.01124 | 6.80102 | 2.06832 | 4.12646 | 4.29238 | 5.87814 |
| ENSMUSG00000079685 | 9_Ulbp1   | 105.141 | 0.23407  | 0.527292 | 0.834617 | 122.361 | 104.282 | 113.758 | 66.0234 | 102.159 | 122.265 |
| ENSMUSG00000079694 | 2_Gm148   | 0       | NA       | NA       | NA       | 0       | 0       | 0       | 0       | 0       | 0       |
| ENSMUSG00000079697 | 1_Gm575   | 1.77267 | -0.02844 | 0.986551 | 0.996006 | 3.03373 | 2.26701 | 0       | 3.30117 | 0.85848 | 1.17563 |
| ENSMUSG00000079699 | 2_Gm659   | 0.65846 | 0.36026  | 0.903114 | NA       | 0       | 2.26701 | 0       | 0.82529 | 0.85848 | 0       |
| ENSMUSG00000079704 | 2_Gm144   | 0.17236 | 1.1315   | 0.781553 | NA       | 0       | 0       | 1.03416 | 0       | 0       | 0       |
| ENSMUSG00000079707 | 9_Tcte3   | 2.49807 | -0.43854 | 0.840861 | 0.953262 | 0       | 2.26701 | 4.13665 | 0       | 8.58477 | 0       |
| ENSMUSG00000079710 | 9_Gm344   | 12.957  | 0.74644  | 0.359157 | 0.733027 | 32.3598 | 10.2015 | 6.20497 | 9.90351 | 12.0187 | 7.05377 |
| ENSMUSG00000079722 | 1_Ttl2    | 19.7308 | -0.93734 | 0.095049 | 0.418579 | 9.1012  | 18.136  | 13.4441 | 28.8852 | 20.6034 | 28.2151 |
| ENSMUSG00000079737 | 3_311000  | 71.8008 | 0.28181  | 0.513597 | 0.828304 | 118.316 | 60.0757 | 57.913  | 64.3728 | 67.8197 | 62.3083 |
| ENSMUSG00000079845 | 8_Xlr4a   | 408.477 | 0.30186  | 0.596624 | 0.868228 | 869.67  | 228.968 | 254.404 | 262.443 | 485.039 | 350.337 |
| ENSMUSG00000079852 | 4_Klra4   | 0.19594 | -0.79206 | 0.84609  | NA       | 0       | 0       | 0       | 0       | 0       | 1.17563 |
| ENSMUSG00000079853 | 5_Klra1   | 0.35746 | 2.04359  | 0.612655 | NA       | 1.01124 | 1.1335  | 0       | 0       | 0       | 0       |
| ENSMUSG00000079941 | 1_Gm112   | 8.42645 | -2.13478 | 0.070691 | 0.355025 | 5.05622 | 2.26701 | 2.06832 | 3.30117 | 34.3391 | 3.52688 |
| ENSMUSG00000080058 | 1_Gm111   | 0       | NA       | NA       | NA       | 0       | 0       | 0       | 0       | 0       | 0       |
| ENSMUSG00000080115 | 3_Mettl21 | 8.95104 | -0.70956 | 0.398922 | 0.759197 | 7.07871 | 7.93452 | 5.17081 | 4.95175 | 8.58477 | 19.9857 |
| ENSMUSG00000080268 | 3_Brms1   | 511.719 | 0.24306  | 0.685589 | 0.90421  | 133.484 | 769.648 | 761.143 | 556.247 | 376.013 | 473.778 |
| ENSMUSG00000080316 | 10_Spaca  | 646.614 | -0.12649 | 0.6936   | 0.905638 | 765.512 | 558.817 | 530.525 | 555.422 | 840.449 | 628.961 |
| ENSMUSG00000080717 | 9_B23030  | 64.225  | 0.57423  | 0.198404 | 0.590646 | 102.136 | 82.7457 | 45.5031 | 55.2946 | 42.0654 | 57.6058 |
| ENSMUSG00000080907 | 1_493045  | 0.3683  | 0.16972  | 0.966824 | NA       | 0       | 0       | 1.03416 | 0       | 0       | 1.17563 |
| ENSMUSG00000081044 | 8_AU015f  | 0.78454 | 0.8396   | 0.762445 | NA       | 2.02249 | 0       | 1.03416 | 1.65058 | 0       | 0       |
| ENSMUSG00000081058 | 5_Hist2h3 | 9.12915 | -0.03571 | 0.96521  | 0.990727 | 15.1687 | 6.80102 | 5.17081 | 14.03   | 7.72629 | 5.87814 |
| ENSMUSG00000081362 | 3_Cyp2j7  | 0.19594 | -0.79206 | 0.84609  | NA       | 0       | 0       | 0       | 0       | 0       | 1.17563 |
| ENSMUSG00000081512 | 1_Gm158   | 33.8762 | 2.09463  | 8.77E-06 | 0.000468 | 46.5172 | 53.2746 | 65.1522 | 14.8553 | 12.8772 | 10.5807 |
| ENSMUSG00000081534 | 2_Slc48a1 | 1787.59 | -0.62117 | 0.119702 | 0.470491 | 803.939 | 1450.88 | 1971.11 | 2570.79 | 1871.48 | 2057.35 |
| ENSMUSG00000081607 | 2_Gm152   | 2.28475 | -1.75423 | 0.29173  | 0.676701 | 2.02249 | 1.1335  | 0       | 1.65058 | 7.72629 | 1.17563 |
| ENSMUSG00000081650 | 1_Gm161   | 1.31994 | -1.41447 | 0.453279 | NA       | 0       | 1.1335  | 1.03416 | 0.82529 | 2.57543 | 2.35126 |
| ENSMUSG00000081683 | 5_Fzd10   | 156.271 | 0.58882  | 0.089871 | 0.408696 | 149.664 | 206.298 | 206.832 | 128.746 | 94.4325 | 151.656 |
| ENSMUSG00000081769 | 8_Gm122   | 24.294  | 1.22983  | 0.039713 | 0.250561 | 17.1912 | 40.8061 | 44.4689 | 18.9817 | 13.7356 | 10.5807 |
| ENSMUSG00000081906 | 2_Rpl9-ps | 1.26879 | -1.36475 | 0.536822 | NA       | 1.01124 | 1.1335  | 0       | 0       | 4.29238 | 1.17563 |
| ENSMUSG00000081984 | 3_Dnajb3  | 12.5596 | -0.2175  | 0.778888 | 0.934571 | 19.2136 | 12.4685 | 3.10248 | 11.5541 | 13.7356 | 15.2832 |
| ENSMUSG00000082101 | 3_Slfn14  | 0.18892 | 1.1315   | 0.781553 | NA       | 0       | 1.1335  | 0       | 0       | 0       | 0       |
| ENSMUSG00000082229 | 1_Nap112  | 17.9433 | -1.19977 | 0.083416 | 0.390037 | 16.1799 | 12.4685 | 4.13665 | 33.837  | 25.7543 | 15.2832 |
| ENSMUSG00000082361 | 6_Btc     | 487.768 | 0.86386  | 0.081512 | 0.384779 | 1132.59 | 353.653 | 402.289 | 328.466 | 332.231 | 377.377 |
| ENSMUSG00000082766 | 1_170006  | 1.32547 | -1.4211  | 0.505722 | NA       | 0       | 1.1335  | 1.03416 | 0       | 3.43391 | 2.35126 |
| ENSMUSG00000082932 | 3_Cyp2j8  | 1.06899 | -0.14491 | 0.947347 | NA       | 1.01124 | 0       | 2.06832 | 2.47588 | 0.85848 | 0       |
| ENSMUSG00000082976 | 9_Gm150   | 25.9802 | 7.25905  | 1.66E-07 | 1.59E-05 | 53.5959 | 83.8792 | 17.5807 | 0.82529 | 0       | 0       |
| ENSMUSG00000083012 | 8_Fam22f  | 443.173 | 0.08206  | 0.751241 | 0.925466 | 421.689 | 499.875 | 445.724 | 459.688 | 379.447 | 452.617 |
| ENSMUSG00000083193 | 1_493059  | 0.19594 | -0.79206 | 0.84609  | NA       | 0       | 0       | 0       | 0       | 0       | 1.17563 |
| ENSMUSG00000083282 | 2_Ctsf    | 755.445 | -0.84596 | 0.012368 | 0.117242 | 391.352 | 501.008 | 728.05  | 1100.94 | 923.721 | 887.599 |
| ENSMUSG00000083649 | 5_Ras12-9 | 4.14622 | -1.93492 | 0.135563 | 0.49987  | 4.04498 | 0       | 1.03416 | 3.30117 | 9.44325 | 7.05377 |

|                    |           |         |          |          |          |         |         |         |         |         |         |
|--------------------|-----------|---------|----------|----------|----------|---------|---------|---------|---------|---------|---------|
| ENSMUSG00000083695 | 6_Rnf138i | 0.59607 | -1.18871 | 0.690318 | NA       | 0       | 0       | 1.03416 | 0.82529 | 1.71695 | 0       |
| ENSMUSG00000083780 | 8_Gm127i  | 14.1737 | -2.05628 | 0.088988 | 0.405806 | 12.1349 | 2.26701 | 2.06832 | 4.95175 | 60.0934 | 3.52688 |
| ENSMUSG00000083929 | 3_Gm106i  | 10.1703 | -0.95189 | 0.241507 | 0.632942 | 12.1349 | 2.26701 | 6.20497 | 9.90351 | 12.8772 | 17.6344 |
| ENSMUSG00000084128 | 10_Espr2  | 3376.97 | 0.56186  | 0.153376 | 0.528463 | 2206.54 | 5089.43 | 4783    | 2555.93 | 2471.56 | 3155.39 |
| ENSMUSG00000084174 | 2_Sync    | 5.64957 | 1.75881  | 0.196255 | 0.588086 | 0       | 14.7355 | 11.3758 | 0.82529 | 3.43391 | 3.52688 |
| ENSMUSG00000084346 | 4_Cyp4a3  | 0.19594 | -0.79206 | 0.84609  | NA       | 0       | 0       | 0       | 0       | 0       | 1.17563 |
| ENSMUSG00000084754 | 1_Gm125i  | 0.19594 | -0.79206 | 0.84609  | NA       | 0       | 0       | 0       | 0       | 0       | 1.17563 |
| ENSMUSG00000084756 | 1_Gm138i  | 0.13755 | -0.79206 | 0.84609  | NA       | 0       | 0       | 0       | 0.82529 | 0       | 0       |
| ENSMUSG00000084758 | 1_Gm127i  | 0.97517 | 1.25117  | 0.587981 | NA       | 3.03373 | 1.1335  | 0       | 0.82529 | 0.85848 | 0       |
| ENSMUSG00000084772 | 1_Gm154i  | 0.41818 | -2.121   | 0.592183 | NA       | 0       | 0       | 0       | 1.65058 | 0.85848 | 0       |
| ENSMUSG00000084773 | 1_Gm121i  | 0.13755 | -0.79206 | 0.84609  | NA       | 0       | 0       | 0       | 0.82529 | 0       | 0       |
| ENSMUSG00000084776 | 1_Gm149i  | 0.81365 | -0.46703 | 0.846308 | NA       | 2.02249 | 0       | 0       | 0.82529 | 0.85848 | 1.17563 |
| ENSMUSG00000084786 | 9_Ubl5    | 2099.02 | -0.2998  | 0.320565 | 0.701497 | 1341.92 | 2138.92 | 2164.5  | 2314.95 | 2384.85 | 2248.98 |
| ENSMUSG00000084788 | 1_Gm113i  | 1.3749  | -1.60705 | 0.42591  | NA       | 2.02249 | 0       | 0       | 2.47588 | 2.57543 | 1.17563 |
| ENSMUSG00000084789 | 1_Gm129i  | 0.7366  | -0.1284  | 0.970222 | NA       | 0       | 0       | 2.06832 | 0       | 0       | 2.35126 |
| ENSMUSG00000084792 | 1_170005  | 6.7645  | 0.60823  | 0.5125   | 0.828197 | 9.1012  | 10.2015 | 5.17081 | 1.65058 | 8.58477 | 5.87814 |
| ENSMUSG00000084796 | 1_Mir142f | 6.32281 | 1.91481  | 0.12676  | 0.484087 | 1.01124 | 13.602  | 15.5124 | 5.77705 | 0.85848 | 1.17563 |
| ENSMUSG00000084797 | 1_Gm143i  | 4.25884 | -0.73258 | 0.545806 | 0.842614 | 0       | 3.40051 | 6.20497 | 5.77705 | 4.29238 | 5.87814 |
| ENSMUSG00000084799 | 7_Ino80dc | 76.9189 | -0.22628 | 0.564864 | 0.850965 | 98.0907 | 56.6751 | 57.913  | 80.8787 | 92.7155 | 75.2402 |
| ENSMUSG00000084805 | 1_Gm122i  | 0.14308 | -0.79206 | 0.84609  | NA       | 0       | 0       | 0       | 0       | 0.85848 | 0       |
| ENSMUSG00000084806 | 1_Gm152i  | 1.82806 | 1.66108  | 0.308643 | 0.691466 | 2.02249 | 2.26701 | 4.13665 | 0.82529 | 1.71695 | 0       |
| ENSMUSG00000084816 | 1_Platr29 | 1.11443 | 0.9649   | 0.704135 | NA       | 0       | 2.26701 | 2.06832 | 0       | 0       | 2.35126 |
| ENSMUSG00000084823 | 2_Gm172i  | 2.15391 | -0.62958 | 0.698146 | 0.905638 | 4.04498 | 0       | 1.03416 | 4.95175 | 1.71695 | 1.17563 |
| ENSMUSG00000084840 | 1_Gm114i  | 0.63088 | 0.24708  | 0.944742 | NA       | 0       | 0       | 2.06832 | 0       | 1.71695 | 0       |
| ENSMUSG00000084843 | 1_B23031  | 3.38622 | -1.53811 | 0.289869 | 0.674932 | 3.03373 | 0       | 2.06832 | 4.95175 | 0.85848 | 9.40502 |
| ENSMUSG00000084845 | 9_Tmem2   | 20.2421 | -0.85238 | 0.249999 | 0.641576 | 4.04498 | 12.4685 | 26.8882 | 34.6623 | 25.7543 | 17.6344 |
| ENSMUSG00000084861 | 1_170009  | 0       | NA       | NA       | NA       | 0       | 0       | 0       | 0       | 0       | 0       |
| ENSMUSG00000084883 | 1_Ccdc85  | 39.3846 | 0.39534  | 0.600381 | 0.869697 | 7.07871 | 57.8086 | 69.2888 | 36.3129 | 22.3204 | 43.4982 |
| ENSMUSG00000084891 | 1_Gm129i  | 0.31544 | 0.16972  | 0.966824 | NA       | 0       | 0       | 1.03416 | 0       | 0.85848 | 0       |
| ENSMUSG00000084897 | 1_Gm142i  | 2.53368 | -0.91072 | 0.484654 | 0.812793 | 2.02249 | 2.26701 | 1.03416 | 4.95175 | 2.57543 | 2.35126 |
| ENSMUSG00000084898 | 1_Gm123i  | 0.53302 | 1.01035  | 0.786953 | NA       | 2.02249 | 0       | 0       | 0       | 0       | 1.17563 |
| ENSMUSG00000084902 | 1_Gm281i  | 6.66725 | 0.98697  | 0.264163 | 0.652958 | 8.08995 | 9.06802 | 9.30745 | 1.65058 | 6.00934 | 5.87814 |
| ENSMUSG00000084904 | 1_Gm148i  | 6.20019 | -1.77322 | 0.106182 | 0.442704 | 3.03373 | 3.40051 | 2.06832 | 6.60234 | 19.745  | 2.35126 |
| ENSMUSG00000084907 | 1_Gm145i  | 1.63389 | -2.96226 | 0.132715 | NA       | 0       | 0       | 1.03416 | 3.30117 | 4.29238 | 1.17563 |
| ENSMUSG00000084909 | 1_493052  | 0.13755 | -0.79206 | 0.84609  | NA       | 0       | 0       | 0       | 0.82529 | 0       | 0       |
| ENSMUSG00000084917 | 3_Gm174i  | 12.7435 | 0.51527  | 0.487705 | 0.814019 | 25.2811 | 10.2015 | 9.30745 | 11.5541 | 6.00934 | 14.1075 |
| ENSMUSG00000084918 | 1_Gm127i  | 1.5986  | -0.32566 | 0.870501 | NA       | 2.02249 | 2.26701 | 0       | 4.12646 | 0       | 1.17563 |
| ENSMUSG00000084920 | 1_Gm152i  | 25.2914 | 0.6712   | 0.29665  | 0.680154 | 50.5622 | 13.602  | 28.9565 | 13.2047 | 26.6128 | 18.81   |
| ENSMUSG00000084921 | 1_Gm138i  | 0.13755 | -0.79206 | 0.84609  | NA       | 0       | 0       | 0       | 0.82529 | 0       | 0       |
| ENSMUSG00000084923 | 1_Gm156i  | 0.47104 | -2.2721  | 0.552052 | NA       | 0       | 0       | 0       | 1.65058 | 0       | 1.17563 |
| ENSMUSG00000084945 | 1_C03003  | 0.14308 | -0.79206 | 0.84609  | NA       | 0       | 0       | 0       | 0       | 0.85848 | 0       |
| ENSMUSG00000084954 | 1_Gm163i  | 0.2751  | -1.54073 | 0.703687 | NA       | 0       | 0       | 0       | 1.65058 | 0       | 0       |
| ENSMUSG00000084956 | 7_Gm161i  | 0.67119 | 1.66035  | 0.567496 | NA       | 0       | 1.1335  | 2.06832 | 0.82529 | 0       | 0       |
| ENSMUSG00000084957 | 2_Bbip1   | 481.636 | -0.23897 | 0.553682 | 0.846015 | 683.601 | 337.784 | 304.043 | 489.398 | 590.632 | 484.359 |
| ENSMUSG00000084966 | 1_281047  | 0.14308 | -0.79206 | 0.84609  | NA       | 0       | 0       | 0       | 0       | 0.85848 | 0       |
| ENSMUSG00000084969 | 1_Gm112i  | 0.28616 | -1.57932 | 0.696464 | NA       | 0       | 0       | 0       | 0       | 1.71695 | 0       |
| ENSMUSG00000084973 | 1_Gm138i  | 1.69245 | -1.18772 | 0.53277  | 0.837668 | 0       | 0       | 3.10248 | 3.30117 | 2.57543 | 1.17563 |
| ENSMUSG00000084979 | 1_Gm162i  | 1.85741 | -0.56567 | 0.769705 | 0.931729 | 0       | 4.53401 | 0       | 0.82529 | 3.43391 | 2.35126 |
| ENSMUSG00000084989 | 3_Crocc2  | 46.2093 | -0.78261 | 0.170615 | 0.552625 | 13.1462 | 35.1386 | 53.7764 | 73.451  | 52.3671 | 49.3764 |
| ENSMUSG00000084996 | 1_Gm114i  | 0.51708 | 2.58222  | 0.5182   | NA       | 0       | 0       | 3.10248 | 0       | 0       | 0       |
| ENSMUSG00000084999 | 1_Gm158i  | 2.45492 | 0.42107  | 0.741378 | 0.922625 | 3.03373 | 3.40051 | 2.06832 | 2.47588 | 2.57543 | 1.17563 |
| ENSMUSG00000085000 | 1_Gm145i  | 0       | NA       | NA       | NA       | 0       | 0       | 0       | 0       | 0       | 0       |
| ENSMUSG00000085007 | 2_Gm115i  | 0.3683  | 0.16972  | 0.966824 | NA       | 0       | 0       | 1.03416 | 0       | 0       | 1.17563 |
| ENSMUSG00000085014 | 1_Gm134i  | 1.86034 | 0.41133  | 0.80071  | 0.941902 | 3.03373 | 2.26701 | 1.03416 | 2.47588 | 0       | 2.35126 |
| ENSMUSG00000085020 | 1_231008  | 0.50756 | -0.81123 | 0.79835  | NA       | 1.01124 | 0       | 0       | 0       | 0.85848 | 1.17563 |
| ENSMUSG00000085024 | 1_C23003  | 10.9943 | -0.83395 | 0.318571 | 0.699702 | 16.1799 | 2.26701 | 5.17081 | 15.6806 | 13.7356 | 12.9319 |
| ENSMUSG00000085025 | 1_Gm137i  | 0.58781 | -2.5686  | 0.518601 | NA       | 0       | 0       | 0       | 0       | 0       | 3.52688 |
| ENSMUSG00000085027 | 1_Gm118i  | 0.16854 | 1.1315   | 0.781553 | NA       | 1.01124 | 0       | 0       | 0       | 0       | 0       |
| ENSMUSG00000085032 | 1_Gm112i  | 0.332   | 0.16972  | 0.966824 | NA       | 0       | 1.1335  | 0       | 0       | 0.85848 | 0       |
| ENSMUSG00000085035 | 1_Gm120i  | 4.06211 | -1.49699 | 0.161057 | 0.539395 | 2.02249 | 2.26701 | 2.06832 | 4.95175 | 6.00934 | 7.05377 |
| ENSMUSG00000085046 | 1_Gm114i  | 0.2751  | -1.54073 | 0.703687 | NA       | 0       | 0       | 0       | 1.65058 | 0       | 0       |
| ENSMUSG00000085053 | 1_Gm148i  | 0.28063 | -1.56014 | 0.700051 | NA       | 0       | 0       | 0       | 0.82529 | 0.85848 | 0       |
| ENSMUSG00000085054 | 2_Gm158i  | 13.5944 | -0.6977  | 0.421395 | 0.77414  | 22.2474 | 6.80102 | 2.06832 | 19.807  | 18.8865 | 11.7563 |
| ENSMUSG00000085067 | 2_Gm156i  | 1.22989 | 0.2575   | 0.917597 | NA       | 4.04498 | 0       | 0       | 2.47588 | 0.85848 | 0       |
| ENSMUSG00000085074 | 1_Gm114i  | 0.13755 | -0.79206 | 0.84609  | NA       | 0       | 0       | 0       | 0.82529 | 0       | 0       |
| ENSMUSG00000085079 | 3_Khdc1b  | 0.33349 | -1.76186 | 0.662172 | NA       | 0       | 0       | 0       | 0.82529 | 0       | 1.17563 |
| ENSMUSG00000085084 | 7_493057  | 11.9148 | -0.63408 | 0.443132 | 0.787841 | 18.2024 | 5.66751 | 4.13665 | 22.2829 | 9.44325 | 11.7563 |
| ENSMUSG00000085085 | 2_170008  | 4.90525 | -0.03501 | 0.974178 | 0.99348  | 8.08995 | 2.26701 | 4.13665 | 1.65058 | 8.58477 | 4.70251 |
| ENSMUSG00000085111 | 3_Asc4    | 0.28063 | -1.56014 | 0.700051 | NA       | 0       | 0       | 0       | 0.82529 | 0.85848 | 0       |
| ENSMUSG00000085113 | 1_B13001  | 0.19594 | -0.79206 | 0.84609  | NA       | 0       | 0       | 0       | 0       | 0       | 1.17563 |
| ENSMUSG00000085124 | 1_Gm127i  | 57.9888 | -0.01404 | 0.972286 | 0.9926   | 55.6184 | 44.2066 | 73.4255 | 56.9452 | 69.5366 | 48.2007 |
| ENSMUSG00000085126 | 1_Gm125i  | 0.46955 | -0.60795 | 0.850453 | NA       | 0       | 1.1335  | 0       | 0.82529 | 0.85848 | 0       |
| ENSMUSG00000085129 | 1_503142  | 0.68392 | 1.68811  | 0.559594 | NA       | 1.01124 | 2.26701 | 0       | 0.82529 | 0       | 0       |
| ENSMUSG00000085139 | 1_A73004  | 14.9654 | 0.18405  | 0.819149 | 0.948173 | 31.3486 | 11.335  | 5.17081 | 15.6806 | 18.028  | 8.22939 |
| ENSMUSG00000085146 | 1_Eif2c5  | 5.47065 | 0.28835  | 0.750922 | 0.925449 | 4.04498 | 6.80102 | 7.23913 | 6.60234 | 3.43391 | 4.70251 |

|                    |          |         |          |          |          |         |         |         |         |         |         |
|--------------------|----------|---------|----------|----------|----------|---------|---------|---------|---------|---------|---------|
| ENSMUSG00000085152 | 1_Gm114  | 15.6655 | 0.24562  | 0.700991 | 0.906307 | 22.2474 | 11.335  | 17.5807 | 14.8553 | 19.745  | 8.22939 |
| ENSMUSG00000085158 | 1_Gm142  | 0.19594 | -0.79206 | 0.84609  | NA       | 0       | 0       | 0       | 0       | 0       | 1.17563 |
| ENSMUSG00000085162 | 7_Gm122  | 1.46429 | -0.89311 | 0.656277 | NA       | 3.03373 | 0       | 0       | 0.82529 | 2.57543 | 2.35126 |
| ENSMUSG00000085167 | 1_Gm120  | 0.14308 | -0.79206 | 0.84609  | NA       | 0       | 0       | 0       | 0       | 0.85848 | 0       |
| ENSMUSG00000085171 | 7_D83002 | 1.29016 | 1.82489  | 0.461915 | NA       | 5.05622 | 0       | 1.03416 | 1.65058 | 0       | 0       |
| ENSMUSG00000085180 | 1_A18385 | 22.9503 | -0.1814  | 0.826324 | 0.950291 | 37.416  | 2.26701 | 24.8199 | 27.2346 | 28.3297 | 17.6344 |
| ENSMUSG00000085183 | 1_Gm126  | 4.74888 | -2.13891 | 0.05851  | 0.317521 | 3.03373 | 1.1335  | 1.03416 | 4.12646 | 8.58477 | 10.5807 |
| ENSMUSG00000085188 | 1_Gm113  | 0.13755 | -0.79206 | 0.84609  | NA       | 0       | 0       | 0       | 0.82529 | 0       | 0       |
| ENSMUSG00000085217 | 1_603047 | 1.52879 | -2.84858 | 0.164407 | NA       | 1.01124 | 0       | 0       | 4.95175 | 0.85848 | 2.35126 |
| ENSMUSG00000085222 | 1_Gm139  | 0.31162 | 0.16972  | 0.966824 | NA       | 1.01124 | 0       | 0       | 0       | 0.85848 | 0       |
| ENSMUSG00000085237 | 2_Gm154  | 10.9676 | -1.9047  | 0.011592 | 0.112151 | 2.02249 | 5.66751 | 6.20497 | 17.3311 | 14.5941 | 19.9857 |
| ENSMUSG00000085238 | 1_493047 | 0.84293 | 0.66417  | 0.781157 | NA       | 2.02249 | 0       | 1.03416 | 0.82529 | 0       | 1.17563 |
| ENSMUSG00000085250 | 1_Gm152  | 9.45326 | -0.35099 | 0.687449 | 0.904573 | 12.1349 | 3.40051 | 9.30745 | 4.12646 | 17.1695 | 10.5807 |
| ENSMUSG00000085251 | 1_Gm123  | 0.31162 | 0.16972  | 0.966824 | NA       | 1.01124 | 0       | 0       | 0       | 0.85848 | 0       |
| ENSMUSG00000085261 | 1_Gm138  | 1.67357 | 0.10561  | 0.951462 | NA       | 1.01124 | 0       | 4.13665 | 0.82529 | 1.71695 | 2.35126 |
| ENSMUSG00000085271 | 7_E13000 | 1.80055 | -4.21612 | 0.036264 | 0.238522 | 0       | 0       | 0       | 3.30117 | 5.15086 | 2.35126 |
| ENSMUSG00000085272 | 7_Sbk3   | 12.1825 | 0.07829  | 0.910923 | 0.975173 | 17.1912 | 10.2015 | 10.3416 | 14.03   | 15.4526 | 5.87814 |
| ENSMUSG00000085275 | 1_Gm144  | 0.13755 | -0.79206 | 0.84609  | NA       | 0       | 0       | 0       | 0.82529 | 0       | 0       |
| ENSMUSG00000085277 | 1_Gm139  | 0       | NA       | NA       | NA       | 0       | 0       | 0       | 0       | 0       | 0       |
| ENSMUSG00000085287 | 8_483341 | 31.9179 | 0.04149  | 0.932013 | 0.982317 | 41.461  | 35.1386 | 20.6832 | 37.1382 | 30.0467 | 27.0394 |
| ENSMUSG00000085298 | 2_F73003 | 0.14308 | -0.79206 | 0.84609  | NA       | 0       | 0       | 0       | 0       | 0.85848 | 0       |
| ENSMUSG00000085312 | 1_Gm127  | 1.45853 | 0.66251  | 0.746667 | NA       | 2.02249 | 1.1335  | 2.06832 | 0       | 0       | 3.52688 |
| ENSMUSG00000085316 | 1_D33005 | 2.86698 | -0.4643  | 0.722032 | 0.914033 | 5.05622 | 1.1335  | 1.03416 | 2.47588 | 5.15086 | 2.35126 |
| ENSMUSG00000085318 | 1_Gm125  | 0.7867  | -0.29634 | 0.91643  | NA       | 1.01124 | 1.1335  | 0       | 0       | 2.57543 | 0       |
| ENSMUSG00000085325 | 7_Gm149  | 0.14308 | -0.79206 | 0.84609  | NA       | 0       | 0       | 0       | 0       | 0.85848 | 0       |
| ENSMUSG00000085338 | 1_241000 | 0.19594 | -0.79206 | 0.84609  | NA       | 0       | 0       | 0       | 0       | 0       | 1.17563 |
| ENSMUSG00000085354 | 1_Gm204  | 1.47399 | 1.26577  | 0.472186 | NA       | 3.03373 | 2.26701 | 1.03416 | 1.65058 | 0.85848 | 0       |
| ENSMUSG00000085357 | 1_Gm134  | 0.68944 | 2.99651  | 0.450864 | NA       | 0       | 0       | 4.13665 | 0       | 0       | 0       |
| ENSMUSG00000085375 | 1_Gm125  | 0.48016 | 1.00965  | 0.794176 | NA       | 2.02249 | 0       | 0       | 0       | 0.85848 | 0       |
| ENSMUSG00000085377 | 1_493055 | 0.87266 | 0.69554  | 0.770075 | NA       | 0       | 1.1335  | 2.06832 | 0       | 0.85848 | 1.17563 |
| ENSMUSG00000085380 | 1_E13012 | 1.31761 | -2.58295 | 0.20814  | NA       | 1.01124 | 0       | 0       | 1.65058 | 1.71695 | 3.52688 |
| ENSMUSG00000085382 | 1_Gm138  | 2.38533 | -0.35338 | 0.798268 | 0.940562 | 3.03373 | 2.26701 | 1.03416 | 1.65058 | 5.15086 | 1.17563 |
| ENSMUSG00000085389 | 7_170000 | 0.78819 | -1.70906 | 0.475579 | NA       | 1.01124 | 0       | 0       | 0.82529 | 1.71695 | 1.17563 |
| ENSMUSG00000085395 | 1_Gm130  | 19.4017 | -0.49817 | 0.51938  | 0.831665 | 3.03373 | 22.6701 | 22.7516 | 27.2346 | 26.6128 | 14.1075 |
| ENSMUSG00000085402 | 1_Gm121  | 0.19594 | -0.79206 | 0.84609  | NA       | 0       | 0       | 0       | 0       | 0       | 1.17563 |
| ENSMUSG00000085411 | 1_Gm143  | 0.14308 | -0.79206 | 0.84609  | NA       | 0       | 0       | 0       | 0       | 0.85848 | 0       |
| ENSMUSG00000085412 | 7_Halr1  | 0.18892 | 1.1315   | 0.781553 | NA       | 0       | 1.1335  | 0       | 0       | 0       | 0       |
| ENSMUSG00000085419 | 1_Gm117  | 7.97923 | -2.2279  | 0.014418 | 0.129516 | 4.04498 | 3.40051 | 1.03416 | 14.8553 | 16.3111 | 8.22939 |
| ENSMUSG00000085421 | 1_473249 | 1.22484 | -0.49869 | 0.843006 | NA       | 2.02249 | 0       | 1.03416 | 0       | 4.29238 | 0       |
| ENSMUSG00000085427 | 7_643071 | 0.48227 | 1.03727  | 0.788557 | NA       | 0       | 0       | 2.06832 | 0.82529 | 0       | 0       |
| ENSMUSG00000085429 | 1_Gm134  | 0.17236 | 1.1315   | 0.781553 | NA       | 0       | 0       | 1.03416 | 0       | 0       | 0       |
| ENSMUSG00000085433 | 2_Gm160  | 22.5177 | -0.29888 | 0.601985 | 0.870033 | 10.1124 | 22.6701 | 27.9224 | 28.8852 | 23.1789 | 22.3369 |
| ENSMUSG00000085438 | 1_170002 | 6203.09 | 0.20209  | 0.668429 | 0.898206 | 11639.4 | 3902.65 | 4368.3  | 5262.89 | 6412.82 | 5632.43 |
| ENSMUSG00000085451 | 1_Gm151  | 5.49741 | 0.01362  | 0.988538 | 0.996991 | 8.08995 | 2.26701 | 6.20497 | 7.42763 | 4.29238 | 4.70251 |
| ENSMUSG00000085463 | 1_943002 | 0.19594 | -0.79206 | 0.84609  | NA       | 0       | 0       | 0       | 0       | 0       | 1.17563 |
| ENSMUSG00000085469 | 1_Gm142  | 0.18892 | 1.1315   | 0.781553 | NA       | 0       | 1.1335  | 0       | 0       | 0       | 0       |
| ENSMUSG00000085470 | 1_170001 | 0.82682 | -0.465   | 0.866068 | NA       | 0       | 0       | 2.06832 | 0       | 1.71695 | 1.17563 |
| ENSMUSG00000085473 | 2_Gm166  | 0       | NA       | NA       | NA       | 0       | 0       | 0       | 0       | 0       | 0       |
| ENSMUSG00000085478 | 1_Gm118  | 0.16854 | 1.1315   | 0.781553 | NA       | 1.01124 | 0       | 0       | 0       | 0       | 0       |
| ENSMUSG00000085489 | 7_Gm366  | 0       | NA       | NA       | NA       | 0       | 0       | 0       | 0       | 0       | 0       |
| ENSMUSG00000085497 | 2_Gm159  | 0.14308 | -0.79206 | 0.84609  | NA       | 0       | 0       | 0       | 0       | 0.85848 | 0       |
| ENSMUSG00000085504 | 1_Gm140  | 1.07813 | -2.24225 | 0.315109 | NA       | 0       | 1.1335  | 0       | 3.30117 | 0.85848 | 1.17563 |
| ENSMUSG00000085515 | 1_C63002 | 0.18892 | 1.1315   | 0.781553 | NA       | 0       | 1.1335  | 0       | 0       | 0       | 0       |
| ENSMUSG00000085524 | 1_Gm142  | 1.16772 | 0.53254  | 0.806359 | NA       | 1.01124 | 0       | 3.10248 | 0       | 1.71695 | 1.17563 |
| ENSMUSG00000085525 | 7_Gm131  | 30.5316 | -0.07989 | 0.869454 | 0.963129 | 41.461  | 24.9371 | 22.7516 | 33.837  | 34.3391 | 25.8638 |
| ENSMUSG00000085532 | 1_B43031 | 0.16854 | 1.1315   | 0.781553 | NA       | 1.01124 | 0       | 0       | 0       | 0       | 0       |
| ENSMUSG00000085542 | 1_170003 | 0       | NA       | NA       | NA       | 0       | 0       | 0       | 0       | 0       | 0       |
| ENSMUSG00000085549 | 7_170004 | 0.96454 | 1.27806  | 0.687297 | NA       | 0       | 0       | 4.13665 | 1.65058 | 0       | 0       |
| ENSMUSG00000085562 | 7_261002 | 0.50054 | 1.08003  | 0.733943 | NA       | 1.01124 | 1.1335  | 0       | 0       | 0.85848 | 0       |
| ENSMUSG00000085565 | 1_Gm157  | 2.37634 | -1.81998 | 0.313866 | 0.695349 | 1.01124 | 1.1335  | 1.03416 | 9.90351 | 0       | 1.17563 |
| ENSMUSG00000085576 | 2_Dpy19  | 0.33902 | -1.78366 | 0.658108 | NA       | 0       | 0       | 0       | 0       | 0.85848 | 1.17563 |
| ENSMUSG00000085578 | 1_Gm115  | 1.96181 | 0.965    | 0.572052 | 0.854806 | 0       | 5.66751 | 2.06832 | 0.82529 | 0.85848 | 2.35126 |
| ENSMUSG00000085582 | 7_311009 | 14.1499 | 0.53062  | 0.489381 | 0.814396 | 28.3148 | 9.06802 | 12.4099 | 8.25292 | 6.86782 | 19.9857 |
| ENSMUSG00000085583 | 1_Gm156  | 5.18173 | 0.51176  | 0.632809 | 0.883314 | 1.01124 | 9.06802 | 8.27329 | 5.77705 | 3.43391 | 3.52688 |
| ENSMUSG00000085584 | 3_Rgag1  | 8.76227 | -1.0701  | 0.233946 | 0.625952 | 1.01124 | 5.66751 | 10.3416 | 11.5541 | 14.5941 | 9.40502 |
| ENSMUSG00000085591 | 1_Gm134  | 2.33163 | -1.28325 | 0.451699 | 0.793953 | 4.04498 | 0       | 0       | 3.30117 | 4.29238 | 2.35126 |
| ENSMUSG00000085601 | 7_Gm496  | 6.50415 | 1.10009  | 0.254209 | 0.645159 | 6.06747 | 9.06802 | 11.3758 | 5.77705 | 0.85848 | 5.87814 |
| ENSMUSG00000085620 | 1_G63001 | 0.73089 | -2.88699 | 0.388908 | NA       | 0       | 0       | 0       | 0       | 0.85848 | 3.52688 |
| ENSMUSG00000085632 | 1_Gm123  | 0.35746 | 2.04359  | 0.612655 | NA       | 1.01124 | 1.1335  | 0       | 0       | 0       | 0       |
| ENSMUSG00000085640 | 1_Gm140  | 0.14308 | -0.79206 | 0.84609  | NA       | 0       | 0       | 0       | 0       | 0.85848 | 0       |
| ENSMUSG00000085643 | 1_Gm125  | 0.50436 | 1.09238  | 0.730574 | NA       | 0       | 1.1335  | 1.03416 | 0       | 0.85848 | 0       |
| ENSMUSG00000085654 | 1_Gm125  | 0.38486 | 0.16972  | 0.966824 | NA       | 0       | 1.1335  | 0       | 0       | 0       | 1.17563 |
| ENSMUSG00000085656 | 1_Gm131  | 0.14308 | -0.79206 | 0.84609  | NA       | 0       | 0       | 0       | 0       | 0.85848 | 0       |
| ENSMUSG00000085658 | 1_Gm157  | 2.90179 | -0.14481 | 0.909925 | 0.974747 | 5.05622 | 1.1335  | 2.06832 | 1.65058 | 5.15086 | 2.35126 |
| ENSMUSG00000085660 | 1_Gm124  | 0       | NA       | NA       | NA       | 0       | 0       | 0       | 0       | 0       | 0       |

|                    |          |         |          |          |          |         |         |         |         |         |         |
|--------------------|----------|---------|----------|----------|----------|---------|---------|---------|---------|---------|---------|
| ENSMUSG00000085668 | 2_Gm134  | 1.47166 | 0.50424  | 0.806919 | NA       | 4.04498 | 1.1335  | 0       | 2.47588 | 0       | 1.17563 |
| ENSMUSG00000085675 | 1_Gm120  | 2.96427 | -2.92613 | 0.077973 | 0.374649 | 2.02249 | 0       | 0       | 2.47588 | 8.58477 | 4.70251 |
| ENSMUSG00000085677 | 7_493059 | 0.14308 | -0.79206 | 0.84609  | NA       | 0       | 0       | 0       | 0       | 0.85848 | 0       |
| ENSMUSG00000085682 | 1_Gm142  | 0.2751  | -1.54073 | 0.703687 | NA       | 0       | 0       | 0       | 1.65058 | 0       | 0       |
| ENSMUSG00000085683 | 1_913040 | 1.48884 | 1.31324  | 0.509109 | NA       | 2.02249 | 3.40051 | 1.03416 | 2.47588 | 0       | 0       |
| ENSMUSG00000085701 | 1_Gm129  | 1.66889 | 0.89326  | 0.6578   | NA       | 1.01124 | 4.53401 | 1.03416 | 0       | 3.43391 | 0       |
| ENSMUSG00000085708 | 1_Gm160  | 0.99918 | 0.11838  | 0.964108 | NA       | 0       | 0       | 3.10248 | 0       | 1.71695 | 1.17563 |
| ENSMUSG00000085709 | 1_Gm142  | 0.33708 | 1.97061  | 0.625968 | NA       | 2.02249 | 0       | 0       | 0       | 0       | 0       |
| ENSMUSG00000085721 | 1_Gm127  | 1.24284 | 2.63777  | 0.225367 | NA       | 1.01124 | 1.1335  | 4.13665 | 0       | 0       | 1.17563 |
| ENSMUSG00000085740 | 1_493050 | 0.14308 | -0.79206 | 0.84609  | NA       | 0       | 0       | 0       | 0       | 0.85848 | 0       |
| ENSMUSG00000085744 | 1_Gm122  | 0.50562 | 2.55291  | 0.52315  | NA       | 3.03373 | 0       | 0       | 0       | 0       | 0       |
| ENSMUSG00000085750 | 1_Gm140  | 0.51138 | -0.81111 | 0.797958 | NA       | 0       | 0       | 1.03416 | 0       | 0.85848 | 1.17563 |
| ENSMUSG00000085757 | 7_170001 | 0.14308 | -0.79206 | 0.84609  | NA       | 0       | 0       | 0       | 0       | 0.85848 | 0       |
| ENSMUSG00000085772 | 7_D63002 | 31.3055 | -1.6182  | 0.001972 | 0.032165 | 15.1687 | 12.4685 | 18.6149 | 65.1981 | 44.6408 | 31.742  |
| ENSMUSG00000085793 | 1_Lin52  | 315.106 | 0.10803  | 0.768514 | 0.931262 | 475.285 | 242.57  | 262.677 | 300.406 | 309.91  | 299.785 |
| ENSMUSG00000085795 | 7_Zfp703 | 385.622 | 0.13563  | 0.663138 | 0.896048 | 484.386 | 310.58  | 415.733 | 368.906 | 316.778 | 417.348 |
| ENSMUSG00000085798 | 1_Gm201  | 0.13755 | -0.79206 | 0.84609  | NA       | 0       | 0       | 0       | 0.82529 | 0       | 0       |
| ENSMUSG00000085806 | 1_Gm120  | 0.31162 | 0.16972  | 0.966824 | NA       | 1.01124 | 0       | 0       | 0       | 0.85848 | 0       |
| ENSMUSG00000085833 | 2_Gm130  | 10.9146 | 0.63615  | 0.404973 | 0.763614 | 7.07871 | 17.0025 | 15.5124 | 5.77705 | 6.00934 | 14.1075 |
| ENSMUSG00000085836 | 1_Gm130  | 26.2882 | 0.55068  | 0.3361   | 0.714392 | 15.1687 | 37.4056 | 41.3665 | 26.4094 | 19.745  | 17.6344 |
| ENSMUSG00000085840 | 1_Gm112  | 1.14222 | -0.19888 | 0.92734  | NA       | 0       | 1.1335  | 2.06832 | 2.47588 | 0       | 1.17563 |
| ENSMUSG00000085844 | 1_Gm116  | 0.19594 | -0.79206 | 0.84609  | NA       | 0       | 0       | 0       | 0       | 0       | 1.17563 |
| ENSMUSG00000085868 | 1_Gm136  | 0.73362 | -1.59314 | 0.566092 | NA       | 0       | 0       | 1.03416 | 1.65058 | 1.71695 | 0       |
| ENSMUSG00000085870 | 1_Gm128  | 1.73259 | -1.95022 | 0.253478 | 0.644684 | 0       | 1.1335  | 1.03416 | 3.30117 | 2.57543 | 2.35126 |
| ENSMUSG00000085896 | 2_533042 | 0.13755 | -0.79206 | 0.84609  | NA       | 0       | 0       | 0       | 0.82529 | 0       | 0       |
| ENSMUSG00000085912 | 1_Trp53α | 7.2618  | 0.51771  | 0.539293 | 0.84017  | 4.04498 | 10.2015 | 11.3758 | 6.60234 | 4.29238 | 7.05377 |
| ENSMUSG00000085920 | 1_Gm129  | 0.47657 | -2.28567 | 0.465885 | NA       | 0       | 0       | 0       | 0.82529 | 0.85848 | 1.17563 |
| ENSMUSG00000085925 | 2_Rtl1   | 3.82943 | -1.089   | 0.324727 | 0.705439 | 4.04498 | 2.26701 | 1.03416 | 5.77705 | 5.15086 | 4.70251 |
| ENSMUSG00000085931 | 1_Gm126  | 1.82214 | 1.65341  | 0.386629 | 0.751493 | 5.05622 | 2.26701 | 1.03416 | 0       | 2.57543 | 0       |
| ENSMUSG00000085932 | 1_Gm155  | 0.71834 | -1.44802 | 0.614149 | NA       | 0       | 1.1335  | 0       | 0.82529 | 0       | 2.35126 |
| ENSMUSG00000085933 | 2_Tmem6  | 0       | NA       | NA       | NA       | 0       | 0       | 0       | 0       | 0       | 0       |
| ENSMUSG00000085949 | 1_Gm142  | 2.41668 | 1.53974  | 0.280785 | 0.667117 | 1.01124 | 5.66751 | 4.13665 | 1.65058 | 0.85848 | 1.17563 |
| ENSMUSG00000085950 | 1_Gm135  | 1.02676 | -3.40933 | 0.173543 | NA       | 0       | 0       | 0       | 4.12646 | 0.85848 | 1.17563 |
| ENSMUSG00000085952 | 1_Gm123  | 0.14308 | -0.79206 | 0.84609  | NA       | 0       | 0       | 0       | 0       | 0.85848 | 0       |
| ENSMUSG00000085957 | 4_Syna   | 3.80419 | -2.11299 | 0.09043  | 0.409937 | 0       | 2.26701 | 2.06832 | 6.60234 | 6.00934 | 5.87814 |
| ENSMUSG00000085962 | 8_Gm169  | 17.9454 | -0.67613 | 0.354    | 0.729719 | 13.1462 | 3.40051 | 24.8199 | 22.2829 | 24.0374 | 19.9857 |
| ENSMUSG00000085965 | 1_231001 | 0       | NA       | NA       | NA       | 0       | 0       | 0       | 0       | 0       | 0       |
| ENSMUSG00000085973 | 1_Gm147  | 0.80663 | 0.84943  | 0.72447  | NA       | 2.02249 | 1.1335  | 0       | 0.82529 | 0.85848 | 0       |
| ENSMUSG00000085975 | 1_Gm135  | 3.5746  | 2.81159  | 0.03911  | 0.24866  | 9.1012  | 5.66751 | 4.13665 | 0.82529 | 1.71695 | 0       |
| ENSMUSG00000085976 | 1_Gm138  | 1.23564 | -1.38298 | 0.465141 | NA       | 1.01124 | 0       | 1.03416 | 2.47588 | 1.71695 | 1.17563 |
| ENSMUSG00000085980 | 1_Gm124  | 0.37783 | 2.11394  | 0.599927 | NA       | 0       | 2.26701 | 0       | 0       | 0       | 0       |
| ENSMUSG00000085981 | 1_Gm113  | 0.52793 | -0.81058 | 0.79629  | NA       | 0       | 1.1335  | 0       | 0       | 0.85848 | 1.17563 |
| ENSMUSG00000085985 | 1_Gm116  | 0       | NA       | NA       | NA       | 0       | 0       | 0       | 0       | 0       | 0       |
| ENSMUSG00000085987 | 2_Gm134  | 0.78648 | -1.69846 | 0.478201 | NA       | 0       | 0       | 1.03416 | 1.65058 | 0.85848 | 1.17563 |
| ENSMUSG00000085989 | 1_Gm743  | 0.18892 | 1.1315   | 0.781553 | NA       | 0       | 1.1335  | 0       | 0       | 0       | 0       |
| ENSMUSG00000085991 | 1_Gm114  | 0.36448 | 0.16972  | 0.966824 | NA       | 1.01124 | 0       | 0       | 0       | 0       | 1.17563 |
| ENSMUSG00000085992 | 1_Gm115  | 0       | NA       | NA       | NA       | 0       | 0       | 0       | 0       | 0       | 0       |
| ENSMUSG00000085999 | 1_Gm134  | 0       | NA       | NA       | NA       | 0       | 0       | 0       | 0       | 0       | 0       |
| ENSMUSG00000086006 | 2_Gm132  | 87.0968 | 0.29365  | 0.442725 | 0.787602 | 109.214 | 83.8792 | 94.1087 | 55.2946 | 78.9799 | 101.104 |
| ENSMUSG00000086007 | 1_170005 | 1.63858 | -1.88862 | 0.294411 | NA       | 1.01124 | 0       | 1.03416 | 0.82529 | 3.43391 | 3.52688 |
| ENSMUSG00000086008 | 8_Gm881  | 2.91575 | 0.47662  | 0.755242 | 0.92689  | 8.08995 | 0       | 2.06832 | 4.12646 | 0.85848 | 2.35126 |
| ENSMUSG00000086013 | 1_Gm157  | 37.6554 | -0.81941 | 0.075911 | 0.368979 | 36.4048 | 22.6701 | 22.7516 | 55.2946 | 52.3671 | 36.4445 |
| ENSMUSG00000086022 | 1_Rad51a | 9.94052 | 0.74786  | 0.403274 | 0.761674 | 24.2699 | 5.66751 | 7.23913 | 3.30117 | 8.58477 | 10.5807 |
| ENSMUSG00000086025 | 1_493340 | 0       | NA       | NA       | NA       | 0       | 0       | 0       | 0       | 0       | 0       |
| ENSMUSG00000086040 | 8_Wipf3  | 147.69  | -1.55599 | 3.21E-05 | 0.001319 | 84.9445 | 49.8741 | 89.9721 | 261.618 | 216.336 | 183.398 |
| ENSMUSG00000086042 | 1_Gm126  | 0.31544 | 0.16972  | 0.966824 | NA       | 0       | 0       | 1.03416 | 0       | 0.85848 | 0       |
| ENSMUSG00000086048 | 7_Drr1   | 0       | NA       | NA       | NA       | 0       | 0       | 0       | 0       | 0       | 0       |
| ENSMUSG00000086070 | 1_843043 | 2.239   | 0.71178  | 0.659688 | 0.894966 | 1.01124 | 2.26701 | 5.17081 | 4.12646 | 0.85848 | 0       |
| ENSMUSG00000086075 | 1_Gm157  | 5.11112 | -1.21674 | 0.281211 | 0.667804 | 5.05622 | 0       | 4.13665 | 9.90351 | 6.86782 | 4.70251 |
| ENSMUSG00000086095 | 1_Gm153  | 0.97859 | -2.08098 | 0.354718 | NA       | 1.01124 | 0       | 0       | 1.65058 | 0.85848 | 2.35126 |
| ENSMUSG00000086096 | 1_Gm126  | 6.46926 | -1.64861 | 0.082643 | 0.387853 | 3.03373 | 1.1335  | 5.17081 | 13.2047 | 6.86782 | 9.40502 |
| ENSMUSG00000086105 | 1_Gm116  | 5.05941 | -2.64805 | 0.024855 | 0.188346 | 1.01124 | 0       | 3.10248 | 8.25292 | 8.58477 | 9.40502 |
| ENSMUSG00000086109 | 2_Gm133  | 1.17874 | 0.5773   | 0.743502 | NA       | 1.01124 | 1.1335  | 2.06832 | 0.82529 | 0.85848 | 1.17563 |
| ENSMUSG00000086111 | 1_Gm153  | 11.2256 | 0.10941  | 0.878779 | 0.966267 | 6.06747 | 11.335  | 17.5807 | 13.2047 | 8.58477 | 10.5807 |
| ENSMUSG00000086124 | 1_A53007 | 0.97517 | 1.25117  | 0.587981 | NA       | 3.03373 | 1.1335  | 0       | 0.82529 | 0.85848 | 0       |
| ENSMUSG00000086130 | 1_Gm162  | 32.0929 | 0.42064  | 0.428787 | 0.779125 | 50.5622 | 31.7381 | 27.9224 | 18.1564 | 39.4899 | 24.6882 |
| ENSMUSG00000086136 | 1_Gm127  | 0.14308 | -0.79206 | 0.84609  | NA       | 0       | 0       | 0       | 0       | 0.85848 | 0       |
| ENSMUSG00000086138 | 7_493047 | 0.30991 | 0.16972  | 0.966824 | NA       | 0       | 0       | 1.03416 | 0.82529 | 0       | 0       |
| ENSMUSG00000086147 | 2_Gm131  | 0.99724 | 2.34844  | 0.360898 | NA       | 2.02249 | 0       | 3.10248 | 0       | 0.85848 | 0       |
| ENSMUSG00000086148 | 1_Gm152  | 0.50562 | 2.55291  | 0.52315  | NA       | 3.03373 | 0       | 0       | 0       | 0       | 0       |
| ENSMUSG00000086152 | 1_Gm114  | 0.9794  | 0.41509  | 0.895546 | NA       | 0       | 3.40051 | 0       | 2.47588 | 0       | 0       |
| ENSMUSG00000086154 | 1_Gm161  | 3.18581 | -1.40902 | 0.249776 | 0.641438 | 3.03373 | 1.1335  | 1.03416 | 5.77705 | 3.43391 | 4.70251 |
| ENSMUSG00000086158 | 2_Ccpg1o | 155.419 | -0.18456 | 0.532899 | 0.837668 | 164.833 | 136.02  | 135.475 | 146.077 | 181.997 | 168.115 |
| ENSMUSG00000086166 | 1_Gm143  | 0.4547  | -0.61836 | 0.875203 | NA       | 1.01124 | 0       | 0       | 0       | 1.71695 | 0       |
| ENSMUSG00000086177 | 1_Gm146  | 0.13755 | -0.79206 | 0.84609  | NA       | 0       | 0       | 0       | 0.82529 | 0       | 0       |

|                    |           |         |          |          |          |         |         |         |         |         |         |
|--------------------|-----------|---------|----------|----------|----------|---------|---------|---------|---------|---------|---------|
| ENSMUSG00000086179 | 1_Gm143   | 0.28063 | -1.56014 | 0.700051 | NA       | 0       | 0       | 0       | 0.82529 | 0.85848 | 0       |
| ENSMUSG00000086187 | 1_Gm128   | 2.8169  | -0.65557 | 0.623544 | 0.879158 | 1.01124 | 3.40051 | 2.06832 | 1.65058 | 1.71695 | 7.05377 |
| ENSMUSG00000086197 | 1_Gm139   | 0.16854 | 1.1315   | 0.781553 | NA       | 1.01124 | 0       | 0       | 0       | 0       | 0       |
| ENSMUSG00000086202 | 1_170001  | 0.16854 | 1.1315   | 0.781553 | NA       | 1.01124 | 0       | 0       | 0       | 0       | 0       |
| ENSMUSG00000086203 | 1_Gm139   | 0.30609 | 0.16972  | 0.966824 | NA       | 1.01124 | 0       | 0       | 0.82529 | 0       | 0       |
| ENSMUSG00000086212 | 7_Mkln1o  | 14.6823 | -0.10741 | 0.884302 | 0.967903 | 27.3036 | 6.80102 | 8.27329 | 17.3311 | 15.4526 | 12.9319 |
| ENSMUSG00000086214 | 1_Gm140   | 0.16854 | 1.1315   | 0.781553 | NA       | 1.01124 | 0       | 0       | 0       | 0       | 0       |
| ENSMUSG00000086228 | 1_Ubap1l  | 28.7592 | -1.93764 | 0.013508 | 0.12414  | 2.02249 | 21.5366 | 12.4099 | 70.1499 | 42.9238 | 23.5126 |
| ENSMUSG00000086232 | 1_Gm754   | 2.11635 | -3.37776 | 0.120455 | 0.471646 | 1.01124 | 0       | 0       | 8.25292 | 3.43391 | 0       |
| ENSMUSG00000086238 | 1_Gm142   | 0.44364 | -0.57976 | 0.883757 | NA       | 1.01124 | 0       | 0       | 1.65058 | 0       | 0       |
| ENSMUSG00000086254 | 1_310000  | 0.35746 | 2.04359  | 0.612655 | NA       | 1.01124 | 1.1335  | 0       | 0       | 0       | 0       |
| ENSMUSG00000086256 | 1_Gm120   | 4.21521 | -2.77376 | 0.035549 | 0.235338 | 0       | 2.26701 | 1.03416 | 4.95175 | 11.1602 | 5.87814 |
| ENSMUSG00000086262 | 7_A93003  | 10.8728 | -3.84398 | 0.000468 | 0.011115 | 0       | 2.26701 | 2.06832 | 27.2346 | 26.6128 | 7.05377 |
| ENSMUSG00000086277 | 2_493055  | 1.10745 | -1.13843 | 0.60444  | NA       | 0       | 0       | 2.06832 | 0.82529 | 2.57543 | 1.17563 |
| ENSMUSG00000086283 | 7_281043  | 39.9438 | -0.50905 | 0.24487  | 0.6364   | 29.3261 | 28.3376 | 41.3665 | 58.5958 | 42.0654 | 39.9713 |
| ENSMUSG00000086290 | 8_Snhg12  | 289.777 | 0.29114  | 0.248208 | 0.639821 | 330.677 | 334.383 | 291.634 | 255.841 | 259.26  | 266.868 |
| ENSMUSG00000086308 | 1_G63001  | 6.91051 | 0.7539   | 0.431907 | 0.780264 | 16.1799 | 6.80102 | 3.10248 | 4.12646 | 7.72629 | 3.52688 |
| ENSMUSG00000086316 | 7_221001  | 375.857 | -0.3284  | 0.331396 | 0.711299 | 459.105 | 256.172 | 284.394 | 428.327 | 430.955 | 396.187 |
| ENSMUSG00000086319 | 1_Gm160   | 4.04888 | 0.60865  | 0.567908 | 0.852443 | 6.06747 | 2.26701 | 6.20497 | 2.47588 | 2.57543 | 4.70251 |
| ENSMUSG00000086320 | 1_Gm128   | 9.53431 | 2.13469  | 0.043137 | 0.263717 | 7.07871 | 24.9371 | 14.4783 | 0       | 6.00934 | 4.70251 |
| ENSMUSG00000086322 | 7_E13021  | 626.693 | -0.03106 | 0.958373 | 0.989358 | 159.777 | 754.913 | 945.224 | 779.901 | 467.87  | 652.473 |
| ENSMUSG00000086328 | 1_270003  | 92.7763 | -0.03031 | 0.269654 | 0.980211 | 74.8321 | 92.9472 | 107.553 | 92.4327 | 90.1401 | 98.7527 |
| ENSMUSG00000086335 | 1_Gm121   | 6.75601 | 0.41637  | 0.629452 | 0.881466 | 11.1237 | 5.66751 | 6.20497 | 3.30117 | 6.00934 | 8.22939 |
| ENSMUSG00000086339 | 1_Gm119   | 0.46401 | -0.58035 | 0.881878 | NA       | 0       | 1.1335  | 0       | 1.65058 | 0       | 0       |
| ENSMUSG00000086344 | 1_Gm113   | 0.60858 | -2.64656 | 0.451247 | NA       | 0       | 0       | 0       | 2.47588 | 0       | 1.17563 |
| ENSMUSG00000086346 | 1_Gm125   | 0       | NA       | NA       | NA       | 0       | 0       | 0       | 0       | 0       | 0       |
| ENSMUSG00000086348 | 1_170001  | 0       | NA       | NA       | NA       | 0       | 0       | 0       | 0       | 0       | 0       |
| ENSMUSG00000086349 | 1_Gm134   | 0.16854 | 1.1315   | 0.781553 | NA       | 1.01124 | 0       | 0       | 0       | 0       | 0       |
| ENSMUSG00000086352 | 1_493040  | 0.17236 | 1.1315   | 0.781553 | NA       | 0       | 0       | 1.03416 | 0       | 0       | 0       |
| ENSMUSG00000086353 | 1_Gm134   | 0.6487  | 1.59294  | 0.652367 | NA       | 3.03373 | 0       | 0       | 0       | 0.85848 | 0       |
| ENSMUSG00000086363 | 7_A33010  | 5.48712 | -3.88539 | 0.003745 | 0.050858 | 1.01124 | 0       | 1.03416 | 13.2047 | 9.44325 | 8.22939 |
| ENSMUSG00000086368 | 2_Gm138   | 17.3048 | 0.48316  | 0.380828 | 0.748108 | 22.2474 | 22.6701 | 15.5124 | 13.2047 | 13.7356 | 16.4588 |
| ENSMUSG00000086370 | 8_Ftx     | 292.184 | 0.03768  | 0.933147 | 0.982803 | 488.431 | 215.366 | 184.081 | 257.491 | 327.938 | 279.799 |
| ENSMUSG00000086405 | 1_933019  | 0.19594 | -0.79206 | 0.84609  | NA       | 0       | 0       | 0       | 0       | 0       | 1.17563 |
| ENSMUSG00000086425 | 7_F73001  | 0.14308 | -0.79206 | 0.84609  | NA       | 0       | 0       | 0       | 0       | 0.85848 | 0       |
| ENSMUSG00000086441 | 1_Gm150   | 0.13755 | -0.79206 | 0.84609  | NA       | 0       | 0       | 0       | 0       | 0.85848 | 0       |
| ENSMUSG00000086455 | 1_Gm118   | 2.17407 | 0.39489  | 0.79505  | 0.939004 | 2.02249 | 2.26701 | 3.10248 | 3.30117 | 0       | 2.35126 |
| ENSMUSG00000086470 | 1_Gm125   | 6.28624 | 0.27935  | 0.777288 | 0.933996 | 14.1574 | 2.26701 | 4.13665 | 4.95175 | 5.15086 | 7.05377 |
| ENSMUSG00000086474 | 2_913020  | 6.40024 | 0.47827  | 0.601327 | 0.870033 | 4.04498 | 7.93452 | 10.3416 | 2.47588 | 7.72629 | 5.87814 |
| ENSMUSG00000086477 | 1_Gm155   | 11.424  | -0.87914 | 0.196298 | 0.588113 | 7.07871 | 6.80102 | 10.3416 | 14.8553 | 18.8865 | 10.5807 |
| ENSMUSG00000086478 | 1_Gm141   | 2.06527 | -1.55881 | 0.410013 | 0.76693  | 1.01124 | 0       | 2.06832 | 0       | 3.43391 | 5.87814 |
| ENSMUSG00000086481 | 1_Gm117   | 0       | NA       | NA       | NA       | 0       | 0       | 0       | 0       | 0       | 0       |
| ENSMUSG00000086485 | 2_Gm154   | 0.14308 | -0.79206 | 0.84609  | NA       | 0       | 0       | 0       | 0       | 0.85848 | 0       |
| ENSMUSG00000086491 | 1_Gm132   | 1.57865 | 1.92279  | 0.352587 | NA       | 0       | 2.26701 | 5.17081 | 0       | 0.85848 | 1.17563 |
| ENSMUSG00000086494 | 1_221041  | 0.50585 | -0.79082 | 0.803359 | NA       | 0       | 0       | 1.03416 | 0.82529 | 0       | 1.17563 |
| ENSMUSG00000086498 | 1_Gm126   | 2.07812 | 1.40654  | 0.53171  | 0.837082 | 9.1012  | 0       | 0       | 1.65058 | 1.71695 | 0       |
| ENSMUSG00000086501 | 1_493059  | 0       | NA       | NA       | NA       | 0       | 0       | 0       | 0       | 0       | 0       |
| ENSMUSG00000086503 | 3_Xist    | 34391.7 | 0.25982  | 0.550505 | 0.844362 | 60428.9 | 24952.9 | 27058.8 | 24761.2 | 38752.5 | 30395.9 |
| ENSMUSG00000086523 | 1_Gm134   | 0.31544 | 0.16972  | 0.966824 | NA       | 0       | 0       | 1.03416 | 0       | 0.85848 | 0       |
| ENSMUSG00000086526 | 2_Gm127   | 0.81598 | 0.84024  | 0.726871 | NA       | 1.01124 | 1.1335  | 1.03416 | 0       | 1.71695 | 0       |
| ENSMUSG00000086540 | 1_Scml1   | 0.16854 | 1.1315   | 0.781553 | NA       | 1.01124 | 0       | 0       | 0       | 0       | 0       |
| ENSMUSG00000086557 | 1_Gm159   | 0.33902 | -1.78366 | 0.658108 | NA       | 0       | 0       | 0       | 0       | 0.85848 | 1.17563 |
| ENSMUSG00000086563 | 1_Platr15 | 0.52942 | -2.42393 | 0.511797 | NA       | 0       | 0       | 0       | 0.82529 | 0       | 2.35126 |
| ENSMUSG00000086564 | 9_Cd101   | 5.17446 | 2.86967  | 0.019579 | 0.160857 | 5.05622 | 18.136  | 4.13665 | 0.82529 | 1.71695 | 1.17563 |
| ENSMUSG00000086588 | 1_Gm117   | 1.01894 | -0.9446  | 0.676434 | NA       | 1.01124 | 0       | 1.03416 | 0       | 1.71695 | 2.35126 |
| ENSMUSG00000086593 | 2_Gm165   | 1.71474 | 1.19214  | 0.618194 | 0.877535 | 7.07871 | 0       | 0       | 0       | 0.85848 | 2.35126 |
| ENSMUSG00000086596 | 1_Susd5   | 13.532  | -1.05861 | 0.090004 | 0.408797 | 11.1237 | 7.93452 | 7.23913 | 20.6323 | 15.4526 | 18.81   |
| ENSMUSG00000086598 | 9_Btbd18  | 2.43665 | 0.4188   | 0.748758 | 0.924822 | 2.02249 | 2.26701 | 4.13665 | 3.30117 | 1.71695 | 1.17563 |
| ENSMUSG00000086605 | 1_Gm142   | 69.5375 | -1.8958  | 0.005346 | 0.064868 | 46.5172 | 30.6046 | 11.3758 | 176.613 | 113.319 | 38.7957 |
| ENSMUSG00000086610 | 1_Gm154   | 21.4457 | -0.35036 | 0.51127  | 0.827179 | 18.2024 | 13.602  | 24.8199 | 28.8852 | 23.1789 | 19.9857 |
| ENSMUSG00000086613 | 1_170000  | 0       | NA       | NA       | NA       | 0       | 0       | 0       | 0       | 0       | 0       |
| ENSMUSG00000086628 | 7_Gm161   | 0.17236 | 1.1315   | 0.781553 | NA       | 0       | 0       | 1.03416 | 0       | 0       | 0       |
| ENSMUSG00000086631 | 2_Gm127   | 11.7162 | -1.12105 | 0.117737 | 0.466696 | 5.05622 | 7.93452 | 9.30745 | 22.2829 | 16.3111 | 9.40502 |
| ENSMUSG00000086632 | 1_170011  | 0       | NA       | NA       | NA       | 0       | 0       | 0       | 0       | 0       | 0       |
| ENSMUSG00000086644 | 1_Gm134   | 5.47399 | -2.39937 | 0.023041 | 0.179143 | 3.03373 | 1.1335  | 1.03416 | 8.25292 | 11.1602 | 8.22939 |
| ENSMUSG00000086650 | 1_A43004  | 0.62706 | 0.22967  | 0.938749 | NA       | 1.01124 | 0       | 1.03416 | 0       | 1.71695 | 0       |
| ENSMUSG00000086653 | 1_913001  | 0.57232 | -2.56648 | 0.518957 | NA       | 0       | 0       | 0       | 0       | 3.43391 | 0       |
| ENSMUSG00000086658 | 1_Gm142   | 0.18892 | 1.1315   | 0.781553 | NA       | 0       | 1.1335  | 0       | 0       | 0       | 0       |
| ENSMUSG00000086662 | 7_BC046   | 4.525   | -1.13351 | 0.306988 | 0.689923 | 3.03373 | 4.53401 | 1.03416 | 10.7288 | 4.29238 | 3.52688 |
| ENSMUSG00000086665 | 1_Gm130   | 0.17236 | 1.1315   | 0.781553 | NA       | 0       | 0       | 1.03416 | 0       | 0       | 0       |
| ENSMUSG00000086702 | 1_Gm123   | 1.13479 | 1.55083  | 0.477502 | NA       | 2.02249 | 0       | 3.10248 | 0.82529 | 0.85848 | 0       |
| ENSMUSG00000086707 | 1_Gm120   | 0.19594 | -0.79206 | 0.84609  | NA       | 0       | 0       | 0       | 0       | 0       | 1.17563 |
| ENSMUSG00000086712 | 2_A14278  | 24.3179 | 0.12912  | 0.817996 | 0.948003 | 33.3711 | 26.0706 | 16.5466 | 24.7588 | 14.5941 | 30.5663 |
| ENSMUSG00000086713 | 1_493040  | 0.34472 | 1.99863  | 0.620844 | NA       | 0       | 0       | 2.06832 | 0       | 0       | 0       |
| ENSMUSG00000086715 | 1_B23011  | 2.18325 | -2.4074  | 0.137279 | 0.502778 | 1.01124 | 0       | 1.03416 | 4.95175 | 2.57543 | 3.52688 |

|                    |                   |         |          |          |          |         |         |         |         |         |         |
|--------------------|-------------------|---------|----------|----------|----------|---------|---------|---------|---------|---------|---------|
| ENSMUSG00000086733 | 1_Gm116           | 0       | NA       | NA       | NA       | 0       | 0       | 0       | 0       | 0       | 0       |
| ENSMUSG00000086749 | 1_Gm120           | 0.41818 | -2.121   | 0.592183 | NA       | 0       | 0       | 0       | 1.65058 | 0.85848 | 0       |
| ENSMUSG00000086752 | 1_Gm116           | 0       | NA       | NA       | NA       | 0       | 0       | 0       | 0       | 0       | 0       |
| ENSMUSG00000086755 | 1_Gm112           | 0.75567 | 3.11976  | 0.431825 | NA       | 0       | 4.53401 | 0       | 0       | 0       | 0       |
| ENSMUSG00000086757 | 1_Gm230           | 0.67798 | 2.97576  | 0.379561 | NA       | 3.03373 | 0       | 1.03416 | 0       | 0       | 0       |
| ENSMUSG00000086764 | 1_493052          | 0.42924 | -2.15458 | 0.590406 | NA       | 0       | 0       | 0       | 0       | 2.57543 | 0       |
| ENSMUSG00000086765 | 7_Gm118           | 3.27396 | -1.8408  | 0.310266 | 0.692329 | 0       | 1.1335  | 3.10248 | 2.47588 | 0       | 12.9319 |
| ENSMUSG00000086771 | 1_170008          | 0.58672 | -1.17297 | 0.695297 | NA       | 1.01124 | 0       | 0       | 1.65058 | 0.85848 | 0       |
| ENSMUSG00000086782 | 2_E13010          | 110.786 | 0.3144   | 0.386358 | 0.751493 | 154.72  | 123.552 | 89.9721 | 83.3545 | 107.31  | 105.807 |
| ENSMUSG00000086784 | 1_Isoc2a          | 148.733 | -0.84031 | 0.177824 | 0.562816 | 26.2924 | 141.688 | 152.022 | 266.569 | 145.941 | 159.885 |
| ENSMUSG00000086788 | 2_170002          | 0.84337 | -0.4151  | 0.862469 | NA       | 0       | 1.1335  | 1.03416 | 0       | 1.71695 | 1.17563 |
| ENSMUSG00000086804 | 7_Gm431           | 0.59607 | -1.18871 | 0.690318 | NA       | 0       | 0       | 1.03416 | 0.82529 | 1.71695 | 0       |
| ENSMUSG00000086825 | 1_Gm156           | 47.416  | -0.30709 | 0.538575 | 0.839843 | 60.6747 | 22.6701 | 43.4348 | 42.0899 | 49.7917 | 65.8352 |
| ENSMUSG00000086848 | 3_Lce6a           | 0.57377 | 1.14946  | 0.753929 | NA       | 0       | 2.26701 | 0       | 0       | 0       | 1.17563 |
| ENSMUSG00000086852 | 1_Gm113           | 0.64362 | 0.28088  | 0.924731 | NA       | 1.01124 | 1.1335  | 0       | 0       | 1.71695 | 0       |
| ENSMUSG00000086855 | 1_Gm138           | 1.02294 | 0.19395  | 0.923506 | NA       | 1.01124 | 2.26701 | 0       | 0.82529 | 0.85848 | 1.17563 |
| ENSMUSG00000086859 | 3_Snhg20          | 137.341 | -0.34853 | 0.300823 | 0.683968 | 90.0007 | 126.952 | 145.817 | 160.932 | 163.969 | 136.373 |
| ENSMUSG00000086860 | 1_Gm172           | 2.19107 | -1.61367 | 0.3116   | 0.693376 | 0       | 2.26701 | 1.03416 | 5.77705 | 1.71695 | 2.35126 |
| ENSMUSG00000086872 | 1_Gm142           | 1.06728 | 3.62328  | 0.213945 | NA       | 0       | 2.26701 | 4.13665 | 0       | 0       | 0       |
| ENSMUSG00000086885 | 1_Gm138           | 0.50585 | -0.79082 | 0.803359 | NA       | 0       | 0       | 1.03416 | 0.82529 | 0       | 1.17563 |
| ENSMUSG00000086892 | 1_493343          | 8.9622  | -1.43473 | 0.124213 | 0.479216 | 9.1012  | 3.40051 | 2.06832 | 17.3311 | 17.1695 | 4.70251 |
| ENSMUSG00000086899 | 7_160000          | 0.37783 | 2.11394  | 0.599927 | NA       | 0       | 2.26701 | 0       | 0       | 0       | 0       |
| ENSMUSG00000086904 | 1_Gm134           | 15.8835 | -1.42045 | 0.044961 | 0.270653 | 16.1799 | 3.40051 | 6.20497 | 22.2829 | 24.8958 | 22.3369 |
| ENSMUSG00000086907 | 1_Gm152           | 0.61411 | -2.65929 | 0.354083 | NA       | 0       | 0       | 0       | 1.65058 | 0.85848 | 1.17563 |
| ENSMUSG00000086917 | 1_Gm116           | 0.28063 | -1.56014 | 0.700051 | NA       | 0       | 0       | 0       | 0.82529 | 0.85848 | 0       |
| ENSMUSG00000086919 | 1_Gm114           | 0.36448 | 0.16972  | 0.966824 | NA       | 1.01124 | 0       | 0       | 0       | 0       | 1.17563 |
| ENSMUSG00000086924 | 1_Gm117           | 13.4839 | -0.09994 | 0.892689 | 0.970981 | 10.1124 | 9.06802 | 19.6491 | 5.77705 | 16.3111 | 19.9857 |
| ENSMUSG00000086939 | 1_Gm135           | 1.08366 | -2.25053 | 0.299898 | NA       | 0       | 1.1335  | 0       | 2.47588 | 1.71695 | 1.17563 |
| ENSMUSG00000086940 | 1_Gm127           | 0.73911 | -1.55797 | 0.6475   | NA       | 0       | 1.1335  | 0       | 3.30117 | 0       | 0       |
| ENSMUSG00000086943 | 2_473241          | 3.98645 | 0.37108  | 0.757449 | 0.927689 | 6.06747 | 1.1335  | 6.20497 | 4.95175 | 0.85848 | 4.70251 |
| ENSMUSG00000086952 | 1_Gm125           | 0.16854 | 1.1315   | 0.781553 | NA       | 1.01124 | 0       | 0       | 0       | 0       | 0       |
| ENSMUSG00000086957 | 1_Gm138           | 0.98219 | 0.11323  | 0.960754 | NA       | 3.03373 | 0       | 0       | 0.82529 | 0.85848 | 1.17563 |
| ENSMUSG00000086965 | 1_Gm163           | 25.7622 | 0.60931  | 0.403293 | 0.761674 | 8.08995 | 39.6726 | 45.5031 | 23.1082 | 11.1602 | 27.0394 |
| ENSMUSG00000086981 | 2_Gm121           | 0.96243 | 1.22994  | 0.587862 | NA       | 2.02249 | 0       | 2.06832 | 0.82529 | 0.85848 | 0       |
| ENSMUSG00000086987 | 1_Gm124           | 0.65252 | 1.60581  | 0.582146 | NA       | 2.02249 | 0       | 1.03416 | 0       | 0.85848 | 0       |
| ENSMUSG00000087006 | 3_Gm138           | 13.5257 | -1.2652  | 0.093232 | 0.415917 | 3.03373 | 14.7355 | 6.20497 | 22.2829 | 13.7356 | 21.1613 |
| ENSMUSG00000087018 | 1_290007          | 0       | NA       | NA       | NA       | 0       | 0       | 0       | 0       | 0       | 0       |
| ENSMUSG00000087028 | 7_Gm133           | 4.97843 | 0.05835  | 0.957527 | 0.98909  | 1.01124 | 10.2015 | 4.13665 | 4.12646 | 6.86782 | 3.52688 |
| ENSMUSG00000087029 | 1_Gm141           | 2.69743 | -2.09345 | 0.203914 | 0.594896 | 2.02249 | 0       | 1.03416 | 1.65058 | 10.3017 | 1.17563 |
| ENSMUSG00000087032 | 1_Gm138           | 0.83082 | -3.10906 | 0.330544 | NA       | 0       | 0       | 0       | 4.12646 | 0.85848 | 0       |
| ENSMUSG00000087038 | 9_290007          | 0.13755 | -0.79206 | 0.84609  | NA       | 0       | 0       | 0       | 0.82529 | 0       | 0       |
| ENSMUSG00000087040 | 1_Gm140           | 0.2751  | -1.54073 | 0.703687 | NA       | 0       | 0       | 0       | 1.65058 | 0       | 0       |
| ENSMUSG00000087041 | 1_Gm162           | 10.314  | -0.46158 | 0.644054 | 0.889191 | 1.01124 | 15.869  | 9.30745 | 21.4576 | 6.00934 | 8.22939 |
| ENSMUSG00000087075 | 1_A23006          | 0.28063 | -1.56014 | 0.700051 | NA       | 0       | 0       | 0       | 0.82529 | 0.85848 | 0       |
| ENSMUSG00000087085 | 1_Gm120           | 1.1809  | -3.61111 | 0.119598 | NA       | 0       | 0       | 0       | 2.47588 | 3.43391 | 1.17563 |
| ENSMUSG00000087094 | 1_Gm130           | 0       | NA       | NA       | NA       | 0       | 0       | 0       | 0       | 0       | 0       |
| ENSMUSG00000087107 | 7_Al6622          | 46.1847 | 1.81225  | 0.000207 | 0.005971 | 95.057  | 78.2117 | 42.4006 | 23.1082 | 17.1695 | 21.1613 |
| ENSMUSG00000087112 | 1_Gm723           | 0.36448 | 0.16972  | 0.966824 | NA       | 1.01124 | 0       | 0       | 0       | 0       | 1.17563 |
| ENSMUSG00000087116 | 1_Gm123           | 0.14308 | -0.79206 | 0.84609  | NA       | 0       | 0       | 0       | 0       | 0.85848 | 0       |
| ENSMUSG00000087119 | 4_Atq4a- $\alpha$ | 3.09571 | 1.75824  | 0.301446 | 0.684667 | 10.1124 | 2.26701 | 2.06832 | 4.12646 | 0       | 0       |
| ENSMUSG00000087124 | 1_Gm138           | 0.13755 | -0.79206 | 0.84609  | NA       | 0       | 0       | 0       | 0.82529 | 0       | 0       |
| ENSMUSG00000087141 | 1_Plcxd2          | 139.276 | -0.72705 | 0.065112 | 0.337895 | 135.507 | 112.217 | 67.2205 | 208.799 | 170.837 | 141.075 |
| ENSMUSG00000087147 | 1_Gm142           | 0.31544 | 0.16972  | 0.966824 | NA       | 0       | 0       | 1.03416 | 0       | 0.85848 | 0       |
| ENSMUSG00000087153 | 7_Gm648           | 2166.13 | 0.35138  | 0.405799 | 0.764253 | 3891.27 | 1678.72 | 1715.67 | 1574.66 | 2181.39 | 1955.07 |
| ENSMUSG00000087166 | 9_L1td1           | 0.2751  | -1.54073 | 0.703687 | NA       | 0       | 0       | 0       | 1.65058 | 0       | 0       |
| ENSMUSG00000087172 | 1_Gm121           | 0.72427 | -1.58004 | 0.576714 | NA       | 1.01124 | 0       | 0       | 2.47588 | 0.85848 | 0       |
| ENSMUSG00000087179 | 8_Gm142           | 14.4461 | -1.19804 | 0.116382 | 0.463991 | 3.03373 | 6.80102 | 16.5466 | 25.5841 | 20.6034 | 14.1075 |
| ENSMUSG00000087187 | 1_Gm134           | 4.57536 | -0.86461 | 0.454558 | 0.795965 | 1.01124 | 6.80102 | 2.06832 | 5.77705 | 9.44325 | 2.35126 |
| ENSMUSG00000087194 | 9_Skint6          | 8.28985 | 0.47904  | 0.648478 | 0.890982 | 19.2136 | 6.80102 | 3.10248 | 7.42763 | 12.0187 | 1.17563 |
| ENSMUSG00000087196 | 1_Gm133           | 2.81897 | 0.4699   | 0.752701 | 0.925804 | 3.03373 | 5.66751 | 1.03416 | 2.47588 | 0       | 4.70251 |
| ENSMUSG00000087211 | 1_Gm153           | 0.44746 | -0.57987 | 0.8834   | NA       | 0       | 0       | 1.03416 | 1.65058 | 0       | 0       |
| ENSMUSG00000087211 | 7_Lhx1os          | 0.41818 | -2.121   | 0.592183 | NA       | 0       | 0       | 0       | 1.65058 | 0.85848 | 0       |
| ENSMUSG00000087214 | 1_Gm155           | 0.19594 | -0.79206 | 0.84609  | NA       | 0       | 0       | 0       | 0       | 0       | 1.17563 |
| ENSMUSG00000087215 | 1_Gm146           | 0       | NA       | NA       | NA       | 0       | 0       | 0       | 0       | 0       | 0       |
| ENSMUSG00000087220 | 1_Gm113           | 0.2751  | -1.54073 | 0.703687 | NA       | 0       | 0       | 0       | 1.65058 | 0       | 0       |
| ENSMUSG00000087225 | 1_Gm140           | 0.16854 | 1.1315   | 0.781553 | NA       | 1.01124 | 0       | 0       | 0       | 0       | 0       |
| ENSMUSG00000087226 | 1_Gm140           | 0.13755 | -0.79206 | 0.84609  | NA       | 0       | 0       | 0       | 0.82529 | 0       | 0       |
| ENSMUSG00000087228 | 1_Gm128           | 0.42371 | -2.13816 | 0.587702 | NA       | 0       | 0       | 0       | 0.82529 | 1.71695 | 0       |
| ENSMUSG00000087230 | 8_Mroh3           | 11.9126 | 1.14509  | 0.163241 | 0.541263 | 4.04498 | 20.4031 | 24.8199 | 7.42763 | 7.72629 | 7.05377 |
| ENSMUSG00000087236 | 1_Gm130           | 1.72745 | 0.03831  | 0.981427 | 0.993854 | 1.01124 | 2.26701 | 2.06832 | 3.30117 | 1.71695 | 0       |
| ENSMUSG00000087238 | 1_Gm128           | 0.13755 | -0.79206 | 0.84609  | NA       | 0       | 0       | 0       | 0.82529 | 0       | 0       |
| ENSMUSG00000087246 | 1_Gm133           | 1.49805 | -2.82292 | 0.168671 | NA       | 1.01124 | 0       | 0       | 1.65058 | 5.15086 | 1.17563 |
| ENSMUSG00000087247 | 3_Fam15c          | 0       | NA       | NA       | NA       | 0       | 0       | 0       | 0       | 0       | 0       |
| ENSMUSG00000087259 | 7_261003          | 167.729 | 0.48671  | 0.203744 | 0.594896 | 133.484 | 253.905 | 199.593 | 131.221 | 114.177 | 173.993 |
| ENSMUSG00000087260 | 5_Lamtor3         | 990.756 | 0.0204   | 0.948182 | 0.986924 | 1280.24 | 879.598 | 833.534 | 899.569 | 1167.53 | 884.072 |

|                    |           |         |          |          |          |         |         |         |         |         |         |
|--------------------|-----------|---------|----------|----------|----------|---------|---------|---------|---------|---------|---------|
| ENSMUSG00000087265 | 1_Gm123   | 9.50987 | 0.49185  | 0.642553 | 0.888404 | 1.01124 | 17.0025 | 15.5124 | 14.8553 | 5.15086 | 3.52688 |
| ENSMUSG00000087268 | 1_Gm144   | 0       | NA       | NA       | NA       | 0       | 0       | 0       | 0       | 0       | 0       |
| ENSMUSG00000087272 | 1_Gm154   | 0.83635 | 0.89415  | 0.744789 | NA       | 0       | 2.26701 | 1.03416 | 0       | 1.71695 | 0       |
| ENSMUSG00000087273 | 1_Gm132   | 0       | NA       | NA       | NA       | 0       | 0       | 0       | 0       | 0       | 0       |
| ENSMUSG00000087277 | 1_201001  | 0.3409  | 1.98467  | 0.623395 | NA       | 1.01124 | 0       | 1.03416 | 0       | 0       | 0       |
| ENSMUSG00000087278 | 1_A93000  | 7.24316 | 0.01221  | 0.988169 | 0.996838 | 10.1124 | 4.53401 | 7.23913 | 7.42763 | 9.44325 | 4.70251 |
| ENSMUSG00000087279 | 10_49305  | 0.19594 | -0.79206 | 0.84609  | NA       | 0       | 0       | 0       | 0       | 0       | 1.17563 |
| ENSMUSG00000087289 | 2_493342  | 1.07619 | 3.6327   | 0.132059 | NA       | 2.02249 | 3.40051 | 1.03416 | 0       | 0       | 0       |
| ENSMUSG00000087292 | 1_Gm138   | 1.02676 | -3.40933 | 0.173543 | NA       | 0       | 0       | 0       | 4.12646 | 0.85848 | 1.17563 |
| ENSMUSG00000087303 | 2_Lipo2   | 9.28031 | 0.41631  | 0.583946 | 0.860815 | 14.1574 | 11.335  | 6.20497 | 8.25292 | 5.15086 | 10.5807 |
| ENSMUSG00000087308 | 1_Gm161   | 2.46805 | 0.4546   | 0.745667 | 0.924182 | 1.01124 | 4.53401 | 3.10248 | 4.12646 | 0.85848 | 1.17563 |
| ENSMUSG00000087312 | 1_Gm138   | 1.5899  | 0.2931   | 0.861048 | NA       | 1.01124 | 2.26701 | 2.06832 | 2.47588 | 1.71695 | 0       |
| ENSMUSG00000087319 | 1_Gm159   | 0.17236 | 1.1315   | 0.781553 | NA       | 0       | 0       | 1.03416 | 0       | 0       | 0       |
| ENSMUSG00000087333 | 1_Gm136   | 0.65293 | 0.39484  | 0.911066 | NA       | 0       | 2.26701 | 0       | 1.65058 | 0       | 0       |
| ENSMUSG00000087335 | 2_493052  | 0       | NA       | NA       | NA       | 0       | 0       | 0       | 0       | 0       | 0       |
| ENSMUSG00000087340 | 1_Gm152   | 21.5264 | 0.78115  | 0.186751 | 0.573937 | 43.4835 | 21.5366 | 16.5466 | 15.6806 | 15.4526 | 16.4588 |
| ENSMUSG00000087344 | 1_Gm156   | 0.81005 | -3.04708 | 0.244783 | NA       | 0       | 0       | 0       | 1.65058 | 0.85848 | 2.35126 |
| ENSMUSG00000087351 | 1_Gm114   | 0.69327 | 1.69652  | 0.556341 | NA       | 0       | 2.26701 | 1.03416 | 0       | 0.85848 | 0       |
| ENSMUSG00000087357 | 1_Gm124   | 4.60078 | 0.16106  | 0.871276 | 0.963578 | 7.07871 | 2.26701 | 5.17081 | 4.95175 | 3.43391 | 4.70251 |
| ENSMUSG00000087358 | 8_493045  | 1.15477 | -1.20455 | 0.574786 | NA       | 0       | 0       | 2.06832 | 1.65058 | 0.85848 | 2.35126 |
| ENSMUSG00000087360 | 2_Gm151   | 0.28063 | -1.56014 | 0.700051 | NA       | 0       | 0       | 0       | 0.82529 | 0.85848 | 0       |
| ENSMUSG00000087361 | 7_061004  | 13.1519 | 0.79924  | 0.236349 | 0.628499 | 25.2811 | 11.335  | 13.4441 | 7.42763 | 12.0187 | 9.40502 |
| ENSMUSG00000087362 | 7_Gm137   | 8.20246 | -1.06086 | 0.237888 | 0.630377 | 1.01124 | 5.66751 | 9.30745 | 13.2047 | 9.44325 | 10.5807 |
| ENSMUSG00000087370 | 2_Tmem1   | 989.369 | 0.53508  | 0.185165 | 0.572285 | 1831.36 | 912.47  | 768.382 | 772.474 | 866.203 | 785.319 |
| ENSMUSG00000087373 | 7_Gm158   | 4.74237 | -0.38492 | 0.714518 | 0.911174 | 7.07871 | 1.1335  | 4.13665 | 7.42763 | 5.15086 | 3.52688 |
| ENSMUSG00000087378 | 1_Gm124   | 0.32647 | 0.16972  | 0.966824 | NA       | 0       | 1.1335  | 0       | 0.82529 | 0       | 0       |
| ENSMUSG00000087385 | 8_AA4153  | 72.2559 | -0.17669 | 0.637903 | 0.885931 | 67.7534 | 49.8741 | 85.8354 | 83.3545 | 73.829  | 72.8889 |
| ENSMUSG00000087388 | 1_Gm121   | 0.13755 | -0.79206 | 0.84609  | NA       | 0       | 0       | 0       | 0.82529 | 0       | 0       |
| ENSMUSG00000087390 | 1_Gm759   | 23.3699 | -1.00737 | 0.064534 | 0.336509 | 9.1012  | 15.869  | 21.7174 | 33.0117 | 33.4806 | 27.0394 |
| ENSMUSG00000087403 | 8_Kantr   | 21.4573 | -0.91029 | 0.186935 | 0.573937 | 4.04498 | 17.0025 | 23.7857 | 27.2346 | 34.3391 | 22.3369 |
| ENSMUSG00000087407 | 1_Gm114   | 0.13755 | -0.79206 | 0.84609  | NA       | 0       | 0       | 0       | 0.82529 | 0       | 0       |
| ENSMUSG00000087408 | 9_Cers1   | 26.167  | -1.06817 | 0.19781  | 0.589992 | 3.03373 | 13.602  | 34.1273 | 58.5958 | 20.6034 | 27.0394 |
| ENSMUSG00000087410 | 7_231006  | 11.3418 | -1.52805 | 0.089654 | 0.408201 | 13.1462 | 1.1335  | 3.10248 | 18.9817 | 12.8772 | 18.81   |
| ENSMUSG00000087444 | 1_Gm547   | 7.98099 | 0.12019  | 0.88246  | 0.967828 | 13.1462 | 4.53401 | 7.23913 | 9.90351 | 6.00934 | 7.05377 |
| ENSMUSG00000087450 | 1_Gm139   | 0.19594 | -0.79206 | 0.84609  | NA       | 0       | 0       | 0       | 0       | 0       | 1.17563 |
| ENSMUSG00000087461 | 2_C23001  | 0.8601  | 2.09416  | 0.435398 | NA       | 0       | 2.26701 | 2.06832 | 0.82529 | 0       | 0       |
| ENSMUSG00000087464 | 1_Gm128   | 0.58781 | -2.5686  | 0.518601 | NA       | 0       | 0       | 0       | 0       | 0       | 3.52688 |
| ENSMUSG00000087470 | 1_A63003  | 0.75719 | -2.96484 | 0.263722 | NA       | 0       | 0       | 0       | 1.65058 | 1.71695 | 1.17563 |
| ENSMUSG00000087475 | 3_493340  | 1.17874 | 0.5773   | 0.743502 | NA       | 1.01124 | 1.1335  | 2.06832 | 0.82529 | 0.85848 | 1.17563 |
| ENSMUSG00000087485 | 1_Gm133   | 1.18446 | 1.61475  | 0.457931 | NA       | 2.02249 | 3.40051 | 0       | 0.82529 | 0.85848 | 0       |
| ENSMUSG00000087491 | 7_Gm145   | 0.19594 | -0.79206 | 0.84609  | NA       | 0       | 0       | 0       | 0       | 0       | 1.17563 |
| ENSMUSG00000087501 | 1_Gm121   | 14.7485 | -0.09367 | 0.880076 | 0.966708 | 12.1349 | 17.0025 | 13.4441 | 11.5541 | 12.0187 | 22.3369 |
| ENSMUSG00000087523 | 1_Gm123   | 12.592  | -0.72395 | 0.305904 | 0.688731 | 5.05622 | 9.06802 | 14.4783 | 21.4576 | 13.7356 | 11.7563 |
| ENSMUSG00000087543 | 1_Gm165   | 45.8026 | -0.58019 | 0.234112 | 0.626031 | 28.3148 | 23.8036 | 57.913  | 59.421  | 48.9332 | 56.4301 |
| ENSMUSG00000087547 | 1_Platr27 | 0.13755 | -0.79206 | 0.84609  | NA       | 0       | 0       | 0       | 0.82529 | 0       | 0       |
| ENSMUSG00000087559 | 1_Gm138   | 0.2751  | -1.54073 | 0.703687 | NA       | 0       | 0       | 0       | 1.65058 | 0       | 0       |
| ENSMUSG00000087574 | 1_C03003  | 96.8256 | -0.74889 | 0.027427 | 0.199884 | 80.8995 | 65.7432 | 70.323  | 134.523 | 133.064 | 96.4015 |
| ENSMUSG00000087575 | 7_Gm129   | 1.57677 | 0.25343  | 0.886278 | NA       | 3.03373 | 1.1335  | 1.03416 | 0.82529 | 3.43391 | 0       |
| ENSMUSG00000087585 | 1_Gm141   | 0.7154  | -2.88643 | 0.46663  | NA       | 0       | 0       | 0       | 0       | 4.29238 | 0       |
| ENSMUSG00000087586 | 1_Gm693   | 7.43441 | 0.72267  | 0.476237 | 0.807493 | 14.1574 | 1.1335  | 12.4099 | 3.30117 | 7.72629 | 5.87814 |
| ENSMUSG00000087587 | 1_Gm152   | 0.33902 | -1.78366 | 0.658108 | NA       | 0       | 0       | 0       | 0       | 0.85848 | 1.17563 |
| ENSMUSG00000087590 | 2_Epb41L  | 16.3963 | -0.29676 | 0.598847 | 0.869073 | 15.1687 | 12.4685 | 16.5466 | 22.2829 | 15.4526 | 16.4588 |
| ENSMUSG00000087595 | 1_181001  | 11.1064 | 0.01439  | 0.985177 | 0.995165 | 16.1799 | 10.2015 | 7.23913 | 8.25292 | 18.8865 | 5.87814 |
| ENSMUSG00000087598 | 9_Zfp111  | 386.427 | 0.0093   | 0.975652 | 0.993623 | 496.521 | 333.25  | 333     | 353.225 | 405.201 | 397.362 |
| ENSMUSG00000087602 | 1_Gm127   | 0.41818 | -2.121   | 0.592183 | NA       | 0       | 0       | 0       | 1.65058 | 0.85848 | 0       |
| ENSMUSG00000087610 | 1_Gm162   | 5.27146 | -1.44822 | 0.13326  | 0.496768 | 3.03373 | 2.26701 | 3.10248 | 5.77705 | 6.86782 | 10.5807 |
| ENSMUSG00000087617 | 1_Gm142   | 3.01996 | -2.9755  | 0.110208 | 0.450658 | 2.02249 | 0       | 0       | 13.2047 | 1.71695 | 1.17563 |
| ENSMUSG00000087620 | 7_533043  | 1.95609 | -1.5127  | 0.413298 | 0.768469 | 3.03373 | 0       | 0       | 4.95175 | 2.57543 | 1.17563 |
| ENSMUSG00000087622 | 1_Gm122   | 1.6536  | -0.54836 | 0.807547 | NA       | 4.04498 | 0       | 0       | 3.30117 | 2.57543 | 0       |
| ENSMUSG00000087624 | 1_923011  | 15.4438 | -0.1814  | 0.804376 | 0.942951 | 7.07871 | 14.7355 | 21.7174 | 9.90351 | 27.4713 | 11.7563 |
| ENSMUSG00000087637 | 1_Gm119   | 0.19594 | -0.79206 | 0.84609  | NA       | 0       | 0       | 0       | 0       | 0       | 1.17563 |
| ENSMUSG00000087647 | 2_Gm154   | 0.37783 | 2.11394  | 0.599927 | NA       | 0       | 2.26701 | 0       | 0       | 0       | 0       |
| ENSMUSG00000087648 | 1_E13001  | 3.04849 | -2.23951 | 0.110157 | 0.450628 | 0       | 1.1335  | 2.06832 | 5.77705 | 3.43391 | 5.87814 |
| ENSMUSG00000087651 | 2_150000  | 16.5869 | -0.28156 | 0.675946 | 0.900949 | 22.2474 | 10.2015 | 12.4099 | 26.4094 | 9.44325 | 18.81   |
| ENSMUSG00000087659 | 7_Gm126   | 2.51096 | 1.60357  | 0.308193 | 0.690547 | 7.07871 | 1.1335  | 3.10248 | 0       | 2.57543 | 1.17563 |
| ENSMUSG00000087662 | 1_Gm113   | 0.30991 | 0.16972  | 0.966824 | NA       | 0       | 0       | 1.03416 | 0.82529 | 0       | 0       |
| ENSMUSG00000087674 | 7_493044  | 4.85429 | -1.88214 | 0.101628 | 0.43384  | 2.02249 | 0       | 4.13665 | 9.90351 | 6.00934 | 7.05377 |
| ENSMUSG00000087677 | 1_Gm152   | 0.31162 | 0.16972  | 0.966824 | NA       | 1.01124 | 0       | 0       | 0       | 0.85848 | 0       |
| ENSMUSG00000087678 | 1_Gm141   | 0.16854 | 1.1315   | 0.781553 | NA       | 1.01124 | 0       | 0       | 0       | 0       | 0       |
| ENSMUSG00000087679 | 2_C33000  | 858.468 | -0.28444 | 0.429164 | 0.779159 | 470.229 | 873.931 | 978.317 | 996.953 | 888.524 | 942.854 |
| ENSMUSG00000087681 | 1_Gm135   | 0.72194 | 1.64311  | 0.563319 | NA       | 2.02249 | 1.1335  | 0       | 0       | 0       | 1.17563 |
| ENSMUSG00000087684 | 1_120000  | 3.00107 | 0.53017  | 0.664351 | 0.896403 | 3.03373 | 4.53401 | 3.10248 | 4.12646 | 0.85848 | 2.35126 |
| ENSMUSG00000087687 | 2_Pet100  | 405.072 | -0.4145  | 0.142155 | 0.510922 | 281.126 | 411.462 | 349.547 | 453.086 | 488.473 | 446.739 |
| ENSMUSG00000089652 | 1_Gm160   | 592.903 | 1.43041  | 0.000925 | 0.018546 | 1280.24 | 765.114 | 549.14  | 217.877 | 401.767 | 343.283 |
| ENSMUSG00000089661 | 9_Mia     | 7.12188 | -1.76592 | 0.062365 | 0.329792 | 2.02249 | 4.53401 | 3.10248 | 8.25292 | 6.00934 | 18.81   |

|                    |           |         |          |          |          |         |         |         |         |         |         |
|--------------------|-----------|---------|----------|----------|----------|---------|---------|---------|---------|---------|---------|
| ENSMUSG00000089669 | 7_Tnfsf13 | 318.847 | -0.87066 | 0.001338 | 0.024325 | 227.53  | 200.63  | 248.199 | 388.713 | 463.578 | 384.43  |
| ENSMUSG00000089672 | 4_Lilr4b  | 254.686 | 2.80569  | 1.05E-08 | 1.46E-06 | 548.094 | 599.623 | 189.252 | 54.4693 | 75.546  | 61.1326 |
| ENSMUSG00000089678 | 8_Agxt2   | 0.16854 | 1.1315   | 0.781553 | NA       | 1.01124 | 0       | 0       | 0       | 0       | 0       |
| ENSMUSG00000089682 | 9_Bcl2l2  | 1409.31 | -0.24409 | 0.356842 | 0.731488 | 1083.04 | 1372.67 | 1415.77 | 1724.04 | 1441.38 | 1418.98 |
| ENSMUSG00000089687 | 2_Rab42   | 7.74225 | -0.63021 | 0.50584  | 0.82532  | 2.02249 | 10.2015 | 6.20497 | 9.90351 | 14.5941 | 3.52688 |
| ENSMUSG00000089694 | 2_Gm447   | 9.04714 | -0.01136 | 0.990876 | 0.997381 | 7.07871 | 5.66751 | 14.4783 | 18.1564 | 7.72629 | 1.17563 |
| ENSMUSG00000089704 | 9_Galnt2  | 62.6191 | 4.03923  | 0.058158 | 0.316292 | 157.754 | 141.688 | 54.8106 | 0       | 21.4619 | 0       |
| ENSMUSG00000089712 | 1_Gm158   | 0       | NA       | NA       | NA       | 0       | 0       | 0       | 0       | 0       | 0       |
| ENSMUSG00000089714 | 1_Gm160   | 221.88  | 0.75432  | 0.024059 | 0.184329 | 295.283 | 281.109 | 259.575 | 127.095 | 218.912 | 149.305 |
| ENSMUSG00000089715 | 11_Cbx6   | 1124.47 | -0.90102 | 0.030412 | 0.213391 | 454.049 | 783.251 | 1115.86 | 1891.57 | 1268.83 | 1233.23 |
| ENSMUSG00000089719 | 1_Gm157   | 1.88537 | -2.11569 | 0.293759 | 0.678007 | 0       | 1.1335  | 1.03416 | 7.42763 | 1.71695 | 0       |
| ENSMUSG00000089722 | 2_Gm117   | 33.1611 | -0.15838 | 0.87965  | 0.966669 | 0       | 58.9422 | 35.1615 | 41.2646 | 28.3297 | 35.2688 |
| ENSMUSG00000089726 | 2_Mir17hg | 140.416 | 1.01864  | 0.03947  | 0.249849 | 309.441 | 142.821 | 111.689 | 66.0234 | 118.47  | 94.0502 |
| ENSMUSG00000089736 | 1_Tgfbp3l | 44.1658 | -0.41592 | 0.436622 | 0.784325 | 22.2474 | 27.2041 | 64.118  | 48.6922 | 59.2349 | 43.4982 |
| ENSMUSG00000089739 | 2_Gm204   | 57.7581 | 1.35467  | 0.716386 | 0.912108 | 0       | 105.416 | 143.748 | 97.3845 | 0       | 0       |
| ENSMUSG00000089751 | 3_Olf121  | 0       | NA       | NA       | NA       | 0       | 0       | 0       | 0       | 0       | 0       |
| ENSMUSG00000089753 | 9_Gm117   | 1.09621 | -3.49123 | 0.134604 | NA       | 0       | 0       | 0       | 1.65058 | 2.57543 | 2.35126 |
| ENSMUSG00000089756 | 2_Gm889   | 470.225 | 0.05178  | 0.926385 | 0.980037 | 919.221 | 218.766 | 297.839 | 361.478 | 572.604 | 451.441 |
| ENSMUSG00000089762 | 3_Ier5l   | 22.5929 | 0.59559  | 0.333818 | 0.712377 | 12.1349 | 39.6726 | 29.9907 | 17.3311 | 22.3204 | 14.1075 |
| ENSMUSG00000089768 | 2_Tmsb1f  | 86.855  | -0.53291 | 0.343838 | 0.721639 | 126.406 | 30.6046 | 55.8447 | 85.0051 | 133.922 | 89.3477 |
| ENSMUSG00000089773 | 7_Skint1  | 8.45545 | 0.33034  | 0.673275 | 0.900436 | 15.1687 | 6.80102 | 6.20497 | 6.60234 | 7.72629 | 8.22939 |
| ENSMUSG00000089774 | 2_Slc5a3  | 711.619 | -0.82811 | 0.071426 | 0.356746 | 857.535 | 274.308 | 406.425 | 940.833 | 982.956 | 807.656 |
| ENSMUSG00000089789 | 1_Rdh1    | 35.6163 | -0.83527 | 0.077795 | 0.374151 | 31.3486 | 24.9371 | 20.6832 | 57.7705 | 47.2162 | 31.742  |
| ENSMUSG00000089798 | 9_170002  | 5.88863 | -0.20703 | 0.852304 | 0.957929 | 11.1237 | 2.26701 | 3.10248 | 9.07822 | 8.58477 | 1.17563 |
| ENSMUSG00000089809 | 8_A93001  | 5.03317 | -0.905   | 0.491387 | 0.815538 | 6.06747 | 4.53401 | 0       | 11.5541 | 6.86782 | 1.17563 |
| ENSMUSG00000089815 | 7_Gm508   | 0.44917 | -0.60728 | 0.852512 | NA       | 1.01124 | 0       | 0       | 0.82529 | 0.85848 | 0       |
| ENSMUSG00000089824 | 10_Rbm1   | 866.332 | 0.4599   | 0.189643 | 0.578028 | 1393.49 | 821.79  | 794.236 | 600.813 | 825.855 | 761.807 |
| ENSMUSG00000089830 | 1_Gm157   | 2.57572 | -0.19247 | 0.89335  | 0.971054 | 2.02249 | 0       | 5.17081 | 2.47588 | 3.43391 | 2.35126 |
| ENSMUSG00000089832 | 8_Shkbp1  | 339.512 | 0.3086   | 0.607256 | 0.872213 | 92.0232 | 530.479 | 504.671 | 363.954 | 243.807 | 302.136 |
| ENSMUSG00000089837 | 9_Npcd    | 0.66697 | -2.7655  | 0.413774 | NA       | 0       | 0       | 0       | 1.65058 | 0       | 2.35126 |
| ENSMUSG00000089840 | 1_Gm449   | 3.50224 | 1.85035  | 0.162278 | 0.540795 | 12.1349 | 2.26701 | 2.06832 | 1.65058 | 1.71695 | 1.17563 |
| ENSMUSG00000089844 | 7_A53003  | 38.4319 | 2.81159  | 2.79E-06 | 0.000185 | 77.8658 | 77.0782 | 46.5373 | 3.30117 | 12.8772 | 12.9319 |
| ENSMUSG00000089847 | 7_Timm1f  | 252.275 | 0.17267  | 0.502853 | 0.82368  | 256.856 | 275.441 | 269.916 | 257.491 | 222.346 | 231.599 |
| ENSMUSG00000089857 | 9_Zfp882  | 103.807 | -0.16491 | 0.790943 | 0.937373 | 200.226 | 37.4056 | 55.8447 | 108.113 | 110.744 | 110.509 |
| ENSMUSG00000089862 | 8_Umad1   | 213.744 | 0.50334  | 0.166896 | 0.547332 | 352.924 | 209.698 | 189.252 | 162.583 | 194.016 | 173.993 |
| ENSMUSG00000089872 | 10_Rps6k  | 309.08  | 0.18113  | 0.59921  | 0.869111 | 214.384 | 374.056 | 397.118 | 293.804 | 295.316 | 279.799 |
| ENSMUSG00000089876 | 3_Tmem1   | 200.897 | 0.61832  | 0.086733 | 0.399198 | 169.889 | 285.643 | 274.053 | 125.444 | 162.252 | 188.1   |
| ENSMUSG00000089879 | 1_493044  | 0.17236 | 1.1315   | 0.781553 | NA       | 0       | 0       | 1.03416 | 0       | 0       | 0       |
| ENSMUSG00000089901 | 1_Gm811   | 169.793 | -0.32341 | 0.297161 | 0.680785 | 170.9   | 147.355 | 134.441 | 172.486 | 226.638 | 166.939 |
| ENSMUSG00000089911 | 4_Hiat1   | 1891.88 | 0.31541  | 0.399353 | 0.759197 | 3121.71 | 1568.77 | 1602.95 | 1496.26 | 1875.77 | 1685.85 |
| ENSMUSG00000089917 | 7_Uckl1   | 744.577 | -0.17361 | 0.656355 | 0.894153 | 386.295 | 881.865 | 831.466 | 839.322 | 709.102 | 819.413 |
| ENSMUSG00000089922 | 2_311003  | 0.30609 | 0.16972  | 0.966824 | NA       | 1.01124 | 0       | 0       | 0.82529 | 0       | 0       |
| ENSMUSG00000089926 | 1_Gm157   | 0.37783 | 2.11394  | 0.599927 | NA       | 0       | 2.26701 | 0       | 0       | 0       | 0       |
| ENSMUSG00000089929 | 1_Bcl2a1t | 45.9807 | 1.97408  | 0.000152 | 0.004665 | 106.181 | 72.5442 | 41.3665 | 17.3311 | 23.1789 | 15.2832 |
| ENSMUSG00000089942 | 9_Pira2   | 64.7207 | 2.65211  | 7.55E-06 | 0.000418 | 87.9783 | 182.494 | 65.1522 | 25.5841 | 18.8865 | 8.22939 |
| ENSMUSG00000089943 | 1_Ugt1a5  | 0.50562 | 2.55291  | 0.52315  | NA       | 3.03373 | 0       | 0       | 0       | 0       | 0       |
| ENSMUSG00000089945 | 10_Pakap  | 268.564 | -2.15151 | 0.000353 | 0.008925 | 31.3486 | 120.151 | 144.783 | 637.951 | 445.55  | 231.599 |
| ENSMUSG00000089951 | 8_Gm144   | 53.2313 | -0.06977 | 0.895933 | 0.97156  | 77.8658 | 47.6071 | 29.9907 | 51.9934 | 34.3391 | 77.5914 |
| ENSMUSG00000089953 | 3_Rnf224  | 21.3856 | 0.1873   | 0.726143 | 0.91596  | 15.1687 | 28.3376 | 24.8199 | 16.5058 | 22.3204 | 21.1613 |
| ENSMUSG00000089960 | 1_Ugt1a1  | 22.939  | -0.47031 | 0.419658 | 0.773473 | 14.1574 | 26.0706 | 17.5807 | 16.5058 | 38.6315 | 24.6882 |
| ENSMUSG00000089984 | 7_Fbxo24  | 26.4388 | 0.7475   | 0.416237 | 0.770359 | 3.03373 | 26.0706 | 70.323  | 28.0599 | 11.1602 | 19.9857 |
| ENSMUSG00000089989 | 9_Flt3l   | 128.677 | 0.56979  | 0.134751 | 0.498606 | 98.0907 | 180.227 | 183.047 | 113.89  | 90.9986 | 105.807 |
| ENSMUSG00000089992 | 3_G6pd2   | 1.07452 | -0.15686 | 0.941803 | NA       | 1.01124 | 0       | 2.06832 | 1.65058 | 1.71695 | 0       |
| ENSMUSG00000089996 | 5_Tmsb1f  | 70.0471 | -0.10922 | 0.847404 | 0.955658 | 125.394 | 36.2721 | 40.3323 | 58.5958 | 83.2723 | 76.4158 |
| ENSMUSG00000089997 | 1_181002  | 3.01046 | -0.56928 | 0.63837  | 0.886296 | 2.02249 | 1.1335  | 4.13665 | 4.12646 | 4.29238 | 2.35126 |
| ENSMUSG00000090000 | 1_Ier3ip1 | 880.808 | 0.32546  | 0.482008 | 0.81105  | 1690.8  | 638.162 | 610.155 | 742.763 | 857.619 | 745.348 |
| ENSMUSG00000090013 | 1_Gm650   | 0       | NA       | NA       | NA       | 0       | 0       | 0       | 0       | 0       | 0       |
| ENSMUSG00000090015 | 8_Gm154   | 264.784 | 0.07712  | 0.884139 | 0.967903 | 501.577 | 159.824 | 154.09  | 217.877 | 320.212 | 235.126 |
| ENSMUSG00000090019 | 5_Gimap1  | 16.9709 | 0.59674  | 0.320239 | 0.701314 | 15.1687 | 30.6046 | 15.5124 | 12.3794 | 12.8772 | 15.2832 |
| ENSMUSG00000090023 | 1_Gm163   | 1.55766 | 1.00724  | 0.612595 | NA       | 3.03373 | 0       | 3.10248 | 0       | 0.85848 | 2.35126 |
| ENSMUSG00000090035 | 3_Galnt4  | 5768.13 | 0.42535  | 0.231105 | 0.62248  | 9105.24 | 5401.14 | 5330.07 | 3782.31 | 5180.05 | 5809.95 |
| ENSMUSG00000090053 | 9_Palm2   | 15.2122 | -2.11839 | 0.004626 | 0.059057 | 7.07871 | 9.06802 | 1.03416 | 23.1082 | 27.4713 | 23.5126 |
| ENSMUSG00000090061 | 9_Nwd2    | 6.14741 | -1.35128 | 0.157404 | 0.535192 | 5.05622 | 2.26701 | 3.10248 | 14.03   | 7.72629 | 4.70251 |
| ENSMUSG00000090066 | 2_111000  | 78.4827 | -0.67851 | 0.252259 | 0.643943 | 112.248 | 29.4711 | 39.2981 | 137.824 | 72.1121 | 79.9427 |
| ENSMUSG00000090071 | 4_Cdk5r2  | 13.6931 | -2.16152 | 0.017794 | 0.150203 | 3.03373 | 9.06802 | 3.10248 | 39.614  | 21.4619 | 5.87814 |
| ENSMUSG00000090077 | 9_Lime1   | 161.063 | -0.36641 | 0.630407 | 0.881949 | 14.1574 | 208.565 | 199.593 | 232.732 | 159.677 | 151.656 |
| ENSMUSG00000090083 | 10_Rnf8   | 355.018 | -0.1806  | 0.631929 | 0.883009 | 194.159 | 411.462 | 392.981 | 352.4   | 392.324 | 386.782 |
| ENSMUSG00000090084 | 7_Srxp    | 595.291 | -0.6979  | 0.011777 | 0.113442 | 529.892 | 360.454 | 471.578 | 741.113 | 746.875 | 721.835 |
| ENSMUSG00000090086 | 7_A14805  | 268.237 | -0.20768 | 0.471213 | 0.804868 | 241.687 | 206.298 | 298.873 | 292.153 | 295.316 | 275.097 |
| ENSMUSG00000090093 | 8_Gm143   | 161.27  | 0.11545  | 0.814827 | 0.947066 | 283.148 | 88.4132 | 131.339 | 122.969 | 175.988 | 165.764 |
| ENSMUSG00000090100 | 7_Ttbk2   | 664.186 | 0.02173  | 0.963837 | 0.990164 | 1166.98 | 374.056 | 466.407 | 600.813 | 763.186 | 613.678 |
| ENSMUSG00000090104 | 1_Slimapo | 0.56126 | -2.54391 | 0.473253 | NA       | 0       | 0       | 0       | 1.65058 | 1.71695 | 0       |
| ENSMUSG00000090110 | 8_Cmc4    | 71.8262 | 0.52527  | 0.408701 | 0.766014 | 167.867 | 54.4081 | 32.059  | 56.9452 | 73.829  | 45.8495 |
| ENSMUSG00000090112 | 8_Shprh   | 1130.01 | 0.14373  | 0.722551 | 0.914147 | 1865.75 | 824.057 | 868.696 | 968.068 | 1136.62 | 1116.85 |
| ENSMUSG00000090113 | 7_Nhlrc4  | 6.57739 | 2.00584  | 0.054294 | 0.303788 | 7.07871 | 5.66751 | 18.6149 | 0.82529 | 2.57543 | 4.70251 |

|                    |           |         |          |          |          |         |         |         |         |         |         |
|--------------------|-----------|---------|----------|----------|----------|---------|---------|---------|---------|---------|---------|
| ENSMUSG00000090115 | 7_Usp49   | 672.277 | 0.16124  | 0.481121 | 0.810738 | 715.961 | 683.502 | 730.118 | 654.457 | 642.999 | 606.624 |
| ENSMUSG00000090121 | 10_Abhd1  | 1.13291 | -0.25628 | 0.893998 | NA       | 1.01124 | 0       | 2.06832 | 0.82529 | 1.71695 | 1.17563 |
| ENSMUSG00000090122 | 3_Kcne1l  | 12.9895 | -1.98179 | 0.003817 | 0.051553 | 6.06747 | 3.40051 | 6.20497 | 23.9335 | 17.1695 | 21.1613 |
| ENSMUSG00000090124 | 7_Ugt1a7i | 228.714 | 0.44552  | 0.24765  | 0.63901  | 343.823 | 253.905 | 193.388 | 137.824 | 244.666 | 198.681 |
| ENSMUSG00000090125 | 3_Pou3f1  | 9.98084 | 3.63123  | 0.000372 | 0.009275 | 28.3148 | 17.0025 | 10.3416 | 1.65058 | 2.57543 | 0       |
| ENSMUSG00000090137 | 8_Uba52   | 6176.12 | -0.15153 | 0.829784 | 0.951112 | 796.861 | 7691.95 | 9067.53 | 8077.96 | 4840.09 | 6582.34 |
| ENSMUSG00000090141 | 1_Gm614   | 0.8427  | 3.28753  | 0.406676 | NA       | 5.05622 | 0       | 0       | 0       | 0       | 0       |
| ENSMUSG00000090145 | 7_Ugt1a6l | 93.5526 | -0.36644 | 0.390839 | 0.753993 | 64.7196 | 87.2797 | 93.0745 | 62.7222 | 134.781 | 118.738 |
| ENSMUSG00000090150 | 8_Acad11  | 852.357 | -0.15835 | 0.507819 | 0.826498 | 892.929 | 739.044 | 784.929 | 931.755 | 901.401 | 864.086 |
| ENSMUSG00000090164 | 8_BC035f  | 7.97583 | 0.5337   | 0.611234 | 0.874284 | 12.1349 | 10.2015 | 6.20497 | 10.7288 | 8.58477 | 0       |
| ENSMUSG00000090171 | 1_Ugt1a2  | 3.28765 | 0.40377  | 0.803834 | 0.942928 | 3.03373 | 0       | 8.27329 | 4.12646 | 4.29238 | 0       |
| ENSMUSG00000090173 | 8_Fbxw1C  | 34.986  | 0.25164  | 0.625036 | 0.879812 | 38.4273 | 39.6726 | 36.1957 | 21.4576 | 50.6501 | 23.5126 |
| ENSMUSG00000090176 | 1_Cd200r  | 9.1978  | -1.15378 | 0.187541 | 0.574893 | 6.06747 | 7.93452 | 3.10248 | 17.3311 | 4.29238 | 16.4588 |
| ENSMUSG00000090202 | 1_493050  | 1.12083 | -1.17102 | 0.705426 | NA       | 2.02249 | 0       | 0       | 0       | 0       | 4.70251 |
| ENSMUSG00000090206 | 7_Tepp    | 19.0091 | -0.22779 | 0.678402 | 0.901447 | 24.2699 | 14.7355 | 13.4441 | 18.9817 | 21.4619 | 21.1613 |
| ENSMUSG00000090210 | 7_Itga10  | 40.2251 | -0.55372 | 0.358474 | 0.732668 | 11.1237 | 35.1386 | 51.7081 | 51.9934 | 54.9425 | 36.4445 |
| ENSMUSG00000090211 | 2_Gm160   | 3.24103 | -0.10589 | 0.944767 | 0.986649 | 6.06747 | 2.26701 | 1.03416 | 0       | 7.72629 | 2.35126 |
| ENSMUSG00000090213 | 1_Tmem1   | 779.804 | -0.24914 | 0.533953 | 0.838255 | 411.576 | 865.996 | 860.422 | 998.604 | 636.99  | 905.233 |
| ENSMUSG00000090215 | 8_Trim34f | 511.833 | 1.4525   | 2.49E-06 | 0.000169 | 947.536 | 726.575 | 574.994 | 257.491 | 289.307 | 275.097 |
| ENSMUSG00000090223 | 1_Pcp4    | 306.865 | -1.97042 | 2.76E-06 | 0.000183 | 193.148 | 82.7457 | 98.2453 | 585.958 | 479.03  | 402.065 |
| ENSMUSG00000090231 | 10_Cfb    | 1225.58 | 3.91947  | 3.47E-15 | 1.63E-12 | 1141.69 | 3875.45 | 1880.11 | 151.854 | 111.602 | 92.803  |
| ENSMUSG00000090236 | 2_Car15   | 10.4489 | -0.53753 | 0.488182 | 0.814112 | 4.04498 | 11.335  | 10.3416 | 18.9817 | 8.58477 | 9.40502 |
| ENSMUSG00000090247 | 7_Bloc1s1 | 627.41  | -0.45005 | 0.384759 | 0.750802 | 210.339 | 651.764 | 729.084 | 995.303 | 499.634 | 678.337 |
| ENSMUSG00000090254 | 7_Gm196   | 0.33708 | 1.97061  | 0.625968 | NA       | 2.02249 | 0       | 0       | 0       | 0       | 0       |
| ENSMUSG00000090258 | 7_Churc1  | 846.724 | -0.2391  | 0.349082 | 0.726134 | 889.895 | 740.177 | 700.127 | 874.81  | 1001.84 | 873.491 |
| ENSMUSG00000090263 | 1_D73004  | 0.42371 | -2.13816 | 0.587702 | NA       | 0       | 0       | 0       | 0.82529 | 1.71695 | 0       |
| ENSMUSG00000090264 | 1_Eif4ebp | 17.7434 | 0.35976  | 0.576931 | 0.857141 | 29.3261 | 13.602  | 16.5466 | 14.03   | 9.44325 | 23.5126 |
| ENSMUSG00000090266 | 10_Mettl2 | 242.702 | 0.03129  | 0.934552 | 0.983652 | 355.958 | 170.025 | 209.935 | 230.257 | 267.845 | 222.194 |
| ENSMUSG00000090268 | 1_Gm528i  | 0       | NA       | NA       | NA       | 0       | 0       | 0       | 0       | 0       | 0       |
| ENSMUSG00000090272 | 7_Mndal   | 3878.11 | 2.39328  | 1.41E-05 | 0.000701 | 11667.7 | 4821.92 | 3058.02 | 741.113 | 1716.1  | 1263.8  |
| ENSMUSG00000090273 | 3_Prr22   | 3.13203 | -0.30586 | 0.840196 | 0.95317  | 0       | 2.26701 | 6.20497 | 7.42763 | 1.71695 | 1.17563 |
| ENSMUSG00000090284 | 2_Gm176   | 0.17236 | 1.1315   | 0.781553 | NA       | 0       | 0       | 1.03416 | 0       | 0       | 0       |
| ENSMUSG00000090286 | 1_Gm176   | 1.54533 | 0.25068  | 0.898756 | NA       | 4.04498 | 0       | 1.03416 | 2.47588 | 1.71695 | 0       |
| ENSMUSG00000090290 | 1_Gm172   | 213.851 | 0.12966  | 0.640141 | 0.887258 | 191.125 | 230.101 | 249.233 | 211.275 | 199.167 | 202.208 |
| ENSMUSG00000090291 | 2_Lrrc10b | 1.7181  | 0.04465  | 0.979205 | 0.993796 | 2.02249 | 2.26701 | 1.03416 | 4.12646 | 0.85848 | 0       |
| ENSMUSG00000090308 | 1_Gm517   | 0.30991 | 0.16972  | 0.966824 | NA       | 0       | 0       | 1.03416 | 0.82529 | 0       | 0       |
| ENSMUSG00000090317 | 1_Gm173   | 0.13755 | -0.79206 | 0.84609  | NA       | 0       | 0       | 0       | 0.82529 | 0       | 0       |
| ENSMUSG00000090326 | 1_Dthd1   | 0.17236 | 1.1315   | 0.781553 | NA       | 0       | 0       | 1.03416 | 0       | 0       | 0       |
| ENSMUSG00000090342 | 1_Vmn2r4  | 9.29619 | 0.22088  | 0.783231 | 0.935592 | 15.1687 | 5.66751 | 9.30745 | 13.2047 | 7.72629 | 4.70251 |
| ENSMUSG00000090346 | 1_Vmn1r5  | 0       | NA       | NA       | NA       | 0       | 0       | 0       | 0       | 0       | 0       |
| ENSMUSG00000090356 | 2_Teddm1  | 1.98767 | 4.51679  | 0.204342 | 0.185597 | 2.02249 | 6.80102 | 3.10248 | 0       | 0       | 0       |
| ENSMUSG00000090363 | 8_Gm351i  | 49.1705 | 0.96091  | 0.131058 | 0.492423 | 123.372 | 23.8036 | 47.5714 | 27.2346 | 37.773  | 35.2688 |
| ENSMUSG00000090369 | 3_493341  | 5.2298  | -0.32133 | 0.730405 | 0.91869  | 3.03373 | 5.66751 | 5.17081 | 4.12646 | 5.15086 | 8.22939 |
| ENSMUSG00000090383 | 1_Vmn2r5  | 0.16854 | 1.1315   | 0.781553 | NA       | 1.01124 | 0       | 0       | 0       | 0       | 0       |
| ENSMUSG00000090394 | 8_493052  | 610.986 | -0.8901  | 0.013832 | 0.126103 | 576.409 | 307.179 | 401.255 | 883.888 | 889.382 | 607.8   |
| ENSMUSG00000090399 | 1_Gm383i  | 13.4838 | -1.70661 | 0.009684 | 0.098401 | 6.06747 | 5.66751 | 7.23913 | 16.5058 | 26.6128 | 18.81   |
| ENSMUSG00000090439 | 1_Gm174   | 0.91981 | -1.91197 | 0.480917 | NA       | 0       | 1.1335  | 0       | 0       | 0.85848 | 3.52688 |
| ENSMUSG00000090440 | 1_Gm973   | 0.16854 | 1.1315   | 0.781553 | NA       | 1.01124 | 0       | 0       | 0       | 0       | 0       |
| ENSMUSG00000090451 | 1_Gm613   | 2.64514 | -0.21458 | 0.864917 | 0.962077 | 2.02249 | 1.1335  | 4.13665 | 2.47588 | 2.57543 | 3.52688 |
| ENSMUSG00000090470 | 2_Prr23ac | 0.76124 | -1.60899 | 0.634506 | NA       | 0       | 1.1335  | 0       | 0       | 3.43391 | 0       |
| ENSMUSG00000090472 | 8_Gm304i  | 0       | NA       | NA       | NA       | 0       | 0       | 0       | 0       | 0       | 0       |
| ENSMUSG00000090486 | 2_BC035f  | 3.04987 | 0.21775  | 0.891344 | 0.970606 | 1.01124 | 7.93452 | 1.03416 | 6.60234 | 1.71695 | 0       |
| ENSMUSG00000090509 | 2_Sfta2   | 1.61581 | 0.32203  | 0.865705 | NA       | 0       | 3.40051 | 2.06832 | 1.65058 | 2.57543 | 0       |
| ENSMUSG00000090512 | 8_Gm342i  | 0.16854 | 1.1315   | 0.781553 | NA       | 1.01124 | 0       | 0       | 0       | 0       | 0       |
| ENSMUSG00000090523 | 2_Gypc    | 277.905 | 0.22082  | 0.389596 | 0.7531   | 308.43  | 279.975 | 309.214 | 275.648 | 256.685 | 237.477 |
| ENSMUSG00000090544 | 2_Gm657i  | 1614.78 | 0.38349  | 0.268614 | 0.656292 | 2545.3  | 1576.7  | 1361.99 | 1217.31 | 1396.74 | 1590.62 |
| ENSMUSG00000090546 | 1_Cdr1    | 1.4855  | -1.69331 | 0.407306 | NA       | 1.01124 | 1.1335  | 0       | 2.47588 | 4.29238 | 0       |
| ENSMUSG00000090550 | 2_Prlh    | 0       | NA       | NA       | NA       | 0       | 0       | 0       | 0       | 0       | 0       |
| ENSMUSG00000090551 | 1_A73001  | 14.129  | 1.01     | 0.146979 | 0.518795 | 23.2586 | 17.0025 | 16.5466 | 5.77705 | 16.3111 | 5.87814 |
| ENSMUSG00000090553 | 8_Snrpe   | 1226.36 | 0.45987  | 0.322903 | 0.703332 | 2425.98 | 954.409 | 880.071 | 891.316 | 1248.23 | 958.137 |
| ENSMUSG00000090581 | 8_Vmn2r6  | 0.44364 | -0.57976 | 0.883757 | NA       | 1.01124 | 0       | 0       | 1.65058 | 0       | 0       |
| ENSMUSG00000090588 | 2_Gm957i  | 12921.6 | 1.01871  | 0.061649 | 0.327774 | 5386.9  | 25941.3 | 20580.8 | 9006.42 | 6692.69 | 9921.12 |
| ENSMUSG00000090602 | 2_Gm561   | 30.075  | 1.43636  | 0.131583 | 0.493329 | 16.1799 | 92.9472 | 22.7516 | 2.47588 | 34.3391 | 11.7563 |
| ENSMUSG00000090622 | 1_A93003  | 42.0689 | -0.22386 | 0.585536 | 0.861948 | 48.5397 | 30.6046 | 37.2298 | 47.0417 | 45.4993 | 43.4982 |
| ENSMUSG00000090625 | 1_Gm207i  | 670.682 | 3.41238  | NA       | NA       | 3401.83 | 102.015 | 174.773 | 135.348 | 109.027 | 101.104 |
| ENSMUSG00000090626 | 9_Tex9    | 285.669 | 0.05598  | 0.90241  | 0.973635 | 488.431 | 181.36  | 203.73  | 263.268 | 315.061 | 262.165 |
| ENSMUSG00000090631 | 3_Olfr456 | 0.47657 | -2.28567 | 0.465885 | NA       | 0       | 0       | 0       | 0.82529 | 0.85848 | 1.17563 |
| ENSMUSG00000090634 | 1_Gm812i  | 0.14308 | -0.79206 | 0.84609  | NA       | 0       | 0       | 0       | 0       | 0.85848 | 0       |
| ENSMUSG00000090638 | 1_Gm170i  | 0.93864 | 0.31034  | 0.906909 | NA       | 2.02249 | 1.1335  | 0       | 2.47588 | 0       | 0       |
| ENSMUSG00000090639 | 1_Gm204i  | 204.887 | -0.72542 | 0.019497 | 0.160514 | 121.349 | 185.894 | 156.158 | 230.257 | 265.269 | 270.394 |
| ENSMUSG00000090641 | 1_Zfp712  | 83.6727 | 0.23185  | 0.698362 | 0.905638 | 174.945 | 58.9422 | 37.2298 | 73.451  | 89.2816 | 68.1864 |
| ENSMUSG00000090659 | 8_Zfp493  | 45.3606 | 0.34116  | 0.594495 | 0.866686 | 98.0907 | 26.0706 | 27.9224 | 31.3611 | 55.801  | 32.9176 |
| ENSMUSG00000090665 | 1_Gad1-p  | 5.54465 | 3.42844  | 0.005766 | 0.068273 | 6.06747 | 18.136  | 6.20497 | 0.82529 | 0.85848 | 1.17563 |
| ENSMUSG00000090667 | 2_Gm765   | 2.22359 | -1.71335 | 0.256892 | 0.648401 | 1.01124 | 0       | 2.06832 | 3.30117 | 3.43391 | 3.52688 |
| ENSMUSG00000090673 | 1_Gm340   | 192.517 | 0.35235  | 0.250708 | 0.642255 | 200.226 | 227.834 | 219.242 | 132.047 | 179.422 | 196.33  |

|                    |           |         |          |          |          |         |         |         |         |         |         |
|--------------------|-----------|---------|----------|----------|----------|---------|---------|---------|---------|---------|---------|
| ENSMUSG00000090675 | 1_Olfr111 | 0.87454 | 3.33882  | 0.1991   | NA       | 1.01124 | 1.1335  | 3.10248 | 0       | 0       | 0       |
| ENSMUSG00000090691 | 3_Gm366   | 8.51204 | 0.93379  | 0.442869 | 0.787616 | 23.2586 | 0       | 10.3416 | 8.25292 | 6.86782 | 2.35126 |
| ENSMUSG00000090693 | 3_Trim43  | 7.14192 | -0.36382 | 0.675583 | 0.900812 | 6.06747 | 2.26701 | 10.3416 | 9.07822 | 6.86782 | 8.22939 |
| ENSMUSG00000090698 | 2_Apold1  | 54.9972 | 0.19624  | 0.713264 | 0.910879 | 95.057  | 43.0731 | 38.264  | 51.9934 | 68.6782 | 32.9176 |
| ENSMUSG00000090700 | 1_Cyp4f4  | 5.5654  | -0.04429 | 0.966203 | 0.990834 | 2.02249 | 10.2015 | 4.13665 | 2.47588 | 5.15086 | 9.40502 |
| ENSMUSG00000090707 | 8_Gm823   | 6.82901 | 0.77956  | 0.408889 | 0.766081 | 16.1799 | 3.40051 | 6.20497 | 3.30117 | 6.00934 | 5.87814 |
| ENSMUSG00000090713 | 1_Gm812   | 0.82488 | 2.02448  | 0.453765 | NA       | 2.02249 | 0       | 2.06832 | 0       | 0.85848 | 0       |
| ENSMUSG00000090733 | 6_Rps27   | 10886.4 | -0.46341 | 0.05875  | 0.317811 | 8152.65 | 9454.55 | 9851.42 | 11575.6 | 14159.7 | 12124.2 |
| ENSMUSG00000090744 | 7_Gm687   | 1.28364 | -1.30837 | 0.540528 | NA       | 0       | 2.26701 | 0       | 0.82529 | 3.43391 | 1.17563 |
| ENSMUSG00000090747 | 2_Esp8    | 0.33708 | 1.97061  | 0.625968 | NA       | 2.02249 | 0       | 0       | 0       | 0       | 0       |
| ENSMUSG00000090799 | 1_Klhl33  | 22.0734 | -1.26323 | 0.062421 | 0.329854 | 7.07871 | 10.2015 | 21.7174 | 48.6922 | 18.8865 | 25.8638 |
| ENSMUSG00000090812 | 8_Samd1   | 10.769  | -0.01406 | 0.985504 | 0.995304 | 11.1237 | 4.53401 | 16.5466 | 9.90351 | 15.4526 | 7.05377 |
| ENSMUSG00000090817 | 7_Gm445   | 0.13755 | -0.79206 | 0.84609  | NA       | 0       | 0       | 0       | 0.82529 | 0       | 0       |
| ENSMUSG00000090827 | 8_Gm829   | 0       | NA       | NA       | NA       | 0       | 0       | 0       | 0       | 0       | 0       |
| ENSMUSG00000090840 | 2_170009  | 2.43876 | 0.43938  | 0.785551 | 0.936103 | 0       | 2.26701 | 6.20497 | 4.12646 | 0.85848 | 1.17563 |
| ENSMUSG00000090841 | 1_Myl6    | 10135.2 | -0.30527 | 0.568124 | 0.852443 | 2816.32 | 12155.7 | 12229   | 12709.5 | 9898.24 | 11002.7 |
| ENSMUSG00000090843 | 2_Heatr4  | 1.64956 | 0.75764  | 0.634489 | NA       | 4.04498 | 1.1335  | 1.03416 | 1.65058 | 0.85848 | 1.17563 |
| ENSMUSG00000090862 | 3_Rps13   | 6581.35 | 0.08541  | 0.741843 | 0.922751 | 7842.2  | 6143.59 | 6342.51 | 5758.06 | 7212.07 | 6189.68 |
| ENSMUSG00000090863 | 1_A53008  | 34.231  | 0.43221  | 0.375542 | 0.745495 | 27.3036 | 56.6751 | 34.1273 | 25.5841 | 33.4806 | 28.2151 |
| ENSMUSG00000090872 | 8_Gm323   | 1.88917 | 4.44395  | 0.164169 | 0.542268 | 0       | 11.335  | 0       | 0       | 0       | 0       |
| ENSMUSG00000090877 | 3_Hspa1b  | 5133.33 | 1.17044  | 0.000414 | 0.010016 | 8610.75 | 6875.83 | 5837.84 | 2516.32 | 2808.08 | 4151.14 |
| ENSMUSG00000090881 | 1_Gm690   | 46.1698 | 2.10639  | 0.002042 | 0.032982 | 120.338 | 69.1437 | 35.1615 | 5.77705 | 26.6128 | 19.9857 |
| ENSMUSG00000090891 | 3_D6Ert   | 8.39833 | 0.599    | 0.441285 | 0.78682  | 11.1237 | 7.93452 | 11.3758 | 4.95175 | 10.3017 | 4.70251 |
| ENSMUSG00000090894 | 2_Olfr110 | 0.33349 | -1.76186 | 0.662172 | NA       | 0       | 0       | 0       | 0.82529 | 0       | 1.17563 |
| ENSMUSG00000090897 | 1_Esp6Es  | 119.317 | 1.53729  | 0.011856 | 0.113942 | 355.958 | 99.7483 | 76.528  | 55.2946 | 56.6595 | 71.7133 |
| ENSMUSG00000090919 | 6_Pabpc4  | 30.3861 | -0.39925 | 0.547663 | 0.843809 | 50.5622 | 13.602  | 14.4783 | 34.6623 | 45.4993 | 23.5126 |
| ENSMUSG00000090935 | 10_Synj2  | 1427.74 | 0.18331  | 0.695199 | 0.905638 | 2634.29 | 956.676 | 963.839 | 1188.42 | 1522.94 | 1300.24 |
| ENSMUSG00000090936 | 2_Gm177   | 37.0764 | 0.32995  | 0.449575 | 0.792693 | 49.551  | 32.8716 | 41.3665 | 37.9634 | 26.6128 | 34.0932 |
| ENSMUSG00000090942 | 1_F83001  | 487.443 | 4.73002  | 7.65E-12 | 2.07E-09 | 2029.57 | 462.469 | 326.795 | 42.9152 | 42.9238 | 19.9857 |
| ENSMUSG00000090946 | 3_Ccdc71  | 454.388 | 0.69337  | 0.112426 | 0.4549   | 910.12  | 445.467 | 328.863 | 324.34  | 364.853 | 352.688 |
| ENSMUSG00000090957 | 1_Gm753   | 1.788   | -3.0929  | 0.109608 | 0.449911 | 0       | 1.1335  | 0       | 4.12646 | 4.29238 | 1.17563 |
| ENSMUSG00000090958 | 2_Lrrc32  | 127.46  | 0.26726  | 0.626664 | 0.880584 | 47.5285 | 190.428 | 179.944 | 146.077 | 96.1494 | 104.631 |
| ENSMUSG00000090961 | 1_Vmn2r   | 0.19594 | -0.79206 | 0.84609  | NA       | 0       | 0       | 0       | 0       | 0       | 1.17563 |
| ENSMUSG00000090963 | 1_Gm176   | 17.7373 | 0.52434  | 0.516335 | 0.830302 | 43.4835 | 7.93452 | 11.3758 | 10.7288 | 22.3204 | 10.5807 |
| ENSMUSG00000090965 | 1_Gm172   | 4.37706 | 0.65565  | 0.559023 | 0.848321 | 3.03373 | 4.53401 | 8.27329 | 1.65058 | 1.71695 | 7.05377 |
| ENSMUSG00000090967 | 2_Vmn2r   | 0       | NA       | NA       | NA       | 0       | 0       | 0       | 0       | 0       | 0       |
| ENSMUSG00000090996 | 1_Gm204   | 0.94459 | 3.4426   | 0.370547 | NA       | 0       | 5.66751 | 0       | 0       | 0       | 0       |
| ENSMUSG00000091002 | 2_Tcerg1  | 0       | NA       | NA       | NA       | 0       | 0       | 0       | 0       | 0       | 0       |
| ENSMUSG00000091007 | 1_D63003  | 7.65235 | -0.95865 | 0.343887 | 0.721645 | 4.04498 | 2.26701 | 9.30745 | 19.807  | 3.43391 | 7.05377 |
| ENSMUSG00000091017 | 1_Fam71   | 0.32647 | 0.16972  | 0.966824 | NA       | 0       | 1.1335  | 0       | 0.82529 | 0       | 0       |
| ENSMUSG00000091021 | 1_Gm173   | 323.926 | 0.55072  | 0.19976  | 0.591685 | 611.803 | 284.509 | 258.54  | 218.702 | 299.608 | 270.394 |
| ENSMUSG00000091022 | 8_Gm311   | 0.16854 | 1.1315   | 0.781553 | NA       | 1.01124 | 0       | 0       | 0       | 0       | 0       |
| ENSMUSG00000091028 | 1_Gm107   | 1.86923 | 4.43731  | 0.073456 | 0.362638 | 7.07871 | 0       | 4.13665 | 0       | 0       | 0       |
| ENSMUSG00000091034 | 8_Gm176   | 0.79754 | -1.72019 | 0.536271 | NA       | 0       | 0       | 1.03416 | 0       | 2.57543 | 1.17563 |
| ENSMUSG00000091043 | 1_Glyat1  | 0.30991 | 0.16972  | 0.966824 | NA       | 0       | 0       | 1.03416 | 0.82529 | 0       | 0       |
| ENSMUSG00000091049 | 8_Gm197   | 0.30991 | 0.16972  | 0.966824 | NA       | 0       | 0       | 1.03416 | 0.82529 | 0       | 0       |
| ENSMUSG00000091055 | 2_Siglec1 | 0.13755 | -0.79206 | 0.84609  | NA       | 0       | 0       | 0       | 0.82529 | 0       | 0       |
| ENSMUSG00000091060 | 2_742046  | 10.828  | 0.49079  | 0.589839 | 0.864564 | 26.2924 | 2.26701 | 9.30745 | 8.25292 | 9.44325 | 9.40502 |
| ENSMUSG00000091086 | 1_Gm542   | 264.261 | -0.21105 | 0.628597 | 0.881265 | 356.969 | 157.557 | 220.276 | 208.799 | 388.032 | 253.936 |
| ENSMUSG00000091089 | 1_A93001  | 16.9395 | -0.78831 | 0.329271 | 0.709946 | 10.1124 | 2.26701 | 24.8199 | 18.1564 | 27.4713 | 18.81   |
| ENSMUSG00000091091 | 2_Kcnmb   | 0.50203 | -0.79092 | 0.80375  | NA       | 1.01124 | 0       | 0       | 0.82529 | 0       | 1.17563 |
| ENSMUSG00000091110 | 1_Gm283   | 0.19594 | -0.79206 | 0.84609  | NA       | 0       | 0       | 0       | 0       | 0       | 1.17563 |
| ENSMUSG00000091119 | 1_Ccdc15  | 5.4779  | 0.75169  | 0.493314 | 0.816268 | 15.1687 | 2.26701 | 3.10248 | 2.47588 | 5.15086 | 4.70251 |
| ENSMUSG00000091140 | 1_Gm171   | 0       | NA       | NA       | NA       | 0       | 0       | 0       | 0       | 0       | 0       |
| ENSMUSG00000091144 | 2_Phfl1c  | 231.401 | 1.48484  | 0.000255 | 0.007019 | 462.139 | 330.983 | 229.584 | 85.8304 | 149.375 | 130.495 |
| ENSMUSG00000091155 | 1_Serpine | 54.5262 | -1.24711 | 0.013394 | 0.123525 | 48.5397 | 20.4031 | 27.9224 | 104.812 | 54.9425 | 70.5377 |
| ENSMUSG00000091183 | 5_Gm514   | 113.236 | 0.60045  | 0.311606 | 0.693376 | 266.969 | 54.4081 | 87.9037 | 94.0833 | 86.7062 | 89.3477 |
| ENSMUSG00000091185 | 1_Gm327   | 0       | NA       | NA       | NA       | 0       | 0       | 0       | 0       | 0       | 0       |
| ENSMUSG00000091191 | 1_Gm173   | 43.9907 | 0.94626  | 0.118725 | 0.4687   | 27.3036 | 85.0127 | 61.0155 | 20.6323 | 20.6034 | 49.3764 |
| ENSMUSG00000091198 | 1_Gm521   | 0.44746 | -0.57987 | 0.8834   | NA       | 0       | 0       | 1.03416 | 1.65058 | 0       | 0       |
| ENSMUSG00000091215 | 3_Gm172   | 0.14308 | -0.79206 | 0.84609  | NA       | 0       | 0       | 0       | 0       | 0.85848 | 0       |
| ENSMUSG00000091227 | 1_Gm375   | 0.51708 | 2.58222  | 0.5182   | NA       | 0       | 0       | 3.10248 | 0       | 0       | 0       |
| ENSMUSG00000091228 | 1_Gm203   | 737.867 | 0.33096  | 0.681987 | 0.902515 | 60.6747 | 1242.32 | 1163.43 | 808.787 | 417.22  | 734.767 |
| ENSMUSG00000091230 | 1_Gm697   | 0.72255 | 3.05804  | 0.351905 | NA       | 0       | 2.26701 | 2.06832 | 0       | 0       | 0       |
| ENSMUSG00000091243 | 1_Vgll3   | 347.403 | 0.53046  | 0.147389 | 0.519469 | 597.645 | 318.514 | 315.419 | 288.027 | 285.014 | 279.799 |
| ENSMUSG00000091255 | 1_Speer4  | 2.33663 | 0.84486  | 0.750568 | 0.925295 | 0       | 9.06802 | 0       | 4.95175 | 0       | 0       |
| ENSMUSG00000091264 | 2_Smim1   | 568.678 | 0.16773  | 0.728487 | 0.917581 | 1063.83 | 374.056 | 367.127 | 508.38  | 606.085 | 492.588 |
| ENSMUSG00000091272 | 1_Gm176   | 1.73579 | -3.04398 | 0.105401 | 0.440822 | 1.01124 | 0       | 0       | 3.30117 | 2.57543 | 3.52688 |
| ENSMUSG00000091275 | 1_Gm324   | 8.03772 | 0.85519  | 0.43628  | 0.784268 | 18.2024 | 2.26701 | 10.3416 | 0.82529 | 6.00934 | 10.5807 |
| ENSMUSG00000091277 | 1_Gm181   | 7.19581 | -0.02753 | 0.981012 | 0.993796 | 16.1799 | 0       | 5.17081 | 9.07822 | 6.86782 | 5.87814 |
| ENSMUSG00000091285 | 1_Gm174   | 0.31544 | 0.16972  | 0.966824 | NA       | 0       | 0       | 1.03416 | 0       | 0.85848 | 0       |
| ENSMUSG00000091297 | 1_Gm843   | 3.47408 | -0.52312 | 0.645243 | 0.889294 | 1.01124 | 3.40051 | 4.13665 | 3.30117 | 4.29238 | 4.70251 |
| ENSMUSG00000091311 | 2_Spata3  | 0.30991 | 0.16972  | 0.966824 | NA       | 0       | 0       | 1.03416 | 0.82529 | 0       | 0       |
| ENSMUSG00000091318 | 2_Gm541   | 3.89694 | -1.49748 | 0.315481 | 0.696629 | 6.06747 | 0       | 0       | 6.60234 | 6.00934 | 4.70251 |
| ENSMUSG00000091337 | 3_Eid1    | 1052.64 | -0.09111 | 0.866953 | 0.962814 | 1966.87 | 486.273 | 604.985 | 1096.81 | 1180.41 | 980.474 |

|                    |           |         |          |          |          |         |         |         |         |         |         |
|--------------------|-----------|---------|----------|----------|----------|---------|---------|---------|---------|---------|---------|
| ENSMUSG00000091345 | 8_Col6a5  | 65.4063 | 0.42135  | 0.389439 | 0.752994 | 49.551  | 122.418 | 52.7422 | 47.0417 | 58.3764 | 62.3083 |
| ENSMUSG00000091350 | 1_Vmn2r5  | 0 NA    | NA       | NA       | NA       | 0       | 0       | 0       | 0       | 0       | 0       |
| ENSMUSG00000091376 | 1_AadacL  | 45.9427 | 0.55829  | 0.214167 | 0.605026 | 75.8433 | 48.7406 | 39.2981 | 31.3611 | 36.9145 | 43.4982 |
| ENSMUSG00000091381 | 2_Vmn2r8  | 0.8911  | -0.70899 | 0.795921 | NA       | 1.01124 | 0       | 1.03416 | 3.30117 | 0       | 0       |
| ENSMUSG00000091383 | 1_Hist1h2 | 1.07813 | 1.1564   | 0.611764 | NA       | 0       | 3.40051 | 1.03416 | 0       | 0.85848 | 1.17563 |
| ENSMUSG00000091387 | 1_Gcnt4   | 16.2621 | -0.43761 | 0.548609 | 0.843853 | 24.2699 | 7.93452 | 9.30745 | 29.7105 | 14.5941 | 11.7563 |
| ENSMUSG00000091388 | 1_Gm175   | 0.65463 | 1.62138  | 0.64602  | NA       | 0       | 0       | 3.10248 | 0.82529 | 0       | 0       |
| ENSMUSG00000091400 | 1_Gm635   | 0.19594 | -0.79206 | 0.84609  | NA       | 0       | 0       | 0       | 0       | 0       | 1.17563 |
| ENSMUSG00000091402 | 7_Rd3l    | 66.9959 | -2.10666 | 0.000207 | 0.005971 | 40.4498 | 12.4685 | 22.7516 | 151.854 | 113.319 | 61.1326 |
| ENSMUSG00000091405 | 2_Hist2h4 | 26.5226 | -0.44774 | 0.343988 | 0.721692 | 26.2924 | 19.2695 | 21.7174 | 26.4094 | 36.056  | 29.3907 |
| ENSMUSG00000091415 | 4_Ak9     | 0.54638 | 2.65324  | 0.465678 | NA       | 1.01124 | 2.26701 | 0       | 0       | 0       | 0       |
| ENSMUSG00000091423 | 1_Gm175   | 0.86695 | -1.81778 | 0.499607 | NA       | 0       | 1.1335  | 0       | 0       | 1.71695 | 2.35126 |
| ENSMUSG00000091430 | 1_Platr19 | 0.13755 | -0.79206 | 0.84609  | NA       | 0       | 0       | 0       | 0.82529 | 0       | 0       |
| ENSMUSG00000091449 | 2_Gm102   | 6.13072 | -0.69625 | 0.573085 | 0.855421 | 0       | 5.66751 | 8.27329 | 4.12646 | 3.43391 | 15.2832 |
| ENSMUSG00000091455 | 3_Otogl   | 1.25518 | -0.39256 | 0.840576 | NA       | 1.01124 | 1.1335  | 1.03416 | 0.82529 | 0       | 3.52688 |
| ENSMUSG00000091460 | 2_Gm780   | 2.4093  | -2.57621 | 0.136862 | 0.502096 | 0       | 0       | 2.06832 | 6.60234 | 3.43391 | 2.35126 |
| ENSMUSG00000091471 | 1_Gm205   | 0.44746 | -0.57987 | 0.8834   | NA       | 0       | 0       | 1.03416 | 1.65058 | 0       | 0       |
| ENSMUSG00000091472 | 2_Gm373   | 10.3956 | 1.43225  | 0.112962 | 0.455953 | 29.3261 | 6.80102 | 9.30745 | 2.47588 | 8.58477 | 5.87814 |
| ENSMUSG00000091474 | 2_261002  | 557.503 | 0.64555  | 0.207509 | 0.599079 | 1247.88 | 394.459 | 398.152 | 380.46  | 509.077 | 414.997 |
| ENSMUSG00000091476 | 6_Gm164   | 35.0854 | -0.24554 | 0.683057 | 0.902945 | 56.6297 | 15.869  | 23.7857 | 33.0117 | 50.6501 | 30.5663 |
| ENSMUSG00000091477 | 1_Gm579   | 1.18742 | 3.78347  | 0.180545 | NA       | 5.05622 | 0       | 2.06832 | 0       | 0       | 0       |
| ENSMUSG00000091504 | 1_Vmn2r1  | 0 NA    | NA       | NA       | NA       | 0       | 0       | 0       | 0       | 0       | 0       |
| ENSMUSG00000091511 | 2_Vmn2r8  | 0.48016 | 1.00965  | 0.794176 | NA       | 2.02249 | 0       | 0       | 0       | 0.85848 | 0       |
| ENSMUSG00000091512 | 5_Lamtor3 | 799.688 | -0.07277 | 0.776473 | 0.933844 | 655.286 | 872.797 | 810.783 | 845.099 | 824.138 | 790.022 |
| ENSMUSG00000091514 | 1_Gm174   | 21.2613 | -0.65382 | 0.224758 | 0.614548 | 19.2136 | 18.136  | 12.4099 | 27.2346 | 31.7636 | 18.81   |
| ENSMUSG00000091519 | 1_Skor2   | 0.13755 | -0.79206 | 0.84609  | NA       | 0       | 0       | 0       | 0.82529 | 0       | 0       |
| ENSMUSG00000091530 | 1_Cldn20  | 10.1988 | 0.58581  | 0.406522 | 0.764314 | 17.1912 | 9.06802 | 10.3416 | 6.60234 | 8.58477 | 9.40502 |
| ENSMUSG00000091531 | 1_Olfr102 | 0.16854 | 1.1315   | 0.781553 | NA       | 1.01124 | 0       | 0       | 0       | 0       | 0       |
| ENSMUSG00000091537 | 2_Tma7    | 2837.51 | 0.09948  | 0.735014 | 0.920451 | 3783.07 | 2582.12 | 2440.62 | 2627.73 | 2933.42 | 2658.09 |
| ENSMUSG00000091541 | 1_Vmn1r5  | 0.13755 | -0.79206 | 0.84609  | NA       | 0       | 0       | 0       | 0.82529 | 0       | 0       |
| ENSMUSG00000091550 | 1_Gm681   | 0.84355 | 2.06627  | 0.450721 | NA       | 0       | 1.1335  | 3.10248 | 0.82529 | 0       | 0       |
| ENSMUSG00000091556 | 8_Gm145   | 0.95502 | -0.83094 | 0.685828 | NA       | 1.01124 | 0       | 1.03416 | 1.65058 | 0.85848 | 1.17563 |
| ENSMUSG00000091561 | 2_Gm666   | 0.28616 | -1.57932 | 0.696464 | NA       | 0       | 0       | 0       | 0       | 1.71695 | 0       |
| ENSMUSG00000091563 | 8_Gm810   | 16.3375 | -0.92251 | 0.337462 | 0.71586  | 19.2136 | 0       | 14.4783 | 19.807  | 16.3111 | 28.2151 |
| ENSMUSG00000091568 | 7_Gm820   | 10.3234 | -0.40095 | 0.714797 | 0.911309 | 22.2474 | 1.1335  | 3.10248 | 7.42763 | 6.86782 | 21.1613 |
| ENSMUSG00000091586 | 1_Cyp4f11 | 110.958 | -0.47486 | 0.398349 | 0.758965 | 33.3711 | 109.95  | 135.475 | 181.564 | 99.5833 | 105.807 |
| ENSMUSG00000091594 | 2_Gm170   | 0.53684 | 1.02757  | 0.740993 | NA       | 1.01124 | 0       | 1.03416 | 0       | 0       | 1.17563 |
| ENSMUSG00000091614 | 1_Gm176   | 0.47657 | -2.28567 | 0.465885 | NA       | 0       | 0       | 0       | 0.82529 | 0.85848 | 1.17563 |
| ENSMUSG00000091617 | 8_Gm375   | 7.63076 | 1.21043  | 0.518241 | 0.831479 | 16.1799 | 15.869  | 0       | 0       | 13.7356 | 0       |
| ENSMUSG00000091618 | 2_H60c    | 360.724 | 0.82623  | 0.049343 | 0.287305 | 634.05  | 506.676 | 243.028 | 222.829 | 285.014 | 272.746 |
| ENSMUSG00000091625 | 8_Lsm5    | 239.537 | 0.5707   | 0.314424 | 0.695926 | 550.117 | 158.69  | 149.953 | 141.125 | 238.657 | 198.681 |
| ENSMUSG00000091635 | 1_Vmn2r1  | 0.16854 | 1.1315   | 0.781553 | NA       | 1.01124 | 0       | 0       | 0       | 0       | 0       |
| ENSMUSG00000091636 | 1_A33005  | 2.99086 | 1.04282  | 0.633401 | 0.88353  | 12.1349 | 0       | 0       | 4.95175 | 0.85848 | 0       |
| ENSMUSG00000091648 | 2_C2cd4d  | 3.2028  | -1.46814 | 0.289896 | 0.674932 | 4.04498 | 0       | 1.03416 | 5.77705 | 6.00934 | 2.35126 |
| ENSMUSG00000091649 | 3_Ph1f1b  | 1095.64 | 3.19468  | 2.69E-13 | 9.72E-11 | 2636.31 | 2143.45 | 1146.89 | 151.854 | 301.325 | 193.979 |
| ENSMUSG00000091680 | 2_Klhdc7l | 0 NA    | NA       | NA       | NA       | 0       | 0       | 0       | 0       | 0       | 0       |
| ENSMUSG00000091685 | 6_Gm173   | 0.16854 | 1.1315   | 0.781553 | NA       | 1.01124 | 0       | 0       | 0       | 0       | 0       |
| ENSMUSG00000091694 | 8_Apol11l | 3.1955  | 2.14457  | 0.110346 | 0.451009 | 6.06747 | 4.53401 | 5.17081 | 0.82529 | 2.57543 | 0       |
| ENSMUSG00000091695 | 1_Gm176   | 1.89989 | -2.20424 | 0.327675 | 0.708848 | 2.02249 | 0       | 0       | 1.65058 | 7.72629 | 0       |
| ENSMUSG00000091698 | 8_Gm652   | 0.47463 | 1.00958  | 0.794968 | NA       | 2.02249 | 0       | 0       | 0.82529 | 0       | 0       |
| ENSMUSG00000091705 | 8_H2-Q2   | 687.511 | 2.8261   | 2.67E-05 | 0.00115  | 196.181 | 1913.35 | 1505.74 | 183.215 | 150.233 | 176.344 |
| ENSMUSG00000091712 | 1_Sec14lf | 5.06568 | -0.09015 | 0.928616 | 0.98119  | 2.02249 | 3.40051 | 9.30745 | 4.95175 | 6.00934 | 4.70251 |
| ENSMUSG00000091721 | 3_Gm554   | 0.18892 | 1.1315   | 0.781553 | NA       | 0       | 1.1335  | 0       | 0       | 0       | 0       |
| ENSMUSG00000091722 | 1_Siah3   | 0.70987 | -2.87998 | 0.389265 | NA       | 0       | 0       | 0       | 0.82529 | 3.43391 | 0       |
| ENSMUSG00000091725 | 8_Gm822   | 0.16854 | 1.1315   | 0.781553 | NA       | 1.01124 | 0       | 0       | 0       | 0       | 0       |
| ENSMUSG00000091732 | 1_Gm175   | 1.9118  | -4.29028 | 0.029194 | 0.207881 | 0       | 0       | 0       | 2.47588 | 4.29238 | 4.70251 |
| ENSMUSG00000091735 | 2_Gpr62   | 3.4556  | -2.46169 | 0.081051 | 0.383655 | 0       | 1.1335  | 2.06832 | 9.07822 | 2.57543 | 5.87814 |
| ENSMUSG00000091736 | 3_Yy2     | 67.7561 | 0.81685  | 0.160156 | 0.538658 | 155.732 | 49.8741 | 53.7764 | 37.9634 | 70.3951 | 38.7957 |
| ENSMUSG00000091740 | 2_Gm792   | 0 NA    | NA       | NA       | NA       | 0       | 0       | 0       | 0       | 0       | 0       |
| ENSMUSG00000091742 | 1_Gm509   | 0.17236 | 1.1315   | 0.781553 | NA       | 0       | 0       | 1.03416 | 0       | 0       | 0       |
| ENSMUSG00000091754 | 8_Gm363   | 27.5712 | 1.13383  | 0.077534 | 0.373828 | 66.7421 | 17.0025 | 29.9907 | 18.1564 | 20.6034 | 12.9319 |
| ENSMUSG00000091756 | 1_Gm309   | 1.69687 | 4.29797  | 0.092668 | 0.414733 | 7.07871 | 0       | 3.10248 | 0       | 0       | 0       |
| ENSMUSG00000091764 | 3_Zfp964  | 134.047 | -0.08694 | 0.858635 | 0.959215 | 221.463 | 82.7457 | 85.8354 | 140.3   | 162.252 | 111.685 |
| ENSMUSG00000091779 | 8_Gm212   | 0 NA    | NA       | NA       | NA       | 0       | 0       | 0       | 0       | 0       | 0       |
| ENSMUSG00000091780 | 2_Sco2    | 5.57789 | -1.13188 | 0.41363  | 0.768597 | 0       | 1.1335  | 9.30745 | 10.7288 | 1.71695 | 10.5807 |
| ENSMUSG00000091794 | 2_Vmn2r1  | 2.66318 | 0.51561  | 0.705461 | 0.908371 | 6.06747 | 2.26701 | 1.03416 | 0.82529 | 3.43391 | 2.35126 |
| ENSMUSG00000091803 | 7_Cox16   | 464.412 | 0.27191  | 0.574692 | 0.856603 | 901.019 | 287.91  | 335.068 | 415.122 | 433.531 | 413.821 |
| ENSMUSG00000091811 | 1_Inafm1  | 365.217 | -0.18289 | 0.648908 | 0.89122  | 190.114 | 386.524 | 449.86  | 449.784 | 349.4   | 365.62  |
| ENSMUSG00000091814 | 1_Gm805   | 2.273   | 1.54463  | 0.462222 | 0.799907 | 6.06747 | 0       | 4.13665 | 0       | 3.43391 | 0       |
| ENSMUSG00000091827 | 2_Speer4l | 0.16854 | 1.1315   | 0.781553 | NA       | 1.01124 | 0       | 0       | 0       | 0       | 0       |
| ENSMUSG00000091831 | 4_Gm470   | 7.2777  | -0.72501 | 0.560286 | 0.848924 | 7.07871 | 1.1335  | 8.27329 | 1.65058 | 23.1789 | 2.35126 |
| ENSMUSG00000091844 | 1_Gm825   | 2.88835 | 2.36657  | 0.095997 | 0.420219 | 9.1012  | 2.26701 | 3.10248 | 0.82529 | 0.85848 | 1.17563 |
| ENSMUSG00000091864 | 1_Gm171   | 4.84326 | -0.40734 | 0.685166 | 0.903927 | 6.06747 | 2.26701 | 4.13665 | 3.30117 | 8.58477 | 4.70251 |
| ENSMUSG00000091867 | 2_Cyp2a2  | 0 NA    | NA       | NA       | NA       | 0       | 0       | 0       | 0       | 0       | 0       |
| ENSMUSG00000091882 | 8_Gm633   | 0.17236 | 1.1315   | 0.781553 | NA       | 0       | 0       | 1.03416 | 0       | 0       | 0       |

|                    |           |         |          |          |          |         |         |         |         |         |         |
|--------------------|-----------|---------|----------|----------|----------|---------|---------|---------|---------|---------|---------|
| ENSMUSG00000091896 | 7_Ube2d2  | 3508.38 | 0.41164  | 0.36581  | 0.739044 | 6780.39 | 2727.21 | 2508.88 | 2538.6  | 3510.31 | 2984.92 |
| ENSMUSG00000091897 | 1_Gm170   | 0.39188 | -1.97195 | 0.623385 | NA       | 0       | 0       | 0       | 0       | 0       | 2.35126 |
| ENSMUSG00000091898 | 8_Tnnc1   | 17.9431 | -2.51664 | 0.000163 | 0.004918 | 3.03373 | 6.80102 | 6.20497 | 31.3611 | 21.4619 | 38.7957 |
| ENSMUSG00000091900 | 2_Gm435   | 179.783 | 0.07508  | 0.85432  | 0.958493 | 264.946 | 155.29  | 133.407 | 184.865 | 212.044 | 128.143 |
| ENSMUSG00000091922 | 1_Gm174   | 0.79372 | -1.7202  | 0.536801 | NA       | 1.01124 | 0       | 0       | 0       | 2.57543 | 1.17563 |
| ENSMUSG00000091923 | 7_Gm826   | 0       | NA       | NA       | NA       | 0       | 0       | 0       | 0       | 0       | 0       |
| ENSMUSG00000091931 | 5_AK010f  | 94.8065 | 0.17961  | 0.658625 | 0.894702 | 132.473 | 106.549 | 63.0839 | 77.5775 | 102.159 | 86.9965 |
| ENSMUSG00000091938 | 2_Gm256   | 50.1081 | 3.09638  | 5.06E-06 | 0.0003   | 32.3598 | 157.557 | 79.6304 | 13.2047 | 12.0187 | 5.87814 |
| ENSMUSG00000091945 | 1_Vmn2r1  | 0.14308 | -0.79206 | 0.84609  | NA       | 0       | 0       | 0       | 0       | 0.85848 | 0       |
| ENSMUSG00000091955 | 2_Gm984   | 1.80964 | -0.02537 | 0.988012 | 0.996838 | 2.02249 | 3.40051 | 0       | 0.82529 | 3.43391 | 1.17563 |
| ENSMUSG00000091956 | 2_C2cd4b  | 0.8601  | 2.09416  | 0.435398 | NA       | 0       | 2.26701 | 2.06832 | 0.82529 | 0       | 0       |
| ENSMUSG00000091962 | 2_Vmn2r7  | 0.16854 | 1.1315   | 0.781553 | NA       | 1.01124 | 0       | 0       | 0       | 0       | 0       |
| ENSMUSG00000091971 | 3_Hspa1a  | 1709.2  | 0.83749  | 0.00561  | 0.066852 | 1993.16 | 2348.62 | 2232.75 | 991.176 | 1098.85 | 1590.62 |
| ENSMUSG00000091972 | 1_Tmem2   | 0.17236 | 1.1315   | 0.781553 | NA       | 0       | 0       | 1.03416 | 0       | 0       | 0       |
| ENSMUSG00000091985 | 1_Gm173   | 93.7084 | 0.16183  | 0.696171 | 0.905638 | 145.619 | 72.5442 | 78.5963 | 79.2281 | 100.442 | 85.8208 |
| ENSMUSG00000091996 | 7_BC049c  | 3.58544 | 1.02149  | 0.391188 | 0.754323 | 8.08995 | 2.26701 | 4.13665 | 4.12646 | 1.71695 | 1.17563 |
| ENSMUSG00000092009 | 1_Myh15   | 804.261 | -0.55016 | 0.476164 | 0.807493 | 1469.34 | 89.5467 | 399.186 | 1167.79 | 703.951 | 995.757 |
| ENSMUSG00000092019 | 2_Gm402   | 0.31544 | 0.16972  | 0.966824 | NA       | 0       | 0       | 1.03416 | 0       | 0.85848 | 0       |
| ENSMUSG00000092035 | 8_Peg10   | 66.6795 | -0.06444 | 0.911504 | 0.975173 | 123.372 | 32.8716 | 39.2981 | 74.2763 | 73.829  | 56.4301 |
| ENSMUSG00000092043 | 1_Esp6    | 451.306 | 1.2131   | 0.010168 | 0.101842 | 1080.01 | 396.726 | 414.699 | 250.064 | 239.515 | 326.825 |
| ENSMUSG00000092060 | 4_Bend4   | 63.7892 | -0.83165 | 0.065747 | 0.340073 | 62.6971 | 30.6046 | 44.4689 | 101.511 | 85.8477 | 57.6058 |
| ENSMUSG00000092071 | 1_A23006  | 7.83458 | -1.17008 | 0.280851 | 0.667132 | 4.04498 | 0       | 10.3416 | 14.8553 | 6.00934 | 11.7563 |
| ENSMUSG00000092074 | 1_Dynl1a  | 342.051 | 3.22725  | NA       | NA       | 1749.45 | 74.8112 | 29.9907 | 28.0599 | 93.574  | 76.4158 |
| ENSMUSG00000092080 | 1_Vmn2r1  | 0.13755 | -0.79206 | 0.84609  | NA       | 0       | 0       | 0       | 0.82529 | 0       | 0       |
| ENSMUSG00000092083 | 4_Kcnb2   | 32.7572 | -1.6448  | 0.008152 | 0.086764 | 26.2924 | 6.80102 | 14.4783 | 57.7705 | 61.8103 | 29.3907 |
| ENSMUSG00000092086 | 1_Gm679   | 162.772 | 0.23623  | 0.641271 | 0.887777 | 287.193 | 154.156 | 86.8696 | 115.541 | 200.025 | 132.846 |
| ENSMUSG00000092090 | 2_Gm329   | 1.06328 | -2.2504  | 0.301977 | NA       | 1.01124 | 0       | 0       | 2.47588 | 1.71695 | 1.17563 |
| ENSMUSG00000092094 | 5_Zfp804f | 1.45406 | -1.72739 | 0.455441 | NA       | 2.02249 | 0       | 0       | 4.12646 | 2.57543 | 0       |
| ENSMUSG00000092097 | 1_Gm581f  | 8.20489 | -0.29232 | 0.737941 | 0.921405 | 8.08995 | 9.06802 | 5.17081 | 16.5058 | 6.86782 | 3.52688 |
| ENSMUSG00000092116 | 1_Gm103f  | 1.77652 | -0.06495 | 0.965942 | 0.990781 | 2.02249 | 1.1335  | 2.06832 | 0.82529 | 3.43391 | 1.17563 |
| ENSMUSG00000092118 | 1_Fancf   | 40.6213 | 0.24741  | 0.621977 | 0.878215 | 67.7534 | 38.5391 | 25.854  | 33.837  | 37.773  | 39.9713 |
| ENSMUSG00000092124 | 1_B93009  | 4.17243 | -0.77643 | 0.522038 | 0.832206 | 7.07871 | 1.1335  | 1.03416 | 7.42763 | 6.00934 | 2.35126 |
| ENSMUSG00000092130 | 1_D03002  | 0.4547  | -0.61836 | 0.875203 | NA       | 1.01124 | 0       | 0       | 0       | 1.71695 | 0       |
| ENSMUSG00000092137 | 7_Gcom1   | 44.579  | 0.62459  | 0.597536 | 0.868406 | 0       | 55.5416 | 106.519 | 21.4576 | 14.5941 | 69.362  |
| ENSMUSG00000092148 | 1_Gm800   | 0.17236 | 1.1315   | 0.781553 | NA       | 0       | 0       | 1.03416 | 0       | 0       | 0       |
| ENSMUSG00000092152 | 1_Gm170   | 0       | NA       | NA       | NA       | 0       | 0       | 0       | 0       | 0       | 0       |
| ENSMUSG00000092164 | 2_Rergl   | 0.81918 | -0.48877 | 0.859522 | NA       | 2.02249 | 0       | 0       | 0       | 1.71695 | 1.17563 |
| ENSMUSG00000092166 | 1_Gm794   | 0.18892 | 1.1315   | 0.781553 | NA       | 0       | 1.1335  | 0       | 0       | 0       | 0       |
| ENSMUSG00000092167 | 8_Gm369   | 12.9932 | 0.5281   | 0.578176 | 0.858146 | 27.3036 | 2.26701 | 16.5466 | 8.25292 | 18.8865 | 4.70251 |
| ENSMUSG00000092171 | 1_483342  | 5.26176 | 1.28287  | 0.180847 | 0.567284 | 7.07871 | 10.2015 | 5.17081 | 2.47588 | 4.29238 | 2.35126 |
| ENSMUSG00000092192 | 7_Dyx1c1  | 22.4049 | -1.24889 | 0.017687 | 0.149519 | 15.1687 | 10.2015 | 14.4783 | 33.837  | 36.056  | 24.6882 |
| ENSMUSG00000092210 | 1_A93000  | 5.03733 | -1.88654 | 0.069869 | 0.352558 | 2.02249 | 3.40051 | 1.03416 | 5.77705 | 8.58477 | 9.40502 |
| ENSMUSG00000092216 | 2_Gm193   | 0       | NA       | NA       | NA       | 0       | 0       | 0       | 0       | 0       | 0       |
| ENSMUSG00000092219 | 1_Gm204   | 0.28616 | -1.57932 | 0.696464 | NA       | 0       | 0       | 0       | 0       | 1.71695 | 0       |
| ENSMUSG00000092233 | 1_Gm204f  | 1.86632 | -2.09847 | 0.212726 | 0.603937 | 1.01124 | 1.1335  | 0       | 4.12646 | 2.57543 | 2.35126 |
| ENSMUSG00000092242 | 1_Gm205   | 0.16854 | 1.1315   | 0.781553 | NA       | 1.01124 | 0       | 0       | 0       | 0       | 0       |
| ENSMUSG00000092243 | 8_Gm703   | 4.00657 | 2.44713  | 0.068276 | 0.347454 | 1.01124 | 7.93452 | 11.3758 | 0.82529 | 1.71695 | 1.17563 |
| ENSMUSG00000092252 | 1_Gm204   | 0.37783 | 2.11394  | 0.599927 | NA       | 0       | 2.26701 | 0       | 0       | 0       | 0       |
| ENSMUSG00000092260 | 7_Zfp963  | 163.09  | -0.24085 | 0.615916 | 0.876673 | 247.755 | 82.7457 | 117.894 | 151.029 | 218.053 | 161.061 |
| ENSMUSG00000092274 | 2_Neat1   | 27881.5 | 0.35684  | 0.198129 | 0.590334 | 29108.7 | 30351.8 | 34475.8 | 19517.3 | 29141   | 24694.1 |
| ENSMUSG00000092276 | 2_170011  | 0.13755 | -0.79206 | 0.84609  | NA       | 0       | 0       | 0       | 0.82529 | 0       | 0       |
| ENSMUSG00000092277 | 1_Gm196   | 2.04497 | 4.55719  | 0.070357 | 0.3544   | 0       | 10.2015 | 2.06832 | 0       | 0       | 0       |
| ENSMUSG00000092305 | 1_Prps11  | 3.09328 | -0.52217 | 0.719354 | 0.913031 | 2.02249 | 5.66751 | 0       | 1.65058 | 6.86782 | 2.35126 |
| ENSMUSG00000092310 | 2_Gm205   | 0.70434 | -2.87023 | 0.38272  | NA       | 0       | 0       | 0       | 1.65058 | 2.57543 | 0       |
| ENSMUSG00000092329 | 1_Gm203   | 2115.83 | 0.06696  | 0.889938 | 0.97035  | 857.535 | 2762.35 | 2874.97 | 2326.5  | 1674.03 | 2199.6  |
| ENSMUSG00000092335 | 1_Gm722   | 16.9148 | -0.0578  | 0.939088 | 0.985171 | 31.3486 | 10.2015 | 8.27329 | 16.5058 | 25.7543 | 9.40502 |
| ENSMUSG00000092341 | 2_Malat1  | 21335.7 | 0.17593  | 0.686522 | 0.904408 | 35771.8 | 14166.5 | 17966.5 | 16595   | 26124.3 | 17389.9 |
| ENSMUSG00000092349 | 1_Platr17 | 12.6414 | -2.06773 | 0.075009 | 0.366546 | 10.1124 | 4.53401 | 0       | 38.7887 | 18.8865 | 3.52688 |
| ENSMUSG00000092356 | 1_Gm205   | 2.64484 | 4.93004  | 0.097096 | 0.422657 | 0       | 15.869  | 0       | 0       | 0       | 0       |
| ENSMUSG00000092367 | 1_Gm204   | 32.5638 | 0.02458  | 0.975224 | 0.993623 | 5.05622 | 51.0076 | 42.4006 | 16.5058 | 36.9145 | 43.4982 |
| ENSMUSG00000092392 | 1_Gm205   | 4.16247 | -0.74111 | 0.512886 | 0.828304 | 3.03373 | 2.26701 | 4.13665 | 5.77705 | 8.58477 | 1.17563 |
| ENSMUSG00000092403 | 1_Gm204f  | 7.91501 | 4.66349  | 0.000496 | 0.011585 | 20.2249 | 9.06802 | 16.5466 | 1.65058 | 0       | 0       |
| ENSMUSG00000092416 | 2_Zfp141  | 519.339 | 0.48163  | 0.32851  | 0.709501 | 1082.03 | 357.053 | 376.435 | 376.333 | 483.323 | 440.86  |
| ENSMUSG00000092417 | 3_Gpank1  | 191.792 | 0.36938  | 0.518071 | 0.83141  | 64.7196 | 316.247 | 267.848 | 209.624 | 134.781 | 157.534 |
| ENSMUSG00000092443 | 1_Gm207f  | 0.75737 | -0.28008 | 0.933932 | NA       | 0       | 0       | 2.06832 | 2.47588 | 0       | 0       |
| ENSMUSG00000092463 | 1_Gm204f  | 1.92526 | 4.47684  | 0.036855 | 0.240222 | 1.01124 | 2.26701 | 8.27329 | 0       | 0       | 0       |
| ENSMUSG00000092470 | 1_Gm205   | 17.2976 | 0.74894  | 0.434967 | 0.783106 | 3.03373 | 24.9371 | 37.2298 | 5.77705 | 25.7543 | 7.05377 |
| ENSMUSG00000092473 | 3_Vmn1r1  | 0.31162 | 0.16972  | 0.966824 | NA       | 1.01124 | 0       | 0       | 0       | 0.85848 | 0       |
| ENSMUSG00000092486 | 1_261052  | 198.801 | 0.16835  | 0.704092 | 0.908143 | 326.632 | 123.552 | 180.978 | 176.613 | 227.496 | 157.534 |
| ENSMUSG00000092511 | 7_Gm205   | 271.902 | 1.88654  | 9.56E-06 | 0.000498 | 444.948 | 488.54  | 351.615 | 151.029 | 136.498 | 58.7814 |
| ENSMUSG00000092518 | 9_Fam71e  | 2.57021 | 0.74791  | 0.606034 | 0.871767 | 3.03373 | 4.53401 | 2.06832 | 0       | 3.43391 | 2.35126 |
| ENSMUSG00000092519 | 2_Actl9   | 0.3683  | 0.16972  | 0.966824 | NA       | 0       | 0       | 1.03416 | 0       | 0       | 1.17563 |
| ENSMUSG00000092534 | 8_Pagrb1b | 73.3235 | -1.20943 | 0.019688 | 0.161169 | 73.8208 | 20.4031 | 38.264  | 89.1316 | 99.5833 | 118.738 |
| ENSMUSG00000092539 | 1_Gm204f  | 0.13755 | -0.79206 | 0.84609  | NA       | 0       | 0       | 0       | 0.82529 | 0       | 0       |
| ENSMUSG00000092541 | 7_Gm205   | 0.67416 | 2.9665   | 0.455571 | NA       | 4.04498 | 0       | 0       | 0       | 0       | 0       |

|                    |           |         |          |          |          |         |         |         |         |         |         |
|--------------------|-----------|---------|----------|----------|----------|---------|---------|---------|---------|---------|---------|
| ENSMUSG00000092544 | 8_Gm204   | 2.47927 | 4.84004  | 0.039624 | 0.250185 | 0       | 4.53401 | 10.3416 | 0       | 0       | 0       |
| ENSMUSG00000092558 | 3_Med20   | 1189.23 | 0.01468  | 0.951898 | 0.988    | 1059.78 | 1258.19 | 1267.88 | 1090.21 | 1263.68 | 1195.61 |
| ENSMUSG00000092586 | 8_Ly6g6c  | 5163.64 | 0.17182  | 0.675848 | 0.900949 | 2912.38 | 6534.64 | 6965.08 | 4723.97 | 3978.18 | 5867.56 |
| ENSMUSG00000092592 | 1_Gm204   | 15.1569 | 0.33945  | 0.657505 | 0.894702 | 33.3711 | 10.2015 | 7.23913 | 12.3794 | 17.1695 | 10.5807 |
| ENSMUSG00000092600 | 1_Gm204   | 5.11174 | -0.32733 | 0.733683 | 0.919947 | 3.03373 | 3.40051 | 7.23913 | 6.60234 | 6.86782 | 3.52688 |
| ENSMUSG00000092602 | 1_493141  | 0.14308 | -0.79206 | 0.84609  | NA       | 0       | 0       | 0       | 0       | 0.85848 | 0       |
| ENSMUSG00000092604 | 1_Gm205   | 0       | NA       | NA       | NA       | 0       | 0       | 0       | 0       | 0       | 0       |
| ENSMUSG00000092607 | 9_Scnm1   | 286.662 | 0.04729  | 0.875095 | 0.964429 | 221.463 | 332.116 | 320.59  | 291.328 | 265.269 | 289.204 |
| ENSMUSG00000092609 | 1_Gm204   | 55.5081 | 9.32503  | 0.017015 | 0.145112 | 0       | 130.353 | 202.696 | 0       | 0       | 0       |
| ENSMUSG00000092622 | 8_Khdc3   | 2.88503 | -0.75321 | 0.547574 | 0.843809 | 1.01124 | 2.26701 | 3.10248 | 2.47588 | 2.57543 | 5.87814 |
| ENSMUSG00000093376 | 1_Vmn1r2  | 0.14308 | -0.79206 | 0.84609  | NA       | 0       | 0       | 0       | 0       | 0.85848 | 0       |
| ENSMUSG00000093387 | 1_Gm207   | 4.16926 | -0.00052 | 0.999649 | 0.999741 | 9.1012  | 2.26701 | 1.03416 | 3.30117 | 3.43391 | 5.87814 |
| ENSMUSG00000093445 | 7_Lrch4   | 612.733 | 0.30991  | 0.636242 | 0.885114 | 127.417 | 1032.62 | 874.901 | 653.632 | 390.607 | 597.219 |
| ENSMUSG00000093456 | 7_Gm206   | 6.81881 | 1.14032  | 0.552923 | 0.845776 | 0       | 12.4685 | 15.5124 | 0       | 0       | 12.9319 |
| ENSMUSG00000093482 | 8_Gm206   | 0.14308 | -0.79206 | 0.84609  | NA       | 0       | 0       | 0       | 0       | 0.85848 | 0       |
| ENSMUSG00000093485 | 1_Gm207   | 21.2169 | 1.9776   | 0.580955 | 0.859684 | 78.8771 | 22.6701 | 0       | 0       | 25.7543 | 0       |
| ENSMUSG00000093489 | 1_Gm206   | 0       | NA       | NA       | NA       | 0       | 0       | 0       | 0       | 0       | 0       |
| ENSMUSG00000093536 | 7_Smim1   | 1.52158 | -0.34002 | 0.883408 | NA       | 4.04498 | 0       | 0       | 1.65058 | 3.43391 | 0       |
| ENSMUSG00000093550 | 7_Higd1c  | 0.28616 | -1.57932 | 0.696464 | NA       | 0       | 0       | 0       | 0       | 1.71695 | 0       |
| ENSMUSG00000093573 | 1_Gm206   | 0.90765 | 3.38453  | 0.190174 | NA       | 1.01124 | 3.40051 | 1.03416 | 0       | 0       | 0       |
| ENSMUSG00000093574 | 1_Gm206   | 7.41149 | 6.42049  | 0.100846 | 0.432147 | 0       | 0       | 44.4689 | 0       | 0       | 0       |
| ENSMUSG00000093575 | 1_Gm206   | 4.50686 | 5.7055   | 0.000508 | 0.011732 | 15.1687 | 5.66751 | 6.20497 | 0       | 0       | 0       |
| ENSMUSG00000093587 | 2_Gm205   | 8.44417 | 0.46608  | 0.736631 | 0.920922 | 28.3148 | 0       | 1.03416 | 8.25292 | 6.00934 | 7.05377 |
| ENSMUSG00000093593 | 1_Gm206   | 54.0719 | -0.22169 | 0.833898 | 0.952011 | 0       | 69.1437 | 80.6646 | 67.674  | 44.6408 | 62.3083 |
| ENSMUSG00000093594 | 1_Gm207   | 66.4841 | 0.16746  | 0.733725 | 0.919947 | 108.203 | 39.6726 | 63.0839 | 51.9934 | 80.6968 | 55.2545 |
| ENSMUSG00000093639 | 2_Gm424   | 4.80058 | -5.62378 | 0.001305 | 0.023983 | 0       | 0       | 0       | 16.5058 | 1.71695 | 10.5807 |
| ENSMUSG00000093661 | 1_Eif4e3  | 277.513 | 0.98873  | 0.018315 | 0.153553 | 548.094 | 317.381 | 241.994 | 235.208 | 174.271 | 148.129 |
| ENSMUSG00000093662 | 2_Gm206   | 0       | NA       | NA       | NA       | 0       | 0       | 0       | 0       | 0       | 0       |
| ENSMUSG00000093668 | 3_Pou5f2  | 0       | NA       | NA       | NA       | 0       | 0       | 0       | 0       | 0       | 0       |
| ENSMUSG00000093674 | 7_Rpl41   | 10182.7 | -0.039   | 0.953858 | 0.988507 | 1737.32 | 13935.3 | 14462.7 | 14296.5 | 7167.42 | 9496.72 |
| ENSMUSG00000093675 | 7_Gm206   | 0.16854 | 1.1315   | 0.781553 | NA       | 1.01124 | 0       | 0       | 0       | 0       | 0       |
| ENSMUSG00000093701 | 7_Gm219   | 81.163  | -0.82078 | 0.155812 | 0.532939 | 90.0007 | 22.6701 | 63.0839 | 59.421  | 133.064 | 118.738 |
| ENSMUSG00000093752 | 1_Gm207   | 4676.27 | 0.36301  | 0.321389 | 0.702424 | 7715.79 | 4071.54 | 3997.03 | 3600.75 | 4595.43 | 4077.08 |
| ENSMUSG00000093769 | 3_Hist2h3 | 67.1408 | 0.53318  | 0.347338 | 0.724598 | 144.608 | 54.4081 | 39.2981 | 64.3728 | 56.6595 | 43.4982 |
| ENSMUSG00000093795 | 1_Gm947   | 0       | NA       | NA       | NA       | 0       | 0       | 0       | 0       | 0       | 0       |
| ENSMUSG00000093803 | 2_Ppp2r3  | 102.802 | 0.12433  | 0.871165 | 0.963578 | 12.1349 | 146.222 | 163.398 | 129.571 | 64.3858 | 101.104 |
| ENSMUSG00000093805 | 7_Gm999   | 4.07648 | -0.33603 | 0.774678 | 0.933172 | 3.03373 | 5.66751 | 2.06832 | 5.77705 | 0.85848 | 7.05377 |
| ENSMUSG00000093812 | 1_Gm562   | 0       | NA       | NA       | NA       | 0       | 0       | 0       | 0       | 0       | 0       |
| ENSMUSG00000093817 | 7_Gm210   | 0       | NA       | NA       | NA       | 0       | 0       | 0       | 0       | 0       | 0       |
| ENSMUSG00000093833 | 1_Gm797   | 0       | NA       | NA       | NA       | 0       | 0       | 0       | 0       | 0       | 0       |
| ENSMUSG00000093844 | 1_Gm163   | 0.14308 | -0.79206 | 0.84609  | NA       | 0       | 0       | 0       | 0       | 0.85848 | 0       |
| ENSMUSG00000093846 | 1_Gm442   | 6.65562 | -0.28281 | 0.729178 | 0.917707 | 7.07871 | 5.66751 | 5.17081 | 6.60234 | 6.00934 | 9.40502 |
| ENSMUSG00000093847 | 1_Gm503   | 0.4821  | -2.30304 | 0.543942 | NA       | 0       | 0       | 0       | 0       | 1.71695 | 1.17563 |
| ENSMUSG00000093857 | 1_Gm216   | 0       | NA       | NA       | NA       | 0       | 0       | 0       | 0       | 0       | 0       |
| ENSMUSG00000093862 | 1_Gm511   | 0.69094 | 0.12901  | 0.959664 | NA       | 1.01124 | 1.1335  | 0       | 0.82529 | 0       | 1.17563 |
| ENSMUSG00000093865 | 7_Lrit3   | 21.9522 | -2.21999 | 0.001222 | 0.022836 | 9.1012  | 10.2015 | 4.13665 | 43.7405 | 48.0747 | 16.4588 |
| ENSMUSG00000093877 | 1_Olfr134 | 0.18892 | 1.1315   | 0.781553 | NA       | 0       | 1.1335  | 0       | 0       | 0       | 0       |
| ENSMUSG00000093898 | 2_Gm362   | 1.34833 | 3.96501  | 0.252343 | NA       | 8.08995 | 0       | 0       | 0       | 0       | 0       |
| ENSMUSG00000093901 | 1_Olfr893 | 1.24517 | 0.28419  | 0.908959 | NA       | 0       | 0       | 4.13665 | 2.47588 | 0.85848 | 0       |
| ENSMUSG00000093904 | 1_Tomm2   | 2876.34 | -0.03796 | 0.922196 | 0.978156 | 4353.41 | 2072.04 | 2090.04 | 2925.66 | 3195.25 | 2621.65 |
| ENSMUSG00000093908 | 1_Gm578   | 4.60765 | -2.09929 | 0.06111  | 0.326108 | 1.01124 | 1.1335  | 3.10248 | 8.25292 | 9.44325 | 4.70251 |
| ENSMUSG00000093910 | 1_Zfp853  | 11.7655 | -2.18277 | 0.01873  | 0.155978 | 0       | 4.53401 | 8.27329 | 23.9335 | 19.745  | 14.1075 |
| ENSMUSG00000093920 | 1_Olfr463 | 0       | NA       | NA       | NA       | 0       | 0       | 0       | 0       | 0       | 0       |
| ENSMUSG00000093926 | 1_Gm170   | 0       | NA       | NA       | NA       | 0       | 0       | 0       | 0       | 0       | 0       |
| ENSMUSG00000093930 | 1_Hmgcs   | 15601.7 | 0.33935  | 0.312944 | 0.694375 | 24176.8 | 14795.6 | 13311.7 | 12097.1 | 14418.1 | 14810.6 |
| ENSMUSG00000093931 | 2_Amy2a   | 0       | NA       | NA       | NA       | 0       | 0       | 0       | 0       | 0       | 0       |
| ENSMUSG00000093938 | 2_Evi2b   | 101.786 | 1.98078  | 1.66E-05 | 0.000801 | 202.249 | 199.497 | 85.8354 | 48.6922 | 40.3484 | 34.0932 |
| ENSMUSG00000093948 | 7_Gm103   | 0.526   | 2.60438  | 0.478686 | NA       | 2.02249 | 1.1335  | 0       | 0       | 0       | 0       |
| ENSMUSG00000093954 | 8_Gm168   | 25.9427 | -0.23579 | 0.690885 | 0.905638 | 37.416  | 11.335  | 22.7516 | 34.6623 | 28.3297 | 21.1613 |
| ENSMUSG00000093962 | 7_Gm117   | 0.14308 | -0.79206 | 0.84609  | NA       | 0       | 0       | 0       | 0       | 0.85848 | 0       |
| ENSMUSG00000093973 | 1_Mrgpra  | 2.93608 | 4.04447  | 0.062604 | 0.330345 | 2.02249 | 14.7355 | 0       | 0       | 0.85848 | 0       |
| ENSMUSG00000093979 | 7_Gm223   | 30.3415 | 0.29622  | 0.717531 | 0.912533 | 77.8658 | 7.93452 | 14.4783 | 32.1864 | 24.8958 | 24.6882 |
| ENSMUSG00000093985 | 7_Gm104   | 6.384   | -0.25522 | 0.868512 | 0.962942 | 11.1237 | 0       | 6.20497 | 0       | 6.86782 | 14.1075 |
| ENSMUSG00000093989 | 1_Rnasek  | 341.848 | -0.13461 | 0.769213 | 0.931453 | 157.754 | 379.723 | 440.553 | 467.115 | 307.335 | 298.609 |
| ENSMUSG00000093996 | 1_Fam20   | 0.72576 | 1.65146  | 0.50543  | NA       | 1.01124 | 1.1335  | 1.03416 | 0       | 0       | 1.17563 |
| ENSMUSG00000094002 | 2_Gm986   | 1.67212 | -1.96906 | 0.337411 | NA       | 2.02249 | 0       | 0       | 0.82529 | 6.00934 | 1.17563 |
| ENSMUSG00000094004 | 7_Gm512   | 1.17563 | -3.57851 | 0.325604 | NA       | 0       | 0       | 0       | 0       | 0       | 7.05377 |
| ENSMUSG00000094018 | 1_S100a2  | 30.9225 | -0.00628 | 0.989662 | 0.997255 | 26.2924 | 37.4056 | 28.9565 | 22.2829 | 41.2069 | 29.3907 |
| ENSMUSG00000094024 | 1_Esp18   | 2.97197 | 1.957    | 0.304135 | 0.686957 | 13.1462 | 0       | 1.03416 | 2.47588 | 0       | 1.17563 |
| ENSMUSG00000094025 | 7_Gm887   | 0       | NA       | NA       | NA       | 0       | 0       | 0       | 0       | 0       | 0       |
| ENSMUSG00000094027 | 1_Gm217   | 1.80258 | 3.29238  | 0.152959 | 0.527868 | 2.02249 | 7.93452 | 0       | 0       | 0.85848 | 0       |
| ENSMUSG00000094030 | 1_Gm218   | 1.53724 | 4.15431  | 0.12987  | NA       | 8.08995 | 1.1335  | 0       | 0       | 0       | 0       |
| ENSMUSG00000094053 | 2_Scgb2b  | 0.36448 | 0.16972  | 0.966824 | NA       | 1.01124 | 0       | 0       | 0       | 0       | 1.17563 |
| ENSMUSG00000094066 | 1_Fam20   | 0.72576 | 1.65146  | 0.50543  | NA       | 1.01124 | 1.1335  | 1.03416 | 0       | 0       | 1.17563 |
| ENSMUSG00000094076 | 7_Gm476   | 38.2845 | 0.14948  | 0.812218 | 0.946162 | 74.8321 | 28.3376 | 17.5807 | 46.2164 | 27.4713 | 35.2688 |

|                    |           |         |          |          |          |         |         |         |         |         |         |
|--------------------|-----------|---------|----------|----------|----------|---------|---------|---------|---------|---------|---------|
| ENSMUSG00000094081 | 2_Gm208   | 1.4135  | 1.74295  | 0.349745 | NA       | 1.01124 | 3.40051 | 2.06832 | 0.82529 | 0       | 1.17563 |
| ENSMUSG00000094083 | 1_Gm160   | 0.2751  | -1.54073 | 0.703687 | NA       | 0       | 0       | 0       | 1.65058 | 0       | 0       |
| ENSMUSG00000094084 | 2_Tdpoz1  | 0.35746 | 2.04359  | 0.612655 | NA       | 1.01124 | 1.1335  | 0       | 0       | 0       | 0       |
| ENSMUSG00000094091 | 1_Gm218   | 0       | NA       | NA       | NA       | 0       | 0       | 0       | 0       | 0       | 0       |
| ENSMUSG00000094103 | 1_170004  | 312.247 | 0.45049  | 0.078257 | 0.375394 | 363.037 | 378.59  | 340.239 | 285.551 | 240.374 | 265.692 |
| ENSMUSG00000094105 | 7_Gm892   | 0       | NA       | NA       | NA       | 0       | 0       | 0       | 0       | 0       | 0       |
| ENSMUSG00000094107 | 1_Vmn2r4  | 0.8907  | -0.51569 | 0.828523 | NA       | 0       | 1.1335  | 1.03416 | 0.82529 | 0       | 2.35126 |
| ENSMUSG00000094113 | 7_543040  | 0.19594 | -0.79206 | 0.84609  | NA       | 0       | 0       | 0       | 0       | 0       | 1.17563 |
| ENSMUSG00000094114 | 1_Gm219   | 140.058 | -0.28961 | 0.489441 | 0.814396 | 178.99  | 73.6777 | 125.134 | 128.746 | 165.686 | 168.115 |
| ENSMUSG00000094115 | 1_Spin2-p | 0.17236 | 1.1315   | 0.781553 | NA       | 0       | 0       | 1.03416 | 0       | 0       | 0       |
| ENSMUSG00000094116 | 1_Gm112   | 1.73954 | 3.19981  | 0.164206 | 0.542287 | 2.02249 | 0       | 7.23913 | 0       | 0       | 1.17563 |
| ENSMUSG00000094125 | 1_Gm136   | 0.31162 | 0.16972  | 0.966824 | NA       | 1.01124 | 0       | 0       | 0       | 0.85848 | 0       |
| ENSMUSG00000094127 | 1_G53001  | 7.41579 | 6.42155  | 0.100789 | 0.432087 | 44.4948 | 0       | 0       | 0       | 0       | 0       |
| ENSMUSG00000094133 | 1_Olfr143 | 0.13755 | -0.79206 | 0.84609  | NA       | 0       | 0       | 0       | 0.82529 | 0       | 0       |
| ENSMUSG00000094144 | 8_Gm213   | 0       | NA       | NA       | NA       | 0       | 0       | 0       | 0       | 0       | 0       |
| ENSMUSG00000094155 | 1_Gm216   | 0       | NA       | NA       | NA       | 0       | 0       | 0       | 0       | 0       | 0       |
| ENSMUSG00000094157 | 7_Gm799   | 0       | NA       | NA       | NA       | 0       | 0       | 0       | 0       | 0       | 0       |
| ENSMUSG00000094195 | 2_Gm650   | 0       | NA       | NA       | NA       | 0       | 0       | 0       | 0       | 0       | 0       |
| ENSMUSG00000094205 | 7_Gm892   | 0       | NA       | NA       | NA       | 0       | 0       | 0       | 0       | 0       | 0       |
| ENSMUSG00000094248 | 1_Hist1h2 | 0.37783 | 2.11394  | 0.599927 | NA       | 0       | 2.26701 | 0       | 0       | 0       | 0       |
| ENSMUSG00000094258 | 7_Gm815   | 0       | NA       | NA       | NA       | 0       | 0       | 0       | 0       | 0       | 0       |
| ENSMUSG00000094271 | 1_Gm132   | 3.91343 | -1.09781 | 0.486853 | 0.813832 | 3.03373 | 4.53401 | 0       | 9.90351 | 6.00934 | 0       |
| ENSMUSG00000094282 | 1_Ccdc42  | 0       | NA       | NA       | NA       | 0       | 0       | 0       | 0       | 0       | 0       |
| ENSMUSG00000094293 | 1_Gm389   | 1.06176 | 2.44546  | 0.348939 | NA       | 1.01124 | 4.53401 | 0       | 0.82529 | 0       | 0       |
| ENSMUSG00000094296 | 1_Gm217   | 0.18892 | 1.1315   | 0.781553 | NA       | 0       | 1.1335  | 0       | 0       | 0       | 0       |
| ENSMUSG00000094305 | 1_Scgb2b  | 0.19594 | -0.79206 | 0.84609  | NA       | 0       | 0       | 0       | 0       | 0       | 1.17563 |
| ENSMUSG00000094311 | 1_Rfp14b  | 0       | NA       | NA       | NA       | 0       | 0       | 0       | 0       | 0       | 0       |
| ENSMUSG00000094336 | 1_Gm136   | 0.31162 | 0.16972  | 0.966824 | NA       | 1.01124 | 0       | 0       | 0       | 0.85848 | 0       |
| ENSMUSG00000094338 | 1_Hist1h2 | 2.80492 | 2.70451  | 0.297226 | 0.680822 | 0       | 0       | 14.4783 | 0       | 0       | 2.35126 |
| ENSMUSG00000094370 | 7_Gm337   | 4.24606 | 1.70399  | 0.284748 | 0.670966 | 12.1349 | 0       | 7.23913 | 0       | 2.57543 | 3.52688 |
| ENSMUSG00000094374 | 1_Gm543   | 0.18892 | 1.1315   | 0.781553 | NA       | 0       | 1.1335  | 0       | 0       | 0       | 0       |
| ENSMUSG00000094379 | 1_Vmn1r2  | 0.14308 | -0.79206 | 0.84609  | NA       | 0       | 0       | 0       | 0       | 0.85848 | 0       |
| ENSMUSG00000094385 | 1_Vmn1r1  | 0       | NA       | NA       | NA       | 0       | 0       | 0       | 0       | 0       | 0       |
| ENSMUSG00000094410 | 7_Gm383   | 2178.08 | 0.31058  | 0.37909  | 0.74711  | 3387.67 | 2042.57 | 1804.61 | 1704.23 | 2289.56 | 1839.86 |
| ENSMUSG00000094421 | 1_Gm209   | 0.8618  | 3.31799  | 0.400367 | NA       | 0       | 0       | 5.17081 | 0       | 0       | 0       |
| ENSMUSG00000094430 | 2_Gm933   | 0.332   | 0.16972  | 0.966824 | NA       | 0       | 1.1335  | 0       | 0       | 0.85848 | 0       |
| ENSMUSG00000094437 | 1_Gm983   | 217.832 | 0.00727  | 0.982692 | 0.994334 | 237.642 | 215.366 | 201.662 | 152.679 | 238.657 | 260.989 |
| ENSMUSG00000094441 | 1_Zfp955c | 270.964 | 0.18049  | 0.375913 | 0.920596 | 527.87  | 148.489 | 187.183 | 196.42  | 323.646 | 242.179 |
| ENSMUSG00000094475 | 7_Gm110   | 39.7428 | -0.89828 | 0.038239 | 0.245561 | 20.2249 | 36.2721 | 26.8882 | 50.3428 | 50.6501 | 54.0789 |
| ENSMUSG00000094483 | 2_Purb    | 6603.04 | 0.52182  | 0.282861 | 0.669522 | 13897.5 | 4755.04 | 4700.26 | 4643.92 | 6140.69 | 5480.78 |
| ENSMUSG00000094487 | 1_Gm219   | 16.8541 | 1.34647  | 0.050194 | 0.290147 | 39.4385 | 12.4685 | 20.6832 | 7.42763 | 12.8772 | 8.22939 |
| ENSMUSG00000094500 | 2_Smim1f  | 0       | NA       | NA       | NA       | 0       | 0       | 0       | 0       | 0       | 0       |
| ENSMUSG00000094504 | 2_Gm529   | 0.18892 | 1.1315   | 0.781553 | NA       | 0       | 1.1335  | 0       | 0       | 0       | 0       |
| ENSMUSG00000094559 | 1_Cyp2d3  | 0.38486 | 0.16972  | 0.966824 | NA       | 0       | 1.1335  | 0       | 0       | 0       | 1.17563 |
| ENSMUSG00000094590 | 2_Gm102   | 0.09765 | 1.32248  | 0.608162 | NA       | 0       | 2.26701 | 2.06832 | 1.65058 | 0       | 0       |
| ENSMUSG00000094595 | 1_Fsbp    | 74.0518 | -0.29108 | 0.596952 | 0.868285 | 116.293 | 55.5416 | 27.9224 | 90.7822 | 73.829  | 79.9427 |
| ENSMUSG00000094606 | 7_Vmn2r5  | 0.8911  | 3.36172  | 0.18618  | NA       | 1.01124 | 2.26701 | 2.06832 | 0       | 0       | 0       |
| ENSMUSG00000094613 | 2_A63007  | 0.61982 | 0.2847   | 0.936624 | NA       | 0       | 0       | 2.06832 | 1.65058 | 0       | 0       |
| ENSMUSG00000094618 | 1_Gm132   | 0.13755 | -0.79206 | 0.84609  | NA       | 0       | 0       | 0       | 0.82529 | 0       | 0       |
| ENSMUSG00000094620 | 1_Cldn34c | 0.28063 | -1.56014 | 0.700051 | NA       | 0       | 0       | 0       | 0.82529 | 0.85848 | 0       |
| ENSMUSG00000094622 | 1_Gm305   | 44.2207 | -0.06885 | 0.917589 | 0.976775 | 81.9108 | 34.0051 | 13.4441 | 32.1864 | 53.2256 | 50.552  |
| ENSMUSG00000094626 | 1_Cecr6   | 1.31696 | -2.59282 | 0.276738 | NA       | 0       | 1.1335  | 0       | 2.47588 | 4.29238 | 0       |
| ENSMUSG00000094628 | 7_Gm325   | 2.40161 | 0.85292  | 0.559545 | 0.848542 | 5.05622 | 2.26701 | 2.06832 | 3.30117 | 1.71695 | 0       |
| ENSMUSG00000094634 | 7_Gm346   | 19.9436 | 0.30865  | 0.646182 | 0.889732 | 37.416  | 7.93452 | 20.6832 | 17.3311 | 16.3111 | 19.9857 |
| ENSMUSG00000094638 | 1_Gm219   | 0.85848 | -3.14809 | 0.426095 | NA       | 0       | 0       | 0       | 0       | 5.15086 | 0       |
| ENSMUSG00000094648 | 1_Gm132   | 0       | NA       | NA       | NA       | 0       | 0       | 0       | 0       | 0       | 0       |
| ENSMUSG00000094649 | 1_Gm710   | 5.3459  | -0.4402  | 0.661679 | 0.895681 | 8.08995 | 2.26701 | 3.10248 | 5.77705 | 3.43391 | 9.40502 |
| ENSMUSG00000094651 | 2_Gal3st2 | 0.71874 | 3.04967  | 0.267382 | NA       | 1.01124 | 2.26701 | 1.03416 | 0       | 0       | 0       |
| ENSMUSG00000094685 | 1_Gm590   | 340.611 | -0.01373 | 0.971462 | 0.992434 | 507.645 | 240.303 | 268.882 | 335.069 | 361.419 | 330.351 |
| ENSMUSG00000094686 | 1_Ccl21a  | 213.292 | -0.45341 | 0.383233 | 0.749884 | 65.7309 | 211.965 | 262.677 | 291.328 | 244.666 | 203.384 |
| ENSMUSG00000094690 | 1_160001  | 2.06476 | -0.41464 | 0.793393 | 0.938313 | 0       | 2.26701 | 3.10248 | 4.12646 | 1.71695 | 1.17563 |
| ENSMUSG00000094706 | 7_Gm103   | 0       | NA       | NA       | NA       | 0       | 0       | 0       | 0       | 0       | 0       |
| ENSMUSG00000094707 | 1_A83001  | 38.6546 | -1.33858 | 0.088689 | 0.404886 | 51.5735 | 6.80102 | 7.23913 | 62.7222 | 60.0934 | 43.4982 |
| ENSMUSG00000094724 | 7_Rnasct  | 3932.29 | 0.01421  | 0.948543 | 0.986924 | 3796.21 | 4103.28 | 3955.67 | 3777.36 | 4172.2  | 3789.05 |
| ENSMUSG00000094732 | 1_150001  | 0.94207 | -3.27249 | 0.280284 | NA       | 0       | 0       | 0       | 3.30117 | 0       | 2.35126 |
| ENSMUSG00000094733 | 1_Gm541   | 1.45723 | 2.89924  | 0.217074 | NA       | 3.03373 | 4.53401 | 0       | 0       | 0       | 1.17563 |
| ENSMUSG00000094764 | 1_Olfr346 | 0       | NA       | NA       | NA       | 0       | 0       | 0       | 0       | 0       | 0       |
| ENSMUSG00000094778 | 1_Olfr143 | 0.36448 | 0.16972  | 0.966824 | NA       | 1.01124 | 0       | 0       | 0       | 0       | 1.17563 |
| ENSMUSG00000094786 | 1_Gm144   | 94.6877 | -0.67428 | 0.239051 | 0.630782 | 134.495 | 29.4711 | 54.8106 | 125.444 | 132.205 | 91.699  |
| ENSMUSG00000094790 | 1_Gm662   | 0.30609 | 0.16972  | 0.966824 | NA       | 1.01124 | 0       | 0       | 0.82529 | 0       | 0       |
| ENSMUSG00000094796 | 1_BC147f  | 21.8449 | 4.47736  | 1.22E-08 | 1.62E-06 | 43.4835 | 48.7406 | 33.0932 | 0.82529 | 2.57543 | 2.35126 |
| ENSMUSG00000094800 | 8_Gm978   | 41.5143 | -0.37108 | 0.480009 | 0.809966 | 48.5397 | 22.6701 | 37.2298 | 28.0599 | 64.3858 | 48.2007 |
| ENSMUSG00000094804 | 1_Gm219   | 0       | NA       | NA       | NA       | 0       | 0       | 0       | 0       | 0       | 0       |
| ENSMUSG00000094811 | 7_Gm211   | 0       | NA       | NA       | NA       | 0       | 0       | 0       | 0       | 0       | 0       |
| ENSMUSG00000094814 | 1_Gm219   | 0.34472 | 1.99863  | 0.620844 | NA       | 0       | 0       | 2.06832 | 0       | 0       | 0       |

|                    |            |         |          |          |          |         |         |         |         |         |         |
|--------------------|------------|---------|----------|----------|----------|---------|---------|---------|---------|---------|---------|
| ENSMUSG00000094817 | 8_Cphx3    | 0.19594 | -0.79206 | 0.84609  | NA       | 0       | 0       | 0       | 0       | 0       | 1.17563 |
| ENSMUSG00000094825 | 8_Gm319    | 10.6805 | 0.11454  | 0.882499 | 0.967828 | 20.2249 | 6.80102 | 6.20497 | 8.25292 | 12.0187 | 10.5807 |
| ENSMUSG00000094840 | 5_Muc3a    | 3.22692 | 0.69567  | 0.587477 | 0.862925 | 2.02249 | 7.93452 | 2.06832 | 4.12646 | 0.85848 | 2.35126 |
| ENSMUSG00000094841 | 1_Gm106    | 0.28616 | -1.57932 | 0.696464 | NA       | 0       | 0       | 0       | 0       | 1.71695 | 0       |
| ENSMUSG00000094845 | 1_Tmem9    | 0.37783 | 2.11394  | 0.599927 | NA       | 0       | 2.26701 | 0       | 0       | 0       | 0       |
| ENSMUSG00000094870 | 7_Zfp131   | 891.946 | 0.28385  | 0.511479 | 0.827179 | 1593.72 | 708.439 | 636.009 | 730.384 | 936.598 | 746.524 |
| ENSMUSG00000094904 | 1_Gm144    | 0       | NA       | NA       | NA       | 0       | 0       | 0       | 0       | 0       | 0       |
| ENSMUSG00000094910 | 1_D43001   | 37.2871 | -1.49385 | 0.002871 | 0.042089 | 22.2474 | 14.7355 | 21.7174 | 76.7522 | 50.6501 | 37.6201 |
| ENSMUSG00000094918 | 3_Gm876    | 0       | NA       | NA       | NA       | 0       | 0       | 0       | 0       | 0       | 0       |
| ENSMUSG00000094925 | 7_Gm579    | 0.13755 | -0.79206 | 0.84609  | NA       | 0       | 0       | 0       | 0.82529 | 0       | 0       |
| ENSMUSG00000094929 | 1_Gm352    | 1.17979 | 3.77253  | 0.293767 | NA       | 7.07871 | 0       | 0       | 0       | 0       | 0       |
| ENSMUSG00000094931 | 1_Vmn1r1   | 0       | NA       | NA       | NA       | 0       | 0       | 0       | 0       | 0       | 0       |
| ENSMUSG00000094932 | 7_Gm200    | 39.7428 | -0.89828 | 0.038239 | 0.245561 | 20.2249 | 36.2721 | 26.8882 | 50.3428 | 50.6501 | 54.0789 |
| ENSMUSG00000094935 | 1_Gm972    | 65.7017 | -0.52427 | 0.392312 | 0.754651 | 16.1799 | 79.3452 | 66.1863 | 87.481  | 49.7917 | 95.2259 |
| ENSMUSG00000094936 | 7_Rbm4     | 353.034 | 0.09736  | 0.7245   | 0.915486 | 321.576 | 414.862 | 358.854 | 336.719 | 382.881 | 303.312 |
| ENSMUSG00000094942 | 7_Gm360    | 99.2666 | 0.75831  | 0.198715 | 0.590735 | 245.732 | 61.2092 | 67.2205 | 73.451  | 70.3951 | 77.5914 |
| ENSMUSG00000094945 | 3_Rhox4a   | 435.576 | -0.38094 | 0.286704 | 0.672535 | 271.013 | 477.205 | 386.776 | 461.338 | 394.041 | 623.083 |
| ENSMUSG00000094954 | 1_Gm801    | 0.13755 | -0.79206 | 0.84609  | NA       | 0       | 0       | 0       | 0.82529 | 0       | 0       |
| ENSMUSG00000094958 | 1_311002   | 8.01684 | 1.01845  | 0.235015 | 0.626778 | 19.2136 | 5.66751 | 7.23913 | 4.95175 | 5.15086 | 5.87814 |
| ENSMUSG00000094973 | 2_Gm899    | 1.00156 | -3.37011 | 0.372785 | NA       | 0       | 0       | 0       | 0       | 6.00934 | 0       |
| ENSMUSG00000094978 | 2_Scgb1b   | 0.19594 | -0.79206 | 0.84609  | NA       | 0       | 0       | 0       | 0       | 0       | 1.17563 |
| ENSMUSG00000094985 | 1_Topaz1   | 0.31544 | 0.16972  | 0.966824 | NA       | 0       | 0       | 1.03416 | 0       | 0.85848 | 0       |
| ENSMUSG00000094991 | 2_Gm217    | 0.13755 | -0.79206 | 0.84609  | NA       | 0       | 0       | 0       | 0.82529 | 0       | 0       |
| ENSMUSG00000094992 | 1_Fbxw25   | 0.28616 | -1.57932 | 0.696464 | NA       | 0       | 0       | 0       | 0       | 1.71695 | 0       |
| ENSMUSG00000095022 | 8_Gm207    | 0       | NA       | NA       | NA       | 0       | 0       | 0       | 0       | 0       | 0       |
| ENSMUSG00000095026 | 1_Gm333    | 23.4568 | 0.23822  | 0.65257  | 0.892459 | 19.2136 | 23.8036 | 33.0932 | 15.6806 | 26.6128 | 22.3369 |
| ENSMUSG00000095028 | 6_Sirpb1b  | 26.65   | 3.6952   | 3.81E-06 | 0.000235 | 61.6859 | 66.8767 | 19.6491 | 4.95175 | 0.85848 | 5.87814 |
| ENSMUSG00000095029 | 1_Gm213    | 2.07809 | 4.58165  | 0.142762 | 0.511466 | 0       | 12.4685 | 0       | 0       | 0       | 0       |
| ENSMUSG00000095040 | 2_170000   | 2.6142  | -0.96114 | 0.485871 | 0.813523 | 2.02249 | 2.26701 | 1.03416 | 0.82529 | 6.00934 | 3.52688 |
| ENSMUSG00000095048 | 7_Gm112    | 1.95123 | 0.32077  | 0.88634  | 0.969051 | 2.02249 | 4.53401 | 0       | 0       | 5.15086 | 0       |
| ENSMUSG00000095061 | 1_E03001   | 0.76269 | 1.73729  | 0.607535 | NA       | 0       | 3.40051 | 0       | 0       | 0       | 1.17563 |
| ENSMUSG00000095071 | 2_AF067C   | 0.19594 | -0.79206 | 0.84609  | NA       | 0       | 0       | 0       | 0       | 0       | 1.17563 |
| ENSMUSG00000095098 | 1_Ccdc85   | 5.70008 | 0.35864  | 0.791107 | 0.937373 | 0       | 6.80102 | 12.4099 | 8.25292 | 0.85848 | 5.87814 |
| ENSMUSG00000095101 | 2_Gm132    | 4.77799 | 0.7251   | 0.658649 | 0.894702 | 0       | 14.7355 | 3.10248 | 4.95175 | 0       | 5.87814 |
| ENSMUSG00000095104 | 1_Esp15    | 0.6761  | 0.03867  | 0.98952  | NA       | 2.02249 | 0       | 0       | 0       | 0.85848 | 1.17563 |
| ENSMUSG00000095105 | 1_Edarad   | 310.808 | 0.08562  | 0.743432 | 0.923259 | 322.587 | 333.25  | 304.043 | 263.268 | 321.929 | 319.771 |
| ENSMUSG00000095113 | 1_Gm363    | 0       | NA       | NA       | NA       | 0       | 0       | 0       | 0       | 0       | 0       |
| ENSMUSG00000095115 | 1_Itprip12 | 630.038 | -0.26811 | 0.516484 | 0.830302 | 904.052 | 402.394 | 408.494 | 688.294 | 769.195 | 607.8   |
| ENSMUSG00000095123 | 1_Gm217    | 397.593 | -0.09713 | 0.785676 | 0.936159 | 529.892 | 307.179 | 315.419 | 341.671 | 489.332 | 402.065 |
| ENSMUSG00000095125 | 1_Vmn1r1   | 0.18892 | 1.1315   | 0.781553 | NA       | 0       | 1.1335  | 0       | 0       | 0       | 0       |
| ENSMUSG00000095139 | 2_Pou3f2   | 3.5212  | 0.05476  | 0.969901 | 0.991928 | 2.02249 | 6.80102 | 2.06832 | 1.65058 | 8.58477 | 0       |
| ENSMUSG00000095143 | 5_Hsd3b4   | 0       | NA       | NA       | NA       | 0       | 0       | 0       | 0       | 0       | 0       |
| ENSMUSG00000095180 | 8_Rhox5    | 6.49328 | -0.86559 | 0.3088   | 0.691472 | 5.05622 | 5.66751 | 3.10248 | 6.60234 | 10.3017 | 8.22939 |
| ENSMUSG00000095186 | 1_Gm107    | 1.57338 | 0.24624  | 0.917664 | NA       | 1.01124 | 0       | 4.13665 | 0       | 4.29238 | 0       |
| ENSMUSG00000095187 | 1_Olfr138  | 0       | NA       | NA       | NA       | 0       | 0       | 0       | 0       | 0       | 0       |
| ENSMUSG00000095190 | 2_Gm106    | 0.18892 | 1.1315   | 0.781553 | NA       | 0       | 1.1335  | 0       | 0       | 0       | 0       |
| ENSMUSG00000095193 | 1_Gm209    | 67.6279 | 0.28689  | 0.633896 | 0.883693 | 140.563 | 31.7381 | 50.6739 | 55.2946 | 78.1214 | 49.3764 |
| ENSMUSG00000095195 | 7_Gm300    | 1.89596 | 4.45498  | 0.16154  | 0.540065 | 0       | 0       | 11.3758 | 0       | 0       | 0       |
| ENSMUSG00000095199 | 7_Gm144    | 0.17236 | 1.1315   | 0.781553 | NA       | 0       | 0       | 1.03416 | 0       | 0       | 0       |
| ENSMUSG00000095217 | 1_Hist1h2  | 0.37783 | 2.11394  | 0.599927 | NA       | 0       | 2.26701 | 0       | 0       | 0       | 0       |
| ENSMUSG00000095241 | 1_Gm547    | 1743.35 | 0.84868  | 0.270109 | 0.656915 | 209.328 | 3586.4  | 2929.78 | 1513.59 | 849.034 | 1371.96 |
| ENSMUSG00000095253 | 4_Zfp799   | 467.255 | -0.13083 | 0.765272 | 0.929992 | 729.107 | 279.975 | 328.863 | 422.55  | 511.652 | 531.384 |
| ENSMUSG00000095257 | 1_Scgb1b   | 0.58781 | -2.5686  | 0.518601 | NA       | 0       | 0       | 0       | 0       | 0       | 3.52688 |
| ENSMUSG00000095264 | 1_Gm285    | 0.56675 | 2.70271  | 0.498103 | NA       | 0       | 3.40051 | 0       | 0       | 0       | 0       |
| ENSMUSG00000095276 | 1_Gfy      | 0.5534  | 1.07975  | 0.726619 | NA       | 1.01124 | 1.1335  | 0       | 0       | 0       | 1.17563 |
| ENSMUSG00000095280 | 1_Gm217    | 8.23353 | 1.47772  | 0.078264 | 0.375394 | 18.2024 | 5.66751 | 12.4099 | 4.12646 | 4.29238 | 4.70251 |
| ENSMUSG00000095294 | 1_Gm211    | 1.53651 | -3.98197 | 0.137189 | NA       | 0       | 0       | 0       | 0       | 6.86782 | 2.35126 |
| ENSMUSG00000095295 | 8_Gm348    | 2.16686 | 0.25423  | 0.885468 | 0.968779 | 5.05622 | 0       | 2.06832 | 3.30117 | 2.57543 | 0       |
| ENSMUSG00000095300 | 1_Gm906    | 0       | NA       | NA       | NA       | 0       | 0       | 0       | 0       | 0       | 0       |
| ENSMUSG00000095304 | 8_Plac9a   | 21.4606 | -0.54238 | 0.700731 | 0.906172 | 2.02249 | 45.3401 | 5.17081 | 58.5958 | 0       | 17.6344 |
| ENSMUSG00000095306 | 2_Gm218    | 6.60698 | 0.18768  | 0.814794 | 0.947066 | 7.07871 | 6.80102 | 7.23913 | 5.77705 | 6.86782 | 5.87814 |
| ENSMUSG00000095315 | 1_Gm101    | 10.4489 | 0.54221  | 0.523568 | 0.832707 | 6.06747 | 24.9371 | 6.20497 | 5.77705 | 10.3017 | 9.40502 |
| ENSMUSG00000095318 | 1_Gm802    | 0       | NA       | NA       | NA       | 0       | 0       | 0       | 0       | 0       | 0       |
| ENSMUSG00000095325 | 1_Zfp870   | 269.116 | -0.15589 | 0.682667 | 0.902945 | 376.183 | 197.23  | 190.286 | 273.997 | 312.486 | 264.516 |
| ENSMUSG00000095330 | 1_Gm218    | 0.42924 | -2.15458 | 0.590406 | NA       | 0       | 0       | 0       | 0       | 2.57543 | 0       |
| ENSMUSG00000095332 | 1_Gm982    | 102.761 | -1.21523 | 0.005406 | 0.065366 | 40.4498 | 53.2746 | 92.0404 | 160.932 | 160.535 | 109.333 |
| ENSMUSG00000095339 | 1_Zscan4   | 0.16854 | 1.1315   | 0.781553 | NA       | 1.01124 | 0       | 0       | 0       | 0       | 0       |
| ENSMUSG00000095362 | 7_Gm143    | 600.202 | 0.18945  | 0.728816 | 0.917597 | 1222.59 | 354.786 | 341.273 | 525.711 | 693.649 | 463.197 |
| ENSMUSG00000095363 | 2_Gm456    | 0.18892 | 1.1315   | 0.781553 | NA       | 0       | 1.1335  | 0       | 0       | 0       | 0       |
| ENSMUSG00000095366 | 1_Gm218    | 2.27518 | -2.49817 | 0.149787 | 0.523169 | 2.02249 | 0       | 0       | 4.12646 | 5.15086 | 2.35126 |
| ENSMUSG00000095368 | 7_Gm301    | 0       | NA       | NA       | NA       | 0       | 0       | 0       | 0       | 0       | 0       |
| ENSMUSG00000095369 | 1_Gm218    | 0.64511 | -1.32057 | 0.604751 | NA       | 1.01124 | 0       | 0       | 0.82529 | 0.85848 | 1.17563 |
| ENSMUSG00000095371 | 1_Gm961    | 0       | NA       | NA       | NA       | 0       | 0       | 0       | 0       | 0       | 0       |
| ENSMUSG00000095377 | 1_Olfr91   | 0.52091 | 1.15042  | 0.761139 | NA       | 0       | 2.26701 | 0       | 0       | 0.85848 | 0       |
| ENSMUSG00000095385 | 1_D63003   | 18.3657 | -1.44591 | 0.01952  | 0.160552 | 8.08995 | 11.335  | 10.3416 | 39.614  | 23.1789 | 17.6344 |

|                    |           |         |          |          |          |         |         |         |         |         |         |
|--------------------|-----------|---------|----------|----------|----------|---------|---------|---------|---------|---------|---------|
| ENSMUSG00000095388 | 7_Gm106   | 0       | NA       | NA       | NA       | 0       | 0       | 0       | 0       | 0       | 0       |
| ENSMUSG00000095403 | 7_Gm210   | 7530.99 | 0.40197  | 0.384148 | 0.750377 | 14639.8 | 5642.58 | 5437.62 | 5205.94 | 7329.68 | 6930.33 |
| ENSMUSG00000095406 | 1_Gm180   | 12.6868 | -0.00705 | 0.993139 | 0.997864 | 7.07871 | 7.93452 | 22.7516 | 4.95175 | 14.5941 | 18.81   |
| ENSMUSG00000095407 | 1_Tmem2   | 53.3429 | -1.39285 | 0.000554 | 0.012594 | 36.4048 | 26.0706 | 25.854  | 85.8304 | 82.4138 | 63.4839 |
| ENSMUSG00000095409 | 1_Gm130   | 0.16854 | 1.1315   | 0.781553 | NA       | 1.01124 | 0       | 0       | 0       | 0       | 0       |
| ENSMUSG00000095427 | 1_Rps2-p  | 3076.83 | -0.03347 | 0.962063 | 0.990106 | 411.576 | 4534.01 | 4178.01 | 3962.23 | 2532.51 | 2842.67 |
| ENSMUSG00000095432 | 8_Zfp748  | 568.598 | 0.40391  | 0.439604 | 0.785475 | 1212.48 | 380.857 | 349.547 | 439.881 | 537.407 | 491.412 |
| ENSMUSG00000095440 | 1_Fignl2  | 203.679 | 0.32893  | 0.333536 | 0.712065 | 155.732 | 262.973 | 261.643 | 169.185 | 178.563 | 193.979 |
| ENSMUSG00000095445 | 1_Gm144   | 0       | NA       | NA       | NA       | 0       | 0       | 0       | 0       | 0       | 0       |
| ENSMUSG00000095448 | 1_Olfr859 | 0.17236 | 1.1315   | 0.781553 | NA       | 0       | 0       | 1.03416 | 0       | 0       | 0       |
| ENSMUSG00000095463 | 8_Entpd4  | 669.153 | -0.28859 | 0.366976 | 0.739587 | 412.588 | 682.369 | 712.537 | 724.607 | 746.875 | 735.943 |
| ENSMUSG00000095464 | 1_Gm219   | 0.34472 | 1.99863  | 0.620844 | NA       | 0       | 0       | 2.06832 | 0       | 0       | 0       |
| ENSMUSG00000095466 | 7_Gm301   | 0       | NA       | NA       | NA       | 0       | 0       | 0       | 0       | 0       | 0       |
| ENSMUSG00000095470 | 1_Gm218   | 0       | NA       | NA       | NA       | 0       | 0       | 0       | 0       | 0       | 0       |
| ENSMUSG00000095474 | 1_Cldn34  | 0.17236 | 1.1315   | 0.781553 | NA       | 0       | 0       | 1.03416 | 0       | 0       | 0       |
| ENSMUSG00000095490 | 1_Gm795   | 0.332   | 0.16972  | 0.966824 | NA       | 0       | 1.1335  | 0       | 0       | 0.85848 | 0       |
| ENSMUSG00000095493 | 1_A63002  | 1.57884 | 3.09045  | 0.124478 | NA       | 1.01124 | 4.53401 | 3.10248 | 0.82529 | 0       | 0       |
| ENSMUSG00000095498 | 1_lfna1   | 0       | NA       | NA       | NA       | 0       | 0       | 0       | 0       | 0       | 0       |
| ENSMUSG00000095503 | 4_Gm314   | 0       | NA       | NA       | NA       | 0       | 0       | 0       | 0       | 0       | 0       |
| ENSMUSG00000095514 | 2_D13Ert  | 4.59835 | 3.14043  | 0.015734 | 0.137061 | 5.05622 | 12.4685 | 7.23913 | 1.65058 | 0       | 1.17563 |
| ENSMUSG00000095518 | 1_Gm806   | 0.2751  | -1.54073 | 0.703687 | NA       | 0       | 0       | 0       | 1.65058 | 0       | 0       |
| ENSMUSG00000095533 | 7_Gm104   | 0       | NA       | NA       | NA       | 0       | 0       | 0       | 0       | 0       | 0       |
| ENSMUSG00000095538 | 1_Gm219   | 3.79125 | -5.29256 | 0.012405 | 0.117485 | 0       | 0       | 0       | 10.7288 | 12.0187 | 0       |
| ENSMUSG00000095540 | 1_Esp4    | 0.19594 | -0.79206 | 0.84609  | NA       | 0       | 0       | 0       | 0       | 0       | 1.17563 |
| ENSMUSG00000095545 | 7_Gm424   | 26.9824 | -0.77379 | 0.436063 | 0.784198 | 0       | 34.0051 | 25.854  | 42.9152 | 30.9052 | 28.2151 |
| ENSMUSG00000095547 | 1_Gm107   | 2.05181 | 0.091    | 0.958968 | 0.989586 | 3.03373 | 3.40051 | 0       | 3.30117 | 2.57543 | 0       |
| ENSMUSG00000095550 | 2_Gm216   | 0.52091 | 1.15042  | 0.761139 | NA       | 0       | 2.26701 | 0       | 0       | 0.85848 | 0       |
| ENSMUSG00000095551 | 1_Gm798   | 0       | NA       | NA       | NA       | 0       | 0       | 0       | 0       | 0       | 0       |
| ENSMUSG00000095557 | 7_Gm341   | 0.19594 | -0.79206 | 0.84609  | NA       | 0       | 0       | 0       | 0       | 0       | 1.17563 |
| ENSMUSG00000095562 | 7_Gm218   | 0.7154  | -2.88643 | 0.46663  | NA       | 0       | 0       | 0       | 0       | 4.29238 | 0       |
| ENSMUSG00000095567 | 7_Noc2l   | 1093.69 | 0.3763   | 0.439841 | 0.785475 | 478.319 | 1753.53 | 1474.71 | 926.803 | 863.628 | 1065.12 |
| ENSMUSG00000095576 | 5_Fmo6    | 2.60036 | -1.03553 | 0.543288 | 0.84123  | 5.05622 | 0       | 0       | 4.12646 | 1.71695 | 4.70251 |
| ENSMUSG00000095595 | 1_Fam17   | 1358.62 | 0.33356  | 0.369    | 0.740777 | 2224.74 | 1230.98 | 1088.97 | 1038.22 | 1288.57 | 1280.26 |
| ENSMUSG00000095609 | 1_Gm211   | 8.23636 | 6.57213  | 0.092998 | 0.415354 | 0       | 32.8716 | 16.5466 | 0       | 0       | 0       |
| ENSMUSG00000095620 | 7_201000  | 0.14308 | -0.79206 | 0.84609  | NA       | 0       | 0       | 0       | 0       | 0.85848 | 0       |
| ENSMUSG00000095648 | 7_Gm200   | 30.6706 | -0.30268 | 0.709057 | 0.909883 | 57.6409 | 12.4685 | 12.4099 | 44.5658 | 46.3578 | 10.5807 |
| ENSMUSG00000095651 | 1_Gm218   | 26.1849 | 0.43224  | 0.391447 | 0.754323 | 33.3711 | 34.0051 | 22.7516 | 15.6806 | 26.6128 | 24.6882 |
| ENSMUSG00000095653 | 1_Gm218   | 0       | NA       | NA       | NA       | 0       | 0       | 0       | 0       | 0       | 0       |
| ENSMUSG00000095654 | 2_Plscr5  | 5.55664 | 0.42513  | 0.6516   | 0.892215 | 3.03373 | 5.66751 | 10.3416 | 4.12646 | 4.29238 | 5.87814 |
| ENSMUSG00000095655 | 1_Gm144   | 0       | NA       | NA       | NA       | 0       | 0       | 0       | 0       | 0       | 0       |
| ENSMUSG00000095663 | 1_Gm231   | 0.14308 | -0.79206 | 0.84609  | NA       | 0       | 0       | 0       | 0       | 0.85848 | 0       |
| ENSMUSG00000095677 | 1_Dynl1f  | 1791.95 | -0.05753 | 0.814965 | 0.947066 | 1872.82 | 1622.04 | 1773.59 | 1601.89 | 2019.14 | 1862.19 |
| ENSMUSG00000095681 | 7_Gm828   | 8.12378 | 0.35196  | 0.754239 | 0.926508 | 12.1349 | 7.93452 | 7.23913 | 13.2047 | 0       | 8.22939 |
| ENSMUSG00000095687 | 1_Rnaset  | 1324.79 | 0.0988   | 0.697563 | 0.905638 | 1479.45 | 1455.42 | 1175.84 | 1412.9  | 1222.47 | 1202.67 |
| ENSMUSG00000095717 | 1_Gm205   | 0.14308 | -0.79206 | 0.84609  | NA       | 0       | 0       | 0       | 0       | 0.85848 | 0       |
| ENSMUSG00000095718 | 2_Gm650   | 0.56675 | 2.70271  | 0.498103 | NA       | 0       | 3.40051 | 0       | 0       | 0       | 0       |
| ENSMUSG00000095720 | 1_Gm160   | 1.08919 | -2.25789 | 0.298145 | NA       | 0       | 1.1335  | 0       | 1.65058 | 2.57543 | 1.17563 |
| ENSMUSG00000095724 | 1_Gm213   | 0.30609 | 0.16972  | 0.966824 | NA       | 1.01124 | 0       | 0       | 0.82529 | 0       | 0       |
| ENSMUSG00000095730 | 2_Vmn2r2  | 2.73373 | -1.14025 | 0.583183 | 0.860399 | 5.05622 | 0       | 0       | 0       | 4.29238 | 7.05377 |
| ENSMUSG00000095741 | 3_Rhox2f  | 0.13755 | -0.79206 | 0.84609  | NA       | 0       | 0       | 0       | 0.82529 | 0       | 0       |
| ENSMUSG00000095743 | 1_Gm176   | 0       | NA       | NA       | NA       | 0       | 0       | 0       | 0       | 0       | 0       |
| ENSMUSG00000095770 | 1_Gm216   | 0       | NA       | NA       | NA       | 0       | 0       | 0       | 0       | 0       | 0       |
| ENSMUSG00000095779 | 1_Gm216   | 15.5765 | -0.8419  | 0.276238 | 0.662803 | 7.07871 | 6.80102 | 19.6491 | 34.6623 | 11.1602 | 14.1075 |
| ENSMUSG00000095788 | 6_Sirpb1a | 34.7381 | 3.74034  | 9.77E-08 | 9.91E-06 | 76.8546 | 88.4132 | 28.9565 | 4.12646 | 7.72629 | 2.35126 |
| ENSMUSG00000095789 | 6_Nupr1l  | 23.6939 | 0.31358  | 0.589015 | 0.863829 | 39.4385 | 20.4031 | 18.6149 | 14.03   | 21.4619 | 28.2151 |
| ENSMUSG00000095797 | 8_Gm824   | 0.48016 | 1.00965  | 0.794176 | NA       | 2.02249 | 0       | 0       | 0       | 0.85848 | 0       |
| ENSMUSG00000095799 | 1_Gm833   | 0.34472 | 1.99863  | 0.620844 | NA       | 0       | 0       | 2.06832 | 0       | 0       | 0       |
| ENSMUSG00000095821 | 1_Tcstv3  | 0.18892 | 1.1315   | 0.781553 | NA       | 0       | 1.1335  | 0       | 0       | 0       | 0       |
| ENSMUSG00000095822 | 2_Gm911   | 1.05455 | 2.42781  | 0.340919 | NA       | 0       | 3.40051 | 2.06832 | 0       | 0.85848 | 0       |
| ENSMUSG00000095824 | 1_Gm136   | 0.31162 | 0.16972  | 0.966824 | NA       | 1.01124 | 0       | 0       | 0       | 0.85848 | 0       |
| ENSMUSG00000095829 | 8_Speer1  | 0       | NA       | NA       | NA       | 0       | 0       | 0       | 0       | 0       | 0       |
| ENSMUSG00000095845 | 1_Gm574   | 0.17236 | 1.1315   | 0.781553 | NA       | 0       | 0       | 1.03416 | 0       | 0       | 0       |
| ENSMUSG00000095872 | 7_Gm151   | 0.33708 | 1.97061  | 0.625968 | NA       | 2.02249 | 0       | 0       | 0       | 0       | 0       |
| ENSMUSG00000095891 | 7_Gm107   | 1.41327 | 0.42901  | 0.071058 | NA       | 4.04498 | 3.40051 | 1.03416 | 0       | 0       | 0       |
| ENSMUSG00000095912 | 1_Gm331   | 0       | NA       | NA       | NA       | 0       | 0       | 0       | 0       | 0       | 0       |
| ENSMUSG00000095930 | 1_Nim1k   | 61.7    | -1.10004 | 0.01507  | 0.133565 | 47.5285 | 37.4056 | 33.0932 | 109.764 | 91.857  | 50.552  |
| ENSMUSG00000095935 | 1_Gm112   | 1.53045 | 0.27813  | 0.922341 | NA       | 5.05622 | 0       | 0       | 4.12646 | 0       | 0       |
| ENSMUSG00000095941 | 1_Gm219   | 0.13755 | -0.79206 | 0.84609  | NA       | 0       | 0       | 0       | 0.82529 | 0       | 0       |
| ENSMUSG00000095956 | 2_170003  | 1.86188 | -3.12354 | 0.111596 | 0.453007 | 0       | 1.1335  | 0       | 3.30117 | 0.85848 | 5.87814 |
| ENSMUSG00000095959 | 1_Gm108   | 0.81365 | -0.46703 | 0.846308 | NA       | 2.02249 | 0       | 0       | 0.82529 | 0.85848 | 1.17563 |
| ENSMUSG00000095975 | 3_Cphx1   | 2.0614  | 0.49211  | 0.790121 | 0.937308 | 5.05622 | 0       | 2.06832 | 0       | 1.71695 | 3.52688 |
| ENSMUSG00000095990 | 1_Zfp97   | 379.688 | 0.67898  | 0.259241 | 0.64893  | 963.716 | 223.3   | 215.106 | 251.714 | 324.504 | 299.785 |
| ENSMUSG00000096001 | 2_261052  | 16641.8 | -0.23705 | 0.487214 | 0.814019 | 9652.33 | 19015.6 | 17165   | 17475.6 | 17890.7 | 18651.3 |
| ENSMUSG00000096003 | 7_Gm350   | 2.10744 | -1.48702 | 0.483898 | 0.812102 | 0       | 3.40051 | 0       | 4.95175 | 4.29238 | 0       |
| ENSMUSG00000096010 | 2_Hist4h4 | 1.93036 | 4.4803   | 0.021798 | 0.172964 | 4.04498 | 3.40051 | 4.13665 | 0       | 0       | 0       |

|                    |            |         |          |          |          |         |         |         |         |         |         |
|--------------------|------------|---------|----------|----------|----------|---------|---------|---------|---------|---------|---------|
| ENSMUSG00000096014 | 1_Sox1     | 9.0907  | -2.0753  | 0.019656 | 0.161119 | 5.05622 | 1.1335  | 4.13665 | 16.5058 | 7.72629 | 19.9857 |
| ENSMUSG00000096035 | 2_Gm104    | 3.44853 | 1.40867  | 0.231776 | 0.623126 | 3.03373 | 6.80102 | 5.17081 | 2.47588 | 0.85848 | 2.35126 |
| ENSMUSG00000096039 | 7_D83003   | 41.9057 | 0.25217  | 0.597367 | 0.868406 | 64.7196 | 27.2041 | 44.4689 | 35.4876 | 36.056  | 43.4982 |
| ENSMUSG00000096042 | 1_Vmn2r1   | 0.14308 | -0.79206 | 0.84609  | NA       | 0       | 0       | 0       | 0       | 0.85848 | 0       |
| ENSMUSG00000096045 | 7_Gm216    | 0 NA    | NA       | NA       | NA       | 0       | 0       | 0       | 0       | 0       | 0       |
| ENSMUSG00000096049 | 1_Gm207    | 0.18892 | 1.1315   | 0.781553 | NA       | 0       | 1.1335  | 0       | 0       | 0       | 0       |
| ENSMUSG00000096051 | 1_Vmn1r4   | 0 NA    | NA       | NA       | NA       | 0       | 0       | 0       | 0       | 0       | 0       |
| ENSMUSG00000096054 | 2_Syne1    | 3558.38 | 0.70811  | 0.009895 | 0.099856 | 5382.85 | 4162.22 | 3698.16 | 2475.05 | 2741.12 | 2890.87 |
| ENSMUSG00000096066 | 4_Gm104    | 0 NA    | NA       | NA       | NA       | 0       | 0       | 0       | 0       | 0       | 0       |
| ENSMUSG00000096083 | 1_Gm104    | 0.2751  | -1.54073 | 0.703687 | NA       | 0       | 0       | 0       | 1.65058 | 0       | 0       |
| ENSMUSG00000096094 | 2_A63009   | 5.64958 | 0.87971  | 0.328356 | 0.709325 | 10.1124 | 5.66751 | 6.20497 | 4.95175 | 3.43391 | 3.52688 |
| ENSMUSG00000096097 | 1_Gm144    | 0 NA    | NA       | NA       | NA       | 0       | 0       | 0       | 0       | 0       | 0       |
| ENSMUSG00000096139 | 4_Gm797    | 0.17236 | 1.1315   | 0.781553 | NA       | 0       | 0       | 1.03416 | 0       | 0       | 0       |
| ENSMUSG00000096140 | 1_Ankrd6i  | 3.42429 | 2.7796   | 0.14741  | 0.519469 | 0       | 17.0025 | 1.03416 | 1.65058 | 0.85848 | 0       |
| ENSMUSG00000096141 | 2_Dnah7a   | 7.93524 | -0.89865 | 0.309284 | 0.691812 | 6.06747 | 1.1335  | 9.30745 | 9.90351 | 9.44325 | 11.7563 |
| ENSMUSG00000096145 | 2_Vkorc1   | 545.482 | -0.5148  | 0.100613 | 0.431747 | 328.654 | 464.736 | 554.311 | 707.276 | 598.358 | 619.556 |
| ENSMUSG00000096146 | 1_Kcnj11   | 6.5278  | -2.07718 | 0.099458 | 0.428954 | 0       | 3.40051 | 4.13665 | 18.1564 | 1.71695 | 11.7563 |
| ENSMUSG00000096156 | 1_Gm924    | 406.899 | 0.42462  | 0.333922 | 0.712471 | 652.253 | 507.809 | 238.891 | 269.045 | 407.777 | 365.62  |
| ENSMUSG00000096169 | 1_Gm446    | 0.34472 | 1.99863  | 0.620844 | NA       | 0       | 0       | 2.06832 | 0       | 0       | 0       |
| ENSMUSG00000096175 | 3_Gm217    | 0.32647 | 0.16972  | 0.966824 | NA       | 0       | 1.1335  | 0       | 0.82529 | 0       | 0       |
| ENSMUSG00000096180 | 1_Vmn2r4   | 0.17236 | 1.1315   | 0.781553 | NA       | 0       | 0       | 1.03416 | 0       | 0       | 0       |
| ENSMUSG00000096188 | 1_Cmtm4    | 2225.25 | 0.29351  | 0.226986 | 0.617717 | 2790.02 | 2167.26 | 2395.12 | 1946.86 | 2078.37 | 1973.88 |
| ENSMUSG00000096192 | 1_Gm188    | 0.74086 | -1.60873 | 0.6374   | NA       | 1.01124 | 0       | 0       | 0       | 3.43391 | 0       |
| ENSMUSG00000096199 | 1_Pthrhd1  | 133.505 | -0.23388 | 0.431292 | 0.780069 | 116.293 | 126.952 | 125.134 | 165.884 | 133.922 | 132.846 |
| ENSMUSG00000096210 | 1_H1f0     | 4182.02 | -0.08379 | 0.7511   | 0.925449 | 4209.81 | 3296.23 | 4675.44 | 4355.89 | 4026.26 | 4528.52 |
| ENSMUSG00000096215 | 8_Smim2    | 101.25  | 0.64626  | 0.534271 | 0.838255 | 14.1574 | 164.358 | 173.739 | 101.511 | 64.3858 | 89.3477 |
| ENSMUSG00000096218 | 2_Gm291    | 0.67416 | 2.9665   | 0.455571 | NA       | 4.04498 | 0       | 0       | 0       | 0       | 0       |
| ENSMUSG00000096228 | 1_Olfr5    | 0.13755 | -0.79206 | 0.84609  | NA       | 0       | 0       | 0       | 0.82529 | 0       | 0       |
| ENSMUSG00000096230 | 4_Gm164    | 0 NA    | NA       | NA       | NA       | 0       | 0       | 0       | 0       | 0       | 0       |
| ENSMUSG00000096255 | 1_Dynlt1b  | 5797.69 | -0.18492 | 0.62592  | 0.880099 | 3024.63 | 6850.89 | 6404.56 | 6382.81 | 5931.22 | 6192.03 |
| ENSMUSG00000096256 | 1_Gm210    | 5.40003 | -1.47217 | 0.20982  | 0.601596 | 3.03373 | 5.66751 | 0       | 10.7288 | 9.44325 | 3.52688 |
| ENSMUSG00000096265 | 1_A93046   | 1.75332 | -1.90009 | 0.497659 | 0.819569 | 0       | 2.26701 | 0       | 8.25292 | 0       | 0       |
| ENSMUSG00000096276 | 8_Gm204    | 2.03782 | 1.05019  | 0.566157 | 0.85179  | 5.05622 | 0       | 3.10248 | 0       | 1.71695 | 2.35126 |
| ENSMUSG00000096283 | 1_Gm617    | 0.18892 | 1.1315   | 0.781553 | NA       | 0       | 1.1335  | 0       | 0       | 0       | 0       |
| ENSMUSG00000096284 | 2_Tcstv1   | 0 NA    | NA       | NA       | NA       | 0       | 0       | 0       | 0       | 0       | 0       |
| ENSMUSG00000096299 | 3_Gm218    | 2.65001 | 0.64261  | 0.635237 | 0.884141 | 4.04498 | 3.40051 | 2.06832 | 0.82529 | 0.85848 | 4.70251 |
| ENSMUSG00000096322 | 1_Gm389    | 0.79048 | -0.17164 | 0.959096 | NA       | 0       | 2.26701 | 0       | 2.47588 | 0       | 0       |
| ENSMUSG00000096323 | 1_Gm207    | 0 NA    | NA       | NA       | NA       | 0       | 0       | 0       | 0       | 0       | 0       |
| ENSMUSG00000096327 | 1_Gm219    | 0.14308 | -0.79206 | 0.84609  | NA       | 0       | 0       | 0       | 0       | 0.85848 | 0       |
| ENSMUSG00000096330 | 7_Gm219    | 0.45299 | -0.6074  | 0.85212  | NA       | 0       | 0       | 1.03416 | 0.82529 | 0.85848 | 0       |
| ENSMUSG00000096337 | 1_Gm136    | 0.31162 | 0.16972  | 0.966824 | NA       | 1.01124 | 0       | 0       | 0       | 0.85848 | 0       |
| ENSMUSG00000096345 | 1_Esp16    | 0.67416 | 2.9665   | 0.455571 | NA       | 4.04498 | 0       | 0       | 0       | 0       | 0       |
| ENSMUSG00000096351 | 1_Samd1    | 42.0323 | -1.76359 | 0.012641 | 0.119114 | 8.08995 | 35.1386 | 14.4783 | 105.637 | 61.8103 | 27.0394 |
| ENSMUSG00000096368 | 2_Olfr132  | 0.44746 | -0.57987 | 0.8834   | NA       | 0       | 0       | 1.03416 | 1.65058 | 0       | 0       |
| ENSMUSG00000096370 | 8_Gm219    | 135.1   | 0.71911  | 0.035357 | 0.234786 | 151.687 | 188.161 | 164.432 | 123.794 | 75.546  | 106.982 |
| ENSMUSG00000096373 | 1_Vmn2r3   | 0.17236 | 1.1315   | 0.781553 | NA       | 0       | 0       | 1.03416 | 0       | 0       | 0       |
| ENSMUSG00000096385 | 7_Gm111    | 0.84486 | -1.80051 | 0.448209 | NA       | 0       | 0       | 1.03416 | 0.82529 | 0.85848 | 2.35126 |
| ENSMUSG00000096393 | 1_Gm590    | 0 NA    | NA       | NA       | NA       | 0       | 0       | 0       | 0       | 0       | 0       |
| ENSMUSG00000096433 | 1_Gm494    | 613.897 | 0.70788  | 0.221046 | 0.611852 | 1537.09 | 374.056 | 373.332 | 418.423 | 477.313 | 503.169 |
| ENSMUSG00000096445 | 1_Dcpp1    | 0.18892 | 1.1315   | 0.781553 | NA       | 0       | 1.1335  | 0       | 0       | 0       | 0       |
| ENSMUSG00000096446 | 1_Gm810    | 0.38486 | 0.16972  | 0.966824 | NA       | 0       | 1.1335  | 0       | 0       | 0       | 1.17563 |
| ENSMUSG00000096449 | 1_Gm407    | 0.76079 | -0.3439  | 0.902119 | NA       | 2.02249 | 0       | 0       | 0.82529 | 1.71695 | 0       |
| ENSMUSG00000096458 | 7_Moap1    | 130.596 | 0.09394  | 0.815976 | 0.947424 | 182.024 | 109.95  | 112.724 | 108.113 | 170.837 | 99.9284 |
| ENSMUSG00000096463 | 1_Gm217    | 0.14308 | -0.79206 | 0.84609  | NA       | 0       | 0       | 0       | 0       | 0.85848 | 0       |
| ENSMUSG00000096472 | 1_Cdkn2d   | 238.881 | 0.45228  | 0.138369 | 0.504954 | 219.44  | 301.512 | 307.146 | 222.829 | 174.271 | 208.086 |
| ENSMUSG00000096477 | 1_Olfr92   | 0.14308 | -0.79206 | 0.84609  | NA       | 0       | 0       | 0       | 0       | 0.85848 | 0       |
| ENSMUSG00000096484 | 1_Gm136    | 0.31162 | 0.16972  | 0.966824 | NA       | 1.01124 | 0       | 0       | 0       | 0.85848 | 0       |
| ENSMUSG00000096486 | 1_Gm542    | 0.14308 | -0.79206 | 0.84609  | NA       | 0       | 0       | 0       | 0       | 0.85848 | 0       |
| ENSMUSG00000096488 | 1_Gm104    | 4.42609 | 0.55487  | 0.593378 | 0.866332 | 8.08995 | 3.40051 | 4.13665 | 2.47588 | 2.57543 | 5.87814 |
| ENSMUSG00000096508 | 7_Gm790    | 2.86566 | -0.51157 | 0.758902 | 0.927759 | 5.05622 | 0       | 2.06832 | 5.77705 | 4.29238 | 0       |
| ENSMUSG00000096519 | 1_Gm107    | 0.33708 | 1.97061  | 0.625968 | NA       | 2.02249 | 0       | 0       | 0       | 0       | 0       |
| ENSMUSG00000096527 | 5_Gm637    | 0 NA    | NA       | NA       | NA       | 0       | 0       | 0       | 0       | 0       | 0       |
| ENSMUSG00000096528 | 1_G43004   | 7.42264 | 2.31268  | 0.01334  | 0.123292 | 14.1574 | 13.602  | 9.30745 | 0.82529 | 4.29238 | 2.35126 |
| ENSMUSG00000096537 | 5_119000   | 1.04524 | -1.06144 | 0.630962 | NA       | 1.01124 | 0       | 1.03416 | 1.65058 | 2.57543 | 0       |
| ENSMUSG00000096549 | 9_Prickle4 | 15.8811 | 0.11262  | 0.891912 | 0.970752 | 5.05622 | 10.2015 | 34.1273 | 17.3311 | 8.58477 | 19.9857 |
| ENSMUSG00000096553 | 1_Gm100    | 3.19429 | -1.8985  | 0.330298 | 0.710498 | 4.04498 | 0       | 0       | 8.25292 | 6.86782 | 0       |
| ENSMUSG00000096569 | 2_Amy2a2   | 0 NA    | NA       | NA       | NA       | 0       | 0       | 0       | 0       | 0       | 0       |
| ENSMUSG00000096573 | 2_170000   | 0.19594 | -0.79206 | 0.84609  | NA       | 0       | 0       | 0       | 0       | 0       | 1.17563 |
| ENSMUSG00000096574 | 7_Gm295    | 0.14308 | -0.79206 | 0.84609  | NA       | 0       | 0       | 0       | 0       | 0.85848 | 0       |
| ENSMUSG00000096582 | 1_Gm132    | 0 NA    | NA       | NA       | NA       | 0       | 0       | 0       | 0       | 0       | 0       |
| ENSMUSG00000096593 | 1_Vmn2r5   | 0.13755 | -0.79206 | 0.84609  | NA       | 0       | 0       | 0       | 0.82529 | 0       | 0       |
| ENSMUSG00000096597 | 1_Gm218    | 0.46955 | -0.60795 | 0.850453 | NA       | 0       | 1.1335  | 0       | 0.82529 | 0.85848 | 0       |
| ENSMUSG00000096606 | 2_Gm498    | 14.2238 | -1.07483 | 0.094808 | 0.418051 | 11.1237 | 10.2015 | 6.20497 | 25.5841 | 14.5941 | 17.6344 |
| ENSMUSG00000096607 | 1_753041   | 0.13755 | -0.79206 | 0.84609  | NA       | 0       | 0       | 0       | 0.82529 | 0       | 0       |
| ENSMUSG00000096612 | 2_Gm456    | 0.18892 | 1.1315   | 0.781553 | NA       | 0       | 1.1335  | 0       | 0       | 0       | 0       |

|                    |            |         |          |          |          |         |         |         |         |         |         |
|--------------------|------------|---------|----------|----------|----------|---------|---------|---------|---------|---------|---------|
| ENSMUSG00000096619 | 1_Gm203    | 1.05393 | 1.11974  | 0.617353 | NA       | 2.02249 | 2.26701 | 0       | 0       | 0.85848 | 1.17563 |
| ENSMUSG00000096620 | 1_Gm516    | 0.28616 | -1.57932 | 0.696464 | NA       | 0       | 0       | 0       | 0       | 1.71695 | 0       |
| ENSMUSG00000096629 | 7_Gm338    | 11.2269 | 0.24879  | 0.740875 | 0.922404 | 21.2361 | 9.06802 | 6.20497 | 8.25292 | 12.0187 | 10.5807 |
| ENSMUSG00000096644 | 1_Magea1   | 0.60858 | -2.64656 | 0.451247 | NA       | 0       | 0       | 0       | 2.47588 | 0       | 1.17563 |
| ENSMUSG00000096658 | 1_Vmn2r3   | 0.33708 | 1.97061  | 0.625968 | NA       | 2.02249 | 0       | 0       | 0       | 0       | 0       |
| ENSMUSG00000096682 | 1_lfna5    | 0.34472 | 1.99863  | 0.620844 | NA       | 0       | 0       | 2.06832 | 0       | 0       | 0       |
| ENSMUSG00000096687 | 7_AA4743   | 178.392 | -0.46359 | 0.197989 | 0.590191 | 206.294 | 111.083 | 132.373 | 189.817 | 230.93  | 199.857 |
| ENSMUSG00000096688 | 1_Mup17    | 1.28634 | 1.82951  | 0.53756  | NA       | 6.06747 | 0       | 0       | 1.65058 | 0       | 0       |
| ENSMUSG00000096696 | 1_Zfp960   | 234.138 | 0.4675   | 0.414058 | 0.768871 | 532.926 | 126.952 | 155.124 | 163.408 | 207.751 | 218.667 |
| ENSMUSG00000096700 | 1_Gm112    | 0.53302 | 1.01035  | 0.786953 | NA       | 2.02249 | 0       | 0       | 0       | 0       | 1.17563 |
| ENSMUSG00000096719 | 1_Mrgpra   | 1.86563 | 2.25748  | 0.250261 | 0.641949 | 5.05622 | 0       | 4.13665 | 0.82529 | 0       | 1.17563 |
| ENSMUSG00000096727 | 2_Psmb9    | 1449.82 | 1.9894   | 1.15E-05 | 0.000587 | 1066.86 | 3513.86 | 2368.23 | 615.668 | 538.265 | 596.043 |
| ENSMUSG00000096729 | 1_Gm136    | 0.31162 | 0.16972  | 0.966824 | NA       | 1.01124 | 0       | 0       | 0       | 0.85848 | 0       |
| ENSMUSG00000096736 | 1_Gm175    | 0.33902 | -1.78366 | 0.658108 | NA       | 0       | 0       | 0       | 0       | 0.85848 | 1.17563 |
| ENSMUSG00000096740 | 7_Lbhd1    | 430.112 | -0.23323 | 0.537963 | 0.839833 | 560.229 | 380.857 | 245.096 | 486.097 | 436.965 | 471.427 |
| ENSMUSG00000096753 | 7_Fam18    | 1.17563 | -3.57851 | 0.325604 | NA       | 0       | 0       | 0       | 0       | 0       | 7.05377 |
| ENSMUSG00000096764 | 1_Gm219    | 7.91969 | 6.51922  | 2.04E-05 | 0.000937 | 24.2699 | 5.66751 | 17.5807 | 0       | 0       | 0       |
| ENSMUSG00000096768 | 7_Erd1     | 13.6217 | 1.03333  | 0.408517 | 0.766014 | 0       | 24.9371 | 29.9907 | 15.6806 | 1.71695 | 9.40502 |
| ENSMUSG00000096770 | 2_Amy2a    | 0       | NA       | NA       | NA       | 0       | 0       | 0       | 0       | 0       | 0       |
| ENSMUSG00000096775 | 1_Gm579    | 18.4376 | 1.84911  | 0.019827 | 0.162073 | 46.5172 | 27.2041 | 12.4099 | 5.77705 | 3.43391 | 15.2832 |
| ENSMUSG00000096793 | 7_Gm300    | 0.37783 | 2.11394  | 0.599927 | NA       | 0       | 2.26701 | 0       | 0       | 0       | 0       |
| ENSMUSG00000096795 | 4_Zfp433   | 243.6   | 0.45787  | 0.376963 | 0.746094 | 513.712 | 153.023 | 178.91  | 174.137 | 236.081 | 205.735 |
| ENSMUSG00000096796 | 1_170002   | 0.16854 | 1.1315   | 0.781553 | NA       | 1.01124 | 0       | 0       | 0       | 0       | 0       |
| ENSMUSG00000096798 | 1_Gm630    | 0.42371 | -2.13816 | 0.587702 | NA       | 0       | 0       | 0       | 0.82529 | 1.71695 | 0       |
| ENSMUSG00000096807 | 1_Hist1h2  | 2.00263 | -0.86754 | 0.703274 | 0.90765  | 2.02249 | 2.26701 | 0       | 0       | 7.72629 | 0       |
| ENSMUSG00000096839 | 7_Gm346    | 0.6818  | 2.98321  | 0.371064 | NA       | 2.02249 | 0       | 2.06832 | 0       | 0       | 0       |
| ENSMUSG00000096846 | 7_Gm889    | 0.14308 | -0.79206 | 0.84609  | NA       | 0       | 0       | 0       | 0       | 0.85848 | 0       |
| ENSMUSG00000096847 | 1_Tmem1    | 6.323   | -2.03501 | 0.077258 | 0.372992 | 0       | 3.40051 | 4.13665 | 14.8553 | 12.0187 | 3.52688 |
| ENSMUSG00000096850 | 1_Gm217    | 2.27518 | -2.49817 | 0.149787 | 0.523169 | 2.02249 | 0       | 0       | 4.12646 | 5.15086 | 2.35126 |
| ENSMUSG00000096856 | 7_Gm107    | 221.874 | 0.31734  | 0.575199 | 0.856733 | 479.33  | 123.552 | 135.475 | 163.408 | 224.921 | 204.559 |
| ENSMUSG00000096872 | 2_Scgb2a   | 0       | NA       | NA       | NA       | 0       | 0       | 0       | 0       | 0       | 0       |
| ENSMUSG00000096878 | 2_Gm216    | 1.82464 | -0.17332 | 0.950027 | 0.987438 | 0       | 0       | 5.17081 | 5.77705 | 0       | 0       |
| ENSMUSG00000096879 | 2_Gm485    | 629.255 | -0.2273  | 0.588086 | 0.863131 | 910.12  | 349.119 | 479.851 | 598.337 | 737.432 | 700.674 |
| ENSMUSG00000096883 | 1_Shisa8   | 1.47826 | -1.6721  | 0.413209 | NA       | 0       | 1.1335  | 1.03416 | 4.12646 | 2.57543 | 0       |
| ENSMUSG00000096901 | 7_Gm302    | 0.13755 | -0.79206 | 0.84609  | NA       | 0       | 0       | 0       | 0.82529 | 0       | 0       |
| ENSMUSG00000096904 | 7_Gm359    | 1.51687 | 4.13479  | 0.218296 | NA       | 9.1012  | 0       | 0       | 0       | 0       | 0       |
| ENSMUSG00000096910 | 1_Zfp955l  | 276.676 | 0.24822  | 0.617347 | 0.877328 | 532.926 | 199.497 | 168.568 | 217.877 | 256.685 | 284.502 |
| ENSMUSG00000096911 | 7_Gm216    | 0       | NA       | NA       | NA       | 0       | 0       | 0       | 0       | 0       | 0       |
| ENSMUSG00000096914 | 3_Galnt1f6 | 3.13317 | -0.99504 | 0.461478 | 0.799907 | 4.04498 | 2.26701 | 0       | 4.12646 | 6.00934 | 2.35126 |
| ENSMUSG00000096915 | 1_Gm296    | 0       | NA       | NA       | NA       | 0       | 0       | 0       | 0       | 0       | 0       |
| ENSMUSG00000096916 | 7_Zfp850   | 127.126 | 0.70489  | 0.149976 | 0.523171 | 263.935 | 116.751 | 92.0404 | 82.5292 | 119.328 | 88.1721 |
| ENSMUSG00000096917 | 1_250000   | 38.7711 | 0.39145  | 0.456045 | 0.796585 | 65.7309 | 23.8036 | 42.4006 | 28.0599 | 42.0654 | 30.5663 |
| ENSMUSG00000096918 | 1_Gm168    | 0.62518 | -2.68247 | 0.441863 | NA       | 0       | 0       | 0       | 0       | 2.57543 | 1.17563 |
| ENSMUSG00000096921 | 1_Gm268    | 0.30609 | 0.16972  | 0.966824 | NA       | 1.01124 | 0       | 0       | 0.82529 | 0       | 0       |
| ENSMUSG00000096922 | 1_Gm173    | 2.44583 | -1.90368 | 0.202618 | 0.593711 | 1.01124 | 0       | 2.06832 | 4.95175 | 4.29238 | 2.35126 |
| ENSMUSG00000096923 | 1_A73007   | 1.48975 | -0.24205 | 0.904883 | NA       | 4.04498 | 0       | 0       | 0.82529 | 1.71695 | 2.35126 |
| ENSMUSG00000096924 | 1_Gm268    | 4.42017 | -0.64587 | 0.539114 | 0.84017  | 4.04498 | 1.1335  | 5.17081 | 5.77705 | 6.86782 | 3.52688 |
| ENSMUSG00000096926 | 1_Gm268    | 27.4038 | -0.7668  | 0.137855 | 0.503967 | 25.2811 | 17.0025 | 18.6149 | 27.2346 | 48.0747 | 28.2151 |
| ENSMUSG00000096930 | 1_Gm266    | 0       | NA       | NA       | NA       | 0       | 0       | 0       | 0       | 0       | 0       |
| ENSMUSG00000096932 | 1_503340   | 9.09399 | 0.05532  | 0.952207 | 0.988111 | 12.1349 | 1.1335  | 14.4783 | 7.42763 | 11.1602 | 8.22939 |
| ENSMUSG00000096934 | 1_Gm266    | 0.64511 | -1.32057 | 0.604751 | NA       | 1.01124 | 0       | 0       | 0.82529 | 0.85848 | 1.17563 |
| ENSMUSG00000096936 | 1_Gm351    | 0.94567 | -0.83771 | 0.752477 | NA       | 2.02249 | 0       | 0       | 2.47588 | 0       | 1.17563 |
| ENSMUSG00000096937 | 1_Gm108    | 11.3142 | 0.72772  | 0.53037  | 0.836542 | 25.2811 | 5.66751 | 11.3758 | 17.3311 | 0       | 8.22939 |
| ENSMUSG00000096938 | 7_953005   | 10.5707 | 0.05579  | 0.937959 | 0.985118 | 7.07871 | 17.0025 | 8.27329 | 10.7288 | 8.58477 | 11.7563 |
| ENSMUSG00000096940 | 1_Gm475    | 24.5041 | -0.31713 | 0.509132 | 0.827179 | 23.2586 | 21.5366 | 20.6832 | 32.1864 | 22.3204 | 27.0394 |
| ENSMUSG00000096941 | 1_Gm267    | 0.62535 | 0.25948  | 0.930855 | NA       | 0       | 0       | 2.06832 | 0.82529 | 0.85848 | 0       |
| ENSMUSG00000096943 | 1_Gm267    | 1.92645 | -2.20967 | 0.319986 | 0.701203 | 2.02249 | 0       | 0       | 0       | 6.00934 | 3.52688 |
| ENSMUSG00000096944 | 1_Gm267    | 6.60254 | -0.46461 | 0.604134 | 0.871111 | 10.1124 | 3.40051 | 3.10248 | 9.07822 | 6.86782 | 7.05377 |
| ENSMUSG00000096945 | 1_Gm265    | 3.30369 | -1.48723 | 0.260456 | 0.649568 | 3.03373 | 1.1335  | 1.03416 | 1.65058 | 9.44325 | 3.52688 |
| ENSMUSG00000096946 | 1_Fmr1os   | 1.43877 | 1.22347  | 0.556881 | NA       | 5.05622 | 0       | 1.03416 | 0.82529 | 1.71695 | 0       |
| ENSMUSG00000096947 | 1_Gm267    | 1.40437 | 2.89934  | 0.221282 | NA       | 3.03373 | 4.53401 | 0       | 0       | 0.85848 | 0       |
| ENSMUSG00000096948 | 1_Gm422    | 1.81323 | 1.08556  | 0.624959 | 0.879812 | 4.04498 | 3.40051 | 0       | 0       | 3.43391 | 0       |
| ENSMUSG00000096950 | 2_Gm953    | 18.7999 | -0.08236 | 0.874321 | 0.964209 | 18.2024 | 17.0025 | 19.6491 | 22.2829 | 18.028  | 17.6344 |
| ENSMUSG00000096954 | 1_Gdap1C   | 128.165 | 0.45181  | 0.22381  | 0.613717 | 184.046 | 162.091 | 98.2453 | 104.812 | 121.045 | 98.7527 |
| ENSMUSG00000096956 | 2_Snhg18   | 336.603 | -0.85866 | 0.008566 | 0.089954 | 263.935 | 176.826 | 277.155 | 499.302 | 443.833 | 358.566 |
| ENSMUSG00000096957 | 1_E23001   | 6.50013 | -3.03878 | 0.00374  | 0.050854 | 1.01124 | 1.1335  | 2.06832 | 11.5541 | 10.3017 | 12.9319 |
| ENSMUSG00000096958 | 1_Gm265    | 0.45852 | -0.61845 | 0.874837 | NA       | 0       | 0       | 1.03416 | 0       | 1.71695 | 0       |
| ENSMUSG00000096959 | 1_493050   | 26.9424 | 0.50506  | 0.294578 | 0.679002 | 36.4048 | 29.4711 | 28.9565 | 17.3311 | 28.3297 | 21.1613 |
| ENSMUSG00000096960 | 1_A23002   | 7.11028 | 0.57358  | 0.524628 | 0.833095 | 12.1349 | 10.2015 | 3.10248 | 3.30117 | 6.86782 | 7.05377 |
| ENSMUSG00000096965 | 7_330000   | 1.25621 | 2.71403  | 0.282928 | NA       | 1.01124 | 5.66751 | 0       | 0       | 0.85848 | 0       |
| ENSMUSG00000096968 | 1_Gm266    | 1.93059 | 1.61598  | 0.305858 | 0.688731 | 2.02249 | 5.66751 | 1.03416 | 0.82529 | 0.85848 | 1.17563 |
| ENSMUSG00000096971 | 1_493055   | 111.156 | -0.7824  | 0.028108 | 0.202638 | 100.113 | 63.4762 | 81.6988 | 155.98  | 152.809 | 112.86  |
| ENSMUSG00000096972 | 7_Gm268    | 248.255 | 1.17094  | 0.718186 | 0.912538 | 103.147 | 0       | 0       | 154.33  | 288.448 | 15.2832 |
| ENSMUSG00000096974 | 1_Gm268    | 5.98904 | -0.03435 | 0.968261 | 0.991244 | 8.08995 | 4.53401 | 5.17081 | 7.42763 | 6.00934 | 4.70251 |
| ENSMUSG00000096975 | 1_Gm163    | 14.8687 | -0.07959 | 0.907839 | 0.974731 | 19.2136 | 15.869  | 8.27329 | 8.25292 | 22.3204 | 15.2832 |

|                    |          |         |          |          |          |         |         |         |         |         |         |
|--------------------|----------|---------|----------|----------|----------|---------|---------|---------|---------|---------|---------|
| ENSMUSG00000096976 | 1_Gm268  | 7.71351 | -0.69185 | 0.683616 | 0.903102 | 1.01124 | 0       | 16.5466 | 0.82529 | 0.85848 | 27.0394 |
| ENSMUSG00000096977 | 1_Gm108  | 3.13588 | 1.30117  | 0.340677 | 0.719259 | 10.1124 | 2.26701 | 1.03416 | 1.65058 | 2.57543 | 1.17563 |
| ENSMUSG00000096978 | 1_Gm268  | 0.33902 | -1.78366 | 0.658108 | NA       | 0       | 0       | 0       | 0       | 0.85848 | 1.17563 |
| ENSMUSG00000096979 | 1_Gm268  | 5.89283 | 1.47802  | 0.117714 | 0.466696 | 13.1462 | 4.53401 | 8.27329 | 3.30117 | 2.57543 | 3.52688 |
| ENSMUSG00000096980 | 1_Gm265  | 45.1091 | 1.87014  | 0.096807 | 0.421931 | 152.698 | 19.2695 | 40.3323 | 0       | 26.6128 | 31.742  |
| ENSMUSG00000096981 | 1_Gm168  | 28.2918 | -0.19244 | 0.747602 | 0.924734 | 13.1462 | 22.6701 | 43.4348 | 38.7887 | 22.3204 | 29.3907 |
| ENSMUSG00000096982 | 1_Redurr | 0.14308 | -0.79206 | 0.84609  | NA       | 0       | 0       | 0       | 0       | 0.85848 | 0       |
| ENSMUSG00000096983 | 1_201001 | 6.70632 | -0.05458 | 0.949579 | 0.987335 | 9.1012  | 4.53401 | 6.20497 | 7.42763 | 9.44325 | 3.52688 |
| ENSMUSG00000096984 | 1_Gm265  | 0.86884 | 0.69729  | 0.744954 | NA       | 1.01124 | 1.1335  | 1.03416 | 0       | 0.85848 | 1.17563 |
| ENSMUSG00000096986 | 2_493050 | 0.73362 | -1.59314 | 0.566092 | NA       | 0       | 0       | 1.03416 | 1.65058 | 1.71695 | 0       |
| ENSMUSG00000096987 | 1_Gm265  | 46.2229 | -0.74993 | 0.133685 | 0.497275 | 24.2699 | 32.8716 | 46.5373 | 83.3545 | 51.5086 | 38.7957 |
| ENSMUSG00000096988 | 1_A93002 | 2.9695  | -1.30987 | 0.346972 | 0.724502 | 4.04498 | 0       | 1.03416 | 5.77705 | 3.43391 | 3.52688 |
| ENSMUSG00000096990 | 1_Gm267  | 8.47925 | 0.13636  | 0.900179 | 0.972744 | 14.1574 | 0       | 12.4099 | 5.77705 | 10.3017 | 8.22939 |
| ENSMUSG00000096991 | 1_Gm267  | 16.4639 | 0.45296  | 0.515422 | 0.829821 | 29.3261 | 20.4031 | 7.23913 | 9.90351 | 15.4526 | 16.4588 |
| ENSMUSG00000096995 | 1_281002 | 37.301  | -0.67224 | 0.12743  | 0.485365 | 23.2586 | 37.4056 | 25.854  | 42.9152 | 53.2256 | 41.147  |
| ENSMUSG00000096996 | 1_Gm267  | 46.9775 | -0.67415 | 0.108032 | 0.446816 | 47.5285 | 35.1386 | 25.854  | 54.4693 | 60.0934 | 58.7814 |
| ENSMUSG00000096997 | 1_Gm267  | 0.53364 | 2.62307  | 0.473724 | NA       | 0       | 1.1335  | 2.06832 | 0       | 0       | 0       |
| ENSMUSG00000096999 | 1_Gm267  | 0.13755 | -0.79206 | 0.84609  | NA       | 0       | 0       | 0       | 0.82529 | 0       | 0       |
| ENSMUSG00000097000 | 1_Gm174  | 65.9458 | 0.49452  | 0.207998 | 0.599354 | 83.9333 | 63.4762 | 83.7671 | 39.614  | 66.1027 | 58.7814 |
| ENSMUSG00000097002 | 1_Gm267  | 20.0673 | -0.10181 | 0.865296 | 0.962167 | 14.1574 | 30.6046 | 13.4441 | 25.5841 | 15.4526 | 21.1613 |
| ENSMUSG00000097005 | 1_493059 | 0.13755 | -0.79206 | 0.84609  | NA       | 0       | 0       | 0       | 0.82529 | 0       | 0       |
| ENSMUSG00000097006 | 7_953008 | 581.575 | 0.57884  | 0.17421  | 0.557874 | 365.059 | 888.666 | 836.637 | 583.482 | 379.447 | 436.158 |
| ENSMUSG00000097007 | 1_493043 | 2.84551 | -0.09667 | 0.938894 | 0.985171 | 3.03373 | 1.1335  | 4.13665 | 3.30117 | 4.29238 | 1.17563 |
| ENSMUSG00000097008 | 1_Gm268  | 0.17236 | 1.1315   | 0.781553 | NA       | 0       | 0       | 1.03416 | 0       | 0       | 0       |
| ENSMUSG00000097013 | 1_Gm267  | 6.49898 | -0.19709 | 0.829304 | 0.951083 | 8.08995 | 6.80102 | 3.10248 | 4.95175 | 4.29238 | 11.7563 |
| ENSMUSG00000097014 | 1_Gm267  | 0.98092 | -0.79471 | 0.69779  | NA       | 0       | 1.1335  | 1.03416 | 0.82529 | 1.71695 | 1.17563 |
| ENSMUSG00000097015 | 1_Gm267  | 1.6392  | -1.16638 | 0.609293 | NA       | 3.03373 | 0       | 0       | 1.65058 | 5.15086 | 0       |
| ENSMUSG00000097016 | 1_Gm267  | 7.22901 | -0.15559 | 0.892915 | 0.970997 | 17.1912 | 2.26701 | 1.03416 | 4.12646 | 12.8772 | 5.87814 |
| ENSMUSG00000097017 | 1_Gm267  | 4.43971 | -0.44026 | 0.695171 | 0.905638 | 8.08995 | 1.1335  | 2.06832 | 4.95175 | 6.86782 | 3.52688 |
| ENSMUSG00000097019 | 1_Gm266  | 71.2235 | 0.46911  | 0.312179 | 0.693828 | 97.0795 | 77.0782 | 73.4255 | 31.3611 | 66.1027 | 82.2939 |
| ENSMUSG00000097020 | 1_Gm266  | 6.69819 | -1.52053 | 0.160288 | 0.538686 | 5.05622 | 0       | 5.17081 | 5.77705 | 7.72629 | 16.4588 |
| ENSMUSG00000097021 | 7_493343 | 3.92813 | -1.45575 | 0.236737 | 0.6287   | 1.01124 | 2.26701 | 3.10248 | 7.42763 | 8.58477 | 1.17563 |
| ENSMUSG00000097023 | 8_Al8545 | 0.76124 | -1.60899 | 0.634506 | NA       | 0       | 1.1335  | 0       | 0       | 3.43391 | 0       |
| ENSMUSG00000097025 | 1_Gm265  | 0.66016 | 1.6214   | 0.645133 | NA       | 0       | 0       | 3.10248 | 0       | 0.85848 | 0       |
| ENSMUSG00000097026 | 1_Gm267  | 89.7453 | 0.10172  | 0.821509 | 0.948384 | 131.462 | 63.4762 | 83.7671 | 65.1981 | 119.328 | 75.2402 |
| ENSMUSG00000097027 | 1_Gm265  | 13.1132 | -1.90529 | 0.014844 | 0.132113 | 10.1124 | 2.26701 | 4.13665 | 29.7105 | 17.1695 | 15.2832 |
| ENSMUSG00000097031 | 2_Gm268  | 0.39188 | -1.97195 | 0.623385 | NA       | 0       | 0       | 0       | 0       | 0       | 2.35126 |
| ENSMUSG00000097033 | 1_Gm268  | 97.9856 | 0.21833  | 0.599197 | 0.869111 | 63.7084 | 117.884 | 134.441 | 73.451  | 96.1494 | 102.28  |
| ENSMUSG00000097035 | 2_Gm266  | 0.89048 | 2.04633  | 0.447947 | NA       | 3.03373 | 1.1335  | 0       | 0       | 0       | 1.17563 |
| ENSMUSG00000097038 | 1_Gm268  | 0.95229 | -2.01695 | 0.53251  | NA       | 1.01124 | 0       | 0       | 0       | 0       | 4.70251 |
| ENSMUSG00000097039 | 8_Pvt1   | 23.5469 | 0.26065  | 0.710122 | 0.910052 | 46.5172 | 19.2695 | 11.3758 | 21.4576 | 30.9052 | 11.7563 |
| ENSMUSG00000097042 | 1_Gm174  | 216.686 | -0.18858 | 0.599736 | 0.869281 | 266.969 | 156.423 | 184.081 | 186.516 | 281.58  | 224.545 |
| ENSMUSG00000097045 | 1_Gm266  | 2.65337 | -0.1776  | 0.916723 | 0.976775 | 3.03373 | 4.53401 | 0       | 5.77705 | 2.57543 | 0       |
| ENSMUSG00000097047 | 1_111002 | 11.0129 | -0.06701 | 0.925195 | 0.979484 | 14.1574 | 7.93452 | 10.3416 | 14.03   | 13.7356 | 5.87814 |
| ENSMUSG00000097050 | 1_Gm991  | 15.2877 | -1.47351 | 0.064522 | 0.336509 | 9.1012  | 10.2015 | 5.17081 | 32.1864 | 29.1882 | 5.87814 |
| ENSMUSG00000097051 | 1_Gm268  | 6.45881 | 0.08086  | 0.926185 | 0.979994 | 9.1012  | 6.80102 | 4.13665 | 6.60234 | 8.58477 | 3.52688 |
| ENSMUSG00000097055 | 1_Gm441  | 3.95095 | -2.16832 | 0.117074 | 0.465237 | 2.02249 | 2.26701 | 0       | 1.65058 | 6.00934 | 11.7563 |
| ENSMUSG00000097056 | 1_Gm426  | 3.0041  | -0.49797 | 0.710739 | 0.910439 | 4.04498 | 3.40051 | 0       | 3.30117 | 2.57543 | 4.70251 |
| ENSMUSG00000097057 | 1_Gm176  | 29.5356 | 0.20433  | 0.70915  | 0.909883 | 18.2024 | 47.6071 | 28.9565 | 22.2829 | 24.8958 | 35.2688 |
| ENSMUSG00000097058 | 1_493055 | 8.45451 | -1.76703 | 0.355575 | 0.235419 | 4.04498 | 3.40051 | 4.13665 | 13.2047 | 18.8865 | 7.05377 |
| ENSMUSG00000097059 | 1_Fam12  | 57.4203 | -0.33247 | 0.588815 | 0.863695 | 87.9783 | 14.7355 | 49.6398 | 71.8004 | 59.2349 | 61.1326 |
| ENSMUSG00000097061 | 1_933015 | 126.544 | -0.03479 | 0.929867 | 0.981773 | 176.968 | 100.882 | 97.2112 | 113.065 | 157.101 | 114.036 |
| ENSMUSG00000097062 | 1_Gm175  | 30.7404 | -0.20728 | 0.689114 | 0.905638 | 29.3261 | 38.5391 | 17.5807 | 28.8852 | 26.6128 | 43.4982 |
| ENSMUSG00000097065 | 1_A63007 | 1.2817  | 0.29096  | 0.888148 | NA       | 2.02249 | 2.26701 | 0       | 0.82529 | 2.57543 | 0       |
| ENSMUSG00000097068 | 1_Gm267  | 0.14308 | -0.79206 | 0.84609  | NA       | 0       | 0       | 0       | 0       | 0.85848 | 0       |
| ENSMUSG00000097069 | 1_Gm169  | 3.92234 | 0.89805  | 0.494109 | 0.816886 | 9.1012  | 0       | 6.20497 | 3.30117 | 2.57543 | 2.35126 |
| ENSMUSG00000097073 | 7_943003 | 71.8671 | -1.00303 | 0.079016 | 0.377521 | 87.9783 | 31.7381 | 23.7857 | 94.0833 | 121.904 | 71.7133 |
| ENSMUSG00000097074 | 1_483342 | 0.28063 | -1.56014 | 0.700051 | NA       | 0       | 0       | 0       | 0.82529 | 0.85848 | 0       |
| ENSMUSG00000097075 | 2_D83004 | 18.8744 | -0.25496 | 0.677621 | 0.901447 | 8.08995 | 26.0706 | 17.5807 | 21.4576 | 18.8865 | 21.1613 |
| ENSMUSG00000097076 | 1_Platr7 | 2.32501 | 0.63889  | 0.639398 | 0.886942 | 1.01124 | 3.40051 | 4.13665 | 1.65058 | 2.57543 | 1.17563 |
| ENSMUSG00000097077 | 1_Gm167  | 4.27769 | 1.05201  | 0.340238 | 0.719132 | 3.03373 | 10.2015 | 4.13665 | 1.65058 | 4.29238 | 2.35126 |
| ENSMUSG00000097078 | 1_Gm265  | 0.18892 | 1.1315   | 0.781553 | NA       | 0       | 1.1335  | 0       | 0       | 0       | 0       |
| ENSMUSG00000097080 | 7_170008 | 31.8945 | -0.31801 | 0.462179 | 0.799907 | 29.3261 | 23.8036 | 32.059  | 35.4876 | 37.773  | 32.9176 |
| ENSMUSG00000097081 | 1_Gm104  | 9.71452 | -0.78332 | 0.329393 | 0.709971 | 2.02249 | 9.06802 | 10.3416 | 10.7288 | 12.0187 | 14.1075 |
| ENSMUSG00000097084 | 1_Fox11  | 6.23744 | -0.84591 | 0.466802 | 0.803613 | 3.03373 | 0       | 10.3416 | 9.90351 | 9.44325 | 4.70251 |
| ENSMUSG00000097085 | 1_Gm266  | 3.62241 | 0.17525  | 0.873112 | 0.639308 | 3.03373 | 2.26701 | 6.20497 | 4.12646 | 2.57543 | 3.52688 |
| ENSMUSG00000097088 | 1_Gm266  | 6.79608 | -0.98431 | 0.282113 | 0.668755 | 4.04498 | 4.53401 | 5.17081 | 15.6806 | 4.29238 | 7.05377 |
| ENSMUSG00000097090 | 1_Gm267  | 64.1228 | 0.24657  | 0.5316   | 0.836985 | 67.7534 | 66.8767 | 74.4596 | 51.9934 | 78.9799 | 44.6739 |
| ENSMUSG00000097093 | 1_C33001 | 9.82776 | 0.51122  | 0.535693 | 0.83864  | 6.06747 | 9.06802 | 19.6491 | 6.60234 | 12.8772 | 4.70251 |
| ENSMUSG00000097094 | 1_Gm265  | 1.42434 | 0.58395  | 0.772822 | NA       | 4.04498 | 1.1335  | 0       | 1.65058 | 1.71695 | 0       |
| ENSMUSG00000097097 | 1_503342 | 0.13755 | -0.79206 | 0.84609  | NA       | 0       | 0       | 0       | 0.82529 | 0       | 0       |
| ENSMUSG00000097098 | 7_933011 | 10.7909 | -0.26797 | 0.698071 | 0.905638 | 12.1349 | 9.06802 | 8.27329 | 10.7288 | 16.3111 | 8.22939 |
| ENSMUSG00000097100 | 1_923010 | 1.90871 | 0.75946  | 0.645177 | 0.889294 | 2.02249 | 1.1335  | 4.13665 | 3.30117 | 0.85848 | 0       |
| ENSMUSG00000097102 | 1_231006 | 0.70178 | -1.4485  | 0.616293 | NA       | 0       | 0       | 1.03416 | 0.82529 | 0       | 2.35126 |
| ENSMUSG00000097103 | 1_Gm288  | 11.9106 | 0.24495  | 0.728929 | 0.917639 | 21.2361 | 10.2015 | 7.23913 | 10.7288 | 10.3017 | 11.7563 |

|                    |           |         |          |          |          |         |         |         |         |         |         |
|--------------------|-----------|---------|----------|----------|----------|---------|---------|---------|---------|---------|---------|
| ENSMUSG00000097104 | 1_Gm265   | 0.18892 | 1.1315   | 0.781553 | NA       | 0       | 1.1335  | 0       | 0       | 0       | 0       |
| ENSMUSG00000097107 | 1_Platr6  | 3.31867 | -0.75632 | 0.510217 | 0.827179 | 2.02249 | 3.40051 | 2.06832 | 5.77705 | 4.29238 | 2.35126 |
| ENSMUSG00000097108 | 1_Gm265   | 8.88937 | -3.9947  | 0.000634 | 0.014016 | 0       | 0       | 3.10248 | 14.03   | 19.745  | 16.4588 |
| ENSMUSG00000097109 | 1_Gm265   | 0.2751  | -1.54073 | 0.703687 | NA       | 0       | 0       | 0       | 1.65058 | 0       | 0       |
| ENSMUSG00000097113 | 7_Gm197   | 10.386  | 0.25524  | 0.708271 | 0.909748 | 13.1462 | 11.335  | 9.30745 | 9.90351 | 6.86782 | 11.7563 |
| ENSMUSG00000097115 | 2_181001  | 2.23843 | -0.18864 | 0.903761 | 0.973878 | 4.04498 | 2.26701 | 0       | 1.65058 | 4.29238 | 1.17563 |
| ENSMUSG00000097117 | 1_Gm267   | 0       | NA       | NA       | NA       | 0       | 0       | 0       | 0       | 0       | 0       |
| ENSMUSG00000097119 | 1_B23035  | 523.717 | 0.13085  | 0.772429 | 0.932508 | 910.12  | 388.791 | 343.342 | 430.803 | 596.642 | 472.602 |
| ENSMUSG00000097121 | 1_D13002  | 7.2218  | -1.65732 | 0.069733 | 0.352075 | 5.05622 | 1.1335  | 4.13665 | 13.2047 | 6.86782 | 12.9319 |
| ENSMUSG00000097122 | 1_Gm266   | 8.22762 | 0.88606  | 0.341189 | 0.719594 | 22.2474 | 5.66751 | 4.13665 | 6.60234 | 6.00934 | 4.70251 |
| ENSMUSG00000097123 | 1_Gm629   | 26.4429 | -1.3449  | 0.01372  | 0.12546  | 22.2474 | 7.93452 | 14.4783 | 35.4876 | 42.0654 | 36.4445 |
| ENSMUSG00000097125 | 1_Gm268   | 2.78435 | 1.21178  | 0.412511 | 0.767971 | 2.02249 | 2.26701 | 7.23913 | 1.65058 | 0       | 3.52688 |
| ENSMUSG00000097128 | 1_Gm268   | 10.0802 | 1.80116  | 0.022981 | 0.178758 | 23.2586 | 13.602  | 10.3416 | 5.77705 | 5.15086 | 2.35126 |
| ENSMUSG00000097129 | 1_493050  | 2.97373 | -0.44076 | 0.718758 | 0.912754 | 1.01124 | 4.53401 | 2.06832 | 4.12646 | 2.57543 | 3.52688 |
| ENSMUSG00000097131 | 1_D23001  | 52.8192 | -0.5038  | 0.303083 | 0.685834 | 67.7534 | 26.0706 | 37.2298 | 64.3728 | 72.1121 | 49.3764 |
| ENSMUSG00000097134 | 1_111000  | 3.82617 | 0.24579  | 0.825853 | 0.950142 | 6.06747 | 3.40051 | 3.10248 | 5.77705 | 3.43391 | 1.17563 |
| ENSMUSG00000097136 | 1_Gm267   | 4.87417 | 0.59229  | 0.557257 | 0.848091 | 10.1124 | 3.40051 | 4.13665 | 4.95175 | 4.29238 | 2.35126 |
| ENSMUSG00000097138 | 1_Gm266   | 3.09066 | 0.2582   | 0.877742 | 0.965654 | 8.08995 | 0       | 2.06832 | 4.95175 | 3.43391 | 0       |
| ENSMUSG00000097140 | 1_Gm267   | 10.0927 | -0.31103 | 0.698167 | 0.905638 | 14.1574 | 6.80102 | 6.20497 | 12.3794 | 16.3111 | 4.70251 |
| ENSMUSG00000097142 | 1_Gm267   | 792.271 | -0.73082 | 0.711919 | 0.910719 | 0       | 853.528 | 933.848 | 913.599 | 846.458 | 1206.19 |
| ENSMUSG00000097146 | 1_Gm421   | 8.5342  | 0.42286  | 0.582619 | 0.860399 | 13.1462 | 5.66751 | 10.3416 | 5.77705 | 6.86782 | 9.40502 |
| ENSMUSG00000097147 | 1_Gm267   | 0.39188 | -1.97195 | 0.623385 | NA       | 0       | 0       | 0       | 0       | 0       | 2.35126 |
| ENSMUSG00000097148 | 2_Gm383   | 23.6978 | -0.30185 | 0.655523 | 0.893662 | 16.1799 | 26.0706 | 21.7174 | 49.5175 | 14.5941 | 14.1075 |
| ENSMUSG00000097151 | 1_Gm265   | 28.627  | 0.44085  | 0.359967 | 0.733629 | 44.4948 | 29.4711 | 24.8199 | 23.9335 | 23.1789 | 25.8638 |
| ENSMUSG00000097152 | 1_Gm265   | 0.70178 | -1.4485  | 0.616293 | NA       | 0       | 0       | 1.03416 | 0.82529 | 0       | 2.35126 |
| ENSMUSG00000097154 | 2_Gm265   | 4.64746 | 0.83461  | 0.385204 | 0.750802 | 6.06747 | 5.66751 | 6.20497 | 3.30117 | 4.29238 | 2.35126 |
| ENSMUSG00000097155 | 1_Gm265   | 1.91044 | 0.44768  | 0.786122 | 0.936317 | 0       | 4.53401 | 2.06832 | 1.65058 | 0.85848 | 2.35126 |
| ENSMUSG00000097156 | 7_Gm376   | 31.418  | -1.75561 | 0.000249 | 0.006901 | 16.1799 | 12.4685 | 14.4783 | 52.8187 | 54.9425 | 37.6201 |
| ENSMUSG00000097157 | 1_Gm265   | 3.42371 | 0.03564  | 0.978186 | 0.993796 | 7.07871 | 2.26701 | 1.03416 | 5.77705 | 0.85848 | 3.52688 |
| ENSMUSG00000097158 | 1_Gm265   | 22.7251 | 0.50185  | 0.369656 | 0.741108 | 14.1574 | 31.7381 | 34.1273 | 19.807  | 18.8865 | 17.6344 |
| ENSMUSG00000097159 | 1_Gm265   | 9.04046 | 0.3327   | 0.673503 | 0.900436 | 12.1349 | 7.93452 | 10.3416 | 7.42763 | 12.8772 | 3.52688 |
| ENSMUSG00000097160 | 1_A63007  | 0.61965 | -2.67071 | 0.351111 | NA       | 0       | 0       | 0       | 0.82529 | 1.71695 | 1.17563 |
| ENSMUSG00000097162 | 1_231001  | 27.9311 | -0.38592 | 0.395888 | 0.756854 | 24.2699 | 21.5366 | 26.8882 | 36.3129 | 29.1882 | 29.3907 |
| ENSMUSG00000097163 | 2_BC051C  | 6.8634  | 0.17724  | 0.833687 | 0.952011 | 8.08995 | 3.40051 | 10.3416 | 6.60234 | 6.86782 | 5.87814 |
| ENSMUSG00000097164 | 1_Cep83c  | 453.174 | 0.25529  | 0.538697 | 0.839843 | 770.568 | 311.713 | 397.118 | 387.887 | 466.153 | 385.606 |
| ENSMUSG00000097165 | 1_221000  | 1.75336 | 0.06668  | 0.971285 | 0.992398 | 0       | 3.40051 | 2.06832 | 2.47588 | 2.57543 | 0       |
| ENSMUSG00000097168 | 1_C23008  | 1.56807 | 0.26364  | 0.912968 | NA       | 5.05622 | 0       | 0       | 0.82529 | 0       | 3.52688 |
| ENSMUSG00000097172 | 1_493044  | 0.526   | 2.60438  | 0.478686 | NA       | 2.02249 | 1.1335  | 0       | 0       | 0       | 0       |
| ENSMUSG00000097173 | 1_Gm268   | 0.58079 | -1.00254 | 0.785266 | NA       | 0       | 1.1335  | 0       | 0       | 0       | 2.35126 |
| ENSMUSG00000097174 | 1_Gm489   | 31.498  | -0.20585 | 0.635913 | 0.884798 | 28.3148 | 29.4711 | 29.9907 | 38.7887 | 28.3297 | 34.0932 |
| ENSMUSG00000097176 | 1_Gm268   | 1.08001 | -0.09946 | 0.964774 | NA       | 1.01124 | 1.1335  | 1.03416 | 3.30117 | 0       | 0       |
| ENSMUSG00000097180 | 5_270003  | 72.1063 | 0.15517  | 0.665867 | 0.897065 | 84.9445 | 69.1437 | 73.4255 | 54.4693 | 69.5366 | 81.1183 |
| ENSMUSG00000097182 | 2_A83000  | 0.78648 | -1.69846 | 0.478201 | NA       | 0       | 0       | 1.03416 | 1.65058 | 0.85848 | 1.17563 |
| ENSMUSG00000097183 | 2_Gm175   | 32.7226 | -0.78782 | 0.136893 | 0.502096 | 25.2811 | 12.4685 | 34.1273 | 33.837  | 50.6501 | 39.9713 |
| ENSMUSG00000097184 | 1_463242  | 23.1156 | -1.10684 | 0.051176 | 0.29274  | 12.1349 | 10.2015 | 21.7174 | 37.9634 | 34.3391 | 22.3369 |
| ENSMUSG00000097185 | 1_Gm265   | 0.14308 | -0.79206 | 0.84609  | NA       | 0       | 0       | 0       | 0       | 0.85848 | 0       |
| ENSMUSG00000097187 | 1_Gm194   | 27.5414 | -0.67215 | 0.409347 | 0.766531 | 2.02249 | 31.7381 | 29.9907 | 36.3129 | 24.0374 | 41.147  |
| ENSMUSG00000097189 | 1_Gm265   | 2.58891 | -0.53099 | 0.686051 | 0.904398 | 1.01124 | 2.26701 | 3.10248 | 1.65058 | 5.15086 | 2.35126 |
| ENSMUSG00000097191 | 2_573042  | 6.17773 | 0.02581  | 0.978539 | 0.993796 | 6.06747 | 2.26701 | 10.3416 | 9.07822 | 3.43391 | 5.87814 |
| ENSMUSG00000097193 | 1_Gm266   | 4.40894 | -0.35908 | 0.716611 | 0.912165 | 4.04498 | 3.40051 | 4.13665 | 3.30117 | 6.86782 | 4.70251 |
| ENSMUSG00000097194 | 1_933017  | 99.1614 | 4.27734  | 2.19E-18 | 1.90E-15 | 228.541 | 207.431 | 130.304 | 9.07822 | 13.7356 | 5.87814 |
| ENSMUSG00000097196 | 2_Gm266   | 0.60858 | -2.64656 | 0.451247 | NA       | 0       | 0       | 0       | 2.47588 | 0       | 1.17563 |
| ENSMUSG00000097197 | 1_953002  | 15.5845 | -0.1478  | 0.799368 | 0.940835 | 15.1687 | 14.7355 | 14.4783 | 12.3794 | 21.4619 | 15.2832 |
| ENSMUSG00000097201 | 1_Gm267   | 3.41511 | -0.51525 | 0.807473 | 0.944396 | 0       | 2.26701 | 6.20497 | 0       | 12.0187 | 0       |
| ENSMUSG00000097203 | 1_473241  | 4.94759 | -0.45014 | 0.695882 | 0.905638 | 6.06747 | 3.40051 | 3.10248 | 11.5541 | 0.85848 | 4.70251 |
| ENSMUSG00000097206 | 1_Gm266   | 5.53119 | 0.05099  | 0.956144 | 0.988881 | 7.07871 | 6.80102 | 3.10248 | 4.95175 | 7.72629 | 3.52688 |
| ENSMUSG00000097207 | 7_603044  | 36.2095 | -0.03227 | 0.940288 | 0.985535 | 45.506  | 32.8716 | 28.9565 | 37.9634 | 34.3391 | 37.6201 |
| ENSMUSG00000097208 | 1_Gm266   | 5.30515 | -1.16347 | 0.27416  | 0.66065  | 1.01124 | 6.80102 | 2.06832 | 8.25292 | 4.29238 | 9.40502 |
| ENSMUSG00000097209 | 1_AU0227  | 22.5746 | 0.21018  | 0.692185 | 0.905638 | 20.2249 | 28.3376 | 23.7857 | 15.6806 | 18.028  | 29.3907 |
| ENSMUSG00000097213 | 1_Gm267   | 3.19678 | 0.962    | 0.430655 | 0.780048 | 6.06747 | 4.53401 | 2.06832 | 3.30117 | 0.85848 | 2.35126 |
| ENSMUSG00000097217 | 1_Gm265   | 24.5295 | -0.09572 | 0.880776 | 0.967183 | 40.4498 | 15.869  | 14.4783 | 18.1564 | 20.6034 | 37.6201 |
| ENSMUSG00000097219 | 1_Gm265   | 2.34305 | 0.19516  | 0.882644 | 0.967828 | 1.01124 | 3.40051 | 3.10248 | 2.47588 | 1.71695 | 2.35126 |
| ENSMUSG00000097220 | 1_Gm265   | 1.0045  | -2.08915 | 0.350296 | NA       | 0       | 1.1335  | 0       | 0.82529 | 1.71695 | 2.35126 |
| ENSMUSG00000097221 | 1_181004  | 0       | NA       | NA       | NA       | 0       | 0       | 0       | 0       | 0       | 0       |
| ENSMUSG00000097222 | 1_101000  | 0.19594 | -0.79206 | 0.84609  | NA       | 0       | 0       | 0       | 0       | 0       | 1.17563 |
| ENSMUSG00000097223 | 1_Gm244   | 1.13655 | -2.3397  | 0.351842 | NA       | 0       | 0       | 1.03416 | 0       | 3.43391 | 2.35126 |
| ENSMUSG00000097226 | 1_Gm266   | 1.69435 | 1.50614  | 0.438002 | 0.785475 | 2.02249 | 4.53401 | 1.03416 | 0       | 2.57543 | 0       |
| ENSMUSG00000097229 | 1_Platr23 | 0.14308 | -0.79206 | 0.84609  | NA       | 0       | 0       | 0       | 0       | 0.85848 | 0       |
| ENSMUSG00000097230 | 1_Gm268   | 21.1116 | 0.28958  | 0.652915 | 0.892622 | 41.461  | 13.602  | 14.4783 | 15.6806 | 21.4619 | 19.9857 |
| ENSMUSG00000097231 | 1_Gm268   | 35.2489 | -0.22294 | 0.694761 | 0.905638 | 14.1574 | 32.8716 | 50.6739 | 46.2164 | 33.4806 | 34.0932 |
| ENSMUSG00000097232 | 1_Gm268   | 7.57175 | 0.25133  | 0.772565 | 0.932508 | 8.08995 | 10.2015 | 6.20497 | 6.60234 | 2.57543 | 11.7563 |
| ENSMUSG00000097233 | 1_Gm175   | 22.2115 | -0.97315 | 0.148021 | 0.52067  | 8.08995 | 7.93452 | 28.9565 | 33.0117 | 31.7636 | 23.5126 |
| ENSMUSG00000097234 | 1_Gm265   | 16.32   | 0.22979  | 0.749149 | 0.924897 | 32.3598 | 7.93452 | 12.4099 | 10.7288 | 18.028  | 16.4588 |
| ENSMUSG00000097236 | 1_483144  | 12.6152 | 0.35968  | 0.719878 | 0.913031 | 30.3373 | 10.2015 | 2.06832 | 6.60234 | 20.6034 | 5.87814 |
| ENSMUSG00000097237 | 1_Gm265   | 0.30609 | 0.16972  | 0.966824 | NA       | 1.01124 | 0       | 0       | 0.82529 | 0       | 0       |

|                    |           |         |          |          |          |         |         |         |         |         |         |
|--------------------|-----------|---------|----------|----------|----------|---------|---------|---------|---------|---------|---------|
| ENSMUSG00000097239 | 7_Gm270   | 71.1128 | -0.47577 | 0.240884 | 0.632003 | 71.7983 | 55.5416 | 50.6739 | 73.451  | 63.5273 | 111.685 |
| ENSMUSG00000097240 | 1_Gm266   | 2.64742 | 1.82617  | 0.198609 | 0.590735 | 4.04498 | 2.26701 | 6.20497 | 1.65058 | 1.71695 | 0       |
| ENSMUSG00000097242 | 1_Gm169   | 34.3639 | -0.80374 | 0.071337 | 0.356646 | 26.2924 | 26.0706 | 22.7516 | 34.6623 | 54.084  | 42.3226 |
| ENSMUSG00000097243 | 1_Gm269   | 17.8898 | -0.95482 | 0.112851 | 0.455953 | 16.1799 | 9.06802 | 11.3758 | 30.5358 | 24.8958 | 15.2832 |
| ENSMUSG00000097246 | 1_Gm268   | 10.4585 | -0.14143 | 0.856655 | 0.959059 | 4.04498 | 12.4685 | 13.4441 | 8.25292 | 16.3111 | 8.22939 |
| ENSMUSG00000097248 | 8_Gm269   | 226.275 | 0.34823  | 0.199342 | 0.591206 | 223.485 | 264.106 | 273.019 | 198.07  | 212.044 | 186.925 |
| ENSMUSG00000097252 | 1_Gm663   | 1.10722 | 0.63869  | 0.801872 | NA       | 3.03373 | 0       | 1.03416 | 0       | 2.57543 | 0       |
| ENSMUSG00000097254 | 1_C43004  | 44.5839 | -0.0628  | 0.894069 | 0.971192 | 64.7196 | 35.1386 | 31.0248 | 43.7405 | 54.084  | 38.7957 |
| ENSMUSG00000097257 | 1_Gm267   | 8.83266 | 0.69216  | 0.413068 | 0.768348 | 17.1912 | 10.2015 | 5.17081 | 3.30117 | 7.72629 | 9.40502 |
| ENSMUSG00000097258 | 1_Gm267   | 35.9552 | 0.15324  | 0.771568 | 0.932465 | 58.6522 | 23.8036 | 31.0248 | 26.4094 | 42.9238 | 32.9176 |
| ENSMUSG00000097259 | 1_Gm267   | 2.29744 | 0.22801  | 0.870053 | 0.963272 | 2.02249 | 3.40051 | 2.06832 | 0.82529 | 4.29238 | 1.17563 |
| ENSMUSG00000097261 | 2_493053  | 0.55573 | -2.53048 | 0.482371 | NA       | 0       | 0       | 0       | 2.47588 | 0.85848 | 0       |
| ENSMUSG00000097262 | 1_493341  | 17.0427 | 0.97673  | 0.257522 | 0.648651 | 28.3148 | 20.4031 | 18.6149 | 1.65058 | 8.58477 | 24.6882 |
| ENSMUSG00000097263 | 1_Gm268   | 28.3592 | 0.14115  | 0.836576 | 0.95293  | 59.6634 | 17.0025 | 12.4099 | 24.7588 | 25.7543 | 30.5663 |
| ENSMUSG00000097265 | 1_Gm268   | 0.28063 | -1.56014 | 0.700051 | NA       | 0       | 0       | 0       | 0.82529 | 0.85848 | 0       |
| ENSMUSG00000097267 | 1_170010  | 27.768  | 0.61327  | 0.366331 | 0.739399 | 57.6409 | 19.2695 | 23.7857 | 10.7288 | 35.1976 | 19.9857 |
| ENSMUSG00000097271 | 1_Gm990   | 7.44926 | 0.26893  | 0.7424   | 0.922965 | 4.04498 | 9.06802 | 11.3758 | 6.60234 | 7.72629 | 5.87814 |
| ENSMUSG00000097272 | 1_Gm266   | 58.6584 | 0.68633  | 0.723516 | 0.914709 | 202.249 | 14.7355 | 0       | 27.2346 | 26.6128 | 81.1183 |
| ENSMUSG00000097274 | 1_Gm265   | 0.62518 | -2.68247 | 0.441863 | NA       | 0       | 0       | 0       | 0       | 2.57543 | 1.17563 |
| ENSMUSG00000097277 | 7_290007  | 121.965 | -0.50725 | 0.284259 | 0.670663 | 167.867 | 55.5416 | 78.5963 | 145.251 | 139.932 | 144.602 |
| ENSMUSG00000097280 | 1_A18490  | 0.52982 | 2.61357  | 0.388937 | NA       | 1.01124 | 1.1335  | 1.03416 | 0       | 0       | 0       |
| ENSMUSG00000097281 | 2_Gm266   | 0.83082 | 0.89778  | 0.708428 | NA       | 0       | 2.26701 | 1.03416 | 0.82529 | 0.85848 | 0       |
| ENSMUSG00000097282 | 1_503141  | 2.78633 | -1.11301 | 0.385367 | 0.750802 | 1.01124 | 1.1335  | 3.10248 | 2.47588 | 4.29238 | 4.70251 |
| ENSMUSG00000097283 | 1_Gm266   | 0.19594 | -0.79206 | 0.84609  | NA       | 0       | 0       | 0       | 0       | 0       | 1.17563 |
| ENSMUSG00000097284 | 7_493048  | 189.115 | 0.09277  | 0.834541 | 0.952109 | 312.474 | 126.952 | 145.817 | 149.378 | 193.157 | 206.91  |
| ENSMUSG00000097285 | 1_Gm266   | 0.82111 | -3.06884 | 0.332105 | NA       | 0       | 0       | 0       | 0       | 2.57543 | 2.35126 |
| ENSMUSG00000097286 | 1_Gm266   | 0.45852 | -0.61845 | 0.874837 | NA       | 0       | 0       | 1.03416 | 0       | 1.71695 | 0       |
| ENSMUSG00000097287 | 2_D13001  | 123.534 | -0.45186 | 0.149595 | 0.523129 | 113.259 | 83.8792 | 115.826 | 141.95  | 151.092 | 135.197 |
| ENSMUSG00000097289 | 1_201030  | 5.40092 | -0.63503 | 0.523867 | 0.832707 | 7.07871 | 3.40051 | 2.06832 | 4.12646 | 5.15086 | 10.5807 |
| ENSMUSG00000097290 | 7_130000  | 460.808 | 0.06609  | 0.869025 | 0.962942 | 733.152 | 345.718 | 335.068 | 433.278 | 475.596 | 442.036 |
| ENSMUSG00000097294 | 1_Gm268   | 14.4142 | -0.4102  | 0.598971 | 0.869086 | 4.04498 | 13.602  | 19.6491 | 14.03   | 25.7543 | 9.40502 |
| ENSMUSG00000097296 | 1_Gm265   | 149.255 | -0.1416  | 0.683394 | 0.902964 | 107.192 | 147.355 | 171.671 | 167.534 | 175.988 | 125.792 |
| ENSMUSG00000097298 | 1_A13005  | 0.37783 | 2.11394  | 0.599927 | NA       | 0       | 2.26701 | 0       | 0       | 0       | 0       |
| ENSMUSG00000097300 | 1_Gm268   | 2.15756 | -0.05426 | 0.969304 | 0.991822 | 3.03373 | 2.26701 | 1.03416 | 0.82529 | 3.43391 | 2.35126 |
| ENSMUSG00000097301 | 1_AW121   | 0.69881 | -2.85985 | 0.385416 | NA       | 0       | 0       | 0       | 2.47588 | 1.71695 | 0       |
| ENSMUSG00000097303 | 1_311008  | 3.97484 | -0.86768 | 0.410279 | 0.767001 | 3.03373 | 3.40051 | 2.06832 | 4.95175 | 6.86782 | 3.52688 |
| ENSMUSG00000097305 | 1_Gm172   | 10.2505 | -0.1184  | 0.867852 | 0.962942 | 8.08995 | 9.06802 | 12.4099 | 8.25292 | 15.4526 | 8.22939 |
| ENSMUSG00000097307 | 1_Gm268   | 1.13673 | -0.25187 | 0.908104 | NA       | 0       | 0       | 3.10248 | 0.82529 | 1.71695 | 1.17563 |
| ENSMUSG00000097308 | 1_Gm641   | 0.91318 | -0.6847  | 0.768894 | NA       | 1.01124 | 1.1335  | 0       | 2.47588 | 0.85848 | 0       |
| ENSMUSG00000097309 | 1_Gm172   | 35.5052 | 0.31905  | 0.521685 | 0.831998 | 53.5959 | 26.0706 | 38.264  | 22.2829 | 35.1976 | 37.6201 |
| ENSMUSG00000097310 | 1_A93003  | 2.46319 | 0.54133  | 0.757759 | 0.927714 | 0       | 6.80102 | 2.06832 | 2.47588 | 3.43391 | 0       |
| ENSMUSG00000097312 | 1_Gm268   | 16.4153 | -0.39873 | 0.867434 | 0.862925 | 28.3148 | 6.80102 | 7.23913 | 18.9817 | 17.1695 | 19.9857 |
| ENSMUSG00000097313 | 1_Gm265   | 4.05863 | -0.45949 | 0.69499  | 0.905638 | 7.07871 | 1.1335  | 2.06832 | 7.42763 | 4.29238 | 2.35126 |
| ENSMUSG00000097317 | 1_Gm172   | 10.6123 | -0.61113 | 0.398034 | 0.758531 | 9.1012  | 6.80102 | 9.30745 | 18.9817 | 7.72629 | 11.7563 |
| ENSMUSG00000097318 | 1_170000  | 25.1727 | -0.21639 | 0.674308 | 0.900436 | 25.2811 | 27.2041 | 17.5807 | 36.3129 | 22.3204 | 22.3369 |
| ENSMUSG00000097322 | 7_A53008  | 30.3674 | 0.74102  | 0.453427 | 0.795539 | 85.9558 | 2.26701 | 25.854  | 20.6323 | 36.9145 | 10.5807 |
| ENSMUSG00000097323 | 1_493042  | 1.97777 | -0.88393 | 0.57673  | 0.857002 | 1.01124 | 0       | 3.10248 | 1.65058 | 2.57543 | 3.52688 |
| ENSMUSG00000097324 | 8_Mir143f | 24.2268 | -1.56077 | 0.002548 | 0.038884 | 13.1462 | 10.2015 | 13.4441 | 32.1864 | 44.6408 | 31.742  |
| ENSMUSG00000097326 | 1_A33004  | 4.30998 | -0.85011 | 0.482153 | 0.811069 | 7.07871 | 1.1335  | 1.03416 | 8.25292 | 6.00934 | 2.35126 |
| ENSMUSG00000097327 | 7_E03003  | 2.13184 | -0.98031 | 0.553222 | 0.845971 | 1.01124 | 2.26701 | 1.03416 | 4.95175 | 0       | 3.52688 |
| ENSMUSG00000097328 | 7_Tnfsf12 | 193.881 | -1.04836 | 0.036798 | 0.240032 | 57.6409 | 142.821 | 178.91  | 370.556 | 201.742 | 211.613 |
| ENSMUSG00000097329 | 1_493140  | 1.22629 | 1.44736  | 0.451457 | NA       | 2.02249 | 2.26701 | 1.03416 | 0       | 0.85848 | 1.17563 |
| ENSMUSG00000097331 | 1_F42001  | 49.6367 | -0.038   | 0.925228 | 0.979484 | 59.6634 | 37.4056 | 49.6398 | 42.0899 | 54.9425 | 54.0789 |
| ENSMUSG00000097332 | 1_261002  | 0.13755 | -0.79206 | 0.84609  | NA       | 0       | 0       | 0       | 0.82529 | 0       | 0       |
| ENSMUSG00000097333 | 7_Zfp87   | 296.869 | 0.05865  | 0.894746 | 0.971269 | 496.521 | 206.298 | 205.798 | 267.395 | 334.806 | 270.394 |
| ENSMUSG00000097334 | 1_270001  | 4.00025 | 0.42874  | 0.678173 | 0.901447 | 3.03373 | 4.53401 | 6.20497 | 4.12646 | 2.57543 | 3.52688 |
| ENSMUSG00000097335 | 1_Gm265   | 7.20345 | 0.38477  | 0.719323 | 0.913031 | 18.2024 | 1.1335  | 5.17081 | 6.60234 | 8.58477 | 3.52688 |
| ENSMUSG00000097336 | 8_Fendrr  | 4.07618 | 1.28291  | 0.303477 | 0.686187 | 3.03373 | 11.335  | 3.10248 | 4.95175 | 0.85848 | 1.17563 |
| ENSMUSG00000097337 | 1_Gm266   | 17.6671 | -1.33922 | 0.053877 | 0.302008 | 18.2024 | 3.40051 | 8.27329 | 23.1082 | 28.3297 | 24.6882 |
| ENSMUSG00000097339 | 5_Gm266   | 3.0952  | -0.9702  | 0.465033 | 0.802138 | 3.03373 | 2.26701 | 1.03416 | 2.47588 | 8.58477 | 1.17563 |
| ENSMUSG00000097340 | 1_Gm266   | 113.287 | 0.59695  | 0.173821 | 0.557372 | 212.361 | 108.816 | 87.9037 | 97.3845 | 81.5553 | 91.699  |
| ENSMUSG00000097343 | 1_903040  | 70.99   | -0.53438 | 0.172778 | 0.556473 | 71.7983 | 46.4736 | 55.8447 | 85.0051 | 102.159 | 64.6595 |
| ENSMUSG00000097344 | 1_Gm267   | 0.34472 | 1.99863  | 0.620844 | NA       | 0       | 0       | 2.06832 | 0       | 0       | 0       |
| ENSMUSG00000097345 | 1_AA5431  | 19.7997 | -0.30881 | 0.553317 | 0.845971 | 17.1912 | 19.2695 | 16.5466 | 23.9335 | 17.1695 | 24.6882 |
| ENSMUSG00000097346 | 1_Gm266   | 8.58556 | 0.35722  | 0.757646 | 0.927689 | 0       | 12.4685 | 16.5466 | 5.77705 | 12.0187 | 4.70251 |
| ENSMUSG00000097347 | 1_Gm172   | 1557.46 | 1.04927  | 0.369929 | 0.240613 | 3842.73 | 1233.25 | 1224.45 | 1093.51 | 1067.95 | 882.896 |
| ENSMUSG00000097348 | 8_Rmst    | 40.5271 | -1.46997 | 0.01368  | 0.125182 | 40.4498 | 13.602  | 10.3416 | 64.3728 | 62.6688 | 51.7276 |
| ENSMUSG00000097350 | 1_473249  | 30.8315 | -0.45098 | 0.377949 | 0.746591 | 32.3598 | 15.869  | 29.9907 | 45.3911 | 34.3391 | 27.0394 |
| ENSMUSG00000097353 | 1_A43004  | 44.9431 | -0.45018 | 0.246214 | 0.637806 | 39.4385 | 38.5391 | 36.1957 | 54.4693 | 57.518  | 43.4982 |
| ENSMUSG00000097354 | 7_231000  | 140.962 | 0.84072  | 0.054125 | 0.303207 | 266.969 | 137.154 | 138.578 | 75.1016 | 133.922 | 94.0502 |
| ENSMUSG00000097356 | 1_Gm267   | 0.14308 | -0.79206 | 0.84609  | NA       | 0       | 0       | 0       | 0       | 0.85848 | 0       |
| ENSMUSG00000097357 | 1_Gm167   | 10.1124 | -1.01236 | 0.166508 | 0.546351 | 8.08995 | 7.93452 | 4.13665 | 10.7288 | 18.028  | 11.7563 |
| ENSMUSG00000097358 | 1_Gm267   | 64.409  | -0.14913 | 0.722504 | 0.914147 | 85.9558 | 47.6071 | 49.6398 | 60.2463 | 80.6968 | 62.3083 |
| ENSMUSG00000097360 | 7_943006  | 2.19114 | -1.68753 | 0.367799 | 0.739951 | 0       | 0       | 3.10248 | 0.82529 | 6.86782 | 2.35126 |
| ENSMUSG00000097363 | 1_Gm267   | 0.55573 | -2.53048 | 0.482371 | NA       | 0       | 0       | 0       | 2.47588 | 0.85848 | 0       |

|                    |           |         |          |          |          |         |         |         |         |         |         |
|--------------------|-----------|---------|----------|----------|----------|---------|---------|---------|---------|---------|---------|
| ENSMUSG00000097364 | 1_Gm267   | 8.97198 | -0.51125 | 0.508919 | 0.827179 | 11.1237 | 6.80102 | 4.13665 | 9.07822 | 8.58477 | 14.1075 |
| ENSMUSG00000097365 | 7_C03003  | 3.18348 | -0.6534  | 0.587309 | 0.862925 | 4.04498 | 2.26701 | 1.03416 | 3.30117 | 2.57543 | 5.87814 |
| ENSMUSG00000097367 | 1_Gm267   | 114.317 | 1.48758  | NA       | NA       | 505.622 | 0       | 0       | 14.8553 | 153.667 | 11.7563 |
| ENSMUSG00000097369 | 1_Gm265   | 0.17236 | 1.1315   | 0.781553 | NA       | 0       | 0       | 1.03416 | 0       | 0       | 0       |
| ENSMUSG00000097372 | 1_Gm268   | 6.52066 | -0.92243 | 0.29807  | 0.681298 | 7.07871 | 2.26701 | 4.13665 | 7.42763 | 11.1602 | 7.05377 |
| ENSMUSG00000097373 | 1_Gm268   | 1.09445 | 0.68854  | 0.783266 | NA       | 2.02249 | 0       | 2.06832 | 2.47588 | 0       | 0       |
| ENSMUSG00000097375 | 2_672042  | 244.063 | 0.10574  | 0.842648 | 0.953741 | 472.251 | 154.156 | 132.373 | 199.721 | 247.241 | 258.638 |
| ENSMUSG00000097376 | 1_Gm870   | 0.50054 | 1.08003  | 0.733943 | NA       | 1.01124 | 1.1335  | 0       | 0       | 0.85848 | 0       |
| ENSMUSG00000097377 | 1_Gm108   | 2.42055 | -0.3116  | 0.824046 | 0.949196 | 1.01124 | 4.53401 | 1.03416 | 2.47588 | 4.29238 | 1.17563 |
| ENSMUSG00000097378 | 7_B23020  | 8.27425 | -0.33468 | 0.707023 | 0.909172 | 13.1462 | 3.40051 | 5.17081 | 5.77705 | 6.86782 | 15.2832 |
| ENSMUSG00000097379 | 1_Gm268   | 41.4204 | 0.3741   | 0.41174  | 0.767412 | 66.7421 | 36.2721 | 37.2298 | 33.837  | 40.3484 | 34.0932 |
| ENSMUSG00000097380 | 1_Gm268   | 25.5081 | -0.15885 | 0.78077  | 0.935516 | 30.3373 | 28.3376 | 13.4441 | 17.3311 | 28.3297 | 35.2688 |
| ENSMUSG00000097381 | 1_A23008  | 4.27846 | -2.84479 | 0.026214 | 0.194636 | 1.01124 | 0       | 2.06832 | 5.77705 | 8.58477 | 8.22939 |
| ENSMUSG00000097383 | 1_150002  | 6.26953 | -1.03131 | 0.294496 | 0.678986 | 8.08995 | 1.1335  | 3.10248 | 8.25292 | 11.1602 | 5.87814 |
| ENSMUSG00000097384 | 1_Gm268   | 2.4619  | 1.46834  | 0.322076 | 0.702839 | 3.03373 | 5.66751 | 2.06832 | 1.65058 | 0       | 2.35126 |
| ENSMUSG00000097386 | 1_913021  | 7.46914 | -0.55876 | 0.524534 | 0.833095 | 5.05622 | 5.66751 | 7.23913 | 3.30117 | 9.44325 | 14.1075 |
| ENSMUSG00000097387 | 1_493056  | 1.54535 | -0.14021 | 0.936733 | NA       | 1.01124 | 3.40051 | 0       | 1.65058 | 0.85848 | 2.35126 |
| ENSMUSG00000097390 | 1_Gm267   | 7.81019 | -0.21712 | 0.811929 | 0.946139 | 3.03373 | 10.2015 | 8.27329 | 5.77705 | 4.29238 | 15.2832 |
| ENSMUSG00000097391 | 8_Mirg    | 27.681  | -0.64982 | 0.20031  | 0.592148 | 14.1574 | 22.6701 | 27.9224 | 41.2646 | 28.3297 | 31.742  |
| ENSMUSG00000097392 | 2_D93001  | 179.162 | -0.12089 | 0.785543 | 0.936103 | 271.013 | 100.882 | 142.714 | 160.107 | 186.29  | 213.964 |
| ENSMUSG00000097393 | 7_D03006  | 1.82534 | -0.70799 | 0.664495 | 0.896508 | 2.02249 | 0       | 2.06832 | 2.47588 | 0.85848 | 3.52688 |
| ENSMUSG00000097397 | 1_Gm168   | 35.3432 | -0.07362 | 0.894258 | 0.971192 | 19.2136 | 54.4081 | 29.9907 | 48.6922 | 29.1882 | 30.5663 |
| ENSMUSG00000097398 | 2_Platr5  | 0.49883 | 1.09243  | 0.73138  | NA       | 0       | 1.1335  | 1.03416 | 0.82529 | 0       | 0       |
| ENSMUSG00000097401 | 1_Gm267   | 3.52666 | 1.06384  | 0.46597  | 0.803159 | 11.1237 | 2.26701 | 1.03416 | 3.30117 | 3.43391 | 0       |
| ENSMUSG00000097402 | 1_Gm173   | 10.8525 | 0.26911  | 0.733539 | 0.919947 | 16.1799 | 9.06802 | 10.3416 | 4.12646 | 17.1695 | 8.22939 |
| ENSMUSG00000097404 | 1_Gm108   | 14.6475 | 0.83702  | 0.204549 | 0.595444 | 11.1237 | 18.136  | 26.8882 | 9.90351 | 7.72629 | 14.1075 |
| ENSMUSG00000097405 | 1_D63004  | 38.8123 | 1.22499  | 0.160911 | 0.539316 | 4.04498 | 90.6802 | 68.2547 | 19.807  | 17.1695 | 32.9176 |
| ENSMUSG00000097408 | 1_Gm268   | 6.01005 | -0.52292 | 0.58385  | 0.860815 | 6.06747 | 6.80102 | 2.06832 | 10.7288 | 6.86782 | 3.52688 |
| ENSMUSG00000097410 | 1_Gm266   | 10.7152 | -0.24706 | 0.742415 | 0.922965 | 14.1574 | 9.06802 | 6.20497 | 7.42763 | 18.028  | 9.40502 |
| ENSMUSG00000097411 | 1_B43021  | 0.33708 | 1.97061  | 0.625968 | NA       | 2.02249 | 0       | 0       | 0       | 0       | 0       |
| ENSMUSG00000097412 | 1_181001  | 108.199 | -0.21066 | 0.576111 | 0.856895 | 133.484 | 82.7457 | 84.8012 | 108.939 | 141.649 | 97.5771 |
| ENSMUSG00000097413 | 1_A83005  | 0       | NA       | NA       | NA       | 0       | 0       | 0       | 0       | 0       | 0       |
| ENSMUSG00000097414 | 1_B13004  | 50.6158 | -0.16996 | 0.71183  | 0.910709 | 30.3373 | 55.5416 | 56.8789 | 55.2946 | 38.6315 | 67.0108 |
| ENSMUSG00000097415 | 2_AU0202  | 599.899 | 1.30507  | 7.76E-06 | 0.000423 | 997.087 | 895.467 | 670.137 | 336.719 | 383.739 | 316.244 |
| ENSMUSG00000097417 | 1_Gm266   | 721.93  | 1.57807  | NA       | NA       | 3026.65 | 151.889 | 66.1863 | 69.3246 | 520.237 | 497.291 |
| ENSMUSG00000097418 | 7_Mir155f | 6.95713 | 1.79545  | 0.096123 | 0.420324 | 21.2361 | 9.06802 | 2.06832 | 4.12646 | 1.71695 | 3.52688 |
| ENSMUSG00000097422 | 1_Gm265   | 17.8032 | 0.0172   | 0.976999 | 0.993796 | 23.2586 | 13.602  | 16.5466 | 11.5541 | 17.1695 | 24.6882 |
| ENSMUSG00000097423 | 1_Gm265   | 2.51308 | 1.19024  | 0.396486 | 0.757228 | 6.06747 | 3.40051 | 1.03416 | 0.82529 | 2.57543 | 1.17563 |
| ENSMUSG00000097425 | 2_Vmn1r1  | 2.56637 | 0.97383  | 0.540863 | 0.84046  | 7.07871 | 1.1335  | 2.06832 | 0.82529 | 4.29238 | 0       |
| ENSMUSG00000097429 | 1_Gm265   | 0.94246 | 0.30662  | 0.894486 | NA       | 1.01124 | 1.1335  | 1.03416 | 2.47588 | 0       | 0       |
| ENSMUSG00000097431 | 1_Gm267   | 30.6583 | -1.40721 | 0.004092 | 0.053916 | 20.2249 | 13.602  | 16.5466 | 39.614  | 57.518  | 36.4445 |
| ENSMUSG00000097434 | 2_Gm166   | 0.36448 | 0.16972  | 0.966824 | NA       | 1.01124 | 0       | 0       | 0       | 0       | 1.17563 |
| ENSMUSG00000097435 | 1_Gm267   | 0       | NA       | NA       | NA       | 0       | 0       | 0       | 0       | 0       | 0       |
| ENSMUSG00000097440 | 1_Gm267   | 10.5576 | -0.80528 | 0.24154  | 0.632942 | 8.08995 | 5.66751 | 9.30745 | 16.5058 | 12.0187 | 11.7563 |
| ENSMUSG00000097443 | 1_Gm175   | 17.5746 | 0.4896   | 0.426494 | 0.777537 | 32.3598 | 13.602  | 15.5124 | 12.3794 | 16.3111 | 15.2832 |
| ENSMUSG00000097444 | 1_Gm104   | 3.48106 | 0.0492   | 0.965641 | 0.990781 | 5.05622 | 4.53401 | 1.03416 | 3.30117 | 3.43391 | 3.52688 |
| ENSMUSG00000097445 | 1_Gm266   | 22.4498 | 0.26357  | 0.679632 | 0.902041 | 41.461  | 12.4685 | 19.6491 | 26.4094 | 20.6034 | 14.1075 |
| ENSMUSG00000097448 | 1_Platr22 | 2.41079 | -1.35994 | 0.438878 | 0.785475 | 4.04498 | 0       | 0       | 4.95175 | 4.29238 | 1.17563 |
| ENSMUSG00000097452 | 1_Gm282   | 0.2751  | -1.54073 | 0.703687 | NA       | 0       | 0       | 0       | 1.65058 | 0       | 0       |
| ENSMUSG00000097453 | 1_Gm268   | 0.13755 | -0.79206 | 0.84609  | NA       | 0       | 0       | 0       | 0.82529 | 0       | 0       |
| ENSMUSG00000097454 | 1_Gm268   | 7.04454 | 0.32264  | 0.801627 | 0.942214 | 5.05622 | 6.80102 | 11.3758 | 0       | 2.57543 | 16.4588 |
| ENSMUSG00000097457 | 1_231003  | 11.8479 | 1.54983  | 0.044139 | 0.267332 | 22.2474 | 10.2015 | 20.6832 | 4.12646 | 10.3017 | 3.52688 |
| ENSMUSG00000097459 | 1_Gm268   | 0.58672 | -1.17297 | 0.695297 | NA       | 1.01124 | 0       | 0       | 1.65058 | 0.85848 | 0       |
| ENSMUSG00000097460 | 1_Gm267   | 9.0759  | 0.39332  | 0.661675 | 0.895681 | 19.2136 | 2.26701 | 9.30745 | 8.25292 | 6.00934 | 9.40502 |
| ENSMUSG00000097461 | 1_Gm267   | 131.046 | 0.24894  | 0.732809 | 0.919789 | 321.576 | 55.5416 | 49.6398 | 70.1499 | 145.941 | 143.427 |
| ENSMUSG00000097463 | 1_493044  | 1.42605 | -1.64492 | 0.374832 | NA       | 1.01124 | 0       | 1.03416 | 3.30117 | 0.85848 | 2.35126 |
| ENSMUSG00000097465 | 1_Gm166   | 0       | NA       | NA       | NA       | 0       | 0       | 0       | 0       | 0       | 0       |
| ENSMUSG00000097467 | 1_Gm267   | 6.1181  | 0.14626  | 0.867877 | 0.962942 | 5.05622 | 10.2015 | 4.13665 | 6.60234 | 6.00934 | 4.70251 |
| ENSMUSG00000097468 | 1_231001  | 22.9151 | -0.26718 | 0.602291 | 0.870033 | 19.2136 | 22.6701 | 20.6832 | 21.4576 | 33.4806 | 19.9857 |
| ENSMUSG00000097469 | 1_Gm267   | 29.6141 | 1.06791  | 0.254713 | 0.645853 | 97.0795 | 6.80102 | 16.5466 | 18.9817 | 30.0467 | 8.22939 |
| ENSMUSG00000097471 | 7_583043  | 5.57014 | 0.79614  | 0.446961 | 0.790514 | 7.07871 | 10.2015 | 4.13665 | 8.25292 | 2.57543 | 1.17563 |
| ENSMUSG00000097472 | 1_Gm265   | 10.7064 | 0.38846  | 0.63511  | 0.884141 | 12.1349 | 14.7355 | 9.30745 | 2.47588 | 10.3017 | 15.2832 |
| ENSMUSG00000097474 | 1_Gm265   | 0.13755 | -0.79206 | 0.84609  | NA       | 0       | 0       | 0       | 0.82529 | 0       | 0       |
| ENSMUSG00000097476 | 1_Gm265   | 0.64893 | -1.32054 | 0.604258 | NA       | 0       | 0       | 1.03416 | 0.82529 | 0.85848 | 1.17563 |
| ENSMUSG00000097479 | 1_Gm265   | 40.1039 | 0.72086  | 0.393105 | 0.755029 | 115.282 | 17.0025 | 17.5807 | 23.1082 | 52.3671 | 15.2832 |
| ENSMUSG00000097487 | 7_Ptges3l | 37.9133 | -0.27589 | 0.592708 | 0.866044 | 19.2136 | 34.0051 | 49.6398 | 47.867  | 30.9052 | 45.8495 |
| ENSMUSG00000097488 | 1_473248  | 134.042 | 0.43389  | 0.350901 | 0.727659 | 254.834 | 99.7483 | 107.553 | 112.24  | 128.772 | 101.104 |
| ENSMUSG00000097489 | 1_Gm268   | 3.43017 | -1.5627  | 0.199998 | 0.592038 | 3.03373 | 1.1335  | 1.03416 | 4.12646 | 7.72629 | 3.52688 |
| ENSMUSG00000097494 | 7_493340  | 26.8222 | 0.32851  | 0.551744 | 0.845088 | 39.4385 | 23.8036 | 25.854  | 16.5058 | 18.8865 | 36.4445 |
| ENSMUSG00000097495 | 1_Gm266   | 0.55722 | 1.09192  | 0.723275 | NA       | 0       | 1.1335  | 1.03416 | 0       | 0       | 1.17563 |
| ENSMUSG00000097497 | 1_Gm266   | 0.17236 | 1.1315   | 0.781553 | NA       | 0       | 0       | 1.03416 | 0       | 0       | 0       |
| ENSMUSG00000097500 | 1_Gm265   | 0.4878  | 1.03731  | 0.787764 | NA       | 0       | 0       | 2.06832 | 0       | 0.85848 | 0       |
| ENSMUSG00000097501 | 1_Gm265   | 1.02082 | 1.06769  | 0.634873 | NA       | 2.02249 | 0       | 2.06832 | 0       | 0.85848 | 1.17563 |
| ENSMUSG00000097502 | 1_493052  | 0.32647 | 0.16972  | 0.966824 | NA       | 0       | 1.1335  | 0       | 0.82529 | 0       | 0       |
| ENSMUSG00000097504 | 1_493051  | 29.6794 | -0.86553 | 0.066081 | 0.340793 | 19.2136 | 18.136  | 25.854  | 46.2164 | 36.9145 | 31.742  |

|                    |          |         |          |          |          |         |         |         |         |         |         |
|--------------------|----------|---------|----------|----------|----------|---------|---------|---------|---------|---------|---------|
| ENSMUSG00000097505 | 1_Gm265  | 0.37783 | 2.11394  | 0.599927 | NA       | 0       | 2.26701 | 0       | 0       | 0       | 0       |
| ENSMUSG00000097507 | 1_Gm265  | 15.2697 | 1.24164  | 0.042833 | 0.262546 | 23.2586 | 23.8036 | 17.5807 | 9.07822 | 12.0187 | 5.87814 |
| ENSMUSG00000097511 | 1_Gm166  | 0.28616 | -1.57932 | 0.696464 | NA       | 0       | 0       | 0       | 0       | 1.71695 | 0       |
| ENSMUSG00000097514 | 1_Gm176  | 0.77396 | -0.32929 | 0.921995 | NA       | 0       | 0       | 2.06832 | 0       | 2.57543 | 0       |
| ENSMUSG00000097515 | 2_170004 | 2.21081 | -0.19669 | 0.889188 | 0.970094 | 4.04498 | 1.1335  | 1.03416 | 3.30117 | 2.57543 | 1.17563 |
| ENSMUSG00000097517 | 1_Gm266  | 1.00156 | -3.37011 | 0.372785 | NA       | 0       | 0       | 0       | 0       | 6.00934 | 0       |
| ENSMUSG00000097518 | 1_Gm266  | 10.055  | -0.59985 | 0.620889 | 0.878215 | 0       | 2.26701 | 21.7174 | 13.2047 | 13.7356 | 9.40502 |
| ENSMUSG00000097519 | 2_493055 | 10.038  | -0.18552 | 0.826387 | 0.950291 | 2.02249 | 15.869  | 10.3416 | 9.07822 | 11.1602 | 11.7563 |
| ENSMUSG00000097520 | 1_Gm268  | 3.94217 | -1.4628  | 0.211437 | 0.602834 | 4.04498 | 1.1335  | 1.03416 | 5.77705 | 3.43391 | 8.22939 |
| ENSMUSG00000097523 | 1_170002 | 8.32458 | -0.43246 | 0.610608 | 0.874214 | 4.04498 | 6.80102 | 10.3416 | 4.12646 | 12.8772 | 11.7563 |
| ENSMUSG00000097524 | 1_Gm268  | 0.18892 | 1.1315   | 0.781553 | NA       | 0       | 1.1335  | 0       | 0       | 0       | 0       |
| ENSMUSG00000097526 | 1_Gm268  | 150.504 | -3.29571 | 2.11E-22 | 3.66E-19 | 31.3486 | 27.2041 | 24.8199 | 278.949 | 242.091 | 298.609 |
| ENSMUSG00000097527 | 1_170011 | 15.2016 | 0.52412  | 0.373405 | 0.74415  | 20.2249 | 19.2695 | 14.4783 | 12.3794 | 15.4526 | 9.40502 |
| ENSMUSG00000097532 | 1_Gm434  | 10.0105 | 0.26389  | 0.695875 | 0.905638 | 12.1349 | 10.2015 | 10.3416 | 9.07822 | 7.72629 | 10.5807 |
| ENSMUSG00000097533 | 1_Gm265  | 21.645  | 0.04751  | 0.951037 | 0.987725 | 40.4498 | 6.80102 | 18.6149 | 9.90351 | 31.7636 | 22.3369 |
| ENSMUSG00000097534 | 1_Gm166  | 69.2804 | 1.08132  | 0.004835 | 0.060658 | 98.0907 | 105.416 | 78.5963 | 33.0117 | 52.3671 | 48.2007 |
| ENSMUSG00000097535 | 1_Gm265  | 1.20082 | 1.38699  | 0.593008 | NA       | 0       | 0       | 5.17081 | 0       | 0.85848 | 1.17563 |
| ENSMUSG00000097536 | 2_261003 | 111.557 | -0.56133 | 0.249923 | 0.64154  | 151.687 | 55.5416 | 63.0839 | 126.27  | 162.252 | 110.509 |
| ENSMUSG00000097537 | 1_261002 | 38.6526 | -0.08169 | 0.877311 | 0.96546  | 61.6859 | 27.2041 | 23.7857 | 38.7887 | 46.3578 | 34.0932 |
| ENSMUSG00000097540 | 1_170003 | 5.18735 | -0.31084 | 0.763345 | 0.929481 | 2.02249 | 6.80102 | 5.17081 | 3.30117 | 10.3017 | 3.52688 |
| ENSMUSG00000097541 | 1_Gm267  | 0.85949 | 0.69762  | 0.769854 | NA       | 2.02249 | 1.1335  | 0       | 0.82529 | 0       | 1.17563 |
| ENSMUSG00000097542 | 1_Gm267  | 125.559 | -0.3179  | 0.394586 | 0.755773 | 93.0345 | 85.0127 | 157.193 | 147.727 | 130.489 | 139.9   |
| ENSMUSG00000097544 | 1_Gm267  | 2.21261 | -2.45059 | 0.259579 | 0.649246 | 2.02249 | 0       | 0       | 0       | 7.72629 | 3.52688 |
| ENSMUSG00000097545 | 7_Mir124 | 305.077 | -2.2946  | 0.003027 | 0.043656 | 174.945 | 113.35  | 21.7174 | 909.472 | 468.728 | 142.251 |
| ENSMUSG00000097546 | 1_Gm267  | 0.81365 | -0.46703 | 0.846308 | NA       | 2.02249 | 0       | 0       | 0.82529 | 0.85848 | 1.17563 |
| ENSMUSG00000097547 | 7_B23011 | 0.53684 | 1.02757  | 0.740993 | NA       | 1.01124 | 0       | 1.03416 | 0       | 0       | 1.17563 |
| ENSMUSG00000097550 | 7_Gm213  | 0       | NA       | NA       | NA       | 0       | 0       | 0       | 0       | 0       | 0       |
| ENSMUSG00000097553 | 1_493045 | 0       | NA       | NA       | NA       | 0       | 0       | 0       | 0       | 0       | 0       |
| ENSMUSG00000097554 | 1_Gm268  | 15551   | 0.32558  | 0.24446  | 0.636309 | 17187.1 | 20336.2 | 14371.7 | 11771.1 | 15602.8 | 14037   |
| ENSMUSG00000097557 | 1_C13006 | 1.48422 | -0.23371 | 0.90815  | NA       | 4.04498 | 0       | 0       | 1.65058 | 0.85848 | 2.35126 |
| ENSMUSG00000097558 | 1_Gm269  | 100.948 | 0.05824  | 0.896515 | 0.97156  | 158.765 | 61.2092 | 88.9379 | 99.0351 | 110.744 | 86.9965 |
| ENSMUSG00000097560 | 1_Gm269  | 0.706   | 3.02814  | 0.366206 | NA       | 0       | 1.1335  | 3.10248 | 0       | 0       | 0       |
| ENSMUSG00000097561 | 1_463241 | 4.86622 | -0.86748 | 0.457269 | 0.797438 | 8.08995 | 1.1335  | 1.03416 | 3.30117 | 8.58477 | 7.05377 |
| ENSMUSG00000097565 | 1_Gm269  | 6.06507 | -5.96122 | 0.12772  | 0.48592  | 0       | 0       | 0       | 22.2829 | 0       | 14.1075 |
| ENSMUSG00000097566 | 1_A93002 | 39.678  | 0.70662  | 0.117074 | 0.465237 | 67.7534 | 36.2721 | 43.4348 | 30.5358 | 28.3297 | 31.742  |
| ENSMUSG00000097567 | 1_Gm266  | 12.1872 | 0.01081  | 0.987382 | 0.996462 | 11.1237 | 11.335  | 14.4783 | 14.8553 | 15.4526 | 5.87814 |
| ENSMUSG00000097569 | 2_Gm266  | 4.3129  | 2.49254  | 0.050778 | 0.291517 | 9.1012  | 3.40051 | 9.30745 | 0       | 1.71695 | 2.35126 |
| ENSMUSG00000097571 | 8_Jpx    | 46.2014 | 0.09763  | 0.833477 | 0.952011 | 70.7871 | 36.2721 | 36.1957 | 40.4393 | 52.3671 | 41.147  |
| ENSMUSG00000097572 | 1_Gm267  | 191.986 | 0.58739  | 0.100705 | 0.431864 | 308.43  | 166.625 | 216.14  | 133.697 | 155.384 | 171.642 |
| ENSMUSG00000097574 | 1_C92000 | 15.9912 | -0.41055 | 0.4594   | 0.798898 | 14.1574 | 13.602  | 13.4441 | 16.5058 | 20.6034 | 17.6344 |
| ENSMUSG00000097575 | 1_Gm267  | 0.52942 | -2.42393 | 0.511797 | NA       | 0       | 0       | 0       | 0.82529 | 0       | 2.35126 |
| ENSMUSG00000097576 | 1_D93003 | 4.84002 | -0.17234 | 0.853719 | 0.958478 | 5.05622 | 4.53401 | 4.13665 | 5.77705 | 6.00934 | 3.52688 |
| ENSMUSG00000097577 | 1_623040 | 46.4933 | -0.08857 | 0.839311 | 0.953167 | 61.6859 | 37.4056 | 36.1957 | 47.0417 | 56.6595 | 39.9713 |
| ENSMUSG00000097578 | 1_Gm267  | 9.77277 | 0.33879  | 0.620072 | 0.877704 | 12.1349 | 11.335  | 9.30745 | 9.90351 | 7.72629 | 8.22939 |
| ENSMUSG00000097579 | 1_Gm267  | 12.9652 | 0.35374  | 0.634163 | 0.883719 | 16.1799 | 19.2695 | 8.27329 | 5.77705 | 18.8865 | 9.40502 |
| ENSMUSG00000097580 | 1_Gm543  | 5.17603 | 0.79945  | 0.422652 | 0.774546 | 10.1124 | 2.26701 | 7.23913 | 3.30117 | 3.43391 | 4.70251 |
| ENSMUSG00000097581 | 1_Gm219  | 0.92421 | 3.41041  | 0.272798 | NA       | 1.01124 | 4.53401 | 0       | 0       | 0       | 0       |
| ENSMUSG00000097582 | 1_Gm265  | 154.638 | 1.43186  | 0.648153 | 0.89089  | 658.32  | 0       | 18.6149 | 0       | 199.167 | 51.7276 |
| ENSMUSG00000097584 | 1_170012 | 0       | NA       | NA       | NA       | 0       | 0       | 0       | 0       | 0       | 0       |
| ENSMUSG00000097585 | 1_Gm265  | 2.65085 | 0.19437  | 0.872651 | 0.963879 | 3.03373 | 3.40051 | 2.06832 | 2.47588 | 2.57543 | 2.35126 |
| ENSMUSG00000097587 | 1_493057 | 13.6085 | -1.13674 | 0.076529 | 0.371048 | 7.07871 | 9.06802 | 9.30745 | 19.807  | 12.8772 | 23.5126 |
| ENSMUSG00000097590 | 1_Gm266  | 11.0374 | 0.35973  | 0.832329 | 0.951799 | 1.01124 | 1.1335  | 35.1615 | 28.0599 | 0.85848 | 0       |
| ENSMUSG00000097591 | 1_A33003 | 2.63046 | 0.51046  | 0.725092 | 0.915633 | 3.03373 | 0       | 6.20497 | 2.47588 | 1.71695 | 2.35126 |
| ENSMUSG00000097595 | 1_150000 | 6.29861 | -1.17284 | 0.169559 | 0.550941 | 4.04498 | 3.40051 | 4.13665 | 9.07822 | 7.72629 | 9.40502 |
| ENSMUSG00000097597 | 1_Gm266  | 0.45299 | -0.6074  | 0.85212  | NA       | 0       | 0       | 1.03416 | 0.82529 | 0.85848 | 0       |
| ENSMUSG00000097598 | 1_Gm266  | 1.90116 | -1.41894 | 0.403194 | 0.761667 | 1.01124 | 0       | 2.06832 | 0.82529 | 5.15086 | 2.35126 |
| ENSMUSG00000097601 | 1_Gm266  | 9.57459 | -0.83207 | 0.339032 | 0.717664 | 14.1574 | 3.40051 | 3.10248 | 15.6806 | 12.8772 | 8.22939 |
| ENSMUSG00000097602 | 1_493051 | 0.30991 | 0.16972  | 0.966824 | NA       | 0       | 0       | 1.03416 | 0.82529 | 0       | 0       |
| ENSMUSG00000097604 | 1_Gm173  | 2.06778 | -2.26992 | 0.16246  | 0.540887 | 1.01124 | 1.1335  | 0       | 3.30117 | 3.43391 | 3.52688 |
| ENSMUSG00000097609 | 1_Gm266  | 0.14308 | -0.79206 | 0.84609  | NA       | 0       | 0       | 0       | 0       | 0.85848 | 0       |
| ENSMUSG00000097613 | 1_Gm175  | 13.7555 | -0.6373  | 0.348841 | 0.725931 | 12.1349 | 4.53401 | 15.5124 | 18.9817 | 13.7356 | 17.6344 |
| ENSMUSG00000097615 | 1_Gm206  | 0.83635 | -3.11863 | 0.316988 | NA       | 0       | 0       | 0       | 3.30117 | 1.71695 | 0       |
| ENSMUSG00000097616 | 7_111001 | 86.7939 | -0.15466 | 0.762676 | 0.929057 | 138.54  | 48.7406 | 58.9472 | 66.8487 | 112.46  | 95.2259 |
| ENSMUSG00000097617 | 1_Gm106  | 8.11477 | -0.28934 | 0.715722 | 0.911636 | 8.08995 | 5.66751 | 8.27329 | 9.07822 | 12.8772 | 4.70251 |
| ENSMUSG00000097618 | 1_Gm265  | 0.56042 | -1.00363 | 0.787433 | NA       | 1.01124 | 0       | 0       | 0       | 0       | 2.35126 |
| ENSMUSG00000097619 | 7_483342 | 9.63683 | -1.19717 | 0.150298 | 0.523581 | 9.1012  | 1.1335  | 7.23913 | 14.8553 | 13.7356 | 11.7563 |
| ENSMUSG00000097621 | 1_Gm265  | 1.52026 | 2.07414  | 0.318639 | NA       | 0       | 2.26701 | 5.17081 | 0.82529 | 0.85848 | 0       |
| ENSMUSG00000097622 | 1_A33003 | 2.73236 | 0.39751  | 0.815243 | 0.947066 | 4.04498 | 0       | 5.17081 | 2.47588 | 0       | 4.70251 |
| ENSMUSG00000097624 | 1_Gm509  | 0.83933 | -1.79678 | 0.507673 | NA       | 0       | 0       | 1.03416 | 1.65058 | 0       | 2.35126 |
| ENSMUSG00000097625 | 1_Gm265  | 8.50846 | 1.07927  | 0.176754 | 0.560968 | 14.1574 | 6.80102 | 13.4441 | 4.12646 | 4.29238 | 8.22939 |
| ENSMUSG00000097627 | 1_493051 | 0.13755 | -0.79206 | 0.84609  | NA       | 0       | 0       | 0       | 0.82529 | 0       | 0       |
| ENSMUSG00000097632 | 1_493055 | 1.46252 | 2.04636  | 0.383502 | NA       | 5.05622 | 0       | 2.06832 | 1.65058 | 0       | 0       |
| ENSMUSG00000097633 | 1_Gm166  | 6.69727 | -0.5151  | 0.591082 | 0.865185 | 10.1124 | 1.1335  | 5.17081 | 5.77705 | 8.58477 | 9.40502 |
| ENSMUSG00000097636 | 7_Mirt1  | 487.552 | 0.67592  | 0.059516 | 0.320263 | 405.509 | 800.253 | 593.609 | 325.165 | 438.682 | 362.093 |
| ENSMUSG00000097637 | 1_493341 | 4.99395 | 0.23007  | 0.857901 | 0.959137 | 0       | 6.80102 | 9.30745 | 1.65058 | 5.15086 | 7.05377 |

|                    |           |         |          |          |          |         |         |         |         |         |         |
|--------------------|-----------|---------|----------|----------|----------|---------|---------|---------|---------|---------|---------|
| ENSMUSG00000097638 | 1_Carlr   | 1.69733 | -1.98888 | 0.313352 | 0.694744 | 2.02249 | 0       | 0       | 4.95175 | 0.85848 | 2.35126 |
| ENSMUSG00000097639 | 2_Platr4  | 0.41818 | -2.121   | 0.592183 | NA       | 0       | 0       | 0       | 1.65058 | 0.85848 | 0       |
| ENSMUSG00000097641 | 1_Gm268   | 0.16854 | 1.1315   | 0.781553 | NA       | 1.01124 | 0       | 0       | 0       | 0       | 0       |
| ENSMUSG00000097643 | 1_A13005  | 7.68149 | -0.27742 | 0.725604 | 0.915844 | 8.08995 | 4.53401 | 8.27329 | 10.7288 | 8.58477 | 5.87814 |
| ENSMUSG00000097645 | 1_Gm268   | 3.58296 | 0.92453  | 0.525301 | 0.833379 | 6.06747 | 6.80102 | 1.03416 | 0       | 1.71695 | 5.87814 |
| ENSMUSG00000097648 | 1_933018  | 1.14244 | -2.38375 | 0.337782 | NA       | 1.01124 | 0       | 0       | 4.12646 | 1.71695 | 0       |
| ENSMUSG00000097650 | 1_492150  | 2.57271 | 0.64829  | 0.641784 | 0.88812  | 2.02249 | 3.40051 | 4.13665 | 3.30117 | 2.57543 | 0       |
| ENSMUSG00000097651 | 1_493046  | 0.14308 | -0.79206 | 0.84609  | NA       | 0       | 0       | 0       | 0       | 0.85848 | 0       |
| ENSMUSG00000097654 | 1_Gm267   | 9.13874 | 0.7297   | 0.355422 | 0.730563 | 12.1349 | 15.869  | 6.20497 | 4.12646 | 9.44325 | 7.05377 |
| ENSMUSG00000097658 | 1_Gm167   | 5.19051 | 0.11444  | 0.909392 | 0.974731 | 3.03373 | 9.06802 | 4.13665 | 2.47588 | 7.72629 | 4.70251 |
| ENSMUSG00000097660 | 1_Gm267   | 10.9763 | -0.45152 | 0.513352 | 0.828304 | 7.07871 | 13.602  | 7.23913 | 10.7288 | 15.4526 | 11.7563 |
| ENSMUSG00000097661 | 1_Gm267   | 0.18892 | 1.1315   | 0.781553 | NA       | 0       | 1.1335  | 0       | 0       | 0       | 0       |
| ENSMUSG00000097662 | 1_Gm209   | 6.62081 | -0.30681 | 0.744869 | 0.923721 | 8.08995 | 5.66751 | 4.13665 | 6.60234 | 12.8772 | 2.35126 |
| ENSMUSG00000097664 | 1_Gm267   | 32.4748 | 0.17866  | 0.680162 | 0.9022   | 36.4048 | 36.2721 | 31.0248 | 33.837  | 32.6221 | 24.6882 |
| ENSMUSG00000097665 | 1_Gm168   | 0.64191 | 0.29808  | 0.908164 | NA       | 0       | 1.1335  | 1.03416 | 0.82529 | 0.85848 | 0       |
| ENSMUSG00000097666 | 1_A33009  | 14.2269 | -2.13245 | 0.009569 | 0.097435 | 2.02249 | 5.66751 | 8.27329 | 39.614  | 18.028  | 11.7563 |
| ENSMUSG00000097667 | 1_Gm267   | 8.1139  | -0.17623 | 0.836005 | 0.952513 | 13.1462 | 5.66751 | 4.13665 | 10.7288 | 10.3017 | 4.70251 |
| ENSMUSG00000097668 | 2_Gm267   | 3.19045 | 1.37718  | 0.33958  | 0.718268 | 7.07871 | 3.40051 | 3.10248 | 0       | 0.85848 | 4.70251 |
| ENSMUSG00000097672 | 1_Gm266   | 0.13755 | -0.79206 | 0.84609  | NA       | 0       | 0       | 0       | 0.82529 | 0       | 0       |
| ENSMUSG00000097673 | 1_Gm266   | 0.57232 | -2.56648 | 0.518957 | NA       | 0       | 0       | 0       | 0       | 3.43391 | 0       |
| ENSMUSG00000097674 | 1_Gm266   | 19.403  | 0.3518   | 0.575311 | 0.856733 | 32.3598 | 18.136  | 14.4783 | 9.90351 | 18.028  | 23.5126 |
| ENSMUSG00000097676 | 1_Gm266   | 0.17236 | 1.1315   | 0.781553 | NA       | 0       | 0       | 1.03416 | 0       | 0       | 0       |
| ENSMUSG00000097677 | 1_Gm266   | 0.44364 | -0.57976 | 0.883757 | NA       | 1.01124 | 0       | 0       | 1.65058 | 0       | 0       |
| ENSMUSG00000097681 | 1_Gm266   | 2.91448 | 0.18251  | 0.883521 | 0.967903 | 5.05622 | 1.1335  | 3.10248 | 4.12646 | 1.71695 | 2.35126 |
| ENSMUSG00000097682 | 1_493055  | 0.13755 | -0.79206 | 0.84609  | NA       | 0       | 0       | 0       | 0.82529 | 0       | 0       |
| ENSMUSG00000097690 | 1_493050  | 0.45852 | -0.61845 | 0.874837 | NA       | 0       | 0       | 1.03416 | 0       | 1.71695 | 0       |
| ENSMUSG00000097693 | 2_493047  | 0.87774 | 2.0248   | 0.445958 | NA       | 2.02249 | 0       | 2.06832 | 0       | 0       | 1.17563 |
| ENSMUSG00000097694 | 7_G73001  | 0.19594 | -0.79206 | 0.84609  | NA       | 0       | 0       | 0       | 0       | 0       | 1.17563 |
| ENSMUSG00000097695 | 1_Gm269   | 1.51776 | -0.1877  | 0.906341 | NA       | 1.01124 | 1.1335  | 2.06832 | 0.82529 | 1.71695 | 2.35126 |
| ENSMUSG00000097697 | 1_483341  | 2.21679 | -0.60845 | 0.668422 | 0.898206 | 2.02249 | 2.26701 | 1.03416 | 1.65058 | 5.15086 | 1.17563 |
| ENSMUSG00000097701 | 1_Gm175   | 0.56679 | -2.55638 | 0.475485 | NA       | 0       | 0       | 0       | 0.82529 | 2.57543 | 0       |
| ENSMUSG00000097702 | 1_Gm267   | 1.91767 | -0.8254  | 0.652191 | 0.892215 | 0       | 0       | 4.13665 | 3.30117 | 1.71695 | 2.35126 |
| ENSMUSG00000097703 | 1_Gm266   | 2.70563 | 0.75416  | 0.650029 | 0.891567 | 8.08995 | 1.1335  | 1.03416 | 0.82529 | 5.15086 | 0       |
| ENSMUSG00000097706 | 1_E03003  | 0.13755 | -0.79206 | 0.84609  | NA       | 0       | 0       | 0       | 0.82529 | 0       | 0       |
| ENSMUSG00000097707 | 1_Gm267   | 0.65252 | 1.60581  | 0.582146 | NA       | 2.02249 | 0       | 1.03416 | 0       | 0.85848 | 0       |
| ENSMUSG00000097709 | 7_281042  | 13.0201 | -0.32478 | 0.605358 | 0.871518 | 13.1462 | 11.335  | 10.3416 | 18.9817 | 13.7356 | 10.5807 |
| ENSMUSG00000097710 | 1_231002  | 0       | NA       | NA       | NA       | 0       | 0       | 0       | 0       | 0       | 0       |
| ENSMUSG00000097712 | 1_Gm105   | 0       | NA       | NA       | NA       | 0       | 0       | 0       | 0       | 0       | 0       |
| ENSMUSG00000097714 | 1_Gm201   | 0.98241 | -2.08095 | 0.354303 | NA       | 0       | 0       | 1.03416 | 1.65058 | 0.85848 | 2.35126 |
| ENSMUSG00000097715 | 1_Gpr137  | 83.5278 | 0.15839  | 0.67817  | 0.901447 | 65.7309 | 107.683 | 91.0062 | 63.5475 | 94.4325 | 78.7671 |
| ENSMUSG00000097716 | 1_170002  | 0       | NA       | NA       | NA       | 0       | 0       | 0       | 0       | 0       | 0       |
| ENSMUSG00000097717 | 1_170006  | 0.28616 | -1.57932 | 0.696464 | NA       | 0       | 0       | 0       | 0       | 1.71695 | 0       |
| ENSMUSG00000097718 | 1_Gm268   | 16.65   | -1.10982 | 0.068697 | 0.348694 | 9.1012  | 11.335  | 11.3758 | 23.9335 | 30.0467 | 14.1075 |
| ENSMUSG00000097722 | 1_Gm268   | 4.84473 | -0.76162 | 0.442796 | 0.787616 | 3.03373 | 5.66751 | 2.06832 | 5.77705 | 4.29238 | 8.22939 |
| ENSMUSG00000097723 | 1_Gm268   | 153.721 | 0.34357  | 0.298202 | 0.681298 | 163.822 | 191.562 | 160.295 | 101.511 | 160.535 | 144.602 |
| ENSMUSG00000097727 | 7_F63004  | 10.5791 | -1.69229 | 0.500052 | 0.289727 | 5.05622 | 9.06802 | 1.03416 | 22.2829 | 15.4526 | 10.5807 |
| ENSMUSG00000097728 | 1_Gm268   | 14.0161 | -0.42773 | 0.505868 | 0.82532  | 8.08995 | 11.335  | 16.5466 | 21.4576 | 13.7356 | 12.9319 |
| ENSMUSG00000097729 | 1_231001  | 402.327 | -0.473   | 0.094641 | 0.41805  | 398.43  | 273.174 | 339.205 | 490.224 | 475.596 | 437.334 |
| ENSMUSG00000097731 | 1_270001  | 6.75994 | 0.56556  | 0.658493 | 0.894702 | 15.1687 | 9.06802 | 0       | 9.90351 | 1.71695 | 4.70251 |
| ENSMUSG00000097732 | 2_D93004  | 1.72318 | 0.55317  | 0.781965 | 0.935592 | 4.04498 | 1.1335  | 1.03416 | 4.12646 | 0       | 0       |
| ENSMUSG00000097734 | 1_B93008  | 5.19519 | -0.76429 | 0.420065 | 0.773473 | 3.03373 | 2.26701 | 6.20497 | 6.60234 | 6.00934 | 7.05377 |
| ENSMUSG00000097735 | 7_D93003  | 0.14308 | -0.79206 | 0.84609  | NA       | 0       | 0       | 0       | 0       | 0.85848 | 0       |
| ENSMUSG00000097736 | 7_953005  | 0.13755 | -0.79206 | 0.84609  | NA       | 0       | 0       | 0       | 0.82529 | 0       | 0       |
| ENSMUSG00000097737 | 1_Gm265   | 42.3533 | 0.42028  | 0.297596 | 0.680939 | 49.551  | 56.6751 | 39.2981 | 33.837  | 39.4899 | 35.2688 |
| ENSMUSG00000097738 | 1_493044  | 0.45299 | -0.6074  | 0.85212  | NA       | 0       | 0       | 1.03416 | 0.82529 | 0.85848 | 0       |
| ENSMUSG00000097740 | 1_E03004  | 0.17236 | 1.1315   | 0.781553 | NA       | 0       | 0       | 1.03416 | 0       | 0       | 0       |
| ENSMUSG00000097742 | 1_Gm265   | 0.18892 | 1.1315   | 0.781553 | NA       | 0       | 1.1335  | 0       | 0       | 0       | 0       |
| ENSMUSG00000097743 | 1_Gm169   | 204.536 | 0.23091  | 0.602548 | 0.870033 | 357.98  | 158.69  | 145.817 | 166.709 | 214.619 | 183.398 |
| ENSMUSG00000097744 | 1_D03004  | 0.44746 | -0.57987 | 0.8834   | NA       | 0       | 0       | 1.03416 | 1.65058 | 0       | 0       |
| ENSMUSG00000097746 | 1_Gm622   | 3.80348 | -1.08132 | 0.426776 | 0.777557 | 5.05622 | 2.26701 | 0       | 9.07822 | 1.71695 | 4.70251 |
| ENSMUSG00000097747 | 1_Gm265   | 17.9379 | -1.08107 | 0.075853 | 0.368902 | 15.1687 | 7.93452 | 11.3758 | 17.3311 | 33.4806 | 22.3369 |
| ENSMUSG00000097748 | 1_Gm265   | 22.9426 | 0.98554  | 0.704484 | 0.908152 | 86.967  | 4.53401 | 0       | 26.4094 | 19.745  | 0       |
| ENSMUSG00000097751 | 1_Gm266   | 29.3508 | 0.31832  | 0.793887 | 0.938336 | 68.7646 | 21.5366 | 7.23913 | 0       | 29.1882 | 49.3764 |
| ENSMUSG00000097754 | 1_Ptgs2os | 15.2404 | 0.63098  | 0.299831 | 0.683022 | 26.2924 | 15.869  | 13.4441 | 12.3794 | 12.8772 | 10.5807 |
| ENSMUSG00000097755 | 1_201011  | 6.4448  | 0.29852  | 0.723855 | 0.915005 | 8.08995 | 7.93452 | 5.17081 | 4.95175 | 4.29238 | 8.22939 |
| ENSMUSG00000097757 | 1_Gm175   | 12.8291 | -0.1293  | 0.83752  | 0.952966 | 15.1687 | 11.335  | 10.3416 | 12.3794 | 17.1695 | 10.5807 |
| ENSMUSG00000097759 | 1_Gm267   | 0.63637 | 0.32817  | 0.912305 | NA       | 0       | 1.1335  | 1.03416 | 1.65058 | 0       | 0       |
| ENSMUSG00000097762 | 1_473246  | 0.97178 | 1.22768  | 0.641346 | NA       | 1.01124 | 0       | 3.10248 | 0       | 1.71695 | 0       |
| ENSMUSG00000097764 | 1_Gm266   | 0       | NA       | NA       | NA       | 0       | 0       | 0       | 0       | 0       | 0       |
| ENSMUSG00000097766 | 1_573042  | 0.72255 | 0.35084  | 0.351905 | NA       | 0       | 2.26701 | 2.06832 | 0       | 0       | 0       |
| ENSMUSG00000097767 | 8_Miat    | 33.9817 | -0.94146 | 0.14305  | 0.511849 | 23.2586 | 13.602  | 33.0932 | 77.5775 | 35.1976 | 21.1613 |
| ENSMUSG00000097768 | 1_231004  | 52.6823 | 0.71192  | 0.142053 | 0.510871 | 35.3936 | 87.2797 | 73.4255 | 37.1382 | 33.4806 | 49.3764 |
| ENSMUSG00000097770 | 1_Gm267   | 288.078 | 0.88255  | 0.139561 | 0.507179 | 755.4   | 179.093 | 186.149 | 182.39  | 254.968 | 170.466 |
| ENSMUSG00000097772 | 7_543041  | 159.558 | 0.44021  | 0.141304 | 0.509869 | 202.249 | 177.96  | 170.637 | 113.065 | 147.658 | 145.778 |
| ENSMUSG00000097773 | 1_Gm106   | 10.0732 | 0.16955  | 0.805619 | 0.943389 | 9.1012  | 12.4685 | 10.3416 | 9.90351 | 6.86782 | 11.7563 |

|                    |          |         |          |          |          |         |         |         |         |         |         |
|--------------------|----------|---------|----------|----------|----------|---------|---------|---------|---------|---------|---------|
| ENSMUSG00000097774 | 1_Gm265  | 0       | NA       | NA       | NA       | 0       | 0       | 0       | 0       | 0       | 0       |
| ENSMUSG00000097775 | 1_493144 | 0.33708 | 1.97061  | 0.625968 | NA       | 2.02249 | 0       | 0       | 0       | 0       | 0       |
| ENSMUSG00000097776 | 1_Gm267  | 2.04381 | -4.38901 | 0.021751 | 0.172753 | 0       | 0       | 0       | 4.12646 | 3.43391 | 4.70251 |
| ENSMUSG00000097779 | 1_483340 | 39.351  | -0.11964 | 0.773443 | 0.932641 | 43.4835 | 39.6726 | 29.9907 | 36.3129 | 45.4993 | 41.147  |
| ENSMUSG00000097781 | 1_933013 | 14.4136 | -0.2545  | 0.739647 | 0.92176  | 26.2924 | 6.80102 | 6.20497 | 12.3794 | 17.1695 | 17.6344 |
| ENSMUSG00000097783 | 1_Gm267  | 0.42924 | -2.15458 | 0.590406 | NA       | 0       | 0       | 0       | 0       | 2.57543 | 0       |
| ENSMUSG00000097784 | 1_A43010 | 12.7735 | -0.96127 | 0.190229 | 0.578426 | 15.1687 | 5.66751 | 5.17081 | 23.1082 | 14.5941 | 12.9319 |
| ENSMUSG00000097785 | 1_B23021 | 11.4355 | -0.99335 | 0.192877 | 0.583012 | 8.08995 | 5.66751 | 9.30745 | 24.7588 | 13.7356 | 7.05377 |
| ENSMUSG00000097787 | 1_270004 | 50.615  | -0.26355 | 0.485042 | 0.812961 | 49.551  | 44.2066 | 44.4689 | 56.9452 | 62.6688 | 45.8495 |
| ENSMUSG00000097788 | 1_Gm165  | 4.31969 | 0.67627  | 0.512446 | 0.828187 | 3.03373 | 6.80102 | 6.20497 | 4.95175 | 2.57543 | 2.35126 |
| ENSMUSG00000097789 | 1_Gm211  | 164.077 | -0.98072 | 0.001373 | 0.024698 | 115.282 | 90.6802 | 125.134 | 240.16  | 218.053 | 195.154 |
| ENSMUSG00000097791 | 1_Gm173  | 7.05341 | 0.13147  | 0.874658 | 0.964407 | 7.07871 | 4.53401 | 10.3416 | 4.95175 | 6.00934 | 9.40502 |
| ENSMUSG00000097792 | 1_Gm270  | 44.9861 | 0.00039  | 0.999298 | 0.999528 | 64.7196 | 34.0051 | 36.1957 | 43.7405 | 48.9332 | 42.3226 |
| ENSMUSG00000097793 | 1_Gm172  | 37.5199 | 0.23069  | 0.677125 | 0.901447 | 68.7646 | 23.8036 | 28.9565 | 41.2646 | 31.7636 | 30.5663 |
| ENSMUSG00000097796 | 1_Gm167  | 0.76632 | -0.35568 | 0.91595  | NA       | 2.02249 | 0       | 0       | 0       | 2.57543 | 0       |
| ENSMUSG00000097797 | 6_Gm269  | 4.18122 | -1.21937 | 0.28014  | 0.667117 | 1.01124 | 3.40051 | 3.10248 | 2.47588 | 6.86782 | 8.22939 |
| ENSMUSG00000097799 | 1_Gm268  | 8.96254 | 1.50076  | 0.648863 | 0.89122  | 29.3261 | 0       | 10.3416 | 0       | 0       | 14.1075 |
| ENSMUSG00000097800 | 1_B23034 | 26.3424 | 1.15868  | 0.127861 | 0.486151 | 9.1012  | 30.6046 | 69.2888 | 10.7288 | 17.1695 | 21.1613 |
| ENSMUSG00000097801 | 1_Gm267  | 0.58672 | -1.17297 | 0.695297 | NA       | 1.01124 | 0       | 0       | 1.65058 | 0.85848 | 0       |
| ENSMUSG00000097805 | 1_Gm174  | 2.53387 | 2.75478  | 0.174909 | 0.558483 | 12.1349 | 0       | 1.03416 | 0       | 0.85848 | 1.17563 |
| ENSMUSG00000097809 | 1_Gm265  | 0.13755 | -0.79206 | 0.84609  | NA       | 0       | 0       | 0       | 0.82529 | 0       | 0       |
| ENSMUSG00000097811 | 1_281042 | 1.75723 | -0.4308  | 0.877546 | 0.965537 | 0       | 4.53401 | 0       | 0       | 6.00934 | 0       |
| ENSMUSG00000097812 | 1_Gm268  | 0.53496 | -2.43802 | 0.508122 | NA       | 0       | 0       | 0       | 0       | 0.85848 | 2.35126 |
| ENSMUSG00000097815 | 1_Gm268  | 887.642 | 0.29282  | 0.288712 | 0.673672 | 1086.08 | 963.477 | 882.14  | 652.806 | 826.713 | 914.638 |
| ENSMUSG00000097817 | 1_Gm268  | 0.56042 | -1.00363 | 0.787433 | NA       | 1.01124 | 0       | 0       | 0       | 0       | 2.35126 |
| ENSMUSG00000097818 | 1_Gm266  | 0.17236 | 1.1315   | 0.781553 | NA       | 0       | 0       | 1.03416 | 0       | 0       | 0       |
| ENSMUSG00000097819 | 1_Gm268  | 18.6976 | 1.09365  | 0.114379 | 0.459477 | 37.416  | 10.2015 | 28.9565 | 15.6806 | 12.8772 | 7.05377 |
| ENSMUSG00000097823 | 2_Gm167  | 17.712  | -0.5845  | 0.387379 | 0.752114 | 19.2136 | 6.80102 | 16.5466 | 18.1564 | 32.6221 | 12.9319 |
| ENSMUSG00000097824 | 1_Gm265  | 12.7697 | -1.41235 | 0.053089 | 0.299403 | 5.05622 | 4.53401 | 11.3758 | 26.4094 | 16.3111 | 12.9319 |
| ENSMUSG00000097827 | 1_533043 | 2.93899 | -2.22414 | 0.122828 | 0.476952 | 1.01124 | 0       | 2.06832 | 3.30117 | 7.72629 | 3.52688 |
| ENSMUSG00000097828 | 1_643056 | 6.23383 | 0.20528  | 0.814724 | 0.947066 | 8.08995 | 4.53401 | 7.23913 | 3.30117 | 6.00934 | 8.22939 |
| ENSMUSG00000097831 | 1_493054 | 0.86844 | -3.13495 | 0.234256 | NA       | 0       | 0       | 0       | 0.82529 | 0.85848 | 3.52688 |
| ENSMUSG00000097832 | 1_Gm269  | 15.4336 | -0.11766 | 0.860111 | 0.960183 | 8.08995 | 14.7355 | 21.7174 | 23.1082 | 12.0187 | 12.9319 |
| ENSMUSG00000097835 | 1_Gm269  | 16.2725 | -0.33439 | 0.600267 | 0.869697 | 22.2474 | 12.4685 | 8.27329 | 15.6806 | 15.4526 | 23.5126 |
| ENSMUSG00000097837 | 1_Gm267  | 4.721   | -1.25129 | 0.211953 | 0.603223 | 3.03373 | 2.26701 | 3.10248 | 5.77705 | 9.44325 | 4.70251 |
| ENSMUSG00000097838 | 1_C53005 | 1.04695 | -1.07762 | 0.677131 | NA       | 2.02249 | 0       | 0       | 0.82529 | 3.43391 | 0       |
| ENSMUSG00000097839 | 1_Gm269  | 10.9172 | -0.22185 | 0.769323 | 0.93146  | 18.2024 | 6.80102 | 5.17081 | 11.5541 | 12.0187 | 11.7563 |
| ENSMUSG00000097841 | 1_493051 | 2.32816 | 2.1115   | 0.164759 | 0.543595 | 5.05622 | 2.26701 | 4.13665 | 1.65058 | 0.85848 | 0       |
| ENSMUSG00000097842 | 2_933010 | 18.5168 | -0.58144 | 0.283878 | 0.670589 | 12.1349 | 14.7355 | 17.5807 | 23.9335 | 18.028  | 24.6882 |
| ENSMUSG00000097847 | 1_493047 | 0.14308 | -0.79206 | 0.84609  | NA       | 0       | 0       | 0       | 0       | 0.85848 | 0       |
| ENSMUSG00000097848 | 1_Gm807  | 0.44364 | -0.57976 | 0.883757 | NA       | 1.01124 | 0       | 0       | 1.65058 | 0       | 0       |
| ENSMUSG00000097850 | 2_463140 | 127.173 | -0.35305 | 0.361342 | 0.734288 | 92.0232 | 141.688 | 101.348 | 98.2098 | 173.412 | 156.359 |
| ENSMUSG00000097854 | 1_Gm266  | 113.649 | 0.89451  | 0.751173 | 0.925449 | 0       | 244.837 | 198.559 | 152.679 | 0       | 85.8208 |
| ENSMUSG00000097855 | 7_A93000 | 13.6248 | 0.22964  | 0.75066  | 0.9253   | 13.1462 | 14.7355 | 16.5466 | 21.4576 | 11.1602 | 4.70251 |
| ENSMUSG00000097857 | 1_Gm266  | 1.61536 | 0.86568  | 0.604047 | NA       | 2.02249 | 2.26701 | 2.06832 | 2.47588 | 0.85848 | 0       |
| ENSMUSG00000097858 | 2_953005 | 8.64481 | -0.05911 | 0.934389 | 0.983573 | 9.1012  | 7.93452 | 8.27329 | 8.25292 | 7.72629 | 10.5807 |
| ENSMUSG00000097859 | 1_Gm266  | 1.3636  | 3.9824   | 0.137966 | NA       | 4.04498 | 0       | 4.13665 | 0       | 0       | 0       |
| ENSMUSG00000097860 | 1_Gm268  | 3.17427 | 0.30974  | 0.818382 | 0.948003 | 2.02249 | 4.53401 | 4.13665 | 5.77705 | 2.57543 | 0       |
| ENSMUSG00000097861 | 1_Gm268  | 23.7121 | -1.11157 | 0.116362 | 0.463991 | 8.08995 | 9.06802 | 27.9224 | 51.9934 | 24.0374 | 21.1613 |
| ENSMUSG00000097863 | 1_101000 | 2.53539 | -0.91565 | 0.517829 | 0.831239 | 3.03373 | 2.26701 | 0       | 4.12646 | 3.43391 | 2.35126 |
| ENSMUSG00000097864 | 1_Gm268  | 3.0272  | 0.89512  | 0.473289 | 0.806475 | 3.03373 | 6.80102 | 2.06832 | 1.65058 | 3.43391 | 1.17563 |
| ENSMUSG00000097867 | 1_Lppos  | 57.8264 | -0.06158 | 0.875591 | 0.964617 | 45.506  | 51.0076 | 73.4255 | 65.1981 | 60.0934 | 51.7276 |
| ENSMUSG00000097868 | 1_A33006 | 8.25398 | 0.4044   | 0.608412 | 0.872658 | 15.1687 | 6.80102 | 6.20497 | 7.42763 | 6.86782 | 7.05377 |
| ENSMUSG00000097869 | 1_C23002 | 1.00405 | -0.9462  | 0.714666 | NA       | 2.02249 | 0       | 0       | 1.65058 | 0       | 2.35126 |
| ENSMUSG00000097870 | 1_Gm268  | 0.14308 | -0.79206 | 0.84609  | NA       | 0       | 0       | 0       | 0       | 0.85848 | 0       |
| ENSMUSG00000097871 | 1_B23010 | 0       | NA       | NA       | NA       | 0       | 0       | 0       | 0       | 0       | 0       |
| ENSMUSG00000097872 | 1_Gm267  | 11.1133 | -0.55091 | 0.66643  | 0.897441 | 6.06747 | 2.26701 | 18.6149 | 0       | 19.745  | 19.9857 |
| ENSMUSG00000097873 | 1_Gm268  | 1.66743 | -4.08992 | 0.11244  | NA       | 0       | 0       | 0       | 4.12646 | 0       | 5.87814 |
| ENSMUSG00000097875 | 1_Gm267  | 39.4566 | -0.16109 | 0.684059 | 0.90338  | 41.461  | 34.0051 | 36.1957 | 42.0899 | 39.4899 | 43.4982 |
| ENSMUSG00000097876 | 1_Gm168  | 47.0967 | 0.17714  | 0.714345 | 0.911154 | 73.8208 | 43.0731 | 33.0932 | 37.1382 | 56.6595 | 38.7957 |
| ENSMUSG00000097879 | 1_Gm268  | 36.389  | -0.20717 | 0.654218 | 0.893223 | 44.4948 | 34.0051 | 22.7516 | 33.0117 | 42.9238 | 41.147  |
| ENSMUSG00000097881 | 7_Celrr  | 0.56679 | -2.55638 | 0.475485 | NA       | 0       | 0       | 0       | 0.82529 | 2.57543 | 0       |
| ENSMUSG00000097884 | 1_Gm265  | 0.83082 | -3.10906 | 0.330544 | NA       | 0       | 0       | 0       | 4.12646 | 0.85848 | 0       |
| ENSMUSG00000097886 | 2_Gsg112 | 1.3059  | -2.58034 | 0.279484 | NA       | 0       | 1.1335  | 0       | 4.12646 | 2.57543 | 0       |
| ENSMUSG00000097887 | 1_Gm265  | 2.45882 | -1.84285 | 0.252554 | 0.643959 | 2.02249 | 1.1335  | 0       | 1.65058 | 1.71695 | 8.22939 |
| ENSMUSG00000097888 | 1_Gm266  | 2.13287 | 0.60059  | 0.75874  | 0.927759 | 1.01124 | 6.80102 | 0       | 4.12646 | 0.85848 | 0       |
| ENSMUSG00000097889 | 1_Gm265  | 30.3563 | 0.14068  | 0.824249 | 0.949196 | 42.4723 | 34.0051 | 18.6149 | 23.9335 | 13.7356 | 49.3764 |
| ENSMUSG00000097890 | 1_493054 | 9.68963 | -1.06509 | 0.158731 | 0.537239 | 6.06747 | 4.53401 | 8.27329 | 18.1564 | 12.8772 | 8.22939 |
| ENSMUSG00000097902 | 1_Gm265  | 0.41818 | -2.121   | 0.592183 | NA       | 0       | 0       | 0       | 1.65058 | 0.85848 | 0       |
| ENSMUSG00000097903 | 1_Gm266  | 5.19241 | -0.21448 | 0.839271 | 0.953167 | 10.1124 | 1.1335  | 3.10248 | 5.77705 | 5.15086 | 5.87814 |
| ENSMUSG00000097904 | 1_Gm267  | 17.737  | 0.41823  | 0.485095 | 0.812961 | 19.2136 | 12.4685 | 28.9565 | 12.3794 | 14.5941 | 18.81   |
| ENSMUSG00000097907 | 1_Raxos1 | 20.7916 | -1.14943 | 0.059151 | 0.318878 | 9.1012  | 7.93452 | 21.7174 | 33.837  | 27.4713 | 24.6882 |
| ENSMUSG00000097908 | 7_493340 | 124.397 | 0.34282  | 0.235511 | 0.627524 | 131.462 | 145.088 | 140.646 | 101.511 | 112.46  | 115.212 |
| ENSMUSG00000097912 | 1_633040 | 0.17236 | 1.1315   | 0.781553 | NA       | 0       | 0       | 1.03416 | 0       | 0       | 0       |
| ENSMUSG00000097913 | 1_Gm268  | 0.51538 | 1.15053  | 0.76193  | NA       | 0       | 2.26701 | 0       | 0.82529 | 0       | 0       |

|                    |           |         |          |          |          |         |         |         |         |         |         |
|--------------------|-----------|---------|----------|----------|----------|---------|---------|---------|---------|---------|---------|
| ENSMUSG00000097914 | 1_Gm268   | 0.47845 | 1.02683  | 0.749277 | NA       | 1.01124 | 0       | 1.03416 | 0.82529 | 0       | 0       |
| ENSMUSG00000097915 | 1_A33000  | 9.44456 | -0.1974  | 0.812244 | 0.946162 | 4.04498 | 9.06802 | 13.4441 | 16.5058 | 7.72629 | 5.87814 |
| ENSMUSG00000097917 | 1_Gm268   | 0.13755 | -0.79206 | 0.84609  | NA       | 0       | 0       | 0       | 0.82529 | 0       | 0       |
| ENSMUSG00000097921 | 1_Gm265   | 3.42178 | 0.9838   | 0.45071  | 0.79295  | 2.02249 | 4.53401 | 7.23913 | 3.30117 | 3.43391 | 0       |
| ENSMUSG00000097922 | 1_493044  | 2.02933 | 0.17949  | 0.898052 | 0.97174  | 2.02249 | 3.40051 | 1.03416 | 1.65058 | 1.71695 | 2.35126 |
| ENSMUSG00000097927 | 1_Gm699   | 0.16854 | 1.1315   | 0.781553 | NA       | 1.01124 | 0       | 0       | 0       | 0       | 0       |
| ENSMUSG00000097928 | 1_Gm265   | 23.6359 | 0.60242  | 0.315295 | 0.696604 | 23.2586 | 21.5366 | 40.3323 | 9.90351 | 19.745  | 27.0394 |
| ENSMUSG00000097929 | 7_Tunar   | 1.35174 | -1.42064 | 0.551916 | NA       | 0       | 2.26701 | 0       | 4.12646 | 1.71695 | 0       |
| ENSMUSG00000097930 | 1_C33000  | 1.40949 | 0.55372  | 0.819755 | NA       | 5.05622 | 0       | 0       | 0.82529 | 2.57543 | 0       |
| ENSMUSG00000097934 | 1_672048  | 2.57069 | -2.6922  | 0.093423 | 0.415963 | 1.01124 | 0       | 1.03416 | 3.30117 | 7.72629 | 2.35126 |
| ENSMUSG00000097944 | 1_A13001  | 53.5323 | -0.48604 | 0.269839 | 0.656811 | 58.6522 | 31.7381 | 43.4348 | 56.1199 | 80.6968 | 50.552  |
| ENSMUSG00000097960 | 1_A33007  | 27.6781 | -1.30433 | 0.044974 | 0.270653 | 6.06747 | 19.2695 | 22.7516 | 55.2946 | 40.3484 | 22.3369 |
| ENSMUSG00000097961 | 1_Gm270   | 4.33887 | -5.47573 | 0.010093 | 0.101447 | 0       | 0       | 0       | 0       | 15.4526 | 10.5807 |
| ENSMUSG00000097970 | 1_Gm270   | 6.54944 | 0.4234   | 0.688716 | 0.90542  | 16.1799 | 2.26701 | 4.13665 | 5.77705 | 8.58477 | 2.35126 |
| ENSMUSG00000097971 | 3_Gm269   | 180.188 | 2.54831  | 0.007868 | 0.084781 | 8.08995 | 576.953 | 338.171 | 58.5958 | 33.4806 | 65.8352 |
| ENSMUSG00000097974 | 1_Gm106   | 5.57023 | 0.09918  | 0.93552  | 0.984107 | 13.1462 | 0       | 4.13665 | 6.60234 | 6.00934 | 3.52688 |
| ENSMUSG00000097986 | 1_Gm269   | 0.33708 | 1.97061  | 0.625968 | NA       | 2.02249 | 0       | 0       | 0       | 0       | 0       |
| ENSMUSG00000097992 | 1_Gm270   | 2.01638 | 0.87301  | 0.617515 | 0.87739  | 1.01124 | 5.66751 | 1.03416 | 0       | 0.85848 | 3.52688 |
| ENSMUSG00000097997 | 1_Gm270   | 1.20866 | 1.64868  | 0.45987  | NA       | 0       | 4.53401 | 1.03416 | 0.82529 | 0.85848 | 0       |
| ENSMUSG00000097998 | 1_Gm270   | 0.47657 | -2.28567 | 0.465885 | NA       | 0       | 0       | 0       | 0.82529 | 0.85848 | 1.17563 |
| ENSMUSG00000098001 | 1_Gm270   | 0.36128 | 2.05714  | 0.610196 | NA       | 0       | 1.1335  | 1.03416 | 0       | 0       | 0       |
| ENSMUSG00000098004 | 1_Gm270   | 0       | NA       | NA       | NA       | 0       | 0       | 0       | 0       | 0       | 0       |
| ENSMUSG00000098008 | 1_A93000  | 2.80587 | -0.76037 | 0.606291 | 0.871807 | 5.05622 | 1.1335  | 0       | 1.65058 | 4.29238 | 4.70251 |
| ENSMUSG00000098022 | 7_Zfp82   | 57.6623 | 0.50231  | 0.340954 | 0.719594 | 83.9333 | 68.0102 | 50.6739 | 21.4576 | 67.8197 | 54.0789 |
| ENSMUSG00000098040 | 1_Gm207   | 1.65194 | -4.09157 | 0.046119 | NA       | 0       | 0       | 0       | 4.12646 | 3.43391 | 2.35126 |
| ENSMUSG00000098041 | 1_Gm269   | 32.7891 | 0.02588  | 0.971852 | 0.992434 | 69.7759 | 18.136  | 11.3758 | 32.1864 | 42.9238 | 22.3369 |
| ENSMUSG00000098045 | 1_Gm269   | 0.19594 | -0.79206 | 0.84609  | NA       | 0       | 0       | 0       | 0       | 0       | 1.17563 |
| ENSMUSG00000098051 | 1_Gm270   | 0.2751  | -1.54073 | 0.703687 | NA       | 0       | 0       | 0       | 1.65058 | 0       | 0       |
| ENSMUSG00000098061 | 1_Gm269   | 0.44364 | -0.57976 | 0.883757 | NA       | 1.01124 | 0       | 0       | 1.65058 | 0       | 0       |
| ENSMUSG00000098066 | 1_Gm269   | 12.6871 | -0.41409 | 0.511427 | 0.827179 | 14.1574 | 10.2015 | 8.27329 | 16.5058 | 12.8772 | 14.1075 |
| ENSMUSG00000098086 | 1_170012  | 1.03036 | 2.39395  | 0.279935 | NA       | 2.02249 | 2.26701 | 1.03416 | 0       | 0.85848 | 0       |
| ENSMUSG00000098087 | 1_Gm177   | 1.16835 | -2.39173 | 0.328002 | NA       | 0       | 1.1335  | 0       | 3.30117 | 2.57543 | 0       |
| ENSMUSG00000098088 | 1_Gm269   | 21.6867 | 0.33452  | 0.594585 | 0.866686 | 35.3936 | 21.5366 | 15.5124 | 9.90351 | 26.6128 | 21.1613 |
| ENSMUSG00000098097 | 7_653040  | 0.13755 | -0.79206 | 0.84609  | NA       | 0       | 0       | 0       | 0.82529 | 0       | 0       |
| ENSMUSG00000098098 | 7_Bvht    | 51.903  | -0.70155 | 0.151587 | 0.525642 | 24.2699 | 40.8061 | 53.7764 | 87.481  | 59.2349 | 45.8495 |
| ENSMUSG00000098109 | 1_953008  | 0       | NA       | NA       | NA       | 0       | 0       | 0       | 0       | 0       | 0       |
| ENSMUSG00000098112 | 7_Bin2    | 33.7625 | 0.98183  | 0.063083 | 0.33148  | 25.2811 | 66.8767 | 42.4006 | 24.7588 | 19.745  | 23.5126 |
| ENSMUSG00000098120 | 1_Gm591   | 4.00641 | -0.32692 | 0.762783 | 0.929057 | 2.02249 | 5.66751 | 3.10248 | 6.60234 | 4.29238 | 2.35126 |
| ENSMUSG00000098132 | 1_Rassf1  | 17.4599 | -0.44043 | 0.428838 | 0.779125 | 17.1912 | 14.7355 | 12.4099 | 21.4576 | 15.4526 | 23.5126 |
| ENSMUSG00000098134 | 1_Rnf113  | 268.248 | -0.09571 | 0.710073 | 0.910052 | 255.845 | 255.038 | 266.814 | 259.142 | 266.986 | 305.663 |
| ENSMUSG00000098144 | 7_170002  | 0       | NA       | NA       | NA       | 0       | 0       | 0       | 0       | 0       | 0       |
| ENSMUSG00000098164 | 1_Gm549   | 0.61771 | 0.23492  | 0.937546 | NA       | 2.02249 | 0       | 0       | 0.82529 | 0.85848 | 0       |
| ENSMUSG00000098176 | 1_Ccdc16  | 142.239 | -0.15821 | 0.618166 | 0.877535 | 155.732 | 106.549 | 140.646 | 142.776 | 140.79  | 166.939 |
| ENSMUSG00000098178 | 1_Gm424   | 16035   | 0.27203  | 0.261909 | 0.651129 | 16187   | 16378   | 20061.7 | 13460.5 | 15336.7 | 14785.9 |
| ENSMUSG00000098183 | 1_Gm270   | 16.2541 | 0.64924  | 0.295914 | 0.679814 | 27.3036 | 13.602  | 18.6149 | 9.07822 | 17.1695 | 11.7563 |
| ENSMUSG00000098188 | 1_Sowahc  | 1730.34 | 0.83667  | 0.024014 | 0.184063 | 3296.66 | 1764.86 | 1593.64 | 1176.87 | 1212.17 | 1337.86 |
| ENSMUSG00000098196 | 1_Gm269   | 1.99198 | 0.37791  | 0.890058 | 0.97035  | 0       | 6.80102 | 0       | 0       | 5.15086 | 0       |
| ENSMUSG00000098202 | 1_B83001  | 0.17236 | 1.1315   | 0.781553 | NA       | 0       | 0       | 1.03416 | 0       | 0       | 0       |
| ENSMUSG00000098206 | 1_A43010  | 32.3203 | -0.28401 | 0.654745 | 0.893223 | 54.6072 | 20.4031 | 12.4099 | 33.0117 | 42.9238 | 30.5663 |
| ENSMUSG00000098207 | 1_Arl14   | 0.67798 | 2.97576  | 0.379561 | NA       | 3.03373 | 0       | 1.03416 | 0       | 0       | 0       |
| ENSMUSG00000098221 | 1_Gm270   | 1.05587 | -0.85011 | 0.740728 | NA       | 0       | 2.26701 | 0       | 0       | 1.71695 | 2.35126 |
| ENSMUSG00000098234 | 7_Snhg6   | 168.91  | 0.46442  | 0.29944  | 0.682414 | 303.373 | 160.957 | 123.065 | 106.463 | 169.12  | 150.48  |
| ENSMUSG00000098274 | 7_Rpl24   | 8491.6  | -0.20667 | 0.410649 | 0.767001 | 6496.23 | 8488.8  | 8668.34 | 8935.44 | 9222.62 | 9138.16 |
| ENSMUSG00000098292 | 1_Gm271   | 55.1954 | 0.2092   | 0.708873 | 0.909864 | 21.2361 | 74.8112 | 81.6988 | 49.5175 | 59.2349 | 44.6739 |
| ENSMUSG00000098294 | 1_Gm272   | 1.85358 | -2.12036 | 0.246582 | 0.638285 | 0       | 0       | 2.06832 | 4.12646 | 2.57543 | 2.35126 |
| ENSMUSG00000098304 | 1_170002  | 0.35746 | 2.04359  | 0.612655 | NA       | 1.01124 | 1.1335  | 0       | 0       | 0       | 0       |
| ENSMUSG00000098306 | 7_Gm280   | 0       | NA       | NA       | NA       | 0       | 0       | 0       | 0       | 0       | 0       |
| ENSMUSG00000098318 | 7_119000  | 45.4498 | -0.42571 | 0.256432 | 0.648048 | 37.416  | 40.8061 | 38.264  | 54.4693 | 52.3671 | 49.3764 |
| ENSMUSG00000098340 | 1_Gm272   | 0.32647 | 0.16972  | 0.966824 | NA       | 0       | 1.1335  | 0       | 0.82529 | 0       | 0       |
| ENSMUSG00000098348 | 7_Btg1-ps | 1.90873 | 2.43508  | 0.201911 | 0.593308 | 3.03373 | 5.66751 | 1.03416 | 0       | 1.71695 | 0       |
| ENSMUSG00000098374 | 1_Gm280   | 758.567 | 0.27499  | 0.286433 | 0.672397 | 817.085 | 848.994 | 825.261 | 583.482 | 684.206 | 792.373 |
| ENSMUSG00000098387 | 2_Pet117  | 5.73038 | 6.04973  | 0.122278 | 0.475668 | 34.3823 | 0       | 0       | 0       | 0       | 0       |
| ENSMUSG00000098424 | 1_Gm272   | 9.37754 | -1.78145 | 0.065727 | 0.340069 | 1.01124 | 4.53401 | 7.23913 | 25.5841 | 12.0187 | 5.87814 |
| ENSMUSG00000098434 | 1_201011  | 0.9807  | 1.24268  | 0.636798 | NA       | 3.03373 | 1.1335  | 0       | 0       | 1.71695 | 0       |
| ENSMUSG00000098456 | 1_Gm121   | 0.82849 | -0.39891 | 0.868081 | NA       | 1.01124 | 1.1335  | 0       | 1.65058 | 0       | 1.17563 |
| ENSMUSG00000098463 | 1_Cphx2   | 1.57143 | -4.02127 | 0.142903 | NA       | 0       | 0       | 0       | 8.25292 | 0       | 1.17563 |
| ENSMUSG00000098470 | 1_C1rb    | 220.935 | 0.34513  | 0.525141 | 0.833294 | 82.922  | 379.723 | 279.224 | 165.884 | 230.93  | 186.925 |
| ENSMUSG00000098488 | 7_Pla2g4t | 52.3366 | 0.00635  | 0.988214 | 0.996838 | 44.4948 | 45.3401 | 67.2205 | 37.1382 | 57.518  | 62.3083 |
| ENSMUSG00000098505 | 2_Gm144   | 0.18892 | 1.1315   | 0.781553 | NA       | 0       | 1.1335  | 0       | 0       | 0       | 0       |
| ENSMUSG00000098509 | 2_Rgs21   | 0.16854 | 1.1315   | 0.781553 | NA       | 1.01124 | 0       | 0       | 0       | 0       | 0       |
| ENSMUSG00000098519 | 1_Gm271   | 0.14308 | -0.79206 | 0.84609  | NA       | 0       | 0       | 0       | 0       | 0.85848 | 0       |
| ENSMUSG00000098534 | 1_Gm271   | 1.43519 | -0.6118  | 0.770966 | NA       | 0       | 3.40051 | 0       | 0.82529 | 0.85848 | 3.52688 |
| ENSMUSG00000098549 | 1_Gm526   | 2.14864 | -0.17235 | 0.926672 | 0.980091 | 5.05622 | 0       | 1.03416 | 1.65058 | 5.15086 | 0       |
| ENSMUSG00000098557 | 1_Kctd12  | 4148.61 | 0.79653  | 0.132396 | 0.494714 | 10002.2 | 2631.99 | 3162.47 | 2692.1  | 3133.44 | 3269.42 |
| ENSMUSG00000098559 | 1_Gm150   | 3.59102 | 0.8338   | 0.514639 | 0.829322 | 5.05622 | 4.53401 | 4.13665 | 0       | 4.29238 | 3.52688 |

|                    |           |         |          |          |          |         |         |         |         |         |         |
|--------------------|-----------|---------|----------|----------|----------|---------|---------|---------|---------|---------|---------|
| ENSMUSG00000098627 | 7_493052  | 6.80591 | -0.33543 | 0.691198 | 0.905638 | 8.08995 | 6.80102 | 3.10248 | 7.42763 | 6.00934 | 9.40502 |
| ENSMUSG00000098630 | 1_Gm271   | 1.03229 | -3.417   | 0.158827 | NA       | 0       | 0       | 0       | 3.30117 | 1.71695 | 1.17563 |
| ENSMUSG00000098640 | 1_Gm142   | 0.13755 | -0.79206 | 0.84609  | NA       | 0       | 0       | 0       | 0.82529 | 0       | 0       |
| ENSMUSG00000098650 | 1_Gm280   | 800.385 | 0.59197  | 0.162212 | 0.540795 | 1518.89 | 753.779 | 614.292 | 557.072 | 765.761 | 592.516 |
| ENSMUSG00000098659 | 7_111001  | 0.17236 | 1.1315   | 0.781553 | NA       | 0       | 0       | 1.03416 | 0       | 0       | 0       |
| ENSMUSG00000098678 | 1_Mroh6   | 72.0053 | 0.65498  | 0.369342 | 0.740977 | 12.1349 | 126.952 | 125.134 | 52.8187 | 51.5086 | 63.4839 |
| ENSMUSG00000098682 | 7_Otx2os  | 16.562  | -1.28568 | 0.08227  | 0.38708  | 16.1799 | 2.26701 | 10.3416 | 30.5358 | 18.8865 | 21.1613 |
| ENSMUSG00000098684 | 1_Gm272   | 0.32647 | 0.16972  | 0.966824 | NA       | 0       | 1.1335  | 0       | 0.82529 | 0       | 0       |
| ENSMUSG00000098692 | 1_Gm280   | 3.71594 | -3.28607 | 0.031382 | 0.218078 | 2.02249 | 0       | 0       | 4.95175 | 9.44325 | 5.87814 |
| ENSMUSG00000098715 | 6_Gm280   | 4.22297 | -1.02353 | 0.354001 | 0.729719 | 4.04498 | 1.1335  | 3.10248 | 7.42763 | 2.57543 | 7.05377 |
| ENSMUSG00000098727 | 1_170001  | 0.39188 | -1.97195 | 0.623385 | NA       | 0       | 0       | 0       | 0       | 0       | 2.35126 |
| ENSMUSG00000098754 | 7_Gm280   | 1.57387 | -4.0211  | 0.229116 | NA       | 0       | 0       | 0       | 0       | 9.44325 | 0       |
| ENSMUSG00000098758 | 1_763040  | 0.2751  | -1.54073 | 0.703687 | NA       | 0       | 0       | 0       | 1.65058 | 0       | 0       |
| ENSMUSG00000098773 | 1_Gm271   | 0.76124 | -1.60899 | 0.634506 | NA       | 0       | 1.1335  | 0       | 0       | 3.43391 | 0       |
| ENSMUSG00000098781 | 1_Gm280   | 7.44048 | 0.36706  | 0.735342 | 0.920521 | 11.1237 | 9.06802 | 5.17081 | 11.5541 | 7.72629 | 0       |
| ENSMUSG00000098784 | 1_Gm271   | 0.28616 | -1.57932 | 0.696464 | NA       | 0       | 0       | 0       | 0       | 1.71695 | 0       |
| ENSMUSG00000098789 | 7_Jmjd7   | 88.315  | 0.17357  | 0.777062 | 0.933844 | 28.3148 | 130.353 | 122.031 | 78.4028 | 53.2256 | 117.563 |
| ENSMUSG00000098794 | 1_Gm280   | 4.25475 | 2.28888  | 0.345718 | 0.722872 | 21.2361 | 0       | 0       | 0       | 4.29238 | 0       |
| ENSMUSG00000098905 | 1_Zfp953  | 178.993 | 0.58052  | 0.319957 | 0.701203 | 416.633 | 122.418 | 104.45  | 108.113 | 187.148 | 135.197 |
| ENSMUSG00000098923 | 1_Tmem1   | 390.214 | 0.28003  | 0.341114 | 0.719594 | 530.903 | 400.127 | 352.649 | 326.816 | 363.994 | 366.796 |
| ENSMUSG00000098950 | 7_Gm280   | 1222.72 | 0.26068  | 0.497214 | 0.819208 | 1837.43 | 1207.18 | 953.497 | 798.058 | 1143.49 | 1396.65 |
| ENSMUSG00000099009 | 1_Gm280   | 73.1118 | -1.15542 | 0.003599 | 0.049603 | 60.6747 | 30.6046 | 44.4689 | 108.113 | 99.5833 | 95.2259 |
| ENSMUSG00000099032 | 2_Tcf24   | 13.1506 | -1.40703 | 0.119492 | 0.47032  | 17.1912 | 2.26701 | 2.06832 | 20.6323 | 21.4619 | 15.2832 |
| ENSMUSG00000099041 | 1_Gm280   | 65.5617 | -0.96713 | 0.075945 | 0.36904  | 33.3711 | 30.6046 | 69.2888 | 136.173 | 68.6782 | 55.2545 |
| ENSMUSG00000099061 | 1_Gm280   | 1.6676  | 0.1212   | 0.950898 | NA       | 4.04498 | 1.1335  | 0       | 2.47588 | 0       | 2.35126 |
| ENSMUSG00000099083 | 7_Atf7    | 2288.85 | 0.24333  | 0.377892 | 0.746591 | 3018.56 | 2164.99 | 2260.68 | 1956.77 | 2348.79 | 1983.28 |
| ENSMUSG00000099102 | 1_Gm119   | 0.13755 | -0.79206 | 0.84609  | NA       | 0       | 0       | 0       | 0.82529 | 0       | 0       |
| ENSMUSG00000099104 | 1_Gm170   | 0.54638 | 2.65324  | 0.465678 | NA       | 1.01124 | 2.26701 | 0       | 0       | 0       | 0       |
| ENSMUSG00000099115 | 1_Gm171   | 0.16854 | 1.1315   | 0.781553 | NA       | 1.01124 | 0       | 0       | 0       | 0       | 0       |
| ENSMUSG00000099137 | 1_Gm106   | 35.8688 | -0.62523 | 0.139878 | 0.507212 | 26.2924 | 30.6046 | 27.9224 | 41.2646 | 51.5086 | 37.6201 |
| ENSMUSG00000099139 | 1_111002  | 0.38486 | 0.16972  | 0.966824 | NA       | 0       | 1.1335  | 0       | 0       | 0       | 1.17563 |
| ENSMUSG00000099170 | 1_573040  | 10.1023 | -0.60966 | 0.410116 | 0.76693  | 13.1462 | 5.66751 | 5.17081 | 14.03   | 12.0187 | 10.5807 |
| ENSMUSG00000099190 | 1_Gm271   | 0.34472 | 1.99863  | 0.620844 | NA       | 0       | 0       | 2.06832 | 0       | 0       | 0       |
| ENSMUSG00000099207 | 7_Gm106   | 1.78522 | -0.64111 | 0.694059 | 0.905638 | 3.03373 | 1.1335  | 0       | 2.47588 | 1.71695 | 2.35126 |
| ENSMUSG00000099269 | 2_Calm5   | 0.19594 | -0.79206 | 0.84609  | NA       | 0       | 0       | 0       | 0       | 0       | 1.17563 |
| ENSMUSG00000099294 | 1_Gm112   | 0.14308 | -0.79206 | 0.84609  | NA       | 0       | 0       | 0       | 0       | 0.85848 | 0       |
| ENSMUSG00000099338 | 1_281003  | 6.93306 | -0.84606 | 0.358934 | 0.732887 | 7.07871 | 6.80102 | 1.03416 | 10.7288 | 7.72629 | 8.22939 |
| ENSMUSG00000099349 | 6_170004  | 0.18892 | 1.1315   | 0.781553 | NA       | 0       | 1.1335  | 0       | 0       | 0       | 0       |
| ENSMUSG00000099364 | 1_573041  | 2.35579 | -1.21875 | 0.420788 | 0.77399  | 2.02249 | 2.26701 | 0       | 5.77705 | 1.71695 | 2.35126 |
| ENSMUSG00000099375 | 1_Gm281   | 0.96055 | -0.84074 | 0.682207 | NA       | 1.01124 | 0       | 1.03416 | 0.82529 | 1.71695 | 1.17563 |
| ENSMUSG00000099378 | 1_170006  | 0.16854 | 1.1315   | 0.781553 | NA       | 1.01124 | 0       | 0       | 0       | 0       | 0       |
| ENSMUSG00000099384 | 6_170011  | 0.69094 | 0.12901  | 0.959664 | NA       | 1.01124 | 1.1335  | 0       | 0.82529 | 0       | 1.17563 |
| ENSMUSG00000099391 | 2_170000  | 0.16854 | 1.1315   | 0.781553 | NA       | 1.01124 | 0       | 0       | 0       | 0       | 0       |
| ENSMUSG00000099398 | 1_Ms4a14  | 8.97227 | 0.6973   | 0.359029 | 0.732887 | 9.1012  | 17.0025 | 7.23913 | 7.42763 | 6.00934 | 7.05377 |
| ENSMUSG00000099411 | 1_231001  | 3.35303 | -0.19839 | 0.86155  | 0.960565 | 4.04498 | 2.26701 | 3.10248 | 5.77705 | 2.57543 | 2.35126 |
| ENSMUSG00000099413 | 1_Gm177   | 13.829  | 1.06501  | 0.139862 | 0.507212 | 30.3373 | 13.602  | 12.4099 | 9.90351 | 12.0187 | 4.70251 |
| ENSMUSG00000099418 | 1_Gm665   | 0       | NA       | NA       | NA       | 0       | 0       | 0       | 0       | 0       | 0       |
| ENSMUSG00000099419 | 1_170000  | 0.35746 | 2.04359  | 0.612655 | NA       | 1.01124 | 1.1335  | 0       | 0       | 0       | 0       |
| ENSMUSG00000099420 | 1_Gm132   | 0       | NA       | NA       | NA       | 0       | 0       | 0       | 0       | 0       | 0       |
| ENSMUSG00000099422 | 1_Gm427   | 1.22629 | 1.44736  | 0.451457 | NA       | 2.02249 | 2.26701 | 1.03416 | 0       | 0.85848 | 1.17563 |
| ENSMUSG00000099443 | 1_Gm144   | 0       | NA       | NA       | NA       | 0       | 0       | 0       | 0       | 0       | 0       |
| ENSMUSG00000099446 | 1_231000  | 1.29232 | -1.4386  | 0.48897  | NA       | 0       | 0       | 2.06832 | 2.47588 | 0.85848 | 2.35126 |
| ENSMUSG00000099452 | 1_Gm285   | 1.49478 | 4.10408  | 0.138461 | NA       | 0       | 7.93452 | 1.03416 | 0       | 0       | 0       |
| ENSMUSG00000099465 | 1_Gm383   | 4.4038  | 0.32213  | 0.74639  | 0.924339 | 5.05622 | 4.53401 | 5.17081 | 3.30117 | 6.00934 | 2.35126 |
| ENSMUSG00000099470 | 1_Gm293   | 2.25939 | 0.34476  | 0.831974 | 0.951799 | 1.01124 | 5.66751 | 1.03416 | 4.12646 | 1.71695 | 0       |
| ENSMUSG00000099481 | 6_Xndc1   | 504.573 | 0.30721  | 0.215009 | 0.606021 | 541.016 | 550.882 | 582.233 | 401.092 | 490.19  | 462.022 |
| ENSMUSG00000099512 | 1_Gm287   | 1.87803 | -2.13731 | 0.259127 | 0.64893  | 2.02249 | 0       | 0       | 1.65058 | 1.71695 | 5.87814 |
| ENSMUSG00000099516 | 1_Gm290   | 0.37783 | 2.11394  | 0.599927 | NA       | 0       | 2.26701 | 0       | 0       | 0       | 0       |
| ENSMUSG00000099517 | 1_Hist1h3 | 0.37783 | 2.11394  | 0.599927 | NA       | 0       | 2.26701 | 0       | 0       | 0       | 0       |
| ENSMUSG00000099518 | 1_Gm132   | 0       | NA       | NA       | NA       | 0       | 0       | 0       | 0       | 0       | 0       |
| ENSMUSG00000099545 | 1_Gm132   | 0.56675 | 2.70271  | 0.498103 | NA       | 0       | 3.40051 | 0       | 0       | 0       | 0       |
| ENSMUSG00000099564 | 1_Gm287   | 0.42371 | -2.13816 | 0.587702 | NA       | 0       | 0       | 0       | 0.82529 | 1.71695 | 0       |
| ENSMUSG00000099574 | 1_170012  | 0.19594 | -0.79206 | 0.84609  | NA       | 0       | 0       | 0       | 0       | 0       | 1.17563 |
| ENSMUSG00000099576 | 1_Gm290   | 0.19594 | -0.79206 | 0.84609  | NA       | 0       | 0       | 0       | 0       | 0       | 1.17563 |
| ENSMUSG00000099583 | 1_Hist1h3 | 1.9053  | 2.47002  | 0.196213 | 0.588086 | 1.01124 | 5.66751 | 3.10248 | 1.65058 | 0       | 0       |
| ENSMUSG00000099597 | 1_Gm289   | 518.287 | 0.36646  | 0.344454 | 0.721883 | 886.861 | 421.663 | 442.621 | 429.152 | 485.039 | 444.387 |
| ENSMUSG00000099608 | 1_493341  | 0.17236 | 1.1315   | 0.781553 | NA       | 0       | 0       | 1.03416 | 0       | 0       | 0       |
| ENSMUSG00000099622 | 1_Gm291   | 0.17236 | 1.1315   | 0.781553 | NA       | 0       | 0       | 1.03416 | 0       | 0       | 0       |
| ENSMUSG00000099625 | 1_Gm293   | 0.13755 | -0.79206 | 0.84609  | NA       | 0       | 0       | 0       | 0.82529 | 0       | 0       |
| ENSMUSG00000099630 | 1_170009  | 0.45299 | -0.6074  | 0.85212  | NA       | 0       | 0       | 1.03416 | 0.82529 | 0.85848 | 0       |
| ENSMUSG00000099664 | 1_Gm285   | 0       | NA       | NA       | NA       | 0       | 0       | 0       | 0       | 0       | 0       |
| ENSMUSG00000099689 | 6_Zfp383  | 274.338 | -0.50136 | 0.239068 | 0.630782 | 357.98  | 137.154 | 186.149 | 348.273 | 320.212 | 296.258 |
| ENSMUSG00000099696 | 6_290005  | 66.5376 | -1.2243  | 0.043813 | 0.266078 | 71.7983 | 13.602  | 34.1273 | 124.619 | 79.8384 | 75.2402 |
| ENSMUSG00000099703 | 6_Gm282   | 26.834  | 0.08833  | 0.886421 | 0.969051 | 16.1799 | 46.4736 | 20.6832 | 36.3129 | 24.8958 | 16.4588 |
| ENSMUSG00000099715 | 2_Gm280   | 0       | NA       | NA       | NA       | 0       | 0       | 0       | 0       | 0       | 0       |

|                     |           |         |          |          |          |         |         |         |         |         |         |
|---------------------|-----------|---------|----------|----------|----------|---------|---------|---------|---------|---------|---------|
| ENSMUSG00000099762  | 3_Gm857   | 2.32694 | -1.84544 | 0.371275 | 0.742208 | 3.03373 | 0       | 0       | 5.77705 | 5.15086 | 0       |
| ENSMUSG00000099784  | 1_Dalir   | 0.95479 | 1.22544  | 0.650493 | NA       | 4.04498 | 0       | 0       | 0.82529 | 0.85848 | 0       |
| ENSMUSG00000099804  | 1_Gm284   | 88.1882 | -0.10966 | 0.821242 | 0.948338 | 125.394 | 66.8767 | 62.0497 | 54.4693 | 122.762 | 97.5771 |
| ENSMUSG00000099810  | 1_Gm295   | 0.13755 | -0.79206 | 0.84609  | NA       | 0       | 0       | 0       | 0.82529 | 0       | 0       |
| ENSMUSG00000099812  | 1_Gm285   | 0 NA    | NA       | NA       | NA       | 0       | 0       | 0       | 0       | 0       | 0       |
| ENSMUSG00000099825  | 1_181001  | 0.81045 | 0.84753  | 0.695924 | NA       | 1.01124 | 1.1335  | 1.03416 | 0.82529 | 0.85848 | 0       |
| ENSMUSG00000099843  | 1_Gm716   | 30.0012 | 1.3769   | 0.008395 | 0.088746 | 58.6522 | 44.2066 | 26.8882 | 15.6806 | 14.5941 | 19.9857 |
| ENSMUSG00000099847  | 1_Gm294   | 0.19594 | -0.79206 | 0.84609  | NA       | 0       | 0       | 0       | 0       | 0       | 1.17563 |
| ENSMUSG00000099853  | 1_Gm293   | 0.28616 | -1.57932 | 0.696464 | NA       | 0       | 0       | 0       | 0       | 1.71695 | 0       |
| ENSMUSG00000099877  | 6_Pinc    | 0.55019 | 2.66232  | 0.46328  | NA       | 0       | 2.26701 | 1.03416 | 0       | 0       | 0       |
| ENSMUSG00000099878  | 1_Gm281   | 2.13033 | 1.41855  | 0.341835 | 0.719718 | 4.04498 | 2.26701 | 3.10248 | 1.65058 | 1.71695 | 0       |
| ENSMUSG00000099899  | 1_Gm287   | 0.41818 | -2.121   | 0.592183 | NA       | 0       | 0       | 0       | 1.65058 | 0.85848 | 0       |
| ENSMUSG00000099906  | 1_Gm286   | 4.09482 | -2.31372 | 0.100326 | 0.430879 | 4.04498 | 0       | 0       | 6.60234 | 6.86782 | 7.05377 |
| ENSMUSG00000099913  | 1_Gm285   | 19.9294 | 0.79262  | 0.441164 | 0.786762 | 65.7309 | 6.80102 | 3.10248 | 9.90351 | 12.8772 | 21.1613 |
| ENSMUSG00000099922  | 1_Gm290   | 0 NA    | NA       | NA       | NA       | 0       | 0       | 0       | 0       | 0       | 0       |
| ENSMUSG00000099950  | 1_913022  | 0.16854 | 1.1315   | 0.781553 | NA       | 1.01124 | 0       | 0       | 0       | 0       | 0       |
| ENSMUSG00000099968  | 6_170002  | 0.13755 | -0.79206 | 0.84609  | NA       | 0       | 0       | 0       | 0.82529 | 0       | 0       |
| ENSMUSG00000099974  | 1_Bcl2a1c | 44.7632 | 1.94749  | 9.69E-06 | 0.000503 | 77.8658 | 75.9447 | 58.9472 | 15.6806 | 15.4526 | 24.6882 |
| ENSMUSG00000099983  | 1_170002  | 0.14308 | -0.79206 | 0.84609  | NA       | 0       | 0       | 0       | 0       | 0.85848 | 0       |
| ENSMUSG00000099988  | 6_170005  | 0.47104 | -2.2721  | 0.552052 | NA       | 0       | 0       | 0       | 1.65058 | 0       | 1.17563 |
| ENSMUSG000000100002 | 1_Gm296   | 0.92683 | -3.22973 | 0.303548 | NA       | 0       | 0       | 0       | 0       | 0.85848 | 4.70251 |
| ENSMUSG000000100009 | 6_Gm796   | 13.2878 | 0.94085  | 0.198777 | 0.590744 | 27.3036 | 11.335  | 13.4441 | 4.95175 | 8.58477 | 14.1075 |
| ENSMUSG000000100014 | 1_Gm292   | 0 NA    | NA       | NA       | NA       | 0       | 0       | 0       | 0       | 0       | 0       |
| ENSMUSG000000100022 | 1_Gm295   | 2.73325 | -0.33371 | 0.796046 | 0.939697 | 4.04498 | 1.1335  | 2.06832 | 1.65058 | 5.15086 | 2.35126 |
| ENSMUSG000000100029 | 1_Gm294   | 0.19594 | -0.79206 | 0.84609  | NA       | 0       | 0       | 0       | 0       | 0       | 1.17563 |
| ENSMUSG000000100071 | 1_Gm287   | 1.56781 | 3.07675  | 0.126021 | NA       | 1.01124 | 3.40051 | 4.13665 | 0       | 0.85848 | 0       |
| ENSMUSG000000100079 | 1_lfnab   | 0 NA    | NA       | NA       | NA       | 0       | 0       | 0       | 0       | 0       | 0       |
| ENSMUSG000000100094 | 1_181000  | 0.63958 | -1.30846 | 0.65661  | NA       | 1.01124 | 0       | 0       | 1.65058 | 0       | 1.17563 |
| ENSMUSG000000100096 | 1_Gm287   | 0 NA    | NA       | NA       | NA       | 0       | 0       | 0       | 0       | 0       | 0       |
| ENSMUSG000000100106 | 1_Gm288   | 41.0861 | 0.52417  | 0.406371 | 0.764314 | 76.8546 | 34.0051 | 34.1273 | 13.2047 | 37.773  | 50.552  |
| ENSMUSG000000100108 | 1_Gm281   | 0.18892 | 1.1315   | 0.781553 | NA       | 0       | 1.1335  | 0       | 0       | 0       | 0       |
| ENSMUSG000000100110 | 1_Gm287   | 0.19594 | -0.79206 | 0.84609  | NA       | 0       | 0       | 0       | 0       | 0       | 1.17563 |
| ENSMUSG000000100113 | 1_Gm285   | 0.2751  | -1.54073 | 0.703687 | NA       | 0       | 0       | 0       | 1.65058 | 0       | 0       |
| ENSMUSG000000100120 | 1_Gm553   | 1.45704 | -0.86528 | 0.625458 | NA       | 2.02249 | 0       | 1.03416 | 2.47588 | 0.85848 | 2.35126 |
| ENSMUSG000000100129 | 1_Gm290   | 0.35746 | 2.04359  | 0.612655 | NA       | 1.01124 | 1.1335  | 0       | 0       | 0       | 0       |
| ENSMUSG000000100147 | 2_170004  | 98.1422 | -1.17657 | 0.018241 | 0.153082 | 87.9783 | 29.4711 | 63.0839 | 128.746 | 181.997 | 97.5771 |
| ENSMUSG000000100150 | 1_Gm195   | 3.33646 | 2.22522  | 0.157139 | 0.534837 | 7.07871 | 2.26701 | 7.23913 | 0       | 3.43391 | 0       |
| ENSMUSG000000100155 | 1_Gm210   | 0.33902 | -1.78366 | 0.658108 | NA       | 0       | 0       | 0       | 0       | 0.85848 | 1.17563 |
| ENSMUSG000000100157 | 6_231003  | 115.518 | 0.07167  | 0.83583  | 0.952513 | 147.642 | 87.2797 | 119.963 | 113.89  | 105.593 | 118.738 |
| ENSMUSG000000100175 | 6_170002  | 0.18892 | 1.1315   | 0.781553 | NA       | 0       | 1.1335  | 0       | 0       | 0       | 0       |
| ENSMUSG000000100181 | 1_Gm290   | 28.8229 | 0.29869  | 0.533809 | 0.838255 | 22.2474 | 31.7381 | 41.3665 | 23.9335 | 26.6128 | 27.0394 |
| ENSMUSG000000100182 | 6_181000  | 1.98217 | 1.27048  | 0.405318 | 0.763962 | 2.02249 | 3.40051 | 3.10248 | 1.65058 | 1.71695 | 0       |
| ENSMUSG000000100188 | 1_Gm295   | 0.13755 | -0.79206 | 0.84609  | NA       | 0       | 0       | 0       | 0.82529 | 0       | 0       |
| ENSMUSG000000100210 | 1_Hist1h3 | 0.42924 | -2.15458 | 0.590406 | NA       | 0       | 0       | 0       | 0       | 2.57543 | 0       |
| ENSMUSG000000100211 | 1_170006  | 0.56675 | 2.70271  | 0.498103 | NA       | 0       | 3.40051 | 0       | 0       | 0       | 0       |
| ENSMUSG000000100213 | 1_Gm281   | 31.1882 | -0.45509 | 0.560038 | 0.848816 | 57.6409 | 6.80102 | 14.4783 | 42.0899 | 43.7823 | 22.3369 |
| ENSMUSG000000100217 | 1_993011  | 0 NA    | NA       | NA       | NA       | 0       | 0       | 0       | 0       | 0       | 0       |
| ENSMUSG000000100234 | 1_Gm132   | 0 NA    | NA       | NA       | NA       | 0       | 0       | 0       | 0       | 0       | 0       |
| ENSMUSG000000100235 | 6_Gm285   | 87.2475 | 0.31901  | 0.590909 | 0.865084 | 173.934 | 54.4081 | 62.0497 | 42.0899 | 109.885 | 81.1183 |
| ENSMUSG000000100241 | 1_Slc18a3 | 0.68774 | -2.83311 | 0.475143 | NA       | 0       | 0       | 0       | 4.12646 | 0       | 0       |
| ENSMUSG000000100247 | 1_A53005  | 0.35746 | 2.04359  | 0.612655 | NA       | 1.01124 | 1.1335  | 0       | 0       | 0       | 0       |
| ENSMUSG000000100252 | 6_Mir124- | 202.227 | -1.30233 | 0.165387 | 0.545104 | 264.946 | 74.8112 | 10.3416 | 472.067 | 325.363 | 65.8352 |
| ENSMUSG000000100253 | 1_170002  | 0.19594 | -0.79206 | 0.84609  | NA       | 0       | 0       | 0       | 0       | 0       | 1.17563 |
| ENSMUSG000000100254 | 1_Trpc2   | 0.37783 | 2.11394  | 0.599927 | NA       | 0       | 2.26701 | 0       | 0       | 0       | 0       |
| ENSMUSG000000100255 | 1_Gm281   | 3.1641  | 0.83584  | 0.602073 | 0.870033 | 7.07871 | 0       | 5.17081 | 3.30117 | 3.43391 | 0       |
| ENSMUSG000000100287 | 1_Gm280   | 3.18103 | 4.1707   | 0.012198 | 0.116135 | 5.05622 | 9.06802 | 4.13665 | 0.82529 | 0       | 0       |
| ENSMUSG000000100291 | 6_231006  | 1.08703 | -1.12244 | 0.619723 | NA       | 1.01124 | 0       | 1.03416 | 3.30117 | 0       | 1.17563 |
| ENSMUSG000000100301 | 6_603040  | 5.88398 | -0.53654 | 0.594342 | 0.866686 | 9.1012  | 1.1335  | 4.13665 | 9.90351 | 5.15086 | 5.87814 |
| ENSMUSG000000100306 | 1_Gm293   | 0.53302 | 1.01035  | 0.786953 | NA       | 2.02249 | 0       | 0       | 0       | 0       | 1.17563 |
| ENSMUSG000000100334 | 1_C23002  | 0.48398 | 1.0269   | 0.748454 | NA       | 1.01124 | 0       | 1.03416 | 0       | 0.85848 | 0       |
| ENSMUSG000000100335 | 1_231000  | 0.95884 | -0.82358 | 0.717442 | NA       | 0       | 0       | 2.06832 | 1.65058 | 0.85848 | 1.17563 |
| ENSMUSG000000100345 | 1_Gm294   | 0.67672 | 1.66034  | 0.566611 | NA       | 0       | 1.1335  | 2.06832 | 0       | 0.85848 | 0       |
| ENSMUSG000000100354 | 1_Gm291   | 1.61856 | 0.19816  | 0.90019  | NA       | 3.03373 | 1.1335  | 1.03416 | 2.47588 | 0.85848 | 1.17563 |
| ENSMUSG000000100367 | 1_Gm293   | 0.13755 | -0.79206 | 0.84609  | NA       | 0       | 0       | 0       | 0.82529 | 0       | 0       |
| ENSMUSG000000100371 | 1_Gm296   | 0.17236 | 1.1315   | 0.781553 | NA       | 0       | 0       | 1.03416 | 0       | 0       | 0       |
| ENSMUSG000000100387 | 1_Gm285   | 0.16854 | 1.1315   | 0.781553 | NA       | 1.01124 | 0       | 0       | 0       | 0       | 0       |
| ENSMUSG000000100392 | 1_Gm289   | 0.69454 | 3.00678  | 0.371611 | NA       | 3.03373 | 1.1335  | 0       | 0       | 0       | 0       |
| ENSMUSG000000100396 | 1_Gm293   | 10.8633 | 0.19269  | 0.817083 | 0.947598 | 13.1462 | 12.4685 | 9.30745 | 4.95175 | 20.6034 | 4.70251 |
| ENSMUSG000000100410 | 1_231002  | 0.61771 | 0.23492  | 0.937546 | NA       | 2.02249 | 0       | 0       | 0.82529 | 0.85848 | 0       |
| ENSMUSG000000100417 | 1_Gm285   | 0.28063 | -1.56014 | 0.700051 | NA       | 0       | 0       | 0       | 0.82529 | 0.85848 | 0       |
| ENSMUSG000000100426 | 1_Gm420   | 1.36064 | -0.69235 | 0.714865 | NA       | 1.01124 | 1.1335  | 1.03416 | 4.12646 | 0.85848 | 0       |
| ENSMUSG000000100437 | 1_Gm291   | 0.13755 | -0.79206 | 0.84609  | NA       | 0       | 0       | 0       | 0.82529 | 0       | 0       |
| ENSMUSG000000100444 | 1_C53004  | 0.8669  | 3.32792  | 0.20126  | NA       | 3.03373 | 1.1335  | 1.03416 | 0       | 0       | 0       |
| ENSMUSG000000100448 | 1_Gm145   | 0.13755 | -0.79206 | 0.84609  | NA       | 0       | 0       | 0       | 0.82529 | 0       | 0       |
| ENSMUSG000000100454 | 1_Gm289   | 314.452 | -0.77233 | 0.677685 | 0.901447 | 0       | 374.056 | 322.658 | 270.696 | 359.702 | 559.599 |

|                    |           |         |          |          |          |         |         |         |         |         |         |
|--------------------|-----------|---------|----------|----------|----------|---------|---------|---------|---------|---------|---------|
| ENSMUSG00000100465 | 1_Gm292   | 1.54726 | -1.02079 | 0.552809 | NA       | 2.02249 | 0       | 1.03416 | 2.47588 | 2.57543 | 1.17563 |
| ENSMUSG00000100475 | 1_Gm295   | 0.30991 | 0.16972  | 0.966824 | NA       | 0       | 0       | 1.03416 | 0.82529 | 0       | 0       |
| ENSMUSG00000100480 | 1_Gm291   | 2.8789  | -1.11105 | 0.466567 | 0.803611 | 1.01124 | 4.53401 | 0       | 1.65058 | 7.72629 | 2.35126 |
| ENSMUSG00000100486 | 6_Gm413   | 0.4821  | -2.30304 | 0.543942 | NA       | 0       | 0       | 0       | 0       | 1.71695 | 1.17563 |
| ENSMUSG00000100502 | 1_Gm282   | 23.8217 | 0.33139  | 0.575417 | 0.856733 | 42.4723 | 19.2695 | 17.5807 | 16.5058 | 18.8865 | 28.2151 |
| ENSMUSG00000100512 | 1_Ovol3   | 0       | NA       | NA       | NA       | 0       | 0       | 0       | 0       | 0       | 0       |
| ENSMUSG00000100536 | 1_Gm288   | 12.6588 | -0.39128 | 0.536483 | 0.838957 | 12.1349 | 10.2015 | 10.3416 | 10.7288 | 13.7356 | 18.81   |
| ENSMUSG00000100546 | 1_Gm294   | 0.31162 | 0.16972  | 0.966824 | NA       | 1.01124 | 0       | 0       | 0       | 0.85848 | 0       |
| ENSMUSG00000100550 | 1_231003  | 0.65463 | 1.62138  | 0.64602  | NA       | 0       | 0       | 3.10248 | 0.82529 | 0       | 0       |
| ENSMUSG00000100552 | 1_Gm290   | 0       | NA       | NA       | NA       | 0       | 0       | 0       | 0       | 0       | 0       |
| ENSMUSG00000100553 | 6_Gm177   | 0.18892 | 1.1315   | 0.781553 | NA       | 0       | 1.1335  | 0       | 0       | 0       | 0       |
| ENSMUSG00000100558 | 1_170002  | 0.47657 | -2.28567 | 0.465885 | NA       | 0       | 0       | 0       | 0.82529 | 0.85848 | 1.17563 |
| ENSMUSG00000100562 | 1_Gm296   | 0.14308 | -0.79206 | 0.84609  | NA       | 0       | 0       | 0       | 0       | 0.85848 | 0       |
| ENSMUSG00000100580 | 6_493343  | 0.2751  | -1.54073 | 0.703687 | NA       | 0       | 0       | 0       | 1.65058 | 0       | 0       |
| ENSMUSG00000100586 | 1_Vmn1r5  | 5.43864 | -0.08407 | 0.928997 | 0.981421 | 8.08995 | 5.66751 | 2.06832 | 5.77705 | 5.15086 | 5.87814 |
| ENSMUSG00000100594 | 1_281041  | 49.2725 | 0.14112  | 0.749716 | 0.925082 | 71.7983 | 40.8061 | 42.4006 | 39.614  | 57.518  | 43.4982 |
| ENSMUSG00000100596 | 1_Gm295   | 1.43918 | 0.61991  | 0.756923 | NA       | 3.03373 | 2.26701 | 0       | 2.47588 | 0.85848 | 0       |
| ENSMUSG00000100605 | 1_Gm292   | 0       | NA       | NA       | NA       | 0       | 0       | 0       | 0       | 0       | 0       |
| ENSMUSG00000100612 | 1_Gm291   | 0       | NA       | NA       | NA       | 0       | 0       | 0       | 0       | 0       | 0       |
| ENSMUSG00000100617 | 1_Gm714   | 0.45852 | -0.61845 | 0.874837 | NA       | 0       | 0       | 1.03416 | 0       | 1.71695 | 0       |
| ENSMUSG00000100618 | 1_Gm295   | 1.00489 | -2.16546 | 0.397065 | NA       | 1.01124 | 0       | 0       | 3.30117 | 1.71695 | 0       |
| ENSMUSG00000100621 | 1_Gm283   | 0       | NA       | NA       | NA       | 0       | 0       | 0       | 0       | 0       | 0       |
| ENSMUSG00000100622 | 1_Gm203   | 3.27324 | 0.72494  | 0.609714 | 0.873366 | 9.1012  | 0       | 3.10248 | 1.65058 | 3.43391 | 2.35126 |
| ENSMUSG00000100625 | 6_170001  | 0.18892 | 1.1315   | 0.781553 | NA       | 0       | 1.1335  | 0       | 0       | 0       | 0       |
| ENSMUSG00000100627 | 6_A83000  | 81.6435 | -0.12605 | 0.77838  | 0.934544 | 110.226 | 43.0731 | 80.6646 | 71.8004 | 93.574  | 90.5233 |
| ENSMUSG00000100631 | 1_Olfr996 | 0.6761  | 0.03867  | 0.98952  | NA       | 2.02249 | 0       | 0       | 0       | 0.85848 | 1.17563 |
| ENSMUSG00000100635 | 1_Gm291   | 3.58847 | -0.68925 | 0.601315 | 0.870033 | 5.05622 | 0       | 3.10248 | 5.77705 | 1.71695 | 5.87814 |
| ENSMUSG00000100642 | 1_Gm282   | 1.19888 | 3.79611  | 0.178267 | NA       | 2.02249 | 0       | 5.17081 | 0       | 0       | 0       |
| ENSMUSG00000100658 | 1_F73031  | 13.582  | 0.09603  | 0.882328 | 0.967828 | 17.1912 | 13.602  | 11.3758 | 18.9817 | 8.58477 | 11.7563 |
| ENSMUSG00000100666 | 1_170000  | 0.28063 | -1.56014 | 0.700051 | NA       | 0       | 0       | 0       | 0.82529 | 0.85848 | 0       |
| ENSMUSG00000100671 | 1_Gm283   | 0.69836 | 3.01466  | 0.275678 | NA       | 2.02249 | 1.1335  | 1.03416 | 0       | 0       | 0       |
| ENSMUSG00000100679 | 1_Gm287   | 0.33708 | 1.97061  | 0.625968 | NA       | 2.02249 | 0       | 0       | 0       | 0       | 0       |
| ENSMUSG00000100680 | 1_181004  | 15.7153 | -0.02602 | 0.968621 | 0.991338 | 11.1237 | 18.136  | 17.5807 | 24.7588 | 8.58477 | 14.1075 |
| ENSMUSG00000100684 | 1_Gm202   | 1.84041 | -0.09418 | 0.947898 | 0.986859 | 2.02249 | 2.26701 | 1.03416 | 1.65058 | 1.71695 | 2.35126 |
| ENSMUSG00000100691 | 1_201032  | 94.4262 | -0.77932 | 0.0817   | 0.385306 | 38.4273 | 91.8137 | 78.5963 | 150.203 | 97.0079 | 110.509 |
| ENSMUSG00000100704 | 1_Gm284   | 0       | NA       | NA       | NA       | 0       | 0       | 0       | 0       | 0       | 0       |
| ENSMUSG00000100714 | 6_201030  | 0.13755 | -0.79206 | 0.84609  | NA       | 0       | 0       | 0       | 0.82529 | 0       | 0       |
| ENSMUSG00000100717 | 6_170012  | 0.16854 | 1.1315   | 0.781553 | NA       | 1.01124 | 0       | 0       | 0       | 0       | 0       |
| ENSMUSG00000100725 | 6_Gm280   | 5717.74 | 0.42478  | 0.216129 | 0.607397 | 8667.38 | 5919.15 | 5073.6  | 3718.77 | 5718.32 | 5209.21 |
| ENSMUSG00000100727 | 6_170000  | 0.16854 | 1.1315   | 0.781553 | NA       | 1.01124 | 0       | 0       | 0       | 0       | 0       |
| ENSMUSG00000100729 | 1_Gm290   | 0.17236 | 1.1315   | 0.781553 | NA       | 0       | 0       | 1.03416 | 0       | 0       | 0       |
| ENSMUSG00000100733 | 1_493241  | 6.73663 | 0.41741  | 0.645402 | 0.889294 | 12.1349 | 7.93452 | 3.10248 | 8.25292 | 4.29238 | 4.70251 |
| ENSMUSG00000100760 | 1_Gm403   | 5.58978 | 0.14391  | 0.908552 | 0.974731 | 14.1574 | 3.40051 | 0       | 4.95175 | 5.15086 | 5.87814 |
| ENSMUSG00000100775 | 1_Gm291   | 0.16854 | 1.1315   | 0.781553 | NA       | 1.01124 | 0       | 0       | 0       | 0       | 0       |
| ENSMUSG00000100782 | 1_Gm282   | 0.33708 | 1.97061  | 0.625968 | NA       | 2.02249 | 0       | 0       | 0       | 0       | 0       |
| ENSMUSG00000100783 | 1_231004  | 3.39017 | -0.55468 | 0.654891 | 0.893282 | 3.03373 | 1.1335  | 4.13665 | 7.42763 | 3.43391 | 1.17563 |
| ENSMUSG00000100796 | 1_Gm281   | 0       | NA       | NA       | NA       | 0       | 0       | 0       | 0       | 0       | 0       |
| ENSMUSG00000100798 | 1_Gm195   | 0.17236 | 1.1315   | 0.781553 | NA       | 0       | 0       | 1.03416 | 0       | 0       | 0       |
| ENSMUSG00000100813 | 1_Gm288   | 9.99385 | -0.26729 | 0.705234 | 0.908152 | 12.1349 | 5.66751 | 9.30745 | 9.07822 | 12.0187 | 11.7563 |
| ENSMUSG00000100816 | 1_Gm283   | 0.13755 | -0.79206 | 0.84609  | NA       | 0       | 0       | 0       | 0.82529 | 0       | 0       |
| ENSMUSG00000100824 | 1_Gm293   | 0.70538 | 1.60629  | 0.573761 | NA       | 2.02249 | 0       | 1.03416 | 0       | 0       | 1.17563 |
| ENSMUSG00000100832 | 1_Gm292   | 3.23142 | -0.40435 | 0.766326 | 0.930427 | 6.06747 | 2.26701 | 0       | 4.95175 | 2.57543 | 3.52688 |
| ENSMUSG00000100837 | 6_170006  | 0.14308 | -0.79206 | 0.84609  | NA       | 0       | 0       | 0       | 0       | 0.85848 | 0       |
| ENSMUSG00000100838 | 1_Gm290   | 4.85269 | 2.27744  | 0.079054 | 0.377521 | 15.1687 | 5.66751 | 3.10248 | 1.65058 | 0       | 3.52688 |
| ENSMUSG00000100846 | 1_Gm288   | 0.61982 | 0.2847   | 0.936624 | NA       | 0       | 0       | 2.06832 | 1.65058 | 0       | 0       |
| ENSMUSG00000100850 | 1_493043  | 0.19594 | -0.79206 | 0.84609  | NA       | 0       | 0       | 0       | 0       | 0       | 1.17563 |
| ENSMUSG00000100855 | 1_Gm697   | 39.0277 | 0.42773  | 0.378665 | 0.746999 | 28.3148 | 40.8061 | 65.1522 | 28.8852 | 36.9145 | 34.0932 |
| ENSMUSG00000100872 | 2_170006  | 0       | NA       | NA       | NA       | 0       | 0       | 0       | 0       | 0       | 0       |
| ENSMUSG00000100891 | 1_281004  | 1.47444 | -1.68143 | 0.410747 | NA       | 1.01124 | 1.1335  | 0       | 4.12646 | 2.57543 | 0       |
| ENSMUSG00000100911 | 2_170002  | 0.16854 | 1.1315   | 0.781553 | NA       | 1.01124 | 0       | 0       | 0       | 0       | 0       |
| ENSMUSG00000100923 | 1_Olfr10  | 0       | NA       | NA       | NA       | 0       | 0       | 0       | 0       | 0       | 0       |
| ENSMUSG00000100932 | 1_Gm294   | 1.05248 | -1.08606 | 0.727252 | NA       | 2.02249 | 0       | 0       | 0       | 4.29238 | 0       |
| ENSMUSG00000100936 | 1_Gm288   | 0.14308 | -0.79206 | 0.84609  | NA       | 0       | 0       | 0       | 0       | 0.85848 | 0       |
| ENSMUSG00000100937 | 1_170002  | 5.97047 | -1.07178 | 0.391537 | 0.754323 | 0       | 2.26701 | 9.30745 | 4.95175 | 14.5941 | 4.70251 |
| ENSMUSG00000100967 | 1_Gm296   | 52.337  | 0.13402  | 0.776956 | 0.933844 | 69.7759 | 53.2746 | 41.3665 | 35.4876 | 72.9705 | 41.147  |
| ENSMUSG00000100969 | 6_170003  | 0.16854 | 1.1315   | 0.781553 | NA       | 1.01124 | 0       | 0       | 0       | 0       | 0       |
| ENSMUSG00000100975 | 1_Gm288   | 177.854 | 0.29579  | 0.303652 | 0.68632  | 214.384 | 207.431 | 166.5   | 166.709 | 163.969 | 148.129 |
| ENSMUSG00000100987 | 1_Gm162   | 1.73579 | -3.04398 | 0.105401 | 0.440822 | 1.01124 | 0       | 0       | 3.30117 | 2.57543 | 3.52688 |
| ENSMUSG00000100992 | 1_Gm239   | 5.12468 | 0.099    | 0.93593  | 0.984134 | 0       | 4.53401 | 11.3758 | 4.12646 | 6.00934 | 4.70251 |
| ENSMUSG00000101007 | 1_Gm295   | 0.74468 | -1.60878 | 0.636852 | NA       | 0       | 0       | 1.03416 | 0       | 3.43391 | 0       |
| ENSMUSG00000101008 | 1_Gm294   | 0.28063 | -1.56014 | 0.700051 | NA       | 0       | 0       | 0       | 0.82529 | 0.85848 | 0       |
| ENSMUSG00000101012 | 6_170000  | 0.13755 | -0.79206 | 0.84609  | NA       | 0       | 0       | 0       | 0.82529 | 0       | 0       |
| ENSMUSG00000101026 | 1_D73000  | 24.105  | 0.48252  | 0.370171 | 0.741454 | 25.2811 | 20.4031 | 38.264  | 17.3311 | 16.3111 | 27.0394 |
| ENSMUSG00000101028 | 1_Gm287   | 2.48701 | -0.87438 | 0.515611 | 0.829821 | 3.03373 | 1.1335  | 1.03416 | 3.30117 | 1.71695 | 4.70251 |
| ENSMUSG00000101061 | 1_Platr1  | 1.17321 | 0.58654  | 0.759268 | NA       | 1.01124 | 1.1335  | 2.06832 | 1.65058 | 0       | 1.17563 |

|                    |           |         |          |           |          |         |         |         |         |         |         |
|--------------------|-----------|---------|----------|-----------|----------|---------|---------|---------|---------|---------|---------|
| ENSMUSG00000101067 | 1_Gm290   | 0.6725  | -2.77083 | 0.325128  | NA       | 0       | 0       | 0       | 0.82529 | 0.85848 | 2.35126 |
| ENSMUSG00000101086 | 1_Gm286   | 0.33349 | -1.76186 | 0.662172  | NA       | 0       | 0       | 0       | 0.82529 | 0       | 1.17563 |
| ENSMUSG00000101089 | 1_261001  | 0       | NA       | NA        | NA       | 0       | 0       | 0       | 0       | 0       | 0       |
| ENSMUSG00000101112 | 1_Gm291   | 0.13755 | -0.79206 | 0.84609   | NA       | 0       | 0       | 0       | 0.82529 | 0       | 0       |
| ENSMUSG00000101152 | 1_Gm283   | 7.67092 | 1.00943  | 0.535211  | 0.83862  | 27.3036 | 3.40051 | 0       | 0       | 9.44325 | 5.87814 |
| ENSMUSG00000101163 | 1_Gm132   | 0       | NA       | NA        | NA       | 0       | 0       | 0       | 0       | 0       | 0       |
| ENSMUSG00000101174 | 6_Hoxd4   | 3.62962 | 1.14542  | 0.300073  | 0.683483 | 4.04498 | 5.66751 | 5.17081 | 1.65058 | 1.71695 | 3.52688 |
| ENSMUSG00000101176 | 1_Gm290   | 9.75776 | 0.60808  | 0.467358  | 0.803613 | 15.1687 | 5.66751 | 14.4783 | 3.30117 | 12.8772 | 7.05377 |
| ENSMUSG00000101179 | 1_Gm294   | 0.2751  | -1.54073 | 0.703687  | NA       | 0       | 0       | 0       | 1.65058 | 0       | 0       |
| ENSMUSG00000101211 | 1_Gm288   | 0.69836 | 3.01466  | 0.275678  | NA       | 2.02249 | 1.1335  | 1.03416 | 0       | 0       | 0       |
| ENSMUSG00000101223 | 6_493056  | 0.47657 | -2.28567 | 0.465885  | NA       | 0       | 0       | 0       | 0.82529 | 0.85848 | 1.17563 |
| ENSMUSG00000101224 | 1_Gm282   | 0       | NA       | NA        | NA       | 0       | 0       | 0       | 0       | 0       | 0       |
| ENSMUSG00000101252 | 1_lfna6   | 0.18892 | 1.1315   | 0.781553  | NA       | 0       | 1.1335  | 0       | 0       | 0       | 0       |
| ENSMUSG00000101257 | 1_231001  | 2.61964 | -0.63281 | 0.684074  | 0.90338  | 5.05622 | 1.1335  | 0       | 5.77705 | 2.57543 | 1.17563 |
| ENSMUSG00000101264 | 1_Gm283   | 0.88346 | 3.3513   | 0.276131  | NA       | 3.03373 | 2.26701 | 0       | 0       | 0       | 0       |
| ENSMUSG00000101265 | 1_Gm290   | 0.13755 | -0.79206 | 0.84609   | NA       | 0       | 0       | 0       | 0.82529 | 0       | 0       |
| ENSMUSG00000101287 | 1_Gm281   | 0       | NA       | NA        | NA       | 0       | 0       | 0       | 0       | 0       | 0       |
| ENSMUSG00000101299 | 1_Gm281   | 1.4999  | -0.91851 | 0.645591  | NA       | 2.02249 | 1.1335  | 0       | 4.12646 | 1.71695 | 0       |
| ENSMUSG00000101324 | 1_Gm291   | 0.47657 | -2.28567 | 0.465885  | NA       | 0       | 0       | 0       | 0.82529 | 0.85848 | 1.17563 |
| ENSMUSG00000101337 | 6_Dnah7c  | 13.1586 | -0.78166 | 0.259188  | 0.64893  | 15.1687 | 4.53401 | 9.30745 | 18.9817 | 18.028  | 12.9319 |
| ENSMUSG00000101344 | 1_Gm291   | 3.65091 | -1.32153 | 0.347772  | 0.725068 | 1.01124 | 0       | 5.17081 | 5.77705 | 1.71695 | 8.22939 |
| ENSMUSG00000101355 | 1_Hist1h3 | 0       | NA       | NA        | NA       | 0       | 0       | 0       | 0       | 0       | 0       |
| ENSMUSG00000101356 | 1_Gm288   | 0.17236 | 1.1315   | 0.781553  | NA       | 0       | 0       | 1.03416 | 0       | 0       | 0       |
| ENSMUSG00000101365 | 1_Gm193   | 1.03418 | 2.39893  | 0.278771  | NA       | 1.01124 | 2.26701 | 2.06832 | 0       | 0.85848 | 0       |
| ENSMUSG00000101378 | 1_Gm280   | 0.17236 | 1.1315   | 0.781553  | NA       | 0       | 0       | 1.03416 | 0       | 0       | 0       |
| ENSMUSG00000101389 | 1_Ms4a4e  | 51.9575 | 1.80819  | 0.00261   | 0.039484 | 106.181 | 106.549 | 29.9907 | 32.1864 | 18.028  | 18.81   |
| ENSMUSG00000101429 | 1_BC0554  | 7.11649 | -1.64744 | 0.212638  | 0.603937 | 8.08995 | 2.26701 | 0       | 14.8553 | 16.3111 | 1.17563 |
| ENSMUSG00000101493 | 1_281040  | 24.0247 | -0.32969 | 0.517661  | 0.831239 | 27.3036 | 17.0025 | 19.6491 | 26.4094 | 32.6221 | 21.1613 |
| ENSMUSG00000101514 | 1_Gm552   | 0.13755 | -0.79206 | 0.84609   | NA       | 0       | 0       | 0       | 0.82529 | 0       | 0       |
| ENSMUSG00000101517 | 6_473246  | 2.31675 | -1.1833  | 0.4111739 | 0.767412 | 1.01124 | 1.1335  | 2.06832 | 4.12646 | 0.85848 | 4.70251 |
| ENSMUSG00000101523 | 1_Gm100   | 71.3691 | 0.01678  | 0.982087  | 0.993958 | 65.7309 | 139.421 | 10.3416 | 61.8969 | 84.9892 | 65.8352 |
| ENSMUSG00000101540 | 1_Gm284   | 0.13755 | -0.79206 | 0.84609   | NA       | 0       | 0       | 0       | 0.82529 | 0       | 0       |
| ENSMUSG00000101549 | 1_Gm296   | 8.36748 | -0.00091 | 0.999169  | 0.999484 | 6.06747 | 5.66751 | 13.4441 | 14.8553 | 4.29238 | 5.87814 |
| ENSMUSG00000101559 | 1_Gm282   | 0.13755 | -0.79206 | 0.84609   | NA       | 0       | 0       | 0       | 0.82529 | 0       | 0       |
| ENSMUSG00000101583 | 1_Gm207   | 1.67438 | 0.9305   | 0.63902   | NA       | 1.01124 | 5.66751 | 0       | 1.65058 | 1.71695 | 0       |
| ENSMUSG00000101585 | 6_160001  | 2.8508  | 0.38761  | 0.759413  | 0.927999 | 3.03373 | 5.66751 | 1.03416 | 3.30117 | 1.71695 | 2.35126 |
| ENSMUSG00000101588 | 1_Gm282   | 0.2751  | -1.54073 | 0.703687  | NA       | 0       | 0       | 0       | 1.65058 | 0       | 0       |
| ENSMUSG00000101595 | 1_Gm293   | 5.46087 | 1.98875  | 0.082797  | 0.388297 | 10.1124 | 5.66751 | 10.3416 | 0       | 4.29238 | 2.35126 |
| ENSMUSG00000101599 | 1_Gm203   | 207.828 | 0.25992  | 0.54178   | 0.840676 | 322.587 | 191.562 | 165.466 | 146.902 | 265.269 | 155.183 |
| ENSMUSG00000101603 | 1_Gm287   | 1.73132 | -0.47695 | 0.813123  | 0.946551 | 1.01124 | 3.40051 | 0       | 0.82529 | 5.15086 | 0       |
| ENSMUSG00000101625 | 1_Gm293   | 1.74356 | 3.24876  | 0.088489  | 0.404488 | 3.03373 | 4.53401 | 2.06832 | 0.82529 | 0       | 0       |
| ENSMUSG00000101643 | 1_Gm283   | 0.4821  | -2.30304 | 0.543942  | NA       | 0       | 0       | 0       | 0       | 1.71695 | 1.17563 |
| ENSMUSG00000101645 | 1_Gm286   | 32.3698 | 8.547    | 0.028748  | 0.205706 | 0       | 56.6751 | 137.543 | 0       | 0       | 0       |
| ENSMUSG00000101655 | 1_231004  | 15.6609 | -0.12019 | 0.852676  | 0.95799  | 14.1574 | 12.4685 | 18.6149 | 25.5841 | 13.7356 | 9.40502 |
| ENSMUSG00000101659 | 1_Gm290   | 0.16854 | 1.1315   | 0.781553  | NA       | 1.01124 | 0       | 0       | 0       | 0       | 0       |
| ENSMUSG00000101677 | 1_Gm294   | 0.14308 | -0.79206 | 0.84609   | NA       | 0       | 0       | 0       | 0       | 0.85848 | 0       |
| ENSMUSG00000101678 | 3_Gm296   | 62.7768 | -0.78994 | 0.066516  | 0.342316 | 43.4835 | 64.6097 | 29.9907 | 67.674  | 81.5553 | 89.3477 |
| ENSMUSG00000101698 | 1_Gm295   | 1.88162 | -0.79727 | 0.67971   | 0.902041 | 4.04498 | 0       | 0       | 0.82529 | 1.71695 | 4.70251 |
| ENSMUSG00000101702 | 1_170007  | 0.34472 | 1.99863  | 0.620844  | NA       | 0       | 0       | 2.06832 | 0       | 0       | 0       |
| ENSMUSG00000101716 | 1_Gm120   | 1.83469 | -0.70863 | 0.664309  | 0.896403 | 1.01124 | 0       | 3.10248 | 1.65058 | 1.71695 | 3.52688 |
| ENSMUSG00000101722 | 1_Gm291   | 1.71858 | -3.04574 | 0.173457  | 0.556925 | 0       | 0       | 1.03416 | 4.12646 | 5.15086 | 0       |
| ENSMUSG00000101731 | 1_383043  | 0.91467 | -1.98417 | 0.46084   | NA       | 1.01124 | 0       | 0       | 3.30117 | 0       | 1.17563 |
| ENSMUSG00000101734 | 1_493340  | 0.16854 | 1.1315   | 0.781553  | NA       | 1.01124 | 0       | 0       | 0       | 0       | 0       |
| ENSMUSG00000101741 | 1_Gm280   | 0.16854 | 1.1315   | 0.781553  | NA       | 1.01124 | 0       | 0       | 0       | 0       | 0       |
| ENSMUSG00000101746 | 1_231004  | 0.74613 | 1.69605  | 0.548416  | NA       | 0       | 2.26701 | 1.03416 | 0       | 0       | 1.17563 |
| ENSMUSG00000101750 | 1_Olfr139 | 0.19594 | -0.79206 | 0.84609   | NA       | 0       | 0       | 0       | 0       | 0       | 1.17563 |
| ENSMUSG00000101791 | 1_221001  | 15.6133 | 0.83506  | 0.197918  | 0.590112 | 26.2924 | 15.869  | 17.5807 | 5.77705 | 12.8772 | 15.2832 |
| ENSMUSG00000101797 | 1_Gm292   | 0.16854 | 1.1315   | 0.781553  | NA       | 1.01124 | 0       | 0       | 0       | 0       | 0       |
| ENSMUSG00000101818 | 1_Gm282   | 1.73574 | 2.11671  | 0.222791  | 0.613525 | 4.04498 | 2.26701 | 2.06832 | 0       | 0.85848 | 1.17563 |
| ENSMUSG00000101828 | 1_D13005  | 13.3617 | 0.00517  | 0.994915  | 0.998081 | 26.2924 | 5.66751 | 8.27329 | 14.8553 | 18.028  | 7.05377 |
| ENSMUSG00000101832 | 1_Gm289   | 0.72809 | -1.58013 | 0.576135  | NA       | 0       | 0       | 1.03416 | 2.47588 | 0.85848 | 0       |
| ENSMUSG00000101848 | 1_493341  | 0.30609 | 0.16972  | 0.966824  | NA       | 1.01124 | 0       | 0       | 0.82529 | 0       | 0       |
| ENSMUSG00000101849 | 1_Gm283   | 2.64409 | -1.46973 | 0.31131   | 0.693321 | 0       | 1.1335  | 3.10248 | 4.12646 | 5.15086 | 2.35126 |
| ENSMUSG00000101856 | 1_170009  | 37.5529 | 0.05988  | 0.909722  | 0.974731 | 62.6971 | 29.4711 | 22.7516 | 39.614  | 34.3391 | 36.4445 |
| ENSMUSG00000101859 | 1_Gm292   | 0.55019 | -2.51397 | 0.52782   | NA       | 0       | 0       | 0       | 3.30117 | 0       | 0       |
| ENSMUSG00000101880 | 1_Gm292   | 0.14308 | -0.79206 | 0.84609   | NA       | 0       | 0       | 0       | 0       | 0.85848 | 0       |
| ENSMUSG00000101888 | 1_170002  | 0       | NA       | NA        | NA       | 0       | 0       | 0       | 0       | 0       | 0       |
| ENSMUSG00000101892 | 1_913040  | 300.913 | 0.21014  | 0.461784  | 0.799907 | 257.867 | 366.121 | 344.376 | 274.822 | 269.562 | 292.731 |
| ENSMUSG00000101895 | 1_Gm289   | 0.30991 | 0.16972  | 0.966824  | NA       | 0       | 0       | 1.03416 | 0.82529 | 0       | 0       |
| ENSMUSG00000101903 | 1_Gm292   | 4.12088 | -0.50232 | 0.681583  | 0.902515 | 6.06747 | 0       | 4.13665 | 4.12646 | 6.86782 | 3.52688 |
| ENSMUSG00000101904 | 1_Gm294   | 28.4585 | 0.65477  | 0.344244  | 0.721706 | 56.6297 | 28.3376 | 19.6491 | 14.03   | 40.3484 | 11.7563 |
| ENSMUSG00000101941 | 1_Gm289   | 0.61771 | 0.23492  | 0.937546  | NA       | 2.02249 | 0       | 0       | 0.82529 | 0.85848 | 0       |
| ENSMUSG00000101951 | 1_Gm287   | 2.41822 | -0.76672 | 0.59432   | 0.866686 | 2.02249 | 3.40051 | 0       | 3.30117 | 3.43391 | 2.35126 |
| ENSMUSG00000101959 | 1_Ldhal6t | 11.2692 | 0.25673  | 0.71825   | 0.912538 | 14.1574 | 7.93452 | 14.4783 | 5.77705 | 11.1602 | 14.1075 |
| ENSMUSG00000101966 | 1_Gm524   | 0.6729  | 1.65149  | 0.512816  | NA       | 1.01124 | 1.1335  | 1.03416 | 0       | 0.85848 | 0       |

|                    |           |         |          |          |          |         |         |         |         |         |         |
|--------------------|-----------|---------|----------|----------|----------|---------|---------|---------|---------|---------|---------|
| ENSMUSG00000101972 | 1_Hist1h3 | 0       | NA       | NA       | NA       | 0       | 0       | 0       | 0       | 0       | 0       |
| ENSMUSG00000101976 | 1_Olfr998 | 0.34472 | 1.99863  | 0.620844 | NA       | 0       | 0       | 2.06832 | 0       | 0       | 0       |
| ENSMUSG00000101997 | 1_Gm287   | 0.14308 | -0.79206 | 0.84609  | NA       | 0       | 0       | 0       | 0       | 0.85848 | 0       |
| ENSMUSG00000102018 | 6_K23001  | 101.757 | 0.21246  | 0.608837 | 0.872658 | 67.7534 | 131.486 | 128.236 | 89.9569 | 75.546  | 117.563 |
| ENSMUSG00000102030 | 1_Gm291   | 2.61142 | -1.04276 | 0.533305 | 0.837995 | 5.05622 | 0       | 0       | 2.47588 | 3.43391 | 4.70251 |
| ENSMUSG00000102037 | 1_Bcl2a1  | 30.2834 | 4.61021  | 2.10E-08 | 2.54E-06 | 86.967  | 60.0757 | 27.9224 | 3.30117 | 3.43391 | 0       |
| ENSMUSG00000102049 | 1_Zbed6   | 763.84  | 0.11686  | 0.82071  | 0.948338 | 1458.21 | 427.331 | 498.466 | 581.831 | 809.544 | 807.656 |
| ENSMUSG00000102067 | 1_Gm292   | 0       | NA       | NA       | NA       | 0       | 0       | 0       | 0       | 0       | 0       |
| ENSMUSG00000102084 | 1_Gm296   | 0.14308 | -0.79206 | 0.84609  | NA       | 0       | 0       | 0       | 0       | 0.85848 | 0       |
| ENSMUSG00000102098 | 1_231001  | 0.13755 | -0.79206 | 0.84609  | NA       | 0       | 0       | 0       | 0.82529 | 0       | 0       |
| ENSMUSG00000102121 | 1_Gm280   | 0       | NA       | NA       | NA       | 0       | 0       | 0       | 0       | 0       | 0       |
| ENSMUSG00000102123 | 1_Gm431   | 3.84571 | 0.55447  | 0.604584 | 0.871119 | 6.06747 | 4.53401 | 3.10248 | 4.12646 | 1.71695 | 3.52688 |
| ENSMUSG00000102144 | 1_493042  | 0.28616 | -1.57932 | 0.696464 | NA       | 0       | 0       | 0       | 0       | 1.71695 | 0       |
| ENSMUSG00000102202 | 1_Gm332   | 27.2334 | -0.18183 | 0.712433 | 0.910879 | 25.2811 | 17.0025 | 34.1273 | 27.2346 | 29.1882 | 30.5663 |
| ENSMUSG00000102206 | 5_Pcdha1  | 2.50036 | -1.91029 | 0.213641 | 0.604733 | 2.02249 | 1.1335  | 0       | 6.60234 | 1.71695 | 3.52688 |
| ENSMUSG00000102222 | 1_Pcdhga  | 117.845 | -0.31958 | 0.398745 | 0.759197 | 78.8771 | 141.688 | 94.1087 | 146.902 | 105.593 | 139.9   |
| ENSMUSG00000102252 | 5_Snrpn   | 301.043 | -0.9775  | 0.007784 | 0.084295 | 255.845 | 140.554 | 212.003 | 485.272 | 406.918 | 305.663 |
| ENSMUSG00000102279 | 1_Gm371   | 0.17236 | 1.1315   | 0.781553 | NA       | 0       | 0       | 1.03416 | 0       | 0       | 0       |
| ENSMUSG00000102312 | 1_Pcdha3  | 2.28699 | 0.73365  | 0.671534 | 0.899842 | 0       | 4.53401 | 4.13665 | 2.47588 | 2.57543 | 0       |
| ENSMUSG00000102336 | 1_Gm372   | 43.3976 | 0.00475  | 0.991768 | 0.997512 | 61.6859 | 27.2041 | 41.3665 | 44.5658 | 42.0654 | 43.4982 |
| ENSMUSG00000102343 | 1_Gm373   | 0.16854 | 1.1315   | 0.781553 | NA       | 1.01124 | 0       | 0       | 0       | 0       | 0       |
| ENSMUSG00000102395 | 1_Flg     | 0       | NA       | NA       | NA       | 0       | 0       | 0       | 0       | 0       | 0       |
| ENSMUSG00000102418 | 1_Sh2d1b  | 17.3681 | 1.59228  | 0.008913 | 0.092529 | 28.3148 | 22.6701 | 26.8882 | 8.25292 | 5.15086 | 12.9319 |
| ENSMUSG00000102422 | 1_Schp1   | 20.7209 | -0.23485 | 0.715139 | 0.911362 | 11.1237 | 17.0025 | 28.9565 | 30.5358 | 12.0187 | 24.6882 |
| ENSMUSG00000102424 | 1_Paupar  | 54.0984 | 0.37662  | 0.441447 | 0.78682  | 92.0232 | 47.6071 | 43.4348 | 32.1864 | 54.084  | 55.2545 |
| ENSMUSG00000102428 | 1_Pcdhga  | 30.8974 | -0.56191 | 0.323049 | 0.70347  | 13.1462 | 21.5366 | 40.3323 | 41.2646 | 42.0654 | 27.0394 |
| ENSMUSG00000102439 | 2_Flg     | 1.01888 | 3.56275  | 0.226331 | NA       | 4.04498 | 0       | 2.06832 | 0       | 0       | 0       |
| ENSMUSG00000102440 | 1_Pcdhga  | 98.9454 | -0.36594 | 0.258538 | 0.64893  | 70.7871 | 100.882 | 87.9037 | 110.589 | 114.177 | 109.333 |
| ENSMUSG00000102476 | 1_Gm372   | 0.63809 | 0.28723  | 0.911583 | NA       | 1.01124 | 1.1335  | 0       | 0.82529 | 0.85848 | 0       |
| ENSMUSG00000102531 | 1_111000  | 0.63958 | -1.30846 | 0.65661  | NA       | 1.01124 | 0       | 0       | 1.65058 | 0       | 1.17563 |
| ENSMUSG00000102543 | 5_Pcdhgc  | 47.8675 | -0.4973  | 0.319752 | 0.701104 | 32.3598 | 37.4056 | 49.6398 | 53.644  | 82.4138 | 31.742  |
| ENSMUSG00000102544 | 1_Gm510   | 9.10946 | -0.3494  | 0.68094  | 0.902507 | 9.1012  | 3.40051 | 11.3758 | 12.3794 | 4.29238 | 14.1075 |
| ENSMUSG00000102545 | 1_643057  | 18.3226 | -0.27103 | 0.692281 | 0.905638 | 29.3261 | 6.80102 | 13.4441 | 17.3311 | 17.1695 | 25.8638 |
| ENSMUSG00000102548 | 1_Gm167   | 0.65081 | 1.61461  | 0.58054  | NA       | 1.01124 | 0       | 2.06832 | 0.82529 | 0       | 0       |
| ENSMUSG00000102569 | 1_Gm370   | 0.2751  | -1.54073 | 0.703687 | NA       | 0       | 0       | 0       | 1.65058 | 0       | 0       |
| ENSMUSG00000102590 | 1_Mannr   | 0.78625 | 0.81424  | 0.772913 | NA       | 3.03373 | 0       | 0       | 0.82529 | 0.85848 | 0       |
| ENSMUSG00000102595 | 1_Gm300   | 0.35746 | 2.04359  | 0.612655 | NA       | 1.01124 | 1.1335  | 0       | 0       | 0       | 0       |
| ENSMUSG00000102627 | 1_Snruf   | 15.0024 | -1.59623 | 0.19149  | 0.580631 | 0       | 7.93452 | 14.4783 | 46.2164 | 2.57543 | 18.81   |
| ENSMUSG00000102669 | 5_Gm424   | 0.81724 | 2.00696  | 0.545532 | NA       | 4.04498 | 0       | 0       | 0       | 0.85848 | 0       |
| ENSMUSG00000102674 | 1_803044  | 2.31292 | 0.53728  | 0.720465 | 0.913116 | 5.05622 | 0       | 3.10248 | 1.65058 | 1.71695 | 2.35126 |
| ENSMUSG00000102679 | 1_Gm205   | 0.2751  | -1.54073 | 0.703687 | NA       | 0       | 0       | 0       | 1.65058 | 0       | 0       |
| ENSMUSG00000102692 | 1_Dchs2   | 58.7603 | -1.01051 | 0.004517 | 0.058012 | 40.4498 | 35.1386 | 41.3665 | 81.7039 | 79.8384 | 74.0646 |
| ENSMUSG00000102697 | 1_Pcdhac  | 107.901 | -1.15748 | 0.000801 | 0.016577 | 64.7196 | 64.6097 | 71.3571 | 165.058 | 169.978 | 111.685 |
| ENSMUSG00000102724 | 1_Flg     | 0       | NA       | NA       | NA       | 0       | 0       | 0       | 0       | 0       | 0       |
| ENSMUSG00000102742 | 1_Pcdhga  | 27.499  | -1.00427 | 0.063344 | 0.332302 | 11.1237 | 17.0025 | 26.8882 | 45.3911 | 35.1976 | 29.3907 |
| ENSMUSG00000102748 | 1_Pcdhgb  | 94.9796 | -0.18385 | 0.668901 | 0.898328 | 102.136 | 47.6071 | 116.86  | 103.987 | 97.0079 | 102.28  |
| ENSMUSG00000102752 | 1_Gm769   | 512.528 | -0.59854 | 0.042684 | 0.262061 | 325.621 | 414.862 | 482.953 | 702.324 | 599.217 | 550.194 |
| ENSMUSG00000102758 | 3_Naaladl | 239.391 | 0.72922  | 0.216737 | 0.607835 | 604.724 | 134.887 | 156.158 | 177.438 | 178.563 | 184.574 |
| ENSMUSG00000102762 | 1_493040  | 3.44906 | -1.16674 | 0.341538 | 0.719594 | 2.02249 | 3.40051 | 1.03416 | 3.30117 | 8.58477 | 2.35126 |
| ENSMUSG00000102777 | 1_Gm381   | 0.63809 | 0.28723  | 0.911583 | NA       | 1.01124 | 1.1335  | 0       | 0.82529 | 0.85848 | 0       |
| ENSMUSG00000102785 | 5_Gm244   | 0.45852 | -0.61845 | 0.874837 | NA       | 0       | 0       | 1.03416 | 0       | 1.71695 | 0       |
| ENSMUSG00000102794 | 1_Gm377   | 0.16854 | 1.1315   | 0.781553 | NA       | 1.01124 | 0       | 0       | 0       | 0       | 0       |
| ENSMUSG00000102805 | 5_Gm372   | 250.154 | 0.65454  | 0.249102 | 0.640512 | 574.387 | 128.086 | 215.106 | 140.3   | 223.204 | 219.842 |
| ENSMUSG00000102829 | 1_Flg     | 0.17236 | 1.1315   | 0.781553 | NA       | 0       | 0       | 1.03416 | 0       | 0       | 0       |
| ENSMUSG00000102836 | 1_Gm370   | 0.13755 | -0.79206 | 0.84609  | NA       | 0       | 0       | 0       | 0.82529 | 0       | 0       |
| ENSMUSG00000102843 | 1_Serpinb | 166.103 | 0.7134   | 0.116592 | 0.464143 | 316.519 | 183.627 | 118.929 | 102.336 | 158.818 | 116.387 |
| ENSMUSG00000102885 | 1_Gm372   | 0.19594 | -0.79206 | 0.84609  | NA       | 0       | 0       | 0       | 0       | 0       | 1.17563 |
| ENSMUSG00000102886 | 1_Gm306   | 0.48227 | 1.03727  | 0.788557 | NA       | 0       | 0       | 2.06832 | 0.82529 | 0       | 0       |
| ENSMUSG00000102887 | 1_Gm108   | 0.17236 | 1.1315   | 0.781553 | NA       | 0       | 0       | 1.03416 | 0       | 0       | 0       |
| ENSMUSG00000102893 | 1_Gm378   | 1.23929 | -3.6707  | 0.103667 | NA       | 0       | 0       | 0       | 1.65058 | 3.43391 | 2.35126 |
| ENSMUSG00000102909 | 1_Gm245   | 0.62324 | 0.22022  | 0.950888 | NA       | 2.02249 | 0       | 0       | 0       | 1.71695 | 0       |
| ENSMUSG00000102917 | 1_Gm377   | 10.2348 | -0.41063 | 0.549203 | 0.843853 | 11.1237 | 9.06802 | 6.20497 | 11.5541 | 12.8772 | 10.5807 |
| ENSMUSG00000102918 | 1_Pcdhgc  | 865.553 | -0.89105 | 0.011342 | 0.11048  | 443.936 | 581.487 | 794.236 | 1313.04 | 1203.58 | 857.033 |
| ENSMUSG00000102938 | 1_Gm381   | 0.2751  | -1.54073 | 0.703687 | NA       | 0       | 0       | 0       | 1.65058 | 0       | 0       |
| ENSMUSG00000102941 | 1_Gm375   | 0       | NA       | NA       | NA       | 0       | 0       | 0       | 0       | 0       | 0       |
| ENSMUSG00000102976 | 5_Zc3h11  | 4564.4  | 0.28952  | 0.389297 | 0.752914 | 6874.44 | 4076.08 | 4111.83 | 3437.34 | 4607.45 | 4279.29 |
| ENSMUSG00000103034 | 1_Gm879   | 453.54  | 1.79463  | NA       | NA       | 2009.34 | 66.8767 | 36.1957 | 75.1016 | 445.55  | 88.1721 |
| ENSMUSG00000103037 | 1_Pcdhgb  | 64.7905 | -0.49503 | 0.291824 | 0.676701 | 67.7534 | 28.3376 | 65.1522 | 65.1981 | 95.2909 | 67.0108 |
| ENSMUSG00000103067 | 1_Gm304   | 0.98219 | 0.11323  | 0.960754 | NA       | 3.03373 | 0       | 0       | 0.82529 | 0.85848 | 1.17563 |
| ENSMUSG00000103088 | 1_Pcdhgb  | 66.6026 | -0.75353 | 0.133655 | 0.497275 | 73.8208 | 30.6046 | 44.4689 | 103.162 | 97.0079 | 50.552  |
| ENSMUSG00000103092 | 1_Pcdha5  | 1.26006 | -3.70814 | 0.17506  | NA       | 0       | 0       | 0       | 4.12646 | 3.43391 | 0       |
| ENSMUSG00000103103 | 1_483344  | 20.241  | -0.09994 | 0.866483 | 0.962585 | 11.1237 | 22.6701 | 24.8199 | 25.5841 | 13.7356 | 23.5126 |
| ENSMUSG00000103114 | 1_Gm322   | 0.31162 | 0.16972  | 0.966824 | NA       | 1.01124 | 0       | 0       | 0       | 0.85848 | 0       |
| ENSMUSG00000103115 | 1_Gm375   | 14.0162 | -0.00617 | 0.992019 | 0.997512 | 14.1574 | 9.06802 | 18.6149 | 12.3794 | 14.5941 | 15.2832 |
| ENSMUSG00000103126 | 2_Gm373   | 2.6007  | 4.91242  | 0.008566 | 0.089954 | 9.1012  | 3.40051 | 3.10248 | 0       | 0       | 0       |

|                    |          |         |          |          |          |         |         |         |         |         |         |
|--------------------|----------|---------|----------|----------|----------|---------|---------|---------|---------|---------|---------|
| ENSMUSG00000103144 | 1_Pcdhga | 83.9316 | -0.56404 | 0.27492  | 0.661287 | 108.203 | 34.0051 | 61.0155 | 126.27  | 104.734 | 69.362  |
| ENSMUSG00000103156 | 1_Gm382  | 2.55274 | 0.32385  | 0.829703 | 0.951112 | 1.01124 | 4.53401 | 3.10248 | 4.95175 | 1.71695 | 0       |
| ENSMUSG00000103158 | 5_Gm319  | 0.56042 | -1.00363 | 0.787433 | NA       | 1.01124 | 0       | 0       | 0       | 0       | 2.35126 |
| ENSMUSG00000103164 | 1_Gm381  | 4.28389 | -0.30725 | 0.777073 | 0.933844 | 3.03373 | 1.1335  | 7.23913 | 4.12646 | 4.29238 | 5.87814 |
| ENSMUSG00000103168 | 1_Gm309  | 0.16854 | 1.1315   | 0.781553 | NA       | 1.01124 | 0       | 0       | 0       | 0       | 0       |
| ENSMUSG00000103170 | 1_Gm371  | 5.71399 | -0.05487 | 0.956037 | 0.988881 | 9.1012  | 5.66751 | 2.06832 | 3.30117 | 9.44325 | 4.70251 |
| ENSMUSG00000103174 | 1_Gm371  | 0.45852 | -0.61845 | 0.874837 | NA       | 0       | 0       | 1.03416 | 0       | 1.71695 | 0       |
| ENSMUSG00000103181 | 1_A33006 | 0.89623 | -0.52841 | 0.824248 | NA       | 0       | 1.1335  | 1.03416 | 0       | 0.85848 | 2.35126 |
| ENSMUSG00000103255 | 1_Pcdhac | 4.64192 | -3.63507 | 0.059754 | 0.321343 | 0       | 0       | 2.06832 | 20.6323 | 5.15086 | 0       |
| ENSMUSG00000103283 | 2_Gm372  | 20.0093 | -0.08555 | 0.872308 | 0.963879 | 23.2586 | 19.2695 | 15.5124 | 18.9817 | 17.1695 | 25.8638 |
| ENSMUSG00000103305 | 1_Gm340  | 0.17236 | 1.1315   | 0.781553 | NA       | 0       | 0       | 1.03416 | 0       | 0       | 0       |
| ENSMUSG00000103308 | 5_Gm378  | 0.18892 | 1.1315   | 0.781553 | NA       | 0       | 1.1335  | 0       | 0       | 0       | 0       |
| ENSMUSG00000103310 | 1_Pcdha1 | 7.24335 | -1.1964  | 0.336934 | 0.715288 | 11.1237 | 0       | 2.06832 | 18.1564 | 8.58477 | 3.52688 |
| ENSMUSG00000103332 | 1_Pcdhga | 46.9269 | -0.38773 | 0.428505 | 0.778929 | 29.3261 | 45.3401 | 47.5714 | 79.2281 | 37.773  | 42.3226 |
| ENSMUSG00000103334 | 1_Gm297  | 0.19594 | -0.79206 | 0.84609  | NA       | 0       | 0       | 0       | 0       | 0       | 1.17563 |
| ENSMUSG00000103335 | 1_Flg    | 0       | NA       | NA       | NA       | 0       | 0       | 0       | 0       | 0       | 0       |
| ENSMUSG00000103346 | 1_C23005 | 0.94079 | 0.26128  | 0.921564 | NA       | 0       | 0       | 3.10248 | 0.82529 | 1.71695 | 0       |
| ENSMUSG00000103362 | 1_Tdpoz2 | 0.28616 | -1.57932 | 0.696464 | NA       | 0       | 0       | 0       | 0       | 1.71695 | 0       |
| ENSMUSG00000103383 | 1_Gm377  | 0.50562 | 2.55291  | 0.52315  | NA       | 3.03373 | 0       | 0       | 0       | 0       | 0       |
| ENSMUSG00000103392 | 1_Gm383  | 2.26192 | 3.65501  | 0.08854  | 0.404614 | 7.07871 | 5.66751 | 0       | 0.82529 | 0       | 0       |
| ENSMUSG00000103400 | 1_Gm158  | 7.98    | -0.34632 | 0.642701 | 0.888504 | 8.08995 | 6.80102 | 6.20497 | 8.25292 | 10.3017 | 8.22939 |
| ENSMUSG00000103408 | 1_Gm379  | 2.29384 | -2.4539  | 0.126607 | 0.483956 | 0       | 1.1335  | 1.03416 | 4.95175 | 4.29238 | 2.35126 |
| ENSMUSG00000103409 | 1_Lsmem  | 2.24032 | -0.64711 | 0.641392 | 0.887861 | 1.01124 | 1.1335  | 3.10248 | 4.12646 | 1.71695 | 2.35126 |
| ENSMUSG00000103428 | 1_Gm207  | 0.16854 | 1.1315   | 0.781553 | NA       | 1.01124 | 0       | 0       | 0       | 0       | 0       |
| ENSMUSG00000103442 | 5_Pcdha1 | 5.72451 | 0.34085  | 0.833329 | 0.952011 | 17.1912 | 0       | 2.06832 | 9.07822 | 6.00934 | 0       |
| ENSMUSG00000103451 | 1_Gm339  | 0.28063 | -1.56014 | 0.700051 | NA       | 0       | 0       | 0       | 0.82529 | 0.85848 | 0       |
| ENSMUSG00000103464 | 1_Gm382  | 2.1747  | -1.0081  | 0.556441 | 0.847468 | 1.01124 | 3.40051 | 0       | 6.60234 | 0.85848 | 1.17563 |
| ENSMUSG00000103472 | 1_Pcdhga | 170.463 | -0.29208 | 0.442294 | 0.78732  | 94.0457 | 199.497 | 166.5   | 179.088 | 202.601 | 181.047 |
| ENSMUSG00000103517 | 1_Gm374  | 0.18892 | 1.1315   | 0.781553 | NA       | 0       | 1.1335  | 0       | 0       | 0       | 0       |
| ENSMUSG00000103523 | 1_221001 | 0       | NA       | NA       | NA       | 0       | 0       | 0       | 0       | 0       | 0       |
| ENSMUSG00000103565 | 1_Sgsm3  | 17.1584 | 3.21014  | NA       | NA       | 0       | 92.9472 | 0       | 7.42763 | 2.57543 | 0       |
| ENSMUSG00000103567 | 1_Pcdhga | 133.834 | -0.6969  | 0.043776 | 0.26603  | 105.169 | 78.2117 | 123.065 | 166.709 | 192.299 | 137.548 |
| ENSMUSG00000103585 | 1_Pcdhgb | 68.6251 | -0.54638 | 0.141998 | 0.510781 | 48.5397 | 62.3427 | 56.8789 | 93.258  | 88.4231 | 62.3083 |
| ENSMUSG00000103586 | 5_583040 | 1.0138  | 2.37275  | 0.284974 | NA       | 2.02249 | 1.1335  | 2.06832 | 0       | 0.85848 | 0       |
| ENSMUSG00000103594 | 1_A43003 | 0.14308 | -0.79206 | 0.84609  | NA       | 0       | 0       | 0       | 0       | 0.85848 | 0       |
| ENSMUSG00000103640 | 1_Gm314  | 0.13755 | -0.79206 | 0.84609  | NA       | 0       | 0       | 0       | 0.82529 | 0       | 0       |
| ENSMUSG00000103655 | 1_Gm372  | 0.14308 | -0.79206 | 0.84609  | NA       | 0       | 0       | 0       | 0       | 0.85848 | 0       |
| ENSMUSG00000103677 | 1_Pcdhga | 225.618 | -0.47492 | 0.135883 | 0.50073  | 150.675 | 180.227 | 235.789 | 275.648 | 283.297 | 228.072 |
| ENSMUSG00000103686 | 1_Gm370  | 0.33902 | -1.78366 | 0.658108 | NA       | 0       | 0       | 0       | 0       | 0.85848 | 1.17563 |
| ENSMUSG00000103692 | 1_493050 | 0.33708 | 1.97061  | 0.625968 | NA       | 2.02249 | 0       | 0       | 0       | 0       | 0       |
| ENSMUSG00000103707 | 5_Pcdha6 | 1.37382 | 1.10491  | 0.705861 | NA       | 0       | 5.66751 | 0       | 0       | 2.57543 | 0       |
| ENSMUSG00000103708 | 1_Gm332  | 0.37783 | 2.11394  | 0.599927 | NA       | 0       | 2.26701 | 0       | 0       | 0       | 0       |
| ENSMUSG00000103711 | 1_Tstd1  | 23.7345 | 0.43046  | 0.438595 | 0.785475 | 16.1799 | 31.7381 | 34.1273 | 23.9335 | 22.3204 | 14.1075 |
| ENSMUSG00000103718 | 1_Gm352  | 0.16854 | 1.1315   | 0.781553 | NA       | 1.01124 | 0       | 0       | 0       | 0       | 0       |
| ENSMUSG00000103726 | 1_Gm300  | 0.82849 | -0.39891 | 0.868081 | NA       | 1.01124 | 1.1335  | 0       | 1.65058 | 0       | 1.17563 |
| ENSMUSG00000103749 | 1_Pcdhgb | 59.9755 | -0.99162 | 0.00836  | 0.088492 | 46.5172 | 40.8061 | 33.0932 | 89.9569 | 69.5366 | 79.9427 |
| ENSMUSG00000103750 | 1_Flg    | 0.56675 | 2.70271  | 0.498103 | NA       | 0       | 3.40051 | 0       | 0       | 0       | 0       |
| ENSMUSG00000103766 | 5_Gm383  | 139.419 | 0.6793   | 0.229137 | 0.620552 | 52.5847 | 224.434 | 237.857 | 103.987 | 91.857  | 125.792 |
| ENSMUSG00000103770 | 1_Pcdha9 | 0.68774 | -2.83311 | 0.475143 | NA       | 0       | 0       | 0       | 4.12646 | 0       | 0       |
| ENSMUSG00000103777 | 1_Flg    | 0       | NA       | NA       | NA       | 0       | 0       | 0       | 0       | 0       | 0       |
| ENSMUSG00000103793 | 1_Pcdhga | 121.678 | -0.36376 | 0.304805 | 0.687401 | 134.495 | 77.0782 | 107.553 | 127.095 | 154.526 | 129.319 |
| ENSMUSG00000103800 | 1_Pcdha8 | 5.61734 | 0.11728  | 0.910607 | 0.974995 | 5.05622 | 1.1335  | 11.3758 | 6.60234 | 6.00934 | 3.52688 |
| ENSMUSG00000103827 | 1_Gm329  | 0.75017 | -1.59352 | 0.563543 | NA       | 0       | 1.1335  | 0       | 1.65058 | 1.71695 | 0       |
| ENSMUSG00000103844 | 1_493343 | 0       | NA       | NA       | NA       | 0       | 0       | 0       | 0       | 0       | 0       |
| ENSMUSG00000103897 | 1_Pcdhga | 61.4411 | -0.62206 | 0.107545 | 0.446362 | 51.5735 | 44.2066 | 49.6398 | 94.9086 | 69.5366 | 58.7814 |
| ENSMUSG00000103906 | 1_Tigd5  | 46.343  | 0.2156   | 0.706148 | 0.908737 | 22.2474 | 60.0757 | 67.2205 | 61.0716 | 27.4713 | 39.9713 |
| ENSMUSG00000103912 | 1_Gm338  | 0.30609 | 0.16972  | 0.966824 | NA       | 1.01124 | 0       | 0       | 0.82529 | 0       | 0       |
| ENSMUSG00000103923 | 1_Gm378  | 0.7298  | -1.59306 | 0.566687 | NA       | 1.01124 | 0       | 0       | 1.65058 | 1.71695 | 0       |
| ENSMUSG00000103927 | 1_Gm993  | 1.56913 | -1.82564 | 0.300585 | NA       | 1.01124 | 0       | 1.03416 | 3.30117 | 1.71695 | 2.35126 |
| ENSMUSG00000103965 | 1_Gm301  | 0.69881 | -2.85985 | 0.385416 | NA       | 0       | 0       | 0       | 2.47588 | 1.71695 | 0       |
| ENSMUSG00000103983 | 1_Gm200  | 130.395 | -0.02543 | 0.953041 | 0.988326 | 203.26  | 97.4812 | 86.8696 | 123.794 | 141.649 | 129.319 |
| ENSMUSG00000103998 | 1_Gm380  | 5.70348 | 1.41745  | 0.175461 | 0.558909 | 16.1799 | 4.53401 | 4.13665 | 4.12646 | 1.71695 | 3.52688 |
| ENSMUSG00000104000 | 1_Gm383  | 0.2751  | -1.54073 | 0.703687 | NA       | 0       | 0       | 0       | 1.65058 | 0       | 0       |
| ENSMUSG00000104003 | 1_Gm424  | 13.8009 | 0.43848  | 0.562773 | 0.850759 | 25.2811 | 6.80102 | 15.5124 | 6.60234 | 18.028  | 10.5807 |
| ENSMUSG00000104004 | 1_493056 | 0.50562 | 2.55291  | 0.52315  | NA       | 3.03373 | 0       | 0       | 0       | 0       | 0       |
| ENSMUSG00000104011 | 1_Gm323  | 6.76551 | 0.10719  | 0.906437 | 0.974391 | 11.1237 | 6.80102 | 3.10248 | 9.07822 | 3.43391 | 7.05377 |
| ENSMUSG00000104043 | 1_Gm652  | 40.3243 | -0.0236  | 0.961373 | 0.990106 | 56.6297 | 34.0051 | 28.9565 | 31.3611 | 36.9145 | 54.0789 |
| ENSMUSG00000104063 | 1_Pcdhgb | 73.0578 | -0.41631 | 0.23251  | 0.624408 | 65.7309 | 71.4107 | 50.6739 | 88.3063 | 76.4045 | 85.8208 |
| ENSMUSG00000104077 | 1_Gm370  | 0.4821  | -2.30304 | 0.543942 | NA       | 0       | 0       | 0       | 0       | 1.71695 | 1.17563 |
| ENSMUSG00000104109 | 1_Gm302  | 0.17236 | 1.1315   | 0.781553 | NA       | 0       | 0       | 1.03416 | 0       | 0       | 0       |
| ENSMUSG00000104111 | 1_Gm372  | 0.17236 | 1.1315   | 0.781553 | NA       | 0       | 0       | 1.03416 | 0       | 0       | 0       |
| ENSMUSG00000104148 | 5_Pcdha2 | 4.66713 | -2.17592 | 0.248352 | 0.639857 | 5.05622 | 0       | 0       | 5.77705 | 17.1695 | 0       |
| ENSMUSG00000104156 | 2_Gm381  | 159.212 | -0.24035 | 0.606713 | 0.871949 | 70.7871 | 142.821 | 224.413 | 159.281 | 195.733 | 162.237 |
| ENSMUSG00000104158 | 2_Gm381  | 0.18892 | 1.1315   | 0.781553 | NA       | 0       | 1.1335  | 0       | 0       | 0       | 0       |
| ENSMUSG00000104212 | 1_Gm379  | 0.75567 | 3.11976  | 0.431825 | NA       | 0       | 4.53401 | 0       | 0       | 0       | 0       |

|                    |          |         |          |          |          |         |         |         |         |         |         |
|--------------------|----------|---------|----------|----------|----------|---------|---------|---------|---------|---------|---------|
| ENSMUSG00000104217 | 1_Gm379  | 9.42446 | -2.77887 | 0.41758  | 0.771198 | 3.03373 | 0       | 4.13665 | 0       | 0       | 49.3764 |
| ENSMUSG00000104237 | 1_Gm335  | 6.58774 | -0.29427 | 0.766856 | 0.930427 | 4.04498 | 3.40051 | 10.3416 | 3.30117 | 13.7356 | 4.70251 |
| ENSMUSG00000104252 | 5_Pcdha4 | 13.5899 | 0.27138  | 0.826156 | 0.950197 | 40.4498 | 0       | 4.13665 | 11.5541 | 17.1695 | 8.22939 |
| ENSMUSG00000104266 | 1_Gm377  | 2.97674 | -1.32419 | 0.406015 | 0.764314 | 5.05622 | 0       | 0       | 4.12646 | 5.15086 | 3.52688 |
| ENSMUSG00000104275 | 1_Gm378  | 0.14308 | -0.79206 | 0.84609  | NA       | 0       | 0       | 0       | 0       | 0.85848 | 0       |
| ENSMUSG00000104301 | 3_Wdr49  | 4.48024 | 0.06711  | 0.944359 | 0.986462 | 5.05622 | 4.53401 | 4.13665 | 3.30117 | 5.15086 | 4.70251 |
| ENSMUSG00000104318 | 1_Pcdha7 | 0.99599 | 0.36661  | 0.907416 | NA       | 0       | 3.40051 | 0       | 0       | 2.57543 | 0       |
| ENSMUSG00000104328 | 1_Gm373  | 2.19984 | -2.41821 | 0.135813 | 0.500579 | 1.01124 | 0       | 1.03416 | 2.47588 | 5.15086 | 3.52688 |
| ENSMUSG00000104336 | 1_Gm342  | 0       | NA       | NA       | NA       | 0       | 0       | 0       | 0       | 0       | 0       |
| ENSMUSG00000104340 | 1_Gm105  | 0.54638 | 2.65324  | 0.465678 | NA       | 1.01124 | 2.26701 | 0       | 0       | 0       | 0       |
| ENSMUSG00000104346 | 1_Pcdhga | 52.2214 | -0.79458 | 0.038896 | 0.247749 | 38.4273 | 30.6046 | 45.5031 | 64.3728 | 72.1121 | 62.3083 |
| ENSMUSG00000104367 | 1_Gm380  | 14.6895 | -0.49967 | 0.515885 | 0.829903 | 3.03373 | 15.869  | 17.5807 | 18.1564 | 11.1602 | 22.3369 |
| ENSMUSG00000104401 | 1_Gm207  | 0.13755 | -0.79206 | 0.84609  | NA       | 0       | 0       | 0       | 0.82529 | 0       | 0       |
| ENSMUSG00000104411 | 1_Gm303  | 1.71005 | 0.5132   | 0.822513 | 0.948763 | 6.06747 | 0       | 0       | 2.47588 | 1.71695 | 0       |
| ENSMUSG00000104414 | 1_Gm377  | 0.30991 | 0.16972  | 0.966824 | NA       | 0       | 0       | 1.03416 | 0.82529 | 0       | 0       |
| ENSMUSG00000104445 | 1_Rhbg   | 292.215 | 1.05677  | 0.140712 | 0.508609 | 54.6072 | 638.162 | 491.227 | 185.691 | 139.073 | 244.531 |
| ENSMUSG00000104448 | 1_Gm372  | 0.19594 | -0.79206 | 0.84609  | NA       | 0       | 0       | 0       | 0       | 0       | 1.17563 |
| ENSMUSG00000104509 | 1_Gm339  | 0       | NA       | NA       | NA       | 0       | 0       | 0       | 0       | 0       | 0       |
| ENSMUSG00000104520 | 1_Gm373  | 2.29573 | 0.23562  | 0.863134 | 0.96133  | 1.01124 | 3.40051 | 3.10248 | 1.65058 | 3.43391 | 1.17563 |
| ENSMUSG00000104529 | 4_Rbakdn | 0.84104 | -1.80057 | 0.448659 | NA       | 1.01124 | 0       | 0       | 0.82529 | 0.85848 | 2.35126 |
| ENSMUSG00000104556 | 1_Gm431  | 0.28063 | -1.56014 | 0.700551 | NA       | 0       | 0       | 0       | 0.82529 | 0.85848 | 0       |
| ENSMUSG00000104557 | 1_Gm365  | 0.16854 | 1.1315   | 0.781553 | NA       | 1.01124 | 0       | 0       | 0       | 0       | 0       |
| ENSMUSG00000104586 | 1_492153 | 3.1222  | -2.96777 | 0.050559 | 0.291317 | 1.01124 | 1.1335  | 0       | 3.30117 | 8.58477 | 4.70251 |
| ENSMUSG00000104588 | 1_Gm436  | 0       | NA       | NA       | NA       | 0       | 0       | 0       | 0       | 0       | 0       |
| ENSMUSG00000104607 | 1_Gm432  | 0.28063 | -1.56014 | 0.700051 | NA       | 0       | 0       | 0       | 0.82529 | 0.85848 | 0       |
| ENSMUSG00000104619 | 1_Gm426  | 0.92574 | -2.0054  | 0.375086 | NA       | 1.01124 | 0       | 0       | 1.65058 | 1.71695 | 1.17563 |
| ENSMUSG00000104633 | 1_Gm436  | 2.27853 | -0.50148 | 0.81716  | 0.947623 | 0       | 5.66751 | 0       | 3.30117 | 0       | 4.70251 |
| ENSMUSG00000104667 | 1_Gm496  | 0.66548 | -1.32042 | 0.602157 | NA       | 0       | 1.1335  | 0       | 0.82529 | 0.85848 | 1.17563 |
| ENSMUSG00000104671 | 1_Gm430  | 16.8217 | -0.19686 | 0.743653 | 0.92327  | 22.2474 | 10.2015 | 14.4783 | 21.4576 | 13.7356 | 18.81   |
| ENSMUSG00000104675 | 1_Gm436  | 0.33708 | 1.97061  | 0.625968 | NA       | 2.02249 | 0       | 0       | 0       | 0       | 0       |
| ENSMUSG00000104684 | 1_543042 | 3.44157 | 0.27057  | 0.854348 | 0.958493 | 10.1124 | 1.1335  | 0       | 3.30117 | 2.57543 | 3.52688 |
| ENSMUSG00000104701 | 1_Gm425  | 1.46487 | -2.78507 | 0.257635 | NA       | 1.01124 | 0       | 0       | 6.60234 | 0       | 1.17563 |
| ENSMUSG00000104713 | 4_Gbp6   | 2139.02 | 4.17926  | 5.24E-15 | 2.30E-12 | 7305.23 | 2881.36 | 1976.28 | 162.583 | 306.476 | 202.208 |
| ENSMUSG00000104736 | 1_Gm431  | 0.17236 | 1.1315   | 0.781553 | NA       | 0       | 0       | 1.03416 | 0       | 0       | 0       |
| ENSMUSG00000104752 | 1_Gm556  | 0.33902 | -1.78366 | 0.658108 | NA       | 0       | 0       | 0       | 0       | 0.85848 | 1.17563 |
| ENSMUSG00000104763 | 1_983013 | 3.15247 | 0.28294  | 0.81668  | 0.947571 | 6.06747 | 1.1335  | 3.10248 | 1.65058 | 3.43391 | 3.52688 |
| ENSMUSG00000104781 | 1_Gm433  | 1.37275 | 1.70144  | 0.361733 | NA       | 3.03373 | 1.1335  | 2.06832 | 0.82529 | 0       | 1.17563 |
| ENSMUSG00000104818 | 1_Gm436  | 1.78157 | 3.2338   | 0.087855 | 0.402225 | 4.04498 | 3.40051 | 2.06832 | 0       | 0       | 1.17563 |
| ENSMUSG00000104824 | 1_Gm216  | 0.95502 | -0.83094 | 0.685828 | NA       | 1.01124 | 0       | 1.03416 | 1.65058 | 0.85848 | 1.17563 |
| ENSMUSG00000104833 | 1_Gm424  | 0       | NA       | NA       | NA       | 0       | 0       | 0       | 0       | 0       | 0       |
| ENSMUSG00000104835 | 4_Gm554  | 2.602   | 0.67321  | 0.645999 | 0.889622 | 3.03373 | 5.66751 | 1.03416 | 3.30117 | 2.57543 | 0       |
| ENSMUSG00000104861 | 1_RP24-4 | 0.42371 | -2.13816 | 0.587702 | NA       | 0       | 0       | 0       | 0.82529 | 1.71695 | 0       |
| ENSMUSG00000104878 | 1_Gm435  | 0       | NA       | NA       | NA       | 0       | 0       | 0       | 0       | 0       | 0       |
| ENSMUSG00000104904 | 1_Gm430  | 2.97907 | -0.83686 | 0.53835  | 0.839833 | 0       | 2.26701 | 4.13665 | 2.47588 | 4.29238 | 4.70251 |
| ENSMUSG00000104937 | 1_Gm430  | 0.13755 | -0.79206 | 0.84609  | NA       | 0       | 0       | 0       | 0.82529 | 0       | 0       |
| ENSMUSG00000104939 | 1_Gm336  | 0.58119 | -1.14565 | 0.753509 | NA       | 1.01124 | 0       | 0       | 2.47588 | 0       | 0       |
| ENSMUSG00000104941 | 1_Gm895  | 5.37206 | 4.9512   | 0.001702 | 0.028847 | 9.1012  | 18.136  | 4.13665 | 0       | 0.85848 | 0       |
| ENSMUSG00000104955 | 1_170001 | 0       | NA       | NA       | NA       | 0       | 0       | 0       | 0       | 0       | 0       |
| ENSMUSG00000105000 | 1_Gm436  | 0.16854 | 1.1315   | 0.781553 | NA       | 1.01124 | 0       | 0       | 0       | 0       | 0       |
| ENSMUSG00000105003 | 1_Gm425  | 0.84742 | -3.13601 | 0.312779 | NA       | 0       | 0       | 0       | 1.65058 | 3.43391 | 0       |
| ENSMUSG00000105006 | 1_Gm948  | 8.04809 | 0.02292  | 0.975205 | 0.993623 | 8.08995 | 9.06802 | 7.23913 | 8.25292 | 8.58477 | 7.05377 |
| ENSMUSG00000105039 | 1_Gm426  | 0.14308 | -0.79206 | 0.84609  | NA       | 0       | 0       | 0       | 0       | 0.85848 | 0       |
| ENSMUSG00000105053 | 1_Gm430  | 3.40051 | 5.29309  | 0.062094 | 0.329194 | 0       | 20.4031 | 0       | 0       | 0       | 0       |
| ENSMUSG00000105057 | 1_Gm401  | 0.17236 | 1.1315   | 0.781553 | NA       | 0       | 0       | 1.03416 | 0       | 0       | 0       |
| ENSMUSG00000105068 | 1_Gm429  | 0.2751  | -1.54073 | 0.703687 | NA       | 0       | 0       | 0       | 1.65058 | 0       | 0       |
| ENSMUSG00000105076 | 1_A93000 | 14.9967 | -0.85238 | 0.297709 | 0.680996 | 16.1799 | 5.66751 | 10.3416 | 24.7588 | 28.3297 | 4.70251 |
| ENSMUSG00000105078 | 1_Gm359  | 1.00616 | 2.36056  | 0.36952  | NA       | 4.04498 | 1.1335  | 0       | 0       | 0.85848 | 0       |
| ENSMUSG00000105096 | 1_Gbp10  | 1252.48 | 4.75663  | 1.18E-18 | 1.08E-15 | 4361.5  | 1674.18 | 1211    | 59.421  | 115.894 | 92.8746 |
| ENSMUSG00000105103 | 1_Gm431  | 53.2691 | 0.82114  | 0.343688 | 0.721499 | 100.113 | 66.8767 | 37.2298 | 4.95175 | 89.2816 | 21.1613 |
| ENSMUSG00000105127 | 1_Gm424  | 5.0597  | 0.74181  | 0.445036 | 0.788998 | 4.04498 | 4.53401 | 10.3416 | 3.30117 | 3.43391 | 4.70251 |
| ENSMUSG00000105161 | 1_Gm425  | 74.9531 | 0.50618  | 0.220381 | 0.611551 | 119.327 | 63.4762 | 80.6646 | 49.5175 | 62.6688 | 74.0646 |
| ENSMUSG00000105168 | 1_Gm435  | 0.13755 | -0.79206 | 0.84609  | NA       | 0       | 0       | 0       | 0.82529 | 0       | 0       |
| ENSMUSG00000105204 | 1_Gm437  | 3.39108 | -0.26547 | 0.838044 | 0.952966 | 5.05622 | 0       | 4.13665 | 2.47588 | 5.15086 | 3.52688 |
| ENSMUSG00000105208 | 1_Gm435  | 0.16854 | 1.1315   | 0.781553 | NA       | 1.01124 | 0       | 0       | 0       | 0       | 0       |
| ENSMUSG00000105218 | 4_Gm432  | 0.31162 | 0.16972  | 0.966824 | NA       | 1.01124 | 0       | 0       | 0       | 0.85848 | 0       |
| ENSMUSG00000105219 | 1_Gm438  | 0.19594 | -0.79206 | 0.84609  | NA       | 0       | 0       | 0       | 0       | 0       | 1.17563 |
| ENSMUSG00000105239 | 1_Gm430  | 0       | NA       | NA       | NA       | 0       | 0       | 0       | 0       | 0       | 0       |
| ENSMUSG00000105258 | 1_Gm427  | 0.33708 | 1.97061  | 0.625968 | NA       | 2.02249 | 0       | 0       | 0       | 0       | 0       |
| ENSMUSG00000105260 | 1_Gm424  | 0.14308 | -0.79206 | 0.84609  | NA       | 0       | 0       | 0       | 0       | 0.85848 | 0       |
| ENSMUSG00000105276 | 1_Gm426  | 0.31162 | 0.16972  | 0.966824 | NA       | 1.01124 | 0       | 0       | 0       | 0.85848 | 0       |
| ENSMUSG00000105279 | 1_Gm626  | 0.36448 | 0.16972  | 0.966824 | NA       | 1.01124 | 0       | 0       | 0       | 0       | 1.17563 |
| ENSMUSG00000105283 | 1_Gm333  | 2.50733 | 2.2439   | 0.220732 | 0.611741 | 9.1012  | 3.40051 | 0       | 0.82529 | 1.71695 | 0       |
| ENSMUSG00000105324 | 1_Gm427  | 0.50562 | 2.55291  | 0.52315  | NA       | 3.03373 | 0       | 0       | 0       | 0       | 0       |
| ENSMUSG00000105331 | 1_Gm298  | 0.50756 | -0.81123 | 0.79835  | NA       | 1.01124 | 0       | 0       | 0       | 0.85848 | 1.17563 |
| ENSMUSG00000105335 | 1_Gm424  | 0.33708 | 1.97061  | 0.625968 | NA       | 2.02249 | 0       | 0       | 0       | 0       | 0       |

|                    |           |         |          |          |          |         |         |         |         |         |         |
|--------------------|-----------|---------|----------|----------|----------|---------|---------|---------|---------|---------|---------|
| ENSMUSG00000105337 | 4_Gm438   | 0.19594 | -0.79206 | 0.84609  | NA       | 0       | 0       | 0       | 0       | 0       | 1.17563 |
| ENSMUSG00000105340 | 4_Gm428   | 63.1197 | -0.54409 | 0.319951 | 0.701203 | 83.9333 | 20.4031 | 49.6398 | 80.8787 | 81.5553 | 62.3083 |
| ENSMUSG00000105345 | 1_BC0303  | 26.7116 | -0.34633 | 0.468098 | 0.804041 | 24.2699 | 18.136  | 27.9224 | 28.0599 | 26.6128 | 35.2688 |
| ENSMUSG00000105352 | 4_C03001  | 0.18892 | 1.1315   | 0.781553 | NA       | 0       | 1.1335  | 0       | 0       | 0       | 0       |
| ENSMUSG00000105353 | 1_Gm424   | 6.1243  | -0.24274 | 0.780676 | 0.935516 | 5.05622 | 3.40051 | 8.27329 | 5.77705 | 6.00934 | 8.22939 |
| ENSMUSG00000105354 | 1_RP23-1  | 0.55019 | -2.51397 | 0.52782  | NA       | 0       | 0       | 0       | 3.30117 | 0       | 0       |
| ENSMUSG00000105361 | 1_Yam1    | 36674.1 | 0.01823  | 0.970861 | 0.992187 | 13667   | 42277.4 | 54773.3 | 35480.1 | 32436.7 | 41410.3 |
| ENSMUSG00000105376 | 4_Gm424   | 1.65961 | -1.89457 | 0.379931 | NA       | 1.01124 | 0       | 1.03416 | 0       | 0.85848 | 7.05377 |
| ENSMUSG00000105383 | 4_Gm426   | 197.828 | 0.15701  | 0.574252 | 0.856242 | 185.058 | 223.3   | 217.174 | 184.865 | 170.837 | 205.735 |
| ENSMUSG00000105402 | 4_Gm371   | 109.868 | -0.98665 | 0.006806 | 0.076678 | 76.8546 | 49.8741 | 94.1087 | 141.95  | 145.941 | 150.48  |
| ENSMUSG00000105437 | 1_Gm424   | 0.2751  | -1.54073 | 0.703687 | NA       | 0       | 0       | 0       | 1.65058 | 0       | 0       |
| ENSMUSG00000105440 | 1_Gm436   | 2.23653 | -0.68217 | 0.648835 | 0.89122  | 2.02249 | 0       | 3.10248 | 1.65058 | 4.29238 | 2.35126 |
| ENSMUSG00000105443 | 1_Gm438   | 0.19594 | -0.79206 | 0.84609  | NA       | 0       | 0       | 0       | 0       | 0       | 1.17563 |
| ENSMUSG00000105471 | 1_A43007  | 0.67439 | 0.08323  | 0.974074 | NA       | 1.01124 | 0       | 1.03416 | 0.82529 | 0       | 1.17563 |
| ENSMUSG00000105475 | 1_493043  | 0.13755 | -0.79206 | 0.84609  | NA       | 0       | 0       | 0       | 0.82529 | 0       | 0       |
| ENSMUSG00000105476 | 1_Gm437   | 39.3499 | 0.84635  | 0.221211 | 0.612045 | 92.0232 | 20.4031 | 39.2981 | 15.6806 | 46.3578 | 22.3369 |
| ENSMUSG00000105484 | 1_Gm427   | 0       | NA       | NA       | NA       | 0       | 0       | 0       | 0       | 0       | 0       |
| ENSMUSG00000105501 | 1_533042  | 0.36128 | 2.05714  | 0.610196 | NA       | 0       | 1.1335  | 1.03416 | 0       | 0       | 0       |
| ENSMUSG00000105504 | 4_Gbp5    | 845.943 | 4.36423  | 1.50E-29 | 8.68E-26 | 2069.01 | 1593.71 | 1176.88 | 56.1199 | 72.9705 | 106.982 |
| ENSMUSG00000105511 | 1_Gm427   | 0.13755 | -0.79206 | 0.84609  | NA       | 0       | 0       | 0       | 0.82529 | 0       | 0       |
| ENSMUSG00000105516 | 4_Gm435   | 1.99621 | 0.15087  | 0.914121 | 0.976048 | 2.02249 | 1.1335  | 3.10248 | 1.65058 | 1.71695 | 2.35126 |
| ENSMUSG00000105518 | 1_Gm426   | 4.71914 | 5.77082  | 0.031617 | 0.218957 | 28.3148 | 0       | 0       | 0       | 0       | 0       |
| ENSMUSG00000105527 | 1_493342  | 1.1178  | 1.5687   | 0.608572 | NA       | 5.05622 | 0       | 0       | 1.65058 | 0       | 0       |
| ENSMUSG00000105535 | 1_Gm430   | 0.33902 | -1.78366 | 0.658108 | NA       | 0       | 0       | 0       | 0       | 0.85848 | 1.17563 |
| ENSMUSG00000105550 | 1_Gm425   | 3.35024 | 2.15756  | 0.113796 | 0.457664 | 10.1124 | 1.1335  | 5.17081 | 1.65058 | 0.85848 | 1.17563 |
| ENSMUSG00000105552 | 1_Gm197   | 14.1914 | 0.99405  | 0.161006 | 0.539395 | 30.3373 | 18.136  | 8.27329 | 10.7288 | 9.44325 | 8.22939 |
| ENSMUSG00000105560 | 1_Gm427   | 0.13755 | -0.79206 | 0.84609  | NA       | 0       | 0       | 0       | 0.82529 | 0       | 0       |
| ENSMUSG00000105570 | 1_Gm426   | 0.30609 | 0.16972  | 0.966824 | NA       | 1.01124 | 0       | 0       | 0.82529 | 0       | 0       |
| ENSMUSG00000105575 | 1_Gm434   | 0.18892 | 1.1315   | 0.781553 | NA       | 0       | 1.1335  | 0       | 0       | 0       | 0       |
| ENSMUSG00000105579 | 2_Gm432   | 0.28616 | -1.57932 | 0.696464 | NA       | 0       | 0       | 0       | 0       | 1.71695 | 0       |
| ENSMUSG00000105602 | 1_Gm106   | 1.24306 | 0.24956  | 0.902042 | NA       | 2.02249 | 0       | 2.06832 | 1.65058 | 1.71695 | 0       |
| ENSMUSG00000105636 | 1_Gm436   | 1.84445 | -1.34245 | 0.41579  | 0.770103 | 2.02249 | 1.1335  | 0       | 3.30117 | 3.43391 | 1.17563 |
| ENSMUSG00000105646 | 1_Gm432   | 0.80452 | -3.0413  | 0.339074 | NA       | 0       | 0       | 0       | 2.47588 | 0       | 2.35126 |
| ENSMUSG00000105650 | 1_Gm428   | 1.46298 | -1.56328 | 0.440544 | NA       | 0       | 2.26701 | 0       | 3.30117 | 0.85848 | 2.35126 |
| ENSMUSG00000105651 | 1_Gm430   | 0.13755 | -0.79206 | 0.84609  | NA       | 0       | 0       | 0       | 0.82529 | 0       | 0       |
| ENSMUSG00000105652 | 1_493051  | 0.89322 | 2.15447  | 0.508316 | NA       | 0       | 4.53401 | 0       | 0.82529 | 0       | 0       |
| ENSMUSG00000105664 | 1_Gm427   | 0.65293 | 0.39484  | 0.911066 | NA       | 0       | 2.26701 | 0       | 1.65058 | 0       | 0       |
| ENSMUSG00000105686 | 1_Gm432   | 3.97187 | -0.42584 | 0.760989 | 0.928372 | 9.1012  | 0       | 1.03416 | 3.30117 | 6.86782 | 3.52688 |
| ENSMUSG00000105699 | 1_Gm437   | 1.63665 | -0.46896 | 0.784991 | NA       | 3.03373 | 0       | 1.03416 | 0.82529 | 2.57543 | 2.35126 |
| ENSMUSG00000105704 | 1_Gm430   | 1.00156 | -3.37011 | 0.372785 | NA       | 0       | 0       | 0       | 0       | 6.00934 | 0       |
| ENSMUSG00000105734 | 1_493055  | 0.98407 | 2.33691  | 0.376276 | NA       | 4.04498 | 0       | 1.03416 | 0.82529 | 0       | 0       |
| ENSMUSG00000105765 | 1_493053  | 0.13755 | -0.79206 | 0.84609  | NA       | 0       | 0       | 0       | 0.82529 | 0       | 0       |
| ENSMUSG00000105769 | 1_Gm433   | 0.45299 | -0.6074  | 0.85212  | NA       | 0       | 0       | 1.03416 | 0.82529 | 0.85848 | 0       |
| ENSMUSG00000105789 | 1_Gm429   | 2.40526 | 0.14492  | 0.9224   | 0.978174 | 0       | 3.40051 | 4.13665 | 1.65058 | 1.71695 | 3.52688 |
| ENSMUSG00000105797 | 1_Gm426   | 0.35746 | 2.04359  | 0.612655 | NA       | 1.01124 | 1.1335  | 0       | 0       | 0       | 0       |
| ENSMUSG00000105827 | 1_Hist2h2 | 6.70631 | -0.09674 | 0.916623 | 0.976775 | 2.02249 | 10.2015 | 7.23913 | 8.25292 | 4.29238 | 8.22939 |
| ENSMUSG00000105838 | 1_493042  | 0.13755 | -0.79206 | 0.84609  | NA       | 0       | 0       | 0       | 0.82529 | 0       | 0       |
| ENSMUSG00000105845 | 1_Gm428   | 0.47657 | -2.28567 | 0.465885 | NA       | 0       | 0       | 0       | 0.82529 | 0.85848 | 1.17563 |
| ENSMUSG00000105851 | 1_913060  | 10.9336 | 0.61497  | 0.383778 | 0.749994 | 17.1912 | 11.335  | 11.3758 | 11.5541 | 9.44325 | 4.70251 |
| ENSMUSG00000105858 | 1_231007  | 0.18892 | 1.1315   | 0.781553 | NA       | 0       | 1.1335  | 0       | 0       | 0       | 0       |
| ENSMUSG00000105867 | 1_Gm425   | 6.39496 | -0.60944 | 0.518559 | 0.831665 | 3.03373 | 10.2015 | 2.06832 | 7.42763 | 8.58477 | 7.05377 |
| ENSMUSG00000105875 | 1_Gm435   | 5.08087 | 0.93257  | 0.563231 | 0.85076  | 0       | 15.869  | 4.13665 | 5.77705 | 0       | 4.70251 |
| ENSMUSG00000105881 | 1_493242  | 153.751 | 0.23151  | 0.527327 | 0.834617 | 184.046 | 140.554 | 173.739 | 111.414 | 194.016 | 118.738 |
| ENSMUSG00000105888 | 1_BC0371  | 1.34369 | -0.58839 | 0.746909 | NA       | 0       | 1.1335  | 2.06832 | 1.65058 | 0.85848 | 2.35126 |
| ENSMUSG00000105891 | 4_A23000  | 1.71942 | 0.15973  | 0.924194 | 0.978951 | 2.02249 | 3.40051 | 0       | 0.82529 | 1.71695 | 2.35126 |
| ENSMUSG00000105912 | 1_Gm104   | 0.17236 | 1.1315   | 0.781553 | NA       | 0       | 0       | 1.03416 | 0       | 0       | 0       |
| ENSMUSG00000105923 | 4_A83001  | 0.78072 | 0.83791  | 0.802526 | NA       | 3.03373 | 0       | 0       | 1.65058 | 0       | 0       |
| ENSMUSG00000105957 | 1_Gm432   | 64.7599 | 0.11402  | 0.812053 | 0.946139 | 108.203 | 53.2746 | 40.3323 | 59.421  | 62.6688 | 64.6595 |
| ENSMUSG00000105961 | 1_Gm427   | 0.36448 | 0.16972  | 0.966824 | NA       | 1.01124 | 0       | 0       | 0       | 0       | 1.17563 |
| ENSMUSG00000105966 | 1_Gm432   | 1.75993 | 2.13671  | 0.214012 | 0.604946 | 2.02249 | 3.40051 | 3.10248 | 0       | 0.85848 | 1.17563 |
| ENSMUSG00000105993 | 1_Gm433   | 0.36448 | 0.16972  | 0.966824 | NA       | 1.01124 | 0       | 0       | 0       | 0       | 1.17563 |
| ENSMUSG00000106000 | 1_Gm165   | 0.18892 | 1.1315   | 0.781553 | NA       | 0       | 1.1335  | 0       | 0       | 0       | 0       |
| ENSMUSG00000106002 | 1_543043  | 0.55019 | 2.66232  | 0.46328  | NA       | 0       | 2.26701 | 1.03416 | 0       | 0       | 0       |
| ENSMUSG00000106008 | 1_Gm429   | 0       | NA       | NA       | NA       | 0       | 0       | 0       | 0       | 0       | 0       |
| ENSMUSG00000106015 | 1_Gm429   | 1.47781 | 1.26711  | 0.461682 | NA       | 2.02249 | 2.26701 | 2.06832 | 1.65058 | 0.85848 | 0       |
| ENSMUSG00000106019 | 1_Gm436   | 84.5987 | -0.00521 | 0.988972 | 0.997196 | 113.259 | 63.4762 | 76.528  | 82.5292 | 91.857  | 79.9427 |
| ENSMUSG00000106020 | 1_493057  | 0.28616 | -1.57932 | 0.696464 | NA       | 0       | 0       | 0       | 0       | 1.71695 | 0       |
| ENSMUSG00000106052 | 1_Gm436   | 0.16854 | 1.1315   | 0.781553 | NA       | 1.01124 | 0       | 0       | 0       | 0       | 0       |
| ENSMUSG00000106053 | 1_Gm207   | 454.439 | 0.81599  | 0.099054 | 0.427426 | 976.862 | 383.124 | 378.503 | 208.799 | 372.579 | 406.767 |
| ENSMUSG00000106070 | 1_Gm431   | 0.66737 | 1.65149  | 0.513625 | NA       | 1.01124 | 1.1335  | 1.03416 | 0.82529 | 0       | 0       |
| ENSMUSG00000106139 | 1_Gm431   | 10.6724 | -1.26386 | 0.094155 | 0.417342 | 8.08995 | 5.66751 | 5.17081 | 22.2829 | 14.5941 | 8.22939 |
| ENSMUSG00000106144 | 1_RP24-1  | 0.31162 | 0.16972  | 0.966824 | NA       | 1.01124 | 0       | 0       | 0       | 0.85848 | 0       |
| ENSMUSG00000106157 | 1_493055  | 3.98078 | -0.14379 | 0.908733 | 0.974731 | 6.06747 | 0       | 5.17081 | 2.47588 | 4.29238 | 5.87814 |
| ENSMUSG00000106198 | 1_Gm425   | 1.76695 | -0.65178 | 0.692427 | 0.905638 | 2.02249 | 0       | 2.06832 | 3.30117 | 0.85848 | 2.35126 |
| ENSMUSG00000106219 | 1_583041  | 2.46923 | -1.82866 | 0.254448 | 0.645633 | 1.01124 | 2.26701 | 0       | 0.82529 | 6.00934 | 4.70251 |

|                    |           |         |          |          |          |         |         |         |         |         |         |
|--------------------|-----------|---------|----------|----------|----------|---------|---------|---------|---------|---------|---------|
| ENSMUSG00000106223 | 1_Gm437   | 2.86762 | -0.30349 | 0.832418 | 0.951799 | 0       | 5.66751 | 2.06832 | 1.65058 | 4.29238 | 3.52688 |
| ENSMUSG00000106230 | 1_Gm298   | 3.36752 | -1.21332 | 0.448472 | 0.791834 | 6.06747 | 0       | 0       | 5.77705 | 6.00934 | 2.35126 |
| ENSMUSG00000106237 | 1_Gm806   | 1.44681 | 1.29475  | 0.653416 | NA       | 0       | 0       | 6.20497 | 2.47588 | 0       | 0       |
| ENSMUSG00000106245 | 1_Gm438   | 5.28948 | -0.87043 | 0.501137 | 0.822414 | 10.1124 | 0       | 1.03416 | 4.95175 | 8.58477 | 7.05377 |
| ENSMUSG00000106247 | 1_Gm437   | 4.97259 | -1.77719 | 0.227665 | 0.618748 | 0       | 6.80102 | 0       | 4.95175 | 5.15086 | 12.9319 |
| ENSMUSG00000106261 | 1_Gm340   | 0       | NA       | NA       | NA       | 0       | 0       | 0       | 0       | 0       | 0       |
| ENSMUSG00000106269 | 1_493058  | 0.85246 | 2.0811   | 0.438953 | NA       | 2.02249 | 2.26701 | 0       | 0.82529 | 0       | 0       |
| ENSMUSG00000106280 | 1_Gm428   | 0       | NA       | NA       | NA       | 0       | 0       | 0       | 0       | 0       | 0       |
| ENSMUSG00000106304 | 1_Gm425   | 0.47845 | 1.02683  | 0.749277 | NA       | 1.01124 | 0       | 1.03416 | 0.82529 | 0       | 0       |
| ENSMUSG00000106317 | 1_Gm438   | 14.3392 | 0.47926  | 0.559214 | 0.848338 | 32.3598 | 13.602  | 4.13665 | 9.90351 | 15.4526 | 10.5807 |
| ENSMUSG00000106319 | 1_Gm426   | 0.33708 | 1.97061  | 0.625968 | NA       | 2.02249 | 0       | 0       | 0       | 0       | 0       |
| ENSMUSG00000106321 | 1_Gm436   | 0.63637 | 0.32817  | 0.912305 | NA       | 0       | 1.1335  | 1.03416 | 1.65058 | 0       | 0       |
| ENSMUSG00000106334 | 1_Gm435   | 123.532 | 0.69373  | 0.128391 | 0.486779 | 207.305 | 153.023 | 97.2112 | 58.5958 | 100.442 | 124.617 |
| ENSMUSG00000106357 | 1_Gm801   | 1.20996 | -0.48874 | 0.840712 | NA       | 3.03373 | 0       | 0       | 1.65058 | 2.57543 | 0       |
| ENSMUSG00000106365 | 1_Gm435   | 4.99523 | -1.10425 | 0.252562 | 0.643959 | 4.04498 | 3.40051 | 2.06832 | 8.25292 | 5.15086 | 7.05377 |
| ENSMUSG00000106367 | 1_Gm427   | 0.36448 | 0.16972  | 0.966824 | NA       | 1.01124 | 0       | 0       | 0       | 0       | 1.17563 |
| ENSMUSG00000106379 | 1_Lhfp13  | 16.3608 | -1.81214 | 0.018995 | 0.157128 | 15.1687 | 3.40051 | 3.10248 | 33.0117 | 22.3204 | 21.1613 |
| ENSMUSG00000106426 | 1_Gm362   | 0       | NA       | NA       | NA       | 0       | 0       | 0       | 0       | 0       | 0       |
| ENSMUSG00000106438 | 1_Gm427   | 2.70222 | 0.55086  | 0.653951 | 0.893223 | 3.03373 | 4.53401 | 2.06832 | 1.65058 | 2.57543 | 2.35126 |
| ENSMUSG00000106441 | 1_Gm429   | 0.96796 | 1.22011  | 0.637707 | NA       | 2.02249 | 0       | 2.06832 | 0       | 1.71695 | 0       |
| ENSMUSG00000106445 | 1_Gm211   | 0       | NA       | NA       | NA       | 0       | 0       | 0       | 0       | 0       | 0       |
| ENSMUSG00000106447 | 1_Gm429   | 0.70434 | -2.87023 | 0.38272  | NA       | 0       | 0       | 0       | 1.65058 | 2.57543 | 0       |
| ENSMUSG00000106461 | 1_Gm207   | 1.13458 | -0.21412 | 0.921839 | NA       | 2.02249 | 1.1335  | 0       | 2.47588 | 0       | 1.17563 |
| ENSMUSG00000106464 | 1_C13008  | 45.1165 | 0.03086  | 0.948552 | 0.986924 | 68.7646 | 29.4711 | 38.264  | 41.2646 | 41.2069 | 51.7276 |
| ENSMUSG00000106466 | 1_Gm425   | 0.17236 | 1.1315   | 0.781553 | NA       | 0       | 0       | 1.03416 | 0       | 0       | 0       |
| ENSMUSG00000106492 | 1_Gm297   | 1.01974 | 1.32125  | 0.565357 | NA       | 0       | 3.40051 | 1.03416 | 0.82529 | 0.85848 | 0       |
| ENSMUSG00000106501 | 1_Gm427   | 0.14308 | -0.79206 | 0.84609  | NA       | 0       | 0       | 0       | 0       | 0.85848 | 0       |
| ENSMUSG00000106505 | 1_Gm326   | 0.18892 | 1.1315   | 0.781553 | NA       | 0       | 1.1335  | 0       | 0       | 0       | 0       |
| ENSMUSG00000106507 | 1_Gm430   | 1.14393 | -0.21911 | 0.901505 | NA       | 1.01124 | 1.1335  | 1.03416 | 1.65058 | 0.85848 | 1.17563 |
| ENSMUSG00000106515 | 4_Gm303   | 0.44364 | -0.57976 | 0.883757 | NA       | 1.01124 | 0       | 0       | 1.65058 | 0       | 0       |
| ENSMUSG00000106519 | 1_Gm385   | 0.13755 | -0.79206 | 0.84609  | NA       | 0       | 0       | 0       | 0.82529 | 0       | 0       |
| ENSMUSG00000106524 | 1_Gm427   | 3.5819  | -0.69495 | 0.620589 | 0.87799  | 7.07871 | 1.1335  | 0       | 5.77705 | 5.15086 | 2.35126 |
| ENSMUSG00000106525 | 1_Gm426   | 0.19594 | -0.79206 | 0.84609  | NA       | 0       | 0       | 0       | 0       | 0       | 1.17563 |
| ENSMUSG00000106538 | 1_Gm427   | 0.53364 | 2.62307  | 0.473724 | NA       | 0       | 1.1335  | 2.06832 | 0       | 0       | 0       |
| ENSMUSG00000106547 | 1_B23030  | 17.259  | 0.03722  | 0.961294 | 0.990106 | 28.3148 | 18.136  | 6.20497 | 19.807  | 24.0374 | 7.05377 |
| ENSMUSG00000106554 | 1_Gm434   | 0       | NA       | NA       | NA       | 0       | 0       | 0       | 0       | 0       | 0       |
| ENSMUSG00000106577 | 1_Gm310   | 9.57437 | 3.24512  | 0.001814 | 0.030052 | 33.3711 | 12.4685 | 6.20497 | 1.65058 | 2.57543 | 1.17563 |
| ENSMUSG00000106627 | 1_Gm216   | 1.86464 | -0.22725 | 0.922198 | 0.978156 | 4.04498 | 1.1335  | 0       | 0       | 6.00934 | 0       |
| ENSMUSG00000106631 | 1_Gm426   | 219.219 | 0.25988  | 0.523936 | 0.832707 | 358.992 | 149.622 | 207.866 | 180.739 | 211.185 | 206.91  |
| ENSMUSG00000106632 | 1_Gm334   | 0.8544  | -0.35826 | 0.880884 | NA       | 0       | 2.26701 | 0       | 0.82529 | 0.85848 | 1.17563 |
| ENSMUSG00000106634 | 1_Gm430   | 202.487 | 1.60918  | 0.001491 | 0.026215 | 520.791 | 199.497 | 194.422 | 66.8487 | 119.328 | 114.036 |
| ENSMUSG00000106647 | 1_Gm425   | 4.66368 | -2.50204 | 0.028455 | 0.204284 | 2.02249 | 1.1335  | 1.03416 | 10.7288 | 6.00934 | 7.05377 |
| ENSMUSG00000106658 | 1_Gm424   | 0.28616 | -1.57932 | 0.696464 | NA       | 0       | 0       | 0       | 0       | 1.71695 | 0       |
| ENSMUSG00000106659 | 1_Gm430   | 0.49883 | 1.09243  | 0.73138  | NA       | 0       | 1.1335  | 1.03416 | 0.82529 | 0       | 0       |
| ENSMUSG00000106674 | 1_Gm431   | 0.41818 | -2.121   | 0.592183 | NA       | 0       | 0       | 0       | 1.65058 | 0.85848 | 0       |
| ENSMUSG00000106683 | 1_Gm432   | 11.4139 | -0.311   | 0.630121 | 0.881745 | 9.1012  | 9.06802 | 12.4099 | 11.5541 | 14.5941 | 11.7563 |
| ENSMUSG00000106688 | 1_Gm428   | 2.38249 | 4.78686  | 0.040077 | 0.251888 | 8.08995 | 0       | 6.20497 | 0       | 0       | 0       |
| ENSMUSG00000106692 | 1_Gm432   | 0.17236 | 1.1315   | 0.781553 | NA       | 0       | 0       | 1.03416 | 0       | 0       | 0       |
| ENSMUSG00000106715 | 3_Tmem2   | 309.633 | -0.22718 | 0.636294 | 0.885114 | 114.271 | 393.326 | 348.512 | 336.719 | 341.674 | 323.298 |
| ENSMUSG00000106738 | 1_Gm5     | 0.41265 | -2.10335 | 0.599583 | NA       | 0       | 0       | 0       | 2.47588 | 0       | 0       |
| ENSMUSG00000106740 | 1_Gm212   | 0.18892 | 1.1315   | 0.781553 | NA       | 0       | 1.1335  | 0       | 0       | 0       | 0       |
| ENSMUSG00000106741 | 3_493051  | 0.67416 | 2.9665   | 0.455571 | NA       | 4.04498 | 0       | 0       | 0       | 0       | 0       |
| ENSMUSG00000106779 | 1_RP23-2  | 0.44746 | -0.57987 | 0.8834   | NA       | 0       | 0       | 1.03416 | 1.65058 | 0       | 0       |
| ENSMUSG00000106783 | 1_Gm427   | 0.31162 | 0.16972  | 0.966824 | NA       | 1.01124 | 0       | 0       | 0       | 0.85848 | 0       |
| ENSMUSG00000106791 | 1_493055  | 1.80257 | 1.12725  | 0.552115 | 0.845186 | 1.01124 | 3.40051 | 3.10248 | 3.30117 | 0       | 0       |
| ENSMUSG00000106795 | 1_Gm430   | 3.01087 | -2.23715 | 0.130783 | 0.491974 | 0       | 1.1335  | 2.06832 | 9.07822 | 3.43391 | 2.35126 |
| ENSMUSG00000106799 | 1_Gm207   | 68.001  | 0.78187  | 0.174176 | 0.557874 | 151.687 | 53.2746 | 52.7422 | 29.7105 | 61.8103 | 58.7814 |
| ENSMUSG00000106820 | 1_D5Ertdf | 7.30514 | -0.52191 | 0.563831 | 0.850768 | 2.02249 | 6.80102 | 9.30745 | 11.5541 | 9.44325 | 4.70251 |
| ENSMUSG00000106824 | 1_Gm769   | 0.18892 | 1.1315   | 0.781553 | NA       | 0       | 1.1335  | 0       | 0       | 0       | 0       |
| ENSMUSG00000106864 | 3_Gtf3c2  | 1905.81 | 0.16773  | 0.456204 | 0.796623 | 2027.54 | 2028.97 | 1992.83 | 1650.58 | 1922.13 | 1812.82 |
| ENSMUSG00000106871 | 1_Gm328   | 0.90514 | 0.47777  | 0.860163 | NA       | 1.01124 | 0       | 2.06832 | 0       | 0       | 2.35126 |
| ENSMUSG00000106874 | 1_Gm201   | 112.963 | 0.43511  | 0.451555 | 0.793862 | 249.777 | 70.2772 | 69.2888 | 74.2763 | 101.3   | 112.86  |
| ENSMUSG00000106892 | 1_Gm427   | 2.5107  | 0.96932  | 0.61453  | 0.875923 | 1.01124 | 9.06802 | 0       | 4.12646 | 0.85848 | 0       |
| ENSMUSG00000106918 | 3_Mrpl33  | 955.05  | -0.18806 | 0.448886 | 0.792044 | 968.772 | 878.465 | 831.466 | 924.327 | 1140.92 | 986.352 |
| ENSMUSG00000106927 | 1_Gm435   | 5.05444 | -0.52526 | 0.588548 | 0.863595 | 6.06747 | 2.26701 | 4.13665 | 6.60234 | 7.72629 | 3.52688 |
| ENSMUSG00000106943 | 1_Snora2l | 135.564 | 0.0672   | 0.850777 | 0.957445 | 169.889 | 106.549 | 139.612 | 108.113 | 162.252 | 126.968 |
| ENSMUSG00000106951 | 1_593043  | 367.91  | -0.43195 | 0.207706 | 0.599203 | 374.16  | 210.832 | 354.717 | 472.893 | 429.238 | 365.62  |
| ENSMUSG00000106980 | 1_Gm436   | 0.89623 | -0.52841 | 0.824248 | NA       | 0       | 1.1335  | 1.03416 | 0       | 0.85848 | 2.35126 |
| ENSMUSG00000106981 | 1_RP23-4  | 84.2399 | -0.41846 | 0.30934  | 0.691812 | 105.169 | 52.1411 | 58.9472 | 95.7339 | 106.451 | 86.9965 |
| ENSMUSG00000106985 | 1_Gm427   | 0       | NA       | NA       | NA       | 0       | 0       | 0       | 0       | 0       | 0       |
| ENSMUSG00000107002 | 1_NCBP2   | 243.878 | -0.33035 | 0.396014 | 0.757011 | 123.372 | 268.64  | 256.472 | 294.629 | 262.694 | 257.462 |
| ENSMUSG00000107008 | 3_Gm276   | 1.63111 | -0.4609  | 0.783711 | NA       | 3.03373 | 0       | 1.03416 | 1.65058 | 1.71695 | 2.35126 |
| ENSMUSG00000107013 | 1_Gm436   | 0.88223 | -1.92604 | 0.476532 | NA       | 0       | 0       | 1.03416 | 0.82529 | 3.43391 | 0       |
| ENSMUSG00000107022 | 1_Gm366   | 0.18892 | 1.1315   | 0.781553 | NA       | 0       | 1.1335  | 0       | 0       | 0       | 0       |
| ENSMUSG00000107023 | 2_Gm427   | 1137.87 | 0.33982  | 0.386946 | 0.751863 | 1862.71 | 889.8   | 1061.05 | 776.6   | 1222.47 | 1014.57 |

|                    |           |         |          |          |          |         |         |         |         |         |         |
|--------------------|-----------|---------|----------|----------|----------|---------|---------|---------|---------|---------|---------|
| ENSMUSG00000107043 | 1_Gm428   | 2.26198 | -2.35263 | 0.272911 | 0.659357 | 0       | 2.26701 | 0       | 6.60234 | 0       | 4.70251 |
| ENSMUSG00000107044 | 1_Gm430   | 0.17236 | 1.1315   | 0.781553 | NA       | 0       | 0       | 1.03416 | 0       | 0       | 0       |
| ENSMUSG00000107060 | 1_Gm428   | 1.24333 | -2.48165 | 0.327119 | NA       | 0       | 1.1335  | 0       | 0       | 5.15086 | 1.17563 |
| ENSMUSG00000107061 | 1_Gm195   | 0.95164 | -2.01388 | 0.379442 | NA       | 0       | 1.1335  | 0       | 0.82529 | 2.57543 | 1.17563 |
| ENSMUSG00000107068 | 1_Gm427   | 405.639 | -0.36801 | 0.448295 | 0.791834 | 140.563 | 409.195 | 512.944 | 497.651 | 445.55  | 427.929 |
| ENSMUSG00000107071 | 1_Gm438   | 2.93012 | 5.08273  | 0.08016  | 0.381188 | 0       | 0       | 17.5807 | 0       | 0       | 0       |
| ENSMUSG00000107096 | 3_Gm435   | 67.6568 | -0.38894 | 0.259457 | 0.649203 | 66.7421 | 53.2746 | 55.8447 | 80.8787 | 79.8384 | 69.362  |
| ENSMUSG00000107108 | 1_Gm993   | 0.46401 | -0.58035 | 0.881878 | NA       | 0       | 1.1335  | 0       | 1.65058 | 0       | 0       |
| ENSMUSG00000107121 | 1_111000  | 4.16544 | -0.26724 | 0.838437 | 0.952966 | 2.02249 | 0       | 9.30745 | 4.12646 | 6.00934 | 3.52688 |
| ENSMUSG00000107126 | 1_Gm425   | 0.18892 | 1.1315   | 0.781553 | NA       | 0       | 1.1335  | 0       | 0       | 0       | 0       |
| ENSMUSG00000107133 | 1_Gm427   | 1.0484  | 1.13698  | 0.612167 | NA       | 2.02249 | 2.26701 | 0       | 0.82529 | 0       | 1.17563 |
| ENSMUSG00000107153 | 1_Gm384   | 0.332   | 0.16972  | 0.966824 | NA       | 0       | 1.1335  | 0       | 0       | 0.85848 | 0       |
| ENSMUSG00000107169 | 1_Gm437   | 15.593  | -0.29008 | 0.84038  | 0.953235 | 0       | 21.5366 | 20.6832 | 25.5841 | 25.7543 | 0       |
| ENSMUSG00000107192 | 1_Gm195   | 0.33349 | -1.76186 | 0.662172 | NA       | 0       | 0       | 0       | 0.82529 | 0       | 1.17563 |
| ENSMUSG00000107193 | 1_Gm437   | 0.17236 | 1.1315   | 0.781553 | NA       | 0       | 0       | 1.03416 | 0       | 0       | 0       |
| ENSMUSG00000107198 | 1_Gm196   | 0.69836 | 3.01466  | 0.275678 | NA       | 2.02249 | 1.1335  | 1.03416 | 0       | 0       | 0       |
| ENSMUSG00000107218 | 1_Gm425   | 2.13165 | -0.06697 | 0.962067 | 0.990106 | 4.04498 | 1.1335  | 1.03416 | 1.65058 | 2.57543 | 2.35126 |
| ENSMUSG00000107241 | 1_Gm431   | 0.75567 | 3.11976  | 0.431825 | NA       | 0       | 4.53401 | 0       | 0       | 0       | 0       |
| ENSMUSG00000107244 | 1_Gm436   | 0.59225 | -1.1886  | 0.690885 | NA       | 1.01124 | 0       | 0       | 0.82529 | 1.71695 | 0       |
| ENSMUSG00000107252 | 1_Gm437   | 0.2751  | -1.54073 | 0.703687 | NA       | 0       | 0       | 0       | 1.65058 | 0       | 0       |
| ENSMUSG00000107253 | 1_Gm436   | 10.1468 | -1.03889 | 0.244879 | 0.6364   | 2.02249 | 4.53401 | 13.4441 | 20.6323 | 12.0187 | 8.22939 |
| ENSMUSG00000107266 | 1_Gm436   | 0.17236 | 1.1315   | 0.781553 | NA       | 0       | 0       | 1.03416 | 0       | 0       | 0       |
| ENSMUSG00000107271 | 3_BC0284  | 2.72746 | 0.50378  | 0.717875 | 0.912538 | 3.03373 | 3.40051 | 3.10248 | 3.30117 | 0       | 3.52688 |
| ENSMUSG00000107280 | 1_Gm949   | 2.34558 | 0.96349  | 0.556993 | 0.847862 | 7.07871 | 1.1335  | 1.03416 | 2.47588 | 0       | 2.35126 |
| ENSMUSG00000107283 | 1_Mpv17   | 1005.07 | -0.52127 | 0.024613 | 0.187001 | 850.456 | 819.523 | 806.646 | 1265.17 | 1207.02 | 1081.58 |
| ENSMUSG00000107287 | 1_Gm434   | 0       | NA       | NA       | NA       | 0       | 0       | 0       | 0       | 0       | 0       |
| ENSMUSG00000107288 | 1_Gm429   | 0.59607 | -1.18871 | 0.690318 | NA       | 0       | 0       | 1.03416 | 0.82529 | 1.71695 | 0       |
| ENSMUSG00000107313 | 1_Gm433   | 5.66768 | -0.5828  | 0.531406 | 0.836945 | 7.07871 | 3.40051 | 3.10248 | 9.07822 | 4.29238 | 7.05377 |
| ENSMUSG00000107325 | 1_Gm434   | 1.91763 | 3.39427  | 0.068557 | 0.348373 | 4.04498 | 4.53401 | 2.06832 | 0       | 0.85848 | 0       |
| ENSMUSG00000107352 | 1_Gm436   | 47.139  | -0.24335 | 0.552666 | 0.845655 | 54.6072 | 41.9396 | 33.0932 | 55.2946 | 53.2256 | 44.6739 |
| ENSMUSG00000107355 | 1_Al8399  | 33.3369 | 0.63183  | 0.196611 | 0.588849 | 45.506  | 46.4736 | 29.9907 | 34.6623 | 25.7543 | 17.6344 |
| ENSMUSG00000107365 | 1_Gm434   | 0.18892 | 1.1315   | 0.781553 | NA       | 0       | 1.1335  | 0       | 0       | 0       | 0       |
| ENSMUSG00000107387 | 1_Gm429   | 0.17236 | 1.1315   | 0.781553 | NA       | 0       | 0       | 1.03416 | 0       | 0       | 0       |
| ENSMUSG00000107388 | 1_Gm427   | 154.129 | 0.1362   | 0.67798  | 0.901447 | 203.26  | 132.62  | 147.885 | 136.173 | 139.073 | 165.764 |
| ENSMUSG00000107412 | 1_RP23-4  | 114.271 | -0.48453 | 0.158348 | 0.536636 | 84.9445 | 88.4132 | 112.724 | 161.757 | 129.63  | 108.158 |
| ENSMUSG00000107417 | 1_Olfr138 | 6.47409 | -0.36754 | 0.708956 | 0.909883 | 1.01124 | 5.66751 | 10.3416 | 9.07822 | 6.86782 | 5.87814 |
| ENSMUSG00000107419 | 1_RP23-2  | 0.30609 | 0.16972  | 0.966824 | NA       | 1.01124 | 0       | 0       | 0.82529 | 0       | 0       |
| ENSMUSG00000107422 | 1_RP24-4  | 0.14308 | -0.79206 | 0.84609  | NA       | 0       | 0       | 0       | 0       | 0.85848 | 0       |
| ENSMUSG00000107444 | 1_Olfr139 | 0.47508 | -0.61882 | 0.873279 | NA       | 0       | 1.1335  | 0       | 0       | 1.71695 | 0       |
| ENSMUSG00000107451 | 1_RP23-3  | 9.49242 | -0.87728 | 0.22965  | 0.620986 | 6.06747 | 6.80102 | 7.23913 | 16.5058 | 8.58477 | 11.7563 |
| ENSMUSG00000107478 | 1_Atn1    | 19.062  | -7.61344 | 0.051453 | 0.293762 | 0       | 0       | 0       | 76.7522 | 0       | 37.6201 |
| ENSMUSG00000107479 | 1_RP23-1  | 2.95819 | -1.63329 | 0.353298 | 0.729327 | 1.01124 | 3.40051 | 0       | 9.90351 | 3.43391 | 0       |
| ENSMUSG00000107481 | 1_RP24-3  | 6.83763 | 1.89388  | 0.095295 | 0.419012 | 18.2024 | 10.2015 | 4.13665 | 2.47588 | 6.00934 | 0       |
| ENSMUSG00000107482 | 2_RP23-7  | 2.89752 | 0.90917  | 0.723948 | 0.915055 | 0       | 0       | 11.3758 | 0       | 6.00934 | 0       |
| ENSMUSG00000107499 | 1_Ccdc14  | 8.41823 | 0.517    | 0.608008 | 0.872658 | 1.01124 | 10.2015 | 18.6149 | 8.25292 | 7.72629 | 4.70251 |
| ENSMUSG00000107503 | 1_RP23-2  | 2.37317 | 1.62111  | 0.366912 | 0.739587 | 0       | 5.66751 | 5.17081 | 0.82529 | 2.57543 | 0       |
| ENSMUSG00000107504 | 2_RP23-4  | 0.56126 | -2.54391 | 0.473253 | NA       | 0       | 0       | 0       | 1.65058 | 1.71695 | 0       |
| ENSMUSG00000107526 | 1_RP24-3  | 3.9684  | 1.46999  | 0.211673 | 0.602834 | 10.1124 | 2.26701 | 5.17081 | 1.65058 | 3.43391 | 1.17563 |
| ENSMUSG00000107539 | 1_RP23-2  | 5.11118 | -0.7862  | 0.710998 | 0.910557 | 0       | 11.335  | 0       | 18.1564 | 0       | 1.17563 |
| ENSMUSG00000107585 | 1_RP23-4  | 7.34121 | -1.3698  | 0.239505 | 0.631327 | 8.08995 | 0       | 4.13665 | 18.9817 | 3.43391 | 9.40502 |
| ENSMUSG00000107605 | 1_RP23-3  | 2.16857 | 0.37165  | 0.786883 | 0.936514 | 2.02249 | 1.1335  | 4.13665 | 1.65058 | 1.71695 | 2.35126 |
| ENSMUSG00000107614 | 1_RP23-2  | 0.83082 | -3.10906 | 0.330544 | NA       | 0       | 0       | 0       | 4.12646 | 0.85848 | 0       |
| ENSMUSG00000107619 | 1_RP24-8  | 0.51538 | 1.15053  | 0.76193  | NA       | 0       | 2.26701 | 0       | 0.82529 | 0       | 0       |
| ENSMUSG00000107622 | 1_RP24-2  | 0.69648 | 0.11067  | 0.965351 | NA       | 1.01124 | 1.1335  | 0       | 0       | 0.85848 | 1.17563 |
| ENSMUSG00000107623 | 1_RP23-2  | 0.44917 | -0.60728 | 0.852512 | NA       | 1.01124 | 0       | 0       | 0.82529 | 0.85848 | 0       |
| ENSMUSG00000107638 | 2_RP24-3  | 0.81045 | 0.84753  | 0.695924 | NA       | 1.01124 | 1.1335  | 1.03416 | 0.82529 | 0.85848 | 0       |
| ENSMUSG00000107660 | 1_RP24-8  | 0       | NA       | NA       | NA       | 0       | 0       | 0       | 0       | 0       | 0       |
| ENSMUSG00000107667 | 2_RP23-2  | 4.20957 | -0.29381 | 0.792888 | 0.938313 | 6.06747 | 2.26701 | 3.10248 | 5.77705 | 6.86782 | 1.17563 |
| ENSMUSG00000107689 | 1_RP23-2  | 9.13484 | -2.4483  | 0.003416 | 0.047731 | 2.02249 | 3.40051 | 3.10248 | 18.9817 | 12.0187 | 15.2832 |
| ENSMUSG00000107704 | 1_RP23-1  | 0.53496 | -2.43802 | 0.508122 | NA       | 0       | 0       | 0       | 0       | 0.85848 | 2.35126 |
| ENSMUSG00000107705 | 1_Umad1   | 307.823 | 0.06687  | 0.862369 | 0.960913 | 424.723 | 262.973 | 257.506 | 301.232 | 388.89  | 211.613 |
| ENSMUSG00000107726 | 1_RP23-4  | 17.1989 | -0.51909 | 0.495291 | 0.817843 | 26.2924 | 6.80102 | 9.30745 | 13.2047 | 33.4806 | 14.1075 |
| ENSMUSG00000107728 | 1_RP23-1  | 34.4444 | -0.635   | 0.143077 | 0.511849 | 26.2924 | 21.5366 | 33.0932 | 44.5658 | 41.2069 | 39.9713 |
| ENSMUSG00000107736 | 1_RP23-2  | 7.79114 | -1.79642 | 0.053245 | 0.299737 | 2.02249 | 2.26701 | 6.20497 | 13.2047 | 17.1695 | 5.87814 |
| ENSMUSG00000107768 | 1_RP23-2  | 56.5995 | 1.35213  | 0.000932 | 0.018561 | 80.8995 | 102.015 | 61.0155 | 27.2346 | 34.3391 | 34.0932 |
| ENSMUSG00000107773 | 1_RP24-1  | 0.13755 | -0.79206 | 0.84609  | NA       | 0       | 0       | 0       | 0.82529 | 0       | 0       |
| ENSMUSG00000107789 | 1_RP24-1  | 0       | NA       | NA       | NA       | 0       | 0       | 0       | 0       | 0       | 0       |
| ENSMUSG00000107815 | 1_RP23-4  | 0.56126 | -2.54391 | 0.473253 | NA       | 0       | 0       | 0       | 1.65058 | 1.71695 | 0       |
| ENSMUSG00000107859 | 1_RP23-3  | 0.14308 | -0.79206 | 0.84609  | NA       | 0       | 0       | 0       | 0       | 0.85848 | 0       |
| ENSMUSG00000107872 | 2_RP24-1  | 1.39843 | 0.57687  | 0.812475 | NA       | 5.05622 | 0       | 0       | 2.47588 | 0.85848 | 0       |
| ENSMUSG00000107874 | 1_Prmp5   | 403.416 | -1.86967 | 3.37E-05 | 0.001373 | 257.867 | 86.1462 | 175.807 | 755.143 | 644.716 | 500.817 |
| ENSMUSG00000107875 | 1_RP23-2  | 2.8453  | 0.36724  | 0.761171 | 0.92841  | 3.03373 | 4.53401 | 2.06832 | 1.65058 | 3.43391 | 2.35126 |
| ENSMUSG00000107876 | 1_RP23-2  | 1.09428 | -1.14907 | 0.594241 | NA       | 2.02249 | 0       | 0       | 1.65058 | 1.71695 | 1.17563 |
| ENSMUSG00000107877 | 1_RP23-2  | 33.1521 | 0.20441  | 0.710243 | 0.910065 | 17.1912 | 39.6726 | 49.6398 | 36.3129 | 23.1789 | 32.9176 |
| ENSMUSG00000107879 | 1_RP24-3  | 101.278 | -0.87458 | 0.012041 | 0.115028 | 59.6634 | 68.0102 | 86.8696 | 154.33  | 114.177 | 124.617 |

|                    |          |         |          |          |          |         |         |         |         |         |         |
|--------------------|----------|---------|----------|----------|----------|---------|---------|---------|---------|---------|---------|
| ENSMUSG00000107895 | 1_RP23-4 | 0.30991 | 0.16972  | 0.966824 | NA       | 0       | 0       | 1.03416 | 0.82529 | 0       | 0       |
| ENSMUSG00000107906 | 1_Gm558  | 4.53538 | -2.05842 | 0.167865 | 0.548893 | 1.01124 | 1.1335  | 3.10248 | 0       | 13.7356 | 8.22939 |
| ENSMUSG00000107928 | 1_RP23-4 | 638.181 | -0.17188 | 0.69583  | 0.905638 | 295.283 | 777.583 | 728.05  | 845.099 | 571.746 | 611.326 |
| ENSMUSG00000107929 | 1_RP23-1 | 0.4547  | -0.61836 | 0.875203 | NA       | 1.01124 | 0       | 0       | 0       | 1.71695 | 0       |
| ENSMUSG00000107946 | 1_RP24-1 | 0.75017 | -1.59352 | 0.563543 | NA       | 0       | 1.1335  | 0       | 1.65058 | 1.71695 | 0       |
| ENSMUSG00000107956 | 1_CAAAO  | 0.76461 | -0.33793 | 0.889352 | NA       | 1.01124 | 0       | 1.03416 | 0.82529 | 1.71695 | 0       |
| ENSMUSG00000107961 | 1_RP23-2 | 1.17686 | -1.17141 | 0.546307 | NA       | 0       | 1.1335  | 1.03416 | 0.82529 | 1.71695 | 2.35126 |
| ENSMUSG00000107978 | 1_RP23-2 | 0.32647 | 0.16972  | 0.966824 | NA       | 0       | 1.1335  | 0       | 0.82529 | 0       | 0       |
| ENSMUSG00000107985 | 1_RP23-4 | 0.28616 | -1.57932 | 0.696464 | NA       | 0       | 0       | 0       | 0       | 1.71695 | 0       |
| ENSMUSG00000108010 | 1_RP23-7 | 0.14308 | -0.79206 | 0.84609  | NA       | 0       | 0       | 0       | 0       | 0.85848 | 0       |
| ENSMUSG00000108015 | 2_RP23-8 | 0.78648 | -1.69846 | 0.478201 | NA       | 0       | 0       | 1.03416 | 1.65058 | 0.85848 | 1.17563 |
| ENSMUSG00000108022 | 1_RP23-7 | 3.41462 | 0.4092   | 0.716478 | 0.912108 | 5.05622 | 3.40051 | 3.10248 | 1.65058 | 2.57543 | 4.70251 |
| ENSMUSG00000108025 | 1_RP24-4 | 0.16854 | 1.1315   | 0.781553 | NA       | 1.01124 | 0       | 0       | 0       | 0       | 0       |
| ENSMUSG00000108071 | 1_RP23-1 | 0       | NA       | NA       | NA       | 0       | 0       | 0       | 0       | 0       | 0       |
| ENSMUSG00000108072 | 1_RP23-2 | 1.50372 | 1.27918  | 0.467338 | NA       | 1.01124 | 3.40051 | 2.06832 | 0.82529 | 1.71695 | 0       |
| ENSMUSG00000108084 | 1_RP24-3 | 17.1206 | -0.95811 | 0.254676 | 0.645853 | 24.2699 | 3.40051 | 7.23913 | 36.3129 | 19.745  | 11.7563 |
| ENSMUSG00000108085 | 1_RP24-3 | 0.28063 | -1.56014 | 0.700051 | NA       | 0       | 0       | 0       | 0.82529 | 0.85848 | 0       |
| ENSMUSG00000108103 | 1_RP23-4 | 5.74592 | 1.08124  | 0.266082 | 0.654446 | 4.04498 | 9.06802 | 10.3416 | 5.77705 | 1.71695 | 3.52688 |
| ENSMUSG00000108111 | 1_RP24-4 | 0       | NA       | NA       | NA       | 0       | 0       | 0       | 0       | 0       | 0       |
| ENSMUSG00000108118 | 1_RP24-4 | 0.39188 | -1.97195 | 0.623385 | NA       | 0       | 0       | 0       | 0       | 0       | 2.35126 |
| ENSMUSG00000108127 | 1_Gm128  | 4.83762 | 1.78086  | 0.131586 | 0.493329 | 10.1124 | 11.335  | 1.03416 | 2.47588 | 1.71695 | 2.35126 |
| ENSMUSG00000108132 | 1_RP23-3 | 4.26515 | 0.40373  | 0.719637 | 0.913031 | 9.1012  | 3.40051 | 2.06832 | 5.77705 | 1.71695 | 3.52688 |
| ENSMUSG00000108137 | 1_RP23-3 | 25.7847 | 0.74731  | 0.314197 | 0.695638 | 63.7084 | 22.6701 | 10.3416 | 12.3794 | 19.745  | 25.8638 |
| ENSMUSG00000108161 | 1_CAAAO  | 3.59529 | -0.3352  | 0.761845 | 0.928698 | 2.02249 | 3.40051 | 4.13665 | 2.47588 | 6.00934 | 3.52688 |
| ENSMUSG00000108187 | 1_RP24-6 | 25.3766 | -0.0952  | 0.846636 | 0.955568 | 28.3148 | 18.136  | 26.8882 | 22.2829 | 24.8958 | 31.742  |
| ENSMUSG00000108197 | 1_RP23-2 | 1.87943 | 0.27449  | 0.863573 | 0.961572 | 2.02249 | 1.1335  | 3.10248 | 3.30117 | 1.71695 | 0       |
| ENSMUSG00000108206 | 1_RP24-9 | 0.58672 | -1.17297 | 0.695297 | NA       | 1.01124 | 0       | 0       | 1.65058 | 0.85848 | 0       |
| ENSMUSG00000108213 | 1_RP24-4 | 3.42731 | 1.72553  | 0.170053 | 0.5518   | 9.1012  | 4.53401 | 2.06832 | 1.65058 | 0.85848 | 2.35126 |
| ENSMUSG00000108228 | 1_RP23-1 | 3.43421 | -1.49712 | 0.229365 | 0.620605 | 2.02249 | 2.26701 | 1.03416 | 3.30117 | 2.57543 | 9.40502 |
| ENSMUSG00000108236 | 1_RP24-8 | 5.35906 | -1.21804 | 0.292262 | 0.676777 | 3.03373 | 4.53401 | 2.06832 | 9.90351 | 0.85848 | 11.7563 |
| ENSMUSG00000108237 | 1_RP24-3 | 0.18892 | 1.1315   | 0.781553 | NA       | 0       | 1.1335  | 0       | 0       | 0       | 0       |
| ENSMUSG00000108255 | 1_RP23-4 | 2.71489 | 1.15565  | 0.509893 | 0.827179 | 6.06747 | 1.1335  | 4.13665 | 4.95175 | 0       | 0       |
| ENSMUSG00000108258 | 1_RP24-3 | 0.36448 | 0.16972  | 0.966824 | NA       | 1.01124 | 0       | 0       | 0       | 0       | 1.17563 |
| ENSMUSG00000108273 | 1_Zfand4 | 17.066  | -0.34448 | 0.609061 | 0.872719 | 7.07871 | 22.6701 | 15.5124 | 13.2047 | 27.4713 | 16.4588 |
| ENSMUSG00000108274 | 1_RP24-1 | 0.13755 | -0.79206 | 0.84609  | NA       | 0       | 0       | 0       | 0.82529 | 0       | 0       |
| ENSMUSG00000108285 | 1_RP23-6 | 0       | NA       | NA       | NA       | 0       | 0       | 0       | 0       | 0       | 0       |
| ENSMUSG00000108288 | 1_RP23-4 | 50.2864 | -0.68202 | 0.092595 | 0.41462  | 33.3711 | 34.0051 | 48.6056 | 61.8969 | 72.1121 | 51.7276 |
| ENSMUSG00000108298 | 1_RP24-3 | 11.0768 | 0.12354  | 0.91134  | 0.975173 | 26.2924 | 0       | 8.27329 | 11.5541 | 8.58477 | 11.7563 |
| ENSMUSG00000108303 | 1_RP23-1 | 1.26559 | -3.71397 | 0.174027 | NA       | 0       | 0       | 0       | 3.30117 | 4.29238 | 0       |
| ENSMUSG00000108308 | 1_RP23-2 | 6.54347 | -2.16416 | 0.078213 | 0.375394 | 5.05622 | 0       | 2.06832 | 22.2829 | 5.15086 | 4.70251 |
| ENSMUSG00000108311 | 1_RP23-3 | 1.16772 | 0.53254  | 0.806359 | NA       | 1.01124 | 0       | 3.10248 | 0       | 1.71695 | 1.17563 |
| ENSMUSG00000108315 | 1_RP24-1 | 0.13755 | -0.79206 | 0.84609  | NA       | 0       | 0       | 0       | 0.82529 | 0       | 0       |
| ENSMUSG00000108322 | 1_RP23-4 | 2.88091 | 0.62537  | 0.671811 | 0.89998  | 1.01124 | 3.40051 | 6.20497 | 4.95175 | 1.71695 | 0       |
| ENSMUSG00000108329 | 1_RP24-1 | 0.13755 | -0.79206 | 0.84609  | NA       | 0       | 0       | 0       | 0.82529 | 0       | 0       |
| ENSMUSG00000108345 | 1_RP24-1 | 0.13755 | -0.79206 | 0.84609  | NA       | 0       | 0       | 0       | 0.82529 | 0       | 0       |
| ENSMUSG00000108356 | 1_RP23-2 | 0.28063 | -1.56014 | 0.700051 | NA       | 0       | 0       | 0       | 0.82529 | 0.85848 | 0       |
| ENSMUSG00000108360 | 1_RP23-2 | 0.13755 | -0.79206 | 0.84609  | NA       | 0       | 0       | 0       | 0.82529 | 0       | 0       |
| ENSMUSG00000108371 | 1_RP24-4 | 0.14308 | -0.79206 | 0.84609  | NA       | 0       | 0       | 0       | 0       | 0.85848 | 0       |
| ENSMUSG00000108373 | 1_RP23-2 | 0       | NA       | NA       | NA       | 0       | 0       | 0       | 0       | 0       | 0       |
| ENSMUSG00000108379 | 1_RP23-3 | 0.31162 | 0.16972  | 0.966824 | NA       | 1.01124 | 0       | 0       | 0       | 0.85848 | 0       |
| ENSMUSG00000108383 | 1_RP24-1 | 0.18892 | 1.1315   | 0.781553 | NA       | 0       | 1.1335  | 0       | 0       | 0       | 0       |
| ENSMUSG00000108393 | 1_RP23-4 | 1.25449 | 2.71847  | 0.282475 | NA       | 0       | 5.66751 | 1.03416 | 0.82529 | 0       | 0       |
| ENSMUSG00000108398 | 1_RP23-3 | 11.9108 | -0.56047 | 0.528936 | 0.835785 | 1.01124 | 12.4685 | 15.5124 | 18.1564 | 13.7356 | 10.5807 |
| ENSMUSG00000108409 | 1_RP23-1 | 2.45685 | -1.88062 | 0.183484 | 0.570219 | 1.01124 | 1.1335  | 1.03416 | 5.77705 | 3.43391 | 2.35126 |
| ENSMUSG00000108411 | 1_RP23-7 | 0       | NA       | NA       | NA       | 0       | 0       | 0       | 0       | 0       | 0       |
| ENSMUSG00000108413 | 1_RP23-4 | 0       | NA       | NA       | NA       | 0       | 0       | 0       | 0       | 0       | 0       |
| ENSMUSG00000108415 | 1_RP24-1 | 0.17236 | 1.1315   | 0.781553 | NA       | 0       | 0       | 1.03416 | 0       | 0       | 0       |
| ENSMUSG00000108434 | 1_RP23-2 | 14.6836 | -0.74873 | 0.373091 | 0.744037 | 23.2586 | 2.26701 | 7.23913 | 23.1082 | 14.5941 | 17.6344 |
| ENSMUSG00000108439 | 1_Myh14  | 1242.21 | 1.04865  | 0.263883 | 0.652946 | 42.4723 | 2363.35 | 2618.5  | 860.78  | 525.388 | 1042.78 |
| ENSMUSG00000108441 | 1_RP24-5 | 0       | NA       | NA       | NA       | 0       | 0       | 0       | 0       | 0       | 0       |
| ENSMUSG00000108456 | 1_RP24-1 | 24.7598 | -0.11244 | 0.868277 | 0.962942 | 46.5172 | 10.2015 | 14.4783 | 23.9335 | 24.0374 | 29.3907 |
| ENSMUSG00000108470 | 1_RP23-2 | 0.71685 | 0.16413  | 0.955031 | NA       | 0       | 2.26701 | 0       | 0       | 0.85848 | 1.17563 |
| ENSMUSG00000108473 | 1_RP23-3 | 29.2723 | 1.48291  | 0.050065 | 0.289727 | 87.9783 | 24.9371 | 16.5466 | 11.5541 | 24.0374 | 10.5807 |
| ENSMUSG00000108483 | 1_RP23-4 | 0.56126 | -2.54391 | 0.473253 | NA       | 0       | 0       | 0       | 1.65058 | 1.71695 | 0       |
| ENSMUSG00000108504 | 1_RP23-3 | 0.47845 | 1.02683  | 0.749277 | NA       | 1.01124 | 0       | 1.03416 | 0.82529 | 0       | 0       |
| ENSMUSG00000108513 | 1_RP24-1 | 0.72427 | -1.58004 | 0.576714 | NA       | 1.01124 | 0       | 0       | 2.47588 | 0.85848 | 0       |
| ENSMUSG00000108530 | 1_RP23-2 | 2.38255 | -0.42891 | 0.806907 | 0.944132 | 6.06747 | 0       | 0       | 3.30117 | 2.57543 | 2.35126 |
| ENSMUSG00000108532 | 1_RP23-2 | 0.19594 | -0.79206 | 0.84609  | NA       | 0       | 0       | 0       | 0       | 0       | 1.17563 |
| ENSMUSG00000108546 | 1_RP24-6 | 2.80366 | 0.9654   | 0.538555 | 0.839843 | 0       | 9.06802 | 2.06832 | 2.47588 | 0.85848 | 2.35126 |
| ENSMUSG00000108550 | 1_RP23-3 | 0.14308 | -0.79206 | 0.84609  | NA       | 0       | 0       | 0       | 0       | 0.85848 | 0       |
| ENSMUSG00000108569 | 1_RP23-4 | 1.36578 | -3.81461 | 0.082902 | NA       | 0       | 0       | 0       | 4.12646 | 1.71695 | 2.35126 |
| ENSMUSG00000108580 | 1_RP23-6 | 0.19594 | -0.79206 | 0.84609  | NA       | 0       | 0       | 0       | 0       | 0       | 1.17563 |
| ENSMUSG00000108596 | 1_Iltgam | 92.5408 | 1.10775  | 0.061576 | 0.327485 | 44.4948 | 206.298 | 128.236 | 39.614  | 56.6595 | 79.9427 |
| ENSMUSG00000108600 | 1_RP23-1 | 0.2751  | -1.54073 | 0.703687 | NA       | 0       | 0       | 0       | 1.65058 | 0       | 0       |
| ENSMUSG00000108621 | 1_Gm374  | 842.798 | 0.02395  | 0.964276 | 0.990499 | 1616.98 | 454.535 | 477.783 | 789.805 | 973.513 | 744.172 |

|                    |          |         |          |          |          |         |         |         |         |         |         |
|--------------------|----------|---------|----------|----------|----------|---------|---------|---------|---------|---------|---------|
| ENSMUSG00000108622 | 1_RP23-1 | 0.52942 | -2.42393 | 0.511797 | NA       | 0       | 0       | 0       | 0.82529 | 0       | 2.35126 |
| ENSMUSG00000108626 | 1_RP23-1 | 0.30609 | 0.16972  | 0.966824 | NA       | 1.01124 | 0       | 0       | 0.82529 | 0       | 0       |
| ENSMUSG00000108632 | 1_Zfp865 | 4.03858 | 2.239    | 0.260386 | 0.649568 | 0       | 17.0025 | 3.10248 | 4.12646 | 0       | 0       |
| ENSMUSG00000108634 | 1_RP24-4 | 0.34472 | 1.99863  | 0.620844 | NA       | 0       | 0       | 2.06832 | 0       | 0       | 0       |
| ENSMUSG00000108644 | 1_WI1-25 | 0.13755 | -0.79206 | 0.84609  | NA       | 0       | 0       | 0       | 0.82529 | 0       | 0       |
| ENSMUSG00000108652 | 1_RP23-5 | 0.13755 | -0.79206 | 0.84609  | NA       | 0       | 0       | 0       | 0.82529 | 0       | 0       |
| ENSMUSG00000108653 | 1_AC155  | 1385.99 | -0.04561 | 0.931107 | 0.981779 | 445.959 | 1946.22 | 1700.16 | 1504.51 | 1187.27 | 1531.84 |
| ENSMUSG00000108657 | 1_RP23-4 | 0.19594 | -0.79206 | 0.84609  | NA       | 0       | 0       | 0       | 0       | 0       | 1.17563 |
| ENSMUSG00000108683 | 1_RP23-3 | 0.14308 | -0.79206 | 0.84609  | NA       | 0       | 0       | 0       | 0       | 0.85848 | 0       |
| ENSMUSG00000108684 | 1_Pik3c2 | 0.91322 | -0.75675 | 0.781782 | NA       | 1.01124 | 0       | 1.03416 | 0       | 3.43391 | 0       |
| ENSMUSG00000108695 | 1_RP23-7 | 0.89322 | 2.15447  | 0.508316 | NA       | 0       | 4.53401 | 0       | 0.82529 | 0       | 0       |
| ENSMUSG00000108713 | 1_RP23-2 | 1.75976 | -1.22877 | 0.450662 | 0.79295  | 2.02249 | 1.1335  | 0       | 2.47588 | 2.57543 | 2.35126 |
| ENSMUSG00000108723 | 1_RP23-3 | 14.2678 | -0.37627 | 0.547289 | 0.843648 | 9.1012  | 13.602  | 14.4783 | 10.7288 | 18.8865 | 18.81   |
| ENSMUSG00000108726 | 1_RP23-4 | 0.69327 | -2.84872 | 0.397281 | NA       | 0       | 0       | 0       | 3.30117 | 0.85848 | 0       |
| ENSMUSG00000108736 | 1_RP24-1 | 7.01366 | 0.0436   | 0.958693 | 0.989571 | 6.06747 | 9.06802 | 6.20497 | 9.07822 | 3.43391 | 8.22939 |
| ENSMUSG00000108763 | 1_RP23-1 | 2.12652 | -0.14862 | 0.936716 | 0.984592 | 5.05622 | 0       | 1.03416 | 4.95175 | 1.71695 | 0       |
| ENSMUSG00000108777 | 1_RP24-1 | 0.82129 | -0.44577 | 0.853002 | NA       | 0       | 0       | 2.06832 | 0.82529 | 0.85848 | 1.17563 |
| ENSMUSG00000108783 | 1_RP23-2 | 0.54638 | 2.65324  | 0.465678 | NA       | 1.01124 | 2.26701 | 0       | 0       | 0       | 0       |
| ENSMUSG00000108789 | 1_Ccdc10 | 28.1842 | -1.58074 | 0.010728 | 0.105739 | 6.06747 | 14.7355 | 21.7174 | 59.421  | 37.773  | 29.3907 |
| ENSMUSG00000108795 | 1_RP24-1 | 0.33902 | -1.78366 | 0.658108 | NA       | 0       | 0       | 0       | 0       | 0.85848 | 1.17563 |
| ENSMUSG00000108801 | 1_RP23-4 | 23.0405 | 0.57359  | 0.3115   | 0.693376 | 30.3373 | 31.7381 | 20.6832 | 11.5541 | 27.4713 | 16.4588 |
| ENSMUSG00000108803 | 1_RP23-2 | 0.35746 | 2.04359  | 0.612655 | NA       | 1.01124 | 1.1335  | 0       | 0       | 0       | 0       |
| ENSMUSG00000108815 | 1_RP23-3 | 52.5471 | 2.1843   | 0.041205 | 0.25685  | 23.2586 | 98.6148 | 136.509 | 0       | 36.9145 | 19.9857 |

S3 Table. Differentially expressed genes of HSV-CD80 infected mouse corneas vs. Uninfected corneas

| Row                   | names           | baseMean    | log2FoldC | pvalue   | padj     | Parental 1 | Parental 2 | Parental 3 | HSV-CD80 | HSV-CD80 | HSV-CD80 3 |
|-----------------------|-----------------|-------------|-----------|----------|----------|------------|------------|------------|----------|----------|------------|
| ENSMUSG000000045868   | 12_Gvin1        | 28.48820521 | 8.382614  | 3.60E-10 | 7.17E-06 | 0          | 0          | 0          | 94.2587  | 36.20288 | 40.46765   |
| ENSMUSG000000075122   | 4_Cd80          | 127.3709402 | 2.812334  | 1.19E-08 | 0.000118 | 41.41874   | 17.175     | 36.81959   | 333.3781 | 178.7517 | 156.6824   |
| ENSMUSG000000025389   | 7_Mip           | 418.4801275 | -3.084443 | 4.13E-07 | 0.002587 | 627.7782   | 1268.374   | 349.7861   | 36.71128 | 67.11319 | 141.118    |
| ENSMUSG000000080058   | 1_Gm11175       | 14.46890457 | -7.21532  | 8.55E-07 | 0.002587 | 8.933454   | 24.90376   | 52.92816   | 0        | 0        | 0          |
| ENSMUSG000000092367   | 1_Gm20479       | 16.40236723 | 7.582407  | 6.34E-07 | 0.002587 | 0          | 0          | 0          | 4.960984 | 50.9103  | 42.54291   |
| ENSMUSG000000097751   | 1_Gm26690       | 16.03804497 | 7.553694  | 7.13E-07 | 0.002587 | 0          | 0          | 0          | 67.46938 | 21.49546 | 7.263424   |
| ENSMUSG000000107478   | 1_Atm1/ Gm45234 | 145.7498975 | -10.5564  | 9.09E-07 | 0.002587 | 21.11544   | 251.6138   | 601.7701   | 0        | 0        | 0          |
| ENSMUSG000000004514   | 10_Prrt2        | 58.41676824 | -2.701    | 1.12E-05 | 0.027835 | 64.15844   | 144.27     | 95.50081   | 12.89856 | 5.656701 | 28.01607   |
| ENSMUSG000000032401   | 15_Lclt         | 82.66945245 | -3.6313   | 1.59E-05 | 0.035122 | 96.64373   | 332.3363   | 29.91591   | 4.960984 | 12.44474 | 19.71501   |
| ENSMUSG000000104217   | 1_Gm37988       | 15.41168773 | -3.55731  | 1.88E-05 | 0.03754  | 25.98823   | 38.64376   | 20.71102   | 2.97659  | 0        | 4.150528   |
| ENSMUSG000000039697   | 15_Ncoa7        | 383.7295285 | 1.582413  | 0.000111 | 0.19469  | 200.5966   | 166.5975   | 209.4114   | 894.9615 | 434.4346 | 396.3754   |
| ENSMUSG000000099041   | 1_Gm28035       | 93.57346776 | -1.68985  | 0.000117 | 0.19469  | 168.9235   | 126.2363   | 133.471    | 32.74249 | 30.54618 | 69.52135   |
| ENSMUSG000000045932   | 12_Iffit2       | 5161.619671 | 1.887784  | 0.000146 | 0.223526 | 2360.868   | 1474.474   | 2753.415   | 13972.12 | 5867.13  | 4541.716   |
| ENSMUSG000000004613   | 7_Lim2          | 159.931452  | -3.13908  | 0.000207 | 0.258312 | 210.3422   | 585.6677   | 65.58489   | 5.953181 | 46.38494 | 45.65581   |
| ENSMUSG000000048852   | 13_Gm12185      | 256.9076092 | 1.690576  | 0.000194 | 0.258312 | 114.5106   | 123.66     | 126.5673   | 635.9982 | 326.9573 | 123.7522   |
| ENSMUSG000000105096   | 1_Gbp10         | 1521.915073 | 1.866004  | 0.00204  | 0.258312 | 631.8388   | 563.3401   | 770.9101   | 4279.345 | 1670.989 | 215.067    |
| ENSMUSG000000046229   | 9_Scand1        | 27.31412425 | -2.42483  | 0.000224 | 0.26193  | 38.98234   | 36.92626   | 62.13305   | 1.984394 | 12.44474 | 11.41395   |
| ENSMUSG000000047085   | 14_Lrrc4b       | 26.4088766  | -2.02797  | 0.000292 | 0.295018 | 38.98234   | 54.96001   | 33.36775   | 9.921968 | 5.667601 | 15.56448   |
| ENSMUSG000000078921   | 3_Tgtp2         | 3481.883436 | 1.638767  | 0.000271 | 0.295018 | 1772.885   | 1324.193   | 1981.354   | 8575.557 | 4257.233 | 2980.079   |
| ENSMUSG000000090942   | 1_F830016B08Rik | 555.0960196 | 2.339191  | 0.000296 | 0.295018 | 174.6084   | 165.7388   | 209.4114   | 1991.339 | 461.5868 | 327.8917   |
| ENSMUSG000000054072   | 11_ligp1        | 5755.94064  | 2.016588  | 0.000332 | 0.31456  | 2332.444   | 1804.234   | 2707.39    | 17582.72 | 6416.961 | 3691.895   |
| ENSMUSG000000078922   | 9_Tgtp1         | 6761.170465 | 1.612335  | 0.000374 | 0.324304 | 3276.141   | 2588.273   | 4134.149   | 16374.22 | 8586.871 | 5607.364   |
| ENSMUSG000000097861   | 1_Gm26858       | 38.1697657  | -2.02971  | 0.00361  | 0.324304 | 60.90991   | 60.97127   | 62.13305   | 7.937575 | 9.050721 | 28.01607   |
| ENSMUSG000000029343   | 17_Crybb1       | 287.4010593 | -2.92757  | 0.000474 | 0.379944 | 383.3264   | 984.1278   | 156.4832   | 8.929771 | 82.58783 | 108.9514   |
| ENSMUSG000000044424   | 3_Gm9493        | 1354.590534 | 2.357781  | 0.000484 | 0.379944 | 483.2186   | 443.1151   | 400.413    | 5086.993 | 384.929  | 878.8744   |
| ENSMUSG000000050217   | 13_Lgsn         | 297.2118524 | -3.45322  | 0.000496 | 0.379944 | 235.5183   | 1369.707   | 28.7653    | 20.83613 | 59.96103 | 68.48372   |
| ENSMUSG000000024678   | 6_Ms44d         | 103.1807356 | 1.547701  | 0.000546 | 0.402474 | 54.41286   | 43.79626   | 59.83183   | 234.1584 | 133.4981 | 93.38689   |
| ENSMUSG000000002944   | 15_Cd36         | 160.4807729 | 2.048342  | 0.00062  | 0.441309 | 77.96469   | 60.97127   | 48.32571   | 451.4496 | 243.2381 | 80.9353    |
| ENSMUSG000000032988   | 3_Slc16a8       | 75.93008167 | -2.07371  | 0.000722 | 0.495975 | 128.3169   | 154.575    | 85.1453    | 9.921968 | 22.6268  | 54.9945    |
| ENSMUSG000000040264   | 10_Gbp2b        | 12822.81694 | 1.526705  | 0.000789 | 0.523673 | 6502.742   | 5302.783   | 8017.465   | 30047.69 | 17383.04 | 9683.182   |
| ENSMUSG000000029298   | 15_Gbp9         | 3716.935531 | 1.391624  | 0.000931 | 0.529891 | 2074.186   | 1606.722   | 2473.816   | 8158.834 | 4827.428 | 3160.627   |
| ENSMUSG000000067299   | 11_Crygd        | 882.3293473 | -3.28726  | 0.000924 | 0.529891 | 870.6057   | 3812.851   | 118.513    | 30.7581  | 219.48   | 241.7683   |
| ENSMUSG000000068606   | 5_Gm4841        | 571.4832823 | 2.220959  | 0.000896 | 0.529891 | 187.6025   | 208.6763   | 209.4114   | 2081.629 | 421.9899 | 319.5907   |
| ENSMUSG000000073658   | 4_Crygb         | 1759.33568  | -3.07604  | 0.000847 | 0.529891 | 1698.168   | 7462.539   | 276.1469   | 122.0402 | 425.3839 | 571.7353   |
| ENSMUSG000000079362   | 5_Gbp6          | 3998.26593  | 1.432992  | 0.000913 | 0.529891 | 2279.655   | 1526.858   | 2677.474   | 8637.073 | 5510.758 | 3357.777   |
| ENSMUSG000000020641   | 15_Rsad2        | 11087.33781 | 1.264463  | 0.001039 | 0.559209 | 6201.441   | 4686.2     | 8665.26    | 20300.35 | 16204.18 | 10466.59   |
| ENSMUSG0000000104713  | 4_Gbp6          | 2642.438383 | 1.651599  | 0.001021 | 0.559209 | 1274.235   | 1074.297   | 1479.687   | 7167.63  | 2875.867 | 1982.915   |
| ENSMUSG000000058447   | 8_Gm26920       | 11.80693785 | -5.94375  | 0.001112 | 0.567887 | 0          | 38.64376   | 31.06653   | 0        | 1.13134  | 0          |
| ENSMUSG000000079363   | 7_Gbp4          | 8492.848961 | 1.341928  | 0.001109 | 0.567887 | 5411.237   | 3321.646   | 5682.873   | 16900.09 | 12338.4  | 7302.854   |
| ENSMUSG000000024254   | 15_Abcg8        | 12.37324919 | -2.61034  | 0.001181 | 0.588189 | 22.7397    | 31.77376   | 9.204897   | 2.97659  | 3.39402  | 4.150528   |
| ENSMUSG0000000040164  | 3_Kcns1         | 55.44557977 | -1.34541  | 0.001328 | 0.634213 | 69.84337   | 106.485    | 62.13305   | 24.80492 | 36.20288 | 33.20423   |
| ENSMUSG000000091649   | 3_Phf11b        | 1363.330298 | 1.351802  | 0.001337 | 0.634213 | 782.0833   | 521.2614   | 999.8819   | 2586.657 | 2139.364 | 1150.734   |
| ENSMUSG000000029352   | 14_Crybb3       | 279.6854557 | -2.82396  | 0.001537 | 0.662354 | 314.2952   | 1013.325   | 142.6759   | 6.945378 | 95.03257 | 105.8385   |
| ENSMUSG000000039304   | 11_Tnfrsf10     | 3944.800571 | 1.347191  | 0.001534 | 0.662354 | 1977.542   | 1909.86    | 2791.385   | 8933.74  | 4448.429 | 3607.847   |
| ENSMUSG000000040328   | 14_Olf56        | 450.5549064 | 1.615096  | 0.001451 | 0.662354 | 241.2033   | 142.5525   | 281.9      | 1108.284 | 597.3476 | 332.0423   |
| ENSMUSG0000000041323  | 5_Ak7           | 136.29828   | 0.901007  | 0.001563 | 0.662354 | 84.46175   | 100.4738   | 101.2539   | 196.455  | 174.2264 | 162.9082   |
| ENSMUSG000000073555   | 1_Gm4951        | 560.2397842 | 1.755986  | 0.001471 | 0.662354 | 243.6397   | 176.0438   | 348.6355   | 1568.663 | 630.1564 | 394.3002   |
| ENSMUSG000000078995   | 9_Zfp456        | 25.91722745 | 1.716186  | 0.001652 | 0.685709 | 13.80625   | 12.0225    | 10.35551   | 59.53181 | 32.80886 | 26.97843   |
| ENSMUSG000000105504   | 4_Gbp5          | 1136.474076 | 1.25157   | 0.001693 | 0.688069 | 749.598    | 403.6126   | 864.1097   | 2030.035 | 1590.664 | 1180.825   |
| ENSMUSG0000000000001  | 4_Gnai3         | 6092.327376 | 0.775931  | 0.070432 | 0.688272 | 4650.269   | 4195.854   | 4631.214   | 12699.13 | 5401.018 | 4976.483   |
| ENSMUSG00000000000031 | 15_H19          | 416.9827036 | -0.50481  | 0.077976 | 0.688272 | 531.9466   | 405.3301   | 530.4322   | 293.6903 | 333.7453 | 406.7518   |
| ENSMUSG00000000000058 | 6_Cav2          | 4034.113714 | 0.841973  | 0.082579 | 0.688272 | 2820.535   | 2623.482   | 3224.015   | 9251.243 | 3262.785 | 3002.622   |
| ENSMUSG00000000000078 | 6_Klf6          | 4355.285628 | 0.628699  | 0.075523 | 0.688272 | 3417.452   | 3060.586   | 3785.514   | 7624.04  | 4386.206 | 3857.916   |
| ENSMUSG00000000000088 | 6_Cox5a         | 1710.106268 | 0.569911  | 0.098978 | 0.688272 | 1357.885   | 1284.69    | 1487.741   | 2924.004 | 1654.019 | 1552.298   |
| ENSMUSG00000000000093 | 6_Tbx2          | 283.1116645 | -0.96686  | 0.029444 | 0.688272 | 341.9076   | 516.9676   | 264.6408   | 121.048  | 170.8324 | 283.2736   |
| ENSMUSG00000000000127 | 14_Fer          | 943.1689691 | 0.457541  | 0.13414  | 0.688272 | 763.4042   | 757.4177   | 864.1097   | 1432.732 | 984.2559 | 857.0841   |
| ENSMUSG00000000000142 | 15_Axin2        | 337.3547875 | -0.69201  | 0.062007 | 0.688272 | 374.3929   | 517.8264   | 357.8404   | 180.5798 | 292.6814 | 355.9078   |
| ENSMUSG00000000000148 | 17_Brat1        | 286.1556819 | -0.78186  | 0.06645  | 0.688272 | 307.7981   | 386.4376   | 391.2081   | 105.1729 | 253.4022 | 272.8972   |
| ENSMUSG00000000000149 | 10_Gna12        | 767.2768738 | -0.86083  | 0.067182 | 0.688272 | 919.3336   | 1021.913   | 1027.497   | 223.2443 | 644.8639 | 766.8101   |
| ENSMUSG00000000000154 | 15_Slc22a18     | 416.7787246 | -0.85253  | 0.14453  | 0.688272 | 471.8488   | 516.1089   | 621.3305   | 76.39915 | 393.7064 | 421.2786   |
| ENSMUSG00000000000184 | 12_Ccnd2        | 5635.685283 | 0.731523  | 0.123684 | 0.688272 | 4586.11    | 4796.979   | 5359.551   | 7264.865 | 5567.325 | 6239.282   |
| ENSMUSG00000000000204 | 15_Slfra4       | 18464.6198  | 0.816613  | 0.023913 | 0.688272 | 14707.71   | 9882.498   | 15532.11   | 27040.34 | 28160.19 | 15464.87   |
| ENSMUSG00000000000247 | 11_Lhx2         | 158.7020388 | -0.56563  | 0.160333 | 0.688272 | 171.3599   | 257.6251   | 139.2241   | 153.7905 | 85.98185 | 144.2309   |
| ENSMUSG00000000000266 | 11_Mid2         | 2500.386931 | 0.754665  | 0.07934  | 0.688272 | 1920.693   | 1852.324   | 1809.913   | 5200.104 | 2070.352 | 2148.936   |
| ENSMUSG00000000000276 | 11_Dgke         | 416.0080384 | 0.548341  | 0.134745 | 0.688272 | 324.0407   | 329.7601   | 360.1416   | 720.3349 | 415.2018 | 346.5691   |
| ENSMUSG00000000000282 | 12_Mnt          | 579.0618743 | -0.56943  | 0.172154 | 0.688272 | 636.7116   | 709.3277   | 729.4881   | 234.1584 | 531.7298 | 632.9556   |
| ENSMUSG00000000000301 | 16_Pemt         | 39.00379765 | -0.93472  | 0.193995 | 0.688272 | 42.23087   | 54.96001   | 56.37999   | 3.968787 | 33.9402  | 42.54291   |
| ENSMUSG00000000000305 | 12_Cdh4         | 215.5691447 | -0.66412  | 0.129727 | 0.688272 | 242.8275   | 277.3763   | 272.6951   | 82.35234 | 175.3577 | 242.8059   |
| ENSMUSG00000000000325 | 15_Arvf         | 925.8338058 | -0.87288  | 0.11987  | 0.688272 | 1045.214   | 1241.753   | 1305.945   | 185.5408 | 803.2515 | 973.2989   |
| ENSMUSG00000000000326 | 12_Comt         | 1013.196196 | -0.60046  | 0.141024 | 0.688272 | 1149.167   | 1222.86    | 1290.987   | 408.7851 | 971.8211 | 1035.557   |
| ENSMUSG00000000000355 | 13_Mct1         | 647.9197523 | 0.927149  | 0.06367  | 0.688272 | 483.2186   | 376.9913   | 479.8052   | 1521.038 | 579.2461 | 447.2194   |
| ENSMUSG00000000000386 | 14_Mx1          | 5139.845156 | 1.162013  | 0.002389 | 0.688272 | 3086.102   | 2008.617   | 4431.007   | 7297.608 | 8461.293 | 5554.444   |
| ENSMUSG00000000000420 | 15_Galnt1       | 2744.659888 | 0.552663  | 0.117875 | 0.688272 | 2380.359   | 2113.384   | 2182.711   | 4729.802 | 2722.004 | 2340.898   |
| ENSMUSG00000000000489 | 6_Pdgfr         | 108.660228  | -0.66559  | 0.123902 |          |            |            |            |          |          |            |

|                    |             |              |          |          |          |          |          |          |          |           |          |
|--------------------|-------------|--------------|----------|----------|----------|----------|----------|----------|----------|-----------|----------|
| ENSMUSG00000001157 | 13_Gmcl1    | 725.7136659  | 0.588638 | 0.113109 | 0.688272 | 579.8624 | 528.9901 | 630.5354 | 1296.801 | 655.0459  | 663.0469 |
| ENSMUSG00000001211 | 14_Agpat3   | 3215.226263  | -0.56938 | 0.108666 | 0.688272 | 3510.847 | 3914.184 | 4099.631 | 1566.679 | 2958.454  | 3241.563 |
| ENSMUSG00000001229 | 7_Dpp9      | 670.0131766  | -0.77836 | 0.158587 | 0.688272 | 717.1127 | 887.9477 | 934.297  | 145.8529 | 682.1981  | 652.6706 |
| ENSMUSG00000001248 | 14_Gramd1a  | 494.7613444  | -0.50456 | 0.137673 | 0.688272 | 533.5708 | 580.5152 | 627.0836 | 264.9165 | 458.1927  | 504.2892 |
| ENSMUSG00000001249 | 14_Hpn      | 32.74320369  | -1.06839 | 0.079903 | 0.688272 | 33.29742 | 55.81876 | 43.72326 | 6.945378 | 32.80886  | 23.86554 |
| ENSMUSG00000001270 | 8_Ckb       | 522.3192749  | -1.36522 | 0.02492  | 0.688272 | 692.7487 | 1043.382 | 521.2273 | 77.39135 | 340.5334  | 458.8334 |
| ENSMUSG00000001280 | 12_Sp1      | 4761.942792  | 0.600135 | 0.099809 | 0.688272 | 3900.671 | 3533.757 | 3922.437 | 8540.83  | 3426.934  | 4247.028 |
| ENSMUSG00000001285 | 12_Myg1     | 431.7515131  | -0.61404 | 0.137755 | 0.688272 | 492.1521 | 491.2051 | 583.3603 | 173.6344 | 417.4645  | 432.6926 |
| ENSMUSG00000001313 | 12_Rnd2     | 167.7110262  | -0.56986 | 0.091529 | 0.688272 | 195.7239 | 218.9813 | 186.3992 | 101.2041 | 124.4474  | 179.5103 |
| ENSMUSG00000001323 | 17_Srr      | 589.8436132  | 0.384757 | 0.187495 | 0.688272 | 522.201  | 523.8376 | 489.0101 | 855.2737 | 539.6492  | 609.09   |
| ENSMUSG00000001333 | 9_Sync      | 17.49370528  | -1.26322 | 0.065723 | 0.688272 | 30.86102 | 25.76251 | 17.25918 | 2.97659  | 13.77608  | 14.52685 |
| ENSMUSG00000001376 | 17_Ccdc132  | 832.3860938  | 0.683133 | 0.096346 | 0.688272 | 656.2028 | 589.9614 | 670.8069 | 1630.179 | 772.7053  | 674.4608 |
| ENSMUSG00000001435 | 14_Col18a1  | 1500.911627  | -1.16015 | 0.055093 | 0.688272 | 1738.775 | 2796.949 | 1685.647 | 240.1116 | 1036.308  | 1507.679 |
| ENSMUSG00000001436 | 15_Slc19a1  | 210.6327715  | -0.9446  | 0.084731 | 0.688272 | 251.761  | 328.9013 | 250.8334 | 45.64105 | 170.8324  | 215.8275 |
| ENSMUSG00000001441 | 13_Nppeps   | 4385.472625  | 0.378247 | 0.13475  | 0.688272 | 3812.148 | 3720.965 | 3908.629 | 5900.594 | 4837.61   | 4132.889 |
| ENSMUSG00000001473 | 6_Tubb6     | 822.5329407  | -0.65942 | 0.147451 | 0.688272 | 923.3943 | 884.5127 | 1213.896 | 297.659  | 941.275   | 674.4608 |
| ENSMUSG00000001506 | 10_Col1a1   | 20327.16603  | -1.10619 | 0.01772  | 0.688272 | 24485.79 | 32883.26 | 25909.48 | 6023.627 | 12902.89  | 20567.94 |
| ENSMUSG00000001510 | 8_Dlx3      | 95.87143595  | -0.54035 | 0.13458  | 0.688272 | 105.5772 | 123.66   | 111.6094 | 59.53181 | 60.91175  | 105.8385 |
| ENSMUSG00000001542 | 6_El12      | 1517.194547  | 0.589955 | 0.129854 | 0.688272 | 1246.623 | 1090.613 | 1296.74  | 2794.026 | 1442.459  | 1232.707 |
| ENSMUSG00000001555 | 10_Fkbp10   | 402.1690315  | -0.81701 | 0.111189 | 0.688272 | 536.8194 | 571.9276 | 430.3289 | 108.1495 | 313.3812  | 452.4076 |
| ENSMUSG00000001604 | 14_Tcea3    | 114.9958132  | -0.74077 | 0.045528 | 0.688272 | 119.3834 | 171.75   | 140.3747 | 58.53961 | 96.16391  | 103.7632 |
| ENSMUSG00000001627 | 11_Irfd1    | 961.5105212  | 0.718919 | 0.070312 | 0.688272 | 747.9737 | 608.8539 | 823.8383 | 1800.837 | 1023.863  | 763.6972 |
| ENSMUSG00000001630 | 13_Slk38l   | 1276.428017  | 0.412644 | 0.156843 | 0.688272 | 1078.512 | 966.9528 | 1240.36  | 1806.79  | 1401.73   | 1164.223 |
| ENSMUSG00000001663 | 10_Gst1     | 332.4477076  | -0.77342 | 0.108132 | 0.688272 | 435.3028 | 476.6064 | 346.3342 | 108.1495 | 244.3695  | 383.9239 |
| ENSMUSG00000001666 | 8_Ddt       | 396.6388642  | -0.80939 | 0.161165 | 0.688272 | 459.6668 | 523.8376 | 531.5828 | 75.40696 | 372.2109  | 417.1281 |
| ENSMUSG00000001707 | 7_Eef1e1    | 312.189766   | 0.53356  | 0.143617 | 0.688272 | 249.3246 | 213.8288 | 302.611  | 506.0204 | 345.0587  | 256.2951 |
| ENSMUSG00000001751 | 9_Naglu     | 425.0351528  | -0.85354 | 0.17717  | 0.688272 | 486.4672 | 616.5827 | 538.4865 | 61.5162  | 381.2616  | 465.8988 |
| ENSMUSG00000001761 | 7_Smo       | 1097.36618   | -0.47296 | 0.179524 | 0.688272 | 1210.889 | 1352.532 | 1263.372 | 572.4976 | 1072.9525 | 1211.954 |
| ENSMUSG00000001767 | 5_Crmk1     | 1199.33838   | 0.577043 | 0.139243 | 0.688272 | 940.4491 | 935.179  | 1012.539 | 2224.505 | 1962.328  | 1021.03  |
| ENSMUSG00000001774 | 7_Chordc1   | 1271.252378  | 0.125825 | 0.038305 | 0.688272 | 835.684  | 743.6777 | 933.1464 | 3062.912 | 1135.865  | 916.2291 |
| ENSMUSG00000001802 | 16_Lrp3     | 117.4302454  | -1.42333 | 0.018732 | 0.688272 | 164.0507 | 201.8063 | 147.2783 | 18.85174 | 53.30432  | 118.2901 |
| ENSMUSG00000001827 | 11_Folr1    | 890.6398824  | -0.75191 | 0.120139 | 0.688272 | 1031.408 | 1373.142 | 948.1044 | 282.7761 | 694.6428  | 1013.767 |
| ENSMUSG00000001833 | 16_Sep7     | 4885.322776  | 1.020211 | 0.047024 | 0.688272 | 3355.73  | 2995.321 | 3328.721 | 12202.04 | 3904.255  | 3525.874 |
| ENSMUSG00000001847 | 14_Rac1     | 9832.396786  | 0.350356 | 0.147982 | 0.688272 | 8463.229 | 8127.212 | 9342.97  | 12581.06 | 11013.6   | 9466.317 |
| ENSMUSG00000001891 | 16_Ugp2     | 2393.751051  | 1.11302  | 0.039937 | 0.688272 | 1492.699 | 1525.999 | 1522.26  | 6341.13  | 1693.616  | 1786.802 |
| ENSMUSG00000001909 | 15_Trm11    | 502.0076292  | -0.70752 | 0.098856 | 0.688272 | 592.8565 | 595.1139 | 680.0118 | 183.5564 | 446.8793  | 513.6279 |
| ENSMUSG00000001911 | 16_Nfix     | 1296.827205  | -0.41647 | 0.183222 | 0.688272 | 1292.102 | 1676.28  | 1479.687 | 805.6638 | 1147.179  | 1380.051 |
| ENSMUSG00000001930 | 17_Vwf      | 369.3502264  | -0.91823 | 0.063365 | 0.688272 | 473.4731 | 576.2214 | 399.2624 | 100.2119 | 309.9872  | 356.9434 |
| ENSMUSG00000002012 | 13_Pnck     | 44.04814479  | -0.88718 | 0.155821 | 0.688272 | 43.85514 | 81.58127 | 46.02448 | 11.90636 | 24.88948  | 56.0325  |
| ENSMUSG00000002020 | 15_Ltbp2    | 482.1663669  | -0.73951 | 0.12571  | 0.688272 | 514.8918 | 802.9315 | 491.3114 | 170.6579 | 351.8468  | 561.3589 |
| ENSMUSG00000002032 | 16_Tmem25   | 87.78009886  | -0.68769 | 0.107065 | 0.688272 | 103.9529 | 128.8125 | 92.04897 | 44.64886 | 56.56701  | 100.8503 |
| ENSMUSG00000002043 | 16_Trappc6a | 325.3877539  | -1.2367  | 0.099837 | 0.688272 | 364.6473 | 455.9964 | 549.9926 | 20.83613 | 321.9247  | 328.9294 |
| ENSMUSG00000002058 | 13_Unc119   | 328.9231152  | -0.86512 | 0.065219 | 0.688272 | 478.3459 | 473.1714 | 322.1714 | 103.1885 | 300.9365  | 295.7251 |
| ENSMUSG00000002059 | 17_Rab34    | 411.1569632  | -0.48933 | 0.157698 | 0.688272 | 471.8488 | 522.1201 | 446.4375 | 219.2755 | 375.6049  | 431.6549 |
| ENSMUSG00000002076 | 12_Hsf2bp   | 10.59109081  | 1.216551 | 0.10742  | 0.688272 | 3.248529 | 11.16375 | 4.602448 | 9.921968 | 16.9701   | 17.63975 |
| ENSMUSG00000002083 | 12_Bbc3     | 14.45588385  | -1.1779  | 0.106982 | 0.688272 | 22.7397  | 18.8925  | 18.40979 | 1.984394 | 10.18206  | 14.52685 |
| ENSMUSG00000002100 | 15_Mylbp3   | 2.442108719  | -2.50402 | 0.125722 | 0.688272 | 4.060661 | 2.576251 | 5.753061 | 0        | 2.26268   |          |
| ENSMUSG00000002104 | 11_Rapsn    | 89.98219945  | -1.33277 | 0.057044 | 0.688272 | 90.14667 | 194.9363 | 101.2539 | 9.921968 | 55.43567  | 88.19873 |
| ENSMUSG00000002105 | 15_Slc39a13 | 389.4346582  | -0.8697  | 0.046291 | 0.688272 | 483.2186 | 571.0689 | 455.6424 | 132.9544 | 307.7245  | 385.9991 |
| ENSMUSG00000002257 | 7_Def6      | 436.5196116  | -0.67458 | 0.17756  | 0.688272 | 468.6003 | 483.4764 | 658.1501 | 127.9934 | 437.8286  | 443.0689 |
| ENSMUSG00000002274 | 12_Metrn    | 51.172440035 | -0.88613 | 0.09744  | 0.688272 | 58.47352 | 80.72252 | 59.83183 | 13.89076 | 46.38494  | 47.73108 |
| ENSMUSG00000002279 | 18_Lmf1     | 190.8979056  | -0.85603 | 0.181736 | 0.688272 | 222.5242 | 237.8738 | 277.2975 | 26.78931 | 176.4891  | 204.4135 |
| ENSMUSG00000002280 | 10_Narf1    | 390.350696   | -0.68729 | 0.178756 | 0.688272 | 431.2422 | 522.1201 | 491.3114 | 105.1729 | 362.393   | 409.8647 |
| ENSMUSG00000002308 | 15_Cdc320   | 168.280748   | -0.50114 | 0.157772 | 0.688272 | 206.2816 | 183.7725 | 201.3571 | 90.28991 | 176.4891  | 151.4944 |
| ENSMUSG00000002332 | 15_Dhrs1    | 1862.18867   | -0.58086 | 0.108373 | 0.688272 | 2135.095 | 2553.064 | 2007.818 | 916.7899 | 1606.503  | 1953.861 |
| ENSMUSG00000002342 | 17_Tmem161a | 465.6296609  | -0.66394 | 0.075576 | 0.688272 | 521.3889 | 564.1989 | 627.0836 | 209.3535 | 427.6466  | 444.1065 |
| ENSMUSG00000002343 | 11_Armc6    | 223.14583    | -0.98467 | 0.138216 | 0.688272 | 230.6455 | 303.1388 | 355.5391 | 26.78931 | 218.3486  | 204.4135 |
| ENSMUSG00000002345 | 17_C149687  | 373.0149687  | -0.78663 | 0.107306 | 0.688272 | 414.9995 | 455.1376 | 546.5408 | 107.1573 | 367.8655  | 346.5691 |
| ENSMUSG00000002346 | 16_Slc25a42 | 331.6598323  | -0.76162 | 0.119522 | 0.688272 | 366.2716 | 435.3864 | 449.8893 | 95.25089 | 311.1185  | 332.0423 |
| ENSMUSG00000002379 | 6_Ndufa11   | 1016.985151  | -1.0275  | 0.199294 | 0.688272 | 1201.956 | 1431.537 | 1460.127 | 48.61764 | 922.0442  | 1037.032 |
| ENSMUSG00000002393 | 14_Nr2f6    | 536.6072458  | -0.68775 | 0.133821 | 0.688272 | 623.7175 | 652.6502 | 709.9277 | 175.6188 | 505.7409  | 552.6326 |
| ENSMUSG00000002395 | 14_Use1     | 1462.726289  | -0.80452 | 0.167947 | 0.688272 | 1806.182 | 1863.488 | 1911.167 | 268.8853 | 1296.516  | 1630.12  |
| ENSMUSG00000002409 | 17_Dyrk1b   | 179.7399943  | -1.03345 | 0.08823  | 0.688272 | 205.4694 | 253.3313 | 265.7914 | 27.78151 | 157.2563  | 169.134  |
| ENSMUSG00000002413 | 15_Braf     | 2677.216114  | 0.54459  | 0.184062 | 0.688272 | 2264.225 | 2154.604 | 2114.825 | 5065.165 | 2023.967  | 2440.511 |
| ENSMUSG00000002428 | 12_Hlf      | 1065.954099  | 0.822662 | 0.077114 | 0.688272 | 800.7623 | 741.9602 | 767.4583 | 2368.374 | 888.102   | 829.068  |
| ENSMUSG00000002459 | 17_Rgs20    | 208.4073367  | 0.767049 | 0.093539 | 0.688272 | 145.3717 | 138.2588 | 179.4955 | 418.7071 | 228.5307  | 140.0803 |
| ENSMUSG00000002477 | 4_Snrp1     | 1110.056989  | 0.539233 | 0.122485 | 0.688272 | 947.7583 | 802.0727 | 965.3636 | 1829.611 | 112.7397  | 902.7399 |
| ENSMUSG00000002504 | 14_Slc9a3r2 | 219.1205575  | -0.93598 | 0.035705 | 0.688272 | 223.3363 | 364.9688 | 274.9963 | 79.37575 | 157.2563  | 214.7898 |
| ENSMUSG00000002617 | 14_Zfp40    | 127.4438179  | 0.985436 | 0.124024 | 0.688272 | 108.8257 | 76.42877 | 71.33795 | 349.2533 | 63.35505  | 95.46215 |
| ENSMUSG00000002660 | 7_Clpp      | 449.9571309  | -0.81405 | 0.143103 | 0.688272 | 540.0679 | 544.4476 | 636.2885 | 94.2587  | 420.8585  | 463.8215 |
| ENSMUSG00000002661 | 14_Alkhh7   | 185.4114783  | -0.48442 | 0.195732 | 0.688272 | 209.5301 | 204.3826 | 234.7249 | 92.2473  | 188.9334  | 182.6232 |
| ENSMUSG00000002679 | 14_Med6     | 522.1456459  | 0.614742 | 0.10501  | 0.688272 | 443.4242 | 367.5451 | 426.8771 | 938.6182 | 522.6791  | 433.7302 |
| ENSMUSG00000002718 | 14_Cse1l    | 2487.274548  | 0.678868 | 0.089424 | 0.688272 | 2066.064 | 1806.81  | 1865.142 | 4797.272 | 2357.713  | 2030.646 |
| ENSMUSG00000002728 | 14_Naa20    | 2239.382597  | 0.799909 | 0.021814 | 0.688272 | 1657.562 | 1394.61  | 1850.184 | 3911.24  | 2656.387  | 1966.313 |
| ENSMUSG00000002763 | 16_Pex6     | 574.9410829  | -1.00024 | 0.119192 | 0.688272 | 616.40   |          |          |          |           |          |

|                    |                 |             |          |          |          |          |          |          |          |          |          |
|--------------------|-----------------|-------------|----------|----------|----------|----------|----------|----------|----------|----------|----------|
| ENSMUSG00000003363 | 15_Pld3         | 1655.700868 | -0.91027 | 0.194677 | 0.688272 | 1885.771 | 2270.536 | 2327.688 | 155.7749 | 1627.998 | 1666.437 |
| ENSMUSG00000003378 | 9_Grik5         | 244.1559236 | -1.0248  | 0.083299 | 0.688272 | 332.9742 | 389.0139 | 260.0383 | 44.64886 | 167.4383 | 270.872  |
| 1119.223888        | 11_Rabac1       | 1.16636     | 0.093396 | 0.688272 | 1346.515 | 1617.885 | 1681.044 | 98.22748 | 891.496  | 1800.175 |          |
| ENSMUSG00000003411 | 10_Rab3b        | 19.59897362 | -1.75378 | 0.01706  | 0.688272 | 21.92757 | 54.96001 | 13.80735 | 9.921968 | 4.52536  | 12.45518 |
| ENSMUSG00000003418 | 11_St8sia6      | 4609.115152 | 0.825432 | 0.091949 | 0.688272 | 3313.499 | 3101.806 | 3561.144 | 10596.66 | 3216.4   | 3865.179 |
| ENSMUSG00000003420 | 7_Fcgrt         | 595.3791685 | -0.82034 | 0.128484 | 0.688272 | 738.2281 | 902.5465 | 639.7403 | 144.8607 | 454.7987 | 692.1006 |
| ENSMUSG00000003421 | 12_Nosip        | 763.9169947 | -0.75505 | 0.091837 | 0.688272 | 899.8425 | 882.7952 | 1095.383 | 254.9946 | 737.6337 | 712.8532 |
| ENSMUSG00000003423 | 14_Phi1d1       | 589.9712491 | -0.87015 | 0.179787 | 0.688272 | 675.694  | 774.5927 | 837.6456 | 76.39915 | 599.6103 | 575.8858 |
| ENSMUSG00000003438 | 17_Timm50       | 611.920268  | -0.59673 | 0.156764 | 0.688272 | 699.2458 | 646.6389 | 864.1097 | 245.0726 | 591.6909 | 624.6545 |
| ENSMUSG00000003452 | 15_Bicd1        | 77.80144533 | 0.736137 | 0.183962 | 0.688272 | 60.90991 | 70.41752 | 43.72326 | 174.6266 | 48.64762 | 68.48372 |
| ENSMUSG00000003477 | 5_Inmt          | 156.5713717 | -0.79566 | 0.051399 | 0.688272 | 225.7727 | 221.5576 | 148.429  | 74.41476 | 106.346  | 162.9082 |
| ENSMUSG00000003500 | 13_Impdh1       | 171.0657355 | -0.73498 | 0.118495 | 0.688272 | 246.076  | 209.5351 | 185.2485 | 55.56302 | 162.913  | 167.0588 |
| ENSMUSG00000003526 | 11_Prodh        | 472.4836467 | -0.68574 | 0.190799 | 0.688272 | 527.0738 | 619.1589 | 601.7701 | 122.0402 | 424.2525 | 540.6063 |
| ENSMUSG00000003527 | 8_Dgcr14        | 388.3108573 | -0.68259 | 0.171072 | 0.688272 | 444.2363 | 421.6464 | 569.553  | 113.1104 | 375.6049 | 405.7141 |
| ENSMUSG00000003531 | 14_Dgcr6        | 687.5916623 | -0.77291 | 0.122036 | 0.688272 | 803.1987 | 840.7165 | 958.4599 | 185.5408 | 627.8938 | 709.7403 |
| ENSMUSG00000003534 | 17_Ddr1         | 4735.39363  | -0.766   | 0.142751 | 0.688272 | 5008.419 | 5851.524 | 7031.391 | 1180.714 | 4592.109 | 4748.204 |
| ENSMUSG00000003546 | 9_Klc4          | 735.088322  | -0.88944 | 0.181149 | 0.688272 | 821.8778 | 937.7552 | 1104.588 | 87.31332 | 702.5622 | 756.4338 |
| ENSMUSG00000003575 | 13_Crtc1        | 453.346976  | -0.83666 | 0.113723 | 0.688272 | 544.9407 | 661.2377 | 537.3359 | 107.1573 | 399.3631 | 470.0473 |
| ENSMUSG00000003581 | 14_Rnf215       | 409.1560982 | -0.57376 | 0.147013 | 0.688272 | 466.1639 | 491.2051 | 510.8718 | 176.611  | 384.6556 | 425.4291 |
| ENSMUSG00000003617 | 6_Cp            | 1964.001799 | 0.837922 | 0.035813 | 0.688272 | 1432.601 | 1516.553 | 1278.33  | 3940.014 | 1908.571 | 1707.942 |
| ENSMUSG00000003623 | 4_Crot          | 6617.641506 | 0.731189 | 0.076417 | 0.688272 | 5215.513 | 4592.596 | 5119.073 | 13298.41 | 5686.115 | 5794.137 |
| ENSMUSG00000003657 | 8_Calb2         | 10.41734031 | -1.57429 | 0.049606 | 0.688272 | 25.1761  | 11.16375 | 10.35551 | 6.945378 | 6.788041 | 2.075264 |
| ENSMUSG00000003721 | 14_Insig2       | 2182.757754 | 0.436568 | 0.172163 | 0.688272 | 1824.861 | 1808.528 | 1931.878 | 3441.931 | 2155.203 | 1934.146 |
| ENSMUSG00000003746 | 15_Man1a        | 694.9702336 | 0.760082 | 0.117746 | 0.688272 | 514.0797 | 525.5551 | 508.5706 | 1561.718 | 506.8404 | 553.0579 |
| ENSMUSG00000003762 | 13_Adc4         | 294.1817789 | -0.77436 | 0.175993 | 0.688272 | 322.4165 | 349.5113 | 441.835  | 60.52401 | 371.9066 | 272.8972 |
| ENSMUSG00000003847 | 16_Nfat5        | 6301.343602 | 0.576129 | 0.12466  | 0.688272 | 5170.846 | 5149.066 | 4859.033 | 11450.94 | 5408.937 | 5769.234 |
| ENSMUSG00000003868 | 12_Ruvbl2       | 662.5405375 | -0.90576 | 0.160466 | 0.688272 | 752.0344 | 792.6265 | 1047.057 | 90.28991 | 473.2904 | 549.945  |
| ENSMUSG00000003923 | 14_Tfam         | 717.1681444 | 0.549347 | 0.161763 | 0.688272 | 584.7352 | 554.7526 | 607.5232 | 1320.614 | 621.1057 | 614.2782 |
| ENSMUSG00000003929 | 10_Zfp81        | 349.1918174 | 1.096427 | 0.024595 | 0.688272 | 229.8334 | 238.7326 | 199.0559 | 842.3751 | 299.8051 | 285.4388 |
| ENSMUSG00000003934 | 5_Efnb3         | 27.32722478 | -0.7672  | 0.195877 | 0.688272 | 26.80036 | 49.80751 | 26.46408 | 8.929771 | 26.02082 | 25.9408  |
| ENSMUSG00000004018 | 9_Fanc1         | 364.5806609 | 0.68345  | 0.071913 | 0.688272 | 277.7492 | 269.6476 | 292.2555 | 674.6938 | 347.3214 | 325.8165 |
| ENSMUSG00000004031 | 13_Brnp2        | 7.059417747 | -1.26089 | 0.142221 | 0.688272 | 9.45586  | 15.4575  | 4.602448 | 3.968787 | 3.39402  | 5.18816  |
| ENSMUSG00000004054 | 8_Map3k11       | 740.6936788 | -0.97747 | 0.189203 | 0.688272 | 868.1693 | 961.8002 | 1117.244 | 52.58643 | 726.3203 | 718.0414 |
| ENSMUSG00000004096 | 8_Cwcl5         | 1917.723229 | 0.315677 | 0.174464 | 0.688272 | 1780.194 | 1597.275 | 1748.93  | 2395.163 | 2082.797 | 1901.98  |
| ENSMUSG00000004098 | 7_Col5a3        | 225.9037285 | -0.84455 | 0.09414  | 0.688272 | 291.5555 | 341.7826 | 237.0261 | 63.5006  | 178.7517 | 242.8059 |
| ENSMUSG00000004100 | 11_Ppan         | 303.6851707 | -0.87527 | 0.162502 | 0.688272 | 337.847  | 368.4038 | 472.9016 | 54.64105 | 308.8588 | 288.4617 |
| ENSMUSG00000004105 | 8_Angptl2       | 1038.451883 | -0.84991 | 0.030538 | 0.688272 | 1226.32  | 1662.54  | 1118.395 | 534.7941 | 581.5058 | 107.153  |
| ENSMUSG00000004187 | 10_Kifc2        | 132.4269701 | -0.94331 | 0.089582 | 0.688272 | 159.99   | 199.2301 | 163.3869 | 29.7659  | 92.76989 | 149.419  |
| ENSMUSG00000004233 | 14_Wars2        | 226.3406117 | 0.334168 | 0.171834 | 0.688272 | 215.215  | 189.7838 | 195.6041 | 251.0258 | 251.1575 | 255.2575 |
| ENSMUSG00000004267 | 16_Eno2         | 355.8404992 | -0.72514 | 0.062385 | 0.688272 | 461.2911 | 545.3064 | 323.322  | 175.6188 | 271.5216 | 357.9831 |
| ENSMUSG00000004285 | 12_Atp6v1f      | 1046.449303 | -0.56526 | 0.133751 | 0.688272 | 1171.095 | 1217.708 | 1357.722 | 479.2311 | 970.6898 | 1082.25  |
| ENSMUSG00000004319 | 15_Clc3         | 2717.960235 | 0.629884 | 0.106391 | 0.688272 | 2187.884 | 1890.968 | 2323.086 | 5088.977 | 2457.271 | 2359.575 |
| ENSMUSG00000004356 | 7_Utp20         | 1423.195828 | 0.297907 | 0.188243 | 0.688272 | 1309.969 | 1196.239 | 1324.355 | 1740.313 | 1523.915 | 1444.384 |
| ENSMUSG00000004360 | 8_9330159F19Rik | 58.7119299  | 1.284594 | 0.083855 | 0.688272 | 30.04889 | 36.92626 | 35.66989 | 186.533  | 22.6268  | 40.46765 |
| ENSMUSG00000004364 | 14_Cul3         | 2735.363816 | 0.912004 | 0.067241 | 0.688272 | 1949.117 | 1743.263 | 2003.216 | 6515.756 | 2185.749 | 2015.081 |
| ENSMUSG00000004455 | 16_Ppp1cc       | 3506.941491 | 0.392261 | 0.188883 | 0.688272 | 3145.388 | 2949.807 | 3004.248 | 5273.526 | 3471.778 | 3250.901 |
| ENSMUSG00000004535 | 12_Tax1bp1      | 8132.056045 | 0.694828 | 0.084225 | 0.688272 | 6329.758 | 5770.801 | 6532.025 | 15911.86 | 7418.197 | 6829.694 |
| ENSMUSG00000004562 | 16_Arhgef40     | 603.0455124 | -0.87042 | 0.08506  | 0.688272 | 690.3124 | 898.2527 | 750.1991 | 158.7515 | 477.4255 | 643.3319 |
| ENSMUSG00000004565 | 14_Pnpla6       | 511.3684308 | -0.71301 | 0.198197 | 0.688272 | 549.0014 | 714.4802 | 642.0416 | 114.1026 | 495.527  | 553.0579 |
| ENSMUSG00000004591 | 16_Pkn2         | 3203.9923   | 0.77899  | 0.05997  | 0.688272 | 2367.365 | 2182.084 | 2529.045 | 6520.717 | 2878.129 | 2746.612 |
| ENSMUSG00000004642 | 13_Slbp         | 1471.566451 | 0.701377 | 0.080615 | 0.688272 | 1100.439 | 1063.133 | 1198.938 | 2872.41  | 1332.719 | 1261.761 |
| ENSMUSG00000004655 | 5_Asp1          | 6279.17874  | -0.74562 | 0.080578 | 0.688272 | 8339.785 | 9217.825 | 6041.864 | 2384.249 | 5541.304 | 6150.045 |
| ENSMUSG00000004665 | 10_Cnn2         | 1932.684874 | -0.54554 | 0.189818 | 0.688272 | 2261.788 | 2157.181 | 2462.31  | 773.9135 | 1904.045 | 2036.872 |
| ENSMUSG00000004667 | 18_Polr2e       | 1047.996066 | -0.95417 | 0.146597 | 0.688272 | 1241.75  | 1367.13  | 1538.368 | 124.0246 | 996.7106 | 1019.992 |
| ENSMUSG00000004709 | 14_Cd244        | 14.53697648 | 0.972576 | 0.172729 | 0.688272 | 17.86691 | 7.728752 | 3.451836 | 18.85174 | 23.58014 | 15.56448 |
| ENSMUSG00000004748 | 5_Mtfp1         | 70.59801164 | -0.85582 | 0.101272 | 0.688272 | 91.77094 | 97.03878 | 83.99468 | 41.67227 | 52.04164 | 57.06976 |
| ENSMUSG00000004771 | 12_Rab11a       | 7094.383434 | 0.77529  | 0.060302 | 0.688272 | 5360.072 | 4657.861 | 5680.572 | 14241    | 6963.398 | 5663.396 |
| ENSMUSG00000004788 | 11_Elf2b2       | 607.6920092 | -0.69897 | 0.198737 | 0.688272 | 713.0521 | 676.6952 | 866.4109 | 141.8841 | 636.9445 | 611.1653 |
| ENSMUSG00000004791 | 6_Pgf           | 68.72666409 | -0.72584 | 0.116105 | 0.688272 | 74.71616 | 100.4738 | 81.69346 | 27.78151 | 50.9103  | 76.78477 |
| ENSMUSG00000004837 | 2_Grap          | 47.40683389 | -0.71706 | 0.151933 | 0.688272 | 63.34631 | 52.38376 | 60.98244 | 15.87515 | 44.12226 | 47.73108 |
| ENSMUSG00000004843 | 6_Chmp2b        | 3465.523884 | 0.764451 | 0.074357 | 0.688272 | 2572.023 | 2372.727 | 2760.318 | 7164.653 | 3164.358 | 2759.064 |
| ENSMUSG00000004931 | 10_Apba3        | 285.0632321 | -0.10304 | 0.164566 | 0.688272 | 353.2775 | 389.8726 | 400.413  | 21.82833 | 265.8649 | 279.123  |
| ENSMUSG00000004933 | 17_Matk         | 14.31854173 | -1.13594 | 0.15706  | 0.688272 | 22.7397  | 18.8925  | 17.25918 | 0.992197 | 13.57608 | 12.45158 |
| ENSMUSG00000004934 | 13_Plas4        | 339.1758234 | -0.81315 | 0.194626 | 0.688272 | 360.5867 | 417.3526 | 518.9261 | 52.58643 | 322.4319 | 363.1712 |
| ENSMUSG00000004937 | 5_Sgta          | 1692.56559  | -0.76841 | 0.195038 | 0.688272 | 1945.057 | 2123.689 | 2329.99  | 299.6434 | 171.7118 | 1745.297 |
| ENSMUSG00000004951 | 10_Hspb1        | 9505.567041 | -0.84445 | 0.162389 | 0.688272 | 10872.01 | 11239.32 | 14520.72 | 1571.64  | 8954.557 | 9875.144 |
| ENSMUSG00000004980 | 16_Hnmpa2b1     | 18961.80128 | 0.542558 | 0.127863 | 0.688272 | 15452.44 | 14335.98 | 16525.09 | 32823.86 | 18482.7  | 16150.74 |
| ENSMUSG00000004996 | 9_Mir1          | 185.0967784 | -0.65767 | 0.171493 | 0.688272 | 220.0878 | 225.8513 | 233.5743 | 72.43037 | 183.2771 | 175.3598 |
| ENSMUSG00000005045 | 16_Chd5         | 74.85460524 | -1.14311 | 0.030852 | 0.688272 | 88.52241 | 133.1063 | 87.44652 | 22.82053 | 37.33222 | 79.89767 |
| ENSMUSG00000005087 | 17_Cd4          | 19306.05922 | 0.352299 | 0.177273 | 0.688272 | 16469.23 | 15396.53 | 19016.17 | 25178.98 | 21796.4  | 17979.05 |
| ENSMUSG00000005220 | 10_Corin        | 18.53064256 | 1.092039 | 0.114339 | 0.688272 | 17.86691 | 9.446252 | 8.054285 | 43.65666 | 12.44474 | 19.71501 |
| ENSMUSG00000005225 | 15_Plekha8      | 889.4785457 | 0.402838 | 0.151163 | 0.688272 | 747.1616 | 733.3727 | 818.0852 | 1260.09  | 960.5077 | 817.6541 |
| ENSMUSG00000005233 | 16_Spc25        | 247.9414388 | 0.888488 | 0.073924 | 0.688272 | 188.4147 | 156.2925 | 177.1943 | 574.482  | 201.3875 | 189.8967 |
| ENSMUSG00000005237 | 13_Dnah2        | 16.964263   | -1.36385 | 0.024956 | 0.688272 | 24.36397 | 32.63251 | 16.10857 | 5.953181 | 11.3134  | 11.41395 |
| ENSMUSG00000005357 | 8_Slcl1a6       | 5.261036229 | -2.33901 | 0.028577 | 0.688272 | 4.872793 | 14.5987  |          |          |          |          |

|                    |                 |             |          |          |          |          |          |          |          |          |          |
|--------------------|-----------------|-------------|----------|----------|----------|----------|----------|----------|----------|----------|----------|
| ENSMUSG00000006373 | 10_Pgrmc1       | 4628.638999 | 0.675396 | 0.159348 | 0.688272 | 3514.096 | 3592.152 | 3587.609 | 10157.12 | 3355.555 | 3565.304 |
| ENSMUSG00000006378 | 13_Gcat         | 1331.035269 | -0.82878 | 0.129587 | 0.688272 | 1616.143 | 1580.959 | 1912.317 | 285.7527 | 1241.08  | 1349.959 |
| ENSMUSG00000006423 | 15_C33007P06Rik | 1241.928394 | 0.603479 | 0.14022  | 0.688272 | 959.9402 | 932.6027 | 1065.467 | 2388.218 | 1052.146 | 1053.197 |
| ENSMUSG00000006435 | 15_Neur1a       | 59.34296295 | -0.85061 | 0.091455 | 0.688272 | 77.15256 | 78.14627 | 73.63917 | 18.85174 | 41.85958 | 66.40845 |
| ENSMUSG00000006464 | 8_Bbs1          | 226.3262572 | -0.40016 | 0.158763 | 0.688272 | 233.8941 | 284.2463 | 254.2853 | 159.7437 | 204.7726 | 221.0156 |
| ENSMUSG00000006476 | 19_Nsmf         | 357.739905  | -0.91807 | 0.106499 | 0.688272 | 470.2245 | 514.3914 | 418.8228 | 69.45378 | 289.6231 | 383.9239 |
| ENSMUSG00000006517 | 4_Mvd           | 757.7049079 | -1.16368 | 0.123912 | 0.688272 | 959.1281 | 978.1165 | 1205.841 | 45.64105 | 662.3901 | 665.1222 |
| ENSMUSG00000006527 | 14_Sfmbt1       | 1581.369496 | 0.567965 | 0.070752 | 0.688272 | 1228.756 | 1245.188 | 1348.517 | 2550.938 | 1651.757 | 1463.061 |
| ENSMUSG00000006538 | 10_Ihh          | 6.338263424 | -1.40437 | 0.119776 | 0.688272 | 6.497057 | 8.587502 | 12.65673 | 3.968787 | 1.13134  | 5.18816  |
| ENSMUSG00000006546 | 3_Cryba2        | 593.5091497 | -2.29455 | 0.009196 | 0.688272 | 781.2712 | 1869.499 | 307.2134 | 19.84394 | 201.3785 | 381.8486 |
| ENSMUSG00000006567 | 11_Atp7b        | 46.14708993 | -0.86872 | 0.077697 | 0.688272 | 45.4794  | 78.14627 | 55.22938 | 19.84394 | 29.41484 | 48.76871 |
| ENSMUSG00000006575 | 14_Rundc3a      | 58.3222883  | -0.72462 | 0.158093 | 0.688272 | 55.22499 | 93.60377 | 69.03673 | 19.84394 | 52.04164 | 60.18266 |
| ENSMUSG00000006576 | 16_Slc4a3       | 333.9395871 | -1.26304 | 0.008188 | 0.688272 | 430.4301 | 595.9727 | 387.7563 | 92.2743  | 190.0651 | 307.1391 |
| ENSMUSG00000006589 | 7_Aprt          | 682.7106892 | -0.92334 | 0.188468 | 0.688272 | 877.9149 | 850.1627 | 953.8574 | 63.5006  | 649.3892 | 701.4393 |
| ENSMUSG00000006599 | 13_Gtf2h1       | 1248.377492 | 0.438421 | 0.173483 | 0.688272 | 1110.185 | 932.6027 | 1137.955 | 1949.667 | 1206.009 | 1153.847 |
| ENSMUSG00000006649 | 16_Nphs1        | 29.84084778 | -1.34391 | 0.009301 | 0.688272 | 48.72793 | 54.10126 | 25.31347 | 12.89856 | 20.36412 | 17.63975 |
| ENSMUSG00000006651 | 7_Aplp1         | 77.94626184 | -1.09668 | 0.053196 | 0.688272 | 119.3834 | 115.0725 | 83.99468 | 15.87515 | 56.56701 | 76.78477 |
| ENSMUSG00000006675 | 10_P4hnm        | 68.16496192 | -1.13213 | 0.05947  | 0.688272 | 87.71028 | 122.8013 | 70.18734 | 13.89076 | 40.72824 | 73.67188 |
| ENSMUSG00000006678 | 6_Pola1         | 781.2376813 | 0.952504 | 0.029765 | 0.688272 | 557.1227 | 497.2164 | 543.0889 | 1695.664 | 786.2814 | 608.0524 |
| ENSMUSG00000006699 | 17_Cdc42        | 13266.27953 | 0.652203 | 0.083718 | 0.688272 | 10663.3  | 9496.06  | 10793.89 | 24556.87 | 12752.47 | 11335.09 |
| ENSMUSG00000006715 | 11_Gmnn         | 386.9584341 | 0.406865 | 0.165785 | 0.688272 | 358.1503 | 265.3538 | 375.0995 | 506.0204 | 444.6167 | 372.5099 |
| ENSMUSG00000006740 | 13_Kif5b        | 9321.94339  | 0.587718 | 0.116947 | 0.688272 | 7379.033 | 7032.306 | 8019.766 | 16717.52 | 8761.098 | 8021.933 |
| ENSMUSG00000006764 | 8_Tph2          | 2.057929592 | 2.464233 | 0.140154 | 0.688272 | 0.812132 | 0        | 1.150612 | 5.953181 | 3.39402  | 1.037632 |
| ENSMUSG00000006931 | 15_P3h4         | 611.9351037 | -0.60465 | 0.12934  | 0.688272 | 697.6215 | 735.9489 | 781.2656 | 255.9868 | 579.2461 | 621.5416 |
| ENSMUSG00000006958 | 13_Chrd         | 71.41257645 | -0.90704 | 0.06481  | 0.688272 | 86.08601 | 104.7675 | 88.59713 | 28.77371 | 36.20288 | 84.0482  |
| ENSMUSG00000007036 | 15_Abhd16a      | 1101.799801 | -0.76171 | 0.187888 | 0.688272 | 1308.345 | 1348.238 | 1501.549 | 209.3535 | 1114.37  | 1128.944 |
| ENSMUSG00000007038 | 5_Neu1          | 389.0773373 | -0.5615  | 0.174551 | 0.688272 | 423.933  | 525.5551 | 441.835  | 161.7281 | 376.7363 | 404.6765 |
| ENSMUSG00000007039 | 12_Ddah2        | 266.0147438 | -0.98722 | 0.042301 | 0.688272 | 323.2286 | 409.6239 | 327.9245 | 76.39915 | 178.7517 | 280.1607 |
| ENSMUSG00000007107 | 6_Alp1a4        | 7.546983979 | -1.25203 | 0.151479 | 0.688272 | 7.30919  | 15.4575  | 9.204897 | 5.953181 | 1.13134  | 6.225792 |
| ENSMUSG00000007122 | 11_Casq1        | 183.5704116 | 0.930827 | 0.148221 | 0.688272 | 108.8257 | 197.5126 | 72.48856 | 416.7227 | 72.40577 | 233.4672 |
| ENSMUSG00000007279 | 14_Scub2        | 10.36861966 | -0.9562  | 0.168682 | 0.688272 | 13.80625 | 11.16375 | 16.10857 | 3.968787 | 6.788041 | 10.37632 |
| ENSMUSG00000007379 | 15_Denn2c       | 3007.874472 | 0.372212 | 0.161505 | 0.688272 | 2658.921 | 2394.196 | 2813.247 | 4126.547 | 3191.51  | 2862.827 |
| ENSMUSG00000007415 | 15_Gatad1       | 1289.889892 | 0.455253 | 0.175281 | 0.688272 | 1111.809 | 1043.382 | 1109.19  | 2107.426 | 1211.665 | 1155.922 |
| ENSMUSG00000007458 | 14_M6pr         | 4832.603825 | 0.372992 | 0.174393 | 0.688272 | 4188.978 | 3876.399 | 4569.081 | 6759.837 | 5100.081 | 4501.248 |
| ENSMUSG00000007570 | 15_Fance        | 320.2312081 | -0.86524 | 0.176375 | 0.688272 | 406.8782 | 388.1551 | 445.2869 | 43.65666 | 304.3305 | 333.0799 |
| ENSMUSG00000007603 | 8_Dus3l         | 344.4716758 | -1.07333 | 0.049745 | 0.688272 | 411.751  | 481.7589 | 507.4199 | 68.46158 | 260.2082 | 337.2304 |
| ENSMUSG00000007613 | 15_Tgfb1        | 5340.234963 | 0.805875 | 0.064014 | 0.688272 | 3996.502 | 3586.141 | 4076.619 | 11322.95 | 4442.773 | 4616.245 |
| ENSMUSG00000007617 | 17_Homer1       | 297.0905087 | 0.922209 | 0.048172 | 0.688272 | 194.0996 | 207.8176 | 214.0139 | 667.7485 | 260.2082 | 328.6554 |
| ENSMUSG00000007646 | 13_Rad51c       | 84.30048666 | 0.456168 | 0.173106 | 0.688272 | 67.40697 | 82.44002 | 63.28367 | 117.0792 | 90.50721 | 85.05853 |
| ENSMUSG00000007655 | 16_Cav1         | 2122.909432 | 0.543132 | 0.151466 | 0.688272 | 1813.491 | 1681.433 | 1689.099 | 3831.864 | 1786.386 | 1935.184 |
| ENSMUSG00000007656 | 13_Arpp19       | 2359.569695 | 0.529747 | 0.170208 | 0.688272 | 1962.111 | 1797.364 | 2034.282 | 4293.236 | 2089.585 | 1980.84  |
| ENSMUSG00000007721 | 5_Ccdc124       | 411.6118656 | -1.07734 | 0.198829 | 0.688272 | 473.4731 | 535.8601 | 666.2044 | 14.88295 | 363.1602 | 416.0905 |
| ENSMUSG00000007739 | 10_Cct4         | 4263.546075 | 0.688515 | 0.081107 | 0.688272 | 3397.961 | 2989.31  | 3408.113 | 8188.6   | 4055.854 | 3541.438 |
| ENSMUSG00000007783 | 9_Cpt1c         | 98.05465638 | -0.93435 | 0.068983 | 0.688272 | 140.4989 | 144.27   | 101.2539 | 28.77371 | 65.61773 | 107.9137 |
| ENSMUSG00000007812 | 16_Zfp655       | 944.7887981 | 0.838572 | 0.077343 | 0.688272 | 674.0697 | 632.0402 | 727.1869 | 2132.231 | 760.2605 | 742.9446 |
| ENSMUSG00000007815 | 13_Rhoa         | 9922.41927  | 0.381336 | 0.167418 | 0.688272 | 8578.552 | 8063.665 | 9214.102 | 14146.74 | 10098.34 | 9433.113 |
| ENSMUSG00000007817 | 14_Zm1z1        | 1451.953182 | -0.4344  | 0.138641 | 0.688272 | 1600.713 | 1673.704 | 1745.479 | 875.1176 | 1359.871 | 1456.835 |
| ENSMUSG00000007833 | 13_Aldh16a1     | 502.0967972 | -1.00447 | 0.121156 | 0.688272 | 540.0679 | 674.1189 | 810.0309 | 56.55522 | 488.7389 | 443.0689 |
| ENSMUSG00000007837 | 10_Prrg2        | 292.6535808 | -0.8523  | 0.164453 | 0.688272 | 306.1738 | 362.3926 | 461.3955 | 48.61764 | 268.1276 | 309.2144 |
| ENSMUSG00000007850 | 16_Hnrmph1      | 6790.748319 | 0.463348 | 0.187849 | 0.688272 | 5727.156 | 5388.658 | 6013.099 | 11468.8  | 6229.159 | 5917.616 |
| ENSMUSG00000007872 | 3_Id3           | 1011.292745 | -1.10078 | 0.033793 | 0.688272 | 1235.253 | 1622.179 | 1280.631 | 224.2365 | 746.6845 | 958.772  |
| ENSMUSG00000007892 | 7_Rplp1         | 11476.69012 | -1.35631 | 0.024672 | 0.688272 | 14691.47 | 15642.14 | 19185.31 | 1490.28  | 8237.287 | 9613.661 |
| ENSMUSG00000007950 | 8_Abhd8         | 296.2996657 | -1.46851 | 0.034668 | 0.688272 | 397.1326 | 478.3239 | 430.3289 | 22.82053 | 186.6711 | 262.5209 |
| ENSMUSG00000007989 | 6_Fzd3          | 35.27184919 | 0.819094 | 0.138058 | 0.688272 | 35.73382 | 18.8925  | 21.86163 | 72.43037 | 30.54618 | 32.16659 |
| ENSMUSG00000008035 | 12_Mid1p1       | 2630.064567 | -0.6265  | 0.118657 | 0.688272 | 2890.378 | 2985.016 | 3701.519 | 1093.401 | 2539.859 | 2570.215 |
| ENSMUSG00000008036 | 11_Ap2s1        | 1288.810036 | -0.64193 | 0.136041 | 0.688272 | 1366.006 | 1443.559 | 1903.112 | 493.1218 | 1282.94  | 1244.121 |
| ENSMUSG00000008090 | 14_Fgfr11       | 176.6866255 | -0.54826 | 0.107353 | 0.688272 | 192.4753 | 248.1788 | 188.7004 | 104.1807 | 147.0742 | 179.5103 |
| ENSMUSG00000008140 | 17_Emc10        | 1233.723517 | -0.90142 | 0.108515 | 0.688272 | 1413.11  | 1662.54  | 1745.479 | 241.1038 | 1092.875 | 1247.234 |
| ENSMUSG00000008153 | 11_Clsn3        | 59.85043359 | -1.47158 | 0.033489 | 0.688272 | 87.71028 | 128.8125 | 47.1751  | 6.945378 | 40.72824 | 47.73108 |
| ENSMUSG00000008167 | 14_Fbxw9        | 358.2686762 | -0.78673 | 0.18307  | 0.688272 | 430.4301 | 407.9064 | 522.3779 | 65.48499 | 252.9781 | 70.43446 |
| ENSMUSG00000008200 | 14_Fnbp4        | 2109.260182 | 0.362022 | 0.169301 | 0.688272 | 1824.861 | 1714.924 | 1998.613 | 2868.441 | 2337.791 | 2010.931 |
| ENSMUSG00000008226 | 14_Scm3         | 508.0773505 | 0.490621 | 0.196348 | 0.688272 | 451.5455 | 384.7201 | 431.4795 | 890.0005 | 418.5958 | 472.1226 |
| ENSMUSG00000008333 | 12_Snrpb2       | 871.1613151 | 0.863527 | 0.067285 | 0.688272 | 628.5903 | 565.0576 | 660.4514 | 1964.55  | 742.1591 | 666.1598 |
| ENSMUSG00000008429 | 7_Herpud2       | 895.688477  | 0.362504 | 0.170778 | 0.688272 | 756.9072 | 785.7565 | 808.8803 | 1236.277 | 896.0214 | 890.2883 |
| ENSMUSG00000008461 | 5_Fut1          | 9.931140487 | -1.00944 | 0.170565 | 0.688272 | 15.43051 | 12.88125 | 11.50612 | 4.960984 | 3.39402  | 11.41395 |
| ENSMUSG00000008475 | 13_Arpp5        | 5084.230873 | 0.625056 | 0.094505 | 0.688272 | 3965.641 | 3743.292 | 4290.633 | 9288.947 | 4868.156 | 4348.716 |
| ENSMUSG00000008658 | 15_Rfox1        | 116.219237  | 0.733104 | 0.162451 | 0.688272 | 82.02535 | 68.70002 | 111.6094 | 255.9868 | 81.45649 | 97.53741 |
| ENSMUSG00000008668 | 14_Rps18        | 3553.448669 | -0.85034 | 0.166746 | 0.688272 | 4229.584 | 4540.212 | 4944.18  | 542.7317 | 2480.002 | 3553.981 |
| ENSMUSG00000008763 | 16_Man1a2       | 2276.423613 | 0.516402 | 0.167734 | 0.688272 | 1883.335 | 1842.878 | 1893.908 | 4061.062 | 2180.311 | 1959.049 |
| ENSMUSG00000008855 | 17_Hdac5        | 780.5680696 | -0.96294 | 0.104573 | 0.688272 | 999.7347 | 1055.404 | 1040.153 | 128.9856 | 629.0251 | 830.1057 |
| ENSMUSG00000008859 | 7_Rala          | 2380.053503 | 0.634964 | 0.103858 | 0.688272 | 1897.953 | 1691.738 | 2004.366 | 4475.8   | 2164.254 | 2046.211 |
| ENSMUSG00000008874 | 3_Clec3a        | 17.70405909 | -1.62598 | 0.057827 | 0.688272 | 30.04889 | 31.77376 | 18.40979 | 2.97659  | 2.26268  | 20.75264 |
| ENSMUSG00000008892 | 15_Vdac3        | 2215.396312 | 0.798081 | 0.060985 | 0.688272 | 1723.344 | 1471.039 | 1659.183 | 4608.754 | 1943.642 | 1886.415 |
| ENSMUSG00000008958 | 14_Vps72        | 653.6103869 | -0.54875 | 0.19729  | 0.688272 | 686.2517 | 789.1915 | 853.7542 | 257.9712 | 677.6727 | 656.8211 |
| ENSMUSG00000008976 | 16_Galpa        | 1611.579857 | 0.538977 |          |          |          |          |          |          |          |          |

|                     |             |             |          |          |          |          |          |          |          |          |          |
|---------------------|-------------|-------------|----------|----------|----------|----------|----------|----------|----------|----------|----------|
| ENSMUSG00000001158  | 7_Brf1      | 740.8531299 | -0.54879 | 0.135883 | 0.688272 | 855.1752 | 889.6652 | 895.1762 | 349.2533 | 764.7859 | 691.063  |
| ENSMUSG000000011263 | 15_Excoc3l2 | 121.9505047 | -1.12852 | 0.067906 | 0.688272 | 173.7963 | 185.49   | 142.6759 | 20.83613 | 66.74907 | 142.1556 |
| ENSMUSG000000011267 | 7_Zfp296    | 221.2768839 | -0.86769 | 0.167818 | 0.688272 | 250.1367 | 250.7551 | 356.6898 | 33.73469 | 219.48   | 126.865  |
| ENSMUSG000000011589 | 8_Fsd1      | 3.37195265  | -3.0954  | 0.029979 | 0.688272 | 4.872793 | 8.587502 | 4.602448 | 0        | 1.13134  | 1.037632 |
| ENSMUSG000000011658 | 14_Fuz      | 274.7049971 | -0.71061 | 0.120304 | 0.688272 | 297.2404 | 346.0763 | 379.702  | 94.2587  | 234.1874 | 296.7628 |
| ENSMUSG000000011751 | 16_Sptb4    | 6.4469513   | -1.81634 | 0.058974 | 0.688272 | 12.18198 | 12.0225  | 5.753061 | 0.992197 | 5.656701 | 2.075264 |
| ENSMUSG000000011831 | 16_Evi5     | 2131.058881 | 0.728009 | 0.076733 | 0.688272 | 1660.81  | 1546.609 | 1606.255 | 4271.407 | 1816.932 | 1884.34  |
| ENSMUSG000000011832 | 15_Evi5l    | 512.0396075 | -0.72242 | 0.114043 | 0.688272 | 592.0444 | 691.2939 | 629.3848 | 169.6657 | 437.8286 | 552.0203 |
| ENSMUSG000000011837 | 3_Snapc2    | 343.9327415 | -0.67574 | 0.13063  | 0.688272 | 424.7451 | 427.6576 | 416.5216 | 119.0636 | 314.5125 | 361.094  |
| ENSMUSG000000011877 | 13_Glt1     | 1313.357025 | -0.84533 | 0.164138 | 0.688272 | 1519.499 | 1621.32  | 1921.522 | 211.3379 | 1327.062 | 1279.6   |
| ENSMUSG000000011958 | 17_Bnip2    | 1800.920048 | 0.399496 | 0.188627 | 0.688272 | 1616.143 | 1502.813 | 1540.67  | 2735.487 | 1725.294 | 1685.114 |
| ENSMUSG000000011960 | 12_Ccnt1    | 1445.713765 | 0.564685 | 0.093442 | 0.688272 | 1127.239 | 1070.862 | 1301.342 | 2412.03  | 1423.226 | 1339.583 |
| ENSMUSG000000012017 | 3_Scarf2    | 287.6684743 | -1.48288 | 0.032566 | 0.688272 | 382.5143 | 516.9676 | 371.6477 | 26.78931 | 132.3668 | 295.7251 |
| ENSMUSG000000012126 | 16_Ubxn11   | 33.42806775 | -0.94683 | 0.096639 | 0.688272 | 39.79448 | 47.23126 | 44.87387 | 7.937575 | 31.67752 | 29.0537  |
| ENSMUSG000000012296 | 15_Tjap1    | 361.589729  | -0.8193  | 0.153735 | 0.688272 | 418.2481 | 433.6689 | 532.7334 | 70.44597 | 369.9482 | 344.4938 |
| ENSMUSG000000012350 | 15_Ehf      | 20382.26584 | 0.7064   | 0.080295 | 0.688272 | 15762.67 | 14286.17 | 16420.39 | 40141.31 | 17963.42 | 17719.64 |
| ENSMUSG000000012422 | 14_Tmem167  | 1379.484834 | 0.860082 | 0.06042  | 0.688272 | 1019.226 | 908.5577 | 1012.539 | 3055.966 | 1201.483 | 1079.137 |
| ENSMUSG000000012428 | 9_Steap4    | 1968.882208 | 0.582826 | 0.028303 | 0.688272 | 1579.597 | 1507.107 | 1643.074 | 2886.301 | 2242.316 | 1954.899 |
| ENSMUSG000000012429 | 8_Mplkip    | 237.5420815 | 0.847421 | 0.100624 | 0.688272 | 168.1114 | 174.3263 | 166.8388 | 561.5834 | 182.1458 | 172.2469 |
| ENSMUSG000000012443 | 3_Kif11     | 647.3629522 | 0.691049 | 0.07362  | 0.688272 | 544.1286 | 425.0814 | 516.6248 | 1184.683 | 672.016  | 541.6439 |
| ENSMUSG000000012483 | 4_Rpa3      | 244.5710317 | 0.690434 | 0.097719 | 0.688272 | 207.0937 | 176.0438 | 178.3449 | 475.2623 | 226.268  | 204.4133 |
| ENSMUSG000000012519 | 14_Mklk     | 646.540356  | 0.817388 | 0.038402 | 0.688272 | 442.612  | 347.7938 | 614.4269 | 851.3049 | 109.675  | 530.23   |
| ENSMUSG000000012640 | 16_Zfp715   | 541.0971801 | 0.646132 | 0.180814 | 0.688272 | 446.6727 | 430.2339 | 388.9069 | 1170.792 | 408.4138 | 401.5636 |
| ENSMUSG000000012819 | 15_Cdh23    | 75.12907695 | -1.63411 | 0.010411 | 0.688272 | 99.89226 | 158.01   | 82.84407 | 8.929771 | 42.90092 | 58.1074  |
| ENSMUSG000000012848 | 14_Rps5     | 12655.22847 | -0.75864 | 0.196423 | 0.688272 | 15476.8  | 15326.12 | 16920.9  | 2295.943 | 12296.62 | 13649.01 |
| ENSMUSG000000013033 | 16_Adgr1    | 648.5752187 | -1.01037 | 0.023211 | 0.688272 | 907.9638 | 1060.557 | 631.686  | 224.2365 | 442.354  | 624.6545 |
| ENSMUSG000000013155 | 9_Enkd1     | 78.21494788 | -1.02518 | 0.066839 | 0.688272 | 79.58895 | 100.4738 | 134.6216 | 17.85954 | 59.96103 | 76.78477 |
| ENSMUSG000000013236 | 16_Ptprs    | 3410.580811 | -0.85636 | 0.162509 | 0.688272 | 3823.518 | 4717.115 | 4641.569 | 535.7863 | 3017.284 | 3728.212 |
| ENSMUSG000000013367 | 5_Igln5     | 25.43403931 | -0.99596 | 0.14194  | 0.688272 | 24.36397 | 54.10126 | 23.01224 | 5.953181 | 19.23278 | 25.9408  |
| ENSMUSG000000013415 | 9_Igf2bp1   | 62.53975553 | -0.643   | 0.053744 | 0.688272 | 72.27976 | 81.58127 | 74.78979 | 42.66446 | 52.04164 | 51.8816  |
| ENSMUSG000000013419 | 6_Zfp651    | 399.8970953 | -1.14261 | 0.06151  | 0.688272 | 491.34   | 680.1302 | 479.8052 | 63.5006  | 247.7635 | 436.8431 |
| ENSMUSG000000013539 | 13_Tango2   | 200.3146019 | -0.52665 | 0.113455 | 0.688272 | 247.7003 | 240.4501 | 220.9175 | 112.1182 | 199.1159 | 181.5856 |
| ENSMUSG000000013662 | 5_Alad1     | 2315.391384 | 0.865944 | 0.057296 | 0.688272 | 1711.975 | 1540.598 | 1669.538 | 5129.658 | 2020.573 | 1820.007 |
| ENSMUSG000000013663 | 7_Pten      | 4567.62945  | 1.005457 | 0.042545 | 0.688272 | 3115.339 | 2921.468 | 3075.586 | 11121.53 | 3567.115 | 3604.734 |
| ENSMUSG000000013736 | 16_Tmt1     | 743.9833927 | 0.874429 | 0.050994 | 0.688272 | 559.5591 | 521.2614 | 494.7632 | 1625.218 | 655.0459 | 608.0524 |
| ENSMUSG000000013787 | 5_Ehmt2     | 2508.587427 | -0.81687 | 0.18617  | 0.688272 | 2792.11  | 3237.488 | 3571.5   | 387.949  | 2466.321 | 2596.155 |
| ENSMUSG000000013833 | 15_Med16    | 816.4253952 | -0.97184 | 0.157983 | 0.688272 | 929.8913 | 1129.257 | 1185.13  | 81.36014 | 176.5232 | 810.3906 |
| ENSMUSG000000013858 | 14_Tmem259  | 1085.222177 | -0.87066 | 0.175908 | 0.688272 | 1265.302 | 1460.734 | 1483.139 | 143.8685 | 1002.367 | 1155.922 |
| ENSMUSG000000013878 | 17_Rnf170   | 1214.779428 | 0.686818 | 0.09742  | 0.688272 | 1008.668 | 870.7727 | 913.586  | 2397.148 | 969.5585 | 1128.944 |
| ENSMUSG000000013921 | 14_Clip3    | 174.7771132 | -0.66234 | 0.107002 | 0.688272 | 211.1544 | 285.1051 | 146.1277 | 112.1182 | 106.346  | 187.8114 |
| ENSMUSG000000013936 | 12_Myl2     | 4.283412818 | 2.067738 | 0.10163  | 0.688272 | 0        | 1.7175   | 3.451836 | 8.929771 | 2.26268  | 9.336869 |
| ENSMUSG000000014030 | 15_Pax5     | 17.89152845 | 1.412071 | 0.022979 | 0.688272 | 8.121322 | 7.728752 | 13.80735 | 39.68787 | 20.36412 | 17.63975 |
| ENSMUSG000000014074 | 17_Rnf168   | 1212.483166 | 0.628985 | 0.098164 | 0.688272 | 1005.42  | 879.3602 | 972.2672 | 2238.396 | 1107.582 | 1071.874 |
| ENSMUSG000000014164 | 14_Klhl3    | 16.0851788  | -1.47501 | 0.026377 | 0.688272 | 25.98823 | 30.91501 | 13.80735 | 4.960984 | 13.57608 | 7.263424 |
| ENSMUSG000000014177 | 10_Tvp23b   | 932.9616482 | 0.45213  | 0.173668 | 0.688272 | 799.9502 | 808.084  | 755.9522 | 1507.147 | 827.0096 | 899.627  |
| ENSMUSG000000014198 | 15_Zfp385c  | 20.57366282 | -1.11487 | 0.048813 | 0.688272 | 21.92757 | 32.63251 | 29.91591 | 7.937575 | 11.3134  | 19.71501 |
| ENSMUSG000000014226 | 10_Cacypb   | 1769.541824 | 1.087874 | 0.025069 | 0.688272 | 1119.118 | 1046.817 | 1231.155 | 4274.384 | 1652.888 | 1292.89  |
| ENSMUSG000000014245 | 8_Pigl      | 166.3279855 | -0.39069 | 0.174172 | 0.688272 | 162.4264 | 199.2301 | 204.809  | 141.8841 | 126.7101 | 162.9082 |
| ENSMUSG000000014294 | 4_Ndufa2    | 803.5903907 | -0.88119 | 0.121866 | 0.688272 | 988.3649 | 1046.817 | 1089.63  | 151.8061 | 712.7443 | 832.1809 |
| ENSMUSG000000014303 | 13_Glis2    | 443.85456   | -0.76381 | 0.082222 | 0.688272 | 523.0131 | 667.2489 | 485.5583 | 163.7125 | 347.3214 | 476.2731 |
| ENSMUSG000000014353 | 14_Tmem87b  | 1649.398891 | 0.53873  | 0.166545 | 0.688272 | 1338.394 | 1283.832 | 1412.952 | 3027.192 | 1431.145 | 1402.879 |
| ENSMUSG000000014470 | 6_Rnf166    | 492.3125604 | -0.83924 | 0.063157 | 0.688272 | 543.3164 | 641.4864 | 709.9277 | 159.7437 | 410.6765 | 488.7247 |
| ENSMUSG000000014496 | 7_Ankrd28   | 1080.090795 | 0.561319 | 0.140704 | 0.688272 | 920.1458 | 800.3552 | 897.4774 | 1953.636 | 910.7288 | 998.202  |
| ENSMUSG000000014504 | 16_Srp19    | 702.475096  | 0.503733 | 0.14612  | 0.688272 | 587.1716 | 538.4364 | 617.8787 | 1169.8   | 693.5115 | 608.0524 |
| ENSMUSG000000014602 | 15_Kif1a    | 574.7179442 | -1.026   | 0.020757 | 0.688272 | 739.0403 | 1088.895 | 484.4077 | 244.0804 | 357.5035 | 534.3805 |
| ENSMUSG000000014725 | 14_Adam28   | 2193.331902 | 0.43584  | 0.142962 | 0.688272 | 1854.098 | 1674.563 | 2065.349 | 3255.398 | 2270.6   | 2039.985 |
| ENSMUSG000000014776 | 6_Nr3       | 125.750512  | -0.50214 | 0.179425 | 0.688272 | 164.0507 | 150.2813 | 127.7179 | 74.41476 | 92.76899 | 145.2685 |
| ENSMUSG000000014778 | 10_Fhod1    | 240.5776838 | -0.90342 | 0.080411 | 0.688272 | 293.1797 | 357.2401 | 289.9543 | 58.53961 | 218.3486 | 226.2038 |
| ENSMUSG000000014846 | 12_Tppp3    | 777.595077  | -1.05409 | 0.106785 | 0.688272 | 889.2847 | 968.6703 | 1290.987 | 93.2665  | 60.7026  | 762.6596 |
| ENSMUSG000000014850 | 15_Msh3     | 375.925327  | 0.544964 | 0.162346 | 0.688272 | 325.665  | 276.5176 | 315.2677 | 672.7094 | 366.5542 | 298.838  |
| ENSMUSG000000014905 | 3_Dnajb9    | 910.2734443 | 0.990322 | 0.059832 | 0.688272 | 909.9113 | 621.7352 | 597.1677 | 2290.982 | 691.2488 | 650.5953 |
| ENSMUSG000000014907 | 9_Naf1      | 353.3405128 | 0.911325 | 0.04878  | 0.688272 | 233.0819 | 229.2863 | 273.8457 | 782.8433 | 328.0886 | 272.8972 |
| ENSMUSG000000014932 | 15_Yes1     | 1141.233406 | 1.031179 | 0.034504 | 0.688272 | 753.6587 | 658.6614 | 837.6456 | 2730.526 | 992.1853 | 874.7238 |
| ENSMUSG000000014956 | 15_Ppp1cb   | 9488.924026 | 1.043677 | 0.036605 | 0.688272 | 6218.496 | 5524.34  | 6854.196 | 23303.73 | 7811.903 | 7220.882 |
| ENSMUSG000000015002 | 16_Efr3a    | 2839.8296   | 0.595999 | 0.100231 | 0.688272 | 2269.097 | 2270.536 | 2244.844 | 5040.36  | 2844.189 | 2369.952 |
| ENSMUSG000000015016 | 7_Acsf3     | 178.2276117 | -0.83904 | 0.143439 | 0.688272 | 197.3481 | 221.5576 | 266.942  | 35.71909 | 165.1757 | 182.6232 |
| ENSMUSG000000015083 | 11_C8g      | 44.1413188  | -0.7809  | 0.10221  | 0.688272 | 49.54006 | 63.54752 | 54.07877 | 16.86735 | 48.64762 | 32.16659 |
| ENSMUSG000000015085 | 8_Entp2     | 300.7477102 | -0.69422 | 0.12295  | 0.688272 | 354.9018 | 359.8163 | 400.413  | 104.1807 | 262.4409 | 322.7036 |
| ENSMUSG000000015090 | 13_Ptgsd    | 10781.07304 | -1.16535 | 0.040363 | 0.688272 | 13310.03 | 22232.18 | 9196.843 | 2611.462 | 5990.476 | 11345.47 |
| ENSMUSG000000015092 | 9_Edf1      | 1241.88918  | -0.85641 | 0.17876  | 0.688272 | 1416.359 | 1527.717 | 1855.937 | 172.6422 | 1262.576 | 1216.105 |
| ENSMUSG000000015094 | 16_Npdc1    | 538.6817328 | -0.90781 | 0.094249 | 0.688272 | 592.8565 | 751.4064 | 764.0064 | 119.0636 | 429.9092 | 574.8482 |
| ENSMUSG000000015112 | 15_Slc25a13 | 1403.744597 | 0.362691 | 0.196856 | 0.688272 | 1179.216 | 1137.844 | 1368.078 | 1962.565 | 1467.348 | 1307.416 |
| ENSMUSG000000015126 | 9_Tsr3      | 325.5370039 | -0.68646 | 0.080628 | 0.688272 | 400.3812 | 393.3076 | 410.7685 | 134.9388 | 307.7245 | 306.1015 |
| ENSMUSG000000015127 | 14_Unkl     | 720.8696546 | -0.38112 | 0.153378 | 0.688272 | 791.8289 | 750.5477 | 904.3811 | 511.9736 | 650.5206 | 715.9661 |
| ENSMUSG000000015149 | 13_Sirt2    | 1314.794454 | -0.55212 |          |          |          |          |          |          |          |          |

|                    |                 |             |          |          |          |          |          |          |          |          |          |
|--------------------|-----------------|-------------|----------|----------|----------|----------|----------|----------|----------|----------|----------|
| ENSMUSG00000015943 | 11_Bola1        | 89.83751459 | -1.17838 | 0.004922 | 0.688272 | 110.45   | 142.5525 | 120.8143 | 35.71909 | 47.51628 | 81.97293 |
| ENSMUSG00000015957 | 11_Wnt11        | 218.4290912 | -0.87956 | 0.033564 | 0.688272 | 257.4459 | 345.2176 | 246.231  | 90.28991 | 149.3369 | 222.0533 |
| ENSMUSG00000015961 | 8_Adss          | 10222.61641 | 0.867939 | 0.049332 | 0.688272 | 7314.875 | 6516.197 | 7880.542 | 22162.7  | 9058.64  | 8402.744 |
| ENSMUSG00000015962 | 5_1700016C15Rik | 34.56117003 | 0.651324 | 0.159455 | 0.688272 | 34.10955 | 22.32751 | 24.16285 | 57.54742 | 33.9402  | 35.27949 |
| ENSMUSG00000015968 | 16_Cacna1d      | 196.5069847 | -0.48639 | 0.18323  | 0.688272 | 237.1426 | 299.7038 | 150.7302 | 156.7671 | 144.8115 | 189.8867 |
| ENSMUSG00000016018 | 3_Skiv2l2       | 1397.365533 | 0.559586 | 0.123421 | 0.688272 | 1178.404 | 1047.675 | 1163.269 | 2456.679 | 1329.325 | 1208.841 |
| ENSMUSG00000016308 | 12_Ube2a        | 836.9228552 | 0.687249 | 0.102296 | 0.688272 | 633.4631 | 607.1364 | 683.4636 | 1670.859 | 750.0785 | 676.5361 |
| ENSMUSG00000016327 | 9_Atp1b4        | 8.845318884 | 1.840559 | 0.071014 | 0.688272 | 4.006661 | 5.152501 | 2.301224 | 31.7503  | 5.656701 | 4.150528 |
| ENSMUSG00000016356 | 17_Col20a1      | 184.0282565 | -0.85465 | 0.144346 | 0.688272 | 218.4636 | 250.7551 | 241.6285 | 33.73469 | 169.701  | 189.8867 |
| ENSMUSG00000016382 | 15_Pls3         | 11120.66748 | 0.692867 | 0.077823 | 0.688272 | 8916.399 | 8067.1   | 8517.981 | 21431.45 | 10401.54 | 9389.533 |
| ENSMUSG00000016409 | 4_Nkap          | 550.1172811 | 0.681742 | 0.117828 | 0.688272 | 457.2304 | 388.1551 | 422.2746 | 1118.206 | 471.7688 | 443.0689 |
| ENSMUSG00000016481 | 15_Cr1l         | 1981.721311 | 0.642126 | 0.084045 | 0.688272 | 1622.64  | 1511.4   | 1509.603 | 3637.394 | 1833.902 | 1775.388 |
| ENSMUSG00000016495 | 12_Plgkrt       | 1502.782212 | 0.510446 | 0.047856 | 0.688272 | 1284.793 | 1175.629 | 1258.77  | 2139.176 | 1613.291 | 1545.034 |
| ENSMUSG00000016496 | 7_Cd274         | 6944.421888 | 0.559236 | 0.023161 | 0.688272 | 5923.692 | 5030.559 | 5891.134 | 8966.483 | 8877.626 | 6977.038 |
| ENSMUSG00000016503 | 16_Gtf3a        | 241.3635108 | -0.52412 | 0.139732 | 0.688272 | 266.3794 | 295.4101 | 292.2555 | 124.0246 | 226.268  | 243.8435 |
| ENSMUSG00000016534 | 15_Lamp2        | 13878.19814 | 0.921068 | 0.049582 | 0.688272 | 9923.443 | 8657.92  | 10196.72 | 31770.14 | 11962.79 | 10758.17 |
| ENSMUSG00000016559 | 14_H3f3b        | 20974.90002 | 0.480009 | 0.168341 | 0.688272 | 17187.15 | 16402.13 | 18963.24 | 35279.54 | 19712.47 | 18304.87 |
| ENSMUSG00000016624 | 15_Phl21b       | 19.0444821  | -0.99897 | 0.077254 | 0.688272 | 21.11544 | 28.33876 | 26.46408 | 6.945378 | 15.83876 | 15.56448 |
| ENSMUSG00000016637 | 6_Ilf2f2        | 152.6430946 | -0.49929 | 0.128881 | 0.688272 | 179.4812 | 179.4788 | 177.1943 | 88.30552 | 148.2056 | 143.1932 |
| ENSMUSG00000016756 | 16_Cmah         | 9411.516994 | 0.633533 | 0.066828 | 0.688272 | 7203.612 | 6752.353 | 8177.4   | 16384.15 | 8938.718 | 9012.872 |
| ENSMUSG00000016763 | 14_Scube1       | 344.6539619 | -1.19097 | 0.015664 | 0.688272 | 440.9878 | 567.6339 | 429.1783 | 81.36014 | 261.3396 | 287.4241 |
| ENSMUSG00000016833 | 14_Mrps18c      | 638.1988242 | 0.814112 | 0.047057 | 0.688272 | 480.7822 | 454.2789 | 453.3412 | 1294.817 | 593.9536 | 552.0203 |
| ENSMUSG00000016921 | 14_Srsf6        | 5198.059089 | 0.440844 | 0.175824 | 0.688272 | 4297.803 | 4217.322 | 4715.208 | 8300.719 | 5036.726 | 4620.576 |
| ENSMUSG00000016940 | 18_Kctd2        | 677.2374088 | -0.49437 | 0.146845 | 0.688272 | 797.5138 | 812.3777 | 766.3077 | 356.1987 | 635.8131 | 695.2135 |
| ENSMUSG00000016984 | 7_Elaa1         | 436.2895718 | 0.794447 | 0.115582 | 0.688272 | 297.2404 | 322.0313 | 338.28   | 1010.056 | 332.614  | 317.5154 |
| ENSMUSG00000016995 | 17_Matn4        | 651.4290869 | -1.15613 | 0.021069 | 0.688272 | 773.1498 | 1039.947 | 884.8207 | 176.611  | 345.0587 | 688.987  |
| ENSMUSG00000017007 | 9_Rbpj          | 67.24032508 | -1.27534 | 0.014954 | 0.688272 | 81.21322 | 113.355  | 90.89836 | 18.85174 | 67.17752 | 67.44608 |
| ENSMUSG00000017057 | 9_Ilf3ra1       | 2952.33776  | 1.228256 | 0.012761 | 0.688272 | 1812.679 | 1393.752 | 2092.963 | 7027.73  | 3451.719 | 1935.184 |
| ENSMUSG00000017144 | 8_Rnd3          | 5500.900038 | 0.462946 | 0.126289 | 0.688272 | 4867.108 | 4207.876 | 4802.655 | 8373.149 | 5782.279 | 4972.333 |
| ENSMUSG00000017146 | 12_Brcap1       | 606.1450346 | 0.435952 | 0.18233  | 0.688272 | 508.3947 | 573.6451 | 463.6967 | 948.5402 | 565.6701 | 576.9234 |
| ENSMUSG00000017167 | 6_Cntnap3       | 205.3155643 | -0.84352 | 0.113459 | 0.688272 | 273.6885 | 310.0088 | 207.1102 | 51.59423 | 163.4833 | 222.0533 |
| ENSMUSG00000017176 | 17_Nf5c3b       | 339.9319957 | -0.40976 | 0.192432 | 0.688272 | 375.2051 | 409.6239 | 378.5514 | 204.3925 | 343.9274 | 327.8917 |
| ENSMUSG00000017291 | 13-Taok1        | 3891.337155 | 0.8946   | 0.050838 | 0.688272 | 2869.263 | 2458.602 | 2838.56  | 8710.496 | 3337.453 | 3133.649 |
| ENSMUSG00000017314 | 12_Mpp2         | 185.603572  | -0.83863 | 0.123923 | 0.688272 | 253.3852 | 269.6476 | 191.0016 | 45.64105 | 139.1548 | 214.7898 |
| ENSMUSG00000017344 | 4_Vtn           | 58.19427245 | -1.04364 | 0.036368 | 0.688272 | 104.7651 | 78.14627 | 51.77754 | 20.83613 | 53.17298 | 40.46765 |
| ENSMUSG00000017390 | 15_Aldoc        | 1975.452413 | -0.69234 | 0.088727 | 0.688272 | 2275.594 | 2964.406 | 2081.457 | 859.2424 | 1501.288 | 1720.726 |
| ENSMUSG00000017417 | 14_Plxdcd1      | 108.7329899 | -0.76448 | 0.134396 | 0.688272 | 109.6378 | 157.1513 | 143.8265 | 33.73469 | 81.45649 | 126.5911 |
| ENSMUSG00000017418 | 13_Arl5b        | 2071.090693 | 0.826324 | 0.073385 | 0.688272 | 1514.627 | 1404.057 | 1562.531 | 4589.902 | 1700.404 | 1655.023 |
| ENSMUSG00000017421 | 18_Zfp207       | 5591.725796 | 0.463075 | 0.166194 | 0.688272 | 4709.555 | 4446.609 | 4949.933 | 9111.343 | 5514.152 | 4818.763 |
| ENSMUSG00000017485 | 10_Top2b        | 4144.746191 | 0.927484 | 0.062714 | 0.688272 | 2940.731 | 2717.944 | 2911.049 | 9939.828 | 3198.298 | 3160.627 |
| ENSMUSG00000017493 | 12_lgfbp4       | 2453.035064 | -0.49889 | 0.062599 | 0.688272 | 3195.74  | 2728.249 | 2694.734 | 1664.906 | 233.785  | 2420.796 |
| ENSMUSG00000017548 | 15_Suz12        | 1702.879772 | 0.88928  | 0.074142 | 0.688272 | 1264.49  | 1061.415 | 1256.468 | 4021.374 | 1037.244 | 1276.287 |
| ENSMUSG00000017550 | 14_Alatd5       | 410.2892728 | 0.803987 | 0.051676 | 0.688272 | 322.4165 | 270.5063 | 303.7616 | 823.5234 | 346.1901 | 395.3377 |
| ENSMUSG00000017664 | 16_Slc35c2      | 817.8834482 | -0.86202 | 0.098305 | 0.688272 | 989.9891 | 996.1503 | 1179.377 | 193.4784 | 741.0278 | 807.2378 |
| ENSMUSG00000017677 | 11_Wsb1         | 2379.977476 | 0.560108 | 0.120403 | 0.688272 | 1975.105 | 1664.258 | 2132.084 | 4120.593 | 2301.146 | 2086.678 |
| ENSMUSG00000017686 | 16_Rho1         | 908.297356  | 0.633964 | 0.101878 | 0.688272 | 726.8583 | 699.0227 | 709.9277 | 1702.61  | 825.8783 | 785.4875 |
| ENSMUSG00000017707 | 9_Serinc3       | 6967.256052 | 0.431204 | 0.197368 | 0.688272 | 6021.96  | 5929.67  | 5849.712 | 11354.7  | 6373.97  | 6273.523 |
| ENSMUSG00000017713 | 9_Tha1          | 87.35647686 | -1.04027 | 0.056496 | 0.688272 | 116.947  | 122.8013 | 112.76   | 18.85174 | 65.61773 | 87.16109 |
| ENSMUSG00000017740 | 16_Slc12a5      | 92.37797966 | -0.88603 | 0.0271   | 0.688272 | 142.9353 | 139.1175 | 77.09101 | 53.57863 | 80.32515 | 61.22029 |
| ENSMUSG00000017747 | 13_Ghdc         | 298.8606767 | -0.77846 | 0.074952 | 0.688272 | 374.3929 | 355.5226 | 402.7142 | 103.1885 | 264.7336 | 292.6122 |
| ENSMUSG00000017754 | 13_Pltp         | 663.2131732 | -0.88353 | 0.109965 | 0.688272 | 756.0951 | 1068.285 | 755.9522 | 142.8763 | 570.1954 | 685.8478 |
| ENSMUSG00000017764 | 2_Zswim1        | 148.0015839 | -0.58893 | 0.197483 | 0.688272 | 141.311  | 180.3375 | 211.7126 | 56.55522 | 153.8623 | 144.2309 |
| ENSMUSG00000017765 | 16_Slc12a4      | 777.124774  | -0.7035  | 0.158332 | 0.688272 | 905.5274 | 993.574  | 989.5264 | 214.3145 | 574.6038 | 805.2025 |
| ENSMUSG00000017776 | 15_Crk          | 5402.835652 | 0.595447 | 0.112382 | 0.688272 | 4217.402 | 4102.25  | 4590.942 | 9800.92  | 5217.741 | 4487.759 |
| ENSMUSG00000017831 | 7_Rab5a         | 2275.57122  | 1.071185 | 0.031988 | 0.688272 | 1491.887 | 1361.119 | 1549.875 | 5632.701 | 1887.075 | 1730.77  |
| ENSMUSG00000017858 | 12_Ilf52        | 1207.521586 | 0.376007 | 0.139959 | 0.688272 | 1106.936 | 997.009  | 1049.358 | 1632.164 | 1195.826 | 1263.836 |
| ENSMUSG00000017897 | 18_Eya2         | 843.857207  | -0.71734 | 0.179278 | 0.688272 | 952.631  | 1008.173 | 1187.432 | 207.3691 | 734.2397 | 973.2989 |
| ENSMUSG00000017969 | 17_Ptgis        | 186.8641176 | -0.90091 | 0.06361  | 0.688272 | 394.6962 | 494.6401 | 348.6355 | 103.1885 | 196.8532 | 363.1712 |
| ENSMUSG00000017978 | 18_Cadps2       | 500.3483476 | 0.519371 | 0.093242 | 0.688272 | 374.3929 | 395.0251 | 464.8473 | 768.9525 | 496.6583 | 502.2139 |
| ENSMUSG00000018042 | 17_Cybb53       | 3431.528357 | -0.49126 | 0.181385 | 0.688272 | 3726.875 | 4134.882 | 4168.668 | 1650.023 | 3296.725 | 3611.997 |
| ENSMUSG00000018068 | 13_Ints2        | 716.7041913 | 0.606654 | 0.066273 | 0.688272 | 585.5473 | 522.1201 | 597.1677 | 1183.691 | 770.4426 | 641.2566 |
| ENSMUSG00000018160 | 15_Med1         | 1589.512106 | 0.460603 | 0.099497 | 0.688272 | 1340.83  | 1313.029 | 1360.024 | 2298.92  | 1770.547 | 1453.723 |
| ENSMUSG00000018169 | 12_Mfng         | 36.33182382 | -0.83022 | 0.117307 | 0.688272 | 44.66727 | 56.67751 | 37.9702  | 11.90636 | 29.41484 | 37.35475 |
| ENSMUSG00000018171 | 9_Vmp1          | 3038.300681 | 0.681417 | 0.049488 | 0.688272 | 2405.536 | 2093.633 | 2502.581 | 5323.136 | 3191.51  | 2713.408 |
| ENSMUSG00000018189 | 12_Uchl5        | 694.0049051 | 0.99812  | 0.039799 | 0.688272 | 510.019  | 422.5051 | 456.793  | 1643.078 | 586.2162 | 535.4181 |
| ENSMUSG00000018196 | 18_Glrx2        | 601.9864461 | 0.520549 | 0.189208 | 0.688272 | 501.8977 | 503.2276 | 478.6546 | 1105.307 | 497.7896 | 525.0414 |
| ENSMUSG00000018199 | 8_Trove2        | 888.6416065 | 0.917115 | 0.090558 | 0.688272 | 644.8329 | 653.5089 | 547.6914 | 2233.435 | 588.2969 | 664.0845 |
| ENSMUSG00000018263 | 11_Tbx5         | 21.5518265  | -0.77509 | 0.167223 | 0.688272 | 27.61249 | 37.78501 | 16.10857 | 18.85174 | 11.3134  | 17.63975 |
| ENSMUSG00000018326 | 9_Ywhab         | 7888.205851 | 0.396615 | 0.185975 | 0.688272 | 6930.736 | 6377.079 | 7124.59  | 11889.49 | 7604.868 | 7402.467 |
| ENSMUSG00000018334 | 16_Ksr1         | 569.9192837 | -0.67201 | 0.177426 | 0.688272 | 644.0208 | 693.8702 | 762.8558 | 162.7203 | 627.8938 | 528.1547 |
| ENSMUSG00000018339 | 11_Gpx3         | 2548.857951 | -0.56636 | 0.129782 | 0.688272 | 2924.488 | 4012.94  | 2190.765 | 1576.601 | 1815.801 | 2772.553 |
| ENSMUSG00000018362 | 14_Kpna2        | 350.1990631 | 1.17488  | 0.041627 | 0.688272 | 204.6573 | 213.8288 | 226.6706 | 970.3685 | 238.7128 | 246.9564 |
| ENSMUSG00000018363 | 16_Smurf2       | 1728.208916 | 0.478563 | 0.149204 | 0.688272 | 1419.607 | 1364.554 | 1548.724 | 2813.87  | 1961.249 | 1661.249 |
| ENSMUSG00000018378 | 13_Cuedc1       | 1065.311318 | -0.6643  | 0.115413 | 0.688272 | 1179.216 | 1323.334 | 1416.404 | 414.7383 | 883.5766 | 1174.599 |
| ENSMUSG00000018379 | 17_Srsf1        | 6527.567742 | 0.8      |          |          |          |          |          |          |          |          |

|                     |             |             |          |           |          |          |          |          |          |          |          |
|---------------------|-------------|-------------|----------|-----------|----------|----------|----------|----------|----------|----------|----------|
| ENSMUSG000000019158 | 8_Tmem160   | 105.8310167 | -0.99399 | 0.180398  | 0.688272 | 121.0077 | 148.5638 | 153.0314 | 7.937575 | 113.134  | 91.31162 |
| ENSMUSG000000019194 | 14_Scn1b    | 102.3004304 | -0.71272 | 0.156101  | 0.688272 | 109.6378 | 145.9875 | 125.4167 | 30.7581  | 96.16391 | 105.8385 |
| ENSMUSG000000019214 | 13_Chfr1b   | 132.0166879 | -1.00217 | 0.10236   | 0.688272 | 180.2933 | 140.835  | 207.1102 | 20.83613 | 115.3967 | 127.6287 |
| ENSMUSG000000019235 | 8_Rps6kl1   | 5.087466282 | -1.37679 | 0.150581  | 0.688272 | 6.497057 | 8.587502 | 6.903673 | 0.992197 | 3.39402  | 4.150528 |
| ENSMUSG000000019261 | 2_Map1s     | 127.46602   | -1.56338 | 0.050917  | 0.688272 | 158.3658 | 182.9138 | 230.1224 | 4.960984 | 70.14309 | 118.2901 |
| ENSMUSG000000019278 | 4_Dpep1     | 545.4097287 | -0.53991 | 0.133592  | 0.688272 | 597.7293 | 712.7627 | 628.2342 | 278.8073 | 459.3241 | 595.6008 |
| ENSMUSG000000019320 | 13_Noxo1    | 88.44516577 | -0.61322 | 0.086879  | 0.688272 | 106.3893 | 117.6488 | 96.65142 | 50.60204 | 70.14309 | 89.23636 |
| ENSMUSG000000019326 | 14_Aoc3     | 66.69875976 | -0.54874 | 0.128413  | 0.688272 | 72.27976 | 91.88627 | 73.63917 | 66.47719 | 42.99092 | 52.91924 |
| ENSMUSG000000019362 | 7_D8Erd738e | 636.7653474 | -0.81198 | 0.118459  | 0.688272 | 756.9072 | 814.0952 | 862.9591 | 153.7905 | 615.4449 | 617.3911 |
| ENSMUSG000000019370 | 10_Calm3    | 2447.227648 | -0.65693 | 0.155889  | 0.688272 | 2800.232 | 3118.122 | 3066.381 | 785.8199 | 2400.704 | 2512.107 |
| ENSMUSG000000019373 | 11_Cops3    | 1719.53454  | 0.428854 | 0.15624   | 0.688272 | 1465.899 | 1380.87  | 1551.025 | 2607.493 | 1738.87  | 1573.05  |
| ENSMUSG000000019428 | 16_Fkbp8    | 3209.020496 | -0.9593  | 0.128579  | 0.688272 | 3839.761 | 4048.149 | 4826.818 | 436.5666 | 2837.401 | 3265.428 |
| ENSMUSG000000019464 | 5_Ptger1    | 417.9883844 | -0.66063 | 0.101698  | 0.688272 | 470.2245 | 513.5326 | 552.2938 | 170.6579 | 377.8676 | 423.3539 |
| ENSMUSG000000019467 | 13_Arhgef25 | 329.4489448 | -0.70095 | 0.071984  | 0.688272 | 389.0113 | 492.9226 | 341.7318 | 170.6579 | 216.086  | 366.2841 |
| ENSMUSG000000019478 | 15_Rab4a    | 77.11143963 | -0.5742  | 0.131035  | 0.688272 | 81.21322 | 126.2363 | 69.03673 | 59.53181 | 63.35505 | 63.29556 |
| ENSMUSG000000019539 | 10_Rcn3     | 695.9497011 | -1.17821 | 0.088349  | 0.688272 | 909.588  | 1112.94  | 873.3146 | 64.49279 | 492.1329 | 723.2295 |
| ENSMUSG000000019577 | 6_Pdk4      | 77.31389058 | 1.29942  | 0.053297  | 0.688272 | 36.54595 | 58.39502 | 39.12081 | 225.2287 | 35.07154 | 69.52135 |
| ENSMUSG000000019578 | 11_Ubxkn6   | 1380.540285 | -0.54394 | 0.19238   | 0.688272 | 1505.693 | 1592.982 | 1814.515 | 558.6068 | 1321.405 | 1490.04  |
| ENSMUSG000000019699 | 15_Akt3     | 1261.965845 | 0.822791 | 0.024794  | 0.688272 | 917.7094 | 862.1852 | 955.0081 | 2392.187 | 1290.859 | 1153.847 |
| ENSMUSG000000019737 | 14_Syne4    | 37.92688735 | -0.77696 | 0.178264  | 0.688272 | 34.92168 | 59.25377 | 49.47632 | 10.91416 | 29.41484 | 43.58055 |
| ENSMUSG000000019738 | 15_Polr2l   | 402.4706292 | -0.86706 | 0.142182  | 0.688272 | 462.9153 | 507.5214 | 589.1134 | 71.43817 | 431.0046 | 352.7949 |
| ENSMUSG000000019768 | 16_Esr1     | 188.7819438 | 0.6805   | 0.0904331 | 0.688272 | 142.9353 | 155.4338 | 136.9228 | 358.1831 | 161.7816 | 177.4351 |
| ENSMUSG000000019773 | 7_Fbxo5     | 220.4330615 | 0.525111 | 0.177507  | 0.688272 | 184.354  | 137.4    | 220.9175 | 353.2221 | 253.4202 | 173.2846 |
| ENSMUSG000000019774 | 8_Mtfr1l    | 154.0405681 | 0.5202   | 0.15865   | 0.688272 | 134.8139 | 111.6375 | 133.471  | 256.979  | 149.3369 | 138.0051 |
| ENSMUSG000000019777 | 16_Hdac2    | 1572.885278 | 0.692026 | 0.120553  | 0.688272 | 1205.204 | 1149.008 | 1254.167 | 3289.132 | 1265.914 | 1265.914 |
| ENSMUSG000000019779 | 14_Frk      | 1378.173642 | 0.793102 | 0.067866  | 0.688272 | 1039.529 | 946.3427 | 1040.153 | 2864.472 | 1356.477 | 1022.068 |
| ENSMUSG000000019782 | 9_Rwd4d1    | 1077.426264 | 0.685873 | 0.104571  | 0.688272 | 875.4785 | 765.1464 | 837.6456 | 2160.012 | 952.5884 | 873.8862 |
| ENSMUSG000000019787 | 8_Trdn      | 176.4774297 | 2.021512 | 0.036551  | 0.688272 | 49.54006 | 91.88627 | 67.88611 | 745.1398 | 20.36412 | 84.0482  |
| ENSMUSG000000019792 | 7_Tmtt11    | 263.2552245 | 0.866907 | 0.105193  | 0.688272 | 197.3481 | 173.4675 | 188.7004 | 641.9513 | 192.3278 | 185.7361 |
| ENSMUSG000000019794 | 13_Katna1   | 1822.181822 | 0.461237 | 0.072603  | 0.688272 | 1550.36  | 1409.209 | 1640.773 | 2413.023 | 2186.88  | 1732.846 |
| ENSMUSG000000019795 | 17_Pcmt1    | 1231.677915 | 0.411726 | 0.185887  | 0.688272 | 1050.087 | 1046.817 | 1074.672 | 1903.033 | 1146.048 | 1169.411 |
| ENSMUSG000000019796 | 12_Lrp11    | 75.12082692 | 0.727971 | 0.093677  | 0.688272 | 45.4794  | 60.11252 | 64.43428 | 139.8998 | 17.27443 | 59.52135 |
| ENSMUSG000000019802 | 13_Sec63    | 2693.604218 | 0.576283 | 0.152124  | 0.688272 | 2102.61  | 2090.198 | 2295.471 | 5105.845 | 2340.743 | 2226.758 |
| ENSMUSG000000019809 | 16_Pex3     | 496.2960528 | 0.541654 | 0.159061  | 0.688272 | 398.7569 | 404.4714 | 409.6179 | 896.9459 | 419.7272 | 448.2571 |
| ENSMUSG000000019810 | 15_Fuac2    | 1661.012455 | 0.438995 | 0.192504  | 0.688272 | 1464.274 | 1359.402 | 1407.199 | 2710.682 | 1526.178 | 1498.341 |
| ENSMUSG000000019813 | 15_Cep571l  | 350.8860778 | 0.742817 | 0.022729  | 0.688272 | 263.1308 | 237.0151 | 287.653  | 571.5054 | 425.3839 | 320.6283 |
| ENSMUSG000000019818 | 15_Cd16a    | 15789.19812 | 0.857002 | 0.063286  | 0.688272 | 11274.02 | 10741.25 | 11683.32 | 35342.05 | 13287.59 | 12406.97 |
| ENSMUSG000000019822 | 12_Smpd2    | 365.0662907 | -0.61804 | 0.176578  | 0.688272 | 427.1815 | 483.4764 | 415.371  | 125.0168 | 357.5035 | 381.8486 |
| ENSMUSG000000019823 | 17_Mical1   | 323.8986579 | -0.92352 | 0.090956  | 0.688272 | 413.3753 | 468.8776 | 390.0575 | 68.46158 | 272.653  | 329.967  |
| ENSMUSG000000019832 | 3_Rab32     | 517.9954008 | 0.56286  | 0.138755  | 0.688272 | 446.6727 | 395.0251 | 413.0697 | 931.6728 | 477.4255 | 444.1065 |
| ENSMUSG000000019841 | 15_Rev3l    | 1128.65452  | 0.673541 | 0.148409  | 0.688272 | 929.0792 | 922.2977 | 758.2534 | 2402.108 | 881.3139 | 878.8744 |
| ENSMUSG000000019851 | 7_Perp      | 56951.05813 | 0.391487 | 0.188565  | 0.688272 | 48774.22 | 44554.54 | 54484.94 | 84178.97 | 57058.01 | 52655.68 |
| ENSMUSG000000019857 | 6_Asf1a     | 517.3139741 | 0.809808 | 0.044883  | 0.688272 | 399.569  | 359.8163 | 368.1959 | 1034.861 | 467.2435 | 474.1979 |
| ENSMUSG000000019861 | 14_Gopc     | 1163.972281 | 0.463673 | 0.196138  | 0.688272 | 964.813  | 924.0152 | 1047.057 | 1978.44  | 1032.914 | 1036.594 |
| ENSMUSG000000019868 | 16_Via1     | 870.2836784 | 0.314867 | 0.179897  | 0.688272 | 780.459  | 692.1527 | 854.9048 | 1029.9   | 600.5077 | 903.7775 |
| ENSMUSG000000019872 | 13_Smpd13a  | 2704.536466 | 0.708122 | 0.067726  | 0.688272 | 2027.894 | 1947.646 | 2186.163 | 5163.392 | 2622.446 | 2279.678 |
| ENSMUSG000000019873 | 7_Reep3     | 4766.543293 | 0.497611 | 0.144572  | 0.688272 | 3914.477 | 3884.127 | 4059.36  | 7998.099 | 4260.627 | 4482.571 |
| ENSMUSG000000019874 | 11_Fabp7    | 21.34092273 | 0.64868  | 0.190004  | 0.688272 | 17.05478 | 18.8925  | 13.80735 | 32.74249 | 23.75814 | 21.79027 |
| ENSMUSG000000019877 | 10_Serinc1  | 3891.156034 | 0.694569 | 0.125925  | 0.688272 | 3205.486 | 2994.462 | 2716.595 | 8233.249 | 3036.517 | 3160.627 |
| ENSMUSG000000019878 | 7_Hsf2      | 152.3521838 | 0.804075 | 0.07943   | 0.688272 | 118.5713 | 114.2138 | 100.1033 | 320.4796 | 141.4175 | 119.3277 |
| ENSMUSG000000019883 | 10_Echdc1   | 1921.433108 | 0.862253 | 0.057442  | 0.688272 | 1391.182 | 1280.397 | 1419.855 | 4235.688 | 1708.324 | 1493.153 |
| ENSMUSG000000019906 | 14_Lin7a    | 27.79312475 | 1.086388 | 0.144772  | 0.688272 | 30.04889 | 9.446252 | 13.80735 | 74.41476 | 20.36412 | 18.7738  |
| ENSMUSG000000019916 | 14_P4na1    | 1140.797002 | 0.394305 | 0.122115  | 0.688272 | 1013.541 | 966.094  | 978.0203 | 1540.882 | 1254.656 | 1091.589 |
| ENSMUSG000000019917 | 9_Sept10    | 736.8650014 | 0.642221 | 0.104772  | 0.688272 | 607.4749 | 525.5551 | 593.7158 | 1395.029 | 655.0459 | 641.3695 |
| ENSMUSG000000019920 | 17_Lims1    | 3733.94646  | 0.668892 | 0.096295  | 0.688272 | 3000.828 | 2730.826 | 2919.103 | 7266.849 | 3217.531 | 3268.541 |
| ENSMUSG000000019927 | 6_Ube2d1    | 626.8051214 | 0.684978 | 0.071489  | 0.688272 | 479.9701 | 496.3576 | 485.9979 | 1169.8   | 601.8729 | 546.8321 |
| ENSMUSG000000019932 | 7_Kera      | 7933.820148 | 0.735426 | 0.141219  | 0.688272 | 6415.844 | 6636.422 | 4810.709 | 17718.65 | 5065.01  | 6956.285 |
| ENSMUSG000000019936 | 10_Epvc     | 165.5647031 | 0.979016 | 0.113338  | 0.688272 | 112.0742 | 121.0838 | 101.2539 | 452.4417 | 88.24453 | 118.2901 |
| ENSMUSG000000019943 | 9_Alp2b1    | 9163.064594 | 0.92859  | 0.112583  | 0.688272 | 7701.449 | 6990.227 | 8147.484 | 14232.07 | 97058.01 | 8101.831 |
| ENSMUSG000000019948 | 3_Actr6     | 199.4346878 | 1.060122 | 0.034941  | 0.688272 | 128.3169 | 129.6713 | 130.0192 | 484.192  | 158.3876 | 166.0211 |
| ENSMUSG000000019951 | 9_Uhfr1bp1l | 986.0696667 | 0.411691 | 0.18318   | 0.688272 | 829.187  | 835.564  | 874.4652 | 1502.186 | 1002.367 | 872.6486 |
| ENSMUSG000000019961 | 16_Tmpo     | 4924.337794 | 0.705083 | 0.063847  | 0.688272 | 3712.256 | 3399.792 | 4121.493 | 9206.594 | 4956.401 | 4149.491 |
| ENSMUSG000000019966 | 17_Kil1     | 1258.199183 | 0.105973 | 0.055621  | 0.688272 | 871.4178 | 830.4115 | 807.7297 | 3178.999 | 903.9407 | 956.6968 |
| ENSMUSG000000019971 | 9_Cep290    | 725.2542008 | 1.10517  | 0.028326  | 0.688272 | 484.0308 | 431.0926 | 468.2991 | 1807.783 | 579.2461 | 581.074  |
| ENSMUSG000000019977 | 15_Hbs1l    | 735.5952838 | 0.283134 | 0.185609  | 0.688272 | 638.3359 | 692.1527 | 660.4514 | 823.5234 | 515.6962 | 783.4122 |
| ENSMUSG000000019979 | 12_Apa1     | 925.8073538 | 0.416519 | 0.159678  | 0.688272 | 766.6528 | 748.8302 | 864.1097 | 1330.536 | 1037.439 | 807.2777 |
| ENSMUSG000000019988 | 6_Nedd1     | 467.7730176 | 0.528849 | 0.167765  | 0.688272 | 405.254  | 329.7601 | 414.2204 | 826.4999 | 435.5659 | 395.3378 |
| ENSMUSG000000019992 | 7_Mtfr2     | 75.01099977 | 0.589482 | 0.127393  | 0.688272 | 51.16433 | 60.97127 | 67.88611 | 121.048  | 82.58783 | 66.40845 |
| ENSMUSG000000019998 | 5_Slx7      | 3395.085077 | 0.578738 | 0.09374   | 0.688272 | 2774.244 | 2630.352 | 2764.921 | 5865.868 | 3249.209 | 3085.918 |
| ENSMUSG000000020000 | 17_Moxd1    | 158.2043039 | 0.458292 | 0.164826  | 0.688272 | 102.3287 | 131.3888 | 166.8388 | 213.3223 | 165.1757 | 170.1717 |
| ENSMUSG000000020003 | 15_Pex7     | 697.7280951 | 0.535864 | 0.068594  | 0.688272 | 584.7352 | 561.6226 | 562.6493 | 1113.245 | 672.016  | 692.1006 |
| ENSMUSG000000020015 | 9_Cdk17     | 612.4865729 | 0.744996 | 0.060079  | 0.688272 | 452.3576 | 462.0076 | 459.0942 | 1187.66  | 606.3983 | 507.4021 |
| ENSMUSG000000020017 | 14_Hal      | 143.8648766 | -0.51114 | 0.093821  | 0.688272 | 177.0448 | 152.8575 | 177.1943 | 97.23529 | 413.6802 | 115.1772 |
| ENSMUSG000000020024 | 6_Cep83     | 470.57495   | 0.694776 | 0.10077   | 0.688272 | 370.3323 | 289.3988 | 418.8228 | 898.9303 | 492.1329 |          |

|                    |                  |             |          |          |          |          |          |          |          |           |          |
|--------------------|------------------|-------------|----------|----------|----------|----------|----------|----------|----------|-----------|----------|
| ENSMUSG00000020156 | 16_Mum1          | 822.9545616 | -0.53851 | 0.178678 | 0.688272 | 898.2182 | 989.2803 | 1036.702 | 351.2377 | 851.8991  | 810.3906 |
| ENSMUSG00000020163 | 12_Uqcr11        | 844.4155843 | -1.1009  | 0.171447 | 0.688272 | 1062.269 | 1148.149 | 1244.962 | 37.70348 | 718.401   | 855.0088 |
| ENSMUSG00000020166 | 14_Cno2t         | 1992.651606 | 0.44487  | 0.164603 | 0.688272 | 1770.448 | 1614.45  | 1678.743 | 3139.31  | 202.472   | 1750.485 |
| ENSMUSG00000020167 | 14_Tcf3          | 740.5329053 | -0.99609 | 0.067025 | 0.688272 | 897.4061 | 998.7265 | 1063.166 | 148.8295 | 659.5713  | 675.4985 |
| ENSMUSG00000020169 | 4_Best3          | 14.97004116 | -1.14891 | 0.073467 | 0.688272 | 19.49117 | 27.48001 | 14.95796 | 10.91416 | 4.52536   | 125.5158 |
| ENSMUSG00000020175 | 13_Rab36         | 75.87640405 | -0.86874 | 0.0217   | 0.688272 | 101.5165 | 121.0838 | 71.33795 | 50.60204 | 46.38949  | 64.33319 |
| ENSMUSG00000020184 | 14_Mdm2          | 1609.695079 | 0.383262 | 0.135558 | 0.688272 | 1327.024 | 1320.758 | 1544.121 | 2154.059 | 1729.819  | 1582.389 |
| ENSMUSG00000020189 | 13_Osbp18        | 2314.683619 | 0.884208 | 0.060743 | 0.688272 | 1630.761 | 1491.649 | 1758.135 | 5270.549 | 1847.478  | 1889.528 |
| ENSMUSG00000020193 | 3_Zbpb           | 26.43399286 | 1.462325 | 0.033975 | 0.688272 | 17.05478 | 18.03375 | 6.903673 | 71.43817 | 19.23278  | 25.9408  |
| ENSMUSG00000020205 | 8_Phlda1         | 2307.544974 | -0.35953 | 0.111494 | 0.688272 | 2571.21  | 2503.257 | 2706.24  | 1806.79  | 2246.841  | 2010.931 |
| ENSMUSG00000020211 | 15_Sf3a2         | 481.7573291 | -0.88728 | 0.120423 | 0.688272 | 555.4984 | 593.3964 | 727.1869 | 92.2743  | 485.3449  | 436.8431 |
| ENSMUSG00000020219 | 6_Timm13         | 644.0743683 | -1.14876 | 0.157019 | 0.688272 | 799.9502 | 858.7502 | 1004.484 | 26.78931 | 574.7208  | 599.7513 |
| ENSMUSG00000020227 | 10_Irak3         | 235.6580392 | 0.521667 | 0.048194 | 0.688272 | 195.7239 | 173.4675 | 211.7126 | 309.5654 | 269.2589  | 254.2199 |
| ENSMUSG00000020232 | 17_Hmg20b        | 612.4482557 | -0.77881 | 0.13947  | 0.688272 | 682.191  | 772.8752 | 866.4109 | 148.8295 | 560.0134  | 644.3695 |
| ENSMUSG00000020234 | 10_4930440N11Rik | 9.667216809 | -1.64165 | 0.082071 | 0.688272 | 10.55772 | 13.74    | 19.56041 | 0        | 7.919381  | 6.225792 |
| ENSMUSG00000020238 | 14_Ncln          | 1033.740005 | -0.96256 | 0.187825 | 0.688272 | 1131.3   | 1302.724 | 1664.936 | 82.35234 | 1012.549  | 1008.578 |
| ENSMUSG00000020241 | 13_Col6a2        | 4779.715941 | -0.89519 | 0.079513 | 0.688272 | 5690.61  | 7213.502 | 5746.157 | 1224.371 | 3587.479  | 5216.176 |
| ENSMUSG00000020246 | 13_Hcf2c         | 772.9320504 | 0.553811 | 0.125164 | 0.688272 | 645.6451 | 598.5489 | 635.1379 | 1352.364 | 687.8548  | 718.0414 |
| ENSMUSG00000020253 | 14_Ppm1m         | 176.9630592 | -0.75249 | 0.111918 | 0.688272 | 221.7121 | 253.3313 | 191.0016 | 57.54742 | 149.3369  | 188.849  |
| ENSMUSG00000020257 | 12_Wdr82         | 1884.011388 | 0.332435 | 0.177237 | 0.688272 | 1686.799 | 1594.699 | 1722.466 | 2479.5   | 1979.845  | 1880.759 |
| ENSMUSG00000020258 | 15_Glytck        | 53.63714493 | -0.74149 | 0.102909 | 0.688272 | 63.34631 | 64.40627 | 73.63917 | 22.82053 | 48.46556  | 59.14503 |
| ENSMUSG00000020260 | 8_Pofut2         | 455.2884095 | -0.82283 | 0.109424 | 0.688272 | 548.1892 | 615.7239 | 581.0591 | 113.1104 | 412.9391  | 460.7086 |
| ENSMUSG00000020262 | 15_Adarb1        | 987.5842665 | -0.45457 | 0.096301 | 0.688272 | 1092.318 | 1246.905 | 1086.178 | 650.8811 | 903.9407  | 945.2828 |
| ENSMUSG00000020273 | 13_Papolg        | 756.9518255 | 0.800272 | 0.072418 | 0.688272 | 576.6138 | 494.6401 | 585.6616 | 1611.328 | 667.9007  | 605.9771 |
| ENSMUSG00000020275 | 9_Rel            | 1222.395145 | 0.645258 | 0.097788 | 0.688272 | 980.2435 | 804.649  | 1079.274 | 2254.271 | 1159.424  | 1056.309 |
| ENSMUSG00000020280 | 12_Pus10         | 903.0991431 | 0.763218 | 0.058417 | 0.688272 | 708.9914 | 592.5377 | 707.6264 | 1782.978 | 1520.2216 | 806.2401 |
| ENSMUSG00000020282 | 18_Rhbd1f        | 1755.842091 | -0.99077 | 0.157305 | 0.688272 | 2070.125 | 2282.558 | 2655.613 | 161.7281 | 1565.775  | 1799.254 |
| ENSMUSG00000020283 | 5_Pext13         | 824.5278026 | 0.847466 | 0.070463 | 0.688272 | 603.4142 | 542.7301 | 621.3305 | 1845.486 | 686.7234  | 647.4824 |
| ENSMUSG00000020284 | 16_1810043G02Rik | 201.4036783 | -0.79263 | 0.076976 | 0.688272 | 246.076  | 278.2351 | 241.6285 | 68.46158 | 168.5697  | 205.4511 |
| ENSMUSG00000020287 | 15_Mpg           | 232.733703  | -0.62906 | 0.164125 | 0.688272 | 263.1308 | 300.5626 | 284.2012 | 82.35234 | 216.085   | 250.0693 |
| ENSMUSG00000020290 | 14_Xpo1          | 4527.630454 | 1.086811 | 0.032463 | 0.688272 | 3150.261 | 2594.284 | 2951.32  | 11375.54 | 3608.975  | 3485.406 |
| ENSMUSG00000020300 | 14_Cpeb4         | 3987.538745 | 0.707239 | 0.085422 | 0.688272 | 2978.089 | 3019.366 | 3090.544 | 7941.543 | 3665.542  | 3230.149 |
| ENSMUSG00000020305 | 13_Asb3          | 268.3038886 | 0.79667  | 0.07893  | 0.688272 | 189.2268 | 176.0438 | 223.2187 | 567.5366 | 217.2173  | 236.5801 |
| ENSMUSG00000020308 | 5_Tpgs1          | 86.9835532  | -1.44412 | 0.093263 | 0.688272 | 98.26799 | 124.5188 | 158.7845 | 1.984394 | 66.74907  | 71.59661 |
| ENSMUSG00000020309 | 6_Cha2c          | 151.1803914 | 0.735594 | 0.133501 | 0.688272 | 121.0077 | 95.32127 | 124.2661 | 327.4249 | 117.6594  | 121.403  |
| ENSMUSG00000020311 | 17_Erlac1        | 814.7762435 | 0.773722 | 0.117567 | 0.688272 | 596.9172 | 632.0402 | 575.3061 | 1861.361 | 609.7923  | 613.2406 |
| ENSMUSG00000020326 | 7_Cong1          | 3468.904995 | 0.780062 | 0.07837  | 0.688272 | 2588.265 | 2474.918 | 2596.932 | 7410.718 | 2819.249  | 2932.346 |
| ENSMUSG00000020328 | 10_Nudcd2        | 513.9115003 | 0.655468 | 0.121866 | 0.688272 | 430.4301 | 349.5113 | 417.6722 | 1012.041 | 452.536   | 421.2786 |
| ENSMUSG00000020329 | 12_Polrmt        | 339.6441106 | -1.12616 | 0.108176 | 0.688272 | 389.8234 | 468.0189 | 539.6371 | 29.7659  | 306.5932  | 304.0262 |
| ENSMUSG00000020332 | 7_Meikin         | 4.679628379 | 2.12845  | 0.196988 | 0.688272 | 0.812132 | 0        | 4.602448 | 15.87515 | 6.788041  | 0        |
| ENSMUSG00000020346 | 16_Mgat1         | 1358.002993 | -0.6028  | 0.165384 | 0.688272 | 1547.924 | 1538.88  | 1826.021 | 503.0438 | 1428.883  | 1303.266 |
| ENSMUSG00000020349 | 4_Ppp2ca         | 11904.9735  | 0.5136   | 0.119428 | 0.688272 | 10082.62 | 9076.99  | 10264.61 | 19450.03 | 12158.51  | 10397.07 |
| ENSMUSG00000020358 | 17_Hnnpab        | 7173.673066 | 0.433601 | 0.168309 | 0.688272 | 6046.324 | 5597.334 | 6667.797 | 11059.03 | 7375.206  | 6296.351 |
| ENSMUSG00000020361 | 13_Hspa4         | 6391.934089 | 0.464098 | 0.174452 | 0.688272 | 5182.215 | 5052.886 | 5883.08  | 10485.54 | 6336.636  | 5411.251 |
| ENSMUSG00000020362 | 13_Cno6t         | 4582.835503 | 0.86886  | 0.061149 | 0.688272 | 3199.801 | 3057.151 | 3472.547 | 10297.02 | 3915.568  | 3554.927 |
| ENSMUSG00000020364 | 14_Zfp354a       | 210.9534578 | 0.617325 | 0.160291 | 0.688272 | 182.7297 | 178.62   | 138.0735 | 408.7851 | 169.701   | 187.8114 |
| ENSMUSG00000020368 | 15_Canx          | 9933.525059 | 0.645388 | 0.095251 | 0.688272 | 7696.577 | 7341.456 | 8206.166 | 18664.21 | 9471.579  | 8221.159 |
| ENSMUSG00000020374 | 16_Rasgef1c      | 8.727134918 | -1.19519 | 0.10466  | 0.688272 | 11.36985 | 14.59875 | 10.35551 | 3.968787 | 7.919381  | 4.150528 |
| ENSMUSG00000020377 | 14_Ltcl4s        | 6.178317823 | -2.0097  | 0.068223 | 0.688272 | 12.99411 | 12.0225  | 4.602448 | 0        | 2.26268   | 5.18816  |
| ENSMUSG00000020380 | 16_Rad50         | 1464.832058 | 0.415251 | 0.195007 | 0.688272 | 1292.914 | 1106.929 | 1366.927 | 2268.162 | 1380.235  | 1373.825 |
| ENSMUSG00000020385 | 16_Clk4          | 1549.527821 | 0.64696  | 0.083594 | 0.688272 | 1214.138 | 1136.985 | 1272.577 | 2831.73  | 1298.778  | 1542.959 |
| ENSMUSG00000020386 | 5_Sarl1b         | 1260.097628 | 0.623874 | 0.092633 | 0.688272 | 991.6134 | 899.1115 | 1085.027 | 2265.185 | 1246.737  | 1072.912 |
| ENSMUSG00000020388 | 12_Pdlim4        | 133.0315955 | -1.01216 | 0.057866 | 0.688272 | 180.2933 | 210.3938 | 142.6759 | 30.7581  | 107.4773  | 126.5911 |
| ENSMUSG00000020389 | 18_Cdk13         | 198.0412509 | 0.839437 | 0.031021 | 0.688272 | 136.4382 | 135.6825 | 154.182  | 380.0114 | 188.9338  | 192.9996 |
| ENSMUSG00000020390 | 12_Ube2b         | 3538.90972  | 0.735173 | 0.082981 | 0.688272 | 2645.927 | 2450.014 | 2873.078 | 7233.115 | 3013.89   | 3017.434 |
| ENSMUSG00000020397 | 15_Med7          | 550.6613454 | 0.899183 | 0.044328 | 0.688272 | 401.1933 | 359.8163 | 392.3587 | 1199.566 | 520.4164  | 430.6173 |
| ENSMUSG00000020399 | 14_Havcr2        | 72.03130134 | 0.748712 | 0.14132  | 0.688272 | 75.52829 | 32.63251 | 52.92816 | 91.28211 | 128.9728  | 50.84397 |
| ENSMUSG00000020413 | 11_Hus1          | 540.4729347 | 0.460294 | 0.15504  | 0.688272 | 473.4731 | 419.9289 | 471.751  | 847.3361 | 550.962   | 479.386  |
| ENSMUSG00000020420 | 8_Zfp607         | 201.6270317 | 0.550388 | 0.193386 | 0.688272 | 193.2875 | 150.2813 | 147.2783 | 372.0738 | 191.1965  | 155.6448 |
| ENSMUSG00000020424 | 3_Gatsl3         | 340.7708016 | -0.89435 | 0.112962 | 0.688272 | 362.211  | 465.4426 | 501.6669 | 68.46158 | 305.4618  | 341.3809 |
| ENSMUSG00000020431 | 5_Adcy1          | 181.9901149 | -0.46618 | 0.194378 | 0.688272 | 177.0448 | 292.8338 | 163.3869 | 174.6266 | 134.6295  | 149.419  |
| ENSMUSG00000020435 | 17_Osbp2         | 81.99424678 | -1.03271 | 0.018647 | 0.688272 | 134.0018 | 137.4    | 58.68122 | 50.60204 | 53.17298  | 58.1075  |
| ENSMUSG00000020439 | 17_Smtm          | 512.3765374 | -0.29428 | 0.047246 | 0.688272 | 532.7587 | 1097.483 | 553.4444 | 70.44597 | 305.4618  | 514.6654 |
| ENSMUSG00000020440 | 13_Arf5          | 1933.638255 | -0.56635 | 0.061983 | 0.688272 | 1976.73  | 2218.152 | 2730.403 | 1168.808 | 1760.365  | 1747.372 |
| ENSMUSG00000020441 | 6_2310033P09Rik  | 244.8641178 | -0.65464 | 0.158495 | 0.688272 | 270.44   | 312.5851 | 315.2677 | 81.36014 | 247.7635  | 241.7683 |
| ENSMUSG00000020444 | 19_Guk1          | 484.4190058 | -0.51472 | 0.175168 | 0.688272 | 511.6433 | 591.6789 | 606.3726 | 228.2053 | 457.0614  | 511.5526 |
| ENSMUSG00000020453 | 17_Pat21         | 257.4331588 | -0.58975 | 0.065133 | 0.688272 | 276.1249 | 326.3251 | 325.6232 | 158.7515 | 190.0651  | 267.7091 |
| ENSMUSG00000020457 | 13_Drg1          | 1616.493904 | 0.461139 | 0.139983 | 0.688272 | 1378.188 | 1256.352 | 1446.319 | 2499.344 | 1686.828  | 1431.932 |
| ENSMUSG00000020458 | 16_Rtn4          | 2708.761695 | 0.87601  | 0.080202 | 0.688272 | 1948.305 | 1879.804 | 1904.263 | 6407.607 | 2260.418  | 1852.173 |
| ENSMUSG00000020459 | 14_Mitf2         | 495.5834424 | 0.657022 | 0.086272 | 0.688272 | 382.5143 | 387.2964 | 384.3044 | 922.743  | 452.536   | 444.1065 |
| ENSMUSG00000020460 | 15_Rps27a        | 12550.07959 | 0.402799 | 0.164375 | 0.688272 | 11390.97 | 10052.53 | 10984.89 | 18567.97 | 12108.86  | 12194.25 |
| ENSMUSG00000020461 | 9_Chlc1          | 4.881454908 | 1.96534  | 0.097763 | 0.688272 | 4.060661 | 1.7175   | 0        | 13.89076 | 3.39402   | 6.225792 |
| ENSMUSG00000020463 | 15_Smek2         | 3023.216662 | 1.048097 | 0.035051 | 0.688272 | 2038.452 | 1789.635 | 2084.909 | 7414.687 | 2531.399  | 2279.678 |
| ENSMUSG00000020464 | 15_Pnp1t         | 1241.192828 | 1.352454 | 0.007841 | 0.688272 | 667.5727 | 577.0801 | 851.453  | 3226.624 | 1169.806  | 954.6215 |
| ENSMUSG00000020467 | 15_Etfep1        | 7990.291494 | 0.449693 | 0.173462 | 0.68827  |          |          |          |          |           |          |

|                    |                  |             |           |          |          |          |          |          |          |          |          |
|--------------------|------------------|-------------|-----------|----------|----------|----------|----------|----------|----------|----------|----------|
| ENSMUSG00000020635 | 7_Fkbp1b         | 29.62808039 | -0.83391  | 0.099575 | 0.688272 | 43.85514 | 38.64376 | 31.06653 | 16.86735 | 32.80886 | 14.52685 |
| ENSMUSG00000020638 | 7_Cmpk2          | 4569.046703 | 1.03687   | 0.002156 | 0.688272 | 2752.316 | 2401.066 | 3830.388 | 7298.6   | 6679.432 | 4452.479 |
| ENSMUSG00000020648 | 2_Dus4l          | 112.0003678 | 0.721549  | 0.105569 | 0.688272 | 82.02535 | 83.29877 | 88.59713 | 221.2599 | 83.71917 | 113.1019 |
| ENSMUSG00000020650 | 14_Bcap2l9       | 638.0593516 | 0.997109  | 0.054944 | 0.688272 | 452.3576 | 407.9064 | 417.6722 | 1588.507 | 463.8494 | 498.0634 |
| ENSMUSG00000020659 | 15_Chl1          | 458.0604628 | 0.645315  | 0.058667 | 0.688272 | 329.7257 | 330.6188 | 411.9191 | 825.5078 | 485.3449 | 365.2465 |
| ENSMUSG00000020664 | 9_Dld            | 2186.781363 | 0.85145   | 0.078123 | 0.688272 | 1606.397 | 1508.824 | 1563.682 | 5036.391 | 1752.446 | 1652.948 |
| ENSMUSG00000020669 | 15_Sh3yl1        | 554.5546026 | 0.522039  | 0.182143 | 0.688272 | 452.3576 | 398.4601 | 515.4742 | 995.1734 | 486.4762 | 479.386  |
| ENSMUSG00000020671 | 8_Rab10          | 8023.928459 | 0.711805  | 0.077516 | 0.688272 | 5785.63  | 5684.068 | 6781.708 | 15704.49 | 7480.421 | 6707.254 |
| ENSMUSG00000020674 | 16_Pxdn          | 489.6847225 | -0.5897   | 0.106351 | 0.688272 | 532.7587 | 785.7565 | 446.4375 | 330.4015 | 328.0886 | 514.6655 |
| ENSMUSG00000020676 | 2_Cd11           | 207.1104794 | 1.067676  | 0.026046 | 0.688272 | 148.6202 | 122.8013 | 130.0192 | 484.192  | 188.9338 | 168.0964 |
| ENSMUSG00000020677 | 7_Ddx52          | 953.9520991 | 0.770695  | 0.064737 | 0.688272 | 739.0403 | 693.8702 | 682.313  | 1940.737 | 867.7379 | 800.0143 |
| ENSMUSG00000020681 | 14_Ace           | 456.5723409 | -0.51904  | 0.140098 | 0.688272 | 492.9642 | 661.2377 | 459.0942 | 281.7839 | 334.8767 | 509.4773 |
| ENSMUSG00000020687 | 13_Cdc27         | 1848.176374 | 0.772203  | 0.068095 | 0.688272 | 1405.801 | 1230.589 | 1458.976 | 3796.145 | 1648.363 | 1549.185 |
| ENSMUSG00000020692 | 14_Nle1          | 189.5740949 | -0.75375  | 0.179838 | 0.688272 | 227.397  | 220.6988 | 265.7914 | 40.68007 | 187.8025 | 195.0748 |
| ENSMUSG00000020694 | 16_Tlk2          | 1582.013883 | 0.49123   | 0.148117 | 0.688272 | 1425.292 | 1114.658 | 1406.048 | 2527.125 | 1684.565 | 1334.395 |
| ENSMUSG00000020695 | 14_Mrc2          | 1501.090791 | -0.98611  | 0.068482 | 0.688272 | 1918.256 | 2324.637 | 1742.027 | 339.3313 | 1002.367 | 1679.926 |
| ENSMUSG00000020712 | 11_Tcam1         | 3.124336028 | 1.555743  | 0.189192 | 0.688272 | 0.812132 | 1.7175   | 2.301224 | 2.97659  | 7.88804  | 4.150528 |
| ENSMUSG00000020719 | 14_Ddx5          | 32179.30321 | 0.606195  | 0.121716 | 0.688272 | 25659.32 | 25269.58 | 25620.68 | 60744.27 | 2135.3   | 27646.67 |
| ENSMUSG00000020720 | 13_Psmid12       | 2098.936653 | 0.568485  | 0.118532 | 0.688272 | 1687.611 | 1544.892 | 1839.829 | 3686.011 | 2056.776 | 1778.501 |
| ENSMUSG00000020723 | 3_Cacng4         | 192.8090855 | -1.12733  | 0.002871 | 0.688272 | 263.1308 | 339.2063 | 191.0016 | 96.24309 | 107.4773 | 159.7953 |
| ENSMUSG00000020738 | 16_Sumo2         | 6352.898339 | 0.819591  | 0.075849 | 0.688272 | 4742.04  | 4240.509 | 4803.806 | 14066.37 | 5266.388 | 4998.274 |
| ENSMUSG00000020743 | 15_Mif4gd        | 848.4115966 | -0.45683  | 0.164136 | 0.688272 | 886.0362 | 984.1278 | 1074.672 | 476.2545 | 824.7469 | 844.6325 |
| ENSMUSG00000020744 | 13_Slc25a19      | 199.0555307 | -0.83371  | 0.062872 | 0.688272 | 264.7551 | 258.4838 | 241.6285 | 66.47719 | 160.8503 | 202.3383 |
| ENSMUSG00000020745 | 15_Pafah1b1      | 6015.867487 | 0.738714  | 0.07221  | 0.688272 | 4544.692 | 4433.727 | 4547.219 | 12115.72 | 5333.137 | 5120.714 |
| ENSMUSG00000020747 | 17_Z310067B10Rik | 1325.717528 | -0.99683  | 0.109163 | 0.688272 | 1462.953 | 1833.432 | 1982.505 | 187.5252 | 1157.361 | 1310.529 |
| ENSMUSG00000020766 | 4_Galk1          | 112.6028738 | -1.23723  | 0.051994 | 0.688272 | 138.0625 | 185.49   | 150.7302 | 14.88295 | 17.27443 | 115.1772 |
| ENSMUSG00000020770 | 13_Unk           | 450.3132945 | -0.82764  | 0.054638 | 0.688272 | 488.0914 | 603.7014 | 636.2885 | 159.7347 | 369.9482 | 444.1065 |
| ENSMUSG00000020774 | 9_Aspa           | 137.5557266 | 0.939891  | 0.10517  | 0.688272 | 96.64373 | 109.0613 | 77.09101 | 348.2611 | 78.06247 | 116.2148 |
| ENSMUSG00000020782 | 18_Ligl2         | 1471.686234 | -1.02765  | 0.156578 | 0.688272 | 1610.458 | 1922.742 | 2390.972 | 118.0714 | 192.991  | 1487.964 |
| ENSMUSG00000020783 | 14_1200014J11Rik | 1242.754573 | 0.356295  | 0.15959  | 0.688272 | 1111.809 | 1028.783 | 1129.901 | 1668.875 | 1276.152 | 1241.008 |
| ENSMUSG00000020790 | 14_Ankfy1        | 4878.547938 | 0.36828   | 0.147023 | 0.688272 | 4219.027 | 3755.315 | 4803.806 | 6053.393 | 5764.178 | 4675.57  |
| ENSMUSG00000020794 | 13_Ube2g1        | 1492.525    | 0.986389  | 0.048085 | 0.688272 | 1017.602 | 963.5177 | 1022.894 | 3622.511 | 127.322  | 1111.304 |
| ENSMUSG00000020798 | 14_Spns3         | 20.73364824 | -0.87928  | 0.105452 | 0.688272 | 25.98823 | 22.32751 | 32.21714 | 9.921968 | 21.49546 | 12.45158 |
| ENSMUSG00000020802 | 8_Ube2o          | 611.3455376 | -0.77629  | 0.1703   | 0.688272 | 741.4767 | 771.1577 | 803.1273 | 123.0324 | 572.5481 | 656.8211 |
| ENSMUSG00000020804 | 12_Aanat         | 7.129263227 | -1.40094  | 0.133178 | 0.688272 | 15.43051 | 5.152501 | 10.35551 | 0.992197 | 5.656701 | 5.18816  |
| ENSMUSG00000020808 | 3_Fam64a         | 128.076326  | -0.69401  | 0.119748 | 0.688272 | 161.6143 | 141.6938 | 171.4412 | 46.63325 | 126.7101 | 20.3653  |
| ENSMUSG00000020810 | 5_Cygb           | 517.5666605 | -0.105897 | 0.067939 | 0.688272 | 639.148  | 751.4064 | 707.6264 | 91.28211 | 599.7662 | 556.1708 |
| ENSMUSG00000020811 | 16_Wscd1         | 230.8850084 | -1.53212  | 0.009441 | 0.688272 | 361.3988 | 435.3864 | 232.4236 | 37.70348 | 110.8713 | 207.5264 |
| ENSMUSG00000020821 | 17_Kif1c         | 11805.71551 | -0.57479  | 0.191306 | 0.688272 | 12624.59 | 14144.47 | 15611.51 | 4312.087 | 12027.28 | 12114.35 |
| ENSMUSG00000020829 | 9_Slc46a1        | 104.6649023 | -0.87437  | 0.070591 | 0.688272 | 115.3228 | 163.1625 | 127.7179 | 33.73469 | 78.06247 | 109.989  |
| ENSMUSG00000020839 | 16_Tmigd1        | 643.1594096 | 0.751178  | 0.054361 | 0.688272 | 462.1032 | 427.6576 | 548.842  | 1221.394 | 644.8639 | 554.0955 |
| ENSMUSG00000020841 | 5_Cdp            | 17205.11789 | 0.592163  | 0.09929  | 0.688272 | 13723.41 | 12962.83 | 14482.75 | 30561.65 | 15942.85 | 15557.22 |
| ENSMUSG00000020859 | 16_Spag9         | 3578.842311 | 0.552526  | 0.140048 | 0.688272 | 3009.762 | 2900.858 | 2794.837 | 6445.311 | 3269.573 | 3052.714 |
| ENSMUSG00000020863 | 15_Luc7l3        | 3118.119353 | 0.65709   | 0.139111 | 0.688272 | 2397.414 | 2300.592 | 2562.413 | 6452.256 | 2516.1   | 2479.941 |
| ENSMUSG00000020866 | 17_Cacna1g       | 352.9174691 | -1.37232  | 0.101214 | 0.688272 | 412.5631 | 670.6839 | 444.1363 | 78.38355 | 177.6204 | 334.1175 |
| ENSMUSG00000020868 | 15_Xylt2         | 248.0781272 | -1.12932  | 0.057377 | 0.688272 | 297.2404 | 395.0251 | 329.0751 | 38.69568 | 199.1159 | 229.3167 |
| ENSMUSG00000020877 | 11_Scrn2         | 207.11685   | -1.22249  | 0.096096 | 0.688272 | 276.1249 | 304.8563 | 288.8036 | 13.89076 | 162.913  | 196.1125 |
| ENSMUSG00000020882 | 17_Cacnb1        | 99.5212345  | -0.74827  | 0.132951 | 0.688272 | 108.0136 | 144.27   | 121.9649 | 34.72689 | 66.74907 | 121.403  |
| ENSMUSG00000020886 | 16_Dlg4          | 172.6101511 | -0.87379  | 0.07078  | 0.688272 | 256.6338 | 254.1901 | 158.7845 | 54.57082 | 165.1757 | 146.3061 |
| ENSMUSG00000020888 | 16_Dvl2          | 418.1400574 | -0.74046  | 0.138583 | 0.688272 | 479.158  | 536.7189 | 553.4444 | 115.0948 | 382.393  | 442.0313 |
| ENSMUSG00000020889 | 11_Nr1d1         | 5407.502453 | -0.74944  | 0.195043 | 0.688272 | 6165.707 | 7075.243 | 7102.729 | 1032.877 | 5249.418 | 5819.041 |
| ENSMUSG00000020892 | 10_Aloxex3       | 16.24133021 | -0.18058  | 0.056402 | 0.688272 | 19.49117 | 24.90376 | 21.86163 | 10.91416 | 6.788041 | 13.48922 |
| ENSMUSG00000020895 | 14_Tmem107       | 85.28641732 | -0.59039  | 0.139717 | 0.688272 | 86.08601 | 106.485  | 115.0612 | 47.62545 | 59.96103 | 96.49978 |
| ENSMUSG00000020900 | 15_Myh10         | 1321.446229 | -0.39245  | 0.139649 | 0.688272 | 1461.838 | 1626.473 | 1411.801 | 979.2983 | 1057.803 | 1391.465 |
| ENSMUSG00000020902 | 12_Ntn1          | 1939.986484 | -0.55377  | 0.177767 | 0.688272 | 2216.309 | 2261.948 | 2445.051 | 791.7731 | 1810.144 | 2114.694 |
| ENSMUSG00000020907 | 1_Rcvm           | 39.08210312 | -1.36649  | 0.019242 | 0.688272 | 81.21322 | 64.40627 | 23.01224 | 19.84394 | 29.41484 | 16.60211 |
| ENSMUSG00000020910 | 16_Adpm          | 280.2202563 | 0.528986  | 0.124313 | 0.688272 | 244.4518 | 213.8288 | 230.1224 | 462.3637 | 266.9963 | 263.5585 |
| ENSMUSG00000020911 | 14_Krt19         | 5269.951599 | -0.80663  | 0.176129 | 0.688272 | 5346.266 | 5958.009 | 8813.689 | 972.3529 | 5192.851 | 5336.542 |
| ENSMUSG00000020914 | 17_Top2a         | 3333.932425 | 0.566647  | 0.096219 | 0.688272 | 2969.155 | 2157.181 | 2936.362 | 5223.916 | 3925.75  | 2791.23  |
| ENSMUSG00000020919 | 11_Staf5b        | 802.5620639 | -0.47297  | 0.176943 | 0.688272 | 895.7818 | 907.699  | 995.2795 | 414.7383 | 761.3919 | 840.482  |
| ENSMUSG00000020926 | 16_Adam11        | 64.19407729 | -1.26243  | 0.076096 | 0.688272 | 79.58895 | 135.6825 | 56.37999 | 6.945378 | 46.38494 | 60.18266 |
| ENSMUSG00000020935 | 8_Dcackd         | 515.3400737 | -0.7181   | 0.182176 | 0.688272 | 579.8624 | 649.2152 | 693.8191 | 121.048  | 527.2045 | 520.8913 |
| ENSMUSG00000020937 | 14_Plcl3         | 684.1579914 | -0.92208  | 0.168574 | 0.688272 | 839.7447 | 804.649  | 1042.455 | 78.38355 | 615.449  | 724.2672 |
| ENSMUSG00000020948 | 8_Khlh28         | 224.5891283 | 0.623076  | 0.079036 | 0.688272 | 170.5478 | 182.9138 | 177.1943 | 384.9724 | 228.5307 | 203.3759 |
| ENSMUSG00000020949 | 8_Fkbp3          | 940.8309138 | 0.845496  | 0.101055 | 0.688272 | 726.8583 | 648.3564 | 643.1922 | 2252.287 | 694.6428 | 679.649  |
| ENSMUSG00000020952 | 9_Scd1           | 1628.227456 | 0.734065  | 0.074608 | 0.688272 | 1223.071 | 1119.81  | 1325.505 | 3225.632 | 1591.796 | 1283.551 |
| ENSMUSG00000020953 | 16_Coch          | 98.49600135 | 0.683561  | 0.117031 | 0.688272 | 82.83748 | 66.98252 | 77.09101 | 189.5096 | 90.50721 | 84.0482  |
| ENSMUSG00000020954 | 15_Strn3         | 3689.481797 | 0.910894  | 0.051959 | 0.688272 | 2608.569 | 2315.191 | 2793.686 | 8339.414 | 3125.893 | 2954.138 |
| ENSMUSG00000020955 | 8_Ap4s1          | 336.6523344 | 0.571275  | 0.190531 | 0.688272 | 276.1249 | 269.6476 | 266.942  | 662.7875 | 283.9664 | 260.4456 |
| ENSMUSG00000020962 | 13_Glt2a1        | 755.2475845 | 0.593585  | 0.143709 | 0.688272 | 633.4631 | 588.2439 | 584.511  | 1438.685 | 662.9553 | 623.6169 |
| ENSMUSG00000020982 | 8_Nemf           | 1320.484495 | 0.626334  | 0.12033  | 0.688272 | 1047.651 | 999.5853 | 1067.768 | 2534.071 | 1194.965 | 1079.136 |
| ENSMUSG00000020986 | 13_Sec23a        | 1584.938455 | 0.450439  | 0.171198 | 0.688272 | 1319.715 | 1276.962 | 1422.157 | 2549.946 | 1518.258 | 1422.594 |
| ENSMUSG00000020993 | 8_Trappc6b       | 1025.06523  | 0.618035  | 0.146681 | 0.688272 | 814.5686 | 744.5364 | 867.5615 | 2028.05  | 866.8065 | 829.068  |
| ENSMUSG00000021000 | 15_Ctage5        | 2951.80706  | 0.484657  | 0.147639 | 0.688272 | 2511.113 | 2253.361 | 2617.643 | 4830.014 | 2884.917 | 2613.795 |
| ENSMUSG00000021012 | 15_Zc3h14        | 2751.075892 | 0.        |          |          |          |          |          |          |          |          |

|                     |                 |              |          |          |          |          |          |          |          |          |           |
|---------------------|-----------------|--------------|----------|----------|----------|----------|----------|----------|----------|----------|-----------|
| ENSMUSG000000021180 | 8_Rps6ka5       | 218.6947824  | 0.631507 | 0.10723  | 0.688272 | 185.1661 | 157.1513 | 172.5918 | 399.8553 | 187.8025 | 209.6017  |
| ENSMUSG000000021182 | 14_Ccdc88c      | 255.903448   | -0.77633 | 0.102807 | 0.688272 | 281.8099 | 340.0651 | 347.4849 | 79.37575 | 213.8233 | 272.8972  |
| ENSMUSG000000021187 | 14_Tc2n         | 165.7300288  | 1.130855 | 0.080565 | 0.688272 | 86.08601 | 114.2138 | 111.6094 | 483.1998 | 88.24453 | 111.0266  |
| ENSMUSG000000021188 | 14_Trip11       | 2361.998316  | 0.518177 | 0.149449 | 0.688272 | 1955.614 | 1794.788 | 2076.855 | 4082.89  | 220.821  | 2041.022  |
| ENSMUSG000000021189 | 11_Abxn3        | 1992.057099  | 0.643228 | 0.094495 | 0.688272 | 1530.057 | 1437.548 | 1698.303 | 3719.746 | 1770.547 | 1796.141  |
| ENSMUSG000000021200 | 14_Asb2         | 74.80770972  | -1.10994 | 0.087803 | 0.688272 | 90.9588  | 137.4    | 78.24162 | 11.90636 | 45.2536  | 85.08583  |
| ENSMUSG000000021213 | 11_Akr1c13      | 793.6385908  | 0.607078 | 0.063952 | 0.688272 | 670.009  | 568.4926 | 648.9452 | 1313.669 | 815.8962 | 745.0198  |
| ENSMUSG000000021218 | 9_Gdi2          | 7839.693665  | 0.778196 | 0.075495 | 0.688272 | 5938.31  | 5468.521 | 5918.749 | 16593.5  | 6831.032 | 6288.05   |
| ENSMUSG000000021223 | 13_Papin        | 182.9091745  | -1.10566 | 0.04846  | 0.688272 | 206.2816 | 278.2351 | 264.6408 | 34.72689 | 140.2862 | 173.2846  |
| ENSMUSG000000021243 | 14_Fcf1         | 678.5162514  | 0.406023 | 0.107126 | 0.688272 | 622.0932 | 537.5776 | 591.4146 | 891.9849 | 754.6038 | 673.4232  |
| ENSMUSG000000021245 | 14_Mlh3         | 551.7872902  | 0.647392 | 0.109385 | 0.688272 | 448.297  | 417.3526 | 424.5759 | 1052.721 | 434.4346 | 533.3429  |
| ENSMUSG000000021253 | 6_Tgfb3         | 872.5235519  | -0.51807 | 0.137237 | 0.688272 | 1011.105 | 1123.245 | 948.1044 | 509.9892 | 627.8938 | 1014.804  |
| ENSMUSG000000021256 | 5_Vash1         | 13.56941144  | -1.33253 | 0.035373 | 0.688272 | 17.05478 | 17.175   | 24.16285 | 5.953181 | 5.656701 | 11.41395  |
| ENSMUSG000000021259 | 4_Cyp46a1       | 16.24882506  | -1.68117 | 0.011966 | 0.688272 | 31.67315 | 30.91501 | 11.50612 | 5.953181 | 10.18206 | 7.263424  |
| ENSMUSG000000021260 | 7_Hhpl1         | 3.322071933  | -1.94985 | 0.142007 | 0.688272 | 2.436397 | 7.728752 | 5.753061 | 2.97659  | 0        | 1.037632  |
| ENSMUSG000000021262 | 14_Evl          | 187.6732479  | -0.49752 | 0.164587 | 0.688272 | 233.8941 | 260.2013 | 164.5375 | 111.126  | 179.8831 | 176.3975  |
| ENSMUSG000000021264 | 11_Yy1          | 1349.7688    | 0.756925 | 0.071778 | 0.688272 | 998.1104 | 960.0827 | 1052.81  | 2758.307 | 1187.907 | 1141.395  |
| ENSMUSG000000021268 | 17_Meg3         | 1103.254127  | -0.64344 | 0.053496 | 0.688272 | 1287.23  | 1554.338 | 1194.335 | 847.3361 | 605.267  | 1131.019  |
| ENSMUSG000000021270 | 13_Hsp90aa1     | 10603.16856  | 0.750721 | 0.059354 | 0.688272 | 8191.165 | 7373.229 | 8150.936 | 20738.9  | 10632.33 | 8532.448  |
| ENSMUSG000000021282 | 16_Elf5         | 5578.892944  | 0.850741 | 0.067536 | 0.688272 | 4074.467 | 3692.626 | 4173.27  | 12476.87 | 4894.177 | 4161.942  |
| ENSMUSG000000021290 | 5_2010107E04Rik | 1092.421865  | 0.337742 | 0.108634 | 0.688272 | 916.8972 | 815.8127 | 831.8926 | 2080.637 | 940.1436 | 969.1483  |
| ENSMUSG000000021294 | 7_Klf2a         | 991.3088112  | -1.04202 | 0.022844 | 0.688272 | 1166.222 | 1252.917 | 1584.393 | 294.6825 | 699.1682 | 950.471   |
| ENSMUSG000000021302 | 9_Gggs1         | 573.65763    | 0.870038 | 0.052998 | 0.688272 | 435.3028 | 356.3813 | 425.7265 | 1243.223 | 522.6791 | 458.6334  |
| ENSMUSG000000021314 | 11_Amph         | 148.6816841  | -0.58305 | 0.186163 | 0.688272 | 172.9842 | 262.7776 | 98.95264 | 141.8841 | 96.16391 | 119.3277  |
| ENSMUSG000000021327 | 16_Zkscan3      | 1536.336824  | 0.391435 | 0.190751 | 0.688272 | 1246.623 | 1366.272 | 1374.981 | 2297.928 | 1439.065 | 1493.1573 |
| ENSMUSG000000021357 | 13_Exoc2        | 1715.242829  | 0.408779 | 0.154057 | 0.688272 | 1494.323 | 1386.882 | 1540.67  | 2520.18  | 1677.777 | 1671.625  |
| ENSMUSG000000021360 | 15_Gcnt2        | 259.57036    | 0.590074 | 0.066419 | 0.688272 | 213.5908 | 179.4788 | 228.9718 | 406.8007 | 255.6829 | 272.8972  |
| ENSMUSG000000021374 | 9_Nup153        | 2590.319251  | 0.608538 | 0.084209 | 0.688272 | 2066.876 | 1858.335 | 2231.037 | 4515.488 | 2562.485 | 2307.694  |
| ENSMUSG000000021376 | 10_Tpmt         | 148.4082065  | 0.808703 | 0.081361 | 0.688272 | 108.8257 | 109.0613 | 105.8563 | 316.5108 | 114.2654 | 135.9298  |
| ENSMUSG000000021377 | 14_Dek          | 3646.311301  | 1.137855 | 0.031045 | 0.688272 | 2355.995 | 1995.736 | 2484.172 | 9493.339 | 2861.159 | 2687.467  |
| ENSMUSG000000021379 | 1_Id4           | 196.4069669  | 0.697674 | 0.199559 | 0.688272 | 148.6202 | 143.4113 | 157.6339 | 460.3793 | 121.0534 | 147.3438  |
| ENSMUSG000000021388 | 13_Aspn         | 712.199705   | 0.899361 | 0.12553  | 0.688272 | 540.88   | 490.3464 | 460.2448 | 1859.377 | 362.0288 | 560.3213  |
| ENSMUSG000000021390 | 5_Ogn           | 2751.580959  | 0.949153 | 0.128213 | 0.688272 | 1951.554 | 2109.949 | 1571.736 | 7578.399 | 1255.788 | 2042.06   |
| ENSMUSG000000021392 | 7_Nol8          | 540.4654844  | 0.804996 | 0.084399 | 0.688272 | 382.5143 | 359.8163 | 438.3832 | 1184.683 | 458.1927 | 419.2034  |
| ENSMUSG000000021395 | 10_Spin1        | 3607.142728  | 0.405237 | 0.148054 | 0.688272 | 3084.478 | 2937.785 | 3289.6   | 5200.104 | 3774.151 | 3356.74   |
| ENSMUSG000000021403 | 2_Serpinb9c     | 13.720444631 | 1.530482 | 0.056482 | 0.688272 | 11.36985 | 1.7175   | 8.054285 | 14.88295 | 32.80886 | 13.48922  |
| ENSMUSG000000021404 | 12_Serpinb9c    | 7.077773514  | 1.677721 | 0.060031 | 0.688272 | 3.248529 | 3.435001 | 3.451836 | 16.86735 | 11.3134  | 4.150528  |
| ENSMUSG000000021408 | 14_Rlpk1        | 1278.770419  | 0.455352 | 0.105411 | 0.688272 | 1089.069 | 978.1165 | 1169.022 | 1816.712 | 1436.802 | 1182.901  |
| ENSMUSG000000021413 | 8_Prp4b         | 2301.438476  | 0.532917 | 0.132674 | 0.688272 | 1899.577 | 1821.409 | 1922.673 | 3986.647 | 2114.475 | 2063.865  |
| ENSMUSG000000021423 | 5_Ly86          | 158.0912962  | 0.553954 | 0.116448 | 0.688272 | 151.0566 | 113.355  | 119.6637 | 207.3691 | 227.3994 | 129.704   |
| ENSMUSG000000021427 | 9_Ssr1          | 5095.376426  | 0.54723  | 0.158711 | 0.688272 | 4153.244 | 3927.065 | 4341.259 | 9380.229 | 4426.934 | 4343.528  |
| ENSMUSG000000021431 | 14_Snmp48       | 366.9686157  | 0.538954 | 0.153393 | 0.688272 | 306.986  | 268.7888 | 322.1714 | 643.9357 | 302.7154 | 399.2144  |
| ENSMUSG000000021432 | 14_Slc5b3       | 409.9487938  | 0.402435 | 0.198761 | 0.688272 | 397.1326 | 291.9751 | 370.4971 | 591.3493 | 431.0406 | 377.6981  |
| ENSMUSG000000021456 | 7_Fbp2          | 68.59532934  | -0.55671 | 0.172507 | 0.688272 | 85.27388 | 79.00502 | 80.54285 | 32.74249 | 48.48309 | 69.52135  |
| ENSMUSG000000021464 | 14_Ror2         | 60.17858026  | -1.13775 | 0.0035   | 0.688272 | 73.90403 | 107.3438 | 66.7355  | 32.74249 | 42.99092 | 37.35475  |
| ENSMUSG000000021470 | 17_Erc6l2       | 698.2034423  | 0.494671 | 0.181674 | 0.688272 | 574.9896 | 555.6114 | 608.6738 | 1218.418 | 599.6103 | 631.9179  |
| ENSMUSG000000021495 | 8_Fam193b       | 1044.862742  | -0.78573 | 0.154614 | 0.688272 | 1323.775 | 1304.442 | 1339.312 | 221.2599 | 976.3465 | 1104.041  |
| ENSMUSG000000021510 | 10_Zfp729a      | 568.5107386  | 1.072015 | 0.046407 | 0.688272 | 406.8782 | 348.6526 | 344.033  | 1469.443 | 394.8377 | 447.2194  |
| ENSMUSG000000021519 | 10_Mtfr3        | 408.5071008  | 0.687252 | 0.120874 | 0.688272 | 300.4889 | 328.0426 | 310.6653 | 838.4063 | 313.3812 | 360.0583  |
| ENSMUSG000000021520 | 4_Uqcrb         | 2346.532519  | 0.299921 | 0.038942 | 0.688272 | 1571.476 | 1486.497 | 1570.586 | 5759.703 | 1917.621 | 1773.313  |
| ENSMUSG000000021537 | 8_Cetn3         | 1482.2865    | 0.820515 | 0.069035 | 0.688272 | 1141.046 | 951.4952 | 1122.997 | 3213.725 | 1228.635 | 1235.82   |
| ENSMUSG000000021546 | 17_Hnmpk        | 17066.44025  | 0.627508 | 0.124923 | 0.688272 | 13501.7  | 12591    | 14144.47 | 33172.12 | 15107.92 | 13881.44  |
| ENSMUSG000000021548 | 10_Ccnh         | 501.2398289  | 0.904882 | 0.069434 | 0.688272 | 362.211  | 354.6638 | 330.2257 | 1184.683 | 382.393  | 393.2626  |
| ENSMUSG000000021549 | 13_Rasa1        | 1964.197504  | 0.962133 | 0.054106 | 0.688272 | 1342.454 | 1264.08  | 1391.09  | 4749.646 | 1525.046 | 1512.868  |
| ENSMUSG000000021555 | 14_Naa35        | 1868.020729  | 0.373326 | 0.149254 | 0.688272 | 1606.397 | 1502.813 | 1774.244 | 2524.149 | 1962.875 | 1837.646  |
| ENSMUSG000000021557 | 14_Agtbbp1      | 357.1298172  | 0.536573 | 0.140667 | 0.688272 | 302.9253 | 298.8451 | 272.6951 | 617.1464 | 332.614  | 318.553   |
| ENSMUSG000000021567 | 14_Nkd2         | 417.401035   | -0.48353 | 0.1441   | 0.688272 | 445.8606 | 628.6052 | 385.4551 | 341.3157 | 283.9664 | 419.2034  |
| ENSMUSG000000021578 | 16_Ccdc127      | 1089.863362  | 0.489619 | 0.16189  | 0.688272 | 916.8972 | 851.8802 | 951.5562 | 1838.541 | 970.6898 | 1009.616  |
| ENSMUSG000000021583 | 6_Erap1         | 2775.074748  | 0.991116 | 0.18539  | 0.688272 | 1886.583 | 1621.32  | 2065.349 | 5912.501 | 2873.604 | 2921.092  |
| ENSMUSG000000021585 | 8_Cast          | 14130.86157  | 0.447348 | 0.124878 | 0.688272 | 11940.78 | 10978.26 | 12953.59 | 21024.65 | 14725.52 | 13162.36  |
| ENSMUSG000000021589 | 12_Rhobtb3      | 121.5541649  | 0.647484 | 0.199171 | 0.688272 | 186.7904 | 181.1963 | 128.8686 | 456.4105 | 142.5489 | 179.5103  |
| ENSMUSG000000021590 | 6_Spata9        | 7.886903631  | 1.322885 | 0.111914 | 0.688272 | 4.872793 | 5.152501 | 3.451836 | 16.86735 | 4.52536  | 12.45158  |
| ENSMUSG000000021592 | 15_Arsk         | 472.9738879  | 0.638105 | 0.160346 | 0.688272 | 399.569  | 401.0364 | 309.5147 | 952.5089 | 326.9573 | 448.2571  |
| ENSMUSG000000021596 | 16_Mctp1        | 52.03780428  | 0.943236 | 0.099073 | 0.688272 | 43.04301 | 36.06751 | 27.61469 | 124.0246 | 44.12226 | 37.35475  |
| ENSMUSG000000021597 | 16_Slf1         | 364.4701686  | 1.008377 | 0.029735 | 0.688272 | 269.6279 | 217.2638 | 239.3273 | 830.4687 | 329.32   | 300.9133  |
| ENSMUSG000000021614 | 16_Vcan         | 537.7508534  | 0.557845 | 0.163546 | 0.688272 | 504.3341 | 437.1039 | 363.5934 | 964.4153 | 543.0432 | 447.0152  |
| ENSMUSG000000021615 | 13_Xrc4         | 284.5233083  | 0.724815 | 0.123791 | 0.688272 | 229.0213 | 198.3713 | 216.3151 | 612.1854 | 224.0053 | 227.2414  |
| ENSMUSG000000021619 | 5_Alg10         | 165.1204563  | 0.768816 | 0.138414 | 0.688272 | 135.6261 | 147.705  | 97.80203 | 325.4406 | 123.3161 | 160.833   |
| ENSMUSG000000021622 | 3_Ckmt2         | 189.1923391  | 0.926222 | 0.134219 | 0.688272 | 96.64373 | 171.75   | 123.1155 | 422.6758 | 66.74907 | 254.2199  |
| ENSMUSG000000021635 | 13_Rad17        | 488.291217   | 0.822955 | 0.07052  | 0.688272 | 331.3499 | 339.2063 | 387.7563 | 1048.752 | 461.5868 | 351.098   |
| ENSMUSG000000021638 | 12_Ocln         | 1597.371139  | 0.408819 | 0.154843 | 0.688272 | 1356.261 | 1282.114 | 1479.687 | 2337.616 | 1554.461 | 1574.088  |
| ENSMUSG000000021640 | 5_Naip1         | 831.4722132  | 0.658834 | 0.040669 | 0.688272 | 676.5061 | 553.0351 | 705.3252 | 1341.45  | 944.669  | 767.8477  |
| ENSMUSG000000021661 | 15_Ankra2       | 549.8810282  | 0.453926 | 0.151079 | 0.688272 | 471.0367 | 474.8889 | 446.4375 | 854.2815 | 494.3956 | 558.2461  |
| ENSMUSG000000021665 | 7_Hexb          | 3767.313816  | 0.492179 | 0.171441 | 0.688272 | 3042.247 | 3025.377 | 3325.269 | 6499.881 | 3453.981 | 3257.1    |

|                    |             |             |           |          |          |          |          |          |          |          |          |
|--------------------|-------------|-------------|-----------|----------|----------|----------|----------|----------|----------|----------|----------|
| ENSMUSG00000021832 | 7_Psmc6     | 2368.595721 | 0.855802  | 0.057851 | 0.688272 | 1826.485 | 1504.53  | 1727.069 | 5172.322 | 2126.919 | 1854.249 |
| ENSMUSG00000021835 | 14_Bmp4     | 246.2553633 | -0.88203  | 0.033058 | 0.688272 | 306.986  | 407.9064 | 242.7792 | 127.9934 | 133.4981 | 258.3704 |
| ENSMUSG00000021840 | 16_Mapk1ip1 | 2344.998105 | 0.403068  | 0.187342 | 0.688272 | 2002.718 | 1864.347 | 2191.916 | 3537.182 | 2349.979 | 2124.033 |
| ENSMUSG00000021843 | 16_Ktn1     | 6115.543222 | 0.734605  | 0.066171 | 0.688272 | 4647.02  | 4209.594 | 4917.716 | 12034.36 | 5484.737 | 5399.837 |
| ENSMUSG00000021867 | 16_Tmem254b | 167.9595325 | 0.503919  | 0.10482  | 0.688272 | 120.1956 | 145.1288 | 151.8808 | 238.1272 | 158.3876 | 194.0372 |
| ENSMUSG00000021870 | 17_Slmap    | 3569.383636 | 0.618653  | 0.117978 | 0.688272 | 2825.408 | 2766.893 | 2854.669 | 6775.712 | 3269.573 | 2924.407 |
| ENSMUSG00000021871 | 17_Pnp      | 1890.843841 | 0.417298  | 0.129492 | 0.688272 | 1759.078 | 1384.305 | 1714.412 | 2084.606 | 2593.032 | 1809.63  |
| ENSMUSG00000021877 | 11_Arl4     | 5800.809078 | 0.833671  | 0.04714  | 0.688272 | 3951.835 | 3994.906 | 4563.328 | 12013.52 | 5604.659 | 4676.608 |
| ENSMUSG00000021886 | 6_Gprb5     | 77.72344579 | 0.632284  | 0.17189  | 0.688272 | 86.08601 | 36.92626 | 59.83183 | 127.9934 | 85.98185 | 89.52135 |
| ENSMUSG00000021893 | 13_Capn7    | 2352.430925 | 0.794387  | 0.076834 | 0.688272 | 1802.121 | 1593.84  | 1766.19  | 5067.149 | 2034.15  | 1851.136 |
| ENSMUSG00000021904 | 5_Sema3g    | 113.0661663 | -0.63846  | 0.094761 | 0.688272 | 115.3228 | 174.3263 | 123.1155 | 60.52401 | 108.6086 | 96.49978 |
| ENSMUSG00000021910 | 15_Nisch    | 4732.3164   | -0.59885  | 0.133933 | 0.688272 | 5210.64  | 6091.974 | 5799.085 | 1964.55  | 4464.268 | 4863.381 |
| ENSMUSG00000021911 | 15_Parg     | 1055.575877 | 0.562847  | 0.152607 | 0.688272 | 851.1145 | 803.7902 | 902.0799 | 1954.628 | 949.1943 | 872.6486 |
| ENSMUSG00000021913 | 7_Ogdhl     | 121.612728  | -1.06918  | 0.039701 | 0.688272 | 151.8687 | 236.1563 | 105.8563 | 36.71128 | 85.98185 | 113.1019 |
| ENSMUSG00000021917 | 14_Spcs1    | 2016.45615  | 0.563146  | 0.09731  | 0.688272 | 1740.399 | 1598.993 | 1544.121 | 3412.165 | 1980.977 | 1822.082 |
| ENSMUSG00000021922 | 15_Ith4     | 2.710132013 | -2.75721  | 0.07504  | 0.688272 | 3.248529 | 5.887502 | 2.301224 | 0.992197 | 1.13134  | 0        |
| ENSMUSG00000021929 | 8_Kpna3     | 1856.648829 | 0.954455  | 0.039089 | 0.688272 | 1328.648 | 1124.104 | 1339.312 | 4230.727 | 1616.685 | 1500.416 |
| ENSMUSG00000021930 | 14_Spyrd7   | 665.9452744 | 0.826061  | 0.057466 | 0.688272 | 484.0308 | 416.4939 | 540.7877 | 1387.091 | 638.0758 | 529.1924 |
| ENSMUSG00000021932 | 13_Rnaseh2b | 514.2548966 | 0.632042  | 0.13145  | 0.688272 | 432.8665 | 373.5563 | 403.8649 | 1005.095 | 433.3033 | 436.8431 |
| ENSMUSG00000021936 | 13_Mapk8    | 778.7097166 | 0.722848  | 0.083807 | 0.688272 | 636.7116 | 593.3964 | 532.7334 | 1559.733 | 673.1474 | 676.5361 |
| ENSMUSG00000021945 | 8_Zmym2     | 2229.075491 | 0.7941    | 0.090172 | 0.688272 | 1681.926 | 1601.569 | 1608.556 | 4959     | 1749.052 | 1774.351 |
| ENSMUSG00000021957 | 6_Tkt       | 118055.1311 | -0.8422   | 0.17267  | 0.688272 | 135553   | 150672   | 168477.2 | 18080.8  | 108250   | 127297.7 |
| ENSMUSG00000021963 | 16_Sap18    | 1281.90041  | 0.59793   | 0.131395 | 0.688272 | 996.4862 | 1044.24  | 1019.442 | 2344.561 | 1174.331 | 1112.342 |
| ENSMUSG00000021965 | 2_Ska3      | 131.1813891 | 0.42677   | 0.170851 | 0.688272 | 109.6378 | 102.1913 | 124.2661 | 181.572  | 145.9429 | 123.4782 |
| ENSMUSG00000021969 | 7_Zdhnc20   | 2477.063322 | 0.797845  | 0.077151 | 0.688272 | 1880.086 | 1565.365 | 1901.962 | 5360.839 | 2046.594 | 2027.533 |
| ENSMUSG00000021973 | 8_Micu2     | 3091.61597  | 0.517403  | 0.149164 | 0.688272 | 2559.841 | 2304.886 | 2764.921 | 5332.066 | 2822.694 | 2765.289 |
| ENSMUSG00000021981 | 9_Cab39l    | 3777.281248 | 0.599095  | 0.113833 | 0.688272 | 3070.672 | 2867.367 | 3074.436 | 6945.378 | 3265.048 | 3440.788 |
| ENSMUSG00000021986 | 7_Amer2     | 8.321354492 | -1.70636  | 0.037721 | 0.688272 | 10.55772 | 17.175   | 10.35551 | 2.97659  | 6.788041 | 2.075644 |
| ENSMUSG00000021987 | 8_Mtmr6     | 2405.678433 | 0.631647  | 0.10683  | 0.688272 | 1940.996 | 1817.974 | 1903.112 | 4552.199 | 2189.143 | 2030.646 |
| ENSMUSG00000021990 | 15_Spata13  | 398.5198389 | -0.39108  | 0.191421 | 0.688272 | 489.7157 | 535.0014 | 331.3763 | 341.3157 | 332.614  | 361.096  |
| ENSMUSG00000021993 | 9_Mipep     | 430.6350127 | -0.364809 | 0.134832 | 0.688272 | 358.1503 | 359.8163 | 411.9191 | 535.7863 | 474.0315 | 444.1065 |
| ENSMUSG00000021996 | 16_Esd      | 2451.552985 | 0.409031  | 0.142319 | 0.688272 | 2241.485 | 1892.685 | 2185.012 | 3439.946 | 2701.64  | 2248.549 |
| ENSMUSG00000022008 | 3_Gpalpp1   | 1437.13091  | 0.561433  | 0.166049 | 0.688272 | 1262.866 | 1101.777 | 1118.395 | 2713.658 | 1178.856 | 1247.234 |
| ENSMUSG00000022009 | 1_Nufip1    | 330.9629962 | 0.623381  | 0.129627 | 0.688272 | 265.5672 | 265.3538 | 250.8334 | 633.0216 | 304.3305 | 266.6714 |
| ENSMUSG00000022013 | 2_Dnajc15   | 425.5162928 | 0.45414   | 0.197732 | 0.688272 | 370.3323 | 312.5851 | 394.66   | 684.6158 | 441.2226 | 349.682  |
| ENSMUSG00000022014 | 14_Epsl1    | 481.3204545 | 0.780292  | 0.020286 | 0.688272 | 358.9624 | 260.2013 | 444.1363 | 711.4051 | 639.9445 | 476.2731 |
| ENSMUSG00000022016 | 15_Akap11   | 1371.275482 | 0.560326  | 0.180738 | 0.688272 | 1149.167 | 1120.669 | 1055.111 | 2652.142 | 1136.259 | 1111.304 |
| ENSMUSG00000022019 | 15_Tldr3    | 742.5277237 | 0.537306  | 0.156603 | 0.688272 | 606.6627 | 566.7751 | 644.3428 | 1328.552 | 681.0667 | 627.7674 |
| ENSMUSG00000022020 | 14_Naa16    | 238.4866333 | 0.549983  | 0.176044 | 0.688272 | 199.7845 | 185.49   | 195.6041 | 439.5432 | 220.6113 | 189.8867 |
| ENSMUSG00000022021 | 13_Diap3    | 593.0264602 | 0.645572  | 0.12279  | 0.688272 | 514.8918 | 397.6014 | 475.2028 | 1140.034 | 576.9835 | 453.4452 |
| ENSMUSG00000022023 | 5_Wbp4      | 1079.878327 | 0.530736  | 0.104108 | 0.688272 | 902.2788 | 810.6602 | 937.7489 | 1761.149 | 1032.914 | 1034.519 |
| ENSMUSG00000022024 | 9_Sugt1     | 1075.869101 | 0.678652  | 0.101289 | 0.688272 | 854.3631 | 792.6265 | 835.3444 | 2129.254 | 961.6391 | 881.9873 |
| ENSMUSG00000022033 | 9_Pbk       | 357.9929255 | 0.690254  | 0.083133 | 0.688272 | 300.4889 | 243.0263 | 278.4481 | 660.8031 | 389.181  | 276.0101 |
| ENSMUSG00000022034 | 9_Esco2     | 256.0648052 | 0.93082   | 0.060678 | 0.688272 | 214.4029 | 148.5638 | 165.6881 | 588.3727 | 227.3994 | 191.9619 |
| ENSMUSG00000022035 | 5_Cdc25     | 1569.027257 | 0.670761  | 0.028994 | 0.688272 | 1219.823 | 1104.353 | 1308.246 | 2468.586 | 1891.601 | 1421.556 |
| ENSMUSG00000022040 | 7_Ephx2     | 1634.877004 | 0.360977  | 0.158659 | 0.688272 | 1388.746 | 1427.243 | 1478.537 | 2229.466 | 1655.151 | 1630.12  |
| ENSMUSG00000022051 | 15_Bnip3l   | 5789.97965  | 0.559742  | 0.151607 | 0.688272 | 4922.333 | 4387.355 | 4732.468 | 10726.64 | 4966.553 | 5004.499 |
| ENSMUSG00000022052 | 8_Ppp2r2a   | 2436.094304 | 0.698127  | 0.061187 | 0.688272 | 1811.055 | 1711.489 | 2051.541 | 4483.737 | 2485.584 | 2073.189 |
| ENSMUSG00000022057 | 7_Adamdec1  | 295.0431203 | 0.672839  | 0.125671 | 0.688272 | 256.6338 | 209.5351 | 216.3151 | 585.3961 | 214.9546 | 287.4241 |
| ENSMUSG00000022064 | 9_Pibf1     | 206.3438344 | 0.658039  | 0.141244 | 0.688272 | 166.4871 | 139.1175 | 174.893  | 411.7617 | 191.1965 | 154.6072 |
| ENSMUSG00000022066 | 16_Gm21685  | 380.5439494 | -0.47593  | 0.143049 | 0.688272 | 424.7451 | 463.7251 | 439.5338 | 214.3145 | 376.7363 | 364.2089 |
| ENSMUSG00000022075 | 6_Rhobtb2   | 360.1235082 | -0.4798   | 0.120046 | 0.688272 | 412.5631 | 464.5839 | 380.8526 | 218.2833 | 346.1901 | 338.2681 |
| ENSMUSG00000022091 | 5_Sorbs3    | 579.6631057 | -0.9177   | 0.076968 | 0.688272 | 682.191  | 885.3715 | 706.4758 | 151.8061 | 388.0497 | 664.0845 |
| ENSMUSG00000022098 | 9_Bmp1      | 1039.259737 | -0.71782  | 0.130051 | 0.688272 | 1251.496 | 1312.17  | 1313.999 | 318.4952 | 894.89   | 1144.508 |
| ENSMUSG00000022099 | 16_Dmtn     | 83.70024052 | -0.56784  | 0.194377 | 0.688272 | 97.45586 | 91.88627 | 110.4588 | 34.72689 | 82.58783 | 85.08583 |
| ENSMUSG00000022103 | 9_Gfra2     | 84.20071413 | -0.6917   | 0.123063 | 0.688272 | 82.02535 | 139.1175 | 90.8936  | 53.57863 | 44.12226 | 95.48215 |
| ENSMUSG00000022105 | 6_Rb1       | 1318.37428  | 0.795284  | 0.076256 | 0.688272 | 959.9402 | 893.1002 | 1039.003 | 2832.722 | 1130.209 | 1055.272 |
| ENSMUSG00000022108 | 7_Iitm2b    | 27437.54359 | 0.375791  | 0.196047 | 0.688272 | 23149.02 | 22923.48 | 25580.41 | 40260.37 | 27450.84 | 25261.15 |
| ENSMUSG00000022110 | 13_Suc1a2   | 1595.360492 | 0.776416  | 0.078396 | 0.688272 | 1175.155 | 1136.127 | 1217.348 | 3382.399 | 1398.336 | 1262.798 |
| ENSMUSG00000022111 | 8_Uchl3     | 846.6935636 | 0.725214  | 0.077612 | 0.688272 | 691.9366 | 535.0014 | 688.066  | 1646.055 | 839.4544 | 679.649  |
| ENSMUSG00000022119 | 15_Rbm26    | 1783.174096 | 0.677854  | 0.112752 | 0.688272 | 1456.153 | 1278.679 | 1380.735 | 3607.628 | 1514.864 | 1460.986 |
| ENSMUSG00000022123 | 8_Scel      | 14087.61704 | 0.640933  | 0.109594 | 0.688272 | 11033.63 | 10396.03 | 11597.02 | 27155.43 | 12373.47 | 11970.12 |
| ENSMUSG00000022124 | 14_Fbxl3    | 2027.932381 | 0.494088  | 0.197506 | 0.688272 | 1742.836 | 1647.942 | 1661.484 | 3640.37  | 1665.333 | 1809.63  |
| ENSMUSG00000022125 | 6_Cln5      | 757.8655057 | 0.569981  | 0.14152  | 0.688272 | 653.7664 | 563.3401 | 613.2763 | 1386.099 | 694.6428 | 630.0685 |
| ENSMUSG00000022131 | 2_Gpr180    | 851.3789199 | -0.57926  | 0.049444 | 0.688272 | 989.9891 | 1141.279 | 928.544  | 514.9501 | 712.7443 | 826.767  |
| ENSMUSG00000022136 | 7_Dnajc3    | 4102.737311 | 0.520988  | 0.129534 | 0.688272 | 3371.161 | 3244.358 | 3494.409 | 6941.409 | 3955.165 | 3609.922 |
| ENSMUSG00000022139 | 16_Mbln2    | 7432.973153 | 0.605151  | 0.120238 | 0.688272 | 5840.855 | 5511.459 | 6337.571 | 13904.65 | 6372.839 | 6630.469 |
| ENSMUSG00000022141 | 6_Nipbl     | 3241.640708 | 0.711645  | 0.073435 | 0.688272 | 2493.246 | 2427.687 | 2453.105 | 6337.161 | 2962.98  | 2775.666 |
| ENSMUSG00000022142 | 7_Nup155    | 1073.255919 | 0.520152  | 0.090465 | 0.688272 | 847.866  | 823.5415 | 974.5685 | 1665.898 | 1121.158 | 1006.503 |
| ENSMUSG00000022146 | 12_Osmr     | 4806.439015 | 0.668846  | 0.034062 | 0.688272 | 3602.618 | 3357.713 | 4175.571 | 7797.675 | 5472.292 | 4432.764 |
| ENSMUSG00000022151 | 16_Tlcc3    | 468.1616161 | 0.598965  | 0.121512 | 0.688272 | 365.4595 | 381.2851 | 370.4971 | 860.2346 | 392.575  | 438.9184 |
| ENSMUSG00000022156 | 7_Gzme      | 1.108149555 | 3.689359  | 0.195866 | 0.688272 | 0        | 0        | 0        | 0.992197 | 5.656701 | 0        |
| ENSMUSG00000022177 | 8_Haus4     | 219.2209049 | -0.55341  | 0.189067 | 0.688272 | 264.7551 | 268.7888 | 248.5322 | 90.28991 | 199.1159 | 243.8435 |
| ENSMUSG00000022180 | 6_Slc7a8    | 1044.710611 | -0.76123  | 0.038915 | 0.688272 | 1270.175 | 1685.727 | 986.0746 | 544.7161 | 763.6546 | 1017.917 |
| ENSMUSG00000022181 | 15_C6       | 11.89833115 | 0.950865  | 0.145891 | 0.688272 | 7.30919  | 6.870002 | 10.35551 |          |          |          |

|                    |                 |             |          |          |          |          |           |          |          |          |          |
|--------------------|-----------------|-------------|----------|----------|----------|----------|-----------|----------|----------|----------|----------|
| ENSMUSG00000022360 | 7_Ata2d         | 1052.387093 | 0.718056 | 0.067231 | 0.688272 | 837.3083 | 679.2714  | 871.0134 | 1999.277 | 1021.6   | 905.8528 |
| ENSMUSG00000022361 | 14_Zhx1         | 1660.553337 | 0.754739 | 0.090067 | 0.688272 | 1279.108 | 1264.08   | 1164.419 | 3526.267 | 1371.184 | 1358.26  |
| ENSMUSG00000022367 | 7_Has2          | 458.9420147 | 0.734958 | 0.066653 | 0.688272 | 398.7569 | 254.1901  | 380.8526 | 847.3361 | 411.8078 | 460.7086 |
| ENSMUSG00000022370 | 13_Mrlp13       | 717.2913071 | 0.569184 | 0.051341 | 0.688272 | 644.0208 | 523.8376  | 564.9505 | 1074.549 | 803.2515 | 693.1382 |
| ENSMUSG00000022378 | 13_Fam49b       | 1516.518249 | 0.821904 | 0.038647 | 0.688272 | 1167.034 | 889.6652  | 1231.155 | 2889.277 | 1703.798 | 1218.18  |
| ENSMUSG00000022385 | 10_Gtse1        | 197.1902424 | -0.67636 | 0.163583 | 0.688272 | 242.8275 | 222.4163  | 262.3396 | 60.52401 | 209.2979 | 185.7361 |
| ENSMUSG00000022386 | 12_Trmu         | 238.4187419 | -0.45446 | 0.143598 | 0.688272 | 234.7062 | 291.9751  | 300.3098 | 151.8061 | 229.662  | 222.0533 |
| ENSMUSG00000022401 | 11_Xpnrp3       | 409.9374679 | 0.370882 | 0.131571 | 0.688272 | 354.9018 | 334.9126  | 383.1538 | 519.9111 | 442.354  | 424.3915 |
| ENSMUSG00000022403 | 14_St13         | 3478.130671 | 0.442919 | 0.198421 | 0.688272 | 2889.566 | 2808.972  | 3146.924 | 5751.765 | 3233.37  | 3038.187 |
| ENSMUSG00000022415 | 12_Syngnr1      | 377.1283827 | -1.04988 | 0.027432 | 0.688272 | 479.158  | 723.0677  | 323.322  | 142.8763 | 222.874  | 371.4723 |
| ENSMUSG00000022421 | 18_Nptrx        | 113.7458589 | -0.88318 | 0.027028 | 0.688272 | 131.5654 | 185.49    | 125.4167 | 62.5084  | 63.35505 | 114.1395 |
| ENSMUSG00000022422 | 13_Dscoc1       | 101.964999  | 0.810494 | 0.073989 | 0.688272 | 90.9588  | 64.40627  | 66.7355  | 202.4082 | 106.346  | 80.9353  |
| ENSMUSG00000022432 | 6_Smc1b         | 98.17911935 | 0.894591 | 0.091367 | 0.688272 | 81.21322 | 66.12377  | 58.68122 | 226.2209 | 64.48639 | 92.34925 |
| ENSMUSG00000022438 | 6_Parvb         | 118.3505262 | -0.53566 | 0.149119 | 0.688272 | 148.6202 | 159.7275  | 111.6094 | 73.42256 | 85.98185 | 130.7416 |
| ENSMUSG00000022440 | 8_C1qtnf6       | 142.8677391 | -0.62852 | 0.12819  | 0.688272 | 190.0389 | 186.3488  | 143.8265 | 63.5006  | 119.9221 | 153.5695 |
| ENSMUSG00000022451 | 12_Twf1         | 3113.231739 | 0.386005 | 0.167306 | 0.688272 | 2586.641 | 2593.426  | 2917.952 | 4399.401 | 3354.423 | 2827.547 |
| ENSMUSG00000022463 | 7_SrebT2        | 6801.730805 | -0.70472 | 0.15681  | 0.688272 | 7353.045 | 8264.612  | 9674.347 | 1907.002 | 7024.491 | 6586.888 |
| ENSMUSG00000022469 | 16_Rapgef3      | 628.8711144 | -0.93772 | 0.136634 | 0.688272 | 801.5745 | 870.7727  | 806.5791 | 91.28211 | 468.3748 | 734.6435 |
| ENSMUSG00000022474 | 14_Pmm1         | 1275.761769 | -0.79772 | 0.165128 | 0.688272 | 1616.955 | 1571.513  | 1670.689 | 254.9946 | 1005.761 | 1534.568 |
| ENSMUSG00000022483 | 16_Col2a1       | 35.20669442 | -1.21584 | 0.060057 | 0.688272 | 41.41874 | 77.28752  | 28.7653  | 7.937575 | 22.6268  | 33.20423 |
| ENSMUSG00000022490 | 6_Ppp1r1a       | 56.20880092 | -0.90974 | 0.09611  | 0.688272 | 63.34631 | 115.0725  | 41.42204 | 22.82053 | 39.5969  | 54.9945  |
| ENSMUSG00000022507 | 5.1810013L24Rik | 1626.457797 | 0.7149   | 0.075167 | 0.688272 | 1240.126 | 1136.127  | 1318.601 | 3183.96  | 1484.318 | 1395.615 |
| ENSMUSG00000022512 | 2_Cldn1         | 1020.641799 | 0.753422 | 0.052176 | 0.688272 | 840.5568 | 645.7802  | 793.9224 | 1902.041 | 1116.633 | 824.9175 |
| ENSMUSG00000022514 | 14_Il1rap       | 529.6844005 | 0.830174 | 0.045263 | 0.688272 | 371.1444 | 345.2176  | 428.0277 | 1065.619 | 538.5179 | 429.9797 |
| ENSMUSG00000022519 | 13_Sri          | 288.0434554 | 0.998843 | 0.09237  | 0.688272 | 174.6084 | 256.7663  | 144.9771 | 716.3681 | 134.6295 | 300.9133 |
| ENSMUSG00000022533 | 13_Atp13a3      | 1700.734964 | 0.718235 | 0.111935 | 0.688272 | 1319.715 | 1239.177  | 1299.041 | 3616.557 | 1304.394 | 1365.524 |
| ENSMUSG00000022546 | 4_Gpt           | 958.9183735 | -0.79795 | 0.180428 | 0.688272 | 1181.652 | 1183.358  | 1287.535 | 170.6579 | 805.5142 | 1124.793 |
| ENSMUSG00000022550 | 17_Adc5f        | 203.8676961 | -1.07091 | 0.064955 | 0.688272 | 259.0702 | 315.1613  | 254.2853 | 34.72689 | 174.2264 | 185.7361 |
| ENSMUSG00000022558 | 15_Mroh1        | 980.6955087 | -0.98876 | 0.114933 | 0.688272 | 1134.549 | 1461.591  | 1316.3   | 134.9388 | 866.0065 | 970.186  |
| ENSMUSG00000022559 | 7_Fbxl6         | 316.2715437 | -0.98849 | 0.167718 | 0.688272 | 377.6415 | 405.3301  | 478.6546 | 26.78931 | 289.6231 | 319.5907 |
| ENSMUSG00000022560 | 8_Slc52a2       | 98.66664183 | -0.67095 | 0.179281 | 0.688272 | 126.6926 | 115.9313  | 120.8143 | 29.7659  | 95.03257 | 103.7632 |
| ENSMUSG00000022561 | 12_Gpaa1        | 662.4482022 | -0.83525 | 0.178054 | 0.688272 | 747.9737 | 885.3715  | 913.586  | 101.2041 | 707.0876 | 619.4663 |
| ENSMUSG00000022568 | 16_Scrib        | 2768.521013 | -0.95944 | 0.168835 | 0.688272 | 3115.339 | 3513.147  | 4341.259 | 265.9087 | 2624.709 | 2750.763 |
| ENSMUSG00000022580 | 12_Rhpn1        | 19.50563755 | -1.49008 | 0.025388 | 0.688272 | 25.98823 | 32.63251  | 27.61469 | 2.97659  | 10.18206 | 17.63975 |
| ENSMUSG00000022591 | 5_Gm9747        | 78.49505114 | 1.22792  | 0.077989 | 0.688272 | 64.97057 | 54.96001  | 20.71102 | 224.2365 | 53.17298 | 52.91924 |
| ENSMUSG00000022596 | 3_Slurp1        | 13279.67498 | -0.95828 | 0.145681 | 0.688272 | 16676.32 | 17011.84  | 18916.06 | 1617.281 | 10063.27 | 15939.27 |
| ENSMUSG00000022601 | 11_Zbtb11       | 693.2799789 | 0.630157 | 0.069002 | 0.688272 | 518.9525 | 520.4026  | 593.7158 | 1199.566 | 675.41   | 651.6329 |
| ENSMUSG00000022614 | 7_Lmf2          | 611.1512878 | -0.9221  | 0.147773 | 0.688272 | 695.1851 | 823.5415  | 881.3689 | 82.35234 | 595.0849 | 589.375  |
| ENSMUSG00000022615 | 7_Tymp          | 7.05789177  | -1.97144 | 0.048836 | 0.688272 | 12.99411 | 6.870002  | 13.80735 | 0        | 5.42536  | 1.450528 |
| ENSMUSG00000022619 | 5_Mapk8ip2      | 15.75303367 | -0.89163 | 0.158466 | 0.688272 | 25.1761  | 25.76251  | 10.35551 | 13.89076 | 7.919381 | 11.41395 |
| ENSMUSG00000022620 | 14_Arsa         | 668.8670487 | -0.64764 | 0.149759 | 0.688272 | 713.0521 | 849.304   | 887.1219 | 233.1663 | 630.1564 | 700.4016 |
| ENSMUSG00000022623 | 15_Shank3       | 104.514222  | -0.77521 | 0.174514 | 0.688272 | 105.5772 | 121.0638  | 169.14   | 23.81272 | 99.5793  | 107.9137 |
| ENSMUSG00000022635 | 9_Zorb1         | 873.7192569 | 0.696921 | 0.057867 | 0.688272 | 661.0756 | 667.2489  | 671.9575 | 1611.328 | 821.3529 | 809.353  |
| ENSMUSG00000022636 | 13_Alcam        | 5031.018919 | 0.636809 | 0.092794 | 0.688272 | 3816.209 | 3669.44   | 4329.753 | 9286.962 | 4739.184 | 4344.565 |
| ENSMUSG00000022637 | 10_Cblb         | 735.2052311 | 0.592748 | 0.060812 | 0.688272 | 608.0991 | 591.6789  | 558.0469 | 1197.582 | 739.8864 | 714.9285 |
| ENSMUSG00000022639 | 14_Dubr         | 144.3989452 | 0.758227 | 0.082446 | 0.688272 | 103.9529 | 113.355   | 104.7057 | 288.7293 | 142.5489 | 113.1019 |
| ENSMUSG00000022641 | 15_Bbx          | 1374.437741 | 0.818857 | 0.040497 | 0.688272 | 1057.396 | 882.7952  | 1043.605 | 2741.44  | 1302.172 | 1219.218 |
| ENSMUSG00000022651 | 5_Retnlg        | 1.519058312 | 4.158427 | 0.061362 | 0.688272 | 0        | 0         | 0        | 6.945378 | 1.13134  | 1.037632 |
| ENSMUSG00000022657 | 9_Cd96          | 8.018650788 | 2.625971 | 0.057129 | 0.688272 | 6.497057 | 0         | 0        | 15.87515 | 22.6268  | 31.12896 |
| ENSMUSG00000022661 | 14_Cd200        | 592.47703   | 0.623221 | 0.09176  | 0.688272 | 506.7705 | 457.7139  | 434.9314 | 1064.627 | 541.9119 | 548.9074 |
| ENSMUSG00000022663 | 3_Alg3          | 1472.56843  | 0.659224 | 0.092784 | 0.688272 | 1146.731 | 1036.512  | 1242.661 | 2786.089 | 1368.922 | 1254.497 |
| ENSMUSG00000022664 | 11_Slc35a5      | 641.6292661 | 0.695084 | 0.090102 | 0.688272 | 477.5337 | 471.4539  | 521.2273 | 1260.09  | 587.1655 | 532.3052 |
| ENSMUSG00000022672 | 8_Prkd          | 1061.097742 | 0.611732 | 0.112109 | 0.688272 | 910.4002 | 725.6439  | 882.5195 | 1942.721 | 929.1853 | 913.1162 |
| ENSMUSG00000022674 | 14_Ube2v2       | 1358.95187  | 1.058369 | 0.042315 | 0.688272 | 968.0616 | 750.5477  | 868.7121 | 3557.026 | 1133.603 | 875.7615 |
| ENSMUSG00000022676 | 6_Snai2         | 625.3750786 | 0.616815 | 0.110179 | 0.688272 | 490.5278 | 419.0701  | 571.8542 | 1117.214 | 648.2579 | 505.3268 |
| ENSMUSG00000022686 | 14_B3gnt5       | 54.48878816 | 0.793824 | 0.039087 | 0.688272 | 40.60661 | 38.64376  | 40.27142 | 69.45378 | 87.11319 | 50.84397 |
| ENSMUSG00000022687 | 11_Boc          | 1218.612279 | -0.50122 | 0.163569 | 0.688272 | 1350.576 | 1442.7    | 1491.193 | 603.2557 | 1127.946 | 1296.002 |
| ENSMUSG00000022698 | 17_Naa50        | 4264.085359 | 1.066618 | 0.042047 | 0.688272 | 2788.862 | 2437.992  | 3041.068 | 10869.52 | 3460.769 | 2986.305 |
| ENSMUSG00000022707 | 16_Gbe1         | 461.2709626 | 0.694335 | 0.08509  | 0.688272 | 361.3988 | 356.3813  | 339.4306 | 894.9615 | 399.3631 | 416.0905 |
| ENSMUSG00000022710 | 17_Usrp7        | 5386.793497 | 0.39843  | 0.179757 | 0.688272 | 4635.65  | 4525.614  | 4781.944 | 8094.342 | 5327.481 | 4955.731 |
| ENSMUSG00000022722 | 18_Arl6         | 293.337115  | 0.560202 | 0.167599 | 0.688272 | 258.258  | 237.8738  | 215.1645 | 543.7239 | 246.6321 | 258.3704 |
| ENSMUSG00000022724 | 15_Mlna         | 1593.215144 | 0.377891 | 0.179503 | 0.688272 | 1344.079 | 1275.244  | 1538.368 | 2242.365 | 1674.383 | 1484.851 |
| ENSMUSG00000022749 | 6_Tbc1d23       | 1373.41148  | 0.636913 | 0.10307  | 0.688272 | 1078.512 | 1005.597  | 1141.407 | 2589.634 | 1207.14  | 1218.18  |
| ENSMUSG00000022751 | 8_Nli2          | 440.4353843 | 0.436961 | 0.163214 | 0.688272 | 397.1326 | 346.0763  | 379.702  | 673.7016 | 429.9092 | 416.0905 |
| ENSMUSG00000022752 | 8_Tomm70a       | 2228.136239 | 0.898968 | 0.055363 | 0.688272 | 1680.301 | 1404.7657 | 1586.694 | 5038.375 | 1671.625 | 1671.625 |
| ENSMUSG00000022755 | 4_Adgrg7        | 4.851905228 | 2.095103 | 0.127606 | 0.688272 | 3.248529 | 0         | 2.301224 | 16.86735 | 5.656701 | 1.037632 |
| ENSMUSG00000022756 | 15_Slc7a4       | 159.0698371 | -1.04989 | 0.082598 | 0.688272 | 199.7845 | 279.0938  | 164.5375 | 29.7659  | 100.6893 | 180.548  |
| ENSMUSG00000022758 | 12_P2rx6        | 64.89258437 | -0.90515 | 0.095883 | 0.688272 | 73.90403 | 127.9538  | 51.77754 | 26.78931 | 37.33422 | 71.59661 |
| ENSMUSG00000022760 | 15_Thap7        | 234.3694264 | -0.91853 | 0.108435 | 0.688272 | 294.804  | 308.2913  | 316.4183 | 43.65666 | 212.6919 | 230.3543 |
| ENSMUSG00000022762 | 17_Ncam2        | 5.79252383  | 1.708665 | 0.097725 | 0.688272 | 3.248529 | 2.576251  | 2.301224 | 17.85954 | 5.656701 | 3.112896 |
| ENSMUSG00000022763 | 16_Aifm3        | 44.57108411 | -1.47027 | 0.071109 | 0.688272 | 61.72205 | 91.02752  | 43.72326 | 13.89076 | 12.4474  | 44.61818 |
| ENSMUSG00000022765 | 8_Snap29        | 2012.790777 | 0.553976 | 0.111678 | 0.688272 | 1685.174 | 1543.174  | 1664.936 | 3450.861 | 1969.663 | 1762.937 |
| ENSMUSG00000022770 | 16_Dlg1         | 3304.539645 | 0.432259 | 0.181181 | 0.688272 | 2810.789 | 2653.538  | 2975.483 | 5251.698 | 3046.699 | 3089.031 |
| ENSMUSG00000022772 | 11_Senp5        | 625.1922323 | 0.448863 | 0.131843 | 0.688272 | 544.9407 | 500.6514  | 540.7877 | 940.6026 | 598.4789 | 625.6921 |
| ENSMUSG00000022781 | 8_Pak2          | 4390.759219 | 0.524532 | 0.127365 | 0.688272 | 3534.399 | 3446.165  |          |          |          |          |

|                    |                 |             |          |          |          |          |          |          |          |          |          |
|--------------------|-----------------|-------------|----------|----------|----------|----------|----------|----------|----------|----------|----------|
| ENSMUSG00000022914 | 15_Brwd1        | 2677.762471 | 0.391729 | 0.1782   | 0.688272 | 2387.669 | 2238.762 | 2323.086 | 3968.787 | 2550.041 | 2598.231 |
| ENSMUSG00000022940 | 16_Pigp         | 907.5234483 | 0.862925 | 0.082326 | 0.688272 | 670.8212 | 650.0739 | 610.975  | 2127.27  | 673.1474 | 710.8532 |
| ENSMUSG00000022960 | 12_Donson       | 248.82478   | 0.560158 | 0.088958 | 0.688272 | 226.5849 | 177.7613 | 199.0559 | 389.9333 | 269.2589 | 230.3453 |
| ENSMUSG00000022973 | 17_Synj1        | 1199.152104 | 0.347825 | 0.198439 | 0.688272 | 1040.341 | 1057.98  | 1067.768 | 1672.844 | 1221.847 | 1134.132 |
| ENSMUSG00000022974 | 12_Paxbp1       | 991.7987617 | 0.557651 | 0.133977 | 0.688272 | 818.6292 | 758.2764 | 830.7419 | 1773.056 | 888.102  | 881.9873 |
| ENSMUSG00000022994 | 8_Adcy6         | 1270.18912  | -0.59758 | 0.184433 | 0.688272 | 1418.795 | 1625.614 | 1544.121 | 452.4417 | 1122.289 | 1457.873 |
| ENSMUSG00000023007 | 15_Prpf40b      | 545.3888895 | -0.71958 | 0.156757 | 0.688272 | 626.1539 | 730.7964 | 678.8611 | 147.8373 | 478.5569 | 610.1277 |
| ENSMUSG00000023008 | 18_Fmn13        | 640.0750867 | -0.46577 | 0.168239 | 0.688272 | 735.7918 | 774.5927 | 716.8313 | 344.2923 | 662.9653 | 605.8771 |
| ENSMUSG00000023009 | 14_Nckap5l      | 137.8992151 | -1.37015 | 0.085156 | 0.688272 | 153.493  | 226.7101 | 216.3151 | 5.953181 | 97.29525 | 127.6287 |
| ENSMUSG00000023011 | 7_Faim2         | 33.34299688 | -0.79733 | 0.088496 | 0.688272 | 33.29742 | 56.67751 | 36.81959 | 18.85174 | 30.54618 | 23.86554 |
| ENSMUSG00000023013 | 4_Aqp2          | 62.02556672 | -1.20805 | 0.102849 | 0.688272 | 57.66138 | 99.61503 | 102.4045 | 4.960984 | 45.2536  | 62.25792 |
| ENSMUSG00000023019 | 12_Gpd1         | 64.83719387 | -0.83591 | 0.164139 | 0.688272 | 71.46763 | 123.66   | 54.07877 | 21.82833 | 33.9402  | 84.0482  |
| ENSMUSG00000023020 | 2_Cox14         | 624.5310614 | -0.54363 | 0.089213 | 0.688272 | 691.1245 | 762.5702 | 768.6089 | 344.2923 | 598.4789 | 582.1116 |
| ENSMUSG00000023025 | 15_Larp4        | 2056.030684 | 0.750645 | 0.086919 | 0.688272 | 1594.215 | 1373.142 | 1631.568 | 4300.181 | 1771.679 | 1665.399 |
| ENSMUSG00000023033 | 14_Scn8a        | 159.5838932 | -0.65712 | 0.063383 | 0.688272 | 157.5536 | 263.6363 | 164.5375 | 105.1729 | 124.4474 | 142.1556 |
| ENSMUSG00000023043 | 6_Krt18         | 412.6078169 | -0.93797 | 0.054737 | 0.688272 | 543.3164 | 632.0402 | 451.0399 | 118.0714 | 296.4111 | 434.7678 |
| ENSMUSG00000023044 | 1_Csad          | 665.3813011 | -0.60207 | 0.083829 | 0.688272 | 699.2458 | 907.699  | 799.6754 | 348.2611 | 545.3059 | 692.1006 |
| ENSMUSG00000023046 | 6_Igfbp6        | 515.9721711 | -1.12454 | 0.042734 | 0.688272 | 640.7723 | 793.4852 | 688.066  | 107.1573 | 299.8051 | 566.5471 |
| ENSMUSG00000023051 | 10_Tarbp2       | 584.9711605 | -0.73641 | 0.186884 | 0.688272 | 689.5002 | 745.3952 | 758.2534 | 124.0246 | 618.843  | 573.8105 |
| ENSMUSG00000023055 | 9_Calcoco1      | 1248.356784 | -0.54046 | 0.144389 | 0.688272 | 1341.642 | 1620.462 | 1476.235 | 604.2479 | 1087.218 | 1360.336 |
| ENSMUSG00000023064 | 4_Sncg          | 28.0668939  | -1.11815 | 0.300596 | 0.688272 | 43.04301 | 38.64376 | 33.36775 | 8.929771 | 22.6268  | 21.79027 |
| ENSMUSG00000023068 | 14_Nus1         | 1778.286091 | 0.938975 | 0.353521 | 0.688272 | 1249.059 | 1161.889 | 1242.661 | 3935.053 | 1675.515 | 1393.54  |
| ENSMUSG00000023074 | 11_Mospd1       | 327.7385599 | 0.797965 | 0.135593 | 0.688272 | 259.8823 | 239.5913 | 218.6163 | 786.8121 | 222.874  | 238.6554 |
| ENSMUSG00000023075 | 9_Akirin1       | 2789.001843 | 0.466848 | 0.178551 | 0.688272 | 2351.935 | 2198.401 | 2469.214 | 4624.629 | 2809.177 | 2280.715 |
| ENSMUSG00000023078 | 6_Cxcl13        | 44.91743995 | 1.140444 | 0.039549 | 0.688272 | 38.17021 | 17.175   | 28.7653  | 93.2665  | 59.96103 | 32.16659 |
| ENSMUSG00000023087 | 15_Noct         | 467.3704183 | 0.497399 | 0.133047 | 0.688272 | 384.9507 | 313.4438 | 464.8473 | 672.7094 | 565.6701 | 402.6012 |
| ENSMUSG00000023089 | 12_Ndufa5       | 683.1403394 | 0.434811 | 0.179105 | 0.688272 | 602.6021 | 520.4026 | 620.1799 | 1057.682 | 700.2995 | 597.6761 |
| ENSMUSG00000023106 | 15_Denr         | 1747.344355 | 0.448414 | 0.163719 | 0.688272 | 1502.445 | 1364.554 | 1502.699 | 2941.864 | 1558.987 | 1613.518 |
| ENSMUSG00000023122 | 6_Sult1c2       | 1.534203396 | 4.171848 | 0.045751 | 0.688272 | 0        | 0        | 0        | 4.960984 | 1.13314  | 3.112896 |
| ENSMUSG00000023132 | 7_Gzma          | 209.9077228 | 1.053843 | 0.066569 | 0.688272 | 226.5849 | 75.57002 | 107.0069 | 377.0348 | 351.8468 | 121.403  |
| ENSMUSG00000023150 | 14_Ivns1abp     | 8021.289278 | 0.613292 | 0.135189 | 0.688272 | 6423.153 | 6221.645 | 6380.144 | 15552.69 | 629.7505 | 7290.403 |
| ENSMUSG00000023153 | 9_Tmem52        | 11.37060517 | -1.1501  | 0.195689 | 0.688272 | 9.545586 | 18.8925  | 18.40979 | 0.992197 | 5.566701 | 14.52685 |
| ENSMUSG00000023156 | 4_Rpp14         | 655.9045647 | 0.476331 | 0.155895 | 0.688272 | 734.383  | 551.3176 | 560.3481 | 1072.565 | 597.3476 | 619.4663 |
| ENSMUSG00000023175 | 15_Bsg          | 8676.184682 | -0.40882 | 0.166841 | 0.688272 | 9922.631 | 10561.77 | 9207.198 | 5344.964 | 8434.14  | 8586.405 |
| ENSMUSG00000023186 | 14_Vwa5a        | 5013.304495 | 0.75061  | 0.026833 | 0.688272 | 3692.765 | 3459.905 | 3941.997 | 9026.014 | 5574.113 | 4385.033 |
| ENSMUSG00000023191 | 9_P3h3          | 568.5462483 | -0.91433 | 0.100283 | 0.688272 | 710.6157 | 872.4902 | 645.4934 | 127.9934 | 381.2617 | 673.4232 |
| ENSMUSG00000023206 | 16_Ilf1ra       | 333.809217  | 0.475026 | 0.1668   | 0.688272 | 296.4282 | 217.2638 | 324.4726 | 348.2611 | 511.3656 | 305.0638 |
| ENSMUSG00000023266 | 11_Frs3         | 40.12033165 | -1.35064 | 0.006484 | 0.688272 | 46.29153 | 71.27627 | 55.22938 | 11.90636 | 24.88948 | 31.12896 |
| ENSMUSG00000023277 | 11_Twf2         | 157.6630096 | -0.78958 | 0.165152 | 0.688272 | 255.8216 | 171.75   | 171.4412 | 34.72689 | 161.7816 | 150.4566 |
| ENSMUSG00000023284 | 15_Zfp605       | 244.0098797 | 0.622208 | 0.156357 | 0.688272 | 191.6632 | 200.9476 | 184.0979 | 482.2077 | 181.0144 | 224.1285 |
| ENSMUSG00000023307 | 18_March5       | 1603.280543 | 0.784403 | 0.030271 | 0.688272 | 1204.392 | 1129.257 | 1200.088 | 2986.512 | 1666.464 | 1432.97  |
| ENSMUSG00000023328 | 14_Ache         | 30.81319077 | -1.00581 | 0.061825 | 0.688272 | 41.41874 | 54.10126 | 27.61469 | 10.91416 | 24.88948 | 25.9408  |
| ENSMUSG00000023348 | 11_Trip6        | 664.7774323 | -1.02265 | 0.135262 | 0.688272 | 838.1204 | 854.4565 | 980.3215 | 66.47719 | 550.9626 | 698.3264 |
| ENSMUSG00000023349 | 14_Clec4n       | 56.41713709 | 1.044573 | 0.023104 | 0.688272 | 38.98234 | 33.49126 | 37.9702  | 71.43817 | 112.0027 | 44.61818 |
| ENSMUSG00000023353 | 13_Agap3        | 1463.899627 | -0.89816 | 0.139285 | 0.688272 | 1710.35  | 1833.432 | 2172.356 | 230.1897 | 1380.235 | 1456.835 |
| ENSMUSG00000023411 | 11_Nfatc4       | 342.6950798 | -0.93536 | 0.032595 | 0.688272 | 410.9389 | 568.4926 | 370.4971 | 125.0168 | 239.8441 | 341.3809 |
| ENSMUSG00000023460 | 12_Rab12        | 11.13029845 | 0.454182 | 0.193018 | 0.688272 | 918.5215 | 961.8002 | 930.8452 | 1847.47  | 935.6183 | 1067.723 |
| ENSMUSG00000023473 | 11_Celstr3      | 15.10087868 | -1.11839 | 0.113134 | 0.688272 | 31.67315 | 19.75126 | 10.35551 | 8.929771 | 14.70742 | 5.18816  |
| ENSMUSG00000023484 | 13_Prph         | 6.752270292 | -1.14814 | 0.19826  | 0.688272 | 13.80625 | 6.011252 | 8.054285 | 1.984394 | 3.39402  | 7.263424 |
| ENSMUSG00000023495 | 12_Pcbp4        | 307.2051281 | -1.23987 | 0.046152 | 0.688272 | 420.6845 | 559.9051 | 314.1171 | 42.66446 | 231.9247 | 273.9349 |
| ENSMUSG00000023571 | 4_Fam132a       | 77.13918493 | -0.83118 | 0.116928 | 0.688272 | 89.33454 | 119.3663 | 87.44652 | 21.82833 | 57.69835 | 87.16109 |
| ENSMUSG00000023707 | 13_Ogofod2      | 267.2640783 | -0.65879 | 0.168088 | 0.688272 | 288.3069 | 322.8901 | 370.4971 | 86.32112 | 239.8441 | 295.7251 |
| ENSMUSG00000023791 | 14_Pigx         | 424.7950829 | 0.601824 | 0.119608 | 0.688272 | 326.4771 | 310.0088 | 376.2502 | 774.9057 | 382.393  | 378.7357 |
| ENSMUSG00000023806 | 9_Rspn3b        | 486.8386233 | -0.50645 | 0.189465 | 0.688272 | 513.2675 | 603.7014 | 597.1677 | 224.2365 | 476.2942 | 506.3644 |
| ENSMUSG00000023827 | 8_Agap4a        | 132.2609545 | -0.70006 | 0.159632 | 0.688272 | 164.8628 | 191.5013 | 134.6216 | 42.66446 | 106.346  | 153.5695 |
| ENSMUSG00000023845 | 16_Lnpep        | 825.290789  | 0.933171 | 0.029377 | 0.688272 | 635.0874 | 527.2726 | 539.6371 | 1759.165 | 808.9082 | 681.7243 |
| ENSMUSG00000023852 | 13_Chd1         | 3492.298617 | 0.606326 | 0.102455 | 0.688272 | 2751.504 | 2597.719 | 2958.224 | 6304.419 | 3406.465 | 2935.461 |
| ENSMUSG00000023873 | 12_170001014Rik | 61.3811026  | -0.43342 | 0.193379 | 0.688272 | 64.97057 | 76.42877 | 70.18734 | 54.57082 | 55.43567 | 46.69344 |
| ENSMUSG00000023882 | 15_Zfp54        | 310.3053922 | 1.044794 | 0.04037  | 0.688272 | 202.2209 | 190.6425 | 215.1645 | 763.9915 | 251.1575 | 238.6554 |
| ENSMUSG00000023892 | 7_Zfp51         | 476.1265601 | 0.920762 | 0.085316 | 0.688272 | 350.8411 | 340.9238 | 295.7073 | 1183.691 | 334.8767 | 501.7196 |
| ENSMUSG00000023904 | 10_Hdc1r1       | 1506.264781 | -0.72813 | 0.15463  | 0.688272 | 1777.757 | 1900.414 | 1957.191 | 387.949  | 1452.641 | 1561.636 |
| ENSMUSG00000023909 | 3_Paqr4         | 259.2111341 | -0.6139  | 0.089941 | 0.688272 | 304.5496 | 298.8451 | 337.1293 | 125.0168 | 237.5814 | 252.1446 |
| ENSMUSG00000023911 | 12_Flywch2      | 38.71079877 | -1.45271 | 0.006911 | 0.688272 | 53.60072 | 60.11252 | 56.37999 | 9.921968 | 16.3701  | 35.27949 |
| ENSMUSG00000023919 | 7_Cenpq         | 404.049266  | 0.962563 | 0.040724 | 0.688272 | 289.9312 | 244.7438 | 287.653  | 923.7352 | 346.1901 | 332.0423 |
| ENSMUSG00000023926 | 7_Rhag          | 5.65157708  | 1.278131 | 0.136302 | 0.688272 | 4.060661 | 3.435001 | 2.301224 | 8.929771 | 7.919381 | 7.263424 |
| ENSMUSG00000023931 | 4_Efhb          | 16.7859478  | 1.37666  | 0.027141 | 0.688272 | 8.121322 | 8.587502 | 11.50612 | 37.70348 | 19.12678 | 15.56448 |
| ENSMUSG00000023938 | 7_Aars2         | 174.1118622 | -0.92603 | 0.160192 | 0.688272 | 208.718  | 215.5463 | 260.0383 | 21.82833 | 21.9327  | 147.3438 |
| ENSMUSG00000023939 | 7_Mrpl14        | 639.2033956 | -0.79337 | 0.115116 | 0.688272 | 708.9914 | 790.909  | 931.9958 | 70.6579  | 588.2969 | 644.3695 |
| ENSMUSG00000023940 | 14_Sgol1        | 233.08019   | 0.602732 | 0.110961 | 0.688272 | 203.8452 | 160.5863 | 191.0016 | 408.7851 | 231.9247 | 202.3383 |
| ENSMUSG00000023943 | 7_Sult1c1       | 25.91955711 | 1.185405 | 0.090759 | 0.688272 | 24.36397 | 13.74    | 9.204897 | 65.48499 | 14.70742 | 28.01607 |
| ENSMUSG00000023945 | 16_Vegfa        | 1066.150945 | -0.40442 | 0.177362 | 0.688272 | 1132.112 | 1283.832 | 1227.703 | 655.8421 | 1056.672 | 1040.745 |
| ENSMUSG00000023959 | 8_Clic5         | 3687.190449 | 0.458743 | 0.112611 | 0.688272 | 3013.823 | 3020.225 | 3283.847 | 5478.911 | 3954.034 | 3372.304 |
| ENSMUSG00000023961 | 16_Fnpp4        | 1167.442841 | 0.638946 | 0.108847 | 0.688272 | 890.0969 | 862.1852 | 987.2252 | 2226.49  | 1036.308 | 1002.353 |
| ENSMUSG00000023963 | 9_Cyp39a1       | 1678.916379 | 0.783963 | 0.071393 | 0.688272 | 1233.629 | 1223.719 | 1243.812 | 3528.252 | 1314.617 | 1529.47  |
| ENSMUSG00000023966 | 8_Rspn9         | 41.64558779 | -0.76679 | 0.118303 | 0.688272 | 60.09    |          |          |          |          |          |

|                    |             |             |          |          |          |          |          |          |          |          |          |
|--------------------|-------------|-------------|----------|----------|----------|----------|----------|----------|----------|----------|----------|
| ENSMUSG00000024101 | 14_Wash1    | 571.7524997 | -0.67766 | 0.175688 | 0.688272 | 649.7057 | 698.1639 | 762.8558 | 159.7437 | 563.4074 | 596.6384 |
| ENSMUSG00000024121 | 13_Atp6vOc  | 3051.642301 | -0.56032 | 0.1114   | 0.688272 | 3522.217 | 3591.293 | 3797.02  | 1490.28  | 3065.932 | 2843.112 |
| ENSMUSG00000024122 | 16_Pdk1     | 2744.548986 | 0.472737 | 0.11821  | 0.688272 | 2239.048 | 2247.349 | 2410.532 | 4254.54  | 2681.276 | 2634.548 |
| ENSMUSG00000024131 | 7_Slc3a1    | 5.364489769 | 2.902799 | 0.007718 | 0.688272 | 0.812132 | 0.85875  | 2.301224 | 7.937575 | 6.788041 | 13.48922 |
| ENSMUSG00000024136 | 14_Dnase112 | 86.99157203 | -0.77126 | 0.077534 | 0.688272 | 107.2014 | 109.0613 | 112.76   | 33.73469 | 67.88041 | 91.31162 |
| ENSMUSG00000024137 | 8_Eaf1      | 392.7408565 | -0.92372 | 0.156874 | 0.688272 | 475.0973 | 517.8264 | 549.9926 | 48.61764 | 365.4229 | 399.4883 |
| ENSMUSG00000024143 | 14_Rhoq     | 1884.653773 | 0.597099 | 0.158905 | 0.688272 | 1479.705 | 1620.462 | 1400.295 | 3701.886 | 1477.53  | 1698.045 |
| ENSMUSG00000024145 | 6_Plgf      | 471.3374827 | 0.700998 | 0.056628 | 0.688272 | 378.4536 | 323.7488 | 375.0995 | 854.2815 | 475.1628 | 421.2786 |
| ENSMUSG00000024146 | 9_Cnpt      | 1115.263439 | 0.794097 | 0.073008 | 0.688272 | 812.9443 | 809.8015 | 824.9889 | 2382.265 | 902.8094 | 958.772  |
| ENSMUSG00000024151 | 13_Msh2     | 1648.555291 | 0.530031 | 0.095773 | 0.688272 | 1349.764 | 1240.035 | 1457.826 | 2649.165 | 1624.604 | 1569.937 |
| ENSMUSG00000024158 | 17_HagH     | 463.6938788 | -0.58312 | 0.167995 | 0.688272 | 616.4083 | 480.0414 | 571.8542 | 188.5174 | 410.6765 | 514.6655 |
| ENSMUSG00000024163 | 17_Mapk8ip3 | 1194.970575 | -0.6914  | 0.161057 | 0.688272 | 1406.613 | 1619.603 | 1401.446 | 341.3157 | 1112.107 | 1288.739 |
| ENSMUSG00000024165 | 8_Hn1f      | 1772.222155 | 0.326612 | 0.173    | 0.688272 | 1593.403 | 1393.752 | 1730.521 | 1944.706 | 2178.961 | 1791.991 |
| ENSMUSG00000024168 | 7_Tmem204   | 308.3456315 | -0.68598 | 0.105003 | 0.688272 | 347.5926 | 449.1264 | 344.033  | 129.9778 | 229.662  | 349.682  |
| ENSMUSG00000024170 | 15_Telo2    | 390.1019916 | -0.72362 | 0.164807 | 0.688272 | 478.3459 | 514.3914 | 464.8473 | 98.22748 | 392.575  | 392.2249 |
| ENSMUSG00000024174 | 8_Pot1b     | 156.4261197 | 0.766181 | 0.045765 | 0.688272 | 113.6985 | 131.3888 | 102.4045 | 282.7761 | 139.1548 | 169.134  |
| ENSMUSG00000024177 | 8_Nme4      | 28.51463957 | -0.63303 | 0.18476  | 0.688272 | 43.85514 | 33.49126 | 26.46408 | 17.85954 | 20.36412 | 29.0537  |
| ENSMUSG00000024180 | 13_Tmem8    | 62.59035065 | -0.82281 | 0.114836 | 0.688272 | 77.96469 | 92.74502 | 69.03673 | 18.85174 | 46.38494 | 70.55898 |
| ENSMUSG00000024186 | 15_Rgs11    | 204.638578  | -0.9508  | 0.029466 | 0.688272 | 227.397  | 360.6751 | 220.9175 | 80.36794 | 140.2862 | 198.1877 |
| ENSMUSG00000024193 | 7_Phf1      | 665.6573115 | -0.87607 | 0.094629 | 0.688272 | 819.4414 | 911.9927 | 853.7542 | 157.7593 | 533.9925 | 717.0038 |
| ENSMUSG00000024197 | 9_Plin3     | 1735.323898 | -0.50459 | 0.091792 | 0.688272 | 1809.43  | 2033.521 | 2264.405 | 1084.471 | 1432.277 | 1787.84  |
| ENSMUSG00000024201 | 12_Kdm4b    | 701.8722642 | -0.80867 | 0.15702  | 0.688272 | 816.1928 | 902.5465 | 961.9117 | 136.9232 | 640.3385 | 753.3209 |
| ENSMUSG00000024212 | 8_Mit1      | 1199.938849 | -0.8771  | 0.153995 | 0.688272 | 1349.764 | 1536.304 | 1775.394 | 184.5486 | 1218.453 | 1135.169 |
| ENSMUSG00000024219 | 15_Anks1    | 852.9523435 | -0.77515 | 0.150654 | 0.688272 | 916.8972 | 1071.72  | 1241.51  | 197.4472 | 812.3022 | 877.8367 |
| ENSMUSG00000024220 | 13_Zfp523   | 494.2728765 | -1.1169  | 0.062137 | 0.688272 | 588.7958 | 706.7514 | 734.0905 | 74.41476 | 392.575  | 469.0907 |
| ENSMUSG00000024228 | 13_Nud12    | 245.9756581 | 0.628326 | 0.07244  | 0.688272 | 195.7239 | 179.4788 | 204.809  | 419.6993 | 236.4501 | 239.693  |
| ENSMUSG00000024231 | 14_Cul2     | 1013.525408 | 0.900455 | 0.042639 | 0.688272 | 728.4826 | 657.8027 | 735.2411 | 2208.63  | 958.2451 | 792.7509 |
| ENSMUSG00000024234 | 6_Mtpap     | 590.0448824 | 0.683531 | 0.092502 | 0.688272 | 456.4183 | 422.5051 | 479.8052 | 1147.972 | 527.2045 | 506.3644 |
| ENSMUSG00000024235 | 10_Map3k8   | 530.4084938 | 0.506723 | 0.082352 | 0.688272 | 405.254  | 441.3976 | 468.2991 | 780.8589 | 591.6909 | 494.9505 |
| ENSMUSG00000024241 | 6_Sos1      | 1144.416953 | 0.671438 | 0.091959 | 0.688272 | 891.7211 | 819.2477 | 937.7489 | 2200.693 | 976.3465 | 1040.745 |
| ENSMUSG00000024247 | 14_Pkdc     | 268.4108836 | -1.20157 | 0.032232 | 0.688272 | 365.4595 | 481.7589 | 274.9963 | 53.57863 | 174.2264 | 260.4456 |
| ENSMUSG00000024259 | 8_Slc25a46  | 965.5615307 | 0.887412 | 0.076395 | 0.688272 | 691.1245 | 642.3452 | 699.5722 | 2290.982 | 752.3412 | 717.0038 |
| ENSMUSG00000024270 | 11_Slc39a6  | 2113.032956 | 0.445588 | 0.137954 | 0.688272 | 1791.564 | 1565.502 | 2011.27  | 3139.311 | 2183.486 | 1987.065 |
| ENSMUSG00000024276 | 6_Zfp397    | 1203.737762 | 0.10937  | 0.049515 | 0.688272 | 856.7994 | 734.2314 | 795.073  | 3017.271 | 877.9199 | 941.1323 |
| ENSMUSG00000024283 | 14_Wac      | 3247.961031 | 0.68125  | 0.077614 | 0.688272 | 2415.281 | 2412.229 | 2657.914 | 6160.55  | 3055.75  | 2786.042 |
| ENSMUSG00000024286 | 7_Ccny      | 1970.817921 | 0.57508  | 0.114518 | 0.688272 | 1603.149 | 1562.067 | 1584.393 | 3514.361 | 1763.759 | 1797.179 |
| ENSMUSG00000024287 | 7_Thoc1     | 968.1280817 | 0.916873 | 0.065001 | 0.688272 | 672.4454 | 633.7577 | 705.3252 | 2295.943 | 799.8575 | 701.4393 |
| ENSMUSG00000024290 | 8_Rock1     | 2209.749059 | 1.001452 | 0.045413 | 0.688272 | 1543.051 | 1349.097 | 1524.561 | 5392.59  | 1692.485 | 1756.711 |
| ENSMUSG00000024293 | 15_Esc1     | 1185.200453 | 1.156137 | 0.026813 | 0.688272 | 738.2281 | 687.8589 | 776.6632 | 3076.802 | 954.851  | 867.7991 |
| ENSMUSG00000024294 | 13_Mlb1     | 2597.58041  | 0.630614 | 0.131852 | 0.688272 | 2103.422 | 1947.646 | 2065.349 | 5126.681 | 2078.272 | 2264.113 |
| ENSMUSG00000024298 | 14_Zfp871   | 777.3908892 | 0.829066 | 0.045506 | 0.688272 | 653.7664 | 508.3801 | 517.7754 | 1575.609 | 698.0368 | 710.778  |
| ENSMUSG00000024299 | 16_Adamts10 | 509.4130161 | -1.10994 | 0.030854 | 0.688272 | 635.0874 | 825.259  | 628.2342 | 120.0558 | 339.402  | 508.4397 |
| ENSMUSG00000024301 | 9_Kifc5b    | 97.54573043 | -1.04278 | 0.127406 | 0.688272 | 132.3775 | 97.03878 | 164.5375 | 10.91416 | 85.98185 | 94.42452 |
| ENSMUSG00000024317 | 14_Rnf138   | 475.6549631 | 0.991643 | 0.075859 | 0.688272 | 358.9624 | 263.6363 | 332.5269 | 1222.386 | 386.9183 | 289.4993 |
| ENSMUSG00000024330 | 16_Col11a2  | 164.037668  | -1.05333 | 0.0501   | 0.688272 | 220.9    | 178.62   | 264.6408 | 37.70348 | 114.2654 | 168.0964 |
| ENSMUSG00000024331 | 11_Dsc2     | 41838.89393 | 0.638753 | 0.077904 | 0.688272 | 31116.03 | 29744.53 | 37315.5  | 74017.88 | 43158.36 | 35681.05 |
| ENSMUSG00000024359 | 8_Hspa9     | 4938.031836 | 0.400517 | 0.187422 | 0.688272 | 4277.5   | 4018.951 | 4474.73  | 7482.156 | 4908.585 | 4465.968 |
| ENSMUSG00000024360 | 7_Etf1      | 4454.26752  | 0.625064 | 0.090464 | 0.688272 | 3605.867 | 3227.183 | 3679.658 | 8066.56  | 4320.588 | 3825.749 |
| ENSMUSG00000024379 | 3_Tslp      | 90.27964789 | 0.787331 | 0.054021 | 0.688272 | 64.15844 | 60.11252 | 74.78979 | 167.6813 | 82.58783 | 92.34925 |
| ENSMUSG00000024381 | 15_Bin1     | 229.7081409 | -0.37852 | 0.169087 | 0.688272 | 251.761  | 284.2463 | 242.7792 | 168.6735 | 202.5099 | 228.2791 |
| ENSMUSG00000024383 | 8_Map3k2    | 1178.476715 | 0.752269 | 0.100296 | 0.688272 | 919.3336 | 855.3152 | 859.5072 | 2540.024 | 888.102  | 1008.578 |
| ENSMUSG00000024384 | 3_lws1      | 1384.804399 | 0.53948  | 0.161723 | 0.688272 | 1111.809 | 1041.664 | 1233.456 | 2512.242 | 1218.453 | 1191.202 |
| ENSMUSG00000024392 | 17_Bag6     | 2922.697549 | -0.73779 | 0.183507 | 0.688272 | 3153.509 | 3647.112 | 4161.764 | 634.0138 | 2910.938 | 3028.848 |
| ENSMUSG00000024395 | 7_Lims2     | 55.31091616 | -1.0138  | 0.07598  | 0.688272 | 61.72205 | 91.02752 | 69.03673 | 11.90636 | 45.2536  | 52.91924 |
| ENSMUSG00000024404 | 6_RioK3     | 3224.060286 | 0.425791 | 0.177344 | 0.688272 | 2732.825 | 2577.109 | 2945.567 | 5026.469 | 3125.893 | 2936.499 |
| ENSMUSG00000024409 | 8_Psors1c2  | 5.414817463 | -1.50503 | 0.096818 | 0.688272 | 6.497057 | 9.446252 | 8.054285 | 1.984394 | 3.39402  | 3.112896 |
| ENSMUSG00000024411 | 9_Aqp4      | 128.0509516 | 0.890138 | 0.116373 | 0.688272 | 88.52241 | 115.0725 | 65.58489 | 311.5498 | 84.85051 | 102.7256 |
| ENSMUSG00000024425 | 13_Ndfip1   | 2079.210224 | 0.46882  | 0.199143 | 0.688272 | 1772.885 | 1745.839 | 1714.412 | 3599.69  | 1770.547 | 1871.888 |
| ENSMUSG00000024431 | 14_Nr3c1    | 2718.405069 | 0.723175 | 0.056229 | 0.688272 | 2190.32  | 1909.002 | 2053.843 | 5506.692 | 2228.74  | 2421.833 |
| ENSMUSG00000024446 | 13_Rpp21    | 220.886248  | -0.80613 | 0.104161 | 0.688272 | 246.076  | 281.6701 | 315.2677 | 61.5162  | 207.0352 | 213.7522 |
| ENSMUSG00000024451 | 8_Arap3     | 124.9685017 | -0.67674 | 0.056141 | 0.688272 | 147.8081 | 158.01   | 155.3326 | 64.49279 | 100.8893 | 123.4782 |
| ENSMUSG00000024459 | 18_H2-M5    | 34.94267764 | -1.13953 | 0.046255 | 0.688272 | 49.54006 | 54.10126 | 40.27142 | 7.937575 | 33.9402  | 23.86554 |
| ENSMUSG00000024471 | 12_Myot     | 198.7073164 | 1.577325 | 0.019967 | 0.688272 | 95.01946 | 120.225  | 83.99468 | 637.9826 | 84.85051 | 170.1717 |
| ENSMUSG00000024472 | 9_Dcp2      | 1865.250992 | 0.782418 | 0.034382 | 0.688272 | 1469.959 | 1220.284 | 1424.458 | 3487.572 | 1942.511 | 1646.722 |
| ENSMUSG00000024477 | 3_Pggt1b    | 690.6637946 | 0.608208 | 0.124466 | 0.688272 | 572.5532 | 534.1426 | 535.0346 | 1299.778 | 599.6103 | 602.8642 |
| ENSMUSG00000024479 | 2_Mal2      | 30926.07527 | 0.814357 | 0.068054 | 0.688272 | 22695.85 | 20485.49 | 24085.76 | 66740.12 | 27005.09 | 24544.15 |
| ENSMUSG00000024480 | 7_Ap3s1     | 1085.982068 | 1.098672 | 0.025615 | 0.688272 | 707.3671 | 656.9439 | 709.9277 | 2668.017 | 955.9824 | 817.6541 |
| ENSMUSG00000024483 | 18_Ankhd1   | 4393.550507 | 0.376915 | 0.143219 | 0.688272 | 3884.428 | 3525.17  | 4059.36  | 5980.962 | 4612.474 | 4298.91  |
| ENSMUSG00000024487 | 4_Yipf5     | 1303.264892 | 0.593147 | 0.13049  | 0.688272 | 1015.977 | 1027.924 | 1073.521 | 2432.867 | 1202.615 | 1066.686 |
| ENSMUSG00000024491 | 15_Rbm27    | 1346.221888 | 0.662009 | 0.105192 | 0.688272 | 1003.795 | 956.6477 | 1167.871 | 2592.61  | 1309.272 | 1054.234 |
| ENSMUSG00000024498 | 15_Tcrg1    | 1728.522102 | 0.557314 | 0.147217 | 0.688272 | 1301.848 | 1327.628 | 1567.134 | 3105.576 | 1692.173 | 1369.674 |
| ENSMUSG00000024511 | 15_Rab27b   | 4168.589595 | 0.782096 | 0.109241 | 0.688272 | 3211.983 | 2821.853 | 3163.033 | 9497.308 | 3134.943 | 3182.481 |
| ENSMUSG00000024513 | 16_Mbd2     | 3533.843513 | 0.457031 | 0.100982 | 0.688272 | 2936.67  | 2743.707 | 3256.232 | 5065.165 | 3897.467 | 3303.82  |
| ENSMUSG00000024516 | 12_Sec11c   | 789.2648966 | 0.394257 | 0.156302 | 0.688272 | 681.3789 | 648.3564 | 716.8313 | 1122.175 | 814.5649 | 752.2832 |
| ENSMUSG00000024518 | 3_Rax       | 52.32862011 | -1.28334 | 0.052688 | 0.688272 | 60.09    |          |          |          |          |          |

|                    |                  |             |          |          |          |          |          |          |          |          |          |
|--------------------|------------------|-------------|----------|----------|----------|----------|----------|----------|----------|----------|----------|
| ENSMUSG00000024750 | 10_Zfand5        | 6767.94205  | 0.908336 | 0.048379 | 0.688272 | 4586.923 | 4708.527 | 4819.914 | 15313.57 | 5778.885 | 5399.837 |
| ENSMUSG00000024759 | 13_At13          | 4849.137698 | 0.780649 | 0.073666 | 0.688272 | 3672.462 | 3453.035 | 3579.554 | 10263.28 | 4043.41  | 4083.082 |
| 925.7094837        | 14_Lipo1         | 1.146878    | 0.030952 | 0.688272 | 553.8741 | 573.6451 | 600.6195 | 2428.898 | 683.3294 | 713.8909 |          |
| ENSMUSG00000024766 | 7_Cdc42bpg       | 2367.028024 | -0.76167 | 0.150052 | 0.688272 | 2592.326 | 2918.892 | 3421.92  | 569.521  | 2268.337 | 2431.172 |
| ENSMUSG00000024771 | 6_Lipk           | 182.1787095 | 0.664124 | 0.103727 | 0.688272 | 151.8687 | 133.1063 | 138.0735 | 342.3079 | 148.2056 | 179.5103 |
| ENSMUSG00000024774 | 15_Ankrd22       | 1327.993396 | 0.500125 | 0.113691 | 0.688272 | 1154.04  | 990.139  | 1156.365 | 2098.496 | 1324.799 | 1244.121 |
| ENSMUSG00000024778 | 13_Uhrf2         | 141.0413419 | 0.985834 | 0.02383  | 0.688272 | 90.9588  | 98.75628 | 94.35019 | 299.6434 | 138.0235 | 124.5158 |
| ENSMUSG00000024780 | 6_Cdc371         | 907.2441777 | 0.601904 | 0.124638 | 0.688272 | 741.4767 | 691.2939 | 729.4881 | 1697.649 | 790.8067 | 792.7509 |
| ENSMUSG00000024782 | 7_Ak3            | 3452.40632  | 0.490266 | 0.142399 | 0.688272 | 2952.1   | 2806.396 | 2855.819 | 5711.085 | 3160.964 | 3228.073 |
| ENSMUSG00000024784 | 13_Gpha2         | 975.0093012 | -0.90572 | 0.180336 | 0.688272 | 1311.593 | 1015.902 | 1486.591 | 107.1573 | 950.3257 | 978.487  |
| ENSMUSG00000024786 | 9_1700123101Rik  | 42.86625672 | -0.64768 | 0.144478 | 0.688272 | 47.9158  | 44.65501 | 64.43428 | 21.82833 | 44.12226 | 34.24186 |
| ENSMUSG00000024787 | 13_Snx15         | 418.2941307 | -0.64574 | 0.102794 | 0.688272 | 444.2363 | 533.2839 | 553.4444 | 179.5876 | 428.7779 | 370.4346 |
| ENSMUSG00000024789 | 12_Jak2          | 3243.437634 | 0.932883 | 0.01215  | 0.688272 | 2281.279 | 1988.866 | 2419.737 | 6294.497 | 3587.479 | 2888.768 |
| ENSMUSG00000024793 | 14_Tnfrsf25      | 29.04541415 | -1.47737 | 0.012636 | 0.688272 | 36.54595 | 42.07876 | 49.47632 | 4.960984 | 21.49546 | 19.71501 |
| ENSMUSG00000024795 | 10_Kif20b        | 587.5713022 | 0.764277 | 0.070795 | 0.688272 | 488.9036 | 380.4263 | 437.2326 | 1187.66  | 536.2552 | 494.9505 |
| ENSMUSG00000024797 | 12_Vps51         | 862.4633179 | -0.67927 | 0.191615 | 0.688272 | 927.4549 | 1085.46  | 1172.474 | 223.2443 | 853.0304 | 913.1162 |
| ENSMUSG00000024800 | 7_Rpp30          | 223.354992  | 0.665485 | 0.148796 | 0.688272 | 174.6084 | 145.9875 | 197.9053 | 452.4417 | 210.4293 | 158.7577 |
| ENSMUSG00000024805 | 15_Pcglf5        | 495.9310935 | 0.830424 | 0.20642  | 0.688272 | 358.9624 | 293.6926 | 418.8228 | 867.18   | 592.8222 | 444.1065 |
| ENSMUSG00000024810 | 16_Ii33          | 964.882894  | 0.596906 | 0.142273 | 0.688272 | 786.9561 | 748.8302 | 768.6089 | 1846.478 | 851.8991 | 786.5251 |
| ENSMUSG00000024811 | 11_Tnks2         | 6560.745529 | 0.601788 | 0.116376 | 0.688272 | 5155.415 | 4933.52  | 5547.101 | 12154.41 | 5841.109 | 5732.912 |
| ENSMUSG00000024816 | 12_Frmd8         | 1061.296475 | -0.60934 | 0.133344 | 0.688272 | 1103.688 | 1246.905 | 1495.796 | 445.4964 | 1084.955 | 990.9386 |
| ENSMUSG00000024817 | 13_Uhrf2         | 1113.355193 | 0.556216 | 0.12865  | 0.688272 | 911.2123 | 845.0102 | 948.1044 | 1965.542 | 1044.227 | 966.0355 |
| ENSMUSG00000024831 | 13_ighmbp2       | 164.5427677 | -0.6434  | 0.198096 | 0.688272 | 186.7904 | 194.0776 | 220.9175 | 48.61764 | 170.8324 | 166.0211 |
| ENSMUSG00000024847 | 14_Aip           | 637.9341163 | -0.8012  | 0.190096 | 0.688272 | 732.5432 | 789.1915 | 910.1342 | 103.1885 | 622.2371 | 670.3103 |
| ENSMUSG00000024851 | 13_Pitpnm1       | 639.5470599 | -0.85606 | 0.160668 | 0.688272 | 692.7487 | 815.8127 | 963.0623 | 104.1807 | 685.5921 | 575.8858 |
| ENSMUSG00000024862 | 16_Klc2          | 504.5508913 | -0.93211 | 0.147015 | 0.688272 | 542.5043 | 708.4689 | 735.2411 | 67.46938 | 442.354  | 531.267  |
| ENSMUSG00000024866 | 9_Acy3           | 135.2254058 | -0.81484 | 0.108417 | 0.688272 | 166.4871 | 166.5975 | 184.0979 | 36.71128 | 114.2654 | 143.1932 |
| ENSMUSG00000024867 | 14_Pip5k1b       | 208.3974212 | -0.50585 | 0.182456 | 0.688272 | 255.8216 | 303.9976 | 173.7424 | 221.2599 | 123.3161 | 172.2469 |
| ENSMUSG00000024878 | 8_Cbwd1          | 296.4269255 | 0.715592 | 0.076327 | 0.688272 | 327.9547 | 208.6763 | 226.6706 | 571.5054 | 280.5723 | 253.1822 |
| ENSMUSG00000024885 | 8_Aldh3b1        | 323.6783812 | -0.78411 | 0.164442 | 0.688272 | 416.6238 | 394.1664 | 417.6722 | 66.47719 | 296.4111 | 350.7196 |
| ENSMUSG00000024887 | 9_Asah2          | 545.282111  | 0.810248 | 0.055925 | 0.688272 | 736.8293 | 367.5451 | 444.1363 | 1112.253 | 535.1239 | 435.8055 |
| ENSMUSG00000024889 | 3_Roe1           | 394.4436285 | -0.54308 | 0.19875  | 0.688272 | 443.4242 | 473.1714 | 486.7089 | 156.7671 | 392.575  | 414.0152 |
| ENSMUSG00000024906 | 9_Mus1           | 292.0472373 | -0.87574 | 0.176183 | 0.688272 | 329.7257 | 395.8839 | 408.4673 | 38.69568 | 269.2589 | 310.252  |
| ENSMUSG00000024913 | 16_Lrp5          | 1488.744345 | -0.87749 | 0.175688 | 0.688272 | 1690.859 | 1911.578 | 2181.561 | 192.4862 | 1450.378 | 1505.604 |
| ENSMUSG00000024925 | 10_Rnaseh2c      | 112.6016633 | -1.03415 | 0.118238 | 0.688272 | 117.7592 | 148.5638 | 187.5498 | 13.89076 | 104.0833 | 103.7632 |
| ENSMUSG00000024936 | 7_Kcnk7          | 55.3905225  | -1.26055 | 0.320222 | 0.688272 | 79.58895 | 59.25377 | 95.50081 | 9.921968 | 48.64762 | 39.43002 |
| ENSMUSG00000024940 | 10_Ltbp3         | 1647.693396 | -1.07911 | 0.037043 | 0.688272 | 1950.741 | 2697.334 | 2061.897 | 383.9802 | 1139.259 | 1652.944 |
| ENSMUSG00000024943 | 8_Smc5           | 1013.024999 | 0.697296 | 0.083101 | 0.688272 | 767.4649 | 747.1127 | 804.2779 | 1978.44  | 487.7379 | 913.1162 |
| ENSMUSG00000024944 | 5_Arl2           | 522.0163054 | -0.81851 | 0.129783 | 0.688272 | 643.2087 | 714.4802 | 640.8909 | 117.0792 | 458.1927 | 558.2461 |
| ENSMUSG00000024947 | 16_Men1          | 652.1645207 | -0.67154 | 0.194059 | 0.688272 | 726.8583 | 804.649  | 872.164  | 170.6579 | 652.7832 | 685.8748 |
| ENSMUSG00000024948 | 14_Map4k2        | 797.3048781 | -0.69587 | 0.138408 | 0.688272 | 956.6917 | 1032.218 | 968.8154 | 260.9478 | 631.2878 | 933.8689 |
| ENSMUSG00000024958 | 12_Gpr137        | 510.9536864 | -1.02752 | 0.093738 | 0.688272 | 593.6686 | 709.3277 | 753.6509 | 74.41476 | 448.0107 | 486.6494 |
| ENSMUSG00000024959 | 13_Bad           | 526.1723889 | -1.08117 | 0.082043 | 0.688272 | 648.0815 | 748.8302 | 746.7473 | 71.43817 | 423.1212 | 518.816  |
| ENSMUSG00000024962 | 13_Vegfb         | 317.3164599 | -0.62478 | 0.112476 | 0.688272 | 344.344  | 476.6064 | 333.6775 | 146.8451 | 282.835  | 319.5907 |
| ENSMUSG00000024965 | 8_Fernf3         | 1848.110457 | -0.87538 | 0.168144 | 0.688272 | 2135.095 | 2344.388 | 2697.035 | 254.9946 | 1772.81  | 1884.34  |
| ENSMUSG00000024970 | 4_Al846148       | 299.6983059 | -0.84732 | 0.134842 | 0.688272 | 344.344  | 382.1438 | 429.1783 | 59.53181 | 266.229  | 296.7628 |
| ENSMUSG00000024974 | 10_Smc3          | 2822.984119 | 0.570473 | 0.141795 | 0.688272 | 2287.776 | 2177.791 | 2350.701 | 5228.877 | 2496.868 | 2395.892 |
| ENSMUSG00000024976 | 13_Shoc2         | 2642.957419 | 0.682628 | 0.078042 | 0.688272 | 2050.634 | 1880.663 | 2156.247 | 5000.672 | 2562.485 | 2207.043 |
| ENSMUSG00000024978 | 10_Gpam          | 507.4909717 | -0.45556 | 0.140451 | 0.688272 | 649.7057 | 597.6902 | 513.173  | 331.3937 | 406.1511 | 546.8321 |
| ENSMUSG00000024981 | 5_Acsf5          | 4787.771042 | 0.41447  | 0.150905 | 0.688272 | 4037.109 | 3564.672 | 4712.907 | 6688.399 | 5347.845 | 4375.694 |
| ENSMUSG00000024989 | 14_Cep55         | 319.6046619 | 0.47172  | 0.17354  | 0.688272 | 291.5555 | 209.5351 | 302.611  | 463.3559 | 388.0497 | 262.5209 |
| ENSMUSG00000024993 | 15_Fam45a        | 783.8343712 | 0.781722 | 0.068453 | 0.688272 | 563.6197 | 597.6902 | 568.4024 | 1629.187 | 693.5115 | 650.5953 |
| ENSMUSG00000024997 | 7_Prdx3          | 1742.105889 | 0.369257 | 0.173966 | 0.688272 | 1590.967 | 1338.792 | 1631.568 | 2255.263 | 2069.221 | 1566.824 |
| ENSMUSG00000025001 | 11_Hells         | 962.2796762 | 1.152895 | 0.022922 | 0.688272 | 636.7116 | 475.7476 | 678.8611 | 2397.148 | 873.3946 | 711.8156 |
| ENSMUSG00000025013 | 14_Tl12          | 16.24466624 | -1.01144 | 0.164813 | 0.688272 | 17.86691 | 26.62126 | 20.71102 | 5.953181 | 4.52536  | 21.79027 |
| ENSMUSG00000025016 | 10_Tm9sf3        | 7337.04090  | 0.853469 | 0.068096 | 0.688272 | 5300.787 | 5064.05  | 5319.28  | 16570.68 | 6009.679 | 5757.82  |
| ENSMUSG00000025019 | 15_Lcor          | 441.6926259 | 0.681441 | 0.079782 | 0.688272 | 371.9565 | 303.1388 | 342.8824 | 825.5078 | 418.5958 | 388.0744 |
| ENSMUSG00000025024 | 6_Smndc1         | 971.3705327 | 0.757163 | 0.070395 | 0.688272 | 703.3065 | 660.3789 | 803.1273 | 1956.612 | 914.1228 | 790.6756 |
| ENSMUSG00000025034 | 8_Trim8          | 1208.530498 | -0.67712 | 0.140535 | 0.688272 | 1323.775 | 1375.718 | 1761.587 | 403.8241 | 1186.776 | 1199.503 |
| ENSMUSG00000025040 | 13_Fundc1        | 1021.016037 | 0.673994 | 0.111689 | 0.688272 | 813.7564 | 767.7227 | 778.9644 | 2051.863 | 859.8185 | 853.9712 |
| ENSMUSG00000025044 | 15_Msr1          | 232.80192   | 0.817996 | 0.161883 | 0.688272 | 289.9312 | 87.59252 | 127.7179 | 50.2455  | 409.5451 | 131.7793 |
| ENSMUSG00000025049 | 5-Ta15           | 151.1765844 | 0.666687 | 0.12845  | 0.688272 | 112.0742 | 109.92   | 128.8686 | 298.6512 | 127.8414 | 129.704  |
| ENSMUSG00000025050 | 7_Pcglf6         | 261.9357594 | 0.633621 | 0.108459 | 0.688272 | 167.2992 | 198.3713 | 250.8334 | 468.3169 | 252.2888 | 234.5048 |
| ENSMUSG00000025058 | 4_5430427019Rik  | 35.3705793  | 0.937684 | 0.102556 | 0.688272 | 31.67315 | 18.03375 | 23.01224 | 65.48499 | 54.30432 | 19.71501 |
| ENSMUSG00000025059 | 16_Gk            | 6747.633391 | 0.845106 | 0.040816 | 0.688272 | 4811.071 | 4171.809 | 5495.323 | 13712.16 | 6746.181 | 5949.256 |
| ENSMUSG00000025060 | 14_Slk           | 12595.30948 | 0.46684  | 0.15079  | 0.688272 | 10501.68 | 9751.109 | 11472.75 | 20152.51 | 12445.87 | 11247.93 |
| ENSMUSG00000025094 | 7_Slc18a2        | 96.57147213 | 0.88377  | 0.103993 | 0.688272 | 62.53418 | 85.87502 | 55.22938 | 224.2365 | 63.35505 | 88.19873 |
| ENSMUSG00000025102 | 14_3110040N11Rik | 170.4042682 | -0.5228  | 0.178355 | 0.688272 | 224.9606 | 206.1001 | 171.4412 | 83.34453 | 154.9936 | 181.5856 |
| ENSMUSG00000025103 | 7_Btbd1          | 2768.338759 | 0.601364 | 0.125705 | 0.688272 | 2271.534 | 2122.831 | 2204.573 | 5206.057 | 2314.722 | 2490.317 |
| ENSMUSG00000025104 | 13_Hdgfrrp3      | 1840.40883  | 0.823345 | 0.069284 | 0.688272 | 1412.298 | 1171.335 | 1403.747 | 4004.506 | 1502.42  | 1548.147 |
| ENSMUSG00000025132 | 13_Arhgdia       | 5004.183832 | -0.72966 | 0.192437 | 0.688272 | 5699.544 | 5989.783 | 7040.595 | 1053.713 | 5704.06  | 5167.408 |
| ENSMUSG00000025135 | 12_Anapc11       | 604.8943433 | -0.69078 | 0.052228 | 0.688272 | 687.0638 | 770.2989 | 783.5668 | 286.7449 | 497.7896 | 603.9019 |
| ENSMUSG00000025137 | 15_Pcy2          | 1399.115399 | -0.76269 | 0.179079 | 0.688272 | 1635.634 | 1653.094 | 1992.86  | 281.7389 | 1373.447 | 1457.873 |
| ENSMUSG00000025138 | 14_Sir7          | 813.8679116 | -0.60906 | 0.198577 | 0.688272 | 852.7388 | 943.7665 | 1152.913 | 265.9087 | 806.6455 | 861.2346 |
| ENSMUSG00000025140 | 15_Pycr1         | 56.65205387 | -0.6     |          |          |          |          |          |          |          |          |

|                    |               |             |          |          |          |          |          |          |          |          |          |
|--------------------|---------------|-------------|----------|----------|----------|----------|----------|----------|----------|----------|----------|
| ENSMUSG00000025353 | 4_Ormdl2      | 1175.416324 | 0.523788 | 0.156798 | 0.688272 | 1011.105 | 860.4677 | 1021.744 | 2048.886 | 1136.997 | 973.2989 |
| ENSMUSG00000025359 | 9_Pmel        | 6249.795361 | -0.88852 | 0.092516 | 0.688272 | 6527.918 | 13123.42 | 4695.648 | 2462.632 | 3714.19  | 6974.963 |
| ENSMUSG00000025369 | 14_Smarcc2    | 2789.808363 | -0.41701 | 0.187862 | 0.688272 | 2964.282 | 3195.25  | 1619.265 | 2691.458 | 2857.639 |          |
| ENSMUSG00000025370 | 6_Cdh9        | 8.828755032 | 1.837375 | 0.066803 | 0.688272 | 4.060661 | 5.152501 | 2.301224 | 2.78151  | 2.26268  | 1.411395 |
| ENSMUSG00000025372 | 16_Baiap2     | 2713.161006 | -0.83275 | 0.144222 | 0.688272 | 3056.866 | 3276.991 | 4091.577 | 530.8253 | 2513.838 | 2808.87  |
| ENSMUSG00000025373 | 13_Rnf41      | 460.163059  | -0.63028 | 0.091167 | 0.688272 | 557.9348 | 515.2501 | 604.0714 | 212.3301 | 398.2317 | 473.1602 |
| ENSMUSG00000025375 | 15_Aatk       | 167.4620204 | -1.36401 | 0.011304 | 0.688272 | 220.9    | 274.8001 | 227.8212 | 32.74249 | 93.90123 | 154.6072 |
| ENSMUSG00000025380 | 2_Facn2       | 29.06849437 | -0.77798 | 0.151875 | 0.688272 | 38.17021 | 39.50251 | 32.21714 | 9.921968 | 32.80886 | 21.79027 |
| ENSMUSG00000025384 | 15_Faap100    | 657.7215042 | -0.9404  | 0.196297 | 0.688272 | 681.3789 | 868.1965 | 1044.756 | 54.57082 | 668.622  | 628.805  |
| ENSMUSG00000025386 | 2_Pde6g       | 125.6189354 | -1.10615 | 0.131429 | 0.688272 | 268.0036 | 165.7388 | 70.18734 | 49.60984 | 161.7816 | 38.39239 |
| ENSMUSG00000025395 | 14_Pr1m1      | 773.8510689 | 0.641253 | 0.067232 | 0.688272 | 613.9719 | 554.7526 | 645.4934 | 1345.419 | 797.5948 | 685.8748 |
| ENSMUSG00000025407 | 6_Gli1        | 92.60628361 | -1.14522 | 0.050333 | 0.688272 | 127.5048 | 122.8013 | 132.3204 | 19.84394 | 45.2536  | 107.9137 |
| ENSMUSG00000025409 | 14_Mbd6       | 1108.459494 | -0.90656 | 0.110136 | 0.688272 | 1243.374 | 1551.762 | 1541.82  | 210.3457 | 1054.409 | 1049.046 |
| ENSMUSG00000025422 | 8_Agap2       | 22.72945593 | -0.74554 | 0.178458 | 0.688272 | 38.17021 | 20.61001 | 26.46408 | 9.921968 | 21.49546 | 19.71501 |
| ENSMUSG00000025431 | 4_Crisp1      | 150.3649505 | 1.263592 | 0.020939 | 0.688272 | 79.58895 | 75.57002 | 110.4588 | 388.9412 | 145.9429 | 101.6879 |
| ENSMUSG00000025436 | 11_Xrc6bp1    | 66.92803411 | -0.58301 | 0.198578 | 0.688272 | 86.08601 | 66.12377 | 88.59713 | 29.7659  | 53.17298 | 77.8224  |
| ENSMUSG00000025437 | 15_Usp33      | 1279.457075 | 0.586338 | 0.110148 | 0.688272 | 1050.899 | 984.9865 | 1033.25  | 2291.975 | 1173.2   | 1142.433 |
| ENSMUSG00000025451 | 15_Paip1      | 1454.541597 | 0.925008 | 0.064408 | 0.688272 | 1007.044 | 979.834  | 1024.045 | 3488.564 | 1089.481 | 1138.282 |
| ENSMUSG00000025478 | 15_Dpysl4     | 22.58773546 | -0.86316 | 0.095589 | 0.688272 | 25.98823 | 39.50251 | 21.86163 | 14.88295 | 13.57608 | 19.71501 |
| ENSMUSG00000025482 | 11_Odf3       | 3.855991275 | -2.15316 | 0.080158 | 0.688272 | 5.684925 | 5.152501 | 8.054285 | 0        | 1.13134  | 3.112896 |
| ENSMUSG00000025485 | 12_Ric8       | 1221.411167 | -0.54528 | 0.188644 | 0.688272 | 1296.163 | 1466.745 | 1585.543 | 497.0906 | 1263.707 | 1219.214 |
| ENSMUSG00000025488 | 8_Cox8b       | 121.5458602 | -1.2423  | 0.025473 | 0.688272 | 154.3051 | 232.7213 | 125.4167 | 28.77371 | 65.61773 | 122.4406 |
| ENSMUSG00000025489 | 4>Ifitm5      | 9.936139864 | -1.26547 | 0.199383 | 0.688272 | 12.99411 | 12.88125 | 16.10857 | 0        | 12.44474 | 5.18816  |
| ENSMUSG00000025497 | 14_Cdhr5      | 1.456178902 | -2.73848 | 0.149667 | 0.688272 | 2.436397 | 1.7175   | 3.451836 | 0        | 1.13134  | 0        |
| ENSMUSG00000025508 | 13_Rplp2      | 5427.291681 | -0.88503 | 0.112595 | 0.688272 | 6292.4   | 6689.684 | 8142.882 | 1086.456 | 4997.129 | 5355.219 |
| ENSMUSG00000025511 | 14_Tspan4     | 460.4541189 | -0.71364 | 0.143    | 0.688272 | 561.9955 | 585.6677 | 568.4024 | 135.931  | 397.1004 | 513.8272 |
| ENSMUSG00000025525 | 12_Apol       | 493.3946535 | 0.84868  | 0.069232 | 0.688272 | 359.7746 | 334.9126 | 362.4428 | 1098.362 | 421.9989 | 382.866  |
| ENSMUSG00000025529 | 14_Zfp711     | 36.86653815 | 1.07701  | 0.050098 | 0.688272 | 33.55183 | 25.76251 | 21.86163 | 85.32893 | 29.41484 | 35.27949 |
| ENSMUSG00000025531 | 14_Chm        | 759.9620546 | 1.086901 | 0.30531  | 0.688272 | 505.1462 | 448.2676 | 506.2693 | 1887.158 | 625.6311 | 687.2997 |
| ENSMUSG00000025533 | 15_Asl        | 489.8132548 | -0.71565 | 0.19203  | 0.688272 | 588.7958 | 614.0064 | 623.6318 | 109.1416 | 500.0523 | 503.2515 |
| ENSMUSG00000025537 | 12_Pkgt1      | 28.0705033  | 0.90032  | 0.097996 | 0.688272 | 13.80625 | 26.62126 | 18.40979 | 45.64105 | 20.36412 | 43.58055 |
| ENSMUSG00000025538 | 15_Sumf2      | 187.3168816 | -0.34785 | 0.176062 | 0.688272 | 200.5966 | 224.9926 | 203.6583 | 152.7983 | 168.5697 | 173.2846 |
| ENSMUSG00000025544 | 13_Tm9sf2     | 6043.285101 | 0.833246 | 0.067572 | 0.688272 | 4279.937 | 4200.147 | 4555.273 | 13308.34 | 5266.388 | 4649.629 |
| ENSMUSG00000025555 | 14_Farp1      | 336.2781042 | -0.45196 | 0.14808  | 0.688272 | 333.7863 | 426.7989 | 405.0155 | 215.3067 | 283.9644 | 352.7949 |
| ENSMUSG00000025578 | 9_Cbx8        | 137.2619396 | -0.74535 | 0.057015 | 0.688272 | 131.5654 | 176.0438 | 208.2608 | 66.47719 | 131.2355 | 100.989  |
| ENSMUSG00000025579 | 14_Gaa        | 1228.06689  | -1.12851 | 0.106515 | 0.688272 | 1458.589 | 1979.419 | 1617.761 | 109.1416 | 971.8211 | 1231.669 |
| ENSMUSG00000025591 | 5_Tma16       | 280.4763599 | 0.401864 | 0.181219 | 0.688272 | 233.8941 | 243.8851 | 247.3816 | 400.8475 | 308.8558 | 247.9941 |
| ENSMUSG00000025607 | 15_Copg2      | 5288.093184 | 0.433976 | 0.181228 | 0.688272 | 4474.848 | 4185.549 | 4836.023 | 8413.829 | 4888.521 | 4929.79  |
| ENSMUSG00000025609 | 10_Mkn1       | 2840.857017 | 0.755524 | 0.067417 | 0.688272 | 2150.526 | 1977.702 | 2212.627 | 5743.827 | 2550.042 | 2410.419 |
| ENSMUSG00000025612 | 5_Bach1       | 1770.678307 | 0.41959  | 0.15414  | 0.688272 | 1487.014 | 1408.35  | 1649.978 | 2595.587 | 1889.338 | 1593.803 |
| ENSMUSG00000025613 | 13_Cct8       | 4883.877145 | 0.532557 | 0.129886 | 0.688272 | 4183.293 | 3624.785 | 4169.818 | 8286.828 | 4957.532 | 4081.007 |
| ENSMUSG00000025616 | 14_Usp16      | 1035.853491 | 0.510609 | 0.154022 | 0.688272 | 845.4296 | 818.389  | 899.7787 | 1784.962 | 937.8809 | 928.6807 |
| ENSMUSG00000025626 | 16_Ph16       | 938.6379771 | 0.879709 | 0.066799 | 0.688272 | 670.009  | 632.0402 | 681.1624 | 2155.051 | 194.2008 | 699.364  |
| ENSMUSG00000025630 | 8_Hprt        | 1659.259429 | 0.801882 | 0.057865 | 0.688272 | 1286.417 | 1103.944 | 1239.209 | 3428.04  | 1531.834 | 1366.561 |
| ENSMUSG00000025665 | 16_Rps6k1a    | 185.6799271 | 0.956172 | 0.048791 | 0.688272 | 124.2562 | 130.53   | 124.2661 | 426.6446 | 140.2862 | 168.9064 |
| ENSMUSG00000025732 | 5_Fam195a     | 64.04901866 | -1.11173 | 0.083536 | 0.688272 | 85.27388 | 77.28752 | 100.1033 | 8.929771 | 45.2536  | 67.44608 |
| ENSMUSG00000025735 | 13_Rhbd11     | 11.40283672 | -1.60796 | 0.042805 | 0.688272 | 6.497057 | 26.62126 | 18.40979 | 3.968787 | 5.656701 | 7.263424 |
| ENSMUSG00000025738 | 7_Fbxl16      | 35.46587162 | -1.36991 | 0.013585 | 0.688272 | 43.04301 | 71.27627 | 39.12081 | 15.87515 | 11.3134  | 32.16659 |
| ENSMUSG00000025742 | 5_Prps2       | 1235.322152 | 0.766288 | 0.102571 | 0.688272 | 943.6976 | 876.784  | 923.9415 | 2724.572 | 995.5793 | 947.3581 |
| ENSMUSG00000025746 | 11_Il6        | 70.250364   | 1.810905 | 0.01177  | 0.688272 | 35.73382 | 5.857502 | 49.47632 | 131.9622 | 158.3876 | 37.35475 |
| ENSMUSG00000025747 | 12_Tyms       | 467.3939069 | 0.367729 | 0.148265 | 0.688272 | 439.3635 | 357.2401 | 428.0277 | 587.3805 | 518.1538 | 474.1979 |
| ENSMUSG00000025757 | 12_Hspa4l     | 936.2414356 | 0.623666 | 0.100954 | 0.688272 | 712.2399 | 810.6602 | 688.066  | 1710.547 | 907.3348 | 788.6004 |
| ENSMUSG00000025758 | 10_Plk4       | 337.5020996 | 0.657145 | 0.113163 | 0.688272 | 288.3069 | 228.4276 | 269.2432 | 646.9123 | 321.3006 | 270.822  |
| ENSMUSG00000025759 | 11_Mfsd8      | 469.9409702 | 0.730618 | 0.084848 | 0.688272 | 336.2227 | 357.2401 | 367.0453 | 951.5167 | 405.0198 | 402.6012 |
| ENSMUSG00000025762 | 14_Larp1b     | 598.8850096 | 0.7415   | 0.045303 | 0.688272 | 429.6179 | 389.8726 | 525.8297 | 1088.44  | 607.5296 | 552.0203 |
| ENSMUSG00000025766 | 14_D3ErtD751e | 260.4658361 | 0.952535 | 0.077332 | 0.688272 | 167.2992 | 184.6313 | 180.6461 | 651.8733 | 195.7218 | 182.6232 |
| ENSMUSG00000025779 | 10_Ly96       | 141.3037195 | 1.064539 | 0.030101 | 0.688272 | 95.8316  | 91.02752 | 87.44652 | 332.3859 | 130.1041 | 111.0266 |
| ENSMUSG00000025784 | 4_Clec3b      | 405.4239252 | -0.78941 | 0.182847 | 0.688272 | 502.7098 | 516.9676 | 521.2273 | 80.36794 | 286.219  | 520.0418 |
| ENSMUSG00000025809 | 15_Iltg1      | 8031.56416  | 0.612929 | 0.09861  | 0.688272 | 6467.821 | 6073.082 | 6511.314 | 14623    | 763.929  | 6900.253 |
| ENSMUSG00000025825 | 12_Lscu       | 701.4779866 | -0.4913  | 0.154059 | 0.688272 | 812.9443 | 823.5415 | 822.6877 | 368.105  | 632.491  | 749.1704 |
| ENSMUSG00000025855 | 13_Prkar1b    | 101.6535748 | -0.9461  | 0.03624  | 0.688272 | 133.1897 | 158.8688 | 109.3082 | 40.68007 | 59.96103 | 107.9137 |
| ENSMUSG00000025856 | 15_Pdgra      | 460.0238014 | -0.53873 | 0.063549 | 0.688272 | 476.7216 | 587.3852 | 570.7036 | 294.6825 | 382.393  | 448.2571 |
| ENSMUSG00000025857 | 10_Dnaaf5     | 432.1710445 | -0.62405 | 0.115554 | 0.688272 | 492.1521 | 487.7701 | 592.5652 | 188.5174 | 461.5868 | 370.4346 |
| ENSMUSG00000025860 | 14_Xiap       | 3414.23355  | 0.958156 | 0.048815 | 0.688272 | 2327.571 | 2240.479 | 2393.273 | 8108.232 | 2623.578 | 2792.268 |
| ENSMUSG00000025862 | 14_Stag2      | 3722.232371 | 0.912414 | 0.056829 | 0.688272 | 2746.631 | 2537.607 | 2464.611 | 8643.026 | 2864.189 | 3097.332 |
| ENSMUSG00000025867 | 8_Cplx2       | 223.773436  | -0.53321 | 0.109903 | 0.688272 | 272.0643 | 282.5288 | 239.3273 | 154.7827 | 145.9429 | 247.9941 |
| ENSMUSG00000025868 | 6_Higd2a      | 758.9612509 | -0.52744 | 0.185763 | 0.688272 | 854.3631 | 954.9302 | 879.0677 | 335.3625 | 670.8847 | 859.1594 |
| ENSMUSG00000025870 | 10_Arl10      | 124.571324  | -1.00402 | 0.02911  | 0.688272 | 160.8022 | 170.8913 | 166.8388 | 36.71128 | 106.346  | 105.8385 |
| ENSMUSG00000025887 | 10_Casp12     | 595.9018369 | 1.420776 | 0.07851  | 0.688272 | 332.9742 | 278.2351 | 361.2922 | 1621.25  | 576.9835 | 404.6765 |
| ENSMUSG00000025888 | 5_Casp1       | 551.9922739 | 1.307074 | 0.008809 | 0.688272 | 335.4106 | 239.5913 | 378.5514 | 1372.208 | 569.0641 | 417.1281 |
| ENSMUSG00000025893 | 7_Kbtbd3      | 108.2594291 | 1.115917 | 0.065932 | 0.688272 | 82.83748 | 63.54752 | 58.68122 | 295.6747 | 67.88041 | 80.9353  |
| ENSMUSG00000025894 | 10_Aasdhppt   | 519.1150129 | 0.917096 | 0.096349 | 0.688272 | 366.2716 | 345.2176 | 367.0453 | 1321.606 | 346.1901 | 368.3594 |
| ENSMUSG00000025898 | 5_Cwf19l2     | 750.8482853 | 0.946509 | 0.046767 | 0.688272 | 497.837  | 507.5214 | 533.884  | 1743.29  | 616.5804 | 605.9771 |
| ENSMUSG00000025899 | 13_Alkhh8     | 297.1806666 | 0.907619 | 0.057353 | 0.688272 | 209.5301 | 193.2188 | 217.4657 | 671.7172 | 217.2173 | 273.9349 |
| ENSMUSG00000025903 | 14_Lypl1      | 2383.362015 | 0.842443 | 0.074767 | 0.688272 | 1657.562 | 1562.925 | 1899.661 | 536      |          |          |

|                    |                  |             |          |            |          |          |          |          |          |          |          |
|--------------------|------------------|-------------|----------|------------|----------|----------|----------|----------|----------|----------|----------|
| ENSMUSG00000026014 | 15_Raph1         | 1098.908187 | 0.579879 | 0.100456   | 0.688272 | 863.2965 | 815.8127 | 964.2129 | 1902.041 | 1049.884 | 998.202  |
| ENSMUSG00000026017 | 13_Carf          | 254.0154184 | 0.638284 | 0.174151   | 0.688272 | 199.7845 | 200.9476 | 195.6041 | 522.8877 | 165.1757 | 239.693  |
| ENSMUSG00000026019 | 15_Wdr12         | 497.0893452 | 0.420663 | 0.158057   | 0.688272 | 456.4183 | 365.8276 | 453.3412 | 692.5534 | 571.3268 | 443.0689 |
| ENSMUSG00000026020 | 9_Nop58          | 2100.720738 | 0.79096  | 0.073449   | 0.688272 | 1590.967 | 1337.933 | 1687.948 | 4405.354 | 2006.987 | 1575.125 |
| ENSMUSG00000026021 | 15_Sumo1         | 3363.502751 | 0.916338 | 0.043204   | 0.688272 | 2434.772 | 2116.819 | 2438.147 | 7517.875 | 2091.887 | 2771.515 |
| ENSMUSG00000026027 | 13_Stradb        | 384.9371916 | 0.476151 | 0.159374   | 0.688272 | 341.9076 | 327.1838 | 296.8579 | 623.0996 | 368.8169 | 351.7573 |
| ENSMUSG00000026029 | 14_Casp8         | 1267.478289 | 0.369185 | 0.175388   | 0.688272 | 1168.658 | 948.919  | 1201.239 | 1641.094 | 1478.662 | 1166.298 |
| ENSMUSG00000026031 | 15_Cflar         | 2903.021538 | 0.422724 | 0.122517   | 0.688272 | 2402.287 | 2327.213 | 2713.143 | 4120.593 | 3076.114 | 2778.779 |
| ENSMUSG00000026034 | 17_Clk1          | 4308.667765 | 0.787818 | 0.05946    | 0.688272 | 3169.752 | 2965.265 | 3347.131 | 8862.302 | 3761.706 | 3745.852 |
| ENSMUSG00000026037 | 14_Orc2          | 1064.552057 | 0.906068 | 0.052444   | 0.688272 | 745.5373 | 684.4239 | 727.7717 | 2415.999 | 891.496  | 857.0841 |
| ENSMUSG00000026039 | 9_Sgol2a         | 316.3933546 | 0.761557 | 0.065121   | 0.688272 | 254.1974 | 181.1963 | 269.2432 | 602.2635 | 325.8259 | 265.6338 |
| ENSMUSG00000026049 | 11_Tex30         | 133.1766567 | 0.920026 | 0.060524   | 0.688272 | 84.46175 | 95.32127 | 96.65142 | 285.7527 | 153.8623 | 83.01057 |
| ENSMUSG00000026062 | 12_Slc9a2        | 18.50057491 | 0.693602 | 0.196073   | 0.688272 | 10.55772 | 18.03375 | 13.80735 | 23.81272 | 27.15216 | 17.63975 |
| ENSMUSG00000026064 | 15_Ptp4a1        | 2231.274655 | 0.939741 | 0.051915   | 0.688272 | 1653.501 | 1492.508 | 1441.717 | 5228.877 | 1910.833 | 1660.211 |
| ENSMUSG00000026068 | 11_Il18rap       | 72.50194755 | 0.832417 | 0.178449   | 0.688272 | 95.01946 | 19.75126 | 41.42204 | 106.1651 | 117.6594 | 54.9945  |
| ENSMUSG00000026070 | 15_Il18r1        | 404.0098185 | 0.944359 | 0.021701   | 0.688272 | 282.622  | 212.9701 | 333.6775 | 719.3427 | 572.4581 | 302.9886 |
| ENSMUSG00000026077 | 15_Npas2         | 250.9174074 | -0.55963 | 0.116974   | 0.688272 | 242.0154 | 290.2576 | 364.744  | 141.8841 | 259.0769 | 207.5264 |
| ENSMUSG00000026083 | 12_Elfbf         | 4944.186719 | 0.538359 | 0.135346   | 0.688272 | 3918.538 | 3815.427 | 4363.121 | 8594.409 | 4812.912 | 4160.905 |
| ENSMUSG00000026088 | 15_Mitl1         | 1698.458839 | 0.944162 | 0.025222   | 0.688272 | 1120.742 | 1001.303 | 1363.475 | 3556.033 | 1741.132 | 1408.067 |
| ENSMUSG00000026090 | 16_2010300C02Rik | 617.753643  | -0.56928 | 0.176297   | 0.688272 | 658.6392 | 724.7852 | 830.7419 | 247.057  | 603.0043 | 642.2942 |
| ENSMUSG00000026094 | 14_Stk17b        | 623.3085583 | 0.768149 | 0.108566   | 0.688272 | 504.3341 | 405.3301 | 474.0522 | 1379.154 | 507.9717 | 469.0097 |
| ENSMUSG00000026095 | 15_Ansd1         | 1210.985403 | 0.699924 | 0.077593   | 0.688272 | 925.0186 | 895.6765 | 948.1044 | 2349.522 | 1073.642 | 1073.949 |
| ENSMUSG00000026096 | 14_Osgep1        | 186.1164082 | 0.783362 | 0.116414   | 0.688272 | 151.0566 | 130.53   | 128.8686 | 418.7071 | 139.1548 | 148.3814 |
| ENSMUSG00000026097 | 9_Ormd1          | 513.7136691 | 0.823466 | 0.116626   | 0.688272 | 399.569  | 334.9126 | 378.5514 | 1231.316 | 365.4229 | 372.5099 |
| ENSMUSG00000026098 | 13_Pms1          | 120.8206176 | 0.943207 | 0.064872   | 0.688272 | 87.71028 | 79.86377 | 80.54285 | 283.7683 | 100.6893 | 92.34495 |
| ENSMUSG00000026100 | 6_Mstn           | 5.198749463 | 2.276758 | 0.131958   | 0.688272 | 2.436397 | 1.7175   | 1.150612 | 23.81272 | 0        | 0.275264 |
| ENSMUSG00000026102 | 9_Inpp1          | 1031.023924 | 0.600896 | 0.057815   | 0.688272 | 807.2594 | 737.6664 | 913.586  | 1659.945 | 1086.086 | 981.5999 |
| ENSMUSG00000026103 | 14_Gls           | 5995.975555 | 0.777469 | 0.090989   | 0.688272 | 4541.443 | 4363.31  | 4350.464 | 13122.8  | 4581.927 | 5015.913 |
| ENSMUSG00000026104 | 14_Stat1         | 14353.79102 | 0.806729 | 0.01502    | 0.688272 | 9406.927 | 8800.472 | 13119.28 | 22382.97 | 19173.95 | 13239.15 |
| ENSMUSG00000026107 | 11_Nabp1         | 2633.548477 | 0.886797 | 0.067095   | 0.688272 | 1966.984 | 1761.297 | 1817.967 | 6115.901 | 2180.092 | 1959.049 |
| ENSMUSG00000026110 | 15_Mga4a         | 3677.590811 | 0.533041 | 0.066304   | 0.688272 | 3060.114 | 2725.673 | 3232.069 | 5608.889 | 3745.867 | 3692.933 |
| ENSMUSG00000026112 | 7_Coas5          | 2565.900388 | 0.507361 | 0.135925   | 0.688272 | 2074.186 | 2047.261 | 2236.79  | 4293.236 | 2453.877 | 2290.054 |
| ENSMUSG00000026149 | 2_Tm4sf20        | 1.022959905 | 3.58716  | 0.132171   | 0.688272 | 0        | 0        | 0        | 3.968787 | 1.13134  | 1.037632 |
| ENSMUSG00000026150 | 14_Mff           | 1877.616355 | 0.525548 | 0.140878   | 0.688272 | 1569.852 | 1491.649 | 1556.778 | 3257.382 | 1717.374 | 1672.663 |
| ENSMUSG00000026153 | 15_Fam135a       | 2840.244519 | 0.655577 | 0.109528   | 0.688272 | 2256.915 | 2075.599 | 2285.116 | 5556.302 | 2568.142 | 2299.393 |
| ENSMUSG00000026158 | 11_Ogfr1         | 1107.608354 | 0.993013 | 0.04499    | 0.688272 | 670.009  | 808.084  | 744.446  | 2668.017 | 882.4453 | 872.6486 |
| ENSMUSG00000026159 | 13_Agfr1         | 2995.970509 | 0.667289 | 0.064078   | 0.688272 | 2359.244 | 2108.232 | 2478.418 | 5383.66  | 3021.759 | 2633.51  |
| ENSMUSG00000026179 | 14_Pknd          | 425.7584928 | -0.88816 | 0.117207   | 0.688272 | 514.8918 | 583.0914 | 560.3481 | 82.35234 | 367.6855 | 446.1818 |
| ENSMUSG00000026187 | 8_Xrcc5          | 950.0454964 | 0.435429 | 0.189733   | 0.688272 | 860.8601 | 747.9714 | 814.6334 | 1521.038 | 853.0304 | 902.7399 |
| ENSMUSG00000026193 | 15_Fn1           | 6514.579705 | -0.42916 | 0.194822   | 0.688272 | 7320.559 | 8322.148 | 6786.31  | 3697.918 | 5919.171 | 7041.371 |
| ENSMUSG00000026196 | 7_Bard1          | 149.1364143 | 0.55519  | 0.082554   | 0.688272 | 130.7533 | 96.18002 | 135.7722 | 212.3301 | 165.1757 | 154.6072 |
| ENSMUSG00000026203 | 16_Dnajb2        | 1297.283602 | -0.51533 | 0.172534   | 0.688272 | 1363.57  | 1591.264 | 1624.664 | 604.2479 | 1323.668 | 1276.287 |
| ENSMUSG00000026207 | 16_Speg          | 176.2556817 | -0.71062 | 0.094471   | 0.688272 | 191.6632 | 295.4101 | 169.14   | 88.30552 | 121.0534 | 191.9619 |
| ENSMUSG00000026208 | 9_Des            | 355.1741651 | -0.66191 | 0.188908   | 0.688272 | 311.8588 | 569.3514 | 424.5759 | 150.8139 | 200.2472 | 474.1979 |
| ENSMUSG00000026211 | 17_Obsl1         | 205.106297  | -1.14688 | 0.041997   | 0.688272 | 249.3246 | 365.8276 | 232.4236 | 39.68787 | 149.3369 | 194.0372 |
| ENSMUSG00000026219 | 14_Trip12        | 9375.012974 | 0.635482 | 0.075385   | 0.688272 | 7370.1   | 6847.674 | 7811.506 | 16684.78 | 9370.889 | 8165.127 |
| ENSMUSG00000026222 | 16_Sp100         | 9163.190553 | 0.941841 | 0.007777   | 0.688272 | 5762.89  | 5310.511 | 7749.373 | 16185.71 | 11630.18 | 8340.487 |
| ENSMUSG00000026234 | 12_Ncl           | 12183.51993 | 0.651414 | 0.09018    | 0.688272 | 9979.48  | 8270.623 | 10186.37 | 22610.18 | 11883.6  | 10170.87 |
| ENSMUSG00000026245 | 16_Farsb         | 1018.018353 | 0.480943 | 0.121602   | 0.688272 | 845.4296 | 766.8639 | 937.7489 | 1551.796 | 1096.269 | 910.0033 |
| ENSMUSG00000026270 | 11_Capn10        | 318.3980422 | -0.69186 | 0.158812   | 0.688272 | 352.4654 | 399.3189 | 428.0277 | 93.2665  | 315.6439 | 321.6659 |
| ENSMUSG00000026276 | 17_Sep2          | 5204.621963 | 0.672413 | 0.099379   | 0.688272 | 4086.649 | 3767.337 | 4185.927 | 10232.53 | 4528.754 | 4426.538 |
| ENSMUSG00000026303 | 6_Mlph           | 1479.09266  | -0.52219 | 0.161641   | 0.688272 | 1506.505 | 2195.824 | 1529.163 | 813.6014 | 1578.573 | 1678.889 |
| ENSMUSG00000026304 | 13_Rab17         | 153.9779568 | -0.5778  | 0.19219    | 0.688272 | 179.4812 | 180.3375 | 193.3028 | 59.53181 | 136.8922 | 174.3222 |
| ENSMUSG00000026313 | 15_Hdac4         | 1015.68893  | -0.38503 | 0.175609   | 0.688272 | 1078.512 | 1140.42  | 1232.306 | 660.8031 | 979.7405 | 1002.353 |
| ENSMUSG00000026315 | 13_Serpinb8      | 3734.53576  | 0.515361 | 0.074847   | 0.688272 | 2765.31  | 2602.013 | 2967.429 | 5102.868 | 3915.763 | 3193.831 |
| ENSMUSG00000026319 | 13_2310035C23Rik | 2958.02264  | 0.693663 | 0.073998   | 0.688272 | 2228.491 | 2045.543 | 2507.184 | 5612.857 | 2792.147 | 2561.914 |
| ENSMUSG00000026327 | 8_Serpinb11      | 4379.338714 | 0.659253 | 0.087727   | 0.688272 | 3434.507 | 3188.54  | 3564.596 | 8193.561 | 4365.841 | 3528.987 |
| ENSMUSG00000026333 | 14_Gin1          | 158.8426258 | 0.534904 | 0.146226   | 0.688272 | 123.4441 | 127.9538 | 138.0735 | 268.8853 | 150.4682 | 144.2309 |
| ENSMUSG00000026341 | 16_Actr3         | 12318.53677 | 0.693466 | 0.069344   | 0.688272 | 9526.31  | 8398.577 | 10316.39 | 22992.18 | 12456.05 | 10221.71 |
| ENSMUSG00000026342 | 10_Slc35f5       | 1911.792019 | 0.498027 | 0.125301   | 0.688272 | 1534.118 | 1541.457 | 1679.894 | 3093.67  | 1894.995 | 1726.62  |
| ENSMUSG00000026349 | 14_Ccn2          | 1948.159669 | 0.546981 | 0.13105    | 0.688272 | 1570.664 | 1577.524 | 1601.652 | 3433.001 | 1790.911 | 1715.206 |
| ENSMUSG00000026354 | 8_Lct            | 2.223969387 | 1.899258 | 0.194256   | 0.688272 | 0        | 1.7175   | 1.150612 | 3.968787 | 3.39402  | 3.12896  |
| ENSMUSG00000026356 | 15_Dars          | 1679.279462 | 0.586798 | 0.112328   | 0.688272 | 1353.824 | 1250.34  | 1423.307 | 3010.325 | 1857.27  | 1450.61  |
| ENSMUSG00000026357 | 3_Rgs18          | 14.09769882 | 1.49665  | 0.059988   | 0.688272 | 11.36985 | 6.011252 | 4.602448 | 39.68787 | 13.75608 | 9.336869 |
| ENSMUSG00000026358 | 13_Rgs1          | 36.55304936 | 1.70922  | 0.005671   | 0.688272 | 21.92757 | 7.728752 | 21.86163 | 69.45378 | 72.40577 | 25.9408  |
| ENSMUSG00000026361 | 8_Cdc73          | 1213.152669 | 0.834799 | 0.064386   | 0.688272 | 879.5391 | 848.4452 | 887.1219 | 2651.15  | 972.9525 | 1039.707 |
| ENSMUSG00000026365 | 15_Cfh           | 1581.690667 | 0.827561 | 0.141935   | 0.688272 | 1241.75  | 1136.127 | 1042.455 | 4010.46  | 972.9525 | 1086.401 |
| ENSMUSG00000026377 | 12_Nfk           | 992.1963766 | 0.581161 | 0.100758   | 0.688272 | 821.0656 | 699.0227 | 865.2603 | 1695.664 | 1018.206 | 853.9712 |
| ENSMUSG00000026384 | 13_Ptpn4         | 846.9782682 | 1.043946 | 0.040653   | 0.688272 | 602.6021 | 501.5101 | 555.7456 | 2103.457 | 673.1474 | 645.9317 |
| ENSMUSG00000026388 | 15_311009E18Rik  | 57.14432937 | 0.498727 | 0.190154   | 0.688272 | 47.9158  | 43.79626 | 50.62693 | 86.32112 | 50.9103  | 32.9556  |
| ENSMUSG00000026389 | 16_Steap3        | 1447.689801 | -0.46699 | 0.122532   | 0.688272 | 1655.125 | 1646.224 | 1738.575 | 901.9069 | 1175.462 | 1568.9   |
| ENSMUSG00000026393 | 10_Nek7          | 1805.466761 | 0.683579 | 0.120522   | 0.688272 | 1362.758 | 1376.577 | 1417.554 | 3740.582 | 1439.865 | 1496.265 |
| ENSMUSG00000026395 | 16_Ptpcr         | 699.1931106 | 0.696667 | 0.184415   | 0.688272 | 859.2358 | 293.6926 | 447.5881 | 1172.777 | 980.8719 | 440.9936 |
| ENSMUSG00000026411 | 17_Tmem9         | 619.578387  | -0.69833 | 0.134646   | 0.688272 | 738.2281 | 842.434  | 719.1326 | 197.4472 | 563.4074 | 656.8211 |
| ENSMUSG00000026417 | 13_Pigr          | 911.4499571 | 0.398745 | 0.078363</ |          |          |          |          |          |          |          |

|                    |                 |             |           |          |            |          |          |          |          |          |          |
|--------------------|-----------------|-------------|-----------|----------|------------|----------|----------|----------|----------|----------|----------|
| ENSMUSG00000026640 | 12_Plxna2       | 1143.042952 | -0.30828  | 0.19391  | 0.688272   | 1210.889 | 1380.87  | 1202.39  | 1056.69  | 897.1527 | 1110.266 |
| ENSMUSG00000026643 | 16_Nm12         | 702.1738885 | 0.606961  | 0.15525  | 0.688272   | 559.5591 | 575.3626 | 535.0346 | 1387.091 | 552.094  | 603.9019 |
| ENSMUSG00000026646 | 16_Suv39h2      | 125.2563388 | 0.720638  | 0.133917 | 0.688272   | 95.8316  | 12.13502 | 116.2118 | 254.9946 | 121.0534 | 91.31162 |
| ENSMUSG00000026648 | 18_Dclre1c      | 257.5484243 | 0.448185  | 0.185345 | 0.688272   | 233.8941 | 193.2188 | 226.6706 | 402.8319 | 262.4709 | 226.2038 |
| ENSMUSG00000026655 | 14_Fam107b      | 2958.224001 | 0.608575  | 0.094957 | 0.688272   | 2409.596 | 2122.831 | 2497.979 | 5260.628 | 2935.828 | 2522.484 |
| ENSMUSG00000026656 | 15_Fcgr2b       | 525.3287607 | 0.540987  | 0.188483 | 0.688272   | 574.9896 | 332.3363 | 376.2502 | 665.7641 | 827.0096 | 375.8228 |
| ENSMUSG00000026664 | 7_Phyh          | 2528.699537 | 0.525796  | 0.116373 | 0.688272   | 2046.573 | 1962.244 | 2210.326 | 4210.883 | 2395.047 | 2347.124 |
| ENSMUSG00000026667 | 14_Uhmk1        | 5198.968206 | 0.510738  | 0.182545 | 0.688272   | 4362.774 | 4194.136 | 4307.892 | 9411.979 | 4467.662 | 4449.366 |
| ENSMUSG00000026670 | 15_Uap1         | 2120.159343 | 0.382374  | 0.128264 | 0.688272   | 1838.667 | 1652.235 | 2031.981 | 2684.885 | 2474.241 | 2038.947 |
| ENSMUSG00000026674 | 9_Ddr2          | 3258.080197 | 0.535591  | 0.199345 | 0.688272   | 2698.715 | 2821.853 | 2460.009 | 6231.988 | 2510.444 | 2825.472 |
| ENSMUSG00000026676 | 7_Cdc3          | 887.6455011 | -0.47713  | 0.129933 | 0.688272   | 1020.038 | 930.0265 | 1149.461 | 590.3571 | 647.1265 | 988.8634 |
| ENSMUSG00000026678 | 10_Rgs5         | 2116.723976 | 0.7225152 | 0.148924 | 0.688272   | 1547.112 | 1784.483 | 1455.524 | 4788.342 | 1359.871 | 1765.012 |
| ENSMUSG00000026683 | 14_Nuf2         | 361.8036768 | 0.704808  | 0.07188  | 0.688272   | 312.6709 | 237.8738 | 274.9963 | 674.6938 | 354.1095 | 316.4778 |
| ENSMUSG00000026696 | 15_Vamp4        | 977.2947301 | 0.789613  | 0.071964 | 0.688272   | 704.1186 | 731.6552 | 713.3795 | 2070.715 | 842.8484 | 801.052  |
| ENSMUSG00000026697 | 10_Myoc         | 4601.601328 | -0.61973  | 0.164254 | 0.688272   | 5362.509 | 6421.734 | 4940.728 | 2030.035 | 2887.18  | 5967.422 |
| ENSMUSG00000026707 | 15_Nsun6        | 390.46513   | 0.547228  | 0.098507 | 0.688272   | 348.4047 | 323.7488 | 279.5987 | 629.0528 | 367.6855 | 394.3002 |
| ENSMUSG00000026708 | 16_Cenpl        | 272.8616374 | 0.801328  | 0.045641 | 0.688272   | 217.6514 | 173.4675 | 205.9596 | 525.8643 | 282.835  | 231.392  |
| ENSMUSG00000026709 | 10_Dars2        | 513.2114541 | 0.394207  | 0.139982 | 0.688272   | 471.8488 | 387.2964 | 471.751  | 686.6002 | 529.4672 | 532.3052 |
| ENSMUSG00000026715 | 12_Serpinc1     | 62.3790319  | -0.87768  | 0.154475 | 0.688272   | 74.71616 | 99.61503 | 67.88611 | 11.90636 | 47.51628 | 72.63424 |
| ENSMUSG00000026718 | 17_Stam         | 745.0625177 | 0.663155  | 0.113139 | 0.688272   | 592.0444 | 529.8489 | 608.6738 | 1471.428 | 656.1773 | 612.2029 |
| ENSMUSG00000026721 | 15_Rabgap1l     | 2309.769658 | 0.879777  | 0.087238 | 0.688272   | 1563.354 | 1613.592 | 1702.906 | 5563.248 | 1523.915 | 1891.603 |
| ENSMUSG00000026729 | 9_4930562F07Rik | 4.102940108 | -4.39485  | 0.022327 | 0.688272   | 7.30919  | 16.31625 | 0        | 0.992197 | 0        | 0        |
| ENSMUSG00000026739 | 13_Bmi1         | 1104.792624 | 0.926739  | 0.053361 | 0.688272   | 789.3925 | 789.1915 | 706.4758 | 2561.852 | 954.851  | 826.9928 |
| ENSMUSG00000026740 | 12_Dnajc1       | 926.8186978 | 0.397725  | 0.197526 | 0.688272   | 813.7564 | 797.779  | 788.1693 | 1395.029 | 966.1644 | 800.0143 |
| ENSMUSG00000026753 | 5_Ppp6c         | 1775.453421 | 0.848382  | 0.063051 | 0.688272   | 1307.553 | 1168.759 | 1327.806 | 3919.177 | 1505.814 | 1423.631 |
| ENSMUSG00000026754 | 16_Golga1       | 1407.500948 | 0.525278  | 0.136752 | 0.688272   | 1146.731 | 1084.602 | 1231.155 | 2404.093 | 1364.396 | 1214.03  |
| ENSMUSG00000026755 | 14_Arpc5l       | 2021.647868 | 0.568252  | 0.12002  | 0.688272   | 1633.198 | 1519.988 | 1732.822 | 3586.791 | 1884.813 | 1772.276 |
| ENSMUSG00000026761 | 12_Orc4         | 1050.865898 | 1.0483    | 0.040165 | 0.688272   | 641.5844 | 657.8027 | 755.9522 | 2618.407 | 842.8484 | 788.6004 |
| ENSMUSG00000026764 | 15_Klf5c        | 96.85447491 | 1.010432  | 0.079442 | 0.688272   | 80.40109 | 76.42877 | 35.66898 | 232.1741 | 72.40577 | 84.0482  |
| ENSMUSG00000026766 | 16_Mmadhc       | 2034.46743  | 0.382287  | 0.178826 | 0.688272   | 1801.309 | 1653.953 | 1844.431 | 2895.23  | 2197.062 | 1814.818 |
| ENSMUSG00000026767 | 12_Fam188a      | 2511.405538 | 0.565627  | 0.132325 | 0.688272   | 2030.33  | 1874.652 | 2171.205 | 4497.628 | 2450.483 | 2044.135 |
| ENSMUSG00000026770 | 5_Il2ra         | 58.70233384 | 1.021432  | 0.03429  | 0.688272   | 43.85514 | 34.35001 | 37.9702  | 99.21968 | 98.42659 | 38.39239 |
| ENSMUSG00000026771 | 14_Spopl        | 486.0837259 | 0.866331  | 0.059787 | 0.688272   | 369.5201 | 349.5113 | 314.1171 | 1073.557 | 393.7064 | 416.0905 |
| ENSMUSG00000026775 | 9_Yme1l1        | 3293.369148 | 1.036574  | 0.038642 | 0.688272   | 2218.745 | 1980.278 | 2277.061 | 8113.193 | 2673.357 | 2497.58  |
| ENSMUSG00000026779 | 6_Mastl         | 355.5773335 | 0.69716   | 0.058783 | 0.688272   | 288.3069 | 243.8851 | 281.9    | 640.9591 | 360.8975 | 317.5154 |
| ENSMUSG00000026781 | 15_Acbd5        | 1234.169112 | 0.746403  | 0.081638 | 0.688272   | 898.2182 | 920.5802 | 946.9538 | 2549.946 | 1034.045 | 1055.272 |
| ENSMUSG00000026784 | 14_Pdsr1        | 168.3727084 | 0.948759  | 0.029015 | 0.688272   | 129.9411 | 91.88627 | 123.1155 | 344.2923 | 179.8831 | 141.118  |
| ENSMUSG00000026785 | 14_Pkn3         | 211.8786457 | -0.69442  | 0.174499 | 0.688272   | 235.5183 | 263.6363 | 286.5024 | 59.53181 | 183.2771 | 242.8059 |
| ENSMUSG00000026791 | 14_Slc2a8       | 151.3224809 | -1.13851  | 0.071035 | 0.688272   | 184.354  | 225.8513 | 214.0139 | 19.84394 | 116.258  | 147.3438 |
| ENSMUSG00000026792 | 16_Lrsam1       | 383.6471512 | -0.61552  | 0.157811 | 0.688272   | 428.8058 | 488.6289 | 475.2028 | 141.8841 | 369.9482 | 397.4131 |
| ENSMUSG00000026811 | 18_St6galnac6   | 222.8106939 | -0.83655  | 0.056231 | 0.688272   | 272.8764 | 350.3701 | 233.5743 | 95.25089 | 135.7088 | 249.0317 |
| ENSMUSG00000026814 | 16_Eng          | 677.546124  | -0.81122  | 0.140797 | 0.688272   | 812.9443 | 972.1053 | 804.2779 | 145.8529 | 612.055  | 718.0414 |
| ENSMUSG00000026817 | 14_Ak1          | 513.2378465 | -0.59569  | 0.157476 | 0.688272   | 613.9719 | 633.7577 | 605.222  | 200.4238 | 474.0315 | 552.0203 |
| ENSMUSG00000026825 | 17_Dnm1         | 491.1517691 | -1.02672  | 0.026608 | 0.688272   | 614.7841 | 759.9939 | 601.7701 | 148.8295 | 322.4319 | 499.101  |
| ENSMUSG00000026829 | 9_Gbg1t         | 37.84653811 | -0.94641  | 0.073011 | 0.688272   | 44.66727 | 54.10126 | 50.62693 | 10.91416 | 29.41484 | 37.35475 |
| ENSMUSG00000026832 | 12_Cytlp        | 82.39949612 | 0.769876  | 0.144444 | 0.688272   | 83.64961 | 36.92626 | 62.13305 | 133.9466 | 128.9728 | 48.76871 |
| ENSMUSG00000026833 | 18_Olfm1        | 363.2420041 | -0.35416  | 0.195351 | 0.688272   | 414.9995 | 471.4539 | 335.9787 | 306.5888 | 298.6738 | 351.7573 |
| ENSMUSG00000026834 | 13_Acvr1c       | 1.384344706 | -2.69494  | 0.157465 | 0.688272   | 2.436397 | 2.576251 | 2.301224 | 0.992197 | 0        | 0        |
| ENSMUSG00000026837 | 15_Col5a1       | 2216.562702 | -0.90601  | 0.023753 | 0.688272   | 2693.842 | 3537.192 | 2440.448 | 939.6104 | 1422.095 | 2266.188 |
| ENSMUSG00000026840 | 14_Lamc3        | 85.99800534 | -0.8898   | 0.104649 | 0.688272   | 90.14667 | 156.2925 | 88.59713 | 29.7659  | 46.38494 | 104.8008 |
| ENSMUSG00000026842 | 16_Abl1         | 2094.866727 | -0.68312  | 0.102046 | 0.688272   | 2390.917 | 2584.838 | 2769.523 | 795.7418 | 1844.084 | 2184.215 |
| ENSMUSG00000026854 | 16_Usp20        | 721.2165785 | -0.83687  | 0.150797 | 0.688272   | 829.9991 | 918.8627 | 1025.195 | 131.9622 | 673.1474 | 748.1327 |
| ENSMUSG00000026857 | 9_Ntmt1         | 239.2012798 | -0.90809  | 0.140144 | 0.688272   | 275.3128 | 337.4888 | 323.322  | 36.71128 | 233.0561 | 229.3167 |
| ENSMUSG00000026858 | 16_Fam73b       | 586.5500594 | -0.78533  | 0.162695 | 0.688272   | 696.8094 | 802.9315 | 727.1869 | 120.0558 | 548.7    | 623.6169 |
| ENSMUSG00000026864 | 13_Hspa5        | 14087.36875 | 0.568755  | 0.124141 | 0.688272   | 10949.17 | 10695.73 | 12393.24 | 24642.2  | 14852.23 | 10991.64 |
| ENSMUSG00000026869 | 12_Psm5d        | 1264.727871 | 0.354729  | 0.187168 | 0.688272   | 1113.433 | 1060.557 | 1156.365 | 1757.181 | 1291.99  | 1208.841 |
| ENSMUSG00000026878 | 16_Rab14        | 5337.496406 | 0.773957  | 0.072281 | 0.688272   | 3839.761 | 3694.343 | 4283.729 | 11135.42 | 4656.596 | 4415.124 |
| ENSMUSG00000026883 | 17_Dab2ip       | 1559.631026 | -0.65829  | 0.196298 | 0.688272   | 1658.374 | 1933.047 | 2136.687 | 424.6602 | 1613.291 | 1591.728 |
| ENSMUSG00000026889 | 12_Rbm18        | 949.5154642 | 0.548582  | 0.115552 | 0.688272   | 812.1322 | 717.9152 | 783.5668 | 1620.257 | 855.2931 | 907.9281 |
| ENSMUSG00000026896 | 14_Ilf1h        | 6824.649593 | 1.084433  | 0.006222 | 0.688272   | 4245.015 | 3587     | 5290.514 | 13830.23 | 8012.151 | 5982.986 |
| ENSMUSG00000026914 | 15_Psm14        | 1941.765962 | 0.602906  | 0.077724 | 0.688272   | 1573.912 | 1447.853 | 1603.953 | 3289.132 | 2802.797 | 1652.948 |
| ENSMUSG00000026915 | 16_Slrp         | 1084.019139 | 0.66863   | 0.112991 | 0.688272   | 862.4844 | 841.5752 | 807.7297 | 2168.942 | 892.6273 | 930.756  |
| ENSMUSG00000026921 | 18_Egfl7        | 276.603937  | -0.86838  | 0.052911 | 0.688272   | 332.9742 | 388.1551 | 350.9367 | 88.30552 | 239.8441 | 259.408  |
| ENSMUSG00000026923 | 15_Notch1       | 3047.223801 | -0.6493   | 0.187495 | 0.688272   | 3315.124 | 3496.831 | 4352.766 | 895.9537 | 3106.66  | 3116.009 |
| ENSMUSG00000026939 | 12_Tmem141      | 255.0644255 | -0.6164   | 0.166592 | 0.688272   | 280.1856 | 313.4438 | 332.5269 | 95.25089 | 214.98   | 289.4993 |
| ENSMUSG00000026944 | 18_Abca2        | 1414.675344 | -0.97904  | 0.127468 | 0.688272   | 1685.174 | 2134.853 | 1811.063 | 811.572  | 1207.14  | 1468.249 |
| ENSMUSG00000026946 | 9_Nmi           | 2693.4322   | 0.814104  | 0.01251  | 0.688272   | 1877.65  | 1653.094 | 2328.839 | 4137.461 | 3745.867 | 2417.683 |
| ENSMUSG00000026950 | 16_Neb          | 603.843894  | 1.375205  | 0.052771 | 0.688272   | 321.6043 | 462.0076 | 224.3694 | 1885.174 | 205.9039 | 524.0042 |
| ENSMUSG00000026956 | 15_Uap11        | 611.6355122 | -0.72193  | 0.189658 | 0.688272   | 683.0032 | 789.1915 | 812.3321 | 135.931  | 601.8729 | 647.4842 |
| ENSMUSG00000026958 | 13_Dpp7         | 540.1429659 | -0.51238  | 0.185002 | 0.688272   | 635.8995 | 660.3789 | 608.6738 | 245.0726 | 517.0224 | 573.8105 |
| ENSMUSG00000026959 | 13_Grin1        | 104.1533344 | -0.68804  | 0.155256 | 0.688272   | 118.5713 | 118.5075 | 148.429  | 33.74369 | 102.9519 | 102.7256 |
| ENSMUSG00000026960 | 6_Arf1p6        | 432.2884561 | 0.566141  | 0.161614 | 0.688272   | 341.9076 | 322.0313 | 382.0032 | 806.656  | 378.9889 | 362.1336 |
| ENSMUSG00000026961 | 6_Lrrc26        | 436.910832  | -1.00919  | 0.160483 | 0.688272   | 488.0914 | 565.9164 | 697.2709 | 36.71128 | 391.4437 | 442.0313 |
| ENSMUSG00000026970 | 16_Rbms1        | 6124.561823 | 0.447021  | 0.15347  | 0.688272   | 5061.208 | 4712.821 | 5776.073 | 9321.689 | 6562.904 | 5312.676 |
| ENSMUSG00000026971 | 15_Itgbe        | 718.1280704 | 0.564632  | 0.118927 | 0.688272</ |          |          |          |          |          |          |

|                    |             |             |          |          |          |          |          |          |          |          |          |
|--------------------|-------------|-------------|----------|----------|----------|----------|----------|----------|----------|----------|----------|
| ENSMUSG00000027167 | 11_Elp4     | 404.1667617 | 0.700864 | 0.106249 | 0.688272 | 314.2952 | 278.2351 | 331.3763 | 819.5546 | 336.008  | 345.5315 |
| ENSMUSG00000027170 | 12_Elf3m    | 2922.747093 | 0.551612 | 0.116642 | 0.688272 | 2501.367 | 2199.259 | 2411.683 | 5046.313 | 2741.237 | 2636.623 |
| ENSMUSG00000027171 | 10_Prrg4    | 423.8955354 | 0.57423  | 0.109497 | 0.688272 | 341.9076 | 279.9526 | 400.413  | 664.7719 | 517.0224 | 339.5057 |
| ENSMUSG00000027173 | 7_Depdc7    | 107.3985247 | 0.553673 | 0.146362 | 0.688272 | 90.14667 | 89.31002 | 81.69346 | 182.5642 | 105.2146 | 95.46215 |
| ENSMUSG00000027176 | 8_Cstf3     | 714.1960417 | 0.61816  | 0.111    | 0.688272 | 543.3164 | 520.4026 | 627.0836 | 1309.7   | 702.5622 | 582.1116 |
| ENSMUSG00000027177 | 14_Hlpk3    | 5297.209364 | 0.561877 | 0.134303 | 0.688272 | 4180.856 | 4211.311 | 4443.664 | 9576.684 | 4495.946 | 4874.795 |
| ENSMUSG00000027180 | 12_Fbxo3    | 2594.750981 | 0.575389 | 0.114465 | 0.688272 | 2016.524 | 1981.996 | 2254.049 | 4605.778 | 2428.176 | 2425.984 |
| ENSMUSG00000027184 | 14_Caprin1  | 8371.141842 | 0.61847  | 0.091746 | 0.688272 | 6683.848 | 6051.613 | 7076.264 | 15053.61 | 8172.801 | 7188.715 |
| ENSMUSG00000027189 | 16_Trim44   | 3313.572878 | 0.503207 | 0.162813 | 0.688272 | 2751.504 | 2770.328 | 2702.788 | 5758.71  | 2883.786 | 3014.321 |
| ENSMUSG00000027193 | 12_Api5     | 3633.269363 | 0.739842 | 0.082731 | 0.688272 | 2720.643 | 2550.488 | 2893.789 | 7456.359 | 3272.967 | 2905.37  |
| ENSMUSG00000027195 | 10_Hsd17b12 | 4352.553214 | 0.616889 | 0.129215 | 0.688272 | 3495.417 | 3213.443 | 3599.115 | 8385.055 | 3922.356 | 3499.933 |
| ENSMUSG00000027201 | 16_Myef2    | 767.7242104 | 0.626145 | 0.17489  | 0.688272 | 566.0561 | 662.9552 | 582.2097 | 1601.406 | 569.0641 | 624.6545 |
| ENSMUSG00000027206 | 13_Cops2    | 2566.021185 | 0.960725 | 0.050767 | 0.688272 | 1802.933 | 1632.484 | 1790.352 | 6132.769 | 2106.555 | 1931.033 |
| ENSMUSG00000027208 | 14_Fgf7     | 100.1179955 | 0.962607 | 0.048634 | 0.688272 | 88.52241 | 57.53626 | 57.53061 | 215.3067 | 102.9519 | 78.86004 |
| ENSMUSG00000027210 | 20_Meis2    | 2262.52754  | 0.437666 | 0.18953  | 0.688272 | 1834.607 | 1743.263 | 2188.464 | 3610.604 | 2116.737 | 2081.49  |
| ENSMUSG00000027217 | 13_Tspan18  | 199.4909626 | -0.68936 | 0.060436 | 0.688272 | 215.215  | 322.0313 | 201.3571 | 120.0558 | 138.0235 | 200.263  |
| ENSMUSG00000027223 | 15_Mapk8ip1 | 222.091441  | -0.98509 | 0.025459 | 0.688272 | 271.2521 | 353.8051 | 260.0383 | 75.40696 | 157.2563 | 214.7898 |
| ENSMUSG00000027230 | 9_Creb3l1   | 122.7439753 | -0.67712 | 0.10828  | 0.688272 | 125.0684 | 203.5238 | 124.2661 | 59.53181 | 99.55793 | 124.5158 |
| ENSMUSG00000027239 | 14_Mdk      | 446.6068426 | -1.08781 | 0.046504 | 0.688272 | 514.0797 | 738.5252 | 569.553  | 92.2743  | 319.0379 | 446.1818 |
| ENSMUSG00000027242 | 14_Wdr76    | 399.7332788 | 0.443508 | 0.185558 | 0.688272 | 341.9076 | 303.1388 | 371.6477 | 633.0216 | 369.9482 | 378.7357 |
| ENSMUSG00000027245 | 11_Hypk     | 375.9570543 | 0.655457 | 0.045135 | 0.688272 | 336.2227 | 208.6763 | 331.3763 | 538.7629 | 453.6674 | 371.0368 |
| ENSMUSG00000027248 | 13_Pdia3    | 15262.12372 | 0.881837 | 0.044631 | 0.688272 | 10681.16 | 9818.95  | 11713.23 | 32852.63 | 14775.31 | 11371.47 |
| ENSMUSG00000027254 | 13_Map1a    | 336.1879354 | -0.57408 | 0.128491 | 0.688272 | 393.072  | 508.3801 | 304.9122 | 205.3847 | 230.7934 | 374.5852 |
| ENSMUSG00000027257 | 13_Pascin3  | 627.8252765 | -1.03182 | 0.110218 | 0.688272 | 743.9131 | 900.829  | 884.8207 | 76.39915 | 562.276  | 598.7137 |
| ENSMUSG00000027263 | 12_Tubgcp4  | 904.9827143 | 0.42016  | 0.176069 | 0.688272 | 731.7311 | 752.2652 | 838.7962 | 1385.107 | 858.6871 | 963.3099 |
| ENSMUSG00000027272 | 5_Ubr1      | 1272.279705 | 0.620929 | 0.132853 | 0.688272 | 1060.645 | 1010.749 | 936.5983 | 2475.531 | 1041.964 | 1108.191 |
| ENSMUSG00000027274 | 16_Mkks     | 586.230432  | 0.660679 | 0.096972 | 0.688272 | 483.7275 | 427.6576 | 471.751  | 1114.237 | 479.6882 | 560.3213 |
| ENSMUSG00000027281 | 16_Slx4ip   | 532.9473788 | 0.754778 | 0.053272 | 0.688272 | 415.8117 | 379.5676 | 394.66   | 1029.9   | 492.1329 | 485.6118 |
| ENSMUSG00000027282 | 17_Mtch2    | 2793.592593 | 0.490964 | 0.149094 | 0.688272 | 2369.802 | 2214.717 | 2384.068 | 4661.341 | 2624.709 | 2506.919 |
| ENSMUSG00000027285 | 13_Haus2    | 519.0889906 | 0.817651 | 0.057308 | 0.688272 | 406.0661 | 331.4776 | 390.0575 | 1076.534 | 480.1895 | 429.5797 |
| ENSMUSG00000027286 | 16_Lrrc57   | 328.0791915 | 0.610009 | 0.078434 | 0.688272 | 289.9312 | 246.4613 | 242.7792 | 554.638  | 321.3006 | 313.3649 |
| ENSMUSG00000027287 | 14_Snap23   | 1415.167412 | 0.715448 | 0.084283 | 0.688272 | 1046.026 | 1048.534 | 1119.546 | 2836.691 | 1236.555 | 1203.653 |
| ENSMUSG00000027305 | 9_Ndufaf1   | 336.0588711 | 0.653718 | 0.135955 | 0.688272 | 266.3794 | 217.2638 | 300.3098 | 664.7719 | 263.6022 | 304.0262 |
| ENSMUSG00000027306 | 15_Nusap1   | 699.1946817 | 0.454073 | 0.198089 | 0.688272 | 642.3966 | 486.0526 | 642.0416 | 1137.058 | 662.9653 | 624.6545 |
| ENSMUSG00000027314 | 6_Dil4      | 46.53681114 | -0.72628 | 0.181453 | 0.688272 | 39.79448 | 58.39502 | 75.9404  | 15.87515 | 37.33422 | 51.8816  |
| ENSMUSG00000027318 | 17_Adam33   | 59.86635906 | -0.99211 | 0.052187 | 0.688272 | 69.84337 | 87.59252 | 81.69346 | 26.78931 | 23.75814 | 69.52135 |
| ENSMUSG00000027322 | 11_Siglec1  | 319.0294904 | -0.65343 | 0.142867 | 0.688272 | 419.8723 | 379.5676 | 370.4971 | 112.1182 | 315.6439 | 316.4778 |
| ENSMUSG00000027323 | 10_Rad51    | 417.5440095 | 0.47357  | 0.108331 | 0.688272 | 355.7139 | 319.4551 | 373.9489 | 596.3103 | 484.2136 | 575.6228 |
| ENSMUSG00000027326 | 13_Casc5    | 401.8278195 | 0.19838  | 0.033907 | 0.688272 | 285.8705 | 271.2638 | 293.4061 | 933.6572 | 364.2915 | 316.4778 |
| ENSMUSG00000027341 | 10_Tmem230  | 669.3271615 | 0.526388 | 0.125587 | 0.688272 | 531.9466 | 544.4476 | 569.553  | 1126.143 | 623.3684 | 620.504  |
| ENSMUSG00000027342 | 14_Pcna     | 3287.370954 | 0.46389  | 0.143262 | 0.688272 | 2756.377 | 2543.618 | 2990.441 | 5154.462 | 3339.716 | 2939.612 |
| ENSMUSG00000027346 | 15_Gpcpd1   | 4722.87516  | 0.859996 | 0.049404 | 0.688272 | 3509.223 | 3168.788 | 3388.553 | 10201.77 | 4099.977 | 3988.943 |
| ENSMUSG00000027347 | 18_Rasgrp1  | 345.0116944 | 0.517498 | 0.162004 | 0.688272 | 276.9371 | 214.6876 | 360.1416 | 444.5042 | 497.7896 | 276.0101 |
| ENSMUSG00000027351 | 14_Spred1   | 3017.97428  | 0.899255 | 0.056746 | 0.688272 | 1972.669 | 2018.922 | 2328.839 | 6899.737 | 2473.109 | 2414.57  |
| ENSMUSG00000027353 | 14_Mcm8     | 210.1349034 | 0.513782 | 0.148729 | 0.688272 | 190.8511 | 157.1513 | 171.4412 | 347.2689 | 197.9845 | 196.1125 |
| ENSMUSG00000027357 | 16_Crls1    | 438.2901829 | 0.677744 | 0.114514 | 0.688272 | 345.1562 | 337.4888 | 329.0751 | 882.063  | 354.1095 | 381.8486 |
| ENSMUSG00000027361 | 15_Gabpb1   | 514.4359069 | 0.490142 | 0.141922 | 0.688272 | 421.4966 | 339.2063 | 523.5285 | 775.8979 | 541.9119 | 484.5742 |
| ENSMUSG00000027364 | 12_Usp50    | 270.1971197 | -1.12656 | 0.162202 | 0.688272 | 325.665  | 351.2288 | 434.9314 | 11.90636 | 255.6829 | 241.7683 |
| ENSMUSG00000027365 | 14_Tprm7    | 2201.803085 | 0.994864 | 0.058685 | 0.688272 | 1530.869 | 1432.395 | 1450.922 | 5564.24  | 1580.482 | 1651.91  |
| ENSMUSG00000027366 | 12_Sppl2a   | 5052.054025 | 0.973146 | 0.022537 | 0.688272 | 3422.325 | 2936.067 | 3871.81  | 10764.34 | 5259.6   | 4586.179 |
| ENSMUSG00000027375 | 14_Mal      | 94663.42924 | 0.428164 | 0.13532  | 0.688272 | 79422.47 | 77408.6  | 85324.79 | 140450.4 | 96050.77 | 89323.52 |
| ENSMUSG00000027379 | 13_Bub1     | 350.0963335 | 0.620202 | 0.19306  | 0.688272 | 299.6768 | 205.2413 | 323.322  | 706.4441 | 330.3513 | 235.5425 |
| ENSMUSG00000027399 | 11_IliA     | 1155.272333 | 0.752374 | 0.03666  | 0.688272 | 921.77   | 723.9264 | 936.5983 | 2042.933 | 1312.365 | 994.0515 |
| ENSMUSG00000027404 | 15_Snrpb    | 2885.731567 | -0.72775 | 0.140397 | 0.688272 | 3167.315 | 3434.142 | 4193.981 | 819.5546 | 277.687  | 2721.709 |
| ENSMUSG00000027408 | 7_Cpxm1     | 551.8636895 | -0.93139 | 0.088742 | 0.688272 | 695.1851 | 868.1965 | 608.6738 | 133.9466 | 307.3214 | 657.8587 |
| ENSMUSG00000027420 | 13_Bfsp1    | 480.232109  | -1.53786 | 0.011072 | 0.688272 | 480.7822 | 1318.182 | 344.033  | 112.1182 | 347.7245 | 318.553  |
| ENSMUSG00000027423 | 15_Snx5     | 3529.546692 | 0.746202 | 0.068377 | 0.688272 | 2841.65  | 2390.761 | 2677.474 | 7019.792 | 3395.152 | 2852.451 |
| ENSMUSG00000027427 | 13_Polr3f   | 628.5488012 | 0.64509  | 0.137895 | 0.688272 | 494.5885 | 471.4539 | 505.1187 | 1269.02  | 535.1239 | 495.9881 |
| ENSMUSG00000027428 | 9_Rbbp9     | 590.5703871 | 0.657181 | 0.123453 | 0.688272 | 471.0367 | 474.8889 | 429.1783 | 1179.722 | 485.3449 | 503.2516 |
| ENSMUSG00000027430 | 12_Dtd1     | 293.2679842 | -0.41303 | 0.102133 | 0.688272 | 332.9742 | 332.3363 | 339.4306 | 216.2989 | 276.047  | 262.5209 |
| ENSMUSG00000027433 | 5_Xrn2      | 3292.435382 | 0.630493 | 0.061409 | 0.688272 | 2690.594 | 2360.704 | 2701.637 | 5607.986 | 3456.244 | 2937.536 |
| ENSMUSG00000027447 | 6_Cst3      | 5969.796366 | -0.64044 | 0.107829 | 0.688272 | 7223.104 | 7825.791 | 6771.352 | 2439.812 | 5543.567 | 6015.153 |
| ENSMUSG00000027454 | 10_Gins1    | 147.0992705 | 0.473218 | 0.122799 | 0.688272 | 132.3775 | 107.3438 | 130.0192 | 204.3925 | 166.307  | 142.1556 |
| ENSMUSG00000027457 | 15_Snpb     | 20.04381042 | -1.01043 | 0.09759  | 0.688272 | 20.3033  | 43.79626 | 16.10857 | 10.91416 | 13.57608 | 15.56448 |
| ENSMUSG00000027479 | 14_Mapre1   | 5180.439073 | 0.460939 | 0.186686 | 0.688272 | 4436.678 | 4304.056 | 4338.958 | 8728.355 | 4725.608 | 4548.979 |
| ENSMUSG00000027488 | 12_Snta1    | 87.90284393 | -1.42445 | 0.025473 | 0.688272 | 123.4441 | 160.5863 | 100.1033 | 11.90636 | 45.2536  | 86.12346 |
| ENSMUSG00000027499 | 12_Pkia     | 365.4653227 | 1.139209 | 0.050705 | 0.688272 | 230.6455 | 241.3088 | 155.3326 | 1133.089 | 159.519  | 272.8292 |
| ENSMUSG00000027506 | 15_Tpd52    | 7543.473374 | 0.450999 | 0.191009 | 0.688272 | 6354.934 | 5941.693 | 6825.431 | 12525.49 | 6809.536 | 6803.753 |
| ENSMUSG00000027510 | 17_Rbm38    | 59.55019115 | -0.96186 | 0.0994   | 0.688272 | 75.52829 | 66.12377 | 94.35019 | 11.90636 | 55.43567 | 53.95687 |
| ENSMUSG00000027514 | 14_Zbp1     | 5872.282964 | 0.51809  | 0.198964 | 0.688272 | 4473.224 | 3722.682 | 6291.547 | 4648.442 | 10159.43 | 5938.368 |
| ENSMUSG00000027525 | 17_Phactr3  | 7.93121409  | -1.63374 | 0.055581 | 0.688272 | 19.49117 | 9.446252 | 6.903673 | 2.97659  | 5.656701 | 3.112896 |
| ENSMUSG00000027534 | 16_Snx16    | 315.3447288 | 1.023813 | 0.046142 | 0.688272 | 209.5301 | 188.925  | 225.52   | 770.9369 | 277.1783 | 219.978  |
| ENSMUSG00000027546 | 15_Atp9a    | 2011.298836 | -0.77182 | 0.176934 | 0.688272 | 2225.242 | 2582.262 | 2802.891 | 396.8787 | 1919.884 | 2140.635 |
| ENSMUSG00000027550 | 14_Lrrcc1   | 685.2395974 | 1.019076 | 0.052319 | 0.688272 | 452.3576 | 444.8326 | 461.3955 | 1728.407 | 479.6882 | 544.7568 |
| ENSMUSG00000027551 | 15_Zfp64    | 346.0690902 | -0.84299 |          |          |          |          |          |          |          |          |

|                    |                 |             |          |          |          |          |          |          |          |          |           |
|--------------------|-----------------|-------------|----------|----------|----------|----------|----------|----------|----------|----------|-----------|
| ENSMUSG00000027713 | 6_1810062G17Rik | 4.936215533 | -1.34439 | 0.161885 | 0.688272 | 10.55772 | 6.011252 | 4.602448 | 2.97659  | 3.39402  | 2.075264  |
| ENSMUSG00000027714 | 11_Exosc9       | 859.1978906 | 0.6103   | 0.125975 | 0.688272 | 705.7429 | 598.5489 | 736.3917 | 1614.304 | 736.5024 | 763.6942  |
| ENSMUSG00000027715 | 9_Ccna2         | 1207.377792 | 0.637471 | 0.068979 | 0.688272 | 1016.789 | 784.8977 | 1033.25  | 2026.066 | 1350.82  | 1032.4474 |
| ENSMUSG00000027718 | 8_Il21          | 1.038577911 | 3.604666 | 0.198659 | 0.688272 | 0        | 0        | 0        | 3.968787 | 2.26268  | 0         |
| ENSMUSG00000027720 | 7_Il2           | 1.646368211 | 3.190372 | 0.147144 | 0.688272 | 0.812132 | 0        | 0        | 5.953181 | 0        | 3.112896  |
| ENSMUSG00000027722 | 14_Spata5       | 338.8661988 | 0.664271 | 0.055524 | 0.688272 | 263.943  | 259.3426 | 263.4902 | 588.3727 | 340.5334 | 317.5154  |
| ENSMUSG00000027737 | 10_Slc7a11      | 319.1974118 | 0.808094 | 0.100124 | 0.688272 | 200.5966 | 343.5001 | 151.8808 | 651.8733 | 285.0977 | 282.2359  |
| ENSMUSG00000027746 | 13_Ufm1         | 1664.487517 | 0.621205 | 0.098686 | 0.688272 | 1374.94  | 1195.38  | 1364.626 | 3046.044 | 1527.309 | 1478.626  |
| ENSMUSG00000027761 | 4_Aadac         | 86.71819873 | 0.714287 | 0.093557 | 0.688272 | 76.34042 | 50.66626 | 70.18734 | 156.7671 | 91.63655 | 74.70951  |
| ENSMUSG00000027763 | 13_Mbln1        | 3805.165722 | 0.777728 | 0.063739 | 0.688272 | 2974.028 | 2492.093 | 2946.718 | 7783.784 | 3366.868 | 3267.503  |
| ENSMUSG00000027765 | 6_P2ry1         | 506.2531481 | 0.536022 | 0.140155 | 0.688272 | 384.9507 | 415.6351 | 439.5338 | 875.1176 | 486.4762 | 435.8055  |
| ENSMUSG00000027770 | 5_Dhx36         | 1621.564569 | 0.903704 | 0.063423 | 0.688272 | 1138.609 | 1052.828 | 1197.787 | 3792.176 | 1310.092 | 1237.895  |
| ENSMUSG00000027775 | 9_Mfsd1         | 1880.275715 | 0.494137 | 0.166867 | 0.688272 | 1645.38  | 1417.797 | 1621.212 | 3215.71  | 1702.667 | 1678.889  |
| ENSMUSG00000027782 | 10_Kpna4        | 2936.077703 | 0.822473 | 0.058366 | 0.688272 | 2179.763 | 1963.103 | 2220.681 | 6232.98  | 2629.234 | 2390.704  |
| ENSMUSG00000027787 | 14_Nmd3         | 1033.13529  | 0.825585 | 0.078463 | 0.688272 | 788.5803 | 667.2489 | 780.115  | 2292.967 | 906.2034 | 763.6972  |
| ENSMUSG00000027797 | 15_Dclk1        | 266.6520637 | 0.705554 | 0.146309 | 0.688272 | 201.4088 | 238.7326 | 167.9894 | 574.482  | 202.5099 | 214.7898  |
| ENSMUSG00000027804 | 13_Ppid         | 1219.231406 | 0.745852 | 0.080904 | 0.688272 | 881.1634 | 909.4165 | 942.3513 | 2506.289 | 1100.794 | 975.3741  |
| ENSMUSG00000027808 | 8_Serp1         | 4256.314142 | 0.817324 | 0.060702 | 0.688272 | 3098.284 | 2762.599 | 3385.101 | 8969.459 | 4007.207 | 3315.234  |
| ENSMUSG00000027810 | 14_Elf2a        | 1236.801131 | 0.781673 | 0.071731 | 0.688272 | 989.177  | 797.779  | 942.3513 | 2578.72  | 1079.298 | 1033.482  |
| ENSMUSG00000027822 | 16_Slc33a1      | 944.8878888 | 0.688908 | 0.111398 | 0.688272 | 701.6822 | 711.9039 | 757.1028 | 1928.831 | 750.0785 | 819.7293  |
| ENSMUSG00000027823 | 9_Gmps          | 1659.628412 | 0.80817  | 0.07717  | 0.688272 | 1270.175 | 1076.014 | 1273.728 | 3616.557 | 1435.671 | 1285.626  |
| ENSMUSG00000027828 | 12_Ssr3         | 5877.011831 | 0.787896 | 0.075189 | 0.688272 | 4374.144 | 4033.55  | 4525.357 | 12522.52 | 5259.6   | 4546.904  |
| ENSMUSG00000027829 | 5_Ccnl1         | 2395.069185 | 0.643687 | 0.078012 | 0.688272 | 1953.99  | 1702.043 | 1952.589 | 4333.916 | 2195.931 | 2231.947  |
| ENSMUSG00000027832 | 5_Ptx3          | 110.0594977 | 1.410038 | 0.032266 | 0.688272 | 40.60661 | 26.62126 | 113.9106 | 169.6657 | 242.1068 | 67.44608  |
| ENSMUSG00000027833 | 16_Shox2        | 31.22597207 | 0.722776 | 0.162376 | 0.688272 | 25.1761  | 21.46876 | 24.16285 | 64.49279 | 27.1526  | 24.90317  |
| ENSMUSG00000027834 | 15_Serpinl1     | 143.8824414 | 1.023435 | 0.031883 | 0.688272 | 97.45598 | 85.01627 | 102.4045 | 328.4711 | 124.4474 | 125.5535  |
| ENSMUSG00000027835 | 11_Pdcn10       | 2079.510305 | 1.156036 | 0.021328 | 0.688272 | 1340.018 | 1136.122 | 1388.789 | 5235.823 | 1814.67  | 1561.636  |
| ENSMUSG00000027852 | 14_Nras         | 3048.744362 | 0.546035 | 0.066547 | 0.688272 | 2517.61  | 2320.343 | 2598.082 | 4738.732 | 3242.421 | 2875.278  |
| ENSMUSG00000027855 | 13_Sycp1        | 31.66752082 | 0.740782 | 0.144191 | 0.688272 | 25.98823 | 18.8925  | 26.46408 | 57.54742 | 23.75814 | 37.35475  |
| ENSMUSG00000027868 | 11_Tbx15        | 102.5072718 | 0.986459 | 0.137357 | 0.688272 | 60.09778 | 80.72252 | 65.58489 | 283.7683 | 81.85958 | 83.01057  |
| ENSMUSG00000027875 | 12_Hmgcs2       | 171.5840274 | -0.87132 | 0.043962 | 0.688272 | 198.1603 | 324.6076 | 142.6759 | 107.1573 | 93.03257 | 161.8706  |
| ENSMUSG00000027879 | 9_Sec22b        | 1333.727946 | 0.457604 | 0.189813 | 0.688272 | 1149.167 | 1063.133 | 1159.817 | 2220.536 | 1821.808 | 1127.906  |
| ENSMUSG00000027881 | 14_Prr38b       | 2830.45547  | 0.431247 | 0.162698 | 0.688272 | 2353.559 | 2187.237 | 2691.282 | 4301.173 | 2866.816 | 2582.666  |
| ENSMUSG00000027882 | 18_Stxbp3       | 2334.123878 | 0.766431 | 0.063584 | 0.688272 | 1788.315 | 1532.869 | 1863.992 | 4689.122 | 2212.901 | 1917.544  |
| ENSMUSG00000027893 | 14_Ahcy1        | 3183.779999 | 0.489032 | 0.13261  | 0.688272 | 2720.643 | 2613.177 | 2614.191 | 5181.252 | 2991.263 | 2982.155  |
| ENSMUSG00000027894 | 14_Slc6a17      | 593.1382743 | -0.86538 | 0.052804 | 0.688272 | 679.7546 | 1134.409 | 483.2571 | 312.542  | 343.9274 | 604.9395  |
| ENSMUSG00000027900 | 15_Dram2        | 1704.787527 | 1.057874 | 0.036145 | 0.688272 | 1119.93  | 1021.054 | 1178.227 | 4234.696 | 1388.154 | 1286.664  |
| ENSMUSG00000027901 | 12_Denn2d       | 1556.97893  | 0.546205 | 0.069147 | 0.688272 | 1255.556 | 1116.375 | 1425.608 | 2283.045 | 1866.711 | 1394.577  |
| ENSMUSG00000027905 | 15_Ddx20        | 493.6345325 | 0.681905 | 0.059268 | 0.688272 | 388.1992 | 358.0988 | 391.2081 | 887.024  | 492.1329 | 445.1442  |
| ENSMUSG00000027931 | 12_Npr1         | 172.738892  | -0.66014 | 0.051369 | 0.688272 | 218.4636 | 224.9926 | 191.0016 | 92.2743  | 143.8802 | 166.0211  |
| ENSMUSG00000027957 | 13_Slc35a3      | 2143.875883 | 0.816944 | 0.051332 | 0.688272 | 1643.756 | 1429.819 | 1584.393 | 4438.096 | 1848.61  | 1918.582  |
| ENSMUSG00000027959 | 13_Sass6        | 217.3245111 | 0.667153 | 0.071824 | 0.688272 | 174.6084 | 151.14   | 178.3449 | 383.9802 | 222.874  | 192.9996  |
| ENSMUSG00000027961 | 7_Lrrc39        | 32.59010221 | 1.123089 | 0.090256 | 0.688272 | 17.05478 | 28.33876 | 16.10857 | 86.32112 | 24.88948 | 22.82791  |
| ENSMUSG00000027961 | 14_Vcam1        | 1641.291109 | 1.112402 | 0.004694 | 0.688272 | 1180.84  | 868.1965 | 1065.467 | 3430.024 | 1608.766 | 1694.453  |
| ENSMUSG00000027968 | 11_Larp7        | 657.1319844 | 0.493435 | 0.106946 | 0.688272 | 544.1286 | 509.2389 | 584.511  | 1015.017 | 640.3385 | 649.5577  |
| ENSMUSG00000027981 | 14_Rnpc3        | 451.9498734 | 0.996282 | 0.061731 | 0.688272 | 296.4282 | 323.7488 | 285.3518 | 1136.065 | 373.3422 | 296.7628  |
| ENSMUSG00000027993 | 16_Trim2        | 6388.682297 | 0.467323 | 0.188609 | 0.688272 | 5460.777 | 4786.674 | 5841.658 | 10784.19 | 5589.951 | 5868.847  |
| ENSMUSG00000027995 | 10_Tlr2         | 682.8653204 | 0.56065  | 0.050476 | 0.688272 | 587.9837 | 449.9851 | 617.8787 | 950.5245 | 811.1709 | 679.649   |
| ENSMUSG00000028011 | 16_Tdo2         | 31.89629489 | 1.176467 | 0.066589 | 0.688272 | 19.49117 | 19.75126 | 19.56041 | 83.34453 | 18.10144 | 31.12896  |
| ENSMUSG00000028015 | 3_Ctso          | 2064.506557 | 0.756259 | 0.068309 | 0.688272 | 1504.069 | 1477.909 | 1624.664 | 4188.063 | 1792.043 | 1800.292  |
| ENSMUSG00000028023 | 16_Pltx2        | 354.6078735 | -0.54865 | 0.09766  | 0.688272 | 414.9995 | 485.1939 | 363.5934 | 352.2299 | 201.3785 | 310.252   |
| ENSMUSG00000028028 | 11_Alpk1        | 2093.773534 | 0.396047 | 0.128858 | 0.688272 | 1868.716 | 1670.269 | 1885.853 | 2891.262 | 2086.191 | 2160.35   |
| ENSMUSG00000028030 | 12_Tbck         | 680.0052018 | 0.40651  | 0.186256 | 0.688272 | 563.6197 | 584.8089 | 606.3726 | 1032.877 | 632.4191 | 659.934   |
| ENSMUSG00000028034 | 15_Fubp1        | 3804.022123 | 0.562225 | 0.139232 | 0.688272 | 2966.719 | 2963.547 | 3286.148 | 6891.799 | 3624.814 | 3091.106  |
| ENSMUSG00000028035 | 13_Dnajb4       | 1308.209653 | 0.866237 | 0.060137 | 0.688272 | 940.4491 | 905.9815 | 934.297  | 2924.996 | 1074.773 | 1068.761  |
| ENSMUSG00000028037 | 13>Ifi44        | 19609.64243 | 1.387965 | 0.004221 | 0.688272 | 9829.236 | 8628.722 | 14070.84 | 48211.84 | 22002.3  | 14914.92  |
| ENSMUSG00000028039 | 11_Efnf3        | 555.2142951 | -0.63162 | 0.181217 | 0.688272 | 652.9543 | 643.2039 | 728.3375 | 187.5252 | 446.8793 | 672.3856  |
| ENSMUSG00000028041 | 17_Adam15       | 2553.74719  | -0.78476 | 0.192586 | 0.688272 | 2801.044 | 3289.013 | 3604.868 | 433.59   | 2475.372 | 2718.596  |
| ENSMUSG00000028042 | 15_Zbtb7b       | 2236.808883 | -0.64807 | 0.188002 | 0.688272 | 2379.547 | 2467.189 | 3345.98  | 674.6938 | 2368.399 | 2207.043  |
| ENSMUSG00000028049 | 15_Scam3p       | 792.3089475 | -0.78102 | 0.090337 | 0.688272 | 875.4785 | 1009.89  | 1119.546 | 249.0414 | 770.4426 | 729.4553  |
| ENSMUSG00000028053 | 13_Ash1         | 3180.445114 | 0.444258 | 0.146805 | 0.688272 | 2683.285 | 2702.487 | 2698.185 | 4924.273 | 3171.146 | 2903.295  |
| ENSMUSG00000028063 | 15_Llna         | 2706.573861 | -1.0246  | 0.050489 | 0.688272 | 3117.775 | 3223.748 | 4546.068 | 611.1932 | 2401.835 | 2338.823  |
| ENSMUSG00000028073 | 15_Pear1        | 211.129913  | -0.83022 | 0.124018 | 0.688272 | 265.5672 | 316.0201 | 228.9718 | 50.60204 | 174.2264 | 231.392   |
| ENSMUSG00000028086 | 14_Fbxw7        | 752.1749675 | 0.452998 | 0.154229 | 0.688272 | 647.2693 | 638.9102 | 619.0293 | 1164.839 | 797.5948 | 645.4071  |
| ENSMUSG00000028098 | 13_Rnf115       | 1577.916843 | 0.749699 | 0.055882 | 0.688272 | 1125.615 | 1084.602 | 1320.903 | 3047.036 | 1522.784 | 1366.561  |
| ENSMUSG00000028125 | 14_Abc4a        | 874.863446  | -0.7254  | 0.04782  | 0.688272 | 1184.901 | 1386.023 | 699.5722 | 592.3415 | 564.5387 | 821.8046  |
| ENSMUSG00000028127 | 10_Aboc3        | 5395.389412 | 0.48095  | 0.175509 | 0.688272 | 4458.606 | 4440.597 | 4613.955 | 9233.384 | 4693.93  | 4931.865  |
| ENSMUSG00000028128 | 13_F3           | 4679.644538 | 0.522599 | 0.17742  | 0.688272 | 3739.057 | 3466.775 | 4318.247 | 8339.414 | 3568.611 | 4625.764  |
| ENSMUSG00000028134 | 11_Ptbp2        | 550.6257035 | 0.870025 | 0.062147 | 0.688272 | 405.254  | 419.0701 | 344.033  | 1227.347 | 464.9808 | 443.0689  |
| ENSMUSG00000028136 | 15_Snx27        | 1897.437289 | 0.379767 | 0.157924 | 0.688272 | 1629.137 | 1600.71  | 1717.864 | 2670.994 | 1933.46  | 1832.458  |
| ENSMUSG00000028145 | 9_Them4         | 96.58949009 | 0.822748 | 0.057387 | 0.688272 | 64.97057 | 65.26502 | 79.39224 | 189.5096 | 98.42659 | 81.97293  |
| ENSMUSG00000028156 | 12_Elf4e        | 1969.575197 | 0.695951 | 0.069656 | 0.688272 | 1606.397 | 1370.565 | 1533.766 | 3700.894 | 1954.956 | 1650.873  |
| ENSMUSG00000028161 | 17_Ppp3ca       | 4412.829042 | 0.481687 | 0.1687   | 0.688272 | 3683.019 | 3433.283 | 3932.792 | 7453.382 | 3924.619 | 4049.878  |
| ENSMUSG00000028165 | 9_Cisd2         | 923.535278  | 0.60053  | 0.132569 | 0.688272 | 678.1304 | 759.1352 | 765.1571 | 1742.298 | 771.574  | 824.9175  |
| ENSMUSG00000028173 | 10_Wls          | 5540.11367  | 0.558678 | 0.145565 | 0.688272 | 452      |          |          |          |          |           |

|                    |            |              |           |          |          |          |          |          |          |           |          |
|--------------------|------------|--------------|-----------|----------|----------|----------|----------|----------|----------|-----------|----------|
| ENSMUSG00000028295 | 14_Smim8   | 425.7802793  | 0.786928  | 0.110416 | 0.688272 | 324.8529 | 299.7038 | 312.9665 | 961.4387 | 287.3604  | 368.3594 |
| ENSMUSG00000028312 | 19_Smc2    | 825.207406   | 0.866742  | 0.052657 | 0.688272 | 658.6392 | 468.0189 | 627.0836 | 1728.407 | 862.0812  | 607.0148 |
| 12_5830415F09Rik   |            | 56.06947504  | -0.52429  | 0.175726 | 0.688272 | 74.71616 | 73.85252 | 49.47632 | 36.71128 | 49.77896  | 51.8816  |
| ENSMUSG00000028339 | 17_Col15a1 | 233.42363077 | -0.51596  | 0.134587 | 0.688272 | 217.6514 | 345.2176 | 261.1889 | 144.8607 | 200.2472  | 231.392  |
| ENSMUSG00000028343 | 10_Erp4d   | 1923.093269  | 0.779696  | 0.073454 | 0.688272 | 1419.607 | 1318.182 | 1509.603 | 4000.538 | 1857.66   | 1432.97  |
| ENSMUSG00000028345 | 15_Tex10   | 878.836985   | 0.600861  | 0.084028 | 0.688272 | 691.9366 | 677.5539 | 726.0362 | 1518.061 | 880.1826  | 779.2617 |
| ENSMUSG00000028347 | 14_Tmeff1  | 654.6471893  | 0.639924  | 0.12571  | 0.688272 | 510.019  | 516.9676 | 508.5706 | 1286.879 | 530.5985  | 574.8482 |
| ENSMUSG00000028348 | 7_Murc     | 47.59991812  | 0.76566   | 0.138925 | 0.688272 | 32.48529 | 37.78501 | 35.66898 | 95.25089 | 29.41484  | 54.9945  |
| ENSMUSG00000028358 | 15_Zfp618  | 741.2918517  | -0.34454  | 0.198921 | 0.688272 | 815.3807 | 908.5577 | 764.0064 | 550.6692 | 626.7624  | 782.3746 |
| ENSMUSG00000028362 | 2_Tnfsf8   | 42.95238843  | 1.144366  | 0.016236 | 0.688272 | 25.1761  | 19.75126 | 35.66898 | 59.53181 | 79.19381  | 38.39239 |
| ENSMUSG00000028369 | 15_Svep1   | 688.8672449  | -0.53957  | 0.062382 | 0.688272 | 825.1263 | 942.049  | 681.1624 | 502.0516 | 500.0523  | 682.7619 |
| ENSMUSG00000028373 | 16_Astn2   | 92.44370472  | -0.49843  | 0.176474 | 0.688272 | 107.2014 | 132.2475 | 85.1453  | 71.43817 | 61.09237  | 97.53741 |
| ENSMUSG00000028381 | 8_Ugcg     | 861.2445585  | 0.716402  | 0.098177 | 0.688272 | 744.7252 | 595.9727 | 614.4269 | 1736.344 | 832.6663  | 643.3319 |
| ENSMUSG00000028382 | 15_Ptbp3   | 10141.52643  | 0.898859  | 0.035467 | 0.688272 | 7242.595 | 6337.577 | 7661.926 | 21613.02 | 9626.573  | 8367.465 |
| ENSMUSG00000028383 | 17_Hsd1b   | 2397.901492  | 0.52282   | 0.191044 | 0.688272 | 1955.614 | 1861.77  | 2087.21  | 4455.956 | 2064.696  | 1962.162 |
| ENSMUSG00000028386 | 1_Slc46a2  | 208.2040889  | -0.66752  | 0.087753 | 0.688272 | 259.8823 | 225.8513 | 280.7494 | 91.28211 | 191.1965  | 200.263  |
| ENSMUSG00000028389 | 10_Zfp37   | 151.0996762  | 0.763822  | 0.18456  | 0.688272 | 102.3287 | 124.5188 | 109.3082 | 373.066  | 102.9519  | 94.24252 |
| ENSMUSG00000028393 | 10_Alad    | 2490.564184  | -0.86171  | 0.182762 | 0.688272 | 2880.633 | 3308.765 | 3449.535 | 328.4171 | 2186.88   | 2789.155 |
| ENSMUSG00000028403 | 15_Zdhc21  | 1488.548161  | 0.743792  | 0.082553 | 0.688272 | 1188.962 | 1056.263 | 1094.232 | 3062.912 | 1330.456  | 1198.465 |
| ENSMUSG00000028409 | 11_Smu1    | 2250.222012  | 0.415915  | 0.152118 | 0.688272 | 1983.227 | 1829.138 | 1972.149 | 3346.68  | 2212.901  | 2157.237 |
| ENSMUSG00000028410 | 13_Dnaaj1  | 3310.981439  | 0.835009  | 0.055027 | 0.688272 | 2404.723 | 2308.321 | 2423.189 | 6983.081 | 3296.725  | 2449.849 |
| ENSMUSG00000028412 | 17_Slc44a1 | 2650.36975   | 0.502111  | 0.161729 | 0.688272 | 2273.97  | 2140.864 | 2166.603 | 4585.934 | 2331.692  | 2403.156 |
| ENSMUSG00000028419 | 5_Cmp5     | 2820.177867  | 0.551929  | 0.116708 | 0.688272 | 2280.467 | 2103.079 | 2478.418 | 4855.811 | 2675.619  | 2527.672 |
| ENSMUSG00000028426 | 10_Rad23b  | 4163.040261  | 0.575537  | 0.109083 | 0.688272 | 3304.566 | 3101.806 | 3624.428 | 7246.013 | 4235.377  | 3465.691 |
| ENSMUSG00000028439 | 14_Fam219a | 158.8795266  | -0.76096  | 0.025246 | 0.688272 | 193.2675 | 210.3938 | 195.6041 | 79.37575 | 133.4981  | 141.118  |
| ENSMUSG00000028444 | 17_Cntrf   | 99.02004528  | -0.988    | 0.114699 | 0.688272 | 96.64373 | 168.315  | 130.0192 | 21.82833 | 48.64762  | 128.6664 |
| ENSMUSG00000028445 | 7_Enho     | 52.65536572  | -1.64211  | 0.062116 | 0.688272 | 62.53418 | 106.485  | 70.18734 | 0.992197 | 24.88948  | 50.84397 |
| ENSMUSG00000028447 | 11_Dctr3   | 691.283362   | -0.52987  | 0.173578 | 0.688272 | 773.1498 | 790.0502 | 887.1219 | 308.5732 | 719.5323  | 669.2727 |
| ENSMUSG00000028454 | 16_Pigo    | 504.4004495  | -0.717307 | 0.18937  | 0.688272 | 549.0014 | 662.0964 | 668.5056 | 117.0792 | 493.2643  | 536.4558 |
| ENSMUSG00000028463 | 14_Car9    | 83.11906545  | -0.60874  | 0.165251 | 0.688272 | 106.3893 | 132.2475 | 62.13305 | 45.64105 | 72.40577  | 79.89767 |
| ENSMUSG00000028469 | 15_Npr2    | 525.5907516  | -0.70832  | 0.069103 | 0.688272 | 631.0267 | 800.3552 | 524.6791 | 274.8385 | 340.5335  | 582.1116 |
| ENSMUSG00000028483 | 13_Snapc3  | 463.5642494  | 0.589594  | 0.170832 | 0.688272 | 366.2716 | 379.5676 | 364.744  | 911.8289 | 356.3721  | 402.6012 |
| ENSMUSG00000028484 | 16_Psfp1   | 1196.695496  | 0.849615  | 0.077107 | 0.688272 | 857.6116 | 857.0327 | 848.0011 | 2741.44  | 940.1436  | 935.9441 |
| ENSMUSG00000028487 | 18_Bnc2    | 110.5878967  | 0.40856   | 0.166727 | 0.688272 | 93.3952  | 103.05   | 88.59713 | 133.9466 | 108.6086  | 135.9298 |
| ENSMUSG00000028496 | 17_Mllt3   | 876.4633674  | 0.785179  | 0.060902 | 0.688272 | 642.3966 | 605.4189 | 683.4636 | 1792.9   | 788.5441  | 746.0575 |
| ENSMUSG00000028497 | 12_Hacd4   | 1741.854008  | 0.826919  | 0.060143 | 0.688272 | 1260.429 | 1170.477 | 1337.011 | 3730.66  | 1521.652  | 1430.895 |
| ENSMUSG00000028514 | 15_Usp24   | 5033.017348  | 0.437657  | 0.108041 | 0.688272 | 4216.59  | 4123.719 | 4486.237 | 7259.904 | 3273.176  | 4838.478 |
| ENSMUSG00000028518 | 8_Prkaa2   | 795.5093612  | 0.682219  | 0.140616 | 0.688272 | 635.0874 | 637.1927 | 560.3481 | 1662.922 | 528.3358  | 749.1704 |
| ENSMUSG00000028521 | 17_Slc35d1 | 438.8653822  | 0.342509  | 0.164805 | 0.688272 | 372.7687 | 370.9801 | 417.6722 | 549.677  | 484.2136  | 437.8807 |
| ENSMUSG00000028522 | 16_Mler1   | 1948.144287  | 0.899243  | 0.053477 | 0.688272 | 1405.801 | 1265.798 | 1408.349 | 4418.252 | 1640.443  | 1550.222 |
| ENSMUSG00000028525 | 16_Pde4b   | 796.6551455  | 0.434459  | 0.076538 | 0.688272 | 681.3789 | 650.9327 | 700.7228 | 1062.643 | 879.0513  | 805.2025 |
| ENSMUSG00000028530 | 14_Jak1    | 8024.427767  | 0.367534  | 0.132843 | 0.688272 | 7105.344 | 6590.049 | 7328.249 | 10569.87 | 6755.623  | 7787.429 |
| ENSMUSG00000028538 | 12_Sl3gal3 | 128.6015139  | -0.59935  | 0.17925  | 0.688272 | 125.8805 | 188.0663 | 150.7302 | 52.58643 | 114.2654  | 140.0803 |
| ENSMUSG00000028542 | 17_Slc6a9  | 1115.95972   | -0.7491   | 0.178838 | 0.688272 | 1251.496 | 1531.152 | 1415.253 | 239.1194 | 1024.994  | 1233.745 |
| ENSMUSG00000028549 | 17_Igfb3bp | 241.6935997  | 1.108008  | 0.047745 | 0.688272 | 163.2386 | 157.1513 | 139.2241 | 633.0216 | 144.8115  | 212.7146 |
| ENSMUSG00000028550 | 15_Atg4c   | 525.6330622  | 0.594623  | 0.146917 | 0.688272 | 405.254  | 413.0589 | 438.3832 | 1003.111 | 470.6375  | 423.3539 |
| ENSMUSG00000028552 | 13_Eps15   | 2592.381497  | 0.698438  | 0.076907 | 0.688272 | 2010.839 | 1930.471 | 1989.408 | 5029.446 | 2298.883  | 2295.242 |
| ENSMUSG00000028557 | 10_Rnf11   | 2386.208847  | 0.81138   | 0.083321 | 0.688272 | 1714.411 | 1743.263 | 1733.972 | 5346.949 | 1924.81   | 1854.249 |
| ENSMUSG00000028559 | 17_Osblp9  | 4492.266794  | 0.420772  | 0.108343 | 0.688272 | 3886.865 | 3616.197 | 4022.54  | 6267.707 | 4836.479  | 4323.813 |
| ENSMUSG00000028560 | 11_Usp1    | 1971.143864  | 0.910889  | 0.043559 | 0.688272 | 1420.419 | 1244.329 | 1441.717 | 4371.619 | 1782.992  | 1565.787 |
| ENSMUSG00000028563 | 16_Tmd21   | 375.6417395  | 1.186155  | 0.023786 | 0.688272 | 222.5242 | 227.5688 | 238.1767 | 977.3139 | 299.8051  | 288.4617 |
| ENSMUSG00000028565 | 18_Nfia    | 831.2201699  | 0.58565   | 0.136407 | 0.688272 | 683.0032 | 656.0852 | 654.6983 | 1537.905 | 649.3892  | 806.2401 |
| ENSMUSG00000028568 | 16_Btf3l4  | 2485.462367  | 0.665206  | 0.123702 | 0.688272 | 1994.597 | 1835.149 | 1937.631 | 5060.204 | 1992.29   | 2032.904 |
| ENSMUSG00000028572 | 13_Hoek1   | 2048.645593  | 0.855817  | 0.057793 | 0.688272 | 1508.129 | 1380.012 | 1480.838 | 4514.496 | 1776.204  | 1632.195 |
| ENSMUSG00000028576 | 12_lif74   | 302.8714254  | 0.868051  | 0.082498 | 0.688272 | 190.0389 | 226.7101 | 226.6706 | 691.5612 | 1285.0977 | 197.1501 |
| ENSMUSG00000028577 | 13_Plaa    | 1405.175843  | 0.822647  | 0.056931 | 0.688272 | 1035.469 | 907.699  | 1102.286 | 2952.778 | 1285.202  | 1147.621 |
| ENSMUSG00000028578 | 8_Caap1    | 236.3408028  | 0.826263  | 0.06765  | 0.688272 | 164.0507 | 169.1738 | 178.3449 | 505.0282 | 211.5606  | 189.8867 |
| ENSMUSG00000028583 | 14_Pdpn    | 4057.482046  | 0.402896  | 0.118864 | 0.688272 | 3608.303 | 3177.376 | 3698.067 | 5119.736 | 5011.837  | 3729.25  |
| ENSMUSG00000028597 | 11_Gpx7    | 92.99855558  | -0.62939  | 0.079722 | 0.688272 | 116.1349 | 99.61503 | 123.1155 | 50.60204 | 80.32515  | 88.19873 |
| ENSMUSG00000028600 | 15_Podn    | 225.2630212  | -0.96578  | 0.064822 | 0.688272 | 255.0095 | 368.4038 | 270.3938 | 62.5084  | 138.8922  | 258.3704 |
| ENSMUSG00000028609 | 6_Magoh    | 998.3487112  | 0.516806  | 0.116683 | 0.688272 | 867.3572 | 741.1014 | 856.0654 | 1624.226 | 969.5585  | 931.7936 |
| ENSMUSG00000028614 | 14_Ndc1    | 516.2629979  | 0.554732  | 0.078257 | 0.688272 | 416.6238 | 401.0364 | 437.2326 | 818.5624 | 550.9626  | 473.1602 |
| ENSMUSG00000028618 | 11_Tmem59  | 6928.264755  | 0.453768  | 0.197793 | 0.688272 | 5702.792 | 5835.208 | 6005.045 | 11717.84 | 6129.601  | 6179.099 |
| ENSMUSG00000028626 | 5_Col9a2   | 84.37437448  | -1.22185  | 0.067974 | 0.688272 | 94.20733 | 179.4788 | 80.54285 | 14.88295 | 39.5969   | 97.53741 |
| ENSMUSG00000028631 | 7_Kcng4    | 334.4138366  | -1.07166  | 0.046114 | 0.688272 | 410.9389 | 567.6339 | 380.8526 | 74.41476 | 236.4501  | 336.1928 |
| ENSMUSG00000028641 | 16_P3h1    | 283.6627528  | -0.82412  | 0.04263  | 0.688272 | 376.8293 | 418.2114 | 292.2555 | 114.1026 | 230.7934  | 269.7843 |
| ENSMUSG00000028645 | 10_Slc2a1  | 4405.982394  | -0.78387  | 0.11653  | 0.688272 | 5022.225 | 6384.808 | 5315.828 | 1184.683 | 4021.914  | 4506.436 |
| ENSMUSG00000028647 | 13_Mycbp   | 593.2763022  | 0.737387  | 0.084455 | 0.688272 | 438.5514 | 402.7539 | 493.6126 | 1190.636 | 583.7715  | 450.3323 |
| ENSMUSG00000028657 | 14_Ppt1    | 2306.107515  | 0.459119  | 0.19247  | 0.688272 | 1905.262 | 1982.854 | 1938.781 | 3896.357 | 2066.997  | 2106.393 |
| ENSMUSG00000028670 | 14_Lyp1a2  | 1129.837622  | -0.92493  | 0.163571 | 0.688272 | 1249.059 | 1420.373 | 1770.792 | 133.9466 | 1063.46   | 1141.395 |
| ENSMUSG00000028675 | 12_Prrc2   | 2550.546622  | 0.765341  | 0.085016 | 0.688272 | 1878.462 | 1714.924 | 1964.095 | 5315.198 | 2102.03   | 2028.571 |
| ENSMUSG00000028676 | 17_Srsf10  | 2638.057702  | 0.913173  | 0.052644 | 0.688272 | 1933.687 | 1747.557 | 1808.762 | 6046.447 | 2295.489  | 1996.404 |
| ENSMUSG00000028681 | 11_Ptch2   | 24.89176584  | -1.16651  | 0.160335 | 0.688272 | 39.79448 | 36.92626 | 26.46408 | 0.992197 | 19.23278  | 25.9408  |
| ENSMUSG00000028691 | 12_Prdx1   | 8771.402362  | 0.624383  | 0.110933 | 0.688272 | 7323.808 | 6470.683 | 6912.878 | 16570.68 | 7862.814  | 7487.553 |
| ENSMUSG00000028693 | 15_Nasp    |              |           |          |          |          |          |          |          |           |          |

|                    |                 |             |          |          |          |          |          |          |          |          |          |
|--------------------|-----------------|-------------|----------|----------|----------|----------|----------|----------|----------|----------|----------|
| ENSMUSG00000028931 | 11_Kcnab2       | 62.44507275 | -0.82145 | 0.177005 | 0.688272 | 96.64373 | 75.57002 | 66.7355  | 13.89076 | 80.32515 | 41.50528 |
| ENSMUSG00000028937 | 14_Acof7        | 186.9997906 | -0.99428 | 0.062852 | 0.688272 | 227.397  | 249.0376 | 270.3938 | 40.68007 | 179.8831 | 154.6072 |
| ENSMUSG00000028943 | 17_Esbn         | 48.36816992 | -1.06292 | 0.137899 | 0.688272 | 48.72793 | 73.85252 | 73.63917 | 4.960984 | 35.07154 | 53.95687 |
| ENSMUSG00000028945 | 9_Rheb          | 2253.324486 | 0.736917 | 0.092609 | 0.688272 | 1695.732 | 1622.179 | 1752.382 | 4704.997 | 202.4727 | 1742.184 |
| ENSMUSG00000028949 | 13_Smarcd3      | 100.6841823 | -0.71    | 0.173971 | 0.688272 | 131.5654 | 161.445  | 81.69346 | 40.69007 | 61.09237 | 127.6287 |
| ENSMUSG00000028952 | 12_Zbtb48       | 337.3002234 | -1.00327 | 0.119256 | 0.688272 | 398.7569 | 461.1489 | 490.1608 | 42.66446 | 340.5334 | 290.537  |
| ENSMUSG00000028955 | 3_Vamp3         | 5901.440335 | 0.4479   | 0.150481 | 0.688272 | 4917.46  | 4529.907 | 5530.992 | 9063.718 | 6067.377 | 5299.187 |
| ENSMUSG00000028958 | 14_Tmub1        | 162.424292  | -1.11384 | 0.02081  | 0.688272 | 181.1055 | 217.2638 | 268.0926 | 43.65666 | 135.7608 | 128.6664 |
| ENSMUSG00000028959 | 14_Fastk        | 808.9720724 | -0.84759 | 0.155374 | 0.688272 | 916.0851 | 1034.794 | 1169.022 | 137.9154 | 778.362  | 817.6541 |
| ENSMUSG00000028962 | 14_Slc4a2       | 1964.427615 | -0.80393 | 0.141097 | 0.688272 | 2246.358 | 2540.183 | 2707.39  | 424.6602 | 1950.43  | 1917.544 |
| ENSMUSG00000028967 | 10_Errf1        | 2559.389366 | 0.431356 | 0.083506 | 0.688272 | 2222.806 | 2071.306 | 2244.844 | 3420.102 | 2938.09  | 2459.188 |
| ENSMUSG00000028973 | 18_Abcb8        | 728.8165926 | -0.8995  | 0.136939 | 0.688272 | 838.1204 | 997.8678 | 1007.936 | 118.0714 | 673.1474 | 737.7564 |
| ENSMUSG00000028975 | 16_Pex14        | 701.3747381 | -0.87181 | 0.153689 | 0.688272 | 778.8348 | 873.349  | 1068.919 | 112.1182 | 728.583  | 646.4448 |
| ENSMUSG00000028980 | 14_H6pd         | 776.2086201 | -0.58001 | 0.171155 | 0.688272 | 879.5391 | 959.224  | 951.5562 | 298.6512 | 781.756  | 786.5251 |
| ENSMUSG00000028986 | 12_Klhl7        | 716.2371364 | 0.697286 | 0.126453 | 0.688272 | 561.1833 | 558.1876 | 520.0767 | 1507.147 | 514.7597 | 636.0685 |
| ENSMUSG00000028988 | 13_Ctnnbip1     | 705.3287219 | -0.46564 | 0.161931 | 0.688272 | 727.6704 | 881.0777 | 845.6999 | 396.8787 | 633.5505 | 747.0951 |
| ENSMUSG00000028995 | 14_Fam126a      | 1322.196705 | 0.538015 | 0.089246 | 0.688272 | 1046.026 | 947.2015 | 1242.661 | 2010.191 | 1523.915 | 1163.186 |
| ENSMUSG00000029001 | 15_Fbxo44       | 122.863275  | -0.98655 | 0.047479 | 0.688272 | 146.1838 | 207.8176 | 135.7722 | 38.69568 | 76.93113 | 131.7793 |
| ENSMUSG00000029012 | 11_Orc5         | 499.6733293 | 0.705758 | 0.114622 | 0.688272 | 419.0602 | 358.0988 | 362.4428 | 1036.846 | 385.787  | 435.8055 |
| ENSMUSG00000029014 | 14_Dnajc2       | 1038.573588 | 0.684503 | 0.094739 | 0.688272 | 799.9502 | 682.7064 | 907.833  | 2002.253 | 1002.367 | 836.3314 |
| ENSMUSG00000029016 | 13_Cln6f        | 369.462814  | -0.39742 | 0.196085 | 0.688272 | 421.4966 | 431.0926 | 407.3167 | 231.1819 | 330.3513 | 395.3378 |
| ENSMUSG00000029022 | 18_Mlip         | 338.9945297 | -0.72833 | 0.132391 | 0.688272 | 391.4477 | 395.8839 | 480.9559 | 101.2041 | 317.9066 | 346.5691 |
| ENSMUSG00000029033 | 16_Acap3        | 837.1109294 | -0.8078  | 0.188063 | 0.688272 | 931.5156 | 1054.545 | 1210.444 | 133.9466 | 812.3022 | 879.912  |
| ENSMUSG00000029050 | 5_Ski           | 1964.736504 | -0.29015 | 0.183856 | 0.688272 | 1989.724 | 2128.842 | 2366.809 | 1753.212 | 1717.374 | 1832.458 |
| ENSMUSG00000029054 | 8_Gabrd         | 3.484395214 | -1.58936 | 0.170891 | 0.688272 | 7.30919  | 6.011252 | 2.301224 | 1.984394 | 2.26268  | 1.037632 |
| ENSMUSG00000029059 | 9_Fam213b       | 153.6277159 | -0.77912 | 0.136387 | 0.688272 | 174.6084 | 215.5463 | 192.1522 | 42.66446 | 113.134  | 183.8609 |
| ENSMUSG00000029060 | 17_Mib2         | 590.2528407 | -1.17203 | 0.078656 | 0.688272 | 687.876  | 836.4227 | 928.544  | 62.5084  | 437.8286 | 588.3374 |
| ENSMUSG00000029061 | 2_Mmp23         | 120.271041  | -0.86379 | 0.090033 | 0.688272 | 164.0507 | 158.8688 | 142.6759 | 35.71909 | 79.19381 | 141.118  |
| ENSMUSG00000029070 | 15_Mxra8        | 1132.885079 | -0.74286 | 0.039401 | 0.688272 | 1353.824 | 1617.885 | 1282.933 | 552.6536 | 812.3022 | 1177.712 |
| ENSMUSG00000029071 | 16_Dvl1         | 1192.946061 | -0.67586 | 0.190692 | 0.688272 | 1383.873 | 1455.582 | 1562.531 | 308.5732 | 1194.695 | 1252.422 |
| ENSMUSG00000029084 | 5_Cd38          | 119.3858838 | 0.830562 | 0.042936 | 0.688272 | 69.84337 | 96.18002 | 92.04897 | 223.2443 | 131.2355 | 103.7632 |
| ENSMUSG00000029086 | 15_Prom1        | 6195.044546 | 0.494587 | 0.119911 | 0.688272 | 5057.147 | 4771.216 | 5602.33  | 9892.202 | 5884.1   | 5963.271 |
| ENSMUSG00000029089 | 8_Pacr1         | 201.1855198 | 0.667329 | 0.053885 | 0.688272 | 156.7415 | 144.27   | 165.6881 | 341.3157 | 195.7218 | 203.3759 |
| ENSMUSG00000029092 | 9_DSERtd615e    | 2.433447287 | 0.755625 | 0.028452 | 0.688272 | 0        | 0        | 1.150612 | 4.960984 | 2.26268  | 6.225792 |
| ENSMUSG00000029096 | 15_Htra3        | 594.7760286 | -0.91176 | 0.092715 | 0.688272 | 682.191  | 849.304  | 798.5248 | 132.9544 | 445.768  | 659.934  |
| ENSMUSG00000029119 | 9_Man2b2        | 1236.310723 | -0.90566 | 0.148943 | 0.688272 | 1461.838 | 1663.399 | 1710.96  | 175.6188 | 1087.218 | 1318.83  |
| ENSMUSG00000029122 | 11_Evc          | 254.7681906 | -0.93981 | 0.024277 | 0.688272 | 334.5985 | 398.4601 | 271.5445 | 105.1729 | 158.3876 | 260.4456 |
| ENSMUSG00000029126 | 7_Nsg1          | 115.4857374 | -0.40167 | 0.178802 | 0.688272 | 129.129  | 136.5413 | 128.8686 | 112.1182 | 81.45649 | 104.8008 |
| ENSMUSG00000029127 | 15_Zbtb49       | 150.905345  | -0.55316 | 0.094557 | 0.688272 | 166.4871 | 168.315  | 203.6583 | 88.30552 | 144.8115 | 133.8545 |
| ENSMUSG00000029128 | 12_Rab28        | 1088.784081 | 0.627896 | 0.125599 | 0.688272 | 833.2476 | 847.5865 | 885.9713 | 2115.364 | 919.7795 | 930.756  |
| ENSMUSG00000029131 | 14_Dnajb6       | 4455.096972 | 0.68959  | 0.083049 | 0.688272 | 3353.294 | 3161.06  | 3716.477 | 8573.573 | 4305.88  | 3620.298 |
| ENSMUSG00000029138 | 4_4930548H24Rik | 2.100349974 | 3.551729 | 0.054095 | 0.688272 | 0        | 0.85875  | 0        | 0.992197 | 4.52536  | 6.225792 |
| ENSMUSG00000029152 | 13_Oclad1       | 3587.459374 | 0.441664 | 0.176714 | 0.688272 | 3023.568 | 2960.971 | 3143.472 | 5773.593 | 3356.686 | 3266.466 |
| ENSMUSG00000029156 | 11_Sgcb         | 910.4935583 | 0.399771 | 0.195703 | 0.688272 | 785.3318 | 731.6552 | 838.7962 | 1381.138 | 882.4453 | 843.5949 |
| ENSMUSG00000029158 | 9_Yipf7         | 11.70951908 | 1.455321 | 0.117089 | 0.688272 | 8.121322 | 6.011252 | 4.602448 | 38.69568 | 4.52536  | 8.301057 |
| ENSMUSG00000029161 | 7_Cgref1        | 38.90472232 | -0.74988 | 0.133114 | 0.688272 | 50.3522  | 53.24251 | 42.57265 | 13.89076 | 3.9402   | 39.43002 |
| ENSMUSG00000029162 | 15_Kh           | 209.5276234 | -0.88989 | 0.152442 | 0.688272 | 268.0036 | 258.4838 | 289.9543 | 32.74249 | 165.1757 | 242.8059 |
| ENSMUSG00000029163 | 9_Emilin1       | 315.4960721 | -1.40404 | 0.05029  | 0.688272 | 428.8058 | 541.0126 | 403.8649 | 21.82833 | 150.7934 | 266.6714 |
| ENSMUSG00000029166 | 14_Mapre3       | 374.9312584 | -0.57063 | 0.088156 | 0.688272 | 421.4966 | 501.5101 | 421.124  | 202.4082 | 332.614  | 370.4346 |
| ENSMUSG00000029168 | 14_Dpysl5       | 27.14959321 | -1.42224 | 0.012327 | 0.688272 | 36.54595 | 42.93751 | 39.12081 | 6.945378 | 12.44474 | 24.90317 |
| ENSMUSG00000029169 | 11_Dhx15        | 5000.400405 | 0.676209 | 0.095962 | 0.688272 | 3925.847 | 3547.497 | 4075.468 | 9785.045 | 4499.34  | 4169.206 |
| ENSMUSG00000029176 | 13_Anapc4       | 1174.893339 | 0.438736 | 0.192861 | 0.688272 | 1058.208 | 925.7327 | 1009.087 | 1906.01  | 1081.561 | 1068.761 |
| ENSMUSG00000029178 | 14_Klf3         | 12700.28673 | 0.512168 | 0.124426 | 0.688272 | 10609.69 | 9475.45  | 11323.17 | 20944.28 | 12015.96 | 11833.16 |
| ENSMUSG00000029190 | 19_DSERtd579e   | 2332.74247  | 0.450773 | 0.126326 | 0.688272 | 1970.233 | 1931.329 | 2012.421 | 3547.104 | 2278.519 | 2256.85  |
| ENSMUSG00000029193 | 7_Cckar         | 3.560044638 | -2.55617 | 0.060399 | 0.688272 | 6.497057 | 9.448252 | 2.301224 | 1.984394 | 1.13134  | 0        |
| ENSMUSG00000029201 | 14_Ugdh         | 2316.540262 | 0.447041 | 0.167591 | 0.688272 | 1950.741 | 1894.403 | 2036.583 | 3706.847 | 2121.263 | 2189.404 |
| ENSMUSG00000029202 | 12_Pds5a        | 4013.963484 | 0.677633 | 0.084086 | 0.688272 | 3110.466 | 2962.688 | 3191.798 | 7702.424 | 3699.482 | 3416.922 |
| ENSMUSG00000029203 | 16_Ube2k        | 1939.406055 | 0.536888 | 0.158526 | 0.688272 | 1552.797 | 1553.479 | 1641.923 | 3513.369 | 1684.565 | 1690.303 |
| ENSMUSG00000029208 | 16_Gufl         | 783.1839675 | 0.801795 | 0.082309 | 0.688272 | 585.5473 | 620.0177 | 507.4199 | 1706.579 | 603.0043 | 676.5361 |
| ENSMUSG00000029209 | 15_Gnpda2       | 378.6900605 | 0.679347 | 0.137978 | 0.688272 | 309.4224 | 293.6926 | 270.3938 | 787.8043 | 271.5216 | 339.3057 |
| ENSMUSG00000029213 | 11_Commnd8      | 991.8511366 | 0.572896 | 0.142381 | 0.688272 | 808.8836 | 790.909  | 792.7717 | 1838.541 | 884.708  | 835.2938 |
| ENSMUSG00000029223 | 12_Uchl1        | 27.08710927 | -0.73422 | 0.198286 | 0.688272 | 26.80036 | 51.52501 | 23.01224 | 12.89856 | 19.23278 | 29.0537  |
| ENSMUSG00000029227 | 15_Fip1l1       | 1722.863737 | 0.391109 | 0.194159 | 0.688272 | 1477.268 | 1404.057 | 1591.297 | 2584.673 | 1665.333 | 1614.555 |
| ENSMUSG00000029229 | 8_Chic2         | 1069.513471 | 0.64227  | 0.108212 | 0.688272 | 804.0109 | 784.039  | 918.1885 | 2039.957 | 965.031  | 905.8528 |
| ENSMUSG00000029234 | 13_Tmem165      | 1351.23785  | 0.630392 | 0.100551 | 0.688272 | 1101.251 | 1010.749 | 1070.069 | 2512.242 | 1272.758 | 1140.358 |
| ENSMUSG00000029246 | 14_Ppat         | 427.1143566 | 0.498083 | 0.183009 | 0.688272 | 370.3323 | 336.6301 | 355.5391 | 746.132  | 384.6556 | 369.397  |
| ENSMUSG00000029247 | 17_Paics        | 3552.386563 | 0.525071 | 0.124287 | 0.688272 | 3060.926 | 2776.339 | 2901.844 | 6000.806 | 3319.352 | 3255.052 |
| ENSMUSG00000029250 | 5_Polr2b        | 2326.71483  | 0.43064  | 0.157612 | 0.688272 | 2062.004 | 1862.629 | 2021.625 | 3566.948 | 2264.943 | 2182.14  |
| ENSMUSG00000029253 | 12_Cenpc1       | 473.9518616 | 0.770472 | 0.069906 | 0.688272 | 358.9624 | 340.0651 | 352.0873 | 970.3685 | 431.0406 | 391.1873 |
| ENSMUSG00000029254 | 16_Stap1        | 26.55079278 | 0.770216 | 0.190928 | 0.688272 | 26.80036 | 18.03375 | 13.80735 | 46.63325 | 38.46556 | 15.56448 |
| ENSMUSG00000029265 | 4_Drl           | 1004.567576 | 0.77171  | 0.094423 | 0.688272 | 748.7859 | 672.4014 | 805.4285 | 2180.849 | 841.717  | 778.224  |
| ENSMUSG00000029267 | 17_Mif2         | 907.4974706 | 0.796505 | 0.074361 | 0.688272 | 700.8701 | 636.3339 | 652.3971 | 1941.729 | 798.7261 | 714.9285 |
| ENSMUSG00000029269 | 11_Sult1b1      | 8.974251891 | 1.482172 | 0.104712 | 0.688272 | 4.060661 | 7.728752 | 2.301224 | 25.79712 | 5.686701 | 8.301057 |
| ENSMUSG00000029270 | 10_Fam69a       | 347.6645727 | 0.955189 | 0.055617 | 0.688272 | 238.7669 | 238.7326 | 232.4236 | 829.4765 | 272.653  | 273.9349 |
| ENSMUSG00000029276 | 13_Glrm         | 259.5133074 | 0.903154 | 0.098707 | 0.688272 | 196.536  | 170.0325 |          |          |          |          |

|                    |                  |             |          |          |          |          |          |          |          |          |          |
|--------------------|------------------|-------------|----------|----------|----------|----------|----------|----------|----------|----------|----------|
| ENSMUSG00000029463 | 5_Fam216a        | 129.7477504 | -0.37456 | 0.181601 | 0.688272 | 130.7533 | 146.8463 | 162.2363 | 118.0714 | 107.4773 | 113.1019 |
| ENSMUSG00000029467 | 15_Atp2a2        | 10644.33775 | 0.334202 | 0.185664 | 0.688272 | 8857.926 | 8742.077 | 10651.22 | 12291.33 | 13286.46 | 10037.01 |
| ENSMUSG00000029478 | 16_Ncor2         | 1671.775871 | -1.10886 | 0.105442 | 0.688272 | 1947.493 | 2368.433 | 2537.1   | 159.7437 | 1408.518 | 1609.367 |
| ENSMUSG00000029482 | 4_Aacs           | 2736.990172 | -0.92272 | 0.07314  | 0.688272 | 3170.564 | 3260.675 | 4319.398 | 667.7485 | 2744.631 | 2258.925 |
| ENSMUSG00000029484 | 12_Anxa3         | 1121.956283 | 0.360395 | 0.137494 | 0.688272 | 1009.48  | 867.3377 | 1071.22  | 1401.974 | 1322.029 | 1149.696 |
| ENSMUSG00000029486 | 13_Mrp1          | 350.382602  | 0.911013 | 0.071552 | 0.688272 | 268.8158 | 244.7438 | 216.3151 | 828.4843 | 290.7544 | 253.1822 |
| ENSMUSG00000029501 | 14_Ankle2        | 1373.476653 | 0.378868 | 0.191109 | 0.688272 | 1172.719 | 1142.138 | 1267.975 | 2004.238 | 1372.316 | 1281.476 |
| ENSMUSG00000029512 | 11_Ulk1          | 1089.989255 | -0.53784 | 0.193671 | 0.688272 | 1163.785 | 1258.928 | 1449.771 | 451.4496 | 1035.176 | 1180.825 |
| ENSMUSG00000029516 | 19_Cit           | 347.8457179 | -0.70463 | 0.073786 | 0.688272 | 386.5749 | 446.5501 | 460.2448 | 148.8295 | 281.7037 | 363.1712 |
| ENSMUSG00000029528 | 17_Pxn           | 1785.774368 | -0.56253 | 0.183587 | 0.688272 | 1993.784 | 2225.881 | 2168.904 | 691.5612 | 1762.628 | 1871.888 |
| ENSMUSG00000029530 | 15_Ccr9          | 121.2376379 | 0.496023 | 0.17587  | 0.688272 | 102.3287 | 89.31002 | 110.4588 | 196.455  | 119.9221 | 108.9514 |
| ENSMUSG00000029541 | 12_Cyp2w1        | 3.22834286  | -2.3376  | 0.080501 | 0.688272 | 3.248529 | 6.011252 | 6.903673 | 0        | 1.13134  | 2.075264 |
| ENSMUSG00000029545 | 13_Acads         | 303.8360295 | -0.92943 | 0.175241 | 0.688272 | 346.7804 | 431.9514 | 416.5216 | 31.7503  | 280.5723 | 315.4401 |
| ENSMUSG00000029559 | 15_2210016L21Rik | 367.9128468 | -0.65822 | 0.102608 | 0.688272 | 418.2481 | 461.1489 | 471.751  | 152.7983 | 313.3812 | 390.1497 |
| ENSMUSG00000029561 | 17_Oasl2         | 18228.54344 | 0.731354 | 0.013384 | 0.688272 | 12166.55 | 11693.6  | 17254.58 | 23831.58 | 25628.25 | 18796.7  |
| ENSMUSG00000029569 | 9_Tmem168        | 1282.235029 | 0.866862 | 0.059666 | 0.688272 | 908.7759 | 787.474  | 1028.647 | 2825.777 | 1152.836 | 989.901  |
| ENSMUSG00000029571 | 14_Tmem106b      | 2211.352239 | 0.57781  | 0.157422 | 0.688272 | 1803.746 | 1754.427 | 1765.039 | 4242.634 | 1891.601 | 1810.668 |
| ENSMUSG00000029575 | 17_Mmab          | 395.1168373 | -0.58736 | 0.12697  | 0.688272 | 421.4966 | 485.1939 | 516.6248 | 180.5798 | 350.7154 | 416.0905 |
| ENSMUSG00000029596 | 13_Sds1          | 16.09080538 | -1.1917  | 0.085346 | 0.688272 | 24.36397 | 23.18626 | 19.56041 | 3.968787 | 6.788041 | 18.67738 |
| ENSMUSG00000029598 | 12_Plibd2        | 794.0142624 | -0.74878 | 0.179173 | 0.688272 | 945.3219 | 1049.393 | 991.8276 | 168.6735 | 733.1084 | 875.7615 |
| ENSMUSG00000029599 | 13_Ddx54         | 1117.113535 | -0.86828 | 0.161175 | 0.688272 | 1171.907 | 1401.48  | 1756.985 | 173.6344 | 1151.704 | 1046.971 |
| ENSMUSG00000029602 | 11_Rasal1        | 131.2685379 | -0.86953 | 0.188321 | 0.688272 | 146.1838 | 161.445  | 201.3571 | 17.85954 | 104.0833 | 156.6824 |
| ENSMUSG00000029603 | 15_Dtx1          | 56.16085813 | -1.43939 | 0.00244  | 0.688272 | 62.53418 | 106.485  | 77.09101 | 17.85954 | 29.41484 | 43.58055 |
| ENSMUSG00000029617 | 10_Ccz1          | 1080.530456 | 0.690192 | 0.051807 | 0.688272 | 881.9755 | 746.2539 | 852.6036 | 1911.963 | 1147.179 | 934.2075 |
| ENSMUSG00000029622 | 16_Arcp1b        | 3445.344715 | -0.68093 | 0.14912  | 0.688272 | 3887.677 | 4016.375 | 4826.818 | 1072.565 | 3464.163 | 3404.471 |
| ENSMUSG00000029629 | 16_Phl1a         | 2965.184784 | 0.521661 | 0.129243 | 0.688272 | 2478.627 | 2290.287 | 2535.949 | 5019.524 | 2736.712 | 2730.01  |
| ENSMUSG00000029632 | 7_Ndufa4         | 9922.276288 | 0.573575 | 0.07567  | 0.688272 | 7981.635 | 7126.768 | 8818.291 | 15848.36 | 11124.47 | 8634.136 |
| ENSMUSG00000029638 | 17_Glcl1         | 47.52292205 | 0.735374 | 0.151778 | 0.688272 | 47.10367 | 34.35001 | 25.31347 | 92.2743  | 49.77896 | 36.31712 |
| ENSMUSG00000029640 | 17_Usp12         | 1970.880908 | 0.388757 | 0.124039 | 0.688272 | 1828.922 | 1563.784 | 1728.219 | 2635.275 | 2123.525 | 1945.56  |
| ENSMUSG00000029647 | 15_Pan3          | 1913.592163 | 0.47937  | 0.133181 | 0.688272 | 1583.658 | 1564.643 | 1647.677 | 3065.888 | 1796.568 | 1823.12  |
| ENSMUSG00000029655 | 17_N4bp2l2       | 1687.55022  | 0.780088 | 0.093306 | 0.688272 | 1279.92  | 1149.867 | 1296.74  | 3705.855 | 1406.256 | 1286.664 |
| ENSMUSG00000029661 | 16_Col1a2        | 30266.16353 | -0.57908 | 0.057981 | 0.688272 | 32935.21 | 42466.06 | 33379.26 | 21430.46 | 19885.56 | 31500.43 |
| ENSMUSG00000029664 | 10_Tfp12         | 12.02970578 | 1.101499 | 0.155293 | 0.688272 | 9.745586 | 5.152501 | 8.054285 | 24.80492 | 19.23278 | 5.18816  |
| ENSMUSG00000029669 | 14_Tspan12       | 298.2377105 | 1.101958 | 0.033657 | 0.688272 | 164.0507 | 203.5238 | 201.3571 | 746.132  | 214.9546 | 259.408  |
| ENSMUSG00000029671 | 15_Wnt16         | 176.7587542 | -0.89702 | 0.01052  | 0.688272 | 213.5908 | 291.1163 | 185.2485 | 123.0324 | 95.03257 | 152.5319 |
| ENSMUSG00000029675 | 12_Eln           | 939.214115  | -1.05041 | 0.009494 | 0.688272 | 1185.713 | 1404.057 | 1210.444 | 337.3469 | 606.3983 | 891.3259 |
| ENSMUSG00000029683 | 7_Lmod2          | 60.29912955 | 1.231008 | 0.154841 | 0.688272 | 18.67904 | 58.39502 | 31.06653 | 193.4784 | 12.44474 | 77.1048  |
| ENSMUSG00000029684 | 14_Wasl          | 1957.81014  | 0.614635 | 0.128829 | 0.688272 | 1532.493 | 1466.745 | 1641.923 | 3760.426 | 1640.443 | 1704.829 |
| ENSMUSG00000029685 | 15_Asb15         | 2.365195525 | 2.683603 | 0.103713 | 0.688272 | 0        | 0.85875  | 1.150612 | 7.937575 | 1.13134  | 3.112896 |
| ENSMUSG00000029686 | 15_Cul1          | 5369.457813 | 0.544929 | 0.121831 | 0.688272 | 4443.987 | 4232.78  | 4425.254 | 9235.368 | 5374.997 | 4504.361 |
| ENSMUSG00000029687 | 16_Ezh2          | 896.951805  | 0.535721 | 0.090421 | 0.688272 | 809.6958 | 647.4977 | 739.8436 | 1405.943 | 954.851  | 823.8799 |
| ENSMUSG00000029713 | 15_Gnb2          | 5312.962795 | -0.95698 | 0.196182 | 0.688272 | 6343.564 | 6800.443 | 7895.5   | 387.949  | 5065.01  | 5385.31  |
| ENSMUSG00000029714 | 11_Glyf1         | 903.9140955 | -0.93835 | 0.04631  | 0.688272 | 1073.639 | 1204.827 | 1285.234 | 257.9712 | 698.0368 | 903.7775 |
| ENSMUSG00000029715 | 5_Pop7           | 174.5625967 | -0.80721 | 0.17672  | 0.688272 | 196.536  | 222.4163 | 247.3816 | 31.7503  | 195.7218 | 153.5695 |
| ENSMUSG00000029718 | 14_Poolce        | 3866.229407 | -0.8931  | 0.092865 | 0.688272 | 4423.684 | 5542.374 | 5112.17  | 887.024  | 3054.618 | 4177.507 |
| ENSMUSG00000029727 | 7_Cyp3a13        | 723.9255725 | 0.837995 | 0.043222 | 0.688272 | 519.7646 | 457.7139 | 581.0591 | 1471.428 | 613.1863 | 700.4016 |
| ENSMUSG00000029729 | 12_Zkscan1       | 1542.412949 | 0.594814 | 0.112328 | 0.688272 | 1281.545 | 1197.098 | 1208.143 | 2806.925 | 1361.002 | 1399.766 |
| ENSMUSG00000029752 | 12_Asn5          | 364.1453691 | 0.438622 | 0.162684 | 0.688272 | 291.5555 | 284.2463 | 352.0873 | 448.473  | 503.4463 | 305.0638 |
| ENSMUSG00000029759 | 9_Pon3           | 1537.756084 | 0.761838 | 0.057436 | 0.688272 | 1239.314 | 1057.122 | 1126.449 | 3041.083 | 1345.163 | 1417.405 |
| ENSMUSG00000029769 | 16_Ccdc136       | 157.2245601 | -0.7652  | 0.049476 | 0.688272 | 202.2209 | 236.1563 | 155.3326 | 86.32112 | 97.29525 | 166.0211 |
| ENSMUSG00000029776 | 11_Hilbadh       | 2206.847743 | 0.486216 | 0.166288 | 0.688272 | 1802.933 | 1829.138 | 1883.552 | 3746.535 | 1911.965 | 2066.963 |
| ENSMUSG00000029780 | 14_Nf5c3         | 1524.558506 | 1.355234 | 0.002635 | 0.688272 | 128.2671 | 716.1977 | 926.2427 | 3637.394 | 1686.828 | 1252.422 |
| ENSMUSG00000029782 | 18_Tmem209       | 989.8231053 | 0.575274 | 0.093869 | 0.688272 | 847.0539 | 711.0452 | 827.2901 | 1676.813 | 906.5077 | 916.2291 |
| ENSMUSG00000029787 | 10_Avl9          | 1219.951198 | 0.79727  | 0.060336 | 0.688272 | 877.1028 | 885.3715 | 911.2848 | 2535.063 | 1094.006 | 1016.879 |
| ENSMUSG00000029797 | 12_Sspo          | 36.23366844 | -1.43123 | 0.039946 | 0.688272 | 43.85514 | 58.39502 | 56.37999 | 5.953181 | 11.3134  | 41.50528 |
| ENSMUSG00000029798 | 11_Herc6         | 4702.982993 | 1.309826 | 0.005174 | 0.688272 | 2620.751 | 2137.429 | 3352.884 | 11112.6  | 5424.776 | 3569.454 |
| ENSMUSG00000029802 | 13_Abcg2         | 449.4902029 | 0.60318  | 0.189348 | 0.688272 | 419.8723 | 329.7601 | 321.0208 | 899.9225 | 300.9365 | 425.4291 |
| ENSMUSG00000029811 | 14_Aoc1          | 68.0894198  | 0.576097 | 0.106335 | 0.688272 | 47.10367 | 50.66626 | 66.7355  | 77.39135 | 70.14309 | 86.49978 |
| ENSMUSG00000029816 | 10_Gpmb          | 5517.229203 | -0.6537  | 0.076792 | 0.688272 | 6067.44  | 9508.941 | 4662.28  | 3700.894 | 8831.849 | 5332.391 |
| ENSMUSG00000029817 | 11_Tra2a         | 2627.687445 | 0.75967  | 0.040285 | 0.688272 | 1976.73  | 1834.29  | 2043.487 | 4957.015 | 2567.011 | 2387.591 |
| ENSMUSG00000029819 | 6_Npy            | 2504.118751 | -0.41176 | 0.180081 | 0.688272 | 2745.007 | 2980.722 | 2851.217 | 1485.319 | 2536.465 | 2425.984 |
| ENSMUSG00000029823 | 16_Luc712        | 5873.123674 | 0.635746 | 0.120699 | 0.688272 | 4614.535 | 4440.597 | 4743.974 | 11475.75 | 4842.136 | 5121.752 |
| ENSMUSG00000029826 | 14_Zc3hav1       | 4789.921224 | 0.550845 | 0.062337 | 0.688272 | 3742.305 | 3357.713 | 4559.876 | 7040.629 | 5473.423 | 4565.581 |
| ENSMUSG00000029832 | 16_Nfe2l3        | 1912.03156  | 0.707823 | 0.104009 | 0.688272 | 1463.462 | 1325.052 | 1568.284 | 3941.006 | 1569.169 | 1605.217 |
| ENSMUSG00000029833 | 17_Trim24        | 1052.234799 | 0.536686 | 0.125274 | 0.688272 | 886.8483 | 753.1239 | 936.5983 | 1777.024 | 1101.418 | 948.3957 |
| ENSMUSG00000029836 | 15_Cbx3          | 3308.310822 | 0.872303 | 0.068271 | 0.688272 | 2349.498 | 2183.802 | 2479.569 | 7603.204 | 2617.921 | 2615.87  |
| ENSMUSG00000029840 | 8_Mtpn           | 4700.778957 | 0.950478 | 0.044625 | 0.688272 | 3276.953 | 2961.83  | 3379.348 | 10919.13 | 3987.974 | 3679.443 |
| ENSMUSG00000029861 | 17_Fam131b       | 3.600315384 | -2.03173 | 0.086099 | 0.688272 | 8.121322 | 3.435001 | 5.753061 | 0.992197 | 2.26268  | 1.037632 |
| ENSMUSG00000029862 | 15_Cln1          | 17.14633871 | 0.829821 | 0.152259 | 0.688272 | 7.30919  | 17.175   | 12.65673 | 26.78931 | 19.23278 | 17.71501 |
| ENSMUSG00000029863 | 13_Casp2         | 2059.412873 | 0.397214 | 0.094576 | 0.688272 | 1650.253 | 1712.348 | 1970.999 | 2598.563 | 2328.298 | 2096.017 |
| ENSMUSG00000029869 | 7_Ephb6          | 664.5782223 | -0.86005 | 0.146094 | 0.688272 | 737.416  | 881.9365 | 951.5562 | 116.087  | 617.7117 | 682.7619 |
| ENSMUSG00000029878 | 5_Dbph2          | 6.852724431 | 1.908019 | 0.104553 | 0.688272 | 1.624264 | 6.870002 | 0        | 18.85174 | 3.39402  | 10.37632 |
| ENSMUSG00000029910 | 18_Mad2l1        | 509.4681208 | 0.68154  | 0.0964   | 0.688272 | 444.2363 | 337.4888 | 392.3587 | 981.2827 | 472.9002 | 428.542  |
| ENSMUSG00000029911 | 14_Ssbp1         | 622.5225148 | 0.531785 | 0.193149 | 0.688272 | 512.4554 | 510.9564 | 503.9681 | 1170.792 | 530.5985 | 506.3644 |
| ENSMUSG00000029919 | 5_Hgds           | 2615.980739 | 0.507015 | 0.186121 | 0.688272 |          |          |          |          |          |          |

|                    |                 |             |          |          |          |          |          |          |          |          |          |
|--------------------|-----------------|-------------|----------|----------|----------|----------|----------|----------|----------|----------|----------|
| ENSMUSG00000030156 | 5_Cd69          | 57.65656901 | 1.44601  | 0.004125 | 0.688272 | 38.98234 | 20.61001 | 33.36775 | 125.0168 | 79.19381 | 48.76871 |
| ENSMUSG00000030157 | 5_Clec2d        | 1603.72289  | 1.367023 | 0.007589 | 0.688272 | 886.0362 | 814.0952 | 988.3758 | 4266.446 | 1461.691 | 1205.728 |
| 16_Klr1d           | 21.54127726     | 1.405557    | 0.066885 | 0.688272 | 20.3033  | 6.870002 | 8.054285 | 49.60984 | 35.07154 | 9.338689 |          |
| ENSMUSG00000030167 | 15_Klrc1        | 14.65955725 | 1.706529 | 0.021    | 0.688272 | 12.18198 | 2.576251 | 5.753061 | 32.74249 | 18.10144 | 16.60211 |
| ENSMUSG00000030170 | 14_Wnt5b        | 120.9566973 | -0.63397 | 0.181442 | 0.688272 | 129.129  | 161.445  | 150.7302 | 45.64105 | 89.37587 | 149.419  |
| ENSMUSG00000030180 | 15_Kdm5a        | 2646.179887 | 0.587    | 0.10486  | 0.688272 | 2181.387 | 2010.334 | 2153.946 | 4710.95  | 2400.704 | 2419.758 |
| ENSMUSG00000030187 | 15_Klra2        | 76.16265505 | 1.413158 | 0.034718 | 0.688272 | 64.15844 | 14.59875 | 46.02448 | 176.611  | 112.0027 | 43.58055 |
| ENSMUSG00000030188 | 12_Magohb       | 256.422453  | 0.579383 | 0.186081 | 0.688272 | 203.8452 | 185.49   | 227.8212 | 501.0594 | 201.3785 | 218.9404 |
| ENSMUSG00000030208 | 15_Emp1         | 164561.0064 | 0.51562  | 0.116194 | 0.688272 | 137266.6 | 127813.8 | 141309   | 270074   | 146330.2 | 146592.5 |
| ENSMUSG00000030224 | 10_Strap        | 2576.968087 | 0.574482 | 0.10057  | 0.688272 | 2174.89  | 1921.024 | 2115.976 | 4437.104 | 2683.981 | 2228.834 |
| ENSMUSG00000030232 | 17_Aebp2        | 2675.975005 | 0.50441  | 0.120941 | 0.688272 | 2171.641 | 2029.227 | 2438.147 | 4251.563 | 2855.502 | 2309.769 |
| ENSMUSG00000030245 | 10_Golt1b       | 1142.023293 | 0.421469 | 0.183142 | 0.688272 | 994.0498 | 852.739  | 1082.726 | 1711.54  | 1226.373 | 984.7128 |
| ENSMUSG00000030246 | 11_Ldhb         | 1008.644447 | -0.64016 | 0.089392 | 0.688272 | 1249.059 | 1438.407 | 998.7313 | 510.9814 | 744.4218 | 1110.266 |
| ENSMUSG00000030254 | 16_Rad18        | 369.648601  | 0.626041 | 0.09016  | 0.688272 | 314.2952 | 240.4501 | 317.5689 | 638.9747 | 388.0497 | 318.553  |
| ENSMUSG00000030264 | 14_Thumpd3      | 1044.655072 | 0.685541 | 0.093351 | 0.688272 | 803.1987 | 796.9202 | 803.1273 | 2057.816 | 906.2034 | 900.6646 |
| ENSMUSG00000030265 | 14_Kras         | 1820.756336 | 0.810004 | 0.048936 | 0.688272 | 1363.57  | 1192.804 | 1411.801 | 3706.847 | 1661.939 | 1587.577 |
| ENSMUSG00000030271 | 14_Ogg1         | 160.2208447 | -0.57671 | 0.168783 | 0.688272 | 206.2816 | 159.7275 | 209.4114 | 70.44597 | 138.0235 | 177.4351 |
| ENSMUSG00000030275 | 6_Etnk1         | 6206.645885 | 0.733018 | 0.055733 | 0.688272 | 4683.566 | 4474.089 | 4831.42  | 11909.34 | 5914.646 | 5426.816 |
| ENSMUSG00000030282 | 14_Cmas         | 4782.605676 | 0.44042  | 0.162632 | 0.688272 | 3999.751 | 3709.801 | 4465.526 | 7452.39  | 4601.16  | 4467.006 |
| ENSMUSG00000030284 | 11_Crel2        | 246.577593  | -0.86565 | 0.073613 | 0.688272 | 283.4341 | 342.6413 | 329.0751 | 73.42256 | 182.1458 | 268.7467 |
| ENSMUSG00000030291 | 12_Med21        | 857.8632338 | 0.706636 | 0.097574 | 0.688272 | 653.7664 | 610.5714 | 691.5179 | 1732.376 | 789.6754 | 669.2727 |
| ENSMUSG00000030302 | 16_Atp2b2       | 56.44576135 | -0.67689 | 0.14512  | 0.688272 | 85.27388 | 71.27627 | 51.77754 | 51.59423 | 23.75814 | 54.9945  |
| ENSMUSG00000030303 | 15_Far2         | 95.98725821 | 0.950296 | 0.101862 | 0.688272 | 61.72205 | 63.54752 | 71.33795 | 246.0648 | 67.89041 | 65.37082 |
| ENSMUSG00000030304 | 11_Ergic2       | 1911.37811  | 0.732589 | 0.084892 | 0.688272 | 1455.341 | 1319.899 | 1533.766 | 3893.38  | 1756.739 | 1519.093 |
| ENSMUSG00000030315 | 15_Vgll4        | 1333.086529 | -0.64176 | 0.159415 | 0.688272 | 1478.893 | 1594.699 | 1800.708 | 450.4574 | 120.131  | 1423.631 |
| ENSMUSG00000030319 | 8_Cand2         | 353.1843406 | -0.49902 | 0.056441 | 0.688272 | 387.387  | 468.0189 | 385.4551 | 267.8931 | 278.3097 | 332.0423 |
| ENSMUSG00000030321 | 15_Elfcab12     | 33.1900798  | -0.64872 | 0.141686 | 0.688272 | 42.23087 | 48.09001 | 31.06653 | 21.82833 | 23.75814 | 32.16659 |
| ENSMUSG00000030329 | 11_Plalp        | 427.1425549 | -0.13001 | 0.027727 | 0.688272 | 531.1344 | 729.9377 | 459.0942 | 135.931  | 277.1783 | 429.5797 |
| ENSMUSG00000030351 | 5_Tspan11       | 150.6304076 | -0.65554 | 0.090132 | 0.688272 | 207.9058 | 150.2813 | 194.4534 | 71.43817 | 144.8115 | 134.8922 |
| ENSMUSG00000030361 | 16_Klrb1a       | 3.406779101 | 1.839292 | 0.197826 | 0.688272 | 3.248529 | 0        | 1.150612 | 5.953181 | 0.950721 | 1.037632 |
| ENSMUSG00000030365 | 11_Clec2i       | 9.306913677 | 1.397995 | 0.070551 | 0.688272 | 8.121322 | 2.576251 | 4.602448 | 18.85174 | 11.3134  | 10.37632 |
| ENSMUSG00000030386 | 17_Zfp606       | 318.4073924 | 0.753686 | 0.139081 | 0.688272 | 253.3852 | 240.4501 | 217.4657 | 730.2569 | 224.0053 | 244.8812 |
| ENSMUSG00000030393 | 8_Zik1          | 90.97466331 | 0.762479 | 0.133075 | 0.688272 | 69.03124 | 74.71127 | 58.68122 | 197.4472 | 83.71917 | 62.25792 |
| ENSMUSG00000030397 | 9_Mark4         | 354.0322633 | -0.75094 | 0.152608 | 0.688272 | 401.1933 | 408.7651 | 522.3779 | 89.29771 | 364.2915 | 338.2681 |
| ENSMUSG00000030400 | 17_Erc2         | 587.3732426 | -0.8632  | 0.177325 | 0.688272 | 713.0521 | 739.3839 | 821.537  | 79.37575 | 596.0641 | 601.8266 |
| ENSMUSG00000030409 | 15_Dmpk         | 358.5701214 | -0.10368 | 0.036224 | 0.688272 | 421.4966 | 595.1139 | 430.3289 | 106.1651 | 208.1666 | 390.1497 |
| ENSMUSG00000030410 | 16_Dmwd         | 172.0264653 | -0.99304 | 0.11234  | 0.688272 | 181.1055 | 282.5288 | 223.2187 | 25.79712 | 149.3369 | 170.1717 |
| ENSMUSG00000030421 | 9_Uri1          | 1247.655858 | 0.629749 | 0.137941 | 0.688272 | 989.9891 | 893.959  | 1055.111 | 2472.554 | 1028.388 | 1045.933 |
| ENSMUSG00000030446 | 17_Zfp273       | 60.49265364 | 1.146803 | 0.039625 | 0.688272 | 47.10367 | 36.92626 | 28.7653  | 147.8373 | 45.2536  | 57.06976 |
| ENSMUSG00000030452 | 16_Nlpa2        | 914.5033445 | 0.855131 | 0.057151 | 0.688272 | 680.5668 | 618.3002 | 654.6983 | 1989.355 | 840.5857 | 703.5145 |
| ENSMUSG00000030465 | 18_Psd3         | 593.734347  | 0.573163 | 0.170684 | 0.688272 | 473.4731 | 483.4764 | 475.2028 | 1142.019 | 455.9301 | 532.3052 |
| ENSMUSG00000030469 | 10_Zfp719       | 360.7634549 | 0.838834 | 0.060771 | 0.688272 | 275.3128 | 252.4726 | 248.5322 | 774.9057 | 302.0678 | 311.2896 |
| ENSMUSG00000030471 | 17_Zdhc13       | 985.5713483 | 0.598525 | 0.082233 | 0.688272 | 791.0167 | 711.0452 | 850.3023 | 1674.828 | 1012.549 | 873.8682 |
| ENSMUSG00000030474 | 9_Siglec6       | 21.73039645 | -0.83696 | 0.182683 | 0.688272 | 38.98234 | 14.59875 | 29.91591 | 7.937575 | 19.23278 | 19.71501 |
| ENSMUSG00000030495 | 12_Slcr7a10     | 26.79368716 | -1.46994 | 0.014973 | 0.688272 | 55.22499 | 42.07876 | 20.71102 | 11.90636 | 9.050721 | 7.90227  |
| ENSMUSG00000030499 | 9_Kctd15        | 777.4839607 | -0.7535  | 0.101566 | 0.688272 | 998.9226 | 986.0746 | 245.0726 | 986.7234 | 805.2195 | 21.29025 |
| ENSMUSG00000030510 | 10_Cers3        | 1860.541586 | 0.397956 | 0.19912  | 0.688272 | 1525.996 | 1376.577 | 1914.619 | 2613.446 | 2120.131 | 1612.48  |
| ENSMUSG00000030513 | 14_Pcsk6        | 1141.055092 | -0.49274 | 0.158199 | 0.688272 | 1257.181 | 1240.035 | 1505.001 | 626.0762 | 934.4869 | 1283.551 |
| ENSMUSG00000030515 | 9_Tarsl2        | 268.4954673 | 0.556616 | 0.170114 | 0.688272 | 205.4694 | 222.4163 | 224.3694 | 495.1062 | 210.4293 | 253.1822 |
| ENSMUSG00000030519 | 14_Apba2        | 23.07317606 | -2.08741 | 0.027911 | 0.688272 | 45.4794  | 37.78501 | 28.7653  | 0        | 5.656701 | 20.75264 |
| ENSMUSG00000030521 | 11_Mphosph10    | 575.2247458 | 0.750522 | 0.057947 | 0.688272 | 444.2363 | 377.8501 | 464.8473 | 1105.307 | 572.4581 | 486.6494 |
| ENSMUSG00000030523 | 18_Trpm1        | 3489.750293 | -0.63018 | 0.148342 | 0.688272 | 3847.07  | 6295.498 | 2577.371 | 2900.191 | 1822.589 | 3495.782 |
| ENSMUSG00000030527 | 15_Ctrc3        | 465.914688  | -0.66926 | 0.11795  | 0.688272 | 512.4554 | 626.0289 | 577.6073 | 174.6266 | 425.9369 | 479.386  |
| ENSMUSG00000030528 | 12_Blm          | 294.6840464 | 0.737547 | 0.054143 | 0.688272 | 242.0154 | 179.4788 | 241.6285 | 531.8175 | 317.3085 | 255.2575 |
| ENSMUSG00000030544 | 5_Mesp1         | 7.603556263 | -1.93659 | 0.079977 | 0.688272 | 8.933454 | 14.59875 | 12.65673 | 0        | 0.13134  | 8.301057 |
| ENSMUSG00000030560 | 16_Ctsc         | 2219.777431 | 0.61184  | 0.083621 | 0.688272 | 1915.008 | 1522.564 | 1830.624 | 3755.465 | 2470.847 | 1824.157 |
| ENSMUSG00000030583 | 16_Sipa13       | 1977.086534 | -0.85607 | 0.084107 | 0.688272 | 2183.011 | 2682.736 | 2775.276 | 526.8565 | 1699.273 | 1995.366 |
| ENSMUSG00000030584 | 13_Dpf1         | 8.990402432 | -1.35444 | 0.155314 | 0.688272 | 21.92757 | 8.587502 | 8.054285 | 1.984394 | 11.3134  | 20.75264 |
| ENSMUSG00000030587 | 4_2200002D01Rik | 902.084708  | -0.90539 | 0.132779 | 0.688272 | 956.6917 | 1123.245 | 1448.621 | 150.8139 | 842.9484 | 890.2883 |
| ENSMUSG00000030588 | 11_Yif1b        | 337.0366199 | -0.10429 | 0.119542 | 0.688272 | 389.8234 | 502.3689 | 460.2448 | 40.68007 | 316.7752 | 312.3273 |
| ENSMUSG00000030590 | 14_Fam98c       | 151.2840791 | -0.94485 | 0.07954  | 0.688272 | 190.0389 | 193.2188 | 214.0139 | 33.73469 | 121.0534 | 155.4448 |
| ENSMUSG00000030595 | 15_Nkfbib       | 343.2332132 | -0.86463 | 0.181034 | 0.688272 | 365.4595 | 437.9626 | 525.8297 | 46.63325 | 347.3214 | 336.1922 |
| ENSMUSG00000030598 | 15_Fbxo17       | 39.60706712 | -0.52921 | 0.182798 | 0.688272 | 43.04301 | 48.94876 | 48.32571 | 24.80492 | 36.20288 | 36.31712 |
| ENSMUSG00000030600 | 15_Lfrn1        | 53.00416951 | -0.82859 | 0.070912 | 0.688272 | 60.90778 | 66.12377 | 77.09101 | 21.82833 | 56.56701 | 36.31712 |
| ENSMUSG00000030604 | 9_Zfp626        | 430.6607133 | 0.832159 | 0.072023 | 0.688272 | 324.8529 | 279.0938 | 325.6232 | 944.5714 | 364.2915 | 345.5315 |
| ENSMUSG00000030606 | 8_Hapln3        | 28.05818532 | -1.49196 | 0.036698 | 0.688272 | 38.98234 | 43.79626 | 41.42204 | 3.968787 | 9.050721 | 31.12896 |
| ENSMUSG00000030613 | 13_Ccdc90b      | 1080.600073 | 0.568803 | 0.134703 | 0.688272 | 877.1028 | 856.174  | 858.3566 | 2018.128 | 912.9915 | 960.8473 |
| ENSMUSG00000030614 | 7_Tmem126b      | 456.0825186 | 0.719712 | 0.070904 | 0.688272 | 371.9565 | 313.4438 | 348.6355 | 879.0864 | 407.2824 | 416.0905 |
| ENSMUSG00000030619 | 8_Eed           | 985.5863425 | 0.746316 | 0.088557 | 0.688272 | 735.7918 | 720.4914 | 752.5003 | 2061.785 | 856.4245 | 786.5251 |
| ENSMUSG00000030629 | 14_Zfand6       | 2578.302047 | 0.74314  | 0.112443 | 0.688272 | 1910.135 | 1833.432 | 2042.336 | 5648.576 | 2091.848 | 1943.485 |
| ENSMUSG00000030641 | 9_Ddias         | 170.7717274 | 0.908063 | 0.089532 | 0.688272 | 114.5106 | 100.4738 | 141.5253 | 410.7695 | 138.0235 | 119.3277 |
| ENSMUSG00000030652 | 10_Coq7         | 264.2362973 | -0.45481 | 0.150317 | 0.688272 | 289.9312 | 322.8901 | 303.7616 | 167.6813 | 212.6919 | 288.4617 |
| ENSMUSG00000030653 | 16_Pde2a        | 162.2322775 | -0.58108 | 0.189808 | 0.688272 | 178.6691 | 211.2526 | 193.3028 | 61.5162  | 159.519  | 169.134  |
| ENSMUSG00000030655 | 14_Smg1         | 5054.201146 | 0.687152 | 0.058602 | 0.688272 | 4255.573 | 3483.091 | 3879.864 | 9134.164 | 5178.144 | 4394.372 |
| ENSMUSG00000030660 | 9_Pik3c2a       | 1121.428591 | 0.935522 | 0.052833 | 0.688272 |          |          |          |          |          |          |

|                    |                 |             |          |          |          |          |          |          |          |          |          |
|--------------------|-----------------|-------------|----------|----------|----------|----------|----------|----------|----------|----------|----------|
| ENSMUSG00000030846 | 15_Tial1        | 1642.367055 | 0.640996 | 0.097666 | 0.688272 | 1281.545 | 1270.95  | 1297.89  | 3090.693 | 1509.208 | 1403.916 |
| ENSMUSG00000030852 | 15_Tacc2        | 995.159149  | -0.53832 | 0.079508 | 0.688272 | 1040.341 | 1310.453 | 1185.13  | 582.4195 | 919.7795 | 932.8312 |
| ENSMUSG00000030861 | 14_Acadsb       | 1542.262511 | 0.504473 | 0.18808  | 0.688272 | 1355.449 | 1224.578 | 1246.113 | 2772.198 | 1314.617 | 1340.621 |
| ENSMUSG00000030869 | 11_Ndufb1       | 904.202248  | 0.580643 | 0.15867  | 0.688272 | 704.1186 | 725.6439 | 744.446  | 1737.337 | 773.8366 | 739.8317 |
| ENSMUSG00000030876 | 6_Mett9         | 1394.864294 | 0.871194 | 0.038821 | 0.688272 | 999.7347 | 936.8965 | 1021.744 | 2937.895 | 1280.667 | 1192.239 |
| ENSMUSG00000030881 | 14_Arfp2        | 872.1624274 | -0.47266 | 0.190255 | 0.688272 | 964.813  | 1051.11  | 1025.195 | 432.5978 | 857.5558 | 901.7023 |
| ENSMUSG00000030884 | 11_Uqerc2       | 3923.529673 | 0.357874 | 0.198598 | 0.688272 | 3540.084 | 3283.861 | 3494.409 | 5616.826 | 3835.243 | 3770.725 |
| ENSMUSG00000030921 | 16_Trim30a      | 8041.576994 | 1.34572  | 0.003529 | 0.688272 | 4335.974 | 3475.362 | 5812.892 | 18630.48 | 9717.08  | 6277.674 |
| ENSMUSG00000030922 | 11_Lymr1        | 86.97075409 | 0.527617 | 0.156366 | 0.688272 | 82.83748 | 61.83002 | 69.03673 | 133.9466 | 98.42659 | 75.74714 |
| ENSMUSG00000030929 | 16_Eri2         | 229.9475514 | 0.846706 | 0.057795 | 0.688272 | 190.0389 | 137.4    | 165.6881 | 476.2545 | 230.7934 | 179.5103 |
| ENSMUSG00000030960 | 16_Mett10       | 374.5412529 | 0.828579 | 0.106311 | 0.688272 | 308.6102 | 266.2126 | 234.7249 | 876.1098 | 265.8649 | 295.7251 |
| ENSMUSG00000030965 | 18_Fam175b      | 919.1986172 | 0.40969  | 0.150259 | 0.688272 | 748.7859 | 771.1577 | 849.1517 | 1332.52  | 886.9706 | 926.6054 |
| ENSMUSG00000030966 | 12_Trim21       | 1601.518074 | 0.71611  | 0.018018 | 0.688272 | 1221.447 | 1019.337 | 1395.692 | 2395.163 | 2063.564 | 1513.905 |
| ENSMUSG00000030967 | 13_Zranb1       | 1519.708874 | 0.601383 | 0.150192 | 0.688272 | 1263.678 | 1136.985 | 1221.95  | 2968.653 | 1244.474 | 1282.513 |
| ENSMUSG00000030968 | 2_Pdltt         | 19.90942718 | 0.838341 | 0.088405 | 0.688272 | 14.61838 | 15.4575  | 12.65673 | 27.78151 | 27.15216 | 21.79027 |
| ENSMUSG00000030978 | 9_Rrm1          | 2600.300874 | 0.461832 | 0.103023 | 0.688272 | 2338.129 | 1957.092 | 2267.856 | 3794.161 | 2748.025 | 2496.543 |
| ENSMUSG00000031004 | 7_Mki67         | 4386.828695 | 0.382817 | 0.173281 | 0.688272 | 4056.6   | 3270.98  | 4097.33  | 6090.104 | 4717.688 | 4088.27  |
| ENSMUSG00000031007 | 2_Atp6ap2       | 7167.041992 | 0.690513 | 0.092862 | 0.688272 | 5269.926 | 5202.309 | 5979.731 | 14193.38 | 6285.726 | 6071.185 |
| ENSMUSG00000031010 | 17_Usp9x        | 5561.537611 | 0.795828 | 0.072361 | 0.688272 | 4340.034 | 3983.742 | 3871.81  | 11915.29 | 4579.665 | 4678.683 |
| ENSMUSG00000031012 | 17_Cask         | 1393.166982 | 0.477266 | 0.119861 | 0.688272 | 1196.271 | 1108.647 | 1189.733 | 2172.91  | 1350.82  | 1340.621 |
| ENSMUSG00000031016 | 8_Wee1          | 412.5798583 | 0.57246  | 0.13242  | 0.688272 | 332.9742 | 346.0763 | 316.4183 | 738.1944 | 337.1394 | 404.6765 |
| ENSMUSG00000031021 | 13_Tmem9b       | 1459.735648 | 0.412189 | 0.15976  | 0.688272 | 1272.611 | 1218.567 | 1266.824 | 2149.098 | 1552.199 | 1299.115 |
| ENSMUSG00000031024 | 12_Sf5          | 685.8532195 | -0.50205 | 0.137976 | 0.688272 | 754.4708 | 902.5465 | 754.8015 | 384.9724 | 570.1954 | 748.1327 |
| ENSMUSG00000031059 | 9_Ndufb11       | 1606.297613 | -0.41717 | 0.167475 | 0.688272 | 1828.922 | 1876.369 | 1805.31  | 976.3217 | 1460.56  | 1690.303 |
| ENSMUSG00000031068 | 7_Glrx3         | 3345.624578 | 0.490789 | 0.174082 | 0.688272 | 2982.961 | 2548.771 | 2814.397 | 5764.663 | 2977.687 | 2985.267 |
| ENSMUSG00000031070 | 15_Mlrpgrf      | 93.78521358 | -1.16357 | 0.084423 | 0.688272 | 116.947  | 154.575  | 117.3624 | 9.921968 | 74.66845 | 89.23636 |
| ENSMUSG00000031089 | 7_Slc6a14       | 12890.0111  | 0.882267 | 0.041228 | 0.688272 | 9687.925 | 7759.667 | 9753.739 | 26973.86 | 13513.86 | 9651.016 |
| ENSMUSG00000031093 | 14_Dock11       | 1065.961851 | 0.855012 | 0.062278 | 0.688272 | 808.0715 | 674.1189 | 795.073  | 2350.514 | 925.4362 | 842.5572 |
| ENSMUSG00000031095 | 15_Cul4b        | 1252.782697 | 0.942398 | 0.060547 | 0.688272 | 861.6722 | 835.564  | 875.6158 | 3011.317 | 1057.803 | 874.7238 |
| ENSMUSG00000031109 | 6_Enox2         | 430.5441908 | 0.466532 | 0.180884 | 0.688272 | 345.9683 | 334.0538 | 405.0155 | 702.4753 | 374.4736 | 421.2786 |
| ENSMUSG00000031112 | 10_Stk26        | 1119.397985 | 0.851529 | 0.089608 | 0.688272 | 775.5862 | 814.0952 | 805.4285 | 2631.306 | 772.7053 | 917.2662 |
| ENSMUSG00000031142 | 17_Cacna1f      | 37.4164695  | -0.94748 | 0.19741  | 0.688272 | 73.90403 | 57.53626 | 16.10857 | 26.78931 | 41.85958 | 8.301057 |
| ENSMUSG00000031144 | 15_Syp          | 83.91151264 | -0.63409 | 0.174219 | 0.688272 | 133.1897 | 121.9425 | 50.62693 | 73.42256 | 72.40577 | 51.8816  |
| ENSMUSG00000031145 | 5_Prickle3      | 404.7671395 | -0.52671 | 0.175149 | 0.688272 | 425.5573 | 453.4201 | 554.595  | 190.5018 | 367.6855 | 436.8431 |
| ENSMUSG00000031158 | 11_Tim17b       | 558.1161034 | -0.59427 | 0.19457  | 0.688272 | 664.3241 | 649.2152 | 700.7228 | 190.5018 | 531.7298 | 612.2029 |
| ENSMUSG00000031167 | 16_Rbm3         | 9451.788009 | 0.469372 | 0.113409 | 0.688272 | 8538.758 | 7167.129 | 8077.297 | 14281.68 | 9791.749 | 8854.14  |
| ENSMUSG00000031169 | 13_Porc9        | 505.2158907 | -0.60714 | 0.188423 | 0.688272 | 559.5591 | 656.9439 | 613.2763 | 710.6579 | 481.9509 | 548.9074 |
| ENSMUSG00000031174 | 17_Rpgr         | 232.3108843 | 0.869561 | 0.056223 | 0.688272 | 168.1114 | 139.9763 | 185.2485 | 499.075  | 199.1159 | 202.3383 |
| ENSMUSG00000031176 | 8_Dynl13        | 5200.50544  | 0.869307 | 0.077732 | 0.688272 | 3747.178 | 3412.673 | 3878.713 | 12186.16 | 3857.87  | 4120.437 |
| ENSMUSG00000031196 | 13_F8           | 84.99368742 | 0.798035 | 0.146963 | 0.688272 | 60.90991 | 67.84127 | 57.53061 | 200.4238 | 59.96103 | 63.29556 |
| ENSMUSG00000031197 | 11_Vbp1         | 1439.665388 | 1.522422 | 0.035779 | 0.688272 | 924.2064 | 882.7952 | 873.3146 | 3872.544 | 1096.269 | 988.8634 |
| ENSMUSG00000031198 | 4_Fundc2        | 1584.003583 | 0.822541 | 0.065046 | 0.688272 | 1197.895 | 1098.342 | 1136.805 | 3423.079 | 1276.152 | 1371.75  |
| ENSMUSG00000031200 | 16_Mtcp1        | 137.3585263 | 0.672132 | 0.191757 | 0.688272 | 126.6926 | 97.89753 | 93.19958 | 301.6278 | 104.0833 | 100.8503 |
| ENSMUSG00000031201 | 17_Brc3         | 750.1080722 | 0.817692 | 0.089623 | 0.688272 | 571.7411 | 490.3464 | 567.2518 | 1696.657 | 589.4282 | 585.2245 |
| ENSMUSG00000031204 | 2_Asb12         | 4.145326603 | 2.608885 | 0.058333 | 0.688272 | 0.812132 | 2.576251 | 0        | 14.88295 | 4.52536  | 2.075264 |
| ENSMUSG00000031214 | 13_Ophn1        | 866.323229  | 0.528226 | 0.138297 | 0.688272 | 738.2281 | 662.0964 | 728.3375 | 1489.287 | 760.2605 | 819.7293 |
| ENSMUSG00000031217 | 8_Efnb1         | 1400.604659 | -0.79306 | 0.168921 | 0.688272 | 1500.82  | 1690.879 | 2136.687 | 273.8463 | 1413.044 | 1388.356 |
| ENSMUSG00000031226 | 13_Pbdc1        | 619.2400097 | 0.571526 | 0.154144 | 0.688272 | 510.019  | 457.7139 | 526.9803 | 1142.019 | 608.661  | 470.0473 |
| ENSMUSG00000031229 | 16_Atrx         | 3401.612672 | 0.904792 | 0.062945 | 0.688272 | 2450.203 | 2345.247 | 2310.429 | 7981.231 | 2599.82  | 2722.747 |
| ENSMUSG00000031232 | 16_Mag11        | 3196.264064 | 0.728515 | 0.091413 | 0.688272 | 2463.197 | 2215.576 | 2539.401 | 6592.156 | 2813.643 | 2553.613 |
| ENSMUSG00000031242 | 7_2610002M06Rik | 1115.928371 | 0.938447 | 0.041631 | 0.688272 | 775.5862 | 740.2427 | 780.115  | 2524.149 | 1020.469 | 855.0088 |
| ENSMUSG00000031245 | 8_Hmg15         | 1671.919579 | 0.633262 | 0.139238 | 0.688272 | 1361.134 | 1155.019 | 1416.404 | 3329.813 | 1387.023 | 1382.126 |
| ENSMUSG00000031246 | 14_Sh3bgrl      | 1003.525278 | 0.193408 | 0.060755 | 0.688272 | 719.5491 | 641.4864 | 560.3481 | 2761.284 | 625.6311 | 712.8532 |
| ENSMUSG00000031253 | 15_Srp2         | 308.8713167 | -0.63786 | 0.047257 | 0.688272 | 399.569  | 454.2789 | 273.8457 | 208.3613 | 243.2381 | 273.9349 |
| ENSMUSG00000031255 | 14_Sytl4        | 148.5370301 | 0.571255 | 0.0607   | 0.688272 | 125.0684 | 111.6375 | 121.9649 | 219.2755 | 161.7816 | 151.4943 |
| ENSMUSG00000031262 | 12_Cenp1        | 156.4367562 | 0.644815 | 0.104815 | 0.688272 | 125.0684 | 98.75628 | 142.6759 | 273.8463 | 168.5997 | 129.704  |
| ENSMUSG00000031264 | 13_Blk          | 46.85265379 | 0.724671 | 0.128122 | 0.688272 | 50.3522  | 34.35001 | 20.71102 | 57.54742 | 73.53711 | 44.61818 |
| ENSMUSG00000031273 | 16_Col4a6       | 77.0417172  | -0.6525  | 0.130275 | 0.688272 | 83.64961 | 133.1063 | 65.58489 | 54.57082 | 47.51628 | 77.8224  |
| ENSMUSG00000031278 | 12_Acsd4        | 1344.581353 | 0.842713 | 0.0796   | 0.688272 | 997.2983 | 905.9815 | 984.924  | 3070.849 | 1089.481 | 1018.956 |
| ENSMUSG00000031284 | 16_Pak3         | 74.37089221 | 0.972926 | 0.145397 | 0.688272 | 42.23087 | 66.98252 | 41.42204 | 204.3925 | 36.20288 | 54.9945  |
| ENSMUSG00000031289 | 10_I13ra2       | 16.62456439 | 1.392241 | 0.053761 | 0.688272 | 12.99411 | 8.587502 | 5.753061 | 41.67227 | 20.36412 | 10.37632 |
| ENSMUSG00000031290 | 14_Lrch2        | 170.8376821 | 0.732007 | 0.156695 | 0.688272 | 145.3717 | 123.66   | 116.2118 | 386.9568 | 133.4981 | 119.3277 |
| ENSMUSG00000031292 | 14_Cdkl5        | 311.0732678 | 0.819354 | 0.051798 | 0.688272 | 233.8941 | 214.6876 | 226.6706 | 631.0372 | 311.1185 | 249.0317 |
| ENSMUSG00000031298 | 5_Adgrg2        | 116.1571204 | 0.74521  | 0.065868 | 0.688272 | 86.89814 | 66.98252 | 107.0069 | 207.3691 | 117.6594 | 111.0266 |
| ENSMUSG00000031302 | 16_Nlgn3        | 79.53098474 | -0.61128 | 0.077955 | 0.688272 | 95.8316  | 114.2138 | 78.24162 | 72.43037 | 57.1298  | 63.29556 |
| ENSMUSG00000031309 | 15_Rps6ka3      | 5242.545826 | 0.815291 | 0.070203 | 0.688272 | 3894.174 | 3578.412 | 3925.889 | 11416.22 | 4399.782 | 4240.802 |
| ENSMUSG00000031314 | 17_Taf1         | 2341.241077 | 0.492005 | 0.179168 | 0.688272 | 2024.646 | 1892.685 | 1920.372 | 4088.843 | 2072.615 | 2048.286 |
| ENSMUSG00000031333 | 7_Abcb7         | 1222.757446 | 0.903269 | 0.068859 | 0.688272 | 857.6116 | 821.824  | 876.7664 | 2900.191 | 926.5675 | 953.5389 |
| ENSMUSG00000031337 | 16_Mtnr1        | 262.4518104 | 0.875728 | 0.067499 | 0.688272 | 190.0389 | 166.5975 | 199.0559 | 591.3493 | 214.9546 | 212.7146 |
| ENSMUSG00000031342 | 17_Gpm6b        | 1631.752319 | 0.678037 | 0.15652  | 0.688272 | 1360.321 | 1291.56  | 1113.793 | 3546.111 | 1175.462 | 1303.266 |
| ENSMUSG00000031347 | 12_Cetn2        | 1129.626775 | 0.803211 | 0.066553 | 0.688272 | 875.4785 | 778.0277 | 815.784  | 2394.171 | 925.4362 | 988.8634 |
| ENSMUSG00000031351 | 15_Zfp185       | 12716.78243 | 0.487533 | 0.124965 | 0.688272 | 10229.62 | 9984.689 | 11550.99 | 20263.64 | 12458.32 | 11813.44 |
| ENSMUSG00000031352 | 10_Hccs         | 333.5403809 | 0.652718 | 0.136694 | 0.688272 | 283.4341 | 257.6251 | 237.0261 | 670.725  | 280.5723 | 271.8596 |
| ENSMUSG00000031353 | 13_Rbbp7        | 4014.688041 | 0.561798 | 0.1382   | 0.688272 | 3433.695 | 2990.168 | 3304.558 | 7278.756 | 3672.33  | 3408.621 |
| ENSMUSG00000031357 | 3_Sypa1         | 1437.195101 |          |          |          |          |          |          |          |          |          |

|                     |                |             |          |          |          |          |          |          |          |          |          |
|---------------------|----------------|-------------|----------|----------|----------|----------|----------|----------|----------|----------|----------|
| ENSMUSG000000031536 | 5_Poib         | 1659.306028 | 0.460352 | 0.15508  | 0.688272 | 1350.576 | 1315.605 | 1524.561 | 2607.493 | 1729.819 | 1427.782 |
| ENSMUSG000000031555 | 13_Adam9       | 1879.291857 | 0.413002 | 0.186264 | 0.688272 | 1559.294 | 1627.332 | 1649.978 | 2903.168 | 1863.317 | 1672.663 |
| 3562.487364         | 15_Plekha2     | 0.431942    | 0.138422 | 0.688272 | 2909.057 | 2764.317 | 3426.523 | 5171.33  | 3821.667 | 3282.03  |          |
| ENSMUSG000000031561 | 15_Tenn3       | 521.4543065 | -0.51141 | 0.175397 | 0.688272 | 555.4984 | 825.259  | 457.9436 | 506.0204 | 295.2798 | 488.7247 |
| ENSMUSG000000031565 | 17_Frg1        | 1317.884976 | -0.63984 | 0.078905 | 0.688272 | 1480.517 | 2011.193 | 1324.355 | 729.2647 | 943.5378 | 1418.443 |
| ENSMUSG000000031578 | 4_Mak16        | 589.711228  | 0.584762 | 0.064207 | 0.688272 | 483.2186 | 404.4714 | 528.131  | 918.7743 | 651.6519 | 552.0203 |
| ENSMUSG000000031583 | 12_Wrn         | 515.9672512 | 0.717887 | 0.071702 | 0.688272 | 403.6297 | 363.2513 | 403.8649 | 998.15   | 479.6882 | 447.2194 |
| ENSMUSG000000031585 | 13_Gtf2e2      | 876.1770464 | 0.658081 | 0.13144  | 0.688272 | 682.191  | 610.5714 | 746.7473 | 1774.048 | 741.0278 | 702.4769 |
| ENSMUSG000000031590 | 7_Frg1         | 1355.856955 | 0.684444 | 0.088166 | 0.688272 | 1067.142 | 948.919  | 1104.588 | 2619.4   | 1280.677 | 1114.417 |
| ENSMUSG000000031591 | 14_Asah1       | 1591.746576 | 0.590103 | 0.156419 | 0.688272 | 1324.588 | 1239.177 | 1248.414 | 3096.646 | 1313.486 | 1328.169 |
| ENSMUSG000000031592 | 9_Pcm1         | 3283.727395 | 0.825469 | 0.084609 | 0.688272 | 2343.813 | 2304.886 | 2458.858 | 7473.226 | 2540.99  | 2580.591 |
| ENSMUSG000000031600 | 10_Vps37a      | 1230.848036 | 0.741255 | 0.102847 | 0.688272 | 918.5215 | 933.4615 | 912.4354 | 2641.228 | 997.842  | 981.5999 |
| ENSMUSG000000031601 | 16_Cnot7       | 1213.969029 | 0.885655 | 0.059486 | 0.688272 | 832.4355 | 809.8015 | 915.8872 | 2756.323 | 963.9018 | 1005.465 |
| ENSMUSG000000031608 | 13_Galnt7      | 4761.244022 | 0.539694 | 0.109601 | 0.688272 | 3839.761 | 3599.022 | 4204.337 | 7930.629 | 4817.246 | 4176.469 |
| ENSMUSG000000031609 | 3_Sap30        | 245.7316926 | 0.712383 | 0.060894 | 0.688272 | 191.6632 | 164.88   | 202.5077 | 440.5354 | 270.3903 | 204.4135 |
| ENSMUSG000000031613 | 8_Hpgd         | 198.3526043 | 0.972455 | 0.103851 | 0.688272 | 146.1838 | 138.2588 | 117.3624 | 511.9736 | 91.63855 | 184.6985 |
| ENSMUSG000000031626 | 16_Sorbs2      | 2747.689487 | 0.508154 | 0.175716 | 0.688272 | 2325.134 | 2045.543 | 2435.846 | 4755.599 | 2097.505 | 2826.51  |
| ENSMUSG000000031628 | 8_Casp3        | 383.9809053 | 0.575839 | 0.133466 | 0.688272 | 315.1073 | 279.9526 | 330.2257 | 675.686  | 406.1511 | 296.7628 |
| ENSMUSG000000031629 | 13_Cenpu       | 138.1871101 | 0.776853 | 0.018115 | 0.688272 | 121.0077 | 79.86377 | 104.7057 | 199.4316 | 179.8831 | 144.2309 |
| ENSMUSG000000031634 | 12_Ufsp2       | 744.6132407 | 0.454026 | 0.158088 | 0.688272 | 669.1969 | 599.4077 | 616.7281 | 1176.745 | 709.3502 | 696.2511 |
| ENSMUSG000000031637 | 13_Lrp2bp      | 7.640628082 | 1.254346 | 0.066658 | 0.688272 | 4.060661 | 4.293751 | 0        | 23.81272 | 2.26268  | 11.41395 |
| ENSMUSG000000031639 | 11_Tlr3        | 2608.473584 | 1.332022 | 0.004541 | 0.688272 | 1461.026 | 1240.894 | 1747.78  | 6394.708 | 2694.852 | 111.581  |
| ENSMUSG000000031644 | 18_Nek1        | 783.2377718 | 0.736078 | 0.103063 | 0.688272 | 625.3418 | 576.2214 | 561.4987 | 1663.914 | 630.1564 | 642.2942 |
| ENSMUSG000000031647 | 10_Mfap3l      | 7766.24655  | 0.547502 | 0.174264 | 0.688272 | 6464.572 | 5975.184 | 6490.603 | 14602.16 | 6102.449 | 6962.511 |
| ENSMUSG000000031661 | 11_Nkd1        | 139.1896319 | -1.15659 | 0.016723 | 0.688272 | 138.8746 | 286.8226 | 150.7302 | 55.56302 | 72.40577 | 130.7416 |
| ENSMUSG000000031684 | 10_Slc10a7     | 963.9242582 | 0.28693  | 0.193678 | 0.688272 | 851.1145 | 802.9315 | 951.5562 | 1069.588 | 1063.46  | 1044.895 |
| ENSMUSG000000031696 | 8_Vps35        | 5773.436089 | 0.919797 | 0.058285 | 0.688272 | 4187.354 | 3725.258 | 4066.263 | 13572.26 | 4607.948 | 4481.533 |
| ENSMUSG000000031697 | 11_Orc6        | 464.507402  | 0.769531 | 0.163304 | 0.688272 | 400.3812 | 365.8276 | 399.2624 | 760.0228 | 454.7987 | 406.7518 |
| ENSMUSG000000031701 | 5_Dnajp2       | 4463.961131 | 0.705003 | 0.078796 | 0.688272 | 3368.724 | 3105.241 | 3709.573 | 8698.589 | 4159.938 | 3741.701 |
| ENSMUSG000000031703 | 7_Iltfg1       | 2549.75733  | 0.733766 | 0.106324 | 0.688272 | 1987.287 | 1909.86  | 1847.883 | 5468.989 | 2009.26  | 2075.264 |
| ENSMUSG000000031706 | 6_Rfx1         | 343.3385284 | -0.99227 | 0.082599 | 0.688272 | 384.1385 | 465.4426 | 521.2273 | 63.5006  | 288.4917 | 337.2304 |
| ENSMUSG000000031712 | 8_Iil15        | 131.2926402 | 0.987001 | 0.010273 | 0.688272 | 93.3952  | 72.13502 | 98.95264 | 247.057  | 140.2862 | 133.9298 |
| ENSMUSG000000031715 | 14_Smarca5     | 3510.741102 | 0.101089 | 0.039811 | 0.688272 | 2389.293 | 2192.389 | 2404.779 | 8465.423 | 3069.328 | 2543.236 |
| ENSMUSG000000031727 | 7_Pmfbp1       | 1.3763779   | -2.67911 | 0.179967 | 0.688272 | 4.060661 | 0.85875  | 2.301224 | 0        | 0        | 1.037632 |
| ENSMUSG000000031730 | 17_Dhodh       | 178.3867579 | -0.44927 | 0.0987   | 0.688272 | 199.7845 | 201.8063 | 216.3151 | 131.9622 | 148.2056 | 172.2469 |
| ENSMUSG000000031731 | 16_Ap1g1       | 4572.476141 | 0.439871 | 0.153212 | 0.688272 | 3851.131 | 3810.275 | 3981.118 | 7066.426 | 4653.202 | 4072.706 |
| ENSMUSG000000031737 | 10_Irx5        | 174.2200457 | -0.57231 | 0.043743 | 0.688272 | 183.5419 | 206.9588 | 234.7249 | 123.0324 | 141.4175 | 155.6448 |
| ENSMUSG000000031740 | 7_Mmp2         | 3783.268853 | -0.53341 | 0.19731  | 0.688272 | 4465.103 | 4785.815 | 4173.27  | 1560.726 | 3431.355 | 4283.345 |
| ENSMUSG000000031749 | 12_St3gal2     | 865.6834793 | -0.48634 | 0.143584 | 0.688272 | 906.3395 | 1058.839 | 1065.467 | 481.2155 | 767.0486 | 915.1915 |
| ENSMUSG000000031754 | 9_Nudt21       | 1054.6982   | 0.70603  | 0.084555 | 0.688272 | 808.0715 | 741.1014 | 856.0554 | 2082.621 | 934.4869 | 905.8528 |
| ENSMUSG000000031760 | 8_Mi3          | 32.73898479 | -1.10169 | 0.112944 | 0.688272 | 47.9158  | 68.70002 | 17.25918 | 13.89076 | 11.3134  | 37.35475 |
| ENSMUSG000000031765 | 7_Mt1          | 1547.75539  | -0.75403 | 0.155573 | 0.688272 | 1691.671 | 1857.477 | 2280.513 | 380.0114 | 1719.637 | 1357.223 |
| ENSMUSG000000031780 | 1_Cd17         | 4.573162218 | 1.671425 | 0.172478 | 0.688272 | 0.812132 | 3.435001 | 2.301224 | 2.97659  | 15.83876 | 2.075264 |
| ENSMUSG000000031788 | 13_Kifc3       | 1884.659168 | -0.90971 | 0.142887 | 0.688272 | 2083.119 | 2406.218 | 2890.338 | 279.7995 | 1755.84  | 1892.641 |
| ENSMUSG000000031799 | 9_Tpm4         | 8121.29903  | 0.718864 | 0.0557   | 0.688272 | 6449.954 | 5442.759 | 6523.971 | 15025.83 | 8542.749 | 6742.533 |
| ENSMUSG000000031807 | 10_Pgl3        | 712.0471143 | -1.02697 | 0.180044 | 0.688272 | 814.5686 | 942.049  | 1109.19  | 43.65666 | 631.2878 | 731.5306 |
| ENSMUSG000000031808 | 6_Slc27a1      | 508.7800151 | -1.07045 | 0.100243 | 0.688272 | 591.2322 | 736.8077 | 739.8436 | 61.5162  | 385.787  | 537.4934 |
| ENSMUSG000000031818 | 12_Cox4i1      | 3905.40296  | -0.72439 | 0.187412 | 0.688272 | 4567.431 | 5014.243 | 5015.518 | 854.2815 | 3864.658 | 4116.286 |
| ENSMUSG000000031819 | 13_Emc8        | 862.7326166 | -0.35324 | 0.163991 | 0.688272 | 960.7524 | 987.5628 | 955.0081 | 623.0996 | 778.362  | 871.6109 |
| ENSMUSG000000031822 | 18_Gse1        | 400.7647487 | -0.93412 | 0.116249 | 0.688272 | 463.7275 | 461.1489 | 653.5477 | 69.45378 | 354.1095 | 402.6012 |
| ENSMUSG000000031825 | 16_Crispld2    | 1027.08089  | -0.61201 | 0.075019 | 0.688272 | 1122.367 | 1540.598 | 1062.015 | 617.1464 | 730.8457 | 1089.514 |
| ENSMUSG000000031828 | 8_Klhl36       | 134.408487  | -0.11908 | 0.099076 | 0.688272 | 172.9842 | 189.7838 | 197.9053 | 9.921968 | 116.528  | 119.3277 |
| ENSMUSG000000031833 | 9_Mast3        | 323.510278  | -0.89311 | 0.088112 | 0.688272 | 434.4907 | 403.6126 | 423.4253 | 75.40696 | 278.3097 | 325.8165 |
| ENSMUSG000000031834 | 15_Pik3r2      | 1205.316404 | -0.95508 | 0.106986 | 0.688272 | 1422.856 | 1578.383 | 1769.641 | 201.416  | 997.842  | 1261.661 |
| ENSMUSG000000031837 | 13_Necab2      | 115.0465431 | -1.03545 | 0.092305 | 0.688272 | 107.2014 | 257.8251 | 98.95264 | 29.7659  | 70.14309 | 126.5911 |
| ENSMUSG000000031840 | 12_Rab3a       | 151.574882  | -0.6107  | 0.094558 | 0.688272 | 174.6084 | 224.9926 | 149.5796 | 82.35234 | 135.7608 | 142.1556 |
| ENSMUSG000000031842 | 13_Pde4c       | 9.986283562 | -1.56684 | 0.067322 | 0.688272 | 9.745586 | 12.0225  | 23.01224 | 0.992197 | 7.919381 | 6.225792 |
| ENSMUSG000000031843 | 1_Mphosph6     | 717.4716004 | 0.426169 | 0.146809 | 0.688272 | 635.8995 | 555.6114 | 645.4934 | 1018.986 | 817.9589 | 630.8803 |
| ENSMUSG000000031847 | 7_170030J22Rik | 42.74034099 | 0.606733 | 0.108446 | 0.688272 | 38.98234 | 29.19751 | 33.36775 | 46.63325 | 54.30432 | 53.95687 |
| ENSMUSG000000031849 | 8_Comp         | 68.86174576 | -1.12697 | 0.10546  | 0.688272 | 69.03124 | 107.3438 | 107.0069 | 7.937575 | 42.99092 | 78.86004 |
| ENSMUSG000000031865 | 15_Dctn1       | 2901.024108 | -0.95305 | 0.117302 | 0.688272 | 3204.674 | 3900.444 | 4372.326 | 446.4886 | 2698.246 | 2783.967 |
| ENSMUSG000000031871 | 8_Cdh5         | 262.8660969 | -0.48888 | 0.076991 | 0.688272 | 318.3558 | 330.6188 | 271.5445 | 181.572  | 236.4501 | 238.6554 |
| ENSMUSG000000031878 | 17_Nae1        | 1579.787108 | 0.922127 | 0.056941 | 0.688272 | 1067.954 | 1070.862 | 1135.654 | 3698.91  | 1321.405 | 1183.398 |
| ENSMUSG000000031884 | 9_Ces2d-ps     | 4.645267297 | -2.04325 | 0.192901 | 0.688272 | 9.745586 | 0        | 12.65673 | 0        | 3.39402  | 0.257624 |
| ENSMUSG000000031885 | 13_Cdbf        | 1932.466996 | 0.770195 | 0.062037 | 0.688272 | 1417.983 | 1270.95  | 1597.05  | 3886.435 | 1732.082 | 1690.303 |
| ENSMUSG000000031891 | 5_Hsd11b2      | 1.911294733 | -4.31326 | 0.022283 | 0.688272 | 4.872793 | 4.293751 | 2.301224 | 0        | 0        | 0        |
| ENSMUSG000000031902 | 9_Nfatc3       | 2433.793807 | 0.487118 | 0.154494 | 0.688272 | 2031.955 | 1954.516 | 2094.114 | 4071.976 | 2252.498 | 2197.705 |
| ENSMUSG000000031918 | 16_Mtmr2       | 1550.098519 | 0.561782 | 0.10965  | 0.688272 | 1245.811 | 1226.295 | 1235.757 | 2646.189 | 1491.106 | 1335.432 |
| ENSMUSG000000031922 | 12_Cep57       | 892.032897  | 0.712174 | 0.103666 | 0.688272 | 716.3006 | 565.9164 | 746.7473 | 1822.666 | 793.4725 | 747.0951 |
| ENSMUSG000000031925 | 16_Mam12       | 1077.174101 | 0.512027 | 0.114331 | 0.688272 | 885.2241 | 801.214  | 978.0203 | 1710.547 | 955.9824 | 1132.057 |
| ENSMUSG000000031931 | 3_Ankrd49      | 526.8580271 | 0.745419 | 0.066207 | 0.688272 | 404.4418 | 378.7088 | 398.1118 | 1040.814 | 488.7389 | 540.3323 |
| ENSMUSG000000031939 | 15_Taf1d       | 480.8054554 | 1.021515 | 0.036885 | 0.688272 | 319.1679 | 293.6926 | 339.4306 | 1150.948 | 391.4437 | 390.1499 |
| ENSMUSG000000031955 | 9_Bcar1        | 847.7362647 | -0.97678 | 0.129219 | 0.688272 | 1011.105 | 1085.46  | 1276.029 | 107.1573 | 794.2008 | 812.4659 |
| ENSMUSG000000032000 | 17_Birc3       | 1134.792824 | 0.396733 | 0.190366 | 0.688272 | 1005.42  | 809.8015 | 1124.148 | 1116.221 | 1632.524 | 1120.643 |
| ENSMUSG000000032002 | 9_Doun1d5      | 1205.423621 | 0.875828 | 0.05546  |          |          |          |          |          |          |          |

|                    |                 |             |           |          |          |          |          |          |          |          |          |
|--------------------|-----------------|-------------|-----------|----------|----------|----------|----------|----------|----------|----------|----------|
| ENSMUSG00000032261 | 16_Sh3bgrl2     | 2329.127477 | 0.422207  | 0.193869 | 0.688272 | 1994.597 | 1966.538 | 2011.27  | 3713.793 | 2167.648 | 2120.92  |
| ENSMUSG00000032265 | 14_Fam46a       | 3214.891335 | 0.760284  | 0.038007 | 0.688272 | 2237.424 | 2346.106 | 2577.371 | 5974.017 | 3347.635 | 2806.795 |
| ENSMUSG00000032267 | 7_Usp28         | 636.4189996 | 0.373414  | 0.142634 | 0.688272 | 575.8017 | 560.7639 | 526.9803 | 839.3985 | 612.055  | 703.5145 |
| ENSMUSG00000032269 | 7_Htr3a         | 26.06865306 | -0.7885   | 0.13388  | 0.688272 | 34.92168 | 45.51376 | 18.40979 | 19.84394 | 16.9701  | 20.75264 |
| ENSMUSG00000032293 | 7_Ireb2         | 2210.534853 | 0.946848  | 0.052801 | 0.688272 | 1584.47  | 1440.983 | 1505.001 | 5249.713 | 1725.294 | 1757.749 |
| ENSMUSG00000032295 | 15_Man2c1       | 1461.035779 | -0.69155  | 0.197328 | 0.688272 | 1626.701 | 1840.302 | 1946.836 | 348.2611 | 1405.124 | 1598.991 |
| ENSMUSG00000032301 | 13_Psma4        | 3218.963549 | 0.669835  | 0.055765 | 0.688272 | 2626.435 | 2226.739 | 2601.534 | 5621.787 | 3458.507 | 2778.779 |
| ENSMUSG00000032307 | 16_Ube2q2       | 2787.361312 | 0.941514  | 0.050095 | 0.688272 | 1894.704 | 1803.375 | 2028.529 | 6522.702 | 2362.238 | 2112.619 |
| ENSMUSG00000032314 | 14_Etfa         | 2769.29948  | 0.574693  | 0.127055 | 0.688272 | 2169.205 | 2102.221 | 2403.629 | 5020.516 | 2477.635 | 2442.586 |
| ENSMUSG00000032320 | 7_Ron2          | 1168.182019 | 0.576496  | 0.191262 | 0.688272 | 905.5274 | 956.6477 | 951.5562 | 2341.584 | 858.8871 | 995.0892 |
| ENSMUSG00000032327 | 14_Str6a        | 250.9492886 | -1.15026  | 0.052785 | 0.688272 | 391.4477 | 400.1776 | 246.231  | 48.61764 | 138.0235 | 281.1983 |
| ENSMUSG00000032328 | 12_Tmem30a      | 4423.093189 | 1.009738  | 0.053844 | 0.688272 | 2883.881 | 2886.259 | 3036.465 | 11194.96 | 3243.552 | 3293.444 |
| ENSMUSG00000032334 | 9_Lox1          | 597.472239  | -1.06569  | 0.012923 | 0.688272 | 781.2712 | 899.9702 | 744.446  | 192.4862 | 408.4138 | 558.2461 |
| ENSMUSG00000032336 | 17_Nptn         | 4671.434649 | 0.579837  | 0.130162 | 0.688272 | 3862.501 | 3531.181 | 3841.894 | 8604.331 | 4130.523 | 4058.179 |
| ENSMUSG00000032344 | 17_Mb21d1       | 332.8451043 | 0.776342  | 0.023886 | 0.688272 | 231.4577 | 226.7101 | 278.4481 | 580.4351 | 355.2408 | 324.7788 |
| ENSMUSG00000032355 | 16_Mlip         | 16.58861704 | 1.241467  | 0.14647  | 0.688272 | 7.30919  | 12.0225  | 10.35551 | 52.58643 | 7.919381 | 9.338689 |
| ENSMUSG00000032358 | 12_Fam83b       | 1252.068637 | 0.586122  | 0.061617 | 0.688272 | 1020.038 | 924.0152 | 1059.714 | 1982.409 | 1410.781 | 1115.454 |
| ENSMUSG00000032363 | 15_Adam287      | 37.34505202 | -1.25116  | 0.03375  | 0.688272 | 56.84925 | 59.25377 | 41.42204 | 6.945378 | 30.54618 | 29.0537  |
| ENSMUSG00000032369 | 13_Plsr1        | 1415.393367 | 0.466188  | 0.107685 | 0.688272 | 1127.239 | 998.7265 | 1440.566 | 1610.335 | 1932.329 | 1383.164 |
| ENSMUSG00000032372 | 14_Plsr2        | 114.318132  | 1.094905  | 0.025344 | 0.688272 | 79.58895 | 71.27627 | 67.88611 | 267.8931 | 100.6893 | 98.57505 |
| ENSMUSG00000032376 | 12_Usp3         | 1263.316826 | 0.505446  | 0.07821  | 0.688272 | 1044.402 | 994.4328 | 1094.232 | 1906.01  | 1298.778 | 1242.046 |
| ENSMUSG00000032377 | 8_Plsr4         | 1925.013314 | 0.58868   | 0.140461 | 0.688272 | 1464.274 | 1459.875 | 1689.099 | 3619.534 | 1565.775 | 1751.523 |
| ENSMUSG00000032384 | 15_Csnk1g1      | 1236.766894 | 0.388428  | 0.18213  | 0.688272 | 1062.269 | 1001.303 | 1150.612 | 1802.822 | 1258.05  | 1145.546 |
| ENSMUSG00000032386 | 15_Trip4        | 1065.666684 | 0.560368  | 0.134866 | 0.688272 | 877.1028 | 827.8352 | 879.0677 | 1911.963 | 1004.63  | 893.4012 |
| ENSMUSG00000032387 | 14_Rbpm2        | 110.2281884 | -0.6003   | 0.122548 | 0.688272 | 145.3717 | 156.2925 | 96.65142 | 82.35234 | 64.48639 | 116.2148 |
| ENSMUSG00000032393 | 14_Dpp8         | 3266.345887 | 0.578564  | 0.110581 | 0.688272 | 2675.163 | 2544.477 | 2640.655 | 5816.258 | 3061.153 | 2905.37  |
| ENSMUSG00000032397 | 6_Tipin         | 692.1557952 | 0.687794  | 0.082285 | 0.688272 | 538.4436 | 471.4539 | 581.0591 | 1308.708 | 686.7234 | 566.5471 |
| ENSMUSG00000032398 | 6_Snapc5        | 498.9008642 | 0.500525  | 0.171243 | 0.688272 | 417.4359 | 424.2226 | 398.1118 | 863.2112 | 440.0913 | 450.3323 |
| ENSMUSG00000032400 | 17_Zwihc        | 348.5422125 | 0.559486  | 0.084173 | 0.688272 | 293.1797 | 243.0263 | 309.5147 | 547.6926 | 369.9482 | 327.8917 |
| ENSMUSG00000032405 | 9_Pias1         | 1423.090204 | 0.314741  | 0.18956  | 0.688272 | 1278.296 | 1220.284 | 1307.095 | 1837.549 | 1469.611 | 1425.706 |
| ENSMUSG00000032407 | 13_U2surp       | 2280.072389 | 0.78789   | 0.077971 | 0.688272 | 1798.061 | 1482.203 | 1737.424 | 4874.663 | 1937.986 | 1850.098 |
| ENSMUSG00000032409 | 14_Atr          | 906.921431  | 0.87636   | 0.060112 | 0.688272 | 657.8271 | 608.8539 | 652.3971 | 2040.949 | 773.8366 | 707.6651 |
| ENSMUSG00000032410 | 13_Xrn1         | 2043.807821 | 0.171724  | 0.061071 | 0.688272 | 1622.64  | 1341.368 | 1617.241 | 3844.763 | 2002.472 | 1777.464 |
| ENSMUSG00000032412 | 8_Atp1b3        | 10888.99748 | 0.45085   | 0.186102 | 0.688272 | 9110.499 | 8958.482 | 9535.123 | 18027.22 | 10110.79 | 9591.871 |
| ENSMUSG00000032413 | 12_Rasa2        | 1173.19801  | 0.72724   | 0.098962 | 0.688272 | 880.3513 | 836.4227 | 934.297  | 2452.711 | 967.2958 | 968.1107 |
| ENSMUSG00000032420 | 7_Nt5e          | 1662.538442 | 0.423184  | 0.176069 | 0.688272 | 1424.48  | 1174.77  | 1662.634 | 2438.82  | 1638.18  | 1636.346 |
| ENSMUSG00000032422 | 17_Snx14        | 1186.308372 | 0.676446  | 0.099184 | 0.688272 | 935.5763 | 887.089  | 917.0379 | 2335.631 | 1057.803 | 984.7128 |
| ENSMUSG00000032423 | 12_Syncrnc      | 4028.249631 | 0.812409  | 0.073986 | 0.688272 | 3108.03  | 2602.013 | 3059.478 | 8746.215 | 3613.5   | 3040.262 |
| ENSMUSG00000032437 | 9_Slt3b         | 2840.88796  | 0.394534  | 0.194877 | 0.688272 | 2524.107 | 2346.106 | 2494.522 | 4312.087 | 2778.571 | 2589.93  |
| ENSMUSG00000032449 | 13_Slc25a36     | 1632.759571 | 0.669067  | 0.109057 | 0.688272 | 1263.678 | 1245.188 | 1273.728 | 3246.468 | 1304.435 | 1463.061 |
| ENSMUSG00000032458 | 6_Copb2         | 6024.5738   | 0.41518   | 0.15074  | 0.688272 | 5240.689 | 4686.2   | 5564.36  | 8801.778 | 6282.332 | 5572.084 |
| ENSMUSG00000032468 | 11_Armc8        | 1527.021286 | 0.53864   | 0.088249 | 0.688272 | 1237.689 | 1191.087 | 1310.547 | 2430.882 | 1621.21  | 1703.712 |
| ENSMUSG00000032469 | 12_Dbr1         | 391.7002645 | 0.349469  | 0.188525 | 0.688272 | 332.1621 | 332.3363 | 369.3465 | 522.8877 | 409.5451 | 383.9239 |
| ENSMUSG00000032470 | 16_Mras         | 325.9837884 | -0.49893  | 0.083695 | 0.688272 | 349.2168 | 454.2789 | 341.7318 | 242.096  | 250.0262 | 318.553  |
| ENSMUSG00000032475 | 15_Nck1         | 1538.582512 | 0.859351  | 0.045069 | 0.688272 | 1115.87  | 1051.969 | 1112.642 | 3273.257 | 1361.002 | 1316.755 |
| ENSMUSG00000032482 | 9_Cspg5         | 157.9409411 | -0.80095  | 0.059155 | 0.688272 | 220.9    | 260.2013 | 120.8143 | 138.9076 | 79.19381 | 127.6287 |
| ENSMUSG00000032484 | 8_Ngp           | 2.976590445 | 5.125122  | 0.072991 | 0.688272 | 0        | 0        | 0        | 17.85954 | 0        | 0        |
| ENSMUSG00000032492 | 14_Pth1r        | 115.3300232 | -1.15407  | 0.018756 | 0.688272 | 146.1838 | 156.2925 | 174.893  | 29.7659  | 76.93113 | 107.9137 |
| ENSMUSG00000032495 | 8_Lrrc2         | 10.79883951 | 1.772209  | 0.010507 | 0.688272 | 4.060661 | 6.011252 | 4.602448 | 21.82833 | 15.83876 | 12.45158 |
| ENSMUSG00000032502 | 8_Stac          | 97.56723063 | -1.22316  | 0.026036 | 0.688272 | 118.5713 | 202.6651 | 88.59713 | 48.61764 | 29.41484 | 97.53741 |
| ENSMUSG00000032507 | 15_Fbxl2        | 42.72666032 | -0.9417   | 0.057099 | 0.688272 | 67.40697 | 72.13502 | 28.7653  | 33.73469 | 29.41484 | 24.90317 |
| ENSMUSG00000032512 | 6_Wdr48         | 1334.601149 | 0.313468  | 0.187466 | 0.688272 | 1160.537 | 1117.234 | 1293.288 | 1670.859 | 1332.719 | 1432.97  |
| ENSMUSG00000032513 | 7_Gorasp1       | 1049.54696  | -0.5966   | 0.163163 | 0.688272 | 1093.13  | 1275.244 | 1422.157 | 412.7539 | 927.6989 | 1166.298 |
| ENSMUSG00000032525 | 14_Nktr         | 4431.494003 | 0.408994  | 0.103373 | 0.688272 | 3838.137 | 3673.733 | 3910.931 | 6077.205 | 4701.849 | 4387.108 |
| ENSMUSG00000032527 | 13_Pccb         | 680.4570326 | -0.46722  | 0.139044 | 0.688272 | 789.3925 | 830.4115 | 749.0485 | 402.8319 | 582.6402 | 728.4177 |
| ENSMUSG00000032537 | 14_Ephb1        | 57.81784089 | -0.63037  | 0.166908 | 0.688272 | 70.6555  | 85.87502 | 54.07877 | 32.74249 | 67.0154  | 68.48372 |
| ENSMUSG00000032540 | 15_Abhd5        | 1656.182943 | 0.351069  | 0.180589 | 0.688272 | 1430.165 | 1429.819 | 1507.302 | 2281.06  | 1672.121 | 1616.631 |
| ENSMUSG00000032551 | 6_1110059G10Rik | 339.8833039 | 0.814031  | 0.091396 | 0.688272 | 247.7003 | 249.0376 | 242.7792 | 764.9837 | 268.1276 | 266.8714 |
| ENSMUSG00000032554 | 15_Trl          | 1856.785758 | -0.80572  | 0.05251  | 0.688272 | 2849.772 | 2935.208 | 1301.342 | 1314.661 | 1101.337 | 1720.394 |
| ENSMUSG00000032555 | 9_Topbp1        | 1897.995892 | 0.413169  | 0.121366 | 0.688272 | 1712.787 | 1467.604 | 1704.057 | 2643.212 | 1983.239 | 1877.076 |
| ENSMUSG00000032556 | 10_Bfsp2        | 201.6325394 | -1.76088  | 0.00821  | 0.688272 | 234.7062 | 586.5264 | 112.76   | 42.68446 | 33.71917 | 149.419  |
| ENSMUSG00000032560 | 13_Dnajc13      | 2796.663579 | 0.487092  | 0.080604 | 0.688272 | 2300.77  | 2224.163 | 2462.31  | 4067.015 | 3132.681 | 2593.043 |
| ENSMUSG00000032561 | 14_Acpp         | 2062.457004 | 0.434968  | 0.10261  | 0.688272 | 1782.63  | 1611.874 | 1867.443 | 2866.457 | 2284.176 | 1962.162 |
| ENSMUSG00000032570 | 16_Atp2c1       | 2601.712188 | 0.50481   | 0.144169 | 0.688272 | 2191.945 | 2038.673 | 2222.983 | 4385.51  | 2507.05  | 2264.113 |
| ENSMUSG00000032575 | 1759.094064     | 0.368155    | 0.179936  | 0.688272 | 1612.895 | 1327.628 | 1667.237 | 2176.88  | 2194.8   | 1575.125 |          |
| ENSMUSG00000032582 | 14_Rbm6         | 2187.59947  | 0.564486  | 0.10532  | 0.688272 | 1790.751 | 1625.614 | 1878.95  | 3760.426 | 2095.242 | 1974.614 |
| ENSMUSG00000032589 | 14_Bsn          | 65.1616584  | -0.9407   | 0.102835 | 0.688272 | 90.14667 | 78.14627 | 88.59713 | 12.89856 | 59.96103 | 61.22029 |
| ENSMUSG00000032609 | 12_Klhdc8b      | 291.8859973 | -1.11054  | 0.032946 | 0.688272 | 363.0231 | 492.0639 | 341.7318 | 71.43817 | 182.1458 | 300.9133 |
| ENSMUSG00000032633 | 12_Flcn         | 793.949808  | -0.69973  | 0.078058 | 0.688272 | 974.5586 | 1051.969 | 921.6403 | 324.4484 | 676.5414 | 814.5412 |
| ENSMUSG00000032643 | 12_Fhl3         | 100.7976257 | -0.75755  | 0.062144 | 0.688272 | 131.5654 | 112.4963 | 135.7722 | 42.66446 | 96.16391 | 86.12346 |
| ENSMUSG00000032657 | 15_Fam189b      | 175.9979626 | -0.101284 | 0.055188 | 0.688272 | 213.5908 | 250.7551 | 241.6285 | 40.68007 | 126.7101 | 182.6232 |
| ENSMUSG00000032673 | 5_Prsnd1        | 211.9011883 | 0.610194  | 0.129841 | 0.688272 | 176.2327 | 164.88   | 162.2363 | 394.8943 | 183.2771 | 189.8667 |
| ENSMUSG00000032688 | 7_Malt1         | 947.0358417 | 0.597448  | 0.106327 | 0.688272 | 800.7623 | 682.7064 | 777.8138 | 1680.781 | 952.5884 | 787.5627 |
| ENSMUSG00000032690 | 16_Oas2         | 10770.20338 | 0.536914  | 0.168891 | 0.688272 | 7262.086 | 6979.922 | 12125.15 | 9051.812 | 17527.85 | 11674.4  |
| ENSMUSG00000032698 | 15_Lmo2         | 359.5494275 | 0.51604   | 0.132838 | 0.688272 | 289.9312 | 316.0201 | 281      |          |          |          |

|                    |                  |              |          |          |          |          |          |          |          |          |           |
|--------------------|------------------|--------------|----------|----------|----------|----------|----------|----------|----------|----------|-----------|
| ENSMUSG00000032997 | 16_Chpf          | 355.8736298  | -1.49383 | 0.037179 | 0.688272 | 431.2422 | 614.0064 | 530.4322 | 26.78931 | 181.0144 | 351.7573  |
| ENSMUSG00000033004 | 14_Mycbp2        | 7256.69788   | 0.385257 | 0.137823 | 0.688272 | 6705.775 | 5625.673 | 6549.284 | 9813.819 | 7807.378 | 7038.258  |
| 9_Sox10            |                  | 132.5507707  | -1.2007  | 0.030859 | 0.688272 | 168.9235 | 244.7438 | 140.3747 | 30.7581  | 73.53711 | 136.9674  |
| ENSMUSG00000033007 | 15_Asic4         | 3.240374657  | -2.34355 | 0.105981 | 0.688272 | 8.121322 | 6.870002 | 1.150612 | 0        | 2.26268  | 0.1037632 |
| ENSMUSG00000033014 | 12_Trim33        | 1875.760305  | 0.613135 | 0.152838 | 0.688272 | 1504.069 | 1395.469 | 1549.875 | 3738.598 | 1595.19  | 1471.362  |
| ENSMUSG00000033029 | 12_170008BE04Rik | 108.5925418  | -1.04632 | 0.026425 | 0.688272 | 131.5654 | 165.7388 | 141.5253 | 31.7503  | 80.32515 | 100.8503  |
| ENSMUSG00000033031 | 13_C330027C09Rik | 497.5852691  | 0.761894 | 0.098916 | 0.688272 | 370.3323 | 294.5513 | 442.9857 | 1040.814 | 469.5061 | 367.3218  |
| ENSMUSG00000033033 | 10_Calhm2        | 152.3054994  | -0.5426  | 0.106993 | 0.688272 | 178.6691 | 177.7613 | 185.2485 | 84.33673 | 142.5489 | 145.2685  |
| ENSMUSG00000033054 | 7_Npat           | 720.6020471  | 0.68168  | 0.092294 | 0.688272 | 586.3594 | 505.8039 | 568.4024 | 1398.998 | 641.4698 | 622.5792  |
| ENSMUSG00000033055 | 10_Ankrd54       | 375.6207136  | -0.73949 | 0.143934 | 0.688272 | 399.569  | 502.3689 | 507.4199 | 102.1963 | 378.9989 | 363.1712  |
| ENSMUSG00000033065 | 13_PfkM          | 1453.285125  | -0.51687 | 0.183883 | 0.688272 | 1482.141 | 2036.097 | 1614.309 | 774.9057 | 1043.096 | 1769.163  |
| ENSMUSG00000033088 | 18_Triobp        | 1934.316333  | -0.74118 | 0.190371 | 0.688272 | 218.041  | 2294.581 | 2848.916 | 400.8475 | 1985.502 | 1958.012  |
| ENSMUSG00000033096 | 7_Apmap          | 952.8640324  | 0.377181 | 0.1677   | 0.688272 | 848.6781 | 822.6827 | 815.784  | 1348.395 | 957.1137 | 924.5302  |
| ENSMUSG00000033111 | 15_3830406C13Rik | 1328.973153  | 0.886828 | 0.059818 | 0.688272 | 933.952  | 924.874  | 940.0501 | 3031.161 | 1103.057 | 1040.745  |
| ENSMUSG00000033124 | 15_Atg9a         | 936.6013069  | -0.64758 | 0.199192 | 0.688272 | 968.8737 | 1198.815 | 1262.221 | 263.9244 | 988.7913 | 936.9818  |
| ENSMUSG00000033152 | 13_Podxl2        | 435.0237844  | -1.13019 | 0.069806 | 0.688272 | 525.4495 | 865.6202 | 400.413  | 82.35234 | 233.0561 | 503.2516  |
| ENSMUSG00000033166 | 10_Dis3          | 626.3647577  | 0.54523  | 0.136229 | 0.688272 | 546.565  | 455.9964 | 525.8297 | 1090.424 | 589.4282 | 549.945   |
| ENSMUSG00000033170 | 14_Card10        | 446.9519459  | -1.02257 | 0.10317  | 0.688272 | 510.019  | 580.5152 | 706.4758 | 61.5162  | 405.0198 | 418.1657  |
| ENSMUSG00000033174 | 17_Mgll          | 4519.471941  | -0.78721 | 0.04888  | 0.688272 | 5027.91  | 7495.172 | 4645.021 | 2017.136 | 3381.576 | 4550.017  |
| ENSMUSG00000033182 | 12_Kbtbd12       | 3.693987829  | 1.562143 | 0.167509 | 0.688272 | 0.812132 | 2.576251 | 2.301224 | 8.929771 | 3.39402  | 4.150528  |
| ENSMUSG00000033184 | 14_Tmed7         | 3361.519507  | 0.867566 | 0.054615 | 0.688272 | 2391.729 | 2249.926 | 2499.13  | 7417.663 | 2908.675 | 2701.994  |
| ENSMUSG00000033186 | 8_Mzt1           | 867.6914721  | 0.699363 | 0.136133 | 0.688272 | 670.8212 | 600.2664 | 713.3795 | 1870.291 | 656.1773 | 695.2135  |
| ENSMUSG00000033191 | 14_Tie1          | 190.848134   | -0.80082 | 0.105782 | 0.688272 | 242.0154 | 288.5401 | 196.7547 | 62.5084  | 130.1041 | 225.1662  |
| ENSMUSG00000033192 | 4_Lpcat2         | 242.5731851  | 0.365029 | 0.188536 | 0.688272 | 207.0937 | 202.6651 | 226.6706 | 321.4718 | 269.2589 | 228.2791  |
| ENSMUSG00000033209 | 17_Tct28         | 552.1171716  | -0.92108 | 0.032216 | 0.688272 | 613.9719 | 905.9815 | 647.7946 | 225.2287 | 330.3513 | 599.377   |
| ENSMUSG00000033213 | 16_AA467197      | 507.1049991  | 0.585217 | 0.037492 | 0.688272 | 424.7451 | 297.9863 | 358.991  | 944.5714 | 644.8639 | 371.4723  |
| ENSMUSG00000033228 | 7_Scaf11         | 3549.173187  | 0.450749 | 0.170063 | 0.688272 | 3008.138 | 2895.706 | 3093.996 | 5727.952 | 3432.486 | 3136.762  |
| ENSMUSG00000033249 | 10_Hsf4          | 42.63134979  | -1.04945 | 0.108396 | 0.688272 | 54.41286 | 66.12377 | 51.77754 | 5.953181 | 33.9402  | 43.58055  |
| ENSMUSG00000033256 | 14_Slf           | 77.92680048  | -0.77152 | 0.190384 | 0.688272 | 90.9588  | 87.59252 | 116.2118 | 15.87515 | 78.06247 | 78.86004  |
| ENSMUSG00000033276 | 18_Stk36         | 66.84287672  | -0.62106 | 0.188452 | 0.688272 | 57.66138 | 101.3325 | 83.99468 | 28.77371 | 57.69835 | 71.59661  |
| ENSMUSG00000033278 | 9_Ptprm          | 390.7747335  | -0.47639 | 0.116428 | 0.688272 | 426.3694 | 572.7864 | 364.744  | 332.3859 | 266.229  | 362.1336  |
| ENSMUSG00000033282 | 13_Rgprip11      | 538.8804043  | 0.795846 | 0.089269 | 0.688272 | 359.7746 | 380.4263 | 441.835  | 1180.714 | 412.9391 | 457.5957  |
| ENSMUSG00000033287 | 15_Kctd17        | 617.4378187  | -0.8934  | 0.122035 | 0.688272 | 740.6645 | 781.4627 | 885.9713 | 114.1026 | 520.4164 | 662.0093  |
| ENSMUSG00000033295 | 13_Ptprf         | 11404.36535  | -0.72931 | 0.185644 | 0.688272 | 12435.37 | 13576.84 | 16668.92 | 2532.086 | 11288.51 | 11924.47  |
| ENSMUSG00000033306 | 14_Lpp           | 3373.665158  | 0.629103 | 0.098513 | 0.688272 | 2774.244 | 2531.596 | 2642.956 | 6273.66  | 3009.365 | 3010.171  |
| ENSMUSG00000033307 | 6_Mif            | 1671.552567  | -1.29171 | 0.08729  | 0.688272 | 2116.416 | 2304.886 | 2699.336 | 95.25089 | 1320.274 | 1493.153  |
| ENSMUSG00000033319 | 5_Fem1c          | 2617.271984  | 0.748727 | 0.069707 | 0.688272 | 1941.808 | 1795.647 | 2121.729 | 5264.596 | 2352.056 | 2227.796  |
| ENSMUSG00000033327 | 16_Tnxb          | 1111.296219  | -0.86458 | 0.197912 | 0.688272 | 1327.836 | 1450.429 | 1525.712 | 150.8139 | 685.5921 | 1527.394  |
| ENSMUSG00000033342 | 13_Lppr5         | 4.034078667  | 1.963532 | 0.16071  | 0.688272 | 0.812132 | 0.85875  | 3.451836 | 15.87515 | 1.13124  | 2.075264  |
| ENSMUSG00000033352 | 11_Map2k4        | 2375.251027  | 0.408038 | 0.15564  | 0.688272 | 2057.943 | 1954.516 | 2112.524 | 3489.556 | 2440.301 | 2196.667  |
| ENSMUSG00000033355 | 5_Rtp4           | 4400.426637  | 0.852776 | 0.010384 | 0.688272 | 2901.748 | 2802.102 | 3706.122 | 7599.235 | 5232.448 | 4160.905  |
| ENSMUSG00000033364 | 13_Usp37         | 899.7291531  | 0.577708 | 0.115992 | 0.688272 | 756.0951 | 655.2264 | 754.8015 | 1596.445 | 807.7768 | 828.0304  |
| ENSMUSG00000033382 | 13_Trappc8       | 1892.969578  | 0.689251 | 0.092495 | 0.688272 | 1460.214 | 1382.588 | 1505.001 | 3737.605 | 1712.849 | 1559.561  |
| ENSMUSG00000033389 | 16_Arhgap44      | 88.7971778   | -0.4724  | 0.178647 | 0.688272 | 99.08013 | 118.5075 | 92.04897 | 76.39915 | 55.43567 | 91.31162  |
| ENSMUSG00000033392 | 15_Clasp2        | 1148.206755  | 0.454772 | 0.186931 | 0.688272 | 972.9343 | 984.1278 | 949.255  | 1907.002 | 1035.176 | 1040.745  |
| ENSMUSG00000033409 | 13_Syce11        | 4.010651526  | -1.46805 | 0.173289 | 0.688272 | 7.30919  | 3.435001 | 6.903673 | 1.984394 | 3.39402  | 0.1037632 |
| ENSMUSG00000033411 | 13_Cldsp12       | 945.2171343  | 0.795969 | 0.079884 | 0.688272 | 673.2576 | 658.6614 | 740.9942 | 2048.886 | 793.0694 | 756.4338  |
| ENSMUSG00000033417 | 15_Cadul1        | 1367.7110063 | 0.777079 | 0.068018 | 0.688272 | 994.0498 | 1010.749 | 1019.442 | 2836.691 | 1206.009 | 1139.32   |
| ENSMUSG00000033434 | 15_Gtbbp6        | 211.2939799  | -1.17223 | 0.142379 | 0.688272 | 257.4459 | 262.7776 | 357.8404 | 9.921968 | 162.913  | 216.8651  |
| ENSMUSG00000033446 | 7_Lpar6          | 1151.102617  | 0.605584 | 0.183759 | 0.688272 | 981.0557 | 911.134  | 846.8505 | 2135.208 | 985.3972 | 1046.971  |
| ENSMUSG00000033453 | 7_Adamts15       | 124.0776743  | -0.5776  | 0.041908 | 0.688272 | 159.99   | 137.4    | 148.429  | 110.1338 | 96.16391 | 92.34925  |
| ENSMUSG00000033454 |                  | 873.0804502  | 0.587679 | 0.138623 | 0.688272 | 716.3006 | 654.3677 | 722.5844 | 1637.125 | 769.3113 | 738.794   |
| ENSMUSG00000033467 | 12_Crlf2         | 89.39339937  | -0.87815 | 0.0411   | 0.688272 | 99.89226 | 101.3325 | 146.1277 | 36.71128 | 84.85051 | 67.44608  |
| ENSMUSG00000033486 | 14_Catsper2      | 90.1772136   | 0.47158  | 0.177583 | 0.688272 | 88.52241 | 67.84127 | 70.18734 | 126.009  | 98.6086  | 79.89767  |
| ENSMUSG00000033487 | 14_Fncd3a        | 8817.616906  | 0.829023 | 0.017233 | 0.688272 | 6065.003 | 5758.779 | 7231.597 | 15832.48 | 10089.29 | 7928.547  |
| ENSMUSG00000033488 | 11_BC026585      | 103.0988054  | -0.6651  | 0.03818  | 0.688272 | 134.8139 | 127.9538 | 116.2118 | 66.47719 | 98.42659 | 74.70951  |
| ENSMUSG00000033501 | 4_Crygs          | 989.8371824  | -2.36386 | 0.004216 | 0.688272 | 1240.126 | 3334.527 | 398.1118 | 60.52401 | 386.9183 | 518.816   |
| ENSMUSG00000033538 | 13_Casp4         | 315.537691   | 1.152143 | 0.013634 | 0.688272 | 238.7669 | 131.3888 | 217.4657 | 602.2635 | 486.4762 | 216.8651  |
| ENSMUSG00000033543 | 17_Gltf2a2       | 861.79141    | 0.894914 | 0.078721 | 0.688272 | 660.2635 | 572.7864 | 575.3061 | 2066.746 | 647.1265 | 648.52    |
| ENSMUSG00000033576 | 11_Apo6l         | 164.6912625  | 0.639525 | 0.142499 | 0.688272 | 104.7651 | 97.89753 | 184.0979 | 135.931  | 282.835  | 182.8323  |
| ENSMUSG00000033595 | 6_Lg13           | 15.49551451  | -1.1087  | 0.189429 | 0.688272 | 17.86691 | 31.77376 | 13.80735 | 1.984394 | 6.788041 | 20.75264  |
| ENSMUSG00000033596 | 4_Rtwd3          | 2196.743766  | 0.466535 | 0.102416 | 0.688272 | 1903.638 | 1702.043 | 1928.426 | 3233.569 | 2364.501 | 2048.286  |
| ENSMUSG00000033597 | 8_Caskin1        | 35.790381    | -1.38958 | 0.075225 | 0.688272 | 34.92168 | 75.57002 | 44.87387 | 2.97659  | 16.9701  | 39.43002  |
| ENSMUSG00000033632 | 15_AW554918      | 386.785127   | 0.543818 | 0.14441  | 0.688272 | 329.7257 | 297.1276 | 317.5689 | 673.7016 | 314.5125 | 388.074   |
| ENSMUSG00000033633 | 13_Clec18a       | 72.97402576  | -0.90546 | 0.108606 | 0.688272 | 82.83748 | 145.9875 | 56.37999 | 23.81272 | 52.04164 | 76.78477  |
| ENSMUSG00000033671 | 17_Cep350        | 2854.221639  | 0.542139 | 0.081998 | 0.688272 | 2457.512 | 2139.147 | 2376.014 | 4537.316 | 2990.132 | 2625.209  |
| ENSMUSG00000033697 | 15_Arhgap39      | 349.2831385  | -0.65917 | 0.182742 | 0.688272 | 396.3205 | 448.2676 | 438.3832 | 101.2041 | 359.7662 | 351.7573  |
| ENSMUSG00000033703 | 8_Fuk            | 440.9509961  | -0.69739 | 0.13701  | 0.688272 | 501.0856 | 546.1651 | 589.1134 | 138.9076 | 424.2525 | 446.1818  |
| ENSMUSG00000033707 | 8_Lrrc24         | 99.58775549  | -0.87723 | 0.022723 | 0.688272 | 115.3228 | 149.4225 | 121.9649 | 44.64886 | 76.93113 | 89.23636  |
| ENSMUSG00000033715 | 14_Akr1c14       | 90.19690078  | 0.103269 | 0.087598 | 0.688272 | 66.59484 | 54.10126 | 58.68122 | 237.135  | 64.48639 | 60.18266  |
| ENSMUSG00000033720 | 12_Sfxm5         | 98.61969688  | -0.66195 | 0.071558 | 0.688272 | 137.2503 | 133.965  | 90.8936  | 56.55522 | 84.85051 | 88.19873  |
| ENSMUSG00000033721 | 16_Vav3          | 653.7441019  | 0.647523 | 0.088344 | 0.688272 | 528.698  | 470.5951 | 529.2816 | 1206.511 | 605.267  | 582.116   |
| ENSMUSG00000033722 | 9_BC034090       | 333.3670194  | -0.96722 | 0.027117 | 0.688272 | 380.89   | 613.1477 | 329.0751 | 39.8998  | 209.2979 | 327.8917  |
| ENSMUSG00000033728 | 14_Lrrc14        | 415.9642334  | -0.65169 | 0.160074 | 0.688272 | 484.8429 | 477.4651 | 562.6493 | 137.9154 | 384.6556 | 448.2571  |
| ENSMUSG00000033760 | 16_Rbm4b         | 772.8342973  | 0.454317 | 0.188463 |          |          |          |          |          |          |           |

ENSMUSG00000034041 4\_Lyl1 40.69345939 -0.97702 0.173006 0.688272 54.41286 53.24251 54.07877 3.968787 45.2536 33.20423  
ENSMUSG00000034042 16\_Gbp111 2511.935001 0.345668 0.16121 0.688272 2298.334 1972.549 2366.809 3253.413 2600.951 2579.553  
ENSMUSG00000034083 16\_Ccdc174 569.9428736 0.502989 0.167035 0.688272 434.4907 462.8664 517.7754 978.3061 513.6284 512.5902  
ENSMUSG00000034127 14\_Tspan8 58.45745853 1.080668 0.074314 0.688272 44.66727 30.05626 37.9702 152.7983 39.5969 45.65581  
ENSMUSG00000034156 16\_Bzrap1 215.4336634 -0.89545 0.07385 0.688272 293.1797 319.4551 227.8212 61.5162 156.1249 234.5048  
ENSMUSG00000034161 7\_Scx 29.55033919 -1.35817 0.01853 0.688272 43.04301 53.24251 31.06653 6.945378 18.10144 24.90317  
ENSMUSG00000034163 10\_Zfc3h1 1898.547422 0.608296 0.137418 0.688272 1497.572 1583.535 1431.361 3661.206 1702.667 1514.943  
ENSMUSG00000034164 17\_Emid1 12.73083062 -0.98859 0.181265 0.688272 9.745586 21.46876 19.56041 2.97659 10.18206 12.45158  
ENSMUSG00000034175 13\_Rhbd3 200.9508476 -1.03847 0.059068 0.688272 236.3305 286.8226 287.653 40.68007 154.9936 199.2254  
ENSMUSG00000034189 4\_Hsd1 1048.757264 -0.37553 0.185693 0.688272 1117.494 1157.595 1278.33 686.6002 1040.833 1011.691  
ENSMUSG00000034194 16\_R3hcc1 361.3263927 -0.70378 0.168212 0.688272 419.0602 446.5501 477.504 96.24309 352.9781 375.6228  
ENSMUSG00000034201 13\_Gas21 525.149773 -0.78128 0.107179 0.688272 606.6627 630.3227 754.8015 150.8139 510.2344 498.0634  
ENSMUSG00000034205 16\_Lox1 612.3938096 -0.38017 0.187421 0.688272 725.234 770.2989 582.2097 613.1776 423.1212 560.3213  
ENSMUSG00000034216 12\_Vps18 295.5622731 -1.0429 0.136888 0.688272 338.6591 425.9401 429.1783 26.78931 285.0977 267.7091  
ENSMUSG00000034218 15\_Atm 883.7381518 1.02982 0.005926 0.688272 668.3848 473.1714 601.7701 1698.641 1052.146 808.3154  
ENSMUSG00000034220 7\_Gpc1 814.4439206 -0.83187 0.12948 0.688272 932.3277 1144.714 1051.659 173.6344 762.5322 821.8046  
ENSMUSG00000034224 14\_Slc38a8 183.8083522 -1.33946 0.003216 0.688272 251.761 310.8676 227.8212 65.48499 74.66845 172.2469  
ENSMUSG00000034245 10\_Hdac1 470.6123705 -0.74332 0.064354 0.688272 527.0738 687.0002 553.4444 194.4706 381.2616 480.4236  
ENSMUSG00000034252 14\_Senp6 2223.08699 0.708104 0.098052 0.688272 1659.186 1672.845 1732.822 4553.191 1885.944 1834.533  
ENSMUSG00000034254 17\_Agat1 891.4465633 -0.84174 0.153107 0.688272 1002.171 1142.138 1288.686 157.7593 879.0513 878.8744  
ENSMUSG00000034258 3\_Mfsd7c 79.51274241 -0.57524 0.178052 0.688272 105.5772 114.2138 65.58489 79.37575 40.72824 71.59661  
ENSMUSG00000034259 7\_Extoc4 222.6337112 -0.83514 0.050873 0.688272 223.3363 261.0601 371.6477 88.30552 203.8412 187.8114  
ENSMUSG00000034282 3\_Eypl 26890.35128 -0.97764 0.197266 0.688272 28704.81 33670.74 44628.79 1809.767 25818.31 26709.69  
ENSMUSG00000034297 14\_Med13 3142.356577 0.815376 0.064099 0.688272 2315.389 2131.418 2385.219 6716.18 2824.956 2480.978  
ENSMUSG00000034310 8\_Tmem132d 177.6544794 -0.53745 0.128302 0.688272 207.9058 255.0488 167.9894 131.9622 113.134 189.8867  
ENSMUSG00000034312 13\_Iqsec1 901.5579973 -0.66897 0.027773 0.688272 1020.038 1254.634 1045.906 524.8721 691.2488 872.8486  
ENSMUSG00000034317 14\_Trim59 437.7894424 0.720307 0.037012 0.688272 263.1308 242.1676 341.7318 1079.51 373.3422 326.8541  
ENSMUSG00000034327 17\_Kctd9 1408.724364 0.649345 0.07132 0.688272 1124.803 914.569 1251.866 2462.632 1423.226 1275.25  
ENSMUSG00000034329 16\_Brip1 251.5611402 0.746541 0.054836 0.688272 195.7239 155.4338 212.8632 465.3403 245.5008 234.5048  
ENSMUSG00000034343 14\_Ube2f 2027.152982 0.391765 0.136943 0.688272 1672.18 1698.608 1890.456 2813.87 2048.857 2038.947  
ENSMUSG00000034349 14\_Smca 2146.641066 1.00608 0.045794 0.688272 1515.439 1252.917 1513.055 5220.94 1879.156 1498.341  
ENSMUSG00000034362 7\_Csta1 4454.118699 0.750487 0.050269 0.688272 3475.926 3317.352 3169.936 8592.424 4144.099 4024.975  
ENSMUSG00000034384 11\_Barlh2 1.816747512 3.326621 0.150405 0.688272 0.812132 0 0 9.050721 1.037632  
ENSMUSG00000034401 16\_Spata6 434.119138 0.758003 0.06663 0.688272 317.5437 306.5738 344.033 868.1722 382.393 385.9991  
ENSMUSG00000034403 16\_Pja1 2852.843155 -0.36847 0.110773 0.688272 3058.49 3185.963 3401.209 2171.919 2559.091 2740.386  
ENSMUSG00000034416 18\_Pkd112 4.284982306 -1.33694 0.196376 0.688272 9.745586 5.152501 3.451836 1.984394 2.26268 3.112896  
ENSMUSG00000034422 14\_Parp14 10283.13154 0.861312 0.006956 0.688272 7150.012 6270.594 8484.614 17071.74 12950.45 9771.381  
ENSMUSG00000034424 5\_Gcsh 1865.330894 0.429025 0.196547 0.688272 1571.476 1489.073 1709.81 2994.45 1764.891 1662.287  
ENSMUSG00000034429 14\_Zfp707 269.3556107 -0.74852 0.181117 0.688272 324.8529 348.6526 339.4306 80.36794 248.8948 273.9349  
ENSMUSG00000034438 16\_Gbp8 854.1184205 1.194586 0.006691 0.688272 549.0014 353.8051 655.8489 1739.321 1146.048 680.6866  
ENSMUSG00000034442 10\_Trmf5 306.4621133 0.529225 0.117235 0.688272 246.8882 258.4838 247.3816 501.0594 309.9872 274.9725  
ENSMUSG00000034445 7\_Cyb561a3 309.8820389 -0.52403 0.160897 0.688272 374.3929 350.3701 371.6477 147.8373 322.4319 292.6122  
ENSMUSG00000034450 7\_Gulo 9.476042754 -1.28898 0.082927 0.688272 15.43051 14.59875 10.35551 6.945378 2.26268 7.263424  
ENSMUSG00000034457 10\_Eda2r 46.65742733 0.326774 0.040723 0.688272 24.04501 29.91591 130.97 44.12226 24.90317  
ENSMUSG00000034459 8\_Iift1 15012.72926 1.141598 0.002278 0.688272 8810.822 7554.426 11729.34 28986.04 18879.8 14115.95  
ENSMUSG00000034460 9\_Six4 47.7554623 0.838507 0.114985 0.688272 38.17021 36.92626 27.61469 103.1885 33.9402 46.69344  
ENSMUSG00000034471 12\_Caskin2 587.305349 -1.02506 0.131671 0.688272 652.9543 839.8577 869.8628 60.52401 535.1239 565.5095  
ENSMUSG00000034473 13\_Sec22a 667.3165748 0.521543 0.096382 0.688272 536.8194 519.5439 587.9628 1052.721 682.1981 624.6545  
ENSMUSG00000034480 18\_Diap2 369.1622948 0.976676 0.049851 0.688272 262.3187 244.7438 239.3273 883.0552 304.3305 281.1983  
ENSMUSG00000034484 7\_Snx2 3757.626216 0.702973 0.043326 0.688272 2917.179 2537.607 3125.062 6583.226 4070.562 3312.122  
ENSMUSG00000034487 3\_Kdelc2 677.7034389 0.602995 0.131389 0.688272 553.8741 518.6851 541.9383 1280.926 567.9327 602.8642  
ENSMUSG00000034522 9\_Zfp395 713.1571276 -0.453 0.114865 0.688272 754.4708 886.2302 831.8926 470.3013 596.2162 739.8317  
ENSMUSG00000034557 14\_Zfyve9 1544.903549 0.545041 0.138377 0.688272 1299.411 1188.51 1281.782 2737.471 1416.438 1345.809  
ENSMUSG00000034560 5\_A230046K03Rik 1208.744807 0.925794 0.042105 0.688272 842.9932 760.8527 897.4774 2703.736 1079.298 968.1107  
ENSMUSG00000034586 14\_Hid1 74.28552508 -1.18392 0.023279 0.688272 93.3952 133.1063 82.84407 20.83613 41.89598 73.67188  
ENSMUSG00000034601 16\_2700049A03Rik 392.5137729 0.370617 0.138306 0.688272 332.1621 330.6188 364.744 505.0282 397.1004 425.4291  
ENSMUSG00000034607 6\_Pof1b 5221.790666 0.141582 0.043107 0.688272 3552.266 3076.043 3745.242 12754.69 4422.408 3780.094  
ENSMUSG00000034610 14\_Zccho1 2004.989876 0.883189 0.041894 0.688272 1399.304 1283.832 1546.423 4301.173 1832.771 1666.437  
ENSMUSG00000034620 17\_Tmem5 670.3559059 0.626876 0.125486 0.688272 527.0738 514.3914 539.6371 1295.809 584.9028 560.3213  
ENSMUSG00000034636 9\_Zygf1b 1892.946665 0.565822 0.176911 0.688272 1600.713 1517.412 1461.277 3673.113 1535.229 1569.937  
ENSMUSG00000034640 9\_Tipar 2349.385687 0.975313 0.036993 0.688272 1672.992 1405.429 1629.267 5420.371 2116.737 1806.517  
ENSMUSG00000034647 14\_Ankrd12 1332.650843 0.865418 0.060552 0.688272 1033.844 886.2302 913.586 2951.786 993.3166 1217.142  
ENSMUSG00000034653 11\_Ythcd2 510.0217229 0.671063 0.082742 0.688272 405.254 358.9576 416.5216 948.5402 502.315 428.542  
ENSMUSG00000034663 13\_Bmp2k 1205.318555 0.540164 0.071629 0.688272 953.4432 921.439 1072.37 1870.291 1225.241 1189.126  
ENSMUSG00000034675 17\_Dbn1 141.1862724 -1.03637 0.006859 0.688272 159.99 237.8738 171.4412 62.5084 93.90123 121.403  
ENSMUSG00000034685 4\_Fam171a2 321.1366269 -1.15424 0.096493 0.688272 393.072 471.4539 464.8473 28.77371 251.1575 317.5154  
ENSMUSG00000034686 7\_Prr7 1.615249382 -0.06921 0.06751 0.688272 0.812132 7.728752 1.150612 0 0  
ENSMUSG00000034687 8\_Fras1 715.8422902 -0.52104 0.028753 0.688272 786.9561 952.354 791.6211 545.7082 604.1356 614.2782  
ENSMUSG00000034724 17\_Cnotf1 2080.67808 1.022839 0.022294 0.688272 1418.795 1246.905 1452.072 4722.857 1832.771 180.786  
ENSMUSG00000034738 8\_Nostrin 77.97006437 0.655837 0.069094 0.688272 58.47352 60.11252 63.28367 126.009 76.93113 83.01057  
ENSMUSG00000034739 17\_Mfpr 2102.010368 -1.09749 0.025013 0.688272 2682.473 3897.867 2014.722 670.725 1189.038 2157.237  
ENSMUSG00000034748 16\_Sirt6 281.2696338 -1.04804 0.140234 0.688272 345.9683 325.4663 465.9979 24.80492 242.1068 283.2736  
ENSMUSG00000034761 15\_Map4k5 3427.221413 0.554104 0.134246 0.688272 2826.22 2632.069 2873.078 6130.784 3068.194 3032.996  
ENSMUSG00000034762 9\_Glis1 20.61564118 -1.37695 0.116323 0.688272 24.36397 49.80751 14.95796 0.992197 16.9701 16.60211  
ENSMUSG00000034771 15\_Tle2 169.8516513 -1.18633 0.025907 0.688272 227.397 285.9638 194.4534 37.70348 108.6086 164.9835  
ENSMUSG00000034773 16\_BC030867 91.12389305 -0.84446 0.131322 0.688272 123.4441 109.0613 118.513 19.84394 81.45649 94.42452  
ENSMUSG00000034785 14\_Dio1 1.519502937 -2.84349 0.133274 0.688272 0.406061 1.7175 2.301224 0 0 1.037632  
ENSMUSG00000034786 17\_Gpsm3 61.46062511 -0.55066 0.165978 0.688272 79.58895 81.58127 57.53061 38.69568 66.74907 44.61818  
ENSMUSG00000034795 14\_Ccdc122 77.30827169 1.081457 0.062142 0.688272 47.9158 54.96001 46.02448 199.4316 66.74907 48.76871  
ENSMUSG00000034796 14\_Cpne7 287.598912 -0.85834 0.134109 0.688272 374.3929 463.7251 273.8457 67.46938 192.3732 183.8325  
ENSMUSG00000034801 13\_Sos2 1519.711702 0.482059 0.193789 0.688272 1262.053 1287.267 1255.318 2666.033 1310.092 1337.508  
ENSMUSG00000034810 7\_Scn7a 371.0803311 0.903944 0.118467 0.688272 252.5731 296.2688 226.6706 941.5948 186.6711 322.7036  
ENSMUSG00000034825 13\_Nrip3 10.69555838 1.564066 0.039774 0.688272 2.436397 6.011252 8.054285 23.81272 12.44474 11.41395  
ENSMUSG00000034826 14\_Nup54 780.9407071 0.484117 0.067149 0.688272 666.7605 611.4302 675.4093 1092.409 879.0513 760.5843  
ENSMUSG00000034829 7\_Nxn1 14.69499916 -1.03183 0.1981 0.688272 33.29742 18.8925 6.903673 15.87515 9.050721 4.150528  
ENSMUSG00000034833 9\_Tespa1 8.078377449 1.636636 0.032845 0.688272 5.684925 2.576251 3.451836 12.89856 12.44474 11.41395  
ENSMUSG00000034837 12\_Gnat1 623.6450156 -1.1341 0.077871 0.688272 1264.49 982.4103 323.322 290.7137 713.8756 167.0588  
ENSMUSG00000034845 5\_Plvap 274.6253791 -0.9004 0.073652 0.688272 348.4047 346.9351 377.4008 69.45378 265.8649 239.693  
ENSMUSG00000034854 8\_Mfsd12 318.9909522 -0.84443 0.156972 0.688272 388.1992 443.9739 396.9612 54.57082 305.4618 324.7788  
ENSMUSG00000034855 12\_Cxd10 2012.845837 1.359461 0.002455 0.688272 1131.3 545.3064 1710.96 3159.155 3154.176 2376.177  
ENSMUSG00000034863 7\_Ano8 187.5081007 -0.79061 0.077183 0.688272 204.6573 237.8738 270.3938 68.46158 140.2862 203.3759  
ENSMUSG00000034875 5\_Nudt19 609.4844231 0.585406 0.140423 0.688272 506.7705 450.8439 505.1187 1134.081 496.6583 563.4342  
ENSMUSG00000034880 6\_Mprl34 108.1543551 -0.72152 0.049468 0.688272 130.7533 123.66 149.5796 55.56302 81.45649 107.9137  
ENSMUSG00000034881 7\_Tbxa2r 11.93007437 -1.69208 0.037629 0.688272 17.05478 18.03375 19.56041 0.992197 4.52536 11.41395  
ENSMUSG00000034883 43.55688246 0.891681 0.105488 0.688272 29.23676 25.76251 36.81959 98.22748 59.96103 77.16109  
ENSMUSG00000034889 7\_Cactin 484.0523124 -0.82642 0.19313 0.688272 542.5043 614.8652 699.5722 69.45378 519.2851 458.6334  
ENSMUSG00000034892 8\_Rps29 74.18101051 -0.93261 0.083997 0.688272 9284.295 9546.726 10378.52 1548.819 6472.397 7282.102  
ENSMUSG00000034902 17\_Pip5k1c 915.9720079 -0.87664 0.136739 0.688272 1170.282 1222.002 1165.57 157.7593 822.4843 957.7344  
ENSMUSG00000034911 7\_Ushbp1 84.4274033 -1.02477 0.057309 0.688272 103.9529 105.6263 130.0192 19.84394 59.96103 77.16109  
ENSMUSG00000034917 7\_Tjp3 3619.961011 -0.82147 0.190269 0.688272 3764.233 4209.594 5896.887 559.599 3784.333 3505.121  
ENSMUSG00000034930 15\_Rtkn 1149.908857 -0.77947 0.19225 0.688272 1238.502 1406.633 1714.412 203.4003 1124.552 121.954  
ENSMUSG00000034949 18\_Zfp2 127.631003 -0.8827 0.067864 0.688272 146.9959 176.9025 172.5918 42.66446 80.32515 146.3061  
ENSMUSG00000034973 12\_Dopey1 1381.185527 0.485362 0.159229 0.688272 1160.537 1155.878 1136.805 2317.772 1276.152 1239.97  
ENSMUSG00000034974 12\_Dapk3 448.3214225 -0.92372 0.186223 0.688272 547.3771 585.6677 628.2342 42.66446 449.142 436.8431  
ENSMUSG00000034990 14\_Otoa 1.614843287 -2.91118 0.132298 0.688272 0.812132 4.293751 3.451836 0 1.13134 0  
ENSMUSG00000034993 7\_Vat1 4937.128286 -0.60615 0.189944 0.688272 5533.057 6145.217 6199.498 1629.187 4747.103 5368.708  
ENSMUSG00000034994 9\_Eef2 43335.0873 -0.80363 0.192475 0.688272 48943.15 55348.17 61014.66 6757.853 41642.37 46304.33

9364.86 20660.60

|                    |                 |              |          |          |          |          |          |          |          |          |          |
|--------------------|-----------------|--------------|----------|----------|----------|----------|----------|----------|----------|----------|----------|
| ENSMUSG00000034998 | 18_Foxn2        | 902.6658325  | 0.73741  | 0.055068 | 0.688272 | 691.1245 | 611.4302 | 728.3375 | 1716.5   | 865.4752 | 803.1272 |
| ENSMUSG00000035000 | 8_Dpp4          | 613.4117919  | 0.60611  | 0.178918 | 0.688272 | 505.1462 | 527.2726 | 426.8771 | 1233.301 | 426.5152 | 561.3589 |
| ENSMUSG00000035021 | 13_Baz1a        | 2579.552747  | 0.414994 | 0.101014 | 0.688272 | 2153.775 | 2080.752 | 2399.026 | 3259.367 | 3167.752 | 2416.645 |
| ENSMUSG00000035027 | 17_Map2k2       | 1443.155252  | -1.01085 | 0.129168 | 0.688272 | 1650.253 | 1895.262 | 2251.748 | 155.779  | 1312.355 | 1393.54  |
| ENSMUSG00000035045 | 17_Zc3h12b      | 90.55675567  | 0.70258  | 0.129277 | 0.688272 | 68.2191  | 58.39502 | 80.54285 | 180.5798 | 74.66845 | 80.9353  |
| ENSMUSG00000035125 | 10_Gctf2        | 164.7496211  | 0.699904 | 0.120181 | 0.688272 | 135.6261 | 130.53   | 110.4588 | 328.4171 | 165.1757 | 118.2901 |
| ENSMUSG00000035133 | 8_Arhgap5       | 2628.449717  | 1.222709 | 0.022457 | 0.688272 | 1641.319 | 1554.338 | 1534.917 | 7067.418 | 2074.878 | 1897.829 |
| ENSMUSG00000035150 | 15_Elf2s3x      | 6376.743932  | 0.495056 | 0.157518 | 0.688272 | 5621.579 | 4835.623 | 5422.835 | 10778.23 | 6080.953 | 5521.24  |
| ENSMUSG00000035151 | 12_Elmod2       | 640.883901   | 0.967171 | 0.036275 | 0.688272 | 458.0425 | 423.3639 | 419.9734 | 1461.506 | 553.2553 | 529.1924 |
| ENSMUSG00000035161 | 6_Ints6         | 668.3281583  | 0.621796 | 0.119546 | 0.688272 | 518.1403 | 474.8889 | 586.8122 | 1258.106 | 570.1954 | 601.8266 |
| ENSMUSG00000035164 | 7_Zc3h12c       | 1004.888182  | 0.567176 | 0.070743 | 0.688272 | 862.4844 | 734.2314 | 833.0432 | 1582.554 | 1113.239 | 903.7775 |
| ENSMUSG00000035171 | 9_1110059E24Rik | 1358.442427  | 0.925708 | 0.032548 | 0.688272 | 943.6976 | 873.349  | 994.1289 | 2944.84  | 1250.131 | 1144.508 |
| ENSMUSG00000035172 | 15_Plekhh3      | 1062.956189  | -0.96187 | 0.18987  | 0.688272 | 1221.447 | 1361.119 | 1631.568 | 82.35234 | 949.1943 | 1132.057 |
| ENSMUSG00000035173 | 14_Ccdc186      | 1558.671863  | 0.474768 | 0.156895 | 0.688272 | 1318.091 | 1259.787 | 1335.861 | 2562.844 | 1405.124 | 1470.325 |
| ENSMUSG00000035186 | 6_Ubd           | 61.16098008  | 1.371731 | 0.032423 | 0.688272 | 43.85514 | 10.305   | 48.32571 | 83.34453 | 132.3668 | 48.76871 |
| ENSMUSG00000035199 | 6_Arl6ip5       | 2548.302782  | 0.285857 | 0.17334  | 0.688272 | 2288.588 | 2233.609 | 2367.96  | 2945.832 | 2856.634 | 2597.193 |
| ENSMUSG00000035200 | 6_Chrrn4        | 65.47327706  | -0.80062 | 0.110314 | 0.688272 | 83.64961 | 121.9425 | 43.72326 | 39.68787 | 38.46556 | 65.37082 |
| ENSMUSG00000035206 | 9_Sppl2b        | 507.9271653  | -0.97614 | 0.180973 | 0.688272 | 635.8995 | 642.3452 | 742.1448 | 39.68787 | 446.8793 | 504.6063 |
| ENSMUSG00000035208 | 15_Slfn8        | 1792.746701  | 1.378536 | 0.002345 | 0.688272 | 1057.396 | 673.2602 | 1257.619 | 3802.098 | 2583.981 | 1382.126 |
| ENSMUSG00000035227 | 6_Spccs2        | 2627.922433  | 0.373674 | 0.184052 | 0.688272 | 2253.667 | 2166.627 | 2448.503 | 3740.582 | 2757.076 | 2401.081 |
| ENSMUSG00000035234 | 18_Fam175a      | 213.8709189  | 0.594209 | 0.126281 | 0.688272 | 180.2933 | 170.0325 | 161.0857 | 381.0036 | 70.8324  | 219.978  |
| ENSMUSG00000035235 | 12_Trim13       | 521.883039   | 0.717203 | 0.083767 | 0.688272 | 408.5025 | 381.2851 | 394.66   | 1032.877 | 498.921  | 415.0528 |
| ENSMUSG00000035236 | 17_Scai         | 566.8759314  | 1.00796  | 0.044419 | 0.688272 | 382.5143 | 381.2851 | 365.8947 | 1381.138 | 440.0913 | 450.3323 |
| ENSMUSG00000035242 | 15_Oaz1         | 6046.092755  | -0.66793 | 0.143385 | 0.688272 | 6799.171 | 7366.359 | 8098.008 | 1990.347 | 5820.745 | 6201.927 |
| ENSMUSG00000035245 | 12_Eogt         | 1819.087329  | 0.351315 | 0.176543 | 0.688272 | 1548.736 | 1565.502 | 1682.195 | 2488.43  | 1841.822 | 1787.84  |
| ENSMUSG00000035248 | 8_Zchch6        | 3134.598852  | 0.394984 | 0.109942 | 0.688272 | 2658.109 | 2511.844 | 2955.923 | 4135.476 | 3431.355 | 3117.047 |
| ENSMUSG00000035268 | 14_Pkig         | 306.0794304  | -0.35114 | 0.149328 | 0.688272 | 345.1562 | 342.6413 | 341.7318 | 265.9087 | 243.2381 | 297.8004 |
| ENSMUSG00000035273 | 14_Hpse         | 806.2765693  | 0.443725 | 0.087766 | 0.688272 | 685.4396 | 698.1639 | 666.2044 | 1122.175 | 867.7379 | 797.9391 |
| ENSMUSG00000035279 | 7_Ssc5d         | 244.3943113  | -0.99078 | 0.08553  | 0.688272 | 238.7669 | 401.8951 | 334.8281 | 58.53961 | 133.4981 | 298.838  |
| ENSMUSG00000035284 | 9_Vps13c        | 2148.277534  | 0.34665  | 0.192747 | 0.688272 | 1924.753 | 1848.889 | 1900.811 | 2990.481 | 2123.552 | 2101.205 |
| ENSMUSG00000035293 | 13_G2g3         | 574.5322437  | 0.934646 | 0.053245 | 0.688272 | 414.9995 | 333.1951 | 436.082  | 1328.552 | 469.5061 | 464.8592 |
| ENSMUSG00000035297 | 14_Cops4        | 2048.625347  | 0.331762 | 0.1944   | 0.688272 | 1838.667 | 1708.913 | 1895.058 | 2756.323 | 2071.484 | 2021.307 |
| ENSMUSG00000035310 | 15_Lin5a        | 713.7553001  | 0.602544 | 0.107495 | 0.688272 | 566.8683 | 543.5889 | 590.264  | 1278.942 | 721.795  | 581.074  |
| ENSMUSG00000035314 | 8_Gdps2         | 490.3458853  | -0.89635 | 0.178225 | 0.688272 | 577.426  | 607.9952 | 728.3375 | 57.54742 | 483.0822 | 487.6871 |
| ENSMUSG00000035329 | 7_Fbxo33        | 430.1728469  | 0.636563 | 0.13669  | 0.688272 | 312.6709 | 340.0651 | 357.8404 | 838.4063 | 419.7272 | 312.3273 |
| ENSMUSG00000035342 | 13_Ltze2        | 971.4507197  | -1.07523 | 0.093187 | 0.688272 | 1140.234 | 1278.679 | 1533.766 | 123.0324 | 756.8665 | 996.1268 |
| ENSMUSG00000035351 | 15_Nup37        | 294.4581342  | 0.517342 | 0.118241 | 0.688272 | 237.9547 | 230.1451 | 258.8877 | 473.2779 | 287.3604 | 279.1237 |
| ENSMUSG00000035352 | 3_Cd12          | 115.920495   | 0.90929  | 0.021886 | 0.688272 | 96.64373 | 67.84127 | 77.09101 | 20.416   | 154.936  | 97.53741 |
| ENSMUSG00000035365 | 15_Parppb       | 123.8600188  | 0.654946 | 0.086475 | 0.688272 | 108.0136 | 80.72252 | 100.1033 | 214.3145 | 116.528  | 123.4782 |
| ENSMUSG00000035367 | 8_Rmi1          | 632.0991614  | 0.944391 | 0.03895  | 0.688272 | 495.4006 | 373.5563 | 428.0277 | 1405.943 | 578.1148 | 511.5526 |
| ENSMUSG00000035373 | 2_Cd7           | 723.8123553  | 1.105075 | 0.013962 | 0.688272 | 477.5337 | 246.4613 | 654.6983 | 883.0552 | 1348.557 | 732.5682 |
| ENSMUSG00000035385 | 5_Cd2           | 861.0360161  | 1.104313 | 0.100986 | 0.688272 | 532.7587 | 304.8563 | 803.1273 | 1271.004 | 1411.912 | 842.5572 |
| ENSMUSG00000035390 | 16_Brsk1        | 38.97844062  | -1.22433 | 0.024894 | 0.688272 | 46.29153 | 71.27627 | 46.02448 | 9.921968 | 27.15216 | 33.20423 |
| ENSMUSG00000035392 | 17_Dennd1a      | 445.4571109  | -0.56731 | 0.104914 | 0.688272 | 478.3459 | 575.3626 | 541.9383 | 227.2131 | 401.6257 | 448.2571 |
| ENSMUSG00000035394 | 11_Clap53       | 2771561748   | 2.400711 | 0.111183 | 0.688272 | 0.812132 | 1.1715   | 0        | 0.992197 | 7.919381 | 5.18816  |
| ENSMUSG00000035399 | 12_Oser1        | 1754.724869  | 0.509258 | 0.050067 | 0.688272 | 1452.904 | 1359.402 | 1532.615 | 2479.5   | 1961.744 | 1742.184 |
| ENSMUSG00000035403 | 10_Crb2         | 114.3165057  | -1.16726 | 0.025903 | 0.688272 | 172.172  | 218.1226 | 83.99468 | 37.70348 | 70.14309 | 103.7632 |
| ENSMUSG00000035413 | 8_Tmem98        | 454.3422518  | -0.91964 | 0.025115 | 0.688272 | 627.7782 | 747.9714 | 407.3167 | 226.2209 | 260.2082 | 456.5581 |
| ENSMUSG00000035437 | 15_Rabgap1      | 2949.659744  | 0.451518 | 0.196122 | 0.688272 | 2521.67  | 2388.184 | 2565.865 | 4929.234 | 2493.474 | 2799.531 |
| ENSMUSG00000035441 | 14_Myo1d        | 2396.174511  | -0.38564 | 0.199514 | 0.688272 | 2532.228 | 2749.718 | 2861.572 | 1471.428 | 2347.531 | 2414.57  |
| ENSMUSG00000035451 | 6_Foxa1         | 70.35961618  | 0.636875 | 0.170236 | 0.688272 | 58.47352 | 58.39502 | 48.32571 | 134.9388 | 70.14309 | 51.8816  |
| ENSMUSG00000035455 | 12_Fignl1       | 389.979392   | 0.647177 | 0.091409 | 0.688272 | 315.1073 | 267.9301 | 329.0751 | 708.4285 | 391.4437 | 327.8917 |
| ENSMUSG00000035459 | 15_Stab2        | 9.420210645  | -1.68243 | 0.034398 | 0.688272 | 11.36985 | 18.03375 | 13.80735 | 5.953181 | 1.13134  | 6.225792 |
| ENSMUSG00000035476 | 9_Tab3          | 654.1519017  | 0.711757 | 0.124207 | 0.688272 | 547.3771 | 465.4426 | 475.2028 | 1384.115 | 596.2162 | 456.5581 |
| ENSMUSG00000035486 | 14_Pik5         | 136.0401788  | -1.47545 | 0.026353 | 0.688272 | 172.172  | 287.6813 | 140.3747 | 17.85954 | 62.23271 | 139.9298 |
| ENSMUSG00000035504 | 16_Reep6        | 199.7283697  | -0.90919 | 0.146737 | 0.688272 | 250.9488 | 262.7776 | 268.0926 | 28.77371 | 196.8532 | 190.9243 |
| ENSMUSG00000035513 | 19_Ntnq2        | 77.54759582  | -0.98476 | 0.113592 | 0.688272 | 111.2621 | 122.8013 | 74.78979 | 12.89856 | 66.74907 | 76.78477 |
| ENSMUSG00000035545 | 13_Leng8        | 3669.055496  | -0.65232 | 0.085578 | 0.688272 | 4086.649 | 4894.876 | 4472.429 | 1629.187 | 3091.953 | 3839.239 |
| ENSMUSG00000035559 | 8_Mpv1732       | 239.9627452  | -0.73334 | 0.193749 | 0.688272 | 285.0584 | 299.7038 | 314.1171 | 50.60204 | 231.9247 | 258.3704 |
| ENSMUSG00000035566 | 6_Pcdh17        | 14.999441144 | 1.115056 | 0.093605 | 0.688272 | 13.80625 | 4.293751 | 10.35551 | 27.78151 | 19.23278 | 14.52685 |
| ENSMUSG00000035572 | 16_Dcaf10       | 860.8311406  | 0.517119 | 0.114549 | 0.688272 | 706.555  | 705.8927 | 712.2289 | 1405.943 | 853.0304 | 881.3369 |
| ENSMUSG00000035585 | 16_Tsen34       | 1400.432964  | -0.76235 | 0.120384 | 0.688272 | 1599.088 | 1667.693 | 2019.324 | 393.9021 | 1313.486 | 1409.104 |
| ENSMUSG00000035595 | 6_1600002K03Rik | 115.0576259  | -0.61008 | 0.163401 | 0.688272 | 120.1956 | 135.6825 | 161.0857 | 49.60984 | 133.4981 | 90.27399 |
| ENSMUSG00000035597 | 18_Prrp39       | 1481.346581  | 0.956959 | 0.056314 | 0.688272 | 1037.093 | 964.3765 | 1020.593 | 3584.807 | 1158.492 | 1122.718 |
| ENSMUSG00000035615 | 12_Fmpd1        | 305.4034579  | -0.56931 | 0.173957 | 0.688272 | 324.0407 | 363.2513 | 407.3167 | 125.0168 | 295.2798 | 317.5154 |
| ENSMUSG00000035623 | 14_Rsf1         | 1419.738742  | 0.494158 | 0.190833 | 0.688272 | 1250.684 | 1103.494 | 1182.829 | 2518.196 | 1226.373 | 1236.857 |
| ENSMUSG00000035637 | 14_Grhrp        | 243.6382932  | -0.99325 | 0.08172  | 0.688272 | 294.804  | 323.7488 | 354.3885 | 45.64105 | 190.0651 | 253.1822 |
| ENSMUSG00000035640 | 18_Cbapc        | 445.2252527  | -1.13972 | 0.131007 | 0.688272 | 507.5826 | 586.5264 | 743.2954 | 29.7659  | 313.3812 | 490.8    |
| ENSMUSG00000035649 | 17_Zcchc7       | 1457.73124   | 0.515124 | 0.121534 | 0.688272 | 1224.695 | 1133.55  | 1242.661 | 2409.054 | 1367.79  | 1368.637 |
| ENSMUSG00000035681 | 6_Kcnc2         | 169.3372155  | 0.531636 | 0.157667 | 0.688272 | 135.6261 | 137.4    | 142.6759 | 290.7137 | 142.5489 | 167.0588 |
| ENSMUSG00000035686 | 8_Thrsp         | 36.15598904  | -1.01014 | 0.098301 | 0.688272 | 31.67315 | 83.29877 | 29.91591 | 20.83613 | 16.9701  | 34.24186 |
| ENSMUSG00000035725 | 13_Prxk         | 1767.68794   | 0.728158 | 0.04416  | 0.688272 | 1266.114 | 1205.685 | 1521.109 | 3176.022 | 1898.389 | 1538.808 |
| ENSMUSG00000035726 | 7_Supt16        | 2186.093163  | 0.434793 | 0.1558   | 0.688272 | 1916.632 | 1669.41  | 1991.71  | 3305.008 | 2270.6   | 1963.2   |
| ENSMUSG00000035735 | 10_Dagla        | 362.9221125  | -0.83859 | 0.188766 | 0.688272 | 423.1209 | 419.9289 | 553.4444 | 51.59423 | 363.1602 | 366.2841 |
| ENSMUSG00000035745 | 8_Grin3b        | 8.744729501  | -1.63564 |          |          |          |          |          |          |          |          |

|                    |                 |             |          |          |          |          |          |          |          |          |          |
|--------------------|-----------------|-------------|----------|----------|----------|----------|----------|----------|----------|----------|----------|
| ENSMUSG00000036111 | 7_Lmo1          | 54.15493408 | -1.36377 | 0.008869 | 0.688272 | 83.64961 | 103.05   | 47.1751  | 21.82833 | 21.49546 | 47.73108 |
| ENSMUSG00000036114 | 3_Rpp25l        | 225.9558577 | -0.8545  | 0.100634 | 0.688272 | 280.1856 | 294.5513 | 298.0085 | 54.57082 | 224.0053 | 204.4135 |
| ENSMUSG00000036172 | 17_Cd200r3      | 2.77601642  | 1.919957 | 0.189702 | 0.688272 | 0.812132 | 2.576251 | 0        | 8.929771 | 2.26268  | 2.075264 |
| ENSMUSG00000036181 | 2_Hist1h1c      | 649.5722232 | -0.5334  | 0.105606 | 0.688272 | 717.1127 | 874.2077 | 713.3795 | 369.0972 | 541.9119 | 681.7243 |
| ENSMUSG00000036185 | 9_Sapcd1        | 22.80730664 | -0.90296 | 0.176544 | 0.688272 | 32.48529 | 36.92626 | 19.56041 | 4.960984 | 16.9701  | 25.9408  |
| ENSMUSG00000036186 | 5_Fam69b        | 60.77233391 | -1.80318 | 0.003587 | 0.688272 | 77.15256 | 124.5188 | 81.69346 | 8.929771 | 21.49546 | 50.84397 |
| ENSMUSG00000036199 | 8_Ndufa13       | 895.8758213 | -1.05222 | 0.143991 | 0.688272 | 1157.288 | 1263.222 | 1205.841 | 70.44597 | 784.0187 | 894.4388 |
| ENSMUSG00000036202 | 15_Rif1         | 1815.972275 | 1.093742 | 0.017551 | 0.688272 | 1188.149 | 1094.048 | 1194.335 | 4279.345 | 1566.906 | 1573.05  |
| ENSMUSG00000036208 | 13_BC027231     | 335.8073935 | 0.650706 | 0.039642 | 0.688272 | 302.1132 | 241.3088 | 240.4779 | 532.8097 | 348.4528 | 349.682  |
| ENSMUSG00000036214 | 13_Zndr1as      | 171.1160059 | 0.5973   | 0.199036 | 0.688272 | 151.8687 | 121.0838 | 135.7722 | 344.2923 | 122.1847 | 151.4943 |
| ENSMUSG00000036249 | 16_Rbm43        | 1027.092292 | 0.909338 | 0.015904 | 0.688272 | 712.2399 | 584.8089 | 844.5493 | 1959.589 | 1084.955 | 976.4118 |
| ENSMUSG00000036257 | 14_PnplA8       | 1839.007799 | 0.816745 | 0.08467  | 0.688272 | 1399.304 | 1229.73  | 1366.927 | 4131.508 | 1405.124 | 1501.454 |
| ENSMUSG00000036264 | 9_Fstl4         | 67.90249011 | -1.07276 | 0.049878 | 0.688272 | 62.53418 | 160.5863 | 52.92816 | 43.65666 | 31.67752 | 56.03213 |
| ENSMUSG00000036278 | 6_Macrod1       | 147.0263869 | -0.60131 | 0.117385 | 0.688272 | 139.6867 | 194.0776 | 197.9053 | 73.42256 | 138.0235 | 139.0427 |
| ENSMUSG00000036282 | 14_Naa30        | 812.4974972 | 0.961796 | 0.044586 | 0.688272 | 585.5473 | 519.5439 | 548.842  | 1898.073 | 688.9861 | 633.9932 |
| ENSMUSG00000036291 | 5_Ap5m1         | 408.5368869 | 0.588677 | 0.167411 | 0.688272 | 374.3929 | 289.3988 | 315.2677 | 787.8043 | 357.5035 | 326.8541 |
| ENSMUSG00000036292 | 13_Gramd1c      | 303.082395  | 0.708164 | 0.117067 | 0.688272 | 250.9488 | 182.055  | 257.7371 | 618.1386 | 264.7336 | 244.8812 |
| ENSMUSG00000036298 | 10_Slc2a13      | 60.99470577 | 0.869932 | 0.195571 | 0.688272 | 42.23087 | 54.96001 | 32.21714 | 158.7515 | 24.88948 | 52.91924 |
| ENSMUSG00000036309 | 14_Skp1a        | 5323.191838 | 0.758771 | 0.085553 | 0.688272 | 3976.199 | 3762.185 | 4126.095 | 11271.36 | 4547.987 | 4255.329 |
| ENSMUSG00000036323 | 14_Srp72        | 4379.117504 | 0.450718 | 0.186588 | 0.688272 | 3758.548 | 3537.192 | 3806.225 | 7212.279 | 4231.212 | 3729.25  |
| ENSMUSG00000036381 | 13_P2ry1a       | 205.7481436 | 0.689405 | 0.048517 | 0.688272 | 194.0996 | 115.0725 | 163.3869 | 309.5654 | 250.0262 | 202.3383 |
| ENSMUSG00000036391 | 16_Sec24a       | 776.7987204 | 0.578005 | 0.090678 | 0.688272 | 570.9289 | 639.7689 | 659.3007 | 1314.661 | 759.1292 | 717.0038 |
| ENSMUSG00000036402 | 13_Gng12        | 4606.406381 | 0.583156 | 0.097587 | 0.688272 | 3737.432 | 3461.622 | 3864.906 | 8049.693 | 4329.639 | 4195.146 |
| ENSMUSG00000036412 | 5_Arsi          | 66.18334307 | -0.85371 | 0.105348 | 0.688272 | 64.97057 | 103.05   | 87.44652 | 18.85174 | 66.74907 | 56.03213 |
| ENSMUSG00000036430 | 7_Tbcc          | 226.6148314 | -0.6256  | 0.037081 | 0.688272 | 248.5124 | 253.3313 | 323.322  | 142.8763 | 193.4592 | 198.1877 |
| ENSMUSG00000036438 | 12_Calm2        | 5730.959858 | 0.502198 | 0.171217 | 0.688272 | 4918.272 | 4519.602 | 4678.389 | 10367.46 | 4972.24  | 4929.79  |
| ENSMUSG00000036452 | 17_Arhgap26     | 775.157454  | 0.521392 | 0.045389 | 0.688272 | 604.2263 | 573.6451 | 749.0485 | 968.3841 | 914.1228 | 841.5196 |
| ENSMUSG00000036459 | 15_Wtp          | 293.1010938 | -0.69942 | 0.185517 | 0.688272 | 400.3812 | 349.5113 | 338.28   | 74.41476 | 268.1276 | 327.8917 |
| ENSMUSG00000036461 | 15_Elf1         | 4326.10431  | 0.574642 | 0.080639 | 0.688272 | 3360.603 | 3229.76  | 3837.291 | 7159.692 | 449.0194 | 3950.471 |
| ENSMUSG00000036478 | 7_Btg1          | 1852.558436 | 0.504807 | 0.164169 | 0.688272 | 1601.525 | 1422.09  | 1571.736 | 3202.811 | 1764.891 | 1552.298 |
| ENSMUSG00000036499 | 8_Eea1          | 2119.141966 | 0.613305 | 0.117993 | 0.688272 | 1702.229 | 1587.829 | 1736.274 | 3977.717 | 1826.108 | 1728.695 |
| ENSMUSG00000036501 | 6_Fam13b        | 1367.139355 | 0.430677 | 0.173379 | 0.688272 | 1132.112 | 1182.499 | 1179.377 | 2144.137 | 1261.444 | 1303.266 |
| ENSMUSG00000036503 | 13_Rnf13        | 3286.082984 | 0.773041 | 0.099349 | 0.688272 | 2500.555 | 2428.546 | 2349.55  | 7274.787 | 2478.766 | 2684.354 |
| ENSMUSG00000036521 | 5_Scgb2b2       | 38.0011264  | 1.145896 | 0.117455 | 0.688272 | 28.42463 | 27.48001 | 14.95796 | 107.1573 | 14.70742 | 35.27949 |
| ENSMUSG00000036545 | 8_Adamts2       | 728.427008  | -0.70813 | 0.032104 | 0.688272 | 899.8425 | 920.5802 | 890.5738 | 388.9412 | 520.4164 | 750.208  |
| ENSMUSG00000036553 | 16_Sh3tc1       | 205.1512964 | -0.83687 | 0.170362 | 0.688272 | 229.0213 | 261.9188 | 298.0085 | 35.71909 | 244.3695 | 161.8706 |
| ENSMUSG00000036560 | 14_Lgi4         | 249.7901319 | -0.8043  | 0.074775 | 0.688272 | 303.7374 | 364.9688 | 284.2012 | 98.22748 | 154.9935 | 292.6122 |
| ENSMUSG00000036564 | 16_Ndrgr4       | 326.5313324 | -0.46952 | 0.152571 | 0.688272 | 377.6415 | 425.9401 | 333.6775 | 191.494  | 295.2798 | 335.1552 |
| ENSMUSG00000036565 | 7_Tlyh3         | 470.297975  | -1.13048 | 0.029356 | 0.688272 | 603.4142 | 731.6552 | 601.7701 | 102.1963 | 342.7961 | 439.956  |
| ENSMUSG00000036570 | 14_Fxyd1        | 265.8589273 | -0.98606 | 0.070355 | 0.688272 | 341.9076 | 416.4939 | 301.4604 | 62.5084  | 170.8324 | 301.9509 |
| ENSMUSG00000036572 | 16_Upf3b        | 856.8060121 | 0.542711 | 0.170857 | 0.688272 | 718.737  | 659.5202 | 714.5301 | 1586.523 | 733.1084 | 728.4177 |
| ENSMUSG00000036578 | 7_Fxyd7         | 5.609403884 | -1.81741 | 0.087641 | 0.688272 | 8.121322 | 7.728752 | 10.35551 | 0        | 2.26268  | 5.18816  |
| ENSMUSG00000036586 | 6_Griffin       | 60.42283898 | -2.41464 | 0.00461  | 0.688272 | 73.0919  | 183.7725 | 48.32571 | 1.984394 | 16.9701  | 38.39239 |
| ENSMUSG00000036596 | 6_Cpz           | 258.7490313 | -1.07257 | 0.081789 | 0.688272 | 284.2463 | 442.2564 | 325.6232 | 44.64886 | 152.7309 | 302.9886 |
| ENSMUSG00000036599 | 10_Chst12       | 186.760391  | -0.89922 | 0.111058 | 0.688272 | 236.3305 | 255.9076 | 237.0261 | 36.71128 | 171.9633 | 182.6232 |
| ENSMUSG00000036622 | 15_Atp13a2      | 956.0680732 | -1.09668 | 0.10147  | 0.688272 | 1103.688 | 1341.368 | 1463.579 | 101.2041 | 776.0993 | 950.471  |
| ENSMUSG00000036676 | 14_Tmtc3        | 1897.411821 | 0.958184 | 0.042752 | 0.688272 | 1326.212 | 1189.369 | 1353.12  | 4407.338 | 1599.715 | 1508.717 |
| ENSMUSG00000036707 | 16_Cab39        | 8699.284925 | 0.518704 | 0.138972 | 0.688272 | 7026.568 | 6665.619 | 7764.331 | 14824.41 | 1333.087 | 7601.693 |
| ENSMUSG00000036712 | 14_Cyld         | 2613.208288 | 0.77665  | 0.038198 | 0.688272 | 1981.603 | 1748.415 | 2049.24  | 4967.929 | 2557.96  | 2374.102 |
| ENSMUSG00000036733 | 15_Rbm42        | 709.9035638 | -0.88921 | 0.19783  | 0.688272 | 825.9384 | 873.349  | 1066.617 | 73.42256 | 771.574  | 648.52   |
| ENSMUSG00000036737 | 12_Oxsr1        | 1905.296174 | 0.336397 | 0.17279  | 0.688272 | 1725.781 | 1582.677 | 1744.328 | 2503.313 | 2005.866 | 1869.813 |
| ENSMUSG00000036745 | 15_Tli7         | 206.9492553 | 0.722927 | 0.152277 | 0.688272 | 157.5536 | 168.315  | 142.6759 | 463.3559 | 144.8115 | 164.9835 |
| ENSMUSG00000036748 | 15_Cuedc2       | 612.8793302 | -0.8032  | 0.147388 | 0.688272 | 755.2829 | 798.6377 | 783.5668 | 128.9856 | 549.8313 | 660.9716 |
| ENSMUSG00000036768 | 5_Kif15         | 500.541391  | 0.542771 | 0.146285 | 0.688272 | 419.0602 | 370.9801 | 432.6302 | 867.18   | 517.0224 | 396.3754 |
| ENSMUSG00000036769 | 14_Wdr44        | 1009.126866 | 0.96075  | 0.028734 | 0.688272 | 680.5668 | 647.4977 | 727.1869 | 2221.529 | 945.8003 | 832.1809 |
| ENSMUSG00000036781 | 13_Rps27l       | 1616.196377 | 0.439733 | 0.196283 | 0.688272 | 1456.153 | 1292.419 | 1366.927 | 2646.189 | 1491.106 | 1444.384 |
| ENSMUSG00000036792 | 12_Mbd5         | 626.2112182 | 0.499064 | 0.105722 | 0.688272 | 524.6374 | 503.2276 | 529.2816 | 978.3061 | 595.0849 | 626.7298 |
| ENSMUSG00000036810 | 16_Cnep1r1      | 784.427114  | 0.670766 | 0.109783 | 0.688272 | 678.9425 | 537.5776 | 599.4689 | 1546.835 | 676.5414 | 667.1974 |
| ENSMUSG00000036820 | 11_Amdhd2       | 182.4731849 | -1.21373 | 0.148772 | 0.688272 | 217.6514 | 258.4838 | 288.8036 | 5.953181 | 140.2862 | 183.6609 |
| ENSMUSG00000036822 | 6_Topors        | 1214.230301 | 0.445522 | 0.174501 | 0.688272 | 1097.191 | 929.1677 | 1058.563 | 1922.877 | 1064.591 | 1212.984 |
| ENSMUSG00000036825 | 12_Ssx2lp       | 1076.980818 | 0.435885 | 0.151834 | 0.688272 | 892.5333 | 816.6715 | 1037.852 | 1610.335 | 1054.409 | 1050.092 |
| ENSMUSG00000036826 | 14_lgflr1       | 11.49357653 | -2.18213 | 0.096092 | 0.688272 | 23.55183 | 24.90376 | 8.054285 | 0        | 0        | 12.45158 |
| ENSMUSG00000036840 | 4_Siah1a        | 879.5073113 | 0.522688 | 0.131356 | 0.688272 | 713.0521 | 701.5989 | 751.3497 | 1489.287 | 800.9888 | 820.767  |
| ENSMUSG00000036860 | 14_Mrp55        | 222.517445  | -0.63011 | 0.058769 | 0.688272 | 259.0702 | 258.4838 | 293.4061 | 118.0714 | 204.7726 | 201.3006 |
| ENSMUSG00000036862 | 14_Dchs1        | 333.3725234 | -1.14504 | 0.031182 | 0.688272 | 462.9153 | 566.7751 | 347.4849 | 75.40696 | 222.874  | 324.7788 |
| ENSMUSG00000036867 | 7_Smad6         | 170.6464962 | -0.62431 | 0.055862 | 0.688272 | 185.1661 | 189.7838 | 246.231  | 101.2041 | 144.8115 | 156.6824 |
| ENSMUSG00000036879 | 15_Pkhb         | 2217.401577 | 0.590341 | 0.128938 | 0.688272 | 1813.491 | 1730.382 | 1766.19  | 4101.742 | 1759.234 | 2133.372 |
| ENSMUSG00000036882 | 6_Arhgap33      | 99.00343115 | -1.15844 | 0.063572 | 0.688272 | 131.5654 | 151.9988 | 126.5673 | 14.88295 | 61.09237 | 70.9137  |
| ENSMUSG00000036898 | 16_Zfp157       | 296.9297882 | 0.616357 | 0.168393 | 0.688272 | 250.9488 | 218.9813 | 233.5743 | 599.2869 | 230.7934 | 247.9941 |
| ENSMUSG00000036902 | 9_Neto2         | 103.2524925 | 0.996134 | 0.04865  | 0.688272 | 76.34042 | 62.68877 | 67.88611 | 227.2131 | 121.0534 | 64.33319 |
| ENSMUSG00000036904 | 5_Fzd8          | 130.7694801 | -0.40157 | 0.145928 | 0.688272 | 135.6261 | 151.14   | 159.9351 | 105.1729 | 116.0528 | 116.2248 |
| ENSMUSG00000036907 | 9_C1q12         | 3.698416827 | -1.71585 | 0.170163 | 0.688272 | 8.933454 | 6.870002 | 1.150612 | 0.992197 | 1.13134  | 3.112896 |
| ENSMUSG00000036916 | 13_Zfp280c      | 423.4242381 | 0.684128 | 0.136263 | 0.688272 | 325.665  | 279.0938 | 378.5514 | 858.2502 | 346.1901 | 352.7949 |
| ENSMUSG00000036934 | 8_4821524J17Rik | 306.3443252 | 0.474167 | 0.152795 | 0.688272 | 248.5124 | 254.1901 | 266.942  | 488.1608 | 278.3097 | 301.9509 |
| ENSMUSG00000036943 | 8_Rabb8         | 982.9030028 | 0.733232 | 0.072447 |          |          |          |          |          |          |          |

|                    |                  |             |          |          |          |          |          |          |          |          |          |
|--------------------|------------------|-------------|----------|----------|----------|----------|----------|----------|----------|----------|----------|
| ENSMUSG00000037242 | 8_Clic4          | 4893.00941  | 0.550075 | 0.050187 | 0.688272 | 3810.524 | 3401.51  | 4702.552 | 6499.881 | 6234.815 | 4708.774 |
| ENSMUSG00000037253 | 8_Mex3c          | 2190.59129  | 0.682186 | 0.072574 | 0.688272 | 1776.133 | 1437.548 | 1832.925 | 3973.748 | 2363.369 | 1759.824 |
| ENSMUSG00000037266 | 18_Rsrp1         | 6521.86198  | 0.496657 | 0.17946  | 0.688272 | 5441.286 | 5212.614 | 5577.017 | 11494.6  | 5825.27  | 5580.385 |
| ENSMUSG00000037270 | 17_4932438A13Rik | 2257.470896 | 0.625805 | 0.10186  | 0.688272 | 1893.892 | 1746.698 | 1685.647 | 4247.595 | 2104.293 | 1866.7   |
| ENSMUSG00000037286 | 15_Stag1         | 1567.103965 | 0.694154 | 0.098242 | 0.688272 | 1254.744 | 1147.29  | 1189.733 | 3149.233 | 1366.695 | 1294.965 |
| ENSMUSG00000037306 | 13_Man1c1        | 413.2684795 | -0.74847 | 0.04391  | 0.688272 | 449.9212 | 732.5139 | 371.6477 | 258.9634 | 293.0171 | 373.5475 |
| ENSMUSG00000037315 | 14_Jade3         | 441.7003901 | 0.772662 | 0.048386 | 0.688272 | 317.5437 | 312.5851 | 348.6355 | 847.3361 | 453.6674 | 370.4346 |
| ENSMUSG00000037325 | 10_Bbs7          | 329.2986549 | 0.526678 | 0.189244 | 0.688272 | 278.5613 | 272.2238 | 258.8877 | 604.2479 | 269.2589 | 292.6122 |
| ENSMUSG00000037326 | 9_Capn15         | 1322.711012 | -1.06714 | 0.167135 | 0.688272 | 1500.008 | 1742.404 | 2129.783 | 76.39915 | 1208.271 | 1279.4   |
| ENSMUSG00000037343 | 7_Taf2           | 837.7566305 | 0.414253 | 0.193508 | 0.688272 | 705.7429 | 718.7739 | 730.6387 | 1307.715 | 763.6546 | 800.0143 |
| ENSMUSG00000037344 | 13_Slc12a9       | 299.0736675 | -0.99089 | 0.129967 | 0.688272 | 383.3264 | 412.2001 | 398.1118 | 35.71909 | 257.9455 | 307.1391 |
| ENSMUSG00000037348 | 15_Paqr7         | 106.8084081 | -0.85715 | 0.053686 | 0.688272 | 125.0684 | 165.7388 | 121.9649 | 42.66446 | 71.27443 | 114.1395 |
| ENSMUSG00000037349 | 9_Nutl22         | 397.6822283 | -1.02749 | 0.145942 | 0.688272 | 491.34   | 554.7526 | 554.595  | 34.72689 | 343.9274 | 406.7518 |
| ENSMUSG00000037361 | 7_SF3b6          | 2846.083012 | 0.509286 | 0.124445 | 0.688272 | 2431.524 | 2243.914 | 2371.412 | 4690.114 | 2792.147 | 2547.387 |
| ENSMUSG00000037369 | 16_Kdm6a         | 2062.106997 | 0.668175 | 0.090051 | 0.688272 | 1681.114 | 1498.519 | 1599.351 | 3951.92  | 1837.296 | 1804.442 |
| ENSMUSG00000037373 | 12_Ctbp1         | 2150.649026 | -0.54513 | 0.118933 | 0.688272 | 2312.14  | 2509.268 | 2835.108 | 1083.479 | 2103.161 | 2060.737 |
| ENSMUSG00000037379 | 7_Spon2          | 1570.555781 | -0.79893 | 0.182856 | 0.688272 | 2014.9   | 1911.578 | 2057.294 | 263.9244 | 1521.652 | 1653.986 |
| ENSMUSG00000037400 | 16_Atp11b        | 5059.767941 | 0.862967 | 0.057683 | 0.688272 | 3745.554 | 3283.002 | 3741.791 | 11201.9  | 426.8869 | 4149.491 |
| ENSMUSG00000037416 | 12_Dmxl1         | 1482.047264 | 0.976833 | 0.049809 | 0.688272 | 1034.656 | 962.659  | 998.7313 | 3585.799 | 1185.644 | 1124.793 |
| ENSMUSG00000037418 | 5_Best1          | 0.903974865 | 3.395359 | 0.167533 | 0.688272 | 0        | 0        | 0        | 0.992197 | 3.39402  | 1.037632 |
| ENSMUSG00000037434 | 7_Slc30a1        | 857.2435609 | 0.684735 | 0.096086 | 0.688272 | 721.9855 | 554.7526 | 696.1203 | 1665.898 | 778.362  | 726.3424 |
| ENSMUSG00000037437 | 18_Adam32        | 3.88472116  | 2.121433 | 0.073096 | 0.688272 | 2.436397 | 1.7175   | 0        | 5.953181 | 0.907021 | 4.150528 |
| ENSMUSG00000037440 | 7_Vnn1           | 922.8387854 | 0.591565 | 0.031464 | 0.688272 | 719.5491 | 678.4127 | 811.1815 | 1329.544 | 1100.794 | 897.5517 |
| ENSMUSG00000037446 | 13_Tulp1         | 51.25427235 | -1.10383 | 0.111257 | 0.688272 | 112.0742 | 75.57002 | 21.86163 | 23.81272 | 56.56701 | 17.63975 |
| ENSMUSG00000037458 | 14_Azin1         | 3735.847455 | 0.827374 | 0.058959 | 0.688272 | 2728.764 | 2409.653 | 2940.965 | 7966.348 | 3274.098 | 3095.256 |
| ENSMUSG00000037463 | 14_Fbxo27        | 126.2891016 | -0.72874 | 0.080062 | 0.688272 | 129.9411 | 207.8176 | 134.6216 | 60.52401 | 96.16391 | 128.6694 |
| ENSMUSG00000037474 | 13_Dtl           | 705.7058961 | 0.630625 | 0.077029 | 0.688272 | 589.608  | 484.3351 | 587.9628 | 1235.285 | 670.8847 | 666.1598 |
| ENSMUSG00000037475 | 15_Thoc2         | 2666.360864 | 0.970401 | 0.044748 | 0.688272 | 1931.25  | 1652.235 | 1822.57  | 6309.38  | 2147.284 | 2135.447 |
| ENSMUSG00000037486 | 17_Asx12         | 1595.50052  | 0.563158 | 0.133847 | 0.688272 | 1300.224 | 1193.663 | 1370.379 | 2873.402 | 1446.984 | 1388.352 |
| ENSMUSG00000037499 | 9_Nenf           | 438.2169058 | -0.77662 | 0.136715 | 0.688272 | 564.4319 | 612.2889 | 483.2571 | 11.126   | 376.7363 | 481.4613 |
| ENSMUSG00000037531 | 8_Mrpl47         | 326.8194483 | 0.48369  | 0.194037 | 0.688272 | 283.4341 | 255.9076 | 278.4481 | 555.6302 | 328.0886 | 259.408  |
| ENSMUSG00000037533 | 17_Rapgef6       | 1679.640985 | 0.562107 | 0.078755 | 0.688272 | 1409.861 | 1318.182 | 1341.614 | 2752.354 | 1663.07  | 1592.765 |
| ENSMUSG00000037541 | 19_Shank1        | 38.25017177 | -0.55796 | 0.182236 | 0.688272 | 42.23087 | 57.53626 | 36.81959 | 34.72689 | 26.02082 | 32.16659 |
| ENSMUSG00000037563 | 14_Rps16         | 8784.560792 | -0.49667 | 0.194812 | 0.688272 | 10044.45 | 9791.47  | 11027.47 | 3972.756 | 8594.791 | 9276.431 |
| ENSMUSG00000037572 | 16_Wdhd1         | 557.6610575 | 0.437272 | 0.155508 | 0.688272 | 468.6003 | 414.7764 | 538.4865 | 828.4843 | 562.276  | 533.3429 |
| ENSMUSG00000037600 | 16_Kdfl          | 377.1507179 | -0.72475 | 0.174202 | 0.688272 | 391.4477 | 470.5951 | 547.6914 | 93.2665  | 380.1303 | 379.7733 |
| ENSMUSG00000037608 | 15_Bclaf1        | 3640.991741 | 0.745254 | 0.074631 | 0.688272 | 2706.837 | 2569.381 | 2886.886 | 7407.741 | 3125.893 | 3149.213 |
| ENSMUSG00000037621 | 8_Atoh8          | 42.25410514 | -1.15328 | 0.067107 | 0.688272 | 53.60072 | 73.85252 | 47.1751  | 6.945378 | 41.85958 | 30.09133 |
| ENSMUSG00000037640 | 15_Zfp60         | 471.2041889 | 0.801596 | 0.115931 | 0.688272 | 371.9565 | 326.3251 | 332.5269 | 1098.362 | 322.4319 | 375.6228 |
| ENSMUSG00000037643 | 14_Pkci          | 7902.960603 | 0.444251 | 0.157159 | 0.688272 | 6594.513 | 6463.813 | 7029.089 | 12418.34 | 7694.244 | 7217.769 |
| ENSMUSG00000037646 | 9_Vps13b         | 1753.138326 | 0.456737 | 0.178615 | 0.688272 | 1619.392 | 1313.029 | 1501.549 | 2854.55  | 1592.927 | 1637.383 |
| ENSMUSG00000037656 | 8_Slc20a2        | 1174.386612 | -0.51007 | 0.058654 | 0.688272 | 1294.539 | 1552.62  | 1292.137 | 781.8511 | 1015.943 | 1109.229 |
| ENSMUSG00000037661 | 14_Gpr160        | 786.6620647 | 0.313348 | 0.167095 | 0.688272 | 708.1793 | 670.6839 | 726.0362 | 952.5089 | 867.7379 | 794.8262 |
| ENSMUSG00000037674 | 15_Rfx7          | 1549.011435 | 0.64494  | 0.106281 | 0.688272 | 1145.919 | 1136.985 | 1342.764 | 2948.809 | 1277.238 | 1442.309 |
| ENSMUSG00000037685 | 15_Atp8a1        | 2343.711577 | 0.649561 | 0.04455  | 0.688272 | 1819.176 | 1814.539 | 1840.979 | 3973.748 | 2323.773 | 2290.054 |
| ENSMUSG00000037686 | 5_Aspg           | 14.29280825 | -1.17768 | 0.057171 | 0.688272 | 17.05478 | 20.61001 | 21.86163 | 5.953181 | 6.780401 | 4.150528 |
| ENSMUSG00000037692 | 14_Ahdc1         | 805.7851302 | -1.00728 | 0.082051 | 0.688272 | 854.3631 | 1085.46  | 1288.686 | 145.8529 | 643.7325 | 816.6164 |
| ENSMUSG00000037703 | 14_Lzts3         | 333.6554042 | -0.55901 | 0.134696 | 0.688272 | 349.2168 | 457.7139 | 385.4551 | 169.6657 | 271.5216 | 368.3594 |
| ENSMUSG00000037706 | 16_Cdb1          | 2536.892579 | -0.44913 | 0.188727 | 0.688272 | 2879.821 | 3115.546 | 2790.234 | 1347.403 | 2415.411 | 2672.94  |
| ENSMUSG00000037716 | 14_Ccdc33        | 10.47424004 | -1.31142 | 0.07205  | 0.688272 | 10.55772 | 21.46876 | 12.65673 | 4.960984 | 0.507021 | 4.150528 |
| ENSMUSG00000037720 | 16_Tmem33        | 1643.676977 | 0.776643 | 0.08723  | 0.688272 | 1223.883 | 1142.138 | 1269.125 | 3556.033 | 1340.638 | 1330.244 |
| ENSMUSG00000037722 | 7_Gnpat1         | 418.9130977 | 1.054178 | 0.051709 | 0.688272 | 275.3128 | 250.7551 | 291.1049 | 1082.487 | 320.1692 | 293.6499 |
| ENSMUSG00000037730 | 13_Mynn          | 689.6462707 | 0.485382 | 0.170852 | 0.688272 | 598.5414 | 540.1539 | 585.6616 | 1166.823 | 632.4191 | 614.2782 |
| ENSMUSG00000037761 | 16_Actr5         | 205.6996197 | -0.79609 | 0.172678 | 0.688272 | 223.3363 | 235.2976 | 324.4726 | 40.68007 | 207.0352 | 203.3759 |
| ENSMUSG00000037784 | 14_Dzip1l        | 112.5948018 | -0.56547 | 0.076139 | 0.688272 | 137.2503 | 159.7275 | 105.8563 | 97.23529 | 69.37587 | 86.12346 |
| ENSMUSG00000037788 | 14_Vopp1         | 2270.744908 | 0.474241 | 0.126253 | 0.688272 | 1912.571 | 1783.624 | 2006.668 | 3552.065 | 2268.337 | 2101.205 |
| ENSMUSG00000037795 | 14_N4bp2         | 742.1120632 | 0.505173 | 0.176991 | 0.688272 | 618.8447 | 602.8427 | 619.0293 | 1291.84  | 579.2461 | 740.8693 |
| ENSMUSG00000037801 | 13_Iqch          | 2.092777432 | 3.546588 | 0.044809 | 0.688272 | 0        | 0.85875  | 0        | 1.984394 | 4.52536  | 5.18816  |
| ENSMUSG00000037808 | 12_Fam76b        | 1010.455015 | 0.864288 | 0.056899 | 0.688272 | 737.416  | 641.4864 | 770.9101 | 2220.536 | 851.8991 | 840.482  |
| ENSMUSG00000037813 | 13_D630003M21Rik | 73.56065156 | -1.23537 | 0.04185  | 0.688272 | 77.96469 | 154.575  | 77.09101 | 14.88295 | 45.2536  | 71.59661 |
| ENSMUSG00000037818 | 16_3110057O12Rik | 187.7865046 | 0.608348 | 0.137568 | 0.688272 | 161.6143 | 168.315  | 116.2118 | 340.3235 | 161.7816 | 178.4727 |
| ENSMUSG00000037826 | 5_Ppm1k          | 403.3251334 | 1.026494 | 0.019738 | 0.688272 | 286.6827 | 249.0376 | 261.1889 | 895.9537 | 359.7662 | 367.3218 |
| ENSMUSG00000037849 | 7_Gm4955         | 102.6416281 | 1.301632 | 0.007756 | 0.688272 | 73.0919  | 33.49126 | 71.33795 | 188.5174 | 67.4383  | 81.97293 |
| ENSMUSG00000037857 | 16_Nufip2        | 1821.820431 | 0.837192 | 0.048663 | 0.688272 | 1348.139 | 1161.889 | 1412.952 | 3804.083 | 1661.399 | 1541.921 |
| ENSMUSG00000037860 | 15_Aim2          | 108.3676751 | 0.977916 | 0.031543 | 0.688272 | 85.27388 | 60.11252 | 73.63917 | 225.2287 | 118.7907 | 87.16109 |
| ENSMUSG00000037876 | 16_Jmjd1c        | 3725.629698 | 0.591432 | 0.094365 | 0.688272 | 3108.03  | 2843.322 | 2966.278 | 6546.515 | 3529.781 | 3359.853 |
| ENSMUSG00000037904 | 14_Ankrd9        | 128.1487511 | -1.05146 | 0.095823 | 0.688272 | 149.4323 | 159.7275 | 209.4114 | 17.85954 | 113.134  | 119.3277 |
| ENSMUSG00000037907 | 16_Ankrd13b      | 162.2898432 | -1.07659 | 0.075334 | 0.688272 | 185.1661 | 209.5351 | 265.7914 | 25.79712 | 125.5788 | 161.8706 |
| ENSMUSG00000037921 | 14_Dcx60         | 11499.39808 | 1.230777 | 0.008279 | 0.688272 | 6716.333 | 5685.785 | 8213.069 | 27520.56 | 11513.65 | 9346.99  |
| ENSMUSG00000037940 | 15_Ippp4b        | 146.4373793 | 0.752189 | 0.050831 | 0.688272 | 125.0684 | 95.32127 | 107.0069 | 264.9165 | 136.8922 | 149.419  |
| ENSMUSG00000037960 | 10_1110007C09Rik | 970.9818916 | -0.92827 | 0.098494 | 0.688272 | 650.5179 | 750.5477 | 844.5493 | 112.182  | 581.5088 | 486.6494 |
| ENSMUSG00000037962 | 7_Fam101a        | 21.08249467 | -1.01072 | 0.069722 | 0.688272 | 20.3033  | 37.78501 | 26.46408 | 10.91416 | 11.3134  | 19.71501 |
| ENSMUSG00000037965 | 14_Zc3h7a        | 4767.28728  | 0.646362 | 0.062221 | 0.688272 | 3736.62  | 3457.328 | 3956.955 | 8354.297 | 4804.801 | 4293.721 |
| ENSMUSG00000037971 | 10_1110032A03Rik | 469.2940681 | 0.444334 | 0.15454  | 0.688272 | 430.4301 | 383.8613 | 378.5514 | 710.4129 | 418.5958 | 493.9129 |
| ENSMUSG00000037977 | 6_6430571L13Rik  | 44          |          |          |          |          |          |          |          |          |          |

|                    |                 |              |          |          |          |          |          |          |          |           |           |
|--------------------|-----------------|--------------|----------|----------|----------|----------|----------|----------|----------|-----------|-----------|
| ENSMUSG00000038181 | 16_Chp2         | 652.9015492  | -0.98083 | 0.078018 | 0.688272 | 770.7134 | 948.919  | 880.2183 | 126.009  | 567.9327  | 623.6169  |
| ENSMUSG00000038201 | 9_Kcna7         | 31.53126858  | 1.343345 | 0.078517 | 0.688272 | 7.30919  | 33.49126 | 12.65673 | 80.36794 | 16.9701   | 38.39239  |
| ENSMUSG00000038204 | 13_Asb10        | 15.17921944  | -1.10676 | 0.130969 | 0.688272 | 14.61838 | 36.06751 | 11.50612 | 11.90636 | 4.52536   | 12.45158  |
| ENSMUSG00000038206 | 12_Fbxo8        | 482.6987715  | 0.575131 | 0.170399 | 0.688272 | 406.0661 | 368.4038 | 388.9069 | 928.6962 | 425.3839  | 371.7357  |
| ENSMUSG00000038208 | 13_Pgap3        | 248.5627135  | -0.80482 | 0.159867 | 0.688272 | 299.6768 | 288.5401 | 360.1416 | 49.60984 | 231.9247  | 261.8433  |
| ENSMUSG00000038212 | 15_Hiit1        | 2397.786464  | 0.638507 | 0.093112 | 0.688272 | 1871.965 | 1750.992 | 2004.366 | 4450.003 | 2206.113  | 2103.28   |
| ENSMUSG00000038225 | 14_Himpol       | 344.8412562  | 0.629004 | 0.086974 | 0.688272 | 281.8099 | 245.6026 | 285.3518 | 612.1854 | 322.4319  | 321.6659  |
| ENSMUSG00000038233 | 8_Fam198a       | 106.042786   | -0.60104 | 0.118    | 0.688272 | 129.9411 | 133.965  | 119.6637 | 84.33673 | 53.17298  | 115.1772  |
| ENSMUSG00000038250 | 8_Usps38        | 1044.873128  | 0.556835 | 0.122358 | 0.688272 | 868.1693 | 779.7452 | 889.4232 | 1816.712 | 1023.863  | 891.3259  |
| ENSMUSG00000038271 | 17_Iifo1        | 144.3838606  | -0.8581  | 0.042296 | 0.688272 | 164.0507 | 228.4276 | 165.6881 | 61.5162  | 96.16391  | 150.4566  |
| ENSMUSG00000038274 | 11_Fau          | 3175.252056  | -0.87935 | 0.058232 | 0.688272 | 3817.833 | 4311.785 | 4212.391 | 930.6806 | 2633.76   | 3145.063  |
| ENSMUSG00000038276 | 12_Asic3        | 5.466586524  | -2.40997 | 0.028547 | 0.688272 | 13.80625 | 10.305   | 3.451836 | 0.992197 | 1.13134   | 3.112896  |
| ENSMUSG00000038280 | 12_Ostm1        | 846.4450617  | 0.523669 | 0.167384 | 0.688272 | 695.9973 | 707.6102 | 680.0118 | 1518.061 | 744.4218  | 732.5682  |
| ENSMUSG00000038295 | 14_Atg9b        | 473.2619508  | -0.55103 | 0.194325 | 0.688272 | 538.4436 | 549.6001 | 599.4689 | 185.5408 | 494.3956  | 472.1226  |
| ENSMUSG00000038296 | 14_Galnt18      | 4866.22179   | -0.67039 | 0.170722 | 0.688272 | 5360.072 | 5470.239 | 7100.427 | 1444.639 | 4782.175  | 5039.779  |
| ENSMUSG00000038299 | 15_Wdr36        | 1837.746009  | 0.53803  | 0.124506 | 0.688272 | 1573.1   | 1315.605 | 1608.556 | 3121.451 | 1730.95   | 1676.813  |
| ENSMUSG00000038301 | 15_Snx10        | 722.2688627  | 1.108098 | 0.010545 | 0.688272 | 474.2852 | 401.0364 | 498.215  | 1595.452 | 778.362   | 586.2621  |
| ENSMUSG00000038305 | 14_Spats2l      | 859.0594688  | 0.4661   | 0.062102 | 0.688272 | 737.416  | 614.0064 | 813.4828 | 1047.76  | 1030.651  | 911.041   |
| ENSMUSG00000038319 | 14_Kcnnh2       | 40.73427081  | -1.98968 | 0.002276 | 0.688272 | 47.10367 | 103.05   | 44.87387 | 4.960984 | 22.6268   | 21.79027  |
| ENSMUSG00000038323 | 3_1700066M21Rik | 145.5641354  | 1.047877 | 0.085483 | 0.688272 | 96.64373 | 55.57002 | 112.76   | 396.8787 | 95.03257  | 96.49978  |
| ENSMUSG00000038335 | 13_Tsr1         | 962.640449   | 0.347742 | 0.190354 | 0.688272 | 901.4667 | 735.9489 | 904.3811 | 1249.176 | 1075.904  | 908.9657  |
| ENSMUSG00000038344 | 14_Tlxing       | 435.6353597  | 0.776052 | 0.13432  | 0.688272 | 312.6709 | 301.4213 | 349.7861 | 1021.963 | 315.6439  | 312.3723  |
| ENSMUSG00000038351 | 14_Sgsm2        | 666.2734986  | -0.85164 | 0.116194 | 0.688272 | 826.7506 | 911.134  | 834.1938 | 146.8451 | 555.488   | 723.2295  |
| ENSMUSG00000038379 | 15_Ttk          | 280.682497   | 0.626562 | 0.130337 | 0.688272 | 242.8275 | 174.3263 | 245.0804 | 497.0906 | 322.4319  | 202.3483  |
| ENSMUSG00000038384 | 16_Seld1b       | 1109.223302  | -0.59076 | 0.088931 | 0.688272 | 1211.701 | 1313.888 | 1473.934 | 554.638  | 1077.036  | 1022.1343 |
| ENSMUSG00000038388 | 14_Mpp6         | 781.2642201  | 0.701226 | 0.074137 | 0.688272 | 618.8447 | 600.2664 | 566.1012 | 1494.248 | 752.3412  | 655.7835  |
| ENSMUSG00000038390 | 11_Gpr162       | 112.3321194  | -1.04961 | 0.078188 | 0.688272 | 144.5595 | 188.925  | 120.8143 | 21.82833 | 171.27443 | 126.5911  |
| ENSMUSG00000038403 | 10_Hfe2         | 36.86486733  | 1.003693 | 0.196165 | 0.688272 | 19.49117 | 30.05626 | 24.16285 | 108.1495 | 11.3134   | 28.01607  |
| ENSMUSG00000038406 | 15_Scaf1        | 1397.916854  | -0.87488 | 0.143211 | 0.688272 | 1508.942 | 1811.963 | 2106.771 | 237.135  | 1302.172  | 1420.518  |
| ENSMUSG00000038437 | 11_Mllt6        | 1372.109557  | -0.55026 | 0.164282 | 0.688272 | 1530.869 | 1702.902 | 1658.032 | 593.3337 | 1263.707  | 1483.814  |
| ENSMUSG00000038456 | 9_Denn25a       | 222.3349589  | -0.51139 | 0.175447 | 0.688272 | 242.0154 | 339.2063 | 202.5077 | 136.9232 | 167.4383  | 245.9188  |
| ENSMUSG00000038457 | 16_Tmem255b     | 27.48739616  | -1.06234 | 0.087338 | 0.688272 | 37.35808 | 36.06751 | 37.9702  | 4.960984 | 22.6268   | 25.9408   |
| ENSMUSG00000038473 | 14_Nos1ap       | 117.5306321  | -0.82779 | 0.047896 | 0.688272 | 130.7533 | 182.055  | 138.0735 | 48.61764 | 90.50721  | 115.1772  |
| ENSMUSG00000038481 | 12_Cdk19        | 1310.439328  | 0.517251 | 0.135939 | 0.688272 | 1132.112 | 920.5802 | 1181.679 | 2179.856 | 1247.868  | 1200.54   |
| ENSMUSG00000038486 | 9_Sv2a          | 259.6727921  | -0.96509 | 0.043338 | 0.688272 | 341.0955 | 485.1939 | 203.6583 | 100.2119 | 179.8831  | 247.9941  |
| ENSMUSG00000038489 | 8_Polr2l        | 155.2274381  | -0.4807  | 0.185557 | 0.688272 | 179.4812 | 174.3263 | 188.7004 | 84.33673 | 131.2355  | 173.2846  |
| ENSMUSG00000038497 | 6_Tmc03         | 475.2877292  | -0.52239 | 0.115911 | 0.688272 | 537.6315 | 593.3964 | 549.9926 | 256.979  | 433.3033  | 480.4236  |
| ENSMUSG00000038502 | 15_Plov1        | 961.1168072  | -1.11051 | 0.143865 | 0.688272 | 1114.245 | 1476.192 | 1350.819 | 59.53181 | 762.5232  | 1003.39   |
| ENSMUSG00000038507 | 6_Parp12        | 8160.025922  | 0.750695 | 0.014849 | 0.688272 | 5694.671 | 5229.789 | 7327.098 | 11898.42 | 11186.69  | 12763.483 |
| ENSMUSG00000038508 | 7_Gdf15         | 2.645751884  | -2.70723 | 0.068667 | 0.688272 | 5.684925 | 6.870002 | 1.150612 | 0        | 1.13134   | 1.037632  |
| ENSMUSG00000038510 | 12_Rp2          | 394.0808996  | 0.768706 | 0.132999 | 0.688272 | 341.9076 | 233.5801 | 299.1591 | 888.0161 | 350.7154  | 251.107   |
| ENSMUSG00000038520 | 14_Tbc1d17      | 703.4632796  | -0.8856  | 0.167771 | 0.688272 | 804.823  | 939.4727 | 994.1289 | 94.2587  | 635.8131  | 572.2832  |
| ENSMUSG00000038521 | 17_C1s1         | 3538.580715  | 0.484124 | 0.12709  | 0.688272 | 3372.785 | 2789.221 | 2688.98  | 5478.91  | 3749.261  | 3152.326  |
| ENSMUSG00000038525 | 16_Armc10       | 619.1116231  | 0.399975 | 0.151466 | 0.688272 | 538.4436 | 443.9739 | 531.5828 | 1094.393 | 565.6701  | 540.8063  |
| ENSMUSG00000038533 | 15_Cbf2a22      | 946.4615192  | 0.320434 | 0.198739 | 0.688272 | 870.6057 | 835.564  | 819.2358 | 1247.191 | 952.5884  | 953.5839  |
| ENSMUSG00000038535 | 17_Zfp280d      | 850.4138168  | 0.755021 | 0.082399 | 0.688272 | 628.5903 | 623.4527 | 646.644  | 1774.048 | 712.7443  | 717.0038  |
| ENSMUSG00000038538 | 17_Ubn2         | 1847.288645  | 0.802952 | 0.060607 | 0.688272 | 1400.928 | 1285.549 | 1351.969 | 3869.568 | 1547.673  | 1628.045  |
| ENSMUSG00000038541 | 7_Srd5a2        | 5.3847379    | -4.78891 | 0.007815 | 0.688272 | 0.812132 | 25.76251 | 4.602448 | 0        | 1.13134   | 0         |
| ENSMUSG00000038543 | 13_BC028528     | 52.9269672   | 0.821524 | 0.072465 | 0.688272 | 38.98234 | 37.78501 | 37.9702  | 87.31332 | 79.19381  | 36.31712  |
| ENSMUSG00000038545 | 13_Cul7         | 568.0039805  | -1.05271 | 0.066962 | 0.688272 | 687.876  | 861.3265 | 750.1991 | 103.1885 | 400.4944  | 604.9395  |
| ENSMUSG00000038546 | 8_Ranbp9        | 1407.822139  | 0.639619 | 0.079886 | 0.688272 | 1145.919 | 1069.144 | 1087.328 | 2534.071 | 1413.044  | 1197.427  |
| ENSMUSG00000038552 | 14_Fndc4        | 162.6641252  | -0.62732 | 0.071412 | 0.688272 | 169.7356 | 256.7663 | 165.6881 | 102.1963 | 130.1041  | 151.4943  |
| ENSMUSG00000038555 | 7_Reep2         | 42.32544304  | -1.16132 | 0.019101 | 0.688272 | 51.97646 | 70.41752 | 52.92816 | 12.89856 | 29.41484  | 36.31712  |
| ENSMUSG00000038583 | 12_Pln          | 22.09543867  | 1.977328 | 0.037975 | 0.688272 | 9.745586 | 14.59875 | 2.301224 | 80.36794 | 7.919381  | 17.63975  |
| ENSMUSG00000038604 | 8_Fam65a        | 253.4431915  | -0.94957 | 0.081381 | 0.688272 | 293.9918 | 382.1438 | 325.6232 | 55.56302 | 194.8905  | 268.7467  |
| ENSMUSG00000038607 | 12_Gng10        | 418.9895979  | 0.676859 | 0.121695 | 0.688272 | 341.0955 | 292.8338 | 333.6775 | 849.3205 | 334.8767  | 362.1336  |
| ENSMUSG00000038608 | 15_Dock10       | 201.643826   | 0.477479 | 0.186633 | 0.688272 | 192.4753 | 165.7388 | 147.2783 | 299.6434 | 251.1575  | 153.5695  |
| ENSMUSG00000038612 | 16_Mcl1         | 7033.173328  | 0.715937 | 0.060085 | 0.688272 | 5307.284 | 4758.335 | 5903.791 | 13202.17 | 7052.774  | 5974.685  |
| ENSMUSG00000038622 | 7_Med30         | 319.8980846  | 0.659195 | 0.111789 | 0.688272 | 254.1974 | 247.3201 | 242.7792 | 620.123  | 298.6738  | 256.2951  |
| ENSMUSG00000038628 | 8_Polr3k        | 779.9540238  | 0.671953 | 0.116114 | 0.688272 | 586.3594 | 595.9727 | 622.4812 | 1571.64  | 676.5414  | 626.7298  |
| ENSMUSG00000038642 | 10_Ctss         | 2610.798324  | 0.547686 | 0.17501  | 0.688272 | 2816.474 | 1427.243 | 2119.428 | 3329.813 | 3986.843  | 1984.99   |
| ENSMUSG00000038646 | 13_Fam103a1     | 783.2355064  | 0.795512 | 0.074044 | 0.688272 | 589.608  | 542.7301 | 585.6616 | 1674.828 | 653.9146  | 652.6706  |
| ENSMUSG00000038663 | 7_Fsd2          | 35.71917982  | 1.278856 | 0.07882  | 0.688272 | 11.36985 | 28.33876 | 23.01224 | 88.30552 | 12.44474  | 50.84397  |
| ENSMUSG00000038679 | 16_Tpss1        | 879.9882901  | 0.598193 | 0.174381 | 0.688272 | 766.6528 | 642.3452 | 691.5179 | 1763.134 | 662.9653  | 753.3209  |
| ENSMUSG00000038695 | 12_Josd2        | 356.5814307  | -1.03416 | 0.107728 | 0.688272 | 434.4907 | 492.0639 | 510.8718 | 44.64886 | 295.2798  | 362.1336  |
| ENSMUSG00000038702 | 6_Dsel          | 409.3731615  | 0.928095 | 0.094396 | 0.688272 | 280.1856 | 294.5513 | 271.5445 | 1046.768 | 272.653   | 290.537   |
| ENSMUSG00000038722 | 17_Bud31        | 1201.773813  | 0.530275 | 0.138485 | 0.688272 | 1029.784 | 903.4052 | 1017.141 | 2075.676 | 1120.027  | 1064.61   |
| ENSMUSG00000038729 | 20_Akap2        | 625.6838448  | 0.648443 | 0.129411 | 0.688272 | 436.9271 | 684.4239 | 340.5812 | 1119.198 | 556.6193  | 616.3534  |
| ENSMUSG00000038733 | 13_Wdr26        | 101035.43186 | 0.567231 | 0.108141 | 0.688272 | 8191.165 | 7788.865 | 8524.885 | 17700.79 | 9484.024  | 9122.861  |
| ENSMUSG00000038736 | 9_Nudcd1        | 666.6244124  | 0.883155 | 0.040635 | 0.688272 | 479.9701 | 443.1151 | 483.2571 | 1398.998 | 690.1175  | 504.2892  |
| ENSMUSG00000038738 | 15_Shank1       | 385.6612872  | -0.67557 | 0.153066 | 0.688272 | 402.8176 | 498.9339 | 521.2273 | 127.0012 | 328.922   | 434.7678  |
| ENSMUSG00000038740 | 9_Mvb12b        | 336.6782101  | -0.70487 | 0.12875  | 0.688272 | 389.8234 | 504.0864 | 357.8404 | 116.087  | 282.835   | 369.397   |
| ENSMUSG00000038742 | 6_Angptl6       | 15.89053944  | -1.81291 | 0.012283 | 0.688272 | 25.98823 | 20.61001 | 27.61469 | 1.984394 | 5.656701  | 13.48922  |
| ENSMUSG00000038765 | 13_Lmx1b        | 342.8961238  | -1.10238 | 0.03295  | 0.688272 | 451.5455 | 567.6339 | 384.3044 | 88.30552 | 201.3785  | 364.2089  |
| ENSMUSG00000038774 | 8_Asc3          | 2401.279234  | 0.98467  | 0.016077 |          |          |          |          |          |           |           |

|                    |                  |             |          |          |          |          |          |          |          |          |          |
|--------------------|------------------|-------------|----------|----------|----------|----------|----------|----------|----------|----------|----------|
| ENSMUSG00000039166 | 15_Akap7         | 369.3316209 | 0.849271 | 0.05464  | 0.688272 | 272.8764 | 269.6476 | 248.5322 | 787.8043 | 300.9365 | 336.1928 |
| ENSMUSG00000039167 | 11_Adgr14        | 122.6835849 | 0.831713 | 0.05511  | 0.688272 | 90.14667 | 91.88627 | 82.84407 | 247.057  | 100.6893 | 123.4782 |
| ENSMUSG00000039178 | 9_Tbcl19         | 448.2761564 | 0.62426  | 0.166337 | 0.688272 | 355.7139 | 328.9013 | 373.9489 | 917.7821 | 368.8169 | 344.4938 |
| ENSMUSG00000039187 | 16_Fanci         | 378.9408061 | 0.569779 | 0.050229 | 0.688272 | 323.2286 | 251.6138 | 340.5812 | 466.3325 | 520.4164 | 371.4723 |
| ENSMUSG00000039191 | 12_Rbpb          | 1481.481617 | 0.457934 | 0.150688 | 0.688272 | 1193.022 | 1170.477 | 1381.885 | 2325.709 | 1435.671 | 1382.126 |
| ENSMUSG00000039194 | 15_Rlbp1         | 474.6031189 | -0.73115 | 0.134889 | 0.688272 | 704.9307 | 783.1802 | 288.8036 | 478.2389 | 212.6919 | 379.7733 |
| ENSMUSG00000039195 | 4_111008P14Rik   | 325.3566895 | -0.7482  | 0.14085  | 0.688272 | 365.4595 | 407.0476 | 451.0399 | 87.31332 | 300.9365 | 340.3433 |
| ENSMUSG00000039199 | 5_Zdhnc1         | 199.2561463 | -0.94631 | 0.096559 | 0.688272 | 241.2033 | 276.5176 | 269.2432 | 38.69568 | 156.1249 | 213.7522 |
| ENSMUSG00000039217 | 12_I118          | 1060.348183 | 0.804088 | 0.07417  | 0.688272 | 841.3689 | 717.0564 | 721.4338 | 2377.304 | 853.0304 | 851.8959 |
| ENSMUSG00000039219 | 17_Arid4b        | 1845.344715 | 0.79311  | 0.170422 | 0.688272 | 1419.607 | 1277.82  | 1354.27  | 3917.193 | 1548.805 | 1554.373 |
| ENSMUSG00000039221 | 10_Rpl2211       | 1512.806501 | 1.110215 | 0.038885 | 0.688272 | 1061.457 | 893.959  | 918.1885 | 3966.803 | 1106.451 | 1129.981 |
| ENSMUSG00000039242 | 9_B3galnt2       | 1116.587527 | 0.395092 | 0.184234 | 0.688272 | 993.2377 | 917.1452 | 983.7734 | 1665.898 | 1088.349 | 1051.121 |
| ENSMUSG00000039244 | 10_E130309D02Rik | 406.3501742 | -0.65766 | 0.195519 | 0.688272 | 470.2245 | 449.9851 | 571.8542 | 114.1026 | 448.0107 | 383.9239 |
| ENSMUSG00000039263 | 16_Npep1         | 628.16079   | -0.85074 | 0.11278  | 0.688272 | 733.3554 | 833.8465 | 857.206  | 139.8998 | 575.8521 | 628.805  |
| ENSMUSG00000039270 | 9_Megf9          | 3453.539938 | 0.66673  | 0.133976 | 0.688272 | 2596.387 | 2716.227 | 2695.884 | 7180.528 | 2688.064 | 2844.149 |
| ENSMUSG00000039278 | 10_Pcsk1n        | 1.715342584 | -4.12764 | 0.049439 | 0.688272 | 0.812132 | 2.576251 | 6.903673 | 0        | 0        | 0        |
| ENSMUSG00000039285 | 12_Azi2          | 3049.987643 | 0.865931 | 0.033755 | 0.688272 | 2067.689 | 1959.668 | 2456.557 | 6172.456 | 3142.863 | 2500.693 |
| ENSMUSG00000039321 | 1_Uts2r          | 9.065922526 | -1.56746 | 0.043779 | 0.688272 | 12.18198 | 18.03375 | 10.35551 | 4.960984 | 6.788041 | 2.075264 |
| ENSMUSG00000039323 | 18_Igfbp2        | 7247.370685 | -1.02041 | 0.066052 | 0.688272 | 9252.622 | 10847.73 | 9025.401 | 1416.857 | 5352.37  | 7589.241 |
| ENSMUSG00000039345 | 15_Mettl22       | 95.76478451 | -0.94201 | 0.133546 | 0.688272 | 146.1838 | 127.9538 | 103.5551 | 14.88295 | 80.32515 | 101.6879 |
| ENSMUSG00000039347 | 7_Atp6v02        | 337.9163185 | -0.41957 | 0.196183 | 0.688272 | 399.569  | 464.5839 | 295.7073 | 283.7683 | 234.1874 | 349.682  |
| ENSMUSG00000039361 | 9_Picalm         | 4524.26261  | 0.829682 | 0.061003 | 0.688272 | 3393.088 | 3009.92  | 3371.293 | 9731.466 | 4105.633 | 3534.175 |
| ENSMUSG00000039382 | 11_Wdr45         | 384.2672994 | -0.49869 | 0.197261 | 0.688272 | 428.8058 | 448.2676 | 472.9016 | 177.6032 | 360.8975 | 417.1281 |
| ENSMUSG00000039385 | 4_Cdh6           | 28.07280774 | -0.68258 | 0.157047 | 0.688272 | 30.86102 | 46.37251 | 26.46408 | 21.82833 | 16.9701  | 25.9408  |
| ENSMUSG00000039396 | 10_Neii3         | 105.9437244 | 0.831703 | 0.031955 | 0.688272 | 90.14667 | 59.25377 | 79.39224 | 185.5408 | 116.528  | 104.8008 |
| ENSMUSG00000039410 | 16_Pdrn16        | 127.7653697 | -0.87827 | 0.00776  | 0.688272 | 161.6143 | 200.0888 | 134.6216 | 85.32893 | 78.02477 | 106.8761 |
| ENSMUSG00000039428 | 10_Tmem135       | 1253.016831 | 0.475639 | 0.174168 | 0.688272 | 1008.668 | 1009.032 | 1127.6   | 2105.442 | 119.0677 | 1138.282 |
| ENSMUSG00000039452 | 5_Snx22          | 65.70083627 | -0.89477 | 0.114389 | 0.688272 | 92.58307 | 97.89753 | 65.58489 | 14.88295 | 59.96103 | 63.29556 |
| ENSMUSG00000039456 | 9_Morc3          | 1986.928832 | 0.681177 | 0.070271 | 0.688272 | 1572.288 | 1342.227 | 1664.936 | 3650.292 | 2003.603 | 1688.227 |
| ENSMUSG00000039476 | 13_Prrx2         | 76.14984182 | -1.40233 | 0.03885  | 0.688272 | 105.5772 | 131.3888 | 94.35019 | 6.945378 | 54.30432 | 64.33319 |
| ENSMUSG00000039477 | 16_Tnrc18        | 2673.630606 | -0.81268 | 0.150405 | 0.688272 | 2998.392 | 3263.251 | 3960.407 | 539.7551 | 2449.351 | 2830.66  |
| ENSMUSG00000039480 | 13_Nt5dc1        | 928.1136549 | 0.735946 | 0.087605 | 0.688272 | 675.694  | 654.3677 | 759.404  | 1905.018 | 828.141  | 746.0575 |
| ENSMUSG00000039481 | 5_Ntrn           | 2.14016198  | -2.34676 | 0.168725 | 0.688272 | 2.436397 | 2.576251 | 5.753061 | 0        | 0        | 2.075264 |
| ENSMUSG00000039483 | 10_Asb6          | 411.0099084 | -0.9443  | 0.138925 | 0.688272 | 502.7098 | 510.0976 | 609.8244 | 54.57082 | 391.4437 | 397.4131 |
| ENSMUSG00000039518 | 7_Cdsn           | 30.51260034 | -1.61238 | 0.02681  | 0.688272 | 36.54595 | 57.53626 | 43.72326 | 1.984394 | 21.49546 | 21.79027 |
| ENSMUSG00000039519 | 6_Cyp7b1         | 137.6215503 | 1.204454 | 0.106669 | 0.688272 | 95.8316  | 67.84127 | 86.29591 | 305.5966 | 167.4833 | 102.7256 |
| ENSMUSG00000039529 | 8_Atp8b1         | 870.3542453 | 0.559388 | 0.118779 | 0.688272 | 713.0521 | 611.4302 | 787.0187 | 1496.233 | 812.3022 | 802.6896 |
| ENSMUSG00000039531 | 7_Zufsp          | 535.4681285 | 1.235974 | 0.01389  | 0.688272 | 315.9194 | 267.9301 | 373.9489 | 1333.513 | 539.6492 | 881.8486 |
| ENSMUSG00000039546 | 9_Alap1          | 10.73711427 | -1.49202 | 0.046734 | 0.688272 | 12.99411 | 24.04501 | 10.35551 | 2.97659  | 6.788041 | 7.263424 |
| ENSMUSG00000039556 | 16_Ppp1r3f       | 91.90480661 | -0.56987 | 0.125954 | 0.688272 | 98.26799 | 115.0725 | 116.2118 | 54.57082 | 65.61773 | 101.6879 |
| ENSMUSG00000039568 | 6_Ubalad1        | 969.6324776 | -0.73776 | 0.135343 | 0.688272 | 1085.009 | 1165.324 | 1386.488 | 276.8229 | 853.0304 | 1051.121 |
| ENSMUSG00000039577 | 17_Nphp4         | 68.29268566 | -1.15413 | 0.114322 | 0.688272 | 91.77094 | 98.75628 | 92.04897 | 4.960984 | 59.96103 | 62.25792 |
| ENSMUSG00000039578 | 16_Ccser1        | 130.9561565 | 0.518934 | 0.157529 | 0.688272 | 123.4441 | 107.3438 | 92.04897 | 212.3301 | 118.7901 | 131.7793 |
| ENSMUSG00000039585 | 15_Myo9a         | 1123.071577 | 0.708374 | 0.135587 | 0.688272 | 920.1458 | 884.5127 | 753.6509 | 2445.765 | 875.5558 | 876.7991 |
| ENSMUSG00000039611 | 2_Tmem246        | 419.8357475 | -0.50114 | 0.112503 | 0.688272 | 479.9701 | 498.9339 | 497.0644 | 244.0804 | 363.1602 | 435.8055 |
| ENSMUSG00000039615 | 8_Stub1          | 1136.779443 | -0.76318 | 0.190951 | 0.688272 | 1257.181 | 1434.113 | 1600.501 | 213.3223 | 1134.734 | 1180.825 |
| ENSMUSG00000039621 | 13_Prex1         | 287.0616431 | -0.92791 | 0.036998 | 0.688272 | 414.1874 | 358.9576 | 355.5391 | 90.28991 | 252.2888 | 251.107  |
| ENSMUSG00000039623 | 13_ApSz1         | 334.10573   | -0.77812 | 0.164204 | 0.688272 | 373.5808 | 410.4826 | 482.1065 | 71.43817 | 311.1185 | 355.9078 |
| ENSMUSG00000039630 | 9_Hnrnpu         | 6377.784469 | 1.00595  | 0.050482 | 0.688272 | 4377.392 | 3885.845 | 4457.471 | 15879.12 | 5114.789 | 4552.092 |
| ENSMUSG00000039639 | 6_Kcne1          | 16.47365001 | -0.9882  | 0.130039 | 0.688272 | 26.80036 | 18.03375 | 20.71102 | 3.968787 | 15.83876 | 13.48922 |
| ENSMUSG00000039646 | 5_Vasn           | 1404.082807 | -0.90039 | 0.105386 | 0.688272 | 1618.579 | 1876.369 | 1990.559 | 280.7917 | 1250.131 | 1408.067 |
| ENSMUSG00000039676 | 3_Capsl          | 84.17625149 | 0.577581 | 0.181655 | 0.688272 | 69.03124 | 70.41752 | 63.28367 | 153.7905 | 64.48639 | 84.0482  |
| ENSMUSG00000039682 | 12_Lap3          | 899.9564524 | 0.457764 | 0.157194 | 0.688272 | 779.6469 | 650.9327 | 844.5493 | 909.8445 | 1396.074 | 818.6917 |
| ENSMUSG00000039683 | 16_Sdk1          | 121.9423929 | -1.06115 | 0.037857 | 0.688272 | 131.5654 | 262.7776 | 100.1033 | 55.56302 | 63.35051 | 118.2901 |
| ENSMUSG00000039686 | 14_Zer1          | 793.5413513 | -0.84638 | 0.084497 | 0.688272 | 902.2788 | 1100.918 | 1056.262 | 219.2755 | 648.2579 | 834.2562 |
| ENSMUSG00000039691 | 10_Tspan10       | 639.4082085 | -1.35296 | 0.015791 | 0.688272 | 801.5745 | 1373.142 | 582.2097 | 154.7827 | 303.1991 | 621.5462 |
| ENSMUSG00000039701 | 11_Usp53         | 2082.169285 | 0.610336 | 0.121458 | 0.688272 | 1724.969 | 1498.519 | 1721.316 | 3916.201 | 1857.66  | 1774.351 |
| ENSMUSG00000039704 | 6_Lmbrd2         | 560.1987774 | 0.846293 | 0.063648 | 0.688272 | 432.0543 | 352.9463 | 416.5216 | 1222.386 | 479.6882 | 457.5957 |
| ENSMUSG00000039713 | 16_Plexkg5       | 556.9517959 | -0.99382 | 0.156753 | 0.688272 | 641.5844 | 762.5702 | 820.3864 | 51.59423 | 475.1628 | 590.4126 |
| ENSMUSG00000039715 | 8_Wdr34          | 297.7815716 | -0.78332 | 0.126101 | 0.688272 | 366.2716 | 363.2513 | 400.413  | 76.39915 | 279.441  | 300.9133 |
| ENSMUSG00000039735 | 15_Fnbp11        | 2938.0306   | 0.618213 | 0.120117 | 0.688272 | 2444.518 | 2141.723 | 2367.96  | 5586.068 | 2522.888 | 2565.026 |
| ENSMUSG00000039741 | 15_Bahcc1        | 306.8923548 | -0.88353 | 0.06945  | 0.688272 | 364.6473 | 393.3076 | 436.082  | 87.31332 | 234.1874 | 325.8165 |
| ENSMUSG00000039747 | 11_Oral2         | 270.0239764 | -0.45446 | 0.188636 | 0.688272 | 324.0407 | 273.0826 | 339.4306 | 149.8217 | 255.6829 | 278.0854 |
| ENSMUSG00000039753 | 16_Fbx15         | 1613.014587 | 0.654415 | 0.092254 | 0.688272 | 1288.854 | 1222.86  | 1248.414 | 3051.997 | 1503.551 | 1362.411 |
| ENSMUSG00000039756 | 12_Dntlp2        | 1214.88925  | 0.656699 | 0.112112 | 0.688272 | 949.3825 | 893.959  | 986.0746 | 2378.296 | 1129.077 | 952.5462 |
| ENSMUSG00000039759 | 10_Thap3         | 234.2533781 | -0.91487 | 0.195426 | 0.688272 | 271.2521 | 316.8788 | 330.2257 | 23.81272 | 169.701  | 293.6499 |
| ENSMUSG00000039770 | 5_Ypel5          | 1952.896101 | 0.726179 | 0.073115 | 0.688272 | 1454.529 | 1320.758 | 1639.622 | 3836.825 | 1803.356 | 1662.287 |
| ENSMUSG00000039781 | 14_Cep131        | 163.2417748 | -1.01551 | 0.158718 | 0.688272 | 170.5478 | 243.0263 | 241.6285 | 13.89076 | 151.5996 | 158.7577 |
| ENSMUSG00000039782 | 14_Cpeb2         | 3100.79737  | 0.636313 | 0.082033 | 0.688272 | 2522.483 | 2274.829 | 2486.473 | 5627.74  | 2815.906 | 2877.354 |
| ENSMUSG00000039787 | 13_Cercarn       | 274.4362516 | -0.81413 | 0.090243 | 0.688272 | 334.5985 | 377.8501 | 337.1293 | 94.2587  | 169.701  | 333.0799 |
| ENSMUSG00000039789 | 7_Zfp597         | 323.0541736 | 0.735001 | 0.096521 | 0.688272 | 245.2639 | 249.8963 | 232.4236 | 667.7485 | 291.8857 | 251.107  |
| ENSMUSG00000039795 | 14_Zfand1        | 633.9628498 | 0.350805 | 0.169401 | 0.688272 | 570.9289 | 538.4364 | 562.6493 | 837.4141 | 606.3983 | 687.9501 |
| ENSMUSG00000039834 | 17_Zfp335        | 551.4301187 | -0.91507 | 0.161888 | 0.688272 | 590.4201 | 755.7002 | 815.784  | 69.45378 | 656.6701 | 511.5526 |
| ENSMUSG00000039841 | 14_Zfp800        | 728.0731003 | 1.007445 | 0.032214 | 0.688272 | 491.34   | 445.6914 | 514.3236 | 1695.664 | 627.8938 | 593.5255 |
| ENSMUSG00000039842 | 15_Mcph1         | 244.2296629 | 0.365443 | 0.180148 | 0        |          |          |          |          |          |          |

|                    |                 |             |           |          |          |          |          |          |          |          |          |
|--------------------|-----------------|-------------|-----------|----------|----------|----------|----------|----------|----------|----------|----------|
| ENSMUSG00000040111 | 14_Gramd1b      | 418.470375  | -0.42006  | 0.169799 | 0.688272 | 488.0914 | 595.1139 | 353.2379 | 353.2221 | 338.2707 | 382.8862 |
| ENSMUSG00000040123 | 16_Zmym5        | 1986.559428 | 0.763411  | 0.078202 | 0.688272 | 1483.765 | 1428.96  | 1506.151 | 4150.359 | 1573.694 | 1776.426 |
| ENSMUSG00000040124 | 5_Gorab         | 402.3512787 | 0.480982  | 0.17859  | 0.688272 | 343.5319 | 334.0538 | 330.2257 | 676.6782 | 390.3123 | 339.3057 |
| ENSMUSG00000040128 | 9_Pnrc1         | 610.9638987 | 0.686224  | 0.148067 | 0.688272 | 459.6668 | 464.5839 | 480.9559 | 1321.606 | 500.0523 | 438.9184 |
| ENSMUSG00000040136 | 9_Abcb8         | 11.05087463 | -1.555805 | 0.081271 | 0.688272 | 12.18198 | 22.32751 | 14.95796 | 0.992197 | 3.39402  | 12.45158 |
| ENSMUSG00000040146 | 8_Rgl3          | 93.68155904 | -0.6116   | 0.127926 | 0.688272 | 128.3169 | 123.66   | 87.44652 | 49.60984 | 72.40577 | 100.8503 |
| ENSMUSG00000040152 | 8_Thbs1         | 3145.60536  | -0.33278  | 0.130382 | 0.688272 | 3703.323 | 3614.48  | 3202.154 | 2582.688 | 2814.774 | 2968.214 |
| ENSMUSG00000040187 | 15_Amtl2        | 435.1628739 | 0.527699  | 0.089243 | 0.688272 | 359.7746 | 273.9413 | 436.082  | 495.1062 | 603.0043 | 443.0689 |
| ENSMUSG00000040195 | 11_Tmem194      | 612.837436  | 0.473728  | 0.146626 | 0.688272 | 517.3282 | 431.0926 | 591.4146 | 947.548  | 607.5296 | 582.1116 |
| ENSMUSG00000040204 | 6_2810417H13Rik | 550.8160565 | 0.755505  | 0.043929 | 0.688272 | 413.3753 | 336.6301 | 479.8052 | 985.2514 | 617.7117 | 472.1226 |
| ENSMUSG00000040212 | 11_Emp3         | 379.4887783 | -0.78422  | 0.180364 | 0.688272 | 507.5826 | 505.8039 | 426.8771 | 70.44597 | 381.2616 | 384.9615 |
| ENSMUSG00000040242 | 14_Fgfr10p2     | 2479.998867 | 0.629988  | 0.084876 | 0.688272 | 2005.966 | 1848.03  | 1987.107 | 4489.691 | 2345.268 | 2203.931 |
| ENSMUSG00000040249 | 15_Lrp1         | 8919.964796 | -0.99266  | 0.12598  | 0.688272 | 10849.27 | 13072.75 | 11697.12 | 1087.448 | 7609.394 | 9203.796 |
| ENSMUSG00000040250 | 14_Asun         | 1297.082429 | 0.521094  | 0.098997 | 0.688272 | 1007.856 | 1028.783 | 1159.817 | 2069.723 | 1265.97  | 1250.347 |
| ENSMUSG00000040253 | 15_Gbp7         | 6255.303203 | 1.238849  | 0.002255 | 0.688272 | 3603.43  | 2950.666 | 4616.256 | 12961.07 | 7984.998 | 5415.402 |
| ENSMUSG00000040260 | 7_Daam2         | 280.8968231 | -0.61954  | 0.078135 | 0.688272 | 311.0466 | 424.2226 | 285.3518 | 159.7437 | 221.7427 | 283.2736 |
| ENSMUSG00000040265 | 16_Dnm3         | 88.37991934 | 0.541149  | 0.180284 | 0.688272 | 68.2191  | 83.29877 | 64.43428 | 148.8295 | 93.90123 | 71.59661 |
| ENSMUSG00000040269 | 5_Mrps28        | 265.6741695 | -0.42382  | 0.117458 | 0.688272 | 276.1249 | 277.3763 | 360.1416 | 209.3555 | 237.5814 | 233.4672 |
| ENSMUSG00000040274 | 11_Cdkc1        | 1500.00166  | 0.393224  | 0.138436 | 0.688272 | 1268.55  | 1215.132 | 1407.199 | 2029.042 | 1683.434 | 1396.653 |
| ENSMUSG00000040276 | 14_Pacsin1      | 57.41730534 | -1.29927  | 0.022189 | 0.688272 | 89.33454 | 101.3325 | 54.07877 | 12.89856 | 33.9402  | 52.91924 |
| ENSMUSG00000040296 | 15_Ddx58        | 7143.950799 | 0.687026  | 0.021875 | 0.688272 | 5209.016 | 4699.94  | 6514.766 | 10656.19 | 8936.455 | 6847.133 |
| ENSMUSG00000040297 | 12_Suco         | 4851.93616  | 0.828229  | 0.076984 | 0.688272 | 3585.564 | 3410.097 | 3493.258 | 10894.32 | 3947.246 | 3871.334 |
| ENSMUSG00000040302 | 17_Rbm48        | 170.693507  | 0.785823  | 0.122976 | 0.688272 | 130.7533 | 117.6488 | 127.7179 | 389.9333 | 134.6295 | 123.4782 |
| ENSMUSG00000040310 | 12_Alx4         | 233.2151102 | -0.49168  | 0.147052 | 0.688272 | 266.3794 | 286.8226 | 264.6408 | 177.6032 | 240.2862 | 263.5585 |
| ENSMUSG00000040321 | 3_Zfp770        | 293.6302681 | 0.934711  | 0.073425 | 0.688272 | 212.7786 | 184.6313 | 208.2608 | 712.3973 | 247.7635 | 197.1501 |
| ENSMUSG00000040322 | 10_Slc25a24     | 3298.156181 | 0.729421  | 0.076815 | 0.688272 | 2462.385 | 2221.587 | 2761.469 | 6530.639 | 3182.46  | 2630.397 |
| ENSMUSG00000040325 | 16_Yprp         | 1242.117954 | 0.343376  | 0.168967 | 0.688272 | 1055.772 | 1057.122 | 1172.474 | 1625.218 | 1339.507 | 1202.616 |
| ENSMUSG00000040327 | 16_Cul9         | 274.5227517 | -1.18809  | 0.04775  | 0.688272 | 345.9683 | 446.5501 | 352.0873 | 41.67227 | 190.0651 | 270.822  |
| ENSMUSG00000040329 | 14_Ii7          | 34.51770772 | 1.456612  | 0.015635 | 0.688272 | 16.24264 | 16.31625 | 21.01224 | 89.29771 | 37.33422 | 24.90317 |
| ENSMUSG00000040339 | 10_Fam102b      | 3465.963028 | 0.526664  | 0.118926 | 0.688272 | 2831.905 | 2710.216 | 2978.935 | 5781.531 | 3478.871 | 3014.321 |
| ENSMUSG00000040351 | 11_Ank1b1       | 1535.210481 | 0.518601  | 0.096093 | 0.688272 | 1154.852 | 1253.775 | 1378.433 | 2411.038 | 1589.533 | 1423.631 |
| ENSMUSG00000040359 | 14_Ulf1         | 1493.615629 | 0.564584  | 0.124412 | 0.688272 | 1207.641 | 1166.183 | 1241.51  | 2661.072 | 1339.268 | 1296.002 |
| ENSMUSG00000040364 | 6_Sec1          | 5.244617863 | -1.9905   | 0.081145 | 0.688272 | 6.497057 | 9.446252 | 9.204897 | 0        | 1.13134  | 5.18816  |
| ENSMUSG00000040370 | 13_Lymm5        | 523.4305431 | 0.955899  | 0.058852 | 0.688272 | 371.9565 | 351.2288 | 345.1836 | 1263.067 | 373.3422 | 435.8055 |
| ENSMUSG00000040373 | 12_Cacng5       | 9.210569628 | -1.64847  | 0.043469 | 0.688272 | 12.99411 | 19.75126 | 9.204897 | 7.937575 | 3.22668  | 3.112896 |
| ENSMUSG00000040374 | 13_Pex2         | 908.8632342 | 0.618159  | 0.123869 | 0.688272 | 726.8583 | 669.8252 | 754.8015 | 1732.376 | 781.756  | 767.5627 |
| ENSMUSG00000040390 | 13_Map3k10      | 208.3617046 | -0.9969   | 0.12311  | 0.688272 | 235.5183 | 277.3763 | 319.8702 | 26.78931 | 181.0144 | 209.6017 |
| ENSMUSG00000040396 | 12_Abhd13       | 1305.636155 | 0.593837  | 0.127712 | 0.688272 | 1040.341 | 963.5177 | 1118.395 | 2416.991 | 1219.585 | 1074.987 |
| ENSMUSG00000040407 | 17_Akap9        | 3906.04526  | 0.552511  | 0.079405 | 0.688272 | 3339.488 | 2818.418 | 3343.679 | 6247.863 | 4034.359 | 3652.465 |
| ENSMUSG00000040413 | 15_Timd2        | 76.80797515 | 0.55537   | 0.186343 | 0.688272 | 69.03124 | 46.37251 | 71.33795 | 106.1651 | 110.8713 | 57.06976 |
| ENSMUSG00000040415 | 15_Dtx3         | 895.6229235 | -0.95222  | 0.030297 | 0.688272 | 1050.899 | 1406.633 | 1085.027 | 627.836  | 600.6646 | 1367.599 |
| ENSMUSG00000040423 | 10_Rc3h1        | 1576.89975  | 0.725456  | 0.056355 | 0.688272 | 1169.47  | 1161.889 | 1234.607 | 2991.473 | 1537.938 | 1307.599 |
| ENSMUSG00000040429 | 6_Mterf1a       | 100.3005774 | 0.992046  | 0.02385  | 0.688272 | 64.97057 | 65.26502 | 71.33795 | 209.3535 | 87.11319 | 103.7632 |
| ENSMUSG00000040434 | 16_Gylt1b       | 300.4684987 | -0.67337  | 0.163871 | 0.688272 | 357.3382 | 330.6188 | 419.9734 | 92.2743  | 297.5424 | 305.0638 |
| ENSMUSG00000040451 | 17_Sgms1        | 1959.737825 | 0.361455  | 0.170962 | 0.688272 | 1714.411 | 1611.015 | 1821.419 | 2644.205 | 2160.86  | 1806.517 |
| ENSMUSG00000040455 | 17_Usp45        | 1499.982903 | 0.694213  | 0.115342 | 0.688272 | 1151.603 | 1032.218 | 1254.167 | 3099.623 | 1272.504 | 1234.782 |
| ENSMUSG00000040459 | 10_Argl1u       | 1729.9263   | 0.484942  | 0.152524 | 0.688272 | 1434.225 | 1428.102 | 1463.579 | 2873.402 | 1539.754 | 1640.496 |
| ENSMUSG00000040464 | 15_Gtpbp10      | 423.1735886 | 0.67355   | 0.094641 | 0.688272 | 348.4047 | 295.4101 | 334.8281 | 809.6326 | 557.5035 | 393.2626 |
| ENSMUSG00000040466 | 15_Blvrb        | 533.8455661 | -0.89824  | 0.102343 | 0.688272 | 583.1109 | 667.2489 | 834.1938 | 115.0948 | 451.4047 | 552.0203 |
| ENSMUSG00000040471 | 17_Ggt6         | 93.7594124  | -0.91952  | 0.102772 | 0.688272 | 122.632  | 105.6263 | 138.0735 | 19.84394 | 97.29525 | 76.78477 |
| ENSMUSG00000040473 | 15_Cfap69       | 81.40034008 | 0.975063  | 0.067213 | 0.688272 | 61.72205 | 48.94876 | 54.07877 | 190.5018 | 79.19381 | 53.95687 |
| ENSMUSG00000040483 | 15_Xaf1         | 3372.133431 | 0.639468  | 0.027205 | 0.688272 | 2519.234 | 2224.163 | 3167.635 | 4816.123 | 4152.018 | 3353.627 |
| ENSMUSG00000040488 | 16_Ltbp4        | 2065.376515 | -1.16415  | 0.133832 | 0.688272 | 2351.935 | 2945.513 | 3271.19  | 115.0948 | 1491.106 | 2217.42  |
| ENSMUSG00000040489 | 5_Sox30         | 6.817533369 | 1.046248  | 0.196577 | 0.688272 | 0.406061 | 2.576251 | 6.903673 | 7.937575 | 0.507021 | 10.37632 |
| ENSMUSG00000040495 | 4_Chrm4         | 23.54803534 | -1.24913  | 0.168592 | 0.688272 | 25.1761  | 66.12377 | 8.054285 | 4.960984 | 7.919381 | 29.0537  |
| ENSMUSG00000040502 | 5_March9        | 276.378176  | -0.54819  | 0.069179 | 0.688272 | 308.6102 | 336.6301 | 339.4306 | 151.8061 | 248.8948 | 272.8972 |
| ENSMUSG00000040505 | 13_Abcg5        | 23.48297044 | -1.3255   | 0.04612  | 0.688272 | 32.48529 | 53.24251 | 14.95796 | 17.85954 | 6.789041 | 15.56448 |
| ENSMUSG00000040520 | 7_Manea         | 673.9782036 | 0.833997  | 0.097513 | 0.688272 | 459.6668 | 471.4539 | 522.3779 | 1578.585 | 514.7597 | 497.0258 |
| ENSMUSG00000040521 | 11_Tsfm         | 252.2383442 | -0.53505  | 0.115049 | 0.688272 | 263.1308 | 316.8788 | 315.2677 | 140.8919 | 262.4709 | 214.7898 |
| ENSMUSG00000040522 | 5_Tir8          | 41.1382546  | 0.776304  | 0.105868 | 0.688272 | 37.35808 | 21.46876 | 32.21714 | 70.44597 | 53.17298 | 32.16659 |
| ENSMUSG00000040528 | 15_Mlir1        | 143.0027625 | 0.085868  | 0.023744 | 0.688272 | 116.1349 | 105.6263 | 83.99468 | 248.0492 | 177.6204 | 126.591  |
| ENSMUSG00000040543 | 16_Pitpnm3      | 884.5243434 | -0.46318  | 0.192529 | 0.688272 | 999.7347 | 946.3427 | 1129.901 | 484.192  | 723.195  | 1025.18  |
| ENSMUSG00000040549 | 16_Kcap5        | 2495.886352 | 0.535318  | 0.133367 | 0.688272 | 2088.804 | 1954.516 | 2071.102 | 4334.908 | 2351.787 | 2172.802 |
| ENSMUSG00000040550 | 16_Otud6b       | 919.438744  | 0.544491  | 0.121736 | 0.688272 | 747.9737 | 721.3502 | 774.3619 | 1582.554 | 865.4572 | 824.917  |
| ENSMUSG00000040554 | 10_Aip1         | 37.12687742 | -0.93452  | 0.149472 | 0.688272 | 76.34042 | 52.38376 | 17.25918 | 32.74249 | 30.54618 | 13.48922 |
| ENSMUSG00000040557 | 14_Wbscr27      | 486.3361806 | -0.45456  | 0.147389 | 0.688272 | 547.3771 | 564.1989 | 575.3061 | 288.7293 | 428.7779 | 512.6279 |
| ENSMUSG00000040563 | 13_Lppr2        | 132.8187686 | -0.91935  | 0.048799 | 0.688272 | 156.7415 | 190.6425 | 173.7424 | 40.68007 | 107.4773 | 127.6287 |
| ENSMUSG00000040565 | 7_Btaf1         | 2008.869395 | 0.583138  | 0.100906 | 0.688272 | 1584.47  | 1579.242 | 1661.484 | 3531.228 | 1900.651 | 1796.141 |
| ENSMUSG00000040586 | 8_Ofd1          | 566.9347702 | 0.592666  | 0.165482 | 0.688272 | 492.9642 | 431.9514 | 431.4795 | 1108.284 | 437.8286 | 499.101  |
| ENSMUSG00000040599 | 13_Mis12        | 896.5321146 | 0.662952  | 0.088604 | 0.688272 | 694.373  | 658.6614 | 729.4881 | 1688.719 | 859.8185 | 748.1327 |
| ENSMUSG00000040613 | 14_Apobec1      | 1500.161171 | 0.632714  | 0.054485 | 0.688272 | 1401.74  | 873.349  | 1254.167 | 2225.497 | 1835.034 | 1411.18  |
| ENSMUSG00000040618 | 6_Pck2          | 430.1084832 | -0.85762  | 0.055078 | 0.688272 | 478.3459 | 597.6902 | 586.8122 | 142.8763 | 336.008  | 438.9184 |
| ENSMUSG00000040648 | 14_Ppi5k2       | 1094.877927 | 0.713358  | 0.05829  | 0.688272 | 873.0421 | 719.6327 | 896.3268 | 2028.05  | 1087.218 | 964.9972 |
| ENSMUSG00000040649 | 15_Rimkb        | 336.8814405 | 0.551029  | 0.160464 | 0.688272 | 282.622  | 287.6813 | 249.6828 | 612.1854 | 297.5424 | 291.5746 |
| ENSMUSG00000040651 | 8_Fam208a       | 1741.29585  |           |          |          |          |          |          |          |          |          |

|                    |              |             |          |          |          |           |          |          |          |          |          |
|--------------------|--------------|-------------|----------|----------|----------|-----------|----------|----------|----------|----------|----------|
| ENSMUSG00000040860 | 16_Crocc     | 308.9265032 | -1.43076 | 0.033787 | 0.688272 | 399.569   | 549.6001 | 402.7142 | 27.78151 | 209.2979 | 264.5962 |
| ENSMUSG00000040865 | 15_Ino80d    | 2045.736206 | 0.494321 | 0.147166 | 0.688272 | 1741.211  | 1554.338 | 1800.708 | 3400.258 | 1927.804 | 1850.098 |
| ENSMUSG00000040875 | 12_Osblp10   | 308.368011  | -0.68733 | 0.17256  | 0.688272 | 354.0896  | 368.4038 | 418.8228 | 87.31332 | 276.047  | 345.5315 |
| ENSMUSG00000040877 | 15_Wdr25     | 111.9643565 | -0.57417 | 0.165852 | 0.688272 | 124.2562  | 138.2588 | 139.2241 | 48.61764 | 105.2146 | 116.2148 |
| ENSMUSG00000040883 | 15_Tmem205   | 773.1059582 | -0.87365 | 0.174845 | 0.688272 | 942.0733  | 947.2015 | 1111.491 | 102.1963 | 726.3203 | 809.353  |
| ENSMUSG00000040907 | 15_Atp1a3    | 270.8052225 | -1.40992 | 0.014662 | 0.688272 | 442.612   | 470.5951 | 266.942  | 46.63325 | 245.5008 | 152.5319 |
| ENSMUSG00000040938 | 16_Slc16a11  | 902.9810015 | -1.04838 | 0.12958  | 0.688272 | 1054.148  | 1155.019 | 1442.868 | 91.28211 | 649.3892 | 1025.18  |
| ENSMUSG00000040943 | 12_Tet2      | 1779.631828 | 0.424561 | 0.12959  | 0.688272 | 1639.695  | 1428.102 | 1491.193 | 2558.876 | 1889.338 | 1670.588 |
| ENSMUSG00000040964 | 16_Arhgef10l | 725.6320069 | -0.90821 | 0.118332 | 0.688272 | 788.5803  | 920.5802 | 1131.052 | 133.9466 | 759.1292 | 620.504  |
| ENSMUSG00000040972 | 8_Igsf21     | 1.757109363 | -3.08885 | 0.09769  | 0.688272 | 4.060661  | 4.293751 | 1.150612 | 0        | 0        | 1.037632 |
| ENSMUSG00000041012 | 3_Cmtm8      | 26.24968563 | -0.74337 | 0.122338 | 0.688272 | 36.54595  | 30.91501 | 31.06653 | 13.89076 | 18.10144 | 26.97843 |
| ENSMUSG00000041028 | 15_Ghltn     | 5952.461334 | 0.567311 | 0.119    | 0.688272 | 4755.846  | 4675.036 | 4960.289 | 10600.63 | 5350.107 | 5372.859 |
| ENSMUSG00000041046 | 7_Ramp3      | 28.45423925 | -1.16385 | 0.067543 | 0.688272 | 45.4794   | 41.22001 | 31.06653 | 4.960984 | 28.2835  | 19.71501 |
| ENSMUSG00000041057 | 9_Wdr43      | 1663.399232 | 0.59767  | 0.092359 | 0.688272 | 1367.631  | 1209.12  | 1394.542 | 2839.667 | 1822.589 | 1346.846 |
| ENSMUSG00000041058 | 15_Wwp1      | 1247.222882 | 0.791058 | 0.099405 | 0.688272 | 1010.292  | 863.044  | 867.5615 | 2793.034 | 898.284  | 1051.121 |
| ENSMUSG00000041073 | 10_Nacad     | 14.35051127 | -1.31685 | 0.110496 | 0.688272 | 21.11544  | 27.48001 | 12.65673 | 0.992197 | 12.44474 | 11.41395 |
| ENSMUSG00000041078 | 6_Grid1      | 64.68934245 | -1.01479 | 0.01628  | 0.688272 | 77.15256  | 120.225  | 62.13305 | 41.67227 | 35.07151 | 51.8816  |
| ENSMUSG00000041084 | 8_Ostc       | 1669.696846 | 0.452903 | 0.144072 | 0.688272 | 1454.529  | 1212.555 | 1562.531 | 2506.289 | 1781.861 | 1500.416 |
| ENSMUSG00000041115 | 16_Iqsec2    | 626.7303351 | -0.73504 | 0.08525  | 0.688272 | 739.8524  | 845.0102 | 764.0064 | 227.2131 | 543.0432 | 641.2566 |
| ENSMUSG00000041117 | 8_Codc8      | 162.3915971 | -1.01638 | 0.041379 | 0.688272 | 196.536   | 288.5401 | 166.8388 | 60.52401 | 80.32515 | 181.5856 |
| ENSMUSG00000041120 | 6_Nbl1       | 1588.163206 | -0.77157 | 0.101983 | 0.688272 | 1928.814  | 2352.976 | 1727.069 | 538.7629 | 1105.319 | 1876.039 |
| ENSMUSG00000041124 | 10_Msantd4   | 836.5850455 | 0.678001 | 0.14415  | 0.688272 | 681.3789  | 647.4977 | 601.7701 | 1692.688 | 695.7742 | 700.4016 |
| ENSMUSG00000041126 | 16_I2afv     | 909.7689747 | -0.51486 | 0.161159 | 0.688272 | 1089.069  | 1069.144 | 1052.81  | 439.5432 | 820.2216 | 987.8257 |
| ENSMUSG00000041130 | 9_Zfp598     | 1298.770914 | -0.73616 | 0.133096 | 0.688272 | 1469.147  | 1570.654 | 1829.473 | 369.0972 | 1235.427 | 1318.83  |
| ENSMUSG00000041132 | 11_N4bp2l1   | 440.1070342 | 0.495343 | 0.177568 | 0.688272 | 354.9018  | 389.0139 | 352.0873 | 758.0384 | 376.7363 | 409.8647 |
| ENSMUSG00000041134 | 15_Cyyr1     | 176.4332066 | 0.996909 | 0.057958 | 0.688272 | 115.3228  | 121.9425 | 116.2118 | 430.6134 | 157.2563 | 117.2524 |
| ENSMUSG00000041135 | 15_Rlpk2     | 607.6301097 | 0.659766 | 0.057104 | 0.688272 | 497.0249  | 425.0814 | 491.3114 | 1054.705 | 613.1863 | 564.4718 |
| ENSMUSG00000041147 | 10_Brc2      | 355.431719  | 0.68043  | 0.058845 | 0.688272 | 280.9977  | 243.0263 | 295.7073 | 627.0684 | 324.6946 | 361.096  |
| ENSMUSG00000041153 | 9_Osgln2     | 469.1908666 | 0.676163 | 0.121036 | 0.688272 | 349.2168  | 367.5451 | 367.0453 | 948.5402 | 431.0406 | 351.7573 |
| ENSMUSG00000041164 | 15_Zmlz2     | 1844.482913 | -0.90399 | 0.149256 | 0.688272 | 2067.689  | 2341.812 | 2802.891 | 264.9165 | 1809.013 | 1780.577 |
| ENSMUSG00000041180 | 13_Hectd11   | 399.8316119 | 0.880133 | 0.049879 | 0.688272 | 278.5613  | 256.7663 | 309.5147 | 866.1878 | 325.8259 | 362.1336 |
| ENSMUSG00000041193 | 15_Pla2g5    | 550.8514915 | -0.60945 | 0.117188 | 0.688272 | 626.1539  | 924.874  | 445.2869 | 458.3949 | 320.1692 | 530.23   |
| ENSMUSG00000041199 | 2_Rpusd1     | 165.0222674 | -0.96624 | 0.141797 | 0.688272 | 206.2816  | 231.0038 | 217.4657 | 19.84394 | 164.0043 | 151.4943 |
| ENSMUSG00000041219 | 14_Arhgap11a | 443.3772771 | 0.473874 | 0.106694 | 0.688272 | 380.89    | 338.3476 | 394.66   | 646.9123 | 486.4762 | 412.9776 |
| ENSMUSG00000041225 | 16_Arhgap12  | 2043.110715 | 0.847509 | 0.068324 | 0.688272 | 1429.353  | 1327.628 | 1622.363 | 4555.176 | 1635.918 | 1688.227 |
| ENSMUSG00000041231 | 15_Ublcp1    | 941.2061267 | 0.403323 | 0.194195 | 0.688272 | 865.7329  | 775.4515 | 790.4705 | 1433.724 | 929.9616 | 851.8959 |
| ENSMUSG00000041236 | 7_Vpsd1      | 2521.506094 | 0.537133 | 0.11268  | 0.688272 | 2083.931  | 2002.606 | 2086.06  | 4256.524 | 2385.996 | 2313.92  |
| ENSMUSG00000041238 | 15_Rbbp8     | 775.5096792 | 0.803843 | 0.072591 | 0.688272 | 594.4808  | 510.0976 | 590.264  | 1659.945 | 678.8041 | 619.4663 |
| ENSMUSG00000041247 | 7_Lamp3      | 0.948267844 | -3.28586 | 0.166086 | 0.688272 | 0.812132  | 2.576251 | 2.301224 | 0        | 0        | 0        |
| ENSMUSG00000041264 | 16_Usp1      | 786.7395813 | 0.316767 | 0.194582 | 0.688272 | 717.1127  | 732.5139 | 652.3971 | 1008.072 | 800.9888 | 809.353  |
| ENSMUSG00000041278 | 10_Ttc1      | 925.1128158 | 0.547957 | 0.072411 | 0.688272 | 759.3436  | 725.6439 | 769.7595 | 1458.529 | 961.6391 | 875.7615 |
| ENSMUSG00000041287 | 5_Sox15      | 911.5878931 | -0.84488 | 0.160646 | 0.688272 | 1059.02   | 1106.929 | 1350.819 | 152.7983 | 772.7053 | 1027.256 |
| ENSMUSG00000041297 | 7_Cdk13      | 1558.21159  | 0.468689 | 0.134961 | 0.688272 | 1340.018  | 1245.188 | 1308.246 | 2525.141 | 1495.632 | 1435.045 |
| ENSMUSG00000041303 | 7_Gtf3c3     | 924.1466864 | 0.632318 | 0.111096 | 0.688272 | 1010.5079 | 655.2264 | 708.7771 | 1735.352 | 873.3946 | 761.6219 |
| ENSMUSG00000041328 | 15_Pdf11     | 1647.199551 | 0.69219  | 0.09738  | 0.688272 | 1296.163  | 1101.777 | 1380.735 | 3268.296 | 1370.053 | 1466.174 |
| ENSMUSG00000041329 | 13_Atp1b2    | 387.2122854 | -0.62831 | 0.116644 | 0.688272 | 512.4554  | 642.3452 | 255.4359 | 315.5186 | 266.229  | 311.2896 |
| ENSMUSG00000041351 | 16_Rap1ap    | 1729.609759 | -0.88398 | 0.152277 | 0.688272 | 1960.487  | 2327.213 | 2442.75  | 259.9556 | 1633.655 | 1753.598 |
| ENSMUSG00000041353 | 12_Tmem29    | 425.1676856 | 0.585891 | 0.154831 | 0.688272 | 363.8352  | 296.2688 | 360.1416 | 803.6794 | 372.2109 | 354.8702 |
| ENSMUSG00000041354 | 15_Rgl2      | 1160.160748 | -0.90157 | 0.148272 | 0.688272 | 1366.006  | 1489.073 | 1678.743 | 167.6813 | 1083.824 | 1175.637 |
| ENSMUSG00000041378 | 1_Cldn5      | 115.7853551 | -1.38881 | 0.026788 | 0.688272 | 142.1231  | 222.4163 | 138.0735 | 16.86735 | 61.09237 | 114.1395 |
| ENSMUSG00000041390 | 18_Mdfic     | 971.2914397 | 0.740699 | 0.093642 | 0.688272 | 754.4708  | 722.2089 | 705.3252 | 2033.011 | 742.1591 | 870.5733 |
| ENSMUSG00000041406 | 14_BC055324  | 218.2421472 | 0.584661 | 0.098871 | 0.688272 | 178.6691  | 137.4    | 208.2608 | 349.2533 | 226.268  | 209.6017 |
| ENSMUSG00000041408 | 16_Wapl      | 3730.145991 | 0.815925 | 0.052789 | 0.688272 | 2816.474  | 2634.646 | 2656.763 | 7759.971 | 6424.668 | 3070.353 |
| ENSMUSG00000041423 | 15_Pqri6     | 103.1506515 | -0.65686 | 0.159235 | 0.688272 | 115.3228  | 163.1625 | 100.1033 | 51.59423 | 61.09237 | 127.6287 |
| ENSMUSG00000041426 | 12_Hibch     | 391.8457555 | 0.730618 | 0.093019 | 0.688272 | 289.1191  | 269.6476 | 325.6232 | 800.7028 | 323.5633 | 342.4186 |
| ENSMUSG00000041429 | 2_Nhl1       | 115.2895692 | -0.9569  | 0.155704 | 0.688272 | 151.0566  | 151.14   | 154.182  | 12.89856 | 17.6594  | 104.8008 |
| ENSMUSG00000041439 | 15_Mfsd6     | 3785.612796 | 0.364695 | 0.196814 | 0.688272 | 2984.331  | 3119.84  | 3815.43  | 5233.838 | 4026.439 | 3523.798 |
| ENSMUSG00000041459 | 15_Tardbp    | 6134.071266 | 0.504174 | 0.131298 | 0.688272 | 5111.56   | 4760.911 | 5346.894 | 10154.14 | 5854.685 | 5576.235 |
| ENSMUSG00000041471 | 8_Fam35a     | 181.9806728 | 0.799268 | 0.053643 | 0.688272 | 148.6202  | 117.6488 | 132.3204 | 357.1909 | 161.7816 | 174.3222 |
| ENSMUSG00000041476 | 12_Smpx      | 112.9849401 | 1.866212 | 0.035521 | 0.688272 | 34.92168  | 79.86377 | 31.06653 | 433.59   | 23.75814 | 74.70951 |
| ENSMUSG00000041479 | 13_Syt15     | 48.7808363  | -0.53298 | 0.157979 | 0.688272 | 70.6555   | 54.96001 | 47.1751  | 40.68007 | 41.89598 | 37.35475 |
| ENSMUSG00000041481 | 16_Serpina3g | 519.8640691 | 0.645053 | 0.189184 | 0.688272 | 464.5396  | 255.0488 | 497.0644 | 379.0192 | 1055.54  | 467.921  |
| ENSMUSG00000041483 | 14_Zfp281    | 562.471485  | 0.717328 | 0.105587 | 0.688272 | 415.8117  | 370.9801 | 460.2448 | 1232.308 | 501.1837 | 394.3002 |
| ENSMUSG00000041488 | 15_Stx3      | 1338.659769 | 0.502007 | 0.082714 | 0.688272 | 1058.208  | 1057.122 | 1209.293 | 1974.472 | 1500.157 | 1232.707 |
| ENSMUSG00000041506 | 14_Rrp9      | 305.1206141 | -0.86871 | 0.183027 | 0.688272 | 341.9076  | 396.7426 | 444.1363 | 39.68787 | 328.0886 | 280.1607 |
| ENSMUSG00000041534 | 8_Rbp3       | 202.8003428 | -0.82119 | 0.133824 | 0.688272 | 322.4165  | 339.2063 | 115.0612 | 179.5876 | 188.9378 | 71.59661 |
| ENSMUSG00000041556 | 8_Fbxo2      | 12.92790959 | -1.20404 | 0.100686 | 0.688272 | 20.3033   | 23.18626 | 10.35551 | 2.97659  | 12.4444  | 8.301057 |
| ENSMUSG00000041559 | 7_Fmod       | 5276.250272 | -0.50253 | 0.183582 | 0.688272 | 5539.554  | 6931.832 | 6086.738 | 3670.136 | 2922.251 | 6506.991 |
| ENSMUSG00000041560 | 12_Gliscr2   | 2211.170622 | -0.64286 | 0.174044 | 0.688272 | 2505.428  | 2575.392 | 3006.549 | 695.53   | 2148.415 | 2335.71  |
| ENSMUSG00000041577 | 5_Prelp      | 2296.421923 | -0.48902 | 0.19191  | 0.688272 | 2373.862  | 2991.027 | 2680.926 | 1253.145 | 1680.04  | 2799.531 |
| ENSMUSG00000041592 | 16_Sdk2      | 73.6102946  | -1.04699 | 0.033867 | 0.688272 | 85.27388  | 151.14   | 60.98244 | 33.73469 | 44.12226 | 66.04845 |
| ENSMUSG00000041598 | 7_Cdc42ep4   | 3203.039995 | -0.67219 | 0.185607 | 0.688272 | 3548.205  | 3793.1   | 4466.676 | 869.1644 | 3167.752 | 3373.342 |
| ENSMUSG00000041609 | 16_Ccdc64    | 799.7679516 | -1.04412 | 0.040706 | 0.688272 | 972.9343  | 1168.759 | 1089.63  | 181.572  | 682.1981 | 703.5145 |
| ENSMUSG00000041617 | 10_Ccdc74a   | 36.37529406 | -0.91335 | 0.047296 | 0.688272 | 50.3522   | 50.66626 | 41.42204 | 16.86735 | 22.6268  | 36.31712 |
| ENSMUSG00000041633 | 14_Kctd12    |             |          |          |          |           |          |          |          |          |          |

ENSMUSG000000041975 17\_Mettl8 189.5105313 0.495564 0.077209 0.688272 164.0507 150.2813 157.6339 263.9244 195.7218 205.4511  
ENSMUSG000000041997 16\_Tik1 1555.738466 0.681058 0.086593 0.688272 1213.325 1127.539 1244.962 3004.372 1411.912 1332.32  
241.7990591 -0.87602 0.066909 0.688272 305.3617 383.8613 249.6828 81.36014 161.7816 268.7467  
ENSMUSG000000042029 6\_Ncapp2 744.8218727 0.815657 0.049869 0.688272 605.8506 471.4539 541.9383 1508.139 712.7443 628.805  
ENSMUSG000000042032 13\_Mat2b 2012.737827 0.478426 0.171292 0.688272 1682.738 159.185 181.515 3382.399 1832.771 1814.818  
ENSMUSG000000042042 13\_Csghlact2 593.7023994 0.746528 0.122619 0.688272 457.2304 426.7989 446.4375 1323.591 441.2226 466.9344  
ENSMUSG000000042043 5\_Tbca 1569.674458 0.673249 0.076596 0.688272 1186.525 1118.093 1325.505 2927.973 1456.035 1403.914  
ENSMUSG000000042063 11\_Zfp386 660.0796303 0.936718 0.079221 0.688272 504.3341 443.9739 410.7685 1647.047 485.3449 469.0097  
ENSMUSG000000042066 15\_Tmcc2 115.6641166 -0.80055 0.02999 0.688272 148.6202 187.2075 104.7057 71.43817 80.32515 101.6879  
ENSMUSG000000042073 16\_Abhd14b 297.0069219 -0.70141 0.075855 0.688272 350.8411 480.9001 271.5445 190.5018 169.701 318.553  
ENSMUSG000000042109 7\_Csdc2 86.40409354 -1.00729 0.042401 0.688272 93.3952 164.0213 88.59713 30.7581 56.56701 85.08583  
ENSMUSG000000042116 3\_Vwa1 205.8025815 -0.74134 0.163292 0.688272 223.3363 283.3876 265.7914 51.59423 185.5398 225.1662  
ENSMUSG000000042133 16\_Ppig 2618.1973 0.753633 0.098243 0.688272 1994.597 1727.805 2126.331 5614.842 2237.791 2007.818  
ENSMUSG000000042138 6\_Msantd2 353.3184987 0.468162 0.148129 0.688272 319.9801 273.9413 295.7073 551.6614 325.8259 352.7949  
ENSMUSG000000042167 5\_Papd4 661.5363713 0.817329 0.066312 0.688272 501.8977 443.9739 491.3114 1415.865 584.9028 531.2676  
ENSMUSG000000042178 6\_Armc5 338.4876025 -1.02481 0.108093 0.688272 393.8841 467.1601 500.5163 43.65666 313.3812 312.3273  
ENSMUSG000000042182 16\_Bend6 14.00220415 0.146948 0.078888 0.688272 8.121322 11.16375 8.054285 22.82053 20.36412 13.48922  
ENSMUSG000000042197 13\_Zfp451 835.2339598 0.644135 0.111076 0.688272 650.5179 632.0402 673.1081 1612.32 727.451 713.9661  
ENSMUSG000000042202 15\_Slc35a2 631.0521808 0.487979 0.132548 0.688272 551.4377 522.9789 501.6669 1011.049 584.9028 614.2782  
ENSMUSG000000042203 7\_Tbcl1d22b 740.0243207 -0.53968 0.17047 0.688272 760.1557 878.5015 991.8276 330.4015 734.2397 745.0198  
ENSMUSG000000042208 15\_0610010F05Rik 213.4241965 0.925616 0.050893 0.688272 162.4264 164.0213 115.0612 472.2857 181.0144 185.7361  
ENSMUSG000000042213 15\_Zfand4 49.26721033 0.129449 0.025288 0.688272 43.85514 30.05626 18.40979 98.22748 53.17298 51.8816  
ENSMUSG000000042225 3\_Ammecr1 381.8768313 0.779187 0.09803 0.688272 306.1738 243.0263 294.5567 832.4531 309.9872 305.0638  
ENSMUSG000000042240 14\_Crybb2 3248.492162 -2.76608 0.002914 0.688272 3972.138 11309.74 1710.96 57.54742 927.6989 1512.868  
ENSMUSG000000042244 4\_Pglyrp3 1.227886912 2.703031 0.199189 0.688272 0.812132 0 0 0.992197 4.52536 1.037632  
ENSMUSG000000042268 10\_Slc26a9 14.43225366 -1.34911 0.034631 0.688272 27.61249 13.74 20.71102 5.953181 11.3134 7.263424  
ENSMUSG000000042271 13\_Nxt2 589.3744457 0.886592 0.067918 0.688272 429.6179 390.7314 421.124 1364.271 460.4554 470.0473  
ENSMUSG000000042272 17\_Sestd1 461.8193704 0.524965 0.14444 0.688272 408.5025 370.9801 356.6898 789.7887 442.354 402.6012  
ENSMUSG000000042286 13\_Stab1 474.0531593 -1.04316 0.060123 0.688272 567.6804 677.5539 669.6562 90.28991 384.6556 454.4828  
ENSMUSG000000042289 11\_Hsd3b7 334.9118029 -0.50234 0.144477 0.688272 400.3812 401.0364 376.2502 177.6032 306.5932 347.6067  
ENSMUSG000000042292 16\_Mkl1 597.7968766 -0.90507 0.098856 0.688272 715.4884 784.8977 837.6456 123.0324 549.8313 575.8858  
ENSMUSG000000042293 7\_Gm5617 65.32204595 -1.06056 0.179321 0.688272 66.59484 97.03878 101.2539 3.968787 45.2536 77.8224  
ENSMUSG000000042298 18\_Ttc19 503.951862 0.571188 0.151398 0.688272 443.4242 397.6014 375.0995 933.6572 416.3332 457.5959  
ENSMUSG000000042305 12\_Tmem183a 1663.607503 0.390086 0.18153 0.688272 1448.032 1366.272 1506.151 2439.812 1710.586 1510.792  
ENSMUSG000000042308 14\_Sett1a 1214.584602 -0.65123 0.190136 0.688272 1341.642 1528.575 1582.092 345.2845 1247.868 1242.046  
ENSMUSG000000042323 16\_Pbrm1 2779.930694 0.573615 0.144472 0.688272 2243.109 2144.299 2316.182 5195.143 2385.996 2394.855  
ENSMUSG000000042328 13\_Hps4 395.8366326 -0.57108 0.139281 0.688272 422.3087 495.4989 501.6669 183.5564 338.2707 433.7302  
ENSMUSG000000042348 9\_Arl15 761.9792022 0.692849 0.104993 0.688272 563.6197 599.4077 584.511 1539.889 599.6103 684.8732  
ENSMUSG000000042354 6\_Gnl3 847.8545687 0.562252 0.12344 0.688272 766.5061 644.9214 732.9399 1467.459 883.5766 681.7243  
ENSMUSG000000042363 14\_Lgalsl 2620.774988 0.606795 0.110326 0.688272 2163.52 1920.165 2149.343 4750.638 2668.831 2072.151  
ENSMUSG000000042380 8\_Smim12 179.3979221 -0.71022 0.110145 0.688272 203.033 226.7101 238.1767 63.5006 168.5997 176.3975  
ENSMUSG000000042396 9\_Rbm7 1339.342361 0.545725 0.12934 0.688272 1109.373 1014.184 1143.708 2321.741 1139.643 1127.906  
ENSMUSG000000042401 6\_Ctacc1 8.84264008 -0.03427 0.01149 0.688272 10.55772 20.61001 11.50612 3.968787 2.26268 4.150528  
ENSMUSG000000042404 16\_Dennd4b 255.3889998 -0.90024 0.025765 0.688272 138.3558 337.4888 341.7318 94.2587 207.0352 233.4672  
ENSMUSG000000042408 13\_Zmyym6 637.4469842 0.518046 0.182154 0.688272 525.4495 503.2276 544.2395 1129.12 475.1628 647.4824  
ENSMUSG000000042410 15\_Aggs 2794.232126 0.72153 0.064687 0.688272 2175.702 1878.945 2274.76 5368.777 2611.133 2456.075  
ENSMUSG000000042419 8\_Nfklb1 120.520458 -0.99598 0.126922 0.688272 133.1897 170.0325 178.3449 15.87515 93.90123 131.7793  
ENSMUSG000000042423 8\_Fhrs 1480.659079 -0.65756 0.162748 0.688272 1601.525 1714.924 2120.578 474.2701 1488.844 1483.814  
ENSMUSG000000042425 17\_Frmpd3 5.748441459 0.1775572 0.090174 0.688272 2.436397 5.152501 0 11.90636 5.566701 9.338689  
ENSMUSG000000042436 12\_Mfap4 2677.928819 -0.81821 0.117903 0.688272 3139.703 4022.386 3090.544 698.5066 1952.693 3163.74  
ENSMUSG000000042444 9\_Fam63b 2381.18181 0.690297 0.114652 0.688272 1892.268 1779.33 1794.955 4924.273 1966.269 1929.996  
ENSMUSG000000042453 14\_Rein 2296.286993 -0.59749 0.129203 0.688272 2651.612 3799.111 1844.431 1968.518 1260.313 2253.737  
ENSMUSG000000042460 5\_Ctgal1 313.7890433 0.1081294 0.052797 0.688272 235.5183 184.6313 184.0979 824.5156 244.3695 209.6017  
ENSMUSG000000042473 8\_Tbcl1dbb 521.7193676 0.996549 0.027639 0.688272 366.2716 324.6076 354.3885 1175.753 429.9092 479.386  
ENSMUSG000000042485 6\_Mustn1 76.51974027 -0.51077 0.142429 0.688272 88.52241 92.74502 88.59713 58.53961 49.77896 80.9353  
ENSMUSG000000042508 16\_Mtfr1 1315.527096 0.608937 0.083815 0.688272 1018.414 1057.122 1050.509 2313.803 1244.474 1208.841  
ENSMUSG000000042581 14\_Thsd7b 7.354846975 1.247317 0.153663 0.688272 5.684925 6.011252 1.150612 8.929771 6.788041 15.56448  
ENSMUSG000000042589 18\_Cux2 193.9604236 -0.72975 0.054097 0.688272 270.44 234.4388 220.9175 93.2665 140.2862 204.4135  
ENSMUSG000000042590 16\_Ipo11 796.5400957 0.532854 0.166948 0.688272 662.6999 630.3227 660.4514 1445.631 702.5622 677.5737  
ENSMUSG000000042595 7\_Fam199x 397.4739234 0.914092 0.092633 0.688272 268.8158 256.7663 301.4604 995.1734 265.8649 296.7628  
ENSMUSG000000042599 8\_Kdm7a 2846.651106 0.954736 0.032733 0.688272 2041.7 1744.122 2027.379 6351.052 2547.778 2367.878  
ENSMUSG000000042607 15\_Asb4 3.350572116 2.643651 0.054435 0.688272 0.812132 0.85875 1.150612 11.90636 2.26268 3.112896  
ENSMUSG000000042613 9\_Pbixp1 2811.347186 -0.57749 0.104248 0.688272 3136.454 3697.778 3265.437 1385.107 2443.695 2939.612  
ENSMUSG000000042642 13\_Flad1 630.9397833 -0.79205 0.142524 0.688272 751.2223 929.1677 719.1326 144.8607 579.2461 662.0093  
ENSMUSG000000042659 14\_Arrdc4 3801.847811 0.390517 0.134076 0.688272 3106.406 3047.705 3717.628 4913.359 4458.611 3567.379  
ENSMUSG000000042670 5\_Immp11 906.0082595 0.796747 0.102082 0.688272 700.8701 643.2039 642.0416 2061.785 711.6129 676.5361  
ENSMUSG000000042675 15\_Ymp13 863.0794897 -0.64151 0.134347 0.688272 916.8972 1088.037 1150.612 330.4015 753.4725 939.057  
ENSMUSG000000042686 5\_Jph1 61.51875344 0.171554 0.122276 0.688272 42.23087 53.24251 26.46408 161.7281 29.41484 56.03213  
ENSMUSG000000042699 11\_Dhx9 5156.588319 0.674721 0.09008 0.688272 3956.708 3783.653 4176.722 9959.672 4799.145 4263.63  
ENSMUSG000000042712 10\_Wbp5 918.2998888 0.55088 0.181142 0.688272 793.4531 723.9264 717.982 1743.29 721.795 809.353  
ENSMUSG000000042717 5\_Pppl13a 85.04678815 2.746501 0.004191 0.688272 20.3033 24.00451 21.86163 389.9333 14.70749 39.43002  
ENSMUSG000000042719 7\_Naa25 2137.99632 0.61447 0.040513 0.688272 1664.059 1469.322 1935.33 2901.183 2942.616 1915.469  
ENSMUSG000000042737 9\_Dpm3 141.1743876 -1.6415 0.025115 0.688272 138.8746 237.8738 264.6408 8.929771 62.58783 114.1395  
ENSMUSG000000042742 7\_B630005N14Rik 616.819901 0.950434 0.056082 0.688272 446.6727 420.7876 394.66 1473.412 493.2643 472.1226  
ENSMUSG000000042750 7\_Bex2 18.85213585 -0.83843 0.114481 0.688272 22.7397 25.76251 24.16285 18.85714 10.18206 11.41395  
ENSMUSG000000042757 15\_Tmem108 47.03307984 -0.83387 0.11196 0.688272 55.22499 88.45127 36.81959 19.84394 36.20288 45.65581  
ENSMUSG000000042770 8\_Hebp1 268.1080344 -0.43838 0.153592 0.688272 331.3499 324.6076 269.2432 171.65 240.9754 270.822  
ENSMUSG000000042772 15\_Smg7 2436.023745 0.314193 0.163916 0.688272 2146.465 2023.216 2346.098 2878.365 288.753 2433.247  
ENSMUSG000000042804 13\_Gpr153 382.7345627 -0.62792 0.11951 0.688272 474.2852 503.2276 416.5216 175.6188 280.5723 446.1818  
ENSMUSG000000042810 14\_Krba1 1351.976709 -0.46203 0.164554 0.688272 1420.419 1597.275 1682.195 757.0462 1198.089 1456.835  
ENSMUSG000000042812 5\_Foxf1 11.18228902 1.40482 0.039607 0.688272 4.872793 7.728752 5.753061 16.86735 21.49546 10.37632  
ENSMUSG000000042831 13\_Alkhd6 218.0378865 -0.63437 0.178551 0.688272 253.3852 249.8963 292.2555 71.43817 216.086 225.1662  
ENSMUSG000000042842 10\_Serpinb6b 311.8448513 0.866504 0.032878 0.688272 238.7669 163.1625 261.1889 594.3259 330.3513 283.2736  
ENSMUSG000000042870 14\_Tom1 875.1997535 -0.73515 0.159629 0.688272 1015.165 1138.703 1126.449 218.2833 789.6754 962.9226  
ENSMUSG000000042901 10\_Aida 3549.232355 0.93609 0.018267 0.688272 2364.929 2167.486 2777.578 7125.958 3879.365 2980.079  
ENSMUSG000000042978 10\_Sbk1 252.7400244 -0.63811 0.16926 0.688272 273.6885 292.8338 356.6898 88.30552 220.6113 284.3112  
ENSMUSG000000042985 7\_Upk3b 125.456801 -0.73246 0.088791 0.688272 159.99 158.01 151.8808 57.54742 76.93113 148.3814  
ENSMUSG000000042988 10\_Notum 50.48688634 -1.21181 0.090746 0.688272 75.52829 101.3325 34.51836 6.945378 31.67752 52.91924  
ENSMUSG000000043003 13\_Rasef 1156.782623 0.603474 0.146435 0.688272 987.5527 832.129 935.4476 2239.388 934.4869 1011.691  
ENSMUSG000000043019 12\_Edem3 1728.014336 0.578273 0.142153 0.688272 1305.096 1373.142 1480.838 3223.647 1542.017 1443.346  
ENSMUSG000000043036 13\_Ccdc63 7.01755255 -1.61194 0.063093 0.688272 12.18198 13.74 5.753061 4.960984 3.39402 2.075264  
ENSMUSG000000043059 16\_Zfp513 460.8807174 -0.74989 0.180759 0.688272 550.6256 540.1539 643.1922 97.23529 478.5569 455.5205  
ENSMUSG000000043099 4\_Hic1 42.05351498 -1.60719 0.003529 0.688272 58.47352 80.72252 50.62693 8.929771 20.36412 33.20423  
ENSMUSG000000043131 14\_Mob1a 7021.911602 0.616074 0.10782 0.688272 5711.726 5187.71 5735.801 10309.45 6501.812 5954.97  
ENSMUSG000000043153 5\_Ispd 85.21265961 0.721348 0.095369 0.688272 74.71616 65.26502 52.92816 159.7437 73.53711 85.08583  
ENSMUSG000000043154 15\_Ppp23a 1315.158263 0.746374 0.106963 0.688272 1013.541 915.4277 1018.292 2856.535 1020.469 1066.668  
ENSMUSG000000043165 7\_Lor 3.066466474 -1.71262 0.181346 0.688272 4.872793 3.435001 5.753061 0 2.26268 2.075264  
ENSMUSG000000043207 10\_Zmpste24 1926.055819 0.551231 0.153346 0.688272 1595.84 1482.203 1609.706 3521.306 1764.891 1582.389  
ENSMUSG000000043241 14\_Upf2 1611.37379 0.632528 0.096879 0.688272 1325.4 1228.872 1236.908 2991.473 1395.615  
ENSMUSG000000043243 15\_Fam129c 84.82209548 -0.76685 0.053182 0.688272 91.77094 102.1913 126.5673 39.68787 79.19381 69.52135  
ENSMUSG000000043251 5\_Exoc3l 18.63224674 -2.10226 0.06942 0.688272 29.23676 36.08751 25.31347 0.992197 5.566701 14.52685  
ENSMUSG000000043262 14\_Uevld 1000.010827 0.538178 0.147887 0.688272 845.4296 761.7114 839.9468 1772.064 931.0929 849.8207  
ENSMUSG000000043263 13\_Pyhn1 1379.696942 1.216633 0.011058 0.688272 915.273 683.5652 891.7244 3271.273 1554.461 961.8849  
ENSMUSG000000043286 11\_Pnpla1 11.03211773 -1.44725 0.042287 0.688272 18.67904 10.305 19.56041 5.953181 3.39402 8.31057  
ENSMUSG000000043298 8\_Smco3 16.82755892 -1.37355 0.126689 0.688272 19.49117 49.80751 3.451836 7.937575 6.788041 13.48922  
ENSMUSG000000043323 16\_Fbrs1 965.252037 -0.70998 0.095665 0.688272 1079.324 1199.674 1315.15 353.2221 880.1826 963.9602  
ENSMUSG000000043336 14\_Filip1 1043.379657 0.619738 0.066713 0.688272 783.7076 795.2027 88

|                    |                  |             |          |          |          |          |          |          |          |          |          |
|--------------------|------------------|-------------|----------|----------|----------|----------|----------|----------|----------|----------|----------|
| ENSMUSG00000043346 | 8_Gm6741         | 423.0353784 | 0.422551 | 0.198112 | 0.688272 | 346.7804 | 388.1551 | 349.7861 | 661.7953 | 375.6049 | 416.0905 |
| ENSMUSG00000043372 | 12_Hexim2        | 49.49300545 | -0.94174 | 0.040081 | 0.688272 | 48.72793 | 66.12377 | 80.54285 | 20.83613 | 35.07134 | 45.65581 |
| ENSMUSG00000043398 | 4_Gpr135         | 3.597233688 | -2.05255 | 0.119577 | 0.688272 | 7.30919  | 7.728752 | 2.301224 | 0        | 1.13134  | 3.112896 |
| ENSMUSG00000043415 | 5_Otud1          | 525.1133664 | 0.716358 | 0.096442 | 0.688272 | 378.4536 | 381.2851 | 432.6302 | 1069.588 | 444.6167 | 444.1065 |
| ENSMUSG00000043424 | 10_Elf3j2        | 1554.971373 | 1.098971 | 0.032181 | 0.688272 | 1015.977 | 914.569  | 1039.003 | 3936.045 | 1294.253 | 1129.981 |
| ENSMUSG00000043448 | 13_Gjc2          | 6.967921282 | -2.22201 | 0.032614 | 0.688272 | 15.43051 | 12.0225  | 6.903673 | 0        | 2.26268  | 5.18816  |
| ENSMUSG00000043461 | 13_Splssb        | 252.3427362 | 0.621979 | 0.185751 | 0.688272 | 191.6632 | 145.1288 | 260.0383 | 495.1062 | 185.5398 | 236.5801 |
| ENSMUSG00000043467 | 19_Zbtb37        | 470.2494188 | 0.589319 | 0.170866 | 0.688272 | 424.7451 | 348.6526 | 353.2379 | 915.7977 | 360.8975 | 418.1657 |
| ENSMUSG00000043518 | 7_Rai2           | 50.16009777 | -0.8457  | 0.025723 | 0.688272 | 74.71616 | 67.84127 | 50.62693 | 39.68787 | 32.80886 | 35.27949 |
| ENSMUSG00000043535 | 13_Setx          | 2080.351674 | 0.637982 | 0.092504 | 0.688272 | 1766.387 | 1479.627 | 1637.321 | 3841.786 | 1881.227 |          |
| ENSMUSG00000043542 | 12_Zc2hc1a       | 402.622025  | 0.957786 | 0.046583 | 0.688272 | 293.9918 | 263.6363 | 300.3098 | 976.3217 | 319.0379 | 370.4346 |
| ENSMUSG00000043556 | 9_Fbxi7          | 9.811449886 | -1.86795 | 0.015043 | 0.688272 | 20.3033  | 12.0225  | 13.80735 | 1.984394 | 4.52536  | 6.225792 |
| ENSMUSG00000043557 | 15_Mdga1         | 45.58493233 | -0.69057 | 0.160606 | 0.688272 | 51.16433 | 63.54752 | 54.07877 | 17.85954 | 33.9402  | 52.91924 |
| ENSMUSG00000043614 | 13_Vps37d        | 30.09792765 | -1.1352  | 0.051057 | 0.688272 | 33.29742 | 51.52501 | 39.12081 | 6.945378 | 23.75814 | 25.9408  |
| ENSMUSG00000043629 | 12_1700019D03Rik | 167.8671393 | 0.907642 | 0.137819 | 0.688272 | 99.89226 | 139.9763 | 110.4588 | 434.5822 | 78.06247 | 144.2309 |
| ENSMUSG00000043639 | 14_Rbm20         | 491.7470688 | -0.60794 | 0.077375 | 0.688272 | 626.1539 | 738.5252 | 416.5216 | 355.2065 | 332.614  | 481.4613 |
| ENSMUSG00000043670 | 4_Diras1         | 6.606652997 | -1.7095  | 0.056324 | 0.688272 | 9.745586 | 13.74    | 6.903673 | 3.968787 | 1.13134  | 4.150528 |
| ENSMUSG00000043681 | 5_Fam25c         | 336.2367466 | -0.90086 | 0.159877 | 0.688272 | 397.9448 | 437.1039 | 478.6546 | 45.64105 | 290.7544 | 367.3218 |
| ENSMUSG00000043687 | 15_1190005I06Rik | 15.9309444  | -1.62819 | 0.033113 | 0.688272 | 17.05478 | 37.78501 | 17.25918 | 1.984394 | 9.050721 | 12.45158 |
| ENSMUSG00000043702 | 9_Pde12          | 655.5698173 | 0.544775 | 0.146347 | 0.688272 | 510.8311 | 474.8889 | 614.4269 | 1137.058 | 661.834  | 534.3805 |
| ENSMUSG00000043782 | 8_Ccdc64b        | 824.5607267 | -0.82594 | 0.169323 | 0.688272 | 946.9461 | 1015.902 | 1200.088 | 138.9076 | 812.3022 | 833.2185 |
| ENSMUSG00000043811 | 5_Rtn4r          | 19.84087457 | -1.09775 | 0.198018 | 0.688272 | 26.80036 | 16.31625 | 37.9702  | 0.992197 | 20.36412 | 16.60211 |
| ENSMUSG00000043822 | 18_Adamts15      | 626.6977076 | -0.73431 | 0.148991 | 0.688272 | 665.9484 | 821.824  | 860.6579 | 172.6422 | 528.3358 | 710.7778 |
| ENSMUSG00000043832 | 13_Clec4a3       | 148.7780173 | 0.768882 | 0.188194 | 0.688272 | 189.2268 | 53.24251 | 87.44652 | 267.8931 | 202.5099 | 92.34925 |
| ENSMUSG00000043861 | 8_Kbtbd7         | 399.9638901 | 0.788691 | 0.098763 | 0.688272 | 277.7492 | 310.0088 | 292.2555 | 888.0161 | 298.6738 | 333.0799 |
| ENSMUSG00000043903 | 3_Gm22           | 43.28125967 | -0.88363 | 0.097097 | 0.688272 | 52.78859 | 62.68877 | 52.92816 | 16.86735 | 21.49546 | 52.91924 |
| ENSMUSG00000043924 | 16_Ncmap         | 32.56316596 | -0.92579 | 0.188732 | 0.688272 | 39.79448 | 52.38376 | 35.66898 | 3.968787 | 28.2835  | 35.27949 |
| ENSMUSG00000043929 | 16_Klhl15        | 256.9565825 | 0.924405 | 0.083514 | 0.688272 | 179.4812 | 181.1963 | 171.4412 | 634.0138 | 20.2472  | 175.3598 |
| ENSMUSG00000043932 | 5_Klrl2          | 11.4268542  | 1.429402 | 0.047544 | 0.688272 | 10.55772 | 4.293751 | 3.451836 | 20.83613 | 16.9701  | 12.45158 |
| ENSMUSG00000043943 | 14_Naalad2       | 113.9096655 | 0.764488 | 0.175789 | 0.688272 | 82.83748 | 108.2025 | 62.13305 | 267.8931 | 81.45649 | 80.9353  |
| ENSMUSG00000043991 | 3_Pura           | 2039.006128 | 0.786847 | 0.107021 | 0.688272 | 1558.482 | 1441.842 | 1488.892 | 4645.465 | 1465.085 | 1634.271 |
| ENSMUSG00000043998 | 10_Mgat2         | 917.5685362 | 0.61431  | 0.106136 | 0.688272 | 749.598  | 729.0789 | 824.9889 | 1781.985 | 908.4661 | 835.2938 |
| ENSMUSG00000044006 | 8_Clip2          | 74.61461777 | -1.27773 | 0.042901 | 0.688272 | 90.9588  | 123.9665 | 82.04897 | 18.85174 | 22.6268  | 89.23636 |
| ENSMUSG00000044018 | 3_Mrpl50         | 594.1647011 | 0.661656 | 0.100321 | 0.688272 | 458.0425 | 422.5051 | 500.5163 | 1139.042 | 538.5179 | 506.3644 |
| ENSMUSG00000044024 | 15_RelI2         | 9.791563786 | -1.72315 | 0.059546 | 0.688272 | 24.36397 | 10.305   | 10.35551 | 0.992197 | 3.39402  | 9.338689 |
| ENSMUSG00000044030 | 4_Irf2bp1        | 429.6265761 | -0.64723 | 0.182464 | 0.688272 | 469.4124 | 527.2726 | 576.4567 | 130.97   | 412.9391 | 460.7086 |
| ENSMUSG00000044042 | 18_Fmn1          | 803.7731777 | 0.526095 | 0.123634 | 0.688272 | 626.1539 | 729.0789 | 621.3305 | 1337.481 | 737.6337 | 770.9606 |
| ENSMUSG00000044098 | 14_Rsbm1         | 847.6809232 | 0.9152   | 0.068285 | 0.688272 | 602.6021 | 544.4476 | 615.5775 | 2025.074 | 642.6012 | 655.7835 |
| ENSMUSG00000044103 | 4_Ilf19          | 637.7013334 | 0.498273 | 0.15911  | 0.688272 | 549.8135 | 403.6126 | 632.8367 | 817.5702 | 911.8601 | 510.515  |
| ENSMUSG00000044139 | 12_Prs53         | 19.7901072  | -1.413   | 0.017101 | 0.688272 | 23.55183 | 35.20876 | 27.61469 | 7.937575 | 6.789041 | 17.63975 |
| ENSMUSG00000044147 | 7_Arf6           | 5123.016001 | 0.577852 | 0.138635 | 0.688272 | 3956.708 | 3635.948 | 4739.371 | 9351.455 | 4888.521 | 4166.093 |
| ENSMUSG00000044149 | 6_Nkrf           | 231.2300657 | 0.7632   | 0.111922 | 0.688272 | 192.4753 | 149.4225 | 172.5918 | 501.0594 | 204.7726 | 167.0588 |
| ENSMUSG00000044150 | 12_A83008D01Rik  | 232.0677979 | 1.169042 | 0.025707 | 0.688272 | 158.3658 | 128.8125 | 141.5253 | 592.3415 | 199.1159 | 172.2469 |
| ENSMUSG00000044155 | 11_Lsm8          | 809.7521574 | 0.483819 | 0.124985 | 0.688272 | 671.6333 | 591.6789 | 762.8558 | 1249.176 | 811.1709 | 771.9983 |
| ENSMUSG00000044177 | 4_Wfikkn2        | 170.8349266 | -1.15434 | 0.018254 | 0.688272 | 265.5672 | 309.1501 | 132.3204 | 71.43817 | 52.58783 | 163.9459 |
| ENSMUSG00000044206 | 3_Vsig4          | 4.514274074 | 1.684285 | 0.128034 | 0.688272 | 2.436397 | 1.7175   | 2.301224 | 12.89856 | 5.656701 | 2.075264 |
| ENSMUSG00000044221 | 14_Grsf1         | 1447.307793 | 0.633919 | 0.119681 | 0.688272 | 1187.337 | 1097.483 | 1118.395 | 2806.925 | 1215.059 | 1258.648 |
| ENSMUSG00000044224 | 16_Dnajc21       | 1089.222133 | 0.524898 | 0.148443 | 0.688272 | 896.5939 | 826.1177 | 957.3093 | 1895.096 | 966.1644 | 994.0515 |
| ENSMUSG00000044252 | 17_Osblp1a       | 949.659802  | 0.414199 | 0.137645 | 0.688272 | 795.0774 | 781.4627 | 866.4109 | 1367.247 | 936.7496 | 950.471  |
| ENSMUSG00000044258 | 9_Ctla2a         | 137.6596086 | 0.648351 | 0.130737 | 0.688272 | 125.0684 | 91.88627 | 104.7057 | 226.2209 | 187.8025 | 90.27399 |
| ENSMUSG00000044287 | 6_Nm1f           | 1.535042285 | -2.85746 | 0.125137 | 0.688272 | 2.436397 | 3.435001 | 2.301224 | 0        | 0        | 1.037632 |
| ENSMUSG00000044288 | 6_Cnrf1          | 14.20881778 | 0.857207 | 0.164988 | 0.688272 | 9.745586 | 10.305   | 10.35551 | 27.78151 | 13.57608 | 13.48922 |
| ENSMUSG00000044308 | 17_Ubr3          | 2859.892725 | 0.534633 | 0.130947 | 0.688272 | 2359.244 | 2263.666 | 2385.219 | 4956.023 | 2628.103 | 2567.102 |
| ENSMUSG00000044320 | 14_1700001O22Rik | 15.79829557 | -0.95459 | 0.149968 | 0.688272 | 22.7397  | 18.8925  | 20.71102 | 3.968787 | 18.10144 | 10.37632 |
| ENSMUSG00000044328 | 13_Trip53i13     | 62.86872514 | -1.44163 | 0.064472 | 0.688272 | 97.45586 | 102.1913 | 75.9404  | 2.97659  | 38.46556 | 60.18266 |
| ENSMUSG00000044339 | 12_Alkhh2        | 35.11189889 | -0.87054 | 0.090082 | 0.688272 | 46.29153 | 36.92626 | 52.92816 | 11.90636 | 29.41484 | 33.20423 |
| ENSMUSG00000044350 | 14_Lacc1         | 150.7508939 | 0.69835  | 0.054061 | 0.688272 | 122.632  | 97.03878 | 125.4167 | 244.0804 | 186.6711 | 128.8661 |
| ENSMUSG00000044405 | 4_Adig           | 1.685936996 | -3.00925 | 0.10818  | 0.688272 | 1.624264 | 5.152501 | 2.301224 | 0        | 0        | 1.037632 |
| ENSMUSG00000044408 | 6_Sptssa         | 1179.688434 | 0.722278 | 0.141003 | 0.688272 | 881.9755 | 896.5352 | 892.875  | 2645.197 | 810.0395 | 951.5086 |
| ENSMUSG00000044429 | 8_Cryga          | 110.7910023 | -2.54273 | 0.017963 | 0.688272 | 102.3287 | 449.9851 | 14.95796 | 2.97659  | 38.46556 | 56.03213 |
| ENSMUSG00000044430 | 11_Klk12         | 2.313664069 | -2.46785 | 0.10878  | 0.688272 | 5.684925 | 2.576251 | 3.451836 | 0        | 1.13134  | 1.037632 |
| ENSMUSG00000044433 | 15_Camsap3       | 1153.89745  | -0.76865 | 0.196193 | 0.688272 | 1291.29  | 1407.492 | 1663.785 | 206.3769 | 1120.057 | 1251.384 |
| ENSMUSG00000044477 | 10_Zlfand3       | 1263.964603 | -0.3906  | 0.165756 | 0.688272 | 1344.891 | 1476.192 | 1480.838 | 824.5156 | 1280.677 | 1176.675 |
| ENSMUSG00000044496 | 6_2510039O18Rik  | 1242.040659 | -0.6444  | 0.121244 | 0.688272 | 1285.605 | 1477.909 | 1781.148 | 497.0906 | 1241.08  | 1169.411 |
| ENSMUSG00000044501 | 17_Zfp758        | 234.2129951 | 1.475051 | 0.017614 | 0.688272 | 125.0684 | 140.835  | 105.8563 | 716.3661 | 145.9429 | 171.2093 |
| ENSMUSG00000044550 | 11_Tcoal3        | 107.2042013 | -0.72706 | 0.092193 | 0.688272 | 122.632  | 190.6425 | 87.44652 | 65.48499 | 70.14309 | 106.8761 |
| ENSMUSG00000044566 | 15_Cage1         | 120.8179463 | 0.568028 | 0.048254 | 0.688272 | 102.3287 | 95.32127 | 94.35019 | 164.7047 | 131.2355 | 136.9674 |
| ENSMUSG00000044573 | 14_Acp1          | 1309.132102 | 0.380687 | 0.17981  | 0.688272 | 1126.427 | 1076.873 | 1209.293 | 1890.135 | 1271.626 | 1280.348 |
| ENSMUSG00000044583 | 13_Tlr7          | 107.6337333 | 1.084454 | 0.05091  | 0.688272 | 95.8316  | 45.51376 | 65.58489 | 253.0102 | 114.2654 | 71.59661 |
| ENSMUSG00000044628 | 4_Rnf208         | 223.3731131 | -0.99714 | 0.155532 | 0.688272 | 253.3852 | 305.7151 | 333.6775 | 20.83613 | 227.3994 | 199.2254 |
| ENSMUSG00000044646 | 14_Zbtb7c        | 682.8025185 | -0.5816  | 0.196551 | 0.688272 | 758.5315 | 815.8127 | 881.3689 | 245.0726 | 618.843  | 777.1864 |
| ENSMUSG00000044700 | 15_Tmem201       | 420.2364119 | -0.71249 | 0.16112  | 0.688272 | 509.2069 | 551.3176 | 505.1187 | 112.1182 | 401.6257 | 442.0313 |
| ENSMUSG00000044703 | 5_Phf11a         | 521.4314954 | 1.11769  | 0.071605 | 0.688272 | 291.5555 | 182.9138 | 513.173  | 848.3283 | 836.0603 | 456.5581 |
| ENSMUSG00000044712 | 15_Slc38a6       | 243.4938664 | 0.437874 | 0.158876 | 0.688272 | 220.0878 | 185.49   | 215.1645 | 351.2377 | 216.086  | 272.8972 |
| ENSMUSG00000044715 | 6_Gskip          | 705.7990531 | 0.428447 | 0.133968 | 0.688272 |          |          |          |          |          |          |

|                     |                  |             |          |          |          |          |          |          |          |          |          |
|---------------------|------------------|-------------|----------|----------|----------|----------|----------|----------|----------|----------|----------|
| ENSMUSG000000045252 | 11_Zfp574        | 322.3241732 | -0.87896 | 0.132825 | 0.688272 | 336.2227 | 407.9064 | 508.5706 | 60.52401 | 290.7544 | 329.967  |
| ENSMUSG000000045268 | 13_Zfp691        | 114.2931904 | -0.90761 | 0.072776 | 0.688272 | 160.8022 | 132.2475 | 154.182  | 32.74249 | 79.19381 | 126.5911 |
| ENSMUSG000000045273 | 8_Cenph          | 118.6632769 | 0.679876 | 0.120411 | 0.688272 | 90.14667 | 85.87502 | 97.80203 | 225.2287 | 127.8414 | 85.08584 |
| ENSMUSG000000045287 | 6_Rtn4r1         | 140.4873995 | -1.06235 | 0.019405 | 0.688272 | 189.2268 | 234.4388 | 146.1277 | 51.59423 | 81.45649 | 140.0803 |
| ENSMUSG000000045318 | 6_Adra2c         | 22.30557176 | -1.46086 | 0.049863 | 0.688272 | 33.29742 | 46.37251 | 18.40979 | 3.968787 | 7.919381 | 23.86554 |
| ENSMUSG000000045319 | 13_Proser2       | 1504.459045 | -0.41588 | 0.142566 | 0.688272 | 1575.536 | 1747.557 | 1836.377 | 982.2748 | 135.163  | 1539.864 |
| ENSMUSG000000045328 | 11_Cenpe         | 887.5337423 | 0.66245  | 0.064652 | 0.688272 | 778.0226 | 545.3064 | 738.693  | 1491.272 | 1010.287 | 761.6219 |
| ENSMUSG000000045333 | 15_Zfp423        | 87.07046522 | -1.19831 | 0.010252 | 0.688272 | 85.27388 | 134.8238 | 143.8265 | 29.7659  | 50.9103  | 77.8224  |
| ENSMUSG000000045348 | 15_Nypa1         | 451.0881078 | -0.76891 | 0.112399 | 0.688272 | 458.0425 | 530.7076 | 716.8313 | 138.9076 | 423.1212 | 438.9184 |
| ENSMUSG000000045377 | 5_Tmem88         | 40.23272746 | -1.00822 | 0.031565 | 0.688272 | 48.72793 | 58.39502 | 54.07877 | 15.87515 | 24.88948 | 39.43002 |
| ENSMUSG000000045410 | 17_Akrl1e        | 558.4979792 | 0.486119 | 0.169447 | 0.688272 | 483.2186 | 459.4314 | 453.3412 | 943.5792 | 497.7896 | 513.6279 |
| ENSMUSG000000045414 | 7_1190002N15Rik  | 527.7287278 | 0.70762  | 0.144958 | 0.688272 | 418.2481 | 437.9626 | 346.3342 | 1147.972 | 354.1095 | 461.7463 |
| ENSMUSG000000045427 | 13_HnmpH2        | 2617.479576 | 0.569131 | 0.135226 | 0.688272 | 2192.757 | 1905.567 | 2225.284 | 4748.654 | 2462.927 | 2169.689 |
| ENSMUSG000000045466 | 18_Zfp956        | 172.3344243 | -0.67441 | 0.044872 | 0.688272 | 201.4088 | 236.1563 | 197.9053 | 93.2665  | 140.2862 | 164.9835 |
| ENSMUSG000000045519 | 14_Zfp560        | 296.4495111 | 0.776621 | 0.101618 | 0.688272 | 219.2757 | 232.7213 | 203.6583 | 646.9123 | 261.3396 | 214.7898 |
| ENSMUSG000000045532 | 5_C1ql1          | 6.307722107 | -1.56732 | 0.12581  | 0.688272 | 13.80625 | 12.0225  | 2.301224 | 1.984394 | 5.656701 | 2.075264 |
| ENSMUSG000000045598 | 10_Zfp553        | 316.7222497 | -0.48723 | 0.160768 | 0.688272 | 366.2716 | 357.2401 | 385.4551 | 166.6891 | 300.9365 | 323.7412 |
| ENSMUSG000000045624 | 15_Esf1          | 641.3569937 | 0.858903 | 0.083065 | 0.688272 | 456.4183 | 443.1151 | 468.2991 | 1491.272 | 540.7806 | 448.2571 |
| ENSMUSG000000045625 | 4_Plgz           | 85.84253942 | -0.77479 | 0.128187 | 0.688272 | 113.6985 | 79.00502 | 132.3204 | 26.78931 | 79.19381 | 84.0482  |
| ENSMUSG000000045672 | 15_Col27a1       | 268.1429911 | -0.8035  | 0.086963 | 0.688272 | 319.1679 | 442.2564 | 261.1889 | 101.2041 | 181.0144 | 304.0262 |
| ENSMUSG000000045679 | 13_Pqlc3         | 1899.776167 | 0.572036 | 0.144244 | 0.688272 | 1549.548 | 1410.068 | 1624.664 | 3526.267 | 1639.312 | 1648.797 |
| ENSMUSG000000045751 | 16_Mms22l        | 352.2012787 | 0.487894 | 0.111108 | 0.688272 | 273.6885 | 246.4613 | 360.1416 | 489.153  | 398.2317 | 345.5315 |
| ENSMUSG000000045767 | 8_B230219D22Rik  | 2038.628138 | 0.571089 | 0.155193 | 0.688272 | 1703.041 | 1622.179 | 1595.899 | 3835.833 | 1588.402 | 1886.415 |
| ENSMUSG000000045775 | 15_Slc16a5       | 6.727538893 | -1.34404 | 0.134966 | 0.688272 | 10.55772 | 13.74    | 4.602448 | 2.97659  | 2.26268  | 6.225792 |
| ENSMUSG000000045776 | 2_Ltrm1          | 21.20530505 | 1.444    | 0.199181 | 0.688272 | 21.92757 | 12.0225  | 0        | 57.54742 | 30.54618 | 5.18816  |
| ENSMUSG000000045817 | 8_Zfp3612        | 3835.85433  | 0.727501 | 0.056457 | 0.688272 | 2832.717 | 2816.701 | 3016.905 | 7262.881 | 3895.204 | 3190.719 |
| ENSMUSG000000045827 | 10_Serpinb9      | 1112.171064 | 0.029839 | 0.011101 | 0.688272 | 797.5138 | 607.1364 | 789.3199 | 2229.466 | 1365.528 | 884.0625 |
| ENSMUSG000000045854 | 4_Lym2           | 257.3958128 | 0.539906 | 0.177357 | 0.688272 | 221.7121 | 212.1113 | 195.6041 | 470.3013 | 219.48   | 225.1662 |
| ENSMUSG000000045871 | 5_Slitrk6        | 405.2711617 | 0.659062 | 0.179377 | 0.688272 | 319.9801 | 303.1388 | 319.8702 | 877.102  | 353.2408 | 256.2951 |
| ENSMUSG000000045948 | 8_Mrps12         | 95.64943528 | -1.10704 | 0.096828 | 0.688272 | 103.1408 | 142.5525 | 146.1277 | 10.91416 | 87.11319 | 84.0482  |
| ENSMUSG000000045961 | 16_Wnk1          | 8864.952217 | 0.426442 | 0.162053 | 0.688272 | 7488.671 | 7373.229 | 7831.066 | 13652.63 | 8659.277 | 8184.842 |
| ENSMUSG000000045968 | 7_Teddmd         | 15.59349519 | 0.786234 | 0.187521 | 0.688272 | 9.745586 | 16.31625 | 8.054285 | 17.85954 | 26.02082 | 15.56448 |
| ENSMUSG000000045994 | 16_B3gat1        | 22.04973861 | -0.85802 | 0.151327 | 0.688272 | 34.92168 | 31.77376 | 18.40979 | 21.82833 | 18.1044  | 7.263424 |
| ENSMUSG000000045996 | 12_Polr2c        | 396.0680679 | 0.943479 | 0.045705 | 0.688272 | 285.0584 | 250.7551 | 277.2975 | 902.8991 | 356.3721 | 304.0262 |
| ENSMUSG000000046031 | 6_Fam26f         | 52.79126131 | 1.042754 | 0.049711 | 0.688272 | 48.72793 | 14.59875 | 40.27142 | 84.33673 | 76.93113 | 51.8816  |
| ENSMUSG000000046049 | 6_Rp111          | 38.13220004 | -1.15621 | 0.128773 | 0.688272 | 77.96469 | 56.67751 | 23.01224 | 21.82833 | 44.12226 | 5.18816  |
| ENSMUSG000000046062 | 5_Ppp1r15b       | 3125.942226 | 0.547531 | 0.072941 | 0.688272 | 2490.809 | 2252.502 | 2876.53  | 4834.975 | 3336.322 | 2964.515 |
| ENSMUSG000000046080 | 17_Clec9a        | 16.50175326 | 1.059771 | 0.131234 | 0.688272 | 17.05478 | 6.870002 | 8.054285 | 37.70348 | 15.83876 | 13.48922 |
| ENSMUSG000000046085 | 7_4931422A03Rik  | 1.89904678  | -2.16962 | 0.182802 | 0.688272 | 1.624264 | 4.293751 | 3.451836 | 0.992197 | 0        | 1.037632 |
| ENSMUSG000000046096 | 6_BC030336       | 651.3477673 | 0.664035 | 0.165463 | 0.688272 | 501.0856 | 504.9451 | 506.2693 | 1411.896 | 466.1121 | 517.7784 |
| ENSMUSG000000046110 | 15_Serinc4       | 12.17532436 | 2.111945 | 0.005393 | 0.688272 | 5.684925 | 3.435001 | 4.602448 | 30.7581  | 19.23278 | 9.338689 |
| ENSMUSG000000046111 | 16_Cep295        | 863.2758285 | 0.630603 | 0.065851 | 0.688272 | 715.4884 | 578.7977 | 738.693  | 1534.928 | 817.9589 | 793.7885 |
| ENSMUSG000000046138 | 14_9930021J03Rik | 1495.374482 | 0.648216 | 0.113014 | 0.688272 | 1201.956 | 1120.669 | 1172.474 | 2921.027 | 1270.495 | 1285.626 |
| ENSMUSG000000046182 | 8_Gsg1l          | 54.4986447  | -0.97212 | 0.063387 | 0.688272 | 76.34042 | 74.71127 | 65.58489 | 26.78931 | 19.23278 | 64.33319 |
| ENSMUSG000000046186 | 8_Cd109          | 3930.506645 | 0.645468 | 0.102071 | 0.688272 | 3063.363 | 2772.904 | 3360.938 | 7467.273 | 3415.516 | 3503.046 |
| ENSMUSG000000046230 | 9_Vps13a         | 1882.836579 | 0.939048 | 0.038954 | 0.688272 | 1387.934 | 1186.793 | 1297.89  | 4237.673 | 1592.927 | 1593.803 |
| ENSMUSG000000046295 | 13_Ankle1        | 85.55244906 | -0.74177 | 0.142306 | 0.688272 | 105.5772 | 90.16877 | 125.4167 | 25.79712 | 79.19381 | 87.16109 |
| ENSMUSG000000046311 | 13_Zfp62         | 1068.445023 | 1.004233 | 0.053114 | 0.688272 | 743.9131 | 673.2602 | 715.6807 | 2671.986 | 771.574  | 834.2562 |
| ENSMUSG000000046312 | 4_A1644131       | 421.5661555 | -0.45051 | 0.101621 | 0.688272 | 427.9937 | 547.0239 | 485.5583 | 305.5966 | 345.0587 | 418.1657 |
| ENSMUSG000000046314 | 15_Stxbp6        | 186.4299348 | 0.771135 | 0.161982 | 0.688272 | 151.0566 | 142.5525 | 119.6637 | 437.5588 | 100.6893 | 167.0588 |
| ENSMUSG000000046324 | 12_Emp1          | 7295.581169 | 0.509621 | 0.133556 | 0.688272 | 5892.831 | 5567.278 | 6601.062 | 12150.44 | 6990.55  | 6571.324 |
| ENSMUSG000000046329 | 14_Slc25a23      | 413.4769951 | -0.75444 | 0.040395 | 0.688272 | 462.1032 | 694.7289 | 400.413  | 224.2365 | 313.3812 | 385.9991 |
| ENSMUSG000000046337 | 17_Fam178b       | 21.40333197 | -0.96483 | 0.10523  | 0.688272 | 15.43051 | 42.93751 | 26.46408 | 9.921968 | 18.10144 | 15.56448 |
| ENSMUSG000000046351 | 10_Zfp322a       | 605.7048765 | 0.919692 | 0.064151 | 0.688272 | 435.3028 | 389.0139 | 432.6302 | 1434.717 | 480.8195 | 461.7463 |
| ENSMUSG000000046352 | 7_Glb2           | 3172.510161 | 0.39445  | 0.168168 | 0.688272 | 2554.156 | 2469.766 | 3201.003 | 3974.74  | 4040.16  | 2795.381 |
| ENSMUSG000000046404 | 5_Yod1           | 545.7180886 | 0.793144 | 0.077209 | 0.688272 | 427.9937 | 346.9351 | 423.4253 | 1159.878 | 449.142  | 466.9344 |
| ENSMUSG000000046449 | 15_C77370        | 39.70836495 | 0.898048 | 0.066781 | 0.688272 | 25.1761  | 36.06751 | 21.86163 | 76.39915 | 36.20288 | 42.54291 |
| ENSMUSG000000046470 | 5_Sox18          | 44.2119245  | -1.18777 | 0.058024 | 0.688272 | 61.72205 | 52.38376 | 70.18734 | 6.945378 | 29.41484 | 44.61818 |
| ENSMUSG000000046491 | 10_C1qtnf2       | 141.8574566 | -0.95497 | 0.071335 | 0.688272 | 164.8628 | 211.2526 | 185.2485 | 33.73469 | 109.74   | 146.3061 |
| ENSMUSG000000046519 | 15_Golph3l       | 923.1521901 | 0.52635  | 0.161745 | 0.688272 | 766.6528 | 770.2989 | 732.9399 | 1637.125 | 885.8393 | 746.0577 |
| ENSMUSG000000046532 | 7_Ar             | 114.1995566 | 0.869846 | 0.10199  | 0.688272 | 82.02535 | 66.73377 | 73.63917 | 258.9634 | 64.48639 | 119.3247 |
| ENSMUSG000000046541 | 9_Zfp526         | 306.686376  | -0.6341  | 0.133309 | 0.688272 | 358.9624 | 340.0651 | 419.9734 | 121.048  | 279.441  | 320.6283 |
| ENSMUSG000000046573 | 6_Lym4           | 126.5879913 | 0.594306 | 0.14838  | 0.688272 | 104.7651 | 94.46252 | 103.5551 | 229.1975 | 128.9278 | 98.57505 |
| ENSMUSG000000046574 | 7_Prr12          | 611.291828  | -1.07138 | 0.108001 | 0.688272 | 710.6157 | 838.999  | 935.4476 | 66.47719 | 150.2344 | 605.9771 |
| ENSMUSG000000046658 | 16_Zfp316        | 318.2251843 | -0.54682 | 0.071941 | 0.688272 | 379.2657 | 346.9351 | 407.3167 | 197.4472 | 255.6829 | 322.7036 |
| ENSMUSG000000046667 | 14_Rbm12b1       | 181.7799951 | 0.708058 | 0.128086 | 0.688272 | 135.6261 | 155.4338 | 123.1155 | 380.0114 | 147.0742 | 149.419  |
| ENSMUSG000000046675 | 6_Tmem25t        | 276.8692951 | 0.606578 | 0.108331 | 0.688272 | 218.4636 | 235.2976 | 204.809  | 495.1062 | 264.7336 | 242.8059 |
| ENSMUSG000000046688 | 14_Tifa          | 583.8786743 | 0.83299  | 0.044509 | 0.688272 | 452.3576 | 349.5113 | 457.9436 | 1177.738 | 552.094  | 513.6279 |
| ENSMUSG000000046719 | 7_Nxph3          | 14.89053834 | -1.25521 | 0.063471 | 0.688272 | 18.67904 | 29.19751 | 14.95796 | 3.968787 | 5.050721 | 13.48922 |
| ENSMUSG000000046727 | 12_Cysltm1       | 91.50852677 | -0.65566 | 0.105321 | 0.688272 | 108.0136 | 142.5525 | 85.1453  | 53.57863 | 62.22371 | 97.53741 |
| ENSMUSG000000046743 | 6_Fat4           | 1039.207581 | -0.47058 | 0.124663 | 0.688272 | 1210.889 | 1391.175 | 1019.442 | 856.2659 | 673.1474 | 1084.326 |
| ENSMUSG000000046753 | 9_Cdc66          | 395.462352  | 0.605162 | 0.151767 | 0.688272 | 313.483  | 295.4101 | 332.5269 | 764.9837 | 303.991  | 363.1712 |
| ENSMUSG000000046782 | 14_4921506M07Rik | 8.575637911 | 1.326235 | 0.133745 | 0.688272 | 3.248529 | 6.870002 | 4.602448 | 23.81272 | 5.569701 | 7.263424 |
| ENSMUSG000000046785 | 8_Epm2aip1       | 1543.031674 | 0.724682 | 0.115211 | 0.688272 |          |          |          |          |          |          |

|                    |                 |             |           |          |          |          |          |          |          |          |          |
|--------------------|-----------------|-------------|-----------|----------|----------|----------|----------|----------|----------|----------|----------|
| ENSMUSG00000047394 | 7_Odf3b         | 1.56037691  | -2.877786 | 0.199184 | 0.688272 | 4.872793 | 0        | 3.451836 | 0        | 0        | 1.037632 |
| ENSMUSG00000047412 | 15_Zbtb44       | 802.5367551 | 0.555411  | 0.165169 | 0.688272 | 672.4454 | 628.6052 | 648.9452 | 1497.225 | 643.7325 | 724.2672 |
| ENSMUSG00000047414 | 6_Flt2          | 1292.606891 | 0.63254   | 0.14424  | 0.688272 | 1076.075 | 954.9302 | 1010.237 | 2604.517 | 1031.782 | 1078.1   |
| ENSMUSG00000047417 | 17_Rexo1        | 572.3151805 | -1.02485  | 0.117643 | 0.688272 | 673.2576 | 755.7002 | 873.3146 | 67.46938 | 96.5572  | 568.6224 |
| ENSMUSG00000047419 | 5_Cmya5         | 321.1265575 | 1.176583  | 0.094928 | 0.688272 | 150.2445 | 287.6813 | 153.0314 | 919.7664 | 495.5793 | 361.4778 |
| ENSMUSG00000047428 | 14_Dlk2         | 107.99239   | -0.99309  | 0.145677 | 0.688272 | 104.7651 | 122.8013 | 203.6583 | 13.89076 | 18.17907 | 84.0482  |
| ENSMUSG00000047446 | 18_Arl4a        | 458.3261849 | 0.702457  | 0.195573 | 0.688272 | 345.1562 | 424.2226 | 277.2975 | 1072.565 | 298.6738 | 332.0423 |
| ENSMUSG00000047485 | 6_Kihl34        | 3.807347627 | -2.13532  | 0.081193 | 0.688272 | 5.684925 | 6.011252 | 6.903673 | 0        | 1.13134  | 3.112896 |
| ENSMUSG00000047490 | 1_4932411E22Rik | 9.555986871 | -1.3806   | 0.172586 | 0.688272 | 19.49117 | 20.61001 | 1.150612 | 2.97659  | 7.919381 | 5.18816  |
| ENSMUSG00000047496 | 6_Rnf152        | 5350.034905 | 0.737362  | 0.093986 | 0.688272 | 4047.667 | 3827.45  | 4160.613 | 11258.46 | 4430.328 | 4375.694 |
| ENSMUSG00000047502 | 14_Mroh7        | 59.20587936 | -0.85771  | 0.14175  | 0.688272 | 69.84337 | 115.0725 | 43.72326 | 17.89594 | 47.51628 | 61.22029 |
| ENSMUSG00000047507 | 12_Baiap3       | 64.35788284 | -1.01713  | 0.126452 | 0.688272 | 82.83748 | 103.05   | 72.48856 | 10.91416 | 32.80886 | 84.0482  |
| ENSMUSG00000047515 | 8_BC049715      | 22.97445154 | 0.936658  | 0.054082 | 0.688272 | 17.86691 | 11.16375 | 18.40979 | 31.7503  | 31.67752 | 26.97843 |
| ENSMUSG00000047534 | 16_Misr18bp1    | 209.3489265 | 0.983565  | 0.060131 | 0.688272 | 176.2327 | 113.355  | 132.3204 | 502.0516 | 176.4891 | 155.6448 |
| ENSMUSG00000047554 | 13_Tmem41b      | 1541.756586 | 0.57317   | 0.138075 | 0.688272 | 1267.738 | 1161.03  | 1289.836 | 2828.753 | 1442.459 | 1260.723 |
| ENSMUSG00000047617 | 11_BC029214     | 406.8007777 | -0.64996  | 0.162091 | 0.688272 | 497.837  | 525.5551 | 467.1485 | 133.9466 | 372.2109 | 444.1065 |
| ENSMUSG00000047648 | 13_Fbxo30       | 376.7893459 | 0.866796  | 0.060501 | 0.688272 | 249.3246 | 245.6026 | 306.0628 | 826.4999 | 329.22   | 304.0262 |
| ENSMUSG00000047654 | 6_Tssk6         | 6.291440017 | -1.78506  | 0.106248 | 0.688272 | 4.872793 | 12.88125 | 11.50612 | 0        | 2.26268  | 6.225792 |
| ENSMUSG00000047656 | 8_Trpt1         | 120.1930777 | -0.90661  | 0.053907 | 0.688272 | 142.1231 | 138.2588 | 189.851  | 37.70348 | 106.346  | 106.8761 |
| ENSMUSG00000047658 | 6_Gal3st3       | 7.35434517  | -2.05617  | 0.028304 | 0.688272 | 12.18198 | 6.31625  | 6.903673 | 0.992197 | 5.656701 | 2.075264 |
| ENSMUSG00000047669 | 17_Slc3l2       | 155.3159126 | 0.380726  | 0.199345 | 0.688272 | 130.7533 | 130.53   | 143.8265 | 213.3223 | 164.4443 | 194.419  |
| ENSMUSG00000047686 | 9_Zcchc5        | 31.16632175 | -0.99046  | 0.060784 | 0.688272 | 46.29153 | 50.66626 | 27.61469 | 18.85174 | 12.04474 | 31.12896 |
| ENSMUSG00000047694 | 12_Yipf6        | 1505.500444 | 0.838006  | 0.061917 | 0.688272 | 1061.457 | 1073.438 | 1105.738 | 3277.226 | 1339.507 | 1175.637 |
| ENSMUSG00000047714 | 14_Ppp1f2       | 3119.68496  | 0.846835  | 0.07839  | 0.688272 | 2208.187 | 2231.033 | 2249.447 | 7163.661 | 2496.868 | 2368.914 |
| ENSMUSG00000047721 | 8_Bola2         | 233.0437911 | -1.11192  | 0.096987 | 0.688272 | 309.4224 | 274.8001 | 371.6477 | 24.80492 | 193.4592 | 224.1285 |
| ENSMUSG00000047735 | 14_Samd9l       | 14669.80421 | 1.417163  | 0.006949 | 0.688272 | 7830.578 | 6624.399 | 9524.767 | 39567.89 | 14147.41 | 10333.78 |
| ENSMUSG00000047746 | 14_Fbxo40       | 25.53421468 | 1.263802  | 0.138127 | 0.688272 | 8.121322 | 23.18626 | 13.80735 | 76.39915 | 6.788044 | 24.90317 |
| ENSMUSG00000047757 | 16_Fancb        | 87.23540446 | 0.790473  | 0.096795 | 0.688272 | 72.27976 | 47.23126 | 72.48856 | 177.6032 | 78.06247 | 75.74714 |
| ENSMUSG00000047787 | 7_Flt1f1        | 57.39457221 | -0.77893  | 0.096723 | 0.688272 | 61.72205 | 103.9088 | 51.77754 | 32.74249 | 35.07154 | 59.14503 |
| ENSMUSG00000047789 | 4_Slc38a9       | 459.9067917 | 0.429706  | 0.192571 | 0.688272 | 417.4359 | 409.6239 | 348.6355 | 719.3427 | 414.0705 | 540.3323 |
| ENSMUSG00000047793 | 13_Nsd3         | 5234.501455 | -0.40361  | 0.151126 | 0.688272 | 5264.241 | 7064.079 | 5557.456 | 3885.443 | 4188.221 | 5447.568 |
| ENSMUSG00000047819 | 3_Tigld4        | 116.4635424 | 1.481551  | 0.072396 | 0.688272 | 65.78271 | 67.84127 | 50.62693 | 418.7071 | 29.41484 | 66.40845 |
| ENSMUSG00000047822 | 7_Gm6484        | 2.288329449 | -2.445399 | 0.116499 | 0.688272 | 3.248529 | 6.011252 | 2.301224 | 0        | 1.13134  | 1.037632 |
| ENSMUSG00000047854 | 5_Stx19         | 284.233743  | 0.774397  | 0.078745 | 0.688272 | 219.2757 | 181.1963 | 228.9718 | 585.3961 | 260.2802 | 230.3543 |
| ENSMUSG00000047867 | 11_Gimap6       | 144.01309   | 0.555141  | 0.107641 | 0.688272 | 142.1231 | 96.18002 | 111.6094 | 217.2911 | 139.1548 | 157.7201 |
| ENSMUSG00000047879 | 16_Usp14        | 1754.286351 | 0.828936  | 0.065631 | 0.688272 | 1309.157 | 1163.607 | 1318.601 | 3797.137 | 1612.16  | 1325.056 |
| ENSMUSG00000047880 | 14_Cxcr5        | 8.651704969 | 1.276765  | 0.126225 | 0.688272 | 8.121322 | 3.435001 | 3.451836 | 15.87515 | 15.83876 | 5.18816  |
| ENSMUSG00000047910 | 6_Pcdhb16       | 105.7519168 | 0.70648   | 0.145649 | 0.688272 | 78.77682 | 91.02752 | 71.33795 | 219.2755 | 72.40577 | 101.6879 |
| ENSMUSG00000047921 | 15_Trappc9      | 1255.061347 | -0.8136   | 0.147965 | 0.688272 | 1397.679 | 1579.242 | 1822.57  | 254.9946 | 1203.746 | 1272.137 |
| ENSMUSG00000047992 | 10_Fam69c       | 15.16047992 | -0.95405  | 0.198305 | 0.688272 | 23.55183 | 24.90376 | 11.50612 | 8.929771 | 3.39402  | 18.67738 |
| ENSMUSG00000047996 | 16_Prrg1        | 79.67174205 | 0.875361  | 0.180769 | 0.688272 | 63.34631 | 62.68877 | 42.57265 | 215.3067 | 46.38494 | 47.73108 |
| ENSMUSG00000048001 | 7_Hes5          | 4.691066196 | -2.1361   | 0.075061 | 0.688272 | 4.060661 | 8.587502 | 10.35551 | 0.992197 | 0        | 4.150528 |
| ENSMUSG00000048004 | 14_Tmem196      | 1.034979559 | -3.42771  | 0.137272 | 0.688272 | 1.624264 | 3.435001 | 1.150612 | 0        | 0        | 0        |
| ENSMUSG00000048007 | 4_Timm8a1       | 184.3073876 | 1.078769  | 0.043882 | 0.688272 | 147.8081 | 97.03878 | 110.4588 | 441.5276 | 197.9845 | 111.0266 |
| ENSMUSG00000048013 | 9_Krt35         | 1.28035566  | -3.73599  | 0.177237 | 0.688272 | 0.812132 | 6.870002 | 0        | 0        | 0        | 0        |
| ENSMUSG00000048038 | 6_4932418E24Rik | 1.384632327 | -3.85314  | 0.131787 | 0.688272 | 4.872793 | 3.435001 | 0        | 0        | 0        | 0        |
| ENSMUSG00000048039 | 8_Isg20l2       | 790.3260546 | 0.378702  | 0.165072 | 0.688272 | 650.5179 | 647.4977 | 764.0064 | 1068.596 | 875.6572 | 735.6811 |
| ENSMUSG00000048047 | 3_Zbtb33        | 1158.760357 | 1.040342  | 0.042947 | 0.688272 | 782.0833 | 710.1864 | 782.4162 | 2903.168 | 893.7587 | 880.9496 |
| ENSMUSG00000048100 | 13_Taf13        | 907.6249942 | 0.733908  | 0.073958 | 0.688272 | 725.234  | 643.2039 | 676.5599 | 1807.783 | 829.2723 | 763.6972 |
| ENSMUSG00000048109 | 10_Rbm1m        | 365.3389358 | 0.477784  | 0.162465 | 0.688272 | 315.1073 | 275.6588 | 325.6232 | 571.5054 | 408.4138 | 295.7251 |
| ENSMUSG00000048118 | 17_Arid4a       | 1297.568587 | 0.409047  | 0.172205 | 0.688272 | 1057.396 | 1096.624 | 1190.884 | 1947.682 | 1270.495 | 1222.331 |
| ENSMUSG00000048120 | 16_Entpd1       | 854.3290719 | 0.424088  | 0.091899 | 0.688272 | 785.3318 | 674.1189 | 729.4881 | 1090.424 | 1022.731 | 823.8799 |
| ENSMUSG00000048126 | 16_Col6a1       | 5977.405895 | -0.6041   | 0.071255 | 0.688272 | 6682.224 | 8973.94  | 5976.279 | 3566.948 | 4325.113 | 6339.932 |
| ENSMUSG00000048148 | 16_Nwd1         | 126.6451155 | -0.94863  | 0.111155 | 0.688272 | 155.1172 | 223.2751 | 121.9649 | 83.34453 | 72.40577 | 103.7632 |
| ENSMUSG00000048154 | 16_Kmt2d        | 2876.469678 | -0.65038  | 0.190144 | 0.688272 | 3141.327 | 3449.6   | 3951.202 | 823.5234 | 2949.404 | 2943.762 |
| ENSMUSG00000048200 | 11_Cracr2b      | 271.8076647 | -0.87647  | 0.109042 | 0.688272 | 315.9194 | 369.2626 | 370.4971 | 60.52401 | 121.6919 | 301.9509 |
| ENSMUSG00000048232 | 12_Fbxo10       | 225.9724513 | -0.75012  | 0.066745 | 0.688272 | 270.44   | 339.2063 | 240.4779 | 105.1729 | 150.4682 | 250.0693 |
| ENSMUSG00000048240 | 14_Gng7         | 157.5782152 | -0.67407  | 0.088454 | 0.688272 | 180.2933 | 222.4163 | 178.3449 | 74.41476 | 118.7907 | 171.2093 |
| ENSMUSG00000048249 | 14_Crebrf       | 1468.229135 | 0.920028  | 0.056212 | 0.688272 | 1024.911 | 955.789  | 1065.467 | 3424.071 | 1143.785 | 1195.352 |
| ENSMUSG00000048279 | 17_Sacs         | 91.91014953 | 0.808449  | 0.188224 | 0.688272 | 80.40109 | 80.72252 | 99.12081 | 225.2287 | 67.88041 | 58.1074  |
| ENSMUSG00000048280 | 17_Zfp738       | 358.5780409 | 0.970134  | 0.054629 | 0.688272 | 262.3187 | 254.1901 | 210.562  | 859.2424 | 296.4111 | 268.7467 |
| ENSMUSG00000048329 | 7_Mtsd6l        | 11.41663907 | -1.33161  | 0.119306 | 0.688272 | 12.99411 | 23.18626 | 12.65673 | 0.992197 | 12.44474 | 6.225792 |
| ENSMUSG00000048368 | 8_Omd           | 277.2351029 | 1.173278  | 0.072089 | 0.688272 | 151.0566 | 196.6538 | 163.3869 | 806.656  | 114.2654 | 231.392  |
| ENSMUSG00000048379 | 8_Socs4         | 1339.632785 | 0.882942  | 0.054832 | 0.688272 | 959.1281 | 874.2077 | 992.9783 | 2995.442 | 1135.865 | 1080.175 |
| ENSMUSG00000048387 | 7_Osr1          | 10.59352886 | -0.92315  | 0.182835 | 0.688272 | 11.36985 | 12.0225  | 18.40979 | 10.91416 | 5.566701 | 5.18816  |
| ENSMUSG00000048402 | 14_Gli2         | 248.9213112 | -0.79126  | 0.046056 | 0.688272 | 273.6885 | 387.2964 | 285.3518 | 107.1573 | 201.3785 | 238.6554 |
| ENSMUSG00000048416 | 15_Mif1         | 78.15888294 | 1.297953  | 0.017472 | 0.688272 | 47.9158  | 39.50251 | 48.32571 | 202.4082 | 63.35059 | 67.44608 |
| ENSMUSG00000048445 | 6_Cdc57         | 114.8742708 | -0.56052  | 0.192452 | 0.688272 | 134.0018 | 120.225  | 156.4832 | 48.61764 | 107.4773 | 122.4400 |
| ENSMUSG00000048455 | 9_Spr1b1        | 29.24529974 | -1.64442  | 0.005968 | 0.688272 | 58.47352 | 21.46876 | 52.92816 | 12.89856 | 20.36412 | 9.338689 |
| ENSMUSG00000048481 | 15_Myopop       | 45.43545663 | -0.7805   | 0.185327 | 0.688272 | 51.16433 | 73.85252 | 47.1751  | 12.89856 | 29.41484 | 58.1074  |
| ENSMUSG00000048490 | 13_Nrip1        | 2314.308426 | 0.454777  | 0.170658 | 0.688272 | 1904.45  | 1882.38  | 2071.102 | 3759.434 | 2150.678 | 2117.807 |
| ENSMUSG00000048495 | 16_Tynv5        | 133.8486302 | 0.769327  | 0.061371 | 0.688272 | 97.45586 | 96.18002 | 103.5551 | 255.9868 | 110.8713 | 139.0427 |
| ENSMUSG00000048521 | 7_Cxcr6         | 18.15041959 | 0.945057  | 0.07672  | 0.688272 | 13.80625 | 12.88125 | 10.35551 | 24.80492 | 29.41484 | 17.63975 |
| ENSMUSG00000048537 | 15_Phldb1       | 706.6167971 | -0.94086  | 0.13453  | 0.688272 | 920.1458 | 1029.642 | 837.6456 | 101.2041 | 564.5387 | 786.5251 |
| ENSMUSG00000048546 | 7_Tob2          | 962.8362985 | -0.39857  | 0.173177 | 0.688272 | 1008.668 | 1075.155 | 1201.239 | 621.1152 | 876.7886 | 99       |

|                    |                  |             |          |          |          |          |          |          |          |          |          |
|--------------------|------------------|-------------|----------|----------|----------|----------|----------|----------|----------|----------|----------|
| ENSMUSG00000049287 | 5_Iba57          | 123.0185291 | -0.68552 | 0.157194 | 0.688272 | 125.8805 | 162.3038 | 166.8388 | 39.68787 | 119.9221 | 123.4782 |
| ENSMUSG00000049295 | 16_Zfp219        | 806.5320001 | -1.09447 | 0.084112 | 0.688272 | 940.4491 | 1134.409 | 1220.799 | 103.1885 | 652.7832 | 787.5627 |
| ENSMUSG00000049307 | 5_Fut4           | 303.6945908 | 0.582574 | 0.058714 | 0.688272 | 205.4694 | 237.0151 | 287.653  | 426.6446 | 378.9989 | 286.3865 |
| ENSMUSG00000049336 | 16_Temn2         | 145.7949533 | -0.88179 | 0.024098 | 0.688272 | 173.7963 | 265.3538 | 127.7179 | 112.1182 | 83.71917 | 112.0643 |
| ENSMUSG00000049396 | 6_Gemin4         | 144.3851231 | 1.050788 | 0.056218 | 0.688272 | 142.1231 | 66.12377 | 73.63917 | 329.4093 | 97.29525 | 157.7201 |
| ENSMUSG00000049411 | 13_Tmem241       | 121.7149338 | 0.454348 | 0.16715  | 0.688272 | 104.7651 | 105.6263 | 97.80203 | 178.5954 | 108.6086 | 134.8922 |
| ENSMUSG00000049421 | 13_Zfp260        | 1552.747664 | 0.903576 | 0.072055 | 0.688272 | 1140.234 | 1077.732 | 1027.497 | 3713.793 | 1174.331 | 1182.901 |
| ENSMUSG00000049422 | 6_Chehd10        | 293.2467396 | -1.43051 | 0.046665 | 0.688272 | 325.665  | 588.2439 | 369.3465 | 23.81272 | 162.913  | 289.4993 |
| ENSMUSG00000049482 | 15_Ctut2         | 345.5742957 | -0.97908 | 0.127533 | 0.688272 | 407.6904 | 446.5501 | 521.2273 | 44.64886 | 346.1901 | 307.1391 |
| ENSMUSG00000049488 | 14_Tmem67        | 186.6502308 | 0.696295 | 0.075846 | 0.688272 | 153.493  | 127.9538 | 146.1277 | 345.2845 | 168.5697 | 178.4277 |
| ENSMUSG00000049502 | 16_Dtx3l         | 7321.479555 | 0.848827 | 0.014899 | 0.688272 | 4867.92  | 4465.501 | 6350.228 | 12673.33 | 8983.972 | 6587.926 |
| ENSMUSG00000049516 | 8_Sply2d1        | 1569.344341 | 0.576117 | 0.079483 | 0.688272 | 1211.701 | 1179.064 | 1389.939 | 2595.587 | 1572.563 | 1467.212 |
| ENSMUSG00000049551 | 2_Fzd9           | 4.074886168 | -1.89477 | 0.135152 | 0.688272 | 3.248529 | 10.305   | 5.753061 | 0.992197 | 0        | 4.150528 |
| ENSMUSG00000049556 | 4_Lingo1         | 19.60492343 | -1.58324 | 0.045469 | 0.688272 | 26.80036 | 32.63251 | 28.7653  | 1.984394 | 5.566701 | 21.79027 |
| ENSMUSG00000049562 | 5_Ap5b1          | 127.999926  | -1.03281 | 0.178863 | 0.688272 | 151.8687 | 164.88   | 199.0559 | 7.937575 | 105.2146 | 139.0427 |
| ENSMUSG00000049565 | 16_Aknad1        | 124.1455359 | 0.83103  | 0.033082 | 0.688272 | 92.58307 | 82.44002 | 93.19958 | 231.1819 | 132.3668 | 113.1019 |
| ENSMUSG00000049580 | 12_Tsku          | 412.5842534 | -0.64915 | 0.148289 | 0.688272 | 462.9153 | 523.8376 | 524.6791 | 142.8763 | 418.5958 | 402.6017 |
| ENSMUSG00000049598 | 9_Vsig8          | 22.49231682 | -0.91945 | 0.181625 | 0.688272 | 25.98823 | 30.05626 | 32.21714 | 3.968787 | 14.70742 | 28.01602 |
| ENSMUSG00000049600 | 7_Zbtb45         | 133.0923935 | -0.69812 | 0.156117 | 0.688272 | 162.4264 | 162.3038 | 169.14   | 39.68787 | 130.1041 | 134.8922 |
| ENSMUSG00000049606 | 16_Zfp644        | 1231.973939 | 0.673111 | 0.117003 | 0.688272 | 990.8013 | 899.9702 | 958.4599 | 2495.375 | 989.9226 | 1057.347 |
| ENSMUSG00000049658 | 13_Bdp1          | 1530.551699 | 0.675413 | 0.101893 | 0.688272 | 1249.059 | 1039.947 | 1247.264 | 2984.528 | 1456.085 | 1197.427 |
| ENSMUSG00000049659 | 15_Atfph         | 4305.456388 | 0.671053 | 0.041409 | 0.688272 | 3242.032 | 3071.75  | 3652.043 | 7311.498 | 4549.119 | 4006.297 |
| ENSMUSG00000049670 | 8_Morn4          | 66.24379587 | -0.87695 | 0.042653 | 0.688272 | 98.26799 | 97.89753 | 60.98244 | 37.70348 | 36.20288 | 66.40845 |
| ENSMUSG00000049685 | 8_Cyp2g1         | 1.21897557  | -3.65629 | 0.085584 | 0.688272 | 2.436397 | 2.576251 | 2.301224 | 0        | 0        | 0        |
| ENSMUSG00000049686 | 14_Orai1         | 179.0708579 | -0.74423 | 0.158982 | 0.688272 | 224.9606 | 216.4051 | 231.273  | 44.64886 | 165.1757 | 191.9619 |
| ENSMUSG00000049744 | 15_Arhgap15      | 39.70991704 | 1.03027  | 0.027179 | 0.688272 | 26.80036 | 28.33876 | 23.01224 | 64.49279 | 64.48639 | 31.12896 |
| ENSMUSG00000049775 | 16_Tmsb4x        | 115782.6185 | 0.53331  | 0.103334 | 0.688272 | 98230.64 | 90379.17 | 95258.03 | 191510.9 | 106344.8 | 112972.2 |
| ENSMUSG00000049799 | 13_Lrrc19        | 2.247435725 | 1.931133 | 0.183277 | 0.688272 | 0.812132 | 0.85875  | 1.150612 | 3.968787 | 5.656701 | 1.037632 |
| ENSMUSG00000049807 | 16_Arhgap23      | 1868.729425 | -0.58043 | 0.196833 | 0.688272 | 1939.372 | 2129.701 | 2649.86  | 674.6938 | 191.884  | 1898.867 |
| ENSMUSG00000049823 | 9_Zbtb12         | 158.8596491 | -1.14358 | 0.002642 | 0.688272 | 191.6632 | 224.9926 | 239.3273 | 59.53181 | 125.5788 | 112.0643 |
| ENSMUSG00000049872 | 7_Fam26e         | 126.3906045 | 0.533018 | 0.188769 | 0.688272 | 98.26799 | 115.0725 | 96.65142 | 225.2287 | 113.134  | 109.989  |
| ENSMUSG00000049878 | 12_Rlf           | 1313.935324 | 0.758289 | 0.053972 | 0.688272 | 1011.917 | 895.6765 | 1021.744 | 2565.821 | 1175.462 | 1212.992 |
| ENSMUSG00000049882 | 9_Vcpkmt         | 372.4431855 | 0.623549 | 0.126035 | 0.688272 | 277.7492 | 266.2126 | 335.9787 | 701.4831 | 345.0587 | 308.1767 |
| ENSMUSG00000049907 | 8_Ras11b         | 472.2568139 | -0.45809 | 0.191253 | 0.688272 | 538.4436 | 568.4926 | 532.7334 | 254.0024 | 410.6765 | 529.1924 |
| ENSMUSG00000049908 | 6_Gja8           | 134.925931  | -1.27658 | 0.197975 | 0.688272 | 38.98234 | 446.5501 | 87.44652 | 11.90636 | 44.12226 | 180.548  |
| ENSMUSG00000049929 | 7_Lpar4          | 29.88607857 | 0.123836 | 0.1475   | 0.688272 | 25.98823 | 21.46876 | 11.50612 | 80.36794 | 19.23278 | 20.75264 |
| ENSMUSG00000049950 | 6_Rpp38          | 144.1165243 | 0.471692 | 0.11717  | 0.688272 | 134.8139 | 102.1913 | 125.4167 | 194.4706 | 158.3876 | 149.419  |
| ENSMUSG00000049969 | 3_Plekhf2        | 2306.568937 | 0.697538 | 0.057474 | 0.688272 | 1729.029 | 1617.027 | 1933.028 | 4238.665 | 2191.406 | 2130.259 |
| ENSMUSG00000050014 | 7_Apol10b        | 27.48961519 | 0.994525 | 0.035986 | 0.688272 | 15.43051 | 18.03375 | 21.86163 | 40.69007 | 42.99092 | 25.9408  |
| ENSMUSG00000050029 | 7_Rap2c          | 965.9391463 | 0.886838 | 0.042443 | 0.688272 | 716.3006 | 556.4701 | 761.7052 | 2041.941 | 937.8809 | 781.3369 |
| ENSMUSG00000050050 | 16_Ccdc158       | 35.39755446 | 0.856008 | 0.10968  | 0.688272 | 17.86691 | 29.19751 | 28.7653  | 72.43037 | 35.07154 | 29.0537  |
| ENSMUSG00000050052 | 11_Tdrp          | 480.3159824 | 0.324908 | 0.190549 | 0.688272 | 397.1326 | 409.6239 | 472.9016 | 480.2233 | 592.8222 | 529.1924 |
| ENSMUSG00000050088 | 9_1600012H06Rik  | 773.8921889 | 0.64738  | 0.131519 | 0.688272 | 588.7958 | 589.1027 | 631.686  | 1553.78  | 645.9932 | 633.9932 |
| ENSMUSG00000050103 | 17_Agmo          | 126.7792802 | 0.100932 | 0.078458 | 0.688272 | 90.9588  | 90.16877 | 71.33795 | 325.4406 | 76.93113 | 105.8385 |
| ENSMUSG00000050107 | 2_Gsg2           | 50.93590267 | 0.468633 | 0.16621  | 0.688272 | 46.29153 | 39.50251 | 41.42204 | 56.55522 | 55.43567 | 66.40845 |
| ENSMUSG00000050132 | 13_Sarm1         | 9.636883787 | -1.16143 | 0.109282 | 0.688272 | 15.43051 | 16.31625 | 8.054285 | 3.968787 | 6.788041 | 7.263424 |
| ENSMUSG00000050164 | 10_Mchr1         | 32.28600133 | -0.90348 | 0.035701 | 0.688272 | 45.4794  | 40.36126 | 40.27142 | 16.86735 | 23.75814 | 26.97843 |
| ENSMUSG00000050212 | 4_Eva1b          | 39.80374306 | -1.48534 | 0.028039 | 0.688272 | 52.78859 | 57.53626 | 65.58489 | 3.968787 | 22.6268  | 36.37172 |
| ENSMUSG00000050229 | 3_Pigm           | 603.5049575 | 0.60974  | 0.181225 | 0.688272 | 479.158  | 427.6576 | 526.9803 | 1238.262 | 495.527  | 453.4452 |
| ENSMUSG00000050234 | 7_Gja4           | 55.00839583 | -0.9644  | 0.175137 | 0.688272 | 65.78271 | 69.55817 | 82.84407 | 5.953181 | 38.46556 | 67.44608 |
| ENSMUSG00000050248 | 11_Evc2          | 197.4682265 | -0.76924 | 0.078085 | 0.688272 | 213.5908 | 307.4326 | 225.52   | 78.38355 | 148.2056 | 211.6769 |
| ENSMUSG00000050288 | 6_Fzd2           | 185.2514258 | -0.78101 | 0.052096 | 0.688272 | 203.8452 | 255.9076 | 242.7792 | 77.39135 | 144.8115 | 186.7738 |
| ENSMUSG00000050295 | 3_Foxc1          | 1395.761384 | 0.592452 | 0.148764 | 0.688272 | 1020.85  | 1010.749 | 1308.246 | 2646.189 | 1201.483 | 1187.051 |
| ENSMUSG00000050299 | 7_Gm9843         | 3205.796828 | -0.93456 | 0.10448  | 0.688272 | 3730.935 | 3689.191 | 5207.67  | 596.3103 | 2827.219 | 3183.455 |
| ENSMUSG00000050310 | 8_Rictor         | 1662.396335 | 0.549085 | 0.18088  | 0.688272 | 1422.856 | 1239.177 | 1387.638 | 2851.574 | 1461.691 | 1611.443 |
| ENSMUSG00000050312 | 11_Nsun3         | 490.1697244 | 0.712296 | 0.081675 | 0.688272 | 387.387  | 344.3588 | 383.1538 | 963.4231 | 431.0406 | 431.6549 |
| ENSMUSG00000050332 | 7_Amer1          | 1531.269966 | 0.40597  | 0.171342 | 0.688272 | 1351.388 | 1163.607 | 1437.115 | 2254.271 | 1492.238 | 1489.002 |
| ENSMUSG00000050334 | 12_C130071C03Rik | 8.530413581 | 1.588169 | 0.175581 | 0.688272 | 4.872793 | 7.728752 | 0        | 28.77371 | 5.656701 | 4.150528 |
| ENSMUSG00000050373 | 13_Snx21         | 321.1555094 | -0.58493 | 0.148444 | 0.688272 | 346.7804 | 381.2851 | 428.0277 | 136.9232 | 299.8051 | 334.1175 |
| ENSMUSG00000050382 | 14_Kif7          | 78.08337493 | -0.57635 | 0.126831 | 0.688272 | 91.77094 | 98.75628 | 89.74774 | 41.67227 | 65.61773 | 80.9393  |
| ENSMUSG00000050395 | 8_Tnfrsf15       | 12.28389279 | 1.655395 | 0.021997 | 0.688272 | 8.933454 | 5.152501 | 3.451836 | 27.78151 | 16.9701  | 11.41395 |
| ENSMUSG00000050428 | 7_Fbxo46         | 238.8657714 | -0.59322 | 0.077707 | 0.688272 | 268.8158 | 269.6476 | 323.322  | 133.9466 | 245.5008 | 191.9619 |
| ENSMUSG00000050463 | 8_Krt78          | 1943.663924 | -0.73061 | 0.154208 | 0.688272 | 2301.583 | 2462.037 | 2512.937 | 499.075  | 1809.013 | 2077.339 |
| ENSMUSG00000050471 | 16_Fam11b        | 435.6052104 | 0.346044 | 0.194863 | 0.688272 | 419.0602 | 362.3926 | 369.3465 | 580.4351 | 455.9301 | 426.4668 |
| ENSMUSG00000050493 | 8_Fam1167b       | 27.52346496 | -0.79457 | 0.092859 | 0.688272 | 34.10955 | 32.63251 | 37.9702  | 12.89856 | 22.6268  | 24.90317 |
| ENSMUSG00000050541 | 14_Adra1b        | 14.24618033 | -1.00491 | 0.082265 | 0.688272 | 15.43051 | 23.18626 | 18.40979 | 8.929771 | 10.18206 | 9.338689 |
| ENSMUSG00000050545 | 8_Fam228b        | 26.22167337 | 0.96945  | 0.081013 | 0.688272 | 23.55183 | 14.59875 | 53.57863 | 22.6268  | 28.01607 | 28.01607 |
| ENSMUSG00000050549 | 8_5730508B09Rik  | 819.7900799 | 1.105156 | 0.181684 | 0.688272 | 510.8311 | 423.3639 | 627.0836 | 1907.002 | 787.4127 | 663.0469 |
| ENSMUSG00000050552 | 8_Lamtor4        | 649.7001056 | -0.78861 | 0.199395 | 0.688272 | 768.277  | 772.0165 | 928.544  | 104.1807 | 627.8938 | 697.2887 |
| ENSMUSG00000050555 | 9_Hyls1          | 110.1549599 | 0.539392 | 0.180361 | 0.688272 | 88.52241 | 86.73377 | 94.35019 | 193.4784 | 108.6086 | 89.23636 |
| ENSMUSG00000050558 | 13_Prxkr2        | 55.96904556 | 0.625159 | 0.133633 | 0.688272 | 41.41874 | 36.92626 | 54.07877 | 85.32893 | 72.40577 | 45.65581 |
| ENSMUSG00000050565 | 7_Tor1aip2       | 11593.41865 | 0.720131 | 0.039111 | 0.688272 | 8261.821 | 7907.372 | 10106.98 | 20201.13 | 12941.4  | 10141.82 |
| ENSMUSG00000050578 | 9_Mmp13          | 209.8265573 | 1.039181 | 0.08349  | 0.688272 | 155.1172 | 83.29877 | 173.7424 | 218.2833 | 522.6791 | 105.8385 |
| ENSMUSG00000050619 | 14_Zscan29       | 818.4396403 | 0.42713  | 0.1603   | 0.688272 | 700.0579 | 673.2602 | 721.4338 | 1246.199 | 798.7261 | 770.9606 |
| ENSMUSG00000050623 | 4_Tex40          | 25.30618246 | -0.7878  | 0.11047  | 0.6      |          |          |          |          |          |          |

|                    |                  |             |           |          |          |          |          |          |          |          |          |
|--------------------|------------------|-------------|-----------|----------|----------|----------|----------|----------|----------|----------|----------|
| ENSMUSG00000051224 | 13_Tceanc        | 153.9499952 | 0.841418  | 0.093997 | 0.688272 | 128.3169 | 101.3325 | 101.2539 | 346.2767 | 107.4773 | 139.0427 |
| ENSMUSG00000051228 | 5_Nyx            | 6.230360732 | -1.363131 | 0.106077 | 0.688272 | 11.36985 | 8.587502 | 6.903673 | 2.97659  | 3.39402  | 4.150528 |
| ENSMUSG00000051235 | 8_Gen1           | 144.2250002 | 0.708309  | 0.092322 | 0.688272 | 127.5048 | 81.58127 | 119.6637 | 264.9165 | 148.2056 | 123.4782 |
| ENSMUSG00000051243 | 12_Zgr1          | 82.27329311 | -1.68779  | 0.00811  | 0.688272 | 95.8316  | 176.0438 | 104.7057 | 9.921968 | 40.72824 | 66.40845 |
| ENSMUSG00000051278 | 12_Zgr12         | 307.8549582 | 1.552566  | 0.055074 | 0.688272 | 273.6885 | 223.2751 | 251.9841 | 449.4652 | 328.0886 | 320.6283 |
| ENSMUSG00000051285 | 17_Pcmtd1        | 3020.25553  | 1.028376  | 0.04997  | 0.688272 | 2018.148 | 2036.956 | 1906.564 | 7669.681 | 2108.818 | 2981.366 |
| ENSMUSG00000051316 | 8_Ta7            | 315.393518  | 0.588792  | 0.091363 | 0.688272 | 256.6338 | 233.5801 | 265.7914 | 534.7941 | 309.9872 | 291.5746 |
| ENSMUSG00000051319 | 6_1500011K16Rik  | 217.9309199 | -0.74563  | 0.021133 | 0.688272 | 241.2033 | 252.4726 | 325.6232 | 125.0168 | 164.0443 | 199.2254 |
| ENSMUSG00000051329 | 13_Nup160        | 880.8957289 | 0.517443  | 0.091192 | 0.688272 | 738.2281 | 680.9889 | 754.8015 | 1363.278 | 948.063  | 800.0143 |
| ENSMUSG00000051331 | 14_Cacna1c       | 115.6948912 | -0.6302   | 0.082911 | 0.688272 | 130.7533 | 187.2075 | 103.5551 | 101.2041 | 78.06247 | 93.38689 |
| ENSMUSG00000051341 | 5_Zfp52          | 165.1951245 | 1.271488  | 0.021186 | 0.688272 | 99.08013 | 83.29877 | 108.1575 | 442.5198 | 122.1847 | 135.9298 |
| ENSMUSG00000051343 | 11_Rab11fp5      | 358.3677362 | -0.50313  | 0.188668 | 0.688272 | 450.7334 | 448.2676 | 361.2922 | 170.6579 | 365.4229 | 353.8325 |
| ENSMUSG00000051403 | 8_Ppp1r37        | 1357.388539 | -0.9523   | 0.187337 | 0.688272 | 1527.621 | 1862.629 | 1979.053 | 112.1182 | 1256.919 | 1405.991 |
| ENSMUSG00000051427 | 14_Ccdc157       | 385.2657753 | -0.63328  | 0.059862 | 0.688272 | 419.0602 | 520.4026 | 465.9979 | 221.2599 | 276.047  | 408.827  |
| ENSMUSG00000051431 | 7_Gpr87          | 3382.372644 | 0.627687  | 0.039772 | 0.688272 | 2689.782 | 2340.094 | 2944.416 | 5332.066 | 3788.858 | 3199.02  |
| ENSMUSG00000051444 | 9_Bbs12          | 111.2428892 | 0.681203  | 0.135838 | 0.688272 | 83.64961 | 101.3325 | 71.33795 | 220.2677 | 99.55793 | 91.31162 |
| ENSMUSG00000051451 | 5_Crebzf         | 1001.001876 | 0.694366  | 0.115172 | 0.688272 | 738.2281 | 743.6777 | 812.3321 | 2067.738 | 769.3113 | 874.7238 |
| ENSMUSG00000051469 | 14_Zfp191        | 877.9968626 | 0.734526  | 0.123772 | 0.688272 | 678.1304 | 651.7914 | 647.7946 | 1939.745 | 695.7742 | 654.7458 |
| ENSMUSG00000051483 | 8_Cbr1           | 761.4935518 | -0.60948  | 0.093367 | 0.688272 | 842.1811 | 952.354  | 965.3636 | 365.1284 | 645.9952 | 797.9391 |
| ENSMUSG00000051497 | 15_Kcnj16        | 563.8719335 | 0.952199  | 0.030713 | 0.688272 | 403.6297 | 330.6188 | 418.8228 | 1187.66  | 409.5451 | 632.9556 |
| ENSMUSG00000051498 | 6_Tlr6           | 231.5465006 | 0.664627  | 0.02828  | 0.688272 | 189.2268 | 156.2925 | 192.1522 | 351.2377 | 265.864  | 234.5048 |
| ENSMUSG00000051502 | 6_Ufsp1          | 60.01185486 | -0.66734  | 0.166746 | 0.688272 | 82.83748 | 67.84127 | 70.18734 | 24.80492 | 40.72824 | 73.6718  |
| ENSMUSG00000051510 | 13_Mafg          | 1208.289703 | -0.60311  | 0.118247 | 0.688272 | 1387.122 | 1463.31  | 1521.109 | 521.8955 | 1150.573 | 1205.728 |
| ENSMUSG00000051550 | 10_Zfp579        | 167.3567316 | -0.65248  | 0.158173 | 0.688272 | 185.1661 | 229.2863 | 199.0559 | 57.54742 | 162.913  | 170.1717 |
| ENSMUSG00000051579 | 10_Tceal8        | 739.055161  | 0.557572  | 0.120342 | 0.688272 | 559.5591 | 643.2039 | 591.4146 | 1278.942 | 636.9445 | 724.2672 |
| ENSMUSG00000051652 | 4_Ltrc3          | 60.18023823 | -0.71421  | 0.064496 | 0.688272 | 77.15256 | 79.00502 | 67.88611 | 30.7581  | 55.43567 | 50.84397 |
| ENSMUSG00000051671 | 6_Coa6           | 172.591519  | 0.696422  | 0.182991 | 0.688272 | 140.4989 | 113.355  | 141.5253 | 390.9255 | 127.8414 | 121.403  |
| ENSMUSG00000051705 | 12_Senp8         | 319.725707  | 0.823152  | 0.058325 | 0.688272 | 230.6455 | 196.6538 | 265.7914 | 659.8109 | 274.9156 | 290.537  |
| ENSMUSG00000051730 | 15_Mtll5         | 292.5700326 | 0.669448  | 0.084234 | 0.688272 | 239.579  | 203.5238 | 234.7249 | 534.7941 | 302.0678 | 240.7306 |
| ENSMUSG00000051735 | 6_Rln1           | 47.42371864 | -0.78328  | 0.083    | 0.688272 | 70.6555  | 48.09001 | 60.98244 | 23.81272 | 50.9103  | 30.09133 |
| ENSMUSG00000051747 | 14_Tln           | 1582.747996 | 1.299261  | 0.04834  | 0.688272 | 788.5803 | 1217.708 | 737.5424 | 4614.707 | 593.9536 | 1543.997 |
| ENSMUSG00000051790 | 15_Nlgn2         | 606.7299018 | -0.61659  | 0.146262 | 0.688272 | 680.5668 | 814.954  | 707.6264 | 236.1428 | 545.3059 | 655.7835 |
| ENSMUSG00000051804 | 3_Adam6b         | 1.187853118 | 3.801659  | 0.155506 | 0.688272 | 0        | 0        | 0        | 2.97659  | 0        | 4.150528 |
| ENSMUSG00000051817 | 8_Sox12          | 133.1739336 | -1.03253  | 0.035234 | 0.688272 | 176.2327 | 199.2301 | 161.0857 | 38.69568 | 83.71917 | 140.0803 |
| ENSMUSG00000051851 | 5_Cxcl1c         | 57.57713732 | -1.16306  | 0.182176 | 0.688272 | 74.71616 | 113.355  | 50.62693 | 1.984394 | 37.33422 | 67.44608 |
| ENSMUSG00000051890 | 13_Klhlcd1       | 127.6819996 | 0.689089  | 0.166216 | 0.688272 | 87.71028 | 112.4963 | 93.19958 | 266.9009 | 79.19381 | 126.5911 |
| ENSMUSG00000051900 | 12_Abca16        | 18.27133212 | 1.197356  | 0.043266 | 0.688272 | 11.36985 | 13.74    | 8.054285 | 37.70348 | 16.9701  | 21.79027 |
| ENSMUSG00000051977 | 14_Prdm9         | 283.5260408 | 0.446535  | 0.140051 | 0.688272 | 245.2639 | 231.0038 | 243.9298 | 422.6758 | 276.047  | 282.2359 |
| ENSMUSG00000051984 | 13_Sec31b        | 20.11720357 | -1.08207  | 0.037617 | 0.688272 | 31.67315 | 28.33876 | 21.86163 | 10.91416 | 11.3134  | 16.60211 |
| ENSMUSG00000051985 | 12_Igfn1         | 215.4074704 | -0.96737  | 0.07237  | 0.688272 | 234.7062 | 467.1601 | 153.0314 | 90.28991 | 121.0534 | 226.2038 |
| ENSMUSG00000052013 | 14_Btla          | 14.94097092 | 1.118199  | 0.123314 | 0.688272 | 15.43051 | 6.870002 | 5.753061 | 30.7581  | 21.49546 | 9.338689 |
| ENSMUSG00000052033 | 13_Pfdn4         | 520.0286298 | 0.491168  | 0.14701  | 0.688272 | 421.4966 | 412.2001 | 463.6967 | 852.2971 | 492.1329 | 478.3484 |
| ENSMUSG00000052105 | 16_Mtcl1         | 535.1908419 | -0.6586   | 0.150094 | 0.688272 | 613.1598 | 644.9214 | 707.6264 | 179.5876 | 491.0016 | 574.8482 |
| ENSMUSG00000052133 | 16_Sema5b        | 73.33188491 | -0.8958   | 0.135521 | 0.688272 | 95.01946 | 132.2475 | 58.68122 | 17.89594 | 53.17298 | 83.01057 |
| ENSMUSG00000052144 | 8_Ppp4r2         | 2893.078251 | 0.725289  | 0.081595 | 0.688272 | 2247.17  | 1945.928 | 2349.55  | 5786.492 | 2705.034 | 2324.296 |
| ENSMUSG00000052155 | 5_Acvr2a         | 1002.393052 | 0.862165  | 0.062557 | 0.688272 | 739.0403 | 667.2489 | 728.3375 | 2237.404 | 786.2814 | 856.0465 |
| ENSMUSG00000052270 | 7_Fpr2           | 87.2666584  | 1.07176   | 0.070745 | 0.688272 | 83.64961 | 37.78501 | 47.1751  | 168.6735 | 144.8115 | 41.50528 |
| ENSMUSG00000052271 | 7_Bhlh15         | 9.160375262 | -0.97402  | 0.189226 | 0.688272 | 14.61838 | 13.74    | 8.054285 | 8.929771 | 3.39402  | 6.225792 |
| ENSMUSG00000052293 | 14_Taf9          | 44.26113663 | -1.28929  | 0.031055 | 0.688272 | 43.85514 | 54.10126 | 90.8936  | 42.66446 | 10.18206 | 23.86554 |
| ENSMUSG00000052299 | 8_Ltn1           | 1401.315605 | 0.556835  | 0.114641 | 0.688272 | 1121.555 | 1060.557 | 1220.799 | 2420.96  | 1306.698 | 1277.325 |
| ENSMUSG00000052301 | 14_Doc2a         | 1.580880026 | -2.91844  | 0.188745 | 0.688272 | 2.436397 | 6.011252 | 0        | 0        | 0        | 1.037632 |
| ENSMUSG00000052364 | 4_B630019K06Rik  | 107.9767363 | 0.63318   | 0.183687 | 0.688272 | 87.71028 | 79.00502 | 87.44652 | 220.2677 | 76.93113 | 96.49978 |
| ENSMUSG00000052373 | 14_Mpp3          | 25.62854543 | -0.80618  | 0.156803 | 0.688272 | 30.86102 | 40.36126 | 26.46408 | 8.929771 | 18.10144 | 29.0537  |
| ENSMUSG00000052414 | 9_Gm28047        | 5.656700516 | 6.047395  | 0.122428 | 0.688272 | 0        | 0        | 0        | 0        | 0        | 3.9402   |
| ENSMUSG00000052415 | 5_Tchh           | 60.70474021 | -0.52995  | 0.147426 | 0.688272 | 61.72205 | 65.26502 | 88.59713 | 57.54742 | 47.51628 | 43.58055 |
| ENSMUSG00000052419 | 7_2810001J05Rik  | 1191.607713 | 0.574539  | 0.139425 | 0.688272 | 1041.153 | 861.3265 | 969.966  | 2189.778 | 1048.758 | 1038.67  |
| ENSMUSG00000052477 | 15_C130026I21Rik | 205.7925779 | 0.818877  | 0.020043 | 0.688272 | 164.8628 | 118.5075 | 163.3869 | 250.0336 | 343.9274 | 194.0372 |
| ENSMUSG00000052496 | 4_Pkdre1         | 9.583958256 | -1.27888  | 0.07697  | 0.688272 | 17.05478 | 15.4575  | 8.054285 | 4.960984 | 6.788041 | 5.13816  |
| ENSMUSG00000052539 | 15_Mag13         | 2376.598483 | 0.54468   | 0.134365 | 0.688272 | 1858.971 | 1905.567 | 2035.433 | 4178.141 | 2019.442 | 2262.038 |
| ENSMUSG00000052560 | 15_Cpne8         | 2425.078992 | 0.685993  | 0.060716 | 0.688272 | 1897.953 | 1746.698 | 1933.028 | 4451.987 | 2340.743 | 2180.065 |
| ENSMUSG00000052584 | 9_Serp2          | 4.280513163 | -3.50549  | 0.017172 | 0.688272 | 12.99411 | 6.011252 | 4.602448 | 0        | 0        | 2.075264 |
| ENSMUSG00000052613 | 16_Pcdh15        | 22.66473247 | 1.408408  | 0.13481  | 0.688272 | 7.30919  | 24.04501 | 5.753061 | 73.42256 | 19.23278 | 6.225792 |
| ENSMUSG00000052616 | 10_Ccdc79        | 36.07793259 | 0.87327   | 0.182237 | 0.688272 | 28.42463 | 17.175   | 31.06653 | 90.28991 | 21.49546 | 28.01607 |
| ENSMUSG00000052656 | 12_Rnf103        | 1705.581138 | 0.75643   | 0.099608 | 0.688272 | 1284.793 | 1246.905 | 1273.728 | 3703.871 | 1320.274 | 1403.916 |
| ENSMUSG00000052676 | 16_Zmat1         | 141.6347123 | 0.966621  | 0.08033  | 0.688272 | 97.45586 | 114.2138 | 75.9404  | 347.2689 | 89.37587 | 125.5535 |
| ENSMUSG00000052681 | 7_Rap1b          | 4445.861373 | 0.916097  | 0.044956 | 0.688272 | 3266.396 | 2794.373 | 3179.141 | 9913.038 | 4201.797 | 3320.423 |
| ENSMUSG00000052698 | 14_Tln2          | 729.410347  | -0.52779  | 0.142629 | 0.688272 | 804.823  | 943.7665 | 835.3444 | 370.0894 | 624.4997 | 797.9391 |
| ENSMUSG00000052748 | 14_Swt1          | 499.3615716 | 0.791008  | 0.077838 | 0.688272 | 374.3929 | 350.3701 | 372.7983 | 1067.604 | 424.2525 | 406.7518 |
| ENSMUSG00000052751 | 16_Repin1        | 212.3131472 | -0.3994   | 0.163352 | 0.688272 | 224.9606 | 277.3763 | 222.0681 | 162.7203 | 171.9637 | 214.7898 |
| ENSMUSG00000052812 | 4_Atad2b         | 577.6955706 | 0.504528  | 0.156128 | 0.688272 | 540.0679 | 412.2001 | 480.9559 | 960.4465 | 571.3268 | 501.1763 |
| ENSMUSG00000052819 | 5_Best2          | 156.8070212 | -0.77481  | 0.140118 | 0.688272 | 172.9842 | 275.6588 | 144.9771 | 54.57082 | 100.6893 | 191.9619 |
| ENSMUSG00000052837 | 5_Junb           | 2201.295055 | -1.24279  | 0.054714 | 0.688272 | 2670.291 | 2727.391 | 3886.768 | 249.0414 | 1841.822 | 1832.458 |
| ENSMUSG00000052848 | 7_C130026L21Rik  | 0.865166311 | 3.342596  | 0.16769  | 0.688272 | 0        | 0        | 0        | 1.984394 | 1.13134  | 2.075264 |
| ENSMUSG00000052906 | 6_Ubxn8          | 387.2035427 | 0.567931  | 0.122281 | 0.688272 | 310.2345 | 297.9863 | 327.9245 | 680.647  | 360.8975 | 345.5315 |
| ENSMUSG00000052909 | 7_Gm9894         | 18.14314087 | 1.306162  | 0.063452 | 0.688272 | 17.05478 | 9.446252 | 4.602448 | 46.63325 | 12.44474 |          |

|                    |                  |             |           |          |          |          |          |          |          |          |          |
|--------------------|------------------|-------------|-----------|----------|----------|----------|----------|----------|----------|----------|----------|
| ENSMUSG00000053644 | 13_Aldh7a1       | 618.3350319 | -0.45453  | 0.191651 | 0.688272 | 697.6215 | 824.4002 | 622.4812 | 341.3157 | 561.1447 | 663.0469 |
| ENSMUSG00000053693 | 16_Mast1         | 35.77314551 | -0.90001  | 0.037983 | 0.688272 | 38.98234 | 55.81876 | 44.87387 | 18.85174 | 26.02082 | 30.09133 |
| ENSMUSG00000053702 | 16_Nebl          | 4144.654117 | 0.792496  | 0.087542 | 0.688272 | 2986.21  | 2895.706 | 3220.563 | 9144.086 | 3184.722 | 3436.637 |
| ENSMUSG00000053774 | 8_Ubxn7          | 1464.019536 | 0.754101  | 0.097499 | 0.688272 | 1127.239 | 1028.783 | 1113.793 | 3153.201 | 1170.937 | 1190.164 |
| ENSMUSG00000053799 | 6_Excoc6         | 468.590533  | 0.450669  | 0.177446 | 0.688272 | 423.933  | 368.4038 | 395.8106 | 750.1008 | 446.8793 | 426.4668 |
| ENSMUSG00000053819 | 16_Camk2d        | 1641.094454 | 0.505339  | 0.1949   | 0.688272 | 1407.425 | 1310.453 | 1351.969 | 2984.528 | 1339.507 | 1452.685 |
| ENSMUSG00000053821 | 3_Gm9922         | 1.237323825 | -3.65049  | 0.119652 | 0.688272 | 0.812132 | 0.85875  | 5.753061 | 0        | 0        | 0        |
| ENSMUSG00000053825 | 14_Ppfia2        | 365.5071587 | 0.58386   | 0.14571  | 0.688272 | 306.1738 | 278.2351 | 293.4061 | 672.7094 | 278.3097 | 364.2089 |
| ENSMUSG00000053835 | 17_H2-T24        | 1279.245543 | 0.666201  | 0.027238 | 0.688272 | 985.9285 | 811.519  | 1170.173 | 1888.151 | 1571.431 | 1248.271 |
| ENSMUSG00000053870 | 7_Fggt           | 634.8299136 | 0.693421  | 0.102855 | 0.688272 | 500.2734 | 466.3014 | 489.0101 | 1279.934 | 545.3059 | 528.1547 |
| ENSMUSG00000053907 | 10_Mat2a         | 6769.516754 | 0.49013   | 0.175042 | 0.688272 | 5674.368 | 5426.443 | 5791.031 | 11672.2  | 6488.235 | 5564.821 |
| ENSMUSG00000053929 | 16_Cyhr1         | 1847.786273 | -0.63461  | 0.196461 | 0.688272 | 2058.755 | 2358.987 | 2325.387 | 541.7395 | 1778.467 | 2023.383 |
| ENSMUSG00000053963 | 6_6330403A02Rik  | 13.80386965 | -1.04675  | 0.156543 | 0.688272 | 12.18198 | 34.35001 | 9.204897 | 9.921968 | 6.788041 | 10.37632 |
| ENSMUSG00000054005 | 4_Mill1          | 2.61376455  | 2.986439  | 0.101159 | 0.688272 | 0.812132 | 0.85875  | 0        | 4.960984 | 9.050721 | 0        |
| ENSMUSG00000054021 | 5_Sirt5          | 118.46087   | -0.45628  | 0.193092 | 0.688272 | 121.8198 | 144.27   | 144.9771 | 68.46158 | 110.8713 | 120.3653 |
| ENSMUSG00000054079 | 12_Utp18         | 649.8713471 | 0.812132  | 0.074642 | 0.688272 | 480.7822 | 484.3351 | 449.8893 | 1413.88  | 557.7507 | 512.5902 |
| ENSMUSG00000054099 | 11_Slc25a40      | 258.5002517 | 0.800488  | 0.109488 | 0.688272 | 176.2327 | 200.9476 | 188.7004 | 588.3727 | 179.8831 | 216.8651 |
| ENSMUSG00000054178 | 1_Gm9938         | 99.18374398 | 0.863053  | 0.097495 | 0.688272 | 71.46763 | 72.99377 | 66.7355  | 230.1897 | 76.93113 | 76.78477 |
| ENSMUSG00000054203 | 7_Ilf205         | 688.8164363 | 1.45894   | 0.004039 | 0.688272 | 421.4966 | 250.7551 | 430.3289 | 1553.78  | 1052.146 | 424.3915 |
| ENSMUSG00000054206 | 2_Gzmm           | 19.98093828 | -0.79763  | 0.165295 | 0.688272 | 30.86102 | 19.75126 | 25.31347 | 7.937575 | 12.49546 | 14.52685 |
| ENSMUSG00000054256 | 11_Msl1          | 117.9345345 | -1.17439  | 0.008359 | 0.688272 | 167.2992 | 231.8626 | 90.8936  | 60.52401 | 66.74907 | 90.27399 |
| ENSMUSG00000054263 | 11_Lifr          | 3498.168888 | 0.665284  | 0.085868 | 0.688272 | 2762.874 | 2504.116 | 2850.066 | 6607.039 | 2952.798 | 321.122  |
| ENSMUSG00000054293 | 10_A630033H20Rik | 25.77639099 | 1.168502  | 0.047851 | 0.688272 | 12.99411 | 12.0225  | 23.01224 | 56.55522 | 28.2835  | 21.79027 |
| ENSMUSG00000054302 | 15_Eapp          | 985.1602668 | 0.510826  | 0.134842 | 0.688272 | 821.8778 | 759.9939 | 856.0554 | 1643.078 | 946.9317 | 883.0249 |
| ENSMUSG00000054321 | 6_Tarf4b         | 169.4912134 | 0.675049  | 0.101852 | 0.688272 | 127.5048 | 133.1063 | 131.1698 | 320.4796 | 170.8324 | 133.8545 |
| ENSMUSG00000054342 | 8_Kcnm4          | 126.7687206 | -0.86058  | 0.169125 | 0.688272 | 156.7415 | 121.9425 | 211.7126 | 21.82633 | 142.5489 | 105.8385 |
| ENSMUSG00000054387 | 13_Mdm4          | 3470.283098 | 0.561328  | 0.111144 | 0.688272 | 2822.971 | 2832.158 | 2755.716 | 6043.471 | 3087.427 | 3279.955 |
| ENSMUSG00000054404 | 12_Slfn5         | 2026.135835 | 1.139285  | 0.003553 | 0.688272 | 1272.611 | 845.0102 | 1678.743 | 3330.805 | 3159.833 | 1869.813 |
| ENSMUSG00000054408 | 9_Spc3           | 2004.102455 | 0.926079  | 0.041797 | 0.688272 | 1445.595 | 1275.244 | 1425.608 | 4498.62  | 1573.577 | 1625.969 |
| ENSMUSG00000054414 | 4_Slc30a5        | 2269.119026 | 0.528873  | 0.130025 | 0.688272 | 1876.837 | 1781.048 | 1915.769 | 3889.412 | 2080.534 | 2071.114 |
| ENSMUSG00000054435 | 16_Gimnap4       | 163.0094357 | 0.676034  | 0.163506 | 0.688272 | 163.2386 | 90.16877 | 123.1155 | 319.4874 | 173.095  | 108.9514 |
| ENSMUSG00000054452 | 9_Aes            | 4390.502535 | -0.74733  | 0.181943 | 0.688272 | 5079.075 | 5472.815 | 5956.719 | 921.7508 | 4041.995 | 4898.661 |
| ENSMUSG00000054484 | 14_Tmem62        | 380.3249209 | 0.437451  | 0.142547 | 0.688272 | 321.6043 | 101.8676 | 337.1293 | 565.5522 | 372.2109 | 374.5852 |
| ENSMUSG00000054509 | 7_Parp4          | 2601.940837 | 0.323483  | 0.156923 | 0.688272 | 2128.598 | 2359.846 | 2446.201 | 3085.732 | 3025.203 | 2566.064 |
| ENSMUSG00000054519 | 8_Zfp867         | 575.916541  | 0.683112  | 0.08976  | 0.688272 | 463.7275 | 420.7876 | 441.835  | 1114.237 | 489.8703 | 525.0418 |
| ENSMUSG00000054537 | 8_Tmprss11e      | 5741.085353 | 0.744542  | 0.066474 | 0.688272 | 4362.774 | 3983.742 | 4528.809 | 11441.02 | 5233.579 | 4896.586 |
| ENSMUSG00000054580 | 14_Pla2r1        | 298.697229  | 0.508853  | 0.162301 | 0.688272 | 256.6338 | 223.2751 | 260.0383 | 508.0048 | 269.2589 | 274.9725 |
| ENSMUSG00000054604 | 7_Cggbp1         | 3491.516404 | 0.804105  | 0.064445 | 0.688272 | 2521.67  | 2322.919 | 2784.481 | 7372.022 | 3060.275 | 2887.73  |
| ENSMUSG00000054626 | 11_Xlr           | 26.80066233 | 1.046068  | 0.188148 | 0.688272 | 25.98823 | 20.61001 | 5.753061 | 72.43037 | 21.49546 | 14.52685 |
| ENSMUSG00000054648 | 7_Zfp869         | 523.1502073 | 0.764211  | 0.063837 | 0.688272 | 410.1267 | 404.4714 | 348.6355 | 1044.783 | 452.536  | 478.3484 |
| ENSMUSG00000054675 | 5_Tmem119        | 171.4268815 | -1.24295  | 0.011446 | 0.688272 | 240.3911 | 259.3426 | 223.2187 | 44.64886 | 93.90123 | 167.0581 |
| ENSMUSG00000054693 | 14_Adam10        | 4074.38547  | 0.780899  | 0.05429  | 0.688272 | 3004.077 | 2831.299 | 3158.43  | 8187.608 | 388.637  | 3426.268 |
| ENSMUSG00000054702 | 14_Ap1r3         | 945.150491  | 0.922839  | 0.040132 | 0.688272 | 648.0815 | 560.7639 | 744.446  | 2087.582 | 850.7678 | 779.2167 |
| ENSMUSG00000054708 | 17_Ankrd24       | 402.8821083 | -0.62764  | 0.123772 | 0.688272 | 488.0914 | 524.6964 | 454.4918 | 168.6735 | 338.2707 | 443.0689 |
| ENSMUSG00000054716 | 4_Zfp771         | 52.37315506 | -1.07781  | 0.127811 | 0.688272 | 73.0919  | 58.39502 | 81.69346 | 4.960984 | 45.2536  | 50.84397 |
| ENSMUSG00000054737 | 11_Zfp182        | 295.5423571 | -0.884469 | 0.078944 | 0.688272 | 207.9058 | 218.9813 | 199.0559 | 685.608  | 250.0262 | 211.6769 |
| ENSMUSG00000054752 | 16_Fsd11         | 93.23736555 | 0.95174   | 0.129683 | 0.688272 | 57.66138 | 68.70002 | 64.34248 | 253.0102 | 55.43567 | 60.18266 |
| ENSMUSG00000054766 | 13_Set           | 6047.015029 | 0.510785  | 0.120064 | 0.688272 | 5197.646 | 4427.716 | 5337.69  | 9728.49  | 6328.717 | 5261.832 |
| ENSMUSG00000054814 | 14_Usp46         | 2270.47636  | 0.444113  | 0.171654 | 0.688272 | 2016.524 | 1772.46  | 1982.505 | 3615.565 | 2056.776 | 2179.027 |
| ENSMUSG00000054823 | 15_Whsc111       | 3160.554696 | 0.408722  | 0.128494 | 0.688272 | 2649.175 | 2607.166 | 2891.488 | 4440.081 | 3397.414 | 2978.004 |
| ENSMUSG00000054850 | 4_Smin10l2a      | 12.59567367 | -1.02829  | 0.143373 | 0.688272 | 14.61838 | 22.32751 | 13.80735 | 7.937575 | 3.39402  | 13.48922 |
| ENSMUSG00000054863 | 8_Fam19a5        | 59.64324767 | -0.6873   | 0.069394 | 0.688272 | 77.15256 | 85.87502 | 57.53061 | 41.67227 | 39.5969  | 56.03213 |
| ENSMUSG00000054874 | 12_Pcnx13        | 1687.22206  | -0.9558   | 0.186043 | 0.688272 | 1986.475 | 2292.863 | 2400.177 | 136.9232 | 1615.554 | 1691.34  |
| ENSMUSG00000054894 | 5_Atp5s          | 181.6663543 | 0.731861  | 0.154998 | 0.688272 | 153.493  | 126.2363 | 130.0192 | 409.7773 | 121.0534 | 194.419  |
| ENSMUSG00000054905 | 2_Slf3a          | 251.3773381 | -1.007725 | 0.017147 | 0.688272 | 171.3599 | 160.5863 | 169.14   | 527.8487 | 274.9156 | 204.4135 |
| ENSMUSG00000054934 | 10_Kcnmb4        | 8.982619945 | -1.70883  | 0.037954 | 0.688272 | 10.55772 | 18.03375 | 12.65673 | 5.953181 | 5.856701 | 1.037632 |
| ENSMUSG00000054945 | 3_Gm9958         | 40.82645267 | 0.803042  | 0.194769 | 0.688272 | 32.48529 | 29.19751 | 27.61469 | 100.2119 | 30.54618 | 24.90317 |
| ENSMUSG00000054951 | 2_9130008F23Rik  | 384.0045258 | 0.47653   | 0.16098  | 0.688272 | 302.9253 | 279.0938 | 382.0032 | 604.2479 | 376.7363 | 359.0207 |
| ENSMUSG00000054958 | 6_Nlts1a         | 1.180910503 | -3.58892  | 0.114805 | 0.688272 | 1.624264 | 0.85875  | 4.602448 | 0        | 0        | 0        |
| ENSMUSG00000055003 | 14_Ltrm2         | 90.4118617  | -1.04923  | 0.043811 | 0.688272 | 108.8257 | 182.055  | 74.78979 | 52.58643 | 33.9402  | 90.27399 |
| ENSMUSG00000055013 | 14_Agap1         | 616.9905348 | -0.39608  | 0.153921 | 0.688272 | 687.876  | 713.6214 | 701.8734 | 416.7227 | 538.5179 | 643.3319 |
| ENSMUSG00000055026 | 13_Gabrg3        | 8.694289269 | -1.9985   | 0.039372 | 0.688272 | 7.30919  | 27.48001 | 6.903673 | 1.984394 | 2.26268  | 6.225972 |
| ENSMUSG00000055027 | 17_Smyd1         | 113.7407864 | 0.901293  | 0.124793 | 0.688272 | 78.77682 | 97.03878 | 62.13305 | 266.9009 | 52.04164 | 125.5535 |
| ENSMUSG00000055041 | 7_Commd5         | 353.4705361 | -0.63995  | 0.157529 | 0.688272 | 410.9389 | 428.5164 | 452.1906 | 121.048  | 356.3721 | 351.7573 |
| ENSMUSG00000055053 | 17_Nfic          | 1308.144504 | -0.79053  | 0.052739 | 0.688272 | 1500.82  | 1743.263 | 1729.37  | 516.9345 | 963.9018 | 1394.572 |
| ENSMUSG00000055069 | 3_Rab39          | 7.611772594 | 1.39441   | 0.095669 | 0.688272 | 6.497057 | 2.576251 | 3.451836 | 16.86735 | 9.050721 | 7.263424 |
| ENSMUSG00000055204 | 14_Ankrd17       | 4991.180424 | 0.383616  | 0.156164 | 0.688272 | 4210.093 | 4283.446 | 4501.195 | 7063.449 | 5177.012 | 4711.887 |
| ENSMUSG00000055228 | 7_Zfp935         | 154.083797  | 0.956364  | 0.082472 | 0.688272 | 103.9529 | 97.89753 | 112.76   | 386.9568 | 110.8713 | 112.0643 |
| ENSMUSG00000055240 | 16_Zfp101        | 434.7280665 | 0.776357  | 0.076373 | 0.688272 | 384.1385 | 271.3651 | 306.0628 | 888.0161 | 534.1095 | 404.6765 |
| ENSMUSG00000055296 | 14_Tmem245       | 3102.790626 | 0.590194  | 0.114297 | 0.688272 | 2587.453 | 2477.494 | 2365.658 | 5638.654 | 2709.56  | 2837.924 |
| ENSMUSG00000055302 | 5_Mrfap1         | 4719.386681 | 0.555367  | 0.161527 | 0.688272 | 3774.79  | 3602.457 | 4089.275 | 8814.677 | 3980.054 | 4055.066 |
| ENSMUSG00000055322 | 14_Tns1          | 2524.46954  | -0.74804  | 0.075202 | 0.688272 | 2692.218 | 4278.294 | 2523.292 | 1197.582 | 1664.201 | 2791.23  |
| ENSMUSG00000055341 | 9_Zfp457         | 28.54993029 | 1.201726  | 0.026966 | 0.688272 | 18.67904 | 21.46876 | 11.50612 | 58.53961 | 36.20288 | 24.90317 |
| ENSMUSG00000055373 | 8_Fut9           | 337.9960477 | 1.197186  | 0.043432 | 0.688272 | 203.033  | 176.0438 | 237.0261 | 950.5245 | 208.1666 | 253.1822 |
| ENSMUSG00000055415 | 7_Atp10b         | 1100.904323 | 0.373458  | 0.154847 | 0.6      |          |          |          |          |          |          |

|                    |             |             |           |          |          |          |          |          |          |          |          |
|--------------------|-------------|-------------|-----------|----------|----------|----------|----------|----------|----------|----------|----------|
| ENSMUSG00000055917 | 14_Zfp277   | 575.0388612 | 0.6677755 | 0.103842 | 0.688272 | 444.2363 | 387.2964 | 501.6669 | 1106.299 | 539.6492 | 471.085  |
| 110.6662312        | 12_Triq     | 0.996298    | 0.084846  | 0.688272 | 77.15256 | 79.00502 | 65.58489 | 286.7449 | 73.53711 | 81.97293 |          |
| ENSMUSG00000056019 | 12_Zfp709   | 179.4712276 | 0.826054  | 0.127587 | 0.688272 | 129.9411 | 139.9763 | 118.513  | 423.668  | 101.8206 | 162.9082 |
| ENSMUSG00000056025 | 12_Clc3a1   | 73.36721854 | 0.767999  | 0.043128 | 0.688272 | 51.97646 | 44.65501 | 66.7355  | 119.0636 | 75.79979 | 81.97293 |
| ENSMUSG00000056073 | 14_Grik2    | 18.48723524 | 0.969855  | 0.124448 | 0.688272 | 10.55772 | 15.4575  | 11.50612 | 40.68007 | 19.23779 | 13.48922 |
| ENSMUSG00000056078 | 5_Lipm      | 2547.033455 | 0.882188  | 0.045443 | 0.688272 | 1834.607 | 1651.377 | 1889.305 | 5546.38  | 2184.618 | 2175.914 |
| ENSMUSG00000056089 | 5_Gm5468    | 2.900359851 | -2.1959   | 0.144516 | 0.688272 | 5.684925 | 5.152501 | 3.451836 | 0        | 0        | 3.112896 |
| ENSMUSG00000056091 | 12_St3gal5  | 402.7157184 | -0.49124  | 0.119272 | 0.688272 | 456.4183 | 577.9389 | 377.4008 | 389.9333 | 266.9963 | 347.6067 |
| ENSMUSG00000056128 | 3_Gm9991    | 18.82793263 | -0.91556  | 0.144451 | 0.688272 | 31.67315 | 29.19751 | 12.65673 | 11.90636 | 19.23278 | 8.301057 |
| ENSMUSG00000056144 | 13_Trim34a  | 946.7270163 | 0.1713467 | 0.014834 | 0.688272 | 711.4278 | 642.3452 | 798.5248 | 1473.412 | 1116.633 | 938.0194 |
| ENSMUSG00000056145 | 5_Al504432  | 42.12415309 | 1.365068  | 0.051485 | 0.688272 | 40.60661 | 13.74    | 16.10857 | 99.21968 | 63.35505 | 19.71501 |
| ENSMUSG00000056153 | 14_Socs6    | 1275.389861 | 0.559559  | 0.14839  | 0.688272 | 989.177  | 1005.597 | 1098.835 | 2324.717 | 1215.059 | 1018.955 |
| ENSMUSG00000056174 | 8_Col8a2    | 2695.593843 | -0.83073  | 0.016133 | 0.688272 | 3497.853 | 4243.944 | 2610.739 | 1601.406 | 1635.918 | 2583.704 |
| ENSMUSG00000056185 | 4_Snx32     | 104.7338614 | -0.96079  | 0.039104 | 0.688272 | 136.4382 | 162.3038 | 116.2118 | 36.71128 | 66.74907 | 109.989  |
| ENSMUSG00000056216 | 9_Cebpg     | 1705.91557  | 0.719652  | 0.070546 | 0.688272 | 1300.224 | 1197.957 | 1369.228 | 3327.828 | 1553.33  | 1486.927 |
| ENSMUSG00000056220 | 14_Pla2g4a  | 2260.022216 | 0.73709   | 0.073606 | 0.688272 | 1812.679 | 1401.48  | 1870.895 | 4427.182 | 2231.003 | 1816.894 |
| ENSMUSG00000056228 | 9_Cars2     | 206.875782  | -0.58554  | 0.18769  | 0.688272 | 229.0213 | 236.1563 | 279.5987 | 77.39135 | 211.5606 | 207.5264 |
| ENSMUSG00000056234 | 14_Ncoa4    | 7721.247022 | 0.467322  | 0.153326 | 0.688272 | 6605.071 | 6201.894 | 6637.881 | 12425.28 | 6639.835 | 7817.52  |
| ENSMUSG00000056260 | 15_Lif1     | 685.1800733 | 0.985645  | 0.066397 | 0.688272 | 500.2734 | 419.0701 | 460.2448 | 1739.321 | 503.4463 | 488.7247 |
| ENSMUSG00000056267 | 14_Cep70    | 323.8698062 | 0.860046  | 0.068379 | 0.688272 | 254.1974 | 212.9701 | 223.2187 | 721.3271 | 253.4202 | 278.0854 |
| ENSMUSG00000056268 | 15_Dennnd1b | 1757.687115 | 0.710247  | 0.083736 | 0.688272 | 1338.394 | 1222.002 | 1440.566 | 3483.603 | 1585.007 | 1476.55  |
| ENSMUSG00000056290 | 15_Ms4a4b   | 107.7841778 | 1.002331  | 0.119404 | 0.688272 | 131.5654 | 24.90376 | 58.68122 | 206.3769 | 150.4682 | 74.70951 |
| ENSMUSG00000056342 | 16_Usp34    | 4031.576438 | 0.721407  | 0.101574 | 0.688272 | 3276.953 | 2881.107 | 2974.332 | 8429.704 | 3420.041 | 3207.321 |
| ENSMUSG00000056383 | 10_Al987944 | 374.909044  | 0.927942  | 0.073272 | 0.688272 | 247.7003 | 224.9926 | 302.611  | 903.8913 | 282.835  | 287.4241 |
| ENSMUSG00000056418 | 3_BC043934  | 48.83941498 | -0.70431  | 0.157044 | 0.688272 | 59.28565 | 87.59252 | 34.51836 | 35.71909 | 27.15216 | 48.76871 |
| ENSMUSG00000056427 | 10_Slit3    | 594.3044465 | -0.84767  | 0.111687 | 0.688272 | 752.0344 | 551.8802 | 688.066  | 144.8607 | 438.96   | 690.0253 |
| ENSMUSG00000056429 | 4_Tgolin1   | 4176.73809  | 0.49831   | 0.197315 | 0.688272 | 3566.885 | 3544.921 | 3275.793 | 7561.532 | 3550.145 | 3561.153 |
| ENSMUSG00000056481 | 6_C2d48     | 359.4340554 | -0.83744  | 0.110574 | 0.688272 | 437.7392 | 537.5776 | 407.3167 | 98.22748 | 240.9754 | 434.7678 |
| ENSMUSG00000056494 | 7_Cngb3     | 123.0775172 | 1.705242  | 0.003138 | 0.688272 | 48.72793 | 55.81876 | 69.03673 | 356.1987 | 126.7101 | 81.97293 |
| ENSMUSG00000056498 | 13_Tmem154  | 4120.457725 | 0.35213   | 0.162497 | 0.688272 | 3639.164 | 3235.771 | 3985.72  | 5254.674 | 4675.829 | 3931.588 |
| ENSMUSG00000056531 | 11_Ccdc18   | 112.2458143 | 0.900843  | 0.06547  | 0.688272 | 86.89814 | 72.13502 | 75.9404  | 251.0258 | 16.16391 | 91.31162 |
| ENSMUSG00000056536 | 14_Pign     | 2516.805194 | 0.711445  | 0.079019 | 0.688272 | 1988.912 | 1703.76  | 2033.132 | 4927.249 | 2373.552 | 2074.226 |
| ENSMUSG00000056537 | 11_Rlim     | 2503.760912 | 0.797261  | 0.069673 | 0.688272 | 1940.996 | 1685.727 | 1860.54  | 5316.191 | 2218.558 | 2004.555 |
| ENSMUSG00000056553 | 14_Ptprn2   | 20.83688681 | -0.7946   | 0.190618 | 0.688272 | 28.42463 | 36.92626 | 13.80735 | 13.89076 | 10.18206 | 21.79027 |
| ENSMUSG00000056569 | 10_Mpz      | 153.7638311 | -0.75187  | 0.137147 | 0.688272 | 165.675  | 212.9701 | 200.2065 | 52.58643 | 95.03257 | 196.1125 |
| ENSMUSG00000056596 | 8_Tmp1      | 38.19624967 | -0.81475  | 0.147367 | 0.688272 | 48.72793 | 66.12377 | 31.06653 | 14.88295 | 23.75814 | 44.61818 |
| ENSMUSG00000056602 | 11_Fry      | 335.7841937 | -0.47663  | 0.116719 | 0.688272 | 363.8352 | 496.3576 | 311.8159 | 294.6825 | 252.2888 | 295.7251 |
| ENSMUSG00000056608 | 13_Chd9     | 3019.844582 | 0.547652  | 0.114314 | 0.688272 | 2381.172 | 2353.834 | 2625.697 | 5164.384 | 2895.099 | 2698.881 |
| ENSMUSG00000056612 | 6_Ppp1r14b  | 2710.787879 | -0.61574  | 0.147492 | 0.688272 | 3095.036 | 3010.778 | 3736.038 | 1033.869 | 2712.954 | 2676.053 |
| ENSMUSG00000056632 | 7_Dsg3      | 17167.23728 | 0.4208    | 0.167362 | 0.688272 | 14131.91 | 12926.77 | 16985.34 | 23156.88 | 21485.28 | 14317.25 |
| ENSMUSG00000056665 | 2_Them6     | 280.3207844 | -0.84876  | 0.137417 | 0.688272 | 319.9801 | 359.8163 | 401.5636 | 55.56302 | 240.9754 | 304.0262 |
| ENSMUSG00000056666 | 13_Retsat   | 512.6358702 | -0.37046  | 0.197392 | 0.688272 | 517.3282 | 589.9614 | 627.0836 | 347.2689 | 464.9808 | 529.1924 |
| ENSMUSG00000056671 | 6_Prelid2   | 87.31075137 | 0.922708  | 0.025762 | 0.688272 | 65.78271 | 60.97127 | 54.07877 | 166.6891 | 99.55793 | 76.78477 |
| ENSMUSG00000056763 | 16_Cssp1    | 710.6683142 | 0.554223  | 0.128144 | 0.688272 | 551.4377 | 553.8939 | 622.4812 | 1242.23  | 614.3177 | 679.649  |
| ENSMUSG00000056832 | 14_Ttcd2    | 165.5807406 | 0.578732  | 0.138273 | 0.688272 | 149.4323 | 116.79   | 132.3204 | 292.6981 | 153.8623 | 148.3814 |
| ENSMUSG00000056888 | 11_Glipr1   | 79.68921492 | 1.086205  | 0.014044 | 0.688272 | 61.72205 | 42.93751 | 48.32571 | 142.8763 | 121.0534 | 61.22029 |
| ENSMUSG00000056895 | 4_Hist3h2ba | 5.113741515 | -1.66179  | 0.183714 | 0.688272 | 3.248529 | 12.0225  | 8.054285 | 0        | 1.13134  | 6.225792 |
| ENSMUSG00000056900 | 13_Usp13    | 74.70816853 | 0.923897  | 0.093962 | 0.688272 | 51.16433 | 60.97127 | 42.57265 | 166.6891 | 40.78284 | 86.12346 |
| ENSMUSG00000056919 | 9_Cep162    | 549.5447157 | 0.462225  | 0.14623  | 0.688272 | 502.7098 | 414.7764 | 469.4497 | 851.3049 | 546.4373 | 512.5902 |
| ENSMUSG00000056938 | 16_Acbd4    | 567.0438021 | -0.93336  | 0.082558 | 0.688272 | 661.8877 | 797.779  | 773.2113 | 125.0168 | 444.6167 | 599.7513 |
| ENSMUSG00000056999 | 14_Ide      | 3104.282613 | 0.386611  | 0.195342 | 0.688272 | 2747.443 | 2535.031 | 2790.234 | 4639.512 | 3069.326 | 2844.149 |
| ENSMUSG00000057003 | 12_MyH4     | 329.0428611 | 1.1464921 | 0.088038 | 0.688272 | 108.0136 | 347.7938 | 69.03673 | 900.9147 | 57.69835 | 490.8    |
| ENSMUSG00000057054 | 11_Inca1    | 20.34024182 | -0.92595  | 0.102545 | 0.688272 | 26.80036 | 30.05626 | 23.01224 | 7.937575 | 12.44474 | 21.79027 |
| ENSMUSG00000057069 | 6_Ero1lb    | 176.380316  | 0.613942  | 0.130741 | 0.688272 | 161.6143 | 132.2475 | 124.2661 | 323.4562 | 164.0443 | 152.5319 |
| ENSMUSG00000057113 | 13_Npm1     | 6511.546875 | 0.810268  | 0.066032 | 0.688272 | 5183.84  | 3837.755 | 5167.399 | 13474.03 | 6621.734 | 4784.521 |
| ENSMUSG00000057134 | 4_Ado       | 565.1025325 | 0.254766  | 0.173635 | 0.688272 | 445.8606 | 432.8101 | 512.0224 | 1013.033 | 502.315  | 484.5742 |
| ENSMUSG00000057143 | 14_Trim12c  | 3480.881198 | 0.899389  | 0.040282 | 0.688272 | 2390.105 | 2234.468 | 2664.818 | 7563.516 | 3151.914 | 2880.467 |
| ENSMUSG00000057147 | 12_Dph6     | 1082.442164 | 0.507605  | 0.18607  | 0.688272 | 928.2671 | 808.084  | 945.8032 | 1934.784 | 897.1527 | 980.5623 |
| ENSMUSG00000057229 | 11_Atp5a1   | 346.9628477 | -0.45814  | 0.195264 | 0.688272 | 380.89   | 413.0589 | 410.7685 | 188.5174 | 295.2798 | 393.2626 |
| ENSMUSG00000057234 | 9_Mettl15   | 163.65604   | 0.438695  | 0.153468 | 0.688272 | 159.99   | 124.5188 | 132.3204 | 229.1975 | 171.9637 | 163.9459 |
| ENSMUSG00000057236 | 10_Rbbp4    | 4304.085574 | 0.457143  | 0.196984 | 0.688272 | 3744.741 | 3400.951 | 3738.339 | 7010.865 | 3849.95  | 4079.969 |
| ENSMUSG00000057262 | 1_Gm10020   | 947.6815214 | 1.923653  | 0.006471 | 0.688272 | 488.9036 | 358.9576 | 338.28   | 3441.931 | 496.6583 | 561.3589 |
| ENSMUSG00000057321 | 2_Usp17d    | 1.061768459 | 3.63319   | 0.190008 | 0.688272 | 0        | 0        | 0        | 2.97659  | 3.39402  | 0        |
| ENSMUSG00000057335 | 11_Cep170   | 308.8704334 | 0.551974  | 0.180037 | 0.688272 | 287.4948 | 249.8963 | 214.0139 | 570.5132 | 276.407  | 255.2575 |
| ENSMUSG00000057342 | 13_Sphk2    | 1404.699662 | -0.95636  | 0.112047 | 0.688272 | 1611.27  | 1786.2   | 2164.301 | 223.2443 | 1281.808 | 1361.373 |
| ENSMUSG00000057367 | 12_Birc2    | 1526.539106 | 0.822096  | 0.042427 | 0.688272 | 1161.349 | 1091.472 | 1056.262 | 3093.67  | 1434.539 | 1321.943 |
| ENSMUSG00000057396 | 6_Zfp759    | 187.0762211 | 1.022923  | 0.088917 | 0.688272 | 142.1231 | 114.2138 | 113.9106 | 508.997  | 117.6594 | 125.5535 |
| ENSMUSG00000057406 | 16_Whsc1    | 1601.095184 | 0.341783  | 0.182019 | 0.688272 | 1458.589 | 1310.453 | 1468.181 | 2141.161 | 1680.04  | 1548.147 |
| ENSMUSG00000057409 | 6_Zfp53     | 280.0934871 | 0.991641  | 0.071284 | 0.688272 | 190.8511 | 165.7388 | 205.9596 | 705.4519 | 245.5008 | 167.0588 |
| ENSMUSG00000057411 | 8_Fam173a   | 422.8473681 | -1.04597  | 0.118711 | 0.688272 | 531.1344 | 569.3514 | 608.6738 | 45.64105 | 337.1394 | 445.1442 |
| ENSMUSG00000057440 | 7_Mpp7      | 2186.42427  | 0.860479  | 0.05976  | 0.688272 | 1590.155 | 1410.068 | 1659.183 | 4843.905 | 1830.508 | 1784.727 |
| ENSMUSG00000057457 | 11_Phex     | 14.45045431 | 1.22352   | 0.195283 | 0.688272 | 8.933454 | 14.59875 | 2.301224 | 44.64886 | 7.919381 | 8.301057 |
| ENSMUSG00000057469 | 7_E2f6      | 624.1372719 | 0.339663  | 0.17873  | 0.688272 | 553.8741 | 550.4589 | 548.842  | 827.4921 | 617.717  | 646.4448 |
| ENSMUSG00000057497 | 8_Fam136a   | 614.9319793 | 0.504193  | 0.18019  | 0.688272 | 496.2128 | 456.8551 | 573.0048 | 1073.557 | 556.6193 | 533.3429 |
| ENSMUSG00000057506 | 4_Bloc1s2   | 476.5480201 | 0.431176  | 0.110287 | 0.688272 | 397.1326 | 384.7    |          |          |          |          |

|                    |                  |             |          |          |          |          |          |          |          |          |          |
|--------------------|------------------|-------------|----------|----------|----------|----------|----------|----------|----------|----------|----------|
| ENSMUSG00000058470 | 10_Gm8369        | 14.41582235 | 1.258696 | 0.073295 | 0.688272 | 14.61838 | 6.011252 | 4.602448 | 29.7659  | 16.9701  | 14.52685 |
| ENSMUSG00000058486 | 11_Wdr91         | 397.7927099 | -0.83648 | 0.146706 | 0.688272 | 440.1756 | 589.1027 | 500.5163 | 76.39915 | 378.9989 | 401.5636 |
| ENSMUSG00000058503 | 11_Fam133b       | 561.1766579 | 0.550352 | 0.181538 | 0.688272 | 450.7334 | 430.2339 | 485.5583 | 1061.651 | 486.4762 | 452.4076 |
| ENSMUSG00000058558 | 12_Rpl5          | 23152.46012 | 0.392748 | 0.183868 | 0.688272 | 20966    | 19304.71 | 19790.53 | 34689.19 | 21917.89 | 22346.44 |
| ENSMUSG00000058587 | 7_Tmod3          | 7405.314318 | 0.465802 | 0.160994 | 0.688272 | 6182.762 | 5658.305 | 6819.678 | 11997.64 | 7080.68  | 6863.388 |
| ENSMUSG00000058600 | 13_Rpl30         | 7643.374843 | 0.609185 | 0.110959 | 0.688272 | 6460.511 | 5850.665 | 5848.561 | 14168.57 | 6704.321 | 6827.619 |
| ENSMUSG00000058624 | 12_Gda           | 9524.636247 | 0.975201 | 0.022578 | 0.688272 | 6330.57  | 5838.643 | 7099.277 | 20590.07 | 20590.07 | 7765.638 |
| ENSMUSG00000058656 | 12_Samd12        | 227.9648387 | 0.383636 | 0.158681 | 0.688272 | 189.2268 | 187.2075 | 217.4657 | 297.659  | 250.0262 | 226.2038 |
| ENSMUSG00000058672 | 6_Tubb2a         | 905.7850838 | -0.76957 | 0.143493 | 0.688272 | 1102.875 | 1092.33  | 1230.004 | 219.2755 | 980.8719 | 809.353  |
| ENSMUSG00000058690 | 14_Ccser2        | 4495.125351 | 0.521581 | 0.150798 | 0.688272 | 3692.765 | 3469.351 | 3912.081 | 7864.152 | 3947.246 | 4085.157 |
| ENSMUSG00000058704 | 7_Memo1          | 1167.106029 | 0.678403 | 0.10791  | 0.688272 | 888.4726 | 814.0952 | 990.677  | 2318.764 | 1070.248 | 920.3796 |
| ENSMUSG00000058706 | 5_0610030E20Rik  | 1152.079612 | 0.554804 | 0.081785 | 0.688272 | 940.4491 | 910.2752 | 949.255  | 1878.229 | 1092.875 | 1141.395 |
| ENSMUSG00000058709 | 11_Egln2         | 873.4512108 | -1.03385 | 0.107264 | 0.688272 | 1016.789 | 1210.838 | 1293.288 | 109.1416 | 754.6038 | 856.0465 |
| ENSMUSG00000058729 | 13_Lin9          | 194.055738  | 0.511225 | 0.196785 | 0.688272 | 174.6084 | 139.9763 | 165.6881 | 342.3079 | 179.8831 | 161.8706 |
| ENSMUSG00000058743 | 5_Kcnj14         | 33.26950464 | -0.78266 | 0.173745 | 0.688272 | 53.60072 | 51.52501 | 20.71102 | 19.84394 | 37.33422 | 16.60211 |
| ENSMUSG00000058748 | 8_Zfp958         | 189.5490941 | 1.14401  | 0.057776 | 0.688272 | 109.6378 | 150.2813 | 94.35019 | 523.8799 | 134.6295 | 124.5158 |
| ENSMUSG00000058756 | 13_Thra          | 2120.871415 | -0.62324 | 0.161248 | 0.688272 | 2419.342 | 2721.379 | 2575.07  | 746.132  | 1962.875 | 2300.43  |
| ENSMUSG00000058799 | 14_Nap111        | 3178.905253 | 0.770483 | 0.073466 | 0.688272 | 2399.038 | 2243.056 | 2407.081 | 6627.875 | 2852.108 | 2544.274 |
| ENSMUSG00000058806 | 14_Col13a1       | 80.28995504 | -0.89235 | 0.051342 | 0.688272 | 93.3952  | 139.1175 | 80.54285 | 50.60204 | 35.07154 | 83.01057 |
| ENSMUSG00000058833 | 11_2810428115Rik | 267.3653931 | -1.12089 | 0.097892 | 0.688272 | 341.9076 | 335.7713 | 421.124  | 26.78931 | 228.5307 | 250.0693 |
| ENSMUSG00000058835 | 14_Abi1          | 4850.036876 | 0.680751 | 0.078979 | 0.688272 | 3670.837 | 3422.12  | 4086.974 | 9163.93  | 4682.617 | 4073.743 |
| ENSMUSG00000058883 | 14_Zfp708        | 6.765904454 | -2.46667 | 0.160997 | 0.688272 | 14.61838 | 19.75126 | 0        | 0        | 0        | 6.225792 |
| ENSMUSG00000058886 | 8_Deaf1          | 544.8584754 | -0.75805 | 0.196846 | 0.688272 | 631.8388 | 710.1864 | 712.2289 | 100.2119 | 541.9119 | 572.7729 |
| ENSMUSG00000058900 | 4_Ral1           | 87.22330448 | 0.987388 | 0.092112 | 0.688272 | 64.15844 | 58.39502 | 52.92816 | 222.2521 | 75.79979 | 49.80634 |
| ENSMUSG00000058921 | 3_Slc10a5        | 32.97413875 | 0.990165 | 0.071947 | 0.688272 | 24.36397 | 22.32751 | 19.56041 | 61.5162  | 19.23278 | 50.84397 |
| ENSMUSG00000058927 | 5_Gm10053        | 1817.907754 | 0.784557 | 0.047249 | 0.688272 | 1312.406 | 1298.43  | 1395.692 | 3549.088 | 1894.995 | 1456.833 |
| ENSMUSG00000058966 | 13_Fam57b        | 69.97122713 | -1.43868 | 0.002688 | 0.688272 | 136.4382 | 99.61503 | 70.18734 | 25.79712 | 57.69835 | 30.09135 |
| ENSMUSG00000059005 | 13_Hnnpa3        | 21904.2991  | 0.727966 | 0.069264 | 0.688272 | 16633.28 | 14774.8  | 18069.21 | 42794.44 | 20996.54 | 18157.52 |
| ENSMUSG00000059022 | 14_Kcp           | 14.08764594 | -1.69015 | 0.032227 | 0.688272 | 14.61838 | 29.19751 | 20.71102 | 1.984394 | 4.52536  | 13.48922 |
| ENSMUSG00000059142 | 15_Zfp945        | 960.791023  | 1.288646 | 0.029355 | 0.688272 | 591.2322 | 553.8939 | 529.2816 | 2796.011 | 643.7325 | 650.5953 |
| ENSMUSG00000059182 | 7_Skap2          | 965.4370402 | 0.39278  | 0.137529 | 0.688272 | 875.4785 | 714.4802 | 914.7366 | 1164.839 | 1203.746 | 919.342  |
| ENSMUSG00000059203 | 10_I1rapl2       | 1.522270313 | 3.008129 | 0.199528 | 0.688272 | 0        | 0        | 1.150612 | 6.945378 | 0        | 1.037632 |
| ENSMUSG00000059213 | 6_Ddn            | 1.791478719 | -4.21664 | 0.031027 | 0.688272 | 2.436397 | 6.011252 | 2.301224 | 0        | 0        | 0        |
| ENSMUSG00000059263 | 7_Usp47          | 4999.552639 | 0.460485 | 0.15739  | 0.688272 | 4216.59  | 4089.369 | 4319.398 | 8070.529 | 4799.145 | 4502.286 |
| ENSMUSG00000059273 | 7_Zc3h4          | 1357.150317 | -0.58222 | 0.126065 | 0.688272 | 1569.039 | 1600.71  | 1712.111 | 601.2713 | 1306.698 | 1353.072 |
| ENSMUSG00000059326 | 6_Csf2ra         | 208.9543162 | -0.81068 | 0.068191 | 0.688272 | 244.4518 | 262.7776 | 291.1049 | 70.44597 | 200.2472 | 184.6985 |
| ENSMUSG00000059401 | 13_Mamld1        | 67.75567956 | -0.68817 | 0.093573 | 0.688272 | 78.77682 | 106.485  | 65.58489 | 62.5084  | 35.07154 | 58.1074  |
| ENSMUSG00000059423 | 13_Zfp933        | 374.3243992 | 1.006937 | 0.038376 | 0.688272 | 258.258  | 232.7213 | 255.4359 | 887.024  | 304.3305 | 308.1767 |
| ENSMUSG00000059447 | 13_Hadhb         | 2540.095944 | 0.469454 | 0.153639 | 0.688272 | 2164.332 | 2096.209 | 2130.934 | 4134.484 | 2413.148 | 2301.468 |
| ENSMUSG00000059474 | 13_Mbt1d         | 1135.149594 | 0.693051 | 0.101369 | 0.688272 | 930.7035 | 777.169  | 895.1762 | 2275.107 | 1010.287 | 922.4549 |
| ENSMUSG00000059475 | 13_Zfp426        | 759.5699394 | 0.825574 | 0.036837 | 0.688272 | 542.5043 | 536.7189 | 564.9505 | 1513.1   | 681.0667 | 719.079  |
| ENSMUSG00000059479 | 7_B3gn8          | 1109.468754 | -0.82741 | 0.176948 | 0.688272 | 1210.077 | 1355.967 | 1691.4   | 178.5954 | 1105.319 | 1115.454 |
| ENSMUSG00000059482 | 15_2610031B20Rik | 370.1765479 | 0.634345 | 0.155542 | 0.688272 | 310.2345 | 278.2351 | 281.9    | 753.0774 | 287.3604 | 310.252  |
| ENSMUSG00000059486 | 11_Kbtbd2        | 1104.71065  | 0.613205 | 0.08823  | 0.688272 | 898.2182 | 796.0615 | 926.2427 | 1954.628 | 997.842  | 1055.272 |
| ENSMUSG00000059518 | 14_Znh1t         | 486.6010959 | -0.6392  | 0.188659 | 0.688272 | 544.1286 | 513.5326 | 720.2832 | 152.7983 | 513.6284 | 475.2355 |
| ENSMUSG00000059534 | 8_Uqcr10         | 932.7096034 | -0.95653 | 0.093752 | 0.688272 | 1146.731 | 1228.872 | 1317.451 | 169.6657 | 797.5948 | 935.9441 |
| ENSMUSG00000059588 | 13_Calcr1        | 418.8551474 | 0.818324 | 0.169672 | 0.688272 | 304.5496 | 356.3813 | 248.5322 | 1071.573 | 210.4293 | 321.6659 |
| ENSMUSG00000059668 | 5_Krt4           | 5432.467407 | -0.65596 | 0.197756 | 0.688272 | 5680.865 | 4652.709 | 9606.461 | 1808.775 | 4793.488 | 6052.508 |
| ENSMUSG00000059708 | 12_Akap17b       | 710.1370051 | 0.75662  | 0.11815  | 0.688272 | 596.9172 | 500.6514 | 486.7089 | 1562.71  | 544.1746 | 569.66   |
| ENSMUSG00000059714 | 13_Flort1        | 642.1659846 | -0.79859 | 0.164442 | 0.688272 | 776.3984 | 797.779  | 872.164  | 163.7125 | 599.6103 | 643.3319 |
| ENSMUSG00000059734 | 6_Ndufs8         | 1200.238153 | -0.83169 | 0.165107 | 0.688272 | 1515.439 | 1455.582 | 1639.622 | 200.4238 | 1135.865 | 1254.497 |
| ENSMUSG00000059810 | 18_Rgs3          | 448.0134178 | -0.65308 | 0.152068 | 0.688272 | 521.3889 | 583.0914 | 538.4865 | 150.8139 | 424.2525 | 470.0473 |
| ENSMUSG00000059811 | 12_Atl2          | 3201.833562 | 0.613203 | 0.110902 | 0.688272 | 2605.32  | 2369.292 | 2619.944 | 5956.157 | 2906.413 | 2753.876 |
| ENSMUSG00000059820 | 14_AU019823      | 896.2617248 | 0.768174 | 0.09197  | 0.688272 | 665.1363 | 612.2889 | 712.2289 | 1930.815 | 717.2696 | 739.8317 |
| ENSMUSG00000059834 | 12_Sclt1         | 234.3932406 | 0.988829 | 0.065256 | 0.688272 | 159.99   | 136.5413 | 174.893  | 571.5054 | 217.0842 | 147.3438 |
| ENSMUSG00000059839 | 8_Zfp874b        | 212.0800019 | 1.063785 | 0.05487  | 0.688272 | 157.5536 | 128.8125 | 125.4167 | 549.677  | 146.0742 | 163.9459 |
| ENSMUSG00000059895 | 12_Ptp4a3        | 282.0539084 | -0.75195 | 0.078195 | 0.688272 | 318.3558 | 409.6239 | 333.6775 | 109.1416 | 220.6113 | 300.9133 |
| ENSMUSG00000059897 | 4_Zfp930         | 226.361706  | 1.105338 | 0.048125 | 0.688272 | 146.9959 | 142.5525 | 141.5253 | 599.2869 | 149.3369 | 178.4727 |
| ENSMUSG00000059898 | 8_Dsc3           | 31501.74352 | 0.665798 | 0.106059 | 0.688272 | 25114.38 | 22076.75 | 25886.47 | 62087.71 | 26975.67 | 26868.48 |
| ENSMUSG00000059920 | 9_4930453N24Rik  | 1285.606661 | 0.878019 | 0.039153 | 0.688272 | 913.6487 | 820.9652 | 983.7734 | 2697.783 | 1267.101 | 1030.369 |
| ENSMUSG00000059970 | 6_Hspa2          | 178.1163568 | -0.44647 | 0.138795 | 0.688272 | 198.1603 | 166.5975 | 251.9841 | 143.8685 | 161.7816 | 146.3061 |
| ENSMUSG00000059981 | 11-Taok2         | 1741.602012 | -0.61384 | 0.137149 | 0.688272 | 1869.528 | 2188.096 | 2262.103 | 691.5612 | 1736.607 | 1701.717 |
| ENSMUSG00000059994 | 10_Fcrl1         | 1.478707621 | -2.79366 | 0.156138 | 0.688272 | 4.872793 | 1.7175   | 1.150612 | 0        | 1.13134  | 0        |
| ENSMUSG00000060002 | 14_Chp1t         | 446.7365861 | 0.923205 | 0.138468 | 0.688272 | 314.2952 | 382.1438 | 228.9718 | 1202.543 | 218.3486 | 334.1175 |
| ENSMUSG00000060032 | 6_H2afj          | 164.1366505 | -0.73994 | 0.025668 | 0.688272 | 193.2875 | 215.5463 | 207.1102 | 90.28991 | 138.7907 | 159.7953 |
| ENSMUSG00000060073 | 9_Psma3          | 3390.191724 | 0.763595 | 0.053334 | 0.688272 | 2671.103 | 2261.948 | 2607.287 | 6625.89  | 3306.907 | 2868.015 |
| ENSMUSG00000060090 | 16_Rp2           | 501.4708405 | 0.951873 | 0.055815 | 0.688272 | 331.3499 | 320.3138 | 373.9489 | 1193.613 | 412.9391 | 376.6604 |
| ENSMUSG00000060121 | 15_Gemin2        | 280.6673268 | 0.452355 | 0.176452 | 0.688272 | 240.3911 | 218.9813 | 251.9841 | 443.512  | 274.9156 | 254.2199 |
| ENSMUSG00000060126 | 14_Tp1t          | 47573.60449 | 0.502414 | 0.195123 | 0.688272 | 40014.56 | 39135.82 | 38967.78 | 86592.98 | 39005.21 | 41725.26 |
| ENSMUSG00000060131 | 11_Atp8B4        | 57.9932929  | 0.985942 | 0.11917  | 0.688272 | 67.40697 | 18.03375 | 31.06653 | 94.2587  | 102.994  | 34.24186 |
| ENSMUSG00000060147 | 15_Serpinb6a     | 1807.774958 | 0.41931  | 0.187257 | 0.688272 | 1626.701 | 1514.835 | 1499.248 | 2821.08  | 1782.992 | 1601.066 |
| ENSMUSG00000060149 | 6_BC002059       | 278.9623923 | 0.960276 | 0.074755 | 0.688272 | 193.2875 | 193.2188 | 181.7967 | 699.4988 | 216.086  | 198.8867 |
| ENSMUSG00000060166 | 5_Zdhhc8         | 461.416234  | -1.07148 | 0.125826 | 0.688272 | 568.4925 | 662.9552 | 644.3428 | 41.67227 | 665.4229 | 485.6118 |
| ENSMUSG00000060180 | 12_Myh13         | 4.207413568 | 3.617098 | 0.020566 | 0.688272 | 0        | 0.85875  | 1.150612 | 17.85954 | 2.26268  | 3.112896 |
| ENSMUSG00000060212 | 13_Pcnx12        | 10.45473638 | -0.87523 | 0.194613 | 0.688272 | 17.054   |          |          |          |          |          |

|                    |                 |             |          |          |          |          |          |          |          |          |          |
|--------------------|-----------------|-------------|----------|----------|----------|----------|----------|----------|----------|----------|----------|
| ENSMUSG00000061046 | 9_Haghl         | 197.8307406 | -1.12079 | 0.050451 | 0.688272 | 245.2639 | 334.0538 | 233.5743 | 35.71909 | 151.5996 | 186.7738 |
| ENSMUSG00000061062 | 4_Gm10093       | 1072.947124 | 0.422575 | 0.174164 | 0.688272 | 899.0303 | 823.5415 | 1028.647 | 1615.296 | 1103.057 | 968.1107 |
| 13_Zfp143          | 639.786978      | 0.380041    | 0.145076 | 0.688272 | 558.7469 | 537.5776 | 571.8542 | 852.2971 | 719.5323 | 598.7137 |          |
| ENSMUSG00000061126 | 4_Cyp4f39       | 22.76239674 | -1.09092 | 0.067754 | 0.688272 | 23.55183 | 25.76251 | 43.72326 | 6.945378 | 15.83876 | 20.75264 |
| ENSMUSG00000061136 | 13_Prp40a       | 3394.072104 | 0.909882 | 0.046667 | 0.688272 | 2382.796 | 2133.994 | 2557.811 | 7606.181 | 2632.968 | 2720.671 |
| ENSMUSG00000061186 | 15_Snfbt2       | 21.62024362 | 0.869934 | 0.178131 | 0.688272 | 13.80625 | 24.90376 | 6.903673 | 41.67227 | 23.75814 | 18.67738 |
| ENSMUSG00000061244 | 13_Exoc5        | 1526.272623 | 0.98253  | 0.039896 | 0.688272 | 1070.39  | 919.7215 | 1087.328 | 3579.846 | 1311.223 | 1189.126 |
| ENSMUSG00000061259 | 11_Tmprss11d    | 3954.280421 | 0.481583 | 0.175819 | 0.688272 | 3412.579 | 3215.161 | 3273.491 | 6766.782 | 3641.784 | 3415.885 |
| ENSMUSG00000061273 | 3_Mmgf1         | 859.0820392 | 0.941178 | 0.060143 | 0.688272 | 587.1716 | 609.7127 | 568.4024 | 2063.769 | 681.0667 | 644.3695 |
| ENSMUSG00000061306 | 15_Slc38a10     | 2094.48665  | -0.77611 | 0.172202 | 0.688272 | 2401.475 | 2833.017 | 2699.336 | 415.7305 | 1971.926 | 2245.436 |
| ENSMUSG00000061371 | 6_Zfp873        | 96.23274085 | 1.069238 | 0.058928 | 0.688272 | 69.03124 | 60.97127 | 56.37999 | 248.0492 | 72.40577 | 70.55898 |
| ENSMUSG00000061374 | 13_Fiz1         | 579.3103572 | -0.37775 | 0.188425 | 0.688272 | 596.9172 | 607.9952 | 759.404  | 398.8631 | 580.3775 | 532.3052 |
| ENSMUSG00000061393 | 13_Acvr2b       | 23.58819565 | -1.41067 | 0.077368 | 0.688272 | 28.42463 | 42.07876 | 32.21714 | 0.992197 | 18.10144 | 19.71501 |
| ENSMUSG00000061410 | 6_Zcchc14       | 856.3106875 | -0.46305 | 0.098219 | 0.688272 | 877.1028 | 1027.065 | 1073.521 | 560.5912 | 808.9082 | 790.6756 |
| ENSMUSG00000061411 | 12_No1d         | 88.33302001 | -0.54583 | 0.124169 | 0.688272 | 103.9529 | 125.3775 | 85.1453  | 86.32112 | 56.56701 | 72.63424 |
| ENSMUSG00000061451 | 13_Tmem151a     | 17.57218233 | -1.13329 | 0.122995 | 0.688272 | 23.55183 | 25.76251 | 23.01224 | 1.984394 | 12.44474 | 18.67738 |
| ENSMUSG00000061458 | 8_No1o          | 492.5308893 | 0.472499 | 0.120722 | 0.688272 | 415.8117 | 376.9913 | 445.2869 | 737.2022 | 530.5985 | 449.2944 |
| ENSMUSG00000061479 | 15_Snra         | 832.3337275 | -0.73846 | 0.153686 | 0.688272 | 877.9149 | 1020.195 | 1224.251 | 217.2911 | 881.3139 | 773.0359 |
| ENSMUSG00000061524 | 8_Zic2          | 60.56707863 | -0.6085  | 0.188883 | 0.688272 | 66.59484 | 102.1913 | 50.62693 | 60.52401 | 30.54618 | 52.91924 |
| ENSMUSG00000061544 | 13_Zfp229       | 248.5352808 | 1.069233 | 0.070617 | 0.688272 | 159.1779 | 176.0438 | 146.1277 | 680.647  | 166.307  | 162.9082 |
| ENSMUSG00000061589 | 14_Dot1l        | 1026.409889 | -0.75118 | 0.188716 | 0.688272 | 1195.459 | 1240.894 | 1426.759 | 203.4003 | 1053.278 | 1038.67  |
| ENSMUSG00000061603 | 7_Akap6         | 57.80607064 | 0.88021  | 0.196165 | 0.688272 | 50.3522  | 39.50251 | 32.21714 | 158.7515 | 32.80886 | 33.20423 |
| ENSMUSG00000061665 | 6_Cd2ap         | 4289.84718  | 0.836126 | 0.060912 | 0.688272 | 3091.787 | 2892.271 | 3257.383 | 9309.783 | 3785.464 | 3402.396 |
| ENSMUSG00000061718 | 12_Ppp1r1b      | 51.36930927 | -0.81385 | 0.143184 | 0.688272 | 55.22499 | 96.18002 | 44.87387 | 18.85174 | 33.9402  | 59.14503 |
| ENSMUSG00000061740 | 7_Cyp2d22       | 163.9458669 | -0.65042 | 0.062651 | 0.688272 | 174.6084 | 259.3426 | 166.8398 | 112.1182 | 99.55793 | 171.2093 |
| ENSMUSG00000061778 | 10_Mospd2       | 659.5021941 | 0.717699 | 0.128593 | 0.688272 | 542.5043 | 456.8551 | 497.0644 | 1431.74  | 632.8612 | 495.9881 |
| ENSMUSG00000061808 | 3_Tir           | 1249.104788 | -1.0531  | 0.101853 | 0.688272 | 2074.186 | 2067.012 | 915.8872 | 656.8343 | 615.449  | 1165.261 |
| ENSMUSG00000061816 | 15_Myl1         | 1026.099152 | 1.132148 | 0.094742 | 0.688272 | 527.8859 | 925.7327 | 475.2028 | 2801.964 | 326.9573 | 1098.852 |
| ENSMUSG00000061972 | 2_Olfrr9        | 7.445010992 | 1.616427 | 0.090943 | 0.688272 | 2.436397 | 0.85875  | 8.054285 | 15.87515 | 10.18206 | 7.263424 |
| ENSMUSG00000061979 | 8_Wbscr16       | 309.0928566 | -0.71484 | 0.113973 | 0.688272 | 377.6415 | 351.2288 | 423.4253 | 104.1807 | 293.0171 | 305.0638 |
| ENSMUSG00000062012 | 13_Zfp13        | 56.88616932 | -1.00273 | 0.119792 | 0.688272 | 66.59484 | 81.58127 | 79.39224 | 7.937575 | 49.77896 | 56.03213 |
| ENSMUSG00000062014 | 12_Gmfb         | 4303.219022 | 1.037627 | 0.039733 | 0.688272 | 2957.785 | 2664.702 | 2835.108 | 10673.06 | 3283.149 | 3405.508 |
| ENSMUSG00000062044 | 13_Lmtk3        | 25.80858479 | -1.59799 | 0.017345 | 0.688272 | 32.48529 | 51.52501 | 32.21714 | 2.97659  | 16.9701  | 18.67738 |
| ENSMUSG00000062075 | 13_Lmbn2        | 566.1042084 | -0.76587 | 0.199196 | 0.688272 | 596.9172 | 707.6102 | 834.1938 | 102.1963 | 561.1447 | 594.5632 |
| ENSMUSG00000062078 | 14_Qk           | 3654.300619 | 0.685596 | 0.090947 | 0.688272 | 2772.619 | 2656.973 | 2976.634 | 7175.567 | 3218.663 | 3125.348 |
| ENSMUSG00000062082 | 16_Cd200r4      | 38.58820369 | 1.41909  | 0.100986 | 0.688272 | 29.23676 | 16.31625 | 17.25918 | 78.38355 | 63.35505 | 26.97843 |
| ENSMUSG00000062101 | 12_Zfp119b      | 191.6366725 | 0.98925  | 0.055394 | 0.688272 | 120.1956 | 140.835  | 124.2661 | 464.3481 | 141.4175 | 158.7577 |
| ENSMUSG00000062115 | 15_Rai1         | 770.6956452 | -1.09196 | 0.07588  | 0.688272 | 898.2182 | 1094.048 | 1155.215 | 109.1416 | 600.7416 | 766.8014 |
| ENSMUSG00000062169 | 12_Ppef1        | 4.710975915 | 1.838495 | 0.140036 | 0.688272 | 3.248529 | 1.7175   | 1.150612 | 16.86735 | 1.13134  | 1.450528 |
| ENSMUSG00000062169 | 13_Cnh4         | 1472.649038 | 0.547651 | 0.12789  | 0.688272 | 1169.47  | 1139.562 | 1280.631 | 2571.774 | 1358.739 | 1315.717 |
| ENSMUSG00000062198 | 4_270097O09Rik  | 299.2619328 | 0.537893 | 0.092903 | 0.688272 | 223.3363 | 248.1788 | 261.1889 | 471.2935 | 289.6231 | 301.9509 |
| ENSMUSG00000062203 | 14_Gsp1         | 3258.316196 | 0.756296 | 0.067502 | 0.688272 | 2433.96  | 2250.784 | 2585.425 | 6545.522 | 3147.388 | 2586.817 |
| ENSMUSG00000062209 | 15_Erb4         | 76.28053081 | 0.917295 | 0.149477 | 0.688272 | 62.53418 | 63.54752 | 32.21714 | 189.5096 | 36.20288 | 73.67188 |
| ENSMUSG00000062210 | 13_Tnfrfa8      | 2056.321384 | 0.618255 | 0.083494 | 0.688272 | 1593.403 | 1488.214 | 1785.75  | 3626.479 | 2000.209 | 1843.872 |
| ENSMUSG00000062257 | 12_Opcml        | 68.73898558 | 1.055316 | 0.107765 | 0.688272 | 43.04301 | 57.53626 | 33.36775 | 186.533  | 32.80886 | 59.14503 |
| ENSMUSG00000062270 | 13_Morf41       | 9664.227601 | 0.529987 | 0.140128 | 0.688272 | 7952.398 | 7517.499 | 8256.792 | 16880.24 | 8763.725 | 8594.706 |
| ENSMUSG00000062373 | 7_Tmem65        | 2175.645184 | 0.797573 | 0.065024 | 0.688272 | 1554.421 | 1497.66  | 1715.563 | 4576.012 | 1849.741 | 1860.474 |
| ENSMUSG00000062397 | 7_Zfp706        | 4145.283009 | 0.502051 | 0.140089 | 0.688272 | 3325.681 | 3313.917 | 3654.344 | 6921.556 | 3990.237 | 3665.954 |
| ENSMUSG00000062488 | 9_Iff13b        | 12329.89201 | 0.933535 | 0.004571 | 0.688272 | 7975.95  | 6924.103 | 10523.5  | 19962.01 | 16721.21 | 11872.59 |
| ENSMUSG00000062515 | 3_Fabp4         | 65.42557099 | 0.89905  | 0.020071 | 0.688272 | 57.66138 | 37.78501 | 41.42204 | 107.1573 | 76.93113 | 71.59661 |
| ENSMUSG00000062524 | 4_Ncr1          | 39.15768316 | 1.016823 | 0.068001 | 0.688272 | 36.54595 | 18.03375 | 23.01224 | 77.39135 | 50.9103  | 29.0537  |
| ENSMUSG00000062591 | 5_Tubb4a        | 51.76514346 | -1.27154 | 0.017959 | 0.688272 | 86.89814 | 77.28752 | 55.22938 | 12.89856 | 30.54618 | 47.73108 |
| ENSMUSG00000062593 | 15_Llrb4a       | 412.0261235 | 0.757216 | 0.155899 | 0.688272 | 479.9701 | 154.575  | 284.2012 | 589.3649 | 702.5622 | 301.4833 |
| ENSMUSG00000062604 | 11_Srp2         | 3291.12507  | 0.546911 | 0.124271 | 0.688272 | 2624.811 | 2587.414 | 2812.096 | 5735.89  | 2974.293 | 2612.246 |
| ENSMUSG00000062609 | 13_Kcnj15       | 438.3634282 | 0.665369 | 0.052866 | 0.688272 | 332.9742 | 294.5513 | 390.0575 | 742.1632 | 424.2525 | 446.1818 |
| ENSMUSG00000062627 | 9_Mysm1         | 892.9045922 | 0.690357 | 0.100991 | 0.688272 | 698.4337 | 695.5877 | 655.8489 | 1791.907 | 772.7053 | 742.9446 |
| ENSMUSG00000062743 | 9_Zfp677        | 171.0894728 | 0.992749 | 0.115021 | 0.688272 | 141.311  | 116.79   | 85.1453  | 471.2935 | 104.0833 | 70.9137  |
| ENSMUSG00000062762 | 15_El24         | 2576.871437 | 0.412563 | 0.194182 | 0.688272 | 2298.334 | 2121.972 | 2212.627 | 4037.249 | 2371.989 | 2419.758 |
| ENSMUSG00000062797 | 11_T7Rn6        | 540.277921  | 0.106111 | 0.124342 | 0.688272 | 425.5573 | 421.6464 | 490.1608 | 786.1098 | 524.284  | 503.2516 |
| ENSMUSG00000062859 | 14_Tcp11        | 14.73291485 | -2.5884  | 0.030516 | 0.688272 | 17.05478 | 54.10126 | 4.602448 | 0        | 2.26268  | 10.37632 |
| ENSMUSG00000062901 | 2_Khlz24        | 735.5035217 | 0.653029 | 0.192869 | 0.688272 | 576.6138 | 616.5827 | 522.3779 | 1618.273 | 451.4047 | 627.7674 |
| ENSMUSG00000062929 | 7_Clf2          | 1407.888517 | 0.972326 | 0.046229 | 0.688272 | 940.4491 | 892.2415 | 1019.442 | 3348.664 | 1090.612 | 1155.922 |
| ENSMUSG00000062931 | 15_Zfp938       | 216.3209773 | 0.894399 | 0.090487 | 0.688272 | 155.1172 | 159.7275 | 139.2241 | 523.8799 | 154.9936 | 164.9835 |
| ENSMUSG00000062944 | 4_9130023H24Rik | 362.3264963 | 0.349451 | 0.180115 | 0.688272 | 325.665  | 301.4213 | 329.0751 | 473.2779 | 394.8377 | 349.682  |
| ENSMUSG00000062949 | 4_His69         | 418.591471  | 0.208181 | 0.028124 | 0.688272 | 224.9606 | 260.2013 | 273.8457 | 1129.12  | 303.1991 | 320.6283 |
| ENSMUSG00000063011 | 6_Msln          | 16.71900342 | -1.41763 | 0.015454 | 0.688272 | 27.61249 | 22.32751 | 23.01224 | 5.953181 | 7.919381 | 13.48922 |
| ENSMUSG00000063015 | 12_Ccni         | 2764.231684 | 0.513241 | 0.177329 | 0.688272 | 2164.332 | 2414.806 | 2254.049 | 4963.961 | 2324.904 | 2463.339 |
| ENSMUSG00000063047 | 8_Zfp780b       | 315.1329713 | 0.864168 | 0.036058 | 0.688272 | 241.2033 | 233.5801 | 195.6041 | 632.0294 | 263.6022 | 324.7788 |
| ENSMUSG00000063052 | 9_Lrrc4         | 518.281014  | 0.627537 | 0.152224 | 0.688272 | 414.9995 | 377.8501 | 429.1783 | 1043.791 | 425.3839 | 418.1657 |
| ENSMUSG00000063108 | 14_Zfp26        | 980.8305315 | 0.791827 | 0.055102 | 0.688272 | 779.6469 | 673.2602 | 701.8734 | 1989.355 | 885.8393 | 855.0088 |
| ENSMUSG00000063142 | 13_Kcna1        | 38.80322081 | 0.716001 | 0.189429 | 0.688272 | 27.61249 | 35.20876 | 25.31347 | 78.38355 | 23.75814 | 42.54291 |
| ENSMUSG00000063145 | 10_Bbs5         | 134.6264908 | 0.138502 | 0.037785 | 0.688272 | 88.52241 | 73.85252 | 102.4045 | 315.5186 | 115.3967 | 112.0643 |
| ENSMUSG00000063146 | 11_Clf2         | 430.6523427 | -0.86287 | 0.142472 | 0.688272 | 514.0797 | 578.7977 | 574.1554 | 75.40696 | 425.3869 | 416.0905 |
| ENSMUSG00000063160 | 12_Numbl        | 338.3506477 | -0.80857 | 0.058704 | 0.688272 | 402.0054 | 424.2226 | 465.9979 | 124.0246 | 257.9455 | 355.9078 |
| ENSMUSG00000063172 | 13_H            |             |          |          |          |          |          |          |          |          |          |

|                     |                  |             |          |          |          |          |          |          |          |          |          |
|---------------------|------------------|-------------|----------|----------|----------|----------|----------|----------|----------|----------|----------|
| ENSMUSG00000063704  | 12_Mapk15        | 21.62157656 | -1.16103 | 0.151653 | 0.688272 | 26.80036 | 31.77376 | 31.06653 | 1.984394 | 0.950721 | 29.0537  |
| ENSMUSG00000063757  | 3_4632433K11Rik  | 21.51149554 | 1.222135 | 0.137164 | 0.688272 | 12.99411 | 12.0225  | 13.80735 | 68.46158 | 12.44474 | 9.336869 |
| ENSMUSG00000063760  | 9_Rnf217         | 727.8128483 | 7.444369 | 0.056525 | 0.688272 | 545.7528 | 512.6739 | 574.1554 | 1403.958 | 690.1175 | 640.219  |
| ENSMUSG00000063785  | 12_Utp14a        | 1103.195513 | 0.400842 | 0.143008 | 0.688272 | 968.0616 | 865.6202 | 1019.442 | 1551.796 | 1126.815 | 1087.438 |
| ENSMUSG00000063787  | 3_Chchd1         | 468.5639094 | 0.354639 | 0.146483 | 0.688272 | 432.0543 | 386.4376 | 415.371  | 590.3571 | 518.1538 | 469.0097 |
| ENSMUSG00000063796  | 8_Slc22a8        | 104.3219973 | -0.75548 | 0.127565 | 0.688272 | 128.3169 | 186.3488 | 78.24162 | 60.52401 | 53.17298 | 119.3277 |
| ENSMUSG00000063800  | 5_Prp38a         | 1077.45437  | 0.458498 | 0.146504 | 0.688272 | 946.9461 | 789.1915 | 987.2252 | 1660.937 | 1077.036 | 1003.39  |
| ENSMUSG00000063802  | 5_Hspbp1         | 459.5322473 | -0.94398 | 0.180926 | 0.688272 | 516.5161 | 589.9614 | 707.6264 | 42.66446 | 435.5659 | 464.8592 |
| ENSMUSG00000063810  | 6_Alms1          | 497.24665   | 0.624911 | 0.107348 | 0.688272 | 419.8723 | 358.0988 | 395.8106 | 917.7821 | 470.6375 | 421.2186 |
| ENSMUSG00000063838  | 6_170027J19Rik   | 473.5309805 | -0.70919 | 0.094089 | 0.688272 | 560.3712 | 592.5377 | 609.8244 | 174.6266 | 426.5152 | 477.3108 |
| ENSMUSG00000063856  | 7_Gpx1           | 4500.974039 | -0.7382  | 0.169521 | 0.688272 | 5396.618 | 5238.376 | 6248.974 | 1039.822 | 4392.994 | 4689.059 |
| ENSMUSG00000063884  | 6_Ptcd3          | 956.763506  | 0.566413 | 0.125455 | 0.688272 | 799.1381 | 708.4689 | 806.5791 | 1680.781 | 968.4271 | 777.1864 |
| ENSMUSG00000063889  | 16_Crem          | 205.4864001 | 0.880764 | 0.026042 | 0.688272 | 161.6143 | 129.6713 | 142.6759 | 388.9412 | 239.8441 | 170.1717 |
| ENSMUSG00000063894  | 14_Zkscan8       | 1186.621051 | 0.711722 | 0.10711  | 0.688272 | 890.909  | 881.0777 | 927.3934 | 2472.554 | 916.3855 | 1031.406 |
| ENSMUSG00000063895  | 6_Nup1           | 1533.249287 | 0.524853 | 0.140931 | 0.688272 | 1264.49  | 1192.804 | 1315.15  | 2650.158 | 1367.79  | 1409.104 |
| ENSMUSG00000063931  | 14_Pepd          | 787.2851059 | -0.51032 | 0.192109 | 0.688272 | 850.3024 | 968.6703 | 956.1587 | 351.2377 | 769.3113 | 828.0304 |
| ENSMUSG00000063952  | 15_Brpf3         | 955.5830513 | -0.48308 | 0.195019 | 0.688272 | 1015.977 | 1114.658 | 1211.595 | 465.3403 | 877.9199 | 1048.038 |
| ENSMUSG00000063954  | 7_Hist2h2aa2     | 46.6999725  | -1.87124 | 0.008386 | 0.688272 | 56.03712 | 62.68877 | 101.2539 | 2.97659  | 27.15216 | 30.09133 |
| ENSMUSG00000063972  | 13_Nr6a1         | 356.6098291 | 0.382317 | 0.191814 | 0.688272 | 323.2286 | 299.7038 | 306.0628 | 511.9736 | 367.6855 | 331.0046 |
| ENSMUSG00000063975  | 13_Slco1a5       | 159.3987162 | 0.645936 | 0.117911 | 0.688272 | 121.8198 | 106.485  | 144.9771 | 295.6747 | 150.4682 | 136.9674 |
| ENSMUSG00000064023  | 4_Klk8           | 48.12474607 | -0.90461 | 0.132131 | 0.688272 | 54.41286 | 53.24251 | 80.54285 | 9.921968 | 41.89558 | 48.76871 |
| ENSMUSG00000064061  | 13_Dzip3         | 345.3740046 | 0.846774 | 0.107942 | 0.688272 | 228.2091 | 269.6476 | 242.7792 | 330.4687 | 237.5814 | 263.5585 |
| ENSMUSG00000064080  | 12_Fbln2         | 831.2098645 | -0.87577 | 0.047551 | 0.688272 | 958.316  | 1223.719 | 1045.906 | 281.7839 | 613.1863 | 864.3475 |
| ENSMUSG00000064090  | 12_Vrk2          | 382.2414889 | 0.683663 | 0.101505 | 0.688272 | 310.2345 | 259.3426 | 310.6653 | 747.1242 | 312.2499 | 353.8325 |
| ENSMUSG00000064105  | 12_Cnrm2         | 132.6184579 | -0.58012 | 0.131168 | 0.688272 | 141.311  | 153.7163 | 181.7967 | 65.48499 | 115.3967 | 138.0051 |
| ENSMUSG00000064127  | 13_Med14         | 3457.067111 | 0.608671 | 0.098274 | 0.688272 | 2768.559 | 2518.714 | 2928.308 | 6219.09  | 3319.352 | 2988.38  |
| ENSMUSG00000064128  | 6_Cenp3          | 461.0715924 | 0.84343  | 0.028591 | 0.688272 | 326.4771 | 270.5063 | 393.5093 | 870.1566 | 475.1628 | 430.6173 |
| ENSMUSG00000064138  | 13_Fam172a       | 720.1137808 | 0.809912 | 0.096208 | 0.688272 | 493.7764 | 524.6964 | 551.1432 | 1637.125 | 520.4164 | 593.5255 |
| ENSMUSG00000064215  | 13_Ilf2          | 2042.490158 | -0.55344 | 0.101982 | 0.688272 | 2623.187 | 2645.809 | 2019.324 | 1259.098 | 1428.883 | 2278.64  |
| ENSMUSG00000064220  | 6_Hist2h2aa1     | 4.302168832 | -5.4717  | 0.008982 | 0.688272 | 0        | 15.4575  | 10.35551 | 0        | 0        | 0        |
| ENSMUSG00000064254  | 6_Eth2           | 272.9113255 | -0.66972 | 0.18175  | 0.688272 | 345.9683 | 297.9863 | 361.2922 | 78.38355 | 297.5424 | 256.2951 |
| ENSMUSG00000064262  | 7_Gimap8         | 85.47134464 | 0.538683 | 0.181606 | 0.688272 | 95.8316  | 53.24251 | 59.83183 | 128.9856 | 62.58783 | 32.34925 |
| ENSMUSG00000064264  | 14_Zfp428        | 27.07863707 | -1.13191 | 0.017852 | 0.688272 | 31.67315 | 42.93751 | 36.81959 | 11.90636 | 21.49546 | 17.63975 |
| ENSMUSG00000064280  | 13_Ccdc146       | 1.930899082 | 2.347194 | 0.148537 | 0.688272 | 0.812132 | 0        | 1.150612 | 1.984394 | 4.52536  | 3.112896 |
| ENSMUSG00000064284  | 12_Cdpf1         | 167.0412698 | -0.78904 | 0.080456 | 0.688272 | 230.6455 | 212.9701 | 191.0016 | 57.54742 | 135.7608 | 174.3222 |
| ENSMUSG00000064289  | 15_Tank          | 1860.50613  | 0.77834  | 0.058695 | 0.688272 | 1386.31  | 1270.95  | 1454.374 | 3767.371 | 1677.777 | 1606.254 |
| ENSMUSG00000064326  | 12_Siva1         | 206.7572254 | -1.00796 | 0.026495 | 0.688272 | 246.076  | 260.2013 | 122.1714 | 62.5084  | 174.2264 | 175.3598 |
| ENSMUSG00000064341  | 1_mt-Nd1         | 55777.99948 | 1.096581 | 0.062577 | 0.688272 | 37840.49 | 34085.51 | 34708.21 | 156141   | 36108.98 | 35783.78 |
| ENSMUSG00000064345  | 1_mt-Nd2         | 38787.70683 | 1.233365 | 0.047757 | 0.688272 | 23499.86 | 21804.53 | 24132.94 | 116238.8 | 23021.64 | 24028.45 |
| ENSMUSG00000064351  | 1_mt-Co1         | 22244.87833 | 1.038221 | 0.061461 | 0.688272 | 151255.6 | 139218   | 146657   | 590347.2 | 151863.2 | 155520.3 |
| ENSMUSG00000064354  | 1_mt-Co2         | 104878.9635 | 1.034051 | 0.065157 | 0.688272 | 71361.24 | 66825.37 | 68284.23 | 279803.5 | 68089.7  | 74909.77 |
| ENSMUSG00000064356  | 3_mt-Atp8        | 16212.63102 | 1.300256 | 0.042987 | 0.688272 | 9820.302 | 8845.127 | 9426.965 | 50250.8  | 9169.512 | 9763.08  |
| ENSMUSG00000064357  | 1_mt-Atp6        | 108528.937  | 1.173937 | 0.054908 | 0.688272 | 69430.8  | 63125.01 | 67420.12 | 317019.8 | 65338.28 | 68839.62 |
| ENSMUSG00000064358  | 1_mt-Co3         | 106709.8367 | 1.058924 | 0.061355 | 0.688272 | 72211.54 | 68779.02 | 66658.41 | 288092.3 | 75811.47 |          |
| ENSMUSG00000064360  | 1_mt-Nd3         | 7051.396171 | 1.554549 | 0.022175 | 0.688272 | 3675.71  | 3716.671 | 3352.884 | 23787.92 | 3723.24  | 4051.953 |
| ENSMUSG00000064363  | 1_mt-Nd4         | 67324.61664 | 1.062778 | 0.069725 | 0.688272 | 44497.53 | 42025.52 | 42429.09 | 186490.3 | 41984.03 | 44701.19 |
| ENSMUSG00000064367  | 1_mt-Nd5         | 46572.30367 | 0.954793 | 0.096127 | 0.688272 | 32841    | 31213.85 | 31045.82 | 123904.5 | 28424.92 | 32003.69 |
| ENSMUSG00000064368  | 1_mt-Nd6         | 15031.61051 | 1.090366 | 0.08576  | 0.688272 | 9450.782 | 9438.524 | 9932.084 | 44153.75 | 7857.157 | 9357.366 |
| ENSMUSG00000064370  | 1_mt-Cytb        | 86673.86823 | 0.958709 | 0.090425 | 0.688272 | 61864.17 | 57969.08 | 56837.94 | 228760.9 | 54976.34 | 59634.79 |
| ENSMUSG00000064371  | 3_mt-Nd4l        | 8052.427121 | 0.892834 | 0.096818 | 0.688272 | 5667.058 | 5538.08  | 5707.036 | 20197.16 | 5434.958 | 5770.272 |
| ENSMUSG00000064372  | 13_C330021F23Rik | 18.7561899  | -0.8802  | 0.136008 | 0.688272 | 30.86102 | 29.19751 | 12.65673 | 11.90636 | 11.3134  | 16.60211 |
| ENSMUSG00000064390  | 12_Aurkaip1      | 798.656417  | -0.78484 | 0.138387 | 0.688272 | 969.6858 | 919.7215 | 1142.558 | 189.5096 | 757.9979 | 812.4659 |
| ENSMUSG00000064600  | 12_2610305D13Rik | 43.14961641 | 1.050564 | 0.131875 | 0.688272 | 34.10955 | 24.90376 | 25.31347 | 122.0402 | 20.36412 | 32.16659 |
| ENSMUSG00000064603  | 14_Hnnp7         | 3143.405564 | 0.486282 | 0.177419 | 0.688272 | 2537.101 | 2651.821 | 2667.119 | 5435.254 | 2783.097 | 2786.042 |
| ENSMUSG00000064605  | 11_Cldn19        | 122.0199126 | -0.86988 | 0.076918 | 0.688272 | 121.0077 | 240.4501 | 111.6094 | 60.52401 | 66.74907 | 131.7793 |
| ENSMUSG00000064609  | 5_Insl5          | 1.227869612 | 2.703031 | 0.199189 | 0.688272 | 0.812132 | 0        | 0        | 0.992197 | 4.52536  | 1.037632 |
| ENSMUSG00000064619  | 14_Kndc1         | 132.1243777 | -0.87553 | 0.045306 | 0.688272 | 185.1661 | 166.5975 | 161.0857 | 45.64105 | 109.74   | 124.5158 |
| ENSMUSG000000646150 | 12_Slc31a1       | 2980.910977 | 0.492193 | 0.162666 | 0.688272 | 2521.67  | 2357.269 | 2553.208 | 5086.001 | 2701.64  | 2665.677 |
| ENSMUSG000000646232 | 3_Ipo7           | 2694.647041 | 0.101467 | 0.045991 | 0.688272 | 1910.135 | 1717.5   | 1987.107 | 6030.572 | 2399.572 | 2122.995 |
| ENSMUSG000000646235 | 6_Pomgnt2        | 126.0229596 | -1.09555 | 0.088667 | 0.688272 | 143.7474 | 197.5126 | 173.7424 | 16.86735 | 39.37587 | 134.8922 |
| ENSMUSG000000646324 | 2_Impad1         | 2125.784794 | 0.861164 | 0.078109 | 0.688272 | 1546.3   | 1459.017 | 1523.41  | 4945.109 | 1589.533 | 1691.34  |
| ENSMUSG000000646357 | 6_Wdr6           | 1153.010584 | -1.06659 | 0.071778 | 0.688272 | 1380.625 | 1884.098 | 1417.554 | 187.5252 | 901.6781 | 1146.583 |
| ENSMUSG000000646363 | 12_Serpinaf3     | 75.41178623 | 0.919176 | 0.121383 | 0.688272 | 64.97057 | 21.46876 | 70.18734 | 65.48499 | 162.913  | 67.44608 |
| ENSMUSG000000646407 | 3_Gm10263        | 14.9865607  | -2.11215 | 0.016949 | 0.688272 | 19.49117 | 19.75126 | 29.91591 | 0        | 5.656701 | 10.37632 |
| ENSMUSG000000646415 | 4_Msl2           | 1493.832135 | 0.73007  | 0.076123 | 0.688272 | 1146.731 | 1071.72  | 1152.913 | 2986.512 | 1733.447 | 1231.669 |
| ENSMUSG000000646551 | 12_Hmgb1         | 5925.960651 | 0.514847 | 0.176885 | 0.688272 | 4939.388 | 4410.541 | 5289.364 | 10619.48 | 5318.43  | 4978.559 |
| ENSMUSG000000646595 | 9_Msf47b         | 417.7896062 | 0.687487 | 0.084815 | 0.688272 | 275.3128 | 350.3701 | 334.8281 | 786.8121 | 411.8078 | 347.6067 |
| ENSMUSG000000646607 | 4_6030419C18Rik  | 70.45976091 | -1.09023 | 0.015717 | 0.688272 | 89.33454 | 100.4738 | 97.80203 | 24.80492 | 41.85958 | 68.48372 |
| ENSMUSG000000646613 | 14_Zfp932        | 374.4659225 | 0.887145 | 0.10797  | 0.688272 | 271.2521 | 265.3538 | 251.9841 | 941.5948 | 236.4501 | 280.1607 |
| ENSMUSG000000646621 | 12_Tecpr1        | 674.2129659 | -0.90222 | 0.103303 | 0.688272 | 786.9561 | 1065.709 | 782.4162 | 144.8607 | 531.7298 | 733.6059 |
| ENSMUSG000000646637 | 1_Tlc32          | 68.7143731  | 0.890108 | 0.096627 | 0.688272 | 50.3522  | 54.96001 | 39.12081 | 156.7671 | 63.35055 | 47.73108 |
| ENSMUSG000000646640 | 11_Fbxl18        | 305.9873864 | -0.60441 | 0.119763 | 0.688272 | 307.7981 | 426.7989 | 372.7983 | 144.8607 | 256.8142 | 326.8541 |
| ENSMUSG000000646677 | 11_Pydc3         | 112.2576703 | 1.18876  | 0.044417 | 0.688272 | 98.26799 | 33.49126 | 73.69317 | 235.1506 | 169.701  | 63.29556 |
| ENSMUSG000000646705 | 6_Fxyd6          | 425.0468096 | -0.45615 | 0.180138 | 0.688272 | 497.0249 | 541.8714 | 436.082  | 296.6668 | 280.5723 | 498.0634 |
| ENSMUSG000000646721 | 3_Zfp575         | 4.115718368 | -3.40368 | 0.0      |          |          |          |          |          |          |          |

|                     |                   |              |           |          |          |          |          |          |          |          |           |
|---------------------|-------------------|--------------|-----------|----------|----------|----------|----------|----------|----------|----------|-----------|
| ENSMUSG00000067847  | 13_Romo1          | 303.1922855  | -1.05553  | 0.044551 | 0.688272 | 385.7628 | 392.4489 | 449.8893 | 65.48499 | 244.3695 | 281.1983  |
| ENSMUSG00000067851  | 11_Arfgef1        | 4487.90822   | 0.761202  | 0.070381 | 0.688272 | 3331.366 | 3240.065 | 3420.77  | 9218.501 | 3994.672 | 3721.1925 |
| ENSMUSG00000067873  | 11_Hlatsf1        | 1377.680581  | 0.513354  | 0.185482 | 0.688272 | 1126.427 | 1161.889 | 1117.244 | 2492.398 | 1002.875 | 1275.25   |
| ENSMUSG00000067916  | 9_Gm13139         | 1176.495215  | 1.188781  | 0.04128  | 0.688272 | 742.2888 | 671.5427 | 738.693  | 3319.891 | 827.0096 | 759.5467  |
| ENSMUSG00000067924  | 4_Cxx1b           | 183.0703827  | -0.83771  | 0.086533 | 0.688272 | 227.397  | 279.9526 | 196.7547 | 55.56302 | 143.6802 | 195.0748  |
| ENSMUSG00000067925  | 4_Cxx1a           | 279.4288597  | -0.77616  | 0.049598 | 0.688272 | 341.0955 | 395.0251 | 322.1714 | 118.0714 | 213.8233 | 286.3865  |
| ENSMUSG00000067928  | 6_Zfp760          | 328.9034626  | 1.085433  | 0.034506 | 0.688272 | 203.8452 | 215.5463 | 212.8632 | 819.5546 | 234.1874 | 287.4241  |
| ENSMUSG00000067929  | 3_Gm10226         | 17.53735447  | 1.51685   | 0.053229 | 0.688272 | 12.99411 | 9.446252 | 4.602448 | 49.60984 | 19.23278 | 9.338689  |
| ENSMUSG00000067931  | 5_Zfp948          | 227.4128513  | 0.866977  | 0.097889 | 0.688272 | 160.8022 | 171.75   | 150.7302 | 544.7161 | 166.307  | 170.1717  |
| ENSMUSG00000067942  | 5_Zfp160          | 493.1818088  | 0.960147  | 0.077065 | 0.688272 | 332.1621 | 343.5001 | 329.0751 | 1254.137 | 336.008  | 364.2089  |
| ENSMUSG00000067995  | 4_Gtf2f2          | 800.5105702  | 0.5152    | 0.143871 | 0.688272 | 656.2028 | 628.6052 | 692.6685 | 1349.388 | 810.0395 | 666.1598  |
| ENSMUSG00000068039  | 12_Top1           | 5185.418947  | 0.462973  | 0.152045 | 0.688272 | 4547.128 | 4024.104 | 4510.399 | 8273.929 | 5137.415 | 4619.538  |
| ENSMUSG00000068101  | 10_Cenpm          | 100.7192018  | -0.80851  | 0.168758 | 0.688272 | 100.7044 | 112.4963 | 171.4412 | 21.82833 | 108.6086 | 89.23636  |
| ENSMUSG00000068115  | 13_Ninl           | 96.12556116  | -0.51442  | 0.126398 | 0.688272 | 95.8316  | 129.6713 | 113.9106 | 77.39135 | 64.48639 | 95.46215  |
| ENSMUSG00000068130  | 11_Zfp442         | 92.25184801  | 1.195928  | 0.051548 | 0.688272 | 65.78271 | 50.66626 | 51.77754 | 257.9712 | 58.82969 | 68.48372  |
| ENSMUSG00000068134  | 13_Zfp120         | 567.1964416  | 1.151553  | 0.046715 | 0.688272 | 399.569  | 315.1613 | 341.7318 | 1569.655 | 399.3631 | 377.6981  |
| ENSMUSG00000068205  | 14_Macrod2        | 62.70706345  | 0.71149   | 0.146954 | 0.688272 | 46.29153 | 54.96001 | 41.42204 | 127.0012 | 46.38494 | 60.18266  |
| ENSMUSG00000068245  | 14_Ph1f1d         | 7186.281639  | 1.038185  | 0.005532 | 0.688272 | 4421.248 | 3931.359 | 5768.019 | 13611.95 | 8996.417 | 1388.760  |
| ENSMUSG00000068250  | 13_Amn1           | 406.8264437  | 0.874973  | 0.068194 | 0.688272 | 306.1738 | 268.7888 | 286.5024 | 922.743  | 299.8051 | 356.9454  |
| ENSMUSG00000068263  | 11_Efcsc1         | 43.12258672  | -1.41415  | 0.048067 | 0.688272 | 48.72793 | 91.02752 | 48.32571 | 5.953181 | 16.9701  | 47.73108  |
| ENSMUSG00000068267  | 5_Cenpb           | 3281.468827  | -0.67249  | 0.13629  | 0.688272 | 3697.638 | 3853.212 | 4547.219 | 1113.245 | 3026.335 | 3451.164  |
| ENSMUSG00000068284  | 14_Gm608          | 2736.298758  | 0.783437  | 0.16937  | 0.688272 | 2525.731 | 2158.898 | 2454.256 | 3866.591 | 2693.721 | 2718.596  |
| ENSMUSG00000068323  | 12_Slc4a5         | 1763.288563  | -0.88272  | 0.020711 | 0.688272 | 2277.219 | 3018.507 | 1563.682 | 1319.622 | 859.8185 | 1540.884  |
| ENSMUSG00000068479  | 5_Mfap1a          | 2047.971071  | 0.545369  | 0.142032 | 0.688272 | 1725.781 | 1633.343 | 1637.321 | 3659.222 | 1759.234 | 1872.926  |
| ENSMUSG00000068523  | 12_Gng5           | 2961.244461  | 0.53554   | 0.150856 | 0.688272 | 2334.88  | 2270.536 | 2506.033 | 5640.639 | 2686.933 | 2328.446  |
| ENSMUSG00000068547  | 6_Clc4a4          | 1097.53737   | 0.519827  | 0.149404 | 0.688272 | 981.0557 | 883.654  | 841.0975 | 1894.104 | 955.9824 | 1029.331  |
| ENSMUSG00000068551  | 12_Zfp467         | 1094.394801  | -0.39153  | 0.159943 | 0.688272 | 1195.458 | 1203.968 | 1326.656 | 753.0774 | 920.9108 | 1166.298  |
| ENSMUSG00000068617  | 4_Elfcab1         | 56.9712366   | 0.84534   | 0.111832 | 0.688272 | 43.04301 | 44.65501 | 34.51836 | 127.0012 | 40.72824 | 51.8816   |
| ENSMUSG00000068699  | 12_Flnc           | 241.5198291  | -0.65132  | 0.141304 | 0.688272 | 242.8275 | 374.4151 | 268.0926 | 114.1026 | 154.9936 | 294.6875  |
| ENSMUSG00000068732  | 5_Tmem167b        | 1751.639274  | 0.466721  | 0.174621 | 0.688272 | 1509.754 | 1405.774 | 1496.946 | 2917.059 | 1615.554 | 1564.749  |
| ENSMUSG00000068740  | 13_Celrs2         | 1823.950782  | -0.80947  | 0.133502 | 0.688272 | 2007.591 | 2309.179 | 2651.01  | 410.7695 | 1814.67  | 1750.485  |
| ENSMUSG00000068749  | 9_Psma5           | 2449.355301  | -0.420139 | 0.109051 | 0.688272 | 2209     | 1848.03  | 2228.736 | 3065.888 | 3064.8   | 2279.678  |
| ENSMUSG00000068758  | 7_Il3ra           | 41.1170464   | -1.22031  | 0.099124 | 0.688272 | 31.67315 | 69.55877 | 71.33795 | 3.968787 | 32.80886 | 37.35475  |
| ENSMUSG00000068798  | 10_Rap1a          | 1984.906359  | 1.069825  | 0.031688 | 0.688272 | 1335.957 | 1151.584 | 1355.421 | 4890.538 | 1663.07  | 1512.868  |
| ENSMUSG00000068823  | 10_Csde1          | 8351.2544473 | 0.734693  | 0.077185 | 0.688272 | 6728.515 | 5954.574 | 6125.859 | 16878.26 | 7432.904 | 6987.414  |
| ENSMUSG00000068855  | 3_Hist2h2ac       | 1.3432736    | -2.64933  | 0.178399 | 0.688272 | 2.436397 | 3.435001 | 1.150612 | 0        | 0        | 1.037632  |
| ENSMUSG00000068856  | 3_Slfb4           | 732.8496147  | -0.56401  | 0.075875 | 0.688272 | 773.962  | 836.4227 | 1012.539 | 423.668  | 720.6636 | 629.8427  |
| ENSMUSG00000068882  | 13_Ssb            | 3921.87006   | 0.930113  | 0.06021  | 0.688272 | 2796.983 | 2409.653 | 2892.639 | 9299.861 | 3328.403 | 2803.682  |
| ENSMUSG000000689072 | 9_Slc7a14         | 5.587591222  | 1.305436  | 0.153186 | 0.688272 | 4.872793 | 3.435001 | 1.150612 | 9.921968 | 7.919381 | 6.225792  |
| ENSMUSG00000069094  | 12_Pde7a          | 1474.06106   | 0.554037  | 0.112094 | 0.688272 | 1203.58  | 1108.647 | 1271.426 | 2527.125 | 1383.629 | 1349.959  |
| ENSMUSG00000069135  | 11_Fgfr1op        | 581.483275   | 0.566422  | 0.154779 | 0.688272 | 514.8918 | 461.1489 | 430.3289 | 1077.526 | 495.527  | 509.4773  |
| ENSMUSG00000069184  | 2_Zfp72           | 62.77888444  | 1.227813  | 0.032418 | 0.688272 | 41.41674 | 44.65501 | 26.46408 | 159.7437 | 57.69935 | 46.9344   |
| ENSMUSG00000069206  | 13_Zfp874a        | 128.4840715  | 1.124688  | 0.105173 | 0.688272 | 86.89814 | 94.46252 | 60.98244 | 385.9646 | 55.43567 | 87.16109  |
| ENSMUSG00000069208  | 8_Zfp825          | 235.8638528  | 1.014703  | 0.065291 | 0.688272 | 172.172  | 153.7163 | 142.6759 | 605.2401 | 175.3577 | 166.0211  |
| ENSMUSG00000069237  | 8_Fam8a1          | 1656.201423  | 0.947688  | 0.05742  | 0.688272 | 1123.179 | 1168.759 | 1101.136 | 3987.639 | 1275.02  | 1281.476  |
| ENSMUSG00000069259  | 10_Prl6a1         | 4.184957906  | 2.486117  | 0.036784 | 0.688272 | 1.624264 | 0        | 2.301224 | 6.945378 | 0.950721 | 5.18816   |
| ENSMUSG00000069295  | 1_Vmn1r196        | 2.136792975  | 1.961906  | 0.198783 | 0.688272 | 0.812132 | 1.7175   | 0        | 5.953181 | 2.26268  | 2.075264  |
| ENSMUSG00000069441  | 3_Dsg1a           | 19686.72745  | 0.565286  | 0.197341 | 0.688272 | 16236.96 | 14463.93 | 16934.71 | 39286.03 | 14810.37 | 16388.36  |
| ENSMUSG00000069456  | 4_Rdh16           | 1559.943926  | 0.446182  | 0.098716 | 0.688272 | 1359.509 | 1150.725 | 1452.072 | 2163.981 | 1680.04  | 1553.335  |
| ENSMUSG00000069495  | 12_Epc2           | 935.142394   | 0.49222   | 0.171334 | 0.688272 | 814.5686 | 685.2827 | 831.8926 | 1590.491 | 831.535  | 857.0841  |
| ENSMUSG00000069515  | 5_Lyz1            | 59.58883356  | 0.614578  | 0.073444 | 0.688272 | 43.85514 | 52.38376 | 44.87387 | 68.46158 | 82.58783 | 65.37082  |
| ENSMUSG00000069539  | 11_Scy12          | 1193.666216  | 0.553988  | 0.086398 | 0.688272 | 988.3649 | 899.9702 | 1013.689 | 1928.831 | 1272.758 | 1058.385  |
| ENSMUSG00000069565  | 12_Dazap1         | 1020.002298  | -0.46171  | 0.138972 | 0.688272 | 1043.59  | 1094.907 | 1407.199 | 628.0606 | 960.5077 | 985.7505  |
| ENSMUSG00000069622  | 4_Gm10273         | 1214.02689   | 0.960513  | 0.04704  | 0.688272 | 1109.373 | 577.0801 | 785.8681 | 1756.188 | 1689.091 | 1366.561  |
| ENSMUSG00000069662  | 5_Marcks          | 2498.644281  | 0.908128  | 0.072989 | 0.688272 | 1691.671 | 1599.852 | 1920.372 | 5973.025 | 211.6566 | 1691.34   |
| ENSMUSG00000069727  | 5_Gm5595          | 159.1322983  | 0.037006  | 0.079294 | 0.688272 | 96.64373 | 111.6375 | 104.7057 | 425.6524 | 913.8055 | 124.5158  |
| ENSMUSG00000069743  | 4_Zfp820          | 168.7496292  | 1.205344  | 0.053781 | 0.688272 | 101.5165 | 94.46252 | 110.4588 | 491.1374 | 101.8206 | 113.1019  |
| ENSMUSG00000069755  | 4_Zfp125          | 62.6535422   | 1.044386  | 0.084936 | 0.688272 | 47.10367 | 50.66626 | 64.43428 | 220.2677 | 54.30432 | 59.14503  |
| ENSMUSG00000069792  | 5_Wfdc17          | 104.9870288  | 0.720433  | 0.192754 | 0.688272 | 121.0077 | 35.20876 | 81.69346 | 188.5174 | 126.7101 | 76.78477  |
| ENSMUSG00000069793  | 11_Slfn9          | 8.471413537  | 1.292496  | 0.004184 | 0.688272 | 1430.977 | 1124.963 | 1743.177 | 5719.022 | 2792.147 | 2018.194  |
| ENSMUSG00000069804  | 2_Gm10277         | 2.765563324  | 1.017564  | 0.181951 | 0.688272 | 8.121322 | 3.435001 | 5.753061 | 7.937575 | 16.9701  | 10.37632  |
| ENSMUSG00000069806  | 5_Cacng7          | 97.82054129  | -0.84403  | 0.06847  | 0.688272 | 112.8864 | 185.49   | 78.24162 | 47.62545 | 72.40577 | 90.27399  |
| ENSMUSG00000069833  | 12_Ahnak          | 62060.83579  | 0.296059  | 0.193694 | 0.688272 | 58454.84 | 50985.72 | 57705.5  | 76728.56 | 65109.75 | 63380.34  |
| ENSMUSG00000069844  | 12_Sco1           | 337.2110266  | 0.566491  | 0.092838 | 0.688272 | 284.2463 | 247.3201 | 284.2012 | 554.638  | 340.5334 | 312.3737  |
| ENSMUSG00000069874  | 6_Irgm2           | 5351.572866  | 0.089105  | 0.001823 | 0.688272 | 3227.413 | 2834.384 | 4205.487 | 9272.079 | 7652.384 | 4917.338  |
| ENSMUSG00000069892  | 9_9930111J21Rik2  | 3261.903911  | 1.228045  | 0.009159 | 0.688272 | 1759.078 | 1521.705 | 2575.07  | 7505.969 | 3713.058 | 2496.544  |
| ENSMUSG00000069893  | 10_9930111J21Rik1 | 799.9279539  | 0.709346  | 0.031557 | 0.688272 | 698.4337 | 494.6401 | 628.2342 | 957.4699 | 1284.071 | 736.7188  |
| ENSMUSG00000069899  | 3_Gm12166         | 129.0041327  | 0.599444  | 0.059718 | 0.688272 | 111.2621 | 110.7788 | 85.1453  | 139.8998 | 188.9338 | 138.0051  |
| ENSMUSG00000069919  | 7_Hba-a1          | 27.75924149  | -1.70894  | 0.033099 | 0.688272 | 40.60661 | 72.99377 | 13.80735 | 3.968787 | 11.3134  | 23.86554  |
| ENSMUSG00000069920  | 10_B3gnt9         | 176.1863288  | -0.47697  | 0.072834 | 0.688272 | 198.1603 | 225.8513 | 191.0016 | 140.8919 | 141.4175 | 159.7953  |
| ENSMUSG00000070000  | 13_Fcho1          | 203.016663   | -0.94502  | 0.175787 | 0.688272 | 230.6455 | 232.7213 | 338.28   | 20.83613 | 178.7517 | 216.8651  |
| ENSMUSG00000070003  | 6_Ssbp4           | 277.3771718  | -1.21946  | 0.099213 | 0.688272 | 304.5496 | 385.5788 | 474.0522 | 18.85174 | 247.7635 | 233.4672  |
| ENSMUSG00000070031  | 11_Sp140          | 1336.651487  | 0.956184  | 0.013821 | 0.688272 | 925.8307 | 743.6777 | 1058.563 | 2548.954 | 1633.655 | 1109.229  |
| ENSMUSG00000070034  | 13_Sp110          | 1766.279     | 0.551529  | 0.122849 | 0.688272 | 1374.94  | 1172.194 | 1751.232 | 1593.468 | 2933.565 | 1772.276  |
| ENSMUSG00000070263  | 4_Ndu1af3         | 32           |           |          |          |          |          |          |          |          |           |

|                    |                  |               |          |          |          |          |          |          |          |          |          |
|--------------------|------------------|---------------|----------|----------|----------|----------|----------|----------|----------|----------|----------|
| ENSMUSG00000070933 | 10_Speer4d       | 1.227134595   | 3.843448 | 0.148787 | 0.688272 | 0        | 0        | 0        | 3.968787 | 3.39402  | 0        |
| ENSMUSG00000070972 | 13_DnJac25       | 222.3785017   | 0.56161  | 0.154311 | 0.688272 | 201.4088 | 185.49   | 151.8808 | 394.8943 | 213.8233 | 186.7738 |
| ENSMUSG00000071001 | 4_Hrct1          | 10.38408925   | -1.64136 | 0.050031 | 0.688272 | 15.43051 | 18.8925  | 12.65673 | 0.992197 | 10.18206 | 4.150258 |
| ENSMUSG00000071072 | 12_Ptges3        | 3769.669717   | 0.910002 | 0.066604 | 0.688272 | 2664.606 | 2318.626 | 2873.078 | 8857.341 | 3335.191 | 2569.177 |
| ENSMUSG00000071073 | 4_Lrrc73         | 6.046745802   | -1.96427 | 0.039235 | 0.688272 | 6.497057 | 12.0225  | 10.35551 | 0.992197 | 2.26268  | 4.150528 |
| ENSMUSG00000071076 | 5_Jund           | 737.46309     | -0.63572 | 0.016111 | 0.688272 | 782.0833 | 889.6652 | 1020.593 | 494.114  | 593.9536 | 644.3695 |
| ENSMUSG00000071172 | 12_Srsf3         | 7501.476878   | 0.608658 | 0.122164 | 0.688272 | 6082.058 | 5449.629 | 6294.999 | 14113.01 | 6854.79  | 6214.378 |
| ENSMUSG00000071176 | 10_Arhgef10      | 576.444122    | -0.58991 | 0.164544 | 0.688272 | 628.5903 | 739.3839 | 709.9277 | 225.2287 | 533.9925 | 621.5416 |
| ENSMUSG00000071180 | 4_Smin15         | 1293.368097   | 0.895204 | 0.0646   | 0.688272 | 934.7641 | 805.5077 | 973.4178 | 2967.661 | 1183.382 | 895.4765 |
| ENSMUSG00000071253 | 8_Slc25a16       | 565.5836534   | 0.575932 | 0.122619 | 0.688272 | 460.4789 | 432.8101 | 469.4497 | 1013.033 | 511.3657 | 506.3644 |
| ENSMUSG00000071256 | 3_Zfp213         | 186.4412285   | -0.75071 | 0.184061 | 0.688272 | 216.8393 | 232.7213 | 251.9841 | 39.68787 | 171.9637 | 205.4511 |
| ENSMUSG00000071266 | 13_Zfp946        | 433.7562758   | 1.234992 | 0.028845 | 0.688272 | 264.7551 | 252.4726 | 258.8877 | 1201.55  | 290.7544 | 334.1175 |
| ENSMUSG00000071267 | 11_Zfp942        | 429.719854    | 1.278021 | 0.024101 | 0.688272 | 255.0095 | 234.4388 | 263.4902 | 1203.535 | 304.3305 | 317.5154 |
| ENSMUSG00000071281 | 10_Zfp65         | 412.2782901   | 1.08019  | 0.048796 | 0.688272 | 290.7433 | 234.4388 | 269.2432 | 1074.549 | 272.653  | 332.0423 |
| ENSMUSG00000071291 | 10_Zfp58         | 155.7324942   | 0.787577 | 0.167536 | 0.688272 | 115.3228 | 119.3663 | 108.1575 | 385.9646 | 101.8206 | 103.7632 |
| ENSMUSG00000071302 | 10_2610044O15Rik | 361.2986921   | 1.030136 | 0.049373 | 0.688272 | 260.6944 | 217.2638 | 234.7249 | 901.9069 | 252.2888 | 300.9133 |
| ENSMUSG00000071337 | 11_Tia1          | 1388.15149    | 0.605828 | 0.102461 | 0.688272 | 1136.173 | 1106.929 | 1059.714 | 2515.219 | 1212.797 | 1298.078 |
| ENSMUSG00000071342 | 4_Lsmem1         | 5.118103659   | 0.971463 | 0.065712 | 0.688272 | 2.436397 | 2.576251 | 1.150612 | 11.90636 | 2.26268  | 10.37632 |
| ENSMUSG00000071350 | 12_Setdb2        | 585.2721056   | 1.036244 | 0.015255 | 0.688272 | 359.7746 | 376.1326 | 415.371  | 1265.051 | 621.1057 | 474.1979 |
| ENSMUSG00000071359 | 13_Tbp1          | 598.9747771   | 0.522758 | 0.169243 | 0.688272 | 461.2911 | 476.6064 | 537.3359 | 1065.619 | 536.2552 | 516.7408 |
| ENSMUSG00000071454 | 13_Dtnb          | 1098.535833   | -0.6157  | 0.139466 | 0.688272 | 1195.459 | 1353.39  | 1439.416 | 432.5978 | 1022.731 | 1147.621 |
| ENSMUSG00000071506 | 3_Tmem139        | 133.3587561   | 0.530164 | 0.063008 | 0.688272 | 98.26799 | 114.2138 | 115.0612 | 139.8998 | 158.3876 | 174.3222 |
| ENSMUSG00000071528 | 3_Usmg5          | 1054.21617    | 0.706962 | 0.097784 | 0.688272 | 774.7741 | 852.739  | 775.5126 | 2143.145 | 922.0422 | 857.0841 |
| ENSMUSG00000071533 | 11_Pcpn          | 2509.233194   | 0.648912 | 0.096789 | 0.688272 | 1958.051 | 1872.934 | 2031.981 | 4760.56  | 2306.802 | 2125.07  |
| ENSMUSG00000071547 | 3_Nl5d2          | 575.3042052   | -1.01254 | 0.049839 | 0.688272 | 701.6822 | 931.744  | 674.2587 | 138.9076 | 423.1212 | 582.1116 |
| ENSMUSG00000071553 | 10_Cpa2          | 8.664926853   | -1.06704 | 0.13328  | 0.688272 | 10.55772 | 12.0225  | 12.65673 | 6.945378 | 5.656701 | 4.150528 |
| ENSMUSG00000071561 | 2_BC100530       | 20244.85716   | 0.915449 | 0.0338   | 0.688272 | 13971.92 | 13521.88 | 14593.21 | 43076.22 | 21621.27 | 15044.63 |
| ENSMUSG00000071567 | 6_AB30039N20Rik  | 13.20787819   | 0.946447 | 0.198322 | 0.688272 | 7.30919  | 5.152501 | 14.95796 | 27.78151 | 14.70742 | 9.338698 |
| ENSMUSG00000071604 | 4_Fam189a2       | 130.6850162   | -0.9223  | 0.037854 | 0.688272 | 152.6808 | 253.3313 | 107.0069 | 71.43817 | 80.32515 | 119.3277 |
| ENSMUSG00000071648 | 3_Rom1           | 178.9179294   | -0.94899 | 0.036612 | 0.688272 | 302.1132 | 275.6588 | 128.8686 | 90.28991 | 169.701  | 106.8761 |
| ENSMUSG00000071649 | 5_B3ga3          | 581.1453235   | -0.94298 | 0.170517 | 0.688272 | 677.3182 | 755.7002 | 860.6579 | 59.53181 | 597.9717 | 625.6921 |
| ENSMUSG00000071654 | 5_Uqcc3          | 322.6427778   | -0.70656 | 0.18473  | 0.688272 | 376.8293 | 394.1664 | 429.1783 | 78.38355 | 331.4827 | 325.8165 |
| ENSMUSG00000071660 | 10_Tlcc9c        | 1529.409513   | 0.614676 | 0.11621  | 0.688272 | 1239.314 | 1066.568 | 1319.752 | 2849.589 | 1381.366 | 1319.868 |
| ENSMUSG00000071708 | 11_Sms           | 379.0542598   | 0.859604 | 0.060111 | 0.688272 | 264.7551 | 262.7776 | 280.7494 | 829.4765 | 294.1484 | 342.4186 |
| ENSMUSG00000071711 | 11_Mpst          | 953.1266405   | -0.86626 | 0.076259 | 0.688272 | 1018.414 | 1258.069 | 1416.404 | 267.8931 | 779.4933 | 978.487  |
| ENSMUSG00000071719 | 2_Tmem28         | 7.02571022    | -1.06561 | 0.199266 | 0.688272 | 8.933454 | 13.74    | 5.753061 | 2.97659  | 4.52536  | 6.225792 |
| ENSMUSG00000071722 | 4_Spin4          | 78.64676883   | 0.538351 | 0.159144 | 0.688272 | 60.90991 | 66.12377 | 65.58489 | 129.9778 | 73.5371  | 75.74714 |
| ENSMUSG00000071748 | 2_Gm14698        | 742.5177756   | 1.062807 | 0.046831 | 0.688272 | 530.3223 | 431.0926 | 480.9559 | 1910.971 | 536.2552 | 565.5905 |
| ENSMUSG00000071757 | 10_Zhx2          | 66.27722599   | -0.51012 | 0.163927 | 0.688272 | 95.8316  | 76.42877 | 60.98244 | 46.63325 | 56.56701 | 61.22029 |
| ENSMUSG00000071847 | 12_Apcdd1        | 332.3491092   | -0.72352 | 0.068112 | 0.688272 | 397.1326 | 453.4201 | 391.2081 | 139.8998 | 265.8649 | 346.5691 |
| ENSMUSG00000071855 | 4_Cdc112         | 92.92610107   | 0.711318 | 0.125696 | 0.688272 | 72.27976 | 78.14627 | 60.98244 | 187.5252 | 73.53711 | 85.08583 |
| ENSMUSG00000071984 | 10_Fndc1         | 1045.491013   | -0.44892 | 0.186605 | 0.688272 | 1138.609 | 1326.769 | 1155.215 | 717.3583 | 686.7234 | 128.271  |
| ENSMUSG00000072066 | 6_6720489N17Rik  | 40.07794861   | 1.09376  | 0.100786 | 0.688272 | 25.98823 | 26.62126 | 24.16285 | 110.1338 | 32.80886 | 20.75264 |
| ENSMUSG00000072235 | 5_Tuba1a         | 5202.287641   | -0.51618 | 0.133676 | 0.688272 | 5924.504 | 6582.32  | 5862.369 | 2668.017 | 4828.56  | 5347.956 |
| ENSMUSG00000072244 | 9_Trim6          | 98.1316904    | 0.71929  | 0.07339  | 0.688272 | 64.15844 | 60.97127 | 97.80203 | 128.9856 | 153.8623 | 83.01057 |
| ENSMUSG00000072437 | 3_Nanos1         | 25.50240899   | 1.568981 | 0.020353 | 0.688272 | 18.67904 | 9.446252 | 10.35551 | 69.45378 | 18.1044  | 26.97843 |
| ENSMUSG00000072501 | 4_Phf201         | 2053.871602   | 0.828893 | 0.066399 | 0.688272 | 1539.803 | 1389.458 | 1509.603 | 4484.73  | 1758.103 | 1641.534 |
| ENSMUSG00000072568 | 4_Fam84b         | 2002.909508   | 0.572339 | 0.117469 | 0.688272 | 1504.881 | 1550.044 | 1777.696 | 3541.15  | 1988.389 | 1745.297 |
| ENSMUSG00000072596 | 4_Ear2           | 4.842270871   | 1.862814 | 0.061662 | 0.688272 | 2.436397 | 2.576251 | 1.150612 | 10.91416 | 6.788041 | 5.18816  |
| ENSMUSG00000072620 | 3_Slfn2          | 6571.688745   | 0.684698 | 0.027203 | 0.688272 | 4845.993 | 4008.646 | 6268.535 | 8488.244 | 9408.224 | 6410.49  |
| ENSMUSG00000072676 | 11_Tmem254a      | 167.9595325   | 0.503919 | 0.10482  | 0.688272 | 120.1956 | 145.1288 | 151.8808 | 238.1272 | 158.3876 | 194.0372 |
| ENSMUSG00000072704 | 6_Smin101        | 1601.651874   | 0.991655 | 0.069141 | 0.688272 | 1023.287 | 1105.212 | 1087.328 | 4143.414 | 1115.501 | 1135.169 |
| ENSMUSG00000072761 | 10_Gm6712        | 63.48045427   | 0.629866 | 0.168227 | 0.688272 | 43.85514 | 54.10126 | 51.77754 | 120.0558 | 50.9103  | 60.18266 |
| ENSMUSG00000072762 | 9_4930522L14Rik  | 195.3948262   | 0.989089 | 0.060927 | 0.688272 | 133.1897 | 133.1063 | 126.5673 | 483.1998 | 144.8115 | 151.4943 |
| ENSMUSG00000072763 | 2_5430403G16Rik  | 78.8412884    | 0.904997 | 0.1599   | 0.688272 | 56.84925 | 58.39502 | 49.47632 | 212.3301 | 56.56701 | 39.43002 |
| ENSMUSG00000072772 | 3_Grcc10         | 503.1291042   | -0.86559 | 0.073565 | 0.688272 | 583.923  | 679.2714 | 685.7648 | 140.8919 | 416.3332 | 512.5902 |
| ENSMUSG00000072774 | 10_Zfp951        | 64.96930668   | 1.077147 | 0.093652 | 0.688272 | 45.4794  | 28.33876 | 51.77754 | 176.611  | 42.99092 | 44.61818 |
| ENSMUSG00000072825 | 10_Cep170b       | 4525.57261    | -0.821   | 0.166733 | 0.688272 | 4836.247 | 5464.228 | 7038.294 | 805.6638 | 4463.137 | 4545.866 |
| ENSMUSG00000072845 | 3_Tmprss11a      | 41616.97729   | 0.796577 | 0.063491 | 0.688272 | 31102.23 | 28082.85 | 32048    | 87295.46 | 56592.58 | 34592.58 |
| ENSMUSG00000072847 | 4_A530017D24Rik  | 147.4451342   | 0.685383 | 0.168918 | 0.688272 | 116.947  | 114.2138 | 108.1575 | 317.503  | 95.03257 | 132.8169 |
| ENSMUSG00000072872 | 3_Rybp           | 1248.846485   | 0.515274 | 0.136873 | 0.688272 | 1040.341 | 989.2803 | 1055.111 | 2113.379 | 1186.776 | 1108.191 |
| ENSMUSG00000072941 | 5_Sod3           | 1075.642615   | -0.63074 | 0.142645 | 0.688272 | 1469.959 | 1245.188 | 1205.841 | 400.8475 | 1086.086 | 1045.933 |
| ENSMUSG00000072955 | 13_Tmsb15l       | 26.43884515   | 0.743174 | 0.152842 | 0.688272 | 19.49117 | 21.46876 | 18.40979 | 50.60204 | 23.75814 | 20.90317 |
| ENSMUSG00000072964 | 13_Bhlhb9        | 265.1004791   | 0.724965 | 0.170316 | 0.688272 | 230.6455 | 214.6876 | 154.182  | 594.3259 | 514.9936 | 241.7683 |
| ENSMUSG00000072980 | 3_Oip5           | 96.18522813   | 0.842071 | 0.081848 | 0.688272 | 76.34042 | 45.51376 | 85.1453  | 195.4628 | 91.63855 | 83.01057 |
| ENSMUSG00000072982 | 1_9230009102Rik  | 26.61726954   | 0.882286 | 0.14283  | 0.688272 | 17.86691 | 18.8925  | 19.56041 | 57.54742 | 14.70742 | 31.12896 |
| ENSMUSG00000073008 | 11_Gpr174        | 8.468735044   | 1.530895 | 0.041304 | 0.688272 | 4.872793 | 2.576251 | 5.753061 | 14.88295 | 11.3134  | 11.41395 |
| ENSMUSG00000073016 | 3_Uprt           | 219.8666088   | 0.507532 | 0.191886 | 0.688272 | 187.6025 | 191.5013 | 165.6881 | 387.949  | 193.5492 | 192.9996 |
| ENSMUSG00000073051 | 10_Gm14812       | 1.178104597   | -3.6152  | 0.107294 | 0.688272 | 1.624264 | 4.293751 | 1.150612 | 0        | 0        | 0        |
| ENSMUSG00000073062 | 3_Zxdb           | 245.9424417   | 0.552711 | 0.188483 | 0.688272 | 152.6808 | 211.2526 | 234.7249 | 446.4886 | 199.1159 | 231.392  |
| ENSMUSG00000073077 | 3_Gm7173         | 23.62397573   | 1.422633 | 0.042218 | 0.688272 | 12.18198 | 13.74    | 12.65673 | 68.46158 | 18.1044  | 16.60211 |
| ENSMUSG00000073079 | 5_Srp54a         | 996.3267994   | 1.329772 | 0.015723 | 0.688272 | 571.7411 | 562.4814 | 567.2518 | 2781.128 | 790.8067 | 704.5522 |
| ENSMUSG00000073103 | 11_Lrrc61        | 433.4817402   | -0.49341 | 0.1905   | 0.688272 | 492.1521 | 518.6851 | 509.7212 | 210.3457 | 381.2616 | 488.7247 |
| ENSMUSG00000073103 | 2_Gm10466        | 30.77170923   | 0.853741 | 0.123433 | 0.688272 | 29.23676 | 18.03375 | 18.40979 | 63.5006  | 30.54618 | 24.90317 |
| ENSMUSG00000073125 | 10_Xlr3b         | 27.06544217</ |          |          |          |          |          |          |          |          |          |

|                    |                  |               |          |          |          |          |          |          |          |          |          |
|--------------------|------------------|---------------|----------|----------|----------|----------|----------|----------|----------|----------|----------|
| ENSMUSG00000073987 | 4_Ggh            | 538.796562    | 0.888004 | 0.089533 | 0.688272 | 389.0113 | 383.8613 | 361.2922 | 1312.676 | 381.2616 | 404.6765 |
| ENSMUSG00000074037 | 3_Mc1r           | 15.24843566   | -1.07118 | 0.09843  | 0.688272 | 21.92757 | 28.33876 | 11.50612 | 5.953181 | 11.3134  | 12.45158 |
| 3_Fbwx18           | 3.177340217      | 1.976759      | 0.119742 | 0.688272 | 0.812132 | 0.85875  | 2.301224 | 1.984394 | 7.919381 | 5.18816  |          |
| ENSMUSG00000074063 | 9_Osgn1          | 727.1411393   | -1.03406 | 0.176278 | 0.688272 | 860.048  | 913.7102 | 1157.516 | 44.64886 | 709.3502 | 67.5737  |
| ENSMUSG00000074151 | 12_Nlrc5         | 2004.310095   | 0.72926  | 0.058973 | 0.688272 | 1483.765 | 1133.55  | 1907.715 | 1881.205 | 3605.581 | 2014.004 |
| ENSMUSG00000074158 | 9_9830147E19Rik  | 123.053201    | 0.984132 | 0.107937 | 0.688272 | 90.14667 | 87.59252 | 70.18734 | 327.4249 | 63.35505 | 99.61268 |
| ENSMUSG00000074165 | 10_Zfp788        | 455.1497841   | 1.031318 | 0.059571 | 0.688272 | 310.2345 | 317.7376 | 269.2432 | 1176.745 | 302.0678 | 354.8702 |
| ENSMUSG00000074166 | 7_AW146154       | 335.7682153   | 0.850222 | 0.085426 | 0.688272 | 231.4577 | 268.7888 | 218.6163 | 764.9837 | 231.9247 | 298.838  |
| ENSMUSG00000074170 | 5_Plekhf1        | 175.9419669   | -0.59743 | 0.188923 | 0.688272 | 184.354  | 206.1001 | 245.0804 | 64.49279 | 171.9637 | 183.6609 |
| ENSMUSG00000074195 | 3_Clcab4         | 153.6539068   | 0.751991 | 0.081794 | 0.688272 | 118.5713 | 120.225  | 104.7057 | 307.581  | 138.0235 | 132.8169 |
| ENSMUSG00000074212 | 7_Dnajb14        | 922.6019589   | 0.547765 | 0.149328 | 0.688272 | 769.9013 | 774.5927 | 704.1746 | 1664.906 | 804.3828 | 817.6541 |
| ENSMUSG00000074213 | 2_Gm10642        | 5.673705354   | -1.85675 | 0.079964 | 0.688272 | 4.060661 | 11.16375 | 11.50612 | 0.992197 | 1.13134  | 5.18816  |
| ENSMUSG00000074264 | 12_Amy1          | 111.6648993   | 0.746628 | 0.17289  | 0.688272 | 81.21322 | 109.0613 | 59.83183 | 250.0336 | 17.27443 | 98.57055 |
| ENSMUSG00000074282 | 10_Zfp94         | 84.90014547   | -0.43603 | 0.155298 | 0.688272 | 105.5772 | 99.61503 | 87.44652 | 73.42256 | 76.93113 | 66.40845 |
| ENSMUSG00000074345 | 3_TnfaiP8I3      | 53.13571458   | 1.294726 | 0.005416 | 0.688272 | 29.23676 | 26.62126 | 36.81959 | 112.1182 | 48.64762 | 65.37082 |
| ENSMUSG00000074357 | 2_AA386476       | 10.88259727   | 0.939847 | 0.189764 | 0.688272 | 4.872793 | 9.446252 | 8.054285 | 7.937575 | 21.49546 | 13.48922 |
| ENSMUSG00000074358 | 9_Cdc61          | 244.4567927   | -0.75846 | 0.108415 | 0.688272 | 278.5613 | 304.8563 | 338.28   | 75.40696 | 233.0561 | 236.5801 |
| ENSMUSG00000074384 | 3_AlA29214       | 267.8474365   | 0.739782 | 0.03059  | 0.688272 | 182.7297 | 204.3826 | 215.1645 | 462.3637 | 260.2082 | 282.2359 |
| ENSMUSG00000074405 | 6_Zfp865         | 201.3465080   | -0.73311 | 0.169825 | 0.688272 | 276.9371 | 241.3088 | 235.8755 | 50.60204 | 171.9637 | 231.392  |
| ENSMUSG00000074406 | 4_Zfp628         | 178.8437556   | -1.03327 | 0.194928 | 0.688272 | 198.9724 | 235.2976 | 286.5024 | 8.929771 | 174.2264 | 169.134  |
| ENSMUSG00000074449 | 3_Gm15319        | 7.574643627   | 2.489855 | 0.023603 | 0.688272 | 4.060661 | 2.576251 | 0        | 25.79712 | 6.788041 | 6.225792 |
| ENSMUSG00000074500 | 12_Zfp558        | 44.33718753   | 0.937621 | 0.086252 | 0.688272 | 32.48529 | 30.05626 | 28.7653  | 102.1963 | 36.20288 | 36.31712 |
| ENSMUSG00000074513 | 9_Arfip1         | 2516.8772325  | 0.748929 | 0.081574 | 0.688272 | 1925.565 | 1655.67  | 2052.692 | 5184.228 | 2201.588 | 2081.49  |
| ENSMUSG00000074516 | 5_Gm10709        | 856.7555963   | -0.99547 | 0.091953 | 0.688272 | 1185.713 | 1009.89  | 1227.703 | 140.8919 | 716.1383 | 860.197  |
| ENSMUSG00000074519 | 11_Etoh1         | 192.4403542   | 0.917001 | 0.06851  | 0.688272 | 115.3228 | 154.575  | 130.0192 | 447.4808 | 151.5996 | 155.6448 |
| ENSMUSG00000074527 | 11_Gm14296       | 321.5072704   | 0.765077 | 0.107254 | 0.688272 | 264.7551 | 237.0151 | 212.8632 | 695.53   | 226.268  | 292.6122 |
| ENSMUSG00000074577 | 9_Fam65c         | 314.6293058   | -1.14055 | 0.101452 | 0.688272 | 354.0896 | 433.6689 | 510.8718 | 28.77371 | 251.1575 | 309.2144 |
| ENSMUSG00000074578 | 12_1500012F01Rik | 759.1450552   | 0.52265  | 0.070189 | 0.688272 | 581.4866 | 546.1651 | 742.1448 | 859.2424 | 107.751  | 753.3209 |
| ENSMUSG00000074579 | 13_Lekr1         | 83.16972547   | 1.12103  | 0.03689  | 0.688272 | 44.66727 | 50.66626 | 62.13305 | 203.4003 | 76.93113 | 61.22029 |
| ENSMUSG00000074627 | 11_Mroh8         | 2.167358933   | 1.994471 | 0.172617 | 0.688272 | 1.624264 | 0.85875  | 0        | 2.97659  | 3.39402  | 4.150528 |
| ENSMUSG00000074649 | 6_BC029722       | 243.1512146   | -0.5585  | 0.134782 | 0.688272 | 266.3794 | 312.5851 | 289.9543 | 134.9388 | 169.701  | 285.3488 |
| ENSMUSG00000074650 | 2_Gm10735        | 3.251090742   | 1.624783 | 0.195316 | 0.688272 | 0        | 2.576251 | 2.301224 | 5.953181 | 4.52536  | 4.150528 |
| ENSMUSG00000074652 | 3_MyH7b          | 11.152016     | -1.81577 | 0.022859 | 0.688272 | 17.05478 | 18.8925  | 16.10857 | 0.992197 | 4.52536  | 9.338689 |
| ENSMUSG00000074656 | 12_Elf2s2        | 4631.17438    | 0.76734  | 0.07427  | 0.688272 | 3524.654 | 3049.422 | 3709.573 | 9535.011 | 4402.044 | 3566.341 |
| ENSMUSG00000074657 | 4_Klf5a          | 39.26879254   | -0.51907 | 0.18188  | 0.688272 | 48.72793 | 50.66626 | 39.12081 | 29.7659  | 36.20288 | 31.12896 |
| ENSMUSG00000074698 | 10_Csnk2a1       | 3573.746435   | 0.552794 | 0.119976 | 0.688272 | 2949.664 | 2857.921 | 2884.585 | 6247.863 | 3289.937 | 3212.509 |
| ENSMUSG00000074733 | 14_Zfp950        | 478.4014723   | 0.833179 | 0.077668 | 0.688272 | 340.2834 | 361.5338 | 330.2257 | 1067.604 | 360.8975 | 409.8647 |
| ENSMUSG00000074735 | 2_Gm21994        | 52.24453969   | 1.298483 | 0.061599 | 0.688272 | 22.7397  | 36.92626 | 31.06653 | 157.7593 | 32.80886 | 32.16659 |
| ENSMUSG00000074738 | 2_B930041F14Rik  | 142.5905461   | -0.85335 | 0.117615 | 0.688272 | 191.6632 | 210.3938 | 148.429  | 33.73469 | 118.7907 | 152.5319 |
| ENSMUSG00000074746 | 2_Pdzd8          | 1771.94155    | 0.717739 | 0.099034 | 0.688272 | 1316.466 | 1296.713 | 1407.199 | 3671.128 | 1434.539 | 1505.604 |
| ENSMUSG00000074749 | 10_Kiz           | 391.1320058   | 0.591495 | 0.125546 | 0.688272 | 335.4106 | 276.5176 | 324.4726 | 707.4363 | 331.4827 | 371.4723 |
| ENSMUSG00000074781 | 4_Ube2n          | 3492.080702   | 0.639471 | 0.075051 | 0.688272 | 2780.741 | 2539.324 | 2871.928 | 6230.996 | 3503.76  | 3025.735 |
| ENSMUSG00000074793 | 10_Hspa12b       | 103.7504185   | -0.61448 | 0.140548 | 0.688272 | 113.6985 | 154.575  | 108.1575 | 55.56302 | 70.14309 | 120.3653 |
| ENSMUSG00000074794 | 9_Arrdc3         | 5943.907264   | 0.765571 | 0.057168 | 0.688272 | 4383.889 | 4395.084 | 4481.634 | 11759.52 | 5065.01  | 5578.31  |
| ENSMUSG00000074796 | 10_Slc4a11       | 1227.991393   | -0.85327 | 0.085275 | 0.688272 | 1664.059 | 1975.984 | 1102.286 | 360.1674 | 1168.674 | 1096.777 |
| ENSMUSG00000074811 | 2_Hsp6           | 142.7517364   | -0.8421  | 0.141449 | 0.688272 | 150.2445 | 182.055  | 217.4657 | 29.7659  | 124.4474 | 152.5319 |
| ENSMUSG00000074829 | 10_2010315B03Rik | 840.6259257   | 1.048062 | 0.040082 | 0.688272 | 531.1344 | 533.2839 | 579.9085 | 2096.512 | 634.6818 | 668.2351 |
| ENSMUSG00000074865 | 10_Zfp934        | 68.31591148   | 0.907033 | 0.130454 | 0.688272 | 46.29153 | 48.09001 | 48.32571 | 173.6344 | 39.5969  | 53.9568  |
| ENSMUSG00000074867 | 3_Zfp808         | 165.9411595   | 1.236223 | 0.02827  | 0.688272 | 109.6378 | 99.61503 | 87.44652 | 442.5198 | 101.8206 | 154.6072 |
| ENSMUSG00000074892 | 3_Zfp808         | 1420.674062   | 0.492976 | 0.150547 | 0.688272 | 1049.275 | 1094.907 | 1396.843 | 1283.903 | 2304.54  | 1394.572 |
| ENSMUSG00000074893 | 3_Zfp808         | 15314.56776   | 1.042215 | 0.002669 | 0.688272 | 9145.42  | 7520.934 | 13368.96 | 21656.68 | 24536.5  | 15658.91 |
| ENSMUSG00000074896 | 3_lif3           | 684.2061703   | 0.752438 | 0.082172 | 0.688272 | 509.2069 | 505.8039 | 514.3236 | 1419.834 | 590.5595 | 565.5095 |
| ENSMUSG00000074909 | 4_Ranbp6         | 166.3840153   | -0.50415 | 0.146061 | 0.688272 | 172.9842 | 201.8063 | 210.562  | 95.25089 | 177.6204 | 140.0803 |
| ENSMUSG00000074916 | 5_Cstb14         | 38.08446198   | 0.888661 | 0.060146 | 0.688272 | 27.61249 | 28.33876 | 24.16285 | 73.42256 | 40.2824  | 34.24186 |
| ENSMUSG00000074968 | 4_Qser1          | 1576.113759   | 0.808935 | 0.058016 | 0.688272 | 1171.095 | 1141.279 | 1124.148 | 3297.07  | 1432.277 | 1290.814 |
| ENSMUSG00000075000 | 11_Nbrf2         | 409.4765671   | 0.401617 | 0.190615 | 0.688272 | 351.6532 | 316.0201 | 391.2081 | 581.4273 | 462.7181 | 353.8325 |
| ENSMUSG00000075010 | 4_AW112010       | 401.9339223   | 1.513359 | 0.007003 | 0.688272 | 314.2952 | 137.4    | 173.7424 | 1015.017 | 515.8911 | 255.2575 |
| ENSMUSG00000075014 | 1_Gm10800        | 42.04324357   | 1.768611 | 0.004656 | 0.688272 | 19.49117 | 17.175   | 20.71102 | 113.1104 | 22.6268  | 59.14503 |
| ENSMUSG00000075015 | 3_Gm10801        | 5.354539844   | 2.704653 | 0.061578 | 0.688272 | 0        | 0        | 4.602448 | 16.86735 | 3.62962  | 7.263424 |
| ENSMUSG00000075028 | 11_Prdm11        | 771.5012254   | -0.4686  | 0.195494 | 0.688272 | 828.3748 | 905.9815 | 952.7068 | 391.9177 | 699.1682 | 850.8583 |
| ENSMUSG00000075054 | 4_YaeI1d1        | 632.5061602   | 0.551406 | 0.161905 | 0.688272 | 532.7587 | 494.6401 | 512.0224 | 1167.816 | 543.0432 | 544.7568 |
| ENSMUSG00000075217 | 1_4833423E24Rik  | 942.3323356   | 0.627884 | 0.124969 | 0.688272 | 800.7623 | 616.5827 | 804.2779 | 1794.884 | 840.5857 | 796.9014 |
| ENSMUSG00000075227 | 6_Znh12          | 172.1503605   | -1.1721  | 0.164239 | 0.688272 | 185.9783 | 212.9701 | 316.4183 | 5.953181 | 153.8623 | 157.7201 |
| ENSMUSG00000075229 | 10_Cdc658        | 278.5594324   | 0.505149 | 0.162628 | 0.688272 | 248.5124 | 207.8176 | 234.7249 | 468.3169 | 243.2381 | 268.7467 |
| ENSMUSG00000075232 | 4_Amd1           | 4562.914838   | 0.733436 | 0.068635 | 0.688272 | 3555.515 | 3194.551 | 3532.379 | 8920.842 | 4594.372 | 3579.831 |
| ENSMUSG00000075272 | 4_Ttc30a2        | 7.372020299   | 2.09624  | 0.11015  | 0.688272 | 0        | 7.728752 | 0        | 3.968787 | 16.9701  | 15.56448 |
| ENSMUSG00000075307 | 3_KhlH41         | 200.9319622   | 1.56909  | 0.029544 | 0.688272 | 88.52241 | 114.2138 | 101.2539 | 666.7563 | 66.74907 | 168.0964 |
| ENSMUSG00000075376 | 10_Rc3h2         | 1488.831049   | 0.887024 | 0.066421 | 0.688272 | 1103.688 | 966.094  | 1065.467 | 3447.884 | 1210.534 | 1139.32  |
| ENSMUSG00000075410 | 12_Gm11744       | 49.11823316   | -1.21615 | 0.009298 | 0.688272 | 74.71616 | 78.14627 | 52.92816 | 16.86735 | 30.54618 | 41.05028 |
| ENSMUSG00000075470 | 1_Alg10b         | 938.2960556   | 0.534251 | 0.147135 | 0.688272 | 760.1557 | 723.9264 | 815.784  | 1653     | 853.0304 | 823.8799 |
| ENSMUSG00000075528 | 13_Aarsd1        | 450.6447673   | -0.62986 | 0.169696 | 0.688272 | 480.7822 | 516.1089 | 645.4934 | 138.9076 | 484.9808 | 457.5597 |
| ENSMUSG00000075590 | 2_Nrbp2          | 1154.475777   | -0.42417 | 0.181441 | 0.688272 | 1256.368 | 1444.418 | 1267.975 | 692.5534 | 1006.893 | 1258.648 |
| ENSMUSG00000075592 | 9_Nynrin         | 517.2870989   | -0.90511 | 0.109367 | 0.688272 | 554.6863 | 818.389  | 650.0958 | 106.1651 | 414.0705 | 560.3213 |
| ENSMUSG00000075600 | 2_Zc3h3          | 339.5612749   | -0.80982 | 0.182307 | 0.688272 | 366.2716 | 446.5501 | 484.4077 | 57.54742 | 311.1185 | 371.4723 |
| ENSMUSG00000075602 | 10_Lyba          | 31498.20119</ |          |          |          |          |          |          |          |          |          |

|                    |                 |             |          |          |          |          |          |          |          |          |          |
|--------------------|-----------------|-------------|----------|----------|----------|----------|----------|----------|----------|----------|----------|
| ENSMUSG00000078580 | 3_E430018J23Rik | 101.5210497 | -0.59195 | 0.103643 | 0.688272 | 120.1956 | 119.3663 | 126.5673 | 54.57082 | 82.58783 | 105.8385 |
| ENSMUSG00000078588 | 10_Ccdc24       | 46.70194723 | -0.83885 | 0.105624 | 0.688272 | 77.96469 | 46.37251 | 55.22938 | 38.69568 | 46.38494 | 15.56448 |
| ENSMUSG00000078606 | 8_Gm4070        | 7990.859511 | 1.346126 | 0.003935 | 0.688272 | 4760.719 | 3131.003 | 5643.752 | 17603.56 | 11019.25 | 5786.874 |
| ENSMUSG00000078616 | 1_Trim30c       | 218.4552786 | 1.347019 | 0.003837 | 0.688272 | 114.5106 | 86.73377 | 169.14   | 439.5432 | 333.7453 | 167.0588 |
| ENSMUSG00000078622 | 8_Cdc47         | 2586.320029 | 0.467856 | 0.181957 | 0.688272 | 2209     | 2184.661 | 2118.277 | 4370.627 | 2283.044 | 2352.312 |
| ENSMUSG00000078639 | 1_Gm12695       | 34.77783519 | 1.252161 | 0.055541 | 0.688272 | 23.55183 | 19.75126 | 18.40979 | 78.38355 | 13.57608 | 54.9945  |
| ENSMUSG00000078640 | 9_Gm11627       | 2.449996867 | -2.56255 | 0.117589 | 0.688272 | 0.812132 | 6.011252 | 5.753061 | 0.992197 | 1.13134  | 0        |
| ENSMUSG00000078681 | 10_Tm2d3        | 506.8953288 | -0.54501 | 0.182941 | 0.688272 | 589.608  | 576.2214 | 638.5897 | 210.3457 | 493.2643 | 533.3429 |
| ENSMUSG00000078716 | 9_Tmem8b        | 137.7084057 | -0.50136 | 0.127121 | 0.688272 | 156.7415 | 170.8913 | 156.4632 | 87.31332 | 107.4773 | 147.3438 |
| ENSMUSG00000078719 | 2_Mspm          | 1.670882401 | -4.12289 | 0.090042 | 0.688272 | 4.872793 | 5.152501 | 0        | 0        | 0        | 0        |
| ENSMUSG00000078747 | 9_Gm20878       | 13.55021734 | 0.92922  | 0.158186 | 0.688272 | 12.99411 | 11.16375 | 3.451836 | 15.87515 | 18.10144 | 19.71501 |
| ENSMUSG00000078763 | 2_Slfn1         | 690.4644186 | 0.745019 | 0.068142 | 0.688272 | 698.4337 | 313.4438 | 536.1852 | 964.4153 | 1029.519 | 600.789  |
| ENSMUSG00000078771 | 10_Evi2a        | 129.8701228 | 0.743662 | 0.122463 | 0.688272 | 142.1231 | 76.42877 | 72.48856 | 228.2053 | 169.701  | 90.27399 |
| ENSMUSG00000078772 | 2_Gm12353       | 1.850069978 | 3.37052  | 0.070556 | 0.688272 | 0.812132 | 0        | 0        | 3.968787 | 1.13134  | 5.18816  |
| ENSMUSG00000078773 | 11_Rad54b       | 197.5317994 | 0.627454 | 0.105533 | 0.688272 | 161.6143 | 109.0613 | 195.6041 | 308.5732 | 168.5697 | 241.7683 |
| ENSMUSG00000078779 | 4_Zfp59         | 210.995584  | 0.689583 | 0.155791 | 0.688272 | 214.4029 | 139.9763 | 130.0192 | 437.5588 | 182.1458 | 161.8706 |
| ENSMUSG00000078784 | 8_1810022K09Rik | 759.5503901 | 1.022873 | 0.057087 | 0.688272 | 535.1951 | 452.5614 | 515.4742 | 1942.721 | 601.8729 | 509.4773 |
| ENSMUSG00000078794 | 4_Dact3         | 77.50320475 | -0.91295 | 0.26721  | 0.688272 | 103.9529 | 120.225  | 79.39224 | 41.67227 | 42.99092 | 76.78477 |
| ENSMUSG00000078815 | 8_Cacng6        | 10.43206342 | 1.66322  | 0.072548 | 0.688272 | 4.872793 | 7.728752 | 2.301224 | 31.7503  | 4.52536  | 11.41395 |
| ENSMUSG00000078816 | 9_Prkcg         | 19.44594767 | -0.88029 | 0.151645 | 0.688272 | 29.23676 | 30.05626 | 16.10857 | 6.945378 | 13.57608 | 20.75264 |
| ENSMUSG00000078853 | 8_Igtp          | 7271.968997 | 0.991159 | 0.002812 | 0.688272 | 4621.844 | 3874.681 | 6107.449 | 9853.507 | 11962.79 | 7211.543 |
| ENSMUSG00000078861 | 8_Zfp931        | 105.0613548 | 0.882977 | 0.144259 | 0.688272 | 88.52241 | 65.26502 | 67.88611 | 271.8619 | 73.53711 | 63.29556 |
| ENSMUSG00000078864 | 10_Gm14322      | 121.6011995 | 0.901261 | 0.064761 | 0.688272 | 84.46175 | 78.14627 | 92.04897 | 272.8541 | 97.29525 | 104.8008 |
| ENSMUSG00000078868 | 3_Gm14412       | 10.20062661 | 1.177269 | 0.130158 | 0.688272 | 4.872793 | 10.305   | 3.451836 | 21.82833 | 12.44474 | 8.301057 |
| ENSMUSG00000078869 | 2_Gm14409       | 30.66492152 | 0.768668 | 0.194482 | 0.688272 | 24.36397 | 27.48001 | 16.10857 | 67.46938 | 22.6268  | 25.9408  |
| ENSMUSG00000078870 | 9_Gm14410       | 191.4895986 | 1.327723 | 0.040703 | 0.688272 | 120.1956 | 115.0725 | 92.04897 | 538.7629 | 70.14309 | 212.7146 |
| ENSMUSG00000078872 | 9_Gm14401       | 12.52708668 | 1.193282 | 0.190999 | 0.688272 | 5.684925 | 10.305   | 6.903673 | 36.71128 | 12.44474 | 3.112896 |
| ENSMUSG00000078877 | 11_Gm14295      | 206.7151725 | 1.094775 | 0.040135 | 0.688272 | 134.8139 | 126.2363 | 134.6216 | 527.8487 | 155.8623 | 162.9082 |
| ENSMUSG00000078878 | 9_Gm14305       | 315.170073  | 1.200425 | 0.067968 | 0.688272 | 217.6514 | 209.5351 | 146.1277 | 947.548  | 159.519  | 210.6393 |
| ENSMUSG00000078886 | 12_Gm20616      | 107.0535575 | 1.254899 | 0.17508  | 0.688272 | 81.21322 | 12.0225  | 96.65142 | 359.1752 | 61.09327 | 32.16659 |
| ENSMUSG00000078887 | 10_Gm6726       | 167.2314225 | 1.216364 | 0.025225 | 0.688272 | 111.2621 | 64.40627 | 126.5673 | 416.7227 | 126.7101 | 157.7201 |
| ENSMUSG00000078891 | 4_Gm11008       | 8.508039514 | 2.062033 | 0.012377 | 0.688272 | 4.872793 | 2.576251 | 2.301224 | 18.85174 | 7.919381 | 14.52685 |
| ENSMUSG00000078894 | 9_2210418010Rik | 133.5742128 | 1.185917 | 0.01524  | 0.688272 | 82.02535 | 93.60377 | 69.03673 | 331.3937 | 115.3967 | 109.989  |
| ENSMUSG00000078897 | 10_Gm4724       | 70.67056864 | 1.196285 | 0.007819 | 0.688272 | 47.9158  | 28.33876 | 52.92816 | 139.8998 | 79.19381 | 75.74714 |
| ENSMUSG00000078898 | 9_Gm47203       | 82.37275407 | 1.115825 | 0.073135 | 0.688272 | 57.66138 | 52.38376 | 46.02448 | 228.2053 | 49.77896 | 60.18266 |
| ENSMUSG00000078899 | 9_Gm4631        | 892.0958624 | 0.891965 | 0.097518 | 0.688272 | 670.009  | 650.9327 | 553.4444 | 2198.708 | 539.6492 | 739.8317 |
| ENSMUSG00000078901 | 8_Gm14440       | 248.2198747 | 1.145999 | 0.070114 | 0.688272 | 159.1779 | 164.0213 | 140.3747 | 725.2959 | 157.2563 | 143.1932 |
| ENSMUSG00000078919 | 10_Dpm1         | 523.7423403 | 1.02441  | 0.057289 | 0.688272 | 356.526  | 303.1388 | 376.2502 | 1339.466 | 378.9989 | 388.0744 |
| ENSMUSG00000078920 | 2_Ilf47         | 6096.442953 | 1.758281 | 0.002716 | 0.688272 | 3835.7   | 3244.358 | 4689.895 | 10779.23 | 8689.823 | 5339.655 |
| ENSMUSG00000078941 | 9_Ak6           | 1256.468497 | 0.476434 | 0.1517   | 0.688272 | 1112.621 | 974.6815 | 1065.467 | 2031.027 | 1260.313 | 1094.702 |
| ENSMUSG00000078945 | 10_Naip2        | 172.3006866 | 0.70556  | 0.059697 | 0.688272 | 158.3658 | 102.1913 | 132.3204 | 243.0882 | 255.6829 | 142.1556 |
| ENSMUSG00000078974 | 10_Sec61g       | 1288.718444 | 0.602815 | 0.063718 | 0.688272 | 1122.367 | 945.484  | 1002.183 | 2100.481 | 1414.175 | 1147.621 |
| ENSMUSG00000078994 | 8_Zfp429        | 171.3533342 | 0.85893  | 0.075227 | 0.688272 | 119.3834 | 118.5075 | 127.7119 | 382.988  | 130.1041 | 149.419  |
| ENSMUSG00000079038 | 2_D130040H23Rik | 13.55129286 | 1.300849 | 0.143982 | 0.688272 | 5.684925 | 12.0225  | 5.753061 | 42.66446 | 7.919381 | 7.263424 |
| ENSMUSG00000079043 | 2_Fastkdp       | 271.498331  | 0.663404 | 0.066074 | 0.688272 | 217.6514 | 206.9588 | 205.9596 | 480.2233 | 268.1276 | 250.0693 |
| ENSMUSG00000079056 | 10_Kcnip3       | 57.23011708 | -0.97466 | 0.015496 | 0.688272 | 74.71616 | 96.18002 | 56.37999 | 30.7581  | 48.7284  | 44.61818 |
| ENSMUSG00000079057 | 3_Cyp4v3        | 237.5602789 | 0.511389 | 0.196319 | 0.688272 | 198.9724 | 213.8288 | 174.893  | 423.668  | 200.2472 | 213.7522 |
| ENSMUSG00000079065 | 8_BC005561      | 238.6920161 | 0.899381 | 0.054234 | 0.688272 | 155.9294 | 193.2188 | 150.7302 | 526.8565 | 196.8532 | 208.564  |
| ENSMUSG00000079083 | 2_Jrkl          | 428.6781104 | 0.957317 | 0.064626 | 0.688272 | 304.5496 | 262.7776 | 307.2134 | 1047.76  | 303.1991 | 346.5691 |
| ENSMUSG00000079084 | 9_Ccdc82        | 400.1732541 | 0.850384 | 0.057226 | 0.688272 | 283.4341 | 276.5176 | 296.8579 | 864.2034 | 342.7961 | 337.2304 |
| ENSMUSG00000079104 | 4_Prps1l3       | 552.1875252 | 0.627463 | 0.132449 | 0.688272 | 471.8488 | 428.5164 | 401.5636 | 1069.588 | 506.8404 | 434.7678 |
| ENSMUSG00000079105 | 3_C7            | 15.37410297 | 1.243569 | 0.137721 | 0.688272 | 8.933454 | 13.74    | 4.602448 | 41.67227 | 5.656701 | 17.63975 |
| ENSMUSG00000079144 | 7_A130010J15Rik | 639.2428291 | 1.382994 | 0.190945 | 0.688272 | 527.8859 | 503.2276 | 633.9873 | 862.219  | 747.8158 | 560.3213 |
| ENSMUSG00000079165 | 10_Sap25        | 71.4927397  | -1.53724 | 0.002555 | 0.688272 | 104.7651 | 97.89753 | 116.2118 | 13.89076 | 46.38494 | 49.80634 |
| ENSMUSG00000079173 | 11_Zan          | 17.34652544 | -1.0583  | 0.055735 | 0.688272 | 26.80036 | 24.90376 | 18.40979 | 7.937575 | 13.57608 | 12.45158 |
| ENSMUSG00000079184 | 10_Mphosph8     | 605.4445163 | 0.680023 | 0.137192 | 0.688272 | 470.2245 | 474.8889 | 451.0399 | 1276.957 | 460.4554 | 499.101  |
| ENSMUSG00000079227 | 9_Ccr5          | 308.1922741 | 0.896556 | 0.064354 | 0.688272 | 332.1621 | 139.9763 | 173.7424 | 521.8955 | 459.3241 | 222.0533 |
| ENSMUSG00000079235 | 10_Ccdc13       | 8.790726517 | -1.19157 | 0.149651 | 0.688272 | 12.18198 | 12.88125 | 11.50612 | 0.992197 | 7.919381 | 7.263424 |
| ENSMUSG00000079263 | 8_Gm6614        | 3.320482685 | 2.13448  | 0.145463 | 0.688272 | 0        | 2.576251 | 1.150612 | 10.91416 | 1.13134  | 0.150528 |
| ENSMUSG00000079283 | 2_2310009B15Rik | 123.2618286 | -0.65018 | 0.025672 | 0.688272 | 131.5654 | 171.75   | 148.429  | 99.21968 | 97.29525 | 91.31662 |
| ENSMUSG00000079298 | 9_Kirb1b        | 7.762709957 | 2.276118 | 0.090921 | 0.688272 | 4.872793 | 1.7175   | 1.150612 | 14.88295 | 13.57608 | 10.37632 |
| ENSMUSG00000079316 | 10_Rab9         | 987.1352813 | 0.56402  | 0.151777 | 0.688272 | 851.1145 | 716.1977 | 822.6877 | 1821.673 | 877.9199 | 833.2185 |
| ENSMUSG00000079317 | 10_Trappc2      | 223.6966157 | 1.001787 | 0.04739  | 0.688272 | 131.5654 | 171.75   | 143.8265 | 534.7941 | 177.6204 | 182.6232 |
| ENSMUSG00000079334 | 8_Nat6          | 383.8788663 | -1.08199 | 0.107897 | 0.688272 | 469.4124 | 529.8489 | 564.9505 | 39.68787 | 325.8259 | 373.5475 |
| ENSMUSG00000079339 | 6_Ilf11b1       | 25088.15253 | 0.892537 | 0.017588 | 0.688272 | 17127.06 | 15548.53 | 20022.95 | 48328.91 | 27449.7  | 22051.67 |
| ENSMUSG00000079396 | 4_Gm3411        | 6.59823829  | 0.306301 | 0.097503 | 0.688272 | 0        | 0        | 4.602448 | 24.80492 | 10.18206 | 0        |
| ENSMUSG00000079402 | 9_Gm3020        | 3.543093117 | 1.822575 | 0.117133 | 0.688272 | 1.624264 | 0.85875  | 2.301224 | 8.929771 | 3.94002  | 4.150528 |
| ENSMUSG00000079410 | 4_Gm2897        | 19.42400203 | 1.085093 | 0.190007 | 0.688272 | 8.121322 | 18.8925  | 10.35551 | 46.63325 | 4.52536  | 28.01607 |
| ENSMUSG00000079418 | 3_Alg4a         | 390.6704638 | 0.673931 | 0.074057 | 0.688272 | 301.301  | 307.4326 | 294.5567 | 718.3505 | 340.5334 | 381.8486 |
| ENSMUSG00000079419 | 4_Ms4a6c        | 614.7168252 | 0.941791 | 0.090589 | 0.688272 | 695.9973 | 205.2413 | 361.2922 | 1153.925 | 873.3946 | 398.4507 |
| ENSMUSG00000079427 | 10_Mtfrsl       | 184.8570576 | 0.38729  | 0.182632 | 0.688272 | 154.3051 | 181.1963 | 144.9771 | 248.0492 | 185.5398 | 195.0748 |
| ENSMUSG00000079428 | 8_Tcea17        | 13.04663002 | 1.554386 | 0.129081 | 0.688272 | 5.684925 | 5.152501 | 9.204897 | 48.61764 | 3.39402  | 6.225792 |
| ENSMUSG00000079444 | 9_Gm21981       | 8.995281684 | -1.36502 | 0.170424 | 0.688272 | 8.121322 | 14.59875 | 16.10857 | 4.960984 | 10.18206 | 0        |
| ENSMUSG00000079451 | 9_Tmprss11g     | 19778.36428 | 0.691701 | 0.054309 | 0.688272 | 14819.79 | 13267.69 | 17290.25 | 34526.46 | 22362.07 | 16403.93 |
| ENSMUSG00000079478 | 8_Ssccar1       | 198.2815    |          |          |          |          |          |          |          |          |          |

|                    |                 |             |          |          |          |          |          |          |          |          |          |
|--------------------|-----------------|-------------|----------|----------|----------|----------|----------|----------|----------|----------|----------|
| ENSMUSG00000085772 | 7_D630024D03Rik | 21.55070858 | -0.86215 | 0.088668 | 0.688272 | 31.67315 | 30.91501 | 20.71102 | 14.88295 | 12.44474 | 18.67738 |
| ENSMUSG00000085957 | 4_Syna          | 5.008059601 | -2.60398 | 0.02227  | 0.688272 | 11.36985 | 8.587502 | 5.753061 | 0        | 2.26268  | 2.075624 |
| ENSMUSG00000085975 | 1_Gm13572       | 4.119744844 | 1.708637 | 0.116037 | 0.688272 | 0.812132 | 1.7175   | 3.451836 | 8.929771 | 5.656701 | 4.150528 |
| ENSMUSG00000086040 | 8_Wipf3         | 97.3500706  | -0.69198 | 0.099605 | 0.688272 | 111.2621 | 163.1625 | 86.29591 | 83.34453 | 49.77896 | 90.27399 |
| ENSMUSG00000086075 | 1_Gm15728       | 5.891146286 | -1.5087  | 0.140283 | 0.688272 | 7.30919  | 12.0225  | 6.903673 | 4.960984 | 0        | 4.150528 |
| ENSMUSG00000086096 | 1_Gm12688       | 6.956888935 | -1.79739 | 0.045864 | 0.688272 | 8.933454 | 15.4575  | 8.054285 | 2.97659  | 1.13134  | 5.18816  |
| ENSMUSG00000086105 | 1_Gm11636       | 3.543744746 | -2.0501  | 0.10139  | 0.688272 | 5.684925 | 6.870002 | 4.602448 | 0.992197 | 0        | 3.112896 |
| ENSMUSG00000086130 | 1_Gm16211       | 29.6427551  | 0.673579 | 0.144097 | 0.688272 | 24.36397 | 22.32751 | 21.86163 | 49.60984 | 31.67752 | 28.01607 |
| ENSMUSG00000086256 | 1_Gm12052       | 2.804010175 | -2.07855 | 0.131021 | 0.688272 | 4.060661 | 6.011252 | 3.451836 | 0        | 2.26268  | 1.037632 |
| ENSMUSG00000086262 | 7_A930031H19Rik | 3.296303226 | -1.85953 | 0.135046 | 0.688272 | 5.684925 | 5.152501 | 4.602448 | 0        | 2.26268  | 2.075264 |
| ENSMUSG00000086322 | 7_E130218I03Rik | 839.5523615 | -0.77428 | 0.187009 | 0.688272 | 971.3101 | 1014.184 | 1193.185 | 156.7671 | 753.4725 | 948.3957 |
| ENSMUSG00000086491 | 1_Gm13291       | 1.241806756 | 3.859288 | 0.151182 | 0.688272 | 0        | 0        | 0        | 0        | 2.26268  | 5.18816  |
| ENSMUSG00000086503 | 3_Xist          | 29765.3488  | 0.727519 | 0.074659 | 0.688272 | 23996.07 | 22303.46 | 20946.89 | 59290.71 | 24905.32 | 27149.64 |
| ENSMUSG00000086784 | 1_Isoc2a        | 147.5143109 | -0.82377 | 0.176405 | 0.688272 | 182.7297 | 228.4276 | 154.182  | 25.79712 | 141.4175 | 152.5319 |
| ENSMUSG00000087006 | 3_Gm13889       | 16.92706876 | -1.71302 | 0.012063 | 0.688272 | 21.11544 | 26.62126 | 29.91591 | 2.97659  | 14.70742 | 6.225792 |
| ENSMUSG00000087041 | 1_Gm16295       | 15.1892899  | -1.32556 | 0.096373 | 0.688272 | 21.92757 | 22.32751 | 20.71102 | 0.992197 | 15.83876 | 9.338689 |
| ENSMUSG00000087107 | 7_Al662270      | 56.20120007 | 0.789607 | 0.126382 | 0.688272 | 63.34631 | 26.62126 | 33.36775 | 93.2665  | 78.06247 | 42.54291 |
| ENSMUSG00000087153 | 7_Gm6483        | 1972.635408 | 0.642894 | 0.110837 | 0.688272 | 1581.221 | 1517.412 | 1522.26  | 3817.97  | 1756.515 | 1721.432 |
| ENSMUSG00000087260 | 5_Lamtor5       | 875.4465102 | 0.380446 | 0.176074 | 0.688272 | 764.2164 | 733.3727 | 784.7175 | 1256.12  | 877.9199 | 836.3314 |
| ENSMUSG00000087289 | 2_4933424M12Rik | 1.204696364 | 2.677675 | 0.190436 | 0.688272 | 0.812132 | 0        | 0        | 1.984394 | 3.39402  | 1.037632 |
| ENSMUSG00000087303 | 2_Lipo2         | 7.454214868 | 1.262573 | 0.114247 | 0.688272 | 3.248529 | 4.293751 | 5.753061 | 13.89076 | 11.3134  | 6.225792 |
| ENSMUSG00000087361 | 1_Gm10043K17Rik | 11.87621511 | 1.190901 | 0.076338 | 0.688272 | 7.30919  | 8.587502 | 5.753061 | 24.80492 | 11.3134  | 13.48922 |
| ENSMUSG00000087370 | 2_Tmem170b      | 921.451107  | 0.763142 | 0.057213 | 0.688272 | 678.1304 | 604.5602 | 767.4583 | 1796.868 | 910.7288 | 770.9606 |
| ENSMUSG00000087403 | 8_Kantr         | 21.61790877 | -0.92598 | 0.164    | 0.688272 | 24.36397 | 31.77376 | 28.7653  | 3.968787 | 16.9701  | 23.86554 |
| ENSMUSG00000087408 | 9_Cers1         | 31.38110397 | -1.43933 | 0.054789 | 0.688272 | 41.41874 | 59.25377 | 36.81959 | 2.97659  | 13.7608  | 34.24186 |
| ENSMUSG00000089652 | 1_Gm16025       | 624.93466   | 1.125733 | 0.004545 | 0.688272 | 358.9624 | 336.6301 | 483.2571 | 1256.12  | 763.6545 | 550.9826 |
| ENSMUSG00000089704 | 9_Galn2         | 89.00691684 | 0.94072  | 0.044242 | 0.688272 | 60.90991 | 64.40627 | 57.53061 | 154.7827 | 141.4175 | 54.9946  |
| ENSMUSG00000089714 | 1_Gm16092       | 233.0423537 | 0.551366 | 0.046858 | 0.688272 | 199.7845 | 153.7163 | 214.0139 | 289.7215 | 280.5723 | 260.4456 |
| ENSMUSG00000089715 | 11_Cbx6         | 1097.273778 | -0.85245 | 0.036707 | 0.688272 | 1299.411 | 1730.382 | 1206.992 | 445.4964 | 781.756  | 1119.605 |
| ENSMUSG00000089726 | 2_Mir17hg       | 140.9406231 | 0.959203 | 0.037343 | 0.688272 | 103.1408 | 80.72252 | 103.5551 | 303.6122 | 142.5489 | 112.0643 |
| ENSMUSG00000089739 | 1_Gm20431       | 293.7544115 | -2.60082 | 0.126908 | 0.688272 | 280.1856 | 583.9502 | 648.9452 | 0        | 105.2146 | 144.2309 |
| ENSMUSG00000089756 | 1_Gm8898        | 345.6260162 | 1.116635 | 0.041226 | 0.688272 | 203.033  | 231.8626 | 219.7669 | 901.9069 | 218.3486 | 298.838  |
| ENSMUSG00000089762 | 3_Ier5l         | 45.62629204 | -1.23399 | 0.044994 | 0.688272 | 37.35808 | 48.94876 | 105.8563 | 11.90636 | 39.5969  | 30.09133 |
| ENSMUSG00000089768 | 2_Tmsb15b1      | 55.57337911 | 0.776759 | 0.179326 | 0.688272 | 51.97646 | 38.64376 | 32.21714 | 124.0246 | 30.54618 | 56.03213 |
| ENSMUSG00000089798 | 9_1700028K03Rik | 3.18520598  | 2.558489 | 0.062573 | 0.688272 | 0.812132 | 0.85875  | 1.150612 | 10.91416 | 2.26268  | 3.112896 |
| ENSMUSG00000089832 | 8_Shkbp1        | 532.603756  | -0.87816 | 0.140714 | 0.688272 | 606.6627 | 679.2714 | 783.5668 | 90.28991 | 529.4672 | 506.3644 |
| ENSMUSG00000089837 | 9_Npcd          | 1.527757364 | -3.99435 | 0.108349 | 0.688272 | 4.872793 | 4.293751 | 0        | 0        | 0        | 0        |
| ENSMUSG00000089844 | 7_AS30032D15Rik | 48.54236195 | 1.133413 | 0.006353 | 0.688272 | 34.10955 | 24.90376 | 32.21714 | 76.39915 | 76.93113 | 46.69344 |
| ENSMUSG00000089857 | 9_Zfp82         | 72.61241809 | 0.991067 | 0.124911 | 0.688272 | 60.90991 | 41.22001 | 43.72326 | 196.455  | 37.3422  | 56.03213 |
| ENSMUSG00000089862 | 8_Umad1         | 203.7569295 | 0.645287 | 0.066654 | 0.688272 | 160.8022 | 145.9875 | 170.2906 | 346.2767 | 209.2979 | 189.8867 |
| ENSMUSG00000089911 | 4_Hiat1         | 1761.015228 | 0.526942 | 0.141935 | 0.688272 | 1456.153 | 1381.729 | 1491.193 | 3062.912 | 1565.775 | 1608.33  |
| ENSMUSG00000089929 | 1_Bcl2a1b       | 56.94914869 | 0.825002 | 0.109919 | 0.688272 | 45.4794  | 24.04501 | 54.07877 | 104.1807 | 72.40577 | 41.50528 |
| ENSMUSG00000089945 | 10_Pakap        | 199.0120582 | -1.60183 | 0.005785 | 0.688272 | 286.6827 | 198.3713 | 413.0697 | 30.7581  | 119.9221 | 145.2885 |
| ENSMUSG00000089960 | 1_Ugt1a1        | 32.0032855  | -1.22855 | 0.015178 | 0.688272 | 30.04889 | 58.39502 | 46.02448 | 13.89076 | 26.02082 | 17.63975 |
| ENSMUSG00000089996 | 5_Tmsb15b2      | 46.89493169 | 1.294643 | 0.026462 | 0.688272 | 25.98823 | 25.76251 | 29.91591 | 123.0324 | 36.20288 | 40.46765 |
| ENSMUSG00000090000 | 1_Ier3p1        | 806.3654768 | 0.591739 | 0.197226 | 0.688272 | 659.4513 | 571.0689 | 699.5722 | 1658.953 | 636.9445 | 612.2699 |
| ENSMUSG00000090015 | 8_Gm15446       | 198.3971866 | 1.069662 | 0.039579 | 0.688272 | 139.6867 | 130.53   | 113.9106 | 492.1296 | 159.519  | 154.6072 |
| ENSMUSG00000090066 | 2_1110002E22Rik | 45.2415191  | 0.951124 | 0.112943 | 0.688272 | 31.67315 | 37.78501 | 23.01224 | 110.1338 | 29.41484 | 39.53002 |
| ENSMUSG00000090093 | 8_Gm14399       | 121.1633189 | 1.117838 | 0.027437 | 0.688272 | 82.02535 | 91.88627 | 55.22938 | 277.8151 | 88.24453 | 31.7793  |
| ENSMUSG00000090100 | 7_Ttbk2         | 513.0592774 | 0.863075 | 0.068873 | 0.688272 | 376.0172 | 398.4601 | 317.5689 | 1144.995 | 373.3422 | 467.9721 |
| ENSMUSG00000090112 | 8_Shrp          | 997.5562715 | 0.518703 | 0.188141 | 0.688272 | 788.5803 | 835.564  | 836.495  | 1830.603 | 822.4843 | 871.6109 |
| ENSMUSG00000090213 | 1_Tmem189       | 853.6659322 | -0.48874 | 0.190641 | 0.688272 | 944.5097 | 1011.608 | 1034.4   | 403.8241 | 864.3438 | 863.3099 |
| ENSMUSG00000090215 | 8_Trim34b       | 599.0212115 | 0.171296 | 0.018879 | 0.688272 | 427.1815 | 413.9176 | 521.2273 | 929.6884 | 725.189  | 576.9234 |
| ENSMUSG00000090236 | 2_Car15         | 14.69229009 | -1.29308 | 0.045081 | 0.688272 | 25.1761  | 15.4575  | 21.86163 | 3.968787 | 11.3134  | 10.37632 |
| ENSMUSG00000090247 | 7_Bloc1s1       | 698.5852168 | -0.71283 | 0.138703 | 0.688272 | 837.3083 | 847.5865 | 918.1885 | 206.3769 | 650.5206 | 731.5306 |
| ENSMUSG00000090264 | 1_Elf4ebp3      | 29.05421218 | -0.96421 | 0.071111 | 0.688272 | 27.61249 | 53.24251 | 34.51836 | 28.77371 | 13.57608 | 16.60211 |
| ENSMUSG00000090266 | 10_Mettl23      | 207.8545505 | 0.495647 | 0.184362 | 0.688272 | 172.9842 | 188.0663 | 156.4832 | 349.2533 | 169.701  | 210.6393 |
| ENSMUSG00000090272 | 7_Mndal         | 4319.946131 | 1.552389 | 0.002708 | 0.688272 | 1972.669 | 1748.415 | 2869.627 | 11447.97 | 4812.721 | 3068.278 |
| ENSMUSG00000090273 | 3_Prr22         | 6.718657267 | -1.89703 | 0.090303 | 0.688272 | 5.684925 | 7.728752 | 18.40979 | 0        | 2.26268  | 6.225792 |
| ENSMUSG00000090342 | 1_Vmn2r46       | 6.809270341 | 1.408923 | 0.180704 | 0.688272 | 3.248529 | 7.728752 | 0        | 14.88295 | 5.656701 | 9.338689 |
| ENSMUSG00000090363 | 8_Gm3512        | 43.48815974 | 1.489121 | 0.02444  | 0.688272 | 31.67315 | 20.61001 | 16.10857 | 121.048  | 23.75814 | 47.73108 |
| ENSMUSG00000090399 | 1_Gm38399       | 10.116759   | -1.15075 | 0.081746 | 0.688272 | 15.43051 | 13.74    | 12.65673 | 5.953181 | 5.656701 | 7.263424 |
| ENSMUSG00000090439 | 1_Gm17455       | 2.117416369 | -3.3595  | 0.117654 | 0.688272 | 8.121322 | 0        | 3.451836 | 0        | 1.13134  | 0        |
| ENSMUSG00000090550 | 2_Prlh          | 1.433275974 | -3.90281 | 0.06533  | 0.688272 | 4.872793 | 2.576251 | 1.150612 | 0        | 0        | 0        |
| ENSMUSG00000090551 | 14_60959823     | 0.853561    | 0.127331 | 0.688272 | 9.745586 | 11.16375 | 10.35551 | 22.82053 | 16.9701  | 16.60211 |          |
| ENSMUSG00000090553 | 8_Snrpe         | 1105.125253 | 0.804085 | 0.073372 | 0.688272 | 838.1204 | 740.2427 | 836.495  | 2380.28  | 952.5884 | 883.0249 |
| ENSMUSG00000090639 | 1_Gm20425       | 201.2566161 | -0.69545 | 0.021161 | 0.688272 | 265.5672 | 231.0038 | 249.6828 | 119.0636 | 185.5398 | 156.6824 |
| ENSMUSG00000090641 | 1_Zfp712        | 66.47283284 | 0.130108 | 0.089701 | 0.688272 | 44.66727 | 50.66626 | 35.66898 | 171.65   | 58.02969 | 37.35475 |
| ENSMUSG00000090659 | 8_Zfp493        | 36.13167453 | 1.171225 | 0.074623 | 0.688272 | 24.36397 | 28.33876 | 13.80735 | 96.24309 | 26.08862 | 28.01607 |
| ENSMUSG00000090675 | 1_Olf111        | 0.872738852 | 3.353073 | 0.175031 | 0.688272 | 0        | 0        | 0        | 0.992197 | 1.13134  | 3.112896 |
| ENSMUSG00000090691 | 8_Gm3667        | 6.368249101 | 2.685658 | 0.068579 | 0.688272 | 2.436397 | 2.576251 | 0        | 22.82053 | 0        | 10.37632 |
| ENSMUSG00000090693 | 3_Trim43a       | 3.369407685 | 3.405129 | 0.032356 | 0.688272 | 1.624264 | 0        | 0        | 5.953181 | 2.26268  | 10.37632 |
| ENSMUSG00000090707 | 8_Gm8237        | 5.38919682  | 1.944271 | 0.072374 | 0.688272 | 0.812132 | 2.576251 | 3.451836 | 15.87515 | 3.39402  | 6.225792 |
| ENSMUSG00000090872 | 8_Gm3239        | 1.885566839 | 4.458675 | 0.154721 | 0.688272 | 0        | 0        | 0        | 0        | 11.3134  | 0        |
| ENSMUSG00000090877 | 3_Hspa1b        | 8214.565071 | -0.40953 | 0.181352 | 0.688272 | 7348.172 | 9222.977 | 11547.54 | 8448.556 | 6862.709 | 5857.433 |
| ENSMUSG00000090881 | 1_Gm6904        | 50.45366784 | 1.467938 | 0.005624 |          |          |          |          |          |          |          |

|                    |                 |             |          |          |          |          |          |          |          |          |          |
|--------------------|-----------------|-------------|----------|----------|----------|----------|----------|----------|----------|----------|----------|
| ENSMUSG00000092097 | 1_Gm5819        | 13.33448061 | -1.37269 | 0.03863  | 0.688272 | 12.18198 | 18.03375 | 27.61469 | 7.937575 | 9.050721 | 5.18816  |
| ENSMUSG00000092167 | 8_Gm3696        | 9.985597927 | 1.666784 | 0.106723 | 0.688272 | 6.497057 | 0.85875  | 6.903673 | 26.78931 | 2.26268  | 16.60211 |
| ENSMUSG00000092260 | 7_Zfp963        | 122.0709724 | 0.623229 | 0.181075 | 0.688272 | 99.08013 | 96.18002 | 93.19958 | 243.0882 | 82.58783 | 118.2901 |
| ENSMUSG00000092341 | 2_Malat1        | 16750.01481 | 1.017099 | 0.01222  | 0.688272 | 12393.95 | 10585.04 | 9983.861 | 35097.97 | 14139.49 | 18026.78 |
| ENSMUSG00000092356 | 1_Gm20532       | 2.639793574 | 4.944884 | 0.091753 | 0.688272 | 0        | 0        | 0        | 0        | 15.83876 | 0        |
| ENSMUSG00000092403 | 1_Gm20497       | 9.215609363 | 2.196118 | 0.005411 | 0.688272 | 4.060661 | 3.435001 | 2.301224 | 19.84394 | 9.050721 | 16.60211 |
| ENSMUSG00000092416 | 2_Zfp141        | 455.5809416 | 0.937719 | 0.052679 | 0.688272 | 316.7315 | 295.4101 | 325.6232 | 1061.651 | 356.3721 | 377.6981 |
| ENSMUSG00000092463 | 1_Gm20489       | 1.925988924 | 4.494346 | 0.029891 | 0.688272 | 0        | 0        | 0        | 0.992197 | 2.26268  | 8.301057 |
| ENSMUSG00000092486 | 1_2610524H06Rik | 166.1915883 | 0.751112 | 0.077248 | 0.688272 | 121.0077 | 132.2475 | 118.513  | 320.4796 | 123.3161 | 181.5856 |
| ENSMUSG00000092511 | 7_Gm20547       | 309.1959215 | 1.1414   | 0.077448 | 0.688272 | 412.5631 | 67.84127 | 97.80203 | 436.5666 | 487.6076 | 352.7949 |
| ENSMUSG00000092534 | 8_Pagrlb1       | 32.59552214 | 1.037717 | 0.090795 | 0.688272 | 22.7397  | 12.88125 | 28.7653  | 72.43037 | 20.36412 | 38.39239 |
| ENSMUSG00000092592 | 1_Gm20449       | 11.47240797 | 1.439952 | 0.077058 | 0.688272 | 4.872793 | 6.870002 | 6.903673 | 32.74249 | 10.18206 | 7.263424 |
| ENSMUSG00000093445 | 7_Lrch4         | 962.3591692 | -0.87943 | 0.177647 | 0.688272 | 1076.887 | 1154.16  | 1509.603 | 125.0168 | 1030.651 | 877.8367 |
| ENSMUSG00000093456 | 7_Gm20662       | 4.668203686 | 5.769437 | 0.004661 | 0.688272 | 0        | 0        | 0        | 0        | 12.44474 | 15.56448 |
| ENSMUSG00000093573 | 1_Gm20610       | 0.903974865 | 3.395359 | 0.167533 | 0.688272 | 0        | 0        | 0        | 0.992197 | 3.39402  | 1.037632 |
| ENSMUSG00000093575 | 1_Gm20695       | 6.420845904 | 1.184563 | 0.174485 | 0.688272 | 4.872793 | 3.435001 | 3.451836 | 14.88295 | 5.656701 | 6.225792 |
| ENSMUSG00000093594 | 1_Gm20707       | 53.06544096 | 0.936039 | 0.053461 | 0.688272 | 43.04301 | 31.77376 | 34.51836 | 106.1651 | 39.5969  | 63.29556 |
| ENSMUSG00000093639 | 2_Gm24419       | 3.493439816 | -5.1827  | 0.003622 | 0.688272 | 4.060661 | 14.59875 | 2.301224 | 0        | 0        | 0        |
| ENSMUSG00000093661 | 1_Elf4e3        | 293.2565132 | 0.729056 | 0.062642 | 0.688272 | 251.761  | 187.2075 | 223.2187 | 537.7707 | 316.7752 | 242.8059 |
| ENSMUSG00000093701 | 1_Gm21970       | 42.05603358 | 1.149134 | 0.075611 | 0.688272 | 36.54595 | 30.05626 | 11.50612 | 88.30552 | 22.6268  | 63.29556 |
| ENSMUSG00000093752 | 1_Gm20716       | 4434.258128 | 0.513357 | 0.139994 | 0.688272 | 3687.08  | 3599.881 | 3673.904 | 7570.462 | 4063.774 | 4010.448 |
| ENSMUSG00000093769 | 3_Hist2h3c1     | 62.29360791 | 0.774347 | 0.162899 | 0.688272 | 41.41874 | 43.79626 | 52.92816 | 141.8841 | 54.30432 | 39.43002 |
| ENSMUSG00000093803 | 2_Ppp2r3d       | 169.4441326 | -1.11119 | 0.132413 | 0.688272 | 209.5301 | 220.6988 | 264.6408 | 11.90636 | 145.9429 | 163.9459 |
| ENSMUSG00000093904 | 1_Tomm20        | 2395.132773 | 0.507638 | 0.177905 | 0.688272 | 2081.495 | 1951.939 | 1900.811 | 4271.407 | 2068.09  | 2097.054 |
| ENSMUSG00000093910 | 1_Zfp853        | 1.802853    | -2.18551 | 0.012444 | 0.688272 | 18.67904 | 19.75126 | 19.56041 | 0        | 4.52536  | 8.301057 |
| ENSMUSG00000093973 | 1_Mrgpra2a      | 2.781969162 | 0.519382 | 0.03201  | 0.688272 | 0        | 0        | 0        | 1.984394 | 14.70742 | 0        |
| ENSMUSG00000093979 | 2_Gm2237        | 22.5565224  | 1.434009 | 0.116261 | 0.688272 | 8.121322 | 21.46876 | 6.903673 | 76.39915 | 7.919381 | 14.52685 |
| ENSMUSG00000093989 | 1_Rnasek        | 436.1405132 | -0.75034 | 0.082623 | 0.688272 | 510.8311 | 584.8089 | 545.3901 | 154.7827 | 378.9989 | 442.0313 |
| ENSMUSG00000094027 | 1_Gm21762       | 1.842397744 | 3.301664 | 0.136488 | 0.688272 | 0        | 0        | 1.150612 | 1.984394 | 7.919381 | 0        |
| ENSMUSG00000094030 | 1_Gm21833       | 1.703254455 | 1.389603 | 0.167783 | 0.688272 | 0        | 0        | 1.150612 | 7.937575 | 1.13134  | 0        |
| ENSMUSG00000094076 | 7_Gm4767        | 30.47405496 | 0.916932 | 0.145081 | 0.688272 | 17.86691 | 21.46876 | 24.16285 | 73.42256 | 28.2835  | 17.63975 |
| ENSMUSG00000094127 | 1_G530012D18Rik | 7.276109977 | 6.412182 | 0.101294 | 0.688272 | 0        | 0        | 0        | 43.65666 | 0        | 0        |
| ENSMUSG00000094338 | 1_Hist1h2bl     | 27.68074653 | -3.37879 | 0.002571 | 0.688272 | 41.41874 | 65.26502 | 44.87387 | 0        | 0        | 14.52685 |
| ENSMUSG00000094410 | 7_Gm38394       | 1933.41597  | 0.6963   | 0.033716 | 0.688272 | 1421.231 | 1507.965 | 1498.097 | 3323.859 | 2038.675 | 1810.668 |
| ENSMUSG00000094441 | 1_Zfp955a       | 223.4283097 | 0.811772 | 0.11658  | 0.688272 | 182.7297 | 148.5638 | 155.3326 | 517.9267 | 148.2056 | 87.81614 |
| ENSMUSG00000094483 | 2_Purb          | 5836.195102 | 0.95447  | 0.044152 | 0.688272 | 4018.43  | 3931.359 | 3969.612 | 13635.76 | 4745.972 | 4716.038 |
| ENSMUSG00000094487 | 1_Gm21958       | 17.62235949 | 1.090203 | 0.085938 | 0.688272 | 9.745586 | 13.74    | 10.35551 | 38.69568 | 12.44474 | 20.75264 |
| ENSMUSG00000094622 | 1_Gm3055        | 32.98024857 | 0.867133 | 0.196986 | 0.688272 | 27.61249 | 20.61001 | 21.86163 | 80.36794 | 33.9402  | 13.48922 |
| ENSMUSG00000094628 | 1_Gm3252        | 1.692946439 | 3.223703 | 0.083247 | 0.688272 | 0        | 0.85875  | 0        | 4.960984 | 2.26268  | 2.075264 |
| ENSMUSG00000094634 | 7_Gm3468        | 15.94936098 | 1.115045 | 0.112785 | 0.688272 | 11.36985 | 8.587502 | 10.35551 | 36.71128 | 7.919381 | 20.75264 |
| ENSMUSG00000094732 | 1_1500015L24Rik | 0.94049817  | -3.27505 | 0.15819  | 0.688272 | 1.624264 | 1.7175   | 2.301224 | 0        | 0        | 0        |
| ENSMUSG00000094786 | 1_Gm14403       | 97.09130864 | 0.778762 | 0.189219 | 0.688272 | 38.98234 | 51.52501 | 35.66898 | 131.9622 | 29.41484 | 54.9945  |
| ENSMUSG00000094796 | 1_BC147527      | 33.02830379 | 0.757879 | 0.173866 | 0.688272 | 35.73382 | 10.305   | 27.61469 | 42.66446 | 48.64762 | 33.20423 |
| ENSMUSG00000094800 | 8_Gm9780        | 28.53359123 | 0.759037 | 0.174778 | 0.688272 | 30.86102 | 12.0225  | 20.71102 | 47.62545 | 22.6268  | 37.35475 |
| ENSMUSG00000094870 | 7_Zfp131        | 766.1367645 | 0.785443 | 0.061558 | 0.688272 | 608.287  | 520.4026 | 559.1975 | 1563.702 | 707.0876 | 638.1437 |
| ENSMUSG00000094935 | 1_Gm9726        | 82.76402893 | -1.05793 | 0.113911 | 0.688272 | 155.1172 | 133.965  | 46.02448 | 15.87515 | 19.19381 | 66.4048  |
| ENSMUSG00000094942 | 7_Gm3604        | 89.69840581 | 1.132996 | 0.056076 | 0.688272 | 64.97057 | 54.10126 | 49.47632 | 241.1038 | 61.09237 | 67.44608 |
| ENSMUSG00000094958 | 1_3110021N24Rik | 7.717728536 | 1.130366 | 0.185238 | 0.688272 | 6.497057 | 3.435001 | 4.602448 | 18.85174 | 5.656701 | 7.263424 |
| ENSMUSG00000095029 | 1_Gm21370       | 10.49061145 | -0.20375 | 0.146506 | 0.688272 | 15.43051 | 5.152501 | 29.91591 | 0        | 12.44474 | 0        |
| ENSMUSG00000095098 | 1_Cdc85b        | 13.91667896 | -1.73739 | 0.081662 | 0.688272 | 10.55772 | 18.03375 | 35.66898 | 0        | 7.788041 | 12.45158 |
| ENSMUSG00000095180 | 8_Rhox5         | 8.059004841 | -1.33118 | 0.07833  | 0.688272 | 11.36985 | 9.446252 | 13.80735 | 4.960984 | 5.656701 | 3.112896 |
| ENSMUSG00000095193 | 1_Gm20939       | 55.24902677 | 0.991367 | 0.094191 | 0.688272 | 38.17021 | 36.06751 | 36.81959 | 137.9154 | 31.67752 | 50.84397 |
| ENSMUSG00000095195 | 7_Gm3005        | 1.902325453 | 4.477219 | 0.151058 | 0.688272 | 0        | 0        | 0        | 0        | 0        | 11.41395 |
| ENSMUSG00000095280 | 1_Gm21738       | 6.95348142  | 2.761108 | 0.038065 | 0.688272 | 0        | 0        | 5.753061 | 17.85954 | 5.656701 | 12.45158 |
| ENSMUSG00000095295 | 8_Gm3488        | 1.172708034 | 3.784811 | 0.163237 | 0.688272 | 0        | 0        | 0        | 4.960984 | 0        | 2.075264 |
| ENSMUSG00000095332 | 1_Gm9821        | 78.79995542 | -0.63626 | 0.143148 | 0.688272 | 88.52241 | 115.0725 | 83.99468 | 39.68787 | 53.17298 | 92.34925 |
| ENSMUSG00000095362 | 7_Gm14325       | 475.8024148 | 0.984034 | 0.064673 | 0.688272 | 333.7863 | 321.1726 | 303.7616 | 1199.566 | 354.1095 | 342.4186 |
| ENSMUSG00000095385 | 1_D630033O11Rik | 13.72172061 | -0.82593 | 0.160272 | 0.688272 | 16.24264 | 14.59875 | 21.86163 | 7.937575 | 11.3134  | 10.37632 |
| ENSMUSG00000095403 | 7_Gm21092       | 6698.330036 | 0.78821  | 0.076339 | 0.688272 | 5232.568 | 4829.611 | 4676.088 | 14364.03 | 5631.811 | 5455.869 |
| ENSMUSG00000095432 | 8_Zfp748        | 476.9666552 | 1.02908  | 0.046417 | 0.688272 | 314.2952 | 308.2913 | 318.7196 | 1189.644 | 380.1303 | 350.7196 |
| ENSMUSG00000095547 | 1_Gm10719       | 1.061768459 | 3.63319  | 0.190008 | 0.688272 | 0        | 0        | 2.97659  | 3.39402  | 0        | 0        |
| ENSMUSG00000095595 | 1_Fam177a       | 1234.126812 | 0.635004 | 0.074029 | 0.688272 | 948.5704 | 922.2977 | 1029.798 | 2182.833 | 1228.635 | 1092.627 |
| ENSMUSG00000095648 | 7_Gm2004        | 17.92235141 | 1.659908 | 0.068574 | 0.688272 | 10.55772 | 1.7175   | 13.80735 | 56.55522 | 12.44474 | 12.45158 |
| ENSMUSG00000095651 | 1_Gm21817       | 21.72895194 | 1.123897 | 0.026717 | 0.688272 | 12.18198 | 17.175   | 11.50612 | 32.74249 | 33.9402  | 22.82791 |
| ENSMUSG00000095845 | 1_Gm5741        | 1.478628963 | -2.80907 | 0.144616 | 0.688272 | 3.248529 | 3.435001 | 1.150612 | 0        | 0        | 1.037632 |
| ENSMUSG00000095990 | 1_Zfp97         | 337.4626578 | 1.111904 | 0.036557 | 0.688272 | 222.5242 | 229.2863 | 188.7004 | 945.5636 | 222.874  | 215.8275 |
| ENSMUSG00000096039 | 7_D830030K20Rik | 32.84695623 | 1.134611 | 0.023599 | 0.688272 | 17.05478 | 24.05011 | 20.71102 | 63.5006  | 27.15216 | 44.61818 |
| ENSMUSG00000096351 | 1_Samd11        | 37.42271032 | -1.54911 | 0.008613 | 0.688272 | 61.72205 | 59.25377 | 46.02448 | 7.937575 | 35.07154 | 14.52685 |
| ENSMUSG00000096433 | 1_Gm4944        | 540.4233894 | 1.193915 | 0.039395 | 0.688272 | 334.5985 | 282.5288 | 369.3465 | 1508.139 | 373.3422 | 374.5852 |
| ENSMUSG00000096488 | 1_Gm10409       | 3.377726982 | 1.732496 | 0.137001 | 0.688272 | 1.624264 | 0.85875  | 2.301224 | 7.937575 | 3.39402  | 4.150528 |
| ENSMUSG00000096606 | 1_Gm4980        | 12.65433869 | -0.83899 | 0.17416  | 0.688272 | 17.05478 | 18.8925  | 12.65673 | 10.91416 | 10.18206 | 6.225792 |
| ENSMUSG00000096696 | 1_Zfp960        | 191.3911015 | 1.231272 | 0.030026 | 0.688272 | 121.0077 | 111.6375 | 110.4588 | 522.8877 | 126.7101 | 155.6484 |
| ENSMUSG00000096768 | 7_Erd1          | 45.34162033 | -1.98252 | 0.036994 | 0.688272 | 57.66138 | 48.94876 | 110.4588 | 0        | 24.89948 | 30.09133 |
| ENSMUSG00000096775 | 1_Gm5796        | 19.06222991 | 1.527317 | 0.050639 | 0.688272 | 11.36985 | 15.4575  | 2.301224 | 45.64105 | 27.15216 | 12.45158 |
| ENSMUSG00000096795 | 4_Zfp433        | 211.0023183 | 0.961121 | 0.058715 | 0.688272 | 150.2445 | 139.1175 | 140.3747 | 504.036  | 152.7309 | 179.5103 |
| ENSMUSG00000096847 | 1_Tmem151b      | 5.396562697 | -1.74704 | 0.139654 | 0.688272 | 11.36985 | 11.6375  | 2.301224 | 0        | 3.39402  | 4.150528 |
| ENSMUSG00000096    |                 |             |          |          |          |          |          |          |          |          |          |

|                     |                 |             |          |          |          |          |          |          |          |          |          |
|---------------------|-----------------|-------------|----------|----------|----------|----------|----------|----------|----------|----------|----------|
| ENSMUSG00000097381  | 1_A230087F16Rik | 3.599862518 | -2.59301 | 0.073607 | 0.688272 | 11.36985 | 6.011252 | 1.150612 | 0.992197 | 0        | 2.075264 |
| ENSMUSG00000097415  | 2_AU020206      | 715.8433813 | 0.539474 | 0.051607 | 0.688272 | 639.9602 | 523.8376 | 586.8122 | 978.3061 | 893.7587 | 672.3856 |
| ENSMUSG00000097418  | 7_Mir155hg      | 6.594641897 | 2.095346 | 0.05084  | 0.688272 | 2.436397 | 1.7175   | 3.451836 | 20.83613 | 0.050721 | 2.075264 |
| ENSMUSG00000097423  | 1_Gm26522       | 2.00151627  | 2.580494 | 0.155535 | 0.688272 | 1.624264 | 0        | 0        | 5.953181 | 3.39402  | 1.037632 |
| ENSMUSG00000097425  | 2_Vmn1r181      | 1.69196699  | 4.313915 | 0.039719 | 0.688272 | 0        | 0        | 0        | 6.945378 | 1.13134  | 2.075264 |
| ENSMUSG00000097460  | 1_Gm26734       | 6.723871729 | 1.61827  | 0.111731 | 0.688272 | 2.436397 | 5.152501 | 2.301224 | 18.85174 | 2.26268  | 9.338689 |
| ENSMUSG00000097461  | 1_Gm26735       | 86.17905102 | 2.121544 | 0.008101 | 0.688272 | 53.60072 | 30.05626 | 12.65673 | 315.5186 | 55.43567 | 49.80634 |
| ENSMUSG00000097488  | 1_4732487G21Rik | 122.4754233 | 0.723735 | 0.110346 | 0.688272 | 93.3952  | 88.45127 | 95.50081 | 250.0336 | 99.55793 | 107.9137 |
| ENSMUSG00000097507  | 1_Gm26538       | 16.67658523 | 0.819964 | 0.180259 | 0.688272 | 19.49117 | 9.446252 | 6.903673 | 22.82053 | 23.75814 | 17.63975 |
| ENSMUSG00000097517  | 1_Gm26695       | 4.664239735 | -5.59942 | 0.006601 | 0.688272 | 21.11544 | 6.870002 | 0        | 0        | 0        | 0        |
| ENSMUSG00000097526  | 1_Gm26847       | 45.26343583 | -1.19254 | 0.032882 | 0.688272 | 45.4794  | 109.92   | 33.36775 | 30.7581  | 27.15216 | 24.90317 |
| ENSMUSG00000097527  | 1_1700112J16Rik | 12.63950719 | 1.274752 | 0.034995 | 0.688272 | 7.30919  | 6.870002 | 8.054285 | 19.84394 | 19.23278 | 14.52685 |
| ENSMUSG00000097534  | 1_Gm16675       | 73.9283296  | 0.782366 | 0.023724 | 0.688272 | 58.47352 | 43.79626 | 60.98244 | 96.24309 | 105.2146 | 78.86004 |
| ENSMUSG00000097569  | 2_Gm26640       | 4.847737197 | 1.629997 | 0.150888 | 0.688272 | 0.812132 | 0.85875  | 5.753061 | 8.929771 | 3.39402  | 9.338689 |
| ENSMUSG00000097572  | 1_Gm26797       | 197.186343  | 0.465656 | 0.171578 | 0.688272 | 163.2386 | 151.14   | 182.9473 | 302.62   | 166.307  | 216.8651 |
| ENSMUSG00000097590  | 1_Gm26675       | 6.376962895 | 5.227811 | 0.006365 | 0.688272 | 0        | 0.85875  | 0        | 0.992197 | 1.13134  | 35.27949 |
| ENSMUSG00000097616  | 7_1110019D14Rik | 65.54720731 | 0.707681 | 0.153351 | 0.688272 | 51.97646 | 44.65501 | 52.92816 | 135.931  | 48.64762 | 59.14503 |
| ENSMUSG00000097743  | 1_Gm16973       | 178.9780159 | 0.650357 | 0.140732 | 0.688272 | 129.9411 | 164.88   | 123.1155 | 351.2377 | 158.3876 | 146.3061 |
| ENSMUSG00000097748  | 1_Gm26533       | 18.16240104 | 2.232984 | 0.099261 | 0.688272 | 6.497057 | 6.870002 | 5.753061 | 85.32893 | 4.52536  | 0        |
| ENSMUSG00000097754  | 1_Ptgs2o52      | 12.87553032 | 1.320334 | 0.054588 | 0.688272 | 0.060661 | 11.16375 | 6.903673 | 25.79712 | 15.83876 | 13.48922 |
| ENSMUSG00000097764  | 1_Gm26635       | 1.717500445 | -4.15478 | 0.195035 | 0.688272 | 0        | 10.305   | 0        | 0        | 0        | 0        |
| ENSMUSG00000097770  | 1_Gm26776       | 214.1231227 | 2.633382 | 0.002941 | 0.688272 | 21.11544 | 144.27   | 12.65673 | 741.171  | 178.7517 | 186.7738 |
| ENSMUSG00000097799  | 1_Gm26890       | 7.292079455 | 3.17163  | 0.076731 | 0.688272 | 0        | 0        | 4.602448 | 28.77371 | 0        | 10.37326 |
| ENSMUSG00000097827  | 1_5330439K02Rik | 2.532558962 | -1.98094 | 0.193465 | 0.688272 | 3.248529 | 7.728752 | 1.150612 | 0.992197 | 0        | 2.075264 |
| ENSMUSG00000097855  | 7_A930007119Rik | 10.49051913 | 1.219175 | 0.0651   | 0.688272 | 8.121322 | 6.011252 | 4.602448 | 12.89856 | 14.70742 | 16.60211 |
| ENSMUSG00000097858  | 2_9530052C20Rik | 5.737804048 | 1.447346 | 0.090325 | 0.688272 | 3.248529 | 2.576251 | 3.451836 | 8.929771 | 7.919381 | 8.301057 |
| ENSMUSG00000097873  | 1_Gm26867       | 1.79846809  | -4.22927 | 0.077704 | 0.688272 | 6.497057 | 4.293751 | 0        | 0        | 0        | 0        |
| ENSMUSG00000097875  | 1_Gm26704       | 31.0551192  | 0.558913 | 0.170221 | 0.688272 | 25.1761  | 24.90376 | 25.31347 | 40.68007 | 33.9402  | 36.31712 |
| ENSMUSG00000097879  | 1_Gm26869       | 26.71135704 | 0.742429 | 0.124211 | 0.688272 | 21.11544 | 21.46876 | 17.25918 | 43.65666 | 33.9402  | 22.82791 |
| ENSMUSG00000097921  | 1_Gm26576       | 2.844720876 | 1.98095  | 0.154827 | 0.688272 | 2.436397 | 0.85875  | 0        | 1.984394 | 4.52536  | 7.263424 |
| ENSMUSG00000097928  | 1_Gm26578       | 36.86044671 | -0.68047 | 0.132409 | 0.688272 | 42.23087 | 41.22001 | 52.92816 | 22.82053 | 21.49546 | 40.46765 |
| ENSMUSG00000098022  | 7_Zfp82         | 49.86267296 | 1.023514 | 0.034222 | 0.688272 | 47.9158  | 17.77376 | 18.40979 | 82.35234 | 67.88041 | 50.84397 |
| ENSMUSG00000098041  | 1_Gm26981       | 24.04865298 | 1.077658 | 0.158972 | 0.688272 | 21.92757 | 12.88125 | 11.50612 | 68.46158 | 18.10144 | 11.41395 |
| ENSMUSG00000098086  | 1_1700120C18Rik | 0.880784317 | 3.363758 | 0.163946 | 0.688272 | 0        | 0        | 0        | 1.984394 | 2.26268  | 1.037632 |
| ENSMUSG00000098088  | 1_Gm26916       | 17.49182838 | 1.04612  | 0.063498 | 0.688272 | 11.36985 | 13.74    | 8.054285 | 34.72689 | 21.49546 | 15.56448 |
| ENSMUSG00000098176  | 1_Ccdc166       | 154.096282  | -0.38748 | 0.191136 | 0.688272 | 161.6143 | 182.055  | 180.6461 | 152.7983 | 106.349  | 141.118  |
| ENSMUSG00000098188  | 1_Sowahc        | 1843.698027 | 0.562264 | 0.125197 | 0.688272 | 1335.957 | 1451.288 | 1679.894 | 3234.562 | 176.147  | 1598.991 |
| ENSMUSG00000098221  | 1_Gm27030       | 2.717783213 | -2.70748 | 0.09407  | 0.688272 | 4.872793 | 6.870002 | 2.301224 | 0        | 2.26268  | 0        |
| ENSMUSG00000098234  | 7_Snhg6         | 160.1448689 | 0.620409 | 0.146969 | 0.688272 | 121.0077 | 107.3438 | 150.7302 | 297.659  | 160.6503 | 123.4782 |
| ENSMUSG00000098294  | 1_Gm27204       | 2.019565662 | -2.26519 | 0.192131 | 0.688272 | 4.872793 | 1.7175   | 3.451836 | 0        | 0        | 2.075264 |
| ENSMUSG00000098387  | 2_Pet117        | 5.622448618 | 6.040395 | 0.122865 | 0.688272 | 0        | 0        | 0        | 33.73469 | 0        | 0        |
| ENSMUSG00000098557  | 1_Kctd12        | 3896.387604 | 1.00793  | 0.054285 | 0.688272 | 2502.991 | 2523.008 | 2738.457 | 9813.819 | 2626.972 | 3173.079 |
| ENSMUSG00000098650  | 1_Gm28048       | 711.8745013 | 0.101741 | 0.013023 | 0.688272 | 536.8194 | 443.9739 | 431.4795 | 1490.28  | 752.3412 | 616.3534 |
| ENSMUSG00000098678  | 1_Mroh6         | 147.1800354 | -1.22919 | 0.081744 | 0.688272 | 178.6691 | 207.8176 | 232.4236 | 11.90636 | 126.7101 | 125.5535 |
| ENSMUSG00000098794  | 1_Gm28038       | 3.472688853 | 5.347253 | 0.05513  | 0.688272 | 0        | 0        | 0        | 20.83613 | 0        | 0        |
| ENSMUSG00000098905  | 1_Zfp983        | 150.0034047 | 1.268089 | 0.027524 | 0.688272 | 97.45586 | 67.84127 | 98.95264 | 408.7851 | 122.1847 | 104.8008 |
| ENSMUSG00000098950  | 1_Gm28036       | 1136.288853 | 0.47446  | 0.149735 | 0.688272 | 938.8248 | 1019.337 | 895.1762 | 1802.822 | 1204.877 | 956.6989 |
| ENSMUSG00000099597  | 1_Gm28933       | 477.2025348 | 0.621727 | 0.102408 | 0.688272 | 388.1992 | 341.7826 | 398.1118 | 870.1566 | 420.8585 | 444.1065 |
| ENSMUSG00000099974  | 1_Bcl2a1d       | 56.93761497 | 0.68871  | 0.103083 | 0.688272 | 61.72205 | 38.64376 | 29.91591 | 76.39915 | 75.79979 | 59.14503 |
| ENSMUSG00000010009  | 6_Gm7967        | 11.63066102 | 1.47088  | 0.127999 | 0.688272 | 12.18198 | 6.011252 | 0        | 26.78931 | 11.3134  | 13.48922 |
| ENSMUSG000000100182 | 6_1810006J02Rik | 1.415218356 | 4.047075 | 0.049129 | 0.688272 | 0        | 0        | 0        | 1.984394 | 3.39402  | 3.112896 |
| ENSMUSG000000100235 | 6_Gm28557       | 66.3561271  | 1.376674 | 0.02083  | 0.688272 | 46.29153 | 19.75126 | 44.87387 | 170.6579 | 54.30432 | 62.25972 |
| ENSMUSG000000100254 | 1_Ttroc2        | 4.577628392 | -3.53649 | 0.054645 | 0.688272 | 9.745586 | 15.4575  | 0        | 0        | 2.26268  | 0        |
| ENSMUSG000000100586 | 2_Vmn1r190      | 3.18409001  | 2.145805 | 0.164794 | 0.688272 | 0        | 3.435001 | 0        | 7.937575 | 5.656701 | 2.075264 |
| ENSMUSG000000100679 | 1_Gm28778       | 4.16610597  | -3.49916 | 0.156375 | 0.688272 | 0        | 0        | 23.01224 | 1.984394 | 0        | 0        |
| ENSMUSG000000100691 | 1_2010320M18Rik | 96.26002383 | -0.82928 | 0.04919  | 0.688272 | 108.8257 | 133.985  | 126.5673 | 37.70348 | 91.63855 | 78.86004 |
| ENSMUSG000000100725 | 6_Gm28062       | 5618.110197 | 0.457225 | 0.12659  | 0.688272 | 4602.353 | 4493.84  | 5109.868 | 8504.119 | 5907.858 | 5090.623 |
| ENSMUSG000000101599 | 1_Gm20342       | 186.9015267 | 0.589    | 0.107902 | 0.688272 | 160.8022 | 158.01   | 128.8686 | 316.5108 | 191.1965 | 166.0211 |
| ENSMUSG000000101625 | 1_Gm29371       | 1.874682898 | 2.424184 | 0.137511 | 0.688272 | 0.812132 | 0.85875  | 0        | 2.97659  | 4.52536  | 2.075264 |
| ENSMUSG000000101904 | 1_Gm29427       | 26.26179405 | 0.931281 | 0.129887 | 0.688272 | 27.61249 | 13.74    | 12.65673 | 55.56302 | 28.2835  | 19.71501 |
| ENSMUSG000000102037 | 1_Bcl2a1a       | 40.63481928 | 1.304534 | 0.020393 | 0.688272 | 25.98823 | 14.59875 | 29.91591 | 85.32893 | 59.96103 | 28.01607 |
| ENSMUSG000000102049 | 1_Zbed6         | 609.7934659 | 0.857139 | 0.105787 | 0.688272 | 584.7352 | 335.7713 | 380.8526 | 1430.748 | 426.5152 | 500.1387 |
| ENSMUSG000000102742 | 1_Pcdhga11      | 24.03943103 | -0.71015 | 0.182595 | 0.688272 | 30.86102 | 34.35001 | 24.16285 | 10.91416 | 16.9701  | 26.97843 |
| ENSMUSG000000102752 | 1_Gm7694        | 477.1188234 | -0.43363 | 0.146557 | 0.688272 | 509.2069 | 644.0627 | 491.3114 | 319.4874 | 414.0705 | 484.5742 |
| ENSMUSG000000102758 | 3_Naalad12      | 207.6650402 | 1.291636 | 0.029886 | 0.688272 | 126.6926 | 132.2475 | 102.4045 | 593.3337 | 34.6295  | 156.6824 |
| ENSMUSG000000102805 | 5_Gm37240       | 225.6529729 | 1.020974 | 0.114245 | 0.688272 | 147.8081 | 234.4388 | 64.43428 | 563.5678 | 127.8414 | 215.8275 |
| ENSMUSG000000102843 | 1_Serpinb10     | 170.5856949 | 0.579466 | 0.189439 | 0.688272 | 168.1114 | 109.92   | 132.3204 | 310.5575 | 183.2771 | 119.3277 |
| ENSMUSG000000102918 | 1_Pcdhgc3       | 788.1089436 | -0.68605 | 0.041949 | 0.688272 | 1019.226 | 1099.2   | 797.3742 | 435.5744 | 580.3757 | 796.9014 |
| ENSMUSG000000103126 | 2_Gm37387       | 3.257327796 | 1.841971 | 0.169616 | 0.688272 | 3.248529 | 0.85875  | 0        | 8.929771 | 3.39402  | 3.112896 |
| ENSMUSG000000103392 | 1_Gm38303       | 2.10034637  | 4.61903  | 0.047538 | 0.688272 | 0        | 0        | 0        | 6.945378 | 5.656701 | 0        |
| ENSMUSG000000103586 | 5_5830405F06Rik | 0.865166311 | 1.342596 | 0.16769  | 0.688272 | 0        | 0        | 0        | 1.984394 | 1.13134  | 2.075264 |
| ENSMUSG000000104043 | 1_Gm6525        | 29.8707637  | 0.963767 | 0.057027 | 0.688272 | 26.80036 | 15.4575  | 18.40979 | 55.56302 | 33.9402  | 29.0537  |
| ENSMUSG000000104156 | 2_Gm38102       | 191.2825983 | -0.70157 | 0.137217 | 0.688272 | 216.0272 | 288.5401 | 205.9596 | 69.45378 | 142.5849 | 225.1662 |
| ENSMUSG000000104367 | 1_Gm38079       | 19.69675332 | -1.16954 | 0.087672 | 0.688272 | 30.04889 | 20.61001 | 31.06653 | 2.97659  | 15.83876 | 17.63975 |
| ENSMUSG000000105053 | 1_Gm43064       | 3.39402031  | 5.308007 | 0.059044 | 0.688272 | 0        | 0        | 0        | 0        | 20.36412 | 0        |
| ENSMUSG000000105161 | 1_Gm42595       | 72.64770864 | 0.584879 | 0.137477 | 0.688272 | 66.59484 | 48.09001 | 59.83183 | 117.0792 | 63.35505 | 80.9353  |
| ENSMUSG000000       |                 |             |          |          |          |          |          |          |          |          |          |

|                     |                 |             |           |          |          |          |          |          |          |          |          |
|---------------------|-----------------|-------------|-----------|----------|----------|----------|----------|----------|----------|----------|----------|
| ENSMUSG00000003402  | 13_Pkrcsh       | 1449.520634 | -0.71066  | 0.201219 | 0.68835  | 1571.476 | 1838.584 | 1988.258 | 315.5186 | 1542.017 | 1441.271 |
| ENSMUSG000000010205 | 10_Raver1       | 1003.196823 | -0.62572  | 0.200933 | 0.68835  | 1059.02  | 1199.674 | 1393.391 | 304.6044 | 1098.531 | 963.9602 |
| ENSMUSG000000019837 | 7_Glf3c6        | 700.8724542 | 0.363291  | 0.201322 | 0.68835  | 626.966  | 548.7414 | 663.9032 | 973.3451 | 748.9471 | 643.3319 |
| ENSMUSG000000020034 | 7_Tcpt112       | 1442.471545 | 0.330897  | 0.20159  | 0.68835  | 1242.562 | 1235.742 | 1355.421 | 1948.675 | 1406.256 | 1466.174 |
| ENSMUSG000000020074 | 6_Ccar1         | 2337.596403 | 0.485904  | 0.201558 | 0.68835  | 1953.99  | 1936.482 | 1952.589 | 4177.149 | 2030.755 | 1974.614 |
| ENSMUSG000000020865 | 16_Abcc3        | 61.772201   | -0.63621  | 0.201781 | 0.68835  | 77.15256 | 82.44002 | 65.58489 | 23.81272 | 78.06247 | 43.58055 |
| ENSMUSG000000021044 | 14_Aodk1        | 352.0409124 | -0.60024  | 0.19981  | 0.68835  | 384.1385 | 446.5501 | 441.835  | 117.0792 | 381.2616 | 341.3809 |
| ENSMUSG000000021629 | 9_Slc30a5       | 1143.690296 | 0.469105  | 0.200541 | 0.68835  | 988.3649 | 929.1677 | 960.7611 | 1977.448 | 1035.176 | 971.2236 |
| ENSMUSG000000022184 | 8_Flbox4        | 415.3430741 | 0.42165   | 0.199962 | 0.68835  | 375.2051 | 339.2063 | 350.9367 | 650.8811 | 409.5451 | 366.2841 |
| ENSMUSG000000022949 | 9_Clic6         | 262.1816913 | -0.49473  | 0.200628 | 0.68835  | 302.9253 | 391.5901 | 225.52   | 296.6668 | 156.1249 | 200.263  |
| ENSMUSG000000023050 | 8_Map3k12       | 147.0877032 | -0.37685  | 0.201407 | 0.68835  | 157.5536 | 199.2301 | 141.5253 | 126.009  | 123.3161 | 134.8922 |
| ENSMUSG000000023393 | 15_Slc17a9      | 259.4474607 | -0.53869  | 0.200971 | 0.68835  | 279.3735 | 265.3538 | 377.4008 | 119.0636 | 210.4293 | 305.0638 |
| ENSMUSG000000024781 | 15_Lipa         | 1335.712707 | 0.406537  | 0.201353 | 0.68835  | 1154.852 | 1240.894 | 1050.509 | 2067.738 | 1260.313 | 1239.97  |
| ENSMUSG000000025781 | 14_Atp5c1       | 4103.592774 | 0.412075  | 0.200545 | 0.68835  | 3721.19  | 3369.736 | 3473.698 | 6470.115 | 3891.81  | 3695.008 |
| ENSMUSG000000025940 | 6_Tmem70        | 442.0673966 | 0.550499  | 0.20167  | 0.68835  | 343.5319 | 348.6526 | 384.3044 | 860.2346 | 347.3214 | 368.3594 |
| ENSMUSG000000026353 | 9_Ubxn4         | 2361.740279 | 0.380414  | 0.201383 | 0.68835  | 1987.287 | 1998.312 | 2171.205 | 3508.408 | 2365.632 | 2139.597 |
| ENSMUSG000000028223 | 8_Decr1         | 715.6252229 | 0.516433  | 0.200621 | 0.68835  | 648.0815 | 608.8539 | 509.7212 | 1303.747 | 550.9626 | 672.3856 |
| ENSMUSG000000028467 | 15_Gba2         | 287.3068462 | -0.62592  | 0.201126 | 0.68835  | 345.1562 | 345.2176 | 355.5391 | 90.28991 | 242.1068 | 345.5315 |
| ENSMUSG000000029560 | 12_Snx8         | 1745.781622 | -0.77418  | 0.200166 | 0.68835  | 1970.233 | 2128.842 | 2510.636 | 294.6825 | 1726.425 | 1843.872 |
| ENSMUSG000000029601 | 13_Lcqd         | 23.53740227 | -0.90436  | 0.200351 | 0.68835  | 43.04301 | 29.19751 | 19.56041 | 3.968787 | 22.6268  | 22.82791 |
| ENSMUSG000000029710 | 15_Ephb4        | 1047.425485 | -0.611335 | 0.199693 | 0.68835  | 1164.598 | 1314.747 | 1320.903 | 334.3703 | 926.5675 | 1223.368 |
| ENSMUSG000000029915 | 14_Clec5a       | 61.45891373 | -0.72706  | 0.199781 | 0.68835  | 67.40697 | 31.77376 | 36.81959 | 127.9934 | 74.68645 | 30.09133 |
| ENSMUSG000000030042 | 15_Pole4        | 1598.993874 | 0.50364   | 0.201327 | 0.68835  | 1300.224 | 1331.063 | 1337.011 | 2931.942 | 1315.749 | 1377.975 |
| ENSMUSG000000031832 | 14_Taf1c        | 307.6061496 | -0.99045  | 0.200011 | 0.68835  | 332.1621 | 405.3301 | 490.1608 | 18.85174 | 268.1276 | 331.0046 |
| ENSMUSG000000032299 | 9_Commdd4       | 449.0810655 | -0.72231  | 0.20176  | 0.68835  | 512.4554 | 577.0801 | 587.9628 | 93.2685  | 441.2226 | 482.4989 |
| ENSMUSG000000034059 | 13_Ype4         | 37.1372237  | -0.54018  | 0.201019 | 0.68835  | 43.04301 | 38.64376 | 50.62693 | 33.73469 | 21.99546 | 35.27949 |
| ENSMUSG000000034342 | 9_Cbl           | 3715.726939 | 0.343929  | 0.199913 | 0.68835  | 3242.844 | 3064.88  | 3517.421 | 5146.525 | 3722.109 | 3600.583 |
| ENSMUSG000000034435 | 5_Tmem30b       | 1095.71918  | 0.402096  | 0.20056  | 0.68835  | 905.5274 | 898.2527 | 1028.647 | 1680.781 | 1044.227 | 1016.879 |
| ENSMUSG000000034781 | 5_Gna11         | 1406.87077  | -0.64997  | 0.200737 | 0.68835  | 1602.337 | 1753.568 | 1799.557 | 381.9958 | 1371.184 | 1532.583 |
| ENSMUSG000000035376 | 9_Hacd2         | 2912.253198 | 0.44029   | 0.200687 | 0.68835  | 2383.608 | 2315.191 | 2715.445 | 4790.326 | 2666.559 | 2602.381 |
| ENSMUSG000000035772 | 11_Mrs2         | 564.0404301 | 0.307     | 0.201474 | 0.68835  | 474.2852 | 504.9451 | 533.884  | 701.4831 | 604.1356 | 565.5095 |
| ENSMUSG000000036112 | 14_Metap2       | 4294.325582 | 0.407583  | 0.201228 | 0.68835  | 3737.432 | 3397.216 | 3940.846 | 6678.477 | 4201.797 | 3810.185 |
| ENSMUSG000000036334 | 12_Igsf10       | 780.801825  | 0.446483  | 0.200679 | 0.68835  | 695.9973 | 644.9214 | 642.0416 | 1284.895 | 645.9952 | 770.9606 |
| ENSMUSG000000036864 | 14_Proser3      | 214.8587831 | -0.6497   | 0.199801 | 0.68835  | 282.622  | 249.0376 | 255.4359 | 60.52401 | 219.48   | 222.0533 |
| ENSMUSG000000036880 | 9_Acaa2         | 2133.759113 | -0.46604  | 0.201416 | 0.68835  | 2513.549 | 2320.343 | 2592.329 | 1073.557 | 1888.207 | 2414.57  |
| ENSMUSG000000037060 | 2_Prkcdbp       | 1202.436887 | -0.46856  | 0.201621 | 0.68835  | 1321.339 | 1400.622 | 1465.88  | 584.4039 | 1237.686 | 1204.691 |
| ENSMUSG000000037316 | 8_Bag4          | 534.2985874 | 0.525966  | 0.200901 | 0.68835  | 443.4242 | 410.4826 | 460.2448 | 1003.111 | 454.7987 | 433.7302 |
| ENSMUSG000000037652 | 15_Phc3         | 1834.662192 | 0.436468  | 0.200263 | 0.68835  | 1576.349 | 1575.807 | 1525.712 | 3015.286 | 1611.028 | 1703.792 |
| ENSMUSG000000038827 | 11_Fam206a      | 531.4553829 | 0.373898  | 0.20177  | 0.68835  | 463.7275 | 438.8214 | 486.7089 | 767.9603 | 489.8703 | 541.6439 |
| ENSMUSG000000040118 | 15_Cacna2d1     | 364.6166794 | 0.80013   | 0.200219 | 0.68835  | 232.2698 | 349.5113 | 216.3151 | 928.6962 | 152.7309 | 308.1767 |
| ENSMUSG000000041241 | 12_Mu11         | 595.9916623 | -0.62382  | 0.200922 | 0.68835  | 662.6999 | 715.3389 | 790.4705 | 179.5876 | 592.8222 | 635.0308 |
| ENSMUSG000000043190 | 13_Rfssd        | 260.2579619 | 0.570133  | 0.201613 | 0.68835  | 201.4088 | 212.1113 | 215.1645 | 517.9267 | 211.5606 | 203.3759 |
| ENSMUSG000000045176 | 3_Borcs6        | 152.8158122 | -0.59803  | 0.201698 | 0.68835  | 169.7356 | 186.3488 | 195.6041 | 52.58643 | 153.8623 | 158.5757 |
| ENSMUSG000000047090 | 13_Tmem198b     | 328.7458881 | -0.37036  | 0.201643 | 0.68835  | 384.9507 | 413.9176 | 312.9665 | 254.9946 | 259.0769 | 346.5691 |
| ENSMUSG000000048897 | 15_Zfp710       | 1030.32594  | -0.54712  | 0.201257 | 0.68835  | 1076.075 | 1083.743 | 1414.102 | 401.8397 | 1060.612 | 953.5839 |
| ENSMUSG000000050079 | 9_Rspr1         | 708.469422  | 0.491677  | 0.199764 | 0.68835  | 601.7899 | 566.7751 | 598.3183 | 1256.121 | 667.4907 | 560.3213 |
| ENSMUSG000000050914 | 15_Ankrd37      | 55.4135972  | 0.548628  | 0.201202 | 0.68835  | 59.28565 | 27.48001 | 48.32571 | 74.41476 | 56.56701 | 66.40845 |
| ENSMUSG000000051373 | 5_Ppapid3       | 26.02581746 | -0.80152  | 0.201211 | 0.68835  | 25.98823 | 31.77376 | 41.42204 | 5.953181 | 27.15216 | 23.86554 |
| ENSMUSG000000051499 | 7_Zfp786        | 14.3563215  | -0.79677  | 0.201033 | 0.68835  | 12.18198 | 27.48001 | 14.95796 | 9.921968 | 10.18206 | 11.41395 |
| ENSMUSG000000053128 | 14_Rnf26        | 496.64318   | -0.62763  | 0.201119 | 0.68835  | 561.1833 | 550.4589 | 697.2709 | 149.8217 | 514.7597 | 506.3644 |
| ENSMUSG000000054162 | 15_Spook3       | 50.10537456 | 0.936587  | 0.200422 | 0.68835  | 29.23676 | 42.93751 | 31.06653 | 144.8607 | 20.36412 | 32.16659 |
| ENSMUSG000000059890 | 15_Ube4a        | 2337.407436 | 0.435762  | 0.201135 | 0.68835  | 2011.651 | 1944.211 | 2005.517 | 3826.903 | 2261.549 | 1974.614 |
| ENSMUSG000000061111 | 8_Fam195b       | 1006.958251 | -0.77638  | 0.201549 | 0.68835  | 1202.768 | 1259.787 | 1351.969 | 165.6969 | 961.6391 | 1099.89  |
| ENSMUSG000000068744 | 12_Psc1         | 120.3254305 | -0.53986  | 0.199822 | 0.68835  | 147.8081 | 124.5188 | 155.3326 | 52.58643 | 112.0027 | 129.704  |
| ENSMUSG000000074639 | 6_BC089597      | 26.93111628 | -0.74825  | 0.201251 | 0.68835  | 31.67315 | 32.63251 | 36.81959 | 7.937575 | 32.80886 | 19.71501 |
| ENSMUSG000000075302 | 10_Erich2       | 14.07240768 | 0.76437   | 0.199892 | 0.68835  | 10.55772 | 10.305   | 10.35551 | 15.87515 | 24.89948 | 12.45158 |
| ENSMUSG000000087308 | 1_Gm18195       | 1.765532952 | 2.183549  | 0.201438 | 0.68835  | 0.812132 | 0        | 1.150612 | 0.992197 | 4.52536  | 3.112896 |
| ENSMUSG000000089951 | 8_Gm14435       | 41.35930581 | 0.718435  | 0.200593 | 0.68835  | 34.10955 | 16.31625 | 43.72326 | 76.39915 | 47.51628 | 30.09133 |
| ENSMUSG000000097445 | 1_Gm26831       | 19.13448701 | 0.798305  | 0.201154 | 0.68835  | 12.99411 | 16.31625 | 12.65673 | 40.68007 | 12.44474 | 19.71501 |
| ENSMUSG000000097540 | 1_1700337F24Rik | 7.346585384 | -1.11433  | 0.20146  | 0.68835  | 4.872793 | 13.74    | 11.50612 | 1.984394 | 6.788041 | 5.18816  |
| ENSMUSG000000103906 | 1_Tigd5         | 63.0550219  | -0.6207   | 0.201309 | 0.68835  | 74.71616 | 77.28752 | 77.09101 | 21.82833 | 59.96103 | 67.44608 |
| ENSMUSG000000104667 | 1_Gm4961        | 1.313053865 | -2.5616   | 0.201433 | 0.68835  | 2.436397 | 0.85875  | 3.451836 | 0        | 1.13134  | 0        |
| ENSMUSG000000105552 | 1_Gm19710       | 14.18012109 | 0.943061  | 0.200372 | 0.68835  | 15.43051 | 7.728752 | 5.753061 | 29.7659  | 18.10144 | 8.301057 |
| ENSMUSG000000039233 | 12_Tbce         | 736.3503899 | 0.455399  | 0.201853 | 0.688479 | 614.7841 | 602.8427 | 645.4934 | 1243.223 | 678.8041 | 632.9556 |
| ENSMUSG000000024975 | 12_Pcd4         | 3402.734945 | 0.543954  | 0.20204  | 0.688558 | 2801.044 | 2760.023 | 2745.36  | 6594.14  | 2440.301 | 3075.554 |
| ENSMUSG000000027386 | 9_Fbln7         | 125.1475331 | -0.41091  | 0.201972 | 0.688558 | 135.6261 | 170.8913 | 121.9649 | 127.0012 | 91.63855 | 103.7632 |
| ENSMUSG000000030779 | 15_Rbtp6        | 2404.610087 | 0.403802  | 0.202084 | 0.688558 | 2068.501 | 1972.549 | 2170.054 | 3730.66  | 2357.713 | 2128.183 |
| ENSMUSG000000035890 | 8_Rnf126        | 751.4587245 | -0.84471  | 0.202084 | 0.688558 | 806.4473 | 924.0152 | 1165.57  | 94.2587  | 806.6457 | 711.8156 |
| ENSMUSG000000036138 | 16_Acaa1a       | 1273.501139 | -0.7026   | 0.202058 | 0.688558 | 1436.662 | 1558.632 | 1737.424 | 282.7761 | 1331.587 | 1293.927 |
| ENSMUSG000000041420 | 18_Meis3        | 123.3663082 | -0.70335  | 0.201993 | 0.688558 | 149.4323 | 153.7163 | 155.3326 | 30.7581  | 98.42659 | 152.5319 |
| ENSMUSG000000000037 | 16_Scm12        | 174.2384506 | 0.511968  | 0.203434 | 0.688638 | 142.9353 | 154.575  | 133.471  | 311.5498 | 161.7816 | 141.118  |
| ENSMUSG000000002210 | 11_Smg9         | 350.4932054 | -0.80647  | 0.202216 | 0.688638 | 398.7569 | 429.3751 | 509.7212 | 51.59423 | 343.1901 | 367.3218 |
| ENSMUSG000000002900 | 15_Lamb1        | 3938.911287 | -0.37529  | 0.203419 | 0.688638 | 4143.498 | 4810.719 | 4390.736 | 2530.102 | 3565.175 | 4225.238 |
| ENSMUSG000000003541 | 6_Ier3          | 1697.307476 | -0.44855  | 0.203862 | 0.688638 | 1973.481 | 1887.533 | 2015.872 | 902.8991 | 1949.299 | 1454.76  |
| ENSMUSG000000005973 | 16_Ron1         | 4759.295686 | 0.403356  | 0.2      |          |          |          |          |          |          |          |

|                    |                  |             |          |          |          |          |          |          |          |          |          |   |
|--------------------|------------------|-------------|----------|----------|----------|----------|----------|----------|----------|----------|----------|---|
| ENSMUSG00000043953 | 12_Corl2         | 478.3829412 | 0.500356 | 0.20382  | 0.688638 | 413.3753 | 328.9013 | 446.4375 | 335.3625 | 794.2008 | 552.0203 | 0 |
| ENSMUSG00000046192 | 4_Iqub           | 2.16934209  | 2.54478  | 0.203854 | 0.688638 | 0.812132 | 0        | 1.150612 | 9.921968 | 1.13134  | 0        | 0 |
| ENSMUSG00000047613 | 10_A430005L14Rik | 475.7502611 | -0.43539 | 0.202879 | 0.688638 | 553.8741 | 563.3401 | 523.5285 | 257.9712 | 452.536  | 503.2516 | 0 |
| ENSMUSG00000047767 | 16_Atg16l2       | 95.70144787 | -0.67239 | 0.20308  | 0.688638 | 128.3169 | 121.9425 | 102.4045 | 28.77371 | 72.40577 | 120.3653 | 0 |
| ENSMUSG00000048806 | 4_Irfn1          | 6.185936071 | 1.729869 | 0.20285  | 0.688638 | 2.436397 | 6.011252 | 2.301224 | 2.97659  | 6.788041 | 16.60211 | 0 |
| ENSMUSG00000049439 | 13_Cyp20a1       | 226.7334043 | 0.412708 | 0.203447 | 0.688638 | 198.9724 | 184.6313 | 200.2065 | 346.2767 | 209.2979 | 221.0156 | 0 |
| ENSMUSG00000054237 | 5_Fra10a1        | 275.9908913 | 0.545544 | 0.203739 | 0.688638 | 240.3911 | 194.9363 | 238.1767 | 526.8565 | 226.266  | 229.3167 | 0 |
| ENSMUSG00000061143 | 15_Mam13         | 842.1327276 | -0.35463 | 0.203553 | 0.688638 | 908.7759 | 984.1278 | 942.3513 | 575.4742 | 745.5531 | 896.5141 | 0 |
| ENSMUSG00000063019 | 5_Mam1a          | 363.4997411 | -0.86793 | 0.203111 | 0.688638 | 425.5573 | 455.9964 | 456.793  | 92.2743  | 377.8676 | 372.5099 | 0 |
| ENSMUSG00000078866 | 10_Gm14420       | 181.8243876 | 0.659203 | 0.203609 | 0.688638 | 140.4989 | 139.9763 | 142.6759 | 407.7929 | 119.9221 | 140.0083 | 0 |
| ENSMUSG00000092071 | 1_A230065N10Rik  | 8.599948373 | -1.37709 | 0.202691 | 0.688638 | 14.61838 | 18.03375 | 4.602448 | 3.968787 | 0        | 10.37632 | 0 |
| ENSMUSG00000093938 | 2_Evi2b          | 131.6929872 | 0.654721 | 0.203548 | 0.688638 | 161.6143 | 81.58127 | 63.28367 | 198.4394 | 199.1159 | 86.12346 | 0 |
| ENSMUSG00000096719 | 1_Mrgpra2b       | 5.967150162 | -1.5334  | 0.202923 | 0.688638 | 14.61838 | 1.1715   | 10.35551 | 4.960984 | 0        | 4.150528 | 0 |
| ENSMUSG00000097971 | 3_Gm26917        | 513.3936225 | -1.22477 | 0.203869 | 0.688638 | 572.5532 | 462.8664 | 1121.847 | 7.937575 | 575.8521 | 339.3057 | 0 |
| ENSMUSG00000107043 | 1_Gm42849        | 2.009927701 | -2.18082 | 0.202725 | 0.688638 | 4.060661 | 3.435001 | 2.301224 | 0        | 2.26268  | 0        | 0 |
| ENSMUSG00000039492 | 7_Cdc27          | 1.652832697 | -2.97965 | 0.204105 | 0.689038 | 0        | 7.728752 | 1.150612 | 0        | 0        | 1.037632 | 0 |
| ENSMUSG00000057181 | 15_5730455P16Rik | 538.4330789 | 0.584987 | 0.204162 | 0.689038 | 474.2852 | 426.7989 | 391.2081 | 1095.385 | 367.6855 | 475.2355 | 0 |
| ENSMUSG00000067780 | 3_Pt15           | 148.0797392 | 0.708852 | 0.204151 | 0.689038 | 136.4382 | 85.87502 | 115.0612 | 346.2767 | 105.2146 | 99.61268 | 0 |
| ENSMUSG00000087598 | 9_Zfp111         | 340.306009  | 0.377829 | 0.204152 | 0.689038 | 292.3676 | 326.3251 | 269.2432 | 487.1686 | 332.614  | 334.1175 | 0 |
| ENSMUSG00000091968 | 4.1110001J03Rik  | 115.3378743 | -0.60962 | 0.204197 | 0.68904  | 136.4382 | 150.2813 | 131.1698 | 39.68787 | 99.55793 | 134.8922 | 0 |
| ENSMUSG00000015745 | 9_Plekho1        | 186.3619593 | -0.67139 | 0.204295 | 0.689082 | 274.5007 | 199.2301 | 212.8632 | 50.60204 | 213.9546 | 166.0211 | 0 |
| ENSMUSG00000025584 | 17_Dbe8a         | 397.5303718 | 0.353502 | 0.204353 | 0.689082 | 342.7198 | 319.4551 | 385.4551 | 537.7707 | 424.1212 | 376.8604 | 0 |
| ENSMUSG00000050628 | 6_Ubal2d         | 1421.392248 | -0.56889 | 0.204291 | 0.689082 | 1544.675 | 1564.643 | 1984.806 | 514.9501 | 1458.297 | 1460.986 | 0 |
| ENSMUSG00000051390 | 9_Zbtb22         | 835.4152552 | -0.63539 | 0.204383 | 0.689082 | 933.952  | 949.7777 | 1165.57  | 239.1194 | 858.6871 | 865.3851 | 0 |
| ENSMUSG00000097392 | 2_D930016D06Rik  | 142.6278205 | 0.559228 | 0.20432  | 0.689082 | 129.9411 | 115.9313 | 100.1033 | 265.9087 | 100.6893 | 143.1932 | 0 |
| ENSMUSG00000024181 | 8_Mrpl28         | 584.556617  | -0.72666 | 0.204423 | 0.689103 | 706.555  | 677.5539 | 801.9766 | 117.0792 | 595.0849 | 609.09   | 0 |
| ENSMUSG00000010045 | 2_Tmem115        | 646.5801684 | -0.84189 | 0.204629 | 0.689141 | 726.8583 | 841.5752 | 921.6403 | 78.38355 | 644.8639 | 686.1598 | 0 |
| ENSMUSG00000020075 | 7_Ddx21          | 2984.710714 | 0.328448 | 0.204907 | 0.689141 | 2636.993 | 2398.489 | 2904.145 | 3833.848 | 3386.101 | 2748.687 | 0 |
| ENSMUSG00000020932 | 14_Gfap          | 38.30488888 | 0.538299 | 0.204873 | 0.689141 | 32.48529 | 33.49126 | 27.61469 | 56.55522 | 47.51628 | 32.16659 | 0 |
| ENSMUSG00000022475 | 18_Hdac7         | 3937.775551 | -0.76206 | 0.204786 | 0.689141 | 4397.696 | 4955.848 | 5509.131 | 674.6938 | 3944.983 | 4144.302 | 0 |
| ENSMUSG00000022855 | 8_Senp2          | 2975.737952 | 0.384415 | 0.204755 | 0.689141 | 2573.647 | 2445.721 | 2725.8   | 4482.745 | 2912.069 | 2714.445 | 0 |
| ENSMUSG00000024758 | 14_Rtn3          | 5233.747674 | 0.464615 | 0.204548 | 0.689141 | 4388.762 | 4437.162 | 4368.874 | 9092.492 | 4504.996 | 4610.199 | 0 |
| ENSMUSG00000030839 | 10_Sergef        | 368.62574   | -0.6548  | 0.204937 | 0.689141 | 441.7999 | 407.9064 | 502.8175 | 99.21968 | 356.3721 | 403.6389 | 0 |
| ENSMUSG00000031441 | 15_Atp11a        | 2860.402727 | -0.29911 | 0.204815 | 0.689141 | 2937.482 | 3465.916 | 3064.08  | 2289.99  | 2542.121 | 2862.827 | 0 |
| ENSMUSG00000032705 | 8_Ekd2           | 495.726667  | 0.331487 | 0.20487  | 0.689141 | 446.6727 | 417.3526 | 453.3412 | 567.8265 | 475.1628 | 524.0042 | 0 |
| ENSMUSG00000034303 | 6_Cdc15          | 47.48138368 | 0.567191 | 0.204695 | 0.689141 | 35.73382 | 41.22001 | 37.9702  | 84.33673 | 44.12226 | 41.50528 | 0 |
| ENSMUSG00000053291 | 15_Rab4b         | 227.5614899 | -0.64175 | 0.204953 | 0.689141 | 505.1462 | 516.1089 | 541.9383 | 118.0714 | 438.96   | 445.1442 | 0 |
| ENSMUSG00000055320 | 16_Tead1         | 3504.625398 | 0.365025 | 0.204536 | 0.689141 | 2948.852 | 2995.321 | 3247.027 | 5099.892 | 3474.345 | 3262.313 | 0 |
| ENSMUSG00000060950 | 11_Trmf61a       | 218.6975971 | -0.75031 | 0.204622 | 0.689141 | 213.5908 | 282.5288 | 326.7738 | 42.66446 | 218.3486 | 228.2791 | 0 |
| ENSMUSG00000071655 | 11_Ubxn1         | 1937.813515 | -0.58624 | 0.20486  | 0.689141 | 2157.023 | 2209.564 | 2611.889 | 650.8811 | 2061.302 | 1936.221 | 0 |
| ENSMUSG00000095028 | 6_Sirpb1b        | 37.22394159 | 0.939853 | 0.204838 | 0.689141 | 47.9158  | 7.728752 | 20.71102 | 60.52401 | 66.74907 | 19.71501 | 0 |
| ENSMUSG00000009092 | 4_Der13          | 11.30081536 | -1.20549 | 0.205614 | 0.689234 | 11.36985 | 16.31625 | 19.50441 | 0        | 10.18206 | 10.37632 | 0 |
| ENSMUSG00000010529 | 5_Gm266          | 32.36581515 | 0.726436 | 0.20565  | 0.689234 | 17.86691 | 18.8925  | 16.10857 | 45.64105 | 14.70742 | 26.97843 | 0 |
| ENSMUSG00000018372 | 13_Cep95         | 316.2897706 | 0.42607  | 0.20532  | 0.689234 | 269.6279 | 268.7888 | 271.5445 | 504.036  | 295.2798 | 288.4617 | 0 |
| ENSMUSG00000022253 | 14_Nadk2         | 405.5925995 | 0.563546 | 0.205503 | 0.689234 | 358.9624 | 309.1501 | 314.1171 | 800.7028 | 288.4917 | 362.1936 | 0 |
| ENSMUSG00000024357 | 9_Sil1           | 657.8240671 | -0.47436 | 0.205898 | 0.689234 | 676.5061 | 732.5139 | 885.9713 | 324.4484 | 693.5115 | 633.9332 | 0 |
| ENSMUSG00000025467 | 8_Prap1          | 13.63855693 | -1.11579 | 0.205559 | 0.689234 | 13.80625 | 11.16375 | 31.06653 | 0.992197 | 11.3134  | 13.48922 | 0 |
| ENSMUSG00000027163 | 13_Commdd9       | 520.4395424 | -0.71788 | 0.205413 | 0.689234 | 624.5296 | 620.0177 | 697.2709 | 107.1573 | 522.6791 | 550.9826 | 0 |
| ENSMUSG00000028159 | 14_Dapp1         | 989.826479  | 0.354351 | 0.205464 | 0.689234 | 855.9873 | 826.9765 | 923.9415 | 1362.286 | 1094.006 | 875.7615 | 0 |
| ENSMUSG00000029860 | 16_Zyx           | 1833.785511 | -0.75812 | 0.20566  | 0.689234 | 2024.646 | 2255.937 | 2633.751 | 320.4796 | 1932.329 | 1835.571 | 0 |
| ENSMUSG00000030541 | 16_Ihd2          | 107.2147972 | -0.56061 | 0.205325 | 0.689234 | 1141.046 | 1251.199 | 1244.962 | 378.027  | 908.4661 | 1179.788 | 0 |
| ENSMUSG00000031274 | 16_Col4a5        | 1560.712601 | -0.37842 | 0.205892 | 0.689234 | 1622.64  | 2188.954 | 1480.838 | 1194.605 | 1238.871 | 1638.421 | 0 |
| ENSMUSG00000033233 | 17_Trim45        | 163.028897  | -0.54188 | 0.205818 | 0.689234 | 207.9058 | 185.49   | 186.3992 | 76.39915 | 116.528  | 205.4511 | 0 |
| ENSMUSG00000034903 | 18_Cobll1        | 1802.58152  | 0.301851 | 0.205143 | 0.689234 | 1556.857 | 1580.1   | 1707.508 | 2302.889 | 1867.843 | 1800.292 | 0 |
| ENSMUSG00000035093 | 16_Secisbp2l     | 2108.622205 | 0.405675 | 0.205889 | 0.689234 | 1776.133 | 1826.562 | 1839.829 | 3316.914 | 1980.977 | 1911.318 | 0 |
| ENSMUSG00000037089 | 9_Slc35b2        | 781.7177934 | -0.60064 | 0.205691 | 0.689234 | 906.3395 | 983.269  | 936.5983 | 247.057  | 794.2008 | 822.8422 | 0 |
| ENSMUSG00000041361 | 13_Myzap         | 333.4941953 | 0.331817 | 0.20588  | 0.689234 | 293.9918 | 289.3988 | 302.611  | 411.7617 | 397.1004 | 306.1015 | 0 |
| ENSMUSG00000041605 | 16_5730559C18Rik | 1002.13364  | -0.61585 | 0.205165 | 0.689234 | 1018.414 | 1134.409 | 1485.44  | 317.503  | 1070.248 | 986.7881 | 0 |
| ENSMUSG00000041907 | 9_Gpr45          | 3.356533734 | -1.52354 | 0.205089 | 0.689234 | 4.872793 | 7.728752 | 2.301224 | 0.992197 | 1.13134  | 3.112896 | 0 |
| ENSMUSG00000042854 | 9_Trip53kb       | 49.87393956 | -0.49532 | 0.205608 | 0.689234 | 48.72793 | 57.53626 | 69.03673 | 34.72689 | 37.33422 | 51.8816  | 0 |
| ENSMUSG00000050708 | 14_Ftl1          | 8563.981565 | -0.87991 | 0.205562 | 0.689234 | 11157.88 | 11316.61 | 10818.06 | 836.4219 | 8332.32  | 8922.598 | 0 |
| ENSMUSG00000052446 | 16_Zfp961        | 352.8407628 | 0.569427 | 0.205383 | 0.689234 | 288.3069 | 279.9526 | 284.2012 | 709.4207 | 288.4917 | 266.6714 | 0 |
| ENSMUSG00000053886 | 3_Sln24a4        | 2040.307459 | 0.317777 | 0.205804 | 0.689234 | 1862.219 | 1631.625 | 1956.041 | 2633.29  | 2177.83  | 1980.84  | 0 |
| ENSMUSG00000057135 | 12_Sclmp         | 61.2730735  | 0.662167 | 0.205433 | 0.689234 | 63.34631 | 24.90376 | 54.07877 | 63.5006  | 112.0027 | 49.80634 | 0 |
| ENSMUSG00000059323 | 13_Tonsl         | 954.2140596 | -0.65192 | 0.20595  | 0.689234 | 1115.057 | 1193.663 | 1189.733 | 250.0336 | 1003.499 | 973.2989 | 0 |
| ENSMUSG00000079036 | 10_Alkhh1        | 429.3246058 | 0.343701 | 0.205301 | 0.689234 | 388.1992 | 353.8051 | 393.5093 | 581.4273 | 449.142  | 409.8647 | 0 |
| ENSMUSG00000084989 | 3_Croc2          | 44.83550479 | -0.71646 | 0.205553 | 0.689234 | 50.3522  | 69.55877 | 47.1751  | 12.89856 | 507.154  | 53.95687 | 0 |
| ENSMUSG00000090486 | 2_BC035947       | 1.944451675 | 2.470984 | 0.205927 | 0.689234 | 0        | 1.1715   | 0        | 0.992197 | 7.919381 | 1.037632 | 0 |
| ENSMUSG00000097290 | 17_1300002E11Rik | 398.2091899 | 0.503331 | 0.205195 | 0.689234 | 295.6161 | 334.0538 | 358.991  | 719.3427 | 345.0587 | 336.1928 | 0 |
| ENSMUSG00000018245 | 6_Qtrt1          | 172.8244366 | -0.8028  | 0.206098 | 0.689396 | 224.1485 | 189.7838 | 245.0804 | 25.79712 | 167.4383 | 184.9951 | 0 |
| ENSMUSG00000018446 | 8_C1qbp          | 932.7531957 | 0.347145 | 0.206163 | 0.689396 | 827.5627 | 759.1352 | 876.7664 | 1240.246 | 1066.854 | 825.6685 | 0 |
| ENSMUSG00000021428 | 8_Rlok1          | 594.8773316 | 0.411736 | 0.206172 | 0.689396 | 514.8918 | 508.3801 | 508.5706 | 932.665  | 584.9028 | 519.8537 |   |

|                     |                 |             |          |          |          |          |          |          |          |          |          |
|---------------------|-----------------|-------------|----------|----------|----------|----------|----------|----------|----------|----------|----------|
| ENSMUSG000000096974 | 1_Gm26881       | 4.168597454 | 1.26683  | 0.207576 | 0.690952 | 1.624264 | 3.435001 | 2.301224 | 7.937575 | 4.52536  | 5.18816  |
| ENSMUSG000000036555 | 14_Lyce         | 249.9657866 | -0.60058 | 0.207929 | 0.691204 | 286.6827 | 317.7376 | 299.1591 | 80.36794 | 252.2888 | 263.5585 |
| ENSMUSG000000049123 | 9_Catsperg2     | 5.268874689 | -1.21744 | 0.207961 | 0.691204 | 4.872793 | 10.305   | 6.903673 | 3.968787 | 4.52536  | 1.037632 |
| ENSMUSG000000005813 | 12_Metap1       | 1453.789676 | 0.3379   | 0.208035 | 0.691219 | 1249.059 | 1203.968 | 1400.295 | 1939.745 | 1608.766 | 1320.906 |
| ENSMUSG000000004189 | 15_Ccdc114      | 34.20674247 | -0.6676  | 0.208013 | 0.691219 | 43.85514 | 36.08751 | 46.02448 | 12.89856 | 24.88944 | 41.50528 |
| ENSMUSG000000000168 | 9_Dlat          | 1073.115271 | 0.371493 | 0.212026 | 0.691581 | 932.3277 | 905.1227 | 969.966  | 1591.484 | 1037.439 | 1002.353 |
| ENSMUSG000000000253 | 12_Gmpr         | 722.1064544 | -0.62496 | 0.253634 | 0.691581 | 826.7506 | 911.9927 | 889.4232 | 167.6813 | 752.3412 | 784.4498 |
| ENSMUSG000000000275 | 16_Trim25       | 8239.306672 | 0.263102 | 0.226385 | 0.691581 | 7154.072 | 7124.192 | 8192.358 | 8399.938 | 9495.337 | 9069.942 |
| ENSMUSG000000000440 | 12_Pparg        | 18.75265179 | 0.718488 | 0.243656 | 0.691581 | 21.11544 | 8.587502 | 12.65673 | 22.82053 | 32.80886 | 14.52685 |
| ENSMUSG000000000538 | 18_Tom112       | 2327.415246 | -0.48044 | 0.243889 | 0.691581 | 2549.283 | 2753.153 | 2831.656 | 968.3841 | 2313.591 | 2548.422 |
| ENSMUSG000000000631 | 19_Myo18a       | 6151.470537 | -0.65909 | 0.245388 | 0.691581 | 6626.999 | 7182.587 | 8788.375 | 1304.739 | 6569.692 | 6436.432 |
| ENSMUSG000000000673 | 8_Haao          | 13.72906998 | -0.8125  | 0.225018 | 0.691581 | 17.86691 | 20.61001 | 13.80735 | 3.968787 | 14.70742 | 11.41395 |
| ENSMUSG000000000738 | 17_Spg7         | 1199.418566 | -0.5464  | 0.230877 | 0.691581 | 1278.296 | 1491.649 | 1501.549 | 419.6993 | 1195.826 | 1309.492 |
| ENSMUSG000000000915 | 15_Hip1r        | 2507.313375 | -0.62144 | 0.227549 | 0.691581 | 2669.478 | 2983.298 | 3464.493 | 677.6704 | 2688.064 | 2560.876 |
| ENSMUSG000000001054 | 9_Rmnd5b        | 946.1876487 | -0.48171 | 0.253092 | 0.691581 | 1050.899 | 1084.602 | 1172.474 | 382.988  | 953.7197 | 1032.444 |
| ENSMUSG000000001065 | 14_Zfp276       | 513.2097371 | -0.65652 | 0.219453 | 0.691581 | 572.5532 | 600.2664 | 711.0783 | 127.0012 | 558.882  | 509.4773 |
| ENSMUSG000000001082 | 12_Mfhd10       | 540.8945731 | -0.83502 | 0.241055 | 0.691581 | 599.3535 | 665.5314 | 814.6334 | 50.60204 | 548.7    | 566.5471 |
| ENSMUSG000000001123 | 15_Lgals9       | 4589.900106 | 0.519843 | 0.2108   | 0.691581 | 3279.39  | 2960.971 | 5075.35  | 3386.368 | 7851.5   | 4985.822 |
| ENSMUSG000000001128 | 7_Cfp           | 159.3431408 | -0.68052 | 0.251266 | 0.691581 | 201.4088 | 184.6313 | 202.5077 | 30.7581  | 182.1458 | 154.6072 |
| ENSMUSG000000001151 | 9_Pcnt          | 865.6380303 | -0.37234 | 0.243962 | 0.691581 | 867.3572 | 972.1053 | 1090.78  | 524.8721 | 822.4843 | 916.2291 |
| ENSMUSG000000001158 | 13_Snmp27       | 719.5760257 | 0.429811 | 0.239575 | 0.691581 | 691.9366 | 529.8489 | 617.8787 | 1198.574 | 674.2787 | 604.9395 |
| ENSMUSG000000001173 | 15_Ocrl         | 1193.269882 | 0.3938   | 0.23082  | 0.691581 | 1076.075 | 1042.523 | 975.7191 | 1887.158 | 1091.743 | 1086.401 |
| ENSMUSG000000001260 | 10_Gabrg1       | 3.276079145 | 1.407977 | 0.240571 | 0.691581 | 1.624264 | 2.576251 | 1.150612 | 8.929771 | 2.26268  | 3.112896 |
| ENSMUSG000000001349 | 4_Cnn1          | 69.46271067 | -0.57457 | 0.208617 | 0.691581 | 71.46763 | 123.66   | 54.07877 | 62.5084  | 40.72824 | 64.33319 |
| ENSMUSG000000001383 | 8_Zmat2         | 2306.014658 | 0.380116 | 0.20914  | 0.691581 | 2026.27  | 1823.985 | 2162     | 3416.134 | 2353.187 | 2054.511 |
| ENSMUSG000000001508 | 15_Sgca         | 16.72305982 | -0.69335 | 0.235248 | 0.691581 | 25.1761  | 24.04501 | 12.65673 | 14.88295 | 9.050721 | 14.52685 |
| ENSMUSG000000001518 | 12_lfkg2        | 405.3543055 | -0.48655 | 0.217394 | 0.691581 | 419.8723 | 475.7476 | 523.5285 | 185.5408 | 393.7064 | 433.7302 |
| ENSMUSG000000001583 | 13_Tnk1         | 274.0665084 | -0.78109 | 0.231884 | 0.691581 | 315.9194 | 346.0763 | 377.4008 | 36.71128 | 259.0769 | 309.2144 |
| ENSMUSG000000001729 | 14_Akt1         | 3025.369405 | -0.70973 | 0.232092 | 0.691581 | 3423.137 | 3646.253 | 4195.132 | 547.6926 | 232.681  | 327.5471 |
| ENSMUSG000000001755 | 12_Coasy        | 548.0661511 | -0.56018 | 0.215747 | 0.691581 | 593.6686 | 667.2489 | 698.4216 | 194.4706 | 544.1746 | 590.4126 |
| ENSMUSG000000001768 | 15_Rin2         | 3044.065931 | 0.34409  | 0.229059 | 0.691581 | 2697.903 | 2504.116 | 2846.614 | 4358.721 | 3077.245 | 2779.816 |
| ENSMUSG000000001844 | 10_Zdhnc4       | 597.009235  | -0.47402 | 0.224595 | 0.691581 | 651.33   | 663.8139 | 767.4583 | 275.8307 | 566.8014 | 656.8211 |
| ENSMUSG000000001901 | 15_Kcnh6        | 2.231707159 | -1.66272 | 0.251034 | 0.691581 | 3.248529 | 3.435001 | 3.451836 | 0.992197 | 2.26268  | 0        |
| ENSMUSG000000001918 | 17_Slc1a5       | 434.4407998 | -0.42981 | 0.241747 | 0.691581 | 524.6374 | 446.5501 | 524.6791 | 220.2677 | 453.6674 | 436.8431 |
| ENSMUSG000000001942 | 7_Siae          | 436.1489876 | 0.379513 | 0.221736 | 0.691581 | 361.3988 | 390.7314 | 385.4551 | 655.8421 | 408.4138 | 415.0528 |
| ENSMUSG000000001998 | 15_Apde1        | 370.8569339 | 0.471921 | 0.236522 | 0.691581 | 284.2463 | 327.1838 | 321.0208 | 665.7641 | 328.0886 | 298.838  |
| ENSMUSG000000002222 | 14_Rmnd5a       | 3952.610812 | 0.475087 | 0.22048  | 0.691581 | 3383.343 | 3240.923 | 3298.805 | 7094.207 | 3087.427 | 3610.96  |
| ENSMUSG000000002297 | 15_Dbf4         | 354.4613107 | 0.483473 | 0.253713 | 0.691581 | 311.8588 | 226.7101 | 348.6355 | 633.0216 | 345.0587 | 261.8433 |
| ENSMUSG000000002319 | 15_Ipo4         | 1086.438327 | -0.64779 | 0.243341 | 0.691581 | 1145.919 | 1316.464 | 1516.507 | 247.057  | 1221.487 | 1070.836 |
| ENSMUSG000000002325 | 14_lrf9         | 4785.777802 | 0.285789 | 0.220917 | 0.691581 | 4026.551 | 4000.917 | 4913.114 | 5668.42  | 5188.326 | 4917.338 |
| ENSMUSG000000002486 | 15_Tchp         | 419.8162471 | -0.52265 | 0.223402 | 0.691581 | 446.6727 | 468.8776 | 569.553  | 169.6657 | 398.2317 | 465.8968 |
| ENSMUSG000000002578 | 15_lkzf4        | 77.78076524 | -0.52295 | 0.230982 | 0.691581 | 97.45586 | 124.5188 | 52.92816 | 75.40696 | 52.04164 | 64.33319 |
| ENSMUSG000000002608 | 8_Codc97        | 970.7857669 | -0.63942 | 0.246098 | 0.691581 | 1013.541 | 1150.725 | 1383.036 | 226.2209 | 1062.328 | 988.8634 |
| ENSMUSG000000002820 | 15_Atg4d        | 1067.349677 | -0.72181 | 0.229315 | 0.691581 | 1132.924 | 1299.289 | 1554.477 | 190.5018 | 1104.188 | 1122.718 |
| ENSMUSG000000002833 | 10_Hdgfrp2      | 854.2218035 | -0.65602 | 0.240655 | 0.691581 | 891.7211 | 1124.104 | 1119.546 | 190.5018 | 829.2723 | 970.186  |
| ENSMUSG000000002948 | 18_Map2k7       | 1413.963343 | -0.47468 | 0.244596 | 0.691581 | 1638.883 | 1658.247 | 1636.17  | 597.3025 | 1403.993 | 1549.185 |
| ENSMUSG000000002984 | 16_Tomn40       | 639.5682734 | -0.7547  | 0.25263  | 0.691581 | 731.7311 | 700.7402 | 976.8697 | 84.33673 | 688.9861 | 654.7458 |
| ENSMUSG000000003031 | 14_Cdkn1b       | 2353.049623 | 0.514148 | 0.212156 | 0.691581 | 1879.274 | 1888.347 | 2071.102 | 4448.018 | 2067.207 | 1967.35  |
| ENSMUSG000000003068 | 15_Stk11        | 1491.785483 | -0.64293 | 0.211539 | 0.691581 | 1734.714 | 1721.794 | 1999.764 | 396.8787 | 1468.479 | 1629.082 |
| ENSMUSG000000003199 | 16_Mpnd         | 833.7939314 | -0.90167 | 0.208256 | 0.691581 | 1022.474 | 1102.635 | 1133.353 | 72.43037 | 754.6038 | 917.2667 |
| ENSMUSG000000003282 | 9_Plag1         | 90.5311255  | 0.447906 | 0.241194 | 0.691581 | 78.77682 | 84.15752 | 66.7355  | 143.8685 | 93.0123  | 75.74714 |
| ENSMUSG000000003299 | 9_Mrpl4         | 536.2865033 | -0.82182 | 0.25083  | 0.691581 | 638.3359 | 652.6502 | 764.0064 | 48.61764 | 560.0134 | 554.0955 |
| ENSMUSG000000003341 | 8_Atp8b3        | 2.931505376 | -1.64775 | 0.21176  | 0.691581 | 2.436397 | 5.152501 | 5.753061 | 1.984394 | 2.26268  | 0        |
| ENSMUSG000000003573 | 15_Homer3       | 424.4469724 | -0.70177 | 0.220122 | 0.691581 | 487.2793 | 524.6964 | 564.9505 | 86.32112 | 455.9301 | 427.5004 |
| ENSMUSG000000003585 | 13_Sec14l2      | 41.40389896 | -0.48942 | 0.251799 | 0.691581 | 59.28565 | 46.37251 | 39.12081 | 24.80492 | 37.33422 | 41.50528 |
| ENSMUSG000000003644 | 17_Rps6ka1      | 1184.243077 | -0.64677 | 0.251245 | 0.691581 | 1320.527 | 1429.819 | 1585.543 | 254.0024 | 1258.648 | 1258.648 |
| ENSMUSG000000003848 | 14_Nob1         | 495.4904573 | -0.44752 | 0.231691 | 0.691581 | 568.4925 | 533.2839 | 613.2763 | 241.1038 | 512.4971 | 504.2892 |
| ENSMUSG000000003873 | 10_Bax          | 394.4480246 | -0.70946 | 0.240253 | 0.691581 | 486.4672 | 486.0526 | 495.9138 | 68.46158 | 397.1004 | 432.6926 |
| ENSMUSG000000003882 | 4_Ilt7r         | 43.69089609 | 0.782785 | 0.24581  | 0.691581 | 59.28565 | 17.175   | 19.56041 | 58.53961 | 83.71917 | 23.86554 |
| ENSMUSG000000004085 | 14_Zak          | 2423.658425 | 0.347253 | 0.221459 | 0.691581 | 2093.677 | 2037.814 | 2269.007 | 3479.634 | 2364.501 | 2297.317 |
| ENSMUSG000000004127 | 12_Trm110a      | 232.8786457 | 0.364336 | 0.239616 | 0.691581 | 213.5908 | 181.1963 | 216.3151 | 328.4171 | 252.2888 | 205.4511 |
| ENSMUSG000000004394 | 12_Tmed4        | 866.7212283 | -0.32182 | 0.212674 | 0.691581 | 920.9579 | 977.2578 | 960.677  | 621.1152 | 827.0096 | 863.3099 |
| ENSMUSG000000004540 | 7_Psg17         | 77.81032913 | 0.359439 | 0.231703 | 0.691581 | 69.03124 | 68.70002 | 66.7355  | 90.28991 | 85.98185 | 86.12346 |
| ENSMUSG000000004567 | 15_Mcoln1       | 461.1262371 | -0.53775 | 0.230605 | 0.691581 | 494.5885 | 559.0464 | 584.511  | 168.6735 | 452.536  | 507.4021 |
| ENSMUSG000000004610 | 4_Etfb          | 1278.579736 | -0.67196 | 0.239196 | 0.691581 | 1447.22  | 1552.62  | 1713.261 | 262.9322 | 1273.889 | 1421.556 |
| ENSMUSG000000004880 | 11_Lbr          | 1776.513249 | 0.335248 | 0.214036 | 0.691581 | 1544.675 | 1455.582 | 1713.261 | 2430.882 | 1831.64  | 1683.039 |
| ENSMUSG000000004947 | 15_Dlx2         | 701.9553599 | -0.70568 | 0.213421 | 0.691581 | 766.6528 | 826.9765 | 1017.141 | 147.8373 | 754.4218 | 708.7027 |
| ENSMUSG000000005043 | 13_Sgsh         | 526.4512268 | -0.53174 | 0.248077 | 0.691581 | 558.7469 | 626.0289 | 682.313  | 186.533  | 501.1837 | 603.9012 |
| ENSMUSG000000005131 | 3_4930550C18Rik | 46.17433093 | 0.698211 | 0.214782 | 0.691581 | 34.10955 | 32.63251 | 39.12081 | 103.1885 | 31.67752 | 36.37172 |
| ENSMUSG000000005161 | 15_Prdx2        | 3121.476628 | -0.51345 | 0.219443 | 0.691581 | 3601.806 | 3739.857 | 3671.603 | 1252.152 | 3031.991 | 3431.449 |
| ENSMUSG000000005354 | 15_Txn2         | 1758.726425 | -0.51624 | 0.244309 | 0.691581 | 1909.323 | 2035.238 | 2265.555 | 648.8967 | 1821.458 | 1871.888 |
| ENSMUSG000000005370 | 3_Msh6          | 1840.757728 | 0.280725 | 0.227259 | 0.691581 | 179.284  | 1547.468 | 1720.165 | 2281.06  | 1949.299 | 1827.27  |
| ENSMUSG000000005378 | 17_Wbscr22      | 495.0081336 | -0.43092 | 0.224291 | 0.691581 | 494.5885 | 565.0576 | 645.4934 | 266.9009 | 523.8105 | 474.1979 |
| ENSMUSG000000005447 | 12_Pafah1b3     | 855.3489186 | -0.65166 | 0.245371 | 0.691581 | 1008.668 | 1006.455 | 1120.696 | 186.533  | 828.141  | 981.5999 |
| ENSMUSG000000005501 |                 |             |          |          |          |          |          |          |          |          |          |

|                    |                 |             |          |          |          |          |          |          |          |          |          |
|--------------------|-----------------|-------------|----------|----------|----------|----------|----------|----------|----------|----------|----------|
| ENSMUSG00000010086 | 17_Rnf112       | 18.66525461 | -0.71739 | 0.214745 | 0.691581 | 19.49117 | 21.46876 | 28.7653  | 7.937575 | 13.57608 | 20.75264 |
| ENSMUSG00000010142 | 12_Tnfrsf13b    | 29.68467037 | 0.548445 | 0.222827 | 0.691581 | 25.98823 | 23.18626 | 23.01224 | 34.72689 | 45.2536  | 25.9408  |
| 668.3214274        | 7_Ai597479      | 0.485412    | 0.21114  | 0.691581 | 565.244  | 486.9114 | 619.0293 | 1179.722 | 538.5179 | 620.504  |          |
| ENSMUSG00000010362 | 9_Rdm1          | 382.5086215 | -0.5666  | 0.24229  | 0.691581 | 455.6062 | 444.8326 | 469.4497 | 122.0402 | 350.7154 | 45.4076  |
| ENSMUSG00000010476 | 13_Ebf3         | 50.49624689 | 0.459919 | 0.251181 | 0.691581 | 43.04301 | 42.07876 | 42.57265 | 77.39135 | 41.89598 | 56.0213  |
| ENSMUSG00000011171 | 11_Vlpr2        | 117.4072718 | -0.48395 | 0.218413 | 0.691581 | 140.4989 | 173.4675 | 96.65142 | 123.0324 | 70.14309 | 100.8503 |
| ENSMUSG00000012535 | 14_Tnp3         | 2548.810084 | 0.302137 | 0.229845 | 0.691581 | 2310.516 | 2219.869 | 2318.483 | 3383.391 | 2441.548 |          |
| ENSMUSG00000013150 | 15_Gfod2        | 389.6543108 | -0.65114 | 0.210183 | 0.691581 | 411.751  | 475.7476 | 540.7877 | 104.1807 | 391.4437 | 414.0152 |
| ENSMUSG00000013483 | 14_Card14       | 686.5236176 | -0.64329 | 0.249928 | 0.691581 | 782.8954 | 737.6664 | 990.677  | 155.7749 | 669.7533 | 782.3746 |
| ENSMUSG00000013766 | 11_Ly6g6e       | 801.6501929 | -0.51632 | 0.20991  | 0.691581 | 846.2417 | 877.6427 | 1106.889 | 343.3001 | 770.4426 | 865.3845 |
| ENSMUSG00000014077 | 13_Chp1         | 6496.290328 | 0.286949 | 0.247073 | 0.691581 | 5754.769 | 5562.984 | 6239.769 | 8496.181 | 6430.537 | 6493.501 |
| ENSMUSG00000014158 | 11_Trpv4        | 449.1163583 | -0.85468 | 0.219629 | 0.691581 | 489.7157 | 550.4589 | 694.9697 | 48.61764 | 362.0288 | 548.9074 |
| ENSMUSG00000014195 | 15_Dnajc7       | 3975.934628 | 0.277304 | 0.225712 | 0.691581 | 3600.182 | 3301.895 | 3883.316 | 4803.225 | 4311.537 | 3955.453 |
| ENSMUSG00000014402 | 14_Tsg101       | 2491.05776  | 0.318962 | 0.219036 | 0.691581 | 2200.066 | 2163.192 | 2287.417 | 3374.461 | 2564.748 | 2356.462 |
| ENSMUSG00000014444 | 16_Piezo1       | 3556.641824 | -0.6956  | 0.241699 | 0.691581 | 3780.475 | 4506.721 | 4906.21  | 651.8733 | 3705.139 | 3789.432 |
| ENSMUSG00000014551 | 8_Mrps25        | 870.7973694 | 0.29696  | 0.247119 | 0.691581 | 780.459  | 804.649  | 759.404  | 1148.964 | 908.4661 | 822.8422 |
| ENSMUSG00000014767 | 16_Tbp          | 558.4299967 | 0.404444 | 0.218804 | 0.691581 | 504.3341 | 467.1601 | 470.6004 | 875.1176 | 549.8313 | 483.5365 |
| ENSMUSG00000014856 | 12_Tmem208      | 415.5381337 | -0.44444 | 0.23931  | 0.691581 | 490.5278 | 479.1826 | 467.1485 | 199.4316 | 438.6973 | 420.241  |
| ENSMUSG00000015093 | 15_Clic3        | 2492.473666 | -0.86346 | 0.244287 | 0.691581 | 2979.713 | 3031.388 | 3639.386 | 188.5174 | 2521.757 | 2594.08  |
| ENSMUSG00000015143 | 14_Actn1        | 956.1938867 | -0.35893 | 0.213731 | 0.691581 | 1005.42  | 1240.894 | 976.8697 | 649.8889 | 970.6898 | 893.4012 |
| ENSMUSG00000015363 | 13_Trabd        | 2038.286475 | -0.70607 | 0.214784 | 0.691581 | 2269.909 | 2360.704 | 2951.32  | 420.6914 | 2114.475 | 2112.619 |
| ENSMUSG00000015452 | 14_Ager         | 14.82584456 | -0.98956 | 0.252024 | 0.691581 | 25.1761  | 22.32751 | 11.50612 | 0.992197 | 11.3134  | 17.63975 |
| ENSMUSG00000015597 | 16_Zfp318       | 747.8238453 | 0.410839 | 0.233262 | 0.691581 | 642.3966 | 701.5989 | 582.2097 | 1204.527 | 639.2072 | 717.0038 |
| ENSMUSG00000015605 | 5_Srf           | 833.8588954 | -0.67219 | 0.208658 | 0.691581 | 978.6193 | 934.3202 | 1160.968 | 203.4003 | 892.6273 | 833.1285 |
| ENSMUSG00000015672 | 3_Mrpl32        | 381.8438725 | 0.517318 | 0.236665 | 0.691581 | 324.0407 | 261.9188 | 356.6698 | 770.2569 | 322.4319 | 295.7251 |
| ENSMUSG00000015755 | 16_Tab2         | 3388.650646 | 0.308425 | 0.238041 | 0.691581 | 3026.004 | 2936.067 | 3121.611 | 4605.778 | 3439.274 | 3203.17  |
| ENSMUSG00000015944 | 9_Gatsl2        | 1042.704297 | -0.416   | 0.227497 | 0.691581 | 1080.948 | 1278.679 | 1216.197 | 561.5834 | 1077.036 | 1041.783 |
| ENSMUSG00000016028 | 9_Celsr1        | 3829.216496 | -0.67058 | 0.241208 | 0.691581 | 3916.913 | 4549.659 | 5643.752 | 804.6716 | 4158.806 | 3901.497 |
| ENSMUSG00000016194 | 14_Hsd11b1      | 78.21743225 | 0.535393 | 0.23354  | 0.691581 | 77.15256 | 48.94876 | 65.58489 | 136.9232 | 82.58783 | 58.1074  |
| ENSMUSG00000016386 | 15_Mpped2       | 244.4667604 | 0.344489 | 0.229155 | 0.691581 | 207.9058 | 207.8176 | 208.2608 | 405.8085 | 214.9546 | 222.0533 |
| ENSMUSG00000016493 | 13_Ccd4         | 156.3188453 | 0.628017 | 0.220712 | 0.691581 | 132.3775 | 138.2588 | 97.80203 | 328.4171 | 91.63855 | 149.419  |
| ENSMUSG00000016552 | 13_Foxred2      | 76.45882374 | -0.51849 | 0.24991  | 0.691581 | 94.20733 | 115.9313 | 59.83183 | 56.55522 | 42.99092 | 89.23636 |
| ENSMUSG00000016757 | 10_Tll12        | 812.9760059 | -0.64677 | 0.22448  | 0.691581 | 922.5822 | 917.1452 | 1136.805 | 203.4003 | 893.7587 | 804.1649 |
| ENSMUSG00000016758 | 3_Bik           | 199.7669524 | -0.65337 | 0.243336 | 0.691581 | 210.3422 | 250.7551 | 271.5445 | 45.64105 | 201.3785 | 218.9404 |
| ENSMUSG00000017221 | 14_Psmid3       | 2544.083558 | -0.67355 | 0.245709 | 0.691581 | 2887.942 | 2853.627 | 3640.537 | 508.0048 | 2874.735 | 2499.656 |
| ENSMUSG00000017286 | 15_Glod4        | 2814.612023 | 0.291176 | 0.227203 | 0.691581 | 2555.78  | 2558.217 | 2480.72  | 3655.253 | 2809.117 | 2828.585 |
| ENSMUSG00000017405 | 14_Nek8         | 219.4426462 | -0.58128 | 0.222814 | 0.691581 | 243.6397 | 279.9526 | 265.7914 | 72.43037 | 204.7726 | 250.0693 |
| ENSMUSG00000017412 | 15_CacnB4       | 213.4906349 | 0.68632  | 0.236713 | 0.691581 | 175.4206 | 199.2301 | 116.2118 | 509.9892 | 124.4474 | 155.6448 |
| ENSMUSG00000017446 | 14_C1qtnf1      | 613.4474422 | -0.41654 | 0.237137 | 0.691581 | 675.694  | 716.1977 | 712.2289 | 339.3313 | 518.1538 | 719.079  |
| ENSMUSG00000017478 | 15_Zc3h18       | 1032.114442 | -0.50039 | 0.236029 | 0.691581 | 1060.645 | 1112.94  | 1454.374 | 435.5744 | 1151.704 | 977.4494 |
| ENSMUSG00000017734 | 16_Dbndd2       | 1329.803878 | -0.48653 | 0.237954 | 0.691581 | 1488.638 | 1542.315 | 1624.664 | 550.6692 | 1402.862 | 1369.674 |
| ENSMUSG00000017781 | 17_Pitpna       | 4544.777118 | 0.28975  | 0.254701 | 0.691581 | 4053.352 | 3957.121 | 4259.566 | 6008.744 | 4758.416 | 4231.464 |
| ENSMUSG00000017837 | 12_Nkiras2      | 2305.705376 | -0.56389 | 0.244369 | 0.691581 | 2509.488 | 2709.357 | 3033.014 | 714.3817 | 2423.331 | 2444.661 |
| ENSMUSG00000018209 | 15_Stk4         | 1646.988422 | 0.334511 | 0.240588 | 0.691581 | 1556.857 | 1386.023 | 1427.91  | 2349.522 | 1627.998 | 1533.62  |
| ENSMUSG00000018239 | 9_Zcchc10       | 189.4047678 | 0.507053 | 0.222254 | 0.691581 | 160.8022 | 144.27   | 164.5375 | 348.2611 | 162.913  | 155.8448 |
| ENSMUSG00000018417 | 14_Myo1b        | 369.1802748 | 0.400392 | 0.237206 | 0.691581 | 328.9135 | 297.9863 | 327.9245 | 486.1764 | 501.1837 | 272.8972 |
| ENSMUSG00000018427 | 7_Ypel2         | 1511.183152 | 0.340713 | 0.225627 | 0.691581 | 1270.987 | 1202.25  | 1528.013 | 2064.762 | 1594.058 | 1407.029 |
| ENSMUSG00000018433 | 14_Nol11        | 855.5162714 | 0.392979 | 0.252344 | 0.691581 | 727.6704 | 695.5877 | 796.2236 | 1380.146 | 787.4127 | 746.0575 |
| ENSMUSG00000018537 | 16_Pcgl2        | 498.4294139 | -0.52909 | 0.237111 | 0.691581 | 557.1227 | 616.5827 | 592.5652 | 181.572  | 500.0523 | 542.6816 |
| ENSMUSG00000018548 | 15_Trim37       | 1250.748278 | 0.420863 | 0.222844 | 0.691581 | 1139.421 | 1030.5   | 1039.003 | 2051.863 | 1094.006 | 1149.696 |
| ENSMUSG00000018623 | 9_Mmp7          | 1.031481896 | 2.411004 | 0.254525 | 0.691581 | 0        | 0.85875  | 0        | 0.992197 | 2.26268  | 2.075264 |
| ENSMUSG00000018830 | 8_Myh11         | 2280.13297  | -0.62237 | 0.228135 | 0.691581 | 1951.554 | 4737.725 | 1603.953 | 1426.779 | 1279.546 | 2681.241 |
| ENSMUSG00000018849 | 6_Wwc1          | 3409.409507 | -0.51977 | 0.231277 | 0.691581 | 3587.188 | 3836.037 | 4627.762 | 1316.645 | 3592.005 | 3496.82  |
| ENSMUSG00000018906 | 14_P4ha2        | 522.570039  | -0.50703 | 0.208895 | 0.691581 | 612.3477 | 649.2152 | 578.7579 | 228.2053 | 478.5569 | 588.3374 |
| ENSMUSG00000018974 | 7_Sart3         | 866.6093636 | -0.5878  | 0.242981 | 0.691581 | 950.1946 | 1027.065 | 1144.859 | 248.0492 | 941.275  | 888.213  |
| ENSMUSG00000018995 | 12_Nars2        | 226.5314969 | 0.399781 | 0.220063 | 0.691581 | 185.9783 | 196.6538 | 203.6583 | 344.2923 | 226.268  | 202.3383 |
| ENSMUSG00000019124 | 10_Scm1         | 684.6727597 | -0.33962 | 0.246163 | 0.691581 | 719.5491 | 918.004  | 656.9995 | 608.2166 | 495.527  | 709.7403 |
| ENSMUSG00000019254 | 16_Ppp1r12c     | 875.5260561 | -0.63735 | 0.214771 | 0.691581 | 1050.899 | 1064.85  | 1081.575 | 232.1741 | 908.4661 | 915.1915 |
| ENSMUSG00000019256 | 17_Ahr          | 678.3489033 | 0.409286 | 0.235503 | 0.691581 | 616.4083 | 569.3514 | 562.6493 | 1104.315 | 616.5804 | 600.789  |
| ENSMUSG00000019368 | 13_Sec14a       | 108.6193215 | -0.49522 | 0.208972 | 0.691581 | 116.947  | 112.4963 | 151.8808 | 55.56302 | 100.8893 | 114.1395 |
| ENSMUSG00000019433 | 8_Glpc1         | 4001.878188 | -0.76851 | 0.21234  | 0.691581 | 4468.351 | 4804.707 | 5856.616 | 639.9669 | 4118.078 | 4123.55  |
| ENSMUSG00000019471 | 9_Cdc37         | 2697.969898 | -0.66921 | 0.231443 | 0.691581 | 2937.482 | 3171.365 | 3829.237 | 590.3571 | 2845.32  | 2814.058 |
| ENSMUSG00000019564 | 12_Arid3a       | 400.1598101 | -0.39965 | 0.213092 | 0.691581 | 381.7021 | 445.6914 | 538.4865 | 253.0102 | 384.6556 | 397.4131 |
| ENSMUSG00000019579 | 13_Mydgf        | 1042.24833  | -0.41093 | 0.250051 | 0.691581 | 1144.294 | 1109.505 | 1315.15  | 544.7161 | 1130.209 | 1009.616 |
| ENSMUSG00000019659 | 8_Ccdc12        | 1445.146205 | -0.64223 | 0.252115 | 0.691581 | 1629.137 | 1628.19  | 2027.379 | 317.503  | 1520.521 | 1548.147 |
| ENSMUSG00000019726 | 10_Lyst         | 832.3149991 | 0.357833 | 0.226819 | 0.691581 | 778.0226 | 730.7964 | 680.0118 | 1212.465 | 824.7469 | 767.8477 |
| ENSMUSG00000019791 | 11_Hint3        | 428.8839406 | 0.441537 | 0.245249 | 0.691581 | 350.029  | 360.6751 | 380.8526 | 745.1398 | 374.4736 | 362.1336 |
| ENSMUSG00000019803 | 11_Nr2e1        | 8.748683573 | -1.13952 | 0.217567 | 0.691581 | 9.745586 | 26.01001 | 5.753061 | 10.94116 | 3.39402  | 2.075264 |
| ENSMUSG00000019814 | 4_Ltv1          | 891.8041276 | 0.377756 | 0.218091 | 0.691581 | 775.5862 | 694.7289 | 857.206  | 1306.723 | 931.0929 | 785.4875 |
| ENSMUSG00000019897 | 8_Ccdc59        | 755.091567  | 0.422579 | 0.233113 | 0.691581 | 631.0267 | 645.7802 | 659.3007 | 1259.098 | 675.41   | 659.934  |
| ENSMUSG00000019907 | 9_Ppp1r12a      | 2592.277521 | 0.321974 | 0.234994 | 0.691581 | 2385.232 | 2187.237 | 2340.345 | 3595.721 | 2620.184 | 2424.946 |
| ENSMUSG00000019913 | 3_Sim1          | 1.624127112 | 2.212142 | 0.254205 | 0.691581 | 0.812132 | 0.85875  | 0        | 4.960984 | 0        | 3.112896 |
| ENSMUSG00000019945 | 9_1700040L02Rik | 16.42764636 | -0.76306 | 0.209825 | 0.691581 | 29.23676 | 15.4575  | 17.25918 | 9.921968 | 9.050721 | 17.63975 |
| ENSMUSG00000019982 | 14_Myb          | 131.679839  | 0.374779 | 0.252665 | 0.691581 | 111.2621 | 107.3438 | 125.4167 | 124.0246 | 192.3278 | 129.704  |
| ENSMUSG00000020009 | 12_Irfn1        | 3438.754017 | 0.39713  | 0.21155  | 0.691581 | 2748.255 | 2547.912 | 3609.4   |          |          |          |

|                    |                 |             |          |          |          |           |          |          |          |          |          |
|--------------------|-----------------|-------------|----------|----------|----------|-----------|----------|----------|----------|----------|----------|
| ENSMUSG00000020834 | 17_Dhrs13       | 83.11962345 | -0.38382 | 0.24241  | 0.691581 | 81.213222 | 102.1913 | 98.95264 | 59.53181 | 76.93113 | 79.89767 |
| ENSMUSG00000020849 | 13_Ywhae        | 12874.57483 | 0.36441  | 0.208528 | 0.691581 | 10891.5   | 10761    | 12119.4  | 18652.31 | 13266.09 | 11557.15 |
| ENSMUSG00000020876 | 14_Snx11        | 539.98274   | -0.46003 | 0.227729 | 0.691581 | 583.1109  | 631.1814 | 661.602  | 254.9946 | 573.5894 | 535.4181 |
| ENSMUSG00000020884 | 15_Asrp1        | 0.797373133 | -0.3325  | 0.223405 | 0.691581 | 1.624264  | 0.85875  | 2.301224 | 0        | 0        | 0        |
| ENSMUSG00000020899 | 15_Pfas         | 577.9185257 | -0.31832 | 0.23773  | 0.691581 | 626.1539  | 612.2889 | 685.7648 | 407.7929 | 580.3775 | 555.1332 |
| ENSMUSG00000020922 | 11_Lsm12        | 900.5734002 | 0.332824 | 0.243304 | 0.691581 | 864.1086  | 678.4127 | 849.1517 | 1203.535 | 997.842  | 810.3906 |
| ENSMUSG00000020923 | 17_Ubf1         | 2736.072837 | -0.40585 | 0.239248 | 0.691581 | 2947.228  | 3155.048 | 3252.78  | 1453.568 | 2786.491 | 2821.322 |
| ENSMUSG00000020978 | 10_Kihdc2       | 716.4499258 | 0.467774 | 0.245028 | 0.691581 | 659.4513  | 596.8314 | 547.6914 | 1297.793 | 557.7507 | 639.1814 |
| ENSMUSG00000020988 | 8_Lzhgdh        | 405.1179836 | 0.431673 | 0.24018  | 0.691581 | 349.2168  | 365.8276 | 319.8702 | 681.6392 | 378.9989 | 335.1552 |
| ENSMUSG00000021124 | 13_Vti1b        | 1367.542471 | 0.301758 | 0.230317 | 0.691581 | 1235.253  | 1161.889 | 1278.33  | 1797.861 | 1329.931 | 1405.991 |
| ENSMUSG00000021143 | 9_Pacs2         | 1173.45559  | -0.45214 | 0.233291 | 0.691581 | 1332.709  | 1440.124 | 1294.439 | 552.6536 | 1177.725 | 1243.083 |
| ENSMUSG00000021208 | 9>Ifi2712b      | 9.779697543 | -0.82815 | 0.252428 | 0.691581 | 9.745586  | 12.88125 | 14.95796 | 8.929771 | 9.050721 | 3.112896 |
| ENSMUSG00000021255 | 17_Esrb         | 15.75588038 | -0.79902 | 0.239607 | 0.691581 | 25.98823  | 25.76251 | 8.054285 | 13.89076 | 13.57608 | 7.263424 |
| ENSMUSG00000021277 | 16_Traf3        | 1018.240112 | -0.31013 | 0.241265 | 0.691581 | 1015.977  | 1119.81  | 1246.113 | 740.1788 | 1005.761 | 981.5999 |
| ENSMUSG00000021279 | 4_Cdc42bbp      | 2526.131496 | -0.59348 | 0.240281 | 0.691581 | 2652.424  | 3050.281 | 3412.716 | 717.3583 | 2717.479 | 2606.532 |
| ENSMUSG00000021301 | 8_Hecw1         | 5.140429684 | 1.349139 | 0.247272 | 0.691581 | 4.872793  | 2.576251 | 1.150612 | 16.86735 | 2.26268  | 3.112896 |
| ENSMUSG00000021371 | 4_Mcur1         | 762.5343456 | 0.383243 | 0.219274 | 0.691581 | 686.2517  | 587.3852 | 712.2289 | 1143.011 | 750.0785 | 696.2511 |
| ENSMUSG00000021375 | 9_Kif13a        | 1696.926679 | -0.33406 | 0.248195 | 0.691581 | 1798.061  | 2025.792 | 1853.636 | 1175.753 | 1423.226 | 1905.292 |
| ENSMUSG00000021418 | 15_Rpp40        | 211.9850565 | 0.451325 | 0.223605 | 0.691581 | 181.1055  | 166.5975 | 189.851  | 356.1987 | 193.4592 | 184.6985 |
| ENSMUSG00000021476 | 8_Habp4         | 329.2835834 | -0.28396 | 0.25245  | 0.691581 | 373.5808  | 355.5226 | 355.5391 | 263.9244 | 293.0171 | 334.1775 |
| ENSMUSG00000021482 | 9_Aaed1         | 708.3352338 | 0.328726 | 0.251496 | 0.691581 | 640.7723  | 600.2664 | 643.1922 | 1002.119 | 601.4698 | 722.1919 |
| ENSMUSG00000021483 | 7_Cdk20         | 187.6356268 | -0.58566 | 0.23912  | 0.691581 | 211.9665  | 210.3938 | 253.1347 | 57.54742 | 247.0352 | 185.7361 |
| ENSMUSG00000021493 | 15_Pdlim7       | 447.4113907 | -0.70503 | 0.231922 | 0.691581 | 484.0308  | 584.8089 | 594.8665 | 84.33673 | 469.5061 | 466.9344 |
| ENSMUSG00000021504 | 14_B4gal7       | 288.1898573 | -0.4355  | 0.21504  | 0.691581 | 317.5437  | 322.0313 | 354.3885 | 153.7905 | 291.8857 | 289.4993 |
| ENSMUSG00000021506 | 7_Pitx1         | 31.80205935 | -1.27513 | 0.210318 | 0.691581 | 28.42463  | 31.77376 | 74.78979 | 0        | 35.07154 | 20.75264 |
| ENSMUSG00000021556 | 11_Golm1        | 703.3714812 | 0.265012 | 0.243694 | 0.691581 | 613.9719  | 689.5764 | 613.2763 | 822.5312 | 716.1383 | 764.7348 |
| ENSMUSG00000021621 | 15_Zcchc9       | 706.2187936 | 0.344296 | 0.219056 | 0.691581 | 632.651   | 585.6677 | 648.9452 | 973.3451 | 764.7859 | 631.9179 |
| ENSMUSG00000021639 | 16_Glf2h2       | 343.8338015 | 0.474608 | 0.222772 | 0.691581 | 285.0584  | 291.9751 | 286.5024 | 611.1932 | 287.3604 | 300.9133 |
| ENSMUSG00000021687 | 14_Scampa1      | 3184.36494  | 0.452313 | 0.230667 | 0.691581 | 2692.218  | 2559.076 | 2816.698 | 5581.107 | 2582.849 | 2874.241 |
| ENSMUSG00000021696 | 8_Elov17        | 292.1152308 | 0.583514 | 0.215485 | 0.691581 | 237.9547  | 274.8001 | 188.7004 | 594.3259 | 217.2173 | 239.693  |
| ENSMUSG00000021715 | 12_Cwc27        | 453.1150536 | 0.333176 | 0.253563 | 0.691581 | 389.0113  | 362.3926 | 452.1906 | 632.0294 | 438.96   | 444.1065 |
| ENSMUSG00000021786 | 12_Oxsm         | 324.7946868 | 0.426577 | 0.234588 | 0.691581 | 267.1915  | 268.7888 | 295.7073 | 537.7707 | 291.8857 | 287.4241 |
| ENSMUSG00000021830 | 13_Txndc16      | 656.8604893 | 0.254168 | 0.253428 | 0.691581 | 551.4377  | 610.5714 | 454.4918 | 1292.832 | 431.0406 | 600.7789 |
| ENSMUSG00000021890 | 5_Eaf1          | 1583.204988 | 0.284874 | 0.250146 | 0.691581 | 1377.376  | 1340.509 | 1564.832 | 2027.058 | 1613.291 | 1576.163 |
| ENSMUSG00000021898 | 14_Asb14        | 9.980654212 | 1.268035 | 0.214684 | 0.691581 | 4.872793  | 10.305   | 2.301224 | 29.7659  | 2.26268  | 10.37632 |
| ENSMUSG00000021900 | 10_Btd          | 329.4467711 | -0.5367  | 0.217714 | 0.691581 | 371.9565  | 407.9064 | 390.0575 | 127.0012 | 134.5125 | 365.2465 |
| ENSMUSG00000021901 | 10_Bap1         | 1023.739506 | -0.46515 | 0.243872 | 0.691581 | 1109.373  | 1159.313 | 1293.288 | 451.4496 | 1062.328 | 1066.686 |
| ENSMUSG00000021916 | 15_Glt8d1       | 545.9649196 | 0.50403  | 0.221788 | 0.691581 | 445.8606  | 484.3351 | 424.5759 | 1018.986 | 429.9092 | 472.1226 |
| ENSMUSG00000021953 | 14_Tdh          | 4.796624661 | 1.336577 | 0.214157 | 0.691581 | 4.060661  | 1.7175   | 2.301224 | 0.992197 | 12.44474 | 7.263424 |
| ENSMUSG00000021982 | 13_Cdcac1       | 498.8001496 | 0.372561 | 0.252388 | 0.691581 | 410.1267  | 425.0814 | 469.4497 | 764.9837 | 434.4346 | 488.7247 |
| ENSMUSG00000021998 | 16_Lcp1         | 788.0701989 | 0.502951 | 0.244645 | 0.691581 | 942.0733  | 453.4201 | 560.3481 | 882.063  | 1289.728 | 600.789  |
| ENSMUSG00000022095 | 9_Fam160b2      | 1172.701286 | -0.60242 | 0.230613 | 0.691581 | 1283.981  | 1388.599 | 1569.435 | 334.3703 | 1247.868 | 1211.954 |
| ENSMUSG00000022100 | 13_Xpo7         | 2045.416828 | 0.289419 | 0.24942  | 0.691581 | 1802.121  | 1757.003 | 1964.095 | 2682.9   | 2065.827 | 2000.555 |
| ENSMUSG00000022120 | 3_Rnf219        | 301.5472648 | 0.399545 | 0.213923 | 0.691581 | 280.1856  | 267.5688 | 272.6951 | 448.473  | 266.9663 | 313.3649 |
| ENSMUSG00000022129 | 3_Dct           | 14316.46671 | -0.46318 | 0.250874 | 0.691581 | 15164.94  | 23462.77 | 11157.49 | 13889.76 | 8027.989 | 14195.84 |
| ENSMUSG00000022179 | 4_4931414P19Rik | 180.3585033 | -0.35343 | 0.217021 | 0.691581 | 204.6573  | 194.0776 | 208.2608 | 129.9778 | 186.7386 | 186.7738 |
| ENSMUSG00000022193 | 6_Psmf5         | 1528.75962  | -0.62991 | 0.232823 | 0.691581 | 1883.335  | 1673.704 | 2014.722 | 385.9646 | 1606.503 | 1608.33  |
| ENSMUSG00000022231 | 9_Sema5a        | 2254.964064 | 0.449778 | 0.243295 | 0.691581 | 1871.153  | 2088.481 | 1759.286 | 3989.623 | 1849.741 | 1971.501 |
| ENSMUSG00000022237 | 16_Ankrd33b     | 72.43184206 | 0.58328  | 0.25456  | 0.691581 | 73.90403  | 61.83002 | 37.9702  | 139.8998 | 70.14309 | 50.84397 |
| ENSMUSG00000022263 | 9_Trio          | 1283.340723 | -0.30267 | 0.237525 | 0.691581 | 1304.284  | 1471.898 | 1476.235 | 944.5714 | 1193.564 | 1309.492 |
| ENSMUSG00000022280 | 8_Rnf19a        | 1132.737749 | 0.364848 | 0.241662 | 0.691581 | 975.3707  | 925.7327 | 1070.069 | 1709.555 | 1089.481 | 1026.218 |
| ENSMUSG00000022330 | 4_Osr2          | 608.2656443 | -0.41813 | 0.220523 | 0.691581 | 596.9172  | 638.0514 | 852.6036 | 357.1909 | 603.0043 | 601.8266 |
| ENSMUSG00000022335 | 16_Zfat         | 128.9264661 | -0.40896 | 0.239234 | 0.691581 | 125.0684  | 135.6825 | 180.6461 | 84.33673 | 135.7608 | 112.0643 |
| ENSMUSG00000022346 | 14_Myc          | 416.7638124 | -0.52945 | 0.253777 | 0.691581 | 440.9878  | 397.6014 | 638.5897 | 160.7359 | 480.8195 | 381.8486 |
| ENSMUSG00000022358 | 6_Fbxo32        | 1921.887023 | 0.404224 | 0.240405 | 0.691581 | 1556.045  | 1810.245 | 1597.05  | 3120.459 | 1647.231 | 1800.292 |
| ENSMUSG00000022372 | 14_Sla          | 126.7804646 | 0.519187 | 0.249859 | 0.691581 | 138.8746  | 74.71127 | 98.95264 | 202.4082 | 160.6503 | 85.0853  |
| ENSMUSG00000022414 | 7_Tab1          | 650.8364976 | -0.81701 | 0.214759 | 0.691581 | 758.5315  | 847.5865 | 884.8207 | 81.36014 | 643.7325 | 688.9877 |
| ENSMUSG00000022420 | 15_Dnal4        | 484.3677085 | -0.68915 | 0.220249 | 0.691581 | 568.4925  | 593.3964 | 631.686  | 103.1885 | 486.4762 | 522.9666 |
| ENSMUSG00000022428 | 7_Cby1          | 212.9052172 | -0.58336 | 0.219777 | 0.691581 | 265.5672  | 271.3651 | 228.9718 | 72.43037 | 190.0651 | 249.0312 |
| ENSMUSG00000022453 | 7_Naga          | 1033.30609  | -0.52994 | 0.229547 | 0.691581 | 1139.421  | 1215.132 | 1308.246 | 381.9958 | 1075.904 | 1079.137 |
| ENSMUSG00000022462 | 6_Slc38a2       | 9621.454123 | 0.327546 | 0.230269 | 0.691581 | 8113.2    | 7797.452 | 9691.606 | 12894.59 | 1045.12  | 8816.76  |
| ENSMUSG00000022476 | 7_Polr3h        | 277.4441893 | -0.53054 | 0.25145  | 0.691581 | 337.847   | 314.3026 | 331.3763 | 98.22748 | 260.2082 | 322.7036 |
| ENSMUSG00000022510 | 14_Trip63       | 9739.016266 | 0.395786 | 0.217752 | 0.691581 | 8775.246  | 7927.982 | 9431.567 | 15079.41 | 9417.275 | 8702.62  |
| ENSMUSG00000022515 | 5_Anks3         | 479.9703173 | -0.56716 | 0.218619 | 0.691581 | 518.9525  | 619.1589 | 581.0591 | 164.7047 | 498.921  | 497.0258 |
| ENSMUSG00000022516 | 9_Nudt16l1      | 767.6762304 | -0.505   | 0.233119 | 0.691581 | 898.2182  | 868.1965 | 935.4476 | 304.6044 | 796.434  | 803.1272 |
| ENSMUSG00000022517 | 16_Mgrr1        | 1166.351359 | -0.6063  | 0.219655 | 0.691581 | 1306.721  | 1533.728 | 1383.036 | 342.3079 | 1178.586 | 1253.46  |
| ENSMUSG00000022540 | 16_Rogdi        | 252.5002907 | -0.74956 | 0.212424 | 0.691581 | 318.3558  | 339.2063 | 292.2555 | 45.64105 | 221.7427 | 297.8004 |
| ENSMUSG00000022544 | 13_Eef2kmt      | 450.8746025 | -0.51259 | 0.24158  | 0.691581 | 527.0738  | 531.5664 | 531.5828 | 170.6579 | 464.9808 | 479.386  |
| ENSMUSG00000022545 | 13_Erc4         | 362.1105128 | -0.28769 | 0.240984 | 0.691581 | 362.211   | 405.3301 | 426.8771 | 295.6747 | 348.4528 | 334.1175 |
| ENSMUSG00000022564 | 6_Grina         | 1654.583852 | -0.70563 | 0.229694 | 0.691581 | 2017.336  | 2285.134 | 1851.335 | 310.5576 | 173.031  | 1740.109 |
| ENSMUSG00000022565 | 15_Plec         | 12164.27668 | -0.77232 | 0.245875 | 0.691581 | 12864.17  | 14290.46 | 18879.24 | 1540.882 | 1340.87  | 11940.03 |
| ENSMUSG00000022571 | 8_Pyclr         | 294.5338163 | -0.69418 | 0.211139 | 0.691581 | 323.2286  | 354.6638 | 414.2204 | 67.46938 | 270.3903 | 337.2304 |
| ENSMUSG00000022574 | 6_Naprt         | 821.2100189 | -0.84946 | 0.22769  | 0.691581 | 919.3336  | 1036.512 | 1212.745 | 79.37575 | 806.6455 | 872.6486 |
| ENSMUSG00000022595 | 7_Lypd2         | 41972.59098 | -0.76497 | 0.24248  | 0.691581 | 49036.54  | 50636.21 | 58867.62 | 5460.059 | 41610.69 | 46224.43 |
| ENSMUSG00000022598 | 6_Psca          | 17379.64816 | -0.65266 | 0.210513 | 0.691581 | 20661.45  | 21120.1  |          |          |          |          |

|                    |            |             |          |          |          |          |          |          |          |          |          |
|--------------------|------------|-------------|----------|----------|----------|----------|----------|----------|----------|----------|----------|
| ENSMUSG00000024242 | 14_Map4k3  | 1948.797223 | 0.372491 | 0.217926 | 0.691581 | 1729.029 | 1719.218 | 1647.677 | 2929.957 | 1878.025 | 1788.878 |
| ENSMUSG00000024319 | 17_Vps52   | 1432.85751  | -0.54406 | 0.242727 | 0.691581 | 1595.84  | 1631.625 | 1872.046 | 481.2155 | 1503.551 | 1512.868 |
| ENSMUSG00000024325 | 8_Ring1    | 401.3971145 | -0.73461 | 0.231021 | 0.691581 | 487.2793 | 518.6851 | 498.215  | 66.47719 | 380.1303 | 457.5957 |
| ENSMUSG00000024327 | 15_Slc39a7 | 1963.09868  | -0.65024 | 0.252678 | 0.691581 | 2217.933 | 2410.512 | 2565.865 | 408.7851 | 2130.313 | 2045.103 |
| ENSMUSG00000024378 | 9_Stard4   | 2799.759898 | 0.421743 | 0.232068 | 0.691581 | 2525.731 | 2243.056 | 2411.683 | 4673.247 | 2470.341 | 2470.672 |
| ENSMUSG00000024393 | 14_Prrc2a  | 5765.693381 | -0.81861 | 0.211181 | 0.691581 | 6367.116 | 7443.647 | 8265.997 | 737.2022 | 6075.296 | 5704.901 |
| ENSMUSG00000024426 | 17_Atata1  | 366.9837719 | -0.38536 | 0.238021 | 0.691581 | 373.5808 | 429.3751 | 444.1363 | 218.2833 | 348.4528 | 388.0744 |
| ENSMUSG00000024505 | 15_Dtwd2   | 57.58238079 | 0.502063 | 0.237925 | 0.691581 | 48.72793 | 50.66626 | 42.57265 | 101.2041 | 45.2536  | 57.06976 |
| ENSMUSG00000024560 | 6_Cxxx1    | 810.994817  | -0.7354  | 0.234778 | 0.691581 | 919.3336 | 1066.568 | 1053.961 | 128.9856 | 808.9082 | 888.213  |
| ENSMUSG00000024570 | 6_Rbfa     | 269.3041609 | -0.63833 | 0.254433 | 0.691581 | 328.1014 | 298.8451 | 356.6898 | 60.52401 | 299.8051 | 271.8596 |
| ENSMUSG00000024603 | 7_Dctn4    | 1839.903156 | 0.328629 | 0.217968 | 0.691581 | 1573.1   | 1562.925 | 1758.135 | 2508.274 | 1905.177 | 1731.808 |
| ENSMUSG00000024608 | 10_Rps14   | 10196.10169 | -0.65944 | 0.241886 | 0.691581 | 12270.51 | 12136.72 | 13052.54 | 2148.106 | 10378.91 | 11189.82 |
| ENSMUSG00000024665 | 7_Fads2    | 1810.336928 | -0.5996  | 0.231709 | 0.691581 | 2157.835 | 2154.604 | 2231.037 | 513.958  | 1773.941 | 2030.646 |
| ENSMUSG00000024799 | 14_Tm7sf2  | 858.3601415 | -0.62184 | 0.223134 | 0.691581 | 1038.717 | 967.8115 | 1114.943 | 234.1584 | 870.0005 | 924.5302 |
| ENSMUSG00000024806 | 3_Mlana    | 662.5269737 | -0.50963 | 0.232255 | 0.691581 | 674.0697 | 1156.737 | 503.9681 | 454.4261 | 437.8286 | 748.1327 |
| ENSMUSG00000024827 | 9_Gldc     | 2547.910934 | -0.40098 | 0.21293  | 0.691581 | 2671.103 | 3118.122 | 2909.898 | 1542.866 | 2160.86  | 2884.617 |
| ENSMUSG00000024870 | 5_Rab1b    | 2791.151546 | -0.63359 | 0.252831 | 0.691581 | 3224.165 | 3297.601 | 3661.248 | 623.0996 | 2960.717 | 2980.079 |
| ENSMUSG00000024909 | 14_Efemp2  | 408.1025911 | -0.72529 | 0.24175  | 0.691581 | 505.1462 | 565.9164 | 454.4918 | 66.47719 | 394.8377 | 461.7463 |
| ENSMUSG00000024937 | 14_Ehbp11  | 1083.164076 | -0.44495 | 0.253361 | 0.691581 | 1115.057 | 1218.567 | 1412.952 | 508.0048 | 1190.17  | 1054.234 |
| ENSMUSG00000024941 | 8_Scyl1    | 1180.684516 | -0.72057 | 0.234585 | 0.691581 | 1372.503 | 1497.66  | 1538.368 | 199.4316 | 1244.474 | 1231.669 |
| ENSMUSG00000024952 | 12_Rps6k4a | 2225.610043 | -0.57136 | 0.247185 | 0.691581 | 2381.172 | 2452.591 | 3148.075 | 689.5768 | 2611.133 | 2071.114 |
| ENSMUSG00000024953 | 16_Prdx5   | 9157.159553 | -0.62501 | 0.248472 | 0.691581 | 10624.31 | 10416.64 | 12289.69 | 2173.901 | 9673.975 | 9624.031 |
| ENSMUSG00000024965 | 13_Esrra   | 1050.490157 | -0.96385 | 0.233242 | 0.691581 | 1175.967 | 1360.26  | 1630.417 | 49.60984 | 1014.812 | 1071.874 |
| ENSMUSG00000024967 | 8_Kcnk4    | 34.27895447 | -0.78294 | 0.22103  | 0.691581 | 27.61249 | 57.53626 | 44.87387 | 7.937575 | 28.2335  | 39.43002 |
| ENSMUSG00000024963 | 11_Dnajc4  | 408.3329485 | -0.67624 | 0.245835 | 0.691581 | 471.0367 | 476.6064 | 559.1975 | 80.36794 | 432.1719 | 430.6173 |
| ENSMUSG00000024969 | 15_Mark2   | 4381.594624 | -0.52981 | 0.21234  | 0.691581 | 4644.584 | 4949.836 | 5937.158 | 1738.329 | 4466.631 | 4553.13  |
| ENSMUSG00000024991 | 7_Eif3a    | 9027.039003 | 0.329306 | 0.242436 | 0.691581 | 7988.944 | 7374.088 | 8641.097 | 12738.81 | 9101.631 | 8317.659 |
| ENSMUSG00000025027 | 17_Xpnp2p1 | 2426.031937 | -0.50055 | 0.248233 | 0.691581 | 2681.66  | 2735.119 | 3111.255 | 932.665  | 2639.416 | 2456.075 |
| ENSMUSG00000025037 | 6_Maoa     | 569.9852643 | 0.485681 | 0.223585 | 0.691581 | 487.2793 | 491.2051 | 446.4375 | 1036.846 | 455.9301 | 502.2139 |
| ENSMUSG00000025066 | 9_Sfr1     | 4436.777005 | 0.472374 | 0.218304 | 0.691581 | 3668.401 | 3395.498 | 4086.974 | 7879.035 | 3939.326 | 3651.427 |
| ENSMUSG00000025076 | 9_Casp7    | 1234.451591 | 0.311519 | 0.228198 | 0.691581 | 1038.717 | 974.6815 | 1292.137 | 1259.098 | 1504.885 | 1301.191 |
| ENSMUSG00000025082 | 8_Vwa2     | 11.48698839 | -0.85489 | 0.234717 | 0.691581 | 9.745586 | 12.88125 | 21.86163 | 3.968787 | 9.050721 | 11.41395 |
| ENSMUSG00000025128 | 7_Bhlhe22  | 20.84652546 | 0.788035 | 0.234945 | 0.691581 | 11.36985 | 16.31625 | 18.40979 | 48.61764 | 15.83876 | 14.52685 |
| ENSMUSG00000025150 | 10_Cbr2    | 22581.46104 | -0.72272 | 0.244808 | 0.691581 | 25534.25 | 27231.83 | 31600.41 | 3736.613 | 18817.58 | 28568.09 |
| ENSMUSG00000025158 | 7_Rfng     | 630.4734965 | -0.71471 | 0.249203 | 0.691581 | 721.9855 | 750.5477 | 877.917  | 101.2041 | 687.8548 | 643.3319 |
| ENSMUSG00000025169 | 6_Ogfd3    | 170.6745918 | -0.49118 | 0.237964 | 0.691581 | 178.6691 | 214.6876 | 204.809  | 74.41476 | 184.4084 | 167.0588 |
| ENSMUSG00000025172 | 2_Ankrd2   | 2.444066347 | -1.86903 | 0.253589 | 0.691581 | 4.060661 | 1.7175   | 5.753061 | 0        | 0        | 3.112896 |
| ENSMUSG00000025195 | 8_Dnmpb    | 919.4848381 | -0.50227 | 0.21505  | 0.691581 | 942.0733 | 1128.398 | 1163.269 | 396.8787 | 912.9915 | 973.2989 |
| ENSMUSG00000025262 | 8_Fam120c  | 420.0303839 | 0.487982 | 0.242941 | 0.691581 | 327.2893 | 374.4151 | 347.4849 | 784.8277 | 329.122  | 356.9454 |
| ENSMUSG00000025270 | 13_Alas2   | 129.5647152 | -0.4035  | 0.253579 | 0.691581 | 142.1231 | 151.9988 | 148.429  | 73.42256 | 124.4474 | 136.9674 |
| ENSMUSG00000025314 | 16_Ptprj   | 2776.052824 | 0.256834 | 0.24542  | 0.691581 | 2528.167 | 2429.404 | 2631.45  | 3290.125 | 3064.8   | 2712.37  |
| ENSMUSG00000025316 | 16_Banp    | 369.8021797 | -0.51074 | 0.230645 | 0.691581 | 413.3753 | 434.5276 | 455.6424 | 149.8217 | 421.9899 | 343.4562 |
| ENSMUSG00000025330 | 6_Padi4    | 1783.676818 | -0.60508 | 0.245124 | 0.691581 | 1840.292 | 2087.622 | 2529.045 | 482.2077 | 1771.679 | 1991.216 |
| ENSMUSG00000025362 | 5_Rps26    | 6143.320109 | -0.76867 | 0.236954 | 0.691581 | 7619.424 | 7321.704 | 8285.558 | 814.5936 | 5972.344 | 6846.296 |
| ENSMUSG00000025371 | 12_Chmp6   | 658.3844392 | -0.6336  | 0.225624 | 0.691581 | 757.7193 | 775.4515 | 868.7121 | 170.6579 | 724.0577 | 653.7082 |
| ENSMUSG00000025381 | 2_Cnpy2    | 875.8962498 | -0.39311 | 0.245215 | 0.691581 | 881.0657 | 1021.913 | 980.3215 | 483.1998 | 839.4544 | 949.4333 |
| ENSMUSG00000025403 | 4_Shm2     | 957.5874265 | -0.64553 | 0.22385  | 0.691581 | 1039.529 | 1084.602 | 1380.735 | 244.0804 | 1054.409 | 942.1699 |
| ENSMUSG00000025423 | 15_Pias2   | 899.1623789 | 0.482554 | 0.234767 | 0.691581 | 760.9679 | 783.1802 | 706.4758 | 1662.922 | 735.3711 | 746.0575 |
| ENSMUSG00000025439 | 5_Clns1a   | 1048.748678 | 0.303086 | 0.250735 | 0.691581 | 953.4432 | 822.6827 | 1041.304 | 1364.271 | 1092.875 | 1017.917 |
| ENSMUSG00000025486 | 16_Sirt3   | 162.5651874 | -0.61919 | 0.233515 | 0.691581 | 194.0996 | 224.9926 | 171.4412 | 45.64105 | 161.7816 | 177.4351 |
| ENSMUSG00000025499 | 17_Hras    | 2112.399964 | -0.55223 | 0.237697 | 0.691581 | 2311.328 | 2348.682 | 2875.38  | 708.4285 | 2253.629 | 2176.952 |
| ENSMUSG00000025507 | 13_Pid1    | 110.0179988 | -0.63259 | 0.248208 | 0.691581 | 134.8139 | 116.79   | 149.5796 | 27.78151 | 109.74   | 121.403  |
| ENSMUSG00000025510 | 13_Cd151   | 3422.594004 | -0.50694 | 0.208649 | 0.691581 | 3942.902 | 3880.692 | 4229.65  | 1444.639 | 3450.587 | 3587.904 |
| ENSMUSG00000025551 | 13_Fgf14   | 50.37648455 | 0.901573 | 0.215164 | 0.691581 | 29.23676 | 36.06751 | 40.27142 | 145.8529 | 24.88948 | 25.9408  |
| ENSMUSG00000025571 | 13_Tnrc6c  | 968.1427824 | -0.33814 | 0.240439 | 0.691581 | 993.2377 | 1118.952 | 1131.052 | 645.9201 | 890.3647 | 1029.331 |
| ENSMUSG00000025572 | 17_Tme8    | 1165.292882 | -0.69302 | 0.253339 | 0.691581 | 1229.568 | 1436.689 | 1653.43  | 205.3847 | 117.764  | 1348.922 |
| ENSMUSG00000025576 | 17_Rbf3ox3 | 4.965071494 | -1.3437  | 0.212235 | 0.691581 | 3.248529 | 14.59875 | 3.451836 | 1.984394 | 3.39402  | 3.112896 |
| ENSMUSG00000025646 | 8_Atrip    | 180.6344061 | -0.44215 | 0.225412 | 0.691581 | 211.1544 | 217.2638 | 195.6041 | 94.2587  | 178.7517 | 186.7738 |
| ENSMUSG00000025651 | 14_Uqcrc1  | 4160.509245 | -0.63958 | 0.228312 | 0.691581 | 4491.091 | 4968.729 | 5743.856 | 1038.83  | 4275.334 | 4445.216 |
| ENSMUSG00000025730 | 14_Rab40c  | 1091.930641 | -0.57496 | 0.245002 | 0.691581 | 1216.574 | 1294.995 | 1408.349 | 323.4562 | 1121.158 | 1187.051 |
| ENSMUSG00000025733 | 17_Rho2    | 916.119879  | -0.48804 | 0.254597 | 0.691581 | 1018.414 | 1101.777 | 1088.479 | 360.1674 | 926.5675 | 1001.315 |
| ENSMUSG00000025736 | 14_Jmjd8   | 1136.991638 | -0.58627 | 0.222672 | 0.691581 | 1318.091 | 1415.22  | 1361.174 | 353.2221 | 1116.633 | 1257.61  |
| ENSMUSG00000025743 | 14_Sdc3    | 1599.638433 | -0.44241 | 0.245883 | 0.691581 | 1896.329 | 2099.644 | 1532.615 | 780.8589 | 1655.151 | 1633.233 |
| ENSMUSG00000025777 | 8_Gdap1    | 14.87451779 | 1.378661 | 0.221631 | 0.691581 | 9.745586 | 13.74    | 1.150612 | 53.57863 | 7.919381 | 3.112896 |
| ENSMUSG00000025780 | 17_Ilti5   | 1354.642883 | 0.51156  | 0.239642 | 0.691581 | 1165.41  | 1183.358 | 1002.183 | 2567.805 | 889.2333 | 1319.868 |
| ENSMUSG00000025792 | 9_Slc25a10 | 704.865975  | -0.88607 | 0.212147 | 0.691581 | 792.641  | 924.0152 | 1027.497 | 64.49279 | 726.3203 | 694.1759 |
| ENSMUSG00000025793 | 15_Hgs     | 1638.543388 | -0.7237  | 0.21444  | 0.691581 | 1705.478 | 1999.171 | 2418.587 | 320.4796 | 1787.517 | 1600.029 |
| ENSMUSG00000025817 | 12_Nudt5   | 901.1554838 | 0.379721 | 0.215475 | 0.691581 | 803.1987 | 781.4627 | 765.1571 | 1351.372 | 912.9915 | 792.7509 |
| ENSMUSG00000025821 | 9_Zfp282   | 1439.949729 | -0.48784 | 0.214816 | 0.691581 | 1519.499 | 1575.807 | 1947.986 | 655.8421 | 1527.309 | 1413.255 |
| ENSMUSG00000025858 | 12_Get4    | 1132.968974 | -0.46724 | 0.236092 | 0.691581 | 1258.805 | 1201.392 | 1484.29  | 512.9658 | 1146.048 | 1194.315 |
| ENSMUSG00000025876 | 15_Unc5a   | 1744.832725 | -0.89561 | 0.251938 | 0.691581 | 1812.679 | 2162.333 | 2833.958 | 105.1729 | 1767.777 | 1877.076 |
| ENSMUSG00000025916 | 10_Ppp142  | 2.793896978 | 1.841116 | 0.215684 | 0.691581 | 0.812132 | 1.7175   | 1.150612 | 10.91416 | 1.13134  | 1.037632 |
| ENSMUSG00000025930 | 6_Msc      | 4.119525682 | -1.24771 | 0.208895 | 0.691581 | 6.497057 | 5.152501 | 5.753061 | 2.97659  | 2.26268  | 2.075264 |
| ENSMUSG00000025950 | 16_Ihd1    | 2635.714151 | 0.454512 | 0.229845 | 0.691581 | 2299.146 | 2121.113 | 2251.748 | 4647.45  | 2240.053 | 2254.774 |
| ENSMUSG00000026035 | 15_Ppi3    | 339.2291785 | 0.467555 | 0.249556 | 0.691581 | 280.1856 | 256.7663 |          |          |          |          |

|                    |                  |             |           |          |          |          |          |          |          |          |          |
|--------------------|------------------|-------------|-----------|----------|----------|----------|----------|----------|----------|----------|----------|
| ENSMUSG00000026723 | 10_Trdmt1        | 248.0565955 | 0.50393   | 0.245471 | 0.691581 | 223.3363 | 206.9588 | 185.2485 | 472.2857 | 200.2472 | 200.263  |
| ENSMUSG00000026765 | 12_Lypd6b        | 289.5937074 | 0.326894  | 0.229537 | 0.691581 | 235.5183 | 244.7438 | 291.1049 | 370.0894 | 281.7037 | 314.4025 |
| ENSMUSG00000026778 | 13_Prkqc         | 354.0718192 | 0.377851  | 0.250529 | 0.691581 | 301.301  | 376.1326 | 246.231  | 500.0672 | 361.7752 | 383.9239 |
| ENSMUSG00000026782 | 15_Abi2          | 325.9794707 | 0.543698  | 0.243417 | 0.691581 | 282.622  | 287.6813 | 225.52   | 654.8499 | 224.0053 | 281.1983 |
| ENSMUSG00000026796 | 16_Fam129b       | 16523.03507 | -0.69114  | 0.247986 | 0.691581 | 17940    | 19222.26 | 24058.15 | 2993.458 | 17835.58 | 17088.76 |
| ENSMUSG00000026797 | 15_Stxbp1        | 276.0978638 | -0.33487  | 0.232269 | 0.691581 | 315.9194 | 345.2176 | 262.3396 | 207.3691 | 271.5216 | 254.2199 |
| ENSMUSG00000026820 | 5_Ptges2         | 385.9756822 | -0.64829  | 0.232452 | 0.691581 | 440.1756 | 449.9851 | 523.5285 | 92.2743  | 394.8377 | 415.0528 |
| ENSMUSG00000026841 | 7_Fibcd1         | 4.315785212 | -1.35392  | 0.226768 | 0.691581 | 5.684925 | 9.446252 | 3.451836 | 0.992197 | 1.13134  | 5.18816  |
| ENSMUSG00000026853 | 15_Crat          | 743.3617372 | -0.52398  | 0.235382 | 0.691581 | 833.2476 | 941.1902 | 856.0554 | 278.8073 | 709.3502 | 841.5196 |
| ENSMUSG00000026860 | 16_Sh3glb2       | 1209.42871  | -0.83689  | 0.216511 | 0.691581 | 1380.625 | 1546.609 | 1724.768 | 135.931  | 1166.412 | 1302.228 |
| ENSMUSG00000026879 | 14_Gsn           | 26833.321   | -0.59289  | 0.243202 | 0.691581 | 28520.46 | 31103.93 | 37187.78 | 7538.711 | 28493.93 | 28155.11 |
| ENSMUSG00000026894 | 4_Morn5          | 0.956037518 | -3.29936  | 0.25363  | 0.691581 | 0        | 3.435001 | 2.301224 | 0        | 0        | 0        |
| ENSMUSG00000026895 | 7_Ndufa8         | 1412.33534  | -0.65272  | 0.237731 | 0.691581 | 1630.761 | 1685.727 | 1862.841 | 315.5186 | 1492.238 | 1486.927 |
| ENSMUSG00000026918 | 16_Brd3          | 1745.277676 | -0.31623  | 0.245889 | 0.691581 | 1716.847 | 1867.782 | 2222.983 | 1257.113 | 1683.434 | 1723.507 |
| ENSMUSG00000026928 | 14_Card9         | 24.75253872 | -0.92742  | 0.216186 | 0.691581 | 35.73382 | 25.76251 | 35.66898 | 2.97659  | 32.80886 | 15.56448 |
| ENSMUSG00000026930 | 15_Gpsm1         | 589.281464  | -0.62735  | 0.214489 | 0.691581 | 700.0579 | 694.7289 | 751.3497 | 164.7047 | 569.0641 | 655.7835 |
| ENSMUSG00000026938 | 10_Fcna          | 38.97672304 | -0.51523  | 0.243558 | 0.691581 | 36.54595 | 54.96001 | 46.02448 | 21.82833 | 35.07154 | 39.43002 |
| ENSMUSG00000026985 | 1_IIf18          | 52.21198838 | 0.541245  | 0.244733 | 0.691581 | 43.85514 | 41.22001 | 42.57265 | 90.28991 | 61.09327 | 34.24186 |
| ENSMUSG00000027001 | 10_Dusp19        | 206.1849015 | 0.410134  | 0.20957  | 0.691581 | 164.8628 | 170.0325 | 196.7547 | 311.5498 | 195.7218 | 198.1877 |
| ENSMUSG00000027006 | 13_Dnajc10       | 2304.37334  | 0.492218  | 0.217994 | 0.691581 | 1925.565 | 1940.776 | 1878.95  | 4254.54  | 1887.075 | 1939.334 |
| ENSMUSG00000027068 | 6_Dhrs9          | 5.786832756 | 1.105598  | 0.245755 | 0.691581 | 4.060661 | 3.435001 | 3.451836 | 5.953181 | 14.70742 | 3.112896 |
| ENSMUSG00000027076 | 10_Timm10        | 145.5891599 | -0.64822  | 0.241819 | 0.691581 | 179.4812 | 151.14   | 202.5077 | 35.71909 | 170.8324 | 133.8545 |
| ENSMUSG00000027086 | 16_Fastkl21      | 258.1073737 | 0.48099   | 0.214296 | 0.691581 | 177.8569 | 255.9076 | 212.8632 | 439.5432 | 221.7427 | 240.7306 |
| ENSMUSG00000027165 | 16_B230118H07Rik | 428.3120226 | 0.502407  | 0.223618 | 0.691581 | 370.3323 | 360.6751 | 332.5269 | 797.7262 | 337.1394 | 371.4723 |
| ENSMUSG00000027198 | 16_Ext2          | 1521.522464 | -0.48899  | 0.232766 | 0.691581 | 1637.258 | 1763.873 | 1929.577 | 639.9669 | 1539.754 | 1618.706 |
| ENSMUSG00000027220 | 2_Syt13          | 15.04227256 | -0.82085  | 0.227738 | 0.691581 | 23.55183 | 25.76251 | 8.054285 | 10.91416 | 14.70742 | 7.263424 |
| ENSMUSG00000027236 | 8_Eif3j1         | 452.2244387 | 0.585103  | 0.213531 | 0.691581 | 404.4418 | 356.3813 | 324.4726 | 934.6494 | 378.9989 | 314.4025 |
| ENSMUSG00000027259 | 15_Adal          | 437.5042311 | 0.521059  | 0.216979 | 0.691581 | 390.6356 | 353.8051 | 333.6775 | 826.4999 | 329.22   | 391.1873 |
| ENSMUSG00000027327 | 16_1700373H04Rik | 384.4428349 | -0.65583  | 0.250871 | 0.691581 | 437.7392 | 450.8439 | 522.3779 | 81.36014 | 373.3422 | 440.9936 |
| ENSMUSG00000027349 | 5_Fam98b         | 971.7751881 | 0.39255   | 0.221578 | 0.691581 | 793.4531 | 775.4515 | 952.7068 | 1483.334 | 958.2451 | 867.4604 |
| ENSMUSG00000027367 | 16_Stard7        | 1586.773321 | 0.376852  | 0.230106 | 0.691581 | 1466.711 | 1346.52  | 1328.957 | 2432.867 | 1487.712 | 1457.873 |
| ENSMUSG00000027406 | 12_Idh3b         | 1795.818607 | -0.33723  | 0.240595 | 0.691581 | 1893.892 | 2000.888 | 2119.428 | 1170.792 | 1737.738 | 1852.173 |
| ENSMUSG00000027416 | 2_Otor           | 9.972993808 | 1.099684  | 0.248027 | 0.691581 | 5.684925 | 12.0225  | 1.150612 | 25.79712 | 7.919381 | 7.263424 |
| ENSMUSG00000027466 | 15_Rbck1         | 1726.392747 | -0.76596  | 0.237981 | 0.691581 | 1980.79  | 2057.566 | 2484.172 | 233.1663 | 1879.156 | 1723.507 |
| ENSMUSG00000027498 | 14_Cstf1         | 819.183868  | -0.4688   | 0.243571 | 0.691581 | 890.0969 | 886.2302 | 1076.973 | 362.158  | 839.4544 | 860.197  |
| ENSMUSG00000027519 | 10_Rab22a        | 1971.597033 | 0.269872  | 0.235598 | 0.691581 | 1739.587 | 1687.444 | 1936.48  | 2248.318 | 2289.832 | 1927.92  |
| ENSMUSG00000027520 | 15_Zdf2          | 37.53985782 | 0.767429  | 0.240879 | 0.691581 | 36.54595 | 24.90376 | 21.86163 | 93.2665  | 23.75814 | 24.90317 |
| ENSMUSG00000027602 | 9_Map1lc3a       | 1028.252103 | -0.73248  | 0.239224 | 0.691581 | 1180.84  | 1364.554 | 1305.945 | 163.7125 | 931.0929 | 1223.368 |
| ENSMUSG00000027635 | 15_Dsn1          | 169.1247788 | 0.385291  | 0.238878 | 0.691581 | 157.5536 | 112.4963 | 170.2906 | 217.291  | 202.5099 | 154.6072 |
| ENSMUSG00000027656 | 7_Wisp2          | 342.4665004 | -0.33299  | 0.223965 | 0.691581 | 379.2657 | 345.2176 | 421.124  | 253.0102 | 305.4618 | 350.7196 |
| ENSMUSG00000027667 | 13_Zfp639        | 386.5110399 | 0.390893  | 0.247496 | 0.691581 | 343.5319 | 357.2401 | 302.611  | 608.2166 | 360.8975 | 346.5991 |
| ENSMUSG00000027673 | 12_Ndufb5        | 1211.93999  | 0.376093  | 0.243858 | 0.691581 | 1075.263 | 1066.568 | 1022.894 | 1887.158 | 1607.985 | 1151.772 |
| ENSMUSG00000027695 | 16_Pld1          | 673.9591974 | 0.370444  | 0.218013 | 0.691581 | 597.7293 | 549.6001 | 616.7281 | 983.267  | 593.9536 | 702.4769 |
| ENSMUSG00000027698 | 14_Nceh1         | 325.1972220 | 0.487308  | 0.234248 | 0.691581 | 294.804  | 298.8451 | 218.6163 | 584.4039 | 268.1276 | 286.3865 |
| ENSMUSG00000027739 | 9_Rab33b         | 551.5246843 | 0.458095  | 0.215546 | 0.691581 | 434.4907 | 490.3464 | 469.4497 | 946.5558 | 503.4463 | 464.8592 |
| ENSMUSG00000027774 | 16_Gfm1          | 824.0915208 | 0.314428  | 0.253849 | 0.691581 | 713.0521 | 673.2602 | 818.0852 | 1111.26  | 862.0812 | 766.8101 |
| ENSMUSG00000027799 | 12_Nbea          | 1572.645181 | 0.399198  | 0.214296 | 0.691581 | 1300.224 | 1378.294 | 1391.09  | 2466.601 | 1459.429 | 1440.233 |
| ENSMUSG00000027806 | 9_Tsc22d2        | 874.247217  | 0.484958  | 0.218947 | 0.691581 | 737.416  | 635.4752 | 813.4828 | 1564.694 | 791.9381 | 702.4769 |
| ENSMUSG00000027809 | 14_Etfhd         | 1006.293317 | 0.417902  | 0.233777 | 0.691581 | 894.9697 | 840.7165 | 849.1517 | 1668.875 | 893.7587 | 890.2883 |
| ENSMUSG00000027820 | 12_Mme           | 445.7961596 | 0.612126  | 0.254258 | 0.691581 | 355.7139 | 412.2001 | 289.9543 | 992.1968 | 238.7128 | 385.9991 |
| ENSMUSG00000027843 | 13_Ptprn22       | 131.2216081 | 0.434681  | 0.213944 | 0.691581 | 125.8805 | 99.61503 | 109.3082 | 195.4628 | 147.0742 | 109.989  |
| ENSMUSG00000027887 | 11_Syp12         | 29.57036335 | 0.707219  | 0.213626 | 0.691581 | 23.55183 | 23.18626 | 20.71102 | 49.60984 | 14.70742 | 45.65581 |
| ENSMUSG00000027889 | 17_Ampd2         | 526.224177  | -0.65391  | 0.228778 | 0.691581 | 563.6197 | 698.1639 | 668.5056 | 125.0168 | 552.094  | 549.945  |
| ENSMUSG00000027895 | 9_Kcnca4         | 28.21713296 | -0.65873  | 0.236585 | 0.691581 | 28.42463 | 53.24251 | 21.86163 | 19.84394 | 15.83876 | 30.09133 |
| ENSMUSG00000027896 | 15_Slc16a4       | 92.16655543 | 0.573183  | 0.232181 | 0.691581 | 67.40697 | 92.74502 | 62.13305 | 180.5798 | 71.27443 | 78.86004 |
| ENSMUSG00000027942 | 16_4933434E20Rik | 1149.391383 | 0.315842  | 0.239859 | 0.691581 | 1028.971 | 978.1165 | 1065.467 | 1578.585 | 1099.663 | 1145.546 |
| ENSMUSG00000027952 | 16_Pmvk          | 1402.919895 | -0.69392  | 0.241338 | 0.691581 | 1748.521 | 1597.275 | 1855.937 | 256.979  | 1459.429 | 1499.378 |
| ENSMUSG00000027983 | 10_Cyp2u1        | 34.38897447 | -0.59582  | 0.223512 | 0.691581 | 40.60661 | 55.81876 | 27.61469 | 27.78151 | 19.32278 | 35.27949 |
| ENSMUSG00000027985 | 14_Lef1          | 27.62055866 | -0.59866  | 0.230971 | 0.691581 | 32.48529 | 46.37251 | 20.71102 | 23.81272 | 12.6268  | 19.71501 |
| ENSMUSG00000027999 | 15_Pla2g12a      | 266.9908712 | -0.31267  | 0.237432 | 0.691581 | 298.8646 | 310.0088 | 278.4481 | 218.2633 | 271.2173 | 279.123  |
| ENSMUSG00000028007 | 13_Snx7          | 309.7009848 | 0.403997  | 0.2309   | 0.691581 | 288.3069 | 244.7438 | 266.942  | 484.192  | 303.1991 | 270.822  |
| ENSMUSG00000028018 | 15_Gstcd         | 281.833554  | 0.346643  | 0.225026 | 0.691581 | 244.4518 | 244.7438 | 255.4359 | 390.9255 | 291.8857 | 263.5585 |
| ENSMUSG00000028020 | 16_Glrb          | 175.515485  | -0.718622 | 0.238663 | 0.691581 | 110.45   | 182.9138 | 104.7057 | 431.6056 | 91.63855 | 131.7793 |
| ENSMUSG00000028047 | 11_Thbs3         | 232.9578716 | -0.62767  | 0.249922 | 0.691581 | 268.0036 | 303.1388 | 277.2975 | 56.55522 | 224.0053 | 268.7467 |
| ENSMUSG00000028088 | 14_Fmo5          | 775.651793  | 0.416647  | 0.242229 | 0.691581 | 639.148  | 680.1302 | 674.2587 | 1239.254 | 621.1057 | 800.0143 |
| ENSMUSG00000028114 | 16_Mettl14       | 601.9665222 | 0.473084  | 0.213909 | 0.691581 | 510.8311 | 488.6289 | 513.173  | 1059.666 | 548.7    | 490.8    |
| ENSMUSG00000028221 | 3_Tmem55a        | 614.2184841 | 0.449707  | 0.244822 | 0.691581 | 524.6374 | 504.0864 | 529.2816 | 1084.471 | 488.7389 | 554.0955 |
| ENSMUSG00000028262 | 13_Clca3a2       | 28.6276288  | 0.752155  | 0.209283 | 0.691581 | 24.36397 | 18.8925  | 20.71102 | 53.57863 | 40.72824 | 13.48922 |
| ENSMUSG00000028271 | 9_Gltf2b         | 886.8324258 | 0.350379  | 0.226937 | 0.691581 | 799.9502 | 762.5702 | 776.6632 | 1286.879 | 845.111  | 849.8292 |
| ENSMUSG00000028273 | 15_Pdlim5        | 9745.828296 | 0.363746  | 0.245342 | 0.691581 | 8250.451 | 8041.337 | 9279.687 | 14808.54 | 9479.499 | 8615.459 |
| ENSMUSG00000028322 | 11_Exosc3        | 351.8710871 | 0.453877  | 0.23038  | 0.691581 | 284.2463 | 275.6588 | 331.3763 | 602.2635 | 329.22   | 188.4617 |
| ENSMUSG00000028333 | 10_Anp32b        | 3726.802531 | 0.354339  | 0.236475 | 0.691581 | 3135.642 | 3047.705 | 3631.332 | 5358.855 | 3978.923 | 3208.358 |
| ENSMUSG00000028416 | 11_Bag1          | 2435.972109 | 0.323556  | 0.243944 | 0.691581 | 2168.39  | 2035.238 | 2288.567 | 3421.095 | 2417.674 | 2284.866 |
| ENSMUSG00000028435 | 8_Aqp3           | 32916.23159 | -0.43921  | 0.229412 | 0.691581 | 34317.46 | 35113.44 | 44234.13 | 16692.72 | 33894.95 | 33244.69 |
| ENSMUSG00000028457 | 16_Atp8b5        | 39.70827812 | 0.493693  | 0.       |          |          |          |          |          |          |          |

|                    |             |             |           |          |          |          |          |          |          |          |          |
|--------------------|-------------|-------------|-----------|----------|----------|----------|----------|----------|----------|----------|----------|
| ENSMUSG00000029090 | 12_Adgra3   | 454.3086177 | -0.36395  | 0.243659 | 0.691581 | 478.3459 | 652.6502 | 402.7142 | 428.629  | 336.008  | 427.5044 |
| ENSMUSG00000029093 | 14_Sorcs2   | 190.9621038 | -0.58021  | 0.241789 | 0.691581 | 224.1485 | 248.1788 | 214.0139 | 58.53961 | 192.3278 | 208.564  |
| ENSMUSG00000029095 | 17_Ablim2   | 80.35372609 | -0.48811  | 0.249208 | 0.691581 | 71.46763 | 109.92   | 100.1033 | 42.66446 | 65.61173 | 92.34925 |
| ENSMUSG00000029103 | 16_Lrpap1   | 1643.717131 | -0.444906 | 0.23054  | 0.691581 | 1845.164 | 2056.707 | 1790.352 | 798.7184 | 1542.017 | 1829.345 |
| ENSMUSG00000029154 | 13_CwH43    | 5729.468512 | 0.32478   | 0.245785 | 0.691581 | 4990.552 | 4471.512 | 5800.236 | 7667.697 | 6284.594 | 5162.22  |
| ENSMUSG00000029173 | 12_Sepseccs | 661.2109301 | 0.414847  | 0.240984 | 0.691581 | 557.9348 | 551.3176 | 591.4146 | 1096.377 | 586.0342 | 584.1869 |
| ENSMUSG00000029191 | 16_Rfc1     | 2378.298237 | 0.312301  | 0.240917 | 0.691581 | 2078.246 | 1971.691 | 2316.182 | 3225.632 | 2372.42  | 2305.618 |
| ENSMUSG00000029199 | 11_Lias     | 511.6746015 | 0.290492  | 0.251418 | 0.691581 | 445.8606 | 446.5501 | 489.0101 | 654.8499 | 492.1329 | 541.6439 |
| ENSMUSG00000029249 | 15_Rest     | 1357.733802 | 0.375009  | 0.209727 | 0.691581 | 1164.598 | 1131.833 | 1250.715 | 2016.144 | 1245.605 | 1337.508 |
| ENSMUSG00000029291 | 11_Rufy3    | 758.8368127 | 0.314799  | 0.249682 | 0.691581 | 689.5002 | 706.7514 | 632.8367 | 1042.799 | 756.8665 | 724.2672 |
| ENSMUSG00000029321 | 1_Slc10a6   | 72.21662859 | 0.483873  | 0.241518 | 0.691581 | 55.22499 | 42.07876 | 83.99468 | 101.2041 | 66.74907 | 84.0482  |
| ENSMUSG00000029333 | 14_Rasgef1b | 1258.608741 | 0.312358  | 0.22842  | 0.691581 | 1094.754 | 1122.387 | 1151.763 | 1688.719 | 1310.092 | 1183.938 |
| ENSMUSG00000029345 | 13_Tfp11    | 909.5744223 | -0.63612  | 0.250264 | 0.691581 | 1043.59  | 1063.133 | 1213.896 | 205.3847 | 969.5585 | 961.8849 |
| ENSMUSG00000029370 | 10_Rassf6   | 176.9678474 | 0.465051  | 0.234562 | 0.691581 | 151.8687 | 139.1175 | 155.3326 | 307.581  | 147.0742 | 160.833  |
| ENSMUSG00000029415 | 4_Sdad1     | 1015.358532 | 0.282328  | 0.249992 | 0.691581 | 882.7877 | 910.2752 | 956.1587 | 1276.957 | 1115.501 | 950.471  |
| ENSMUSG00000029420 | 12_Rimbp2   | 364.1146701 | -0.47196  | 0.2135   | 0.691581 | 359.7746 | 437.9626 | 471.751  | 185.5408 | 315.6439 | 414.0152 |
| ENSMUSG00000029439 | 14_Sfswap   | 1450.139341 | -0.37265  | 0.244677 | 0.691581 | 1514.627 | 1604.145 | 1790.352 | 853.2893 | 1476.399 | 1462.024 |
| ENSMUSG00000029452 | 18_Tmem116  | 148.1582628 | -0.40578  | 0.246588 | 0.691581 | 176.2327 | 172.6088 | 157.6339 | 96.24309 | 110.8713 | 175.3598 |
| ENSMUSG00000029456 | 12_Acad10   | 413.6945509 | -0.5812   | 0.23806  | 0.691581 | 417.4359 | 554.7526 | 515.4742 | 131.9622 | 366.5542 | 495.9881 |
| ENSMUSG00000029464 | 10_Gpn3     | 306.402249  | -0.3033   | 0.235676 | 0.691581 | 343.5319 | 300.5626 | 371.6477 | 255.9868 | 264.7336 | 301.9509 |
| ENSMUSG00000029524 | 16_Sirt4    | 124.3759678 | -0.49406  | 0.21261  | 0.691581 | 147.8081 | 174.3263 | 113.9106 | 65.48499 | 110.8713 | 133.8545 |
| ENSMUSG00000029544 | 16_Cabp1    | 25.0085584  | -0.668    | 0.212279 | 0.691581 | 32.48529 | 38.64376 | 20.71102 | 11.90636 | 20.36412 | 25.9408  |
| ENSMUSG00000029547 | 10_Ints1    | 818.0649899 | -0.91967  | 0.2216   | 0.691581 | 855.1752 | 1092.33  | 1263.372 | 58.53961 | 883.5766 | 755.3961 |
| ENSMUSG00000029554 | 15_Mad1l1   | 777.3928724 | -0.7069   | 0.246641 | 0.691581 | 876.2906 | 917.1452 | 1098.835 | 131.9622 | 847.3737 | 792.7509 |
| ENSMUSG00000029570 | 5_Lfng      | 411.2488074 | -0.5569   | 0.244521 | 0.691581 | 471.0367 | 430.2339 | 573.0048 | 130.97   | 388.0497 | 474.1979 |
| ENSMUSG00000029577 | 13_Ube3b    | 1845.09543  | -0.61895  | 0.252318 | 0.691581 | 1993.784 | 2169.203 | 2541.702 | 446.4886 | 1932.329 | 1987.065 |
| ENSMUSG00000029610 | 13_Aimp2    | 350.4804629 | -0.55804  | 0.230859 | 0.691581 | 361.3988 | 422.5051 | 468.2991 | 121.048  | 365.4229 | 364.2089 |
| ENSMUSG00000029657 | 15_Hsph1    | 1085.801352 | 0.325698  | 0.234164 | 0.691581 | 945.3219 | 1004.738 | 941.2007 | 1442.654 | 1237.686 | 943.2075 |
| ENSMUSG00000029659 | 16_Medag    | 494.702652  | 0.55564   | 0.219453 | 0.691581 | 421.4966 | 419.0701 | 361.2922 | 990.2124 | 350.7154 | 425.2019 |
| ENSMUSG00000029676 | 15_Pot1a    | 997.1647801 | 0.423511  | 0.226172 | 0.691581 | 916.0851 | 853.5977 | 785.8681 | 1642.086 | 922.0422 | 863.3099 |
| ENSMUSG00000029703 | 10_Lrwd1    | 360.7087754 | -0.70681  | 0.236605 | 0.691581 | 382.5143 | 450.8439 | 508.5706 | 66.47719 | 321.2616 | 374.5852 |
| ENSMUSG00000029716 | 13_Tfr2     | 4.688270545 | -1.29074  | 0.238558 | 0.691581 | 6.497057 | 11.16375 | 2.301224 | 4.960984 | 1.13134  | 2.075264 |
| ENSMUSG00000029757 | 16_Dync1i1  | 65.11495623 | -0.5837   | 0.235774 | 0.691581 | 67.40697 | 118.5075 | 48.32571 | 66.47719 | 33.9402  | 56.03213 |
| ENSMUSG00000029767 | 16_Calu     | 5788.254053 | 0.394737  | 0.212401 | 0.691581 | 5314.593 | 4854.515 | 4834.872 | 8999.225 | 5428.17  | 5298.149 |
| ENSMUSG00000029790 | 16_Cep41    | 312.7416837 | 0.37294   | 0.235347 | 0.691581 | 263.1308 | 270.5063 | 284.2012 | 454.4261 | 341.6647 | 262.5209 |
| ENSMUSG00000029804 | 16_Herc3    | 1069.569562 | 0.329436  | 0.2381   | 0.691581 | 964.0009 | 930.8852 | 949.255  | 1513.1   | 1020.469 | 1039.707 |
| ENSMUSG00000029829 | 4_Tmem213   | 2.904917524 | -1.65554  | 0.225182 | 0.691581 | 4.872793 | 6.011252 | 2.301224 | 0        | 1.13134  | 3.112896 |
| ENSMUSG00000029875 | 4_Ccdc184   | 0.756499159 | -2.97035  | 0.246611 | 0.691581 | 0.812132 | 2.576251 | 1.150612 | 0        | 0        | 0        |
| ENSMUSG00000029994 | 17_Anxa4    | 2761.610627 | 0.307565  | 0.242265 | 0.691581 | 2481.876 | 2203.553 | 2720.047 | 3618.542 | 2962.98  | 2582.666 |
| ENSMUSG00000030034 | 11_Ino80b   | 177.4298453 | -0.73919  | 0.215875 | 0.691581 | 204.6573 | 190.6425 | 270.3938 | 33.73469 | 174.2264 | 190.9243 |
| ENSMUSG00000030036 | 8_Mogs      | 892.3752944 | -0.59832  | 0.240696 | 0.691581 | 941.2612 | 1001.303 | 1281.782 | 256.979  | 1027.257 | 845.6701 |
| ENSMUSG00000030046 | 6_Bmp10     | 2.81764271  | 1.46807   | 0.231843 | 0.691581 | 2.436397 | 0.85875  | 1.150612 | 5.953181 | 3.39402  | 3.112896 |
| ENSMUSG00000030057 | 15_Cnbp     | 8222.808361 | 0.420976  | 0.244541 | 0.691581 | 7426.949 | 6497.304 | 7170.615 | 13932.43 | 7298.275 | 7011.128 |
| ENSMUSG00000030084 | 11_Plxna1   | 2600.452716 | -0.62588  | 0.237838 | 0.691581 | 2741.758 | 3279.567 | 3446.083 | 654.8499 | 2802.329 | 2678.128 |
| ENSMUSG00000030091 | 17_Nup210   | 171.0930992 | -0.57632  | 0.21933  | 0.691581 | 198.1603 | 197.5126 | 218.6163 | 58.53961 | 186.6711 | 167.0588 |
| ENSMUSG00000030094 | 8_Xpc       | 877.3940181 | -0.37956  | 0.226727 | 0.691581 | 881.8678 | 960.0827 | 1034.4   | 524.8721 | 829.2723 | 933.8689 |
| ENSMUSG00000030127 | 15_Cops7a   | 2457.251117 | -0.48796  | 0.22903  | 0.691581 | 2770.183 | 2659.549 | 3176.84  | 1048.752 | 2551.172 | 2537.01  |
| ENSMUSG00000030142 | 10_Clec4e   | 72.84873728 | 0.757742  | 0.219248 | 0.691581 | 85.27388 | 30.91501 | 46.02448 | 99.21968 | 141.4175 | 34.24186 |
| ENSMUSG00000030162 | 14_Olr1     | 3.736937761 | -1.336    | 0.220159 | 0.691581 | 6.497057 | 6.011252 | 3.451836 | 0.992197 | 3.39402  | 2.075264 |
| ENSMUSG00000030205 | 15_Gprc5d   | 0.756499159 | -2.97035  | 0.246611 | 0.691581 | 0.812132 | 2.576251 | 1.150612 | 0        | 0        | 0        |
| ENSMUSG00000030243 | 16_Reclq    | 851.5407377 | 0.373528  | 0.223892 | 0.691581 | 829.9991 | 683.5652 | 712.2289 | 1264.059 | 810.0395 | 809.353  |
| ENSMUSG00000030281 | 16_Ilt1rc   | 1083.119958 | -0.68724  | 0.240401 | 0.691581 | 1129.676 | 1268.374 | 1610.857 | 213.3223 | 1164.149 | 1112.342 |
| ENSMUSG00000030324 | 8_Rho       | 1633.58071  | -0.77828  | 0.218508 | 0.691581 | 3023.568 | 2417.382 | 750.1991 | 1457.537 | 1725.294 | 427.5044 |
| ENSMUSG00000030347 | 6_D6Wsu163e | 473.0465042 | 0.393988  | 0.249525 | 0.691581 | 417.4359 | 353.8051 | 455.6424 | 726.2881 | 501.1837 | 383.9239 |
| ENSMUSG00000030352 | 14_Tspan9   | 1536.848771 | -0.56293  | 0.238504 | 0.691581 | 1623.452 | 1889.25  | 1985.957 | 493.1218 | 1693.616 | 1535.695 |
| ENSMUSG00000030374 | 15_Strna    | 2262.940973 | -0.54717  | 0.246899 | 0.691581 | 2434.772 | 2597.719 | 3028.411 | 743.1554 | 2385.996 | 2387.591 |
| ENSMUSG00000030376 | 7_Slc8a2    | 14.79756189 | -0.83293  | 0.228973 | 0.691581 | 21.92757 | 23.18626 | 11.50612 | 3.968787 | 14.70742 | 13.48922 |
| ENSMUSG00000030417 | 15_Pdcd5    | 988.5171901 | 0.466058  | 0.217482 | 0.691581 | 860.8601 | 786.6152 | 843.3987 | 1738.329 | 866.6065 | 835.2938 |
| ENSMUSG00000030512 | 13_Snrpa1   | 625.6005476 | 0.346133  | 0.232285 | 0.691581 | 596.9172 | 492.0639 | 563.7999 | 825.5078 | 739.8964 | 535.4181 |
| ENSMUSG00000030516 | 14_Tjp1     | 9733.95545  | 0.369568  | 0.223845 | 0.691581 | 7893.925 | 8544.565 | 9043.811 | 14560.49 | 9696.716 | 8664.228 |
| ENSMUSG00000030530 | 15_Furin    | 1777.973081 | -0.75383  | 0.214542 | 0.691581 | 1970.233 | 2093.633 | 2632.601 | 305.5966 | 2039.806 | 1625.969 |
| ENSMUSG00000030538 | 15_Cib1     | 713.866968  | -0.57537  | 0.250738 | 0.691581 | 842.1811 | 817.5302 | 903.2305 | 206.3769 | 726.3203 | 787.5627 |
| ENSMUSG00000030551 | 13_Nr2f2    | 1407.877849 | 0.514377  | 0.240686 | 0.691581 | 1072.827 | 1150.725 | 1255.318 | 2763.268 | 1079.298 | 1125.831 |
| ENSMUSG00000030557 | 16_Mef2a    | 3083.775938 | 0.466045  | 0.215661 | 0.691581 | 2653.236 | 2362.422 | 2754.565 | 5410.449 | 2630.366 | 2691.618 |
| ENSMUSG00000030562 | 16_Nox4     | 87.46829225 | 0.732464  | 0.222843 | 0.691581 | 64.15844 | 72.13502 | 60.98244 | 217.2911 | 53.17298 | 57.06976 |
| ENSMUSG00000030602 | 12_Pak4     | 3358.158168 | -0.59102  | 0.226247 | 0.691581 | 3426.386 | 3847.201 | 4836.023 | 1046.768 | 3657.623 | 3334.949 |
| ENSMUSG00000030611 | 10_Mpsr11   | 193.0154522 | -0.70317  | 0.218011 | 0.691581 | 256.6338 | 212.1113 | 248.5322 | 40.68007 | 195.7218 | 204.4135 |
| ENSMUSG00000030630 | 15_Fah      | 972.4479787 | -0.48339  | 0.254551 | 0.691581 | 1055.772 | 1149.008 | 1196.637 | 388.9412 | 1017.075 | 1027.256 |
| ENSMUSG00000030654 | 9_Arl6ip1   | 5584.792012 | 0.395238  | 0.222088 | 0.691581 | 4889.848 | 4700.799 | 4883.198 | 8823.606 | 5210.953 | 5000.349 |
| ENSMUSG00000030659 | 14_Nucb2    | 563.7367735 | 0.452416  | 0.249593 | 0.691581 | 516.5161 | 401.0364 | 510.8718 | 979.2983 | 543.0432 | 431.6549 |
| ENSMUSG00000030682 | 4_Cdip1     | 1529.13599  | -0.54965  | 0.212755 | 0.691581 | 1683.55  | 1732.958 | 2034.282 | 565.5522 | 1514.864 | 1643.609 |
| ENSMUSG00000030695 | 13_Aldoa    | 12481.32751 | -0.65091  | 0.226278 | 0.691581 | 13893.96 | 16099.85 | 15756.48 | 2968.653 | 13140.52 | 13028.51 |
| ENSMUSG00000030713 | 6_Klk7      | 0.797373133 | -3.0325   | 0.223405 | 0.691581 | 1.624264 | 0.85875  | 2.301224 | 0        | 0        | 0        |
| ENSMUSG00000030720 | 16_Cln3     | 396.7900973 | -0.61717  | 0.21422  | 0.691581 | 488.9036 | 486.0526 | 465.9979 | 115.0948 | 410.6765 | 414.0152 |
| ENSMUSG00000030733 | 10_Sh2b1    | 994.8953426 | -0.66425  | 0.251198 | 0.691581 | 1111.809 | 1240.894 | 1307.095 | 198.4394 | 984.2    |          |

|                     |             |              |          |          |          |          |          |          |          |          |          |
|---------------------|-------------|--------------|----------|----------|----------|----------|----------|----------|----------|----------|----------|
| ENSMUSG000000031553 | 15_Adam3    | 0.873211775  | 3.353126 | 0.254409 | 0.691581 | 0        | 0        | 0        | 2.97659  | 2.26268  | 0        |
| ENSMUSG000000031568 | 16_Rwdd4a   | 624.3778787  | 0.387306 | 0.233241 | 0.691581 | 518.9525 | 541.8714 | 562.6493 | 969.3763 | 608.661  | 544.7568 |
| ENSMUSG000000031574 | 7_Slar      | 63.20800851  | 0.421818 | 0.213747 | 0.691581 | 54.41286 | 59.25377 | 48.32571 | 81.36014 | 62.22371 | 74.1788  |
| ENSMUSG000000031604 | 10_Msmo1    | 4982.445714  | 0.445966 | 0.222245 | 0.691581 | 4288.87  | 3789.665 | 4577.135 | 8472.369 | 4693.93  | 4072.706 |
| ENSMUSG000000031617 | 16_Tmem184c | 377.4473775  | 0.533692 | 0.264446 | 0.691581 | 310.2345 | 322.8901 | 292.2555 | 740.1788 | 280.5723 | 318.505  |
| ENSMUSG000000031660 | 13_Brd7     | 1468.882633  | 0.310708 | 0.239235 | 0.691581 | 1302.66  | 1272.668 | 1358.873 | 1980.425 | 1547.673 | 1350.997 |
| ENSMUSG000000031669 | 9_Glms3     | 156.256622   | 0.397417 | 0.23537  | 0.691581 | 133.1897 | 149.4225 | 121.9649 | 235.1506 | 150.4682 | 147.3438 |
| ENSMUSG000000031683 | 16_Lsm6     | 888.5845882  | 0.347267 | 0.248084 | 0.691581 | 761.78   | 735.9489 | 849.1517 | 1303.747 | 838.323  | 842.5572 |
| ENSMUSG000000031736 | 10_Crnde    | 87.15160595  | 0.372064 | 0.232883 | 0.691581 | 65.78271 | 77.28752 | 85.1453  | 99.29771 | 99.5793  | 105.8385 |
| ENSMUSG000000031767 | 13_Nudt7    | 490.7025704  | 0.32755  | 0.249472 | 0.691581 | 435.3028 | 441.3976 | 429.1783 | 690.569  | 455.9301 | 491.8376 |
| ENSMUSG000000031772 | 17_Cntnap4  | 63.72888271  | -0.63335 | 0.239771 | 0.691581 | 79.58895 | 115.9313 | 36.81959 | 64.49279 | 30.54618 | 54.9945  |
| ENSMUSG000000031785 | 15_Adgrp1   | 643.2064979  | -0.63811 | 0.21911  | 0.691581 | 704.1186 | 778.8865 | 866.4109 | 169.6657 | 670.8847 | 669.2727 |
| ENSMUSG000000031787 | 7_Katnb1    | 333.2179362  | -0.7601  | 0.223072 | 0.691581 | 363.8352 | 415.6351 | 477.504  | 52.58643 | 334.8767 | 354.8702 |
| ENSMUSG000000031790 | 7_Mmp15     | 767.8549503  | -0.64397 | 0.254701 | 0.691581 | 834.8719 | 897.394  | 1076.973 | 166.6891 | 777.2307 | 853.9712 |
| ENSMUSG000000031805 | 17_Jak3     | 573.4940106  | -0.78276 | 0.235191 | 0.691581 | 650.5179 | 691.2939 | 834.1938 | 73.42256 | 592.8222 | 598.7137 |
| ENSMUSG000000031816 | 14_Mthfsd   | 717.8524705  | -0.57722 | 0.25011  | 0.691581 | 814.5686 | 852.739  | 911.2848 | 207.3691 | 713.8756 | 807.2777 |
| ENSMUSG000000031820 | 8_Babam1    | 1023.766397  | -0.57889 | 0.223049 | 0.691581 | 1167.034 | 1153.302 | 1358.873 | 329.4093 | 1122.289 | 1011.691 |
| ENSMUSG000000031823 | 13_Zdhc7    | 473.3364203  | -0.7131  | 0.232649 | 0.691581 | 528.698  | 594.2552 | 640.8909 | 85.32893 | 512.4971 | 478.3484 |
| ENSMUSG000000031848 | 14_Lsm4     | 377.5016167  | -0.82977 | 0.217676 | 0.691581 | 430.4301 | 444.8326 | 574.1554 | 44.64886 | 375.6049 | 395.3378 |
| ENSMUSG000000031860 | 17_Pbx4     | 5.832450356  | -1.19964 | 0.212209 | 0.691581 | 4.872793 | 10.305   | 9.204897 | 0.992197 | 3.39402  | 6.225792 |
| ENSMUSG000000031883 | 12_Car7     | 17.1858104   | -0.79301 | 0.235643 | 0.691581 | 25.98823 | 23.18626 | 16.10857 | 5.953181 | 9.050721 | 12.82791 |
| ENSMUSG000000031903 | 6_Pla2g15   | 339.1789027  | -0.40244 | 0.254583 | 0.691581 | 406.8782 | 423.3639 | 327.9245 | 189.5096 | 319.0379 | 368.3594 |
| ENSMUSG000000031906 | 8_Smpd3     | 12.0868556   | -0.10643 | 0.220694 | 0.691581 | 18.67904 | 17.175   | 12.65673 | 2.97659  | 3.39402  | 17.63975 |
| ENSMUSG000000031928 | 14_Mre11a   | 875.1004035  | 0.337104 | 0.213226 | 0.691581 | 787.7682 | 721.3502 | 811.1815 | 1206.511 | 855.2931 | 868.498  |
| ENSMUSG000000031936 | 9_Hephl1    | 285.8624115  | 0.321646 | 0.24227  | 0.691581 | 272.8764 | 231.8626 | 257.7371 | 374.0582 | 308.8558 | 269.7843 |
| ENSMUSG000000031950 | 7_Gabarapl2 | 2357.168761  | 0.330416 | 0.223688 | 0.691581 | 2094.489 | 2054.989 | 2115.976 | 3293.101 | 2382.602 | 2201.855 |
| ENSMUSG000000031952 | 4_Chts5     | 237.7190298  | -0.4948  | 0.229802 | 0.691581 | 295.6161 | 376.1326 | 162.2363 | 226.2209 | 148.2056 | 217.9027 |
| ENSMUSG000000031958 | 16_Ldhd     | 142.1970812  | -0.51541 | 0.222475 | 0.691581 | 151.8687 | 185.49   | 164.5375 | 64.49279 | 117.6594 | 169.134  |
| ENSMUSG000000031986 | 5_Sprtn     | 326.1003127  | -0.48701 | 0.231722 | 0.691581 | 362.211  | 340.0651 | 439.5338 | 144.8607 | 346.1901 | 323.7412 |
| ENSMUSG000000032013 | 5_Trim29    | 22000.36788  | -0.6662  | 0.243181 | 0.691581 | 24061.04 | 25757.35 | 31156.27 | 4556.168 | 23663.3  | 23108.07 |
| ENSMUSG000000032014 | 5_Oaf       | 267.5587275  | -0.65787 | 0.236371 | 0.691581 | 313.483  | 398.4601 | 270.3938 | 63.5006  | 265.8649 | 293.6499 |
| ENSMUSG000000032085 | 4_Tagln     | 1012.422032  | -0.50912 | 0.243035 | 0.691581 | 1002.171 | 1640.213 | 925.0921 | 507.0126 | 177.9979 | 1242.046 |
| ENSMUSG000000032103 | 10_Pus3     | 188.8486962  | 0.591486 | 0.213992 | 0.691581 | 164.0507 | 127.095  | 161.0857 | 387.949  | 141.4175 | 151.4943 |
| ENSMUSG000000032175 | 10_Tyk2     | 1021.810439  | -0.58577 | 0.236955 | 0.691581 | 1089.881 | 1254.634 | 1334.71  | 302.62   | 1053.278 | 1095.739 |
| ENSMUSG000000032177 | 16_Pde4a    | 273.0616889  | -0.48559 | 0.231515 | 0.691581 | 276.1249 | 343.5001 | 335.9787 | 122.0402 | 293.0171 | 267.7091 |
| ENSMUSG000000032184 | 4_Lysmd2    | 136.7038317  | 0.458489 | 0.220278 | 0.691581 | 120.1956 | 101.3325 | 124.2661 | 222.2521 | 113.134  | 139.0427 |
| ENSMUSG000000032207 | 9_Lipc      | 7.572805315  | -0.95695 | 0.244613 | 0.691581 | 12.18198 | 12.0225  | 5.753061 | 5.953181 | 2.26268  | 7.263424 |
| ENSMUSG000000032252 | 14_Glce     | 1321.316715  | 0.409547 | 0.218884 | 0.691581 | 1205.204 | 1117.234 | 1082.726 | 2110.403 | 1150.573 | 1261.761 |
| ENSMUSG000000032279 | 10_Idd3a    | 1681.955447  | 0.339506 | 0.248583 | 0.691581 | 1460.214 | 1411.785 | 1583.242 | 2450.726 | 1631.392 | 1554.373 |
| ENSMUSG000000032281 | 11_Acsbg1   | 447.2957273  | -0.61111 | 0.210442 | 0.691581 | 481.5944 | 535.0014 | 605.222  | 136.9232 | 457.0614 | 467.9721 |
| ENSMUSG000000032289 | 15_Thsd4    | 591.2125029  | -0.28233 | 0.253243 | 0.691581 | 630.2146 | 683.5652 | 632.8367 | 489.153  | 491.0016 | 620.504  |
| ENSMUSG000000032290 | 6_Ptprn9    | 1992.46406   | 0.327138 | 0.208959 | 0.691581 | 1759.078 | 1645.365 | 1898.51  | 2664.048 | 2106.555 | 1881.227 |
| ENSMUSG000000032297 | 11_Celf6    | 4.2605853    | -1.28057 | 0.218977 | 0.691581 | 5.684925 | 7.728752 | 4.602448 | 1.984394 | 4.52536  | 1.037632 |
| ENSMUSG000000032312 | 6_Csk       | 3439.060406  | -0.69987 | 0.219699 | 0.691581 | 3821.894 | 4048.149 | 4901.608 | 704.4597 | 3590.873 | 3567.379 |
| ENSMUSG000000032349 | 13_Elov15   | 2289.221133  | 0.450689 | 0.231177 | 0.691581 | 1904.45  | 1875.51  | 2023.927 | 4009.467 | 1875.762 | 2046.21  |
| ENSMUSG000000032459 | 9_Mrps22    | 287.091819   | 0.47409  | 0.212398 | 0.691581 | 253.3852 | 207.8176 | 260.0383 | 474.2701 | 312.2499 | 214.7898 |
| ENSMUSG000000032480 | 17_Dhx30    | 1184.404223  | -0.52871 | 0.225778 | 0.691581 | 1259.617 | 1435.83  | 1501.549 | 449.4652 | 116.886  | 1298.078 |
| ENSMUSG000000032481 | 16_Smarcc1  | 2239.578432  | 0.28837  | 0.234474 | 0.691581 | 1922.317 | 1993.159 | 2134.385 | 2873.402 | 2336.217 | 2177.99  |
| ENSMUSG000000032485 | 14_Scap     | 1573.759921  | -0.67718 | 0.248894 | 0.691581 | 1830.546 | 1835.149 | 2143.59  | 300.6356 | 1801.093 | 1531.545 |
| ENSMUSG000000032518 | 5_Rpsa      | 22593.87933  | -0.58402 | 0.23814  | 0.691581 | 26623.32 | 25516.05 | 29177.22 | 6601.085 | 22995.62 | 24649.99 |
| ENSMUSG000000032519 | 11_Slc25a38 | 292.3803659  | -0.62534 | 0.236321 | 0.691581 | 337.847  | 347.7938 | 378.5514 | 75.40696 | 293.0171 | 321.6659 |
| ENSMUSG000000032526 | 10_Deb1     | 185.3741373  | 0.393525 | 0.223049 | 0.691581 | 177.0448 | 166.5975 | 136.9228 | 268.8853 | 170.8324 | 191.9619 |
| ENSMUSG000000032536 | 9_Trak1     | 1432.898033  | -0.42968 | 0.222419 | 0.691581 | 1517.875 | 1638.495 | 1777.696 | 747.1242 | 1408.518 | 1507.679 |
| ENSMUSG000000032598 | 8_Nckip5d   | 321.3741283  | -0.67286 | 0.216443 | 0.691581 | 366.2716 | 370.9801 | 447.5881 | 76.39915 | 348.4528 | 318.553  |
| ENSMUSG000000032637 | 15_Atn2l    | 2064.305001  | -0.45454 | 0.213845 | 0.691581 | 2142.405 | 2365.857 | 2652.161 | 1028.908 | 2171.042 | 2025.458 |
| ENSMUSG000000032735 | 14_Ablm3    | 79.4392496   | -0.60129 | 0.21835  | 0.691581 | 64.15844 | 142.5525 | 80.54285 | 49.60984 | 46.38494 | 93.38689 |
| ENSMUSG000000032744 | 4_Heyl      | 85.99539886  | -0.60292 | 0.226515 | 0.691581 | 94.20733 | 127.095  | 89.74774 | 37.70348 | 52.04164 | 115.1772 |
| ENSMUSG000000032754 | 14_Slc8b1   | 2737.302016  | -0.66322 | 0.22467  | 0.691581 | 3004.077 | 3235.771 | 3826.936 | 634.0138 | 2912.069 | 2810.945 |
| ENSMUSG000000032766 | 9_Gngt11    | 266.3341125  | 0.672022 | 0.248108 | 0.691581 | 201.4088 | 261.0601 | 154.182  | 635.9982 | 148.2056 | 197.1501 |
| ENSMUSG000000032782 | 19_Cntrob   | 311.9081358  | -0.5222  | 0.225747 | 0.691581 | 308.6102 | 390.7314 | 403.8649 | 127.9934 | 288.4917 | 351.7573 |
| ENSMUSG000000032796 | 7_Lama1     | 72.9167315   | -0.60632 | 0.244776 | 0.691581 | 76.34042 | 111.6375 | 75.9404  | 25.79712 | 55.43567 | 92.34425 |
| ENSMUSG000000032816 | 14_Igdc4    | 230.4529278  | -0.50234 | 0.218516 | 0.691581 | 249.3246 | 370.1213 | 191.0016 | 238.1272 | 125.5788 | 208.564  |
| ENSMUSG000000032883 | 15_Acs3     | 1672.434235  | 0.511855 | 0.231257 | 0.691581 | 1416.359 | 1360.26  | 1360.024 | 3241.507 | 1329.325 | 1327.131 |
| ENSMUSG000000032977 | 8_Fam207a   | 655.1517612  | -0.62117 | 0.23928  | 0.691581 | 735.7918 | 759.1352 | 887.1219 | 167.6813 | 690.1175 | 691.063  |
| ENSMUSG000000033020 | 6_Polr2f    | 692.0512664  | -0.84281 | 0.233181 | 0.691581 | 740.6645 | 838.999  | 1086.178 | 67.46938 | 708.2189 | 710.778  |
| ENSMUSG000000033021 | 16_Gmppa    | 790.9213859  | -0.65354 | 0.229311 | 0.691581 | 864.9208 | 972.964  | 1063.166 | 186.533  | 862.0812 | 795.8638 |
| ENSMUSG000000033036 | 9_Gm7879    | 252.4720649  | 0.33349  | 0.221117 | 0.691581 | 221.7121 | 195.7951 | 253.1347 | 300.6356 | 298.6738 | 244.8812 |
| ENSMUSG000000033082 | 10_Clec1a   | 47.51713357  | 0.636455 | 0.251907 | 0.691581 | 31.67315 | 45.51376 | 34.51836 | 102.1963 | 32.80886 | 38.39239 |
| ENSMUSG000000033083 | 16_Tbc1d4   | 315.8769292  | 0.471753 | 0.235705 | 0.691581 | 263.1308 | 272.2238 | 258.8877 | 559.599  | 235.3187 | 306.1015 |
| ENSMUSG000000033102 | 14_Cdc14b   | 625.7943186  | 0.462584 | 0.213103 | 0.691581 | 521.3889 | 492.9226 | 564.9505 | 1079.51  | 566.8014 | 529.1924 |
| ENSMUSG000000033105 | 12_Lss      | 4204.3591126 | -0.38078 | 0.244299 | 0.691581 | 4699.809 | 4293.791 | 5274.406 | 2424.929 | 4356.791 | 4176.469 |
| ENSMUSG000000033128 | 8_Gga1      | 1410.412348  | -0.80853 | 0.221114 | 0.691581 | 1570.664 | 1748.415 | 2067.65  | 176.611  | 1390.417 | 1508.717 |
| ENSMUSG000000033227 | 7_Wnt6      | 61.8012706   | -0.45737 | 0.209012 | 0.691581 | 56.84925 | 77.28752 | 80.54285 | 52.58643 | 59.96103 | 43.58055 |
| ENSMUSG000000033253 | 18_Szt2     | 949.6863865  | -0.74235 | 0.20989  | 0.691581 | 1046.838 | 1213.414 | 1305.945 | 172.6422 | 954.851  | 1004.428 |
| ENSMUSG000000033272 | 12_Slc35a4  | 1787.514048  | -0.50808 | 0.244    |          |          |          |          |          |          |          |

|                    |                  |             |          |          |          |          |          |          |          |          |          |
|--------------------|------------------|-------------|----------|----------|----------|----------|----------|----------|----------|----------|----------|
| ENSMUSG00000034659 | 14_Tmem109       | 1810.237471 | -0.73513 | 0.21765  | 0.691581 | 1988.1   | 2342.671 | 2454.256 | 321.4718 | 1850.872 | 1904.055 |
| ENSMUSG00000034667 | 7_Xpot           | 2503.694316 | 0.35311  | 0.225943 | 0.691581 | 2038.452 | 2174.356 | 2384.068 | 3626.479 | 2490.08  | 2308.731 |
| ENSMUSG00000034684 | 12_Sema3f        | 2719.210788 | -0.67572 | 0.251331 | 0.691581 | 2828.656 | 3229.76  | 3975.365 | 523.8799 | 2966.374 | 2791.23  |
| ENSMUSG00000034706 | 16_Dnaic2        | 8.518140553 | -1.16955 | 0.214855 | 0.691581 | 13.80625 | 14.59875 | 6.903673 | 0.992197 | 3.39402  | 11.41395 |
| ENSMUSG00000034757 | 15_Tmub2         | 892.010931  | -0.49408 | 0.252642 | 0.691581 | 969.6858 | 1051.969 | 1108.039 | 346.2767 | 927.6899 | 948.3957 |
| ENSMUSG00000034758 | 12_Tle6          | 70.35411815 | -0.82121 | 0.218301 | 0.691581 | 75.52829 | 82.44002 | 97.80203 | 22.82053 | 66.74907 | 76.78477 |
| ENSMUSG00000034777 | 2_Vax2           | 3.007247246 | -1.69996 | 0.223735 | 0.691581 | 5.684925 | 6.870002 | 1.150612 | 0        | 2.26268  | 2.075264 |
| ENSMUSG00000034793 | 15_G6pc3         | 626.7920216 | -0.60934 | 0.251311 | 0.691581 | 698.4337 | 771.1577 | 801.9766 | 159.7437 | 604.1356 | 725.3048 |
| ENSMUSG00000034912 | 16_Mdga2         | 3.716319416 | 1.455724 | 0.228735 | 0.691581 | 4.060661 | 1.7175   | 0        | 7.937575 | 3.39402  | 5.18816  |
| ENSMUSG00000034926 | 3_Dhcr2a         | 19807.14256 | -0.62708 | 0.238482 | 0.691581 | 21623.83 | 22814.42 | 27697.53 | 4953.047 | 21280.51 | 20473.52 |
| ENSMUSG00000034928 | 16_Rnf44         | 2608.629924 | -0.46907 | 0.213465 | 0.691581 | 2698.715 | 2914.598 | 3473.698 | 1255.129 | 2606.608 | 2703.032 |
| ENSMUSG00000035011 | 15_Zbtb7a        | 3609.104947 | -0.31348 | 0.250354 | 0.691581 | 3492.98  | 3571.542 | 4934.975 | 2875.386 | 3518.468 | 3261.278 |
| ENSMUSG00000035020 | 11_Epgn          | 731.2679571 | 0.534763 | 0.221756 | 0.691581 | 670.8212 | 489.4876 | 631.686  | 1394.037 | 688.9861 | 512.5902 |
| ENSMUSG00000035033 | 15_Tbr1          | 0.999769357 | 3.555331 | 0.221361 | 0.691581 | 0        | 0        | 0        | 4.960984 | 0        | 1.037632 |
| ENSMUSG00000035041 | 8_Creb3i3        | 8.682367058 | -0.9047  | 0.228342 | 0.691581 | 9.745586 | 13.74    | 10.35551 | 2.97659  | 9.050721 | 6.225792 |
| ENSMUSG00000035198 | 9_Tubg1          | 761.3602514 | -0.71344 | 0.209768 | 0.691581 | 862.4844 | 942.9077 | 1032.099 | 155.7749 | 761.3919 | 813.5035 |
| ENSMUSG00000035203 | 15_Epn1          | 1917.517568 | -0.77527 | 0.237148 | 0.691581 | 2191.945 | 2385.608 | 2684.378 | 247.057  | 2044.332 | 1951.786 |
| ENSMUSG00000035372 | 1_1810055G02Rik  | 290.0539387 | -0.5606  | 0.227975 | 0.691581 | 326.4771 | 367.5451 | 342.8824 | 99.21968 | 316.7752 | 287.4241 |
| ENSMUSG00000035401 | 9_2210018M11Rik  | 1060.978642 | 0.307476 | 0.237303 | 0.691581 | 932.3277 | 894.8177 | 1018.292 | 1413.88  | 1079.298 | 1027.256 |
| ENSMUSG00000035448 | 8_Ccr3           | 0.715418181 | 3.059971 | 0.24058  | 0.691581 | 0        | 0        | 0        | 0.992197 | 2.26268  | 1.037632 |
| ENSMUSG00000035509 | 17_Fbxl21        | 26.68705442 | 0.5899   | 0.240462 | 0.691581 | 21.92757 | 25.76251 | 16.10857 | 40.68007 | 20.36412 | 35.27949 |
| ENSMUSG00000035530 | 13_Eif1          | 7050.217665 | 0.332774 | 0.23677  | 0.691581 | 6294.024 | 6048.178 | 6380.144 | 10095.6  | 6681.942 | 6601.415 |
| ENSMUSG00000035539 | 13_Ccdc180       | 1.897219532 | -2.1547  | 0.252136 | 0.691581 | 3.248529 | 6.011252 | 0        | 0.992197 | 1.13134  | 0        |
| ENSMUSG00000035569 | 16_Ankrd11       | 4498.727287 | -0.35946 | 0.248472 | 0.691581 | 4656.766 | 4973.023 | 5539.047 | 2721.596 | 4607.948 | 4493.984 |
| ENSMUSG00000035699 | 7_Slc51a         | 4.545215869 | -1.16864 | 0.253398 | 0.691581 | 6.497057 | 7.728752 | 4.602448 | 0.992197 | 2.26268  | 5.18816  |
| ENSMUSG00000035713 | 15_Usp35         | 68.41616337 | -0.54357 | 0.249143 | 0.691581 | 83.64961 | 99.61503 | 59.83183 | 28.77371 | 70.14309 | 68.48372 |
| ENSMUSG00000035722 | 15_Abca7         | 1225.665326 | -0.77436 | 0.237395 | 0.691581 | 1350.576 | 1542.315 | 1747.78  | 159.7437 | 1264.838 | 1288.739 |
| ENSMUSG00000035757 | 16_Selo          | 592.3244863 | -0.40636 | 0.240915 | 0.691581 | 624.5296 | 681.8477 | 719.1326 | 320.4796 | 578.1148 | 629.8427 |
| ENSMUSG00000035764 | 5_Fbxo45         | 832.6445453 | 0.403922 | 0.245977 | 0.691581 | 758.5315 | 653.5089 | 738.693  | 1353.356 | 785.15   | 706.6274 |
| ENSMUSG00000035798 | 13_Zdhhc17       | 371.9984246 | 0.466178 | 0.229796 | 0.691581 | 351.6532 | 308.2913 | 277.2975 | 643.9357 | 290.7544 | 360.0583 |
| ENSMUSG00000035828 | 10_Pim3          | 563.3494767 | -0.5139  | 0.241092 | 0.691581 | 652.9543 | 622.5939 | 712.2289 | 213.3223 | 579.2461 | 599.7513 |
| ENSMUSG00000035829 | 13_Ppp1r26       | 233.3066929 | -0.36831 | 0.252528 | 0.691581 | 267.1915 | 277.3763 | 243.9298 | 143.8685 | 219.48   | 247.9941 |
| ENSMUSG00000035847 | 15_Iids          | 3083.791785 | 0.429271 | 0.219533 | 0.691581 | 2568.774 | 2672.431 | 2644.107 | 5142.556 | 2647.336 | 2827.547 |
| ENSMUSG00000035949 | 15_Fbxw2         | 1506.732285 | 0.325088 | 0.215779 | 0.691581 | 1337.582 | 1281.255 | 1394.542 | 2054.84  | 1508.076 | 1464.099 |
| ENSMUSG00000035983 | 4_Gm7008         | 9.606740084 | -0.83793 | 0.248764 | 0.691581 | 12.99411 | 10.305   | 13.80735 | 10.91416 | 3.39402  | 6.225792 |
| ENSMUSG00000036057 | 11_Ptfn23        | 1365.114388 | -0.74842 | 0.213886 | 0.691581 | 1508.942 | 1747.557 | 1877.799 | 235.1506 | 1351.951 | 1469.287 |
| ENSMUSG00000036086 | 16_Zranb3        | 410.1421871 | 0.295659 | 0.241399 | 0.691581 | 373.5808 | 322.0313 | 409.6179 | 493.1218 | 441.2226 | 421.2786 |
| ENSMUSG00000036168 | 15_Ccdc38        | 18.87503015 | 0.843608 | 0.235582 | 0.691581 | 11.36985 | 15.4575  | 13.80735 | 47.62545 | 13.57608 | 14.1395  |
| ENSMUSG00000036180 | 14_Gatad2a       | 1974.693607 | -0.58686 | 0.251336 | 0.691581 | 1983.227 | 2309.179 | 2820.15  | 563.5678 | 2226.477 | 1945.56  |
| ENSMUSG00000036270 | 16_Edc4          | 1042.573851 | -0.68154 | 0.226643 | 0.691581 | 1200.331 | 1322.475 | 1330.108 | 219.2755 | 1065.722 | 1117.53  |
| ENSMUSG00000036304 | 13_Zdhhc23       | 24.14324605 | -0.56654 | 0.247451 | 0.691581 | 21.11544 | 30.91501 | 34.51836 | 15.87515 | 23.75814 | 18.67738 |
| ENSMUSG00000036362 | 2_P2ry13         | 40.15297735 | 0.566038 | 0.242433 | 0.691581 | 47.9158  | 25.76251 | 23.01224 | 44.64886 | 62.2371  | 37.35475 |
| ENSMUSG00000036368 | 7_Rmdn2          | 59.70959926 | 0.70287  | 0.242253 | 0.691581 | 53.60072 | 54.96001 | 27.61469 | 136.9232 | 38.46556 | 46.69344 |
| ENSMUSG00000036376 | 2_Abt1           | 219.651005  | -0.42004 | 0.229179 | 0.691581 | 255.8216 | 212.9701 | 285.3518 | 127.9934 | 237.5814 | 198.1877 |
| ENSMUSG00000036446 | 4_Lum            | 10292.58984 | 0.581686 | 0.209509 | 0.691581 | 8820.568 | 9147.407 | 6767.9   | 20816.29 | 6698.665 | 9504.71  |
| ENSMUSG00000036529 | 17_Sbf1          | 3019.769934 | -0.76502 | 0.229894 | 0.691581 | 3516.532 | 3733.846 | 4156.011 | 428.629  | 3115.711 | 3167.891 |
| ENSMUSG00000036537 | 6_Rnf13a1        | 81.64164874 | -0.5036  | 0.20899  | 0.691581 | 100.7044 | 95.32127 | 90.89836 | 41.67227 | 92.76989 | 68.48372 |
| ENSMUSG00000036550 | 15_Cnot1         | 5990.043497 | 0.279905 | 0.233011 | 0.691581 | 5586.657 | 5216.049 | 5429.739 | 7566.493 | 6363.788 | 5777.535 |
| ENSMUSG00000036644 | 15_Tbc1d9b       | 1310.444976 | -0.52997 | 0.252535 | 0.691581 | 1487.826 | 1621.32  | 1536.067 | 444.5042 | 1332.719 | 1440.233 |
| ENSMUSG00000036686 | 16_Cc2d1a        | 1161.409115 | -0.82593 | 0.210734 | 0.691581 | 1266.114 | 1453.864 | 1735.123 | 145.8529 | 1198.089 | 1169.411 |
| ENSMUSG00000036718 | 17_Micall2       | 267.4664501 | -0.64349 | 0.238059 | 0.691581 | 295.6161 | 320.3138 | 362.4428 | 65.48499 | 245.5008 | 315.4401 |
| ENSMUSG00000036779 | 12_Papd5         | 1268.425434 | 0.395583 | 0.241088 | 0.691581 | 1106.124 | 1061.415 | 1119.546 | 2037.972 | 1084.955 | 1200.54  |
| ENSMUSG00000036873 | 13_2410004B18Rik | 337.7443807 | 0.363785 | 0.232782 | 0.691581 | 312.6709 | 265.3538 | 308.364  | 488.1608 | 341.6647 | 310.252  |
| ENSMUSG00000036885 | 14_Arhgfr26      | 166.2725081 | 0.507621 | 0.236046 | 0.691581 | 132.3775 | 145.1288 | 134.6216 | 309.5654 | 124.4474 | 151.4943 |
| ENSMUSG00000036890 | 13_Gtdc1         | 351.79211   | 0.463018 | 0.212722 | 0.691581 | 279.3735 | 298.8451 | 309.5147 | 603.2557 | 316.7752 | 302.9886 |
| ENSMUSG00000036915 | 16_Kirrel2       | 5.833467908 | -1.28273 | 0.215016 | 0.691581 | 11.36985 | 7.728752 | 5.753061 | 4.960984 | 0        | 5.18816  |
| ENSMUSG00000036944 | 5_Tmem71         | 47.67700457 | 0.675276 | 0.209654 | 0.691581 | 36.54595 | 26.62126 | 47.1751  | 69.45378 | 80.32515 | 25.9408  |
| ENSMUSG00000036957 | 7_Lfn3           | 28.0075803  | -0.59256 | 0.244097 | 0.691581 | 21.11544 | 35.20876 | 44.87387 | 16.86735 | 27.15216 | 22.82791 |
| ENSMUSG00000037108 | 13_Zcwpw1        | 412.9960484 | 0.293637 | 0.231982 | 0.691581 | 368.708  | 340.0651 | 405.0155 | 471.2935 | 407.2824 | 485.6118 |
| ENSMUSG00000037190 | 12_Cyb56d12      | 209.6182528 | -0.55283 | 0.212406 | 0.691581 | 231.4577 | 244.7438 | 271.5445 | 79.37575 | 225.1367 | 205.4511 |
| ENSMUSG00000037351 | 9_Acrlb1         | 1801.525273 | -0.49302 | 0.232771 | 0.691581 | 1964.548 | 2117.678 | 2236.79  | 743.1554 | 1892.372 | 1854.249 |
| ENSMUSG00000037487 | 6_Ubr5           | 6672.147011 | 0.306019 | 0.234228 | 0.691581 | 5809.994 | 5806.01  | 6285.794 | 8928.779 | 6958.873 | 6243.432 |
| ENSMUSG00000037490 | 15_Slc2a12       | 419.7896488 | 0.341689 | 0.229838 | 0.691581 | 367.0837 | 380.4263 | 363.5934 | 540.7473 | 356.3721 | 510.515  |
| ENSMUSG00000037525 | 4_Bodn3d         | 122.2810599 | -0.65916 | 0.215455 | 0.691581 | 124.2562 | 130.53   | 194.4534 | 34.72689 | 121.0534 | 128.6664 |
| ENSMUSG00000037553 | 14_Zdhhc18       | 1263.545284 | -0.52369 | 0.224629 | 0.691581 | 1295.351 | 1462.452 | 1713.261 | 503.0438 | 1423.256 | 1183.936 |
| ENSMUSG00000037570 | 15_Mcsl1         | 1046.540691 | -0.83319 | 0.246581 | 0.691581 | 1232.005 | 1274.385 | 1515.356 | 92.2743  | 1086.086 | 1079.137 |
| ENSMUSG00000037606 | 17_Osblp5        | 3599.522207 | -0.57137 | 0.253754 | 0.691581 | 3875.495 | 4152.916 | 4880.897 | 1047.76  | 3808.091 | 3831.975 |
| ENSMUSG00000037622 | 14_Wdct1         | 2883.941529 | -0.72412 | 0.239362 | 0.691581 | 3207.11  | 3621.35  | 3950.051 | 467.3247 | 3045.588 | 3012.246 |
| ENSMUSG00000037740 | 8_Mrps26         | 493.7038099 | -0.48296 | 0.253807 | 0.691581 | 557.9348 | 553.0351 | 615.5775 | 202.4082 | 561.1447 | 472.1226 |
| ENSMUSG00000037747 | 9_Phyhlp1        | 150.6588783 | 0.473629 | 0.243418 | 0.691581 | 120.1956 | 122.8013 | 135.7722 | 249.0414 | 101.8206 | 174.3222 |
| ENSMUSG00000037771 | 11_Slc32a1       | 2.326476169 | -2.42937 | 0.22855  | 0.691581 | 5.684925 | 6.011252 | 0        | 0        | 2.26268  | 0        |
| ENSMUSG00000037916 | 13_Ndufv1        | 2136.59123  | -0.64073 | 0.24012  | 0.691581 | 2493.246 | 2437.992 | 2878.831 | 497.0906 | 2214.033 | 2298.355 |
| ENSMUSG00000037926 | 15_Ssh2          | 1305.960538 | 0.316267 | 0.214526 | 0.691581 | 1144.294 | 1205.685 | 1140.257 | 1738.329 | 1361.002 | 1246.196 |
| ENSMUSG00000037936 | 15_Scarb1        | 950.7437793 | -0.53917 | 0.23651  | 0.691581 | 1074.451 | 1087.178 | 1217.348 | 333.3781 | 950.3257 | 1041.783 |
| ENSMUSG00000037938 | 4_Ctchd5         | 235.4533813 | -0.57857 | 0.208791 | 0.691581 | 253.3852 | 270.5063 | 322.1714 | 83.34453 | 2        |          |

|                    |              |             |           |          |          |          |          |          |          |           |          |
|--------------------|--------------|-------------|-----------|----------|----------|----------|----------|----------|----------|-----------|----------|
| ENSMUSG00000039087 | 16_Rreb1     | 2958.598086 | -0.36494  | 0.240735 | 0.691581 | 3069.86  | 3119.84  | 3802.773 | 1827.627 | 3073.851  | 2857.639 |
| ENSMUSG00000039089 | 14_L3mbt3    | 410.351851  | 0.401339  | 0.225958 | 0.691581 | 360.5867 | 380.4263 | 319.8702 | 638.9747 | 395.969   | 366.2841 |
| ENSMUSG00000039115 | 13_Iiga9     | 347.853953  | -0.38348  | 0.21578  | 0.691581 | 378.4536 | 485.1939 | 317.5689 | 298.6512 | 253.4202  | 353.8325 |
| ENSMUSG00000039145 | 16_Camk1d    | 5704.363227 | 0.288107  | 0.25369  | 0.691581 | 5190.337 | 4877.701 | 5342.292 | 7565.501 | 5553.749  | 5696.6   |
| ENSMUSG00000039158 | 11_Akna      | 160.9708481 | -0.63814  | 0.226019 | 0.691581 | 233.8941 | 181.1963 | 172.5918 | 45.64105 | 193.4592  | 139.0427 |
| ENSMUSG00000039176 | 17_Polg      | 899.6243386 | -0.49713  | 0.218158 | 0.691581 | 1046.026 | 993.574  | 1119.546 | 384.9724 | 957.1137  | 896.5141 |
| ENSMUSG00000039205 | 16_Ciz1      | 1410.143662 | -0.63398  | 0.219795 | 0.691581 | 1500.82  | 1745.839 | 1898.51  | 377.0348 | 1391.548  | 1547.109 |
| ENSMUSG00000039262 | 16_Prrc2b    | 4648.16321  | -0.37376  | 0.219307 | 0.691581 | 4945.885 | 5397.245 | 5397.521 | 2836.691 | 4421.277  | 4890.36  |
| ENSMUSG00000039307 | 16_Hexdc     | 449.6009929 | -0.57638  | 0.22243  | 0.691581 | 502.7098 | 564.1989 | 547.6914 | 151.8061 | 393.7064  | 537.4934 |
| ENSMUSG00000039316 | 14_Rtrn1     | 105.5717067 | -0.42511  | 0.214512 | 0.691581 | 132.3775 | 107.3438 | 123.1155 | 65.48499 | 108.8086  | 96.49978 |
| ENSMUSG00000039357 | 1_Fut11      | 541.7834989 | 0.433159  | 0.245455 | 0.691581 | 484.0308 | 458.5726 | 440.6844 | 928.6962 | 446.8793  | 491.8376 |
| ENSMUSG00000039364 | 13_Sectm1b   | 430.4069836 | 0.438418  | 0.23082  | 0.691581 | 299.6768 | 311.7263 | 485.5583 | 378.027  | 655.0459  | 452.4076 |
| ENSMUSG00000039427 | 14_Alg1      | 354.4442284 | -0.63596  | 0.251483 | 0.691581 | 393.8841 | 425.9401 | 474.0522 | 81.36014 | 352.9781  | 398.4507 |
| ENSMUSG00000039438 | 6_Ttc36      | 395.2356487 | -0.53807  | 0.230962 | 0.691581 | 453.1698 | 475.7476 | 475.2028 | 142.8763 | 394.8377  | 429.5797 |
| ENSMUSG00000039449 | 14_Prp18     | 1545.347187 | 0.379025  | 0.237184 | 0.691581 | 1349.764 | 1255.493 | 1425.608 | 2396.155 | 1426.62   | 1418.443 |
| ENSMUSG00000039450 | 11_Dcxr      | 710.5253562 | -0.7091   | 0.239564 | 0.691581 | 795.0774 | 863.9027 | 986.0746 | 127.0012 | 651.6519  | 839.4443 |
| ENSMUSG00000039497 | 7_Dse        | 524.1243646 | 0.444922  | 0.227894 | 0.691581 | 444.2363 | 489.4876 | 398.1118 | 889.0083 | 455.9301  | 467.9721 |
| ENSMUSG00000039637 | 14_Coro7     | 1009.994824 | -0.69849  | 0.252488 | 0.691581 | 1137.797 | 1175.629 | 1435.964 | 171.65   | 1044.227  | 1094.702 |
| ENSMUSG00000039640 | 7_Mrpl12     | 675.6670867 | -0.65124  | 0.223039 | 0.691581 | 811.32   | 784.039  | 881.3689 | 164.7047 | 730.8457  | 681.7243 |
| ENSMUSG00000039660 | 16_D2Wsu81e  | 487.0416262 | -0.6543   | 0.25301  | 0.691581 | 520.5767 | 597.6902 | 668.5056 | 102.1963 | 536.2552  | 497.0258 |
| ENSMUSG00000039672 | 12_Kcne2     | 8.61486906  | -0.9893   | 0.226438 | 0.691581 | 12.18198 | 12.88125 | 9.204897 | 10.91416 | 3.39402   | 3.112896 |
| ENSMUSG00000039783 | 15_Kmo       | 30.43578382 | 0.674104  | 0.226468 | 0.691581 | 36.54595 | 12.88125 | 20.71102 | 35.71909 | 49.7786   | 26.97843 |
| ENSMUSG00000039849 | 5_Poif1      | 1369.374882 | -0.66358  | 0.212032 | 0.691581 | 1559.294 | 1635.06  | 1842.13  | 336.3547 | 1344.032  | 1499.378 |
| ENSMUSG00000039860 | 15_Srm3      | 5.956458062 | -1.29675  | 0.221803 | 0.691581 | 12.99411 | 11.16375 | 1.150612 | 4.960984 | 3.39402   | 2.075264 |
| ENSMUSG00000039952 | 19_Dag1      | 4991.912027 | -0.37003  | 0.22833  | 0.691581 | 5021.413 | 5909.919 | 5954.418 | 3055.96  | 4999.977  | 5039.779 |
| ENSMUSG00000040022 | 14_Rab11fip2 | 616.5642525 | 0.519117  | 0.225956 | 0.691581 | 505.1462 | 519.5439 | 495.9138 | 1185.675 | 451.4047  | 541.6439 |
| ENSMUSG00000040029 | 14_Ipo8      | 2028.913118 | 0.360048  | 0.247884 | 0.691581 | 1719.284 | 1653.933 | 1958.342 | 3059.935 | 1914.227  | 1867.738 |
| ENSMUSG00000040105 | 3_Ppapedc2   | 494.5583084 | 0.533831  | 0.22717  | 0.691581 | 366.2716 | 401.0364 | 445.2869 | 971.3607 | 375.6049  | 407.7894 |
| ENSMUSG00000040127 | 13_Sdr9c7    | 944.823878  | 0.34096   | 0.210966 | 0.691581 | 860.8601 | 729.0789 | 911.2848 | 1074.549 | 1280.898  | 862.2722 |
| ENSMUSG00000040170 | 13_Fmo2      | 943.0711439 | 0.585189  | 0.241916 | 0.691581 | 733.3554 | 766.0052 | 764.0064 | 1919.901 | 271.7688  | 1003.39  |
| ENSMUSG00000040219 | 4_Ttc12      | 223.4532387 | -0.29998  | 0.245475 | 0.691581 | 242.0154 | 266.2126 | 231.273  | 179.5876 | 417.2173  | 204.4135 |
| ENSMUSG00000040254 | 11_Sema3d    | 1108.918029 | 0.581792  | 0.226928 | 0.691581 | 912.0244 | 854.4565 | 898.6281 | 2351.506 | 720.6636  | 916.2291 |
| ENSMUSG00000040268 | 16_Plekha1   | 2349.345419 | 0.423232  | 0.241164 | 0.691581 | 2014.088 | 2041.249 | 1966.396 | 3988.631 | 2086.191  | 1999.517 |
| ENSMUSG00000040280 | 9_Ndufa42    | 97.98742155 | -0.76289  | 0.218227 | 0.691581 | 101.5165 | 134.8238 | 133.471  | 16.86735 | 99.55793  | 101.6879 |
| ENSMUSG00000040387 | 16_Klhl32    | 11.64183055 | 0.792461  | 0.245318 | 0.691581 | 8.121322 | 9.446252 | 8.054285 | 22.82053 | 17.919381 | 13.48922 |
| ENSMUSG00000040552 | 8_C3ar1      | 273.8665142 | 0.562566  | 0.219541 | 0.691581 | 332.9742 | 145.9875 | 184.0979 | 352.2299 | 427.6466  | 200.263  |
| ENSMUSG00000040569 | 13_Slc26a7   | 1130.884472 | 0.684997  | 0.248994 | 0.691581 | 929.0792 | 1009.032 | 663.9032 | 2712.666 | 479.6882  | 990.9368 |
| ENSMUSG00000040667 | 11_Nup88     | 1348.203156 | 0.313791  | 0.252089 | 0.691581 | 1121.555 | 1157.595 | 1327.806 | 1833.58  | 1398.336  | 1250.347 |
| ENSMUSG00000040729 | 6_Cep126     | 103.6395299 | 0.554738  | 0.209878 | 0.691581 | 77.15256 | 77.28752 | 97.80203 | 194.4706 | 84.85051  | 90.27399 |
| ENSMUSG00000040746 | 15_Rnf167    | 1246.317543 | -0.34375  | 0.236371 | 0.691581 | 1322.963 | 1408.35  | 1450.922 | 808.6404 | 1175.462  | 1311.567 |
| ENSMUSG00000040761 | 16_Spen      | 2629.450735 | -0.54914  | 0.220911 | 0.691581 | 2751.504 | 3082.055 | 3538.132 | 949.5324 | 2763.864  | 2691.618 |
| ENSMUSG00000040771 | 13_Oard1     | 625.2532192 | 0.297022  | 0.247994 | 0.691581 | 584.7352 | 531.5664 | 567.2518 | 819.5546 | 603.0043  | 645.4071 |
| ENSMUSG00000040785 | 17_Ttc3      | 3408.358278 | 0.395559  | 0.254503 | 0.691581 | 3000.828 | 2979.005 | 2852.367 | 5552.333 | 2751.419  | 3314.197 |
| ENSMUSG00000040857 | 15_Erf       | 1419.029959 | -0.71078  | 0.214834 | 0.691581 | 1586.906 | 1641.933 | 2056.144 | 287.7371 | 1471.933  | 1503.529 |
| ENSMUSG00000040913 | 10_Fbxw4     | 585.3010201 | -0.66753  | 0.226933 | 0.691581 | 653.7664 | 664.6727 | 836.495  | 133.9466 | 633.5505  | 589.375  |
| ENSMUSG00000040928 | 15_S100bpb   | 722.4145596 | 0.446805  | 0.252801 | 0.691581 | 599.3535 | 675.8364 | 559.1975 | 1269.02  | 556.6193  | 674.4608 |
| ENSMUSG00000040940 | 18_Arhgef1   | 2119.214565 | -0.78633  | 0.217136 | 0.691581 | 2458.324 | 2602.013 | 2988.14  | 299.6434 | 2126.919  | 2240.248 |
| ENSMUSG00000040945 | 13_Rcc2      | 2575.611546 | -0.69279  | 0.215355 | 0.691581 | 2824.596 | 2973.852 | 3748.694 | 561.5834 | 2732.186  | 2612.758 |
| ENSMUSG00000040990 | 17_Sh3kbp1   | 258.8147906 | 0.485277  | 0.226518 | 0.691581 | 249.3246 | 228.4276 | 169.14   | 451.4496 | 226.268   | 228.2791 |
| ENSMUSG00000041000 | 8_Trim62     | 142.5426906 | -0.46762  | 0.232137 | 0.691581 | 148.6202 | 176.0438 | 171.4412 | 73.42256 | 167.4383  | 118.2901 |
| ENSMUSG00000041040 | 12_Fam117b   | 419.505712  | 0.499254  | 0.253972 | 0.691581 | 393.072  | 349.5113 | 300.3098 | 804.6716 | 328.0886  | 341.3809 |
| ENSMUSG00000041168 | 9_Lonp1      | 1243.016154 | -0.65012  | 0.210418 | 0.691581 | 1348.952 | 1507.965 | 1698.303 | 325.4406 | 1277.283  | 1300.135 |
| ENSMUSG00000041261 | 9_Car8       | 42.14307159 | 0.725393  | 0.227408 | 0.691581 | 43.04301 | 25.76251 | 26.46408 | 95.25089 | 26.02082  | 36.31712 |
| ENSMUSG00000041319 | 13_Thoc6     | 330.8208235 | -0.62138  | 0.232383 | 0.691581 | 364.6473 | 343.5001 | 494.7632 | 92.2743  | 347.3214  | 342.4186 |
| ENSMUSG00000041362 | 16_Shtn1     | 1103.307112 | 0.352892  | 0.225164 | 0.691581 | 933.952  | 881.9365 | 1091.931 | 1550.804 | 1163.018  | 998.202  |
| ENSMUSG00000041375 | 18_Ccdc9     | 972.1882193 | -0.54099  | 0.23735  | 0.691581 | 1045.214 | 1161.03  | 1250.715 | 338.391  | 1001.236  | 1036.594 |
| ENSMUSG00000041417 | 15_Pik3r1    | 2909.689498 | 0.471964  | 0.221318 | 0.691581 | 2390.105 | 2480.071 | 2443.9   | 5207.049 | 2304.54   | 2632.473 |
| ENSMUSG00000041445 | 8_Mmm2       | 164.5747709 | -0.37769  | 0.231918 | 0.691581 | 200.5966 | 206.1001 | 150.7302 | 118.0714 | 170.8324  | 141.118  |
| ENSMUSG00000041477 | 14_Dcp1b     | 317.46688   | -0.31581  | 0.225924 | 0.691581 | 300.5378 | 342.6413 | 383.1538 | 240.1116 | 304.3305  | 304.0262 |
| ENSMUSG00000041528 | 15_Rnf123    | 1098.91073  | -0.7059   | 0.213061 | 0.691581 | 1245.811 | 1372.283 | 1469.332 | 226.2209 | 1116.633  | 1163.186 |
| ENSMUSG00000041570 | 14_Camsap2   | 2317.46976  | 0.384602  | 0.213773 | 0.691581 | 2027.082 | 1963.103 | 2041.186 | 3543.135 | 2245.71   | 2084.603 |
| ENSMUSG00000041644 | 14_Slc5a12   | 0.805142807 | -0.304485 | 0.220888 | 0.691581 | 0.812132 | 1.1715   | 2.301224 | 0        | 0         | 0        |
| ENSMUSG00000041671 | 13_Pyroxdl1  | 1401.161771 | 0.377132  | 0.209366 | 0.691581 | 1160.537 | 1099.2   | 1397.994 | 2036.98  | 1401.73   | 1310.529 |
| ENSMUSG00000041688 | 16_Amot      | 188.3149182 | 0.623722  | 0.243943 | 0.691581 | 142.1231 | 179.4788 | 123.1155 | 415.7305 | 108.6086  | 160.833  |
| ENSMUSG00000041840 | 7_Haus1      | 284.6874339 | 0.405545  | 0.219135 | 0.691581 | 256.6338 | 224.1338 | 254.2853 | 440.5354 | 265.8649  | 266.6714 |
| ENSMUSG00000041841 | 7_Rpl37      | 6489.464283 | -0.64031  | 0.248688 | 0.691581 | 7910.167 | 7503.759 | 8305.118 | 1432.732 | 6740.524  | 7044.484 |
| ENSMUSG00000041936 | 18_Agm       | 5213.104873 | -0.53887  | 0.24194  | 0.691581 | 5504.632 | 6140.064 | 6881.811 | 1795.876 | 5347.845  | 5608.401 |
| ENSMUSG00000041954 | 16_Tnfrsf18  | 126.0675646 | -0.73109  | 0.235878 | 0.691581 | 176.2327 | 135.6825 | 159.9351 | 21.82833 | 140.2862  | 122.4406 |
| ENSMUSG00000041958 | 10_Pigs      | 1062.110688 | -0.55315  | 0.245252 | 0.691581 | 1144.294 | 1269.233 | 1376.132 | 343.3001 | 1158.492  | 1081.213 |
| ENSMUSG00000042105 | 18_Innp5f    | 1186.067159 | 0.439498  | 0.221284 | 0.691581 | 1047.651 | 948.919  | 1024.045 | 1993.323 | 967.2958  | 1135.169 |
| ENSMUSG00000042198 | 12_Chchd7    | 423.9718872 | 0.458949  | 0.244416 | 0.691581 | 378.4536 | 364.9688 | 327.9245 | 756.054  | 356.3721  | 360.0583 |
| ENSMUSG00000042216 | 13_Sgsm1     | 511.1026555 | -0.61351  | 0.22557  | 0.691581 | 536.0072 | 552.1764 | 766.3077 | 150.8139 | 511.3657  | 549.945  |
| ENSMUSG00000042228 | 14_Lyn       | 1411.40486  | 0.314593  | 0.22091  | 0.691581 | 1310.781 | 1102.635 | 1361.174 | 1681.774 | 1701.536  | 1310.529 |
| ENSMUSG00000042284 | 9_Iiga1      | 213.6303289 | 0.529496  | 0.247925 | 0.691581 | 210.3422 | 179.4788 | 134.6216 | 412.7539 | 176.4891  | 168.0964 |
| ENSMUSG00000042350 | 13_Arel1     | 2061.005464 | 0.29054   | 0.230799 | 0.691581 | 176      |          |          |          |           |          |

|                    |                  |              |          |          |          |          |          |          |          |          |          |
|--------------------|------------------|--------------|----------|----------|----------|----------|----------|----------|----------|----------|----------|
| ENSMUSG00000044562 | 10_Rasip1        | 68.16558898  | -0.65982 | 0.232862 | 0.691581 | 68.2191  | 83.29877 | 98.95264 | 18.85174 | 57.69835 | 81.97293 |
| ENSMUSG00000044937 | 14_Ttc41         | 69.44767314  | 0.484082 | 0.219169 | 0.691581 | 51.16433 | 61.83002 | 60.98244 | 96.24309 | 52.04164 | 94.42452 |
| ENSMUSG00000044949 | 113_Ubltd2       | 113.0666814  | -0.41023 | 0.219714 | 0.691581 | 121.8198 | 133.965  | 131.1698 | 69.45378 | 112.0027 | 190.989  |
| ENSMUSG00000044966 | 4_Fbxa048        | 25.44477809  | 0.620826 | 0.227443 | 0.691581 | 22.7397  | 14.59875 | 23.01224 | 43.65666 | 23.75814 | 24.90317 |
| ENSMUSG00000045009 | 9_Prt3           | 6.4744091537 | -1.05777 | 0.24484  | 0.691581 | 6.497057 | 9.446252 | 10.35551 | 1.984394 | 2.26268  | 8.301057 |
| ENSMUSG00000045083 | 14_Lingo2        | 2.683126237  | -1.48154 | 0.233501 | 0.691581 | 4.060661 | 4.293751 | 3.451836 | 0.992197 | 2.26268  | 1.037632 |
| ENSMUSG00000045092 | 8_Stpr1          | 132.6449555  | 0.418391 | 0.213314 | 0.691581 | 113.6985 | 121.0838 | 105.8563 | 200.4238 | 132.3668 | 122.4406 |
| ENSMUSG00000045128 | 8_Rpi18a         | 13293.67641  | -0.68754 | 0.216111 | 0.691581 | 16096.46 | 15409.41 | 17702.17 | 2880.347 | 13166.54 | 14507.13 |
| ENSMUSG00000045180 | 13_Shroom2       | 926.9577153  | 0.317255 | 0.220691 | 0.691581 | 835.684  | 839.8577 | 800.826  | 1240.246 | 967.2958 | 877.8367 |
| ENSMUSG00000045281 | 5_Gpr20          | 3.703833462  | -1.32032 | 0.248282 | 0.691581 | 4.872793 | 8.587502 | 2.301224 | 0.992197 | 3.39402  | 2.075264 |
| ENSMUSG00000045374 | 18_Wdr81         | 575.7563906  | -0.80525 | 0.220463 | 0.691581 | 649.7057 | 752.2652 | 795.073  | 73.42256 | 615.449  | 568.6224 |
| ENSMUSG00000045435 | 9_Tmem60         | 291.4945186  | 0.487808 | 0.211623 | 0.691581 | 291.5555 | 208.6763 | 227.8212 | 504.036  | 264.7336 | 252.1446 |
| ENSMUSG00000045498 | 1_Pcdhb3         | 16.62522136  | -0.75504 | 0.24163  | 0.691581 | 18.67904 | 18.8925  | 25.31347 | 18.85174 | 4.52536  | 13.48922 |
| ENSMUSG00000045503 | 16_Sys1          | 647.9743697  | -0.50347 | 0.2247   | 0.691581 | 717.1127 | 782.3215 | 780.115  | 266.9009 | 648.2579 | 693.1382 |
| ENSMUSG00000045555 | 3_Mettl24        | 8.047845793  | -1.01129 | 0.222568 | 0.691581 | 5.684925 | 9.446252 | 17.25918 | 2.97659  | 5.656701 | 7.263424 |
| ENSMUSG00000045576 | 16_Stl7l         | 356.4471521  | 0.430923 | 0.235895 | 0.691581 | 311.8588 | 271.3651 | 327.9245 | 591.3493 | 302.0678 | 334.1175 |
| ENSMUSG00000045648 | 15_Vwv21         | 1.322929087  | 3.95667  | 0.243055 | 0.691581 | 0        | 0        | 0        | 7.937575 | 0        | 0        |
| ENSMUSG00000045659 | 17_Plekha7       | 3209.956053  | -0.49098 | 0.210418 | 0.691581 | 3320.808 | 3582.706 | 4349.314 | 1460.514 | 3306.907 | 3239.487 |
| ENSMUSG00000045752 | 12_Tss04         | 352.2775311  | -0.78197 | 0.233688 | 0.691581 | 408.5025 | 442.2564 | 485.5583 | 45.64105 | 365.4229 | 366.2841 |
| ENSMUSG00000045975 | 7_C2cd2          | 2520.644252  | 0.298323 | 0.254107 | 0.691581 | 2165.144 | 2188.096 | 2430.093 | 3393.313 | 2440.301 | 2506.919 |
| ENSMUSG00000045980 | 13_Tmem104       | 294.8045851  | -0.69746 | 0.238415 | 0.691581 | 291.5555 | 364.1101 | 438.3832 | 58.53961 | 337.1394 | 279.123  |
| ENSMUSG00000046027 | 16_Stard5        | 358.591752   | 0.318202 | 0.250262 | 0.691581 | 324.8529 | 286.8226 | 346.3342 | 480.2233 | 356.3721 | 356.9454 |
| ENSMUSG00000046056 | 14_Sbsn          | 215.5375308  | -0.67797 | 0.226511 | 0.691581 | 259.0702 | 205.2413 | 331.3763 | 55.56302 | 274.9156 | 167.0588 |
| ENSMUSG00000046269 | 16_Usp27x        | 81.70224511  | 0.542597 | 0.214277 | 0.691581 | 69.84337 | 65.26502 | 64.43428 | 135.931  | 101.8206 | 52.91924 |
| ENSMUSG00000046345 | 4_Smco1          | 5.699595118  | 1.338296 | 0.231845 | 0.691581 | 2.436397 | 6.011252 | 1.150612 | 16.86735 | 5.656701 | 2.075264 |
| ENSMUSG00000046432 | 12_Ngfr1p        | 514.6251632  | -0.42504 | 0.234662 | 0.691581 | 592.8565 | 634.6164 | 541.9383 | 272.8541 | 470.6375 | 574.8482 |
| ENSMUSG00000046761 | 12_Fam83h        | 5174.160822  | -0.73119 | 0.225016 | 0.691581 | 5545.239 | 5865.264 | 7963.386 | 920.7586 | 5529.99  | 5220.327 |
| ENSMUSG00000046844 | 6_Valt1l         | 735.6605779  | -0.49163 | 0.226964 | 0.691581 | 829.9991 | 1142.997 | 606.3726 | 805.6638 | 383.5243 | 645.4071 |
| ENSMUSG00000046982 | 10_Tshz1         | 846.7770283  | -0.31304 | 0.239441 | 0.691581 | 860.8601 | 973.8228 | 980.3215 | 654.8499 | 693.5115 | 917.2667 |
| ENSMUSG00000047220 | 5_Ccdc36         | 5.75037822   | 1.188007 | 0.216779 | 0.691581 | 3.248529 | 1.7175   | 5.753061 | 7.937575 | 3.39402  | 12.45158 |
| ENSMUSG00000047281 | 3_Sfn            | 19569.49581  | -0.88978 | 0.244182 | 0.691581 | 21945.44 | 22896.86 | 31417.46 | 1316.645 | 21730.78 | 18109.79 |
| ENSMUSG00000047284 | 14_Neur14        | 925.2727966  | -0.62535 | 0.247594 | 0.691581 | 1072.827 | 1168.759 | 1126.449 | 223.2443 | 880.1826 | 1080.175 |
| ENSMUSG00000047454 | 11_Gphn          | 1097.071851  | 0.291389 | 0.245896 | 0.691581 | 969.6858 | 903.4052 | 1087.328 | 1384.115 | 1186.776 | 1051.121 |
| ENSMUSG00000047466 | 9_8030462N17Rik  | 454.9674879  | 0.347936 | 0.248595 | 0.691581 | 421.4966 | 407.9064 | 371.6477 | 656.8343 | 467.2435 | 404.6765 |
| ENSMUSG00000047547 | 14_Cltb          | 3910.801483  | -0.39251 | 0.238357 | 0.691581 | 3979.448 | 4290.316 | 5048.886 | 2227.482 | 4052.46  | 3866.217 |
| ENSMUSG00000047591 | 4_Mafa           | 0.748729485  | -2.95764 | 0.239605 | 0.691581 | 1.624264 | 1.7175   | 1.150612 | 0        | 0        | 0        |
| ENSMUSG00000047675 | 15_Rps8          | 14468.18118  | -0.57447 | 0.230975 | 0.691581 | 17168.47 | 16783.41 | 17981.77 | 4505.566 | 14274.12 | 16095.75 |
| ENSMUSG00000047766 | 15_Lrrc49        | 229.0838398  | 0.287009 | 0.24186  | 0.691581 | 203.8452 | 217.2638 | 197.9053 | 266.9009 | 248.8948 | 239.693  |
| ENSMUSG00000047804 | 15_Akap10        | 865.2171978  | 0.42163  | 0.218174 | 0.691581 | 704.9307 | 717.0564 | 797.3742 | 1393.044 | 859.8184 | 719.079  |
| ENSMUSG00000047963 | 7_Stbd1          | 152.1879966  | 0.398568 | 0.218406 | 0.691581 | 112.0742 | 127.095  | 155.3326 | 204.3925 | 135.7608 | 178.4727 |
| ENSMUSG00000047989 | 11_Ino80c        | 793.3589149  | 0.30897  | 0.25476  | 0.691581 | 727.6704 | 674.9777 | 723.735  | 1082.487 | 813.5649 | 736.7188 |
| ENSMUSG00000048520 | 16_Fbxl13        | 2.105832753  | 1.964799 | 0.220412 | 0.691581 | 1.624264 | 0.85875  | 0        | 6.945378 | 1.14334  | 2.075264 |
| ENSMUSG00000048720 | 7_Tbcl1d12       | 262.1987779  | 0.589805 | 0.250512 | 0.691581 | 204.6573 | 206.1001 | 217.4657 | 575.4742 | 164.0443 | 205.4511 |
| ENSMUSG00000048732 | 5_Khl11          | 144.0350773  | 0.347375 | 0.240588 | 0.691581 | 126.6926 | 109.0613 | 144.9771 | 180.5798 | 161.7816 | 141.118  |
| ENSMUSG00000048794 | 14_Ccdc37        | 13.07165597  | -0.73053 | 0.21497  | 0.691581 | 18.67904 | 16.31625 | 13.80735 | 7.937575 | 11.3134  | 10.37632 |
| ENSMUSG00000048827 | 11_Pkd13         | 15.4694497   | -0.70298 | 0.244899 | 0.691581 | 17.86691 | 15.4575  | 24.16285 | 6.945378 | 16.7901  | 11.41395 |
| ENSMUSG00000048856 | 8_Slc25a47       | 33.08041749  | -0.76302 | 0.216234 | 0.691581 | 38.98234 | 45.51376 | 40.27142 | 6.945378 | 29.41484 | 37.35475 |
| ENSMUSG00000048874 | 15_Phl3          | 1982.937617  | 0.363571 | 0.241601 | 0.691581 | 1680.301 | 1685.727 | 1837.528 | 3004.372 | 1764.891 | 1924.807 |
| ENSMUSG00000048988 | 8_Elfn1          | 115.5879484  | -0.70717 | 0.234328 | 0.691581 | 142.9353 | 147.705  | 139.2241 | 22.82053 | 139.1548 | 101.6879 |
| ENSMUSG00000049037 | 8_Clec4a1        | 162.2753805  | 0.608414 | 0.242949 | 0.691581 | 185.9783 | 79.86377 | 119.6637 | 242.096  | 256.8142 | 89.23636 |
| ENSMUSG00000049097 | 9_Ankrd34a       | 3.062711118  | -1.35456 | 0.251329 | 0.691581 | 4.872793 | 6.011252 | 2.301224 | 1.984394 | 1.13134  | 2.075264 |
| ENSMUSG00000049305 | 6_Cdc671         | 954.8868688  | -0.51336 | 0.250181 | 0.691581 | 1015.977 | 1127.539 | 1225.402 | 351.2377 | 980.8719 | 1028.293 |
| ENSMUSG00000049357 | 11_4933408B17Rik | 14.72671215  | 0.793917 | 0.246468 | 0.691581 | 14.61838 | 5.152501 | 12.65673 | 28.77371 | 14.70742 | 12.45158 |
| ENSMUSG00000049382 | 9_Krt8           | 1426.020044  | -0.6513  | 0.242949 | 0.691581 | 1560.106 | 1847.172 | 1820.268 | 321.4718 | 1290.859 | 1716.243 |
| ENSMUSG00000049420 | 8_Tmem200a       | 47.62473511  | 0.599603 | 0.219817 | 0.691581 | 41.41874 | 34.35001 | 37.9702  | 91.28211 | 35.07154 | 45.65581 |
| ENSMUSG00000049470 | 13_Aff4          | 5752.198559  | 0.418032 | 0.210822 | 0.691581 | 5044.153 | 4745.454 | 4984.452 | 9317.72  | 5141.941 | 5279.472 |
| ENSMUSG00000049521 | 1_Ccdc42ep1      | 429.4950703  | -0.84649 | 0.234323 | 0.691581 | 531.1344 | 580.5152 | 544.2395 | 39.68787 | 393.7064 | 487.6871 |
| ENSMUSG00000049532 | 10_Sall2         | 103.8863832  | -0.49822 | 0.237617 | 0.691581 | 121.0077 | 170.0325 | 73.63917 | 94.2587  | 67.88041 | 96.99879 |
| ENSMUSG00000049577 | 14_Zfpm1         | 69.80045501  | -0.90587 | 0.254753 | 0.691581 | 70.6555  | 91.88627 | 110.4588 | 3.968787 | 71.27443 | 70.5598  |
| ENSMUSG00000049653 | 4_Spatc1         | 0.756499159  | -2.97035 | 0.246611 | 0.691581 | 0.812132 | 2.576251 | 1.150612 | 0        | 0        | 0        |
| ENSMUSG00000049721 | 14_Gal3st1       | 168.0784476  | -0.68386 | 0.212308 | 0.691581 | 189.2268 | 190.6425 | 241.6285 | 40.68007 | 159.519  | 186.7738 |
| ENSMUSG00000049858 | 7_Suox           | 220.8910458  | -0.39868 | 0.227759 | 0.691581 | 230.6455 | 293.6926 | 228.9718 | 136.9232 | 229.662  | 205.4511 |
| ENSMUSG00000049940 | 7_Pgrmc2         | 1021.426001  | 0.384843 | 0.243912 | 0.691581 | 838.1204 | 900.829  | 919.3391 | 1613.312 | 909.5974 | 947.3581 |
| ENSMUSG00000050010 | 8_Shisa3         | 51.46531317  | 0.5543   | 0.231699 | 0.691581 | 43.04301 | 46.37251 | 35.66898 | 93.2665  | 39.5969  | 50.84397 |
| ENSMUSG00000050105 | 5_Grrp1          | 14.35739607  | -1.06145 | 0.21805  | 0.691581 | 14.61838 | 13.74    | 29.91591 | 0.992197 | 11.3134  | 15.56448 |
| ENSMUSG00000050106 | 17_Tmc8          | 72.27626365  | -0.75255 | 0.226369 | 0.691581 | 77.15256 | 86.73377 | 108.1575 | 12.89856 | 79.19381 | 69.52135 |
| ENSMUSG00000050141 | 13_Fam205c       | 2.167280275  | 1.969476 | 0.237924 | 0.691581 | 0        | 2.576251 | 0        | 2.97659  | 2.26268  | 5.18816  |
| ENSMUSG00000050390 | 12_C77080        | 4911.082575  | -0.65484 | 0.249589 | 0.691581 | 5081.511 | 5472.815 | 7466.322 | 1066.612 | 5334.269 | 5844.967 |
| ENSMUSG00000050505 | 7_Pcdh20         | 75.3200967   | 0.682682 | 0.250176 | 0.691581 | 51.16433 | 59.25377 | 63.28367 | 167.6813 | 31.67752 | 78.00064 |
| ENSMUSG00000050777 | 7_Tmem37         | 67.72205629  | -0.61516 | 0.219082 | 0.691581 | 80.40109 | 92.74502 | 72.48856 | 22.82053 | 61.09237 | 76.78477 |
| ENSMUSG00000051107 | 4_Gm15440        | 181.0612618  | -0.66622 | 0.244998 | 0.691581 | 185.9783 | 238.7326 | 241.6285 | 39.68787 | 169.701  | 210.6393 |
| ENSMUSG00000051113 | 9_Fam71e1        | 31.44401011  | -0.69782 | 0.226168 | 0.691581 | 32.48529 | 43.79626 | 40.27142 | 8.929771 | 26.2028  | 26.97843 |
| ENSMUSG00000051184 | 6_Zfp524         | 228.1935692  | -0.95155 | 0.246655 | 0.691581 | 262.3187 | 276.5176 | 363.5934 | 9.921968 | 228.5078 | 228.2791 |
| ENSMUSG00000051255 | 5_Gm6563         | 258.3178758  | 0.527729 | 0.220323 | 0.691581 | 220.9    | 148.5638 | 265.7914 | 460.3793 | 210.4293 | 243.8435 |
| ENSMUSG00000051650 | 10_B3gn2         | 256.8661881  | -0.78638 | 0.213183 | 0.691581 | 304.5496 | 273.9413 | 396.9612 | 40.68007 | 300      |          |

|                     |                  |               |          |          |          |          |          |          |          |          |          |
|---------------------|------------------|---------------|----------|----------|----------|----------|----------|----------|----------|----------|----------|
| ENSMUSG00000054836  | 12_Elp6          | 126.651849    | -0.47693 | 0.252932 | 0.691581 | 146.9959 | 144.27   | 150.7302 | 55.56302 | 135.7608 | 126.5911 |
| ENSMUSG00000054855  | 13_Rnd1          | 40.49493291   | 0.060688 | 0.22931  | 0.691581 | 34.92168 | 22.32751 | 39.12081 | 27.78151 | 69.01175 | 49.80634 |
| ENSMUSG00000054893  | 15_Zfp667        | 63.88727689   | 0.621115 | 0.215838 | 0.691581 | 44.66727 | 62.68877 | 43.72326 | 123.0324 | 40.72824 | 68.48372 |
| ENSMUSG00000054939  | 6_Zfp174         | 123.5275384   | 0.406824 | 0.233313 | 0.691581 | 110.45   | 104.7675 | 103.5551 | 188.5174 | 117.6594 | 116.2148 |
| ENSMUSG00000054966  | 13_Lmtd1         | 3.872135808   | -1.44128 | 0.213043 | 0.691581 | 0.060661 | 9.448252 | 3.451836 | 0.992197 | 1.13134  | 4.150528 |
| ENSMUSG00000055239  | 10_Kcmf1         | 2264.161749   | 0.350891 | 0.223749 | 0.691581 | 1905.262 | 1873.793 | 2191.916 | 3249.445 | 2245.71  | 2118.845 |
| ENSMUSG00000055319  | 8_Sec23ip        | 1346.454827   | 0.31119  | 0.253499 | 0.691581 | 1134.549 | 1165.324 | 1305.945 | 1829.611 | 1408.518 | 1234.782 |
| ENSMUSG00000055489  | 7_Ano5           | 56.32129406   | 1.023278 | 0.219436 | 0.691581 | 30.86102 | 54.10126 | 26.46408 | 174.6266 | 12.44474 | 39.43002 |
| ENSMUSG00000055561  | 9_Spink5         | 3034.858579   | 0.498012 | 0.244424 | 0.691581 | 2718.206 | 1671.128 | 3159.581 | 4834.975 | 3783.201 | 2042.06  |
| ENSMUSG00000055943  | 5_Emc7           | 1123.331516   | 0.419955 | 0.223349 | 0.691581 | 944.5097 | 961.8002 | 976.8697 | 1847.47  | 1008.024 | 1001.315 |
| ENSMUSG000000596054 | 9_S100a8         | 55.76461483   | 0.864335 | 0.232806 | 0.691581 | 62.53418 | 21.46876 | 34.51836 | 111.126  | 89.37587 | 15.56448 |
| ENSMUSG000000596211 | 13_R3hdm1        | 1619.925568   | 0.368036 | 0.230258 | 0.691581 | 1328.648 | 1444.418 | 1470.482 | 2439.812 | 1566.906 | 1469.287 |
| ENSMUSG000000596300 | 14_Gm13247       | 3.964024896   | 1.445989 | 0.226393 | 0.691581 | 3.248529 | 0.85875  | 2.301224 | 11.90636 | 3.39402  | 2.075264 |
| ENSMUSG000000596458 | 16_Mok           | 87.2982544    | -0.58359 | 0.237721 | 0.691581 | 117.7592 | 89.31002 | 107.0069 | 31.7503  | 69.01175 | 108.9514 |
| ENSMUSG000000596724 | 14_Nbeal2        | 8417.463859   | -0.80808 | 0.239968 | 0.691581 | 8828.689 | 10696.59 | 12619.91 | 915.7977 | 8633.256 | 8810.534 |
| ENSMUSG000000597182 | 14_Scn3a         | 6.233041537   | 0.974359 | 0.248443 | 0.691581 | 5.684925 | 3.435001 | 3.451836 | 11.90636 | 5.656701 | 7.263424 |
| ENSMUSG000000597454 | 5_Lypd3          | 11405.38547   | -0.72274 | 0.216921 | 0.691581 | 12387.45 | 12844.33 | 17380    | 2204.661 | 12294.27 | 11321.6  |
| ENSMUSG000000597531 | 13_Dtnbp1        | 641.0959045   | -0.5028  | 0.247907 | 0.691581 | 736.6039 | 746.2539 | 772.0607 | 245.0726 | 648.2579 | 698.3264 |
| ENSMUSG000000597541 | 14_Pus7          | 514.6249602   | 0.324907 | 0.225977 | 0.691581 | 453.1698 | 424.2226 | 493.6126 | 642.9435 | 612.055  | 461.7463 |
| ENSMUSG000000597572 | 15_Zbtb8os       | 583.5014351   | 0.423681 | 0.24081  | 0.691581 | 539.2558 | 453.4201 | 502.8175 | 973.3451 | 497.7896 | 534.3805 |
| ENSMUSG000000597604 | 9_Lmcd1          | 62.0891092    | -0.48142 | 0.235685 | 0.691581 | 64.97057 | 94.46252 | 57.53061 | 50.60204 | 39.5969  | 65.37082 |
| ENSMUSG000000597614 | 6_Gnai1          | 123.5832252   | 0.806682 | 0.233525 | 0.691581 | 101.5165 | 111.6375 | 83.99468 | 245.0726 | 75.79979 | 123.4782 |
| ENSMUSG000000597766 | 13_Ankrd29       | 428.7693691   | 0.519461 | 0.236317 | 0.691581 | 358.9624 | 362.3926 | 335.9787 | 835.4297 | 315.6439 | 364.2089 |
| ENSMUSG000000597788 | 13_Ddx49         | 733.1605609   | -0.75208 | 0.220762 | 0.691581 | 870.6057 | 859.609  | 1029.798 | 119.0636 | 786.2814 | 733.6059 |
| ENSMUSG000000597982 | 7_Zfp809         | 395.049757    | 0.503767 | 0.223878 | 0.691581 | 331.3499 | 273.0826 | 376.2502 | 724.3037 | 340.5334 | 324.7788 |
| ENSMUSG000000598056 | 15_Palld         | 1099.10692    | -0.65811 | 0.213693 | 0.691581 | 1253.932 | 1393.752 | 1388.789 | 272.8541 | 107.1248 | 1215.067 |
| ENSMUSG000000598135 | 12_Gstm1         | 1215.148492   | -0.52812 | 0.240959 | 0.691581 | 1358.697 | 1564.643 | 1381.885 | 476.2545 | 957.1137 | 1552.298 |
| ENSMUSG000000598153 | 14_Se2f1         | 5.803962628   | -1.17993 | 0.251007 | 0.691581 | 11.36985 | 10.305   | 2.301224 | 1.984394 | 6.788041 | 2.075264 |
| ENSMUSG000000598240 | 13_Cryz1         | 823.9598595   | 0.383582 | 0.250258 | 0.691581 | 747.9737 | 736.8077 | 660.4514 | 1300.77  | 719.5323 | 778.224  |
| ENSMUSG000000598252 | 6_Tcp11x2        | 1.300490856   | 2.817082 | 0.241804 | 0.691581 | 0.812132 | 0        | 0        | 5.953181 | 0        | 1.037632 |
| ENSMUSG000000598301 | 6_Upf1           | 1421.994737   | -0.63892 | 0.229588 | 0.691581 | 1576.349 | 1756.144 | 1862.841 | 351.2377 | 1479.793 | 1505.604 |
| ENSMUSG000000598881 | 12_Zfp516        | 669.2437953   | -0.39044 | 0.243495 | 0.691581 | 659.4513 | 749.6889 | 868.7121 | 390.9255 | 636.9445 | 709.7403 |
| ENSMUSG000000599070 | 14_Rpl18         | 8159.318748   | -0.87446 | 0.22785  | 0.691581 | 10003.84 | 10178.77 | 11494.61 | 674.6938 | 7902.411 | 8701.583 |
| ENSMUSG000000599278 | 9_Naa38          | 356.8016232   | -0.60244 | 0.236087 | 0.691581 | 377.6415 | 421.6464 | 491.3114 | 102.1963 | 386.9183 | 361.096  |
| ENSMUSG000000599540 | 15_Tcea2         | 77.03699493   | -0.58946 | 0.246302 | 0.691581 | 99.08013 | 111.6375 | 66.7355  | 30.7581  | 55.43567 | 98.57505 |
| ENSMUSG000000599669 | 7_Taf1b          | 566.5153256   | 0.428555 | 0.235127 | 0.691581 | 523.8253 | 412.2001 | 513.173  | 928.6962 | 553.2253 | 467.9721 |
| ENSMUSG000000599742 | 10_Kcnh1         | 24.60784871   | 0.794139 | 0.223488 | 0.691581 | 21.92757 | 13.74    | 18.40979 | 57.54742 | 21.49546 | 14.52685 |
| ENSMUSG000000599842 | 12_Zfp341        | 72.05280285   | -0.83051 | 0.217406 | 0.691581 | 67.40697 | 102.1913 | 107.0069 | 9.921968 | 81.45649 | 64.33319 |
| ENSMUSG000000599851 | 15_Suv420h2      | 556.0460881   | -0.67589 | 0.242842 | 0.691581 | 656.2028 | 667.2489 | 728.3375 | 111.126  | 356.2552 | 637.1061 |
| ENSMUSG000000600227 | 15_Casc4         | 611.4421888   | 0.613667 | 0.227387 | 0.691581 | 472.6609 | 533.2839 | 444.1363 | 1350.38  | 384.8556 | 483.5365 |
| ENSMUSG000000600261 | 15_Gtf2i         | 2827.806353   | -0.3054  | 0.233348 | 0.691581 | 2995.143 | 3361.148 | 3021.507 | 2061.785 | 2615.658 | 2911.596 |
| ENSMUSG000000600402 | 7_Chts8          | 5.941493658   | -1.24285 | 0.248956 | 0.691581 | 8.933454 | 10.305   | 5.753061 | 0        | 3.39402  | 7.263424 |
| ENSMUSG000000600450 | 13_Rnf14         | 1763.132353   | 0.372187 | 0.210685 | 0.691581 | 1612.082 | 1505.389 | 1493.495 | 2617.415 | 1727.556 | 1622.857 |
| ENSMUSG000000600703 | 13_lpmk          | 2381.765253   | 0.339447 | 0.217858 | 0.691581 | 2111.544 | 1946.787 | 2250.597 | 3330.805 | 2395.045 | 2525.812 |
| ENSMUSG000000601028 | 6_Claspr         | 400.5756507   | -0.75258 | 0.22773  | 0.691581 | 451.5455 | 520.4026 | 536.1852 | 62.5084  | 395.969  | 436.8431 |
| ENSMUSG000000601130 | 12_Ppm1b         | 1715.99977    | 0.392876 | 0.214528 | 0.691581 | 1469.959 | 1440.983 | 1540.67  | 2652.142 | 1684.565 | 1507.679 |
| ENSMUSG000000601184 | 8_Tmprss11c      | 1.315635893   | 2.834195 | 0.215939 | 0.691581 | 0.812132 | 0        | 0        | 3.968787 | 0        | 3.112896 |
| ENSMUSG000000601286 | 7_Exosc5         | 317.3684432   | -0.63139 | 0.242905 | 0.691581 | 353.2775 | 394.1664 | 409.6179 | 77.39135 | 319.0379 | 350.1796 |
| ENSMUSG000000601474 | 11_Mrps36        | 241.6089907   | 0.369318 | 0.235032 | 0.691581 | 227.397  | 206.1001 | 199.0559 | 353.2221 | 238.7128 | 225.1662 |
| ENSMUSG000000601527 | 6_Krt5           | 514468.4363   | -0.66952 | 0.238784 | 0.691581 | 564115.9 | 579620.3 | 751508.5 | 108556.3 | 543295.3 | 539750.3 |
| ENSMUSG000000601689 | 15_Dlgap4        | 824.5756638   | -0.58736 | 0.213337 | 0.691581 | 931.5156 | 1026.207 | 1012.539 | 264.9165 | 866.6085 | 845.6701 |
| ENSMUSG000000601755 | 10_Bod11         | 1816.735386   | 0.376492 | 0.227018 | 0.691581 | 1605.585 | 1523.423 | 1614.309 | 2782.12  | 1660.807 | 1514.168 |
| ENSMUSG000000601838 | 7_Suc1g2         | 2330.087454   | 0.372983 | 0.254706 | 0.691581 | 2034.391 | 1951.939 | 2105.62  | 3670.136 | 2072.615 | 2145.823 |
| ENSMUSG000000601887 | 14_Ssbp3         | 1259.455467   | -0.28008 | 0.254462 | 0.691581 | 1279.108 | 1422.09  | 1442.868 | 975.3295 | 1139.259 | 1298.078 |
| ENSMUSG000000602031 | 12_Atlh1         | 726.5565396   | -0.53815 | 0.251076 | 0.691581 | 800.7623 | 861.3265 | 919.3391 | 243.0882 | 728.583  | 806.2401 |
| ENSMUSG000000602098 | 11_Btbd3         | 3645.706133   | 0.327149 | 0.223719 | 0.691581 | 2998.392 | 3142.167 | 3562.295 | 4982.812 | 3693.825 | 3494.745 |
| ENSMUSG000000602248 | 5_Cks2           | 538.7848017   | 0.435309 | 0.250371 | 0.691581 | 510.019  | 391.5901 | 472.9016 | 912.8211 | 514.7597 | 430.6173 |
| ENSMUSG000000602380 | 3_Tubb3          | 23.33473263   | -1.07233 | 0.230038 | 0.691581 | 48.72793 | 20.61001 | 25.31347 | 1.984394 | 35.07154 | 8.301057 |
| ENSMUSG000000602619 | 5_2310039H08Rik  | 49.85789406   | -0.41404 | 0.245753 | 0.691581 | 56.84925 | 49.80751 | 64.43428 | 41.67227 | 40.72824 | 45.65581 |
| ENSMUSG000000602661 | 6_Ncs1           | 193.4116766   | -0.45222 | 0.253752 | 0.691581 | 227.397  | 213.8288 | 228.9718 | 91.28211 | 219.48   | 179.5103 |
| ENSMUSG000000602691 | 10_Cebpzos       | 234.6891823   | 0.388041 | 0.231215 | 0.691581 | 212.7786 | 174.3263 | 223.2187 | 346.2767 | 214.9546 | 236.5801 |
| ENSMUSG000000602729 | 11_Ppox          | 737.9512861   | -0.44738 | 0.245409 | 0.691581 | 819.4414 | 891.3827 | 843.3987 | 348.2611 | 681.8548 | 837.3691 |
| ENSMUSG000000602760 | 10_1810041L15Rik | 113.4309511   | -0.55946 | 0.25247  | 0.691581 | 127.5048 | 170.8913 | 107.0069 | 59.53181 | 61.09237 | 154.6072 |
| ENSMUSG000000602785 | 13_Kcnc3         | 45.89502978   | -0.64031 | 0.244714 | 0.691581 | 63.34631 | 62.68877 | 41.42204 | 13.89076 | 45.2536  | 48.76871 |
| ENSMUSG000000602905 | 1_Vmn1r32        | 1.227611122   | 2.696853 | 0.249599 | 0.691581 | 0        | 0.85875  | 0        | 0        | 3.39402  | 3.112896 |
| ENSMUSG000000602906 | 12_Hdac10        | 360.3416745   | -0.68871 | 0.232797 | 0.691581 | 406.0661 | 441.3976 | 486.7089 | 73.42256 | 339.402  | 415.0528 |
| ENSMUSG000000602937 | 7_Mtap           | 902.0914169   | 0.326967 | 0.246579 | 0.691581 | 782.8954 | 753.1239 | 865.2603 | 1252.152 | 933.5376 | 815.5788 |
| ENSMUSG000000603275 | 15_Hacd1         | 32.70215153   | 0.682949 | 0.252191 | 0.691581 | 22.7397  | 24.04501 | 28.7653  | 67.46938 | 15.83876 | 37.35475 |
| ENSMUSG000000603316 | 13_Rpl127        | 372.9569788   | 0.373476 | 0.251598 | 0.691581 | 341.0955 | 305.7151 | 327.9245 | 288.7293 | 450.2734 | 524.0042 |
| ENSMUSG000000603382 | 5_Bcl9l          | 1362.624455   | -0.93241 | 0.245431 | 0.691581 | 1556.857 | 1671.128 | 2136.687 | 68.46158 | 1267.101 | 1475.513 |
| ENSMUSG000000603434 | 5_Sorcs3         | 26.10144108   | -0.64361 | 0.25156  | 0.691581 | 30.86102 | 47.23126 | 17.25918 | 25.79712 | 14.70742 | 20.75264 |
| ENSMUSG000000603457 | 14_Rps15         | 10035.36119   | -0.91959 | 0.233002 | 0.691581 | 12470.29 | 12624.49 | 14294.05 | 611.1932 | 9409.356 | 10802.79 |
| ENSMUSG000000603506 | 13_Arhgap22      | 292.4528707   | -0.73162 | 0.214181 | 0.691581 | 315.9194 | 300.5626 | 478.6546 | 59.53181 | 316.7752 | 283.2736 |
| ENSMUSG000000603576 | 11_Kihdc3        | 886.4940649   | -0.59586 | 0.230936 | 0.691581 | 993.2377 | 1009.89  | 1197.787 | 259.9556 | 898.284  | 959.8097 |
| ENSMUSG000000603659 | 15_Zbtb18        | 1607.702080</ |          |          |          |          |          |          |          |          |          |

|                    |                 |             |           |          |          |          |          |          |          |          |          |
|--------------------|-----------------|-------------|-----------|----------|----------|----------|----------|----------|----------|----------|----------|
| ENSMUSG00000069020 | 9_Urm1          | 615.5952321 | -0.58714  | 0.21344  | 0.691581 | 710.6157 | 702.4577 | 804.2779 | 199.4316 | 632.4191 | 644.3695 |
| ENSMUSG00000069041 | 8_Slc25a31      | 11.19608384 | 1.124475  | 0.213631 | 0.691581 | 0.812132 | 6.870002 | 13.80735 | 21.82833 | 12.44474 | 11.41395 |
| ENSMUSG00000069114 | 8_Zbtb10        | 134.5479926 | 0.617115  | 0.248903 | 0.691581 | 106.3893 | 120.225  | 92.04897 | 289.7215 | 71.27443 | 127.6287 |
| ENSMUSG00000069171 | 13_Nr2f1        | 119.2017193 | -0.472125 | 0.254496 | 0.691581 | 121.0077 | 200.0888 | 94.35019 | 123.0324 | 79.19381 | 97.53741 |
| ENSMUSG00000069372 | 2_Cttnx3        | 24.35424544 | 0.662616  | 0.250482 | 0.691581 | 19.49117 | 23.18626 | 13.80735 | 48.61764 | 19.23278 | 21.79027 |
| ENSMUSG00000069554 | 4_IJ30134H01Rik | 1.869570041 | 2.259379  | 0.246308 | 0.691581 | 0        | 0.85875  | 1.150612 | 6.945378 | 2.26268  | 0        |
| ENSMUSG00000069729 | 13_Arid1b       | 2157.963451 | -0.37384  | 0.208643 | 0.691581 | 2196.005 | 2437.992 | 2674.023 | 1366.255 | 211.081  | 2162.425 |
| ENSMUSG00000069855 | 9_Slc47a2       | 7.451583756 | -1.02462  | 0.220832 | 0.691581 | 11.36985 | 6.011252 | 12.65673 | 2.97659  | 3.39402  | 8.301057 |
| ENSMUSG00000070047 | 12_Fat1         | 8678.332097 | -0.37912  | 0.237389 | 0.691581 | 8656.517 | 11129.4  | 9650.184 | 5164.384 | 8530.304 | 8939.2   |
| ENSMUSG00000070371 | 11_Prsx36       | 91.54990777 | -0.67343  | 0.22732  | 0.691581 | 103.9529 | 97.89753 | 135.7722 | 23.81272 | 75.79979 | 112.0643 |
| ENSMUSG00000070565 | 11_Rasal2       | 2126.297342 | 0.377566  | 0.217586 | 0.691581 | 1897.141 | 1859.194 | 1792.654 | 3193.882 | 2171.042 | 1843.872 |
| ENSMUSG00000070639 | 5_Lrrc8b        | 3660.134157 | 0.390164  | 0.224952 | 0.691581 | 3066.611 | 3092.36  | 3345.98  | 5734.898 | 3384.97  | 3335.987 |
| ENSMUSG00000070643 | 11_Sox13        | 902.9082666 | -0.66548  | 0.248051 | 0.691581 | 959.1281 | 1100.059 | 1263.372 | 187.5252 | 841.717  | 1065.648 |
| ENSMUSG00000070803 | 6_Cited4        | 234.7097812 | -0.7602   | 0.241112 | 0.691581 | 256.6338 | 316.8788 | 311.8159 | 32.74249 | 255.6829 | 234.5048 |
| ENSMUSG00000070806 | 5_Zmynd12       | 5.117388581 | -1.13704  | 0.232374 | 0.691581 | 8.121322 | 6.011252 | 6.903673 | 0.992197 | 4.52536  | 4.150528 |
| ENSMUSG00000070942 | 8_Il1rl2        | 1593.788261 | 0.32783   | 0.236873 | 0.691581 | 1452.904 | 1171.335 | 1616.61  | 1976.456 | 1880.287 | 1465.136 |
| ENSMUSG00000070990 | 2_Foxe1         | 28.48298663 | -0.57589  | 0.226533 | 0.691581 | 38.17021 | 34.35001 | 37.9702  | 2.97659  | 29.41484 | 28.01607 |
| ENSMUSG00000071054 | 12_Safb         | 1977.814825 | -0.50939  | 0.223299 | 0.691581 | 2011.651 | 2368.433 | 2590.028 | 811.617  | 2054.514 | 2030.646 |
| ENSMUSG00000071064 | 13_Zfp827       | 414.4790083 | -0.29632  | 0.253839 | 0.691581 | 446.6727 | 483.4764 | 440.6844 | 405.8085 | 306.5932 | 403.6389 |
| ENSMUSG00000071074 | 9_Yipf3         | 1092.598999 | -0.66022  | 0.252123 | 0.691581 | 1219.01  | 1381.729 | 1414.102 | 219.2755 | 1181.119 | 1140.358 |
| ENSMUSG00000071177 | 4_Serpina1d     | 3.947311659 | 2.145054  | 0.254773 | 0.691581 | 0        | 4.293751 | 0        | 6.945378 | 7.44434  | 0        |
| ENSMUSG00000071203 | 6_Naip5         | 53.7482413  | 0.596425  | 0.225154 | 0.691581 | 57.66138 | 28.33876 | 41.42204 | 85.32893 | 10.14079 | 37.35475 |
| ENSMUSG00000071335 | 4_G630090E17Rik | 35.43718612 | 0.538131  | 0.217607 | 0.691581 | 25.98823 | 23.18626 | 37.9702  | 50.60204 | 39.5969  | 35.27949 |
| ENSMUSG00000071379 | 1_Hpca1         | 1059.42337  | -0.45823  | 0.251487 | 0.691581 | 1092.318 | 1202.25  | 1384.186 | 474.2701 | 1097.4   | 1106.116 |
| ENSMUSG00000071415 | 6_Rpl23         | 15874.81217 | 0.281056  | 0.224227 | 0.691581 | 14954.6  | 13594.02 | 14451.69 | 19992.77 | 15834.24 | 16421.57 |
| ENSMUSG00000071424 | 9_Grid2         | 7.043184683 | -0.90874  | 0.230606 | 0.691581 | 8.933454 | 9.446252 | 9.204897 | 4.960984 | 4.52536  | 5.18816  |
| ENSMUSG00000071477 | 10_Zfp777       | 415.4640043 | -0.56507  | 0.251155 | 0.691581 | 438.5514 | 462.0076 | 586.8122 | 129.9778 | 421.9899 | 453.4452 |
| ENSMUSG00000071647 | 4_Eml3          | 1409.225826 | -0.56649  | 0.23931  | 0.691581 | 1578.785 | 1634.202 | 1834.076 | 440.5354 | 1479.793 | 1487.964 |
| ENSMUSG00000071657 | 12_Bscl2        | 1148.628985 | -0.57073  | 0.219087 | 0.691581 | 1218.198 | 1409.209 | 1491.193 | 385.9646 | 1210.534 | 1176.675 |
| ENSMUSG00000071669 | 14_Snx29        | 514.4226729 | -0.4858   | 0.254459 | 0.691581 | 559.5591 | 644.9214 | 596.0171 | 207.3691 | 507.9717 | 570.6929 |
| ENSMUSG00000072294 | 4_Klf12         | 31.86035056 | -0.56779  | 0.225849 | 0.691581 | 37.35808 | 45.51376 | 31.06653 | 16.86735 | 27.15216 | 33.20423 |
| ENSMUSG00000072582 | 9_Pthr2         | 464.6175895 | 0.279402  | 0.254466 | 0.691581 | 420.6845 | 395.8839 | 442.9857 | 568.5288 | 511.3657 | 448.2857 |
| ENSMUSG00000072680 | 11_Tmem254c     | 672.1855376 | -0.32847  | 0.226403 | 0.691581 | 740.6645 | 726.5027 | 777.8138 | 465.3403 | 686.7234 | 636.0685 |
| ENSMUSG00000072753 | 11_923002A06Rik | 7.606038463 | -1.26168  | 0.24071  | 0.691581 | 13.80625 | 13.74    | 4.602448 | 8.929771 | 4.52536  | 0        |
| ENSMUSG00000072946 | 12_Ptgr2        | 1313.315607 | 0.391201  | 0.247567 | 0.691581 | 1128.052 | 1159.313 | 1121.847 | 2116.356 | 1199.259 | 1215.067 |
| ENSMUSG00000073002 | 9_Vamp5         | 89.27922176 | -0.55308  | 0.227619 | 0.691581 | 115.3228 | 99.61503 | 103.5551 | 39.68787 | 63.35505 | 114.1395 |
| ENSMUSG00000073399 | 9_Trim40        | 68.87299349 | 0.441379  | 0.238197 | 0.691581 | 67.40697 | 52.38376 | 55.22938 | 78.38355 | 100.6893 | 59.14503 |
| ENSMUSG00000073530 | 11_Pappa2       | 122.3189054 | -0.34531  | 0.236244 | 0.691581 | 150.2445 | 141.6938 | 118.513  | 114.1026 | 97.29525 | 112.0643 |
| ENSMUSG00000073542 | 2_Cep76         | 150.3084004 | 0.509176  | 0.229493 | 0.691581 | 120.1956 | 114.2138 | 138.0735 | 276.8229 | 30.1041  | 122.4406 |
| ENSMUSG00000073568 | 1_Arl14ep1      | 6.429643685 | 1.039018  | 0.221654 | 0.691581 | 5.684925 | 3.435001 | 3.451836 | 12.89856 | 7.919381 | 5.18816  |
| ENSMUSG00000073640 | 2_Rpl27-ps3     | 6387.688697 | -0.48896  | 0.246245 | 0.691581 | 7491.919 | 6835.652 | 8051.984 | 2563.837 | 6819.718 | 6563.023 |
| ENSMUSG00000073684 | 13_Faap20       | 258.9353051 | -0.62335  | 0.251039 | 0.691581 | 278.5613 | 340.0651 | 323.322  | 64.49279 | 242.1068 | 305.0638 |
| ENSMUSG00000073791 | 11_Efcab7       | 141.851195  | 0.592371  | 0.254157 | 0.691581 | 112.8864 | 97.89753 | 128.8686 | 305.5966 | 117.6594 | 88.19873 |
| ENSMUSG00000074006 | 3_Omp           | 1669.401649 | -0.56102  | 0.252923 | 0.691581 | 1852.473 | 2033.521 | 2083.579 | 503.0438 | 1704.93  | 1838.684 |
| ENSMUSG00000074064 | 6_Mlycd         | 288.8490147 | -0.57933  | 0.239224 | 0.691581 | 330.5378 | 372.6976 | 334.8281 | 89.29771 | 272.653  | 333.0799 |
| ENSMUSG00000074093 | 3_Svip          | 1413.949769 | 0.526545  | 0.217098 | 0.691581 | 1151.603 | 1091.472 | 1233.456 | 2732.51  | 1066.854 | 1207.804 |
| ENSMUSG00000074129 | 12_Rpl13a       | 12145.50329 | -0.47629  | 0.252324 | 0.691581 | 13862.28 | 13618.06 | 14916.54 | 4971.898 | 12180.01 | 13324.23 |
| ENSMUSG00000074247 | 10_Dda1         | 889.8437443 | -0.6364   | 0.216486 | 0.691581 | 989.6858 | 1104.353 | 1174.775 | 238.1272 | 951.457  | 900.6646 |
| ENSMUSG00000074491 | 9_Clec4g        | 0.698900175 | 3.033862  | 0.246401 | 0.691581 | 0        | 0        | 0        | 0.992197 | 1.13134  | 2.075264 |
| ENSMUSG00000074637 | 7_Sox2          | 12.00322983 | 0.756258  | 0.209098 | 0.691581 | 7.30919  | 10.305   | 9.204897 | 13.89076 | 14.70742 | 16.60211 |
| ENSMUSG00000074748 | 3_Atxn713b      | 1985.898001 | 0.42782   | 0.251875 | 0.691581 | 1739.587 | 1720.077 | 1621.212 | 3441.931 | 1723.031 | 1669.55  |
| ENSMUSG00000074766 | 10_Ism1         | 86.80815958 | 0.394953  | 0.253537 | 0.691581 | 76.34042 | 80.72252 | 67.88611 | 127.0012 | 84.85051 | 84.0482  |
| ENSMUSG00000074873 | 3_Alf606181     | 107.8323358 | 0.366371  | 0.216196 | 0.691581 | 93.3952  | 92.74502 | 96.65142 | 140.8919 | 115.3967 | 107.9137 |
| ENSMUSG00000074884 | 12_Serf2        | 7845.269946 | -0.35216  | 0.22202  | 0.691581 | 8576.116 | 8590.078 | 9227.909 | 5020.516 | 7581.11  | 8075.89  |
| ENSMUSG00000075044 | 11_Slc22a29     | 5.886403638 | 1.072261  | 0.226521 | 0.691581 | 3.248529 | 2.576251 | 5.753061 | 10.91416 | 4.52536  | 8.301057 |
| ENSMUSG00000075273 | 4_Tlc30b        | 258.2072592 | 0.484104  | 0.247738 | 0.691581 | 198.1603 | 246.4613 | 201.3571 | 474.2701 | 205.9039 | 223.0909 |
| ENSMUSG00000075289 | 4_Carns1        | 41.27674167 | -0.57958  | 0.231555 | 0.691581 | 49.54006 | 54.96001 | 43.72326 | 17.85954 | 32.80886 | 48.76871 |
| ENSMUSG00000075486 | 9_Commnd6       | 472.1245567 | 0.366615  | 0.226184 | 0.691581 | 406.8782 | 426.7989 | 403.8649 | 695.53   | 426.5152 | 473.1602 |
| ENSMUSG00000076435 | 3_Acsf2         | 507.2929602 | -0.37839  | 0.210684 | 0.691581 | 531.1344 | 607.1364 | 582.2097 | 390.9255 | 357.5035 | 574.8482 |
| ENSMUSG00000078160 | 2_Gm16503       | 16.34448385 | 0.856547  | 0.253404 | 0.691581 | 9.745586 | 13.74    | 11.50612 | 37.70348 | 5.856701 | 19.71501 |
| ENSMUSG00000078184 | 1_Rbmn8a2       | 6.449732152 | -1.42353  | 0.216197 | 0.691581 | 8.933454 | 14.59875 | 4.602448 | 0        | 2.26268  | 8.301057 |
| ENSMUSG00000078193 | 2_Gm2000        | 3341.64834  | -0.41352  | 0.228104 | 0.691581 | 3786.16  | 3577.553 | 4088.125 | 1804.806 | 3155.308 | 3637.938 |
| ENSMUSG00000078441 | 10_Scamp4       | 915.3775059 | -0.73227  | 0.240667 | 0.691581 | 1005.42  | 1104.353 | 1318.601 | 143.8685 | 982.0032 | 938.0194 |
| ENSMUSG00000078632 | 3_Lrrc37a       | 1.315833071 | 2.825995  | 0.223059 | 0.691581 | 0        | 0.85875  | 0        | 4.960984 | 0        | 2.075264 |
| ENSMUSG00000078657 | 6_Crmn          | 43.71692674 | 0.45234   | 0.231093 | 0.691581 | 43.04301 | 35.20876 | 32.21714 | 49.60984 | 56.56701 | 45.65581 |
| ENSMUSG00000078746 | 2_Fam205a4      | 1.037785466 | -3.40601  | 0.231328 | 0.691581 | 1.624264 | 0        | 4.602448 | 0        | 0        | 0        |
| ENSMUSG00000078787 | 8_Cyp21b4       | 3.454955782 | -1.51597  | 0.230997 | 0.691581 | 2.436397 | 6.011252 | 6.903673 | 1.984394 | 3.39402  | 0        |
| ENSMUSG00000078875 | 10_Gm14419      | 38.90795615 | 0.681873  | 0.229464 | 0.691581 | 37.35808 | 40.36126 | 11.50612 | 59.53181 | 32.80886 | 51.8816  |
| ENSMUSG00000078902 | 3_Gm14443       | 20.30866711 | 0.765383  | 0.249204 | 0.691581 | 15.43051 | 13.74    | 16.10857 | 43.65666 | 9.050721 | 23.86554 |
| ENSMUSG00000078903 | 10_Gm14391      | 234.3843803 | 0.540264  | 0.254306 | 0.691581 | 204.6573 | 226.7101 | 141.5253 | 463.3559 | 70.8324  | 199.2254 |
| ENSMUSG00000078942 | 10_Naip6        | 22.45026695 | 0.724438  | 0.218081 | 0.691581 | 23.55183 | 15.4575  | 11.50612 | 35.71909 | 33.9402  | 14.52685 |
| ENSMUSG00000079020 | 9_Slc45a4       | 683.2406754 | -0.4135   | 0.252454 | 0.691581 | 746.3495 | 767.7227 | 827.2901 | 349.2533 | 673.1474 | 735.6811 |
| ENSMUSG00000079092 | 3_Prl2c2        | 2.352603923 | 2.833646  | 0.217916 | 0.691581 | 0.812132 | 0.85875  | 0        | 0        | 12.44474 | 0        |
| ENSMUSG00000079260 | 2_Tmppe         | 435.1386989 | -0.29299  | 0.253821 | 0.691581 | 483.2186 | 459.4314 | 494.7632 | 323.4562 | 427.6466 | 422.3163 |
| ENSMUSG00000079383 | 9_Gm3298        | 1.488295223 | 4.126379  | 0.210092 | 0.691581 | 0        | 0        | 0        | 0.929771 | 0        | 0        |
| ENSMUSG00000079465 | 8_Col4a3        | 514.9396993 | -0.       |          |          |          |          |          |          |          |          |

|                     |                  |             |           |          |          |          |          |          |          |          |          |
|---------------------|------------------|-------------|-----------|----------|----------|----------|----------|----------|----------|----------|----------|
| ENSMUSG00000091764  | 3_Zfp964         | 106.8714584 | 0.595735  | 0.230738 | 0.691581 | 107.2014 | 82.44002 | 65.58489 | 217.2911 | 82.58783 | 86.12346 |
| ENSMUSG00000091803  | 7_Cox16          | 422.7831237 | 0.551603  | 0.253877 | 0.691581 | 331.3499 | 313.4438 | 384.3044 | 884.0474 | 287.3604 | 336.1928 |
| ENSMUSG00000091811  | 1_Inafm1         | 405.9565798 | -0.46437  | 0.235998 | 0.691581 | 475.0973 | 455.9964 | 480.9559 | 186.533  | 385.787  | 451.3698 |
| ENSMUSG00000091844  | 1_Gm8251         | 3.268309471 | 1.415574  | 0.237611 | 0.691581 | 2.436397 | 1.7175   | 1.150612 | 8.929771 | 2.26268  | 3.112896 |
| ENSMUSG00000092035  | 8_Peg10          | 52.23840957 | 0.684946  | 0.249712 | 0.691581 | 43.85514 | 46.37251 | 29.91591 | 121.048  | 32.80886 | 39.43002 |
| ENSMUSG00000092329  | 1_Gm20388        | 2675.819955 | -0.56217  | 0.240721 | 0.691581 | 3010.574 | 3130.145 | 3431.125 | 841.3829 | 2757.076 | 2884.617 |
| ENSMUSG00000092609  | 1_Gm20481        | 308.5803512 | -2.18655  | 0.209279 | 0.691581 | 381.7021 | 455.1376 | 681.1624 | 0        | 130.1041 | 203.3759 |
| ENSMUSG00000094024  | 1_Esp18          | 2.841591176 | 2.228853  | 0.239736 | 0.691581 | 0.812132 | 0        | 2.301224 | 12.89856 | 0        | 1.037632 |
| ENSMUSG00000094271  | 1_Gm13290        | 4.470896371 | -1.36318  | 0.241029 | 0.691581 | 3.248529 | 6.870002 | 9.204897 | 2.97659  | 4.52536  | 0        |
| ENSMUSG00000094686  | 1_Cd121a         | 228.4218418 | -0.622347 | 0.224268 | 0.691581 | 298.8646 | 255.9076 | 276.1469 | 64.49279 | 211.5606 | 263.5585 |
| ENSMUSG00000094840  | 5_Muc3a          | 2.54569754  | 1.77785   | 0.230033 | 0.691581 | 2.436397 | 0.85875  | 0        | 1.984394 | 7.919381 | 2.075264 |
| ENSMUSG00000095253  | 4_Zfp799         | 373.5718363 | 0.531817  | 0.21282  | 0.691581 | 303.7374 | 309.1501 | 303.7616 | 715.3739 | 279.441  | 329.967  |
| ENSMUSG00000095788  | 6_Sirpb1a        | 50.76474509 | 0.777714  | 0.251258 | 0.691581 | 72.27976 | 18.8925  | 20.71102 | 75.40696 | 88.24453 | 29.0537  |
| ENSMUSG00000096156  | 1_Gm9242         | 393.9591066 | 0.504416  | 0.246135 | 0.691581 | 405.254  | 263.6363 | 308.364  | 639.9669 | 506.8404 | 239.693  |
| ENSMUSG00000096199  | 1_Pthr1          | 137.7496523 | -0.32787  | 0.227038 | 0.691581 | 141.311  | 155.4338 | 163.3869 | 114.1026 | 126.7101 | 125.5535 |
| ENSMUSG00000096284  | 2_Tcstv1         | 0.805142807 | -3.04485  | 0.220888 | 0.691581 | 0.812132 | 1.7175   | 2.301224 | 0        | 0        | 0        |
| ENSMUSG00000096629  | 7_Gm3383         | 9.141278019 | 0.938189  | 0.235756 | 0.691581 | 8.121322 | 6.011252 | 4.602448 | 20.83613 | 9.050721 | 6.225792 |
| ENSMUSG00000096981  | 1_Gm16845        | 33.99647122 | -0.65959  | 0.220961 | 0.691581 | 42.23087 | 41.22001 | 41.42204 | 12.89856 | 22.6268  | 43.58055 |
| ENSMUSG00000097090  | 1_Gm26724        | 60.60135707 | 0.412625  | 0.223898 | 0.691581 | 54.41286 | 57.53626 | 43.72326 | 66.47719 | 66.79407 | 74.70951 |
| ENSMUSG00000097107  | 1_Platr6         | 4.191359878 | -1.25107  | 0.211708 | 0.691581 | 6.497057 | 4.293751 | 6.903673 | 1.984394 | 3.39402  | 2.075264 |
| ENSMUSG00000097180  | 5_2700038G22Rik  | 66.49746981 | 0.385807  | 0.230572 | 0.691581 | 58.47352 | 59.25377 | 55.22938 | 83.34453 | 69.0175  | 73.67188 |
| ENSMUSG00000097230  | 1_Gm26853        | 18.17131993 | 0.769545  | 0.246542 | 0.691581 | 17.86691 | 12.0225  | 10.35551 | 40.68007 | 13.57608 | 14.52685 |
| ENSMUSG00000097324  | 8_Mir143hg       | 17.36489564 | -0.89403  | 0.219714 | 0.691581 | 14.61838 | 43.79626 | 9.204897 | 12.89856 | 10.18206 | 13.48922 |
| ENSMUSG00000097329  | 1_4931403G20Rik  | 1.072553002 | 2.401313  | 0.252136 | 0.691581 | 0        | 0        | 1.150612 | 1.984394 | 2.26268  | 1.037632 |
| ENSMUSG00000097404  | 1_Gm10814        | 23.46487004 | -0.60144  | 0.250506 | 0.691581 | 29.23676 | 25.76251 | 29.91591 | 10.91416 | 18.10144 | 26.97843 |
| ENSMUSG00000097518  | 1_Gm26694        | 14.59191189 | -1.39789  | 0.210152 | 0.691581 | 17.86691 | 21.46876 | 24.16285 | 0        | 2.26268  | 21.79027 |
| ENSMUSG00000097580  | 1_Gm5432         | 4.652092724 | 1.224008  | 0.226656 | 0.691581 | 2.436397 | 2.576251 | 3.451836 | 9.921968 | 2.26268  | 2.763424 |
| ENSMUSG00000097591  | 1_A330032B11Rik  | 1.868624195 | 2.261445  | 0.236422 | 0.691581 | 0        | 0.85875  | 1.150612 | 2.97659  | 0        | 6.225792 |
| ENSMUSG00000097674  | 1_Gm26610        | 17.20120562 | 0.744395  | 0.221666 | 0.691581 | 8.121322 | 14.59875 | 16.10857 | 31.7503  | 18.10144 | 14.52685 |
| ENSMUSG00000097690  | 1_4930505N22Rik  | 1.162080495 | -2.36838  | 0.25342  | 0.691581 | 1.624264 | 0.85875  | 3.451836 | 0        | 0        | 1.037632 |
| ENSMUSG00000097695  | 1_Gm26905        | 0.699800175 | 3.033862  | 0.246401 | 0.691581 | 0        | 0        | 0.992197 | 1.13134  | 2.075264 | 0        |
| ENSMUSG00000097706  | 1_E030037K01Rik  | 0.740959811 | -2.94429  | 0.252314 | 0.691581 | 2.436397 | 0.85875  | 1.150612 | 0        | 0        | 0        |
| ENSMUSG00000097757  | 1_Gm17518        | 5.919738704 | 0.817492  | 0.237189 | 0.691581 | 6.497057 | 9.446252 | 4.602448 | 14.88295 | 11.3134  | 10.37632 |
| ENSMUSG00000097797  | 6_Gm26901        | 4.432355381 | -1.33313  | 0.229538 | 0.691581 | 2.436397 | 5.152501 | 11.50612 | 0.992197 | 3.39402  | 3.112896 |
| ENSMUSG00000097903  | 1_Gm26679        | 3.21482053  | 1.540671  | 0.253118 | 0.691581 | 0.812132 | 0.85875  | 3.451836 | 9.921968 | 1.13134  | 3.112896 |
| ENSMUSG00000097907  | 1_Raxos1         | 17.08855109 | -0.72857  | 0.249897 | 0.691581 | 20.3033  | 27.48001 | 16.10857 | 8.929771 | 7.919381 | 21.79027 |
| ENSMUSG00000098051  | 1_Gm27032        | 0.805142807 | -3.04485  | 0.220888 | 0.691581 | 0.812132 | 1.7175   | 2.301224 | 0        | 0        | 0        |
| ENSMUSG00000098112  | 7_Bln2           | 57.69647633 | -0.66478  | 0.230228 | 0.691581 | 101.5165 | 36.92626 | 73.63917 | 24.80492 | 66.74902 | 42.54291 |
| ENSMUSG00000098943  | 1_Gm7160         | 36.165602   | 0.540563  | 0.243999 | 0.691581 | 34.10955 | 26.62126 | 27.61469 | 57.54742 | 44.12226 | 26.97843 |
| ENSMUSG00000010016  | 1_Gm28856        | 39.72820341 | 0.607672  | 0.222761 | 0.691581 | 27.61249 | 29.19751 | 37.9702  | 75.40696 | 33.9402  | 34.24186 |
| ENSMUSG000000100252 | 6_Mir124-2hg     | 83.16086177 | 1.161292  | 0.215003 | 0.691581 | 86.98814 | 49.80751 | 17.25918 | 259.9556 | 74.66845 | 10.37632 |
| ENSMUSG000000100367 | 1_Gm29336        | 0.740959811 | -2.94429  | 0.252314 | 0.691581 | 2.436397 | 0.85875  | 1.150612 | 0        | 0        | 0        |
| ENSMUSG000000100733 | 1_4932411K12Rik  | 5.383968113 | 1.256038  | 0.236709 | 0.691581 | 6.497057 | 1.7175   | 1.150612 | 11.90636 | 7.919381 | 3.112896 |
| ENSMUSG000000100975 | 1_Gm28875        | 175.2731607 | 0.322355  | 0.232235 | 0.691581 | 156.7415 | 159.7275 | 150.7302 | 210.3457 | 207.0352 | 167.0588 |
| ENSMUSG000000101026 | 1_D730001G18Rik  | 34.22871534 | -0.54048  | 0.226539 | 0.691581 | 35.73382 | 44.65501 | 41.42204 | 24.80492 | 20.36412 | 38.39239 |
| ENSMUSG000000101152 | 1_Gm28305        | 6.459648229 | 1.86164   | 0.227706 | 0.691581 | 0.812132 | 0.85875  | 6.903673 | 26.78931 | 3.39402  | 0        |
| ENSMUSG000000101211 | 1_Gm28818        | 0.692227633 | 3.020763  | 0.249332 | 0.691581 | 0        | 0        | 0.984394 | 1.13134  | 1.037632 | 0        |
| ENSMUSG000000101257 | 1_2310015K22Rik  | 1.015387363 | 3.575275  | 0.217414 | 0.691581 | 0        | 0        | 0.960984 | 1.13134  | 0        | 0        |
| ENSMUSG000000101264 | 1_Gm28347        | 0.873211775 | 3.353126  | 0.254409 | 0.691581 | 0        | 0        | 0.297659 | 2.26268  | 0        | 0        |
| ENSMUSG000000102222 | 1_Pcdhga10       | 123.7569686 | -0.45746  | 0.227293 | 0.691581 | 121.8198 | 178.62   | 128.8686 | 77.39135 | 141.4175 | 94.42452 |
| ENSMUSG000000102692 | 1_Dchs2          | 45.94817383 | -0.46115  | 0.240915 | 0.691581 | 58.47352 | 61.83002 | 39.12081 | 39.68787 | 35.07154 | 41.50528 |
| ENSMUSG000000103156 | 1_Gm38293        | 1.724658978 | 2.265722  | 0.224019 | 0.691581 | 0        | 1.7175   | 0        | 0.992197 | 4.52536  | 3.112896 |
| ENSMUSG000000103283 | 2_Gm37276        | 15.33684911 | 0.725064  | 0.214426 | 0.691581 | 14.61838 | 12.88125 | 6.903673 | 22.82053 | 19.23278 | 15.56448 |
| ENSMUSG000000104671 | 1_Gm43062        | 12.24440008 | 0.815506  | 0.224088 | 0.691581 | 5.684925 | 8.587502 | 12.65673 | 21.82833 | 10.18206 | 14.52685 |
| ENSMUSG000000105550 | 1_Gm42586        | 3.726351641 | 1.390269  | 0.248942 | 0.691581 | 3.248529 | 1.7175   | 1.150612 | 9.921968 | 1.13134  | 5.18816  |
| ENSMUSG000000106445 | 1_Gm21190        | 1.050518908 | -3.44401  | 0.234559 | 0.691581 | 0        | 5.152501 | 1.150612 | 0        | 0        | 0        |
| ENSMUSG000000106464 | 1_C130083M11Rik  | 37.95287281 | 0.548991  | 0.251633 | 0.691581 | 32.48529 | 33.49126 | 26.46408 | 67.46938 | 29.41484 | 38.39239 |
| ENSMUSG000000107325 | 1_Gm43425        | 2.367173082 | 1.529337  | 0.244423 | 0.691581 | 1.624264 | 0.85875  | 1.150612 | 3.968787 | 4.52536  | 2.075264 |
| ENSMUSG000000107444 | 1_Olfr1396       | 1.129054854 | -2.3109   | 0.254174 | 0.691581 | 1.624264 | 1.7175   | 2.301224 | 0        | 1.13134  | 0        |
| ENSMUSG000000107481 | 1_RP24-315D19    | 7.585428837 | 1.237601  | 0.24536  | 0.691581 | 7.30919  | 6.011252 | 0        | 17.85954 | 10.18206 | 4.150528 |
| ENSMUSG000000107504 | 2_RP23-438P19    | 0.981372144 | -3.33218  | 0.243233 | 0.691581 | 2.436397 | 0        | 3.451836 | 0        | 0        | 0        |
| ENSMUSG000000107667 | 2_RP23-210L10    | 2.485960989 | 1.651115  | 0.249305 | 0.691581 | 2.436397 | 0        | 1.150612 | 5.953181 | 2.26268  | 3.112896 |
| ENSMUSG000000108132 | 1_RP23-322E20    | 3.283927478 | 1.422529  | 0.235905 | 0.691581 | 2.436397 | 1.7175   | 1.150612 | 8.929771 | 3.39402  | 2.075264 |
| ENSMUSG000000108439 | 1_Myhl4          | 2669.704923 | -1.12826  | 0.31924  | 0.691581 | 2772.619 | 3845.483 | 4372.326 | 41.67227 | 2358.844 | 2627.284 |
| ENSMUSG000000109621 | 18_Vav2          | 1291.477249 | -0.49117  | 0.255244 | 0.692153 | 1361.946 | 1468.463 | 1697.153 | 508.0048 | 1401.73  | 1311.567 |
| ENSMUSG000000110554 | 14_Mettl16       | 723.020419  | 0.387534  | 0.255092 | 0.692153 | 648.8936 | 614.0064 | 616.7281 | 1162.855 | 659.5713 | 636.0885 |
| ENSMUSG000000117721 | 15_Pigt          | 2518.849964 | -0.63828  | 0.255184 | 0.692153 | 2764.498 | 3002.19  | 3434.577 | 551.6614 | 2828.35  | 2531.822 |
| ENSMUSG000000140356 | 16_Skiv2l        | 1460.76906  | -0.66629  | 0.255227 | 0.692153 | 1500.008 | 1854.9   | 2021.625 | 286.7449 | 1639.312 | 1462.024 |
| ENSMUSG000000140896 | 13_Prex2         | 312.867723  | 0.603341  | 0.255043 | 0.692153 | 255.8216 | 283.3876 | 205.9596 | 696.5222 | 184.4084 | 251.107  |
| ENSMUSG000000149489 | 5_Fam58b         | 253.6245213 | -0.41537  | 0.255169 | 0.692153 | 287.4948 | 302.2801 | 279.5987 | 130.97   | 269.2599 | 252.1446 |
| ENSMUSG000000159149 | 17_Mfsd4         | 642.701626  | 0.353133  | 0.255176 | 0.692153 | 551.4377 | 515.2501 | 627.0836 | 950.5245 | 588.2969 | 623.6169 |
| ENSMUSG000000194606 | 7_Vmnr2f50       | 1.023712222 | 2.411024  | 0.255262 | 0.692153 | 0.812132 | 0        | 0.992197 | 2.26268  | 2.075264 | 0        |
| ENSMUSG00000025731  | 55_0610011F06Rik | 317.1547514 | -0.49217  | 0.255392 | 0.692164 | 345.9683 | 389.8726 | 376.2502 | 128.9856 | 266.229  | 375.6228 |
| ENSMUSG00000027199  | 14_Gatm          | 245.691866  | 0.396944  | 0.255372 | 0.692164 | 269.6279 | 181.1963 | 185.2485 | 356.1987 | 268.1276 | 213.7522 |
| ENSMUSG00000028016  | 9_Ints12         | 516.4339406 | 0.361127  | 0.255398 | 0.692164 | 452.3576 | 430.2339 | 474.0522 | 770.9369 | 536.2552 | 434.7678 |
| ENSMUSG000000280462 | 12_Os9           | 3137.934523 | -0.56421  | 0.255414 | 0.692164 |          |          |          |          |          |          |

|                      |                  |             |           |          |          |          |          |          |          |          |          |
|----------------------|------------------|-------------|-----------|----------|----------|----------|----------|----------|----------|----------|----------|
| ENSMUSG00000097333   | 7_Zfp87          | 256.8064734 | 0.488722  | 0.257515 | 0.694857 | 210.3422 | 228.4276 | 202.5077 | 487.1686 | 205.9039 | 206.4888 |
| ENSMUSG00000001175   | 13_Calm1         | 10469.46806 | 0.363194  | 0.257682 | 0.694931 | 9457.279 | 8676.812 | 9341.82  | 16272.03 | 9737.444 | 9331.425 |
| ENSMUSG000000020528  | 14_Prrspap2      | 809.881247  | 0.306656  | 0.257681 | 0.694931 | 787.7682 | 644.9214 | 739.8436 | 1076.534 | 849.6364 | 760.5843 |
| ENSMUSG000000025574  | 13_Tk1           | 664.4130465 | -0.64284  | 0.257679 | 0.694931 | 836.4961 | 728.2202 | 865.2603 | 140.8919 | 692.3801 | 723.2295 |
| ENSMUSG000000029765  | 12_Plxna4        | 244.3873129 | -0.444398 | 0.257596 | 0.694931 | 261.5066 | 351.2288 | 232.4236 | 255.9868 | 124.4474 | 240.7306 |
| ENSMUSG000000044337  | 5_Ackr3          | 937.3559742 | -0.31734  | 0.257784 | 0.695113 | 1074.451 | 1020.195 | 1025.195 | 627.0684 | 928.8302 | 948.3957 |
| ENSMUSG000000031304  | 18_I2rg          | 230.3226845 | 0.579721  | 0.257891 | 0.695144 | 287.4948 | 121.0838 | 144.9771 | 205.3847 | 443.4853 | 179.5103 |
| ENSMUSG000000033628  | 15_Pik3c3        | 1022.656423 | 0.252766  | 0.257866 | 0.695144 | 893.3454 | 930.0265 | 976.8697 | 1223.379 | 1061.197 | 1051.121 |
| ENSMUSG000000044636  | 5_Csrnp2         | 150.7167749 | -0.29736  | 0.2579   | 0.695144 | 177.0448 | 161.445  | 159.9351 | 136.9232 | 140.2862 | 128.6664 |
| ENSMUSG000000041460  | 14_Cacna2d4      | 41.91924428 | -0.5998   | 0.257968 | 0.695233 | 65.78271 | 53.24251 | 32.21714 | 40.68007 | 42.99092 | 16.60211 |
| ENSMUSG000000023932  | 8_Cdc5l          | 1914.32465  | 0.290574  | 0.258038 | 0.695326 | 1653.501 | 1687.444 | 1826.021 | 2547.961 | 1919.884 | 1851.136 |
| ENSMUSG000000028803  | 18_Nipal3        | 1589.4516   | -0.39982  | 0.258116 | 0.695443 | 1651.065 | 1866.064 | 1907.715 | 849.3205 | 1468.479 | 1794.066 |
| ENSMUSG000000039007  | 9_Ccq            | 1416.041585 | 0.383603  | 0.258151 | 0.695443 | 1197.083 | 1348.238 | 1141.407 | 2263.201 | 1252.393 | 1293.927 |
| ENSMUSG000000024773  | 14_Atg2a         | 1200.998974 | -0.83093  | 0.258233 | 0.695466 | 1314.842 | 1536.304 | 1761.587 | 97.23529 | 1284.071 | 1211.954 |
| ENSMUSG000000024869  | 9_Nudt8          | 298.3075267 | -0.66059  | 0.258223 | 0.695466 | 345.9683 | 338.3476 | 411.9191 | 60.52401 | 277.1783 | 355.9078 |
| ENSMUSG000000032562  | 13_GnaI2         | 6598.282611 | -0.57565  | 0.258264 | 0.695466 | 7569.884 | 7800.028 | 8322.377 | 1819.689 | 7079.926 | 6997.791 |
| ENSMUSG000000022228  | 13_Zscan26       | 1597.401176 | 0.288942  | 0.258478 | 0.695487 | 1428.541 | 1349.097 | 1372.68  | 2585.665 | 1316.88  | 1531.545 |
| ENSMUSG000000022283  | 14_Pabpc1        | 12966.0716  | 0.279966  | 0.258393 | 0.695487 | 11423.45 | 10898.4  | 12814.37 | 16437.72 | 14036.54 | 12185.95 |
| ENSMUSG000000022390  | 10_Zc3h7b        | 3150.524377 | -0.40506  | 0.258425 | 0.695487 | 3341.924 | 3576.695 | 3851.099 | 1628.195 | 3022.941 | 3482.293 |
| ENSMUSG000000023330  | 12_Dtdw1         | 150.5855477 | 0.386224  | 0.258537 | 0.695487 | 117.7592 | 116.79   | 157.6339 | 219.2755 | 156.1249 | 135.9298 |
| ENSMUSG000000028964  | 14_Park7         | 2331.265889 | -0.53626  | 0.258509 | 0.695487 | 2654.048 | 2720.521 | 2904.145 | 754.0696 | 2356.581 | 2598.231 |
| ENSMUSG000000029600  | 10_Rita1         | 120.5215447 | -0.79522  | 0.258453 | 0.695487 | 142.1231 | 141.6938 | 174.893  | 12.89566 | 105.2146 | 146.3061 |
| ENSMUSG000000035258  | 14_Abi3bp        | 2311.456032 | 0.447454  | 0.258592 | 0.695487 | 1801.309 | 1989.724 | 2076.855 | 4096.781 | 1672.121 | 2231.947 |
| ENSMUSG000000038000  | 9_Acd            | 353.1844995 | -0.63163  | 0.258621 | 0.695487 | 428.8058 | 418.2114 | 440.6844 | 78.38355 | 372.2109 | 380.811  |
| ENSMUSG000000040479  | 11_Dgkz          | 1701.249422 | -0.7201   | 0.258574 | 0.695487 | 1910.947 | 2145.158 | 2295.471 | 247.057  | 1753.577 | 1855.286 |
| ENSMUSG000000042210  | 16_Abhd14a       | 97.49196766 | -0.67334  | 0.258381 | 0.695487 | 137.2503 | 115.0725 | 107.0069 | 19.84394 | 91.63855 | 114.1395 |
| ENSMUSG000000028060  | 14_2810403A07Rik | 1835.989589 | 0.310256  | 0.258727 | 0.695529 | 1616.955 | 1593.84  | 1707.508 | 2562.844 | 1798.831 | 1735.958 |
| ENSMUSG000000034171  | 13_Faah          | 99.04672405 | -0.46096  | 0.258677 | 0.695529 | 103.9529 | 109.0613 | 131.1698 | 47.62545 | 101.8206 | 100.6503 |
| ENSMUSG000000004209  | 15_Kank3         | 170.6593922 | -0.45955  | 0.258742 | 0.695529 | 192.4753 | 203.5238 | 196.7547 | 82.35234 | 140.2862 | 208.564  |
| ENSMUSG000000000486  | 13_Sept1         | 65.32781633 | -0.55955  | 0.259059 | 0.695563 | 90.9588  | 58.39502 | 83.99468 | 24.80492 | 74.66845 | 59.14503 |
| ENSMUSG000000001988  | 8_Npas1          | 2.809774306 | -1.64172  | 0.258859 | 0.695563 | 7.30919  | 4.293751 | 1.150612 | 0.992197 | 0        | 3.112896 |
| ENSMUSG000000020330  | 16_Hmnr          | 564.0424023 | 0.41134   | 0.259051 | 0.695563 | 512.4554 | 395.0251 | 545.3901 | 914.8055 | 547.5686 | 469.0097 |
| ENSMUSG000000022452  | 14_Smdt1         | 1164.618839 | -0.52829  | 0.259087 | 0.695563 | 1252.308 | 1381.799 | 1492.344 | 390.9255 | 1217.797 | 1257.61  |
| ENSMUSG000000024908  | 14_Ppp6b3        | 3725.363139 | 0.355502  | 0.259103 | 0.695563 | 3199.801 | 3094.936 | 3511.668 | 5685.288 | 3528.65  | 3331.837 |
| ENSMUSG000000025142  | 17_Aspcscr1      | 833.1458592 | -0.72032  | 0.259099 | 0.695563 | 920.9579 | 1035.653 | 1154.064 | 122.0402 | 828.141  | 938.0194 |
| ENSMUSG000000041235  | 11_Chd7          | 427.2949319 | -0.2787   | 0.25881  | 0.695563 | 491.34   | 487.7701 | 425.7265 | 347.2689 | 428.7779 | 382.8862 |
| ENSMUSG000000049321  | 17_Zfp2          | 155.171155  | 0.603607  | 0.258992 | 0.695563 | 138.0625 | 114.2138 | 117.3624 | 344.2923 | 90.50721 | 126.5911 |
| ENSMUSG000000052914  | 4_Cyp2j6         | 799.6868689 | 0.423657  | 0.258896 | 0.695563 | 704.9307 | 702.4577 | 642.0416 | 1376.177 | 648.2579 | 724.2672 |
| ENSMUSG000000097554  | 1_Gm26825        | 15635.50128 | 0.288496  | 0.258855 | 0.695563 | 13629.2  | 13260.82 | 15342.26 | 16863.38 | 20297.37 | 14419.97 |
| ENSMUSG000000030307  | 8_Slc6a11        | 8.525796375 | -1.06496  | 0.259206 | 0.695696 | 17.05478 | 12.88125 | 4.602448 | 9.921968 | 5.656701 | 1.037632 |
| ENSMUSG000000052736  | 15_Klrc2         | 7.246707745 | 0.914507  | 0.259223 | 0.695696 | 4.872793 | 3.435001 | 6.903673 | 12.89856 | 10.18206 | 5.13816  |
| ENSMUSG000000019470  | 12_Xab2          | 1177.14018  | -0.70069  | 0.25951  | 0.695617 | 1302.66  | 1422.09  | 1647.677 | 188.5174 | 1242.211 | 1259.685 |
| ENSMUSG000000020705  | 6_Ddx42          | 2340.133794 | 0.28355   | 0.259356 | 0.695817 | 2130.223 | 2015.487 | 2187.314 | 3085.732 | 2297.752 | 2324.296 |
| ENSMUSG000000023027  | 12_Atf1          | 1038.055027 | 0.326999  | 0.259509 | 0.695817 | 981.8678 | 819.2477 | 961.9117 | 1471.428 | 996.7106 | 997.1644 |
| ENSMUSG000000026181  | 11_Ppm1f         | 764.9649935 | -0.37504  | 0.259512 | 0.695817 | 842.9932 | 881.9365 | 866.4109 | 432.5978 | 739.8964 | 825.9551 |
| ENSMUSG000000026821  | 15_Ralgds        | 1344.963283 | -0.62211  | 0.259469 | 0.695817 | 1411.486 | 1650.518 | 1829.473 | 312.542  | 1526.178 | 1329.583 |
| ENSMUSG000000028672  | 13_Hmgcl         | 584.6162625 | -0.51202  | 0.25936  | 0.695817 | 647.2693 | 693.0114 | 721.4338 | 209.3535 | 586.0342 | 650.5953 |
| ENSMUSG000000041440  | 18_Gk5           | 696.713166  | 0.378523  | 0.259446 | 0.695817 | 620.469  | 563.3401 | 633.9873 | 1101.338 | 606.3983 | 654.7458 |
| ENSMUSG000000020817  | 16_Rabep1        | 969.1431535 | 0.517915  | 0.259548 | 0.695819 | 822.6899 | 838.999  | 729.4881 | 1961.573 | 702.5622 | 759.5467 |
| ENSMUSG0000000005718 | 7_Tfap4          | 200.6299583 | -0.42176  | 0.25995  | 0.696261 | 197.3481 | 207.8176 | 284.2012 | 110.1338 | 208.1666 | 196.1125 |
| ENSMUSG000000020032  | 14_Nuak1         | 325.8958699 | -0.28603  | 0.259922 | 0.696261 | 368.708  | 376.1326 | 329.0751 | 254.9946 | 309.9872 | 316.4778 |
| ENSMUSG000000030357  | 10_Fkbp4         | 2784.876453 | -0.4724   | 0.259949 | 0.696261 | 3162.443 | 3064.88  | 3482.903 | 1132.907 | 2958.454 | 2908.483 |
| ENSMUSG000000031965  | 14_Tbx20         | 158.3776363 | 0.832626  | 0.259901 | 0.696261 | 108.0136 | 169.1738 | 64.43428 | 435.5744 | 47.51628 | 25.5535  |
| ENSMUSG000000032491  | 14_Nradd         | 243.932818  | -0.56718  | 0.260004 | 0.696261 | 265.5672 | 282.5288 | 325.6232 | 72.43037 | 259.0769 | 258.3704 |
| ENSMUSG000000036611  | 5_Eepd1          | 53.07703237 | -0.44419  | 0.259774 | 0.696261 | 44.66727 | 71.27627 | 67.88611 | 52.58643 | 38.46556 | 43.58055 |
| ENSMUSG000000040904  | 10_Gm21988       | 43.20430392 | -0.74655  | 0.260027 | 0.696261 | 40.60661 | 51.52501 | 70.18734 | 8.929771 | 59.96103 | 28.0167  |
| ENSMUSG000000041632  | 5_Mrps27         | 322.6631141 | -0.3816   | 0.25988  | 0.696261 | 318.3558 | 361.5338 | 415.371  | 190.5018 | 346.1901 | 304.0262 |
| ENSMUSG000000061981  | 14_Flot2         | 820.6738068 | -0.52366  | 0.260019 | 0.696261 | 870.6057 | 1039.088 | 994.1289 | 280.7917 | 893.7587 | 845.6701 |
| ENSMUSG000000004798  | 14_Ulk2          | 840.1622189 | 0.426921  | 0.260178 | 0.696382 | 691.9366 | 729.0789 | 729.4881 | 1460.514 | 677.6727 | 752.2832 |
| ENSMUSG0000000006641 | 12_Slc5a6        | 379.3241011 | -0.38073  | 0.260355 | 0.696382 | 436.9271 | 426.7989 | 423.4253 | 224.2365 | 323.5633 | 440.9936 |
| ENSMUSG000000015478  | 13_Rnf5          | 692.8330455 | -0.38121  | 0.260126 | 0.696382 | 715.4884 | 813.2365 | 822.6877 | 386.9568 | 691.2488 | 727.3801 |
| ENSMUSG000000042148  | 8_Cox10          | 263.7665306 | -0.53793  | 0.260369 | 0.696382 | 291.5555 | 301.4213 | 344.033  | 87.31332 | 288.4917 | 269.7843 |
| ENSMUSG000000042353  | 9_Frem3          | 56.8293283  | -0.56127  | 0.260422 | 0.696382 | 96.64373 | 69.55877 | 36.81959 | 62.5084  | 33.9402  | 41.50528 |
| ENSMUSG000000047123  | 8_Ticam1         | 419.4781036 | -0.65504  | 0.260244 | 0.696382 | 469.4124 | 461.1489 | 608.6738 | 85.32893 | 450.2734 | 442.0313 |
| ENSMUSG000000048399  | 4_Tprg           | 1594.889904 | 0.247433  | 0.260357 | 0.696382 | 1467.523 | 1355.967 | 1552.176 | 1825.642 | 1764.891 | 1603.142 |
| ENSMUSG000000048540  | 8_Nhlh2          | 4.165954465 | 1.965531  | 0.260389 | 0.696382 | 2.436397 | 2.576251 | 0        | 18.85174 | 1.13134  | 0        |
| ENSMUSG000000074300  | 4_BC030870       | 289.03139   | 0.382044  | 0.260293 | 0.696382 | 249.3246 | 230.1451 | 273.8457 | 451.4496 | 265.8649 | 263.5585 |
| ENSMUSG000000085549  | 7_1700047F07Rik  | 3.076104435 | -1.76965  | 0.260246 | 0.696382 | 5.684925 | 1.7175   | 6.903673 | 0        | 0        | 4.150528 |
| ENSMUSG000000044533  | 15_Rps2          | 8294.038272 | -0.51264  | 0.260524 | 0.696561 | 9082.886 | 9275.361 | 10898.6  | 2927.973 | 8679.641 | 8899.77  |
| ENSMUSG000000001288  | 14_Rarg          | 5295.544843 | -0.52698  | 0.261806 | 0.696702 | 5528.996 | 5847.23  | 7380.026 | 1799.845 | 5593.97  | 5713.202 |
| ENSMUSG0000000004263 | 15_Atn1          | 1164.918009 | -0.7261   | 0.261259 | 0.696702 | 1556.857 | 1548.327 | 1250.715 | 162.7203 | 1193.564 | 1277.325 |
| ENSMUSG000000005069  | 12_Pex5          | 662.5406979 | -0.43878  | 0.261332 | 0.696702 | 634.2752 | 802.9315 | 850.3023 | 315.5186 | 694.6428 | 677.5737 |
| ENSMUSG000000006906  | 10_Stambp        | 988.5862867 | 0.343035  | 0.261654 | 0.696702 | 882.7877 | 786.6152 | 945.8032 | 1456.545 | 943.5376 | 916.2291 |
| ENSMUSG000000010660  | 2_Plcd1          | 2030.255643 | -0.63265  | 0.260823 | 0.696702 | 2245.545 | 2291.146 | 2868.476 | 445.4964 | 2089.585 | 2241.285 |
| ENSMUSG00000         |                  |             |           |          |          |          |          |          |          |          |          |

|                      |                 |              |          |          |          |          |           |          |          |           |          |
|----------------------|-----------------|--------------|----------|----------|----------|----------|-----------|----------|----------|-----------|----------|
| ENSMUSG00000007777   | 9_0610009B22Rik | 434.5495004  | 0.425964 | 0.262211 | 0.696848 | 384.1385 | 358.0988  | 370.4971 | 747.1242 | 405.0198  | 342.4186 |
| ENSMUSG00000023017   | 9_Asic1         | 172.0010794  | -0.44785 | 0.262111 | 0.696848 | 198.1603 | 178.62    | 218.6163 | 81.36014 | 167.4383  | 187.8114 |
| ENSMUSG000000027363  | 15_Usp8         | 2672.5030081 | 0.340689 | 0.262234 | 0.696848 | 2293.461 | 2250.784  | 2531.347 | 3961.842 | 2675.146  | 2375.14  |
| ENSMUSG000000028329  | 13_Xpa          | 304.6739155  | 0.413381 | 0.262203 | 0.696848 | 259.0702 | 252.4726  | 272.6951 | 510.9814 | 256.8142  | 276.0101 |
| ENSMUSG000000031467  | 10_Agap5        | 406.5905172  | 0.464625 | 0.262241 | 0.696848 | 500.8411 | 334.9126  | 339.4306 | 748.1164 | 364.2915  | 301.9509 |
| ENSMUSG000000032812  | 16_Arap1        | 3672.480956  | -0.63373 | 0.262156 | 0.696848 | 4105.328 | 4197.571  | 5096.061 | 789.7887 | 4053.592  | 3792.545 |
| ENSMUSG000000041161  | 8_Otud3         | 176.2062963  | -0.58376 | 0.26224  | 0.696848 | 179.4812 | 230.1451  | 224.3694 | 49.60984 | 188.9338  | 184.6985 |
| ENSMUSG000000049349  | 3_Gm5105        | 0.849548304  | 3.318305 | 0.262158 | 0.696848 | 0        | 0         | 0        | 1.984394 | 0         | 3.112896 |
| ENSMUSG000000020053  | 18_lgf1         | 725.2996326  | 0.6292   | 0.262313 | 0.696854 | 548.1892 | 722.2089  | 438.3832 | 1680.781 | 392.575   | 569.66   |
| ENSMUSG000000027840  | 5_Wnt2b         | 221.798337   | -0.43259 | 0.262313 | 0.696854 | 264.7551 | 303.9976  | 195.6041 | 215.3067 | 117.6594  | 233.4672 |
| ENSMUSG000000005881  | 13_Ergic3       | 2728.804039  | -0.65565 | 0.262666 | 0.696955 | 3146.2   | 3363.725  | 3497.861 | 521.8955 | 2864.553  | 2966.59  |
| ENSMUSG000000019179  | 10_Mdn2         | 2578.464624  | -0.56971 | 0.262621 | 0.696955 | 2834.341 | 3037.4    | 3371.293 | 722.3193 | 2840.795  | 2664.639 |
| ENSMUSG000000020400  | 17_Tnfp1        | 789.4531538  | -0.64306 | 0.262622 | 0.696955 | 853.5509 | 945.484   | 1088.479 | 163.7125 | 856.4245  | 829.068  |
| ENSMUSG000000022489  | 5_Pde1b         | 153.7366247  | -0.46362 | 0.26258  | 0.696955 | 188.4147 | 221.5576  | 124.2661 | 80.36794 | 145.9429  | 161.8706 |
| ENSMUSG000000035126  | 19_Wdr78        | 152.2741486  | 0.401319 | 0.262615 | 0.696955 | 129.9411 | 127.095   | 136.9228 | 243.0882 | 132.3668  | 144.2309 |
| ENSMUSG000000035285  | 5_Nat14         | 42.0270311   | -0.48806 | 0.262503 | 0.696955 | 47.10367 | 58.39502  | 41.42204 | 22.82053 | 42.99092  | 39.43002 |
| ENSMUSG000000039046  | 15_Usp6nl       | 2560.426861  | 0.274102 | 0.262594 | 0.696955 | 2256.103 | 2285.134  | 2412.834 | 3299.054 | 2669.963  | 2439.473 |
| ENSMUSG0000000067825 | 11_Pex2b        | 547.7738972  | -0.45262 | 0.262495 | 0.696955 | 558.7469 | 637.1927  | 703.024  | 245.0726 | 540.7806  | 601.8266 |
| ENSMUSG000000086477  | 1_Gm15506       | 10.70402808  | -0.72731 | 0.262647 | 0.696955 | 10.55772 | 14.59875  | 14.95796 | 6.945378 | 6.788041  | 10.37632 |
| ENSMUSG000000009281  | 6_Rarres2       | 931.5345392  | -0.36585 | 0.263471 | 0.697035 | 1274.235 | 930.0265  | 942.3513 | 577.4585 | 958.2451  | 906.8904 |
| ENSMUSG000000018648  | 15_Dusp14       | 375.6544311  | -0.36392 | 0.262769 | 0.697035 | 384.9507 | 420.7876  | 462.5461 | 226.2209 | 399.3631  | 360.0583 |
| ENSMUSG000000019806  | 13_Aig1         | 767.5104433  | 0.34762  | 0.262903 | 0.697035 | 699.2458 | 702.4577  | 624.7824 | 1147.972 | 698.0368  | 732.5682 |
| ENSMUSG000000020226  | 9_Slc5a4b       | 3.624229592  | -1.31308 | 0.26316  | 0.697035 | 5.684925 | 5.857502  | 1.150612 | 1.984394 | 2.26268   | 2.075264 |
| ENSMUSG000000023143  | 10_Nagpa        | 197.0051587  | -0.6754  | 0.263726 | 0.697035 | 222.5242 | 239.5913  | 264.6408 | 35.71909 | 217.2173  | 202.3383 |
| ENSMUSG000000024423  | 5_Impact        | 820.5805302  | 0.407539 | 0.263433 | 0.697035 | 739.0403 | 768.5814  | 608.6738 | 1355.341 | 666.3593  | 785.4875 |
| ENSMUSG000000024835  | 14_Coro1b       | 4623.692332  | -0.58402 | 0.263446 | 0.697035 | 5167.597 | 5181.699  | 6291.547 | 1227.347 | 5234.711  | 4639.253 |
| ENSMUSG000000025144  | 17_Str1a        | 344.6590616  | -0.57979 | 0.263514 | 0.697035 | 373.5808 | 395.8839  | 469.4497 | 95.25089 | 352.9781  | 380.811  |
| ENSMUSG000000029725  | 10_Ppp1r35      | 62.71522544  | -0.75826 | 0.263463 | 0.697035 | 64.15844 | 55.57002  | 96.65142 | 8.929771 | 78.06247  | 52.91924 |
| ENSMUSG000000031997  | 8_Trpc6         | 5.156051294  | 1.155873 | 0.262946 | 0.697035 | 4.872793 | 3.435001  | 1.150612 | 10.91416 | 2.26268   | 8.301057 |
| ENSMUSG000000032998  | 16_Foxj3        | 1372.684705  | 0.387269 | 0.263495 | 0.697035 | 1197.895 | 1142.138  | 1228.854 | 2237.404 | 1261.444  | 1168.374 |
| ENSMUSG000000034064  | 14_Poglut1      | 721.4295685  | 0.368619 | 0.263781 | 0.697035 | 632.651  | 625.1702  | 631.686  | 1132.097 | 633.5505  | 673.4232 |
| ENSMUSG000000035891  | 16_Cerk         | 1226.630413  | -0.40014 | 0.263098 | 0.697035 | 1269.363 | 1440.124  | 1477.386 | 637.9826 | 1215.059  | 1319.686 |
| ENSMUSG000000038260  | 9_Trpm4         | 915.894641   | -0.73191 | 0.263213 | 0.697035 | 1019.226 | 1123.245  | 1287.535 | 123.0324 | 900.5467  | 1041.783 |
| ENSMUSG000000038976  | 12_Ppp1r9b      | 2064.110202  | -0.51109 | 0.263563 | 0.697035 | 2315.389 | 2343.529  | 2618.793 | 721.3271 | 2186.88   | 2198.742 |
| ENSMUSG000000039656  | 16_Rxb          | 781.7154571  | -0.64119 | 0.263255 | 0.697035 | 845.4296 | 948.0602  | 1064.316 | 165.6969 | 730.8457  | 935.9441 |
| ENSMUSG000000040220  | 9_Gas8          | 300.292933   | -0.58065 | 0.263045 | 0.697035 | 334.5985 | 346.9351  | 398.1118 | 82.35234 | 320.1692  | 319.5907 |
| ENSMUSG000000041548  | 4_Hspb8         | 616.4706801  | -0.31591 | 0.262894 | 0.697035 | 694.373  | 765.1464  | 591.4146 | 541.7395 | 451.4047  | 654.7548 |
| ENSMUSG000000042496  | 17_Prdm10       | 240.4083388  | -0.33794 | 0.263601 | 0.697035 | 247.7003 | 268.7888  | 288.8036 | 158.7515 | 238.7128  | 239.693  |
| ENSMUSG000000044080  | 9_S100a1        | 658.6159056  | -0.42209 | 0.263263 | 0.697035 | 721.1734 | 966.094   | 575.3061 | 421.6836 | 481.9509  | 785.4875 |
| ENSMUSG000000045725  | 5_Prr15         | 42.05915116  | -0.47284 | 0.263774 | 0.697035 | 40.60661 | 42.07876  | 64.43428 | 41.67227 | 28.2835   | 35.27949 |
| ENSMUSG000000048327  | 6_Ckap2l        | 1413.743467  | 0.281406 | 0.263037 | 0.697035 | 1287.23  | 1146.432  | 1395.692 | 1803.814 | 1452.641  | 1396.653 |
| ENSMUSG000000050199  | 13_Lgr4         | 1537.143062  | 0.411675 | 0.263402 | 0.697035 | 1326.212 | 1312.17   | 1319.752 | 2624.361 | 1200.313  | 1380.051 |
| ENSMUSG000000055944  | 3_E130018O15Rik | 1.320744881  | -2.59319 | 0.263761 | 0.697035 | 0        | 0.3435001 | 3.451836 | 0        | 0         | 1.037632 |
| ENSMUSG000000059395  | 4_Nkap1         | 21.98397982  | 0.797216 | 0.263201 | 0.697035 | 17.05478 | 12.88125  | 18.40979 | 45.64105 | 6.788041  | 31.12896 |
| ENSMUSG000000059741  | 13_Myl3         | 23.33987153  | -0.73351 | 0.263751 | 0.697035 | 25.1761  | 19.75126  | 42.57265 | 5.953181 | 23.75814  | 22.82791 |
| ENSMUSG000000060093  | 6_Hist1h4a      | 1.251274592  | 2.724257 | 0.263027 | 0.697035 | 0        | 0.85875   | 0        | 0.992197 | 0.5656701 | 0        |
| ENSMUSG000000070583  | 1_Fv1           | 72.87984221  | 0.366495 | 0.263159 | 0.697035 | 60.09778 | 72.13502  | 58.68122 | 92.2743  | 81.45649  | 72.63424 |
| ENSMUSG000000073497  | 6_AA792892      | 1.497372398  | 2.082556 | 0.263716 | 0.697035 | 1.624264 | 0         | 0        | 1.984394 | 2.26268   | 3.112896 |
| ENSMUSG000000079470  | 8_Utp14b        | 512.6139002  | 0.42801  | 0.2632   | 0.697035 | 466.1639 | 431.0926  | 414.2204 | 891.9849 | 433.3033  | 438.9184 |
| ENSMUSG000000100150  | 1_Gm19585       | 3.55737924   | 1.703917 | 0.263009 | 0.697035 | 4.872793 | 0         | 0        | 6.945378 | 2.26268   | 7.263424 |
| ENSMUSG000000032531  | 15_Amotl2       | 2967.575596  | -0.29729 | 0.263824 | 0.697057 | 2856.269 | 3061.445  | 3899.424 | 2327.694 | 2985.607  | 2675.015 |
| ENSMUSG000000079481  | 11_Nhs12        | 159.3683673  | 0.431895 | 0.263922 | 0.697224 | 127.5048 | 148.5638  | 131.1698 | 264.9165 | 122.1847  | 161.8706 |
| ENSMUSG000000010122  | 14_Slc47a1      | 252.3318694  | 0.29262  | 0.264092 | 0.69737  | 236.3305 | 226.7101  | 217.4657 | 308.5732 | 236.4501  | 288.4617 |
| ENSMUSG000000018569  | 12_Cldn7        | 5672.951112  | -0.45642 | 0.264605 | 0.69737  | 5570.415 | 6164.109  | 7954.182 | 2542.008 | 6235.947  | 5571.047 |
| ENSMUSG000000020062  | 6_Slc5a8        | 1106.087421  | 0.451146 | 0.2647   | 0.69737  | 953.4432 | 811.519   | 1039.003 | 2003.245 | 914.1228  | 915.1915 |
| ENSMUSG000000020803  | 3_Tyndc17       | 6179.609334  | 0.29952  | 0.264164 | 0.69737  | 5532.244 | 5146.49   | 5942.912 | 8387.04  | 6367.182  | 5701.788 |
| ENSMUSG000000021686  | 4_Ap3b1         | 3351.96915   | 0.238379 | 0.264962 | 0.69737  | 2979.713 | 2901.717  | 3345.98  | 3637.394 | 3773.019  | 3473.992 |
| ENSMUSG000000021745  | 13_Ptprg        | 1806.787066  | 0.345877 | 0.264207 | 0.69737  | 1460.214 | 1624.755  | 1689.099 | 2708.697 | 1730.95   | 1627.007 |
| ENSMUSG000000023066  | 9_Rtn           | 297.9227595  | 0.327379 | 0.264888 | 0.69737  | 297.2404 | 227.5688  | 268.0926 | 403.8241 | 305.4618  | 285.3488 |
| ENSMUSG000000024098  | 5_Twsg1         | 4979.414727  | 0.359115 | 0.264816 | 0.69737  | 4272.627 | 4353.005  | 4463.224 | 7755.01  | 4397.519  | 4635.102 |
| ENSMUSG000000025077  | 13_Dlre1a       | 634.8201157  | 0.276471 | 0.264941 | 0.69737  | 592.0444 | 508.3801  | 622.4812 | 778.8745 | 673.1474  | 633.9932 |
| ENSMUSG000000026344  | 9_Lypd1         | 70.47628117  | -0.46103 | 0.264684 | 0.69737  | 59.28565 | 110.7788  | 74.78979 | 46.63325 | 57.69835  | 73.67188 |
| ENSMUSG000000027750  | 16_Postn        | 4842.411718  | 0.438407 | 0.264496 | 0.69737  | 4494.339 | 4249.096  | 3593.362 | 8553.729 | 3693.825  | 4470.119 |
| ENSMUSG000000030816  | 8_Rnf40         | 1642.806398  | -0.60934 | 0.264777 | 0.69737  | 1797.249 | 1924.459  | 2232.187 | 387.949  | 1772.81   | 1742.184 |
| ENSMUSG000000030842  | 11_Lamtor1      | 1614.265675  | -0.57013 | 0.26452  | 0.69737  | 1854.91  | 1842.878  | 2089.512 | 446.4886 | 1749.052  | 1702.754 |
| ENSMUSG000000031360  | 14_Ctpe2        | 351.3046492  | 0.387115 | 0.264901 | 0.69737  | 318.3558 | 314.3026  | 280.7494 | 560.5912 | 298.6738  | 335.1552 |
| ENSMUSG000000037185  | 8_Krt80         | 6270.13746   | -0.59374 | 0.26433  | 0.69737  | 6622.938 | 7416.167  | 8588.169 | 1591.484 | 6840.082  | 6561.985 |
| ENSMUSG000000037366  | 14_Pafah2       | 298.8563815  | -0.34595 | 0.264543 | 0.69737  | 305.3617 | 356.3813  | 341.7318 | 191.494  | 281.7037  | 316.4778 |
| ENSMUSG000000037370  | 13_Enpp1        | 273.0171277  | 0.344287 | 0.264774 | 0.69737  | 264.7551 | 222.4163  | 234.7249 | 386.9568 | 238.7128  | 290.537  |
| ENSMUSG000000037845  | 14_Fdxacb1      | 237.9435253  | 0.32019  | 0.264358 | 0.69737  | 233.8941 | 173.4675  | 227.8212 | 301.6278 | 251.1575  | 239.693  |
| ENSMUSG000000039033  | 11_Tas1p        | 233.5912218  | 0.376307 | 0.264679 | 0.69737  | 232.2698 | 188.925   | 188.7004 | 355.2065 | 208.1666  | 228.2791 |
| ENSMUSG000000039474  | 13_Wfs1         | 3417.545034  | -0.61255 | 0.264993 | 0.69737  | 3466.18  | 3971.72   | 4959.138 | 814.5936 | 3722.109  | 3571.53  |
| ENSMUSG000000039530  | 16_Tuc3         | 983.9700037  | 0.35799  | 0.26465  | 0.69737  | 873.8542 | 888.8065  | 824.9889 | 1516.077 | 874.5259  | 925.5678 |
| ENSMUSG000000040287  | 9_Stac3         | 52.3928787   | -0.5222  | 0.26425  | 0.69737  | 63.34631 | 64.40627  | 57.53061 | 27.78151 | 32.80886  | 68.48372 |
| ENSMUSG000000055991  | 15_Zkscan5      | 316.5803044  | -0.32121 | 0.264647 | 0.69737  | 353.2775 | 33        |          |          |           |          |

|                      |                  |             |           |          |          |          |          |          |          |          |          |
|----------------------|------------------|-------------|-----------|----------|----------|----------|----------|----------|----------|----------|----------|
| ENSMUSG00000075033   | 3_Nxpe3          | 45.68476778 | 0.435274  | 0.265773 | 0.697531 | 38.17021 | 40.36126 | 37.9702  | 61.5162  | 57.69835 | 38.39239 |
| ENSMUSG00000034730   | 16_Adgrb1        | 21.9027941  | -0.92229  | 0.266045 | 0.697559 | 26.80036 | 29.19751 | 29.91591 | 0.992197 | 23.75814 | 20.75264 |
| ENSMUSG000000022723  | 15_Crygb3        | 2497.714751 | 0.281471  | 0.266325 | 0.697598 | 2293.461 | 2095.351 | 2376.014 | 3275.242 | 2540.99  | 2450.245 |
| ENSMUSG000000025147  | 6_Mob2           | 714.1725043 | -0.422566 | 0.266334 | 0.697598 | 736.6039 | 803.7902 | 915.8872 | 344.2923 | 709.3502 | 775.1112 |
| ENSMUSG000000026042  | 16_Col5a2        | 5131.839455 | -0.26767  | 0.266259 | 0.697598 | 5529.808 | 6317.832 | 4971.795 | 4768.498 | 4163.332 | 5039.779 |
| ENSMUSG000000028700  | 14_Pomgnt1       | 817.3901964 | -0.43414  | 0.26622  | 0.697598 | 907.1516 | 968.6703 | 942.3513 | 374.0582 | 827.0096 | 885.1002 |
| ENSMUSG000000042821  | 7_Snai1          | 35.51441911 | -0.72499  | 0.266132 | 0.697598 | 51.16433 | 48.09001 | 33.36775 | 7.937575 | 23.75814 | 48.76871 |
| ENSMUSG000000045008  | 1_9030612E09Rik  | 3.024840183 | -1.31846  | 0.266102 | 0.697598 | 3.248529 | 5.152501 | 4.602448 | 2.97659  | 1.13134  | 1.037632 |
| ENSMUSG000000051557  | 15_Puol1         | 153.3726669 | -0.57809  | 0.266266 | 0.697598 | 138.0625 | 186.3488 | 226.6706 | 46.63325 | 160.6503 | 161.8706 |
| ENSMUSG000000059013  | 12_Sh2d3c        | 73.43903112 | -0.61958  | 0.266311 | 0.697598 | 88.52241 | 102.1913 | 75.9404  | 18.85174 | 81.45649 | 67.81788 |
| ENSMUSG000000021238  | 10_Aldh6a1       | 1508.738529 | 0.467785  | 0.266378 | 0.697604 | 1226.32  | 1310.453 | 1262.221 | 2827.761 | 1073.642 | 1352.035 |
| ENSMUSG000000042747  | 12_Krtcap2       | 594.6356811 | -0.39429  | 0.2665   | 0.697742 | 646.4572 | 639.7689 | 739.8436 | 315.5186 | 635.8131 | 590.4126 |
| ENSMUSG000000043257  | 15_Pigv          | 581.8279695 | -0.38118  | 0.266472 | 0.697742 | 619.6569 | 692.1527 | 662.7526 | 319.4874 | 582.6402 | 614.2782 |
| ENSMUSG000000012076  | 7_Brms1l         | 559.2601508 | 0.399949  | 0.267365 | 0.697746 | 501.0856 | 487.7701 | 457.9436 | 931.6728 | 484.2136 | 492.8752 |
| ENSMUSG000000016487  | 15_Ptfbfp1       | 4843.492381 | 0.285438  | 0.267397 | 0.697746 | 4253.948 | 4294.61  | 4549.52  | 6499.881 | 4670.172 | 4792.823 |
| ENSMUSG000000016494  | 9_Cd34           | 2039.734878 | 0.434053  | 0.266912 | 0.697746 | 1900.389 | 1598.993 | 1706.358 | 3572.901 | 1506.945 | 1952.824 |
| ENSMUSG000000017132  | 17_Cyth1         | 2192.625986 | -0.40235  | 0.267574 | 0.697746 | 2363.305 | 2237.903 | 2888.036 | 1139.042 | 2233.265 | 2294.204 |
| ENSMUSG000000020704  | 13_Asic2         | 7.522915393 | -0.88468  | 0.267321 | 0.697746 | 12.18198 | 11.16375 | 5.753061 | 3.968787 | 7.919381 | 4.150528 |
| ENSMUSG000000022436  | 15_Sh3bp1        | 2293.523553 | -0.66765  | 0.267138 | 0.697746 | 2465.633 | 2645.809 | 3333.323 | 414.7383 | 2478.766 | 2422.871 |
| ENSMUSG000000024070  | 15_Prk3          | 1369.638536 | 0.040089  | 0.267627 | 0.697746 | 1197.895 | 1163.607 | 1175.926 | 2301.897 | 1080.43  | 1298.078 |
| ENSMUSG000000024442  | 5_061009020Rik   | 825.1261525 | -0.42188  | 0.267029 | 0.697746 | 858.4237 | 990.139  | 986.0746 | 397.8709 | 813.4353 | 904.8152 |
| ENSMUSG000000025875  | 14_Tspan17       | 600.1513076 | -0.55109  | 0.267515 | 0.697746 | 630.2146 | 693.0114 | 816.9346 | 183.5564 | 587.1655 | 690.0253 |
| ENSMUSG000000026856  | 14_Dolpp1        | 621.6249268 | -0.59053  | 0.267022 | 0.697746 | 719.5491 | 655.2264 | 866.4109 | 161.7281 | 710.4816 | 616.3534 |
| ENSMUSG000000026984  | 4_IIf6           | 79.31472228 | 0.467397  | 0.266567 | 0.697746 | 81.21322 | 47.23126 | 71.33795 | 114.1026 | 101.8206 | 60.18266 |
| ENSMUSG000000028423  | 15_Nfx1          | 2033.487715 | 0.223448  | 0.267596 | 0.697746 | 1848.413 | 1848.889 | 1931.878 | 2222.521 | 260.826  | 2188.366 |
| ENSMUSG000000028480  | 14_Glirp2        | 167.1684806 | 0.48723   | 0.26746  | 0.697746 | 168.1114 | 98.75628 | 150.7302 | 217.2911 | 160.2082 | 197.9137 |
| ENSMUSG000000032298  | 13_Neil1         | 169.3351139 | -0.49954  | 0.266987 | 0.697746 | 184.354  | 203.5238 | 170.1102 | 65.48499 | 158.3876 | 197.1501 |
| ENSMUSG000000032777  | 9_Gtf3c1         | 2637.608202 | -0.49225  | 0.266963 | 0.697746 | 2610.193 | 3184.246 | 3455.288 | 1002.119 | 2876.998 | 2696.806 |
| ENSMUSG000000033114  | 10_Slc35d2       | 157.3967905 | 0.392007  | 0.267159 | 0.697746 | 160.8022 | 114.2138 | 133.471  | 239.1194 | 150.4682 | 146.3061 |
| ENSMUSG000000033545  | 14_Znrf1         | 782.0789212 | -0.40359  | 0.267493 | 0.697746 | 811.32   | 869.0552 | 991.8276 | 403.8241 | 849.6364 | 766.8101 |
| ENSMUSG0000000338259 | 4_Gdf5           | 1.659415973 | -1.8914   | 0.266794 | 0.697746 | 4.060661 | 2.576251 | 1.150612 | 0        | 1.13134  | 1.037632 |
| ENSMUSG000000038267  | 14_Slc22a23      | 886.3223001 | -0.2623   | 0.267624 | 0.697746 | 911.2123 | 976.399  | 1012.539 | 715.3739 | 979.594  | 904.8152 |
| ENSMUSG000000039179  | 13_Tekt5         | 46.99159918 | -0.46914  | 0.266632 | 0.697746 | 51.16433 | 48.09001 | 64.43428 | 26.78931 | 52.04164 | 39.43002 |
| ENSMUSG000000040389  | 15_Wdr47         | 934.0533966 | 0.348594  | 0.267116 | 0.697746 | 804.0109 | 808.9427 | 852.6036 | 1418.841 | 858.6871 | 861.2346 |
| ENSMUSG000000040659  | 3_Efh2           | 3613.251421 | -0.53586  | 0.267459 | 0.697746 | 3981.072 | 4055.019 | 4786.546 | 1156.901 | 4142.967 | 3557.003 |
| ENSMUSG000000041079  | 11_Rwdd2b        | 102.9037138 | 0.355274  | 0.267616 | 0.697746 | 99.89226 | 93.60377 | 77.09101 | 134.9388 | 115.3967 | 96.49978 |
| ENSMUSG000000042212  | 3_Spr2d2         | 2.878119748 | 1.788829  | 0.267466 | 0.697746 | 1.624264 | 0        | 2.301224 | 0.992197 | 11.3134  | 1.037632 |
| ENSMUSG000000043430  | 5_Psapi1         | 2150.489378 | -0.49668  | 0.267658 | 0.697746 | 2278.031 | 2329.789 | 2943.266 | 806.656  | 2422.199 | 2122.995 |
| ENSMUSG000000046818  | 7_Dtdl4l         | 87.41390841 | 0.554942  | 0.267006 | 0.697746 | 63.34631 | 85.87502 | 63.28367 | 167.6813 | 50.9103  | 93.36869 |
| ENSMUSG000000047517  | 9_Dmbt1          | 5.553969956 | -1.09417  | 0.267184 | 0.697746 | 4.060661 | 9.446252 | 9.204897 | 0.992197 | 3.39402  | 6.225792 |
| ENSMUSG000000063564  | 13_Col23a1       | 1115.790957 | -0.37336  | 0.266677 | 0.697746 | 1180.84  | 1641.93  | 955.0081 | 838.4063 | 866.6065 | 121.954  |
| ENSMUSG000000066829  | 6_Zfp810         | 362.3797424 | 0.463789  | 0.267095 | 0.697746 | 313.483  | 304.8563 | 295.7073 | 666.7563 | 262.4709 | 331.0046 |
| ENSMUSG000000089917  | 7_Uckl1          | 819.8364887 | -0.43281  | 0.26682  | 0.697746 | 879.5391 | 926.5915 | 1019.442 | 379.0192 | 880.1826 | 834.2562 |
| ENSMUSG0000000100622 | 1_Gm20379        | 2.620485377 | 1.722119  | 0.267436 | 0.697746 | 0.812132 | 1.7175   | 1.150612 | 8.929771 | 0        | 3.12896  |
| ENSMUSG0000000101549 | 1_Gm29630        | 6.296822042 | 1.018349  | 0.267643 | 0.697746 | 4.060661 | 1.7175   | 6.903673 | 5.953181 | 5.656701 | 13.48922 |
| ENSMUSG0000000101791 | 1_2210011K15Rik  | 16.41411417 | 0.607742  | 0.267277 | 0.697746 | 11.36985 | 12.88125 | 14.95796 | 25.79712 | 15.83876 | 17.63975 |
| ENSMUSG000000046167  | 5_Gldn           | 60.60067745 | 0.578708  | 0.267754 | 0.697906 | 52.78859 | 58.39502 | 34.51836 | 121.048  | 41.85958 | 54.9945  |
| ENSMUSG000000037958  | 13_Ccdc55        | 856.7910288 | 0.341134  | 0.267821 | 0.697989 | 743.9131 | 670.6839 | 853.7542 | 1243.223 | 865.4752 | 763.6972 |
| ENSMUSG000000023918  | 12_Adgrf4        | 573.9127677 | 0.287245  | 0.267892 | 0.697992 | 569.3047 | 484.3351 | 497.0644 | 693.5456 | 673.1474 | 526.0795 |
| ENSMUSG000000031838  | 7_IIf30          | 683.1737228 | -0.51424  | 0.267885 | 0.697992 | 817.8171 | 777.169  | 815.784  | 233.1663 | 743.2904 | 711.8156 |
| ENSMUSG000000002733  | 8_Plekha3        | 419.8815807 | 0.374916  | 0.267957 | 0.698054 | 352.4654 | 385.5788 | 358.991  | 661.7953 | 399.3631 | 361.096  |
| ENSMUSG000000015668  | 13_Pdzd11        | 855.2584776 | 0.248083  | 0.268092 | 0.698054 | 827.5627 | 760.8527 | 757.1028 | 975.3295 | 965.0331 | 845.6701 |
| ENSMUSG000000031879  | 13_Fam96b        | 321.8385947 | -0.59015  | 0.268044 | 0.698054 | 380.89   | 354.6638 | 424.5759 | 83.34453 | 371.0796 | 316.4778 |
| ENSMUSG000000041625  | 14_Ggact         | 248.9876369 | -0.32769  | 0.268032 | 0.698054 | 270.44   | 334.0538 | 226.6706 | 222.2521 | 194.5905 | 245.9188 |
| ENSMUSG000000078789  | 9_Dph1           | 217.3511495 | -0.65346  | 0.268072 | 0.698054 | 272.8764 | 258.4838 | 265.7914 | 44.64886 | 182.1458 | 280.1607 |
| ENSMUSG000000001482  | 14_Def8          | 1406.549266 | -0.49899  | 0.268857 | 0.698311 | 1568.227 | 1651.377 | 1722.466 | 508.0048 | 1388.154 | 1601.066 |
| ENSMUSG000000006818  | 4_Sod2           | 2040.540166 | 0.291575  | 0.269167 | 0.698311 | 1859.783 | 1725.229 | 1920.372 | 2727.549 | 2140.495 | 1869.813 |
| ENSMUSG000000007888  | 15_Crlf1         | 569.5302997 | -0.67641  | 0.268441 | 0.698311 | 559.5591 | 712.7627 | 829.5913 | 102.1963 | 539.6492 | 673.4232 |
| ENSMUSG000000015980  | 14_Lrrc27        | 72.72568352 | -0.46967  | 0.269626 | 0.698311 | 79.58895 | 71.3322  | 72.48856 | 60.52401 | 37.33422 | 65.08583 |
| ENSMUSG000000017210  | 14_Med24         | 1029.270207 | -0.53855  | 0.269803 | 0.698311 | 1094.754 | 1248.623 | 1313.999 | 321.4718 | 1178.856 | 1017.917 |
| ENSMUSG000000017491  | 8_Rarb           | 213.1607063 | 0.439127  | 0.268937 | 0.698311 | 184.354  | 197.5126 | 161.0857 | 343.3001 | 143.6802 | 249.0317 |
| ENSMUSG000000018841  | 17_Rad51d        | 437.5844997 | -0.29831  | 0.26962  | 0.698311 | 506.7705 | 450.8439 | 490.1608 | 315.5186 | 450.2734 | 411.9399 |
| ENSMUSG000000019790  | 16_Stxbp5        | 2220.47654  | 0.263186  | 0.26941  | 0.698311 | 1986.475 | 1957.951 | 2111.373 | 2797.003 | 2341.874 | 2128.183 |
| ENSMUSG000000020319  | 9_Wdpcp          | 425.7682671 | 0.317458  | 0.269465 | 0.698311 | 386.5749 | 356.3813 | 394.66   | 597.3025 | 412.9391 | 406.7518 |
| ENSMUSG000000020780  | 15_Srp68         | 2346.778457 | -0.48478  | 0.269757 | 0.698311 | 2650.799 | 2568.522 | 2982.742 | 889.0083 | 2568.142 | 2411.457 |
| ENSMUSG000000021494  | 8_Ddx41          | 708.4133576 | -0.61364  | 0.268659 | 0.698311 | 868.9814 | 783.1802 | 918.1885 | 162.7203 | 831.535  | 685.8748 |
| ENSMUSG000000021794  | 15_Glud1         | 3622.879311 | 0.348441  | 0.269259 | 0.698311 | 3250.153 | 3042.552 | 3270.04  | 5549.357 | 3260.886 | 3344.284 |
| ENSMUSG000000022634  | 9_Yaf2           | 317.9397159 | 0.48735   | 0.269698 | 0.698311 | 240.3911 | 265.3538 | 288.8036 | 611.1932 | 234.1874 | 267.7091 |
| ENSMUSG000000024118  | 13_1600002H07Rik | 130.7160793 | -0.38399  | 0.269394 | 0.698311 | 140.4989 | 128.8125 | 174.893  | 82.35234 | 117.6594 | 140.0803 |
| ENSMUSG000000024208  | 15_Uqc2c         | 759.6988906 | -0.44839  | 0.268581 | 0.698311 | 819.4414 | 875.0665 | 936.5983 | 330.4015 | 761.3919 | 835.2938 |
| ENSMUSG000000024664  | 4_Fads3          | 360.1865021 | -0.38514  | 0.268821 | 0.698311 | 371.9565 | 480.0414 | 371.6477 | 205.3847 | 357.5035 | 374.5852 |
| ENSMUSG000000027215  | 13_Cd82          | 558.693806  | -0.4705   | 0.269059 | 0.698311 | 5959.426 | 6299.792 | 7209.735 | 2237.404 | 5854.685 | 5959.121 |
| ENSMUSG000000030880  | 13_Polr3e        | 596.7477785 | -0.33611  | 0.2687   | 0.698311 | 661.8877 | 660.3789 | 675.4093 | 373.066  | 587.1655 | 622.5792 |
| ENSMUSG000000032338  | 8_Hcn4           | 3.596855579 | -1.28865  | 0.2698   | 0.698311 | 1.624264 | 6.870002 | 6.903673 | 2.97659  |          |          |

|                       |                 |             |           |          |          |          |          |          |          |          |          |
|-----------------------|-----------------|-------------|-----------|----------|----------|----------|----------|----------|----------|----------|----------|
| ENSMUSG00000058715    | 11_Fcer1g       | 323.8915604 | 0.502108  | 0.270112 | 0.698444 | 396.3205 | 178.62   | 228.9718 | 370.0894 | 531.7298 | 237.6177 |
| ENSMUSG00000074178    | 2_Gm10638       | 9.903188862 | -0.99291  | 0.270135 | 0.698444 | 10.55772 | 19.75126 | 9.204897 | 1.984394 | 3.39402  | 14.52685 |
| ENSMUSG00000001552    | 14_Jup          | 22466.21821 | -0.74184  | 0.270273 | 0.698529 | 23735.38 | 26560.29 | 34059.27 | 2745.409 | 24793.32 | 22903.65 |
| ENSMUSG000000023345   | 15_Poc1a        | 115.3668261 | -0.53226  | 0.270258 | 0.698529 | 142.1231 | 125.3775 | 141.5253 | 39.68787 | 133.4981 | 108.989  |
| ENSMUSG000000032580   | 12_Rbm5         | 4364.752522 | 0.249258  | 0.270207 | 0.698529 | 3964.829 | 3866.094 | 4135.3   | 5384.652 | 4398.65  | 4439.99  |
| ENSMUSG000000018287   | 12_Spag7        | 1086.845757 | -0.33861  | 0.270414 | 0.698762 | 1201.143 | 1185.934 | 1254.167 | 665.7641 | 1124.552 | 1089.514 |
| ENSMUSG000000062545   | 4_Tlr12         | 10.13700707 | -0.88457  | 0.270433 | 0.698762 | 9.745586 | 21.46876 | 8.054285 | 2.97659  | 11.3134  | 7.263424 |
| ENSMUSG000000033107   | 5_Rnf125        | 12.02233202 | 0.743574  | 0.270469 | 0.698764 | 8.121322 | 8.587502 | 10.35551 | 20.83613 | 16.9701  | 7.263424 |
| ENSMUSG000000024524   | 16_Gnal         | 212.7601822 | 0.452782  | 0.270513 | 0.698787 | 187.6025 | 164.0213 | 187.5498 | 382.988  | 169.701  | 184.6985 |
| ENSMUSG000000002699   | 12_Lcp2         | 112.2342144 | 0.525942  | 0.27067  | 0.698992 | 129.9411 | 54.96001 | 90.89636 | 117.0792 | 192.3278 | 88.19873 |
| ENSMUSG000000022443   | 16_My9n         | 14064.4689  | -0.62978  | 0.270644 | 0.698992 | 14739.39 | 16194.31 | 20325.56 | 2990.481 | 15798.03 | 14339.04 |
| ENSMUSG0000000097257  | 1_Gm26768       | 8.135203134 | 0.937608  | 0.270697 | 0.698992 | 5.684925 | 8.587502 | 2.301224 | 16.86735 | 10.18206 | 5.18816  |
| ENSMUSG000000051154   | 11_Commnd3      | 1125.863068 | 0.445034  | 0.270758 | 0.699056 | 989.9891 | 934.3202 | 936.5983 | 2050.871 | 858.6871 | 984.7128 |
| ENSMUSG000000062866   | 15_Phactr2      | 1775.235155 | 0.394965  | 0.270862 | 0.699231 | 1559.294 | 1547.468 | 1494.645 | 2914.082 | 1355.345 | 1780.577 |
| ENSMUSG000000097231   | 1_Gm26852       | 40.90271556 | -0.604    | 0.270896 | 0.699231 | 45.4794  | 60.97127 | 41.42204 | 13.89076 | 32.80886 | 50.84397 |
| ENSMUSG000000023764   | 18_Sfi1         | 1473.297213 | -0.41643  | 0.270984 | 0.699368 | 1672.18  | 1626.473 | 1754.683 | 742.1632 | 1263.707 | 1780.577 |
| ENSMUSG000000053965   | 10_Pde5a        | 2285.834633 | 0.434871  | 0.271101 | 0.699581 | 1989.724 | 2006.899 | 1835.226 | 4110.671 | 1824.852 | 1947.635 |
| ENSMUSG0000000001700  | 9_Gramd3        | 2200.050217 | 0.236758  | 0.271681 | 0.699655 | 1991.348 | 1976.843 | 2091.813 | 2556.891 | 2407.492 | 2175.914 |
| ENSMUSG000000006307   | 16_Kmt2b        | 1968.552328 | -0.58019  | 0.271316 | 0.699655 | 2190.32  | 2284.276 | 2602.685 | 508.0048 | 2164.254 | 2061.775 |
| ENSMUSG0000000010051  | 15_Hyal1        | 953.247863  | -0.31275  | 0.271455 | 0.699655 | 976.1829 | 1088.895 | 1103.437 | 652.8655 | 867.7379 | 1030.369 |
| ENSMUSG000000014426   | 8_Map3k4        | 850.8951579 | -0.40645  | 0.271424 | 0.699655 | 938.0127 | 955.789  | 1015.99  | 423.668  | 834.929  | 936.9818 |
| ENSMUSG0000000015542  | 17_Nat9         | 365.4619965 | -0.68181  | 0.271187 | 0.699655 | 395.5084 | 436.2451 | 518.9261 | 61.5162  | 354.1095 | 426.4668 |
| ENSMUSG000000026798   | 10_Cox4         | 241.0071538 | -0.53499  | 0.271548 | 0.699655 | 268.8158 | 271.3651 | 315.2677 | 77.39135 | 257.9455 | 255.2575 |
| ENSMUSG0000000028540  | 6_Dph2          | 221.6882105 | -0.35908  | 0.271236 | 0.699655 | 248.5124 | 218.1226 | 280.7494 | 139.8998 | 225.3189 | 272.5264 |
| ENSMUSG0000000032583  | 7_Mon1a         | 285.6078331 | -0.8368   | 0.271647 | 0.699655 | 332.9742 | 340.9238 | 424.5759 | 19.84394 | 332.4317 | 572.8972 |
| ENSMUSG0000000032942  | 14_Ucp3         | 81.10195559 | -0.39952  | 0.271599 | 0.699655 | 86.89814 | 112.4963 | 77.09101 | 53.57863 | 73.53711 | 83.01057 |
| ENSMUSG0000000036120  | 9_Rtxank        | 202.3272993 | -0.55567  | 0.271667 | 0.699655 | 238.7669 | 249.8963 | 233.5743 | 59.53181 | 219.48   | 212.7146 |
| ENSMUSG0000000036281  | 13_Snap4c       | 509.0125723 | -0.54085  | 0.271526 | 0.699655 | 588.7958 | 605.4189 | 615.5775 | 154.7827 | 538.5179 | 550.9826 |
| ENSMUSG0000000045098  | 18_Suv420h1     | 178.453433  | 0.307912  | 0.271628 | 0.699655 | 1582.033 | 1548.327 | 1664.936 | 2522.164 | 1684.565 | 1728.695 |
| ENSMUSG000000057177   | 12_Gsk3a        | 2375.459428 | -0.48694  | 0.271403 | 0.699655 | 2625.623 | 2596.861 | 3095.147 | 890.9927 | 2545.515 | 2498.618 |
| ENSMUSG0000000079554  | 2_Aox2          | 33.23950711 | -0.47894  | 0.271585 | 0.699655 | 43.85514 | 27.48001 | 44.87387 | 25.79712 | 29.41484 | 28.01607 |
| ENSMUSG0000000093593  | 1_Gm20683       | 107.6543657 | -1.72633  | 0.271543 | 0.699655 | 172.9842 | 183.7725 | 139.2241 | 0        | 69.01175 | 80.9353  |
| ENSMUSG00000000100255 | 1_Gm28196       | 2.684274109 | 1.666365  | 0.271692 | 0.699655 | 0.812132 | 0.85875  | 2.301224 | 6.945378 | 0        | 5.18816  |
| ENSMUSG0000000025410  | 9_Dctn2         | 2935.947203 | -0.52591  | 0.271736 | 0.699677 | 3194.116 | 3511.43  | 3690.013 | 942.587  | 2992.395 | 3285.143 |
| ENSMUSG00000000037617 | 11_Spag1        | 217.7586141 | 0.276944  | 0.271876 | 0.699833 | 192.4753 | 184.6313 | 214.0139 | 254.0024 | 234.1874 | 227.2414 |
| ENSMUSG0000000037887  | 11_Dusp8        | 79.16343817 | -0.41586  | 0.271901 | 0.699833 | 105.5772 | 95.32127 | 70.18734 | 49.60984 | 71.27443 | 83.01057 |
| ENSMUSG0000000084920  | 1_Gm15230       | 25.16877841 | 0.659593  | 0.271908 | 0.699833 | 20.3033  | 15.4575  | 23.01224 | 49.60984 | 13.57608 | 29.0537  |
| ENSMUSG0000000086965  | 1_Gm16314       | 40.4252152  | -0.68339  | 0.271937 | 0.699833 | 50.3522  | 47.23126 | 51.77754 | 7.937575 | 39.5969  | 45.65581 |
| ENSMUSG0000000002107  | 18_Celf2        | 897.3421885 | 0.449135  | 0.272206 | 0.699902 | 749.598  | 822.6827 | 704.1746 | 1634.148 | 664.066  | 809.353  |
| ENSMUSG0000000002603  | 15_Tgfb1        | 422.0025587 | -0.48555  | 0.272197 | 0.699902 | 446.6727 | 475.7476 | 554.595  | 163.7125 | 412.9391 | 478.3484 |
| ENSMUSG0000000024309  | 14_Pfdn6        | 585.4705695 | -0.51907  | 0.272036 | 0.699902 | 684.6274 | 632.8989 | 751.3497 | 195.4628 | 641.4698 | 607.0148 |
| ENSMUSG0000000026880  | 11_Stom         | 9253.588457 | 0.37804   | 0.272008 | 0.699902 | 7503.289 | 7079.537 | 9561.587 | 8384.063 | 14621.4  | 8371.616 |
| ENSMUSG0000000029477  | 14_Mom3         | 1.682724995 | -1.90993  | 0.272137 | 0.699902 | 1.624264 | 5.152501 | 1.150612 | 0        | 1.13134  | 1.037632 |
| ENSMUSG0000000037791  | 15_Phlf2        | 1089.579948 | -0.3071   | 0.272214 | 0.699902 | 1201.143 | 1150.725 | 1263.372 | 735.2178 | 1073.642 | 1113.379 |
| ENSMUSG0000000047728  | 12_BC025446     | 10.37662064 | 0.716094  | 0.272245 | 0.699902 | 10.55772 | 6.011252 | 6.930673 | 13.89076 | 12.44474 | 12.45158 |
| ENSMUSG0000000074651  | 2_Mcidas        | 2.850392562 | 0.1401057 | 0.272084 | 0.699902 | 1.624264 | 0.85875  | 2.301224 | 4.960984 | 1.13134  | 6.225792 |
| ENSMUSG0000000002908  | 15_Kcnk1        | 22.35360068 | -0.53995  | 0.272415 | 0.699978 | 25.1761  | 30.05626 | 24.16285 | 13.89076 | 16.9701  | 23.86554 |
| ENSMUSG0000000025402  | 12_Nab2         | 759.0537707 | -0.54512  | 0.272387 | 0.699978 | 851.1145 | 863.9027 | 987.2252 | 230.1897 | 727.4517 | 894.4388 |
| ENSMUSG0000000028556  | 15_Dock7        | 2909.277861 | 0.336978  | 0.272319 | 0.699978 | 2535.477 | 2613.177 | 2564.714 | 4367.65  | 2577.193 | 2797.456 |
| ENSMUSG0000000052353  | 13_Cemip        | 679.2048263 | -0.32977  | 0.272393 | 0.699978 | 835.684  | 868.1965 | 564.9505 | 513.958  | 645.9952 | 646.4448 |
| ENSMUSG0000000029028  | 14_Lrrc47       | 1124.322503 | -0.40994  | 0.272506 | 0.700049 | 1180.028 | 1227.154 | 1441.717 | 560.5912 | 1236.555 | 1099.89  |
| ENSMUSG0000000038354  | 13_Ankrd35      | 1963.834426 | -0.49427  | 0.272557 | 0.700049 | 2148.902 | 2169.203 | 2572.769 | 715.3739 | 2045.463 | 2131.296 |
| ENSMUSG0000000054453  | 11_Sytl5        | 14.32654997 | 0.65584   | 0.272583 | 0.700049 | 7.30919  | 10.305   | 16.10857 | 18.85174 | 14.70742 | 18.67738 |
| ENSMUSG0000000090626  | 9_Tex9          | 246.1330454 | 0.498275  | 0.27257  | 0.700049 | 216.8393 | 221.5576 | 173.7424 | 479.2311 | 181.0414 | 204.4135 |
| ENSMUSG0000000022553  | 15_Maf1         | 935.3875522 | -0.35873  | 0.272625 | 0.70005  | 1042.778 | 1039.088 | 1071.22  | 537.7707 | 924.3049 | 997.1644 |
| ENSMUSG0000000038291  | 16_Snx25        | 1361.55382  | 0.296415  | 0.272654 | 0.70005  | 1280.732 | 1220.284 | 1165.57  | 1833.58  | 1219.585 | 1449.572 |
| ENSMUSG0000000020775  | 13_Mrp38        | 448.7355356 | -0.60709  | 0.272742 | 0.700104 | 463.7275 | 526.4139 | 635.1379 | 106.1651 | 464.9808 | 495.9884 |
| ENSMUSG0000000087543  | 1_Gm16576       | 44.82270349 | -0.54073  | 0.272745 | 0.700104 | 56.03712 | 61.83002 | 41.42204 | 27.78151 | 23.75814 | 55.1071  |
| ENSMUSG000000018845   | 14_Unc45b       | 51.82900407 | 0.466954  | 0.272909 | 0.700155 | 45.4794  | 51.52501 | 33.36775 | 70.44597 | 39.5969  | 70.55898 |
| ENSMUSG0000000028640  | 11_Tlap2c       | 802.9676069 | -0.27357  | 0.272901 | 0.700155 | 828.3748 | 816.6715 | 991.8276 | 633.0216 | 773.8966 | 774.0735 |
| ENSMUSG0000000030032  | 12_Wdr54        | 170.2322859 | -0.48326  | 0.272977 | 0.700155 | 208.718  | 213.8288 | 172.5918 | 68.46158 | 173.0395 | 184.6985 |
| ENSMUSG0000000030714  | 14_Ccdc101      | 185.1113005 | -0.6091   | 0.272974 | 0.700155 | 204.6573 | 216.4051 | 249.6828 | 43.65666 | 199.1159 | 197.1501 |
| ENSMUSG0000000032511  | 17_Scn5a        | 3.571205347 | -1.24     | 0.273011 | 0.700155 | 2.436397 | 6.870002 | 5.753061 | 0.992197 | 2.26268  | 3.112896 |
| ENSMUSG0000000045665  | 4_Mfsd5         | 1211.964    | -0.58682  | 0.272821 | 0.700155 | 1273.423 | 1384.305 | 1707.508 | 308.5732 | 1324.799 | 1273.175 |
| ENSMUSG0000000089943  | 1_Ugt1a5        | 2.290383032 | -1.80128  | 0.272837 | 0.700155 | 2.436397 | 2.576251 | 5.753061 | 2.97659  | 0        | 0        |
| ENSMUSG0000000031728  | 9_Zfp821        | 242.2383062 | -0.48233  | 0.273174 | 0.700371 | 271.2521 | 279.9526 | 295.7073 | 94.2587  | 259.0769 | 253.1822 |
| ENSMUSG00000000037152 | 11_Ndufc1       | 524.4696771 | 0.412341  | 0.273236 | 0.700371 | 431.2422 | 461.1489 | 457.9436 | 893.9693 | 110.6765 | 491.8376 |
| ENSMUSG0000000042903  | 8_Foxo4         | 1119.637619 | -0.30017  | 0.273205 | 0.700371 | 1229.568 | 1187.652 | 1289.836 | 779.8667 | 1039.702 | 1191.202 |
| ENSMUSG0000000107253  | 1_Gm143634      | 9.877152591 | -0.98481  | 0.273232 | 0.700371 | 14.61838 | 18.8925  | 5.753061 | 1.984394 | 4.52536  | 13.48922 |
| ENSMUSG0000000100444  | 1_CS30043A13Rik | 1.000718806 | 2.371871  | 0.273305 | 0.700458 | 0        | 0.85875  | 0        | 2.97659  | 1.13134  | 10.37632 |
| ENSMUSG0000000044708  | 5_Kcnj10        | 15.73704863 | -0.7537   | 0.273551 | 0.700729 | 26.80036 | 19.75126 | 12.65673 | 19.84394 | 18.2066  | 5.18816  |
| ENSMUSG0000000078349  | 2_AW011738      | 771.2343074 | 0.302288  | 0.273541 | 0.700729 | 665.1363 | 574.5039 | 833.0432 | 775.8979 | 955.9824 | 822.8422 |
| ENSMUSG0000000078552  | 10_Dcdc2b       | 9.972531784 | -0.96754  | 0.273487 | 0.700729 | 17.05478 | 15.4575  | 6.903673 | 0.992197 | 0.505072 | 10.37632 |
| ENSMUSG0000000105078  | 1_Gm35911       | 0.850021227 | 3.318439  | 0.273507 | 0.700729 | 0        | 0        | 0        | 3.968787 | 1.13134  | 0        |
| ENSMUSG0000000        |                 |             |           |          |          |          |          |          |          |          |          |

|                      |                  |             |          |          |          |          |          |          |          |          |          |
|----------------------|------------------|-------------|----------|----------|----------|----------|----------|----------|----------|----------|----------|
| ENSMUSG00000063849   | 5_Ppdc           | 318.5253399 | -0.44231 | 0.275302 | 0.701963 | 318.3558 | 409.6239 | 372.7983 | 144.8607 | 317.9066 | 347.6067 |
| ENSMUSG00000085793   | 1_Lin52          | 285.3749162 | 0.393214 | 0.275254 | 0.701963 | 263.943  | 243.8851 | 232.4236 | 466.3325 | 242.1068 | 263.5585 |
| ENSMUSG00000096945   | 1_Gm26546        | 3.530994474 | -1.61224 | 0.275291 | 0.701963 | 5.684925 | 0        | 10.35551 | 2.97659  | 1.13134  | 1.037632 |
| ENSMUSG00000021219   | 16_Rgs6          | 87.3264518  | -0.37393 | 0.27545  | 0.701965 | 102.3287 | 106.485  | 87.44652 | 90.28991 | 55.43567 | 81.97293 |
| ENSMUSG00000024140   | 9_Epas1          | 13327.44697 | -0.29408 | 0.275584 | 0.701965 | 12939.7  | 14874.41 | 16229.38 | 9569.738 | 12649.51 | 13701.93 |
| ENSMUSG00000028036   | 6_Ptgr           | 171.2152555 | 0.575091 | 0.275396 | 0.701965 | 156.7415 | 127.095  | 128.8686 | 369.0972 | 95.03257 | 150.4566 |
| ENSMUSG00000031748   | 15_Gnao1         | 342.6539011 | -0.43438 | 0.275539 | 0.701965 | 385.7628 | 543.5889 | 251.9841 | 340.3235 | 211.5606 | 322.7036 |
| ENSMUSG00000053553   | 11_311008217Rik  | 182.8425324 | -0.48438 | 0.27552  | 0.701965 | 196.536  | 185.49   | 257.7371 | 74.41476 | 187.8025 | 195.0748 |
| ENSMUSG00000053801   | 16_Grwd1         | 341.4687661 | -0.57061 | 0.275521 | 0.701965 | 341.0955 | 383.8613 | 499.3657 | 97.23529 | 399.3631 | 327.8917 |
| ENSMUSG00000062794   | 8_Zfp599         | 70.18717182 | 0.482135 | 0.275566 | 0.701965 | 64.97057 | 56.67751 | 54.07877 | 126.009  | 63.35505 | 56.03213 |
| ENSMUSG000000102976  | 5_Zc3h11a        | 4460.982473 | 0.337046 | 0.27538  | 0.701965 | 3903.107 | 3887.562 | 4036.347 | 6744.954 | 4068.299 | 4125.625 |
| ENSMUSG00000021135   | 7_Slc10a1        | 4.982815791 | 1.021193 | 0.275656 | 0.702008 | 4.872793 | 2.576251 | 2.301224 | 6.945378 | 9.050721 | 4.150528 |
| ENSMUSG00000034839   | 5_Larp6          | 44.17171679 | -0.53105 | 0.275672 | 0.702008 | 55.22499 | 57.53626 | 43.72326 | 20.83613 | 31.67752 | 56.03213 |
| ENSMUSG000000103567  | 1_Podhga5        | 118.2529199 | -0.41177 | 0.27595  | 0.702626 | 142.1231 | 168.315  | 94.35019 | 103.1885 | 78.06247 | 123.4782 |
| ENSMUSG00000050071   | 8_Bex1           | 31.24510582 | -0.57694 | 0.276021 | 0.702718 | 35.73382 | 56.67751 | 19.56041 | 27.78151 | 24.88948 | 22.82791 |
| ENSMUSG00000020921   | 6_Tmem101        | 309.9568489 | -0.45562 | 0.276095 | 0.702816 | 323.2286 | 332.3363 | 419.9734 | 137.9154 | 286.229  | 360.0583 |
| ENSMUSG00000029735   | 17_Tpk1          | 158.1091765 | 0.446492 | 0.276187 | 0.70296  | 121.8198 | 120.225  | 159.9351 | 273.8463 | 124.4474 | 148.3814 |
| ENSMUSG000000303271  | 15_Sult2b1       | 50.77022585 | -0.56196 | 0.27641  | 0.703234 | 52.78859 | 40.36126 | 88.59713 | 22.82053 | 55.43567 | 44.61818 |
| ENSMUSG00000020658   | 9_Efr3b          | 129.2906716 | -0.4022  | 0.276546 | 0.703234 | 115.3228 | 208.6763 | 117.3624 | 106.1651 | 112.0027 | 116.2148 |
| ENSMUSG000000226615  | 14_Eprs          | 4102.311934 | 0.259569 | 0.276754 | 0.703234 | 3845.446 | 3390.346 | 3967.311 | 5076.079 | 4364.71  | 3969.98  |
| ENSMUSG000000226893  | 4_Gca            | 156.4419754 | 0.521397 | 0.276532 | 0.703234 | 120.1956 | 129.6713 | 135.7722 | 314.5264 | 135.7608 | 102.7256 |
| ENSMUSG00000031105   | 16_Slc25a14      | 103.7777497 | 0.433962 | 0.27674  | 0.703234 | 77.15256 | 97.03878 | 90.89836 | 174.6266 | 91.63855 | 91.31162 |
| ENSMUSG00000034891   | 13_Sncb          | 9.933237498 | -1.03739 | 0.276715 | 0.703234 | 19.49117 | 14.59875 | 5.753061 | 0.992197 | 13.57608 | 5.18816  |
| ENSMUSG00000034932   | 4_Mrpl54         | 414.578507  | -0.62028 | 0.27638  | 0.703234 | 487.2793 | 483.4764 | 536.1852 | 88.30552 | 424.2525 | 467.9721 |
| ENSMUSG00000036980   | 13_Taf6          | 839.9624515 | -0.47226 | 0.276362 | 0.703234 | 925.0186 | 933.4615 | 1070.069 | 328.4171 | 916.3855 | 866.4228 |
| ENSMUSG00000040594   | 18_Ranbp17       | 152.1053117 | 0.367146 | 0.276717 | 0.703234 | 129.9411 | 133.1063 | 135.7722 | 227.2131 | 127.8414 | 158.5777 |
| ENSMUSG00000041263   | 14_Rusc1         | 369.1830345 | -0.45513 | 0.276679 | 0.703234 | 384.1385 | 412.2001 | 484.4077 | 157.7593 | 393.7064 | 382.8862 |
| ENSMUSG00000042429   | 8_Adora1         | 160.1101018 | -0.42611 | 0.276611 | 0.703234 | 190.8511 | 231.8626 | 127.7179 | 110.1338 | 115.3967 | 184.6985 |
| ENSMUSG000000078765  | 10_Utaf114       | 485.7222098 | -0.41972 | 0.276667 | 0.703234 | 540.88   | 561.6226 | 564.9505 | 228.2053 | 510.2344 | 508.4397 |
| ENSMUSG00000097108   | 1_Gm26581        | 2.746659234 | -2.1099  | 0.276593 | 0.703234 | 6.497057 | 6.870002 | 0        | 0        | 0        | 3.112896 |
| ENSMUSG00000016529   | 5_Iil10          | 4.151347135 | 1.354419 | 0.276885 | 0.70339  | 4.872793 | 0.85875  | 1.150612 | 7.937575 | 9.050721 | 1.037632 |
| ENSMUSG00000058571   | 10_Gpc6          | 1306.256093 | 0.384475 | 0.276861 | 0.70339  | 1090.694 | 1191.945 | 1117.244 | 2130.247 | 1036.308 | 1271.099 |
| ENSMUSG000000303119  | 14_Cdk12         | 1345.490061 | 0.281492 | 0.277585 | 0.703526 | 1179.216 | 1118.952 | 1346.216 | 1724.438 | 1453.772 | 1250.347 |
| ENSMUSG0000005951    | 13_ShpK          | 227.7417532 | -0.31106 | 0.27711  | 0.703526 | 253.3852 | 263.6363 | 239.3273 | 160.7359 | 213.8233 | 235.5245 |
| ENSMUSG00000009894   | 15_Snap47        | 1349.816751 | -0.40901 | 0.277603 | 0.703526 | 1470.771 | 1497.66  | 1651.128 | 653.8577 | 1353.083 | 1472.4   |
| ENSMUSG00000015776   | 12_Med22         | 1376.163551 | -0.32962 | 0.277238 | 0.703526 | 1469.147 | 1525.999 | 1602.803 | 855.2737 | 1403.993 | 1399.766 |
| ENSMUSG00000021743   | 5_Fezf2          | 1.557283384 | -1.82154 | 0.277475 | 0.703526 | 2.436397 | 2.576251 | 2.301224 | 0.992197 | 0        | 1.037632 |
| ENSMUSG00000022757   | 18_Tfg           | 1995.292517 | 0.294701 | 0.277693 | 0.703526 | 1745.272 | 1671.128 | 1960.643 | 2685.877 | 2092.979 | 1815.856 |
| ENSMUSG00000025496   | 4_Drd4           | 2.198405727 | -1.62477 | 0.277112 | 0.703526 | 2.436397 | 5.152501 | 2.301224 | 0        | 2.26268  | 1.037632 |
| ENSMUSG00000027107   | 3_Chna1          | 20.13693904 | -0.63014 | 0.277125 | 0.703526 | 21.92757 | 27.48001 | 24.16285 | 24.80492 | 7.919387 | 14.52685 |
| ENSMUSG00000027333   | 18_Smox          | 2862.386161 | -0.65298 | 0.277399 | 0.703526 | 3138.079 | 3187.681 | 4172.12  | 530.8253 | 3429.092 | 2716.521 |
| ENSMUSG00000028167   | 15_Bdn2          | 177.9653479 | -0.43959 | 0.27757  | 0.703526 | 203.033  | 265.3538 | 146.1277 | 177.6032 | 96.16391 | 179.5103 |
| ENSMUSG00000028698   | 13_Pik3r3        | 1988.534055 | 0.734636 | 0.277751 | 0.703526 | 1672.18  | 1848.03  | 1675.291 | 3223.647 | 1799.962 | 1712.093 |
| ENSMUSG00000031533   | 3_Mrps31         | 256.0496297 | 0.283854 | 0.277565 | 0.703526 | 246.8882 | 224.9926 | 220.9175 | 322.464  | 252.2888 | 268.7467 |
| ENSMUSG00000032553   | 14_Srpb          | 750.2204628 | -0.37371 | 0.277542 | 0.703526 | 804.823  | 848.4452 | 887.1219 | 408.7851 | 787.4127 | 764.7348 |
| ENSMUSG00000032590   | 14_Apeh          | 1454.397979 | -0.51938 | 0.277207 | 0.703526 | 1586.906 | 1621.32  | 1931.878 | 474.2701 | 1606.432 | 1506.64  |
| ENSMUSG00000034206   | 15_Polq          | 128.0484439 | 0.450246 | 0.277612 | 0.703526 | 133.1897 | 86.73377 | 104.7057 | 199.4316 | 154.9936 | 89.23636 |
| ENSMUSG0000003036131 | 12_Fmrd7         | 7.996191505 | 0.818481 | 0.27772  | 0.703526 | 8.121322 | 3.435001 | 5.753061 | 9.921968 | 12.44474 | 8.301057 |
| ENSMUSG00000036931   | 14_Nfkbid        | 27.50214827 | -0.71543 | 0.277538 | 0.703526 | 45.4794  | 29.19751 | 27.61469 | 5.953181 | 33.9402  | 22.82791 |
| ENSMUSG00000038644   | 14_Pold1         | 428.4748129 | -0.85065 | 0.277142 | 0.703526 | 500.2734 | 482.6176 | 670.8069 | 25.79712 | 463.8494 | 427.5044 |
| ENSMUSG00000040525   | 13_Cblc          | 1483.767084 | -0.77051 | 0.277515 | 0.703526 | 1612.895 | 1760.438 | 2239.091 | 144.8607 | 1594.058 | 1551.26  |
| ENSMUSG00000059878   | 12_Zfp422        | 620.2405783 | 0.381747 | 0.277285 | 0.703526 | 574.9896 | 491.2051 | 549.9626 | 1007.08  | 543.0432 | 555.1332 |
| ENSMUSG00000061414   | 7_Cracr2a        | 12.46093171 | -0.85349 | 0.277132 | 0.703526 | 15.43051 | 25.76251 | 6.903673 | 12.89856 | 3.39402  | 10.37632 |
| ENSMUSG00000062077   | 14_Trim54        | 15.12870984 | -0.95262 | 0.277435 | 0.703526 | 12.18198 | 29.19751 | 18.40979 | 0.992197 | 11.3134  | 18.67738 |
| ENSMUSG00000098120   | 1_Gm5914         | 5.939887377 | -1.21093 | 0.277695 | 0.703526 | 11.36985 | 0.85875  | 12.65673 | 1.984394 | 5.656701 | 3.112896 |
| ENSMUSG00000020885   | 14_Adgre5        | 556.8208391 | -0.50447 | 0.27783  | 0.703545 | 673.2576 | 650.9327 | 635.1379 | 191.494  | 625.6311 | 564.471  |
| ENSMUSG00000035967   | 15_Ddx28b        | 635.9819062 | 0.472505 | 0.277823 | 0.703545 | 600.9778 | 515.2501 | 482.1065 | 1184.683 | 418.5968 | 614.2782 |
| ENSMUSG00000011306   | 6_Sugp1          | 616.3105886 | -0.43322 | 0.278052 | 0.703546 | 637.5238 | 699.8814 | 787.0187 | 280.7917 | 610.9237 | 681.7243 |
| ENSMUSG00000021866   | 15_Anxa11        | 3217.376067 | -0.41785 | 0.278242 | 0.703546 | 3319.184 | 3624.785 | 4096.179 | 1518.061 | 3387.232 | 3358.815 |
| ENSMUSG00000022557   | 10_Bop1          | 945.1261377 | -0.71643 | 0.278302 | 0.703546 | 1048.463 | 1112.082 | 1364.626 | 124.0246 | 1080.43  | 941.1323 |
| ENSMUSG00000022892   | 10_App           | 18399.56268 | -0.24559 | 0.278679 | 0.703546 | 18286.78 | 21146.72 | 20452.13 | 15143.9  | 16876.2  | 18491.64 |
| ENSMUSG00000024066   | 8_Xdh            | 6644.796621 | 0.422381 | 0.278596 | 0.703546 | 5097.754 | 4676.754 | 7262.664 | 5181.252 | 11064.51 | 6585.851 |
| ENSMUSG00000024525   | 6_Impa2          | 194.8469591 | -0.42066 | 0.27818  | 0.703546 | 197.3481 | 212.9701 | 258.8877 | 98.22748 | 188.9338 | 212.7146 |
| ENSMUSG00000025038   | 7_Ethc2          | 15.72533347 | 0.869308 | 0.277945 | 0.703546 | 14.61838 | 12.88125 | 5.753061 | 41.67227 | 9.050721 | 10.37632 |
| ENSMUSG00000027827   | 16_Kcnab1        | 137.2585413 | 0.625865 | 0.278554 | 0.703546 | 110.45   | 127.095  | 86.29591 | 317.503  | 70.14309 | 112.0643 |
| ENSMUSG00000027865   | 10_Gdap2         | 581.7549619 | 0.304594 | 0.278748 | 0.703546 | 511.6433 | 494.6401 | 555.7456 | 795.7418 | 609.7923 | 522.9666 |
| ENSMUSG00000028300   | 14_3110043021Rik | 272.3663691 | 0.479373 | 0.27845  | 0.703546 | 273.6885 | 198.3713 | 210.562  | 514.9501 | 222.874  | 213.7522 |
| ENSMUSG00000028673   | 10_Fuca1         | 1594.338862 | -0.4323  | 0.278442 | 0.703546 | 1730.654 | 1981.137 | 1782.298 | 709.4207 | 1660.807 | 1701.717 |
| ENSMUSG00000029462   | 18_Vps29         | 1218.445526 | 0.3141   | 0.278742 | 0.703546 | 1132.112 | 1023.63  | 1103.437 | 1740.313 | 1207.14  | 1104.041 |
| ENSMUSG00000029536   | 8_Gatc           | 504.6122966 | 0.336773 | 0.278738 | 0.703546 | 453.1698 | 425.9401 | 459.0942 | 752.0852 | 468.3748 | 469.0907 |
| ENSMUSG00000036912   | 17_Piwi4         | 24.71627533 | 0.530366 | 0.278391 | 0.703546 | 14.61838 | 23.18626 | 23.01224 | 31.7503  | 33.9402  | 21.79927 |
| ENSMUSG00000039100   | 9_March6         | 3610.699146 | 0.392374 | 0.278127 | 0.703546 | 2991.895 | 3220.313 | 3156.129 | 6081.174 | 3047.83  | 3166.853 |
| ENSMUSG00000040482   | 15_Dxo           | 257.0006807 | -0.70494 | 0.278161 | 0.703546 | 315.9194 | 315.1613 | 324.4726 | 35.71909 | 285.0977 | 265.6338 |
| ENSMUSG00000045467   | 13_Tll13         | 38.6112969  | -0.55553 | 0.278221 | 0.703546 | 51.16433 | 39.50251 | 47.1751  | 16.86735 | 27.15216 | 49.80634 |
| ENSMUSG00000045462   | 15_Ttrap         | 2952.913835 | -0.46047 | 0.277911 | 0.703546 | 3075.545 | 3536.333 |          |          |          |          |

|                       |                  |             |          |          |          |          |          |          |          |          |          |
|-----------------------|------------------|-------------|----------|----------|----------|----------|----------|----------|----------|----------|----------|
| ENSMUSG000000028972   | 11_Car6          | 268.4864689 | -0.30585 | 0.28031  | 0.704952 | 315.9194 | 331.4776 | 242.7792 | 237.135  | 213.8233 | 269.7843 |
| ENSMUSG000000033323   | 13_Cldp1         | 398.6320879 | -0.41531 | 0.280225 | 0.704952 | 420.6845 | 401.8951 | 544.2395 | 199.4316 | 408.4138 | 417.1281 |
| ENSMUSG0000000035671  | 5_Zswim4         | 1436.948145 | -0.72521 | 0.280344 | 0.704952 | 1575.536 | 1686.321 | 2107.921 | 178.5954 | 1686.321 | 1477.588 |
| ENSMUSG0000000043496  | 7_Trl1           | 54.26887113 | -0.4429  | 0.280262 | 0.704952 | 55.22499 | 73.85252 | 58.68122 | 58.53961 | 30.54618 | 48.76871 |
| ENSMUSG0000000045312  | 11_Lfplp2        | 1433.084324 | -0.28449 | 0.280136 | 0.704952 | 1480.517 | 1838.584 | 1402.596 | 1487.303 | 1150.573 | 1238.933 |
| ENSMUSG0000000052949  | 14_Rnf157        | 83.86850118 | -0.48338 | 0.280381 | 0.704952 | 103.1408 | 121.9425 | 67.88611 | 40.68007 | 80.32515 | 89.23636 |
| ENSMUSG0000000105875  | 1_Gm43518        | 4.336229451 | 1.752424 | 0.280085 | 0.704952 | 0        | 2.576251 | 3.451836 | 0        | 15.83876 | 4.150528 |
| ENSMUSG000000021013   | 15_Ttc8          | 437.160486  | 0.325258 | 0.280504 | 0.705119 | 381.7021 | 395.0251 | 387.7563 | 635.006  | 395.969  | 427.5044 |
| ENSMUSG000000009863   | 14_Sdhb          | 1991.157972 | -0.32695 | 0.280917 | 0.705687 | 2244.733 | 2101.362 | 2301.224 | 1237.269 | 2004.735 | 2057.624 |
| ENSMUSG0000000013701  | 12_Timm23        | 601.4244712 | -0.57568 | 0.280906 | 0.705687 | 411.751  | 858.7502 | 889.4232 | 851.3049 | 308.8558 | 288.4617 |
| ENSMUSG000000018593   | 12_Sparc         | 22771.84116 | -0.27597 | 0.280809 | 0.705687 | 23474.68 | 28334.46 | 23020.3  | 18571.94 | 18989.54 | 24240.12 |
| ENSMUSG000000020225   | 10_Tmbim4        | 1286.344606 | 0.282354 | 0.281049 | 0.705687 | 1208.453 | 1067.427 | 1206.992 | 1709.555 | 1290.859 | 1234.782 |
| ENSMUSG000000020925   | 16_Cdc43         | 458.7522659 | 0.442291 | 0.280965 | 0.705687 | 371.9565 | 358.0988 | 437.2326 | 831.4609 | 393.7064 | 360.0583 |
| ENSMUSG0000000045100  | 11_Slc25a26      | 96.00891582 | -0.34756 | 0.280906 | 0.705687 | 97.45586 | 98.75628 | 126.5673 | 83.34453 | 97.29525 | 72.63424 |
| ENSMUSG000000048138   | 9_Dmrt2          | 1.544147759 | 2.073976 | 0.281072 | 0.705687 | 0        | 1.7175   | 0        | 1.984394 | 4.52536  | 1.037632 |
| ENSMUSG000000060244   | 1_Alyrf2         | 66.0154088  | -0.45591 | 0.281084 | 0.705687 | 88.52241 | 74.71127 | 65.58489 | 33.73469 | 58.82969 | 74.70951 |
| ENSMUSG0000000066113  | 15_Adamts1       | 472.2187171 | -0.30353 | 0.280912 | 0.705687 | 480.7822 | 566.7751 | 517.7754 | 426.6446 | 336.008  | 505.3268 |
| ENSMUSG0000000085287  | 8_4833418N02Rik  | 27.22050321 | 0.52412  | 0.281021 | 0.705687 | 24.36397 | 24.04501 | 18.40979 | 40.68007 | 35.07154 | 20.75264 |
| ENSMUSG000000028773   | 8_Fabp3          | 154.3346748 | -0.51146 | 0.28121  | 0.705735 | 165.675  | 274.8001 | 103.5551 | 127.9934 | 84.85051 | 169.134  |
| ENSMUSG0000000050721  | 8_Plekho2        | 537.4784837 | -0.53387 | 0.28121  | 0.705735 | 727.6704 | 568.4926 | 610.975  | 168.6735 | 643.7325 | 505.3268 |
| ENSMUSG0000000064310  | 10_Zpld1         | 2.463164706 | 1.604771 | 0.281139 | 0.705735 | 0.812132 | 1.7175   | 1.150612 | 8.929771 | 1.13134  | 1.037632 |
| ENSMUSG0000000028188  | 13_Spata1        | 84.02264254 | 0.601791 | 0.281455 | 0.705897 | 64.97057 | 61.83002 | 73.63917 | 185.5408 | 73.53711 | 44.61818 |
| ENSMUSG000000031497   | 8_Tnfrsf13b      | 6.566413194 | 0.860058 | 0.281496 | 0.705897 | 4.872793 | 3.435001 | 5.753061 | 8.929771 | 10.18206 | 6.225792 |
| ENSMUSG0000000031627  | 7_Irf2           | 1723.348906 | 0.26515  | 0.281454 | 0.705897 | 1582.033 | 1416.079 | 1698.303 | 1790.915 | 2167.648 | 1685.114 |
| ENSMUSG0000000033313  | 11_Fbxl8         | 76.82916988 | -0.57685 | 0.281509 | 0.705897 | 69.03124 | 88.45127 | 118.513  | 23.81272 | 79.19381 | 81.97293 |
| ENSMUSG0000000048096  | 7_Lmod1          | 84.3307084  | -0.53248 | 0.281522 | 0.705897 | 89.33454 | 134.8238 | 74.78979 | 36.71128 | 64.48639 | 105.8385 |
| ENSMUSG0000000059409  | 8_Ppp2r5d        | 1135.513292 | -0.44231 | 0.281441 | 0.705897 | 1263.678 | 1349.097 | 1311.698 | 481.2155 | 1216.191 | 1191.202 |
| ENSMUSG0000000061894  | 15_Zscan20       | 151.8337417 | -0.31115 | 0.281362 | 0.705897 | 156.7415 | 158.01   | 189.851  | 115.0948 | 147.0742 | 144.2309 |
| ENSMUSG0000000002496  | 9_Tsc2           | 1670.547375 | -0.45584 | 0.281884 | 0.706009 | 1742.024 | 2000.888 | 2053.843 | 680.647  | 1694.747 | 1851.136 |
| ENSMUSG0000000003970  | 8_Rpl8           | 12150.95893 | -0.80895 | 0.281975 | 0.706009 | 14339.01 | 14974.89 | 17099.25 | 880.0786 | 12172.09 | 13440.45 |
| ENSMUSG00000000004415 | 15_Col26a1       | 9.204167344 | -0.84188 | 0.281757 | 0.706009 | 6.497057 | 19.75126 | 9.204897 | 6.945378 | 4.52536  | 3.801057 |
| ENSMUSG0000000017679  | 16_Tlpa1         | 1613.531038 | 0.287515 | 0.281767 | 0.706009 | 1422.856 | 1371.424 | 1565.983 | 2179.856 | 1605.372 | 1535.695 |
| ENSMUSG00000000024855 | 9_Pacs1          | 909.2788724 | -0.39628 | 0.281713 | 0.706009 | 970.498  | 1053.687 | 1075.822 | 455.4183 | 918.6482 | 981.5999 |
| ENSMUSG00000002026955 | 13_Sapcd2        | 76.58465726 | -0.51864 | 0.28193  | 0.706009 | 86.08601 | 72.99377 | 111.6094 | 30.7581  | 66.74907 | 91.31162 |
| ENSMUSG00000000029720 | 9_Gm20605        | 421.0274358 | -0.68134 | 0.281709 | 0.706009 | 453.1698 | 628.6052 | 474.0522 | 75.40696 | 506.5932 | 588.3374 |
| ENSMUSG0000000030029  | 14_Lrig1         | 5704.433324 | -0.43092 | 0.281987 | 0.706009 | 6400.414 | 6492.152 | 6757.545 | 2500.336 | 5827.533 | 6248.62  |
| ENSMUSG0000000032867  | 8_Fbxw5          | 2067.299572 | -0.57097 | 0.281658 | 0.706009 | 2275.594 | 2446.579 | 2709.692 | 508.0048 | 2167.648 | 2296.28  |
| ENSMUSG0000000038812  | 16_Tmrt12        | 497.4632522 | -0.45644 | 0.281992 | 0.706009 | 561.1833 | 542.7301 | 622.4812 | 203.4003 | 522.6791 | 532.3052 |
| ENSMUSG0000000046959  | 16_Slc26a1       | 12.67711156 | -1.00822 | 0.281983 | 0.706009 | 14.61838 | 25.76251 | 10.35551 | 0.992197 | 5.656701 | 18.67738 |
| ENSMUSG0000000053338  | 9_Tamr1          | 9.473485663 | 0.833901 | 0.281974 | 0.706009 | 8.933454 | 3.435001 | 8.054285 | 9.921968 | 19.23278 | 7.263424 |
| ENSMUSG000000020956   | 14_Dtd2          | 162.1214004 | -0.29619 | 0.282209 | 0.706372 | 190.0389 | 188.0663 | 157.6339 | 130.97   | 149.3369 | 156.6824 |
| ENSMUSG0000000074207  | 10_Adh1          | 14213.85765 | -0.40816 | 0.282184 | 0.706372 | 16207.72 | 15819.04 | 16606.78 | 6876.916 | 13202.74 | 15669.95 |
| ENSMUSG0000000031202  | 5_Rab39b         | 16.28461552 | 0.80866  | 0.282293 | 0.706494 | 14.61838 | 9.446252 | 11.50612 | 41.67227 | 9.050721 | 11.41395 |
| ENSMUSG0000000063065  | 13_Mapk3         | 3228.963557 | -0.58299 | 0.282364 | 0.706584 | 3652.158 | 3825.732 | 4139.902 | 775.8979 | 3369.131 | 3610.96  |
| ENSMUSG0000000057836  | 12_Xlr3a         | 14.24194909 | 0.795223 | 0.282504 | 0.706845 | 9.745586 | 11.16375 | 10.35551 | 29.7659  | 19.23278 | 5.18816  |
| ENSMUSG0000000064068  | 13_Mtx1          | 621.4223523 | -0.47786 | 0.282555 | 0.706884 | 674.8818 | 709.3277 | 785.8681 | 234.1584 | 692.3801 | 931.9179 |
| ENSMUSG0000000038848  | 14_Ythdf1        | 1212.435354 | 0.257201 | 0.282596 | 0.706897 | 1033.844 | 1039.088 | 1241.51  | 1406.935 | 1373.447 | 1179.788 |
| ENSMUSG0000000026725  | 17_Tnn           | 244.2294628 | -0.44828 | 0.282665 | 0.706981 | 245.2639 | 308.2913 | 292.2555 | 177.6032 | 124.4474 | 317.5154 |
| ENSMUSG0000000090137  | 8_Uba52          | 7864.660496 | -0.75506 | 0.28273  | 0.707056 | 9900.703 | 9555.314 | 10174.86 | 781.8511 | 7677.274 | 9097.958 |
| ENSMUSG00000000058761 | 12_Rnf169        | 1275.092182 | 0.239335 | 0.282935 | 0.70739  | 1126.427 | 1107.788 | 1274.878 | 1420.826 | 1440.196 | 1280.438 |
| ENSMUSG0000000066191  | 11_Anks6         | 156.2010944 | -0.65682 | 0.282923 | 0.70739  | 192.4753 | 176.0438 | 204.809  | 27.78151 | 174.2264 | 161.8706 |
| ENSMUSG0000000018585  | 9_Atox1          | 1743.866758 | -0.67972 | 0.283175 | 0.707635 | 2138.344 | 2000.888 | 2302.375 | 261.94   | 1832.771 | 1926.883 |
| ENSMUSG0000000021280  | 8_Exoc314        | 47.10370589 | -0.81179 | 0.28312  | 0.707635 | 64.15844 | 54.10126 | 62.13305 | 3.968787 | 36.20288 | 62.25792 |
| ENSMUSG0000000038074  | 16_Fkbp14        | 428.7074164 | 0.413094 | 0.283153 | 0.707635 | 376.0172 | 395.8839 | 331.763  | 740.1788 | 355.2408 | 373.5475 |
| ENSMUSG0000000041777  | 11_Cir1          | 1065.256867 | 0.409003 | 0.283155 | 0.707635 | 920.9579 | 818.389  | 1006.786 | 1838.54  | 906.2034 | 900.6646 |
| ENSMUSG0000000003166  | 19_Dgcr2         | 3514.280998 | -0.44994 | 0.284157 | 0.707756 | 3747.99  | 4067.041 | 4358.519 | 1439.678 | 3776.413 | 3696.045 |
| ENSMUSG0000000009555  | 16_Cdk9          | 1011.943201 | -0.46705 | 0.2843   | 0.707756 | 1085.009 | 1185.934 | 1251.866 | 394.8943 | 1163.018 | 990.9386 |
| ENSMUSG0000000010311  | 15_Optc          | 422.9477835 | -0.52225 | 0.283575 | 0.707756 | 432.8665 | 738.5252 | 324.4726 | 257.9712 | 230.7934 | 553.057  |
| ENSMUSG0000000017404  | 12_Rpl19         | 12360.58115 | -0.49462 | 0.284427 | 0.707756 | 14358.5  | 13887.71 | 15130.55 | 4237.673 | 13005.89 | 13543.17 |
| ENSMUSG0000000017723  | 11_Wfdc2         | 1897.743587 | -0.63793 | 0.283968 | 0.707756 | 2014.9   | 2291.146 | 2625.697 | 355.2065 | 2027.361 | 2072.151 |
| ENSMUSG0000000020069  | 16_Hnnp3         | 1014.035302 | 0.296105 | 0.283842 | 0.707756 | 1080.948 | 923.1565 | 967.6648 | 1514.092 | 1079.298 | 1055.272 |
| ENSMUSG0000000020101  | 14_4632428N05Rik | 292.1541181 | -0.40478 | 0.283464 | 0.707756 | 428.8058 | 274.8001 | 294.5567 | 176.611  | 340.5334 | 237.6177 |
| ENSMUSG0000000020472  | 14_Zkscan17      | 552.7645826 | -0.46379 | 0.283366 | 0.707756 | 557.1227 | 657.8027 | 707.6264 | 228.2053 | 507.9717 | 657.8587 |
| ENSMUSG0000000022742  | 5_Cpox           | 774.845175  | 0.295967 | 0.284501 | 0.707756 | 629.4024 | 656.0852 | 801.9766 | 991.2046 | 870.0005 | 700.4016 |
| ENSMUSG00000000024369 | 16_Nelfe         | 847.1141079 | -0.56043 | 0.283706 | 0.707756 | 945.3219 | 959.224  | 1124.148 | 228.2053 | 984.2659 | 841.5196 |
| ENSMUSG0000000024668  | 7_Sdhaf2         | 962.0412327 | 0.251257 | 0.28383  | 0.707756 | 856.7994 | 845.869  | 933.1464 | 1181.706 | 1000.105 | 954.6215 |
| ENSMUSG00000000025575 | 14_Cant1         | 1661.671663 | -0.51076 | 0.284502 | 0.707756 | 1632.386 | 1876.369 | 2349.55  | 563.5678 | 1847.478 | 1700.679 |
| ENSMUSG0000000026459  | 5_Myog           | 5.112573544 | -1.11782 | 0.284424 | 0.707756 | 3.248529 | 0.85875  | 5.753061 | 10.91416 | 6.788041 | 3.112896 |
| ENSMUSG0000000027298  | 17_Tyros3        | 1353.792687 | -0.56123 | 0.283816 | 0.707756 | 1458.589 | 1519.988 | 1862.841 | 365.1284 | 1588.987 | 1357.223 |
| ENSMUSG0000000028101  | 18_Plas3         | 1000.954942 | -0.42383 | 0.284253 | 0.707756 | 1078.512 | 1191.945 | 1170.173 | 451.4496 | 1039.702 | 1073.949 |
| ENSMUSG0000000028834  | 13_Tmrm3         | 56.9499072  | -0.59116 | 0.283578 | 0.707756 | 62.53418 | 108.2025 | 34.51836 | 60.52401 | 27.15216 | 48.76871 |
| ENSMUSG0000000029238  | 11_Clock         | 4866.848685 | 0.399711 | 0.283728 | 0.707756 | 4196.287 | 3951.11  | 4443.664 | 8320.562 | 4432.591 | 3856.878 |
| ENSMUSG0000000030327  | 8_Necap1         | 517.6151152 | 0.294175 | 0.284166 | 0.707756 | 508.3947 | 407.0476 | 479.8052 | 682.6314 | 932.8612 | 494.9505 |
| ENSMUSG0000000032567  | 14_Aste1         | 103.5860229 | 0.351846 | 0.284119 | 0.707756 | 99.89226 | 68.7000  |          |          |          |          |

|                      |                  |              |          |          |          |          |          |          |          |          |          |
|----------------------|------------------|--------------|----------|----------|----------|----------|----------|----------|----------|----------|----------|
| ENSMUSG00000026288   | 14_Innp5d        | 183.3308902  | -0.49825 | 0.285369 | 0.708409 | 287.4948 | 177.7613 | 178.3449 | 81.36014 | 230.7934 | 144.2309 |
| ENSMUSG00000017670   | 16_Elmo2         | 1442.352901  | -0.44005 | 0.285466 | 0.708472 | 1560.106 | 1703.76  | 1717.864 | 609.2088 | 1554.461 | 1508.717 |
| 242.4579543          | 8_Pdk3           | 0.435099     | 0.285435 | 0.708472 | 231.4577 | 194.9363 | 192.1522 | 428.629  | 222.874  | 184.6985 |          |
| ENSMUSG00000054753   | 9_AJ018091       | 26.35936873  | 0.572161 | 0.285501 | 0.708472 | 19.49117 | 18.8925  | 25.31347 | 33.73469 | 44.12226 | 16.60211 |
| ENSMUSG00000067813   | 3_Xkr9           | 3.505785593  | 1.489436 | 0.285638 | 0.708723 | 3.248529 | 0        | 2.301224 | 9.921968 | 4.52536  | 1037632  |
| ENSMUSG00000001036   | 17_Epn2          | 1295.312972  | -0.28799 | 0.285739 | 0.708795 | 1355.449 | 1428.102 | 1488.892 | 903.8913 | 1282.94  | 1312.605 |
| ENSMUSG000000001569  | 10_Nom1          | 803.7634189  | 0.301047 | 0.285727 | 0.708795 | 722.7976 | 694.7289 | 743.2954 | 1105.307 | 851.8991 | 704.5522 |
| ENSMUSG00000000561   | 14_Wdr77         | 1322.345879  | 0.310208 | 0.285814 | 0.708806 | 1158.1   | 1102.635 | 1281.782 | 1836.556 | 1419.832 | 1135.169 |
| ENSMUSG000000004207  | 14_Psap          | 18937.53548  | -0.46368 | 0.286099 | 0.708806 | 21029.35 | 22854.78 | 21980.14 | 7276.771 | 20907.17 | 19577    |
| ENSMUSG000000020831  | 18_0610010K14Rik | 473.3398642  | -0.61339 | 0.285976 | 0.708806 | 532.7587 | 587.3852 | 597.1677 | 99.21968 | 468.3748 | 555.1332 |
| ENSMUSG000000023960  | 13_Ennp5         | 2811.949608  | 0.385855 | 0.285895 | 0.708806 | 2468.07  | 2498.104 | 2348.399 | 4718.888 | 2327.167 | 2511.07  |
| ENSMUSG000000024992  | 12_Pde6c         | 4.831801607  | -1.63793 | 0.28604  | 0.708806 | 6.497057 | 15.4575  | 0        | 4.960984 | 0        | 2.075264 |
| ENSMUSG000000027649  | 15_Ctnnb1        | 655.2107149  | -0.50972 | 0.285819 | 0.708806 | 707.3671 | 791.7677 | 810.0309 | 214.3145 | 685.5921 | 722.1919 |
| ENSMUSG000000029392  | 12_Rilp1         | 205.9316033  | -0.32289 | 0.285999 | 0.708806 | 194.9117 | 252.4726 | 239.3273 | 148.8295 | 182.1458 | 217.9027 |
| ENSMUSG00000030789   | 9_Iltax          | 139.4833188  | 0.753638 | 0.285934 | 0.708806 | 129.129  | 69.55877 | 112.76   | 60.52401 | 389.181  | 75.74714 |
| ENSMUSG000000031953  | 1_Tmem170        | 193.8762708  | 0.325336 | 0.286079 | 0.708806 | 164.8628 | 163.1625 | 188.7004 | 271.8619 | 188.9338 | 185.7361 |
| ENSMUSG000000092305  | 1_Prps111        | 4.286778886  | -1.25364 | 0.285953 | 0.708806 | 4.872793 | 5.152501 | 8.054285 | 1.984394 | 5.656701 | 0        |
| ENSMUSG000000006154  | 13_Eps811        | 7750.484334  | -0.52021 | 0.286263 | 0.709126 | 8261.009 | 8868.314 | 10269.21 | 2417.984 | 8508.809 | 8177.578 |
| ENSMUSG000000030279  | 15_C2cd5         | 1149.753946  | 0.251901 | 0.286336 | 0.709218 | 1006.232 | 1068.285 | 1074.672 | 1436.701 | 1136.991 | 1175.637 |
| ENSMUSG000000052296  | 7_Ppp6r1         | 2700.690058  | -0.52142 | 0.28654  | 0.709636 | 2897.688 | 3023.66  | 3629.031 | 843.3673 | 3027.466 | 2782.929 |
| ENSMUSG000000024429  | 9_Gnl1           | 1071.722831  | -0.58256 | 0.286719 | 0.709752 | 1128.052 | 1366.272 | 1361.174 | 255.9868 | 1146.942 | 1169.411 |
| ENSMUSG000000025232  | 7_Hexa           | 1200.059865  | -0.31903 | 0.286726 | 0.709752 | 1289.666 | 1505.389 | 1201.239 | 790.7809 | 1139.997 | 1276.287 |
| ENSMUSG000000030203  | 17_Dusp16        | 1864.523907  | 0.297864 | 0.286691 | 0.709752 | 1642.131 | 1582.677 | 1793.804 | 2597.571 | 1721.9   | 1849.06  |
| ENSMUSG0000000049928 | 15_Glip2r        | 7.419658252  | 0.789338 | 0.28673  | 0.709752 | 6.497057 | 5.152501 | 4.602448 | 10.91416 | 9.050721 | 8.301057 |
| ENSMUSG000000032913  | 13_Lng2          | 862.8691193  | 0.373854 | 0.286769 | 0.709761 | 766.6528 | 711.0452 | 777.8138 | 1407.927 | 750.0785 | 763.6972 |
| ENSMUSG000000044352  | 6_Sowaha         | 32.51311997  | 0.596959 | 0.286819 | 0.709797 | 30.86102 | 25.76251 | 21.86163 | 63.5006  | 27.15216 | 25.9408  |
| ENSMUSG000000005732  | 14_Ranbp1        | 1468.760183  | 0.289192 | 0.286925 | 0.709881 | 1324.588 | 1147.29  | 1494.645 | 1818.697 | 170.586  | 136.7585 |
| ENSMUSG000000024790  | 7_Sacd31         | 216.6831346  | -0.54053 | 0.286893 | 0.709881 | 213.5908 | 254.1901 | 302.611  | 66.47719 | 218.3486 | 244.8812 |
| ENSMUSG0000000046556 | 6_Zfp319         | 354.7360713  | -0.53861 | 0.28705  | 0.710102 | 357.3382 | 403.2339 | 472.9016 | 106.1651 | 402.7571 | 359.0207 |
| ENSMUSG000000015133  | 16_Lrrk1         | 1863.509453  | -0.48438 | 0.287827 | 0.710211 | 2070.125 | 2039.532 | 2410.532 | 668.7407 | 2096.373 | 1895.754 |
| ENSMUSG0000000019312 | 10_Grb7          | 2342.21306   | -0.49271 | 0.287626 | 0.710211 | 2400.663 | 2714.509 | 3099.749 | 819.5546 | 2465.19  | 2553.613 |
| ENSMUSG000000020021  | 4_Fgd6           | 1630.05107   | 0.225596 | 0.288012 | 0.710211 | 1513.814 | 1477.05  | 1517.657 | 1733.368 | 1892.933 | 1645.684 |
| ENSMUSG0000000022090 | 10_Pdlim2        | 1300.81977   | -0.6314  | 0.287405 | 0.710211 | 1451.28  | 1331.063 | 1960.643 | 254.9946 | 1454.903 | 1352.035 |
| ENSMUSG000000022359  | 9_Wdyhvf1        | 362.2459135  | 0.350543 | 0.287702 | 0.710211 | 308.6102 | 307.4326 | 356.6898 | 498.0828 | 352.9781 | 349.682  |
| ENSMUSG000000022556  | 9_Hsf1           | 607.0469974  | -0.61869 | 0.287186 | 0.710211 | 608.5668 | 712.7627 | 812.3321 | 123.0324 | 613.1863 | 700.4016 |
| ENSMUSG000000023988  | 8_Bysl           | 513.75009393 | -0.46458 | 0.288052 | 0.710211 | 500.2734 | 590.8202 | 696.1203 | 210.3457 | 596.2162 | 488.7247 |
| ENSMUSG000000024049  | 14_Myom1         | 218.493863   | 0.607803 | 0.287875 | 0.710211 | 133.1897 | 268.7888 | 117.3624 | 412.7539 | 101.8267 | 277.0478 |
| ENSMUSG000000026866  | 16_Kynu          | 10.1879817   | 0.757177 | 0.28751  | 0.710211 | 8.933454 | 6.870002 | 6.903673 | 19.84394 | 11.3134  | 7.263424 |
| ENSMUSG000000028115  | 16_Bnlp1         | 2253.31569   | -0.44571 | 0.287755 | 0.710211 | 2449.391 | 2374.444 | 2972.031 | 943.5792 | 2431.25  | 2349.199 |
| ENSMUSG000000028197  | 4_Col24a1        | 92.40719583  | -0.4896  | 0.287136 | 0.710211 | 111.2621 | 143.4113 | 69.03673 | 96.24309 | 45.2536  | 89.23636 |
| ENSMUSG000000029145  | 12_Elf2b4        | 583.2660864  | -0.56922 | 0.287802 | 0.710211 | 622.9054 | 648.3564 | 819.2358 | 150.8139 | 659.5713 | 598.7137 |
| ENSMUSG000000029380  | 11_Cxcd1         | 168.012874   | 0.635934 | 0.287724 | 0.710211 | 121.0077 | 63.54752 | 210.562  | 272.8541 | 260.2082 | 79.89767 |
| ENSMUSG000000029618  | 13_Ocm           | 181.4360314  | 0.294669 | 0.287431 | 0.710211 | 161.6143 | 146.8463 | 180.6461 | 173.6344 | 218.3486 | 207.5264 |
| ENSMUSG000000030748  | 9_Ill4ra         | 539.5192326  | -0.61354 | 0.288005 | 0.710211 | 691.1245 | 577.0801 | 689.2167 | 117.0792 | 694.6428 | 467.9721 |
| ENSMUSG000000031157  | 10_Pqbp1         | 612.7594843  | -0.42812 | 0.287806 | 0.710211 | 694.373  | 675.8364 | 738.693  | 270.8697 | 635.8131 | 660.9716 |
| ENSMUSG000000032462  | 14_Pik3cb        | 1758.265671  | 0.291274 | 0.287349 | 0.710211 | 1491.887 | 1557.773 | 1694.852 | 2405.085 | 1787.517 | 1612.48  |
| ENSMUSG000000034121  | 12_Mks1          | 267.606047   | -0.39869 | 0.288047 | 0.710211 | 274.5007 | 318.5963 | 319.8702 | 136.9232 | 257.9455 | 297.8004 |
| ENSMUSG000000034848  | 17_Tlcl21b       | 240.6386664  | 0.365377 | 0.287796 | 0.710211 | 217.6514 | 205.2413 | 208.2608 | 378.027  | 211.5606 | 223.9099 |
| ENSMUSG000000035842  | 9_Ddx11          | 180.4969343  | -0.35427 | 0.287274 | 0.710211 | 206.2816 | 204.3826 | 196.7547 | 108.1495 | 176.4891 | 190.9423 |
| ENSMUSG000000036046  | 14_5031439G07Rik | 1729.758609  | -0.28943 | 0.287668 | 0.710211 | 1783.442 | 1988.007 | 1936.48  | 1197.582 | 1729.819 | 1743.222 |
| ENSMUSG000000037295  | 7_Ldlrap1        | 3259.908161  | -0.5087  | 0.288098 | 0.710211 | 3512.472 | 3710.66  | 4263.018 | 1060.658 | 3699.482 | 3313.159 |
| ENSMUSG000000037355  | 14_Lvsssa        | 897.5986727  | 0.388264 | 0.288163 | 0.710211 | 789.3925 | 794.344  | 749.0485 | 1487.303 | 685.5921 | 879.912  |
| ENSMUSG000000041912  | 12_Tdrhk         | 55.25513058  | 0.529049 | 0.288109 | 0.710211 | 43.04301 | 55.81876 | 36.81959 | 106.1651 | 42.99092 | 46.69344 |
| ENSMUSG0000000442377 | 8_Fam83g         | 3119.567516  | -0.59466 | 0.28792  | 0.710211 | 3378.47  | 3262.392 | 4619.708 | 720.3349 | 242.304  | 331.197  |
| ENSMUSG000000043895  | 5_Stpr2          | 249.7767169  | -0.41288 | 0.28813  | 0.710211 | 298.6768 | 256.7663 | 299.1591 | 124.0246 | 290.7545 | 228.2791 |
| ENSMUSG000000045917  | 17_6330416G13Rik | 239.9912262  | -0.34542 | 0.287699 | 0.710211 | 282.622  | 300.5626 | 222.0681 | 154.7827 | 240.3698 | 235.5425 |
| ENSMUSG000000049717  | 8_Lig4           | 257.2734468  | 0.422111 | 0.287835 | 0.710211 | 201.4088 | 197.5126 | 261.1889 | 428.629  | 268.1276 | 186.7738 |
| ENSMUSG000000051065  | 8_Mb21d2         | 1005.01276   | 0.259084 | 0.287291 | 0.710211 | 900.6546 | 872.4902 | 972.2672 | 1269.02  | 1034.045 | 981.5999 |
| ENSMUSG000000091756  | 1_Gm3095         | 2.059916353  | 2.249669 | 0.288105 | 0.710211 | 0        | 0        | 2.301224 | 6.945378 | 0        | 3.128986 |
| ENSMUSG000000028470  | 10_Hint2         | 396.8353367  | -0.49131 | 0.288244 | 0.710322 | 475.0973 | 446.5501 | 469.4497 | 138.9076 | 415.2018 | 435.8055 |
| ENSMUSG000000013629  | 16_Cad           | 1128.870393  | -0.61595 | 0.288424 | 0.710332 | 1197.083 | 1283.832 | 1617.761 | 235.1506 | 207.5507 | 1099.89  |
| ENSMUSG000000020536  | 12_Ligl1         | 1433.967316  | -0.6449  | 0.288513 | 0.710332 | 1536.554 | 1691.738 | 2019.324 | 253.0102 | 1548.805 | 1554.373 |
| ENSMUSG000000020660  | 5_Pomc           | 2.185593627  | -1.61388 | 0.288712 | 0.710332 | 2.436397 | 0        | 1.7175   | 5.753061 | 0        | 1.13134  |
| ENSMUSG000000020806  | 15_Rhbd2         | 900.9630383  | -0.7174  | 0.288422 | 0.710332 | 977.8071 | 993.574  | 1389.939 | 112.1182 | 1055.54  | 876.7991 |
| ENSMUSG0000000025188 | 15_Hps1          | 275.1940788  | -0.71598 | 0.288664 | 0.710332 | 301.301  | 341.7826 | 383.1538 | 33.73469 | 257.5424 | 293.6499 |
| ENSMUSG000000029101  | 14_Rgs12         | 3967.49196   | -0.41395 | 0.28829  | 0.710332 | 4137.813 | 4356.44  | 5104.115 | 1852.431 | 4311.537 | 4042.615 |
| ENSMUSG0000000320221 | 13_Crtam         | 4.406925586  | 1.181873 | 0.288456 | 0.710332 | 4.060661 | 1.7175   | 2.301224 | 8.929771 | 1.13134  | 8.301057 |
| ENSMUSG000000032743  | 15_D430042O09Rik | 583.0338432  | -0.38328 | 0.288413 | 0.710332 | 587.9837 | 701.5989 | 690.3673 | 305.5966 | 609.7923 | 602.8642 |
| ENSMUSG000000034664  | 13_Igta2b        | 119.5566896  | -0.64951 | 0.288623 | 0.710332 | 128.3169 | 148.5638 | 161.0857 | 21.82833 | 127.8414 | 129.704  |
| ENSMUSG000000038618  | 11_Rassf7        | 3496.401994  | -0.51674 | 0.288659 | 0.710332 | 3686.268 | 3687.473 | 4974.096 | 1126.143 | 3786.595 | 3717.836 |
| ENSMUSG000000040410  | 14_Fbx4          | 428.3603654  | 0.313197 | 0.288472 | 0.710332 | 414.1874 | 351.2288 | 380.8526 | 605.2401 | 412.9391 | 405.7141 |
| ENSMUSG000000051811  | 14_Cox6b2        | 80.34909916  | -0.68109 | 0.288626 | 0.710332 | 82.83748 | 139.1175 | 74.78979 | 15.87515 | 66.74907 | 102.7256 |
| ENSMUSG000000079278  | 1_Tmem233        | 4.382063884  | 1.196646 | 0.288684 | 0.710332 | 1.624264 | 5.152501 | 1.150612 | 10.91416 | 2.26268  | 5.18816  |
| ENSMUSG000000029368  | 10_Alb           | 1.644656928  | -1.83684 | 0.288781 | 0.710398 | 0.812132 | 3.435001 | 3.451836 | 0        | 1.13134  | 1.037632 |
| ENSMUSG000000033777  | 3_Tlr13          | 164.7870879  | 0.557449 | 0.28881  |          |          |          |          |          |          |          |

|                     |                  |             |          |          |          |          |          |          |          |          |          |
|---------------------|------------------|-------------|----------|----------|----------|----------|----------|----------|----------|----------|----------|
| ENSMUSG00000000823  | 16_Znf512b       | 1306.023901 | -0.44068 | 0.291342 | 0.710656 | 1405.801 | 1562.925 | 1542.971 | 542.7317 | 1350.82  | 1430.895 |
| ENSMUSG00000001445  | 10_Mrp10         | 952.5239369 | -0.36629 | 0.292161 | 0.710656 | 1007.044 | 1036.512 | 1174.775 | 517.9267 | 978.6092 | 1000.277 |
| ENSMUSG000000002658 | 9_Glf2f1         | 1680.073198 | -0.56302 | 0.29146  | 0.710656 | 1904.45  | 1813.68  | 2293.17  | 431.6056 | 1936.854 | 1700.679 |
| ENSMUSG000000003955 | 7_Fam162a        | 1179.458636 | 0.253323 | 0.290381 | 0.710656 | 1080.136 | 1024.489 | 1124.148 | 1462.498 | 1264.821 | 1190.643 |
| ENSMUSG000000005312 | 14_Ubqln1        | 3403.222218 | 0.33949  | 0.292294 | 0.710656 | 2733.637 | 2906.011 | 3374.745 | 5156.447 | 3318.221 | 2920.273 |
| ENSMUSG000000016541 | 9_Atxn10         | 2428.807036 | 0.265106 | 0.291758 | 0.710656 | 2170.017 | 2181.226 | 2267.856 | 3187.928 | 2455.008 | 2310.807 |
| ENSMUSG000000017760 | 15_Ctsa          | 2621.392267 | -0.47541 | 0.290913 | 0.710656 | 2944.791 | 3028.812 | 3174.539 | 949.5324 | 2887.18  | 2743.499 |
| ENSMUSG000000017950 | 16_Hnf4a         | 11.4978558  | -0.78268 | 0.292198 | 0.710656 | 17.86691 | 19.75126 | 5.753061 | 6.945378 | 12.44474 | 6.225792 |
| ENSMUSG000000018581 | 15_Dnah11        | 4.599256392 | -1.16188 | 0.29168  | 0.710656 | 9.745586 | 6.870002 | 2.301224 | 1.984394 | 5.656701 | 1.037632 |
| ENSMUSG000000019528 | 18_Gyg           | 10758.64115 | 0.343605 | 0.290645 | 0.710656 | 9625.391 | 9370.682 | 9454.58  | 16762.17 | 9240.786 | 10098.24 |
| ENSMUSG000000021217 | 7_Tshz3          | 44.59735267 | 0.544449 | 0.29151  | 0.710656 | 30.04889 | 45.51376 | 33.36775 | 86.32112 | 33.9402  | 38.39239 |
| ENSMUSG000000021288 | 18_Klc1          | 2651.983673 | -0.56876 | 0.292176 | 0.710656 | 2882.257 | 3161.918 | 3459.891 | 650.8811 | 2946.01  | 2810.945 |
| ENSMUSG000000022218 | 15_Tgm1          | 919.4783003 | -0.6036  | 0.290455 | 0.710656 | 1059.832 | 1139.562 | 1127.6   | 198.4394 | 1142.654 | 848.783  |
| ENSMUSG000000022995 | 16_Enah          | 698.1164602 | 0.381286 | 0.292162 | 0.710656 | 613.9719 | 631.1814 | 574.1554 | 1160.87  | 584.9028 | 623.6169 |
| ENSMUSG000000024105 | 2_Themis3        | 2.838964972 | 1.538225 | 0.291007 | 0.710656 | 0.812132 | 3.435001 | 0        | 4.960984 | 6.788041 | 1.037632 |
| ENSMUSG000000025226 | 11_Fbxl15        | 18.61416311 | -0.75832 | 0.291598 | 0.710656 | 21.92757 | 24.04501 | 24.16285 | 2.97659  | 14.70742 | 23.86554 |
| ENSMUSG000000025909 | 16_Sntg1         | 18.9052841  | 0.693709 | 0.291833 | 0.710656 | 9.745586 | 23.18626 | 10.35551 | 37.70348 | 15.83876 | 16.60211 |
| ENSMUSG000000026360 | 9_Rgs2           | 259.0883022 | 0.415558 | 0.291447 | 0.710656 | 295.6161 | 197.5126 | 172.5918 | 384.9724 | 307.7245 | 196.1125 |
| ENSMUSG000000026940 | 3_Ccdc183        | 4.006541722 | -1.23869 | 0.292114 | 0.710656 | 4.872793 | 8.587502 | 3.451836 | 2.97659  | 0        | 4.150528 |
| ENSMUSG000000028414 | 16_Fktn          | 707.0308205 | 0.39207  | 0.292454 | 0.710656 | 639.9602 | 601.1252 | 593.7158 | 1190.636 | 546.4373 | 670.3103 |
| ENSMUSG000000028713 | 17_Cyp4b1        | 139.9071155 | -0.3392  | 0.291488 | 0.710656 | 141.311  | 168.315  | 166.8388 | 85.32893 | 107.4773 | 70.1717  |
| ENSMUSG000000028749 | 7_Pla2g2f        | 175.8909094 | -0.55905 | 0.292109 | 0.710656 | 203.8452 | 216.4051 | 208.2608 | 47.62545 | 168.5697 | 210.6393 |
| ENSMUSG000000029146 | 14_Snx17         | 1538.753811 | -0.35653 | 0.292009 | 0.710656 | 1690.047 | 1620.462 | 1873.197 | 859.2424 | 1564.643 | 1624.932 |
| ENSMUSG000000029581 | 14_Fscn1         | 594.2861612 | -0.63237 | 0.291035 | 0.710656 | 677.3182 | 656.9439 | 833.0432 | 117.0792 | 77.4496  | 506.3644 |
| ENSMUSG000000030785 | 8_Cox6a2         | 42.202045   | -0.85959 | 0.290213 | 0.710656 | 37.35808 | 76.42877 | 49.47632 | 6.945378 | 12.44474 | 70.55898 |
| ENSMUSG000000030814 | 17_Bcl7c         | 604.7048368 | -0.45804 | 0.291587 | 0.710656 | 683.8153 | 651.7914 | 764.0064 | 240.1116 | 598.4789 | 690.0253 |
| ENSMUSG000000030942 | 7_Thumpd1        | 1112.749083 | 0.359377 | 0.292404 | 0.710656 | 969.6858 | 933.4615 | 1021.744 | 1780.001 | 1015.943 | 955.6591 |
| ENSMUSG000000031373 | 4_Car5b          | 1777.151756 | 0.322333 | 0.291118 | 0.710656 | 1683.55  | 1459.017 | 1595.899 | 2578.72  | 1846.347 | 1499.378 |
| ENSMUSG000000031375 | 17_Bgn           | 9762.466156 | -0.29187 | 0.292304 | 0.710656 | 10638.12 | 11514.12 | 10087.42 | 6749.915 | 9068.822 | 10516.4  |
| ENSMUSG000000031935 | 8_Med17          | 805.6082029 | 0.289924 | 0.29174  | 0.710656 | 725.234  | 693.8702 | 755.9522 | 1096.377 | 833.7977 | 728.4177 |
| ENSMUSG000000032333 | 5_Sltnl1         | 374.2276025 | -0.60895 | 0.29086  | 0.710656 | 440.1756 | 406.1889 | 509.7212 | 79.37575 | 369.9482 | 439.956  |
| ENSMUSG000000032724 | 5_Abtb2          | 642.9277702 | -0.46489 | 0.291253 | 0.710656 | 666.7605 | 692.1527 | 877.917  | 254.0024 | 716.1383 | 650.5953 |
| ENSMUSG000000033773 | 14_Rpap2         | 242.2239798 | 0.320701 | 0.292298 | 0.710656 | 228.2091 | 205.2413 | 212.8632 | 342.3079 | 248.8948 | 215.8272 |
| ENSMUSG000000034488 | 14_Edi3          | 82.91955269 | 0.666443 | 0.290959 | 0.710656 | 75.52829 | 69.55877 | 47.1751  | 203.4003 | 39.5969  | 62.25792 |
| ENSMUSG000000035495 | 15_Tst2          | 931.7927564 | 0.241708 | 0.290219 | 0.710656 | 833.2476 | 841.5752 | 887.1219 | 1092.409 | 1041.964 | 894.4388 |
| ENSMUSG000000037071 | 2_Scd1           | 2466.665519 | -0.23226 | 0.291433 | 0.710656 | 2621.563 | 2620.906 | 2752.264 | 2482.476 | 2042.069 | 2280.715 |
| ENSMUSG000000037262 | 7_Kin            | 295.8502722 | 0.338047 | 0.292414 | 0.710656 | 274.5007 | 254.1901 | 255.4359 | 440.5354 | 294.1484 | 256.2951 |
| ENSMUSG000000039813 | 14_Tbc1d2        | 1280.822587 | -0.64426 | 0.290134 | 0.710656 | 1308.345 | 1439.265 | 1938.781 | 232.1741 | 1466.217 | 1300.153 |
| ENSMUSG000000041673 | 11_Lrrc18        | 7.984348239 | 0.995867 | 0.292088 | 0.710656 | 2.436397 | 11.16375 | 2.301224 | 17.85954 | 7.919381 | 6.225792 |
| ENSMUSG000000041771 | 13_Slc24a4       | 50.29131295 | -0.5857  | 0.290566 | 0.710656 | 47.9158  | 92.74502 | 40.27142 | 24.80492 | 31.67752 | 64.33319 |
| ENSMUSG000000042302 | 14_Ehbp1         | 1006.671328 | 0.415311 | 0.292221 | 0.710656 | 800.7623 | 942.049  | 845.6999 | 1761.149 | 739.8964 | 950.471  |
| ENSMUSG000000043501 | 4_Lgals2         | 0.902430103 | -3.19928 | 0.290944 | 0.710656 | 0.812132 | 0        | 4.602448 | 0        | 0        | 0        |
| ENSMUSG000000044393 | 15_Dsg2          | 1910.384223 | 0.306822 | 0.291551 | 0.710656 | 1543.863 | 1713.207 | 1867.443 | 2699.768 | 1729.819 | 1908.205 |
| ENSMUSG000000045211 | 4_Nudt18         | 967.8045279 | -0.37068 | 0.292483 | 0.710656 | 1002.171 | 1060.557 | 1211.595 | 520.9033 | 1010.287 | 1001.315 |
| ENSMUSG000000046317 | 14_BC107364      | 1.233252862 | -2.4934  | 0.291391 | 0.710656 | 4.060661 | 0        | 2.301224 | 0        | 0        | 1.037632 |
| ENSMUSG000000046861 | 9_Hectd3         | 1048.295489 | -0.44692 | 0.291836 | 0.710656 | 1114.245 | 1240.035 | 1273.728 | 426.6446 | 1090.612 | 1144.508 |
| ENSMUSG000000048251 | 15_Bcl11b        | 167.5887294 | 0.405566 | 0.290186 | 0.710656 | 140.4989 | 121.0838 | 171.4412 | 273.8463 | 148.2056 | 150.4566 |
| ENSMUSG000000048349 | 9_Pou4f1         | 9.269537366 | 0.774317 | 0.292414 | 0.710656 | 8.933454 | 6.870002 | 4.602448 | 17.85954 | 9.050721 | 8.301057 |
| ENSMUSG000000050520 | 4_Cldn8          | 125.8927445 | 0.517698 | 0.292229 | 0.710656 | 113.6985 | 79.86377 | 117.3624 | 235.1506 | 71.27443 | 138.0051 |
| ENSMUSG000000050536 | 11_Clec12a       | 82.09799916 | 0.487334 | 0.291451 | 0.710656 | 97.45586 | 56.67751 | 50.62693 | 127.9934 | 100.6893 | 59.14503 |
| ENSMUSG000000053930 | 13_Shisa6        | 12.39435586 | -0.7294  | 0.290283 | 0.710656 | 17.86691 | 21.46876 | 6.903673 | 11.90636 | 7.919381 | 8.301057 |
| ENSMUSG000000055150 | 14_Zfp78         | 34.46634546 | 0.549758 | 0.291375 | 0.710656 | 32.48529 | 17.175   | 34.51836 | 59.53181 | 35.07154 | 28.01607 |
| ENSMUSG000000056310 | 14_Tywi          | 435.9032905 | -0.49308 | 0.292267 | 0.710656 | 507.5826 | 498.9339 | 522.3779 | 150.8139 | 423.1212 | 512.5902 |
| ENSMUSG000000059439 | 15_Bcas3         | 682.7363477 | -0.42273 | 0.291903 | 0.710656 | 700.0579 | 824.4002 | 821.537  | 307.851  | 745.5531 | 697.2887 |
| ENSMUSG000000059791 | 14_Nrm           | 397.5156728 | -0.40893 | 0.291787 | 0.710656 | 383.3264 | 398.4601 | 578.7579 | 212.3301 | 448.0107 | 364.2089 |
| ENSMUSG000000061032 | 8_Rrp1           | 3301.630745 | -0.49    | 0.2912   | 0.710656 | 3567.697 | 3742.433 | 4260.717 | 1138.05  | 3612.369 | 3488.519 |
| ENSMUSG000000061723 | 17_Tnni3         | 618.7478665 | 0.634184 | 0.29095  | 0.710656 | 384.9507 | 711.9039 | 357.8404 | 1319.622 | 239.8441 | 698.3264 |
| ENSMUSG000000062590 | 13_Armc9         | 174.6591309 | -0.28407 | 0.290244 | 0.710656 | 203.8452 | 183.7725 | 187.5498 | 137.9154 | 171.9637 | 162.9082 |
| ENSMUSG000000073164 | 11_2410018L13Rik | 24.35460028 | 0.542596 | 0.291336 | 0.710656 | 14.61838 | 23.18626 | 21.86163 | 39.68787 | 26.02082 | 20.75264 |
| ENSMUSG000000074886 | 10_Grk6          | 987.2899871 | -0.4709  | 0.291452 | 0.710656 | 1084.196 | 1062.274 | 1294.439 | 371.0816 | 1066.854 | 1044.895 |
| ENSMUSG000000075031 | 3_Hist1h2bb      | 1.072562874 | -2.26272 | 0.291397 | 0.710656 | 0.812132 | 3.435001 | 1.150612 | 0        | 0        | 1.037632 |
| ENSMUSG000000078664 | 2_Sprz2a1        | 1.218198267 | -3.66355 | 0.291969 | 0.710656 | 7.30919  | 0        | 0        | 0        | 0        | 0        |
| ENSMUSG000000085272 | 7_Sbk3           | 10.09409531 | 0.701685 | 0.292226 | 0.710656 | 6.497057 | 8.587502 | 8.054285 | 16.86735 | 10.18206 | 10.37632 |
| ENSMUSG000000095677 | 1_Dyntl1f        | 1605.681544 | 0.252016 | 0.291812 | 0.710656 | 1417.171 | 1304.442 | 1676.442 | 1837.549 | 1618.948 | 1779.539 |
| ENSMUSG000000096764 | 1_Gm21985        | 10.55863546 | 1.516354 | 0.290759 | 0.710656 | 16.24264 | 0        | 0        | 23.81272 | 5.656701 | 17.63975 |
| ENSMUSG000000097148 | 2_Gm3839         | 25.44945201 | -0.48811 | 0.291082 | 0.710656 | 27.61249 | 32.63251 | 28.7653  | 15.87515 | 26.02082 | 21.79027 |
| ENSMUSG000000097714 | 1_Gm20109        | 1.233252862 | -2.4934  | 0.291391 | 0.710656 | 4.060661 | 0        | 2.301224 | 0        | 0        | 1.037632 |
| ENSMUSG000000105957 | 1_Gm43254        | 56.09726238 | 0.546947 | 0.291678 | 0.710656 | 34.10955 | 63.54752 | 39.12081 | 106.1651 | 53.17298 | 40.46765 |
| ENSMUSG000000039648 | 14_Ccbl1         | 577.8236056 | -0.5651  | 0.292552 | 0.710666 | 674.0697 | 717.9152 | 676.5599 | 146.8451 | 553.2253 | 698.3264 |
| ENSMUSG000000052504 | 6_Epha3          | 48.87960346 | 0.557542 | 0.292622 | 0.710666 | 43.85514 | 36.92626 | 37.9702  | 100.2119 | 32.80886 | 41.50528 |
| ENSMUSG000000062683 | 11_Atp5g2        | 390.7937896 | -0.44154 | 0.292618 | 0.710666 | 432.8665 | 455.9964 | 461.3955 | 164.7047 | 384.6556 | 445.1442 |
| ENSMUSG000000079484 | 12_Phyhd1        | 264.714109  | -0.37912 | 0.292629 | 0.710666 | 272.0643 | 376.9913 | 248.5322 | 161.7281 | 235.3187 | 293.8499 |
| ENSMUSG000000029430 | 13_Ran           | 4993.001811 | 0.292285 | 0.292686 | 0.710717 | 4439.927 | 3941.664 | 5085.706 | 6571.32  | 5470.029 | 4449.366 |
| ENSMUSG00000004371  | 14_Ii1           | 11.59044918 | 0.760061 | 0.293015 | 0.710825 | 5.684925 | 12.0225  | 8.054285 | 13.89076 | 22.6268  | 7.263424 |
| ENSMUSG000000020170 | 3_Fisz2          | 1536.882878 | 0.282124 | 0.292954 | 0.710825 | 1401.74  | 1349.097 | 141      |          |          |          |

|                     |                  |             |          |          |          |          |          |          |          |          |          |
|---------------------|------------------|-------------|----------|----------|----------|----------|----------|----------|----------|----------|----------|
| ENSMUSG00000029625  | 16_Cpsf4         | 492.6544834 | -0.46021 | 0.294236 | 0.711358 | 516.5161 | 539.2951 | 655.8489 | 194.4706 | 522.6791 | 527.1171 |
| ENSMUSG00000056870  | 9_Gulp1          | 179.5543904 | 0.653265 | 0.294232 | 0.711358 | 124.2562 | 172.6088 | 121.9649 | 444.5042 | 78.06247 | 135.9298 |
| ENSMUSG00000026925  | 16_Innp5e        | 627.854939  | -0.35059 | 0.294302 | 0.711433 | 631.0267 | 709.3277 | 770.9101 | 363.144  | 649.3892 | 643.3319 |
| ENSMUSG00000039714  | 8_Cplx3          | 16.67588824 | -0.88365 | 0.294397 | 0.711575 | 36.54595 | 22.32751 | 5.753061 | 10.91416 | 20.36412 | 4.150528 |
| ENSMUSG00000026650  | 5_Meig1          | 0.8685455   | -3.17352 | 0.294486 | 0.711705 | 4.060661 | 0        | 1.150612 | 0        | 0        | 0        |
| ENSMUSG00000073434  | 11_Wdr90         | 257.9096959 | -0.63242 | 0.294536 | 0.711738 | 316.7315 | 324.6076 | 299.1591 | 47.62545 | 251.1575 | 308.1767 |
| ENSMUSG00000083929  | 3_Gm10600        | 5.031953397 | 1.050769 | 0.294659 | 0.711951 | 4.060661 | 3.435001 | 2.301224 | 11.90636 | 6.225792 |          |
| ENSMUSG00000039164  | 2_Naif1          | 154.6085623 | -0.42234 | 0.294838 | 0.712297 | 177.8569 | 148.5638 | 204.809  | 75.40696 | 154.9936 | 166.0211 |
| ENSMUSG00000033685  | 12_Ucp2          | 11365.37498 | -0.59292 | 0.294892 | 0.71234  | 12276.19 | 13261.68 | 15467.68 | 2468.586 | 12310.11 | 12408    |
| ENSMUSG00000000743  | 8_Chmp1a         | 2885.91123  | -0.49957 | 0.295015 | 0.712499 | 3291.572 | 3221.172 | 3629.031 | 938.6182 | 3018.415 | 3216.659 |
| ENSMUSG00000071362  | 2_Gm10330        | 2.297601438 | 1.487579 | 0.29503  | 0.712499 | 1.624264 | 0.85875  | 1.150612 | 6.945378 | 1.13134  | 2.075264 |
| ENSMUSG00000079018  | 10_Ly6c1         | 2608.004815 | 0.436503 | 0.295166 | 0.712743 | 2962.658 | 1422.09  | 2264.405 | 2669.009 | 4238     | 2091.866 |
| ENSMUSG00000025466  | 18_Fuom          | 347.4467842 | -0.3268  | 0.295229 | 0.712808 | 379.2657 | 401.8951 | 378.5514 | 219.2755 | 326.9573 | 378.7357 |
| ENSMUSG00000002372  | 8_Ranbp3         | 1020.019402 | -0.65545 | 0.295563 | 0.713103 | 1098.815 | 1197.098 | 1447.47  | 163.7125 | 1136.997 | 1076.024 |
| ENSMUSG00000022175  | 8_Lrp10          | 2796.0114   | -0.62588 | 0.295598 | 0.713103 | 2948.04  | 3335.386 | 3895.973 | 521.8955 | 3250.34  | 2824.434 |
| ENSMUSG00000022607  | 14_Ptk2          | 1256.93267  | 0.265709 | 0.295782 | 0.713103 | 1152.416 | 1059.698 | 1212.745 | 1620.257 | 1314.617 | 1181.863 |
| ENSMUSG00000024515  | 13_Smad4         | 2114.894507 | 0.295665 | 0.295413 | 0.713103 | 1837.043 | 1781.048 | 2079.156 | 2938.887 | 2132.576 | 1920.675 |
| ENSMUSG00000024892  | 15_Pcx           | 1916.331884 | -0.65839 | 0.295479 | 0.713103 | 2102.61  | 2235.327 | 2700.487 | 300.6356 | 2043.2   | 2115.732 |
| ENSMUSG00000028991  | 15_Mtor          | 2074.591366 | -0.39908 | 0.295799 | 0.713103 | 2264.225 | 2351.258 | 2463.461 | 986.2436 | 2285.307 | 2097.054 |
| ENSMUSG00000032187  | 16_Smarca4       | 3563.127981 | -0.56807 | 0.295792 | 0.713103 | 3680.583 | 4092.804 | 4993.657 | 883.0552 | 401.108  | 3627.562 |
| ENSMUSG00000035951  | 1_AscJ3          | 0.827671526 | -3.11326 | 0.295646 | 0.713103 | 3.248529 | 1.7175   | 0        | 0        | 0        | 0        |
| ENSMUSG00000039670  | 2_Oxld1          | 55.25681378 | -0.45552 | 0.295635 | 0.713103 | 55.22499 | 58.39502 | 78.24162 | 28.77371 | 48.64762 | 62.25792 |
| ENSMUSG00000041915  | 8_Ammecr1        | 1706.431283 | 0.248926 | 0.295816 | 0.713103 | 1535.742 | 1496.802 | 1646.526 | 2125.286 | 1799.962 | 1634.271 |
| ENSMUSG00000042790  | 15_Rnf214        | 720.7632376 | 0.254771 | 0.295454 | 0.713103 | 634.2752 | 661.2377 | 676.5599 | 896.9459 | 773.8366 | 681.7243 |
| ENSMUSG00000054641  | 10_Mmmr1         | 55.93514214 | 0.60476  | 0.295744 | 0.713103 | 38.98234 | 43.79626 | 50.62693 | 122.0402 | 28.2835  | 51.8816  |
| ENSMUSG00000059305  | 10_Vpreb1        | 2.152765118 | -1.57607 | 0.295583 | 0.713103 | 1.624264 | 3.435001 | 4.602448 | 0.992197 | 2.26268  |          |
| ENSMUSG00000018286  | 6_Psmb6          | 2505.569676 | -0.56332 | 0.295953 | 0.713145 | 3029.253 | 2666.419 | 3270.04  | 621.1152 | 2860.855 | 2639.736 |
| ENSMUSG00000020940  | 13_1700023F06Rik | 3.673416594 | -1.25663 | 0.296012 | 0.713145 | 5.684925 | 5.152501 | 4.602448 | 0        | 4.52536  | 2.075264 |
| ENSMUSG00000026786  | 14_Apbb1p        | 127.2457105 | 0.5088   | 0.296021 | 0.713145 | 139.6867 | 93.60377 | 81.69346 | 247.057  | 101.8206 | 99.61268 |
| ENSMUSG00000027878  | 11_Notch2        | 3736.151203 | -0.30083 | 0.295919 | 0.713145 | 3844.634 | 4222.475 | 4305.591 | 2457.672 | 3888.416 | 3698.121 |
| ENSMUSG00000040715  | 12_Rsc1a1        | 396.9418147 | -0.62883 | 0.296049 | 0.713145 | 381.7021 | 551.3176 | 513.173  | 75.40696 | 436.6973 | 423.3539 |
| ENSMUSG00000044589  | 7_Frsr1          | 5.088395684 | 1.566883 | 0.295942 | 0.713145 | 2.436397 | 5.152501 | 0        | 13.89076 | 9.050721 | 0        |
| ENSMUSG00000006288  | 7_Tic5           | 672.8281227 | -0.30785 | 0.296327 | 0.713193 | 691.1245 | 765.1464 | 776.6632 | 439.5432 | 676.5414 | 687.9501 |
| ENSMUSG00000006731  | 9_Bdgalt1        | 679.665924  | -0.65133 | 0.296376 | 0.713193 | 800.7623 | 655.2264 | 1035.551 | 116.087  | 777.2307 | 693.1382 |
| ENSMUSG000000008690 | 15_NcapH2        | 3999.162551 | -0.52174 | 0.296147 | 0.713193 | 4484.594 | 4514.45  | 5144.387 | 1180.714 | 4288.91  | 4381.92  |
| ENSMUSG00000014498  | 9_Ankrd52        | 1647.791174 | -0.44329 | 0.29646  | 0.713193 | 1764.763 | 1918.448 | 2013.571 | 666.7563 | 1759.234 | 1763.973 |
| ENSMUSG00000019842  | 16_Traf3ip2      | 666.9507286 | -0.32202 | 0.296289 | 0.713193 | 670.8212 | 699.8814 | 852.6036 | 432.5978 | 701.4309 | 644.3695 |
| ENSMUSG00000020974  | 5_Pole2          | 201.0313571 | 0.371138 | 0.296402 | 0.713193 | 201.4088 | 134.8238 | 189.851  | 281.7839 | 236.4501 | 161.8706 |
| ENSMUSG00000022477  | 12_Aco2          | 4600.12067  | -0.4016  | 0.296399 | 0.713193 | 4859.799 | 5261.563 | 5587.372 | 2162.989 | 4848.055 | 4878.946 |
| ENSMUSG00000039613  | 7_Tssc1          | 452.6416568 | -0.47983 | 0.29639  | 0.713193 | 507.5826 | 499.7926 | 574.1554 | 162.7203 | 518.1538 | 453.4452 |
| ENSMUSG00000039671  | 18_Zmynd8        | 1389.471355 | -0.31    | 0.296499 | 0.713193 | 1457.777 | 1532.01  | 1624.664 | 889.0083 | 1423.226 | 1410.142 |
| ENSMUSG00000055865  | 8_Fam19a3        | 29.84813274 | -0.61088 | 0.296385 | 0.713193 | 37.35808 | 42.93751 | 27.61469 | 16.86735 | 41.85958 | 12.45158 |
| ENSMUSG00000063524  | 13_Eno1          | 5400.083554 | -0.5118  | 0.296182 | 0.713193 | 6181.95  | 6326.413 | 6535.477 | 1659.945 | 6244.997 | 5451.719 |
| ENSMUSG00000068739  | 13_Sars          | 2363.131756 | -0.41778 | 0.296488 | 0.713193 | 2587.453 | 2591.708 | 2929.458 | 1053.713 | 2612.964 | 2404.193 |
| ENSMUSG00000052534  | 15_Pbx1          | 3880.085463 | 0.314666 | 0.296539 | 0.713204 | 3397.149 | 3343.115 | 3635.934 | 5719.022 | 3478.871 | 3706.422 |
| ENSMUSG00000038429  | 10_Usp5          | 2519.643987 | -0.47405 | 0.296576 | 0.713207 | 2693.842 | 2847.616 | 3248.178 | 911.8289 | 2818.168 | 2598.231 |
| ENSMUSG00000019960  | 7_Dusp6          | 1909.813199 | 0.308703 | 0.296766 | 0.71357  | 1604.773 | 1579.242 | 1935.33  | 2720.604 | 1799.962 | 1818.969 |
| ENSMUSG00000024206  | 14_Rfx2          | 320.8866386 | -0.69267 | 0.296834 | 0.71357  | 329.7257 | 395.8839 | 463.6967 | 43.65666 | 391.4437 | 300.9133 |
| ENSMUSG00000062432  | 4_Cyp26c1        | 4.261613407 | -1.50355 | 0.296818 | 0.71357  | 7.30919  | 6.870002 | 4.602448 | 0        | 6.788041 | 0        |
| ENSMUSG00000037217  | 15_Syn1          | 8.161290077 | 0.818674 | 0.296953 | 0.71377  | 8.933454 | 5.152501 | 3.451836 | 13.89076 | 11.3134  | 6.225792 |
| ENSMUSG00000046330  | 9_Rpl37a         | 8735.895339 | -0.5679  | 0.29702  | 0.713844 | 10333.57 | 9952.915 | 11013.66 | 2083.613 | 9212.502 | 9819.112 |
| ENSMUSG00000039959  | 12_Hip1          | 367.8684917 | -0.27781 | 0.297072 | 0.713884 | 386.5749 | 477.4651 | 345.1836 | 328.4171 | 316.7752 | 352.7949 |
| ENSMUSG00000052336  | 6_Cx3c1          | 141.0856178 | -0.38986 | 0.297238 | 0.714196 | 163.2386 | 209.5351 | 107.0069 | 127.0012 | 100.6893 | 139.0427 |
| ENSMUSG00000021868  | 6_Ppif           | 388.3750221 | -0.39025 | 0.297402 | 0.714272 | 451.5455 | 354.6638 | 515.4742 | 219.2755 | 459.3241 | 329.967  |
| ENSMUSG00000030082  | 14_Sec61a1       | 4979.242456 | -0.36054 | 0.297378 | 0.714272 | 5155.415 | 5323.393 | 6315.71  | 2766.245 | 5544.698 | 4769.995 |
| ENSMUSG00000037805  | 14_Rpl10a        | 9555.876378 | -0.42519 | 0.297521 | 0.714272 | 10721.77 | 10373.7  | 11766.16 | 4106.703 | 9950.136 | 10416.79 |
| ENSMUSG00000039831  | 16_Arhgap29      | 715.976606  | 0.436745 | 0.297513 | 0.714272 | 601.7899 | 665.5314 | 558.0469 | 1320.614 | 528.3358 | 621.5416 |
| ENSMUSG00000049922  | 8_Slc35c1        | 880.5553289 | -0.44977 | 0.297334 | 0.714272 | 931.5156 | 940.3315 | 1178.227 | 357.1909 | 977.4778 | 898.5894 |
| ENSMUSG00000050614  | 15_A430033K04Rik | 251.0377782 | 0.314366 | 0.297448 | 0.714272 | 249.3246 | 206.9588 | 215.1645 | 342.3079 | 220.6113 | 271.8596 |
| ENSMUSG00000072969  | 2_Armcx5         | 184.9946308 | 0.46044  | 0.297476 | 0.714272 | 154.3051 | 155.4338 | 157.6339 | 350.2455 | 134.6295 | 157.7201 |
| ENSMUSG00000035575  | 11_Utp6          | 1322.75054  | 0.302258 | 0.297609 | 0.714398 | 1246.623 | 1091.472 | 1216.197 | 1877.236 | 1304.435 | 1200.54  |
| ENSMUSG00000043969  | 4_Emx2           | 811.3473259 | 0.38867  | 0.297698 | 0.714526 | 695.1851 | 614.8652 | 798.5248 | 1354.349 | 653.9146 | 751.2456 |
| ENSMUSG00000004865  | 15_Srp1          | 1409.343278 | 0.227958 | 0.298065 | 0.715005 | 1343.267 | 1240.894 | 1310.547 | 1612.32  | 1566.906 | 1382.126 |
| ENSMUSG00000022696  | 17_Sid1          | 113.1355886 | 0.444846 | 0.297965 | 0.715005 | 78.77682 | 79.00502 | 130.0192 | 94.2587  | 187.8025 | 108.9514 |
| ENSMUSG00000029433  | 14_Diablo        | 888.9986746 | 0.217419 | 0.298012 | 0.715005 | 825.1263 | 810.6602 | 830.7419 | 979.2983 | 923.1735 | 964.9978 |
| ENSMUSG00000033774  | 4_Npbw1          | 1.854231429 | 1.580453 | 0.297981 | 0.715005 | 0.812132 | 0.85875  | 1.150612 | 1.984394 | 1.13134  | 5.18816  |
| ENSMUSG00000097857  | 1_Gm26603        | 1.332203395 | 1.835299 | 0.298077 | 0.715005 | 0.812132 | 0.85875  | 0        | 1.984394 | 2.26268  | 2.075264 |
| ENSMUSG00000033778  | 14_Brd8          | 1692.496366 | 0.242881 | 0.298174 | 0.715057 | 1596.652 | 1428.96  | 1625.815 | 2071.707 | 1683.434 | 1748.41  |
| ENSMUSG00000033981  | 14_Gria2         | 30.75312011 | 0.768593 | 0.298207 | 0.715057 | 31.67315 | 24.90376 | 11.50612 | 79.37575 | 21.49546 | 15.56448 |
| ENSMUSG000000440033 | 15_Sta2          | 6197.045017 | 0.348023 | 0.298172 | 0.715057 | 4904.466 | 4716.256 | 6739.135 | 5320.159 | 9207.977 | 6294.276 |
| ENSMUSG00000027332  | 11_Lvd           | 1015.394735 | -0.34523 | 0.298315 | 0.715145 | 1109.373 | 1122.387 | 1177.076 | 587.3805 | 953.7197 | 1142.433 |
| ENSMUSG00000042807  | 15_Hecw2         | 77.6681669  | 0.604715 | 0.29829  | 0.715145 | 55.22499 | 85.87502 | 43.72326 | 168.6735 | 42.99092 | 69.52135 |
| ENSMUSG00000001095  | 5_Slc13a2        | 382.2437586 | -0.59191 | 0.299348 | 0.715245 | 385.7628 | 480.9001 | 512.0224 | 87.31332 | 483.9274 | 483.5365 |
| ENSMUSG00000001829  | 16_Clpb          | 558.8539018 | -0.40876 | 0.300085 | 0.715245 | 632.651  | 595.1139 | 684.6142 | 257.9712 | 574.7208 | 608.0524 |
| ENSMUSG00000003435  | 8_Supt5          | 3632.765946 | -0.55222 | 0.298914 | 0.715245 | 3980.26  | 4213.887 | 4764.685 | 931.6728 | 4125.997 | 3790.094 |
| ENSMUSG00000003469  | 9_Phy            |             |          |          |          |          |          |          |          |          |          |

|                     |                 |              |          |          |          |          |          |          |          |          |          |
|---------------------|-----------------|--------------|----------|----------|----------|----------|----------|----------|----------|----------|----------|
| ENSMUSG00000034951  | 10_Cog7         | 1015.275579  | -0.3155  | 0.299917 | 0.715245 | 1098.815 | 1078.59  | 1200.088 | 638.9747 | 1001.236 | 1073.949 |
| ENSMUSG00000036167  | 15_Pphn1        | 1500.733239  | 0.300236 | 0.299383 | 0.715245 | 1326.212 | 1249.482 | 1460.127 | 2124.293 | 1467.338 | 1376.639 |
| ENSMUSG00000037012  | 18_Hk1          | 1729.814368  | -0.46812 | 0.29969  | 0.715245 | 1858.158 | 2067.012 | 2098.716 | 629.0528 | 1899.338 | 1836.908 |
| ENSMUSG00000038217  | 13_Tlcd2        | 228.6546861  | -0.30704 | 0.298843 | 0.715245 | 237.1426 | 291.1163 | 230.1224 | 163.7125 | 219.48   | 230.3543 |
| ENSMUSG00000039148  | 4_Sart1         | 1239.910658  | -0.60939 | 0.300335 | 0.715245 | 1373.316 | 1476.192 | 1644.225 | 241.1038 | 1384.76  | 1319.868 |
| ENSMUSG00000039768  | 16_Dnajc11      | 1633.621717  | -0.41326 | 0.300572 | 0.715245 | 1828.922 | 1659.964 | 2109.072 | 744.1476 | 1768.285 | 1691.34  |
| ENSMUSG00000039824  | 3_Myl6b         | 48.97212417  | -0.645   | 0.30012  | 0.715245 | 50.3522  | 67.84127 | 60.98244 | 10.91416 | 37.33422 | 66.04845 |
| ENSMUSG00000040666  | 17_Sh3bgr       | 75.64400214  | 0.713083 | 0.300676 | 0.715245 | 43.85514 | 76.42877 | 51.77754 | 192.4862 | 26.02082 | 63.29556 |
| ENSMUSG00000042115  | 4_Klhd8a        | 517.8158987  | -0.47038 | 0.30019  | 0.715245 | 600.9778 | 576.2214 | 627.0836 | 188.5174 | 584.9028 | 529.1924 |
| ENSMUSG00000042625  | 16_Safb2        | 1541.255654  | -0.43505 | 0.299158 | 0.715245 | 1643.756 | 1776.754 | 1895.058 | 639.9669 | 1598.584 | 1693.416 |
| ENSMUSG00000043807  | 6_Ly6b5b        | 12.48251234  | -0.7653  | 0.300136 | 0.715245 | 21.11544 | 15.4575  | 10.35551 | 2.97659  | 13.57608 | 11.41395 |
| ENSMUSG00000044348  | 14_Slc25a5      | 94.16131212  | 0.477165 | 0.298712 | 0.715245 | 77.15256 | 76.42877 | 82.84407 | 178.5954 | 69.01175 | 80.9353  |
| ENSMUSG00000046862  | 14_Praemf8      | 963.1360011  | 0.283029 | 0.298968 | 0.715245 | 866.545  | 785.7565 | 955.0081 | 1280.926 | 1002.367 | 888.213  |
| ENSMUSG00000046876  | 15_Atxn1        | 714.9522899  | 0.31627  | 0.299606 | 0.715245 | 644.0208 | 639.7689 | 627.0836 | 1052.721 | 639.2072 | 686.9124 |
| ENSMUSG00000048772  | 15_Tmem53       | 106.8914712  | -0.69498 | 0.300512 | 0.715245 | 133.1897 | 133.1063 | 130.0192 | 13.89076 | 109.74   | 121.403  |
| ENSMUSG00000051527  | 10_Usp29        | 3.079079128  | 1.667754 | 0.300595 | 0.715245 | 3.248529 | 0        | 1.150612 | 11.90636 | 1.13134  | 1.037632 |
| ENSMUSG00000054150  | 11_Syne3        | 940.944794   | -0.36034 | 0.300407 | 0.715245 | 976.995  | 978.1165 | 1218.498 | 527.8487 | 910.7288 | 1033.482 |
| ENSMUSG00000055334  | 8_Snupn         | 275.345343   | 0.290426 | 0.300536 | 0.715245 | 246.8882 | 249.0376 | 247.3816 | 372.0738 | 278.3097 | 258.3704 |
| ENSMUSG00000064120  | 13_Mocs1        | 830.8970809  | -0.47409 | 0.298843 | 0.715245 | 882.7877 | 900.829  | 1114.943 | 303.6122 | 871.1319 | 912.0786 |
| ENSMUSG00000071723  | 7_Gsp12         | 131.7837684  | 0.465918 | 0.299629 | 0.715245 | 135.6261 | 123.66   | 72.48856 | 229.1975 | 105.2146 | 124.5158 |
| ENSMUSG00000075012  | 4_Fjk1          | 644.0635087  | -0.25699 | 0.3006   | 0.715245 | 636.7116 | 695.5877 | 772.0607 | 624.0918 | 510.2344 | 625.6921 |
| ENSMUSG00000079364  | 3_Gm3558        | 17.43663503  | 0.780228 | 0.300043 | 0.715245 | 13.80625 | 15.4575  | 9.204897 | 44.64886 | 9.050721 | 12.45158 |
| ENSMUSG00000085931  | 1_Gm12648       | 1.84713181   | 1.57464  | 0.299598 | 0.715245 | 0.812132 | 0.85875  | 1.150612 | 4.960984 | 2.26268  | 1.037632 |
| ENSMUSG00000087340  | 1_Gm15228       | 22.45847498  | 0.589213 | 0.299042 | 0.715245 | 18.67904 | 14.59875 | 20.71102 | 42.66446 | 21.49546 | 16.60211 |
| ENSMUSG00000087651  | 2_1500009L16Rik | 11.98242853  | 0.69903  | 0.300331 | 0.715245 | 6.497057 | 12.88125 | 8.054285 | 21.82633 | 10.18206 | 12.45158 |
| ENSMUSG00000090812  | 8_Samd15        | 8.319651664  | 0.834354 | 0.30063  | 0.715245 | 8.121322 | 5.152501 | 4.602448 | 10.91416 | 4.52536  | 16.60211 |
| ENSMUSG00000090919  | 6_Pabpc4l       | 20.83771975  | 0.713051 | 0.299255 | 0.715245 | 19.49117 | 16.31625 | 11.50612 | 49.60984 | 13.57608 | 14.52685 |
| ENSMUSG00000096937  | 1_Gm10825       | 10.19408943  | 1.135166 | 0.300241 | 0.715245 | 8.933454 | 0        | 10.35551 | 24.80492 | 5.656701 | 11.41395 |
| ENSMUSG00000097876  | 1_Gm16892       | 42.46272713  | 0.484173 | 0.300199 | 0.715245 | 33.29742 | 42.93751 | 29.91591 | 72.43037 | 42.99092 | 33.20423 |
| ENSMUSG00000108546  | 1_RP24-63G4     | 5.965976274  | -1.17338 | 0.300034 | 0.715245 | 9.745586 | 6.870002 | 8.054285 | 0        | 9.050721 | 2.075624 |
| ENSMUSG00000026355  | 11_Mcm6         | 2152.259085  | 0.273042 | 0.300745 | 0.715288 | 2031.143 | 2172.954 | 2191.916 | 2199.7   | 2172.954 | 2153.087 |
| ENSMUSG00000024007  | 14_Ppil1        | 663.3092541  | -0.53134 | 0.300793 | 0.715318 | 751.2223 | 736.8077 | 864.1097 | 187.5252 | 763.6546 | 676.5361 |
| ENSMUSG00000086022  | 1_Rad51ap2      | 9.541470707  | 0.854495 | 0.300969 | 0.715651 | 7.30919  | 5.152501 | 8.054285 | 23.81272 | 5.656701 | 7.263442 |
| ENSMUSG00000010936  | 10_Vac14        | 523.2259152  | -0.50421 | 0.301301 | 0.715778 | 583.1109 | 567.6339 | 690.3673 | 166.6891 | 570.1954 | 561.3589 |
| ENSMUSG000000015488 | 14_Cacfd1       | 1072.556915  | -0.30277 | 0.301163 | 0.715778 | 1115.87  | 1167.9   | 1270.276 | 702.4753 | 1062.328 | 1116.492 |
| ENSMUSG000000017843 | 13_Ppp2r5c      | 3388.352533  | 0.264632 | 0.301227 | 0.715778 | 2969.155 | 2967.841 | 3298.805 | 4458.932 | 3416.647 | 3218.735 |
| ENSMUSG000000018669 | 14_Cdk5rap2     | 873.0208118  | -0.5152  | 0.301098 | 0.715778 | 1020.038 | 989.2803 | 1072.37  | 264.9165 | 838.323  | 1053.197 |
| ENSMUSG00000020436  | 17_Gabrg2       | 9.645715112  | 1.190274 | 0.301225 | 0.715778 | 8.121322 | 6.011252 | 3.451836 | 34.72689 | 4.52536  | 1.037632 |
| ENSMUSG00000025408  | 15_Ddl13        | 238.4110447  | -0.36202 | 0.301327 | 0.715778 | 256.6338 | 273.9413 | 273.8457 | 135.931  | 217.2173 | 272.8972 |
| ENSMUSG00000046607  | 6_Hrk           | 3.015482907  | 1.491303 | 0.301346 | 0.715778 | 0.812132 | 1.7175   | 2.301224 | 4.960984 | 0        | 8.301057 |
| ENSMUSG00000071014  | 10_Ndufb6       | 597.9971976  | 0.457256 | 0.301248 | 0.715778 | 505.9583 | 526.4139 | 479.8052 | 1158.886 | 459.3241 | 457.5957 |
| ENSMUSG00000089876  | 3_Tmem102       | 274.2843876  | -0.33858 | 0.301309 | 0.715778 | 286.6827 | 292.8338 | 339.4306 | 166.6891 | 285.0977 | 274.9275 |
| ENSMUSG00000003528  | 14_Slc25a1      | 1604.769246  | -0.47206 | 0.30182  | 0.716193 | 1708.726 | 1826.562 | 2059.596 | 574.482  | 1763.759 | 1695.491 |
| ENSMUSG000000019143 | 15_Hars2        | 671.3885998  | 0.235457 | 0.301952 | 0.716193 | 579.8624 | 601.1252 | 669.6562 | 778.8745 | 702.5622 | 696.2511 |
| ENSMUSG00000024142  | 14_Mlsl8        | 1016.9586149 | -0.42179 | 0.301896 | 0.716193 | 647.2693 | 688.7177 | 762.8558 | 268.8853 | 613.1863 | 684.8372 |
| ENSMUSG00000024914  | 16_Drap1        | 1608.349419  | -0.62223 | 0.301766 | 0.716193 | 1802.121 | 1893.544 | 2153.946 | 289.7215 | 1763.979 | 1763.979 |
| ENSMUSG00000027936  | 18_Ctrc2        | 775.3373184  | -0.44444 | 0.301851 | 0.716193 | 915.273  | 857.0327 | 908.9836 | 307.581  | 824.7469 | 838.4067 |
| ENSMUSG000000031708 | 15_Tec1         | 4362.704224  | -0.60942 | 0.301737 | 0.716193 | 4924.77  | 5206.603 | 5680.572 | 833.4453 | 4637.363 | 4893.473 |
| ENSMUSG00000036777  | 7_Anln          | 1643.041514  | 0.313768 | 0.301924 | 0.716193 | 1534.118 | 1188.51  | 1672.99  | 2228.474 | 1802.225 | 1431.932 |
| ENSMUSG000000037519 | 16_Ppf1a1       | 2259.727682  | -0.26943 | 0.301595 | 0.716193 | 2255.291 | 2432.839 | 2722.348 | 1661.93  | 2245.71  | 2240.242 |
| ENSMUSG00000048755  | 8_Mcat          | 335.5420062  | -0.42241 | 0.301825 | 0.716193 | 386.5749 | 386.4376 | 379.702  | 146.8451 | 360.8975 | 352.7949 |
| ENSMUSG000000074342 | 3_I830077J02Rik | 58.8416818   | 0.503551 | 0.301765 | 0.716193 | 73.90403 | 32.63251 | 39.12081 | 61.5162  | 95.03255 | 50.84397 |
| ENSMUSG000000079108 | 5_Srp54b        | 2107.0221199 | 0.320446 | 0.301899 | 0.716193 | 1925.565 | 1764.732 | 1931.878 | 3150.225 | 2021.705 | 1848.023 |
| ENSMUSG000000095304 | 8_Plac9a        | 11.99072051  | 1.407198 | 0.301733 | 0.716193 | 0.406061 | 15.4575  | 0        | 1.984394 | 45.2536  | 5.18816  |
| ENSMUSG000000003078 | 15_Ccm2         | 544.3257282  | -0.63527 | 0.302013 | 0.71625  | 657.8271 | 613.1477 | 715.6807 | 93.2665  | 651.6519 | 534.3805 |
| ENSMUSG000000004460 | 16_Dnajb11      | 1554.667224  | 0.246943 | 0.302254 | 0.71625  | 1426.104 | 1347.379 | 1492.344 | 1636.133 | 1939.117 | 1486.927 |
| ENSMUSG00000026827  | 12_Gpd2         | 4391.71532   | 0.292926 | 0.302217 | 0.71625  | 3847.07  | 3527.746 | 4467.827 | 5905.555 | 4749.366 | 3852.728 |
| ENSMUSG00000028031  | 6_Dkk2          | 1787.764643  | 0.429404 | 0.30212  | 0.71625  | 1649.44  | 1617.885 | 1303.644 | 3251.429 | 1288.596 | 1615.593 |
| ENSMUSG00000028430  | 14_Nol6         | 1064.846282  | -0.54708 | 0.302264 | 0.71625  | 1070.39  | 1238.318 | 1484.29  | 283.7683 | 1208.271 | 1104.041 |
| ENSMUSG00000049764  | 7_Zfp280b       | 514.8378066  | 0.271563 | 0.302109 | 0.71625  | 478.3459 | 450.8439 | 470.6004 | 678.8626 | 487.607  | 522.9666 |
| ENSMUSG000000055312 | 2_Them7         | 8.823049842  | -0.75788 | 0.302149 | 0.71625  | 9.745586 | 15.4575  | 8.054285 | 9.929771 | 4.52536  | 6.225792 |
| ENSMUSG000000075569 | 9_Rshp10b       | 26.89402224  | -0.48435 | 0.302241 | 0.71625  | 33.29742 | 38.64376 | 21.86163 | 19.84394 | 24.88948 | 22.82791 |
| ENSMUSG00000024772  | 5_Ehd1          | 2526.766251  | -0.51629 | 0.302476 | 0.716434 | 2712.521 | 2783.209 | 3426.523 | 760.0228 | 2914.332 | 2563.989 |
| ENSMUSG00000028899  | 11_Taf12        | 518.80995    | 0.260443 | 0.302489 | 0.716434 | 468.6003 | 450.8439 | 497.0644 | 627.0684 | 595.0849 | 474.1979 |
| ENSMUSG00000040952  | 16_Rps19        | 8473.806857  | -0.51837 | 0.302521 | 0.716434 | 9872.279 | 9564.455 | 10513.14 | 2467.593 | 8666.065 | 9769.306 |
| ENSMUSG00000058420  | 7_Syt17         | 27.49180761  | -0.60802 | 0.302431 | 0.716434 | 29.23676 | 54.10126 | 16.10857 | 27.78151 | 16.9701  | 20.75264 |
| ENSMUSG000000097469 | 1_Gm26733       | 30.31696561  | 0.910238 | 0.302503 | 0.716434 | 26.80036 | 14.59875 | 21.86163 | 95.25089 | 6.788041 | 16.60211 |
| ENSMUSG00000022186  | 14_Oxct1        | 6721.351045  | 0.362097 | 0.302931 | 0.716525 | 6019.524 | 5939.975 | 5687.476 | 10934.01 | 5325.218 | 6421.905 |
| ENSMUSG00000023079  | 10_Glf2ird1     | 1005.844689  | -0.47182 | 0.302969 | 0.716525 | 1081.76  | 1149.867 | 1274.878 | 359.1752 | 1061.197 | 1108.191 |
| ENSMUSG00000024960  | 8_Plcb3         | 3790.336184  | -0.5559  | 0.303029 | 0.716525 | 3946.962 | 4305.774 | 5297.418 | 936.6338 | 4257.233 | 3997.996 |
| ENSMUSG00000026235  | 14_Epha4        | 2519.019481  | 0.283507 | 0.302818 | 0.716525 | 2252.855 | 2200.977 | 2363.357 | 3470.704 | 2557.96  | 2868.264 |
| ENSMUSG00000026972  | 15_Arrdc1       | 1255.87564   | -0.62566 | 0.302903 | 0.716525 | 1369.255 | 1542.315 | 1660.333 | 221.2599 | 1361.002 | 1381.088 |
| ENSMUSG00000028703  | 14_Lrrc41       | 1402.480797  | -0.47404 | 0.302995 | 0.716525 | 1481.329 | 1565.502 | 1845.582 | 502.0516 | 1601.978 | 1418.443 |
| ENSMUSG00000028716  | 15_Pdzk1tip1    | 4721.430593  | -0.58445 | 0.303015 | 0.716525 | 5312.969 | 5262.421 | 6419.265 | 1022.955 | 5274.308 | 5036.666 |
| ENSMUSG00000029592  | 11_Usp30        | 576.7581672  | -0.52684 | 0.30     |          |          |          |          |          |          |          |

|                      |                 |             |           |          |          |          |          |          |          |          |          |
|----------------------|-----------------|-------------|-----------|----------|----------|----------|----------|----------|----------|----------|----------|
| ENSMUSG00000048078   | 16_Tenm4        | 828.7300319 | -0.34414  | 0.304334 | 0.717432 | 861.6722 | 1178.205 | 740.9942 | 539.7551 | 799.8575 | 851.8959 |
| ENSMUSG000000061171  | 15_Slc38a11     | 64.05808418 | -0.46897  | 0.304169 | 0.717432 | 69.84337 | 90.16877 | 63.28367 | 83.34453 | 36.20288 | 41.50528 |
| ENSMUSG000000073422  | 10_H2-Ke6       | 580.7965832 | -0.50625  | 0.304197 | 0.717432 | 684.6274 | 676.6952 | 683.4636 | 178.5954 | 659.5713 | 801.8266 |
| ENSMUSG000000028194  | 15_Ddah1        | 1184.170894 | 0.258926  | 0.304641 | 0.717615 | 1064.705 | 1094.048 | 1075.822 | 1452.576 | 1367.79  | 1050.084 |
| ENSMUSG000000086712  | 2_Al427809      | 20.99568745 | 0.562321  | 0.304623 | 0.717615 | 21.92757 | 17.175   | 11.50612 | 32.74249 | 26.02082 | 16.60211 |
| ENSMUSG000000082229  | 1_Nap112        | 8.383345325 | 0.852212  | 0.30471  | 0.717692 | 8.933454 | 4.293751 | 4.602448 | 15.87515 | 12.44474 | 4.150528 |
| ENSMUSG000000024312  | 9_Wdr46         | 649.0554516 | -0.61581  | 0.304767 | 0.717741 | 715.4884 | 727.3614 | 913.586  | 122.0402 | 757.9979 | 657.8587 |
| ENSMUSG000000063568  | 11_Jazf1        | 78.59182989 | 0.416718  | 0.304885 | 0.717934 | 64.15844 | 67.84127 | 70.18734 | 131.9622 | 67.88041 | 69.52135 |
| ENSMUSG00000004367   | 7_Slc16a13      | 594.513036  | -0.39086  | 0.30498  | 0.718073 | 626.966  | 623.4527 | 773.2113 | 294.6825 | 644.8639 | 603.9019 |
| ENSMUSG000000047434  | 13_Xxy1t1       | 491.9842632 | -0.27123  | 0.305157 | 0.71832  | 506.7705 | 539.2951 | 568.4024 | 387.949  | 414.0705 | 535.4181 |
| ENSMUSG000000090053  | 9_Palm2         | 8.790855172 | -1.08217  | 0.305155 | 0.71832  | 6.497057 | 25.76251 | 3.451836 | 6.945378 | 9.050721 | 1.037632 |
| ENSMUSG000000018776  | 9_Slc35g3       | 1.167122921 | -2.39875  | 0.305193 | 0.71832  | 2.436397 | 3.435001 | 0        | 0        | 1.13134  | 0        |
| ENSMUSG000000009076  | 10_Zmat5        | 255.6494302 | -0.76511  | 0.30531  | 0.718398 | 292.3676 | 331.4776 | 341.7318 | 19.84394 | 270.3903 | 278.0854 |
| ENSMUSG000000026470  | 14_Stx6         | 1750.072288 | -0.26841  | 0.305333 | 0.718398 | 1736.339 | 1857.477 | 2143.59  | 1301.762 | 1700.404 | 1760.862 |
| ENSMUSG000000029557  | 7_Ftsj2         | 103.1953205 | -0.53875  | 0.305508 | 0.718398 | 107.2014 | 147.705  | 111.6094 | 30.7581  | 110.8713 | 111.0266 |
| ENSMUSG000000037465  | 9_Klf10         | 1142.4618   | 0.347388  | 0.305515 | 0.718398 | 959.9402 | 772.0165 | 1285.234 | 1323.591 | 1551.067 | 962.9226 |
| ENSMUSG000000042207  | 17_Kdm5b        | 4370.514692 | 0.222882  | 0.305387 | 0.718398 | 3851.131 | 3838.613 | 4411.447 | 4843.905 | 4879.47  | 4398.522 |
| ENSMUSG000000044279  | 15_Crb3         | 756.8392584 | -0.50151  | 0.305498 | 0.718398 | 747.9737 | 809.8015 | 1103.437 | 251.0258 | 860.9498 | 767.8477 |
| ENSMUSG000000045790  | 9_Ccdc149       | 145.2526972 | -0.32828  | 0.30537  | 0.718398 | 170.5478 | 182.055  | 132.3204 | 129.9778 | 104.0833 | 152.5319 |
| ENSMUSG000000047390  | 6_Defb9         | 18.83342752 | 0.771541  | 0.305412 | 0.718398 | 12.99411 | 20.61001 | 0.054285 | 46.63325 | 10.18206 | 14.52685 |
| ENSMUSG000000004815  | 12_Dgkq         | 638.8055453 | -0.48931  | 0.305648 | 0.718461 | 719.5491 | 745.3952 | 773.2113 | 209.3535 | 702.5622 | 682.7619 |
| ENSMUSG000000036687  | 13_Tmem184a     | 1868.579437 | -0.55229  | 0.30565  | 0.718461 | 2052.258 | 2158.039 | 2455.406 | 464.3481 | 1984.371 | 2097.054 |
| ENSMUSG000000052295  | 4_8030423F21Rik | 7.739671829 | 1.021314  | 0.30559  | 0.718461 | 1.624264 | 2.576251 | 11.50612 | 16.86735 | 4.52536  | 9.338689 |
| ENSMUSG0000000001155 | 13_Fctd         | 2.588369057 | -1.40897  | 0.305818 | 0.71848  | 3.248529 | 3.435001 | 4.602448 | 0        | 1.13134  | 3.112896 |
| ENSMUSG000000002546  | 16_Golga2       | 3739.917985 | -0.41808  | 0.306134 | 0.71848  | 3951.835 | 4209.594 | 4672.636 | 1619.265 | 3952.902 | 4033.276 |
| ENSMUSG000000015750  | 15_Aph1a        | 2757.82051  | -0.34646  | 0.305821 | 0.71848  | 2943.167 | 2929.197 | 3389.703 | 1544.85  | 2891.705 | 2848.3   |
| ENSMUSG000000020070  | 18_Rufy2        | 398.3632692 | 0.465508  | 0.305941 | 0.71848  | 327.2893 | 375.2738 | 301.4604 | 775.8979 | 277.1783 | 303.0799 |
| ENSMUSG000000020331  | 9_Hcn2          | 61.06231526 | -0.58666  | 0.306323 | 0.71848  | 66.59484 | 73.85252 | 79.39224 | 14.88295 | 61.09237 | 70.55898 |
| ENSMUSG000000020716  | 15_Nf1          | 1138.190451 | 0.314712  | 0.306379 | 0.71848  | 1053.335 | 1046.817 | 943.5019 | 1660.781 | 1006.893 | 1097.815 |
| ENSMUSG000000020848  | 7_Doc2b         | 9.243784488 | -0.75669  | 0.305978 | 0.71848  | 12.18198 | 14.59875 | 0.054285 | 10.91416 | 6.52536  | 5.18816  |
| ENSMUSG000000026803  | 17_Tf1f         | 586.4521841 | 0.235931  | 0.306305 | 0.71848  | 548.1892 | 483.4764 | 584.511  | 653.8577 | 331.2878 | 617.3911 |
| ENSMUSG000000026888  | 14_Grb14        | 50.21117557 | 0.677811  | 0.306269 | 0.71848  | 34.10955 | 57.53626 | 24.16285 | 119.0636 | 24.88948 | 41.50528 |
| ENSMUSG000000032739  | 16_Pram1        | 26.67160931 | -0.51615  | 0.306302 | 0.71848  | 29.23676 | 32.63251 | 32.21714 | 11.90636 | 26.02082 | 28.01607 |
| ENSMUSG000000033216  | 9_Eefsec        | 412.009456  | -0.53513  | 0.306318 | 0.71848  | 492.1521 | 442.2564 | 528.131  | 112.1182 | 449.142  | 448.2571 |
| ENSMUSG000000033855  | 15_Ston1        | 231.6589252 | -0.33428  | 0.306028 | 0.71848  | 232.2698 | 329.7601 | 212.8632 | 182.5642 | 185.5398 | 246.9564 |
| ENSMUSG000000036435  | 13_Exoc1        | 1265.530366 | 0.249883  | 0.306134 | 0.71848  | 1204.392 | 1035.653 | 1228.854 | 1551.796 | 1355.345 | 1217.142 |
| ENSMUSG000000038776  | 13_Ephn3        | 4225.349691 | -0.32948  | 0.306208 | 0.71848  | 4542.255 | 4666.449 | 4908.511 | 2560.86  | 3801.303 | 4872.72  |
| ENSMUSG000000041649  | 13_Klf8         | 25.86770223 | 0.669448  | 0.306379 | 0.71848  | 21.11544 | 13.74    | 25.31347 | 58.53961 | 14.70742 | 21.79027 |
| ENSMUSG000000041775  | 7_Mapk1ip1      | 250.8377238 | -0.27177  | 0.306269 | 0.71848  | 260.6944 | 312.5851 | 249.6828 | 210.3457 | 220.6113 | 251.107  |
| ENSMUSG000000042155  | 3_Klhl23        | 173.000454  | 0.468402  | 0.305936 | 0.71848  | 168.1114 | 137.4    | 130.0192 | 324.4484 | 112.0027 | 166.0211 |
| ENSMUSG000000005370  | 15_Tmem39b      | 173.2484277 | -0.60566  | 0.305953 | 0.71848  | 180.2933 | 194.9363 | 251.9841 | 35.71909 | 186.671  | 189.8867 |
| ENSMUSG000000055760  | 12_Gemin6       | 148.8990681 | 0.385417  | 0.305904 | 0.71848  | 112.8864 | 108.2025 | 166.8388 | 215.3067 | 170.8324 | 119.3277 |
| ENSMUSG000000009171  | 1_Ugt1a2        | 2.30898294  | 0.2097952 | 0.30591  | 0.71848  | 0        | 2.576251 | 0        | 2.97659  | 0        | 8.301057 |
| ENSMUSG000000019975  | 11_Lkb1         | 380.9645839 | 0.435768  | 0.306499 | 0.718615 | 337.0349 | 343.5001 | 291.1049 | 708.4285 | 297.5424 | 308.1767 |
| ENSMUSG000000022043  | 18_Trim35       | 638.2897384 | -0.31489  | 0.306517 | 0.718615 | 681.3789 | 867.3377 | 574.1554 | 634.0138 | 450.2734 | 622.5792 |
| ENSMUSG0000000041757 | 15_Plekha6      | 6592.670939 | -0.38743  | 0.306581 | 0.718615 | 6930.736 | 7191.174 | 8295.913 | 3223.647 | 6513.125 | 7401.43  |
| ENSMUSG000000056328  | 14_Myl1         | 1585.706129 | 0.526645  | 0.306564 | 0.718615 | 953.4432 | 1887.533 | 1057.413 | 2650.158 | 778.362  | 2187.328 |
| ENSMUSG000000026142  | 15_Rhbd1        | 1457.813044 | 0.251211  | 0.306623 | 0.718628 | 1304.284 | 1240.035 | 1449.771 | 1832.588 | 1506.946 | 1413.255 |
| ENSMUSG000000048661  | 14_LemD3        | 542.8514472 | 0.409815  | 0.3067   | 0.718639 | 467.7881 | 442.2564 | 489.0101 | 970.3685 | 444.6167 | 443.0689 |
| ENSMUSG000000050908  | 12_Tvp23a       | 81.7735781  | -0.49746  | 0.306669 | 0.718639 | 89.33454 | 112.4963 | 85.1453  | 29.7659  | 82.58783 | 91.31162 |
| ENSMUSG000000021553  | 13_Slc28a3      | 3102.578994 | 0.228874  | 0.306759 | 0.718693 | 2789.674 | 2671.572 | 3110.105 | 3504.439 | 3501.498 | 3038.187 |
| ENSMUSG00000001017   | 15_Chtop        | 3216.753141 | 0.328179  | 0.308254 | 0.718721 | 2788.862 | 2766.893 | 3001.947 | 4952.054 | 2878.129 | 2912.633 |
| ENSMUSG00000001227   | 11_Sema6b       | 26.5003763  | -0.72427  | 0.308246 | 0.718721 | 40.60661 | 35.20876 | 23.01224 | 3.968787 | 27.15216 | 29.0537  |
| ENSMUSG000000002625  | 9_Akap8l        | 735.8091131 | -0.34133  | 0.30874  | 0.718721 | 805.6351 | 890.524  | 770.9101 | 422.6758 | 724.0577 | 801.052  |
| ENSMUSG000000003949  | 16_Hlf          | 6440.223349 | 0.334708  | 0.308936 | 0.718721 | 5546.863 | 5640.271 | 5902.64  | 10026.15 | 539.5122 | 645.895  |
| ENSMUSG000000006442  | 10_Srm          | 821.0192827 | -0.62129  | 0.306934 | 0.718721 | 975.3707 | 870.7727 | 1139.106 | 146.8451 | 939.0223 | 855.0088 |
| ENSMUSG000000014592  | 19_Camta1       | 617.6549438 | 0.35473   | 0.308746 | 0.718721 | 584.7352 | 499.7926 | 541.9383 | 989.2202 | 560.0134 | 530.23   |
| ENSMUSG000000020325  | 10_Fst3         | 195.6488152 | -0.35531  | 0.308243 | 0.718721 | 198.1603 | 218.9813 | 241.6285 | 115.0948 | 219.48   | 180.548  |
| ENSMUSG000000020372  | 15_Gnb211       | 20348.26202 | -0.48394  | 0.307544 | 0.718721 | 23563.2  | 22577.4  | 25047.68 | 6693.36  | 21793    | 22414.93 |
| ENSMUSG000000020758  | 15_Iltg4        | 10056.1422  | -0.70183  | 0.307733 | 0.718721 | 10619.44 | 11816.4  | 14929.19 | 1146.98  | 11591.71 | 10233.13 |
| ENSMUSG000000021978  | 8_Extl3         | 1738.542996 | -0.40782  | 0.309549 | 0.718721 | 1915.82  | 1949.363 | 2082.608 | 769.9447 | 1839.559 | 1873.964 |
| ENSMUSG000000024055  | 14_Cyp4f13      | 484.6842949 | -0.4518   | 0.309488 | 0.718721 | 499.4613 | 562.4814 | 617.8787 | 187.5252 | 488.7389 | 552.0203 |
| ENSMUSG000000024213  | 13_Nudt3        | 1804.009379 | -0.41884  | 0.308019 | 0.718721 | 1919.068 | 1947.646 | 2325.387 | 783.8355 | 1861.054 | 1987.065 |
| ENSMUSG000000024858  | 13_Adrbk1       | 2872.363032 | -0.54361  | 0.307407 | 0.718721 | 3190.867 | 3204.856 | 3825.785 | 738.1944 | 324.552  | 3030.923 |
| ENSMUSG000000024999  | 7_Noc3l         | 634.587534  | 0.331024  | 0.309549 | 0.718721 | 523.8253 | 563.3401 | 599.4689 | 963.4231 | 619.9744 | 537.4934 |
| ENSMUSG000000025231  | 16_Sufu         | 747.2712961 | -0.44017  | 0.308321 | 0.718721 | 788.5803 | 863.9027 | 928.544  | 299.6434 | 849.6364 | 753.3209 |
| ENSMUSG000000025470  | 10_Zfp511       | 209.9209716 | -0.34235  | 0.30698  | 0.718721 | 185.1661 | 239.5913 | 279.5987 | 138.9076 | 202.5099 | 213.7522 |
| ENSMUSG000000026628  | 13_Atf3         | 332.1136455 | 0.462192  | 0.309434 | 0.718721 | 318.3558 | 173.4675 | 346.3342 | 248.0492 | 583.7715 | 322.7036 |
| ENSMUSG000000027376  | 15_Prom2        | 2012.047909 | -0.39579  | 0.307592 | 0.718721 | 2217.121 | 2200.118 | 2441.599 | 938.6182 | 2102.03  | 2172.802 |
| ENSMUSG000000028137  | 9_Celf3         | 39.40333372 | -0.54537  | 0.307402 | 0.718721 | 51.97646 | 45.51376 | 42.57265 | 12.89856 | 42.99092 | 40.46765 |
| ENSMUSG000000028149  | 12_Rap1gds1     | 1051.73757  | 0.279067  | 0.308418 | 0.718721 | 916.8972 | 957.5065 | 976.8697 | 1444.639 | 1032.914 | 981.5999 |
| ENSMUSG000000028794  | 13_A3gal2       | 10.67000994 | -0.84995  | 0.307281 | 0.718721 | 7.30919  | 12.0225  | 21.86163 | 3.968787 | 14.70742 | 4.150528 |
| ENSMUSG000000029098  | 16_Acox3        | 1092.031476 | -0.34758  | 0.307581 | 0.718721 | 1150.791 | 1207.403 | 1130.547 | 607.2245 | 1135.865 | 1140.358 |
| ENSMUSG000000030154  | 10_Kirb1f       | 9.181937429 | 0.800375  | 0.30884  | 0.718721 | 10.5572  | 2.576251 | 6.903673 | 10.91416 | 15.83876 | 8.301057 |
| ENSMUSG000000030435  | 15_U2af2        | 3537.740035 | -0.51971  | 0.       |          |          |          |          |          |          |          |

|                       |                  |             |          |          |          |          |          |          |          |          |          |
|-----------------------|------------------|-------------|----------|----------|----------|----------|----------|----------|----------|----------|----------|
| ENSMUSG00000048087    | 5_Gm4737         | 1458.579191 | -0.40215 | 0.309293 | 0.718721 | 1690.047 | 1494.225 | 1797.256 | 671.7172 | 1626.867 | 1471.362 |
| ENSMUSG00000050122    | 18_Vvba3b        | 6.200768212 | 0.851259 | 0.307085 | 0.718721 | 6.497057 | 4.293751 | 2.301224 | 8.929771 | 7.919381 | 7.263424 |
| ENSMUSG00000051124    | 6_Gimap9         | 204.6894447 | 0.372429 | 0.308332 | 0.718721 | 189.2268 | 183.7275 | 162.2363 | 330.4015 | 192.3278 | 170.1717 |
| ENSMUSG00000052572    | 15_Dlg2          | 1290.72325  | 0.384962 | 0.307315 | 0.718721 | 1121.555 | 1061.415 | 1175.926 | 2209.622 | 1026.125 | 1149.696 |
| ENSMUSG00000053178    | 5_Mlrrf1b        | 30.70389531 | 0.601185 | 0.308586 | 0.718721 | 33.29742 | 18.03375 | 21.86163 | 63.5006  | 22.6268  | 24.90317 |
| ENSMUSG00000053293    | 9_Pom121         | 1079.802556 | -0.4867  | 0.309049 | 0.718721 | 1182.464 | 1164.465 | 1433.663 | 358.1831 | 1217.322 | 1122.718 |
| ENSMUSG00000054717    | 6_Hmgb2          | 3365.189678 | 0.330444 | 0.309212 | 0.718721 | 3220.104 | 2582.262 | 3142.322 | 5108.821 | 3194.904 | 2942.725 |
| ENSMUSG00000055980    | 2_Irs1           | 122.7975916 | -0.49196 | 0.308477 | 0.718721 | 136.4382 | 152.8575 | 141.5253 | 124.0246 | 41.85958 | 140.0803 |
| ENSMUSG00000059173    | 19_Pde1a         | 95.06367296 | 0.520513 | 0.308984 | 0.718721 | 82.02535 | 83.29877 | 69.03673 | 188.5174 | 52.04164 | 95.46215 |
| ENSMUSG00000062312    | 5_Erbb2          | 3281.687996 | -0.60015 | 0.307825 | 0.718721 | 3482.423 | 3767.337 | 4613.955 | 646.9123 | 564.913  | 3632.75  |
| ENSMUSG00000071078    | 5_Nr2c2ap        | 236.5211205 | -0.55209 | 0.308903 | 0.718721 | 285.0584 | 259.3426 | 299.1591 | 59.53181 | 254.5515 | 261.4833 |
| ENSMUSG00000078240    | 2_Gm3550         | 8.730409078 | 0.809579 | 0.307187 | 0.718721 | 4.060661 | 10.305   | 4.602448 | 15.87515 | 11.3134  | 6.225792 |
| ENSMUSG00000081512    | 1_Gm15821        | 48.20581448 | 0.387916 | 0.308299 | 0.718721 | 48.72793 | 39.50251 | 36.81959 | 45.64105 | 53.17298 | 65.37082 |
| ENSMUSG00000090110    | 8_Cmc4           | 68.66471983 | 0.643134 | 0.308359 | 0.718721 | 49.54006 | 68.70002 | 42.57265 | 164.7047 | 54.30432 | 32.16659 |
| ENSMUSG00000095241    | 1_Gm5478         | 3055.783384 | -0.7879  | 0.307857 | 0.718721 | 3287.511 | 3469.351 | 4853.282 | 205.3847 | 3579.56  | 2939.612 |
| ENSMUSG00000097793    | 1_Gm17259        | 33.64165946 | 0.563737 | 0.309533 | 0.718721 | 32.48529 | 21.46876 | 27.61469 | 67.46938 | 23.75814 | 29.0537  |
| ENSMUSG00000099411    | 1_2310015D24Rik  | 2.162998392 | 1.359914 | 0.309273 | 0.718721 | 1.624264 | 0.85875  | 1.150612 | 3.968787 | 2.26268  | 3.112896 |
| ENSMUSG00000101389    | 1_Ms4a4a         | 65.65585612 | 0.647094 | 0.306994 | 0.718721 | 85.27388 | 26.62126 | 41.42204 | 104.1807 | 106.346  | 30.09133 |
| ENSMUSG00000103983    | 1_Gm20045        | 111.304378  | 0.435676 | 0.30905  | 0.718721 | 92.58307 | 103.9088 | 87.44652 | 199.4316 | 97.29525 | 87.16109 |
| ENSMUSG00000106157    | 1_493055A03Rik   | 2.413851003 | 1.691853 | 0.308885 | 0.718721 | 1.624264 | 1.7175   | 0        | 5.953181 | 0        | 5.18816  |
| ENSMUSG00000108409    | 1_RP23-166E8     | 1.967907146 | -1.4798  | 0.309335 | 0.718721 | 4.060661 | 3.435001 | 1.150612 | 0.992197 | 1.13134  | 1.016732 |
| ENSMUSG00000109257    | 11_Ap2a2         | 2058.944004 | -0.30411 | 0.309633 | 0.718748 | 2145.653 | 2318.626 | 2361.056 | 1307.715 | 2061.302 | 2159.312 |
| ENSMUSG00000104246    | 5_Dhx29          | 1027.386434 | 0.250347 | 0.309604 | 0.718748 | 930.7035 | 862.1852 | 1022.894 | 1251.16  | 1131.34  | 966.0355 |
| ENSMUSG00000103039    | 7_Llbr           | 1324.359726 | -0.66327 | 0.309839 | 0.719143 | 1459.402 | 1558.632 | 1852.485 | 183.5564 | 158.2558 | 173.8225 |
| ENSMUSG000001026439   | 14_Rbbp5         | 835.4580701 | 0.258307 | 0.309901 | 0.719202 | 735.7918 | 732.5139 | 814.6334 | 1060.658 | 897.1527 | 771.9983 |
| ENSMUSG000001015312   | 8_Gadd45b        | 319.7383142 | -0.30187 | 0.309938 | 0.719205 | 339.4713 | 319.4551 | 400.413  | 220.2677 | 308.8558 | 329.967  |
| ENSMUSG000001045075   | 3_Gm9796         | 1.136162699 | -2.38862 | 0.309975 | 0.719208 | 3.248529 | 2.576251 | 0        | 0.992197 | 0        | 0        |
| ENSMUSG000001030681   | 18_Mvp           | 4612.9291   | -0.69226 | 0.310067 | 0.719337 | 4842.744 | 5186.851 | 7067.06  | 556.6224 | 5458.716 | 4565.581 |
| ENSMUSG000001035370   | 7_Adat3          | 87.77751499 | -0.76382 | 0.310164 | 0.719338 | 107.2014 | 112.4963 | 111.6094 | 6.945378 | 107.4773 | 80.9353  |
| ENSMUSG000001043964   | 14_Ora3          | 695.7749193 | -0.41002 | 0.310115 | 0.719338 | 727.6704 | 766.0052 | 888.2725 | 318.4952 | 660.7026 | 813.5035 |
| ENSMUSG000001046070   | 8_Igfals         | 1.223457585 | -2.4839  | 0.310176 | 0.719338 | 0        | 5.152501 | 1.150612 | 0        | 1.037632 | 0        |
| ENSMUSG000001032388   | 6_Spg21          | 3473.439903 | 0.252646 | 0.310219 | 0.719354 | 3090.975 | 3028.812 | 3390.854 | 4474.808 | 3552.408 | 3302.783 |
| ENSMUSG000001003433   | 15_Zbed4         | 704.5680137 | 0.247549 | 0.310328 | 0.719522 | 614.7841 | 582.2327 | 736.3917 | 823.5234 | 753.4725 | 717.0038 |
| ENSMUSG000001020366   | 18_Mapk9         | 1063.401026 | 0.345579 | 0.310395 | 0.719594 | 960.7524 | 933.4615 | 915.8872 | 1694.672 | 909.5974 | 966.0355 |
| ENSMUSG000001002205   | 15_Vrk3          | 746.0195272 | -0.43332 | 0.310565 | 0.719598 | 795.8895 | 825.259  | 950.4056 | 304.6044 | 813.4335 | 786.5251 |
| ENSMUSG000001028062   | 15_Lamtor2       | 1092.263323 | -0.58889 | 0.310613 | 0.719598 | 1267.738 | 1292.419 | 1376.132 | 220.2677 | 1203.746 | 1193.277 |
| ENSMUSG0000010030970  | 16_Ctbp2         | 1068.647934 | -0.25313 | 0.310513 | 0.719598 | 1128.052 | 1135.268 | 1223.101 | 806.656  | 1089.481 | 1029.331 |
| ENSMUSG0000010070424  | 11_Art5          | 22.32088729 | -0.69686 | 0.310529 | 0.719598 | 21.11544 | 45.51376 | 16.10857 | 10.91416 | 1.82026  | 30.09133 |
| ENSMUSG0000010097163  | 2_BC051077       | 5.555395576 | 0.936719 | 0.310443 | 0.719598 | 2.436397 | 3.435001 | 5.753061 | 7.937575 | 3.39402  | 10.37632 |
| ENSMUSG00000101595    | 1_Gm29395        | 6.635422702 | 0.878733 | 0.310601 | 0.719598 | 8.121322 | 3.435001 | 2.301224 | 9.921968 | 5.656701 | 10.37632 |
| ENSMUSG0000010045991  | 18_Oneuc12       | 3.512144725 | 1.356894 | 0.31076  | 0.719855 | 4.060661 | 1.7175   | 0        | 7.937575 | 1.13134  | 6.225792 |
| ENSMUSG000001003379   | 7_Cd79a          | 6.831389409 | -0.97468 | 0.31087  | 0.719941 | 11.36985 | 4.293751 | 11.50612 | 0.992197 | 4.52536  | 8.301057 |
| ENSMUSG0000010098923  | 1_Tmem185b       | 387.2890011 | 0.28001  | 0.310843 | 0.719941 | 350.029  | 345.2176 | 354.3885 | 520.9033 | 399.3631 | 353.8325 |
| ENSMUSG0000010054808  | 13_Actn4         | 67738.28131 | -0.57839 | 0.310965 | 0.720077 | 72162    | 76588.5  | 94663.16 | 14634.9  | 77666.5  | 70714.63 |
| ENSMUSG000001001440   | 5_Kpnb1          | 7552.931623 | 0.247142 | 0.311072 | 0.720114 | 7130.521 | 6282.617 | 7309.839 | 9241.321 | 8374.179 | 6979.113 |
| ENSMUSG0000010032599  | 12_lp6k2         | 672.0541073 | -0.21793 | 0.311089 | 0.720114 | 706.555  | 750.5477 | 711.0783 | 643.9357 | 600.7416 | 619.4663 |
| ENSMUSG0000010054892  | 14_Txk           | 18.28146673 | 0.575197 | 0.311047 | 0.720114 | 21.11544 | 11.16375 | 11.50612 | 16.86735 | 28.2835  | 20.75264 |
| ENSMUSG0000010027185  | 14_Nat10         | 602.9889126 | -0.31799 | 0.311315 | 0.720552 | 648.8936 | 668.1077 | 690.3673 | 368.105  | 618.843  | 623.6169 |
| ENSMUSG0000010048752  | 7_Prss50         | 2.580599383 | -1.40441 | 0.311356 | 0.720564 | 4.060661 | 2.576251 | 4.602448 | 0        | 1.13134  | 3.112896 |
| ENSMUSG0000010022404  | 7_Slc25a17       | 2401.874913 | 0.285454 | 0.311432 | 0.720573 | 2217.121 | 1925.318 | 2353.002 | 3274.249 | 2495.736 | 2145.823 |
| ENSMUSG0000010044770  | 14_Scm14         | 19.58259007 | 0.632156 | 0.311413 | 0.720573 | 21.92757 | 18.03375 | 5.753061 | 30.7581  | 19.23278 | 21.79027 |
| ENSMUSG0000010052821  | 3_Cyslt1r1       | 98.30560473 | 0.585186 | 0.311568 | 0.720674 | 94.20733 | 66.98252 | 74.78979 | 225.2287 | 74.66845 | 53.95687 |
| ENSMUSG0000010073565  | 4_Prr16          | 49.33535381 | 0.495027 | 0.311584 | 0.720674 | 54.41286 | 36.06751 | 32.21714 | 87.31332 | 48.64762 | 37.35475 |
| ENSMUSG0000010103686  | 1_Gm37073        | 0.812912481 | -3.06202 | 0.311559 | 0.720674 | 0        | 2.576251 | 2.301224 | 0        | 0        | 0        |
| ENSMUSG0000010025041  | 16_Nf5c2         | 3548.979445 | 0.232078 | 0.311635 | 0.720679 | 3268.832 | 3064.021 | 3459.891 | 4271.407 | 3814.879 | 3414.847 |
| ENSMUSG0000010063458  | 12_1700112E06Rik | 29.56599795 | -0.50553 | 0.311659 | 0.720679 | 49.54006 | 33.49126 | 20.71102 | 24.80492 | 26.02082 | 22.82791 |
| ENSMUSG0000010023120  | 9_Gm853          | 0.819901852 | -3.09991 | 0.311707 | 0.720708 | 4.060661 | 0.85875  | 0        | 0        | 0        | 0        |
| ENSMUSG0000010001665  | 10_Gst3          | 935.9085089 | -0.30727 | 0.311822 | 0.720785 | 1028.971 | 1006.455 | 1070.069 | 592.3415 | 902.8094 | 1014.804 |
| ENSMUSG0000010021115  | 14_Vrk1          | 482.6182823 | 0.249142 | 0.311819 | 0.720785 | 473.4731 | 404.4714 | 445.2869 | 589.3649 | 506.9404 | 476.2731 |
| ENSMUSG0000010024767  | 11_Otub1         | 1441.860557 | -0.49868 | 0.311849 | 0.720785 | 1599.088 | 1625.614 | 1840.979 | 442.5198 | 1590.664 | 1552.298 |
| ENSMUSG00000100000861 | 15_Bcl11a        | 231.8258644 | 0.351201 | 0.312037 | 0.721121 | 221.7121 | 180.3375 | 209.4114 | 359.1752 | 201.3785 | 218.9404 |
| ENSMUSG0000010002006  | 12_Pdzd4         | 125.5645756 | -0.36279 | 0.312067 | 0.721121 | 141.311  | 147.705  | 134.6216 | 73.42256 | 111.1304 | 143.1932 |
| ENSMUSG00000100024135 | 9_Srbd1          | 557.7395688 | 0.261817 | 0.312177 | 0.721209 | 523.0131 | 455.9964 | 543.0889 | 704.4597 | 591.6909 | 528.1547 |
| ENSMUSG0000010052525  | 14_Spyda         | 38.69879516 | 0.553805 | 0.312168 | 0.721209 | 30.04889 | 27.48001 | 36.81959 | 79.37575 | 29.41484 | 29.0537  |
| ENSMUSG0000010055882  | 8_Abhd16b        | 5.247224992 | -0.99502 | 0.312409 | 0.721661 | 8.121322 | 2.576251 | 10.35551 | 4.960984 | 3.39402  | 2.075624 |
| ENSMUSG000001001493   | 9_Meox1          | 120.9436499 | -0.29263 | 0.312681 | 0.722121 | 115.3228 | 148.5638 | 135.7722 | 112.1182 | 101.8206 | 112.0643 |
| ENSMUSG0000010097154  | 2_Gm26510        | 4.510945244 | 0.954788 | 0.31265  | 0.722121 | 4.060661 | 1.7175   | 3.451836 | 5.953181 | 5.656701 | 6.225792 |
| ENSMUSG0000010024875  | 4_Yf1fa          | 971.9281551 | -0.55259 | 0.312865 | 0.722183 | 1067.142 | 1106.929 | 1293.288 | 234.1584 | 1062.328 | 1067.723 |
| ENSMUSG0000010035226  | 5_Rims4          | 3.411997607 | -1.22634 | 0.312761 | 0.722183 | 4.060661 | 6.870002 | 3.451836 | 2.97659  | 0        | 3.112896 |
| ENSMUSG000001004322   | 6_Dsc1           | 35.94420949 | 0.602393 | 0.312889 | 0.722183 | 45.4794  | 24.90376 | 14.95796 | 68.46158 | 32.80886 | 29.0537  |
| ENSMUSG0000010053461  | 9_Hhpl2          | 1.994022074 | -1.45344 | 0.31279  | 0.722183 | 1.624264 | 2.576251 | 4.602448 | 0.992197 | 1.13134  | 1.037632 |
| ENSMUSG000001009318   | 7_1190002F15Rik  | 44.28911701 | -0.3687  | 0.312871 | 0.722183 | 46.29153 | 47.23126 | 56.37996 | 36.71128 | 40.72824 | 38.39239 |
| ENSMUSG0000010028461  | 12_Ccdc107       | 203.2854485 | -0.42052 | 0.313098 | 0.722538 | 238.7669 | 257.6251 | 201.3571 | 91.28211 | 226.268  | 204.4135 |
| ENSMUSG0000010029480  | 13_Dhx37         | 376.3352496 | -0.50738 | 0.313116 | 0.722538 | 389.0113 | 461.1489 | 475.2028 | 114.1026 | 436.6973 | 381.8486 |
| ENSMUSG0000010042079  | 13_Hmnpf         | 13538.40473 | 0.       |          |          |          |          |          |          |          |          |

|                     |                  |             |           |          |          |          |          |          |          |          |          |
|---------------------|------------------|-------------|-----------|----------|----------|----------|----------|----------|----------|----------|----------|
| ENSMUSG00000044338  | 9_Aplnr          | 37.64043215 | 0.477115  | 0.314402 | 0.722772 | 44.66727 | 27.48001 | 21.86163 | 47.62545 | 52.04164 | 32.16659 |
| ENSMUSG00000048027  | 7_Rgmb           | 644.7579261 | -0.27358  | 0.314387 | 0.722772 | 706.555  | 694.7289 | 715.6807 | 452.4417 | 639.2072 | 659.934  |
| ENSMUSG00000005399  | 8_Adamts18       | 78.81674586 | -0.51288  | 0.314299 | 0.722772 | 70.6555  | 151.9988 | 55.22938 | 62.5084  | 46.38494 | 86.12346 |
| ENSMUSG000000059689 | 14_Zfp637        | 391.5708415 | -0.32294  | 0.314123 | 0.722772 | 407.6904 | 469.7364 | 428.0277 | 240.1116 | 364.6556 | 419.2034 |
| ENSMUSG000000060538 | 14_Tmem219       | 362.4295126 | -0.4148   | 0.314035 | 0.722772 | 429.6179 | 374.4151 | 438.3832 | 160.7359 | 356.3721 | 415.0528 |
| ENSMUSG000000064010 | 12_Dppa1         | 1.309012847 | 1.814798  | 0.31379  | 0.722772 | 0.812132 | 0.85875  | 0        | 2.97659  | 1.13134  | 2.075264 |
| ENSMUSG000000064373 | 11_Sepp1         | 4490.857291 | 0.40823   | 0.314613 | 0.722772 | 3917.726 | 4087.651 | 3573.801 | 8112.201 | 3328.403 | 3925.362 |
| ENSMUSG000000071658 | 4_Gng3           | 11.96568325 | -0.7045   | 0.313906 | 0.722772 | 22.7397  | 14.59875 | 6.903673 | 7.937575 | 11.3134  | 8.301057 |
| ENSMUSG000000071659 | 3_Hnnrpul2       | 7128.600345 | 0.269701  | 0.314139 | 0.722772 | 6134.034 | 6288.628 | 6970.408 | 9615.379 | 7203.242 | 6559.91  |
| ENSMUSG000000089669 | 7_Tnfrf13        | 245.991671  | -0.25569  | 0.314497 | 0.722772 | 254.1974 | 273.0826 | 276.1469 | 223.2443 | 200.2472 | 249.0317 |
| ENSMUSG000000089824 | 10_Rbm12         | 894.5171535 | 0.325189  | 0.314408 | 0.722772 | 760.1557 | 778.0277 | 844.5493 | 1367.247 | 820.2216 | 796.9014 |
| ENSMUSG000000096508 | 7_Gm7903         | 1.451188434 | 2.018028  | 0.313685 | 0.722772 | 0.812132 | 0.85875  | 0        | 4.960984 | 0        | 2.075264 |
| ENSMUSG000000014748 | 13_Tex261        | 1665.70255  | -0.35613  | 0.314997 | 0.723027 | 1841.916 | 1779.33  | 1989.408 | 881.0708 | 1697.01  | 1805.48  |
| ENSMUSG000000027329 | 9_Spef1          | 87.56089772 | -0.39681  | 0.315057 | 0.723081 | 103.1408 | 78.14627 | 117.3624 | 49.60984 | 83.71917 | 93.38689 |
| ENSMUSG000000015846 | 14_Rxra          | 3810.215497 | -0.48192  | 0.315564 | 0.723105 | 4038.733 | 4285.164 | 4998.259 | 1245.207 | 4210.848 | 4083.082 |
| ENSMUSG000000018040 | 9_Rrp7a          | 1077.157628 | -0.56994  | 0.315512 | 0.723105 | 1249.059 | 1247.764 | 1364.626 | 233.1663 | 1233.161 | 1135.169 |
| ENSMUSG000000022096 | 14_Hr            | 4178.620481 | -0.61303  | 0.315313 | 0.723105 | 4230.397 | 4442.315 | 6487.151 | 768.9525 | 4714.294 | 4428.614 |
| ENSMUSG000000025010 | 13_Ccnj          | 183.2820047 | 0.302498  | 0.315743 | 0.723105 | 179.4812 | 163.1625 | 149.5796 | 243.0882 | 202.5099 | 161.8706 |
| ENSMUSG000000025484 | 8_Bet1f          | 456.135501  | -0.48573  | 0.31524  | 0.723105 | 568.4925 | 499.7926 | 528.131  | 147.8373 | 483.0822 | 509.4773 |
| ENSMUSG000000025588 | 3_Nat1           | 7.75080222  | 1.035437  | 0.315494 | 0.723105 | 4.060661 | 7.728752 | 3.451836 | 23.81272 | 2.26268  | 5.18816  |
| ENSMUSG000000025854 | 15_Fam20c        | 67.36866774 | -0.63173  | 0.315762 | 0.723105 | 85.27388 | 80.72252 | 79.39224 | 13.89076 | 96.16391 | 48.76871 |
| ENSMUSG000000028248 | 15_Pnir          | 3042.159111 | 0.321773  | 0.315305 | 0.723105 | 2682.473 | 2746.283 | 2684.378 | 4643.481 | 2568.142 | 2928.198 |
| ENSMUSG000000034570 | 12_Inpp5j        | 18.93692857 | -0.68721  | 0.315794 | 0.723105 | 23.55183 | 22.32751 | 24.16285 | 3.968787 | 14.70742 | 24.90317 |
| ENSMUSG000000036752 | 4_Tubb4b         | 13725.43475 | -0.51104  | 0.315785 | 0.723105 | 15047.18 | 14941.4  | 18405.19 | 3954.897 | 15681.51 | 14322.44 |
| ENSMUSG000000038425 | 17_Poli          | 131.0575836 | 0.314165  | 0.315222 | 0.723105 | 106.3893 | 120.225  | 124.2661 | 164.7047 | 112.0027 | 158.7577 |
| ENSMUSG000000038534 | 17_Osblp7        | 508.6395154 | -0.67197  | 0.315394 | 0.723105 | 556.3105 | 589.1027 | 729.4881 | 65.48499 | 590.5595 | 520.8913 |
| ENSMUSG000000039328 | 9_Rnf122         | 104.2419333 | -0.47987  | 0.315748 | 0.723105 | 126.6926 | 134.8238 | 102.4045 | 38.69568 | 102.1847 | 100.6503 |
| ENSMUSG000000047878 | 12_Aqalt         | 246.5495737 | -0.38928  | 0.315786 | 0.723105 | 278.5613 | 274.8001 | 285.3518 | 121.048  | 234.1874 | 285.3488 |
| ENSMUSG000000051237 | 6_9230109A22Rik  | 1.088171008 | 2.4222907 | 0.31541  | 0.723105 | 0        | 0        | 1.150612 | 1.984394 | 3.39402  | 0        |
| ENSMUSG000000067297 | 4_lfit1b12       | 282.2317926 | 0.346773  | 0.315715 | 0.723105 | 216.0272 | 201.8063 | 327.9245 | 371.0816 | 333.7453 | 242.8059 |
| ENSMUSG000000068735 | 14_Trp53i11      | 624.7710307 | -0.56709  | 0.315594 | 0.723105 | 693.5609 | 720.4914 | 823.8383 | 138.9076 | 715.0069 | 656.8211 |
| ENSMUSG000000091277 | 1_Gm1818         | 4.469394986 | 1.934022  | 0.315607 | 0.723105 | 0        | 0        | 5.753061 | 15.87515 | 0        | 5.18816  |
| ENSMUSG000000094910 | 1_DA30019H16Rik  | 23.29620244 | -0.47943  | 0.315149 | 0.723105 | 24.36397 | 31.77376 | 25.31347 | 21.82833 | 14.70742 | 21.79027 |
| ENSMUSG000000097457 | 1_2310031A07Rik  | 13.14792208 | 1.02031   | 0.315504 | 0.723105 | 14.61838 | 0        | 11.50612 | 21.82833 | 10.18206 | 20.75264 |
| ENSMUSG000000037514 | 17_Plnk2         | 1201.861615 | 0.259146  | 0.315862 | 0.723118 | 1123.991 | 1048.534 | 1110.341 | 1586.523 | 1138.128 | 1203.653 |
| ENSMUSG000000000876 | 11_Pxmp4         | 476.01341   | -0.28255  | 0.31597  | 0.723283 | 527.8859 | 482.6176 | 556.8963 | 331.3937 | 470.6375 | 486.6494 |
| ENSMUSG000000016477 | 17_E2f3          | 318.8118023 | 0.25738   | 0.31598  | 0.723283 | 293.9918 | 256.7663 | 321.0208 | 383.9802 | 329.327  | 327.8917 |
| ENSMUSG000000039601 | 15_Rcan2         | 131.639473  | 0.639441  | 0.316083 | 0.723435 | 133.1897 | 113.355  | 62.13305 | 302.62   | 50.9103  | 127.6287 |
| ENSMUSG000000003200 | 9_Sh3g1          | 1155.355166 | -0.65708  | 0.316235 | 0.723487 | 1276.672 | 1486.712 | 1516.507 | 156.7671 | 1248.202 | 1248.271 |
| ENSMUSG000000020592 | 14_Sdc1          | 42796.95427 | -0.36755  | 0.316601 | 0.723487 | 43590.38 | 44515.04 | 56552.59 | 22293.67 | 46177.91 | 43652.14 |
| ENSMUSG000000022570 | 5_Tsta3          | 618.8076083 | -0.61248  | 0.316486 | 0.723487 | 747.9737 | 729.0789 | 767.4583 | 107.1573 | 699.1682 | 662.0093 |
| ENSMUSG000000028013 | 16_Ppa2          | 620.6082079 | 0.303322  | 0.316388 | 0.723487 | 573.3653 | 512.6739 | 581.0591 | 897.9381 | 596.2162 | 562.3966 |
| ENSMUSG000000030166 | 14_Rad52         | 246.018416  | 0.281108  | 0.316552 | 0.723487 | 216.8393 | 199.2301 | 250.8334 | 315.5186 | 235.3187 | 258.3704 |
| ENSMUSG000000032316 | 7_Clk3           | 932.7172588 | -0.39971  | 0.31648  | 0.723487 | 991.6134 | 992.7153 | 1198.938 | 427.6368 | 969.5585 | 1015.842 |
| ENSMUSG000000034574 | 9_Daam1          | 3382.390211 | 0.303734  | 0.316406 | 0.723487 | 2892.815 | 3019.366 | 3171.087 | 4980.828 | 3223.138 | 3007.058 |
| ENSMUSG000000035215 | 8_Lsm7           | 41.83923857 | -1.06201  | 0.316615 | 0.723487 | 45.4794  | 33.49126 | 90.89836 | 58.53961 | 22.6268  | 0        |
| ENSMUSG000000037104 | 8_Socs5          | 753.2463998 | 0.224153  | 0.316299 | 0.723487 | 678.9425 | 698.1639 | 707.6264 | 890.9927 | 786.2814 | 757.4714 |
| ENSMUSG000000040340 | 13_1700019B03Rik | 2.444779323 | -1.37571  | 0.316554 | 0.723487 | 4.872793 | 3.435001 | 2.301224 | 1.984394 | 0        | 2.075264 |
| ENSMUSG000000041620 | 8_Mmp1b          | 2.889366346 | -1.18949  | 0.316444 | 0.723487 | 4.872793 | 2.576251 | 4.602448 | 1.984394 | 2.26268  | 1.037632 |
| ENSMUSG000000042190 | 12_Cmklr1        | 153.2834077 | -0.41785  | 0.316651 | 0.723487 | 177.0448 | 189.7838 | 158.7845 | 72.43037 | 187.8025 | 133.8545 |
| ENSMUSG000000046434 | 15_Hnmpa1        | 9664.184419 | 0.278897  | 0.31615  | 0.723487 | 9244.501 | 7731.328 | 9223.307 | 13047.39 | 10146.99 | 8591.594 |
| ENSMUSG000000050244 | 8_Heatr1         | 1037.265621 | 0.255825  | 0.316492 | 0.723487 | 934.7641 | 863.044  | 1039.003 | 1114.237 | 1034.435 | 968.1107 |
| ENSMUSG000000057110 | 15_Cntrl         | 1153.215814 | 0.219479  | 0.316607 | 0.723487 | 1080.136 | 978.1165 | 1139.106 | 1298.786 | 1206.009 | 1217.142 |
| ENSMUSG000000001910 | 4_Nacc1          | 2736.868888 | -0.59742  | 0.316871 | 0.723737 | 2935.046 | 3258.098 | 3693.465 | 514.9501 | 3136.075 | 3087.058 |
| ENSMUSG000000002803 | 13_Btdb6         | 331.7013296 | -0.50945  | 0.316946 | 0.723737 | 404.4418 | 398.4601 | 365.8947 | 97.23529 | 337.1394 | 387.0368 |
| ENSMUSG000000028755 | 3_Cda            | 533.1204734 | -0.58514  | 0.316912 | 0.723737 | 550.6256 | 594.2552 | 774.3619 | 112.1182 | 639.2072 | 528.1547 |
| ENSMUSG000000028796 | 17_Phc2          | 1789.897344 | -0.62729  | 0.316978 | 0.723737 | 1919.88  | 2041.249 | 2557.811 | 291.7059 | 2095.242 | 1833.496 |
| ENSMUSG000000040272 | 14_Accs          | 176.5254772 | -0.34248  | 0.316918 | 0.723737 | 205.4694 | 220.6988 | 165.6881 | 118.0714 | 144.8115 | 204.4135 |
| ENSMUSG000000053565 | 9_Elf3k          | 2670.502826 | -0.55598  | 0.31693  | 0.723737 | 3138.079 | 3034.823 | 3373.595 | 599.2869 | 2932.434 | 2944.8   |
| ENSMUSG000000107482 | 2_RP23-74K24     | 7.223802238 | -1.47274  | 0.317175 | 0.724104 | 8.933454 | 3.435001 | 19.56041 | 0        | 0        | 11.41395 |
| ENSMUSG000000015095 | 12_Fbxw5         | 1418.764263 | -0.61422  | 0.317295 | 0.724117 | 1658.374 | 1636.778 | 1853.636 | 242.096  | 1484.318 | 1637.383 |
| ENSMUSG000000027676 | 11_Ccdc39        | 62.69585443 | 0.549001  | 0.31734  | 0.724117 | 56.84925 | 56.67751 | 59.12081 | 131.9622 | 53.17298 | 38.39239 |
| ENSMUSG000000057657 | 3_Rps18-ps3      | 2711.611395 | -0.70048  | 0.317295 | 0.724117 | 3423.949 | 3271.838 | 3375.896 | 279.7995 | 2737.843 | 3180.342 |
| ENSMUSG000000098781 | 1_Gm28044        | 6.5989331   | 0.827345  | 0.317349 | 0.724117 | 3.248529 | 4.293751 | 6.903673 | 10.91416 | 9.050721 | 5.18816  |
| ENSMUSG000000003476 | 15_Chrh2         | 14.51162841 | -0.68184  | 0.317511 | 0.724224 | 14.61838 | 24.04501 | 14.95796 | 6.945378 | 6.788041 | 19.71501 |
| ENSMUSG000000004626 | 14_Stxbp2        | 1830.818979 | -0.45693  | 0.317733 | 0.724224 | 2017.336 | 2038.673 | 2298.923 | 654.8499 | 1953.824 | 2021.307 |
| ENSMUSG000000020776 | 18_Fbf1          | 787.4392546 | -0.53331  | 0.317425 | 0.724224 | 876.2906 | 976.399  | 941.2007 | 202.4082 | 822.4843 | 905.8528 |
| ENSMUSG000000025504 | 12_Eps8l2        | 10194.54334 | -0.56288  | 0.317569 | 0.724224 | 10429.4  | 11857.62 | 14188.2  | 2299.912 | 11274.94 | 11117.19 |
| ENSMUSG000000025583 | 15_Rptor         | 952.0528847 | -0.51977  | 0.317715 | 0.724224 | 1047.651 | 1103.494 | 1213.896 | 259.9556 | 1060.066 | 1027.256 |
| ENSMUSG000000026609 | 15_Ush2a         | 180.5443205 | -0.46439  | 0.317508 | 0.724224 | 196.536  | 204.3826 | 223.2187 | 71.43817 | 195.7218 | 191.9619 |
| ENSMUSG000000030272 | 15_Camk1         | 422.9734421 | -0.26679  | 0.317737 | 0.724224 | 450.7334 | 522.9789 | 411.9191 | 340.3235 | 368.8169 | 443.0689 |
| ENSMUSG000000031851 | 14_Nlpcr         | 367.4067341 | -0.27307  | 0.317522 | 0.724224 | 394.6962 | 377.8501 | 433.7808 | 271.8619 | 337.1394 | 389.112  |
| ENSMUSG000000031875 | 6_Ctnm3          | 383.8098549 | -0.26273  | 0.317653 | 0.724224 | 452.3576 | 449.9851 | 353.2379 | 333.3781 | 325.8259 | 388.0744 |
| ENSMUSG000000035666 | 14_Gtf3c4        | 1229.04656  | 0.22673   | 0.317612 | 0.724224 | 1112.621 | 1139.562 | 1146.01  | 1493.256 | 1262.576 | 1220.255 |
| ENSMUSG000000032202 | 11_Rab27a        | 1761.570248 | 0.32089   |          |          |          |          |          |          |          |          |

|                      |                 |             |           |          |          |          |          |          |          |          |           |
|----------------------|-----------------|-------------|-----------|----------|----------|----------|----------|----------|----------|----------|-----------|
| ENSMUSG00000096850   | 1_Gm21748       | 1.541941168 | -1.83347  | 0.320157 | 0.726913 | 3.248529 | 1.7175   | 2.301224 | 1.984394 | 0        | 0         |
| ENSMUSG00000014771   | 12_Pdd2         | 347.3676402 | 0.330494  | 0.320358 | 0.726959 | 324.8529 | 269.6476 | 329.0751 | 525.8643 | 309.9872 | 324.7748  |
| ENSMUSG000000025494  | 7_Sigir         | 122.1069683 | -0.58737  | 0.320292 | 0.726959 | 155.9294 | 129.6713 | 154.182  | 25.79712 | 17.6594  | 149.119   |
| ENSMUSG000000027082  | 15_Tfpi         | 278.3938561 | 0.476688  | 0.320396 | 0.726959 | 255.8216 | 255.0488 | 187.5498 | 548.6848 | 74.2264  | 249.0317  |
| ENSMUSG000000027460  | 7_Angp4         | 24.94099463 | -0.71055  | 0.320323 | 0.726959 | 21.92757 | 42.07876 | 28.7653  | 3.968787 | 24.89948 | 28.01607  |
| ENSMUSG000000073680  | 2_Tmem89b       | 12.38123044 | 0.695181  | 0.320322 | 0.726959 | 8.933454 | 14.59875 | 4.602448 | 19.84394 | 16.9701  | 9.336899  |
| ENSMUSG000000104063  | 1_Pcdhgb7       | 71.85440613 | -0.38557  | 0.320383 | 0.726959 | 57.66138 | 83.29877 | 103.5551 | 64.49279 | 71.27443 | 50.84397  |
| ENSMUSG000000031107  | 6_RbmX2         | 158.1589388 | 0.321384  | 0.320491 | 0.727091 | 144.5595 | 121.0838 | 156.4832 | 214.3145 | 177.6204 | 134.8922  |
| ENSMUSG000000005823  | 8_Gpr108        | 1465.996185 | -0.50821  | 0.320537 | 0.727112 | 1602.337 | 1652.235 | 1910.016 | 417.7149 | 1655.151 | 1558.523  |
| ENSMUSG000000004929  | 12_Thop1        | 10.0065929  | -0.73273  | 0.320649 | 0.727134 | 498.6492 | 557.3289 | 670.8069 | 38.69568 | 157.0224 | 483.5365  |
| ENSMUSG000000018820  | 13_Zfyve27      | 874.9949092 | -0.41967  | 0.320797 | 0.727134 | 952.631  | 1046.817 | 1004.484 | 361.1596 | 908.4661 | 976.4118  |
| ENSMUSG000000028671  | 16_Gale         | 1059.204582 | -0.71587  | 0.320615 | 0.727134 | 1202.768 | 1179.064 | 1568.284 | 99.21968 | 1218.453 | 1087.438  |
| ENSMUSG000000032839  | 13_Trpc1        | 70.3684748  | 0.489708  | 0.320867 | 0.727134 | 63.34631 | 69.55877 | 42.57265 | 133.9466 | 58.82969 | 53.95687  |
| ENSMUSG000000033644  | 4_PiwiI2        | 16.9741188  | 0.561352  | 0.320875 | 0.727134 | 12.99411 | 15.4575  | 12.65673 | 26.78931 | 21.49546 | 12.45158  |
| ENSMUSG000000034544  | 17_Rsrc1        | 761.6366602 | 0.300217  | 0.320685 | 0.727134 | 655.3907 | 657.8027 | 735.2411 | 1105.307 | 698.0368 | 718.0414  |
| ENSMUSG000000046441  | 5_Cmtr2         | 198.1687256 | 0.30527   | 0.320875 | 0.727134 | 181.1055 | 165.7388 | 185.2485 | 279.7995 | 193.4592 | 183.6609  |
| ENSMUSG000000057948  | 12_Unc13d       | 161.0893513 | -0.66689  | 0.320812 | 0.727134 | 205.4694 | 183.7725 | 203.6583 | 20.83613 | 162.913  | 189.8867  |
| ENSMUSG000000008511  | 3_AscI4         | 0.789603459 | -0.302311 | 0.320753 | 0.727134 | 2.436397 | 0        | 2.301224 | 0        | 0        | 0         |
| ENSMUSG000000046259  | 2_Spr2h         | 4.589532541 | 1.444312  | 0.320916 | 0.727145 | 1.624264 | 3.435001 | 2.301224 | 0        | 18.1014  | 2.075264  |
| ENSMUSG000000006469  | 13_Slc34a3      | 2.26267381  | -1.62811  | 0.321072 | 0.727168 | 2.436397 | 4.293751 | 3.451836 | 0        | 3.39402  | 0         |
| ENSMUSG000000024854  | 3_Pold4         | 374.0450727 | -0.63495  | 0.321023 | 0.727168 | 457.2304 | 419.9289 | 487.8595 | 56.55522 | 436.6973 | 385.9991  |
| ENSMUSG000000031779  | 3_Cd22          | 13.45021639 | 0.679715  | 0.32105  | 0.727168 | 8.933454 | 9.446252 | 12.65673 | 8.929771 | 28.2835  | 12.45158  |
| ENSMUSG000000070319  | 5_Elf3g         | 1717.824269 | -0.4013   | 0.321048 | 0.727168 | 1805.37  | 1890.109 | 2170.054 | 764.9837 | 1880.287 | 1796.141  |
| ENSMUSG000000022957  | 19_Itns1        | 1014.793613 | -0.24212  | 0.32115  | 0.727178 | 1045.214 | 1226.295 | 1027.497 | 826.4999 | 927.6989 | 1035.557  |
| ENSMUSG000000080268  | 3_Brms1         | 695.9903756 | -0.59593  | 0.321119 | 0.727178 | 794.2653 | 741.9602 | 976.8697 | 130.97   | 768.1799 | 763.6972  |
| ENSMUSG000000029428  | 13_Stx2         | 287.8767777 | -0.3157   | 0.321225 | 0.727184 | 309.4224 | 323.7488 | 324.4726 | 180.5798 | 271.5216 | 317.5154  |
| ENSMUSG0000000049728 | 14_Zfp668       | 156.0804497 | -0.29768  | 0.321203 | 0.727184 | 154.3051 | 166.5975 | 195.6041 | 115.0948 | 160.6503 | 144.2309  |
| ENSMUSG000000045248  | 5_Med26         | 242.5443002 | -0.37769  | 0.321414 | 0.727527 | 237.1426 | 282.5288 | 302.611  | 124.0246 | 256.8142 | 252.1446  |
| ENSMUSG000000026269  | 14_RnppeI1      | 1776.643328 | -0.57337  | 0.321513 | 0.727586 | 1988.912 | 1956.233 | 2430.093 | 370.0894 | 2023.967 | 1890.566  |
| ENSMUSG000000027646  | 15_Src          | 2903.36845  | -0.59163  | 0.321501 | 0.727586 | 3145.388 | 3219.455 | 4106.535 | 552.6536 | 3209.612 | 3186.568  |
| ENSMUSG000000018931  | 3_Natd1         | 720.7505955 | -0.43404  | 0.321561 | 0.727613 | 742.2888 | 857.8915 | 884.8207 | 286.7449 | 707.0876 | 845.6701  |
| ENSMUSG000000023010  | 14_Tmbim6       | 15109.15604 | -0.31182  | 0.321606 | 0.727613 | 14322.76 | 16506.9  | 19377.46 | 9618.356 | 16127.25 | 14702.21  |
| ENSMUSG0000000106943 | 1_Snora26       | 123.4941414 | 0.332012  | 0.321634 | 0.727613 | 125.8805 | 109.92   | 92.04897 | 166.6891 | 106.346  | 140.0803  |
| ENSMUSG000000030432  | 12_Rpl28        | 9198.797682 | -0.6565   | 0.321683 | 0.727642 | 10530.11 | 10850.31 | 12388.64 | 1195.597 | 1076.67  | 10049.47  |
| ENSMUSG000000006411  | 12_Pvrl4        | 9899.15152  | -0.42689  | 0.321947 | 0.727734 | 10106.17 | 10553.18 | 13400.03 | 4051.14  | 10107.21 | 10317.18  |
| ENSMUSG000000021906  | 13_Oxnad1       | 560.3884692 | 0.260276  | 0.321859 | 0.727734 | 493.7764 | 501.5101 | 535.0346 | 712.3973 | 501.1837 | 618.4287  |
| ENSMUSG000000036095  | 10_Dgk          | 8.734260522 | 0.868742  | 0.321928 | 0.727734 | 4.872793 | 6.870002 | 6.903673 | 22.82053 | 6.788041 | 14.50528  |
| ENSMUSG0000000446694 | 6_Fam46b        | 1741.744075 | -0.5099   | 0.32202  | 0.727734 | 1846.789 | 1772.46  | 2519.841 | 510.9814 | 2023.967 | 1776.426  |
| ENSMUSG0000000503070 | 4_Ch25h         | 139.0854221 | 0.290068  | 0.322053 | 0.727734 | 115.3228 | 113.355  | 147.2783 | 166.6891 | 153.8623 | 138.0051  |
| ENSMUSG000000052752  | 15_Traf7        | 2229.309246 | -0.51164  | 0.322037 | 0.727734 | 2494.87  | 2565.946 | 2800.59  | 616.1542 | 2551.172 | 2347.124  |
| ENSMUSG000000067261  | 4_Foxd3         | 5.479199549 | -0.86895  | 0.322002 | 0.727734 | 4.872793 | 9.446252 | 6.903673 | 2.97659  | 4.52536  | 4.150528  |
| ENSMUSG000000094690  | 1_1600014C23Rik | 1.031284764 | 2.422904  | 0.32188  | 0.727734 | 0.812132 | 0        | 0        | 0        | 2.26268  | 3.112896  |
| ENSMUSG000000097234  | 1_Gm26518       | 14.0408103  | 0.704587  | 0.321949 | 0.727734 | 9.745586 | 12.0225  | 10.35551 | 31.7503  | 7.919381 | 12.45158  |
| ENSMUSG000000072214  | 6_Sept5         | 3637.558848 | -0.57925  | 0.322092 | 0.72774  | 3939.653 | 4218.181 | 4916.566 | 730.2569 | 3793.383 | 4227.313  |
| ENSMUSG000000020198  | 7_Ap3d1         | 3077.330084 | -0.46984  | 0.322268 | 0.727743 | 3330.554 | 3602.457 | 3788.966 | 1023.947 | 3512.811 | 3205.245  |
| ENSMUSG000000031698  | 14_Mylk3        | 2.444976456 | -1.38975  | 0.322229 | 0.727743 | 4.060661 | 4.293751 | 2.301224 | 2.97659  | 0        | 1.037632  |
| ENSMUSG000000057246  | 14_BC051142     | 7.118757407 | -0.79666  | 0.322165 | 0.727743 | 7.30919  | 12.88125 | 6.903673 | 4.960984 | 3.39402  | 7.263424  |
| ENSMUSG000000075271  | 4_Ttc30a1       | 167.402421  | 0.389781  | 0.322264 | 0.727743 | 155.1172 | 138.2588 | 141.5253 | 285.7527 | 143.6802 | 140.0803  |
| ENSMUSG000000108206  | 1_RP24-92L16    | 1.14673828  | -2.36518  | 0.322276 | 0.727743 | 2.436397 | 0        | 3.451836 | 0.992197 | 0        | 0         |
| ENSMUSG000000025020  | 11_Slit1        | 13.54501012 | -0.78469  | 0.322315 | 0.727748 | 12.99411 | 15.4575  | 23.01224 | 1.984394 | 10.18206 | 17.63975  |
| ENSMUSG000000001018  | 15_Snapin       | 949.5830683 | 0.330618  | 0.322451 | 0.727807 | 847.0539 | 841.5752 | 835.3444 | 1472.42  | 769.3113 | 931.7936  |
| ENSMUSG000000021175  | 15_Cdca7l       | 359.2425114 | 0.297942  | 0.322429 | 0.727807 | 288.3069 | 266.2126 | 413.0697 | 430.6134 | 398.2317 | 359.0207  |
| ENSMUSG000000034379  | 8_Wdr5b         | 16.1205214  | 0.375088  | 0.322379 | 0.727807 | 151.0566 | 161.445  | 108.1575 | 254.0024 | 143.6802 | 148.3814  |
| ENSMUSG000000025978  | 14_Rftn2        | 109.058938  | -0.31049  | 0.322511 | 0.727861 | 128.3169 | 131.3888 | 102.4045 | 112.1182 | 82.58783 | 97.53741  |
| ENSMUSG000000027778  | 15_Iff80        | 491.0671493 | 0.374661  | 0.322578 | 0.72793  | 436.115  | 429.3751 | 417.6722 | 825.5078 | 367.885  | 470.0473  |
| ENSMUSG000000030890  | 15_Ilk          | 1301.413477 | -0.35034  | 0.322662 | 0.728037 | 1342.454 | 1559.49  | 1473.934 | 714.3817 | 1198.089 | 1520.131  |
| ENSMUSG000000074182  | 8_Znhit6        | 613.0730302 | 0.262001  | 0.322706 | 0.728052 | 519.7646 | 577.9389 | 575.3061 | 799.7106 | 563.4074 | 642.2942  |
| ENSMUSG000000028524  | 21_Sgip1        | 215.7614756 | 0.366786  | 0.322926 | 0.728467 | 176.2327 | 218.9813 | 170.2906 | 344.2923 | 173.095  | 211.6769  |
| ENSMUSG000000049339  | 16_Fam134a      | 1773.786634 | -0.48614  | 0.322989 | 0.728526 | 1952.366 | 2038.673 | 2218.38  | 551.6614 | 1802.225 | 2079.415  |
| ENSMUSG000000001415  | 10_Smg5         | 2166.765283 | -0.44937  | 0.32552  | 0.72859  | 2247.982 | 2432.839 | 2823.602 | 798.7184 | 2581.718 | 2115.732  |
| ENSMUSG000000003808  | 18_Farsa        | 974.8053413 | -0.47961  | 0.324666 | 0.72859  | 1061.457 | 1023.63  | 1320.903 | 318.4952 | 1143.785 | 980.5623  |
| ENSMUSG000000008730  | 17_Hipk1        | 6044.988351 | 0.265629  | 0.324499 | 0.72859  | 5239.065 | 5510.6   | 5720.843 | 8264.999 | 5813.957 | 5720.466  |
| ENSMUSG000000009293  | 17_Ube2g2       | 1642.37209  | -0.39319  | 0.325516 | 0.72859  | 1797.249 | 1821.409 | 1975.601 | 736.21   | 187.467  | 1745.297  |
| ENSMUSG000000017386  | 10_Traf4        | 711.0655911 | -0.58675  | 0.32536  | 0.72859  | 723.6098 | 775.4515 | 1062.015 | 140.8919 | 760.2656 | 804.1649  |
| ENSMUSG000000017756  | 8_Slc12a7       | 577.1419729 | -0.40602  | 0.325217 | 0.72859  | 628.5903 | 654.3677 | 690.3673 | 249.0414 | 607.5296 | 632.9556  |
| ENSMUSG000000018599  | 5_Mief2         | 235.5993042 | -0.56729  | 0.32456  | 0.72859  | 263.943  | 294.5513 | 285.3518 | 50.60204 | 254.5515 | 264.5962  |
| ENSMUSG000000020333  | 17_AscI6        | 281.8202838 | -0.47353  | 0.325066 | 0.72859  | 422.3087 | 371.8388 | 188.7004 | 360.1674 | 141.4175 | 206.4888  |
| ENSMUSG000000020755  | 9_Sap30bp       | 772.5973785 | -0.33624  | 0.325203 | 0.72859  | 866.545  | 792.6265 | 927.3934 | 433.59   | 612.3022 | 803.1272  |
| ENSMUSG000000020827  | 18_Mink1        | 5534.165896 | -0.48736  | 0.326038 | 0.72859  | 5923.692 | 6299.792 | 7156.807 | 1684.75  | 8109.237 | 6030.1718 |
| ENSMUSG000000021239  | 12_Vsx2         | 75.02491362 | -0.48605  | 0.32333  | 0.72859  | 64.15844 | 137.4    | 60.98244 | 59.53181 | 42.99092 | 85.0853   |
| ENSMUSG000000021540  | 16_Smad5        | 2306.132856 | 0.296223  | 0.325342 | 0.72859  | 2083.119 | 2155.463 | 1972.149 | 3365.532 | 2029.624 | 2230.909  |
| ENSMUSG000000021728  | 7_Emb           | 769.434741  | 0.455798  | 0.324619 | 0.72859  | 708.1793 | 668.9664 | 569.553  | 1529.967 | 583.7715 | 556.1708  |
| ENSMUSG000000021738  | 4_Atnx7         | 1201.396265 | 0.284533  | 0.323397 | 0.72859  | 1101.251 | 1020.195 | 1128.75  | 1693.68  | 1182.25  | 1082.25   |
| ENSMUSG000000022037  | 14_Clu          | 13018.58779 | -0.46449  | 0.325961 | 0.72859  | 12955.13 | 16664.91 | 15669.04 | 4506.558 | 15696.21 | 12619.68  |
| ENSMUSG000000022130  | 9_Tgds          | 383.4936918 | 0.267536  | 0.3259   | 0.72859  | 369.5201 | 337.4888 | 337.1293 | 508.997  |          |           |

|                     |                  |              |          |          |          |          |          |          |          |          |          |
|---------------------|------------------|--------------|----------|----------|----------|----------|----------|----------|----------|----------|----------|
| ENSMUSG000000038801 | 6_Scgb1c1        | 7.174866953  | -0.94935 | 0.323894 | 0.72859  | 11.36985 | 11.16375 | 5.753061 | 0.992197 | 3.39402  | 10.37632 |
| ENSMUSG000000039463 | 14_Slc9a8        | 1064.627064  | -0.41195 | 0.324008 | 0.72859  | 1135.361 | 1213.414 | 1297.89  | 448.473  | 1158.492 | 1134.132 |
| ENSMUSG000000039607 | 15_Rbms3         | 287.7636474  | 0.538403 | 0.325204 | 0.72859  | 228.2091 | 255.0488 | 220.9175 | 651.8733 | 164.0443 | 206.4888 |
| ENSMUSG000000039910 | 9_Cited2         | 1036.79662   | 0.386194 | 0.325941 | 0.72859  | 887.6605 | 950.6365 | 858.3566 | 1810.759 | 942.4063 | 770.9606 |
| ENSMUSG000000040498 | 6_Igslf23        | 1.062520776  | 2.465211 | 0.325014 | 0.72859  | 0.812132 | 0        | 0        | 0        | 4.52536  | 1.037632 |
| ENSMUSG000000040731 | 13_Elf4h         | 7897.550622  | -0.29793 | 0.326212 | 0.72859  | 8355.216 | 8171.008 | 9604.159 | 5011.586 | 8308.562 | 7934.772 |
| ENSMUSG000000041301 | 15_Cftr          | 63.5926359   | 0.445926 | 0.324682 | 0.72859  | 55.22499 | 52.38376 | 54.07877 | 115.0948 | 49.77896 | 54.9945  |
| ENSMUSG000000041923 | 15_Nol4          | 16.74652586  | -0.53892 | 0.326127 | 0.72859  | 15.43051 | 22.32751 | 21.86163 | 11.90636 | 11.3134  | 17.63975 |
| ENSMUSG000000044060 | 17_A830010M20Rik | 116.207706   | 0.414953 | 0.325807 | 0.72859  | 116.947  | 91.02752 | 90.89636 | 198.4394 | 83.71917 | 116.2148 |
| ENSMUSG000000044067 | 6_Gpr22          | 1.349331636  | 2.805286 | 0.324962 | 0.72859  | 0        | 0        | 1.150612 | 6.945378 | 0        | 0        |
| ENSMUSG000000044068 | 6_Zrsr1          | 357.2649734  | 0.322789 | 0.325235 | 0.72859  | 348.4047 | 322.0313 | 281.9    | 532.8097 | 307.7245 | 350.7196 |
| ENSMUSG000000044390 | 4_Tigd3          | 14.47461222  | -0.80763 | 0.323839 | 0.72859  | 12.18198 | 15.4575  | 27.61469 | 1.984394 | 19.23278 | 10.37632 |
| ENSMUSG000000044442 | 11_N6amt1        | 412.2975898  | 0.27166  | 0.324974 | 0.72859  | 414.1874 | 372.6976 | 333.6775 | 541.7395 | 414.0705 | 397.4131 |
| ENSMUSG000000047423 | 9_Al837181       | 587.3193632  | -0.62966 | 0.325048 | 0.72859  | 613.1598 | 750.5477 | 776.6632 | 89.29771 | 617.7117 | 676.5361 |
| ENSMUSG000000048534 | 6_Amica1         | 131.5118368  | 0.516249 | 0.323291 | 0.72859  | 151.0566 | 68.70002 | 104.7057 | 126.009  | 254.5515 | 84.0482  |
| ENSMUSG000000048965 | 8_Mrgpre         | 71.14152895  | -0.38662 | 0.325752 | 0.72859  | 80.40109 | 97.89753 | 63.28367 | 46.63325 | 57.69835 | 80.9353  |
| ENSMUSG000000049109 | 14_Themis        | 2.650289613  | 1.451356 | 0.325263 | 0.72859  | 3.248529 | 0.85875  | 0        | 3.968787 | 6.788041 | 1.037632 |
| ENSMUSG000000052920 | 14_Prkg1         | 326.8268274  | 0.463281 | 0.325662 | 0.72859  | 289.1191 | 283.3876 | 251.9841 | 650.8811 | 271.6919 | 277.8972 |
| ENSMUSG000000053654 | 7_Krt42          | 1.749713897  | -1.93257 | 0.324663 | 0.72859  | 0        | 2.576251 | 5.753061 | 0        | 1.13134  | 1.037632 |
| ENSMUSG000000054499 | 9_Dedd2          | 923.4222097  | -0.46295 | 0.324294 | 0.72859  | 1008.668 | 1009.032 | 1193.185 | 318.4952 | 967.2958 | 1043.858 |
| ENSMUSG000000055435 | 6_Maf            | 367.8679593  | 0.45455  | 0.324535 | 0.72859  | 311.8588 | 334.0538 | 285.3518 | 727.2803 | 272.653  | 276.0101 |
| ENSMUSG000000055932 | 14_Fto           | 1310.492328  | -0.29887 | 0.325685 | 0.72859  | 1366.006 | 1546.609 | 1424.458 | 835.4297 | 1263.707 | 1426.144 |
| ENSMUSG000000059555 | 6_Tor4a          | 810.4037698  | -0.47313 | 0.325092 | 0.72859  | 883.5998 | 923.1565 | 1019.442 | 264.9165 | 902.8094 | 868.498  |
| ENSMUSG000000061315 | 13_Naca          | 11594.9098   | 0.234832 | 0.324663 | 0.72859  | 10756.69 | 10010.45 | 11193.15 | 14589.26 | 11776.12 | 11243.78 |
| ENSMUSG000000061601 | 15_Pc1o          | 168.9306494  | 0.365305 | 0.324597 | 0.72859  | 159.1779 | 160.5863 | 123.1155 | 261.94   | 132.3668 | 176.3975 |
| ENSMUSG000000062040 | 14_Zfp27         | 151.8480189  | -0.27923 | 0.324568 | 0.72859  | 166.4871 | 170.8913 | 162.2363 | 146.8451 | 113.134  | 151.4943 |
| ENSMUSG000000068580 | 11_Zfyve19       | 446.3740808  | -0.50895 | 0.324071 | 0.72859  | 490.5278 | 498.9339 | 583.3603 | 127.0012 | 462.7181 | 515.7031 |
| ENSMUSG000000070337 | 4_Gpr179         | 67.23652909  | -0.45018 | 0.325694 | 0.72859  | 77.15256 | 101.3325 | 54.07877 | 33.73469 | 64.48639 | 72.63424 |
| ENSMUSG000000071083 | 1_Gm10311        | 14.71668279  | 0.898776 | 0.323861 | 0.72859  | 5.684925 | 13.74    | 11.50612 | 40.68007 | 13.57608 | 3.12896  |
| ENSMUSG000000071550 | 13_Clfap44       | 2.163195524  | 1.344586 | 0.324341 | 0.72859  | 0.812132 | 1.7175   | 1.150612 | 4.960984 | 2.26268  | 2.075624 |
| ENSMUSG000000073207 | 1_Ccdc160        | 2.114157612  | 1.437168 | 0.326273 | 0.72859  | 2.436397 | 0.85875  | 0        | 2.97659  | 2.26268  | 4.150528 |
| ENSMUSG000000073982 | 10_Rhog          | 1136.112735  | -0.52648 | 0.325189 | 0.72859  | 1270.987 | 1286.408 | 1465.88  | 292.6981 | 1353.083 | 1147.621 |
| ENSMUSG000000075023 | 11_Accsl         | 0.613374122  | -2.66429 | 0.326165 | 0.72859  | 0.812132 | 1.7175   | 1.150612 | 0        | 0        | 0        |
| ENSMUSG000000078518 | 1_Gm13030        | 10.62617071  | 0.719574 | 0.325803 | 0.72859  | 5.684925 | 10.305   | 8.054285 | 5.953181 | 19.03278 | 14.52685 |
| ENSMUSG000000087523 | 1_Gm12319        | 12.37769829  | -0.6714  | 0.323437 | 0.72859  | 12.99411 | 12.0225  | 20.71102 | 4.960984 | 9.520721 | 14.52685 |
| ENSMUSG000000091119 | 1_Ccdc152        | 4.986707052  | 1.101052 | 0.323371 | 0.72859  | 1.624264 | 3.435001 | 4.602448 | 14.88295 | 2.26268  | 3.112896 |
| ENSMUSG000000094825 | 8_Gm3194         | 8.598798515  | 0.804185 | 0.323906 | 0.72859  | 8.121322 | 6.011252 | 4.602448 | 19.84394 | 6.225761 | 6.225792 |
| ENSMUSG000000096146 | 1_Kcnj11         | 4.947597031  | -1.57077 | 0.326226 | 0.72859  | 3.248529 | 18.8925  | 0        | 0        | 3.39402  | 4.150528 |
| ENSMUSG000000096188 | 1_Cmtm4          | 2258.797454  | 0.225117 | 0.323627 | 0.72859  | 2020.585 | 2122.831 | 2105.62  | 2737.471 | 2163.122 | 2403.156 |
| ENSMUSG000000108213 | 1_RP244-49MM4    | 3.582504899  | 1.34469  | 0.325483 | 0.72859  | 0.812132 | 5.152501 | 0        | 8.929771 | 4.52536  | 2.075624 |
| ENSMUSG000000108308 | 1_RP23-292C5     | 3.912454597  | -1.20283 | 0.324448 | 0.72859  | 3.248529 | 8.587502 | 4.602448 | 4.960984 | 0        | 4.52536  |
| ENSMUSG000000032292 | 8_Nr2e3          | 49.97498663  | -0.73254 | 0.326342 | 0.728641 | 95.8316  | 77.28752 | 13.80735 | 48.61764 | 49.77896 | 14.52685 |
| ENSMUSG000000084843 | 1_B230312C02Rik  | 2.904165207  | -1.28126 | 0.326369 | 0.728641 | 4.060661 | 6.011252 | 2.301224 | 2.97659  | 0        | 2.075624 |
| ENSMUSG000000078905 | 8_Gm14393        | 8.51022017   | 1.941207 | 0.326453 | 0.728747 | 0        | 3.435001 | 0        | 8.929771 | 4.52536  | 0        |
| ENSMUSG000000002767 | 13_Mrlp2         | 437.510692   | -0.50624 | 0.326776 | 0.728897 | 471.0367 | 503.2276 | 566.1012 | 124.0246 | 486.4762 | 474.1979 |
| ENSMUSG000000020847 | 15_Rph3al        | 66.1546338   | -0.42273 | 0.326731 | 0.728897 | 69.03124 | 83.29877 | 74.78979 | 31.7503  | 75.79979 | 62.25928 |
| ENSMUSG000000027655 | 14_Dhx3          | 383.1379152  | -0.37617 | 0.326768 | 0.728897 | 401.1933 | 417.3526 | 479.8052 | 188.5174 | 407.2824 | 404.6765 |
| ENSMUSG000000028708 | 16_Mknk1         | 506.3810112  | -0.3256  | 0.326661 | 0.728897 | 563.6197 | 553.0351 | 573.0048 | 292.6981 | 521.5478 | 534.3805 |
| ENSMUSG000000035049 | 3_Rrp12          | 565.7198649  | -0.53051 | 0.326651 | 0.728897 | 583.923  | 620.8764 | 800.826  | 150.8139 | 713.8756 | 524.0042 |
| ENSMUSG000000058046 | 1_4933430117Rik  | 4.706609773  | 0.959857 | 0.326723 | 0.728897 | 5.684925 | 2.576251 | 1.150612 | 6.945378 | 5.656701 | 6.225792 |
| ENSMUSG000000097581 | 1_Gm21936        | 1.062717908  | 2.45487  | 0.326591 | 0.728897 | 0        | 0.85875  | 0        | 0.992197 | 4.52536  | 0        |
| ENSMUSG000000008384 | 8_Sertad1        | 715.0880135  | -0.54594 | 0.32685  | 0.728901 | 804.0109 | 771.1577 | 971.1166 | 167.6813 | 819.0902 | 757.4714 |
| ENSMUSG000000033379 | 13_Atp6v0b       | 2233.599985  | -0.3686  | 0.326851 | 0.728901 | 2485.937 | 2410.512 | 2655.613 | 1094.393 | 2301.146 | 2454     |
| ENSMUSG000000030872 | 14_Gga2          | 1151.757646  | -0.29612 | 0.327041 | 0.729243 | 1213.325 | 1420.373 | 1174.775 | 805.6638 | 966.1644 | 1330.244 |
| ENSMUSG000000014075 | 15_Tctex1d2      | 338.1180163  | 0.390605 | 0.327114 | 0.729324 | 311.8588 | 297.9863 | 268.0926 | 591.3493 | 264.7336 | 294.6875 |
| ENSMUSG000000069089 | 7_Cdk7           | 767.4789637  | 0.314601 | 0.327256 | 0.729559 | 723.6098 | 632.8989 | 696.1203 | 1154.917 | 659.5713 | 737.7564 |
| ENSMUSG000000027412 | 12_Lpin3         | 618.2843143  | -0.49772 | 0.32746  | 0.72964  | 674.8818 | 705.0339 | 791.6211 | 180.5798 | 705.9562 | 651.6329 |
| ENSMUSG000000028434 | 12_Epb414b       | 2173.414464  | 0.239036 | 0.327601 | 0.72964  | 1970.233 | 1901.273 | 2110.223 | 2763.268 | 2100.899 | 2194.952 |
| ENSMUSG000000029474 | 7_Rnf34          | 907.5897144  | 0.21994  | 0.327578 | 0.72964  | 830.8112 | 814.0952 | 871.0134 | 1080.502 | 927.6989 | 921.4173 |
| ENSMUSG000000033955 | 12_Tnks1bp1      | 6248.720896  | -0.58624 | 0.327594 | 0.72964  | 6732.576 | 6901.776 | 8868.918 | 1180.714 | 7022.228 | 6786.114 |
| ENSMUSG000000040225 | 15_Prrc2c        | 6468.169948  | 0.232658 | 0.327519 | 0.72964  | 5596.403 | 5707.254 | 6540.079 | 7840.339 | 6976.974 | 6147.97  |
| ENSMUSG000000042808 | 7_Gpx2           | 96.29185289  | -0.60055 | 0.327622 | 0.72964  | 116.947  | 95.32127 | 135.7722 | 18.85174 | 115.3967 | 95.46215 |
| ENSMUSG000000047222 | 6_Rnase2a        | 1.054948234  | 2.454916 | 0.327436 | 0.72964  | 0.812132 | 0        | 0        | 0.992197 | 4.52536  | 0        |
| ENSMUSG000000054582 | 4_Pabpc1         | 18.16595536  | -0.61986 | 0.327593 | 0.72964  | 12.18198 | 30.91501 | 23.01224 | 10.91416 | 10.18206 | 21.79027 |
| ENSMUSG000000102336 | 1_Gm37233        | 37.19374451  | 0.463228 | 0.327364 | 0.72964  | 25.98823 | 36.92626 | 31.06653 | 60.52401 | 27.15216 | 41.50528 |
| ENSMUSG000000025162 | 17_Csnk1d        | 3834.8111005 | -0.35241 | 0.327678 | 0.729683 | 4004.624 | 4248.237 | 4649.624 | 1995.308 | 4120.341 | 3990.733 |
| ENSMUSG000000004264 | 17_Phb2          | 1490.413147  | -0.434   | 0.327776 | 0.729775 | 1608.022 | 1596.417 | 1934.179 | 580.4351 | 1760.365 | 1463.061 |
| ENSMUSG000000019989 | 7_Enpp3          | 5818.559938  | 0.22343  | 0.327865 | 0.729775 | 5256.119 | 5204.885 | 5646.054 | 7130.919 | 5963.294 | 5710.089 |
| ENSMUSG000000031813 | 7_Mvb12a         | 805.0016313  | -0.64569 | 0.327819 | 0.729775 | 884.4119 | 960.9415 | 1101.136 | 108.1495 | 889.2333 | 886.1378 |
| ENSMUSG000000061759 | 15_Armt1         | 501.9394611  | 0.248671 | 0.327864 | 0.729775 | 453.1698 | 441.3976 | 482.1065 | 639.9669 | 512.4971 | 482.4989 |
| ENSMUSG000000035228 | 14_Ccdc106       | 12.77337173  | -0.82664 | 0.327938 | 0.729854 | 17.86691 | 24.04501 | 6.903673 | 1.984394 | 11.3134  | 14.52685 |
| ENSMUSG000000004542 | 15_Psg19         | 7.436489668  | 0.845308 | 0.328873 | 0.729894 | 5.684925 | 3.435001 | 6.903673 | 11.90636 | 13.57608 | 3.112896 |
| ENSMUSG000000005958 | 14_Ephb3         | 3357.685279  | -0.63756 | 0.328221 | 0.729894 | 3612.364 | 3881.551 | 4769.287 | 473.2779 | 3782.07  | 3627.562 |
| ENSMUSG000000007591 | 14_Tssk4         | 15.54538968  | -0.6088  | 0.329221 | 0.729894 | 16.24264 | 17.175   | 23.01224 | 6.945378 | 10.18206 | 19.71501 |
| ENSMUSG000000009079 | 15_Zfp949        | 6010.683255  | -0.26826 | 0.329334 | 0.729894 | 6211.187 | 6166.685 | 7325.947 | 4222.79  | 6129.601 | 6007.89  |
| ENSMUSG000000018559 | 16_Ews           |              |          |          |          |          |          |          |          |          |          |

|                     |                  |             |          |          |          |          |          |          |          |          |          |
|---------------------|------------------|-------------|----------|----------|----------|----------|----------|----------|----------|----------|----------|
| ENSMUSG00000097387  | 1_4930563E18Rik  | 0.731036187 | 3.089575 | 0.329309 | 0.729894 | 0        | 0        | 0        | 0.992197 | 3.39402  | 0        |
| ENSMUSG00000100596  | 1_Gm29502        | 1.016336812 | 2.391494 | 0.3285   | 0.729894 | 0        | 0.85875  | 0        | 2.97659  | 2.26268  | 0        |
| ENSMUSG00000060416  | 2_Gm839          | 1.008567138 | 2.391492 | 0.329437 | 0.73001  | 0.812132 | 0        | 0        | 2.97659  | 2.26268  | 0        |
| ENSMUSG00000029221  | 15_Slc30a9       | 1347.047661 | 0.309557 | 0.329491 | 0.730019 | 1207.641 | 1183.358 | 1218.498 | 2040.949 | 1185.644 | 1246.196 |
| ENSMUSG00000054459  | 6_Vsnl1          | 1023.834307 | 0.319703 | 0.329514 | 0.730019 | 968.8737 | 798.6377 | 965.3636 | 1556.757 | 903.9407 | 949.4333 |
| ENSMUSG00000012405  | 15_Rpl15         | 10470.82759 | -0.38622 | 0.329595 | 0.73005  | 11802.72 | 11404.2  | 12385.19 | 4742.701 | 10892.54 | 11597.61 |
| ENSMUSG00000025512  | 14_Chid1         | 840.8740483 | -0.37434 | 0.329682 | 0.73005  | 960.7524 | 917.1452 | 969.966  | 401.8397 | 919.7795 | 875.7615 |
| ENSMUSG00000031657  | 16_Heatr3        | 951.5928823 | 0.272601 | 0.329677 | 0.73005  | 894.9697 | 851.0215 | 839.9468 | 1311.684 | 954.851  | 857.0841 |
| ENSMUSG00000033257  | 14_Tll4          | 1262.008944 | 0.232384 | 0.329649 | 0.73005  | 1130.488 | 1076.873 | 1274.878 | 1524.014 | 1337.244 | 1228.556 |
| ENSMUSG00000072714  | 1_Rpl21-ps4      | 166.2927696 | -0.63459 | 0.329712 | 0.73005  | 170.5478 | 206.1001 | 230.1224 | 24.80492 | 186.6711 | 179.5103 |
| ENSMUSG00000021313  | 15_Ryr2          | 31.1976983  | 0.607201 | 0.329969 | 0.730294 | 26.80036 | 26.62126 | 20.71102 | 64.49279 | 35.07154 | 13.48922 |
| ENSMUSG00000022332  | 7_Khdrbs3        | 186.3684189 | 0.312434 | 0.329891 | 0.730294 | 140.4989 | 191.5013 | 166.8388 | 234.1584 | 228.5307 | 156.6824 |
| ENSMUSG00000028064  | 17_Sema4a        | 3413.771401 | -0.46971 | 0.329934 | 0.730294 | 3678.147 | 3757.032 | 4458.622 | 1112.253 | 3838.637 | 3637.938 |
| ENSMUSG00000028826  | 14_Tmem57        | 1321.498517 | 0.253311 | 0.329923 | 0.730294 | 1221.447 | 1166.183 | 1230.004 | 1726.422 | 1192.432 | 1392.502 |
| ENSMUSG00000006235  | 5_Epor           | 6.588951473 | -0.90194 | 0.330243 | 0.730304 | 6.497057 | 11.16375 | 8.054285 | 0.992197 | 4.52536  | 8.301057 |
| ENSMUSG00000015467  | 14_Egfl8         | 25.47403623 | -0.73379 | 0.330707 | 0.730304 | 31.67315 | 36.06751 | 27.61469 | 2.97659  | 19.23278 | 35.27949 |
| ENSMUSG00000017588  | 2_Krt27          | 0.605604448 | -2.64836 | 0.330183 | 0.730304 | 1.624264 | 0.85875  | 1.150612 | 0        | 0        | 0        |
| ENSMUSG00000022442  | 15_Tll1          | 277.5962066 | -0.49139 | 0.330389 | 0.730304 | 319.9801 | 319.4551 | 333.6775 | 83.34453 | 288.4917 | 320.6283 |
| ENSMUSG00000029550  | 11_Spp33         | 2801.219414 | -0.25995 | 0.330559 | 0.730304 | 2701.152 | 3011.637 | 3446.083 | 2077.66  | 2878.129 | 2692.655 |
| ENSMUSG00000030219  | 13_Erp27         | 14.92561157 | 0.716129 | 0.330387 | 0.730304 | 12.99411 | 17.175   | 3.451836 | 28.77371 | 14.70742 | 12.45158 |
| ENSMUSG00000031641  | 13_Cbr4          | 494.2245848 | 0.341291 | 0.330062 | 0.730304 | 428.8058 | 404.4714 | 475.2028 | 788.7965 | 433.3033 | 343.7678 |
| ENSMUSG00000031782  | 14_Coq9          | 646.6473411 | -0.37135 | 0.33069  | 0.730304 | 716.3006 | 734.2314 | 737.5424 | 313.5342 | 655.0459 | 723.2295 |
| ENSMUSG00000031983  | 6_2310022B05Rik  | 3023.803909 | -0.33975 | 0.33005  | 0.730304 | 3061.738 | 3216.02  | 3856.852 | 1684.75  | 3358.949 | 2964.515 |
| ENSMUSG00000033585  | 4_Cox8a          | 2105.888999 | -0.33895 | 0.330641 | 0.730304 | 2364.117 | 2309.179 | 2382.918 | 1132.097 | 2201.588 | 2245.436 |
| ENSMUSG00000037594  | 10_BC022687      | 243.4286179 | -0.40825 | 0.330642 | 0.730304 | 257.4459 | 291.1163 | 284.2012 | 105.1729 | 259.0769 | 263.5585 |
| ENSMUSG00000047824  | 13_Pygo2         | 1143.52163  | -0.32715 | 0.330546 | 0.730304 | 1200.331 | 1283.832 | 1333.559 | 647.9045 | 1223.979 | 1172.524 |
| ENSMUSG00000061559  | 15_Wdr61         | 1329.836205 | 0.294992 | 0.330612 | 0.730304 | 1251.496 | 1098.342 | 1233.456 | 1934.784 | 1272.889 | 1187.051 |
| ENSMUSG00000064308  | 10_2410137M14Rik | 0.605604448 | -2.64836 | 0.330183 | 0.730304 | 1.624264 | 0.85875  | 1.150612 | 0        | 0        | 0        |
| ENSMUSG00000073409  | 12_H2-Q6         | 2102.429588 | 0.364308 | 0.330606 | 0.730304 | 1868.716 | 1261.504 | 2385.219 | 1825.642 | 3147.388 | 2126.108 |
| ENSMUSG00000085395  | 1_Gm13056        | 21.264192   | -0.71045 | 0.330434 | 0.730304 | 25.1761  | 20.61001 | 33.36775 | 2.97659  | 22.6268  | 22.82791 |
| ENSMUSG00000086147  | 2_Gm13150        | 1.041316989 | 2.359435 | 0.330543 | 0.730304 | 0        | 0        | 1.150612 | 1.984394 | 0        | 3.12896  |
| ENSMUSG00000087220  | 1_Gm11377        | 0.605604448 | -2.64836 | 0.330183 | 0.730304 | 1.624264 | 0.85875  | 1.150612 | 0        | 0        | 0        |
| ENSMUSG00000093930  | 1_Hmgcs1         | 15572.45378 | 0.318018 | 0.330651 | 0.730304 | 13819.24 | 12335.95 | 15434.31 | 23721.44 | 14767.38 | 13356.4  |
| ENSMUSG00000097007  | 1_4930432B10Rik  | 1.854428561 | 1.557967 | 0.330363 | 0.730304 | 0        | 1.7175   | 1.150612 | 2.97659  | 1.13304  | 4.150528 |
| ENSMUSG00000020583  | 4_Matn3          | 25.2217428  | -0.68813 | 0.330796 | 0.730304 | 16.24264 | 60.97127 | 16.10857 | 28.77371 | 14.70742 | 14.52685 |
| ENSMUSG00000061928  | 6_Dsg1b          | 2222.294178 | 0.239336 | 0.330765 | 0.730304 | 2005.154 | 1847.172 | 2263.254 | 2668.017 | 2469.715 | 2080.452 |
| ENSMUSG00000004896  | 16_Rrnad1        | 391.08099   | -0.24523 | 0.331052 | 0.730638 | 431.2422 | 419.0701 | 422.2746 | 303.6122 | 367.8855 | 402.6012 |
| ENSMUSG00000029111  | 7_Nelfa          | 569.7219677 | -0.40503 | 0.331078 | 0.730638 | 603.4142 | 629.4639 | 714.5301 | 245.0726 | 631.2878 | 594.5632 |
| ENSMUSG000000334807 | 8_Colgal11       | 1557.420932 | -0.27008 | 0.331024 | 0.730638 | 1671.368 | 1638.495 | 1798.407 | 1069.588 | 1638.495 | 1628.045 |
| ENSMUSG00000040263  | 16_Klhdcd4       | 534.9708256 | -0.48771 | 0.331024 | 0.730638 | 589.608  | 552.1764 | 731.7893 | 164.7047 | 576.9835 | 594.5632 |
| ENSMUSG00000020023  | 17_Tmcc3         | 2188.893122 | 0.213675 | 0.331227 | 0.730725 | 2058.755 | 1990.583 | 2031.981 | 2566.813 | 2374.683 | 2110.544 |
| ENSMUSG00000038994  | 6_Hlis1          | 1.144594202 | -2.33477 | 0.331183 | 0.730725 | 0        | 3.435001 | 2.301224 | 0        | 1.13134  | 0        |
| ENSMUSG00000073418  | 4_C4b            | 2940.830164 | -0.39709 | 0.331225 | 0.730725 | 3208.734 | 3983.742 | 2836.259 | 1360.302 | 2806.855 | 3449.089 |
| ENSMUSG00000014786  | 7_Slc9a5         | 37.75644485 | -0.58703 | 0.331617 | 0.730857 | 34.92168 | 58.39502 | 42.57265 | 9.921968 | 35.07154 | 45.65581 |
| ENSMUSG00000022240  | 9_Ctnd2          | 52.61874088 | -0.47119 | 0.331531 | 0.730857 | 52.78859 | 93.60377 | 36.81959 | 45.64105 | 33.9402  | 52.91924 |
| ENSMUSG00000024033  | 9_Rsp1           | 66.2316248  | -0.49232 | 0.331539 | 0.730857 | 88.52241 | 72.13502 | 71.33795 | 22.82053 | 80.32515 | 62.25792 |
| ENSMUSG00000027954  | 9_Efna1          | 988.8220782 | -0.42131 | 0.331591 | 0.730857 | 1096.378 | 1063.133 | 1236.908 | 394.8943 | 1126.815 | 1014.804 |
| ENSMUSG00000043456  | 16_Zfp536        | 68.21751321 | -0.41365 | 0.331532 | 0.730857 | 73.0919  | 106.485  | 54.07877 | 71.43817 | 42.99092 | 61.22029 |
| ENSMUSG00000074060  | 10_Fbxw15        | 1.952486272 | -1.51473 | 0.33155  | 0.730857 | 3.248529 | 4.293751 | 1.150612 | 1.984394 | 0        | 1.037632 |
| ENSMUSG00000084918  | 1_Gm12708        | 0.707845639 | 0.348033 | 0.331607 | 0.730857 | 0        | 0        | 1.984394 | 2.26268  | 0        | 0        |
| ENSMUSG00000087194  | 9_Skint6         | 7.383770475 | 0.916004 | 0.331411 | 0.730857 | 4.060661 | 3.435001 | 8.054285 | 18.85174 | 6.788041 | 3.112896 |
| ENSMUSG00000099364  | 1_5730419F03Rik  | 0.707845639 | 0.348033 | 0.331607 | 0.730857 | 0        | 0        | 1.984394 | 2.26268  | 0        | 0        |
| ENSMUSG00000033237  | 18_Arid2         | 1933.607452 | 0.302453 | 0.331667 | 0.730865 | 1729.029 | 1701.184 | 1765.039 | 2897.215 | 1715.112 | 1794.066 |
| ENSMUSG00000033530  | 7_Tic7b          | 464.6895833 | -0.24141 | 0.331707 | 0.730865 | 480.7822 | 518.6851 | 510.8718 | 361.1596 | 455.9301 | 460.7086 |
| ENSMUSG00000048799  | 7_Cep120         | 700.033927  | 0.258917 | 0.331731 | 0.730865 | 653.7664 | 620.0177 | 638.5897 | 926.7118 | 630.8131 | 725.3048 |
| ENSMUSG00000021131  | 13_Erh           | 2013.436984 | 0.225953 | 0.331812 | 0.730938 | 1926.378 | 1691.738 | 1950.288 | 2292.967 | 237.934  | 1911.318 |
| ENSMUSG00000092586  | 8_Ly6g6c         | 6297.310359 | -0.38779 | 0.331837 | 0.730938 | 6951.851 | 6555.699 | 7908.157 | 2857.527 | 6522.176 | 6988.452 |
| ENSMUSG00000037259  | 10_Dzank1        | 112.5709383 | 0.458263 | 0.331951 | 0.731107 | 108.0136 | 107.3438 | 69.03673 | 204.3925 | 73.53711 | 113.1019 |
| ENSMUSG00000000794  | 9_Konn3          | 74.54243937 | 0.558569 | 0.332312 | 0.731128 | 72.27976 | 77.28752 | 31.06653 | 146.8451 | 42.99092 | 76.78477 |
| ENSMUSG00000010021  | 13_Kir19a        | 5.085024768 | -1.07443 | 0.332049 | 0.731128 | 5.684925 | 6.870002 | 8.054285 | 0        | 6.788041 | 3.112896 |
| ENSMUSG00000015568  | 15_Lpl           | 563.2405682 | 0.448792 | 0.332262 | 0.731128 | 492.9642 | 638.9102 | 296.8579 | 1017.002 | 461.5868 | 472.1226 |
| ENSMUSG00000021768  | 15_Dusp13        | 10.10429704 | -0.67458 | 0.332132 | 0.731128 | 12.18198 | 14.59875 | 10.35551 | 3.968787 | 10.18206 | 9.338689 |
| ENSMUSG00000021891  | 7_Mett16         | 461.5287253 | 0.319922 | 0.332328 | 0.731128 | 390.6356 | 384.7201 | 456.793  | 699.4988 | 402.7571 | 434.7678 |
| ENSMUSG00000042594  | 16_Sh2b3         | 833.640445  | -0.27837 | 0.332105 | 0.731128 | 901.4667 | 842.434  | 997.5807 | 568.5288 | 820.2216 | 871.6109 |
| ENSMUSG00000042660  | 7_Wdr55          | 352.8335893 | -0.35033 | 0.332257 | 0.731128 | 370.3323 | 378.7088 | 437.2326 | 193.4784 | 407.2284 | 329.967  |
| ENSMUSG00000056055  | 13_Sag           | 420.8381757 | -0.57084 | 0.332317 | 0.731128 | 727.6704 | 579.6564 | 201.3571 | 386.9568 | 483.0822 | 146.3061 |
| ENSMUSG00000073838  | 10_Tufm          | 1103.439995 | -0.53837 | 0.332298 | 0.731128 | 1245.811 | 1280.397 | 1394.542 | 256.797  | 1394.542 | 1148.659 |
| ENSMUSG00000097021  | 7_4933433G15Rik  | 3.32302334  | -1.10517 | 0.332304 | 0.731128 | 3.248529 | 6.870002 | 3.451836 | 0.992197 | 2.26268  | 3.112896 |
| ENSMUSG00000036197  | 15_Gxylt1        | 845.2018551 | 0.330544 | 0.332377 | 0.731156 | 800.7623 | 688.7177 | 757.1028 | 1329.544 | 774.968  | 720.1167 |
| ENSMUSG00000033250  | 8_Glc            | 1761.437923 | 0.284738 | 0.332426 | 0.731184 | 1624.264 | 1545.75  | 1594.748 | 2529.11  | 1565.775 | 1708.98  |
| ENSMUSG00000011127  | 12_Araf          | 1864.673051 | -0.2346  | 0.333892 | 0.731185 | 1922.317 | 2053.272 | 2072.252 | 1446.623 | 1749.052 | 1944.522 |
| ENSMUSG00000005469  | 9_Prkaca         | 1437.843459 | -0.32375 | 0.332663 | 0.731185 | 1538.99  | 1621.32  | 1635.02  | 815.5858 | 1487.712 | 1528.433 |
| ENSMUSG00000007207  | 10_Stx1a         | 65.4378506  | -0.83877 | 0.333138 | 0.731185 | 75.52829 | 84.15752 | 92.04897 | 1.984394 | 73.53711 | 65.37082 |
| ENSMUSG00000019461  | 12_Plscr3        | 1990.147121 | -0.50466 | 0.332854 | 0.731185 | 2096.925 | 2150.311 | 2756.867 | 555.6302 | 2258.155 | 2122.995 |
| ENSMUSG00000020099  | 7_Unc5b          | 812.7964816 | -0.46786 | 0.332658 | 0.731185 | 773.1498 | 961.8002 | 1095.383 | 277.8151 | 795.3321 | 973.2989 |
| ENSMUSG00000021097  | 14_Clmm          | 686.380836  | -0.27259 | 0.334005 | 0.731185 | 752.8465 | 7        |          |          |          |          |

|                      |                  |             |          |          |          |          |          |          |          |          |          |
|----------------------|------------------|-------------|----------|----------|----------|----------|----------|----------|----------|----------|----------|
| ENSMUSG00000070044   | 15_Fam149a       | 209.4819868 | -0.24671 | 0.332684 | 0.731185 | 247.7003 | 225.8513 | 208.2608 | 190.5018 | 183.2771 | 201.3006 |
| ENSMUSG00000073771   | 11_Btbd19        | 89.74944982 | -0.29062 | 0.33357  | 0.731185 | 102.3287 | 103.9088 | 89.74774 | 75.40696 | 88.24453 | 78.86004 |
| ENSMUSG00000078876   | 10_Gm14408       | 0.992196815 | 3.542151 | 0.333121 | 0.731185 | 0        | 0        | 0        | 5.953181 | 0        | 0        |
| ENSMUSG00000079049   | 8_Serpinb1c      | 29.13666758 | 0.435226 | 0.333756 | 0.731185 | 25.1761  | 20.61001 | 28.7653  | 32.74249 | 26.02082 | 41.50528 |
| ENSMUSG00000096688   | 1_Mup17          | 0.992196815 | 3.542151 | 0.333121 | 0.731185 | 0        | 0        | 0        | 5.953181 | 0        | 0        |
| ENSMUSG00000098183   | 1_Gm27010        | 16.37733122 | 0.601138 | 0.332904 | 0.731185 | 16.24264 | 6.870002 | 16.10857 | 26.78931 | 13.57608 | 18.67738 |
| ENSMUSG00000091736   | 3_Yy2            | 72.43049125 | 0.530591 | 0.33416  | 0.731444 | 65.78271 | 42.07876 | 70.18734 | 152.7983 | 49.77896 | 53.95687 |
| ENSMUSG00000005320   | 9_Fgfr4          | 4.630859661 | -0.97627 | 0.334367 | 0.731816 | 9.745586 | 5.152501 | 3.451836 | 1.984394 | 2.26268  | 5.18816  |
| ENSMUSG000000002341  | 8_Ncan           | 15.21832546 | 0.626582 | 0.334473 | 0.731967 | 14.61838 | 12.0225  | 9.204897 | 28.77371 | 9.050721 | 17.63975 |
| ENSMUSG000000016346  | 17_Kcnq2         | 7.767736309 | -0.84149 | 0.334769 | 0.732454 | 9.745586 | 15.4575  | 4.602448 | 7.937575 | 6.788041 | 2.075264 |
| ENSMUSG000000052276  | 8_Ostn           | 5.322958276 | 1.019461 | 0.334754 | 0.732454 | 2.436397 | 6.870002 | 1.150612 | 12.89856 | 3.39402  | 5.18816  |
| ENSMUSG000000006360  | 11_Crip1         | 1812.300663 | -0.64955 | 0.334978 | 0.732591 | 2243.109 | 1994.877 | 2402.478 | 223.2443 | 2012.654 | 1997.442 |
| ENSMUSG000000017428  | 16_Psmid11       | 2502.701945 | 0.223201 | 0.334971 | 0.732591 | 2273.97  | 2178.649 | 2476.117 | 2868.441 | 2865.684 | 2353.35  |
| ENSMUSG0000000019188 | 16_H13           | 1368.202229 | -0.36138 | 0.334913 | 0.732591 | 1460.214 | 1504.53  | 1651.128 | 679.6548 | 1515.996 | 1397.69  |
| ENSMUSG000000050394  | 14_Armcx6        | 78.75502659 | -0.42232 | 0.334952 | 0.732591 | 66.59484 | 138.2588 | 65.58489 | 66.47719 | 58.82969 | 76.78477 |
| ENSMUSG000000024082  | 4_Ndufaf7        | 412.3223234 | 0.229781 | 0.33506  | 0.732633 | 373.5808 | 378.7088 | 386.6057 | 498.0828 | 408.4138 | 428.542  |
| ENSMUSG000000047495  | 15_Dlgap2        | 1.610809799 | -1.91039 | 0.335108 | 0.732633 | 1.624264 | 6.011252 | 0        | 0.992197 | 0        | 1.037632 |
| ENSMUSG0000000097472 | 1_Gm26586        | 9.636280887 | 0.73167  | 0.335086 | 0.732633 | 8.933454 | 2.576251 | 10.35551 | 11.90636 | 14.70742 | 9.338689 |
| ENSMUSG000000002249  | 17_Tead3         | 1389.672381 | -0.54457 | 0.33593  | 0.732783 | 1425.292 | 1623.897 | 1897.359 | 313.5342 | 1620.079 | 1457.873 |
| ENSMUSG000000002949  | 14_Timn44        | 911.6458998 | -0.26011 | 0.335877 | 0.732783 | 1007.044 | 926.5915 | 1047.057 | 653.8577 | 961.6391 | 873.6862 |
| ENSMUSG000000006205  | 13_Htra1         | 1596.459373 | -0.36929 | 0.335737 | 0.732783 | 1733.902 | 1963.103 | 1701.755 | 767.9603 | 1682.303 | 1729.733 |
| ENSMUSG000000025321  | 14_Igfb8         | 424.5602897 | 0.631701 | 0.33603  | 0.732783 | 384.1385 | 421.6464 | 193.3028 | 1082.487 | 199.1159 | 266.6714 |
| ENSMUSG000000026259  | 14_Ngef          | 1036.210558 | -0.47856 | 0.335849 | 0.732783 | 1153.228 | 1142.997 | 1323.204 | 316.5108 | 1122.289 | 1159.035 |
| ENSMUSG000000026712  | 3_Mrc1           | 416.1286735 | 0.411195 | 0.336078 | 0.732783 | 380.89   | 401.8951 | 288.8036 | 757.0462 | 349.5841 | 318.535  |
| ENSMUSG0000000031150 | 12_Ccdc120       | 1051.997278 | -0.31018 | 0.335623 | 0.732783 | 1056.584 | 1078.59  | 1358.873 | 653.8577 | 1109.845 | 1054.234 |
| ENSMUSG000000034968  | 3_Lbx2           | 0.970311811 | -0.06635 | 0.335988 | 0.732783 | 1.624264 | 0.85875  | 2.301224 | 0        | 0        | 1.037632 |
| ENSMUSG000000040383  | 16_Aqr           | 1835.433849 | 2.06335  | 0.336044 | 0.732783 | 1691.671 | 1591.264 | 1830.624 | 2019.121 | 2006.997 | 1873.926 |
| ENSMUSG000000041828  | 15_Abca8a        | 748.9142547 | 0.532377 | 0.335253 | 0.732783 | 634.2752 | 727.3614 | 475.2028 | 1577.593 | 324.6946 | 754.3585 |
| ENSMUSG0000000597472 | 9_Penk           | 884.6468408 | -0.37266 | 0.336096 | 0.732783 | 896.5939 | 1247.764 | 850.3023 | 534.7941 | 650.5206 | 1127.906 |
| ENSMUSG000000053119  | 11_Chmp3         | 4297.399382 | 0.247953 | 0.335888 | 0.732783 | 3983.508 | 3736.422 | 4067.414 | 5694.218 | 4142.967 | 4159.867 |
| ENSMUSG000000053333  | 15_Disl32        | 650.5425651 | -0.27921 | 0.335842 | 0.732783 | 661.0756 | 686.1414 | 792.7177 | 444.5042 | 638.0758 | 680.6866 |
| ENSMUSG000000053646  | 13_Plxnb1        | 6755.416393 | -0.5156  | 0.336037 | 0.732783 | 7062.301 | 7719.306 | 9067.974 | 1738.329 | 7636.546 | 7308.043 |
| ENSMUSG000000056508  | 5_1700001K19Rik  | 4.091652714 | -1.19265 | 0.335533 | 0.732783 | 3.248529 | 10.305   | 3.451836 | 0        | 3.39402  | 4.150528 |
| ENSMUSG000000056947  | 5_Mab211         | 902.0718647 | -0.23222 | 0.335664 | 0.732783 | 886.8483 | 1089.754 | 946.9538 | 796.734  | 773.8366 | 918.3044 |
| ENSMUSG000000057329  | 7_Bcl2           | 1105.990656 | 0.355526 | 0.335596 | 0.732783 | 952.631  | 949.7777 | 1009.087 | 1851.439 | 877.9199 | 995.0892 |
| ENSMUSG000000060380  | 2_C030014I23Rik  | 98.62895338 | -0.44173 | 0.335898 | 0.732783 | 128.3169 | 109.92   | 102.4045 | 41.67227 | 85.98185 | 123.4782 |
| ENSMUSG000000064179  | 13_Tnt1          | 27.13002328 | -0.49224 | 0.335886 | 0.732783 | 26.80036 | 31.77376 | 36.81959 | 23.81272 | 12.44474 | 31.12896 |
| ENSMUSG000000066042  | 4_Medf18         | 91.2479408  | -0.29614 | 0.335448 | 0.732783 | 94.20733 | 114.2138 | 93.19958 | 76.39915 | 79.19381 | 90.27399 |
| ENSMUSG000000079055  | 10_Slc8a3        | 45.07295444 | 0.448481 | 0.335291 | 0.732783 | 41.41874 | 42.93751 | 29.91591 | 64.49279 | 29.41484 | 62.5792  |
| ENSMUSG000000097504  | 1_4930516B21Rik  | 24.76819021 | -0.44462 | 0.335446 | 0.732783 | 25.1761  | 31.77376 | 28.7653  | 18.85174 | 18.10144 | 25.9408  |
| ENSMUSG000000102887  | 1_Gm10857        | 0.970311811 | -0.06635 | 0.335988 | 0.732783 | 1.624264 | 0.85875  | 2.301224 | 0        | 0        | 1.037632 |
| ENSMUSG000000103310  | 1_Pcdha12        | 6.784867449 | -1.08061 | 0.336016 | 0.732783 | 11.36985 | 9.446252 | 6.903673 | 10.91416 | 0        | 2.075264 |
| ENSMUSG000000104301  | 3_Wdr49          | 3.364205006 | 1.069501 | 0.335746 | 0.732783 | 0.812132 | 3.435001 | 2.301224 | 4.960984 | 4.52536  | 4.150528 |
| ENSMUSG000000026177  | 11_Slc11a1       | 103.5398627 | -0.43008 | 0.336416 | 0.733383 | 132.3775 | 130.53   | 93.19958 | 52.58643 | 135.7608 | 76.78477 |
| ENSMUSG000000072049  | 5_Vmn2r121       | 0.992673342 | 2.359212 | 0.336445 | 0.733383 | 0        | 0.85875  | 0        | 1.984394 | 0        | 3.112896 |
| ENSMUSG000000038762  | 15_Abci1         | 2369.496986 | -0.42968 | 0.336493 | 0.733407 | 2459.136 | 2589.991 | 3110.105 | 902.8991 | 2591.9   | 2562.951 |
| ENSMUSG000000006273  | 14_Atp6b1b2      | 5214.455211 | 0.216916 | 0.336813 | 0.733463 | 4635.65  | 4644.98  | 5189.261 | 6001.799 | 5847.897 | 4967.145 |
| ENSMUSG000000013562  | 12_4833413E03Rik | 0.962739269 | -2.06641 | 0.336766 | 0.733463 | 1.624264 | 0.85875  | 2.301224 | 0.992197 | 0        | 0        |
| ENSMUSG000000021235  | 13_Coq6          | 333.701507  | -0.45148 | 0.336684 | 0.733463 | 399.569  | 370.1213 | 386.6057 | 116.087  | 355.2408 | 374.5852 |
| ENSMUSG000000021569  | 9_Trip13         | 242.0433771 | 0.334684 | 0.336805 | 0.733463 | 205.4694 | 186.3488 | 250.8334 | 343.3001 | 280.5723 | 185.7361 |
| ENSMUSG000000028334  | 10_Nans          | 1538.142134 | -0.45204 | 0.33674  | 0.733463 | 1681.926 | 1707.195 | 1942.233 | 525.8643 | 1733.213 | 1638.421 |
| ENSMUSG000000035048  | 13_Anapc13       | 666.9125549 | -0.45111 | 0.336665 | 0.733463 | 780.459  | 744.5364 | 785.8681 | 230.1897 | 682.1981 | 778.224  |
| ENSMUSG000000036377  | 18_C530008M17Rik | 16.4166864  | -0.5601  | 0.336665 | 0.733463 | 17.86691 | 25.76251 | 14.95796 | 9.921968 | 11.3134  | 18.67738 |
| ENSMUSG000000038900  | 17_Rpl12         | 12428.08911 | -0.29004 | 0.336608 | 0.733463 | 13727.47 | 12374.86 | 14317.07 | 7851.253 | 12375.73 | 13322.16 |
| ENSMUSG000000001039  | 12_B9d1          | 161.5655891 | -0.49888 | 0.336902 | 0.733496 | 187.6025 | 192.36   | 187.5498 | 46.63325 | 167.4383 | 187.8114 |
| ENSMUSG0000000043432 | 7_Leng9          | 208.7801814 | -0.38381 | 0.336866 | 0.733496 | 224.9606 | 261.9188 | 222.0681 | 100.2119 | 205.9039 | 237.6177 |
| ENSMUSG000000038980  | 1_Rbbp9nl        | 131.7668767 | -0.62034 | 0.336989 | 0.733605 | 159.99   | 131.3888 | 187.5498 | 20.83613 | 141.4175 | 149.419  |
| ENSMUSG0000000097397 | 1_Gm16861        | 41.29285346 | -0.48701 | 0.337033 | 0.73362  | 40.60661 | 46.37251 | 57.53061 | 18.85174 | 54.30432 | 30.09133 |
| ENSMUSG000000030980  | 16_Knop1         | 1981.028774 | 0.228771 | 0.33707  | 0.733622 | 1824.049 | 1714.924 | 1934.179 | 2403.101 | 2160.86  | 1849.06  |
| ENSMUSG000000020950  | 10_Foxg1         | 8.999114261 | 0.764785 | 0.33715  | 0.733714 | 9.745586 | 7.728752 | 2.301224 | 16.86735 | 9.050721 | 8.301057 |
| ENSMUSG000000034731  | 9_Dgkh           | 180.0581233 | 0.264907 | 0.337225 | 0.733717 | 166.4871 | 149.4225 | 174.893  | 195.4628 | 202.874  | 171.2093 |
| ENSMUSG000000055301  | 8_Adh7           | 7516.547551 | 0.301662 | 0.337188 | 0.733717 | 6791.861 | 6164.968 | 7244.254 | 11113.6  | 6272.15  | 7512.456 |
| ENSMUSG000000000167  | 14_Pih1d2        | 48.04791305 | 0.378739 | 0.337609 | 0.733802 | 39.79448 | 38.64376 | 47.1751  | 70.44597 | 48.64762 | 43.58055 |
| ENSMUSG000000010095  | 13_Slc3a2        | 3068.284764 | -0.32411 | 0.337737 | 0.733802 | 3226.601 | 3546.638 | 3461.041 | 1717.493 | 3266.179 | 3191.756 |
| ENSMUSG000000015342  | 6_Xk             | 83.01797381 | 0.451274 | 0.337581 | 0.733802 | 73.0919  | 69.55877 | 67.88611 | 158.7515 | 64.48639 | 64.33319 |
| ENSMUSG000000019505  | 7_Ubb            | 20626.40322 | -0.57346 | 0.337395 | 0.733802 | 23891.3  | 24059.6  | 26067.12 | 3832.856 | 22333.2  | 22674.34 |
| ENSMUSG000000022382  | 14_Wnt7b         | 1667.711507 | -0.48044 | 0.337511 | 0.733802 | 1677.865 | 1854.042 | 2296.622 | 513.958  | 1800.469 | 1773.313 |
| ENSMUSG000000025495  | 14_Pldss2        | 972.3585628 | -0.30673 | 0.337356 | 0.733802 | 977.8071 | 1066.568 | 1181.679 | 599.2869 | 939.0123 | 1069.799 |
| ENSMUSG000000027654  | 2_Fam83d         | 121.4682101 | -0.39665 | 0.337723 | 0.733802 | 129.9411 | 135.6825 | 148.429  | 56.55522 | 135.7608 | 122.4406 |
| ENSMUSG000000032258  | 15_Lca5          | 147.8375439 | 0.323088 | 0.337509 | 0.733802 | 137.2503 | 134.8238 | 121.9649 | 218.2833 | 147.0742 | 127.6827 |
| ENSMUSG000000037712  | 15_Fermt2        | 578.3181137 | 0.385285 | 0.337649 | 0.733802 | 516.5161 | 614.0064 | 373.9489 | 969.3768 | 462.7181 | 533.3429 |
| ENSMUSG000000039515  | 11_Ppp2r4        | 3136.070743 | -0.46788 | 0.337692 | 0.733802 | 3479.174 | 3591.293 | 3849.948 | 987.2358 | 3547.883 | 3360.89  |
| ENSMUSG000000040405  | 18_Havcr1        | 1.82932991  | 1.728619 | 0.337594 | 0.733802 | 2.436397 | 0        | 0.97659  | 4.52536  | 1.037632 | 0        |
| ENSMUSG000000040591  | 18_1110051M20Rik | 251.3331626 | -0.28277 | 0.337518 | 0.733802 | 282.622  | 248.1788 | 296.8579 | 175.6188 | 243.2381 | 261.4833 |
| ENSMUSG000000056293  | 12_Gsdmc2        | 1.323108788 | 2.755131 | 0.337743 | 0.733802 | 0        | 0        | 1.150612 | 0        | 0        |          |

|                      |                  |             |          |          |          |          |          |          |          |          |          |
|----------------------|------------------|-------------|----------|----------|----------|----------|----------|----------|----------|----------|----------|
| ENSMUSG00000020741   | 17_Cluh          | 1456.791852 | -0.49358 | 0.33972  | 0.735451 | 1533.306 | 1739.828 | 1837.528 | 407.7929 | 1583.876 | 1638.421 |
| ENSMUSG00000002221   | 11_Paxip1        | 607.596272  | -0.30389 | 0.339801 | 0.735467 | 651.33   | 645.7802 | 716.8313 | 371.0816 | 649.3892 | 611.1653 |
| ENSMUSG000000022754  | 5_Tmem45a        | 184.4085205 | 0.377282 | 0.339801 | 0.735467 | 179.4812 | 154.575  | 147.2783 | 313.5342 | 153.8623 | 157.7201 |
| ENSMUSG000000035139  | 14_Seisb2p       | 653.0093651 | -0.25135 | 0.33984  | 0.735472 | 635.8995 | 714.4802 | 778.9644 | 496.0984 | 673.1474 | 619.4663 |
| ENSMUSG000000021974  | 14_Fg9           | 22.77945905 | 0.246227 | 0.339911 | 0.735545 | 21.92757 | 14.59875 | 17.25918 | 47.62545 | 24.88948 | 10.37391 |
| ENSMUSG000000071369  | 10_Map3k5        | 1742.019283 | 0.218334 | 0.33995  | 0.735549 | 1524.372 | 1568.937 | 1738.575 | 2079.645 | 1718.506 | 1822.082 |
| ENSMUSG000000058441  | 7_Panx2          | 8.106783259 | -0.89437 | 0.339992 | 0.73556  | 13.80625 | 5.152501 | 12.65673 | 0.992197 | 5.856701 | 10.37632 |
| ENSMUSG000000047040  | 9_Prr15l         | 144.4104336 | -0.37314 | 0.340053 | 0.735612 | 154.3051 | 166.5975 | 167.9894 | 75.40696 | 127.8414 | 174.3222 |
| ENSMUSG000000025204  | 10_Ndufb8        | 1518.725636 | -0.37175 | 0.340136 | 0.735702 | 1744.46  | 1676.28  | 1719.014 | 708.4285 | 1600.846 | 1663.324 |
| ENSMUSG000000036620  | 14_Mgat4b        | 697.8168193 | -0.4267  | 0.340168 | 0.735702 | 753.6587 | 851.8802 | 795.073  | 263.9244 | 741.0278 | 781.3369 |
| ENSMUSG000000002396  | 8_Ocel1          | 433.7810057 | -0.46074 | 0.340368 | 0.735716 | 463.7275 | 484.3351 | 559.1975 | 144.8607 | 514.7597 | 435.8055 |
| ENSMUSG000000003033  | 14_Ap1m1         | 655.494491  | -0.52537 | 0.340404 | 0.735716 | 758.5315 | 770.2989 | 791.6211 | 156.7671 | 776.0993 | 679.649  |
| ENSMUSG000000024754  | 12_Tmem2         | 2145.675709 | 0.216615 | 0.340285 | 0.735716 | 1852.473 | 1900.414 | 2202.272 | 2390.202 | 2410.886 | 217.807  |
| ENSMUSG000000027536  | 6_Chmp4c         | 5458.410395 | 0.26787  | 0.340287 | 0.735716 | 4827.314 | 4498.134 | 5534.444 | 7489.102 | 5214.347 | 5187.123 |
| ENSMUSG000000054312  | 6_Mrps21         | 639.2630126 | -0.40879 | 0.340226 | 0.735716 | 680.5668 | 694.7289 | 812.3321 | 263.9244 | 661.834  | 722.1919 |
| ENSMUSG000000098374  | 1_Gm28043        | 769.5386913 | 0.211417 | 0.340433 | 0.735716 | 661.8877 | 705.0339 | 773.2113 | 801.695  | 847.3737 | 828.0304 |
| ENSMUSG000000100071  | 1_Gm28707        | 1.941683631 | 1.530811 | 0.340362 | 0.735716 | 0.812132 | 0        | 2.301224 | 0.992197 | 3.39402  | 4.150528 |
| ENSMUSG000000022701  | 17_2610015P09Rik | 356.5516172 | 0.298567 | 0.340864 | 0.735769 | 319.1679 | 305.7151 | 334.8281 | 495.1062 | 283.9664 | 400.526  |
| ENSMUSG000000024924  | 14_Vldlr         | 675.7232937 | 0.432084 | 0.340795 | 0.735769 | 653.7664 | 583.0914 | 489.0101 | 1251.16  | 403.8884 | 673.4232 |
| ENSMUSG000000029151  | 14_Slc30a3       | 2.414678062 | -1.34032 | 0.340779 | 0.735769 | 2.436397 | 3.435001 | 4.602448 | 2.97659  | 0        | 1.037632 |
| ENSMUSG000000038845  | 11_Phb           | 2091.868044 | -0.47152 | 0.340787 | 0.735769 | 2368.177 | 2280.841 | 2642.956 | 643.9357 | 2391.653 | 2223.646 |
| ENSMUSG000000042564  | 12_Fam227a       | 36.76889487 | 0.404305 | 0.340734 | 0.735769 | 27.61249 | 35.20876 | 32.21714 | 52.58643 | 41.85958 | 31.12896 |
| ENSMUSG000000044807  | 13_Zfp354c       | 202.3365163 | 0.54997  | 0.340546 | 0.735769 | 154.3051 | 219.8401 | 118.513  | 447.4808 | 99.55793 | 174.3222 |
| ENSMUSG000000046402  | 10_Rbp1          | 1820.230756 | -0.51931 | 0.340709 | 0.735769 | 2338.129 | 1829.138 | 2265.555 | 467.3247 | 2335.086 | 1686.152 |
| ENSMUSG000000049285  | 4_Mblac1         | 52.41090359 | -0.4681  | 0.340839 | 0.735769 | 43.04301 | 48.94876 | 90.89636 | 30.7581  | 39.5969  | 61.22029 |
| ENSMUSG000000053477  | 15_Tcf4          | 1429.117703 | 0.411927 | 0.340792 | 0.735769 | 1220.635 | 1347.379 | 1111.491 | 2641.228 | 942.4063 | 1311.567 |
| ENSMUSG000000072770  | 9_Acrbp          | 66.71047497 | -0.55081 | 0.34056  | 0.735769 | 78.77682 | 80.72252 | 78.24162 | 15.87515 | 66.74967 | 79.89767 |
| ENSMUSG000000078762  | 10_Haus5         | 160.5191336 | -0.52234 | 0.340627 | 0.735769 | 191.6632 | 159.7275 | 216.3151 | 41.67227 | 174.2264 | 179.5103 |
| ENSMUSG000000001348  | 14_Acp5          | 544.1731529 | -0.5338  | 0.340979 | 0.735802 | 549.8135 | 594.2552 | 787.0187 | 129.9778 | 617.7117 | 586.2621 |
| ENSMUSG000000023004  | 8_Tuba1b         | 19282.62014 | -0.48359 | 0.340926 | 0.735802 | 22574.84 | 21203.4  | 23674.99 | 5566.224 | 22192.37 | 20483.89 |
| ENSMUSG000000048216  | 13_Gpr85         | 4.534805847 | 0.954951 | 0.34099  | 0.735802 | 3.248529 | 2.576251 | 3.451836 | 7.937575 | 7.919381 | 2.075264 |
| ENSMUSG000000022681  | 14_Ntn1          | 583.3915807 | 0.321114 | 0.341154 | 0.735915 | 501.8977 | 505.8039 | 548.842  | 907.8601 | 493.2643 | 542.6816 |
| ENSMUSG000000029551  | 13_Psmg3         | 246.745162  | -0.67464 | 0.341131 | 0.735915 | 295.6161 | 284.2463 | 330.2257 | 25.79712 | 311.1185 | 233.6472 |
| ENSMUSG000000044595  | 10_Dnd1          | 18.88213597 | -0.64292 | 0.341143 | 0.735915 | 16.24264 | 23.18626 | 29.91591 | 22.82053 | 4.52536  | 16.60211 |
| ENSMUSG0000000009905 | 5_Kdsr           | 957.3413993 | 0.354789 | 0.341239 | 0.735941 | 835.684  | 861.3265 | 823.8383 | 1599.421 | 725.189  | 898.5894 |
| ENSMUSG000000035086  | 13_Becn1         | 2281.752421 | 0.197336 | 0.341214 | 0.735941 | 2100.174 | 2065.294 | 2212.627 | 2567.805 | 2412.017 | 2332.597 |
| ENSMUSG000000029553  | 10_Tfec          | 21.89384318 | 0.251589 | 0.341319 | 0.736033 | 20.3033  | 24.04501 | 9.204897 | 28.77371 | 28.2835  | 20.75264 |
| ENSMUSG000000015243  | 4_Abca1          | 995.5571184 | 0.316171 | 0.34164  | 0.736141 | 923.3943 | 992.7153 | 744.446  | 1505.163 | 902.8094 | 904.8152 |
| ENSMUSG000000019027  | 7_Dnah1          | 30.10890088 | -0.54662 | 0.34158  | 0.736141 | 32.48529 | 54.96001 | 19.56041 | 16.86735 | 21.94546 | 35.27949 |
| ENSMUSG000000021501  | 4_Caml           | 435.9931303 | 0.26959  | 0.341702 | 0.736141 | 350.029  | 416.4939 | 419.9734 | 586.3883 | 432.1719 | 410.9023 |
| ENSMUSG000000025229  | 15_Pitx3         | 0.764268833 | -2.98263 | 0.341681 | 0.736141 | 0        | 3.435001 | 1.150612 | 0        | 0        | 0        |
| ENSMUSG000000031862  | 10_Atp13a1       | 1172.759692 | -0.57917 | 0.341465 | 0.736141 | 1280.732 | 1360.26  | 1574.037 | 211.3379 | 1409.65  | 1200.54  |
| ENSMUSG000000031898  | 8_Dpep3          | 1.048889531 | 2.369703 | 0.341572 | 0.736141 | 0        | 0        | 1.150612 | 0.992197 | 0        | 4.150528 |
| ENSMUSG000000039830  | 8_Olig2          | 1.048889531 | 2.369703 | 0.341572 | 0.736141 | 0        | 0        | 1.150612 | 0.992197 | 0        | 4.150528 |
| ENSMUSG000000051378  | 10_Kif18b        | 209.0437768 | -0.49603 | 0.341494 | 0.736141 | 231.4577 | 218.1226 | 284.2012 | 61.5162  | 254.5515 | 204.4135 |
| ENSMUSG000000060743  | 12_H3f3a         | 14048.37205 | 0.261545 | 0.341633 | 0.736141 | 12777.28 | 12238.91 | 13319.49 | 19418.28 | 13089.6  | 13446.67 |
| ENSMUSG000000015766  | 14_Eps8          | 3220.22058  | 0.25789  | 0.341751 | 0.736167 | 2863.578 | 2626.058 | 3310.311 | 4093.804 | 3588.611 | 2838.961 |
| ENSMUSG000000039633  | 6_Lonf1          | 545.6365919 | 0.31984  | 0.341817 | 0.73623  | 500.2734 | 460.2901 | 495.9138 | 823.5234 | 423.1212 | 570.6976 |
| ENSMUSG000000030556  | 12_Lrrc28        | 497.5798427 | 0.22093  | 0.34208  | 0.736718 | 451.5455 | 437.1039 | 490.1608 | 503.0438 | 583.7715 | 519.8537 |
| ENSMUSG000000036661  | 13_Denn3         | 153.9788953 | -0.48625 | 0.342139 | 0.736763 | 166.4871 | 211.2526 | 161.0857 | 47.62545 | 165.1757 | 172.2469 |
| ENSMUSG000000001281  | 9_Iltb7          | 1193.072177 | -0.51085 | 0.342656 | 0.737149 | 1383.061 | 1192.804 | 1630.417 | 309.5654 | 1337.244 | 1305.341 |
| ENSMUSG000000002768  | 7_Mea1           | 1268.627846 | -0.49301 | 0.342964 | 0.737149 | 1417.171 | 1426.384 | 1606.255 | 350.2455 | 1349.689 | 1462.024 |
| ENSMUSG000000005506  | 16_Celf1         | 2796.749403 | 0.251728 | 0.342952 | 0.737149 | 2461.573 | 2565.087 | 2633.751 | 3766.357 | 2750.386 | 2603.419 |
| ENSMUSG000000020432  | 12_Tcn2          | 1904.782363 | -0.50763 | 0.342593 | 0.737149 | 2062.816 | 2345.247 | 2301.224 | 489.153  | 2027.361 | 2202.893 |
| ENSMUSG000000021458  | 16_20101110i1Rik | 758.2127421 | -0.33592 | 0.342527 | 0.737149 | 890.0969 | 832.129  | 815.784  | 407.7929 | 768.1799 | 835.2938 |
| ENSMUSG000000022227  | 4_Mcpt1          | 7.081621003 | 0.736063 | 0.342381 | 0.737149 | 5.684925 | 3.435001 | 6.903673 | 6.945378 | 10.18206 | 9.336899 |
| ENSMUSG000000023018  | 4_Smarcd1        | 432.2000719 | -0.43913 | 0.342968 | 0.737149 | 461.2911 | 524.6964 | 506.2693 | 154.7827 | 461.5868 | 484.5742 |
| ENSMUSG000000026317  | 7_Cln8           | 532.4835289 | -0.24495 | 0.343003 | 0.737149 | 570.9289 | 583.9502 | 577.6073 | 402.8319 | 565.6701 | 493.9129 |
| ENSMUSG000000027439  | 9_Gzf1           | 615.8920917 | 0.331279 | 0.343093 | 0.737149 | 596.105  | 537.5776 | 502.8175 | 980.2905 | 531.7298 | 546.8323 |
| ENSMUSG000000028778  | 15_Hcrr1         | 1.097897499 | -2.29249 | 0.342871 | 0.737149 | 3.248529 | 0        | 2.301224 | 0        | 0        | 1.037632 |
| ENSMUSG000000033039  | 9_Mical1         | 4072.030682 | -0.33304 | 0.342647 | 0.737149 | 4011.933 | 4383.061 | 5224.93  | 2254.271 | 4329.639 | 4228.351 |
| ENSMUSG000000036782  | 13_Klhl13        | 136.1127962 | 0.466528 | 0.342774 | 0.737149 | 108.8257 | 147.705  | 86.29591 | 261.94   | 90.50721 | 121.403  |
| ENSMUSG000000037466  | 13_4930427A07Rik | 227.0705261 | -0.52155 | 0.342835 | 0.737149 | 250.9488 | 244.7438 | 307.2134 | 57.54742 | 272.653  | 229.3167 |
| ENSMUSG000000041986  | 15_Elmod1        | 23.40785771 | 0.667018 | 0.342872 | 0.737149 | 16.24264 | 30.91501 | 6.903673 | 47.62545 | 16.9701  | 21.79027 |
| ENSMUSG000000051396  | 14_Hspa14        | 941.5690492 | 0.218304 | 0.342808 | 0.737149 | 865.7329 | 838.1402 | 907.833  | 1138.05  | 961.6391 | 938.0194 |
| ENSMUSG000000052372  | 10_Illrap11      | 15.63588432 | 0.702975 | 0.343077 | 0.737149 | 12.99411 | 14.59875 | 8.054285 | 37.70348 | 9.050721 | 11.41395 |
| ENSMUSG000000063410  | 7_Slk24          | 5248.77859  | 0.237279 | 0.342573 | 0.737149 | 4548.752 | 4596.031 | 5310.075 | 6639.781 | 5460.979 | 4937.053 |
| ENSMUSG000000064030  | 14_Pym1          | 511.9169815 | -0.56872 | 0.343046 | 0.737149 | 599.3535 | 540.1539 | 694.9697 | 98.22748 | 607.5296 | 531.2676 |
| ENSMUSG000000066438  | 6_Plekhd1        | 8.09835959  | -0.8115  | 0.343095 | 0.737149 | 17.05478 | 10.305   | 3.451836 | 4.960984 | 4.52536  | 8.301057 |
| ENSMUSG000000078652  | 9_Psmc3          | 2521.705463 | 0.23069  | 0.343072 | 0.737149 | 2230.927 | 2225.022 | 2506.033 | 3142.287 | 2651.861 | 2374.102 |
| ENSMUSG000000090588  | 2_Gm9573         | 20992.65343 | -0.51633 | 0.342523 | 0.737149 | 22396.98 | 23548.65 | 28183.09 | 5285.432 | 25681.95 | 20649.92 |
| ENSMUSG000000085658  | 1_Gm15704        | 1.839283477 | 1.544665 | 0.343137 | 0.737159 | 0        | 1.7175   | 1.150612 | 4.960984 | 1.13134  | 2.075624 |
| ENSMUSG000000036896  | 5_C1qc           | 484.9082453 | -0.43193 | 0.343228 | 0.73721  | 618.0326 | 525.5551 | 526.9803 | 183.5564 | 589.4282 | 465.8968 |
| ENSMUSG000000040688  | 16_Tbl3          | 686.9517079 | -0.63236 | 0.343234 | 0.73721  | 804.823  | 792.6265 | 907.833  | 89.29771 | 823.6156 | 703.5145 |
| ENSMUSG000000000782  | 15_Tcf7          | 107.3351429 | -0.29997 | 0.343337 | 0.737343 | 111.     |          |          |          |          |          |

|                     |                 |             |           |          |          |          |          |          |          |          |          |
|---------------------|-----------------|-------------|-----------|----------|----------|----------|----------|----------|----------|----------|----------|
| ENSMUSG00000022526  | 7_Zfp251        | 215.4251883 | -0.25579  | 0.346277 | 0.739792 | 203.033  | 246.4613 | 254.2853 | 196.455  | 176.4891 | 215.8275 |
| ENSMUSG00000024386  | 8_Proc          | 0.676609627 | 2.990962  | 0.345913 | 0.739792 | 0        | 0        | 0        | 1.984394 | 0        | 2.075624 |
| ENSMUSG00000024749  | 8_Tmc1          | 1.930036211 | -1.42468  | 0.346361 | 0.739792 | 2.436397 | 2.576251 | 3.451836 | 1.984394 | 1.13134  | 0        |
| ENSMUSG00000025366  | 7_Esy1t         | 1082.30049  | -0.47869  | 0.345849 | 0.739792 | 1136.985 | 1216.849 | 1426.759 | 319.4874 | 1201.483 | 1192.239 |
| ENSMUSG00000025931  | 15_Paqr8        | 1528.913286 | 0.322848  | 0.345903 | 0.739792 | 1272.611 | 1281.255 | 1522.26  | 2398.14  | 1281.808 | 1417.405 |
| ENSMUSG00000028848  | 13_Gpn2         | 224.0283796 | -0.55894  | 0.346122 | 0.739792 | 271.2521 | 237.0151 | 292.2555 | 45.64105 | 274.9156 | 223.0909 |
| ENSMUSG00000028857  | 16_Tmem222      | 948.9269013 | -0.5287   | 0.346585 | 0.739792 | 1105.312 | 1057.122 | 1200.088 | 215.3067 | 102.1567 | 542.6816 |
| ENSMUSG00000029674  | 13_Limk1        | 230.1280205 | -0.49006  | 0.346515 | 0.739792 | 238.7669 | 262.7776 | 304.9122 | 66.47719 | 243.2381 | 264.5962 |
| ENSMUSG00000030539  | 13_Sema4b       | 2220.03699  | -0.53708  | 0.345697 | 0.739792 | 2250.418 | 2445.721 | 3189.497 | 500.0672 | 2550.041 | 2384.478 |
| ENSMUSG00000031930  | 10_Wvp2         | 2030.023465 | -0.44796  | 0.346547 | 0.739792 | 2132.659 | 2290.287 | 2604.986 | 683.6236 | 2273.994 | 2194.592 |
| ENSMUSG00000032579  | 14_Hemk1        | 301.3711189 | -0.34004  | 0.345583 | 0.739792 | 359.7746 | 334.9126 | 315.2677 | 168.6735 | 272.653  | 356.9454 |
| ENSMUSG00000033099  | 9_Nol12         | 537.5174214 | -0.54496  | 0.346332 | 0.739792 | 602.6021 | 591.6789 | 719.1326 | 115.0948 | 653.9146 | 542.6816 |
| ENSMUSG00000038422  | 2_Hdh3          | 337.9126037 | -0.61231  | 0.3461   | 0.739792 | 387.387  | 421.6464 | 416.5216 | 48.61764 | 375.6049 | 377.6981 |
| ENSMUSG00000039810  | 11_Zc3h10       | 287.492225  | -0.36449  | 0.346333 | 0.739792 | 272.8764 | 319.4551 | 378.5514 | 146.8451 | 303.1991 | 304.0262 |
| ENSMUSG00000040447  | 15_Spns2        | 4246.173051 | -0.44173  | 0.346561 | 0.739792 | 4604.789 | 4821.883 | 5246.791 | 1453.568 | 4633.969 | 4716.038 |
| ENSMUSG00000041722  | 7_Khdc1c        | 9.881053761 | 0.761814  | 0.346528 | 0.739792 | 8.933454 | 1.7175   | 11.50612 | 10.91416 | 15.83876 | 10.37632 |
| ENSMUSG00000042369  | 8_Rbm45         | 574.4681599 | 0.270238  | 0.345788 | 0.739792 | 532.7587 | 510.9564 | 518.9261 | 802.6872 | 541.9119 | 539.5687 |
| ENSMUSG00000045165  | 6_Al467606      | 326.768457  | -0.30797  | 0.346485 | 0.739792 | 339.4713 | 350.3701 | 394.66   | 198.4394 | 339.4042 | 338.2681 |
| ENSMUSG00000046733  | 7_Gprc5a        | 2756.489347 | -0.41975  | 0.346606 | 0.739792 | 2983.774 | 3257.24  | 3222.865 | 1036.846 | 3009.365 | 3028.848 |
| ENSMUSG00000050945  | 7_Zfp4308       | 98.8601697  | 0.349206  | 0.346628 | 0.739792 | 82.83748 | 70.41752 | 108.1575 | 127.0012 | 79.19381 | 125.5535 |
| ENSMUSG00000060034  | 5_Clf2          | 4.123145736 | -1.00759  | 0.34587  | 0.739792 | 7.30919  | 6.870002 | 2.301224 | 2.97659  | 1.13134  | 4.150528 |
| ENSMUSG00000075224  | 8_Lrrc55        | 11.73219658 | 0.800065  | 0.345883 | 0.739792 | 10.55772 | 6.011252 | 9.204897 | 28.77371 | 3.39402  | 12.5158  |
| ENSMUSG00000091735  | 2_Gpr62         | 1.983249362 | -1.47039  | 0.346031 | 0.739792 | 3.248529 | 4.293751 | 1.150612 | 0        | 1.13134  | 2.075624 |
| ENSMUSG00000096839  | 7_Gm3460        | 0.676609627 | 2.990962  | 0.345913 | 0.739792 | 0        | 0        | 0        | 1.984394 | 0        | 2.075624 |
| ENSMUSG00000097960  | 1_A330074K22Rik | 20.29650597 | -0.63059  | 0.346087 | 0.739792 | 22.7397  | 36.06751 | 14.95796 | 5.953181 | 19.23278 | 22.82791 |
| ENSMUSG00000104818  | 1_Gm43661       | 2.170846724 | 1.382103  | 0.346604 | 0.739792 | 2.436397 | 0        | 1.150612 | 3.968787 | 3.39402  | 2.075624 |
| ENSMUSG00000095069  | 8_Fam105a       | 152.7157628 | 0.373473  | 0.346769 | 0.740013 | 177.8569 | 115.0725 | 105.8563 | 205.3847 | 197.9845 | 114.1395 |
| ENSMUSG00000027965  | 15_Olfm3        | 9.909530559 | 0.866596  | 0.346942 | 0.740303 | 8.933454 | 8.587502 | 3.451836 | 26.78931 | 3.39402  | 8.301057 |
| ENSMUSG00000027562  | 12_Car2         | 88.2981924  | -0.39657  | 0.34704  | 0.740434 | 110.45   | 127.095  | 63.28367 | 83.34453 | 54.30432 | 91.31162 |
| ENSMUSG00000027593  | 15_Raly         | 3318.13591  | -0.36034  | 0.347164 | 0.740489 | 3583.127 | 3574.977 | 4032.895 | 1597.437 | 3684.775 | 3435.6   |
| ENSMUSG00000030662  | 9_Ipo5          | 5703.293061 | -0.20406  | 0.347177 | 0.740489 | 5450.219 | 4797.837 | 5654.108 | 6452.256 | 5975.738 | 5889.6   |
| ENSMUSG00000062127  | 11_Cttnbp2nl    | 2010.6477   | 0.253436  | 0.347124 | 0.740489 | 1836.231 | 1605.863 | 2061.897 | 2616.423 | 2060.17  | 1883.302 |
| ENSMUSG00000000776  | 12_Polr3d       | 398.990302  | -0.28419  | 0.347457 | 0.740576 | 404.4418 | 413.0589 | 497.0644 | 267.8931 | 414.0705 | 397.4131 |
| ENSMUSG00000017767  | 3_Spata25       | 2.367931    | 2.453137  | 0.3473   | 0.740576 | 0        | 0        | 2.301224 | 1.190636 | 0        | 0        |
| ENSMUSG00000026737  | 12_Plip4k2a     | 311.7004471 | 0.316655  | 0.34759  | 0.740576 | 286.6827 | 285.1051 | 261.1889 | 479.2311 | 285.0977 | 272.8972 |
| ENSMUSG00000029346  | 12_Srrd         | 135.2110667 | -0.38774  | 0.347445 | 0.740576 | 133.1897 | 149.4225 | 177.1943 | 64.49279 | 144.8115 | 142.1556 |
| ENSMUSG00000029616  | 9_Erp29         | 1919.572312 | -0.38573  | 0.347564 | 0.740576 | 2093.677 | 2036.956 | 2393.273 | 838.4063 | 2109.949 | 2045.173 |
| ENSMUSG00000029821  | 15_Dna5         | 186.6029818 | 0.507239  | 0.347506 | 0.740576 | 138.0625 | 203.5238 | 120.8143 | 397.8709 | 112.0027 | 147.3438 |
| ENSMUSG00000032294  | 16_Pkm          | 20331.33348 | -0.55392  | 0.347373 | 0.740576 | 23293.58 | 23238.66 | 26029.15 | 4030.303 | 25166.66 | 20229.67 |
| ENSMUSG00000038732  | 14_Mboat1       | 2030.572732 | 0.236151  | 0.347543 | 0.740576 | 1786.691 | 1684.009 | 2124.03  | 2350.514 | 2348.662 | 1889.528 |
| ENSMUSG00000038836  | 15_Agbl3        | 168.3276038 | 0.450828  | 0.347381 | 0.740576 | 129.9411 | 162.3038 | 134.6216 | 329.4093 | 106.346  | 147.3438 |
| ENSMUSG00000074682  | 4_Zcchc3        | 188.3797984 | -0.24954  | 0.347542 | 0.740576 | 199.7845 | 188.925  | 225.52   | 167.6813 | 159.519  | 188.849  |
| ENSMUSG00000027469  | 16_Tpx2         | 846.6428358 | 0.252229  | 0.347645 | 0.740615 | 834.0597 | 625.1702 | 859.5072 | 973.3451 | 976.3465 | 811.4283 |
| ENSMUSG00000039004  | 5_Bmp6          | 51.64027746 | -0.38635  | 0.347688 | 0.740627 | 58.47352 | 51.52501 | 65.58489 | 29.7659  | 46.38494 | 58.1074  |
| ENSMUSG00000001865  | 2_Cpa3          | 71.1002639  | 0.484334  | 0.347811 | 0.740664 | 73.0919  | 54.10126 | 50.62693 | 142.8763 | 50.9103  | 54.9945  |
| ENSMUSG00000075284  | 10_Wlfp1        | 397.980381  | -0.242687 | 0.347807 | 0.740664 | 367.0837 | 324.6076 | 327.9245 | 764.9837 | 268.1276 | 335.1552 |
| ENSMUSG00000075330  | 3_A930003A15Rik | 4.84471115  | -1.24287  | 0.347817 | 0.740664 | 10.55772 | 8.587502 | 1.150612 | 1.984394 | 6.788041 | 0        |
| ENSMUSG00000029381  | 15_Shroom3      | 660.5864553 | -0.5233   | 0.347866 | 0.740688 | 732.5432 | 685.2827 | 919.3391 | 162.7203 | 846.2424 | 617.3911 |
| ENSMUSG00000020661  | 15_Dnm13a       | 1285.676952 | -0.21982  | 0.347917 | 0.740718 | 1343.267 | 1474.474 | 1332.409 | 1058.674 | 1169.806 | 1335.432 |
| ENSMUSG000000001138 | 13_Cnrm3        | 535.1362423 | -0.23602  | 0.348701 | 0.74098  | 538.4436 | 608.8539 | 589.1134 | 417.7149 | 505.709  | 550.9826 |
| ENSMUSG000000003360 | 14_Ddx23        | 1648.580461 | -0.47892  | 0.34943  | 0.74098  | 1840.292 | 1930.471 | 1988.258 | 469.3091 | 1832.771 | 1830.383 |
| ENSMUSG000000005917 | 15_Olx1         | 1993.299937 | -0.24808  | 0.348917 | 0.74098  | 1743.648 | 2272.253 | 2477.268 | 1644.07  | 1853.135 | 1969.426 |
| ENSMUSG00000013338  | 16_Fer1l4       | 263.8465719 | -0.58015  | 0.348167 | 0.74098  | 272.0643 | 325.4663 | 350.9367 | 46.63325 | 308.8558 | 279.123  |
| ENSMUSG000000015087 | 14_Rabl6        | 2040.579796 | -0.3369   | 0.348236 | 0.74098  | 2160.272 | 2094.492 | 2578.522 | 1089.432 | 2117.869 | 2202.893 |
| ENSMUSG00000027221  | 5_Cbst1         | 31.09248729 | -0.50368  | 0.349229 | 0.74098  | 40.60661 | 42.07876 | 26.48408 | 12.89856 | 27.15272 | 37.35475 |
| ENSMUSG00000027792  | 11_Bche         | 72.67035059 | 0.657294  | 0.348164 | 0.74098  | 53.60072 | 79.86377 | 35.66898 | 188.5174 | 31.67757 | 46.69489 |
| ENSMUSG00000029416  | 17_Slc15a4      | 504.7913153 | -0.30678  | 0.348779 | 0.74098  | 526.2617 | 582.2327 | 566.1012 | 299.6434 | 529.4672 | 525.0418 |
| ENSMUSG00000029624  | 10_Ptcd1        | 472.8770204 | -0.54108  | 0.348806 | 0.74098  | 495.4006 | 572.7864 | 613.2763 | 101.2041 | 543.0432 | 511.5526 |
| ENSMUSG00000030822  | 15_Prr14        | 647.0070892 | -0.38069  | 0.349454 | 0.74098  | 680.5668 | 725.6439 | 789.3199 | 288.7293 | 690.1175 | 707.6651 |
| ENSMUSG00000031266  | 6_Gla           | 189.6962209 | 0.296446  | 0.349025 | 0.74098  | 185.1661 | 180.3375 | 144.9771 | 246.0648 | 222.874  | 158.5777 |
| ENSMUSG00000032280  | 16_Tle3         | 2334.324479 | -0.36787  | 0.34909  | 0.74098  | 2338.941 | 2582.262 | 2969.73  | 1108.284 | 2632.628 | 2374.102 |
| ENSMUSG00000032487  | 8_Ptgs2         | 304.7243102 | 0.480999  | 0.349152 | 0.74098  | 337.847  | 143.4113 | 281.9    | 405.8085 | 494.3956 | 164.9835 |
| ENSMUSG00000032523  | 10_Hhail        | 21.6302729  | -0.70149  | 0.349059 | 0.74098  | 19.49117 | 44.65501 | 16.10857 | 5.953181 | 12.44474 | 31.12896 |
| ENSMUSG00000032615  | 14_Nf5m         | 215.2056884 | -0.41781  | 0.349385 | 0.74098  | 225.7727 | 221.5576 | 291.1049 | 87.31332 | 233.0561 | 232.4296 |
| ENSMUSG00000032656  | 14_Marh3        | 347.8748114 | -0.43491  | 0.349262 | 0.74098  | 357.3382 | 399.3189 | 442.9857 | 126.009  | 388.0497 | 373.5475 |
| ENSMUSG00000033285  | 15_Wdr3         | 868.6984003 | 0.255139  | 0.348274 | 0.74098  | 773.1498 | 763.4289 | 839.9468 | 1138.05  | 940.1436 | 757.4714 |
| ENSMUSG00000033458  | 17_Fan1         | 197.3394029 | -0.23207  | 0.348814 | 0.74098  | 217.6514 | 218.1226 | 203.6583 | 182.5642 | 174.2264 | 187.8114 |
| ENSMUSG00000033585  | 4_Ndn           | 960.2921265 | -0.20534  | 0.34905  | 0.74098  | 959.1281 | 1017.619 | 1109.19  | 927.704  | 885.8393 | 862.2722 |
| ENSMUSG00000035621  | 13_Midn         | 3020.991765 | -0.40109  | 0.349316 | 0.74098  | 3203.861 | 2717.944 | 4393.037 | 1341.45  | 3219.934 | 3249.876 |
| ENSMUSG00000037103  | 7_Dcaf15        | 512.3632075 | -0.62592  | 0.348511 | 0.74098  | 579.0502 | 616.5827 | 669.6562 | 66.47719 | 590.9626 | 591.4503 |
| ENSMUSG00000037638  | 13_Rabl6        | 614.78447   | -0.46036  | 0.348186 | 0.74098  | 631.8388 | 686.1414 | 818.0852 | 198.4394 | 650.1175 | 664.0845 |
| ENSMUSG00000038766  | 16_Gabp2        | 3780.181281 | 0.240394  | 0.34935  | 0.74098  | 3512.472 | 3238.347 | 3647.44  | 4961.976 | 3637.258 | 3683.594 |
| ENSMUSG00000040632  | 15_Nrl          | 97.12427196 | -0.62661  | 0.348721 | 0.74098  | 189.2268 | 122.8013 | 41.42204 | 121.048  | 79.19381 | 29.0537  |
| ENSMUSG00000040929  | 16_Rfx3         | 191.5728258 | 0.413293  | 0.34925  | 0.74098  | 149.4323 | 180.3375 | 163.3869 | 356.1987 | 140.2862 | 159.7953 |
| ENSMUSG00000042256  | 4_Ptchd4        | 4.691110241 | 0.934033  | 0.348602 | 0.74098  | 3.248529 | 5.152501 | 1.150612 | 7.937575 | 3.39402  | 7.263424 |
| ENSMUSG00000042846  | 8_Lrrtm3        | 12.1996141  | 0.5727    |          |          |          |          |          |          |          |          |

|                      |                 |             |          |          |          |          |          |           |          |          |          |
|----------------------|-----------------|-------------|----------|----------|----------|----------|----------|-----------|----------|----------|----------|
| ENSMUSG00000030987   | 4_Stim1         | 2037.552866 | -0.33563 | 0.35047  | 0.74125  | 2160.272 | 2396.772 | 2263.254  | 1066.612 | 2105.424 | 2232.984 |
| ENSMUSG00000033557   | 17_Fam20b       | 3560.429102 | 0.234993 | 0.350542 | 0.74125  | 3229.85  | 3172.223 | 3411.565  | 4640.505 | 3481.133 | 3427.299 |
| ENSMUSG00000034135   | 14_Sik3         | 1671.247821 | -0.38874 | 0.350663 | 0.74125  | 1729.842 | 1884.098 | 2071.102  | 721.3271 | 1939.117 | 1682.002 |
| ENSMUSG00000040511   | 13_Pvr          | 275.660361  | 1.294454 | 0.350691 | 0.74125  | 261.5066 | 183.7725 | 298.0085  | 325.4406 | 325.8259 | 259.408  |
| ENSMUSG00000046909   | 9_Tefm          | 153.053934  | 0.367282 | 0.350413 | 0.74125  | 122.632  | 138.2588 | 140.3747  | 254.9946 | 144.8115 | 117.2524 |
| ENSMUSG00000060969   | 8_Irx1          | 34.64713019 | -0.50586 | 0.350399 | 0.74125  | 48.72793 | 28.33876 | 44.87387  | 13.89076 | 30.54618 | 41.50528 |
| ENSMUSG00000068220   | 5_Lgals1        | 1634.4952   | -0.52293 | 0.350243 | 0.74125  | 2219.557 | 1868.207 | 1593.598  | 384.9724 | 1889.207 | 1751.523 |
| ENSMUSG00000094475   | 7_Gm11007       | 32.63274657 | -0.43835 | 0.350336 | 0.74125  | 29.23676 | 35.20876 | 48.32571  | 19.84394 | 36.20288 | 26.97843 |
| ENSMUSG00000094932   | 7_Gm2007        | 32.63274657 | -0.43835 | 0.350336 | 0.74125  | 29.23676 | 35.20876 | 48.32571  | 19.84394 | 36.20288 | 26.97843 |
| ENSMUSG00000106688   | 1_Gm42851       | 3.222117281 | 1.508724 | 0.350617 | 0.74125  | 0        | 1.7175   | 0.5451836 | 7.937575 | 0        | 6.225792 |
| ENSMUSG00000002416   | 13_Ndufb2       | 666.4039072 | 0.250018 | 0.350952 | 0.741338 | 624.5296 | 586.5264 | 615.5775  | 890.0005 | 630.1564 | 651.6329 |
| ENSMUSG00000005800   | 2_Mmp8          | 4.855387419 | 1.189087 | 0.351003 | 0.741338 | 6.497057 | 0        | 2.301224  | 6.945378 | 11.3134  | 2.075264 |
| ENSMUSG00000009654   | 4_Olt3          | 4.411868319 | 1.063477 | 0.351164 | 0.741338 | 4.060661 | 4.293751 | 0         | 5.953181 | 9.050721 | 3.112896 |
| ENSMUSG000000014747  | 6_Ankrd53       | 1.485992542 | -1.64278 | 0.351154 | 0.741338 | 2.436397 | 0.85875  | 3.451836  | 0        | 1.13134  | 1.037632 |
| ENSMUSG00000015994   | 9_Fnta          | 1770.504421 | 0.239651 | 0.351074 | 0.741338 | 1633.198 | 1677.998 | 1560.23   | 2329.678 | 1713.98  | 1707.942 |
| ENSMUSG00000030237   | 14_Slco1a4      | 198.736526  | 0.65449  | 0.350825 | 0.741338 | 177.0448 | 200.9476 | 85.1453   | 517.9267 | 71.27443 | 140.0803 |
| ENSMUSG00000032434   | 8_Cmtm6         | 3430.026076 | 0.224534 | 0.350971 | 0.741338 | 3029.253 | 2961.83  | 3500.162  | 3700.894 | 4147.493 | 3240.525 |
| ENSMUSG00000032563   | 15_Mrp3         | 724.6772027 | 0.258705 | 0.350812 | 0.741338 | 644.0208 | 650.0739 | 685.7648  | 970.3685 | 765.9172 | 631.9179 |
| ENSMUSG00000036894   | 3_Rap2b         | 1400.615998 | 0.339357 | 0.350982 | 0.741338 | 1130.488 | 1119.81  | 1460.127  | 2257.248 | 1298.778 | 1137.245 |
| ENSMUSG000000061455  | 13_Stx17        | 1607.482227 | 0.250679 | 0.351064 | 0.741338 | 1579.597 | 1339.65  | 1485.44   | 2140.169 | 1598.584 | 1501.454 |
| ENSMUSG000000074141  | 12_Ila1i        | 1091.545793 | -0.46283 | 0.351185 | 0.741338 | 1146.731 | 1195.38  | 1453.223  | 345.2845 | 1319.143 | 1089.514 |
| ENSMUSG000000101061  | 1_Platr1        | 0.89156886  | 2.072225 | 0.351155 | 0.741338 | 0        | 0        | 1.150612  | 0.992197 | 1.13134  | 2.075264 |
| ENSMUSG00000036523   | 16_Greb1        | 80.38546338 | -0.46872 | 0.351258 | 0.741412 | 85.27388 | 139.1175 | 55.22938  | 55.56302 | 47.51628 | 99.61268 |
| ENSMUSG000000040414  | 7_Slc25a28      | 349.2273093 | -0.48688 | 0.351347 | 0.741522 | 359.7746 | 416.4939 | 446.4375  | 98.22748 | 380.1303 | 394.3002 |
| ENSMUSG000000020160  | 18_Meis1        | 1378.397352 | 0.242304 | 0.35148  | 0.741723 | 1242.562 | 1265.798 | 1280.631  | 1828.619 | 1380.981 | 1317.793 |
| ENSMUSG000000023047  | 10_Amrh2        | 1.445118569 | -1.60494 | 0.351614 | 0.74185  | 1.624264 | 2.576251 | 2.301224  | 0        | 1.13134  | 1.037632 |
| ENSMUSG000000097061  | 1_9330151L19Rik | 110.8578388 | 0.343042 | 0.3516   | 0.74185  | 104.7651 | 95.32127 | 93.19958  | 173.6344 | 100.8893 | 97.53741 |
| ENSMUSG00000030983   | 4_Bcpi          | 978.683722  | 0.225398 | 0.351697 | 0.741946 | 904.7152 | 795.2027 | 1002.183  | 1148.964 | 1041.964 | 967.0731 |
| ENSMUSG000000028019  | 9_Pdgfc         | 162.979973  | 0.421174 | 0.351749 | 0.741977 | 136.4382 | 159.7275 | 121.9649  | 301.6278 | 109.74   | 148.3814 |
| ENSMUSG00000049001   | 5_Ndnf          | 249.1474162 | 0.440102 | 0.351875 | 0.742163 | 224.9606 | 255.0488 | 154.182   | 477.2467 | 182.1458 | 201.3006 |
| ENSMUSG000000023456  | 14_Tp1          | 6378.93356  | -0.43506 | 0.352176 | 0.742347 | 7490.295 | 7035.741 | 7474.376  | 2199.7   | 7032.176 | 6681.313 |
| ENSMUSG000000029036  | 18_Atat3a       | 783.0090194 | -0.49778 | 0.352143 | 0.742347 | 913.6487 | 866.174  | 980.3215  | 203.4003 | 917.5168 | 826.9922 |
| ENSMUSG00000034066   | 13_Farp2        | 273.4680628 | 0.223852 | 0.352173 | 0.742347 | 270.44   | 234.4388 | 251.9841  | 293.6903 | 286.2299 | 304.0262 |
| ENSMUSG00000038167   | 6_Plekhh6       | 1648.480564 | -0.59404 | 0.352099 | 0.742347 | 1783.442 | 1910.719 | 2255.2    | 253.0102 | 1863.317 | 1825.195 |
| ENSMUSG000000051067  | 7_Lingo3        | 4.6568255   | -1.0434  | 0.352117 | 0.742347 | 5.684925 | 5.857502 | 4.602448  | 5.953181 | 0        | 3.112896 |
| ENSMUSG000000079685  | 9_Ulbp1         | 102.1218008 | 0.30222  | 0.352185 | 0.742347 | 108.8257 | 71.27627 | 94.35019  | 120.0558 | 104.0833 | 914.1395 |
| ENSMUSG000000064210  | 6_Ano6          | 910.9101693 | -0.27149 | 0.352246 | 0.742395 | 1008.668 | 1215.99  | 764.0064  | 813.6014 | 750.0785 | 913.1162 |
| ENSMUSG000000022552  | 15_Sharpin      | 614.1753713 | -0.39778 | 0.352394 | 0.742629 | 624.5296 | 748.8302 | 721.4338  | 254.9946 | 649.3892 | 685.8748 |
| ENSMUSG0000000018770 | 9_Atp5g3        | 3671.576619 | 0.728567 | 0.353497 | 0.742972 | 3296.445 | 3264.11  | 3394.306  | 5339.011 | 3526.569 | 3199.02  |
| ENSMUSG000000022684  | 14_Bfar         | 697.803145  | 0.246107 | 0.353564 | 0.742972 | 644.0208 | 622.5939 | 648.9452  | 915.7977 | 630.1564 | 725.3048 |
| ENSMUSG000000022847  | 14_Thpo         | 13.95651486 | -0.62385 | 0.353309 | 0.742972 | 15.43051 | 18.03375 | 17.25918  | 3.968787 | 12.44474 | 16.60211 |
| ENSMUSG000000025225  | 14_NKb2         | 788.2752422 | -0.54678 | 0.353171 | 0.742972 | 821.8778 | 806.3665 | 1179.377  | 166.6891 | 948.063  | 807.2777 |
| ENSMUSG000000027803  | 14_Wvtr1        | 1752.829086 | 0.261575 | 0.353101 | 0.742972 | 1612.082 | 1556.914 | 1614.309  | 2447.75  | 1675.515 | 1610.405 |
| ENSMUSG00000030058   | 17_Cogp1        | 3511.642054 | -0.36179 | 0.353537 | 0.742972 | 3696.826 | 3951.11  | 4200.885  | 1657.961 | 4018.52  | 3544.551 |
| ENSMUSG000000303080  | 16_Mzf1         | 19.55065873 | -0.53201 | 0.353049 | 0.742972 | 29.23676 | 28.33876 | 11.50612  | 15.87515 | 14.70742 | 17.63975 |
| ENSMUSG00000030406   | 7_Gipr          | 4.154578881 | -0.99667 | 0.353028 | 0.742972 | 6.497057 | 7.728752 | 2.301224  | 3.968787 | 3.39402  | 1.037632 |
| ENSMUSG000000302417  | 10_Rwdd2a       | 6.550606282 | 0.8063   | 0.353095 | 0.742972 | 7.30919  | 3.435001 | 3.451836  | 11.90636 | 9.050721 | 4.150528 |
| ENSMUSG00000035775   | 2_Krt20         | 23.70171081 | 0.499936 | 0.353068 | 0.742972 | 17.86691 | 29.19751 | 11.50612  | 23.81272 | 33.9402  | 25.9408  |
| ENSMUSG00000037470   | 14_Uggt1        | 3022.979712 | 0.208904 | 0.35277  | 0.742972 | 2660.545 | 2721.379 | 3031.863  | 3304.015 | 3498.104 | 2921.972 |
| ENSMUSG000000040957  | 14_Cables1      | 163.0146167 | -0.29068 | 0.353388 | 0.742972 | 174.6084 | 155.4338 | 208.2608  | 115.0948 | 161.7816 | 162.9082 |
| ENSMUSG00000043313   | 6_Pcdh19        | 73.51653909 | 0.514078 | 0.353144 | 0.742972 | 72.72976 | 67.84127 | 41.42204  | 154.7827 | 49.77896 | 54.9945  |
| ENSMUSG00000045838   | 8_A430105119Rik | 844.7593318 | -0.32994 | 0.352615 | 0.742972 | 930.7035 | 841.5752 | 1050.509  | 462.3637 | 860.9498 | 922.4549 |
| ENSMUSG00000047888   | 9_Tnrc6b        | 2272.482029 | 0.252363 | 0.352937 | 0.742972 | 2126.974 | 1896.12  | 2199.97   | 3065.888 | 2133.707 | 2212.232 |
| ENSMUSG000000052456  | 8_Asna1         | 1372.797822 | -0.59048 | 0.352866 | 0.742972 | 1638.883 | 1580.1   | 1730.521  | 211.3379 | 1495.632 | 1502.314 |
| ENSMUSG000000052926  | 15_Rnaseh2a     | 505.6498172 | -0.39952 | 0.352817 | 0.742972 | 570.9289 | 529.8489 | 624.7824  | 208.3613 | 527.2045 | 572.7729 |
| ENSMUSG000000054474  | 15_Thns12       | 275.0108616 | -0.34665 | 0.353199 | 0.742972 | 315.1073 | 302.2801 | 306.0628  | 140.8919 | 294.1484 | 291.5746 |
| ENSMUSG000000063904  | 3_4930533O14Rik | 2253.18663  | -0.51292 | 0.353145 | 0.742972 | 2445.33  | 2553.064 | 2950.169  | 536.7785 | 2508.181 | 2525.596 |
| ENSMUSG000000069744  | 7_Psmb3         | 1995.680704 | -0.46002 | 0.353256 | 0.742972 | 2348.686 | 2090.198 | 2494.527  | 618.1386 | 2306.802 | 2115.732 |
| ENSMUSG000000072889  | 9_Nfix1         | 493.7237939 | 0.246691 | 0.352762 | 0.742972 | 453.1698 | 409.6239 | 492.462   | 635.006  | 498.921  | 473.1602 |
| ENSMUSG000000084796  | 1_Mir142hg      | 13.76325983 | -0.80812 | 0.352704 | 0.742972 | 25.11761 | 11.16375 | 16.10857  | 0.992197 | 13.57608 | 15.56448 |
| ENSMUSG000000086715  | 1_B230112J18Rik | 1.429697695 | -1.65647 | 0.352896 | 0.742972 | 0.812132 | 3.435001 | 2.301224  | 0.992197 | 0        | 1.037632 |
| ENSMUSG000000090996  | 1_Gm20458       | 0.942783419 | 3.457036 | 0.353536 | 0.742972 | 0        | 0        | 0         | 0        | 0.556701 | 0        |
| ENSMUSG000000097081  | 1_Gm10425       | 9.785306987 | -0.80924 | 0.353335 | 0.742972 | 19.49117 | 5.152501 | 12.65673  | 1.984394 | 9.050721 | 10.37632 |
| ENSMUSG00000103707   | 5_Pcdha6        | 0.942783419 | 3.457036 | 0.353536 | 0.742972 | 0        | 0        | 0         | 0        | 0.556701 | 0        |
| ENSMUSG00000107355   | 1_Al839979      | 35.28616177 | 0.426913 | 0.353354 | 0.742972 | 30.86102 | 20.61001 | 39.12081  | 44.64886 | 46.38494 | 30.09133 |
| ENSMUSG000000011213  | 15_Aim1         | 4448.944642 | -0.51086 | 0.353727 | 0.743158 | 4517.079 | 4941.249 | 6227.113  | 1092.409 | 5113.657 | 4802.161 |
| ENSMUSG000000025724  | 12_Sec11a       | 1297.890191 | 0.222192 | 0.35369  | 0.743158 | 1213.325 | 1131.833 | 1249.565  | 1615.296 | 1313.486 | 1263.836 |
| ENSMUSG000000020525  | 17_Ppm1d        | 591.1975446 | 0.290992 | 0.353938 | 0.743246 | 566.0561 | 488.6289 | 540.7877  | 853.2893 | 608.661  | 489.7623 |
| ENSMUSG000000025184  | 10_R3hcc1       | 674.9905323 | 0.286396 | 0.354076 | 0.743246 | 621.2811 | 565.0576 | 638.5897  | 986.2436 | 636.9445 | 601.8266 |
| ENSMUSG000000028436  | 8_Dcaf12        | 2432.577627 | 0.206674 | 0.354104 | 0.743246 | 2188.696 | 2098.786 | 2488.774  | 2471.562 | 2789.885 | 2557.763 |
| ENSMUSG000000040380  | 13_Clnb3        | 101.6916358 | 0.265433 | 0.354017 | 0.743246 | 88.52241 | 98.75628 | 89.74774  | 115.0948 | 114.2654 | 103.7632 |
| ENSMUSG000000044066  | 14_Cep68        | 536.170578  | 0.244899 | 0.353951 | 0.743246 | 491.34   | 512.6739 | 468.2991  | 700.491  | 543.0432 | 501.1763 |
| ENSMUSG000000084904  | 1_Gm14827       | 4.206611605 | -0.96766 | 0.354036 | 0.743246 | 2.436397 | 5.152501 | 9.204897  | 2.97659  | 3.39402  | 2.075264 |
| ENSMUSG000000091460  | 2_Gm7808        | 1.761588378 | -0.24097 | 0.353944 | 0.743246 | 1.624264 | 6.870002 | 0         | 0        | 0        | 2.075264 |
| ENSMUSG000000096740  | 7_Lbhd1         | 349.9377562 | 0.347771 | 0.353982 | 0.743246 | 341.0955 | 289.3988 | 293.4061  | 549.677  | 380.1303 | 245.9188 |

|                      |                  |             |          |          |          |          |          |          |          |           |          |
|----------------------|------------------|-------------|----------|----------|----------|----------|----------|----------|----------|-----------|----------|
| ENSMUSG00000038599   | 14_Capn8         | 1.350083953 | 1.705737 | 0.355709 | 0.744063 | 0.812132 | 0        | 1.150612 | 3.968787 | 1.13134   | 1.037632 |
| ENSMUSG00000060038   | 14_Dhps          | 357.5347214 | -0.35451 | 0.355726 | 0.744063 | 397.1326 | 365.8276 | 440.6844 | 177.6032 | 378.9989  | 384.9615 |
| ENSMUSG000000018740  | 14_Slc25a35      | 443.255522  | -0.2433  | 0.35584  | 0.744207 | 445.0484 | 480.0414 | 516.6248 | 334.3703 | 431.0406  | 452.4076 |
| ENSMUSG000000078931  | 4_Pdf            | 143.6774909 | 0.541827 | 0.35587  | 0.744207 | 110.45   | 121.0838 | 119.6637 | 339.3313 | 91.63555  | 79.89767 |
| ENSMUSG000000027284  | 16_Cdan1         | 431.072063  | -0.3061  | 0.355942 | 0.74428  | 496.2128 | 486.9114 | 446.4375 | 254.0024 | 452.536   | 450.3323 |
| ENSMUSG000000041272  | 11_Tox           | 685.9462825 | 0.366185 | 0.356081 | 0.744363 | 746.3495 | 539.2951 | 512.0224 | 441.5276 | 907.3348  | 969.1483 |
| ENSMUSG000000079215  | 8_Zfp684         | 2010.106916 | 0.259172 | 0.356081 | 0.744363 | 1811.055 | 1917.589 | 1761.587 | 2795.018 | 1859.923  | 1915.469 |
| ENSMUSG000000098789  | 7_Jmj7           | 113.6683996 | -0.51992 | 0.356094 | 0.744363 | 121.0077 | 132.2475 | 148.429  | 27.78151 | 130.1041  | 122.4406 |
| ENSMUSG000000001870  | 15_Ltbp1         | 2093.515113 | 0.198175 | 0.356177 | 0.744382 | 2009.215 | 2012.052 | 1828.323 | 2383.257 | 2233.265  | 2094.979 |
| ENSMUSG000000022554  | 6_Hgh1           | 188.4263914 | -0.47828 | 0.356272 | 0.744382 | 230.6455 | 208.6763 | 218.6163 | 54.57082 | 211.5606  | 206.4888 |
| ENSMUSG000000028661  | 8_Epha8          | 2.530572201 | -1.84165 | 0.356308 | 0.744382 | 4.060661 | 7.728752 | 0        | 0        | 3.39402   | 0        |
| ENSMUSG000000034382  | 14_Al661453      | 22541.2825  | -0.54679 | 0.356296 | 0.744382 | 24154.44 | 25541.81 | 30591.32 | 4415.276 | 26241.43  | 24303.42 |
| ENSMUSG000000036636  | 9_Clcn7          | 1205.977593 | -0.42781 | 0.356249 | 0.744382 | 1366.818 | 1387.74  | 1395.692 | 424.6602 | 1383.629  | 1277.325 |
| ENSMUSG000000099696  | 6_2900052N01Rik  | 32.4194629  | 0.632238 | 0.356327 | 0.744382 | 19.49117 | 39.50251 | 17.25918 | 70.44597 | 13.57608  | 34.24186 |
| ENSMUSG000000025064  | 14_Col17a1       | 62496.82682 | -0.44843 | 0.356429 | 0.744402 | 61900.71 | 70444.14 | 84052.21 | 20578.16 | 72892.24  | 65113.49 |
| ENSMUSG000000027219  | 13_Slc28a2       | 104.6977363 | 0.505747 | 0.356449 | 0.744402 | 130.7533 | 48.09001 | 80.54285 | 122.0402 | 185.5398  | 61.22029 |
| ENSMUSG000000032323  | 13_Cyp11a1       | 8.061126818 | 0.688456 | 0.356395 | 0.744402 | 7.30919  | 4.293751 | 6.903673 | 6.945378 | 13.57608  | 9.338689 |
| ENSMUSG000000012114  | 16_Med15         | 1438.338922 | -0.45756 | 0.35694  | 0.744473 | 1534.93  | 1629.049 | 1829.473 | 449.4652 | 1747.92   | 1439.196 |
| ENSMUSG000000013584  | 5_Aldh1a2        | 169.947508  | -0.32561 | 0.356838 | 0.744473 | 177.8569 | 229.2863 | 159.9351 | 148.8295 | 109.74    | 150.0372 |
| ENSMUSG000000014791  | 9_Elmo3          | 1302.989261 | -0.49629 | 0.357119 | 0.744473 | 1394.431 | 1476.192 | 1704.057 | 333.3781 | 1047.387  | 194.491  |
| ENSMUSG000000020918  | 14_Kat2a         | 1361.653617 | -0.4764  | 0.357299 | 0.744473 | 1407.425 | 1489.932 | 1855.937 | 389.9333 | 1514.864  | 1511.83  |
| ENSMUSG000000021798  | 13_Ldb3          | 244.3542522 | 0.539066 | 0.357112 | 0.744473 | 147.8081 | 280.8113 | 169.14   | 496.0984 | 97.29525  | 274.9725 |
| ENSMUSG000000021876  | 14_Rnase4        | 1221.831405 | 0.280184 | 0.357036 | 0.744473 | 1226.32  | 1044.24  | 1040.153 | 1756.188 | 1077.036  | 1187.051 |
| ENSMUSG000000023092  | 16_Fhl1          | 1473.733138 | 0.45184  | 0.356585 | 0.744473 | 1246.623 | 1478.768 | 1009.087 | 2867.449 | 791.9381  | 1448.534 |
| ENSMUSG000000024084  | 7_Qcct           | 211.2214072 | 0.457767 | 0.35658  | 0.744473 | 190.0389 | 213.8288 | 130.0192 | 403.8241 | 211.0534  | 208.564  |
| ENSMUSG000000030298  | 10_Sec13         | 1801.506169 | -0.39021 | 0.357163 | 0.744473 | 1996.221 | 1894.403 | 2240.242 | 751.093  | 2025.099  | 1901.98  |
| ENSMUSG000000031389  | 17_Arhgap4       | 209.283132  | -0.44661 | 0.357305 | 0.744473 | 254.1974 | 198.3713 | 271.5445 | 74.41476 | 257.9455  | 199.2254 |
| ENSMUSG000000032852  | 3_Rspo4          | 0.842925212 | 0.272213 | 0.35683  | 0.744473 | 0        | 0.85875  | 0        | 0.992197 | 1.13134   | 2.075624 |
| ENSMUSG000000033860  | 13_Fgg           | 0.669037085 | 2.976319 | 0.357305 | 0.744473 | 0        | 0        | 0        | 2.97659  | 0         | 1.037632 |
| ENSMUSG000000034871  | 2_Fam151a        | 1.00187526  | -3.37848 | 0.357141 | 0.744473 | 0        | 0.611252 | 0        | 0        | 0         | 0        |
| ENSMUSG000000033859  | 14_Atf5          | 940.7051289 | -0.33659 | 0.357086 | 0.744473 | 900.6546 | 1060.557 | 1188.582 | 505.0282 | 1055.54   | 933.8689 |
| ENSMUSG000000043290  | 6_Zfp784         | 153.9441215 | -0.28034 | 0.35671  | 0.744473 | 172.172  | 167.4563 | 166.8388 | 110.1338 | 136.8922  | 170.1717 |
| ENSMUSG000000049699  | 4_Ucn2           | 29.8463464  | -0.42829 | 0.357304 | 0.744473 | 32.48529 | 41.22001 | 28.7653  | 17.85954 | 32.80886  | 25.9408  |
| ENSMUSG000000054792  | 15_Klhl18        | 857.8906552 | -0.37053 | 0.35688  | 0.744473 | 907.1516 | 887.089  | 1108.039 | 401.8397 | 1006.893  | 836.3314 |
| ENSMUSG000000074817  | 2_Pap0b          | 1.799228649 | 1.992793 | 0.356813 | 0.744473 | 0        | 0        | 2.301224 | 3.968787 | 4.52536   | 0        |
| ENSMUSG000000079029  | 2_Gm5662         | 0.669037085 | 2.976319 | 0.357305 | 0.744473 | 0        | 0        | 0        | 2.97659  | 0         | 1.037632 |
| ENSMUSG000000079534  | 1_Gm5640         | 2.263564204 | -2.44749 | 0.356892 | 0.744473 | 0        | 0        | 11.50612 | 0        | 0         | 2.075264 |
| ENSMUSG000000086154  | 1_Gm16196        | 2.792197525 | -1.17225 | 0.357142 | 0.744473 | 2.436397 | 6.870002 | 2.301224 | 2.97659  | 1.13134   | 1.037632 |
| ENSMUSG000000107008  | 3_Gm2762         | 0.669037085 | 2.976319 | 0.357305 | 0.744473 | 0        | 0        | 0        | 2.97659  | 0         | 1.037632 |
| ENSMUSG000000101337  | 6_Dnah7c         | 7.602085801 | 0.759784 | 0.357375 | 0.74454  | 5.684925 | 7.728752 | 3.451836 | 14.88295 | 4.52536   | 9.338689 |
| ENSMUSG000000031824  | 14_6430548M08Rik | 1764.295548 | -0.41045 | 0.357505 | 0.744656 | 1856.534 | 2016.346 | 2167.753 | 671.7172 | 1991.159  | 1882.265 |
| ENSMUSG000000078576  | 1_Gm12886        | 4.275452279 | 1.045772 | 0.357496 | 0.744656 | 2.436397 | 2.576251 | 3.451836 | 11.90636 | 1.13134   | 4.150528 |
| ENSMUSG000000021611  | 8_Tert           | 66.50876223 | -0.4419  | 0.357594 | 0.744665 | 74.71616 | 85.87502 | 69.03673 | 25.79712 | 67.88041  | 75.74714 |
| ENSMUSG000000037752  | 4_Xkr8           | 110.9536035 | -0.28616 | 0.35755  | 0.744665 | 109.6378 | 126.2363 | 130.0192 | 84.33673 | 166.16391 | 119.3277 |
| ENSMUSG000000038602  | 7_Slc35f1        | 46.4735731  | 0.550491 | 0.357622 | 0.744665 | 30.04889 | 49.80751 | 33.36775 | 101.2041 | 16.02082  | 38.39239 |
| ENSMUSG000000006024  | 12_Napa          | 2219.632347 | -0.41255 | 0.357782 | 0.744921 | 2385.232 | 2457.743 | 2761.469 | 835.4297 | 2380.34   | 2497.58  |
| ENSMUSG000000034311  | 3_Kir4           | 482.1565204 | 0.253364 | 0.357854 | 0.744993 | 500.2734 | 382.1438 | 437.2326 | 562.5756 | 576.9835  | 437.7302 |
| ENSMUSG000000028070  | 7_Apoa1bp        | 1379.224423 | -0.31346 | 0.358019 | 0.745069 | 1481.329 | 1562.067 | 1541.82  | 768.9525 | 1443.59   | 1437.58  |
| ENSMUSG000000030708  | 13_Dnajb13       | 11.39097994 | -0.74529 | 0.35804  | 0.745069 | 8.933454 | 18.8925  | 14.95796 | 1.984394 | 9.050721  | 14.52685 |
| ENSMUSG000000035900  | 18_Gramd4        | 2006.214884 | -0.40234 | 0.357971 | 0.745069 | 2091.24  | 2058.424 | 2702.788 | 813.6014 | 2276.256  | 2094.979 |
| ENSMUSG000000037001  | 10_Zfp39         | 169.1905973 | 0.260547 | 0.357935 | 0.745069 | 157.5536 | 146.8463 | 157.6339 | 219.2755 | 171.9637  | 161.8706 |
| ENSMUSG000000031896  | 6_Ctfr           | 8.405270192 | -0.70693 | 0.358135 | 0.745188 | 8.933454 | 8.587502 | 13.80735 | 2.97659  | 6.788041  | 9.338689 |
| ENSMUSG000000006014  | 16_Prg4          | 447.5487452 | -0.45728 | 0.358493 | 0.745295 | 536.8194 | 273.9413 | 743.2954 | 559.599  | 349.584   | 222.0533 |
| ENSMUSG000000010453  | 12_Kans13        | 1921.353778 | -0.29578 | 0.358752 | 0.745295 | 2027.082 | 2206.129 | 2119.428 | 1142.019 | 2056.776  | 1976.689 |
| ENSMUSG000000018750  | 14_Zbtb4         | 1660.921502 | -0.22449 | 0.358429 | 0.745295 | 1742.024 | 1899.555 | 1728.219 | 1653.992 | 1278.414  | 1663.324 |
| ENSMUSG000000020447  | 5_Npc11          | 2.373409824 | -1.28662 | 0.358654 | 0.745295 | 3.248529 | 3.435001 | 3.451836 | 0.992197 | 0         | 3.112896 |
| ENSMUSG000000024818  | 14_Slc25a45      | 247.8012944 | -0.42554 | 0.358592 | 0.745295 | 265.5672 | 291.9751 | 294.5567 | 90.28991 | 271.5216  | 272.8972 |
| ENSMUSG000000029003  | 11_Mad2l2        | 178.0183635 | -0.45471 | 0.358785 | 0.745295 | 194.9117 | 206.1001 | 216.3151 | 59.53181 | 226.268   | 164.9835 |
| ENSMUSG0000000302591 | 15_Mst1          | 334.8035511 | -0.55164 | 0.358782 | 0.745295 | 366.2716 | 376.9801 | 456.793  | 64.49279 | 376.763   | 373.5475 |
| ENSMUSG000000034789  | 7_Rab24          | 685.4888271 | -0.32615 | 0.35869  | 0.745295 | 749.598  | 741.9602 | 796.2236 | 367.1128 | 728.583   | 729.4553 |
| ENSMUSG000000035704  | 17_Alg8          | 297.3499898 | 0.249544 | 0.358587 | 0.745295 | 245.2639 | 255.0488 | 315.2677 | 343.3001 | 345.0587  | 280.1607 |
| ENSMUSG000000050957  | 4_Insl6          | 46.51541308 | 0.374734 | 0.358374 | 0.745295 | 39.79448 | 36.92626 | 44.87387 | 55.56302 | 65.61733  | 36.37172 |
| ENSMUSG000000052273  | 2_Dnah3          | 5.262422717 | 0.921062 | 0.358707 | 0.745295 | 1.624264 | 2.576251 | 6.903673 | 3.968787 | 11.1314   | 5.18816  |
| ENSMUSG000000052605  | 11_Isoe2b        | 41.37569299 | -0.51695 | 0.358413 | 0.745295 | 48.72793 | 38.64376 | 58.68122 | 12.89856 | 50.9103   | 38.39239 |
| ENSMUSG000000073433  | 10_Arhgdg        | 4.457566535 | -1.16476 | 0.358265 | 0.745295 | 7.30919  | 7.728752 | 3.451836 | 0.992197 | 0         | 7.263424 |
| ENSMUSG000000078532  | 9_Nkain1         | 12.09464602 | -0.78707 | 0.358256 | 0.745295 | 15.43051 | 18.8925  | 11.50612 | 0.992197 | 10.18206  | 15.56448 |
| ENSMUSG000000095463  | 8_Entpd4         | 669.0157782 | -0.29802 | 0.358543 | 0.745295 | 726.0462 | 807.2252 | 680.0118 | 404.8163 | 681.0667  | 714.9285 |
| ENSMUSG000000102202  | 1_Gm33280        | 21.77483015 | 0.475647 | 0.358577 | 0.745295 | 17.05478 | 21.46876 | 16.10857 | 24.80492 | 16.9701   | 34.24186 |
| ENSMUSG000000030199  | 16_Elv6          | 1882.954597 | 0.202537 | 0.358944 | 0.745315 | 1732.278 | 1611.015 | 1910.016 | 1930.815 | 2134.839  | 1978.764 |
| ENSMUSG000000040867  | 11_Begain        | 31.31944546 | -0.49203 | 0.358892 | 0.745315 | 35.73382 | 39.50251 | 34.51836 | 12.89856 | 23.75814  | 41.50528 |
| ENSMUSG000000041187  | 16_Prk2d         | 977.9336452 | -0.48978 | 0.358932 | 0.745315 | 1037.905 | 1092.33  | 1296.74  | 257.9712 | 1121.156  | 1061.498 |
| ENSMUSG000000050240  | 14_Hic2          | 171.5160447 | -0.41309 | 0.358937 | 0.745315 | 217.6514 | 181.1963 | 188.7004 | 70.44597 | 158.3876  | 212.7146 |
| ENSMUSG000000043183  | 18_Simc1         | 194.0725921 | 0.231175 | 0.358982 | 0.745316 | 170.5478 | 184.6313 | 180.6461 | 220.2677 | 194.5905  | 213.7522 |
| ENSMUSG000000029843  | 4_Slc13a4        | 284.0392442 | -0.39695 | 0.359093 | 0.745336 | 281.8099 | 478.3239 | 208.2608 | 229.1975 | 178.7517  | 327.8917 |
| ENSMUSG000000051674  | 14_Dcun1d4       | 861.0865514 | 0.327318 | 0.359141 | 0.745336 | 788.5803 | 747.1127 | 755.9522 | 1402.966 | 733.1084  | 738.794  |
| ENSMUSG000000099713  | 1_Gm26745        | 2.          |          |          |          |          |          |          |          |           |          |

|                     |                 |             |          |          |          |          |          |          |          |          |          |
|---------------------|-----------------|-------------|----------|----------|----------|----------|----------|----------|----------|----------|----------|
| ENSMUSG00000020357  | 3_Fit4          | 161.0488192 | -0.40049 | 0.360987 | 0.746382 | 155.9294 | 178.62   | 215.1645 | 71.43817 | 195.7218 | 149.419  |
| ENSMUSG00000021241  | 6_Isca2         | 400.0702242 | 0.24641  | 0.361568 | 0.746382 | 379.2657 | 339.2063 | 379.702  | 519.9111 | 412.9391 | 369.397  |
| ENSMUSG00000023262  | 12_Acy1         | 183.15989   | -0.53442 | 0.361471 | 0.746382 | 211.1544 | 208.6763 | 230.1224 | 38.69568 | 218.3486 | 191.9619 |
| ENSMUSG00000024777  | 9_Ppp2r5b       | 3797.556915 | -0.46579 | 0.361684 | 0.746382 | 3990.818 | 4094.521 | 5130.579 | 1116.221 | 4304.749 | 4148.453 |
| ENSMUSG00000027613  | 15_Elf6         | 2957.616243 | -0.50721 | 0.361556 | 0.746382 | 3215.231 | 2993.603 | 4207.788 | 728.2725 | 3688.169 | 2921.633 |
| ENSMUSG00000027742  | 13_Cog6         | 1075.669468 | 0.22822  | 0.360881 | 0.746382 | 942.8855 | 933.4615 | 1096.533 | 1337.481 | 1026.125 | 1117.53  |
| ENSMUSG00000028758  | 12_Klf17        | 15.42649513 | -0.70824 | 0.361178 | 0.746382 | 19.49117 | 17.175   | 20.71102 | 1.984394 | 12.44474 | 20.75264 |
| ENSMUSG00000029466  | 11_Anapc7       | 1320.96738  | -0.34255 | 0.361146 | 0.746382 | 1383.061 | 1465.887 | 1582.092 | 659.8109 | 1454.903 | 1380.051 |
| ENSMUSG00000030697  | 7_Ppp4c         | 1534.156224 | -0.34694 | 0.361726 | 0.746382 | 1681.926 | 1639.354 | 1831.774 | 753.0774 | 1743.395 | 1555.41  |
| ENSMUSG00000031099  | 16_Smarca1      | 115.861277  | 0.549778 | 0.360683 | 0.746382 | 124.2562 | 101.3325 | 56.37999 | 261.94   | 84.85051 | 66.40845 |
| ENSMUSG00000031139  | 14_Mcf2         | 0.827582996 | 2.060229 | 0.360985 | 0.746382 | 0.812132 | 0        | 0        | 1.984394 | 1.13134  | 1.037632 |
| ENSMUSG00000032313  | 11_Al118078     | 7.260893179 | -0.69251 | 0.361801 | 0.746382 | 11.36985 | 8.587502 | 6.903673 | 5.953181 | 4.52536  | 6.225792 |
| ENSMUSG00000033807  | 17_Rap1gap2     | 319.0220016 | -0.32033 | 0.361695 | 0.746382 | 362.211  | 346.0763 | 354.3885 | 176.611  | 330.3513 | 344.4938 |
| ENSMUSG00000042700  | 15_Sipa11       | 2723.477929 | -0.31649 | 0.360818 | 0.746382 | 2900.936 | 2903.435 | 3258.533 | 1506.155 | 3037.648 | 2734.16  |
| ENSMUSG00000044618  | 7_Olfml2a       | 1079.007137 | -0.28448 | 0.361507 | 0.746382 | 1057.396 | 1446.135 | 1051.659 | 1091.416 | 728.583  | 1098.852 |
| ENSMUSG00000047497  | 9_Adamts12      | 33.98141626 | -0.43505 | 0.361512 | 0.746382 | 32.48529 | 55.81876 | 28.7653  | 27.78151 | 23.75814 | 35.27949 |
| ENSMUSG00000047586  | 3_Nccrp1        | 6382.093759 | -0.6327  | 0.360871 | 0.746382 | 6471.881 | 7462.539 | 9344.121 | 734.2256 | 7552.827 | 6726.969 |
| ENSMUSG00000049897  | 14_Stkl1        | 2.389303621 | -0.25618 | 0.361397 | 0.746382 | 0.406061 | 2.576251 | 3.451836 | 1.984394 | 2.26268  | 0        |
| ENSMUSG00000051586  | 14_Mical3       | 1745.670031 | -0.31401 | 0.361699 | 0.746382 | 1906.886 | 1880.663 | 2017.023 | 967.3919 | 1763.759 | 1938.297 |
| ENSMUSG00000053773  | 4_Rdh8          | 6.414874398 | -1.14241 | 0.361358 | 0.746382 | 9.745586 | 6.870002 | 2.301224 | 1.984394 | 6.788041 | 0        |
| ENSMUSG00000056487  | 8_Mettl7a2      | 0.929437837 | -0.01006 | 0.360752 | 0.746382 | 0.812132 | 2.576251 | 1.150612 | 0        | 0        | 1.037632 |
| ENSMUSG00000061461  | 11_Smim20       | 804.1534103 | -0.27104 | 0.361429 | 0.746382 | 929.8913 | 857.8915 | 850.3023 | 525.8643 | 848.5051 | 812.4659 |
| ENSMUSG00000067713  | 6_Prkg1         | 1250.175411 | -0.27873 | 0.361819 | 0.746382 | 1415.546 | 1337.074 | 1358.873 | 790.7809 | 1234.292 | 1364.486 |
| ENSMUSG00000079608  | 10_Star6        | 11.41374361 | 0.679564 | 0.361275 | 0.746382 | 5.684925 | 13.74    | 6.903673 | 22.82053 | 7.919381 | 11.41395 |
| ENSMUSG00000100658  | 1_FT30311021Rik | 16.9001044  | -0.49618 | 0.361174 | 0.746382 | 17.05478 | 17.175   | 25.31347 | 16.86735 | 13.57608 | 11.41395 |
| ENSMUSG00000104529  | 4_Rbakdn        | 0.921865295 | -0.01004 | 0.36158  | 0.746382 | 0.812132 | 2.576251 | 1.150612 | 0.992197 | 0        | 0        |
| ENSMUSG00000106715  | 3_Tmem265       | 335.8498075 | -0.44249 | 0.360961 | 0.746382 | 365.4595 | 371.8388 | 423.4253 | 112.1182 | 392.575  | 349.682  |
| ENSMUSG00000107198  | 1_Gm19619       | 0.827582996 | 2.060229 | 0.360985 | 0.746382 | 0.812132 | 0        | 0        | 1.984394 | 1.13134  | 1.037632 |
| ENSMUSG00000108417  | 14_Maob         | 111.6633689 | 0.467437 | 0.361882 | 0.746391 | 87.71028 | 97.03878 | 96.65142 | 231.1819 | 71.27443 | 86.12346 |
| ENSMUSG00000104349  | 15_Snhg11       | 67.01738235 | 0.72259  | 0.361898 | 0.746391 | 59.28565 | 70.41752 | 21.86163 | 178.5954 | 54.30432 | 17.63975 |
| ENSMUSG000001009731 | 4_Kcnd1         | 30.35748551 | -0.49772 | 0.362273 | 0.746422 | 33.29742 | 42.07876 | 31.06653 | 10.91416 | 30.54618 | 34.24186 |
| ENSMUSG00000102391  | 15_Rangap1      | 2831.119194 | -0.41685 | 0.362205 | 0.746422 | 2982.149 | 2979.863 | 3749.845 | 1045.775 | 3108.923 | 3102.161 |
| ENSMUSG000001022529 | 11_Zfp263       | 756.8198217 | 0.307105 | 0.361994 | 0.746422 | 666.7605 | 626.8877 | 736.3917 | 1154.917 | 748.9471 | 607.0148 |
| ENSMUSG000001022982 | 9_Sod1          | 1585.462311 | -0.23137 | 0.362288 | 0.746422 | 1705.478 | 1790.494 | 1640.773 | 1200.558 | 1482.056 | 1693.416 |
| ENSMUSG000001024376 | 6_Epb414a       | 1527.46669  | 0.195887 | 0.36215  | 0.746422 | 1369.255 | 1347.379 | 1555.628 | 1651.016 | 1615.554 | 1652.969 |
| ENSMUSG000001027130 | 15_Slc12a6      | 2883.136664 | 0.261161 | 0.362272 | 0.746422 | 2662.169 | 2524.726 | 2682.077 | 4029.311 | 2501.393 | 2889.144 |
| ENSMUSG000001035270 | 15_Impg2        | 37.89801252 | 0.6898   | 0.362217 | 0.746422 | 39.79448 | 34.35001 | 12.65673 | 87.31332 | 41.85958 | 141.1395 |
| ENSMUSG000001071047 | 4_Cest1a        | 1.814106168 | 1.671596 | 0.362167 | 0.746422 | 0.812132 | 1.7175   | 0        | 4.960984 | 3.39402  | 0        |
| ENSMUSG000001072647 | 5_Adam1a        | 90.16170326 | -0.26802 | 0.362207 | 0.746422 | 96.64373 | 105.6263 | 93.19958 | 82.35234 | 78.06247 | 85.08583 |
| ENSMUSG000001097402 | 1_Gm17399       | 9.66900123  | 0.654424 | 0.361965 | 0.746422 | 0.406061 | 9.446252 | 9.204897 | 15.87515 | 9.050721 | 10.37632 |
| ENSMUSG000001005566 | 13_Trim28       | 3308.760375 | -0.48874 | 0.363234 | 0.746486 | 3608.303 | 3922.771 | 4060.51  | 843.3673 | 3853.344 | 3564.266 |
| ENSMUSG000001006850 | 7_Tmco6         | 211.404481  | -0.4569  | 0.363311 | 0.746486 | 231.4577 | 221.5576 | 280.7494 | 67.46938 | 216.086  | 251.107  |
| ENSMUSG000001019102 | 10_Aldh3a1      | 377139.9192 | -0.41055 | 0.362964 | 0.746486 | 405027.4 | 414219.9 | 472082.3 | 140362.1 | 401581.6 | 429586.2 |
| ENSMUSG000001020111 | 15_Micu1        | 2742.295367 | -0.3368  | 0.362798 | 0.746486 | 3011.386 | 3058.868 | 3112.406 | 1377.169 | 2908.675 | 2985.267 |
| ENSMUSG000001020701 | 12_Tmem132e     | 44.25960961 | -0.61823 | 0.363391 | 0.746486 | 52.78859 | 65.26502 | 42.57265 | 6.945378 | 42.99092 | 54.9945  |
| ENSMUSG000001020778 | 12_Ten1         | 448.7961387 | -0.45383 | 0.363285 | 0.746486 | 514.8918 | 514.3914 | 526.9803 | 137.9154 | 480.8195 | 517.7784 |
| ENSMUSG000001020787 | 14_Prxr1        | 2.412218378 | -1.24451 | 0.362577 | 0.746486 | 3.248529 | 3.435001 | 3.451836 | 0        | 2.26268  | 2.075264 |
| ENSMUSG000001021692 | 8_Dimt1         | 251.5164747 | 0.388268 | 0.363151 | 0.746486 | 228.2091 | 217.2638 | 208.2608 | 459.3871 | 208.1666 | 187.8114 |
| ENSMUSG000001025580 | 15_Elf4a3       | 1767.346406 | -0.34119 | 0.363539 | 0.746486 | 1867.092 | 1856.618 | 2202.272 | 894.9615 | 2016.048 | 1767.087 |
| ENSMUSG000001026519 | 16_Tmem63a      | 1616.585531 | -0.43996 | 0.362481 | 0.746486 | 1684.362 | 1825.703 | 2073.403 | 531.8175 | 1781.861 | 1802.367 |
| ENSMUSG000001026965 | 12_Anapc2       | 2646.342551 | -0.47947 | 0.363543 | 0.746486 | 2853.02  | 3042.552 | 3350.582 | 708.4285 | 2901.887 | 3021.585 |
| ENSMUSG000001027384 | 6_Ndufaf5       | 136.3862177 | 0.388025 | 0.363132 | 0.746486 | 120.1956 | 112.4963 | 121.9649 | 243.0882 | 119.9221 | 100.6503 |
| ENSMUSG000001027425 | 18_Csp2bp       | 979.8228138 | -0.3165  | 0.363321 | 0.746486 | 993.2377 | 1027.065 | 1240.36  | 553.6458 | 986.5286 | 1078.1   |
| ENSMUSG000001027463 | 14_Slc52a3      | 688.3538775 | -0.39815 | 0.36271  | 0.746486 | 700.8701 | 722.2089 | 925.0921 | 283.7683 | 799.8575 | 698.3264 |
| ENSMUSG000001027955 | 16_Fam198b      | 1359.808186 | 0.359559 | 0.362823 | 0.746486 | 1288.042 | 1159.313 | 1126.449 | 2378.296 | 1048.752 | 1157.997 |
| ENSMUSG000001030401 | 15_Rtn2         | 61.4713717  | -0.47623 | 0.363469 | 0.746486 | 47.10367 | 113.355  | 54.07877 | 45.64105 | 33.9402  | 74.70951 |
| ENSMUSG000001030847 | 8_Bag3          | 1543.868169 | -0.27376 | 0.362982 | 0.746486 | 1461.838 | 1632.484 | 1975.601 | 1047.76  | 1558.987 | 1586.539 |
| ENSMUSG000001031378 | 14_Abcd1        | 318.0870557 | -0.43229 | 0.36292  | 0.746486 | 355.7139 | 395.0251 | 345.1836 | 110.1338 | 363.4212 | 395.207  |
| ENSMUSG000001032011 | 4_Thy1          | 665.0469526 | -0.39287 | 0.363358 | 0.746486 | 900.6546 | 607.1364 | 757.1028 | 285.5727 | 774.1608 | 695.2135 |
| ENSMUSG000001034269 | 12_Setd5        | 3819.003389 | 0.205263 | 0.362997 | 0.746486 | 3460.495 | 3409.238 | 3774.008 | 4575.02  | 3960.822 | 3734.438 |
| ENSMUSG000001035799 | 5_Twist1        | 207.7015306 | 0.470372 | 0.363264 | 0.746486 | 181.1055 | 173.4675 | 167.9894 | 440.5354 | 123.3161 | 159.7953 |
| ENSMUSG000001038764 | 14_Ptpr3        | 2331.321131 | 0.215821 | 0.362423 | 0.746486 | 2100.174 | 2035.238 | 2336.893 | 2865.464 | 2298.883 | 2351.274 |
| ENSMUSG000001043284 | 12_Tmem11       | 487.0598489 | -0.29642 | 0.362451 | 0.746486 | 504.3341 | 516.1089 | 590.264  | 296.6668 | 528.3358 | 486.6494 |
| ENSMUSG000001049739 | 10_Zfp646       | 1399.833797 | -0.39207 | 0.363356 | 0.746486 | 1487.014 | 1525.999 | 1753.533 | 568.5288 | 1563.512 | 1500.416 |
| ENSMUSG000001051969 | 7_Tir11         | 8.680371715 | 0.629829 | 0.362358 | 0.746486 | 7.30919  | 5.152501 | 8.054285 | 10.91416 | 11.3134  | 9.336869 |
| ENSMUSG000001052180 | 14_Serpinb6c    | 17.56015836 | 0.612156 | 0.36276  | 0.746486 | 12.99411 | 17.175   | 11.50612 | 38.69568 | 13.57608 | 11.41395 |
| ENSMUSG000001055116 | 7_Arntl         | 534.3674728 | -0.25659 | 0.363053 | 0.746486 | 514.8918 | 611.4302 | 619.0293 | 508.997  | 567.9327 | 383.9239 |
| ENSMUSG000001062519 | 12_Zfp398       | 765.787567  | 0.31063  | 0.363424 | 0.746486 | 664.3241 | 658.6614 | 728.3375 | 1203.535 | 679.9354 | 659.934  |
| ENSMUSG000001066632 | 2_Pgk1-rs7      | 2543.534388 | 0.245397 | 0.362737 | 0.746486 | 2697.903 | 2357.269 | 1927.275 | 2580.704 | 3186.985 | 2511.07  |
| ENSMUSG000001073139 | 9_BC023829      | 614.0941602 | 0.221162 | 0.363555 | 0.746486 | 613.1598 | 549.6001 | 538.4865 | 752.0852 | 621.1057 | 610.1277 |
| ENSMUSG000001074923 | 10_Pak6         | 1538.859494 | -0.44296 | 0.362857 | 0.746486 | 1519.499 | 1625.614 | 2178.109 | 521.8955 | 1815.801 | 1578.238 |
| ENSMUSG000001097444 | 1_Gm10489       | 2.46465751  | 1.384938 | 0.362882 | 0.746486 | 0.812132 | 0        | 3.451836 | 4.960984 | 4.52536  | 1.037632 |
| ENSMUSG000001097574 | 1_C920006O11Rik | 11.2930512  | 0.597138 | 0.363458 | 0.746486 | 7.30919  | 13.74    | 5.753061 | 13.89076 | 13.57608 | 13.8922  |
| ENSMUSG000001051367 | 8_Six1          | 70.95645646 | 0.550229 | 0.363594 | 0.746489 | 53.60072 | 54.96001 | 64.43428 | 165.6969 | 36.20288 | 50.84397 |
| ENSMUSG000001029004 | 15_Kmt2e        | 3837.261158 | 0.260217 | 0.363634 | 0.746493 | 3385.779 | 35       |          |          |          |          |

|                      |                 |             |          |          |          |          |           |          |          |          |          |
|----------------------|-----------------|-------------|----------|----------|----------|----------|-----------|----------|----------|----------|----------|
| ENSMUSG000000024169  | 15_lft140       | 575.9682772 | -0.31444 | 0.365391 | 0.747558 | 622.9054 | 652.6502  | 639.7403 | 320.4796 | 573.5894 | 646.4448 |
| ENSMUSG000000008604  | 11_Ubqln4       | 1339.840997 | -0.28845 | 0.365474 | 0.74765  | 1409.049 | 1477.05   | 1533.766 | 808.6404 | 1423.226 | 1387.314 |
| 476.1555766          | 15_Tbrq4        | -0.52176    | 0.36569  | 0.748016 | 526.2617 | 575.3626 | 582.2097  | 102.1963 | 564.5387 | 560.3644 |          |
| ENSMUSG000000001150  | 6_Mcm3ap        | 949.2634244 | -0.29951 | 0.366135 | 0.748199 | 975.3707 | 1065.709  | 1101.136 | 553.6458 | 1004.63  | 995.0892 |
| ENSMUSG000000003680  | 15_Taf6l        | 616.5656154 | -0.2124  | 0.365968 | 0.748199 | 676.5061 | 617.4414  | 692.6685 | 505.0282 | 613.1863 | 594.5632 |
| ENSMUSG000000011632  | 7_Plnlyp        | 19.37636956 | -0.93174 | 0.366008 | 0.748199 | 25.98823 | 11.16375  | 39.12081 | 0        | 19.23278 | 20.75264 |
| ENSMUSG0000000027253 | 15_Lrp4         | 1669.891884 | -0.26684 | 0.366155 | 0.748199 | 1716.035 | 1889.25   | 1866.293 | 1107.292 | 1587.27  | 1853.211 |
| ENSMUSG000000085167  | 1_Gm12063       | 0.707855511 | -2.88429 | 0.366135 | 0.748199 | 0.812132 | 3.435001  | 0        | 0        | 0        | 0        |
| ENSMUSG000000085950  | 1_Gm13589       | 0.707855511 | -2.88429 | 0.366135 | 0.748199 | 0.812132 | 3.435001  | 0        | 0        | 0        | 0        |
| ENSMUSG000000086238  | 1_Gm14258       | 1.310366433 | -2.61248 | 0.366114 | 0.748199 | 0        | 0.6870002 | 0        | 0.992197 | 0        | 0        |
| ENSMUSG000000086907  | 1_Gm15298       | 0.707855511 | -2.88429 | 0.366135 | 0.748199 | 0.812132 | 3.435001  | 0        | 0        | 0        | 0        |
| ENSMUSG000000097039  | 8_Pvt1          | 21.10357598 | 0.597772 | 0.365837 | 0.748199 | 21.92757 | 14.59875  | 13.80735 | 45.64105 | 19.23278 | 11.41395 |
| ENSMUSG000000097203  | 1_4732419C18Rik | 3.001641721 | 1.17639  | 0.366085 | 0.748199 | 3.248529 | 0         | 2.301224 | 5.953181 | 3.39402  | 3.112896 |
| ENSMUSG000000000934  | 8_Top1mt        | 273.0742334 | -0.43574 | 0.366421 | 0.748216 | 285.8705 | 321.1726  | 334.8281 | 92.2743  | 305.4618 | 298.838  |
| ENSMUSG0000000022999 | 14_Lmbr1l       | 1430.590189 | -0.40717 | 0.366435 | 0.748216 | 1556.857 | 1598.993  | 1737.424 | 533.8019 | 1565.775 | 1590.69  |
| ENSMUSG0000000026799 | 15_Med27        | 286.3363409 | -0.47321 | 0.36632  | 0.748216 | 315.1073 | 335.7713  | 337.1293 | 95.25089 | 322.4319 | 312.3273 |
| ENSMUSG0000000028702 | 15_Rad54l       | 204.7876331 | 0.279288 | 0.366369 | 0.748216 | 187.6025 | 153.7163  | 214.0139 | 228.2053 | 263.6022 | 181.5856 |
| ENSMUSG0000000032199 | 12_Polr2m       | 3682.86307  | 0.234669 | 0.366469 | 0.748216 | 3426.386 | 3299.318  | 3426.523 | 4897.483 | 3493.578 | 3553.89  |
| ENSMUSG0000000035944 | 17_Ttc38        | 467.0374295 | -0.31953 | 0.366309 | 0.748216 | 503.522  | 482.6176  | 569.553  | 269.8775 | 416.3332 | 560.3213 |
| ENSMUSG0000000046562 | 5_Unc119b       | 2948.589371 | -0.35102 | 0.366502 | 0.748216 | 3149.449 | 3538.132  | 1395.029 | 3252.603 | 3127.423 |          |
| ENSMUSG0000000047730 | 17_Fcgbp        | 974.5913929 | -0.60476 | 0.366202 | 0.748216 | 860.8601 | 1229.73   | 1437.115 | 134.9388 | 1148.31  | 1036.594 |
| ENSMUSG000000063804  | 7_Lin28b        | 4.026154303 | 1.085861 | 0.366393 | 0.748216 | 2.436397 | 5.152501  | 0        | 8.929771 | 4.52536  | 3.112896 |
| ENSMUSG000000016831  | 11_Tox4         | 1991.554762 | 0.20147  | 0.366585 | 0.748309 | 1759.078 | 1804.234  | 1995.161 | 2193.747 | 2266.074 | 1931.033 |
| ENSMUSG0000000029563 | 16_Foxp2        | 255.0539497 | 0.484564 | 0.366664 | 0.748394 | 267.1915 | 226.7101  | 143.8265 | 530.8253 | 145.9429 | 215.8275 |
| ENSMUSG0000000029510 | 15_Gp2c         | 548.6376777 | -0.32265 | 0.366736 | 0.748433 | 579.0502 | 587.3852  | 662.7526 | 301.6278 | 524.9418 | 636.0685 |
| ENSMUSG0000000097217 | 1_Gm26549       | 19.62613506 | 0.558253 | 0.366758 | 0.748433 | 12.99411 | 19.75126  | 14.95796 | 39.68787 | 15.83876 | 14.52685 |
| ENSMUSG0000000021485 | 13_Mdx2         | 62.15730192 | -0.47362 | 0.366975 | 0.748798 | 81.21322 | 51.52501  | 83.99468 | 21.82833 | 69.01175 | 65.37082 |
| ENSMUSG0000000028527 | 18_Ak4          | 207.4389222 | 0.281314 | 0.367047 | 0.748869 | 198.9724 | 188.925   | 173.7424 | 265.9087 | 250.0262 | 167.0588 |
| ENSMUSG0000000022747 | 16_St3ga6l      | 295.069894  | 0.57688  | 0.367086 | 0.748871 | 237.9547 | 298.8451  | 173.7424 | 32.2412  | 122.1847 | 205.4511 |
| ENSMUSG000000058454  | 14_Dhcr7        | 1869.100762 | -0.37954 | 0.367411 | 0.749401 | 2087.992 | 1902.99   | 2349.55  | 795.7418 | 2122.394 | 1955.936 |
| ENSMUSG0000000097242 | 1_Gm16907       | 28.63896639 | -0.38839 | 0.367421 | 0.749401 | 30.04889 | 38.64376  | 28.7653  | 25.79712 | 26.02082 | 22.82791 |
| ENSMUSG0000000029020 | 13_Mfn2         | 2526.947248 | -0.31501 | 0.367503 | 0.749415 | 2521.67  | 2859.638  | 3023.809 | 1389.076 | 2728.792 | 2638.698 |
| ENSMUSG0000000062175 | 13_Tgfr1        | 372.7450322 | -0.27243 | 0.367466 | 0.749415 | 374.3929 | 419.9289  | 429.1783 | 250.0336 | 354.1095 | 408.827  |
| ENSMUSG0000000045886 | 6_Gm9803        | 130.0958779 | -0.47994 | 0.367667 | 0.749673 | 129.129  | 135.6825  | 189.851  | 39.68787 | 123.3161 | 162.9084 |
| ENSMUSG0000000079941 | 1_Gm11273       | 4.48133665  | -0.90753 | 0.36774  | 0.749746 | 3.248529 | 8.587502  | 5.753061 | 4.960984 | 2.26268  | 2.075264 |
| ENSMUSG0000000028033 | 16_Kcnq5        | 77.54389965 | -0.42108 | 0.367869 | 0.749783 | 95.01946 | 115.9313  | 55.22938 | 97.23529 | 52.04164 | 49.80634 |
| ENSMUSG0000000055553 | 16_Kxd1         | 639.4714483 | -0.35605 | 0.367813 | 0.749783 | 729.2947 | 700.7402  | 723.735  | 298.6512 | 653.9146 | 730.493  |
| ENSMUSG0000000078429 | 8_Ctbsp2        | 7410.135671 | -0.3053  | 0.367871 | 0.749783 | 7499.229 | 8509.356  | 8565.157 | 4202.946 | 7482.683 | 8201.444 |
| ENSMUSG0000000030444 | 8_Med29         | 315.6986664 | -0.46909 | 0.367986 | 0.749833 | 345.9683 | 358.9576  | 394.66   | 89.29771 | 359.7662 | 345.5315 |
| ENSMUSG000000006007  | 14_Pdc          | 130.7017388 | 0.802147 | 0.368122 | 0.749833 | 138.0625 | 103.9088  | 43.72326 | 394.8943 | 85.98185 | 17.63975 |
| ENSMUSG0000000021606 | 7_Ndufs6        | 895.9625554 | -0.38992 | 0.368059 | 0.749833 | 972.9343 | 964.3765  | 1111.491 | 362.1518 | 996.7106 | 968.1107 |
| ENSMUSG0000000030041 | 9_Mtap          | 7.196256042 | -0.75535 | 0.368029 | 0.749833 | 9.745586 | 10.305    | 6.903673 | 1.984394 | 9.050721 | 5.18816  |
| ENSMUSG0000000033356 | 3_Pus7l         | 12.01799576 | 0.257547 | 0.367987 | 0.749833 | 108.0136 | 101.3325  | 124.2661 | 129.9778 | 144.8115 | 123.4782 |
| ENSMUSG0000000050357 | 8_Rtptr         | 8.605993975 | -0.84362 | 0.368105 | 0.749833 | 12.99411 | 5.152501  | 14.95796 | 0.992197 | 11.3134  | 6.225792 |
| ENSMUSG0000000009580 | 15_Odam         | 5.989521889 | 0.960552 | 0.368381 | 0.750075 | 0.812132 | 6.870002  | 4.602448 | 14.88295 | 5.656701 | 3.112896 |
| ENSMUSG0000000022708 | 16_Zbtb20       | 1849.361647 | 0.430876 | 0.368361 | 0.750075 | 1580.409 | 1720.935  | 1424.458 | 3673.113 | 1700.248 | 1627.007 |
| ENSMUSG0000000031932 | 14_Gpr83        | 4.909722496 | -0.87492 | 0.368362 | 0.750075 | 7.30919  | 6.011252  | 5.753061 | 5.953181 | 3.39402  | 1.037632 |
| ENSMUSG0000000047719 | 2_Ubiad1        | 420.7171116 | -0.31941 | 0.368391 | 0.750075 | 431.2422 | 480.9001  | 489.0101 | 230.1897 | 458.1927 | 434.7678 |
| ENSMUSG0000000003153 | 10_Slc2a3       | 37.25184584 | -0.3618  | 0.368674 | 0.750151 | 47.10367 | 43.79626  | 34.51836 | 32.74249 | 37.33422 | 28.01607 |
| ENSMUSG0000000003410 | 7_Elav13        | 6.04965385  | -0.7374  | 0.368692 | 0.750151 | 9.745586 | 6.011252  | 6.903673 | 4.960984 | 4.52536  | 4.150528 |
| ENSMUSG0000000026639 | 18_Lamb3        | 2817.404514 | -0.57665 | 0.368558 | 0.750151 | 2749.067 | 3137.015  | 4233.102 | 464.3481 | 3741.342 | 2579.553 |
| ENSMUSG0000000028539 | 14_Artm         | 301.2096845 | -0.37328 | 0.368664 | 0.750151 | 332.1621 | 319.4551  | 368.1959 | 134.9388 | 298.6738 | 353.8325 |
| ENSMUSG0000000031343 | 13_Gabra3       | 60.2136408  | 0.594628 | 0.368476 | 0.750151 | 48.72793 | 58.39502  | 36.81959 | 43.8685  | 22.6268  | 50.84397 |
| ENSMUSG0000000031781 | 13_Claipin1     | 1093.554662 | -0.37453 | 0.368627 | 0.750151 | 1206.016 | 1178.205  | 1319.752 | 469.3091 | 1233.161 | 1154.884 |
| ENSMUSG0000000079343 | 3_C1s2          | 375.5525791 | 0.25004  | 0.368535 | 0.750151 | 405.254  | 352.9463  | 270.3938 | 418.7071 | 410.8765 | 395.3378 |
| ENSMUSG0000000002017 | 7_Fam98a        | 1119.611562 | 0.25638  | 0.368937 | 0.750343 | 1028.971 | 953.2127  | 1079.274 | 1535.921 | 1144.916 | 975.3741 |
| ENSMUSG0000000022986 | 5_Krt75         | 403.0867192 | -0.51703 | 0.368882 | 0.750343 | 402.8176 | 480.0414  | 540.7877 | 95.25089 | 350.7154 | 548.9074 |
| ENSMUSG0000000035781 | 13_R3hdm4       | 3223.948472 | -0.38025 | 0.368923 | 0.750343 | 3116.963 | 3523.452  | 4298.687 | 1393.044 | 3636.127 | 3375.417 |
| ENSMUSG0000000073460 | 4_Pnlidc1       | 11.53509065 | -0.80171 | 0.368899 | 0.750343 | 10.55772 | 12.88125  | 18.40979 | 5.953181 | 7.919381 | 13.48922 |
| ENSMUSG0000000010825 | 17_Grid2lp      | 36.49792784 | -0.41575 | 0.369122 | 0.750582 | 45.4794  | 36.92626  | 42.57265 | 18.85174 | 42.99092 | 32.16659 |
| ENSMUSG0000000023249 | 14_Parp3        | 444.8356666 | -0.21067 | 0.369205 | 0.750582 | 462.9153 | 515.2501  | 453.3412 | 404.8163 | 444.6167 | 388.0744 |
| ENSMUSG0000000038816 | 14_Cttnal1      | 1682.908061 | 0.267232 | 0.369203 | 0.750582 | 1477.268 | 1605.004  | 1500.398 | 2410.046 | 1467.348 | 1637.383 |
| ENSMUSG0000000039662 | 16_lcm1         | 1817.902852 | -0.3105  | 0.369159 | 0.750582 | 1915.008 | 2067.012  | 2056.144 | 1000.134 | 1926.672 | 1942.447 |
| ENSMUSG0000000030413 | 7_Pglyrp1       | 8817.050117 | -0.43367 | 0.369451 | 0.750933 | 8883.914 | 9553.596  | 11959.46 | 2953.77  | 10077.98 | 9473.581 |
| ENSMUSG0000000030701 | 16_Plekhb1      | 214.8472344 | -0.39589 | 0.369491 | 0.750933 | 291.5555 | 297.9863  | 142.6759 | 247.057  | 119.9221 | 189.8867 |
| ENSMUSG0000000041750 | 13_Cd1d2        | 3.06554168  | 1.770888 | 0.369466 | 0.750933 | 4.060661 | 0         | 0        | 0        | 10.18206 | 4.150528 |
| ENSMUSG0000000000340 | 10_Dbt          | 590.8263527 | 0.275262 | 0.369588 | 0.750977 | 534.383  | 525.5551  | 544.2395 | 852.2971 | 501.1837 | 587.2997 |
| ENSMUSG0000000038366 | 15_Lasp1        | 4447.195709 | -0.32328 | 0.369558 | 0.750977 | 4474.036 | 4751.465  | 5604.632 | 2382.265 | 4926.986 | 4543.791 |
| ENSMUSG0000000097122 | 1_Gm26624       | 8.226637085 | 0.828568 | 0.36963  | 0.750985 | 5.684925 | 8.587502  | 3.451836 | 21.82833 | 5.566701 | 4.150528 |
| ENSMUSG000000001472  | 16_Tcf25        | 5385.112056 | -0.38492 | 0.36967  | 0.75099  | 5814.866 | 6199.318  | 6283.493 | 2178.864 | 5774.36  | 6059.771 |
| ENSMUSG0000000042262 | 4_Cor8          | 2.087458238 | 1.986479 | 0.369709 | 0.750992 | 2.436397 | 0         | 0        | 0        | 9.050721 | 1.037632 |
| ENSMUSG0000000043067 | 15_Pdy19l1      | 992.9935454 | 0.28512  | 0.369946 | 0.751397 | 925.8307 | 888.8065  | 871.0134 | 1471.428 | 984.2659 | 816.6164 |
| ENSMUSG0000000068391 | 8_Chracl1       | 554.7752726 | -0.36779 | 0.369997 | 0.751425 | 606.6627 | 655.2264  | 613.2763 | 250.0336 | 536.2552 | 667.1974 |
| ENSMUSG0000000025212 | 16_Sfxn3        | 1306.885894 | -0.24872 | 0.370059 | 0.751475 | 1364.382 | 1440.124  | 1453.223 | 918.7743 | 1229.767 | 1435.045 |
| ENSMUSG0000000001056 | 3_Nhp2          | 814.4840117 | -0.49847 | 0.370377 | 0.751488 | 994.8619 | 791.7677  |          |          |          |          |

|                     |                 |             |          |          |          |          |          |          |          |          |          |
|---------------------|-----------------|-------------|----------|----------|----------|----------|----------|----------|----------|----------|----------|
| ENSMUSG00000073436  | 11_Eme2         | 502.3151917 | -0.44456 | 0.371522 | 0.751686 | 503.522  | 605.4189 | 628.2342 | 158.7515 | 581.5088 | 536.4558 |
| ENSMUSG00000087119  | 4_Alg4a-ps      | 3.414437547 | 1.258567 | 0.371199 | 0.751686 | 1.624264 | 0        | 4.602448 | 9.921968 | 2.26268  | 2.075264 |
| ENSMUSG00000099083  | 7_Aif7          | 2286.10343  | 0.224625 | 0.371378 | 0.751686 | 2049.822 | 2111.667 | 2164.301 | 2961.707 | 2160.86  | 2268.264 |
| ENSMUSG000000042106 | 5_Fam212a       | 136.7989977 | -0.47913 | 0.371606 | 0.751779 | 164.0507 | 136.5413 | 177.1943 | 38.69568 | 166.307  | 138.0051 |
| ENSMUSG00000020629  | 12_Adi1         | 463.3144224 | 0.300351 | 0.371835 | 0.751805 | 397.1326 | 437.9626 | 409.6179 | 711.4051 | 374.4736 | 449.2947 |
| ENSMUSG00000020691  | 13_Mettl2       | 397.4336677 | 0.21381  | 0.371667 | 0.751805 | 368.708  | 347.7938 | 387.7563 | 441.5276 | 455.3901 | 382.8862 |
| ENSMUSG00000021068  | 15_Nin          | 593.0069805 | 0.225483 | 0.371958 | 0.751805 | 521.3889 | 563.3401 | 555.7456 | 748.1164 | 614.3177 | 555.1332 |
| ENSMUSG00000021177  | 15_Tdp1         | 254.7587109 | -0.3711  | 0.371859 | 0.751805 | 265.5672 | 300.5626 | 295.7073 | 114.1026 | 295.2798 | 257.3328 |
| ENSMUSG00000032411  | 15_Tfdp2        | 740.4441976 | 0.314341 | 0.371919 | 0.751805 | 640.7723 | 655.2264 | 684.6142 | 1136.065 | 537.3865 | 788.6004 |
| ENSMUSG00000032902  | 1_Slc16a1       | 670.2847636 | 0.364112 | 0.371815 | 0.751805 | 709.8035 | 608.8539 | 439.5338 | 1128.128 | 629.0251 | 506.3644 |
| ENSMUSG00000052915  | 14_Msl1         | 2536.617804 | 0.209489 | 0.371846 | 0.751805 | 2418.53  | 2266.242 | 2373.713 | 3142.287 | 2567.011 | 2451.925 |
| ENSMUSG00000053279  | 6_Aldh1a1       | 3512.2629   | 0.309549 | 0.371954 | 0.751805 | 3162.443 | 3217.737 | 3030.712 | 5474.942 | 2634.891 | 3552.852 |
| ENSMUSG00000058586  | 11_Serh1        | 814.0627612 | -0.39711 | 0.371695 | 0.751805 | 925.0186 | 881.0777 | 969.966  | 314.5264 | 848.5051 | 945.2828 |
| ENSMUSG00000031711  | 6_Zfp330        | 702.5440636 | 0.209482 | 0.372243 | 0.751999 | 628.5903 | 622.5939 | 704.1746 | 837.4141 | 700.2995 | 722.1919 |
| ENSMUSG00000038910  | 6_Plcl2         | 63.3052675  | 0.52079  | 0.372182 | 0.751999 | 93.3952  | 30.05626 | 32.21714 | 99.21968 | 80.32515 | 44.61818 |
| ENSMUSG00000039157  | 12_Fam102a      | 2411.185585 | -0.34416 | 0.37219  | 0.751999 | 2418.53  | 2637.222 | 3036.465 | 1177.738 | 2676.751 | 2520.408 |
| ENSMUSG00000040537  | 17_Adam22       | 141.3144033 | 0.446643 | 0.372117 | 0.751999 | 121.0077 | 157.1513 | 80.54285 | 264.9165 | 89.37587 | 134.8922 |
| ENSMUSG00000097842  | 2_9330104G04Rik | 18.13274581 | -0.53202 | 0.372216 | 0.751999 | 20.3033  | 12.0225  | 32.21714 | 11.90636 | 14.70742 | 17.63975 |
| ENSMUSG00000058569  | 7_Tmed9         | 3646.326623 | -0.29607 | 0.372296 | 0.75203  | 3931.532 | 3763.902 | 4361.971 | 2128.262 | 4037.753 | 3654.54  |
| ENSMUSG00000063600  | 14_Egfm1        | 1.625076561 | 1.455944 | 0.372354 | 0.75207  | 0.812132 | 1.1715   | 0        | 2.97659  | 1.13134  | 3.112896 |
| ENSMUSG00000028330  | 8_Ncbp1         | 1420.422361 | 0.209333 | 0.372709 | 0.752232 | 1348.952 | 1188.51  | 1415.253 | 1685.742 | 1496.763 | 1387.314 |
| ENSMUSG00000029472  | 13_Anapc5       | 5718.667254 | -0.22985 | 0.372736 | 0.752232 | 6013.027 | 6254.278 | 6252.426 | 4243.626 | 5334.269 | 6214.378 |
| ENSMUSG00000031479  | 8_Vps36         | 1538.608402 | 0.232478 | 0.372528 | 0.752232 | 1443.159 | 1309.594 | 1492.344 | 2012.175 | 1446.984 | 1527.394 |
| ENSMUSG00000035443  | 9_Thyn1         | 206.0949675 | 0.219517 | 0.372672 | 0.752232 | 198.1603 | 192.36   | 180.6461 | 230.1897 | 218.3486 | 216.8651 |
| ENSMUSG00000036905  | 8_C1qb          | 560.6994667 | -0.48692 | 0.372673 | 0.752232 | 706.555  | 639.7689 | 616.7281 | 140.8919 | 683.3294 | 576.9234 |
| ENSMUSG00000045246  | 11_Kcng4        | 14.78422455 | -0.49831 | 0.372576 | 0.752232 | 15.43051 | 21.46876 | 14.95796 | 10.91416 | 12.44474 | 13.48922 |
| ENSMUSG00000057286  | 5_Stf6galnac2   | 3740.666416 | -0.29165 | 0.372503 | 0.752232 | 3945.338 | 4009.505 | 4397.639 | 2293.959 | 3366.868 | 4430.689 |
| ENSMUSG00000069769  | 13_Msl2         | 2464.866723 | 0.325095 | 0.37264  | 0.752232 | 2193.569 | 2338.377 | 2033.132 | 4026.335 | 1885.944 | 2311.844 |
| ENSMUSG00000056380  | 13_Gpr50        | 23.4064096  | 0.495569 | 0.372806 | 0.752298 | 21.11544 | 12.0225  | 25.31347 | 22.82053 | 39.5969  | 19.71501 |
| ENSMUSG00000050534  | 15_Pkracb       | 1201.159828 | 0.296185 | 0.373072 | 0.752406 | 1093.13  | 1112.082 | 1029.798 | 1854.416 | 1011.418 | 1106.116 |
| ENSMUSG00000013646  | 17_Sh3bp5l      | 2538.221676 | -0.43129 | 0.373322 | 0.752406 | 2592.326 | 2753.153 | 3398.908 | 847.3361 | 2983.344 | 2654.263 |
| ENSMUSG00000017466  | 9_Timp2         | 5768.230911 | -0.25556 | 0.37307  | 0.752406 | 6220.932 | 7118.181 | 5494.173 | 5249.713 | 4141.836 | 6384.55  |
| ENSMUSG00000022272  | 17_Myo10        | 2113.10212  | -0.24899 | 0.373323 | 0.752406 | 2053.882 | 2285.993 | 2545.154 | 1511.116 | 2281.913 | 2000.555 |
| ENSMUSG00000022629  | 16_Klf21a       | 9843.617256 | 0.204797 | 0.373022 | 0.752406 | 8847.368 | 8765.264 | 9826.227 | 11926.21 | 9562.087 | 10134.55 |
| ENSMUSG00000022941  | 8_Ripply3       | 797.2510803 | 0.235185 | 0.37329  | 0.752406 | 618.0326 | 754.8414 | 824.9889 | 941.5948 | 744.4218 | 899.627  |
| ENSMUSG00000025993  | 10_Slc40a1      | 75.93736112 | 0.403423 | 0.373541 | 0.752406 | 79.58895 | 63.54752 | 52.92816 | 133.9466 | 63.35505 | 62.25792 |
| ENSMUSG00000030428  | 16_Ttyh1        | 124.6844792 | -0.27926 | 0.373026 | 0.752406 | 123.4441 | 162.3038 | 124.2661 | 126.009  | 117.6594 | 94.42452 |
| ENSMUSG00000031826  | 19_Usp10        | 2014.938156 | -0.26692 | 0.37357  | 0.752406 | 1971.857 | 2246.491 | 2384.068 | 1317.637 | 2071.484 | 2098.092 |
| ENSMUSG00000037493  | 6_Cib2          | 453.5029268 | -0.36969 | 0.373339 | 0.752406 | 498.6492 | 485.1939 | 549.9926 | 206.3769 | 416.3332 | 564.4718 |
| ENSMUSG00000041143  | 16_Tmco4        | 644.4268762 | -0.44805 | 0.37319  | 0.752406 | 693.5609 | 727.3614 | 810.0309 | 196.455  | 763.8546 | 675.4985 |
| ENSMUSG00000043487  | 3_Acot6         | 69.36778104 | 0.441063 | 0.373549 | 0.752406 | 66.59484 | 62.68877 | 47.1751  | 131.9622 | 61.09237 | 46.69344 |
| ENSMUSG00000045636  | 16_Mtus1        | 5412.0565   | 0.25531  | 0.373201 | 0.752406 | 4724.985 | 5094.106 | 4984.452 | 7629.001 | 5484.177 | 5145.617 |
| ENSMUSG00000053877  | 12_Scap         | 2953.052595 | -0.60315 | 0.37297  | 0.752406 | 3344.36  | 3580.988 | 3759.05  | 362.1518 | 3467.557 | 3204.208 |
| ENSMUSG00000059316  | 2_Sic27a4       | 2790.187478 | -0.51127 | 0.373353 | 0.752406 | 2997.58  | 3096.653 | 3744.092 | 607.2245 | 3297.856 | 2997.719 |
| ENSMUSG00000064267  | 13_Hvcn1        | 134.9975605 | -0.46677 | 0.373392 | 0.752406 | 152.6808 | 198.3713 | 118.513  | 45.64105 | 176.4891 | 118.2901 |
| ENSMUSG00000071691  | 10_Gm960        | 41.35119748 | 0.361716 | 0.373476 | 0.752406 | 35.73382 | 28.33876 | 54.57082 | 44.12226 | 40.46765 |          |
| ENSMUSG00000095325  | 1_Zfp870        | 226.1607966 | 0.33537  | 0.373432 | 0.752406 | 224.1485 | 180.3375 | 195.6041 | 369.0972 | 196.8532 | 190.9243 |
| ENSMUSG00000097662  | 1_Gm2093        | 4.598051224 | 0.835815 | 0.373578 | 0.752406 | 3.248529 | 4.269371 | 2.301224 | 7.937575 | 5.656701 | 1.905258 |
| ENSMUSG00000020154  | 9_Ptprb         | 391.6523054 | 0.31135  | 0.373616 | 0.752407 | 322.4165 | 398.4601 | 327.9245 | 591.3493 | 300.9365 | 408.827  |
| ENSMUSG00000041293  | 5_Adgrf1        | 3883.757129 | 0.187465 | 0.373726 | 0.752552 | 3608.303 | 3513.147 | 3774.008 | 4163.258 | 4407.701 | 3836.126 |
| ENSMUSG00000024120  | 12_Lrrprc       | 1045.203762 | 0.210276 | 0.373816 | 0.752592 | 1002.171 | 951.4952 | 953.8574 | 1278.942 | 1091.743 | 993.0139 |
| ENSMUSG00000035456  | 8_Prdm8         | 22.19904997 | 0.517873 | 0.373821 | 0.752592 | 16.24264 | 18.03375 | 20.71102 | 34.72689 | 11.3134  | 32.16659 |
| ENSMUSG00000025083  | 17_Afp112       | 1353.338544 | -0.25876 | 0.373976 | 0.752595 | 1277.484 | 1465.887 | 1679.894 | 947.548  | 1434.539 | 1314.68  |
| ENSMUSG00000029009  | 17_Mthfr        | 1372.613733 | -0.4591  | 0.373894 | 0.752595 | 1509.754 | 1468.463 | 1789.202 | 402.8319 | 1744.526 | 1320.906 |
| ENSMUSG00000032374  | 14_Plcl2        | 183.8988563 | 0.500215 | 0.373951 | 0.752595 | 157.5536 | 175.185  | 124.2661 | 413.7461 | 127.8414 | 140.8008 |
| ENSMUSG00000040174  | 14_Alkhh3       | 460.846873  | -0.27457 | 0.374011 | 0.752595 | 506.7705 | 453.4201 | 553.4444 | 303.6122 | 506.8404 | 440.9936 |
| ENSMUSG00000075467  | 4_Dnlz          | 571.447312  | -0.4491  | 0.373945 | 0.752595 | 639.9602 | 603.7014 | 735.2411 | 174.6266 | 687.8548 | 587.2997 |
| ENSMUSG00000005413  | 7_Hmxo1         | 237.7787607 | -0.39189 | 0.374269 | 0.752832 | 329.7257 | 241.3088 | 238.1767 | 112.1182 | 313.3812 | 191.9619 |
| ENSMUSG00000031691  | 13_Tnpo2        | 2629.568264 | -0.34272 | 0.374281 | 0.752832 | 2822.971 | 2799.526 | 3198.702 | 1268.028 | 2955.06  | 2733.123 |
| ENSMUSG00000033639  | 12_Nudt1        | 257.5586173 | -0.38848 | 0.37426  | 0.752832 | 291.5555 | 264.4951 | 319.8702 | 108.1495 | 312.2499 | 249.0317 |
| ENSMUSG00000044749  | 13_Abca6        | 41.65746877 | 0.487675 | 0.374237 | 0.752832 | 37.35808 | 30.05626 | 36.81959 | 70.44597 | 19.23278 | 56.03213 |
| ENSMUSG00000038664  | 16_Herc1        | 2473.767917 | 0.213439 | 0.374329 | 0.752853 | 2365.741 | 2184.661 | 2320.785 | 3112.521 | 2488.948 | 2369.952 |
| ENSMUSG000000004317 | 14_Clc5         | 397.3663123 | 0.339016 | 0.37441  | 0.75294  | 348.4047 | 375.2738 | 329.0751 | 665.7641 | 357.5035 | 308.1767 |
| ENSMUSG00000000902  | 13_Smarcb1      | 1315.4954   | -0.39412 | 0.375401 | 0.752946 | 1441.535 | 1464.169 | 1576.339 | 506.0204 | 1522.784 | 1382.126 |
| ENSMUSG00000001418  | 13_Glmp         | 1901.155028 | -0.3939  | 0.376155 | 0.752946 | 2005.154 | 2269.677 | 2202.272 | 728.2725 | 2099.221 | 2132.334 |
| ENSMUSG00000004568  | 12_Arhgef18     | 3631.678154 | -0.31158 | 0.374778 | 0.752946 | 3625.358 | 3965.709 | 4475.881 | 1999.277 | 3955.165 | 3768.68  |
| ENSMUSG00000009185  | 2_Ccl8          | 227.879854  | 0.324938 | 0.374726 | 0.752946 | 260.6944 | 177.7613 | 167.9894 | 223.2443 | 139.402  | 198.1877 |
| ENSMUSG00000020490  | 16_Btn10        | 0.947487541 | -3.30193 | 0.374891 | 0.752946 | 5.684925 | 0        | 0        | 0        | 0        | 0        |
| ENSMUSG00000021176  | 5_Elfcab11      | 47.54425754 | 0.353883 | 0.374973 | 0.752946 | 47.10367 | 30.05626 | 48.32571 | 59.53181 | 45.2536  | 54.9945  |
| ENSMUSG00000021782  | 14_Dlg5         | 1375.770552 | -0.36059 | 0.374821 | 0.752946 | 1368.443 | 1551.762 | 1720.165 | 623.0996 | 1474.136 | 1517.018 |
| ENSMUSG00000024366  | 7_Gfra3         | 23.20449795 | -0.66196 | 0.374618 | 0.752946 | 22.7397  | 36.06751 | 26.46408 | 3.968787 | 14.70742 | 35.27949 |
| ENSMUSG00000027751  | 13_Supt20       | 1995.846016 | 0.243992 | 0.375671 | 0.752946 | 1931.25  | 1690.879 | 1860.54  | 2710.682 | 1836.165 | 1945.56  |
| ENSMUSG00000027884  | 16_Clc1         | 1204.6801   | 0.223085 | 0.37619  | 0.752946 | 1091.506 | 1014.184 | 1230.004 | 1511.116 | 1201.483 | 1179.788 |
| ENSMUSG00000028619  | 15_Tceanc2      | 623.8860619 | 0.213899 | 0.37598  | 0.752946 | 540.0679 | 581.3739 | 612.1256 | 762.0072 | 619.9744 | 627.7674 |
| ENSMUSG00000031098  | 17_Sytl8        | 3240.797764 | -0.51143 | 0.375737 | 0.752946 | 3329.742 | 3514.006 | 458      |          |          |          |

|                      |                  |             |          |          |          |          |          |          |          |          |          |
|----------------------|------------------|-------------|----------|----------|----------|----------|----------|----------|----------|----------|----------|
| ENSMUSG00000091931   | 5_AK010878       | 89.22933543 | 0.344557 | 0.375751 | 0.752946 | 82.83748 | 81.58127 | 71.33795 | 129.9778 | 106.346  | 63.29556 |
| ENSMUSG00000092137   | 7_Gcom1          | 99.65735647 | -1.42458 | 0.375104 | 0.752946 | 162.4264 | 130.53   | 142.6759 | 0        | 55.43567 | 106.8761 |
| ENSMUSG000000100147  | 2_170047M11Rik   | 70.54037455 | -0.44841 | 0.37575  | 0.752946 | 108.8257 | 79.00502 | 56.37999 | 86.32112 | 29.41484 | 63.29556 |
| ENSMUSG000000024921  | 8_Smarca2        | 2770.730222 | 0.28008  | 0.376245 | 0.752981 | 2533.04  | 2366.716 | 2608.438 | 4134.484 | 2343.005 | 2638.698 |
| ENSMUSG000000073599  | 9_Escor          | 99.0903876  | 0.385892 | 0.376346 | 0.75308  | 108.8257 | 78.14627 | 72.48856 | 65.48499 | 157.2563 | 117.2524 |
| ENSMUSG000000107876  | 1_RP23-281H4     | 1.414355479 | -1.66746 | 0.37637  | 0.75308  | 1.624264 | 2.576251 | 2.301224 | 1.984394 | 0        | 0        |
| ENSMUSG000000017188  | 3_Coa3           | 1120.366361 | -0.37475 | 0.376509 | 0.753207 | 1196.271 | 1267.515 | 1331.258 | 467.3247 | 1235.423 | 1224.406 |
| ENSMUSG000000028927  | 6_Padi2          | 42.13750128 | -0.47492 | 0.376502 | 0.753207 | 56.03712 | 57.53626 | 33.36775 | 31.7503  | 18.10144 | 56.03213 |
| ENSMUSG000000031385  | 14_Plxnb3        | 13.42360484 | -0.56693 | 0.376555 | 0.753224 | 17.05478 | 17.175   | 13.80735 | 6.945378 | 7.919381 | 17.63975 |
| ENSMUSG000000040918  | 12_Slc19a2       | 3316.541579 | 0.235278 | 0.376737 | 0.753511 | 2942.355 | 2894.847 | 3303.407 | 4402.377 | 3065.932 | 3290.331 |
| ENSMUSG000000097055  | 1_Gm4419         | 2.381533946 | -1.25042 | 0.376807 | 0.753577 | 4.872793 | 1.1715   | 3.451836 | 1.984394 | 2.26268  | 0        |
| ENSMUSG000000028399  | 17_Ptprd         | 473.7460761 | 0.372849 | 0.376897 | 0.753681 | 423.1209 | 485.1939 | 330.2257 | 835.4297 | 346.1901 | 422.3163 |
| ENSMUSG000000032607  | 12_Amt           | 353.2317088 | -0.23442 | 0.377035 | 0.753693 | 402.8176 | 367.5451 | 375.0995 | 272.8541 | 321.3006 | 379.7733 |
| ENSMUSG000000035620  | 14_Ric8b         | 392.8626859 | 0.252591 | 0.377054 | 0.753693 | 368.708  | 367.5451 | 339.4306 | 536.7785 | 384.6556 | 360.0583 |
| ENSMUSG000000086006  | 2_Gm13293        | 85.91080971 | 0.3051   | 0.376983 | 0.753693 | 89.33454 | 83.29877 | 57.53061 | 107.1573 | 83.71917 | 94.42452 |
| ENSMUSG000000097479  | 1_Gm26582        | 39.79155247 | 0.703107 | 0.376966 | 0.753693 | 17.86691 | 38.64376 | 34.51836 | 113.1104 | 16.9701  | 17.63975 |
| ENSMUSG000000036169  | 5_Sotdcl1        | 90.60806457 | -0.46096 | 0.377165 | 0.753763 | 94.20733 | 111.6375 | 109.3082 | 136.9232 | 40.72824 | 50.84397 |
| ENSMUSG000000097051  | 1_Gm26836        | 5.146548635 | 0.896298 | 0.377144 | 0.753763 | 3.248529 | 0.85875  | 6.903673 | 8.929771 | 6.788041 | 4.150528 |
| ENSMUSG000000004864  | 12_Mapk13        | 780.2296567 | -0.50862 | 0.37734  | 0.753915 | 851.9267 | 894.8177 | 1002.183 | 169.6657 | 962.7704 | 800.0143 |
| ENSMUSG000000004945  | 15_Tmem242       | 655.3974032 | -0.26405 | 0.377355 | 0.753915 | 686.2517 | 675.8364 | 783.5668 | 434.5822 | 652.7832 | 699.364  |
| ENSMUSG000000023965  | 13_Fbx17         | 159.0288361 | 0.260503 | 0.377308 | 0.753915 | 466.1639 | 479.1826 | 471.751  | 734.2256 | 475.1628 | 487.6871 |
| ENSMUSG000000025008  | 15_Tctn3         | 295.5179832 | 0.210796 | 0.377532 | 0.754098 | 267.1915 | 255.9076 | 299.1591 | 317.503  | 317.9066 | 315.4401 |
| ENSMUSG000000025317  | 7_Car5a          | 1.452226414 | -1.72482 | 0.37756  | 0.754098 | 3.248529 | 3.435001 | 0        | 0.992197 | 0        | 1.037632 |
| ENSMUSG000000039826  | 13_Trub2         | 493.6984712 | -0.20897 | 0.377503 | 0.754098 | 544.9407 | 529.8489 | 513.173  | 405.8085 | 467.2435 | 501.1763 |
| ENSMUSG000000030589  | 15_Rasgrp4       | 57.75617486 | -0.44729 | 0.377668 | 0.754163 | 93.3952  | 46.37251 | 59.83183 | 34.72689 | 76.93113 | 35.27949 |
| ENSMUSG000000033508  | 7_Asprv1         | 74571.75756 | -0.47755 | 0.377655 | 0.754163 | 83683.72 | 86452.96 | 90270.12 | 18659.25 | 82672.68 | 85691.81 |
| ENSMUSG000000033502  | 14_Cdc14a        | 396.0931907 | 0.407511 | 0.377724 | 0.754199 | 340.2834 | 354.6638 | 326.7738 | 769.9447 | 259.0769 | 325.8165 |
| ENSMUSG000000023868  | 15_Pde10a        | 62.32254207 | 0.294756 | 0.377923 | 0.754205 | 52.78859 | 56.67751 | 58.68122 | 76.39915 | 58.82969 | 70.55898 |
| ENSMUSG000000026592  | 13_Tex35         | 2.142071063 | -1.53586 | 0.377836 | 0.754205 | 4.872793 | 3.435001 | 1.150612 | 0        | 3.39402  | 0        |
| ENSMUSG000000026874  | 10_Hc            | 22.22869611 | 0.414244 | 0.377958 | 0.754205 | 19.49117 | 21.46876 | 16.10857 | 28.77371 | 22.6268  | 24.90317 |
| ENSMUSG000000030218  | 2_Mgp            | 2405.425717 | -0.33126 | 0.377943 | 0.754205 | 2953.725 | 2273.971 | 2813.247 | 1233.301 | 2646.205 | 2512.107 |
| ENSMUSG000000032504  | 15_Pdcdf6p       | 8134.147732 | 0.233302 | 0.377992 | 0.754205 | 7037.937 | 7133.638 | 8262.546 | 10606.58 | 8399.609 | 7365.112 |
| ENSMUSG000000046410  | 9_Kcnk6          | 1088.884044 | 0.22837  | 0.377982 | 0.754205 | 980.2435 | 872.4902 | 1156.365 | 1230.324 | 1373.889 | 1109.992 |
| ENSMUSG000000100967  | 1_Gm29666        | 48.62405203 | 0.346247 | 0.377906 | 0.754205 | 37.35808 | 46.37251 | 44.87387 | 68.46158 | 53.17298 | 41.50528 |
| ENSMUSG000000000959  | 6_Oxal1          | 932.8641016 | -0.38368 | 0.378324 | 0.754347 | 920.1458 | 1039.088 | 1209.293 | 382.988  | 983.1345 | 1062.535 |
| ENSMUSG000000001524  | 14_Glt2f4        | 224.3414837 | -0.42464 | 0.378301 | 0.754347 | 252.5731 | 217.2638 | 301.4604 | 79.37575 | 255.6829 | 239.693  |
| ENSMUSG000000023968  | 15_Crip3         | 6.111681427 | -0.72999 | 0.378245 | 0.754347 | 7.30919  | 8.587502 | 6.903673 | 3.968787 | 6.788041 | 3.112896 |
| ENSMUSG000000032415  | 14_Ube2cbp       | 35.98342397 | -0.38645 | 0.378323 | 0.754347 | 37.35808 | 40.36126 | 44.87387 | 42.66446 | 22.6268  | 28.01607 |
| ENSMUSG000000039804  | 15_Ncoa5         | 876.0591401 | -0.2705  | 0.378261 | 0.754347 | 879.5391 | 943.7665 | 1050.509 | 564.56   | 940.1436 | 877.8367 |
| ENSMUSG000000046169  | 9_Adamts6        | 69.36589372 | 0.482317 | 0.378329 | 0.754347 | 54.41286 | 61.83002 | 57.53061 | 147.8373 | 52.04164 | 42.54291 |
| ENSMUSG000000050022  | 16_Amz1          | 26.73256887 | -0.4515  | 0.37814  | 0.754347 | 42.23087 | 21.46876 | 28.7653  | 15.87515 | 27.15216 | 24.90317 |
| ENSMUSG000000030924  | 15_2610020H08Rik | 113.1494283 | 0.311036 | 0.378447 | 0.754484 | 99.08013 | 85.87502 | 118.513  | 163.7125 | 100.6893 | 111.0266 |
| ENSMUSG000000074269  | 10_Rec114        | 8.149515644 | -0.64485 | 0.378473 | 0.754484 | 9.745586 | 8.587502 | 11.50612 | 3.968787 | 6.788041 | 3.301057 |
| ENSMUSG000000054545  | 17_Ugt1a6a       | 3453.820384 | 1.194231 | 0.3787   | 0.75486  | 3205.486 | 2917.175 | 3542.735 | 3571.909 | 3860.132 | 3625.486 |
| ENSMUSG000000020007  | 3_Il20ra         | 248.1554145 | 0.273421 | 0.37883  | 0.754968 | 241.2033 | 177.7613 | 255.4359 | 303.6122 | 293.0711 | 217.9027 |
| ENSMUSG000000028862  | 6_Mapk3k6        | 1060.660401 | -0.50492 | 0.378835 | 0.754968 | 1159.725 | 1112.082 | 1461.277 | 239.1194 | 1340.638 | 1051.142 |
| ENSMUSG000000059991  | 7_Nbptx2         | 40.19849021 | -0.53991 | 0.378867 | 0.754968 | 38.98234 | 32.63251 | 71.33795 | 12.89856 | 53.17298 | 32.16659 |
| ENSMUSG000000024581  | 12_Napg          | 948.1679494 | 0.268046 | 0.378985 | 0.755069 | 868.9814 | 747.1127 | 965.3636 | 1337.481 | 925.4362 | 844.6325 |
| ENSMUSG000000037161  | 14_Mgapr         | 40310.11135 | -0.20236 | 0.378994 | 0.755069 | 39674.28 | 40939.2  | 48784.8  | 34654.64 | 37820.7  | 39987.23 |
| ENSMUSG000000030109  | 15_Slc6a12       | 40.74948519 | -0.63309 | 0.37907  | 0.755069 | 34.10955 | 83.29877 | 31.06653 | 7.937575 | 36.20288 | 51.8816  |
| ENSMUSG000000031490  | 5_Elrf4ebp1      | 547.3352344 | -0.50233 | 0.379069 | 0.755069 | 598.5414 | 586.5264 | 739.8436 | 124.0246 | 667.4907 | 567.5847 |
| ENSMUSG000000041216  | 15_Clvs1         | 23.7759416  | 0.540139 | 0.379108 | 0.75507  | 19.49117 | 29.19751 | 9.204897 | 53.10476 | 15.83876 | 33.20423 |
| ENSMUSG000000024853  | 9_Sf3b2          | 4859.785663 | -0.32525 | 0.379259 | 0.755282 | 4988.928 | 5151.643 | 6075.232 | 2503.313 | 5348.976 | 5090.623 |
| ENSMUSG000000026048  | 16_Erc5          | 968.5930687 | 0.203375 | 0.37929  | 0.755282 | 903.091  | 897.394  | 900.9293 | 1172.777 | 1003.499 | 933.8689 |
| ENSMUSG000000006542  | 13_Pkrqg3        | 6.042423037 | 0.783836 | 0.379424 | 0.755405 | 4.872793 | 6.011252 | 2.301224 | 4.960984 | 5.656701 | 12.45158 |
| ENSMUSG000000011884  | 13_Gltp          | 5390.541857 | -0.30873 | 0.379766 | 0.755405 | 5377.939 | 5643.706 | 6873.757 | 2997.427 | 5726.844 | 5723.578 |
| ENSMUSG000000028405  | 9_Aco1           | 1852.593097 | -0.21067 | 0.379854 | 0.755405 | 1958.051 | 1992.301 | 2012.421 | 1449.6   | 1764.891 | 1938.297 |
| ENSMUSG000000028798  | 16_Elrf3i        | 2811.890698 | -0.41093 | 0.379446 | 0.755405 | 3386.591 | 3026.236 | 3215.961 | 980.2905 | 3146.257 | 3116.009 |
| ENSMUSG000000028840  | 10_Zfp593        | 160.9514719 | -0.56294 | 0.379664 | 0.755405 | 190.0389 | 188.925  | 196.7547 | 25.79712 | 200.2472 | 163.9459 |
| ENSMUSG000000031458  | 7_Coprs          | 81.6015971  | -0.27959 | 0.379661 | 0.755405 | 87.71028 | 102.1913 | 78.24162 | 67.46938 | 80.32515 | 73.67188 |
| ENSMUSG0000000302118 | 15_Fez1          | 119.4353716 | -0.30763 | 0.379717 | 0.755405 | 134.0018 | 163.1625 | 98.95264 | 113.1104 | 85.98185 | 121.403  |
| ENSMUSG000000032436  | 16_Cmtm7         | 202.8035078 | -0.50074 | 0.379827 | 0.755405 | 240.3911 | 214.6876 | 257.7371 | 46.63325 | 235.3187 | 222.0533 |
| ENSMUSG0000000304832 | 15_Tet3          | 4941.217154 | -0.1903  | 0.379879 | 0.755405 | 5062.832 | 5088.954 | 5648.355 | 4243.626 | 5688.273 | 4915.263 |
| ENSMUSG000000044365  | 15_Cxxc4         | 59.94093771 | 0.545396 | 0.379883 | 0.755405 | 44.66727 | 70.41752 | 31.06653 | 132.9544 | 32.80886 | 47.73108 |
| ENSMUSG000000045826  | 8_Ptprcap        | 12.95292569 | -0.78619 | 0.37979  | 0.755405 | 20.3033  | 13.74    | 14.95796 | 2.97659  | 22.6268  | 3.112896 |
| ENSMUSG000000062753  | 13_Al13582       | 475.8116834 | -0.52261 | 0.379707 | 0.755405 | 514.0797 | 524.6964 | 644.3428 | 95.25089 | 506.8404 | 569.66   |
| ENSMUSG000000069516  | 7_Lyz2           | 3516.21089  | 0.332488 | 0.379511 | 0.755405 | 3905.544 | 2544.477 | 2888.036 | 3200.827 | 5674.802 | 2883.58  |
| ENSMUSG000000097206  | 1_Gm26699        | 4.346052031 | 0.870505 | 0.379693 | 0.755405 | 4.060661 | 1.1715   | 3.451836 | 6.945378 | 6.788041 | 3.112896 |
| ENSMUSG000000041703  | 7_Zic5           | 44.13875587 | 0.570747 | 0.379955 | 0.755473 | 22.7397  | 65.26502 | 18.40979 | 85.32893 | 30.4618  | 42.54291 |
| ENSMUSG000000038500  | 15_Prr3          | 198.6095221 | -0.37317 | 0.380197 | 0.755841 | 215.215  | 256.7663 | 200.2065 | 88.30552 | 207.0352 | 224.1285 |
| ENSMUSG000000062200  | 12_Vmn2r7        | 3.187943767 | -1.00404 | 0.380216 | 0.755841 | 3.248529 | 6.011252 | 3.451836 | 1.984394 | 3.39402  | 1.037632 |
| ENSMUSG000000091471  | 1_Gm20538        | 1.034494807 | -2.16639 | 0.380262 | 0.755858 | 0        | 1.1715   | 3.451836 | 0        | 0        | 1.037632 |
| ENSMUSG000000024063  | 12_Lbh           | 873.551459  | -0.22619 | 0.380407 | 0.755944 | 890.909  | 1126.68  | 807.7297 | 789.7887 | 779.4933 | 846.7078 |
| ENSMUSG000000031285  | 14_Dcx           | 2.053569051 | 1.632048 | 0.380483 | 0.755944 | 0.812132 | 0        | 2.301224 | 6.945378 | 2.26268  | 0        |
| ENSMUSG000000037395  | 15_Rcoo3         | 884.0525909 | 0.291363 |          |          |          |          |          |          |          |          |

|                      |                  |             |          |          |          |          |          |          |          |          |          |
|----------------------|------------------|-------------|----------|----------|----------|----------|----------|----------|----------|----------|----------|
| ENSMUSG00000059901   | 12_Adamts14      | 53.36362632 | -0.60426 | 0.382024 | 0.75664  | 64.15844 | 64.40627 | 64.43428 | 6.945378 | 61.09237 | 59.14503 |
| ENSMUSG00000015869   | 16_Prrsap1       | 790.8534838 | -0.26537 | 0.382113 | 0.756742 | 778.8348 | 910.2752 | 900.9293 | 514.9501 | 814.929  | 805.2025 |
| ENSMUSG000000001507  | 16_Iltga3        | 5796.914535 | -0.56291 | 0.382352 | 0.757013 | 6083.682 | 6453.508 | 8203.864 | 888.0161 | 7108.21  | 6044.207 |
| ENSMUSG000000024182  | 16_Axin1         | 1294.399023 | -0.37863 | 0.382388 | 0.757013 | 1411.486 | 1444.418 | 1533.766 | 521.8955 | 1506.945 | 1347.884 |
| ENSMUSG000000026966  | 6_Snsa1          | 715.405052  | -0.41011 | 0.382331 | 0.757013 | 779.6469 | 772.0165 | 897.4774 | 253.0102 | 746.6845 | 843.5949 |
| ENSMUSG000000084792  | 1_1700056N10Rik  | 6.503495254 | 0.720606 | 0.382402 | 0.757013 | 3.248529 | 6.870002 | 4.602448 | 8.929771 | 10.18206 | 5.18816  |
| ENSMUSG000000059772  | 12_Slx1b         | 215.5047725 | -0.37573 | 0.382683 | 0.757495 | 242.8275 | 279.9526 | 207.1102 | 94.2587  | 236.4501 | 232.4296 |
| ENSMUSG000000051703  | 14_Tmem198       | 9.086419378 | -0.8824  | 0.382911 | 0.75787  | 14.61838 | 10.305   | 10.35551 | 0        | 6.788041 | 12.45158 |
| ENSMUSG000000096924  | 1_Gm26824        | 2.414800453 | 1.243436 | 0.382966 | 0.757904 | 1.624264 | 2.576251 | 0        | 3.968787 | 1.13134  | 5.18816  |
| ENSMUSG0000000018570 | 17_2810408A11Rik | 53.65642832 | -0.34878 | 0.383453 | 0.757939 | 55.22499 | 68.70002 | 56.37999 | 37.70348 | 39.5969  | 64.33319 |
| ENSMUSG000000020964  | 14_Sel1          | 3628.795814 | 0.219169 | 0.383075 | 0.757939 | 3342.736 | 3337.962 | 3380.498 | 4625.622 | 3832.98  | 3252.977 |
| ENSMUSG000000021514  | 17_Zfp369        | 267.4688203 | 0.263919 | 0.38326  | 0.757939 | 268.8158 | 257.6251 | 202.5077 | 320.4796 | 228.5307 | 326.8541 |
| ENSMUSG000000026409  | 14_Pfkfb2        | 1989.224838 | 0.213767 | 0.383555 | 0.757939 | 1797.249 | 1718.359 | 2011.27  | 2482.476 | 1936.854 | 1989.141 |
| ENSMUSG000000028651  | 12_Ppie          | 721.3494902 | -0.27526 | 0.383331 | 0.757939 | 743.1009 | 731.6552 | 895.1762 | 457.4027 | 743.2904 | 757.4714 |
| ENSMUSG000000030650  | 17_Tmc5          | 3.276082749 | 1.099689 | 0.383302 | 0.757939 | 1.624264 | 3.435001 | 1.150612 | 2.97659  | 1.13134  | 9.338689 |
| ENSMUSG000000031967  | 15_Afg3l1        | 1334.060456 | -0.3693  | 0.383253 | 0.757939 | 1431.789 | 1446.994 | 1632.719 | 560.5912 | 1514.864 | 1417.405 |
| ENSMUSG000000043795  | 8_Prr33          | 152.3400412 | -0.32978 | 0.383307 | 0.757939 | 171.3599 | 184.6313 | 153.0314 | 117.0792 | 93.90123 | 194.0372 |
| ENSMUSG000000044842  | 15_Smim5         | 61.51146691 | -0.52334 | 0.383525 | 0.757939 | 66.59484 | 63.54752 | 87.44652 | 13.89076 | 70.14309 | 67.44608 |
| ENSMUSG000000049241  | 5_Hcar1          | 324.2849808 | -0.30678 | 0.383411 | 0.757939 | 354.0896 | 347.7938 | 373.9489 | 184.5486 | 306.5932 | 378.7357 |
| ENSMUSG000000053226  | 8_Dand5          | 49.92500395 | -0.3432  | 0.383246 | 0.757939 | 48.72793 | 66.98252 | 51.77754 | 38.69568 | 37.33422 | 56.03213 |
| ENSMUSG000000063929  | 6_Cyp4a32        | 19.10865448 | 0.454162 | 0.383529 | 0.757939 | 12.99411 | 21.46876 | 13.80735 | 18.85174 | 22.6268  | 24.90317 |
| ENSMUSG000000070939  | 9_Tgfbtrap1      | 939.9646693 | -0.23346 | 0.383484 | 0.757939 | 994.8619 | 1043.382 | 1009.087 | 672.7094 | 966.1644 | 953.5839 |
| ENSMUSG000000074218  | 2_Cox7a1         | 44.65003501 | -0.43708 | 0.383495 | 0.757939 | 44.66727 | 67.84127 | 41.42204 | 21.82833 | 35.07154 | 57.06976 |
| ENSMUSG000000094724  | 7_Rnaset2b       | 3702.396872 | 0.177321 | 0.383058 | 0.757939 | 3461.307 | 3543.203 | 3420.77  | 3724.707 | 4095.451 | 3968.943 |
| ENSMUSG000000028396  | 5_2310002L09Rik  | 17.81714631 | 0.982586 | 0.383607 | 0.757968 | 8.933454 | 22.32751 | 4.602448 | 59.53181 | 1.13134  | 10.37632 |
| ENSMUSG000000013275  | 9_Slc41a1        | 3155.801972 | -0.27462 | 0.383687 | 0.758051 | 3154.321 | 3475.362 | 3736.038 | 1949.667 | 3274.098 | 3345.326 |
| ENSMUSG000000036160  | 13_Surf6         | 616.1422366 | -0.28276 | 0.383792 | 0.758108 | 665.9484 | 627.7464 | 735.2411 | 374.0582 | 638.0758 | 655.7835 |
| ENSMUSG000000038936  | 13_Sccpdh        | 319.3973191 | 0.448785 | 0.383791 | 0.758108 | 268.0036 | 327.1838 | 215.1645 | 660.8031 | 188.938  | 256.2951 |
| ENSMUSG000000028468  | 15_Rgp1          | 2262.594072 | -0.40598 | 0.383835 | 0.758117 | 2369.802 | 2538.466 | 2828.205 | 800.7028 | 228.9322 | 2512.107 |
| ENSMUSG000000061175  | 11_Fnip2         | 1697.425694 | 1.190286 | 0.38401  | 0.758387 | 1525.184 | 1530.293 | 1701.755 | 1840.525 | 1913.096 | 1673.701 |
| ENSMUSG000000027628  | 10_Aar2          | 648.9147525 | -0.32008 | 0.384193 | 0.758406 | 675.694  | 702.4577 | 783.5668 | 338.3391 | 712.7443 | 680.6866 |
| ENSMUSG000000039372  | 5_March4         | 20.04066917 | -0.46568 | 0.384135 | 0.758406 | 27.61249 | 25.76251 | 16.10857 | 11.90366 | 18.10144 | 20.75264 |
| ENSMUSG000000039886  | 8_Tmem120a       | 390.6611834 | -0.4361  | 0.384166 | 0.758406 | 464.5396 | 418.2114 | 464.8473 | 121.048  | 458.1927 | 417.1281 |
| ENSMUSG000000041741  | 10_Pde3a         | 182.3245502 | 0.487373 | 0.384226 | 0.758406 | 179.4812 | 156.2925 | 119.6637 | 404.8163 | 102.9519 | 130.7416 |
| ENSMUSG000000060216  | 15_Arrb2         | 295.5784805 | -0.50478 | 0.384248 | 0.758406 | 443.4242 | 296.2688 | 300.3098 | 70.44597 | 388.0497 | 274.9725 |
| ENSMUSG000000079553  | 10_Kifc1         | 226.3278659 | -0.49699 | 0.384114 | 0.758406 | 272.0643 | 270.5063 | 251.9841 | 52.58643 | 291.8857 | 218.9404 |
| ENSMUSG000000020312  | 11_Shc2          | 100.4368159 | -0.33733 | 0.384317 | 0.758409 | 88.52241 | 147.705  | 100.1033 | 75.40696 | 74.66845 | 116.2148 |
| ENSMUSG000000020610  | 16_Arm2          | 906.6605937 | 0.184121 | 0.384326 | 0.758409 | 829.9991 | 845.869  | 871.0134 | 1007.08  | 927.0422 | 963.9602 |
| ENSMUSG000000023243  | 8_Kcnk5          | 631.9830497 | -0.35456 | 0.384581 | 0.758537 | 710.6157 | 620.8764 | 796.2236 | 290.7137 | 647.1265 | 726.3424 |
| ENSMUSG000000032062  | 1_231003G06Rik   | 339.6017826 | 0.256977 | 0.384485 | 0.758537 | 328.1014 | 302.2801 | 298.0085 | 472.2857 | 311.1185 | 325.8165 |
| ENSMUSG000000032300  | 6_1700017B05Rik  | 2.31719651  | -0.49756 | 0.384538 | 0.758537 | 471.8488 | 486.9114 | 541.9383 | 96.24309 | 536.685  | 429.5977 |
| ENSMUSG000000044071  | 7_Fam19a2        | 2.390757895 | 1.512568 | 0.384477 | 0.758537 | 0        | 2.576251 | 1.150612 | 4.960984 | 5.567601 | 0        |
| ENSMUSG000000055271  | 4_933016L109Rik  | 7.710908606 | -0.64947 | 0.384573 | 0.758537 | 8.933454 | 11.16375 | 8.054285 | 3.968787 | 7.919381 | 6.225792 |
| ENSMUSG0000000019518 | 10_Apd4m1        | 633.3804303 | -0.32909 | 0.38491  | 0.758711 | 665.9484 | 680.1302 | 769.7595 | 317.503  | 681.0667 | 685.8748 |
| ENSMUSG000000027702  | 7_Lrrc34         | 1.492903255 | -1.73802 | 0.384885 | 0.758711 | 4.872793 | 0.85875  | 1.150612 | 0        | 0        | 2.075264 |
| ENSMUSG000000032840  | 7_2410131K14Rik  | 429.7244631 | -1.25669 | 0.384844 | 0.758711 | 445.0484 | 504.9451 | 453.3412 | 290.7137 | 428.7779 | 455.5205 |
| ENSMUSG000000036731  | 7_Cysr1          | 1123.650471 | -0.59641 | 0.385028 | 0.758711 | 1326.212 | 1333.639 | 1397.994 | 130.97   | 1296.516 | 1256.572 |
| ENSMUSG000000040037  | 13_Negr1         | 52.66773295 | 0.654854 | 0.38505  | 0.758711 | 49.54006 | 52.38376 | 20.71102 | 137.9154 | 18.10144 | 37.35475 |
| ENSMUSG000000042451  | 12_Mybpb         | 4.991699165 | -0.90232 | 0.38503  | 0.758711 | 2.436397 | 6.870002 | 10.35551 | 3.968787 | 1.13134  | 5.18816  |
| ENSMUSG000000046756  | 10_Mrps7         | 714.2785001 | -0.36852 | 0.384807 | 0.758711 | 764.2164 | 722.2089 | 928.544  | 308.5732 | 820.2216 | 741.9069 |
| ENSMUSG000000056752  | 16_Dnah9         | 16.09578233 | 0.480302 | 0.385006 | 0.758711 | 13.80625 | 13.74    | 12.65673 | 12.89856 | 23.75814 | 19.71501 |
| ENSMUSG000000058145  | 15_Adamts17      | 106.2511969 | -0.33174 | 0.38484  | 0.758711 | 112.8864 | 127.095  | 115.0612 | 57.54742 | 109.74   | 115.1772 |
| ENSMUSG000000067028  | 11_Cntnap5b      | 1.880989298 | -1.35292 | 0.384799 | 0.758711 | 0.406061 | 1.7175   | 2.301224 | 0        | 1.13134  | 2.075264 |
| ENSMUSG000000029102  | 9_Hgfac          | 63.65478754 | -0.71958 | 0.385251 | 0.758814 | 73.0919  | 85.01627 | 79.39224 | 2.97659  | 79.19381 | 62.25792 |
| ENSMUSG000000030322  | 12_Mbd4          | 223.7704946 | 0.239624 | 0.385293 | 0.758814 | 194.9117 | 210.3938 | 210.562  | 284.7605 | 237.5814 | 204.4135 |
| ENSMUSG000000038930  | 11_Rccd1         | 168.2828105 | -0.26534 | 0.385247 | 0.758814 | 172.172  | 205.2413 | 171.4412 | 127.0012 | 159.519  | 174.3222 |
| ENSMUSG000000039018  | 14_Mtg1          | 240.3045353 | -0.28955 | 0.385236 | 0.758814 | 268.8158 | 245.6026 | 278.4481 | 145.8529 | 261.3396 | 241.7683 |
| ENSMUSG000000057060  | 7_Slc35f3        | 133.4440455 | -0.33386 | 0.385281 | 0.758814 | 137.2503 | 190.6425 | 118.513  | 133.9466 | 79.19381 | 141.118  |
| ENSMUSG000000001424  | 14_Snd1          | 2105.83205  | -0.41205 | 0.38573  | 0.759    | 2224.43  | 2288.569 | 2700.487 | 723.3115 | 2427.856 | 2270.339 |
| ENSMUSG000000017119  | 19_Nbr1          | 4596.365142 | 0.211793 | 0.385709 | 0.759    | 4222.275 | 4168.374 | 4388.435 | 5858.922 | 4363.943 | 4556.242 |
| ENSMUSG000000030607  | 7_Acan           | 3.893078006 | -1.08027 | 0.385653 | 0.759    | 1.624264 | 1.7175   | 12.65673 | 1.98439  | 2.26268  | 3.112896 |
| ENSMUSG000000030823  | 6_9130019O22Rik  | 129.4898033 | -0.26839 | 0.385436 | 0.759    | 145.3717 | 137.4    | 141.5253 | 90.28991 | 135.7608 | 126.5911 |
| ENSMUSG000000043004  | 13_Gng2          | 177.756864  | 0.357712 | 0.385596 | 0.759    | 156.7415 | 186.3488 | 124.2661 | 296.6668 | 169.701  | 132.8169 |
| ENSMUSG000000049643  | 15_2310022A10Rik | 451.1610836 | -0.46956 | 0.385618 | 0.759    | 455.6062 | 521.2614 | 594.8665 | 118.0714 | 517.0224 | 500.1387 |
| ENSMUSG000000062563  | 14_Cys1          | 132.2401784 | -0.37973 | 0.385665 | 0.759    | 139.6867 | 170.8913 | 138.0735 | 85.32893 | 75.79979 | 183.6609 |
| ENSMUSG000000091255  | 1_Speer4e        | 1.794703545 | 2.3581   | 0.38547  | 0.759    | 0        | 1.7175   | 0        | 0        | 9.050721 | 0        |
| ENSMUSG0000000108653 | 1_AC155806       | 1616.151684 | -0.45769 | 0.385725 | 0.759    | 1874.401 | 1769.025 | 1967.547 | 437.5588 | 1942.511 | 1705.867 |
| ENSMUSG000000024544  | 8_Ldlrad4        | 156.6678784 | -0.26339 | 0.385846 | 0.759078 | 158.3658 | 200.0888 | 154.182  | 127.0012 | 131.2355 | 169.134  |
| ENSMUSG000000057219  | 11_Armc7         | 212.4542761 | -0.3972  | 0.385821 | 0.759078 | 252.5731 | 230.1451 | 241.6285 | 80.36794 | 237.5814 | 232.4296 |
| ENSMUSG000000001622  | 15_Csn3          | 90.96836522 | -0.43954 | 0.385997 | 0.759086 | 57.66138 | 155.4338 | 101.2539 | 109.1416 | 48.64762 | 73.67188 |
| ENSMUSG000000005089  | 15_Slc1a2        | 108.7895814 | 0.396177 | 0.385901 | 0.759086 | 108.0136 | 87.59252 | 86.29591 | 200.4238 | 78.06247 | 92.34925 |
| ENSMUSG000000024594  | 8_Prrc1          | 1346.762323 | -0.24347 | 0.386003 | 0.759086 | 1287.23  | 1416.938 | 1676.442 | 973.3451 | 1362.133 | 1364.486 |
| ENSMUSG000000028370  | 7_Pappa          | 57.17345177 | 0.560497 | 0.385936 | 0.759086 | 44.66727 | 76.42877 | 17.25918 | 115.0948 | 41.85958 | 47.73108 |
| ENSMUSG000000002731  | 6_Pkr4           | 696.4000083 | 0.267099 | 0.386312 | 0.75924  | 649.7057 | 596.8314 | 650.0958 | 1012.041 | 609.7923 | 659.934  |
| ENSMUSG000000015837  | 15_Sqstm1        | 4709.       |          |          |          |          |          |          |          |          |          |

|                      |                  |             |           |          |          |          |          |          |          |          |          |
|----------------------|------------------|-------------|-----------|----------|----------|----------|----------|----------|----------|----------|----------|
| ENSMUSG00000046378   | 11_Aspdh1        | 1.421730888 | -1.62589  | 0.387752 | 0.759461 | 2.436397 | 1.7175   | 2.301224 | 0        | 0        | 2.075264 |
| ENSMUSG00000048388   | 3_Fam171b        | 136.9660106 | 0.544937  | 0.387645 | 0.759461 | 129.9411 | 147.705  | 56.37999 | 314.5264 | 74.66845 | 88.57505 |
| ENSMUSG00000051727   | 14_Kctd14        | 110.1881744 | 0.276182  | 0.388006 | 0.759461 | 98.26799 | 103.05   | 97.80203 | 151.8061 | 107.4773 | 102.7256 |
| ENSMUSG00000055605   | 6_Krt72          | 0.669787444 | -2.7775   | 0.387767 | 0.759461 | 0        | 1.7175   | 2.301224 | 0        | 0        | 0        |
| ENSMUSG00000059586   | 9_Nsmce2         | 520.9339312 | 0.295494  | 0.387546 | 0.759461 | 504.3341 | 404.4714 | 494.7632 | 796.734  | 485.3449 | 439.956  |
| ENSMUSG00000068860   | 5_Gm128          | 27.68781258 | -0.53535  | 0.386871 | 0.759461 | 17.05478 | 42.07876 | 39.12081 | 12.89856 | 37.33422 | 17.63975 |
| ENSMUSG00000075610   | 9_Tmem92         | 1.011382917 | -2.14279  | 0.387078 | 0.759461 | 1.624264 | 0        | 3.451836 | 0.992197 | 0        | 0        |
| ENSMUSG00000078908   | 9_Mon1b          | 1071.232504 | -0.26465  | 0.3874   | 0.759461 | 1088.257 | 1138.703 | 1280.631 | 690.569  | 1157.361 | 1071.874 |
| ENSMUSG00000084128   | 10_Esrp2         | 4548.863324 | -0.34048  | 0.387763 | 0.759461 | 4772.901 | 4650.991 | 5825.549 | 2164.973 | 5079.717 | 4799.044 |
| ENSMUSG00000091780   | 2_Sco2           | 5.594489481 | -1.13254  | 0.388    | 0.759461 | 2.436397 | 10.305   | 10.35551 | 0        | 1.13134  | 9.330869 |
| ENSMUSG00000094945   | 3_Rhox4a2        | 418.4537618 | -0.28849  | 0.387475 | 0.759461 | 461.2911 | 389.8726 | 529.2816 | 265.9087 | 476.2942 | 388.0744 |
| ENSMUSG00000097615   | 1_Gm2061         | 0.669787444 | -2.7775   | 0.387767 | 0.759461 | 0        | 1.7175   | 2.301224 | 0        | 0        | 0        |
| ENSMUSG00000100502   | 1_Gm28286        | 22.45210067 | 0.488411  | 0.387078 | 0.759461 | 15.43051 | 22.32751 | 18.40979 | 41.67227 | 19.23278 | 17.63975 |
| ENSMUSG00000103088   | 1_Pcdhgb6        | 56.61968839 | -0.37722  | 0.386934 | 0.759461 | 64.15844 | 66.98252 | 60.98244 | 72.43037 | 30.54618 | 44.61818 |
| ENSMUSG00000148277   | 15_Syng2         | 1927.219703 | -0.4733   | 0.388154 | 0.759642 | 2068.501 | 2065.294 | 2587.727 | 484.192  | 2362.238 | 1995.366 |
| ENSMUSG0000014601    | 13_Strip1        | 1680.342148 | -0.37662  | 0.38829  | 0.759833 | 1766.387 | 1941.634 | 1987.107 | 670.725  | 1947.036 | 1769.163 |
| ENSMUSG00000062190   | 12_Lanc12        | 494.1865153 | 0.272305  | 0.388387 | 0.759949 | 444.2363 | 462.8664 | 436.082  | 727.2803 | 466.1121 | 428.542  |
| ENSMUSG00000078599   | 9_Skint8         | 7.60749188  | 0.961464  | 0.388599 | 0.760288 | 6.497057 | 7.728752 | 1.150612 | 20.83613 | 1.13134  | 8.301057 |
| ENSMUSG00000026679   | 3_Enkur          | 11.2660609  | 0.63199   | 0.388734 | 0.760479 | 6.497057 | 12.0225  | 8.054285 | 22.82053 | 6.788041 | 11.41395 |
| ENSMUSG00000049760   | 5_2410015M20Rik  | 1156.838915 | -0.41241  | 0.388832 | 0.760595 | 1331.085 | 1373.142 | 1258.77  | 387.949  | 1254.656 | 1335.432 |
| ENSMUSG00000009108   | 15_Gnat2         | 27.0835134  | -0.45932  | 0.389034 | 0.760651 | 39.79448 | 30.05626 | 24.16285 | 34.72689 | 19.23278 | 14.52685 |
| ENSMUSG00000026849   | 18_Tor1a         | 532.5196339 | -0.33644  | 0.389132 | 0.760651 | 605.0385 | 559.9051 | 617.8787 | 254.9946 | 586.3775 | 576.9234 |
| ENSMUSG00000031386   | 14_Hcfc1         | 3105.643555 | -0.29895  | 0.389463 | 0.760651 | 3111.278 | 3411.815 | 3755.598 | 1746.266 | 3535.438 | 3073.466 |
| ENSMUSG00000033966   | 7_Cdk14          | 2.770145644 | 1.138881  | 0.389496 | 0.760651 | 1.624264 | 3.435001 | 0        | 4.960984 | 4.52536  | 2.075264 |
| ENSMUSG00000034755   | 18_Pcdh11x       | 10.2204416  | 0.83867   | 0.389206 | 0.760651 | 12.18198 | 5.152501 | 4.602448 | 29.7659  | 3.39402  | 6.225792 |
| ENSMUSG00000037725   | 7_Ckap2          | 421.5065928 | 0.265964  | 0.389505 | 0.760651 | 432.0543 | 329.7601 | 386.6057 | 590.3571 | 408.4138 | 381.8486 |
| ENSMUSG00000038112   | 15_AW551984      | 191.5125522 | 0.391765  | 0.38951  | 0.760651 | 184.354  | 135.6825 | 177.1943 | 358.1831 | 150.4682 | 181.9392 |
| ENSMUSG00000038780   | 14_Smurf1        | 2121.356379 | -0.33219  | 0.389341 | 0.760651 | 2165.144 | 2301.451 | 2626.847 | 1034.861 | 2380.34  | 2219.495 |
| ENSMUSG00000049641   | 12_Vgll2         | 6.971293859 | 0.716727  | 0.389484 | 0.760651 | 2.436397 | 7.728752 | 5.753061 | 10.91416 | 5.656701 | 9.338689 |
| ENSMUSG00000055805   | 14_Fmnl1         | 840.0283236 | -0.46431  | 0.389247 | 0.760651 | 961.5645 | 918.004  | 1042.455 | 216.2989 | 925.4362 | 976.4114 |
| ENSMUSG00000060314   | 12_Zfp941        | 95.22346606 | 0.329248  | 0.38934  | 0.760651 | 86.08601 | 97.89753 | 69.03673 | 141.8841 | 100.6893 | 75.74718 |
| ENSMUSG00000071652   | 6_Ints5          | 585.3891065 | -0.50812  | 0.389363 | 0.760651 | 646.4572 | 607.9952 | 807.7297 | 121.048  | 700.2995 | 628.805  |
| ENSMUSG00000075053   | 2_Vdac3-ps1      | 39.79671267 | 0.397944  | 0.389083 | 0.760651 | 34.10955 | 41.22001 | 27.61469 | 65.48499 | 35.07154 | 35.27949 |
| ENSMUSG00000078651   | 8_Aoc2           | 83.05241213 | -0.40648  | 0.389281 | 0.760651 | 90.14667 | 93.60377 | 100.1033 | 32.74249 | 101.8206 | 79.89767 |
| ENSMUSG00000079003   | 1_Samd1          | 204.7300344 | -0.47412  | 0.389004 | 0.760651 | 232.2698 | 261.9188 | 219.7669 | 53.57863 | 196.2736 | 196.1125 |
| ENSMUSG00000096472   | 1_Cdkn2d         | 302.6195596 | -0.26516  | 0.389272 | 0.760651 | 317.5437 | 279.0938 | 394.66   | 215.3067 | 300.9365 | 308.1767 |
| ENSMUSG000000106871  | 1_Gm3289         | 2.13987436  | -1.62466  | 0.389075 | 0.760651 | 0        | 1.7175   | 8.054285 | 0.992197 | 0        | 2.075264 |
| ENSMUSG000000101175  | 13_Prox1         | 61.55941886 | -0.5082   | 0.389718 | 0.760964 | 62.53418 | 125.3775 | 28.7653  | 70.44597 | 40.72824 | 41.50528 |
| ENSMUSG00000024026   | 12_Glo1          | 2011.23877  | 0.221037  | 0.389861 | 0.760964 | 1923.941 | 1838.584 | 1809.913 | 2612.454 | 2051.12  | 1831.421 |
| ENSMUSG00000025956   | 10_Mettl21a      | 419.7427438 | 0.258497  | 0.38985  | 0.760964 | 393.8841 | 377.8501 | 375.0995 | 595.3181 | 402.7571 | 373.5475 |
| ENSMUSG00000029918   | 9_Mrps33         | 727.207887  | 0.228862  | 0.389766 | 0.760964 | 686.2517 | 674.9777 | 647.7946 | 963.4231 | 693.5115 | 697.2887 |
| ENSMUSG000000446934  | 4_Csl            | 3.12648802  | -0.95964  | 0.389795 | 0.760964 | 3.248529 | 3.435001 | 5.753061 | 1.984394 | 2.26268  | 2.075264 |
| ENSMUSG00000047034   | 9_Ankr33         | 6.713096434 | -0.77412  | 0.3901   | 0.761356 | 14.61838 | 6.011252 | 4.602448 | 2.97659  | 7.919381 | 4.150528 |
| ENSMUSG00000008028   | 15_1700008O03Rik | 4.25185795  | -0.98328  | 0.390169 | 0.761369 | 4.872793 | 5.152501 | 6.903673 | 0        | 3.39402  | 5.18816  |
| ENSMUSG00000035067   | 9_Xlr6           | 222.767179  | 0.30935   | 0.390183 | 0.761369 | 220.9    | 200.9476 | 174.893  | 349.2533 | 193.4592 | 197.1501 |
| ENSMUSG000000507963  | 9_Itpk1          | 289.9309132 | -0.50683  | 0.390245 | 0.761416 | 342.7198 | 332.3363 | 346.3342 | 58.53961 | 67.9677  | 324.7788 |
| ENSMUSG00000015396   | 3_Cd83           | 69.34327742 | 0.344102  | 0.390305 | 0.761459 | 81.21322 | 48.94876 | 52.92816 | 92.2743  | 82.58783 | 58.1074  |
| ENSMUSG00000026082   | 11_Rev1          | 457.7332665 | 0.293685  | 0.390467 | 0.761668 | 416.6238 | 431.9514 | 385.4551 | 690.569  | 503.7154 | 471.085  |
| ENSMUSG00000054115   | 11_Skp2          | 179.0407178 | 0.298057  | 0.390489 | 0.761668 | 185.9783 | 138.2588 | 157.6339 | 261.94   | 181.0144 | 149.419  |
| ENSMUSG0000005001334 | 9_Fndc5          | 25.06684847 | -0.50679  | 0.390528 | 0.761669 | 34.92168 | 36.06751 | 17.25918 | 18.85174 | 11.3134  | 32.16659 |
| ENSMUSG00000016253   | 12_Nelfcd        | 643.3748172 | -0.41294  | 0.390611 | 0.761757 | 695.9973 | 724.7852 | 783.5668 | 215.3067 | 718.401  | 722.1919 |
| ENSMUSG000000205161  | 16_Slc16a3       | 142.3640511 | -0.57583  | 0.390675 | 0.761807 | 168.9235 | 164.88   | 177.1943 | 23.81272 | 222.874  | 96.49978 |
| ENSMUSG00000026018   | 12_Ica11         | 7.895130841 | -0.71768  | 0.390785 | 0.761946 | 8.121322 | 4.293751 | 17.25918 | 6.945378 | 4.52536  | 6.225792 |
| ENSMUSG00000028613   | 14_Lrp8          | 252.5008174 | -0.25462  | 0.390862 | 0.761956 | 270.44   | 290.2576 | 263.4902 | 282.7761 | 228.5307 | 179.5103 |
| ENSMUSG00000030249   | 15_Abc9          | 316.3772768 | 0.330221  | 0.390916 | 0.761956 | 254.1974 | 290.2576 | 296.8579 | 522.8877 | 234.1874 | 299.8757 |
| ENSMUSG00000050447   | 15_Lypd6         | 551.180735  | 0.360657  | 0.390943 | 0.761956 | 493.7764 | 499.7926 | 454.4918 | 997.1758 | 395.969  | 465.8968 |
| ENSMUSG00000059108   | 3_Iiftm6         | 28.93990648 | 0.619679  | 0.390875 | 0.761956 | 46.29153 | 10.305   | 11.50612 | 32.74249 | 52.04164 | 20.75264 |
| ENSMUSG00000096917   | 1_2500002B13Rik  | 38.09263645 | 0.422646  | 0.391026 | 0.762043 | 34.92168 | 31.77376 | 31.06653 | 64.49279 | 23.75814 | 42.54291 |
| ENSMUSG00000018761   | 14_Mpdu1         | 1224.721941 | -0.39618  | 0.391065 | 0.762046 | 1322.151 | 1283.832 | 1569.435 | 446.4886 | 1732.316 | 1354.11  |
| ENSMUSG00000007476   | 18_Lrrc8a        | 519.9390877 | -0.37235  | 0.39129  | 0.762076 | 530.3223 | 546.1651 | 683.4636 | 217.2911 | 588.2969 | 654.0955 |
| ENSMUSG00000025228   | 4_Actr1a         | 6397.289811 | -0.29292  | 0.391311 | 0.762076 | 6946.979 | 6701.687 | 7484.732 | 3583.815 | 6926.064 | 6740.458 |
| ENSMUSG000000334037  | 14_Fgd5          | 125.139489  | -0.24204  | 0.391156 | 0.762076 | 129.9411 | 139.9763 | 136.9228 | 102.1963 | 113.134  | 128.6664 |
| ENSMUSG000000303424  | 16_Tmem132c      | 399.3365404 | -0.30467  | 0.391303 | 0.762076 | 384.1385 | 565.9164 | 373.9489 | 352.2299 | 259.0769 | 460.7086 |
| ENSMUSG00000045539   | 3_Spr3           | 2.50588622  | -1.78839  | 0.391279 | 0.762076 | 2.436397 | 0        | 9.204897 | 0        | 3.39402  | 0        |
| ENSMUSG000000555762  | 15_Eef1d         | 3525.343505 | -0.40664  | 0.39129  | 0.762076 | 3843.009 | 3824.015 | 4389.585 | 1206.511 | 4094.32  | 3794.62  |
| ENSMUSG00000028687   | 17_Mutyh         | 41.22531158 | -0.49354  | 0.391391 | 0.762158 | 40.60661 | 60.11252 | 43.72326 | 11.90636 | 46.38494 | 44.61818 |
| ENSMUSG0000005005078 | 16_Jkamp         | 594.0623696 | 0.24548   | 0.391542 | 0.762168 | 578.2381 | 517.8264 | 535.0346 | 795.7418 | 504.5777 | 632.9556 |
| ENSMUSG00000024002   | 16_Brd4          | 1928.918662 | -0.22648  | 0.391498 | 0.762168 | 1903.638 | 2035.238 | 2301.224 | 1454.561 | 2069.221 | 1809.63  |
| ENSMUSG0000004042121 | 16_Ssh1          | 674.9186365 | -0.30542  | 0.391478 | 0.762168 | 739.8524 | 741.1014 | 757.1028 | 363.144  | 748.9471 | 699.364  |
| ENSMUSG00000055409   | 13_Nell1         | 9.017195555 | 0.640263  | 0.391549 | 0.762168 | 8.933454 | 8.587502 | 3.451836 | 13.89076 | 6.788041 | 12.45158 |
| ENSMUSG00000040998   | 18_Npnt          | 925.2624971 | -0.39771  | 0.391653 | 0.762221 | 1177.592 | 1407.492 | 570.7036 | 1161.862 | 728.3358 | 705.5898 |
| ENSMUSG00000078970   | 5_Wdr92          | 377.4934146 | 0.220314  | 0.391637 | 0.762221 | 340.2834 | 325.4663 | 380.8526 | 467.3247 | 385.787  | 365.2465 |
| ENSMUSG00000071234   | 2_Synd1l1        | 1.460074746 | -1.68196  | 0.391704 | 0.762247 | 0.060661 | 2.576251 | 0        | 0.992197 | 1.13134  | 0        |
| ENSMUSG00000002688   | 7_Prk1d          | 45.17638537 | 0.376828  | 0.39177  | 0.762299 | 44.66727 | 42.07876 | 31.06653 | 68.46158 | 33.9402  | 50.84397 |
| ENSMUSG00000016252   | 7_Atp5e          | 1689.722586 | -0.29989  | 0.392005 | 0.76244  | 1739.587 | 1870.358 | 1979.053 | 939.6104 | 1726.425 | 1883.302 |
| ENSMUSG000000019804  | 12_Snx3          | 1740.614851 | -0.191079 | 0.39     |          |          |          |          |          |          |          |

|                       |             |             |          |          |          |          |          |          |          |          |          |
|-----------------------|-------------|-------------|----------|----------|----------|----------|----------|----------|----------|----------|----------|
| ENSMUSG000000013822   | 6_Elof1     | 1195.864002 | -0.41022 | 0.393369 | 0.762877 | 1331.897 | 1321.617 | 1440.566 | 397.8709 | 1351.951 | 1331.282 |
| ENSMUSG000000005142   | 9_Man2b1    | 1450.231605 | -0.37319 | 0.39361  | 0.762949 | 1551.172 | 1637.637 | 1721.316 | 576.4663 | 1668.727 | 1546.072 |
| ENSMUSG000000008398   | 14_Elk3     | 1274.452545 | -0.19851 | 0.393744 | 0.762949 | 1314.03  | 1313.029 | 1458.976 | 1098.362 | 1340.638 | 1121.68  |
| ENSMUSG0000000022971  | 18_Ilnar2   | 509.9412825 | 0.246661 | 0.393503 | 0.762949 | 478.3459 | 451.7026 | 469.4497 | 697.5144 | 522.6791 | 439.956  |
| ENSMUSG0000000025255  | 18_Zfmx4    | 665.0487963 | 0.37095  | 0.393526 | 0.762949 | 620.469  | 643.2039 | 476.3534 | 1213.457 | 466.1121 | 570.6976 |
| ENSMUSG0000000026987  | 16_Baz2b    | 1765.030726 | 0.228919 | 0.393767 | 0.762949 | 1616.143 | 1569.795 | 1690.249 | 2370.358 | 1695.879 | 1647.76  |
| ENSMUSG0000000028133  | 17_Rwdd3    | 155.5803236 | 0.330003 | 0.393465 | 0.762949 | 138.0625 | 136.5413 | 139.2241 | 244.0804 | 107.4773 | 168.0964 |
| ENSMUSG0000000028603  | 15_Scp2     | 5259.980722 | 0.18824  | 0.393633 | 0.762949 | 4906.903 | 4788.391 | 5056.94  | 6276.637 | 5162.305 | 5368.708 |
| ENSMUSG0000000028730  | 14_Clap57   | 1.483383768 | -1.70534 | 0.393789 | 0.762949 | 1.624264 | 5.152501 | 0        | 0.992197 | 1.13134  | 0        |
| ENSMUSG0000000047013  | 15_Fbxo41   | 10.01776367 | -0.5974  | 0.393701 | 0.762949 | 13.80625 | 12.0225  | 10.35551 | 6.945378 | 4.52536  | 12.45158 |
| ENSMUSG0000000069911  | 10_Fam196b  | 13.52325073 | 0.788615 | 0.393706 | 0.762949 | 12.18198 | 12.88125 | 4.602448 | 37.70348 | 3.39402  | 10.37632 |
| ENSMUSG0000000031563  | 7_Wwc2      | 1646.522616 | -0.17716 | 0.393835 | 0.762965 | 1683.55  | 1745.839 | 1813.365 | 1606.367 | 1479.793 | 1550.222 |
| ENSMUSG0000000048478  | 6_Spata33   | 4.917405285 | -0.84756 | 0.393879 | 0.762974 | 3.248529 | 7.728752 | 8.054285 | 1.984394 | 2.26268  | 6.225792 |
| ENSMUSG0000000040312  | 14_Cchcr1   | 360.057002  | -0.45826 | 0.394045 | 0.76301  | 388.1992 | 361.5338 | 500.5163 | 98.22748 | 406.1511 | 405.7141 |
| ENSMUSG0000000057667  | 6_Bloc1s3   | 253.0743865 | 0.219003 | 0.393979 | 0.76301  | 216.0272 | 224.9926 | 261.1889 | 297.659  | 260.2082 | 258.3704 |
| ENSMUSG0000000068747  | 14_Sort1    | 3085.826543 | -0.19736 | 0.394023 | 0.76301  | 3095.848 | 3627.361 | 3166.485 | 2780.135 | 2645.073 | 3200.057 |
| ENSMUSG0000000095681  | 7_Gm8281    | 7.25382742  | 0.692679 | 0.39405  | 0.76301  | 8.121322 | 6.011252 | 2.301224 | 11.90636 | 7.919381 | 7.263424 |
| ENSMUSG0000000022026  | 6_Olfm4     | 129.7053673 | 0.361919 | 0.394296 | 0.763338 | 108.0136 | 127.9538 | 104.7057 | 191.494  | 76.93113 | 169.134  |
| ENSMUSG0000000042729  | 9_Wdr74     | 450.2846932 | -0.36555 | 0.394287 | 0.763338 | 503.522  | 473.1714 | 544.2395 | 188.5174 | 517.0224 | 475.2355 |
| ENSMUSG0000000020537  | 9_Drg2      | 817.9166131 | -0.39528 | 0.394387 | 0.763365 | 880.3513 | 901.6877 | 1005.635 | 294.6825 | 951.457  | 873.6862 |
| ENSMUSG0000000074227  | 11_Spnt2    | 7358.569561 | -0.41318 | 0.394359 | 0.763365 | 7482.986 | 7971.778 | 9760.643 | 2447.75  | 8396.806 | 8091.455 |
| ENSMUSG0000000013593  | 12_Ndufs2   | 2309.910799 | -0.2752  | 0.394452 | 0.763418 | 2497.306 | 2455.167 | 2636.052 | 1376.177 | 2458.402 | 2436.36  |
| ENSMUSG0000000019817  | 18_Plgl1    | 353.7589589 | 0.432802 | 0.394592 | 0.76354  | 283.4341 | 328.9013 | 291.1049 | 735.2178 | 204.7726 | 279.123  |
| ENSMUSG0000000032356  | 12_Rasgr1   | 4916.10366  | -0.24052 | 0.39456  | 0.76354  | 5037.656 | 5309.653 | 5627.644 | 3534.205 | 4337.558 | 5649.907 |
| ENSMUSG0000000058317  | 11_Ube2e2   | 961.6025521 | 0.294887 | 0.394679 | 0.763604 | 853.5509 | 797.779  | 940.0501 | 1513.1   | 823.6156 | 941.5196 |
| ENSMUSG0000000078896  | 11_Gm8923   | 26.31697161 | 0.877908 | 0.394702 | 0.763604 | 12.99411 | 23.18626 | 19.58041 | 82.35234 | 1.13134  | 18.67738 |
| ENSMUSG0000000005580  | 11_Adcy9    | 191.9006216 | -0.33719 | 0.394974 | 0.763834 | 194.0996 | 241.3088 | 207.1102 | 97.23529 | 184.4084 | 227.2414 |
| ENSMUSG0000000009900  | 7_Wnt3a     | 410.6586074 | -0.46887 | 0.394952 | 0.763834 | 449.9212 | 443.1151 | 537.3359 | 104.1807 | 409.5451 | 519.8537 |
| ENSMUSG0000000021902  | 6_Phf7      | 169.8883276 | 0.27201  | 0.394917 | 0.763834 | 189.2268 | 136.5413 | 135.7722 | 224.2365 | 168.5697 | 164.9835 |
| ENSMUSG0000000040506  | 16_Ambrat   | 1155.236644 | -0.34549 | 0.39492  | 0.763834 | 1190.586 | 1319.899 | 1368.078 | 520.9033 | 1304.435 | 1227.519 |
| ENSMUSG00000000002102 | 15_Psmc3    | 2732.222158 | -0.37028 | 0.395381 | 0.764129 | 3164.879 | 2829.582 | 3248.178 | 1095.385 | 3140.6   | 2914.708 |
| ENSMUSG0000000002981  | 9_Clptm1    | 2151.888872 | -0.36089 | 0.395241 | 0.764129 | 2265.849 | 2378.738 | 2614.191 | 904.8835 | 2511.575 | 2236.097 |
| ENSMUSG0000000022054  | 11_Nefm     | 41.72837927 | -0.35693 | 0.395472 | 0.764129 | 61.72205 | 42.93751 | 35.66898 | 41.67227 | 36.20288 | 32.16659 |
| ENSMUSG0000000025977  | 15_Boll     | 0.826830679 | 3.279439 | 0.395346 | 0.764129 | 0        | 0        | 0        | 4.960984 | 0        | 0        |
| ENSMUSG0000000030707  | 15_Coro1a   | 313.6014694 | -0.55874 | 0.395459 | 0.764129 | 497.0249 | 264.4951 | 358.991  | 53.57863 | 436.6973 | 270.822  |
| ENSMUSG0000000031667  | 15_Aktip    | 2490.841493 | 0.237006 | 0.395243 | 0.764129 | 2323.51  | 2234.468 | 2302.375 | 3431.017 | 2241.185 | 2412.495 |
| ENSMUSG0000000035105  | 5_Egln3     | 12245.63015 | 0.20915  | 0.395216 | 0.764129 | 11349.55 | 10798.78 | 11930.7  | 15584.44 | 11560.03 | 12250.28 |
| ENSMUSG0000000091956  | 2_C2cd4b    | 2.730792449 | -1.49824 | 0.395412 | 0.764129 | 9.745586 | 0        | 2.301224 | 0        | 2.26268  | 2.07564  |
| ENSMUSG0000000095935  | 1_Gm11238   | 0.826830679 | 3.279439 | 0.395346 | 0.764129 | 0        | 0        | 0        | 4.960984 | 0        | 0        |
| ENSMUSG0000000012282  | 2_Wnt8a     | 0.654248096 | -2.74609 | 0.39576  | 0.764168 | 1.624264 | 0        | 2.301224 | 0        | 0        | 0        |
| ENSMUSG0000000013846  | 9_St3gal1   | 811.789053  | -0.2455  | 0.395792 | 0.764168 | 896.5939 | 1000.444 | 744.446  | 600.2791 | 888.102  | 740.8693 |
| ENSMUSG0000000016087  | 13_Fil1     | 85.40112362 | 0.382229 | 0.395977 | 0.764168 | 74.71616 | 83.29877 | 64.43428 | 151.8061 | 76.93113 | 61.22029 |
| ENSMUSG0000000021134  | 17_Srsf5    | 11329.76316 | 0.197184 | 0.39586  | 0.764168 | 10356.31 | 9965.796 | 11348.49 | 13811.38 | 11170.85 | 11325.75 |
| ENSMUSG0000000024340  | 14_Btnl2    | 1.182455265 | 1.609475 | 0.395618 | 0.764168 | 0.812132 | 0.85875  | 0        | 0.992197 | 3.39402  | 1.037632 |
| ENSMUSG0000000040699  | 13_Limd2    | 238.9913501 | -0.35706 | 0.395991 | 0.764168 | 295.6161 | 251.6138 | 257.7371 | 106.1651 | 273.7843 | 249.0317 |
| ENSMUSG0000000042064  | 13_Myo3b    | 1.743567614 | 1.461514 | 0.395588 | 0.764168 | 1.624264 | 0        | 1.150612 | 0.992197 | 5.656701 | 1.037632 |
| ENSMUSG0000000047246  | 6_Hist1h2be | 61.37379615 | 0.350497 | 0.395815 | 0.764168 | 46.29153 | 54.96001 | 60.98244 | 90.28991 | 44.12226 | 71.59661 |
| ENSMUSG0000000054199  | 16_Gon4l    | 1500.442656 | -0.31772 | 0.395741 | 0.764168 | 1599.9   | 1633.343 | 1761.587 | 756.054  | 1676.646 | 1575.125 |
| ENSMUSG0000000059436  | 12_Max      | 1560.87531  | 0.196603 | 0.395919 | 0.764168 | 1357.885 | 1380.87  | 1625.815 | 1760.157 | 1716.243 | 1524.282 |
| ENSMUSG0000000059900  | 14_Tmem40   | 1138.03796  | -0.48006 | 0.39589  | 0.764168 | 1244.186 | 1239.177 | 1493.495 | 260.9478 | 1333.85  | 1256.572 |
| ENSMUSG0000000071280  | 1_Gm10322   | 0.654248096 | -2.74609 | 0.39576  | 0.764168 | 1.624264 | 0        | 2.301224 | 0        | 0        | 0        |
| ENSMUSG00000000102893 | 1_Gm37855   | 0.654248096 | -2.74609 | 0.39576  | 0.764168 | 1.624264 | 0        | 2.301224 | 0        | 0        | 0        |
| ENSMUSG0000000025477  | 13_Inpp5a   | 1029.687928 | -0.21214 | 0.396139 | 0.764187 | 1025.723 | 1099.2   | 1190.884 | 807.6482 | 1079.298 | 975.3741 |
| ENSMUSG0000000031349  | 4_Nsdh1     | 3128.464719 | 0.210052 | 0.39615  | 0.764187 | 2848.148 | 2667.278 | 3188.346 | 3805.075 | 3392.889 | 2869.053 |
| ENSMUSG0000000031732  | 12_Phlpp2   | 968.7194471 | 0.198415 | 0.396154 | 0.764187 | 877.9149 | 868.1965 | 960.7611 | 1103.323 | 1096.269 | 905.8528 |
| ENSMUSG0000000041491  | 7_Cep78     | 189.6912569 | 0.241633 | 0.39614  | 0.764187 | 192.4753 | 151.9988 | 177.1943 | 238.1272 | 183.2771 | 195.0748 |
| ENSMUSG0000000022394  | 14_L3mbtl2  | 452.7898068 | -0.48151 | 0.396233 | 0.764218 | 518.9525 | 502.3689 | 561.4987 | 103.1885 | 543.0432 | 487.6871 |
| ENSMUSG0000000031723  | 8_Txn14b    | 177.2729982 | -0.22337 | 0.396285 | 0.764218 | 190.0389 | 183.7725 | 199.0559 | 148.8295 | 182.1458 | 159.7953 |
| ENSMUSG0000000058147  | 1_Xlr3c     | 2.138018215 | 1.45176  | 0.396265 | 0.764218 | 1.624264 | 1.7175   | 0        | 4.960984 | 4.52536  | 0        |
| ENSMUSG0000000003665  | 6_Has1      | 20.40058025 | -0.52607 | 0.396349 | 0.764267 | 31.67315 | 12.88125 | 27.61469 | 8.929771 | 22.6268  | 18.67738 |
| ENSMUSG0000000003813  | 15_Rad23a   | 1152.192262 | -0.40268 | 0.396625 | 0.764283 | 1187.337 | 1314.747 | 1433.663 | 396.8787 | 1314.67  | 1265.911 |
| ENSMUSG0000000005533  | 9_Igf1r     | 1221.443264 | -0.35754 | 0.396566 | 0.764283 | 1243.374 | 1392.893 | 1479.687 | 520.9033 | 1380.235 | 1311.567 |
| ENSMUSG0000000023953  | 8_Po1h      | 459.4316462 | 0.190324 | 0.396437 | 0.764283 | 405.254  | 437.1039 | 445.2869 | 479.2311 | 511.3657 | 478.3484 |
| ENSMUSG0000000040697  | 10_Dnajc16  | 955.366153  | -0.26378 | 0.396488 | 0.764283 | 994.0498 | 978.1165 | 1155.215 | 608.2166 | 1017.075 | 979.5247 |
| ENSMUSG0000000041396  | 13_Mettl18  | 116.5080667 | 0.359814 | 0.396665 | 0.764283 | 106.3893 | 105.6263 | 94.35019 | 204.3925 | 97.29525 | 91.31162 |
| ENSMUSG0000000059995  | 12_Atxn713  | 1660.428822 | -0.31946 | 0.396504 | 0.764283 | 1742.836 | 1879.804 | 1907.715 | 833.4453 | 1919.684 | 1678.889 |
| ENSMUSG0000000078486  | 3_Perm1     | 1047.620355 | -0.30076 | 0.396513 | 0.764283 | 1080.948 | 1142.138 | 1246.113 | 569.521  | 1096.289 | 1150.734 |
| ENSMUSG0000000098098  | 7_Bvht      | 46.0370513  | -0.41921 | 0.396655 | 0.764283 | 52.78859 | 70.41752 | 34.51836 | 23.81272 | 40.72824 | 53.95687 |
| ENSMUSG0000000003123  | 15_Lipe     | 857.8277216 | -0.53673 | 0.396804 | 0.764408 | 865.7329 | 1003.879 | 1177.076 | 140.8919 | 921.9829 | 1028.293 |
| ENSMUSG0000000058444  | 7_Map2k5    | 359.0635394 | -0.21271 | 0.396806 | 0.764408 | 335.4106 | 407.0476 | 414.2204 | 307.581  | 339.402  | 350.7196 |
| ENSMUSG0000000005674  | 9_Tomtm40l  | 550.5640791 | -0.3043  | 0.396994 | 0.764412 | 586.3594 | 638.0514 | 600.6195 | 295.6747 | 573.5894 | 609.09   |
| ENSMUSG0000000027684  | 16_Mecom    | 227.3012719 | 0.377205 | 0.397002 | 0.764412 | 220.9    | 207.8176 | 164.5375 | 406.8007 | 144.8115 | 218.9404 |
| ENSMUSG0000000034674  | 18_Tdg      | 1263.449985 | 0.18334  | 0.396956 | 0.764412 | 1133.737 | 1147.29  | 1165.25  | 1365.263 | 1398.336 | 1266.94  |
| ENSMUSG0000000036534  | 5_Slc38a7   | 352.6332494 | -0.37778 | 0.397039 | 0.764412 | 393.072  | 388.1551 | 414.2204 | 137.9154 | 401.6257 | 380.811  |
| ENSMUSG0000000049755  | 14_Zfp672   | 654.010002  | 0.214659 | 0.397036 | 0.764412 | 546.565  | 620.0177 | 650.0958 | 791.7731 | 712.7443 |          |

|                     |                 |             |          |          |          |          |          |          |          |          |          |
|---------------------|-----------------|-------------|----------|----------|----------|----------|----------|----------|----------|----------|----------|
| ENSMUSG00000058831  | 13_Opn1sw       | 26.7836316  | -0.75127 | 0.399718 | 0.767198 | 48.72793 | 40.36126 | 11.50612 | 21.82833 | 36.20288 | 2.075264 |
| ENSMUSG00000046711  | 15_Hmga1        | 1326.327389 | -0.40319 | 0.399778 | 0.767239 | 1311.593 | 1393.752 | 1826.021 | 466.3325 | 1552.199 | 1408.067 |
| ENSMUSG00000000194  | 13_Gpr107       | 1952.46887  | -0.26752 | 0.399816 | 0.767239 | 1990.536 | 2040.391 | 2367.96  | 1213.457 | 2138.233 | 1964.238 |
| ENSMUSG000000000605 | 8_Clc4          | 1292.631897 | 0.270408 | 0.400078 | 0.767277 | 1172.719 | 1231.448 | 1111.491 | 1933.792 | 1086.086 | 1220.255 |
| ENSMUSG000000001016 | 12_Ilf2         | 1449.963386 | 0.173206 | 0.400239 | 0.767277 | 1381.437 | 1349.955 | 1357.722 | 1609.343 | 1509.208 | 1492.115 |
| ENSMUSG000000017724 | 14_Elv4         | 213.4893704 | -0.38465 | 0.400044 | 0.767277 | 257.4459 | 211.2526 | 256.5865 | 87.31332 | 192.3278 | 276.0101 |
| ENSMUSG000000021646 | 8_Mccc2         | 414.6934527 | -0.20795 | 0.400138 | 0.767277 | 406.8782 | 451.7026 | 475.2028 | 344.2923 | 384.6556 | 425.4291 |
| ENSMUSG000000025209 | 4_Peo1          | 326.6164192 | -0.32447 | 0.400294 | 0.767277 | 321.6043 | 381.2851 | 386.6057 | 164.7047 | 337.1394 | 368.3594 |
| ENSMUSG000000026922 | 13_Agpat2       | 612.904206  | -0.49557 | 0.400288 | 0.767277 | 690.3124 | 637.1927 | 823.8383 | 127.0012 | 730.8457 | 668.2351 |
| ENSMUSG000000039153 | 16_Runx2        | 357.1842326 | 0.234999 | 0.400276 | 0.767277 | 331.3499 | 304.8563 | 348.6355 | 472.2857 | 326.9573 | 359.0207 |
| ENSMUSG000000040629 | 8_Mael          | 1.625155219 | 1.510052 | 0.400159 | 0.767277 | 2.436397 | 0        | 0        | 2.97659  | 2.26268  | 2.075264 |
| ENSMUSG000000046947 | 12_Adc2         | 470.9055715 | -0.34598 | 0.400125 | 0.767277 | 492.9642 | 508.3801 | 579.9085 | 213.3223 | 481.9509 | 548.9074 |
| ENSMUSG000000054146 | 8_Krt15         | 40836.69788 | -0.40326 | 0.400052 | 0.767277 | 42042.46 | 41853.77 | 55625.19 | 14179.48 | 42673.02 | 48646.27 |
| ENSMUSG000000063077 | 14_Kif1b        | 5152.002828 | 0.219196 | 0.400298 | 0.767277 | 4583.674 | 4963.576 | 4737.07  | 6813.416 | 4839.873 | 4974.408 |
| ENSMUSG000000097579 | 1_Gm26799       | 12.22357214 | 0.541478 | 0.399909 | 0.767277 | 8.121322 | 10.305   | 11.50612 | 15.87515 | 19.23278 | 8.301057 |
| ENSMUSG000000034842 | 16_Art3         | 312.3680803 | 0.261699 | 0.400461 | 0.767441 | 261.5066 | 309.1501 | 281.9    | 444.5042 | 278.3097 | 298.838  |
| ENSMUSG000000092116 | 1_Gm10320       | 1.143646711 | 1.562202 | 0.400432 | 0.767441 | 0.812132 | 0.85875  | 0        | 1.984394 | 1.13134  | 2.075264 |
| ENSMUSG000000003206 | 6_Ebi3          | 16.63771293 | -0.64849 | 0.400717 | 0.767842 | 18.67904 | 18.03375 | 24.16285 | 1.984394 | 20.36412 | 16.60211 |
| ENSMUSG000000030795 | 18_Fus          | 10061.41758 | 0.210385 | 0.400747 | 0.767842 | 9167.348 | 8718.032 | 10102.37 | 12824.14 | 9988.602 | 9568.005 |
| ENSMUSG000000029471 | 13_Camkk2       | 624.6802009 | -0.21341 | 0.400982 | 0.768145 | 645.6451 | 691.2939 | 675.4093 | 486.1764 | 579.2461 | 670.3103 |
| ENSMUSG000000035547 | 14_Capn5        | 11947.32303 | -0.41018 | 0.400976 | 0.768145 | 12244.52 | 13338.11 | 15320.4  | 3887.427 | 13643.96 | 13249.52 |
| ENSMUSG000000020271 | 17_Fbxw1        | 2899.750888 | 0.19574  | 0.401327 | 0.768392 | 2550.095 | 2642.374 | 2917.952 | 3444.907 | 3110.054 | 2733.123 |
| ENSMUSG000000025173 | 13_Wdr45b       | 1280.290769 | 0.175534 | 0.401323 | 0.768392 | 1217.386 | 1142.997 | 1247.264 | 1372.208 | 1389.286 | 1312.605 |
| ENSMUSG000000030509 | 16_Asb7         | 484.177479  | 0.268116 | 0.401189 | 0.768392 | 406.8782 | 412.2001 | 499.3657 | 703.4675 | 452.536  | 430.6173 |
| ENSMUSG000000033909 | 17_Usip36       | 712.4586731 | -0.37577 | 0.401192 | 0.768392 | 759.3436 | 727.3614 | 927.3934 | 280.7917 | 821.3529 | 758.509  |
| ENSMUSG000000040797 | 16_Iqsec3       | 17.67903612 | -0.63314 | 0.401343 | 0.768392 | 37.35808 | 18.8925  | 0.854285 | 20.83613 | 14.70742 | 6.225792 |
| ENSMUSG000000097850 | 2_4631405K08Rik | 122.8695862 | -0.27808 | 0.401316 | 0.768392 | 147.8081 | 116.79   | 139.2241 | 90.28991 | 141.4175 | 101.6879 |
| ENSMUSG000000034708 | 11_Grn          | 4611.209699 | -0.4309  | 0.401412 | 0.768451 | 5222.01  | 4927.509 | 5734.651 | 1336.489 | 5483.605 | 4962.994 |
| ENSMUSG000000020752 | 11_Recql5       | 470.6239232 | -0.37684 | 0.401612 | 0.76857  | 500.2734 | 522.9789 | 571.8542 | 181.572  | 514.7597 | 532.3052 |
| ENSMUSG000000023286 | 16_Ube2j2       | 767.8066229 | 0.321963 | 0.401774 | 0.76857  | 735.7918 | 632.8989 | 750.1991 | 995.1734 | 822.4843 | 676.3109 |
| ENSMUSG000000032584 | 12_Mst1r        | 2463.561972 | -0.4814  | 0.401571 | 0.76857  | 2457.512 | 2711.074 | 3443.782 | 555.6302 | 2966.374 | 2640.993 |
| ENSMUSG000000036721 | 13_Zscan12      | 152.6997138 | 0.29514  | 0.401783 | 0.76857  | 121.0077 | 146.8463 | 143.8265 | 230.1897 | 142.5489 | 131.7793 |
| ENSMUSG000000040151 | 9_Hs2st1        | 751.134346  | 0.300017 | 0.401653 | 0.76857  | 706.555  | 712.7627 | 600.6195 | 1202.543 | 648.2579 | 636.0685 |
| ENSMUSG000000044674 | 6_Fzd1          | 834.1385344 | -0.18496 | 0.40174  | 0.76857  | 873.8542 | 860.4677 | 928.544  | 762.9994 | 735.3711 | 843.5949 |
| ENSMUSG000000052151 | 11_PPap2c       | 2822.507478 | -0.42435 | 0.401598 | 0.76857  | 3023.568 | 3030.53  | 3649.742 | 853.2893 | 3314.827 | 3063.09  |
| ENSMUSG000000058388 | 14_Phrf1        | 766.7760375 | 0.277284 | 0.401683 | 0.76857  | 731.7311 | 687.8589 | 660.4514 | 1169.8   | 674.2887 | 676.5361 |
| ENSMUSG000000024939 | 6_Fam89b        | 228.3276224 | -0.83795 | 0.401943 | 0.768655 | 242.8275 | 313.4438 | 322.1714 | 1.984394 | 234.3177 | 254.2199 |
| ENSMUSG000000035211 | 8_Xrra1         | 5.787544262 | -0.95    | 0.401879 | 0.768655 | 12.99411 | 5.152501 | 4.602448 | 0        | 6.788041 | 5.18816  |
| ENSMUSG000000071632 | 295.3423122     | -0.2349     | 0.40191  | 0.768655 | 291.5555 | 310.0088 | 356.6898 | 227.2131 | 266.9963 | 319.5907 |          |
| ENSMUSG000000033918 | 15_Parl         | 1059.98327  | 0.20121  | 0.402064 | 0.768811 | 1026.535 | 933.4615 | 998.7313 | 1309.7   | 1060.066 | 1031.406 |
| ENSMUSG000000058076 | 12_Sdhc         | 1195.290666 | -0.25699 | 0.402125 | 0.768855 | 1290.478 | 1328.487 | 1285.234 | 757.0462 | 1208.271 | 1302.228 |
| ENSMUSG000000001558 | 5_Kln10         | 4.014645788 | -0.85889 | 0.402252 | 0.769023 | 3.248529 | 4.293751 | 0.854285 | 1.984394 | 3.39402  | 3.128986 |
| ENSMUSG000000056771 | 7_Gm10010       | 13.4861581  | 0.573833 | 0.402298 | 0.769038 | 8.121322 | 16.31625 | 0.854285 | 21.82633 | 7.919381 | 18.67738 |
| ENSMUSG000000026634 | 16_Angel2       | 1050.488966 | 0.206573 | 0.402403 | 0.769091 | 973.7465 | 991.8565 | 960.7611 | 1332.52  | 1103.681 | 1030.369 |
| ENSMUSG000000030431 | 8_Tmem238       | 95.07588847 | -0.35732 | 0.402394 | 0.769091 | 100.7044 | 98.75628 | 120.8143 | 45.64105 | 114.2654 | 90.27399 |
| ENSMUSG000000040282 | 13_BC052040     | 422.4578749 | 0.204888 | 0.402483 | 0.76917  | 360.5867 | 370.9801 | 446.4375 | 443.512  | 477.4255 | 435.8055 |
| ENSMUSG000000027997 | 9_Casp6         | 484.0177241 | -0.18772 | 0.402541 | 0.769208 | 493.7764 | 528.1314 | 524.6791 | 466.3325 | 424.2525 | 466.9344 |
| ENSMUSG000000025804 | 4_Ccr1          | 140.6637589 | 0.478112 | 0.402657 | 0.769217 | 180.2933 | 61.83002 | 110.4588 | 219.2755 | 203.6412 | 68.48372 |
| ENSMUSG000000029082 | 17_Bst1         | 145.6303593 | 0.321346 | 0.402662 | 0.769217 | 159.99   | 107.3438 | 120.8143 | 161.7281 | 214.9546 | 108.9514 |
| ENSMUSG000000043088 | 16_Ilf7re       | 1136.572297 | -0.32915 | 0.402636 | 0.769217 | 1171.095 | 1197.957 | 1427.91  | 544.7161 | 1226.373 | 1251.384 |
| ENSMUSG000000105827 | 1_Hist2h2bb     | 8.478639263 | -0.71973 | 0.402732 | 0.769278 | 16.24264 | 9.446252 | 5.753061 | 1.984394 | 10.18206 | 7.263424 |
| ENSMUSG000000028567 | 8_Txndc12       | 2062.148243 | 0.181177 | 0.402882 | 0.769412 | 1884.147 | 1864.347 | 2050.391 | 2373.335 | 2133.707 | 2066.963 |
| ENSMUSG000000035439 | 13_Haus8        | 158.3942938 | -0.33719 | 0.402919 | 0.769412 | 161.6143 | 160.5863 | 208.2608 | 79.37575 | 177.6204 | 162.9082 |
| ENSMUSG000000061510 | 3_Gm10101       | 20.33235364 | 0.422125 | 0.402858 | 0.769412 | 15.43051 | 20.61001 | 16.10857 | 29.7659  | 20.36412 | 19.71501 |
| ENSMUSG000000033862 | 6_Cdk10         | 624.9913303 | -0.46083 | 0.403137 | 0.769755 | 654.5785 | 732.5139 | 784.7175 | 154.7827 | 673.1474 | 750.208  |
| ENSMUSG000000008348 | 20888.41952     | -0.54408    | 0.404315 | 0.769855 | 22003.91 | 24891.73 | 27447.85 | 3045.052 | 2612.46  | 21819.33 |          |
| ENSMUSG000000016554 | 8_Erf3d         | 3126.502694 | -0.44368 | 0.404248 | 0.769855 | 3421.513 | 3355.996 | 4032.895 | 844.3595 | 2844.9   | 3263.353 |
| ENSMUSG000000020359 | 13_Phypy1       | 422.409741  | 0.241842 | 0.403329 | 0.769855 | 380.0779 | 409.6239 | 371.6477 | 581.4273 | 400.4944 | 391.1873 |
| ENSMUSG000000020476 | 14_Dbn1         | 5389.28227  | -0.44281 | 0.403768 | 0.769855 | 5647.567 | 5860.97  | 7121.138 | 1473.412 | 6588.925 | 5563.681 |
| ENSMUSG000000021708 | 16_Rasgrf2      | 49.22951946 | 0.433208 | 0.404172 | 0.769855 | 49.54006 | 47.23126 | 28.7653  | 91.28211 | 133.902  | 44.61818 |
| ENSMUSG000000023104 | 9_Ric2          | 935.7239628 | -0.37895 | 0.40379  | 0.769855 | 1041.966 | 972.964  | 1158.666 | 356.1987 | 1126.845 | 957.7344 |
| ENSMUSG000000024830 | 16_Rps6kb2      | 447.8074638 | -0.50329 | 0.403906 | 0.769855 | 458.8547 | 513.5326 | 602.9207 | 87.31332 | 539.6492 | 484.5742 |
| ENSMUSG000000027864 | 9_Plgrn         | 6183.708384 | -0.23713 | 0.404275 | 0.769855 | 6042.263 | 6491.293 | 7538.811 | 4325.978 | 6541.408 | 6162.497 |
| ENSMUSG000000028433 | 14_Ubpap2       | 1872.326641 | -0.28728 | 0.404354 | 0.769855 | 1833.794 | 1955.374 | 2385.219 | 1097.37  | 2135.97  | 1826.232 |
| ENSMUSG000000028607 | 16_Cpt2         | 416.4241659 | -0.24785 | 0.403908 | 0.769855 | 409.3146 | 467.1601 | 479.8052 | 282.7761 | 429.9092 | 429.5797 |
| ENSMUSG000000028843 | 8_Sh3bgr13      | 4719.69524  | -0.50311 | 0.403446 | 0.769855 | 5079.075 | 5089.813 | 6434.223 | 904.8835 | 5601.265 | 5208.913 |
| ENSMUSG000000028893 | 8_Sesn2         | 427.5681374 | -0.43098 | 0.403882 | 0.769855 | 479.158  | 468.8776 | 524.6791 | 126.009  | 533.9925 | 432.6926 |
| ENSMUSG000000029171 | 12_Pgm1         | 726.9815124 | 0.237769 | 0.403585 | 0.769855 | 621.2811 | 582.2327 | 798.5248 | 749.1086 | 931.0929 | 679.649  |
| ENSMUSG000000029507 | 16_Pus1         | 382.9949973 | -0.53087 | 0.404216 | 0.769855 | 422.3087 | 436.2451 | 499.3657 | 61.5162  | 448.8793 | 431.6549 |
| ENSMUSG000000031483 | 7_Erlin2        | 4523.086052 | 0.196765 | 0.404332 | 0.769855 | 4097.207 | 4036.985 | 4511.55  | 5509.669 | 4726.739 | 4256.367 |
| ENSMUSG000000032558 | 18_Nlph3        | 188.147494  | -0.2123  | 0.403917 | 0.769855 | 211.9665 | 191.5013 | 202.5077 | 180.5798 | 161.7816 | 180.548  |
| ENSMUSG000000033161 | 10_Atp1a1       | 16604.81884 | -0.33547 | 0.403539 | 0.769855 | 17274.86 | 18690.7  | 19614.48 | 7554.587 | 18687.48 | 17806.8  |
| ENSMUSG000000033308 | 16_Dpyd         | 302.3919745 | 0.274993 | 0.403509 | 0.769855 | 251.761  | 270.5063 | 299.1591 | 429.6212 | 236.4501 | 326.8541 |
| ENSMUSG000000035678 | 7_Tnfrsf9       | 11.82766699 | -0.61911 | 0.40402  | 0.769855 | 10.55772 | 12.88125 | 19.56041 | 2.97659  | 13.57608 | 11.41395 |
| ENSMUSG000000039579 | 15_Grin3a       | 60.89516756 | 0.4316</ |          |          |          |          |          |          |          |          |

|                      |                 |             |          |          |          |          |          |          |          |          |           |
|----------------------|-----------------|-------------|----------|----------|----------|----------|----------|----------|----------|----------|-----------|
| ENSMUSG000000035923  | 3_Myf6          | 23.59655391 | 0.693342 | 0.405341 | 0.770218 | 12.99411 | 35.20876 | 5.753061 | 51.59423 | 9.050721 | 26.97843  |
| ENSMUSG000000078517  | 11_Ecm1         | 734.1568912 | -0.21635 | 0.405347 | 0.770218 | 763.4042 | 796.0615 | 807.7297 | 544.7161 | 737.6337 | 755.3961  |
| ENSMUSG000000017832  | 2_Hspb9         | 3.058487837 | -1.24907 | 0.405636 | 0.770465 | 4.872793 | 0        | 8.054285 | 0.992197 | 3.39402  | 1.037632  |
| ENSMUSG000000026424  | 8_Gpr3711       | 16.9358065  | -0.53851 | 0.405756 | 0.770473 | 23.55183 | 28.33876 | 8.054285 | 16.86735 | 11.3134  | 13.489922 |
| ENSMUSG000000029017  | 13_Pmpcb        | 1023.94134  | 0.210205 | 0.405715 | 0.770473 | 925.8307 | 966.9528 | 965.3636 | 1269.02  | 1056.672 | 959.8097  |
| ENSMUSG000000045350  | 14_Fam186a      | 2.840328434 | -1.13725 | 0.405743 | 0.770473 | 6.497057 | 1.7175   | 3.451836 | 0        | 2.26268  | 3.112896  |
| ENSMUSG000000030256  | 11_Bhlhe41      | 792.4268724 | 0.409296 | 0.406009 | 0.77081  | 675.694  | 826.9765 | 539.6371 | 1497.225 | 412.9391 | 802.0896  |
| ENSMUSG000000034463  | 3_Scara3        | 932.5802872 | -0.2346  | 0.406067 | 0.77081  | 1033.032 | 958.3652 | 1033.25  | 657.8265 | 872.2632 | 1040.745  |
| ENSMUSG000000042535  | 8_Gltbp1        | 2007.768605 | -0.45291 | 0.406096 | 0.77081  | 2154.587 | 2284.276 | 2522.142 | 505.0282 | 2374.683 | 2206.006  |
| ENSMUSG000000096879  | 2_Gm4858        | 514.1908249 | 0.339316 | 0.406128 | 0.77081  | 448.297  | 452.5614 | 461.3955 | 892.9771 | 348.4528 | 481.4613  |
| ENSMUSG000000096968  | 1_Gm26620       | 1.995645495 | 1.318732 | 0.406079 | 0.77081  | 2.436397 | 0.85875  | 0        | 1.984394 | 5.656701 | 1.037632  |
| ENSMUSG000000004151  | 16_Etv1         | 93.28345743 | 0.379364 | 0.406232 | 0.770879 | 68.2191  | 90.16877 | 85.1453  | 166.6891 | 63.35505 | 86.12346  |
| ENSMUSG000000027978  | 9_Prss12        | 57.19142537 | -0.3571  | 0.406241 | 0.770879 | 55.22499 | 69.55877 | 67.88611 | 29.7659  | 54.30432 | 66.40845  |
| ENSMUSG000000037649  | 9_H2-DMa        | 195.833961  | -0.48843 | 0.4064   | 0.771034 | 244.4518 | 204.3826 | 237.0261 | 41.67227 | 228.5307 | 218.9404  |
| ENSMUSG000000096549  | 9_Prickle4      | 20.83365836 | -0.61747 | 0.406387 | 0.771034 | 30.86102 | 24.04501 | 20.71102 | 4.960984 | 10.18206 | 34.24186  |
| ENSMUSG000000026750  | 6_Psmb7         | 2922.458472 | 0.185027 | 0.406482 | 0.771116 | 2860.33  | 2546.194 | 2799.439 | 3256.39  | 3284.28  | 2788.117  |
| ENSMUSG000000025927  | 13_Tflap2b      | 1613.975929 | 0.324221 | 0.406914 | 0.771274 | 1443.159 | 1567.219 | 1289.836 | 2743.424 | 1183.382 | 1456.835  |
| ENSMUSG000000028630  | 8_Dyrk2         | 503.4204622 | -0.28114 | 0.406803 | 0.771274 | 478.3459 | 571.0689 | 607.5232 | 299.6434 | 530.5985 | 533.3429  |
| ENSMUSG000000030677  | 8_Klf22         | 376.3341194 | -0.39558 | 0.406729 | 0.771274 | 450.7334 | 338.3476 | 493.6126 | 141.8841 | 478.5569 | 354.8702  |
| ENSMUSG000000031778  | 12_Cx3cl1       | 921.4217305 | -0.40081 | 0.406846 | 0.771274 | 991.6134 | 1096.624 | 1057.413 | 307.581  | 965.0331 | 1110.266  |
| ENSMUSG000000038387  | 8_Rras          | 527.2409861 | -0.41481 | 0.406722 | 0.771274 | 629.4024 | 572.7864 | 605.222  | 165.6969 | 540.7806 | 649.5577  |
| ENSMUSG000000039220  | 16_Pp01r10      | 1260.195788 | -0.33177 | 0.406821 | 0.771274 | 1281.545 | 1272.668 | 1659.183 | 601.2713 | 1389.286 | 1357.223  |
| ENSMUSG000000050762  | 5_Prss27        | 6193.528059 | -0.56314 | 0.4069   | 0.771274 | 6808.916 | 7346.608 | 8005.959 | 770.9369 | 7750.811 | 6477.937  |
| ENSMUSG000000063919  | 10_Srm4         | 36.76497268 | -0.45656 | 0.406891 | 0.771274 | 60.09778 | 38.64376 | 28.7653  | 49.60984 | 23.75814 | 19.71501  |
| ENSMUSG000000067219  | 9_Nipal1        | 28.24045854 | 0.537994 | 0.406762 | 0.771274 | 25.1761  | 8.587502 | 35.66986 | 48.61764 | 31.67752 | 19.71501  |
| ENSMUSG000000024269  | 11_Tpqs2        | 187.9393017 | 0.249948 | 0.406953 | 0.771274 | 202.2209 | 152.8575 | 159.9351 | 242.096  | 176.4891 | 194.0372  |
| ENSMUSG000000007029  | 16_Vars         | 1422.722157 | -0.51236 | 0.407081 | 0.771296 | 1481.329 | 1564.643 | 1972.149 | 254.0024 | 1701.536 | 1562.674  |
| ENSMUSG000000009876  | 13_Cox4i2       | 12.25520766 | -0.62867 | 0.407075 | 0.771296 | 14.61838 | 20.61001 | 9.204897 | 2.97659  | 14.70742 | 11.41395  |
| ENSMUSG0000000043140 | 9_Tmem186       | 392.3499551 | -0.23869 | 0.407073 | 0.771296 | 452.3576 | 371.8388 | 449.8893 | 282.7761 | 417.4645 | 379.7733  |
| ENSMUSG000000053192  | 9_Mitl11        | 257.470425  | 0.34043  | 0.407159 | 0.771371 | 211.9665 | 197.5126 | 272.6951 | 440.5354 | 197.9845 | 224.1285  |
| ENSMUSG0000000100680 | 1.1810044D09Rik | 18.40606129 | -0.45735 | 0.407277 | 0.771521 | 27.61249 | 15.4575  | 20.71102 | 10.91416 | 18.10144 | 17.63975  |
| ENSMUSG000000018659  | 12_Pnpo         | 500.5187983 | -0.25497 | 0.407442 | 0.771666 | 514.0797 | 530.7076 | 589.1134 | 325.4406 | 500.0523 | 503.7192  |
| ENSMUSG000000021118  | 7_Plek2         | 802.096551  | 0.223522 | 0.407436 | 0.771666 | 756.9072 | 591.6789 | 872.164  | 887.024  | 901.6781 | 843.1272  |
| ENSMUSG000000042606  | 9_Hlrp3         | 459.6400334 | -0.29525 | 0.40758  | 0.771666 | 544.1286 | 479.1826 | 495.9138 | 254.0024 | 524.9418 | 459.671   |
| ENSMUSG000000057738  | 13_Sptan1       | 16855.22224 | -0.27508 | 0.407508 | 0.771666 | 17356.08 | 18442.52 | 19573.06 | 9788.022 | 17726.97 | 18244.68  |
| ENSMUSG000000089942  | 9_Pira2         | 95.68813692 | 0.471317 | 0.407586 | 0.771666 | 128.3169 | 42.93751 | 69.03673 | 86.32112 | 182.1458 | 65.37082  |
| ENSMUSG0000000106438 | 1_Gm42749       | 4.612271599 | -0.89585 | 0.407523 | 0.771666 | 4.872793 | 1.7175   | 11.50612 | 2.97659  | 4.5256   | 2.075264  |
| ENSMUSG000000005355  | 8_Casp14        | 134.4294185 | 0.248453 | 0.407631 | 0.771679 | 105.5772 | 146.8463 | 116.2118 | 159.7437 | 139.1548 | 139.0427  |
| ENSMUSG0000000025190 | 13_Got1         | 490.7789837 | -0.28734 | 0.407679 | 0.771696 | 542.5043 | 657.8027 | 417.6722 | 310.5576 | 492.1329 | 524.0042  |
| ENSMUSG000000091568  | 7_Gm8206        | 6.217874068 | 1.206164 | 0.407787 | 0.771828 | 8.933454 | 0        | 2.301224 | 21.82833 | 1.13134  | 3.112896  |
| ENSMUSG000000039234  | 11_Sec24d       | 616.7147076 | -0.207   | 0.407984 | 0.772126 | 626.966  | 687.0002 | 668.5056 | 485.1842 | 650.5206 | 582.1116  |
| ENSMUSG000000006445  | 3_Epha2         | 3972.142715 | -0.53371 | 0.408065 | 0.772206 | 4370.895 | 3832.602 | 5892.285 | 628.0606 | 4768.599 | 4340.445  |
| ENSMUSG000000001786  | 14_Fbxo7        | 751.8266236 | 0.190712 | 0.408439 | 0.77229  | 722.7976 | 664.6727 | 719.1326 | 809.6326 | 675.6572 | 719.079   |
| ENSMUSG000000005625  | 15_Psmd4        | 2496.748694 | -0.41653 | 0.408574 | 0.77229  | 2840.026 | 2665.561 | 3058.327 | 758.0384 | 2998.051 | 2680.489  |
| ENSMUSG000000018238  | 6_Gdf9          | 4.387055997 | -1.08836 | 0.408571 | 0.77229  | 2.436397 | 8.587502 | 6.903673 | 0        | 1.13134  | 7.263424  |
| ENSMUSG000000022297  | 14_Fzd6         | 4497.455678 | 0.18937  | 0.408153 | 0.77229  | 4020.866 | 4084.216 | 4503.496 | 5413.426 | 4555.907 | 4406.823  |
| ENSMUSG000000023032  | 12_Slc4a8       | 100.4364025 | -0.29983 | 0.408279 | 0.77229  | 115.3228 | 140.835  | 75.9404  | 88.22748 | 88.24453 | 84.0482   |
| ENSMUSG000000024493  | 8_Lars          | 2322.392588 | 0.191797 | 0.408509 | 0.77229  | 2150.526 | 2063.577 | 2290.869 | 2699.768 | 2581.718 | 2147.898  |
| ENSMUSG000000027490  | 17_E2F1         | 232.9835048 | -0.42757 | 0.408251 | 0.77229  | 291.5555 | 215.5463 | 294.5567 | 71.43817 | 260.2082 | 264.5962  |
| ENSMUSG000000031311  | 17_Nono         | 6137.590139 | 0.166996 | 0.408439 | 0.77229  | 5828.673 | 5272.726 | 6120.106 | 7233.115 | 6367.182 | 6003.739  |
| ENSMUSG000000033998  | 8_Kcnk1         | 954.0738592 | 0.201434 | 0.408471 | 0.77229  | 843.8053 | 828.694  | 990.677  | 1102.331 | 1063.46  | 895.4765  |
| ENSMUSG000000056966  | 7_Glc3          | 23.72324484 | 0.589781 | 0.408407 | 0.77229  | 17.05478 | 21.46876 | 18.40979 | 50.60204 | 7688041  | 28.01607  |
| ENSMUSG000000061490  | 5_Ube2d4        | 0.86611576  | 2.110643 | 0.408419 | 0.77229  | 0        | 0.85875  | 0        | 0        | 2.26268  | 2.075264  |
| ENSMUSG000000084816  | 1_Platr29       | 0.86611576  | 2.110643 | 0.408419 | 0.77229  | 0        | 0.85875  | 0        | 0        | 2.26268  | 2.075264  |
| ENSMUSG000000032178  | 13_Ilf3         | 1892.77179  | -0.23841 | 0.408714 | 0.772481 | 1902.826 | 2017.204 | 2226.434 | 1288.864 | 1892.732 | 2028.571  |
| ENSMUSG000000022148  | 15_Fyb          | 138.1952396 | 0.283106 | 0.408903 | 0.772638 | 153.493  | 89.31002 | 131.1698 | 140.8919 | 174.2264 | 140.0803  |
| ENSMUSG000000032788  | 14_Pdxk         | 6953.419729 | -0.32026 | 0.408991 | 0.772638 | 6597.762 | 7835.237 | 8733.146 | 3427.048 | 7600.343 | 7526.983  |
| ENSMUSG0000000061099 | 12_Gapdhs       | 10.40364781 | -0.67913 | 0.408965 | 0.772638 | 10.5572  | 19.75126 | 8.054285 | 3.968787 | 4.52536  | 15.56448  |
| ENSMUSG000000063870  | 12_Chd4         | 7369.528221 | -0.2472  | 0.408982 | 0.772638 | 7330.305 | 8301.538 | 8366.101 | 4795.287 | 7874.127 | 7549.811  |
| ENSMUSG000000097872  | 1_Gm26702       | 11.73548011 | -0.68265 | 0.408932 | 0.772638 | 11.36985 | 13.74    | 18.40979 | 5.953181 | 2.26268  | 18.67738  |
| ENSMUSG000000020178  | 5_Adora2a       | 16.51833003 | -0.61889 | 0.409154 | 0.772657 | 20.3033  | 15.4575  | 24.16285 | 2.97659  | 23.75814 | 12.45158  |
| ENSMUSG000000021265  | 3_Slc25a29      | 69.78036395 | -0.56337 | 0.409076 | 0.772657 | 81.21322 | 93.60377 | 74.78979 | 10.91416 | 55.43567 | 102.7256  |
| ENSMUSG000000030067  | 17_Foxp1        | 3308.850986 | 0.224809 | 0.409373 | 0.772657 | 2990.271 | 2823.571 | 3341.378 | 4405.354 | 2998.051 | 3294.482  |
| ENSMUSG000000036469  | 16_March1       | 93.62708777 | 0.458383 | 0.409328 | 0.772657 | 112.8864 | 88.94876 | 74.78979 | 180.5798 | 91.63855 | 52.91924  |
| ENSMUSG000000038210  | 10_Hoxa11       | 0.858346086 | 2.110687 | 0.4095   | 0.772657 | 0.812132 | 0        | 0        | 0        | 2.26268  | 2.075264  |
| ENSMUSG000000038963  | 15_Slc04d1      | 794.4377491 | -0.44385 | 0.409149 | 0.772657 | 808.0715 | 903.4052 | 1035.551 | 215.3067 | 787.4127 | 1016.879  |
| ENSMUSG0000000042102 | 6_Dmgd3         | 46.93968613 | -0.35546 | 0.409347 | 0.772657 | 47.9158  | 68.70002 | 41.42204 | 52.58643 | 30.54618 | 40.46765  |
| ENSMUSG000000043843  | 16_Tmem145      | 4.06841025  | -0.87428 | 0.409196 | 0.772657 | 5.684925 | 4.293751 | 5.753061 | 1.984394 | 5.656701 | 1.037632  |
| ENSMUSG000000062981  | 4_Mrpl42        | 1050.041265 | 0.184778 | 0.409274 | 0.772657 | 1006.232 | 885.3715 | 1057.413 | 1165.831 | 1014.188 | 1081.213  |
| ENSMUSG000000064147  | 6_Rab44         | 101.8626328 | -0.47052 | 0.409312 | 0.772657 | 137.2503 | 80.72252 | 136.9228 | 27.78151 | 115.3967 | 113.1019  |
| ENSMUSG000000091230  | 1_Gm6970        | 0.858346086 | 2.110687 | 0.4095   | 0.772657 | 0.812132 | 0        | 0        | 0        | 2.26268  | 2.075264  |
| ENSMUSG0000000100157 | 6.2310034O05Rik | 107.1776223 | 0.278757 | 0.409436 | 0.772657 | 104.7651 | 89.31002 | 96.65142 | 144.8607 | 87.11319 | 120.3653  |
| ENSMUSG0000000105076 | 1_A930003O13Rik | 8.790965068 | 0.615131 | 0.409505 | 0.772657 | 6.497057 | 5.87502  | 5.753061 | 15.87515 | 5.656701 | 10.37632  |
| ENSMUSG000000091345  | 8_Col6a5        | 65.21388645 | 0.412345 | 0.40955  | 0.772669 | 72.27976 | 44.65501 | 50.62693 | 48.61764 | 122.1847 | 52.91924  |
| ENSMUSG000000036246  | 14_Gmip         | 342.4988536 | -0.36158 | 0.409626 | 0.772738 | 367.8959 | 353.80   |          |          |          |           |

|                      |             |              |          |          |          |          |          |          |          |          |          |
|----------------------|-------------|--------------|----------|----------|----------|----------|----------|----------|----------|----------|----------|
| ENSMUSG00000022801   | 13_Lrch3    | 1139.205241  | 0.222084 | 0.41131  | 0.773497 | 998.1104 | 1076.873 | 1080.425 | 1522.03  | 1046.49  | 1111.304 |
| ENSMUSG00000001014   | 5_Icam4     | 1.327446631  | -1.49146 | 0.411526 | 0.773831 | 1.624264 | 0.85875  | 3.451836 | 0.992197 | 0        | 1.037632 |
| ENSMUSG000000037257  | 7_Aagab     | 2264.9968    | -0.23619 | 0.411583 | 0.773865 | 2380.359 | 2471.483 | 2497.979 | 1516.077 | 2339.611 | 2384.478 |
| ENSMUSG000000039063  | 5_Echdc3    | 766.1002783  | -0.33273 | 0.411672 | 0.773959 | 787.7682 | 788.3327 | 986.0746 | 359.1752 | 782.8874 | 892.3663 |
| ENSMUSG000000006241  | 15_Ccdc159  | 65.87051946  | -0.39547 | 0.41209  | 0.774001 | 82.02535 | 75.57002 | 66.7355  | 26.78931 | 61.09237 | 83.01057 |
| ENSMUSG000000008489  | 18_Elavl2   | 12.55125101  | 0.628024 | 0.412045 | 0.774001 | 17.86691 | 6.870002 | 4.602448 | 21.82833 | 15.83876 | 8.301057 |
| ENSMUSG000000021500  | 15_Ddx46    | 2467.670458  | 0.243237 | 0.411912 | 0.774001 | 2273.97  | 2150.311 | 2356.454 | 3523.291 | 2238.922 | 2263.076 |
| ENSMUSG000000025332  | 14_Kdm5c    | 3552.988693  | -0.31231 | 0.412049 | 0.774001 | 3542.521 | 3843.766 | 4421.802 | 1804.806 | 4191.615 | 3513.422 |
| ENSMUSG000000027330  | 16_Cdc25b   | 661.3053949  | -0.30994 | 0.411908 | 0.774001 | 747.1616 | 635.4752 | 813.4828 | 341.3157 | 733.008  | 697.2887 |
| ENSMUSG000000028438  | 16_Klf24    | 248.8037782  | 0.245205 | 0.411852 | 0.774001 | 218.4636 | 220.6988 | 243.9298 | 214.3145 | 336.108  | 259.408  |
| ENSMUSG000000030092  | 14_Cntn6    | 9.206264978  | 0.670689 | 0.411922 | 0.774001 | 4.872793 | 12.88125 | 3.451836 | 16.86735 | 6.788041 | 10.37632 |
| ENSMUSG000000031065  | 14_Cdk16    | 2329.098498  | -0.30802 | 0.411901 | 0.774001 | 2483.5   | 2539.324 | 2707.39  | 1167.816 | 2586.243 | 2490.317 |
| ENSMUSG000000031209  | 14_Heph     | 420.3429802  | 0.367315 | 0.412041 | 0.774001 | 350.8411 | 493.7814 | 256.5865 | 712.3973 | 285.0977 | 423.3539 |
| ENSMUSG000000033159  | 14_Cnppd1   | 1078.540536  | -0.28168 | 0.412018 | 0.774001 | 1091.506 | 1157.595 | 1301.342 | 615.162  | 1165.28  | 1140.358 |
| ENSMUSG000000062980  | 15_Cped1    | 1056.583511  | 0.368394 | 0.412122 | 0.774001 | 955.0674 | 1070.003 | 742.1448 | 1948.675 | 685.5921 | 938.0194 |
| ENSMUSG000000062647  | 16_Rpl7a    | 15456.55207  | -0.44074 | 0.412182 | 0.774041 | 17528.25 | 16980.07 | 18889.6  | 3999.545 | 17652.3  | 17689.55 |
| ENSMUSG000000021461  | 16_Fancf    | 135.8532416  | -0.26467 | 0.412257 | 0.774109 | 137.2503 | 151.14   | 156.4832 | 93.2665  | 124.4474 | 152.5319 |
| ENSMUSG000000002812  | 4_Flii      | 5067.18376   | -0.44089 | 0.412313 | 0.774142 | 5002.734 | 5765.649 | 6737.985 | 1356.333 | 6261.967 | 5278.434 |
| ENSMUSG000000024571  | 14_Gm16286  | 1381.091505  | -0.31652 | 0.41236  | 0.774156 | 1436.662 | 1483.92  | 1675.291 | 673.7016 | 1522.784 | 1494.19  |
| ENSMUSG000000023832  | 13_Acat2    | 2056.436053  | -0.21701 | 0.412487 | 0.774248 | 2282.091 | 1974.267 | 2376.014 | 1544.85  | 2198.194 | 1963.2   |
| ENSMUSG000000060703  | 12_Cd302    | 268.643065   | 0.378895 | 0.41247  | 0.774248 | 281.8099 | 230.1451 | 188.7004 | 501.0594 | 178.7177 | 231.392  |
| ENSMUSG000000024210  | 2_Ip6k3     | 24.87380224  | -0.61223 | 0.41259  | 0.774369 | 26.80036 | 50.66626 | 12.65673 | 14.88295 | 7.919381 | 36.31712 |
| ENSMUSG000000037669  | 14_Ldah     | 747.4635971  | 0.180026 | 0.412792 | 0.774601 | 697.6215 | 696.4464 | 708.7771 | 860.2346 | 745.5531 | 776.1488 |
| ENSMUSG000000078302  | 4_Foxd1     | 11.7188583   | -0.60005 | 0.412761 | 0.774601 | 8.121322 | 17.175   | 17.25918 | 15.87515 | 5.656701 | 6.225792 |
| ENSMUSG000000004561  | 14_Mettl17  | 324.8591996  | -0.28878 | 0.412935 | 0.774695 | 315.9194 | 379.5676 | 376.2502 | 186.533  | 323.5633 | 367.3218 |
| ENSMUSG000000021662  | 9_Arhgef28  | 1130.803508  | -0.21754 | 0.412914 | 0.774695 | 1098.003 | 1201.392 | 1348.517 | 857.258  | 1077.306 | 1202.616 |
| ENSMUSG000000021947  | 10_Cryl1    | 348.446174   | -0.40654 | 0.412989 | 0.774695 | 394.6962 | 401.0364 | 395.8106 | 116.087  | 321.3006 | 461.7463 |
| ENSMUSG000000026927  | 17_Sdcccag3 | 1287.496324  | -0.24793 | 0.413101 | 0.774695 | 1317.278 | 1429.819 | 1446.319 | 829.4765 | 1379.104 | 1322.981 |
| ENSMUSG000000030737  | 16_Slco2b1  | 129.3856851  | -0.28056 | 0.413058 | 0.774695 | 136.4382 | 146.8463 | 142.6759 | 114.1026 | 83.71917 | 152.5319 |
| ENSMUSG000000041258  | 16_Tp236    | 1035.015296  | -0.2224  | 0.413064 | 0.774695 | 1056.584 | 1073.438 | 1213.896 | 750.1008 | 1094.006 | 1022.068 |
| ENSMUSG000000008772  | 1_Gm15409   | 1.863512005  | -1.30425 | 0.413113 | 0.774695 | 2.436397 | 4.293751 | 1.150612 | 0        | 2.26268  | 1.037632 |
| ENSMUSG000000028080  | 15_Lrba     | 2760.396484  | 0.200055 | 0.413227 | 0.774835 | 2465.633 | 2530.737 | 2711.993 | 3480.626 | 2637.154 | 2736.236 |
| ENSMUSG000000026691  | 10_Fmo3     | 6.638753177  | 0.696549 | 0.413496 | 0.774901 | 5.684925 | 6.011252 | 3.451836 | 10.91416 | 3.39402  | 10.37632 |
| ENSMUSG000000050335  | 16_Lgals3   | 10501.38075  | -0.24789 | 0.413416 | 0.774901 | 10470.82 | 10875.21 | 12858.09 | 6890.807 | 11357.52 | 10555.83 |
| ENSMUSG000000054589  | 1_Gm9949    | 9.839671046  | -0.5895  | 0.413478 | 0.774901 | 10.55772 | 7.728752 | 17.25918 | 5.953181 | 11.3134  | 6.225792 |
| ENSMUSG000000097085  | 1_Gm26634   | 2.899856559  | 0.999638 | 0.413304 | 0.774901 | 1.624264 | 0.85875  | 3.451836 | 2.97659  | 2.26268  | 6.225792 |
| ENSMUSG000000097746  | 1_Gm6225    | 3.626361839  | -1.00281 | 0.413416 | 0.774901 | 6.497057 | 3.435001 | 4.602448 | 4.960984 | 2.26268  | 0        |
| ENSMUSG000000097815  | 1_Gm26809   | 911.0266593  | 0.189964 | 0.413481 | 0.774901 | 787.7682 | 853.5977 | 912.4354 | 1065.619 | 961.6391 | 885.1002 |
| ENSMUSG0000000005417 | 17_Mrip1    | 14445.82737  | -0.33907 | 0.413753 | 0.774929 | 15078.05 | 15722    | 17606.67 | 6296.481 | 16351.26 | 15620.51 |
| ENSMUSG000000017817  | 11_Jph2     | 112.5184595  | -0.38665 | 0.413761 | 0.774929 | 109.6378 | 172.6088 | 100.1033 | 57.54742 | 83.71917 | 151.4943 |
| ENSMUSG000000021368  | 14_Tbc1d7   | 349.5565225  | -0.25441 | 0.413681 | 0.774929 | 371.9565 | 375.2738 | 393.5093 | 224.2365 | 373.342  | 359.0207 |
| ENSMUSG000000033326  | 15_Kdm4a    | 1773.360331  | -0.35647 | 0.413584 | 0.774929 | 1734.714 | 1975.984 | 2263.254 | 728.2725 | 2005.866 | 1932.071 |
| ENSMUSG000000039677  | 13_Scubc3   | 273.76918556 | -0.72289 | 0.413685 | 0.774929 | 17.05478 | 63.54752 | 8.054285 | 5.953181 | 15.83876 | 32.16659 |
| ENSMUSG000000042626  | 13_Shc1     | 1945.852873  | -0.27385 | 0.413783 | 0.774929 | 2130.223 | 2065.294 | 2194.217 | 1122.175 | 2157.466 | 2005.743 |
| ENSMUSG000000090610  | 2_Hist4h4   | 2.787434805  | 1.115431 | 0.413598 | 0.774929 | 4.060661 | 0        | 1.150612 | 3.968787 | 3.39402  | 4.150528 |
| ENSMUSG000000001985  | 9_Grik3     | 43.96571522  | -0.40294 | 0.413985 | 0.774935 | 57.66138 | 60.11252 | 32.21714 | 31.7503  | 26.02082 | 56.03213 |
| ENSMUSG000000026873  | 9_Phf19     | 197.7258501  | -0.33559 | 0.414015 | 0.774935 | 230.6455 | 187.2075 | 243.9298 | 94.2587  | 209.2979 | 221.0156 |
| ENSMUSG000000032359  | 14_Ctsh     | 3035.021211  | 0.165128 | 0.414005 | 0.774935 | 2921.239 | 2851.051 | 2812.096 | 3193.882 | 3339.716 | 3092.144 |
| ENSMUSG000000039943  | 16_Plc4b    | 976.0270471  | 0.379697 | 0.413886 | 0.774935 | 804.823  | 1099.2   | 640.8909 | 1815.72  | 655.0459 | 840.482  |
| ENSMUSG000000042258  | 13_Isl1     | 3.394105531  | 1.295667 | 0.41402  | 0.774935 | 4.060661 | 1.7175   | 0        | 8.929771 | 5.656701 | 0        |
| ENSMUSG000000048992  | 8_Prss32    | 1844.685233  | -0.42494 | 0.413968 | 0.774935 | 2044.137 | 1935.623 | 2363.357 | 525.8643 | 2190.274 | 2008.856 |
| ENSMUSG000000027748  | 11_Tpca2    | 5.176283601  | -0.81365 | 0.414085 | 0.774984 | 10.55772 | 6.870002 | 2.301224 | 5.953181 | 2.26268  | 3.112896 |
| ENSMUSG000000023505  | 13_Cdca3    | 392.2957268  | -0.40756 | 0.41443  | 0.77522  | 477.5337 | 368.4038 | 495.9138 | 132.9544 | 514.7597 | 364.2089 |
| ENSMUSG000000029030  | 14_Tpgrl    | 2088.801217  | -0.18082 | 0.414349 | 0.77522  | 2232.551 | 2266.242 | 2159.699 | 1808.775 | 2185.257 | 2185.257 |
| ENSMUSG000000034820  | 3_Cpsf7     | 1758.17861   | 0.17746  | 0.414308 | 0.77522  | 1615.331 | 1625.614 | 1709.81  | 2008.206 | 1890.469 | 1699.641 |
| ENSMUSG000000047182  | 6_Irs3      | 14.58498827  | -0.77514 | 0.414372 | 0.77522  | 24.36397 | 24.90376 | 5.753061 | 0.992197 | 16.9701  | 14.52685 |
| ENSMUSG000000058546  | 8_Rpl23a    | 12841.31614  | -0.4666  | 0.414444 | 0.77522  | 14914.81 | 13960.7  | 15824.37 | 2833.714 | 14079.53 | 15434.78 |
| ENSMUSG000000063646  | 13_Jakmip1  | 294.6657637  | -0.39551 | 0.414313 | 0.77522  | 298.8646 | 303.9976 | 401.5636 | 104.1807 | 306.5932 | 352.7949 |
| ENSMUSG000000008450  | 7_Nutf2     | 261.4973908  | 0.234981 | 0.414639 | 0.77526  | 224.1485 | 237.8738 | 256.5865 | 551.2377 | 276.047  | 223.0909 |
| ENSMUSG000000016256  | 10_Ctsc     | 1082.556565  | -0.43492 | 0.414508 | 0.77526  | 1363.57  | 1237.459 | 1132.202 | 299.6434 | 1471.569 | 1044.895 |
| ENSMUSG000000020828  | 13_Pld2     | 1076.442309  | -0.39643 | 0.414767 | 0.77526  | 1174.343 | 1157.595 | 1338.162 | 356.1987 | 1279.546 | 1152.809 |
| ENSMUSG000000028841  | 14_Cnksr1   | 1933.049284  | -0.46    | 0.414777 | 0.77526  | 2027.894 | 2097.927 | 2590.028 | 451.4496 | 2183.486 | 2247.511 |
| ENSMUSG000000031990  | 14_Jam3     | 205.5729     | -0.30038 | 0.414749 | 0.77526  | 195.7239 | 299.7038 | 185.2485 | 223.2443 | 132.3668 | 197.1501 |
| ENSMUSG000000037415  | 5_Ranbp10   | 1682.813632  | -0.26507 | 0.414677 | 0.77526  | 1733.09  | 1823.985 | 1953.739 | 1008.072 | 1794.305 | 1783.69  |
| ENSMUSG000000038126  | 17_Mphosph9 | 342.888702   | 0.254075 | 0.414757 | 0.77526  | 328.1014 | 303.1388 | 307.2134 | 494.114  | 314.5125 | 310.252  |
| ENSMUSG000000079177  | 2_Fam228a   | 8.186676348  | 0.641612 | 0.414775 | 0.77526  | 8.933454 | 7.728752 | 2.301224 | 12.89856 | 7.919381 | 9.338689 |
| ENSMUSG0000000009418 | 15_Nav1     | 1598.620429  | -0.18024 | 0.415014 | 0.77528  | 1656.75  | 1851.465 | 1586.694 | 1524.014 | 1402.862 | 1569.937 |
| ENSMUSG000000019866  | 13_Aim1     | 10138.03004  | 0.173825 | 0.415138 | 0.77528  | 9134.051 | 9058.097 | 10392.33 | 10877.45 | 11166.33 | 10199.92 |
| ENSMUSG000000020680  | 15_Taf15    | 2181.68227   | 0.194142 | 0.41497  | 0.77528  | 1975.918 | 1928.753 | 2201.121 | 2670.002 | 2202.719 | 2111.581 |
| ENSMUSG000000021532  | 10_Fastkl3  | 150.6752907  | 0.24605  | 0.415061 | 0.77528  | 134.8139 | 130.53   | 148.429  | 188.5174 | 173.095  | 128.6664 |
| ENSMUSG000000025592  | 17_Dach2    | 22.9830801   | 0.543129 | 0.415125 | 0.77528  | 17.05478 | 27.48001 | 11.50612 | 45.64105 | 11.3134  | 24.90317 |
| ENSMUSG000000028668  | 5_Tceb3     | 2974.340074  | 0.181241 | 0.414878 | 0.77528  | 2668.666 | 2656.114 | 3038.767 | 2946.825 | 3427.961 | 3107.708 |
| ENSMUSG000000044375  | 7_BC027072  | 36.86007281  | -0.56744 | 0.415126 | 0.77528  | 60.90991 | 48.94876 | 21.86163 | 25.79712 | 54.30432 | 9.338689 |
| ENSMUSG000000054052  | 5_Rdh19     | 84.8251985   | -0.30186 | 0.414918 | 0.77528  | 90.14667 | 66.98252 | 124.2661 | 70.44597 | 80.32515 | 76.78477 |
| ENSMUSG000000059291  | 15_Rpl11    | 11362.00298  | -0.2849  | 0.414869 |          |          |          |          |          |          |          |

|                      |                 |              |           |          |          |          |          |          |          |          |           |
|----------------------|-----------------|--------------|-----------|----------|----------|----------|----------|----------|----------|----------|-----------|
| ENSMUSG00000034947   | 13_Tmem106a     | 643.8828316  | 0.301906  | 0.416914 | 0.776195 | 611.5355 | 473.1714 | 645.4934 | 488.1608 | 1018.206 | 626.7298  |
| ENSMUSG00000004099   | 15_Dnmt1        | 2613.260388  | -0.34006  | 0.417005 | 0.776209 | 2689.782 | 2785.786 | 3283.847 | 1138.05  | 3024.072 | 2758.026  |
| ENSMUSG000000011427  | 15_Zfp790       | 337.8387121  | 0.224634  | 0.417038 | 0.776209 | 301.301  | 329.7601 | 303.7616 | 439.5432 | 350.7154 | 301.9509  |
| ENSMUSG000000020792  | 15_Excot        | 1209.384047  | -0.43983  | 0.417006 | 0.776209 | 1294.539 | 1343.944 | 1538.368 | 311.5498 | 1422.095 | 1345.809  |
| ENSMUSG000000005899  | 12_Smpd4        | 908.6763849  | -0.26937  | 0.41747  | 0.776287 | 968.8737 | 983.269  | 1027.497 | 531.875  | 985.5705 |           |
| ENSMUSG000000026156  | 8_B3gat2        | 80.62285349  | 0.361275  | 0.41731  | 0.776287 | 63.34631 | 70.41752 | 78.24162 | 139.8998 | 75.79979 | 56.03213  |
| ENSMUSG000000028979  | 17_Masp2        | 51.36049409  | -0.51036  | 0.417427 | 0.776287 | 63.34631 | 60.98244 | 11.90636 | 38.46556 | 76.78477 |           |
| ENSMUSG000000039130  | 18_Zc3hc1       | 342.8692909  | -0.29901  | 0.417144 | 0.776287 | 352.4654 | 383.0026 | 399.2624 | 182.5642 | 351.8468 | 388.0744  |
| ENSMUSG000000044647  | 16_Csmp3        | 33.25363447  | 0.549773  | 0.417457 | 0.776287 | 29.23676 | 37.78501 | 13.80735 | 75.40696 | 21.49546 | 21.79027  |
| ENSMUSG000000044678  | 11_Ly6k         | 7.208655111  | 0.65301   | 0.417169 | 0.776287 | 5.684925 | 4.293751 | 6.903673 | 4.960984 | 7.919381 | 13.8922   |
| ENSMUSG000000046020  | 13_Pofut1       | 1442.235737  | -0.19982  | 0.417341 | 0.776287 | 1484.578 | 1563.784 | 1577.489 | 1128.128 | 1356.477 | 1542.959  |
| ENSMUSG000000060036  | 13_Rpl3         | 19514.72696  | -0.296    | 0.417449 | 0.776287 | 22556.16 | 20253.62 | 21718.95 | 10147.2  | 20635.64 | 21776.78  |
| ENSMUSG000000062694  | 7_Cav3          | 27.86937448  | -0.63603  | 0.417301 | 0.776287 | 38.17021 | 43.79626 | 19.56041 | 2.97659  | 30.54618 | 32.16659  |
| ENSMUSG000000097207  | 7_6030443J06Rik | 31.59703167  | 0.353888  | 0.417422 | 0.776287 | 30.86102 | 29.19751 | 23.01224 | 44.64886 | 32.80886 | 29.0537   |
| ENSMUSG000000022070  | 6_Bora          | 175.1432448  | 0.244846  | 0.417549 | 0.776289 | 175.4206 | 133.1063 | 172.5918 | 216.2989 | 195.7218 | 157.7201  |
| ENSMUSG000000025500  | 11_Lmmt2        | 102.229152   | -0.46217  | 0.417528 | 0.776289 | 114.5106 | 121.0838 | 119.6637 | 24.80492 | 110.8713 | 122.4406  |
| ENSMUSG000000022437  | 6_Samm50        | 1481.164849  | -0.24629  | 0.417683 | 0.776293 | 1530.057 | 1554.338 | 1737.424 | 955.4855 | 1552.199 | 1557.486  |
| ENSMUSG000000029228  | 15_Lnx1         | 472.0192725  | -0.35708  | 0.417863 | 0.776293 | 525.4495 | 482.6176 | 582.2097 | 191.494  | 554.3567 | 495.9881  |
| ENSMUSG000000036299  | 4_BC031181      | 900.0419127  | 0.215932  | 0.417745 | 0.776293 | 825.1263 | 827.8352 | 845.6999 | 1192.621 | 876.7886 | 832.1809  |
| ENSMUSG000000040631  | 7_Dok4          | 749.4657158  | -0.42352  | 0.417784 | 0.776293 | 757.7193 | 811.519  | 1006.786 | 216.2989 | 822.4843 | 881.9873  |
| ENSMUSG000000046201  | 8_Scaf8         | 1683.545189  | 0.193503  | 0.417829 | 0.776293 | 1571.476 | 1502.813 | 1638.472 | 2087.582 | 1656.282 | 1644.647  |
| ENSMUSG000000059554  | 12_Ccdc28a      | 242.7719845  | -0.20338  | 0.417648 | 0.776293 | 250.9488 | 248.1788 | 280.7494 | 219.2755 | 211.5606 | 245.9188  |
| ENSMUSG000000071540  | 3_3425401B19Rik | 42.56690857  | 0.502884  | 0.417721 | 0.776293 | 35.73382 | 37.78501 | 32.21714 | 64.49279 | 13.57608 | 17.59661  |
| ENSMUSG000000097294  | 1_Gm26888       | 15.40687299  | -0.5702   | 0.417863 | 0.776293 | 22.7397  | 12.88125 | 19.56041 | 3.968787 | 13.57608 | 19.71501  |
| ENSMUSG000000059775  | 4_Rps26-ps1     | 28.98746155  | -0.8046   | 0.418    | 0.776474 | 42.23087 | 29.19751 | 39.12081 | 0        | 26.02082 | 37.35475  |
| ENSMUSG000000028081  | 6_Rps3a1        | 17169.77387  | 0.173867  | 0.418225 | 0.77665  | 16941.08 | 15464.37 | 16003.86 | 19962.01 | 17096.81 | 17550.51  |
| ENSMUSG000000032601  | 13_Prkar2a      | 1897.290919  | 0.227566  | 0.41832  | 0.77665  | 1722.532 | 1629.049 | 1892.757 | 2590.626 | 1742.264 | 1806.517  |
| ENSMUSG000000043668  | 13_Tox3         | 19.21334878  | -0.52796  | 0.418228 | 0.77665  | 22.7397  | 32.63251 | 12.65673 | 24.80492 | 7.919381 | 14.52685  |
| ENSMUSG000000044172  | 6_Ptx4          | 22.32998886  | -0.50594  | 0.418295 | 0.77665  | 28.42463 | 24.90376 | 25.31347 | 10.91416 | 10.18206 | 34.24186  |
| ENSMUSG000000044957  | 3_Pp2d1         | 10.12884015  | 0.625851  | 0.418406 | 0.77665  | 6.497057 | 9.446252 | 8.054285 | 20.83613 | 4.52536  | 11.471395 |
| ENSMUSG000000073755  | 4_5730409E04Rik | 360.5776924  | -0.20794  | 0.418335 | 0.77665  | 382.5143 | 425.9401 | 350.9367 | 325.4406 | 300.9365 | 377.6981  |
| ENSMUSG000000074156  | 4_Ces1h         | 6.943248442  | 0.954771  | 0.418406 | 0.77665  | 10.55772 | 3.435001 | 0        | 17.85954 | 5.656701 | 4.150528  |
| ENSMUSG000000085583  | 1_Gm15676       | 8.071404578  | -0.718    | 0.418356 | 0.77665  | 10.55772 | 6.870002 | 12.65673 | 0.992197 | 9.500721 | 8.301057  |
| ENSMUSG000000032127  | 8_Vps11         | 1332.2692228 | -0.3503   | 0.418521 | 0.776719 | 1440.722 | 1530.293 | 1508.452 | 540.7473 | 1510.339 | 1463.061  |
| ENSMUSG000000097365  | 7_C030034L19Rik | 1.617582678  | 1.507136  | 0.418505 | 0.776719 | 2.436397 | 0        | 0        | 3.968787 | 2.26268  | 1.037632  |
| ENSMUSG000000035517  | 17_Tdrd7        | 3727.585267  | 0.192975  | 0.418584 | 0.776763 | 3274.517 | 3276.132 | 3885.617 | 3576.87  | 4452.955 | 3899.421  |
| ENSMUSG000000035557  | 9_Krt17         | 4458.417526  | -0.68021  | 0.418663 | 0.776837 | 5641.07  | 2825.288 | 8004.808 | 301.6278 | 7151.291 | 2826.51   |
| ENSMUSG000000030359  | 14_Pzp          | 1.97463884   | 1.162509  | 0.418774 | 0.776971 | 0.812132 | 1.1715   | 1.150612 | 4.960984 | 1.13134  | 2.075264  |
| ENSMUSG000000020107  | 10_Anapc16      | 570.2321804  | -0.18976  | 0.419067 | 0.777153 | 628.5903 | 589.1027 | 605.222  | 472.2857 | 543.0432 | 583.1492  |
| ENSMUSG000000027800  | 14_Tms4f1       | 478.5930351  | 0.212109  | 0.419055 | 0.777153 | 488.0914 | 385.5788 | 456.793  | 561.5834 | 538.5179 | 440.9936  |
| ENSMUSG000000028822  | 11_Tmem50a      | 1864.258042  | -0.18849  | 0.419012 | 0.777153 | 2018.148 | 1954.516 | 1984.806 | 1496.233 | 1797.699 | 1934.146  |
| ENSMUSG000000037197  | 11_Rbm17        | 1421.658262  | 0.216714  | 0.419042 | 0.777153 | 1247.435 | 1204.827 | 1493.495 | 1793.892 | 157.127  | 1723.175  |
| ENSMUSG000000037419  | 8_Endod1        | 4438.791394  | 0.184481  | 0.418917 | 0.777153 | 3977.823 | 3775.925 | 4712.907 | 4681.185 | 4959.795 | 4525.113  |
| ENSMUSG000000048022  | 11_Tmem229a     | 10.79240072  | 0.604986  | 0.419107 | 0.777154 | 5.684925 | 12.0225  | 8.054285 | 21.82833 | 6.788041 | 10.37632  |
| ENSMUSG000000031393  | 16_Mecp2        | 1305.529058  | 0.226346  | 0.419323 | 0.777338 | 1228.756 | 1185.934 | 1195.486 | 1791.907 | 1176.594 | 1254.497  |
| ENSMUSG000000031841  | 18_Cdh13        | 308.8810006  | -0.28064  | 0.419301 | 0.777338 | 311.0466 | 310.8676 | 394.66   | 183.5564 | 319.0379 | 334.1175  |
| ENSMUSG000000095567  | 7_Noc2l         | 1428.235376  | -0.39688  | 0.419299 | 0.777338 | 1498.384 | 1525.14  | 1846.732 | 469.3091 | 1750.183 | 1479.663  |
| ENSMUSG000000021650  | 6_Plot2         | 479.8223134  | 0.231383  | 0.419386 | 0.777382 | 427.9937 | 456.8551 | 439.5338 | 640.9591 | 506.8404 | 406.7518  |
| ENSMUSG000000012609  | 18_Tll5         | 372.3941785  | -0.18646  | 0.419957 | 0.777551 | 391.4477 | 412.2001 | 385.4551 | 323.4562 | 358.6348 | 363.1712  |
| ENSMUSG000000012777  | 14_Acpt         | 0.621143796  | -0.268093 | 0.420062 | 0.777551 | 0        | 2.576251 | 1.150612 | 0        | 0        | 0         |
| ENSMUSG000000021666  | 16_Gfm2         | 854.2463576  | 0.199888  | 0.420026 | 0.777551 | 756.9072 | 820.9652 | 807.7297 | 1031.885 | 940.1436 | 767.8477  |
| ENSMUSG000000024258  | 3_Polr2d        | 439.4500282  | -0.35721  | 0.419907 | 0.777551 | 501.0856 | 466.3014 | 513.173  | 174.6266 | 500.0523 | 481.4613  |
| ENSMUSG000000026043  | 18_Col3a1       | 12006.99944  | -0.20142  | 0.41958  | 0.777551 | 14113.23 | 11171.48 | 13247    | 12849.94 | 10197.9  | 10462.44  |
| ENSMUSG000000026427  | 16_Eif2d        | 941.5698966  | -0.21625  | 0.420022 | 0.777551 | 994.0498 | 952.354  | 1089.63  | 687.5924 | 951.457  | 974.3365  |
| ENSMUSG000000028961  | 15_Pgd          | 4690.411001  | -0.31514  | 0.419921 | 0.777551 | 4875.229 | 4784.956 | 5941.761 | 2300.904 | 5527.728 | 4711.887  |
| ENSMUSG000000029778  | 12_Adcyap1r1    | 120.8524174  | -0.28271  | 0.419906 | 0.777551 | 134.8139 | 157.1513 | 105.8563 | 115.0948 | 81.7046  | 130.7416  |
| ENSMUSG000000030722  | 7_Nfatc2lp      | 217.1038063  | 0.264987  | 0.419729 | 0.777551 | 224.9606 | 166.5975 | 200.2065 | 304.6044 | 219.48   | 186.7738  |
| ENSMUSG000000030996  | 7_Art1          | 30.77758329  | 0.573488  | 0.419675 | 0.777551 | 12.18198 | 33.49126 | 28.7653  | 58.53961 | 10.18206 | 41.50528  |
| ENSMUSG000000047379  | 6_B4gat1        | 480.7442132  | -0.20324  | 0.419725 | 0.777551 | 476.7216 | 513.5326 | 553.4444 | 408.7851 | 515.8911 | 416.0905  |
| ENSMUSG000000058063  | 4_Trim31        | 0.621143796  | -0.268093 | 0.420062 | 0.777551 | 0        | 2.576251 | 1.150612 | 0        | 0        | 0         |
| ENSMUSG000000068697  | 6_Myoz1         | 67.68158384  | 0.509485  | 0.419675 | 0.777551 | 47.9158  | 88.45127 | 31.06653 | 117.0792 | 27.15216 | 94.42452  |
| ENSMUSG000000091985  | 1_Gm17354       | 88.26162213  | 0.322596  | 0.420007 | 0.777551 | 73.90403 | 86.73377 | 74.78979 | 142.8763 | 72.40577 | 78.86004  |
| ENSMUSG000000097783  | 1_Gm26747       | 0.621143796  | -0.268093 | 0.420062 | 0.777551 | 0        | 2.576251 | 1.150612 | 0        | 0        | 0         |
| ENSMUSG000000029175  | 17_Slc35f6      | 1376.780423  | -0.27192  | 0.42011  | 0.777567 | 1459.402 | 1410.068 | 1648.827 | 830.4687 | 1644.996 | 1266.949  |
| ENSMUSG000000000216  | 8_Scnn1g        | 23.9785446   | 0.431561  | 0.420407 | 0.77796  | 18.67904 | 16.31625 | 26.46408 | 16.86735 | 27.15216 | 38.39239  |
| ENSMUSG000000003824  | 12_Syoc2        | 151.8263984  | 0.289961  | 0.42049  | 0.77796  | 141.311  | 105.6263 | 163.3869 | 220.2677 | 140.2862 | 140.0803  |
| ENSMUSG0000000030125 | 11_Lrrc23       | 8.763345861  | -0.62766  | 0.420518 | 0.77796  | 8.933454 | 17.175   | 5.753061 | 8.929771 | 4.52536  | 7.263424  |
| ENSMUSG000000034334  | 7_Fam15b1b      | 97.52969814  | 0.274671  | 0.420444 | 0.77796  | 85.27388 | 94.46252 | 85.1453  | 137.9154 | 97.29525 | 85.05853  |
| ENSMUSG000000052631  | 14_Sh2d6        | 2.68283616   | -1.00928  | 0.420458 | 0.77796  | 1.624264 | 3.435001 | 5.753061 | 1.984394 | 2.26268  | 1.037632  |
| ENSMUSG000000097310  | 1_A930038B10Rik | 4.39599264   | -0.99114  | 0.420583 | 0.77797  | 4.872793 | 3.435001 | 9.204897 | 0        | 6.788041 | 2.075264  |
| ENSMUSG0000000107121 | 1.1110006C24Rik | 5.503242107  | -0.93364  | 0.420601 | 0.77797  | 6.497057 | 9.446252 | 5.753061 | 1.984394 | 0        | 9.338689  |
| ENSMUSG000000027455  | 16_Nsf1c        | 1770.566635  | -0.29754  | 0.420682 | 0.777974 | 1954.802 | 1829.138 | 2073.403 | 914.8055 | 1999.078 | 1852.173  |
| ENSMUSG000000037129  | 7_Tmprss1p3     | 2070.296975  | -0.29955  | 0.42066  | 0.777974 | 2204.127 | 2086.763 | 2562.413 | 1074.549 | 2329.429 | 2164.51   |
| ENSMUSG000000097042  | 1_Gm17491       | 184.2978169  | 0.261095  | 0.420796 | 0.778113 | 176.2327 | 172.6088 | 154.182  | 261.94   | 156.1249 | 184.6985  |
| ENSMUSG000000026600  | 12_Soat1        | 365.7521593  | 0.278966  | 0.420867 | 0.77     |          |          |          |          |          |           |

|                      |                  |             |          |          |          |          |          |          |          |          |          |
|----------------------|------------------|-------------|----------|----------|----------|----------|----------|----------|----------|----------|----------|
| ENSMUSG000000042628  | 7_Zfyve1         | 824.0242943 | -0.27262 | 0.423315 | 0.780329 | 814.5686 | 890.524  | 999.8819 | 483.1998 | 830.4036 | 925.5678 |
| ENSMUSG000000048833  | 8_Slc39a9        | 1841.897226 | 0.174378 | 0.423378 | 0.780353 | 1742.024 | 1663.399 | 1786.901 | 2099.488 | 1982.108 | 1777.464 |
| 430.4471308          | 12_Saal1         | -0.19824    | 0.423765 | 0.780884 | 456.4183 | 437.9626 | 485.5583 | 344.2923 | 429.9092 | 428.542  |          |
| ENSMUSG000000022861  | 16_Dgk           | 8.278400233 | -0.71645 | 0.423803 | 0.780884 | 13.80625 | 14.59875 | 2.301224 | 3.968787 | 5.656701 | 9.338689 |
| ENSMUSG000000024191  | 14_Bnip1         | 492.7129211 | -0.24504 | 0.423824 | 0.780884 | 492.9642 | 517.8264 | 592.5652 | 328.4171 | 534.0432 | 481.4613 |
| ENSMUSG000000035356  | 16_Nfkbi2        | 3012.354616 | 0.19293  | 0.423819 | 0.780884 | 2793.735 | 2549.629 | 3090.544 | 3051.005 | 3661.017 | 2928.198 |
| ENSMUSG000000062997  | 6_Rpl35          | 3435.505263 | -0.67184 | 0.423886 | 0.780927 | 4340.034 | 4004.352 | 4319.398 | 143.8685 | 3724.372 | 4081.007 |
| ENSMUSG000000031970  | 16_Dbndd1        | 41.19777098 | -0.40849 | 0.424063 | 0.781036 | 56.03712 | 37.78501 | 47.1751  | 20.83613 | 28.2835  | 57.06976 |
| ENSMUSG000000056413  | 16_Adap1         | 1060.613851 | -0.53596 | 0.42399  | 0.781036 | 1125.615 | 1151.584 | 1488.892 | 142.8763 | 1273.889 | 1180.825 |
| 1_F420014N23Rik      | 43.74980163      | 0.316452    | 0.424054 | 0.781036 | 42.23087 | 41.22001 | 33.36775 | 58.53961 | 73.3422  | 49.80634 |          |
| ENSMUSG000000025374  | 13_Nabp2         | 764.5570251 | -0.35491 | 0.424313 | 0.781352 | 773.1498 | 851.8802 | 949.255  | 303.6122 | 870.0005 | 839.4443 |
| ENSMUSG000000061815  | 11_Rufy4         | 6.86515054  | -0.87245 | 0.42429  | 0.781352 | 10.55772 | 10.305   | 5.753061 | 0.992197 | 1.13134  | 12.45158 |
| ENSMUSG000000097027  | 1_Gm26559        | 7.153529258 | -0.68918 | 0.424414 | 0.781467 | 11.36985 | 6.011252 | 9.204897 | 9.921968 | 2.26268  | 4.150528 |
| ENSMUSG000000031156  | 17_Slc35a2       | 579.4527246 | -0.27557 | 0.424546 | 0.781496 | 563.6197 | 633.7577 | 706.4758 | 336.3547 | 634.6818 | 601.8266 |
| ENSMUSG000000033032  | 15_Afaf111       | 226.6606082 | -0.22065 | 0.424548 | 0.781496 | 228.2091 | 226.7101 | 277.2975 | 185.5408 | 202.5099 | 239.693  |
| ENSMUSG000000046854  | 16_Pip5ki1       | 2.792465089 | -1.08495 | 0.424497 | 0.781496 | 1.624264 | 5.125201 | 4.602448 | 0        | 2.26268  | 3.112896 |
| ENSMUSG000000001525  | 10_Tubb5         | 8548.31462  | -0.32222 | 0.424753 | 0.781538 | 9090.195 | 8709.445 | 10697.24 | 3984.662 | 10225.05 | 8583.292 |
| ENSMUSG000000026805  | 14_Barlh1        | 1.350637179 | -1.44631 | 0.424672 | 0.781538 | 1.624264 | 0.85875  | 3.451836 | 0        | 1.13134  | 1.037632 |
| ENSMUSG000000031530  | 6_Dusp4          | 64.05885391 | -0.31753 | 0.424764 | 0.781538 | 73.0919  | 85.87502 | 54.07877 | 73.42256 | 54.30432 | 43.58055 |
| ENSMUSG0000000041870 | 16_Ankrd13a      | 4099.85657  | -0.2826  | 0.424767 | 0.781538 | 4264.506 | 4259.401 | 4976.397 | 2247.326 | 4566.089 | 4285.42  |
| ENSMUSG000000086498  | 1_Gm12681        | 1.902130986 | 1.810723 | 0.424653 | 0.781538 | 1.624264 | 0.85875  | 0        | 8.929771 | 0        | 0        |
| ENSMUSG000000042082  | 6_Arsb           | 1100.757221 | -0.28135 | 0.424825 | 0.781566 | 1241.75  | 1220.284 | 1160.968 | 603.2557 | 1140.391 | 1237.895 |
| ENSMUSG000000089804  | 7_Flbox24        | 42.94842939 | -0.66745 | 0.42486  | 0.781566 | 52.78859 | 45.51376 | 59.83183 | 2.97659  | 26.02082 | 70.55898 |
| ENSMUSG0000000017999 | 16_Ddx27         | 985.6573502 | -0.27076 | 0.425078 | 0.781709 | 1010.292 | 1069.144 | 1154.064 | 572.4976 | 1121.158 | 986.7881 |
| ENSMUSG000000039620  | 16_G430573F11Rik | 110.6853398 | 0.265373 | 0.425095 | 0.781709 | 90.9588  | 107.3438 | 103.5551 | 154.7827 | 99.55793 | 107.9137 |
| ENSMUSG000000064329  | 13_Scn1a         | 12.97290186 | 0.670471 | 0.425003 | 0.781709 | 12.18198 | 12.0225  | 5.753061 | 33.73469 | 7.919381 | 6.225792 |
| ENSMUSG000000079014  | 4_Serpina3i      | 170.2017469 | 0.463468 | 0.42502  | 0.781709 | 161.6143 | 79.00502 | 188.7004 | 95.25089 | 358.6348 | 138.0051 |
| ENSMUSG000000022194  | 15_Pabpn1        | 1573.987002 | -0.26974 | 0.425254 | 0.781857 | 1704.665 | 1717.5   | 1739.726 | 897.9381 | 1720.768 | 1663.324 |
| ENSMUSG000000068917  | 12_Clk2          | 947.2308914 | -0.25843 | 0.425252 | 0.781857 | 972.1222 | 1010.749 | 1112.642 | 579.4429 | 946.9317 | 1061.498 |
| ENSMUSG000000047037  | 5_Nlpa1          | 141.4699933 | 0.355027 | 0.425355 | 0.78197  | 131.5654 | 123.66   | 117.3624 | 247.057  | 85.98185 | 143.1932 |
| ENSMUSG0000000001166 | 17_Oas1c         | 377.0620871 | -0.28904 | 0.42548  | 0.781971 | 416.6238 | 395.8839 | 431.4795 | 203.4003 | 393.7064 | 421.2786 |
| ENSMUSG000000015697  | 14_Setdb1        | 1359.425221 | 0.168987 | 0.425534 | 0.781971 | 1234.441 | 1247.764 | 1357.722 | 1383.122 | 1504.682 | 1428.819 |
| ENSMUSG000000026380  | 10_Tfcp2l1       | 908.0551511 | 0.326615 | 0.425471 | 0.781971 | 776.3984 | 760.8527 | 880.2183 | 1373.2   | 504.4164 | 1137.245 |
| ENSMUSG000000032557  | 11_Uba5          | 977.3016806 | 0.2017   | 0.425586 | 0.781971 | 951.0068 | 839.8577 | 936.5983 | 1220.402 | 1020.469 | 895.4765 |
| ENSMUSG000000052369  | 7_Tmem106c       | 865.2342847 | -0.22966 | 0.425555 | 0.781971 | 942.8855 | 936.0377 | 922.7909 | 597.3025 | 819.0902 | 973.2989 |
| ENSMUSG000000090019  | 5_Gimap1         | 24.00360979 | -0.44685 | 0.425591 | 0.781971 | 32.48529 | 17.175   | 33.36775 | 14.88295 | 30.54618 | 15.56448 |
| ENSMUSG000000070526  | 2_Peg12          | 7.476280537 | 0.600559 | 0.4259   | 0.782466 | 6.497057 | 7.728752 | 3.451836 | 9.921968 | 7.919381 | 9.338689 |
| ENSMUSG000000049538  | 14_Adamts16      | 127.3696988 | -0.48388 | 0.426012 | 0.782599 | 99.08013 | 284.2463 | 62.13305 | 138.9076 | 66.74907 | 113.1019 |
| ENSMUSG000000035382  | 8_Pcsk7          | 1023.157162 | -0.41539 | 0.42653  | 0.783455 | 1090.694 | 1164.465 | 1253.017 | 291.7059 | 1280.677 | 1058.385 |
| ENSMUSG000000041842  | 15_Fhdcl1        | 2551.518277 | -0.24911 | 0.426595 | 0.783455 | 2593.138 | 2699.052 | 3021.507 | 1606.367 | 2813.643 | 2575.403 |
| ENSMUSG0000000104252 | 5_Pcdha4         | 10.35198734 | 1.265484 | 0.426589 | 0.783455 | 11.36985 | 0        | 6.903673 | 39.68787 | 0        | 4.150528 |
| ENSMUSG000000031618  | 13_Nr3c2         | 142.6780891 | 0.39207  | 0.426765 | 0.783549 | 121.8198 | 159.7275 | 88.59713 | 259.9556 | 84.85051 | 141.118  |
| ENSMUSG000000035711  | 4_Dok3           | 43.6806843  | -0.60744 | 0.426757 | 0.783549 | 66.59484 | 42.93751 | 48.32571 | 4.960984 | 67.88041 | 31.2896  |
| ENSMUSG000000079197  | 10_Psm2e         | 5921.068844 | 0.229883 | 0.426687 | 0.783549 | 5637.009 | 4802.131 | 5911.845 | 4996.703 | 7949.927 | 6228.905 |
| ENSMUSG000000018102  | 4_Hist1h2bc      | 438.6150416 | 0.255503 | 0.426895 | 0.783573 | 380.0779 | 421.6464 | 398.1118 | 647.9045 | 394.8377 | 389.112  |
| ENSMUSG000000021880  | 6_Rnase6         | 33.26027277 | 0.402534 | 0.426874 | 0.783573 | 40.60661 | 23.18626 | 21.86163 | 43.65666 | 46.38494 | 23.86554 |
| ENSMUSG000000028121  | 8_Bcar3          | 615.8864874 | -0.31934 | 0.426862 | 0.783573 | 639.9602 | 638.0514 | 773.2113 | 293.6903 | 731.977  | 618.4287 |
| ENSMUSG000000004895  | 9_Prcr           | 683.8463833 | -0.35476 | 0.427004 | 0.7837   | 662.9543 | 810.6602 | 838.7962 | 272.8541 | 781.756  | 746.0575 |
| ENSMUSG000000022952  | 16_Runx1         | 769.8156262 | 0.256374 | 0.427128 | 0.783855 | 717.1127 | 666.3902 | 721.4338 | 1103.323 | 820.2216 | 590.4126 |
| ENSMUSG000000031734  | 12_Irx3          | 82.58900526 | -0.26131 | 0.4273   | 0.783882 | 74.71616 | 97.89753 | 97.80203 | 74.41476 | 65.61773 | 85.05853 |
| ENSMUSG000000043857  | 16_Mgat5b        | 22.82711477 | -0.6773  | 0.427269 | 0.783882 | 26.80036 | 27.48001 | 29.91591 | 0.992197 | 23.75814 | 28.16007 |
| ENSMUSG000000047881  | 14_Rell1         | 1748.429854 | 0.20505  | 0.427283 | 0.783882 | 1556.857 | 1453.864 | 1862.841 | 1922.877 | 2094.111 | 1600.029 |
| ENSMUSG000000069117  | 3_Gm10260        | 8441.126789 | -0.49129 | 0.427244 | 0.783882 | 10439.15 | 9359.519 | 9795.161 | 1466.467 | 9722.737 | 9863.73  |
| ENSMUSG000000025047  | 8_Pdccl1         | 955.3512531 | -0.33066 | 0.427472 | 0.783954 | 951.8189 | 1050.252 | 1190.884 | 429.6212 | 1152.836 | 956.6968 |
| ENSMUSG000000029371  | 7_Cxcl5          | 100.0614193 | 0.560885 | 0.427453 | 0.783954 | 126.6926 | 28.33876 | 87.44652 | 119.0636 | 202.5099 | 36.31712 |
| ENSMUSG000000030161  | 8_Gabarrapl1     | 895.7577175 | -0.24157 | 0.427422 | 0.783954 | 959.1281 | 1124.963 | 827.2901 | 640.9591 | 803.2515 | 1018.955 |
| ENSMUSG000000063063  | 12_Ctnna2        | 12.65104206 | -0.66907 | 0.427497 | 0.783954 | 25.1761  | 18.8925  | 2.301224 | 9.921968 | 11.3134  | 8.301057 |
| ENSMUSG000000000555  | 6_Iiga5          | 320.9083851 | -0.41768 | 0.428005 | 0.783995 | 429.6179 | 327.1838 | 344.033  | 96.24309 | 125.3839 | 302.9886 |
| ENSMUSG000000000594  | 7_Gm2a           | 1247.574745 | -0.18468 | 0.427778 | 0.783995 | 1396.055 | 1384.305 | 1201.239 | 1085.463 | 1123.421 | 1294.965 |
| ENSMUSG000000005687  | 14_Bcas2         | 1172.558936 | 0.208357 | 0.427975 | 0.783995 | 1102.875 | 1033.935 | 1127.6   | 1537.905 | 1103.057 | 1129.981 |
| ENSMUSG000000020475  | 3_Pgam2          | 133.4450377 | -0.44529 | 0.427845 | 0.783995 | 118.5713 | 195.7951 | 147.2783 | 52.58643 | 75.79979 | 120.6393 |
| ENSMUSG000000022387  | 16_Brd1          | 1833.451072 | -0.20818 | 0.427731 | 0.783995 | 1805.37  | 1933.906 | 2157.398 | 1381.138 | 1777.335 | 1945.56  |
| ENSMUSG000000026489  | 13_Adc3          | 294.3735355 | -0.35172 | 0.428035 | 0.783995 | 283.4341 | 384.7201 | 322.1714 | 188.5714 | 164.0443 | 423.3539 |
| ENSMUSG000000042439  | 12_Zfp532        | 583.1974651 | -0.25329 | 0.427947 | 0.783995 | 596.9172 | 582.2327 | 723.735  | 373.066  | 587.1655 | 636.0685 |
| ENSMUSG000000048222  | 3_Mfap1b         | 1308.210089 | 0.218812 | 0.427946 | 0.783995 | 1194.646 | 1083.743 | 1349.668 | 1722.454 | 1304.435 | 1194.315 |
| ENSMUSG000000048707  | 9_Tpm            | 1025.202822 | -0.43598 | 0.427574 | 0.783995 | 1093.13  | 989.2803 | 1454.374 | 267.8931 | 1233.161 | 1113.379 |
| ENSMUSG000000049436  | 4_Apklb1         | 26055.75909 | 0.16334  | 0.428035 | 0.783995 | 25081.08 | 22909.74 | 25756.45 | 28581.22 | 27352.41 | 26653.65 |
| ENSMUSG000000069808  | 13_Fam57a        | 838.4111579 | 0.179174 | 0.427895 | 0.783995 | 775.5862 | 722.2089 | 861.8085 | 889.0083 | 929.9616 | 851.8959 |
| ENSMUSG000000071661  | 3_Zbtb3          | 63.09506225 | -0.44975 | 0.427828 | 0.783995 | 66.59484 | 81.58127 | 70.18734 | 16.86735 | 76.93114 | 68.40845 |
| ENSMUSG000000100594  | 1_2810414N06Rik  | 46.09678164 | 0.325443 | 0.42807  | 0.783995 | 42.23087 | 40.36126 | 40.27142 | 70.44597 | 40.72824 | 42.54291 |
| ENSMUSG0000000103409 | 1_Lsmem2         | 2.674793151 | -1.01733 | 0.427621 | 0.783995 | 1.624264 | 3.435001 | 5.753061 | 0.992197 | 1.13134  | 3.112896 |
| ENSMUSG000000006276  | 9_Eps15l1        | 1959.529996 | -0.28546 | 0.428204 | 0.784167 | 1973.481 | 2123.689 | 2361.056 | 1052.721 | 2132.576 | 2113.657 |
| ENSMUSG000000004939  | 6_Nmrk2          | 2.106703544 | 1.39124  | 0.42849  | 0.784246 | 0        | 3.435001 | 0        | 4.960984 | 1.13134  | 3.112896 |
| ENSMUSG000000017376  | 15_Nlk           | 832.8237559 | 0.267979 | 0.428747 | 0.784246 | 793.4531 | 731.6552 | 742.1448 | 1287.871 | 720.6636 | 721.1543 |
| ENSMUSG000000020455  | 16_Trim11        | 886.9044758 | -0.29711 | 0.428    |          |          |          |          |          |          |          |

|                      |                 |              |           |          |          |          |          |           |          |          |          |
|----------------------|-----------------|--------------|-----------|----------|----------|----------|----------|-----------|----------|----------|----------|
| ENSMUSG00000097693   | 2_4930471M09Rik | 0.819734664  | 2.032768  | 0.429512 | 0.784327 | 0        | 0.85875  | 0         | 1.984394 | 0        | 2.075264 |
| ENSMUSG000000108695  | 1_RP23-74K24    | 0.754226736  | 0.224554  | 0.429619 | 0.784327 | 0        | 0        | 0         | 0        | 4.52536  | 0        |
| ENSMUSG000000032381  | 5_Fam96a        | 824.8269738  | 0.224454  | 0.429892 | 0.784446 | 791.0167 | 682.7064 | 808.8803  | 1110.268 | 822.4843 | 733.8059 |
| ENSMUSG000000070934  | 6_Rraga         | 1076.153738  | 0.190325  | 0.429898 | 0.784446 | 982.6799 | 1008.173 | 1025.195  | 1336.489 | 1078.167 | 1026.218 |
| ENSMUSG000000038658  | 15_Ric1         | 1062.872862  | 0.241555  | 0.430185 | 0.78491  | 966.4373 | 995.2915 | 960.7611  | 1541.874 | 945.8003 | 967.0731 |
| ENSMUSG000000052214  | 9_Opa3          | 1079.045248  | -0.23405  | 0.430252 | 0.784952 | 1081.76  | 1127.539 | 1289.836  | 730.2569 | 1183.382 | 1061.498 |
| ENSMUSG000000086158  | 2_Ccpq1os       | 134.4586115  | 0.216146  | 0.430287 | 0.784952 | 124.2562 | 123.66   | 125.4167  | 161.7281 | 135.7608 | 135.9298 |
| ENSMUSG000000032477  | 13_Cdc25a       | 406.648523   | 0.200946  | 0.430388 | 0.784993 | 373.5808 | 355.5226 | 406.1661  | 444.5042 | 487.6076 | 372.5099 |
| ENSMUSG000000041720  | 12_Pi4ka        | 1790.421554  | -0.23309  | 0.430359 | 0.784993 | 1758.266 | 2050.696 | 1995.161  | 1194.605 | 1841.822 | 1901.98  |
| ENSMUSG000000000544  | 14_Gpa33        | 41.99597814  | -0.38532  | 0.431167 | 0.785049 | 44.66727 | 36.06751 | 62.13305  | 20.83613 | 38.46556 | 49.80634 |
| ENSMUSG000000004846  | 10_Plod3        | 908.6349369  | -0.4171   | 0.431161 | 0.785049 | 992.4255 | 986.704  | 1137.955  | 251.0258 | 1129.077 | 954.6215 |
| ENSMUSG000000023041  | 6_Krt6b         | 112498.3004  | -0.32974  | 0.431168 | 0.785049 | 117616.2 | 110288.4 | 147991.7  | 51166.6  | 138930.8 | 108996   |
| ENSMUSG000000023443  | 13_Esx1         | 0.937207511  | -0.202144 | 0.430581 | 0.785049 | 0        | 3.435001 | 1.150612  | 0        | 0        | 1.037632 |
| ENSMUSG000000025959  | 13_Klf7         | 816.8304296  | 0.193058  | 0.431072 | 0.785049 | 798.3259 | 725.6439 | 762.8558  | 995.1734 | 867.7379 | 751.2456 |
| ENSMUSG000000026114  | 14_Cnga3        | 4.307597613  | -0.76807  | 0.430363 | 0.785049 | 4.872793 | 3.435001 | 8.054285  | 2.97659  | 3.39402  | 3.112896 |
| ENSMUSG000000027102  | 4_Hoxd8         | 18.23594951  | 0.485415  | 0.431113 | 0.785049 | 21.11544 | 12.88125 | 11.50612  | 33.73469 | 13.57608 | 16.60211 |
| ENSMUSG000000028392  | 15_Bsry1        | 2638.948219  | -0.37023  | 0.430788 | 0.785049 | 2585.017 | 2772.904 | 3569.199  | 964.4153 | 3064.8   | 2877.354 |
| ENSMUSG000000028992  | 13_Nmna1        | 120.1544347  | -0.25785  | 0.430832 | 0.785049 | 121.0077 | 139.1175 | 132.3204  | 80.36794 | 126.7101 | 121.403  |
| ENSMUSG000000045094  | 7_Arhgef37      | 1325.124485  | -0.37696  | 0.43092  | 0.785049 | 1516.251 | 1493.367 | 1481.988  | 448.473  | 1496.763 | 1513.905 |
| ENSMUSG000000045639  | 14_Zfp629       | 587.3913782  | -0.19224  | 0.431005 | 0.785049 | 593.6686 | 617.4414 | 668.5056  | 488.1608 | 533.9925 | 622.5792 |
| ENSMUSG000000046585  | 8_Cfap58        | 1.444653872  | -1.74215  | 0.430808 | 0.785049 | 3.248529 | 3.435001 | 0         | 1.984394 | 0        | 0        |
| ENSMUSG000000051079  | 8_Rgs13         | 0.81196499   | 2.032714  | 0.430679 | 0.785049 | 0.812132 | 0        | 0         | 1.984394 | 0        | 2.075264 |
| ENSMUSG000000060862  | 9_Zbtb40        | 456.0291771  | -0.35004  | 0.430703 | 0.785049 | 425.5573 | 563.3401 | 544.2395  | 186.533  | 509.103  | 507.4021 |
| ENSMUSG000000069049  | 11_Elf2s3y      | 0.81196499   | 2.032714  | 0.430679 | 0.785049 | 0.812132 | 0        | 0         | 1.984394 | 0        | 2.075264 |
| ENSMUSG000000069633  | 12_Pex11g       | 131.9781638  | -0.41753  | 0.431091 | 0.785049 | 146.1838 | 137.4    | 169.14    | 38.69568 | 157.2563 | 143.1932 |
| ENSMUSG000000091530  | 1_Cldn20        | 10.289076    | 0.53031   | 0.430507 | 0.785049 | 6.497057 | 8.587502 | 10.35551  | 16.86735 | 9.050721 | 10.37632 |
| ENSMUSG000000097017  | 1_Gm26707       | 5.146300815  | -0.81482  | 0.430999 | 0.785049 | 5.684925 | 9.446252 | 4.602448  | 7.937575 | 1.13134  | 2.075264 |
| ENSMUSG000000097373  | 1_Gm26877       | 0.81196499   | 2.032714  | 0.430679 | 0.785049 | 0.812132 | 0        | 0         | 1.984394 | 0        | 2.075264 |
| ENSMUSG000000021244  | 15_Vlpm1        | 1407.152242  | 0.192153  | 0.431271 | 0.785115 | 1270.987 | 1359.402 | 1310.547  | 1768.095 | 1362.133 | 1371.75  |
| ENSMUSG000000030889  | 13_Vwa3a        | 2.61837983   | -0.98239  | 0.431314 | 0.785115 | 2.436397 | 3.435001 | 4.602448  | 0.992197 | 1.13134  | 3.112896 |
| ENSMUSG000000097859  | 1_Gm26601       | 1.879881661  | 1.440089  | 0.431322 | 0.785115 | 0        | 0.85875  | 2.301224  | 3.968787 | 0        | 4.150258 |
| ENSMUSG000000020395  | 13_Irk          | 22.25141607  | 0.508636  | 0.431382 | 0.785152 | 27.61249 | 11.16375 | 16.10857  | 12.89856 | 41.85958 | 23.86554 |
| ENSMUSG000000045064  | 4_Ze2hnc1c      | 87.81188421  | -0.33867  | 0.43148  | 0.785257 | 78.77682 | 99.61503 | 116.2118  | 83.34453 | 44.12226 | 104.8008 |
| ENSMUSG000000039269  | 5_2300002M23Rik | 0.834956448  | -1.78482  | 0.431556 | 0.785324 | 0.812132 | 0.85875  | 2.301224  | 0        | 0        | 1.037632 |
| ENSMUSG000000000531  | 4_Grasp         | 62.36752167  | -0.45773  | 0.431903 | 0.785647 | 70.6555  | 79.00502 | 66.7355   | 15.87515 | 59.96103 | 81.97293 |
| ENSMUSG000000026641  | 13_Usf1         | 1282.824723  | -0.439    | 0.43184  | 0.785647 | 1332.709 | 1376.577 | 1720.165  | 311.5498 | 1512.602 | 1443.366 |
| ENSMUSG000000029206  | 13_Nsun7        | 2.17426573   | -1.14744  | 0.432055 | 0.785647 | 2.436397 | 4.293751 | 2.301224  | 2.97659  | 0        | 1.037632 |
| ENSMUSG000000030323  | 13_Irf122       | 584.5949662  | -0.28712  | 0.431968 | 0.785647 | 595.2929 | 663.8139 | 668.5056  | 311.5498 | 606.3983 | 662.0093 |
| ENSMUSG000000043020  | 13_Wdr63        | 2.820657579  | 1.046382  | 0.432128 | 0.785647 | 3.248529 | 0        | 2.301224  | 4.960984 | 2.26268  | 4.150528 |
| ENSMUSG000000048758  | 13_Rpl29        | 2673.670193  | -0.34081  | 0.432116 | 0.785647 | 3063.363 | 2907.728 | 2992.742  | 1081.495 | 3034.254 | 2962.44  |
| ENSMUSG000000050195  | 8_Scd4          | 60.33579119  | 0.26084   | 0.431985 | 0.785647 | 51.97646 | 57.53626 | 55.22938  | 62.5084  | 61.09237 | 73.67188 |
| ENSMUSG000000050211  | 14_Pla2g4e      | 29.61780361  | -0.38227  | 0.432074 | 0.785647 | 27.61249 | 35.20876 | 37.9702   | 25.79712 | 15.83876 | 35.27949 |
| ENSMUSG000000051306  | 7_Usp42         | 549.7282865  | 0.196953  | 0.432125 | 0.785647 | 492.9642 | 455.1376 | 589.1134  | 558.6068 | 638.0758 | 564.471  |
| ENSMUSG000000094649  | 1_Gm1702        | 3.437837807  | 0.871742  | 0.432105 | 0.785647 | 2.436397 | 2.576251 | 2.301224  | 7.937575 | 2.26268  | 3.112896 |
| ENSMUSG000000038712  | 16_Fam36a       | 1968.587396  | -0.27304  | 0.432172 | 0.785657 | 2054.694 | 2010.334 | 2397.876  | 1109.276 | 2137.101 | 2102.243 |
| ENSMUSG000000072974  | 4_Gm4787        | 17.33230776  | 0.499697  | 0.432236 | 0.785701 | 13.80625 | 7.728752 | 21.86163  | 27.78152 | 20.36412 | 12.45158 |
| ENSMUSG000000033200  | 16_Tpsg1        | 1.642957119  | 1.348802  | 0.432306 | 0.785716 | 0.812132 | 0.85875  | 1.150612  | 4.960984 | 0        | 2.075264 |
| ENSMUSG0000000100181 | 1_Gm29096       | 36.44798724  | -0.37404  | 0.432323 | 0.785716 | 29.23676 | 40.36126 | 54.07877  | 21.82833 | 31.67752 | 41.50528 |
| ENSMUSG000000009090  | 17_Ap1b1        | 3313.8471969 | -0.3931   | 0.432381 | 0.785748 | 3279.39  | 3778.501 | 4229.65   | 1045.775 | 4020.783 | 3528.987 |
| ENSMUSG0000000017002 | 14_Slpi         | 101.6871808  | -0.52703  | 0.433382 | 0.785828 | 152.6808 | 91.02752 | 116.2118  | 19.84394 | 162.913  | 67.44608 |
| ENSMUSG000000022433  | 18_Csnk1c       | 1736.017709  | -0.3447   | 0.433408 | 0.785828 | 1848.413 | 1960.527 | 2018.174  | 688.5846 | 1878.714 | 1921.695 |
| ENSMUSG000000023232  | 17_Serinc2      | 1481.3033    | -0.49879  | 0.433333 | 0.785828 | 1481.329 | 1690.02  | 2033.132  | 243.0882 | 1935.034 | 1605.219 |
| ENSMUSG000000027204  | 13_Fbn1         | 2272.601789  | -0.18519  | 0.432978 | 0.785828 | 2497.306 | 2649.244 | 2107.921  | 2226.49  | 1941.38  | 2213.269 |
| ENSMUSG000000028059  | 14_Arhgef2      | 877.4570771  | -0.25808  | 0.43262  | 0.785828 | 914.4608 | 1019.337 | 933.1464  | 523.8799 | 939.0123 | 934.9065 |
| ENSMUSG000000028581  | 17_Laptm5       | 487.4815115  | -0.43667  | 0.433176 | 0.785828 | 803.1987 | 404.4714 | 474.0522  | 166.6891 | 719.5323 | 356.9454 |
| ENSMUSG000000028797  | 20_Tmem234      | 2161.807444  | -0.19835  | 0.432745 | 0.785828 | 2171.641 | 2352.976 | 2405.93   | 1644.07  | 2114.475 | 2281.753 |
| ENSMUSG000000029363  | 14_Rfc5         | 817.0698544  | 0.188609  | 0.432939 | 0.785828 | 799.1381 | 667.2489 | 824.9889  | 794.7496 | 919.7795 | 896.5141 |
| ENSMUSG000000030805  | 14_Stx4a        | 1345.603787  | -0.37084  | 0.432943 | 0.785828 | 1468.335 | 1507.965 | 1576.339  | 467.3247 | 1539.754 | 1513.905 |
| ENSMUSG000000031545  | 5_Gpat4         | 1608.552808  | -0.25677  | 0.432745 | 0.785828 | 1693.296 | 1789.635 | 1770.792  | 962.4309 | 1823.72  | 1611.443 |
| ENSMUSG000000032058  | 14_Ppp2r1b      | 2225.725099  | 0.172463  | 0.432792 | 0.785828 | 2056.319 | 1967.397 | 2255.2    | 2496.367 | 2405.229 | 2173.839 |
| ENSMUSG000000033693  | 16_Ehmt1        | 1455.245744  | -0.23017  | 0.43307  | 0.785828 | 1366.818 | 1671.128 | 1675.291  | 998.15   | 1522.784 | 1497.303 |
| ENSMUSG0000000338205 | 12_Prkab2       | 521.0101177  | 0.237046  | 0.432772 | 0.785828 | 486.4672 | 479.1826 | 469.4497  | 732.2412 | 437.8286 | 520.8913 |
| ENSMUSG000000040687  | 16_Madd         | 1462.387938  | -0.33138  | 0.433271 | 0.785828 | 1519.499 | 1539.739 | 1633.0216 | 1724.162 | 1528.432 | 1528.432 |
| ENSMUSG000000045282  | 7_Tmem86b       | 47.42931587  | -0.36596  | 0.432997 | 0.785828 | 51.16433 | 48.09001 | 60.98244  | 21.82833 | 47.51628 | 54.9945  |
| ENSMUSG000000047330  | 8_Kcne4         | 166.6397946  | 0.248357  | 0.433375 | 0.785828 | 164.0507 | 153.7163 | 139.2241  | 219.2755 | 135.7608 | 187.8114 |
| ENSMUSG000000047898  | 6_Cor4          | 4.145397702  | 0.865679  | 0.433262 | 0.785828 | 4.060661 | 3.435001 | 1.150612  | 3.968787 | 10.18206 | 2.075264 |
| ENSMUSG000000050556  | 8_Kcnb1         | 35.26279808  | -0.51655  | 0.432532 | 0.785828 | 63.34631 | 41.22001 | 19.56041  | 19.84394 | 52.04164 | 15.56448 |
| ENSMUSG000000052429  | 17_Prrm1        | 190.7873229  | -0.42434  | 0.433255 | 0.785828 | 203.8452 | 217.2638 | 234.7249  | 51.59423 | 205.9039 | 231.392  |
| ENSMUSG000000054252  | 17_Fgfr3        | 2890.466259  | -0.36971  | 0.433271 | 0.785828 | 2821.347 | 2871.661 | 4083.522  | 1071.573 | 3272.967 | 3221.848 |
| ENSMUSG000000067148  | 15_Polr1c       | 650.4465806  | -0.34044  | 0.433411 | 0.785828 | 708.1793 | 712.7627 | 759.404   | 265.9087 | 746.6845 | 709.7403 |
| ENSMUSG000000078813  | 3_Leng1         | 260.167396   | -0.24577  | 0.432712 | 0.785828 | 275.3128 | 292.8338 | 278.4481  | 168.6735 | 274.9156 | 270.822  |
| ENSMUSG000000085271  | 7_E130006D01Rik | 0.597834774  | -0.263036 | 0.433166 | 0.785828 | 2.436397 | 0        | 1.150612  | 0        | 0        | 0        |
| ENSMUSG000000086632  | 1_1700112J05Rik | 0.597834774  | -0.263036 | 0.433166 | 0.785828 | 2.436397 | 0        | 1.150612  | 0        | 0        | 0        |
| ENSMUSG000000097165  | 1_221008F06Rik  | 1.190027807  | 1.63191   | 0.433104 | 0.785828 | 0.812132 | 0.85875  | 0         | 0        | 3.39402  | 2.075264 |
| ENSMUSG000000022956  | 10_Atp5o        | 2753.730564  | -0.28308  | 0.433495 | 0.785909 | 3001.641 | 2911.163 | 3156.129  | 1454.561 | 2985.607 | 3013.284 |
| ENSMUSG000000028971  | 4_Cort          | 13.35658667  | -0        |          |          |          |          |           |          |          |          |

|                      |                 |             |          |          |          |          |          |          |          |          |          |
|----------------------|-----------------|-------------|----------|----------|----------|----------|----------|----------|----------|----------|----------|
| ENSMUSG00000026885   | 13_Ttl11        | 11.05322867 | -0.56657 | 0.435587 | 0.787098 | 11.36985 | 15.4575  | 12.65673 | 2.97659  | 12.44474 | 11.41395 |
| ENSMUSG00000026976   | 5_Pax8          | 1.135877037 | 1.593721 | 0.435441 | 0.787098 | 1.624264 | 0        | 0        | 1.984394 | 1.13134  | 2.075264 |
| ENSMUSG00000033826   | 9_Dnah8         | 49.47621833 | -0.31143 | 0.435487 | 0.787098 | 68.2191  | 53.24251 | 42.57265 | 46.63325 | 50.9103  | 35.27949 |
| ENSMUSG00000040420   | 14_Cdh18        | 1.436884198 | -1.73345 | 0.435613 | 0.787098 | 4.060661 | 2.576251 | 0        | 1.984394 | 0        | 0        |
| ENSMUSG00000050315   | 13_Synpo2       | 324.8123793 | 0.395149 | 0.435528 | 0.787098 | 229.0213 | 376.9913 | 235.8755 | 607.2245 | 170.8324 | 328.9294 |
| ENSMUSG00000001763   | 14_Tspan33      | 202.1717153 | -0.30916 | 0.435986 | 0.787131 | 216.8393 | 213.8288 | 240.4779 | 99.21968 | 220.6113 | 222.0533 |
| ENSMUSG000000021704  | 7_Mtx3          | 562.8754217 | 0.136592 | 0.435915 | 0.787131 | 523.0131 | 539.2951 | 441.835  | 955.4855 | 380.1303 | 537.4934 |
| ENSMUSG000000021997  | 4_Lrrc83        | 0.820010454 | 2.045789 | 0.435813 | 0.787131 | 0.812132 | 0        | 0        | 2.97659  | 1.13134  | 0        |
| ENSMUSG000000029917  | 15_C13006K24Rik | 0.819537532 | 2.04559  | 0.435916 | 0.787131 | 0.812132 | 0        | 0        | 0.992197 | 0        | 3.112896 |
| ENSMUSG00000050323   | 14_Ndufaf6      | 77.99250372 | 0.299068 | 0.435727 | 0.787131 | 59.28565 | 78.14627 | 72.48856 | 107.1573 | 92.76989 | 58.1074  |
| ENSMUSG00000068944   | 1_4921513D11Rik | 0.820010454 | 2.045789 | 0.435813 | 0.787131 | 0.812132 | 0        | 0        | 2.97659  | 1.13134  | 0        |
| ENSMUSG000000089736  | 1_Tgfb3l        | 44.16540627 | -0.42448 | 0.435868 | 0.787131 | 58.47352 | 57.53626 | 35.66898 | 21.82833 | 27.15216 | 64.33319 |
| ENSMUSG00000092086   | 1_Gm6793        | 154.6191436 | 0.370365 | 0.435945 | 0.787131 | 120.1956 | 130.53   | 154.182  | 281.7839 | 153.8623 | 87.16109 |
| ENSMUSG000000099545  | 1_Gm13276       | 2.030024722 | -1.42148 | 0.435979 | 0.787131 | 1.624264 | 6.011252 | 1.150612 | 0        | 3.39402  | 0        |
| ENSMUSG000000025602  | 13_Zfp202       | 184.665245  | 0.235672 | 0.436233 | 0.78715  | 168.9235 | 174.3263 | 165.6881 | 252.018  | 181.0144 | 166.0211 |
| ENSMUSG000000028391  | 16_Wdr31        | 110.8369838 | 0.250332 | 0.436171 | 0.78715  | 115.3228 | 89.31002 | 98.95264 | 98.22748 | 121.0534 | 142.1556 |
| ENSMUSG000000028517  | 8_Ppap2b        | 2166.479896 | -0.19204 | 0.436077 | 0.78715  | 2378.735 | 2442.286 | 2110.223 | 2003.245 | 1741.132 | 2323.258 |
| ENSMUSG000000039738  | 16_Slx4         | 490.1052949 | -0.3013  | 0.436234 | 0.78715  | 531.9466 | 499.7926 | 591.4146 | 247.057  | 583.7715 | 486.6494 |
| ENSMUSG00000074939   | 3_Chrm5         | 1.421809546 | -1.57362 | 0.436154 | 0.78715  | 4.060661 | 0        | 2.301224 | 0        | 1.13134  | 1.037632 |
| ENSMUSG000000090936  | 2_Gm17705       | 36.9006378  | 0.322934 | 0.436135 | 0.78715  | 27.61249 | 38.64376 | 32.21714 | 48.61764 | 32.80886 | 41.50528 |
| ENSMUSG00000003348   | 9_Mob3a         | 480.0661282 | -0.31921 | 0.436293 | 0.787171 | 541.6922 | 492.0639 | 564.9505 | 219.2755 | 562.276  | 501.1387 |
| ENSMUSG000000010803  | 12_Gabra1       | 14.59979506 | 0.689571 | 0.436325 | 0.787171 | 11.36985 | 16.31625 | 5.753061 | 38.69568 | 11.3134  | 4.150528 |
| ENSMUSG000000001785  | 11_Pwp1         | 816.6980283 | 0.200704 | 0.43667  | 0.787211 | 732.5432 | 727.3614 | 820.3864 | 1016.01  | 873.3946 | 730.493  |
| ENSMUSG000000002228  | 7_Ppm1j         | 77.33582017 | -0.54627 | 0.436645 | 0.787211 | 80.40109 | 93.60377 | 101.2539 | 10.91416 | 117.6594 | 60.18266 |
| ENSMUSG000000013089  | 15_Etv5         | 629.8045621 | -0.19937 | 0.436828 | 0.787211 | 687.0638 | 635.4752 | 697.2709 | 501.0594 | 567.9327 | 90.0253  |
| ENSMUSG000000016262  | 14_Sertad4      | 1059.875374 | 2.131327 | 0.436553 | 0.787211 | 938.8248 | 842.434  | 1164.419 | 1321.606 | 1015.943 | 1076.024 |
| ENSMUSG000000020917  | 17_Acly         | 11695.03927 | -0.26876 | 0.436597 | 0.787211 | 12050.42 | 12199.41 | 14093.85 | 6623.906 | 13224.23 | 11978.42 |
| ENSMUSG000000021486  | 6_Prelid1       | 3947.542003 | -0.39186 | 0.436951 | 0.787211 | 4179.232 | 4355.581 | 4906.21  | 1210.48  | 4749.366 | 4284.383 |
| ENSMUSG000000023083  | 7_H2-M10        | 0.550052045 | 2.678213 | 0.436906 | 0.787211 | 0        | 0        | 0        | 2.26268  | 1.037632 | 0        |
| ENSMUSG000000026281  | 15_Ditymk       | 639.7123464 | 0.166324 | 0.436951 | 0.787211 | 592.8565 | 624.3114 | 591.4146 | 692.5534 | 672.016  | 665.1222 |
| ENSMUSG000000026751  | 14_Nr5a1        | 0.550052045 | 2.678213 | 0.436906 | 0.787211 | 0        | 0        | 0        | 2.26268  | 1.037632 | 0        |
| ENSMUSG000000029438  | 9_Bcl7a         | 1211.082667 | -0.25325 | 0.436637 | 0.787211 | 1217.386 | 1258.928 | 1475.085 | 753.0774 | 1178.856 | 1383.164 |
| ENSMUSG000000029580  | 14_Actb         | 42892.25442 | -0.30954 | 0.436979 | 0.787211 | 42634.5  | 43513.73 | 56279.89 | 20871.85 | 50716.85 | 43336.7  |
| ENSMUSG000000037020  | 16_Wdr62        | 111.312189  | -0.47037 | 0.436428 | 0.787211 | 117.7592 | 133.1063 | 136.9228 | 22.82053 | 124.4474 | 13.82169 |
| ENSMUSG000000049493  | 13_Pls1         | 12.86636985 | 0.582872 | 0.436963 | 0.787211 | 8.121322 | 18.03375 | 4.602448 | 19.84394 | 7.919381 | 18.67738 |
| ENSMUSG000000052026  | 7_Slc6a7        | 12.49699169 | -0.5068  | 0.436586 | 0.787211 | 12.99411 | 13.74    | 17.25918 | 4.960984 | 13.57608 | 12.45158 |
| ENSMUSG000000100642  | 1_Gm28230       | 1.578963029 | 1.749534 | 0.436628 | 0.787211 | 0        | 0        | 2.301224 | 1.984394 | 0        | 5.18816  |
| ENSMUSG000000106002  | 1_543043415Rik  | 0.550052045 | 2.678213 | 0.436906 | 0.787211 | 0        | 0        | 0        | 2.26268  | 1.037632 | 0        |
| ENSMUSG000000015879  | 8_Fam184b       | 18.31428009 | 0.433628 | 0.437032 | 0.787234 | 16.24264 | 18.8925  | 11.50612 | 29.7659  | 15.83876 | 17.63975 |
| ENSMUSG000000010538  | 14_Tsac         | 18.45523179 | 0.41181  | 0.437372 | 0.787239 | 12.99411 | 20.61001 | 13.80735 | 21.82833 | 24.89948 | 16.60211 |
| ENSMUSG0000000016283 | 13_H2-M2        | 4.517598948 | 0.776967 | 0.437294 | 0.787239 | 2.436397 | 5.152501 | 2.301224 | 2.97659  | 9.050721 | 5.18816  |
| ENSMUSG000000020628  | 15_Trappc12     | 1156.581349 | -0.24688 | 0.437169 | 0.787239 | 1184.901 | 1201.392 | 1379.584 | 721.3271 | 1232.029 | 1220.255 |
| ENSMUSG000000024590  | 8_Ltmb1         | 4018.049085 | 0.184088 | 0.437364 | 0.787239 | 3657.843 | 3394.64  | 4234.253 | 4731.787 | 4088.663 | 4001.109 |
| ENSMUSG000000029513  | 14_Prkab1       | 2441.032349 | -0.29437 | 0.437238 | 0.787239 | 2459.136 | 2571.957 | 3036.465 | 1250.168 | 2846.452 | 2482.016 |
| ENSMUSG000000031979  | 17_Cog2         | 903.708459  | -0.25761 | 0.43739  | 0.787239 | 946.134  | 955.789  | 1050.509 | 534.7941 | 975.2152 | 959.8097 |
| ENSMUSG000000037278  | 9_Tmem97        | 426.7132761 | -0.21357 | 0.437162 | 0.787239 | 469.4124 | 434.5276 | 470.6004 | 311.5498 | 457.0164 | 417.1821 |
| ENSMUSG000000037353  | 8_Letmd1        | 336.4835277 | -0.22696 | 0.437089 | 0.787239 | 335.4106 | 383.8613 | 369.3465 | 237.135  | 325.8259 | 367.3214 |
| ENSMUSG000000099913  | 1_Gm28551       | 19.25172453 | 0.849624 | 0.437269 | 0.787239 | 17.05478 | 20.61001 | 3.451836 | 64.49279 | 7.888041 | 3.112896 |
| ENSMUSG000000107874  | 1_Prrmp5        | 208.3705381 | -0.51223 | 0.437456 | 0.787287 | 166.4871 | 480.9001 | 87.44652 | 253.0102 | 85.98185 | 176.3975 |
| ENSMUSG0000000018167 | 10_Star3        | 626.3863411 | -0.44623 | 0.437569 | 0.78731  | 713.0521 | 660.3789 | 793.9224 | 140.8919 | 782.8874 | 667.1974 |
| ENSMUSG000000057101  | 8_Zfp180        | 865.7471721 | 0.177938 | 0.437553 | 0.78731  | 812.9443 | 820.9652 | 803.1273 | 830.4687 | 1028.388 | 898.5814 |
| ENSMUSG000000060019  | 5_Gm10073       | 24.0844839  | -0.4316  | 0.437627 | 0.78731  | 16.24264 | 40.36126 | 26.46408 | 21.82833 | 14.70742 | 24.90374 |
| ENSMUSG000000091449  | 2_Gm10269       | 3.297089404 | 1.217097 | 0.437598 | 0.78731  | 3.248529 | 2.576251 | 0        | 0        | 5.656701 | 8.301057 |
| ENSMUSG000000073448  | 1_Gm10509       | 12.30957501 | 0.664929 | 0.437843 | 0.787556 | 6.497057 | 5.152501 | 17.25918 | 29.7659  | 7.919381 | 7.263424 |
| ENSMUSG000000097233  | 1_Gm17552       | 12.44773484 | 0.588302 | 0.437825 | 0.787556 | 10.55772 | 11.16375 | 8.054285 | 7.937575 | 7.919381 | 29.0537  |
| ENSMUSG000000042282  | 4_Gucy2f        | 116.1899329 | 0.517539 | 0.437941 | 0.787635 | 98.26799 | 143.4113 | 44.87387 | 269.8775 | 57.69835 | 83.01057 |
| ENSMUSG000000045107  | 4_Saysd1        | 127.4824132 | -0.29746 | 0.437966 | 0.787635 | 127.5048 | 146.8463 | 147.2783 | 68.46158 | 135.7608 | 139.0427 |
| ENSMUSG000000027784  | 10_Ppm1l        | 977.1301515 | 0.20993  | 0.438201 | 0.787987 | 840.5568 | 1008.173 | 869.8628 | 1276.957 | 920.9108 | 946.3204 |
| ENSMUSG000000040562  | 12_Gstm2        | 1701.571871 | -0.24338 | 0.438256 | 0.788014 | 1882.522 | 1882.923 | 1784.599 | 1069.588 | 1666.464 | 1939.334 |
| ENSMUSG000000020454  | 17_Elfl4nfl1    | 1425.483764 | 0.169199 | 0.438341 | 0.788096 | 1282.357 | 1276.962 | 1467.03  | 1486.311 | 1578.219 | 1462.024 |
| ENSMUSG000000004508  | 6_Gab2          | 294.656991  | 0.183263 | 0.438439 | 0.788201 | 270.44   | 272.2238 | 285.3518 | 294.6825 | 311.1185 | 334.1175 |
| ENSMUSG000000056209  | 7_Npm3          | 498.0351276 | -0.26181 | 0.43866  | 0.788254 | 536.0072 | 493.7814 | 599.4689 | 295.6747 | 535.1239 | 528.1547 |
| ENSMUSG000000057967  | 12_Fgf18        | 21.28810585 | -0.56007 | 0.438602 | 0.788254 | 15.43051 | 34.35001 | 26.46408 | 16.86735 | 4.52536  | 30.09133 |
| ENSMUSG000000062742  | 3_Gm5239        | 16.7346678  | -0.55391 | 0.438656 | 0.788254 | 20.3033  | 19.75126 | 19.56041 | 2.97659  | 18.10144 | 19.71501 |
| ENSMUSG000000095306  | 2_Gm21807       | 8.600261062 | -0.53868 | 0.438666 | 0.788254 | 11.36985 | 7.728752 | 11.50612 | 6.945378 | 6.788041 | 7.263424 |
| ENSMUSG000000096883  | 1_Shisa8        | 1.309763206 | -1.40273 | 0.438654 | 0.788254 | 0.812132 | 2.576251 | 2.301224 | 0        | 1.13134  | 1.037632 |
| ENSMUSG000000037509  | 18_Arhgef4      | 4975.889118 | -0.40271 | 0.439034 | 0.788843 | 5147.294 | 5243.529 | 6606.815 | 1438.685 | 5723.45  | 5065.562 |
| ENSMUSG000000094370  | 7_Gm3373        | 4.33969467  | 1.466397 | 0.439111 | 0.78891  | 0        | 6.870002 | 0        | 1.190636 | 0        | 7.263424 |
| ENSMUSG000000032212  | 9_Sltm          | 2077.57048  | 0.201034 | 0.439171 | 0.788948 | 1927.19  | 1857.477 | 2014.722 | 2645.197 | 2204.982 | 1815.856 |
| ENSMUSG000000005682  | 8_Pan2          | 1060.182541 | -0.24817 | 0.439348 | 0.788982 | 1129.676 | 1125.822 | 1197.787 | 645.9201 | 1125.683 | 1136.207 |
| ENSMUSG000000031148  | 14_Gpkow        | 1468.49411  | 0.188706 | 0.439248 | 0.788982 | 1346.515 | 1355.108 | 1416.404 | 1831.595 | 1497.894 | 1363.449 |
| ENSMUSG000000031453  | 15_Rasa3        | 798.4286411 | -0.22648 | 0.439349 | 0.788982 | 885.2241 | 808.084  | 889.4232 | 538.7629 | 858.6871 | 810.3906 |
| ENSMUSG000000075296  | 4_Aldh3b2       | 6857.259451 | -0.40044 | 0.439344 | 0.788982 | 7145.951 | 6964.464 | 9298.096 | 2034.996 | 8376.442 | 7923.670 |
| ENSMUSG000000021469  | 9_Msx2          | 67.33179821 | -0.26388 | 0.439404 | 0.78901  | 61.72205 | 70.41752 | 88.59713 | 57.54742 | 64.48639 | 61.22029 |
| ENSMUSG000000024132  | 5_Ecrl1         | 688.0520496 | -0.23427 | 0.439482 | 0.789079 | 747.9737 | 744.5364 | 738.693  | 450.4574 | 678.8041 | 767.8477 |
| ENSMUSG0000000018411 | 17_Mapt         | 136.13929   | -0.23633 | 0.439626 | 0.789267 |          |          |          |          |          |          |

|                        |                  |             |          |          |          |          |          |          |          |          |          |
|------------------------|------------------|-------------|----------|----------|----------|----------|----------|----------|----------|----------|----------|
| ENSMUSG00000008940     | 1_Gm4491         | 3.979970339 | 1.063518 | 0.441387 | 0.790482 | 1.624264 | 6.011252 | 0        | 11.90636 | 2.26268  | 2.075264 |
| ENSMUSG00000009168     | 1_C230088H06Rik  | 1.018599364 | 2.321423 | 0.441594 | 0.790482 | 0        | 0        | 1.150612 | 4.960984 | 0        | 0        |
| 14_Ppp2r1a             | 5311.773356      | -0.36721    | 0.441836 | 0.790533 | 5477.832 | 5952.857 | 6521.669 | 1822.666 | 6112.631 | 5982.986 | 0        |
| ENSMUSG000000022416    | 15_Cacna1i       | 295.8329609 | -0.39631 | 0.441879 | 0.790533 | 297.2404 | 286.8226 | 424.5759 | 94.2587  | 347.3214 | 324.7788 |
| ENSMUSG000000031465    | 6_Angpt2         | 137.0053359 | -0.23717 | 0.441731 | 0.790533 | 163.2386 | 161.445  | 119.6637 | 140.8919 | 127.8414 | 108.9514 |
| ENSMUSG000000032033    | 11_Barrx2        | 635.49155   | -0.29299 | 0.441865 | 0.790533 | 682.191  | 624.3114 | 792.7717 | 353.2221 | 815.6962 | 544.7568 |
| ENSMUSG0000000045179   | 9_Sox3           | 1.835357689 | -1.29198 | 0.441808 | 0.790533 | 3.248529 | 0        | 4.602448 | 0.992197 | 1.13134  | 1.037632 |
| ENSMUSG000000050271    | 12_D8Ertd82e     | 169.5517497 | -0.50149 | 0.441847 | 0.790533 | 173.7963 | 176.0438 | 246.231  | 30.7581  | 254.5515 | 135.9298 |
| ENSMUSG000000021681    | 8_Aggf1          | 1152.047573 | 0.178582 | 0.441983 | 0.790648 | 1054.148 | 1062.274 | 1126.449 | 1388.083 | 1109.845 | 1171.448 |
| ENSMUSG000000030158    | 12_Clec12b       | 0.812162122 | 0.2019   | 0.442028 | 0.790656 | 0        | 0.85875  | 0        | 2.97659  | 0        | 1.037632 |
| ENSMUSG000000027419    | 9_Pcsk2          | 70.96242659 | -0.33547 | 0.442143 | 0.790792 | 73.90403 | 94.46252 | 69.03673 | 40.68007 | 54.30432 | 93.38689 |
| ENSMUSG0000000078656   | 11_Vps25         | 2845.819576 | -0.1841  | 0.442226 | 0.79087  | 2961.846 | 2895.706 | 3224.015 | 2270.146 | 2738.974 | 2984.23  |
| ENSMUSG000000022602    | 12_Arc           | 112.8568379 | -0.46085 | 0.442268 | 0.790873 | 119.3834 | 101.3325 | 171.4412 | 26.78931 | 148.2056 | 109.989  |
| ENSMUSG000000022878    | 5_Adiipoq        | 2.275163207 | 1.040929 | 0.44244  | 0.79111  | 2.436397 | 0.85875  | 1.150612 | 4.960984 | 1.13134  | 3.112896 |
| ENSMUSG000000051246    | 2_Msantd1        | 3.4008188   | -0.86657 | 0.442581 | 0.79122  | 5.684925 | 5.152501 | 2.301224 | 1.984394 | 1.13134  | 4.150528 |
| ENSMUSG000000108723    | 8_Htr2b          | 10.14482079 | 0.60352  | 0.442573 | 0.79122  | 13.80625 | 7.728752 | 2.301224 | 8.929771 | 13.57608 | 14.52685 |
| ENSMUSG000000026228    | 1_RP23-324J22    | 9.866445076 | 0.496269 | 0.442668 | 0.791283 | 8.121322 | 9.446252 | 6.903673 | 11.90636 | 12.44474 | 10.37632 |
| ENSMUSG0000000097792   | 1_Gm27042        | 39.93321266 | 0.338978 | 0.442696 | 0.791283 | 38.98234 | 33.49126 | 33.36775 | 63.5006  | 33.9402  | 36.3712  |
| ENSMUSG000000009350    | 13_Mpo           | 0.470249085 | -0.27463 | 0.442873 | 0.791316 | 0.812132 | 0.85875  | 1.150612 | 0        | 0        | 0        |
| ENSMUSG0000000097254   | 1_C430042M11Rik  | 38.46531464 | 0.364913 | 0.442801 | 0.791316 | 37.35808 | 25.76251 | 37.9702  | 63.5006  | 35.07154 | 31.12896 |
| ENSMUSG000000101324    | 1_Gm29187        | 0.470249085 | -0.27463 | 0.442873 | 0.791316 | 0.812132 | 0.85875  | 1.150612 | 0        | 0        | 0        |
| ENSMUSG0000000108580   | 1_RP23-68N11     | 0.470249085 | -0.27463 | 0.442873 | 0.791316 | 0.812132 | 0.85875  | 1.150612 | 0        | 0        | 0        |
| ENSMUSG000000042605    | 15_Abxn2         | 1136.793364 | -0.16559 | 0.442913 | 0.791316 | 1110.997 | 1247.764 | 1247.264 | 1027.916 | 1096.269 | 1090.551 |
| ENSMUSG000000000134    | 17_Tfe3          | 1653.323712 | -0.32861 | 0.443173 | 0.791338 | 1768.012 | 1737.252 | 2017.023 | 699.4988 | 1992.29  | 1705.867 |
| 13_Spata7              | 129.2773854      | -0.309274   | 0.443465 | 0.791338 | 133.1697 | 117.6488 | 95.50081 | 210.3457 | 100.6893 | 118.2901 | 0        |
| ENSMUSG000000027273    | 13_Snap25        | 87.18741693 | 0.724517 | 0.443183 | 0.791338 | 99.08013 | 77.28752 | 20.71102 | 257.9712 | 57.69835 | 10.37632 |
| ENSMUSG000000028082    | 13_Sh3d19        | 4967.501955 | 0.188077 | 0.44333  | 0.791338 | 4441.551 | 4519.602 | 4971.795 | 6247.863 | 4850.055 | 4974.145 |
| ENSMUSG000000035277    | 15_Arx           | 0.804392448 | 2.018932 | 0.443172 | 0.791338 | 0.812132 | 0        | 0        | 2.97659  | 0        | 1.037632 |
| ENSMUSG000000036533    | 8_Cdc42ep3       | 666.6906541 | 0.247004 | 0.443227 | 0.791338 | 607.4749 | 534.1426 | 688.066  | 966.3997 | 631.2878 | 572.7729 |
| ENSMUSG000000038057    | 4_Dbil5          | 7.955098369 | -0.58712 | 0.443267 | 0.791338 | 12.99411 | 8.587502 | 6.903673 | 3.968787 | 9.050721 | 6.225792 |
| ENSMUSG000000039835    | 15_Nhs1f         | 2351.048973 | -0.19106 | 0.443482 | 0.791338 | 2307.268 | 2433.698 | 2778.728 | 1850.447 | 2399.975 | 276.177  |
| ENSMUSG000000042709    | 14_Atpaf2        | 358.2021183 | -0.27981 | 0.443148 | 0.791338 | 395.5084 | 405.3301 | 377.4008 | 192.4862 | 378.9989 | 399.4883 |
| ENSMUSG000000050822    | 11_Slc29a4       | 6.25959138  | -0.76529 | 0.443444 | 0.791338 | 4.060661 | 13.74    | 5.753061 | 0.992197 | 6.788041 | 6.225792 |
| ENSMUSG000000061731    | 9_Ext1           | 962.0588432 | 0.182262 | 0.443404 | 0.791338 | 869.7936 | 845.0102 | 989.5264 | 945.5636 | 1146.408 | 976.4118 |
| ENSMUSG0000000078671   | 10_Chd2          | 2444.128333 | 0.168255 | 0.443344 | 0.791338 | 2325.134 | 2200.977 | 2379.466 | 2863.48  | 2444.826 | 2450.887 |
| ENSMUSG000000091477    | 1_Gm5799         | 1.556245404 | 1.725374 | 0.443361 | 0.791338 | 0        | 0        | 2.301224 | 4.960984 | 0        | 2.075264 |
| ENSMUSG0000000097348   | 8_Rmt            | 25.95798238 | -0.533   | 0.443424 | 0.791338 | 22.7397  | 49.80751 | 19.56041 | 39.68787 | 13.57608 | 10.37632 |
| ENSMUSG000000004668    | 14_Abc13         | 4.399178297 | 0.866307 | 0.443727 | 0.791643 | 1.624264 | 4.293751 | 3.451836 | 0.992197 | 5.656701 | 10.37632 |
| ENSMUSG000000057098    | 14_Ebf1          | 171.4765554 | 0.385976 | 0.443732 | 0.791643 | 163.2386 | 132.2475 | 150.7302 | 333.3781 | 90.50721 | 158.7577 |
| ENSMUSG000000006711    | 15_D130043K22Rik | 1.309101377 | -1.53008 | 0.443845 | 0.791754 | 3.248529 | 2.576251 | 0        | 0.992197 | 0        | 1.037632 |
| ENSMUSG0000000097002   | 1_Gm2670         | 22.5737488  | -0.43502 | 0.443873 | 0.791754 | 32.48529 | 26.62126 | 18.40979 | 13.89076 | 30.54618 | 13.8922  |
| ENSMUSG000000034908    | 15_Sid2          | 6169.112657 | -0.41282 | 0.444032 | 0.791909 | 6654.611 | 6429.463 | 8053.134 | 1647.047 | 7796.065 | 6484.356 |
| ENSMUSG000000052305    | 5_Hbb-bs         | 139.8786117 | -0.38633 | 0.44404  | 0.791909 | 158.3658 | 194.9363 | 121.9649 | 54.57082 | 115.3967 | 194.0372 |
| ENSMUSG0000000022594   | 14_Lynx1         | 7794.272637 | -0.35681 | 0.444639 | 0.791957 | 8013.308 | 8237.132 | 10009.17 | 2830.738 | 9135.571 | 8539.712 |
| ENSMUSG000000028455    | 15_Stom12        | 1009.510222 | -0.32671 | 0.444692 | 0.791957 | 1087.445 | 1084.602 | 1197.787 | 425.6524 | 1184.513 | 1077.062 |
| ENSMUSG000000030269    | 14_Mtmr14        | 695.0643619 | -0.17991 | 0.44465  | 0.791957 | 676.5061 | 719.6327 | 819.2358 | 601.2713 | 672.016  | 681.7243 |
| ENSMUSG000000031355    | 16_Arhgap6       | 72.18271693 | 0.389247 | 0.444655 | 0.791957 | 60.90991 | 81.58127 | 44.87387 | 130.97   | 70.14309 | 41.61818 |
| ENSMUSG000000037568    | 12_Vash2         | 9.046730157 | -0.54894 | 0.444283 | 0.791957 | 9.745586 | 15.4575  | 6.903673 | 5.953181 | 7.919381 | 8.301057 |
| ENSMUSG000000039131    | 15_Gipc2         | 79.04214031 | 0.302792 | 0.444492 | 0.791957 | 81.21322 | 57.53626 | 73.63917 | 112.1182 | 91.63855 | 58.1074  |
| ENSMUSG000000042388    | 14_Dlgap2        | 5.897001588 | -0.81346 | 0.444635 | 0.791957 | 8.121322 | 8.587502 | 5.753061 | 0        | 5.656701 | 2.763424 |
| ENSMUSG000000045757    | 6_Zfp764         | 188.6773066 | -0.23826 | 0.44414  | 0.791957 | 200.5966 | 188.925  | 223.2187 | 130.97   | 178.5717 | 209.6017 |
| ENSMUSG000000051354    | 13_Samd3         | 7.851821468 | 0.846164 | 0.444566 | 0.791957 | 14.61838 | 0.85875  | 1.150612 | 11.90636 | 11.3134  | 7.263424 |
| ENSMUSG000000061904    | 12_Slc25a3       | 1740.3021   | 0.162646 | 0.444297 | 0.791957 | 6499.494 | 6641.574 | 7073.963 | 8125.1   | 7513.23  | 6988.452 |
| ENSMUSG000000062727    | 4_Hist1h2bk      | 71.63842156 | -0.65793 | 0.444699 | 0.791957 | 16.24264 | 19.75126 | 28.7653  | 0.992197 | 20.36412 | 19.71501 |
| ENSMUSG000000074472    | 9_Zfp872         | 1.483176764 | 1.287906 | 0.444703 | 0.791957 | 1.624264 | 0.85875  | 0        | 1.984394 | 3.39402  | 1.037632 |
| ENSMUSG0000000086904   | 1_Gm13404        | 10.69651181 | -0.58873 | 0.444576 | 0.791957 | 15.43051 | 9.446252 | 13.80735 | 15.87515 | 3.39402  | 6.225792 |
| ENSMUSG000000090290    | 1_Gm17296        | 239.3756011 | -0.20586 | 0.444412 | 0.791957 | 257.4459 | 272.2238 | 239.3273 | 187.5252 | 229.662  | 250.0693 |
| ENSMUSG000000106547    | 1_B230303X12Rik  | 14.64014483 | 0.561103 | 0.444681 | 0.791957 | 7.30919  | 11.16375 | 17.25918 | 27.78151 | 18.10144 | 6.225792 |
| ENSMUSG000000107060    | 1_Gm42810        | 0.888642521 | -1.91852 | 0.444173 | 0.791957 | 1.624264 | 2.576251 | 0        | 0        | 1.13134  | 0        |
| ENSMUSG000000019437    | 17_Tlcl1         | 333.6175106 | -0.21122 | 0.444928 | 0.792222 | 341.9076 | 401.8951 | 330.2257 | 342.3079 | 252.2888 | 333.0799 |
| ENSMUSG0000000042185   | 13_Nfkrb         | 835.6230822 | -0.26025 | 0.444931 | 0.792222 | 852.7388 | 878.5015 | 1001.033 | 493.1218 | 970.6898 | 817.6541 |
| ENSMUSG000000026126    | 15_Ptpn18        | 204.061586  | -0.36717 | 0.445065 | 0.792389 | 207.0937 | 191.5013 | 291.1049 | 77.39135 | 234.1874 | 223.0909 |
| ENSMUSG000000047539    | 9_Fbxo28         | 1280.975763 | 0.194002 | 0.44515  | 0.792469 | 1161.349 | 1135.268 | 1288.686 | 1598.429 | 1345.163 | 1156.96  |
| ENSMUSG000000097405    | 1_D630044L22Rik  | 68.83923497 | -0.61934 | 0.445191 | 0.792472 | 79.58895 | 77.28752 | 93.19958 | 3.968787 | 90.50721 | 68.48372 |
| ENSMUSG000000004885    | 5_Crabp2         | 126.4916147 | -0.3374  | 0.445483 | 0.792733 | 154.3051 | 87.59252 | 181.7967 | 80.36794 | 158.3876 | 96.49978 |
| ENSMUSG000000037990    | 18_Sh3rf3        | 85.46109654 | -0.24631 | 0.445407 | 0.792733 | 101.5165 | 82.44002 | 94.35019 | 76.39915 | 66.74907 | 91.31162 |
| ENSMUSG000000041957    | 15_Pknox1        | 115.6568201 | 0.258267 | 0.445497 | 0.792733 | 88.52241 | 115.0725 | 112.76   | 155.7749 | 97.29525 | 124.5158 |
| ENSMUSG000000075593    | 10_Gal3st4       | 271.2672286 | -0.19766 | 0.445489 | 0.792733 | 264.7551 | 295.4101 | 309.5147 | 228.2053 | 244.3695 | 285.3488 |
| ENSMUSG0000000061702   | 10_Tmem91        | 5.613991501 | -0.72891 | 0.445581 | 0.792812 | 2.436397 | 9.446252 | 9.204897 | 2.97659  | 3.39402  | 6.225792 |
| ENSMUSG000000013643    | 13_Lypd8         | 321.259357  | 0.345127 | 0.445823 | 0.792931 | 247.7003 | 176.0438 | 425.7265 | 259.9556 | 506.8404 | 31.12896 |
| ENSMUSG000000033350    | 7_Cht2           | 111.9358254 | -0.3219  | 0.445831 | 0.792931 | 123.4441 | 173.4675 | 75.9404  | 116.087  | 75.79979 | 106.8761 |
| ENSMUSG000000036925    | 7_Muc12          | 1.31987409  | -1.51884 | 0.445737 | 0.792931 | 1.624264 | 0.85875  | 3.451836 | 1.984394 | 0        | 0        |
| ENSMUSG0000000040435   | 10_Ppp1r15a      | 939.6117625 | -0.39993 | 0.445783 | 0.792931 | 1031.408 | 1067.427 | 1108.039 | 265.9087 | 1182.25  | 982.6376 |
| ENSMUSG000000060988    | 12_Gaint13       | 7.71639109  | 0.788658 | 0.445847 | 0.792931 | 8.933454 | 3.435001 | 4.602448 | 22.82053 | 3.39402  | 3.112896 |
| ENSMUSG000000089682    | 9_Bcl2l2         | 1373.188202 | -0.18697 | 0.445943 | 0.793031 | 1453.717 | 1495.084 | 1437.115 | 1062.643 | 1370.053 | 1420.518 |
| ENSMUSG0000000107736</ |                  |             |          |          |          |          |          |          |          |          |          |

|                      |                  |              |          |          |          |          |          |          |          |          |          |
|----------------------|------------------|--------------|----------|----------|----------|----------|----------|----------|----------|----------|----------|
| ENSMUSG00000004952   | 13_Rasa4         | 245.6577078  | -0.40954 | 0.448323 | 0.794431 | 318.3558 | 257.6251 | 264.6408 | 68.46158 | 317.9066 | 246.9564 |
| ENSMUSG000000021373  | 15_Cap2          | 119.7828281  | 0.394202 | 0.448566 | 0.794431 | 97.45586 | 138.2588 | 74.78979 | 225.2287 | 66.74907 | 116.2148 |
| ENSMUSG000000024238  | 13_Zeb1          | 499.6932744  | 0.286209 | 0.448578 | 0.794431 | 475.9095 | 489.4876 | 385.4551 | 806.656  | 377.8676 | 462.7839 |
| ENSMUSG000000026457  | 14_Adipor1       | 7368.6575669 | -0.21909 | 0.448561 | 0.794431 | 7438.319 | 7696.119 | 8646.85  | 5000.672 | 7684.062 | 7745.923 |
| ENSMUSG000000028882  | 13_Pp1r18        | 666.2103659  | -0.21288 | 0.448266 | 0.794431 | 697.6215 | 705.8927 | 742.1448 | 471.2935 | 729.7144 | 660.5953 |
| ENSMUSG000000032114  | 8_Slc37a4        | 206.4460471  | -0.30462 | 0.448206 | 0.794431 | 224.9606 | 229.2863 | 230.1224 | 102.1963 | 196.8532 | 255.2575 |
| ENSMUSG000000038115  | 16_Ano2          | 14.40646217  | -0.56625 | 0.448569 | 0.794431 | 24.36397 | 22.32751 | 4.602448 | 8.929771 | 15.83876 | 10.37632 |
| ENSMUSG000000040749  | 11_Siah1b        | 128.4534529  | 0.257674 | 0.448598 | 0.794431 | 120.1956 | 109.0613 | 121.9649 | 183.5564 | 130.1041 | 105.8385 |
| ENSMUSG000000041895  | 15_Wip1          | 964.7840516  | -0.16181 | 0.448605 | 0.794431 | 1002.171 | 1055.404 | 998.7313 | 859.2424 | 954.851  | 918.3044 |
| ENSMUSG000000055407  | 13_Map6          | 65.1370937   | -0.26485 | 0.448131 | 0.794431 | 72.27976 | 76.42877 | 64.43428 | 49.60984 | 55.43567 | 72.63421 |
| ENSMUSG000000055493  | 4_Epm2a          | 230.9291374  | 0.355334 | 0.44851  | 0.794431 | 194.9117 | 240.4501 | 172.5918 | 429.6212 | 142.5489 | 205.4511 |
| ENSMUSG000000056515  | 8_Rab31          | 1009.489433  | 0.220243 | 0.448421 | 0.794431 | 959.1281 | 853.5977 | 984.924  | 974.3373 | 1391.548 | 893.4012 |
| ENSMUSG000000058174  | 7_Gm5148         | 140.3895203  | -0.28085 | 0.448071 | 0.794431 | 149.4323 | 191.5013 | 120.8143 | 98.22748 | 114.2654 | 168.0964 |
| ENSMUSG000000078796  | 3_Zfp541         | 2.294349308  | -1.15884 | 0.448592 | 0.794431 | 4.060661 | 0.85875  | 4.602448 | 0        | 1.13134  | 3.112896 |
| ENSMUSG000000097113  | 7_Gm19705        | 9.288804084  | 0.583104 | 0.448299 | 0.794431 | 12.99411 | 3.435001 | 5.753061 | 12.89856 | 11.3134  | 9.338689 |
| ENSMUSG000000020893  | 17_Per1          | 1034.67616   | -0.46181 | 0.448761 | 0.794567 | 1032.22  | 1172.194 | 1392.241 | 219.2755 | 843.9797 | 1548.147 |
| ENSMUSG000000051022  | 7_Hs3st1         | 227.6805663  | -0.27372 | 0.448755 | 0.794567 | 209.5301 | 258.4838 | 279.5987 | 133.9466 | 262.4709 | 222.0533 |
| ENSMUSG000000034339  | 8_Gm5689         | 0.962186042  | 2.321108 | 0.448933 | 0.794799 | 0.812132 | 0        | 0        | 0.960984 | 0        | 0        |
| ENSMUSG000000004032  | 10_Gstm5         | 350.0252037  | -0.19083 | 0.449152 | 0.794812 | 400.3812 | 390.7314 | 327.9245 | 307.581  | 314.5125 | 359.0297 |
| ENSMUSG000000020123  | 5_Ayvr1a         | 4.085266886  | 0.807452 | 0.449559 | 0.794812 | 5.684925 | 0.85875  | 2.301224 | 5.953181 | 4.52536  | 5.18816  |
| ENSMUSG000000020477  | 10_Mrps24        | 428.339038   | -0.26205 | 0.449471 | 0.794812 | 448.297  | 462.8664 | 490.1608 | 247.057  | 428.7779 | 492.8752 |
| ENSMUSG000000022946  | 8_Dopey2         | 1198.825333  | -0.27718 | 0.449399 | 0.794812 | 1175.155 | 1233.165 | 1532.615 | 651.8733 | 1325.931 | 1274.212 |
| ENSMUSG000000023781  | 2_Hes7           | 2.197180487  | -1.13536 | 0.449417 | 0.794812 | 1.624264 | 5.152501 | 2.301224 | 0.992197 | 0        | 3.112896 |
| ENSMUSG000000029063  | 16_Nadk          | 2435.018889  | -0.25359 | 0.449618 | 0.794812 | 2580.144 | 2356.411 | 3008.851 | 1470.436 | 2779.703 | 2414.57  |
| ENSMUSG000000029446  | 14_PspH          | 334.7070854  | -0.21389 | 0.449583 | 0.794812 | 362.211  | 364.9688 | 350.9367 | 240.1116 | 363.1602 | 326.8541 |
| ENSMUSG000000029761  | 16_Cald1         | 1504.829889  | 0.357069 | 0.449364 | 0.794812 | 1360.321 | 1532.869 | 1065.467 | 2875.386 | 918.8482 | 1276.287 |
| ENSMUSG000000029830  | 15_Svop1         | 7.613142531  | 0.739311 | 0.449497 | 0.794812 | 6.497057 | 6.011252 | 4.602448 | 20.83613 | 5.656701 | 2.075264 |
| ENSMUSG000000045455  | 7_Gm9797         | 198.2807279  | 0.296614 | 0.449383 | 0.794812 | 184.354  | 148.5638 | 201.3571 | 323.4562 | 161.7816 | 170.1717 |
| ENSMUSG000000060843  | 11_Ctnna3        | 1.651002584  | 1.353691 | 0.449339 | 0.794812 | 0.812132 | 0.85875  | 1.150612 | 5.953181 | 1.13134  | 0        |
| ENSMUSG000000061013  | 5_Mlx            | 193.3796904  | 0.295626 | 0.449233 | 0.794812 | 177.8569 | 171.75   | 171.4412 | 314.5264 | 136.8922 | 187.8114 |
| ENSMUSG000000063902  | 12_Gm7964        | 841.1701139  | -0.20704 | 0.449597 | 0.794812 | 871.4178 | 832.9877 | 999.8819 | 646.9123 | 943.5376 | 752.2832 |
| ENSMUSG000000074582  | 10_Arfgef2       | 2788.15204   | -0.20177 | 0.449462 | 0.794812 | 2852.208 | 3097.512 | 2998.495 | 2011.183 | 2922.251 | 2847.761 |
| ENSMUSG000000079037  | 9_Prrp           | 1532.021508  | 0.182803 | 0.44916  | 0.794812 | 1355.449 | 1479.627 | 1470.482 | 1900.057 | 1505.814 | 1480.202 |
| ENSMUSG000000085180  | 1_AlB38599       | 17.32976905  | 0.687533 | 0.449063 | 0.794812 | 11.36985 | 6.870002 | 21.86163 | 36.71128 | 2.26268  | 24.90317 |
| ENSMUSG000000091712  | 1_Sec14i5        | 6.411575555  | -0.69293 | 0.449308 | 0.794812 | 5.684925 | 11.16375 | 6.903673 | 1.984394 | 3.39402  | 9.338689 |
| ENSMUSG000000096938  | 7_953005E022Rik  | 8.864888049  | 0.58875  | 0.449672 | 0.794837 | 8.933454 | 8.587502 | 3.451836 | 6.945378 | 16.9701  | 8.301057 |
| ENSMUSG000000014859  | 8_E2f4           | 1335.048401  | -0.40135 | 0.45008  | 0.794914 | 1414.734 | 1454.723 | 1689.099 | 369.0972 | 1676.646 | 1405.991 |
| ENSMUSG000000029402  | 8_Snmp35         | 188.4582075  | -0.39621 | 0.449978 | 0.794914 | 189.2268 | 203.5238 | 249.6828 | 57.54742 | 239.8441 | 190.9243 |
| ENSMUSG000000029504  | 5_Ddx51          | 542.8143666  | -0.206   | 0.450314 | 0.794914 | 565.244  | 538.4364 | 640.8909 | 402.8319 | 566.8014 | 542.6816 |
| ENSMUSG000000030314  | 16_Atg7          | 900.454621   | -0.2558  | 0.450302 | 0.794914 | 961.5645 | 918.8627 | 1059.714 | 523.8799 | 969.5585 | 969.1483 |
| ENSMUSG000000031775  | 4_Plip           | 1503.70011   | -0.33989 | 0.450253 | 0.794914 | 1586.094 | 1642.789 | 1811.063 | 579.4429 | 1646.1   | 1756.711 |
| ENSMUSG000000041747  | 2_Ulp15          | 626.3780459  | 0.18737  | 0.450275 | 0.794914 | 612.3477 | 530.7076 | 614.4269 | 749.1086 | 667.4907 | 584.1869 |
| ENSMUSG000000044034  | 11_Npb           | 0.5569608    | -0.54226 | 0.450176 | 0.794914 | 1.624264 | 1.7175   | 0        | 0        | 0        | 0        |
| ENSMUSG000000045709  | 10_Smkr-ps       | 0.5569608    | -0.54226 | 0.450176 | 0.794914 | 1.624264 | 1.7175   | 0        | 0        | 0        | 0        |
| ENSMUSG000000045822  | 4_Zswim3         | 76.90744567  | -0.2542  | 0.450209 | 0.794914 | 85.27388 | 81.58127 | 83.99468 | 53.57863 | 79.19381 | 77.8224  |
| ENSMUSG000000048562  | 6_Sp8            | 0.5569608    | -0.54226 | 0.450176 | 0.794914 | 1.624264 | 1.7175   | 0        | 0        | 0        | 0        |
| ENSMUSG000000058665  | 8_En1            | 0.5569608    | -0.54226 | 0.450176 | 0.794914 | 1.624264 | 1.7175   | 0        | 0        | 0        | 0        |
| ENSMUSG000000070985  | 3_Acnat1         | 2.595189282  | -1.00681 | 0.449776 | 0.794914 | 2.436397 | 3.435001 | 4.602448 | 1.984394 | 0        | 3.112896 |
| ENSMUSG000000073830  | 11_Mup14         | 0.5569608    | -0.54226 | 0.450176 | 0.794914 | 1.624264 | 1.7175   | 0        | 0        | 0        | 0        |
| ENSMUSG000000087360  | 2_Gm15104        | 0.5569608    | -0.54226 | 0.450176 | 0.794914 | 1.624264 | 1.7175   | 0        | 0        | 0        | 0        |
| ENSMUSG000000090961  | 1_Vmn2r8         | 0.5569608    | -0.54226 | 0.450176 | 0.794914 | 1.624264 | 1.7175   | 0        | 0        | 0        | 0        |
| ENSMUSG000000044250  | 7_Pced1b         | 146.4295363  | -0.35013 | 0.450454 | 0.79509  | 156.7415 | 157.1513 | 178.3449 | 56.55522 | 160.6503 | 169.134  |
| ENSMUSG000000013465  | 18_Nelfb         | 1572.836241  | -0.36117 | 0.450527 | 0.795125 | 1669.744 | 1702.043 | 1934.179 | 539.7551 | 1792.043 | 1799.254 |
| ENSMUSG000000024926  | 9_Kat5           | 735.4484019  | -0.22768 | 0.450648 | 0.795125 | 771.5256 | 785.7565 | 822.6877 | 481.2155 | 754.6038 | 796.9014 |
| ENSMUSG000000033068  | 16_Entpd6        | 277.1548951  | -0.39879 | 0.450673 | 0.795125 | 293.1797 | 315.1613 | 337.1293 | 82.35234 | 376.7363 | 328.3704 |
| ENSMUSG000000034154  | 15_Ino80         | 1273.629336  | 0.18238  | 0.450578 | 0.795125 | 1193.834 | 1042.523 | 1343.915 | 1467.459 | 1264.838 | 1329.207 |
| ENSMUSG000000092417  | 3_Gpank1         | 252.3230476  | -0.41937 | 0.450638 | 0.795125 | 297.2404 | 269.6476 | 299.1591 | 63.5006  | 315.6439 | 268.7467 |
| ENSMUSG000000018405  | 7_Mrm1           | 201.0106353  | -0.23945 | 0.450831 | 0.795333 | 229.0213 | 208.6763 | 215.1645 | 138.9076 | 178.7517 | 235.5425 |
| ENSMUSG000000026872  | 16_Zeb2          | 648.0022829  | 0.324185 | 0.451016 | 0.795519 | 603.4142 | 619.1589 | 593.9681 | 1176.745 | 488.7389 | 495.9681 |
| ENSMUSG000000033762  | 7_Recu4l         | 113.7397614  | -0.49253 | 0.451    | 0.795519 | 130.7533 | 139.1175 | 128.8686 | 17.85954 | 140.2862 | 125.5535 |
| ENSMUSG000000021874  | 12_4933413J09Rik | 9.671628953  | 0.520312 | 0.451108 | 0.795577 | 8.121322 | 7.728752 | 8.054285 | 16.86735 | 7.919381 | 9.338689 |
| ENSMUSG000000038781  | 6_Stap2          | 2209.274083  | -0.33618 | 0.451129 | 0.795577 | 2355.995 | 2364.139 | 2676.324 | 863.2112 | 2465.19  | 2530.785 |
| ENSMUSG000000041096  | 13_Tsyp12        | 425.7837516  | -0.18791 | 0.451195 | 0.795622 | 444.2363 | 510.9564 | 405.0155 | 407.7929 | 365.4229 | 421.2786 |
| ENSMUSG000000018697  | 14_Aatf          | 463.9719079  | 0.20419  | 0.451314 | 0.795722 | 419.0602 | 367.5451 | 507.4199 | 499.075  | 548.7    | 442.0313 |
| ENSMUSG000000045594  | 9_Glb1           | 455.1747209  | -0.25786 | 0.451371 | 0.795722 | 505.9583 | 522.9789 | 457.9436 | 264.9165 | 497.7896 | 481.4613 |
| ENSMUSG000000046750  | 16_BC089491      | 29.60506055  | -0.38918 | 0.451454 | 0.795722 | 36.54595 | 38.64376 | 25.31347 | 14.88295 | 24.88948 | 37.35475 |
| ENSMUSG000000051695  | 6_Pcbp1          | 4080.922437  | -0.22257 | 0.451481 | 0.795722 | 3965.641 | 4062.747 | 5157.043 | 2861.496 | 4429.197 | 4009.41  |
| ENSMUSG000000094437  | 1_Gm9830         | 203.3334114  | 0.191598 | 0.451491 | 0.795722 | 202.2209 | 178.62   | 188.7004 | 233.1663 | 214.9546 | 202.3383 |
| ENSMUSG0000000106317 | 1_Gm43848        | 13.65571732  | 0.606803 | 0.45139  | 0.795722 | 13.80625 | 9.446252 | 9.204897 | 31.7503  | 13.57608 | 4.150528 |
| ENSMUSG000000027394  | 13_Tli           | 528.981287   | -0.16799 | 0.451643 | 0.795918 | 553.062  | 565.9164 | 560.3481 | 495.1062 | 466.1121 | 533.3429 |
| ENSMUSG000000052957  | 7_Gas1           | 2253.391438  | 0.325985 | 0.451682 | 0.795918 | 1877.65  | 2073.023 | 2049.24  | 4155.32  | 1579.351 | 1785.765 |
| ENSMUSG000000026490  | 17_Cdc42bpa      | 1561.158967  | 0.263634 | 0.452044 | 0.796344 | 1424.48  | 1490.79  | 1341.614 | 2446.757 | 1211.665 | 1451.647 |
| ENSMUSG000000041165  | 6_Sperm1         | 1.316112466  | 1.850297 | 0.452021 | 0.796344 | 0.812132 | 0.85875  | 0        | 0        | 6.225792 | 0        |
| ENSMUSG000000057530  | 14_Ece1          | 4687.054411  | -0.33565 | 0.451976 | 0.796344 | 4698.997 | 4841.634 | 6148.871 | 1880.213 | 5510.758 | 5041.854 |
| ENSMUSG000000005202  | 2_Shtg           | 0.564730474  | -0.55976 | 0.45216  | 0.796408 | 0.812132 | 2.576251 | 0        | 0        | 0        | 0        |
| ENSMUSG000000072963  | 6_Gm10447        | 0.564730474  | -0.55976 | 0.45216  | 0.796408 | 0.812132 | 2.576251 | 0        | 0        | 0        | 0        |
| ENSMUSG0             |                  |              |          |          |          |          |          |          |          |          |          |

|                     |                  |             |          |          |          |          |          |          |          |          |          |
|---------------------|------------------|-------------|----------|----------|----------|----------|----------|----------|----------|----------|----------|
| ENSMUSG00000087141  | 1_Plcxd2         | 94.33498405 | 0.297776 | 0.453419 | 0.797132 | 100.7044 | 85.01627 | 67.88611 | 132.9544 | 112.0027 | 67.44608 |
| ENSMUSG00000092166  | 1_Gm7942         | 0.801930806 | -1.7025  | 0.453705 | 0.797132 | 0.812132 | 1.7175   | 1.150612 | 0        | 1.13134  | 0        |
| ENSMUSG000000108298 | 1_RP24-315D19    | 8.620156013 | 0.980848 | 0.453607 | 0.797132 | 3.248529 | 1.7175   | 12.65673 | 25.79712 | 0        | 8.301057 |
| ENSMUSG000000102440 | 1_Pcdhg9         | 94.5906485  | -0.26171 | 0.454034 | 0.797241 | 86.89814 | 127.9538 | 94.35019 | 69.45378 | 100.6893 | 88.19873 |
| ENSMUSG00000001289  | 12_Pfdn5         | 2909.26268  | -0.36404 | 0.454193 | 0.79745  | 3350.045 | 3322.505 | 3150.376 | 960.4465 | 3184.722 | 3487.481 |
| ENSMUSG000000027296 | 7_Itpka          | 15.83895627 | -0.58886 | 0.454427 | 0.797586 | 17.05478 | 21.46876 | 18.40979 | 1.984394 | 22.6268  | 13.48922 |
| ENSMUSG000000033268 | 8_Duox1          | 618.3950564 | -0.33504 | 0.454551 | 0.797586 | 617.2205 | 635.4752 | 816.9346 | 250.0336 | 692.3801 | 698.3264 |
| ENSMUSG000000033540 | 18_Idua          | 237.9677456 | -0.2214  | 0.45451  | 0.797586 | 239.579  | 299.7038 | 228.9718 | 178.5954 | 231.9247 | 249.0317 |
| ENSMUSG000000035521 | 13_Gnptg         | 754.8830079 | -0.22392 | 0.454516 | 0.797586 | 765.8406 | 819.2477 | 854.9048 | 502.0516 | 760.2605 | 826.9928 |
| ENSMUSG000000038312 | 10_Edem2         | 746.8700783 | -0.30581 | 0.454441 | 0.797586 | 740.6645 | 856.174  | 880.2183 | 343.3001 | 872.2632 | 788.6004 |
| ENSMUSG000000046991 | 9_Wdr27          | 6.428604103 | -0.65338 | 0.454475 | 0.797586 | 4.060661 | 10.305   | 9.204897 | 3.968787 | 7.919381 | 3.112896 |
| ENSMUSG000000059674 | 6_Cdh24          | 56.5601319  | -0.57096 | 0.454545 | 0.797586 | 74.71616 | 53.24251 | 74.78979 | 4.960984 | 61.09237 | 70.55898 |
| ENSMUSG000000020323 | 14_Prss57        | 2.077652093 | -1.59514 | 0.454605 | 0.797611 | 1.624264 | 7.728752 | 0        | 0        | 0        | 3.112896 |
| ENSMUSG000000030159 | 15_Clec1b        | 3.486283573 | 0.847484 | 0.454672 | 0.797658 | 3.248529 | 0.85875  | 3.451836 | 6.945378 | 2.26268  | 4.150528 |
| ENSMUSG00000003062  | 12_Star3nl       | 373.0557883 | 0.191813 | 0.454836 | 0.797665 | 358.1503 | 352.9463 | 333.6775 | 452.4417 | 403.8884 | 337.2304 |
| ENSMUSG000000022407 | 8_Adsl           | 996.0732172 | -0.29359 | 0.454737 | 0.797665 | 1055.772 | 1060.557 | 1174.775 | 478.2389 | 1103.057 | 1104.041 |
| ENSMUSG000000037946 | 11_Fgd3          | 3252.849741 | -0.32006 | 0.454799 | 0.797665 | 3244.468 | 3523.452 | 4068.564 | 1397.013 | 3964.216 | 3319.385 |
| ENSMUSG000000049526 | 7_Tmem202        | 15.73067376 | 0.459674 | 0.454796 | 0.797665 | 17.05478 | 11.16375 | 11.50612 | 27.78151 | 11.3134  | 15.56448 |
| ENSMUSG000000058932 | 6_Gm2174         | 139.9665297 | -1.24778 | 0.455033 | 0.79794  | 192.4753 | 164.88   | 233.5743 | 0        | 123.3161 | 225.5535 |
| ENSMUSG000000007659 | 18_Bcd21         | 2138.679626 | -0.31113 | 0.455652 | 0.797958 | 2161.896 | 2308.321 | 2634.902 | 948.5402 | 2519.494 | 1258.925 |
| ENSMUSG000000020672 | 13_Sntg2         | 9.455401416 | -0.54728 | 0.456382 | 0.797958 | 12.99411 | 10.305   | 10.35551 | 10.91416 | 9.050721 | 3.112896 |
| ENSMUSG000000021609 | 6_Slc6a3         | 7.536516026 | -0.61811 | 0.456106 | 0.797958 | 14.61838 | 6.870002 | 5.753061 | 6.945378 | 7.919381 | 3.112896 |
| ENSMUSG000000022583 | 12_Ly6f          | 0.661464543 | 2.958376 | 0.456902 | 0.797958 | 0        | 0        | 0        | 3.968787 | 0        | 0        |
| ENSMUSG000000026768 | 10_Itg8a         | 165.283717  | 0.339403 | 0.456312 | 0.797958 | 142.9353 | 178.62   | 116.2118 | 294.6825 | 110.8713 | 148.3814 |
| ENSMUSG000000026774 | 11_4931423N10Rik | 0.880794189 | -1.93032 | 0.455272 | 0.797958 | 0.812132 | 3.435001 | 0        | 0        | 0        | 1.037632 |
| ENSMUSG000000026941 | 16_Mamdc4        | 67.00989543 | -0.43558 | 0.455781 | 0.797958 | 42.23087 | 117.6488 | 71.33795 | 42.66446 | 31.67752 | 96.49978 |
| ENSMUSG000000027247 | 16_Arhgap1       | 4017.033436 | -0.24629 | 0.456792 | 0.797958 | 3908.792 | 4393.366 | 4775.804 | 2409.054 | 4428.065 | 4187.883 |
| ENSMUSG000000030236 | 10_Slc1b2        | 0.778740258 | -1.7025  | 0.456544 | 0.797958 | 0.812132 | 1.7175   | 1.150612 | 0.992197 | 0        | 0        |
| ENSMUSG000000031596 | 15_Slc7a2        | 1081.30912  | -0.29713 | 0.455881 | 0.797958 | 1186.525 | 1498.519 | 891.7244 | 1398.005 | 641.4698 | 871.6109 |
| ENSMUSG000000031659 | 12_Adcy7         | 757.0958786 | -0.18298 | 0.456029 | 0.797958 | 903.091  | 820.1065 | 691.5179 | 759.0306 | 678.8041 | 690.0253 |
| ENSMUSG000000034723 | 11_Tmx4          | 886.6195211 | 0.382799 | 0.456471 | 0.797958 | 843.8053 | 909.4165 | 555.7456 | 1795.876 | 523.8105 | 691.063  |
| ENSMUSG000000038290 | 15_Smg6          | 1169.362626 | -0.18548 | 0.455829 | 0.797958 | 1186.525 | 1264.939 | 1281.782 | 905.8757 | 1150.573 | 1226.481 |
| ENSMUSG000000038523 | 10_170003F12Rik  | 0.880794189 | -1.93032 | 0.455272 | 0.797958 | 0.812132 | 3.435001 | 0        | 0        | 0        | 1.037632 |
| ENSMUSG000000039523 | 16_Cep104        | 715.1483061 | -0.26617 | 0.455557 | 0.797958 | 734.1675 | 765.1464 | 843.3987 | 392.9099 | 774.968  | 780.2993 |
| ENSMUSG000000039678 | 12_Tbc1d13       | 728.7114497 | -0.30612 | 0.456891 | 0.797958 | 847.0539 | 702.4577 | 867.5615 | 333.3781 | 827.0096 | 794.8262 |
| ENSMUSG000000040824 | 3_Snrpd2         | 1128.557517 | -0.40222 | 0.455703 | 0.797958 | 1299.411 | 1152.443 | 1402.596 | 303.6122 | 1446.984 | 1166.298 |
| ENSMUSG000000042229 | 9_Rabif          | 860.1401677 | 0.192951 | 0.456307 | 0.797958 | 812.1322 | 771.1577 | 824.9889 | 1078.518 | 918.6482 | 755.3961 |
| ENSMUSG000000045378 | 4_Pxt1           | 0.519288956 | 2.604947 | 0.456341 | 0.797958 | 0        | 0        | 0        | 1.984394 | 1.13134  | 0        |
| ENSMUSG000000046974 | 6_BC053393       | 1.451940751 | 1.257532 | 0.455297 | 0.797958 | 1.624264 | 0.85875  | 0        | 1.984394 | 1.13134  | 3.112896 |
| ENSMUSG000000048230 | 5_Fbxo43         | 1.514136986 | 1.300164 | 0.455755 | 0.797958 | 0.812132 | 1.7175   | 0        | 0.992197 | 4.52536  | 1.037632 |
| ENSMUSG000000049148 | 8_Plcxd3         | 6.672090822 | 0.784682 | 0.455771 | 0.797958 | 2.436397 | 7.728752 | 4.602448 | 18.85174 | 2.26268  | 4.150528 |
| ENSMUSG000000049404 | 7_Rarres1        | 242.5679162 | 0.196818 | 0.455708 | 0.797958 | 201.4088 | 231.8626 | 245.0804 | 228.2053 | 273.9156 | 273.9349 |
| ENSMUSG000000050043 | 16_Tmx2          | 1354.663761 | 0.200766 | 0.456926 | 0.797958 | 1273.423 | 1258.928 | 1249.565 | 1809.767 | 1245.605 | 1290.814 |
| ENSMUSG000000051506 | 16_Wdrf4         | 102.0900018 | -0.35795 | 0.456312 | 0.797958 | 139.6867 | 103.9088 | 100.1033 | 43.65666 | 138.0235 | 87.16109 |
| ENSMUSG000000052549 | 4_Arl13a         | 0.519288956 | 2.604947 | 0.456341 | 0.797958 | 0        | 0        | 0        | 1.984394 | 1.13134  | 0        |
| ENSMUSG000000052673 | 1_Gm9887         | 1.414820175 | -1.52543 | 0.456347 | 0.797958 | 0        | 1.7175   | 4.602448 | 0        | 1.13134  | 1.037632 |
| ENSMUSG000000054061 | 8_Gm9934         | 2.125424949 | -1.0978  | 0.456719 | 0.797958 | 3.248529 | 4.293751 | 1.150612 | 1.984394 | 0        | 2.075264 |
| ENSMUSG000000058498 | 12_Rnf207        | 37.40309161 | -0.45471 | 0.456706 | 0.797958 | 51.16433 | 54.10126 | 24.16285 | 11.90636 | 38.46556 | 44.61818 |
| ENSMUSG000000059743 | 12_Fdps          | 7984.225052 | -0.31131 | 0.456169 | 0.797958 | 8365.774 | 8006.987 | 10154.15 | 3552.065 | 9356.183 | 8470.191 |
| ENSMUSG000000061311 | 6_Rag1           | 0.661464543 | 2.958376 | 0.456902 | 0.797958 | 0        | 0        | 0        | 3.968787 | 0        | 0        |
| ENSMUSG000000062496 | 9_4930431F12Rik  | 0.519288956 | 2.604947 | 0.456341 | 0.797958 | 0        | 0        | 0        | 1.984394 | 1.13134  | 0        |
| ENSMUSG000000063130 | 3_Calm13         | 99559.76189 | -0.19804 | 0.455832 | 0.797958 | 105841.1 | 96188.61 | 117117.4 | 74268.91 | 97351.82 | 106590.8 |
| ENSMUSG000000063590 | 3_Slc22a28       | 0.661464543 | 2.958376 | 0.456902 | 0.797958 | 0        | 0        | 0        | 3.968787 | 0        | 0        |
| ENSMUSG000000063651 | 11_Cnfn          | 179.3977988 | -0.6828  | 0.456039 | 0.797958 | 208.718  | 250.7551 | 203.6583 | 3.968787 | 193.4592 | 215.8275 |
| ENSMUSG000000072915 | 3_Gm12258        | 198.8376675 | 0.261825 | 0.456108 | 0.797958 | 185.1661 | 180.3375 | 177.1943 | 304.6044 | 165.1577 | 180.548  |
| ENSMUSG000000076439 | 12_Mog           | 0.519288956 | 2.604947 | 0.456341 | 0.797958 | 0        | 0        | 0        | 1.984394 | 1.13134  | 0        |
| ENSMUSG000000079442 | 12_St6galnac4    | 102.0380687 | -0.31457 | 0.456246 | 0.797958 | 121.8198 | 133.1063 | 83.99468 | 53.57863 | 109.74   | 109.989  |
| ENSMUSG000000092130 | 1_D030025P21Rik  | 0.873221647 | -1.93021 | 0.45628  | 0.797958 | 0.812132 | 3.435001 | 0        | 0.992197 | 0        | 0        |
| ENSMUSG000000093948 | 7_Gm10378        | 0.519288956 | 2.604947 | 0.456341 | 0.797958 | 0        | 0        | 0        | 1.984394 | 1.13134  | 0        |
| ENSMUSG000000096218 | 2_Gm2916         | 0.661464543 | 2.958376 | 0.456902 | 0.797958 | 0        | 0        | 0        | 3.968787 | 0        | 0        |
| ENSMUSG000000097008 | 1_Gm26860        | 0.7863128   | -1.7025  | 0.455607 | 0.797958 | 0.812132 | 1.7175   | 1.150612 | 0        | 0        | 1.037632 |
| ENSMUSG000000097172 | 1_4930444M15Rik  | 0.519288956 | 2.604947 | 0.456341 | 0.797958 | 0        | 0        | 0        | 1.984394 | 1.13134  | 0        |
| ENSMUSG000000097715 | 1_Gpr137b-ps     | 96.19848139 | -0.2551  | 0.455297 | 0.797958 | 95.8316  | 109.92   | 108.1575 | 64.49279 | 107.4773 | 91.31162 |
| ENSMUSG000000099784 | 1_Dalir          | 0.661464543 | 2.958376 | 0.456902 | 0.797958 | 0        | 0        | 0        | 3.968787 | 0        | 0        |
| ENSMUSG000000106741 | 3_4930513D17Rik  | 0.661464543 | 2.958376 | 0.456902 | 0.797958 | 0        | 0        | 0        | 3.968787 | 0        | 0        |
| ENSMUSG000000108513 | 1_RP24-136L4     | 0.778740258 | -1.7025  | 0.456544 | 0.797958 | 0.812132 | 1.7175   | 1.150612 | 0.992197 | 0        | 0        |
| ENSMUSG000000024935 | 10_Slc1a1        | 3829.613091 | 0.186704 | 0.456978 | 0.797979 | 3763.421 | 3131.003 | 3852.249 | 4412.299 | 4361.316 | 3457.39  |
| ENSMUSG000000034377 | 10_Tulp4         | 5202.031159 | 0.186086 | 0.457186 | 0.798272 | 4803.762 | 4725.702 | 5071.898 | 6663.594 | 4941.694 | 5005.537 |
| ENSMUSG000000001521 | 12_Tulp3         | 416.1767897 | -0.20253 | 0.457722 | 0.798548 | 453.1698 | 429.3752 | 453.3412 | 304.6044 | 419.7272 | 436.8431 |
| ENSMUSG000000001576 | 14_Ergic1        | 2343.784361 | -0.20902 | 0.457785 | 0.798548 | 2274.782 | 2485.223 | 2779.879 | 1659.945 | 2461.796 | 2401.081 |
| ENSMUSG000000020523 | 14_Fam114a2      | 1046.272841 | 0.163416 | 0.457496 | 0.798548 | 989.177  | 964.3765 | 1007.936 | 1193.613 | 1009.155 | 1113.379 |
| ENSMUSG000000021414 | 7_Fam217a        | 5.628541896 | 0.709246 | 0.457513 | 0.798548 | 6.497057 | 1.7175   | 4.602448 | 9.921968 | 7.919381 | 3.112896 |
| ENSMUSG000000025648 | 17_Pfkfb4        | 1498.416806 | -0.39028 | 0.457633 | 0.798548 | 1593.403 | 1604.145 | 1901.962 | 422.6758 | 1747.92  | 1720.394 |
| ENSMUSG000000026201 | 12_Stk16         | 802.1800269 | -0.28981 | 0.457653 | 0.798548 | 774.7741 | 875.0665 | 997.5807 | 398.8631 | 873.3946 | 893.4012 |
| ENSMUSG000000039059 | 11_Hrh3          | 2.554472624 | -0.93244 | 0.457435 | 0.798548 | 4.872793 | 1.7175   | 3.451836 | 1.984394 | 2.26268  | 1.037632 |
| ENSMUSG000000050612 | 5_Txndc2         | 1.238007668 | -1.34583 | 0.45767  | 0.798548 | 2.436397 | 1.7175   | 1.150612 | 0.992197 | 1.13134  | 0        |
| ENSMUSG000000052062 | 14_Pard3b        | 576.7369915 | 0.224478 | 0.457695 | 0.798548 | 518.9525 | 547.8826 | 529.2816 | 806.656  | 479.6882 | 577.9611 |

|                    |                  |              |          |          |          |          |          |          |          |          |          |
|--------------------|------------------|--------------|----------|----------|----------|----------|----------|----------|----------|----------|----------|
| ENSMUSG00000014329 | 14_Bicc1         | 608.9663451  | 0.251165 | 0.460557 | 0.800688 | 611.5355 | 529.8489 | 526.9803 | 927.704  | 505.709  | 552.0203 |
| ENSMUSG00000018858 | 15_Ict1          | 441.1945577  | -0.25844 | 0.461747 | 0.800688 | 449.1091 | 492.0639 | 500.5163 | 249.0414 | 472.9002 | 483.5365 |
| 9.186990705        | 16_Ptpr          | 5.006191     | 0.460247 | 0.800688 | 8.121322 | 7.728752 | 6.903673 | 9.921968 | 7.919381 | 14.52685 |          |
| ENSMUSG00000020451 | 17_Limk2         | 94.17.190827 | -0.27552 | 0.461454 | 0.800688 | 9664.373 | 9538.139 | 11738.54 | 4899.468 | 10688.9  | 9973.719 |
| 14_Tpo             | 14_Tpo           | 0.549191126  | -2.5235  | 0.461785 | 0.800688 | 2.436397 | 0.85875  | 0        | 0        | 0        | 0        |
| ENSMUSG00000020799 | 16_Tek1          | 0.770970584  | -1.68786 | 0.460837 | 0.800688 | 1.624264 | 0.85875  | 1.150612 | 0.992197 | 0        | 0        |
| ENSMUSG00000022577 | 16_Ly6h          | 0.549191126  | -2.5235  | 0.461785 | 0.800688 | 2.436397 | 0.85875  | 0        | 0        | 0        | 0        |
| ENSMUSG00000022718 | 11_Dgcr8         | 922.3635975  | 0.175078 | 0.461157 | 0.800688 | 855.9873 | 803.7902 | 940.0501 | 1096.377 | 943.5376 | 894.4388 |
| ENSMUSG00000024949 | 17_Sf1           | 3017.330782  | -0.19207 | 0.460758 | 0.800688 | 2999.204 | 3194.551 | 3459.891 | 2271.139 | 3245.815 | 2933.386 |
| 792.4052849        | 8_Tubgcp2        | -0.28741     | 0.460283 | 0.800688 | 871.4178 | 844.1515 | 897.4774 | 384.9724 | 885.8393 | 870.5733 |          |
| ENSMUSG00000026124 | 4_Cfci1          | 3.989311163  | -0.85318 | 0.460282 | 0.800688 | 0.812132 | 7.728752 | 6.903673 | 1.984394 | 3.39402  | 3.112896 |
| ENSMUSG00000027568 | 9_Nlstr1         | 0.549191126  | -2.5235  | 0.461785 | 0.800688 | 2.436397 | 0.85875  | 0        | 0        | 0        | 0        |
| ENSMUSG00000029148 | 15_Nrbp1         | 2878.735757  | -0.24506 | 0.460943 | 0.800688 | 3146.2   | 3019.366 | 3202.154 | 1685.742 | 3174.54  | 3044.412 |
| ENSMUSG00000029379 | 10_Cxcl3         | 9.275853154  | 0.797184 | 0.461194 | 0.800688 | 4.872793 | 5.152501 | 10.35551 | 5.953181 | 28.2835  | 1.037632 |
| ENSMUSG00000030771 | 15_Micalcl       | 21.927328    | -0.36821 | 0.460717 | 0.800688 | 23.55183 | 24.04501 | 26.46408 | 12.89856 | 24.88948 | 19.71501 |
| ENSMUSG00000031789 | 16_Cngb1         | 55.33393809  | -0.50652 | 0.460915 | 0.800688 | 92.58307 | 75.57002 | 26.46408 | 68.46158 | 55.43567 | 13.48922 |
| ENSMUSG00000032577 | 16_Mapkapk3      | 3523.58876   | -0.29215 | 0.460592 | 0.800688 | 3613.988 | 3666.005 | 4357.368 | 1685.742 | 4007.207 | 3811.223 |
| ENSMUSG00000036356 | 14_Csgalnact1    | 429.5097221  | 0.066099 | 0.461079 | 0.800688 | 415.8117 | 383.8613 | 370.4971 | 668.7407 | 317.9066 | 420.241  |
| ENSMUSG00000038916 | 6_Soga3          | 3.139378778  | -0.95285 | 0.461767 | 0.800688 | 4.872793 | 5.152501 | 2.301224 | 1.984394 | 4.52536  | 0        |
| ENSMUSG00000039347 | 3_Ppl            | 49062.48703  | -0.24695 | 0.460369 | 0.800688 | 48796.96 | 49231.29 | 61725.74 | 29589.29 | 54424.25 | 50607.39 |
| ENSMUSG00000042269 | 15_Fam92b        | 0.549191126  | -2.5235  | 0.461785 | 0.800688 | 2.436397 | 0.85875  | 0        | 0        | 0        | 0        |
| ENSMUSG00000044245 | 9_Id1            | 842.0328345  | -0.25068 | 0.460747 | 0.800688 | 881.9755 | 774.5927 | 1088.479 | 547.6926 | 1010.287 | 749.1704 |
| ENSMUSG00000043366 | 13_Olf7r78       | 0.511243491  | 2.585668 | 0.461548 | 0.800688 | 0        | 0        | 0        | 0.992197 | 0        | 2.075264 |
| ENSMUSG00000044453 | 5_Ffar1          | 0.511243491  | 2.585668 | 0.461548 | 0.800688 | 0        | 0        | 0        | 0.992197 | 0        | 2.075264 |
| ENSMUSG00000045411 | 16_2410002F23Rik | 934.6081461  | -0.16908 | 0.461763 | 0.800688 | 1033.032 | 977.2578 | 957.3093 | 780.8589 | 961.6391 | 897.5517 |
| ENSMUSG00000046793 | 8_Gprb1          | 0.770970584  | -1.68786 | 0.460837 | 0.800688 | 1.624264 | 0.85875  | 1.150612 | 0.992197 | 0        | 0        |
| ENSMUSG00000047977 | 3_Synb           | 0.549191126  | -2.5235  | 0.461785 | 0.800688 | 2.436397 | 0.85875  | 0        | 0        | 0        | 0        |
| ENSMUSG00000050148 | 9_Ubqln2         | 553.9770142  | 0.24219  | 0.461475 | 0.800688 | 474.2852 | 550.4589 | 498.215  | 825.5078 | 476.2942 | 499.101  |
| ENSMUSG00000052234 | 2_Epx            | 0.511243491  | 2.585668 | 0.461548 | 0.800688 | 0        | 0        | 0        | 0.992197 | 0        | 2.075264 |
| ENSMUSG00000053251 | 5_Olftr212       | 0.549191126  | -2.5235  | 0.461785 | 0.800688 | 2.436397 | 0.85875  | 0        | 0        | 0        | 0        |
| ENSMUSG00000060613 | 10_Cyp2c70       | 0.549191126  | -2.5235  | 0.461785 | 0.800688 | 2.436397 | 0.85875  | 0        | 0        | 0        | 0        |
| ENSMUSG00000066979 | 5_Bub3           | 2321.888945  | -0.21963 | 0.460997 | 0.800688 | 2422.59  | 2406.218 | 2665.968 | 1528.975 | 2475.372 | 2432.21  |
| ENSMUSG00000067235 | 14_H2-Q10        | 489.374793   | -0.38961 | 0.460601 | 0.800688 | 517.3282 | 455.1376 | 692.6685 | 146.8451 | 607.5296 | 516.7408 |
| ENSMUSG00000067878 | 13_Mtap7d3       | 13.86571139  | 0.531497 | 0.461333 | 0.800688 | 14.61838 | 14.59875 | 4.602448 | 25.79172 | 9.050721 | 14.52685 |
| ENSMUSG00000078354 | 1_lfna2          | 0.511243491  | 2.585668 | 0.461548 | 0.800688 | 0        | 0        | 0        | 0.992197 | 0        | 2.075264 |
| ENSMUSG00000089687 | 2_Rab42          | 7.791174365  | -0.62903 | 0.460498 | 0.800688 | 5.684925 | 11.16375 | 11.50612 | 1.984394 | 10.18206 | 6.225792 |
| ENSMUSG00000090544 | 2_Gm6576         | 1673.881798  | 0.239713 | 0.4603   | 0.800688 | 1528.433 | 1481.344 | 1595.899 | 2497.359 | 1573.694 | 1366.561 |
| ENSMUSG00000093763 | 1_Gm26717        | 0.549191126  | -2.5235  | 0.461785 | 0.800688 | 2.436397 | 0.85875  | 0        | 0        | 0        | 0        |
| ENSMUSG00000097598 | 1_Gm26677        | 0.511243491  | 2.585668 | 0.461548 | 0.800688 | 0        | 0        | 0        | 0.992197 | 0        | 2.075264 |
| ENSMUSG00000102548 | 1_Gm16701        | 0.511243491  | 2.585668 | 0.461548 | 0.800688 | 0        | 0        | 0        | 0.992197 | 0        | 2.075264 |
| ENSMUSG00000104955 | 1_1700016F12Rik  | 0.549191126  | -2.5235  | 0.461785 | 0.800688 | 2.436397 | 0.85875  | 0        | 0        | 0        | 0        |
| ENSMUSG0000020826  | 6_Nos2           | 48.45444929  | -0.48447 | 0.461963 | 0.800657 | 56.84925 | 44.6501  | 67.88611 | 14.88295 | 82.58783 | 23.86554 |
| ENSMUSG0000020916  | 8_Krt36          | 15.40225642  | -0.57553 | 0.461958 | 0.800857 | 14.61838 | 15.4575  | 25.31347 | 2.97659  | 10.18206 | 23.86554 |
| ENSMUSG0000021009  | 14_Ptpn21        | 1013.493666  | -0.21262 | 0.462134 | 0.800875 | 980.2435 | 1155.019 | 1128.75  | 702.4753 | 1087.218 | 1027.256 |
| ENSMUSG0000022793  | 16_B4gal4        | 99.07642876  | 0.302291 | 0.462104 | 0.800875 | 87.71028 | 108.2025 | 70.18734 | 157.7593 | 80.32515 | 90.27399 |
| ENSMUSG0000096959  | 1_4930509G22Rik  | 28.35378897  | 0.320351 | 0.462098 | 0.800875 | 21.11544 | 24.90376 | 29.91591 | 35.71909 | 29.41484 | 29.0537  |
| ENSMUSG0000097468  | 1_2310010G23Rik  | 18.32163807  | 0.372033 | 0.462021 | 0.800875 | 17.86691 | 17.175   | 12.65673 | 18.85174 | 22.6268  | 20.75264 |
| ENSMUSG0000026824  | 1_Kcnj3          | 36.24421127  | 0.505047 | 0.462255 | 0.800944 | 21.11544 | 49.80751 | 17.25918 | 89.29771 | 19.23278 | 20.75264 |
| ENSMUSG0000027624  | 17_Epb411        | 8128.108847  | -0.28412 | 0.462222 | 0.800944 | 8067.721 | 8416.611 | 10293.38 | 4065.03  | 9142.359 | 8783.555 |
| ENSMUSG0000028216  | 11_Fstl1         | 5169.648844  | 0.216328 | 0.462362 | 0.801061 | 5115.621 | 4888.006 | 4344.711 | 7205.333 | 4497.077 | 4967.145 |
| ENSMUSG0000029338  | 13_Antr2         | 339.7442524  | 0.295384 | 0.462432 | 0.801111 | 314.2952 | 292.8338 | 308.364  | 570.5132 | 230.7934 | 321.6659 |
| ENSMUSG0000026694  | 19_Mettl13       | 306.9054549  | -0.26992 | 0.462554 | 0.801253 | 298.8646 | 358.9576 | 348.6355 | 167.6813 | 339.402  | 327.8917 |
| ENSMUSG0000038152  | 4_5033430115Rik  | 23.36254555  | 0.426016 | 0.462675 | 0.801394 | 24.36397 | 18.03375 | 17.25918 | 12.89856 | 27.15216 | 40.46765 |
| ENSMUSG0000020836  | 15_Coro6         | 38.89623114  | -0.46812 | 0.462831 | 0.801455 | 27.61249 | 79.00502 | 28.7653  | 24.80492 | 19.23278 | 53.9687  |
| ENSMUSG0000029634  | 15_Rnf6          | 2077.806878  | 0.181502 | 0.462778 | 0.801455 | 1896.329 | 1921.883 | 2023.927 | 2620.392 | 2068.09  | 1936.221 |
| ENSMUSG0000059921  | 15_Unc5c         | 227.5939457  | 0.426521 | 0.462797 | 0.801455 | 175.4206 | 278.2351 | 128.8686 | 468.3169 | 104.0833 | 210.6393 |
| ENSMUSG0000039496  | 8_Cdnf           | 104.8584916  | 0.272107 | 0.462872 | 0.801456 | 95.8316  | 92.74502 | 96.65142 | 157.7593 | 80.32515 | 105.8385 |
| ENSMUSG0000020912  | 4_Krt12          | 661833.1624  | -0.17227 | 0.46294  | 0.801504 | 651304.8 | 670133.5 | 782466.9 | 549173   | 651666.6 | 666254.2 |
| ENSMUSG0000093574  | 1_Gm20671        | 33.02664776  | -1.78182 | 0.463004 | 0.801545 | 26.80036 | 23.18626 | 103.5551 | 0        | 0        | 44.61818 |
| ENSMUSG0000002033  | 13_Cd3g          | 17.77935308  | 0.548009 | 0.463129 | 0.801594 | 27.61249 | 5.152501 | 10.35551 | 22.82053 | 28.2835  | 12.45158 |
| ENSMUSG0000024261  | 5_Sly4           | 411.9032244  | 0.387927 | 0.463301 | 0.801594 | 321.6043 | 501.5101 | 247.3816 | 826.4999 | 257.9455 | 316.4778 |
| ENSMUSG0000035458  | 14_Tnni3         | 12.15358781  | -0.48063 | 0.463249 | 0.801594 | 14.61838 | 13.74    | 13.80735 | 5.953181 | 11.3134  | 13.48922 |
| ENSMUSG0000043940  | 14_Wdyf3         | 3359.969694  | -0.1774  | 0.46345  | 0.801594 | 3290.76  | 3576.695 | 3831.538 | 2672.978 | 3365.737 | 3422.111 |
| ENSMUSG0000044556  | 3_Tex38          | 3.103762168  | -0.91232 | 0.463126 | 0.801594 | 1.624264 | 2.576251 | 8.054285 | 0.992197 | 2.26268  | 3.12896  |
| ENSMUSG0000047773  | 12_Ankfn1        | 6.196387599  | -0.63848 | 0.463462 | 0.801594 | 12.18198 | 6.870002 | 3.451836 | 4.960984 | 4.52536  | 5.18816  |
| ENSMUSG0000049090  | 2_Zadn2          | 1366.239491  | 0.221779 | 0.463475 | 0.801594 | 1235.253 | 1257.21  | 1292.137 | 1953.636 | 1177.725 | 1281.476 |
| ENSMUSG0000049999  | 4_Ppp1r3d        | 104.7352803  | 0.210209 | 0.463184 | 0.801594 | 99.89226 | 100.4738 | 90.89836 | 120.0558 | 102.9519 | 114.1395 |
| ENSMUSG0000053080  | 10_2700081O15Rik | 297.4907431  | -0.22304 | 0.463324 | 0.801594 | 302.1132 | 383.0026 | 276.1469 | 306.5888 | 217.2173 | 299.8757 |
| ENSMUSG0000059089  | 4_Fcgr4          | 216.6834825  | 0.348955 | 0.463428 | 0.801594 | 271.2521 | 115.0725 | 185.2485 | 205.3847 | 165.4229 | 157.7201 |
| ENSMUSG0000090258  | 7_Churc1         | 727.9363184  | 0.173134 | 0.463275 | 0.801594 | 674.8818 | 660.3789 | 717.982  | 873.1332 | 738.7651 | 702.4769 |
| ENSMUSG00000004328 | 15_Hlf3a         | 74.73658665  | -0.31235 | 0.463658 | 0.801694 | 71.46763 | 109.0613 | 67.88611 | 81.36014 | 81.85958 | 76.78477 |
| ENSMUSG0000025428  | 15_Atp5a1        | 13033.43364  | -0.15599 | 0.463677 | 0.801694 | 13327.9  | 13659.28 | 14225.02 | 11185.03 | 12684.59 | 13118.78 |
| ENSMUSG0000030898  | 14_Cckbr         | 1.548672862  | 1.709727 | 0.463637 | 0.801694 | 0        | 0        | 2.301224 | 5.953181 | 0        | 1.037632 |
| ENSMUSG0000041268  | 16_Dmxl2         | 471.2625134  | 0.354942 | 0.463715 | 0.801694 | 418.2481 | 528.9901 | 293.4061 | 890.0005 | 308.8558 | 388.0744 |
| ENSMUSG0000078862  | 10_Gm14326       | 257.5144958  | 0.361489 | 0.463734 | 0.801694 | 259.8823 | 222.4163 | 188.7004 | 532.8097 | 186.6711 | 154.6072 |
| ENSMUSG0000057594  | 12_Arl16         | 126.930272   | -0.23698 | 0.463805 | 0.801747 | 134.8139 | 149.4225 | 127.7179 | 119.0636 | 88.24453 | 142.1556 |
| ENSMUSG00000001300 | 15_Efnb2         | 2302.954038  | 0.24171  | 0.463914 | 0.801865 | 1918.256 | 2143.441 | 2270.158 | 3471.697 | 1974.188 | 2039.985 |
| ENSMUSG0000030744  | 12_Rps3          | 15624.07281  | -0.21618 | 0.464151 | 0.80     |          |          |          |          |          |          |

|                     |                  |             |          |          |          |          |          |          |           |          |          |
|---------------------|------------------|-------------|----------|----------|----------|----------|----------|----------|-----------|----------|----------|
| ENSMUSG00000061762  | 12_Tac1          | 15.4608164  | 0.385587 | 0.466274 | 0.804025 | 14.61838 | 12.88125 | 12.65673 | 16.86735  | 18.10144 | 17.63975 |
| ENSMUSG00000071665  | 10_Foxr2         | 0.857485167 | -1.88941 | 0.466397 | 0.804025 | 3.248529 | 0.85875  | 0        | 0         | 0        | 1.037632 |
| 34.92420095         | 9_C1ap74         | -0.36694    | 0.466271 | 0.804025 | 38.98234 | 55.81876 | 23.01224 | 31.7503  | 22.6268   | 37.35475 |          |
| ENSMUSG00000093908  | 1_Gm5784         | 2.51332286  | -0.92026 | 0.466419 | 0.804025 | 3.248529 | 4.293751 | 2.301224 | 0.992197  | 1.13134  | 3.112896 |
| ENSMUSG000000100824 | 1_Gm29375        | 0.503670949 | 2.566714 | 0.466616 | 0.804025 | 0        | 0        | 0        | 1.984394  | 0        | 1.037632 |
| ENSMUSG000000108015 | 2_RP23-81F19     | 0.857485167 | -1.88941 | 0.466397 | 0.804025 | 3.248529 | 0.85875  | 0        | 0         | 0        | 1.037632 |
| ENSMUSG00000090086  | 7_A1480526       | 267.5001722 | -0.21503 | 0.466681 | 0.804066 | 277.7492 | 328.9013 | 255.4359 | 237.135   | 205.9039 | 299.8757 |
| ENSMUSG00000028757  | 4_Ddost          | 3675.601211 | -0.33561 | 0.46682  | 0.804098 | 3992.442 | 3899.585 | 4411.447 | 1355.341  | 4338.689 | 4056.104 |
| ENSMUSG00000045545  | 8_Krt14          | 36703.17245 | -0.5825  | 0.466786 | 0.804098 | 41586.04 | 29267.93 | 61187.25 | 2862.488  | 58843.26 | 26472.07 |
| ENSMUSG00000054057  | 2_A93004D18Rik   | 42.54612785 | -0.30952 | 0.466744 | 0.804098 | 36.54595 | 64.40627 | 40.27142 | 42.66446  | 35.07154 | 36.31712 |
| ENSMUSG00000041133  | 11_Smc1a         | 3708.716088 | 0.1654   | 0.466888 | 0.804145 | 3615.612 | 3118.122 | 3755.598 | 4114.64   | 4058.117 | 3590.207 |
| ENSMUSG00000020532  | 18_Acaca         | 2991.031598 | -0.17111 | 0.467021 | 0.804165 | 3071.484 | 3026.236 | 3406.962 | 2426.913  | 3074.982 | 2939.612 |
| ENSMUSG00000037683  | 14_Armc3         | 7.771308336 | 0.553815 | 0.466976 | 0.804165 | 4.060661 | 6.870002 | 8.054285 | 5.953181  | 11.3134  | 10.37632 |
| ENSMUSG00000044617  | 7_Zbtb39         | 529.7796006 | -0.25482 | 0.467014 | 0.804165 | 566.8683 | 561.6226 | 600.6195 | 309.5654  | 647.1265 | 492.8752 |
| ENSMUSG00000002204  | 8_Napsa          | 54.59459065 | -0.51228 | 0.467351 | 0.804233 | 100.7044 | 38.64376 | 52.92816 | 12.89856  | 87.11319 | 35.27949 |
| ENSMUSG000000005774 | 12_Rfx5          | 904.0760154 | 0.161136 | 0.467497 | 0.804233 | 872.23   | 778.8865 | 910.1342 | 965.4075  | 914.1228 | 983.6752 |
| ENSMUSG00000015970  | 18_Chdh          | 77.74087899 | -0.29839 | 0.467426 | 0.804233 | 74.71616 | 91.88627 | 90.89836 | 69.45378  | 42.99092 | 96.49978 |
| ENSMUSG00000020739  | 11_Nup85         | 799.4764585 | -0.2541  | 0.467333 | 0.804233 | 888.4726 | 832.129  | 888.2725 | 450.4574  | 920.9108 | 816.6164 |
| ENSMUSG00000028707  | 15_Dmbx1         | 2.243837374 | -1.0655  | 0.467453 | 0.804233 | 2.436397 | 4.293751 | 2.301224 | 0         | 3.39402  | 1.037632 |
| ENSMUSG00000033624  | 15_Emi4          | 799.5110795 | 0.194851 | 0.467269 | 0.804233 | 756.9072 | 778.0277 | 701.8734 | 1048.752  | 760.2605 | 751.2456 |
| ENSMUSG00000036196  | 15_Slc26a8       | 17.56121085 | -0.44549 | 0.467334 | 0.804233 | 12.18198 | 30.05626 | 18.40979 | 9.921968  | 19.23278 | 15.56448 |
| ENSMUSG00000048215  | 14_A630023P12Rik | 3.064314483 | 0.875944 | 0.467504 | 0.804233 | 2.436397 | 1.7175   | 2.301224 | 0.992197  | 7.880401 | 4.150528 |
| ENSMUSG00000059796  | 16_Elfa41        | 16273.49526 | 0.167746 | 0.467245 | 0.804233 | 15890.18 | 13938.37 | 16156.9  | 16173.8   | 19403.61 | 16078.11 |
| ENSMUSG00000078851  | 4_Hist3h2a       | 171.1677143 | -0.26823 | 0.467432 | 0.804233 | 190.8511 | 203.5238 | 166.8388 | 217.2911  | 106.346  | 142.1556 |
| ENSMUSG00000097058  | 1_A930556M19Rik  | 4.906037572 | -0.64776 | 0.467259 | 0.804233 | 7.30919  | 6.011252 | 4.602448 | 3.968787  | 3.39402  | 4.150528 |
| ENSMUSG00000021070  | 5_Bdkrb2         | 9.591806295 | -0.7627  | 0.467762 | 0.804399 | 12.99411 | 2.76251  | 20.71102 | 0.992197  | 6.788041 | 13.48922 |
| ENSMUSG00000033291  | 8_Crabp1         | 36.76397158 | -0.47502 | 0.467659 | 0.804399 | 45.4794  | 44.65501 | 37.9702  | 6.945378  | 42.99092 | 42.54291 |
| ENSMUSG00000043885  | 13_Slc36a4       | 828.2199334 | 0.266684 | 0.46773  | 0.804399 | 778.8348 | 810.6602 | 666.2044 | 1322.598  | 633.5505 | 757.4714 |
| ENSMUSG000000104445 | 1_Rhbg           | 479.1076945 | -0.51533 | 0.46771  | 0.804399 | 484.0308 | 541.0126 | 666.2044 | 53.57863  | 636.9445 | 492.8752 |
| ENSMUSG00000024215  | 13_Spdef         | 12.06953054 | -0.6262  | 0.467892 | 0.804414 | 16.24264 | 24.04501 | 3.451836 | 3.968787  | 10.18206 | 14.52685 |
| ENSMUSG00000033147  | 16_Slc22a15      | 521.4926878 | 0.16859  | 0.467851 | 0.804414 | 515.7039 | 497.0644 | 529.8331 | 604.1356  | 521.9289 |          |
| ENSMUSG00000046139  | 7_Patl1          | 822.3081442 | 0.175722 | 0.467889 | 0.804414 | 747.9737 | 755.7002 | 813.4828 | 989.2202  | 877.0005 | 757.4714 |
| ENSMUSG00000028024  | 14_Enpep         | 1151.779589 | 0.187565 | 0.467985 | 0.804484 | 1095.566 | 1004.738 | 1131.052 | 1476.389  | 1127.946 | 1074.987 |
| ENSMUSG00000049624  | 13_Slc17a5       | 901.7642421 | 0.198755 | 0.468014 | 0.804484 | 812.9443 | 794.344  | 912.4354 | 1184.683  | 805.5142 | 900.6646 |
| ENSMUSG00000029108  | 14_Pcdh7         | 1827.646687 | 0.22204  | 0.468143 | 0.804638 | 1634.01  | 1708.913 | 1719.014 | 2442.789  | 2074.878 | 1386.276 |
| ENSMUSG00000007877  | 2_Tcap           | 5.93495697  | -0.38535 | 0.468295 | 0.804718 | 131.5654 | 223.2751 | 166.8388 | 79.37575  | 79.19381 | 240.7306 |
| ENSMUSG00000028996  | 9_Rbp7           | 5.010661747 | 0.674931 | 0.468371 | 0.804718 | 4.060661 | 5.152501 | 2.301224 | 8.929771  | 3.39402  | 6.225792 |
| ENSMUSG00000035864  | 14_Syt1          | 91.51527609 | 0.422482 | 0.468392 | 0.804718 | 105.5772 | 95.32127 | 33.36775 | 164.7047  | 96.16391 | 53.95687 |
| ENSMUSG00000049649  | 8_Gpr3           | 1.658466523 | -1.19128 | 0.468384 | 0.804718 | 4.060661 | 1.7175   | 1.150612 | 1.984394  | 0        | 1.037632 |
| ENSMUSG00000097312  | 1_Gm26870        | 11.70495189 | 0.565361 | 0.468381 | 0.804718 | 9.745586 | 9.446252 | 9.204897 | 27.78151  | 6.788041 | 7.263424 |
| ENSMUSG00000031391  | 18_L1cam         | 3205.532871 | -0.32929 | 0.468632 | 0.805    | 3080.417 | 3394.64  | 4234.253 | 1257.113  | 3685.906 | 3580.868 |
| ENSMUSG00000034177  | 15_Rnf143        | 637.5532598 | -0.20963 | 0.468637 | 0.805    | 633.4631 | 655.2264 | 762.8558 | 456.4105  | 608.681  | 708.7027 |
| ENSMUSG00000046550  | 8_Spin2c         | 27.98503303 | 0.416989 | 0.468797 | 0.805206 | 34.92168 | 24.04501 | 12.65673 | 47.62545  | 23.75814 | 24.90317 |
| ENSMUSG00000036206  | 12_Sh3bp4        | 1009.183169 | -0.368   | 0.468847 | 0.805222 | 1017.602 | 1105.212 | 1288.686 | 314.5264  | 1260.314 | 1068.71  |
| ENSMUSG00000095427  | 1_Rps2-ps6       | 3684.6899   | -0.50979 | 0.468958 | 0.805343 | 4281.561 | 4025.821 | 4679.539 | 403.8241  | 4525.36  | 4192.034 |
| ENSMUSG00000022534  | 13_Melv          | 55.51720329 | 0.48353  | 0.469136 | 0.805579 | 75.52829 | 17.175   | 46.02448 | 40.68007  | 114.2654 | 39.43002 |
| ENSMUSG00000021903  | 11_Galnt15       | 164.4199472 | 0.260104 | 0.469507 | 0.805668 | 157.5536 | 144.27   | 147.2783 | 237.135   | 117.6594 | 182.6232 |
| ENSMUSG00000024640  | 9_Psat1          | 3088.189779 | 0.177303 | 0.469538 | 0.805668 | 2886.318 | 2619.188 | 3190.647 | 2949.801  | 3765.1   | 3118.084 |
| ENSMUSG00000027472  | 14_Pdrg1         | 846.4405337 | -0.2112  | 0.469366 | 0.805668 | 857.6116 | 928.309  | 938.8995 | 583.4117  | 816.8276 | 953.5839 |
| ENSMUSG00000027544  | 16_Nfatc2        | 1164.63819  | -0.26779 | 0.469421 | 0.805668 | 1188.149 | 1276.962 | 1351.969 | 617.1464  | 1390.417 | 1163.186 |
| ENSMUSG00000029088  | 16_Kcnip4        | 67.83802068 | 0.44497  | 0.469241 | 0.805668 | 58.47352 | 78.14627 | 35.66898 | 144.8607  | 32.80886 | 57.06976 |
| ENSMUSG00000029623  | 14_Pdap1         | 1452.816436 | -0.25156 | 0.469592 | 0.805668 | 1493.511 | 1451.288 | 1792.654 | 838.4063  | 1655.151 | 1465.889 |
| ENSMUSG00000031783  | 9_Polr2c         | 815.3771146 | -0.29572 | 0.469571 | 0.805668 | 839.7447 | 910.2752 | 945.8032 | 371.0816  | 903.9407 | 921.4173 |
| ENSMUSG00000043740  | 12_B430306N03Rik | 69.15058015 | 0.445535 | 0.469498 | 0.805668 | 84.46175 | 30.05626 | 60.98244 | 41.672227 | 144.8115 | 52.91924 |
| ENSMUSG00000049106  | 6_Dcaf5          | 1252.157022 | -0.20715 | 0.469497 | 0.805668 | 1251.496 | 1340.509 | 1433.663 | 864.2034  | 1314.617 | 1308.544 |
| ENSMUSG00000062310  | 7_Glip1          | 1.128501627 | 1.556097 | 0.469432 | 0.805668 | 0.812132 | 0.85875  | 0        | 0.968787  | 1.13134  | 0        |
| ENSMUSG00000028182  | 14_Lrrig3        | 31.31490523 | 0.29625  | 0.469808 | 0.805691 | 23.55183 | 22.32751 | 34.51836 | 60.52401  | 15.83876 | 31.12896 |
| ENSMUSG00000041815  | 13_Poldip3       | 3014.428936 | -0.28036 | 0.469774 | 0.805691 | 3167.315 | 3168.788 | 3583.006 | 1473.412  | 3423.435 | 3270.616 |
| ENSMUSG00000045662  | 16_Hennmt1       | 2.550628738 | 0.989564 | 0.469669 | 0.805691 | 2.436397 | 2.576251 | 0        | 5.953181  | 2.26268  | 2.075264 |
| ENSMUSG00000078497  | 9_Gm13145        | 2.525815082 | 1.846076 | 0.469706 | 0.805691 | 3.248529 | 0        | 0        | 11.90636  | 0        | 0        |
| ENSMUSG00000091376  | 1_Aadac12        | 49.09289611 | 0.302489 | 0.46974  | 0.805691 | 47.10367 | 37.78501 | 47.1751  | 74.41476  | 48.64762 | 39.43002 |
| ENSMUSG00000034714  | 9_Tlyh2          | 106.6559808 | -0.36943 | 0.469914 | 0.805805 | 106.3893 | 170.0325 | 83.99468 | 43.65666  | 104.0833 | 131.7793 |
| ENSMUSG00000002870  | 8_Mcm2           | 1356.734981 | -0.30628 | 0.470042 | 0.80587  | 1458.589 | 1341.368 | 1700.605 | 592.3415  | 1578.219 | 1469.287 |
| ENSMUSG00000008682  | 13_Rpl10         | 8017.226991 | 0.196355 | 0.470797 | 0.80587  | 7239.346 | 7364.642 | 7813.807 | 10782.2   | 7639.94  | 7263.424 |
| ENSMUSG00000017688  | 14_Hnf4g         | 6.972894582 | 0.645441 | 0.470267 | 0.80587  | 4.872793 | 6.870002 | 4.602448 | 13.89076  | 2.26268  | 9.336869 |
| ENSMUSG00000020630  | 8_Rnaseh1        | 193.9893021 | -0.34571 | 0.47079  | 0.80587  | 209.5301 | 206.9588 | 234.7249 | 70.44597  | 240.9754 | 201.3006 |
| ENSMUSG00000020870  | 7_Cdc34-ps1      | 1.80896697  | -1.32419 | 0.470806 | 0.80587  | 4.872793 | 1.7175   | 1.150612 | 0         | 0        | 3.112896 |
| ENSMUSG00000022126  | 6_Irg1           | 180.4200565 | 0.389666 | 0.470637 | 0.80587  | 221.7121 | 76.42877 | 170.2906 | 131.9622  | 333.7453 | 148.3814 |
| ENSMUSG00000027422  | 15_Rrbp1         | 8156.26202  | -0.29225 | 0.471025 | 0.80587  | 8443.738 | 8714.597 | 9780.203 | 3758.442  | 9671.827 | 8568.766 |
| ENSMUSG00000028437  | 14_Ubpap1        | 1360.410317 | 0.173249 | 0.470538 | 0.80587  | 1184.901 | 1243.47  | 1408.349 | 1351.372  | 1634.786 | 1339.583 |
| ENSMUSG00000028688  | 13_Toe1          | 383.9652627 | -0.24794 | 0.470901 | 0.80587  | 453.9819 | 382.1438 | 414.2204 | 228.2053  | 442.354  | 382.8862 |
| ENSMUSG00000029361  | 18_Nos1          | 67.13576609 | -0.44902 | 0.470928 | 0.80587  | 53.60072 | 144.27   | 34.51836 | 74.41476  | 31.67752 | 64.33319 |
| ENSMUSG00000030871  | 11_Ears2         | 225.0547247 | -0.22277 | 0.470363 | 0.80587  | 235.5183 | 229.2863 | 262.3396 | 152.7983  | 242.1068 | 228.2791 |
| ENSMUSG00000031072  | 13_Orao1         | 557.121825  | -0.27589 | 0.470413 | 0.80587  | 579.8624 | 595.9727 | 654.6983 | 284.7605  | 662.9653 | 564.4718 |
| ENSMUSG00000031812  | 16_Map1lc3b      | 3413.997441 | -0.24466 | 0.470525 | 0.80587  | 3517.344 | 3760.467 | 3830.388 | 1962.565  | 3775.282 | 3637.938 |
| ENSMUSG00000031995  | 8_Slt14          | 4151.602511 | -0.4     |          |          |          |          |          |           |          |          |

|                     |                 |              |          |          |          |           |          |          |          |          |           |
|---------------------|-----------------|--------------|----------|----------|----------|-----------|----------|----------|----------|----------|-----------|
| ENSMUSG00000050144  | 13_Slc25a44     | 783.3801026  | -0.22325 | 0.47243  | 0.807074 | 786.1439  | 836.4227 | 908.9836 | 505.0282 | 856.4245 | 807.2777  |
| ENSMUSG00000072188  | 4_Gm10354       | 0.883600095  | -1.87958 | 0.47255  | 0.807074 | 0.812132  | 0        | 3.451836 | 0        | 0        | 1.037632  |
| ENSMUSG00000085084  | 7_4930570G19Rik | 7.549633194  | 0.640143 | 0.472507 | 0.807074 | 7.30919   | 6.870002 | 3.451836 | 17.85954 | 5.656701 | 4.150528  |
| ENSMUSG00000009098  | 16_Gm38393      | 23.98708929  | 0.572444 | 0.4728   | 0.807255 | 13.80625  | 25.76251 | 18.40979 | 61.5162  | 6.788041 | 17.63975  |
| ENSMUSG000000015522 | 18_Arnt         | 2285.892136  | 0.179882 | 0.472856 | 0.807255 | 2054.694  | 2060.142 | 2318.483 | 2873.402 | 2201.588 | 2207.043  |
| ENSMUSG000000028933 | 11_Xrc2         | 151.1339834  | 0.252011 | 0.472895 | 0.807255 | 117.7592  | 157.1513 | 139.2241 | 221.2599 | 132.3668 | 139.0427  |
| ENSMUSG000000038304 | 14_Ccl160       | 9.65452158   | 0.687234 | 0.472908 | 0.807255 | 6.497057  | 7.728752 | 8.054285 | 26.78931 | 6.788041 | 2.075264  |
| ENSMUSG000000045502 | 6_Hcar2         | 811.8782156  | 0.219501 | 0.472792 | 0.807255 | 726.0462  | 645.7802 | 879.0677 | 679.6548 | 1081.561 | 859.1594  |
| ENSMUSG000000023452 | 18_Pisd         | 1105.263277  | -0.2942  | 0.472974 | 0.807299 | 1224.695  | 1232.507 | 1195.486 | 497.0906 | 1227.504 | 1254.497  |
| ENSMUSG000000021211 | 3_Akr1c12       | 6.10185585   | 0.682252 | 0.473039 | 0.807302 | 6.497057  | 5.152501 | 2.301224 | 13.89076 | 5.656701 | 3.128986  |
| ENSMUSG000000102123 | 1_Gm4319        | 3.570929869  | 0.763027 | 0.473057 | 0.807302 | 3.248529  | 3.435001 | 1.150612 | 5.953181 | 4.52536  | 3.112896  |
| ENSMUSG000000032578 | 7_Cish          | 647.3105967  | -0.35529 | 0.473248 | 0.807558 | 750.4101  | 588.2439 | 841.0975 | 220.2677 | 802.1201 | 681.7243  |
| ENSMUSG000000020577 | 15_Tspan13      | 205.1107185  | 0.324334 | 0.47333  | 0.807629 | 203.033   | 212.1113 | 131.1698 | 361.1596 | 143.6802 | 179.5103  |
| ENSMUSG000000000085 | 16_Scmh1        | 1029.570433  | -0.26889 | 0.473389 | 0.807661 | 1056.584  | 1112.082 | 1206.992 | 533.8019 | 1061.197 | 1206.766  |
| ENSMUSG000000022783 | 11_Spag6        | 0.876027554  | -1.87975 | 0.473461 | 0.807706 | 0.812132  | 0        | 3.451836 | 0.992197 | 0        | 0         |
| ENSMUSG000000031227 | 8_Magee1        | 98.58550646  | -0.24692 | 0.473497 | 0.807706 | 115.3228  | 127.095  | 78.24162 | 97.23529 | 79.19381 | 94.42452  |
| ENSMUSG000000037243 | 17_Zfp692       | 574.6362092  | -0.36843 | 0.473537 | 0.807706 | 583.1109  | 603.7014 | 755.9522 | 176.611  | 704.8249 | 623.6169  |
| ENSMUSG000000028341 | 9_Nr4a3         | 118.6021919  | 0.374426 | 0.473619 | 0.807777 | 94.20733  | 140.835  | 74.78979 | 231.1819 | 80.32515 | 90.27399  |
| ENSMUSG000000022947 | 7_Cbr3          | 280.2927815  | -0.21678 | 0.473818 | 0.807808 | 283.4341  | 297.1276 | 323.322  | 191.494  | 302.0678 | 284.3112  |
| ENSMUSG000000026174 | 9_Rqcd1         | 1251.51188   | 0.173125 | 0.473897 | 0.807808 | 1167.034  | 1077.732 | 1285.234 | 1503.178 | 1279.546 | 1196.39   |
| ENSMUSG000000026644 | 6_Acbd7         | 1.254289461  | 1.526827 | 0.473722 | 0.807808 | 0.812132  | 0        | 1.150612 | 0        | 4.52536  | 1037632   |
| ENSMUSG000000027313 | 3_Cnac1         | 1385.3799    | -0.38291 | 0.473893 | 0.807808 | 1413.922  | 1470.18  | 1820.268 | 388.9412 | 806.75   | 1412.217  |
| ENSMUSG000000029141 | 16_Slc4a1ap     | 580.8947568  | 0.203267 | 0.473922 | 0.807808 | 511.6433  | 511.8151 | 597.1677 | 775.8979 | 530.5985 | 558.2461  |
| ENSMUSG000000043831 | 11_Lysmd4       | 323.3315166  | -0.18133 | 0.473686 | 0.807808 | 350.029   | 333.1951 | 347.4849 | 258.9634 | 334.8767 | 315.4401  |
| ENSMUSG000000048106 | 5_4632415L05Rik | 314.4141976  | 0.310265 | 0.473867 | 0.807808 | 278.5613  | 291.1163 | 272.6951 | 570.5132 | 230.7934 | 242.8059  |
| ENSMUSG000000025787 | 5_Tgm4          | 6.234781829  | -0.73378 | 0.474112 | 0.808063 | 4.872793  | 13.74    | 4.602448 | 0.992197 | 9.050271 | 4.150528  |
| ENSMUSG000000027883 | 15_Gpsm2        | 1254.5529910 | 0.168471 | 0.474219 | 0.808177 | 1195.459  | 1078.59  | 1270.276 | 1325.575 | 1466.217 | 1191.202  |
| ENSMUSG000000021518 | 3_Ptids1        | 1762.470884  | 0.152082 | 0.474514 | 0.808204 | 1629.137  | 1609.298 | 1770.792 | 1871.283 | 1945.905 | 1748.41   |
| ENSMUSG000000029165 | 16_Agbl5        | 325.858375   | -0.27135 | 0.474448 | 0.808204 | 351.6532  | 326.3251 | 391.2081 | 170.6579 | 342.7961 | 372.5099  |
| ENSMUSG000000031652 | 10_N4bp1        | 2902.544009  | 0.179916 | 0.474451 | 0.808204 | 2426.651  | 2504.974 | 3234.371 | 3053.982 | 3327.271 | 2868.015  |
| ENSMUSG000000031897 | 8_Psmh10        | 1606.283549  | -0.5134  | 0.474288 | 0.808204 | 1713.599  | 1489.073 | 2464.611 | 178.5954 | 2171.042 | 1620.781  |
| ENSMUSG000000037636 | 6_Slc25a43      | 99.50848499  | -0.23846 | 0.474519 | 0.808204 | 103.9529  | 88.45127 | 131.1698 | 87.31332 | 80.32515 | 90.27399  |
| ENSMUSG000000074623 | 4_Gm826         | 13.97018158  | 0.436824 | 0.474338 | 0.808204 | 12.99411  | 8.587502 | 13.80735 | 9.921968 | 19.23278 | 18.67738  |
| ENSMUSG000000097386 | 1_9130213A22Rik | 4.917594504  | 0.651718 | 0.474386 | 0.808204 | 2.436397  | 3.435001 | 5.753061 | 4.960984 | 5.656701 | 7.263424  |
| ENSMUSG000000033126 | 4_Ybey          | 138.9469631  | -0.22021 | 0.474703 | 0.808447 | 137.2503  | 139.9763 | 169.14   | 124.0246 | 122.1847 | 141.118   |
| ENSMUSG000000051391 | 9_Ywhag         | 4015.917951  | -0.18717 | 0.474778 | 0.808506 | 3817.021  | 4015.516 | 4995.958 | 3331.797 | 4339.821 | 3595.395  |
| ENSMUSG000000021363 | 13_Mak          | 17.90574746  | -0.48014 | 0.474897 | 0.808571 | 30.86102  | 18.8925  | 12.65673 | 21.82833 | 16.9701  | 6.225792  |
| ENSMUSG000000095687 | 1_Rnasct2a      | 1286.394533  | 0.168096 | 0.474861 | 0.808571 | 1292.914  | 1185.075 | 1156.365 | 1451.584 | 1452.641 | 1179.788  |
| ENSMUSG000000010057 | 8_Np12          | 337.5531968  | -0.3876  | 0.475446 | 0.808682 | 354.9018  | 385.5788 | 407.3167 | 91.28211 | 347.3214 | 438.9184  |
| ENSMUSG000000020549 | 14_Elae2        | 560.0654904  | -0.32212 | 0.475449 | 0.808682 | 603.4142  | 571.9276 | 691.5179 | 224.2365 | 704.8249 | 564.4718  |
| ENSMUSG000000022223 | 8_Sdr39u1       | 1170.530626  | -0.18539 | 0.475095 | 0.808682 | 1216.574  | 1193.663 | 1326.656 | 879.0864 | 1213.928 | 1193.277  |
| ENSMUSG000000024251 | 9_Thada         | 745.2560241  | 0.15861  | 0.475151 | 0.808682 | 688.6881  | 659.5202 | 765.1571 | 799.7106 | 800.9888 | 757.4714  |
| ENSMUSG000000025178 | 8_Plk42a        | 1701.690813  | -0.28933 | 0.475246 | 0.808682 | 1719.284  | 1902.99  | 1992.86  | 785.8199 | 1979.845 | 1829.345  |
| ENSMUSG000000032571 | 13_Pik3r4       | 772.3997899  | -0.25989 | 0.475384 | 0.808682 | 808.0715  | 862.1852 | 854.9048 | 411.7617 | 850.7678 | 846.7078  |
| ENSMUSG000000039982 | 7_Dtx4          | 473.8689008  | -0.17059 | 0.475141 | 0.808682 | 501.0856  | 556.4701 | 447.5881 | 441.5276 | 463.8494 | 432.6926  |
| ENSMUSG000000040997 | 13_Abhd4        | 3378.882681  | -0.28076 | 0.475433 | 0.808682 | 3506.787  | 3773.348 | 3839.593 | 1611.328 | 1817.412 | 3725.099  |
| ENSMUSG000000041702 | 6_Btbd7         | 1363.021364  | 0.165519 | 0.475179 | 0.808682 | 1267.738  | 1270.95  | 1316.3   | 1644.07  | 1376.841 | 1302.228  |
| ENSMUSG000000063229 | 14_Ldha         | 13021.12392  | -0.28706 | 0.475139 | 0.808682 | 14457.58  | 12995.47 | 15483.79 | 6097.049 | 15540.46 | 13687.4   |
| ENSMUSG000000073910 | 10_Mob3b        | 490.0712316  | 0.241759 | 0.475215 | 0.808682 | 428.8058  | 486.0526 | 432.6302 | 739.1866 | 398.2317 | 455.5205  |
| ENSMUSG000000099689 | 6_Zfp383        | 203.8810784  | 0.300315 | 0.475419 | 0.808682 | 190.8511  | 180.3375 | 177.1943 | 351.2377 | 136.8922 | 186.7738  |
| ENSMUSG000000097537 | 1_2610020C07Rik | 32.89012277  | 0.377747 | 0.475581 | 0.808837 | 33.29742  | 28.33876 | 24.16285 | 60.52401 | 27.15216 | 23.86554  |
| ENSMUSG000000094595 | 1_Fsbp          | 57.53370723  | 0.41745  | 0.475637 | 0.808863 | 53.60072  | 61.83002 | 32.21714 | 114.1026 | 55.43567 | 281.01607 |
| ENSMUSG000000022214 | 14_Dcaf11       | 2816.683821  | -0.25272 | 0.475743 | 0.808974 | 3073.92   | 3033.965 | 3080.189 | 1538.897 | 2959.586 | 3213.547  |
| ENSMUSG000000066149 | 11_Cdc26        | 718.5403789  | 0.198283 | 0.475828 | 0.80905  | 658.6392  | 644.0627 | 705.3252 | 956.4777 | 712.7443 | 633.9932  |
| ENSMUSG000000021099 | 6_Six6          | 27.84870748  | -0.48101 | 0.476119 | 0.809432 | 31.67315  | 47.23126 | 18.40979 | 43.65666 | 14.70742 | 11.31395  |
| ENSMUSG000000058740 | 14_Kcnt1        | 8.317582296  | -0.55896 | 0.476175 | 0.809432 | 8.933454  | 13.74    | 6.903673 | 2.97659  | 9.050271 | 8.301057  |
| ENSMUSG000000099583 | 1_Hist1h3d      | 2.416569047  | 1.050644 | 0.476145 | 0.809432 | 2.436397  | 0        | 2.301224 | 0.992197 | 5.656701 | 3.112896  |
| ENSMUSG000000005198 | 15_Polr2a       | 3221.920997  | -0.24205 | 0.476406 | 0.809688 | 3274.517  | 3434.142 | 3765.953 | 1861.361 | 3555.802 | 3439.75   |
| ENSMUSG000000026942 | 13_Traf2        | 744.0721414  | -0.35933 | 0.476387 | 0.809688 | 806.4473  | 790.909  | 911.2848 | 233.1663 | 916.3855 | 806.2401  |
| ENSMUSG000000043259 | 14_Fam13c       | 52.67308226  | -0.32578 | 0.476538 | 0.809842 | 42.23087  | 80.72252 | 52.92816 | 53.57863 | 50.48616 | 56.03213  |
| ENSMUSG000000020612 | 16_Prkar1a      | 5137.522742  | 0.19119  | 0.476704 | 0.809987 | 4447.236  | 4786.674 | 5159.345 | 6783.65  | 5899.652 | 4758.581  |
| ENSMUSG000000032860 | 4_P2ry2         | 3072.844241  | -0.31819 | 0.476675 | 0.809987 | 3016.259  | 3089.783 | 4124.944 | 1277.949 | 3856.738 | 3071.391  |
| ENSMUSG000000023952 | 13_Gtpab2       | 5337.803805  | -0.34623 | 0.476888 | 0.810092 | 5578.536  | 5714.983 | 6632.128 | 1789.923 | 6461.083 | 5850.17   |
| ENSMUSG000000038991 | 16_Tnxd5        | 2987.44011   | -0.2414  | 0.476854 | 0.810092 | 3113.715  | 3283.861 | 3312.612 | 1715.508 | 3310.301 | 3188.643  |
| ENSMUSG000000049672 | 14_Zbtb14       | 671.632076   | 0.230473 | 0.476888 | 0.810092 | 563.6197  | 619.1589 | 671.9575 | 982.2748 | 557.7507 | 635.0308  |
| ENSMUSG000000024770 | 14_Lipn         | 3.232061644  | 0.896998 | 0.477127 | 0.810159 | 0         | 3.435001 | 3.451836 | 4.960984 | 3.39402  | 4.150528  |
| ENSMUSG000000032087 | 9_Dscaml1       | 6.203781719  | 0.71329  | 0.477131 | 0.810159 | 5.745586  | 8.587502 | 4.602448 | 0.992197 | 10.18206 | 3.112896  |
| ENSMUSG000000044475 | 13_Ascn1        | 751.879823   | -0.20521 | 0.477059 | 0.810159 | 747.9737  | 814.0952 | 853.7542 | 528.8409 | 724.0577 | 842.5572  |
| ENSMUSG000000053749 | 12_Gm9920       | 1.79460219   | -1.32265 | 0.477087 | 0.810159 | 0         | 4.293751 | 3.451836 | 1.984394 | 0        | 1.037632  |
| ENSMUSG000000099528 | 1_G430049J08Rik | 10.64497637  | 0.451289 | 0.477073 | 0.810159 | 8.121322  | 8.587502 | 10.35551 | 13.89076 | 13.57608 | 9.338689  |
| ENSMUSG000000033235 | 12_Elf2b5       | 1896.382024  | -0.26571 | 0.477173 | 0.810162 | 2122.914  | 1925.318 | 2163.151 | 981.2827 | 2215.164 | 1970.463  |
| ENSMUSG000000052707 | 8_Tnrc6a        | 2739.182686  | 0.17624  | 0.477274 | 0.810263 | 2626.435  | 2614.894 | 2474.967 | 3473.681 | 2604.345 | 2640.774  |
| ENSMUSG000000028523 | 13_Tctex1d1     | 0.676776815  | -2.81865 | 0.477418 | 0.8103   | 0.4060661 | 0        | 0        | 0        | 0        | 0         |
| ENSMUSG000000028989 | 13_Angptl7      | 5993.141665  | -0.19027 | 0.477399 | 0.8103   | 6134.846  | 7088.983 | 5939.46  | 5285.432 | 4706.375 | 6803.753  |
| ENSMUSG000000051940 | 2_5031410I06Rik | 0.676776815  | -2       |          |          |           |          |          |          |          |           |

|                     |                  |             |          |          |          |          |           |          |          |          |          |
|---------------------|------------------|-------------|----------|----------|----------|----------|-----------|----------|----------|----------|----------|
| ENSMUSG00000035770  | 7_Dync11l2       | 3372.891139 | 0.190976 | 0.479485 | 0.811398 | 3239.595 | 3024.518  | 3186.045 | 4507.55  | 3117.973 | 3161.665 |
| ENSMUSG00000036492  | 12_Rnf39         | 1538.015483 | -0.18523 | 0.479571 | 0.811398 | 1625.076 | 1507.107  | 1777.696 | 1157.894 | 1587.27  | 1573.05  |
| ENSMUSG00000035359  | 12_Smagp         | 1125.141449 | -0.42234 | 0.479155 | 0.811398 | 1241.75  | 1260.645  | 1363.475 | 225.2287 | 1344.032 | 1315.717 |
| ENSMUSG00000057322  | 12_Rpl38         | 4395.424103 | -0.26256 | 0.479673 | 0.811398 | 4877.666 | 4675.895  | 4829.119 | 2258.24  | 4881.733 | 4849.892 |
| ENSMUSG00000059327  | 9_Eda            | 593.0234953 | 0.164721 | 0.479673 | 0.811398 | 513.2675 | 560.7639  | 604.0714 | 663.7797 | 578.1148 | 638.1437 |
| ENSMUSG00000074480  | 4_Mex3a          | 142.342105  | -0.21619 | 0.479508 | 0.811398 | 137.2503 | 142.5525  | 179.4955 | 112.1182 | 130.1041 | 152.5319 |
| ENSMUSG00000092607  | 9_Scnm1          | 313.0044835 | -0.21116 | 0.47941  | 0.811398 | 335.4106 | 307.4326  | 364.744  | 217.2911 | 331.4827 | 321.6659 |
| ENSMUSG000000101951 | 1_Gm28721        | 1.231296045 | 1.466093 | 0.479076 | 0.811398 | 0        | 0.85875   | 1.150612 | 1.984394 | 3.39402  | 0        |
| ENSMUSG00000055945  | 7_Prr18          | 19.56486004 | -0.41562 | 0.479846 | 0.811587 | 17.86691 | 28.33676  | 20.71102 | 11.90636 | 27.15216 | 11.41395 |
| ENSMUSG00000050017  | 11_Pitpnb        | 4234.339733 | 0.181557 | 0.479888 | 0.811589 | 3760.984 | 3896.15   | 4248.06  | 5448.153 | 4104.502 | 3948.19  |
| ENSMUSG00000002064  | 10_Sdf2          | 2419.949273 | -0.26849 | 0.47993  | 0.811159 | 2710.897 | 2390.761  | 2831.656 | 1226.355 | 2751.419 | 2608.607 |
| ENSMUSG000000027861 | 13_Casq2         | 41.29431513 | 0.282536 | 0.480105 | 0.811719 | 47.10367 | 30.05626  | 34.51836 | 49.60984 | 41.85958 | 44.61818 |
| ENSMUSG00000028479  | 18_Gne           | 2718.337    | -0.24118 | 0.480088 | 0.811719 | 2599.635 | 2808.972  | 3426.523 | 1622.242 | 3036.517 | 2816.133 |
| ENSMUSG00000096948  | 1_Gm4221         | 3.528956069 | -0.92557 | 0.480169 | 0.811719 | 8.933454 | 2.576251  | 2.301224 | 3.968787 | 3.39402  | 0        |
| ENSMUSG00000097398  | 2_Platr5         | 1.237810536 | -1.31823 | 0.480155 | 0.811719 | 3.248529 | 0.85875   | 1.150612 | 0        | 1.13134  | 1.037632 |
| ENSMUSG00000062963  | 10_Ufc1          | 1180.562583 | 0.145468 | 0.480236 | 0.811764 | 1123.991 | 1116.375  | 1122.997 | 1272.989 | 1193.564 | 1253.46  |
| ENSMUSG00000003752  | 9_Itpkc          | 2030.413162 | -0.37843 | 0.480361 | 0.811906 | 2087.18  | 2111.667  | 2686.679 | 556.6224 | 2310.196 | 2430.134 |
| ENSMUSG00000024566  | 8_Atp9b          | 1622.489645 | -0.17056 | 0.480537 | 0.812135 | 1694.92  | 1624.755  | 1835.226 | 1291.84  | 1652.888 | 1635.308 |
| ENSMUSG00000038116  | 16_PhI20         | 803.2750542 | 0.217412 | 0.480748 | 0.812422 | 757.7193 | 801.214   | 669.6562 | 1133.089 | 677.6727 | 780.2993 |
| ENSMUSG000000033044 | 12_Dhrs7c        | 12.0540995  | 0.561165 | 0.480827 | 0.812486 | 7.30919  | 17.175    | 4.602448 | 18.85174 | 5.656701 | 18.67738 |
| ENSMUSG00000030177  | 14_Ccdc77        | 335.4477164 | 0.210172 | 0.480929 | 0.812522 | 305.3617 | 273.9413  | 354.3885 | 448.473  | 308.8558 | 321.6659 |
| ENSMUSG00000058354  | 6_Krt6a          | 172672.77   | -0.31361 | 0.480924 | 0.812522 | 174740   | 169804.1  | 229567.5 | 73445.38 | 225169.5 | 163302.0 |
| ENSMUSG00000034485  | 9_Uaca           | 12584.74913 | -0.24633 | 0.481055 | 0.812664 | 12812.2  | 13052.14  | 15105.24 | 7067.418 | 13719.76 | 13751.74 |
| ENSMUSG00000028644  | 16_Ermap         | 23.2141846  | -0.47871 | 0.481187 | 0.812681 | 30.04889 | 36.06751  | 14.95796 | 34.72689 | 7.919381 | 15.56448 |
| ENSMUSG000000805024 | 1_C230035116Rik  | 6.236104448 | 0.719267 | 0.481154 | 0.812681 | 0.060661 | 7.728752  | 2.301224 | 15.87515 | 2.26268  | 5.18816  |
| ENSMUSG00000097703  | 1_Gm26823        | 2.448693282 | 1.14708  | 0.481176 | 0.812681 | 0        | 0.3435001 | 1.150612 | 7.937575 | 1.13134  | 1.037632 |
| ENSMUSG000000002635 | 11_Pdc2l         | 257.0818828 | -0.28011 | 0.481333 | 0.812859 | 250.9488 | 280.8113  | 314.1171 | 128.9856 | 263.6022 | 304.0262 |
| ENSMUSG000000003549 | 9_Ercc1          | 668.0667863 | -0.43113 | 0.481414 | 0.812874 | 674.8818 | 753.1239  | 873.3146 | 134.9388 | 966.1144 | 605.9771 |
| ENSMUSG00000028532  | 14_Cachd1        | 746.561225  | -0.16486 | 0.481512 | 0.812874 | 766.6528 | 811.519   | 789.3199 | 630.045  | 690.1675 | 791.7133 |
| ENSMUSG00000030491  | 16_Tdr12         | 4.133946747 | 0.953766 | 0.481569 | 0.812874 | 1.624264 | 3.435001  | 3.451836 | 12.89856 | 3.39402  | 0        |
| ENSMUSG000000103749 | 1_Podhgb5        | 44.5653562  | -0.30746 | 0.481587 | 0.812874 | 36.54595 | 68.70002  | 42.57265 | 45.64105 | 40.72824 | 33.20423 |
| ENSMUSG000000104212 | 1_Gm37986        | 0.94599542  | 2.167673 | 0.481537 | 0.812874 | 0        | 0         | 1.150612 | 0        | 4.52536  | 0        |
| ENSMUSG000000105789 | 1_Gm42997        | 1.784087169 | 1.315849 | 0.48153  | 0.812874 | 0        | 0.85875   | 2.301224 | 0        | 0.39402  | 4.150528 |
| ENSMUSG00000039725  | 6_Trp53rka       | 319.5080396 | -0.24862 | 0.481666 | 0.812938 | 299.6768 | 371.8388  | 369.3465 | 186.533  | 333.7453 | 355.907  |
| ENSMUSG00000034413  | 14_Neurl1b       | 55.61763478 | -0.35261 | 0.481737 | 0.81299  | 59.28565 | 64.40627  | 63.28367 | 20.83613 | 66.74907 | 59.14503 |
| ENSMUSG000000105283 | 1_Gm33370        | 2.964165051 | 1.235146 | 0.481798 | 0.813023 | 0        | 0.85875   | 4.602448 | 8.929771 | 3.39402  | 0        |
| ENSMUSG00000075502  | 1_Kbtbd6         | 33.37890005 | 0.364074 | 0.48188  | 0.813094 | 39.79448 | 25.76251  | 21.86163 | 56.55522 | 28.2835  | 28.01607 |
| ENSMUSG00000074457  | 10_Slmoa16       | 11477.14167 | -0.26219 | 0.482063 | 0.813333 | 12132.44 | 11626.62  | 13792.39 | 5948.22  | 12933.35 | 12430.83 |
| ENSMUSG00000016257  | 15_Slmo2         | 1241.332339 | 0.154126 | 0.482142 | 0.813358 | 1188.149 | 1106.07   | 1231.155 | 1303.747 | 1401.713 | 127.142  |
| ENSMUSG00000030982  | 17_9030624J02Rik | 1443.17476  | -0.2267  | 0.482196 | 0.813358 | 1481.329 | 1505.389  | 1682.195 | 888.0161 | 1586.139 | 1515.98  |
| ENSMUSG00000087590  | 2_Epb414aos      | 16.81254751 | -0.37202 | 0.4822   | 0.813358 | 21.92757 | 15.4575   | 19.56041 | 14.88295 | 12.44474 | 16.60211 |
| ENSMUSG00000038751  | 5_Ptk6           | 14.45569792 | 0.484395 | 0.482353 | 0.813449 | 12.99411 | 6.011252  | 17.25918 | 9.921968 | 6.202082 | 14.52685 |
| ENSMUSG00000039201  | 9_Tbcd125        | 260.3873282 | -0.42007 | 0.482335 | 0.813449 | 257.4459 | 293.6926  | 342.8624 | 54.57082 | 306.5932 | 307.1391 |
| ENSMUSG00000047959  | 4_Kcna3          | 3.689342293 | 0.755819 | 0.482377 | 0.813449 | 2.436397 | 3.435001  | 2.301224 | 3.968787 | 7.919381 | 2.075264 |
| ENSMUSG00000062908  | 12_Acadm         | 3495.368287 | 0.159827 | 0.482421 | 0.813455 | 3280.202 | 3183.387  | 3442.631 | 4178.141 | 3345.373 | 3542.476 |
| ENSMUSG00000002014  | 12_Ssr4          | 1191.303227 | -0.24465 | 0.482645 | 0.813547 | 1328.648 | 1178.205  | 1369.228 | 674.6938 | 1301.041 | 1296.002 |
| ENSMUSG00000024397  | 14_Air1          | 301.5492337 | 0.261662 | 0.482604 | 0.813547 | 340.2834 | 237.0151  | 245.0804 | 247.057  | 463.8494 | 276.0101 |
| ENSMUSG00000030206  | 13_Gsg1          | 11.13711209 | -0.46997 | 0.48268  | 0.813547 | 15.43051 | 6.31625   | 6.903673 | 10.91416 | 7.919381 | 9.338689 |
| ENSMUSG00000048347  | 5_Pcdhb18        | 48.96829941 | 0.423331 | 0.482557 | 0.813547 | 42.23087 | 31.77376  | 51.77754 | 106.1651 | 32.80886 | 29.0537  |
| ENSMUSG00000055691  | 5_Gja6           | 1.692351126 | -1.17509 | 0.482597 | 0.813547 | 0.812132 | 1.7175    | 4.602448 | 1.984394 | 0        | 1.037632 |
| ENSMUSG00000041798  | 15_Gck           | 4.662469882 | -0.67588 | 0.482741 | 0.813582 | 4.872793 | 4.293751  | 8.054285 | 1.984394 | 5.656701 | 3.112896 |
| ENSMUSG00000047843  | 16_Bri3          | 623.2476888 | -0.1628  | 0.482845 | 0.813688 | 619.6569 | 635.4752  | 720.2832 | 542.7317 | 601.8729 | 619.4663 |
| ENSMUSG00000021595  | 18_Nsun2         | 2789.868696 | 0.158118 | 0.482898 | 0.813708 | 2666.23  | 2401.066  | 2844.313 | 2849.589 | 3209.612 | 2768.402 |
| ENSMUSG00000020785  | 10_Scamk1        | 200.5770737 | -0.30451 | 0.483037 | 0.813868 | 190.8511 | 216.4051  | 257.7371 | 89.29771 | 224.0053 | 225.1662 |
| ENSMUSG00000055214  | 15_Pld5          | 631.0763836 | -0.27161 | 0.483075 | 0.813868 | 711.4278 | 810.6602  | 548.842  | 781.8511 | 348.4528 | 585.2245 |
| ENSMUSG00000001240  | 13_Ramp2         | 188.1022011 | -0.22252 | 0.483229 | 0.81406  | 189.2268 | 228.4276  | 189.851  | 128.9856 | 186.5171 | 205.541  |
| ENSMUSG00000022311  | 15_Csm2d3        | 20.16042128 | 0.557625 | 0.483276 | 0.814069 | 17.86691 | 24.04501  | 6.903673 | 47.62545 | 7.919381 | 16.60211 |
| ENSMUSG00000034867  | 16_Ankrd27       | 637.2090596 | -0.21643 | 0.483533 | 0.814411 | 631.0267 | 717.0564  | 706.4758 | 421.6836 | 728.583  | 618.4287 |
| ENSMUSG00000041064  | 13_Pir1          | 91.61927006 | -0.29944 | 0.48356  | 0.814411 | 119.3634 | 75.57002  | 108.1575 | 49.60984 | 110.8713 | 86.12346 |
| ENSMUSG00000047003  | 14_Zfp41         | 194.9705012 | -0.25112 | 0.483722 | 0.814615 | 222.5242 | 203.5238  | 209.4114 | 111.126  | 211.5606 | 211.6769 |
| ENSMUSG000000052102 | 14_Gnpda1        | 371.1685685 | -0.19643 | 0.483886 | 0.814822 | 426.3694 | 448.2676  | 314.1171 | 349.2533 | 313.3812 | 375.6228 |
| ENSMUSG000000052143 | 7_Gm9869         | 177.9742056 | -0.34043 | 0.483931 | 0.814829 | 188.4147 | 207.8176  | 200.2065 | 62.5084  | 213.8233 | 195.0748 |
| ENSMUSG00000005615  | 14_Pcylt1a       | 7329.022119 | 0.159913 | 0.484127 | 0.814865 | 6708.212 | 6427.745  | 7634.311 | 8493.205 | 7618.444 | 7902.215 |
| ENSMUSG00000025224  | 14_Gb1           | 2653.32531  | -0.2634  | 0.484044 | 0.814865 | 2530.604 | 2954.101  | 3199.852 | 1381.138 | 3030.86  | 2823.397 |
| ENSMUSG00000034107  | 10_Ano7          | 3.563081537 | 0.751262 | 0.484198 | 0.814865 | 2.436397 | 4.293751  | 1.150612 | 5.953181 | 3.39402  | 4.150528 |
| ENSMUSG00000053716  | 9_Dusp7          | 1658.942266 | -0.27262 | 0.484177 | 0.814865 | 1623.452 | 1465.887  | 2356.454 | 943.5792 | 2299.624 | 1534.658 |
| ENSMUSG00000060012  | 7_Kif13b         | 2118.27333  | -0.23847 | 0.484062 | 0.814865 | 2027.894 | 2292.004  | 2558.961 | 1247.191 | 2246.841 | 2336.747 |
| ENSMUSG00000097773  | 1_Gm10614        | 12.40117482 | -0.4256  | 0.484196 | 0.814865 | 16.24264 | 0.3035    | 16.10857 | 8.929771 | 12.44474 | 10.37632 |
| ENSMUSG00000034858  | 15_Pcm214a       | 785.5785181 | 0.165046 | 0.484417 | 0.815103 | 769.9013 | 751.4064  | 700.7228 | 899.9225 | 724.0577 | 867.4604 |
| ENSMUSG000000448440 | 15_Cyp4f16       | 226.9057125 | -0.28864 | 0.484544 | 0.815103 | 248.5124 | 238.7326  | 261.1889 | 105.1729 | 255.8629 | 252.1446 |
| ENSMUSG00000052684  | 4_Jun            | 1706.445089 | -0.24177 | 0.484502 | 0.815103 | 1712.787 | 1538.022  | 2296.622 | 1106.299 | 2028.493 | 1556.448 |
| ENSMUSG00000075437  | 4_Gm11681        | 1.000688862 | -2.12601 | 0.484542 | 0.815103 | 4.872793 | 0         | 0        | 0        | 1.13134  | 0        |
| ENSMUSG000000103565 | 1_Sgsm3          | 68.58883558 | -1.7815  | 0.484486 | 0.815103 | 80.40109 | 138.2588  | 100.1033 | 0        | 92.76989 | 0        |
| ENSMUSG00000005148  | 7_Klf5           | 2074.672272 | -0.25575 | 0.484692 | 0.815283 | 2049.009 | 2123.689  | 2601.534 | 1140.034 | 2447.089 | 2086.678 |
| ENSMUSG00000008318  | 9_Rett           | 16.18533844 | -0.5297  | 0.485063 | 0.815309 | 27.61249 | 14.59875  | 14.95796 | 2.97659  | 20.36412 | 16.60211 |
| ENSMUSG000000022246 | 13_Rai14         | 1           |          |          |          |          |           |          |          |          |          |

|                     |                  |             |          |          |          |          |          |          |          |          |          |
|---------------------|------------------|-------------|----------|----------|----------|----------|----------|----------|----------|----------|----------|
| ENSMUSG00000091636  | 1_A330050F15Rik  | 2.556893779 | 1.778769 | 0.486464 | 0.815852 | 0        | 3.435001 | 0        | 11.90636 | 0        | 0        |
| ENSMUSG00000097393  | 7_D030068K23Rik  | 2.255816545 | -1.1976  | 0.486352 | 0.815852 | 4.872793 | 0        | 4.602448 | 1.984394 | 0        | 2.075264 |
| ENSMUSG00000050953  | 9_Gja1           | 12837.83117 | 0.252009 | 0.486551 | 0.815861 | 11546.9  | 12658.84 | 10952.68 | 20558.32 | 9889.044 | 11421.22 |
| ENSMUSG00000066107  | 6_Gm12666        | 52.93205112 | 0.258242 | 0.486524 | 0.815861 | 55.22499 | 42.07876 | 47.1751  | 58.53961 | 67.88041 | 46.69344 |
| ENSMUSG00000022939  | 6.190525066      | 6.190525066 | 0.585069 | 0.486782 | 0.816156 | 5.684925 | 3.435001 | 5.753061 | 7.937575 | 10.18206 | 4.150528 |
| ENSMUSG00000039086  | 9_Ss181          | 234.4180364 | 0.18772  | 0.48685  | 0.816156 | 204.6573 | 199.2301 | 254.2853 | 268.8853 | 226.268  | 253.1822 |
| ENSMUSG000000048699 | 4_4732456N10Rik  | 1122.883442 | -0.31805 | 0.486829 | 0.816156 | 1309.157 | 1062.274 | 1366.927 | 433.59   | 1294.253 | 1271.099 |
| ENSMUSG00000029475  | 17_Kdm2b         | 920.1600913 | -0.17485 | 0.487197 | 0.816531 | 959.1281 | 890.524  | 1078.124 | 740.1788 | 886.9706 | 966.0355 |
| ENSMUSG000000048292 | 2_Olfri1417      | 3.02664068  | 0.960898 | 0.487176 | 0.816531 | 0        | 1.7175   | 4.602448 | 2.97659  | 6.788041 | 2.075264 |
| ENSMUSG00000074643  | 12_Cpne1         | 819.0419121 | -0.23333 | 0.487173 | 0.816531 | 738.2281 | 749.6889 | 1167.871 | 580.4351 | 879.0513 | 798.9767 |
| ENSMUSG000000334427 | 16_Myo15b        | 13.08005224 | -0.64266 | 0.487412 | 0.816614 | 15.43051 | 12.88125 | 19.56041 | 0.992197 | 6.788041 | 22.82791 |
| ENSMUSG000000043013 | 10_Onecut1       | 0.977498314 | -2.12574 | 0.487451 | 0.816614 | 4.872793 | 0        | 0        | 0.992197 | 0        | 0        |
| ENSMUSG000000069720 | 4_4930572O03Rik  | 0.977498314 | -2.12574 | 0.487451 | 0.816614 | 4.872793 | 0        | 0        | 0.992197 | 0        | 0        |
| ENSMUSG000000073424 | 9_Cyp4f15        | 137.0636202 | -0.21854 | 0.487357 | 0.816614 | 170.5478 | 128.8125 | 142.6759 | 101.2041 | 138.0235 | 141.118  |
| ENSMUSG000000096923 | 1_A730071L15Rik  | 2.166693188 | -1.16244 | 0.487328 | 0.816614 | 2.436397 | 4.293751 | 2.301224 | 3.968787 | 0        | 0        |
| ENSMUSG000000020097 | 14_Sgpl1         | 3175.705025 | 0.14296  | 0.487714 | 0.816986 | 3035.75  | 2990.168 | 3029.562 | 3476.658 | 3414.384 | 3107.708 |
| ENSMUSG00000024538  | 7_Ppic           | 605.0020494 | 0.219323 | 0.487808 | 0.817075 | 603.4142 | 598.5489 | 475.2028 | 854.2815 | 522.6791 | 575.8858 |
| ENSMUSG000000024986 | 11_Hhex          | 28.53675627 | 0.42258  | 0.487914 | 0.817115 | 34.92168 | 12.88125 | 25.31347 | 40.68007 | 41.85958 | 15.56448 |
| ENSMUSG00000058975  | 6_Kcnc1          | 28.63722089 | 0.352242 | 0.487889 | 0.817115 | 24.36397 | 36.92626 | 13.80735 | 31.7503  | 32.80886 | 32.16659 |
| ENSMUSG000000020812 | 17_1810032O08Rik | 203.5587244 | -0.23371 | 0.487968 | 0.817135 | 215.215  | 187.2075 | 257.7371 | 132.9544 | 209.2979 | 218.9404 |
| ENSMUSG000000021710 | 10_Nln           | 476.9360824 | 0.176419 | 0.488084 | 0.817262 | 442.612  | 443.1151 | 457.9436 | 598.2947 | 467.2435 | 452.4076 |
| ENSMUSG000000019984 | 16_Med23         | 1446.142389 | 0.156375 | 0.488252 | 0.817405 | 1338.394 | 1281.255 | 1484.29  | 1661.93  | 1482.056 | 1428.819 |
| ENSMUSG000000041624 | 9_Gucy1a2        | 8.978344555 | 0.706225 | 0.488239 | 0.817405 | 3.248529 | 13.74    | 3.451836 | 21.82833 | 2.26268  | 9.338689 |
| ENSMUSG000000020623 | 11_Map2k6        | 161.701082  | 0.262062 | 0.488484 | 0.817725 | 162.4264 | 127.095  | 151.8808 | 248.0492 | 119.9221 | 160.833  |
| ENSMUSG000000015377 | 9_Dennadb        | 288.4844896 | -0.44349 | 0.488922 | 0.817823 | 299.6768 | 334.0538 | 363.5934 | 47.62545 | 364.2915 | 321.6659 |
| ENSMUSG000000017561 | 16_Crlf3         | 492.1325253 | 0.155511 | 0.488849 | 0.817823 | 477.5337 | 453.4201 | 465.9979 | 554.638  | 512.4971 | 488.7247 |
| ENSMUSG000000028354 | 13_Fmn2          | 55.69459991 | -0.36671 | 0.488612 | 0.817823 | 60.90991 | 82.44002 | 44.87387 | 69.45378 | 21.49546 | 54.9945  |
| ENSMUSG000000029613 | 15_Elf2a1        | 1173.236169 | 0.153657 | 0.488784 | 0.817823 | 1040.341 | 1102.635 | 1189.733 | 1230.324 | 1322.537 | 1153.847 |
| ENSMUSG000000034292 | 13_Traf3ip1      | 279.9459179 | -0.23036 | 0.488873 | 0.817823 | 324.8529 | 282.5288 | 299.1591 | 173.6344 | 285.0977 | 314.4025 |
| ENSMUSG000000336598 | 3_Ccdc113        | 20.42115283 | -0.36882 | 0.488797 | 0.817823 | 26.80036 | 21.46876 | 20.71102 | 12.89856 | 14.70742 | 25.9408  |
| ENSMUSG000000037016 | 11_Frem2         | 1686.667205 | -0.1797  | 0.488781 | 0.817823 | 1748.521 | 1805.952 | 1820.268 | 1310.692 | 1528.44  | 1906.13  |
| ENSMUSG000000039209 | 12_Rpl39l        | 86.03154862 | 0.261816 | 0.488953 | 0.817823 | 88.52241 | 81.58127 | 64.34248 | 125.0168 | 87.11319 | 69.52135 |
| ENSMUSG000000046447 | 3_Camk2n1        | 248.2996436 | 0.336114 | 0.48883  | 0.817823 | 216.8393 | 237.0151 | 204.809  | 470.3013 | 134.6295 | 226.2038 |
| ENSMUSG000000070847 | 11_Vmn2t30       | 4.8902258   | 0.936237 | 0.488854 | 0.817823 | 1.624264 | 1.7175   | 6.903673 | 16.86735 | 1.13134  | 1.037632 |
| ENSMUSG000000006627 | 15_Sema4f        | 17.04653152 | -0.45751 | 0.489035 | 0.817891 | 30.86102 | 15.4575  | 12.65673 | 7.937575 | 13.57608 | 21.79027 |
| ENSMUSG000000021572 | 8_Cep72          | 166.0272204 | 0.203344 | 0.489119 | 0.817963 | 163.2386 | 126.2363 | 173.7424 | 158.7515 | 159.7218 | 178.4727 |
| ENSMUSG000000025203 | 5_Scd2           | 41696.87892 | -0.14802 | 0.489181 | 0.817976 | 42411.98 | 42420.54 | 46669.98 | 42617.83 | 36597.72 | 39463.22 |
| ENSMUSG000000049800 | 13_Sertad2       | 1664.308537 | 0.187149 | 0.48925  | 0.817976 | 1481.329 | 1434.113 | 1754.683 | 2154.059 | 1540.885 | 1620.781 |
| ENSMUSG000000058499 | 9_Pip            | 0.669986534 | 1.661027 | 0.489218 | 0.817976 | 0        | 0.85875  | 0        | 0.992197 | 1.13134  | 1.037632 |
| ENSMUSG000000022799 | 4_Arhgap31       | 446.1777426 | -0.16775 | 0.489369 | 0.818107 | 486.4672 | 515.2501 | 414.2204 | 439.5432 | 398.2317 | 423.3539 |
| ENSMUSG000000056459 | 14_Zbtb25        | 152.2691008 | 0.210377 | 0.489418 | 0.81812  | 168.9235 | 121.0838 | 133.471  | 177.6032 | 140.2862 | 172.2469 |
| ENSMUSG000000019088 | 13_Dnase1l1      | 557.1462793 | 0.153131 | 0.489536 | 0.818201 | 553.8741 | 535.0014 | 493.6126 | 594.3259 | 598.4789 | 567.5847 |
| ENSMUSG000000027805 | 16_Pfn2          | 681.6642292 | 0.351284 | 0.489549 | 0.818201 | 645.6451 | 680.9889 | 470.6004 | 1382.13  | 420.8585 | 489.7623 |
| ENSMUSG000000020905 | 11_Uspp43        | 625.3466154 | -0.29776 | 0.489729 | 0.818434 | 681.3789 | 616.5827 | 770.9101 | 267.8931 | 713.8756 | 701.4393 |
| ENSMUSG000000047988 | 1_4933428G20Rik  | 10.72371305 | 0.449173 | 0.489853 | 0.818573 | 8.933454 | 6.870002 | 11.50612 | 8.929771 | 13.57608 | 14.52685 |
| ENSMUSG000000042502 | 10_Cd2bp2        | 1893.296572 | -0.22909 | 0.489902 | 0.818585 | 1912.571 | 1993.159 | 2224.133 | 1132.097 | 2019.442 | 2078.377 |
| ENSMUSG000000001134 | 9_Uxt            | 284.8151941 | -0.1743  | 0.490526 | 0.818599 | 330.5378 | 263.6363 | 311.8159 | 254.9946 | 276.047  | 271.8596 |
| ENSMUSG000000006216 | 10_Clnckb        | 0.526662407 | -2.42256 | 0.490586 | 0.818599 | 0        | 0.85875  | 2.301224 | 0        | 0        | 0        |
| ENSMUSG000000006782 | 16_Cnp           | 487.1151931 | -0.24398 | 0.490644 | 0.818599 | 502.7098 | 529.8489 | 554.595  | 268.8853 | 575.8521 | 490.8    |
| ENSMUSG000000021497 | 9_Txndc15        | 673.6356353 | 0.213134 | 0.490416 | 0.818599 | 614.7841 | 661.2377 | 596.0171 | 959.4543 | 569.0641 | 641.2566 |
| ENSMUSG000000021905 | 13_Dph3          | 874.6519718 | 0.167491 | 0.49065  | 0.818599 | 844.6175 | 756.5589 | 871.0134 | 1047.76  | 817.9589 | 910.0033 |
| ENSMUSG000000022902 | 7_Slra2          | 3.609659765 | 0.764478 | 0.490084 | 0.818599 | 1.624264 | 5.152501 | 1.150612 | 4.960984 | 5.656701 | 3.112896 |
| ENSMUSG000000030781 | 13_Slc5a2        | 0.526662407 | -2.42256 | 0.490586 | 0.818599 | 0        | 0.85875  | 2.301224 | 0        | 0        | 0        |
| ENSMUSG000000038374 | 10_Rbm8a         | 1329.414307 | 0.178636 | 0.49058  | 0.818599 | 1245.811 | 1122.387 | 1373.831 | 1625.218 | 1423.226 | 1186.013 |
| ENSMUSG000000041415 | 9_Dicer1         | 2108.207593 | 0.153067 | 0.49024  | 0.818599 | 2093.677 | 1923.6   | 1972.149 | 2451.718 | 2173.304 | 2034.796 |
| ENSMUSG000000047443 | 14_Fam132b       | 383.1631668 | -0.29677 | 0.490474 | 0.818599 | 428.8058 | 376.9913 | 461.3955 | 165.6969 | 434.4346 | 431.6549 |
| ENSMUSG000000060565 | 5_Gm5591         | 0.526662407 | -2.42256 | 0.490586 | 0.818599 | 0        | 0.85875  | 2.301224 | 0        | 0        | 0        |
| ENSMUSG000000070705 | 2_Eid2b          | 102.3528658 | 0.289263 | 0.49029  | 0.818599 | 86.08601 | 92.74502 | 97.80203 | 172.6422 | 85.98185 | 78.86004 |
| ENSMUSG000000074847 | 2_Gm10775        | 0.66221686  | 1.661033 | 0.490313 | 0.818599 | 0.812132 | 0        | 0        | 0.992197 | 1.13134  | 1.037632 |
| ENSMUSG000000089774 | 2_Slc5a3         | 456.7941653 | 0.322748 | 0.49002  | 0.818599 | 371.9565 | 497.2164 | 348.6355 | 841.3829 | 273.7843 | 407.7894 |
| ENSMUSG000000096175 | 3_Gm21761        | 0.84280478  | -1.77702 | 0.490622 | 0.818599 | 1.624264 | 0        | 2.301224 | 0        | 1.13134  | 0        |
| ENSMUSG000000097280 | 1_Al849053       | 0.66221686  | 1.661033 | 0.490313 | 0.818599 | 0.812132 | 0        | 0        | 0.992197 | 1.13134  | 1.037632 |
| ENSMUSG000000107108 | 1_Gm9936         | 0.84280478  | -1.77702 | 0.490622 | 0.818599 | 1.624264 | 0        | 2.301224 | 0        | 1.13134  | 0        |
| ENSMUSG00000108356  | 1_RP23-276L17    | 0.526662407 | -2.42256 | 0.490586 | 0.818599 | 0        | 0.85875  | 2.301224 | 0        | 0        | 0        |
| ENSMUSG000000022887 | 8_Masp1          | 137.6146579 | -0.22805 | 0.490787 | 0.818695 | 151.8687 | 145.9875 | 147.2783 | 92.2743  | 160.6503 | 127.6287 |
| ENSMUSG000000024731 | 15_Msa4a10       | 42.25894615 | -0.46463 | 0.49079  | 0.818695 | 43.04301 | 49.80751 | 54.07877 | 6.945378 | 50.9103  | 48.76871 |
| ENSMUSG000000014773 | 13_Dll1          | 1023.156436 | -0.25566 | 0.490949 | 0.818716 | 1041.153 | 1007.691 | 1292.137 | 555.6302 | 1194.695 | 1048.008 |
| ENSMUSG000000027200 | 17_Sema6d        | 856.3604048 | 0.17582  | 0.490966 | 0.818716 | 721.1734 | 903.4052 | 788.1693 | 1012.041 | 929.9616 | 783.4122 |
| ENSMUSG000000037913 | 13_Tmem156       | 3.429494768 | 0.778236 | 0.49088  | 0.818716 | 2.436397 | 1.7175   | 3.451836 | 2.97659  | 7.919381 | 2.075264 |
| ENSMUSG000000038530 | 11_Rgs4          | 34.26152501 | 0.48538  | 0.490914 | 0.818716 | 25.1761  | 38.64376 | 21.86163 | 82.35234 | 14.70742 | 22.82791 |
| ENSMUSG000000024897 | 8_Abp1a          | 75.89032055 | -0.23355 | 0.491312 | 0.819224 | 87.71028 | 93.60377 | 64.43428 | 69.45378 | 63.50505 | 76.78477 |
| ENSMUSG000000038861 | 14_P14kb         | 1404.052005 | -0.27446 | 0.491378 | 0.819265 | 1478.893 | 1521.705 | 1610.857 | 661.7953 | 1613.291 | 1537.771 |
| ENSMUSG000000021643 | 14_Serf1         | 85.84409286 | 0.385448 | 0.491641 | 0.819371 | 70.6555  | 60.97127 | 92.04897 | 178.5954 | 46.38494 | 66.40845 |
| ENSMUSG000000024124 | 9_Prss30         | 8.663595652 | -0.60939 | 0.491686 | 0.819371 | 8.121322 | 9.446252 | 13.80735 | 0.992197 | 11.3134  | 8.301057 |
| ENSMUSG000000059248 | 13_Septr         | 1830.177263 | -0.34006 | 0.491607 | 0.819371 | 1785.067 | 1956.233 | 2393.273 | 615.162  | 2303.408 | 1927.92  |
| ENSMUSG000000097532 | 1_Gm4349         | 9.330667323 | 0.458136 | 0.49153  |          |          |          |          |          |          |          |

|                      |                  |             |          |          |          |           |          |          |          |          |          |
|----------------------|------------------|-------------|----------|----------|----------|-----------|----------|----------|----------|----------|----------|
| ENSMUSG00000037455   | 16_Slc18b1       | 392.0346431 | 0.174077 | 0.494281 | 0.82163  | 367.0837  | 376.9913 | 361.2922 | 484.192  | 363.1602 | 399.4883 |
| ENSMUSG00000022481   | 4_Lvrn           | 76.99718201 | 0.28286  | 0.494494 | 0.821657 | 78.77682  | 65.26502 | 64.43428 | 124.0246 | 59.96103 | 69.52135 |
| ENSMUSG00000026289   | 15_Atg16l1       | 891.4613084 | -0.2088  | 0.494415 | 0.821657 | 936.3884  | 909.4165 | 1021.744 | 585.3961 | 902.8094 | 993.0139 |
| ENSMUSG00000031796   | 6_Cfap20         | 653.4028316 | 0.154136 | 0.494459 | 0.821657 | 617.2205  | 587.3852 | 651.2465 | 736.21   | 691.2486 | 637.1061 |
| ENSMUSG000000092192  | 7_Dyx1c1         | 15.20344634 | -0.37767 | 0.494504 | 0.821657 | 14.61838  | 19.75126 | 17.25918 | 14.88295 | 10.18208 | 14.52685 |
| ENSMUSG000000100287  | 1_Gm28068        | 4.938333594 | 0.632562 | 0.494353 | 0.821657 | 4.872793  | 4.293751 | 2.301224 | 4.960984 | 9.050721 | 4.150528 |
| ENSMUSG000000004961  | 7_Syt5           | 6.069858004 | -0.56771 | 0.494699 | 0.821895 | 6.497057  | 9.446252 | 5.753061 | 5.953181 | 5.856701 | 3.112896 |
| ENSMUSG00000006586   | 15_Runx1t1       | 52.6687743  | 0.392475 | 0.495451 | 0.821895 | 41.41874  | 61.83002 | 33.36775 | 107.1573 | 32.80886 | 39.43002 |
| ENSMUSG000000021719  | 8_Rgs7bp         | 127.9720529 | 0.382879 | 0.495597 | 0.821895 | 95.01946  | 138.2588 | 100.1033 | 273.8463 | 72.40577 | 88.19873 |
| ENSMUSG000000022243  | 10_Slc45a2       | 312.5839277 | -0.29249 | 0.494937 | 0.821895 | 291.5555  | 522.1201 | 218.6163 | 331.3937 | 203.6412 | 308.1767 |
| ENSMUSG000000022996  | 14_Wnt10b        | 16.91688139 | -0.45366 | 0.495906 | 0.821895 | 18.67904  | 28.33876 | 11.50612 | 8.929771 | 10.18206 | 23.86554 |
| ENSMUSG000000025257  | 5_Ribc1          | 52.28787863 | 0.273067 | 0.495114 | 0.821895 | 51.97646  | 47.23126 | 42.57265 | 38.69668 | 67.88041 | 65.37082 |
| ENSMUSG000000025722  | 16_Wdr73         | 474.1589862 | -0.221   | 0.495632 | 0.821895 | 476.7216  | 486.0526 | 568.4024 | 303.6122 | 545.3059 | 464.8592 |
| ENSMUSG000000027710  | 14_Acad9         | 1329.415434 | 0.167095 | 0.495202 | 0.821895 | 1252.308  | 1209.979 | 1295.589 | 1650.023 | 1233.161 | 1335.432 |
| ENSMUSG000000029310  | 13_Nudt9         | 727.2411582 | -0.26615 | 0.49512  | 0.821895 | 743.9131  | 782.3215 | 856.0554 | 358.1831 | 815.6962 | 807.2777 |
| ENSMUSG000000029451  | 14_Gm13103       | 0.565670052 | 2.717391 | 0.495741 | 0.821895 | 0         | 0        | 0        | 0        | 0        | 0        |
| ENSMUSG000000029597  | 14_Sds           | 0.518892733 | -2.4026  | 0.495812 | 0.821895 | 0.812132  | 0        | 2.301224 | 0        | 0        | 0        |
| ENSMUSG000000030201  | 15_Lrp6          | 2594.435554 | 0.219552 | 0.494972 | 0.821895 | 2426.651  | 2420.817 | 2344.947 | 3804.083 | 2046.594 | 2523.521 |
| ENSMUSG000000032515  | 7_Csrnp1         | 596.2803293 | -0.40957 | 0.495284 | 0.821895 | 704.1186  | 562.4814 | 774.3619 | 123.0324 | 756.8665 | 656.8211 |
| ENSMUSG000000034031  | 5_Ccdc182        | 0.518892733 | -2.4026  | 0.495812 | 0.821895 | 0.812132  | 0        | 2.301224 | 0        | 0        | 0        |
| ENSMUSG000000034709  | 8_Ppp1r21        | 801.6310703 | -0.15483 | 0.495902 | 0.821895 | 829.187   | 865.6202 | 838.7962 | 696.5222 | 843.9797 | 735.6811 |
| ENSMUSG000000035540  | 12_Gc            | 0.565670052 | 2.717391 | 0.495741 | 0.821895 | 0         | 0        | 0        | 0        | 0        | 0        |
| ENSMUSG000000037341  | 13_Slc9a7        | 45.70647467 | 0.269052 | 0.495926 | 0.821895 | 47.9158   | 47.23126 | 28.7653  | 49.60984 | 50.9103  | 49.80634 |
| ENSMUSG000000037529  | 13_Prsx40        | 0.565670052 | 2.717391 | 0.495741 | 0.821895 | 0         | 0        | 0        | 0        | 0        | 0        |
| ENSMUSG000000038690  | 15_Atp5j2        | 2056.415322 | -0.31864 | 0.495422 | 0.821895 | 2266.661  | 2277.406 | 2303.525 | 741.171  | 2373.552 | 2376.177 |
| ENSMUSG000000046748  | 7_Tmem45a2       | 0.565670052 | 2.717391 | 0.495741 | 0.821895 | 0         | 0        | 0        | 0        | 0        | 0        |
| ENSMUSG000000047751  | 9_Utf1           | 0.518892733 | -2.4026  | 0.495812 | 0.821895 | 0.812132  | 0        | 2.301224 | 0        | 0        | 0        |
| ENSMUSG000000062464  | 5_Cyp4f37        | 0.565670052 | 2.717391 | 0.495741 | 0.821895 | 0         | 0        | 0        | 0        | 0        | 0        |
| ENSMUSG000000062518  | 7_Zfp534         | 0.565670052 | 2.717391 | 0.495741 | 0.821895 | 0         | 0        | 0        | 0        | 0        | 0        |
| ENSMUSG000000073598  | 3_1700066B19Rik  | 24.07047815 | -0.31529 | 0.495174 | 0.821895 | 24.36397  | 29.19751 | 26.46408 | 16.86735 | 22.6268  | 24.90317 |
| ENSMUSG000000078593  | 2_1700042G07Rik  | 0.565670052 | 2.717391 | 0.495741 | 0.821895 | 0         | 0        | 0        | 0        | 0        | 0        |
| ENSMUSG000000095264  | 1_Gm2854         | 0.565670052 | 2.717391 | 0.495741 | 0.821895 | 0         | 0        | 0        | 0        | 0        | 0        |
| ENSMUSG000000095718  | 2_Gm6502         | 0.565670052 | 2.717391 | 0.495741 | 0.821895 | 0         | 0        | 0        | 0        | 0        | 0        |
| ENSMUSG000000098692  | 1_Gm28041        | 1.301528835 | -1.54711 | 0.495238 | 0.821895 | 3.248529  | 2.576251 | 0        | 1.984394 | 0        | 0        |
| ENSMUSG000000100211  | 1_1700064M15Rik  | 0.565670052 | 2.717391 | 0.495741 | 0.821895 | 0         | 0        | 0        | 0        | 0        | 0        |
| ENSMUSG000000104318  | 1_Pcdha7         | 0.565670052 | 2.717391 | 0.495741 | 0.821895 | 0         | 0        | 0        | 0        | 0        | 0        |
| ENSMUSG000000104937  | 1_Gm43057        | 0.518892733 | -2.4026  | 0.495812 | 0.821895 | 0.812132  | 0        | 2.301224 | 0        | 0        | 0        |
| ENSMUSG000000030718  | 8_Ppme1          | 879.158388  | -0.17087 | 0.496028 | 0.821995 | 882.7877  | 911.9927 | 998.7313 | 691.5612 | 926.5675 | 863.3099 |
| ENSMUSG000000019987  | 8_Arg1           | 6405.688603 | 0.167454 | 0.496308 | 0.822185 | 6441.02   | 5357.743 | 6304.204 | 6059.346 | 719.823  | 6451.996 |
| ENSMUSG000000025878  | 16_Ulmc1         | 1850.553796 | -0.17753 | 0.496235 | 0.822185 | 1851.661  | 1949.363 | 2091.813 | 1385.107 | 1874.631 | 1950.748 |
| ENSMUSG000000030868  | 6_Dctn5          | 1235.066017 | 0.144745 | 0.4962   | 0.822185 | 1177.592  | 1098.342 | 1243.812 | 1310.692 | 1320.274 | 1259.685 |
| ENSMUSG000000040669  | 14_Phc1          | 1002.61924  | -0.27102 | 0.496302 | 0.822185 | 992.4255  | 1160.172 | 1136.805 | 479.2311 | 1122.289 | 1124.793 |
| ENSMUSG000000038843  | 17_Gcnt1         | 58.25458621 | 0.321052 | 0.496513 | 0.822458 | 71.46763  | 34.35001 | 49.47632 | 81.36014 | 72.40577 | 40.46765 |
| ENSMUSG000000086860  | 1_Gm1720         | 1.799329009 | -1.23574 | 0.496613 | 0.822553 | 0.4060661 | 3.435001 | 0        | 2.26268  | 1.037632 | 0        |
| ENSMUSG000000035674  | 13_Ndufa3        | 846.3367685 | -0.30404 | 0.496679 | 0.822595 | 964.813   | 908.5577 | 931.9958 | 333.3781 | 963.9018 | 975.3741 |
| ENSMUSG0000000048163 | 13_Selgip        | 163.1320162 | -0.49728 | 0.496738 | 0.822624 | 280.9977  | 120.225  | 171.4412 | 24.80492 | 269.2589 | 112.0643 |
| ENSMUSG000000026787  | 3_Gad2           | 4.732829017 | 1.20486  | 0.496783 | 0.822631 | 5.684925  | 1.7175   | 1.150612 | 19.84394 | 0        | 0        |
| ENSMUSG000000003992  | 14_Ssbp2         | 986.1788005 | 0.176334 | 0.497058 | 0.822858 | 958.316   | 929.1677 | 890.5738 | 1240.246 | 863.2125 | 1035.557 |
| ENSMUSG000000024824  | 6_Rad9a          | 329.2623898 | -0.30172 | 0.497308 | 0.822858 | 353.2775  | 356.3813 | 380.8526 | 135.931  | 412.9391 | 336.1928 |
| ENSMUSG000000025577  | 7_Cbx2           | 212.0184441 | -0.30159 | 0.497375 | 0.822858 | 210.3422  | 224.9926 | 266.942  | 90.28991 | 272.3994 | 252.1446 |
| ENSMUSG000000027890  | 17_Gstm4         | 225.9650052 | -0.25137 | 0.497374 | 0.822858 | 232.2698  | 259.3426 | 245.0804 | 127.0012 | 216.086  | 276.0101 |
| ENSMUSG000000028278  | 14_Rragd         | 566.3066433 | 0.354487 | 0.497101 | 0.822858 | 466.1639  | 684.4239 | 340.5812 | 1082.487 | 304.3305 | 519.8537 |
| ENSMUSG000000051435  | 11_Fhad1         | 150.6692159 | -0.1968  | 0.497084 | 0.822858 | 159.1779  | 158.01   | 165.6881 | 123.0324 | 128.9728 | 169.134  |
| ENSMUSG000000066720  | 6_Cldn9          | 1.399202169 | -1.57224 | 0.497223 | 0.822858 | 0         | 1.7175   | 4.602448 | 0        | 0        | 0        |
| ENSMUSG000000072082  | 6_Ccnf           | 330.1246778 | -0.34217 | 0.496979 | 0.822858 | 371.9565  | 294.5513 | 440.6844 | 113.1104 | 424.2525 | 336.1928 |
| ENSMUSG000000074677  | 11_Sirpb1c       | 39.64949504 | 0.414579 | 0.497323 | 0.822858 | 55.22499  | 18.8925  | 27.61469 | 47.62545 | 66.74902 | 21.79027 |
| ENSMUSG000000078144  | 3_Capns2         | 548.3854632 | -0.28949 | 0.497137 | 0.822858 | 643.2087  | 549.6001 | 616.7281 | 243.0882 | 548.7    | 688.987  |
| ENSMUSG000000106223  | 1_Gm43733        | 3.663215222 | -0.89549 | 0.497183 | 0.822858 | 1.624264  | 6.870002 | 5.753061 | 0        | 0.556701 | 2.075264 |
| ENSMUSG000000034981  | 9_Parm1          | 4388.446198 | 0.15987  | 0.497548 | 0.823077 | 3856.816  | 4143.47  | 4436.76  | 5255.667 | 551.017  | 4106.948 |
| ENSMUSG000000038542  | 14_Pcd2          | 475.4589894 | -0.22532 | 0.49773  | 0.82331  | 524.6374  | 504.0864 | 508.5706 | 285.7527 | 518.1538 | 511.5526 |
| ENSMUSG000000021477  | 8_Ctst           | 37537.27013 | 0.170392 | 0.497793 | 0.823329 | 34685.35  | 33945.54 | 37338.51 | 35866.92 | 47905.47 | 35481.83 |
| ENSMUSG000000046157  | 13_Tmem229b      | 649.5019876 | 0.223609 | 0.497949 | 0.823329 | 583.1109  | 542.7301 | 671.9575 | 504.036  | 931.0929 | 664.0845 |
| ENSMUSG000000059355  | 13_Wdr83os       | 499.075582  | -0.296   | 0.497905 | 0.823329 | 514.8918  | 556.4701 | 578.7579 | 208.3613 | 598.4789 | 537.9434 |
| ENSMUSG000000075415  | 13_Fbnp1         | 2172.397523 | -0.17649 | 0.497863 | 0.823329 | 2240.673  | 2384.749 | 2289.718 | 1612.32  | 2198.194 | 2308.731 |
| ENSMUSG000000101174  | 6_Hoxd4          | 3.861343351 | 0.774181 | 0.497939 | 0.823329 | 4.060661  | 4.293751 | 0        | 3.968787 | 5.566701 | 5.18816  |
| ENSMUSG000000019487  | 10_Trip10        | 2390.011411 | -0.36916 | 0.498067 | 0.823455 | 2455.888  | 2657.832 | 2968.579 | 624.0918 | 2923.383 | 2710.295 |
| ENSMUSG000000020220  | 16_Vps13d        | 2148.040249 | 0.139234 | 0.498326 | 0.823661 | 2126.974  | 1953.657 | 2052.692 | 2181.841 | 2320.379 | 2252.699 |
| ENSMUSG000000021178  | 8_Psmc1          | 2830.634539 | 0.146752 | 0.498348 | 0.823661 | 2835.153  | 2474.059 | 2751.114 | 2863.48  | 3184.722 | 2875.278 |
| ENSMUSG000000036117  | 2_Ils5           | 5.231421324 | 0.824591 | 0.498357 | 0.823661 | 3.248529  | 6.870002 | 1.150612 | 15.87515 | 1.13134  | 3.112896 |
| ENSMUSG000000047632  | 10_Fgfbp3        | 229.764394  | 0.348353 | 0.498289 | 0.823661 | 180.2933  | 183.7725 | 242.7792 | 465.3403 | 141.4175 | 164.9835 |
| ENSMUSG000000074646  | 10_6430550D23Rik | 19.69978455 | -0.39972 | 0.49862  | 0.824027 | 17.05478  | 31.77376 | 18.40979 | 15.87515 | 10.18206 | 24.90317 |
| ENSMUSG000000035629  | 17_1700021K19Rik | 1347.777863 | -0.258   | 0.498724 | 0.824064 | 1347.327  | 1420.373 | 1636.17  | 687.5924 | 1485.45  | 1509.755 |
| ENSMUSG000000066643  | 12_Wdr35         | 540.8708211 | 0.180815 | 0.498722 | 0.824064 | 521.3889  | 553.0351 | 446.4375 | 679.6548 | 511.3657 | 533.3429 |
| ENSMUSG000000040432  | 4_Ltb4r2         | 194.836362  | -0.27442 | 0.498811 | 0.824139 | 163.2386  | 218.9813 | 257.7371 | 111.126  | 247.7635 | 170.1717 |
| ENSMUSG000000021087  | 17_Rtn1          | 59.45059984 | -0.37691 | 0.498968 | 0.824252 | 74.71616  | 91.02752 | 35.66898 | 75.40696 | 24.88948 | 54.9945  |
| ENSMUSG000000021453  | 2_Gadd45g        | 90.28390204 | -0.56561 | 0.499142 | 0.824252 | 86.89814  | 86.73377 | 149.5796 | 5.953181 | 148.2056 | 64.33319 |
| ENSMUSG000000026036  | 17_Nif3l1        | 611.9691949 | 0.146752 | 0.499288 | 0.824252 | 559.5591  | 588.2439 | 594.8665 | 616.1542 | 668.622  | 644.3695 |
| ENSMUSG000000042498  | 16_D330045A20Rik | 2.506026109 | -0.9138  | 0.499266 | 0.824    |           |          |          |          |          |          |

|                      |                 |             |           |          |          |          |          |          |          |          |          |
|----------------------|-----------------|-------------|-----------|----------|----------|----------|----------|----------|----------|----------|----------|
| ENSMUSG00000097197   | 1_9530027J09Rik | 12.89779184 | 0.396643  | 0.501159 | 0.825841 | 14.61838 | 9.446252 | 9.204897 | 14.88295 | 14.70742 | 14.52685 |
| ENSMUSG00000099465   | 1_Gm3830        | 3.958749121 | 0.685458  | 0.501239 | 0.825841 | 1.624264 | 5.152501 | 2.301224 | 4.960984 | 4.52536  | 5.18816  |
| 12_Fank1             | 1.760707715     | 1.078223    | 0.501334  | 0.825841 | 2.436397 | 0.85875  | 0        | 3.968787 | 2.26268  | 1.037632 |          |
| ENSMUSG00000002324   | 7_Rec8          | 2.182032968 | -1.04387  | 0.50141  | 0.825856 | 0.812132 | 3.435001 | 4.602448 | 0        | 1.11334  | 3.12896  |
| 114_7349411          | 9_Mgst2         | 114.7349411 | -0.205824 | 0.501426 | 0.825856 | 96.64373 | 97.03878 | 126.5673 | 136.9232 | 110.8713 | 120.3653 |
| ENSMUSG000000051504  | 18_Siglech      | 32.67733861 | 0.314568  | 0.501473 | 0.825866 | 32.48529 | 20.61001 | 34.51836 | 47.62545 | 32.80886 | 28.01607 |
| ENSMUSG000000000976  | 13_Heatr6       | 616.9714914 | -0.1943   | 0.501656 | 0.826042 | 600.1657 | 683.5652 | 691.5179 | 439.5432 | 693.5115 | 593.5255 |
| ENSMUSG000000006587  | 5_Snai3         | 6.558398341 | 0.597489  | 0.501695 | 0.826042 | 3.248529 | 7.728752 | 4.602448 | 3.968787 | 13.57608 | 6.225792 |
| ENSMUSG000000030735  | 5_Gm9755        | 32.54682036 | 0.494421  | 0.501705 | 0.826042 | 8.121322 | 38.64376 | 34.51836 | 64.49279 | 33.9402  | 15.56448 |
| 290.9190437          | 13_Pph          | 290.9190437 | -0.184725 | 0.501749 | 0.826047 | 306.986  | 229.2863 | 280.7494 | 342.3079 | 312.2499 | 273.9349 |
| ENSMUSG000000052512  | 15_Nav2         | 321.132247  | -0.24697  | 0.501799 | 0.826061 | 347.5926 | 322.8901 | 375.0995 | 175.6188 | 338.2707 | 367.3218 |
| ENSMUSG000000002769  | 8_Gnmt          | 11.03064135 | -0.49058  | 0.502115 | 0.826383 | 16.24264 | 8.587502 | 13.80735 | 3.968787 | 9.050721 | 14.52685 |
| ENSMUSG000000011256  | 16_Adam19       | 167.4095635 | -0.18041  | 0.502119 | 0.826383 | 198.1603 | 171.75   | 163.3869 | 146.8451 | 157.2563 | 167.0588 |
| ENSMUSG0000000026788 | 13_Zbtb43       | 818.9398175 | 0.145131  | 0.502116 | 0.826383 | 782.0833 | 740.2427 | 811.1815 | 819.5546 | 860.9498 | 899.627  |
| ENSMUSG000000000394  | 15_Gcg          | 1.383662821 | -1.55252  | 0.502906 | 0.82661  | 1.624264 | 0        | 4.602448 | 0        | 0        | 2.075264 |
| ENSMUSG0000000002320 | 15_Tm9sf1       | 1542.958282 | -0.17418  | 0.502683 | 0.82661  | 1548.736 | 1568.937 | 1790.352 | 1181.706 | 1655.151 | 1512.868 |
| ENSMUSG000000015749  | 12_Ansp32e      | 2514.604839 | 0.204994  | 0.50265  | 0.82661  | 2318.637 | 2229.316 | 2461.159 | 3607.628 | 2201.588 | 2269.301 |
| ENSMUSG000000019082  | 17_Slc25a22     | 465.4774422 | -0.40034  | 0.503004 | 0.82661  | 474.2852 | 538.4364 | 579.9085 | 90.28991 | 584.9028 | 525.0418 |
| ENSMUSG000000026280  | 17_Altg4b       | 1084.007769 | -0.20669  | 0.502367 | 0.82661  | 1133.737 | 1185.075 | 1165.57  | 695.53   | 1150.573 | 1173.562 |
| 13_Ncapd2            | 944.3245859     | -0.3306     | 0.50266   | 0.82661  | 1019.226 | 971.2465 | 1165.57  | 312.542  | 1135.865 | 1061.498 |          |
| ENSMUSG000000038298  | 14_Pdzk1        | 6.847995035 | -0.51544  | 0.502956 | 0.82661  | 8.121322 | 6.870002 | 9.204897 | 5.953181 | 6.788041 | 4.150528 |
| ENSMUSG000000040725  | 13_Hnmpul1      | 4670.680923 | -0.20005  | 0.50241  | 0.82661  | 4716.864 | 4778.945 | 5486.119 | 3137.326 | 5193.982 | 4710.85  |
| ENSMUSG000000041740  | 16_Rnf10        | 7277.52194  | -0.27373  | 0.502628 | 0.82661  | 7410.706 | 7696.119 | 8790.677 | 3337.75  | 8380.967 | 8048.912 |
| ENSMUSG000000042961  | 13_Egflam       | 193.3268267 | -0.22293  | 0.502459 | 0.82661  | 207.9058 | 267.9301 | 148.429  | 185.5408 | 168.5697 | 181.5856 |
| ENSMUSG000000045078  | 12_Rnf126       | 1202.96046  | -0.15133  | 0.502679 | 0.82661  | 1184.089 | 1259.787 | 1354.27  | 1032.877 | 1204.877 | 1181.863 |
| ENSMUSG000000046709  | 16_Mapk10       | 14.94537064 | -0.41963  | 0.502987 | 0.82661  | 17.05478 | 24.90376 | 9.204897 | 15.87515 | 10.18206 | 12.42518 |
| ENSMUSG000000059592  | 14_Zfp658       | 66.46626672 | 0.218987  | 0.502961 | 0.82661  | 59.28565 | 69.55877 | 55.22938 | 66.47719 | 73.3711  | 74.79951 |
| ENSMUSG000000058183  | 14_Mmel1        | 2.469569319 | -1.19307  | 0.502546 | 0.82661  | 0.812132 | 2.576251 | 6.903673 | 0        | 4.52536  |          |
| ENSMUSG000000059832  | 4_Kprp          | 91.56103736 | -0.23906  | 0.502567 | 0.82661  | 89.33454 | 109.0613 | 98.95264 | 61.5162  | 82.58783 | 107.9137 |
| ENSMUSG000000062372  | 13_Otof         | 1.245501552 | -1.37826  | 0.502885 | 0.82661  | 0.812132 | 3.435001 | 1.150612 | 0        | 0        | 2.075264 |
| ENSMUSG000000090891  | 3_D6ErtD527e    | 11.81572531 | -0.42001  | 0.50297  | 0.82661  | 16.24264 | 9.446252 | 14.95796 | 10.91416 | 7.919381 | 11.41395 |
| ENSMUSG000000096256  | 1_Gm21093       | 3.94024166  | -0.82165  | 0.502978 | 0.82661  | 8.121322 | 3.435001 | 3.451836 | 2.97659  | 5.567071 | 0        |
| ENSMUSG000000030793  | 4_Pycard        | 1486.813188 | -0.28953  | 0.503081 | 0.826645 | 1592.591 | 1455.582 | 1858.239 | 641.9513 | 1844.084 | 1528.432 |
| ENSMUSG000000035914  | 10_Cd276        | 951.767593  | -0.25342  | 0.50315  | 0.826645 | 939.6369 | 1004.738 | 1160.968 | 506.0204 | 1166.412 | 932.8312 |
| ENSMUSG000000037772  | 12_Mrp123       | 729.0352381 | -0.31246  | 0.503117 | 0.826645 | 831.6234 | 778.8865 | 812.3321 | 266.9009 | 831.535  | 852.9336 |
| ENSMUSG000000038244  | 13_Mical2       | 438.2319088 | -0.18409  | 0.503267 | 0.826769 | 469.4124 | 428.5164 | 500.5163 | 325.4406 | 459.3241 | 446.1818 |
| ENSMUSG000000021703  | 8_Serinc5       | 1507.260347 | 0.178066  | 0.503468 | 0.826963 | 1406.613 | 1338.792 | 1498.097 | 1945.698 | 1321.431 | 1528.432 |
| ENSMUSG000000031448  | 12_Adprh11      | 4.819325857 | -0.59491  | 0.503435 | 0.826963 | 6.497057 | 5.152501 | 5.753061 | 3.968787 | 3.39402  | 4.150528 |
| ENSMUSG000000037432  | 15_Fer115       | 32.69723256 | -0.28487  | 0.503586 | 0.827089 | 34.92168 | 43.79626 | 28.7653  | 27.78151 | 33.9402  | 26.97843 |
| ENSMUSG000000024502  | 9_Jakmp12       | 14.12588115 | -0.43947  | 0.50379  | 0.827287 | 19.49117 | 18.8925  | 10.35551 | 18.85174 | 6.788041 | 10.37632 |
| ENSMUSG000000034152  | 5_Exoc3         | 1836.826469 | 0.144502  | 0.503784 | 0.827287 | 1774.509 | 1660.823 | 1799.557 | 2051.863 | 1964.006 | 1770.2   |
| ENSMUSG000000006204  | 5_5430419D17Rik | 3.853372941 | 1.051666  | 0.503897 | 0.827395 | 5.684925 | 1.71175  | 0        | 8.929771 | 6.788041 | 0        |
| ENSMUSG000000028692  | 14_Akr1a1       | 8401.501669 | -0.18906  | 0.504134 | 0.827716 | 8785.646 | 8731.772 | 9336.067 | 5786.492 | 8999.628 | 8779.405 |
| ENSMUSG000000022656  | 15_Pvrl3        | 605.6707056 | 0.414917  | 0.504274 | 0.827739 | 478.3459 | 731.6552 | 347.4849 | 1345.419 | 233.0561 | 498.0634 |
| ENSMUSG000000042682  | 8_Selk          | 1629.657993 | 0.149352  | 0.504198 | 0.827739 | 1555.233 | 1422.09  | 1659.183 | 1846.478 | 1697.01  | 1597.953 |
| ENSMUSG000000054169  | 7_Ceacam10      | 1.822638031 | -1.25474  | 0.504356 | 0.827739 | 1.624264 | 6.011252 | 0        | 0        | 2.26268  | 1.037632 |
| ENSMUSG000000097073  | 7_9430037G07Rik | 41.34236247 | 0.419461  | 0.504333 | 0.827739 | 22.7397  | 52.38376 | 31.06653 | 86.32112 | 31.67752 | 32.86554 |
| ENSMUSG0000000107585 | 1_RP23-449F12   | 3.02635434  | 0.980965  | 0.504255 | 0.827739 | 4.060661 | 0.85875  | 1.150612 | 7.937575 | 0        | 4.150528 |
| ENSMUSG000000021298  | 7_Gpr132        | 59.80840507 | -0.42169  | 0.504487 | 0.827781 | 105.5772 | 31.77376 | 67.88611 | 26.78931 | 90.50721 | 36.31712 |
| ENSMUSG000000031532  | 5_Saraf         | 1618.622294 | -0.15495  | 0.504438 | 0.827781 | 1655.938 | 1735.534 | 1724.768 | 1320.614 | 1680.04  | 1594.84  |
| ENSMUSG000000032268  | 13_Tmprss5      | 2.735114148 | -1.1212   | 0.504506 | 0.827781 | 4.060661 | 6.011252 | 1.150612 | 0        | 0        | 5.18816  |
| ENSMUSG000000097047  | 1_1110020A21Rik | 9.186998932 | 0.473136  | 0.504621 | 0.827901 | 9.745586 | 8.587502 | 4.602448 | 13.89076 | 7.919381 | 10.37632 |
| ENSMUSG000000022555  | 11_Dgat1        | 348.0695521 | -0.23372  | 0.504685 | 0.827937 | 385.7628 | 357.2401 | 385.4551 | 200.4238 | 363.1602 | 396.3754 |
| ENSMUSG0000000069814 | 6_E130309D14Rik | 10.89088759 | -0.45316  | 0.504726 | 0.827937 | 14.61838 | 13.74    | 9.204897 | 4.960984 | 12.44474 | 10.37632 |
| ENSMUSG000000036940  | 15_Kdm1a        | 2012.825826 | 0.146416  | 0.504846 | 0.827998 | 1872.777 | 1805.952 | 2053.843 | 2106.434 | 2270.6   | 1967.35  |
| ENSMUSG000000059060  | 13_Rad51b       | 19.14420107 | 0.381494  | 0.504833 | 0.827998 | 11.36985 | 18.03375 | 20.71102 | 29.7659  | 21.49546 | 13.48922 |
| ENSMUSG000000022504  | 9_Cita          | 132.4016429 | 0.274945  | 0.50495  | 0.8281   | 129.9411 | 110.7788 | 118.513  | 81.36014 | 200.2472 | 153.5695 |
| ENSMUSG0000000001025 | 8_S100a6        | 68000.10568 | -0.31191  | 0.505107 | 0.828123 | 73195.85 | 73404.25 | 79366.92 | 24484.44 | 78863.62 | 78865.71 |
| ENSMUSG0000000002052 | 6_Supt6         | 4930.774433 | -0.2581   | 0.505022 | 0.828123 | 4763.967 | 5272.726 | 6075.232 | 2509.266 | 5961.031 | 5002.424 |
| ENSMUSG000000033706  | 13_Smyd5        | 389.2782292 | -0.30331  | 0.505131 | 0.828123 | 386.5749 | 425.9401 | 477.504  | 156.7671 | 496.6583 | 392.2249 |
| ENSMUSG000000050188  | 8_Lsm10         | 171.6515374 | -0.3795   | 0.505079 | 0.828123 | 192.4573 | 194.0776 | 195.6041 | 41.67227 | 192.3278 | 213.7522 |
| ENSMUSG000000026617  | 15_Bpnt1        | 554.4725615 | 0.143927  | 0.50522  | 0.828202 | 524.6374 | 511.8151 | 544.2395 | 584.4039 | 571.3268 | 590.4126 |
| ENSMUSG000000070697  | 4_Utp3          | 928.8357477 | 0.195901  | 0.505277 | 0.828209 | 859.2358 | 767.7227 | 971.1166 | 1257.113 | 896.0214 | 821.8046 |
| ENSMUSG000000071192  | 5_Wfikkn1       | 16.43475849 | -0.58243  | 0.505308 | 0.828209 | 25.1761  | 15.4575  | 18.40979 | 0.992197 | 14.70742 | 23.86554 |
| ENSMUSG000000025816  | 15_Sec61a2      | 480.5802719 | 0.166564  | 0.505386 | 0.82827  | 468.6003 | 448.2676 | 441.835  | 587.3805 | 443.4853 | 493.9129 |
| ENSMUSG000000004473  | 10_Clec11a      | 191.7624902 | -0.22263  | 0.505484 | 0.828294 | 229.0213 | 201.8063 | 188.7004 | 159.7437 | 135.7608 | 235.5425 |
| ENSMUSG000000079436  | 3_Kcnj13        | 342.406797  | -0.31872  | 0.505443 | 0.828294 | 393.072  | 541.0126 | 205.9596 | 412.7539 | 181.0144 | 320.6283 |
| ENSMUSG000000045322  | 10_Tlr9         | 70.63920747 | -0.50384  | 0.505542 | 0.828299 | 128.3169 | 46.37251 | 73.63917 | 9.921968 | 107.4773 | 58.1074  |
| ENSMUSG000000050410  | 15_Tcf19        | 348.9677659 | -0.2924   | 0.50557  | 0.828299 | 397.1326 | 364.1101 | 391.2081 | 144.8607 | 395.969  | 400.526  |
| ENSMUSG000000056476  | 13_Med12l       | 311.1834732 | 0.226549  | 0.505654 | 0.828367 | 237.9547 | 348.6526 | 273.8457 | 429.6212 | 326.9573 | 250.0693 |
| ENSMUSG000000087595  | 1_1810012K08Rik | 12.96878125 | -0.4246   | 0.505726 | 0.828417 | 18.67904 | 15.4575  | 10.35551 | 15.87515 | 10.18206 | 7.263424 |
| ENSMUSG000000034390  | 15_Cmp1         | 1701.100623 | -0.18341  | 0.505775 | 0.82843  | 1616.955 | 1788.777 | 2021.625 | 1269.02  | 1865.58  | 1644.647 |
| ENSMUSG000000090023  | 1_Gm16302       | 1.39845181  | 1.514555  | 0.505829 | 0.82845  | 0        | 0        | 2.301224 | 2.97659  | 0        | 3.12896  |
| ENSMUSG000000030173  | 15_Klra5        | 1.8811069   | 0.937207  | 0.505937 | 0.828466 | 0.812132 | 0.85875  | 2.301224 | 2.97659  | 2.26268  | 2.075264 |
| ENSMUSG000000054309  | 8_Cpsf3         | 1320.57537  | 0.162112  | 0.505964 | 0.828466 | 1214.138 | 1134.409 | 1391.09  | 1240.246 | 1551.067 | 1392.502 |

|                      |                  |             |           |          |          |          |          |          |          |          |          |
|----------------------|------------------|-------------|-----------|----------|----------|----------|----------|----------|----------|----------|----------|
| ENSMUSG00000038572   | 7_Bpifb5         | 12.84033198 | -0.45992  | 0.508833 | 0.830979 | 18.67904 | 15.4575  | 10.35551 | 5.953181 | 7.919381 | 18.67738 |
| ENSMUSG00000003234   | 15_Abcf3         | 1413.835089 | -0.2361   | 0.508978 | 0.831095 | 1532.493 | 1471.898 | 1583.242 | 771.9291 | 1568.037 | 1555.41  |
| ENSMUSG000000079434  | 8_Neu2           | 67.62176239 | -0.28997  | 0.508988 | 0.831095 | 69.03124 | 74.71127 | 79.39224 | 32.74249 | 67.88041 | 81.97293 |
| ENSMUSG000000086212  | 7_Mkln1os        | 11.82176487 | 0.520526  | 0.509171 | 0.831325 | 12.99411 | 10.305   | 5.753061 | 26.78931 | 6.788041 | 8.301057 |
| ENSMUSG000000001741  | 11_Ii16          | 101.3258392 | -0.34086  | 0.509436 | 0.831495 | 157.5536 | 81.58127 | 101.2539 | 36.71128 | 118.7907 | 112.0643 |
| ENSMUSG000000025221  | 15_Kcnip2        | 33.6668931  | -0.28244  | 0.509362 | 0.831495 | 39.79448 | 35.20876 | 35.66898 | 21.82833 | 37.33422 | 32.16659 |
| ENSMUSG000000051839  | 6_Gypa           | 2.472439014 | 0.803029  | 0.509347 | 0.831495 | 1.624264 | 2.576251 | 1.150612 | 2.97659  | 3.39402  | 3.112896 |
| ENSMUSG000000102312  | 1_Pcdha3         | 2.021287501 | 1.403464  | 0.509441 | 0.831495 | 0        | 0        | 3.451836 | 0        | 4.52536  | 4.150528 |
| ENSMUSG000000001021  | 12_S100a3        | 858.0074205 | -0.34399  | 0.509598 | 0.831546 | 946.9461 | 831.2702 | 1101.136 | 255.9868 | 1061.197 | 951.5086 |
| ENSMUSG000000002055  | 9_Spag5          | 481.8796239 | -0.18746  | 0.509567 | 0.831546 | 560.3712 | 495.4989 | 483.2571 | 350.2455 | 470.6375 | 531.2676 |
| ENSMUSG000000092274  | 2_Neat1          | 32840.57905 | -0.14879  | 0.509562 | 0.831546 | 31979.33 | 37051.64 | 34566.69 | 28560.39 | 30293.89 | 34591.54 |
| ENSMUSG000000026974  | 11_Zmynd19       | 614.456721  | -0.148214 | 0.509742 | 0.831577 | 571.7411 | 575.3626 | 601.7701 | 670.725  | 678.8041 | 588.3374 |
| ENSMUSG000000070425  | 12_Xntrpc        | 71.34478391 | -0.33682  | 0.509661 | 0.831577 | 73.0919  | 70.41752 | 95.50081 | 29.7659  | 56.56701 | 102.7256 |
| ENSMUSG000000085525  | 7_Gm13166        | 26.60895266 | 0.321329  | 0.509725 | 0.831577 | 22.7397  | 19.75126 | 28.7653  | 40.68007 | 24.88948 | 22.82791 |
| ENSMUSG000000030486  | 9_Zfp108         | 62.8212146  | -0.24617  | 0.509917 | 0.831725 | 60.09778 | 72.13502 | 72.48856 | 74.41476 | 53.17298 | 48.61818 |
| ENSMUSG000000053093  | 15_Myh7          | 13.62625309 | 0.585047  | 0.509901 | 0.831725 | 10.55772 | 16.31625 | 5.753061 | 18.85174 | 2.26268  | 28.01607 |
| ENSMUSG000000031521  | 4_Aga            | 456.8908729 | 0.216038  | 0.509977 | 0.831756 | 397.9448 | 479.1826 | 391.2081 | 655.8421 | 369.9482 | 447.2194 |
| ENSMUSG000000040703  | 11_Cyp2s1        | 1213.79363  | -0.30807  | 0.510048 | 0.831803 | 1294.539 | 1119.81  | 1614.309 | 466.3325 | 1466.581 | 1301.191 |
| ENSMUSG000000000751  | 13_Rpa1          | 1997.008286 | 0.138684  | 0.510247 | 0.831899 | 1851.661 | 1818.833 | 2033.132 | 2133.223 | 2140.495 | 2004.705 |
| ENSMUSG000000028367  | 5_Txn1           | 7391.113097 | 0.170572  | 0.51023  | 0.831899 | 7184.933 | 5965.738 | 7713.704 | 8490.228 | 8422.827 | 6569.249 |
| ENSMUSG000000063522  | 5_2010109103Rik  | 14.47227818 | 0.462835  | 0.510274 | 0.831899 | 10.55772 | 7.728752 | 18.40979 | 6.945378 | 20.36412 | 22.82791 |
| ENSMUSG000000010787  | 1_RP23-207N15    | 39.90855040 | -0.32958  | 0.510248 | 0.831899 | 47.10367 | 44.65501 | 41.42204 | 16.86735 | 39.5969  | 48.80634 |
| ENSMUSG000000063049  | 4_Inq2           | 244.8765967 | 0.220764  | 0.510517 | 0.832159 | 237.9547 | 216.4051 | 224.3694 | 357.1909 | 195.7218 | 237.6177 |
| ENSMUSG0000000072571 | 2_Tmem253        | 13.22032168 | -0.4929   | 0.510545 | 0.832159 | 12.99411 | 20.61001 | 12.65673 | 2.97659  | 12.44474 | 17.63975 |
| ENSMUSG0000000079471 | 3_Gm7325         | 5.673276476 | 0.630554  | 0.510558 | 0.832159 | 3.248529 | 7.728752 | 2.301224 | 5.953181 | 3.39402  | 11.41395 |
| ENSMUSG0000000054128 | 16_H2-T3         | 11.36423217 | 0.471519  | 0.510612 | 0.832178 | 9.745586 | 5.152501 | 13.80735 | 6.945378 | 16.9701  | 15.56448 |
| ENSMUSG0000000038697 | 14_Taf5l         | 1106.08819  | -0.24246  | 0.510841 | 0.832483 | 1175.967 | 1105.212 | 1315.15  | 597.3025 | 1319.143 | 1123.756 |
| ENSMUSG000000026596  | 13_Abl2          | 1540.867046 | 0.141607  | 0.510911 | 0.832529 | 1469.959 | 1394.61  | 1531.465 | 1616.289 | 1724.162 | 1508.717 |
| ENSMUSG0000000001420 | 13_Tmem79        | 1508.756149 | -0.37478  | 0.511232 | 0.83278  | 1527.621 | 1975.601 | 1607.765 | 1975.601 | 1607.765 | 1593.803 |
| ENSMUSG000000050490  | 7_Gm8394         | 7.898042015 | 0.55479   | 0.511186 | 0.83278  | 4.060661 | 6.011252 | 9.204897 | 5.953181 | 16.9701  | 5.18816  |
| ENSMUSG000000054976  | 14_Nyp2          | 5.055427961 | 0.106072  | 0.51122  | 0.83278  | 6.497057 | 3.435001 | 0        | 15.87515 | 4.52536  | 0        |
| ENSMUSG000000092443  | 1_Gm20726        | 1.350558521 | -1.51246  | 0.51117  | 0.83278  | 0        | 2.576251 | 3.451836 | 0        | 0        | 2.075264 |
| ENSMUSG000000050064  | 14_Zfp697        | 93.29043934 | -0.26912  | 0.511312 | 0.832842 | 103.1408 | 114.2138 | 88.59713 | 126.009  | 64.48639 | 63.29556 |
| ENSMUSG000000032064  | 17_Dixdc1        | 164.9963571 | 0.343791  | 0.511574 | 0.8332   | 122.632  | 170.0325 | 143.8265 | 327.4249 | 95.88185 | 140.0803 |
| ENSMUSG0000000024622 | 7_Hmgxb3         | 819.2080233 | -0.2956   | 0.511764 | 0.833442 | 823.502  | 896.5352 | 988.3758 | 324.4484 | 978.6092 | 903.7775 |
| ENSMUSG000000027004  | 3_Frbz           | 22.4956117  | 0.417294  | 0.511967 | 0.833569 | 21.92757 | 19.75126 | 16.10857 | 46.63325 | 18.10144 | 12.45158 |
| ENSMUSG000000056856  | 11_Jakmip3       | 4.55834358  | -0.71181  | 0.511966 | 0.833569 | 8.933454 | 3.435001 | 4.602448 | 1.984394 | 1.13134  | 7.263424 |
| ENSMUSG000000093985  | 7_Gm10406        | 4.277982395 | 0.105239  | 0.511957 | 0.833569 | 1.624264 | 0        | 6.903673 | 10.91416 | 0        | 6.225792 |
| ENSMUSG000000003872  | 7_Lin7b          | 19.44822567 | -0.49049  | 0.51214  | 0.833677 | 21.92757 | 26.62126 | 19.56041 | 3.968787 | 12.44474 | 32.16659 |
| ENSMUSG000000015947  | 10_Fcgr1         | 398.4005086 | 0.337499  | 0.512113 | 0.833677 | 530.3223 | 207.8176 | 317.5689 | 293.6903 | 729.7144 | 311.2896 |
| ENSMUSG0000000097262 | 1_4933416M07Rik  | 20.06413125 | 0.331258  | 0.51216  | 0.833677 | 16.24264 | 15.4575  | 21.86163 | 27.78151 | 20.36412 | 18.67738 |
| ENSMUSG000000014606  | 14_Slc25a11      | 1639.321503 | -0.23022  | 0.512324 | 0.833809 | 1673.804 | 1696.89  | 1938.781 | 923.7352 | 1779.598 | 1823.12  |
| ENSMUSG0000000021756 | 12_Ilf6t         | 4798.824851 | -0.141972 | 0.512322 | 0.833809 | 4733.918 | 4419.129 | 4535.713 | 5567.216 | 4799.145 | 4737.828 |
| ENSMUSG0000000023980 | 6_Taf8           | 605.0930755 | -0.28618  | 0.512407 | 0.833828 | 648.8936 | 627.7464 | 717.982  | 252.018  | 685.5921 | 698.3264 |
| ENSMUSG000000025785  | 4_Exosc7         | 676.9028065 | -0.2309   | 0.512419 | 0.833828 | 724.4219 | 662.9552 | 805.4285 | 385.9646 | 750.0785 | 732.5682 |
| ENSMUSG0000000017692 | 8_Rnbid3         | 389.6066146 | -0.23352  | 0.512659 | 0.833959 | 394.6962 | 369.2626 | 499.3657 | 230.1897 | 407.2824 | 436.8431 |
| ENSMUSG000000026335  | 16_Pam           | 3620.595148 | 0.182871  | 0.512668 | 0.833959 | 3371.161 | 3728.693 | 3074.436 | 4746.67  | 3105.529 | 3697.083 |
| ENSMUSG000000039043  | 5_Arpin          | 507.1101163 | -0.17101  | 0.512664 | 0.833959 | 523.8253 | 530.7076 | 556.8963 | 396.8787 | 474.0315 | 560.3213 |
| ENSMUSG000000108161  | 1_CAAA01219085   | 2.480011556 | 0.808332  | 0.512637 | 0.833959 | 1.624264 | 2.576251 | 1.150612 | 1.984394 | 3.39402  | 4.150528 |
| ENSMUSG000000039384  | 8_Dusp10         | 149.3047934 | -0.19307  | 0.512812 | 0.834125 | 155.1172 | 171.75   | 150.7302 | 112.1182 | 150.4682 | 155.6448 |
| ENSMUSG0000000025260 | 10_Hsd17b10      | 898.0335661 | -0.18126  | 0.513015 | 0.834136 | 978.6193 | 983.269  | 900.9293 | 646.9123 | 893.7587 | 984.7128 |
| ENSMUSG000000036770  | 11_4933433C11Rik | 6.692868812 | -0.69912  | 0.512866 | 0.834136 | 1.624264 | 9.446252 | 13.80735 | 1.984394 | 10.18206 | 3.112896 |
| ENSMUSG000000038178  | 12_Slc34a2       | 665.3886618 | -0.26201  | 0.513019 | 0.834136 | 759.3436 | 687.8589 | 729.4881 | 318.4952 | 799.8575 | 697.2887 |
| ENSMUSG000000046159  | 15_Chrc3         | 46.17840389 | -0.25918  | 0.513028 | 0.834136 | 49.54006 | 49.80751 | 51.77754 | 44.64886 | 29.41484 | 51.8816  |
| ENSMUSG000000103464  | 1_Gm38246        | 2.35686151  | -1.15936  | 0.513004 | 0.834136 | 0        | 5.152501 | 4.602448 | 0.992197 | 3.39402  | 0        |
| ENSMUSG0000000014867 | 9_Surf4          | 3900.349691 | -0.19426  | 0.513211 | 0.83423  | 3922.598 | 4093.662 | 4471.279 | 2633.29  | 4421.277 | 3859.991 |
| ENSMUSG0000000025017 | 9_Pik3ap1        | 155.169845  | -0.34822  | 0.513197 | 0.83423  | 225.7727 | 129.6713 | 165.6881 | 54.57082 | 218.3486 | 136.9674 |
| ENSMUSG0000000042371 | 12_Slc5a10       | 14.07529954 | -0.61167  | 0.51315  | 0.83423  | 14.61838 | 7.728752 | 28.7653  | 0.992197 | 14.70742 | 17.63975 |
| ENSMUSG0000000026810 | 12_Dpm2          | 661.083299  | -0.3376   | 0.51345  | 0.834522 | 732.5432 | 664.6727 | 816.9346 | 199.4316 | 759.1292 | 793.7885 |
| ENSMUSG0000000027933 | 11_Ints3         | 1634.083478 | -0.29047  | 0.513516 | 0.834522 | 1683.55  | 1768.167 | 1942.233 | 658.8187 | 2000.209 | 1751.523 |
| ENSMUSG0000000093954 | 8_Gm16867        | 20.63981798 | 0.412955  | 0.513496 | 0.834522 | 20.3033  | 22.32751 | 10.35551 | 36.71128 | 11.3134  | 22.82791 |
| ENSMUSG000000071489  | 1_Ptgd           | 3.033630051 | 0.884887  | 0.513594 | 0.834558 | 4.060661 | 0        | 2.301224 | 2.97659  | 6.788041 | 2.075264 |
| ENSMUSG000000032077  | 4_Bud13          | 269.9397901 | -0.23817  | 0.513654 | 0.834598 | 283.4341 | 276.5176 | 316.4183 | 153.7905 | 326.9573 | 262.5209 |
| ENSMUSG000000035311  | 16_Gnptab        | 3022.430434 | 0.138563  | 0.513689 | 0.834598 | 2973.216 | 2723.956 | 2935.211 | 3403.235 | 3003.708 | 3095.256 |
| ENSMUSG0000000024527 | 9_Afg3l2         | 1232.871634 | -0.18336  | 0.513742 | 0.834617 | 1277.484 | 1252.058 | 1403.747 | 871.1488 | 1312.355 | 1280.438 |
| ENSMUSG000000031022  | 14_BC051019      | 1.784648622 | -1.14967  | 0.513798 | 0.834638 | 2.436397 | 2.576251 | 2.301224 | 0        | 0        | 0        |
| ENSMUSG0000000018507 | 16_Trpv2         | 70.55493625 | -0.40637  | 0.514033 | 0.834693 | 105.5772 | 68.70002 | 66.7355  | 15.87515 | 92.76899 | 73.67188 |
| ENSMUSG0000000024660 | 8_Incepp         | 766.2275682 | -0.29751  | 0.514041 | 0.834693 | 765.8406 | 787.474  | 981.4721 | 306.5888 | 968.4271 | 787.5627 |
| ENSMUSG0000000026728 | 9_Vim            | 4263.484516 | -0.14708  | 0.513974 | 0.834693 | 4522.764 | 4924.933 | 3993.775 | 4216.836 | 4124.866 | 3797.733 |
| ENSMUSG000000027752  | 15_Exosc8        | 439.3450622 | 0.178032  | 0.513986 | 0.834693 | 406.0661 | 360.6751 | 470.6004 | 544.7161 | 438.96   | 415.0528 |
| ENSMUSG0000000097536 | 2_2610037D02Rik  | 80.55923548 | 0.311783  | 0.513951 | 0.834693 | 76.34042 | 70.41752 | 69.03673 | 148.8295 | 55.43567 | 63.29556 |
| ENSMUSG000000015748  | 13_Prrp3         | 775.8912816 | 0.143205  | 0.514746 | 0.834752 | 726.0462 | 732.5139 | 753.6509 | 754.0696 | 874.5259 | 814.5412 |
| ENSMUSG0000000025278 | 8_Flnb           | 6377.344718 | -0.30662  | 0.514748 | 0.834752 | 6341.94  | 6526.502 | 8289.01  | 2373.335 | 7991.786 | 6741.496 |
| ENSMUSG000000025355  | 6_Mmp19          | 282.1457424 | 0.272264  | 0.514363 | 0.834752 | 285.8705 | 196.6538 | 284.2012 | 263.9244 | 466.1121 | 196.1125 |
| ENSMUSG0000000027500 | 10_Stmn2         | 29.9376996  |           |          |          |          |          |          |          |          |          |

|                      |                  |             |          |          |          |          |          |          |          |          |          |
|----------------------|------------------|-------------|----------|----------|----------|----------|----------|----------|----------|----------|----------|
| ENSMUSG00000039099   | 7_Wdr93          | 14.36943934 | -0.3641  | 0.515805 | 0.834972 | 13.80625 | 19.75126 | 14.95796 | 12.89856 | 11.3134  | 13.48922 |
| ENSMUSG00000049612   | 10_Omg           | 5.07390352  | 0.761482 | 0.515727 | 0.834972 | 4.060661 | 6.011252 | 1.150612 | 14.88295 | 2.26268  | 2.075264 |
| ENSMUSG000000004393  | 10_Ddx56         | 773.3611188 | -0.32377 | 0.516164 | 0.835257 | 878.727  | 799.4965 | 900.9293 | 252.018  | 982.0032 | 826.9928 |
| ENSMUSG000000026637  | 13_Trafs         | 1073.551537 | -0.19779 | 0.516067 | 0.835257 | 1062.269 | 1033.935 | 1345.066 | 739.1866 | 1125.683 | 1135.169 |
| ENSMUSG000000037033  | 9_Clcab3b        | 364.3543684 | -0.18382 | 0.516088 | 0.835257 | 400.3812 | 309.1501 | 453.3412 | 311.5498 | 374.4736 | 337.2304 |
| ENSMUSG000000054667  | 7_Irs4           | 3.439329861 | 0.726933 | 0.516191 | 0.835257 | 2.436397 | 0.85875  | 4.602448 | 3.968787 | 5.656701 | 3.112896 |
| ENSMUSG000000009714  | 1_Gm26779        | 7.598832026 | 0.516271 | 0.516144 | 0.835257 | 8.933454 | 5.152501 | 4.602448 | 13.89076 | 6.788041 | 6.225792 |
| ENSMUSG000000030963  | 5_Ulmod          | 0.834879747 | 2.057508 | 0.516399 | 0.835526 | 0        | 0.85875  | 0        | 0        | 0        | 4.150528 |
| ENSMUSG000000036832  | 5_Lpar3          | 13.95306292 | 0.40294  | 0.516584 | 0.835621 | 8.933454 | 14.59875 | 12.65673 | 22.82053 | 10.18206 | 14.52685 |
| ENSMUSG000000037017  | 5_Zscan21        | 526.8499964 | 0.159153 | 0.516546 | 0.835621 | 455.6062 | 472.3126 | 566.1012 | 535.7863 | 529.4672 | 601.8266 |
| ENSMUSG000000047562  | 2_Mmp10          | 40.11240402 | 0.33325  | 0.51652  | 0.835621 | 28.42463 | 26.62126 | 51.77754 | 44.64886 | 62.22371 | 26.97843 |
| ENSMUSG000000040181  | 14_Fmo1          | 649.2989512 | 0.260526 | 0.516752 | 0.835825 | 596.9172 | 630.3227 | 545.3901 | 1033.869 | 398.2317 | 691.063  |
| ENSMUSG000000028932  | 7_Psmc2          | 3147.092387 | 0.14643  | 0.516991 | 0.836144 | 2957.785 | 2769.469 | 3235.521 | 3237.538 | 3631.602 | 3050.638 |
| ENSMUSG000000023088  | 16_Abcc1         | 774.8837811 | -0.21118 | 0.517183 | 0.836386 | 791.0167 | 841.5752 | 861.8085 | 478.2389 | 787.4127 | 889.2507 |
| ENSMUSG000000020698  | 11_Cct6b         | 16.19558915 | 0.351665 | 0.517392 | 0.836486 | 12.18198 | 18.8925  | 11.50612 | 18.85174 | 18.10144 | 17.63975 |
| ENSMUSG000000025823  | 9_Pdia4          | 3646.672251 | 0.160119 | 0.51739  | 0.836486 | 3332.99  | 3208.291 | 3792.418 | 3438.954 | 4489.158 | 3618.223 |
| ENSMUSG000000029458  | 14_Brap          | 1695.024103 | -0.20518 | 0.517455 | 0.836486 | 1625.076 | 1787.918 | 2033.132 | 1087.448 | 1799.962 | 1836.609 |
| ENSMUSG000000061118  | 8_Dnajc30        | 247.9976902 | -0.17572 | 0.517322 | 0.836486 | 255.0095 | 231.0038 | 303.7616 | 243.0882 | 208.1666 | 246.9564 |
| ENSMUSG000000097102  | 1_2310069G16Rik  | 0.794082474 | -1.71816 | 0.517449 | 0.836486 | 0        | 2.576251 | 1.150612 | 0        | 0        | 1.037632 |
| ENSMUSG000000085085  | 2_1700886P04Rik  | 3.889256135 | 0.673167 | 0.517655 | 0.836606 | 3.248529 | 3.435001 | 2.301224 | 7.937575 | 2.26268  | 4.150528 |
| ENSMUSG000000103335  | 1_Flg            | 0.572500148 | -2.57394 | 0.517648 | 0.836606 | 0        | 3.435001 | 0        | 0        | 0        | 0        |
| ENSMUSG000000105003  | 1_Gm42512        | 0.572500148 | -2.57394 | 0.517648 | 0.836606 | 0        | 3.435001 | 0        | 0        | 0        | 0        |
| ENSMUSG000000024646  | 13_Cyb5a         | 2477.950231 | 0.158149 | 0.51779  | 0.836757 | 2398.226 | 2322.919 | 2305.827 | 3060.927 | 2235.528 | 2544.274 |
| ENSMUSG000000029621  | 14_Arpc1a        | 2987.720385 | -0.25327 | 0.5179   | 0.836866 | 3047.12  | 3153.331 | 3547.337 | 1463.49  | 3501.498 | 3213.547 |
| ENSMUSG000000037822  | 12_Smim14        | 2180.875253 | 0.219469 | 0.518023 | 0.836941 | 2026.27  | 2073.023 | 1946.836 | 3290.125 | 1654.019 | 2094.979 |
| ENSMUSG000000090286  | 1_Gm17615        | 1.169296943 | 1.363091 | 0.51803  | 0.836941 | 0        | 0.85875  | 1.150612 | 3.968787 | 0        | 1.037632 |
| ENSMUSG000000030309  | 16_Caprin2       | 223.896708  | 0.26399  | 0.518081 | 0.836955 | 218.4636 | 245.6026 | 146.1277 | 357.1909 | 179.8831 | 196.1125 |
| ENSMUSG000000038042  | 9_Ptpdc1         | 205.0417377 | -0.19651 | 0.518143 | 0.836956 | 229.8334 | 222.4163 | 204.809  | 232.1741 | 145.9429 | 195.0748 |
| ENSMUSG000000040606  | 13_Kazn          | 1927.455704 | -0.16847 | 0.518166 | 0.836956 | 1885.771 | 1994.877 | 2239.091 | 1468.451 | 1958.35  | 2018.194 |
| ENSMUSG000000022780  | 5_Mlf2           | 29.43966752 | -0.34424 | 0.518326 | 0.837147 | 31.67315 | 25.76251 | 41.42204 | 12.89856 | 31.67752 | 33.20423 |
| ENSMUSG000000031996  | 16_Aplp2         | 15355.46729 | -0.13412 | 0.51858  | 0.837422 | 15238.04 | 16589.34 | 16378.96 | 14425.5  | 15892.86 | 1508.066 |
| ENSMUSG000000084799  | 7_Ino8Odos       | 64.82784858 | 0.247642 | 0.518557 | 0.837422 | 60.09778 | 55.81876 | 62.13305 | 96.24309 | 56.56701 | 58.1074  |
| ENSMUSG000000028847  | 8_Trapcc3        | 1284.842002 | -0.17431 | 0.518793 | 0.837698 | 1371.691 | 1320.758 | 1411.801 | 874.1254 | 1361.002 | 1369.674 |
| ENSMUSG000000048330  | 14_Ric3          | 203.2021557 | 0.282141 | 0.518927 | 0.837846 | 218.4636 | 195.7951 | 135.7722 | 348.2611 | 153.8623 | 167.0588 |
| ENSMUSG0000000004661 | 15_Arid3b        | 53.34438479 | -0.30044 | 0.519121 | 0.838091 | 80.40109 | 60.11252 | 35.66898 | 33.73469 | 50.0464  | 58.1074  |
| ENSMUSG000000043572  | 7_Pars2          | 135.1089116 | -0.24665 | 0.519191 | 0.838136 | 123.4441 | 145.1288 | 171.4412 | 78.38355 | 133.4981 | 158.7577 |
| ENSMUSG0000000003865 | 14_Gys1          | 364.8794555 | -0.23844 | 0.519544 | 0.83821  | 347.5926 | 472.3126 | 364.744  | 207.3691 | 380.1303 | 417.1281 |
| ENSMUSG0000000116510 | 11_Miffl3        | 370.1223819 | -0.16272 | 0.519658 | 0.83821  | 372.7687 | 352.9463 | 447.5881 | 323.4562 | 359.7662 | 364.2089 |
| ENSMUSG0000000016524 | 12_Ii19          | 1.436519878 | 1.227427 | 0.519401 | 0.83821  | 0.812132 | 1.7175   | 0        | 2.97659  | 0        | 3.112896 |
| ENSMUSG000000020286  | 12_1700093K21Rik | 2.072676495 | -0.94215 | 0.519535 | 0.83821  | 0.812132 | 1.7175   | 5.753061 | 1.984394 | 1.13134  | 1.037632 |
| ENSMUSG000000020722  | 5_Cacng1         | 14.01409415 | -0.38435 | 0.519369 | 0.83821  | 13.80625 | 18.8925  | 14.95796 | 11.90636 | 7.919381 | 16.60211 |
| ENSMUSG000000022340  | 14_Sybu          | 49.04010225 | -0.28824 | 0.519412 | 0.83821  | 53.60072 | 67.84127 | 40.27142 | 59.53181 | 29.41484 | 43.58055 |
| ENSMUSG000000029394  | 11_Cdk2ap1       | 1999.266733 | -0.18288 | 0.519484 | 0.83821  | 2027.082 | 2096.209 | 2254.049 | 1396.021 | 2193.668 | 2028.571 |
| ENSMUSG000000034274  | 11_Thoc5         | 1079.045387 | -0.24316 | 0.519619 | 0.83821  | 1111.809 | 1091.472 | 1305.945 | 562.5756 | 1244.474 | 1157.997 |
| ENSMUSG000000078134  | 1_Gm12355        | 11.58777562 | -0.42266 | 0.519306 | 0.83821  | 13.80625 | 7.728752 | 18.40979 | 8.929771 | 11.3134  | 9.338689 |
| ENSMUSG0000000097313 | 1_Gm26569        | 4.40843451  | -0.6705  | 0.519641 | 0.83821  | 5.684925 | 6.011252 | 4.602448 | 6.945378 | 1.13134  | 2.075264 |
| ENSMUSG000000013622  | 15_Altad1        | 1106.556671 | -0.1691  | 0.519799 | 0.838235 | 1175.967 | 1188.51  | 1149.461 | 879.0864 | 975.2152 | 1271.099 |
| ENSMUSG000000026574  | 5_Dpt            | 2469.984705 | 0.224606 | 0.519717 | 0.838235 | 2412.845 | 2482.647 | 1938.781 | 3568.932 | 1760.356 | 2656.338 |
| ENSMUSG000000029211  | 11_Gabra4        | 14.20211535 | 0.49429  | 0.519771 | 0.838235 | 13.80625 | 14.59875 | 6.903673 | 30.7581  | 5.656701 | 13.48922 |
| ENSMUSG000000021079  | 15_Timm9         | 215.9971436 | 0.179488 | 0.520028 | 0.838536 | 211.9665 | 203.5238 | 192.1522 | 268.8853 | 228.5307 | 190.9243 |
| ENSMUSG000000004071  | 12_Cdip1         | 1033.027845 | -0.15693 | 0.520106 | 0.838569 | 994.0498 | 1243.47  | 1029.798 | 902.8991 | 957.1137 | 1070.836 |
| ENSMUSG000000059552  | 13_Trp53         | 1147.631911 | -0.30873 | 0.520132 | 0.838569 | 1170.282 | 1171.335 | 1468.181 | 409.7773 | 1422.095 | 1244.121 |
| ENSMUSG000000028017  | 7_Egf            | 95.61574325 | -0.2135  | 0.520419 | 0.838895 | 94.20733 | 111.6375 | 102.4045 | 102.1963 | 67.4907  | 96.49978 |
| ENSMUSG000000037754  | 13_Ppp1r16b      | 77.55249969 | -0.20079 | 0.520379 | 0.838895 | 90.14667 | 85.87502 | 72.48856 | 70.44597 | 75.79979 | 76.5898  |
| ENSMUSG000000001739  | 14_Cldn15        | 6.66559388  | 0.544825 | 0.520531 | 0.839007 | 4.872793 | 3.435001 | 8.054285 | 4.960984 | 12.44474 | 6.225792 |
| ENSMUSG000000019923  | 1809_543894      | 1.422304    | 0.520844 | 0.839025 | 1802.933 | 1708.054 | 1649.978 | 2074.684 | 1848.995 | 1726.62  |          |
| ENSMUSG000000021565  | 16_Slc6a19       | 9.728400327 | 0.427208 | 0.520931 | 0.839025 | 9.745586 | 6.011252 | 9.204897 | 11.90636 | 9.050721 | 12.45158 |
| ENSMUSG000000024812  | 9_Tjp2           | 7192.538888 | -0.19868 | 0.520963 | 0.839025 | 6929.112 | 7562.154 | 8569.759 | 4766.513 | 8265.571 | 7062.124 |
| ENSMUSG000000025754  | 11_Agbl1         | 1.421177662 | 1.236835 | 0.520716 | 0.839025 | 1.624264 | 0.85875  | 0        | 3.968787 | 0        | 2.075264 |
| ENSMUSG000000033450  | 7_Tagap          | 133.9756237 | 0.246065 | 0.520957 | 0.839025 | 138.8746 | 127.095  | 101.2539 | 105.1729 | 205.9039 | 125.5535 |
| ENSMUSG000000043411  | 15_Uspl48        | 2052.268345 | 0.135454 | 0.520912 | 0.839025 | 1922.317 | 1972.549 | 1973.3   | 2324.717 | 2045.463 | 2075.264 |
| ENSMUSG000000048921  | 11_Zfp689        | 74.06553033 | -0.24434 | 0.5207   | 0.839025 | 55.22499 | 103.05   | 82.84407 | 69.45378 | 62.22371 | 71.59661 |
| ENSMUSG000000052854  | 15_Nrk           | 47.58938011 | 0.381879 | 0.520689 | 0.839025 | 47.10367 | 44.65501 | 32.21714 | 101.2041 | 27.15216 | 33.20423 |
| ENSMUSG000000063236  | 5_1110038F14Rik  | 375.5888229 | -0.26139 | 0.520717 | 0.839025 | 350.8411 | 369.2626 | 508.5706 | 189.5096 | 414.0705 | 421.2786 |
| ENSMUSG000000071052  | 3_Rpl7a-ps5      | 69.60907423 | -0.46921 | 0.520757 | 0.839025 | 71.46763 | 70.41752 | 65.58489 | 6.945378 | 88.24453 | 54.9945  |
| ENSMUSG000000025702  | 15_March8        | 2561.463441 | 0.14448  | 0.52113  | 0.839069 | 2516.798 | 2376.162 | 2407.081 | 3035.13  | 2468.584 | 2565.026 |
| ENSMUSG000000038253  | 6_Hoxa5          | 1.855929591 | 1.032298 | 0.521159 | 0.839069 | 1.624264 | 0.85875  | 1.150612 | 2.97659  | 4.52536  |          |
| ENSMUSG000000042507  | 14_Elmsan1       | 1712.247816 | -0.17233 | 0.521062 | 0.839069 | 1634.822 | 1753.568 | 2054.993 | 1300.77  | 1770.547 | 1758.786 |
| ENSMUSG0000000108456 | 1_RP24-143K11    | 20.16957156 | 0.471597 | 0.521135 | 0.839069 | 25.98823 | 12.0225  | 12.65673 | 45.64105 | 10.18206 | 14.52685 |
| ENSMUSG000000045903  | 8_Npas4          | 4.492332113 | -0.69471 | 0.521226 | 0.839107 | 4.872793 | 9.446252 | 2.301224 | 2.97659  | 1.13134  | 6.225792 |
| ENSMUSG000000085981  | 1_Gm11375        | 0.955631423 | -1.99275 | 0.521267 | 0.839107 | 0        | 0        | 4.602448 | 0        | 0        | 1.13134  |
| ENSMUSG000000020485  | 14_Supl4a        | 650.5258758 | -0.19325 | 0.521411 | 0.839261 | 698.4337 | 638.0514 | 745.5966 | 440.5354 | 657.3086 | 723.2295 |
| ENSMUSG000000083649  | 5_Ras12.9        | 2.451678206 | -0.94186 | 0.521447 | 0.839261 | 5.684925 | 1.7175   | 2.301224 | 3.968787 | 0        | 1.037632 |
| ENSMUSG000000019558  | 14_Slc6a8        | 3412.345864 | -0.23442 | 0.522166 | 0.839705 | 3489.732 | 3580.988 | 3996.076 | 1826.634 | 3967.61  | 3613.035 |
| ENSMUSG000000034157  | 12_Cipc          | 1795.88059  | 0.14506  | 0.521886 | 0.839705 | 1674.617 | 1583.535 | 1859.389 | 2006.222 | 1717.374 | 1934.146 |
| ENSMUSG000           |                  |             |          |          |          |          |          |          |          |          |          |

|                     |                 |             |           |          |          |          |          |          |          |          |          |
|---------------------|-----------------|-------------|-----------|----------|----------|----------|----------|----------|----------|----------|----------|
| ENSMUSG00000040236  | 3_Trappc5       | 469.4433102 | -0.15187  | 0.524399 | 0.84     | 447.4848 | 498.9339 | 536.1852 | 415.7305 | 476.2942 | 442.0313 |
| ENSMUSG00000048281  | 8_Dleu7         | 1.57281286  | 1.07444   | 0.523584 | 0.84     | 0        | 0.85875  | 2.301224 | 2.97659  | 2.26268  | 1.037632 |
| 7_Cybs61d1          | 7_Cybs61d1      | 756.0429835 | -0.18675  | 0.522873 | 0.84     | 837.3083 | 790.0502 | 787.0187 | 526.8565 | 866.6065 | 728.4177 |
| ENSMUSG00000050742  | 4_Olfr164       | 0.496098408 | 2.545195  | 0.524542 | 0.84     | 0        | 0        | 0        | 2.97659  | 0        | 0        |
| ENSMUSG00000055704  | 4_Gm9978        | 0.940013417 | -1.99308  | 0.523103 | 0.84     | 0        | 0        | 4.602448 | 0        | 0        | 1.037632 |
| ENSMUSG00000055976  | 5_Cldn23        | 1737.608769 | 0.176138  | 0.524073 | 0.84     | 1464.274 | 1536.304 | 1895.058 | 2222.521 | 1723.031 | 1584.464 |
| ENSMUSG00000060860  | 8_Ube2a         | 1155.528307 | -0.37006  | 0.522874 | 0.84     | 1275.86  | 1133.55  | 1499.248 | 265.9087 | 1522.784 | 1235.82  |
| ENSMUSG00000067206  | 3_Lrrc66        | 167.6654439 | -0.19308  | 0.5242   | 0.84     | 179.4812 | 168.315  | 188.7004 | 121.048  | 185.5398 | 162.9082 |
| ENSMUSG00000070419  | 11_Cyp3a57      | 0.496098408 | 2.545195  | 0.524542 | 0.84     | 0        | 0        | 0        | 2.97659  | 0        | 0        |
| ENSMUSG00000070844  | 10_Vmn242       | 0.496098408 | 2.545195  | 0.524542 | 0.84     | 0        | 0        | 0        | 2.97659  | 0        | 0        |
| ENSMUSG00000072674  | 10_Plac9b       | 112.1085382 | -1.07294  | 0.523504 | 0.84     | 147.8081 | 170.0325 | 138.0735 | 0        | 61.09237 | 155.6448 |
| ENSMUSG00000076441  | 9_Ass1          | 1227.971428 | -0.29702  | 0.523485 | 0.84     | 1336.77  | 1374     | 1350.819 | 452.4417 | 1494.5   | 1359.298 |
| ENSMUSG00000079008  | 2_Gm14124       | 0.496098408 | 2.545195  | 0.524542 | 0.84     | 0        | 0        | 0        | 2.97659  | 0        | 0        |
| ENSMUSG00000079244  | 3_Gm5622        | 0.496098408 | 2.545195  | 0.524542 | 0.84     | 0        | 0        | 0        | 2.97659  | 0        | 0        |
| ENSMUSG00000086148  | 1_Gm15271       | 0.496098408 | 2.545195  | 0.524542 | 0.84     | 0        | 0        | 0        | 2.97659  | 0        | 0        |
| ENSMUSG00000095048  | 7_Gm11239       | 1.547438418 | 1.225775  | 0.524044 | 0.84     | 1.624264 | 0        | 1.150612 | 1.984394 | 4.52536  | 0        |
| ENSMUSG00000096345  | 1_Esp16         | 0.853233228 | 2.006658  | 0.524029 | 0.84     | 0        | 0        | 1.150612 | 3.968787 | 0        | 0        |
| ENSMUSG00000097015  | 1_Gm26705       | 0.496098408 | 2.545195  | 0.524542 | 0.84     | 0        | 0        | 0        | 2.97659  | 0        | 0        |
| ENSMUSG00000098306  | 7_Gm28040       | 0.478018759 | -2.29839  | 0.523763 | 0.84     | 0        | 1.7175   | 1.150612 | 0        | 0        | 0        |
| ENSMUSG000000100552 | 1_Gm29019       | 0.478018759 | -2.29839  | 0.523763 | 0.84     | 0        | 1.7175   | 1.150612 | 0        | 0        | 0        |
| ENSMUSG000000102590 | 1_Mannr         | 0.496098408 | 2.545195  | 0.524542 | 0.84     | 0        | 0        | 0        | 2.97659  | 0        | 0        |
| ENSMUSG000000102669 | 5_Gm42415       | 0.853233228 | 2.006658  | 0.524029 | 0.84     | 0        | 0        | 1.150612 | 3.968787 | 0        | 0        |
| ENSMUSG000000103067 | 1_Gm30414       | 0.496098408 | 2.545195  | 0.524542 | 0.84     | 0        | 0        | 0        | 2.97659  | 0        | 0        |
| ENSMUSG000000103383 | 1_Gm37754       | 0.496098408 | 2.545195  | 0.524542 | 0.84     | 0        | 0        | 0        | 2.97659  | 0        | 0        |
| ENSMUSG000000104004 | 1_4930565D16Rik | 0.496098408 | 2.545195  | 0.524542 | 0.84     | 0        | 0        | 0        | 2.97659  | 0        | 0        |
| ENSMUSG000000105324 | 1_Gm42705       | 0.496098408 | 2.545195  | 0.524542 | 0.84     | 0        | 0        | 0        | 2.97659  | 0        | 0        |
| ENSMUSG000000106357 | 1_Gm8013        | 0.496098408 | 2.545195  | 0.524542 | 0.84     | 0        | 0        | 0        | 2.97659  | 0        | 0        |
| ENSMUSG000000108434 | 1_RP23-291B1    | 8.863261632 | 0.626262  | 0.522702 | 0.84     | 11.36985 | 6.011252 | 3.451836 | 22.82053 | 2.26268  | 7.263424 |
| ENSMUSG000000334452 | 7_Slc24a1       | 186.5551956 | -0.36665  | 0.524616 | 0.840085 | 294.804  | 242.1676 | 93.19958 | 266.9009 | 140.2862 | 81.97293 |
| ENSMUSG00000031792  | 14_Usb1         | 506.5302916 | -0.28719  | 0.524707 | 0.840163 | 586.3594 | 477.4651 | 606.3726 | 205.3847 | 618.843  | 544.7568 |
| ENSMUSG00000037902  | 18_Sirpa        | 1669.026949 | -0.19974  | 0.524807 | 0.840257 | 1863.031 | 1770.743 | 1719.014 | 1065.619 | 1921.015 | 1671.784 |
| ENSMUSG00000027207  | 15_Galk2        | 540.551375  | 1.139114  | 0.5249   | 0.840323 | 503.522  | 504.0864 | 536.1852 | 587.3805 | 548.7    | 563.4342 |
| ENSMUSG00000062825  | 15_Actg1        | 94974.39894 | -0.23057  | 0.524933 | 0.840323 | 97632.09 | 96576.77 | 113434.2 | 51789.7  | 111474.3 | 98939.26 |
| ENSMUSG00000030330  | 15_Ing4         | 1116.903893 | -0.19624  | 0.524987 | 0.840342 | 1201.143 | 1151.584 | 1225.402 | 723.3115 | 1139.259 | 1260.723 |
| ENSMUSG000000000385 | 7_Tmprss2       | 701.5291951 | -0.16144  | 0.525276 | 0.840377 | 692.7487 | 736.8077 | 792.7717 | 552.6536 | 691.2488 | 742.9446 |
| ENSMUSG000000000739 | 13_Sult5a1      | 218.1030008 | -0.25897  | 0.525641 | 0.840377 | 220.0878 | 239.5913 | 253.1347 | 106.1651 | 224.0053 | 265.6338 |
| ENSMUSG000000024501 | 19_Dpyl3        | 1238.652874 | -0.19493  | 0.52526  | 0.840377 | 1288.042 | 1537.163 | 1141.407 | 1374.193 | 855.2931 | 1235.82  |
| ENSMUSG000000024680 | 12_Ms4a2        | 6.917702897 | 0.673054  | 0.525127 | 0.840377 | 6.497057 | 6.011252 | 3.451836 | 15.85174 | 5.656701 | 1.037632 |
| ENSMUSG000000026238 | 14_Ptma         | 13387.30492 | 0.161299  | 0.525641 | 0.840377 | 12341.16 | 10832.28 | 14746.24 | 15178.63 | 14883.66 | 12541.86 |
| ENSMUSG000000026510 | 10_Trp53bp2     | 1559.939932 | -0.2096   | 0.525624 | 0.840377 | 1546.3   | 1644.507 | 1828.323 | 947.548  | 1715.12  | 1677.851 |
| ENSMUSG000000026584 | 14_Scy3         | 815.5457643 | 0.150856  | 0.525575 | 0.840377 | 739.8524 | 722.2089 | 857.206  | 913.8133 | 889.2333 | 770.9606 |
| ENSMUSG000000304050 | 11_Oca2         | 407.3764713 | -0.28868  | 0.525165 | 0.840377 | 423.933  | 644.9214 | 274.9963 | 474.2701 | 218.3486 | 407.7894 |
| ENSMUSG000000332869 | 15_Psmf1        | 902.2913067 | -0.17945  | 0.525307 | 0.840377 | 901.4667 | 964.3765 | 1009.087 | 636.9904 | 962.7704 | 939.057  |
| ENSMUSG000000353525 | 16_Sec31a       | 3388.126719 | -0.18035  | 0.52548  | 0.840377 | 3360.603 | 3495.113 | 3943.148 | 2390.202 | 3717.584 | 3422.111 |
| ENSMUSG00000039196  | 2_Orn1          | 0.970708033 | 1.245011  | 0.525209 | 0.840377 | 0.812132 | 0.85875  | 0        | 1.984394 | 1.13134  | 1.037632 |
| ENSMUSG000000393232 | 11_Stx11        | 169.5405446 | 0.196754  | 0.525405 | 0.840377 | 176.2327 | 153.7163 | 143.8265 | 213.3223 | 190.0651 | 140.0803 |
| ENSMUSG00000045316  | 4_Fahd1         | 108.736521  | 0.262371  | 0.525555 | 0.840377 | 88.52241 | 111.6375 | 96.65142 | 178.5954 | 82.58783 | 94.42452 |
| ENSMUSG00000048170  | 14_Mcmbp        | 1961.658031 | 0.143529  | 0.525615 | 0.840377 | 1801.309 | 2180.189 | 2011.27  | 2135.208 | 2197.062 | 1844.91  |
| ENSMUSG000000600044 | 7_Tmem26        | 29.73374648 | 0.416563  | 0.525398 | 0.840377 | 32.48529 | 19.75126 | 24.16285 | 56.55522 | 35.07154 | 10.37632 |
| ENSMUSG000000003227 | 4_Edar          | 90.53839355 | -0.25793  | 0.525761 | 0.840436 | 99.08013 | 129.6713 | 66.7355  | 68.46158 | 72.40577 | 106.8761 |
| ENSMUSG00000034906  | 15_Ncap         | 401.816497  | 0.173378  | 0.525805 | 0.840436 | 332.9742 | 359.8163 | 440.6844 | 371.0816 | 481.9509 | 424.3915 |
| ENSMUSG000000107906 | 1_Gm5580        | 1.256276222 | 1.312287  | 0.525794 | 0.840436 | 0        | 0        | 2.301224 | 0.992197 | 1.13134  | 3.112896 |
| ENSMUSG00000030612  | 6_Mrpl46        | 410.3748802 | -0.24296  | 0.526024 | 0.840718 | 416.6238 | 413.9176 | 503.9681 | 214.3145 | 467.2435 | 446.1818 |
| ENSMUSG000000020014 | 15_Cfap54       | 307.0410115 | 0.38043   | 0.526163 | 0.840766 | 213.5908 | 443.9739 | 142.6759 | 613.1776 | 166.307  | 262.5209 |
| ENSMUSG000000022454 | 16_Nel1         | 66.9708717  | -0.28073  | 0.526292 | 0.840766 | 63.34631 | 79.00502 | 78.24162 | 52.58643 | 37.33422 | 91.31162 |
| ENSMUSG000000025608 | 9_Podxl         | 727.9483052 | -0.19424  | 0.526349 | 0.840766 | 661.8877 | 990.9978 | 677.7105 | 764.9837 | 563.4074 | 708.7027 |
| ENSMUSG00000033416  | 14_Gucd1        | 973.1632098 | -0.20411  | 0.526186 | 0.840766 | 1063.893 | 1003.02  | 1058.563 | 601.2713 | 1047.621 | 1064.61  |
| ENSMUSG00000036103  | 8_Colec12       | 1004.205785 | 0.255347  | 0.526337 | 0.840766 | 976.995  | 1066.568 | 703.024  | 1645.062 | 730.8457 | 902.7399 |
| ENSMUSG00000052712  | 16_BC004004     | 1517.502002 | -0.14097  | 0.526225 | 0.840766 | 1662.435 | 1534.587 | 1577.489 | 1299.778 | 1563.512 | 1467.212 |
| ENSMUSG000000806610 | 1_Gm15408       | 21.09379618 | -0.31735  | 0.526329 | 0.840766 | 25.1761  | 23.18626 | 21.86163 | 17.85954 | 13.57608 | 24.90317 |
| ENSMUSG000000022871 | 12_Fetub        | 204.0325177 | -0.25112  | 0.526538 | 0.840798 | 195.7239 | 233.5801 | 235.8755 | 104.1807 | 217.2173 | 237.6177 |
| ENSMUSG000000028140 | 13_Mrpl9        | 1874.443109 | 0.138421  | 0.526535 | 0.840798 | 1694.92  | 1708.913 | 1950.288 | 1908.987 | 2080.534 | 1903.017 |
| ENSMUSG00000038495  | 14_Otud7b       | 3116.337424 | 0.141531  | 0.526511 | 0.840798 | 2828.656 | 2806.396 | 3256.232 | 3493.525 | 3297.856 | 3051.359 |
| ENSMUSG00000049265  | 7_Kenk3         | 13.27383891 | -0.45617  | 0.526534 | 0.840798 | 25.1761  | 13.74    | 6.903673 | 6.945378 | 11.3134  | 15.56448 |
| ENSMUSG000000021587 | 4_Pcsk1         | 5.576737894 | 0.686037  | 0.526669 | 0.840873 | 0.406061 | 0.587502 | 0        | 8.929771 | 5.565701 | 6.225792 |
| ENSMUSG00000040363  | 14_Bcor         | 1198.122648 | -0.19771  | 0.526649 | 0.840873 | 1172.719 | 1251.199 | 1416.404 | 780.8589 | 1233.161 | 1334.395 |
| ENSMUSG00000044548  | 11_Dact1        | 141.2892817 | 0.256744  | 0.526772 | 0.840941 | 131.5654 | 140.835  | 113.9106 | 224.2365 | 95.03257 | 142.1556 |
| ENSMUSG00000049553  | 15_Polr1a       | 1131.720605 | -0.23439  | 0.526797 | 0.840941 | 1222.259 | 1176.488 | 1271.426 | 596.3103 | 1306.698 | 1217.142 |
| ENSMUSG000000066152 | 11_Slc31a2      | 2930.389222 | 0.138501  | 0.526847 | 0.840955 | 2769.371 | 2660.408 | 2939.814 | 2797.003 | 3320.483 | 3095.256 |
| ENSMUSG000000015588 | 12_Acap1        | 40.19848218 | -0.38116  | 0.527049 | 0.841008 | 54.41286 | 36.92626 | 47.47387 | 11.90636 | 58.82964 | 34.24186 |
| ENSMUSG000000022106 | 14_Rcbtb2       | 1330.153179 | -0.191709 | 0.527049 | 0.841008 | 1243.374 | 1197.957 | 1246.113 | 2064.762 | 1152.809 | 1152.809 |
| ENSMUSG000000440403 | 4_Pcdhb14       | 84.59744396 | 0.307353  | 0.526983 | 0.841008 | 65.78271 | 91.02752 | 70.18734 | 152.7983 | 52.04164 | 75.74714 |
| ENSMUSG000000067220 | 12_Cnga1        | 57.05453597 | 0.517285  | 0.526989 | 0.841008 | 75.52829 | 45.51376 | 19.56041 | 127.9934 | 63.35605 | 10.37632 |
| ENSMUSG000000051726 | 6_Kcnf1         | 4.299674539 | 0.639923  | 0.5274   | 0.841365 | 4.060661 | 2.576251 | 3.451836 | 2.97659  | 3.39402  | 9.338689 |
| ENSMUSG000000062070 | 12_Pgk1         | 3772.705039 | 0.168944  | 0.527344 | 0.841365 | 3637.54  | 3086.348 | 3932.792 | 3697.918 | 4788.963 | 3492.67  |
| ENSMUSG000000097258 | 1_Gm26767       | 33.74678057 | 0.319111  | 0.527389 | 0.841365 | 34.10955 | 31.77376 | 24.16285 | 57.54742 | 23.75814 | 31.12896 |
| ENSMUSG00000048583  | 16_Igf2         | 491.6887066 | -0.20708  | 0.527556 | 0.841478 | 540.88   | 586.5264 | 453.3412 | 527.8487 | 313.3812 | 528.1547 |
| ENSMUSG000000097654 | 1_Gm26714       | 9.829878039 | 0.441698  | 0.527536 | 0.841478 | 8.933454 | 6.870002 | 5.204897 | 11.90636 | 15.83876 | 6.225792 |
| ENSMUSG000000056076 | 13_Elf3b        | 5112.244306 | -0.23927  | 0.527637 | 0.841454 |          |          |          |          |          |          |

|                     |                 |             |          |          |          |          |          |          |          |          |          |
|---------------------|-----------------|-------------|----------|----------|----------|----------|----------|----------|----------|----------|----------|
| ENSMUSG00000036833  | 16_Pnpla7       | 332.7942628 | -0.26368 | 0.529907 | 0.842738 | 380.89   | 336.6301 | 371.6477 | 150.8139 | 392.575  | 364.2089 |
| ENSMUSG00000038496  | 16_Slc19a3      | 17.72412059 | 0.37916  | 0.529523 | 0.842738 | 13.80625 | 12.0225  | 20.71102 | 30.7581  | 12.44474 | 16.60211 |
| ENSMUSG00000040010  | 10_Slc7a5       | 1970.897776 | -0.27414 | 0.529739 | 0.842738 | 1812.679 | 2224.163 | 2435.846 | 857.258  | 2497.999 | 1997.442 |
| ENSMUSG00000043648  | 7_Pld6          | 5.057042531 | -0.69505 | 0.530129 | 0.842738 | 2.436397 | 9.446252 | 6.903673 | 0.992197 | 2.26268  | 8.301057 |
| ENSMUSG00000045201  | 5_Lrrc3b        | 4.666860584 | 0.66387  | 0.529538 | 0.842738 | 4.060661 | 3.435001 | 3.451836 | 10.91416 | 1.13134  | 5.18816  |
| ENSMUSG00000047260  | 4_Emc6          | 405.0334695 | 0.172166 | 0.529438 | 0.842738 | 352.4654 | 347.7938 | 442.9857 | 491.1374 | 425.3839 | 370.4346 |
| ENSMUSG00000056648  | 5_Hoxb8         | 0.541421452 | -2.49957 | 0.530207 | 0.842738 | 3.248529 | 0        | 0        | 0        | 0        | 0        |
| ENSMUSG00000058287  | 5_Gm12253       | 1.159065627 | -1.17247 | 0.529375 | 0.842738 | 0.812132 | 1.7175   | 2.301224 | 0.992197 | 1.13134  | 0        |
| ENSMUSG00000066007  | 15_Zfp600       | 1.159065627 | -1.17247 | 0.529375 | 0.842738 | 0.812132 | 1.7175   | 2.301224 | 0.992197 | 1.13134  | 0        |
| ENSMUSG00000072849  | 10_Serpina1e    | 0.541421452 | -2.49957 | 0.530207 | 0.842738 | 3.248529 | 0        | 0        | 0        | 0        | 0        |
| ENSMUSG00000086405  | 1_933019N18Rik  | 0.541421452 | -2.49957 | 0.530207 | 0.842738 | 3.248529 | 0        | 0        | 0        | 0        | 0        |
| ENSMUSG00000091563  | 8_Gm8108        | 8.528497917 | 0.921936 | 0.529244 | 0.842738 | 0        | 8.587502 | 9.204897 | 18.85174 | 0        | 14.52685 |
| ENSMUSG00000094618  | 1_Gm13271       | 0.541421452 | -2.49957 | 0.530207 | 0.842738 | 3.248529 | 0        | 0        | 0        | 0        | 0        |
| ENSMUSG00000097160  | 1_A630072L19Rik | 0.541421452 | -2.49957 | 0.530207 | 0.842738 | 3.248529 | 0        | 0        | 0        | 0        | 0        |
| ENSMUSG00000104340  | 1_Gm10522       | 0.734248188 | 1.694478 | 0.529977 | 0.842738 | 0        | 0        | 1.150612 | 0.992197 | 2.26268  | 0        |
| ENSMUSG00000033653  | 17_Vps8         | 915.2960701 | -0.16127 | 0.53025  | 0.84274  | 1011.917 | 944.6252 | 942.3513 | 698.5066 | 960.5077 | 933.8689 |
| ENSMUSG00000030873  | 9_Scnn1b        | 33.74675161 | -0.32451 | 0.530466 | 0.843015 | 47.10367 | 42.07876 | 23.01224 | 17.85954 | 35.07154 | 37.35475 |
| ENSMUSG00000018865  | 8_Sult4a1       | 13.80743514 | -0.37688 | 0.530854 | 0.843197 | 15.43051 | 16.31625 | 14.95796 | 11.90636 | 16.9701  | 7.263424 |
| ENSMUSG00000024211  | 15_Gm8          | 22.14572882 | 0.453797 | 0.530776 | 0.843197 | 25.1761  | 24.90376 | 5.753061 | 43.65666 | 14.70742 | 18.67738 |
| ENSMUSG00000028069  | 16_Gpacth4      | 419.355415  | -0.22568 | 0.530841 | 0.843197 | 442.612  | 419.9289 | 493.6126 | 237.135  | 493.2643 | 429.5797 |
| ENSMUSG00000034336  | 3_Ina           | 6.282168647 | -0.61539 | 0.530877 | 0.843197 | 9.745586 | 9.446252 | 3.451836 | 4.960984 | 9.050721 | 1.037632 |
| ENSMUSG00000046079  | 16_Lrrc8d       | 473.3131798 | -0.142   | 0.530652 | 0.843197 | 501.8977 | 510.0976 | 477.504  | 471.7149 | 474.0315 | 458.6334 |
| ENSMUSG00000062232  | 14_Rapgef2      | 1150.380113 | 0.134333 | 0.530811 | 0.843197 | 1128.052 | 1075.155 | 1087.328 | 1270.012 | 1225.241 | 1116.492 |
| ENSMUSG00000097738  | 1_4930445N18Rik | 0.770773452 | -1.67077 | 0.530766 | 0.843197 | 2.436397 | 0        | 1.150612 | 0        | 0        | 1.037632 |
| ENSMUSG00000007867  | 8_Iff43         | 172.0849427 | -0.23378 | 0.531236 | 0.843251 | 181.9176 | 176.9025 | 199.0559 | 95.25089 | 195.7218 | 183.6609 |
| ENSMUSG00000020929  | 14_Eftud2       | 1965.111502 | -0.26167 | 0.531168 | 0.843251 | 2072.561 | 2018.922 | 2336.893 | 880.0786 | 2363.369 | 2118.845 |
| ENSMUSG00000032134  | 6_Muc16         | 6.237758172 | 0.515516 | 0.531251 | 0.843251 | 7.30919  | 3.435001 | 4.602448 | 5.953181 | 6.788041 | 9.338689 |
| ENSMUSG00000033809  | 14_Alg3         | 348.8598334 | -0.28784 | 0.531142 | 0.843251 | 353.2775 | 372.6976 | 424.5759 | 135.931  | 406.1511 | 400.526  |
| ENSMUSG00000042459  | 8_Bpifa2        | 0.80458958  | 2.000285 | 0.531193 | 0.843251 | 0        | 0.85875  | 0        | 3.968787 | 0        | 0        |
| ENSMUSG00000049323  | 8_Smor8         | 1281.002259 | 0.139335 | 0.531292 | 0.843251 | 1236.877 | 1151.584 | 1269.125 | 1282.91  | 1477.53  | 1267.986 |
| ENSMUSG00000071452  | 4_Gm11397       | 0.80458958  | 2.000285 | 0.531193 | 0.843251 | 0        | 0.85875  | 0        | 3.968787 | 0        | 0        |
| ENSMUSG00000075325  | 3_Gm13582       | 0.80458958  | 2.000285 | 0.531193 | 0.843251 | 0        | 0.85875  | 0        | 3.968787 | 0        | 0        |
| ENSMUSG00000096553  | 1_Gm10097       | 0.80458958  | 2.000285 | 0.531193 | 0.843251 | 0        | 0.85875  | 0        | 3.968787 | 0        | 0        |
| ENSMUSG00000022841  | 14_Ap2m1        | 5018.85563  | -0.28263 | 0.531746 | 0.843695 | 5524.935 | 5161.089 | 5840.507 | 1958.597 | 6142.045 | 5485.961 |
| ENSMUSG00000027496  | 15_Aurka        | 305.6495932 | -0.24035 | 0.531679 | 0.843695 | 324.8529 | 288.5401 | 379.702  | 165.6969 | 371.0796 | 304.0262 |
| ENSMUSG00000032047  | 5_Acat1         | 1597.346899 | 0.156202 | 0.53172  | 0.843695 | 1571.476 | 1507.107 | 1454.374 | 1982.409 | 1433.408 | 1635.308 |
| ENSMUSG00000039375  | 16_Wdr17        | 34.47129536 | 0.448453 | 0.53182  | 0.843695 | 41.41874 | 30.91501 | 14.95796 | 75.40696 | 31.67752 | 12.45158 |
| ENSMUSG00000048031  | 15_Fcrl5        | 0.76320091  | -1.67074 | 0.531826 | 0.843695 | 2.436397 | 0        | 1.150612 | 0.992197 | 0        | 0        |
| ENSMUSG00000070637  | 2_Gm694         | 1.562504844 | 1.191655 | 0.531644 | 0.843695 | 0        | 1.7175   | 1.150612 | 0        | 3.39402  | 3.112896 |
| ENSMUSG00000030986  | 12_Dhx32        | 1680.179801 | -0.23798 | 0.531906 | 0.843755 | 1741.211 | 1808.528 | 1905.414 | 856.2659 | 1991.159 | 1778.501 |
| ENSMUSG00000025465  | 12_Echs1        | 1874.761156 | -0.1337  | 0.532262 | 0.844224 | 1988.1   | 1924.459 | 1972.149 | 1666.891 | 1752.446 | 1944.522 |
| ENSMUSG00000100354  | 1_Gm29113       | 1.241131139 | 1.292446 | 0.532287 | 0.844224 | 0        | 0        | 2.301224 | 2.97659  | 1.13134  | 1.037632 |
| ENSMUSG00000055761  | 14_Nkain3       | 0.796819906 | 2.000224 | 0.532375 | 0.844231 | 0.812132 | 0        | 0        | 3.968787 | 0        | 0        |
| ENSMUSG00000087622  | 1_Gm12290       | 0.796819906 | 2.000224 | 0.532375 | 0.844231 | 0.812132 | 0        | 0        | 3.968787 | 0        | 0        |
| ENSMUSG00000037735  | 7_2810032G03Rik | 66.58708613 | 0.221711 | 0.532419 | 0.844234 | 73.0919  | 62.68877 | 48.32571 | 82.35234 | 65.61773 | 67.4408  |
| ENSMUSG00000052087  | 13_Rgs14        | 27.74934962 | -0.47387 | 0.532571 | 0.844272 | 34.10955 | 22.32751 | 40.27142 | 3.968787 | 42.99092 | 22.82791 |
| ENSMUSG00000087351  | 1_Gm11464       | 0.693177082 | 1.711338 | 0.532531 | 0.844272 | 0        | 0.85875  | 0        | 2.26268  | 1.037632 | 0        |
| ENSMUSG00000097281  | 2_Gm26685       | 0.693177082 | 1.711338 | 0.532531 | 0.844272 | 0        | 0.85875  | 0        | 2.26268  | 1.037632 | 0        |
| ENSMUSG00000043085  | 14_Tmem82       | 6.376720468 | -0.61069 | 0.532632 | 0.844302 | 9.745586 | 8.587502 | 4.602448 | 0.992197 | 10.18206 | 4.150528 |
| ENSMUSG00000001380  | 6_Hars          | 1079.176905 | -0.17926 | 0.532876 | 0.844498 | 1139.421 | 1059.698 | 1239.209 | 768.9525 | 1221.847 | 1045.933 |
| ENSMUSG00000001750  | 15_Tcigr1       | 1256.901601 | -0.38204 | 0.533053 | 0.844498 | 1336.77  | 1253.775 | 1676.442 | 245.0726 | 1659.676 | 1369.674 |
| ENSMUSG00000026924  | 17_Sec16a       | 3609.050712 | -0.1909  | 0.532904 | 0.844498 | 3478.362 | 3810.275 | 4253.813 | 2388.218 | 3990.237 | 3733.4   |
| ENSMUSG00000031344  | 11_Gabrg        | 18.17832015 | 0.501503 | 0.533035 | 0.844498 | 12.99411 | 24.04501 | 8.054285 | 40.68007 | 5.656701 | 17.63975 |
| ENSMUSG00000031681  | 14_Smad1        | 633.1880514 | 0.188822 | 0.533036 | 0.844498 | 506.7705 | 554.7526 | 714.5301 | 816.578  | 660.7026 | 545.7945 |
| ENSMUSG00000036078  | 16_Sigmar1      | 1180.361172 | -0.23018 | 0.53282  | 0.844498 | 1170.282 | 1190.228 | 1462.428 | 649.8889 | 1411.912 | 1197.427 |
| ENSMUSG00000046572  | 10_Zfp518b      | 315.1705036 | 0.154992 | 0.533049 | 0.844498 | 309.4224 | 295.4101 | 289.9543 | 377.0348 | 309.9872 | 309.2144 |
| ENSMUSG00000009941  | 10_Nxt2         | 1.151295953 | -1.16161 | 0.533197 | 0.844592 | 1.624264 | 0.85875  | 2.301224 | 0.992197 | 1.13134  | 0        |
| ENSMUSG00000030131  | 8_Mug2          | 1.151295953 | -1.16161 | 0.533197 | 0.844592 | 1.624264 | 0.85875  | 2.301224 | 0.992197 | 1.13134  | 0        |
| ENSMUSG00000025261  | 17_Huwe1        | 14084.33229 | 0.127013 | 0.533334 | 0.844675 | 13696.23 | 12761.03 | 13935.06 | 14107.05 | 15313.82 | 14690.79 |
| ENSMUSG00000095576  | 5_Fmo6          | 2.561896076 | -1.05964 | 0.533304 | 0.844675 | 3.248529 | 6.011252 | 1.150612 | 4.960984 | 0        | 0        |
| ENSMUSG00000007594  | 9_Hapln4        | 3.946533002 | 0.827154 | 0.533444 | 0.844708 | 4.060661 | 4.293751 | 0        | 0.992197 | 10.18206 | 4.150528 |
| ENSMUSG00000014418  | 15_Hps5         | 981.4374992 | 0.136307 | 0.53345  | 0.844708 | 908.7759 | 922.2977 | 974.5685 | 1115.229 | 982.0032 | 985.7505 |
| ENSMUSG00000028648  | 13_Nduf5        | 801.9774875 | -0.2624  | 0.533482 | 0.844708 | 868.1693 | 822.6827 | 933.1464 | 354.2143 | 916.3855 | 917.2667 |
| ENSMUSG00000075553  | 1_Gm5464        | 2.102224529 | 0.870293 | 0.533588 | 0.844809 | 2.436397 | 0.85875  | 1.150612 | 4.960984 | 1.13134  | 2.075264 |
| ENSMUSG000000021254 | 8_Gpacth2l      | 575.6827199 | -0.15126 | 0.533799 | 0.844941 | 610.7234 | 634.6164 | 571.8542 | 471.2935 | 567.9327 | 597.6761 |
| ENSMUSG00000034278  | 3_Dnajc17       | 318.1051166 | -0.24844 | 0.533759 | 0.844941 | 351.6532 | 318.5963 | 365.8947 | 155.7749 | 359.7662 | 356.9454 |
| ENSMUSG00000034330  | 9_Plncg2        | 575.4976335 | -0.27249 | 0.533748 | 0.844941 | 574.9896 | 585.6677 | 728.3375 | 247.057  | 703.6935 | 613.2406 |
| ENSMUSG00000097864  | 1_Gm26856       | 5.019683361 | -0.62171 | 0.533878 | 0.844999 | 6.497057 | 2.576251 | 9.204897 | 2.97659  | 6.788041 | 2.075264 |
| ENSMUSG000000303269 | 14_Cytl2        | 842.0549716 | -0.27317 | 0.534035 | 0.845002 | 878.727  | 900.829  | 984.924  | 347.2689 | 992.1853 | 948.3957 |
| ENSMUSG00000021337  | 7_Scgn          | 4.464264682 | -0.71904 | 0.53399  | 0.845002 | 8.933454 | 4.293751 | 3.451836 | 7.937575 | 1.13134  | 1.037632 |
| ENSMUSG00000038256  | 15_Bcl9         | 895.0217267 | -0.21823 | 0.534049 | 0.845002 | 868.1693 | 957.5065 | 1062.015 | 517.9267 | 1043.096 | 921.4173 |
| ENSMUSG00000048058  | 17_Lldrad3      | 556.7525823 | 0.223273 | 0.534011 | 0.845002 | 505.9583 | 541.8714 | 493.6126 | 870.1566 | 428.7779 | 500.1387 |
| ENSMUSG00000024059  | 9_Clip4         | 4245.055688 | 0.143884 | 0.534116 | 0.84504  | 3880.368 | 3690.908 | 4529.96  | 4857.796 | 4317.194 | 4194.109 |
| ENSMUSG00000053317  | 11_Sec61b       | 889.9458326 | -0.15256 | 0.534315 | 0.845287 | 830.8112 | 954.0715 | 1026.346 | 909.8445 | 875.6572 | 742.9446 |
| ENSMUSG00000021096  | 10_Ppm1a        | 2690.977359 | 0.145351 | 0.534371 | 0.84531  | 2549.283 | 2462.037 | 2655.613 | 3263.335 | 2598.688 | 2616.908 |
| ENSMUSG00000006804  | 4_Gm8225        | 2.230166312 | -1.11023 | 0.534436 | 0.845345 | 5.684925 | 0        | 3.451836 | 0        | 1.13134  | 1.218996 |
| ENSMUSG00000030064  | 16_Frm4db       | 2816.187485 | 0.126467 | 0.534507 | 0.845386 | 2718.206 | 2590.849 | 2769.523 | 2931.942 | 3045.568 | 2841.037 |
| ENSMUSG00000033060  | 15_Lmo7         | 13020.80416 | 0.1388   | 0.534548 |          |          |          |          |          |          |          |

|                      |                  |              |          |          |          |           |          |          |          |          |          |
|----------------------|------------------|--------------|----------|----------|----------|-----------|----------|----------|----------|----------|----------|
| ENSMUSG00000091049   | 8_Gm1979         | 0.888563863  | -1.93727 | 0.53612  | 0.845926 | 0         | 4.293751 | 0        | 0        | 0        | 1.037632 |
| ENSMUSG00000032549   | 7_RabbB          | 27.18543521  | -0.32218 | 0.536222 | 0.845954 | 34.92168  | 32.63251 | 23.01224 | 36.71128 | 19.23278 | 16.60211 |
| ENSMUSG000000003309  | 13_Ap1m2         | 1771.077286  | -0.30152 | 0.536301 | 0.846011 | 1892.268  | 1726.947 | 2247.145 | 612.1854 | 2173.304 | 1974.614 |
| ENSMUSG000000070632  | 4_Btbd8          | 19.77174344  | 0.40576  | 0.536389 | 0.846082 | 15.43051  | 24.04501 | 11.50612 | 38.69568 | 11.3134  | 17.63975 |
| ENSMUSG000000034799  | 16_Unc13a        | 136.5882924  | -0.21909 | 0.536509 | 0.846204 | 129.9411  | 172.6088 | 138.0735 | 87.31332 | 138.0235 | 153.5695 |
| ENSMUSG000000000881  | 12_Dlg3          | 2530.56545   | 0.134613 | 0.536729 | 0.846486 | 2405.536  | 2231.033 | 2601.534 | 2730.526 | 2738.974 | 2475.79  |
| ENSMUSG000000036352  | 16_Ubac1         | 642.8859933  | -0.20187 | 0.536813 | 0.84655  | 646.4572  | 668.9664 | 747.8979 | 398.8631 | 708.2189 | 686.9124 |
| ENSMUSG000000021700  | 9_Rab3c          | 27.43796746  | 0.519324 | 0.53713  | 0.846785 | 20.3033   | 36.92626 | 10.35551 | 70.44597 | 7.919381 | 18.67738 |
| ENSMUSG000000026069  | 15_IIfn1         | 46.89235954  | 0.22813  | 0.537149 | 0.846785 | 46.29153  | 42.93751 | 40.27142 | 59.53181 | 49.77896 | 42.54291 |
| ENSMUSG000000039095  | 8_En2            | 0.685604541  | 1.694861 | 0.537217 | 0.846785 | 0         | 0.85875  | 0        | 0.992197 | 2.26268  | 0        |
| ENSMUSG000000069308  | 7_Hist1h2bp      | 0.880991321  | -1.93721 | 0.53713  | 0.846785 | 0         | 4.293751 | 0        | 0.992197 | 0        | 0        |
| ENSMUSG000000070287  | 3_Slc35g2        | 25.69545032  | 0.459295 | 0.537177 | 0.846785 | 22.7397   | 28.33876 | 13.80735 | 58.53961 | 7.919381 | 22.82791 |
| ENSMUSG000000085129  | 1_5031425F14Rik  | 0.685604541  | 1.694861 | 0.537217 | 0.846785 | 0         | 0.85875  | 0        | 0.992197 | 2.26268  | 0        |
| ENSMUSG000000042254  | 14_Cilp          | 199.415181   | -0.20684 | 0.537446 | 0.84708  | 155.9294  | 261.0601 | 224.3694 | 210.3457 | 153.8623 | 190.9243 |
| ENSMUSG000000021451  | 15_Sema4d        | 3418.970678  | -0.22785 | 0.537495 | 0.84709  | 3414.204  | 3221.172 | 4429.857 | 1907.002 | 3972.135 | 3569.454 |
| ENSMUSG000000002455  | 14_Prp6          | 2103.814447  | -0.1805  | 0.537932 | 0.847218 | 2232.551  | 2158.039 | 2315.032 | 1418.841 | 2220.821 | 2277.602 |
| ENSMUSG000000007041  | 9_Clic1          | 9567.720185  | -0.29032 | 0.538015 | 0.847218 | 10159.77  | 9727.923 | 11693.67 | 3485.587 | 11840.61 | 10498.76 |
| ENSMUSG0000000022962 | 14_Gart          | 1549.736966  | -0.21527 | 0.537828 | 0.847218 | 1520.311  | 1668.552 | 1806.461 | 893.9693 | 1822.589 | 1586.539 |
| ENSMUSG000000023259  | 16_Slc26a6       | 110.5178378  | -0.30738 | 0.537759 | 0.847218 | 138.0625  | 130.53   | 97.80203 | 40.68007 | 134.6295 | 121.403  |
| ENSMUSG000000024387  | 13_Csnk2b        | 960.9871113  | -0.24852 | 0.538007 | 0.847218 | 2007.591  | 1979.419 | 2401.327 | 937.626  | 2354.319 | 2085.64  |
| ENSMUSG000000027225  | 7_Duoxa2         | 19.92769393  | -0.47015 | 0.538087 | 0.847218 | 19.49117  | 12.0225  | 37.9702  | 5.953181 | 31.67752 | 12.45158 |
| ENSMUSG0000000041805 | 3_Pramel1        | 1.340140257  | -1.41312 | 0.538015 | 0.847218 | 0.4060661 | 1.7175   | 0        | 0        | 0.26268  | 0        |
| ENSMUSG000000044645  | 7_Gm7334         | 227.371199   | 0.180912 | 0.537639 | 0.847218 | 190.0389  | 224.9926 | 224.3694 | 227.2131 | 295.2798 | 202.3383 |
| ENSMUSG000000052406  | 14_Rexo4         | 879.9855329  | -0.18913 | 0.537874 | 0.847218 | 947.7583  | 887.9477 | 976.8697 | 578.4507 | 994.448  | 894.4388 |
| ENSMUSG000000053746  | 8_Pthr1          | 92.22498982  | -0.32902 | 0.538061 | 0.847218 | 95.01946  | 91.02752 | 121.9649 | 29.7659  | 122.1847 | 93.38689 |
| ENSMUSG000000057315  | 14_Arhgap24      | 236.6442402  | -0.17507 | 0.537737 | 0.847218 | 246.8882  | 267.9301 | 238.1767 | 221.2599 | 181.0144 | 264.5962 |
| ENSMUSG000000067081  | 12_Asb18         | 1.579168388  | 1.431227 | 0.537869 | 0.847218 | 0.812132  | 1.7175   | 0        | 0.945378 | 0        | 0        |
| ENSMUSG000000000223  | 13_Drp2          | 115.3434753  | 0.231475 | 0.538241 | 0.847242 | 91.77094  | 132.2475 | 94.35019 | 166.6891 | 93.90123 | 113.1019 |
| ENSMUSG0000000019762 | 4_lyd            | 11.97633859  | -0.37691 | 0.538528 | 0.847242 | 12.99411  | 17.175   | 10.35551 | 11.90636 | 9.050721 | 10.37632 |
| ENSMUSG000000021474  | 8_Sfxn1          | 898.5211667  | 0.162544 | 0.538509 | 0.847242 | 851.9267  | 844.1515 | 848.0011 | 1166.823 | 803.4036 | 849.8207 |
| ENSMUSG0000000028191 | 11_Bcl10         | 1286.189315  | 0.156139 | 0.53816  | 0.847242 | 1145.106  | 1099.2   | 1406.048 | 1252.152 | 1535.229 | 1279.4   |
| ENSMUSG000000034190  | 8_Chmp7          | 801.6372062  | -0.15406 | 0.53847  | 0.847242 | 784.5197  | 863.9027 | 884.8207 | 636.9904 | 790.8607 | 848.783  |
| ENSMUSG000000036353  | 13_P2ry12        | 21.07489276  | 0.415996 | 0.538469 | 0.847242 | 28.42463  | 16.31625 | 9.204897 | 39.68787 | 20.36412 | 12.45158 |
| ENSMUSG000000038199  | 12_4931409K22Rik | 0.677834867  | 1.694923 | 0.538422 | 0.847242 | 0.812132  | 0        | 0.992197 | 2.26268  | 0        | 0        |
| ENSMUSG000000043865  | 3_Tas2118        | 0.677834867  | 1.694923 | 0.538422 | 0.847242 | 0.812132  | 0        | 0.992197 | 2.26268  | 0        | 0        |
| ENSMUSG000000079652  | 8_Fam712         | 1.158868494  | -1.14566 | 0.538469 | 0.847242 | 1.624264  | 0.85875  | 2.301224 | 0        | 1.13134  | 1.037632 |
| ENSMUSG0000000108783 | 1_RP23-298C3     | 0.677834867  | 1.694923 | 0.538422 | 0.847242 | 0.812132  | 0        | 0.992197 | 2.26268  | 0        | 0        |
| ENSMUSG0000000442250 | 13_Pglyrpt4      | 19.52518492  | 0.40454  | 0.538575 | 0.84725  | 28.42463  | 6.870002 | 14.95796 | 19.84394 | 29.41484 | 17.63975 |
| ENSMUSG0000000042557 | 14_Sin3a         | 1671.151385  | 0.13167  | 0.538636 | 0.847271 | 1611.27   | 1495.084 | 1678.743 | 1837.549 | 1751.314 | 1652.948 |
| ENSMUSG000000046546  | 3_Fam43a         | 236.452212   | -0.17301 | 0.538674 | 0.847271 | 234.7062  | 234.4388 | 283.0506 | 251.0258 | 230.7934 | 184.6985 |
| ENSMUSG0000000024891 | 5_Slc29a2        | 107.6120521  | -0.41349 | 0.538817 | 0.847398 | 112.0742  | 104.7675 | 151.8808 | 16.86735 | 145.9429 | 114.1395 |
| ENSMUSG0000000096094 | 2_A630095N17Rik  | 6.233504275  | 0.519039 | 0.53884  | 0.847398 | 3.248529  | 4.293751 | 8.054285 | 9.921968 | 5.656701 | 6.225792 |
| ENSMUSG000000033373  | 16_Fntb          | 379.9138294  | -0.27271 | 0.538989 | 0.847567 | 424.7451  | 380.4263 | 441.835  | 156.7671 | 437.8286 | 437.8807 |
| ENSMUSG0000000002778 | 12_Kdelr1        | 2358.828674  | -0.16371 | 0.539175 | 0.84761  | 2406.348  | 2361.563 | 2709.692 | 1750.235 | 2461.796 | 2463.397 |
| ENSMUSG000000038215  | 14_Cep44         | 153.282594   | 0.172143 | 0.539163 | 0.84761  | 149.4323  | 127.9538 | 155.3326 | 182.5642 | 154.9936 | 149.419  |
| ENSMUSG0000000071537 | 6_Klrp2          | 1267.890309  | -0.24165 | 0.539187 | 0.84761  | 1300.224  | 1252.917 | 1568.284 | 634.0138 | 1509.208 | 1342.696 |
| ENSMUSG000000072972  | 3_Adam4          | 16.51287815  | 0.4294   | 0.539069 | 0.84761  | 15.43051  | 8.587502 | 18.40979 | 33.73469 | 13.57608 | 9.336889 |
| ENSMUSG0000000022150 | 16_Dab2          | 689.8317462  | 0.22894  | 0.53923  | 0.84761  | 699.2458  | 655.2264 | 551.1432 | 1101.338 | 550.9626 | 581.074  |
| ENSMUSG000000018001  | 18_Cytl3         | 4099.964147  | -0.1779  | 0.539317 | 0.84762  | 4163.802  | 4281.729 | 4611.653 | 2816.847 | 4588.715 | 4137.039 |
| ENSMUSG0000000028861 | 13_Mrps15        | 342.4818789  | 0.159103 | 0.539321 | 0.84762  | 315.1073  | 307.4326 | 348.6355 | 412.7539 | 358.6348 | 312.3273 |
| ENSMUSG000000079019  | 2_Ins13          | 3.585724814  | -1.05419 | 0.539403 | 0.847682 | 0.812132  | 10.305   | 3.451836 | 6.945378 | 0        | 0        |
| ENSMUSG0000000002129 | 11_Sf3a1         | 1729.720986  | -0.17197 | 0.539572 | 0.847776 | 1636.446  | 1834.29  | 2027.379 | 1287.871 | 1954.956 | 1637.383 |
| ENSMUSG000000039470  | 15_Zdhc2         | 184.6085267  | 0.340372 | 0.539591 | 0.847776 | 167.2992  | 205.2413 | 116.2118 | 383.9802 | 105.2146 | 129.704  |
| ENSMUSG0000000070056 | 5_Mfhas1         | 613.7702209  | -0.15707 | 0.539528 | 0.847776 | 587.9837  | 628.6052 | 724.8856 | 497.0906 | 633.5505 | 610.1277 |
| ENSMUSG000000034265  | 7_Zdhc14         | 65.79681363  | -0.23222 | 0.539744 | 0.847951 | 62.53418  | 81.58127 | 69.03673 | 43.65666 | 62.22371 | 75.74714 |
| ENSMUSG000000085377  | 1_493055L18Rik   | 1.76398819   | -1.17568 | 0.539813 | 0.847991 | 1.624264  | 0        | 0.575061 | 0        | 1.13134  | 2.075264 |
| ENSMUSG000000033910  | 13_Gucy1a3       | 153.5232586  | 0.289139 | 0.539964 | 0.848162 | 138.0625  | 168.315  | 108.1575 | 279.7995 | 107.4773 | 119.3277 |
| ENSMUSG000000035179  | 3_Ppp1r32        | 4.970409474  | -0.6318  | 0.540086 | 0.848262 | 3.248529  | 6.870002 | 8.054285 | 0.992197 | 3.39402  | 7.263424 |
| ENSMUSG000000074028  | 3_Slc22a13       | 4.3747011941 | -0.76502 | 0.540113 | 0.848262 | 1.624264  | 6.870002 | 8.054285 | 0        | 4.52536  | 5.18816  |
| ENSMUSG000000004266  | 15_Ptpn6         | 771.9612745  | -0.31555 | 0.540504 | 0.848665 | 879.5391  | 777.169  | 911.2848 | 235.1506 | 968.4271 | 860.197  |
| ENSMUSG0000000207070 | 11_Map3k3        | 1331.01927   | -0.23158 | 0.540483 | 0.848665 | 1403.364  | 1431.503 | 1495.796 | 684.6158 | 1571.431 | 1417.405 |
| ENSMUSG000000030468  | 12_Siglecg       | 66.47500898  | -0.23571 | 0.540442 | 0.848665 | 81.21322  | 61.83002 | 72.48856 | 41.67227 | 69.01175 | 72.63424 |
| ENSMUSG0000000078630 | 7_Tomt           | 12.6103369   | -0.42314 | 0.540526 | 0.848665 | 12.18198  | 10.305   | 19.56401 | 16.86735 | 6.788041 | 7.263424 |
| ENSMUSG000000021607  | 8_Mrpl36         | 390.5448715  | 0.191425 | 0.540691 | 0.848777 | 371.9565  | 325.4663 | 396.9612 | 546.7004 | 539.7662 | 342.4186 |
| ENSMUSG0000000041890 | 17_Git2          | 1445.699684  | -0.20332 | 0.540739 | 0.848777 | 1450.468  | 1486.497 | 1705.207 | 877.102  | 1622.342 | 1532.583 |
| ENSMUSG000000096299  | 3_Gm21814        | 2.392913802  | 0.879859 | 0.540723 | 0.848777 | 0.406061  | 0.85875  | 0        | 3.968787 | 3.39402  | 2.075264 |
| ENSMUSG000000067608  | 4_Pcna-ps2       | 24.65775838  | 0.416348 | 0.540788 | 0.848787 | 23.55183  | 21.46876 | 18.40979 | 55.56302 | 11.3134  | 17.63975 |
| ENSMUSG000000060424  | 14_Pantr1        | 58.94147376  | 0.362804 | 0.54087  | 0.848849 | 68.2191   | 57.53626 | 28.7653  | 119.0636 | 39.5969  | 40.46765 |
| ENSMUSG0000000026188 | 11_Tmem169       | 10.69642133  | -0.4948  | 0.540991 | 0.848912 | 12.18198  | 9.446252 | 16.10857 | 17.85954 | 3.39402  | 5.18816  |
| ENSMUSG000000055235  | 11_Wdr86         | 32.15401478  | -0.37877 | 0.540995 | 0.848912 | 35.73382  | 55.81876 | 17.25918 | 16.86735 | 22.6268  | 44.61818 |
| ENSMUSG0000000027508 | 15_Pag1          | 522.1171111  | 0.210008 | 0.541049 | 0.848929 | 453.1698  | 535.8601 | 463.6967 | 778.8745 | 406.1511 | 494.9505 |
| ENSMUSG000000028360  | 9_Slc44a5        | 8.027170804  | 0.464641 | 0.541164 | 0.849036 | 5.684925  | 7.728752 | 6.903673 | 11.90636 | 4.52536  | 1.41395  |
| ENSMUSG000000034634  | 7_Ly6d           | 90.95333404  | -0.56902 | 0.541202 | 0.849036 | 102.3287  | 32.63251 | 191.0016 | 10.91416 | 178.7517 | 30.09133 |
| ENSMUSG000000035845  | 17_Alg12         | 340.0962316  | -0.24108 | 0.541369 | 0.849164 | 353.2775  | 340.0651 | 411.9191 | 171.65   | 400.4944 | 363.1712 |
| ENSMUSG000000047343  | 4_Mettl21c       | 1.841821819  | 1.401896 | 0.541357 | 0.849164 | 0.812132  | 0        | 2.301224 | 7.937575 | 0        | 0        |
| ENSMUSG0000000047945 | 6_Marcks11       | 1644.219918  | -0.19    |          |          |           |          |          |          |          |          |

|                      |                 |             |          |          |          |          |          |          |          |          |          |
|----------------------|-----------------|-------------|----------|----------|----------|----------|----------|----------|----------|----------|----------|
| ENSMUSG00000025645   | 8_Cdc51         | 1390.902927 | -0.26667 | 0.543299 | 0.849981 | 1441.535 | 1320.758 | 1794.955 | 593.3337 | 1603.109 | 1591.728 |
| ENSMUSG00000005575   | 15_Ube2m        | 1214.551832 | -0.25695 | 0.543555 | 0.850095 | 1340.83  | 1234.024 | 1392.241 | 534.7941 | 1470.742 | 1314.68  |
| ENSMUSG00000023034   | 6_Nr4a1         | 102.428208  | -0.27133 | 0.543579 | 0.850095 | 116.1349 | 80.72252 | 139.2241 | 57.54742 | 136.8922 | 84.0482  |
| ENSMUSG000000031513  | 8_Leprotl1      | 814.333618  | 0.145963 | 0.543471 | 0.850095 | 760.1557 | 749.6889 | 810.0309 | 986.2436 | 784.0187 | 795.8638 |
| 2464.044837          | 5_Tspan14       | -0.21191    | 0.543584 | 0.850095 | 2493.246 | 2577.968 | 2862.723 | 1411.896 | 2883.786 | 2554.65  |          |
| ENSMUSG00000058267   | 13_Mrps14       | 1045.63122  | 0.142409 | 0.543483 | 0.850095 | 1054.96  | 903.4052 | 1024.045 | 1221.394 | 1026.125 | 1043.858 |
| ENSMUSG000000073293  | 4_Nudt10        | 8.415440593 | 0.591338 | 0.543646 | 0.850124 | 7.30919  | 6.011252 | 6.903673 | 20.83613 | 1.13134  | 8.301057 |
| ENSMUSG000000072623  | 6_Zfp9          | 135.5447601 | 0.293553 | 0.543705 | 0.85015  | 114.5106 | 141.6938 | 109.3082 | 253.0102 | 83.71917 | 111.0266 |
| ENSMUSG000000021468  | 7_Sptlc1        | 1795.248719 | 0.150459 | 0.543784 | 0.850185 | 1629.949 | 1578.383 | 1897.359 | 2168.942 | 1816.932 | 1679.926 |
| ENSMUSG000000024644  | 16_Cndp2        | 1979.276129 | -0.2574  | 0.543813 | 0.850185 | 2097.737 | 1941.634 | 2426.641 | 887.024  | 2475.372 | 2047.248 |
| ENSMUSG000000037408  | 10_Cnrm4        | 382.2997048 | -0.23361 | 0.544187 | 0.850574 | 402.0054 | 400.1776 | 437.2326 | 195.4628 | 435.5659 | 423.3539 |
| ENSMUSG000000055170  | 3_lfng          | 14.51411805 | 0.359773 | 0.54417  | 0.850574 | 14.61838 | 8.587502 | 14.95796 | 12.89856 | 21.49546 | 14.52685 |
| ENSMUSG000000057116  | 4_AF366264      | 0.71105764  | 1.644565 | 0.54419  | 0.850574 | 0        | 0        | 1.150612 | 1.984394 | 1.13134  | 0        |
| ENSMUSG000000022466  | 5_Rpap3         | 494.1879278 | 0.155601 | 0.544294 | 0.850671 | 463.7275 | 421.6464 | 517.7754 | 596.3103 | 496.6583 | 469.0097 |
| ENSMUSG000000042320  | 16_Prox2        | 57.65980182 | -0.21611 | 0.544512 | 0.850923 | 74.71616 | 55.81876 | 55.22938 | 54.57082 | 47.51628 | 58.1074  |
| ENSMUSG000000059456  | 13_Ptk2b        | 1215.614679 | -0.20232 | 0.544541 | 0.850923 | 1229.568 | 1260.645 | 1411.801 | 750.1008 | 1462.823 | 1178.75  |
| ENSMUSG000000028680  | 14_Plk3         | 222.0558377 | -0.38122 | 0.544595 | 0.85094  | 271.2521 | 192.36   | 289.9543 | 42.66446 | 296.4111 | 239.693  |
| ENSMUSG000000015247  | 10_Nlpsnap3b    | 355.6539414 | 0.184232 | 0.544688 | 0.851019 | 348.4047 | 299.7038 | 350.9367 | 448.473  | 407.2824 | 279.123  |
| ENSMUSG000000022824  | 12_Muc13        | 148.6795085 | 0.21819  | 0.544848 | 0.851202 | 127.5048 | 164.0213 | 120.8143 | 217.2911 | 136.8922 | 125.5535 |
| ENSMUSG000000018076  | 12_Med13l       | 2090.806459 | -0.16996 | 0.544934 | 0.851269 | 1986.475 | 2170.921 | 2484.172 | 1529.967 | 2288.701 | 2084.603 |
| ENSMUSG00000006313   | 4_Upk1a         | 15.63692761 | -0.44083 | 0.545212 | 0.85136  | 20.3033  | 16.31625 | 17.25918 | 2.97659  | 20.36412 | 16.60211 |
| ENSMUSG000000021156  | 16_Zmynd11      | 4241.658195 | 0.138108 | 0.545039 | 0.85136  | 3808.9   | 4071.335 | 4236.554 | 5007.617 | 4016.257 | 4309.286 |
| ENSMUSG000000025794  | 8_Rpl14         | 12196.45445 | -0.1693  | 0.545248 | 0.85136  | 12773.21 | 12423.54 | 13536.95 | 8545.791 | 12814.69 | 13084.54 |
| ENSMUSG000000028029  | 10_Aimp1        | 1135.676174 | 0.13129  | 0.545098 | 0.85136  | 1130.488 | 1005.597 | 1116.094 | 1209.488 | 1228.635 | 1123.756 |
| ENSMUSG000000038560  | 7_Sp6           | 434.9911157 | -0.1409  | 0.545214 | 0.85136  | 482.4065 | 425.9401 | 460.2448 | 384.9724 | 417.4645 | 438.9184 |
| ENSMUSG000000040536  | 15_Necab1       | 59.38749987 | 0.387289 | 0.54522  | 0.85136  | 47.10367 | 77.28752 | 29.91591 | 122.0402 | 26.02082 | 53.95687 |
| ENSMUSG000000026943  | 12_Lcn12        | 1.087034299 | -1.13047 | 0.545357 | 0.851463 | 1.624264 | 1.7175   | 1.150612 | 0.992197 | 0        | 1.037632 |
| ENSMUSG000000024354  | 11_Slc32a1      | 37.87432585 | -0.26416 | 0.545439 | 0.851524 | 40.60661 | 35.20876 | 48.32571 | 40.68007 | 39.5969  | 22.82791 |
| ENSMUSG000000085976  | 1_Gm13816       | 1.158206666 | -1.29211 | 0.545498 | 0.85155  | 0.406061 | 0.85875  | 0        | 0.992197 | 0        | 1.037632 |
| ENSMUSG000000040354  | 14_Mars         | 1555.231422 | -0.23132 | 0.545656 | 0.85173  | 1603.149 | 1530.293 | 1905.414 | 824.5156 | 1944.774 | 1523.244 |
| ENSMUSG0000000097558 | 1_Gm26902       | 93.56947414 | 0.263305 | 0.545737 | 0.851789 | 82.02535 | 92.74502 | 80.54285 | 155.7749 | 61.09327 | 89.23636 |
| ENSMUSG000000002266  | 15_Zim1         | 69.71140924 | 0.366013 | 0.546218 | 0.851799 | 61.72205 | 77.28752 | 43.72326 | 39.8998  | 27.15216 | 68.48372 |
| ENSMUSG000000002500  | 15_Rpl3l        | 38.03550235 | 0.342245 | 0.545812 | 0.851799 | 21.11544 | 57.53626 | 21.86163 | 49.60984 | 28.2835  | 49.80634 |
| ENSMUSG000000025427  | 14_Rnf165       | 11.36844263 | -0.42751 | 0.5463   | 0.851799 | 12.18198 | 15.4575  | 11.50612 | 7.937575 | 4.52366  | 16.60211 |
| ENSMUSG000000027984  | 8_Hadh          | 1666.0556   | -0.13275 | 0.546365 | 0.851799 | 1656.75  | 1767.308 | 1804.16  | 1551.796 | 1474.136 | 1742.184 |
| ENSMUSG000000029149  | 14_Krtcap3      | 240.6913777 | -0.33292 | 0.546344 | 0.851799 | 250.9488 | 242.1676 | 311.8159 | 65.48499 | 312.2499 | 261.4833 |
| ENSMUSG0000000032315 | 5_Cyp1a1        | 1.001471123 | 1.301526 | 0.546311 | 0.851799 | 0.812132 | 0.85875  | 0        | 0        | 2.26268  | 2.075264 |
| ENSMUSG000000032370  | 7_Lactb         | 275.9200207 | 0.210517 | 0.546181 | 0.851799 | 257.4459 | 273.0826 | 237.0261 | 416.7227 | 227.3994 | 244.8435 |
| ENSMUSG000000037738  | 9_Nek5          | 24.71054342 | 0.385975 | 0.546385 | 0.851799 | 20.3033  | 18.8925  | 25.31347 | 51.59423 | 12.44474 | 19.71501 |
| ENSMUSG000000052040  | 10_Klf13        | 731.086364  | -0.17045 | 0.546334 | 0.851799 | 752.8465 | 788.3327 | 781.2656 | 520.9033 | 816.8276 | 726.3424 |
| ENSMUSG000000067700  | 5_Gm5862        | 1.729836023 | -1.31262 | 0.546318 | 0.851799 | 5.684925 | 1.7175   | 0        | 2.97659  | 0        | 0        |
| ENSMUSG000000068036  | 14_Mlil4        | 10636.91448 | 0.128459 | 0.545927 | 0.851799 | 9698.482 | 9684.985 | 11108.01 | 11450.94 | 11269.28 | 10609.79 |
| ENSMUSG000000074783  | 10_AU019990     | 0.729989478 | -1.59221 | 0.546063 | 0.851799 | 1.624264 | 1.7175   | 0        | 0        | 0        | 1.037632 |
| ENSMUSG000000079388  | 9_2610042L04Rik | 1.413575176 | -1.70643 | 0.546306 | 0.851799 | 6.497057 | 0        | 0        | 1.984394 | 0        | 0        |
| ENSMUSG000000092470  | 1_Gm20518       | 18.32929217 | 0.532691 | 0.546194 | 0.851799 | 13.80625 | 24.04501 | 6.903673 | 2.97659  | 24.88948 | 37.35475 |
| ENSMUSG000000098348  | 7_Btg1-ps2      | 2.431722357 | 0.912419 | 0.546089 | 0.851799 | 0.406061 | 0.85875  | 0        | 2.97659  | 0.556701 | 1.037632 |
| ENSMUSG000000028413  | 13_B4galt1      | 3642.770953 | 0.137854 | 0.546489 | 0.851895 | 3274.517 | 3243.5   | 3889.069 | 3951.92  | 3992.499 | 3505.121 |
| ENSMUSG000000020871  | 8_Dlx4          | 19.74707765 | -0.32242 | 0.546662 | 0.851962 | 17.05478 | 18.03375 | 31.06653 | 16.86735 | 14.70742 | 20.75264 |
| ENSMUSG000000024248  | 13_Cox7a2l      | 4236.43805  | -0.14468 | 0.546733 | 0.851962 | 4556.062 | 4508.439 | 4281.428 | 3608.62  | 3734.554 | 4729.527 |
| ENSMUSG000000036699  | 12_Zcchc12      | 7.227572003 | 0.471209 | 0.546707 | 0.851962 | 8.933454 | 3.435001 | 5.753061 | 8.929771 | 0.505721 | 7.263424 |
| ENSMUSG000000039914  | 5_Coq10a        | 272.3648725 | -0.17644 | 0.546598 | 0.851962 | 273.6885 | 302.2801 | 291.1049 | 219.2755 | 225.1367 | 322.7036 |
| ENSMUSG000000042472  | 10_Zfp410       | 822.6388266 | 0.137323 | 0.546746 | 0.851962 | 773.1498 | 723.9264 | 853.7542 | 846.3439 | 922.0422 | 816.6164 |
| ENSMUSG000000002147  | 18_Slat6        | 3782.857861 | -0.19246 | 0.546901 | 0.851998 | 3799.154 | 3903.02  | 4402.242 | 2373.335 | 4062.642 | 4156.754 |
| ENSMUSG000000031293  | 13_Rs1          | 146.4272148 | 0.486414 | 0.546838 | 0.851998 | 164.8628 | 160.5863 | 40.27142 | 349.2533 | 133.4981 | 30.9133  |
| ENSMUSG000000036667  | 14_Tcra1        | 611.6830834 | 0.236253 | 0.546871 | 0.851998 | 494.5885 | 705.0339 | 485.5583 | 964.4153 | 444.6167 | 575.8858 |
| ENSMUSG000000038143  | 14_Stox2        | 431.5750813 | 0.228348 | 0.54694  | 0.851998 | 408.5025 | 438.8214 | 345.1836 | 665.7641 | 296.4111 | 434.7678 |
| ENSMUSG000000021209  | 12_Ppp4r4       | 47.48265596 | 0.307644 | 0.547173 | 0.852019 | 38.17021 | 52.38376 | 36.81959 | 86.32112 | 32.80886 | 38.39239 |
| ENSMUSG000000028634  | 16_Hivp3        | 290.9497018 | -0.23259 | 0.547178 | 0.852019 | 320.7922 | 312.5851 | 309.5147 | 151.8061 | 293.0171 | 357.9831 |
| ENSMUSG000000037610  | 15_Kcnmb2       | 0.722326936 | -1.59203 | 0.547235 | 0.852019 | 1.624264 | 1.7175   | 0        | 0.992197 | 0        | 0        |
| ENSMUSG000000039458  | 14_Mtmr12       | 1136.910297 | 0.131114 | 0.547143 | 0.852019 | 1060.645 | 1018.478 | 1177.076 | 1142.019 | 1207.14  | 1216.105 |
| ENSMUSG0000000041346 | 11_Wrap53       | 202.7209832 | -0.33826 | 0.547253 | 0.852019 | 205.4694 | 218.1226 | 255.4359 | 52.58643 | 246.7336 | 219.978  |
| ENSMUSG000000066178  | 2_6030445D17Rik | 4.554684996 | 0.588678 | 0.547106 | 0.852019 | 0.406061 | 3.435001 | 3.451836 | 8.929771 | 2.26268  | 5.18816  |
| ENSMUSG000000092090  | 2_Gm3294        | 0.722326936 | -1.59203 | 0.547235 | 0.852019 | 1.624264 | 1.7175   | 0        | 0.992197 | 0        | 0        |
| ENSMUSG000000016528  | 10_Mapkapk2     | 3108.900446 | -0.22542 | 0.547708 | 0.852062 | 3319.996 | 3161.06  | 3572.651 | 1626.211 | 3715.321 | 3258.165 |
| ENSMUSG000000027276  | 7_Jag1          | 4595.273927 | 0.149396 | 0.547601 | 0.852062 | 4170.299 | 3935.652 | 4967.192 | 5146.525 | 5171.356 | 4180.62  |
| ENSMUSG000000029326  | 13_Enoph1       | 505.0355813 | -0.14761 | 0.547682 | 0.852062 | 521.3889 | 469.7364 | 601.7701 | 463.3559 | 509.103  | 464.8592 |
| ENSMUSG000000029663  | 10_Gngt1        | 89.67754104 | 0.593002 | 0.547582 | 0.852062 | 112.0742 | 74.71127 | 27.61469 | 268.8853 | 47.51628 | 7.263424 |
| ENSMUSG000000037110  | 19_Ralgap2a     | 228.533085  | 0.165984 | 0.547343 | 0.852062 | 194.0996 | 218.9813 | 233.5743 | 277.8151 | 207.0352 | 239.693  |
| ENSMUSG000000037847  | 13_Nmrk1        | 172.560626  | 0.176343 | 0.547679 | 0.852062 | 159.1779 | 164.88   | 162.2363 | 221.2599 | 149.3368 | 178.4727 |
| ENSMUSG000000038132  | 5_Rbm24         | 104.4645097 | 0.443147 | 0.547654 | 0.852062 | 69.84337 | 138.2588 | 57.53061 | 257.9712 | 30.54618 | 72.63424 |
| ENSMUSG000000040134  | 8_Rdh7          | 11.54400886 | -0.41119 | 0.54749  | 0.852062 | 9.745586 | 13.74    | 16.10857 | 4.960984 | 10.18206 | 14.52685 |
| ENSMUSG000000053675  | 8_Tgm5          | 434.8909205 | -0.19782 | 0.547502 | 0.852062 | 444.2363 | 421.6464 | 528.131  | 276.8229 | 481.9509 | 456.5581 |
| ENSMUSG000000054277  | 7_Arfgap3       | 2152.525669 | -0.21261 | 0.547663 | 0.852062 | 2170.017 | 2352.976 | 2409.382 | 1204.527 | 2479.898 | 2298.355 |
| ENSMUSG000000094651  | 2_Gal3st2       | 1.042542229 | 1.1678   | 0.547771 | 0.852093 | 0.812132 | 0        | 1.150612 | 0.992197 | 2.26268  | 1.037632 |
| ENSMUSG000000032112  | 9_Trappc4       | 957.9281109 | -0.14575 | 0.547863 | 0.85217  | 937.2005 | 966.928  | 1114.943 | 796.734  | 948.063  | 983.6752 |
| ENSMUSG000000032249  |                 |             |          |          |          |          |          |          |          |          |          |

|                      |                  |             |          |          |          |          |          |          |          |          |          |
|----------------------|------------------|-------------|----------|----------|----------|----------|----------|----------|----------|----------|----------|
| ENSMUSG000000020052  | 7_Asc1           | 0.73009661  | -1.60751 | 0.550211 | 0.853171 | 0.812132 | 2.576251 | 0        | 0.992197 | 0        | 0        |
| ENSMUSG000000021478  | 5_Drd1           | 57.22769808 | 0.262024 | 0.550218 | 0.853171 | 58.47352 | 58.39502 | 39.12081 | 89.29771 | 44.12226 | 53.95687 |
| ENSMUSG000000022112  | 14_Gpc5          | 0.73009661  | -1.60751 | 0.550211 | 0.853171 | 0.812132 | 2.576251 | 0        | 0.992197 | 0        | 0        |
| ENSMUSG000000027249  | 15_F2            | 0.73009661  | -1.60751 | 0.550211 | 0.853171 | 0.812132 | 2.576251 | 0        | 0.992197 | 0        | 0        |
| ENSMUSG000000030772  | 5_Dkk3           | 13971.2155  | -0.15629 | 0.550305 | 0.853171 | 13560.98 | 16938.85 | 13681.93 | 14690.47 | 10949.11 | 14005.96 |
| ENSMUSG000000042677  | 7_Zc3h12a        | 642.5865273 | -0.38537 | 0.550242 | 0.853171 | 661.0756 | 577.9389 | 944.6525 | 114.1026 | 892.6273 | 665.1222 |
| ENSMUSG000000051716  | 5_Apon           | 1.009516588 | 1.315907 | 0.549976 | 0.853171 | 0.812132 | 0.85875  | 0        | 0.992197 | 3.39402  | 0        |
| ENSMUSG000000079022  | 9_Col22a1        | 21.19574084 | -0.3551  | 0.55004  | 0.853171 | 19.49117 | 33.49126 | 18.40979 | 21.82833 | 9.050721 | 24.90317 |
| ENSMUSG000000097595  | 1_1500002F19Rik  | 4.732614141 | -0.53969 | 0.550098 | 0.853171 | 5.684925 | 4.293751 | 6.903673 | 3.968787 | 3.39402  | 4.150528 |
| ENSMUSG000000106144  | 1_RP24-121111    | 0.73009661  | -1.60751 | 0.550211 | 0.853171 | 0.812132 | 2.576251 | 0        | 0.992197 | 0        | 0        |
| ENSMUSG000000042195  | 8_Sic3sf2        | 747.8356777 | 0.134022 | 0.550424 | 0.853288 | 718.737  | 650.0739 | 770.9101 | 804.6716 | 785.15   | 757.4714 |
| ENSMUSG000000022197  | 15_Pdzd2         | 4116.255381 | -0.16628 | 0.550702 | 0.853358 | 3981.884 | 4124.577 | 4953.385 | 3039.099 | 4093.188 | 4505.398 |
| ENSMUSG000000036136  | 8_Fam110c        | 841.6174217 | 0.165875 | 0.550663 | 0.853358 | 751.2223 | 690.4352 | 938.8995 | 1047.76  | 784.0187 | 837.3691 |
| ENSMUSG000000041141  | 7_Pnmal1         | 2.775314463 | -0.79066 | 0.550745 | 0.853358 | 5.684925 | 2.576251 | 2.301224 | 2.97659  | 0        | 3.112896 |
| ENSMUSG000000044786  | 5_Zfp36          | 2769.824861 | -0.18776 | 0.550555 | 0.853358 | 3164.067 | 2518.714 | 3166.485 | 2019.121 | 3420.041 | 2330.522 |
| ENSMUSG000000046707  | 8_Csnk2a2        | 589.8004328 | 0.147979 | 0.550812 | 0.853358 | 529.5102 | 576.2214 | 573.0048 | 635.006  | 696.9055 | 528.1547 |
| ENSMUSG000000078515  | 4_Ddl2           | 3088.455612 | 0.128714 | 0.550783 | 0.853358 | 2927.737 | 2774.622 | 3150.376 | 3472.689 | 3110.054 | 3095.256 |
| ENSMUSG000000078812  | 10_Eif5a         | 10702.23219 | -0.25364 | 0.550746 | 0.853358 | 11499.79 | 10271.51 | 13150.35 | 4755.599 | 13182.37 | 11353.72 |
| ENSMUSG000000090145  | 7_Ugt1a6b        | 75.13894835 | 0.234802 | 0.550579 | 0.853358 | 56.84925 | 93.60377 | 56.37999 | 63.5006  | 87.11319 | 93.38689 |
| ENSMUSG000000000682  | 7_Cd52           | 244.7057366 | 0.295262 | 0.551026 | 0.853624 | 336.2227 | 151.14   | 171.4412 | 178.5954 | 425.3839 | 205.4511 |
| ENSMUSG000000031523  | 16_Dlc1          | 449.8845277 | -0.20603 | 0.55108  | 0.85364  | 518.1403 | 537.5776 | 390.0575 | 481.2155 | 279.441  | 492.8752 |
| ENSMUSG000000024985  | 18_Tcf7l2        | 408.8225693 | 0.172632 | 0.551214 | 0.853649 | 384.1385 | 356.3813 | 413.0697 | 540.7473 | 351.8468 | 406.7518 |
| ENSMUSG000000043126  | 4_DB03039M14Rik  | 2.431565041 | 0.848652 | 0.551193 | 0.853649 | 0.812132 | 4.293751 | 0        | 2.97659  | 3.39402  | 3.112896 |
| ENSMUSG000000060938  | 14_Rpl26         | 7581.07097  | -0.23142 | 0.551212 | 0.853649 | 8532.261 | 7737.34  | 8293.612 | 3741.574 | 8474.869 | 8706.771 |
| ENSMUSG000000009772  | 15_Nuak2         | 1734.93856  | -0.21785 | 0.551446 | 0.853741 | 1780.194 | 1644.507 | 2172.356 | 966.3997 | 1867.765 | 1858.399 |
| ENSMUSG000000026028  | 12_Trak2         | 1126.76823  | 0.155197 | 0.551342 | 0.853741 | 1080.948 | 1098.342 | 1019.442 | 1444.639 | 1032.914 | 1084.326 |
| ENSMUSG0000000031149 | 7_Praf2          | 196.4810625 | -0.15993 | 0.551567 | 0.853741 | 208.718  | 216.4051 | 196.7547 | 160.7359 | 186.6711 | 209.6017 |
| ENSMUSG000000031971  | 15_Ccsap         | 37.22050655 | -0.27508 | 0.551399 | 0.853741 | 45.4794  | 27.48001 | 49.47632 | 39.68787 | 37.33422 | 23.86554 |
| ENSMUSG000000046731  | 4_Kcld11         | 1591.179666 | -0.23641 | 0.551583 | 0.853741 | 1586.906 | 1612.733 | 1964.095 | 782.8433 | 1865.58  | 1734.921 |
| ENSMUSG000000070342  | 3_Gm10287        | 0.970510901 | 1.289225 | 0.551497 | 0.853741 | 1.624264 | 0        | 0        | 0.992197 | 1.13134  | 2.075264 |
| ENSMUSG000000074619  | 5_1700034123Rik  | 1.545175866 | 1.394339 | 0.551616 | 0.853741 | 1.624264 | 0.85875  | 0        | 0        | 0.678804 | 0        |
| ENSMUSG000000103998  | 1_Gm38025        | 6.830805879 | 0.562908 | 0.55146  | 0.853741 | 8.121322 | 6.011252 | 2.301224 | 15.87515 | 4.52536  | 4.150528 |
| ENSMUSG000000074736  | 10_Syndig1       | 2.015798477 | -1.01038 | 0.551738 | 0.853745 | 3.248529 | 2.576251 | 2.301224 | 3.968787 | 0        | 0        |
| ENSMUSG000000078648  | 2_Gm17546        | 3.002906777 | 0.806013 | 0.551748 | 0.853745 | 0        | 4.293751 | 2.301224 | 5.953181 | 3.39402  | 2.075264 |
| ENSMUSG000000106461  | 1_Gm20755        | 0.662413993 | 1.644431 | 0.551701 | 0.853745 | 0        | 0.85875  | 0        | 1.984394 | 1.13134  | 0        |
| ENSMUSG000000054083  | 7_Capn12         | 4.838559607 | 0.924919 | 0.551842 | 0.853825 | 7.30919  | 2.576251 | 0        | 0        | 0.556701 | 13.48922 |
| ENSMUSG000000040016  | 13_Ptger3        | 23.80511027 | 0.420662 | 0.551965 | 0.853949 | 14.61838 | 32.63251 | 13.80735 | 51.59423 | 13.57608 | 16.60211 |
| ENSMUSG000000021948  | 15_Pkrkd         | 2826.531684 | -0.23053 | 0.552364 | 0.854456 | 2909.87  | 2972.135 | 3273.491 | 1410.904 | 3369.131 | 3023.66  |
| ENSMUSG000000024114  | 14_Prs41         | 27.85417318 | -0.28218 | 0.552378 | 0.854456 | 26.80036 | 32.63251 | 32.21714 | 15.87515 | 30.54618 | 29.0537  |
| ENSMUSG000000036275  | 13_9530068E07Rik | 4497.808999 | 0.145242 | 0.553109 | 0.855122 | 4028.988 | 4187.266 | 4598.997 | 5548.365 | 4378.286 | 4244.953 |
| ENSMUSG000000040481  | 16_Bpif          | 2691.010022 | 0.120724 | 0.553087 | 0.855122 | 2494.058 | 2666.419 | 2575.07  | 2904.16  | 2714.085 | 2792.268 |
| ENSMUSG000000045362  | 7_Tnfrsf26       | 19.36638925 | 0.312279 | 0.553066 | 0.855122 | 20.3033  | 12.0225  | 19.56041 | 22.82053 | 24.88948 | 16.60211 |
| ENSMUSG000000048677  | 8_Tpocn2         | 760.9358241 | -0.30766 | 0.553064 | 0.855122 | 807.2594 | 815.8127 | 902.0799 | 229.1975 | 971.8211 | 839.4443 |
| ENSMUSG000000068686  | 12_Cd59b         | 31.45741583 | 0.250691 | 0.552952 | 0.855122 | 33.55183 | 31.77376 | 31.06653 | 38.69668 | 29.41484 | 34.24186 |
| ENSMUSG000000068859  | 5_Sp9            | 0.654644319 | 1.644409 | 0.552952 | 0.855122 | 0.812132 | 0        | 0        | 1.984394 | 1.13134  | 0        |
| ENSMUSG000000087681  | 1_Gm13565        | 0.654644319 | 1.644409 | 0.552952 | 0.855122 | 0.812132 | 0        | 0        | 1.984394 | 1.13134  | 0        |
| ENSMUSG000000048486  | 6_Fitm2          | 623.3638666 | -0.14416 | 0.553242 | 0.855259 | 627.7782 | 584.8089 | 751.3497 | 569.521  | 588.2969 | 618.4287 |
| ENSMUSG0000000005410 | 5_Mcm5           | 1822.157505 | -0.30346 | 0.553441 | 0.855434 | 2005.966 | 1695.173 | 2338.044 | 579.4429 | 2340.763 | 173.576  |
| ENSMUSG000000020526  | 12_Znh1t3        | 150.6555365 | 0.157095 | 0.553437 | 0.855434 | 149.4323 | 140.835  | 136.9228 | 160.7359 | 169.701  | 146.3061 |
| ENSMUSG0000000025170 | 13_Rab40b        | 62.2024667  | 0.28365  | 0.55359  | 0.855563 | 64.97057 | 61.83002 | 41.42204 | 100.2119 | 37.33422 | 67.44608 |
| ENSMUSG000000079025  | 8_Gsdmc          | 5.336610932 | 0.928149 | 0.553609 | 0.855563 | 9.745586 | 0        | 1.150612 | 1.984394 | 18.10144 | 1.037632 |
| ENSMUSG000000022187  | 2_Gm5546         | 1.128105405 | -1.21808 | 0.553715 | 0.855593 | 1.624264 | 0.85875  | 2.301224 | 1.984394 | 0        | 0        |
| ENSMUSG000000061436  | 15_Hipk2         | 1328.875029 | -0.14343 | 0.553703 | 0.855593 | 1292.102 | 1422.09  | 1470.482 | 1073.557 | 1359.871 | 1355.147 |
| ENSMUSG0000000021400 | 6_Wrnp1          | 747.8521159 | -0.15036 | 0.553766 | 0.855606 | 750.4101 | 808.9427 | 800.826  | 600.2791 | 830.4036 | 696.2511 |
| ENSMUSG000000023905  | 14_Tnfrsf12a     | 546.0394182 | -0.32932 | 0.553961 | 0.855646 | 587.9837 | 496.3576 | 739.8436 | 152.7983 | 778.362  | 520.8913 |
| ENSMUSG000000026141  | 13_Col19a1       | 0.695439634 | 1.610581 | 0.553964 | 0.855646 | 0        | 0        | 1.150612 | 1.984394 | 0        | 1.037632 |
| ENSMUSG000000031682  | 4_1700011L22Rik  | 0.695439634 | 1.610581 | 0.553964 | 0.855646 | 0        | 0        | 1.150612 | 1.984394 | 0        | 1.037632 |
| ENSMUSG000000086987  | 1_Gm12484        | 0.695439634 | 1.610581 | 0.553964 | 0.855646 | 0        | 0        | 1.150612 | 1.984394 | 0        | 1.037632 |
| ENSMUSG000000034853  | 16_Acot11        | 646.2389521 | -0.25304 | 0.554117 | 0.855816 | 608.287  | 674.9777 | 824.9889 | 298.6512 | 829.2723 | 641.2566 |
| ENSMUSG000000039058  | 11_Ak5           | 25.98042948 | -0.28208 | 0.554348 | 0.856107 | 26.80036 | 37.78501 | 20.71102 | 23.81272 | 26.02082 | 20.75264 |
| ENSMUSG000000022802  | 2_Lmln           | 98.51752032 | 0.200946 | 0.554701 | 0.856386 | 100.7044 | 108.2025 | 65.58489 | 109.1416 | 99.57935 | 107.9137 |
| ENSMUSG000000030346  | 16_Rad51ap1      | 175.5840588 | 0.200664 | 0.554623 | 0.856386 | 168.1114 | 138.2588 | 184.0979 | 237.135  | 188.9338 | 136.9674 |
| ENSMUSG000000034645  | 13_Zyg11a        | 1.050311903 | 1.146899 | 0.554618 | 0.856386 | 0        | 0.85875  | 1.150612 | 0.992197 | 2.26268  | 1.037632 |
| ENSMUSG000000053062  | 15_Jam2          | 353.9098761 | 0.294914 | 0.554678 | 0.856386 | 303.7374 | 400.1776 | 249.6828 | 673.7016 | 202.5099 | 293.6499 |
| ENSMUSG000000072966  | 11_Gprasp2       | 193.0606519 | -0.29777 | 0.554902 | 0.856629 | 199.7845 | 292.8338 | 146.1277 | 269.8775 | 83.71917 | 166.0211 |
| ENSMUSG000000002489  | 15_Tiam1         | 3315.752903 | -0.13869 | 0.554973 | 0.856655 | 3216.043 | 3386.911 | 3822.333 | 2781.128 | 3263.916 | 3424.186 |
| ENSMUSG000000016349  | 10_Eef1a2        | 81.68004857 | -0.38134 | 0.555025 | 0.856655 | 59.28565 | 144.27   | 73.63917 | 30.7581  | 44.12226 | 138.0051 |
| ENSMUSG000000021340  | 12_Gpld1         | 474.482111  | -0.14666 | 0.555054 | 0.856655 | 489.7157 | 513.5326 | 492.462  | 402.8319 | 425.3839 | 522.9666 |
| ENSMUSG000000058897  | 17_Col25a1       | 22.46770154 | 0.334644 | 0.555163 | 0.856655 | 17.86691 | 22.32751 | 19.56041 | 37.70348 | 12.44474 | 24.90317 |
| ENSMUSG000000078923  | 10_Ube2v1        | 3184.180384 | -0.22172 | 0.555128 | 0.856655 | 3256.65  | 3191.116 | 3837.291 | 1679.789 | 3761.706 | 3378.53  |
| ENSMUSG0000000097401 | 1_Gm26744        | 3.795366143 | 0.754814 | 0.555177 | 0.856655 | 0.812132 | 4.293751 | 3.451836 | 10.91416 | 2.26268  | 1.037632 |
| ENSMUSG000000045521  | 6_Tssk2          | 2.727332644 | -0.69295 | 0.555289 | 0.856696 | 3.248529 | 3.435001 | 3.451836 | 1.984394 | 1.13134  | 3.112896 |
| ENSMUSG000000096003  | 7_Gm3500         | 2.189934408 | -1.55263 | 0.555253 | 0.856696 | 9.745586 | 0        | 0        | 0        | 3.39402  | 0        |
| ENSMUSG000000028111  | 4_Ctkc           | 1077.246575 | 0.145816 | 0.555357 | 0.856735 | 1081.76  | 1136.985 | 849.1517 | 1082.487 | 1155.098 | 1157.997 |
| ENSMUSG000000032306  | 14_Mpi           | 381.6666817 | -0.19902 | 0.555409 | 0.856749 | 410.1267 | 382.1438 | 431.4795 | 231.1819 | 410.6765 | 424.3915 |
| ENSMUSG000000014769  | 9_Psmb1          | 3741.064291 | 0.131714 | 0.555473 | 0.856781 | 3691.953 | 3237.488 |          |          |          |          |

|                      |                 |              |          |          |          |          |          |          |          |          |          |
|----------------------|-----------------|--------------|----------|----------|----------|----------|----------|----------|----------|----------|----------|
| ENSMUSG00000096687   | 7_AA474331      | 138.0821666  | 0.220892 | 0.557267 | 0.85745  | 148.6202 | 134.8238 | 98.95264 | 202.4082 | 110.8713 | 132.8169 |
| ENSMUSG00000021680   | 7_Chhpb         | 146.0657924  | -0.2907  | 0.557411 | 0.857486 | 132.3775 | 247.3201 | 102.4045 | 153.7905 | 72.40577 | 168.0964 |
| 666.7293506          | 14_Tbocl        | 0.161567     | 0.557496 | 0.857486 | 609.0991 | 632.8989 | 646.644  | 861.2268 | 565.6701 | 684.8372 |          |
| ENSMUSG00000037523   | 13_Mavs         | 1948.793139  | -0.25325 | 0.557609 | 0.857486 | 1933.687 | 2043.826 | 2380.616 | 836.4219 | 2268.337 | 2229.871 |
| ENSMUSG00000042724   | 7_Map3k9        | 1615.311716  | -0.20837 | 0.557525 | 0.857486 | 1734.714 | 1657.388 | 1803.009 | 897.9381 | 1832.771 | 1766.05  |
| ENSMUSG00000049871   | 13_Nlrc3        | 42.80067552  | -0.27144 | 0.557491 | 0.857486 | 58.47352 | 46.37251 | 34.51836 | 31.7503  | 55.43567 | 29.0537  |
| ENSMUSG000000086363  | 7_A33010210Rik  | 1.079264624  | -1.11958 | 0.557569 | 0.857486 | 2.436397 | 0.85875  | 1.150612 | 0.992197 | 0        | 1.037632 |
| ENSMUSG000000097622  | 1_A330033J07Rik | 2.379944386  | 0.899591 | 0.557392 | 0.857486 | 0.812132 | 0.85875  | 3.451836 | 3.968787 | 0        | 5.18816  |
| ENSMUSG000000014609  | 16_Chrne        | 0.646598854  | 1.627182 | 0.557977 | 0.857853 | 0.812132 | 0        | 0        | 0.992197 | 0        | 2.075264 |
| ENSMUSG000000041920  | 13_Slc16a6      | 329.74979    | 0.165641 | 0.557917 | 0.857853 | 367.0837 | 270.5063 | 294.5567 | 313.5342 | 403.8884 | 328.9294 |
| ENSMUSG000000096922  | 1_Gm17308       | 0.646598854  | 1.627182 | 0.557977 | 0.857853 | 0.812132 | 0        | 0        | 0.992197 | 0        | 2.075264 |
| ENSMUSG000000028859  | 14_Csf3r        | 172.5732304  | -0.38534 | 0.558141 | 0.858017 | 338.6591 | 108.2025 | 139.2241 | 71.43817 | 290.7544 | 87.16109 |
| ENSMUSG000000086070  | 1_8430436N08Rik | 2.140363028  | 0.918933 | 0.558176 | 0.858017 | 3.248529 | 0        | 1.150612 | 0.992197 | 2.26268  | 5.18816  |
| ENSMUSG0000000097193 | 1_Gm26664       | 4.922357223  | -0.63606 | 0.558213 | 0.858017 | 0.812132 | 10.305   | 6.903673 | 3.968787 | 3.39402  | 4.150528 |
| ENSMUSG000000054400  | 15_Ckif         | 155.2695875  | 0.158604 | 0.558279 | 0.858053 | 155.1172 | 146.8463 | 138.0735 | 176.611  | 169.701  | 145.2685 |
| ENSMUSG0000000119942 | 12_Cdk1         | 746.7079263  | 0.151676 | 0.558457 | 0.85826  | 747.9737 | 603.7014 | 770.9101 | 754.0696 | 894.89   | 708.7027 |
| ENSMUSG000000031924  | 3_Cyb5b         | 4780.836486  | 0.145462 | 0.558606 | 0.858373 | 4470.788 | 4279.152 | 4870.541 | 5948.22  | 4693.93  | 4422.388 |
| ENSMUSG0000000044186 | 10_Nkx2-6       | 0.722129804  | -1.57431 | 0.55866  | 0.858373 | 2.436397 | 0.85875  | 0        | 0        | 0        | 1.037632 |
| ENSMUSG000000061298  | 14_Agbl4        | 0.722129804  | -1.57431 | 0.55866  | 0.858373 | 2.436397 | 0.85875  | 0        | 0        | 0        | 1.037632 |
| ENSMUSG000000030020  | 13_Prickle2     | 1706.139213  | 0.166236 | 0.559004 | 0.858637 | 1666.495 | 1512.259 | 1645.375 | 2310.826 | 1508.076 | 1593.803 |
| ENSMUSG000000037106  | 8_Fert1f6       | 3.871335761  | 0.771871 | 0.558953 | 0.858637 | 7.30919  | 0        | 1.150612 | 4.960984 | 5.656701 | 4.150528 |
| ENSMUSG000000038268  | 4_Ovca2         | 317.0501315  | 0.159919 | 0.55888  | 0.858637 | 263.1308 | 313.4438 | 322.1714 | 369.0972 | 356.3721 | 280.0854 |
| ENSMUSG000000073702  | 11_Rpl31        | 11201.28771  | -0.22277 | 0.558963 | 0.858637 | 13077.76 | 11461.74 | 11653.4  | 5702.155 | 12673.27 | 12639.4  |
| ENSMUSG000000018565  | 17_Elp5         | 634.1249102  | -0.23221 | 0.559138 | 0.858758 | 664.3241 | 674.9777 | 715.6807 | 307.581  | 737.6337 | 704.5522 |
| ENSMUSG0000000208005 | 13_Guoy1b3      | 83.0870011   | 0.293229 | 0.559255 | 0.858758 | 71.46763 | 89.31002 | 63.28367 | 156.7671 | 55.43567 | 62.25792 |
| ENSMUSG000000037697  | 18_Dhdh1        | 989.3877036  | 0.143844 | 0.559239 | 0.858758 | 1011.917 | 881.0777 | 927.3934 | 1207.504 | 954.851  | 953.5839 |
| ENSMUSG000000078865  | 8_Gm14406       | 18.1822746   | 0.634345 | 0.559206 | 0.858758 | 21.92757 | 20.61001 | 0        | 37.70348 | 22.6268  | 6.225792 |
| ENSMUSG000000030283  | 7_Sltsia1       | 80.89053465  | 0.328765 | 0.559323 | 0.858795 | 69.03124 | 109.0613 | 36.81959 | 147.8373 | 64.48639 | 58.1074  |
| ENSMUSG000000050063  | 18_Klkb         | 1.01935166   | 1.135434 | 0.559394 | 0.858838 | 0.812132 | 0        | 1.150612 | 1.984394 | 1.13134  | 1.037632 |
| ENSMUSG000000068099  | 4_1500009C09Rik | 3.800837053  | 0.611525 | 0.559599 | 0.859036 | 4.060661 | 2.576251 | 2.301224 | 1.984394 | 5.656701 | 6.225792 |
| ENSMUSG000000070683  | 7_Lactb1        | 3.60526928   | -0.64664 | 0.559609 | 0.859036 | 6.497057 | 4.293751 | 2.301224 | 2.97659  | 4.52536  | 1.037632 |
| ENSMUSG000000074102  | 4_Rbm15b        | 1072.363594  | -0.13564 | 0.559697 | 0.859105 | 1075.263 | 1066.568 | 1226.553 | 934.6494 | 1125.683 | 1005.465 |
| ENSMUSG0000000104328 | 1_Gm37323       | 1.151217295  | -1.22465 | 0.559741 | 0.859107 | 0        | 2.576251 | 2.301224 | 0.992197 | 0        | 1.037632 |
| ENSMUSG000000060332  | 9_Tmc2          | 0.714557262  | -1.57413 | 0.559801 | 0.859132 | 2.436397 | 0.85875  | 0        | 0.992197 | 0        | 0        |
| ENSMUSG000000079243  | 2_Xirp1         | 20.995272902 | -0.39606 | 0.55991  | 0.859167 | 17.05478 | 36.06751 | 18.40979 | 9.921968 | 11.3134  | 33.20423 |
| ENSMUSG000000096215  | 8_Smin22        | 137.5977314  | -0.42688 | 0.559878 | 0.859167 | 151.0566 | 155.4338 | 166.8388 | 13.89076 | 164.0443 | 174.3222 |
| ENSMUSG000000022408  | 5_Fam83f        | 1080.317718  | -0.2462  | 0.560152 | 0.859339 | 1097.191 | 1094.048 | 1325.505 | 485.1842 | 1303.304 | 1176.675 |
| ENSMUSG000000027475  | 9_Klf3b         | 1272.174073  | 0.121905 | 0.560113 | 0.859339 | 1187.337 | 1177.347 | 1290.987 | 1303.747 | 1323.668 | 1349.958 |
| ENSMUSG000000097576  | 1_D930030I03Rik | 5.451729076  | -0.48866 | 0.560084 | 0.859339 | 7.30919  | 6.011252 | 5.753061 | 4.960984 | 4.52536  | 4.150528 |
| ENSMUSG000000024661  | 6_Fh1           | 17099.50507  | 0.1329   | 0.560243 | 0.859396 | 16494.4  | 16673.49 | 15769.14 | 15675.72 | 20140.12 | 17844.16 |
| ENSMUSG000000051344  | 13_Plekhh3      | 963.3837045  | 0.128122 | 0.560275 | 0.859396 | 950.1946 | 847.5865 | 964.2129 | 971.3607 | 1061.197 | 985.7505 |
| ENSMUSG000000025872  | 5_Thoc3         | 695.3737786  | -0.17923 | 0.560466 | 0.85949  | 727.6704 | 680.1302 | 807.7297 | 462.3637 | 741.0278 | 753.3209 |
| ENSMUSG000000053025  | 13_Sv2b         | 261.1440745  | -0.30657 | 0.560432 | 0.85949  | 302.1132 | 388.1551 | 176.0437 | 394.8943 | 119.9221 | 185.7361 |
| ENSMUSG000000053846  | 4_Lipg          | 204.3374428  | 0.241531 | 0.560389 | 0.85949  | 199.7845 | 139.9763 | 222.0681 | 135.931  | 314.5125 | 213.7522 |
| ENSMUSG000000033624  | 10_Pdpr         | 598.933352   | 1.172488 | 0.560536 | 0.859531 | 556.3105 | 585.6677 | 547.6914 | 826.4999 | 530.5985 | 546.8321 |
| ENSMUSG000000000183  | 6_Fgl6          | 3.377054968  | 0.682712 | 0.561315 | 0.859571 | 1.624264 | 1.7175   | 4.602448 | 4.960984 | 1.13134  | 6.225792 |
| ENSMUSG000000003545  | 2_Fosb          | 83.32545451  | -0.25794 | 0.560921 | 0.859571 | 99.89226 | 72.13502 | 100.1033 | 41.67227 | 105.2146 | 80.9353  |
| ENSMUSG0000000008373 | 16_Prrp31       | 838.4608389  | -0.20597 | 0.561745 | 0.859571 | 894.9697 | 829.5527 | 969.966  | 482.2077 | 1012.549 | 841.5196 |
| ENSMUSG0000000113707 | 3_Tnfaiip8l2    | 43.0184822   | -0.3378  | 0.561487 | 0.859571 | 63.34631 | 41.22001 | 43.72326 | 4.960984 | 63.35505 | 41.50528 |
| ENSMUSG0000000021273 | 4802.678478     | -0.15665     | 0.560705 | 0.859571 | 5084.76  | 4505.862 | 5598.879 | 3700.894 | 5370.471 | 4555.205 |          |
| ENSMUSG000000022500  | 14_Litaf        | 1163.936074  | 0.160137 | 0.561668 | 0.859571 | 1089.069 | 988.4215 | 1220.799 | 1064.627 | 1511.47  | 1109.229 |
| ENSMUSG000000023912  | 9_Slc25a27      | 243.4622544  | 0.139258 | 0.56124  | 0.859571 | 236.3305 | 231.0038 | 227.8212 | 257.9712 | 240.9754 | 266.6714 |
| ENSMUSG000000027996  | 13_Sfrp2        | 614.6458604  | -0.24076 | 0.561055 | 0.859571 | 586.3594 | 739.3839 | 671.9575 | 639.9669 | 289.6231 | 760.5843 |
| ENSMUSG000000028654  | 13_Mycl         | 1496.80921   | -0.19676 | 0.561756 | 0.859571 | 1523.56  | 1461.593 | 1511.263 | 904.8835 | 1716.243 |          |
| ENSMUSG000000031594  | 9_Fgl1          | 0.646795986  | 1.610039 | 0.561672 | 0.859571 | 0        | 0.85875  | 0        | 1.984394 | 0        | 1.037632 |
| ENSMUSG000000031722  | 9_Hp            | 62.39695236  | -0.48186 | 0.561178 | 0.859571 | 142.9353 | 19.75126 | 55.22938 | 17.85954 | 107.4773 | 31.2896  |
| ENSMUSG000000031858  | 15_Mau2         | 2410.71327   | -0.21319 | 0.561379 | 0.859571 | 2509.488 | 2546.194 | 2709.692 | 1284.895 | 2701.64  | 2712.37  |
| ENSMUSG000000032769  | 4_Tripa1        | 0.646795986  | 1.610039 | 0.561672 | 0.859571 | 0        | 0.85875  | 0        | 1.984394 | 0        | 1.037632 |
| ENSMUSG000000038156  | 15_Spon1        | 4648.900795  | -0.19952 | 0.560634 | 0.859571 | 4840.308 | 6255.995 | 3813.129 | 5400.527 | 3162.096 | 4421.35  |
| ENSMUSG000000039763  | 9_Dnajc28       | 115.3902172  | 0.254798 | 0.561368 | 0.859571 | 105.5772 | 98.75628 | 111.6094 | 200.4238 | 82.58783 | 93.38689 |
| ENSMUSG000000040524  | 9_Zfp609        | 1015.432976  | -0.15114 | 0.561213 | 0.859571 | 1047.651 | 1064.85  | 1093.082 | 764.9837 | 1055.722 | 1056.309 |
| ENSMUSG000000041037  | 8_Irqq          | 747.2929413  | -0.1771  | 0.561128 | 0.859571 | 696.8094 | 825.259  | 852.6036 | 524.8721 | 798.7261 | 785.4875 |
| ENSMUSG000000041347  | 5_Bdkrb1        | 5.961408728  | -0.60664 | 0.561493 | 0.859571 | 9.745586 | 2.576251 | 9.204897 | 1.984394 | 10.18206 | 2.075264 |
| ENSMUSG000000045506  | 3_A930002H24Rik | 0.985853117  | 1.280399 | 0.561546 | 0.859571 | 0.812132 | 0.85875  | 0        | 0        | 1.13134  | 3.112896 |
| ENSMUSG000000047098  | 17_Rnf31        | 1039.554711  | -0.34264 | 0.561463 | 0.859571 | 968.8737 | 1063.992 | 1454.374 | 237.135  | 1375.71  | 1137.245 |
| ENSMUSG000000061535  | 11_C1qtnf7      | 346.5188264  | 0.206296 | 0.56177  | 0.859571 | 341.0955 | 357.2401 | 266.942  | 506.0204 | 260.2082 | 347.6067 |
| ENSMUSG000000075020  | 5_E530001K10Rik | 0.646795986  | 1.610039 | 0.561672 | 0.859571 | 0        | 0.85875  | 0        | 1.984394 | 0        | 1.037632 |
| ENSMUSG000000081044  | 8_AU015836      | 0.646795986  | 1.610039 | 0.561672 | 0.859571 | 0        | 0.85875  | 0        | 1.984394 | 0        | 1.037632 |
| ENSMUSG000000086474  | 2_9130204K15Rik | 8.691719357  | -0.42256 | 0.561155 | 0.859571 | 8.933454 | 9.446252 | 11.50612 | 3.968787 | 7.919381 | 10.37632 |
| ENSMUSG000000091402  | 17_Rd3l         | 28.42745025  | -0.35417 | 0.560729 | 0.859571 | 41.41874 | 36.92626 | 17.25918 | 39.68787 | 12.44474 | 22.82791 |
| ENSMUSG000000091550  | 1_Gm6811        | 0.985853117  | 1.280399 | 0.561546 | 0.859571 | 0.812132 | 0.85875  | 0        | 0        | 1.13134  | 3.112896 |
| ENSMUSG000000097236  | 1_4831440E17Rik | 11.84668157  | 0.533489 | 0.561644 | 0.859571 | 8.121322 | 12.88125 | 8.054285 | 29.7659  | 10.18206 | 2.075264 |
| ENSMUSG000000097707  | 1_Gm26742       | 0.646795986  | 1.610039 | 0.561672 | 0.859571 | 0        | 0.85875  | 0        | 1.984394 | 0        | 1.037632 |
| ENSMUSG000000079110  | 11_Capn3        | 30.55577354  | 0.272244 | 0.561863 | 0.859647 | 34.10955 | 25.76251 | 23.01224 | 28.77371 | 26.02082 | 45.65581 |
| ENSMUSG000000024902  | 4_Mrpl11        | 418.7755834  | -0.16328 | 0.56193  | 0.859684 | 449.9212 | 442.2564 | 434.9314 | 301.6278 | 436.6973 | 447.2194 |
| ENSMUSG000000011179  | 7_Odc1          | 8621.224876  | 0.12737  | 0.562178 | 0.859988 |          |          |          |          |          |          |

|                      |                 |             |          |          |          |          |          |          |          |          |          |
|----------------------|-----------------|-------------|----------|----------|----------|----------|----------|----------|----------|----------|----------|
| ENSMUSG000000047104  | 5_Pbp2          | 67.1323404  | 0.217927 | 0.564425 | 0.861256 | 68.2191  | 48.94876 | 69.03673 | 60.52401 | 92.76989 | 63.29556 |
| ENSMUSG000000078881  | 10_Gm14434      | 21.6882039  | 0.729964 | 0.564428 | 0.861256 | 2.436397 | 46.37251 | 0        | 11.90636 | 23.75814 | 45.65581 |
| ENSMUSG000000023945  | 6_Slc5a7        | 1.620042362 | 1.338105 | 0.564557 | 0.861355 | 1.624264 | 0        | 1.150612 | 6.945378 | 0        | 0        |
| ENSMUSG000000035274  | 13_Tpbp         | 270.7402112 | 0.183438 | 0.564655 | 0.861355 | 233.8941 | 225.8513 | 301.4604 | 365.1284 | 263.6022 | 234.5048 |
| ENSMUSG000000038806  | 7_Sde2          | 1242.659872 | 0.142578 | 0.564615 | 0.861355 | 1104.5   | 1094.907 | 1345.066 | 1438.685 | 1316.88  | 1155.922 |
| ENSMUSG000000087475  | 3_4933406118Rik | 0.986050249 | 1.242667 | 0.564666 | 0.861355 | 0        | 1.7175   | 0        | 0.992197 | 1.13134  | 2.075264 |
| ENSMUSG000000042035  | 11_lgs3         | 4710.097436 | -0.18897 | 0.564813 | 0.861514 | 4388.762 | 4659.579 | 6006.195 | 3091.685 | 5493.788 | 4620.576 |
| ENSMUSG000000017264  | 16_Exosc10      | 1548.295683 | -0.22764 | 0.565107 | 0.861679 | 1641.319 | 1621.32  | 1747.78  | 751.093  | 1832.771 | 1695.491 |
| ENSMUSG000000017309  | 11_Cd300lg      | 33.09844251 | -0.23523 | 0.565168 | 0.861679 | 30.04889 | 39.50251 | 37.9702  | 31.7503  | 27.15216 | 32.16659 |
| ENSMUSG000000024670  | 16_Cd6          | 10.58998578 | -0.61339 | 0.565084 | 0.861679 | 16.24264 | 6.011252 | 16.10857 | 0        | 15.83876 | 9.338689 |
| ENSMUSG000000025068  | 7_Gsto1         | 122331.4735 | 0.117159 | 0.565058 | 0.861679 | 116346.1 | 110834.6 | 124920.8 | 130120.7 | 125359.3 | 126407.5 |
| ENSMUSG000000029106  | 14_Add1         | 9751.777398 | -0.14701 | 0.565181 | 0.861679 | 9315.156 | 10219.13 | 11210.41 | 7570.462 | 10160.57 | 10034.94 |
| ENSMUSG000000046652  | 3_Tas2r143      | 1.143250488 | -0.18149 | 0.565051 | 0.861679 | 1.624264 | 0.85875  | 2.301224 | 0        | 0        | 2.075264 |
| ENSMUSG000000027303  | 17_Ptpra        | 2285.581008 | 0.121294 | 0.565491 | 0.861823 | 2126.162 | 2162.333 | 2280.513 | 2557.883 | 2270.6   | 2315.995 |
| ENSMUSG000000027867  | 10_Spag17       | 3.429030071 | 0.678712 | 0.56542  | 0.861823 | 4.060661 | 2.576251 | 1.150612 | 4.960984 | 6.788041 | 1.037632 |
| ENSMUSG000000032547  | 12_Ryk          | 1733.143325 | 0.129538 | 0.565475 | 0.861823 | 1656.75  | 1579.242 | 1730.521 | 2024.082 | 1674.383 | 1733.883 |
| ENSMUSG000000042992  | 15_Borcs5       | 311.3799275 | -0.19593 | 0.565477 | 0.861823 | 307.7981 | 327.1838 | 362.4428 | 189.5096 | 346.1901 | 335.1552 |
| ENSMUSG000000067722  | 3_BC003965      | 266.5428484 | -0.157   | 0.565319 | 0.861823 | 260.6944 | 265.3538 | 317.5689 | 292.6981 | 227.3994 | 235.5425 |
| ENSMUSG000000074194  | 3_Zfp791        | 138.9208444 | 0.15163  | 0.565593 | 0.861912 | 133.1897 | 127.095  | 134.6216 | 146.8451 | 152.7309 | 139.0427 |
| ENSMUSG0000000003134 | 10_Tbc1d8       | 737.6220977 | -0.1352  | 0.565637 | 0.861912 | 756.9072 | 715.3389 | 844.5493 | 648.8967 | 690.1175 | 769.923  |
| ENSMUSG000000051323  | 16_Pcdh19       | 162.6423711 | 0.285271 | 0.565686 | 0.861922 | 157.5536 | 185.49   | 96.65142 | 297.659  | 110.8713 | 127.6287 |
| ENSMUSG000000000903  | 3_Vpreb3        | 2.045724323 | 1.077647 | 0.566774 | 0.861948 | 0        | 1.7175   | 2.301224 | 0.992197 | 0        | 7.263424 |
| ENSMUSG000000001497  | 18_Pax9         | 6.326818048 | 0.550883 | 0.566786 | 0.861948 | 4.872793 | 2.576251 | 8.054285 | 7.937575 | 12.44474 | 2.075264 |
| ENSMUSG0000000002814 | 15_Top3a        | 365.5235109 | -0.21175 | 0.566586 | 0.861948 | 375.2051 | 352.9463 | 448.7387 | 204.3925 | 418.5958 | 393.2626 |
| ENSMUSG0000000021263 | 10_Degs2        | 31.60318226 | -0.33032 | 0.566251 | 0.861948 | 32.48529 | 42.93751 | 29.91591 | 12.89556 | 47.51628 | 23.86554 |
| ENSMUSG0000000022828 | 10_Gtf2e1       | 540.6109733 | 0.158803 | 0.566579 | 0.861948 | 532.7587 | 490.3464 | 509.7212 | 711.4051 | 503.4463 | 495.9581 |
| ENSMUSG0000000025157 | 7_Zdhc16        | 523.9047655 | -0.19636 | 0.566427 | 0.861948 | 504.3341 | 519.5439 | 654.6983 | 324.4484 | 601.8729 | 538.531  |
| ENSMUSG0000000027939 | 11_Nup210l      | 37.1061797  | -0.25132 | 0.566782 | 0.861948 | 43.85514 | 41.22001 | 35.66898 | 21.82833 | 39.5969  | 40.46765 |
| ENSMUSG0000000028172 | 5_Tac3          | 206.8912912 | 0.327733 | 0.566363 | 0.861948 | 170.5478 | 260.2013 | 119.6637 | 419.6993 | 105.2146 | 166.0211 |
| ENSMUSG000000028234  | 6_Rps20         | 11627.56968 | -0.11742 | 0.56661  | 0.861948 | 11913.98 | 11681.58 | 12706.21 | 11175.11 | 10613.1  | 11675.44 |
| ENSMUSG0000000031294 | 9_D630029K05Rik | 1.279002074 | 0.997194 | 0.566115 | 0.861948 | 1.624264 | 0.85875  | 0        | 1.984394 | 1.13134  | 2.075264 |
| ENSMUSG000000034910  | 5_Pygo1         | 168.193728  | 0.277572 | 0.56596  | 0.861948 | 151.8687 | 194.9363 | 109.3082 | 297.659  | 101.8206 | 153.5695 |
| ENSMUSG000000035916  | 7_Ptprc         | 1.887541087 | 1.278109 | 0.566168 | 0.861948 | 3.248529 | 0        | 0        | 6.945378 | 1.13134  | 0        |
| ENSMUSG000000035954  | 9_Dock4         | 147.6108778 | 0.228002 | 0.565922 | 0.861948 | 131.5654 | 127.095  | 149.5796 | 239.1194 | 121.0534 | 117.2524 |
| ENSMUSG000000037994  | 14_Slc9b2       | 32.4093041  | -0.25658 | 0.566449 | 0.861948 | 38.17021 | 34.35001 | 33.36775 | 28.77371 | 20.36412 | 39.43002 |
| ENSMUSG000000041438  | 7_Cir1a1        | 696.0203306 | 0.14175  | 0.566023 | 0.861948 | 648.8936 | 620.0177 | 716.8313 | 737.0202 | 820.2216 | 632.9556 |
| ENSMUSG000000043122  | 6_A530016L24Rik | 0.421605437 | -0.13998 | 0.566398 | 0.861948 | 0.812132 | 1.7175   | 0        | 0        | 0        | 0        |
| ENSMUSG000000051627  | 2_Hist1h1e      | 7.692766519 | -0.49646 | 0.565967 | 0.861948 | 5.684925 | 4.293751 | 17.25918 | 4.960984 | 5.656701 | 8.301057 |
| ENSMUSG000000055210  | 4_Foxd2         | 7.022723341 | -0.45535 | 0.56661  | 0.861948 | 8.121322 | 6.011252 | 10.35551 | 5.953181 | 3.39402  | 8.301057 |
| ENSMUSG0000000078091 | 1_Gm10912       | 0.421605437 | -0.13998 | 0.566398 | 0.861948 | 0.812132 | 1.7175   | 0        | 0        | 0        | 0        |
| ENSMUSG0000000090631 | 3_Olfra456      | 0.421605437 | -0.13998 | 0.566398 | 0.861948 | 0.812132 | 1.7175   | 0        | 0        | 0        | 0        |
| ENSMUSG0000000097658 | 1_Gm16755       | 4.400293289 | 0.616774 | 0.566778 | 0.861948 | 6.497057 | 2.576251 | 1.150612 | 2.97659  | 9.050721 | 4.150528 |
| ENSMUSG0000000097664 | 1_Gm26765       | 37.54956638 | -0.23758 | 0.566729 | 0.861948 | 34.10955 | 35.20876 | 52.92816 | 35.71909 | 36.20288 | 31.12896 |
| ENSMUSG000000105168  | 1_Gm43565       | 0.421605437 | -0.13998 | 0.566398 | 0.861948 | 0.812132 | 1.7175   | 0        | 0        | 0        | 0        |
| ENSMUSG000000107096  | 3_Gm43597       | 54.55770919 | 0.196214 | 0.566167 | 0.861948 | 52.78859 | 48.09001 | 51.77754 | 65.48499 | 53.17298 | 56.03213 |
| ENSMUSG000000108111  | 1_RP24-457L7    | 0.421605437 | -0.13998 | 0.566398 | 0.861948 | 0.812132 | 1.7175   | 0        | 0        | 0        | 0        |
| ENSMUSG000000022604  | 18_Cep97        | 166.5827883 | 0.199366 | 0.566909 | 0.86207  | 146.9959 | 166.5975 | 151.8808 | 241.1038 | 128.9728 | 163.9459 |
| ENSMUSG000000033022  | 7_Cdo1          | 4493.37228  | 0.180149 | 0.567113 | 0.862314 | 4300.24  | 4113.414 | 4226.198 | 6348.075 | 3447.193 | 4625.113 |
| ENSMUSG000000003464  | 13_Pex19        | 1745.880004 | -0.14672 | 0.56733  | 0.862578 | 1822.425 | 1793.07  | 1888.154 | 1324.583 | 1788.649 | 1858.399 |
| ENSMUSG0000000025869 | 11_Nop16        | 454.0058115 | -0.18258 | 0.567438 | 0.862677 | 466.1639 | 455.9964 | 525.8297 | 301.6278 | 539.6492 | 434.7678 |
| ENSMUSG0000000202250 | 9_Txnr1d        | 1659.608168 | 0.125321 | 0.567535 | 0.862759 | 1617.767 | 1529.434 | 1615.459 | 1725.43  | 1888.207 | 1581.351 |
| ENSMUSG000000036995  | 7_Asap3         | 510.5457181 | -0.2644  | 0.567621 | 0.862824 | 494.5885 | 480.9001 | 696.1203 | 210.3457 | 644.8639 | 536.4558 |
| ENSMUSG000000021481  | 11_Zfp346       | 537.8730283 | -0.14832 | 0.567781 | 0.862897 | 553.8741 | 589.1027 | 553.4444 | 438.551  | 484.2136 | 608.0524 |
| ENSMUSG000000030096  | 8_Slc6a6        | 15605.78798 | -0.15395 | 0.567773 | 0.862897 | 15411.02 | 18531.83 | 15369.88 | 12447.11 | 13953.95 | 17920.94 |
| ENSMUSG000000097863  | 1_1010001B22Rik | 2.37844042  | -0.79182 | 0.567799 | 0.862897 | 2.436397 | 4.293751 | 2.301224 | 2.97659  | 2.26268  | 0        |
| ENSMUSG000000015829  | 13_Tnr          | 41.48362575 | 0.326256 | 0.568118 | 0.863062 | 41.41874 | 48.09001 | 20.71102 | 75.40696 | 37.3422  | 25.9408  |
| ENSMUSG000000024032  | 6_Tfrr1         | 4.398512553 | -0.5957  | 0.568269 | 0.863062 | 2.436397 | 7.728752 | 5.753061 | 1.984394 | 2.26268  | 6.225792 |
| ENSMUSG000000028944  | 14_Prkg2        | 516.5561018 | 0.165489 | 0.568265 | 0.863062 | 472.6609 | 483.4764 | 505.1187 | 665.7641 | 414.0705 | 558.2461 |
| ENSMUSG000000033854  | 9_Kcnk10        | 1.351033402 | 0.191993 | 0.568004 | 0.863062 | 0.812132 | 0.85875  | 1.150612 | 1.984394 | 2.26268  | 1.037632 |
| ENSMUSG000000034145  | 14_Tmem63c      | 5.719941589 | 0.604974 | 0.568011 | 0.863062 | 5.684925 | 7.728752 | 0        | 9.829771 | 6.788041 | 5.18816  |
| ENSMUSG000000042814  | 7_Mctc2         | 125.9831347 | 0.180886 | 0.568126 | 0.863062 | 128.3169 | 96.18002 | 130.0192 | 154.7827 | 133.4981 | 113.1019 |
| ENSMUSG000000055184  | 4_Fam72a        | 50.51275822 | 0.331093 | 0.568282 | 0.863062 | 57.66138 | 21.46876 | 55.22938 | 78.38355 | 63.35505 | 26.97843 |
| ENSMUSG000000055313  | 14_Pgbd1        | 53.99030541 | 0.254671 | 0.568297 | 0.863062 | 64.97057 | 41.22001 | 41.42204 | 83.34453 | 45.2536  | 47.73108 |
| ENSMUSG000000062585  | 11_Cnr2         | 16.94868611 | -0.32804 | 0.568298 | 0.863062 | 25.1761  | 16.31625 | 14.95796 | 10.91416 | 13.57608 | 20.75264 |
| ENSMUSG000000036552  | 16_Ermard       | 615.9575298 | 0.127919 | 0.568363 | 0.863095 | 610.7234 | 592.5377 | 562.6493 | 694.5378 | 607.5296 | 627.7674 |
| ENSMUSG000000050608  | 11_Minos1       | 1296.971978 | 0.122107 | 0.568462 | 0.863114 | 1255.556 | 1271.809 | 1198.938 | 1455.553 | 1286.334 | 1313.642 |
| ENSMUSG000000101523  | 1_Gm10031       | 85.07317785 | -0.46936 | 0.568457 | 0.863114 | 100.7044 | 36.92626 | 158.7845 | 64.49279 | 139.1548 | 10.37632 |
| ENSMUSG000000033705  | 16_Star9        | 269.3043616 | -0.16016 | 0.56852  | 0.863137 | 302.9253 | 295.4101 | 254.2853 | 269.8775 | 295.9039 | 287.4241 |
| ENSMUSG0000000003731 | 13_Kpna6        | 2175.702542 | 0.120419 | 0.568816 | 0.863165 | 2073.373 | 1989.724 | 2191.916 | 2233.435 | 2407.492 | 2158.275 |
| ENSMUSG000000015804  | 14_Med28        | 1040.096788 | 0.14415  | 0.569303 | 0.863165 | 920.1458 | 969.529  | 1078.124 | 1237.269 | 1098.531 | 936.9818 |
| ENSMUSG0000000018925 | 3_Heat9r        | 3.743177457 | 0.823649 | 0.568938 | 0.863165 | 4.872793 | 0.85875  | 2.301224 | 0        | 11.3134  | 3.112896 |
| ENSMUSG000000024803  | 8_Ankrd1        | 11.19902071 | -0.3657  | 0.569449 | 0.863165 | 12.18198 | 16.31625 | 9.204897 | 10.91416 | 61.1317  | 7.263424 |
| ENSMUSG000000025810  | 8_Nrp1          | 926.2018823 | 0.244873 | 0.569401 | 0.863165 | 827.5627 | 1001.303 | 714.5301 | 1610.335 | 121.1057 | 782.3746 |
| ENSMUSG000000026558  | 13_Uck2         | 978.5519356 | -0.19147 | 0.569092 | 0.863165 | 1070.39  | 920.5802 | 1139.106 | 600.2791 | 1131.34  | 1009.616 |
| ENSMUSG000000027300  | 9_Ubox5         | 206.0904357 | -0.15658 | 0.568642 | 0.863165 | 199.7845 | 241.3088 | 210.562  | 167.6813 | 201.3785 | 215.8275 |
| ENSMUSG000000031221  | 7_lgpb1         |             |          |          |          |          |          |          |          |          |          |

|                     |                 |             |          |          |          |          |          |          |          |          |          |
|---------------------|-----------------|-------------|----------|----------|----------|----------|----------|----------|----------|----------|----------|
| ENSMUSG00000033316  | 14_Galnt9       | 2.704220754 | -0.68963 | 0.571031 | 0.864287 | 4.872793 | 1.7175   | 3.451836 | 2.97659  | 1.13134  | 2.075264 |
| ENSMUSG00000033470  | 11_Cyslr2       | 6.130789495 | 0.776168 | 0.57102  | 0.864287 | 10.55772 | 1.7175   | 1.150612 | 10.91416 | 12.44474 | 0        |
| ENSMUSG00000034593  | 16_Myo5a        | 1190.647474 | 0.217972 | 0.57098  | 0.864287 | 1079.324 | 1370.565 | 852.6036 | 1851.439 | 924.3049 | 1065.648 |
| ENSMUSG00000043068  | 5_Fam89a        | 39.18704199 | 0.317984 | 0.571144 | 0.864287 | 43.04301 | 25.76251 | 35.66898 | 23.81272 | 74.66845 | 32.16659 |
| ENSMUSG00000070734  | 15_Slc44a4      | 848.8276241 | -0.26951 | 0.571256 | 0.864326 | 892.5333 | 820.9652 | 1070.069 | 314.5264 | 1071.379 | 923.4925 |
| ENSMUSG00000029534  | 17_Sit7         | 330.8586046 | 0.153867 | 0.57125  | 0.864326 | 350.029  | 272.2238 | 317.5689 | 402.8319 | 315.6439 | 326.8541 |
| ENSMUSG00000020708  | 12_Pmc5         | 3399.055129 | -0.19722 | 0.571617 | 0.864758 | 3479.174 | 3435.001 | 3978.817 | 1954.628 | 3921.225 | 3675.486 |
| ENSMUSG00000036061  | 9_Smug1         | 548.496766  | 0.144253 | 0.571672 | 0.864758 | 519.7646 | 483.4764 | 560.3481 | 653.8577 | 583.7715 | 489.7623 |
| ENSMUSG00000039485  | 7_Tsyp4         | 266.2867148 | -0.21977 | 0.57163  | 0.864758 | 284.2463 | 358.9576 | 216.3151 | 334.3703 | 165.1757 | 238.8554 |
| ENSMUSG00000022031  | 5_Elp3          | 1095.175643 | -0.14844 | 0.571772 | 0.864844 | 1186.525 | 1070.003 | 1197.787 | 829.4765 | 1131.34  | 1155.922 |
| ENSMUSG00000009733  | 8_Tfcp2         | 310.5267984 | -0.15643 | 0.572319 | 0.86492  | 287.4948 | 356.3813 | 338.28   | 254.9946 | 279.441  | 346.5691 |
| ENSMUSG00000015854  | 7_Cd5l          | 0.413835763 | -2.11601 | 0.572778 | 0.86492  | 1.624264 | 0.85875  | 0        | 0        | 0        | 0        |
| ENSMUSG00000020872  | 4_Tac4          | 0.413835763 | -2.11601 | 0.572778 | 0.86492  | 1.624264 | 0.85875  | 0        | 0        | 0        | 0        |
| ENSMUSG00000021361  | 6_Tmem14c       | 1278.842844 | -0.18223 | 0.572044 | 0.86492  | 1289.666 | 1297.572 | 1491.193 | 814.5936 | 1493.369 | 1286.664 |
| ENSMUSG00000021933  | 11_Gucy1b2      | 0.413835763 | -2.11601 | 0.572778 | 0.86492  | 1.624264 | 0.85875  | 0        | 0        | 0        | 0        |
| ENSMUSG00000023391  | 8_Dlx2          | 0.413835763 | -2.11601 | 0.572778 | 0.86492  | 1.624264 | 0.85875  | 0        | 0        | 0        | 0        |
| ENSMUSG00000024353  | 4_Mzb1          | 1.569492257 | -0.939   | 0.572337 | 0.86492  | 3.248529 | 1.7175   | 1.150612 | 0        | 2.26268  | 1.037632 |
| ENSMUSG00000024873  | 6_Cnih2         | 11.9002999  | -0.38544 | 0.572042 | 0.86492  | 9.745586 | 14.59875 | 16.10857 | 9.921968 | 15.83876 | 5.18816  |
| ENSMUSG00000027079  | 15_Clp1         | 441.2903784 | 0.142523 | 0.572262 | 0.86492  | 410.1267 | 387.2964 | 461.3955 | 486.1764 | 501.1837 | 401.5636 |
| ENSMUSG00000027397  | 14_Slc20a1      | 1381.632229 | 0.144002 | 0.57229  | 0.86492  | 1448.032 | 1174.77  | 1315.15  | 1299.778 | 1695.879 | 1356.185 |
| ENSMUSG00000031933  | 17_Izumo1r      | 0.413835763 | -2.11601 | 0.572778 | 0.86492  | 1.624264 | 0.85875  | 0        | 0        | 0        | 0        |
| ENSMUSG00000035694  | 15_Caps2        | 7.796120642 | 0.531454 | 0.5727   | 0.86492  | 5.684925 | 7.728752 | 5.753061 | 10.91416 | 1.13134  | 15.56448 |
| ENSMUSG00000037535  | 5_1700021A07Rik | 0.413835763 | -2.11601 | 0.572778 | 0.86492  | 1.624264 | 0.85875  | 0        | 0        | 0        | 0        |
| ENSMUSG00000042417  | 4_Ccno          | 1.895588197 | -0.82907 | 0.572767 | 0.86492  | 2.436397 | 2.576251 | 2.301224 | 1.984394 | 0        | 2.075264 |
| ENSMUSG00000062054  | 6_Iah1          | 463.0875595 | -0.13644 | 0.572006 | 0.86492  | 468.6003 | 441.3976 | 545.3901 | 438.551  | 419.7272 | 464.8592 |
| ENSMUSG00000068291  | 3_4932435022Rik | 0.413835763 | -2.11601 | 0.572778 | 0.86492  | 1.624264 | 0.85875  | 0        | 0        | 0        | 0        |
| ENSMUSG00000084969  | 1_Gm11205       | 0.413835763 | -2.11601 | 0.572778 | 0.86492  | 1.624264 | 0.85875  | 0        | 0        | 0        | 0        |
| ENSMUSG00000087344  | 1_Gm15627       | 0.413835763 | -2.11601 | 0.572778 | 0.86492  | 1.624264 | 0.85875  | 0        | 0        | 0        | 0        |
| ENSMUSG00000093485  | 1_Gm20708       | 23.08131664 | 1.381187 | 0.572186 | 0.86492  | 0        | 15.4575  | 23.01224 | 77.39135 | 22.6268  | 0        |
| ENSMUSG00000105239  | 1_Gm43091       | 0.413835763 | -2.11601 | 0.572778 | 0.86492  | 1.624264 | 0.85875  | 0        | 0        | 0        | 0        |
| ENSMUSG00000105437  | 1_Gm42450       | 0.413835763 | -2.11601 | 0.572778 | 0.86492  | 1.624264 | 0.85875  | 0        | 0        | 0        | 0        |
| ENSMUSG00000105636  | 1_Gm43625       | 1.530959493 | -0.97673 | 0.572772 | 0.86492  | 4.060661 | 0.85875  | 1.150612 | 1.984394 | 1.13134  | 0        |
| ENSMUSG00000015652  | 9_Steap1        | 48.18605545 | 0.309287 | 0.573104 | 0.865085 | 50.3522  | 53.24251 | 25.31347 | 87.31332 | 40.72824 | 32.16659 |
| ENSMUSG00000016128  | 14_Stard13      | 434.1864053 | -0.13398 | 0.573043 | 0.865085 | 419.0602 | 489.4876 | 454.4918 | 389.9333 | 403.8884 | 448.2571 |
| ENSMUSG00000025364  | 12_Pa2g4        | 3633.456875 | 0.136898 | 0.573104 | 0.865085 | 3421.513 | 3121.557 | 3840.743 | 3588.776 | 4337.558 | 3490.594 |
| ENSMUSG00000036850  | 4_Mrp141        | 438.5377837 | -0.14198 | 0.573078 | 0.865085 | 501.8977 | 456.8551 | 421.124  | 362.1518 | 437.8286 | 451.3699 |
| ENSMUSG00000040822  | 6_1701232O20Rik | 780.2045528 | 0.13182  | 0.57305  | 0.865085 | 730.1068 | 680.1302 | 823.8383 | 753.0774 | 859.8185 | 834.2562 |
| ENSMUSG00000068280  | 9_Timm17a       | 901.1545682 | 0.130612 | 0.573153 | 0.865093 | 918.5215 | 812.3777 | 850.3023 | 1050.736 | 897.1527 | 877.8367 |
| ENSMUSG00000069705  | 10_Agrp         | 2.14899989  | 0.874566 | 0.573238 | 0.865156 | 0.812132 | 2.576251 | 1.150612 | 4.960984 | 3.39402  | 0        |
| ENSMUSG00000069621  | 11_Zfp592       | 934.1588764 | -0.17968 | 0.573404 | 0.86521  | 955.8796 | 994.4328 | 1026.346 | 590.3571 | 977.4778 | 1060.46  |
| ENSMUSG00000071241  | 17_Tbx22        | 26.33998574 | 0.535916 | 0.573398 | 0.86521  | 14.61838 | 39.50251 | 10.35551 | 76.39915 | 6.788041 | 10.37632 |
| ENSMUSG00000069305  | 3_Hist14n       | 0.962662569 | 1.244388 | 0.573367 | 0.86521  | 0.812132 | 0.85875  | 0        | 0.992197 | 0        | 3.112896 |
| ENSMUSG00000056755  | 13_Gm7          | 25.90208011 | -0.30538 | 0.573509 | 0.865303 | 29.23676 | 40.36126 | 16.10857 | 30.7581  | 19.23278 | 19.71501 |
| ENSMUSG000000442708 | 12_Shcnp1l      | 1.588430866 | 1.073459 | 0.573583 | 0.865348 | 0        | 0.85875  | 2.301224 | 2.97659  | 3.39402  | 0        |
| ENSMUSG00000095315  | 1_Gm10130       | 10.44622729 | 0.544284 | 0.573714 | 0.865482 | 8.933454 | 1.7175   | 14.95796 | 5.953181 | 24.88948 | 6.225792 |
| ENSMUSG00000021198  | 16_Unc79        | 150.0619858 | -0.16417 | 0.57388  | 0.865535 | 145.3717 | 154.575  | 176.0437 | 120.0558 | 141.4175 | 162.9082 |
| ENSMUSG00000097277  | 7_2900076A07Rik | 91.09700884 | 0.27471  | 0.573796 | 0.865535 | 67.40697 | 96.18002 | 83.99468 | 164.7047 | 55.43567 | 78.86004 |
| ENSMUSG000000108084 | 1_RP24-315D19   | 9.879882525 | 0.488338 | 0.57384  | 0.865535 | 7.30919  | 9.446252 | 8.054285 | 23.81272 | 3.39402  | 7.263424 |
| ENSMUSG00000102917  | 1_Gm37724       | 10.00451584 | -0.38103 | 0.574013 | 0.865669 | 14.61838 | 11.16375 | 8.054285 | 10.91416 | 9.050721 | 6.225792 |
| ENSMUSG000000202992 | 16_Apoc2        | 10.19334272 | -0.53144 | 0.574172 | 0.865778 | 17.86691 | 11.16375 | 6.903673 | 0.992197 | 16.9701  | 7.263424 |
| ENSMUSG00000027530  | 5_Fabp12        | 6.952398402 | -0.60215 | 0.574144 | 0.865778 | 11.36985 | 6.870002 | 6.903673 | 10.91416 | 5.656701 | 0        |
| ENSMUSG00000097390  | 1_Gm26785       | 8.403108313 | -0.45653 | 0.574219 | 0.865784 | 14.61838 | 8.587502 | 5.753061 | 2.97659  | 10.18206 | 8.301057 |
| ENSMUSG00000023935  | 9_Spats1        | 2.495156639 | 0.825649 | 0.57431  | 0.86579  | 1.624264 | 2.576251 | 1.150612 | 0        | 3.39402  | 6.225792 |
| ENSMUSG000000100022 | 1_Gm29590       | 1.768398731 | 1.034264 | 0.574291 | 0.86579  | 0        | 3.435001 | 0        | 3.968787 | 1.13134  | 2.075264 |
| ENSMUSG00000033216  | 15_Hmbs         | 608.6648765 | -0.19006 | 0.574459 | 0.865949 | 651.33   | 598.5489 | 696.1203 | 366.1206 | 679.9354 | 659.934  |
| ENSMUSG00000031374  | 13_Zfp92        | 58.45856669 | 0.215032 | 0.574673 | 0.866206 | 63.34631 | 47.23126 | 51.77754 | 81.36014 | 52.04164 | 54.9945  |
| ENSMUSG00000024175  | 1_Tekt4         | 1.335415396 | 0.903006 | 0.574809 | 0.866279 | 0.812132 | 0.85875  | 1.150612 | 1.984394 | 1.13134  | 2.075264 |
| ENSMUSG00000031392  | 18_Irak1        | 2011.54399  | -0.12355 | 0.574766 | 0.866279 | 1991.348 | 2100.503 | 2201.121 | 1737.337 | 2022.836 | 2016.119 |
| ENSMUSG00000025354  | 4_Dnajc14       | 2077.210155 | -0.16795 | 0.57489  | 0.866336 | 2142.405 | 2181.226 | 2270.158 | 1382.13  | 2300.014 | 2187.328 |
| ENSMUSG00000033960  | 5_9430020K01Rik | 823.6935874 | -0.19866 | 0.575036 | 0.866492 | 821.8778 | 1081.167 | 736.3917 | 996.1656 | 528.3358 | 778.224  |
| ENSMUSG00000027690  | 13_Slc2a2       | 30.6334736  | 0.402229 | 0.575206 | 0.866649 | 32.48529 | 21.46876 | 25.31347 | 65.48499 | 7.919381 | 31.12896 |
| ENSMUSG000000332251 | 12_Irak1bp1     | 64.81441372 | 0.304861 | 0.575228 | 0.866649 | 58.47352 | 62.68877 | 52.92816 | 121.048  | 29.41484 | 64.33319 |
| ENSMUSG00000047180  | 8_Neur3         | 137.2420679 | 0.243082 | 0.575377 | 0.866809 | 181.9176 | 83.29877 | 111.6094 | 152.7983 | 190.0651 | 103.7632 |
| ENSMUSG000000330286 | 6_Emc3          | 1429.434502 | 0.130305 | 0.575511 | 0.866813 | 1391.995 | 1319.899 | 1383.036 | 1701.618 | 1443.59  | 1336.47  |
| ENSMUSG00000040896  | 16_Kcnk3        | 43.75481708 | 0.285101 | 0.575427 | 0.866813 | 35.73382 | 51.28251 | 31.06653 | 74.41476 | 28.2835  | 41.50528 |
| ENSMUSG00000073494  | 5_Sh2d1b2       | 4.470999685 | 0.715346 | 0.575502 | 0.866813 | 4.060661 | 2.576251 | 3.451836 | 0.992197 | 14.70442 | 1.037632 |
| ENSMUSG00000005649  | 17_Cabp5        | 10.12824417 | 0.559253 | 0.575708 | 0.86692  | 12.99411 | 6.870002 | 4.602448 | 22.82053 | 12.44474 | 1.037632 |
| ENSMUSG00000047473  | 14_Zfp30        | 71.38642486 | -0.22897 | 0.575713 | 0.86692  | 79.58895 | 92.74502 | 58.68122 | 74.41476 | 42.99092 | 79.89767 |
| ENSMUSG00000102428  | 1_Podhga12      | 28.08468261 | -0.31768 | 0.57567  | 0.86692  | 27.61249 | 25.76251 | 40.27142 | 12.89856 | 21.49546 | 40.46765 |
| ENSMUSG00000027465  | 13_Tbc1d20      | 2008.097111 | -0.16666 | 0.575938 | 0.867049 | 1992.16  | 2152.028 | 2227.585 | 1349.388 | 2185.749 | 2141.673 |
| ENSMUSG00000027618  | 17_Nfs1         | 1016.562276 | -0.15962 | 0.57591  | 0.867049 | 986.7406 | 1068.285 | 1163.269 | 728.2725 | 1023.863 | 1128.944 |
| ENSMUSG00000031570  | 16_Ppapedc1b    | 338.6358859 | -0.1343  | 0.575972 | 0.867049 | 333.7863 | 372.6976 | 356.6898 | 297.659  | 321.3006 | 349.682  |
| ENSMUSG00000033526  | 16_Ppfp5k1      | 2326.343927 | -0.16011 | 0.575588 | 0.867049 | 2269.909 | 2481.788 | 2614.191 | 1631.172 | 2418.805 | 2542.199 |
| ENSMUSG00000032497  | 15_Lrrfp2       | 1608.419017 | 0.142242 | 0.57604  | 0.867085 | 1415.546 | 1448.712 | 1717.864 | 1547.827 | 1970.794 | 1537.771 |
| ENSMUSG00000033257  | 5_Annk1         | 1233.296097 | -0.25595 | 0.576176 | 0.867224 | 1365.194 | 1244.329 | 1422.157 | 472.2857 | 1600.846 | 1294.965 |
| ENSMUSG00000022853  | 6_Ehnhadh       | 356.9332329 | 0.164368 | 0.576466 | 0.86753  | 332.9742 | 312.5851 | 364.744  | 470.3013 | 300.9365 | 360.0583 |
| ENSMUSG00000097209  | 1_AU022754      | 26.42997205 | -0.27503 | 0.576454 | 0.86753  | 24.36397 | 40.36126 |          |          |          |          |

|                      |                 |             |          |          |          |          |          |          |          |          |          |
|----------------------|-----------------|-------------|----------|----------|----------|----------|----------|----------|----------|----------|----------|
| ENSMUSG00000059406   | 7_Tmprss9       | 1.998382615 | -0.82173 | 0.578626 | 0.868592 | 1.624264 | 2.576251 | 3.451836 | 0        | 2.26268  | 2.075264 |
| ENSMUSG00000072672   | 10_Duxbl3       | 12.2832057  | 0.584643 | 0.578313 | 0.868592 | 14.61838 | 0        | 14.95796 | 18.85174 | 16.9701  | 8.301057 |
| ENSMUSG000000098178  | 1_Gm42418       | 16714.57859 | 0.127486 | 0.578626 | 0.868592 | 16055.04 | 16191.74 | 15682.84 | 15882.09 | 16346.73 | 20102.09 |
| ENSMUSG000000102697  | 1_Pcdnac2       | 71.27989621 | -0.19846 | 0.578436 | 0.868592 | 85.27388 | 87.59252 | 55.22938 | 63.5006  | 64.48639 | 71.59661 |
| ENSMUSG000000020216  | 13_Jsrp1        | 11.99488819 | -0.52049 | 0.578899 | 0.868894 | 10.55772 | 18.03375 | 13.80735 | 0.992197 | 6.788041 | 21.79027 |
| ENSMUSG000000027317  | 8_Ppp1r14d      | 11.12659511 | -0.35393 | 0.578969 | 0.868933 | 14.61838 | 14.59875 | 8.054285 | 8.929771 | 10.18206 | 10.37632 |
| ENSMUSG000000025955  | 13_Akrlc1       | 4.683129647 | 0.53922  | 0.579015 | 0.868937 | 2.436397 | 3.435001 | 5.753061 | 8.929771 | 3.39402  | 4.150528 |
| ENSMUSG000000035298  | 8_Klh35         | 4.65228034  | -0.6587  | 0.579306 | 0.869308 | 2.436397 | 7.728752 | 6.903673 | 0        | 5.656701 | 5.18816  |
| ENSMUSG000000030483  | 14_Cyp2b10      | 3.065442283 | 0.712138 | 0.579375 | 0.869347 | 4.872793 | 0.85875  | 1.150612 | 1.984394 | 2.26268  | 7.263424 |
| ENSMUSG000000025329  | 3_Padi1         | 477.9803637 | -0.34146 | 0.579513 | 0.869423 | 414.9995 | 503.2276 | 684.6142 | 98.22748 | 607.5569 | 659.2837 |
| ENSMUSG000000040848  | 11_Sft2d2       | 4810.989921 | 0.111342 | 0.579514 | 0.869423 | 4659.202 | 4483.535 | 4733.618 | 4803.225 | 5110.263 | 5076.096 |
| ENSMUSG000000037375  | 16_Hhat         | 90.75611491 | -0.21289 | 0.579697 | 0.869633 | 95.01946 | 72.13502 | 125.4167 | 62.5084  | 95.03257 | 94.42452 |
| ENSMUSG000000079157  | 3_Fam155a       | 3.495485491 | -0.61779 | 0.57975  | 0.869647 | 3.248529 | 6.011252 | 3.451836 | 4.960984 | 2.26268  | 1.037632 |
| ENSMUSG000000029076  | 14_Sdf4         | 4712.015443 | -0.15011 | 0.580031 | 0.869956 | 4927.206 | 5099.259 | 4844.077 | 3399.266 | 5005.049 | 4997.236 |
| ENSMUSG000000043664  | 6_Tmem221       | 16.74349192 | -0.31192 | 0.580044 | 0.869956 | 16.24264 | 19.75126 | 19.56041 | 9.921968 | 21.49546 | 13.48922 |
| ENSMUSG000000027811  | 9_4930579G24Rik | 74.74680361 | 0.222503 | 0.580257 | 0.869958 | 69.84337 | 55.81876 | 81.69346 | 112.1182 | 66.74907 | 62.5792  |
| ENSMUSG000000032059  | 13_Alg9         | 661.6381775 | -0.16415 | 0.580263 | 0.869958 | 707.3671 | 662.9552 | 727.1869 | 465.3403 | 776.0993 | 630.8803 |
| ENSMUSG000000044145  | 2_1810024B03Rik | 5.112356339 | -0.52609 | 0.580259 | 0.869958 | 9.745586 | 2.576251 | 5.753061 | 4.960984 | 4.52536  | 3.112896 |
| ENSMUSG000000059187  | 12_Fam19a1      | 1.531077967 | -1.04218 | 0.580208 | 0.869958 | 1.624264 | 3.435001 | 1.150612 | 2.97659  | 0        | 0        |
| ENSMUSG000000070717  | 1_Gm10300       | 1.32038786  | -1.38006 | 0.58021  | 0.869958 | 0        | 0        | 5.753061 | 0        | 1.13134  | 1.037632 |
| ENSMUSG000000009828  | 15_Ick          | 645.7086352 | 0.162472 | 0.580707 | 0.870179 | 573.3653 | 595.9727 | 659.3007 | 818.5624 | 507.9717 | 719.079  |
| ENSMUSG000000021575  | 15_Ahr          | 42.02511703 | 0.2304   | 0.580804 | 0.870179 | 38.17021 | 37.78501 | 40.27142 | 61.5162  | 30.9402  | 40.46765 |
| ENSMUSG000000025007  | 13_Aldh18a1     | 537.0840208 | -0.25749 | 0.580768 | 0.870179 | 537.6315 | 563.3401 | 653.5477 | 213.3223 | 728.583  | 526.0795 |
| ENSMUSG000000028558  | 14_Cair4        | 13.73159583 | -0.32215 | 0.580735 | 0.870179 | 13.80625 | 13.74    | 18.40979 | 15.87515 | 10.18206 | 10.37632 |
| ENSMUSG000000030060  | 14_Hmces        | 274.8513885 | -0.19017 | 0.580792 | 0.870179 | 287.4948 | 261.0601 | 330.2257 | 172.6422 | 325.8259 | 271.8596 |
| ENSMUSG000000031633  | 4_Slc25a4       | 5063.471737 | -0.13187 | 0.580476 | 0.870179 | 5186.276 | 5522.623 | 5175.453 | 5524.552 | 4128.26  | 4843.666 |
| ENSMUSG000000047045  | 17_Tmem164      | 1887.244988 | -0.12162 | 0.58053  | 0.870179 | 1967.796 | 1971.691 | 1960.643 | 1617.281 | 1841.822 | 1964.238 |
| ENSMUSG000000073761  | 2_4933427104Rik | 1.087231431 | -1.16351 | 0.580715 | 0.870179 | 0.812132 | 2.576251 | 1.150612 | 1.984394 | 0        | 0        |
| ENSMUSG0000000090713 | 1_Gm8127        | 1.887818523 | -0.82241 | 0.580718 | 0.870179 | 3.248529 | 1.7175   | 2.301224 | 1.984394 | 0        | 2.075264 |
| ENSMUSG000000008305  | 18_Tle1         | 215.1599463 | -0.14505 | 0.580858 | 0.870195 | 222.5242 | 248.1788 | 207.1102 | 220.2677 | 183.2771 | 209.6017 |
| ENSMUSG000000005677  | 14_Nr13         | 4.04307981  | 0.669312 | 0.581108 | 0.87031  | 4.872793 | 4.293751 | 0        | 1.984394 | 7.919381 | 5.18816  |
| ENSMUSG000000017943  | 15_Gdap11i      | 4.088310409 | -0.59677 | 0.581182 | 0.87031  | 4.060661 | 6.011252 | 4.602448 | 0.992197 | 6.788041 | 2.075264 |
| ENSMUSG000000028259  | 13_Fhl5         | 2.121517275 | -1.02626 | 0.581169 | 0.87031  | 0        | 0        | 1.7175   | 6.903673 | 2.97659  | 1.13134  |
| ENSMUSG000000030433  | 14_Sbk2         | 4.379207977 | 0.528805 | 0.581237 | 0.87031  | 3.248529 | 5.152501 | 2.301224 | 5.953181 | 3.39402  | 6.225792 |
| ENSMUSG000000037318  | 10_Traf3ip3     | 30.30580563 | 0.318266 | 0.581241 | 0.87031  | 37.35808 | 18.03375 | 25.31347 | 21.82833 | 55.43567 | 23.86554 |
| ENSMUSG000000054013  | 5_Tmem177       | 2.439620377 | -0.85164 | 0.581017 | 0.87031  | 1.624264 | 7.728752 | 0        | 1.984394 | 2.26268  | 1.037632 |
| ENSMUSG000000085578  | 1_Gm11527       | 1.830082227 | 1.19698  | 0.581058 | 0.87031  | 3.248529 | 0        | 0        | 0        | 5.656701 | 2.075264 |
| ENSMUSG000000024339  | 12_Tap2         | 2717.852619 | -0.37189 | 0.5814   | 0.870408 | 2514.361 | 2626.058 | 4058.209 | 418.7071 | 3985.71  | 2704.069 |
| ENSMUSG000000025279  | 7_Dnase1i3      | 49.43119933 | 0.29026  | 0.581682 | 0.870408 | 59.28565 | 40.36126 | 33.36775 | 29.7659  | 87.11319 | 46.69344 |
| ENSMUSG000000030056  | 8_Isv1          | 760.23446   | 0.122807 | 0.58164  | 0.870408 | 705.7429 | 708.4689 | 769.7595 | 840.3907 | 805.5142 | 731.5306 |
| ENSMUSG000000032066  | 9_Bco2          | 54.85064978 | -0.22123 | 0.5817   | 0.870408 | 68.2191  | 59.25377 | 49.47632 | 40.68007 | 42.99092 | 68.48372 |
| ENSMUSG000000040592  | 11_Cd79b        | 40.15985168 | -0.31613 | 0.581578 | 0.870408 | 46.29153 | 34.35001 | 52.92816 | 12.89856 | 50.9103  | 43.58055 |
| ENSMUSG000000053318  | 7_Slamf8        | 41.89998382 | 0.305689 | 0.581475 | 0.870408 | 47.9158  | 27.48001 | 36.81959 | 24.80492 | 78.06247 | 36.31712 |
| ENSMUSG000000053469  | 13_Tg           | 9.996580625 | -0.36903 | 0.581604 | 0.870408 | 10.55772 | 12.88125 | 10.35551 | 6.945378 | 6.788041 | 12.45158 |
| ENSMUSG000000054988  | 9_Agtr1b        | 0.947517485 | 1.22007  | 0.581392 | 0.870408 | 0.812132 | 0.85875  | 0        | 2.97659  | 0        | 1.037632 |
| ENSMUSG0000000097422 | 1_Gm26521       | 15.56809933 | 0.372346 | 0.581489 | 0.870408 | 19.49117 | 16.31625 | 4.602448 | 22.82053 | 13.57608 | 16.60211 |
| ENSMUSG000000022369  | 13_Mtbp         | 254.4178904 | 0.160787 | 0.581986 | 0.870431 | 284.2463 | 188.0663 | 248.5322 | 289.7215 | 253.4022 | 262.5209 |
| ENSMUSG000000026773  | 19_Pfkfb3       | 2424.141094 | 0.123704 | 0.582036 | 0.870431 | 2312.14  | 2247.349 | 2401.327 | 2219.544 | 2705.034 | 2659.451 |
| ENSMUSG000000035596  | 14_Mboat7       | 128.28605   | -0.13737 | 0.582105 | 0.870431 | 1032.22  | 1068.285 | 1131.052 | 815.5858 | 1109.845 | 1012.729 |
| ENSMUSG000000037035  | 5_Inhbb         | 134.843215  | -0.15485 | 0.582108 | 0.870431 | 129.129  | 137.4    | 159.9351 | 120.0558 | 138.0235 | 124.5158 |
| ENSMUSG000000039159  | 16_Ube2h        | 3590.575601 | 0.124797 | 0.581995 | 0.870431 | 3315.936 | 3254.663 | 3736.038 | 4161.273 | 3556.933 | 3518.61  |
| ENSMUSG000000044156  | 14_Hepacam2     | 5.428617187 | -0.48588 | 0.581927 | 0.870431 | 8.933454 | 4.293751 | 5.753061 | 5.953181 | 4.52536  | 3.112896 |
| ENSMUSG000000060579  | 12_Fhit         | 41.00640247 | -0.22437 | 0.582104 | 0.870431 | 47.9158  | 45.51376 | 39.12081 | 40.68007 | 27.15216 | 45.65581 |
| ENSMUSG000000069303  | 5_Hist1h2br     | 13.00755993 | 0.717856 | 0.581923 | 0.870431 | 2.436397 | 4.293751 | 23.01224 | 34.72689 | 13.57608 | 0        |
| ENSMUSG000000097587  | 1_4930578M01Rik | 9.689224204 | -0.36669 | 0.581991 | 0.870431 | 8.121322 | 12.0225  | 12.65673 | 6.945378 | 9.050721 | 9.336899 |
| ENSMUSG000000009628  | 14_Tex15        | 45.09259879 | 0.310623 | 0.582243 | 0.870451 | 41.41874 | 40.36126 | 39.12081 | 91.2821  | 28.2835  | 30.09133 |
| ENSMUSG000000021751  | 13_Acox2        | 6.90147575  | -0.49701 | 0.582273 | 0.870451 | 8.121322 | 6.870002 | 9.204897 | 0.992197 | 7.919381 | 8.301057 |
| ENSMUSG000000040247  | 5_Tbci1d10c     | 30.63191776 | -0.43555 | 0.582262 | 0.870451 | 49.54006 | 14.59875 | 41.42204 | 4.960984 | 45.2536  | 28.01607 |
| ENSMUSG000000073804  | 4_Nps           | 2.829455361 | 0.731102 | 0.582296 | 0.870451 | 4.060661 | 0        | 2.301224 | 2.97659  | 4.52536  | 3.112896 |
| ENSMUSG000000018862  | 11_Otop3        | 5.183481638 | -0.57185 | 0.582456 | 0.870624 | 4.872793 | 6.870002 | 6.903673 | 1.984394 | 1.13134  | 9.336899 |
| ENSMUSG000000000730  | 13_Dnmt3l       | 38.18803971 | -0.22378 | 0.582814 | 0.870854 | 42.23087 | 46.37251 | 34.51836 | 28.77371 | 42.99092 | 34.21886 |
| ENSMUSG000000021140  | 8_Pcnx          | 1944.302545 | -0.12161 | 0.582814 | 0.870854 | 1845.976 | 2116.819 | 2115.976 | 1733.368 | 1878.025 | 1975.651 |
| ENSMUSG000000035085  | 5_1700020L24Rik | 42.13725362 | -0.5807  | 0.582828 | 0.870854 | 48.72793 | 36.06751 | 66.7355  | 0        | 32.80886 | 68.48372 |
| ENSMUSG000000042215  | 8_Bag2          | 1173.859422 | 0.118666 | 0.582776 | 0.870854 | 1147.543 | 1081.167 | 1148.311 | 1245.207 | 1129.077 | 1291.852 |
| ENSMUSG000000108187  | 1_RP24-67N3     | 26.91318694 | -0.2785  | 0.582767 | 0.870854 | 19.49117 | 40.36126 | 28.7653  | 27.78151 | 18.10144 | 26.97843 |
| ENSMUSG000000022779  | 14_Top3b        | 1279.053949 | -0.18442 | 0.583025 | 0.871083 | 1311.593 | 1355.108 | 1415.253 | 762.0072 | 1399.468 | 1430.893 |
| ENSMUSG000000046591  | 10_Ticrr        | 247.6598969 | 0.1375   | 0.583091 | 0.871109 | 238.7669 | 218.1226 | 250.8334 | 257.9712 | 280.5723 | 239.695  |
| ENSMUSG000000105103  | 1_Gm43191       | 61.81669797 | 0.265732 | 0.58313  | 0.871109 | 65.78271 | 39.50251 | 63.28367 | 98.22748 | 66.74907 | 37.35475 |
| ENSMUSG000000078906  | 9_Gm14444       | 24.87107347 | 0.450108 | 0.583222 | 0.871182 | 16.24264 | 17.175   | 29.91591 | 58.53961 | 4.52536  | 22.82791 |
| ENSMUSG000000044465  | 18_Fam160a2     | 1792.448187 | -0.17067 | 0.583268 | 0.871184 | 1794.812 | 1771.602 | 2128.632 | 1187.66  | 2036.412 | 1835.571 |
| ENSMUSG000000022206  | 6_Npr3          | 793.2931119 | 0.276102 | 0.583364 | 0.871197 | 774.7741 | 844.1515 | 533.884  | 1510.124 | 426.5152 | 670.3103 |
| ENSMUSG000000027168  | 21_Pax6         | 15889.96769 | 0.136014 | 0.583321 | 0.871197 | 14829.53 | 15226.5  | 15368.73 | 19939.19 | 14427.98 | 15547.88 |
| ENSMUSG000000019297  | 8_Nop9          | 603.1242109 | -0.19467 | 0.583506 | 0.871213 | 644.8329 | 609.7127 | 676.5599 | 342.3079 | 695.7742 | 649.5577 |
| ENSMUSG000000050840  | 8_Cdh20         | 41.05643647 | -0.36143 | 0.583488 | 0.871213 | 41.41874 | 84.15752 | 12.65673 | 40.68007 | 37.33422 | 30.09133 |
| ENSMUSG0000000055421 | 8_Pcdn9         | 42.85078753 | 0.344162 | 0.583429 | 0.871213 | 47.9158  | 52.38376 | 12.656   |          |          |          |

|                     |                  |             |           |          |          |          |          |          |          |          |          |
|---------------------|------------------|-------------|-----------|----------|----------|----------|----------|----------|----------|----------|----------|
| ENSMUSG00000049134  | 15_Nrap          | 158.0460366 | 0.23259   | 0.586399 | 0.873372 | 115.3228 | 207.8176 | 112.76   | 182.5642 | 110.8713 | 218.9404 |
| ENSMUSG00000094590  | 2_Gm10251        | 0.993701449 | 1.340382  | 0.586467 | 0.873389 | 1.624264 | 0        | 0        | 0        | 2.26268  | 2.075264 |
| 1_Gm28723           | 1.327842854      | 0.893737    | 0.586498  | 0.873389 | 0.812132 | 0.85875  | 1.150612 | 2.97659  | 1.13134  | 1.037632 |          |
| ENSMUSG00000040570  | 14_Rundo3b       | 10.80791671 | 0.571952  | 0.586579 | 0.873445 | 11.36985 | 11.16375 | 3.451836 | 28.77371 | 9.050721 | 1.037632 |
| ENSMUSG00000042111  | 9_Cdc115         | 501.7823888 | -0.144445 | 0.586703 | 0.873564 | 547.3771 | 428.5164 | 605.222  | 495.1062 | 445.748  | 488.7247 |
| ENSMUSG00000042845  | 7_Wfdc12         | 3.69395953  | -0.71296  | 0.586767 | 0.873593 | 4.872793 | 4.293751 | 4.602448 | 0        | 1.13134  | 7.263424 |
| ENSMUSG00000039828  | 6_Wdr70          | 301.5808733 | 0.150088  | 0.586878 | 0.873669 | 255.8216 | 279.9526 | 322.1714 | 266.9009 | 360.8975 | 323.7412 |
| ENSMUSG00000096914  | 3_Gaintl6        | 1.565240318 | 1.047068  | 0.586905 | 0.873669 | 0        | 0.85875  | 2.301224 | 3.968787 | 2.26268  | 0        |
| ENSMUSG00000026272  | 6_Agxt           | 3.867646921 | -0.53662  | 0.586953 | 0.873674 | 5.684925 | 3.435001 | 4.602448 | 2.97659  | 3.39402  | 3.112896 |
| ENSMUSG00000022621  | 16_Rabl2         | 323.7026643 | -0.13509  | 0.587022 | 0.873691 | 350.8411 | 334.0538 | 331.3763 | 269.8775 | 341.6647 | 314.4025 |
| ENSMUSG00000071451  | 9_Psmg4          | 183.2374985 | -0.15247  | 0.587052 | 0.873691 | 180.2933 | 173.4675 | 225.52   | 189.5096 | 158.3876 | 172.2469 |
| ENSMUSG000000228920 | 9_Fbxa42         | 986.6389458 | -0.16989  | 0.587254 | 0.873726 | 947.7583 | 1039.088 | 1147.16  | 646.9123 | 1069.116 | 1069.799 |
| ENSMUSG00000035582  | 13_Gdpd4         | 1.35083627  | 0.941649  | 0.587335 | 0.873726 | 1.624264 | 0        | 1.150612 | 0.992197 | 2.26268  | 2.075264 |
| ENSMUSG00000047518  | 3_Slfnl1         | 0.658805769 | -1.30934  | 0.587466 | 0.873726 | 0.812132 | 0.85875  | 1.150612 | 0        | 1.13134  | 0        |
| ENSMUSG00000049926  | 3_Olfr921        | 0.658805769 | -1.30934  | 0.587466 | 0.873726 | 0.812132 | 0.85875  | 1.150612 | 0        | 1.13134  | 0        |
| ENSMUSG00000066797  | 6_Zfp648         | 0.658805769 | -1.30934  | 0.587466 | 0.873726 | 0.812132 | 0.85875  | 1.150612 | 0        | 1.13134  | 0        |
| ENSMUSG00000072694  | 7_1500011B03Rik  | 181.3029731 | -0.17377  | 0.587286 | 0.873726 | 187.6025 | 226.7101 | 162.2363 | 204.3925 | 134.6295 | 172.2469 |
| ENSMUSG00000073243  | 2_Gm9            | 2.426540713 | -0.94241  | 0.58747  | 0.873726 | 2.436397 | 6.011252 | 1.150612 | 4.960984 | 0        | 0        |
| ENSMUSG00000073471  | 2_Rsph3a         | 242.3133386 | -0.14473  | 0.58747  | 0.873726 | 232.2698 | 237.0151 | 294.5567 | 244.0804 | 235.3187 | 210.6393 |
| ENSMUSG000000102762 | 1_4930403P22Rik  | 1.618532127 | 0.887854  | 0.587258 | 0.873726 | 2.436397 | 0.85875  | 0        | 1.984394 | 3.99402  | 1.037632 |
| ENSMUSG00000064109  | 7_Hcst           | 7.992503332 | -0.52122  | 0.587569 | 0.873809 | 9.745586 | 10.305   | 8.054285 | 0.992197 | 14.70742 | 4.150528 |
| ENSMUSG000000022233 | 13_Rhoc          | 977.0585608 | -0.21601  | 0.588667 | 0.873845 | 1077.699 | 1049.393 | 1022.894 | 471.2935 | 1074.773 | 1166.298 |
| ENSMUSG00000007033  | 4_Hspa11         | 51.72803071 | -0.30078  | 0.588895 | 0.873845 | 88.52241 | 48.94876 | 33.36775 | 31.7503  | 73.53711 | 34.24186 |
| ENSMUSG000000014980 | 14_Tsen15        | 289.7925494 | 0.167472  | 0.588206 | 0.873845 | 289.1191 | 268.7888 | 261.1889 | 389.9333 | 231.9247 | 297.8004 |
| ENSMUSG000000019850 | 11_Tnfr1aP3      | 630.7943611 | 0.191538  | 0.588281 | 0.873845 | 641.5844 | 477.4651 | 647.7946 | 489.153  | 931.0929 | 597.6761 |
| ENSMUSG00000020732  | 13_Rab37         | 13.3741454  | -0.31826  | 0.589068 | 0.873845 | 17.05478 | 10.305   | 17.25918 | 12.89856 | 11.3134  | 11.41395 |
| ENSMUSG000000242227 | 14_Pdzph1        | 29.0094791  | 0.558995  | 0.589041 | 0.873845 | 33.29742 | 30.05626 | 6.903673 | 81.36014 | 20.36412 | 2.075264 |
| ENSMUSG00000025726  | 11_Slc28a1       | 1.09460684  | -1.11392  | 0.588196 | 0.873845 | 1.624264 | 1.1715   | 1.150612 | 0        | 0        | 2.075264 |
| ENSMUSG00000026162  | 7_Nhej1          | 64.03815341 | -0.22861  | 0.588113 | 0.873845 | 71.46763 | 57.53626 | 78.24162 | 35.71909 | 76.93113 | 64.33319 |
| ENSMUSG00000028148  | 11_Them5         | 1.911403336 | -0.82844  | 0.58837  | 0.873845 | 1.624264 | 3.435001 | 2.301224 | 2.97659  | 1.13134  | 0        |
| ENSMUSG00000028936  | 15_Rpl122        | 69.11471723 | 0.10862   | 0.587734 | 0.873845 | 6789.425 | 6409.64  | 7381.94  | 6939.64  | 7192.865 |          |
| ENSMUSG00000030207  | 15_Fam234b       | 657.3905149 | -0.16593  | 0.587954 | 0.873845 | 661.0756 | 674.1189 | 750.1991 | 440.5354 | 738.7651 | 679.649  |
| ENSMUSG00000030222  | 13_Rerg          | 653.5169722 | -0.14836  | 0.588142 | 0.873845 | 693.5609 | 650.0739 | 717.982  | 666.7563 | 681.9509 | 710.778  |
| ENSMUSG00000031876  | 16_Cmtm1         | 0.429375111 | -0.16162  | 0.589086 | 0.873845 | 0        | 2.576251 | 0        | 0        | 0        | 0        |
| ENSMUSG00000032478  | 14_Nme6          | 211.9064822 | -0.24924  | 0.5881   | 0.873845 | 241.2033 | 218.9813 | 230.1224 | 84.33673 | 247.7635 | 249.0317 |
| ENSMUSG00000035266  | 16_Helq          | 232.169996  | 0.129265  | 0.589032 | 0.873845 | 229.0213 | 219.8401 | 216.3151 | 236.1428 | 248.8948 | 242.8059 |
| ENSMUSG00000036231  | 5_Agr3           | 0.429375111 | -0.16162  | 0.589086 | 0.873845 | 0        | 2.576251 | 0        | 0        | 0        | 0        |
| ENSMUSG00000036480  | 9_Prss56         | 0.429375111 | -0.16162  | 0.589086 | 0.873845 | 0        | 2.576251 | 0        | 0        | 0        | 0        |
| ENSMUSG00000038067  | 2_Csf3           | 19.6399359  | 0.434066  | 0.588239 | 0.873845 | 8.121322 | 11.16375 | 31.06653 | 10.91416 | 44.12226 | 12.45158 |
| ENSMUSG00000049124  | 3_Gm8186         | 330.7151893 | -0.15201  | 0.588055 | 0.873845 | 339.4713 | 336.6301 | 368.1959 | 245.0726 | 359.7662 | 335.1552 |
| ENSMUSG00000053137  | 6_Mapk11         | 1250.638621 | -0.24417  | 0.58884  | 0.873845 | 1143.482 | 1285.549 | 1639.622 | 525.8643 | 1575.957 | 1333.357 |
| ENSMUSG00000054640  | 14_Slc8a1        | 61.09452131 | 0.183223  | 0.5881   | 0.873845 | 52.78859 | 66.98252 | 51.77754 | 68.46158 | 62.22371 | 64.33319 |
| ENSMUSG00000056708  | 5_Ier5           | 2389.848116 | 0.155553  | 0.587841 | 0.873845 | 2171.641 | 1917.589 | 2694.734 | 2936.903 | 2564.748 | 2053.474 |
| ENSMUSG00000059852  | 7_Kcng2          | 0.429375111 | -0.16162  | 0.589086 | 0.873845 | 0        | 2.576251 | 0        | 0        | 0        | 0        |
| ENSMUSG00000060791  | 15_Gmfg          | 74.00208277 | 0.238064  | 0.588593 | 0.873845 | 94.20733 | 58.39502 | 50.62693 | 65.48499 | 112.0027 | 63.29556 |
| ENSMUSG00000064036  | 15_Mro           | 4.693538023 | -0.61801  | 0.588801 | 0.873845 | 6.497057 | 6.011252 | 4.602448 | 7.937575 | 0        | 3.112896 |
| ENSMUSG00000069265  | 2_Hist1h3a       | 0.429375111 | -0.16162  | 0.589086 | 0.873845 | 0        | 2.576251 | 0        | 0        | 0        | 0        |
| ENSMUSG00000078505  | 1_Gm436          | 0.429375111 | -0.16162  | 0.589086 | 0.873845 | 0        | 2.576251 | 0        | 0        | 0        | 0        |
| ENSMUSG00000086765  | 7_Gm11827        | 2.094810949 | -0.97293  | 0.588916 | 0.873845 | 4.872793 | 0        | 3.451836 | 0        | 1.13134  | 3.112896 |
| ENSMUSG00000094103  | 1_170040417Rik2  | 377.5004391 | -0.1442   | 0.58828  | 0.873845 | 371.1444 | 344.3588 | 474.0522 | 356.1987 | 377.8676 | 341.3809 |
| ENSMUSG00000097109  | 1_Gm26580        | 0.429375111 | -0.16162  | 0.589086 | 0.873845 | 0        | 2.576251 | 0        | 0        | 0        | 0        |
| ENSMUSG00000097157  | 1_Gm26512        | 2.67841156  | 0.775238  | 0.588314 | 0.873845 | 3.248529 | 2.576251 | 0        | 6.945378 | 2.26268  | 1.037632 |
| ENSMUSG00000102121  | 1_Gm28065        | 0.429375111 | -0.16162  | 0.589086 | 0.873845 | 0        | 2.576251 | 0        | 0        | 0        | 0        |
| ENSMUSG00000104752  | 1_Gm5565         | 0.429375111 | -0.16162  | 0.589086 | 0.873845 | 0        | 2.576251 | 0        | 0        | 0        | 0        |
| ENSMUSG00000108795  | 1_RP24-143L4     | 0.429375111 | -0.16162  | 0.589086 | 0.873845 | 0        | 2.576251 | 0        | 0        | 0        | 0        |
| ENSMUSG00000078601  | 4_Gm12525        | 0.643187763 | -1.30945  | 0.58938  | 0.874087 | 0.812132 | 0.85875  | 1.150612 | 0        | 0        | 1.037632 |
| ENSMUSG00000091742  | 1_Gm5093         | 0.643187763 | -1.30945  | 0.58938  | 0.874087 | 0.812132 | 0.85875  | 1.150612 | 0        | 0        | 1.037632 |
| ENSMUSG000000997182 | 2_A830009L08Rik  | 0.643187763 | -1.30945  | 0.58938  | 0.874087 | 0.812132 | 0.85875  | 1.150612 | 0        | 0        | 1.037632 |
| ENSMUSG00000006219  | 12_Fblm1         | 135.2649268 | -0.17826  | 0.58951  | 0.874215 | 147.8081 | 121.9425 | 161.0857 | 96.24309 | 152.7309 | 131.7793 |
| ENSMUSG00000034566  | 10_Atp5h         | 3519.033408 | 0.112074  | 0.589652 | 0.87423  | 3437.756 | 3222.031 | 3487.505 | 3433.993 | 3792.252 | 3704.664 |
| ENSMUSG00000045967  | 11_Gpr158        | 15.29834402 | 0.326899  | 0.589618 | 0.87423  | 8.121322 | 18.8925  | 13.80735 | 21.82833 | 13.57608 | 15.56448 |
| ENSMUSG00000103750  | 1_Flg            | 0.757438737 | 1.750574  | 0.589607 | 0.87423  | 0        | 0        | 1.150612 | 0        | 3.39402  | 0        |
| ENSMUSG00000026554  | 15_Dcaf8         | 2929.514324 | -0.12555  | 0.589969 | 0.874517 | 2907.433 | 3041.693 | 3221.714 | 2441.796 | 2832.876 | 3131.574 |
| ENSMUSG00000028152  | 10_Tspan5        | 1605.638446 | 0.11907   | 0.589977 | 0.874517 | 1502.445 | 1532.869 | 1583.242 | 1851.439 | 1542.017 | 1621.819 |
| ENSMUSG00000047986  | 12_Palm3         | 4.546264049 | 0.502513  | 0.589943 | 0.874517 | 2.436397 | 4.293751 | 4.602448 | 3.968787 | 6.788041 | 5.18816  |
| ENSMUSG00000029705  | 17_Cux1          | 4892.701413 | -0.1235   | 0.590173 | 0.874589 | 4858.987 | 4954.13  | 5493.022 | 4101.742 | 5005.049 | 4943.279 |
| ENSMUSG00000058443  | 14_Gm110-ps3     | 1244.03483  | -0.16112  | 0.590201 | 0.874589 | 13967.05 | 12316.2  | 13121.58 | 8384.063 | 12681.19 | 14176.13 |
| ENSMUSG00000085451  | 1_Gm15137        | 4.431865943 | 0.666256  | 0.590179 | 0.874589 | 2.436397 | 7.728752 | 0        | 7.937575 | 2.26268  | 6.225792 |
| ENSMUSG00000086109  | 2_Gm13391        | 1.870135097 | -0.76386  | 0.590097 | 0.874589 | 2.436397 | 3.435001 | 1.150612 | 0.992197 | 1.13134  | 2.075264 |
| ENSMUSG00000021185  | 15_9030617O03Rik | 502.0468404 | -0.16524  | 0.590438 | 0.874679 | 539.2558 | 514.3914 | 538.4865 | 333.3781 | 530.5985 | 556.1708 |
| ENSMUSG000000228800 | 15_Hdac1         | 1437.456647 | -0.1921   | 0.590392 | 0.874679 | 1546.3   | 1401.48  | 1651.128 | 815.5858 | 1713.98  | 1496.265 |
| ENSMUSG00000030879  | 9_Mrpl17         | 939.3953937 | -0.1804   | 0.590429 | 0.874679 | 970.498  | 969.529  | 1053.961 | 571.5054 | 1112.107 | 958.772  |
| ENSMUSG00000089789  | 1_Rdh1           | 27.96019372 | -0.26095  | 0.590432 | 0.874679 | 41.41874 | 22.32751 | 27.61469 | 30.7581  | 24.89948 | 20.75264 |
| ENSMUSG00000036242  | 14_3632451O06Rik | 149.8435703 | 0.228644  | 0.590577 | 0.874766 | 138.8746 | 169.1738 | 105.8563 | 229.1975 | 96.16391 | 159.7953 |
| ENSMUSG00000044296  | 10_Zfp879        | 39.13379979 | 0.222694  | 0.590585 | 0.874766 | 46.29153 | 31.77376 | 29.91591 | 39.68787 | 49.77896 | 37.35475 |
| ENSMUSG000000208519 | 16_Dab1          | 102.113436  | -0.21997  | 0.590798 | 0.874931 | 116.1349 | 137.4    | 75.9404  | 116.087  | 63.35505 | 103.7632 |
| ENSMUSG000000228999 | 15_Rint1         | 474.8993677 | 0.127082  | 0.590827 | 0.874931 | 464.5396 | 436.2451 | 461.3955 | 554.638  | 460.4554 | 472.1226 |
| ENSMUSG00000042671  | 12_Rgs8          | 12.70580038 | -0.35727  | 0.590788 | 0.874931 | 20.3033  | 12.0225  | 10.35551 | 14.882   |          |          |

|                       |                 |             |           |          |          |          |           |          |          |          |          |
|-----------------------|-----------------|-------------|-----------|----------|----------|----------|-----------|----------|----------|----------|----------|
| ENSMUSG00000105652    | 1_4930519L02Rik | 1.032707136 | 1.372244  | 0.592929 | 0.876132 | 0.812132 | 0.85875   | 0        | 0        | 4.52536  | 0        |
| ENSMUSG00000030276    | 19_Tll3         | 70.47833403 | -0.30686  | 0.593192 | 0.876282 | 82.02535 | 81.58127  | 70.18734 | 18.85174 | 75.79979 | 94.24252 |
| ENSMUSG000000075254   | 11_Heg1         | 1263.251836 | -0.148255 | 0.593145 | 0.876282 | 1225.507 | 1087.178  | 1282.933 | 1646.055 | 1103.057 | 123.4852 |
| ENSMUSG000000108684   | 1_Plk3c2g       | 1.102573647 | -1.15753  | 0.593189 | 0.876282 | 0        | 0.3435001 | 1.150612 | 0.992197 | 0        | 1.037632 |
| ENSMUSG000000041733   | 10_Coq5         | 499.6817008 | -0.171    | 0.593384 | 0.876479 | 519.7646 | 521.2614  | 546.5408 | 326.4328 | 598.4789 | 485.6118 |
| ENSMUSG000000056426   | 3_Nat3          | 3.527087115 | 0.699019  | 0.593413 | 0.876479 | 0.406061 | 1.7175    | 2.301224 | 10.91416 | 1.13134  | 1.037632 |
| ENSMUSG000000024883   | 6_Rin1          | 1443.963511 | -0.24679  | 0.593532 | 0.87659  | 1429.353 | 1337.933  | 1934.179 | 609.2088 | 1973.057 | 1380.051 |
| ENSMUSG000000029518   | 15_Rab35        | 1619.269653 | -0.16325  | 0.593612 | 0.876624 | 1569.039 | 1669.41   | 1893.908 | 1091.416 | 1844.084 | 1647.76  |
| ENSMUSG000000097542   | 1_Gm26751       | 121.2485248 | -0.24059  | 0.593643 | 0.876624 | 175.4206 | 139.9763  | 78.24162 | 91.28211 | 84.85051 | 157.7201 |
| ENSMUSG000000072494   | 7_Ppp1r3e       | 16.68987395 | -0.28278  | 0.593787 | 0.876772 | 21.92757 | 14.59875  | 18.40979 | 15.87515 | 15.83876 | 13.48922 |
| ENSMUSG000000024271   | 7_Elp2          | 1730.176891 | 0.114736  | 0.594014 | 0.876782 | 1789.939 | 1560.349  | 1633.869 | 1783.97  | 1727.556 | 1885.377 |
| ENSMUSG000000026072   | 12_Il1r1        | 545.9395602 | 0.1697    | 0.59394  | 0.876782 | 527.8859 | 473.1714  | 540.7877 | 765.9759 | 535.1239 | 432.6926 |
| ENSMUSG000000028141   | 10_Oaz3         | 16.50592394 | 0.377893  | 0.593976 | 0.876782 | 17.86691 | 14.59875  | 10.35551 | 5.953181 | 30.54618 | 19.71501 |
| ENSMUSG000000037406   | 6_Hlra4         | 11.85031418 | -0.46101  | 0.593917 | 0.876782 | 16.24264 | 4.293751  | 20.71102 | 2.97659  | 11.3134  | 15.56448 |
| ENSMUSG000000067610   | 1_Klri1         | 6.666949978 | 0.596605  | 0.593888 | 0.876782 | 7.30919  | 5.152501  | 3.451836 | 19.84394 | 1.13134  | 3.12896  |
| ENSMUSG000000020553   | 8_Pcpt          | 69.30443132 | 0.182819  | 0.594219 | 0.876788 | 67.40697 | 61.83002  | 65.58489 | 67.46938 | 62.22371 | 91.31162 |
| ENSMUSG000000027560   | 4_Dok5          | 8.857369509 | -0.38108  | 0.594136 | 0.876788 | 11.36985 | 9.446252  | 9.204897 | 9.921968 | 9.050721 | 4.150528 |
| ENSMUSG000000032288   | 9_Imp3          | 496.8765253 | -0.11795  | 0.594225 | 0.876788 | 494.5885 | 532.4251  | 524.6791 | 491.1374 | 455.9301 | 482.4989 |
| ENSMUSG000000038077   | 7_Kcna6         | 53.8747848  | -0.20708  | 0.594239 | 0.876788 | 56.03712 | 72.13502  | 44.87387 | 56.55522 | 40.72824 | 52.91924 |
| ENSMUSG000000068037   | 10_Mas1         | 0.978556365 | 1.315154  | 0.594188 | 0.876788 | 1.624264 | 0         | 0        | 1.984394 | 2.26268  | 0        |
| ENSMUSG000000014813   | 8_Stc1          | 14.9262609  | -0.24048  | 0.594369 | 0.876792 | 134.0018 | 134.8238  | 104.7057 | 167.6813 | 62.22371 | 86.12346 |
| ENSMUSG0000000015401  | 12_Tmem27       | 265.3332299 | 0.295052  | 0.594353 | 0.876792 | 292.3676 | 260.2013  | 162.2363 | 541.7395 | 141.4175 | 194.0372 |
| ENSMUSG000000042474   | 6_Fcmm          | 5.598069736 | 0.791178  | 0.594374 | 0.876792 | 7.30919  | 2.576251  | 2.301224 | 0        | 20.36412 | 1.037632 |
| ENSMUSG000000022306   | 8_Zifm2         | 13.26409405 | -0.32981  | 0.594474 | 0.876853 | 14.61838 | 13.74     | 16.10857 | 17.85964 | 7.919381 | 9.338689 |
| ENSMUSG000000054999   | 2_Naalad1       | 9.002937778 | -0.39653  | 0.594503 | 0.876853 | 7.30919  | 8.587502  | 14.95796 | 4.960984 | 6.788041 | 11.41395 |
| ENSMUSG000000028669   | 15_Plthd1       | 542.2517509 | -0.12433  | 0.594631 | 0.876977 | 540.0679 | 571.0689  | 585.6616 | 463.3559 | 560.0134 | 533.3429 |
| ENSMUSG000000032040   | 15_Dcps         | 771.357553  | -0.17678  | 0.594937 | 0.8772   | 853.5509 | 774.5927  | 827.2901 | 471.2935 | 885.8393 | 815.5788 |
| ENSMUSG000000036099   | 16_Vezt         | 974.7867949 | 1.114411  | 0.594958 | 0.8772   | 965.6252 | 932.6027  | 910.1342 | 1077.526 | 1010.287 | 952.5462 |
| ENSMUSG000000042672   | 15_Dcst1        | 39.45009189 | -0.23819  | 0.594889 | 0.8772   | 41.41874 | 57.53626  | 28.7653  | 29.7659  | 41.85958 | 37.35475 |
| ENSMUSG000000089809   | 8_A930011G23Rik | 2.765863762 | 0.754283  | 0.594889 | 0.8772   | 3.248529 | 1.7175    | 1.150612 | 5.953181 | 4.52536  | 0        |
| ENSMUSG000000019853   | 5_Hebp2         | 3200.32664  | 1.020624  | 0.595029 | 0.87724  | 3012.198 | 2979.863  | 3250.479 | 3339.734 | 3314.827 | 3304.858 |
| ENSMUSG000000097377   | 1_Gm10822       | 1.705905671 | 0.81506   | 0.595127 | 0.877318 | 0.812132 | 1.7175    | 1.150612 | 0.992197 | 4.52536  | 1.037632 |
| ENSMUSG000000028138   | 8_Adh5          | 1455.934557 | 0.116202  | 0.595369 | 0.877351 | 1449.656 | 1366.272  | 1376.132 | 1654.984 | 1400.599 | 1487.964 |
| ENSMUSG000000033430   | 9_Terf2ip       | 465.5365278 | 0.164261  | 0.595237 | 0.877351 | 439.3635 | 415.6351  | 462.5461 | 646.9123 | 384.6556 | 444.1065 |
| ENSMUSG000000038844   | 8_Kif16b        | 1343.470783 | 0.122515  | 0.595327 | 0.877351 | 1292.914 | 1202.25   | 1364.626 | 1559.733 | 1271.626 | 1369.164 |
| ENSMUSG000000058099   | 15_Nfam1        | 74.33102189 | -0.32213  | 0.595282 | 0.877351 | 123.4441 | 65.26502  | 58.68122 | 28.77371 | 121.0534 | 48.76871 |
| ENSMUSG000000064140   | 2_Trim38        | 1.46244459  | 1.103247  | 0.595253 | 0.877351 | 0.812132 | 0.85875   | 1.150612 | 5.953181 | 0        | 0        |
| ENSMUSG000000022324   | 14_Matn2        | 355.3545656 | 0.176519  | 0.595739 | 0.877576 | 295.6161 | 406.1889  | 299.1591 | 438.551  | 269.2589 | 423.3539 |
| ENSMUSG000000023267   | 10_Gabrr2       | 7.701752832 | -0.43494  | 0.595747 | 0.877576 | 5.684925 | 12.88125  | 8.054285 | 10.91416 | 4.52536  | 1.050528 |
| ENSMUSG000000032878   | 16_Ccdc85a      | 22.4990945  | 0.389911  | 0.595903 | 0.877576 | 22.7397  | 27.48001  | 8.054285 | 48.61764 | 13.57608 | 14.52685 |
| ENSMUSG000000037337   | 10_Map4k1       | 48.09185683 | -0.34455  | 0.595647 | 0.877576 | 78.77682 | 42.07876  | 40.27142 | 11.90636 | 66.74907 | 48.76871 |
| ENSMUSG000000038365   | 7_Fbxo25        | 360.3762251 | -0.12072  | 0.595802 | 0.877576 | 367.8959 | 385.5788  | 372.7983 | 328.4171 | 349.5841 | 357.9831 |
| ENSMUSG000000039395   | 8_Mreg          | 3155.43332  | 0.111513  | 0.595918 | 0.877576 | 2910.682 | 2918.033  | 3272.341 | 3218.686 | 3207.349 | 3405.508 |
| ENSMUSG000000051238   | 5_Swsap1        | 242.4386197 | -0.15916  | 0.595846 | 0.877576 | 265.5672 | 243.8851  | 257.7371 | 170.6579 | 263.6022 | 253.1822 |
| ENSMUSG000000057133   | 14_Chd6         | 2818.606473 | 0.11791   | 0.595889 | 0.877576 | 2723.891 | 2651.821  | 2735.005 | 3204.796 | 2595.294 | 3000.832 |
| ENSMUSG000000090863   | 1_A530084C06Rik | 43.17508817 | -0.26463  | 0.595713 | 0.877576 | 29.23676 | 52.38376  | 59.83183 | 26.78931 | 56.56701 | 34.2186  |
| ENSMUSG000000055200   | 7_Sertad3       | 265.2347415 | -0.22572  | 0.595972 | 0.87759  | 289.1191 | 253.3313  | 315.2677 | 122.0402 | 319.0379 | 292.6122 |
| ENSMUSG000000014554   | 13_Dguok        | 806.0236053 | 0.12015   | 0.597324 | 0.877653 | 806.4473 | 734.2314  | 776.6632 | 756.054  | 862.0812 | 900.6646 |
| ENSMUSG000000021057   | 15_Akap5        | 16.37984754 | 0.353223  | 0.596669 | 0.877653 | 7.30919  | 15.4575   | 20.71102 | 28.77371 | 13.57608 | 12.45158 |
| ENSMUSG000000021196   | 13_Pklp1        | 1169.642777 | -0.15984  | 0.596343 | 0.877653 | 1201.956 | 1386.882  | 1113.793 | 840.3907 | 1391.548 | 1083.288 |
| ENSMUSG000000021820   | 16_Camk2g       | 894.617905  | -0.15311  | 0.596129 | 0.877653 | 911.2123 | 991.8565  | 922.7909 | 626.0762 | 993.3166 | 922.4549 |
| ENSMUSG000000027188   | 8_Pamr1         | 98.47976982 | -0.22469  | 0.596794 | 0.877653 | 112.0742 | 124.5188  | 81.69346 | 86.32112 | 56.56701 | 129.704  |
| ENSMUSG000000030507   | 6_Dbx1          | 1.651754901 | 0.783407  | 0.596823 | 0.877653 | 1.624264 | 0.85875   | 1.150612 | 2.97659  | 2.26268  | 1.037632 |
| ENSMUSG000000031097   | 14_Tnni2        | 735.9633079 | -0.18861  | 0.596804 | 0.877653 | 661.8877 | 900.829   | 789.3199 | 485.1842 | 617.7117 | 960.8473 |
| ENSMUSG000000038528   | 14_BC021785     | 4.086886391 | 0.580284  | 0.597138 | 0.877653 | 4.872793 | 2.576251  | 2.301224 | 6.945378 | 6.788041 | 1.037632 |
| ENSMUSG000000040978   | 4_Gm11992       | 137.2923011 | 0.146768  | 0.597139 | 0.877653 | 121.8198 | 127.9538  | 141.5253 | 147.8373 | 128.9728 | 155.8448 |
| ENSMUSG000000041845   | 10_Rhod         | 2130.556572 | -0.27139  | 0.596721 | 0.877653 | 2108.295 | 2144.299  | 2738.457 | 672.7094 | 2579.455 | 2540.123 |
| ENSMUSG000000042572   | 12_Ube2q1       | 2014.701142 | 0.113695  | 0.596709 | 0.877653 | 1841.916 | 1842.878  | 2121.729 | 2105.442 | 2126.919 | 2049.323 |
| ENSMUSG000000046133   | 3_C130073F10Rik | 0.377113368 | 2.128405  | 0.597398 | 0.877653 | 0        | 0         | 0        | 0        | 2.26268  | 0        |
| ENSMUSG000000048439   | 15_Nupl2        | 282.9504979 | 0.12771   | 0.597424 | 0.877653 | 285.8705 | 261.9188  | 263.4902 | 303.6122 | 271.5216 | 311.2896 |
| ENSMUSG000000048776   | 8_Pthlh         | 1040.994584 | 0.151321  | 0.596526 | 0.877653 | 886.0362 | 855.3152  | 1218.498 | 987.2358 | 1271.626 | 1027.256 |
| ENSMUSG000000051769   | 2_Wfdc15a       | 0.377113368 | 2.128405  | 0.597398 | 0.877653 | 0        | 0         | 0        | 0        | 2.26268  | 0        |
| ENSMUSG000000054455   | 4_Vapb          | 2115.835002 | -0.10983  | 0.597165 | 0.877653 | 2083.119 | 2233.609  | 2272.459 | 1969.511 | 2008.129 | 2128.183 |
| ENSMUSG000000054510   | 5_Gm14461       | 0.377113368 | 2.128405  | 0.597398 | 0.877653 | 0        | 0         | 0        | 0        | 2.26268  | 0        |
| ENSMUSG000000063268   | 12_Parp10       | 1760.341083 | -0.30373  | 0.596841 | 0.877653 | 1712.787 | 1704.619  | 2417.436 | 434.5822 | 2341.874 | 1950.748 |
| ENSMUSG000000069301   | 5_Hist1h2ag     | 0.377113368 | 2.128405  | 0.597398 | 0.877653 | 0        | 0         | 0        | 0        | 2.26268  | 0        |
| ENSMUSG000000071019   | 11_Sdr16c6      | 0.377113368 | 2.128405  | 0.597398 | 0.877653 | 0        | 0         | 0        | 0        | 2.26268  | 0        |
| ENSMUSG000000073226   | 9_Gm10482       | 0.377113368 | 2.128405  | 0.597398 | 0.877653 | 0        | 0         | 0        | 0        | 2.26268  | 0        |
| ENSMUSG000000074507   | 6_Gm14340       | 0.377113368 | 2.128405  | 0.597398 | 0.877653 | 0        | 0         | 0        | 0        | 2.26268  | 0        |
| ENSMUSG000000087647   | 2_Gm15407       | 0.377113368 | 2.128405  | 0.597398 | 0.877653 | 0        | 0         | 0        | 0        | 2.26268  | 0        |
| ENSMUSG000000089926   | 1_Gm15734       | 0.377113368 | 2.128405  | 0.597398 | 0.877653 | 0        | 0         | 0        | 0        | 2.26268  | 0        |
| ENSMUSG000000092252   | 1_Gm20499       | 0.377113368 | 2.128405  | 0.597398 | 0.877653 | 0        | 0         | 0        | 0        | 2.26268  | 0        |
| ENSMUSG000000095217   | 1_Hist1h2bn     | 0.377113368 | 2.128405  | 0.597398 | 0.877653 | 0        | 0         | 0        | 0        | 2.26268  | 0        |
| ENSMUSG000000095377   | 1_Olfr91        | 0.377113368 | 2.128405  | 0.597398 | 0.877653 | 0        | 0         | 0        | 0        | 2.26268  | 0        |
| ENSMUSG000000097300   | 1_Gm26835       | 1.651754901 | 0.783407  | 0.596823 | 0.877653 | 1.624264 | 0.85875   | 1.150612 | 2.97659  | 2.26268  | 1.037632 |
| ENSMUSG000000097913   | 1_Gm26837       | 0.377113368 | 2.128405  | 0.597398 | 0.877653 | 0        | 0         | 0        | 0        | 2.26268  | 0        |
| ENSMUSG000000099516   | 1_Gm29066       | 0.377113368 | 2.128405  | 0.597398 | 0.877653 | 0        | 0         | 0        | 0        | 2.26268  | 0        |
| ENSMUSG000000105664</ |                 |             |           |          |          |          |           |          |          |          |          |

|                       |                  |              |          |          |          |          |          |          |          |          |          |
|-----------------------|------------------|--------------|----------|----------|----------|----------|----------|----------|----------|----------|----------|
| ENSMUSG00000022178    | 10_Ajuba         | 1981.71987   | -0.17129 | 0.599199 | 0.878626 | 1902.014 | 1826.562 | 2569.317 | 1331.528 | 2221.952 | 2038.947 |
| ENSMUSG00000022351    | 14_Sqle          | 6252.680953  | 0.140471 | 0.602004 | 0.878626 | 5736.09  | 5376.635 | 6733.382 | 7936.582 | 6099.054 | 5634.342 |
| ENSMUSG00000022371    | 15_Col14a1       | 1857.063956  | 0.175933 | 0.599141 | 0.878626 | 1652.689 | 1750.133 | 1829.473 | 2585.665 | 3011.041 | 2023.383 |
| ENSMUSG00000022822    | 15_Abc5          | 780.0058128  | -0.15677 | 0.600348 | 0.878626 | 830.8112 | 982.4103 | 653.5477 | 808.6404 | 597.3476 | 807.2777 |
| ENSMUSG00000024414    | 13_Mrp127        | 673.564272   | -0.18841 | 0.602233 | 0.878626 | 728.4826 | 651.7914 | 772.0607 | 378.027  | 779.4933 | 731.5306 |
| ENSMUSG00000024990    | 12_Rbp4          | 19.58521632  | -0.29301 | 0.599037 | 0.878626 | 21.92757 | 26.62126 | 16.10857 | 19.84394 | 10.18206 | 22.82791 |
| ENSMUSG00000025078    | 8_Nhlrc2         | 970.7011204  | 0.117842 | 0.601465 | 0.878626 | 947.7583 | 869.914  | 975.7191 | 1056.69  | 1058.934 | 915.1915 |
| ENSMUSG00000025091    | 3_Pnlprp2        | 12.80882482  | 0.316167 | 0.602174 | 0.878626 | 10.55772 | 11.16375 | 12.65673 | 17.85954 | 9.050721 | 15.56448 |
| ENSMUSG00000026121    | 13_Sema4c        | 783.6119674  | -0.26859 | 0.602217 | 0.878626 | 802.3866 | 733.3727 | 1033.25  | 251.0258 | 969.5585 | 912.0786 |
| ENSMUSG00000026934    | 15_Lhx3          | 0.406066089  | -2.08906 | 0.602089 | 0.878626 | 2.436397 | 0        | 0        | 0        | 0        | 0        |
| ENSMUSG00000026963    | 4_Tmem210        | 1.009240797  | 1.289748 | 0.599673 | 0.878626 | 0        | 1.7175   | 0        | 0        | 2.26268  | 2.075264 |
| ENSMUSG00000027359    | 16_Slc27a2       | 0.699601084  | -1.44534 | 0.599657 | 0.878626 | 0        | 0.85875  | 2.301224 | 0        | 0        | 0        |
| ENSMUSG00000029307    | 7_Dmp1           | 0.361495361  | 2.074578 | 0.600926 | 0.878626 | 0        | 0        | 0        | 0        | 1.13134  | 1.037632 |
| ENSMUSG00000029505    | 17_Ep400         | 2858.673397  | -0.13097 | 0.601076 | 0.878626 | 2706.024 | 3047.705 | 3211.358 | 2291.975 | 3084.033 | 2810.945 |
| ENSMUSG00000030244    | 7_Gys2           | 3.831699835  | 0.725309 | 0.602123 | 0.878626 | 4.872793 | 2.576251 | 1.150612 | 2.97659  | 0        | 0        |
| ENSMUSG00000030858    | 10_1700007K09Rik | 0.361495361  | 2.074578 | 0.600926 | 0.878626 | 0        | 0        | 0        | 0        | 1.13134  | 1.037632 |
| ENSMUSG00000031103    | 12_Elfl4         | 439.1564764  | 0.161123 | 0.600791 | 0.878626 | 424.7451 | 386.4376 | 432.6302 | 342.3079 | 586.0342 | 462.7839 |
| ENSMUSG00000033726    | 8_Emx1           | 0.361495361  | 2.074578 | 0.600926 | 0.878626 | 0        | 0        | 0        | 0        | 1.13134  | 1.037632 |
| ENSMUSG000000335051   | 14_Dhx57         | 607.9256041  | 0.116805 | 0.600397 | 0.878626 | 540.0679 | 600.2664 | 609.8244 | 607.2245 | 656.1773 | 633.9932 |
| ENSMUSG000000335934   | 15_Pknx2         | 56.30220577  | -0.23432 | 0.599643 | 0.878626 | 73.90403 | 70.41752 | 37.9702  | 49.60984 | 38.46556 | 67.44608 |
| ENSMUSG000000337526   | 6_Atg14          | 540.4674649  | -0.12224 | 0.600374 | 0.878626 | 535.1951 | 528.1314 | 627.0836 | 496.0984 | 538.5179 | 517.7784 |
| ENSMUSG000000338193   | 3_Hand2          | 0.406066089  | -2.08906 | 0.602089 | 0.878626 | 2.436397 | 0        | 0        | 0        | 0        | 0        |
| ENSMUSG000000338352   | 15_Arfc5         | 114.4466711  | 0.214929 | 0.600958 | 0.878626 | 133.1897 | 62.68877 | 121.9649 | 105.1729 | 151.5996 | 112.0643 |
| ENSMUSG000000339693   | 11_Msantd3       | 199.7424003  | -0.15927 | 0.600586 | 0.878626 | 193.2875 | 197.5126 | 241.6285 | 146.8451 | 212.6919 | 206.4888 |
| ENSMUSG00000041035    | 8_Dpcc           | 724.8636294  | -0.22929 | 0.601252 | 0.878626 | 754.4708 | 693.8702 | 898.6281 | 313.5342 | 894.89   | 793.7885 |
| ENSMUSG00000043065    | 12_Spice1        | 653.9045691  | 0.123367 | 0.600449 | 0.878626 | 556.3105 | 636.3339 | 685.7648 | 708.4285 | 640.3385 | 696.2511 |
| ENSMUSG00000043986    | 5_Spata31d1d     | 0.361495361  | 2.074578 | 0.600926 | 0.878626 | 0        | 0        | 0        | 0        | 1.13134  | 1.037632 |
| ENSMUSG00000044641    | 7_Pard6b         | 1426.983005  | -0.13341 | 0.600584 | 0.878626 | 1390.37  | 1383.447 | 1705.207 | 1162.855 | 1492.238 | 1427.782 |
| ENSMUSG000000445065   | 7_9930022D16Rik  | 0.361495361  | 2.074578 | 0.600926 | 0.878626 | 0        | 0        | 0        | 0        | 1.13134  | 1.037632 |
| ENSMUSG000000446367   | 10_Mgat4e        | 1.086837166  | -1.10173 | 0.60051  | 0.878626 | 2.436397 | 0.85875  | 1.150612 | 0        | 0        | 0        |
| ENSMUSG000000447369   | 14_Dnah14        | 0.361495361  | 2.074578 | 0.600926 | 0.878626 | 0        | 0        | 0        | 0        | 1.13134  | 1.037632 |
| ENSMUSG000000448626   | 5_Klf17          | 0.361495361  | 2.074578 | 0.600926 | 0.878626 | 0        | 0        | 0        | 0        | 1.13134  | 1.037632 |
| ENSMUSG000000449008   | 4_BB014433       | 0.361495361  | 2.074578 | 0.600926 | 0.878626 | 0        | 0        | 0        | 0        | 1.13134  | 1.037632 |
| ENSMUSG000000505663   | 7_Trhde          | 4.791814896  | 0.577424 | 0.600614 | 0.878626 | 4.060661 | 5.152501 | 2.301224 | 12.89856 | 2.26268  | 2.075264 |
| ENSMUSG000000505191   | 2_Olfrr697       | 0.406066089  | -2.08906 | 0.602089 | 0.878626 | 2.436397 | 0        | 0        | 0        | 0        | 0        |
| ENSMUSG0000005051748  | 2_Wfdc21         | 0.406066089  | -2.08906 | 0.602089 | 0.878626 | 2.436397 | 0        | 0        | 0        | 0        | 0        |
| ENSMUSG0000005051713  | 8_Rfx8           | 0.692028543  | -1.44557 | 0.60063  | 0.878626 | 0        | 0.85875  | 2.301224 | 0.992197 | 0        | 0        |
| ENSMUSG0000005061207  | 11_Stk19         | 469.292502   | -0.14464 | 0.601905 | 0.878626 | 479.158  | 444.8326 | 554.595  | 360.1674 | 470.6375 | 506.3644 |
| ENSMUSG0000005061877  | 12_BC048679      | 0.699601084  | -1.44534 | 0.599657 | 0.878626 | 0        | 0.85875  | 2.301224 | 0        | 0        | 0        |
| ENSMUSG0000005068299  | 11_1700019G17Rik | 56.33170918  | 0.192452 | 0.59935  | 0.878626 | 51.97646 | 54.10126 | 51.77754 | 76.39915 | 49.77896 | 53.95687 |
| ENSMUSG0000005069785  | 4_Gm11444        | 0.361495361  | 2.074578 | 0.600926 | 0.878626 | 0        | 0        | 0        | 0        | 1.13134  | 1.037632 |
| ENSMUSG0000005071478  | 5_Hist1h2ad      | 0.406066089  | -2.08906 | 0.602089 | 0.878626 | 2.436397 | 0        | 0        | 0        | 0        | 0        |
| ENSMUSG0000005071679  | 4_Zcchc16        | 2.09484912   | 0.847933 | 0.601665 | 0.878626 | 1.624264 | 1.7175   | 1.150612 | 6.945378 | 1.13134  | 0        |
| ENSMUSG0000005072718  | 6_Klra10         | 0.406066089  | -2.08906 | 0.602089 | 0.878626 | 2.436397 | 0        | 0        | 0        | 0        | 0        |
| ENSMUSG0000005072905  | 5_Gm2016         | 0.406066089  | -2.08906 | 0.602089 | 0.878626 | 2.436397 | 0        | 0        | 0        | 0        | 0        |
| ENSMUSG0000005074344  | 6_Tmigd3         | 0.406066089  | -2.08906 | 0.602089 | 0.878626 | 2.436397 | 0        | 0        | 0        | 0        | 0        |
| ENSMUSG0000005074673  | 15_Tll9          | 0.406066089  | -2.08906 | 0.602089 | 0.878626 | 2.436397 | 0        | 0        | 0        | 0        | 0        |
| ENSMUSG0000005075046  | 7_Duxf3          | 0.699601084  | -1.44534 | 0.599657 | 0.878626 | 0        | 0.85875  | 2.301224 | 0        | 0        | 0        |
| ENSMUSG0000005075286  | 3_Gm1968         | 0.361495361  | 2.074578 | 0.600926 | 0.878626 | 0        | 0        | 0        | 0        | 1.13134  | 1.037632 |
| ENSMUSG0000005075705  | 12_Msrb1         | 587.0409453  | -0.24285 | 0.601671 | 0.878626 | 674.0697 | 639.7689 | 594.8665 | 227.2131 | 764.7859 | 621.5416 |
| ENSMUSG0000005079355  | 3_Ackr4          | 37.45404955  | -0.25167 | 0.600615 | 0.878626 | 33.29742 | 53.24251 | 35.66898 | 49.60984 | 24.88948 | 28.01607 |
| ENSMUSG0000005079462  | 1_Gm15737        | 1.042739361  | 1.126906 | 0.599228 | 0.878626 | 0        | 0.85875  | 1.150612 | 1.984394 | 2.26268  | 0        |
| ENSMUSG0000005085643  | 1_Gm12519        | 0.361495361  | 2.074578 | 0.600926 | 0.878626 | 0        | 0        | 0        | 0        | 1.13134  | 1.037632 |
| ENSMUSG0000005085992  | 1_Gm11515        | 0.406066089  | -2.08906 | 0.602089 | 0.878626 | 2.436397 | 0        | 0        | 0        | 0        | 0        |
| ENSMUSG0000005086788  | 2_1700029M20Rik  | 0.361495361  | 2.074578 | 0.600926 | 0.878626 | 0        | 0        | 0        | 0        | 1.13134  | 1.037632 |
| ENSMUSG0000005087187  | 1_Gm13431        | 4.031897087  | -0.57163 | 0.600852 | 0.878626 | 4.872793 | 6.011252 | 3.451836 | 0.992197 | 6.788041 | 2.075264 |
| ENSMUSG0000005091007  | 1_D630036h32Rik  | 6.403636734  | -0.5402  | 0.599514 | 0.878626 | 1.624264 | 12.0225  | 9.204897 | 3.968787 | 2.26268  | 9.338689 |
| ENSMUSG0000005091897  | 1_Gm17019        | 0.406066089  | -2.08906 | 0.602089 | 0.878626 | 2.436397 | 0        | 0        | 0        | 0        | 0        |
| ENSMUSG0000005096872  | 2_Scgb2a2        | 0.406066089  | -2.08906 | 0.602089 | 0.878626 | 2.436397 | 0        | 0        | 0        | 0        | 0        |
| ENSMUSG0000005097123  | 1_Gm6297         | 16.55842167  | -0.30708 | 0.601129 | 0.878626 | 19.49117 | 17.175   | 18.40979 | 21.82833 | 7.919381 | 14.52685 |
| ENSMUSG0000005097613  | 1_Gm17597        | 9.411241677  | 0.387352 | 0.601027 | 0.878626 | 8.121322 | 9.446252 | 6.903673 | 11.90636 | 4.52536  | 15.56448 |
| ENSMUSG0000005100480  | 1_Gm29156        | 1.389841956  | 0.962253 | 0.599351 | 0.878626 | 0.812132 | 0.85875  | 1.150612 | 0.992197 | 4.52536  | 0        |
| ENSMUSG0000005103677  | 1_Pcdhga4        | 199.37561176 | -0.16476 | 0.600402 | 0.878626 | 221.7121 | 224.9926 | 185.2485 | 147.8373 | 179.8831 | 236.5801 |
| ENSMUSG0000005103965  | 1_Gm30173        | 0.406066089  | -2.08906 | 0.602089 | 0.878626 | 2.436397 | 0        | 0        | 0        | 0        | 0        |
| ENSMUSG0000005105765  | 1_4930539C22Rik  | 0.406066089  | -2.08906 | 0.602089 | 0.878626 | 2.436397 | 0        | 0        | 0        | 0        | 0        |
| ENSMUSG0000005106559  | 1_Gm43095        | 0.361495361  | 2.074578 | 0.600926 | 0.878626 | 0        | 0        | 0        | 0        | 1.13134  | 1.037632 |
| ENSMUSG00000051069763 | 3_Tmem100        | 189.5127514  | 0.249359 | 0.602409 | 0.878754 | 181.1055 | 178.62   | 159.9351 | 344.2923 | 102.9519 | 170.1717 |
| ENSMUSG0000005097660  | 1_Gm26762        | 10.51917902  | -0.35053 | 0.602401 | 0.878754 | 8.933454 | 13.74    | 12.65673 | 6.945378 | 13.57608 | 7.263424 |
| ENSMUSG0000005074785  | 4_Pknox1         | 238.1378636  | 0.223339 | 0.602492 | 0.878786 | 230.6455 | 262.7776 | 165.6881 | 397.8709 | 179.8831 | 191.9619 |
| ENSMUSG0000005101603  | 1_Gm28730        | 1.017286262  | 1.304144 | 0.60252  | 0.878786 | 0        | 1.7175   | 0        | 0.992197 | 3.39402  | 0        |
| ENSMUSG0000005106632  | 1_Gm33466        | 1.212554568  | -1.20787 | 0.602625 | 0.878876 | 2.436397 | 2.576251 | 0        | 0        | 2.26268  | 0        |
| ENSMUSG0000005001100  | 10_Poldip2       | 1080.272255  | -0.17899 | 0.602696 | 0.878898 | 1159.725 | 1117.234 | 1164.419 | 630.045  | 1237.668 | 1172.524 |
| ENSMUSG0000005045875  | 12_Adra1a        | 33.345338    | -0.26196 | 0.602728 | 0.878898 | 32.48529 | 53.24251 | 23.01224 | 23.81272 | 38.46556 | 29.0537  |
| ENSMUSG0000005024300  | 16_Myo1f         | 177.3399991  | -0.33688 | 0.60288  | 0.879054 | 304.5496 | 145.1288 | 143.8265 | 43.65666 | 280.5723 | 146.3061 |
| ENSMUSG0000005033009  | 15_Ogfd1         | 873.249303   | 0.124045 | 0.602968 | 0.879055 | 796.7017 | 843.2927 | 867.5615 | 1037.838 | 810.0395 | 884.0625 |
| ENSMUSG0000005048668  | 15_Rhno1         | 592.548937   | -0.17939 | 0.60294  | 0.879055 | 609.9113 | 586.5264 | 691.5179 | 353.2221 | 682.1981 | 631.9179 |
| ENSMUSG0000005020527  | 14_Myo19         | 489.2946899  | -0.21801 | 0.603069 | 0.879072 | 508.3947 | 545.3064 | 524.6791 | 222.2521 | 575.8521 | 559.2837 |
| ENSMUSG0000005038236  | 8_Hoxa7          | 0.707444917  | -1.42596 | 0.603057 | 0.879072 | 0.812132 | 0        | 2.301224 | 0        | 1.13134  | 0        |
| ENSMUSG0000005055670  | 13_Zzf1          | 2296.16582   | -0.14006 | 0.603213 | 0.879218 | 2355.183 | 2294.581 | 2572.769 | 1723.446 | 2590.769 | 2240.248 |
| ENSMUSG0000005032602  | 6_Slc25a20       | 406.4115171  | -0.11739 | 0.60327  | 0.879237 | 427.9937 | 431.0926 | 409.6179 | 407.7929 |          |          |

|                      |                 |             |          |          |          |          |          |          |          |          |          |
|----------------------|-----------------|-------------|----------|----------|----------|----------|----------|----------|----------|----------|----------|
| ENSMUSG000000058248  | 12_Kcnh1        | 851.1083573 | 0.155998 | 0.605398 | 0.880534 | 718.737  | 769.4402 | 927.3934 | 692.5534 | 1115.501 | 883.0249 |
| ENSMUSG000000020228  | 11_Helb         | 505.2403473 | 0.122895 | 0.605461 | 0.880562 | 492.9642 | 463.7251 | 494.7632 | 584.4039 | 469.5061 | 526.0795 |
| ENSMUSG0000000005103 | 12_Wdr1         | 11226.07255 | -0.17639 | 0.60552  | 0.880583 | 11518.47 | 10829.7  | 13386.22 | 6788.611 | 13426.74 | 11406.69 |
| ENSMUSG0000000013997 | 10_Nit1         | 829.9388531 | -0.1203  | 0.605891 | 0.880807 | 820.2535 | 820.9652 | 952.7068 | 736.21   | 785.15   | 864.3475 |
| 6_4930538K18Rik      |                 | 2.092034987 | 0.917003 | 0.605944 | 0.880807 | 0        | 4.293751 | 0        | 2.97659  | 1.13134  | 4.150528 |
| 14_Nlrp3             |                 | 40.33998904 | 0.306064 | 0.605983 | 0.880807 | 43.85514 | 20.61001 | 43.72326 | 21.82833 | 74.68845 | 37.35475 |
| ENSMUSG0000000044502 | 16_Bod1         | 890.3632503 | -0.15995 | 0.605895 | 0.880807 | 889.2847 | 930.8852 | 998.7313 | 586.3883 | 1010.287 | 926.8054 |
| ENSMUSG000000064115  | 13_Cadm2        | 105.9490123 | 0.30754  | 0.605963 | 0.880807 | 98.26799 | 116.79   | 69.03673 | 221.2599 | 45.2536  | 85.08583 |
| ENSMUSG000000096946  | 1_Fmr1os        | 1.429144468 | 1.199878 | 0.605834 | 0.880807 | 0        | 2.576251 | 0        | 4.960984 | 0        | 1.037632 |
| 1_BC030343           |                 | 21.17996847 | 0.288162 | 0.605888 | 0.880807 | 12.99411 | 29.19751 | 14.95796 | 23.81272 | 18.10144 | 28.01607 |
| ENSMUSG0000000003074 | 7_Trapcc10      | 2056.752269 | -0.1576  | 0.606858 | 0.880977 | 2070.937 | 2179.508 | 2256.35  | 1349.388 | 2288.701 | 2195.629 |
| ENSMUSG0000000008540 | 11_Mgst1        | 967.6503692 | 0.203309 | 0.607063 | 0.880977 | 918.5215 | 1093.189 | 686.9154 | 1513.1   | 693.5115 | 900.6646 |
| ENSMUSG000000018486  | 2_Wnt9b         | 2.029817718 | 0.742458 | 0.607913 | 0.880977 | 1.624264 | 1.1715   | 1.150612 | 0.992197 | 5.656701 | 1.037632 |
| ENSMUSG0000000019761 | 9_Krt10         | 170.905859  | 0.216578 | 0.607446 | 0.880977 | 144.5595 | 115.0725 | 215.1645 | 242.096  | 192.3278 | 116.2148 |
| ENSMUSG000000020212  | 13_Mdm1         | 123.4200784 | 0.200667 | 0.607348 | 0.880977 | 120.1956 | 125.3775 | 98.95264 | 192.4862 | 101.8206 | 101.6879 |
| ENSMUSG000000021754  | 17_Map3k1       | 2420.032011 | 0.112493 | 0.607221 | 0.880977 | 2229.303 | 2282.558 | 2465.762 | 2748.385 | 2346.399 | 2447.774 |
| ENSMUSG000000021975  | 7_Ints9         | 698.8235614 | -0.16499 | 0.606759 | 0.880977 | 680.5668 | 763.4289 | 772.0607 | 455.4183 | 830.4036 | 691.063  |
| ENSMUSG000000024462  | 17_Gabbr1       | 532.7396328 | -0.16585 | 0.607106 | 0.880977 | 525.4495 | 683.5652 | 480.9559 | 613.1776 | 374.4736 | 518.816  |
| ENSMUSG000000025534  | 17_Gusb         | 466.3449304 | -0.14182 | 0.606241 | 0.880977 | 512.4554 | 501.5101 | 453.3412 | 351.2377 | 513.6284 | 465.8968 |
| ENSMUSG000000028176  | 11_Lrrc7        | 28.6417052  | -0.35367 | 0.606937 | 0.880977 | 38.17021 | 42.07876 | 16.10857 | 46.63325 | 10.18206 | 18.67738 |
| ENSMUSG000000029245  | 16_Epha5        | 78.12573592 | 0.290298 | 0.606415 | 0.880977 | 65.78271 | 91.02752 | 54.07877 | 156.7671 | 42.99092 | 58.1074  |
| ENSMUSG000000029925  | 13_Tbxas1       | 69.69030784 | 0.20666  | 0.607707 | 0.880977 | 77.96469 | 76.42877 | 39.12081 | 68.46158 | 81.45649 | 74.70951 |
| ENSMUSG000000031520  | 5_Vegfc         | 64.87705623 | 0.238935 | 0.606195 | 0.880977 | 55.22499 | 73.85252 | 49.47632 | 109.1416 | 48.64762 | 52.91924 |
| ENSMUSG000000031963  | 7_Bmper         | 209.950278  | -0.18318 | 0.606312 | 0.880977 | 210.3422 | 259.3426 | 200.2065 | 266.9009 | 140.2862 | 182.6232 |
| ENSMUSG000000032360  | 16_Hcrt2        | 0.35392282  | 2.047727 | 0.607895 | 0.880977 | 0        | 0        | 0        | 0.992197 | 1.13134  | 0        |
| ENSMUSG000000035831  | 2_Krt25         | 3.77900317  | -0.79324 | 0.607294 | 0.880977 | 4.872793 | 9.446252 | 0        | 4.960984 | 3.39402  | 0        |
| ENSMUSG000000039294  | 14_BC017643     | 822.7964802 | 0.165396 | 0.607465 | 0.880977 | 798.3259 | 702.4577 | 826.1395 | 608.2166 | 1115.501 | 886.1378 |
| ENSMUSG000000042015  | 16_Wdr41        | 815.8687273 | 0.116152 | 0.607421 | 0.880977 | 724.4219 | 766.8639 | 858.3566 | 894.9615 | 823.6156 | 826.9928 |
| ENSMUSG000000043583  | 1_4930470P17Rik | 0.35392282  | 2.047727 | 0.607895 | 0.880977 | 0        | 0        | 0        | 0.992197 | 1.13134  | 0        |
| ENSMUSG000000049515  | 12_Espnl        | 16.25992484 | 0.31528  | 0.606816 | 0.880977 | 12.18198 | 16.31625 | 14.95796 | 8.929771 | 19.23278 | 25.9408  |
| 5_4933406M09Rik      |                 | 0.35392282  | 2.047727 | 0.607895 | 0.880977 | 0        | 0        | 0        | 0.992197 | 1.13134  | 0        |
| ENSMUSG000000053820  | 4_Bcl2a1c       | 0.35392282  | 2.047727 | 0.607895 | 0.880977 | 0        | 0        | 0        | 0.992197 | 1.13134  | 0        |
| ENSMUSG000000059768  | 3_Olfrr682-ps1  | 0.35392282  | 2.047727 | 0.607895 | 0.880977 | 0        | 0        | 0        | 0.992197 | 1.13134  | 0        |
| ENSMUSG000000063320  | 11_119000707Rik | 27.96792353 | 0.294688 | 0.606821 | 0.880977 | 24.36397 | 29.19751 | 21.86163 | 52.58643 | 16.9701  | 22.82791 |
| ENSMUSG000000063652  | 10_Slc22a21     | 276.9674361 | 0.127459 | 0.60731  | 0.880977 | 281.8099 | 273.9413 | 238.1767 | 296.6668 | 269.2589 | 301.9509 |
| ENSMUSG000000064039  | 3_Ccrl11        | 0.35392282  | 2.047727 | 0.607895 | 0.880977 | 0        | 0        | 0        | 0.992197 | 1.13134  | 0        |
| ENSMUSG000000074862  | 11_BC025920     | 35.70474907 | -0.22816 | 0.60706  | 0.880977 | 26.80036 | 46.37251 | 42.57265 | 38.69568 | 32.80886 | 26.97843 |
| ENSMUSG000000079426  | 12_Arrp4        | 2399.481386 | -0.13166 | 0.60761  | 0.880977 | 2454.263 | 2358.128 | 2714.294 | 1891.127 | 2662.043 | 2317.032 |
| ENSMUSG000000079853  | 5_Klra1         | 0.35392282  | 2.047727 | 0.607895 | 0.880977 | 0        | 0        | 0        | 0.992197 | 1.13134  | 0        |
| ENSMUSG000000085318  | 1_Gm12524       | 0.35392282  | 2.047727 | 0.607895 | 0.880977 | 0        | 0        | 0        | 0.992197 | 1.13134  | 0        |
| ENSMUSG000000085632  | 1_Gm12381       | 0.35392282  | 2.047727 | 0.607895 | 0.880977 | 0        | 0        | 0        | 0.992197 | 1.13134  | 0        |
| ENSMUSG000000085668  | 2_Gm13447       | 1.233558597 | 1.246763 | 0.606988 | 0.880977 | 0        | 0        | 2.301224 | 3.968787 | 1.13134  | 0        |
| ENSMUSG000000086254  | 1_3100003L05Rik | 0.35392282  | 2.047727 | 0.607895 | 0.880977 | 0        | 0        | 0        | 0.992197 | 1.13134  | 0        |
| ENSMUSG000000086852  | 1_Gm11374       | 0.35392282  | 2.047727 | 0.607895 | 0.880977 | 0        | 0        | 0        | 0.992197 | 1.13134  | 0        |
| ENSMUSG000000092233  | 1_Gm20403       | 0.35392282  | 2.047727 | 0.607895 | 0.880977 | 0        | 0        | 0        | 0.992197 | 1.13134  | 0        |
| ENSMUSG000000094084  | 2_Tdpz1         | 0.35392282  | 2.047727 | 0.607895 | 0.880977 | 0        | 0        | 0        | 0.992197 | 1.13134  | 0        |
| ENSMUSG000000095276  | 1_Gly           | 0.35392282  | 2.047727 | 0.607895 | 0.880977 | 0        | 0        | 0        | 0.992197 | 1.13134  | 0        |
| ENSMUSG000000098304  | 1_1700027124Rik | 0.35392282  | 2.047727 | 0.607895 | 0.880977 | 0        | 0        | 0        | 0.992197 | 1.13134  | 0        |
| ENSMUSG000000100129  | 1_Gm29064       | 0.35392282  | 2.047727 | 0.607895 | 0.880977 | 0        | 0        | 0        | 0.992197 | 1.13134  | 0        |
| ENSMUSG000000100891  | 1_2810049E08Rik | 0.35392282  | 2.047727 | 0.607895 | 0.880977 | 0        | 0        | 0        | 0.992197 | 1.13134  | 0        |
| ENSMUSG000000102595  | 1_Gm30097       | 0.35392282  | 2.047727 | 0.607895 | 0.880977 | 0        | 0        | 0        | 0.992197 | 1.13134  | 0        |
| ENSMUSG000000030325  | 16_Klrb1c       | 9.71303208  | 0.428852 | 0.608196 | 0.881208 | 11.36985 | 12.0225  | 1.150612 | 10.91416 | 12.44474 | 10.37632 |
| ENSMUSG000000054715  | 10_Zscan42      | 316.2417812 | -0.13758 | 0.608163 | 0.881208 | 299.6768 | 340.0651 | 354.3885 | 261.94   | 289.6231 | 351.7573 |
| ENSMUSG000000090700  | 1_Cyp4f40       | 6.417306821 | -0.4571  | 0.608206 | 0.881208 | 8.121322 | 6.011252 | 8.054285 | 1.984394 | 10.18206 | 4.150528 |
| ENSMUSG000000046338  | 4_Gpat2         | 33.00013987 | -0.34886 | 0.608315 | 0.881303 | 58.47352 | 25.76251 | 26.46408 | 8.929771 | 31.67752 | 46.69344 |
| ENSMUSG000000075605  | 3_2300055B03Rik | 38.93703214 | -0.28288 | 0.608418 | 0.881387 | 32.48529 | 46.37251 | 49.47632 | 17.85954 | 28.2835  | 59.14503 |
| ENSMUSG000000018900  | 7_Slc22a5       | 1238.248186 | 0.122243 | 0.608493 | 0.881423 | 1155.664 | 1189.369 | 1212.745 | 1475.397 | 1120.027 | 1276.287 |
| ENSMUSG000000033615  | 9_Cplx1         | 11.38614709 | -0.42167 | 0.608531 | 0.881423 | 21.11544 | 15.4575  | 2.301224 | 9.921968 | 10.18206 | 9.338689 |
| ENSMUSG000000026398  | 14_Nr5a2        | 7.03112454  | 0.487802 | 0.608636 | 0.881511 | 2.436397 | 9.446252 | 5.753061 | 15.87515 | 4.52536  | 4.150528 |
| ENSMUSG000000043733  | 14_Ptpn11       | 4828.838904 | -0.12365 | 0.608904 | 0.881555 | 4822.441 | 4979.034 | 5305.472 | 3854.685 | 5065.01  | 4946.392 |
| ENSMUSG0000000448814 | 10_Lonf2        | 93.08678607 | 0.242039 | 0.608932 | 0.881555 | 81.21322 | 109.0613 | 65.58489 | 154.7827 | 56.56701 | 91.31162 |
| ENSMUSG000000051518  | 7_Rps19bp1      | 244.0309736 | -0.21138 | 0.608881 | 0.881555 | 273.6885 | 231.0038 | 280.7494 | 123.0324 | 320.1692 | 235.5425 |
| ENSMUSG000000053838  | 14_Nudcd3       | 2710.810935 | -0.15687 | 0.608782 | 0.881555 | 2742.57  | 2785.786 | 3045.67  | 1789.923 | 3093.084 | 2807.832 |
| ENSMUSG000000054161  | 10_Fam83e       | 178.8549248 | -0.22896 | 0.608766 | 0.881555 | 168.9235 | 181.1963 | 228.9718 | 79.37575 | 195.7218 | 218.9404 |
| ENSMUSG000000071470  | 3_Conb1fp1      | 19.17843084 | 0.349964 | 0.60889  | 0.881555 | 21.92757 | 13.74    | 14.95796 | 40.68007 | 11.3134  | 12.45158 |
| ENSMUSG000000000182  | 9_Fgf23         | 9.21543276  | 0.534456 | 0.608982 | 0.881563 | 3.248529 | 3.435001 | 16.10857 | 8.929771 | 21.49546 | 2.075264 |
| ENSMUSG0000000008734 | 8_Gprc5b        | 528.7761068 | -0.15261 | 0.609054 | 0.881604 | 523.0131 | 644.0627 | 502.8175 | 393.9021 | 496.6583 | 612.2029 |
| ENSMUSG000000027387  | 11_Zc3h8        | 60.542315   | 0.227023 | 0.609124 | 0.881615 | 50.3522  | 68.70002 | 48.32571 | 97.23529 | 50.9103  | 47.73108 |
| ENSMUSG000000029535  | 4_Tripa1        | 727.9632229 | -0.16152 | 0.609174 | 0.881615 | 784.5197 | 706.7514 | 814.6334 | 472.2857 | 800.9888 | 788.6004 |
| ENSMUSG000000034538  | 7_Zfp418        | 84.93748588 | 0.239343 | 0.609211 | 0.881615 | 80.40109 | 69.55877 | 83.99468 | 150.8139 | 66.74907 | 58.1074  |
| ENSMUSG000000035184  | 15_Fam124a      | 471.9660594 | -0.12552 | 0.609265 | 0.881615 | 447.4848 | 527.2726 | 502.8175 | 416.7227 | 432.1719 | 505.3268 |
| ENSMUSG000000089456  | 7_Gm16194       | 1.523575857 | -0.86835 | 0.609283 | 0.881615 | 1.624264 | 0.85875  | 3.451836 | 0        | 1.13134  | 2.075264 |
| ENSMUSG000000009549  | 14_Srp14        | 1348.072572 | 0.122351 | 0.609364 | 0.881621 | 1306.721 | 1240.894 | 1325.505 | 1631.172 | 1258.05  | 1326.094 |
| ENSMUSG000000046791  | 7_2410016O06Rik | 261.1478083 | -0.18196 | 0.609464 | 0.881621 | 269.6279 | 255.9076 | 307.2134 | 153.7905 | 291.8857 | 288.4617 |
| ENSMUSG000000073764  | 2_Gm12888       | 1.113080753 | 1.511427 | 0.609441 | 0.881621 | 0        | 1.7175   | 0        | 4.960984 | 0        | 0        |
| ENSMUSG0000000105527 | 1_4933424H11Rik | 1.113080753 | 1.511427 | 0.609441 | 0.881621 | 0        | 1.7175   | 0        | 4.960984 | 0        | 0        |
| ENSMUSG000000021048  | 6_Mthfd1        | 1849.651744 | -0.18738 | 0.609533 | 0.881657 | 1839.479 | 1917.589 | 2151.645 | 1010.056 | 2174.436 | 2004.705 |
| ENSMUSG0000000041355 | 13_Ssr2         | 2108.812934 | -0.23336 | 0.609841 | 0.8      |          |          |          |          |          |          |

|                      |                 |             |          |          |          |          |          |          |          |          |          |
|----------------------|-----------------|-------------|----------|----------|----------|----------|----------|----------|----------|----------|----------|
| ENSMUSG000000040283  | 14_Btnl9        | 13.79062939 | 0.352089 | 0.61194  | 0.88315  | 8.121322 | 14.59875 | 13.80735 | 26.78931 | 9.050721 | 10.37632 |
| ENSMUSG000000026887  | 9_Mirr          | 442.9487822 | 0.125901 | 0.612018 | 0.883199 | 426.3694 | 391.5901 | 453.3412 | 521.8955 | 415.2018 | 449.2947 |
| ENSMUSG000000037482  | 2_Erv3          | 1.011306217 | 1.112943 | 0.612114 | 0.883209 | 0.812132 | 0        | 1.150612 | 0.992197 | 0        | 3.112896 |
| ENSMUSG000000043441  | 5_Gprl49        | 1.011779139 | 1.112912 | 0.61209  | 0.883209 | 0.812132 | 0        | 1.150612 | 2.97659  | 1.13134  | 0        |
| ENSMUSG000000000131  | 15_Xpo6         | 2206.271535 | -0.17019 | 0.612291 | 0.883262 | 2241.485 | 2322.061 | 2445.051 | 1331.528 | 2616.79  | 2280.715 |
| ENSMUSG000000021094  | 9_Dhrs7         | 466.4181251 | 0.121552 | 0.61228  | 0.883262 | 469.4124 | 409.6239 | 461.3955 | 518.9189 | 502.315  | 436.8431 |
| ENSMUSG000000026692  | 12_Fmo4         | 4.402319867 | 0.524467 | 0.612461 | 0.883262 | 1.624264 | 6.870002 | 2.301224 | 4.960984 | 3.39402  | 7.263424 |
| ENSMUSG000000030045  | 10_Mrpl19       | 566.2476816 | 0.112767 | 0.612376 | 0.883262 | 554.6863 | 535.8601 | 541.9383 | 626.0762 | 546.4373 | 592.4879 |
| ENSMUSG000000034361  | 9_Cpne2         | 167.0197860 | -0.18966 | 0.612414 | 0.883262 | 186.7904 | 164.0213 | 182.9473 | 94.2587  | 194.5905 | 179.5103 |
| ENSMUSG000000052031  | 7_Tagap1        | 590.202758  | 0.112218 | 0.61242  | 0.883262 | 592.0444 | 529.8489 | 579.9085 | 588.3727 | 622.2371 | 628.805  |
| ENSMUSG000000054942  | 13_Fam73a       | 205.6995665 | 0.250951 | 0.612407 | 0.883262 | 198.1603 | 200.9476 | 164.5375 | 392.9099 | 119.9221 | 157.7201 |
| ENSMUSG000000043913  | 14_Ccdc6a       | 23.91080072 | -0.29839 | 0.612611 | 0.883413 | 27.61249 | 38.64376 | 12.65673 | 21.82833 | 14.70742 | 28.01607 |
| ENSMUSG000000015176  | 9_Nolc1         | 1377.031631 | -0.18643 | 0.612809 | 0.883495 | 1419.607 | 1391.175 | 1586.694 | 775.8979 | 1763.759 | 1325.056 |
| ENSMUSG000000030168  | 13_Adiapor2     | 2309.713717 | 0.10096  | 0.612933 | 0.883495 | 2209     | 2249.067 | 2228.736 | 2421.952 | 2396.178 | 2353.35  |
| ENSMUSG000000031512  | 14_Tex29        | 0.954892895 | 1.277888 | 0.61289  | 0.883495 | 1.624264 | 0        | 0        | 0.992197 | 0        | 3.112896 |
| ENSMUSG000000031672  | 7_Got2          | 3665.46474  | -0.19069 | 0.612927 | 0.883495 | 3584.751 | 3794.817 | 4342.41  | 1961.573 | 4508.39  | 3800.846 |
| ENSMUSG000000047606  | 3_Ankrd34c      | 5.644271425 | 0.56952  | 0.612728 | 0.883495 | 8.933454 | 3.435001 | 1.150612 | 10.91416 | 1.13134  | 8.301057 |
| ENSMUSG000000008611  | 1_Gm15326       | 13.09770799 | -0.33598 | 0.612812 | 0.883495 | 17.86691 | 15.4575  | 10.35551 | 5.953181 | 11.3134  | 17.63975 |
| ENSMUSG000000030225  | 11_Dera         | 708.0221041 | -0.11629 | 0.613101 | 0.883651 | 756.0951 | 658.6614 | 795.073  | 666.7563 | 711.6129 | 659.934  |
| ENSMUSG0000000050147 | 8_Fzrl3         | 11.57101104 | -0.34749 | 0.61313  | 0.883651 | 14.61838 | 6.011252 | 18.40979 | 9.921968 | 9.050721 | 11.41395 |
| ENSMUSG000000031757  | 6_Mt4           | 1.238669497 | -1.19926 | 0.61327  | 0.883661 | 0        | 1.7175   | 3.451836 | 0        | 2.26268  | 0        |
| ENSMUSG000000038705  | 13_Gmeb2        | 758.4255824 | -0.15165 | 0.613187 | 0.883661 | 753.6587 | 740.2427 | 900.9293 | 527.8487 | 824.7469 | 803.1272 |
| ENSMUSG000000056071  | 12_S100a9       | 129.3338082 | 0.350757 | 0.613254 | 0.883661 | 199.7845 | 42.07876 | 98.95264 | 84.33673 | 277.1783 | 73.67188 |
| ENSMUSG000000020085  | 15_Aifm2        | 570.8436965 | -0.1731  | 0.613365 | 0.883734 | 581.4866 | 629.4639 | 604.0714 | 347.2689 | 563.4074 | 699.364  |
| ENSMUSG000000041789  | 7_2700046A07Rik | 5.253381031 | 0.549878 | 0.613562 | 0.883889 | 4.872793 | 7.728752 | 0        | 4.960984 | 5.656701 | 8.301057 |
| ENSMUSG000000054034  | 10_Tceal5       | 33.82269599 | -0.25763 | 0.613526 | 0.883889 | 27.61249 | 54.10126 | 28.7653  | 42.66446 | 24.88948 | 24.90317 |
| ENSMUSG000000000215  | 10_Ins2         | 1.482040054 | -0.94353 | 0.6164   | 0.884039 | 3.248529 | 2.576251 | 0        | 0.992197 | 0        | 2.075264 |
| ENSMUSG000000005936  | 18_Kctd20       | 1799.086973 | 0.115475 | 0.615233 | 0.884039 | 1716.847 | 1611.015 | 1853.636 | 1672.844 | 2045.463 | 1894.716 |
| ENSMUSG0000000006301 | 17_Tmbim1       | 5275.484428 | -0.15793 | 0.616789 | 0.884039 | 5166.785 | 5357.743 | 6167.281 | 3435.978 | 6090.004 | 5435.117 |
| ENSMUSG000000015365  | 15_Mov101       | 0.345877355 | 2.019642 | 0.617088 | 0.884039 | 0        | 0        | 0        | 0        | 0        | 2.075264 |
| ENSMUSG000000017868  | 16_Sgk2         | 0.345877355 | 2.019642 | 0.617088 | 0.884039 | 0        | 0        | 0        | 0        | 0        | 2.075264 |
| ENSMUSG000000020383  | 1_Iil3          | 0.345877355 | 2.019642 | 0.617088 | 0.884039 | 0        | 0        | 0        | 0        | 0        | 2.075264 |
| ENSMUSG000000021803  | 9_Cdhr1         | 460.6403623 | 0.114955 | 0.614808 | 0.884039 | 430.4301 | 480.9001 | 415.371  | 484.192  | 468.3748 | 484.5742 |
| ENSMUSG000000022678  | 16_Nde1         | 728.7482916 | -0.14138 | 0.616162 | 0.884039 | 766.6528 | 677.5539 | 849.1517 | 540.7473 | 771.574  | 766.8101 |
| ENSMUSG000000024430  | 13_Cabyr        | 16.22033598 | 0.303023 | 0.616981 | 0.884039 | 17.05478 | 13.74    | 12.65673 | 9.921968 | 16.9701  | 26.97843 |
| ENSMUSG000000025340  | 14_Rabgef1      | 1733.015197 | 0.114085 | 0.614256 | 0.884039 | 1641.319 | 1574.948 | 1777.696 | 1990.347 | 1766.022 | 1647.79  |
| ENSMUSG000000028547  | 15_Tagln2       | 5272.285463 | -0.23396 | 0.614925 | 0.884039 | 5589.906 | 4778.945 | 6727.629 | 2158.028 | 7256.415 | 5122.76  |
| ENSMUSG000000027762  | 6_Sucnr1        | 0.345877355 | 2.019642 | 0.617088 | 0.884039 | 0        | 0        | 0        | 0        | 0        | 2.075264 |
| ENSMUSG000000028307  | 9_Aldob         | 0.345877355 | 2.019642 | 0.617088 | 0.884039 | 0        | 0        | 0        | 0        | 0        | 2.075264 |
| ENSMUSG000000030214  | 6_Plbdl         | 1060.676382 | 0.108397 | 0.613976 | 0.884039 | 1044.402 | 950.6365 | 1067.768 | 1133.089 | 1058.934 | 1109.229 |
| ENSMUSG000000030543  | 10_Mesp2        | 65.07990436 | -0.21692 | 0.616232 | 0.884039 | 63.34631 | 72.99377 | 73.63917 | 41.67227 | 47.51628 | 91.31162 |
| ENSMUSG000000033020  | 15_Ubash3b      | 77.01804693 | 0.172865 | 0.613813 | 0.884039 | 81.21322 | 56.67751 | 79.39224 | 78.38355 | 92.76989 | 73.67188 |
| ENSMUSG000000032965  | 10_Iltf5        | 223.3222229 | 0.161785 | 0.614715 | 0.884039 | 208.718  | 236.1563 | 182.9473 | 333.3781 | 175.3577 | 203.3759 |
| ENSMUSG000000033016  | 15_Nfatc1       | 232.6827965 | -0.1409  | 0.61621  | 0.884039 | 254.1974 | 215.5463 | 262.3396 | 204.3925 | 262.4709 | 197.1501 |
| ENSMUSG000000033533  | 13_Acsm1        | 2241.961957 | -0.13185 | 0.614864 | 0.884039 | 2331.631 | 2271.394 | 2430.093 | 1797.861 | 2006.997 | 2613.795 |
| ENSMUSG000000034621  | 14_Gpatc48      | 1804.55212  | -0.11119 | 0.616188 | 0.884039 | 1799.685 | 1902.132 | 1920.372 | 1552.788 | 1777.335 | 1875.001 |
| ENSMUSG000000035202  | 7_Lars2         | 13121.21917 | 0.17772  | 0.616257 | 0.884039 | 13679.55 | 12003.61 | 11258.74 | 8628.144 | 14891.83 | 18265.44 |
| ENSMUSG000000035849  | 14_Krt222       | 22.50937292 | -0.34135 | 0.615208 | 0.884039 | 29.23676 | 33.49126 | 12.65673 | 35.71909 | 13.57608 | 10.37632 |
| ENSMUSG000000036333  | 10_Kidins220    | 4132.707614 | 0.11568  | 0.613885 | 0.884039 | 4022.491 | 3880.692 | 3998.377 | 4909.39  | 3842.031 | 4143.265 |
| ENSMUSG000000037358  | 6_4930578C19Rik | 23.97239214 | 0.305457 | 0.616502 | 0.884039 | 16.24264 | 27.48001 | 20.71102 | 45.64105 | 19.23278 | 14.52685 |
| ENSMUSG000000037820  | 15_Tgm2         | 27316.17282 | -0.28348 | 0.615398 | 0.884039 | 27256.78 | 27792.59 | 34924.53 | 6974.151 | 38044.7  | 28904.28 |
| ENSMUSG000000037974  | 15_Muc5ac       | 1189.022114 | 0.272801 | 0.614485 | 0.884039 | 729.2947 | 1805.093 | 696.1203 | 613.1776 | 1504.682 | 1785.765 |
| ENSMUSG000000039231  | 18_Suv39h1      | 465.8785468 | 0.119416 | 0.614535 | 0.884039 | 457.2304 | 437.1039 | 445.2869 | 437.5588 | 540.7806 | 477.3108 |
| ENSMUSG000000040463  | 16_Mybbp1a      | 2462.13988  | -0.24953 | 0.615045 | 0.884039 | 2506.24  | 2450.873 | 3066.381 | 855.2737 | 3361.211 | 2532.86  |
| ENSMUSG000000040728  | 15_Espr1        | 7350.817202 | 0.11008  | 0.614194 | 0.884039 | 6713.897 | 6678.5   | 7819.56  | 7212.279 | 7942.008 | 7738.66  |
| ENSMUSG000000041708  | 12_Mpdpd1       | 10.75059644 | -0.32116 | 0.617127 | 0.884039 | 8.933454 | 12.0225  | 14.95796 | 7.937575 | 11.3134  | 9.338689 |
| ENSMUSG000000042211  | 6_Flox38        | 1927.636879 | 0.106578 | 0.615566 | 0.884039 | 1837.043 | 1746.698 | 1985.957 | 2018.128 | 2063.564 | 1914.431 |
| ENSMUSG000000044359  | 1_P2ry4         | 18.61868128 | -0.30343 | 0.61412  | 0.884039 | 26.80036 | 16.31625 | 18.40979 | 7.937575 | 21.49846 | 20.75264 |
| ENSMUSG000000044629  | 5_Cnrip1        | 83.78318101 | -0.1909  | 0.614607 | 0.884039 | 89.33454 | 93.60377 | 85.1453  | 110.1338 | 62.22371 | 62.25792 |
| ENSMUSG000000046204  | 13_Pnma2        | 5.357199953 | 0.554372 | 0.616761 | 0.884039 | 5.684925 | 6.011252 | 1.150612 | 6.945378 | 11.3134  | 1.037632 |
| ENSMUSG000000047230  | 6_Cldn2         | 287.0078625 | -0.16838 | 0.615876 | 0.884039 | 285.8705 | 384.7201 | 240.4779 | 322.464  | 210.4293 | 278.0854 |
| ENSMUSG000000048500  | 2_Defb15        | 0.345877355 | 2.019642 | 0.617088 | 0.884039 | 0        | 0        | 0        | 0        | 0        | 2.075264 |
| ENSMUSG000000049252  | 17_Lrp1b        | 12.49402248 | -0.3421  | 0.614882 | 0.884039 | 12.99411 | 16.31625 | 12.65673 | 18.85174 | 7.919381 | 6.225792 |
| ENSMUSG000000049401  | 10_Ogfr         | 2538.930251 | -0.25676 | 0.616609 | 0.884039 | 2515.173 | 2450.014 | 3327.57  | 826.4999 | 3377.05  | 2737.273 |
| ENSMUSG000000049625  | 5_Tiraf         | 162.5633958 | 0.229349 | 0.616898 | 0.884039 | 204.6573 | 115.0725 | 128.8686 | 109.1416 | 269.2589 | 148.3814 |
| ENSMUSG000000052759  | 7_Gpr25         | 0.345877355 | 2.019642 | 0.617088 | 0.884039 | 0        | 0        | 0        | 0        | 0        | 2.075264 |
| ENSMUSG000000053219  | 15_Rael1e       | 16.93578285 | -0.28909 | 0.614487 | 0.884039 | 25.98823 | 13.74    | 16.10857 | 19.84394 | 12.44474 | 13.48922 |
| ENSMUSG000000056018  | 14_Ccdc7b       | 0.345877355 | 2.019642 | 0.617088 | 0.884039 | 0        | 0        | 0        | 0        | 0        | 2.075264 |
| ENSMUSG000000056699  | 7_Gm5533        | 0.345877355 | 2.019642 | 0.617088 | 0.884039 | 0        | 0        | 0        | 0        | 0        | 2.075264 |
| ENSMUSG000000056718  | 2_Gm13199       | 10.57577069 | -0.31347 | 0.616893 | 0.884039 | 10.55772 | 12.0225  | 12.65673 | 9.921968 | 7.919381 | 10.37632 |
| ENSMUSG000000057193  | 7_Slc44a2       | 3652.935938 | -0.16109 | 0.614809 | 0.884039 | 3519.781 | 3756.173 | 4294.084 | 2336.623 | 4013.995 | 3996.959 |
| ENSMUSG000000059334  | 6_Zfp363        | 0.345877355 | 2.019642 | 0.617088 | 0.884039 | 0        | 0        | 0        | 0        | 0        | 2.075264 |
| ENSMUSG000000059361  | 6_Nrsn2         | 1.579920705 | 0.830395 | 0.615498 | 0.884039 | 1.624264 | 1.7175   | 0        | 3.968787 | 1.13134  | 1.037632 |
| ENSMUSG000000059816  | 5_Fam159a       | 0.345877355 | 2.019642 | 0.617088 | 0.884039 | 0        | 0        | 0        | 0        | 0        | 2.075264 |
| ENSMUSG000000060170  | 3_Olfir1371     | 0.345877355 | 2.019642 | 0.617088 | 0.884039 | 0        | 0        | 0        | 0        | 0        | 2.075264 |
| ENSMUSG000000060679  | 14_Mrps9        | 524.8362518 | 0.127419 | 0.614363 | 0.884039 | 458.8547 | 478.3239 | 568.024  | 611.1932 | 536.2552 | 495.9881 |
| ENSMUSG000000060878  | 2_Olfir1420     | 3.84398345  | -0.54925 | 0.61384  | 0.884039 | 5.684925 | 3.435001 | 4.602448 | 1.984394 | 1.131    |          |

|                     |                  |             |          |          |          |          |          |          |          |          |          |
|---------------------|------------------|-------------|----------|----------|----------|----------|----------|----------|----------|----------|----------|
| ENSMUSG00000031845  | 15_Bco1          | 143.1552216 | 0.135664 | 0.617781 | 0.884339 | 128.3169 | 133.965  | 147.2783 | 142.8763 | 142.5489 | 163.9459 |
| ENSMUSG00000034453  | 7_Polr3b         | 1051.889059 | 0.107086 | 0.617545 | 0.884339 | 1057.396 | 944.6252 | 1036.702 | 1132.097 | 1075.904 | 1064.61  |
| ENSMUSG00000034681  | 16_Rnps1         | 1504.365353 | -0.11851 | 0.617431 | 0.884339 | 1433.413 | 1496.802 | 1768.491 | 1330.536 | 1596.169 | 1427.782 |
| ENSMUSG00000041020  | 14_Map7d2        | 12.79775855 | 0.457055 | 0.617643 | 0.884339 | 16.24264 | 10.305   | 5.753061 | 33.73469 | 4.52536  | 6.225792 |
| ENSMUSG00000072591  | 10_5930412G12Rik | 42.8660585  | -0.20726 | 0.617651 | 0.884339 | 37.35808 | 42.07876 | 58.68122 | 31.7503  | 39.5969  | 47.73108 |
| ENSMUSG00000074521  | 9_Gm14327        | 31.62105065 | 0.403283 | 0.617766 | 0.884339 | 22.7397  | 25.76251 | 33.36775 | 81.36014 | 19.23278 | 7.263424 |
| ENSMUSG00000096458  | 7_Moap1          | 125.2550891 | 0.195919 | 0.617733 | 0.884339 | 157.5536 | 97.03878 | 95.50081 | 178.5954 | 109.74   | 113.1019 |
| ENSMUSG00000041852  | 14_Tcf20         | 7148.489289 | 0.105106 | 0.618013 | 0.884585 | 6766.685 | 6530.795 | 7367.369 | 7166.638 | 7870.733 | 7188.715 |
| ENSMUSG00000056753  | 3_C330011M18Rik  | 23.53049975 | 0.252309 | 0.618041 | 0.884585 | 18.67904 | 24.04501 | 21.86163 | 32.74249 | 15.83876 | 28.01607 |
| ENSMUSG00000056306  | 5_Sertm1         | 0.761056832 | -1.61706 | 0.618095 | 0.884597 | 0        | 3.435001 | 0        | 0        | 1.13134  | 0        |
| ENSMUSG00000020392  | 8_Cdkn2aipn1     | 977.0265459 | 0.106822 | 0.618426 | 0.884944 | 960.7524 | 882.7952 | 979.1709 | 998.15   | 1055.54  | 985.7505 |
| ENSMUSG000000097271 | 1_Gm9903         | 9.267512122 | -0.35729 | 0.618418 | 0.884944 | 11.36985 | 9.446252 | 10.35551 | 3.968787 | 9.050721 | 11.41395 |
| ENSMUSG00000056050  | 12_Mia3          | 1924.4199   | 0.131526 | 0.618566 | 0.885082 | 1750.957 | 1880.663 | 1878.95  | 2482.476 | 1786.386 | 1767.087 |
| ENSMUSG000000019189 | 13_Rnf145        | 4070.920561 | 0.106284 | 0.618819 | 0.88538  | 3808.088 | 3693.485 | 4261.867 | 4104.718 | 4434.853 | 4122.512 |
| ENSMUSG00000032604  | 14_Qars          | 4652.576304 | -0.17642 | 0.618923 | 0.885414 | 4832.186 | 4703.375 | 5274.406 | 2618.407 | 5283.358 | 5203.725 |
| ENSMUSG00000032946  | 16_Rasgrp2       | 48.90428979 | -0.1957  | 0.618932 | 0.885414 | 47.10367 | 67.84127 | 41.42204 | 40.68007 | 48.64762 | 47.73108 |
| ENSMUSG000000007059 | 14_Tubgcp3       | 1008.07902  | -0.10456 | 0.625498 | 0.885455 | 1033.844 | 1063.133 | 1036.702 | 902.8991 | 988.7913 | 1023.105 |
| ENSMUSG000000001305 | 5_Rrp15          | 357.4909997 | 0.142867 | 0.623448 | 0.885455 | 323.2286 | 310.8676 | 385.4551 | 329.4093 | 464.9808 | 331.0046 |
| ENSMUSG000000001943 | 7_Vsig2          | 5.01525795  | -0.454   | 0.623884 | 0.885455 | 7.30919  | 4.293751 | 5.753061 | 1.984394 | 4.52536  | 6.225792 |
| ENSMUSG000000004366 | 3_Sst            | 1.873731491 | 0.888041 | 0.624662 | 0.885455 | 0        | 1.7175   | 2.301224 | 4.960984 | 2.26268  | 0        |
| ENSMUSG000000004988 | 9_Fxyd4          | 208.8339577 | -0.13814 | 0.620614 | 0.885455 | 226.5849 | 222.4163 | 207.1102 | 164.7047 | 231.9427 | 200.263  |
| ENSMUSG000000005952 | 15_Trpv1         | 0.38353737  | -1.95077 | 0.62719  | 0.885455 | 0        | 0        | 2.301224 | 0        | 0        | 0        |
| ENSMUSG000000005968 | 14_Tuft1         | 4361.671318 | -0.16131 | 0.621801 | 0.885455 | 4539.007 | 4176.102 | 5100.663 | 2732.51  | 4682.617 | 4939.129 |
| ENSMUSG000000008307 | 11_1700109H08Rik | 42.34941414 | 0.197883 | 0.621326 | 0.885455 | 39.79448 | 39.50251 | 39.12081 | 58.53961 | 41.85958 | 35.27949 |
| ENSMUSG000000009216 | 7_Fam163b        | 0.330732272 | 1.963673 | 0.627318 | 0.885455 | 0        | 0        | 0        | 1.984394 | 0        | 0        |
| ENSMUSG000000013973 | 12_Dedd          | 718.4766632 | -0.22692 | 0.619026 | 0.885455 | 705.7429 | 735.0902 | 883.6701 | 292.6981 | 929.9616 | 763.8972 |
| ENSMUSG000000014313 | 14_Cox6c         | 2163.594071 | 0.130859 | 0.620976 | 0.885455 | 2040.888 | 2136.571 | 2019.324 | 2793.034 | 1928.935 | 2062.813 |
| ENSMUSG000000014782 | 15_Plekhp4       | 4.85614765  | -0.52591 | 0.622679 | 0.885455 | 7.30919  | 5.152501 | 4.602448 | 1.984394 | 9.050721 | 1.037632 |
| ENSMUSG000000015023 | 7_Ddx19a         | 1221.554158 | 0.107263 | 0.622126 | 0.885455 | 1100.439 | 1142.138 | 1286.384 | 1286.879 | 1269.364 | 1244.121 |
| ENSMUSG000000015354 | 8_Pcolec2        | 356.7381044 | -0.16488 | 0.620509 | 0.885455 | 392.2598 | 405.3301 | 333.6775 | 328.4171 | 238.7124 | 442.0313 |
| ENSMUSG000000019845 | 7_Tube1          | 51.4827007  | -0.17819 | 0.624431 | 0.885455 | 59.28565 | 47.23126 | 57.53061 | 43.65666 | 44.12226 | 57.06976 |
| ENSMUSG000000020690 | 12_Efcab3        | 1.019548813 | 1.088933 | 0.619523 | 0.885455 | 0        | 0.85875  | 1.150612 | 2.97659  | 1.13134  | 0        |
| ENSMUSG000000020894 | 16_Vamp2         | 1532.364312 | -0.11882 | 0.619926 | 0.885455 | 1662.435 | 1649.659 | 1473.934 | 1336.489 | 1381.366 | 1690.303 |
| ENSMUSG000000021066 | 8_Atl1           | 84.26602024 | 0.21523  | 0.621084 | 0.885455 | 63.34631 | 85.87502 | 85.1453  | 129.9778 | 53.17298 | 88.19873 |
| ENSMUSG000000022972 | 9_1110004E09Rik  | 334.3522084 | -0.14899 | 0.626398 | 0.885455 | 343.5319 | 334.9126 | 376.2502 | 234.1584 | 391.4437 | 325.8165 |
| ENSMUSG000000023914 | 16_Mep1a         | 0.38353737  | -1.95077 | 0.62719  | 0.885455 | 0        | 0        | 2.301224 | 0        | 0        | 0        |
| ENSMUSG000000023949 | 6_Tcte1          | 0.330732272 | 1.963673 | 0.627318 | 0.885455 | 0        | 0        | 0        | 1.984394 | 0        | 0        |
| ENSMUSG000000024669 | 7_Cd5            | 33.6247064  | -0.32952 | 0.620128 | 0.885455 | 37.35808 | 30.05626 | 44.87387 | 6.945378 | 44.12226 | 38.39239 |
| ENSMUSG000000024740 | 9_Ddb1           | 11394.71151 | -0.1765  | 0.626416 | 0.885455 | 11641.1  | 11764.02 | 12867.3  | 6255.801 | 13390.54 | 12449.51 |
| ENSMUSG000000024983 | 9_Vlt1a          | 978.8691806 | 0.108998 | 0.621994 | 0.885455 | 905.5274 | 889.6652 | 1030.948 | 980.2905 | 1012.549 | 1054.234 |
| ENSMUSG000000025025 | 13_Mxi1          | 1204.497691 | 0.13544  | 0.626644 | 0.885455 | 1059.02  | 1102.635 | 1282.933 | 1537.905 | 1028.388 | 1216.105 |
| ENSMUSG000000025421 | 14_Hdh2          | 655.4194775 | -0.11281 | 0.620441 | 0.885455 | 707.3671 | 702.4577 | 632.8367 | 592.3415 | 682.1981 | 615.3158 |
| ENSMUSG000000025433 | 7_Crisp3         | 0.38353737  | -1.95077 | 0.62719  | 0.885455 | 0        | 0        | 2.301224 | 0        | 0        | 0        |
| ENSMUSG000000025475 | 17_Adgr1         | 1.87180562  | -0.75144 | 0.622669 | 0.885455 | 2.436397 | 3.435001 | 1.150612 | 1.984394 | 2.26268  | 0        |
| ENSMUSG000000025964 | 15_Adam23        | 45.85602991 | 0.276591 | 0.623879 | 0.885455 | 37.35808 | 66.12377 | 20.71102 | 73.42256 | 33.9402  | 43.58055 |
| ENSMUSG000000026109 | 14_Tmeff2        | 23.85264783 | 0.299415 | 0.62325  | 0.885455 | 20.3033  | 26.62126 | 17.25918 | 45.64105 | 13.57608 | 19.71501 |
| ENSMUSG000000026224 | 11_4933407L21Rik | 0.338304813 | 1.991858 | 0.622158 | 0.885455 | 0        | 0        | 0        | 0.992197 | 0        | 1.037632 |
| ENSMUSG000000026251 | 13_Chnd          | 0.330732272 | 1.963673 | 0.627318 | 0.885455 | 0        | 0        | 0        | 1.984394 | 0        | 0        |
| ENSMUSG000000026749 | 11_Nek6          | 231.1624568 | -0.13907 | 0.623267 | 0.885455 | 263.1308 | 272.2238 | 191.0016 | 217.2911 | 216.086  | 227.2414 |
| ENSMUSG000000027315 | 13_Spint1        | 5410.842053 | -0.19991 | 0.622935 | 0.885455 | 5252.059 | 5525.199 | 6578.049 | 2604.517 | 6573.086 | 5932.143 |
| ENSMUSG000000027505 | 2_Fam209         | 3.659825478 | 0.584041 | 0.621062 | 0.885455 | 2.436397 | 5.152501 | 1.150612 | 7.937575 | 1.13134  | 4.150528 |
| ENSMUSG000000028132 | 15_Tmem56        | 238.8177443 | 0.300131 | 0.625871 | 0.885455 | 224.1485 | 293.6926 | 124.2661 | 510.9814 | 108.6086 | 171.2093 |
| ENSMUSG000000028328 | 13_Tmod1         | 136.46214   | -0.26428 | 0.621989 | 0.885455 | 159.1779 | 193.2188 | 94.35019 | 199.4316 | 54.30432 | 118.2901 |
| ENSMUSG000000028443 | 6_Nudt2          | 597.7104159 | 0.11539  | 0.62005  | 0.885455 | 566.8683 | 525.5551 | 629.3848 | 585.3961 | 622.2371 | 656.8211 |
| ENSMUSG000000028488 | 15_Sh3g2         | 1861.405356 | 0.121151 | 0.619398 | 0.885455 | 1770.448 | 1797.364 | 1782.298 | 2286.021 | 1693.616 | 1838.684 |
| ENSMUSG000000028683 | 14_Eif2b3        | 417.1502055 | 0.117997 | 0.625573 | 0.885455 | 389.8234 | 376.9913 | 433.7808 | 458.3949 | 454.7987 | 389.112  |
| ENSMUSG000000028837 | 8_Psmb2          | 2485.187514 | -0.19006 | 0.624304 | 0.885455 | 2577.708 | 2412.229 | 2955.923 | 1290.848 | 3114.579 | 2559.838 |
| ENSMUSG000000030062 | 7_Rpn1           | 5226.571878 | -0.12947 | 0.626295 | 0.885455 | 5496.511 | 4918.063 | 5968.225 | 4047.171 | 5851.291 | 5078.171 |
| ENSMUSG000000030226 | 12_Lmo3          | 0.66194107  | 1.642846 | 0.624914 | 0.885455 | 0        | 0.85875  | 0        | 0        | 1.12896  | 0        |
| ENSMUSG000000030500 | 5_Slc17a6        | 2.354578171 | 0.868895 | 0.626999 | 0.885455 | 4.006061 | 0.85875  | 0        | 6.945378 | 2.26268  | 0        |
| ENSMUSG000000030699 | 16_Tbx6          | 17.9182308  | -0.36487 | 0.625629 | 0.885455 | 20.3033  | 17.175   | 23.01224 | 2.97659  | 18.10144 | 25.9408  |
| ENSMUSG000000030775 | 9_Trat1          | 0.330732272 | 1.963673 | 0.627318 | 0.885455 | 0        | 0        | 0        | 1.984394 | 0        | 0        |
| ENSMUSG000000030905 | 5_Crym           | 25.39514385 | 0.238087 | 0.62665  | 0.885455 | 26.80036 | 26.62126 | 16.10857 | 21.82833 | 35.07154 | 25.9408  |
| ENSMUSG000000030981 | 9_Mmp21          | 0.338304813 | 1.991858 | 0.622158 | 0.885455 | 0        | 0        | 0        | 0.992197 | 0        | 1.037632 |
| ENSMUSG000000031538 | 5_Plat           | 3690.03627  | 0.166592 | 0.619584 | 0.885455 | 3140.515 | 3135.297 | 4156.011 | 2784.104 | 5156.648 | 3767.642 |
| ENSMUSG000000031844 | 7_Hsd17b2        | 2709.373166 | 0.119216 | 0.624896 | 0.885455 | 2615.878 | 2383.032 | 2793.686 | 2387.226 | 3007.102 | 3069.316 |
| ENSMUSG000000031959 | 14_Wdr59         | 599.1212223 | -0.12857 | 0.625133 | 0.885455 | 636.7116 | 571.0689 | 669.6562 | 468.3169 | 609.7923 | 639.1814 |
| ENSMUSG000000031994 | 13_Adamts8       | 14.71712182 | 0.335944 | 0.626385 | 0.885455 | 17.86691 | 5.152501 | 16.10857 | 21.82833 | 16.9701  | 10.37632 |
| ENSMUSG000000032076 | 18_Cadtn1        | 3347.450902 | 0.14192  | 0.626486 | 0.885455 | 3232.286 | 3206.573 | 3110.105 | 4600.817 | 3002.577 | 2932.348 |
| ENSMUSG000000032078 | 16_Zpr1          | 714.7195934 | -0.16303 | 0.622451 | 0.885455 | 778.0226 | 668.9664 | 818.0852 | 450.4574 | 823.6156 | 749.1704 |
| ENSMUSG000000032322 | 14_Pstpip1       | 173.2212392 | -0.30959 | 0.622864 | 0.885455 | 232.2698 | 152.8575 | 189.851  | 38.69568 | 278.3097 | 147.3438 |
| ENSMUSG000000033047 | 4_Eif3f          | 3301.240297 | -0.13702 | 0.620617 | 0.885455 | 3536.836 | 3149.037 | 3687.712 | 2412.03  | 3634.996 | 3386.831 |
| ENSMUSG000000033634 | 7_Cml2           | 0.330732272 | 1.963673 | 0.627318 | 0.885455 | 0        | 0        | 0        | 1.984394 | 0        | 0        |
| ENSMUSG000000033805 | 12_Ephx4         | 13.3087362  | 0.340655 | 0.622427 | 0.885455 | 12.99411 | 5.152501 | 17.25918 | 15.87515 | 19.23278 | 9.338689 |
| ENSMUSG000000034116 | 17_Vav1          | 121.8975003 | -0.30486 | 0.623401 | 0.885455 | 194.9117 | 92.74502 | 116.2118 | 38.69568 | 204.7726 | 84.0482  |
| ENSMUSG000000037101 | 16_Ttct29        | 0.330732272 | 1.963673 | 0.627318 | 0.885455 | 0        | 0        | 0        | 1.984394 | 0        | 0        |
| ENSMUSG000000037280 | 12_Galnt6        | 28.05369072 | 0.299746 | 0.625453 | 0.885455 | 40.60661 | 20.61001 | 13.80    |          |          |          |

|                    |                  |             |           |          |          |          |          |          |          |          |          |
|--------------------|------------------|-------------|-----------|----------|----------|----------|----------|----------|----------|----------|----------|
| ENSMUSG00000054932 | 6_Afp            | 0.330732272 | 1.963673  | 0.627318 | 0.885455 | 0        | 0        | 0        | 1.984394 | 0        | 0        |
| ENSMUSG00000055102 | 15_Zfp819        | 0.330732272 | 1.963673  | 0.627318 | 0.885455 | 0        | 0        | 0        | 1.984394 | 0        | 0        |
| ENSMUSG00000055125 | 7_M5C1000118Rik  | 1.497776535 | -0.98396  | 0.622075 | 0.885455 | 0.812132 | 5.152501 | 0        | 1.984394 | 0        | 1.037632 |
| ENSMUSG00000055360 | 13_Prl2c5        | 0.338304813 | 1.991858  | 0.622158 | 0.885455 | 0        | 0        | 0        | 0.992197 | 0        | 1.037632 |
| ENSMUSG00000055547 | 4_Apobec4        | 0.330732272 | 1.963673  | 0.627318 | 0.885455 | 0        | 0        | 0        | 1.984394 | 0        | 0        |
| ENSMUSG00000056148 | 8_Rdh9           | 0.330732272 | 1.963673  | 0.627318 | 0.885455 | 0        | 0        | 0        | 1.984394 | 0        | 0        |
| ENSMUSG00000057160 | 2_Gm16372        | 0.330732272 | 1.963673  | 0.627318 | 0.885455 | 0        | 0        | 0        | 1.984394 | 0        | 0        |
| ENSMUSG00000057534 | 13_Gm15698       | 1.019075891 | 1.08896   | 0.619548 | 0.885455 | 0        | 0.85875  | 1.150612 | 0.992197 | 0        | 3.112896 |
| ENSMUSG00000058952 | 12_Cfl           | 0.330732272 | 1.963673  | 0.627318 | 0.885455 | 0        | 0        | 0        | 1.984394 | 0        | 0        |
| ENSMUSG00000059208 | 14_Hnrmnp        | 4045.469669 | 0.130218  | 0.620927 | 0.885455 | 3678.959 | 3615.338 | 4295.235 | 5025.477 | 4135.048 | 3522.761 |
| ENSMUSG00000059246 | 4_Foxb1          | 0.38353737  | -1.95077  | 0.62719  | 0.885455 | 0        | 0        | 2.301224 | 0        | 0        | 0        |
| ENSMUSG00000059645 | 6_Gm7361         | 0.38353737  | -1.95077  | 0.62719  | 0.885455 | 0        | 0        | 2.301224 | 0        | 0        | 0        |
| ENSMUSG00000059939 | 13_9430015G10Rik | 511.402542  | -0.18974  | 0.620404 | 0.885455 | 536.8194 | 520.4026 | 577.6073 | 265.9087 | 580.3775 | 587.2997 |
| ENSMUSG00000060204 | 5_Gm5868         | 0.330732272 | 1.963673  | 0.627318 | 0.885455 | 0        | 0        | 0        | 1.984394 | 0        | 0        |
| ENSMUSG00000060556 | 3_Olfrl1418      | 0.38353737  | -1.95077  | 0.62719  | 0.885455 | 0        | 0        | 2.301224 | 0        | 0        | 0        |
| ENSMUSG00000062202 | 13_Btbd9         | 1059.978625 | -0.19122  | 0.625518 | 0.885455 | 1052.523 | 1124.963 | 1212.745 | 535.7863 | 1297.647 | 1136.207 |
| ENSMUSG00000062561 | 3_Gm10118        | 0.330732272 | 1.963673  | 0.627318 | 0.885455 | 0        | 0        | 0        | 1.984394 | 0        | 0        |
| ENSMUSG00000063260 | 2_Syt10          | 0.38353737  | -1.95077  | 0.62719  | 0.885455 | 0        | 0        | 2.301224 | 0        | 0        | 0        |
| ENSMUSG00000066704 | 6_Cyp2b19        | 520.9047055 | 0.168524  | 0.622586 | 0.885455 | 526.2617 | 519.5439 | 425.7265 | 714.3817 | 368.8169 | 570.6976 |
| ENSMUSG00000066795 | 13_4930444P10Rik | 0.745438826 | -1.61688  | 0.620291 | 0.885455 | 0        | 3.435001 | 0        | 0        | 0        | 1.037632 |
| ENSMUSG00000067919 | 8_Rex2           | 0.330732272 | 1.963673  | 0.627318 | 0.885455 | 0        | 0        | 0        | 1.984394 | 0        | 0        |
| ENSMUSG00000068015 | 16_Lrch1         | 701.8232731 | 0.122271  | 0.62114  | 0.885455 | 694.373  | 581.3739 | 740.9942 | 803.6794 | 690.1175 | 700.4016 |
| ENSMUSG00000069272 | 5_Hist1h2ae      | 0.38353737  | -1.95077  | 0.62719  | 0.885455 | 0        | 0        | 2.301224 | 0        | 0        | 0        |
| ENSMUSG00000069670 | 7_Nkain2         | 5.92020988  | 0.580461  | 0.623318 | 0.885455 | 8.933454 | 5.152501 | 0        | 13.89076 | 3.39402  | 4.150528 |
| ENSMUSG00000069873 | 3_4930438A08Rik  | 2.315118343 | 0.0647775 | 0.620349 | 0.885455 | 1.624264 | 2.576251 | 1.150612 | 2.97659  | 4.52536  | 1.037632 |
| ENSMUSG00000070388 | 3_Fbxo39         | 4.240311218 | 0.489533  | 0.625139 | 0.885455 | 3.248529 | 1.7175   | 5.753061 | 5.953181 | 5.656701 | 3.112896 |
| ENSMUSG00000070837 | 4_Aurkc          | 1.957707732 | 0.768841  | 0.623804 | 0.885455 | 0.812132 | 3.435001 | 0        | 0.992197 | 3.39402  | 3.112896 |
| ENSMUSG00000072249 | 3_Fthl17f        | 0.330732272 | 1.963673  | 0.627318 | 0.885455 | 0        | 0        | 0        | 1.984394 | 0        | 0        |
| ENSMUSG00000072618 | 2_Gm10384        | 4.60190694  | -0.46751  | 0.625719 | 0.885455 | 7.30919  | 5.152501 | 3.451836 | 1.984394 | 4.52536  | 5.18816  |
| ENSMUSG00000072720 | 9_Myo18b         | 35.42691558 | -0.27827  | 0.619205 | 0.885455 | 31.67315 | 44.65501 | 40.27142 | 21.82833 | 18.10144 | 56.03213 |
| ENSMUSG00000073007 | 10_Fam46d        | 0.330732272 | 1.963673  | 0.627318 | 0.885455 | 0        | 0        | 0        | 1.984394 | 0        | 0        |
| ENSMUSG00000073557 | 11_Ppp1r12b      | 1456.119665 | -0.13581  | 0.620977 | 0.885455 | 1353.824 | 1840.302 | 1379.584 | 1348.395 | 1221.847 | 1592.765 |
| ENSMUSG00000074171 | 1_Gm6658         | 0.38353737  | -1.95077  | 0.62719  | 0.885455 | 0        | 0        | 2.301224 | 0        | 0        | 0        |
| ENSMUSG00000074240 | 3_Cib3           | 0.38353737  | -1.95077  | 0.62719  | 0.885455 | 0        | 0        | 2.301224 | 0        | 0        | 0        |
| ENSMUSG00000074780 | 1_Anapc15-ps     | 0.745438826 | -1.61688  | 0.620291 | 0.885455 | 0        | 3.435001 | 0        | 0        | 0        | 1.037632 |
| ENSMUSG00000079009 | 8_Gm14139        | 0.330732272 | 1.963673  | 0.627318 | 0.885455 | 0        | 0        | 0        | 1.984394 | 0        | 0        |
| ENSMUSG00000079011 | 9_Gm11033        | 23.87775377 | 0.265245  | 0.623967 | 0.885455 | 23.55183 | 20.61001 | 20.71102 | 15.87515 | 40.72824 | 21.79027 |
| ENSMUSG00000079031 | 1_BB287469       | 0.330732272 | 1.963673  | 0.627318 | 0.885455 | 0        | 0        | 0        | 1.984394 | 0        | 0        |
| ENSMUSG00000079053 | 3_Gm14010        | 0.338304813 | 1.991858  | 0.622158 | 0.885455 | 0        | 0        | 0        | 0.992197 | 0        | 1.037632 |
| ENSMUSG00000079536 | 1_Gm6880         | 19.00378285 | -0.3922   | 0.625755 | 0.885455 | 17.05478 | 22.32751 | 25.31347 | 1.984394 | 20.36412 | 26.97843 |
| ENSMUSG00000080316 | 10_Spacae6       | 586.4889195 | 0.13403   | 0.625729 | 0.885455 | 541.6922 | 614.8652 | 521.2273 | 751.093  | 557.7507 | 532.3052 |
| ENSMUSG00000084776 | 1_Gm14951        | 0.330732272 | 1.963673  | 0.627318 | 0.885455 | 0        | 0        | 0        | 1.984394 | 0        | 0        |
| ENSMUSG00000084898 | 1_Gm12371        | 0.330732272 | 1.963673  | 0.627318 | 0.885455 | 0        | 0        | 0        | 1.984394 | 0        | 0        |
| ENSMUSG00000084996 | 1_Gm11419        | 0.654171396 | 1.642825  | 0.626163 | 0.885455 | 0.812132 | 0        | 0        | 0        | 0        | 3.112896 |
| ENSMUSG00000085375 | 1_Gm12506        | 0.330732272 | 1.963673  | 0.627318 | 0.885455 | 0        | 0        | 0        | 1.984394 | 0        | 0        |
| ENSMUSG00000085419 | 1_4732490B19Rik  | 1.466697839 | -0.94759  | 0.620788 | 0.885455 | 4.060661 | 1.7175   | 0        | 1.984394 | 0        | 1.037632 |
| ENSMUSG00000085708 | 1_Gm16063        | 0.66194107  | 1.642846  | 0.624914 | 0.885455 | 0        | 0.85875  | 0        | 0        | 0        | 3.112896 |
| ENSMUSG00000085709 | 1_Gm14211        | 0.330732272 | 1.963673  | 0.627318 | 0.885455 | 0        | 0        | 0        | 1.984394 | 0        | 0        |
| ENSMUSG00000085920 | 1_Gm12951        | 0.38353737  | -1.95077  | 0.62719  | 0.885455 | 0        | 0        | 2.301224 | 0        | 0        | 0        |
| ENSMUSG00000085999 | 1_Gm13411        | 0.38353737  | -1.95077  | 0.62719  | 0.885455 | 0        | 0        | 2.301224 | 0        | 0        | 0        |
| ENSMUSG00000086290 | 8_Snhg12         | 304.2849626 | 0.119319  | 0.623581 | 0.885455 | 315.9194 | 278.2351 | 280.7494 | 324.4484 | 333.7453 | 292.6122 |
| ENSMUSG00000086316 | 7_2210013O21Rik  | 312.8179098 | 0.163424  | 0.623403 | 0.885455 | 296.4282 | 318.5963 | 270.3938 | 450.4574 | 255.6829 | 285.3488 |
| ENSMUSG00000086470 | 1_Gm12580        | 5.788846821 | 0.495223  | 0.625661 | 0.885455 | 3.248529 | 7.728752 | 3.451836 | 13.89076 | 2.26268  | 4.150528 |
| ENSMUSG00000086588 | 1_Gm11729        | 1.030620977 | -1.04995  | 0.619068 | 0.885455 | 2.436397 | 1.7175   | 0        | 0.992197 | 0        | 1.037632 |
| ENSMUSG00000087277 | 1_2010013B24Rik  | 0.338304813 | 1.991858  | 0.622158 | 0.885455 | 0        | 0        | 0        | 0.992197 | 0        | 1.037632 |
| ENSMUSG00000087357 | 1_Gm12498        | 3.976551021 | 0.621201  | 0.624526 | 0.885455 | 0        | 6.011252 | 3.451836 | 6.945378 | 2.26268  | 5.18816  |
| ENSMUSG00000087586 | 1_Gm6938         | 7.957402027 | 0.448696  | 0.625969 | 0.885455 | 6.497057 | 6.870002 | 6.903673 | 13.89076 | 1.13134  | 12.45158 |
| ENSMUSG00000089678 | 8_Agxt2          | 0.737866284 | -1.61679  | 0.621371 | 0.885455 | 0        | 3.435001 | 0        | 0.992197 | 0        | 0        |
| ENSMUSG00000090254 | 7_Gm1965         | 0.330732272 | 1.963673  | 0.627318 | 0.885455 | 0        | 0        | 0        | 1.984394 | 0        | 0        |
| ENSMUSG00000090451 | 1_Gm6133         | 1.959773151 | 0.685327  | 0.619994 | 0.885455 | 1.624264 | 1.7175   | 1.150612 | 1.984394 | 1.13134  | 4.150528 |
| ENSMUSG00000090509 | 2_Sfta2          | 1.374026818 | 0.971044  | 0.621214 | 0.885455 | 1.624264 | 0        | 1.150612 | 0        | 3.39402  | 2.075264 |
| ENSMUSG00000090747 | 2_Esp8           | 0.330732272 | 1.963673  | 0.627318 | 0.885455 | 0        | 0        | 0        | 1.984394 | 0        | 0        |
| ENSMUSG00000091511 | 2_Vmn2r87        | 0.330732272 | 1.963673  | 0.627318 | 0.885455 | 0        | 0        | 0        | 1.984394 | 0        | 0        |
| ENSMUSG00000091556 | 8_Gm14569        | 0.338304813 | 1.991858  | 0.622158 | 0.885455 | 0        | 0        | 0        | 0.992197 | 0        | 1.037632 |
| ENSMUSG00000091594 | 2_Gm17067        | 0.338304813 | 1.991858  | 0.622158 | 0.885455 | 0        | 0        | 0        | 0.992197 | 0        | 1.037632 |
| ENSMUSG00000092541 | 7_Gm20537        | 2.2857289   | -1.29525  | 0.619112 | 0.885455 | 9.745586 | 0        | 0        | 3.968787 | 0        | 0        |
| ENSMUSG00000095104 | 1_Esp15          | 0.330732272 | 1.963673  | 0.627318 | 0.885455 | 0        | 0        | 0        | 1.984394 | 0        | 0        |
| ENSMUSG00000095123 | 1_Gm21781        | 360.8150681 | 0.161786  | 0.623316 | 0.885455 | 331.3499 | 371.8388 | 318.7196 | 519.9111 | 306.5932 | 316.4778 |
| ENSMUSG00000095822 | 2_Gm9117         | 1.374026818 | 0.971044  | 0.621214 | 0.885455 | 1.624264 | 0        | 1.150612 | 0        | 3.39402  | 2.075264 |
| ENSMUSG00000095872 | 7_Gm15128        | 0.330732272 | 1.963673  | 0.627318 | 0.885455 | 0        | 0        | 0        | 1.984394 | 0        | 0        |
| ENSMUSG00000096014 | 1_Sox1           | 4.395439082 | -0.66539  | 0.624603 | 0.885455 | 3.248529 | 12.88125 | 0        | 4.960984 | 1.13134  | 4.150528 |
| ENSMUSG00000096519 | 1_Gm10721        | 0.330732272 | 1.963673  | 0.627318 | 0.885455 | 0        | 0        | 0        | 1.984394 | 0        | 0        |
| ENSMUSG00000096537 | 5_1190003K10Rik  | 0.338304813 | 1.991858  | 0.622158 | 0.885455 | 0        | 0        | 0        | 0.992197 | 0        | 1.037632 |
| ENSMUSG00000096936 | 1_Gm3510         | 0.330732272 | 1.963673  | 0.627318 | 0.885455 | 0        | 0        | 0        | 1.984394 | 0        | 0        |
| ENSMUSG00000097332 | 1_261002FO3Rik   | 0.38353737  | -1.95077  | 0.62719  | 0.885455 | 0        | 0        | 2.301224 | 0        | 0        | 0        |
| ENSMUSG00000097411 | 1_B430218F22Rik  | 0.330732272 | 1.963673  | 0.627318 | 0.885455 | 0        | 0        | 0        | 1.984394 | 0        | 0        |
| ENSMUSG00000097775 | 1_4931440J10Rik  | 0.330732272 | 1.963673  | 0.627318 | 0.885455 | 0        | 0        | 0        | 1.984394 | 0        | 0        |
| ENSMUSG00000099512 | 1_Gm28703        | 0.330732272 | 1.963673  | 0.627318 | 0.885455 | 0        | 0        | 0        | 1.984394 | 0        | 0        |
| ENSMUSG00000100301 | 6_6030407O03Rik  | 3.986661905 | 0.583584  | 0.623391 | 0.885455 | 0.812132 | 4.293751 | 4.602448 | 8.929771 | 1.13134  | 4.150528 |
| ENSMUSG00000100306 | 1_Gm29362        | 0.330732272 | 1.963673  | 0.627318 | 0.885455 | 0        | 0        | 0        | 1.984394 | 0        | 0        |
| ENSMUSG00000100334 | 1_C230024C17Rik  | 0.338304813 | 1.991858  | 0.622158 | 0.885455 | 0        | 0        | 0        | 0.992197 | 0        | 1.037632 |
| ENSMUSG00000100410 | 1_2310020H05Rik  | 0.330732272 | 1.963673  | 0.627318 | 0.885455 | 0        | 0        | 0        | 1.984394 | 0        | 0        |
| ENSMUSG00000100512 | 1_Ovol3          | 0.38353737  | -1.95077  | 0.62719  | 0.885455 | 0        | 0        | 2.301224 | 0        | 0        | 0        |
| ENSMUSG00000100612 | 1_Gm29177        | 0.38353737  | -1.95077  | 0.62719  | 0.885455 | 0        | 0        | 2.301224 | 0        | 0        | 0        |
| ENSMUSG00000100816 | 1_Gm28321        | 0.38353737  | -1.95077  | 0.62719  | 0.88545  |          |          |          |          |          |          |

|                      |                  |              |           |          |          |          |          |          |          |          |          |
|----------------------|------------------|--------------|-----------|----------|----------|----------|----------|----------|----------|----------|----------|
| ENSMUSG00000079415   | 2_Cntf           | 182.2521201  | -0.17666  | 0.627754 | 0.885745 | 170.5478 | 250.7551 | 158.7845 | 167.6813 | 127.8414 | 217.9027 |
| ENSMUSG00000003228   | 8_Grk5           | 187.7525643  | 0.133974  | 0.628132 | 0.885824 | 170.5478 | 208.6763 | 157.6339 | 193.4784 | 185.5398 | 210.6393 |
| ENSMUSG000000079710  | 14_Gm3448        | 14.20580527  | 0.391202  | 0.628157 | 0.885824 | 13.80625 | 6.011252 | 17.25918 | 31.7503  | 10.1206  | 6.225792 |
| ENSMUSG000000063681  | 14_Crb1          | 95.31681375  | 0.334562  | 0.628207 | 0.885831 | 72.27976 | 145.9875 | 34.51836 | 205.3847 | 57.69835 | 56.03213 |
| ENSMUSG000000038332  | 12_Sesn1         | 1685.911194  | 0.132516  | 0.62841  | 0.885992 | 1622.64  | 1601.569 | 1601.652 | 2167.95  | 1396.074 | 1725.582 |
| ENSMUSG000000106507  | 1_Gm34056        | 1.426485694  | -0.7856   | 0.6284   | 0.885992 | 0.812132 | 3.435001 | 1.150612 | 0.992197 | 1.13134  | 1.037632 |
| ENSMUSG000000004936  | 8_Map2k1         | 3464.557964  | 0.110612  | 0.628501 | 0.886058 | 3086.914 | 3132.721 | 3776.309 | 3593.737 | 3791.121 | 3406.546 |
| ENSMUSG000000096932  | 1_5033403F01Rik  | 10.84549117  | -0.42583  | 0.628699 | 0.886274 | 11.36985 | 7.728752 | 18.40979 | 11.90636 | 1.13134  | 14.52685 |
| ENSMUSG000000002748  | 7_Baz1b          | 3969.828843  | 0.096611  | 0.629238 | 0.886902 | 3758.548 | 3751.88  | 4000.678 | 4081.898 | 4116.947 | 4109.023 |
| ENSMUSG0000000051721 | 4_BC068281       | 60.49018988  | -0.17334  | 0.629278 | 0.886902 | 59.28565 | 65.26502 | 67.88611 | 45.64105 | 54.30432 | 70.55989 |
| ENSMUSG000000073468  | 11_Sft2d1        | 627.6018503  | 0.117479  | 0.629212 | 0.886902 | 572.5532 | 549.6001 | 684.6142 | 705.4519 | 638.0758 | 615.3158 |
| ENSMUSG000000028351  | 5_Brnp1          | 26.89327289  | -0.27677  | 0.629636 | 0.887137 | 25.98823 | 36.06751 | 26.46408 | 40.68007 | 12.44474 | 19.71501 |
| ENSMUSG000000030102  | 10_Itrp1         | 1069.528268  | -0.14912  | 0.629592 | 0.887137 | 1142.67  | 1336.215 | 895.1762 | 1176.745 | 785.15   | 1081.213 |
| ENSMUSG000000031482  | 8_Slc25a15       | 375.8925343  | 0.13182   | 0.629537 | 0.887137 | 347.5926 | 357.2401 | 371.6477 | 481.2155 | 355.2408 | 342.4186 |
| ENSMUSG000000035104  | 14_Eva1a         | 560.346199   | -0.12887  | 0.629667 | 0.887137 | 530.3223 | 589.9614 | 636.2885 | 633.0216 | 453.6674 | 518.816  |
| ENSMUSG000000068579  | 4_Rpl7a-ps3      | 12.64791567  | -0.36254  | 0.629564 | 0.887137 | 18.67904 | 6.870002 | 17.25918 | 10.91416 | 4.52536  | 17.63975 |
| ENSMUSG000000001156  | 9_Mxd1           | 8580.703393  | 0.139607  | 0.630005 | 0.887157 | 7699.013 | 7377.523 | 9421.212 | 6999.949 | 10919.69 | 9066.829 |
| ENSMUSG000000003814  | 8_Calr           | 17389.45152  | 0.129961  | 0.629816 | 0.887157 | 15682.27 | 15371.63 | 18766.48 | 15419.73 | 22069.05 | 17027.54 |
| ENSMUSG000000022586  | 11_Ly6i          | 30.73087745  | 0.334956  | 0.630021 | 0.887157 | 47.10367 | 14.59875 | 19.56041 | 29.7659  | 58.82969 | 14.52685 |
| ENSMUSG000000028639  | 14_Ybx1          | 6864.747564  | -0.1488   | 0.62982  | 0.887157 | 7474.052 | 6730.884 | 7450.213 | 4534.339 | 8017.807 | 6981.189 |
| ENSMUSG000000034800  | 15_Zfp661        | 159.8732632  | 0.144525  | 0.630038 | 0.887157 | 144.5595 | 139.9763 | 171.4412 | 195.4628 | 170.8324 | 136.9674 |
| ENSMUSG000000038402  | 2_Foxf2          | 42.59924488  | -0.274    | 0.629993 | 0.887157 | 47.9158  | 54.10126 | 37.9702  | 62.5084  | 14.70742 | 38.39239 |
| ENSMUSG000000046108  | 3_Ilt7c          | 2.031486915  | -0.85093  | 0.629935 | 0.887157 | 3.248529 | 0        | 4.602448 | 0        | 2.26268  | 2.075264 |
| ENSMUSG0000000096255 | 1_Dynl11b        | 5778.400891  | -0.18398  | 0.629905 | 0.887157 | 6219.308 | 5856.677 | 6362.885 | 2967.661 | 6837.82  | 6426.055 |
| ENSMUSG000000004698  | 9_Hdac9          | 21.77880536  | 0.263945  | 0.630467 | 0.887209 | 20.3033  | 24.04501 | 14.95796 | 35.71909 | 16.9701  | 18.67738 |
| ENSMUSG000000021620  | 4_Acot12         | 0.666575443  | -1.33189  | 0.630374 | 0.887209 | 0        | 1.7175   | 1.150612 | 0        | 1.13134  | 0        |
| ENSMUSG000000024903  | 10_Lao1          | 0.763862739  | -1.57199  | 0.630725 | 0.887209 | 0        | 0        | 3.451836 | 0        | 1.13134  | 0        |
| ENSMUSG000000029465  | 14_Arpe3         | 4200.552115  | -0.18506  | 0.63019  | 0.887209 | 4393.635 | 4109.979 | 4905.059 | 2168.942 | 5043.514 | 4582.183 |
| ENSMUSG000000038482  | 10_Tfdp1         | 1695.880613  | -0.17607  | 0.630786 | 0.887209 | 1824.049 | 1571.513 | 2002.065 | 951.5167 | 2034.15  | 1791.991 |
| ENSMUSG000000041309  | 17_Nkx6-2        | 0.763862739  | -1.57199  | 0.630725 | 0.887209 | 0        | 0        | 3.451836 | 0        | 1.13134  | 0        |
| ENSMUSG0000000051062 | 6_Fhl1           | 0.763862739  | -1.57199  | 0.630725 | 0.887209 | 0        | 0        | 3.451836 | 0        | 1.13134  | 0        |
| ENSMUSG000000056656  | 5_Apol8          | 19.68156375  | -0.25227  | 0.630623 | 0.887209 | 26.80036 | 15.4575  | 21.86163 | 13.89076 | 20.36412 | 19.71501 |
| ENSMUSG000000057093  | 14_C030039L03Rik | 53.43922398  | 0.219917  | 0.630458 | 0.887209 | 42.23087 | 53.24251 | 52.92816 | 84.33673 | 33.9402  | 53.95687 |
| ENSMUSG000000073906  | 2_Olfir692       | 2.615169787  | 0.613202  | 0.630199 | 0.887209 | 3.248529 | 1.7175   | 1.150612 | 0.992197 | 3.39402  | 5.18816  |
| ENSMUSG000000074067  | 9_Gm10619        | 0.763862739  | -1.57199  | 0.630725 | 0.887209 | 0        | 0        | 3.451836 | 0        | 1.13134  | 0        |
| ENSMUSG000000074731  | 3_Zfp345         | 1.046238983  | -0.101308 | 0.630787 | 0.887209 | 2.436397 | 1.7175   | 0        | 0.992197 | 1.13134  | 0        |
| ENSMUSG000000074874  | 9_Ctla2b         | 42.90950033  | 0.314164  | 0.630356 | 0.887209 | 54.41286 | 36.06751 | 24.16285 | 90.28991 | 32.80886 | 19.71501 |
| ENSMUSG000000099398  | 1_Ms4a14         | 12.40316256  | -0.32968  | 0.630555 | 0.887209 | 20.3033  | 9.446252 | 11.50612 | 8.929771 | 16.9701  | 7.263424 |
| ENSMUSG000000107875  | 1_RP23-205F19    | 2.633987964  | 0.674479  | 0.630565 | 0.887209 | 1.624264 | 0        | 4.602448 | 2.97659  | 4.52536  | 2.075264 |
| ENSMUSG000000107978  | 1_RP23-210L10    | 0.763862739  | -1.57199  | 0.630725 | 0.887209 | 0        | 0        | 3.451836 | 0        | 1.13134  | 0        |
| ENSMUSG000000024067  | 13_Dpy30         | 904.0906459  | 0.136965  | 0.63093  | 0.887284 | 876.2906 | 795.2027 | 912.4354 | 1195.597 | 868.8692 | 776.1488 |
| ENSMUSG000000058589  | 14_Anks1b        | 1137.931075  | 0.108355  | 0.630913 | 0.887284 | 1082.572 | 1059.698 | 1143.708 | 1315.653 | 1117.764 | 1108.191 |
| ENSMUSG000000037260  | 7_Hgsnat         | 518.0229909  | -0.12439  | 0.631096 | 0.887433 | 537.6315 | 614.8652 | 468.2991 | 539.7551 | 441.2226 | 506.3644 |
| ENSMUSG000000078444  | 3_Gm10941        | 3.405376473  | -0.54697  | 0.631125 | 0.887433 | 4.872793 | 6.011252 | 1.150612 | 1.984394 | 2.26268  | 1.97183  |
| ENSMUSG000000006412  | 10_Pf1d2         | 637.849929   | -0.16255  | 0.631599 | 0.887548 | 708.9914 | 638.9102 | 673.1081 | 383.9802 | 708.2189 | 713.8909 |
| ENSMUSG000000022518  | 15_4930562C15Rik | 5.331440139  | -0.42868  | 0.631677 | 0.887548 | 4.872793 | 7.728752 | 5.753061 | 2.97659  | 3.29402  | 7.263424 |
| ENSMUSG000000022860  | 14_Chodl         | 42.2101984   | 0.29975   | 0.631662 | 0.887548 | 33.29742 | 48.09001 | 32.21714 | 87.31332 | 18.10144 | 34.24186 |
| ENSMUSG000000024829  | 12_Mrp121        | 545.1637428  | -0.11002  | 0.631279 | 0.887548 | 556.3105 | 537.5776 | 604.0714 | 484.192  | 555.488  | 533.3429 |
| ENSMUSG000000027670  | 4_Ocstamp        | 2.845183615  | 0.805106  | 0.631352 | 0.887548 | 0        | 1.7175   | 4.602448 | 0        | 4.52536  | 6.225792 |
| ENSMUSG000000032773  | 9_Chrrm1         | 26.67385432  | -0.33063  | 0.631741 | 0.887548 | 21.92757 | 46.37251 | 20.71102 | 7.937575 | 22.6268  | 40.46765 |
| ENSMUSG000000036678  | 7_Aaas           | 391.17112394 | -0.22892  | 0.631735 | 0.887548 | 409.3146 | 396.7426 | 460.2448 | 144.8607 | 487.6076 | 448.2571 |
| ENSMUSG000000039552  | 13_RspH4a        | 0.687867092  | 1.587307  | 0.631719 | 0.887548 | 0        | 0        | 1.150612 | 2.97659  | 0        | 0        |
| ENSMUSG000000045690  | 8_Wdr89          | 162.5338373  | -0.1256   | 0.631406 | 0.887548 | 159.99   | 175.185  | 173.7424 | 164.7047 | 158.3876 | 143.1932 |
| ENSMUSG000000046010  | 7_Zfp80          | 262.5677585  | 0.114879  | 0.631582 | 0.887548 | 255.8216 | 242.7792 | 286.7449 | 277.1783 | 255.2575 | 255.2575 |
| ENSMUSG000000053164  | 6_Gpr21          | 6.206845992  | 0.439533  | 0.631377 | 0.887548 | 5.684925 | 7.728752 | 2.301224 | 11.90636 | 3.39402  | 6.225792 |
| ENSMUSG0000000086353 | 1_Gm13481        | 0.687867092  | 1.587307  | 0.631719 | 0.887548 | 0        | 0        | 1.150612 | 2.97659  | 0        | 0        |
| ENSMUSG000000034591  | 5_Slc41a2        | 72.13969812  | 0.176551  | 0.631796 | 0.887563 | 77.96469 | 65.26502 | 59.83183 | 98.22748 | 72.40577 | 59.14503 |
| ENSMUSG000000020777  | 16_Acox1         | 2159.890487  | -0.10484  | 0.632006 | 0.887794 | 2142.405 | 2267.959 | 2304.676 | 1877.236 | 2138.233 | 2228.834 |
| ENSMUSG000000019826  | 10_Zbtb24        | 387.6480131  | -0.11517  | 0.632155 | 0.887816 | 400.3812 | 367.5451 | 441.835  | 386.9568 | 347.3214 | 381.8486 |
| ENSMUSG000000046500  | 8_Fam19a4        | 1.271626664  | 0.974286  | 0.63213  | 0.887816 | 0.812132 | 1.7175   | 0        | 3.968787 | 1.13134  | 0        |
| ENSMUSG000000097094  | 1_Gm26548        | 1.271626664  | 0.974286  | 0.63213  | 0.887816 | 0.812132 | 1.7175   | 0        | 3.968787 | 1.13134  | 0        |
| ENSMUSG000000031988  | 9_Vps26b         | 1622.013735  | 0.1135    | 0.632387 | 0.888055 | 1532.493 | 1543.174 | 1599.351 | 1960.581 | 1543.148 | 1553.335 |
| ENSMUSG000000036557  | 8_1700011E24Rik  | 0.650957437  | -1.33204  | 0.632476 | 0.888055 | 0        | 1.7175   | 1.150612 | 0        | 1.037632 | 0        |
| ENSMUSG000000060206  | 11_Zfp462        | 1526.780397  | -0.10402  | 0.632503 | 0.888055 | 1556.857 | 1624.755 | 1563.682 | 1346.411 | 1474.136 | 1594.84  |
| ENSMUSG000000070369  | 13_Ilgad         | 0.650957437  | -1.33204  | 0.632476 | 0.888055 | 0        | 1.7175   | 1.150612 | 0        | 1.037632 | 0        |
| ENSMUSG000000027776  | 12_I12a          | 1.061581199  | -0.10061  | 0.632566 | 0.88808  | 1.624264 | 2.576251 | 0        | 0        | 1.13134  | 1.037632 |
| ENSMUSG000000045216  | 7_Hs6t1          | 3069.617537  | -0.1903   | 0.632731 | 0.88825  | 2967.531 | 3011.637 | 3836.141 | 1563.702 | 3838.697 | 3200.057 |
| ENSMUSG000000007805  | 4_Twist2         | 48.81397947  | -0.18043  | 0.632841 | 0.888341 | 45.4794  | 47.23126 | 63.28367 | 48.61764 | 38.46556 | 49.80634 |
| ENSMUSG000000029503  | 16_P2rx2         | 2.664010567  | 0.560691  | 0.632956 | 0.888439 | 2.436397 | 1.7175   | 2.301224 | 1.984394 | 3.39402  | 4.150528 |
| ENSMUSG000000058019  | 12_Ces5a         | 17.14079584  | -0.31108  | 0.633059 | 0.888522 | 13.80625 | 32.63251 | 10.35551 | 13.89076 | 12.44474 | 19.71501 |
| ENSMUSG000000000399  | 10_Ndufa9        | 1668.782586  | -0.12656  | 0.633188 | 0.888543 | 1690.047 | 1750.992 | 1784.599 | 1249.176 | 186.665  | 1701.717 |
| ENSMUSG000000022501  | 5_Prm1           | 1.081350783  | 1.217747  | 0.633128 | 0.888543 | 0.812132 | 0        | 1.150612 | 0        | 4.52536  | 0        |
| ENSMUSG000000045802  | 13_Hsf3          | 1.061778331  | -1.03555  | 0.633208 | 0.888543 | 0.812132 | 3.435001 | 0        | 0.992197 | 1.13134  | 0        |
| ENSMUSG000000013495  | 15_Tmem175       | 594.3386029  | 0.112302  | 0.633328 | 0.888584 | 555.4984 | 572.7864 | 585.6616 | 660.8031 | 539.6492 | 651.6329 |
| ENSMUSG000000036932  | 14_Aifm1         | 952.0534483  | 0.115627  | 0.633636 | 0.888584 | 868.1693 | 894.8177 | 979.1709 | 1134.081 | 952.2451 | 877.8367 |
| ENSMUSG000000037896  | 17_Rcor1         | 1842.290344  | 0.104592  | 0.633507 | 0.888584 | 1710.35  | 1695.173 | 1921.522 | 2036.98  | 1902.914 | 1786.802 |
| EN                   |                  |              |           |          |          |          |          |          |          |          |          |

|                      |                  |              |          |          |          |          |           |          |          |          |          |
|----------------------|------------------|--------------|----------|----------|----------|----------|-----------|----------|----------|----------|----------|
| ENSMUSG00000000359   | 3_Rem1           | 17.73110668  | -0.28708 | 0.636297 | 0.890681 | 22.7397  | 17.175    | 18.40979 | 6.945378 | 20.36412 | 20.75264 |
| ENSMUSG00000034203   | 8_Chchd4         | 409.3270842  | 0.111149 | 0.636435 | 0.89075  | 396.3205 | 355.5226  | 429.1783 | 417.7149 | 427.6466 | 429.5797 |
| ENSMUSG00000039661   | 14_Ustap26       | 7.151409524  | -0.43506 | 0.636418 | 0.89075  | 6.497057 | 11.16375  | 6.903673 | 0.992197 | 9.050721 | 8.201057 |
| ENSMUSG00000076438   | 5_Oxtc2b         | 0.729978136  | -1.54561 | 0.636553 | 0.890852 | 3.248529 | 0         | 0        | 0        | 1.13134  | 0        |
| ENSMUSG000000022400  | 8_Rbxr1          | 2036.708891  | 0.102531 | 0.636644 | 0.890857 | 1976.73  | 1804.234  | 2112.524 | 2217.56  | 2069.221 | 2039.985 |
| ENSMUSG00000032264   | 8_Zw10           | 706.734603   | 0.106607 | 0.636646 | 0.890857 | 670.009  | 634.6164  | 737.5424 | 714.3817 | 777.2307 | 706.6274 |
| ENSMUSG000000027335  | 9_Adrad1         | 1.053811525  | -0.99421 | 0.636883 | 0.891066 | 2.436397 | 1.7175    | 0        | 1.13134  | 1.037632 | 0        |
| ENSMUSG000000028772  | 19_Zcchc17       | 624.7340144  | -0.11427 | 0.63693  | 0.891066 | 627.7782 | 650.9327  | 669.6562 | 512.9658 | 631.2878 | 655.7835 |
| ENSMUSG00000037548   | 14_H2-DMb2       | 105.2755846  | -0.27435 | 0.636886 | 0.891066 | 148.6202 | 94.46252  | 102.4045 | 29.7659  | 151.5996 | 104.8008 |
| ENSMUSG000000024600  | 8_Slc27a6        | 66.31499622  | -0.16507 | 0.637258 | 0.891463 | 71.46763 | 83.29877  | 55.22938 | 67.46938 | 63.35505 | 57.06976 |
| ENSMUSG00000031982   | 4_Arv1           | 57.85725271  | 0.173224 | 0.637347 | 0.891524 | 48.72793 | 62.68877  | 51.77754 | 75.40696 | 57.69835 | 50.84397 |
| ENSMUSG00000074365   | 13_Crxos         | 1.436596578  | -0.8839  | 0.637516 | 0.891699 | 1.624264 | 1.7175    | 2.301224 | 2.97659  | 0        | 0        |
| ENSMUSG00000039745   | 7_Htalp2         | 320.289481   | -0.12105 | 0.637642 | 0.891812 | 334.5985 | 341.7826  | 324.4726 | 264.9165 | 352.9781 | 302.9886 |
| ENSMUSG00000001773   | 13_Folh1         | 69.50464325  | 0.344961 | 0.637828 | 0.89183  | 60.09778 | 93.60377  | 29.91591 | 165.6969 | 28.2835  | 39.43002 |
| ENSMUSG00000026836   | 15_Acvr1         | 599.267664   | 0.108848 | 0.637791 | 0.89183  | 620.469  | 589.1027  | 520.0767 | 657.8265 | 605.267  | 602.8642 |
| ENSMUSG00000033400   | 14_Agl           | 764.8569977  | 0.183926 | 0.637834 | 0.89183  | 698.4337 | 797.779   | 652.3971 | 1245.207 | 563.4074 | 631.9179 |
| ENSMUSG00000051054   | 3_1700014D04Rik  | 2.71727197   | -0.64161 | 0.637701 | 0.89183  | 2.436397 | 5.152501  | 2.301224 | 0        | 2.26268  | 4.150528 |
| ENSMUSG000000017499  | 15_Cdc6          | 223.0480673  | 0.140912 | 0.638044 | 0.892018 | 236.3305 | 173.4675  | 226.6706 | 192.4862 | 261.3396 | 247.9941 |
| ENSMUSG00000031974   | 8_Abcb10         | 301.6432644  | 0.11852  | 0.638058 | 0.892018 | 304.5496 | 283.3876  | 279.5987 | 272.8541 | 328.0886 | 341.3809 |
| ENSMUSG000000038023  | 12_Atp6v0a2      | 1257.127569  | -0.10978 | 0.638246 | 0.892218 | 1252.308 | 1303.583  | 1358.873 | 1053.713 | 1339.507 | 1234.782 |
| ENSMUSG00000031508   | 13_Anrkd10       | 674.5334962  | -0.11158 | 0.638735 | 0.892777 | 654.5785 | 766.0052  | 681.1624 | 598.2947 | 630.1564 | 717.0038 |
| ENSMUSG000000044244  | 18_I20rb         | 1872.150346  | -0.16663 | 0.638722 | 0.892777 | 1984.039 | 1826.562  | 2129.783 | 1073.557 | 1978.714 | 2240.248 |
| ENSMUSG00000004630   | 18_Pcp2          | 2.906341854  | -0.75462 | 0.639679 | 0.892899 | 5.684925 | 5.152501  | 0        | 0        | 4.52536  | 2.075264 |
| ENSMUSG00000005267   | 13_Zfp287        | 90.09276868  | 0.146353 | 0.63938  | 0.892899 | 83.64961 | 90.16877  | 82.84407 | 111.126  | 81.45649 | 91.31162 |
| ENSMUSG000000007653  | 12_Gabrb2        | 34.82621671  | -0.48223 | 0.639273 | 0.892899 | 31.67315 | 31.77376  | 32.21714 | 63.5006  | 24.89948 | 24.90317 |
| ENSMUSG000000022913  | 14_Psmg1         | 380.9718407  | 0.115906 | 0.639659 | 0.892899 | 357.3382 | 362.3926  | 377.4008 | 428.629  | 419.7272 | 340.3433 |
| ENSMUSG000000024256  | 6_Adcyap1        | 0.639223445  | 1.586757 | 0.639416 | 0.892899 | 0        | 0.85875   | 0        | 2.97659  | 0        | 0        |
| ENSMUSG000000024575  | 15_Pde6a         | 135.1389284  | -0.33755 | 0.639346 | 0.892899 | 221.7121 | 177.7613  | 52.92816 | 192.4862 | 136.8922 | 29.0537  |
| ENSMUSG000000024747  | 3_Aldh1a7        | 171.6271713  | 0.187884 | 0.639719 | 0.892899 | 156.7415 | 185.49    | 139.2241 | 258.9634 | 110.8713 | 178.4727 |
| ENSMUSG000000026809  | 15_1700026L06Rik | 1.069350873  | -0.10160 | 0.639334 | 0.892899 | 0.812132 | 3.435001  | 0        | 0        | 1.13134  | 1.037632 |
| ENSMUSG00000034295   | 9_Fhod3          | 86.48982648  | -0.16451 | 0.639549 | 0.892899 | 86.89814 | 109.0613  | 78.24162 | 101.2041 | 66.74907 | 76.78477 |
| ENSMUSG00000036251   | 16_Tpm8          | 0.639223445  | 1.586757 | 0.639416 | 0.892899 | 0        | 0.85875   | 0        | 2.97659  | 0        | 0        |
| ENSMUSG0000000040113 | 14_Mettl11b      | 0.639223445  | 1.586757 | 0.639416 | 0.892899 | 0        | 0.85875   | 0        | 2.97659  | 0        | 0        |
| ENSMUSG000000045983  | 15_Elf4g         | 10740.28203  | -0.15462 | 0.639112 | 0.892899 | 10469.2  | 11010.9   | 12465.73 | 6696.336 | 12644.99 | 11154.54 |
| ENSMUSG000000058064  | 5_Gm10036        | 153.9197606  | -0.20816 | 0.639481 | 0.892899 | 197.3481 | 168.315   | 128.8686 | 78.38355 | 211.5606 | 139.0427 |
| ENSMUSG000000058400  | 13_Qrfrp         | 0.639223445  | 1.586757 | 0.639416 | 0.892899 | 0        | 0.85875   | 0        | 2.97659  | 0        | 0        |
| ENSMUSG000000063882  | 12_Uqgrh         | 2871.815416  | 0.094218 | 0.638891 | 0.892899 | 2870.075 | 2739.413  | 2724.649 | 2999.411 | 2899.625 | 2997.719 |
| ENSMUSG000000078880  | 10_Gm14308       | 11.16700763  | 0.481377 | 0.639673 | 0.892899 | 9.745586 | 18.03375  | 0        | 18.85174 | 7.919381 | 12.45158 |
| ENSMUSG000000097448  | 1_Platr22        | 0.939944493  | 1.21591  | 0.639655 | 0.892899 | 0.812132 | 0.85875   | 0        | 3.968787 | 0        | 0        |
| ENSMUSG000000099762  | 3_Gm8579         | 0.639223445  | 1.586757 | 0.639416 | 0.892899 | 0        | 0.85875   | 0        | 2.97659  | 0        | 0        |
| ENSMUSG000000105923  | 4_A830019L24Rik  | 0.639223445  | 1.586757 | 0.639416 | 0.892899 | 0        | 0.85875   | 0        | 2.97659  | 0        | 0        |
| ENSMUSG000000107313  | 1_Gm43332        | 5.252506324  | -0.42522 | 0.639376 | 0.892899 | 4.872793 | 5.857502  | 4.602448 | 6.945378 | 3.39402  | 3.112896 |
| ENSMUSG000000028179  | 12_Cth           | 254.3387035  | 0.112119 | 0.639792 | 0.892905 | 250.1367 | 240.4501  | 242.7792 | 278.8073 | 265.8649 | 247.9941 |
| ENSMUSG000000039315  | 15_Clnk          | 3.3952159    | 0.797829 | 0.639813 | 0.892905 | 7.30919  | 0         | 0.992197 | 7.919381 | 4.150528 | 0        |
| ENSMUSG000000004768  | 14_Rab23         | 348.209285   | 0.12101  | 0.63987  | 0.892922 | 341.9076 | 311.7263  | 347.4849 | 423.668  | 330.3513 | 334.1175 |
| ENSMUSG000000020411  | 2_Nipal4         | 8.971133772  | -0.38054 | 0.639935 | 0.892951 | 8.121322 | 8.587502  | 13.80735 | 9.921968 | 11.3134  | 2.075264 |
| ENSMUSG000000022061  | 8_Nlx3-1         | 1.189482494  | -1.36862 | 0.640255 | 0.893054 | 0        | 5.152501  | 0        | 1.984394 | 0        | 0        |
| ENSMUSG000000027288  | 16_Zfp106        | 4210.837049  | 0.10922  | 0.640278 | 0.893054 | 4087.461 | 4097.097  | 3962.708 | 5081.04  | 3823.93  | 4212.786 |
| ENSMUSG000000027401  | 9_Tgm3           | 12.73323319  | -0.30883 | 0.640111 | 0.893054 | 9.745586 | 19.75126  | 12.65673 | 7.937575 | 16.9701  | 9.338689 |
| ENSMUSG000000033658  | 16_Ddx19b        | 921.408287   | 0.104778 | 0.6402   | 0.893054 | 899.8425 | 821.824   | 942.3513 | 920.7586 | 1029.519 | 914.1538 |
| ENSMUSG000000097811  | 1_2810425M01Rik  | 1.024937462  | 1.412682 | 0.640224 | 0.893054 | 1.624264 | 0         | 0        | 0        | 4.52536  | 0        |
| ENSMUSG000000104633  | 1_Gm43687        | 1.326320789  | 1.351718 | 0.640166 | 0.893054 | 0        | 0         | 2.301224 | 0        | 5.656701 | 0        |
| ENSMUSG000000072944  | 11_Nup62cl       | 11.59411464  | 0.352448 | 0.640361 | 0.893106 | 14.61838 | 11.16375  | 4.602448 | 21.82833 | 9.050721 | 8.301057 |
| ENSMUSG000000050961  | 4_AY358078       | 0.631453771  | 1.586668 | 0.640693 | 0.893508 | 0.812132 | 0         | 0        | 2.97659  | 0        | 0        |
| ENSMUSG000000020044  | 13_Timp3         | 8598.663547  | 0.215947 | 0.640786 | 0.893574 | 7949.962 | 9559.607  | 6359.433 | 15118.1  | 4794.619 | 7810.257 |
| ENSMUSG0000000047866 | 18_Lonp2         | 2534.15174   | 0.095096 | 0.640946 | 0.893735 | 2372.238 | 2515.279  | 2464.611 | 2701.752 | 2508.181 | 2642.849 |
| ENSMUSG000000035576  | 13_L3mb11        | 2.6876774038 | 0.575115 | 0.641123 | 0.893884 | 2.436397 | 1.7175    | 2.301224 | 2.97659  | 5.656701 | 1.037632 |
| ENSMUSG000000071202  | 4_Cdc678         | 4.923157587  | -0.45533 | 0.641143 | 0.893884 | 4.872793 | 4.293751  | 8.054285 | 4.960984 | 1.13134  | 6.225792 |
| ENSMUSG000000009646  | 13_Pla2g12b      | 3.913001868  | 0.471281 | 0.64173  | 0.894115 | 4.872793 | 2.576251  | 2.301224 | 2.97659  | 4.52536  | 6.225792 |
| ENSMUSG000000020229  | 4_Slc5a4a        | 0.651036095  | -1.29167 | 0.641962 | 0.894115 | 1.624264 | 0         | 1.150612 | 0        | 1.13134  | 0        |
| ENSMUSG000000021366  | 7_Hiverp1        | 2586.934363  | -0.11927 | 0.641774 | 0.894115 | 2455.076 | 2718.803  | 2907.597 | 2032.019 | 2793.279 | 2614.833 |
| ENSMUSG000000029233  | 15_Srd5a3        | 526.7687141  | 0.106342 | 0.641757 | 0.894115 | 539.2558 | 459.4314  | 523.5285 | 560.5912 | 535.1239 | 542.6816 |
| ENSMUSG000000035498  | 9_Cdcp1          | 5093.160047  | 0.119304 | 0.641982 | 0.894115 | 4625.093 | 4468.077  | 5555.155 | 4631.575 | 6175.986 | 5103.074 |
| ENSMUSG000000391126  | 9_Prune2         | 227.2627845  | 0.204326 | 0.64144  | 0.894115 | 187.6025 | 296.2688  | 149.5796 | 356.1987 | 167.4383 | 206.4888 |
| ENSMUSG000000040205  | 8_Cuzd1          | 0.651036095  | -1.29167 | 0.641962 | 0.894115 | 1.624264 | 0         | 1.150612 | 0        | 1.13134  | 0        |
| ENSMUSG000000040229  | 11_Gpr34         | 22.58389352  | 0.362041 | 0.641981 | 0.894115 | 21.11544 | 26.62126  | 11.50612 | 54.57082 | 11.3134  | 10.37632 |
| ENSMUSG000000040627  | 14_Aicda         | 0.651036095  | -1.29167 | 0.641962 | 0.894115 | 1.624264 | 0         | 1.150612 | 0        | 1.13134  | 0        |
| ENSMUSG000000040795  | 12_Iqcc          | 172.8979255  | -0.13935 | 0.641916 | 0.894115 | 185.1661 | 174.3263  | 184.0979 | 126.009  | 181.0144 | 186.7738 |
| ENSMUSG000000048312  | 7_Gm4884         | 0.651036095  | -1.29167 | 0.641962 | 0.894115 | 1.624264 | 0         | 1.150612 | 0        | 1.13134  | 0        |
| ENSMUSG000000074671  | 6_Tsyp13         | 57.31219723  | -0.18102 | 0.641389 | 0.894115 | 73.0919  | 64.40627  | 44.87387 | 48.61764 | 47.51628 | 65.37082 |
| ENSMUSG000000093898  | 2_Gm3629         | 1.898235141  | 1.257661 | 0.641568 | 0.894115 | 0        | 0         | 3.451836 | 7.937575 | 0        | 0        |
| ENSMUSG000000094626  | 1_Cecr6          | 0.651036095  | -1.29167 | 0.641962 | 0.894115 | 1.624264 | 0         | 1.150612 | 0        | 1.13134  | 0        |
| ENSMUSG000000099139  | 1_1110028F18Rik  | 0.651036095  | -1.29167 | 0.641962 | 0.894115 | 1.624264 | 0         | 1.150612 | 0        | 1.13134  | 0        |
| ENSMUSG00000031147   | 8_Magix          | 11.85444198  | -0.36266 | 0.642172 | 0.894179 | 12.99411 | 18.8925   | 8.054285 | 6.945378 | 4.52536  | 19.71501 |
| ENSMUSG000000057723  | 3_Krt33b         | 4.720400958  | 0.566813 | 0.642184 | 0.894179 | 4.872793 | 0.85875   | 5.753061 | 0.992197 | 3.39402  | 12.45158 |
| ENSMUSG000000067212  | 8_H2-123         | 6231.883795  | -0.24448 | 0.642112 | 0.894179 | 6210.375 | 5824.903  | 8240.684 | 1929.823 | 6302.905 | 6882.613 |
| ENSMUSG000000104941  | 1_Gm8953         | 9.085754941  | 0.4047   | 0.642207 | 0.894179 | 12.99411 | 13.435001 | 6.903673 | 9.829771 | 18.10144 | 4.150528 |
| ENSMUSG000000014668  |                  |              |          |          |          |          |           |          |          |          |          |

|                      |                 |              |          |          |          |          |           |          |          |          |          |
|----------------------|-----------------|--------------|----------|----------|----------|----------|-----------|----------|----------|----------|----------|
| ENSMUSG00000055491   | 13_Pprc1        | 957.5228691  | -0.21783 | 0.643945 | 0.895244 | 947.7583 | 961.8002  | 1179.377 | 367.1128 | 1241.08  | 1048.008 |
| ENSMUSG00000078686   | 11_Mup9         | 1.110146189  | -1.13909 | 0.643864 | 0.895244 | 0        | 0.3435001 | 1.150612 | 0        | 0        | 2.075264 |
| ENSMUSG00000090219   | 2_Gm4027        | 0.635418089  | -1.29171 | 0.6441   | 0.895244 | 1.624264 | 0         | 1.150612 | 0        | 0        | 1.037632 |
| ENSMUSG000000907025  | 1_Gm26558       | 1.579130218  | -1.02705 | 0.644649 | 0.895244 | 0.060661 | 0         | 2.301224 | 0        | 0        | 3.112896 |
| ENSMUSG000000907069  | 1_Gm16998       | 4.230694291  | 0.581576 | 0.644638 | 0.895244 | 1.624264 | 5.152501  | 3.451836 | 8.929771 | 0        | 6.225792 |
| ENSMUSG000000907788  | 1_Gm16596       | 4.643354212  | 0.460892 | 0.644229 | 0.895244 | 3.248529 | 1.7175    | 6.903673 | 2.97659  | 6.788041 | 6.225792 |
| ENSMUSG000000101007  | 1_Gm29541       | 0.635418089  | -1.29171 | 0.6441   | 0.895244 | 1.624264 | 0         | 1.150612 | 0        | 0        | 1.037632 |
| ENSMUSG000000103174  | 1_Gm37168       | 0.635418089  | -1.29171 | 0.6441   | 0.895244 | 1.624264 | 0         | 1.150612 | 0        | 0        | 1.037632 |
| ENSMUSG000000020607  | 6_Fam84a        | 3260.440118  | 0.125666 | 0.644827 | 0.895263 | 2802.668 | 3112.97   | 3440.33  | 3981.686 | 3522.993 | 2701.994 |
| ENSMUSG000000021895  | 9_Arhgef3       | 3554.846482  | 0.101497 | 0.644828 | 0.895263 | 3358.979 | 3288.155  | 3642.838 | 4065.03  | 3496.972 | 3477.105 |
| ENSMUSG000000028124  | 15_Gclm         | 1668.963723  | 0.127339 | 0.644809 | 0.895263 | 1573.912 | 1594.699  | 1617.761 | 2178.864 | 1402.862 | 1645.684 |
| ENSMUSG000000004446  | 12_Bid          | 287.6589724  | 0.156874 | 0.645034 | 0.895309 | 297.2404 | 244.7438  | 273.8457 | 227.2131 | 415.2018 | 267.7091 |
| ENSMUSG000000006732  | 14_Mettl1       | 362.6152812  | -0.15732 | 0.645106 | 0.895309 | 344.344  | 328.9013  | 474.0522 | 246.0648 | 425.3839 | 356.9454 |
| ENSMUSG000000009471  | 3_Myod1         | 2.299697469  | 0.624467 | 0.645283 | 0.895309 | 0.812132 | 3.435001  | 1.150612 | 3.968787 | 3.39402  | 1.037632 |
| ENSMUSG000000028099  | 8_Polr3c        | 684.8718878  | -0.1645  | 0.645325 | 0.895309 | 758.5315 | 660.3789  | 752.5003 | 397.8709 | 840.5857 | 699.364  |
| ENSMUSG0000000040035 | 14_Disp2        | 6.558750148  | -0.44737 | 0.645107 | 0.895309 | 10.55772 | 8.587502  | 3.451836 | 8.929771 | 6.788041 | 1.037632 |
| ENSMUSG000000053977  | 13_Cd8a         | 12.58768516  | -0.42241 | 0.645228 | 0.895309 | 28.42463 | 4.293751  | 10.35551 | 7.937575 | 20.36412 | 4.150528 |
| ENSMUSG0000000070890 | 3_Gm12794       | 0.627845547  | -1.29173 | 0.645156 | 0.895309 | 1.624264 | 0         | 1.150612 | 0.992197 | 0        | 0        |
| ENSMUSG0000000073608 | 4_Gm6086        | 0.627845547  | -1.29173 | 0.645156 | 0.895309 | 1.624264 | 0         | 1.150612 | 0.992197 | 0        | 0        |
| ENSMUSG0000000075425 | 3_020204164     | 3.020204164  | 0.678    | 0.645338 | 0.895309 | 0.060661 | 1.7175    | 1.150612 | 8.929771 | 2.26268  | 0        |
| ENSMUSG0000000079469 | 10_Pigb         | 472.5555442  | 0.134842 | 0.645356 | 0.895309 | 406.0661 | 467.1601  | 478.6546 | 623.0996 | 402.7571 | 457.5957 |
| ENSMUSG0000000103114 | 1_Gm32200       | 0.627845547  | -1.29173 | 0.645156 | 0.895309 | 1.624264 | 0         | 1.150612 | 0.992197 | 0        | 0        |
| ENSMUSG0000000019767 | 12_Ccdc170      | 4.088991826  | 0.4995   | 0.64557  | 0.895464 | 1.624264 | 5.152501  | 3.451836 | 8.929771 | 2.26268  | 3.112896 |
| ENSMUSG000000024534  | 15_Sncaip       | 83.12695786  | -0.1842  | 0.645586 | 0.895464 | 91.77094 | 116.79    | 56.37999 | 88.30552 | 65.61773 | 79.89767 |
| ENSMUSG000000026413  | 12_Pkp1         | 28160.53496  | -0.18511 | 0.645639 | 0.895464 | 27015.58 | 27562.2   | 35296.18 | 14299.54 | 36250.4  | 28519.32 |
| ENSMUSG000000039748  | 11_Exo1         | 187.1211434  | 0.127355 | 0.645648 | 0.895464 | 169.7356 | 165.7388  | 201.3571 | 184.5486 | 222.874  | 178.4727 |
| ENSMUSG000000024302  | 15_Dtna         | 329.3601088  | 0.203886 | 0.645773 | 0.895516 | 288.3069 | 414.7764  | 215.1645 | 530.8253 | 225.1367 | 301.9509 |
| ENSMUSG000000038065  | 13_Mturr        | 433.5969399  | -0.15034 | 0.645775 | 0.895516 | 443.4242 | 531.5664  | 393.5093 | 468.3169 | 288.9417 | 476.2731 |
| ENSMUSG0000000014243 | 5_Zswim7        | 60.84184417  | -0.17032 | 0.645896 | 0.895622 | 63.34631 | 75.57002  | 54.07877 | 44.64886 | 59.96103 | 67.44608 |
| ENSMUSG000000022216  | 16_Psme1        | 5314.7711767 | 0.138145 | 0.64617  | 0.895627 | 4766.404 | 4465.501  | 5949.815 | 4353.76  | 6954.348 | 5398.8   |
| ENSMUSG0000000037762 | 6_Slc16a9       | 443.3802985  | 0.12523  | 0.646124 | 0.895627 | 461.2911 | 406.1889  | 405.0155 | 555.6302 | 388.0497 | 444.1065 |
| ENSMUSG0000000042529 | 14_Kcnj12       | 12.8791823   | -0.38145 | 0.646083 | 0.895627 | 9.745586 | 29.19751  | 4.602448 | 6.945378 | 10.18206 | 16.60211 |
| ENSMUSG0000000042631 | 7_Xkr7          | 1.038469309  | -0.99764 | 0.646136 | 0.895627 | 2.348529 | 0.85875   | 0        | 0.992197 | 1.13134  | 0        |
| ENSMUSG0000000052981 | 5_Ube2ql1       | 12.02985552  | -0.30739 | 0.646026 | 0.895627 | 8.933454 | 20.61001  | 10.35551 | 13.89076 | 9.050721 | 9.336889 |
| ENSMUSG0000000072875 | 2_Gpr27         | 40.85311387  | 0.206734 | 0.645952 | 0.895627 | 38.98234 | 40.36126  | 34.51836 | 60.52401 | 27.15216 | 43.58055 |
| ENSMUSG0000000018293 | 4_Pfn1          | 6241.564032  | -0.16372 | 0.646352 | 0.895733 | 6320.825 | 5970.032  | 7495.087 | 3640.37  | 7647.859 | 6375.211 |
| ENSMUSG0000000020176 | 17_Grb10        | 599.4022103  | -0.14548 | 0.646314 | 0.895733 | 622.9054 | 710.1864  | 555.7456 | 736.21   | 427.646  | 543.7192 |
| ENSMUSG0000000032586 | 9_Traip         | 127.8974601  | -0.19759 | 0.646426 | 0.895733 | 149.4323 | 117.6488  | 142.6759 | 61.5162  | 154.936  | 141.118  |
| ENSMUSG0000000097828 | 1_6430562015Rik | 7.460749102  | -0.35008 | 0.646404 | 0.895733 | 8.121322 | 11.16375  | 5.753061 | 7.937575 | 4.52536  | 7.263424 |
| ENSMUSG0000000019880 | 9_Rspo3         | 10.1676935   | -0.35181 | 0.646529 | 0.895813 | 11.36985 | 10.305    | 12.65673 | 16.86735 | 5.656701 | 4.150528 |
| ENSMUSG0000000027777 | 15_Schip1       | 159.4383788  | 0.161734 | 0.646739 | 0.895948 | 136.4382 | 162.3038  | 153.0314 | 233.1663 | 135.7608 | 135.9298 |
| ENSMUSG0000000036834 | 16_Plch1        | 108.547914   | 0.214042 | 0.646761 | 0.895948 | 112.0742 | 127.095   | 62.13305 | 169.6657 | 72.40577 | 107.9137 |
| ENSMUSG0000000048271 | 14_Rbm33        | 1795.64418   | 0.10563  | 0.646716 | 0.895948 | 1771.26  | 1627.332  | 1791.503 | 2109.41  | 1733.213 | 1741.147 |
| ENSMUSG0000000036591 | 15_Arhgap21     | 1743.410464  | 0.097633 | 0.646856 | 0.895955 | 1602.337 | 1690.879  | 1760.437 | 1927.838 | 1751.314 | 1727.657 |
| ENSMUSG0000000071392 | 4_Ect2l         | 2.988316878  | 0.518891 | 0.646817 | 0.895955 | 1.624264 | 3.435001  | 2.301224 | 3.968787 | 4.52536  | 2.075264 |
| ENSMUSG0000000005864 | 7_Cnga2         | 2.337914626  | 0.703537 | 0.64719  | 0.896031 | 3.248529 | 0.85875   | 1.150612 | 0        | 0.656701 | 3.112896 |
| ENSMUSG0000000024673 | 9_Ms4a1         | 5.613684433  | 0.504495 | 0.64717  | 0.896031 | 8.933454 | 2.576251  | 2.301224 | 10.91416 | 7.919381 | 1.037632 |
| ENSMUSG0000000027374 | 12_Mrps5        | 637.4553103  | -0.11171 | 0.647136 | 0.896031 | 626.1539 | 659.5202  | 700.7228 | 526.8565 | 675.41   | 636.0685 |
| ENSMUSG0000000030126 | 17_Tmcc1        | 1018.762176  | 0.102527 | 0.64716  | 0.896031 | 917.7094 | 935.179   | 1095.383 | 1056.69  | 1041.964 | 1065.648 |
| ENSMUSG0000000030145 | 14_Zfp248       | 104.2201606  | 0.194217 | 0.64708  | 0.896031 | 108.8257 | 109.0613  | 73.63917 | 162.7203 | 73.53711 | 97.53741 |
| ENSMUSG0000000074802 | 10_Gas23        | 330.694518   | 0.152665 | 0.647226 | 0.896031 | 334.5985 | 304.8563  | 300.3098 | 479.2311 | 271.5526 | 293.6499 |
| ENSMUSG0000000097077 | 1_Gm16712       | 4.987926691  | 0.433703 | 0.647162 | 0.896031 | 4.872793 | 4.293751  | 3.451836 | 2.97659  | 10.18206 | 4.150528 |
| ENSMUSG0000000002778 | 10_Scpep1       | 845.3894516  | -0.11191 | 0.647303 | 0.896069 | 862.4844 | 985.8453  | 785.8681 | 773.9135 | 762.5232 | 901.7023 |
| ENSMUSG0000000029185 | 14_Fam114a1     | 581.8742466  | 0.118522 | 0.647343 | 0.896069 | 569.3047 | 606.2777  | 498.215  | 702.4753 | 532.8612 | 582.1116 |
| ENSMUSG0000000017718 | 15_Afmid        | 190.6610398  | -0.22474 | 0.647746 | 0.896557 | 206.2816 | 191.5013  | 218.6163 | 72.43037 | 183.2771 | 271.8596 |
| ENSMUSG0000000034300 | 16_Fam53c       | 1088.034772  | -0.10429 | 0.647842 | 0.896557 | 1082.572 | 1094.907  | 1204.691 | 935.6416 | 1105.379 | 1105.078 |
| ENSMUSG0000000038079 | 14_Tmem237      | 227.7721155  | -0.13189 | 0.647832 | 0.896557 | 227.397  | 220.6988  | 266.942  | 250.0336 | 175.3577 | 226.2038 |
| ENSMUSG0000000042359 | 18_Osblp6       | 1202.248097  | 0.13043  | 0.647921 | 0.896557 | 1077.699 | 1179.064  | 1187.432 | 1548.819 | 963.9018 | 1256.572 |
| ENSMUSG0000000047094 | 8_Olrc1         | 29.00488854  | 0.201344 | 0.647907 | 0.896557 | 21.92757 | 32.63251  | 26.46408 | 32.74249 | 26.02082 | 34.24186 |
| ENSMUSG0000000020173 | 17_Cobl         | 2374.210039  | 0.099428 | 0.648033 | 0.896587 | 2182.199 | 2296.298  | 2399.026 | 2602.532 | 2535.333 | 2229.871 |
| ENSMUSG0000000031171 | 11_Ftjg1        | 413.6085434  | -0.12613 | 0.648016 | 0.896587 | 412.5631 | 416.4939  | 465.9979 | 311.5498 | 442.354  | 432.6926 |
| ENSMUSG0000000031709 | 15_Tbc1d9       | 339.6993974  | -0.1576  | 0.648196 | 0.896627 | 168.1114 | 153.7163  | 119.6637 | 132.9544 | 165.1757 | 98.57505 |
| ENSMUSG0000000039414 | 9_Hear5f9       | 1129.954834  | -0.13226 | 0.648154 | 0.896627 | 1129.676 | 1184.217  | 1231.155 | 788.7965 | 1204.777 | 1241.008 |
| ENSMUSG0000000079330 | 8_Lemd1         | 104.8824148  | 0.173275 | 0.648151 | 0.896627 | 110.45   | 88.45127  | 96.65142 | 70.44597 | 134.6295 | 128.6664 |
| ENSMUSG0000000005204 | 12_Senp3        | 1297.727626  | -0.12121 | 0.648901 | 0.897291 | 1338.394 | 1407.894  | 1477.386 | 995.1734 | 1407.387 | 1327.131 |
| ENSMUSG0000000022488 | 8_Nckap11       | 320.5220685  | 0.192788 | 0.648902 | 0.897291 | 427.9937 | 204.3826  | 264.6408 | 254.0024 | 477.4255 | 294.6875 |
| ENSMUSG0000000030484 | 5_Lypd5         | 10.78253772  | 0.47296  | 0.648799 | 0.897291 | 2.436397 | 12.0225   | 12.65673 | 2.97659  | 29.41484 | 5.18816  |
| ENSMUSG0000000038368 | 16_Focad        | 887.1946174  | 0.115457 | 0.648883 | 0.897291 | 813.7564 | 827.8352  | 913.586  | 774.9057 | 1062.328 | 930.756  |
| ENSMUSG0000000052833 | 8_Sae1          | 2434.267128  | 0.108373 | 0.648851 | 0.897291 | 2317.825 | 2155.463  | 2555.509 | 2219.544 | 2805.723 | 2551.537 |
| ENSMUSG0000000020843 | 15_Timm22       | 635.200527   | -0.14023 | 0.648975 | 0.89733  | 637.5238 | 651.7914  | 708.7771 | 424.6602 | 677.6727 | 710.778  |
| ENSMUSG0000000012187 | 13_Mogat1       | 42.03606772  | -0.19418 | 0.649179 | 0.897509 | 43.85514 | 54.96001  | 35.66898 | 40.68007 | 28.2835  | 48.76871 |
| ENSMUSG0000000024045 | 5_Akap8         | 2352.275289  | 0.121163 | 0.649305 | 0.897509 | 2204.127 | 2185.519  | 2371.412 | 3037.114 | 2116.737 | 2198.742 |
| ENSMUSG0000000026527 | 13_Rgs7         | 5.279977109  | 0.512865 | 0.649279 | 0.897509 | 0.060661 | 7.728752  | 1.150612 | 10.91416 | 6.788041 | 1.037632 |
| ENSMUSG0000000027007 | 16_Sfsa2        | 3499.741013  | 0.099683 | 0.64933  | 0.897509 | 3260.711 | 3283.002  | 3593.362 | 3985.655 | 3449.456 | 3426.261 |
| ENSMUSG0000000097454 | 1_Gm26892       | 6.885279625  | -0.38357 | 0.649284 | 0.897509 | 0.060661 | 18.03375  | 8.05     |          |          |          |

|                      |                 |             |          |          |          |          |          |          |          |          |          |
|----------------------|-----------------|-------------|----------|----------|----------|----------|----------|----------|----------|----------|----------|
| ENSMUSG00000046613   | 18_Vva5b2       | 3.657809455 | 0.663958 | 0.652135 | 0.899407 | 2.436397 | 2.576251 | 3.451836 | 0        | 12.44474 | 1.037632 |
| ENSMUSG00000002846   | 9_Timmdc1       | 372.4026649 | -0.11212 | 0.652733 | 0.899611 | 350.8411 | 364.9688 | 445.2869 | 347.2689 | 359.7662 | 366.2841 |
| 5_Cpb1               |                 | 3.843261077 | 0.697473 | 0.652669 | 0.899611 | 0        | 4.293751 | 4.602448 | 7.937575 | 0        | 6.225792 |
| ENSMUSG000000017165  | 1_Gast          | 1.975073593 | -0.79866 | 0.652514 | 0.899611 | 0.060661 | 0        | 3.451836 | 0        | 2.26268  | 2.075604 |
| ENSMUSG000000021385  | 9_Ippk          | 318.9532677 | 0.124235 | 0.652672 | 0.899611 | 289.1191 | 271.3651 | 355.5391 | 317.503  | 382.393  | 297.8004 |
| ENSMUSG000000021795  | 9_Stfpd         | 77.376941   | -0.23876 | 0.652768 | 0.899611 | 76.34042 | 80.72252 | 94.35019 | 37.70348 | 47.51628 | 127.8287 |
| ENSMUSG000000024742  | 15_Fen1         | 736.629515  | -0.18147 | 0.652642 | 0.899611 | 741.4767 | 698.1639 | 908.9836 | 384.9724 | 977.4778 | 708.7027 |
| ENSMUSG000000030525  | 7_Chrra7        | 10.29228171 | -0.37313 | 0.652745 | 0.899611 | 8.933454 | 22.32751 | 3.451836 | 10.91416 | 6.788041 | 9.338689 |
| ENSMUSG000000045215  | 16_Asx13        | 11.59627718 | -0.29122 | 0.652733 | 0.899611 | 12.18198 | 14.59875 | 11.50612 | 10.18206 | 14.88295 | 6.225792 |
| ENSMUSG000000097487  | 17_Ptges3l      | 37.33178016 | -0.23683 | 0.6526   | 0.899611 | 29.23676 | 36.92626 | 55.22938 | 18.85174 | 33.9402  | 49.80634 |
| ENSMUSG000000098134  | 1_Rnf113a2      | 268.5867965 | -0.11503 | 0.652793 | 0.899611 | 279.3735 | 244.7438 | 314.1171 | 251.0258 | 254.5515 | 267.7091 |
| ENSMUSG000000041872  | 9_Ii17f         | 1.286377483 | 1.065724 | 0.652862 | 0.899644 | 2.436397 | 0        | 0        | 0        | 1.13134  | 4.150528 |
| ENSMUSG000000079111  | 3_Kdelr2        | 1590.544829 | -0.09927 | 0.652961 | 0.899718 | 1534.93  | 1584.394 | 1816.817 | 1528.975 | 1597.452 | 1480.701 |
| ENSMUSG000000032418  | 15_Me1          | 550.7097234 | 0.15002  | 0.653028 | 0.899749 | 523.8253 | 571.9276 | 470.6004 | 794.7496 | 437.8286 | 505.3268 |
| ENSMUSG000000006179  | 8_Prss16        | 17.69704014 | 0.26923  | 0.653556 | 0.900414 | 14.61838 | 12.88125 | 20.71102 | 12.89856 | 30.54618 | 14.52685 |
| ENSMUSG0000000074890 | 4_Lcmt2         | 171.0762999 | -0.13197 | 0.653648 | 0.900478 | 161.6143 | 186.3488 | 188.7004 | 130.97   | 185.5398 | 173.2846 |
| ENSMUSG000000032342  | 13_Mto1         | 285.0653844 | 0.110159 | 0.653713 | 0.900506 | 285.0584 | 256.7663 | 280.7494 | 305.5966 | 314.5125 | 267.7091 |
| ENSMUSG0000000015314 | 10_Slamf6       | 20.88878791 | 0.341117 | 0.653865 | 0.900652 | 33.29742 | 6.870002 | 14.95796 | 25.79712 | 35.07154 | 9.338689 |
| ENSMUSG000000104411  | 1_Gm30340       | 1.398262904 | 1.26086  | 0.65392  | 0.900666 | 2.436397 | 0        | 0        | 5.953181 | 0        | 0        |
| ENSMUSG000000032534  | 16_Cep63        | 643.0330258 | 0.123949 | 0.653997 | 0.90071  | 647.2693 | 591.6789 | 607.5232 | 814.5936 | 535.1239 | 662.0093 |
| ENSMUSG000000021190  | 14_Lgmn         | 4027.259697 | -0.16441 | 0.654222 | 0.900771 | 4617.784 | 3834.32  | 4317.097 | 2284.037 | 5135.153 | 3975.168 |
| ENSMUSG000000031445  | 4_Proz          | 4.12733713  | -0.48909 | 0.65418  | 0.900771 | 2.436397 | 8.587502 | 3.451836 | 3.968787 | 1.13134  | 5.18816  |
| ENSMUSG000000041809  | 5_Ethc1         | 53.73959497 | -0.20022 | 0.654165 | 0.900771 | 51.16433 | 69.55877 | 51.77754 | 62.5084  | 28.2835  | 59.14503 |
| ENSMUSG000000100760  | 1_Gm4035        | 4.751216713 | 0.611157 | 0.654115 | 0.900771 | 4.060661 | 6.011252 | 1.150612 | 13.89076 | 3.39402  | 0        |
| 9_Nup50              |                 | 1818.617195 | 0.102453 | 0.654424 | 0.900978 | 1708.726 | 1629.908 | 1923.823 | 1761.149 | 2068.09  | 1820.007 |
| ENSMUSG000000107879  | 1_RP24-363O21   | 75.15460264 | -0.15471 | 0.654463 | 0.900978 | 90.14667 | 74.71127 | 72.48856 | 58.53961 | 67.88041 | 87.16109 |
| ENSMUSG000000046245  | 13_Pilra        | 31.73792973 | 0.28952  | 0.654526 | 0.901002 | 41.41874 | 26.62126 | 17.25918 | 18.85174 | 64.48639 | 21.79027 |
| ENSMUSG000000020121  | 15_Srgap1       | 63.53285733 | -0.14569 | 0.654787 | 0.90105  | 65.78271 | 60.97127 | 73.63917 | 57.54742 | 59.96103 | 63.29556 |
| ENSMUSG000000020901  | 13_Pik3r5       | 99.15709751 | -0.25089 | 0.654659 | 0.90105  | 161.6143 | 66.98252 | 94.35019 | 44.64886 | 51.5996  | 75.74714 |
| ENSMUSG000000021967  | 3_Mrp157        | 202.6161793 | -0.15646 | 0.65475  | 0.90105  | 209.5031 | 178.62   | 253.1347 | 256.979  | 149.3369 | 168.0921 |
| ENSMUSG000000097728  | 1_Gm26840       | 13.34161605 | -0.28805 | 0.654766 | 0.90105  | 9.745586 | 13.74    | 20.71102 | 7.937575 | 11.3134  | 16.60614 |
| ENSMUSG000000099384  | 6_1700110C19Rik | 1.01594059  | -0.87542 | 0.654751 | 0.90105  | 0.812132 | 0.85875  | 2.301224 | 0.992197 | 1.910321 | 0        |
| ENSMUSG000000097243  | 1_Gm26908       | 13.57487839 | -0.29985 | 0.654864 | 0.901094 | 18.67904 | 6.870002 | 19.56041 | 15.87515 | 9.050727 | 11.41395 |
| ENSMUSG000000060639  | 5_Hist14i       | 60.11945087 | -0.15569 | 0.65494  | 0.901137 | 59.28565 | 57.53626 | 73.63917 | 63.5006  | 48.64762 | 58.1074  |
| 3_Ptar1              |                 | 83.70814916 | 0.14781  | 0.655057 | 0.901235 | 98.26799 | 69.55877 | 70.18734 | 89.29771 | 82.58783 | 92.34925 |
| ENSMUSG000000026475  | 7_Rgs16         | 73.92113679 | 0.199741 | 0.655181 | 0.901344 | 90.14667 | 58.39502 | 57.53061 | 45.64105 | 98.42659 | 93.38689 |
| ENSMUSG000000022015  | 8_Tnfrsf11      | 2.315197001 | 0.685374 | 0.655289 | 0.901429 | 2.348529 | 0.85875  | 1.150612 | 2.97659  | 5.656701 | 0        |
| ENSMUSG000000013076  | 15_Amtt1        | 4788.299512 | -0.10169 | 0.655383 | 0.901497 | 4789.143 | 4955.848 | 5125.977 | 4001.53  | 4833.085 | 5024.214 |
| ENSMUSG000000021032  | 13_Ngbl         | 2.938536521 | -0.54292 | 0.655435 | 0.901506 | 3.248529 | 6.011252 | 1.150612 | 2.97659  | 1.13134  | 3.12896  |
| ENSMUSG000000096996  | 1_Gm26792       | 38.41897242 | -0.18773 | 0.655499 | 0.901532 | 37.35808 | 42.93751 | 42.57265 | 46.63325 | 35.07154 | 25.9408  |
| ENSMUSG000000021055  | 13_Esr2         | 11.89004353 | -0.30124 | 0.655619 | 0.901635 | 12.99411 | 10.305   | 16.10857 | 4.960984 | 12.44474 | 14.52685 |
| ENSMUSG000000038633  | 5_Degs1         | 2207.512675 | 0.146732 | 0.655783 | 0.901735 | 2148.902 | 2259.372 | 1877.799 | 3206.78  | 1793.174 | 1599.049 |
| ENSMUSG000000056598  | 16_Lrrc48       | 60.73612244 | -0.17731 | 0.655745 | 0.901735 | 72.27976 | 56.67751 | 64.43428 | 44.64886 | 47.51628 | 78.86004 |
| ENSMUSG000000009741  | 14_Ubp1         | 1610.44336  | 0.099513 | 0.655847 | 0.901761 | 1559.294 | 1570.654 | 1534.917 | 1870.291 | 1566.906 | 1560.599 |
| ENSMUSG000000022303  | 8_Dcstamp       | 6.650663267 | 0.355364 | 0.655963 | 0.901859 | 5.684925 | 6.011252 | 5.753061 | 5.953181 | 11.3134  | 5.18816  |
| ENSMUSG000000027509  | 11_Rae1         | 815.0933084 | -0.15356 | 0.656165 | 0.902011 | 832.4355 | 854.4565 | 888.2725 | 480.2233 | 897.1527 | 938.0194 |
| ENSMUSG000000061313  | 7_Dhdh2         | 369.9446114 | 0.142844 | 0.656143 | 0.902011 | 333.7863 | 396.7426 | 324.4726 | 515.9423 | 315.6439 | 333.0799 |
| ENSMUSG000000048652  | 12_Samd13       | 2.520342175 | 0.617178 | 0.656323 | 0.902105 | 2.436397 | 3.435001 | 0        | 3.968787 | 1.13134  | 4.150528 |
| ENSMUSG000000090061  | 9_Nwd2          | 4.05566025  | -0.45075 | 0.656293 | 0.902105 | 5.684925 | 6.011252 | 2.301224 | 4.960984 | 2.26268  | 3.12896  |
| ENSMUSG000000070822  | 4_Zscan18       | 33.6487854  | -0.20961 | 0.656385 | 0.902127 | 34.10955 | 49.80751 | 24.16285 | 35.71909 | 24.88948 | 33.20423 |
| ENSMUSG000000063376  | 6_Ilna13        | 4.537438281 | 0.461441 | 0.656685 | 0.902415 | 7.30919  | 1.7175   | 2.301224 | 2.97659  | 5.656701 | 7.263424 |
| ENSMUSG000000071893  | 5_Vmn1r4        | 8.710732337 | -0.4143  | 0.656656 | 0.902415 | 12.99411 | 7.728752 | 9.204897 | 18.86735 | 3.39402  | 2.075264 |
| ENSMUSG000000034354  | 17_Mtmr3        | 3037.388819 | -0.13527 | 0.656757 | 0.902452 | 2998.392 | 3191.116 | 3349.432 | 2026.066 | 3442.668 | 3216.659 |
| ENSMUSG000000026421  | 14_Csp1         | 3776.011724 | -0.1569  | 0.656816 | 0.902471 | 3838.949 | 3745.868 | 4358.519 | 2170.927 | 4422.408 | 4119.399 |
| ENSMUSG000000033565  | 16_Rfbx2        | 2364.575471 | 0.092638 | 0.65702  | 0.902639 | 2200.066 | 2208.706 | 2457.707 | 2492.398 | 2398.441 | 2430.134 |
| ENSMUSG000000064063  | 5_BC048507      | 1.865368462 | -0.72188 | 0.657029 | 0.902639 | 2.436397 | 0        | 4.602448 | 1.984394 | 1.13134  | 1.037632 |
| ENSMUSG000000051853  | 9_Arf3          | 5002.374856 | -0.14414 | 0.657112 | 0.902691 | 4878.478 | 5153.36  | 5724.295 | 3156.178 | 5778.885 | 5323.052 |
| ENSMUSG000000061360  | 7_Phf5a         | 822.525784  | -0.13294 | 0.657276 | 0.902854 | 833.2476 | 791.7677 | 956.1587 | 582.4195 | 955.9824 | 815.5788 |
| ENSMUSG000000030007  | 8_Cd7           | 4352.275102 | -0.1482  | 0.657418 | 0.902863 | 4677.881 | 4200.147 | 4848.679 | 2655.119 | 5034.463 | 4697.36  |
| ENSMUSG000000062995  | 12_Ica1         | 39.18276334 | -0.17774 | 0.657407 | 0.902863 | 43.04301 | 43.79626 | 37.9702  | 44.64886 | 28.2835  | 37.35475 |
| ENSMUSG000000068642  | 18_Hmnc1        | 346.4294215 | -0.16496 | 0.657397 | 0.902863 | 379.2657 | 419.0702 | 300.3098 | 433.59   | 207.0352 | 339.3057 |
| ENSMUSG000000027573  | 11_Gid8         | 2074.547329 | 0.098553 | 0.657598 | 0.902984 | 1997.845 | 1799.94  | 2213.778 | 2090.559 | 2174.436 | 2170.726 |
| ENSMUSG000000098470  | 1_C1rb          | 227.593515  | 0.243422 | 0.657587 | 0.902984 | 257.4459 | 181.1963 | 186.3992 | 81.36014 | 378.9989 | 280.1607 |
| ENSMUSG000000097317  | 1_Gm17281       | 7.416377465 | 0.348836 | 0.657653 | 0.902998 | 5.684925 | 10.305   | 3.451836 | 8.929771 | 6.788041 | 9.338689 |
| ENSMUSG000000021647  | 6_Car1pt        | 3.396122904 | 0.710701 | 0.657788 | 0.903121 | 1.624264 | 6.011252 | 0        | 5.953181 | 6.788041 | 0        |
| ENSMUSG000000015790  | 16_Surf1        | 610.5125682 | -0.10969 | 0.657912 | 0.903166 | 631.8388 | 663.8139 | 605.222  | 499.075  | 605.267  | 657.8587 |
| ENSMUSG000000025521  | 14_Tmem192      | 458.1534809 | -0.10842 | 0.657902 | 0.903166 | 497.0249 | 483.4764 | 445.2869 | 388.9412 | 442.354  | 491.8376 |
| ENSMUSG000000042647  | 13_Acad12       | 132.8775392 | -0.2162  | 0.658014 | 0.903244 | 124.2562 | 164.88   | 139.2241 | 54.57082 | 124.4474 | 178.8867 |
| ENSMUSG000000026604  | 17_Ptpn14       | 1534.990624 | -0.1132  | 0.658302 | 0.903416 | 1543.863 | 1528.575 | 1713.261 | 1229.332 | 1466.217 | 189.695  |
| ENSMUSG000000028622  | 11_Mrp133       | 715.1973828 | -0.15019 | 0.658188 | 0.903416 | 715.4884 | 769.4402 | 772.0607 | 431.6056 | 832.6663 | 769.923  |
| ENSMUSG000000034493  | 1_4930556J24Rik | 2.258033008 | -0.62198 | 0.658249 | 0.903416 | 2.436397 | 3.435001 | 2.301224 | 0        | 2.26268  | 3.12896  |
| ENSMUSG000000042800  | 5_1700015E13Rik | 4.979623535 | -0.4523  | 0.658321 | 0.903416 | 6.497057 | 9.448252 | 1.150612 | 2.97659  | 5.656701 | 4.150528 |
| ENSMUSG000000002668  | 7_Dend1c        | 99.85195687 | -0.20459 | 0.658433 | 0.90347  | 110.45   | 113.355  | 96.65142 | 43.65666 | 131.2355 | 103.7632 |
| ENSMUSG000000005397  | 7_Nid1          | 3308.946796 | 0.139208 | 0.659764 | 0.90347  | 2894.439 | 3415.25  | 3138.87  | 4664.317 | 2638.285 | 3102.52  |
| ENSMUSG000000006570  | 3_Derb2         | 15.23683428 | 0.279746 | 0.658524 | 0.90347  | 14.61838 | 20.61001 | 5.753061 | 16.86735 | 16.9701  | 16.60211 |
| ENSMUSG0000000013091 | 5_Tmem190       |             |          |          |          |          |          |          |          |          |          |

|                     |                 |             |          |          |          |          |          |          |          |          |          |
|---------------------|-----------------|-------------|----------|----------|----------|----------|----------|----------|----------|----------|----------|
| ENSMUSG00000020990  | 4_Cdkl1         | 1.684780542 | 0.702452 | 0.66041  | 0.903678 | 1.624264 | 0        | 2.301224 | 2.97659  | 1.13134  | 2.075264 |
| ENSMUSG00000024233  | 10_Lyz1         | 6.797088168 | 0.353996 | 0.660504 | 0.903678 | 4.872793 | 5.152501 | 8.054285 | 10.91416 | 4.52536  | 7.263424 |
| ENSMUSG00000024240  | 13_Epc1         | 968.855324  | 0.110923 | 0.660602 | 0.903678 | 946.134  | 897.394  | 951.5562 | 1194.605 | 955.9824 | 867.4604 |
| ENSMUSG00000024672  | 11_Msa47        | 141.0986447 | 0.189997 | 0.660816 | 0.903678 | 179.4812 | 89.31002 | 126.5673 | 190.5018 | 166.307  | 94.42452 |
| ENSMUSG00000024798  | 15_Htr7         | 20.71005224 | 0.32501  | 0.660721 | 0.903678 | 20.3033  | 5.152501 | 29.91591 | 25.79712 | 31.67752 | 11.41395 |
| ENSMUSG00000028793  | 15_Rnf19b       | 1730.366856 | 0.152522 | 0.6606   | 0.903678 | 1618.579 | 1361.978 | 1936.48  | 1247.191 | 2405.229 | 1812.743 |
| ENSMUSG00000033207  | 6_Mamdc2        | 326.5001491 | 0.176622 | 0.660792 | 0.903678 | 307.7981 | 387.2964 | 224.3694 | 489.153  | 230.7934 | 319.5907 |
| ENSMUSG00000033294  | 11_Noc41        | 554.8613189 | -0.22034 | 0.660767 | 0.903678 | 597.7293 | 499.7926 | 693.8191 | 199.4316 | 787.4127 | 550.9826 |
| ENSMUSG00000033427  | 13_Upb1         | 133.4941765 | -0.14758 | 0.660311 | 0.903678 | 141.311  | 124.5188 | 155.3326 | 105.1729 | 108.6086 | 166.0211 |
| ENSMUSG00000039264  | 9_Gimap3        | 51.74199267 | 0.265265 | 0.660666 | 0.903678 | 77.15256 | 36.92626 | 26.46408 | 41.67227 | 95.03257 | 33.20423 |
| ENSMUSG00000039760  | 8_Il22ra2       | 1.023513131 | -0.85854 | 0.660668 | 0.903678 | 0.812132 | 0.85875  | 2.301224 | 0        | 1.13134  | 1.037632 |
| ENSMUSG00000042942  | 15_Greb11       | 30.52146647 | 0.256142 | 0.66087  | 0.903678 | 30.86102 | 31.77376 | 20.71102 | 53.57863 | 31.67752 | 14.52685 |
| ENSMUSG00000043079  | 17_Synpo        | 820.4796547 | -0.12304 | 0.660833 | 0.903678 | 747.9737 | 916.2865 | 902.0799 | 614.1698 | 866.6065 | 875.7615 |
| ENSMUSG00000048029  | 10_Eno4         | 6.336013015 | -0.35431 | 0.660502 | 0.903678 | 9.745586 | 6.870002 | 4.602448 | 5.953181 | 5.656701 | 5.18816  |
| ENSMUSG00000051314  | 11_Flar2        | 4.139981068 | 0.562046 | 0.660495 | 0.903678 | 8.121322 | 1.7175   | 0        | 3.968787 | 7.919381 | 3.112896 |
| ENSMUSG00000061859  | 16_Inadl        | 2056.760913 | -0.12159 | 0.660291 | 0.903678 | 2043.325 | 2097.068 | 2289.718 | 1497.225 | 2244.579 | 2168.651 |
| ENSMUSG00000097384  | 1_Gm26815       | 3.060151074 | 0.498553 | 0.660837 | 0.903678 | 1.624264 | 2.576251 | 3.451836 | 2.97659  | 5.656701 | 2.075264 |
| ENSMUSG00000039367  | 9_Sec24c        | 4421.258776 | -0.14553 | 0.660977 | 0.903762 | 4291.306 | 4492.981 | 5147.839 | 2769.221 | 5284.49  | 4541.716 |
| ENSMUSG00000044289  | 15_Clsnp        | 294.6436918 | 0.138287 | 0.661424 | 0.90428  | 326.4771 | 224.9926 | 289.9543 | 268.8853 | 384.6556 | 272.8972 |
| ENSMUSG00000061024  | 8_Rrs1          | 433.8341116 | 0.132599 | 0.661447 | 0.90428  | 368.708  | 395.8839 | 477.504  | 514.9501 | 504.5777 | 341.3809 |
| ENSMUSG00000029636  | 10_Wasf3        | 242.8620698 | 0.157278 | 0.661646 | 0.904428 | 237.1426 | 237.8738 | 214.0139 | 360.1674 | 177.6204 | 230.3543 |
| ENSMUSG00000032221  | 14_Mns1         | 34.90032299 | 0.193689 | 0.66163  | 0.904428 | 25.1761  | 32.63251 | 40.27142 | 42.66446 | 27.15216 | 41.50528 |
| ENSMUSG00000071324  | 11_Armc2        | 53.62563692 | 0.175885 | 0.661708 | 0.904451 | 35.73382 | 59.25377 | 56.37999 | 56.55522 | 46.38494 | 67.44608 |
| ENSMUSG00000000632  | 13_Se2b         | 7.573666547 | 0.396223 | 0.661837 | 0.904468 | 11.36985 | 6.870002 | 1.150612 | 11.90636 | 7.919381 | 6.225792 |
| ENSMUSG00000025358  | 15_Cdk2         | 1033.806005 | -0.1234  | 0.661947 | 0.904468 | 1073.639 | 1076.59  | 1081.575 | 739.1866 | 1077.036 | 1152.809 |
| ENSMUSG00000026608  | 12_Kctd3        | 1002.635865 | -0.1152  | 0.661795 | 0.904468 | 1020.85  | 997.8678 | 1109.19  | 765.9759 | 1077.036 | 1044.895 |
| ENSMUSG00000031079  | 12_Zfp300       | 34.84966389 | 0.294621 | 0.661936 | 0.904468 | 37.35808 | 36.92626 | 19.56041 | 76.39915 | 18.10144 | 20.75264 |
| ENSMUSG00000032332  | 17_Col12a1      | 9812.569417 | -0.13865 | 0.661909 | 0.904468 | 10485.44 | 11707.34 | 8658.356 | 11560.09 | 6703.19  | 9761.005 |
| ENSMUSG00000030155  | 7_Clec2e        | 2.063888898 | 0.838352 | 0.662033 | 0.904518 | 2.436397 | 0.85875  | 1.150612 | 7.937575 | 0        | 0        |
| ENSMUSG00000072919  | 3_Noxred1       | 8.273542147 | 0.362001 | 0.662075 | 0.904518 | 5.684925 | 6.870002 | 9.204897 | 8.929771 | 15.83876 | 3.112896 |
| ENSMUSG000000001783 | 3_Rtcb          | 2984.637346 | -0.13606 | 0.66238  | 0.904762 | 3155.134 | 2927.48  | 3293.052 | 1966.534 | 3501.498 | 3064.127 |
| ENSMUSG00000017667  | 9_Zfp334        | 157.908458  | -0.13077 | 0.662378 | 0.904762 | 159.1779 | 189.7838 | 146.1277 | 178.5954 | 135.7608 | 138.0051 |
| ENSMUSG00000034009  | 14_Rxfp1        | 64.0066479  | 0.193729 | 0.662392 | 0.904762 | 52.78859 | 46.37251 | 80.54285 | 93.2665  | 65.61773 | 45.65581 |
| ENSMUSG00000057103  | 10_Cml1         | 34.0965011  | -0.20543 | 0.662436 | 0.904762 | 45.4794  | 39.50251 | 24.16285 | 22.82053 | 37.33422 | 35.27949 |
| ENSMUSG00000034575  | 11_Papd7        | 1110.753266 | 0.135111 | 0.662531 | 0.904781 | 989.9891 | 902.5465 | 1284.083 | 904.8835 | 1419.832 | 1163.186 |
| ENSMUSG00000070426  | 12_Rnf121       | 1044.267352 | 0.109577 | 0.66254  | 0.904781 | 1002.983 | 986.704  | 1024.045 | 890.9927 | 1230.898 | 1129.981 |
| ENSMUSG000000100213 | 1_Gm28151       | 23.24626672 | 0.340745 | 0.662593 | 0.904792 | 20.3033  | 24.04501 | 17.25918 | 56.55522 | 6.788041 | 14.52685 |
| ENSMUSG00000031981  | 7_Capn9         | 1.500779574 | -0.97704 | 0.662779 | 0.904984 | 0        | 2.576251 | 3.451836 | 2.97659  | 0        | 0        |
| ENSMUSG00000000617  | 14_Grm6         | 10.01080358 | 0.339498 | 0.66495  | 0.905023 | 10.55772 | 11.16375 | 4.602448 | 14.88295 | 14.70742 | 4.150528 |
| ENSMUSG00000010054  | 4_Tusc2         | 438.3663567 | -0.13114 | 0.665065 | 0.905023 | 476.7216 | 469.7364 | 428.0277 | 301.6278 | 469.5061 | 484.5742 |
| ENSMUSG00000013160  | 7_Atp6v0d1      | 1907.03058  | -0.13992 | 0.664489 | 0.905023 | 1902.014 | 1997.453 | 2098.716 | 1201.55  | 2149.546 | 2092.904 |
| ENSMUSG00000016918  | 15_Sulf1        | 1041.19706  | 0.123916 | 0.664267 | 0.905023 | 1089.069 | 1061.415 | 838.7962 | 1329.544 | 919.7795 | 1008.578 |
| ENSMUSG00000017801  | 15_Mlx          | 806.5625978 | 0.120442 | 0.663716 | 0.905023 | 817.005  | 673.2602 | 828.4407 | 674.6938 | 977.4778 | 868.498  |
| ENSMUSG00000020303  | 2_Sic2          | 61.67303806 | -0.15086 | 0.664413 | 0.905023 | 64.15844 | 77.28752 | 52.92816 | 58.53961 | 61.09237 | 56.03213 |
| ENSMUSG00000021303  | 13_Gng4         | 22.64613716 | 0.239521 | 0.664789 | 0.905023 | 14.61838 | 24.90376 | 23.01224 | 31.7503  | 13.57608 | 28.01607 |
| ENSMUSG00000021381  | 4_Baxr1         | 0.327124048 | -1.74383 | 0.665469 | 0.905023 | 0.812132 | 0        | 1.150612 | 0        | 0        | 0        |
| ENSMUSG00000021765  | 7_Fst           | 153.044979  | 0.164968 | 0.664008 | 0.905023 | 161.6143 | 153.7163 | 117.3624 | 219.2755 | 158.3876 | 107.9137 |
| ENSMUSG00000023084  | 11_Lrrc71       | 70.6287621  | -0.2299  | 0.665315 | 0.905023 | 73.0919  | 80.72252 | 74.78979 | 23.81272 | 76.93119 | 42.94252 |
| ENSMUSG00000023805  | 16_Symj2        | 1630.600958 | -0.12288 | 0.664359 | 0.905023 | 1652.689 | 1617.885 | 1829.473 | 1179.722 | 1650.625 | 1853.211 |
| ENSMUSG00000026116  | 11_Tmem131      | 2630.813648 | 0.095624 | 0.665415 | 0.905023 | 2389.293 | 2549.629 | 2692.432 | 2977.583 | 2658.649 | 2517.295 |
| ENSMUSG00000026175  | 12_Vil1         | 3.287704535 | -0.48201 | 0.664789 | 0.905023 | 4.872793 | 4.293751 | 2.301224 | 2.97659  | 1.13134  | 4.150528 |
| ENSMUSG00000026926  | 14_Pmpca        | 1993.259976 | 0.091801 | 0.66348  | 0.905023 | 1891.456 | 1861.77  | 2036.583 | 2079.645 | 2151.809 | 1938.297 |
| ENSMUSG00000027073  | 5_Prg2          | 0.327124048 | -1.74383 | 0.665469 | 0.905023 | 0.812132 | 0        | 1.150612 | 0        | 0        | 0        |
| ENSMUSG00000027345  | 6_4921508D12Rik | 0.327124048 | -1.74383 | 0.665469 | 0.905023 | 0.812132 | 0        | 1.150612 | 0        | 0        | 0        |
| ENSMUSG00000027925  | 2_Spr2j-ps      | 0.327124048 | -1.74383 | 0.665469 | 0.905023 | 0.812132 | 0        | 1.150612 | 0        | 0        | 0        |
| ENSMUSG00000031430  | 8_Vsig1         | 0.327124048 | -1.74383 | 0.665469 | 0.905023 | 0.812132 | 0        | 1.150612 | 0        | 0        | 0        |
| ENSMUSG00000032318  | 12_Isl2         | 0.327124048 | -1.74383 | 0.665469 | 0.905023 | 0.812132 | 0        | 1.150612 | 0        | 0        | 0        |
| ENSMUSG00000032493  | 8_Prss44        | 0.327124048 | -1.74383 | 0.665469 | 0.905023 | 0.812132 | 0        | 1.150612 | 0        | 0        | 0        |
| ENSMUSG000000334211 | 14_Mrps17       | 682.222845  | 0.106179 | 0.665111 | 0.905023 | 667.5727 | 656.0852 | 647.7946 | 821.539  | 678.8041 | 621.5416 |
| ENSMUSG000000336030 | 9_Prtg          | 33.46728033 | -0.21364 | 0.663699 | 0.905023 | 33.29742 | 44.65501 | 29.91591 | 44.64886 | 19.23278 | 29.0537  |
| ENSMUSG000000336295 | 4_Lrrn3         | 15.66104487 | 0.255433 | 0.665489 | 0.905023 | 16.24264 | 17.175   | 9.204897 | 21.82833 | 18.10144 | 11.41395 |
| ENSMUSG000000337984 | 9_Neurod6       | 0.327124048 | -1.74383 | 0.665469 | 0.905023 | 0.812132 | 0        | 1.150612 | 0        | 0        | 0        |
| ENSMUSG00000040258  | 6_Nxph4         | 44.39138239 | -0.26532 | 0.664741 | 0.905023 | 51.97646 | 57.53626 | 35.66898 | 12.89856 | 41.85958 | 66.40845 |
| ENSMUSG00000044689  | 5_Gm13749       | 1.079926453 | -0.95701 | 0.663248 | 0.905023 | 0        | 0.85875  | 3.451836 | 0        | 1.13134  | 1.037632 |
| ENSMUSG00000045004  | 3_Spata21       | 0.327124048 | -1.74383 | 0.665469 | 0.905023 | 0.812132 | 0        | 1.150612 | 0        | 0        | 0        |
| ENSMUSG00000046897  | 16_Zfp740       | 2347.860713 | -0.1085  | 0.663471 | 0.905023 | 2367.365 | 2491.234 | 2449.653 | 1883.19  | 2257.024 | 2638.698 |
| ENSMUSG00000047150  | 8_1700001C19Rik | 40.36341612 | -0.18388 | 0.663394 | 0.905023 | 34.92168 | 55.81876 | 37.9702  | 32.74249 | 35.07154 | 45.65581 |
| ENSMUSG00000047237  | 13_Fbxw21       | 0.327124048 | -1.74383 | 0.665469 | 0.905023 | 0.812132 | 0        | 1.150612 | 0        | 0        | 0        |
| ENSMUSG00000049734  | 9_Trex1         | 1138.722512 | -0.42693 | 0.665351 | 0.905023 | 1047.651 | 1033.935 | 1836.377 | 17.85954 | 1697.01  | 1199.503 |
| ENSMUSG00000049809  | 2_Krtap9-3      | 0.327124048 | -1.74383 | 0.665469 | 0.905023 | 0.812132 | 0        | 1.150612 | 0        | 0        | 0        |
| ENSMUSG00000050445  | 3_Cypbb1        | 0.327124048 | -1.74383 | 0.665469 | 0.905023 | 0.812132 | 0        | 1.150612 | 0        | 0        | 0        |
| ENSMUSG00000050483  | 8_Atrnl1        | 1114.586856 | 0.160132 | 0.663205 | 0.905023 | 1066.33  | 1177.347 | 914.7366 | 1703.602 | 805.5142 | 1019.992 |
| ENSMUSG000000505775 | 16_Myh8         | 88.89952643 | 0.166824 | 0.663994 | 0.905023 | 75.52829 | 115.0725 | 58.68122 | 125.0168 | 66.74907 | 92.34925 |
| ENSMUSG00000058976  | 4_Uspl71c       | 0.327124048 | -1.74383 | 0.665469 | 0.905023 | 0.812132 | 0        | 1.150612 | 0        | 0        | 0        |
| ENSMUSG00000060162  | 2_Mageb1        | 0.327124048 | -1.74383 | 0.665469 | 0.905023 | 0.812132 | 0        | 1.150612 | 0        | 0        | 0        |
| ENSMUSG000000607173 | 3_Mrgpra4       | 0.327124048 | -1.74383 | 0.665469 | 0.905023 | 0.812132 | 0        | 1.150612 | 0        | 0        | 0        |
| ENSMUSG00000068966  | 10_Zbtb34       | 543.1178631 | 0.115276 | 0.665271 | 0.905023 | 517.3282 | 473.1714 | 574.1554 | 652.8655 | 569.0641 | 472.1226 |
| ENSMUSG00000073290  | 1_Gm10490       | 0.          |          |          |          |          |          |          |          |          |          |

|                     |                  |             |           |          |          |          |          |          |          |          |          |
|---------------------|------------------|-------------|-----------|----------|----------|----------|----------|----------|----------|----------|----------|
| ENSMUSG000000051076 | 8_Vtcn1          | 52.32150363 | 0.171582  | 0.666656 | 0.905857 | 43.04301 | 42.93751 | 62.13305 | 57.54742 | 41.85958 | 66.40845 |
| ENSMUSG000000070421 | 3_Olfr58         | 1.256087316 | 0.123025  | 0.666586 | 0.905857 | 2.436397 | 0        | 0        | 3.968787 | 1.13134  | 0        |
| ENSMUSG000000072423 | 4_Psmb11         | 1.831483859 | -0.73598  | 0.666618 | 0.905857 | 5.684925 | 0        | 1.150612 | 1.984394 | 1.13134  | 1.037632 |
| ENSMUSG000000091774 | 1_Gm4890         | 26.9210839  | 0.220732  | 0.666593 | 0.905857 | 24.36397 | 36.06751 | 13.80735 | 27.78151 | 29.41484 | 30.09133 |
| ENSMUSG000000028649 | 17_Macf1         | 5744.111977 | 0.095026  | 0.667044 | 0.90621  | 5777.508 | 5374.918 | 5512.583 | 6504.842 | 5990.446 | 5304.375 |
| ENSMUSG000000026669 | 14_Mcm10         | 332.5824428 | 0.151986  | 0.667136 | 0.906211 | 313.483  | 267.0173 | 364.744  | 231.1819 | 442.354  | 376.6604 |
| ENSMUSG000000100335 | 1_231008N11Rik   | 1.045963193 | -1.03651  | 0.667098 | 0.906211 | 1.624264 | 2.576251 | 0        | 0        | 0        | 2.075264 |
| ENSMUSG000000040054 | 15_Baz2a         | 5795.61165  | -0.14703  | 0.667302 | 0.906374 | 5684.113 | 5818.892 | 6769.051 | 3468.72  | 6604.764 | 6428.131 |
| ENSMUSG000000037957 | 14_Wdr20         | 814.7443863 | 0.096578  | 0.667443 | 0.906504 | 773.962  | 735.0902 | 853.7542 | 876.1098 | 860.9498 | 788.6004 |
| ENSMUSG000000019849 | 10_Prep          | 1957.627801 | -0.12015  | 0.667624 | 0.906626 | 1850.849 | 1902.132 | 2364.508 | 1528.975 | 1937.791 | 1861.512 |
| ENSMUSG000000032038 | 6_St3gal4        | 725.4293812 | 0.09767   | 0.667583 | 0.906626 | 753.6587 | 666.3902 | 682.313  | 695.53   | 805.5142 | 749.1704 |
| ENSMUSG000000051860 | 13_Samd7         | 8.95088169  | -0.43208  | 0.667826 | 0.906839 | 18.67904 | 8.587502 | 3.451836 | 12.89856 | 9.050721 | 1.037632 |
| ENSMUSG000000025241 | 15_Fyco1         | 3007.587622 | 0.090831  | 0.668122 | 0.906998 | 2796.171 | 3006.485 | 2936.362 | 3355.61  | 2944.878 | 3006.02  |
| ENSMUSG000000032309 | 15_Fbxo22        | 598.9493759 | 0.124045  | 0.66804  | 0.906998 | 611.5355 | 516.9676 | 591.4146 | 788.7965 | 521.5478 | 563.4342 |
| ENSMUSG000000051736 | 8_Fam229b        | 62.86829126 | 0.205138  | 0.668125 | 0.906998 | 57.66138 | 66.98252 | 50.62693 | 109.1416 | 42.99092 | 49.80634 |
| ENSMUSG000000063903 | 5_Klk1           | 16.10051842 | -0.38503  | 0.668036 | 0.906998 | 32.48529 | 2.576251 | 19.56041 | 9.921968 | 23.75814 | 8.301057 |
| ENSMUSG000000032231 | 14_Anxa2         | 70674.29151 | -0.18365  | 0.668652 | 0.907651 | 75789.8  | 67579.35 | 82130.69 | 31454.62 | 89750.34 | 77340.94 |
| ENSMUSG000000029378 | 5_Areg           | 199.5342421 | 0.204731  | 0.66884  | 0.907783 | 216.8393 | 104.7675 | 234.7249 | 225.2287 | 295.2798 | 120.3653 |
| ENSMUSG000000049409 | 9_Prokr1         | 38.21116143 | 0.179392  | 0.668821 | 0.907783 | 32.48529 | 39.50251 | 35.66898 | 46.63325 | 28.2835  | 46.69344 |
| ENSMUSG000000039851 | 11_4932438H23Rik | 36.44871838 | -0.21351  | 0.669151 | 0.908143 | 37.35808 | 52.38376 | 27.61469 | 48.61764 | 22.6268  | 30.09133 |
| ENSMUSG000000035246 | 16_Pcyt1b        | 66.62142975 | 0.174341  | 0.669351 | 0.908352 | 73.90403 | 72.13502 | 41.42204 | 85.32893 | 54.30432 | 72.63424 |
| ENSMUSG000000034648 | 9_Lrrn1          | 75.52162571 | 0.241814  | 0.66981  | 0.908892 | 72.27976 | 79.00502 | 56.37999 | 127.0012 | 27.15216 | 91.31162 |
| ENSMUSG000000097709 | 7_2810429I04Rik  | 12.83334096 | -0.30565  | 0.66984  | 0.908892 | 9.745586 | 25.76251 | 6.903673 | 12.89856 | 11.3134  | 10.37632 |
| ENSMUSG000000032352 | 15_Lrrc1         | 993.4168342 | 0.108267  | 0.669997 | 0.908962 | 913.6487 | 899.1115 | 1056.262 | 1208.496 | 923.1735 | 959.8097 |
| ENSMUSG000000051413 | 17_Plagl2        | 979.3540377 | 0.104422  | 0.669969 | 0.908962 | 939.6369 | 851.0215 | 1041.304 | 920.7586 | 1144.916 | 978.487  |
| ENSMUSG000000078161 | 8_Erich3         | 7.620500197 | -0.32434  | 0.670028 | 0.908962 | 6.497057 | 5.897502 | 10.35551 | 3.968787 | 9.050721 | 7.263442 |
| ENSMUSG000000047363 | 4_Cstad          | 4.494929057 | -0.41375  | 0.670275 | 0.909235 | 4.060661 | 3.435001 | 8.054285 | 3.968787 | 2.26268  | 5.18816  |
| ENSMUSG000000003382 | 18_Elv3          | 1616.104617 | 0.091771  | 0.670488 | 0.909462 | 1509.754 | 1541.457 | 1643.074 | 1537.905 | 1763.759 | 1700.679 |
| ENSMUSG000000003355 | 6_Fkbp11         | 29.22142819 | -0.30341  | 0.670841 | 0.909815 | 34.10955 | 29.19751 | 33.36775 | 5.953181 | 50.9103  | 21.79027 |
| ENSMUSG000000037708 | 16_Spag6l        | 5.827934769 | 0.363856  | 0.670852 | 0.909815 | 4.060661 | 7.728752 | 3.451836 | 7.937575 | 4.52536  | 7.263424 |
| ENSMUSG000000040899 | 13_Ccr6          | 3.487510458 | -0.54197  | 0.670885 | 0.909815 | 2.348529 | 3.435001 | 5.753061 | 0        | 2.26268  | 6.225792 |
| ENSMUSG000000108763 | 1_RP23-198F11    | 1.548960483 | 0.830089  | 0.670936 | 0.909821 | 2.436397 | 0.85875  | 0        | 4.960984 | 0        | 1.037632 |
| ENSMUSG000000034266 | 5_Batf           | 6.162639749 | -0.28727  | 0.671095 | 0.909913 | 25.1761  | 18.8925  | 25.31347 | 4.960984 | 27.15216 | 24.90317 |
| ENSMUSG000000096878 | 2_Gm21655        | 1.248230758 | 0.128916  | 0.671071 | 0.909913 | 0        | 0        | 2.301224 | 0        | 0        | 5.18816  |
| ENSMUSG000000019854 | 16_Reps1         | 1524.685148 | 0.100509  | 0.671251 | 0.910022 | 1410.674 | 1404.915 | 1599.351 | 1404.951 | 1772.81  | 1555.41  |
| ENSMUSG000000037336 | 14_Mfsd2b        | 53.14678167 | -0.15233  | 0.671266 | 0.910022 | 47.10367 | 60.97127 | 59.83183 | 43.65666 | 55.43567 | 51.8816  |
| ENSMUSG000000097784 | 1_A430105J06Rik  | 9.641901885 | -0.31195  | 0.671348 | 0.91007  | 9.745586 | 12.0225  | 10.35551 | 14.88295 | 5.667091 | 5.18816  |
| ENSMUSG000000027048 | 15_Abcb11        | 0.610162121 | -0.19129  | 0.671477 | 0.910184 | 0.812132 | 1.7175   | 0        | 0        | 1.13134  | 0        |
| ENSMUSG000000027070 | 14_Lrp2          | 130.6796704 | -0.20441  | 0.671639 | 0.910207 | 142.1231 | 192.36   | 85.1453  | 158.7515 | 65.61773 | 140.0803 |
| ENSMUSG000000039114 | 15_Nnn1          | 23.65060797 | 0.122254  | 0.671653 | 0.910207 | 28.42463 | 23.18626 | 13.80735 | 24.80492 | 22.6268  | 29.0537  |
| ENSMUSG000000057816 | 7_1700007G11Rik  | 6.394070703 | 0.397575  | 0.671677 | 0.910207 | 2.436397 | 5.152501 | 9.204897 | 12.89856 | 4.52536  | 4.150528 |
| ENSMUSG000000096988 | 1_A930029G22Rik  | 2.140093506 | -0.64163  | 0.671603 | 0.910207 | 3.248529 | 3.435001 | 1.150612 | 3.968787 | 0        | 1.037632 |
| ENSMUSG000000002103 | 15_Acp2          | 930.3030016 | -0.13695  | 0.671774 | 0.910221 | 982.6799 | 952.354  | 745.5966 | 1117.214 | 855.2931 | 928.8807 |
| ENSMUSG000000021508 | 10_Cxcl14        | 380.1683015 | -0.23383  | 0.671778 | 0.910221 | 666.7605 | 214.6876 | 350.9367 | 210.3457 | 574.7208 | 263.5585 |
| ENSMUSG000000074437 | 5_Defa-rs1       | 3.234406458 | 0.564189  | 0.671931 | 0.910365 | 1.624264 | 1.7175   | 4.602448 | 0.992197 | 1.13134  | 9.338689 |
| ENSMUSG000000048572 | 4_Tmem252        | 34.30634229 | 0.182811  | 0.672005 | 0.910403 | 36.54595 | 30.91501 | 28.7653  | 40.68007 | 42.99092 | 25.9408  |
| ENSMUSG000000101678 | 3_Gm29609        | 48.92061486 | -0.18663  | 0.672207 | 0.91043  | 50.3522  | 43.79626 | 62.13305 | 42.66446 | 64.48639 | 30.09133 |
| ENSMUSG000000028495 | 14_Rps6          | 14292.49718 | -0.11472  | 0.672341 | 0.910611 | 15324.12 | 14105.83 | 15151.26 | 10470.65 | 15165.61 | 15537.3  |
| ENSMUSG000000035107 | 13_Dcbld2        | 354.2649686 | 0.156465  | 0.672294 | 0.910611 | 318.3558 | 407.9064 | 279.5987 | 503.0438 | 254.5515 | 362.1336 |
| ENSMUSG000000101849 | 1_Gm28386        | 1.839639572 | -0.6618   | 0.672321 | 0.910611 | 1.624264 | 1.7175   | 3.451836 | 0        | 1.13134  | 3.112896 |
| ENSMUSG000000059495 | 13_Arhgef12      | 10913.7229  | 0.087499  | 0.672484 | 0.910743 | 10141.09 | 10639.06 | 10968.79 | 11976.81 | 10642.52 | 11114.08 |
| ENSMUSG000000026080 | 13_Cstb10        | 393.4067147 | -0.1067   | 0.672695 | 0.910967 | 358.9624 | 440.5389 | 424.5759 | 363.144  | 352.9781 | 420.241  |
| ENSMUSG000000002602 | 16_Axl           | 3586.040767 | -0.08782  | 0.672971 | 0.911167 | 3665.965 | 3685.756 | 3733.736 | 3249.445 | 3456.244 | 3725.099 |
| ENSMUSG000000025911 | 14_Adhf1e        | 101.3286064 | 0.174792  | 0.673007 | 0.911167 | 98.26799 | 109.0613 | 78.24162 | 143.8685 | 63.35051 | 15.1772  |
| ENSMUSG000000035693 | 14_Shc4          | 27.78048151 | -0.26541  | 0.672952 | 0.911167 | 42.23087 | 25.76251 | 23.01224 | 44.64886 | 11.3134  | 19.71501 |
| ENSMUSG000000096973 | 6_Cest1d         | 7437.681149 | 0.095364  | 0.673026 | 0.911167 | 7473.24  | 6924.103 | 7178.669 | 8099.303 | 6683.957 | 8266.815 |
| ENSMUSG000000015289 | 4_Lage3          | 434.7059053 | -0.14587  | 0.673144 | 0.911266 | 484.8429 | 436.2451 | 448.7387 | 267.8931 | 429.9092 | 540.6063 |
| ENSMUSG000000004892 | 16_Bcan          | 1.395722604 | -0.83846  | 0.673365 | 0.911327 | 0.812132 | 3.435001 | 1.150612 | 2.97659  | 0        | 0        |
| ENSMUSG000000041360 | 7_Pum3           | 1324.041125 | 0.095771  | 0.673373 | 0.911327 | 1264.49  | 1205.685 | 1370.379 | 1408.919 | 1466.217 | 1228.556 |
| ENSMUSG000000066170 | 6_E230001N04Rik  | 5.266997148 | 0.373642  | 0.673357 | 0.911327 | 4.872793 | 4.293751 | 4.602448 | 3.968787 | 4.52536  | 9.338689 |
| ENSMUSG000000068117 | 9_Me1f           | 30.29724221 | -0.22642  | 0.673371 | 0.911327 | 27.61249 | 33.49126 | 36.81959 | 13.89076 | 42.99092 | 26.97843 |
| ENSMUSG000000004113 | 18_Cacna1b       | 4.274248447 | 0.506784  | 0.673459 | 0.911382 | 2.436397 | 6.870002 | 1.150612 | 3.968787 | 10.18206 | 1.037632 |
| ENSMUSG000000021411 | 15_Pxdcl1        | 804.5752377 | -0.14562  | 0.673757 | 0.911476 | 789.3925 | 753.1239 | 992.9783 | 503.0438 | 965.0331 | 823.8799 |
| ENSMUSG000000025081 | 13_Tdrd1         | 2.736317685 | 0.535713  | 0.673582 | 0.911476 | 2.436397 | 0.85875  | 3.451836 | 2.97659  | 5.565701 | 1.037632 |
| ENSMUSG000000045620 | 6_Odf3l1         | 0.594544115 | -1.19086  | 0.673753 | 0.911476 | 0.812132 | 1.7175   | 0        | 0        | 0        | 1.037632 |
| ENSMUSG000000068009 | 11_Bpifb6        | 0.594544115 | -1.19086  | 0.673753 | 0.911476 | 0.812132 | 1.7175   | 0        | 0        | 0        | 1.037632 |
| ENSMUSG000000105057 | 1_Gm40190        | 0.594544115 | -1.19086  | 0.673753 | 0.911476 | 0.812132 | 1.7175   | 0        | 0        | 0        | 1.037632 |
| ENSMUSG000000073633 | 9_Fbxo36         | 109.3051848 | 0.126054  | 0.673924 | 0.91164  | 111.2621 | 98.75628 | 103.5551 | 103.1885 | 105.2146 | 133.8545 |
| ENSMUSG000000005947 | 11_Igtae         | 18.56147456 | 0.309386  | 0.674187 | 0.911829 | 15.43051 | 6.870002 | 27.61469 | 8.929771 | 32.80886 | 19.71501 |
| ENSMUSG000000022425 | 15_Enpp2         | 1116.148423 | 0.23952   | 0.674517 | 0.911829 | 876.2906 | 1596.417 | 598.3183 | 2127.27  | 566.8014 | 931.7936 |
| ENSMUSG000000024604 | 7_Rbm22          | 1006.627985 | 0.095675  | 0.674614 | 0.911829 | 988.3649 | 949.7777 | 981.4721 | 960.4465 | 1169.806 | 989.901  |
| ENSMUSG000000029155 | 16_Spata18       | 1.049163363 | -0.105491 | 0.674499 | 0.911829 | 0        | 0.85875  | 3.451836 | 1.984394 | 0        | 0        |
| ENSMUSG000000033187 | 7_BC016579       | 165.9338561 | 0.151585  | 0.674553 | 0.911829 | 159.1779 | 135.6825 | 177.1943 | 243.0882 | 141.4175 | 139.0427 |
| ENSMUSG000000035355 | 15_Kcnh4         | 6.04708411  | -0.47422  | 0.674332 | 0.911829 | 7.30919  | 3.435001 | 10.35551 | 0        | 7.919381 | 7.263424 |
| ENSMUSG000000037885 | 18_Stk35         | 23021.5646  | -0.10725  | 0.674539 | 0.911829 | 22804.67 | 22902.87 | 25923.29 | 18268.33 | 22374.51 | 25655.72 |
|                     |                  |             |           |          |          |          |          |          |          |          |          |

|                       |                 |             |           |          |          |          |          |          |          |          |          |
|-----------------------|-----------------|-------------|-----------|----------|----------|----------|----------|----------|----------|----------|----------|
| ENSMUSG00000031654    | 15_Cbin1        | 917.9730475 | -0.10826  | 0.676606 | 0.912665 | 873.8542 | 887.089  | 1096.533 | 787.8043 | 1014.812 | 847.7454 |
| ENSMUSG000000044162   | 11_Trip3        | 28.91348299 | 0.220181  | 0.676593 | 0.912665 | 20.3033  | 26.62126 | 33.36775 | 34.72689 | 41.85958 | 16.60211 |
| 1_Gm42530             |                 | 1.677208001 | 0.691573  | 0.676583 | 0.912665 | 1.624264 | 0        | 2.301224 | 3.968787 | 1.13134  | 1.037632 |
| ENSMUSG000000025532   | 13_Crcp         | 646.0333799 | -0.09801  | 0.676668 | 0.912686 | 653.7664 | 624.3114 | 726.0362 | 562.5756 | 651.6519 | 657.8587 |
| ENSMUSG000000024427   | 6_Spry4         | 107.3254621 | -0.12077  | 0.676831 | 0.912728 | 120.1956 | 104.7675 | 110.4588 | 98.22748 | 96.16391 | 114.1395 |
| ENSMUSG000000024457   | 16_Trim26       | 2894.65363  | 0.097222  | 0.676877 | 0.912728 | 2627.248 | 2644.092 | 3120.46  | 2693.814 | 3237.895 | 3044.412 |
| ENSMUSG000000034707   | 6_Gns           | 9068.282602 | -0.09678  | 0.676804 | 0.912728 | 8909.09  | 9806.069 | 9401.652 | 7504.977 | 9477.236 | 9310.673 |
| ENSMUSG000000039936   | 18_Pik3cd       | 173.2894637 | -0.25181  | 0.676882 | 0.912728 | 247.7003 | 143.4113 | 173.7424 | 45.64105 | 271.5216 | 157.7201 |
| ENSMUSG000000024052   | 17_Lpin2        | 6265.942915 | 0.089289  | 0.676932 | 0.912733 | 5977.293 | 6280.899 | 5957.87  | 6100.026 | 7114.998 | 6164.572 |
| ENSMUSG000000030895   | 8_Hpx           | 10.7615827  | -0.3679   | 0.677022 | 0.912792 | 12.99411 | 12.88125 | 10.35551 | 0.992197 | 16.9701  | 10.37632 |
| ENSMUSG000000033579   | 16_Fa2h         | 5.347018329 | -0.39187  | 0.677092 | 0.912826 | 8.933454 | 3.435001 | 5.753061 | 1.984394 | 6.788041 | 5.18816  |
| ENSMUSG000000026851   | 9_BC005624      | 1021.700142 | -0.13072  | 0.677266 | 0.912996 | 996.4862 | 1003.879 | 1203.54  | 684.6158 | 1169.806 | 1071.874 |
| ENSMUSG000000027010   | 16_Slc25a12     | 931.5422355 | -0.08942  | 0.677336 | 0.912996 | 935.5763 | 1015.902 | 929.6946 | 921.7508 | 858.6871 | 927.6431 |
| ENSMUSG000000032051   | 8_Fdx1          | 360.7535364 | 0.096661  | 0.677648 | 0.912996 | 342.7198 | 340.9238 | 362.4428 | 344.2923 | 389.181  | 384.9615 |
| ENSMUSG000000050189   | 4_Etos1         | 0.602392447 | -1.16984  | 0.677716 | 0.912996 | 1.624264 | 0.85875  | 0        | 0        | 1.13134  | 0        |
| ENSMUSG000000050379   | 15_Sept6        | 171.5651562 | 0.14839   | 0.677723 | 0.912996 | 176.2327 | 179.4788 | 132.3204 | 241.1038 | 167.4383 | 132.8169 |
| ENSMUSG000000051339   | 8_2900026A02Rik | 4352.280676 | -0.13178  | 0.677751 | 0.912996 | 3947.775 | 4262.836 | 5442.395 | 2976.59  | 4736.921 | 4747.167 |
| 6_Hist1h4d            |                 | 0.602392447 | -1.16984  | 0.677716 | 0.912996 | 1.624264 | 0.85875  | 0        | 0        | 1.13134  | 0        |
| ENSMUSG000000062064   | 6_Slc2a7        | 0.602392447 | -1.16984  | 0.677716 | 0.912996 | 1.624264 | 0.85875  | 0        | 0        | 1.13134  | 0        |
| ENSMUSG000000085584   | 3_Rgap1         | 4.876416753 | 0.45298   | 0.677541 | 0.912996 | 6.497057 | 3.435001 | 2.301224 | 0.992197 | 5.656701 | 10.37632 |
| ENSMUSG000000091423   | 1_Gm17509       | 0.602392447 | -1.16984  | 0.677716 | 0.912996 | 1.624264 | 0.85875  | 0        | 0        | 1.13134  | 0        |
| ENSMUSG000000096049   | 1_Gm2075        | 0.602392447 | -1.16984  | 0.677716 | 0.912996 | 1.624264 | 0.85875  | 0        | 0        | 1.13134  | 0        |
| ENSMUSG000000010505   | 15_Myt1         | 7.991275764 | -0.40407  | 0.677912 | 0.913143 | 15.43051 | 9.446252 | 2.301224 | 11.90636 | 6.788041 | 2.075264 |
| ENSMUSG000000027569   | 15_Mrgbp        | 648.8579676 | -0.10116  | 0.677946 | 0.913143 | 634.2752 | 691.2939 | 689.2167 | 536.7785 | 650.5206 | 691.063  |
| ENSMUSG000000039218   | 16_Srm2         | 12153.03166 | -0.11416  | 0.678015 | 0.913143 | 11891.24 | 13284.87 | 12724.62 | 8844.442 | 12900.67 | 1037.363 |
| ENSMUSG000000075304   | 2_Sp5           | 2.400220426 | -0.84095  | 0.677986 | 0.913143 | 4.060661 | 5.152501 | 0        | 0        | 0        | 5.18816  |
| ENSMUSG000000026828   | 11_Galnt5       | 48.16674662 | 0.181537  | 0.678231 | 0.913187 | 56.84925 | 47.23126 | 31.06653 | 67.46938 | 40.72824 | 45.65581 |
| ENSMUSG000000030786   | 18_Iltam        | 7414.112441 | -0.112424 | 0.678182 | 0.913187 | 6978.652 | 6462.954 | 7934.621 | 6452.256 | 9384.466 | 7271.726 |
| ENSMUSG000000038708   | 9_Golga4        | 9772.150056 | 0.085907  | 0.678219 | 0.913187 | 9241.252 | 9115.634 | 10087.42 | 10464.7  | 9565.481 | 10158.42 |
| ENSMUSG000000058318   | 15_Phf21a       | 945.3049083 | 0.088226  | 0.678102 | 0.913187 | 893.3454 | 893.1002 | 963.0623 | 959.4543 | 948.063  | 1014.804 |
| ENSMUSG000000090122   | 3_Kcne11        | 6.002227033 | -0.39979  | 0.678306 | 0.913226 | 3.248529 | 13.74    | 3.451836 | 5.953181 | 3.39402  | 6.225792 |
| 16_Atmn711            |                 | 746.7783688 | -0.10256  | 0.678967 | 0.913476 | 769.0892 | 669.8252 | 881.3689 | 665.7641 | 756.8665 | 737.7564 |
| ENSMUSG000000020564   | 16_Pygl         | 2536.659411 | -0.08902  | 0.678983 | 0.913476 | 2535.477 | 2499.822 | 2809.795 | 2430.882 | 2326.035 | 2617.946 |
| ENSMUSG000000024833   | 14_Pola2        | 352.5717129 | -0.18975  | 0.678936 | 0.913476 | 376.8293 | 345.2176 | 405.0155 | 142.8763 | 436.6973 | 408.827  |
| ENSMUSG000000025586   | 16_Cpeb1        | 449.2412285 | 0.151663  | 0.678857 | 0.913476 | 380.0779 | 526.4139 | 370.4971 | 656.8343 | 338.2707 | 423.3539 |
| ENSMUSG000000026339   | 18_Ccdc93       | 987.8043386 | 0.090697  | 0.679024 | 0.913476 | 975.3707 | 935.179  | 959.6105 | 994.1812 | 1110.976 | 951.5086 |
| ENSMUSG000000027356   | 8_Ferm1t        | 2345.531498 | 0.10239   | 0.67886  | 0.913476 | 2144.841 | 2021.498 | 2621.094 | 2201.685 | 2651.861 | 2432.21  |
| ENSMUSG000000028950   | 3_Tast1r1       | 7.974434847 | -0.32017  | 0.679071 | 0.913476 | 8.121322 | 10.305   | 8.054285 | 2.97659  | 9.050721 | 9.338689 |
| ENSMUSG000000030792   | 7_Dklk1         | 93.21797642 | -0.22598  | 0.678709 | 0.913476 | 99.89226 | 80.72252 | 120.8143 | 31.7503  | 136.8922 | 89.2636  |
| ENSMUSG000000046456   | 14_Tmem150b     | 4.320389656 | -0.46746  | 0.678927 | 0.913476 | 1.624264 | 4.293751 | 9.204897 | 0.992197 | 5.656701 | 4.150528 |
| ENSMUSG000000062007   | 12_Hsh2d        | 83.3508438  | -0.22812  | 0.678814 | 0.913476 | 87.71028 | 73.85252 | 108.1575 | 26.78931 | 115.3967 | 88.19873 |
| 9_170008619Rik        |                 | 4.807436506 | 0.401347  | 0.679088 | 0.913476 | 4.060661 | 6.011252 | 2.301224 | 6.945378 | 2.26268  | 7.263424 |
| ENSMUSG000000073888   | 12_Ccl27a       | 33.77162557 | -0.17432  | 0.678825 | 0.913476 | 31.67315 | 37.78501 | 37.9702  | 23.81272 | 35.07154 | 36.31712 |
| ENSMUSG0000000102545  | 1_6430573P05Rik | 14.90099278 | 0.288759  | 0.67883  | 0.913476 | 16.24264 | 10.305   | 13.80735 | 28.77371 | 6.788041 | 13.48922 |
| ENSMUSG000000021573   | 14_Tppp         | 1475.643639 | 0.119742  | 0.679161 | 0.913507 | 1406.613 | 1355.108 | 1481.988 | 1943.714 | 1186.776 | 1479.663 |
| ENSMUSG000000022305   | 12_Lrp12        | 1285.331651 | 0.102032  | 0.679203 | 0.913507 | 1261.241 | 1198.815 | 1259.92  | 1552.788 | 1136.997 | 1302.228 |
| ENSMUSG000000059498   | 13_Fcgr3        | 212.3080028 | 0.165301  | 0.679385 | 0.913677 | 253.3852 | 175.185  | 171.4412 | 178.5954 | 329.22   | 166.0211 |
| ENSMUSG000000074476   | 5_Spc24         | 218.172133  | -0.16094  | 0.679421 | 0.913677 | 231.4577 | 153.7163 | 306.0628 | 181.572  | 268.1276 | 168.0964 |
| ENSMUSG000000001924   | 15_Uba1         | 10899.40411 | -0.17048  | 0.679557 | 0.913696 | 10245.05 | 11232.45 | 13150.35 | 5272.534 | 14047.85 | 11448.19 |
| ENSMUSG000000004296   | 14_Il12b        | 6.026938671 | -0.39814  | 0.679665 | 0.913696 | 13.80625 | 4.293751 | 2.301224 | 5.953181 | 6.556701 | 4.150528 |
| ENSMUSG000000037138   | 16_Aff3         | 445.0185914 | 0.101292  | 0.679658 | 0.913696 | 444.2363 | 452.5614 | 391.2081 | 469.3091 | 409.5451 | 503.2516 |
| ENSMUSG000000050947   | 9_Amigo1        | 209.3271556 | -0.12277  | 0.679649 | 0.913696 | 207.9058 | 243.0263 | 203.6583 | 174.6266 | 178.7517 | 247.9941 |
| ENSMUSG000000067879   | 3_3110035E14Rik | 2.26573225  | -0.74558  | 0.679571 | 0.913696 | 1.624264 | 6.870002 | 0        | 3.968787 | 1.13134  | 0        |
| ENSMUSG000000032966   | 14_Fkbp1a       | 774.3759907 | 0.106827  | 0.679799 | 0.913754 | 773.1498 | 804.649  | 659.3007 | 939.6104 | 729.7144 | 739.8317 |
| ENSMUSG000000053754   | 13_Ch8d         | 2929.626597 | 0.084894  | 0.679791 | 0.913754 | 2711.709 | 2819.277 | 2999.646 | 2919.043 | 3054.618 | 3073.466 |
| ENSMUSG000000031893   | 6_Tsnaxip1      | 0.586774441 | -1.16932  | 0.680013 | 0.91398  | 1.624264 | 0.85875  | 0        | 0        | 0        | 1.037632 |
| ENSMUSG000000053604   | 5_Rpia          | 1208.676716 | -0.11085  | 0.680059 | 0.91398  | 1201.143 | 1163.607 | 1403.747 | 933.6572 | 1318.011 | 1237.895 |
| ENSMUSG000000028402   | 17_Mpdz         | 585.8007592 | 0.147338  | 0.680206 | 0.914115 | 537.6315 | 671.5427 | 457.9436 | 821.539  | 423.1212 | 601.8266 |
| ENSMUSG000000023067   | 13_Cdkn1a       | 3205.109231 | -0.16636  | 0.680393 | 0.914244 | 3194.928 | 2968.451 | 3985.72  | 1599.421 | 3852.123 | 3609.922 |
| ENSMUSG000000040836   | 15_Gpr161       | 184.7993255 | 0.11693   | 0.680349 | 0.914244 | 186.7904 | 172.6088 | 172.5918 | 231.1819 | 176.4891 | 169.134  |
| ENSMUSG00000003034321 | 13_Exosc1       | 291.718892  | 0.108856  | 0.680044 | 0.914245 | 274.5007 | 282.5288 | 285.3518 | 359.1752 | 273.7843 | 274.9725 |
| ENSMUSG000000030138   | 8_Bms1          | 1490.268998 | 0.092075  | 0.680535 | 0.914259 | 1408.237 | 1323.334 | 1597.05  | 1561.718 | 1586.139 | 1465.136 |
| ENSMUSG0000000097142  | 1_Gm26778       | 822.3019515 | -0.81397  | 0.680542 | 0.914259 | 1037.093 | 1073.438 | 1034.4   | 0        | 851.8991 | 936.9818 |
| ENSMUSG000000025239   | 2_Limd1         | 1933.406932 | -0.10888  | 0.680799 | 0.91427  | 1902.826 | 1884.098 | 2232.187 | 1495.241 | 2078.272 | 2007.818 |
| ENSMUSG000000027908   | 2_Tchhl1        | 0.579201899 | -1.16907  | 0.681147 | 0.91427  | 1.624264 | 0.85875  | 0        | 0.992197 | 0        | 0        |
| ENSMUSG000000034098   | 14_Fstf5        | 3.398276854 | -0.54534  | 0.680962 | 0.91427  | 4.872793 | 6.011252 | 1.150612 | 4.960984 | 3.39402  | 0        |
| ENSMUSG000000037313   | 16_Tacc3        | 663.5460094 | 0.111962  | 0.68108  | 0.91427  | 634.2752 | 548.7414 | 730.6387 | 604.2479 | 805.5142 | 657.8587 |
| ENSMUSG000000040829   | 14_Zmynd15      | 77.67486465 | -0.19289  | 0.680944 | 0.91427  | 88.52241 | 74.71127 | 85.1453  | 34.72689 | 104.0833 | 78.86004 |
| ENSMUSG000000041959   | 14_S100a10      | 17163.1796  | 0.108409  | 0.680713 | 0.91427  | 16967.88 | 15016.97 | 17571    | 14513.86 | 21149.27 | 17760.11 |
| ENSMUSG000000042655   | 4_Fam159b       | 0.579201899 | -1.16907  | 0.681147 | 0.91427  | 1.624264 | 0.85875  | 0        | 0.992197 | 0        | 0        |
| ENSMUSG000000043289   | 12_Mel4         | 2.662912028 | 0.731918  | 0.680673 | 0.91427  | 0.812132 | 5.152501 | 0        | 7.937575 | 0        | 2.075264 |
| ENSMUSG000000044701   | 5_Il27          | 12.54615864 | -0.39077  | 0.680991 | 0.91427  | 9.745586 | 7.728752 | 25.31347 | 0.992197 | 16.9701  | 14.52685 |
| ENSMUSG000000053182   | 10_Gm609        | 0.579201899 | -1.16907  | 0.681147 | 0.91427  | 1.624264 | 0.85875  | 0        | 0.992197 | 0        | 0        |
| ENSMUSG000000070730   | 11_Rmdn3        | 718.006703  | 0.109632  | 0.680974 | 0.91427  | 647.2693 | 609.7127 | 815.784  | 803.6794 | 785.15   | 646.4448 |
| ENSMUSG000000085067   | 1_Gm15631       | 0.98858591  | 1.060329  | 0.680998 | 0.91427  | 0.812132 | 0        | 1.150612 | 3.968787 | 0        | 0        |
| ENSMUSG000000086232   | 1_Gm7546        | 0.579201899 | -1.16907  | 0.681147 | 0.91427  | 1.624264 | 0.85875  | 0        | 0.992197 | 0        | 0        |
| ENSMUSG0000           |                 |             |           |          |          |          |          |          |          |          |          |

|                     |                   |             |          |          |          |          |          |          |          |          |          |
|---------------------|-------------------|-------------|----------|----------|----------|----------|----------|----------|----------|----------|----------|
| ENSMUSG00000002565  | 16_Scin           | 3578.502116 | 0.105868 | 0.683703 | 0.915627 | 3525.466 | 3269.262 | 3547.337 | 4544.261 | 3318.221 | 3266.466 |
| ENSMUSG00000045538  | 6_Ddx28           | 179.8552233 | -0.1625  | 0.683721 | 0.915627 | 168.1114 | 182.055  | 219.7669 | 96.24309 | 212.6919 | 200.2623 |
| ENSMUSG000000053004 | 9_Hrh1            | 8.92455946  | 0.2967   | 0.683663 | 0.915627 | 10.55772 | 4.293751 | 9.204897 | 10.91416 | 11.3134  | 7.263424 |
| ENSMUSG000000010663 | 4_Fads1           | 4013.355801 | -0.09219 | 0.684011 | 0.915691 | 3939.653 | 4444.032 | 4040.95  | 3733.637 | 3577.297 | 4344.565 |
| ENSMUSG000000021950 | 15_Anxa8          | 26926.42506 | -0.14367 | 0.684127 | 0.915691 | 28768.16 | 25886.17 | 30143.74 | 15478.27 | 31477.28 | 29804.94 |
| ENSMUSG000000024598 | 8_Fech            | 1815.376888 | 0.088339 | 0.684194 | 0.915691 | 1726.593 | 1750.133 | 1803.009 | 2041.941 | 1717.374 | 1853.211 |
| ENSMUSG000000025473 | 16_Adam8          | 385.4829085 | -0.28974 | 0.684035 | 0.915691 | 507.5826 | 259.3426 | 505.1187 | 67.46938 | 702.5622 | 270.822  |
| ENSMUSG000000032115 | 13_Hyou1          | 2841.053656 | -0.16837 | 0.68411  | 0.915691 | 2680.036 | 3006.485 | 3333.323 | 1372.208 | 3719.846 | 2934.423 |
| ENSMUSG000000037251 | 4_Pomk            | 306.0997094 | -0.10298 | 0.684168 | 0.915691 | 280.9977 | 350.3701 | 319.8702 | 318.4952 | 279.441  | 287.4241 |
| ENSMUSG000000044816 | 10_Gli30023F18Rik | 7.034604106 | 0.378413 | 0.68403  | 0.915691 | 1.624261 | 7.728752 | 9.204897 | 12.89856 | 4.52536  | 6.225792 |
| ENSMUSG000000052395 | 15_Rft1           | 556.4467802 | 0.089116 | 0.684229 | 0.915691 | 550.6256 | 509.2389 | 558.0469 | 559.599  | 576.9835 | 584.1869 |
| ENSMUSG000000061119 | 6_Prop            | 238.9871319 | -0.10527 | 0.684049 | 0.915691 | 276.9371 | 226.7101 | 239.3273 | 220.2677 | 220.6113 | 250.0693 |
| ENSMUSG000000090733 | 6_Rps27           | 8829.477028 | 0.090598 | 0.683937 | 0.915691 | 8844.119 | 8409.741 | 8402.92  | 7999.091 | 9436.508 | 9884.483 |
| ENSMUSG000000022809 | 4_Nrl12           | 1.481842922 | -0.9115  | 0.684387 | 0.915841 | 4.060661 | 1.7175   | 0        | 0        | 0        | 3.112896 |
| ENSMUSG000000040003 | 17_Magi2          | 119.8194524 | 0.202299 | 0.684478 | 0.915902 | 124.2562 | 140.835  | 69.03673 | 192.4862 | 66.74907 | 125.5535 |
| ENSMUSG000000038909 | 16_Kat7           | 1628.84941  | 0.089274 | 0.684623 | 0.916034 | 1516.251 | 1564.643 | 1654.58  | 1561.718 | 1839.559 | 1636.344 |
| ENSMUSG000000036395 | 14_Glb112         | 391.5558634 | 0.110407 | 0.684753 | 0.916147 | 395.5084 | 361.5338 | 372.7983 | 494.114  | 376.7363 | 348.6444 |
| ENSMUSG000000096940 | 1_Gm4755          | 23.13602813 | -0.1886  | 0.684814 | 0.916167 | 28.42463 | 25.76251 | 19.56041 | 22.82053 | 21.49546 | 20.75264 |
| ENSMUSG000000000435 | 1_Myf5            | 1.279396339 | 0.962537 | 0.684952 | 0.916277 | 0        | 2.576251 | 0        | 3.968787 | 1.13134  | 0        |
| ENSMUSG000000054191 | 7_Klf1            | 1.031282805 | -0.87627 | 0.685009 | 0.916277 | 0        | 1.7175   | 2.301224 | 0        | 1.13134  | 1.037632 |
| ENSMUSG000000097065 | 1_A630075F10Rik   | 1.791468847 | -0.6167  | 0.685035 | 0.916277 | 1.624264 | 2.576251 | 2.301224 | 1.984394 | 2.26268  | 0        |
| ENSMUSG000000020251 | 13_Gli8d2         | 148.2539358 | 0.182895 | 0.685154 | 0.916355 | 119.3834 | 136.5413 | 161.0857 | 221.2599 | 76.9313  | 174.3222 |
| ENSMUSG000000059857 | 15_Ntnlg1         | 81.77995588 | 0.189265 | 0.685185 | 0.916355 | 74.71616 | 90.16877 | 64.43428 | 133.9466 | 47.51628 | 79.89767 |
| ENSMUSG000000030825 | 17_Hsd17b14       | 1.78350204  | -0.59243 | 0.685594 | 0.916779 | 3.248529 | 0.85875  | 2.301224 | 0.992197 | 2.56268  | 1.037632 |
| ENSMUSG000000036306 | 11_Lzts1          | 52.30366094 | -0.22055 | 0.685592 | 0.916779 | 56.03712 | 50.66626 | 62.13305 | 17.85954 | 56.56701 | 70.55986 |
| ENSMUSG000000053153 | 14_Spag16         | 1.597793037 | 0.908595 | 0.685816 | 0.916961 | 0        | 0        | 3.451836 | 1.984394 | 0        | 4.150528 |
| ENSMUSG000000079532 | 1_Gm6890          | 25.37047274 | 0.180788 | 0.685822 | 0.916961 | 23.55183 | 21.46876 | 26.46408 | 30.7581  | 27.15216 | 28.2791  |
| ENSMUSG000000020903 | 13_Stx8           | 610.921825  | 0.104787 | 0.68638  | 0.917104 | 621.2811 | 583.0914 | 561.4987 | 515.9423 | 708.2189 | 675.4989 |
| ENSMUSG000000021750 | 15_Fam107a        | 239.8940453 | -0.17027 | 0.686327 | 0.917104 | 249.3246 | 322.8901 | 189.851  | 317.503  | 134.6295 | 225.1662 |
| ENSMUSG000000027270 | 14_Lamp5          | 2.829306271 | 0.5753   | 0.686435 | 0.917104 | 2.436397 | 4.293751 | 0        | 6.945378 | 2.26268  | 1.037632 |
| ENSMUSG000000027963 | 14_Extl2          | 455.8324472 | 0.138145 | 0.686281 | 0.917104 | 447.4848 | 450.8439 | 403.8649 | 658.8187 | 337.1394 | 436.8431 |
| ENSMUSG000000028466 | 15_Creb3          | 1524.356724 | -0.16344 | 0.686092 | 0.917104 | 1631.574 | 1471.898 | 1728.219 | 744.1476 | 1889.338 | 1680.964 |
| ENSMUSG000000029648 | 13_Flt1           | 460.0543963 | 0.124202 | 0.686265 | 0.917104 | 396.3205 | 509.2389 | 415.371  | 580.4351 | 360.8975 | 498.0634 |
| ENSMUSG000000034612 | 7_Chts11          | 312.2453547 | -0.15124 | 0.686393 | 0.917104 | 328.1014 | 397.6014 | 260.0383 | 411.7617 | 209.2999 | 266.6714 |
| ENSMUSG000000068854 | 7_Hist2h2be       | 134.6255433 | 0.185716 | 0.685981 | 0.917104 | 131.5654 | 138.2588 | 108.1575 | 213.3223 | 70.14309 | 146.3061 |
| ENSMUSG000000085949 | 1_Gm14275         | 2.995573813 | 0.573635 | 0.686325 | 0.917104 | 4.872793 | 0        | 2.301224 | 0.992197 | 5.656701 | 4.150528 |
| ENSMUSG000000097033 | 1_Gm26819         | 111.0074474 | -0.15762 | 0.686117 | 0.917104 | 123.4441 | 115.9313 | 111.6094 | 62.5084  | 117.6594 | 134.8922 |
| ENSMUSG000000097050 | 1_Gm9918          | 8.978740159 | -0.30637 | 0.686421 | 0.917104 | 13.80625 | 11.16375 | 4.602448 | 8.929771 | 10.18206 | 5.18816  |
| ENSMUSG000000010376 | 14_Nedd8          | 1721.591134 | -0.12424 | 0.686532 | 0.917142 | 1862.219 | 1627.332 | 1897.359 | 1152.933 | 1907.439 | 1882.265 |
| ENSMUSG000000048756 | 11_Foxo3          | 2866.656857 | -0.09058 | 0.686653 | 0.917142 | 2750.692 | 2879.389 | 3240.124 | 2544.985 | 2830.613 | 2954.138 |
| ENSMUSG000000061650 | 6_Med9            | 425.3514067 | -0.1444  | 0.68659  | 0.917142 | 432.8665 | 443.1151 | 463.6967 | 247.057  | 518.1535 | 447.2194 |
| ENSMUSG000000062510 | 12_Nsl1           | 155.9470418 | -0.14522 | 0.686727 | 0.917142 | 157.5536 | 148.5638 | 185.2485 | 96.24309 | 181.0144 | 167.0588 |
| ENSMUSG000000063558 | 4_Aox1            | 298.7094964 | -0.12435 | 0.686609 | 0.917142 | 331.3499 | 340.9238 | 262.3396 | 335.3625 | 217.2173 | 305.0638 |
| ENSMUSG000000097781 | 1_9330136K24Rik   | 11.63268166 | 0.329975 | 0.68674  | 0.917142 | 14.61838 | 6.011252 | 10.35551 | 25.79712 | 6.788041 | 6.225792 |
| ENSMUSG000000027360 | 5_Hdc             | 99.64957298 | 0.248269 | 0.686933 | 0.917358 | 116.947  | 48.09001 | 108.1575 | 46.63325 | 200.2472 | 77.8224  |
| ENSMUSG000000085152 | 1_Gm11496         | 15.6731741  | 0.236556 | 0.687006 | 0.917351 | 10.55772 | 18.8925  | 13.80735 | 21.82833 | 11.3134  | 17.63975 |
| ENSMUSG000000097191 | 2_57304222O9Rik   | 5.514122538 | 0.387712 | 0.687035 | 0.917351 | 2.436397 | 5.152501 | 6.903673 | 5.953181 | 2.26268  | 10.37632 |
| ENSMUSG000000059835 | 1_Rpl13-ps3       | 14.5122007  | -0.23182 | 0.687231 | 0.917429 | 16.24264 | 14.59875 | 14.95796 | 8.929771 | 13.57608 | 16.60211 |
| ENSMUSG000000060961 | 14_Slc4a4         | 1973.944687 | -0.17941 | 0.68719  | 0.917429 | 2255.291 | 2541.901 | 1492.344 | 2890.269 | 1067.985 | 1595.878 |
| ENSMUSG000000106237 | 1_Gm8066          | 2.685965747 | -0.66836 | 0.687208 | 0.917429 | 2.436397 | 5.152501 | 2.301224 | 0        | 0        | 6.225792 |
| ENSMUSG000000045284 | 9_Dcaf121         | 75.29619363 | 0.207177 | 0.687298 | 0.917456 | 82.02535 | 74.71127 | 52.92816 | 127.9934 | 37.34422 | 76.78477 |
| ENSMUSG000000022048 | 8_Dpysl2          | 225.890692  | 0.171626 | 0.687395 | 0.917525 | 230.6455 | 224.9926 | 181.7967 | 380.0114 | 158.3876 | 179.5103 |
| ENSMUSG000000035505 | 14_Cox18          | 356.0469619 | 0.119285 | 0.687871 | 0.917703 | 307.7981 | 319.4551 | 396.9612 | 311.5498 | 457.0614 | 343.4562 |
| ENSMUSG000000042129 | 8_Rass4f          | 221.4237908 | 0.145743 | 0.687896 | 0.917703 | 279.3735 | 172.6088 | 178.3449 | 242.096  | 282.835  | 173.2846 |
| ENSMUSG000000059363 | 10_Fxn            | 146.9042291 | -0.20918 | 0.687844 | 0.917703 | 176.2327 | 144.27   | 151.8808 | 48.61764 | 192.3278 | 168.0964 |
| ENSMUSG000000062991 | 6_Nrg1            | 330.2746331 | -0.14322 | 0.687751 | 0.917703 | 353.2775 | 285.1051 | 401.5636 | 213.3223 | 412.9391 | 315.4401 |
| ENSMUSG000000069227 | 4_Gprin1          | 9.985874741 | -0.25878 | 0.687779 | 0.917703 | 12.18198 | 11.16375 | 9.204897 | 7.937575 | 9.050721 | 10.37632 |
| ENSMUSG000000074071 | 9_Fam169b         | 42.91513949 | -0.17517 | 0.687897 | 0.917703 | 57.66138 | 36.06751 | 42.57265 | 28.77371 | 50.9103  | 41.50528 |
| ENSMUSG000000079186 | 2_Gzmc            | 11.66952219 | 0.317661 | 0.687639 | 0.917703 | 15.43051 | 8.587502 | 6.903673 | 4.960984 | 23.75814 | 10.37632 |
| ENSMUSG000000079681 | 2_Zglp1           | 3.847898076 | -0.46029 | 0.687715 | 0.917703 | 4.060661 | 6.870002 | 2.301224 | 0.992197 | 6.788041 | 2.075944 |
| ENSMUSG000000027678 | 17_Ncoa3          | 3099.620152 | -0.10573 | 0.688028 | 0.917755 | 3032.502 | 3124.133 | 3482.903 | 2373.335 | 3194.904 | 3389.944 |
| ENSMUSG000000099207 | 6_Gm10637         | 1.798576692 | -0.72217 | 0.688005 | 0.917755 | 3.248529 | 3.435001 | 0        | 2.97659  | 1.13134  | 0        |
| ENSMUSG000000026285 | 7_Pdcd1           | 6.006122586 | 0.47023  | 0.688441 | 0.918138 | 8.933454 | 2.576251 | 3.451836 | 0.992197 | 16.9701  | 3.112896 |
| ENSMUSG000000031297 | 14_Slc7a3         | 47.39028638 | -0.17567 | 0.688453 | 0.918138 | 55.22499 | 57.53626 | 37.9702  | 58.53961 | 29.41484 | 45.65581 |
| ENSMUSG000000038605 | 11_Samd10         | 854.5804297 | -0.11363 | 0.688378 | 0.918138 | 878.727  | 849.304  | 936.5983 | 620.123  | 875.6579 | 667.0731 |
| ENSMUSG000000075327 | 9_Zbtb2           | 263.2895371 | 0.104654 | 0.688519 | 0.918164 | 253.3852 | 222.4163 | 283.0506 | 317.503  | 277.1783 | 226.2038 |
| ENSMUSG000000022898 | 12_Dscr3          | 1471.222667 | -0.09452 | 0.688618 | 0.918234 | 1513.002 | 1405.774 | 1639.622 | 1255.129 | 1446.984 | 1566.824 |
| ENSMUSG000000029130 | 12_Rnf32          | 34.4634869  | 0.205331 | 0.688692 | 0.918271 | 33.29742 | 31.77376 | 31.06653 | 59.53181 | 28.2835  | 22.82791 |
| ENSMUSG000000018572 | 10_Phf23          | 1115.338298 | -0.13773 | 0.689146 | 0.918686 | 1127.239 | 1120.669 | 1257.619 | 663.7797 | 1280.677 | 1242.046 |
| ENSMUSG000000019359 | 14_Gdpd2          | 1566.959342 | 0.133771 | 0.68906  | 0.918686 | 1458.589 | 1236.6   | 1788.051 | 1176.745 | 2105.424 | 1636.346 |
| ENSMUSG000000038013 | 14_Wipf2          | 1192.32278  | 0.085647 | 0.689142 | 0.918686 | 1142.67  | 1125.822 | 1202.39  | 1159.878 | 1311.223 | 1211.954 |
| ENSMUSG000000057841 | 5_Rpl32           | 12079.9675  | -0.14043 | 0.689188 | 0.918686 | 13271.86 | 12187.38 | 12542.82 | 6934.464 | 13571.56 | 13971.72 |
| ENSMUSG000000020143 | 15_Dock2          | 169.4989009 | 0.197133 | 0.689262 | 0.918724 | 231.4577 | 107.3438 | 134.6216 | 113.104  | 286.229  | 144.2309 |
| ENSMUSG000000042501 | 12_Cpa6           | 4.423489126 | -0.42549 | 0.689347 | 0.918759 | 2.436397 | 6.011252 | 6.903673 | 6.945378 | 1.13134  | 3.112896 |
| ENSMUSG000000053931 | 11_Cnn3           | 5703.865372 | 0.080465 | 0.689387 | 0.918759 | 5677.616 | 55       |          |          |          |          |

|                    |                 |             |          |          |         |          |          |          |          |          |          |
|--------------------|-----------------|-------------|----------|----------|---------|----------|----------|----------|----------|----------|----------|
| ENSMUSG00000021822 | 2_Plau          | 1520.881322 | 0.132043 | 0.692943 | 0.92011 | 1401.74  | 1266.657 | 1685.647 | 1242.23  | 2180.092 | 1348.922 |
| ENSMUSG00000022010 | 19_Tsc22d1      | 3181.983044 | 0.151021 | 0.695649 | 0.92011 | 2818.911 | 3589.576 | 2638.354 | 5006.625 | 2276.256 | 2762.177 |
| ENSMUSG00000022472 | 16_Desi1        | 2421.34159  | 0.097998 | 0.692377 | 0.92011 | 2264.225 | 2298.874 | 2454.256 | 2092.543 | 2889.443 | 2528.709 |
| ENSMUSG00000024236 | 17_Svil         | 1825.979164 | -0.09377 | 0.69539  | 0.92011 | 1757.454 | 1963.103 | 1935.33  | 1505.163 | 1856.529 | 1938.297 |
| ENSMUSG00000024268 | 15_Celf4        | 57.21324228 | 0.229719 | 0.693676 | 0.92011 | 46.29153 | 53.24251 | 58.68122 | 115.0948 | 42.99092 | 26.97843 |
| ENSMUSG00000025002 | 5_Cyp2c55       | 0.286250074 | -1.5816  | 0.696001 | 0.92011 | 0        | 1.7175   | 0        | 0        | 0        | 0        |
| ENSMUSG00000025280 | 7_Polr3a        | 538.1154879 | -0.11911 | 0.69498  | 0.92011 | 574.1774 | 570.2101 | 536.1852 | 378.027  | 647.1265 | 522.9666 |
| ENSMUSG00000025418 | 7_Bsnd          | 0.286250074 | -1.5816  | 0.696001 | 0.92011 | 0        | 1.7175   | 0        | 0        | 0        | 0        |
| ENSMUSG00000026258 | 5_3110079015Rik | 0.286250074 | -1.5816  | 0.696001 | 0.92011 | 0        | 1.7175   | 0        | 0        | 0        | 0        |
| ENSMUSG00000026385 | 16_Dbi          | 2972.326217 | -0.09141 | 0.692469 | 0.92011 | 3093.411 | 2960.112 | 3145.774 | 2468.586 | 3099.872 | 3066.203 |
| ENSMUSG00000027203 | 15_Dut          | 513.0736135 | 0.100901 | 0.695442 | 0.92011 | 485.655  | 466.3014 | 533.884  | 626.0762 | 481.9509 | 484.5742 |
| ENSMUSG00000027495 | 4_Fam210b       | 1064.245722 | 0.096342 | 0.692911 | 0.92011 | 999.7347 | 1020.195 | 1066.617 | 1247.191 | 931.0929 | 1120.643 |
| ENSMUSG00000027643 | 9_Ghrh          | 0.286250074 | -1.5816  | 0.696001 | 0.92011 | 0        | 1.7175   | 0        | 0        | 0        | 0        |
| ENSMUSG00000027796 | 2_Smad9         | 85.81358042 | -0.18547 | 0.695959 | 0.92011 | 90.14667 | 115.9313 | 67.88611 | 121.048  | 44.12226 | 75.74714 |
| ENSMUSG00000028385 | 14_Snx30        | 349.0438879 | 0.106518 | 0.695106 | 0.92011 | 345.9683 | 346.0763 | 316.4183 | 437.5588 | 334.8767 | 313.3649 |
| ENSMUSG00000028544 | 14_Slc5a9       | 206.1397859 | 0.121746 | 0.694641 | 0.92011 | 224.9606 | 151.14   | 216.3151 | 183.5564 | 227.3994 | 233.4672 |
| ENSMUSG00000028553 | 12_Angptl3      | 1.015081628 | -0.10551 | 0.691892 | 0.92011 | 4.060661 | 0        | 0        | 0.992197 | 0        | 1.037632 |
| ENSMUSG00000029026 | 16_Trp73        | 86.82058248 | -0.2086  | 0.691762 | 0.92011 | 101.5165 | 76.42877 | 101.2539 | 30.7581  | 91.63855 | 119.3277 |
| ENSMUSG00000029123 | 8_Slk32b        | 2.489458653 | -0.56103 | 0.695328 | 0.92011 | 4.060661 | 2.576251 | 2.301224 | 4.960984 | 0        | 1.037632 |
| ENSMUSG00000031410 | 14_Nxf7         | 0.286250074 | -1.5816  | 0.696001 | 0.92011 | 0        | 1.7175   | 0        | 0        | 0        | 0        |
| ENSMUSG00000031610 | 3_Scrg1         | 9.005745939 | -0.31992 | 0.693634 | 0.92011 | 18.67904 | 4.293751 | 6.903673 | 7.937575 | 7.919381 | 8.301057 |
| ENSMUSG00000031756 | 4_Cenpn         | 105.858272  | 0.121241 | 0.692106 | 0.92011 | 103.9529 | 86.73377 | 113.9106 | 124.0246 | 100.8893 | 105.8385 |
| ENSMUSG00000031766 | 3_Slc12a3       | 1.069429531 | -0.93856 | 0.696169 | 0.92011 | 2.436397 | 1.7175   | 0        | 0        | 2.26268  | 0        |
| ENSMUSG00000032035 | 15_Ets1         | 499.2764915 | 0.09934  | 0.691551 | 0.92011 | 484.8429 | 426.7989 | 535.0346 | 562.5756 | 521.5478 | 464.8592 |
| ENSMUSG00000032382 | 14_Snx1         | 3202.470516 | 0.083378 | 0.69216  | 0.92011 | 3181.122 | 2952.383 | 3196.4   | 3322.867 | 3463.396 | 3078.654 |
| ENSMUSG00000032498 | 9_Mlh1          | 550.5995232 | -0.08697 | 0.691863 | 0.92011 | 590.4201 | 546.1651 | 564.9505 | 519.9111 | 524.9418 | 557.2084 |
| ENSMUSG00000033452 | 12_Cd300a       | 65.16571768 | 0.171469 | 0.693735 | 0.92011 | 78.77682 | 54.10126 | 50.62693 | 63.5006  | 97.29525 | 46.69344 |
| ENSMUSG00000033563 | 16_Lrnf5        | 3.603312463 | 0.53385  | 0.69306  | 0.92011 | 2.436397 | 5.152501 | 1.150612 | 4.960984 | 7.919381 | 0        |
| ENSMUSG00000033753 | 7_A4gnt         | 0.286250074 | -1.5816  | 0.696001 | 0.92011 | 0        | 1.7175   | 0        | 0        | 0        | 0        |
| ENSMUSG00000033809 | 7_Dnajc22       | 0.286250074 | -1.5816  | 0.696001 | 0.92011 | 0        | 1.7175   | 0        | 0        | 0        | 0        |
| ENSMUSG00000033837 | 1_Mc3r          | 0.286250074 | -1.5816  | 0.696001 | 0.92011 | 0        | 1.7175   | 0        | 0        | 0        | 0        |
| ENSMUSG00000033853 | 13_Eftud1       | 688.3903751 | 0.089029 | 0.692288 | 0.92011 | 691.1245 | 613.1477 | 697.2709 | 667.7485 | 739.8964 | 721.1543 |
| ENSMUSG00000033865 | 18_Rtel1        | 717.5866545 | -0.1556  | 0.691792 | 0.92011 | 752.8465 | 736.8077 | 778.9644 | 367.1128 | 767.0486 | 902.7399 |
| ENSMUSG00000033987 | 8_1700019L03Rik | 17.57480589 | -0.34472 | 0.693657 | 0.92011 | 22.7397  | 15.4575  | 20.71102 | 0.992197 | 23.75814 | 21.79027 |
| ENSMUSG00000033907 | 5_Rln1          | 0.96709981  | -0.77088 | 0.694179 | 0.92011 | 1.624264 | 0.85875  | 1.150612 | 0        | 1.13134  | 1.037632 |
| ENSMUSG00000033917 | 9_Adk           | 671.2477744 | 0.126397 | 0.692287 | 0.92011 | 697.6215 | 656.0852 | 571.8542 | 939.6104 | 553.2253 | 609.09   |
| ENSMUSG00000041144 | 10_Dnah7b       | 101.8538343 | 0.188762 | 0.691515 | 0.92011 | 103.9529 | 115.9313 | 65.58489 | 171.65   | 67.88041 | 86.12346 |
| ENSMUSG00000041482 | 16_Piezo2       | 308.3111137 | -0.12304 | 0.696106 | 0.92011 | 365.4595 | 337.4888 | 261.1889 | 323.4562 | 224.0053 | 338.2681 |
| ENSMUSG00000043911 | 4_Olfir922      | 0.286250074 | -1.5816  | 0.696001 | 0.92011 | 0        | 1.7175   | 0        | 0        | 0        | 0        |
| ENSMUSG00000044518 | 3_Foxe3         | 0.286250074 | -1.5816  | 0.696001 | 0.92011 | 0        | 1.7175   | 0        | 0        | 0        | 0        |
| ENSMUSG00000044743 | 3_Defb10        | 0.286250074 | -1.5816  | 0.696001 | 0.92011 | 0        | 1.7175   | 0        | 0        | 0        | 0        |
| ENSMUSG00000044575 | 1_Vmn1r233      | 0.286250074 | -1.5816  | 0.696001 | 0.92011 | 0        | 1.7175   | 0        | 0        | 0        | 0        |
| ENSMUSG00000045608 | 6_Dbx2          | 274.9518299 | 0.099899 | 0.695112 | 0.92011 | 262.3187 | 287.6813 | 246.231  | 312.542  | 254.5515 | 286.3865 |
| ENSMUSG00000046095 | 5_Krt32         | 3.27322128  | -0.42818 | 0.692958 | 0.92011 | 2.436397 | 4.293751 | 4.602448 | 3.968787 | 2.26268  | 2.075264 |
| ENSMUSG00000046213 | 9_Cym           | 0.286250074 | -1.5816  | 0.696001 | 0.92011 | 0        | 1.7175   | 0        | 0        | 0        | 0        |
| ENSMUSG00000046957 | 4_Spz1          | 0.286250074 | -1.5816  | 0.696001 | 0.92011 | 0        | 1.7175   | 0        | 0        | 0        | 0        |
| ENSMUSG00000047861 | 2_Foxi1         | 0.286250074 | -1.5816  | 0.696001 | 0.92011 | 0        | 1.7175   | 0        | 0        | 0        | 0        |
| ENSMUSG00000047990 | 5_C2cd4a        | 0.286250074 | -1.5816  | 0.696001 | 0.92011 | 0        | 1.7175   | 0        | 0        | 0        | 0        |
| ENSMUSG00000048332 | 13_Lhfp         | 600.5206092 | 0.154561 | 0.692537 | 0.92011 | 566.8683 | 614.8652 | 523.5285 | 972.3529 | 450.2734 | 475.2355 |
| ENSMUSG00000048373 | 8_Fgfbp1        | 12745.61163 | -0.12728 | 0.693835 | 0.92011 | 13186.59 | 11635.21 | 15100.63 | 8459.47  | 15345.5  | 12746.27 |
| ENSMUSG00000048865 | 16_Arhgap30     | 299.0964979 | 0.165445 | 0.69275  | 0.92011 | 396.3205 | 191.5013 | 257.7371 | 279.7995 | 437.8286 | 231.392  |
| ENSMUSG00000048922 | 18_Cdca2        | 257.9155909 | -0.11378 | 0.691397 | 0.92011 | 250.1367 | 223.2751 | 331.3763 | 241.1038 | 255.6829 | 245.9188 |
| ENSMUSG00000051359 | 14_Ncald        | 133.5899976 | -0.2017  | 0.692544 | 0.92011 | 130.7533 | 227.5688 | 70.18734 | 162.7203 | 83.71917 | 126.5911 |
| ENSMUSG00000052075 | 6_1700029F12Rik | 0.286250074 | -1.5816  | 0.696001 | 0.92011 | 0        | 1.7175   | 0        | 0        | 0        | 0        |
| ENSMUSG00000054135 | 2_A430110L20Rik | 34.98910274 | -0.15888 | 0.695928 | 0.92011 | 39.79448 | 38.64376 | 32.21714 | 33.73469 | 27.15216 | 38.39239 |
| ENSMUSG00000057047 | 5_1700010B08Rik | 0.286250074 | -1.5816  | 0.696001 | 0.92011 | 0        | 1.7175   | 0        | 0        | 0        | 0        |
| ENSMUSG00000057402 | 5_Cldn34b2      | 0.286250074 | -1.5816  | 0.696001 | 0.92011 | 0        | 1.7175   | 0        | 0        | 0        | 0        |
| ENSMUSG00000058568 | 6_Defb50        | 0.286250074 | -1.5816  | 0.696001 | 0.92011 | 0        | 1.7175   | 0        | 0        | 0        | 0        |
| ENSMUSG00000061322 | 15_Dnaic1       | 9.842871781 | -0.31504 | 0.695693 | 0.92011 | 9.745586 | 13.74    | 9.204897 | 2.97659  | 6.788041 | 16.60211 |
| ENSMUSG00000064145 | 12_Arh2         | 1572.369541 | 0.080086 | 0.695806 | 0.92011 | 1578.785 | 1473.615 | 1533.766 | 1602.398 | 1652.888 | 1592.765 |
| ENSMUSG00000065979 | 12_Cpped1       | 1250.009587 | 0.083119 | 0.69371  | 0.92011 | 1154.852 | 1195.38  | 1292.137 | 1305.731 | 1295.384 | 1256.572 |
| ENSMUSG00000066383 | 6_Iqcf1         | 0.286250074 | -1.5816  | 0.696001 | 0.92011 | 0        | 1.7175   | 0        | 0        | 0        | 0        |
| ENSMUSG00000069266 | 5_Hist1h4b      | 0.286250074 | -1.5816  | 0.696001 | 0.92011 | 0        | 1.7175   | 0        | 0        | 0        | 0        |
| ENSMUSG00000070471 | 3_Erich6        | 3.621489846 | 0.566651 | 0.693195 | 0.92011 | 2.436397 | 5.152501 | 1.150612 | 10.91416 | 0        | 2.075264 |
| ENSMUSG00000070661 | 6_Rnf186        | 0.96709981  | -0.77088 | 0.694179 | 0.92011 | 1.624264 | 0.85875  | 1.150612 | 0        | 1.13134  | 1.037632 |
| ENSMUSG00000070823 | 4_Gm1043        | 0.286250074 | -1.5816  | 0.696001 | 0.92011 | 0        | 1.7175   | 0        | 0        | 0        | 0        |
| ENSMUSG00000071151 | 3_Gm4799        | 1.069429531 | -0.93856 | 0.696169 | 0.92011 | 2.436397 | 1.7175   | 0        | 0        | 2.26268  | 0        |
| ENSMUSG00000073789 | 1_Gm10577       | 0.286250074 | -1.5816  | 0.696001 | 0.92011 | 0        | 1.7175   | 0        | 0        | 0        | 0        |
| ENSMUSG00000074419 | 11_Gm15448      | 20.76304123 | -0.19739 | 0.69241  | 0.92011 | 26.80036 | 18.8925  | 20.71102 | 18.85174 | 23.75814 | 15.56448 |
| ENSMUSG00000074486 | 2_Bglap2        | 0.286250074 | -1.5816  | 0.696001 | 0.92011 | 0        | 1.7175   | 0        | 0        | 0        | 0        |
| ENSMUSG00000074505 | 4_Fat3          | 63.85732174 | 0.227463 | 0.693826 | 0.92011 | 50.3522  | 82.44002 | 43.72326 | 116.087  | 28.2835  | 62.25792 |
| ENSMUSG00000074776 | 3_Gm10754       | 0.286250074 | -1.5816  | 0.696001 | 0.92011 | 0        | 1.7175   | 0        | 0        | 0        | 0        |
| ENSMUSG00000075225 | 11_Ccdc162      | 96.04259799 | 0.154739 | 0.694656 | 0.92011 | 95.8316  | 85.01627 | 92.04897 | 123.0324 | 59.96103 | 120.3653 |
| ENSMUSG00000075604 | 5_Cyp11b1       | 0.286250074 | -1.5816  | 0.696001 | 0.92011 | 0        | 1.7175   | 0        | 0        | 0        | 0        |
| ENSMUSG00000078653 | 4_Cntd1         | 59.10070237 | 0.163581 | 0.696075 | 0.92011 | 63.34631 | 38.64376 | 65.58489 | 80.36794 | 47.51628 | 59.14503 |
| ENSMUSG00000079852 | 4_Klra4         | 0.286250074 | -1.5816  | 0.696001 | 0.92011 | 0        | 1.7175   | 0        | 0        | 0        | 0        |
| ENSMUSG00000085542 | 1_1700037C06Rik | 0.286250074 | -1.5816  | 0.696001 | 0.92011 | 0        | 1.7175   | 0        | 0        | 0        | 0        |
| ENSMUSG00000085675 | 1_Gm12022       | 0.944106394 | -0.85714 | 0.693765 | 0.92011 | 0.812132 | 1.7175   | 1.150612 | 1.984394 | 0        | 0        |
| ENSMUSG00000086344 | 1_Gm11345       | 0.286250074 | -1.5816  | 0.696001 | 0.92011 | 0        | 1.7175   | 0        | 0        | 0        | 0        |
| ENSMUSG00000086943 | 2_4732414G09Rik | 3.798377285 | 0.540632 | 0.693096 | 0.92011 | 0        | 2.576251 | 6.903673 | 5.953181 | 1.13134  | 6.225792 |
| ENSMUSG00000087273 | 1_Gm13203       | 0.286250074 | -1.5816  | 0.696001 | 0.92011 | 0        | 1.7175   | 0        | 0        | 0        | 0        |
| ENSMUSG00000090223 | 1_Pcp4          | 133.1360702 | -0.20942 | 0.692855 | 0.92011 | 146.9959 | 212.1113 | 69.03673 | 189.5096 | 82.58783 | 98.57505 |
| ENSMUSG00000094845 | 1_Tmem95        | 1.069429531 | -0.9     |          |         |          |          |          |          |          |          |

|                      |                  |             |          |          |          |          |          |          |          |           |          |
|----------------------|------------------|-------------|----------|----------|----------|----------|----------|----------|----------|-----------|----------|
| ENSMUSG00000020697   | 16_Lig3          | 1838.514805 | 0.086289 | 0.698081 | 0.921538 | 1659.998 | 1730.382 | 1960.643 | 1769.087 | 1968.532  | 1942.447 |
| ENSMUSG00000025401   | 8_Myo1a          | 4.640439704 | -0.44699 | 0.698022 | 0.921538 | 6.497057 | 6.011252 | 3.451836 | 0        | 0.5656701 | 6.225792 |
| ENSMUSG000000031904  | 4_Slc7a6         | 188.9450722 | -0.12617 | 0.698081 | 0.921538 | 204.6573 | 240.4501 | 146.1277 | 207.3691 | 161.7816  | 173.2846 |
| ENSMUSG000000075270  | 11_Pde11a        | 1.129253944 | 0.711975 | 0.698067 | 0.921538 | 1.624264 | 0.85875  | 0        | 0.992197 | 2.26268   | 1.037632 |
| ENSMUSG000000031949  | 17_Adat1         | 154.5373028 | -0.13841 | 0.698161 | 0.921582 | 170.5478 | 152.8575 | 162.2363 | 94.2587  | 171.9637  | 175.3598 |
| ENSMUSG000000024018  | 17_Ccdc167       | 247.5241244 | -0.1018  | 0.698275 | 0.921671 | 251.761  | 287.6813 | 228.9718 | 217.2911 | 242.1068  | 257.3328 |
| ENSMUSG0000000040428 | 17_Plekha4       | 184.3436131 | -0.20661 | 0.698334 | 0.921688 | 155.1172 | 151.14   | 286.5024 | 68.46158 | 209.2979  | 235.5425 |
| ENSMUSG000000026870  | 19_Cutal         | 72.41882459 | 0.158313 | 0.698511 | 0.921827 | 70.6555  | 85.01627 | 49.47632 | 99.21968 | 55.43567  | 74.70951 |
| ENSMUSG000000033263  | 14_Bckdhb        | 434.0284738 | 0.111203 | 0.698532 | 0.921827 | 423.1209 | 435.3864 | 393.5093 | 561.5834 | 362.0288  | 428.542  |
| ENSMUSG000000003948  | 16_Mmd           | 166.1308677 | 0.185136 | 0.698591 | 0.921844 | 137.2503 | 202.6651 | 126.5673 | 293.6903 | 113.134   | 123.4782 |
| ENSMUSG000000030263  | 13_Lrmp          | 74.15589828 | -0.14573 | 0.69867  | 0.921888 | 90.9588  | 75.57002 | 66.7355  | 52.58643 | 91.63855  | 67.44608 |
| ENSMUSG000000042499  | 13_Hoxd11        | 1.742628066 | -0.55805 | 0.699084 | 0.922372 | 2.436397 | 2.576251 | 1.150612 | 0.992197 | 2.26268   | 1.037632 |
| ENSMUSG000000024900  | 4_Cpt1a          | 2588.932225 | -0.0969  | 0.699147 | 0.922394 | 2341.377 | 2809.831 | 2876.53  | 2155.051 | 2539.859  | 2810.945 |
| ENSMUSG000000000202  | 9_Btbd17         | 0.2784804   | -1.55243 | 0.701483 | 0.922404 | 0.812132 | 0.85875  | 0        | 0        | 0         | 0        |
| ENSMUSG000000001672  | 14_Marveld3      | 735.0294697 | 0.097547 | 0.699662 | 0.922404 | 630.2146 | 686.1414 | 814.6334 | 742.1632 | 842.8484  | 694.1759 |
| ENSMUSG000000003070  | 6_Efna2          | 15.58240794 | -0.22259 | 0.701216 | 0.922404 | 12.99411 | 14.59875 | 23.01224 | 12.89856 | 11.3134   | 18.67738 |
| ENSMUSG000000004654  | 6_Ghrhr          | 0.2784804   | -1.55243 | 0.701483 | 0.922404 | 0.812132 | 0.85875  | 0        | 0        | 0         | 0        |
| ENSMUSG0000000019944 | 14_Rhobtb1       | 364.6088303 | -0.10576 | 0.701263 | 0.922404 | 392.2598 | 311.7263 | 430.3289 | 343.3001 | 316.7752  | 393.2626 |
| ENSMUSG000000020401  | 6_Fam71b         | 0.2784804   | -1.55243 | 0.701483 | 0.922404 | 0.812132 | 0.85875  | 0        | 0        | 0         | 0        |
| ENSMUSG0000000022365 | 5_Der1           | 3145.001738 | 0.08549  | 0.699955 | 0.922404 | 3012.198 | 2936.926 | 3206.756 | 3581.831 | 3181.328  | 2951.026 |
| ENSMUSG0000000023147 | 15_Wrb           | 174.486577  | -0.11935 | 0.701309 | 0.922404 | 191.6632 | 213.8288 | 139.2241 | 175.6188 | 147.0742  | 179.5103 |
| ENSMUSG000000025933  | 15_Tmem14a       | 80.79300923 | 0.176943 | 0.700299 | 0.922404 | 81.21322 | 84.15752 | 62.13305 | 136.9232 | 62.22371  | 58.1074  |
| ENSMUSG000000026127  | 13_Imp4          | 1051.175728 | -0.08725 | 0.700515 | 0.922404 | 1085.009 | 1013.325 | 1150.612 | 921.7508 | 1088.349  | 1048.008 |
| ENSMUSG000000027297  | 14_Ltk           | 56.60989253 | -0.23715 | 0.701333 | 0.922404 | 56.84925 | 49.80751 | 77.09101 | 13.89076 | 73.5371   | 68.48372 |
| ENSMUSG000000027489  | 15_Necab3        | 3.841799557 | -0.47759 | 0.701295 | 0.922404 | 7.30919  | 2.576251 | 3.451836 | 0        | 5.42536   | 5.18816  |
| ENSMUSG000000028750  | 12_Pla2g2c       | 0.2784804   | -1.55243 | 0.701483 | 0.922404 | 0.812132 | 0.85875  | 0        | 0        | 0         | 0        |
| ENSMUSG000000030757  | 13_Zkscaa2       | 95.73304421 | -0.1967  | 0.701283 | 0.922404 | 117.7592 | 110.7788 | 78.24162 | 151.8061 | 45.2536   | 70.55898 |
| ENSMUSG000000032572  | 7_Col6a4         | 37.12054763 | -0.17738 | 0.699777 | 0.922404 | 34.92168 | 39.50251 | 43.72326 | 20.83613 | 46.38494  | 37.35475 |
| ENSMUSG0000000033386 | 10_Frs1          | 295.9996866 | 0.100562 | 0.700015 | 0.922404 | 289.1191 | 264.4951 | 303.7616 | 354.2143 | 287.3604  | 277.0478 |
| ENSMUSG000000035078  | 5_Mttnr9         | 983.1866368 | -0.09011 | 0.701512 | 0.922404 | 978.6193 | 1033.077 | 1029.798 | 848.3283 | 1082.692  | 926.6054 |
| ENSMUSG000000035378  | 17_Shq1          | 212.2226376 | -0.10584 | 0.700643 | 0.922404 | 208.718  | 190.6425 | 261.1889 | 207.3691 | 196.8532  | 208.564  |
| ENSMUSG000000035960  | 13_Apex1         | 747.806751  | -0.11625 | 0.70148  | 0.922404 | 829.187  | 709.3277 | 795.073  | 513.958  | 812.3022  | 826.9928 |
| ENSMUSG000000037625  | 7_Cldn11         | 25.71617629 | 0.251617 | 0.700652 | 0.922404 | 31.67315 | 21.46876 | 17.25918 | 52.58643 | 14.70742  | 16.60211 |
| ENSMUSG000000037737  | 6_Actr3          | 0.2784804   | -1.55243 | 0.701483 | 0.922404 | 0.812132 | 0.85875  | 0        | 0        | 0         | 0        |
| ENSMUSG000000039047  | 17_Plgk          | 1349.596245 | 0.086779 | 0.699674 | 0.922404 | 1331.085 | 1292.419 | 1303.644 | 1557.749 | 1339.507  | 1273.175 |
| ENSMUSG000000040936  | 14_Ulk4          | 48.09662089 | -0.15149 | 0.701317 | 0.922404 | 56.84925 | 49.80751 | 44.87387 | 38.69568 | 59.96103  | 38.39239 |
| ENSMUSG000000043282  | 3_Teddmlb        | 4.272596373 | 0.377923 | 0.701346 | 0.922404 | 4.060661 | 2.576251 | 4.602448 | 6.945378 | 2.26268   | 5.18816  |
| ENSMUSG000000045257  | 9_Morn2          | 135.7223379 | 0.10666  | 0.699369 | 0.922404 | 116.1349 | 131.3888 | 144.9771 | 144.8607 | 136.8922  | 140.0803 |
| ENSMUSG000000047733  | 10_BC048609      | 0.2784804   | -1.55243 | 0.701483 | 0.922404 | 0.812132 | 0.85875  | 0        | 0        | 0         | 0        |
| ENSMUSG000000048581  | 12_E130311K13Rik | 124.070532  | 0.163321 | 0.699667 | 0.922404 | 122.632  | 115.9313 | 112.76   | 204.3925 | 85.98185  | 102.7256 |
| ENSMUSG000000048905  | 4_4930539E08Rik  | 3.698792994 | -0.41336 | 0.699364 | 0.922404 | 4.872793 | 4.293751 | 3.451836 | 0.992197 | 3.39402   | 5.18816  |
| ENSMUSG000000049791  | 3_Fzd4           | 485.0011754 | 0.172904 | 0.699486 | 0.922404 | 482.4065 | 488.6289 | 396.9612 | 847.3361 | 294.1484  | 400.526  |
| ENSMUSG000000050796  | 4_B3galt6        | 144.4554777 | -0.14297 | 0.700044 | 0.922404 | 151.0566 | 145.1288 | 158.7845 | 185.5408 | 138.0235  | 88.19873 |
| ENSMUSG000000054258  | 8_Gm5082         | 0.2784804   | -1.55243 | 0.701483 | 0.922404 | 0.812132 | 0.85875  | 0        | 0        | 0         | 0        |
| ENSMUSG000000054555  | 11_Adam12        | 19.63801881 | 0.196386 | 0.701083 | 0.922404 | 17.86691 | 19.75126 | 17.25918 | 25.79712 | 22.6268   | 14.52685 |
| ENSMUSG0000000557137 | 9_Tmem140        | 675.9984914 | 0.105435 | 0.701563 | 0.922404 | 638.3359 | 645.7802 | 669.6562 | 544.7161 | 627.0096  | 730.493  |
| ENSMUSG000000059547  | 3_Fbxw26         | 0.2784804   | -1.55243 | 0.701483 | 0.922404 | 0.812132 | 0.85875  | 0        | 0        | 0         | 0        |
| ENSMUSG000000062393  | 13_Dgkx          | 4.436450316 | -0.3572  | 0.699351 | 0.922404 | 4.060661 | 5.152501 | 5.753061 | 2.97659  | 4.52536   | 4.150528 |
| ENSMUSG000000064081  | 3_Gm8973         | 0.2784804   | -1.55243 | 0.701483 | 0.922404 | 0.812132 | 0.85875  | 0        | 0        | 0         | 0        |
| ENSMUSG000000070564  | 13_Ntn5          | 2.225007366 | -0.5663  | 0.700783 | 0.922404 | 2.436397 | 4.293751 | 1.150612 | 0        | 3.39402   | 2.075264 |
| ENSMUSG000000078235  | 3_Fam43b         | 2.201541028 | -0.6031  | 0.70044  | 0.922404 | 1.624264 | 5.152501 | 1.150612 | 0        | 1.13134   | 4.150528 |
| ENSMUSG000000078380  | 1_Gm6096         | 3.283255464 | 0.434171 | 0.700127 | 0.922404 | 2.436397 | 2.576251 | 3.451836 | 5.953181 | 1.13134   | 4.150528 |
| ENSMUSG000000089712  | 1_Gm15889        | 0.2784804   | -1.55243 | 0.701483 | 0.922404 | 0.812132 | 0.85875  | 0        | 0        | 0         | 0        |
| ENSMUSG000000090263  | 1_DT30045A05Rik  | 0.2784804   | -1.55243 | 0.701483 | 0.922404 | 0.812132 | 0.85875  | 0        | 0        | 0         | 0        |
| ENSMUSG000000092539  | 1_Gm20468        | 0.2784804   | -1.55243 | 0.701483 | 0.922404 | 0.812132 | 0.85875  | 0        | 0        | 0         | 0        |
| ENSMUSG000000096982  | 1_Redrum         | 0.2784804   | -1.55243 | 0.701483 | 0.922404 | 0.812132 | 0.85875  | 0        | 0        | 0         | 0        |
| ENSMUSG000000096984  | 1_Gm26523        | 0.797572223 | 0.882751 | 0.701232 | 0.922404 | 1.624264 | 0        | 0        | 0.992197 | 1.13134   | 1.037632 |
| ENSMUSG000000097057  | 1_Gm17638        | 29.4049957  | 0.199209 | 0.70152  | 0.922404 | 30.04889 | 23.18626 | 28.7653  | 17.85954 | 47.51628  | 29.0537  |
| ENSMUSG000000097252  | 1_Gm6634         | 1.794016644 | -0.61917 | 0.701394 | 0.922404 | 1.624264 | 3.435001 | 1.150612 | 2.97659  | 0         | 1.037632 |
| ENSMUSG000000097639  | 2_Platr4         | 0.2784804   | -1.55243 | 0.701483 | 0.922404 | 0.812132 | 0.85875  | 0        | 0        | 0         | 0        |
| ENSMUSG000000097776  | 1_Gm26795        | 0.2784804   | -1.55243 | 0.701483 | 0.922404 | 0.812132 | 0.85875  | 0        | 0        | 0         | 0        |
| ENSMUSG000000098040  | 1_Gm20757        | 0.2784804   | -1.55243 | 0.701483 | 0.922404 | 0.812132 | 0.85875  | 0        | 0        | 0         | 0        |
| ENSMUSG000000098097  | 7_6530403H02Rik  | 0.2784804   | -1.55243 | 0.701483 | 0.922404 | 0.812132 | 0.85875  | 0        | 0        | 0         | 0        |
| ENSMUSG000000104861  | 1_RP24-490H13    | 0.2784804   | -1.55243 | 0.701483 | 0.922404 | 0.812132 | 0.85875  | 0        | 0        | 0         | 0        |
| ENSMUSG000000105039  | 1_Gm42637        | 0.2784804   | -1.55243 | 0.701483 | 0.922404 | 0.812132 | 0.85875  | 0        | 0        | 0         | 0        |
| ENSMUSG000000021025  | 7_Nfkbia         | 1077.161232 | -0.11702 | 0.701656 | 0.922466 | 1007.856 | 1068.285 | 1286.384 | 824.5156 | 1332.719  | 943.2075 |
| ENSMUSG000000022056  | 8_Adam7          | 7.648276033 | 0.335427 | 0.701761 | 0.922497 | 7.30919  | 9.446252 | 3.451836 | 15.87515 | 5.656701  | 4.150528 |
| ENSMUSG000000037855  | 15_Zfp365        | 167.2939293 | 0.136074 | 0.701772 | 0.922497 | 135.6261 | 182.9138 | 159.9351 | 238.1272 | 134.6295  | 152.5319 |
| ENSMUSG000000026147  | 16_Col9a1        | 79.63420344 | -0.19491 | 0.701859 | 0.922551 | 68.2191  | 138.2588 | 48.32571 | 73.42256 | 52.04164  | 97.53741 |
| ENSMUSG000000067242  | 11_Lg1           | 193.3610401 | 0.199341 | 0.702046 | 0.922735 | 207.9058 | 228.4276 | 103.5551 | 337.3469 | 108.6086  | 174.3222 |
| ENSMUSG000000039917  | 10_Rhbd2         | 588.0467434 | -0.10172 | 0.702111 | 0.922759 | 592.0444 | 593.3964 | 640.8909 | 455.4183 | 592.8222  | 653.7082 |
| ENSMUSG000000078676  | 9_Casc3          | 1358.561276 | -0.1039  | 0.702173 | 0.922781 | 1328.648 | 1442.7   | 1450.922 | 1009.064 | 1467.348  | 1452.685 |
| ENSMUSG000000026610  | 13_Esrrg         | 44.28311409 | 0.25376  | 0.70225  | 0.922809 | 40.60661 | 54.10126 | 26.46408 | 94.2587  | 18.10144  | 32.18659 |
| ENSMUSG000000027233  | 4_Patl2          | 2.171518425 | -0.51858 | 0.702333 | 0.922809 | 0.812132 | 3.435001 | 3.451836 | 0.992197 | 2.26268   | 2.075264 |
| ENSMUSG000000054619  | 6_Mettl7a1       | 1305.798841 | 0.105412 | 0.702309 | 0.922809 | 1215.762 | 1215.132 | 1343.915 | 1643.078 | 1067.985  | 1348.922 |
| ENSMUSG0000000068114 | 6_Ccdc134        | 224.4638105 | -0.16257 | 0.702554 | 0.923038 | 219.2757 | 235.2976 | 256.5865 | 107.1573 | 291.8657  | 236.5801 |
| ENSMUSG000000000094  | 12_Tbx4          | 8.488346984 | -0.28429 | 0.70292  | 0.923341 | 8.121322 | 12.88125 | 6.903673 | 5.953181 | 5.656701  | 11.41395 |
| ENSMUSG000000021416  | 11_Eci3          | 10.08846842 | -0.36752 | 0.702914 | 0.92334  |          |          |          |          |           |          |

|                     |                  |             |          |          |          |          |          |          |          |          |          |
|---------------------|------------------|-------------|----------|----------|----------|----------|----------|----------|----------|----------|----------|
| ENSMUSG00000043945  | 4_Adam6a         | 0.270710726 | -1.52485 | 0.706654 | 0.923371 | 1.624264 | 0        | 0        | 0        | 0        | 0        |
| ENSMUSG00000044471  | 11_Lincpint      | 2.596901232 | -0.54427 | 0.703852 | 0.923371 | 5.684925 | 3.435001 | 0        | 0.992197 | 3.39402  | 2.075264 |
| ENSMUSG00000044627  | 11_Sw5           | 2973.096219 | 0.076525 | 0.704918 | 0.923371 | 2912.306 | 2802.102 | 2968.579 | 3151.217 | 2964.111 | 3040.262 |
| ENSMUSG00000045036  | 14_Tmem232       | 1.661787127 | 0.651076 | 0.705985 | 0.923371 | 0.812132 | 0.85875  | 2.301224 | 4.960984 | 0        | 1.037632 |
| ENSMUSG00000047257  | 13_Prss45        | 0.553264046 | 1.10757  | 0.705316 | 0.923371 | 0        | 0        | 1.150612 | 0        | 1.13134  | 1.037632 |
| ENSMUSG00000047361  | 15_Gm973         | 120.3647019 | -0.15495 | 0.705704 | 0.923371 | 115.3228 | 133.1063 | 132.3204 | 133.9466 | 62.22371 | 145.2685 |
| ENSMUSG00000047638  | 15_Nr1h4         | 18.39571016 | -0.22156 | 0.705551 | 0.923371 | 12.99411 | 29.19751 | 17.25918 | 22.82053 | 13.57608 | 14.52685 |
| ENSMUSG00000048174  | 2_Tmem81         | 81.73413106 | 0.115907 | 0.70631  | 0.923371 | 77.96469 | 74.71127 | 82.84407 | 81.36014 | 78.06247 | 95.46215 |
| ENSMUSG00000048185  | 4_Gm7075         | 0.270710726 | -1.52485 | 0.706654 | 0.923371 | 1.624264 | 0        | 0        | 0        | 0        | 0        |
| ENSMUSG00000049013  | 3_Prss48         | 0.270710726 | -1.52485 | 0.706654 | 0.923371 | 1.624264 | 0        | 0        | 0        | 0        | 0        |
| ENSMUSG00000055827  | 13_Gsdmc3        | 0.270710726 | -1.52485 | 0.706654 | 0.923371 | 1.624264 | 0        | 0        | 0        | 0        | 0        |
| ENSMUSG00000056738  | 11_A730036117Rik | 0.270710726 | -1.52485 | 0.706654 | 0.923371 | 1.624264 | 0        | 0        | 0        | 0        | 0        |
| ENSMUSG00000058186  | 13_Gm13242       | 0.270710726 | -1.52485 | 0.706654 | 0.923371 | 1.624264 | 0        | 0        | 0        | 0        | 0        |
| ENSMUSG00000062444  | 14_Ap3b2         | 21.29745772 | -0.3126  | 0.704264 | 0.923371 | 28.42463 | 38.64376 | 3.451836 | 9.921968 | 20.36412 | 26.97843 |
| ENSMUSG00000062761  | 7_Zfp512         | 878.9466558 | 0.083414 | 0.704329 | 0.923371 | 886.8483 | 799.4965 | 874.4652 | 965.4075 | 865.4752 | 881.9873 |
| ENSMUSG00000065954  | 10_Tacc1         | 2394.194702 | 0.086003 | 0.705165 | 0.923371 | 2186.26  | 2374.444 | 2408.231 | 2752.354 | 2223.083 | 2420.796 |
| ENSMUSG00000066097  | 6_Cyp2j11        | 0.553264046 | 1.10757  | 0.705316 | 0.923371 | 0        | 0        | 1.150612 | 0        | 1.13134  | 1.037632 |
| ENSMUSG00000066936  | 4_Gm10188        | 0.270710726 | -1.52485 | 0.706654 | 0.923371 | 1.624264 | 0        | 0        | 0        | 0        | 0        |
| ENSMUSG00000067848  | 12_4933402N22Rik | 0.270710726 | -1.52485 | 0.706654 | 0.923371 | 1.624264 | 0        | 0        | 0        | 0        | 0        |
| ENSMUSG00000069835  | 10_Sat2          | 63.04387781 | -0.15414 | 0.704455 | 0.923371 | 66.59484 | 80.72252 | 51.77754 | 60.52401 | 41.85958 | 76.78477 |
| ENSMUSG00000070568  | 10_1700039E15Rik | 0.270710726 | -1.52485 | 0.706654 | 0.923371 | 1.624264 | 0        | 0        | 0        | 0        | 0        |
| ENSMUSG00000072419  | 4_Dppa2          | 0.270710726 | -1.52485 | 0.706654 | 0.923371 | 1.624264 | 0        | 0        | 0        | 0        | 0        |
| ENSMUSG00000072738  | 3_Gm16440        | 0.270710726 | -1.52485 | 0.706654 | 0.923371 | 1.624264 | 0        | 0        | 0        | 0        | 0        |
| ENSMUSG00000072814  | 10_Gm7982        | 0.270710726 | -1.52485 | 0.706654 | 0.923371 | 1.624264 | 0        | 0        | 0        | 0        | 0        |
| ENSMUSG00000074517  | 2_Gm10710        | 0.812914439 | 0.874563 | 0.703122 | 0.923371 | 0.812132 | 0.85875  | 0        | 0        | 1.13134  | 2.075264 |
| ENSMUSG00000079262  | 3_Slco1a6        | 4.817901839 | 0.392869 | 0.706655 | 0.923371 | 7.30919  | 1.7175   | 3.451836 | 9.921968 | 3.39402  | 3.112896 |
| ENSMUSG00000079577  | 1_Gm14692        | 0.270710726 | -1.52485 | 0.706654 | 0.923371 | 1.624264 | 0        | 0        | 0        | 0        | 0        |
| ENSMUSG00000079578  | 1_Gm11440        | 0.270710726 | -1.52485 | 0.706654 | 0.923371 | 1.624264 | 0        | 0        | 0        | 0        | 0        |
| ENSMUSG00000085497  | 2_Gm15985        | 0.270710726 | -1.52485 | 0.706654 | 0.923371 | 1.624264 | 0        | 0        | 0        | 0        | 0        |
| ENSMUSG00000086752  | 1_Gm11674        | 0.270710726 | -1.52485 | 0.706654 | 0.923371 | 1.624264 | 0        | 0        | 0        | 0        | 0        |
| ENSMUSG00000087292  | 1_Gm13832        | 0.270710726 | -1.52485 | 0.706654 | 0.923371 | 1.624264 | 0        | 0        | 0        | 0        | 0        |
| ENSMUSG00000089992  | 3_G6pd2          | 1.365029946 | -0.67899 | 0.704099 | 0.923371 | 0.812132 | 0.85875  | 3.451836 | 0.992197 | 0        | 2.075264 |
| ENSMUSG00000090967  | 2_Vmn2r61        | 0.270710726 | -1.52485 | 0.706654 | 0.923371 | 1.624264 | 0        | 0        | 0        | 0        | 0        |
| ENSMUSG00000091867  | 2_Cyp2a22        | 0.270710726 | -1.52485 | 0.706654 | 0.923371 | 1.624264 | 0        | 0        | 0        | 0        | 0        |
| ENSMUSG00000092216  | 2_Gm19345        | 0.270710726 | -1.52485 | 0.706654 | 0.923371 | 1.624264 | 0        | 0        | 0        | 0        | 0        |
| ENSMUSG00000093847  | 1_Gm5039         | 0.270710726 | -1.52485 | 0.706654 | 0.923371 | 1.624264 | 0        | 0        | 0        | 0        | 0        |
| ENSMUSG00000094083  | 1_Gm1604a        | 0.270710726 | -1.52485 | 0.706654 | 0.923371 | 1.624264 | 0        | 0        | 0        | 0        | 0        |
| ENSMUSG00000094992  | 1_Fbxw25         | 0.270710726 | -1.52485 | 0.706654 | 0.923371 | 1.624264 | 0        | 0        | 0        | 0        | 0        |
| ENSMUSG00000095330  | 1_Gm21834        | 0.270710726 | -1.52485 | 0.706654 | 0.923371 | 1.624264 | 0        | 0        | 0        | 0        | 0        |
| ENSMUSG00000096230  | 4_Gm16429        | 0.270710726 | -1.52485 | 0.706654 | 0.923371 | 1.624264 | 0        | 0        | 0        | 0        | 0        |
| ENSMUSG00000096323  | 1_Gm20767        | 0.270710726 | -1.52485 | 0.706654 | 0.923371 | 1.624264 | 0        | 0        | 0        | 0        | 0        |
| ENSMUSG00000096983  | 1_2010015M23Rik  | 5.958523497 | 0.314464 | 0.704813 | 0.923371 | 4.872793 | 4.293751 | 6.903673 | 8.929771 | 4.52536  | 6.225792 |
| ENSMUSG00000097413  | 1_AB30052D11Rik  | 0.270710726 | -1.52485 | 0.706654 | 0.923371 | 1.624264 | 0        | 0        | 0        | 0        | 0        |
| ENSMUSG00000097435  | 1_Gm26783        | 0.270710726 | -1.52485 | 0.706654 | 0.923371 | 1.624264 | 0        | 0        | 0        | 0        | 0        |
| ENSMUSG00000097632  | 1_4930552P12Rik  | 1.970081167 | 0.59438  | 0.703298 | 0.923371 | 1.624264 | 0.85875  | 2.301224 | 4.960984 | 0        | 2.075264 |
| ENSMUSG00000097871  | 1_B230104I21Rik  | 0.270710726 | -1.52485 | 0.706654 | 0.923371 | 1.624264 | 0        | 0        | 0        | 0        | 0        |
| ENSMUSG00000099853  | 1_Gm29328        | 0.270710726 | -1.52485 | 0.706654 | 0.923371 | 1.624264 | 0        | 0        | 0        | 0        | 0        |
| ENSMUSG00000101585  | 6_1600010M07Rik  | 3.745182316 | -0.44281 | 0.70322  | 0.923371 | 6.497057 | 5.152501 | 1.150612 | 2.97659  | 5.656701 | 1.037632 |
| ENSMUSG00000102909  | 1_Gm2453         | 0.984980367 | -0.93813 | 0.705151 | 0.923371 | 1.624264 | 0        | 2.301224 | 1.984394 | 0        | 0        |
| ENSMUSG00000103334  | 1_Gm29771        | 0.270710726 | -1.52485 | 0.706654 | 0.923371 | 1.624264 | 0        | 0        | 0        | 0        | 0        |
| ENSMUSG00000103442  | 5_Pcdha1         | 5.40329012  | 0.495689 | 0.705524 | 0.923371 | 4.872793 | 5.152501 | 3.451836 | 16.86735 | 0        | 2.075264 |
| ENSMUSG00000104833  | 1_Gm42489        | 0.270710726 | -1.52485 | 0.706654 | 0.923371 | 1.624264 | 0        | 0        | 0        | 0        | 0        |
| ENSMUSG00000029330  | 8_Cds1           | 1959.88082  | 0.085234 | 0.706901 | 0.92357  | 1829.734 | 1797.364 | 2079.156 | 1859.377 | 2199.325 | 1994.329 |
| ENSMUSG00000072640  | 11_Lym9          | 369.4837661 | -0.10204 | 0.706874 | 0.92357  | 377.6415 | 415.6351 | 354.3885 | 422.6758 | 302.0678 | 344.4938 |
| ENSMUSG00000062713  | 7_Sim2           | 7.75058997  | -0.34905 | 0.707166 | 0.923857 | 8.121322 | 12.0225  | 5.753061 | 0.992197 | 11.3134  | 8.301057 |
| ENSMUSG00000036790  | 5_Slitrk2        | 32.97733569 | 0.261361 | 0.707266 | 0.923927 | 24.36397 | 43.79626 | 21.86163 | 71.43817 | 13.57608 | 22.82791 |
| ENSMUSG00000102030  | 1_Gm29106        | 2.270682234 | -0.77943 | 0.70732  | 0.923936 | 4.060661 | 0        | 4.602448 | 4.960984 | 0        | 0        |
| ENSMUSG00000022032  | 14_Scara5        | 779.8947188 | 0.152828 | 0.70743  | 0.924019 | 752.8465 | 698.1639 | 765.1571 | 1264.059 | 484.2136 | 714.9285 |
| ENSMUSG00000101988  | 15_Mgat4c        | 3.380263366 | 0.591017 | 0.707835 | 0.924451 | 1.624264 | 0.85875  | 5.753061 | 10.91416 | 1.13134  | 0        |
| ENSMUSG00000055994  | 15_Nod2          | 208.4098425 | 0.204471 | 0.707853 | 0.924451 | 192.4753 | 102.1913 | 286.5024 | 127.0012 | 371.0796 | 171.2093 |
| ENSMUSG000000031921 | 17_Terf2         | 573.5143657 | -0.08112 | 0.707935 | 0.924498 | 574.9896 | 583.0914 | 610.975  | 542.7317 | 555.488  | 573.8105 |
| ENSMUSG00000030555  | 15_Tlct23        | 345.796897  | 0.086726 | 0.708017 | 0.924544 | 350.8411 | 319.4551 | 335.9787 | 366.1206 | 337.1394 | 365.2465 |
| ENSMUSG000001018983 | 9_E2f2           | 97.24955179 | -0.13665 | 0.708116 | 0.924552 | 112.0742 | 84.15752 | 109.3082 | 65.48499 | 97.29525 | 115.1772 |
| ENSMUSG00000027524  | 9_Edn3           | 1182.544009 | 0.73243  | 0.708082 | 0.924552 | 985.9285 | 1573.23  | 775.5126 | 1888.151 | 708.2189 | 1164.223 |
| ENSMUSG00000032479  | 15_Map4          | 7912.741372 | -0.09391 | 0.708195 | 0.92457  | 7608.054 | 8369.38  | 8524.885 | 6299.458 | 8542.749 | 8131.922 |
| ENSMUSG00000050002  | 13_IdnK          | 30.87172521 | 0.115507 | 0.708292 | 0.92457  | 314.2952 | 284.2463 | 287.653  | 233.1663 | 390.3123 | 337.2304 |
| ENSMUSG00000055978  | 4_Fut2           | 10.87485165 | -0.24629 | 0.70825  | 0.92457  | 12.99411 | 8.587502 | 13.80735 | 6.945378 | 9.336868 | 9.338689 |
| ENSMUSG00000094116  | 1_Gm11237        | 2.519869252 | 0.628023 | 0.708316 | 0.92457  | 2.436397 | 3.435001 | 0        | 1.984394 | 0        | 7.263424 |
| ENSMUSG000000406185 | 10_Zfp84         | 376.749236  | 0.085374 | 0.708391 | 0.924577 | 363.8352 | 376.1326 | 356.6898 | 364.1362 | 397.1004 | 402.6012 |
| ENSMUSG00000097159  | 1_Gm26517        | 9.224264682 | 0.257394 | 0.708414 | 0.924577 | 11.36985 | 6.870002 | 6.903673 | 11.90636 | 7.919381 | 10.37632 |
| ENSMUSG00000040467  | 11_4921522P10Rik | 1.977850841 | 0.583873 | 0.708487 | 0.924612 | 0.812132 | 1.7175   | 2.301224 | 4.960984 | 0        | 2.075264 |
| ENSMUSG000000008626 | 16_Dnajc5        | 4187.034916 | 0.075331 | 0.70867  | 0.924791 | 4098.831 | 3941.664 | 4192.831 | 4287.282 | 4442.773 | 4158.829 |
| ENSMUSG00000036273  | 15_Lrrk2         | 136.1660909 | 0.146478 | 0.708755 | 0.924819 | 134.8139 | 135.6825 | 117.3624 | 210.3457 | 98.42659 | 120.3653 |
| ENSMUSG00000043897  | 12_Vmn2r2        | 1.936848209 | -0.81776 | 0.708785 | 0.924819 | 0        | 0        | 1.7175   | 5.753061 | 0        | 4.150528 |
| ENSMUSG00000073877  | 10_Gm13306       | 7.086793421 | -0.43779 | 0.708915 | 0.924928 | 4.060661 | 14.59875 | 5.753061 | 0        | 5.656701 | 12.45158 |
| ENSMUSG00000041530  | 16_Ago1          | 1578.57354  | -0.08081 | 0.709036 | 0.925026 | 1563.354 | 1738.969 | 1565.983 | 1566.679 | 1432.277 | 1604.179 |
| ENSMUSG00000029810  | 15_Tmem176b      | 3960.541774 | -0.15343 | 0.709093 | 0.925039 | 3967.266 | 4015.516 | 4529.96  | 1874.26  | 4600.029 | 4776.22  |
| ENSMUSG00000085524  | 1_Gm14224        | 1.067719538 | 0.930089 | 0.709144 | 0.925045 | 0        | 0        | 2.301224 | 0.992197 | 0        | 3.112896 |
| ENSMUSG00000019732  | 14_Calr3         | 22.45242318 | 0.175118 | 0.709321 | 0.925089 | 25.1761  | 20.61001 | 17.25918 | 22.82053 | 26.02082 | 22.82791 |
| ENSMUSG00000029147  | 10_Ppm1g         | 1949.331967 | -0.15054 | 0.709345 | 0.925089 | 2028.706 | 1902.132 | 2221.832 | 974.3373 | 2559.091 | 2009.893 |
| ENSMUSG00000033767  | 14_D930015E06Rik | 1981.098174 | -0.0958  | 0.70941  | 0.925089 | 1864.655 | 2036.956 | 2239.091 | 1570.648 | 2064.696 | 2110.544 |
| ENSMUSG00000036390  | 8_Gadd45a        | 540.4951684 | 0.084361 | 0.       |          |          |          |          |          |          |          |

|                     |                  |             |           |          |          |          |          |          |          |          |          |
|---------------------|------------------|-------------|-----------|----------|----------|----------|----------|----------|----------|----------|----------|
| ENSMUSG00000029275  | 17_Gf1           | 3.393304859 | -0.45087  | 0.711964 | 0.925706 | 4.060661 | 0.85875  | 6.903673 | 0.992197 | 3.39402  | 4.150528 |
| ENSMUSG00000029672  | 16_Fam3c         | 455.2471266 | 0.14544   | 0.710697 | 0.925706 | 455.6062 | 490.3464 | 350.9367 | 718.3505 | 354.1095 | 362.1336 |
| ENSMUSG00000030647  | 8_Ndufc2         | 535.4120243 | 0.159755  | 0.711635 | 0.925706 | 494.5885 | 486.9114 | 536.1852 | 929.6884 | 667.8855 | 397.4131 |
| ENSMUSG00000032053  | 7_Pou2af1        | 5.743464571 | 0.342311  | 0.711405 | 0.925706 | 4.060661 | 4.293751 | 6.903673 | 6.945378 | 10.18206 | 2.075264 |
| ENSMUSG00000035824  | 6_Tk2            | 661.6831966 | -0.09285  | 0.711074 | 0.925706 | 654.5785 | 705.0339 | 689.2167 | 534.7941 | 666.3593 | 720.1167 |
| ENSMUSG00000038372  | 13_Gmnds         | 709.0965765 | 0.089294  | 0.711088 | 0.925706 | 616.4083 | 665.5314 | 780.115  | 775.8979 | 729.7144 | 686.9124 |
| ENSMUSG00000040177  | 9_2310057M21Rik  | 209.4534882 | 0.099282  | 0.710816 | 0.925706 | 204.6573 | 212.1113 | 189.851  | 245.0726 | 217.2173 | 187.8114 |
| ENSMUSG00000045326  | 13_Fndc7         | 3.069513245 | 0.440866  | 0.710856 | 0.925706 | 1.624264 | 1.7175   | 4.602448 | 1.984394 | 2.26268  | 6.225792 |
| ENSMUSG00000047592  | 17_Nxpe5         | 51.59713825 | -0.13605  | 0.711437 | 0.925706 | 62.53418 | 45.51376 | 54.07877 | 50.60204 | 41.85958 | 54.9945  |
| ENSMUSG00000048544  | 8_593042Z012Rik  | 0.545691505 | 0.084028  | 0.712012 | 0.925706 | 0        | 0        | 1.150612 | 0.992197 | 1.13134  | 0        |
| ENSMUSG00000049957  | 14_Ccdc137       | 487.2424269 | 0.08134   | 0.710642 | 0.925706 | 460.4789 | 468.8776 | 491.3114 | 494.114  | 514.7597 | 493.9129 |
| ENSMUSG00000050737  | 13_Piges         | 1550.372283 | -0.12967  | 0.711374 | 0.925706 | 1506.505 | 1453.864 | 1899.661 | 957.4699 | 1908.571 | 1576.163 |
| ENSMUSG00000051234  | 6_Rnf7           | 1583.977467 | 0.105378  | 0.711839 | 0.925706 | 1531.681 | 1556.914 | 1490.043 | 2114.371 | 1364.396 | 1446.459 |
| ENSMUSG00000055643  | 5_Chst13         | 1.559775637 | -0.85506  | 0.711463 | 0.925706 | 0.812132 | 5.152501 | 0        | 0        | 3.39402  | 0        |
| ENSMUSG00000066861  | 14_Oas1g         | 1655.452836 | 0.169168  | 0.712103 | 0.925706 | 1425.292 | 1266.657 | 1983.655 | 832.4531 | 2557.96  | 1866.7   |
| ENSMUSG00000068289  | 5_Cma2           | 0.545691505 | 0.084028  | 0.712012 | 0.925706 | 0        | 0        | 1.150612 | 0.992197 | 1.13134  | 0        |
| ENSMUSG00000070280  | 13_Slc22a14      | 1.36222404  | -0.74821  | 0.711007 | 0.925706 | 0.812132 | 4.293751 | 0        | 0.992197 | 0        | 2.075264 |
| ENSMUSG00000072476  | 6_Gm9008         | 1.112952095 | -0.111099 | 0.711124 | 0.925706 | 0        | 0        | 4.602448 | 0        | 0        | 2.075264 |
| ENSMUSG00000082766  | 1_170064H15Rik   | 0.504620399 | 1.108138  | 0.712034 | 0.925706 | 0        | 0.85875  | 0        | 0        | 1.13134  | 1.037632 |
| ENSMUSG00000092277  | 1_Gm19684        | 3.438095417 | 0.540406  | 0.71188  | 0.925706 | 4.060661 | 0.85875  | 3.451836 | 0        | 0        | 2.075264 |
| ENSMUSG00000097722  | 1_Gm26841        | 4.244464739 | -0.49619  | 0.711711 | 0.925706 | 12.18198 | 2.576251 | 0        | 2.97659  | 5.656701 | 2.075264 |
| ENSMUSG00000097759  | 1_Gm26753        | 0.504620399 | 1.108138  | 0.712034 | 0.925706 | 0        | 0.85875  | 0        | 0        | 1.13134  | 1.037632 |
| ENSMUSG00000103181  | 1_A330069K06Rik  | 0.504620399 | 1.108138  | 0.712034 | 0.925706 | 0        | 0.85875  | 0        | 0        | 1.13134  | 1.037632 |
| ENSMUSG00000105797  | 1_Gm42649        | 0.545691505 | 0.084028  | 0.712012 | 0.925706 | 0        | 0        | 1.150612 | 0.992197 | 1.13134  | 0        |
| ENSMUSG00000035069  | 3_Oma1           | 441.4233197 | 0.089624  | 0.712484 | 0.926073 | 402.8176 | 425.9401 | 454.4918 | 400.8475 | 494.3956 | 470.0473 |
| ENSMUSG00000049176  | 14_Fmpdp4        | 78.53865019 | -0.20889  | 0.712489 | 0.926073 | 77.15256 | 127.095  | 48.32571 | 121.048  | 38.46556 | 59.14503 |
| ENSMUSG00000037447  | 16_Arid5a        | 296.5089824 | -0.21227  | 0.712639 | 0.926162 | 324.8529 | 245.6026 | 384.3044 | 82.35234 | 451.4047 | 290.537  |
| ENSMUSG00000071317  | 3_Bves           | 151.2471578 | 0.123381  | 0.712651 | 0.926162 | 160.8022 | 153.7163 | 119.6637 | 201.416  | 125.5788 | 146.3061 |
| ENSMUSG000000017720 | 2_Trp53tg5       | 0.97506616  | -0.81433  | 0.713015 | 0.926216 | 0        | 2.576251 | 1.150612 | 0.992197 | 1.13134  | 0        |
| ENSMUSG00000020566  | 18_Atp6v1c2      | 5.820726548 | -0.32599  | 0.71292  | 0.926216 | 7.30919  | 8.587502 | 3.451836 | 7.937575 | 4.52536  | 3.112896 |
| ENSMUSG00000021365  | 14_Nedd9         | 683.3074078 | 0.087259  | 0.713083 | 0.926216 | 648.8936 | 722.2089 | 616.7281 | 781.8511 | 662.9653 | 667.1974 |
| ENSMUSG00000031861  | 15_Lpar2         | 469.4951574 | -0.09168  | 0.712776 | 0.926216 | 496.2128 | 437.1039 | 520.0767 | 405.8085 | 451.4047 | 506.364  |
| ENSMUSG00000032122  | 14_Slc37a2       | 157.1532838 | -0.13557  | 0.713249 | 0.926216 | 198.1603 | 151.14   | 143.8265 | 106.1651 | 202.5099 | 141.118  |
| ENSMUSG000000339431 | 16_Mtmr7         | 109.0190624 | -0.14783  | 0.71325  | 0.926216 | 106.3893 | 137.4    | 100.1033 | 137.9154 | 63.35505 | 108.9514 |
| ENSMUSG00000040183  | 13_Ankrd6        | 147.3451211 | 0.149189  | 0.713012 | 0.926216 | 131.5654 | 165.7388 | 121.9649 | 212.3301 | 91.63855 | 160.8313 |
| ENSMUSG00000067684  | 1_Obp1a          | 0.975066616 | -0.81433  | 0.713015 | 0.926216 | 0        | 2.576251 | 1.150612 | 0.992197 | 1.13134  | 0        |
| ENSMUSG00000074591  | 7_Ankub1         | 1.587414589 | 0.807651  | 0.713064 | 0.926216 | 0        | 3.435001 | 0        | 2.97659  | 0        | 3.112896 |
| ENSMUSG00000079507  | 10_H2-Q1         | 543.0027867 | -0.24196  | 0.712863 | 0.926216 | 584.7352 | 477.4651 | 703.024  | 91.28211 | 772.7053 | 628.805  |
| ENSMUSG00000097665  | 1_Gm16853        | 0.496850724 | 1.108231  | 0.713166 | 0.926216 | 0.812132 | 0        | 0        | 0        | 1.13134  | 1.037632 |
| ENSMUSG00000106321  | 1_Gm43674        | 0.496850724 | 1.108231  | 0.713166 | 0.926216 | 0.812132 | 0        | 0        | 0        | 1.13134  | 1.037632 |
| ENSMUSG00000030617  | 12_Ccdc83        | 0.797769356 | 0.844335  | 0.713458 | 0.926365 | 0.812132 | 0.85875  | 0        | 1.984394 | 1.13134  | 0        |
| ENSMUSG00000057715  | 13_A830018L16Rik | 0.797769356 | 0.844335  | 0.713458 | 0.926365 | 0.812132 | 0.85875  | 0        | 1.984394 | 1.13134  | 0        |
| ENSMUSG00000025745  | 11_Hadha         | 3486.099735 | -0.10011  | 0.713594 | 0.926482 | 3492.168 | 3532.898 | 3795.869 | 2564.829 | 3804.697 | 3726.137 |
| ENSMUSG00000037884  | 6_1700017G19Rik  | 4.374380782 | -0.45963  | 0.713926 | 0.926852 | 4.060661 | 7.728752 | 3.451836 | 8.929771 | 0        | 2.075264 |
| ENSMUSG00000106365  | 1_Gm43568        | 3.645776975 | -0.37728  | 0.713983 | 0.926866 | 3.248529 | 3.435001 | 5.753061 | 3.968787 | 3.39402  | 2.075264 |
| ENSMUSG00000001986  | 16_Gria3         | 156.5510513 | 0.195659  | 0.714125 | 0.92693  | 155.9294 | 179.4788 | 102.4045 | 286.7449 | 74.66845 | 140.0803 |
| ENSMUSG00000042694  | 17_Obfc1         | 491.3178689 | -0.12024  | 0.714087 | 0.92693  | 484.0308 | 488.6289 | 562.6493 | 316.5108 | 567.9327 | 528.1547 |
| ENSMUSG00000031146  | 6_Plp2           | 6013.48868  | -0.10346  | 0.714277 | 0.92697  | 6247.733 | 5884.157 | 6555.037 | 4309.111 | 6731.474 | 6353.421 |
| ENSMUSG00000069607  | 4_Cd300lh        | 70.95058429 | 0.613355  | 0.714296 | 0.92697  | 137.2503 | 30.91501 | 0        | 64.49279 | 88.24453 | 104.8008 |
| ENSMUSG00000097533  | 1_Gm26590        | 19.97839366 | 0.266693  | 0.714229 | 0.92697  | 11.36985 | 18.03375 | 25.31347 | 39.68787 | 6.788041 | 18.67738 |
| ENSMUSG00000036962  | 12_Cfap221       | 2.153173171 | -0.55078  | 0.714421 | 0.927072 | 2.436397 | 5.152501 | 0        | 0.992197 | 2.26268  | 2.075264 |
| ENSMUSG00000051251  | 3_Nhlh1          | 1.708365355 | 0.672951  | 0.714468 | 0.927073 | 0        | 1.7175   | 2.301224 | 3.968787 | 2.26268  | 0        |
| ENSMUSG00000066151  | 11_Fkbp15        | 2151.136715 | -0.12859  | 0.714536 | 0.9271   | 2139.968 | 2090.198 | 2510.636 | 1265.051 | 2495.736 | 2405.231 |
| ENSMUSG00000071112  | 11_Spx           | 13.76438216 | 0.209507  | 0.714488 | 0.927487 | 13.80625 | 12.88125 | 11.50612 | 10.91416 | 15.83876 | 17.63975 |
| ENSMUSG00000092124  | 1_B930094E09Rik  | 3.581247757 | -0.4389   | 0.715043 | 0.927367 | 4.060661 | 6.011252 | 2.301224 | 6.945378 | 1.13134  | 1.037632 |
| ENSMUSG00000038831  | 16_Ralgps7       | 307.4707392 | -0.09681  | 0.715199 | 0.927779 | 311.0466 | 340.9238 | 301.4604 | 333.3781 | 247.7635 | 310.252  |
| ENSMUSG00000074622  | 4_Mafb           | 842.0774556 | -0.10807  | 0.715351 | 0.927916 | 888.4726 | 711.9039 | 1020.593 | 741.171  | 989.9226 | 700.4016 |
| ENSMUSG00000093846  | 1_Gm4425         | 5.249296281 | 0.343372  | 0.715404 | 0.927925 | 5.684925 | 6.870002 | 1.150612 | 6.945378 | 5.656701 | 5.18816  |
| ENSMUSG00000015656  | 16_Hspa8         | 7624.772395 | 0.116434  | 0.715855 | 0.928026 | 7642.164 | 6542.818 | 7766.632 | 5688.264 | 10460.37 | 7648.386 |
| ENSMUSG00000022089  | 8_Bln3           | 473.8278727 | -0.13562  | 0.7157   | 0.928026 | 531.1344 | 441.3976 | 515.4742 | 280.7917 | 629.0251 | 445.1442 |
| ENSMUSG00000025871  | 18_4833439L19Rik | 2092.414376 | 0.075001  | 0.715557 | 0.928026 | 1927.19  | 2105.656 | 2081.457 | 2162.999 | 2092.929 | 2184.215 |
| ENSMUSG00000031125  | 2_3830403N18Rik  | 4.501322756 | 0.533053  | 0.715765 | 0.928026 | 1.624264 | 6.011252 | 3.451836 | 14.88295 | 0        | 1.037632 |
| ENSMUSG00000032091  | 14_Tmprs4        | 4845.836208 | -0.16832  | 0.715643 | 0.928026 | 4906.903 | 4542.789 | 5934.857 | 1957.604 | 6380.758 | 5352.106 |
| ENSMUSG00000033987  | 15_Dnah17        | 50.72371158 | -0.20132  | 0.715644 | 0.928026 | 60.09778 | 54.10126 | 48.32571 | 16.86735 | 67.88041 | 57.06976 |
| ENSMUSG00000047048  | 3_Olfra42        | 0.936139587 | -0.80911  | 0.715795 | 0.928026 | 2.436397 | 0        | 1.150612 | 0.992197 | 0        | 1.037632 |
| ENSMUSG00000074826  | 11_Gm10767       | 14.92438868 | 0.272841  | 0.715902 | 0.928026 | 17.05478 | 12.0225  | 11.50612 | 32.74249 | 7.919381 | 8.301057 |
| ENSMUSG00000090125  | 3_Pou3f1         | 20.31673084 | -0.25944  | 0.715869 | 0.928026 | 17.05478 | 9.446252 | 40.27142 | 27.78151 | 16.9701  | 10.37632 |
| ENSMUSG00000036941  | 2_Elac1          | 538.9058785 | 0.989871  | 0.715949 | 0.928026 | 531.9466 | 522.1201 | 507.4199 | 685.608  | 470.6375 | 515.7031 |
| ENSMUSG00000056313  | 5_1810011O10Rik  | 1471.139251 | 0.097615  | 0.716008 | 0.928043 | 1379     | 1307.018 | 1578.64  | 1845.486 | 1405.123 | 1311.567 |
| ENSMUSG00000041248  | 8_Kcnj1          | 4.414671584 | -0.50057  | 0.716127 | 0.928137 | 8.933454 | 4.293751 | 2.301224 | 9.921968 | 0        | 1.037632 |
| ENSMUSG00000006932  | 16_Ctnnb1        | 23064.39989 | 0.747332  | 0.716276 | 0.928219 | 21993.35 | 21599.29 | 23818.82 | 24705.7  | 23328.23 | 22941.01 |
| ENSMUSG00000054889  | 9_Dsp            | 117281.1522 | -0.09889  | 0.716283 | 0.928219 | 111058.3 | 116919.7 | 135919.5 | 89200.48 | 130419.8 | 120169.2 |
| ENSMUSG00000013698  | 12_Pea15a        | 5125.131879 | -0.07913  | 0.71642  | 0.928305 | 5471.334 | 5353.449 | 4971.795 | 4497.628 | 5165.699 | 5290.886 |
| ENSMUSG00000020814  | 13_Mxra7         | 4025.199607 | -0.07919  | 0.716625 | 0.928305 | 3924.223 | 4026.68  | 4456.321 | 3607.628 | 3961.953 | 4174.394 |
| ENSMUSG00000022680  | 13_Pdxkd1        | 4175.504244 | 0.071627  | 0.716698 | 0.928305 | 4064.722 | 4038.702 | 4112.288 | 4338.877 | 4211.979 | 4286.458 |
| ENSMUSG00000027559  | 5_Car3           | 1060.414283 | -0.20122  | 0.716639 | 0.928305 | 1336.77  | 1484.779 | 581.0591 | 1720.469 | 506.8404 | 732.5682 |
| ENSMUSG00000038239  | 10_Hrc           |             |           |          |          |          |          |          |          |          |          |

|                       |                  |             |          |          |          |            |          |          |          |          |          |
|-----------------------|------------------|-------------|----------|----------|----------|------------|----------|----------|----------|----------|----------|
| ENSMUSG000000000942   | 10_Hoxa4         | 0.844150452 | 0.955531 | 0.719915 | 0.929415 | 0.812132   | 0.85875  | 0        | 0        | 3.39402  | 0        |
| ENSMUSG00000001020    | 8_S100a4         | 460.4452422 | -0.16258 | 0.719303 | 0.929415 | 575.8017   | 452.5614 | 430.3289 | 213.3223 | 665.228  | 425.4291 |
| ENSMUSG000000003604   | 14_Aven          | 72.72220726 | 0.112001 | 0.718956 | 0.929415 | 75.52829   | 69.55877 | 64.43428 | 74.41476 | 73.53711 | 78.86004 |
| ENSMUSG000000019831   | 14_Wasf1         | 15.16523506 | 0.206298 | 0.719653 | 0.929415 | 14.61838   | 17.175   | 10.35551 | 18.85174 | 11.3134  | 18.67738 |
| ENSMUSG0000000029153  | 11_Ociad2        | 1442.49415  | 0.136548 | 0.719022 | 0.929415 | 1350.576   | 1606.722 | 1165.57  | 2175.888 | 974.0838 | 1382.126 |
| ENSMUSG000000029454   | 15_Mapkapk5      | 801.5757933 | 0.081924 | 0.719167 | 0.929415 | 855.1752   | 727.3614 | 753.6509 | 771.9291 | 859.8185 | 841.5196 |
| ENSMUSG0000000030636  | 15_1700010L04Rik | 0.489278183 | 1.08427  | 0.719938 | 0.929415 | 0.812132   | 0        | 0        | 0.992197 | 1.13134  | 0        |
| ENSMUSG0000000030865  | 4_Chp2           | 21.84981022 | -0.21529 | 0.719218 | 0.929415 | 31.67315   | 21.46876 | 17.25918 | 27.78151 | 9.050721 | 23.86554 |
| ENSMUSG0000000031364  | 2_Gprp           | 0.489278183 | 1.08427  | 0.719938 | 0.929415 | 0.812132   | 0        | 0        | 0.992197 | 1.13134  | 0        |
| ENSMUSG0000000034209  | 4_Ras10a         | 2.918813708 | -0.45908 | 0.719829 | 0.929415 | 0.812132   | 2.576251 | 6.903673 | 2.97659  | 1.13134  | 3.112896 |
| ENSMUSG0000000037426  | 17_Depdc5        | 531.548354  | -0.09113 | 0.719805 | 0.929415 | 535.1951   | 547.0239 | 562.6493 | 426.6446 | 579.2461 | 538.531  |
| ENSMUSG0000000049233  | 6_Apoc-ps        | 107.3512313 | -0.14415 | 0.719516 | 0.929415 | 88.52241   | 100.4738 | 149.5796 | 79.37575 | 87.11319 | 139.0427 |
| ENSMUSG0000000050668  | 9_Gpatch11       | 738.5773937 | 0.100038 | 0.719537 | 0.929415 | 734.1675   | 676.6952 | 728.3375 | 961.4387 | 658.4399 | 672.3856 |
| ENSMUSG0000000062116  | 8_Zfp954         | 325.6397737 | -0.10463 | 0.719959 | 0.929415 | 302.9253   | 340.0651 | 369.3465 | 251.0258 | 381.2616 | 309.2144 |
| ENSMUSG0000000066224  | 13_Arid3c        | 0.489278183 | 1.08427  | 0.719938 | 0.929415 | 0.812132   | 0        | 0        | 0.992197 | 1.13134  | 0        |
| ENSMUSG0000000070504  | 9_Fcrl6          | 0.820762771 | 0.945041 | 0.719101 | 0.929415 | 1.624264   | 0        | 0        | 0        | 2.26268  | 1.037632 |
| ENSMUSG0000000086152  | 1_Gm11454        | 0.844150452 | 0.955531 | 0.719915 | 0.929415 | 0.812132   | 0.85875  | 0        | 0        | 3.39402  | 0        |
| ENSMUSG0000000087610  | 1_Gm16253        | 3.239919849 | -0.40362 | 0.718911 | 0.929415 | 1.624264   | 6.011252 | 3.451836 | 2.97659  | 2.26268  | 3.112896 |
| ENSMUSG0000000090546  | 1_Cdr1           | 0.489278183 | 1.08427  | 0.719938 | 0.929415 | 0.812132   | 0        | 0        | 0.992197 | 1.13134  | 0        |
| ENSMUSG0000000092349  | 1_Platr17        | 5.672736457 | -0.45004 | 0.719796 | 0.929415 | 12.99411   | 4.293751 | 2.301224 | 9.921968 | 4.52536  | 0        |
| ENSMUSG0000000097567  | 1_Gm26637        | 11.32739659 | 0.267671 | 0.719817 | 0.929415 | 6.497057   | 5.152501 | 19.56041 | 10.91416 | 11.3134  | 14.52685 |
| ENSMUSG0000000098206  | 1_AA30106G13Rik  | 26.73757833 | 0.230574 | 0.719738 | 0.929415 | 24.36397   | 19.75126 | 29.91591 | 53.57863 | 20.36412 | 12.45158 |
| ENSMUSG0000000099419  | 1_170001D01Rik   | 0.489278183 | 1.08427  | 0.719938 | 0.929415 | 0.812132   | 0        | 0        | 0.992197 | 1.13134  | 0        |
| ENSMUSG0000000108803  | 1_RP23-268E17    | 0.489278183 | 1.08427  | 0.719938 | 0.929415 | 0.812132   | 0        | 0        | 0.992197 | 1.13134  | 0        |
| ENSMUSG0000000002190  | 13_Clgn          | 4.874315161 | 0.366122 | 0.720203 | 0.929489 | 6.497057   | 1.7175   | 4.602448 | 9.921968 | 3.39402  | 3.112896 |
| ENSMUSG0000000067787  | 10_Blcap         | 824.1676775 | -0.08663 | 0.720172 | 0.929489 | 839.7447   | 841.5752 | 865.2603 | 675.686  | 880.1826 | 842.5572 |
| ENSMUSG0000000072663  | 11_Spef2         | 6.432113241 | 0.324099 | 0.720147 | 0.929489 | 5.684925   | 6.870002 | 4.602448 | 13.89076 | 3.39402  | 4.150528 |
| ENSMUSG0000000085683  | 1_9130409J20Rik  | 1.75388749  | 0.577542 | 0.720092 | 0.929489 | 3.248529   | 0.81875  | 0        | 1.984394 | 3.39402  | 1.037632 |
| ENSMUSG0000000027651  | 16_Rprd1b        | 1282.033153 | 0.768814 | 0.720306 | 0.929561 | 1203.58    | 1259.425 | 1320.903 | 1256.121 | 1397.205 | 1294.965 |
| ENSMUSG0000000041343  | 18_Ankrk42       | 102.0646491 | 0.112901 | 0.720449 | 0.929625 | 90.14667   | 96.18002 | 108.1575 | 122.0402 | 109.74   | 86.12346 |
| ENSMUSG0000000067872  | 2_Codc87         | 1.468705339 | 0.617981 | 0.720446 | 0.929625 | 0.812132   | 2.576251 | 0        | 0.992197 | 3.39402  | 1.037632 |
| ENSMUSG0000000031558  | 15_Slit2         | 496.1072518 | -0.14754 | 0.720545 | 0.929632 | 561.1833   | 668.1077 | 334.8281 | 668.7407 | 360.8975 | 382.8862 |
| ENSMUSG0000000073147  | 3_5031425E22Rik  | 266.7437262 | -0.09278 | 0.720548 | 0.929632 | 261.5066   | 285.1051 | 279.5987 | 279.7995 | 219.48   | 274.9725 |
| ENSMUSG0000000022491  | 4_Glycam1        | 7.538129263 | -0.29878 | 0.72086  | 0.929975 | 12.99411   | 6.011252 | 5.753061 | 3.968787 | 11.3134  | 5.18816  |
| ENSMUSG0000000003458  | 12_Ncstn         | 2904.662744 | -0.14664 | 0.721229 | 0.930149 | 2929.361   | 2905.152 | 3321.817 | 1395.029 | 3698.351 | 3178.267 |
| ENSMUSG0000000027246  | 12_Ell3          | 100.4715242 | 0.11053  | 0.721108 | 0.930149 | 99.08013   | 88.45127 | 102.4045 | 87.31332 | 105.2146 | 120.3653 |
| ENSMUSG0000000033218  | 6_Cnxb2          | 429.1002508 | -0.11807 | 0.721202 | 0.930149 | 421.4966   | 408.7651 | 509.7212 | 281.7839 | 504.5777 | 448.2571 |
| ENSMUSG0000000040424  | 15_Hlfpk4        | 32.81093233 | -0.19671 | 0.721153 | 0.930149 | 36.54595   | 24.90376 | 43.72326 | 13.89076 | 37.33422 | 40.46765 |
| ENSMUSG0000000052221  | 7_Ppp1r36        | 18.35946265 | 0.180041 | 0.721145 | 0.930149 | 17.86691   | 15.4575  | 18.40979 | 23.81272 | 16.9701  | 17.63975 |
| ENSMUSG0000000009112  | 4_Bcl2l13        | 9401.168278 | -0.07992 | 0.722007 | 0.930225 | 9192.524   | 9481.461 | 10310.64 | 8073.505 | 9660.513 | 9688.371 |
| ENSMUSG0000000015721  | 17_Nlrp5         | 0.853985545 | 0.731886 | 0.721777 | 0.930225 | 0.812132   | 0        | 1.150612 | 0.992197 | 1.13134  | 1.037632 |
| ENSMUSG0000000015812  | 7_Gmrl1          | 8.440136443 | -0.25607 | 0.721971 | 0.930225 | 12.8198    | 9.446252 | 5.753061 | 6.945378 | 9.050721 | 7.263424 |
| ENSMUSG0000000023021  | 15_Cers5         | 1098.139833 | 0.096879 | 0.721653 | 0.930225 | 1103.688   | 1066.568 | 1013.689 | 1406.935 | 945.8003 | 1052.159 |
| ENSMUSG0000000025006  | 15_Sorbs1        | 1396.540327 | -0.09783 | 0.721895 | 0.930225 | 1332.709   | 1332.709 | 1585.543 | 1054.705 | 1431.145 | 1561.636 |
| ENSMUSG0000000026579  | 8_F5             | 215.0500162 | -0.14664 | 0.721876 | 0.930225 | 203.033    | 281.6701 | 193.3028 | 278.8073 | 117.6594 | 215.8275 |
| ENSMUSG0000000028174  | 12_Rpe65         | 374.0426934 | 0.257462 | 0.721936 | 0.930225 | 389.8234   | 441.3976 | 191.0016 | 889.0083 | 99.55793 | 233.4672 |
| ENSMUSG0000000028954  | 11_Nub1          | 3527.803259 | 0.090645 | 0.721924 | 0.930225 | 3198.177   | 3199.703 | 3853.4   | 3080.771 | 4141.836 | 3692.933 |
| ENSMUSG0000000034040  | 16_Wbscr17       | 25.5448391  | -0.17685 | 0.721872 | 0.930225 | 25.98823   | 30.05626 | 25.31347 | 21.82833 | 15.83876 | 34.24186 |
| ENSMUSG0000000037580  | 9_Gch1           | 390.7332461 | 0.115409 | 0.721645 | 0.930225 | 336.2227   | 314.3026 | 475.2028 | 360.1674 | 505.709  | 352.7949 |
| ENSMUSG0000000040621  | 14_Gemin8        | 130.2028596 | -0.11293 | 0.721911 | 0.930225 | 118.5713   | 117.6488 | 170.2906 | 131.9622 | 112.0027 | 130.7416 |
| ENSMUSG0000000046364  | 14_Rpl27a        | 10367.20606 | -0.07823 | 0.722035 | 0.930225 | 10694.97   | 10169.32 | 11080.39 | 8958.545 | 10692.3  | 10607.71 |
| ENSMUSG0000000047692  | 5_4930533K18Rik  | 0.853985545 | 0.731886 | 0.721777 | 0.930225 | 0.812132   | 0        | 1.150612 | 0.992197 | 1.13134  | 1.037632 |
| ENSMUSG0000000050635  | 1_Sprzf          | 17.53298386 | -0.27152 | 0.722082 | 0.930225 | 21.92757   | 6.870002 | 28.7653  | 7.937575 | 28.2835  | 11.41395 |
| ENSMUSG0000000072572  | 14_07536364      | 14.07536364 | 0.229536 | 0.721722 | 0.930225 | 17.05478   | 6.870002 | 14.95796 | 9.921968 | 16.9701  | 18.67738 |
| ENSMUSG0000000074497  | 4_AA30078G23Rik  | 2.473467122 | 0.469166 | 0.721718 | 0.930225 | 3.248529   | 1.7175   | 1.150612 | 0.992197 | 5.656701 | 2.075624 |
| ENSMUSG0000000087390  | 1_Gm7598         | 14.38834566 | 0.218484 | 0.722013 | 0.930225 | 16.24264   | 12.0225  | 11.50612 | 8.929771 | 15.83876 | 21.79027 |
| ENSMUSG0000000053110  | 13_Yap1          | 6517.361731 | 0.076793 | 0.722167 | 0.930275 | 6037.391   | 6256.854 | 6737.985 | 7262.881 | 6583.268 | 6225.792 |
| ENSMUSG0000000058260  | 2_Serpina9       | 126.9228396 | -0.11746 | 0.722251 | 0.930324 | 121.0077   | 145.1288 | 130.0192 | 90.28991 | 126.7101 | 148.3814 |
| ENSMUSG0000000022426  | 5_Josd1          | 1108.720721 | -0.08825 | 0.722461 | 0.930518 | 1099.627   | 1118.952 | 1209.293 | 890.9927 | 1162.462 | 1157.997 |
| ENSMUSG0000000024346  | 5_Plfdn1         | 1717.204293 | -0.07898 | 0.722495 | 0.930518 | 1718.472   | 1633.343 | 1941.083 | 1602.398 | 1770.547 | 1637.383 |
| ENSMUSG0000000034387  | 12_Ssu2          | 1.727088718 | -0.53857 | 0.72303  | 0.931086 | 0.406061   | 0.85875  | 1.150612 | 0.992197 | 2.26268  | 1.037632 |
| ENSMUSG0000000054662  | 7_Ano9           | 664.7138914 | -0.0865  | 0.722394 | 0.931086 | 692.7487   | 663.8139 | 697.2709 | 547.6926 | 669.7533 | 717.0038 |
| ENSMUSG0000000029784  | 13_Ssmem1        | 1.414357437 | 0.596807 | 0.723239 | 0.931295 | 2.436397   | 0.85875  | 0        | 1.984394 | 1.13134  | 2.075624 |
| ENSMUSG0000000020415  | 16_Ptfg1         | 470.2875032 | -0.11284 | 0.723333 | 0.931297 | 538.4436   | 395.8839 | 531.5828 | 343.3001 | 561.1447 | 451.3699 |
| ENSMUSG0000000041645  | 13_Dcx24         | 2596.033515 | -0.12997 | 0.723334 | 0.931297 | 2526.543   | 2656.114 | 2955.923 | 1453.568 | 3207.349 | 2776.703 |
| ENSMUSG0000000040707  | 14_Ly9           | 40.60554739 | 0.22502  | 0.72335  | 0.931322 | 59.28565   | 17.175   | 35.66898 | 27.78151 | 74.66845 | 29.0537  |
| ENSMUSG00000000505883 | 15_Spo11         | 5.368951376 | 0.408413 | 0.723558 | 0.931322 | 4.872793   | 7.728752 | 1.150612 | 12.89856 | 4.52536  | 1.037632 |
| ENSMUSG0000000031077  | 7_Fadd           | 459.3289701 | -0.1021  | 0.723477 | 0.931322 | 457.2304   | 444.8326 | 524.6791 | 343.3001 | 528.3358 | 457.5957 |
| ENSMUSG0000000047832  | 8_Cdc4a          | 780.5462119 | -0.11384 | 0.723588 | 0.931322 | 801.5745   | 708.4689 | 923.9415 | 534.794  | 943.5376 | 770.9606 |
| ENSMUSG0000000057933  | 10_Gsta2         | 1392.110982 | 0.104962 | 0.723438 | 0.931322 | 1337.582   | 1380.012 | 1307.095 | 1742.298 | 1038.57  | 1547.109 |
| ENSMUSG0000000086328  | 1_2700033N17Rik  | 95.06106499 | -0.11507 | 0.723711 | 0.931421 | 102.3287   | 106.485  | 87.44652 | 73.42256 | 92.76989 | 107.9137 |
| ENSMUSG0000000018774  | 13_Cd68          | 659.4453445 | -0.18474 | 0.723792 | 0.931464 | 694.373    | 668.1077 | 742.1448 | 223.2443 | 1023.863 | 604.9395 |
| ENSMUSG0000000029658  | 17_Wdr95         | 3.041411555 | 0.482967 | 0.723844 | 0.931472 | 4.872793   | 2.576251 | 0        | 0.992197 | 5.656701 | 4.150528 |
| ENSMUSG000000018893   | 14_Mb            | 707.0592057 | 0.16878  | 0.724002 | 0.931615 | 517.3282   | 947.2015 | 532.7334 | 942.587  | 354.1095 | 948.3957 |
| ENSMUSG0000000064016  | 4_Gm648          | 0.81319023  | 0.928822 | 0.724068 | 0.93164  | 1.624264</ |          |          |          |          |          |

|                     |                  |             |          |          |          |          |          |          |          |           |          |
|---------------------|------------------|-------------|----------|----------|----------|----------|----------|----------|----------|-----------|----------|
| ENSMUSG00000066392  | 11_Nrxn3         | 17.26353677 | 0.271908 | 0.725813 | 0.932585 | 22.7397  | 13.74    | 10.35551 | 35.71909 | 15.83876  | 5.18816  |
| ENSMUSG00000069805  | 10_Fbp1          | 2.748932653 | 0.499748 | 0.726057 | 0.932585 | 3.248529 | 3.435001 | 0        | 1.984394 | 6.788041  | 1.037632 |
| ENSMUSG00000071586  | 4_Gm10337        | 1.385414588 | -0.70475 | 0.726936 | 0.932585 | 0.812132 | 4.293751 | 0        | 0        | 1.13134   | 2.075264 |
| ENSMUSG00000073968  | 3_Trim68         | 496.7533731 | 0.083635 | 0.72656  | 0.932585 | 500.2734 | 443.9739 | 502.8175 | 458.3949 | 552.094   | 522.9666 |
| ENSMUSG00000074676  | 2_Foxs1          | 5.892562517 | -0.29248 | 0.726903 | 0.932585 | 5.684925 | 6.870002 | 6.903673 | 2.97659  | 5.656701  | 7.263424 |
| ENSMUSG00000078612  | 9_170024P16Rik   | 6.472198686 | 0.331031 | 0.725745 | 0.932585 | 9.745586 | 1.7175   | 5.753061 | 9.921968 | 3.39402   | 8.301057 |
| ENSMUSG00000083695  | 6_Rnf138r1       | 0.602313789 | -1.20406 | 0.726817 | 0.932585 | 0        | 2.576251 | 0        | 0        | 0         | 1.037632 |
| ENSMUSG00000097334  | 1_2700012120Rik  | 4.063896579 | 0.343547 | 0.72653  | 0.932585 | 4.060661 | 4.293751 | 2.301224 | 2.97659  | 4.52536   | 6.225792 |
| ENSMUSG00000097337  | 1_Gm26806        | 8.98955202  | 0.293638 | 0.726102 | 0.932585 | 4.872793 | 10.305   | 9.204897 | 17.85954 | 3.39402   | 8.301057 |
| ENSMUSG00000097357  | 1_Gm16793        | 7.359514316 | -0.26759 | 0.725646 | 0.932585 | 8.933454 | 6.011252 | 9.204897 | 7.937575 | 7.919381  | 4.150528 |
| ENSMUSG00000097597  | 1_Gm26674        | 0.602313789 | -1.20406 | 0.726817 | 0.932585 | 0        | 2.576251 | 0        | 0        | 0         | 1.037632 |
| ENSMUSG00000097617  | 1_Gm10687        | 6.718898444 | 0.279992 | 0.726249 | 0.932585 | 4.060661 | 5.152501 | 9.204897 | 7.937575 | 5.656701  | 8.301057 |
| ENSMUSG000000107002 | 1_NCBP2-AS2      | 226.0442306 | -0.13586 | 0.726799 | 0.932585 | 250.9488 | 234.4388 | 224.3694 | 121.048  | 268.1276  | 257.3328 |
| ENSMUSG000000107728 | 1_RP23-174M4     | 25.10472439 | 0.189489 | 0.725551 | 0.932585 | 21.11544 | 35.20876 | 13.80735 | 25.79712 | 21.49546  | 33.20423 |
| ENSMUSG00000098559  | 1_Gm15013        | 4.033212147 | 0.34587  | 0.727072 | 0.932674 | 5.684925 | 2.576251 | 2.301224 | 4.960984 | 4.52536   | 4.150528 |
| ENSMUSG000000002109 | 14_Ddb2          | 417.4405712 | 0.106113 | 0.727616 | 0.932891 | 383.3264 | 438.8214 | 384.3044 | 547.6926 | 329.22    | 421.2786 |
| ENSMUSG00000018401  | 17_Mtmr4         | 2589.567854 | 0.074201 | 0.728085 | 0.932891 | 2373.862 | 2524.726 | 2670.571 | 2565.821 | 2837.401  | 2565.026 |
| ENSMUSG00000031668  | 14_Elf2ak3       | 749.3228821 | -0.07351 | 0.727933 | 0.932891 | 751.2223 | 769.4402 | 784.7175 | 753.0774 | 718.401   | 719.079  |
| ENSMUSG00000038383  | 16_Pigu          | 832.6446041 | 0.083958 | 0.727579 | 0.932891 | 806.4473 | 713.6214 | 905.5317 | 836.4219 | 926.5675  | 807.2777 |
| ENSMUSG000000041205 | 7_Map6d1         | 7.202665174 | -0.39145 | 0.727957 | 0.932891 | 8.933454 | 15.4575  | 0        | 4.960984 | 4.52536   | 9.338689 |
| ENSMUSG000000042428 | 6_Mgat3          | 3044.740738 | -0.09541 | 0.727328 | 0.932891 | 2837.59  | 2961.83  | 3637.085 | 2417.984 | 2960.717  | 3453.24  |
| ENSMUSG000000049128 | 7_Ivl            | 338.8348451 | -0.12263 | 0.727592 | 0.932891 | 359.7746 | 334.9126 | 364.744  | 221.2599 | 451.4047  | 300.9133 |
| ENSMUSG00000054659  | 13_Pm20d2        | 21.82688596 | -0.16788 | 0.727773 | 0.932891 | 24.36397 | 19.75126 | 25.31347 | 21.82833 | 15.83876  | 23.86554 |
| ENSMUSG00000059336  | 14_Slc14a1       | 243.406567  | -0.17588 | 0.72796  | 0.932891 | 302.9253 | 356.3813 | 115.0612 | 329.4093 | 171.9637  | 184.6985 |
| ENSMUSG00000059908  | 9_Mug1           | 0.594741247 | -1.20394 | 0.727873 | 0.932891 | 0        | 2.576251 | 0        | 0.992197 | 0         | 0        |
| ENSMUSG00000060268  | 11_Gm1661        | 4.742562421 | 0.385735 | 0.727633 | 0.932891 | 7.30919  | 2.576251 | 2.301224 | 0.992197 | 0.9050721 | 6.225792 |
| ENSMUSG000000607367 | 9_Lyar           | 519.2358217 | 0.09726  | 0.727789 | 0.932891 | 504.3341 | 425.9401 | 575.3061 | 586.3883 | 580.3775  | 443.0689 |
| ENSMUSG00000068040  | 10_Tm9sf4        | 1904.276923 | -0.11889 | 0.728023 | 0.932891 | 1821.612 | 1996.594 | 2129.783 | 1154.917 | 2267.206  | 2055.549 |
| ENSMUSG00000091272  | 1_Gm17641        | 0.594741247 | -1.20394 | 0.727873 | 0.932891 | 0        | 2.576251 | 0        | 0.992197 | 0         | 0        |
| ENSMUSG000000992210 | 1_A930009A15Rik  | 1.810300812 | 0.500961 | 0.728067 | 0.932891 | 2.436397 | 0.85875  | 1.150612 | 1.984394 | 3.39402   | 1.037632 |
| ENSMUSG000000100618 | 1_Gm29595        | 0.594741247 | -1.20394 | 0.727873 | 0.932891 | 0        | 2.576251 | 0        | 0.992197 | 0         | 0        |
| ENSMUSG000000103718 | 1_Gm35299        | 0.594741247 | -1.20394 | 0.727873 | 0.932891 | 0        | 2.576251 | 0        | 0.992197 | 0         | 0        |
| ENSMUSG000000107417 | 1_Olfri1383      | 4.985059932 | 0.442625 | 0.727957 | 0.932891 | 0.812132 | 1.7175   | 10.35551 | 0.992197 | 5.656701  | 10.37632 |
| ENSMUSG00000001661  | 5_Hoxc6          | 1.520927267 | -0.8049  | 0.728158 | 0.932914 | 4.872793 | 0.85875  | 0        | 0        | 3.39402   | 0        |
| ENSMUSG00000027719  | 15_Adad1         | 0.951757594 | -0.77034 | 0.728291 | 0.932914 | 2.436397 | 0        | 1.150612 | 0.992197 | 1.13134   | 0        |
| ENSMUSG00000028873  | 16_Cdc4a         | 432.8779781 | -0.11457 | 0.728258 | 0.932914 | 438.5514 | 381.2851 | 530.4322 | 297.659  | 512.4971  | 436.8431 |
| ENSMUSG000000100684 | 1_Gm20268        | 1.486388765 | 0.529975 | 0.728223 | 0.932914 | 1.624264 | 0.85875  | 1.150612 | 1.984394 | 2.26268   | 1.037632 |
| ENSMUSG000000002365 | 9_Snx9           | 1302.305463 | -0.07326 | 0.728349 | 0.932993 | 1270.987 | 1315.605 | 1419.855 | 1304.739 | 1251.262  | 1251.384 |
| ENSMUSG000000013611 | 14_Snx31         | 816.2474169 | 0.080709 | 0.728405 | 0.932941 | 745.5373 | 826.1177 | 808.8803 | 874.1254 | 742.1591  | 900.6646 |
| ENSMUSG000000061462 | 15_Obscn         | 169.9770566 | -0.21062 | 0.728573 | 0.933096 | 125.8805 | 297.9863 | 123.1155 | 85.32893 | 93.90123  | 293.8499 |
| ENSMUSG000000019890 | 3_Nts            | 2.426888893 | 0.448219 | 0.729295 | 0.933332 | 4.060661 | 0.85875  | 1.150612 | 1.984394 | 3.39402   | 3.112896 |
| ENSMUSG000000020936 | 8_Nmt1           | 2232.6813   | -0.11881 | 0.729166 | 0.933332 | 2291.025 | 122.141  | 2470.364 | 1363.278 | 2791.016  | 2268.264 |
| ENSMUSG000000029502 | 14_Golga3        | 2252.022999 | 0.07287  | 0.729076 | 0.933332 | 2099.362 | 2125.407 | 2361.056 | 2306.858 | 2379.208  | 2240.248 |
| ENSMUSG000000036327 | 18_Qsox2         | 1500.919213 | 0.090675 | 0.72887  | 0.933332 | 1346.515 | 1386.882 | 1628.116 | 1270.012 | 1736.607  | 1627.383 |
| ENSMUSG000000047407 | 17_Tgfr1         | 1017.772217 | 0.089698 | 0.729275 | 0.933332 | 992.4255 | 884.5127 | 1081.575 | 954.4933 | 1241.08   | 952.5462 |
| ENSMUSG000000049916 | 9_2B10318N02Rik  | 10.12457936 | -0.25415 | 0.728858 | 0.933332 | 12.99411 | 5.152501 | 14.95796 | 5.953181 | 11.1314   | 10.37632 |
| ENSMUSG00000054200  | 6_Ffar4          | 0.805144765 | 0.912396 | 0.729135 | 0.933332 | 1.624264 | 0        | 0        | 0        | 1.13134   | 2.075264 |
| ENSMUSG000000070563 | 4_Spac4          | 5.528679066 | 0.40521  | 0.729114 | 0.933332 | 4.872793 | 2.576251 | 6.903673 | 0.992197 | 2.26268   | 15.56448 |
| ENSMUSG000000074529 | 10_C330013J21Rik | 7.004830953 | -0.27202 | 0.729204 | 0.933332 | 6.497057 | 5.152501 | 11.50612 | 5.953181 | 5.656701  | 7.263424 |
| ENSMUSG000000096997 | 1_Gm26791        | 0.805144765 | 0.912396 | 0.729135 | 0.933332 | 1.624264 | 0        | 0        | 0        | 1.13134   | 2.075264 |
| ENSMUSG000000097336 | 8_Fendrr         | 5.055774554 | 0.461205 | 0.728991 | 0.933332 | 0        | 2.576251 | 10.35551 | 2.97659  | 11.3134   | 3.112896 |
| ENSMUSG000000104520 | 1_Gm37336        | 2.093063095 | 0.514493 | 0.72932  | 0.933332 | 1.624264 | 3.435001 | 0        | 0.992197 | 3.39402   | 3.112896 |
| ENSMUSG000000040560 | 9_Wdr7           | 591.48932   | 0.095058 | 0.729413 | 0.933392 | 523.8253 | 583.9502 | 608.6738 | 751.093  | 528.3358  | 553.0579 |
| ENSMUSG000000028836 | 14_Slc30a2       | 4.436649406 | 0.316666 | 0.729497 | 0.93344  | 4.060661 | 4.293751 | 3.451836 | 3.968787 | 5.656701  | 5.18816  |
| ENSMUSG000000070284 | 10_Gmppb         | 1381.892925 | -0.20119 | 0.729574 | 0.933477 | 1307.533 | 1247.764 | 1878.95  | 361.1596 | 2094.111  | 1401.841 |
| ENSMUSG000000000381 | 10_Wap           | 0.172938678 | 1.140932 | 0.779778 | 0.933583 | 0        | 0        | 0        | 0        | 0         | 1.037632 |
| ENSMUSG000000000416 | 16_Cttnbp2       | 66.04536818 | 0.147637 | 0.748762 | 0.933583 | 56.84925 | 85.01627 | 46.02448 | 102.1963 | 54.30432  | 51.8816  |
| ENSMUSG000000000958 | 9_Slc7a7         | 104.9151966 | -0.12395 | 0.739817 | 0.933583 | 120.1956 | 109.92   | 97.80203 | 64.49279 | 118.7907  | 118.2901 |
| ENSMUSG000000001052 | 15_Sec24b        | 1904.65122  | 0.068494 | 0.76868  | 0.933583 | 1676.241 | 1863.488 | 2038.885 | 1793.892 | 2133.707  | 1921.695 |
| ENSMUSG000000001403 | 13_Ube2c         | 443.4843193 | -0.09235 | 0.742194 | 0.933583 | 463.7275 | 422.5051 | 486.7089 | 336.3547 | 502.315   | 449.2947 |
| ENSMUSG000000001444 | 2_Tbx21          | 6.725589032 | -0.25384 | 0.77556  | 0.933583 | 7.30919  | 4.293751 | 10.35551 | 3.968787 | 11.3134   | 3.112896 |
| ENSMUSG000000001655 | 6_Hoxc13         | 0.165366136 | 1.140932 | 0.779778 | 0.933583 | 0        | 0        | 0        | 0.992197 | 0         | 0        |
| ENSMUSG000000001864 | 13_Air1          | 3172.226023 | 0.704866 | 0.737604 | 0.933583 | 2958.598 | 2995.321 | 3316.064 | 2922.02  | 3498.104  | 3343.251 |
| ENSMUSG000000001999 | 15_Blvr4         | 130.3623463 | 0.094503 | 0.77109  | 0.933583 | 138.0625 | 120.225  | 119.6637 | 119.0636 | 173.095   | 112.0643 |
| ENSMUSG000000002265 | 15_Peg3          | 796.0260044 | 0.145499 | 0.743033 | 0.933583 | 730.1068 | 892.2415 | 645.4934 | 1319.622 | 445.748   | 742.9446 |
| ENSMUSG000000002329 | 6_Mdp1           | 1006.927198 | -0.07058 | 0.762537 | 0.933583 | 1037.093 | 997.8678 | 1059.714 | 861.2268 | 989.922   | 1095.739 |
| ENSMUSG000000002475 | 15_Abhd3         | 31.8287268  | -0.18921 | 0.754808 | 0.933583 | 35.73382 | 46.37251 | 19.56041 | 43.65666 | 12.44474  | 33.20423 |
| ENSMUSG000000002897 | 5_Ill17ra        | 543.4892632 | -0.11995 | 0.767605 | 0.933583 | 579.8624 | 515.2501 | 602.9207 | 276.8229 | 719.5323  | 566.5471 |
| ENSMUSG000000002930 | 6_Ppp1r17        | 0.895462746 | -0.77202 | 0.762707 | 0.933583 | 0.812132 | 2.576251 | 0        | 1.984394 | 0         | 0        |
| ENSMUSG000000003555 | 7_Cyp17a1        | 57.19879981 | 0.120543 | 0.77112  | 0.933583 | 38.98234 | 52.38376 | 73.63917 | 67.46938 | 46.38494  | 64.33319 |
| ENSMUSG000000004040 | 16_Sta3          | 5433.616785 | -0.10435 | 0.758146 | 0.933583 | 5084.76  | 5386.081 | 6419.265 | 3460.782 | 6758.626  | 5492.187 |
| ENSMUSG000000004069 | 16_Dnaj3         | 1222.004276 | -0.0668  | 0.770714 | 0.933583 | 1206.828 | 1177.347 | 1366.927 | 1083.479 | 1276.152  | 1221.293 |
| ENSMUSG000000004070 | 15_Hmox2         | 883.1466751 | -0.06921 | 0.766369 | 0.933583 | 944.5097 | 860.4677 | 907.833  | 755.0618 | 922.042   | 908.9657 |
| ENSMUSG000000004110 | 14_Cacna1e       | 37.01222796 | 0.152481 | 0.764404 | 0.933583 | 25.1761  | 37.78501 | 42.57265 | 58.53961 | 23.75814  | 34.24186 |
| ENSMUSG000000004609 | 11_Cd3           | 97.34585658 | 0.105001 | 0.767065 | 0.933583 | 106.3893 | 102.1913 | 72.48856 | 120.0558 | 91.63855  | 91.31672 |
| ENSMUSG000000004814 | 10_Ccl24         | 10.25110104 | 0.193172 | 0.776037 | 0.933583 | 12.99411 | 8.587502 | 6.903673 | 7.937575 | 14.70742  | 10.37632 |
|                     |                  |             |          |          |          |          |          |          |          |           |          |

|                    |                  |             |           |          |          |          |          |          |          |          |          |   |
|--------------------|------------------|-------------|-----------|----------|----------|----------|----------|----------|----------|----------|----------|---|
| ENSMUSG00000015711 | 8_Prune          | 1229.742908 | -0.08231  | 0.765972 | 0.933583 | 1264.49  | 1168.759 | 1361.174 | 919.7664 | 1361.002 | 1303.266 | 0 |
| ENSMUSG00000015787 | 15_Abo           | 0.188556684 | 1.140932  | 0.779778 | 0.933583 | 0        | 0        | 0        | 0        | 1.13134  | 0        | 0 |
| ENSMUSG00000015981 | 12_Stk32c        | 193.091879  | -0.17736  | 0.756983 | 0.933583 | 172.172  | 190.6425 | 251.9841 | 53.57863 | 280.5723 | 209.6017 | 0 |
| ENSMUSG00000016206 | 6_H2-M3          | 326.7575423 | 0.129981  | 0.766089 | 0.933583 | 343.5319 | 264.4951 | 327.9245 | 173.6344 | 502.315  | 348.6444 | 0 |
| ENSMUSG00000016520 | 7_Lnx2           | 1355.847979 | -0.0693   | 0.767843 | 0.933583 | 1257.993 | 1326.769 | 1580.941 | 1316.645 | 1397.205 | 1255.545 | 0 |
| ENSMUSG00000017288 | 15_Vps53         | 1468.590275 | -0.09378  | 0.770293 | 0.933583 | 1352.2   | 1440.983 | 1755.834 | 992.1968 | 1725.294 | 1545.034 | 0 |
| ENSMUSG00000017697 | 3_Ada            | 56.86540127 | -0.1784   | 0.744173 | 0.933583 | 64.97057 | 51.52501 | 64.43428 | 27.78151 | 96.16391 | 36.31712 | 0 |
| ENSMUSG00000018479 | 12_1700125H20Rik | 0.903035288 | -0.75341  | 0.73541  | 0.933583 | 0.812132 | 2.576251 | 0        | 0.992197 | 0        | 1.037632 | 0 |
| ENSMUSG00000018589 | 8_Glra2          | 1.339390282 | -0.76595  | 0.736397 | 0.933583 | 1.624264 | 3.435001 | 0        | 2.97659  | 0        | 0        | 0 |
| ENSMUSG00000018796 | 12_Acs1          | 9106.625291 | 0.075982  | 0.732789 | 0.933583 | 8223.65  | 8409.741 | 9967.753 | 9414.956 | 9698.979 | 8924.673 | 0 |
| ENSMUSG00000018882 | 12_Mrp45         | 472.2100857 | -0.07064  | 0.760777 | 0.933583 | 495.4006 | 443.9739 | 512.0224 | 436.5666 | 488.7389 | 456.5581 | 0 |
| ENSMUSG00000018914 | 5_Il3            | 1.105590474 | 0.704518  | 0.774395 | 0.933583 | 1.624264 | 0.85875  | 0        | 0        | 0        | 4.150528 | 0 |
| ENSMUSG00000019843 | 14_Fyn           | 277.7936517 | -0.09639  | 0.740798 | 0.933583 | 350.029  | 266.2126 | 245.0804 | 304.6044 | 256.8142 | 244.8812 | 0 |
| ENSMUSG00000019846 | 11_Lama4         | 495.0014701 | -0.06911  | 0.777623 | 0.933583 | 545.7528 | 483.4764 | 491.3114 | 546.7004 | 463.8494 | 438.9184 | 0 |
| ENSMUSG00000020056 | 16_Ccdc53        | 680.4820056 | 0.072264  | 0.743223 | 0.933583 | 675.694  | 631.1814 | 683.4636 | 651.8733 | 731.977  | 708.7027 | 0 |
| ENSMUSG00000020067 | 7_Mypn           | 34.46668337 | -0.15391  | 0.764108 | 0.933583 | 26.80036 | 56.67751 | 25.31347 | 34.72689 | 24.88948 | 38.39239 | 0 |
| ENSMUSG00000020072 | 14_Pblid2        | 33.64117412 | 0.157401  | 0.747861 | 0.933583 | 21.92757 | 30.05626 | 43.72326 | 23.81272 | 41.85958 | 40.46765 | 0 |
| ENSMUSG00000020180 | 9_Snrpd3         | 1355.635202 | 0.074152  | 0.739651 | 0.933583 | 1341.642 | 1215.99  | 1404.897 | 1312.676 | 1502.42  | 1356.185 | 0 |
| ENSMUSG00000020214 | 10_Glpr112       | 0.165366136 | 1.140932  | 0.779778 | 0.933583 | 0        | 0        | 0        | 0.992197 | 0        | 0        | 0 |
| ENSMUSG00000020249 | 11_Hormad2       | 0.172938678 | 1.140932  | 0.779778 | 0.933583 | 0        | 0        | 0        | 0        | 0        | 1.037632 | 0 |
| ENSMUSG00000020243 | 6_Btg2           | 984.8419949 | 0.080159  | 0.779218 | 0.933583 | 1067.954 | 818.389  | 986.0746 | 810.6248 | 1018.206 | 1207.804 | 0 |
| ENSMUSG00000020514 | 8_Mrp22          | 272.1536166 | -0.08901  | 0.746494 | 0.933583 | 291.5555 | 232.7213 | 317.5689 | 239.1914 | 287.3604 | 264.5962 | 0 |
| ENSMUSG00000020542 | 18_Myocd         | 11.50281763 | -0.22292  | 0.750524 | 0.933583 | 7.30919  | 20.61001 | 9.204897 | 9.921968 | 14.70742 | 7.263424 | 0 |
| ENSMUSG00000020598 | 15_Nrcam         | 136.875139  | -0.1443   | 0.752319 | 0.933583 | 144.5595 | 196.6538 | 89.74774 | 191.494  | 95.03257 | 103.7632 | 0 |
| ENSMUSG00000020609 | 14_Apop          | 0.165366136 | 1.140932  | 0.779778 | 0.933583 | 0        | 0        | 0        | 0.992197 | 0        | 0        | 0 |
| ENSMUSG00000020622 | 15_Nt5c1b        | 0.188556684 | 1.140932  | 0.779778 | 0.933583 | 0        | 0        | 0        | 0        | 1.13134  | 0        | 0 |
| ENSMUSG00000020639 | 13_Pfn4          | 16.53548218 | 0.209787  | 0.755156 | 0.933583 | 18.67904 | 18.03375 | 9.204897 | 28.77371 | 7.919381 | 16.60211 | 0 |
| ENSMUSG00000020644 | 8_Id2            | 2563.982332 | 0.09032   | 0.761697 | 0.933583 | 2451.827 | 2378.738 | 2621.094 | 3356.602 | 1962.875 | 2612.758 | 0 |
| ENSMUSG00000020647 | 9_Ncoa1          | 1309.127913 | 0.072562  | 0.751277 | 0.933583 | 1239.314 | 1243.47  | 1346.216 | 1508.139 | 1281.808 | 1235.82  | 0 |
| ENSMUSG00000020679 | 11_Hnf1b         | 0.188556684 | 1.140932  | 0.779778 | 0.933583 | 0        | 0        | 0        | 0        | 1.13134  | 0        | 0 |
| ENSMUSG00000020696 | 18_Rffl          | 1114.076141 | 0.090667  | 0.75139  | 0.933583 | 1101.251 | 1013.325 | 1122.997 | 1468.451 | 948.063  | 1030.369 | 0 |
| ENSMUSG00000020721 | 16_Heiz          | 1200.265643 | 0.740009  | 0.767442 | 0.933583 | 1013.541 | 1233.165 | 1262.221 | 1398.998 | 1146.048 | 1147.621 | 0 |
| ENSMUSG00000020807 | 14_4933427D14Rik | 642.4794524 | 0.75162   | 0.743923 | 0.933583 | 592.0444 | 608.8539 | 676.5599 | 616.1542 | 712.7443 | 648.52   | 0 |
| ENSMUSG00000020891 | 11_Alox8         | 1.581610641 | 0.491964  | 0.77834  | 0.933583 | 0.812132 | 0.85875  | 2.301224 | 0.992197 | 4.25268  | 0        | 0 |
| ENSMUSG00000020904 | 11_Cfap52        | 2.126285869 | 0.433044  | 0.747822 | 0.933583 | 0.812132 | 3.435001 | 1.150612 | 1.984394 | 5.26336  | 3.112896 | 0 |
| ENSMUSG00000020908 | 14_Myrl3         | 558.1308502 | 0.217889  | 0.742354 | 0.933583 | 392.2598 | 864.7615 | 291.1049 | 853.2893 | 150.4682 | 796.9014 | 0 |
| ENSMUSG00000021091 | 8_Serpina3n      | 3923.6197   | 0.172422  | 0.7673   | 0.933583 | 4956.443 | 2252.502 | 3859.153 | 1670.859 | 7766.65  | 3036.111 | 0 |
| ENSMUSG00000021127 | 6_Zfp361l        | 4408.128207 | 0.085162  | 0.744875 | 0.933583 | 4107.765 | 3830.026 | 4897.005 | 5355.878 | 4191.615 | 4066.48  | 0 |
| ENSMUSG00000021318 | 15_Gli3          | 379.3407347 | 0.099157  | 0.757118 | 0.933583 | 336.2227 | 430.2339 | 332.5269 | 508.997  | 311.1185 | 356.9454 | 0 |
| ENSMUSG00000021336 | 16_Slc17a4       | 0.165366136 | 1.140932  | 0.779778 | 0.933583 | 0        | 0        | 0        | 0.992197 | 0        | 0        | 0 |
| ENSMUSG00000021345 | 15_Prl8a6        | 0.188556684 | 1.140932  | 0.779778 | 0.933583 | 0        | 0        | 0        | 0        | 1.13134  | 0        | 0 |
| ENSMUSG00000021364 | 15_Elov12        | 13.49542452 | 0.286363  | 0.748087 | 0.933583 | 14.61838 | 17.175   | 4.602448 | 31.7503  | 4.52536  | 8.301057 | 0 |
| ENSMUSG00000021417 | 14_Ecl2          | 1132.028512 | 0.067586  | 0.777157 | 0.933583 | 1177.592 | 1067.427 | 1071.22  | 993.189  | 1248.999 | 1233.745 | 0 |
| ENSMUSG00000021441 | 4_Cts6           | 0.165366136 | 1.140932  | 0.779778 | 0.933583 | 0        | 0        | 0        | 0.992197 | 0        | 0        | 0 |
| ENSMUSG00000021538 | 3_Il9            | 0.172938678 | 1.140932  | 0.779778 | 0.933583 | 0        | 0        | 0        | 0        | 0        | 1.037632 | 0 |
| ENSMUSG00000021579 | 14_Lrrc14b       | 0.165366136 | 1.140932  | 0.779778 | 0.933583 | 0        | 0        | 0        | 0.992197 | 0        | 0        | 0 |
| ENSMUSG00000021594 | 10_Srd5a1        | 871.4479689 | -0.07878  | 0.770742 | 0.933583 | 829.187  | 851.0215 | 1005.635 | 774.9057 | 1024.994 | 742.9446 | 0 |
| ENSMUSG00000021604 | 15_Irx4          | 0.165366136 | 1.140932  | 0.779778 | 0.933583 | 0        | 0        | 0        | 0.992197 | 0        | 0        | 0 |
| ENSMUSG00000021612 | 14_Slc6a18       | 0.165366136 | 1.140932  | 0.779778 | 0.933583 | 0        | 0        | 0        | 0.992197 | 0        | 0        | 0 |
| ENSMUSG00000021772 | 14_Nkiras1       | 279.1247769 | 0.091045  | 0.767089 | 0.933583 | 278.5613 | 264.4951 | 268.0926 | 376.0426 | 236.4501 | 251.107  | 0 |
| ENSMUSG00000021791 | 6_Dydc2          | 0.188556684 | 1.140932  | 0.779778 | 0.933583 | 0        | 0        | 0        | 0        | 1.13134  | 0        | 0 |
| ENSMUSG00000021814 | 16_Anxa7         | 10463.94573 | 0.074794  | 0.73252  | 0.933583 | 9698.482 | 9685.844 | 11194.31 | 10180.93 | 11504.6  | 10519.51 | 0 |
| ENSMUSG00000021815 | 3_Mss51          | 22.5891795  | 0.159889  | 0.761355 | 0.933583 | 19.49117 | 28.33876 | 16.10857 | 32.74249 | 18.10144 | 20.75264 | 0 |
| ENSMUSG00000021838 | 16_Samd4         | 143.1207101 | 0.125245  | 0.759165 | 0.933583 | 129.129  | 156.2925 | 125.4167 | 227.2131 | 108.6086 | 112.0643 | 0 |
| ENSMUSG00000021850 | 13_1700011H14Rik | 0.165366136 | 1.140932  | 0.779778 | 0.933583 | 0        | 0        | 0        | 0.992197 | 0        | 0        | 0 |
| ENSMUSG00000021908 | 9_Gm6768         | 102.9178402 | 0.125514  | 0.749185 | 0.933583 | 88.52241 | 91.02752 | 116.2118 | 153.7905 | 85.98185 | 81.97293 | 0 |
| ENSMUSG00000021961 | 5_4930578I06Rik  | 1.32395884  | -0.61023  | 0.757951 | 0.933583 | 0.812132 | 1.7175   | 2.301224 | 0        | 0        | 3.112896 | 0 |
| ENSMUSG00000022018 | 7_Rgcc           | 55.16312899 | -0.12283  | 0.744489 | 0.933583 | 60.09778 | 58.39502 | 54.07877 | 54.57082 | 38.46556 | 65.37082 | 0 |
| ENSMUSG00000022039 | 5_Adam2          | 0.473660176 | 0.1035504 | 0.733766 | 0.933583 | 0.812132 | 0        | 0        | 0.992197 | 0        | 1.037632 | 0 |
| ENSMUSG00000022085 | 3_Pebp4          | 3.206232378 | -0.42245  | 0.747603 | 0.933583 | 4.060661 | 6.870002 | 0        | 3.968787 | 2.26268  | 2.075624 | 0 |
| ENSMUSG00000022101 | 5_Fgf17          | 1.80038706  | 0.571723  | 0.732588 | 0.933583 | 0.812132 | 3.435001 | 0        | 0.992197 | 4.52536  | 1.037632 | 0 |
| ENSMUSG00000022113 | 6_Trim52         | 0.188556684 | 1.140932  | 0.779778 | 0.933583 | 0        | 0        | 0        | 0        | 1.13134  | 0        | 0 |
| ENSMUSG00000022122 | 14_Ednrb         | 1085.304149 | 0.180786  | 0.737339 | 0.933583 | 984.3042 | 1441.842 | 625.933  | 2022.097 | 582.6402 | 855.0088 | 0 |
| ENSMUSG00000022160 | 17_Mettl3        | 399.9081286 | -0.08724  | 0.774414 | 0.933583 | 383.3264 | 419.9289 | 432.6302 | 280.7917 | 460.4554 | 422.3163 | 0 |
| ENSMUSG00000022234 | 14_Cct5          | 5048.02635  | -0.08499  | 0.770254 | 0.933583 | 5460.777 | 4701.657 | 5427.437 | 3608.62  | 5793.593 | 5296.074 | 0 |
| ENSMUSG00000022244 | 6_Amacr          | 110.3123234 | -0.09735  | 0.735144 | 0.933583 | 116.947  | 123.66   | 101.2539 | 113.1104 | 105.2146 | 101.6879 | 0 |
| ENSMUSG00000022312 | 10_Eif3h         | 5137.142189 | -0.07267  | 0.766745 | 0.933583 | 5187.9   | 5089.813 | 5521.788 | 4126.547 | 5369.34  | 5527.466 | 0 |
| ENSMUSG00000022321 | 15_Cdh10         | 4.025285157 | 0.320425  | 0.751424 | 0.933583 | 3.248529 | 5.152501 | 2.301224 | 4.960984 | 2.26268  | 6.225792 | 0 |
| ENSMUSG00000022366 | 12_Slc22a22      | 0.188556684 | 1.140932  | 0.779778 | 0.933583 | 0        | 0        | 0        | 0        | 1.13134  | 0        | 0 |
| ENSMUSG00000022377 | 16_Asap1         | 938.1933677 | 0.072703  | 0.76939  | 0.933583 | 942.8855 | 869.0552 | 931.9958 | 1128.128 | 843.9797 | 913.1162 | 0 |
| ENSMUSG00000022435 | 5_Upk3a          | 5.202404092 | -0.36912  | 0.77007  | 0.933583 | 8.933454 | 5.152501 | 3.451836 | 0        | 2.26268  | 11.41395 | 0 |
| ENSMUSG00000022449 | 14_Adamts20      | 11.46388757 | 0.252726  | 0.774502 | 0.933583 | 16.24264 | 13.74    | 1.150612 | 9.921968 | 9.050721 | 18.67738 | 0 |
| ENSMUSG00000022494 | 13_Shisa9        | 16.72457134 | -0.25838  | 0.752102 | 0.933583 | 16.24264 | 29.19751 | 9.204897 | 27.78151 | 3.94042  | 14.52685 | 0 |
| ENSMUSG00000022587 | 14_Ly6e          | 26464.93915 | 0.13516   | 0.750682 | 0.933583 | 22131.41 | 20238.17 | 33309.07 | 15707.47 | 40012.11 | 27391.41 | 0 |
| ENSMUSG00000022658 | 10_Tagln3        | 8.41011384  | -0.23112  | 0.748037 | 0.933583 | 11.36985 | 7.728752 | 8.054285 | 7.937575 | 10.18206 | 5.18816  | 0 |
| ENSMUSG00000022667 | 17_Cd200r1       | 20.85726457 | 0.174217  | 0.761573 | 0.933583 | 26.80036 | 18.03375 | 32.74249 | 19.23278 |          |          |   |

|                     |                  |             |          |          |          |          |          |          |          |          |          |
|---------------------|------------------|-------------|----------|----------|----------|----------|----------|----------|----------|----------|----------|
| ENSMUSG000000024535 | 15_Snx24         | 157.013499  | 0.118938 | 0.74607  | 0.933583 | 166.4871 | 145.9875 | 139.2241 | 232.1741 | 123.3161 | 134.8922 |
| ENSMUSG000000024553 | 7_Galr1          | 0.165366136 | 1.140932 | 0.779778 | 0.933583 | 0        | 0        | 0        | 0.992197 | 0        | 0        |
| ENSMUSG000000024561 | 8_Mbd1           | 1091.099294 | -0.06826 | 0.729777 | 0.933583 | 1004.608 | 1099.2   | 1247.264 | 973.3451 | 1122.289 | 1098.89  |
| ENSMUSG000000024589 | 15_Nedd4l        | 1199.073855 | 0.072619 | 0.75162  | 0.933583 | 1093.942 | 1112.94  | 1300.192 | 1142.019 | 1303.304 | 1242.046 |
| ENSMUSG000000024682 | 3_Gif            | 0.172938678 | 1.140932 | 0.779778 | 0.933583 | 0        | 0        | 0        | 0        | 0        | 1.037632 |
| ENSMUSG000000024713 | 15_Pcsk5         | 152.4365323 | 0.093603 | 0.742726 | 0.933583 | 141.311  | 170.8913 | 130.0192 | 150.8139 | 149.3369 | 172.2469 |
| ENSMUSG000000024725 | 12_Ostf1         | 4887.509238 | -0.08164 | 0.752248 | 0.933583 | 4897.157 | 4720.55  | 5459.654 | 3817.973 | 5129.496 | 5300.225 |
| ENSMUSG000000024729 | 7_1700017D01Rik  | 0.165366136 | 1.140932 | 0.779778 | 0.933583 | 0        | 0        | 0        | 0.992197 | 0        | 0        |
| ENSMUSG000000024757 | 7_Slc22a19       | 0.172938678 | 1.140932 | 0.779778 | 0.933583 | 0        | 0        | 0        | 0        | 0        | 1.037632 |
| ENSMUSG000000024768 | 5_Lipf           | 0.172938678 | 1.140932 | 0.779778 | 0.933583 | 0        | 0        | 0        | 0        | 0        | 1.037632 |
| ENSMUSG000000024791 | 10_Cdca5         | 159.1582034 | 0.117039 | 0.73315  | 0.933583 | 151.8687 | 131.3888 | 174.893  | 127.9934 | 218.3486 | 150.4566 |
| ENSMUSG000000024843 | 15_Chka          | 499.4898952 | 0.109969 | 0.733124 | 0.933583 | 492.9642 | 558.1876 | 390.0575 | 663.7797 | 408.4138 | 483.5365 |
| ENSMUSG000000024973 | 16_Hrasl5        | 0.481429851 | 1.035616 | 0.732596 | 0.933583 | 0        | 0.85875  | 0        | 0.992197 | 0        | 1.037632 |
| ENSMUSG000000025075 | 14_Habp2         | 0.188556684 | 1.140932 | 0.779778 | 0.933583 | 0        | 0        | 0        | 0        | 1.13134  | 0        |
| ENSMUSG000000025090 | 8_Ccdc172        | 0.165366136 | 1.140932 | 0.779778 | 0.933583 | 0        | 0        | 0        | 0.992197 | 0        | 0        |
| ENSMUSG000000025130 | 11_P4hb          | 11192.85478 | -0.07849 | 0.775282 | 0.933583 | 11299.19 | 10702.6  | 12489.89 | 8524.955 | 13090.74 | 11049.74 |
| ENSMUSG000000025141 | 2_Myadml2        | 3.05116799  | 0.391247 | 0.739448 | 0.933583 | 3.248529 | 3.435001 | 1.150612 | 1.984394 | 2.26268  | 6.225792 |
| ENSMUSG000000025194 | 5_Abcc2          | 5.718593959 | -0.28982 | 0.747411 | 0.933583 | 5.684925 | 5.857502 | 4.602448 | 8.929771 | 3.39402  | 3.112896 |
| ENSMUSG000000025196 | 4_Cpn1           | 59.11700377 | -0.26611 | 0.760272 | 0.933583 | 50.3522  | 69.55877 | 73.63917 | 3.968787 | 118.7907 | 38.39239 |
| ENSMUSG000000025333 | 10_Gpr143        | 57.92209946 | -0.12859 | 0.768513 | 0.933583 | 48.72793 | 83.29877 | 49.47632 | 71.43817 | 39.5969  | 54.9945  |
| ENSMUSG000000025429 | 8_Pstpip2        | 291.7649915 | 0.083832 | 0.754301 | 0.933583 | 256.6338 | 271.3651 | 322.1714 | 260.9478 | 329.22   | 310.252  |
| ENSMUSG000000025582 | 15_Ntix1         | 11.70747543 | 0.237454 | 0.743899 | 0.933583 | 15.43051 | 8.587502 | 8.054285 | 14.88295 | 18.1044  | 5.18816  |
| ENSMUSG000000025786 | 15_Zdhc3         | 3148.519605 | 0.075296 | 0.740006 | 0.933583 | 3070.672 | 2941.22  | 3187.196 | 2847.605 | 3572.772 | 3271.654 |
| ENSMUSG000000025791 | 18_Pgm2          | 782.195818  | -0.08218 | 0.743888 | 0.933583 | 733.3554 | 859.609  | 820.3864 | 639.9669 | 819.0902 | 820.767  |
| ENSMUSG000000025889 | 13_Snca          | 51.75950392 | 0.122784 | 0.765109 | 0.933583 | 47.10367 | 60.11252 | 41.42204 | 66.47719 | 37.33422 | 58.1074  |
| ENSMUSG000000026125 | 9_Prss39         | 0.188556684 | 1.140932 | 0.779778 | 0.933583 | 0        | 0        | 0        | 0        | 1.13134  | 0        |
| ENSMUSG000000026227 | 11_2810459M11Rik | 1.74623629  | 0.529701 | 0.73279  | 0.933583 | 1.624264 | 2.576251 | 0        | 2.97659  | 2.26268  | 1.037632 |
| ENSMUSG000000026260 | 12_Ndufa10       | 1426.356038 | -0.07077 | 0.774479 | 0.933583 | 1341.642 | 1478.768 | 1563.682 | 1171.784 | 1520.521 | 1481.739 |
| ENSMUSG000000026311 | 16_Asb1          | 245.2988932 | -0.09272 | 0.732659 | 0.933583 | 282.622  | 267.0713 | 209.4114 | 246.0648 | 221.7427 | 244.8812 |
| ENSMUSG000000026322 | 8_Hlra           | 2.049212114 | 0.542839 | 0.735651 | 0.933583 | 0.812132 | 0.85875  | 3.451836 | 1.984394 | 0        | 5.18816  |
| ENSMUSG000000026348 | 7_Acmsd          | 0.188556684 | 1.140932 | 0.779778 | 0.933583 | 0        | 0        | 0        | 0        | 1.13134  | 0        |
| ENSMUSG000000026401 | 15_Cd5b5         | 0.165366136 | 1.140932 | 0.779778 | 0.933583 | 0        | 0        | 0        | 0.992197 | 0        | 0        |
| ENSMUSG000000026407 | 17_Cacna1s       | 70.88342773 | 0.192882 | 0.744825 | 0.933583 | 63.34631 | 93.60377 | 41.42204 | 99.21968 | 26.02082 | 101.6879 |
| ENSMUSG000000026447 | 16_Pik3c2b       | 593.9868508 | -0.09222 | 0.777744 | 0.933583 | 589.608  | 552.1764 | 697.2709 | 403.8241 | 590.5595 | 730.493  |
| ENSMUSG000000026452 | 15_Syt2          | 10.2063816  | -0.22451 | 0.731606 | 0.933583 | 12.99411 | 7.728752 | 12.65673 | 8.929771 | 11.3134  | 8.301057 |
| ENSMUSG000000026483 | 13_Fam129a       | 4394.558494 | -0.10812 | 0.731555 | 0.933583 | 4364.398 | 5535.504 | 3777.46  | 5135.611 | 3186.985 | 4367.393 |
| ENSMUSG000000026497 | 7_Mixl1          | 0.188556684 | 1.140932 | 0.779778 | 0.933583 | 0        | 0        | 0        | 0        | 1.13134  | 0        |
| ENSMUSG000000026602 | 9_Nphs2          | 2.361478699 | -0.39897 | 0.774294 | 0.933583 | 4.060661 | 1.1715   | 2.301224 | 2.97659  | 0        | 3.112896 |
| ENSMUSG000000026614 | 6_Slc30a10       | 3.05931929  | 0.366397 | 0.769377 | 0.933583 | 0.812132 | 6.011252 | 1.150612 | 3.968787 | 2.26268  | 4.150528 |
| ENSMUSG000000026621 | 13_Marcl         | 1.761578506 | 0.527824 | 0.737121 | 0.933583 | 0.812132 | 3.435001 | 0        | 1.984394 | 2.26268  | 2.075624 |
| ENSMUSG000000026657 | 16_Fmd4a         | 977.2187985 | -0.06696 | 0.777448 | 0.933583 | 997.2983 | 1007.314 | 995.2795 | 1058.674 | 817.9589 | 986.7881 |
| ENSMUSG000000026687 | 14_Aldh9a1       | 816.8555292 | -0.06526 | 0.762644 | 0.933583 | 834.8719 | 872.4902 | 798.5248 | 814.5936 | 755.7352 | 824.9175 |
| ENSMUSG000000026727 | 10_Rsu1          | 910.7971187 | 0.064762 | 0.764363 | 0.933583 | 951.8189 | 866.479  | 852.6036 | 967.3919 | 905.0721 | 921.4173 |
| ENSMUSG000000026735 | 2_Ptfa           | 0.188556684 | 1.140932 | 0.779778 | 0.933583 | 0        | 0        | 0        | 0        | 1.13134  | 0        |
| ENSMUSG000000026890 | 19_Lhx6          | 13.22817337 | -0.22263 | 0.748637 | 0.933583 | 14.61838 | 8.587502 | 19.56041 | 7.937575 | 20.36412 | 8.301057 |
| ENSMUSG000000026933 | 17_Camsap1       | 1331.423905 | -0.09919 | 0.73402  | 0.933583 | 1300.224 | 1294.137 | 1537.218 | 958.4621 | 1508.076 | 1390.427 |
| ENSMUSG000000026989 | 5_Dapl1          | 10925.67007 | -0.08618 | 0.735972 | 0.933583 | 11833.58 | 10872.64 | 11049.33 | 8741.254 | 10460.37 | 12596.85 |
| ENSMUSG000000027072 | 13_Prg3          | 0.165366136 | 1.140932 | 0.779778 | 0.933583 | 0        | 0        | 0        | 0.992197 | 0        | 0        |
| ENSMUSG000000027166 | 14_Dnajc24       | 575.9381633 | 0.07596  | 0.758166 | 0.933583 | 537.6315 | 571.9276 | 573.0048 | 684.6158 | 563.4074 | 525.0418 |
| ENSMUSG000000027377 | 2_Mall           | 8997.971822 | 0.105514 | 0.764063 | 0.933583 | 7910.98  | 7723.6   | 10372.77 | 6216.113 | 12452.66 | 9311.71  |
| ENSMUSG000000027405 | 16_Nop56         | 1889.880846 | 0.074528 | 0.766559 | 0.933583 | 1966.984 | 1690.879 | 1865.142 | 1736.344 | 2292.095 | 1787.84  |
| ENSMUSG000000027429 | 16_Sec23b        | 2451.864117 | 0.078454 | 0.743787 | 0.933583 | 2234.176 | 2208.706 | 2713.143 | 2381.272 | 2796.673 | 2377.215 |
| ENSMUSG000000027452 | 11_Acsn1         | 408.910786  | -0.08256 | 0.759486 | 0.933583 | 380.89   | 440.5389 | 440.6844 | 381.9958 | 338.2707 | 471.085  |
| ENSMUSG000000027566 | 14_Psma7         | 2948.110508 | -0.10896 | 0.742152 | 0.933583 | 3115.339 | 2796.091 | 3266.588 | 1851.439 | 3491.316 | 3167.891 |
| ENSMUSG000000027583 | 13_Zbtb46        | 54.89509321 | 0.107204 | 0.772862 | 0.933583 | 44.66727 | 64.0627  | 49.47632 | 65.48499 | 56.56701 | 48.76871 |
| ENSMUSG000000027606 | 12_Dnajc5b       | 0.481232718 | 1.058458 | 0.773356 | 0.933583 | 0.812132 | 0        | 0        | 0        | 0        | 2.075264 |
| ENSMUSG000000027671 | 14_Actl6a        | 1124.408021 | 0.074084 | 0.776667 | 0.933583 | 1105.312 | 958.3652 | 1223.101 | 1029.9   | 1348.557 | 1081.213 |
| ENSMUSG000000027674 | 16_Pex5l         | 84.27878129 | 0.150329 | 0.745498 | 0.933583 | 86.89814 | 103.05   | 49.47632 | 129.9778 | 66.74907 | 69.52135 |
| ENSMUSG000000027788 | 6_Otol1          | 0.165366136 | 1.140932 | 0.779778 | 0.933583 | 0        | 0        | 0        | 0.992197 | 0        | 0        |
| ENSMUSG000000027863 | 8_Cd2            | 18.67335664 | 0.246139 | 0.761881 | 0.933583 | 29.23676 | 6.870002 | 14.95796 | 6.945378 | 38.46556 | 15.56448 |
| ENSMUSG000000027870 | 8_Hao2           | 0.165366136 | 1.140932 | 0.779778 | 0.933583 | 0        | 0        | 0        | 0        | 0.992197 | 0        |
| ENSMUSG000000027880 | 6_Slc25a54       | 0.172938678 | 1.140932 | 0.779778 | 0.933583 | 0        | 0        | 0        | 0        | 0        | 1.037632 |
| ENSMUSG000000027902 | 8_Chil6          | 1.369993714 | -0.75545 | 0.751292 | 0.933583 | 0        | 5.152501 | 0        | 0.992197 | 0        | 2.075264 |
| ENSMUSG000000027912 | 8_Lce1m          | 0.165366136 | 1.140932 | 0.779778 | 0.933583 | 0        | 0        | 0        | 0.992197 | 0        | 0        |
| ENSMUSG000000027994 | 14_Ccdc109b      | 218.0552303 | 0.097249 | 0.736605 | 0.933583 | 211.1544 | 186.3488 | 234.7249 | 185.5408 | 260.2082 | 230.3543 |
| ENSMUSG000000027998 | 11_Plrp1         | 1129.210973 | 0.07657  | 0.737867 | 0.933583 | 1171.095 | 970.3878 | 1156.365 | 1099.354 | 1200.352 | 1177.712 |
| ENSMUSG000000028009 | 7_1700061117Rik  | 0.53764604  | 1.058708 | 0.765394 | 0.933583 | 0        | 0        | 1.150612 | 0        | 0        | 2.075264 |
| ENSMUSG000000028072 | 6_Ntrk1          | 2.589793387 | -0.46984 | 0.732383 | 0.933583 | 4.060661 | 2.576251 | 2.301224 | 0        | 4.52536  | 2.075264 |
| ENSMUSG000000028102 | 15_Pex11b        | 503.6817658 | -0.06906 | 0.766515 | 0.933583 | 512.4554 | 506.6626 | 528.131  | 445.4964 | 488.7389 | 504.8063 |
| ENSMUSG000000028356 | 4_Ambp           | 0.568882053 | 1.162165 | 0.739898 | 0.933583 | 0        | 0        | 1.150612 | 0        | 2.26268  | 0        |
| ENSMUSG000000028417 | 3_Tal2           | 2.046957789 | 0.490533 | 0.740692 | 0.933583 | 2.436397 | 2.576251 | 0        | 3.968787 | 2.26268  | 1.037632 |
| ENSMUSG000000028420 | 13_Tmem38b       | 169.4530045 | 0.098141 | 0.755486 | 0.933583 | 151.0566 | 194.9363 | 144.9771 | 213.3223 | 164.0443 | 148.3814 |
| ENSMUSG000000028545 | 13_Bend5         | 78.7878601  | -0.10713 | 0.763941 | 0.933583 | 81.21322 | 82.44002 | 81.69346 | 97.23529 | 55.43567 | 74.70951 |
| ENSMUSG000000028546 | 17_Elavl4        | 1.67313508  | -0.60585 | 0.753489 | 0.933583 | 4.060661 | 0.85875  | 1.150612 | 3.968787 | 0        | 0        |
| ENSMUSG000000028575 | 11_Eqtn          | 2.484436967 | 0.501665 | 0.747213 | 0.933583 | 0.812132 | 0.85875  | 4.602448 | 2.97659  | 5.656701 | 0        |
| ENSMUSG000000028591 | 11_Primerf12     | 22.43815351 | 0.170807 | 0.762013 | 0.933583 | 16.24264 | 23.18626 | 24.16285 | 34.72689 | 12.44474 | 23.86554 |
| ENSMUSG000000028610 | 16_Dmrtb1        | 3.470656362 | 0.409146 | 0.739818 | 0.933583 | 5.684925 | 0.85875  | 2.301224 | 1.984394 | 7.919381 | 2.075264 |
| ENSMUSG000000028729 | 15_Ebna1bp2      | 1242.631028 | -0.10345 | 0.743589 | 0.933583 | 1292.914 | 1160.172 | 1408.349 | 827.4921 | 1434.539 | 1332.32  |
| ENSMUSG000000028747 | 10_Htr6          | 0.489002392 | 1.058493 | 0.772    |          |          |          |          |          |          |          |

|                    |                 |              |          |          |          |          |          |          |          |          |          |
|--------------------|-----------------|--------------|----------|----------|----------|----------|----------|----------|----------|----------|----------|
| ENSMUSG00000029736 | 15_Nobox        | 0.188556684  | 1.140932 | 0.779778 | 0.933583 | 0        | 0        | 0        | 0        | 1.13134  | 0        |
| ENSMUSG00000029864 | 7_Gstk1         | 420.9991105  | 0.073677 | 0.762538 | 0.933583 | 400.3812 | 417.3526 | 413.0697 | 393.9021 | 408.4138 | 492.8752 |
| 64.25595254        | 12_Trvp6        | -0.16184     | 0.768104 | 0.933583 | 64.97057 | 72.99377 | 65.58489 | 27.78151 | 45.2536  | 108.9514 |          |
| ENSMUSG00000029922 | 15_Mkrm1        | 5098.829064  | 0.065458 | 0.769504 | 0.933583 | 4785.083 | 4774.651 | 5392.919 | 4820.092 | 5744.945 | 5081.284 |
| 641.1446306        | 16_Nfu1         | 0.737486     | 0.74512  | 0.933583 | 634.2752 | 568.4926 | 671.9575 | 661.7953 | 674.2787 | 636.0685 |          |
| ENSMUSG00000029989 | 14_Tgfa         | 1037.789845  | 0.095135 | 0.774109 | 0.933583 | 868.9814 | 908.5577 | 1233.456 | 804.6716 | 1385.892 | 1025.18  |
| ENSMUSG00000030000 | 10_Add2         | 69.20948477  | -0.17743 | 0.753569 | 0.933583 | 69.03124 | 124.5188 | 26.46408 | 61.5162  | 61.09237 | 72.63424 |
| ENSMUSG00000030004 | 6_Nat8          | 5.80428117   | -0.34656 | 0.766504 | 0.933583 | 4.872793 | 11.16375 | 3.451836 | 4.960984 | 0        | 10.37632 |
| ENSMUSG00000030019 | 6_Fbxi14        | 660.6127215  | 0.09674  | 0.752412 | 0.933583 | 570.9289 | 578.7977 | 766.3077 | 857.258  | 629.0251 | 561.3589 |
| ENSMUSG00000030111 | 9_A2m           | 23290.12252  | -0.0897  | 0.762234 | 0.933583 | 25401.06 | 28786.17 | 17854.05 | 24635.25 | 19509.96 | 23554.25 |
| ENSMUSG00000030116 | 14_Mfap5        | 483.2220034  | 0.081139 | 0.778265 | 0.933583 | 449.1091 | 462.0076 | 498.215  | 614.1698 | 389.181  | 486.6494 |
| ENSMUSG00000030124 | 2_Lag3          | 31.65624007  | 0.181493 | 0.769817 | 0.933583 | 33.29742 | 18.8925  | 36.81959 | 11.90636 | 47.51628 | 41.50528 |
| ENSMUSG00000030134 | 11_Rasgef1a     | 15.5071024   | -0.18359 | 0.748672 | 0.933583 | 15.43051 | 18.03375 | 16.10857 | 20.83613 | 10.18206 | 12.45158 |
| ENSMUSG00000030144 | 4_Clec4d        | 47.0217103   | 0.259672 | 0.740614 | 0.933583 | 63.34631 | 29.19751 | 35.66898 | 42.66446 | 102.9519 | 8.301057 |
| ENSMUSG00000030189 | 15_Ybx3         | 8612.521064  | -0.06447 | 0.779722 | 0.933583 | 8292.682 | 8268.906 | 9853.842 | 9266.126 | 7923.906 | 8069.665 |
| ENSMUSG00000030228 | 15_Pik3c2g      | 0.188556684  | 1.140932 | 0.779778 | 0.933583 | 0        | 0        | 0        | 0        | 1.13134  | 0        |
| ENSMUSG00000030235 | 17_Slco1c1      | 38.62584388  | 0.22556  | 0.742946 | 0.933583 | 48.72793 | 46.37251 | 11.50612 | 72.43037 | 22.6268  | 30.09133 |
| ENSMUSG00000030257 | 16_Srgap3       | 1166.290225  | 0.079492 | 0.74356  | 0.933583 | 1117.494 | 1157.595 | 1127.6   | 1256.121 | 1003.499 | 1335.432 |
| ENSMUSG00000030317 | 8_Timp4         | 4.017515483  | 0.324591 | 0.746075 | 0.933583 | 4.060661 | 4.293751 | 2.301224 | 4.960984 | 2.26268  | 6.225792 |
| ENSMUSG00000030337 | 16_Vamp1        | 604.2290159  | -0.07085 | 0.760463 | 0.933583 | 644.8329 | 641.4864 | 570.7036 | 623.0996 | 535.1239 | 610.1277 |
| ENSMUSG00000030342 | 8_Cd9           | 8739.304456  | -0.07129 | 0.773103 | 0.933583 | 8903.405 | 8314.42  | 9647.883 | 7127.942 | 8810.877 | 9631.301 |
| ENSMUSG00000030344 | 11_Akap3        | 0.481429851  | 1.035616 | 0.732596 | 0.933583 | 0        | 0.85875  | 0        | 0.992197 | 0        | 1.037632 |
| ENSMUSG00000030447 | 15_Cyfp1        | 6075.935025  | 0.071756 | 0.743891 | 0.933583 | 5789.69  | 5479.685 | 6505.561 | 6096.057 | 6642.098 | 5942.519 |
| ENSMUSG00000030494 | 13_Rhpn2        | 3325.086348  | 0.065568 | 0.750658 | 0.933583 | 3091.787 | 3315.635 | 3341.378 | 3524.283 | 3448.325 | 3229.111 |
| ENSMUSG00000030536 | 10_lggap1       | 19105.65137  | 0.073295 | 0.755709 | 0.933583 | 17714.23 | 17442.08 | 20705.26 | 17326.72 | 21554.29 | 19888.33 |
| ENSMUSG00000030545 | 9_Pext1a        | 542.3638685  | -0.06486 | 0.768876 | 0.933583 | 553.8741 | 542.7301 | 567.2518 | 543.7239 | 496.6583 | 549.945  |
| ENSMUSG00000030577 | 13_Cd22         | 10.40410068  | -0.35573 | 0.733319 | 0.933583 | 21.92757 | 6.011252 | 6.903673 | 0.992197 | 20.36412 | 6.225792 |
| ENSMUSG00000030579 | 9_Tyrbp         | 301.0534686  | -0.17336 | 0.775718 | 0.933583 | 470.2245 | 212.9701 | 273.8457 | 94.2587  | 509.103  | 245.9188 |
| ENSMUSG00000030591 | 16_Psmd8        | 2398.684674  | 0.079954 | 0.762111 | 0.933583 | 2407.972 | 2261.948 | 2326.538 | 1927.838 | 2812.511 | 265.966  |
| ENSMUSG00000030990 | 17_Pgap2        | 1996.685602  | 0.073044 | 0.757225 | 0.933583 | 1902.014 | 1796.505 | 2145.892 | 2089.566 | 2172.173 | 1873.964 |
| ENSMUSG00000031073 | 5_Fgf15         | 0.165366136  | 1.140932 | 0.779778 | 0.933583 | 0        | 0        | 0        | 0.992197 | 0        |          |
| ENSMUSG00000031104 | 2_Rab33a        | 2.448852243  | -0.42284 | 0.730357 | 0.933583 | 2.436397 | 2.576251 | 3.451836 | 1.984394 | 1.13134  | 3.112896 |
| ENSMUSG00000031154 | 15_Ottd5        | 2213.661472  | 0.073322 | 0.764724 | 0.933583 | 1998.657 | 2061.001 | 2412.834 | 2011.183 | 2571.536 | 2226.758 |
| ENSMUSG00000031173 | 13_Otc          | 0.172938678  | 1.140932 | 0.779778 | 0.933583 | 0        | 0        | 0        | 0        | 0        | 1.037632 |
| ENSMUSG00000031326 | 2_Cdx4          | 0.165366136  | 1.140932 | 0.779778 | 0.933583 | 0        | 0        | 0        | 0.992197 | 0        | 0        |
| ENSMUSG00000031330 | 8_Zcchc13       | 0.522500957  | 1.005168 | 0.778431 | 0.933583 | 0        | 0        | 1.150612 | 1.984394 | 0        |          |
| ENSMUSG00000031340 | 8_Gabre         | 128.1646266  | -0.10688 | 0.730333 | 0.933583 | 125.0684 | 152.8575 | 120.8143 | 140.8919 | 100.6893 | 128.6664 |
| ENSMUSG00000031390 | 8_Avpr2         | 9.605717243  | -0.28005 | 0.735038 | 0.933583 | 10.55772 | 9.446252 | 11.50612 | 1.984394 | 15.83876 | 8.301057 |
| ENSMUSG00000031400 | 10_G6pdx        | 7566.267623  | -0.10281 | 0.770554 | 0.933583 | 7846.009 | 7244.417 | 8416.728 | 4419.245 | 8864.05  | 8607.158 |
| ENSMUSG00000031424 | 16_Kir3dl1      | 0.188556684  | 1.140932 | 0.779778 | 0.933583 | 0        | 0        | 0        | 0        | 1.13134  | 0        |
| ENSMUSG00000031485 | 14_Prosc        | 869.5786467  | 0.078295 | 0.739852 | 0.933583 | 842.1811 | 844.1515 | 851.453  | 775.8979 | 998.9733 | 904.8152 |
| ENSMUSG00000031504 | 15_Rab20        | 68.49711544  | -0.13735 | 0.777009 | 0.933583 | 64.97057 | 48.09001 | 102.4045 | 38.69568 | 69.37587 | 67.44608 |
| ENSMUSG00000031535 | 6_Dkk4          | 0.188556684  | 1.140932 | 0.779778 | 0.933583 | 0        | 0        | 0        | 0        | 1.13134  | 0        |
| ENSMUSG00000031554 | 17_Adam5        | 5.923112246  | 0.294028 | 0.778982 | 0.933583 | 2.436397 | 3.435001 | 10.35551 | 12.89856 | 2.26268  | 4.150528 |
| ENSMUSG00000031576 | 15_Kcnu1        | 26.27996429  | -0.14112 | 0.753482 | 0.933583 | 21.92757 | 30.91501 | 29.91591 | 21.82833 | 27.15216 | 25.9408  |
| ENSMUSG00000031636 | 6_Pdlin3        | 73.3489226   | 0.161227 | 0.731148 | 0.933583 | 55.22499 | 96.18002 | 56.37999 | 107.1573 | 45.2536  | 79.89767 |
| ENSMUSG00000031688 | 4_Pou4f2        | 0.959330135  | -0.75063 | 0.734726 | 0.933583 | 2.436397 | 0        | 1.150612 | 0        | 1.13134  | 1.037632 |
| ENSMUSG00000031700 | 11_Gpt2         | 396.4122054  | 0.070488 | 0.779157 | 0.933583 | 387.387  | 359.8163 | 413.0697 | 399.8553 | 459.3241 | 359.0207 |
| ENSMUSG00000031791 | 7_Tmem38a       | 339.5427461  | -0.11415 | 0.74543  | 0.933583 | 335.4106 | 400.1776 | 323.322  | 290.7137 | 234.1874 | 453.4452 |
| ENSMUSG00000031802 | 8_Phrx4         | 0.165366136  | 1.140932 | 0.779778 | 0.933583 | 0        | 0        | 0        | 0.992197 | 0        |          |
| ENSMUSG00000031886 | 13_Ces2e        | 387.6953675  | -0.06958 | 0.776901 | 0.933583 | 422.3087 | 385.5788 | 383.1538 | 359.1752 | 348.4528 | 427.5044 |
| ENSMUSG00000031907 | 8_Zfp90         | 234.6855262  | 0.086101 | 0.743975 | 0.933583 | 237.1426 | 221.5576 | 224.3694 | 276.8229 | 237.5814 | 210.6393 |
| ENSMUSG00000031927 | 9_1700012B09Rik | 0.165366136  | 1.140932 | 0.779778 | 0.933583 | 0        | 0        | 0        | 0.992197 | 0        |          |
| ENSMUSG00000031984 | 7.2810004N23Rik | 404.4835169  | 0.08925  | 0.735114 | 0.933583 | 357.3382 | 348.6526 | 470.6004 | 434.5822 | 415.2018 | 400.526  |
| ENSMUSG00000031993 | 6_Snx19         | 1215.715709  | 0.065958 | 0.764966 | 0.933583 | 1127.239 | 1165.324 | 1271.426 | 1159.878 | 1330.456 | 1239.97  |
| ENSMUSG00000032044 | 8_Rpusd4        | 311.7500355  | -0.09341 | 0.765833 | 0.933583 | 304.5496 | 327.1838 | 333.6775 | 212.3301 | 346.1901 | 346.5691 |
| ENSMUSG00000032057 | 8_4833427G06Rik | 0.165366136  | 1.140932 | 0.779778 | 0.933583 | 0        | 0        | 0        | 0.992197 | 0        |          |
| ENSMUSG00000032262 | 13_Elov14       | 125.7993052  | 0.200557 | 0.763443 | 0.933583 | 121.8198 | 158.01   | 71.33795 | 281.7839 | 55.43567 | 66.40845 |
| ENSMUSG00000032274 | 8_Cyp19a1       | 0.165366136  | 1.140932 | 0.779778 | 0.933583 | 0        | 0        | 0        | 0.992197 | 0        |          |
| ENSMUSG00000032489 | 17_Klf9         | 73.77487699  | -0.10044 | 0.733564 | 0.933583 | 79.58895 | 60.97127 | 88.59713 | 66.47719 | 83.71917 | 63.29556 |
| ENSMUSG00000032496 | 7_Lif           | 788.9267325  | 0.156492 | 0.741322 | 0.933583 | 725.234  | 503.2276 | 1010.237 | 409.7773 | 1183.382 | 901.7023 |
| ENSMUSG00000032528 | 4_Vlpr1         | 91.7318562   | -0.13696 | 0.776938 | 0.933583 | 113.6985 | 79.00502 | 95.50081 | 47.62545 | 72.40577 | 142.1556 |
| ENSMUSG00000032593 | 5_Ampg3         | 205.7529866  | -0.20185 | 0.731844 | 0.933583 | 203.8452 | 183.7725 | 272.6951 | 53.57863 | 309.9872 | 210.6393 |
| ENSMUSG00000032806 | 13_Slc10a3      | 632.9369661  | -0.08102 | 0.765201 | 0.933583 | 639.9602 | 573.6451 | 738.693  | 508.0048 | 686.7234 | 650.5953 |
| ENSMUSG00000033220 | 6_Rac2          | 191.2365732  | -0.16859 | 0.756622 | 0.933583 | 279.3735 | 150.2813 | 177.1943 | 75.40696 | 304.3305 | 160.833  |
| ENSMUSG00000033222 | 16_Tlf2         | 330.4948875  | 0.083683 | 0.771816 | 0.933583 | 302.9253 | 316.8788 | 342.8824 | 270.8697 | 416.3332 | 333.0799 |
| ENSMUSG00000033498 | 14_Strc         | 0.520238405  | 1.163167 | 0.746635 | 0.933583 | 0        | 0.85875  | 0        | 0        | 2.26268  | 0        |
| ENSMUSG00000033669 | 7_Zfp7          | 890.482282   | 0.076704 | 0.777983 | 0.933583 | 868.9814 | 775.4515 | 956.1587 | 731.2491 | 978.6092 | 1032.444 |
| ENSMUSG00000033713 | 11_Foxn3        | 528.6549357  | 0.081942 | 0.734429 | 0.933583 | 518.1403 | 469.7364 | 553.4444 | 605.2401 | 515.8911 | 520.9773 |
| ENSMUSG00000033863 | 1_Klf9          | 565.9917619  | 0.121496 | 0.737112 | 0.933583 | 529.5102 | 549.6001 | 547.6914 | 846.3439 | 392.575  | 530.23   |
| ENSMUSG00000034000 | 15_Neu4         | 0.165366136  | 1.140932 | 0.779778 | 0.933583 | 0        | 0        | 0        | 0.992197 | 0        |          |
| ENSMUSG00000034057 | 7_Myrl1         | 4.570955627  | 0.332148 | 0.763481 | 0.933583 | 4.060661 | 3.435001 | 4.602448 | 2.97659  | 11.3134  | 1.037632 |
| ENSMUSG00000034063 | 8_4930590J08Rik | 13.06290588  | 0.2635   | 0.732017 | 0.933583 | 13.80625 | 13.74    | 0.054285 | 27.78151 | 5.856701 | 9.338689 |
| ENSMUSG00000034110 | 8_Kctd7         | 186.9133959  | -0.07965 | 0.773015 | 0.933583 | 204.6573 | 169.1738 | 202.5077 | 166.6891 | 171.9637 | 206.4888 |
| ENSMUSG00000034168 | 6_Irf2bp1       | 1300.2977725 | -0.09459 | 0.731894 | 0.933583 | 1159.725 | 1286.408 | 1583.242 | 1484.326 | 1178.856 | 1109.229 |
| ENSMUSG00000034187 | 16_Nsf          | 1244.257792  | -0.08036 | 0.758756 | 0.933583 | 1232.817 | 1211.697 | 1392.241 | 980.2905 | 1383.629 | 1264.873 |
| ENSMUSG00000034275 | 17_lgsf9b       | 23.96651346  | -0.18788 | 0.765872 | 0.933583 | 25.98823 | 24.04501 | 26.46408 | 6.945378 | 27.15216 | 33.20423 |
| ENSMUSG00000034432 | 11_Cops8        | 1083.762055  | -0.07255 | 0.777765 | 0.933583 | 1076.075 |          |          |          |          |          |

|                    |                  |             |          |          |          |          |          |          |          |          |          |
|--------------------|------------------|-------------|----------|----------|----------|----------|----------|----------|----------|----------|----------|
| ENSMUSG00000036634 | 15_Mag           | 9.804484504 | -0.19555 | 0.770429 | 0.933583 | 12.18198 | 7.728752 | 11.50612 | 6.945378 | 9.050721 | 11.41395 |
| ENSMUSG00000036815 | 16_Dpp10         | 1.694181551 | -0.51247 | 0.778367 | 0.933583 | 1.624264 | 4.293751 | 0        | 1.984394 | 2.26268  | 0        |
| ENSMUSG00000036817 | 14_Sun1          | 3994.854175 | -0.09112 | 0.750262 | 0.933583 | 3890.925 | 3909.89  | 4562.177 | 2886.301 | 4379.418 | 4340.415 |
| ENSMUSG00000036819 | 14_Jmjd4         | 561.0004218 | 0.073025 | 0.759472 | 0.933583 | 526.2617 | 505.8039 | 608.6738 | 540.7473 | 621.1057 | 563.4342 |
| ENSMUSG00000036853 | 5_Mcoln3         | 32.9190725  | -0.17183 | 0.746361 | 0.933583 | 36.54595 | 47.23126 | 20.71102 | 42.66446 | 19.23278 | 31.12896 |
| ENSMUSG00000036923 | 12_Stox1         | 6.764151057 | -0.22988 | 0.768133 | 0.933583 | 7.30919  | 7.728752 | 6.903673 | 8.929771 | 4.52536  | 5.18816  |
| ENSMUSG00000036985 | 12_Zdhhc9        | 3650.967963 | 0.077048 | 0.743465 | 0.933583 | 3356.542 | 3300.177 | 4004.13  | 3434.985 | 4118.078 | 3691.895 |
| ENSMUSG00000037025 | 11_Foxa2         | 0.568882053 | 1.162165 | 0.739898 | 0.933583 | 0        | 0        | 1.150612 | 0        | 2.26268  | 0        |
| ENSMUSG00000037157 | 8_Il22ra1        | 204.3030412 | -0.15661 | 0.768696 | 0.933583 | 166.4871 | 196.6538 | 283.0506 | 71.43817 | 285.0977 | 223.0909 |
| ENSMUSG00000037159 | 11_Wee2          | 0.188556684 | 1.140932 | 0.779778 | 0.933583 | 0        | 0        | 0        | 0        | 1.13134  | 0        |
| ENSMUSG00000037171 | 6_Nodal          | 0.172938678 | 1.140932 | 0.779778 | 0.933583 | 0        | 0        | 0        | 0        | 0        | 1.037632 |
| ENSMUSG00000037188 | 7_Grlh3          | 2488.11456  | -0.13861 | 0.770543 | 0.933583 | 2385.232 | 2310.038 | 3127.364 | 973.3451 | 3223.188 | 2809.52  |
| ENSMUSG00000037411 | 10_Serpine1      | 577.4255053 | 0.103371 | 0.742146 | 0.933583 | 536.8194 | 514.3914 | 619.0293 | 434.5822 | 756.8665 | 602.8642 |
| ENSMUSG00000037451 | 7_Slc22a20       | 0.188556684 | 1.140932 | 0.779778 | 0.933583 | 0        | 0        | 0        | 0        | 1.13134  | 0        |
| ENSMUSG00000037577 | 12_Ephx3         | 1131.511171 | -0.09486 | 0.768349 | 0.933583 | 1041.966 | 1063.992 | 1400.295 | 804.6716 | 1381.366 | 1096.777 |
| ENSMUSG00000037653 | 7_Kctd8          | 8.46837306  | -0.33948 | 0.732877 | 0.933583 | 9.745586 | 12.88125 | 5.753061 | 16.86735 | 4.52536  | 1.037632 |
| ENSMUSG00000037731 | 5_Themis2        | 309.1364185 | 0.125873 | 0.770202 | 0.933583 | 390.6356 | 219.8401 | 276.1469 | 231.1819 | 492.1329 | 244.8812 |
| ENSMUSG00000037851 | 13_lars          | 2046.547685 | 0.083298 | 0.739665 | 0.933583 | 1929.626 | 1756.144 | 2277.061 | 2097.504 | 2341.874 | 1877.076 |
| ENSMUSG00000037942 | 5_Crp            | 0.512468731 | 1.163332 | 0.747768 | 0.933583 | 0.812132 | 0        | 0        | 0        | 2.26268  | 0        |
| ENSMUSG00000037972 | 6_Snn            | 1068.896925 | -0.07036 | 0.734324 | 0.933583 | 1067.954 | 1135.268 | 1081.575 | 1026.924 | 1057.803 | 1043.858 |
| ENSMUSG00000037991 | 9_Rmi2           | 78.6818973  | -0.10202 | 0.776426 | 0.933583 | 62.53418 | 79.86377 | 102.4045 | 80.36794 | 82.58783 | 64.33319 |
| ENSMUSG00000038071 | 3_Npy6r          | 0.165366136 | 1.140932 | 0.779778 | 0.933583 | 0        | 0        | 0        | 0.992197 | 0        | 0        |
| ENSMUSG00000038092 | 6_Hsd3b5         | 0.188556684 | 1.140932 | 0.779778 | 0.933583 | 0        | 0        | 0        | 0        | 1.13134  | 0        |
| ENSMUSG00000038168 | 5_P3h2           | 1938.741444 | 0.074648 | 0.733093 | 0.933583 | 1797.249 | 1805.952 | 2063.048 | 1933.792 | 1918.753 | 2113.657 |
| ENSMUSG00000038170 | 15_Pde4dip       | 1164.603637 | 0.097168 | 0.75323  | 0.933583 | 990.8013 | 1356.625 | 1028.647 | 1428.763 | 907.3348 | 1275.25  |
| ENSMUSG00000038224 | 12_Serpinf2      | 8.111817767 | -0.23987 | 0.775651 | 0.933583 | 8.933454 | 13.74    | 3.451836 | 3.968787 | 11.3134  | 7.263424 |
| ENSMUSG00000038235 | 4_F11r           | 10128.56597 | 0.083625 | 0.764068 | 0.933583 | 9177.094 | 9173.17  | 11155.18 | 8294.765 | 12540.91 | 10430.28 |
| ENSMUSG00000038240 | 13_Pds2          | 90.59674915 | -0.1075  | 0.752882 | 0.933583 | 78.77682 | 98.75628 | 104.7057 | 107.1573 | 82.58783 | 71.59661 |
| ENSMUSG00000038255 | 6_Neurod2        | 0.165366136 | 1.140932 | 0.779778 | 0.933583 | 0        | 0        | 0        | 0.992197 | 0        | 0        |
| ENSMUSG00000038347 | 14_Tcte2         | 153.3322564 | -0.11237 | 0.771334 | 0.933583 | 164.0507 | 170.8913 | 142.6759 | 87.31332 | 165.1757 | 189.8867 |
| ENSMUSG00000038408 | 13_1700018A04Rik | 1.092738553 | -0.95946 | 0.748142 | 0.933583 | 0        | 0        | 0        | 0        | 2.26268  | 0        |
| ENSMUSG00000038623 | 9_Tm6sf1         | 69.45590001 | -0.11046 | 0.764648 | 0.933583 | 88.52241 | 75.57002 | 51.77754 | 70.44597 | 71.27443 | 59.14503 |
| ENSMUSG00000038670 | 10_Mybp2         | 61.9102069  | 0.199144 | 0.749419 | 0.933583 | 43.04301 | 88.45127 | 41.42204 | 76.39915 | 21.49546 | 100.6503 |
| ENSMUSG00000038709 | 14_Txndc8        | 0.172938678 | 1.140932 | 0.779778 | 0.933583 | 0        | 0        | 0        | 0        | 0        | 1.037632 |
| ENSMUSG00000038717 | 7_Atp5l          | 2783.12112  | 0.079035 | 0.755203 | 0.933583 | 2727.952 | 2759.164 | 2633.751 | 3446.892 | 2453.877 | 2677.091 |
| ENSMUSG00000038756 | 13_Tll6          | 0.165366136 | 1.140932 | 0.779778 | 0.933583 | 0        | 0        | 0        | 0.992197 | 0        | 0        |
| ENSMUSG00000038768 | 8_9130409123Rik  | 0.165366136 | 1.140932 | 0.779778 | 0.933583 | 0        | 0        | 0        | 0.992197 | 0        | 0        |
| ENSMUSG00000038792 | 3_4931403M11Rik  | 0.165366136 | 1.140932 | 0.779778 | 0.933583 | 0        | 0        | 0        | 0.992197 | 0        | 0        |
| ENSMUSG00000038805 | 10_Six3          | 120.1088103 | -0.14589 | 0.767915 | 0.933583 | 115.3228 | 166.5975 | 96.65142 | 175.6188 | 55.43567 | 111.0266 |
| ENSMUSG00000038917 | 3_3930402G23Rik  | 5.469644162 | 0.301451 | 0.7639   | 0.933583 | 7.30919  | 6.011252 | 1.150612 | 2.97659  | 10.18206 | 5.18816  |
| ENSMUSG00000038954 | 14_Sup3          | 223.5646222 | 0.071516 | 0.777403 | 0.933583 | 198.1603 | 214.6876 | 241.6285 | 234.1584 | 229.662  | 223.0909 |
| ENSMUSG00000038970 | 7_Lmtk2          | 1892.587913 | -0.08084 | 0.768261 | 0.933583 | 1668.932 | 1931.329 | 2236.79  | 1514.092 | 2106.555 | 1897.829 |
| ENSMUSG00000038990 | 14_Cables2       | 608.6390776 | -0.11723 | 0.73415  | 0.933583 | 557.9348 | 666.3902 | 651.2465 | 368.105  | 713.8756 | 647.4824 |
| ENSMUSG00000039016 | 4_Timm8b         | 600.710366  | -0.06726 | 0.771484 | 0.933583 | 646.4572 | 639.7689 | 582.2097 | 556.6224 | 572.4581 | 654.7458 |
| ENSMUSG00000039070 | 5_Cpa4           | 0.165366136 | 1.140932 | 0.779778 | 0.933583 | 0        | 0        | 0        | 0.992197 | 0        | 0        |
| ENSMUSG00000039200 | 15_Atf7ip2       | 6.175544545 | 0.324539 | 0.773374 | 0.933583 | 5.684925 | 1.7175   | 9.204897 | 14.88295 | 4.52536  | 1.037632 |
| ENSMUSG00000039210 | 16_Gpatc2        | 711.3490154 | 0.064841 | 0.779393 | 0.933583 | 632.651  | 716.1977 | 737.5424 | 768.9525 | 745.5531 | 667.1974 |
| ENSMUSG00000039238 | 6_Zfp750         | 6697.853232 | 0.081539 | 0.774431 | 0.933583 | 5737.714 | 6203.612 | 7584.835 | 5394.574 | 7913.724 | 7352.661 |
| ENSMUSG00000039318 | 12_Rab3gap2      | 1257.664208 | -0.07607 | 0.744239 | 0.933583 | 1301.848 | 1276.103 | 1294.439 | 1051.729 | 1289.728 | 1332.32  |
| ENSMUSG00000039349 | 5_C130074G19Rik  | 191.6281482 | -0.10239 | 0.734763 | 0.933583 | 167.2992 | 237.0151 | 191.0016 | 175.6188 | 164.0443 | 214.7898 |
| ENSMUSG00000039356 | 15_Exosc2        | 565.9045199 | -0.06929 | 0.776132 | 0.933583 | 589.608  | 540.1539 | 608.6738 | 485.1842 | 617.7117 | 554.0955 |
| ENSMUSG00000039391 | 11_Ccdc81        | 3.318191835 | -0.46583 | 0.736704 | 0.933583 | 4.060661 | 5.152501 | 2.301224 | 0        | 1.13134  | 7.263424 |
| ENSMUSG00000039462 | 4_Col10a1        | 63.4666017  | -0.12173 | 0.742673 | 0.933583 | 69.03124 | 69.55877 | 59.83183 | 62.5084  | 44.12226 | 75.54714 |
| ENSMUSG00000039501 | 14_Znf13         | 4324.954908 | 0.144413 | 0.746652 | 0.933583 | 3850.319 | 3391.605 | 5084.555 | 2171.919 | 6431.166 | 5020.064 |
| ENSMUSG00000039508 | 5_Fam26d         | 0.188556684 | 1.140932 | 0.779778 | 0.933583 | 0        | 0        | 0        | 0        | 1.13134  | 0        |
| ENSMUSG00000039765 | 15_Cc2d2a        | 663.7161363 | 0.082748 | 0.745455 | 0.933583 | 666.7605 | 658.6614 | 608.6738 | 779.8667 | 567.9327 | 700.4016 |
| ENSMUSG00000039904 | 9_Gpr37          | 37.4700612  | -0.16609 | 0.742159 | 0.933583 | 42.23087 | 56.67751 | 19.56041 | 35.71909 | 38.48556 | 32.16659 |
| ENSMUSG00000039942 | 15_Ptger4        | 104.6753749 | -0.10623 | 0.756105 | 0.933583 | 102.3287 | 93.60377 | 130.0192 | 119.0636 | 105.2146 | 77.8224  |
| ENSMUSG00000040132 | 6_Svs2           | 0.165366136 | 1.140932 | 0.779778 | 0.933583 | 0        | 0        | 0        | 0.992197 | 0        | 0        |
| ENSMUSG00000040158 | 12_Tax1bp3       | 2621.317446 | -0.09371 | 0.770699 | 0.933583 | 2539.537 | 2554.782 | 3024.959 | 1715.508 | 3036.517 | 2856.601 |
| ENSMUSG00000040209 | 12_Zfp704        | 1338.969261 | 0.099594 | 0.757263 | 0.933583 | 1421.231 | 1390.317 | 1066.617 | 1807.783 | 1048.752 | 1299.115 |
| ENSMUSG00000040548 | 15_Tex2          | 2553.665804 | -0.06442 | 0.773041 | 0.933583 | 2446.954 | 2558.217 | 2827.054 | 2278.084 | 2676.751 | 2534.935 |
| ENSMUSG00000040564 | 13_Apoc1         | 1058.927788 | -0.14146 | 0.757155 | 0.933583 | 1039.529 | 867.3377 | 1425.608 | 474.2701 | 1371.184 | 1175.637 |
| ENSMUSG00000040605 | 6_Bace2          | 1790.269376 | 0.068856 | 0.763336 | 0.933583 | 1626.701 | 1946.787 | 1669.538 | 1936.768 | 1699.273 | 1862.55  |
| ENSMUSG00000040614 | 14_Nlrp9c        | 0.188556684 | 1.140932 | 0.779778 | 0.933583 | 0        | 0        | 0        | 0        | 1.13134  | 0        |
| ENSMUSG00000040620 | 15_Dhx33         | 716.7861925 | 0.074523 | 0.731909 | 0.933583 | 700.8701 | 695.5877 | 698.4216 | 783.8355 | 731.977  | 690.0253 |
| ENSMUSG00000040680 | 8_Kremen2        | 3.226466659 | 0.349731 | 0.761663 | 0.933583 | 1.624264 | 3.435001 | 3.451836 | 1.984394 | 6.788041 | 2.075264 |
| ENSMUSG00000040706 | 4_Agmat          | 2.100635636 | 0.533832 | 0.755494 | 0.933583 | 1.624264 | 3.435001 | 0        | 0        | 3.39402  | 4.150528 |
| ENSMUSG00000040770 | 5_Il25           | 24.07859795 | -0.35998 | 0.776078 | 0.933583 | 4.060661 | 1.7175   | 2.301224 | 0.992197 | 2.26268  | 3.12896  |
| ENSMUSG00000041009 | 8_Iqc4           | 0.165366136 | 1.140932 | 0.779778 | 0.933583 | 0        | 0        | 0        | 0.992197 | 0        | 0        |
| ENSMUSG00000041025 | 15_Iffo2         | 2978.424025 | -0.10287 | 0.768215 | 0.933583 | 2893.627 | 2733.402 | 3626.729 | 1843.502 | 3603.318 | 3169.966 |
| ENSMUSG00000041044 | 9_Lrt1           | 21.4039068  | 0.301828 | 0.738815 | 0.933583 | 21.11544 | 24.90376 | 11.50612 | 48.61764 | 20.36412 | 2.075264 |
| ENSMUSG00000041068 | 6_4930596D02Rik  | 0.188556684 | 1.140932 | 0.779778 | 0.933583 | 0        | 0        | 0        | 0        | 1.13134  | 0        |
| ENSMUSG00000041313 | 14_Slc7a1        | 4604.160946 | -0.08154 | 0.765012 | 0.933583 | 4370.895 | 4387.355 | 5444.697 | 3583.815 | 5078.586 | 4759.618 |
| ENSMUSG00000041372 | 9_B4galnt3       | 7.050657343 | -0.26488 | 0.739546 | 0.933583 | 8.121322 | 6.870002 | 8.054285 | 2.97659  | 9.050721 | 7.263424 |
| ENSMUSG00000041377 | 12_Ninj2         | 2.066264323 | -0.41628 | 0.779771 | 0.933583 | 2.436397 | 3.435001 | 1.150612 | 0        | 2.26268  | 3.12896  |
| ENSMUSG00000041380 | 13_Htr2c         | 0.172938678 | 1.140932 | 0.779778 | 0.933583 | 0        | 0        | 0        | 0        | 0        | 1.037632 |
| ENSMUSG00000041498 | 13_Kif14         | 252.4724616 | 0.091367 | 0.743163 | 0.933583 | 250.9488 | 204.3826 | 278.4481 | 276.8229 | 274.9156 | 229.3167 |
| ENSMUSG00000041523 | 2_Upk2           | 10.67356709 | -0.27585 | 0.730929 |          |          |          |          |          |          |          |

|                    |                  |             |           |          |          |          |          |          |          |          |          |
|--------------------|------------------|-------------|-----------|----------|----------|----------|----------|----------|----------|----------|----------|
| ENSMUSG00000043633 | 6_Fam221b        | 55.89496129 | -0.13741  | 0.733367 | 0.933583 | 64.15844 | 54.96001 | 56.37999 | 34.72689 | 57.69835 | 67.44608 |
| ENSMUSG00000043673 | 10_Kcns3         | 10.11076117 | -0.20483  | 0.75694  | 0.933583 | 9.745586 | 14.59875 | 8.054285 | 10.91416 | 9.050721 | 8.301057 |
| ENSMUSG00000043931 | 10_Gimnap7       | 14.41479167 | 0.210787  | 0.707786 | 0.933583 | 23.55183 | 6.011252 | 10.35551 | 16.86735 | 20.36412 | 9.336869 |
| ENSMUSG00000043962 | 16_Thrap3        | 5009.908213 | 0.061756  | 0.769697 | 0.933583 | 4660.014 | 4718.832 | 5329.635 | 5079.055 | 5291.278 | 4980.634 |
| ENSMUSG00000043972 | 7_Opn5           | 0.579004767 | -1.133393 | 0.744364 | 0.933583 | 2.436397 | 0        | 0        | 0        | 0        | 1.037632 |
| ENSMUSG00000044014 | 8_Npy5r          | 0.188556684 | 1.140932  | 0.779778 | 0.933583 | 0        | 0        | 0        | 0        | 1.13134  | 0        |
| ENSMUSG00000044055 | 5_Otos           | 0.895265614 | -0.73928  | 0.735093 | 0.933583 | 1.624264 | 1.7175   | 0        | 0.992197 | 0        | 1.037632 |
| ENSMUSG00000044340 | 7_Phlp1          | 1623.988764 | -0.07278  | 0.755373 | 0.933583 | 1562.542 | 1671.987 | 1760.437 | 1383.122 | 1625.736 | 1740.109 |
| ENSMUSG00000044469 | 7_Tnfalp81       | 36.19804514 | -0.15465  | 0.753823 | 0.933583 | 35.73382 | 39.50251 | 39.12081 | 17.85954 | 36.20288 | 48.76871 |
| ENSMUSG00000044664 | 7_Prss42         | 0.172938678 | 1.140932  | 0.779778 | 0.933583 | 0        | 0        | 0        | 0        | 0        | 1.037632 |
| ENSMUSG00000044798 | 5_Olfr923        | 0.172938678 | 1.140932  | 0.779778 | 0.933583 | 0        | 0        | 0        | 0        | 0        | 1.037632 |
| ENSMUSG00000044835 | 15_Ankrd45       | 14.86604945 | 0.305438  | 0.752813 | 0.933583 | 13.80625 | 18.03375 | 8.054285 | 35.71909 | 1.13134  | 12.45158 |
| ENSMUSG00000044847 | 13_Lsm11         | 224.8621534 | -0.07544  | 0.761239 | 0.933583 | 240.3911 | 231.8626 | 219.7669 | 204.3925 | 217.2173 | 235.5425 |
| ENSMUSG00000044952 | 5_Kctd21         | 157.1574473 | -0.08501  | 0.760134 | 0.933583 | 154.3051 | 156.2925 | 174.893  | 130.97   | 158.3876 | 168.0964 |
| ENSMUSG00000044994 | 7_Olfr1426       | 0.188556684 | 1.140932  | 0.779778 | 0.933583 | 0        | 0        | 0        | 0        | 1.13134  | 0        |
| ENSMUSG00000045034 | 12_Ankrd34b      | 1.02265417  | -0.98546  | 0.744034 | 0.933583 | 4.060661 | 0        | 0        | 0        | 0        | 2.075264 |
| ENSMUSG00000045052 | 2_Prlhr          | 0.188556684 | 1.140932  | 0.779778 | 0.933583 | 0        | 0        | 0        | 0        | 0        | 1.13134  |
| ENSMUSG00000045062 | 4_Pcdhb7         | 30.97309347 | -0.20296  | 0.731294 | 0.933583 | 34.10955 | 52.38376 | 12.65673 | 34.72689 | 26.02082 | 25.9408  |
| ENSMUSG00000045102 | 11_Poln          | 2.080180563 | 0.411252  | 0.769505 | 0.933583 | 1.624264 | 2.576251 | 1.150612 | 4.960984 | 1.13134  | 1.037632 |
| ENSMUSG00000045111 | 5-Taar6          | 0.188556684 | 1.140932  | 0.779778 | 0.933583 | 0        | 0        | 0        | 0        | 0        | 1.13134  |
| ENSMUSG00000045237 | 5.1110012L19Rik  | 294.5479757 | 0.06978   | 0.764117 | 0.933583 | 288.3069 | 291.9751 | 281.9    | 288.7293 | 300.9365 | 315.4401 |
| ENSMUSG00000045382 | 6_Cxcr4          | 51.66038528 | -0.17424  | 0.777734 | 0.933583 | 94.20733 | 38.64376 | 31.06653 | 37.70348 | 80.32515 | 28.01607 |
| ENSMUSG00000045394 | 8_Epcam          | 3339.119876 | 0.668813  | 0.770887 | 0.933583 | 3037.374 | 3022.801 | 3718.778 | 3337.75  | 3722.109 | 3195.907 |
| ENSMUSG00000045518 | 8_Onecut3        | 0.789999682 | 0.87934   | 0.739275 | 0.933583 | 1.624264 | 0        | 0        | 1.984394 | 1.13134  | 0        |
| ENSMUSG00000045551 | 7_Fpr1           | 19.19629892 | 0.153725  | 0.773816 | 0.933583 | 20.3033  | 14.59875 | 19.56041 | 16.86735 | 28.2835  | 15.56448 |
| ENSMUSG00000045680 | 7_Tcf21          | 1.447580211 | 0.487763  | 0.772322 | 0.933583 | 1.624264 | 0.85875  | 1.150612 | 2.97659  | 0        | 2.075264 |
| ENSMUSG00000045731 | 5_Pnoc           | 0.165366136 | 1.140932  | 0.779778 | 0.933583 | 0        | 0        | 0        | 0.992197 | 0        | 0        |
| ENSMUSG00000045763 | 7_Baspl          | 145.9805134 | 0.168972  | 0.733435 | 0.933583 | 152.6808 | 167.4563 | 92.04897 | 258.9634 | 104.0833 | 100.6503 |
| ENSMUSG00000046006 | 5_Gapt           | 45.21592556 | 0.124005  | 0.744232 | 0.933583 | 53.60072 | 36.92626 | 39.12081 | 47.62545 | 45.2536  | 48.76871 |
| ENSMUSG00000046058 | 7_Eid2           | 64.23846501 | 0.119884  | 0.732731 | 0.933583 | 53.60072 | 74.71127 | 56.37999 | 75.40696 | 59.96103 | 65.37082 |
| ENSMUSG00000046180 | 11_4930550L24Rik | 0.165366136 | 1.140932  | 0.779778 | 0.933583 | 0        | 0        | 0        | 0.992197 | 0        | 0        |
| ENSMUSG00000046223 | 10_Plaur         | 92.29540386 | -0.18756  | 0.77242  | 0.933583 | 81.21322 | 54.96001 | 158.7845 | 35.71909 | 162.913  | 60.18266 |
| ENSMUSG00000046275 | 2_Tusc5          | 22.73496003 | -0.15794  | 0.772352 | 0.933583 | 29.23676 | 24.04501 | 11.90636 | 23.75814 | 29.0537  | 0        |
| ENSMUSG00000046280 | 9_She            | 81.09677519 | 0.127664  | 0.743685 | 0.933583 | 79.58895 | 88.45127 | 64.3428  | 117.0792 | 63.35055 | 73.67188 |
| ENSMUSG00000046354 | 3_Defb14         | 10.50014955 | -0.24228  | 0.751259 | 0.933583 | 16.24264 | 12.0225  | 5.753061 | 15.87515 | 7.919381 | 5.18816  |
| ENSMUSG00000046442 | 4_Ppm1e          | 41.94279181 | 0.179793  | 0.756186 | 0.933583 | 43.04301 | 50.66626 | 24.16285 | 77.39135 | 29.41484 | 26.97843 |
| ENSMUSG00000046593 | 3_Tmem215        | 271.3610966 | 0.091431  | 0.737199 | 0.933583 | 268.0036 | 224.9926 | 295.7073 | 313.5342 | 273.7843 | 252.1446 |
| ENSMUSG00000046794 | 8_Ppp1r3b        | 212.8928606 | 0.10459   | 0.752696 | 0.933583 | 203.033  | 207.8176 | 204.809  | 292.6981 | 208.1666 | 160.833  |
| ENSMUSG00000046806 | 13_3110062M04Rik | 143.4448141 | -0.09153  | 0.775757 | 0.933583 | 127.5048 | 158.8688 | 157.6339 | 105.1729 | 152.7309 | 158.7577 |
| ENSMUSG00000046826 | 7_Fam187b        | 130.8867727 | -0.10029  | 0.753637 | 0.933583 | 134.8139 | 128.8125 | 142.6759 | 95.25089 | 131.2355 | 152.5319 |
| ENSMUSG00000046834 | 6_Krt1           | 102.1174825 | -0.0906   | 0.764523 | 0.933583 | 95.01946 | 100.4738 | 120.8143 | 91.28211 | 96.16391 | 108.9514 |
| ENSMUSG00000046924 | 3_Vmn1r179       | 0.165366136 | 1.140932  | 0.779778 | 0.933583 | 0        | 0        | 0        | 0.992197 | 0        | 0        |
| ENSMUSG00000047033 | 2_Pcdhb15        | 29.37308135 | -0.15314  | 0.779719 | 0.933583 | 38.17021 | 36.06751 | 18.40979 | 40.68007 | 16.9701  | 25.9408  |
| ENSMUSG00000047215 | 14_Rpl9          | 13075.61454 | -0.11187  | 0.766811 | 0.933583 | 14142.47 | 12939.65 | 13664.67 | 6981.097 | 15251.6  | 15474.21 |
| ENSMUSG00000047238 | 4_Mageh1         | 150.2872485 | -0.10223  | 0.779849 | 0.933583 | 151.8687 | 183.7725 | 131.1698 | 199.4316 | 112.0027 | 123.4782 |
| ENSMUSG00000047259 | 2_Mc4r           | 0.887693072 | -0.75597  | 0.763203 | 0.933583 | 1.624264 | 1.7175   | 0        | 1.984394 | 0        | 0        |
| ENSMUSG00000047261 | 9_Gap43          | 50.1350928  | 0.106131  | 0.774975 | 0.933583 | 58.47352 | 48.09001 | 37.9702  | 53.57863 | 49.77896 | 52.91924 |
| ENSMUSG00000047324 | 5_4931429P17Rik  | 0.165366136 | 1.140932  | 0.779778 | 0.933583 | 0        | 0        | 0        | 0.992197 | 0        | 0        |
| ENSMUSG00000047604 | 2_Frat2          | 62.73894077 | 0.129595  | 0.756287 | 0.933583 | 60.09778 | 46.37251 | 73.63917 | 87.31332 | 63.35055 | 45.65581 |
| ENSMUSG00000047678 | 1_Gpr82          | 1.730894074 | 0.544171  | 0.760656 | 0.933583 | 2.436397 | 1.7175   | 0        | 3.968787 | 2.26268  | 0        |
| ENSMUSG00000047696 | 16_Ccdc144b      | 1.406784895 | 0.590111  | 0.732448 | 0.933583 | 2.436397 | 0.85875  | 0        | 2.97659  | 1.13134  | 1.037632 |
| ENSMUSG00000047759 | 6_Hs3a3a1        | 113.4074001 | 0.179337  | 0.747117 | 0.933583 | 108.0136 | 144.27   | 66.7355  | 206.3769 | 55.43567 | 99.61268 |
| ENSMUSG00000047842 | 6_Diras2         | 83.01633537 | -0.13181  | 0.737    | 0.933583 | 110.45   | 66.98252 | 82.84407 | 91.28211 | 90.50721 | 56.03213 |
| ENSMUSG00000048003 | 12_Catsper4      | 28.96073942 | 0.216336  | 0.74327  | 0.933583 | 17.86691 | 29.19751 | 33.36775 | 8.929771 | 41.85958 | 42.54291 |
| ENSMUSG00000048076 | 14_Arf1          | 13225.15335 | -0.0736   | 0.761234 | 0.933583 | 13156.54 | 12583.27 | 14947.6  | 11126.5  | 14485.68 | 13051.34 |
| ENSMUSG00000048153 | 5_Olfr49         | 0.172938678 | 1.140932  | 0.779778 | 0.933583 | 0        | 0        | 0        | 0        | 0        | 1.037632 |
| ENSMUSG00000048487 | 11_Mmg12         | 368.7994181 | 0.071156  | 0.778013 | 0.933583 | 332.9742 | 390.7314 | 355.5391 | 428.629  | 355.2408 | 349.682  |
| ENSMUSG00000048939 | 13_Alp13a5       | 6.250931967 | 0.256275  | 0.775225 | 0.933583 | 6.497057 | 6.011252 | 4.602448 | 11.90636 | 2.26268  | 6.225792 |
| ENSMUSG00000049214 | 13_Skint7        | 0.188556684 | 1.140932  | 0.779778 | 0.933583 | 0        | 0        | 0        | 0        | 1.13134  | 0        |
| ENSMUSG00000049303 | 10_Syrl2         | 99.69896374 | -0.16625  | 0.73098  | 0.933583 | 91.77094 | 104.7675 | 119.6637 | 44.64886 | 147.0742 | 90.27399 |
| ENSMUSG00000049517 | 7_Rps23          | 12537.27127 | -0.06675  | 0.73683  | 0.933583 | 13198.77 | 12932.88 | 10356.55 | 12805.64 | 13568.08 | 0        |
| ENSMUSG00000049630 | 6_C1q3           | 13.16175604 | 0.305259  | 0.734777 | 0.933583 | 15.43051 | 16.31625 | 34.51836 | 30.7581  | 6.788041 | 6.225792 |
| ENSMUSG00000049687 | 5_Fam109b        | 43.94634687 | -0.1411   | 0.746167 | 0.933583 | 63.34631 | 37.78501 | 36.81959 | 32.74249 | 45.2536  | 47.73108 |
| ENSMUSG00000049691 | 8_Nkx3-2         | 0.489002392 | 1.058493  | 0.772214 | 0.933583 | 0        | 0.85875  | 0        | 0        | 0        | 2.075264 |
| ENSMUSG00000049692 | 7_Tmem239        | 0.188556684 | 1.140932  | 0.779778 | 0.933583 | 0        | 0        | 0        | 0        | 1.13134  | 0        |
| ENSMUSG00000049740 | 2_5330417H12Rik  | 0.172938678 | 1.140932  | 0.779778 | 0.933583 | 0        | 0        | 0        | 0        | 0        | 1.037632 |
| ENSMUSG00000049902 | 5_4921517D22Rik  | 0.165366136 | 1.140932  | 0.779778 | 0.933583 | 0        | 0        | 0        | 0.992197 | 0        | 0        |
| ENSMUSG00000050023 | 3_Olfr1176       | 0.165366136 | 1.140932  | 0.779778 | 0.933583 | 0        | 0        | 0        | 0.992197 | 0        | 0        |
| ENSMUSG00000050074 | 12_Spink8        | 19.12171051 | 0.195495  | 0.744886 | 0.933583 | 20.3033  | 13.74    | 19.56041 | 32.74249 | 16.9701  | 11.41395 |
| ENSMUSG00000050179 | 3_A930002I21Rik  | 0.188556684 | 1.140932  | 0.779778 | 0.933583 | 0        | 0        | 0        | 0        | 1.13134  | 0        |
| ENSMUSG00000050222 | 10_I11d7         | 8.251418839 | -0.2345   | 0.774327 | 0.933583 | 8.933454 | 12.0225  | 5.753061 | 12.89856 | 6.788041 | 3.112896 |
| ENSMUSG00000050266 | 4_Olfr690        | 0.172938678 | 1.140932  | 0.779778 | 0.933583 | 0        | 0        | 0        | 0        | 0        | 1.037632 |
| ENSMUSG00000050321 | 2_Neto1          | 1.075103174 | 0.685312  | 0.779354 | 0.933583 | 2.436397 | 0        | 0        | 2.97659  | 0        | 1.037632 |
| ENSMUSG00000050368 | 4_Hoxd10         | 1.461014323 | 0.712991  | 0.759231 | 0.933583 | 3.248529 | 0        | 0        | 0.992197 | 4.52536  | 0        |
| ENSMUSG00000050425 | 2_Mrgprb2        | 3.360132086 | 0.371442  | 0.732527 | 0.933583 | 3.248529 | 4.293751 | 1.150612 | 4.960984 | 3.39402  | 3.112896 |
| ENSMUSG00000050587 | 14_Lrrc4c        | 41.38148688 | 0.1859    | 0.746969 | 0.933583 | 38.98234 | 50.66626 | 26.46408 | 71.43817 | 19.23278 | 41.50528 |
| ENSMUSG00000050786 | 8_Ccdc126        | 129.0168135 | 0.114487  | 0.77063  | 0.933583 | 141.311  | 124.5188 | 105.8563 | 192.4862 | 91.63855 | 118.2901 |
| ENSMUSG00000051008 | 5_4930412M03Rik  | 2.050922107 | -0.42387  | 0.752497 | 0.933583 | 3.248529 | 2.576251 | 1.150612 | 0.992197 | 2.26268  | 2.075264 |
| ENSMUSG00000051050 | 9_Spink14        | 0.165366136 | 1.140932  | 0.779778 | 0.933583 | 0        | 0        | 0        | 0.992197 | 0        | 0        |
| ENSMUSG00000051136 | 1_Gh9r           | 0.489002392 | 1.058493  |          |          |          |          |          |          |          |          |

|                    |                  |             |          |          |          |          |          |          |          |          |          |
|--------------------|------------------|-------------|----------|----------|----------|----------|----------|----------|----------|----------|----------|
| ENSMUSG00000054385 | 14_Ceacam2       | 9.84619182  | -0.28473 | 0.742868 | 0.933583 | 5.684925 | 5.152501 | 21.86163 | 10.91416 | 11.3134  | 4.150528 |
| ENSMUSG00000054517 | 9_Trim65         | 235.9523328 | -0.07621 | 0.769025 | 0.933583 | 218.4636 | 230.1451 | 278.4481 | 233.1663 | 225.1367 | 230.3543 |
| ENSMUSG00000054920 | 12_KlHf5         | 365.2397826 | 0.065041 | 0.778834 | 0.933583 | 349.2168 | 360.6721 | 361.2922 | 403.8241 | 356.3721 | 360.0583 |
| ENSMUSG00000054931 | 6_Zkscan4        | 74.11363254 | 0.106711 | 0.736911 | 0.933583 | 76.34042 | 68.70002 | 69.03673 | 86.32112 | 75.79979 | 68.48372 |
| ENSMUSG00000054944 | 7_5330416C01Rik  | 0.165366136 | 1.140932 | 0.779778 | 0.933583 | 0        | 0        | 0        | 0.992197 | 0        | 0        |
| ENSMUSG00000054994 | 2_AV320801       | 0.481429851 | 1.035616 | 0.732596 | 0.933583 | 0        | 0.85875  | 0        | 0.992197 | 0        | 1.037632 |
| ENSMUSG00000055030 | 1_Spr2e          | 0.851920126 | 0.94252  | 0.765156 | 0.933583 | 0        | 1.7175   | 0        | 0        | 3.39402  | 0        |
| ENSMUSG00000055138 | 9_Gm4861         | 0.165366136 | 1.140932 | 0.779778 | 0.933583 | 0        | 0        | 0        | 0.992197 | 0        | 0        |
| ENSMUSG00000055177 | 15_Cst1          | 0.522500957 | 1.005168 | 0.778431 | 0.933583 | 0        | 0        | 1.150612 | 1.984394 | 0        | 0        |
| ENSMUSG00000055194 | 3_Actb12         | 0.165366136 | 1.140932 | 0.779778 | 0.933583 | 0        | 0        | 0        | 0.992197 | 0        | 0        |
| ENSMUSG00000055357 | 8_4933400A11Rik  | 0.165366136 | 1.140932 | 0.779778 | 0.933583 | 0        | 0        | 0        | 0.992197 | 0        | 0        |
| ENSMUSG00000055416 | 5_Fam136b-ps     | 0.188556684 | 1.140932 | 0.779778 | 0.933583 | 0        | 0        | 0        | 0        | 1.13134  | 0        |
| ENSMUSG00000055523 | 6_Gucy2g         | 9.138099925 | 0.237082 | 0.772825 | 0.933583 | 10.55772 | 4.293751 | 10.35551 | 3.968787 | 9.050721 | 16.60211 |
| ENSMUSG00000055555 | 1_4930502E18Rik  | 0.53764604  | 1.058708 | 0.765394 | 0.933583 | 0        | 0        | 1.150612 | 0        | 0        | 2.075264 |
| ENSMUSG00000055732 | 1_Gm9979         | 0.165366136 | 1.140932 | 0.779778 | 0.933583 | 0        | 0        | 0        | 0.992197 | 0        | 0        |
| ENSMUSG00000055746 | 9_Magea2         | 0.165366136 | 1.140932 | 0.779778 | 0.933583 | 0        | 0        | 0        | 0.992197 | 0        | 0        |
| ENSMUSG00000056296 | 16_Synpr         | 251.7645266 | 0.195974 | 0.746514 | 0.933583 | 179.4812 | 376.1326 | 148.429  | 478.2389 | 105.2146 | 223.0909 |
| ENSMUSG00000056501 | 3_Cebpb          | 107.4029248 | 1.142594 | 0.765421 | 0.933583 | 101.5165 | 73.85252 | 131.1698 | 144.8607 | 138.0235 | 54.9945  |
| ENSMUSG00000056564 | 6_Olfr324        | 0.172938678 | 1.140932 | 0.779778 | 0.933583 | 0        | 0        | 0        | 0        | 0        | 1.037632 |
| ENSMUSG00000056600 | 2_Olfr90         | 0.172938678 | 1.140932 | 0.779778 | 0.933583 | 0        | 0        | 0        | 0        | 0        | 1.037632 |
| ENSMUSG00000056706 | 2_Krtap7-1       | 0.165366136 | 1.140932 | 0.779778 | 0.933583 | 0        | 0        | 0        | 0.992197 | 0        | 0        |
| ENSMUSG00000056941 | 17_Commnd2       | 900.9420922 | -0.09    | 0.752816 | 0.933583 | 868.9814 | 790.909  | 1127.6   | 727.2803 | 968.4271 | 922.4549 |
| ENSMUSG00000056952 | 13_Tatdn2        | 1576.98687  | -0.09674 | 0.730693 | 0.933583 | 1634.822 | 1501.095 | 1753.533 | 1166.823 | 1805.619 | 1600.029 |
| ENSMUSG00000057074 | 6_Ces1g          | 0.877373226 | 0.730074 | 0.747842 | 0.933583 | 0        | 0.85875  | 1.150612 | 0.992197 | 2.26268  | 0        |
| ENSMUSG00000057163 | 3_Prrs2          | 1.177621802 | 0.598476 | 0.749035 | 0.933583 | 0.812132 | 0.85875  | 1.150612 | 0        | 1.13134  | 3.112896 |
| ENSMUSG00000057278 | 8_Snrpg          | 712.2395196 | 0.089522 | 0.763157 | 0.933583 | 727.6704 | 589.1027 | 753.6509 | 561.5834 | 875.6572 | 765.7725 |
| ENSMUSG00000058006 | 12_Grln2         | 1633.920792 | 0.066329 | 0.764645 | 0.933583 | 1655.125 | 1446.135 | 1687.948 | 1591.484 | 1775.073 | 1647.76  |
| ENSMUSG00000058052 | 2_Delfb35        | 0.188556684 | 1.140932 | 0.779778 | 0.933583 | 0        | 0        | 0        | 0        | 1.13134  | 0        |
| ENSMUSG00000058325 | 5_Dock1          | 6389.532766 | 0.065735 | 0.761628 | 0.933583 | 5860.346 | 5947.704 | 6924.384 | 6335.177 | 6743.918 | 6525.668 |
| ENSMUSG00000058488 | 7_Kl             | 0.165366136 | 1.140932 | 0.779778 | 0.933583 | 0        | 0        | 0        | 0.992197 | 0        | 0        |
| ENSMUSG00000058620 | 5_Adra2b         | 0.774381675 | 0.845709 | 0.749633 | 0.933583 | 1.624264 | 0        | 0        | 1.984394 | 0        | 1.037632 |
| ENSMUSG00000058728 | 14_Cd300c        | 0.481232718 | 1.058458 | 0.773356 | 0.933583 | 0.812132 | 0        | 0        | 0        | 0        | 2.075264 |
| ENSMUSG00000059003 | 12_Grln2a        | 2.083877317 | -0.60701 | 0.769888 | 0.933583 | 3.248529 | 4.293751 | 0        | 4.960984 | 0        | 0        |
| ENSMUSG00000059201 | 12_Lep           | 0.522500957 | 1.005168 | 0.778431 | 0.933583 | 0        | 0        | 1.150612 | 1.984394 | 0        | 0        |
| ENSMUSG00000059279 | 10_Olfr224       | 0.172938678 | 1.140932 | 0.779778 | 0.933583 | 0        | 0        | 0        | 0        | 0        | 1.037632 |
| ENSMUSG00000059430 | 14_Actg2         | 50.86897723 | -0.19617 | 0.765089 | 0.933583 | 38.98234 | 89.31002 | 34.51836 | 18.85174 | 38.46556 | 85.08583 |
| ENSMUSG00000059455 | 2_Plac8l1        | 0.172938678 | 1.140932 | 0.779778 | 0.933583 | 0        | 0        | 0        | 0        | 0        | 1.037632 |
| ENSMUSG00000059625 | 6_Sohlh1         | 0.172938678 | 1.140932 | 0.779778 | 0.933583 | 0        | 0        | 0        | 0        | 0        | 1.037632 |
| ENSMUSG00000059639 | 2_Clec4e4        | 0.594622773 | -1.13438 | 0.742206 | 0.933583 | 2.436397 | 0        | 0        | 0        | 1.13134  | 0        |
| ENSMUSG00000059845 | 5_Gm11567        | 0.568882053 | 1.162165 | 0.739898 | 0.933583 | 0        | 0        | 1.150612 | 0        | 2.26268  | 0        |
| ENSMUSG00000059891 | 13_Tsk5          | 1.201009482 | 0.602896 | 0.766455 | 0.933583 | 0        | 1.7175   | 1.150612 | 0        | 2.26268  | 2.075264 |
| ENSMUSG00000060112 | 1_Olfr60         | 0.520238405 | 1.163167 | 0.746635 | 0.933583 | 0        | 0.85875  | 0        | 0        | 2.26268  | 0        |
| ENSMUSG00000060176 | 3_Klf27          | 7.268418965 | 0.268226 | 0.737828 | 0.933583 | 5.684925 | 9.446252 | 4.602448 | 7.937575 | 4.52536  | 11.41395 |
| ENSMUSG00000060317 | 9_Acnat2         | 0.172938678 | 1.140932 | 0.779778 | 0.933583 | 0        | 0        | 0        | 0        | 0        | 1.037632 |
| ENSMUSG00000060371 | 12_Caln1         | 8.804229352 | 0.309105 | 0.758203 | 0.933583 | 8.933454 | 11.16375 | 3.451836 | 19.84394 | 1.13134  | 8.301057 |
| ENSMUSG00000060461 | 5_Dppa5a         | 4.529479701 | 0.430564 | 0.747343 | 0.933583 | 10.55772 | 0.85875  | 0        | 5.953181 | 5.656701 | 4.150528 |
| ENSMUSG00000060534 | 15_Dcc           | 0.481429851 | 1.035616 | 0.732596 | 0.933583 | 0        | 0.85875  | 0        | 0.992197 | 0        | 1.037632 |
| ENSMUSG00000060594 | 5_Layn           | 73.80156051 | -0.09681 | 0.76721  | 0.933583 | 77.15256 | 79.00502 | 72.48856 | 72.43037 | 82.58783 | 59.14503 |
| ENSMUSG00000060675 | 13_Pla2g16       | 2492.557698 | 0.089237 | 0.759849 | 0.933583 | 2409.596 | 2391.619 | 2445.051 | 1863.346 | 3090.821 | 2754.913 |
| ENSMUSG00000060688 | 3_Olfr292        | 0.172938678 | 1.140932 | 0.779778 | 0.933583 | 0        | 0        | 0        | 0        | 0        | 1.037632 |
| ENSMUSG00000060794 | 6_Tsk5           | 0.172938678 | 1.140932 | 0.779778 | 0.933583 | 0        | 0        | 0        | 0        | 0        | 1.037632 |
| ENSMUSG00000061082 | 11_Plac1         | 0.172938678 | 1.140932 | 0.779778 | 0.933583 | 0        | 0        | 0        | 0        | 0        | 1.037632 |
| ENSMUSG00000061517 | 8_Sox21          | 298.2583513 | -0.09705 | 0.769458 | 0.933583 | 251.761  | 310.0088 | 363.5934 | 371.0816 | 265.8649 | 227.2414 |
| ENSMUSG00000061531 | 2_Tmem236        | 4.747678921 | 0.278536 | 0.763795 | 0.933583 | 4.872793 | 3.435001 | 4.602448 | 7.937575 | 4.52536  | 3.112896 |
| ENSMUSG00000061540 | 3_Orm2           | 0.165366136 | 1.140932 | 0.779778 | 0.933583 | 0        | 0        | 0        | 0.992197 | 0        | 0        |
| ENSMUSG00000061576 | 15_Dpp6          | 31.31113309 | -0.18066 | 0.767888 | 0.933583 | 25.1761  | 54.98041 | 19.56041 | 45.64105 | 24.89498 | 17.63975 |
| ENSMUSG00000061613 | 12_U2af1         | 1671.260195 | -0.10143 | 0.744499 | 0.933583 | 1751.769 | 1574.089 | 1863.992 | 1132.097 | 1982.108 | 1723.507 |
| ENSMUSG00000061633 | 3_170029P11Rik   | 0.165366136 | 1.140932 | 0.779778 | 0.933583 | 0        | 0        | 0        | 0.992197 | 0        | 0        |
| ENSMUSG00000061758 | 13_Akrlb10       | 1573.684594 | 0.073902 | 0.742564 | 0.933583 | 1546.3   | 1386.882 | 1667.237 | 1508.139 | 1686.828 | 1646.722 |
| ENSMUSG00000061769 | 2_Klra6          | 0.165366136 | 1.140932 | 0.779778 | 0.933583 | 0        | 0        | 0        | 0.992197 | 0        | 0        |
| ENSMUSG00000061780 | 5_Cld            | 0.797296433 | 0.856532 | 0.749893 | 0.933583 | 0.812132 | 0.85875  | 0        | 0        | 0        | 3.112896 |
| ENSMUSG00000062369 | 2_Uspl71b        | 0.188556684 | 1.140932 | 0.779778 | 0.933583 | 0        | 0        | 0        | 0        | 0        | 1.13134  |
| ENSMUSG00000062438 | 4_Adam1b         | 7.536282693 | 0.279756 | 0.739826 | 0.933583 | 4.872793 | 8.587502 | 6.903673 | 2.97659  | 13.57608 | 8.301057 |
| ENSMUSG00000062480 | 11_Acat3         | 31.24687416 | 0.145457 | 0.773197 | 0.933583 | 22.7397  | 31.77376 | 34.51836 | 24.80492 | 49.77896 | 23.86554 |
| ENSMUSG00000062757 | 1_Olfr1206       | 0.165366136 | 1.140932 | 0.779778 | 0.933583 | 0        | 0        | 0        | 0.992197 | 0        | 0        |
| ENSMUSG00000062791 | 4_Gm382          | 0.165366136 | 1.140932 | 0.779778 | 0.933583 | 0        | 0        | 0        | 0.992197 | 0        | 0        |
| ENSMUSG00000063166 | 4_Gm5449         | 0.774578808 | 0.805458 | 0.765333 | 0.933583 | 0.812132 | 0.85875  | 0        | 2.97659  | 0        | 0        |
| ENSMUSG00000063409 | 12_Lrrc43        | 0.188556684 | 1.140932 | 0.779778 | 0.933583 | 0        | 0        | 0        | 0        | 1.13134  | 0        |
| ENSMUSG00000064224 | 10_Gsdma3        | 0.172938678 | 1.140932 | 0.779778 | 0.933583 | 0        | 0        | 0        | 0        | 0        | 1.037632 |
| ENSMUSG00000064225 | 6_Paqr9          | 49.09746334 | 0.164325 | 0.746132 | 0.933583 | 53.60072 | 54.10126 | 31.06653 | 82.35234 | 35.07154 | 38.39239 |
| ENSMUSG00000064247 | 14_Plxd1         | 50.85908073 | -0.16981 | 0.761254 | 0.933583 | 54.41286 | 54.10126 | 52.92816 | 16.86735 | 53.17298 | 73.67188 |
| ENSMUSG00000064307 | 12_Lrrc51        | 106.4284716 | -0.14698 | 0.742419 | 0.933583 | 121.8198 | 113.355  | 100.1033 | 49.60984 | 118.7907 | 134.8922 |
| ENSMUSG00000064361 | 11_Spag8         | 7.038492392 | -0.26014 | 0.756206 | 0.933583 | 4.872793 | 11.16375 | 6.903673 | 2.97659  | 9.050721 | 7.263424 |
| ENSMUSG00000066364 | 2_Serpina3b      | 1.473063922 | -0.70998 | 0.761557 | 0.933583 | 0        | 4.293751 | 1.150612 | 0        | 3.39402  | 0        |
| ENSMUSG00000066571 | 13_4931406P16Rik | 1729.304915 | 0.072368 | 0.738364 | 0.933583 | 1577.161 | 1643.648 | 1837.528 | 1843.502 | 1716.243 | 1757.749 |
| ENSMUSG00000066584 | 10_Scgb2b27      | 0.165366136 | 1.140932 | 0.779778 | 0.933583 | 0        | 0        | 0        | 0.992197 | 0        | 0        |
| ENSMUSG00000066652 | 5_Lefty2         | 0.512468731 | 1.163332 | 0.747768 | 0.933583 | 0.812132 | 0        | 0        | 0        | 2.26268  | 0        |
| ENSMUSG00000066867 | 8_Oas1e          | 45.42627061 | -0.1544  | 0.779145 | 0.933583 | 33.29742 | 58.39502 | 51.77754 | 18.85174 | 65.61773 | 44.61818 |
| ENSMUSG00000067085 | 1_Gm10197        | 74.73891518 | -0.49826 | 0.759079 | 0.933583 | 77.96469 | 76.42877 | 108.1575 | 0        | 76.93113 | 108.9514 |
| ENSMUSG00000067201 | 11_H2-M9         | 0.165366136 | 1.140932 | 0.779778 | 0.933583 | 0        | 0        | 0        | 0.992197 | 0        | 0        |
| ENSMUSG00000067526 | 1_Olfr1425       | 0.172938678 | 1.140932 | 0.779778 | 0.933583 | 0        | 0        | 0        | 0        | 0        | 1.037632 |
| ENSMUSG00000067586 | 12_Hdac8         | 175.3103825 | -0.07885 | 0.755141 | 0.933583 | 170.5478 | 184.6313 | 185.2485 | 175.6188 | 170.8324 | 164.9835 |
| ENSMUSG00000067597 | 3_S1pr3          | 150.2407554 | -0.11483 | 0.752171 | 0.933583 | 143.7474 | 212.9701 | 111.6094 | 1        |          |          |

|                    |                  |             |          |          |          |          |          |          |          |          |          |
|--------------------|------------------|-------------|----------|----------|----------|----------|----------|----------|----------|----------|----------|
| ENSMUSG00000069830 | 10_Nlrp1a        | 1.154707044 | 0.59336  | 0.746014 | 0.933583 | 1.624264 | 0        | 1.150612 | 1.984394 | 1.13134  | 1.037632 |
| ENSMUSG00000070375 | 6_Olfir406       | 0.188556684 | 1.140932 | 0.779778 | 0.933583 | 0        | 0        | 0        | 0        | 1.13134  | 0        |
| 12_Ampd1           | 44_2821021       | 0.22555     | 0.752274 | 0.933583 | 23.55183 | 78.14627 | 20.71102 | 86.32112 | 23.75814 | 33.20423 | 0        |
| ENSMUSG00000070448 | 11_Vmn2r8r       | 0.165366136 | 1.140932 | 0.779778 | 0.933583 | 0        | 0        | 0.992197 | 0        | 0        | 0        |
| ENSMUSG00000070552 | 2_Mrgprx1        | 0.165366136 | 1.140932 | 0.779778 | 0.933583 | 0        | 0        | 0.992197 | 0        | 0        | 0        |
| ENSMUSG00000070601 | 4_Vmn2r8r        | 0.78999682  | 0.87934  | 0.739275 | 0.933583 | 1.624264 | 0        | 1.984394 | 1.13134  | 0        | 0        |
| ENSMUSG00000070617 | 2_Gm13089        | 0.188556684 | 1.140932 | 0.779778 | 0.933583 | 0        | 0        | 0        | 1.13134  | 0        | 0        |
| ENSMUSG00000070618 | 10_BC080695      | 0.172938678 | 1.140932 | 0.779778 | 0.933583 | 0        | 0        | 0        | 0        | 1.037632 | 0        |
| ENSMUSG00000070719 | 4_Pla2g4d        | 0.172938678 | 1.140932 | 0.779778 | 0.933583 | 0        | 0        | 0        | 0        | 1.037632 | 0        |
| ENSMUSG00000070798 | 4_Psg25          | 0.188556684 | 1.140932 | 0.779778 | 0.933583 | 0        | 0        | 0        | 1.13134  | 0        | 0        |
| ENSMUSG00000070866 | 4_Zfp804a        | 3.621657034 | -0.51872 | 0.755364 | 0.933583 | 6.497057 | 5.152501 | 1.150612 | 8.929771 | 0        | 0        |
| ENSMUSG00000070873 | 5_Llra5          | 22.59029291 | -0.15004 | 0.776906 | 0.933583 | 16.24264 | 30.91501 | 24.16285 | 24.80492 | 24.88948 | 14.52685 |
| ENSMUSG00000070877 | 4_Ldlrad1        | 0.188556684 | 1.140932 | 0.779778 | 0.933583 | 0        | 0        | 0        | 1.13134  | 0        | 0        |
| ENSMUSG00000070999 | 2_Ccin           | 0.172938678 | 1.140932 | 0.779778 | 0.933583 | 0        | 0        | 0        | 0        | 1.037632 | 0        |
| ENSMUSG00000071340 | 1_Trappc3l       | 0.571432225 | -1.1337  | 0.745428 | 0.933583 | 2.436397 | 0        | 0.992197 | 0        | 0        | 0        |
| ENSMUSG00000071341 | 4_Egr4           | 1.137764105 | 0.025001 | 0.731004 | 0.933583 | 0        | 2.301224 | 0        | 4.52536  | 0        | 0        |
| ENSMUSG00000071347 | 3_C1qtlnf9       | 11.87394108 | 0.199433 | 0.756388 | 0.933583 | 7.30919  | 15.4575  | 10.35551 | 11.90636 | 15.83876 | 10.37632 |
| ENSMUSG00000071361 | 1_Mcpt9          | 0.188556684 | 1.140932 | 0.779778 | 0.933583 | 0        | 0        | 0        | 1.13134  | 0        | 0        |
| ENSMUSG00000071398 | 8_2410004P03Rik  | 1.24463076  | -0.54588 | 0.760042 | 0.933583 | 2.436397 | 0.85875  | 1.150612 | 1.984394 | 0        | 1.037632 |
| ENSMUSG00000071494 | 4_Olfir455       | 0.188556684 | 1.140932 | 0.779778 | 0.933583 | 0        | 0        | 0        | 1.13134  | 0        | 0        |
| ENSMUSG00000071591 | 2_Gm10339        | 0.165366136 | 1.140932 | 0.779778 | 0.933583 | 0        | 0        | 0.992197 | 0        | 0        | 0        |
| ENSMUSG00000071633 | 11_Gm4952        | 0.789921024 | 0.793701 | 0.763688 | 0.933583 | 0        | 1.7175   | 0        | 1.984394 | 0        | 1.037632 |
| ENSMUSG00000071650 | 5_Ganab          | 4831.188515 | -0.08501 | 0.751109 | 0.933583 | 4906.903 | 4889.724 | 5123.676 | 3613.581 | 5401.018 | 5052.231 |
| ENSMUSG00000071714 | 5_Csf2rb2        | 171.1229756 | 0.168138 | 0.739066 | 0.933583 | 216.8393 | 89.31002 | 177.1943 | 121.048  | 288.497  | 133.8545 |
| ENSMUSG00000072100 | 4_Cldn34b1       | 0.188556684 | 1.140932 | 0.779778 | 0.933583 | 0        | 0        | 0        | 1.13134  | 0        | 0        |
| ENSMUSG00000072487 | 10_Mroh5         | 0.188556684 | 1.140932 | 0.779778 | 0.933583 | 0        | 0        | 0        | 1.13134  | 0        | 0        |
| ENSMUSG00000072612 | 2_Gm10382        | 1.09044539  | 0.666689 | 0.743797 | 0.933583 | 1.624264 | 0.85875  | 0        | 1.984394 | 0        | 2.075264 |
| ENSMUSG00000072624 | 2_Gm5460         | 0.165366136 | 1.140932 | 0.779778 | 0.933583 | 0        | 0        | 0.992197 | 0        | 0        | 0        |
| ENSMUSG00000072673 | 2_Gm10392        | 1.414081646 | 0.585253 | 0.7626   | 0.933583 | 1.624264 | 1.7175   | 0        | 0.992197 | 0        | 4.150528 |
| ENSMUSG00000072791 | 11_Abcb5         | 0.188556684 | 1.140932 | 0.779778 | 0.933583 | 0        | 0        | 0        | 1.13134  | 0        | 0        |
| ENSMUSG00000072949 | 5_Acot1          | 25.85724648 | -0.15504 | 0.77319  | 0.933583 | 20.3033  | 32.63251 | 28.7653  | 12.89856 | 29.41484 | 31.12896 |
| ENSMUSG00000072968 | 4_Gm17728        | 0.172938678 | 1.140932 | 0.779778 | 0.933583 | 0        | 0        | 0        | 0        | 1.037632 | 0        |
| ENSMUSG00000073000 | 2_Gm10451        | 1.82941844  | -0.63633 | 0.730868 | 0.933583 | 4.872793 | 1.7175   | 0        | 0.992197 | 3.39402  | 0        |
| ENSMUSG00000073018 | 5_Gm1070         | 8.25156096  | 0.209525 | 0.775555 | 0.933583 | 6.497057 | 5.152501 | 11.50612 | 8.929771 | 10.18206 | 7.263424 |
| ENSMUSG00000073154 | 10_9330158H04Rik | 0.895265614 | -0.73928 | 0.735093 | 0.933583 | 1.624264 | 1.7175   | 0        | 0.992197 | 0        | 1.037632 |
| ENSMUSG00000073208 | 12_Speer4c       | 0.165366136 | 1.140932 | 0.779778 | 0.933583 | 0        | 0        | 0.992197 | 0        | 0        | 0        |
| ENSMUSG00000073408 | 2_Dpcr1          | 6.995256472 | -0.29957 | 0.773036 | 0.933583 | 10.55772 | 3.435001 | 9.204897 | 1.984394 | 2.26268  | 14.52685 |
| ENSMUSG00000073430 | 4_Gm10505        | 2.04346804  | -0.47212 | 0.748429 | 0.933583 | 0.812132 | 5.152501 | 1.150612 | 2.97659  | 1.13134  | 1.037632 |
| ENSMUSG00000073492 | 2_Gm10521        | 2.110825178 | 0.485817 | 0.749134 | 0.933583 | 4.060661 | 0        | 1.150612 | 1.984394 | 3.39402  | 2.075264 |
| ENSMUSG00000073602 | 10_Serpinb3b     | 0.188556684 | 1.140932 | 0.779778 | 0.933583 | 0        | 0        | 0        | 1.13134  | 0        | 0        |
| ENSMUSG00000073724 | 12_Pramel4       | 0.165366136 | 1.140932 | 0.779778 | 0.933583 | 0        | 0        | 0.992197 | 0        | 0        | 0        |
| ENSMUSG00000073774 | 2_Kncn           | 0.165366136 | 1.140932 | 0.779778 | 0.933583 | 0        | 0        | 0.992197 | 0        | 0        | 0        |
| ENSMUSG00000073907 | 2_Olfir689       | 0.165366136 | 1.140932 | 0.779778 | 0.933583 | 0        | 0        | 0.992197 | 0        | 0        | 0        |
| ENSMUSG00000073940 | 3_Hbb-bt         | 27.06161337 | -0.16323 | 0.776634 | 0.933583 | 34.10955 | 38.64376 | 12.65673 | 28.77371 | 30.54618 | 17.63975 |
| ENSMUSG00000073967 | 2_Olfir557       | 0.188556684 | 1.140932 | 0.779778 | 0.933583 | 0        | 0        | 0        | 1.13134  | 0        | 0        |
| ENSMUSG00000073977 | 1_Olfir549       | 0.188556684 | 1.140932 | 0.779778 | 0.933583 | 0        | 0        | 0        | 1.13134  | 0        | 0        |
| ENSMUSG00000074123 | 1_7420426K07Rik  | 0.188556684 | 1.140932 | 0.779778 | 0.933583 | 0        | 0        | 0        | 1.13134  | 0        | 0        |
| ENSMUSG00000074203 | 4_G430095P16Rik  | 3.714213868 | -0.39083 | 0.747948 | 0.933583 | 5.684925 | 3.435001 | 3.451836 | 0        | 4.52536  | 5.18816  |
| ENSMUSG00000074217 | 8_2210011C24Rik  | 0.172938678 | 1.140932 | 0.779778 | 0.933583 | 0        | 0        | 0        | 0        | 1.037632 | 0        |
| ENSMUSG00000074361 | 9_C5ar2          | 8.005295983 | 0.219755 | 0.769191 | 0.933583 | 9.745586 | 7.728752 | 4.602448 | 9.921968 | 5.656701 | 1.037632 |
| ENSMUSG00000074378 | 5_Bsph1          | 0.165366136 | 1.140932 | 0.779778 | 0.933583 | 0        | 0        | 0.992197 | 0        | 0        | 0        |
| ENSMUSG00000074385 | 2_Gm10684        | 0.900563774 | 0.770738 | 0.770268 | 0.933583 | 0        | 0.85875  | 1.150612 | 0        | 3.39402  | 0        |
| ENSMUSG00000074433 | 4_Loc3e          | 0.165366136 | 1.140932 | 0.779778 | 0.933583 | 0        | 0        | 0.992197 | 0        | 0        | 0        |
| ENSMUSG00000074489 | 9_Bglap3         | 176.7669283 | -0.13957 | 0.737226 | 0.933583 | 177.8569 | 153.7163 | 224.3694 | 96.24309 | 233.0561 | 175.3598 |
| ENSMUSG00000074575 | 4_Kcng1          | 5.471786282 | -0.27155 | 0.764793 | 0.933583 | 8.933454 | 4.293751 | 4.602448 | 3.968787 | 7.919381 | 3.112896 |
| ENSMUSG00000074576 | 4_Moc3           | 122.8524467 | 0.099904 | 0.758505 | 0.933583 | 103.9529 | 118.5075 | 133.471  | 97.23529 | 145.9429 | 138.0051 |
| ENSMUSG00000074758 | 9_Gm5535         | 0.78999682  | 0.87934  | 0.739275 | 0.933583 | 1.624264 | 0        | 1.984394 | 1.13134  | 0        | 0        |
| ENSMUSG00000074818 | 12_Pdzd7         | 53.09059508 | -0.15635 | 0.739235 | 0.933583 | 51.97646 | 54.10126 | 62.13305 | 72.43037 | 26.02082 | 51.8816  |
| ENSMUSG00000074832 | 10_2410141K09Rik | 0.165366136 | 1.140932 | 0.779778 | 0.933583 | 0        | 0        | 0.992197 | 0        | 0        | 0        |
| ENSMUSG00000074852 | 3_Hpse2          | 0.165366136 | 1.140932 | 0.779778 | 0.933583 | 0        | 0        | 0.992197 | 0        | 0        | 0        |
| ENSMUSG00000074971 | 4_Fibin          | 706.9268543 | 0.098297 | 0.773656 | 0.933583 | 746.3495 | 701.5989 | 600.6195 | 1007.08  | 524.9418 | 660.9716 |
| ENSMUSG00000075024 | 2_Gm10803        | 0.188556684 | 1.140932 | 0.779778 | 0.933583 | 0        | 0        | 0        | 1.13134  | 0        | 0        |
| ENSMUSG00000075266 | 4_Cenpw          | 52.99949491 | 0.159434 | 0.75583  | 0.933583 | 44.66727 | 40.36126 | 65.58489 | 91.28211 | 41.85958 | 34.24186 |
| ENSMUSG00000075269 | 4_Bex6           | 1.866517001 | 0.454508 | 0.770965 | 0.933583 | 2.436397 | 0        | 2.301224 | 0.992197 | 3.39402  | 2.075264 |
| ENSMUSG00000075297 | 10_H60b          | 6.606139903 | 0.354587 | 0.753408 | 0.933583 | 12.18198 | 1.7175   | 3.451836 | 13.89076 | 1.13134  | 7.263424 |
| ENSMUSG00000075402 | 1_Krt76          | 8.238502424 | -0.35496 | 0.736401 | 0.933583 | 6.497057 | 8.587502 | 12.65673 | 0        | 11.3134  | 10.37632 |
| ENSMUSG00000075478 | 2_Slittrk1       | 0.522500957 | 1.005168 | 0.778431 | 0.933583 | 0        | 0        | 1.150612 | 1.984394 | 0        | 0        |
| ENSMUSG00000075510 | 3_Fam187a        | 0.473660176 | 0.135504 | 0.733766 | 0.933583 | 0.812132 | 0        | 0.992197 | 0        | 1.037632 | 0        |
| ENSMUSG00000075520 | 5_Malrd1         | 0.172938678 | 1.140932 | 0.779778 | 0.933583 | 0        | 0        | 0        | 0        | 1.037632 | 0        |
| ENSMUSG00000075574 | 2_Delfb48        | 0.172938678 | 1.140932 | 0.779778 | 0.933583 | 0        | 0        | 0        | 0        | 1.037632 | 0        |
| ENSMUSG00000075591 | 2_Gm10874        | 5.664146364 | -0.36996 | 0.731801 | 0.933583 | 6.497057 | 6.870002 | 5.753061 | 6.945378 | 7.919381 | 0        |
| ENSMUSG00000075596 | 2_B130006D01Rik  | 0.172938678 | 1.140932 | 0.779778 | 0.933583 | 0        | 0        | 0        | 0        | 1.037632 | 0        |
| ENSMUSG00000076436 | 1_Oxct2a         | 0.172938678 | 1.140932 | 0.779778 | 0.933583 | 0        | 0        | 0        | 0        | 1.037632 | 0        |
| ENSMUSG00000078137 | 1_Ankrd63        | 0.188556684 | 1.140932 | 0.779778 | 0.933583 | 0        | 0        | 0        | 1.13134  | 0        | 0        |
| ENSMUSG00000078314 | 2_Gm14762        | 0.481429851 | 1.035616 | 0.732596 | 0.933583 | 0        | 0.85875  | 0        | 0.992197 | 0        | 1.037632 |
| ENSMUSG00000078439 | 9_Sminm24        | 141.7348952 | -0.18099 | 0.738396 | 0.933583 | 158.3658 | 121.9425 | 171.4412 | 44.64886 | 190.0651 | 163.9459 |
| ENSMUSG00000078498 | 5_Gm13151        | 0.165366136 | 1.140932 | 0.779778 | 0.933583 | 0        | 0        | 0.992197 | 0        | 0        | 0        |
| ENSMUSG00000078500 | 3_Gm13235        | 0.165366136 | 1.140932 | 0.779778 | 0.933583 | 0        | 0        | 0.992197 | 0        | 0        | 0        |
| ENSMUSG00000078511 | 3_Pramef25       | 0.522500957 | 1.005168 | 0.778431 | 0.933583 | 0        | 0        | 1.150612 | 1.984394 | 0        | 0        |
| ENSMUSG00000078531 | 3_Gm831          | 2.464667382 | -0.42334 | 0.73395  | 0.933583 | 1.624264 | 3.435001 | 3.451836 | 2.97659  | 2.26268  | 1.037632 |
| ENSMUSG00000078591 | 1_Hs3t4          | 1.098490855 | 0.680163 | 0.744348 | 0.933583 | 1.624264 | 0.85875  | 0        | 2.97659  | 1.13134  | 0        |
| ENSMUSG00000078624 | 2_Olfir613       | 1.162476718 | 0.580514 | 0.731831 | 0.933583 | 0.812132 | 0.85875  | 1.150612 | 1.984394 | 1.13134  | 1.037632 |
| ENSMUSG00000078627 | 9_March10        | 0.473660176 | 0.135504 | 0.733766 | 0.933583 | 0.812132 | 0        | 0.992197 | 0        | 1.037632 | 0        |
| ENSMUSG00000078680 | 3_Mup10          | 0.165366136 | 1.140932 | 0.779778 | 0.933583 | 0        | 0        | 0.992197 | 0        | 0        | 0        |
| ENSMUSG00000078713 | 8_Tomm5          | 497.06012   |          |          |          |          |          |          |          |          |          |

|                    |                 |             |          |          |          |          |          |          |          |          |          |
|--------------------|-----------------|-------------|----------|----------|----------|----------|----------|----------|----------|----------|----------|
| ENSMUSG00000085251 | 1_Gm12326       | 0.165366136 | 1.140932 | 0.779778 | 0.933583 | 0        | 0        | 0        | 0.992197 | 0        | 0        |
| ENSMUSG00000085380 | 1_E130120K24Rik | 0.165366136 | 1.140932 | 0.779778 | 0.933583 | 0        | 0        | 0        | 0.992197 | 0        | 0        |
| ENSMUSG00000085412 | 7_Hair1         | 0.188556684 | 1.140932 | 0.779778 | 0.933583 | 0        | 0        | 0        | 0        | 1.13134  | 0        |
| ENSMUSG00000085469 | 1_Gm14242       | 0.188556684 | 1.140932 | 0.779778 | 0.933583 | 0        | 0        | 0        | 0        | 1.13134  | 0        |
| ENSMUSG00000085478 | 1_Gm11851       | 0.165366136 | 1.140932 | 0.779778 | 0.933583 | 0        | 0        | 0        | 0.992197 | 0        | 0        |
| ENSMUSG00000085601 | 7_Gm4969        | 8.018257173 | 0.257235 | 0.744784 | 0.933583 | 11.36985 | 6.870002 | 3.451836 | 5.953181 | 9.050721 | 11.41395 |
| ENSMUSG00000085806 | 1_Gm12023       | 0.165366136 | 1.140932 | 0.779778 | 0.933583 | 0        | 0        | 0        | 0.992197 | 0        | 0        |
| ENSMUSG00000085989 | 1_Gm7437        | 0.188556684 | 1.140932 | 0.779778 | 0.933583 | 0        | 0        | 0        | 0        | 1.13134  | 0        |
| ENSMUSG00000085991 | 1_Gm11479       | 0.165366136 | 1.140932 | 0.779778 | 0.933583 | 0        | 0        | 0        | 0.992197 | 0        | 0        |
| ENSMUSG00000086124 | 1_AS30076117Rik | 1.09072118  | 0.711717 | 0.770724 | 0.933583 | 2.436397 | 0        | 0        | 2.97659  | 1.13134  | 0        |
| ENSMUSG00000086166 | 1_Gm14342       | 0.165366136 | 1.140932 | 0.779778 | 0.933583 | 0        | 0        | 0        | 0.992197 | 0        | 0        |
| ENSMUSG00000086197 | 1_Gm13976       | 0.165366136 | 1.140932 | 0.779778 | 0.933583 | 0        | 0        | 0        | 0.992197 | 0        | 0        |
| ENSMUSG00000086202 | 1_1700019E08Rik | 0.165366136 | 1.140932 | 0.779778 | 0.933583 | 0        | 0        | 0        | 0.992197 | 0        | 0        |
| ENSMUSG00000086203 | 1_Gm13985       | 0.165366136 | 1.140932 | 0.779778 | 0.933583 | 0        | 0        | 0        | 0.992197 | 0        | 0        |
| ENSMUSG00000086214 | 1_Gm14062       | 0.165366136 | 1.140932 | 0.779778 | 0.933583 | 0        | 0        | 0        | 0.992197 | 0        | 0        |
| ENSMUSG00000086277 | 2_4930558K02Rik | 0.53764604  | 1.058708 | 0.765394 | 0.933583 | 0        | 0        | 1.150612 | 0        | 2.075264 | 0        |
| ENSMUSG00000086339 | 1_Gm11916       | 0.188556684 | 1.140932 | 0.779778 | 0.933583 | 0        | 0        | 0        | 0        | 1.13134  | 0        |
| ENSMUSG00000086349 | 1_Gm13497       | 0.165366136 | 1.140932 | 0.779778 | 0.933583 | 0        | 0        | 0        | 0.992197 | 0        | 0        |
| ENSMUSG00000086352 | 1_4930401G09Rik | 0.172938678 | 1.140932 | 0.779778 | 0.933583 | 0        | 0        | 0        | 0        | 1.037632 | 0        |
| ENSMUSG00000086494 | 1_2210417A02Rik | 0.172938678 | 1.140932 | 0.779778 | 0.933583 | 0        | 0        | 0        | 0        | 1.037632 | 0        |
| ENSMUSG00000086564 | 9_Cd101         | 8.248061061 | 0.267989 | 0.762431 | 0.933583 | 11.36985 | 5.152501 | 5.753061 | 4.960984 | 18.10144 | 4.150528 |
| ENSMUSG00000086628 | 7_Gm16157       | 0.172938678 | 1.140932 | 0.779778 | 0.933583 | 0        | 0        | 0        | 0        | 1.037632 | 0        |
| ENSMUSG00000086650 | 1_A430048G15Rik | 0.481429851 | 1.035616 | 0.732596 | 0.933583 | 0        | 0.85875  | 0        | 0.992197 | 0        | 1.037632 |
| ENSMUSG00000086665 | 1_Gm13067       | 0.172938678 | 1.140932 | 0.779778 | 0.933583 | 0        | 0        | 0        | 0        | 1.037632 | 0        |
| ENSMUSG00000086757 | 1_Gm2309        | 1.082872848 | 0.656228 | 0.753287 | 0.933583 | 1.624264 | 0.85875  | 0        | 2.97659  | 0        | 1.037632 |
| ENSMUSG00000086771 | 1_1700080G11Rik | 0.165366136 | 1.140932 | 0.779778 | 0.933583 | 0        | 0        | 0        | 0.992197 | 0        | 0        |
| ENSMUSG00000086804 | 7_Gm43154       | 0.172938678 | 1.140932 | 0.779778 | 0.933583 | 0        | 0        | 0        | 0        | 1.037632 | 0        |
| ENSMUSG00000086848 | 3_Lce6a         | 0.520238405 | 1.163167 | 0.746635 | 0.933583 | 0        | 0.85875  | 0        | 0        | 2.26268  | 0        |
| ENSMUSG00000086899 | 7_1600002D24Rik | 0.512468731 | 1.163332 | 0.747768 | 0.933583 | 0.812132 | 0        | 0        | 0        | 2.26268  | 0        |
| ENSMUSG00000087112 | 1_Gm7237        | 0.165366136 | 1.140932 | 0.779778 | 0.933583 | 0        | 0        | 0        | 0.992197 | 0        | 0        |
| ENSMUSG00000087196 | 1_Gm13373       | 3.733229177 | -0.38197 | 0.731678 | 0.933583 | 3.248529 | 2.576251 | 6.903673 | 2.97659  | 5.656701 | 1.037632 |
| ENSMUSG00000087210 | 1_Gm15391       | 0.172938678 | 1.140932 | 0.779778 | 0.933583 | 0        | 0        | 0        | 0        | 1.037632 | 0        |
| ENSMUSG00000087225 | 1_Gm14014       | 0.165366136 | 1.140932 | 0.779778 | 0.933583 | 0        | 0        | 0        | 0.992197 | 0        | 0        |
| ENSMUSG00000087230 | 8_Mroh3         | 15.05662482 | 0.249187 | 0.741069 | 0.933583 | 17.86691 | 12.88125 | 10.35551 | 3.968787 | 20.36412 | 24.90317 |
| ENSMUSG00000087319 | 1_Gm15907       | 0.172938678 | 1.140932 | 0.779778 | 0.933583 | 0        | 0        | 0        | 0        | 1.037632 | 0        |
| ENSMUSG00000087333 | 1_Gm13652       | 0.512468731 | 1.163332 | 0.747768 | 0.933583 | 0.812132 | 0        | 0        | 0        | 2.26268  | 0        |
| ENSMUSG00000087373 | 7_Gm15892       | 3.662919004 | 0.322682 | 0.77215  | 0.933583 | 4.872793 | 2.576251 | 2.301224 | 6.945378 | 1.13134  | 4.150528 |
| ENSMUSG00000087461 | 2_C230014C12Rik | 1.193239808 | 0.61994  | 0.734773 | 0.933583 | 0.812132 | 0.85875  | 1.150612 | 0        | 2.26268  | 2.075264 |
| ENSMUSG00000087620 | 7_5330434G04Rik | 0.774578808 | 0.805458 | 0.765333 | 0.933583 | 0.812132 | 0.85875  | 0        | 2.97659  | 0        | 0        |
| ENSMUSG00000087648 | 1_E130018N17Rik | 0.820684113 | 0.860424 | 0.743115 | 0.933583 | 0        | 1.7175   | 0        | 0        | 1.13134  | 2.075264 |
| ENSMUSG00000087674 | 7_4930447M23Rik | 1.771216467 | 0.44989  | 0.774934 | 0.933583 | 1.624264 | 1.7175   | 1.150612 | 1.984394 | 0        | 4.150528 |
| ENSMUSG00000087677 | 1_Gm15226       | 0.165366136 | 1.140932 | 0.779778 | 0.933583 | 0        | 0        | 0        | 0.992197 | 0        | 0        |
| ENSMUSG00000087678 | 1_Gm14120       | 0.165366136 | 1.140932 | 0.779778 | 0.933583 | 0        | 0        | 0        | 0.992197 | 0        | 0        |
| ENSMUSG00000087684 | 1_1200007C13Rik | 3.944157264 | -0.29765 | 0.76688  | 0.933583 | 2.436397 | 6.011252 | 4.602448 | 2.97659  | 4.52536  | 3.112896 |
| ENSMUSG00000089830 | 1_Gm15749       | 2.779596345 | -0.41654 | 0.764997 | 0.933583 | 4.060661 | 4.293751 | 1.150612 | 1.984394 | 0        | 5.18816  |
| ENSMUSG00000089879 | 1_4930448H16Rik | 0.172938678 | 1.140932 | 0.779778 | 0.933583 | 0        | 0        | 0        | 0        | 1.037632 | 0        |
| ENSMUSG00000089922 | 2_3110039M20Rik | 0.165366136 | 1.140932 | 0.779778 | 0.933583 | 0        | 0        | 0        | 0.992197 | 0        | 0        |
| ENSMUSG00000090115 | 7_Usd49         | 688.5418024 | 0.072187 | 0.740198 | 0.933583 | 701.6822 | 634.6164 | 677.7105 | 702.4753 | 682.1981 | 732.5682 |
| ENSMUSG00000090150 | 8_Acad11        | 820.7875016 | -0.07139 | 0.748336 | 0.933583 | 851.9267 | 833.8465 | 837.6456 | 876.1098 | 737.6337 | 787.5627 |
| ENSMUSG00000090284 | 2_Gm17613       | 0.172938678 | 1.140932 | 0.779778 | 0.933583 | 0        | 0        | 0        | 0        | 1.037632 | 0        |
| ENSMUSG00000090308 | 1_Gm5174        | 0.172938678 | 1.140932 | 0.779778 | 0.933583 | 0        | 0        | 0        | 0        | 1.037632 | 0        |
| ENSMUSG00000090326 | 1_Dthd1         | 0.172938678 | 1.140932 | 0.779778 | 0.933583 | 0        | 0        | 0        | 0        | 1.037632 | 0        |
| ENSMUSG00000090383 | 1_Vmn2r58       | 0.165366136 | 1.140932 | 0.779778 | 0.933583 | 0        | 0        | 0        | 0.992197 | 0        | 0        |
| ENSMUSG00000090440 | 1_Gm9732        | 0.165366136 | 1.140932 | 0.779778 | 0.933583 | 0        | 0        | 0        | 0.992197 | 0        | 0        |
| ENSMUSG00000090512 | 8_Gm3424        | 0.165366136 | 1.140932 | 0.779778 | 0.933583 | 0        | 0        | 0        | 0.992197 | 0        | 0        |
| ENSMUSG00000090673 | 1_Gm340         | 209.1680125 | 0.075634 | 0.764649 | 0.933583 | 197.3481 | 197.5126 | 216.3151 | 196.455  | 227.3994 | 219.978  |
| ENSMUSG00000090744 | 7_Gm6871        | 0.568882053 | 1.162165 | 0.739898 | 0.933583 | 0        | 0        | 1.150612 | 0        | 2.26268  | 0        |
| ENSMUSG00000091022 | 8_Gm3115        | 0.165366136 | 1.140932 | 0.779778 | 0.933583 | 0        | 0        | 0        | 0.992197 | 0        | 0        |
| ENSMUSG00000091034 | 8_Gm17660       | 0.172938678 | 1.140932 | 0.779778 | 0.933583 | 0        | 0        | 0        | 0        | 1.037632 | 0        |
| ENSMUSG00000091043 | 1_Glyatl3       | 0.172938678 | 1.140932 | 0.779778 | 0.933583 | 0        | 0        | 0        | 0        | 1.037632 | 0        |
| ENSMUSG00000091198 | 1_Gm5218        | 0.172938678 | 1.140932 | 0.779778 | 0.933583 | 0        | 0        | 0        | 0        | 1.037632 | 0        |
| ENSMUSG00000091285 | 1_Gm17430       | 0.172938678 | 1.140932 | 0.779778 | 0.933583 | 0        | 0        | 0        | 0        | 1.037632 | 0        |
| ENSMUSG00000091311 | 2_Spata31dlb    | 0.172938678 | 1.140932 | 0.779778 | 0.933583 | 0        | 0        | 0        | 0        | 1.037632 | 0        |
| ENSMUSG00000091318 | 2_Gm5415        | 1.564696964 | 0.784222 | 0.77652  | 0.933583 | 0        | 3.435001 | 0        | 5.953181 | 0        | 0        |
| ENSMUSG00000091512 | 5_Lamtor3       | 799.6397963 | -0.08548 | 0.75437  | 0.933583 | 751.2223 | 758.2764 | 960.7611 | 642.9435 | 871.1319 | 813.5035 |
| ENSMUSG00000091635 | 1_Vmn2r13       | 0.165366136 | 1.140932 | 0.779778 | 0.933583 | 0        | 0        | 0        | 0.992197 | 0        | 0        |
| ENSMUSG00000091685 | 6_Gm17359       | 0.165366136 | 1.140932 | 0.779778 | 0.933583 | 0        | 0        | 0        | 0.992197 | 0        | 0        |
| ENSMUSG00000091721 | 3_Gm5549        | 0.188556684 | 1.140932 | 0.779778 | 0.933583 | 0        | 0        | 0        | 0        | 1.13134  | 0        |
| ENSMUSG00000091827 | 2_Speer4f2      | 0.165366136 | 1.140932 | 0.779778 | 0.933583 | 0        | 0        | 0        | 0.992197 | 0        | 0        |
| ENSMUSG00000091831 | 4_Gm4707        | 9.414440421 | 0.337235 | 0.76557  | 0.933583 | 6.497057 | 0.85875  | 5.753061 | 6.945378 | 1.13134  | 8.301057 |
| ENSMUSG00000091882 | 8_Gm6337        | 0.172938678 | 1.140932 | 0.779778 | 0.933583 | 0        | 0        | 0        | 0        | 1.037632 | 0        |
| ENSMUSG00000091922 | 1_Gm17409       | 0.165366136 | 1.140932 | 0.779778 | 0.933583 | 0        | 0        | 0        | 0.992197 | 0        | 0        |
| ENSMUSG00000091962 | 2_Vmn2r78       | 0.165366136 | 1.140932 | 0.779778 | 0.933583 | 0        | 0        | 0        | 0.992197 | 0        | 0        |
| ENSMUSG00000091972 | 1_Tmem207       | 0.172938678 | 1.140932 | 0.779778 | 0.933583 | 0        | 0        | 0        | 0        | 1.037632 | 0        |
| ENSMUSG00000092148 | 1_Gm8005        | 0.172938678 | 1.140932 | 0.779778 | 0.933583 | 0        | 0        | 0        | 0        | 1.037632 | 0        |
| ENSMUSG00000092242 | 1_Gm20515       | 0.165366136 | 1.140932 | 0.779778 | 0.933583 | 0        | 0        | 0        | 0.992197 | 0        | 0        |
| ENSMUSG00000092473 | 3_Vmn1r180      | 0.165366136 | 1.140932 | 0.779778 | 0.933583 | 0        | 0        | 0        | 0.992197 | 0        | 0        |
| ENSMUSG00000092558 | 3_Med20         | 1221.726372 | -0.07681 | 0.73727  | 0.933583 | 1282.357 | 1209.979 | 1270.276 | 1039.822 | 1255.788 | 1272.137 |
| ENSMUSG00000093675 | 7_Gm20618       | 0.165366136 | 1.140932 | 0.779778 | 0.933583 | 0        | 0        | 0        | 0.992197 | 0        | 0        |
| ENSMUSG00000093877 | 1_Olfr1348      | 0.188556684 | 1.140932 | 0.779778 | 0.933583 | 0        | 0        | 0        | 0        | 1.13134  | 0        |
| ENSMUSG00000093901 | 1_Olfr893       | 1.105590474 | 0.704518 | 0.774395 | 0.933583 | 1.624264 | 0.85875  | 0        | 0        | 4.150528 | 0        |
| ENSMUSG00000094018 | 1_S100a2        | 29.25298171 | 0.141465 | 0.74607  | 0.933583 | 31.67315 | 24.04501 | 27.61469 | 25.79712 | 37.33422 | 29.0537  |
| ENSMUSG00000094107 | 1_Vmn2r47       | 0.918456162 | -0.6821  | 0.754098 | 0.933583 | 1.624264 | 1.1715   | 0        | 0        | 1.13134  | 1.037632 |
| ENSMUSG00000094114 | 1_Gm21967       | 118.4924919 | 0.154221 | 0.742629 | 0.933583 | 142.1231 | 126.2363 | 67.88611 | 175.6188 | 73.53711 | 125.5535 |
| ENSMUSG00000094115 | 1_Spin2-ps6     | 0.172938678 | 1.140932 | 0.779778 | 0.933583 | 0        | 0        | 0        | 0        | 1.037632 | 0        |
| ENSMUSG00000094293 | 1_Gm3893        | 2.45374235  | -0.72043 | 0.747349 | 0.933583 | 0        | 0        | 9.204897 | 0.992197 | 4.52536  | 0        |
| ENSMUSG00000094296 | 1_Gm21798       |             |          |          |          |          |          |          |          |          |          |

|                     |                  |             |           |          |          |          |          |          |          |          |          |
|---------------------|------------------|-------------|-----------|----------|----------|----------|----------|----------|----------|----------|----------|
| ENSMUSG00000096283  | 1_Gm6176         | 0.188556684 | 1.140932  | 0.779778 | 0.933583 | 0        | 0        | 0        | 0        | 1.13134  | 0        |
| ENSMUSG00000096368  | 2_Olfr1328       | 0.172938678 | 1.140932  | 0.779778 | 0.933583 | 0        | 0        | 0        | 0        | 0        | 1.037632 |
| ENSMUSG00000096373  | 1_Vmn2r31        | 0.172938678 | 1.140932  | 0.779778 | 0.933583 | 0        | 0        | 0        | 0        | 0        | 1.037632 |
| ENSMUSG00000096385  | 7_Gm11168        | 0.172938678 | 1.140932  | 0.779778 | 0.933583 | 0        | 0        | 0        | 0        | 0        | 1.037632 |
| ENSMUSG00000096445  | 1_Dcnp1          | 0.188556684 | 1.140932  | 0.779778 | 0.933583 | 0        | 0        | 0        | 0        | 1.13134  | 0        |
| ENSMUSG00000096612  | 2_Gm5655         | 0.188556684 | 1.140932  | 0.779778 | 0.933583 | 0        | 0        | 0        | 0        | 1.13134  | 0        |
| ENSMUSG00000096682  | 1_Ilna5          | 0.481232718 | 1.058458  | 0.773356 | 0.933583 | 0.812132 | 0        | 0        | 0        | 0        | 2.075264 |
| ENSMUSG00000096793  | 7_Gm3002         | 0.520238405 | 1.163167  | 0.746635 | 0.933583 | 0        | 0.85875  | 0        | 0        | 2.26268  | 0        |
| ENSMUSG00000096796  | 1_170021P04Rik   | 0.165366136 | 1.140932  | 0.779778 | 0.933583 | 0        | 0        | 0        | 0.992197 | 0        | 0        |
| ENSMUSG00000096904  | 7_Gm3591         | 3.835357183 | -0.6308   | 0.756539 | 0.933583 | 0        | 2.576251 | 11.50612 | 8.929771 | 0        | 0        |
| ENSMUSG00000096921  | 1_Gm26822        | 0.165366136 | 1.140932  | 0.779778 | 0.933583 | 0        | 0        | 0        | 0        | 0.992197 | 0        |
| ENSMUSG00000096926  | 1_Gm26823        | 19.10741976 | 0.174496  | 0.740557 | 0.933583 | 15.43051 | 14.59875 | 24.16285 | 24.80492 | 16.9701  | 18.67738 |
| ENSMUSG00000096943  | 1_Gm26721        | 0.895462746 | -0.77202  | 0.762707 | 0.933583 | 0.812132 | 2.576251 | 0        | 1.984394 | 0        | 0        |
| ENSMUSG00000096958  | 1_Gm26573        | 0.172938678 | 1.140932  | 0.779778 | 0.933583 | 0        | 0        | 0        | 0        | 0        | 1.037632 |
| ENSMUSG00000097035  | 2_Gm26692        | 1.098490855 | 0.680163  | 0.744348 | 0.933583 | 1.624264 | 0.85875  | 0        | 2.97659  | 1.13134  | 0        |
| ENSMUSG00000097038  | 1_Gm26821        | 0.165366136 | 1.140932  | 0.779778 | 0.933583 | 0        | 0        | 0        | 0.992197 | 0        | 0        |
| ENSMUSG00000097088  | 1_Gm26615        | 4.989052533 | -0.25809  | 0.767172 | 0.933583 | 6.497057 | 5.152501 | 4.602448 | 3.968787 | 4.52536  | 5.18816  |
| ENSMUSG00000097100  | 1_9230104M06Rik  | 2.151541836 | 0.385153  | 0.769972 | 0.933583 | 1.624264 | 1.7175   | 2.301224 | 1.984394 | 1.13134  | 4.150528 |
| ENSMUSG00000097104  | 1_Gm26579        | 0.188556684 | 1.140932  | 0.779778 | 0.933583 | 0        | 0        | 0        | 0        | 1.13134  | 0        |
| ENSMUSG00000097131  | 1_D230017M19Rik  | 40.89617399 | 0.164291  | 0.762886 | 0.933583 | 43.85514 | 49.80751 | 21.86163 | 66.47719 | 26.02082 | 37.35475 |
| ENSMUSG00000097173  | 1_Gm26829        | 0.188556684 | 1.140932  | 0.779778 | 0.933583 | 0        | 0        | 0        | 0        | 1.13134  | 0        |
| ENSMUSG00000097183  | 2_Gm17501        | 25.38820055 | -0.17291  | 0.742934 | 0.933583 | 25.1761  | 29.19751 | 26.46408 | 24.80492 | 12.44474 | 34.24186 |
| ENSMUSG00000097223  | 1_Gm2449         | 0.172938678 | 1.140932  | 0.779778 | 0.933583 | 0        | 0        | 0        | 0        | 0        | 1.037632 |
| ENSMUSG00000097237  | 1_Gm26519        | 0.165366136 | 1.140932  | 0.779778 | 0.933583 | 0        | 0        | 0        | 0.992197 | 0        | 0        |
| ENSMUSG00000097303  | 1_3110083C13Rik  | 3.175815511 | -0.35142  | 0.746819 | 0.933583 | 4.872793 | 3.435001 | 2.301224 | 2.97659  | 3.39402  | 2.075264 |
| ENSMUSG00000097307  | 1_Gm26834        | 1.429015809 | -0.77097  | 0.744715 | 0.933583 | 0        | 0.85875  | 4.602448 | 0        | 0        | 3.112896 |
| ENSMUSG00000097340  | 1_Gm26617        | 128.8668943 | 0.14205   | 0.749492 | 0.933583 | 114.5106 | 97.03878 | 156.4832 | 208.3613 | 108.6086 | 88.19873 |
| ENSMUSG00000097344  | 1_Gm26732        | 0.53764604  | 0.058708  | 0.765394 | 0.933583 | 0        | 0        | 1.150612 | 0        | 0        | 2.075264 |
| ENSMUSG00000097358  | 1_Gm26773        | 58.2949037  | 0.117495  | 0.778201 | 0.933583 | 43.85514 | 60.97127 | 63.28367 | 84.33673 | 47.51628 | 49.80634 |
| ENSMUSG00000097369  | 1_Gm26545        | 0.172938678 | 1.140932  | 0.779778 | 0.933583 | 0        | 0        | 0        | 0        | 0        | 1.037632 |
| ENSMUSG00000097467  | 1_Gm26737        | 7.056530266 | -0.26512  | 0.736617 | 0.933583 | 8.121322 | 6.870002 | 8.054285 | 4.960984 | 10.18206 | 4.150528 |
| ENSMUSG00000097500  | 1_Gm26537        | 0.481232718 | 1.058458  | 0.773356 | 0.933583 | 0.812132 | 0        | 0        | 0        | 0        | 2.075264 |
| ENSMUSG00000097524  | 1_Gm26846        | 0.188556684 | 1.140932  | 0.779778 | 0.933583 | 0        | 0        | 0        | 0        | 1.13134  | 0        |
| ENSMUSG00000097577  | 1_6230400D17Rik  | 42.68892345 | 0.139964  | 0.73394  | 0.933583 | 43.04301 | 38.64376 | 40.27142 | 60.52401 | 37.33422 | 36.31712 |
| ENSMUSG00000097585  | 1_Gm26529        | 2.483499347 | 0.387655  | 0.745767 | 0.933583 | 2.436397 | 1.7175   | 2.301224 | 2.97659  | 3.39402  | 2.075264 |
| ENSMUSG00000097604  | 1_Gm17322        | 0.91088362  | -0.70141  | 0.747625 | 0.933583 | 1.624264 | 1.7175   | 0        | 0.992197 | 1.13134  | 0        |
| ENSMUSG00000097621  | 1_Gm26562        | 2.08501763  | 0.520796  | 0.765355 | 0.933583 | 1.624264 | 3.435001 | 0        | 0        | 2.26268  | 5.18816  |
| ENSMUSG00000097625  | 1_Gm26561        | 10.52115914 | 0.225614  | 0.751314 | 0.933583 | 14.61838 | 8.587502 | 5.753061 | 13.89076 | 6.788041 | 13.48922 |
| ENSMUSG00000097643  | 1_A130051J06Rik  | 7.598425619 | -0.23467  | 0.758146 | 0.933583 | 7.30919  | 6.011252 | 11.50612 | 7.937575 | 4.52536  | 8.301057 |
| ENSMUSG00000097645  | 1_Gm26863        | 5.297785652 | -0.35437  | 0.763706 | 0.933583 | 1.624264 | 2.576251 | 13.80735 | 5.953181 | 6.788041 | 1.037632 |
| ENSMUSG00000097661  | 1_Gm26763        | 0.188556684 | 1.140932  | 0.779778 | 0.933583 | 0        | 0        | 0        | 0        | 1.13134  | 0        |
| ENSMUSG00000097668  | 2_Gm26761        | 3.969344758 | 0.350732  | 0.739547 | 0.933583 | 4.060661 | 5.152501 | 1.150612 | 6.945378 | 3.39402  | 3.112896 |
| ENSMUSG00000097676  | 1_Gm26612        | 0.172938678 | 1.140932  | 0.779778 | 0.933583 | 0        | 0        | 0        | 0        | 0        | 1.037632 |
| ENSMUSG00000097732  | 2_D930048G16Rik  | 1.779459064 | 0.439854  | 0.767897 | 0.933583 | 0.812132 | 2.576251 | 1.150612 | 3.968787 | 1.13134  | 1.037632 |
| ENSMUSG00000097737  | 1_Gm26530        | 46.25136689 | 0.119439  | 0.74883  | 0.933583 | 42.23087 | 48.09001 | 42.57265 | 48.61764 | 56.56701 | 39.43002 |
| ENSMUSG00000097740  | 1_E030044B06Rik  | 0.172938678 | 1.140932  | 0.779778 | 0.933583 | 0        | 0        | 0        | 0        | 0        | 1.037632 |
| ENSMUSG00000097766  | 1_5730420D15Rik  | 1.185470134 | 0.637957  | 0.75336  | 0.933583 | 1.624264 | 0        | 1.150612 | 0        | 2.26268  | 0.992197 |
| ENSMUSG00000097779  | 1_4833407H14Rik  | 39.26891762 | -0.13302  | 0.73811  | 0.933583 | 45.4794  | 35.20876 | 42.57265 | 42.66446 | 39.5969  | 30.09133 |
| ENSMUSG00000097817  | 1_Gm26810        | 0.165366136 | 1.140932  | 0.779778 | 0.933583 | 0        | 0        | 0        | 0.992197 | 0        | 0        |
| ENSMUSG00000097818  | 1_Gm26681        | 0.172938678 | 1.140932  | 0.779778 | 0.933583 | 0        | 0        | 0        | 0        | 0        | 1.037632 |
| ENSMUSG00000097854  | 1_Gm26602        | 184.8773185 | -0.58567  | 0.740742 | 0.933583 | 203.033  | 216.4051 | 246.231  | 0        | 244.3695 | 199.2254 |
| ENSMUSG00000097886  | 2_Gsg12          | 0.594622773 | -1.13438  | 0.742206 | 0.933583 | 2.436397 | 0        | 0        | 0        | 1.13134  | 0        |
| ENSMUSG00000097914  | 1_Gm26838        | 0.481429851 | 0.103561  | 0.732596 | 0.933583 | 0        | 0.85875  | 0        | 0.992197 | 0        | 1.037632 |
| ENSMUSG00000097927  | 1_Gm6999         | 0.165366136 | 1.140932  | 0.779778 | 0.933583 | 0        | 0        | 0        | 0.992197 | 0        | 0        |
| ENSMUSG00000097929  | 7_Tunar          | 0.512468731 | 1.163332  | 0.747768 | 0.933583 | 0.812132 | 0        | 0        | 0        | 2.26268  | 0        |
| ENSMUSG00000098001  | 1_Gm27048        | 0.918456162 | -0.6821   | 0.754098 | 0.933583 | 1.624264 | 1.7175   | 0        | 0        | 1.13134  | 1.037632 |
| ENSMUSG00000098020  | 1_B830012L14Rik  | 0.172938678 | 1.140932  | 0.779778 | 0.933583 | 0        | 0        | 0        | 0        | 0        | 1.037632 |
| ENSMUSG00000098340  | 1_Gm27253        | 0.188556684 | 1.140932  | 0.779778 | 0.933583 | 0        | 0        | 0        | 0        | 0        | 1.13134  |
| ENSMUSG00000098424  | 1_Gm27202        | 4.72678514  | -0.29316  | 0.777705 | 0.933583 | 3.248529 | 7.728752 | 4.602448 | 0.992197 | 4.52536  | 7.263424 |
| ENSMUSG00000098434  | 1_20101110E17Rik | 1.098490855 | 0.680163  | 0.744348 | 0.933583 | 1.624264 | 0.85875  | 0        | 2.97659  | 1.13134  | 0        |
| ENSMUSG00000098505  | 2_Gm14496        | 0.188556684 | 1.140932  | 0.779778 | 0.933583 | 0        | 0        | 0        | 0        | 0        | 1.13134  |
| ENSMUSG00000098509  | 2_Rgs21          | 0.165366136 | 1.140932  | 0.779778 | 0.933583 | 0        | 0        | 0        | 0.992197 | 0        | 0        |
| ENSMUSG00000098549  | 1_Gm5269         | 1.710430774 | 0.559887  | 0.77505  | 0.933583 | 0.812132 | 0        | 3.451836 | 4.960984 | 0        | 1.037632 |
| ENSMUSG00000098659  | 7_1110015O18Rik  | 0.172938678 | 1.140932  | 0.779778 | 0.933583 | 0        | 0        | 0        | 0        | 0        | 1.037632 |
| ENSMUSG00000098684  | 1_Gm27246        | 0.188556684 | 1.140932  | 0.779778 | 0.933583 | 0        | 0        | 0        | 0        | 1.13134  | 0        |
| ENSMUSG00000099061  | 1_Gm28050        | 1.406982027 | 0.575378  | 0.766504 | 0.933583 | 1.624264 | 1.7175   | 0        | 3.968787 | 1.13134  | 0        |
| ENSMUSG00000099115  | 1_Gm17190        | 0.165366136 | 1.140932  | 0.779778 | 0.933583 | 0        | 0        | 0        | 0.992197 | 0        | 0        |
| ENSMUSG00000099375  | 1_Gm28187        | 0.473660176 | 0.1035504 | 0.733766 | 0.933583 | 0.812132 | 0        | 0        | 0.992197 | 0        | 1.037632 |
| ENSMUSG00000099378  | 1_1700067G17Rik  | 0.165366136 | 1.140932  | 0.779778 | 0.933583 | 0        | 0        | 0        | 0.992197 | 0        | 0        |
| ENSMUSG00000099391  | 2_1700003C15Rik  | 0.165366136 | 1.140932  | 0.779778 | 0.933583 | 0        | 0        | 0        | 0.992197 | 0        | 0        |
| ENSMUSG00000099517  | 1_Hist1h3g       | 0.568882053 | 1.162165  | 0.739898 | 0.933583 | 0        | 0        | 1.150612 | 0        | 2.26268  | 0        |
| ENSMUSG00000099622  | 1_Gm29188        | 0.172938678 | 1.140932  | 0.779778 | 0.933583 | 0        | 0        | 0        | 0        | 0        | 1.037632 |
| ENSMUSG000000100108 | 1_Gm28100        | 0.188556684 | 1.140932  | 0.779778 | 0.933583 | 0        | 0        | 0        | 0        | 1.13134  | 0        |
| ENSMUSG000000100291 | 6_2310069B03Rik  | 0.910804962 | -0.76518  | 0.770018 | 0.933583 | 0        | 3.435001 | 0        | 0.992197 | 0        | 1.037632 |
| ENSMUSG000000100371 | 1_Gm29669        | 0.172938678 | 1.140932  | 0.779778 | 0.933583 | 0        | 0        | 0        | 0        | 0        | 1.037632 |
| ENSMUSG000000100387 | 1_Gm28514        | 0.165366136 | 1.140932  | 0.779778 | 0.933583 | 0        | 0        | 0        | 0.992197 | 0        | 0        |
| ENSMUSG000000100475 | 1_Gm29543        | 0.172938678 | 1.140932  | 0.779778 | 0.933583 | 0        | 0        | 0        | 0        | 0        | 1.037632 |
| ENSMUSG000000100536 | 1_Gm28873        | 10.04629251 | 0.212156  | 0.742904 | 0.933583 | 9.745586 | 11.16375 | 6.903673 | 11.90636 | 10.18206 | 10.37632 |
| ENSMUSG000000100553 | 6_Gm17751        | 0.188556684 | 1.140932  | 0.779778 | 0.933583 | 0        | 0        | 0        | 0        | 1.13134  | 0        |
| ENSMUSG000000100617 | 1_Gm7145         | 0.172938678 | 1.140932  | 0.779778 | 0.933583 | 0        | 0        | 0        | 0        | 0        | 1.037632 |
| ENSMUSG000000100671 | 1_Gm28322        | 1.154707044 | 0.59336   | 0.746014 | 0.933583 | 1.624264 | 0        | 1.150612 | 1.984394 | 1.13134  | 1.037632 |
| ENSMUSG000000100727 | 6_1700003P14Rik  | 0.165366136 | 1.140932  | 0.779778 | 0.933583 | 0        | 0        | 0        | 0.992197 | 0        | 0        |
| ENSMUSG000000100729 | 1_Gm29010        | 0.172938678 | 1.140932  | 0.779778 | 0.933583 | 0        | 0        | 0        | 0        | 0        | 1.037632 |
| ENSMUSG000000100783 | 1_2310047D07Rik  | 3.160118846 | -0.3784   | 0.738254 | 0.933583 | 3.24852  |          |          |          |          |          |

|                      |                 |             |          |          |          |          |          |          |          |          |          |
|----------------------|-----------------|-------------|----------|----------|----------|----------|----------|----------|----------|----------|----------|
| ENSMUSG00000104003   | 1_Gm42414       | 14.7052216  | 0.204691 | 0.767675 | 0.933583 | 18.67904 | 8.587502 | 13.80735 | 24.80492 | 6.788041 | 15.56448 |
| ENSMUSG00000104109   | 1_Gm30292       | 0.172938678 | 1.140932 | 0.779778 | 0.933583 | 0        | 0        | 0        | 0        | 0        | 1.037632 |
| ENSMUSG00000104111   | 1_Gm37294       | 0.172938678 | 1.140932 | 0.779778 | 0.933583 | 0        | 0        | 0        | 0        | 0        | 1.037632 |
| ENSMUSG00000104158   | 2_Gm38100       | 0.188556684 | 1.140932 | 0.779778 | 0.933583 | 0        | 0        | 0        | 0        | 1.13134  | 0        |
| ENSMUSG00000104346   | 1_Pcdhga3       | 39.74123073 | -0.12978 | 0.759998 | 0.933583 | 52.78859 | 32.63251 | 39.12081 | 37.70348 | 30.54618 | 45.65581 |
| ENSMUSG00000104557   | 1_Gm36520       | 0.165366136 | 1.140932 | 0.779778 | 0.933583 | 0        | 0        | 0        | 0.992197 | 0        | 0        |
| ENSMUSG00000104619   | 1_Gm42678       | 0.165366136 | 1.140932 | 0.779778 | 0.933583 | 0        | 0        | 0        | 0.992197 | 0        | 0        |
| ENSMUSG00000104736   | 1_Gm43146       | 0.172938678 | 1.140932 | 0.779778 | 0.933583 | 0        | 0        | 0        | 0        | 0        | 1.037632 |
| ENSMUSG00000105000   | 1_Gm43616       | 0.165366136 | 1.140932 | 0.779778 | 0.933583 | 0        | 0        | 0        | 0.992197 | 0        | 0        |
| ENSMUSG00000105208   | 1_Gm43525       | 0.165366136 | 1.140932 | 0.779778 | 0.933583 | 0        | 0        | 0        | 0.992197 | 0        | 0        |
| ENSMUSG00000105218   | 4_Gm43248       | 0.165366136 | 1.140932 | 0.779778 | 0.933583 | 0        | 0        | 0        | 0.992197 | 0        | 0        |
| ENSMUSG00000105276   | 1_Gm42691       | 0.165366136 | 1.140932 | 0.779778 | 0.933583 | 0        | 0        | 0        | 0.992197 | 0        | 0        |
| ENSMUSG00000105279   | 1_Gm6260        | 0.165366136 | 1.140932 | 0.779778 | 0.933583 | 0        | 0        | 0        | 0.992197 | 0        | 0        |
| ENSMUSG00000105331   | 1_Gm29865       | 0.165366136 | 1.140932 | 0.779778 | 0.933583 | 0        | 0        | 0        | 0.992197 | 0        | 0        |
| ENSMUSG00000105352   | 4_C030018K13Rik | 0.188556684 | 1.140932 | 0.779778 | 0.933583 | 0        | 0        | 0        | 0        | 1.13134  | 0        |
| ENSMUSG00000105471   | 1_A430073D23Rik | 0.481429851 | 1.035616 | 0.732596 | 0.933583 | 0        | 0.85875  | 0        | 0.992197 | 0        | 1.037632 |
| ENSMUSG00000105516   | 4_Gm43536       | 1.794604148 | 0.454231 | 0.75249  | 0.933583 | 0.812132 | 2.576251 | 1.150612 | 1.984394 | 1.13134  | 3.112896 |
| ENSMUSG00000105575   | 1_Gm43475       | 0.188556684 | 1.140932 | 0.779778 | 0.933583 | 0        | 0        | 0        | 0        | 1.13134  | 0        |
| ENSMUSG00000105602   | 1_Gm10636       | 1.624877471 | -0.45404 | 0.77742  | 0.933583 | 0.812132 | 2.576251 | 2.301224 | 1.984394 | 0        | 2.075264 |
| ENSMUSG00000105650   | 1_Gm42889       | 0.568882053 | 1.162165 | 0.739898 | 0.933583 | 0        | 0        | 1.150612 | 0        | 2.26268  | 0        |
| ENSMUSG00000105961   | 1_Gm42754       | 0.165366136 | 1.140932 | 0.779778 | 0.933583 | 0        | 0        | 0        | 0.992197 | 0        | 0        |
| ENSMUSG00000105993   | 1_Gm43337       | 0.165366136 | 1.140932 | 0.779778 | 0.933583 | 0        | 0        | 0        | 0.992197 | 0        | 0        |
| ENSMUSG00000106000   | 1_Gm16508       | 0.188556684 | 1.140932 | 0.779778 | 0.933583 | 0        | 0        | 0        | 0        | 1.13134  | 0        |
| ENSMUSG00000106052   | 1_Gm43614       | 0.165366136 | 1.140932 | 0.779778 | 0.933583 | 0        | 0        | 0        | 0.992197 | 0        | 0        |
| ENSMUSG00000106367   | 1_Gm42709       | 0.165366136 | 1.140932 | 0.779778 | 0.933583 | 0        | 0        | 0        | 0.992197 | 0        | 0        |
| ENSMUSG00000106379   | 1_Lhfp13        | 6.423760397 | 0.304874 | 0.768116 | 0.933583 | 10.55772 | 4.293751 | 2.301224 | 14.88295 | 3.39402  | 3.112896 |
| ENSMUSG00000106466   | 1_Gm42562       | 0.172938678 | 1.140932 | 0.779778 | 0.933583 | 0        | 0        | 0        | 0        | 0        | 1.037632 |
| ENSMUSG00000106505   | 1_Gm32693       | 0.188556684 | 1.140932 | 0.779778 | 0.933583 | 0        | 0        | 0        | 0        | 1.13134  | 0        |
| ENSMUSG00000106515   | 4_Gm30382       | 0.165366136 | 1.140932 | 0.779778 | 0.933583 | 0        | 0        | 0        | 0.992197 | 0        | 0        |
| ENSMUSG00000106647   | 1_Gm42523       | 1.632725803 | -0.42173 | 0.772006 | 0.933583 | 1.624264 | 1.7175   | 2.301224 | 1.984394 | 1.13134  | 1.037632 |
| ENSMUSG00000106683   | 1_Gm43263       | 9.316207729 | 0.236051 | 0.737296 | 0.933583 | 10.55772 | 10.305   | 4.602448 | 8.929771 | 9.050721 | 12.45158 |
| ENSMUSG00000106692   | 1_Gm43299       | 0.172938678 | 1.140932 | 0.779778 | 0.933583 | 0        | 0        | 0        | 0        | 0        | 1.037632 |
| ENSMUSG00000106740   | 1_Gm21221       | 0.188556684 | 1.140932 | 0.779778 | 0.933583 | 0        | 0        | 0        | 0        | 1.13134  | 0        |
| ENSMUSG00000106783   | 1_Gm42757       | 0.165366136 | 1.140932 | 0.779778 | 0.933583 | 0        | 0        | 0        | 0.992197 | 0        | 0        |
| ENSMUSG00000106824   | 1_Gm7697        | 0.188556684 | 1.140932 | 0.779778 | 0.933583 | 0        | 0        | 0        | 0        | 1.13134  | 0        |
| ENSMUSG00000106927   | 1_Gm43598       | 3.750292548 | 0.298382 | 0.768335 | 0.933583 | 3.248529 | 3.435001 | 3.451836 | 5.953181 | 2.26268  | 4.150528 |
| ENSMUSG00000107022   | 1_Gm36669       | 0.188556684 | 1.140932 | 0.779778 | 0.933583 | 0        | 0        | 0        | 0        | 1.13134  | 0        |
| ENSMUSG00000107061   | 1_Gm19590       | 0.188556684 | 1.140932 | 0.779778 | 0.933583 | 0        | 0        | 0        | 0        | 1.13134  | 0        |
| ENSMUSG00000107071   | 1_Gm43816       | 8.970850421 | -1.03432 | 0.754501 | 0.933583 | 0        | 12.0225  | 24.16285 | 0        | 0        | 17.63975 |
| ENSMUSG00000107126   | 1_Gm42505       | 0.188556684 | 1.140932 | 0.779778 | 0.933583 | 0        | 0        | 0        | 0        | 1.13134  | 0        |
| ENSMUSG00000107153   | 1_Gm38404       | 0.188556684 | 1.140932 | 0.779778 | 0.933583 | 0        | 0        | 0        | 0        | 1.13134  | 0        |
| ENSMUSG00000107193   | 1_Gm43700       | 0.172938678 | 1.140932 | 0.779778 | 0.933583 | 0        | 0        | 0        | 0        | 0        | 1.037632 |
| ENSMUSG00000107241   | 1_Gm43129       | 1.175832173 | 0.786461 | 0.747498 | 0.933583 | 0.812132 | 1.7175   | 0        | 0        | 4.52536  | 0        |
| ENSMUSG00000107266   | 1_Gm43698       | 0.172938678 | 1.140932 | 0.779778 | 0.933583 | 0        | 0        | 0        | 0        | 0        | 1.037632 |
| ENSMUSG00000107387   | 1_Gm42904       | 0.172938678 | 1.140932 | 0.779778 | 0.933583 | 0        | 0        | 0        | 0        | 0        | 1.037632 |
| ENSMUSG00000107419   | 1_RP23-206K5    | 0.165366136 | 1.140932 | 0.779778 | 0.933583 | 0        | 0        | 0        | 0.992197 | 0        | 0        |
| ENSMUSG00000107622   | 1_RP24-226D9    | 0.903113946 | -0.68424 | 0.758677 | 0.933583 | 2.436397 | 0.85875  | 0        | 0.992197 | 1.13134  | 0        |
| ENSMUSG00000107623   | 1_RP23-240C17   | 0.165366136 | 1.140932 | 0.779778 | 0.933583 | 0        | 0        | 0        | 0.992197 | 0        | 0        |
| ENSMUSG00000107929   | 1_RP23-102M16   | 0.165366136 | 1.140932 | 0.779778 | 0.933583 | 0        | 0        | 0        | 0.992197 | 0        | 0        |
| ENSMUSG00000108022   | 1_RP23-78P7     | 4.307619627 | -0.35473 | 0.739546 | 0.933583 | 8.933454 | 4.293751 | 1.150612 | 4.960984 | 3.39402  | 3.112896 |
| ENSMUSG00000108025   | 1_RP24-43A0Q21  | 0.165366136 | 1.140932 | 0.779778 | 0.933583 | 0        | 0        | 0        | 0.992197 | 0        | 0        |
| ENSMUSG00000108379   | 1_RP23-370I17   | 0.165366136 | 1.140932 | 0.779778 | 0.933583 | 0        | 0        | 0        | 0.992197 | 0        | 0        |
| ENSMUSG00000108383   | 1_RP24-136L4    | 0.188556684 | 1.140932 | 0.779778 | 0.933583 | 0        | 0        | 0        | 0        | 1.13134  | 0        |
| ENSMUSG00000108415   | 1_RP24-191C15   | 0.172938678 | 1.140932 | 0.779778 | 0.933583 | 0        | 0        | 0        | 0        | 0        | 1.037632 |
| ENSMUSG00000108626   | 1_RP23-178C20   | 0.165366136 | 1.140932 | 0.779778 | 0.933583 | 0        | 0        | 0        | 0.992197 | 0        | 0        |
| ENSMUSG00000108815   | 1_RP23-325D10   | 91.89899449 | -0.18541 | 0.761072 | 0.933583 | 115.3228 | 99.61503 | 78.24162 | 22.82053 | 98.42659 | 136.9674 |
| ENSMUSG0000027316    | 15_Gfr4a        | 4.343690082 | 0.287344 | 0.779933 | 0.933623 | 4.872793 | 3.435001 | 3.451836 | 6.945378 | 1.13134  | 6.225792 |
| ENSMUSG00000301046   | 11_Mrp152       | 622.9295244 | -0.07629 | 0.779997 | 0.933644 | 636.7116 | 572.7864 | 708.7771 | 489.153  | 687.8548 | 642.2942 |
| ENSMUSG00000301709   | 3_Sdc4          | 8397.921965 | -0.07839 | 0.780369 | 0.93387  | 7928.846 | 8135.8   | 9813.571 | 6475.076 | 9861.892 | 8172.39  |
| ENSMUSG00000302438   | 10_Myo7b        | 3.365904815 | -0.38767 | 0.780475 | 0.93387  | 8.812132 | 6.011252 | 4.602448 | 0        | 5.656701 | 3.112896 |
| ENSMUSG00000302568   | 14_Caly         | 1.771019335 | 0.468833 | 0.780514 | 0.93387  | 2.436397 | 0.85875  | 1.150612 | 0.992197 | 0        | 5.18816  |
| ENSMUSG00000302661   | 9_Oas3          | 6470.167317 | 0.100458 | 0.780236 | 0.93387  | 4863.047 | 5394.669 | 8477.71  | 5150.494 | 8624.206 | 6310.878 |
| ENSMUSG000003041670  | 15_Rims1        | 13.27451262 | 0.186291 | 0.780447 | 0.93387  | 12.18198 | 10.305   | 14.95796 | 23.81272 | 9.050721 | 9.338689 |
| ENSMUSG000003043602  | 5_Zfp3          | 103.9522457 | -0.08783 | 0.780377 | 0.93387  | 110.45   | 114.2138 | 96.65142 | 121.048  | 84.85051 | 96.49978 |
| ENSMUSG000003046516  | 10_Cox17        | 499.5583857 | -0.06729 | 0.78045  | 0.93387  | 469.4124 | 506.6626 | 558.0469 | 534.7941 | 448.0107 | 480.4236 |
| ENSMUSG000003073119  | 3_Speer4a       | 1.113360148 | 0.684031 | 0.780682 | 0.934012 | 0.812132 | 1.7175   | 0        | 0        | 0        | 4.150528 |
| ENSMUSG000003074665  | 10_Bp1fb4       | 1.14666158  | 0.579134 | 0.780727 | 0.934012 | 1.624264 | 0        | 1.150612 | 0.992197 | 0        | 3.112896 |
| ENSMUSG000003044948  | 16_Cfp4d3       | 970.5017257 | -0.12136 | 0.780846 | 0.934092 | 976.995  | 922.2977 | 1134.504 | 438.551  | 1282.94  | 1067.723 |
| ENSMUSG000003087444  | 1_Gm5475        | 7.530300319 | 0.248764 | 0.780887 | 0.934092 | 12.18198 | 6.011252 | 2.301224 | 12.89856 | 4.52536  | 7.263424 |
| ENSMUSG000003005824  | 6_Tnfst14       | 5.590941151 | 0.342434 | 0.781072 | 0.934235 | 8.121322 | 0.85875  | 5.753061 | 0.992197 | 14.70742 | 3.112896 |
| ENSMUSG0000030025197 | 8_Cyp2c44       | 3.954278333 | 0.370125 | 0.781101 | 0.934235 | 5.684925 | 3.435001 | 1.150612 | 8.929771 | 4.52536  | 0        |
| ENSMUSG000003045106  | 12_Ccdc73       | 29.84563519 | 0.164922 | 0.781208 | 0.934307 | 21.92757 | 24.90376 | 37.9702  | 52.58643 | 14.70742 | 26.97843 |
| ENSMUSG000003045364  | 2_IIfne         | 0.572094054 | -0.97735 | 0.781403 | 0.934428 | 0        | 0        | 2.301224 | 0        | 1.13134  | 0        |
| ENSMUSG000003068259  | 2_Olfr461       | 0.572094054 | -0.97735 | 0.781403 | 0.934428 | 0        | 0        | 2.301224 | 0        | 1.13134  | 0        |
| ENSMUSG000003061353  | 11_Cxcl12       | 853.7537434 | 0.0915   | 0.781484 | 0.934469 | 899.8425 | 858.7502 | 721.4338 | 1204.527 | 686.7234 | 751.2456 |
| ENSMUSG000003033419  | 15_Snap91       | 46.22890782 | 0.193729 | 0.781684 | 0.93448  | 48.72793 | 60.97127 | 19.56041 | 98.22748 | 26.02082 | 23.86554 |
| ENSMUSG000003034290  | 9_Nek9          | 3441.511439 | 0.066131 | 0.781812 | 0.93448  | 3307.814 | 3368.877 | 3447.234 | 3577.862 | 3336.322 | 3610.96  |
| ENSMUSG000003042520  | 16_Ubpap2l      | 4974.154974 | -0.06872 | 0.781703 | 0.93448  | 4802.95  | 5062.333 | 5412.479 | 4104.718 | 5649.912 | 4812.538 |
| ENSMUSG000003042734  | 5_Tic9          | 1631.812749 | -0.07627 | 0.781822 | 0.93448  | 1614.519 | 1618.744 | 1791.503 | 1216.433 | 1828.246 | 1721.432 |
| ENSMUSG000003044534  | 7_Ackr2         | 11.86206952 | -0.17293 | 0.781567 | 0.93448  | 11.36985 | 13.74    | 12.65673 | 9.921968 | 7.919381 | 15.56448 |
| ENSMUSG000003059343  | 4_Aldoat1       | 7.140820467 | 0.252916 | 0.781614 | 0.93448  | 6.497057 | 9.446252 | 3.451836 | 8.929771 | 12.44474 | 2.075264 |
| ENSMUSG000003079042  | 9_Apela         | 1.237058219 | -0.56234 | 0.781757 | 0.93448  | 2.436397 | 0.85875  | 1.150612 | 2.97659  | 0        | 0        |
| ENSMUSG000003049550  | 17_Clip1        | 2371.881554 | 0.061079 | 0.781976 | 0.934608 | 2225.242 | 2235.327 | 2504.883 | 2608.485 | 2423.331 | 2234.022 |
| ENSMUSG000003038600  |                 |             |          |          |          |          |          |          |          |          |          |

|                      |                  |             |          |            |          |           |          |          |          |          |          |
|----------------------|------------------|-------------|----------|------------|----------|-----------|----------|----------|----------|----------|----------|
| ENSMUSG00000003437   | 14_Paf1          | 1448.781661 | -0.06578 | 0.784077   | 0.935603 | 1456.965  | 1376.577 | 1612.008 | 1223.379 | 1529.572 | 1494.19  |
| ENSMUSG00000035031   | 15_C8a           | 1.218692908 | 0.501124 | 0.784068   | 0.935603 | 0.812132  | 0        | 2.301224 | 0.992197 | 1.13134  | 2.075264 |
| ENSMUSG000000079120  | 2_Ay761185       | 1.218692908 | 0.501124 | 0.784068   | 0.935603 | 0.812132  | 0        | 2.301224 | 0.992197 | 1.13134  | 2.075264 |
| ENSMUSG000000044165  | 12_Bcl215        | 136.4391504 | 0.900334 | 0.784204   | 0.9357   | 128.3169  | 148.5638 | 119.6637 | 174.6266 | 106.346  | 141.118  |
| ENSMUSG000000025217  | 14_Etrc          | 456.9026479 | -0.06679 | 0.784325   | 0.935787 | 466.1639  | 485.1939 | 451.0399 | 425.6524 | 403.8884 | 509.4773 |
| ENSMUSG000000000732  | 8_Icosl          | 1293.17373  | -0.0871  | 0.784752   | 0.935817 | 1285.605  | 1262.363 | 1448.621 | 850.3127 | 1409.65  | 1502.491 |
| ENSMUSG000000006736  | 18_Tspan31       | 1274.033337 | 0.073069 | 0.784402   | 0.935817 | 1172.719  | 1247.764 | 1304.794 | 1028.908 | 1505.814 | 1384.201 |
| ENSMUSG000000015950  | 13_Ncf1          | 139.2031878 | 0.118162 | 0.786058   | 0.935817 | 170.5478  | 109.92   | 119.6637 | 89.29771 | 216.086  | 129.704  |
| ENSMUSG000000018583  | 5_G3bp1          | 7465.04549  | -0.06276 | 0.78543    | 0.935817 | 7404.209  | 7125.909 | 8352.293 | 6473.092 | 7904.673 | 7530.096 |
| ENSMUSG000000020159  | 8_Gabrp          | 339.9070394 | 0.093207 | 0.784898   | 0.935817 | 362.211   | 246.4613 | 378.5514 | 444.5042 | 271.5216 | 336.1928 |
| ENSMUSG000000020315  | 18_Sptbn1        | 11720.56083 | -0.05906 | 0.785906   | 0.935817 | 11624.86  | 12646.81 | 11609.68 | 12354.83 | 10374.39 | 11712.79 |
| ENSMUSG000000026387  | 15_Sctr          | 0.473857309 | 1.004265 | 0.785272   | 0.935817 | 0         | 0.85875  | 0        | 1.984394 | 0        | 0        |
| ENSMUSG000000027229  | 5_4933406J08Rik  | 0.466087635 | 1.004117 | 0.786417   | 0.935817 | 0.812132  | 0        | 0        | 1.984394 | 0        | 0        |
| ENSMUSG000000027849  | 18_Syt6          | 14.30568683 | -0.16706 | 0.785811   | 0.935817 | 15.43051  | 12.88125 | 17.25918 | 20.83613 | 9.050721 | 10.37632 |
| ENSMUSG000000029135  | 10_Fosl2         | 11399.506   | 0.065037 | 0.786614   | 0.935817 | 10342.5   | 10366.83 | 12718.87 | 10696.87 | 12949.32 | 11322.64 |
| ENSMUSG000000030877  | 10_4933427G17Rik | 6.516864227 | 0.299413 | 0.786642   | 0.935817 | 6.497057  | 0.85875  | 10.35551 | 14.88295 | 3.39402  | 3.112896 |
| ENSMUSG000000032826  | 16_Ank2          | 1102.292604 | 0.063408 | 0.785221   | 0.935817 | 1127.239  | 1117.234 | 989.5264 | 1258.106 | 1073.642 | 1048.008 |
| ENSMUSG000000033405  | 3_Nudt15         | 101.7952284 | -0.08709 | 0.784665   | 0.935817 | 95.01946  | 104.7675 | 115.0612 | 87.31332 | 88.24453 | 120.3653 |
| ENSMUSG000000035930  | 8_Chts4          | 1.484204871 | 0.760743 | 0.785553   | 0.935817 | 3.248529  | 0        | 0        | 0        | 5.656701 | 0        |
| ENSMUSG000000036062  | 13_Phl24         | 77.51139307 | -0.10472 | 0.785566   | 0.935817 | 99.89226  | 59.25377 | 81.69346 | 56.55522 | 82.58783 | 85.08583 |
| ENSMUSG000000037085  | 7_Tmt12          | 164.8190527 | -0.07779 | 0.785251   | 0.935817 | 159.99    | 150.2813 | 197.9053 | 145.8529 | 159.519  | 175.3598 |
| ENSMUSG000000038671  | 15_Arrfp1        | 958.2271754 | 0.063389 | 0.785669   | 0.935817 | 940.4491  | 927.4502 | 943.5019 | 845.3517 | 1048.752 | 1043.858 |
| ENSMUSG000000039977  | 16_Ccdc67        | 2.380034874 | 0.421545 | 0.786387   | 0.935817 | 0.4060661 | 0.85875  | 1.150612 | 1.984394 | 0        | 6.225792 |
| ENSMUSG000000041515  | 9_Irf8           | 316.8838517 | -0.1244  | 0.785286   | 0.935817 | 416.6238  | 235.2976 | 339.4306 | 172.6422 | 470.6375 | 266.6714 |
| ENSMUSG000000042097  | 17_Zfp239        | 62.56775602 | 0.092535 | 0.78655    | 0.935817 | 51.16433  | 65.26502 | 65.58489 | 68.46158 | 56.56701 | 68.48372 |
| ENSMUSG000000043144  | 5_Asp6           | 0.473857309 | 1.004265 | 0.785272   | 0.935817 | 0         | 0.85875  | 0        | 1.984394 | 0        | 0        |
| ENSMUSG000000043850  | 15_Clrn1         | 4.544741301 | -0.26137 | 0.784627   | 0.935817 | 7.30919   | 5.152501 | 2.301224 | 4.960984 | 3.39402  | 4.150528 |
| ENSMUSG000000048142  | 9_NatI8          | 283.6100735 | -0.17524 | 0.785147   | 0.935817 | 276.1429  | 232.7213 | 393.5093 | 93.2665  | 556.6193 | 149.419  |
| ENSMUSG000000048602  | 8_Morc2b         | 0.466087635 | 1.004117 | 0.786417   | 0.935817 | 0.812132  | 0        | 0        | 1.984394 | 0        | 0        |
| ENSMUSG000000049657  | 9_Zbtb5          | 876.4943208 | 0.060744 | 0.786164   | 0.935817 | 829.9991  | 857.0327 | 887.1219 | 806.656  | 952.5884 | 925.567  |
| ENSMUSG000000049892  | 7_Rasd1          | 20.11725788 | -0.19463 | 0.785357   | 0.935817 | 30.04889  | 14.59875 | 19.56041 | 5.953181 | 33.9402  | 16.60211 |
| ENSMUSG000000052469  | 8_Tcp10c         | 0.473857309 | 1.004265 | 0.785272   | 0.935817 | 0         | 0.85875  | 0        | 1.984394 | 0        | 0        |
| ENSMUSG000000056679  | 13_Gpr173        | 32.6446091  | 0.145719 | 0.786606   | 0.935817 | 32.48529  | 35.20876 | 25.31347 | 56.55522 | 20.36412 | 25.9408  |
| ENSMUSG000000057156  | 10_Homez         | 214.6608433 | 0.083805 | 0.78635    | 0.935817 | 190.8511  | 220.6988 | 214.0139 | 283.7683 | 186.6711 | 191.9619 |
| ENSMUSG000000060487  | 5_Samd5          | 36.81300288 | 0.162824 | 0.78505    | 0.935817 | 29.23676  | 39.50251 | 35.66898 | 70.44597 | 16.9701  | 29.0537  |
| ENSMUSG000000062275  | 7_Fbxw24         | 0.466087635 | 1.004117 | 0.786417   | 0.935817 | 0.812132  | 0        | 0        | 1.984394 | 0        | 0        |
| ENSMUSG000000064232  | 2_Gm5414         | 3.145241327 | -0.30033 | 0.785217   | 0.935817 | 2.436397  | 3.435001 | 4.602448 | 1.984394 | 2.26268  | 4.150528 |
| ENSMUSG000000066197  | 4_Gpr139         | 0.466087635 | 1.004117 | 0.786417   | 0.935817 | 0.812132  | 0        | 0        | 1.984394 | 0        | 0        |
| ENSMUSG000000068105  | 10_Tnfrsf13c     | 0.895068481 | -0.69406 | 0.785965   | 0.935817 | 2.436397  | 0.85875  | 0        | 0        | 0        | 2.075264 |
| ENSMUSG000000071551  | 12_Akr1c19       | 0.466087635 | 1.004117 | 0.786417   | 0.935817 | 0.812132  | 0        | 0        | 1.984394 | 0        | 0        |
| ENSMUSG000000073995  | 2_Gm10604        | 8.079874251 | -0.21485 | 0.786419   | 0.935817 | 4.060661  | 9.446252 | 12.65673 | 6.945378 | 10.18206 | 5.18816  |
| ENSMUSG000000086855  | 1_Gm13844        | 1.283439315 | -0.48299 | 0.786652   | 0.935817 | 2.436397  | 0.85875  | 1.150612 | 0.992197 | 2.26268  | 0        |
| ENSMUSG000000089773  | 7_Skint1         | 8.640513336 | 0.212422 | 0.785596   | 0.935817 | 12.18198  | 6.011252 | 5.753061 | 14.88295 | 6.788041 | 6.225792 |
| ENSMUSG000000096449  | 1_Gm4076         | 0.473857309 | 1.004265 | 0.785272   | 0.935817 | 0         | 0.85875  | 0        | 1.984394 | 0        | 0        |
| ENSMUSG000000096658  | 1_Vmn2r39        | 0.473857309 | 1.004265 | 0.785272   | 0.935817 | 0         | 0.85875  | 0        | 1.984394 | 0        | 0        |
| ENSMUSG000000097546  | 1_Gm26749        | 0.473857309 | 1.004265 | 0.785272   | 0.935817 | 0         | 0.85875  | 0        | 1.984394 | 0        | 0        |
| ENSMUSG000000097638  | 1_Carlr          | 0.466087635 | 1.004117 | 0.786417   | 0.935817 | 0.812132  | 0        | 0        | 1.984394 | 0        | 0        |
| ENSMUSG000000097727  | 7_F630040K05Rik  | 5.48760142  | -0.26803 | 0.785596   | 0.935817 | 8.121322  | 5.152501 | 4.602448 | 4.960984 | 9.050721 | 1.037632 |
| ENSMUSG000000097796  | 1_Gm16702        | 0.466087635 | 1.004117 | 0.786417   | 0.935817 | 0.812132  | 0        | 0        | 1.984394 | 0        | 0        |
| ENSMUSG000000097869  | 1_C230021G24Rik  | 0.466087635 | 1.004117 | 0.786417   | 0.935817 | 0.812132  | 0        | 0        | 1.984394 | 0        | 0        |
| ENSMUSG000000100631  | 1_Olfr996        | 0.466087635 | 1.004117 | 0.786417   | 0.935817 | 0.812132  | 0        | 0        | 1.984394 | 0        | 0        |
| ENSMUSG000000100782  | 1_Gm28231        | 0.466087635 | 1.004117 | 0.786417   | 0.935817 | 0.812132  | 0        | 0        | 1.984394 | 0        | 0        |
| ENSMUSG000000101941  | 1_Gm28979        | 0.466087635 | 1.004117 | 0.786417   | 0.935817 | 0.812132  | 0        | 0        | 1.984394 | 0        | 0        |
| ENSMUSG000000104675  | 1_Gm43689        | 0.466087635 | 1.004117 | 0.786417   | 0.935817 | 0.812132  | 0        | 0        | 1.984394 | 0        | 0        |
| ENSMUSG000000026248  | 9_Mrpl44         | 422.4526269 | -0.08626 | 0.786726   | 0.935849 | 411.751   | 452.5614 | 440.6844 | 291.7059 | 526.0731 | 411.9399 |
| ENSMUSG000000027712  | 1_Gm29600        | 5094.662952 | -0.05542 | 0.786819   | 0.935903 | 5245.562  | 5052.886 | 5279.008 | 4753.615 | 5307.116 | 4929.79  |
| ENSMUSG000000095026  | 1_Gm3336         | 26.43778154 | -0.12742 | 0.78718    | 0.936277 | 30.86102  | 23.18626 | 28.7653  | 18.85174 | 23.75814 | 33.20423 |
| ENSMUSG000000030051  | 10_Aplf          | 104.1217824 | 0.074301 | 0.787359   | 0.936435 | 192.4753  | 191.5013 | 212.8632 | 241.1038 | 209.2979 | 177.4351 |
| ENSMUSG000000064302  | 13_Clap1         | 2695.151113 | 0.05592  | 0.787451   | 0.936487 | 1623.452  | 1634.202 | 1729.37  | 1659.949 | 1805.619 | 1718.319 |
| ENSMUSG000000051906  | 14_Cd209f        | 14.87535042 | -0.17923 | 0.787596   | 0.936605 | 20.3033   | 15.4575  | 11.50612 | 7.937575 | 10.18206 | 23.86554 |
| ENSMUSG000000025105  | 8_Bnc1           | 3103.69584  | 0.060987 | 0.787787   | 0.936775 | 2948.04   | 2760.882 | 3405.812 | 2986.512 | 3300.119 | 3220.81  |
| ENSMUSG000000021460  | 16_Auh           | 383.1214291 | 0.071221 | 0.787834   | 0.936776 | 406.0661  | 392.4489 | 322.1714 | 404.8163 | 340.5334 | 432.6926 |
| ENSMUSG000000025877  | 14_Hk3           | 99.41264021 | -0.20473 | 0.788007   | 0.937    | 148.6202  | 63.54752 | 107.0069 | 14.88295 | 186.6711 | 75.74714 |
| ENSMUSG000000025036  | 6_Sfxn2          | 341.693097  | 0.065672 | 0.788174   | 0.937068 | 321.6043  | 306.5738 | 373.9489 | 345.2845 | 366.5542 | 336.1928 |
| ENSMUSG000000017204  | 4_Gsdma          | 28.51363775 | 0.150268 | 0.788441   | 0.937273 | 25.98823  | 35.20876 | 19.56041 | 16.86735 | 47.51628 | 25.9408  |
| ENSMUSG000000095654  | 2_Plscr5         | 5.857213666 | 0.269619 | 0.788436   | 0.937273 | 4.060661  | 1.7175   | 10.35551 | 2.97659  | 5.656701 | 10.37632 |
| ENSMUSG000000044216  | 6_Kcnj4          | 0.523450406 | -0.79883 | 0.788725   | 0.9375   | 0         | 0.85875  | 1.150612 | 0        | 1.13134  | 0        |
| ENSMUSG000000067594  | 5_Krl77          | 6.263044751 | 0.239956 | 0.788684   | 0.9375   | 6.497057  | 6.011252 | 4.602448 | 1.984394 | 10.18206 | 8.301057 |
| ENSMUSG000000038248  | 8_Sobp           | 53.49208235 | -0.12508 | 0.788926   | 0.937629 | 51.16433  | 78.14627 | 37.9702  | 71.43817 | 40.72824 | 41.50528 |
| ENSMUSG000000048938  | 12_Nr1r5         | 2.082276594 | -0.42758 | 0.788928   | 0.937629 | 0.812132  | 5.152501 | 1.150612 | 1.984394 | 3.39402  | 0        |
| ENSMUSG0000000099137 | 1_Gm10603        | 29.38928358 | -0.12288 | 0.789      | 0.937658 | 21.11544  | 38.64376 | 32.21714 | 25.79712 | 30.54618 | 28.01607 |
| ENSMUSG000000019087  | 13_Atp6ap1       | 6086.234696 | 0.05515  | 0.789078   | 0.937695 | 5751.52   | 5785.4   | 6373.24  | 6430.428 | 6140.914 | 6035.906 |
| ENSMUSG000000045404  | 15_Kcnk13        | 33.34457259 | -0.12189 | 0.789219   | 0.937807 | 29.23676  | 40.36126 | 34.51836 | 23.81272 | 44.12226 | 28.01607 |
| ENSMUSG000000021095  | 5_Gsc            | 1.162003795 | 0.572292 | 0.789355   | 0.937912 | 0.812132  | 0.85875  | 1.150612 | 0        | 0        | 4.150528 |
| ENSMUSG000000004651  | 5_Tyr            | 1204.931748 | 0.138172 | 0.78963    | 0.938127 | 1081.76   | 1628.19  | 731.7893 | 2105.442 | 631.2878 | 1051.121 |
| ENSMUSG000000032841  | 15_Prr5l         | 114.6234564 | -0.09957 | 0.789606   | 0.938127 | 136.4382  | 127.095  | 92.04897 | 146.8451 | 82.58783 | 102.7256 |
| ENSMUSG000000024737  | 2_Slc15a3        | 186.1114342 | 0.15477  | 0.789691   | 0.938144 | 233.8941  | 95.32127 | 199.0559 | 91.28211 | 351.8468 | 145.2685 |
| ENSMUSG000000038957  | 13_Edc3          | 921.9036069 | -0.08791 | 0.789806</ |          |           |          |          |          |          |          |

|                      |                  |              |          |          |          |          |          |          |          |          |          |
|----------------------|------------------|--------------|----------|----------|----------|----------|----------|----------|----------|----------|----------|
| ENSMUSG00000015890   | 2_Amdhd1         | 7.627201947  | -0.19768 | 0.79177  | 0.938619 | 8.121322 | 6.011252 | 10.35551 | 4.960984 | 9.050721 | 7.263424 |
| ENSMUSG00000026546   | 16_Cfap45        | 33.10915133  | -0.13065 | 0.791744 | 0.938619 | 25.1761  | 38.64376 | 40.27142 | 31.7503  | 19.23278 | 43.58055 |
| ENSMUSG000000048304  | 8_Slitrlk3       | 8.824075636  | 0.227674 | 0.791729 | 0.938619 | 8.933454 | 8.587502 | 6.903673 | 19.84394 | 4.52536  | 4.150528 |
| ENSMUSG000000053134  | 13_Supt7l        | 452.5165062  | -0.0751  | 0.791788 | 0.938619 | 436.9271 | 426.7989 | 529.2816 | 359.1752 | 526.0731 | 436.8431 |
| ENSMUSG000000056131  | 13_Pgm3          | 286.6490207  | 0.069883 | 0.791656 | 0.938619 | 281.8099 | 269.6476 | 287.653  | 306.5888 | 330.3513 | 243.8435 |
| ENSMUSG000000102424  | 1_Paupar         | 58.18790831  | 0.113802 | 0.791739 | 0.938619 | 59.28565 | 56.67751 | 51.77754 | 90.28991 | 47.51628 | 43.58055 |
| ENSMUSG000000017607  | 9_Tns4           | 11127.95025  | -0.09213 | 0.791972 | 0.938782 | 10077.75 | 11007.46 | 13364.36 | 6807.462 | 13009.28 | 12501.39 |
| ENSMUSG000000030672  | 12_MyIpf         | 454.4844017  | 0.136914 | 0.792199 | 0.938959 | 335.4106 | 649.2152 | 314.1171 | 477.2467 | 218.3486 | 732.5682 |
| ENSMUSG000000086335  | 1_Gm12107        | 7.041762623  | 0.217817 | 0.792216 | 0.938959 | 10.55772 | 4.293751 | 4.602448 | 10.91416 | 5.656701 | 6.225792 |
| ENSMUSG000000022987  | 11_Zfp641        | 42.7020745   | -0.12363 | 0.792655 | 0.939312 | 35.73382 | 64.40627 | 33.36775 | 53.57863 | 32.80886 | 36.17172 |
| ENSMUSG000000037086  | 3_Prr32          | 18.31729032  | -0.16482 | 0.792601 | 0.939312 | 24.36397 | 23.18626 | 10.35551 | 15.87515 | 10.18206 | 25.9408  |
| ENSMUSG000000038346  | 18_Zfp384        | 1410.480078  | -0.08742 | 0.792623 | 0.939312 | 1437.474 | 1413.503 | 1508.452 | 884.0474 | 1699.273 | 1520.131 |
| ENSMUSG000000026131  | 17_Dst           | 16705.01304  | 0.054599 | 0.793058 | 0.939532 | 15986.01 | 15515.9  | 17665.35 | 16641.12 | 16727.99 | 17693.7  |
| ENSMUSG000000031162  | 14_Gata1         | 0.845940081  | 0.698327 | 0.793052 | 0.939532 | 0.812132 | 0        | 1.150612 | 0        | 0        | 3.112896 |
| ENSMUSG000000045973  | 18_Slc25a51      | 1473.579891  | 0.057712 | 0.79317  | 0.939532 | 1425.292 | 1395.469 | 1511.904 | 1653     | 1431.145 | 1424.669 |
| ENSMUSG000000049504  | 12_Proser1       | 507.8099419  | -0.06233 | 0.793163 | 0.939532 | 475.0973 | 493.7814 | 587.9628 | 497.0906 | 500.0523 | 492.8752 |
| ENSMUSG000000059146  | 12_Nlrrk3        | 286.7343062  | -0.07445 | 0.793078 | 0.939532 | 318.3558 | 279.9526 | 284.2012 | 317.503  | 219.408  | 300.9133 |
| ENSMUSG000000070336  | 3_Fbxo47         | 22.5491379   | 0.152903 | 0.793068 | 0.939532 | 21.11544 | 18.8925  | 24.16285 | 34.72689 | 26.02082 | 10.37632 |
| ENSMUSG000000090141  | 1_Gm614          | 1.981626253  | -0.4771  | 0.792937 | 0.939532 | 4.060661 | 1.1715   | 1.150612 | 4.960984 | 0        | 0        |
| ENSMUSG000000026686  | 14_Lmx1a         | 16.28242426  | 0.223376 | 0.793297 | 0.939569 | 13.80625 | 23.18626 | 8.054285 | 34.72689 | 3.39402  | 14.52685 |
| ENSMUSG000000055368  | 13_Slc6a2        | 10.37153113  | -0.19419 | 0.793252 | 0.939569 | 11.36985 | 13.74    | 8.054285 | 7.937575 | 4.52536  | 16.60211 |
| ENSMUSG000000070407  | 5_Hs3st3b1       | 909.639975   | 0.073229 | 0.793583 | 0.939853 | 912.8366 | 841.5752 | 905.5317 | 1179.722 | 795.3321 | 822.8422 |
| ENSMUSG000000022935  | 14_Grik1         | 18.35406807  | 0.206802 | 0.7937   | 0.939935 | 22.7397  | 14.59875 | 13.80735 | 42.66446 | 9.050721 | 7.263424 |
| ENSMUSG000000020091  | 14_Eif4ebp2      | 726.4050398  | -0.09723 | 0.793925 | 0.940004 | 695.1851 | 763.4289 | 793.9224 | 404.8163 | 819.0902 | 881.9873 |
| ENSMUSG000000027977  | 15_Nds31         | 25.41263603  | 0.153164 | 0.793848 | 0.940004 | 21.92757 | 35.20676 | 14.95796 | 38.69568 | 14.70742 | 26.97843 |
| ENSMUSG000000035919  | 16_Bbs9          | 218.6084224  | -0.07536 | 0.794012 | 0.940004 | 249.3246 | 226.7101 | 196.7547 | 254.0024 | 186.6711 | 198.1877 |
| ENSMUSG000000038569  | 13_Rad9b         | 241.4573274  | 0.081344 | 0.793982 | 0.940004 | 243.6397 | 215.5463 | 245.0804 | 318.4952 | 194.5905 | 231.392  |
| ENSMUSG000000097970  | 1_Gm27028        | 6.821690533  | 0.257508 | 0.794024 | 0.940004 | 9.745586 | 4.293751 | 4.602448 | 15.87515 | 2.26268  | 4.150528 |
| ENSMUSG000000015971  | 4_Actr8          | 574.731712   | -0.06934 | 0.794244 | 0.940092 | 616.4083 | 542.7301 | 606.3726 | 451.4496 | 610.9237 | 620.504  |
| ENSMUSG000000035148  | 4_Gpr33          | 1.535229545  | 0.440368 | 0.794285 | 0.940092 | 0.812132 | 0.85875  | 2.301224 | 2.97659  | 2.26268  | 0        |
| ENSMUSG000000037944  | 8_Cor7           | 26.62417482  | 0.164414 | 0.794277 | 0.940092 | 30.86102 | 11.16375 | 33.36775 | 25.79712 | 42.99092 | 15.56448 |
| ENSMUSG000000090176  | 1_Cd200r2        | 6.111297347  | -0.24305 | 0.794304 | 0.940092 | 11.36985 | 6.011252 | 2.301224 | 5.953181 | 7.919381 | 3.112896 |
| ENSMUSG0000000106951 | 1_5930430L01Rik  | 301.6832672  | 0.090163 | 0.794172 | 0.940092 | 337.0349 | 297.9863 | 241.6285 | 367.1128 | 210.4293 | 355.9078 |
| ENSMUSG000000022610  | 9_Mapk12         | 374.9060046  | -0.10429 | 0.794423 | 0.940121 | 419.0602 | 340.0651 | 406.1661 | 203.4003 | 373.3422 | 507.4021 |
| ENSMUSG000000037275  | 14_Gemin5        | 840.3698143  | -0.09189 | 0.794404 | 0.940121 | 806.4473 | 850.1627 | 944.6525 | 514.9501 | 1079.298 | 846.7078 |
| ENSMUSG000000024610  | 14_Cd74          | 3696.835683  | -0.14438 | 0.794511 | 0.940169 | 4387.138 | 3613.621 | 3643.989 | 1024.939 | 5291.278 | 4220.05  |
| ENSMUSG000000024365  | 9_Cyp21a1        | 1.717096399  | -0.4958  | 0.794571 | 0.940184 | 0.812132 | 5.152501 | 0        | 2.26268  | 2.075264 | 0        |
| ENSMUSG000000030666  | 11_Calc3         | 3.903283291  | -0.27907 | 0.794693 | 0.940216 | 1.624264 | 7.728752 | 3.451836 | 2.97659  | 4.52536  | 3.112896 |
| ENSMUSG000000098534  | 1_Gm27167        | 1.363041185  | -0.51469 | 0.794692 | 0.940216 | 1.624264 | 0.85875  | 2.301224 | 0        | 3.39402  | 0        |
| ENSMUSG000000097637  | 1_4933417D19Rik  | 4.823955919  | 0.32539  | 0.794771 | 0.940253 | 6.497057 | 1.7175   | 4.602448 | 0        | 6.788041 | 9.338689 |
| ENSMUSG000000030493  | 13_Faap24        | 106.5276309  | 0.100936 | 0.79507  | 0.940439 | 116.947  | 94.46252 | 96.65142 | 80.36794 | 158.3876 | 92.34925 |
| ENSMUSG000000032402  | 12_Smad3         | 2339.759766  | -0.07523 | 0.794976 | 0.940439 | 2217.121 | 2303.168 | 2682.077 | 1697.649 | 2507.405 | 2568.139 |
| ENSMUSG000000097890  | 1_4930547M16Rik  | 5.75685289   | 0.232214 | 0.795041 | 0.940439 | 48.2793  | 8.587502 | 2.301224 | 5.953181 | 4.52536  | 8.301057 |
| ENSMUSG000000014232  | 14_Cluap1        | 421.92111983 | 0.065961 | 0.795124 | 0.940444 | 448.297  | 364.1101 | 424.5759 | 484.192  | 412.9391 | 397.4131 |
| ENSMUSG000000061825  | 9_Ces2c          | 5.373870705  | 0.310222 | 0.795169 | 0.940444 | 6.497057 | 7.728752 | 0        | 1.984394 | 5.656701 | 10.37632 |
| ENSMUSG000000030217  | 2_Art4           | 1011.015033  | -0.06854 | 0.795366 | 0.940558 | 1069.578 | 988.4215 | 1047.057 | 818.5624 | 949.1943 | 1193.277 |
| ENSMUSG000000038227  | 15_Hoxa9         | 1.21889004   | 0.474487 | 0.795314 | 0.940558 | 0        | 0.85875  | 2.301224 | 1.984394 | 1.13134  | 1.037632 |
| ENSMUSG000000056394  | 17_Lig1          | 1140.357411  | -0.09506 | 0.795407 | 0.940558 | 1114.245 | 1046.817 | 1372.68  | 675.686  | 1443.59  | 1189.126 |
| ENSMUSG000000000244  | 16_Tspan32       | 5.543386461  | 0.230551 | 0.795577 | 0.940579 | 4.872793 | 6.870002 | 3.451836 | 2.97659  | 6.788041 | 8.301057 |
| ENSMUSG000000040234  | 16_Tm7f35        | 1427.796545  | -0.05557 | 0.795654 | 0.940579 | 1423.668 | 1475.333 | 1467.03  | 1402.966 | 1294.253 | 1503.529 |
| ENSMUSG000000047420  | 8_Fam180a        | 49.15378359  | -0.12224 | 0.79566  | 0.940579 | 51.16433 | 53.24251 | 49.47632 | 71.43817 | 26.02082 | 43.58055 |
| ENSMUSG0000000074797 | 11_Itpa          | 604.2076789  | -0.06302 | 0.795619 | 0.940579 | 636.7116 | 591.6789 | 623.6318 | 507.0126 | 655.0459 | 611.1653 |
| ENSMUSG000000078521  | 2_Aunip          | 30.23442263  | 0.115561 | 0.79548  | 0.940579 | 29.23676 | 30.05626 | 27.61469 | 28.77371 | 41.85958 | 23.86554 |
| ENSMUSG000000034430  | 16_Zxdc          | 788.0515674  | -0.05701 | 0.79596  | 0.94065  | 772.3377 | 805.5077 | 833.0432 | 729.2647 | 833.7977 | 754.3585 |
| ENSMUSG000000035506  | 16_Slc12a8       | 6.844416755  | -0.20699 | 0.795975 | 0.94065  | 4.060661 | 7.728752 | 10.35551 | 6.945378 | 6.788041 | 5.18816  |
| ENSMUSG000000036403  | 15_Cep135        | 251.8090166  | 0.077704 | 0.795862 | 0.94065  | 258.258  | 242.1676 | 234.7249 | 330.4015 | 227.3994 | 217.9027 |
| ENSMUSG000000050875  | 11_A730017C20Rik | 165.3110337  | 0.129806 | 0.796    | 0.94065  | 146.9959 | 224.1338 | 102.4045 | 264.9165 | 90.50721 | 162.9082 |
| ENSMUSG000000068252  | 5_Apol7b         | 12.5844528   | -0.21122 | 0.796003 | 0.94065  | 8.933454 | 12.0225  | 19.56041 | 3.968787 | 23.75814 | 7.263424 |
| ENSMUSG000000091387  | 1_Gnt4           | 12.92448565  | 0.176211 | 0.795955 | 0.94065  | 13.80625 | 11.16375 | 11.50612 | 23.81272 | 19.9381  | 9.338689 |
| ENSMUSG000000021759  | 13_Ppap2a        | 803.7247188  | 0.083627 | 0.796435 | 0.940755 | 725.234  | 796.0615 | 820.3864 | 1130.112 | 633.5505 | 717.0038 |
| ENSMUSG000000021966  | 7_Prss52         | 1.241883456  | 0.523219 | 0.796403 | 0.940755 | 0.812132 | 0        | 2.301224 | 0        | 2.26268  | 2.075264 |
| ENSMUSG000000029607  | 14_Ankrd61       | 11.07287411  | 0.184125 | 0.796235 | 0.940755 | 9.745586 | 15.4575  | 5.753061 | 9.921968 | 7.919381 | 17.63975 |
| ENSMUSG000000030350  | 8_Prrm8          | 0.515680732  | -0.77072 | 0.796542 | 0.940755 | 0.812132 | 0        | 1.150612 | 0        | 1.13134  | 0        |
| ENSMUSG000000031495  | 7_Cd209d         | 8.166844933  | 0.186643 | 0.796565 | 0.940755 | 9.745586 | 5.152501 | 8.054285 | 9.921968 | 6.788041 | 9.338689 |
| ENSMUSG000000078605  | 2_E030025P04Rik  | 0.515680732  | -0.77072 | 0.796542 | 0.940755 | 0.812132 | 0        | 1.150612 | 0        | 1.13134  | 0        |
| ENSMUSG000000085654  | 1_Gm12536        | 0.515680732  | -0.77072 | 0.796542 | 0.940755 | 0.812132 | 0        | 1.150612 | 0        | 1.13134  | 0        |
| ENSMUSG000000090470  | 2_Prr23a3        | 0.515680732  | -0.77072 | 0.796542 | 0.940755 | 0.812132 | 0        | 1.150612 | 0        | 1.13134  | 0        |
| ENSMUSG000000091705  | 8_H2-Q2          | 1282.742771  | -0.17665 | 0.796375 | 0.940755 | 1385.497 | 1039.947 | 1658.032 | 192.4862 | 1909.702 | 1510.792 |
| ENSMUSG000000097075  | 16_18629809      | 0.172231     | 0.796529 | 0.940755 | 21.11544 | 9.446252 | 14.95796 | 7.937575 | 26.02082 | 17.63975 |          |
| ENSMUSG000000021610  | 7_Clptm1l        | 2880.739378  | 0.056841 | 0.796838 | 0.940918 | 2775.868 | 2662.126 | 3034.164 | 2741.44  | 3202.824 | 2868.015 |
| ENSMUSG000000024905  | 15_Mll5          | 3.573934553  | -0.30629 | 0.79695  | 0.940918 | 1.624264 | 3.435001 | 6.903673 | 0.992197 | 2.26268  | 6.225792 |
| ENSMUSG000000032640  | 10_Chsy1         | 603.4005713  | 0.066187 | 0.796863 | 0.940918 | 606.6627 | 561.6226 | 600.6195 | 737.2022 | 562.276  | 552.0203 |
| ENSMUSG000000052142  | 15_Rasal3        | 40.12512526  | -0.17809 | 0.796885 | 0.940918 | 64.97057 | 22.32751 | 40.27142 | 13.89076 | 71.27443 | 28.01607 |
| ENSMUSG000000058655  | 8_Eif4b          | 8007.808668  | 0.052294 | 0.796978 | 0.940918 | 7869.561 | 7447.082 | 8271.75  | 8242.179 | 7931.825 | 8284.454 |
| ENSMUSG000000060568  | 14_Fam78b        | 47.1560427   | -0.10461 | 0.796986 | 0.940918 | 41.41674 | 59.25377 | 62.02448 | 52.58643 | 3        |          |

|                      |                 |              |           |          |          |          |          |          |          |          |          |
|----------------------|-----------------|--------------|-----------|----------|----------|----------|----------|----------|----------|----------|----------|
| ENSMUSG00000002028   | 12_Kmt2a        | 2957.851775  | -0.05411  | 0.799783 | 0.941617 | 2927.737 | 3083.772 | 3028.411 | 2656.111 | 2939.222 | 3111.859 |
| ENSMUSG00000004897   | 16_Hdgf         | 7957.499693  | -0.06573  | 0.799659 | 0.941617 | 7669.776 | 7683.238 | 9063.372 | 6344.106 | 8788.25  | 8196.256 |
| 1144.830854          | 16_Rnf185       | 0.059677     |           | 0.79968  | 0.941617 | 1156.476 | 1066.568 | 1140.257 | 1069.588 | 1337.244 | 1098.852 |
| ENSMUSG000000024245  | 4_Tmem178       | 40.291822    | 0.131357  | 0.79966  | 0.941617 | 41.41874 | 54.10126 | 19.56041 | 55.56302 | 31.67752 | 39.43002 |
| ENSMUSG000000026525  | 9_Opn3          | 13.47069229  | 0.191134  | 0.799862 | 0.941617 | 3.248529 | 16.31625 | 18.40979 | 17.85954 | 13.67608 | 11.41395 |
| ENSMUSG000000027071  | 14_P2rx3        | 8.71960848   | -0.21815  | 0.799411 | 0.941617 | 4.872793 | 5.152501 | 18.40979 | 11.90636 | 6.789041 | 5.18816  |
| ENSMUSG000000027227  | 7_Sord          | 1233.511266  | 0.067246  | 0.799187 | 0.941617 | 1098.003 | 1319.899 | 1196.637 | 1361.294 | 1018.206 | 1407.029 |
| ENSMUSG000000031774  | 7_Fam192a       | 858.958088   | -0.06789  | 0.799583 | 0.941617 | 869.7936 | 784.039  | 983.7734 | 701.4831 | 975.2152 | 839.4443 |
| ENSMUSG000000032220  | 9_Myo1e         | 3574.319592  | -0.06948  | 0.799384 | 0.941617 | 3259.086 | 3611.045 | 4111.137 | 2775.174 | 4016.257 | 3673.218 |
| ENSMUSG000000034701  | 13_Neurod1      | 17.39278637  | 0.228094  | 0.799429 | 0.941617 | 24.36397 | 18.8925  | 4.602448 | 30.7581  | 22.6268  | 3.112896 |
| ENSMUSG000000039960  | 5_Rhou          | 636.9172187  | 0.075397  | 0.799134 | 0.941617 | 643.2087 | 544.4476 | 673.1081 | 525.8643 | 824.7469 | 610.1277 |
| ENSMUSG000000059883  | 16_Irak4        | 779.2204241  | 0.073267  | 0.799208 | 0.941617 | 703.3065 | 714.4802 | 860.6579 | 624.0918 | 958.2451 | 814.5412 |
| ENSMUSG000000060586  | 10_H2-Eb1       | 963.0636801  | -0.13859  | 0.799724 | 0.941617 | 1168.658 | 915.4277 | 943.5019 | 292.6981 | 1477.53  | 980.5623 |
| ENSMUSG000000063808  | 14_Gpatch1      | 524.035455   | 0.061773  | 0.799839 | 0.941617 | 487.2793 | 519.5439 | 531.5828 | 476.2545 | 608.661  | 520.8913 |
| ENSMUSG000000074743  | 4_Thbd          | 821.9378268  | -0.10636  | 0.79932  | 0.941617 | 903.091  | 1049.393 | 604.0714 | 1177.738 | 512.4971 | 684.8372 |
| ENSMUSG000000086320  | 1_Gm12840       | 14.59668875  | 0.16789   | 0.799495 | 0.941617 | 11.36985 | 13.74    | 16.10857 | 6.945378 | 24.88948 | 14.52685 |
| ENSMUSG000000097791  | 1_Gm17315       | 7.817004906  | -0.1879   | 0.799895 | 0.941617 | 8.121322 | 7.728752 | 9.204897 | 6.945378 | 4.52536  | 10.37632 |
| ENSMUSG000000037503  | 12_Fam168b      | 4376.4113939 | -0.0523   | 0.800035 | 0.941697 | 4177.608 | 4482.676 | 4707.154 | 4193.024 | 4416.752 | 4281.27  |
| ENSMUSG000000041623  | 17_D11Wsu47e    | 227.2764775  | -0.10297  | 0.800057 | 0.941697 | 218.4636 | 234.4388 | 253.1347 | 117.0792 | 287.3604 | 253.1822 |
| ENSMUSG000000029104  | 15_Htt          | 2926.476087  | -0.07583  | 0.800224 | 0.941782 | 2795.359 | 2944.655 | 3270.04  | 2060.793 | 3466.426 | 3021.585 |
| ENSMUSG000000074115  | 3_Saa1          | 29.90512161  | 0.265397  | 0.800213 | 0.941782 | 51.97646 | 18.8925  | 30.5551  | 4.960984 | 85.98185 | 7.263424 |
| ENSMUSG000000002057  | 4_Foxn1         | 27.74425086  | -0.15663  | 0.800627 | 0.941867 | 37.35808 | 18.03375 | 32.21714 | 11.90636 | 44.12226 | 22.82791 |
| ENSMUSG000000019856  | 13_Fam184a      | 291.7355161  | 0.080566  | 0.800489 | 0.941867 | 289.9312 | 310.0088 | 250.8334 | 374.0582 | 219.48   | 306.1015 |
| ENSMUSG000000022704  | 15_Qtrid1       | 366.2821559  | 0.065491  | 0.800591 | 0.941867 | 329.7257 | 365.8276 | 378.5514 | 408.7851 | 399.3631 | 315.4401 |
| ENSMUSG000000027907  | 4_S100a11       | 28253.09939  | 0.077666  | 0.800357 | 0.941867 | 27254.34 | 24326.68 | 30897.39 | 21297.5  | 36508.48 | 29233.21 |
| ENSMUSG000000028318  | 14_Polr1e       | 191.4077009  | -0.0914   | 0.800445 | 0.941867 | 195.7239 | 170.0325 | 226.6706 | 120.0558 | 227.3994 | 208.564  |
| ENSMUSG000000030336  | 14_Cd27         | 30.77684946  | -0.14322  | 0.800416 | 0.941867 | 38.98234 | 30.05626 | 27.61469 | 11.90636 | 24.8958  | 34.24186 |
| ENSMUSG000000038550  | 10_Ciart        | 197.1485761  | -0.09008  | 0.800574 | 0.941867 | 211.1544 | 208.6763 | 189.851  | 124.0246 | 199.1159 | 250.0693 |
| ENSMUSG000000034768  | 4_Asb16         | 26.01818879  | 0.128719  | 0.800846 | 0.942069 | 29.23676 | 30.05626 | 14.95796 | 22.82053 | 23.75814 | 35.27949 |
| ENSMUSG000000014633  | 15_Cmc2         | 173.8027236  | -0.08014  | 0.800972 | 0.942162 | 181.1055 | 158.01   | 196.7547 | 127.0012 | 202.5099 | 177.4351 |
| ENSMUSG000000039298  | 16_Cdk5rap2     | 746.590741   | -0.054618 | 0.801217 | 0.942393 | 724.4219 | 741.1014 | 731.7893 | 706.4441 | 785.15   | 790.6756 |
| ENSMUSG000000097353  | 1_A430046D13Rik | 36.62601897  | 0.09662   | 0.801287 | 0.942421 | 31.67315 | 37.78501 | 36.81959 | 38.69568 | 38.46556 | 36.31712 |
| ENSMUSG0000000073775 | 4_Klti2         | 230.3773936  | -0.06274  | 0.801386 | 0.942481 | 230.6455 | 236.1563 | 239.3273 | 226.2209 | 245.5008 | 204.4135 |
| ENSMUSG000000022389  | 14_Tef          | 6181.363465  | -0.06571  | 0.801501 | 0.942524 | 6490.56  | 6209.623 | 6266.234 | 5695.21  | 6504.463 | 7132.091 |
| ENSMUSG0000000228801 | 14_Stgp1        | 7.905441085  | 0.278556  | 0.801557 | 0.942524 | 8.121322 | 8.587502 | 4.602448 | 0        | 14.70742 | 11.41395 |
| ENSMUSG000000037331  | 15_Larp1        | 5661.215199  | -0.08646  | 0.801565 | 0.942524 | 5441.286 | 5539.798 | 6511.314 | 3483.603 | 6954.348 | 6036.943 |
| ENSMUSG000000030270  | 11_Cpne9        | 2.447062614  | -0.34924  | 0.80163  | 0.942546 | 2.436397 | 3.435001 | 2.301224 | 1.984394 | 4.52536  | 0        |
| ENSMUSG000000024403  | 16_Atp6v1g2     | 38.90599128  | -0.10665  | 0.801758 | 0.942585 | 45.4794  | 42.07876 | 33.36775 | 49.60984 | 32.80886 | 30.09133 |
| ENSMUSG000000039021  | 15_Ttc16        | 5.660454488  | -0.2808   | 0.801757 | 0.942585 | 11.36985 | 6.011252 | 1.150612 | 4.960984 | 1.13134  | 9.336869 |
| ENSMUSG000000091455  | 3_Otogl         | 0.910398867  | 0.567618  | 0.801892 | 0.942687 | 0        | 0        | 2.301224 | 0.992197 | 1.13134  | 1.037632 |
| ENSMUSG000000019952  | 14_Poc1b        | 852.133424   | 0.054378  | 0.802408 | 0.943238 | 795.0774 | 832.129  | 881.3689 | 917.7821 | 842.8484 | 843.5949 |
| ENSMUSG000000008997  | 1_181020O0C5Rik | 2.200185484  | 0.338643  | 0.802637 | 0.943452 | 1.624264 | 0.85875  | 5.451836 | 1.984394 | 1.13134  | 4.150528 |
| ENSMUSG000000039182  | 5_AW209491      | 300.2309862  | 0.060289  | 0.802728 | 0.943503 | 296.4282 | 309.1501 | 276.1469 | 331.3937 | 299.8051 | 288.4617 |
| ENSMUSG000000000214  | 10_Th           | 9.329284455  | -0.2139   | 0.815113 | 0.943697 | 4.060661 | 14.59875 | 11.50612 | 6.945378 | 2.26268  | 16.60211 |
| ENSMUSG000000000290  | 13_ltgB2        | 310.5268158  | 0.164245  | 0.805047 | 0.943697 | 463.7275 | 158.01   | 256.5865 | 115.0948 | 653.9146 | 215.8275 |
| ENSMUSG000000000938  | 11_Hoxa10       | 0.467037084  | -0.60332  | 0.843226 | 0.943697 | 0.812132 | 0.85875  | 0        | 0        | 1.13134  | 0        |
| ENSMUSG000000001143  | 13_Lman2l       | 643.8720024  | -0.06911  | 0.807434 | 0.943697 | 691.1245 | 632.8989 | 653.5477 | 483.1998 | 759.1292 | 643.3319 |
| ENSMUSG000000001566  | 9_Mnx1          | 0.135355363  | -0.78262  | 0.847901 | 0.943697 | 0.812132 | 0        | 0        | 0        | 0        | 0        |
| ENSMUSG000000001815  | 15_Evx2         | 0.135355363  | -0.78262  | 0.847901 | 0.943697 | 0.812132 | 0        | 0        | 0        | 0        | 0        |
| ENSMUSG000000001964  | 14_Emd          | 1330.809676  | -0.05696  | 0.84294  | 0.943697 | 1343.267 | 1276.962 | 1450.922 | 973.3451 | 1549.936 | 1390.427 |
| ENSMUSG000000001983  | 7_Taco1         | 192.559169   | -0.06435  | 0.815944 | 0.943697 | 210.3422 | 192.36   | 187.5498 | 156.7671 | 207.0352 | 201.3006 |
| ENSMUSG000000002633  | 4_ShH           | 0.135355363  | -0.78262  | 0.847901 | 0.943697 | 0.812132 | 0        | 0        | 0        | 0        | 0        |
| ENSMUSG000000003809  | 14_Gcdh         | 349.4936772  | -0.058    | 0.814731 | 0.943697 | 368.708  | 330.6188 | 370.4971 | 381.9958 | 309.9872 | 335.1552 |
| ENSMUSG000000004231  | 15_Pax2         | 0.135355363  | -0.78262  | 0.847901 | 0.943697 | 0.812132 | 0        | 0        | 0        | 0        | 0        |
| ENSMUSG000000004347  | 16_Pde1c        | 312.2081541  | 0.112751  | 0.826987 | 0.943697 | 291.5555 | 393.3076 | 215.1645 | 543.7239 | 149.3369 | 280.1607 |
| ENSMUSG000000004631  | 15_Sgce         | 273.2322434  | -0.08306  | 0.835216 | 0.943697 | 298.8646 | 334.9126 | 209.4114 | 355.2065 | 162.913  | 278.0854 |
| ENSMUSG000000004633  | 17_Chn2         | 139.1578703  | -0.06309  | 0.826319 | 0.943697 | 134.8139 | 135.6825 | 156.4832 | 138.9076 | 116.528  | 152.5319 |
| ENSMUSG000000004894  | 10_Hapln2       | 0.143125037  | -0.78262  | 0.847901 | 0.943697 | 0        | 0.85875  | 0        | 0        | 0        | 0        |
| ENSMUSG000000005339  | 10_Fcrl1a       | 3.453047011  | 0.314356  | 0.829549 | 0.943697 | 1.624264 | 0.85875  | 6.903673 | 7.937575 | 3.39402  | 0        |
| ENSMUSG000000005364  | 11_lflra        | 0.135355363  | -0.78262  | 0.847901 | 0.943697 | 0.812132 | 0        | 0        | 0        | 0        | 0        |
| ENSMUSG000000005803  | 14_Sqrdl        | 172.6229089  | 0.058739  | 0.844665 | 0.943697 | 191.6632 | 147.705  | 167.9894 | 209.3535 | 168.5697 | 150.4566 |
| ENSMUSG000000005994  | 14_Tyrr1        | 7760.936908  | 0.10056   | 0.843679 | 0.943697 | 6503.554 | 11236.75 | 4731.317 | 12810.25 | 4165.594 | 7118.156 |
| ENSMUSG000000006077  | 7_Krt23         | 505.1295923  | 0.065188  | 0.839831 | 0.943697 | 527.8859 | 466.3014 | 486.7089 | 350.2455 | 615.449  | 584.1869 |
| ENSMUSG000000006930  | 15_Hap1         | 451.5211696  | 0.109994  | 0.811993 | 0.943697 | 384.1385 | 387.2964 | 531.5828 | 208.3613 | 617.7117 | 580.0363 |
| ENSMUSG000000007080  | 14_Pole         | 630.950736   | 0.069251  | 0.845541 | 0.943697 | 609.0991 | 523.8376 | 714.5301 | 417.7149 | 831.535  | 688.9877 |
| ENSMUSG000000007457  | 3_2310003L06Rik | 0.135355363  | -0.78262  | 0.847901 | 0.943697 | 0.812132 | 0        | 0        | 0        | 0        | 0        |
| ENSMUSG000000007589  | 8_Tinf2         | 354.2543645  | 0.054448  | 0.842027 | 0.943697 | 362.211  | 299.7038 | 380.8526 | 315.5186 | 418.5958 | 348.6444 |
| ENSMUSG000000007682  | 5_Dio2          | 483.9673627  | 0.116609  | 0.82771  | 0.943697 | 622.0932 | 236.1563 | 535.0346 | 622.1074 | 666.3593 | 222.0533 |
| ENSMUSG000000007907  | 4_Cabs1         | 0.143125037  | -0.78262  | 0.847901 | 0.943697 | 0        | 0.85875  | 0        | 0        | 0        | 0        |
| ENSMUSG000000007944  | 8_Ttc9b         | 1.245292589  | -0.38218  | 0.838481 | 0.943697 | 0        | 0.85875  | 3.451836 | 0.992197 | 1.13134  | 1.037632 |
| ENSMUSG000000008206  | 15_Cers4        | 474.0746796  | -0.08593  | 0.821001 | 0.943697 | 489.7157 | 622.5939 | 352.0873 | 618.1386 | 329.22   | 432.6926 |
| ENSMUSG000000009070  | 14_Rsph14       | 0.191768685  | -0.78262  | 0.847901 | 0.943697 | 0        | 0        | 1.150612 | 0        | 0        | 0        |
| ENSMUSG000000009246  | 14_Trpm5        | 5.662439975  | -0.1813   | 0.845939 | 0.943697 | 4.060661 | 6.011252 | 8.054285 | 1.984394 | 4.52536  | 9.336869 |
| ENSMUSG000000009545  | 14_Kcnq1        | 15.66974656  | 0.142603  | 0.829674 | 0.943697 | 7.30919  | 18.03375 | 19.56041 | 12.89856 | 11.3134  | 24.90317 |
| ENSMUSG000000009569  | 14_Mkl2         | 1262.190248  | -0.05342  | 0.821631 | 0.943697 | 1198.707 | 1350.814 | 1307.095 | 1069.588 | 1314.617 | 1332.32  |
| ENSMUSG000000010136  | 14_Pifo         | 0.135355363  | -0.78262  | 0.847901 | 0.943697 | 0.812132 | 0        | 0        | 0        | 0        | 0        |
| ENSMUSG000000010841  | 3_1700006E09Rik | 0.191768685  | -0.78262  | 0.847901 | 0.       |          |          |          |          |          |          |

|                    |                  |             |          |          |          |          |          |          |          |          |          |
|--------------------|------------------|-------------|----------|----------|----------|----------|----------|----------|----------|----------|----------|
| ENSMUSG00000020019 | 4_Ntn4           | 1916.876669 | 0.079126 | 0.808608 | 0.943697 | 1769.636 | 1895.262 | 1928.426 | 2686.869 | 1418.7   | 1802.367 |
| ENSMUSG00000020051 | 15_Pah           | 0.135355363 | -0.78262 | 0.847901 | 0.943697 | 0.812132 | 0        | 0        | 0        | 0        | 0        |
| ENSMUSG00000020100 | 15_Slc29a3       | 1279.43189  | 0.057323 | 0.823871 | 0.943697 | 1244.999 | 1138.703 | 1378.433 | 1126.143 | 1530.703 | 1257.61  |
| ENSMUSG00000020140 | 15_Lgr5          | 44.93453853 | -0.13147 | 0.829221 | 0.943697 | 56.03712 | 54.96001 | 29.91591 | 75.40696 | 16.9701  | 36.31712 |
| ENSMUSG00000020155 | 2_Kcnmb1         | 11.88518799 | 0.129593 | 0.844835 | 0.943697 | 12.18198 | 13.74    | 8.054285 | 18.85174 | 10.18206 | 8.301057 |
| ENSMUSG00000020267 | 6_Hint1          | 1917.702049 | 0.046122 | 0.826312 | 0.943697 | 1971.045 | 1780.189 | 1910.016 | 2047.894 | 1896.126 | 1900.942 |
| ENSMUSG00000020405 | 4_Fabp6          | 337.4263187 | -0.09938 | 0.82109  | 0.943697 | 342.7198 | 324.6076 | 379.702  | 151.8061 | 423.1212 | 402.6012 |
| ENSMUSG00000020407 | 13_Upp1          | 2021.082818 | -0.12121 | 0.816222 | 0.943697 | 2100.174 | 1579.242 | 2638.354 | 736.21   | 3076.114 | 1996.404 |
| ENSMUSG00000020427 | 11_lgfbp3        | 505.0499044 | 0.053938 | 0.840872 | 0.943697 | 511.6433 | 441.3976 | 533.884  | 531.8175 | 587.1655 | 424.3915 |
| ENSMUSG00000020428 | 13_Gabra6        | 1.139483302 | 0.496404 | 0.839674 | 0.943697 | 0        | 1.1715   | 1.150612 | 3.968787 | 0        | 0        |
| ENSMUSG00000020481 | 15_Ankrd36       | 0.143125037 | -0.78262 | 0.847901 | 0.943697 | 0        | 0.85875  | 0        | 0        | 0        | 0        |
| ENSMUSG00000020545 | 11_Lrrc72        | 0.191768685 | -0.78262 | 0.847901 | 0.943697 | 0        | 0        | 1.150612 | 0        | 0        | 0        |
| ENSMUSG00000020642 | 12_Rnf144a       | 108.2297618 | -0.09707 | 0.806847 | 0.943697 | 120.1956 | 117.6488 | 97.80203 | 153.7905 | 76.93113 | 83.01057 |
| ENSMUSG00000020653 | 11_Klf11         | 431.4668436 | 0.073443 | 0.805598 | 0.943697 | 355.7139 | 462.0076 | 444.1363 | 547.6926 | 363.1602 | 416.0905 |
| ENSMUSG00000020801 | 8_Med31          | 220.0152384 | 0.059451 | 0.847445 | 0.943697 | 226.5849 | 185.49   | 234.7249 | 282.7761 | 192.3278 | 198.1877 |
| ENSMUSG00000020913 | 3_Krt24          | 0.143125037 | -0.78262 | 0.847901 | 0.943697 | 0        | 0.85875  | 0        | 0        | 0        | 0        |
| ENSMUSG00000020963 | 14_Tshr          | 56.24394588 | -0.1412  | 0.822724 | 0.943697 | 77.96469 | 71.27627 | 27.61469 | 95.25089 | 24.88948 | 40.46765 |
| ENSMUSG00000021130 | 7_Galnt16        | 80.49557496 | -0.0904  | 0.833742 | 0.943697 | 87.71028 | 94.46252 | 66.7355  | 62.5084  | 54.30432 | 117.2524 |
| ENSMUSG00000021133 | 8_Susd6          | 1985.392387 | 0.047155 | 0.843877 | 0.943697 | 1876.837 | 1835.149 | 2147.042 | 1776.032 | 2257.024 | 2020.27  |
| ENSMUSG00000021221 | 15_Dp3           | 17.2766118  | -0.17139 | 0.807265 | 0.943697 | 34.92168 | 9.446252 | 10.35551 | 18.85174 | 12.44474 | 17.63975 |
| ENSMUSG00000021250 | 13_Fos           | 1261.038301 | 0.083932 | 0.807415 | 0.943697 | 1339.206 | 885.3715 | 1448.621 | 1116.221 | 1692.485 | 1084.326 |
| ENSMUSG00000021339 | 3_Mrs2           | 377.7237443 | 0.060306 | 0.811037 | 0.943697 | 356.526  | 373.5563 | 379.702  | 445.4964 | 341.6647 | 369.397  |
| ENSMUSG00000021499 | 12_Catsper3      | 8.708880167 | -0.17825 | 0.804733 | 0.943697 | 7.30919  | 11.16375 | 9.204897 | 4.960984 | 11.3134  | 8.301057 |
| ENSMUSG00000021534 | 7_1700001L19Rik  | 8.829586362 | 0.151929 | 0.834034 | 0.943697 | 8.121322 | 11.16375 | 5.753061 | 11.90636 | 5.656701 | 10.37632 |
| ENSMUSG00000021539 | 8_Lect2          | 0.191768685 | -0.78262 | 0.847901 | 0.943697 | 0        | 0        | 1.150612 | 0        | 0        | 0        |
| ENSMUSG00000021670 | 14_Hmgcr         | 7117.81097  | 0.055989 | 0.822717 | 0.943697 | 6773.994 | 5946.845 | 8218.822 | 7127.942 | 7771.175 | 6868.087 |
| ENSMUSG00000021721 | 4_Hlra1a         | 0.135355363 | -0.78262 | 0.847901 | 0.943697 | 0.812132 | 0        | 0        | 0        | 0        | 0        |
| ENSMUSG00000021747 | 11_4930452B06Rik | 321.9066951 | 0.052202 | 0.843509 | 0.943697 | 296.4282 | 280.8113 | 371.6477 | 344.2923 | 302.0678 | 336.1928 |
| ENSMUSG00000021749 | 5_Oit1           | 1259.840143 | -0.08786 | 0.804758 | 0.943697 | 1297.787 | 1148.149 | 1448.621 | 750.1008 | 1449.247 | 1465.136 |
| ENSMUSG00000021797 | 1_9230112D13Rik  | 0.135355363 | -0.78262 | 0.847901 | 0.943697 | 0.812132 | 0        | 0        | 0        | 0        | 0        |
| ENSMUSG00000021852 | 13_Slc35f4       | 0.143125037 | -0.78262 | 0.847901 | 0.943697 | 0        | 0.85875  | 0        | 0        | 0        | 0        |
| ENSMUSG00000021892 | 14_Sh3bp5        | 319.0353030 | 0.055712 | 0.840226 | 0.943697 | 324.8529 | 327.1838 | 286.5024 | 393.9021 | 296.4111 | 285.3488 |
| ENSMUSG00000021919 | 7_Chat           | 0.824171905 | -0.40476 | 0.844787 | 0.943697 | 0.812132 | 0.85875  | 1.150612 | 0.992197 | 1.13134  | 0        |
| ENSMUSG00000021958 | 4_Plnx1          | 402.106837  | 0.054519 | 0.819992 | 0.943697 | 402.0054 | 378.7088 | 402.7142 | 385.9646 | 459.3241 | 383.9239 |
| ENSMUSG00000021972 | 14_Hmbx1         | 1273.783455 | -0.04349 | 0.838586 | 0.943697 | 1253.932 | 1260.645 | 1364.626 | 1300.77  | 1282.94  | 1179.788 |
| ENSMUSG00000022191 | 15_DrosHa        | 1539.146372 | -0.05149 | 0.833448 | 0.943697 | 1464.274 | 1567.219 | 1668.388 | 1273.981 | 1675.515 | 1585.502 |
| ENSMUSG00000022241 | 5_Tars           | 1866.466006 | 0.064531 | 0.804864 | 0.943697 | 1748.521 | 1630.767 | 2095.265 | 1953.636 | 2152.94  | 1617.668 |
| ENSMUSG00000022269 | 13_March11       | 0.143125037 | -0.78262 | 0.847901 | 0.943697 | 0        | 0.85875  | 0        | 0        | 0        | 0        |
| ENSMUSG00000022304 | 12_Dpys          | 0.135355363 | -0.78262 | 0.847901 | 0.943697 | 0.812132 | 0        | 0        | 0        | 0        | 0        |
| ENSMUSG00000022353 | 9_Mtss1          | 1376.231257 | 0.051879 | 0.84514  | 0.943697 | 1247.435 | 1337.074 | 1470.482 | 1691.696 | 1185.644 | 1325.056 |
| ENSMUSG00000022376 | 17_Adcy8         | 6.798027433 | -0.1924  | 0.832213 | 0.943697 | 2.436397 | 6.870002 | 12.65673 | 4.960984 | 4.52536  | 9.338689 |
| ENSMUSG00000022439 | 9_Parvg          | 30.07059731 | 0.139545 | 0.820299 | 0.943697 | 35.73382 | 22.32751 | 27.61469 | 10.91416 | 47.51628 | 36.31712 |
| ENSMUSG00000022485 | 3_Hoxc5          | 0.451419078 | -0.60276 | 0.844808 | 0.943697 | 0.812132 | 0.85875  | 0        | 0        | 0        | 1.037632 |
| ENSMUSG00000022508 | 5_Bcl6           | 1127.897411 | -0.05287 | 0.809081 | 0.943697 | 1058.208 | 1225.437 | 1162.118 | 1128.128 | 1139.259 | 1054.234 |
| ENSMUSG00000022542 | 6_Sept12         | 0.143125037 | -0.78262 | 0.847901 | 0.943697 | 0        | 0.85875  | 0        | 0        | 0        | 0        |
| ENSMUSG00000022738 | 6_Gsc2           | 0.135355363 | -0.78262 | 0.847901 | 0.943697 | 0.812132 | 0        | 0        | 0        | 0        | 0        |
| ENSMUSG00000022821 | 13_Hgd           | 2.393376541 | -0.28112 | 0.827981 | 0.943697 | 1.624264 | 1.1715   | 4.602448 | 1.984394 | 3.39402  | 1.037632 |
| ENSMUSG00000022883 | 10_Robo1         | 276.8539926 | -0.08739 | 0.831428 | 0.943697 | 281.8099 | 359.8163 | 214.0139 | 346.2767 | 157.2563 | 301.9509 |
| ENSMUSG00000022945 | 11_Chaf1b        | 335.9108462 | -0.08563 | 0.833112 | 0.943697 | 329.7257 | 290.2576 | 417.6722 | 184.5486 | 444.6167 | 348.6444 |
| ENSMUSG00000022993 | 6_4930415O20Rik  | 10.37376278 | 0.152779 | 0.811528 | 0.943697 | 11.36985 | 7.728752 | 10.35551 | 8.929771 | 12.44474 | 11.41395 |
| ENSMUSG00000023015 | 13_Racgap1       | 1847.17568  | -0.05364 | 0.835594 | 0.943697 | 1848.413 | 1674.563 | 2121.729 | 1568.663 | 2096.373 | 1773.313 |
| ENSMUSG00000023026 | 15_Dip2b         | 3100.634816 | -0.05573 | 0.845158 | 0.943697 | 3005.701 | 3012.496 | 3463.342 | 2292.967 | 3628.208 | 3201.095 |
| ENSMUSG00000023176 | 8_Cpn2           | 0.143125037 | -0.78262 | 0.847901 | 0.943697 | 0        | 0.85875  | 0        | 0        | 0        | 0        |
| ENSMUSG00000023333 | 7_Gcm1           | 0.135355363 | -0.78262 | 0.847901 | 0.943697 | 0.812132 | 0        | 0        | 0        | 0        | 0        |
| ENSMUSG00000023944 | 14_Hsp90ab1      | 27900.18335 | -0.07493 | 0.816501 | 0.943697 | 26576.21 | 27705    | 31592.36 | 18339.77 | 33913.05 | 29274.71 |
| ENSMUSG00000023977 | 14_Ubr2          | 3943.667773 | -0.04463 | 0.845659 | 0.943697 | 3730.935 | 4001.776 | 4281.428 | 3417.126 | 4187.09  | 4043.652 |
| ENSMUSG00000023987 | 14_Pgc           | 0.135355363 | -0.78262 | 0.847901 | 0.943697 | 0.812132 | 0        | 0        | 0        | 0        | 0        |
| ENSMUSG00000023992 | 14_Trem2         | 44.8316129  | -0.16568 | 0.820007 | 0.943697 | 59.28565 | 54.96001 | 27.61469 | 11.90636 | 88.24453 | 26.97843 |
| ENSMUSG00000024014 | 7_Plm1           | 2966.092215 | -0.06956 | 0.817414 | 0.943697 | 2875.76  | 2851.909 | 3385.101 | 2103.457 | 3528.65  | 3051.676 |
| ENSMUSG00000024043 | 13_Arhgap28      | 122.1609842 | 0.099026 | 0.823894 | 0.943697 | 122.632  | 152.8575 | 78.24162 | 175.6188 | 78.06247 | 125.5535 |
| ENSMUSG00000024069 | 12_Slc30a6       | 311.1959202 | 0.050276 | 0.832497 | 0.943697 | 298.8646 | 288.5401 | 330.2257 | 327.4249 | 320.1692 | 301.9509 |
| ENSMUSG00000024217 | 9_Snrpc          | 596.9612665 | 0.059402 | 0.823205 | 0.943697 | 530.3223 | 535.0014 | 689.2167 | 641.9513 | 655.0459 | 530.23   |
| ENSMUSG00000024225 | 4_Clps           | 0.191768685 | -0.78262 | 0.847901 | 0.943697 | 0        | 0        | 1.150612 | 0        | 0        | 0        |
| ENSMUSG00000024306 | 12_Ccdc178       | 0.143125037 | -0.78262 | 0.847901 | 0.943697 | 0        | 0.85875  | 0        | 0        | 0        | 0        |
| ENSMUSG00000024349 | 9_Tmem173        | 360.9949606 | 0.114479 | 0.807344 | 0.943697 | 402.8176 | 251.6138 | 385.4551 | 199.4316 | 601.8729 | 324.7788 |
| ENSMUSG00000024352 | 11_Spata24       | 46.78786762 | 0.085803 | 0.830692 | 0.943697 | 43.85514 | 57.53626 | 34.51836 | 54.57082 | 49.77896 | 40.46765 |
| ENSMUSG00000024401 | 14_Tnf           | 265.3295128 | 0.093563 | 0.840765 | 0.943697 | 302.9253 | 206.9588 | 260.0383 | 149.8217 | 449.142  | 223.0099 |
| ENSMUSG00000024420 | 8_Zfp521         | 311.3750293 | -0.0841  | 0.80611  | 0.943697 | 310.2345 | 369.2626 | 281.9    | 367.1128 | 202.5099 | 337.2304 |
| ENSMUSG00000024530 | 7_Slim1          | 16.32652079 | 0.137301 | 0.843745 | 0.943697 | 9.745586 | 23.18626 | 13.80735 | 28.77371 | 7.919381 | 14.52685 |
| ENSMUSG00000024565 | 8_Sall3          | 2.201123103 | 0.440068 | 0.806289 | 0.943697 | 0        | 0        | 5.753061 | 1.984394 | 3.39402  | 2.075264 |
| ENSMUSG00000024642 | 16_Tle4          | 1538.519561 | 0.061149 | 0.827023 | 0.943697 | 1407.425 | 1538.88  | 1571.736 | 1962.565 | 1487.712 | 1262.798 |
| ENSMUSG00000024647 | 14_Cbln2         | 17.31680255 | 0.165216 | 0.846666 | 0.943697 | 11.36985 | 31.77376 | 5.753061 | 34.72689 | 6.788041 | 13.48922 |
| ENSMUSG00000024667 | 11_Tmem216       | 179.3871241 | -0.06569 | 0.830793 | 0.943697 | 178.6691 | 186.3488 | 185.2485 | 129.9778 | 196.8532 | 199.2254 |
| ENSMUSG00000024734 | 8_Zp1            | 0.143125037 | -0.78262 | 0.847901 | 0.943697 | 0        | 0.85875  | 0        | 0        | 0        | 0        |
| ENSMUSG00000024738 | 5_Pga5           | 0.135355363 | -0.78262 | 0.847901 | 0.943697 | 0.812132 | 0        | 0        | 0        | 0        | 0        |
| ENSMUSG00000024857 | 16_Cabp2         | 0.135355363 | -0.78262 | 0.847901 | 0.943697 | 0.812132 | 0        | 0        | 0        | 0        | 0        |
| ENSMUSG00000024966 | 8_Slip1          | 2719.256401 | -0.06984 | 0.811388 | 0.943697 | 2665.418 | 2650.962 | 3038.767 | 1984.394 | 3272.967 | 2703.032 |
| ENSMUSG00000024998 | 17_Plce1         | 1251.668086 | 0.049823 | 0.847596 | 0.943697 | 1220.635 | 1356.825 | 1112.642 | 1416.857 | 1051.015 | 1352.035 |
| ENSMUSG00000025129 | 2_Ppp1r27        | 0.143125037 | -0.78262 | 0.847901 | 0.943697 | 0        | 0.85875  | 0        | 0        | 0        | 0        |
| ENSMUSG00000025176 | 1                |             |          |          |          |          |          |          |          |          |          |

|                    |                  |             |          |          |          |          |          |          |          |          |          |
|--------------------|------------------|-------------|----------|----------|----------|----------|----------|----------|----------|----------|----------|
| ENSMUSG00000026822 | 14_Lcn2          | 609.2865872 | 0.133918 | 0.843807 | 0.943697 | 772.3377 | 275.6588 | 694.9697 | 273.8463 | 1346.295 | 292.6122 |
| ENSMUSG00000026839 | 16_Upp2          | 58.26704649 | -0.08086 | 0.820316 | 0.943697 | 52.78859 | 65.26502 | 62.13305 | 42.66446 | 52.04164 | 74.70951 |
| 1263.626336        | 14_Tor1b         | -0.05626    | 0.820052 | 0.943697 | 1210.077 | 1251.199 | 1403.747 | 1061.651 | 1200.131 | 1404.954 |          |
| ENSMUSG00000026931 | 10_1700019N19Rik | 0.143125037 | -0.78262 | 0.847901 | 0.943697 | 0        | 0.85875  | 0        | 0        | 0        | 0        |
| ENSMUSG00000026979 | 16_Psd4          | 1725.684277 | -0.09415 | 0.808673 | 0.943697 | 1711.975 | 1658.247 | 1975.601 | 918.7743 | 2207.245 | 1882.265 |
| ENSMUSG00000027015 | 4_Cybrd1         | 134.0664221 | -0.1018  | 0.839041 | 0.943697 | 109.6378 | 173.4675 | 133.471  | 169.6657 | 53.17298 | 164.9835 |
| ENSMUSG00000027238 | 16_Frmd5         | 10.61015023 | -0.15064 | 0.817748 | 0.943697 | 11.36985 | 12.88125 | 9.204897 | 13.89076 | 9.050721 | 7.263424 |
| ENSMUSG00000027312 | 14_Atm           | 2086.091017 | 0.039583 | 0.846795 | 0.943697 | 1997.845 | 2118.537 | 2056.144 | 2205.654 | 2045.463 | 2092.904 |
| ENSMUSG00000027358 | 6_Bmp2           | 120.9659132 | -0.07833 | 0.83273  | 0.943697 | 118.5713 | 152.8575 | 101.2539 | 156.7671 | 90.50721 | 105.8385 |
| ENSMUSG00000027400 | 11_Pdyn          | 52.3075494  | 0.099573 | 0.829495 | 0.943697 | 43.85514 | 69.55877 | 69.20288 | 73.67188 | 73.67188 |          |
| ENSMUSG00000027456 | 8_Sdcbp2         | 707.5360289 | -0.10216 | 0.837767 | 0.943697 | 752.0344 | 628.6052 | 816.9346 | 278.8073 | 1110.976 | 657.8587 |
| ENSMUSG00000027484 | 2_Bpifa5         | 0.135355363 | -0.78262 | 0.847901 | 0.943697 | 0.812132 | 0        | 0        | 0        | 0        | 0        |
| ENSMUSG00000027522 | 15_Sbx16         | 1285.118214 | 0.059398 | 0.807257 | 0.943697 | 1263.678 | 1253.775 | 1258.77  | 1537.905 | 1148.31  | 1248.271 |
| ENSMUSG00000027528 | 12_Fabp9         | 0.143125037 | -0.78262 | 0.847901 | 0.943697 | 0        | 0.85875  | 0        | 0        | 0        | 0        |
| ENSMUSG00000027605 | 18_Acs2          | 2021.90429  | -0.059   | 0.807153 | 0.943697 | 2079.871 | 1906.425 | 2203.422 | 1737.337 | 2266.074 | 1938.297 |
| ENSMUSG00000027634 | 14_Ndrg3         | 1112.839868 | 0.053275 | 0.815792 | 0.943697 | 1082.572 | 1181.64  | 1012.539 | 1230.324 | 1043.096 | 1126.868 |
| ENSMUSG00000027744 | 4_Stom3          | 0.443846536 | -0.60249 | 0.845591 | 0.943697 | 0.812132 | 0.85875  | 0        | 0.992197 | 0        | 0        |
| ENSMUSG00000027790 | 14_Sis           | 0.191768685 | -0.78262 | 0.847901 | 0.943697 | 0        | 0        | 1.150612 | 0        | 0        | 0        |
| ENSMUSG00000027801 | 7_Tm4sf4         | 0.135355363 | -0.78262 | 0.847901 | 0.943697 | 0.812132 | 0        | 0        | 0        | 0        | 0        |
| ENSMUSG00000027824 | 4_Vmnr2r1        | 0.135355363 | -0.78262 | 0.847901 | 0.943697 | 0.812132 | 0        | 0        | 0        | 0        | 0        |
| ENSMUSG00000027871 | 16_Hsd3b1        | 0.135355363 | -0.78262 | 0.847901 | 0.943697 | 0.812132 | 0        | 0        | 0        | 0        | 0        |
| ENSMUSG00000027886 | 7_1700013F07Rik  | 0.135355363 | -0.78262 | 0.847901 | 0.943697 | 0.812132 | 0        | 0        | 0        | 0        | 0        |
| ENSMUSG00000027913 | 5_Crot1          | 23.77558495 | -0.14085 | 0.815569 | 0.943697 | 25.98823 | 22.32751 | 26.46408 | 8.929771 | 22.6268  | 36.31712 |
| ENSMUSG00000027966 | 19_Col11a1       | 407.5041727 | -0.09859 | 0.806701 | 0.943697 | 384.9507 | 513.5326 | 365.8947 | 567.5366 | 236.4501 | 376.6604 |
| ENSMUSG00000027971 | 16_Ndst4         | 0.135355363 | -0.78262 | 0.847901 | 0.943697 | 0.812132 | 0        | 0        | 0        | 0        | 0        |
| ENSMUSG00000028126 | 16_Pip5k1a       | 1408.804241 | 0.04596  | 0.842401 | 0.943697 | 1327.836 | 1358.543 | 1472.783 | 1314.661 | 1615.554 | 1363.449 |
| ENSMUSG00000028163 | 17_NfkB1         | 2586.903495 | -0.06086 | 0.839619 | 0.943697 | 2457.512 | 2443.144 | 3023.809 | 1887.158 | 3103.266 | 2606.532 |
| ENSMUSG00000028226 | 15_Mmp16         | 43.2824253  | 0.116649 | 0.824276 | 0.943697 | 41.41874 | 49.80751 | 33.36775 | 75.40696 | 31.67752 | 28.01607 |
| ENSMUSG00000028255 | 6_Clca1          | 4.628891014 | 0.193389 | 0.83808  | 0.943697 | 4.060661 | 4.293751 | 4.602448 | 5.953181 | 6.788041 | 2.075264 |
| ENSMUSG00000028327 | 14_StraB1        | 19.78288081 | 0.148022 | 0.825458 | 0.943697 | 27.61249 | 14.59875 | 13.80735 | 8.929771 | 35.07154 | 18.67738 |
| ENSMUSG00000028332 | 13_Hemgn         | 4.804210717 | 0.230031 | 0.820957 | 0.943697 | 1.624264 | 6.011252 | 5.753061 | 8.929771 | 3.94002  | 3.112896 |
| ENSMUSG00000028337 | 14_Coro2a        | 2673.562609 | -0.08644 | 0.808131 | 0.943697 | 2477.815 | 2613.177 | 3169.936 | 1612.32  | 3312.564 | 2855.563 |
| ENSMUSG00000028571 | 15_Cyp2j13       | 5.623689647 | 0.222009 | 0.846837 | 0.943697 | 4.060661 | 10.305   | 1.150612 | 11.90636 | 1.13134  | 5.18816  |
| ENSMUSG00000028678 | 13_Klf2c         | 371.8929372 | 0.070307 | 0.835912 | 0.943697 | 380.89   | 315.1613 | 392.3587 | 254.9946 | 472.9002 | 415.0528 |
| ENSMUSG00000028706 | 14_Nsun4         | 247.5643521 | -0.0502  | 0.844025 | 0.943697 | 249.3246 | 249.8963 | 256.5865 | 246.0648 | 212.6919 | 250.822  |
| ENSMUSG00000028863 | 13_Meaf6         | 418.5013114 | -0.05842 | 0.813182 | 0.943697 | 423.933  | 426.7989 | 430.3289 | 397.8709 | 362.0288 | 470.0473 |
| ENSMUSG00000028902 | 4_Sf3a3          | 1454.617955 | 0.047418 | 0.836925 | 0.943697 | 1428.541 | 1300.148 | 1563.682 | 1417.849 | 1616.685 | 1400.803 |
| ENSMUSG00000028906 | 15_Epb41         | 4046.225116 | -0.04874 | 0.827754 | 0.943697 | 4000.563 | 4109.979 | 4233.102 | 3479.634 | 4265.152 | 4188.921 |
| ENSMUSG00000028963 | 1_Uts2           | 1.576233823 | -0.40282 | 0.808611 | 0.943697 | 0.812132 | 3.435001 | 1.150612 | 1.984394 | 0        | 0.075264 |
| ENSMUSG00000029005 | 4_Drxin          | 3.940681303 | -0.30586 | 0.822646 | 0.943697 | 3.248529 | 5.857502 | 1.150612 | 0        | 3.39402  | 7.263424 |
| ENSMUSG00000029038 | 9_Ssu72          | 1696.700265 | -0.055   | 0.815075 | 0.943697 | 1626.701 | 1588.688 | 1972.149 | 1561.718 | 1772.81  | 1658.136 |
| ENSMUSG00000029174 | 18_Tbc1d1        | 687.818956  | -0.05187 | 0.807544 | 0.943697 | 695.9973 | 694.7289 | 709.9277 | 668.7407 | 655.0459 | 702.4769 |
| ENSMUSG00000029177 | 9_Cenpa          | 462.5779708 | -0.07127 | 0.826725 | 0.943697 | 501.0856 | 401.8951 | 518.9261 | 326.4328 | 574.7208 | 452.4076 |
| ENSMUSG00000029204 | 7_RhoH           | 34.17470149 | 0.134756 | 0.806422 | 0.943697 | 43.85514 | 24.90376 | 28.7653  | 36.71128 | 53.17298 | 17.63975 |
| ENSMUSG00000029205 | 12_Chma9         | 0.933589415 | 0.590685 | 0.819083 | 0.943697 | 0        | 0        | 2.301224 | 0        | 2.26268  | 1.037632 |
| ENSMUSG00000029212 | 11_Gabrr1        | 31.58220917 | 0.13452  | 0.835811 | 0.943697 | 25.1761  | 27.48001 | 37.9702  | 63.5006  | 13.57608 | 21.79027 |
| ENSMUSG00000029219 | 10_Slc10a4       | 0.135355363 | -0.78262 | 0.847901 | 0.943697 | 0.812132 | 0        | 0        | 0        | 0        | 0        |
| ENSMUSG00000029287 | 14_TgfbR3        | 2158.307669 | 0.064157 | 0.824493 | 0.943697 | 2056.319 | 2294.581 | 1980.203 | 2699.768 | 1664.201 | 2254.774 |
| ENSMUSG00000029311 | 16_Hsd17b11      | 1232.327439 | 0.0552   | 0.842868 | 0.943697 | 1169.47  | 1356.825 | 1099.985 | 1505.163 | 1008.024 | 1254.497 |
| ENSMUSG00000029320 | 11_1700016H13Rik | 3.189920657 | 0.273472 | 0.806349 | 0.943697 | 1.624264 | 2.576251 | 4.602448 | 4.960984 | 2.26268  | 3.112896 |
| ENSMUSG00000029375 | 6_Cxcl15         | 0.135355363 | -0.78262 | 0.847901 | 0.943697 | 0.812132 | 0        | 0        | 0        | 0        | 0        |
| ENSMUSG00000029388 | 14_Elf2b1        | 687.9912394 | -0.06712 | 0.803436 | 0.943697 | 696.8094 | 663.8139 | 751.3497 | 529.8331 | 742.1591 | 743.9822 |
| ENSMUSG00000029437 | 12_IJ31          | 0.135355363 | -0.78262 | 0.847901 | 0.943697 | 0.812132 | 0        | 0        | 0        | 0        | 0        |
| ENSMUSG00000029642 | 11_Polr1d        | 2995.944732 | -0.05169 | 0.83326  | 0.943697 | 3001.641 | 2841.604 | 3305.709 | 2472.554 | 3115.711 | 3238.45  |
| ENSMUSG00000029651 | 16_Mtus2         | 476.772813  | -0.05874 | 0.805826 | 0.943697 | 504.3341 | 463.7251 | 491.3114 | 414.7383 | 472.9002 | 513.8279 |
| ENSMUSG00000029660 | 10_Tex26         | 3.478791335 | -0.27911 | 0.811576 | 0.943697 | 4.060661 | 1.7175   | 5.753061 | 1.984394 | 1.13134  | 6.225792 |
| ENSMUSG00000029712 | 14_Actl6b        | 0.857394679 | -0.60672 | 0.816827 | 0.943697 | 0        | 0.85875  | 2.301224 | 1.984394 | 0        | 0        |
| ENSMUSG00000029755 | 10_Dlx5          | 11.79882414 | -0.14106 | 0.814314 | 0.943697 | 11.36985 | 12.0225  | 13.80735 | 9.921968 | 10.8206  | 13.48922 |
| ENSMUSG00000030103 | 11_Bhlhe40       | 5118.063625 | -0.06443 | 0.840458 | 0.943697 | 4707.93  | 5058.898 | 5930.255 | 3427.048 | 5601.265 | 5982.986 |
| ENSMUSG00000030411 | 15_Nova2         | 18.98123304 | 0.12785  | 0.817892 | 0.943697 | 24.36397 | 13.74    | 16.10857 | 14.88295 | 27.15216 | 17.63975 |
| ENSMUSG00000030534 | 13_Vps33b        | 546.8768552 | -0.06644 | 0.810421 | 0.943697 | 531.1344 | 537.5776 | 609.8244 | 422.6758 | 554.3567 | 625.8921 |
| ENSMUSG00000030546 | 14_Plin1         | 0.135355363 | -0.78262 | 0.847901 | 0.943697 | 0.812132 | 0        | 0        | 0        | 0        | 0        |
| ENSMUSG00000030549 | 6_Rhcg           | 2.362140528 | -0.30622 | 0.812487 | 0.943697 | 1.624264 | 1.7175   | 4.602448 | 1.984394 | 1.13134  | 3.112896 |
| ENSMUSG00000030559 | 7_Rab38          | 616.5479059 | -0.06857 | 0.832246 | 0.943697 | 594.4808 | 741.1014 | 558.0469 | 789.7887 | 463.8494 | 552.0203 |
| ENSMUSG00000030643 | 13_Rab30         | 140.0236522 | 0.087416 | 0.813398 | 0.943697 | 151.0566 | 146.8463 | 109.3082 | 199.4316 | 113.134  | 120.3653 |
| ENSMUSG00000030730 | 12_Atp2a1        | 1197.039419 | 0.100929 | 0.846763 | 0.943697 | 758.5315 | 1842.878 | 864.1097 | 1230.324 | 616.5804 | 1869.813 |
| ENSMUSG00000030750 | 13_Nsmce1        | 623.6110298 | -0.05067 | 0.816319 | 0.943697 | 661.0756 | 595.9727 | 646.644  | 601.2713 | 624.4997 | 612.2029 |
| ENSMUSG00000030790 | 14_Adm           | 153.1461218 | -0.12372 | 0.84099  | 0.943697 | 198.9724 | 93.60377 | 186.3992 | 57.54742 | 281.7037 | 100.6503 |
| ENSMUSG00000030798 | 13_Cd37          | 74.40416759 | -0.15082 | 0.828135 | 0.943697 | 91.77094 | 56.67751 | 86.29591 | 12.89856 | 119.9221 | 78.86004 |
| ENSMUSG00000030801 | 10_Kat8          | 353.2668884 | -0.06277 | 0.834642 | 0.943697 | 367.8959 | 330.6188 | 384.3044 | 254.9946 | 381.2616 | 400.526  |
| ENSMUSG00000030859 | 7_Fam24a         | 0.191768685 | -0.78262 | 0.847901 | 0.943697 | 0        | 0        | 1.150612 | 0        | 0        | 0        |
| ENSMUSG00000030909 | 5_Anks4b         | 0.443846536 | -0.60249 | 0.845591 | 0.943697 | 0.812132 | 0.85875  | 0        | 0.992197 | 0        | 0        |
| ENSMUSG00000030917 | 12_Tmem159       | 853.6910798 | 0.046526 | 0.838524 | 0.943697 | 846.2417 | 748.8302 | 925.0921 | 857.258  | 870.0005 | 874.7238 |
| ENSMUSG00000030994 | 15_D7Ert443e     | 168.5550056 | -0.06047 | 0.835499 | 0.943697 | 175.4206 | 171.75   | 169.14   | 198.4394 | 160.6503 | 135.9298 |
| ENSMUSG00000031026 | 14_Trim66        | 21.74788796 | 0.097834 | 0.833881 | 0.943697 | 19.49117 | 20.61001 | 23.01224 | 19.84394 | 22.6268  | 24.90317 |
| ENSMUSG00000031074 | 14_Fgf3          | 0.135355363 | -0.78262 | 0.847901 | 0.943697 | 0.812132 | 0        | 0        | 0        | 0        | 0        |
| ENSMUSG00000031085 | 15_Gm498         | 0.191768685 | -0.78262 | 0.847901 | 0.943697 | 0        | 0        | 1.150612 | 0        | 0        | 0        |
| ENSMUSG00000031111 | 16_Igsl1         | 9.180283393 | 0.166005 | 0.822196 | 0.943697 | 5.684925 | 11.16375 | 9.204897 | 14.88295 | 7.919381 | 6.225792 |
| ENSMUSG00000031258 | 4_Xlrx           | 25.26706881 | -0.0     |          |          |          |          |          |          |          |          |

|                    |                  |             |          |          |          |          |          |          |          |           |          |
|--------------------|------------------|-------------|----------|----------|----------|----------|----------|----------|----------|-----------|----------|
| ENSMUSG00000032399 | 7_Rpl4           | 30854.85871 | -0.06601 | 0.806528 | 0.943697 | 32093.03 | 30354.24 | 32234.4  | 23055.68 | 33005.72  | 34386.09 |
| ENSMUSG00000032565 | 8_Nudt16         | 137.1751151 | 0.067223 | 0.813358 | 0.943697 | 138.8746 | 133.1063 | 130.0192 | 149.8217 | 117.6594  | 153.5695 |
| ENSMUSG00000032596 | 14_Uba7          | 5411.26123  | -0.11263 | 0.838242 | 0.943697 | 4908.527 | 5046.016 | 6901.371 | 1660.937 | 5087.676  | 5229.666 |
| ENSMUSG00000032625 | 14_Thsd7a        | 81.75457986 | -0.10952 | 0.831891 | 0.943697 | 82.83748 | 103.9088 | 67.88611 | 133.9466 | 40.72824  | 61.22029 |
| ENSMUSG00000032679 | 12_Cd59a         | 286.602028  | 0.087667 | 0.846705 | 0.943697 | 265.5672 | 359.8163 | 208.2608 | 467.3247 | 181.0144  | 237.6177 |
| ENSMUSG00000032802 | 8_Srxn1          | 838.8330951 | -0.06389 | 0.812308 | 0.943697 | 889.2847 | 875.9252 | 806.5791 | 650.8811 | 960.5077  | 849.8207 |
| ENSMUSG00000032818 | 15_Loxhd1        | 0.135355363 | -0.78262 | 0.847901 | 0.943697 | 0.812132 | 0        | 0        | 0        | 0         | 0        |
| ENSMUSG00000032846 | 9_Zswim6         | 649.6851358 | 0.059548 | 0.804892 | 0.943697 | 621.2811 | 611.4302 | 676.5599 | 741.171  | 581.5088  | 666.1598 |
| ENSMUSG00000032849 | 13_Abco4         | 2902.006080 | 0.043692 | 0.835546 | 0.943697 | 2813.226 | 2721.379 | 3039.917 | 2855.542 | 2869.079  | 3112.896 |
| ENSMUSG00000033053 | 3_170028P14Rik   | 0.143125037 | -0.78262 | 0.847901 | 0.943697 | 0        | 0        | 0.85875  | 0        | 0         | 0        |
| ENSMUSG00000033063 | 7_Cntnap3        | 4.232263795 | -0.24103 | 0.811315 | 0.943697 | 2.436397 | 3.435001 | 8.054285 | 4.960984 | 3.39402   | 3.112896 |
| ENSMUSG00000033542 | 13_Arhg6f5       | 4947.00152  | 0.061583 | 0.81696  | 0.943697 | 4613.723 | 4609.771 | 5300.87  | 4030.303 | 5897.676  | 5229.666 |
| ENSMUSG00000033544 | 6_Angptl1        | 293.9396493 | 0.10255  | 0.806888 | 0.943697 | 298.0525 | 321.1726 | 231.273  | 446.4886 | 171.9637  | 294.6875 |
| ENSMUSG00000033590 | 7_Myo5c          | 91.91272885 | 0.076847 | 0.832283 | 0.943697 | 67.40697 | 115.9313 | 85.1453  | 108.1495 | 81.45649  | 93.38689 |
| ENSMUSG00000033717 | 5_Adra2a         | 104.0313583 | -0.08256 | 0.810056 | 0.943697 | 120.1956 | 93.60377 | 107.0069 | 74.41476 | 121.0534  | 107.9137 |
| ENSMUSG00000033730 | 3_Egr3           | 1.568542807 | -0.35658 | 0.816329 | 0.943697 | 3.248529 | 0.85875  | 1.150612 | 1.984394 | 1.13134   | 1.037632 |
| ENSMUSG00000033739 | 8_Fkbp1          | 124.9278777 | -0.06444 | 0.837659 | 0.943697 | 131.5654 | 130.53   | 120.8143 | 93.2665  | 131.2355  | 142.1556 |
| ENSMUSG00000033880 | 11_Lgals3bp      | 7152.16797  | -0.10995 | 0.839498 | 0.943697 | 6363.056 | 6327.272 | 9583.448 | 2279.076 | 106.14.23 | 7745.925 |
| ENSMUSG00000033983 | 13_Coil          | 152.5850416 | 0.061672 | 0.811709 | 0.943697 | 151.8687 | 144.27   | 151.8808 | 150.8139 | 152.7309  | 163.9459 |
| ENSMUSG00000034071 | 14_Zfp551        | 66.61414921 | 0.083371 | 0.804004 | 0.943697 | 64.15844 | 67.84127 | 62.13305 | 75.40696 | 55.43567  | 74.70951 |
| ENSMUSG00000034075 | 10_Zdhc5         | 11216.7767  | 0.054077 | 0.815418 | 0.943697 | 10474.88 | 10122.09 | 12423.16 | 10862.57 | 12485.47  | 10932.49 |
| ENSMUSG00000034087 | 13_Nlrp4b        | 0.143125037 | -0.78262 | 0.847901 | 0.943697 | 0        | 0        | 0.85875  | 0        | 0         | 0        |
| ENSMUSG00000034117 | 3_Ptgd2          | 0.143125037 | -0.78262 | 0.847901 | 0.943697 | 0        | 0        | 0.85875  | 0        | 0         | 0        |
| ENSMUSG00000034118 | 15_Tpst1         | 534.5431285 | 0.053469 | 0.820303 | 0.943697 | 510.019  | 515.2501 | 548.842  | 588.3727 | 562.276   | 482.4989 |
| ENSMUSG00000034359 | 16_Skint2        | 3.645017412 | 0.300459 | 0.831463 | 0.943697 | 5.684925 | 1.7175   | 2.301224 | 1.984394 | 10.18206  | 0        |
| ENSMUSG00000034528 | 15_Hsd17b13      | 3.099228467 | 0.313475 | 0.826904 | 0.943697 | 7.30919  | 0.85875  | 0        | 2.97659  | 2.26268   | 5.18816  |
| ENSMUSG00000034579 | 17_Pla2g3        | 11.69007304 | -0.15048 | 0.843723 | 0.943697 | 14.61838 | 12.88125 | 9.204897 | 2.97659  | 16.9701   | 13.48922 |
| ENSMUSG00000034623 | 14_Prss55        | 0.143125037 | -0.78262 | 0.847901 | 0.943697 | 0        | 0        | 0.85875  | 0        | 0         | 0        |
| ENSMUSG00000034732 | 4_Pabpc5         | 1.488651317 | 0.395119 | 0.838527 | 0.943697 | 1.624264 | 0        | 2.301224 | 3.968787 | 0         | 1.037632 |
| ENSMUSG00000035095 | 11_Fam167a       | 95.06243348 | -0.13384 | 0.812985 | 0.943697 | 99.08013 | 66.98252 | 132.3204 | 46.63325 | 165.1757  | 60.18266 |
| ENSMUSG00000035181 | 5_Heat5a         | 998.4775193 | -0.04893 | 0.827666 | 0.943697 | 993.2377 | 1011.608 | 1041.304 | 887.024  | 1078.167  | 979.5247 |
| ENSMUSG00000035528 | 4_Npffr2         | 0.135355363 | -0.78262 | 0.847901 | 0.943697 | 0.812132 | 0        | 0        | 0        | 0         | 0        |
| ENSMUSG00000035561 | 5_Aldh1b1        | 40.48195063 | -0.10814 | 0.820406 | 0.943697 | 51.97646 | 36.92626 | 36.81959 | 21.82833 | 48.64762  | 46.69344 |
| ENSMUSG00000035594 | 9_Chrrna5        | 2.031734048 | 0.455004 | 0.810227 | 0.943697 | 0.812132 | 4.293751 | 0        | 5.953181 | 1.13134   | 0        |
| ENSMUSG00000035601 | 9_Trrnt10b       | 199.5645355 | 0.050744 | 0.846746 | 0.943697 | 186.7904 | 188.925  | 212.8632 | 220.2677 | 181.0144  | 207.5264 |
| ENSMUSG00000035606 | 8_Ky             | 30.90436337 | 0.125064 | 0.814974 | 0.943697 | 19.49117 | 36.06751 | 33.36775 | 32.74249 | 18.10144  | 45.65581 |
| ENSMUSG00000035877 | 17_Zhx3          | 1074.181878 | 0.051364 | 0.817161 | 0.943697 | 1018.414 | 1159.313 | 987.2252 | 1130.112 | 1103.057  | 1046.971 |
| ENSMUSG00000035953 | 13_Tmem55b       | 915.0813447 | 0.062879 | 0.80857  | 0.943697 | 934.7641 | 865.6202 | 884.8207 | 750.1008 | 1010.287  | 1044.895 |
| ENSMUSG00000035963 | 8_Odf3l2         | 0.143125037 | -0.78262 | 0.847901 | 0.943697 | 0        | 0        | 0.85875  | 0        | 0         | 0        |
| ENSMUSG00000036123 | 6_Slc9a3         | 1.568267017 | -0.37364 | 0.820101 | 0.943697 | 2.436397 | 1.7175   | 1.150612 | 0.992197 | 0         | 3.112896 |
| ENSMUSG00000036216 | 5_Leap2          | 0.135355363 | -0.78262 | 0.847901 | 0.943697 | 0.812132 | 0        | 0        | 0        | 0         | 0        |
| ENSMUSG00000036218 | 15_Pdznm4        | 27.64890874 | -0.12534 | 0.814454 | 0.943697 | 33.29742 | 33.49126 | 19.56041 | 19.84394 | 19.23278  | 40.46765 |
| ENSMUSG00000036315 | 13_Znrd1         | 535.6199486 | -0.08152 | 0.832358 | 0.943697 | 561.1833 | 486.9114 | 604.0714 | 292.6981 | 649.3892  | 619.4663 |
| ENSMUSG00000036513 | 15_Commnd2       | 620.9650477 | 0.045544 | 0.844265 | 0.943697 | 594.4808 | 575.3626 | 663.9032 | 629.0528 | 678.8041  | 584.1869 |
| ENSMUSG00000036526 | 8_Card11         | 17.69405947 | -0.21624 | 0.836499 | 0.943697 | 26.80036 | 12.88125 | 17.25918 | 0        | 30.54618  | 18.67738 |
| ENSMUSG00000036551 | 6_Akap14         | 0.191768685 | -0.78262 | 0.847901 | 0.943697 | 0        | 0        | 1.150612 | 0        | 0         | 0        |
| ENSMUSG00000036587 | 13_Fut7          | 3.658738165 | -0.29825 | 0.81228  | 0.943697 | 4.872793 | 2.576251 | 4.602448 | 0        | 6.788041  | 3.112896 |
| ENSMUSG00000036875 | 15_Dna2          | 165.9678286 | 0.064704 | 0.83169  | 0.943697 | 172.9842 | 125.3775 | 188.7004 | 176.611  | 176.4891  | 155.6448 |
| ENSMUSG00000036968 | 15_Cnpy4         | 460.4773553 | -0.05518 | 0.806927 | 0.943697 | 484.8429 | 477.4651 | 445.2869 | 428.629  | 451.4047  | 475.2355 |
| ENSMUSG00000037005 | 16_Xpnp2p2       | 108.5651352 | -0.07954 | 0.811579 | 0.943697 | 134.0018 | 108.2025 | 92.04897 | 87.31332 | 106.346   | 123.4782 |
| ENSMUSG00000037022 | 2_Mmaa           | 425.7381088 | -0.05054 | 0.844683 | 0.943697 | 424.7451 | 407.9064 | 467.1485 | 365.1284 | 403.8884  | 485.6118 |
| ENSMUSG00000037034 | 15_Pax1          | 0.191768685 | -0.78262 | 0.847901 | 0.943697 | 0        | 0        | 1.150612 | 0        | 0         | 0        |
| ENSMUSG00000037202 | 5_Prf1           | 31.61121092 | 0.142475 | 0.822366 | 0.943697 | 42.23087 | 22.32751 | 25.31347 | 15.87515 | 61.09237  | 22.82791 |
| ENSMUSG00000037247 | 3_Pldi           | 0.191768685 | -0.78262 | 0.847901 | 0.943697 | 0        | 0        | 1.150612 | 0        | 0         | 0        |
| ENSMUSG00000037363 | 8_Letm2          | 85.51510996 | -0.08151 | 0.82043  | 0.943697 | 83.64961 | 99.61503 | 80.54285 | 82.35234 | 61.09237  | 105.8385 |
| ENSMUSG00000037544 | 13_Dlgap5        | 453.4707587 | 0.062665 | 0.816162 | 0.943697 | 447.4848 | 400.1776 | 483.2571 | 381.9958 | 530.5985  | 477.3108 |
| ENSMUSG00000037605 | 16_Adgrl3        | 104.8882493 | -0.08355 | 0.836208 | 0.943697 | 93.3952  | 148.5638 | 81.69346 | 133.9466 | 81.45649  | 90.27399 |
| ENSMUSG00000037660 | 4_Gdf7           | 1.614845245 | -0.33424 | 0.834916 | 0.943697 | 1.624264 | 2.576251 | 1.150612 | 0        | 2.26268   | 2.075264 |
| ENSMUSG00000037935 | 16_Smarce1       | 1867.39875  | -0.05085 | 0.803258 | 0.943697 | 1910.947 | 1845.454 | 1944.534 | 1788.931 | 1901.783  | 1812.743 |
| ENSMUSG00000038028 | 9_Tigar          | 269.7603271 | -0.06003 | 0.820301 | 0.943697 | 276.1249 | 274.8001 | 274.9963 | 219.2755 | 295.2798  | 278.0854 |
| ENSMUSG00000038072 | 14_Galnt11       | 731.6477801 | 0.052555 | 0.814302 | 0.943697 | 720.3612 | 731.6552 | 703.024  | 793.7575 | 674.2787  | 766.8101 |
| ENSMUSG00000038214 | 14_Bend3         | 282.316415  | -0.06397 | 0.80942  | 0.943697 | 256.6338 | 299.7038 | 309.5147 | 237.135  | 294.1484  | 296.7628 |
| ENSMUSG00000038342 | 15_Mlxip         | 1796.380001 | -0.07402 | 0.816011 | 0.943697 | 1736.339 | 1822.268 | 1968.697 | 1178.73  | 2036.412  | 2035.834 |
| ENSMUSG00000038369 | 14_Ncoa6         | 2063.529472 | 0.04398  | 0.840226 | 0.943697 | 1892.268 | 2018.063 | 2186.163 | 2022.097 | 2242.316  | 2020.27  |
| ENSMUSG00000038418 | 7_Egr1           | 1081.414181 | -0.06938 | 0.841941 | 0.943697 | 1404.177 | 772.0165 | 1146.01  | 855.2737 | 1000.663  | 1306.379 |
| ENSMUSG00000038576 | 15_Susd4         | 1604.909318 | -0.07707 | 0.834587 | 0.943697 | 1364.382 | 1507.965 | 2071.102 | 925.7196 | 2053.382  | 1706.905 |
| ENSMUSG00000038648 | 5_Creb3l2        | 1278.184022 | -0.06526 | 0.804481 | 0.943697 | 1175.967 | 1537.163 | 1208.143 | 1396.021 | 1083.824  | 1267.986 |
| ENSMUSG00000038656 | 5_Cyp3a16        | 0.191768685 | -0.78262 | 0.847901 | 0.943697 | 0        | 0        | 1.150612 | 0        | 0         | 0        |
| ENSMUSG00000038859 | 7_Balgp21        | 984.5488106 | -0.04446 | 0.845565 | 0.943697 | 938.8248 | 954.9302 | 1105.738 | 902.8991 | 1017.075  | 987.8257 |
| ENSMUSG00000038902 | 14_Pogz          | 1200.641547 | -0.05955 | 0.803538 | 0.943697 | 1144.294 | 1264.08  | 1267.975 | 1029.9   | 1165.28   | 1332.32  |
| ENSMUSG00000038925 | 12_E330034G19Rik | 0.888157768 | -0.5062  | 0.82405  | 0.943697 | 0        | 0        | 0.85875  | 2.301224 | 0         | 1.13134  |
| ENSMUSG00000039079 | 1_Thr2           | 0.191768685 | -0.78262 | 0.847901 | 0.943697 | 0        | 0        | 1.150612 | 0        | 0         | 0        |
| ENSMUSG00000039236 | 18_Isg20         | 324.1230563 | 0.114293 | 0.844793 | 0.943697 | 311.8588 | 211.2526 | 410.7685 | 110.1338 | 576.9835  | 323.7412 |
| ENSMUSG00000039358 | 3_Drd5           | 0.143125037 | -0.78262 | 0.847901 | 0.943697 | 0        | 0        | 0.85875  | 0        | 0         | 0        |
| ENSMUSG00000039405 | 6_Prss23         | 5058.636139 | -0.04477 | 0.830494 | 0.943697 | 5137.548 | 4860.526 | 5413.63  | 5285.432 | 4829.691  | 4824.989 |
| ENSMUSG00000039473 | 7_Ubn1           | 2405.097558 | 0.042658 | 0.840069 | 0.943697 | 2316.201 | 2277.406 | 2515.238 | 2290.982 | 2509.312  | 2521.446 |
| ENSMUSG00000039616 | 9_Mocos          | 554.1975056 | 0.094887 | 0.830161 | 0.943697 | 482.4065 | 462.8664 | 662.7526 | 275.8307 | 752.3412  | 688.9877 |
| ENSMUSG00000039684 | 8_Gm5422         | 13.52284105 | 0.176879 | 0.814587 | 0.943697 | 15.43051 | 15.4575  | 6.903673 | 8.929771 | 27.       |          |

|                    |                  |             |          |          |          |          |          |          |          |          |          |
|--------------------|------------------|-------------|----------|----------|----------|----------|----------|----------|----------|----------|----------|
| ENSMUSG00000042312 | 9_S100a13        | 191.4267009 | -0.08377 | 0.815282 | 0.943697 | 211.9665 | 202.6651 | 176.0437 | 123.0324 | 188.9338 | 245.9188 |
| ENSMUSG00000042433 | 2_Pih1h3b        | 0.143125037 | -0.78262 | 0.847901 | 0.943697 | 0        | 0.85875  | 0        | 0        | 0        | 0        |
| 13_Asx11           | 1791.35715       | 0.042759    | 0.843499 | 0.943697 | 1728.217 | 1690.879 | 1875.498 | 1685.742 | 1931.198 | 1836.609 |          |
| ENSMUSG00000042678 | 16_Myo15         | 3.464637475 | 0.287699 | 0.81461  | 0.943697 | 0.812132 | 5.152501 | 3.451836 | 2.97659  | 1.13134  | 7.263244 |
| ENSMUSG00000042751 | 14_Nmna12        | 96.42593658 | -0.09028 | 0.803041 | 0.943697 | 124.2562 | 87.59252 | 86.29591 | 86.32112 | 75.79979 | 118.2901 |
| ENSMUSG00000042784 | 9_Muc1           | 2518.657371 | -0.08988 | 0.829964 | 0.943697 | 2058.755 | 2538.466 | 3191.798 | 1303.747 | 3142.863 | 2876.316 |
| ENSMUSG00000042788 | 12_Fam166b       | 1.560497343 | -0.36358 | 0.830835 | 0.943697 | 3.248529 | 0.85875  | 1.150612 | 0.992197 | 0        | 3.112896 |
| ENSMUSG00000043050 | 7_Tnp2           | 0.135355363 | -0.78262 | 0.847901 | 0.943697 | 0.812132 | 0        | 0        | 0        | 0        | 0        |
| ENSMUSG00000043388 | 8_Tmem130        | 4.172926093 | -0.22635 | 0.811757 | 0.943697 | 5.684925 | 4.293751 | 3.451836 | 3.968787 | 4.52536  | 3.112896 |
| ENSMUSG00000043485 | 2_Krt34          | 3.932415046 | 0.256597 | 0.819124 | 0.943697 | 0.812132 | 4.293751 | 5.753061 | 4.52536  | 6.225792 |          |
| ENSMUSG00000043531 | 15_Sorcs1        | 152.6807861 | 0.114484 | 0.830185 | 0.943697 | 115.3228 | 219.8401 | 104.7057 | 263.9244 | 82.58783 | 129.704  |
| ENSMUSG00000043659 | 11_Npsr1         | 100.7047808 | -0.11004 | 0.834251 | 0.943697 | 87.71028 | 151.14   | 74.78979 | 152.7983 | 47.51628 | 90.27399 |
| ENSMUSG00000043747 | 12_1520401A03Rik | 0.143125037 | -0.78262 | 0.847901 | 0.943697 | 0        | 0.85875  | 0        | 0        | 0        | 0        |
| ENSMUSG00000043873 | 11_Chil5         | 1.881197389 | 0.315965 | 0.843342 | 0.943697 | 4.060661 | 0.85875  | 0        | 0.992197 | 2.26268  | 3.112896 |
| ENSMUSG00000043923 | 7_Ccdc84         | 89.14551582 | 0.079407 | 0.84082  | 0.943697 | 82.83748 | 91.88627 | 85.1453  | 55.56302 | 118.7907 | 100.6503 |
| ENSMUSG00000044056 | 3_Efcab9         | 1.981618027 | -0.36237 | 0.818638 | 0.943697 | 2.436397 | 0.85875  | 3.451836 | 0.992197 | 0        | 4.150528 |
| ENSMUSG00000044072 | 14_Eml6          | 48.83859229 | -0.07572 | 0.842465 | 0.943697 | 46.29153 | 63.54752 | 40.27142 | 48.61764 | 48.64762 | 45.65581 |
| ENSMUSG00000044248 | 3_Vmn1r45        | 0.135355363 | -0.78262 | 0.847901 | 0.943697 | 0.812132 | 0        | 0        | 0        | 0        | 0        |
| ENSMUSG00000044447 | 4_Dock5          | 789.8837773 | -0.05169 | 0.846724 | 0.943697 | 792.641  | 926.5915 | 692.6685 | 886.0318 | 677.6727 | 763.6972 |
| ENSMUSG00000044468 | 14_Fam46c        | 222.2493929 | 0.062857 | 0.83499  | 0.943697 | 212.7786 | 233.5801 | 205.9596 | 287.7371 | 190.0651 | 203.3759 |
| ENSMUSG00000044519 | 8_Zfp488         | 1.067530632 | 0.681244 | 0.818677 | 0.943697 | 2.436397 | 0        | 0        | 3.968787 | 0        | 0        |
| ENSMUSG00000044542 | 3_Prop1          | 0.143125037 | -0.78262 | 0.847901 | 0.943697 | 0        | 0.85875  | 0        | 0        | 0        | 0        |
| ENSMUSG00000044544 | 3_4921513I03Rik  | 0.135355363 | -0.78262 | 0.847901 | 0.943697 | 0.812132 | 0        | 0        | 0        | 0        | 0        |
| ENSMUSG00000044676 | 9_Zfp612         | 154.3005772 | -0.07762 | 0.80433  | 0.943697 | 159.99   | 165.7388 | 149.5796 | 132.9544 | 125.5788 | 191.9619 |
| 16_Wdr72           | 32.50579429      | -0.09989    | 0.833255 | 0.943697 | 32.48529 | 35.20676 | 33.36775 | 44.64886 | 19.23278 | 30.09133 |          |
| ENSMUSG00000044991 | 10_1110034G24Rik | 125.2369369 | -0.07536 | 0.809467 | 0.943697 | 134.8139 | 122.8013 | 127.7179 | 93.2665  | 136.8922 | 135.9298 |
| ENSMUSG00000045267 | 3_Tas2r119       | 0.143125037 | -0.78262 | 0.847901 | 0.943697 | 0        | 0.85875  | 0        | 0        | 0        | 0        |
| ENSMUSG00000045288 | 10_Ush1g         | 0.143125037 | -0.78262 | 0.847901 | 0.943697 | 0        | 0.85875  | 0        | 0        | 0        | 0        |
| ENSMUSG00000045314 | 5_Sowahb         | 603.4827906 | 0.050503 | 0.846982 | 0.943697 | 531.1344 | 573.6451 | 674.2587 | 556.6224 | 709.3502 | 575.8858 |
| ENSMUSG00000045440 | 3_Insm2          | 0.143125037 | -0.78262 | 0.847901 | 0.943697 | 0        | 0.85875  | 0        | 0        | 0        | 0        |
| ENSMUSG00000045655 | 9_Fam216b        | 0.135355363 | -0.78262 | 0.847901 | 0.943697 | 0.812132 | 0        | 0        | 0        | 0        | 0        |
| ENSMUSG00000045657 | 3_Podhb10        | 26.20666655 | -0.11568 | 0.82596  | 0.943697 | 22.7397  | 36.06751 | 23.01224 | 33.73469 | 14.70742 | 26.97843 |
| ENSMUSG00000045795 | 9_Whamm          | 527.690156  | 0.05601  | 0.842186 | 0.943697 | 486.4672 | 499.7926 | 566.1012 | 439.5432 | 659.5713 | 514.6655 |
| ENSMUSG00000046034 | 7_Otulin         | 479.7821226 | -0.06203 | 0.833654 | 0.943697 | 483.2186 | 481.7589 | 505.1187 | 350.2455 | 575.8521 | 482.4989 |
| ENSMUSG00000046119 | 2_1110008E08Rik  | 0.135355363 | -0.78262 | 0.847901 | 0.943697 | 0.812132 | 0        | 0        | 0        | 0        | 0        |
| ENSMUSG00000046262 | 14_C87977        | 0.191768685 | -0.78262 | 0.847901 | 0.943697 | 0        | 0        | 1.150612 | 0        | 0        | 0        |
| ENSMUSG00000046272 | 2_Olfr1444       | 0.135355363 | -0.78262 | 0.847901 | 0.943697 | 0.812132 | 0        | 0        | 0        | 0        | 0        |
| ENSMUSG00000046287 | 7_Pnma3          | 4.09898764  | 0.274873 | 0.804112 | 0.943697 | 4.827793 | 1.1715   | 4.602448 | 3.968787 | 1.13134  | 8.301057 |
| ENSMUSG00000046490 | 7_Rnf222         | 69.19271218 | 0.087301 | 0.827912 | 0.943697 | 66.59484 | 64.40627 | 70.18734 | 43.65666 | 89.37587 | 80.9353  |
| ENSMUSG00000046589 | 6_Lrrc8e         | 662.5708135 | -0.05882 | 0.813157 | 0.943697 | 640.7723 | 667.2489 | 720.2832 | 546.7004 | 696.9055 | 703.5145 |
| ENSMUSG00000046714 | 7_Foxc2          | 36.09076916 | -0.11916 | 0.839067 | 0.943697 | 28.42463 | 35.20876 | 49.47632 | 60.52401 | 16.9701  | 25.9408  |
| ENSMUSG00000046718 | 7_Bst2           | 2883.13338  | 0.093902 | 0.833118 | 0.943697 | 2445.33  | 1961.386 | 3961.557 | 1780.993 | 4350.003 | 2799.531 |
| ENSMUSG00000046804 | 13_Phrp1         | 0.191768685 | -0.78262 | 0.847901 | 0.943697 | 0        | 0        | 1.150612 | 0        | 0        | 0        |
| ENSMUSG00000046845 | 1_Ilfr10         | 0.949613516 | -0.63854 | 0.835699 | 0.943697 | 0        | 3.435001 | 0        | 0        | 2.26268  | 0        |
| ENSMUSG00000046908 | 5_Ltb4r1         | 201.3233384 | -0.09226 | 0.83748  | 0.943697 | 199.7845 | 182.9138 | 240.4779 | 101.2041 | 300.9365 | 182.6232 |
| ENSMUSG00000047053 | 5_Teddm1a        | 0.191768685 | -0.78262 | 0.847901 | 0.943697 | 0        | 0        | 1.150612 | 0        | 0        | 0        |
| ENSMUSG00000047084 | 8_Ngrn           | 612.0777044 | -0.04611 | 0.833855 | 0.943697 | 595.2929 | 632.8989 | 637.4391 | 566.5444 | 617.7117 | 622.5792 |
| ENSMUSG00000047143 | 3_Dmtra2         | 640.1736107 | -0.06342 | 0.837385 | 0.943697 | 546.565  | 618.3002 | 798.5248 | 777.8823 | 562.276  | 537.4934 |
| ENSMUSG00000047153 | 3_Khny1          | 2920.480075 | -0.05786 | 0.829378 | 0.943697 | 2740.134 | 2898.282 | 3298.805 | 2266.178 | 3223.188 | 3096.294 |
| ENSMUSG00000047248 | 19_C2cd3         | 901.2022607 | -0.05429 | 0.837843 | 0.943697 | 813.7564 | 914.569  | 1026.346 | 730.2569 | 984.2659 | 938.0194 |
| ENSMUSG00000047342 | 16_Zfp286        | 48.16523801 | -0.10179 | 0.825537 | 0.943697 | 65.78271 | 55.81876 | 27.61469 | 53.57863 | 38.46556 | 47.73108 |
| ENSMUSG00000047370 | 4_Gm7367         | 2.484657759 | -0.40589 | 0.804356 | 0.943697 | 3.248529 | 5.152501 | 0        | 0        | 3.39402  | 3.112896 |
| ENSMUSG00000047557 | 2_Lxn            | 1090.031512 | 0.055618 | 0.803513 | 0.943697 | 1067.142 | 1046.817 | 1093.082 | 1110.268 | 1218.453 | 1004.428 |
| ENSMUSG00000047603 | 9_Zfp235         | 178.7538201 | -0.06194 | 0.827655 | 0.943697 | 155.1172 | 208.6763 | 184.0979 | 167.6813 | 162.913  | 194.0372 |
| ENSMUSG00000047797 | 14_Gjb1          | 6.573788291 | -0.21945 | 0.822287 | 0.943697 | 4.060661 | 6.870002 | 10.35551 | 0.992197 | 6.788041 | 10.37632 |
| ENSMUSG00000047821 | 16_Trim16        | 1925.51858  | 0.053291 | 0.84299  | 0.943697 | 1761.515 | 1787.918 | 2120.578 | 1642.086 | 2357.713 | 1883.302 |
| ENSMUSG00000047904 | 6_Sstr2          | 0.451419078 | -0.60276 | 0.844808 | 0.943697 | 0.812132 | 0.85875  | 0        | 0        | 0        | 1.037632 |
| ENSMUSG00000047953 | 6_Gp5            | 0.451419078 | -0.60276 | 0.844808 | 0.943697 | 0.812132 | 0.85875  | 0        | 0        | 0        | 1.037632 |
| ENSMUSG00000048040 | 8_Arxes2         | 57.99675529 | 0.130551 | 0.805331 | 0.943697 | 57.66138 | 70.41752 | 37.9702  | 101.2041 | 35.07154 | 45.65581 |
| ENSMUSG00000048355 | 2_Arxes1         | 11.60009731 | 0.175337 | 0.818355 | 0.943697 | 8.933454 | 14.59875 | 9.204897 | 16.86735 | 3.39402  | 16.60211 |
| ENSMUSG00000048371 | 7_Pdp2           | 517.6384587 | -0.06413 | 0.806518 | 0.943697 | 507.5826 | 481.7589 | 598.3183 | 429.6212 | 552.094  | 536.4558 |
| ENSMUSG00000048450 | 10_Msx1          | 23.64752371 | -0.11426 | 0.837555 | 0.943697 | 23.55183 | 32.63251 | 17.25918 | 12.89856 | 31.67752 | 23.86554 |
| ENSMUSG00000048647 | 9_Exd1           | 63.48276943 | 0.089183 | 0.8246   | 0.943697 | 78.77682 | 58.39502 | 47.1751  | 76.39915 | 47.51628 | 72.63424 |
| ENSMUSG00000048655 | 17_Ccdc169       | 1.391561154 | 0.536162 | 0.819235 | 0.943697 | 0.812132 | 2.576251 | 0        | 4.960984 | 0        | 0        |
| ENSMUSG00000048728 | 15_Zfp454        | 26.88334759 | 0.099574 | 0.829849 | 0.943697 | 33.29742 | 21.46876 | 23.01224 | 29.7659  | 22.6268  | 31.12896 |
| ENSMUSG00000048763 | 11_Hoxb3         | 1.904782201 | 0.29865  | 0.843269 | 0.943697 | 2.436397 | 2.576251 | 0        | 1.984394 | 3.39402  | 1.037632 |
| ENSMUSG00000049122 | 17_Frmd3         | 17.88920301 | 0.157667 | 0.805883 | 0.943697 | 16.24264 | 24.04501 | 10.35551 | 30.7581  | 12.44474 | 13.48922 |
| ENSMUSG00000049154 | 11_Fam183b       | 0.143125037 | -0.78262 | 0.847901 | 0.943697 | 0        | 0.85875  | 0        | 0        | 0        | 0        |
| ENSMUSG00000049173 | 7_Myoz3          | 4.124046471 | -0.24682 | 0.844348 | 0.943697 | 0.812132 | 10.305   | 2.301224 | 3.968787 | 1.13134  | 6.225792 |
| ENSMUSG00000049387 | 9_Cox7b2         | 0.191768685 | -0.78262 | 0.847901 | 0.943697 | 0        | 0        | 1.150612 | 0        | 0        | 0        |
| ENSMUSG00000049620 | 8_Prss33         | 0.887298807 | -0.66697 | 0.830423 | 0.943697 | 3.248529 | 0        | 0        | 0        | 0        | 2.075264 |
| ENSMUSG00000049761 | 6_Pmis2          | 0.191768685 | -0.78262 | 0.847901 | 0.943697 | 0        | 0        | 1.150612 | 0        | 0        | 0        |
| ENSMUSG00000049904 | 7_Tmem17         | 40.54496372 | -0.09675 | 0.829965 | 0.943697 | 55.22499 | 33.49126 | 36.81959 | 46.63325 | 44.12226 | 26.97843 |
| ENSMUSG00000049946 | 7_BC030500       | 0.135355363 | -0.78262 | 0.847901 | 0.943697 | 0.812132 | 0        | 0        | 0        | 0        | 0        |
| ENSMUSG00000049985 | 14_Ankrk55       | 6.312771795 | -0.22491 | 0.816697 | 0.943697 | 2.436397 | 11.16375 | 6.903673 | 9.921968 | 2.26268  | 5.18816  |
| ENSMUSG00000050097 | 6_Ces2b          | 176.6711711 | -0.05462 | 0.847103 | 0.943697 | 188.4147 | 163.1625 | 188.7004 | 175.6188 | 145.9429 | 198.1877 |
| ENSMUSG00000050100 | 13_Hmx2          | 0.135355363 | -0.78262 | 0.847901 | 0.943697 | 0.812132 | 0        | 0        | 0        | 0        | 0        |
| ENSMUSG00000050108 | 12_Bp1fc         | 11.07998696 | 0.13651  | 0.828209 | 0.943697 | 11.36985 | 7.728752 | 12.65673 | 9.921968 | 11.3134  | 13.48922 |
| ENSMUSG00000050138 | 7_Kcnk12         | 0.143125037 | -0.78262 | 0.847901 | 0.943697 | 0        | 0.85875  | 0        | 0        | 0        | 0        |
| ENSMUSG00000050232 | 6_Cxcr3          | 7.480848753 | -0.25948 | 0.823884 | 0.943697 | 15.43051 | 4.293751 | 4.602448 | 0        | 10.18206 | 10.37632 |
| ENSMUSG0000        |                  |             |          |          |          |          |          |          |          |          |          |

|                    |                 |             |          |          |          |          |          |          |          |          |          |
|--------------------|-----------------|-------------|----------|----------|----------|----------|----------|----------|----------|----------|----------|
| ENSMUSG00000052368 | 2_Gm9873        | 2.855314555 | 0.235571 | 0.839231 | 0.943697 | 4.060661 | 2.576251 | 1.150612 | 3.968787 | 2.26268  | 3.112896 |
| ENSMUSG00000052435 | 6_Cebpe         | 0.902916814 | -0.63068 | 0.809674 | 0.943697 | 3.248529 | 0        | 0        | 0        | 1.13134  | 1.037632 |
| ENSMUSG00000052485 | 7_Tmem171       | 64.721163   | 0.109226 | 0.809844 | 0.943697 | 64.15844 | 52.38376 | 70.18734 | 39.68787 | 100.6893 | 61.22029 |
| ENSMUSG00000052551 | 15_Adarb2       | 5.507786304 | 0.184404 | 0.836939 | 0.943697 | 4.872793 | 6.011252 | 4.602448 | 9.921968 | 4.52536  | 3.112896 |
| ENSMUSG00000052595 | 6_A1cf          | 0.191768685 | -0.78262 | 0.847901 | 0.943697 | 0        | 0        | 1.150612 | 0        | 0        | 0        |
| ENSMUSG00000052776 | 10_Oas1a        | 4735.700366 | 0.094464 | 0.845047 | 0.943697 | 3986.757 | 3691.767 | 6063.726 | 2168.942 | 7348.054 | 5154.956 |
| ENSMUSG00000052850 | 5_Tas2r137      | 0.143125037 | -0.78262 | 0.847901 | 0.943697 | 0        | 0.85875  | 0        | 0        | 0        | 0        |
| ENSMUSG00000052861 | 13_Dnah6        | 6.410536597 | -0.17434 | 0.843805 | 0.943697 | 7.30919  | 9.446252 | 3.451836 | 4.960984 | 10.18206 | 3.112896 |
| ENSMUSG00000053024 | 14_Cntn2        | 4.538230414 | 0.244058 | 0.82265  | 0.943697 | 4.060661 | 6.011252 | 2.301224 | 0.992197 | 4.52536  | 9.338689 |
| ENSMUSG00000053046 | 14_Brsk2        | 10.13722818 | -0.18495 | 0.832969 | 0.943697 | 19.49117 | 10.305   | 2.301224 | 4.960984 | 11.3134  | 12.45158 |
| ENSMUSG00000053184 | 15_Spaca3       | 0.135355363 | -0.78262 | 0.847901 | 0.943697 | 0.812132 | 0        | 0        | 0        | 0        | 0        |
| ENSMUSG00000053358 | 2_Gm9905        | 12.72883099 | -0.16784 | 0.807153 | 0.943697 | 12.99411 | 13.74    | 13.80735 | 20.83613 | 5.656701 | 9.338689 |
| ENSMUSG00000053388 | 10_Trim50       | 0.135355363 | -0.78262 | 0.847901 | 0.943697 | 0.812132 | 0        | 0        | 0        | 0        | 0        |
| ENSMUSG00000053420 | 5_Gm4792        | 2.344268197 | -0.34679 | 0.809323 | 0.943697 | 3.248529 | 3.435001 | 1.150612 | 3.968787 | 2.26268  | 0        |
| ENSMUSG00000053615 | 1_Gm9913        | 2.81898807  | -0.34259 | 0.839023 | 0.943697 | 0        | 6.011252 | 3.451836 | 0        | 2.26268  | 5.18816  |
| ENSMUSG00000053647 | 4_Gper1         | 4.257099466 | -0.24715 | 0.826282 | 0.943697 | 5.684925 | 6.870002 | 1.150612 | 0.992197 | 5.656701 | 5.18816  |
| ENSMUSG00000053797 | 10_Krt16        | 7964.285871 | 0.169675 | 0.839969 | 0.943697 | 6707.4   | 4339.265 | 11442.84 | 1087.448 | 20141.25 | 4067.518 |
| ENSMUSG00000053985 | 9_Zfp14         | 23.49324192 | 0.110377 | 0.833407 | 0.943697 | 31.67315 | 19.75126 | 16.10857 | 29.7659  | 26.02082 | 17.63975 |
| ENSMUSG00000054091 | 9_181003717Rik  | 1632.437633 | 0.047874 | 0.824486 | 0.943697 | 1614.519 | 1473.615 | 1728.219 | 1646.055 | 1708.324 | 1623.894 |
| ENSMUSG00000054215 | 2_Sprz2k        | 0.135355363 | -0.78262 | 0.847901 | 0.943697 | 0.812132 | 0        | 0        | 0        | 0        | 0        |
| ENSMUSG00000054568 | 7_Usp171a       | 0.191768685 | -0.78262 | 0.847901 | 0.943697 | 0        | 0        | 1.150612 | 0        | 0        | 0        |
| ENSMUSG00000054594 | 13_Oscar        | 0.143125037 | -0.78262 | 0.847901 | 0.943697 | 0        | 0.85875  | 0        | 0        | 0        | 0        |
| ENSMUSG00000054720 | 12_Lrrc8c       | 339.3157805 | -0.05374 | 0.84449  | 0.943697 | 314.2952 | 364.9688 | 357.8404 | 388.9412 | 334.8767 | 274.9725 |
| ENSMUSG00000054727 | 2_1700013H16Rik | 0.143125037 | -0.78262 | 0.847901 | 0.943697 | 0        | 0.85875  | 0        | 0        | 0        | 0        |
| ENSMUSG00000054764 | 8_Mtnr1a        | 0.143125037 | -0.78262 | 0.847901 | 0.943697 | 0        | 0.85875  | 0        | 0        | 0        | 0        |
| ENSMUSG00000055024 | 12_Ep300        | 3558.692555 | 0.047241 | 0.829299 | 0.943697 | 3224.165 | 3395.498 | 3882.165 | 3717.761 | 3644.046 | 3488.519 |
| ENSMUSG00000055045 | 5_Gm11190       | 0.191768685 | -0.78262 | 0.847901 | 0.943697 | 0        | 0        | 1.150612 | 0        | 0        | 0        |
| ENSMUSG00000055148 | 7_Klf2          | 104.8371975 | -0.07206 | 0.8382   | 0.943697 | 103.1408 | 105.6263 | 113.9106 | 137.9154 | 79.19381 | 89.23636 |
| ENSMUSG00000055653 | 13_Gpc3         | 1399.508313 | 0.045766 | 0.830111 | 0.943697 | 1349.764 | 1346.52  | 1435.964 | 1441.662 | 1324.799 | 1498.341 |
| ENSMUSG00000055811 | 2_Cldn17        | 235.9448344 | 0.062075 | 0.816033 | 0.943697 | 226.5849 | 225.8513 | 240.4779 | 281.7839 | 212.6919 | 228.2791 |
| ENSMUSG00000056008 | 1_Gm11541       | 0.191768685 | -0.78262 | 0.847901 | 0.943697 | 0        | 0        | 1.150612 | 0        | 0        | 0        |
| ENSMUSG00000056130 | 9_Ticam2        | 17.64366764 | 0.138046 | 0.827035 | 0.943697 | 18.67904 | 14.59875 | 17.25918 | 29.7659  | 7.919381 | 17.63975 |
| ENSMUSG00000056133 | 4_Gm9992        | 17.40258824 | -0.13709 | 0.806932 | 0.943697 | 16.24264 | 18.8925  | 19.56041 | 9.921968 | 16.9701  | 22.82791 |
| ENSMUSG00000056158 | 14_Car10        | 3.735423255 | 0.295313 | 0.818132 | 0.943697 | 4.060661 | 2.576251 | 3.451836 | 8.929771 | 3.9402   | 0        |
| ENSMUSG00000056305 | 4_Usp39         | 569.8558302 | 0.059037 | 0.825384 | 0.943697 | 523.8253 | 530.7076 | 620.1799 | 501.0594 | 692.3801 | 550.9826 |
| ENSMUSG00000056367 | 14_Actr3b       | 30.70756382 | -0.11889 | 0.803108 | 0.943697 | 24.36397 | 39.50251 | 32.21714 | 39.68787 | 21.49546 | 26.97843 |
| ENSMUSG00000056749 | 7_Nfil3         | 72.96647909 | -0.10947 | 0.814976 | 0.943697 | 82.02535 | 67.84127 | 77.09101 | 43.65666 | 114.2654 | 52.91924 |
| ENSMUSG00000056829 | 3_Foxb2         | 0.135355363 | -0.78262 | 0.847901 | 0.943697 | 0.812132 | 0        | 0        | 0        | 0        | 0        |
| ENSMUSG00000057068 | 15_Fam47e       | 6.621072791 | 0.201727 | 0.847384 | 0.943697 | 4.060661 | 0.85875  | 13.80735 | 8.929771 | 7.919381 | 4.150528 |
| ENSMUSG00000057280 | 15_Musk         | 32.3504087  | -0.08448 | 0.841749 | 0.943697 | 37.35808 | 29.19751 | 33.36775 | 29.7659  | 26.02082 | 38.39239 |
| ENSMUSG00000057464 | 3_Olfir1415     | 0.135355363 | -0.78262 | 0.847901 | 0.943697 | 0.812132 | 0        | 0        | 0        | 0        | 0        |
| ENSMUSG00000057674 | 3_Gm11938       | 0.135355363 | -0.78262 | 0.847901 | 0.943697 | 0.812132 | 0        | 0        | 0        | 0        | 0        |
| ENSMUSG00000057719 | 10_Sh3r2        | 718.0524601 | 0.049842 | 0.837681 | 0.943697 | 668.3848 | 644.9214 | 804.2779 | 784.8277 | 675.41   | 730.493  |
| ENSMUSG00000058013 | 11_Sept11       | 1139.874024 | 0.059011 | 0.804866 | 0.943697 | 1106.124 | 1107.788 | 1135.654 | 1116.221 | 1345.163 | 1028.293 |
| ENSMUSG00000058017 | 6_Serpinb3d     | 0.191768685 | -0.78262 | 0.847901 | 0.943697 | 0        | 0        | 1.150612 | 0        | 0        | 0        |
| ENSMUSG00000058207 | 6_Serpina3k     | 0.135355363 | -0.78262 | 0.847901 | 0.943697 | 0.812132 | 0        | 0        | 0        | 0        | 0        |
| ENSMUSG00000058230 | 12_Arhgap35     | 2709.036678 | -0.04953 | 0.814903 | 0.943697 | 2693.842 | 2829.582 | 2743.059 | 2439.812 | 2764.995 | 2782.929 |
| ENSMUSG00000058254 | 12_Tspan7       | 899.6446654 | -0.06698 | 0.80612  | 0.943697 | 890.909  | 1077.732 | 792.7717 | 1008.072 | 755.7352 | 872.6486 |
| ENSMUSG00000058550 | 14_Dppa4        | 0.135355363 | -0.78262 | 0.847901 | 0.943697 | 0.812132 | 0        | 0        | 0        | 0        | 0        |
| ENSMUSG00000058626 | 16_Capn11       | 4.43846536  | -0.60249 | 0.845591 | 0.943697 | 0.812132 | 0.85875  | 0        | 0.992197 | 0        | 0        |
| ENSMUSG00000058755 | 3_Osm           | 21.29660847 | 0.178091 | 0.815584 | 0.943697 | 21.11544 | 14.59875 | 24.16285 | 5.953181 | 46.38494 | 15.56448 |
| ENSMUSG00000058818 | 13_Pirb         | 343.0331982 | 0.114274 | 0.826981 | 0.943697 | 451.5455 | 229.2863 | 307.2134 | 182.5642 | 68.843   | 268.7467 |
| ENSMUSG00000058997 | 7_Vwa8          | 1144.18902  | -0.04943 | 0.826827 | 0.943697 | 1041.966 | 1270.092 | 1179.377 | 1078.518 | 1139.259 | 1155.922 |
| ENSMUSG00000059042 | 3_Klk1b9        | 0.135355363 | -0.78262 | 0.847901 | 0.943697 | 0.812132 | 0        | 0        | 0        | 0        | 0        |
| ENSMUSG00000059043 | 1_Olfir15       | 0.143125037 | -0.78262 | 0.847901 | 0.943697 | 0        | 0.85875  | 0        | 0        | 0        | 0        |
| ENSMUSG00000059049 | 14_Frem1        | 208.3520658 | -0.09439 | 0.811075 | 0.943697 | 240.3911 | 250.7551 | 154.182  | 279.7995 | 140.2862 | 184.6985 |
| ENSMUSG00000059119 | 8_Nap114        | 2870.946806 | -0.04254 | 0.841661 | 0.943697 | 2901.748 | 2769.469 | 3068.682 | 2637.259 | 2999.183 | 2849.338 |
| ENSMUSG00000059128 | 3_Ifln2         | 0.191768685 | -0.78262 | 0.847901 | 0.943697 | 0        | 0        | 1.150612 | 0        | 0        | 0        |
| ENSMUSG00000059256 | 6_Gzmd          | 0.135355363 | -0.78262 | 0.847901 | 0.943697 | 0.812132 | 0        | 0        | 0        | 0        | 0        |
| ENSMUSG00000059412 | 6_Fxyd2         | 9.979881472 | -0.20579 | 0.846467 | 0.943697 | 11.36985 | 17.175   | 3.451836 | 4.960984 | 1.13134  | 21.79027 |
| ENSMUSG00000059606 | 3_Rnase2b       | 0.135355363 | -0.78262 | 0.847901 | 0.943697 | 0.812132 | 0        | 0        | 0        | 0        | 0        |
| ENSMUSG00000059631 | 6_1500035N22Rik | 0.135355363 | -0.78262 | 0.847901 | 0.943697 | 0.812132 | 0        | 0        | 0        | 0        | 0        |
| ENSMUSG00000059830 | 2_Gm16380       | 0.191768685 | -0.78262 | 0.847901 | 0.943697 | 0        | 0        | 1.150612 | 0        | 0        | 0        |
| ENSMUSG00000060030 | 4_Olfir317      | 0.143125037 | -0.78262 | 0.847901 | 0.943697 | 0        | 0.85875  | 0        | 0        | 0        | 0        |
| ENSMUSG00000060063 | 5_Alox5ap       | 150.4669051 | -0.10945 | 0.836259 | 0.943697 | 208.718  | 120.225  | 139.2241 | 86.32112 | 259.0769 | 89.23636 |
| ENSMUSG00000060187 | 4_Lrrc10        | 0.143125037 | -0.78262 | 0.847901 | 0.943697 | 0        | 0.85875  | 0        | 0        | 0        | 0        |
| ENSMUSG00000060397 | 6_Zfp128        | 46.37281879 | 0.101248 | 0.838981 | 0.943697 | 47.10367 | 48.09001 | 39.12081 | 74.41476 | 24.88948 | 44.61818 |
| ENSMUSG00000060600 | 15_Eno3         | 553.9172355 | -0.10558 | 0.810794 | 0.943697 | 466.1639 | 796.0615 | 460.2448 | 464.3481 | 331.4827 | 805.2025 |
| ENSMUSG00000060716 | 6_Plekhh1       | 1973.690867 | -0.06994 | 0.821579 | 0.943697 | 1803.746 | 1799.94  | 2461.159 | 1448.607 | 2276.256 | 2052.436 |
| ENSMUSG00000060726 | 10_Tmsb15a      | 0.143125037 | -0.78262 | 0.847901 | 0.943697 | 0        | 0.85875  | 0        | 0        | 0        | 0        |
| ENSMUSG00000060924 | 14_Csmd1        | 41.16279681 | 0.097057 | 0.825413 | 0.943697 | 26.80036 | 41.22001 | 51.77754 | 50.60204 | 35.07154 | 41.50528 |
| ENSMUSG00000061048 | 7_Cdh3          | 834.4511616 | -0.13697 | 0.822388 | 0.943697 | 773.962  | 723.9264 | 1124.148 | 225.2287 | 1479.793 | 679.649  |
| ENSMUSG00000061536 | 12_Sec22c       | 693.4730121 | -0.04727 | 0.832954 | 0.943697 | 676.5061 | 680.1302 | 758.2534 | 675.686  | 645.9952 | 724.2672 |
| ENSMUSG00000061619 | 3_Vma21-ps      | 0.191768685 | -0.78262 | 0.847901 | 0.943697 | 0        | 0        | 1.150612 | 0        | 0        | 0        |
| ENSMUSG00000061707 | 5_Gm4871        | 0.191768685 | -0.78262 | 0.847901 | 0.943697 | 0        | 0        | 1.150612 | 0        | 0        | 0        |
| ENSMUSG00000061742 | 11_Slc22a12     | 0.143125037 | -0.78262 | 0.847901 | 0.943697 | 0        | 0.85875  | 0        | 0        | 0        | 0        |
| ENSMUSG00000061937 | 7_Csn1s2a       | 0.143125037 | -0.78262 | 0.847901 | 0.943697 | 0        | 0.85875  | 0        | 0        | 0        | 0        |
| ENSMUSG00000061950 | 17_Ppp4r1       | 2181.277564 | 0.068002 | 0.808442 | 0.943697 | 1982.415 | 1972.549 | 2434.695 | 1833.58  | 2731.055 | 2133.372 |
| ENSMUSG00000062028 | 8_Irgc1         | 0.143125037 | -0.78262 | 0.847901 | 0.943697 | 0        | 0.85875  | 0        | 0        | 0        | 0        |
| ENSMUSG00000062083 | 1_Rpl13a-ps1    | 5.601865202 | 0.182672 | 0.832222 | 0.943697 | 4.872793 | 5.152501 | 5.753061 | 3.968787 | 4.52536  | 9.338689 |
| ENSMUSG00000062110 | 14_Scfd2        | 214.268486  | -0.06087 | 0.822262 | 0.943697 | 192.4753 | 211.2526 | 253.1347 | 223.2443 | 210.4293 | 195.0748 |
| ENSMUSG00000062128 | 7_Olfir20       | 0.13535536  |          |          |          |          |          |          |          |          |          |

|                     |                   |             |           |          |          |          |          |          |          |          |          |
|---------------------|-------------------|-------------|-----------|----------|----------|----------|----------|----------|----------|----------|----------|
| ENSMUSG00000066319  | 6_Rtp3            | 7.635223338 | 0.222987  | 0.841474 | 0.943697 | 9.745586 | 11.16375 | 0        | 3.968787 | 14.70742 | 6.225792 |
| ENSMUSG00000066647  | 5_Gm5113          | 54.84631162 | 0.086463  | 0.82068  | 0.943697 | 61.72205 | 50.66626 | 47.1751  | 69.45378 | 42.99092 | 57.06976 |
| ENSMUSG00000066723  | 3_Vmn1r183        | 0.135355363 | -0.78262  | 0.847901 | 0.943697 | 0.812132 | 0        | 0        | 0        | 0        | 0        |
| ENSMUSG00000067360  | 12_Pramel3        | 0.191768685 | -0.78262  | 0.847901 | 0.943697 | 0        | 0        | 1.150612 | 0        | 0        | 0        |
| ENSMUSG00000067627  | 2_Gm10217         | 0.143125037 | -0.78262  | 0.847901 | 0.943697 | 0        | 0.85875  | 0        | 0        | 0        | 0        |
| ENSMUSG00000067998  | 11_Bp1fb9a        | 0.191768685 | -0.78262  | 0.847901 | 0.943697 | 0        | 0        | 1.150612 | 0        | 0        | 0        |
| ENSMUSG00000068167  | 4_Csnka2ip        | 0.191768685 | -0.78262  | 0.847901 | 0.943697 | 0        | 0        | 1.150612 | 0        | 0        | 0        |
| ENSMUSG00000068246  | 5_Apol9b          | 3367.117097 | 0.110296  | 0.830386 | 0.943697 | 2817.287 | 2639.798 | 4258.415 | 1311.684 | 5108.001 | 4067.518 |
| ENSMUSG00000068349  | 12_Gml            | 0.191768685 | -0.78262  | 0.847901 | 0.943697 | 0        | 0        | 1.150612 | 0        | 0        | 0        |
| ENSMUSG000000689248 | 11_Serpinb6e      | 0.135355363 | -0.78262  | 0.847901 | 0.943697 | 0.812132 | 0        | 0        | 0        | 0        | 0        |
| ENSMUSG00000069268  | 4_Hist1h2bf       | 0.191768685 | -0.78262  | 0.847901 | 0.943697 | 0        | 0        | 1.150612 | 0        | 0        | 0        |
| ENSMUSG00000069307  | 5_Hist1h2bq       | 19.17026455 | -0.26092  | 0.805472 | 0.943697 | 22.7397  | 28.33876 | 11.50612 | 0        | 19.23278 | 33.20423 |
| ENSMUSG00000069310  | 3_Hist1h3c        | 0.191768685 | -0.78262  | 0.847901 | 0.943697 | 0        | 0        | 1.150612 | 0        | 0        | 0        |
| ENSMUSG00000069706  | 3_Taar5           | 0.143125037 | -0.78262  | 0.847901 | 0.943697 | 0        | 0.85875  | 0        | 0        | 0        | 0        |
| ENSMUSG00000069867  | 2_Pabpn1l         | 0.143125037 | -0.78262  | 0.847901 | 0.943697 | 0        | 0.85875  | 0        | 0        | 0        | 0        |
| ENSMUSG00000069971  | 5_4933402J07Rik   | 0.143125037 | -0.78262  | 0.847901 | 0.943697 | 0        | 0.85875  | 0        | 0        | 0        | 0        |
| ENSMUSG00000070462  | 4_Mesdc1          | 322.7801889 | 0.066169  | 0.828751 | 0.943697 | 306.986  | 261.0601 | 378.5514 | 377.0348 | 348.4528 | 264.5962 |
| ENSMUSG00000070469  | 11_Adamtsl3       | 253.0470851 | -0.061    | 0.820528 | 0.943697 | 291.5555 | 249.8963 | 233.5743 | 274.8385 | 218.3486 | 250.0693 |
| ENSMUSG00000070495  | 11_Ctclf          | 0.135355363 | -0.78262  | 0.847901 | 0.943697 | 0.812132 | 0        | 0        | 0        | 0        | 0        |
| ENSMUSG00000070530  | 5_Wfdc16          | 0.135355363 | -0.78262  | 0.847901 | 0.943697 | 0.812132 | 0        | 0        | 0        | 0        | 0        |
| ENSMUSG00000070546  | 2_Mrgprb3         | 0.143125037 | -0.78262  | 0.847901 | 0.943697 | 0        | 0.85875  | 0        | 0        | 0        | 0        |
| ENSMUSG00000070551  | 3_Mrgprb5         | 0.191768685 | -0.78262  | 0.847901 | 0.943697 | 0        | 0        | 1.150612 | 0        | 0        | 0        |
| ENSMUSG00000070577  | 5_Gm572           | 0.135355363 | -0.78262  | 0.847901 | 0.943697 | 0.812132 | 0        | 0        | 0        | 0        | 0        |
| ENSMUSG00000070594  | 10_Gm4788         | 4.233993177 | 0.28284   | 0.841317 | 0.943697 | 4.872793 | 4.293751 | 2.301224 | 12.89856 | 0        | 1.037632 |
| ENSMUSG00000070708  | 5_Glsf1l          | 0.135355363 | -0.78262  | 0.847901 | 0.943697 | 0.812132 | 0        | 0        | 0        | 0        | 0        |
| ENSMUSG00000070777  | 4_Ceacam20        | 0.135355363 | -0.78262  | 0.847901 | 0.943697 | 0.812132 | 0        | 0        | 0        | 0        | 0        |
| ENSMUSG00000070778  | 5_Rpl7a-ps8       | 7.81085932  | -0.2237   | 0.823846 | 0.943697 | 12.99411 | 8.587502 | 3.451836 | 0.992197 | 13.57608 | 7.263424 |
| ENSMUSG00000070799  | 3_Psg26           | 0.143125037 | -0.78262  | 0.847901 | 0.943697 | 0        | 0.85875  | 0        | 0        | 0        | 0        |
| ENSMUSG00000070880  | 10_Gad1           | 15.66566868 | 0.152369  | 0.831593 | 0.943697 | 21.11544 | 16.31625 | 6.903673 | 27.78151 | 13.57608 | 8.301057 |
| ENSMUSG00000070900  | 1_Gm10306         | 0.135355363 | -0.78262  | 0.847901 | 0.943697 | 0.812132 | 0        | 0        | 0        | 0        | 0        |
| ENSMUSG00000071089  | 2_Trim75          | 0.191768685 | -0.78262  | 0.847901 | 0.943697 | 0        | 0        | 1.150612 | 0        | 0        | 0        |
| ENSMUSG00000071104  | 9_Ccdc110         | 0.143125037 | -0.78262  | 0.847901 | 0.943697 | 0        | 0.85875  | 0        | 0        | 0        | 0        |
| ENSMUSG00000071158  | 9_Gm156           | 0.143125037 | -0.78262  | 0.847901 | 0.943697 | 0        | 0.85875  | 0        | 0        | 0        | 0        |
| ENSMUSG00000071226  | 11_Ceer2          | 35.83477852 | -0.13849  | 0.818917 | 0.943697 | 39.79448 | 49.80751 | 23.01224 | 58.53961 | 15.83876 | 28.01607 |
| ENSMUSG00000071724  | 4_Smpd5           | 6.760921625 | -0.24379  | 0.82339  | 0.943697 | 8.121322 | 6.870002 | 6.903673 | 0        | 12.44474 | 6.225792 |
| ENSMUSG00000071726  | 2_Gm5941          | 12.44876989 | -0.17965  | 0.822616 | 0.943697 | 16.24264 | 16.31625 | 6.903673 | 2.97659  | 13.57608 | 18.67738 |
| ENSMUSG00000071770  | 5_Rhox4e          | 1.097820799 | 0.737585  | 0.803105 | 0.943697 | 2.436397 | 0        | 0        | 0        | 0        | 4.150528 |
| ENSMUSG00000071815  | 6_Fthl17e         | 0.135355363 | -0.78262  | 0.847901 | 0.943697 | 0.812132 | 0        | 0        | 0        | 0        | 0        |
| ENSMUSG00000071816  | 5_Ssxb5           | 1.511566074 | 0.414024  | 0.806296 | 0.943697 | 0.812132 | 0.85875  | 2.301224 | 1.984394 | 0        | 3.112896 |
| ENSMUSG00000071858  | 3_Gm94            | 78.30170655 | 0.097418  | 0.840336 | 0.943697 | 78.77682 | 54.10126 | 94.35019 | 115.0948 | 85.98185 | 41.50528 |
| ENSMUSG00000071866  | 11_Ppia           | 27899.41396 | 0.043686  | 0.830257 | 0.943697 | 28064.04 | 26215.07 | 28152.03 | 26789.31 | 29391.08 | 28784.95 |
| ENSMUSG00000072259  | 3_Gm5592          | 0.143125037 | -0.78262  | 0.847901 | 0.943697 | 0        | 0.85875  | 0        | 0        | 0        | 0        |
| ENSMUSG00000072601  | 4_Ear1            | 0.143125037 | -0.78262  | 0.847901 | 0.943697 | 0        | 0.85875  | 0        | 0        | 0        | 0        |
| ENSMUSG00000072675  | 12_Duxbl2         | 61.03964382 | -0.1385   | 0.844103 | 0.943697 | 68.2191  | 52.38376 | 71.33795 | 90.28991 | 74.66845 | 9.338689 |
| ENSMUSG00000072707  | 2_Olfr31          | 0.135355363 | -0.78262  | 0.847901 | 0.943697 | 0.812132 | 0        | 0        | 0        | 0        | 0        |
| ENSMUSG00000073400  | 6_Trim10          | 1.226671544 | -0.46552  | 0.845822 | 0.943697 | 0.812132 | 3.435001 | 0        | 0        | 0        | 3.112896 |
| ENSMUSG00000073411  | 11_H2-D1          | 27998.7998  | -0.10081  | 0.825335 | 0.943697 | 27872.38 | 23058.3  | 35999.2  | 12667.38 | 39236.01 | 29159.54 |
| ENSMUSG00000073412  | 6_Lst1            | 124.3991744 | -0.10064  | 0.847035 | 0.943697 | 178.6691 | 108.2025 | 98.95264 | 50.60204 | 171.9637 | 138.0051 |
| ENSMUSG00000073478  | 6_DT30003115Rik   | 25.22837873 | -0.10291  | 0.827646 | 0.943697 | 25.1761  | 33.49126 | 19.56041 | 27.78151 | 21.49546 | 23.86554 |
| ENSMUSG00000073486  | 2_Gm10518         | 0.143125037 | -0.78262  | 0.847901 | 0.943697 | 0        | 0.85875  | 0        | 0        | 0        | 0        |
| ENSMUSG00000073616  | 10_Myeov2         | 677.8666755 | -0.05301  | 0.830705 | 0.943697 | 670.009  | 654.3677 | 746.7473 | 569.521  | 686.7234 | 739.8317 |
| ENSMUSG00000073752  | 1_Gm10570         | 0.143125037 | -0.78262  | 0.847901 | 0.943697 | 0        | 0.85875  | 0        | 0        | 0        | 0        |
| ENSMUSG00000074004  | 3_B3gnf6          | 35.14929487 | -0.08503  | 0.832576 | 0.943697 | 33.29742 | 31.77376 | 43.72326 | 31.7503  | 35.07154 | 35.27949 |
| ENSMUSG00000074221  | 11_Zfp568         | 491.497548  | 0.057825  | 0.807534 | 0.943697 | 490.5278 | 434.5276 | 520.0767 | 491.1374 | 538.5179 | 474.1979 |
| ENSMUSG00000074232  | 2_Gm10647         | 3.397792101 | -0.2255   | 0.837043 | 0.943697 | 3.248529 | 4.293751 | 3.451836 | 4.960984 | 3.39402  | 1.037632 |
| ENSMUSG00000074261  | 2_Erich4          | 0.191768685 | -0.78262  | 0.847901 | 0.943697 | 0        | 0        | 1.150612 | 0        | 0        | 0        |
| ENSMUSG00000074336  | 4_Apoc4           | 0.135355363 | -0.78262  | 0.847901 | 0.943697 | 0.812132 | 0        | 0        | 0        | 0        | 0        |
| ENSMUSG00000074340  | 9_Ovyp1           | 36.66257316 | 0.118173  | 0.845447 | 0.943697 | 38.98234 | 37.78501 | 28.7653  | 71.43817 | 18.10144 | 24.90317 |
| ENSMUSG00000074359  | 2_Psg23           | 0.135355363 | -0.78262  | 0.847901 | 0.943697 | 0.812132 | 0        | 0        | 0        | 0        | 0        |
| ENSMUSG00000074403  | 2_Hist2h3b        | 0.191768685 | -0.78262  | 0.847901 | 0.943697 | 0        | 0        | 1.150612 | 0        | 0        | 0        |
| ENSMUSG00000074417  | 9_Gm14548         | 109.5839778 | -0.09993  | 0.837053 | 0.943697 | 182.7297 | 76.42877 | 80.54285 | 70.44597 | 130.1041 | 117.2524 |
| ENSMUSG00000074454  | 3_Delfb33         | 0.143125037 | -0.78262  | 0.847901 | 0.943697 | 0        | 0.85875  | 0        | 0        | 0        | 0        |
| ENSMUSG00000074564  | 3_Gm10720         | 0.191768685 | -0.78262  | 0.847901 | 0.943697 | 0        | 0        | 1.150612 | 0        | 0        | 0        |
| ENSMUSG00000074570  | 13_Cass4          | 13.08245072 | -0.140828 | 0.806718 | 0.943697 | 12.18198 | 10.305   | 14.95796 | 13.89076 | 14.70742 | 12.45158 |
| ENSMUSG00000074739  | 2_Gm10750         | 0.135355363 | -0.78262  | 0.847901 | 0.943697 | 0.812132 | 0        | 0        | 0        | 0        | 0        |
| ENSMUSG00000075256  | 9_Cerkl           | 31.59703963 | 0.126708  | 0.831887 | 0.943697 | 27.61249 | 34.35001 | 28.7653  | 59.53181 | 23.75814 | 15.56448 |
| ENSMUSG00000075405  | 3_9430097D07Rik   | 0.143125037 | -0.78262  | 0.847901 | 0.943697 | 0        | 0.85875  | 0        | 0        | 0        | 0        |
| ENSMUSG00000075524  | 2_4930407110Rik   | 0.143125037 | -0.78262  | 0.847901 | 0.943697 | 0        | 0.85875  | 0        | 0        | 0        | 0        |
| ENSMUSG00000075551  | 4_Cyp3a41a        | 0.135355363 | -0.78262  | 0.847901 | 0.943697 | 0.812132 | 0        | 0        | 0        | 0        | 0        |
| ENSMUSG00000075570  | 2_Krt26           | 0.143125037 | -0.78262  | 0.847901 | 0.943697 | 0        | 0.85875  | 0        | 0        | 0        | 0        |
| ENSMUSG00000075598  | 5_Smok3c          | 0.191768685 | -0.78262  | 0.847901 | 0.943697 | 0        | 0        | 1.150612 | 0        | 0        | 0        |
| ENSMUSG00000078384  | 2_Gm10935         | 0.143125037 | -0.78262  | 0.847901 | 0.943697 | 0        | 0.85875  | 0        | 0        | 0        | 0        |
| ENSMUSG00000078442  | 2_Ccdc105         | 0.191768685 | -0.78262  | 0.847901 | 0.943697 | 0        | 0        | 1.150612 | 0        | 0        | 0        |
| ENSMUSG00000078519  | 3_2310026L22Rik   | 3.747157247 | -0.20889  | 0.845454 | 0.943697 | 4.060661 | 3.435001 | 4.602448 | 5.953181 | 3.39402  | 1.037632 |
| ENSMUSG00000078598  | 11_Skint5         | 8.137907685 | 0.230094  | 0.814117 | 0.943697 | 5.684925 | 7.728752 | 9.204897 | 18.85174 | 1.13134  | 6.225792 |
| ENSMUSG00000078706  | 4_Gm53            | 0.135355363 | -0.78262  | 0.847901 | 0.943697 | 0.812132 | 0        | 0        | 0        | 0        | 0        |
| ENSMUSG00000078722  | 2_Gm12394         | 7.136595793 | 0.249621  | 0.826645 | 0.943697 | 6.497057 | 12.88125 | 0        | 2.97659  | 9.050721 | 11.41395 |
| ENSMUSG00000078757  | 4_Scgb1b29        | 0.135355363 | -0.78262  | 0.847901 | 0.943697 | 0.812132 | 0        | 0        | 0        | 0        | 0        |
| ENSMUSG00000078768  | 2_Zfp566          | 59.75090049 | 0.083735  | 0.814168 | 0.943697 | 59.28565 | 61.83002 | 52.92816 | 68.46158 | 47.51628 | 68.48372 |
| ENSMUSG00000078810  | 4_Gp6             | 0.135355363 | -0.78262  | 0.847901 | 0.943697 | 0.812132 | 0        | 0        | 0        | 0        | 0        |
| ENSMUSG00000078932  | 8_CN725425        | 0.143125037 | -0.78262  | 0.847901 | 0.943697 | 0        | 0.85875  | 0        | 0        | 0        | 0        |
| ENSMUSG00000078964  | 1_Ces1b           | 0.135355363 | -0.78262  | 0.847901 | 0.943697 | 0.812132 | 0        | 0        | 0        | 0        | 0        |
| ENSMUSG00000079069  | 1_8430423G03Rik   | 0.443846536 | -0.60249  | 0.845591 | 0.943697 | 0.812132 | 0.85875  | 0        | 0.992197 | 0        | 0        |
| ENSMUSG00000079103  | 2_Tgm7            | 0.143125037 | -0.78262  | 0.847901 | 0.943697 | 0        | 0.85875  | 0        | 0        | 0        | 0        |
| ENSMUSG00000079163  | 3_Gm15498         | 0.143125037 | -0.78262  | 0.847901 | 0.943697 | 0        | 0.85875  | 0        | 0        | 0        | 0        |
| ENSMUSG00000079304  | 5_4933413G19Rik</ |             |           |          |          |          |          |          |          |          |          |

|                      |                 |             |          |          |          |          |          |          |            |          |          |
|----------------------|-----------------|-------------|----------|----------|----------|----------|----------|----------|------------|----------|----------|
| ENSMUSG00000085298   | 2_F730035M05Rik | 0.135355363 | -0.78262 | 0.847901 | 0.943697 | 0.812132 | 0        | 0        | 0          | 0        | 0        |
| ENSMUSG00000085411   | 1_Gm14319       | 0.135355363 | -0.78262 | 0.847901 | 0.943697 | 0.812132 | 0        | 0        | 0          | 0        | 0        |
| ENSMUSG00000085463   | 1_9430024E24Rik | 0.191768685 | -0.78262 | 0.847901 | 0.943697 | 0        | 0        | 1.150612 | 0          | 0        | 0        |
| ENSMUSG00000085576   | 2_Dpy1912       | 0.191768685 | -0.78262 | 0.847901 | 0.943697 | 0        | 0        | 1.150612 | 0          | 0        | 0        |
| ENSMUSG00000085591   | 1_Gm13479       | 1.090839655 | 0.614088 | 0.835848 | 0.943697 | 0        | 2.576251 | 0        | 3.968787   | 0        | 0        |
| ENSMUSG00000085660   | 1_Gm12434       | 0.135355363 | -0.78262 | 0.847901 | 0.943697 | 0.812132 | 0        | 0        | 0          | 0        | 0        |
| ENSMUSG00000085701   | 1_Gm12968       | 1.954087678 | 0.377714 | 0.81661  | 0.943697 | 0        | 1.7175   | 3.451836 | 0.992197   | 4.52536  | 1.037632 |
| ENSMUSG00000085840   | 1_Gm11261       | 1.267624176 | -0.47725 | 0.815519 | 0.943697 | 3.248529 | 0        | 1.150612 | 0          | 1.13134  | 2.075264 |
| ENSMUSG00000085933   | 2_Tmem61        | 0.135355363 | -0.78262 | 0.847901 | 0.943697 | 0.812132 | 0        | 0        | 0          | 0        | 0        |
| ENSMUSG00000085952   | 1_Gm12315       | 0.135355363 | -0.78262 | 0.847901 | 0.943697 | 0.812132 | 0        | 0        | 0          | 0        | 0        |
| ENSMUSG00000085965   | 1_2310016D23Rik | 0.135355363 | -0.78262 | 0.847901 | 0.943697 | 0.812132 | 0        | 0        | 0          | 0        | 0        |
| ENSMUSG00000085985   | 1_Gm11682       | 0.143125037 | -0.78262 | 0.847901 | 0.943697 | 0        | 0.85875  | 0        | 0          | 0        | 0        |
| ENSMUSG00000086048   | 7_Drr1          | 0.135355363 | -0.78262 | 0.847901 | 0.943697 | 0.812132 | 0        | 0        | 0          | 0        | 0        |
| ENSMUSG00000086136   | 1_Gm12718       | 0.135355363 | -0.78262 | 0.847901 | 0.943697 | 0.812132 | 0        | 0        | 0          | 0        | 0        |
| ENSMUSG00000086308   | 1_G630016G05Rik | 9.157169545 | -0.16453 | 0.840867 | 0.943697 | 6.497057 | 11.16375 | 11.50612 | 15.87515   | 6.788041 | 3.112896 |
| ENSMUSG00000086319   | 1_Gm16087       | 4.397179023 | 0.247867 | 0.812179 | 0.943697 | 6.497057 | 4.293751 | 1.150612 | 5.953181   | 2.26268  | 6.225792 |
| ENSMUSG00000086346   | 1_Gm12510       | 0.143125037 | -0.78262 | 0.847901 | 0.943697 | 0        | 0.85875  | 0        | 0          | 0        | 0        |
| ENSMUSG00000086348   | 1_1700017J07Rik | 0.143125037 | -0.78262 | 0.847901 | 0.943697 | 0        | 0.85875  | 0        | 0          | 0        | 0        |
| ENSMUSG00000086501   | 1_4930597A21Rik | 0.135355363 | -0.78262 | 0.847901 | 0.943697 | 0.812132 | 0        | 0        | 0          | 0        | 0        |
| ENSMUSG00000086557   | 1_Gm15999       | 0.191768685 | -0.78262 | 0.847901 | 0.943697 | 0        | 0        | 1.150612 | 0          | 0        | 0        |
| ENSMUSG00000086613   | 1_1700007M16Rik | 0.135355363 | -0.78262 | 0.847901 | 0.943697 | 0.812132 | 0        | 0        | 0          | 0        | 0        |
| ENSMUSG00000086707   | 1_Gm12088       | 0.143125037 | -0.78262 | 0.847901 | 0.943697 | 0        | 0.85875  | 0        | 0          | 0        | 0        |
| ENSMUSG00000086733   | 1_Gm11685       | 0.143125037 | -0.78262 | 0.847901 | 0.943697 | 0        | 0.85875  | 0        | 0          | 0        | 0        |
| ENSMUSG00000086749   | 1_Gm12037       | 0.191768685 | -0.78262 | 0.847901 | 0.943697 | 0        | 0        | 1.150612 | 0          | 0        | 0        |
| ENSMUSG00000086755   | 1_Gm11216       | 1.751138227 | -0.4068  | 0.830119 | 0.943697 | 0.812132 | 1.7175   | 3.451836 | 0          | 4.52536  | 0        |
| ENSMUSG00000086764   | 1_4930527A07Rik | 0.191768685 | -0.78262 | 0.847901 | 0.943697 | 0        | 0        | 1.150612 | 0          | 0        | 0        |
| ENSMUSG00000086917   | 1_Gm11630       | 0.135355363 | -0.78262 | 0.847901 | 0.943697 | 0.812132 | 0        | 0        | 0          | 0        | 0        |
| ENSMUSG00000086919   | 1_Gm11497       | 0.443846536 | -0.60249 | 0.845591 | 0.943697 | 0.812132 | 0.85875  | 0        | 0.992197   | 0        | 0        |
| ENSMUSG00000086957   | 1_Gm13869       | 0.83099213  | 0.619815 | 0.816356 | 0.943697 | 0        | 0.85875  | 1.150612 | 2.97659    | 0        | 0        |
| ENSMUSG00000087018   | 1_2900072N19Rik | 0.135355363 | -0.78262 | 0.847901 | 0.943697 | 0.812132 | 0        | 0        | 0          | 0        | 0        |
| ENSMUSG00000087038   | 9_2900079G21Rik | 0.191768685 | -0.78262 | 0.847901 | 0.943697 | 0        | 0        | 1.150612 | 0          | 0        | 0        |
| ENSMUSG00000087085   | 1_Gm12068       | 0.191768685 | -0.78262 | 0.847901 | 0.943697 | 0        | 0        | 1.150612 | 0          | 0        | 0        |
| ENSMUSG00000087094   | 1_Gm13093       | 0.143125037 | -0.78262 | 0.847901 | 0.943697 | 0        | 0.85875  | 0        | 0          | 0        | 0        |
| ENSMUSG00000087214   | 1_Gm15555       | 0.135355363 | -0.78262 | 0.847901 | 0.943697 | 0.812132 | 0        | 0        | 0          | 0        | 0        |
| ENSMUSG00000087215   | 1_Gm14618       | 0.135355363 | -0.78262 | 0.847901 | 0.943697 | 0.812132 | 0        | 0        | 0          | 0        | 0        |
| ENSMUSG00000087226   | 1_Gm14015       | 0.135355363 | -0.78262 | 0.847901 | 0.943697 | 0.812132 | 0        | 0        | 0          | 0        | 0        |
| ENSMUSG00000087228   | 1_Gm12827       | 0.143125037 | -0.78262 | 0.847901 | 0.943697 | 0        | 0.85875  | 0        | 0          | 0        | 0        |
| ENSMUSG00000087236   | 1_Gm1305        | 2.036163062 | -0.35137 | 0.820228 | 0.943697 | 0        | 3.435001 | 3.451836 | 0.992197   | 2.26268  | 2.075264 |
| ENSMUSG00000087247   | 3_Fam150a       | 0.135355363 | -0.78262 | 0.847901 | 0.943697 | 0.812132 | 0        | 0        | 0          | 0        | 0        |
| ENSMUSG00000087268   | 1_Gm14486       | 0.191768685 | -0.78262 | 0.847901 | 0.943697 | 0        | 0        | 1.150612 | 0          | 0        | 0        |
| ENSMUSG00000087335   | 2_4930526F13Rik | 0.135355363 | -0.78262 | 0.847901 | 0.943697 | 0.812132 | 0        | 0        | 0          | 0        | 0        |
| ENSMUSG00000087470   | 1_A630031M04Rik | 0.191768685 | -0.78262 | 0.847901 | 0.943697 | 0        | 0        | 1.150612 | 0          | 0        | 0        |
| ENSMUSG00000087485   | 1_Gm13383       | 2.043428223 | -0.38967 | 0.80681  | 0.943697 | 4.872793 | 0.85875  | 1.150612 | 1.984394   | 3.39402  | 0        |
| ENSMUSG00000087547   | 1_Platr27       | 0.135355363 | -0.78262 | 0.847901 | 0.943697 | 0.812132 | 0        | 0        | 0          | 0        | 0        |
| ENSMUSG00000087559   | 1_Gm13802       | 0.135355363 | -0.78262 | 0.847901 | 0.943697 | 0.812132 | 0        | 0        | 0          | 0        | 0        |
| ENSMUSG000000889751  | 3_Olfr1213      | 0.143125037 | -0.78262 | 0.847901 | 0.943697 | 0        | 0.85875  | 0        | 0          | 0        | 0        |
| ENSMUSG000000889753  | 9_Gm11709       | 0.191768685 | -0.78262 | 0.847901 | 0.943697 | 0        | 0        | 1.150612 | 0          | 0        | 0        |
| ENSMUSG00000090013   | 1_Gm6507        | 0.135355363 | -0.78262 | 0.847901 | 0.943697 | 0.812132 | 0        | 0        | 0          | 0        | 0        |
| ENSMUSG00000090071   | 4_Cdk5r2        | 5.38991986  | -0.22021 | 0.824725 | 0.943697 | 9.745586 | 5.152501 | 2.301224 | 2.97659    | 9.050721 | 3.112896 |
| ENSMUSG00000090231   | 10_Cfb          | 2210.804987 | 0.105372 | 0.836865 | 0.943697 | 2615.878 | 1349.955 | 2424.34  | 1120.19    | 3868.052 | 1886.415 |
| ENSMUSG00000090268   | 1_Gm5286        | 0.143125037 | -0.78262 | 0.847901 | 0.943697 | 0        | 0.85875  | 0        | 0          | 0        | 0        |
| ENSMUSG00000090346   | 1_Vmn1r5        | 0.143125037 | -0.78262 | 0.847901 | 0.943697 | 0        | 0.85875  | 0        | 0          | 0        | 0        |
| ENSMUSG00000090665   | 1_Gad1-ps       | 10.92779627 | -0.23357 | 0.813307 | 0.943697 | 24.36397 | 1.7175   | 9.204897 | 5.953181   | 18.10144 | 6.225792 |
| ENSMUSG00000090817   | 7_Gm4450        | 0.135355363 | -0.78262 | 0.847901 | 0.943697 | 0.812132 | 0        | 0        | 0          | 0        | 0        |
| ENSMUSG00000090843   | 2_Heatr4        | 1.868976686 | 0.329854 | 0.83888  | 0.943697 | 1.624264 | 0        | 3.451836 | 3.968787   | 1.13134  | 1.037632 |
| ENSMUSG0000009091215 | 1_Gm17252       | 0.143125037 | -0.78262 | 0.847901 | 0.943697 | 0        | 0.85875  | 0        | 0          | 0        | 0        |
| ENSMUSG0000009091350 | 1_Vmn2r92       | 0.143125037 | -0.78262 | 0.847901 | 0.943697 | 0        | 0.85875  | 0        | 0          | 0        | 0        |
| ENSMUSG0000009091504 | 1_Vmn2r118      | 0.135355363 | -0.78262 | 0.847901 | 0.943697 | 0.812132 | 0        | 0        | 0          | 0        | 0        |
| ENSMUSG0000009091519 | 1_Skor2         | 0.135355363 | -0.78262 | 0.847901 | 0.943697 | 0.812132 | 0        | 0        | 0          | 0        | 0        |
| ENSMUSG0000009091680 | 2_Klhdc7b       | 0.143125037 | -0.78262 | 0.847901 | 0.943697 | 0        | 0.85875  | 0        | 0          | 0        | 0        |
| ENSMUSG0000009091900 | 2_Gm4353        | 187.7089993 | -0.0723  | 0.847016 | 0.943697 | 215.215  | 159.7275 | 202.5077 | 259.9556   | 154.9936 | 133.8545 |
| ENSMUSG0000009091923 | 7_Gm8267        | 0.135355363 | -0.78262 | 0.847901 | 0.943697 | 0.812132 | 0        | 0        | 0          | 0        | 0        |
| ENSMUSG0000009091938 | 2_Gm2564        | 94.2925251  | -0.14377 | 0.80669  | 0.943697 | 109.6378 | 68.70002 | 118.513  | 31.7503    | 157.2563 | 79.89767 |
| ENSMUSG0000009092164 | 2_Rergl         | 0.800981357 | -0.46587 | 0.839619 | 0.943697 | 0.812132 | 0.85875  | 1.150612 | 1.984394   | 0        | 0        |
| ENSMUSG0000009092518 | 9_Fam71e2       | 3.436324865 | -0.21256 | 0.841806 | 0.943697 | 2.436397 | 5.152501 | 3.451836 | 2.97659    | 4.52536  | 2.075264 |
| ENSMUSG0000009092602 | 1_4931413I07Rik | 0.143125037 | -0.78262 | 0.847901 | 0.943697 | 0        | 0.85875  | 0        | 0          | 0        | 0        |
| ENSMUSG0000009092604 | 1_Gm20508       | 0.135355363 | -0.78262 | 0.847901 | 0.943697 | 0.812132 | 0        | 0        | 0          | 0        | 0        |
| ENSMUSG0000009093489 | 1_Gm20625       | 0.191768685 | -0.78262 | 0.847901 | 0.943697 | 0        | 0        | 1.150612 | 0          | 0        | 0        |
| ENSMUSG0000009093662 | 2_Gm20649       | 0.191768685 | -0.78262 | 0.847901 | 0.943697 | 0        | 0        | 1.150612 | 0          | 0        | 0        |
| ENSMUSG0000009093795 | 1_Gm9476        | 0.191768685 | -0.78262 | 0.847901 | 0.943697 | 0        | 0        | 1.150612 | 0          | 0        | 0        |
| ENSMUSG0000009093812 | 1_Gm5627        | 0.135355363 | -0.78262 | 0.847901 | 0.943697 | 0.812132 | 0        | 0        | 0          | 0        | 0        |
| ENSMUSG0000009093862 | 1_Gm5117        | 0.872815553 | -0.50852 | 0.823564 | 0.943697 | 0.812132 | 0        | 2.301224 | 0.992197   | 1.13134  | 0        |
| ENSMUSG0000009093920 | 1_Olfr463       | 0.191768685 | -0.78262 | 0.847901 | 0.943697 | 0        | 0        | 1.150612 | 0          | 0        | 0        |
| ENSMUSG0000009094002 | 2_Gm9866        | 0.872153724 | -0.71806 | 0.81819  | 0.943697 | 3.248529 | 0        | 0        | 1.984394   | 0        | 0        |
| ENSMUSG0000009094004 | 7_Gm5128        | 0.143125037 | -0.78262 | 0.847901 | 0.943697 | 0        | 0.85875  | 0        | 0          | 0        | 0        |
| ENSMUSG0000009094091 | 1_Gm21885       | 0.135355363 | -0.78262 | 0.847901 | 0.943697 | 0.812132 | 0        | 0        | 0          | 0        | 0        |
| ENSMUSG0000009094195 | 2_Gm6509        | 0.135355363 | -0.78262 | 0.847901 | 0.943697 | 0.812132 | 0        | 0        | 0          | 0        | 0        |
| ENSMUSG0000009094282 | 1_Ccdc42b       | 0.143125037 | -0.78262 | 0.847901 | 0.943697 | 0        | 0.85875  | 0        | 0          | 0        | 0        |
| ENSMUSG0000009094305 | 1_Scgb2b20      | 0.135355363 | -0.78262 | 0.847901 | 0.943697 | 0.812132 | 0        | 0        | 0          | 0        | 0        |
| ENSMUSG0000009094311 | 1_Rfpl4b        | 0.143125037 | -0.78262 | 0.847901 | 0.943697 | 0        | 0.85875  | 0        | 0          | 0        | 0        |
| ENSMUSG0000009094421 | 1_Gm20946       | 2.116776258 | -0.52531 | 0.803958 | 0.943697 | 4.060661 | 0        | 3.451836 | 0          | 0        | 5.18816  |
| ENSMUSG0000009094500 | 2_Smim18        | 0.135355363 | -0.78262 | 0.847901 | 0.943697 | 0.812132 | 0        | 0        | 0          | 0        | 0        |
| ENSMUSG0000009094764 | 1_Olfr346       | 0.191768685 | -0.78262 | 0.847901 | 0.943697 | 0        | 0        | 1.150612 | 0          | 0        | 0        |
| ENSMUSG0000009094925 | 7_Gm5798        | 0.143125037 | -0.78262 | 0.847901 | 0.943697 | 0        | 0.85875  | 0        | 0          | 0        | 0        |
| ENSMUSG0000009094954 | 1_Gm8011        | 0.143125037 | -0.78262 | 0.847901 | 0.943697 | 0        | 0.85875  | 0        | 0          | 0        | 0        |
| ENSMUSG0000009094973 | 2_Gm8994        | 0.135355363 | -0.78262 | 0.847901 | 0.943697 | 0.812132 | 0        | 0        | 0          | 0        | 0        |
| ENSMUSG0000009095071 | 2_AF067061      | 0.143125037 | -0.78262 | 0.847901 | 0.943697 | 0        | 0.85875  | 0        | 0          | 0        | 0        |
| ENSMUSG0000009095139 | 2_Pou3f2        | 3.241225704 | 0.289545 | 0.807455 | 0.943697 | 4.872793 | 2.576251 | 1.150612 | 1.984394</ |          |          |

|                    |                  |             |          |          |          |          |          |          |          |          |          |
|--------------------|------------------|-------------|----------|----------|----------|----------|----------|----------|----------|----------|----------|
| ENSMUSG00000096990 | 1_Gm26790        | 9.457292695 | -0.20346 | 0.843911 | 0.943697 | 14.61838 | 7.728752 | 8.054285 | 13.89076 | 0        | 12.45158 |
| ENSMUSG00000097006 | 7_9530082P21Rik  | 716.5100156 | -0.0874  | 0.828639 | 0.943697 | 717.9248 | 729.0789 | 767.4583 | 358.1831 | 886.9706 | 839.4443 |
| ENSMUSG00000097016 | 1_Gm26708        | 7.332602671 | -0.23239 | 0.845654 | 0.943697 | 9.745586 | 2.576251 | 11.50612 | 16.86735 | 2.26268  | 1.037632 |
| ENSMUSG00000097031 | 2_Gm26820        | 0.143125037 | -0.78262 | 0.847901 | 0.943697 | 0        | 0.85875  | 0        | 0        | 0        | 0        |
| ENSMUSG00000097117 | 1_Gm26730        | 0.135355363 | -0.78262 | 0.847901 | 0.943697 | 0.812132 | 0        | 0        | 0        | 0        | 0        |
| ENSMUSG00000097196 | 2_Gm26665        | 0.135355363 | -0.78262 | 0.847901 | 0.943697 | 0.812132 | 0        | 0        | 0        | 0        | 0        |
| ENSMUSG00000097221 | 1_1810049J17Rik  | 0.135355363 | -0.78262 | 0.847901 | 0.943697 | 0.812132 | 0        | 0        | 0        | 0        | 0        |
| ENSMUSG00000097232 | 1_Gm26854        | 7.691197995 | 0.150522 | 0.840308 | 0.943697 | 9.745586 | 5.152501 | 6.903673 | 7.937575 | 10.18206 | 6.225792 |
| ENSMUSG00000097283 | 1_Gm26686        | 0.191768685 | -0.78262 | 0.847901 | 0.943697 | 0        | 0        | 1.150612 | 0        | 0        | 0        |
| ENSMUSG00000097301 | 1_AW121686       | 0.143125037 | -0.78262 | 0.847901 | 0.943697 | 0        | 0.85875  | 0        | 0        | 0        | 0        |
| ENSMUSG00000097323 | 1_4930426I24Rik  | 1.686057428 | -0.55864 | 0.807828 | 0.943697 | 0        | 6.011252 | 0        | 0.992197 | 0        | 3.112896 |
| ENSMUSG00000097345 | 1_AA543186       | 16.75757036 | 0.138174 | 0.805828 | 0.943697 | 10.55772 | 22.32751 | 14.95796 | 16.86735 | 19.23278 | 16.60211 |
| ENSMUSG00000097391 | 8_Mirg           | 22.20861323 | -0.10242 | 0.846955 | 0.943697 | 25.98823 | 26.62126 | 16.10857 | 13.89076 | 22.6268  | 28.01607 |
| ENSMUSG00000097410 | 1_Gm26668        | 10.32797112 | -0.15778 | 0.816624 | 0.943697 | 8.121322 | 12.0225  | 12.65673 | 13.89076 | 9.050721 | 6.225792 |
| ENSMUSG00000097452 | 1_Gm2824         | 0.191768685 | -0.78262 | 0.847901 | 0.943697 | 0        | 0        | 1.150612 | 0        | 0        | 0        |
| ENSMUSG00000097465 | 1_Gm16619        | 0.191768685 | -0.78262 | 0.847901 | 0.943697 | 0        | 0        | 1.150612 | 0        | 0        | 0        |
| ENSMUSG00000097489 | 1_Gm26808        | 1.568255187 | 0.349169 | 0.840128 | 0.943697 | 0.812132 | 0        | 3.451836 | 2.97659  | 1.13134  | 1.037632 |
| ENSMUSG00000097497 | 1_Gm26652        | 0.451419078 | -0.60276 | 0.844808 | 0.943697 | 0.812132 | 0.85875  | 0        | 0        | 0        | 1.037632 |
| ENSMUSG00000097511 | 1_Gm16677        | 0.143125037 | -0.78262 | 0.847901 | 0.943697 | 0        | 0.85875  | 0        | 0        | 0        | 0        |
| ENSMUSG00000097523 | 1_1700022N22Rik  | 6.611590752 | 0.168051 | 0.841843 | 0.943697 | 6.497057 | 8.587502 | 3.451836 | 3.968787 | 6.788041 | 10.37632 |
| ENSMUSG00000097541 | 1_Gm26752        | 1.211605119 | -0.44965 | 0.820675 | 0.943697 | 2.436397 | 1.7175   | 0        | 1.984394 | 1.13134  | 0        |
| ENSMUSG00000097545 | 7_Mir124a-1hg    | 107.8299711 | -0.15307 | 0.844912 | 0.943697 | 176.2327 | 133.1063 | 31.06653 | 171.65   | 113.134  | 21.79027 |
| ENSMUSG00000097553 | 1_4930455D15Rik  | 0.191768685 | -0.78262 | 0.847901 | 0.943697 | 0        | 0        | 1.150612 | 0        | 0        | 0        |
| ENSMUSG00000097557 | 1_C130060C02Rik  | 1.139483302 | 0.496404 | 0.839674 | 0.943697 | 0        | 1.7175   | 1.150612 | 3.968787 | 0        | 0        |
| ENSMUSG00000097575 | 1_Gm26796        | 0.143125037 | -0.78262 | 0.847901 | 0.943697 | 0        | 0.85875  | 0        | 0        | 0        | 0        |
| ENSMUSG00000097584 | 1_1700125G22Rik  | 0.143125037 | -0.78262 | 0.847901 | 0.943697 | 0        | 0.85875  | 0        | 0        | 0        | 0        |
| ENSMUSG00000097624 | 1_Gm5091         | 0.451419078 | -0.60276 | 0.844808 | 0.943697 | 0.812132 | 0.85875  | 0        | 0        | 0        | 1.037632 |
| ENSMUSG00000097636 | 7_Mir1           | 582.8981959 | 0.071448 | 0.837886 | 0.943697 | 618.8447 | 493.7814 | 592.5652 | 397.8709 | 798.7261 | 595.6008 |
| ENSMUSG00000097641 | 1_Gm26865        | 0.443846536 | -0.60249 | 0.845591 | 0.943697 | 0.812132 | 0.85875  | 0        | 0.992197 | 0        | 0        |
| ENSMUSG00000097650 | 1_4921507G05Rik  | 3.584785924 | -0.28986 | 0.839036 | 0.943697 | 1.624264 | 0        | 10.35551 | 1.984394 | 3.39402  | 4.150528 |
| ENSMUSG00000097651 | 1_4930461G14Rik  | 0.143125037 | -0.78262 | 0.847901 | 0.943697 | 0        | 0.85875  | 0        | 0        | 0        | 0        |
| ENSMUSG00000097694 | 7_G730013B05Rik  | 0.143125037 | -0.78262 | 0.847901 | 0.943697 | 0        | 0.85875  | 0        | 0        | 0        | 0        |
| ENSMUSG00000097710 | 1_2310026J122Rik | 0.135355363 | -0.78262 | 0.847901 | 0.943697 | 0.812132 | 0        | 0        | 0        | 0        | 0        |
| ENSMUSG00000097712 | 1_Gm10532        | 0.143125037 | -0.78262 | 0.847901 | 0.943697 | 0        | 0.85875  | 0        | 0        | 0        | 0        |
| ENSMUSG00000097716 | 1_1700026J14Rik  | 0.135355363 | -0.78262 | 0.847901 | 0.943697 | 0.812132 | 0        | 0        | 0        | 0        | 0        |
| ENSMUSG00000097735 | 7_D930032P07Rik  | 0.143125037 | -0.78262 | 0.847901 | 0.943697 | 0        | 0.85875  | 0        | 0        | 0        | 0        |
| ENSMUSG00000097736 | 7_9530059O14Rik  | 0.143125037 | -0.78262 | 0.847901 | 0.943697 | 0        | 0.85875  | 0        | 0        | 0        | 0        |
| ENSMUSG00000097787 | 1_2700046G09Rik  | 47.08453565 | -0.08113 | 0.83952  | 0.943697 | 38.17021 | 64.40627 | 42.57265 | 48.61764 | 44.12226 | 44.61818 |
| ENSMUSG00000097823 | 2_Gm16701        | 14.83560887 | -0.15686 | 0.824631 | 0.943697 | 23.55183 | 16.31625 | 6.903673 | 18.85174 | 6.788041 | 16.60211 |
| ENSMUSG00000097831 | 1_4930540M05Rik  | 0.191768685 | -0.78262 | 0.847901 | 0.943697 | 0        | 0        | 1.150612 | 0        | 0        | 0        |
| ENSMUSG00000097847 | 1_4930478K11Rik  | 0.143125037 | -0.78262 | 0.847901 | 0.943697 | 0        | 0.85875  | 0        | 0        | 0        | 0        |
| ENSMUSG00000097888 | 1_Gm26682        | 2.31614645  | 0.308798 | 0.84495  | 0.943697 | 3.248529 | 1.7175   | 1.150612 | 0.992197 | 6.788041 | 0        |
| ENSMUSG00000097912 | 1_6330403N20Rik  | 0.451419078 | -0.60276 | 0.844808 | 0.943697 | 0.812132 | 0.85875  | 0        | 0        | 0        | 1.037632 |
| ENSMUSG00000097992 | 1_Gm27016        | 2.29275877  | 0.296825 | 0.837544 | 0.943697 | 4.060661 | 0.85875  | 1.150612 | 0.992197 | 5.656701 | 1.037632 |
| ENSMUSG00000098004 | 1_Gm27027        | 0.135355363 | -0.78262 | 0.847901 | 0.943697 | 0.812132 | 0        | 0        | 0        | 0        | 0        |
| ENSMUSG00000098008 | 1_A930001A20Rik  | 1.731012549 | 0.491059 | 0.828588 | 0.943697 | 0        | 4.293751 | 0        | 4.960984 | 1.13134  | 0        |
| ENSMUSG00000098109 | 1_9530085P06Rik  | 0.135355363 | -0.78262 | 0.847901 | 0.943697 | 0.812132 | 0        | 0        | 0        | 0        | 0        |
| ENSMUSG00000098132 | 1_Rassf10        | 15.39053096 | -0.1369  | 0.811434 | 0.943697 | 12.18198 | 22.32751 | 13.80735 | 16.86735 | 14.70742 | 12.45158 |
| ENSMUSG00000098144 | 7_1700029N11Rik  | 0.135355363 | -0.78262 | 0.847901 | 0.943697 | 0.812132 | 0        | 0        | 0        | 0        | 0        |
| ENSMUSG00000098164 | 1_Gm5493         | 0.800981357 | -0.46587 | 0.839619 | 0.943697 | 0.812132 | 0.85875  | 1.150612 | 1.984394 | 0        | 0        |
| ENSMUSG00000098630 | 1_Gm27198        | 0.143125037 | -0.78262 | 0.847901 | 0.943697 | 0        | 0.85875  | 0        | 0        | 0        | 0        |
| ENSMUSG00000098640 | 1_Gm14214        | 0.135355363 | -0.78262 | 0.847901 | 0.943697 | 0.812132 | 0        | 0        | 0        | 0        | 0        |
| ENSMUSG00000098784 | 1_Gm27174        | 0.143125037 | -0.78262 | 0.847901 | 0.943697 | 0        | 0.85875  | 0        | 0        | 0        | 0        |
| ENSMUSG00000099418 | 1_Gm6657         | 0.191768685 | -0.78262 | 0.847901 | 0.943697 | 0        | 0        | 1.150612 | 0        | 0        | 0        |
| ENSMUSG00000099564 | 1_Gm28729        | 0.135355363 | -0.78262 | 0.847901 | 0.943697 | 0.812132 | 0        | 0        | 0        | 0        | 0        |
| ENSMUSG00000099664 | 1_Gm28511        | 0.135355363 | -0.78262 | 0.847901 | 0.943697 | 0.812132 | 0        | 0        | 0        | 0        | 0        |
| ENSMUSG00000099715 | 2_Gm28077        | 0.143125037 | -0.78262 | 0.847901 | 0.943697 | 0        | 0.85875  | 0        | 0        | 0        | 0        |
| ENSMUSG00000099812 | 1_Gm28515        | 0.143125037 | -0.78262 | 0.847901 | 0.943697 | 0        | 0.85875  | 0        | 0        | 0        | 0        |
| ENSMUSG00000099988 | 6_1700054A03Rik  | 0.143125037 | -0.78262 | 0.847901 | 0.943697 | 0        | 0.85875  | 0        | 0        | 0        | 0        |
| ENSMUSG00000100014 | 1_Gm29290        | 0.191768685 | -0.78262 | 0.847901 | 0.943697 | 0        | 0        | 1.150612 | 0        | 0        | 0        |
| ENSMUSG00000100029 | 1_Gm29440        | 0.135355363 | -0.78262 | 0.847901 | 0.943697 | 0.812132 | 0        | 0        | 0        | 0        | 0        |
| ENSMUSG00000100096 | 1_Gm28760        | 0.191768685 | -0.78262 | 0.847901 | 0.943697 | 0        | 0        | 1.150612 | 0        | 0        | 0        |
| ENSMUSG00000100210 | 1_Hist1h3f       | 0.143125037 | -0.78262 | 0.847901 | 0.943697 | 0        | 0.85875  | 0        | 0        | 0        | 0        |
| ENSMUSG00000100217 | 1_9930111H07Rik  | 0.135355363 | -0.78262 | 0.847901 | 0.943697 | 0.812132 | 0        | 0        | 0        | 0        | 0        |
| ENSMUSG00000100241 | 1_Slc18a3        | 0.135355363 | -0.78262 | 0.847901 | 0.943697 | 0.812132 | 0        | 0        | 0        | 0        | 0        |
| ENSMUSG00000100562 | 1_Gm29611        | 0.143125037 | -0.78262 | 0.847901 | 0.943697 | 0        | 0.85875  | 0        | 0        | 0        | 0        |
| ENSMUSG00000100605 | 1_Gm29243        | 0.143125037 | -0.78262 | 0.847901 | 0.943697 | 0        | 0.85875  | 0        | 0        | 0        | 0        |
| ENSMUSG00000100621 | 1_Gm28374        | 0.135355363 | -0.78262 | 0.847901 | 0.943697 | 0.812132 | 0        | 0        | 0        | 0        | 0        |
| ENSMUSG00000100704 | 1_Gm28434        | 0.135355363 | -0.78262 | 0.847901 | 0.943697 | 0.812132 | 0        | 0        | 0        | 0        | 0        |
| ENSMUSG00000100796 | 1_Gm28163        | 0.143125037 | -0.78262 | 0.847901 | 0.943697 | 0        | 0.85875  | 0        | 0        | 0        | 0        |
| ENSMUSG00000100872 | 2_1700065J18Rik  | 0.143125037 | -0.78262 | 0.847901 | 0.943697 | 0        | 0.85875  | 0        | 0        | 0        | 0        |
| ENSMUSG00000101089 | 1_2610016A17Rik  | 0.191768685 | -0.78262 | 0.847901 | 0.943697 | 0        | 0        | 1.150612 | 0        | 0        | 0        |
| ENSMUSG00000101179 | 1_Gm29455        | 0.143125037 | -0.78262 | 0.847901 | 0.943697 | 0        | 0.85875  | 0        | 0        | 0        | 0        |
| ENSMUSG00000101223 | 6_4930568A12Rik  | 0.135355363 | -0.78262 | 0.847901 | 0.943697 | 0.812132 | 0        | 0        | 0        | 0        | 0        |
| ENSMUSG00000101224 | 1_Gm28209        | 0.143125037 | -0.78262 | 0.847901 | 0.943697 | 0        | 0.85875  | 0        | 0        | 0        | 0        |
| ENSMUSG00000101252 | 1_lfna6          | 0.467037084 | -0.60332 | 0.843226 | 0.943697 | 0.812132 | 0.85875  | 0        | 0        | 1.13134  | 0        |
| ENSMUSG00000101287 | 1_Gm28166        | 0.143125037 | -0.78262 | 0.847901 | 0.943697 | 0        | 0.85875  | 0        | 0        | 0        | 0        |
| ENSMUSG00000101355 | 1_Hist1h3h       | 0.143125037 | -0.78262 | 0.847901 | 0.943697 | 0        | 0.85875  | 0        | 0        | 0        | 0        |
| ENSMUSG00000101856 | 1_1700096K18Rik  | 36.66501414 | 0.103181 | 0.840234 | 0.943697 | 32.48529 | 36.92626 | 36.81959 | 61.5162  | 29.41484 | 22.82791 |
| ENSMUSG00000101859 | 1_Gm29233        | 0.191768685 | -0.78262 | 0.847901 | 0.943697 | 0        | 0        | 1.150612 | 0        | 0        | 0        |
| ENSMUSG00000101888 | 1_1700025H01Rik  | 0.191768685 | -0.78262 | 0.847901 | 0.943697 | 0        | 0        | 1.150612 | 0        | 0        | 0        |
| ENSMUSG00000101972 | 1_Hist1h3i       | 0.143125037 | -0.78262 | 0.847901 | 0.943697 | 0        | 0.85875  | 0        | 0        | 0        | 0        |
| ENSMUSG00000101997 | 1_Gm28722        | 0.143125037 | -0.78262 | 0.847901 | 0.943697 | 0        | 0.85875  | 0        | 0        | 0        | 0        |
| ENSMUSG00000102067 | 1_Gm29230        | 0.191768685 | -0.78262 | 0.847901 | 0.943697 | 0        | 0        | 1.150612 | 0        | 0        | 0        |
| ENSMUSG00000102252 | 5_Shrpn          | 207.8442629 | -0.09107 | 0.814471 | 0.943697 | 205.4694 | 283.3876 | 154.182  | 251.0258 | 140.2862 | 212.7146 |
| ENSMUSG00000102395 | 1_Flg            | 0.191768685 | -0.78262 | 0.847901 | 0.943697 |          |          |          |          |          |          |

|                     |                 |              |          |          |          |          |          |          |          |          |          |
|---------------------|-----------------|--------------|----------|----------|----------|----------|----------|----------|----------|----------|----------|
| ENSMUSG00000106008  | 1_Gm42920       | 0.143125037  | -0.78262 | 0.847901 | 0.943697 | 0        | 0.85875  | 0        | 0        | 0        | 0        |
| ENSMUSG00000106019  | 1_Gm43672       | 81.50454109  | 0.07954  | 0.828879 | 0.943697 | 87.71028 | 79.86377 | 70.18734 | 111.126  | 63.35505 | 76.78477 |
| ENSMUSG00000106020  | 1_4930573C15Rik | 0.191768685  | -0.78262 | 0.847901 | 0.943697 | 0        | 0        | 1.150612 | 0        | 0        | 0        |
| ENSMUSG00000106198  | 1_Gm42504       | 1.203272034  | 0.435882 | 0.830103 | 0.943697 | 0        | 0.85875  | 2.301224 | 1.984394 | 0        | 2.075264 |
| ENSMUSG00000106230  | 1_Gm29811       | 1.710627907  | 0.517564 | 0.822408 | 0.943697 | 0        | 0.85875  | 3.451836 | 5.953181 | 0        | 0        |
| ENSMUSG00000106247  | 1_Gm43720       | 2.705715512  | -0.49477 | 0.847773 | 0.943697 | 0        | 9.446252 | 0        | 0        | 6.788041 | 0        |
| ENSMUSG00000106261  | 1_Gm34086       | 0.135355363  | -0.78262 | 0.847901 | 0.943697 | 0.812132 | 0        | 0        | 0        | 0        | 0        |
| ENSMUSG00000106426  | 1_Gm36211       | 0.135355363  | -0.78262 | 0.847901 | 0.943697 | 0.812132 | 0        | 0        | 0        | 0        | 0        |
| ENSMUSG00000106447  | 1_Gm42957       | 0.135355363  | -0.78262 | 0.847901 | 0.943697 | 0.812132 | 0        | 0        | 0        | 0        | 0        |
| ENSMUSG00000106554  | 1_Gm43419       | 0.143125037  | -0.78262 | 0.847901 | 0.943697 | 0        | 0.85875  | 0        | 0        | 0        | 0        |
| ENSMUSG00000106627  | 1_Gm21680       | 1.471165023  | 0.465763 | 0.814351 | 0.943697 | 0        | 2.576251 | 1.150612 | 3.968787 | 1.13134  | 0        |
| ENSMUSG00000106985  | 1_Gm42761       | 0.191768685  | -0.78262 | 0.847901 | 0.943697 | 0        | 0        | 1.150612 | 0        | 0        | 0        |
| ENSMUSG00000107704  | 1_RP23-119D13   | 0.143125037  | -0.78262 | 0.847901 | 0.943697 | 0        | 0.85875  | 0        | 0        | 0        | 0        |
| ENSMUSG00000108010  | 1_RP23-74G1     | 0.191768685  | -0.78262 | 0.847901 | 0.943697 | 0        | 0        | 1.150612 | 0        | 0        | 0        |
| ENSMUSG00000108071  | 1_RP23-114F22   | 0.143125037  | -0.78262 | 0.847901 | 0.943697 | 0        | 0.85875  | 0        | 0        | 0        | 0        |
| ENSMUSG00000108103  | 1_RP23-418F10   | 7.333393119  | 0.168344 | 0.838247 | 0.943697 | 10.55772 | 4.293751 | 5.753061 | 3.968787 | 9.050721 | 10.37632 |
| ENSMUSG00000108258  | 1_RP24-325P20   | 0.443846536  | -0.60249 | 0.845591 | 0.943697 | 0.812132 | 0.85875  | 0        | 0.992197 | 0        | 0        |
| ENSMUSG00000108285  | 1_RP23-64M7     | 0.191768685  | -0.78262 | 0.847901 | 0.943697 | 0        | 0        | 1.150612 | 0        | 0        | 0        |
| ENSMUSG00000108303  | 1_RP23-174K7    | 0.135355363  | -0.78262 | 0.847901 | 0.943697 | 0.812132 | 0        | 0        | 0        | 0        | 0        |
| ENSMUSG00000108329  | 1_RP24-136L4    | 0.143125037  | -0.78262 | 0.847901 | 0.943697 | 0        | 0.85875  | 0        | 0        | 0        | 0        |
| ENSMUSG00000108373  | 1_RP23-207N5    | 0.143125037  | -0.78262 | 0.847901 | 0.943697 | 0        | 0.85875  | 0        | 0        | 0        | 0        |
| ENSMUSG00000108411  | 1_RP23-74K24    | 0.135355363  | -0.78262 | 0.847901 | 0.943697 | 0.812132 | 0        | 0        | 0        | 0        | 0        |
| ENSMUSG00000108413  | 1_RP23-43ZD9    | 0.143125037  | -0.78262 | 0.847901 | 0.943697 | 0        | 0.85875  | 0        | 0        | 0        | 0        |
| ENSMUSG00000108441  | 1_RP24-549B12   | 0.135355363  | -0.78262 | 0.847901 | 0.943697 | 0.812132 | 0        | 0        | 0        | 0        | 0        |
| ENSMUSG00000108483  | 1_RP23-4H17     | 0.191768685  | -0.78262 | 0.847901 | 0.943697 | 0        | 0        | 1.150612 | 0        | 0        | 0        |
| ENSMUSG00000108550  | 1_RP23-32A8     | 0.143125037  | -0.78262 | 0.847901 | 0.943697 | 0        | 0.85875  | 0        | 0        | 0        | 0        |
| ENSMUSG00000108569  | 1_RP23-44H21    | 0.135355363  | -0.78262 | 0.847901 | 0.943697 | 0.812132 | 0        | 0        | 0        | 0        | 0        |
| ENSMUSG00000108600  | 1_RP23-145H5    | 0.135355363  | -0.78262 | 0.847901 | 0.943697 | 0.812132 | 0        | 0        | 0        | 0        | 0        |
| ENSMUSG00000108622  | 1_RP23-184D18   | 0.135355363  | -0.78262 | 0.847901 | 0.943697 | 0.812132 | 0        | 0        | 0        | 0        | 0        |
| ENSMUSG00000108726  | 1_RP23-470P9    | 0.135355363  | -0.78262 | 0.847901 | 0.943697 | 0.812132 | 0        | 0        | 0        | 0        | 0        |
| ENSMUSG00000097997  | 1_Gm27017       | 1.619481576  | 0.36196  | 0.847988 | 0.943741 | 2.436397 | 1.7175   | 0        | 0        | 4.52536  | 1.037632 |
| ENSMUSG00000048498  | 7_Cd300e1       | 12.49497824  | 0.132162 | 0.848057 | 0.943765 | 17.05478 | 6.011252 | 12.65673 | 7.937575 | 14.70742 | 16.60211 |
| ENSMUSG00000027424  | 11_Mgme1        | 217.5444897  | 0.047662 | 0.848235 | 0.943791 | 203.8452 | 206.9588 | 231.273  | 210.3457 | 230.7934 | 222.0523 |
| ENSMUSG00000032508  | 8_Myd88         | 1292.988872  | 0.081703 | 0.848266 | 0.943791 | 1227.944 | 1108.647 | 1432.512 | 657.8265 | 1856.529 | 1474.475 |
| ENSMUSG00000068962  | 7_Zfp114        | 34.58944353  | -0.08025 | 0.84827  | 0.943791 | 34.10955 | 44.65501 | 27.61469 | 31.7503  | 36.20288 | 33.20423 |
| ENSMUSG00000097772  | 7_5430416N02Rik | 179.2782958  | 0.053343 | 0.848134 | 0.943791 | 167.2992 | 156.2925 | 204.809  | 198.4394 | 177.6204 | 171.2093 |
| ENSMUSG00000022102  | 13_Dok2         | 57.32808533  | -0.10791 | 0.848575 | 0.944077 | 67.40697 | 49.80751 | 60.98244 | 22.82053 | 29.29525 | 45.65811 |
| ENSMUSG00000022235  | 14_Cmb1         | 243.0377788  | 0.05636  | 0.848713 | 0.944179 | 250.9488 | 246.4613 | 217.4657 | 293.6903 | 192.3278 | 257.3328 |
| ENSMUSG00000031444  | 16_F10          | 16.87054971  | 0.225197 | 0.848817 | 0.944241 | 34.10955 | 7.728752 | 4.602448 | 1.984394 | 48.64762 | 4.150528 |
| ENSMUSG00000021699  | 17_Pde4d        | 258.6889312  | 0.051984 | 0.848902 | 0.94426  | 267.1915 | 281.6701 | 212.8632 | 272.8541 | 235.3187 | 282.2359 |
| ENSMUSG00000041961  | 14_Znrf3        | 490.8056106  | -0.0433  | 0.848928 | 0.94426  | 494.5885 | 500.6514 | 499.3657 | 525.8643 | 474.0315 | 450.3323 |
| ENSMUSG00000000731  | 15_Aire         | 5.974145107  | 0.170618 | 0.849069 | 0.944364 | 4.872793 | 5.152501 | 6.903673 | 2.97659  | 4.52536  | 11.41395 |
| ENSMUSG00000030394  | 8_Oat           | 11780.08011  | -0.04978 | 0.849243 | 0.944505 | 11725.56 | 11332.93 | 12891.46 | 9168.891 | 13123.55 | 12438.1  |
| ENSMUSG000000206173 | 15_Plcl4        | 14.33995277  | -0.154   | 0.849317 | 0.944534 | 25.1761  | 12.0225  | 8.054285 | 21.82833 | 3.99402  | 15.56448 |
| ENSMUSG00000103708  | 1_Gm33222       | 0.952419422  | -0.58949 | 0.849476 | 0.944657 | 0        | 0        | 3.451836 | 0        | 2.26268  | 0        |
| ENSMUSG00000036955  | 15_Kif1bp       | 750.0001345  | 0.04275  | 0.84973  | 0.944887 | 744.7252 | 771.1577 | 700.7228 | 808.6404 | 692.3801 | 782.3746 |
| ENSMUSG00000001494  | 6_Sost          | 6.231985131  | -0.18119 | 0.849875 | 0.944892 | 8.121322 | 6.011252 | 5.753061 | 4.960984 | 1.13134  | 11.41395 |
| ENSMUSG00000028199  | 18_Cryz         | 306.4598144  | -0.05901 | 0.849832 | 0.944892 | 358.1503 | 322.0313 | 257.7371 | 376.0426 | 272.653  | 252.1446 |
| ENSMUSG00000037390  | 12_Muc3         | 1.309554243  | -0.46035 | 0.849876 | 0.944892 | 0        | 0        | 4.602448 | 0.992197 | 2.26268  | 0        |
| ENSMUSG00000006705  | 12_Pknox1       | 600.7687232  | -0.04559 | 0.850002 | 0.944979 | 567.6804 | 613.1477 | 650.0958 | 517.9267 | 616.5804 | 639.1814 |
| ENSMUSG00000035349  | 5_Mia2          | 13.43668456  | 0.151344 | 0.850062 | 0.944993 | 4.060661 | 13.74    | 20.71102 | 23.81272 | 7.919381 | 10.37632 |
| ENSMUSG00000021991  | 8_Cacna2d3      | 83.67728081  | 0.069151 | 0.850342 | 0.945032 | 67.40697 | 82.74502 | 85.1453  | 100.2119 | 61.92397 | 95.46215 |
| ENSMUSG00000022041  | 10_Chrna2       | 11.52914348  | 0.118403 | 0.85041  | 0.945032 | 12.18198 | 9.446252 | 11.50612 | 7.937575 | 13.57608 | 14.52685 |
| ENSMUSG00000023048  | 13_Prr13        | 2664.680097  | -0.06774 | 0.850159 | 0.945032 | 2564.713 | 2343.529 | 3273.491 | 1790.915 | 3611.238 | 2044.193 |
| ENSMUSG00000026668  | 10_Ucma         | 0.887208319  | 0.490447 | 0.850358 | 0.945032 | 0        | 0        | 2.301224 | 1.984394 | 0        | 1.037632 |
| ENSMUSG00000030204  | 10_Dxk47        | 1395.958632  | -0.04488 | 0.850344 | 0.945032 | 1362.758 | 1331.922 | 1528.013 | 1183.691 | 1476.399 | 1432.97  |
| ENSMUSG00000030363  | 10_Kik10        | 162.8907098  | -0.08951 | 0.850429 | 0.945032 | 156.7415 | 119.3663 | 227.8212 | 86.32112 | 238.7128 | 148.3814 |
| ENSMUSG00000079323  | 9_Gm20661       | 10.45273641  | 0.132766 | 0.850289 | 0.945032 | 7.30919  | 11.16375 | 11.50612 | 5.953181 | 10.18206 | 16.60211 |
| ENSMUSG00000079502  | 8_1700101E01Rik | 4.594432816  | -0.19613 | 0.850505 | 0.945063 | 1.624264 | 5.152501 | 8.054285 | 1.984394 | 4.52536  | 6.225792 |
| ENSMUSG00000071497  | 3_Nutrf-ps1     | 777.8152564  | -0.05247 | 0.850981 | 0.945539 | 829.9991 | 736.8077 | 808.8803 | 584.4039 | 875.6572 | 831.1433 |
| ENSMUSG00000024907  | 6_Gal           | 0.831744446  | -0.38707 | 0.851307 | 0.945585 | 0.812132 | 0.85875  | 1.150612 | 0        | 1.13134  | 1.037632 |
| ENSMUSG00000037393  | 2_Nmur2         | 0.808751031  | -0.49526 | 0.85114  | 0.945585 | 0        | 1.7175   | 1.150612 | 1.984394 | 0        | 0        |
| ENSMUSG00000039092  | 9_Sptlc3        | 0.808751031  | -0.49526 | 0.85114  | 0.945585 | 0        | 1.7175   | 1.150612 | 1.984394 | 0        | 0        |
| ENSMUSG00000041707  | 7_1810011H11Rik | 4.947458812  | 0.225358 | 0.851246 | 0.945585 | 4.060661 | 9.446252 | 0        | 2.97659  | 9.050721 | 4.150528 |
| ENSMUSG00000078924  | 1_Gm12169       | 0.831744446  | -0.38707 | 0.851307 | 0.945585 | 0.812132 | 0.85875  | 1.150612 | 0        | 1.13134  | 1.037632 |
| ENSMUSG00000079657  | 10_Rab26        | 5.503705158  | -0.15775 | 0.851221 | 0.945585 | 5.684925 | 6.011252 | 5.753061 | 5.953181 | 3.99402  | 6.225792 |
| ENSMUSG00000024593  | 15_Megf10       | 58.44630273  | 0.103237 | 0.851509 | 0.945614 | 61.72205 | 73.85252 | 33.36775 | 95.25089 | 29.41484 | 57.06976 |
| ENSMUSG00000039913  | 12_Pak7         | 12.73282428  | -0.13389 | 0.851486 | 0.945614 | 12.99411 | 15.4575  | 11.50612 | 19.84394 | 12.44474 | 4.150528 |
| ENSMUSG00000053519  | 15_Kcnp1        | 2.254147348  | 0.244642 | 0.851523 | 0.945614 | 3.248529 | 1.7175   | 1.150612 | 2.97659  | 3.99402  | 1.037632 |
| ENSMUSG00000087259  | 7_2610035D17Rik | 199.37258567 | -0.06535 | 0.851516 | 0.945614 | 190.8511 | 197.5126 | 223.2187 | 130.97   | 253.4202 | 200.2623 |
| ENSMUSG00000046671  | 18_Miffr1l      | 734.5284585  | -0.04341 | 0.85159  | 0.945636 | 745.5373 | 785.7565 | 705.3252 | 704.4597 | 662.9653 | 803.1272 |
| ENSMUSG00000107726  | 1_RP23-47A6     | 13.39378528  | 0.132265 | 0.852091 | 0.94614  | 14.61838 | 11.16375 | 12.65673 | 25.79712 | 6.788041 | 9.336869 |
| ENSMUSG000000997162 | 1_2310010J17Rik | 23.3604801   | 0.085705 | 0.852159 | 0.946162 | 25.98823 | 22.32751 | 19.56041 | 23.81272 | 21.49546 | 26.97843 |
| ENSMUSG00000029136  | 9_Rbks          | 96.48963522  | 0.057438 | 0.852349 | 0.946288 | 99.08013 | 90.16877 | 94.35019 | 81.36014 | 102.9519 | 111.0266 |
| ENSMUSG00000060636  | 13_Rpl35a       | 5850.685093  | 0.04219  | 0.852367 | 0.946288 | 5809.181 | 5553.538 | 5341.141 | 4988.766 | 6058.326 | 6153.158 |
| ENSMUSG00000021536  | 7_Adoxy2        | 227.8220369  | -0.06269 | 0.852555 | 0.946444 | 234.7062 | 257.6251 | 205.9596 | 228.2053 | 156.1249 | 284.3112 |
| ENSMUSG00000064057  | 12_Scgb3a1      | 1.87703398   | -0.26289 | 0.852754 | 0.946612 | 3.248529 | 1.7175   | 1.150612 | 2.97659  | 1.13134  | 1.037632 |
| ENSMUSG00000024696  | 8_Lpxn          | 77.60083427  | 0.092996 | 0.85284  | 0.946655 | 102.3287 | 69.55877 | 52.92816 | 46.63325 | 126.7101 | 67.44608 |
| ENSMUSG00000020081  | 5_Tacr2         | 0.831941579  | -0.42431 | 0.853051 | 0.94673  | 0        | 1.7175   | 1.150612 | 0.992197 | 1.13134  | 0        |
| ENSMUSG00000057072  | 11_Spata45      | 0.81612644   | -0.42539 | 0.853    | 0.94673  | 0.812132 | 0.85875  | 1.150612 | 0        |          |          |

|                     |                 |             |          |          |          |          |          |          |          |          |          |
|---------------------|-----------------|-------------|----------|----------|----------|----------|----------|----------|----------|----------|----------|
| ENSMUSG00000051242  | 1_Pcdhb9        | 76.80753634 | 0.086114 | 0.856086 | 0.94862  | 64.97057 | 98.75628 | 59.83183 | 124.0246 | 52.04164 | 61.22029 |
| ENSMUSG00000067596  | 3_Krt74         | 0.903775775 | -0.4718  | 0.855998 | 0.94862  | 0        | 0.85875  | 2.301224 | 0        | 2.26268  | 0        |
| ENSMUSG00000039716  | 12_Dock3        | 34.5072944  | -0.08763 | 0.856281 | 0.948729 | 35.73382 | 45.51376 | 25.31347 | 46.63325 | 23.75814 | 30.09133 |
| ENSMUSG00000079162  | 8_Trim43b       | 6.686239081 | 0.139571 | 0.856237 | 0.948729 | 8.121322 | 5.152501 | 5.753061 | 6.945378 | 7.919381 | 6.225792 |
| ENSMUSG00000035454  | 1_Sam3t         | 1.165688719 | -0.33257 | 0.856447 | 0.948755 | 0.812132 | 0.85875  | 2.301224 | 1.984394 | 0        | 1.037632 |
| ENSMUSG00000096141  | 2_Dnah7a        | 5.159619389 | 0.181333 | 0.856412 | 0.948755 | 6.497057 | 3.435001 | 4.602448 | 5.953181 | 1.13134  | 9.338698 |
| ENSMUSG00000097155  | 1_Gm26511       | 1.984188939 | 0.278333 | 0.856355 | 0.948755 | 2.436397 | 1.7175   | 1.150612 | 0        | 4.52536  | 2.075264 |
| ENSMUSG00000000171  | 4_Sdhd          | 2303.503209 | 0.038156 | 0.856565 | 0.948781 | 2188.696 | 2259.372 | 2371.412 | 2497.359 | 2215.164 | 2289.016 |
| ENSMUSG00000035473  | 10_Galm         | 629.6082875 | -0.04409 | 0.856611 | 0.948781 | 678.9425 | 644.9214 | 593.7158 | 640.9591 | 537.3865 | 681.7243 |
| ENSMUSG00000037143  | 17_Clap61       | 3.22049844  | 0.20802  | 0.856613 | 0.948781 | 4.060661 | 2.576251 | 2.301224 | 5.953181 | 3.39402  | 1.037632 |
| ENSMUSG00000063531  | 7_Sema3e        | 51.10966054 | 0.092773 | 0.8568   | 0.948935 | 43.85514 | 57.53626 | 47.1751  | 86.32112 | 27.15216 | 44.61818 |
| ENSMUSG00000027831  | 9_Veph1         | 79.15114954 | 0.090223 | 0.856965 | 0.949065 | 77.96469 | 101.3325 | 50.62693 | 127.0012 | 46.38494 | 71.59661 |
| ENSMUSG00000032548  | 14_Slco2a1      | 996.1849883 | 0.087783 | 0.857018 | 0.949071 | 985.1163 | 720.4914 | 1192.034 | 463.3559 | 1618.948 | 997.1644 |
| ENSMUSG00000075324  | 13_Fign         | 48.03300782 | 0.078021 | 0.857139 | 0.949152 | 49.54006 | 51.52501 | 39.12081 | 69.45378 | 33.9402  | 44.61818 |
| ENSMUSG00000097246  | 1_Gm26890       | 9.476167786 | 0.134507 | 0.857223 | 0.949193 | 9.745586 | 10.305   | 6.903673 | 3.968787 | 12.44474 | 13.48922 |
| ENSMUSG00000036775  | 12_Decr2        | 405.73929   | -0.0416  | 0.857279 | 0.949202 | 411.751  | 405.3301 | 417.6722 | 366.1206 | 405.0198 | 428.542  |
| ENSMUSG00000024350  | 5_Dnajc18       | 371.8833099 | -0.05841 | 0.85759  | 0.949494 | 341.0955 | 485.1939 | 311.8159 | 416.7227 | 287.3604 | 389.116  |
| ENSMUSG00000032452  | 12_Clstn2       | 131.6464139 | -0.07824 | 0.85771  | 0.949548 | 134.0018 | 176.0438 | 95.50081 | 177.6032 | 78.06247 | 128.6664 |
| ENSMUSG00000036743  | 3_Psma8         | 3.197887463 | 0.242718 | 0.857779 | 0.949548 | 0        | 4.293751 | 4.602448 | 5.953181 | 2.26268  | 2.075264 |
| ENSMUSG00000050538  | 7_B230217C12Rik | 14.05167319 | 0.131095 | 0.857782 | 0.949548 | 9.745586 | 14.59875 | 16.10857 | 24.80492 | 4.52536  | 14.52685 |
| ENSMUSG00000059713  | 12_Rcan3        | 624.653495  | -0.03893 | 0.857979 | 0.949712 | 600.9778 | 634.6164 | 663.9032 | 610.201  | 605.267  | 632.9556 |
| ENSMUSG00000030451  | 15_Herc2        | 3035.092352 | -0.03917 | 0.858216 | 0.949764 | 3064.175 | 3064.88  | 3099.749 | 2659.087 | 3098.741 | 3223.932 |
| ENSMUSG00000039536  | 16_Stau1        | 1873.291152 | 0.04107  | 0.858157 | 0.949764 | 1716.035 | 1823.127 | 2000.914 | 1749.243 | 2106.555 | 1843.872 |
| ENSMUSG00000074647  | 3_Fam83c        | 336.7911159 | -0.05292 | 0.858157 | 0.949764 | 285.0584 | 318.5963 | 425.7265 | 309.5654 | 76.7363  | 305.0638 |
| ENSMUSG000000887574 | 1_C030037D09Rik | 73.37479936 | -0.06055 | 0.858204 | 0.949764 | 65.78271 | 91.02752 | 67.88611 | 79.37575 | 65.6173  | 70.05598 |
| ENSMUSG00000075511  | 8_170001L05Rik  | 205.0585991 | -0.04397 | 0.858378 | 0.949891 | 200.5966 | 207.8176 | 216.3151 | 211.3379 | 200.2472 | 194.0372 |
| ENSMUSG00000031976  | 14_Urb2         | 717.2325754 | 0.052854 | 0.858655 | 0.950144 | 644.0208 | 666.3902 | 801.9766 | 588.3727 | 920.9188 | 681.7243 |
| ENSMUSG00000105881  | 1_4932422M17Rik | 167.955773  | -0.0485  | 0.85877  | 0.950219 | 166.4871 | 173.4675 | 172.5918 | 180.5798 | 140.2862 | 174.3222 |
| ENSMUSG00000070304  | 11_Scn2b        | 53.40048282 | -0.0726  | 0.859007 | 0.950417 | 55.22499 | 69.55877 | 39.12081 | 44.64886 | 47.51628 | 64.33319 |
| ENSMUSG00000074825  | 4_Itprip1       | 174.8097414 | -0.05886 | 0.859044 | 0.950417 | 181.1055 | 164.0213 | 189.851  | 135.931  | 228.5307 | 149.419  |
| ENSMUSG00000025479  | 8_Cyp2e1        | 6.755871576 | 0.180533 | 0.859275 | 0.950444 | 3.248529 | 11.16375 | 4.602448 | 7.937575 | 1.13134  | 12.45158 |
| ENSMUSG00000026200  | 13_Glb1l        | 255.2559266 | -0.05586 | 0.859308 | 0.950444 | 257.4459 | 323.7488 | 199.0559 | 280.7917 | 218.3486 | 252.1446 |
| ENSMUSG00000036422  | 10_Pcdhb        | 18.01610658 | -0.11882 | 0.859187 | 0.950444 | 12.18198 | 15.4575  | 28.7653  | 7.937575 | 27.15216 | 16.60211 |
| ENSMUSG00000045005  | 9_Fzd5          | 1011.891982 | 0.400852 | 0.859259 | 0.950444 | 993.2377 | 1020.195 | 979.1709 | 1099.354 | 1084.955 | 894.4388 |
| ENSMUSG00000044972  | 6_Bag5          | 792.3106452 | 0.038614 | 0.859297 | 0.950444 | 739.8524 | 763.4289 | 842.2481 | 810.6248 | 786.2814 | 811.4283 |
| ENSMUSG00000079697  | 1_Gm5751        | 1.591642867 | 0.340523 | 0.859388 | 0.95048  | 0        | 0.85875  | 3.451836 | 2.97659  | 2.26268  | 0        |
| ENSMUSG00000020656  | 15_Grl1         | 3272.881946 | -0.04113 | 0.859543 | 0.950569 | 3155.134 | 3234.912 | 3569.199 | 2886.301 | 3650.835 | 3140.912 |
| ENSMUSG00000038415  | 9_Foxq1         | 893.2986674 | -0.05678 | 0.859564 | 0.950569 | 763.4042 | 883.654  | 1086.178 | 1144.003 | 748.9471 | 733.6059 |
| ENSMUSG00000054477  | 14_Kcnn2        | 5.867372583 | 0.170331 | 0.859673 | 0.950594 | 2.436397 | 5.152501 | 9.204897 | 9.921968 | 28.2628  | 6.225792 |
| ENSMUSG00000081769  | 8_Gm12216       | 35.09667893 | -0.09098 | 0.859681 | 0.950594 | 44.66727 | 32.63251 | 31.06653 | 16.86735 | 40.72824 | 44.61818 |
| ENSMUSG00000027584  | 16_Opr1         | 2.234168801 | -0.02399 | 0.859833 | 0.950708 | 3.248529 | 1.7175   | 2.301224 | 3.968787 | 1.13134  | 1.037632 |
| ENSMUSG00000035936  | 6_Aldh5a1       | 345.3513817 | 0.052817 | 0.860035 | 0.950679 | 343.5319 | 346.9351 | 326.7738 | 452.4417 | 282.835  | 319.5907 |
| ENSMUSG00000020576  | 9_Nbas          | 1102.041287 | -0.04879 | 0.860179 | 0.950953 | 1041.966 | 1061.415 | 1258.77  | 853.2893 | 1251.262 | 1145.546 |
| ENSMUSG00000040985  | 13_Sun3         | 11.52281165 | -0.11425 | 0.860197 | 0.950953 | 11.36985 | 12.0225  | 12.65673 | 16.86735 | 7.919381 | 8.301057 |
| ENSMUSG00000030742  | 7_Lat           | 16.02944503 | -0.13315 | 0.860364 | 0.950969 | 25.1761  | 11.16375 | 13.80735 | 3.968787 | 19.23278 | 22.82791 |
| ENSMUSG00000048911  | 15_Rnf24        | 160.9095248 | 0.061119 | 0.860358 | 0.950969 | 129.129  | 173.4675 | 170.2906 | 217.2911 | 128.9278 | 146.3061 |
| ENSMUSG00000070574  | 1_2310016G11Rik | 1.237247125 | -0.42638 | 0.860403 | 0.950969 | 0        | 0.85875  | 3.451836 | 0        | 0        | 3.112896 |
| ENSMUSG00000101344  | 1_Gm29183       | 2.287106161 | -0.30657 | 0.860352 | 0.950969 | 3.248529 | 4.293751 | 0        | 0.992197 | 0        | 5.18816  |
| ENSMUSG00000043541  | 16_Casc1        | 11.51864656 | 0.114057 | 0.860452 | 0.950971 | 14.61838 | 10.305   | 8.054285 | 7.937575 | 14.70742 | 13.48922 |
| ENSMUSG00000000567  | 5_Sox9          | 493.7911804 | -0.04945 | 0.860722 | 0.951143 | 450.7334 | 431.9514 | 624.7824 | 528.8409 | 474.0315 | 452.4076 |
| ENSMUSG00000057132  | 15_Rpprip1      | 937.097377  | 0.076958 | 0.860685 | 0.951143 | 175.4206 | 117.6488 | 107.0069 | 187.5252 | 156.1249 | 78.86004 |
| ENSMUSG00000090113  | 7_Nhlrc4        | 0.994675458 | 0.130647 | 0.860751 | 0.951143 | 9.745586 | 8.587502 | 10.35551 | 6.945378 | 5.656701 | 18.67738 |
| ENSMUSG00000071715  | 11_Ncf4         | 124.902244  | -0.1306  | 0.860997 | 0.951361 | 207.0937 | 70.41752 | 113.9106 | 21.82833 | 225.1367 | 111.0266 |
| ENSMUSG00000087687  | 2_Pet100        | 351.9580725 | -0.05127 | 0.861049 | 0.951367 | 387.387  | 307.4326 | 379.702  | 275.8307 | 404.6765 | 350.7196 |
| ENSMUSG00000044811  | 13_AF251705     | 87.71000901 | 0.114715 | 0.861431 | 0.951736 | 127.5048 | 55.81876 | 69.03673 | 37.70348 | 83.2771  | 52.91924 |
| ENSMUSG000000505873 | 5_Reep5         | 5960.184564 | -0.03606 | 0.861819 | 0.951848 | 5922.88  | 5751.909 | 6429.62  | 6092.088 | 5639.73  | 5924.879 |
| ENSMUSG00000022362  | 13_Gm29394      | 33.7671397  | 0.109186 | 0.861736 | 0.951848 | 29.23676 | 18.03375 | 50.62693 | 59.53181 | 19.23278 | 25.9408  |
| ENSMUSG00000032815  | 15_Fanca        | 688.604491  | -0.08711 | 0.861798 | 0.951848 | 627.7782 | 653.5089 | 846.8505 | 252.018  | 951.457  | 800.0143 |
| ENSMUSG000000446962 | 15_Zbtb21       | 630.5256434 | -0.04051 | 0.861696 | 0.951848 | 645.6451 | 616.5827 | 655.8489 | 548.6848 | 659.5713 | 656.8211 |
| ENSMUSG00000047155  | 13_Cyp4x1       | 0.896006101 | -0.45299 | 0.86181  | 0.951848 | 0.812132 | 0        | 2.301224 | 0        | 2.26268  | 0        |
| ENSMUSG00000068921  | 14_Dap3         | 808.2267852 | -0.03923 | 0.861791 | 0.951848 | 773.962  | 772.8752 | 911.2848 | 802.6872 | 800.9888 | 787.5627 |
| ENSMUSG00000090667  | 2_Gm765         | 1.173261261 | -0.31954 | 0.861956 | 0.951947 | 0.812132 | 0.85875  | 2.301224 | 0.992197 | 0        | 2.075264 |
| ENSMUSG00000022055  | 7_Nefl          | 26.14237726 | 0.116783 | 0.862598 | 0.952086 | 26.80036 | 30.05626 | 18.40979 | 53.57863 | 12.44474 | 15.56448 |
| ENSMUSG00000022412  | 12_Mief1        | 680.5274792 | 0.041465 | 0.862578 | 0.952086 | 629.4024 | 628.6052 | 754.8015 | 750.1008 | 668.622  | 651.6329 |
| ENSMUSG00000026204  | 15_Ptprn        | 25.69811842 | -0.0893  | 0.862213 | 0.952086 | 25.1761  | 30.05626 | 24.16285 | 30.7581  | 30.54618 | 13.48922 |
| ENSMUSG00000028617  | 10_Lrrc42       | 819.7736707 | -0.03892 | 0.862609 | 0.952086 | 799.1381 | 837.2815 | 856.0554 | 731.2491 | 870.0005 | 824.9175 |
| ENSMUSG00000031616  | 7_Ednra         | 248.7161015 | -0.05293 | 0.862386 | 0.952086 | 245.2639 | 276.5176 | 238.1767 | 307.581  | 192.3278 | 232.4296 |
| ENSMUSG00000032101  | 6_Ddx25         | 2.984243958 | -0.20694 | 0.862541 | 0.952086 | 4.060661 | 4.293751 | 1.150612 | 3.968787 | 3.39402  | 1.037632 |
| ENSMUSG00000038982  | 13_Bcl1s5       | 380.0843617 | 0.039812 | 0.862297 | 0.952086 | 370.3323 | 359.8163 | 394.66   | 391.9177 | 364.2915 | 399.4883 |
| ENSMUSG00000045349  | 15_Sh2d5        | 203.3107836 | -0.10397 | 0.862593 | 0.952086 | 200.5966 | 163.1625 | 268.0926 | 56.55522 | 340.5334 | 190.9243 |
| ENSMUSG00000044939  | 6_Lrrc4         | 529.2494955 | -0.04018 | 0.862392 | 0.952086 | 537.6315 | 483.4764 | 589.1134 | 519.9111 | 519.2851 | 526.0795 |
| ENSMUSG00000061607  | 14_Mdc1         | 1179.991392 | 0.039884 | 0.862475 | 0.952086 | 1115.057 | 1133.55  | 1242.661 | 1071.573 | 1200.352 | 1316.755 |
| ENSMUSG00000074483  | 2_Bglap         | 2.17233757  | -0.3761  | 0.862592 | 0.952086 | 1.624264 | 0        | 5.753061 | 0        | 5.656701 | 0        |
| ENSMUSG00000097535  | 1_Gm26592       | 1.534480832 | 0.396217 | 0.862706 | 0.952141 | 0        | 1.7175   | 2.301224 | 0        | 0        | 5.18816  |
| ENSMUSG00000070737  | 10_Gm12942      | 282.4730003 | -0.0419  | 0.863036 | 0.952453 | 268.0036 | 296.2688 | 295.7073 | 290.7137 | 255.6829 | 288.4617 |
| ENSMUSG000000004552 | 16_Ctse         | 45.32623205 |          |          |          |          |          |          |          |          |          |

|                      |                  |             |          |          |          |          |          |          |          |           |          |
|----------------------|------------------|-------------|----------|----------|----------|----------|----------|----------|----------|-----------|----------|
| ENSMUSG00000097742   | 1_Gm26535        | 0.474806758 | -0.62322 | 0.865595 | 0.953533 | 0        | 1.7175   | 0        | 0        | 1.13134   | 0        |
| ENSMUSG000000051146  | 2_Camk2n2        | 8.330906193 | 0.128661 | 0.865707 | 0.953604 | 11.36985 | 7.728752 | 4.602448 | 10.91416 | 10.18206  | 5.18816  |
| ENSMUSG000000005686  | 16_Ampd3         | 262.9043202 | 0.051919 | 0.865913 | 0.95362  | 235.5183 | 237.8738 | 301.4604 | 292.6981 | 305.4618  | 204.4135 |
| ENSMUSG000000019146  | 2_Cacng2         | 0.816402231 | -0.38753 | 0.865882 | 0.95362  | 1.624264 | 0        | 1.150612 | 0.992197 | 1.13134   | 0        |
| ENSMUSG000000029828  | 4_4921507P07Rik  | 5.794442473 | -0.16844 | 0.865902 | 0.95362  | 4.872793 | 11.16375 | 2.301224 | 9.921968 | 3.39402   | 3.112896 |
| ENSMUSG000000098292  | 1_Gm27194        | 61.10599703 | -0.09246 | 0.865883 | 0.95362  | 56.84925 | 60.97127 | 71.33795 | 20.83613 | 74.66845  | 81.97293 |
| ENSMUSG000000032042  | 11_Spr           | 4559.075238 | 0.035346 | 0.86608  | 0.953751 | 4395.259 | 4334.971 | 4779.643 | 4394.44  | 4680.783  | 4559.355 |
| ENSMUSG000000032440  | 12_Tgfr2         | 2509.430882 | 0.042979 | 0.866176 | 0.953752 | 2443.706 | 2441.427 | 2531.347 | 3089.701 | 2209.507  | 2340.898 |
| ENSMUSG000000097440  | 1_Gm6277         | 7.335971278 | 0.124219 | 0.866174 | 0.953752 | 7.30919  | 6.870002 | 6.903673 | 7.937575 | 5.566701  | 9.338689 |
| ENSMUSG000000002289  | 15_Angptl4       | 231.3057154 | 0.090977 | 0.867666 | 0.953764 | 234.7062 | 176.0438 | 261.1889 | 89.29771 | 411.8078  | 214.7898 |
| ENSMUSG000000003283  | 13_Hck           | 153.7384854 | 0.103559 | 0.866695 | 0.953764 | 208.718  | 91.88627 | 143.8265 | 53.57863 | 288.4917  | 135.9298 |
| ENSMUSG0000000014351 | 12_Gip           | 2.991619368 | -0.19384 | 0.866753 | 0.953764 | 4.872793 | 3.435001 | 1.150612 | 1.984394 | 3.39402   | 3.112896 |
| ENSMUSG000000017802  | 14_Fam134c       | 4805.259352 | -0.03936 | 0.8668   | 0.953764 | 4676.257 | 4635.534 | 5300.87  | 4128.531 | 4878.339  | 5212.026 |
| ENSMUSG000000023192  | 12_Grm2          | 0.459188752 | -0.6228  | 0.867113 | 0.953764 | 0        | 1.7175   | 0        | 0        | 0         | 1.037632 |
| ENSMUSG000000023964  | 15_Calcr         | 0.45161621  | -0.6226  | 0.867864 | 0.953764 | 0        | 1.7175   | 0        | 0.992197 | 0         | 0        |
| ENSMUSG000000024277  | 14_Mapre2        | 1769.798069 | 0.03592  | 0.86727  | 0.953764 | 1693.296 | 1731.24  | 1819.118 | 1877.236 | 1641.574  | 1856.324 |
| ENSMUSG000000025035  | 8_Arl3           | 433.1280593 | -0.03839 | 0.866858 | 0.953764 | 430.4301 | 452.5614 | 433.7808 | 449.4652 | 392.575   | 439.956  |
| ENSMUSG000000025127  | 15_Gcgr          | 0.459188752 | -0.6228  | 0.867113 | 0.953764 | 0        | 1.7175   | 0        | 0        | 0         | 1.037632 |
| ENSMUSG000000025813  | 13_Homer2        | 4638.993541 | 0.035851 | 0.867558 | 0.953764 | 4539.819 | 4273.141 | 4931.524 | 4996.703 | 4622.656  | 4470.719 |
| ENSMUSG000000029062  | 14_Cdk11b        | 2031.11341  | -0.03869 | 0.867243 | 0.953764 | 1954.802 | 2018.063 | 2202.272 | 1760.157 | 2194.8    | 2056.587 |
| ENSMUSG000000031023  | 5_Akip1          | 470.8537866 | 0.0437   | 0.867205 | 0.953764 | 451.5455 | 433.6689 | 506.2693 | 539.7551 | 494.3956  | 399.4883 |
| ENSMUSG000000031916  | 17_Cog8          | 782.465617  | -0.05    | 0.86762  | 0.953764 | 718.737  | 802.9315 | 866.4109 | 560.5912 | 899.4154  | 846.7078 |
| ENSMUSG000000032034  | 5_Kcnj5          | 1.854040564 | -0.30526 | 0.866766 | 0.953764 | 2.463937 | 2.576251 | 1.150612 | 4.960984 | 0         | 0        |
| ENSMUSG000000034639  | 7_Selmar         | 83.91259576 | 0.058426 | 0.867711 | 0.953764 | 79.58895 | 83.29877 | 83.99468 | 110.1338 | 64.48639  | 81.97293 |
| ENSMUSG000000035551  | 6_Igfbp1         | 0.459188752 | -0.6228  | 0.867113 | 0.953764 | 0        | 1.7175   | 0        | 0        | 0         | 1.037632 |
| ENSMUSG000000044164  | 2_Rnf182         | 15.34389413 | -0.09835 | 0.867702 | 0.953764 | 20.3033  | 14.59875 | 12.65673 | 18.85174 | 9.050721  | 16.60211 |
| ENSMUSG000000045928  | 2_4933440M02Rik  | 0.459188752 | -0.6228  | 0.867113 | 0.953764 | 0        | 1.7175   | 0        | 0        | 0         | 1.037632 |
| ENSMUSG000000050844  | 5_1700220N01Rik  | 0.45161621  | -0.6226  | 0.867864 | 0.953764 | 0        | 1.7175   | 0        | 0.992197 | 0         | 0        |
| ENSMUSG000000054986  | 13_Sec143        | 0.45161621  | -0.6226  | 0.867864 | 0.953764 | 0        | 1.7175   | 0        | 0.992197 | 0         | 0        |
| ENSMUSG000000056912  | 11_1700017N19Rik | 0.45161621  | -0.6226  | 0.867864 | 0.953764 | 0        | 1.7175   | 0        | 0.992197 | 0         | 0        |
| ENSMUSG000000060807  | 7_Serpina6       | 0.459188752 | -0.6228  | 0.867113 | 0.953764 | 0        | 1.7175   | 0        | 0        | 0         | 1.037632 |
| ENSMUSG000000062832  | 2_Vmn1r42        | 0.45161621  | -0.6226  | 0.867864 | 0.953764 | 0        | 1.7175   | 0        | 0.992197 | 0         | 0        |
| ENSMUSG000000073094  | 9_Smim9          | 0.459188752 | -0.6228  | 0.867113 | 0.953764 | 0        | 1.7175   | 0        | 0        | 0         | 1.037632 |
| ENSMUSG000000074435  | 10_Smcp          | 0.459188752 | -0.6228  | 0.867113 | 0.953764 | 0        | 1.7175   | 0        | 0        | 0         | 1.037632 |
| ENSMUSG000000078925  | 10_D030018L15Rik | 0.459188752 | -0.6228  | 0.867113 | 0.953764 | 0        | 1.7175   | 0        | 0        | 0         | 1.037632 |
| ENSMUSG000000085389  | 7_1700003M07Rik  | 0.45161621  | -0.6226  | 0.867864 | 0.953764 | 0        | 1.7175   | 0        | 0.992197 | 0         | 0        |
| ENSMUSG000000087172  | 1_Gm12153        | 0.45161621  | -0.6226  | 0.867864 | 0.953764 | 0        | 1.7175   | 0        | 0.992197 | 0         | 0        |
| ENSMUSG000000092519  | 2_Actl9          | 0.459188752 | -0.6228  | 0.867113 | 0.953764 | 0        | 1.7175   | 0        | 0        | 0         | 1.037632 |
| ENSMUSG000000093783  | 1_1500026H17Rik  | 3.814010848 | 0.187189 | 0.867182 | 0.953764 | 3.248529 | 5.152501 | 2.301224 | 7.937575 | 1.13134   | 3.112896 |
| ENSMUSG000000097860  | 1_Gm26857        | 3.751411144 | -0.19123 | 0.867405 | 0.953764 | 8.121322 | 2.576251 | 1.150612 | 1.984394 | 4.52536   | 4.150528 |
| ENSMUSG000000100855  | 1_Gm6976         | 43.43436122 | 0.076777 | 0.866792 | 0.953764 | 44.66727 | 42.93751 | 39.12081 | 27.78151 | 40.72824  | 65.37082 |
| ENSMUSG000000101655  | 1_2310040G24Rik  | 15.51890879 | -0.09088 | 0.866862 | 0.953764 | 16.24264 | 14.59875 | 17.25918 | 13.89076 | 12.44474  | 16.87738 |
| ENSMUSG000000104939  | 1_Gm33651        | 0.45161621  | -0.6226  | 0.867864 | 0.953764 | 0        | 1.7175   | 0        | 0.992197 | 0         | 0        |
| ENSMUSG000000106779  | 1_RP23-258F1     | 0.459188752 | -0.6228  | 0.867113 | 0.953764 | 0        | 1.7175   | 0        | 0        | 0         | 1.037632 |
| ENSMUSG000000097841  | 1_4930511A02Rik  | 3.592696087 | 0.17165  | 0.867968 | 0.953826 | 2.436397 | 4.293751 | 3.451836 | 4.960984 | 2.26268   | 4.150528 |
| ENSMUSG000000063765  | 11_Chadl         | 18.95203581 | -0.11604 | 0.868214 | 0.953992 | 13.80625 | 22.32751 | 23.01224 | 4.960984 | 22.6268   | 26.97843 |
| ENSMUSG000000097837  | 1_Gm26794        | 2.611006378 | 0.192021 | 0.868215 | 0.953992 | 2.436397 | 2.576251 | 2.301224 | 2.97659  | 2.26268   | 3.112896 |
| ENSMUSG000000003037  | 16_Rab8a         | 1714.52404  | -0.04869 | 0.86847  | 0.954077 | 1682.738 | 1566.36  | 1981.354 | 1276.957 | 2025.099  | 1754.636 |
| ENSMUSG000000006920  | 14_Ezh1          | 1984.285551 | -0.04015 | 0.868507 | 0.954077 | 1912.571 | 2009.476 | 2113.674 | 1639.109 | 2085.06   | 2145.823 |
| ENSMUSG000000038696  | 14_Mapkap1       | 3884.977247 | -0.0359  | 0.86849  | 0.954077 | 3721.19  | 3711.518 | 4367.724 | 3883.458 | 3875.971  | 3750.002 |
| ENSMUSG000000055022  | 14_Cntn1         | 263.0832349 | 0.068652 | 0.868563 | 0.954077 | 233.8941 | 352.0876 | 179.4955 | 472.2857 | 142.5489  | 198.1877 |
| ENSMUSG000000073988  | 13_Tpa           | 10.85941595 | 0.163699 | 0.868456 | 0.954077 | 8.121322 | 14.59875 | 8.054285 | 27.78151 | 4.52536   | 2.075264 |
| ENSMUSG000000101698  | 1_Gm29562        | 1.180357276 | 0.40491  | 0.86858  | 0.954077 | 0.812132 | 0        | 2.301224 | 3.968787 | 0         | 0        |
| ENSMUSG000000046417  | 14_Lrrc75a       | 120.0412812 | -0.04537 | 0.868841 | 0.954311 | 127.5048 | 118.5075 | 119.6637 | 110.1338 | 119.9221  | 124.5158 |
| ENSMUSG000000047250  | 13_Ptgs1         | 1106.508146 | 0.051676 | 0.868901 | 0.954311 | 999.7347 | 969.529  | 1290.987 | 879.0864 | 1441.327  | 1058.385 |
| ENSMUSG000000051648  | 13_Kctd19        | 2.280274107 | -0.00848 | 0.868936 | 0.954311 | 2.436397 | 2.576251 | 2.301224 | 0.992197 | 2.26268   | 3.112896 |
| ENSMUSG000000067049  | 7_Unc93a         | 18.17494432 | -0.09464 | 0.869    | 0.954329 | 12.99411 | 24.90376 | 18.40979 | 11.90636 | 16.9701   | 23.86554 |
| ENSMUSG000000021577  | 13_Sdha          | 4350.435751 | 0.032787 | 0.869157 | 0.954449 | 4357.901 | 4256.825 | 4288.331 | 4527.394 | 4267.415  | 4404.748 |
| ENSMUSG000000026305  | 15_Lrrfp1        | 4521.071586 | 0.038353 | 0.869243 | 0.954469 | 4325.416 | 4061.889 | 4995.958 | 4205.922 | 4990.341  | 4546.904 |
| ENSMUSG000000043102  | 2_Qrpf           | 6.696365399 | -0.1681  | 0.869365 | 0.954469 | 10.55772 | 6.011252 | 4.602448 | 0.992197 | 4.52536   | 13.48922 |
| ENSMUSG000000087501  | 1_Gm12116        | 13.56889501 | 0.100147 | 0.869368 | 0.954469 | 18.67904 | 11.16375 | 9.204897 | 11.90636 | 16.9701   | 13.48922 |
| ENSMUSG000000106892  | 1_Gm42791        | 2.96194494  | 0.356681 | 0.86928  | 0.954469 | 0        | 7.728752 | 0        | 0.992197 | 0.9050721 | 0        |
| ENSMUSG000000009292  | 17_Trpm2         | 26.7032211  | 0.121698 | 0.869715 | 0.954475 | 35.73382 | 22.32751 | 18.40979 | 5.953181 | 4977.896  | 28.01607 |
| ENSMUSG000000021466  | 11_Ptch1         | 654.750183  | -0.04184 | 0.869477 | 0.954475 | 652.9543 | 681.8477 | 658.1501 | 762.0072 | 550.9626  | 622.5792 |
| ENSMUSG000000021846  | 8_Peli2          | 1314.751557 | 0.03724  | 0.869756 | 0.954475 | 1254.744 | 1274.385 | 1364.626 | 1405.94  | 1176.594  | 1412.217 |
| ENSMUSG000000022431  | 2_Ribc2          | 7.376016902 | -0.12976 | 0.86965  | 0.954475 | 9.745586 | 8.587502 | 4.602448 | 3.968787 | 9.050721  | 8.301057 |
| ENSMUSG000000027950  | 7_Chrrb2         | 94.00965918 | -0.07982 | 0.8697   | 0.954475 | 102.3287 | 88.45127 | 98.95264 | 39.68787 | 101.8206  | 132.8169 |
| ENSMUSG000000029387  | 10_Gltf2h        | 572.3596685 | -0.05543 | 0.86965  | 0.954475 | 579.0502 | 570.2101 | 600.6195 | 360.1674 | 690.1175  | 633.9932 |
| ENSMUSG000000032010  | 14_Usp2          | 440.610287  | -0.04379 | 0.869683 | 0.954475 | 423.933  | 426.7989 | 491.3114 | 357.1909 | 452.536   | 491.8376 |
| ENSMUSG000000043230  | 2_Fam124b        | 1.542140258 | 0.279167 | 0.869435 | 0.954475 | 2.348529 | 0.85875  | 0        | 2.97659  | 1.13134   | 1.037632 |
| ENSMUSG000000097520  | 1_Gm26843        | 1.858401105 | 0.256965 | 0.869805 | 0.954475 | 2.436397 | 2.576251 | 0        | 3.968787 | 1.13134   | 1.037632 |
| ENSMUSG000000032246  | 13_Calm4         | 94.84632589 | -0.06796 | 0.870191 | 0.954847 | 103.9529 | 105.6263 | 81.69346 | 127.0012 | 54.34032  | 96.49978 |
| ENSMUSG000000038619  | 12_Ensa          | 2289.266304 | 0.033127 | 0.870314 | 0.954929 | 2332.444 | 2189.813 | 2266.706 | 2294.951 | 2267.206  | 2384.478 |
| ENSMUSG000000005950  | 14_P2rx5         | 2.956010984 | -0.19425 | 0.870792 | 0.955086 | 3.248529 | 1.7175   | 4.602448 | 4.960984 | 1.13134   | 2.075264 |
| ENSMUSG000000014039  | 17_Pdrn15        | 490.3023184 | -0.04606 | 0.870556 | 0.955086 | 431.2422 | 507.5214 | 555.7456 | 392.9099 | 565.6701  | 488.7247 |
| ENSMUSG000000020846  | 6_Fam101b        | 1153.424016 | -0.04557 | 0.870772 | 0.955086 | 1104.5   | 1160.172 | 1250.715 | 1375.185 | 881.3139  | 1148.659 |
| ENSMUSG000000044814  | 5_Olfrr543       | 1.260713463 | -0.33825 | 0.870703 | 0.955086 | 0.812132 | 0        | 3.451836 | 0        | 2.26268   | 1.037632 |
| ENSMUSG000000070520  | 4_Ndnf1          | 314.1840217 | 0.0395   | 0.870592 | 0.955086 | 305.36   |          |          |          |           |          |

|                     |                 |              |           |          |          |          |          |          |          |            |          |
|---------------------|-----------------|--------------|-----------|----------|----------|----------|----------|----------|----------|------------|----------|
| ENSMUSG00000073600  | 3_Prob1         | 46.00417678  | 0.062498  | 0.873434 | 0.956456 | 34.10955 | 54.96001 | 46.02448 | 42.66446 | 46.38494   | 51.8816  |
| ENSMUSG00000074595  | 9_Wfdc6a        | 4.411758737  | -0.19246  | 0.873105 | 0.956456 | 2.436397 | 6.011252 | 5.753061 | 3.968787 | 0          | 8.301057 |
| ENSMUSG00000096035  | 2_Gm1045        | 4.689676706  | 0.15079   | 0.873489 | 0.956464 | 4.872793 | 6.011252 | 2.301224 | 2.97659  | 6.788041   | 5.18816  |
| ENSMUSG00000031673  | 5_Cdh11         | 1092.2089    | 0.057004  | 0.873578 | 0.956509 | 1070.39  | 1252.058 | 889.4232 | 1557.749 | 788.5441   | 995.0892 |
| ENSMUSG00000025464  | 14_Paox         | 261.4547378  | -0.05665  | 0.873694 | 0.956583 | 266.3794 | 252.4726 | 280.7494 | 161.7281 | 330.3513   | 277.0478 |
| ENSMUSG00000040270  | 16_Bach2        | 140.9841972  | 0.051851  | 0.873797 | 0.956642 | 117.7592 | 159.7275 | 138.0735 | 179.5876 | 121.0534   | 129.704  |
| ENSMUSG00000079445  | 3_B3gnt7        | 375.7572427  | 0.073078  | 0.873844 | 0.956642 | 362.211  | 365.8276 | 370.4971 | 166.6891 | 544.1746   | 445.1442 |
| ENSMUSG00000022450  | 5_Ndufa6        | 862.7230571  | 0.038028  | 0.87399  | 0.956697 | 835.684  | 813.2365 | 905.5317 | 1002.119 | 814.5649   | 805.2025 |
| ENSMUSG000000107169 | 1_Gm43796       | 14.939078    | -0.16616  | 0.873964 | 0.956697 | 8.933454 | 18.8925  | 19.56041 | 0        | 21.49546   | 20.75264 |
| ENSMUSG00000019232  | 14_Etnppl       | 33.14354628  | 0.104247  | 0.874134 | 0.956749 | 27.61249 | 46.37251 | 21.86163 | 61.5162  | 12.44474   | 29.0537  |
| ENSMUSG00000022848  | 8_Dirc2         | 1213.937828  | -0.03552  | 0.874133 | 0.956749 | 1252.308 | 1219.425 | 1215.046 | 1275.965 | 1061.197   | 1259.685 |
| ENSMUSG00000022144  | 3_Gdnf          | 69.67740766  | -0.05731  | 0.874248 | 0.956821 | 56.03712 | 85.87502 | 71.33795 | 60.52401 | 63.35505   | 80.9353  |
| ENSMUSG00000060181  | 5_Slc35e3       | 245.638685   | 0.045692  | 0.874534 | 0.957081 | 235.5183 | 265.3538 | 224.3694 | 306.5888 | 225.1367   | 216.8651 |
| ENSMUSG00000031803  | 7_B3gnt3        | 87.91690442  | -0.05919  | 0.874582 | 0.957082 | 84.46175 | 72.13502 | 112.76   | 67.46938 | 109.74     | 80.9353  |
| ENSMUSG00000031543  | 18_Ank1         | 37.29456243  | 0.076772  | 0.874766 | 0.95723  | 30.86102 | 36.92626 | 41.42204 | 58.53961 | 24.88948   | 31.12896 |
| ENSMUSG00000001520  | 12_Nrip2        | 23.13478119  | -0.072633 | 0.875129 | 0.957369 | 25.1761  | 20.61001 | 21.86163 | 27.78151 | 22.6268    | 20.75264 |
| ENSMUSG00000018595  | 6_Glra4         | 1.241418759  | 0.279374  | 0.87529  | 0.957369 | 2.436397 | 0.85875  | 0        | 1.984394 | 1.13134    | 1.037632 |
| ENSMUSG00000020038  | 9_Cry1          | 256.9834537  | 0.039756  | 0.875421 | 0.957369 | 231.4577 | 250.7551 | 278.4481 | 242.096  | 257.9455   | 281.1983 |
| ENSMUSG00000035776  | 14_Cd99l2       | 2386.649024  | -0.0327   | 0.875059 | 0.957369 | 2371.426 | 2416.523 | 2453.105 | 2196.724 | 2468.584   | 2413.532 |
| ENSMUSG00000037681  | 13_Esy13        | 1016.271308  | 0.036465  | 0.875241 | 0.957369 | 939.6369 | 937.7552 | 1133.353 | 969.3763 | 1061.197   | 1056.399 |
| ENSMUSG00000038721  | 8_Hoxb7         | 0.963887808  | 0.33837   | 0.875354 | 0.957369 | 1.624264 | 0.85875  | 0        | 0        | 2.26268    | 1.037632 |
| ENSMUSG00000074607  | 11_Tox2         | 20.07207799  | -0.07669  | 0.875204 | 0.957369 | 20.3033  | 19.75126 | 21.86163 | 23.81272 | 18.10144   | 16.60211 |
| ENSMUSG00000090211  | 2_Gm16050       | 2.896582794  | 0.188763  | 0.875241 | 0.957369 | 3.248529 | 2.576251 | 2.301224 | 5.953181 | 2.26268    | 1.037632 |
| ENSMUSG000000093536 | 7_Smin17        | 1.515250998  | -0.3125   | 0.875162 | 0.957369 | 0.812132 | 0.85875  | 3.451836 | 3.968787 | 0          | 0        |
| ENSMUSG000000095545 | 7_Gm4245        | 18.58400677  | 0.204805  | 0.875386 | 0.957369 | 33.29742 | 17.175   | 1.150612 | 0        | 33.9402    | 25.9408  |
| ENSMUSG000000097335 | 1_Gm26563       | 7.68181246   | 0.162251  | 0.875328 | 0.957369 | 8.121322 | 3.435001 | 10.35551 | 17.85954 | 1.13134    | 5.18816  |
| ENSMUSG000000079168 | 3_Cd209g        | 16.19632238  | -0.09512  | 0.875611 | 0.957524 | 14.61838 | 20.61001 | 14.95796 | 11.90636 | 10.18206   | 24.90317 |
| ENSMUSG00000010358  | 13_Hl35         | 3666.977026  | -0.07323  | 0.875771 | 0.957646 | 3361.415 | 3313.917 | 4604.75  | 1533.936 | 4993.735   | 4194.109 |
| ENSMUSG000000021848 | 15_Otx2         | 278.7161976  | -0.0696   | 0.875991 | 0.957729 | 325.665  | 321.1726 | 209.4114 | 430.6134 | 168.5697   | 216.8651 |
| ENSMUSG00000035354  | 8_Uvrag         | 935.6612437  | 0.033683  | 0.87593  | 0.957729 | 896.5939 | 917.1452 | 960.7611 | 1012.041 | 916.3855   | 911.041  |
| ENSMUSG00000036949  | 16_Slc39a12     | 142.7532072  | -0.07824  | 0.875985 | 0.957729 | 145.3717 | 186.3488 | 108.1575 | 230.1897 | 71.27443   | 115.1772 |
| ENSMUSG00000028246  | 13_Facc         | 39.04033264  | 0.080663  | 0.876092 | 0.957735 | 43.04301 | 49.80751 | 20.71102 | 56.55522 | 35.07154   | 29.0537  |
| ENSMUSG000000062151 | 13_Unc13c       | 96.87125327  | -0.08525  | 0.876065 | 0.957735 | 73.90403 | 82.84407 | 162.7203 | 48.64762 | 70.55898   | 0        |
| ENSMUSG00000042567  | 19_Nek10        | 1.241221627  | 0.318368  | 0.876252 | 0.957804 | 3.248529 | 0        | 0.992197 | 1.13134  | 2.075264   | 0        |
| ENSMUSG00000058385  | 7_Hist1h2bg     | 1.241221627  | 0.318368  | 0.876252 | 0.957804 | 3.248529 | 0        | 0.992197 | 1.13134  | 2.075264   | 0        |
| ENSMUSG00000035948  | 12_Accs3        | 19.66223971  | 0.094281  | 0.876458 | 0.957977 | 16.24264 | 29.19751 | 11.50612 | 28.77371 | 13.57608   | 18.67738 |
| ENSMUSG00000031881  | 5_Cdh16         | 0.808356766  | -0.4096   | 0.876601 | 0.957998 | 1.624264 | 0        | 1.150612 | 0        | 0          | 2.075264 |
| ENSMUSG00000033737  | 14_Fndc3c1      | 5.440507823  | -0.1673   | 0.876622 | 0.957998 | 3.248529 | 9.446252 | 4.602448 | 10.91416 | 3.39402    | 1.037632 |
| ENSMUSG00000039488  | 15_Cntn5        | 5.823158929  | 0.140046  | 0.876614 | 0.957998 | 6.497057 | 4.293751 | 5.753061 | 3.968787 | 11.3134    | 3.112896 |
| ENSMUSG00000063888  | 6_Rpl7l1        | 1951.942264  | 0.039705  | 0.876682 | 0.958011 | 1936.123 | 1816.257 | 2022.776 | 1634.148 | 2321.51    | 1980.84  |
| ENSMUSG00000045934  | 15_Mtmr11       | 463.6066763  | -0.04602  | 0.876815 | 0.958104 | 489.7157 | 476.6064 | 446.4375 | 341.3157 | 467.2435   | 560.3213 |
| ENSMUSG00000020059  | 9_Sypc3         | 2.474910528  | 0.250052  | 0.877362 | 0.958367 | 2.436397 | 4.293751 | 0        | 3.968787 | 0          | 4.150528 |
| ENSMUSG00000028398  | 8_Tmem261       | 338.2723262  | -0.04106  | 0.877307 | 0.958367 | 330.5378 | 343.5001 | 355.5391 | 398.8631 | 293.0171   | 308.1767 |
| ENSMUSG00000032105  | 4_Pdzd3         | 5.934981126  | -0.14162  | 0.877311 | 0.958367 | 6.497057 | 5.887502 | 3.451836 | 1.984394 | 6.788041   | 8.301057 |
| ENSMUSG00000046196  | 4_Tlc39d        | 0.979505815  | 0.389195  | 0.877393 | 0.958367 | 1.624264 | 0.85875  | 0        | 0        | 3.39402    | 0        |
| ENSMUSG00000058594  | 15_Fbxo18       | 1463.091793  | 0.031278  | 0.877373 | 0.958367 | 1452.904 | 1433.254 | 1455.524 | 1447.615 | 1501.288   | 1487.964 |
| ENSMUSG00000062687  | 5_Cks1btr       | 1.265755889  | -0.35875  | 0.877162 | 0.958367 | 1.624264 | 2.576251 | 0        | 0        | 3.39402    | 0        |
| ENSMUSG00000069917  | 7_Hba-a2        | 69.27290189  | -0.06661  | 0.877241 | 0.958367 | 62.53418 | 76.42877 | 73.63917 | 39.68787 | 67.88041   | 95.46215 |
| ENSMUSG00000106245  | 1_Gm43824       | 3.421346302  | 0.2232    | 0.877494 | 0.958426 | 3.248529 | 1.7175   | 4.602448 | 9.921968 | 0          | 1.037632 |
| ENSMUSG00000028280  | 9_Gabrr1        | 3.679971213  | -0.19159  | 0.877899 | 0.958772 | 6.497057 | 5.125201 | 0        | 4.960984 | 3.39402    | 2.075264 |
| ENSMUSG00000033361  | 13_Prrp3        | 232.5953835  | 0.07433   | 0.878005 | 0.958772 | 204.6573 | 291.1163 | 184.0979 | 363.144  | 109.74     | 242.8059 |
| ENSMUSG00000035642  | 16_Aamdc        | 192.1087183  | -0.04587  | 0.877974 | 0.958772 | 199.7845 | 209.5351 | 176.0437 | 177.6032 | 157.2563   | 232.4296 |
| ENSMUSG00000052139  | 18_Bre          | 1803.810798  | -0.03411  | 0.877848 | 0.958772 | 1668.119 | 1813.68  | 1994.011 | 1693.68  | 1777.335   | 1876.039 |
| ENSMUSG00000070891  | 2_Gm12689       | 7.587422909  | -0.139    | 0.877994 | 0.958772 | 8.933454 | 3.435001 | 11.50612 | 4.960984 | 13.57608   | 3.112896 |
| ENSMUSG00000019865  | 9_Nmbr          | 0.45926741   | -0.56676  | 0.878746 | 0.958952 | 1.624264 | 0        | 0        | 0        | 1.13134    | 0        |
| ENSMUSG00000028003  | 6_Lrat          | 297.2224353  | 0.106054  | 0.878283 | 0.958952 | 370.3323 | 336.6301 | 151.8808 | 658.8187 | 100.8893   | 164.9835 |
| ENSMUSG00000043909  | 16_Trp53bp1     | 1915.725038  | 0.031762  | 0.878363 | 0.958952 | 1792.376 | 1932.188 | 1959.492 | 1919.901 | 2008.129   | 1882.265 |
| ENSMUSG00000046811  | 3_Gltpd2        | 0.45926741   | -0.56676  | 0.878746 | 0.958952 | 1.624264 | 0        | 0        | 0        | 1.13134    | 0        |
| ENSMUSG00000059408  | 2_Mrgprh        | 0.45926741   | -0.56676  | 0.878746 | 0.958952 | 1.624264 | 0        | 0        | 0        | 1.13134    | 0        |
| ENSMUSG00000085932  | 1_Gm15556       | 0.45926741   | -0.56676  | 0.878746 | 0.958952 | 1.624264 | 0        | 0        | 0        | 1.13134    | 0        |
| ENSMUSG00000095956  | 2_1700036A12Rik | 0.45926741   | -0.56676  | 0.878746 | 0.958952 | 1.624264 | 0        | 0        | 0        | 1.13134    | 0        |
| ENSMUSG00000098087  | 1_Gm17750       | 0.45926741   | -0.56676  | 0.878746 | 0.958952 | 1.624264 | 0        | 0        | 0        | 1.13134    | 0        |
| ENSMUSG00000103308  | 5_Gm37800       | 0.45926741   | -0.56676  | 0.878746 | 0.958952 | 1.624264 | 0        | 0        | 0        | 1.13134    | 0        |
| ENSMUSG00000105858  | 1_2310074N15Rik | 0.45926741   | -0.56676  | 0.878746 | 0.958952 | 1.624264 | 0        | 0        | 0        | 1.13134    | 0        |
| ENSMUSG00000108237  | 1_RP24-369J3    | 0.45926741   | -0.56676  | 0.878746 | 0.958952 | 1.624264 | 0        | 0        | 0        | 1.13134    | 0        |
| ENSMUSG00000000441  | 17_Raf1         | 2933.5227161 | -0.04141  | 0.879621 | 0.958957 | 2906.621 | 2836.452 | 3183.744 | 2221.529 | 3341.979   | 3110.821 |
| ENSMUSG00000030379  | 16_Dlgap1       | 42.27706155  | -0.09489  | 0.880096 | 0.958957 | 55.22499 | 51.52501 | 24.16285 | 75.40696 | 20.36412   | 26.97843 |
| ENSMUSG00000015165  | 16_Hnmp1        | 4716.266952  | -0.03696  | 0.879497 | 0.958957 | 4676.257 | 4620.935 | 5032.777 | 3902.31  | 5302.591   | 4762.731 |
| ENSMUSG00000019899  | 15_Lama2        | 906.7277741  | 0.05311   | 0.880249 | 0.958957 | 818.6292 | 1069.144 | 782.4162 | 1212.465 | 616.5804   | 941.1323 |
| ENSMUSG00000020181  | 15_Nav3         | 320.8544075  | -0.03746  | 0.879343 | 0.958957 | 341.0955 | 325.4663 | 308.364  | 350.2455 | 315.6439   | 284.3112 |
| ENSMUSG00000021018  | 7_Polr2h        | 430.3102364  | -0.03589  | 0.879526 | 0.958957 | 447.4848 | 402.7539 | 456.793  | 386.9568 | 446.8793   | 440.9936 |
| ENSMUSG00000021879  | 12_Dnah12       | 5.457284245  | -0.14691  | 0.879797 | 0.958957 | 9.745586 | 1.7175   | 5.753061 | 6.945378 | 3.39402    | 5.18816  |
| ENSMUSG00000023224  | 12_Serping1     | 7609.370885  | 0.058048  | 0.880823 | 0.958957 | 7895.549 | 6951.583 | 7521.551 | 4290.259 | 10576.9    | 8420.384 |
| ENSMUSG00000025739  | 13_Gng13        | 12.76610689  | -0.10824  | 0.880097 | 0.958957 | 20.3033  | 11.16375 | 8.054285 | 5.953181 | 12.44474   | 18.67738 |
| ENSMUSG00000025969  | 15_Nrp2         | 990.8261724  | -0.04321  | 0.879469 | 0.958957 | 992.4255 | 1098.342 | 926.2427 | 1235.285 | 855.2931   | 837.3691 |
| ENSMUSG00000028089  | 5_Chd1f         | 517.3360129  | -0.04417  | 0.879466 | 0.958957 | 562.8076 | 442.2564 | 570.7036 | 398.8631 | 569.0641   | 560.3213 |
| ENSMUSG00000028096  | 13_Gpr89        | 673.8824465  | 0.033162  | 0.879214 | 0.958957 | 689.5002 | 638.0514 | 670.8069 | 684.6158 | 713.8756</ |          |

|                     |                  |             |          |          |          |          |          |          |          |          |          |
|---------------------|------------------|-------------|----------|----------|----------|----------|----------|----------|----------|----------|----------|
| ENSMUSG00000103923  | 1_Gm37896        | 0.436076862 | -0.56599 | 0.880917 | 0.958957 | 1.624264 | 0        | 0        | 0.992197 | 0        | 0        |
| ENSMUSG00000104414  | 1_Gm37799        | 0.443649404 | -0.56624 | 0.880199 | 0.958957 | 1.624264 | 0        | 0        | 0        | 0        | 1.037632 |
| ENSMUSG00000105769  | 1_Gm43351        | 0.443649404 | -0.56624 | 0.880199 | 0.958957 | 1.624264 | 0        | 0        | 0        | 0        | 1.037632 |
| ENSMUSG00000039954  | 8_Stk32a         | 7.58511096  | -0.11072 | 0.881041 | 0.959039 | 8.121322 | 5.857502 | 6.903673 | 9.921968 | 6.788041 | 5.18816  |
| ENSMUSG000000101429 | 3_156627451      | 0.213913    | 0.88111  | 0.959062 | 2.436397 | 5.152501 | 1.150612 | 7.937575 | 2.26268  | 0        | 0        |
| ENSMUSG000000071662 | 3_Polr2g         | 666.0652418 | 0.334141 | 0.881275 | 0.959189 | 646.4572 | 642.3452 | 685.7648 | 608.2166 | 730.8457 | 682.7619 |
| ENSMUSG000000044461 | 5_Shise2         | 565.7106843 | 0.060537 | 0.881397 | 0.959227 | 525.4495 | 658.6614 | 477.504  | 830.4687 | 331.4827 | 570.6976 |
| ENSMUSG000000050830 | 17_Vwv2          | 8.550166385 | -0.1249  | 0.881454 | 0.959279 | 8.121322 | 12.88125 | 5.753061 | 11.90636 | 2.26268  | 10.37632 |
| ENSMUSG000000039737 | 11_Pkrnp1        | 284.086351  | -0.04659 | 0.881706 | 0.959501 | 279.3735 | 274.8001 | 311.8159 | 199.4316 | 324.6946 | 314.4025 |
| ENSMUSG000000026917 | 15_Wdr5          | 1188.251424 | -0.04282 | 0.881836 | 0.95959  | 1197.083 | 1142.138 | 1278.33  | 870.1566 | 1390.417 | 1251.384 |
| ENSMUSG000000068227 | 8_Il2rb          | 93.55891711 | -0.09792 | 0.881933 | 0.959643 | 157.5536 | 60.97127 | 71.33795 | 28.77371 | 161.7816 | 80.9353  |
| ENSMUSG000000050592 | 8_Fam78a         | 40.7321477  | 0.059843 | 0.882106 | 0.959779 | 46.29153 | 35.20876 | 37.9702  | 31.7503  | 47.51628 | 45.65581 |
| ENSMUSG000000045475 | 5_Lce3c          | 4.276106549 | -0.18638 | 0.882219 | 0.959849 | 1.624264 | 5.152501 | 6.903673 | 0        | 6.788041 | 5.18816  |
| ENSMUSG000000084758 | 1_Gm12798        | 1.54621122  | -0.28516 | 0.882298 | 0.959882 | 0        | 1.1715   | 3.451836 | 2.97659  | 1.13134  | 0        |
| ENSMUSG000000026701 | 15_Prdx6         | 20784.44482 | 0.033382 | 0.882399 | 0.959888 | 19669.84 | 20368.7  | 21593.54 | 18346.71 | 22132.41 | 22595.48 |
| ENSMUSG000000042834 | 14_Nrep          | 540.4384448 | -0.07438 | 0.882384 | 0.959888 | 515.7039 | 784.8977 | 362.4428 | 828.4843 | 261.3396 | 489.7623 |
| ENSMUSG000000037112 | 16_Sik2          | 849.4595798 | 0.035567 | 0.882574 | 0.960026 | 810.5079 | 801.214  | 905.5317 | 773.9135 | 828.141  | 977.4494 |
| ENSMUSG000000028960 | 18_Ube4b         | 1692.978236 | -0.03287 | 0.882687 | 0.960049 | 1597.464 | 1722.653 | 1816.817 | 1521.038 | 1778.467 | 1721.432 |
| ENSMUSG000000050866 | 7_Clrn3          | 1.204221483 | -0.30048 | 0.882727 | 0.960049 | 0        | 1.1715   | 2.301224 | 0        | 1.13134  | 2.075264 |
| ENSMUSG000000054000 | 5_Tusc1          | 54.02525669 | 0.077127 | 0.88274  | 0.960049 | 49.54006 | 49.80751 | 58.68122 | 94.2587  | 28.2835  | 43.58055 |
| ENSMUSG000000005609 | 15_Ctr9          | 1515.77443  | 0.030389 | 0.882848 | 0.960112 | 1462.65  | 1525.999 | 1510.754 | 1504.17  | 1603.109 | 1487.964 |
| ENSMUSG000000098627 | 7_4930524O08Rik  | 6.21618517  | -0.12118 | 0.882894 | 0.960112 | 5.684925 | 6.870002 | 6.903673 | 7.937575 | 6.788041 | 3.112896 |
| ENSMUSG000000054618 | 8_Gm95f1         | 0.759910251 | -0.34005 | 0.883183 | 0.960178 | 0.812132 | 1.1715   | 0        | 0.992197 | 0        | 1.037632 |
| ENSMUSG000000068696 | 6_Gpr88          | 8.255450963 | -0.12503 | 0.883164 | 0.960178 | 5.684925 | 7.728752 | 12.65673 | 12.89856 | 2.26268  | 8.301057 |
| ENSMUSG000000086924 | 1_Gm11766        | 13.2467634  | -0.09132 | 0.883196 | 0.960178 | 15.43051 | 12.0225  | 13.80735 | 9.921968 | 9.050721 | 19.71501 |
| ENSMUSG000000087659 | 7_Gm12606        | 3.546393649 | 0.163741 | 0.883009 | 0.960178 | 4.060661 | 2.576251 | 3.451836 | 6.945378 | 1.13134  | 3.112896 |
| ENSMUSG000000097762 | 1_4732463B04Rik  | 1.504084021 | -0.28891 | 0.883115 | 0.960178 | 4.060661 | 0.85875  | 0        | 0.992197 | 0        | 3.112896 |
| ENSMUSG000000061356 | 13_Nuggc         | 6.505868721 | -0.15406 | 0.8833   | 0.960186 | 2.436397 | 11.16375 | 6.903673 | 0.992197 | 11.3134  | 6.225792 |
| ENSMUSG000000108273 | 14_Zfand4        | 14.26648897 | 0.163297 | 0.883294 | 0.960186 | 0        | 19.75126 | 20.71102 | 6.945378 | 12.6268  | 15.56448 |
| ENSMUSG000000032330 | 6_Cox7a2         | 2118.393243 | -0.0396  | 0.883407 | 0.96025  | 2309.704 | 2077.317 | 2054.993 | 1625.218 | 2389.39  | 2253.737 |
| ENSMUSG000000000811 | 13_Txnrd3        | 509.1807872 | -0.03671 | 0.883678 | 0.960327 | 514.0797 | 481.7589 | 551.1432 | 453.4339 | 581.5088 | 473.1602 |
| ENSMUSG000000019303 | 14_Psmc3ip       | 177.0917837 | -0.04635 | 0.88363  | 0.960327 | 177.0448 | 161.445  | 201.3571 | 130.97   | 207.0352 | 184.6785 |
| ENSMUSG000000025236 | 10_Adgpk         | 423.7780303 | 0.033686 | 0.883645 | 0.960327 | 428.8058 | 401.8951 | 425.7265 | 417.7149 | 463.8494 | 404.6765 |
| ENSMUSG000000025413 | 13_Ttc4          | 722.9383583 | -0.03655 | 0.883767 | 0.960327 | 710.6157 | 741.1014 | 744.446  | 590.3571 | 787.4127 | 763.6972 |
| ENSMUSG000000032612 | 14_Usp4          | 3540.315777 | -0.03818 | 0.8836   | 0.960327 | 3514.908 | 3405.803 | 3840.743 | 2783.112 | 3973.266 | 3724.061 |
| ENSMUSG000000034602 | 13_Mon2          | 2276.95382  | 0.029911 | 0.883736 | 0.960327 | 2213.06  | 2241.338 | 2305.827 | 2409.054 | 2286.438 | 2206.006 |
| ENSMUSG000000021810 | 2_Ecd            | 1051.582794 | 0.035232 | 0.883826 | 0.960339 | 1033.844 | 1003.02  | 1079.274 | 924.7274 | 1219.585 | 1049.046 |
| ENSMUSG000000028608 | 15_0610037L13Rik | 778.2140415 | -0.0357  | 0.884068 | 0.960549 | 808.8836 | 727.3614 | 827.2901 | 656.8343 | 815.6962 | 833.2185 |
| ENSMUSG000000097289 | 1_2010300F17Rik  | 4.363942461 | -0.14191 | 0.884124 | 0.960558 | 4.872793 | 4.293751 | 4.602448 | 6.945378 | 3.39402  | 2.075264 |
| ENSMUSG000000029595 | 9_Lhx5           | 0.94069726  | 0.282936 | 0.884336 | 0.960683 | 1.624264 | 0.85875  | 0        | 0.992197 | 1.13134  | 1.037632 |
| ENSMUSG000000045699 | 3_Gm21411        | 0.94069726  | 0.282936 | 0.884336 | 0.960683 | 1.624264 | 0.85875  | 0        | 0.992197 | 1.13134  | 1.037632 |
| ENSMUSG000000102674 | 1_8030442B05Rik  | 2.50821196  | 0.204426 | 0.88443  | 0.960733 | 3.248529 | 2.576251 | 1.150612 | 4.960984 | 0        | 3.112896 |
| ENSMUSG000000071036 | 2_Gm10309        | 6.681551103 | 0.164783 | 0.884498 | 0.960755 | 9.745586 | 0        | 9.204897 | 7.937575 | 9.050721 | 4.150528 |
| ENSMUSG000000071311 | 1_Gpr31b         | 7.437666553 | -0.17534 | 0.884679 | 0.960898 | 7.30919  | 2.576251 | 13.80735 | 0        | 14.70742 | 6.225792 |
| ENSMUSG000000000049 | 11_Apoh          | 5.545105658 | 0.138797 | 0.884904 | 0.960953 | 4.872793 | 5.857502 | 2.301224 | 6.945378 | 2.26268  | 8.301057 |
| ENSMUSG000000006050 | 11_Sra1          | 1064.397682 | -0.03005 | 0.884876 | 0.960953 | 1102.875 | 1061.415 | 1062.015 | 1030.892 | 1089.481 | 1039.707 |
| ENSMUSG000000027470 | 9_Mylk2          | 31.43635747 | -0.08162 | 0.884838 | 0.960953 | 21.92757 | 42.93751 | 32.21714 | 25.79712 | 16.9701  | 48.76871 |
| ENSMUSG000000030830 | 18_Igta1         | 130.8078792 | 0.095365 | 0.88497  | 0.960953 | 190.8511 | 72.13502 | 116.2118 | 45.64105 | 262.4709 | 97.53471 |
| ENSMUSG000000031189 | 12_Aff2          | 18.62288455 | -0.08197 | 0.884926 | 0.960953 | 18.67904 | 26.62126 | 12.65673 | 22.82053 | 12.44474 | 19.71501 |
| ENSMUSG000000039521 | 12_Foxp3         | 13.60098519 | -0.1003  | 0.885048 | 0.960985 | 18.67904 | 12.0225  | 11.50612 | 4.960984 | 19.23278 | 15.56448 |
| ENSMUSG000000018347 | 16_Zkscan6       | 403.4191098 | 0.044533 | 0.885326 | 0.96113  | 356.526  | 362.3926 | 472.9016 | 314.5264 | 488.7389 | 425.4291 |
| ENSMUSG000000025134 | 2_Alyref         | 934.9219868 | -0.03929 | 0.885276 | 0.96113  | 937.2005 | 827.8352 | 1078.124 | 753.0774 | 1018.206 | 995.0892 |
| ENSMUSG000000044294 | 7_Krt84          | 3.808210504 | -0.17445 | 0.885289 | 0.96113  | 4.060661 | 3.435001 | 4.602448 | 0        | 4.52536  | 6.225792 |
| ENSMUSG000000067150 | 5_Xpo5           | 1336.799459 | -0.03641 | 0.885381 | 0.961138 | 1365.194 | 1266.657 | 1429.06  | 1141.026 | 1561.249 | 1257.61  |
| ENSMUSG000000030766 | 15_Arhgap17      | 1246.802624 | -0.03303 | 0.885464 | 0.961174 | 1206.828 | 1245.188 | 1331.258 | 1159.878 | 1385.892 | 1151.772 |
| ENSMUSG000000028643 | 10_Ccdc25        | 400.7231743 | 0.03484  | 0.885614 | 0.961214 | 394.6962 | 439.6801 | 382.0032 | 356.1987 | 420.8585 | 410.9023 |
| ENSMUSG000000034936 | 2_Arl4d          | 209.7156581 | -0.07515 | 0.885645 | 0.961214 | 177.8569 | 181.1963 | 286.5024 | 91.28211 | 345.0587 | 176.3975 |
| ENSMUSG000000104904 | 1_Gm43082        | 2.295616322 | -0.20649 | 0.885598 | 0.961214 | 1.624264 | 3.435001 | 2.301224 | 0        | 2.26268  | 4.150528 |
| ENSMUSG000000027291 | 15_Vps39         | 994.7460934 | -0.03973 | 0.885726 | 0.96125  | 1075.263 | 969.529  | 980.3215 | 764.9837 | 1060.893 | 1171.487 |
| ENSMUSG000000028885 | 8_Smpd3b         | 314.243162  | -0.05821 | 0.885904 | 0.961344 | 331.3499 | 281.6701 | 348.8355 | 163.7125 | 382.393  | 307.6981 |
| ENSMUSG000000070354 | 13_Gm21975       | 5.472408294 | -0.19287 | 0.88591  | 0.961344 | 10.55772 | 0        | 6.903673 | 1.984394 | 1.13134  | 2.075264 |
| ENSMUSG000000059854 | 7_Hydn           | 1.272576114 | 0.283134 | 0.886161 | 0.961564 | 0.812132 | 2.576251 | 0        | 1.984394 | 2.26268  | 0        |
| ENSMUSG000000027944 | 13_Hax1          | 786.1340337 | -0.04312 | 0.886345 | 0.961712 | 772.3377 | 744.5364 | 876.7664 | 561.5834 | 923.1735 | 838.4067 |
| ENSMUSG000000020321 | 15_Mdh1          | 7120.118539 | 0.029525 | 0.886415 | 0.961713 | 7445.628 | 6749.777 | 6946.245 | 6860.049 | 7180.616 | 7538.397 |
| ENSMUSG000000031714 | 8_Gab1           | 1701.532111 | 0.030147 | 0.886481 | 0.961713 | 1555.233 | 1727.805 | 1768.491 | 1693.68  | 1733.213 | 1730.77  |
| ENSMUSG000000034898 | 15_Filip1        | 120.7804772 | -0.05411 | 0.886491 | 0.961713 | 107.2014 | 160.5863 | 101.2539 | 118.0714 | 87.11319 | 150.4566 |
| ENSMUSG000000020334 | 6_Slc22a4        | 228.2413899 | 0.037926 | 0.886696 | 0.961931 | 203.033  | 240.4501 | 232.4236 | 217.2911 | 212.6919 | 263.5585 |
| ENSMUSG000000029695 | 13_Aass          | 138.4425319 | -0.07304 | 0.886797 | 0.961931 | 134.8139 | 179.4788 | 111.6094 | 226.2209 | 63.35505 | 115.1772 |
| ENSMUSG000000038984 | 3_Tspy15         | 24.45739136 | 0.09009  | 0.886955 | 0.961931 | 24.36397 | 28.33876 | 18.40979 | 45.64105 | 11.3134  | 18.67738 |
| ENSMUSG000000040723 | 14_Rcsd1         | 123.414749  | -0.03963 | 0.886951 | 0.961931 | 129.129  | 121.9425 | 124.2661 | 116.087  | 13.134   | 135.9298 |
| ENSMUSG000000068231 | 4_Vmn1r43        | 3.649475687 | -0.14591 | 0.886901 | 0.961931 | 5.684925 | 3.435001 | 2.301224 | 3.968787 | 3.39402  | 3.112896 |
| ENSMUSG000000068394 | 4_Cep152         | 264.1759112 | 0.041164 | 0.886982 | 0.961931 | 288.3069 | 225.8513 | 266.942  | 215.3067 | 291.8857 | 296.7628 |
| ENSMUSG000000002227 | 15_Mov10         | 815.7586074 | -0.0819  | 0.887047 | 0.96195  | 713.0521 | 746.2539 | 1057.413 | 221.2599 | 1207.14  | 949.4333 |
| ENSMUSG000000018651 | 14_Tada2a        | 334.881841  | 0.035204 | 0.887225 | 0.961986 | 300.4889 | 357.2401 | 334.8281 | 372.0738 | 329.22   | 315.4401 |
| ENSMUSG000000022711 | 15_Pmm2          | 1518.22759  | -0.03342 | 0.887185 | 0.961986 | 1550.36  | 1426.96  | 1628.116 | 1326.567 | 1681.171 | 1494.19  |
| ENSMUSG000000027612 | 7_Mmp24          | 2.364908572 | 0.2144   |          |          |          |          |          |          |          |          |

|                     |              |             |           |          |          |          |          |          |          |          |          |
|---------------------|--------------|-------------|-----------|----------|----------|----------|----------|----------|----------|----------|----------|
| ENSMUSG00000059288  | 13_Cdyl      | 532.8337185 | 0.0346    | 0.889803 | 0.963112 | 510.8311 | 480.9001 | 587.9628 | 569.521  | 573.5894 | 474.1979 |
| ENSMUSG00000004789  | 9_Dlst       | 2258.116936 | -0.0367   | 0.890052 | 0.963246 | 2246.358 | 2206.988 | 2407.081 | 1755.196 | 2505.294 | 2337.785 |
| ENSMUSG000000018844 | 6_Fndc8      | 1.65242856  | 0.227121  | 0.890144 | 0.963246 | 0.812132 | 2.576251 | 1.150612 | 0        | 2.26268  | 3.112896 |
| ENSMUSG000000028460 | 6_Stt1       | 1.605928989 | 0.234505  | 0.890316 | 0.963246 | 3.248529 | 0        | 1.150612 | 0.992197 | 1.13134  | 3.112896 |
| ENSMUSG000000043635 | 12_Adamts3   | 13.64467113 | -0.09119  | 0.890299 | 0.963246 | 17.05478 | 18.03375 | 6.903673 | 16.86735 | 14.70742 | 8.301057 |
| ENSMUSG000000056812 | 13_St8sia3   | 3.742649575 | 0.205319  | 0.890187 | 0.963246 | 3.248529 | 6.011252 | 1.150612 | 10.91416 | 1.13134  | 0        |
| ENSMUSG000000060890 | 11_Arr3      | 13.44851032 | -0.12641  | 0.890131 | 0.963246 | 22.7397  | 14.59875 | 4.602448 | 20.83613 | 15.30764 | 0        |
| ENSMUSG000000068417 | 7_Pmp2       | 39.35288366 | 0.082703  | 0.890003 | 0.963246 | 52.78859 | 21.46876 | 40.27142 | 17.85954 | 62.22371 | 41.50528 |
| ENSMUSG000000097056 | 1_Gm4262     | 2.630112176 | -0.1864   | 0.89037  | 0.963246 | 3.248529 | 1.7175   | 3.451836 | 3.968787 | 3.39402  | 0        |
| ENSMUSG000000097889 | 1_Gm26541    | 32.43806179 | -0.07792  | 0.890364 | 0.963246 | 26.80036 | 20.61001 | 52.92816 | 41.67227 | 33.9402  | 18.67738 |
| ENSMUSG000000032311 | 17_Nrg4      | 38.36392285 | 0.05394   | 0.890609 | 0.963251 | 39.79448 | 31.77376 | 41.42204 | 33.73469 | 42.99092 | 40.46765 |
| ENSMUSG000000032845 | 15_Alpk2     | 23.08747765 | 0.074467  | 0.890592 | 0.963251 | 23.55183 | 23.18626 | 20.71102 | 33.73469 | 24.88948 | 12.45158 |
| ENSMUSG000000033985 | 17_Testk2    | 86.5719535  | 0.041733  | 0.890474 | 0.963251 | 84.46175 | 95.32127 | 75.9404  | 86.32112 | 87.11319 | 90.27399 |
| ENSMUSG000000079563 | 9_Pglyrp2    | 3.545990179 | -0.20398  | 0.890617 | 0.963251 | 8.121322 | 0.85875  | 2.301224 | 0        | 7.919381 | 2.075264 |
| ENSMUSG00000108470  | 1_RP23-26A14 | 0.855132127 | -0.36     | 0.890593 | 0.963251 | 0        | 1.7175   | 1.150612 | 0        | 2.26268  | 0        |
| ENSMUSG000000105127 | 1_Gm42470    | 6.045514606 | 0.116761  | 0.890796 | 0.963392 | 6.497057 | 5.152501 | 5.753061 | 3.968787 | 4.52536  | 10.37632 |
| ENSMUSG000000040133 | 2_Gpr176     | 19.72902393 | -0.06967  | 0.890931 | 0.963486 | 22.7397  | 17.175   | 20.71102 | 15.87515 | 16.9701  | 24.90317 |
| ENSMUSG000000054136 | 5_Adm2       | 1.351982851 | 0.243489  | 0.891075 | 0.963589 | 0.812132 | 1.7175   | 1.150612 | 0        | 3.39402  | 1.037632 |
| ENSMUSG000000019978 | 15_Epb412    | 2253.136409 | -0.0356   | 0.891264 | 0.96369  | 2303.207 | 2425.969 | 2113.674 | 2589.634 | 1805.619 | 2280.715 |
| ENSMUSG000000042743 | 13_Sgtb      | 64.0653858  | 0.066737  | 0.891236 | 0.96369  | 60.90991 | 80.72252 | 46.02448 | 103.1885 | 52.04164 | 41.50528 |
| ENSMUSG000000020183 | 11_Cpm       | 3189.462956 | 0.02796   | 0.891336 | 0.963715 | 3103.969 | 3122.416 | 3249.329 | 3103.592 | 3403.071 | 3154.401 |
| ENSMUSG000000031129 | 9_Slc9a9     | 198.3010042 | -0.03449  | 0.891445 | 0.96378  | 205.4694 | 200.9476 | 195.6041 | 199.4316 | 178.7517 | 209.6017 |
| ENSMUSG000000023800 | 14_Tiam2     | 188.904349  | 0.040231  | 0.891498 | 0.963785 | 166.4871 | 231.0038 | 161.0857 | 193.4784 | 182.1458 | 199.2254 |
| ENSMUSG000000061232 | 15_H2-K1     | 10585.76563 | 0.058285  | 0.891613 | 0.963858 | 9994.099 | 7840.39  | 13281.52 | 5906.548 | 15311.56 | 11180.49 |
| ENSMUSG000000066442 | 16_MtHfs     | 100.2268878 | -0.06214  | 0.891927 | 0.964144 | 122.632  | 83.29877 | 101.2539 | 143.8685 | 98.42659 | 51.8816  |
| ENSMUSG000000003065 | 8_Rnf17      | 4.243334313 | -0.170948 | 0.892922 | 0.96427  | 5.684925 | 1.7175   | 4.602448 | 8.929771 | 4.52536  | 0        |
| ENSMUSG000000003662 | 10_Ciao1     | 774.2767474 | -0.0298   | 0.892132 | 0.96427  | 777.2105 | 771.1577 | 798.5248 | 717.3583 | 752.3412 | 829.068  |
| ENSMUSG000000005470 | 8_Asf1b      | 296.8013358 | -0.04496  | 0.893128 | 0.96427  | 313.483  | 249.0376 | 341.7318 | 225.2287 | 384.6556 | 266.6714 |
| ENSMUSG000000021613 | 8_Hapln1     | 3.444655324 | 0.202746  | 0.893345 | 0.96427  | 0.812132 | 4.293751 | 4.602448 | 9.921968 | 0        | 1.037632 |
| ENSMUSG000000021675 | 4_Fzr12      | 1.59855358  | 0.203833  | 0.892994 | 0.96427  | 2.436397 | 0.85875  | 1.150612 | 2.97659  | 1.13134  | 1.037632 |
| ENSMUSG000000021823 | 9_Vcl        | 5317.459681 | -0.03588  | 0.892934 | 0.96427  | 4990.552 | 5042.581 | 6117.805 | 4376.58  | 6208.794 | 5168.445 |
| ENSMUSG000000022528 | 7_Hes1       | 2032.67401  | -0.03877  | 0.893197 | 0.96427  | 1908.511 | 1848.889 | 2423.189 | 2489.422 | 1768.285 | 1575.749 |
| ENSMUSG000000023094 | 14_MsrB2     | 125.8159029 | 0.043744  | 0.89303  | 0.96427  | 148.6202 | 127.095  | 95.50081 | 115.0948 | 123.3161 | 145.2685 |
| ENSMUSG000000023235 | 13_Ccl25     | 21.1666236  | -0.07877  | 0.892316 | 0.96427  | 19.49117 | 24.04501 | 21.86163 | 32.74249 | 10.18206 | 18.67738 |
| ENSMUSG000000025089 | 15_Gfra1     | 605.4056663 | 0.040125  | 0.892921 | 0.96427  | 708.1793 | 596.8314 | 485.5583 | 737.2022 | 583.7715 | 520.8913 |
| ENSMUSG000000025357 | 7_Dgka       | 6891.81255  | 0.03686   | 0.892848 | 0.96427  | 6597.762 | 6159.815 | 7653.872 | 5584.084 | 8248.601 | 7106.742 |
| ENSMUSG000000025905 | 13_Oprk1     | 2.786018702 | 0.207825  | 0.89296  | 0.96427  | 4.872793 | 1.7175   | 1.150612 | 7.937575 | 0        | 1.037632 |
| ENSMUSG000000026254 | 17_Elfae2    | 1489.728577 | -0.03745  | 0.892862 | 0.96427  | 1531.681 | 1393.752 | 1601.652 | 1136.065 | 1746.889 | 1528.432 |
| ENSMUSG000000026283 | 13_Ing5      | 517.0849679 | 0.296652  | 0.892449 | 0.96427  | 521.3889 | 504.0864 | 509.7212 | 508.0048 | 549.7313 | 509.4773 |
| ENSMUSG000000026726 | 10_Cubn      | 57.6533645  | 0.066208  | 0.892596 | 0.96427  | 50.3522  | 85.01627 | 33.36775 | 58.53961 | 41.85958 | 76.78477 |
| ENSMUSG000000027378 | 16_Nhppl     | 406.6250755 | 0.033468  | 0.892896 | 0.96427  | 410.9389 | 397.6014 | 396.9612 | 350.2455 | 450.2734 | 433.7302 |
| ENSMUSG000000028637 | 15_Ccdc30    | 8.89726898  | -0.10083  | 0.892922 | 0.96427  | 8.933454 | 12.88125 | 5.753061 | 10.91416 | 4.52536  | 10.37632 |
| ENSMUSG000000030979 | 12_Uros      | 345.8036084 | -0.03081  | 0.893147 | 0.96427  | 354.9018 | 352.9463 | 340.5812 | 338.3391 | 326.9573 | 361.096  |
| ENSMUSG000000035296 | 13_Sgog      | 46.19165227 | 0.080841  | 0.892965 | 0.96427  | 34.92168 | 68.70002 | 31.06653 | 73.42256 | 19.23278 | 49.80634 |
| ENSMUSG000000046916 | 8_Myct1      | 20.97561181 | -0.06716  | 0.893094 | 0.96427  | 25.1761  | 24.04501 | 14.95796 | 22.82053 | 18.10144 | 20.75264 |
| ENSMUSG000000047307 | 2_Pcdh13     | 31.70370677 | -0.06902  | 0.893263 | 0.96427  | 28.42463 | 36.92626 | 32.21714 | 44.64886 | 15.83876 | 32.16659 |
| ENSMUSG000000049091 | 6_Sephs2     | 390.4146695 | 0.033894  | 0.893159 | 0.96427  | 423.1209 | 369.2626 | 364.744  | 387.949  | 444.6167 | 352.7949 |
| ENSMUSG000000056203 | 4_Tas2r135   | 0.752337709 | -0.35755  | 0.893304 | 0.96427  | 0.812132 | 1.7175   | 0        | 1.984394 | 0        | 1.037632 |
| ENSMUSG000000060882 | 5_Kcnd2      | 1.550107065 | 0.253152  | 0.89335  | 0.96427  | 1.624264 | 2.576251 | 0        | 3.968787 | 1.13134  | 0        |
| ENSMUSG000000063767 | 13_S100a7a   | 1531.580827 | 0.034263  | 0.892733 | 0.96427  | 1701.417 | 1544.892 | 1293.288 | 1372.208 | 1563.512 | 1714.168 |
| ENSMUSG000000073802 | 4_Cdkn2b     | 606.5314861 | 0.033025  | 0.893164 | 0.96427  | 591.2322 | 545.3064 | 662.7526 | 681.6392 | 554.3567 | 603.9019 |
| ENSMUSG000000078503 | 9_Gm13225    | 0.752337709 | -0.35755  | 0.893304 | 0.96427  | 0.812132 | 1.7175   | 0        | 1.984394 | 0        | 1.037632 |
| ENSMUSG000000022575 | 4_Gsdmd      | 860.143514  | -0.0701   | 0.893402 | 0.964274 | 876.2906 | 773.734  | 992.9783 | 285.7527 | 1254.656 | 977.4494 |
| ENSMUSG000000038141 | 9_Tmem181a   | 2846.073121 | 0.031302  | 0.893515 | 0.964343 | 2614.253 | 2781.492 | 3050.273 | 2733.502 | 2643.942 | 3252.977 |
| ENSMUSG000000036158 | 12_Prickle1  | 480.7419065 | -0.03776  | 0.893567 | 0.964348 | 474.2852 | 522.1201 | 464.8473 | 573.4898 | 74.4736  | 475.2355 |
| ENSMUSG000000053030 | 11_Spink2    | 8.180579313 | -0.10381  | 0.893617 | 0.964349 | 10.55772 | 6.870002 | 8.054285 | 11.90636 | 3.39402  | 8.301057 |
| ENSMUSG000000047388 | 10_Atmin     | 2182.292498 | -0.03233  | 0.893761 | 0.964452 | 2113.98  | 2097.068 | 2409.382 | 1838.541 | 2288.701 | 2346.086 |
| ENSMUSG000000042684 | 8_Npl        | 46.42894159 | 0.049019  | 0.8939   | 0.96455  | 47.10367 | 40.36126 | 49.47632 | 41.67227 | 54.30432 | 45.65581 |
| ENSMUSG000000023236 | 7_Seg5       | 51.34480356 | 0.080493  | 0.894037 | 0.96456  | 60.09778 | 68.70002 | 20.71102 | 86.32112 | 32.80886 | 39.43002 |
| ENSMUSG000000029027 | 8_Dlfb       | 109.1165376 | -0.04019  | 0.894012 | 0.96456  | 122.632  | 109.0613 | 100.1033 | 116.087  | 91.63855 | 115.1772 |
| ENSMUSG000000040350 | 15_Trim7     | 709.6444082 | -0.03528  | 0.894054 | 0.96456  | 686.2517 | 695.5877 | 773.2113 | 563.5678 | 744.4218 | 794.8262 |
| ENSMUSG000000029337 | 2_Fgf5       | 1.259961146 | 0.321647  | 0.894163 | 0.964625 | 0        | 0        | 3.451836 | 2.97659  | 1.13134  | 0        |
| ENSMUSG000000040043 | 15_Rbms2     | 1695.779376 | 0.032521  | 0.894256 | 0.964673 | 1768.012 | 1635.919 | 1625.815 | 1437.693 | 1776.204 | 1931.033 |
| ENSMUSG000000053441 | 4_Adamts19   | 1.241615892 | 0.262683  | 0.894411 | 0.964788 | 1.624264 | 1.7175   | 0        | 2.97659  | 1.13134  | 0        |
| ENSMUSG000000030353 | 15_Tead4     | 92.21309456 | 0.071113  | 0.894624 | 0.964805 | 71.46763 | 83.29877 | 115.0612 | 45.64105 | 165.1757 | 72.63424 |
| ENSMUSG000000030674 | 5_Qprt       | 5.524357364 | -0.12177  | 0.894481 | 0.964805 | 4.872793 | 7.728752 | 4.602448 | 1.984394 | 5.656701 | 8.301057 |
| ENSMUSG000000030827 | 4_Fgf21      | 7.52780822  | -0.14283  | 0.894717 | 0.964805 | 1.624264 | 12.88125 | 9.204897 | 0.992197 | 0.950721 | 1.413935 |
| ENSMUSG000000042249 | 11_Adrk12    | 136.7756577 | 0.03978   | 0.894589 | 0.964805 | 157.5536 | 133.965  | 112.76   | 152.7983 | 138.0235 | 125.5535 |
| ENSMUSG000000061533 | 15_Cepb128   | 153.5283504 | 0.045763  | 0.894718 | 0.964805 | 145.3717 | 142.5525 | 165.6881 | 211.3379 | 138.8922 | 119.3277 |
| ENSMUSG000000071656 | 6_Lrrn4cl    | 444.5408611 | 0.052008  | 0.894556 | 0.964805 | 426.3694 | 450.8439 | 432.6302 | 643.9357 | 257.9455 | 455.5205 |
| ENSMUSG000000044528 | 10_Tram11    | 15.56814706 | -0.09381  | 0.894772 | 0.964812 | 15.43051 | 25.76251 | 6.903673 | 21.82833 | 7.919381 | 15.56448 |
| ENSMUSG000000035852 | 10_Misp      | 724.9008226 | 0.08589   | 0.895027 | 0.964966 | 633.4631 | 523.8376 | 952.7068 | 159.7437 | 1280.677 | 798.9767 |
| ENSMUSG000000047641 | 7_Krt83      | 1.948777688 | 0.246568  | 0.89506  | 0.964966 | 0        | 0        | 0.85875  | 4.602448 | 3.968787 | 2.26268  |
| ENSMUSG000000047844 | 3_Bex4       | 41.65972209 | 0.080637  | 0.895015 | 0.964966 | 31.67315 | 67.84127 | 21.86163 | 67.46938 | 23.75814 | 37.35475 |
| ENSMUSG000000038580 | 12_Sct       | 7.619561363 | -0.15008  | 0.895143 | 0.965002 | 10.55772 | 0.85875  | 12.65673 | 0.992197 | 11.1314  | 9.338689 |
| ENSMUSG000000031539 | 5_Ap3m2      | 318.6321439 | 0.037859  | 0.895205 | 0.       |          |          |          |          |          |          |

|                     |                  |              |          |          |          |            |          |          |          |          |          |
|---------------------|------------------|--------------|----------|----------|----------|------------|----------|----------|----------|----------|----------|
| ENSMUSG00000050534  | 8_Htr5b          | 41.86461454  | 0.061465 | 0.897579 | 0.965854 | 47.10367   | 44.65501 | 31.06653 | 49.60984 | 23.75814 | 54.9945  |
| ENSMUSG00000055835  | 9_Zfp1           | 207.0849665  | 0.032554 | 0.89763  | 0.965854 | 218.4636   | 186.3488 | 209.4114 | 204.3925 | 219.48   | 204.4135 |
| ENSMUSG00000064202  | 15_4430402I18Rik | 26.00836399  | -0.05668 | 0.897529 | 0.965854 | 25.1761    | 25.76251 | 28.7653  | 25.79712 | 21.49546 | 29.0537  |
| ENSMUSG00000021252  | 16_0160007P14Rik | 1032.7471108 | -0.03135 | 0.897766 | 0.965949 | 1051.711   | 917.1452 | 1163.269 | 947.548  | 1127.946 | 988.8634 |
| ENSMUSG00000014361  | 5_Merlk          | 211.9772145  | 0.044298 | 0.89782  | 0.965955 | 176.2327   | 249.8963 | 200.2065 | 285.7527 | 171.9637 | 187.8114 |
| ENSMUSG00000020340  | 16_Cyfp2         | 3232.951887  | -0.0297  | 0.897974 | 0.966068 | 3069.86    | 3239.206 | 3489.807 | 2795.018 | 3308.038 | 3495.782 |
| ENSMUSG000000087385 | 8_AA415398       | 66.26874699  | 0.049818 | 0.898044 | 0.966091 | 64.15844   | 78.14627 | 52.92816 | 66.47719 | 49.77896 | 86.12346 |
| ENSMUSG00000074469  | 6_Gm15348        | 5.205654263  | 0.130483 | 0.89813  | 0.966131 | 5.684925   | 6.870002 | 2.301224 | 6.945378 | 1.13134  | 8.301057 |
| ENSMUSG00000021203  | 15_Oub2          | 386.6723897  | 0.033693 | 0.898482 | 0.966249 | 363.0231   | 393.3076 | 390.0575 | 318.4952 | 427.6466 | 427.5044 |
| ENSMUSG00000031549  | 15_Ido2          | 1.336364845  | 0.221796 | 0.898441 | 0.966249 | 0.812132   | 1.7175   | 1.150612 | 0        | 2.26268  | 2.075264 |
| ENSMUSG00000035493  | 9_Tgfb1          | 35305.13569  | -0.05362 | 0.898333 | 0.966249 | 32050.8    | 32929.64 | 42902.87 | 18233.6  | 50038.04 | 35675.87 |
| ENSMUSG000000051998 | 14_Lax1          | 14.40134835  | 0.094091 | 0.89835  | 0.966249 | 24.36397   | 6.870002 | 10.35551 | 13.89076 | 22.6268  | 8.301057 |
| ENSMUSG000000103897 | 1_Pcdhga8        | 48.90653387  | -0.04906 | 0.898474 | 0.966249 | 51.97646   | 60.11252 | 36.81959 | 50.60204 | 44.12226 | 49.80634 |
| ENSMUSG00000031776  | 16_Lax1          | 2059.508194  | -0.0263  | 0.8986   | 0.966324 | 2074.186   | 1989.724 | 2171.205 | 2079.645 | 1962.875 | 2079.415 |
| ENSMUSG00000022245  | 15_Skor1         | 1.132663078  | -0.23411 | 0.89867  | 0.966347 | 0.812132   | 1.7175   | 1.150612 | 1.984394 | 1.13134  | 0        |
| ENSMUSG00000026736  | 1_4930426L09Rik  | 2.944950651  | 0.147224 | 0.898754 | 0.966385 | 2.436397   | 2.576251 | 3.451836 | 4.960984 | 1.13134  | 3.112896 |
| ENSMUSG00000054027  | 7_Nt5dc3         | 469.7409311  | -0.03365 | 0.898956 | 0.96655  | 449.9212   | 525.5551 | 449.8893 | 382.988  | 506.8404 | 503.2516 |
| ENSMUSG00000022044  | 14_Stmn4         | 1.986648623  | 0.169518 | 0.899329 | 0.966572 | 1.624264   | 1.7175   | 2.301224 | 2.97659  | 2.26268  | 1.037632 |
| ENSMUSG00000022766  | 12_Serpinf1      | 2.969287781  | -0.14332 | 0.899308 | 0.966572 | 1.624264   | 4.293751 | 3.451836 | 2.97659  | 3.39402  | 2.075264 |
| ENSMUSG00000026058  | 11_Khdrb32       | 6.502706041  | 0.130984 | 0.899575 | 0.966572 | 12.18198   | 5.152501 | 1.150612 | 8.929771 | 2.26268  | 9.338689 |
| ENSMUSG00000028580  | 15_Pum1          | 2199.390523  | -0.02949 | 0.899923 | 0.966572 | 1981.603   | 2172.638 | 2511.786 | 2047.894 | 2328.298 | 2564.124 |
| ENSMUSG00000028636  | 14_Pcns          | 292.0242065  | 0.033658 | 0.899905 | 0.966572 | 250.9488   | 312.5851 | 302.611  | 335.3625 | 283.9664 | 216.6714 |
| ENSMUSG00000035984  | 14_Nme5          | 18.60341344  | -0.06826 | 0.899083 | 0.966572 | 20.3033    | 20.61001 | 16.10857 | 22.82053 | 20.36412 | 11.41395 |
| ENSMUSG00000037461  | 10_Ints7         | 906.4727128  | -0.03623 | 0.899387 | 0.966572 | 833.2476   | 842.434  | 1078.124 | 722.3193 | 1058.934 | 903.7775 |
| ENSMUSG00000040775  | 5_Gm7772         | 1.218228211  | 0.255071 | 0.899882 | 0.966572 | 2.436397   | 0.85875  | 0        | 2.97659  | 0        | 1.037632 |
| ENSMUSG00000041112  | 15_Elmo1         | 123.5639641  | -0.04716 | 0.89944  | 0.966572 | 145.3717   | 146.8463 | 83.99468 | 133.9466 | 135.7608 | 95.46215 |
| ENSMUSG00000042364  | 10_Snx18         | 525.4466262  | 0.031995 | 0.899703 | 0.966572 | 154.8918   | 526.4139 | 517.7754 | 621.1152 | 452.6674 | 518.816  |
| ENSMUSG00000044522  | 8_A73002M07Rik   | 10.26163906  | 0.097182 | 0.899606 | 0.966572 | 12.99411   | 12.0225  | 4.602448 | 12.89856 | 4.52536  | 14.52685 |
| ENSMUSG000000071713 | 4_Csf2b          | 295.7313703  | -0.07358 | 0.899795 | 0.966572 | 432.8665   | 158.01   | 318.7196 | 150.8139 | 527.2045 | 186.7738 |
| ENSMUSG00000072575  | 3_Edmn3b         | 0.744568035  | -0.33656 | 0.899679 | 0.966572 | 1.624264   | 0.85875  | 0        | 1.984394 | 0        | 0        |
| ENSMUSG00000073010  | 9_Gm5127         | 17.16944307  | 0.074045 | 0.899947 | 0.966572 | 18.67904   | 15.4575  | 16.10857 | 27.78151 | 13.57608 | 11.41395 |
| ENSMUSG00000074653  | 10_Lrrc31        | 50.79559575  | 0.044616 | 0.899168 | 0.966572 | 55.22499   | 49.80751 | 44.87387 | 55.56302 | 46.38494 | 52.91924 |
| ENSMUSG00000075318  | 12_Scn2a1        | 34.51950625  | 0.07691  | 0.899386 | 0.966572 | 30.04889   | 42.07876 | 28.7653  | 63.5006  | 14.70742 | 28.01607 |
| ENSMUSG00000092094  | 5_Zfp804b        | 0.744568035  | -0.33656 | 0.899679 | 0.966572 | 1.624264   | 0.85875  | 0        | 1.984394 | 0        | 0        |
| ENSMUSG00000097619  | 7_4833422M21Rik  | 6.033235301  | -0.11985 | 0.899153 | 0.966572 | 5.684925   | 8.587502 | 4.602448 | 8.929771 | 1.13134  | 7.263424 |
| ENSMUSG000000105699 | 1_Gm43703        | 1.481949566  | -0.24255 | 0.899752 | 0.966572 | 0          | 2.576251 | 2.301224 | 2.97659  | 0        | 1.037632 |
| ENSMUSG000000107283 | 3_Mpv17          | 812.8225524  | 0.027322 | 0.899566 | 0.966572 | 786.1439   | 863.9027 | 765.1571 | 834.4375 | 817.9589 | 809.353  |
| ENSMUSG00000078451  | 4_Ppil6          | 30.9281259   | 0.074971 | 0.900017 | 0.966595 | 37.35808   | 26.62126 | 26.46408 | 54.57082 | 13.57608 | 26.97843 |
| ENSMUSG00000026509  | 15_Capn2         | 8573.514934  | 0.030788 | 0.900137 | 0.966672 | 8127.007   | 7995.823 | 9323.41  | 7569.47  | 10023.67 | 8401.707 |
| ENSMUSG00000026241  | 5_Nppc           | 6.940557469  | -0.10416 | 0.900384 | 0.966848 | 4.872793   | 4.293751 | 12.65673 | 7.937575 | 5.656701 | 6.225792 |
| ENSMUSG00000026632  | 17_Tatdn3        | 144.9585482  | -0.0352  | 0.900434 | 0.966848 | 143.7474   | 142.5525 | 154.182  | 157.7593 | 121.0534 | 150.4566 |
| ENSMUSG00000050150  | 16_Slc9b1        | 3.295856644  | -0.1779  | 0.900447 | 0.966848 | 0.812132   | 5.152501 | 4.602448 | 6.945378 | 2.26268  | 0        |
| ENSMUSG00000050765  | 2_Gm5084         | 4.704867878  | -0.12573 | 0.900707 | 0.966972 | 7.30919    | 1.7175   | 5.753061 | 4.960984 | 2.26268  | 6.225792 |
| ENSMUSG00000052302  | 5_Tbc1d30        | 724.9457929  | 0.032641 | 0.900698 | 0.966972 | 764.2164   | 650.9327 | 735.2411 | 699.4988 | 631.2878 | 868.498  |
| ENSMUSG00000099825  | 1_1810012K16Rik  | 1.148005294  | -0.23443 | 0.900645 | 0.966972 | 0          | 2.576251 | 1.150612 | 0.992197 | 1.13134  | 1.037632 |
| ENSMUSG000000404112 | 9_Mrps35         | 493.6971467  | -0.02992 | 0.900813 | 0.967033 | 467.7881   | 490.3464 | 538.4865 | 435.5744 | 521.5478 | 508.4397 |
| ENSMUSG00000032623  | 9_Oast1d         | 0.639975762  | 0.305684 | 0.901089 | 0.967078 | 0.812132   | 0.85875  | 0        | 0        | 1.13134  | 1.037632 |
| ENSMUSG00000042816  | 3_Gpr151         | 0.639975762  | 0.305684 | 0.901089 | 0.967078 | 0.812132   | 0.85875  | 0        | 0        | 1.13134  | 1.037632 |
| ENSMUSG00000046460  | 14_Sh2d7         | 0.639975762  | 0.305684 | 0.901089 | 0.967078 | 0.812132   | 0.85875  | 0        | 0        | 1.13134  | 1.037632 |
| ENSMUSG00000078783  | 1_Gm9733         | 2.937259635  | 0.169804 | 0.901044 | 0.967078 | 4.872793   | 0        | 3.451836 | 4.960984 | 2.26268  | 2.075264 |
| ENSMUSG00000078786  | 9_BC024978       | 523.2520902  | 0.031033 | 0.901129 | 0.967078 | 517.3282   | 556.4701 | 478.6546 | 455.4183 | 583.7715 | 547.8697 |
| ENSMUSG000000101959 | 1_Ldhal6b        | 12.54314437  | -0.08371 | 0.901146 | 0.967078 | 6.497057   | 16.31625 | 16.10857 | 13.89076 | 7.919381 | 14.52685 |
| ENSMUSG00000040165  | 13_Cd209c        | 7.669972194  | -0.10368 | 0.901237 | 0.967124 | 4.872793   | 4.293751 | 14.95796 | 7.937575 | 5.656701 | 8.301057 |
| ENSMUSG00000039706  | 11_Ldb2          | 96.7478203   | 0.060795 | 0.901339 | 0.96718  | 99.08013   | 122.8013 | 62.13305 | 147.8373 | 53.12798 | 95.46215 |
| ENSMUSG00000007050  | 17_Lsm2          | 255.5132812  | -0.03616 | 0.901425 | 0.967221 | 255.0095   | 226.7101 | 294.5567 | 227.2131 | 305.4818 | 224.1285 |
| ENSMUSG00000040084  | 9_Bub1b          | 618.4935136  | -0.03442 | 0.901573 | 0.967328 | 619.6569   | 550.4589 | 707.6264 | 498.0828 | 710.4816 | 624.6545 |
| ENSMUSG00000027650  | 12_Tti1          | 793.2760067  | -0.03288 | 0.90184  | 0.96737  | 738.2281   | 759.9939 | 908.9836 | 643.9357 | 846.2424 | 862.2722 |
| ENSMUSG00000033676  | 13_Gabrb3        | 88.78548282  | -0.07046 | 0.901904 | 0.96737  | 109.6378   | 109.0613 | 54.07877 | 152.7983 | 40.72824 | 66.40845 |
| ENSMUSG00000048482  | 14_Bdnf          | 18.95382969  | 0.065117 | 0.901779 | 0.96737  | 22.7397    | 18.8925  | 13.80735 | 24.80492 | 15.83876 | 17.63975 |
| ENSMUSG00000048834  | 15_Vstm2a        | 38.12701405  | 0.088217 | 0.901828 | 0.96737  | 34.92168   | 50.66626 | 25.31347 | 83.34453 | 15.83876 | 18.67738 |
| ENSMUSG000000505738 | 14_Sucg1         | 1494.78509   | -0.02859 | 0.901865 | 0.96737  | 1531.681   | 1392.034 | 1605.104 | 1330.536 | 1635.918 | 1473.438 |
| ENSMUSG00000074109  | 4_Mrgprx2        | 3.192656131  | 0.185504 | 0.901761 | 0.96737  | 1.624264   | 1.7175   | 5.753061 | 8.929771 | 1.13134  | 0        |
| ENSMUSG00000020042  | 15_Btbd11        | 485.1949891  | -0.02818 | 0.902987 | 0.967857 | 478.3459   | 478.3239 | 513.173  | 439.5432 | 519.2851 | 482.4989 |
| ENSMUSG00000021951  | 5_Nbam2          | 299.0182193  | -0.03375 | 0.903183 | 0.967857 | 336.2227   | 266.2126 | 304.9122 | 246.0648 | 331.4827 | 309.2144 |
| ENSMUSG00000022076  | 9_Khl1           | 3.554963682  | -0.18787 | 0.903184 | 0.967857 | 1.624264   | 8.587502 | 1.150612 | 8.929771 | 0        | 1.037632 |
| ENSMUSG00000026456  | 18_Cyb5r1        | 981.2924186  | -0.0298  | 0.902957 | 0.967857 | 943.6976   | 910.2752 | 1120.696 | 868.1722 | 986.5286 | 1058.385 |
| ENSMUSG00000028310  | 2_Ppp3r2         | 0.839592779  | -0.32023 | 0.902828 | 0.967857 | 1.624264   | 0        | 1.150612 | 0        | 2.26268  | 0        |
| ENSMUSG00000031635  | 13_Anxat10       | 2.002266629  | 0.181037 | 0.902675 | 0.967857 | 1.624264   | 1.7175   | 2.301224 | 2.97659  | 3.39402  | 0        |
| ENSMUSG00000032024  | 10_Clmp          | 480.2278583  | -0.04584 | 0.902771 | 0.967857 | 467.7881   | 632.0402 | 363.5934 | 635.006  | 345.0587 | 437.8807 |
| ENSMUSG000000440584 | 8_Abcb1a         | 201.4429958  | 0.050533 | 0.90301  | 0.967857 | 177.0448   | 256.7663 | 159.9351 | 297.659  | 134.6295 | 182.6232 |
| ENSMUSG00000040600  | 9_EpsRl3         | 14.12155612  | -0.0833  | 0.902486 | 0.967857 | 15.43051   | 18.8925  | 9.204897 | 16.86735 | 5.656701 | 18.67738 |
| ENSMUSG000000446610 | 14_Oacyl         | 23.1023848   | -0.06449 | 0.903113 | 0.967857 | 17.86691   | 30.05626 | 23.01224 | 31.7503  | 20.36412 | 15.56448 |
| ENSMUSG000000051590 | 8_Map3k19        | 1.79743011   | -0.22371 | 0.903065 | 0.967857 | 4.060661   | 1.7175   | 0        | 3.968787 | 0        | 1.037632 |
| ENSMUSG00000056987  | 7_Fam71d         | 0.767758583  | -0.28131 | 0.903069 | 0.967857 | 1.624264   | 0.85875  | 0        | 0.992197 | 1.13134  | 0        |
| ENSMUSG00000079259  | 2_Trim71         | 0.839592779  | -0.32023 | 0.902828 | 0.967857 | 1.624264   | 0        | 1.150612 | 0        | 2.26268  | 0        |
| ENSMUSG00000079699  | 6_Gm6592         | 0.647824094  | 0.411436 | 0.903165 | 0.967857 | 1.624264</ |          |          |          |          |          |

|                      |                 |             |          |          |          |          |          |          |          |          |          |
|----------------------|-----------------|-------------|----------|----------|----------|----------|----------|----------|----------|----------|----------|
| ENSMUSG00000020668   | 9_Kif3c         | 312.5593673 | -0.03532 | 0.905802 | 0.969151 | 315.9194 | 371.8388 | 261.1889 | 345.2845 | 251.1575 | 329.967  |
| ENSMUSG00000086368   | 2_Gm13830       | 20.38120496 | -0.06111 | 0.905922 | 0.969211 | 18.67904 | 27.48001 | 16.10857 | 21.82833 | 22.6268  | 15.56448 |
| ENSMUSG000000095186  | 1_Gm10718       | 1.835687084 | -0.2136  | 0.905957 | 0.969211 | 2.436397 | 3.435001 | 0        | 0.992197 | 0        | 4.150528 |
| ENSMUSG000000078452  | 10_Raet1d       | 7.064063595 | 0.141455 | 0.906154 | 0.969371 | 9.745586 | 10.305   | 0        | 14.88295 | 2.26268  | 5.18816  |
| ENSMUSG000000027858  | 13_Tspan2       | 40.42200509 | 0.058362 | 0.906598 | 0.969375 | 36.54595 | 48.94876 | 33.36775 | 63.5006  | 24.88948 | 35.27949 |
| ENSMUSG000000029763  | 17_Excoc4       | 1583.581709 | 0.026199 | 0.906345 | 0.969375 | 1521.936 | 1496.802 | 1689.099 | 1590.491 | 1728.688 | 1474.475 |
| ENSMUSG000000030069  | 15_Prok2        | 2.816871005 | 0.178944 | 0.906315 | 0.969375 | 1.624264 | 1.7175   | 4.602448 | 0        | 7.919381 | 1.037632 |
| ENSMUSG000000031166  | 13_Wdr13        | 1758.912504 | 0.029126 | 0.906211 | 0.969375 | 1637.258 | 1807.669 | 1778.846 | 2101.473 | 1605.372 | 1622.857 |
| ENSMUSG000000032530  | 13_Lyz14        | 0.767482792 | -0.31149 | 0.906683 | 0.969375 | 0.812132 | 1.7175   | 0        | 0        | 0        | 2.075264 |
| ENSMUSG000000042385  | 14_GzmK         | 2.957447144 | 0.151996 | 0.906694 | 0.969375 | 5.684925 | 2.576251 | 0        | 2.97659  | 3.39402  | 3.112896 |
| ENSMUSG000000049751  | 6_Rpl36al       | 3537.222012 | -0.03707 | 0.906437 | 0.969375 | 3728.499 | 3217.737 | 3801.622 | 2404.093 | 4254.97  | 3816.411 |
| ENSMUSG000000051920  | 6_Rspo2         | 67.28730592 | -0.06764 | 0.906659 | 0.969375 | 50.3522  | 109.0613 | 47.1751  | 111.126  | 36.20288 | 49.80634 |
| ENSMUSG000000093996  | 1_Fam205a3      | 0.956236609 | 0.258811 | 0.906542 | 0.969375 | 0        | 2.576251 | 0        | 0.992197 | 1.13134  | 1.037632 |
| ENSMUSG000000094066  | 1_Fam205a2      | 0.956236609 | 0.258811 | 0.906542 | 0.969375 | 0        | 2.576251 | 0        | 0.992197 | 1.13134  | 1.037632 |
| ENSMUSG000000097429  | 1_Gm26520       | 0.956236609 | 0.258811 | 0.906542 | 0.969375 | 0        | 2.576251 | 0        | 0.992197 | 1.13134  | 1.037632 |
| ENSMUSG000000040828  | 9_Catsperd      | 9.77368453  | 0.082764 | 0.906752 | 0.969386 | 7.30919  | 12.0225  | 9.204897 | 9.921968 | 5.656701 | 14.52685 |
| ENSMUSG000000014852  | 16_Adamts13     | 8.26501485  | -0.08642 | 0.906894 | 0.969451 | 9.745586 | 7.728752 | 8.054285 | 5.953181 | 5.656701 | 12.45158 |
| ENSMUSG000000024274  | 8_Zscan30       | 21.54799447 | -0.06169 | 0.906911 | 0.969451 | 23.55183 | 24.04501 | 18.40979 | 22.82053 | 12.44474 | 28.01607 |
| ENSMUSG000000030945  | 16_Acsm2        | 25.79946906 | 0.057356 | 0.907007 | 0.969502 | 23.55183 | 24.90376 | 27.61469 | 37.70348 | 19.23278 | 21.79027 |
| ENSMUSG000000021684  | 16_Pde8b        | 38.62098816 | -0.05192 | 0.907066 | 0.969513 | 34.10955 | 51.52501 | 32.21714 | 48.61764 | 36.20288 | 29.0537  |
| ENSMUSG000000050439  | 6_Enthd1        | 3.770339569 | -0.13081 | 0.907214 | 0.969567 | 2.436397 | 2.576251 | 6.903673 | 0.992197 | 4.52536  | 5.18816  |
| ENSMUSG000000051950  | 10_B3glct       | 623.8629636 | -0.04813 | 0.907182 | 0.969567 | 600.9778 | 766.8639 | 535.0346 | 942.587  | 390.3123 | 507.4021 |
| ENSMUSG000000015714  | 11_Cers2        | 2362.333252 | 0.023797 | 0.907347 | 0.969646 | 2343.813 | 2276.547 | 2408.231 | 2293.959 | 2486.686 | 2364.763 |
| ENSMUSG000000034872  | 5_Gipco3        | 0.91730958  | 0.295868 | 0.907385 | 0.969646 | 2.436397 | 0        | 0        | 0.992197 | 0        | 2.075264 |
| ENSMUSG0000000019863 | 6_Qrs1          | 379.6751351 | 0.028582 | 0.90765  | 0.969744 | 396.3205 | 360.6751 | 370.4971 | 361.1596 | 435.5659 | 353.8325 |
| ENSMUSG000000022965  | 7_IlfngR2       | 1557.369891 | 0.028493 | 0.907706 | 0.969744 | 1534.93  | 1389.458 | 1701.755 | 1368.239 | 1745.658 | 1604.179 |
| ENSMUSG000000028976  | 10_Slc2a5       | 1.660671157 | 0.219378 | 0.907667 | 0.969744 | 0        | 3.435001 | 1.150612 | 1.984394 | 3.39402  | 0        |
| ENSMUSG000000028998  | 6_Tomm7         | 1342.939033 | 0.024789 | 0.907852 | 0.969744 | 1346.515 | 1264.939 | 1383.036 | 1406.935 | 1263.707 | 1392.502 |
| ENSMUSG000000055108  | 6_Phrx2         | 0.63240322  | 0.284972 | 0.907922 | 0.969744 | 0.812132 | 0.85875  | 0        | 0.992197 | 1.13134  | 0        |
| ENSMUSG000000061802  | 5_Armc4         | 0.63240322  | 0.284972 | 0.907922 | 0.969744 | 0.812132 | 0.85875  | 0        | 0.992197 | 1.13134  | 0        |
| ENSMUSG000000097308  | 1_Gm6410        | 0.63240322  | 0.284972 | 0.907922 | 0.969744 | 0.812132 | 0.85875  | 0        | 0.992197 | 1.13134  | 0        |
| ENSMUSG000000099481  | 6_Xndc1         | 550.1373547 | 0.025573 | 0.907964 | 0.969744 | 531.1344 | 534.1426 | 570.7036 | 530.8253 | 549.8313 | 584.1869 |
| ENSMUSG0000000102777 | 1_Gm38161       | 0.63240322  | 0.284972 | 0.907922 | 0.969744 | 0.812132 | 0.85875  | 0        | 0.992197 | 1.13134  | 0        |
| ENSMUSG000000103726  | 1_Gm30074       | 0.63240322  | 0.284972 | 0.907922 | 0.969744 | 0.812132 | 0.85875  | 0        | 0.992197 | 1.13134  | 0        |
| ENSMUSG0000000107872 | 2_RP24-127M20   | 1.537492097 | 0.269998 | 0.908028 | 0.969761 | 0.812132 | 0        | 3.451836 | 4.960984 | 0        | 0        |
| ENSMUSG000000004462  | 6_Tbccc1        | 346.6043404 | 0.027337 | 0.908206 | 0.969899 | 335.4106 | 357.2401 | 337.1293 | 336.3547 | 383.5243 | 329.967  |
| ENSMUSG000000025069  | 14_Gsto2        | 22.01378498 | 0.062233 | 0.908429 | 0.970066 | 13.80625 | 22.32751 | 28.7653  | 17.85954 | 19.23278 | 30.09133 |
| ENSMUSG000000025873  | 15_Fat2         | 2224.52937  | -0.0255  | 0.908459 | 0.970066 | 2157.835 | 2156.322 | 2418.587 | 2021.105 | 2376.964 | 2216.387 |
| ENSMUSG000000024273  | 7_2700862C07Rik | 236.9272971 | 0.028133 | 0.908519 | 0.970077 | 222.5242 | 235.2976 | 246.231  | 229.1975 | 203.0561 | 255.2575 |
| ENSMUSG000000025404  | 15_R3hdn2       | 2024.071355 | -0.02614 | 0.908673 | 0.970165 | 1882.522 | 1978.561 | 2266.706 | 2168.942 | 1943.642 | 1904.055 |
| ENSMUSG000000047459  | 14_Dynlrb1      | 1658.852247 | -0.02932 | 0.908698 | 0.970165 | 1733.902 | 1587.829 | 1705.207 | 1329.544 | 1868.974 | 1727.657 |
| ENSMUSG000000063730  | 13_Hsd3b2       | 0.783297931 | -0.30878 | 0.90886  | 0.970234 | 0        | 2.576251 | 0        | 0.992197 | 1.13134  | 0        |
| ENSMUSG000000085836  | 1_Gm13074       | 32.04464583 | -0.06566 | 0.908837 | 0.970234 | 22.7397  | 27.48001 | 48.32571 | 14.88295 | 37.33422 | 41.50528 |
| ENSMUSG000000097681  | 1_Gm26643       | 3.231200725 | -0.12814 | 0.908931 | 0.970257 | 2.436397 | 4.293751 | 3.451836 | 4.960984 | 1.13134  | 3.112896 |
| ENSMUSG000000025026  | 14_Add3         | 2994.637674 | 0.028449 | 0.909156 | 0.970341 | 2844.899 | 2908.587 | 3142.322 | 3502.455 | 2525.151 | 3044.412 |
| ENSMUSG000000025967  | 16_Eef1b2       | 8824.994208 | 0.023347 | 0.909089 | 0.970341 | 8847.368 | 8719.098 | 9194.541 | 8737.285 | 8719.381 | 9162.291 |
| ENSMUSG000000085316  | 1_D330050G23Rik | 2.501786    | -0.15188 | 0.909128 | 0.970341 | 2.436397 | 4.293751 | 1.150612 | 4.960984 | 1.13134  | 1.037632 |
| ENSMUSG000000040966  | 9_Slc22a2       | 0.932848928 | 0.246315 | 0.909374 | 0.970417 | 0.812132 | 1.7175   | 0        | 0.992197 | 0        | 2.075264 |
| ENSMUSG000000082932  | 3_Cyp2j8        | 0.932848928 | 0.246315 | 0.909374 | 0.970417 | 0.812132 | 1.7175   | 0        | 0.992197 | 0        | 2.075264 |
| ENSMUSG000000085357  | 1_Gm13480       | 1.233176162 | 0.329005 | 0.909333 | 0.970417 | 3.248529 | 0        | 0        | 0        | 0        | 4.150528 |
| ENSMUSG000000005107  | 13_Slc2a9       | 220.541272  | -0.03851 | 0.909499 | 0.970457 | 230.6455 | 195.7951 | 243.9298 | 150.8139 | 273.7843 | 228.2791 |
| ENSMUSG000000029788  | 13_Cpa5         | 0.624633546 | 0.322632 | 0.909606 | 0.970457 | 1.624264 | 0        | 0        | 0.992197 | 1.13134  | 0        |
| ENSMUSG000000030172  | 15_Erc1         | 1543.406483 | 0.027245 | 0.909581 | 0.970457 | 1451.28  | 1489.932 | 1645.375 | 1353.356 | 1754.709 | 1565.787 |
| ENSMUSG0000000060747 | 1_A530053M12Rik | 0.624633546 | 0.322632 | 0.909606 | 0.970457 | 1.624264 | 0        | 0        | 0.992197 | 1.13134  | 0        |
| ENSMUSG000000029556  | 12_Hnf1a        | 0.775331125 | -0.26123 | 0.909829 | 0.970487 | 1.624264 | 0.85875  | 0        | 0        | 1.13134  | 1.037632 |
| ENSMUSG000000060747  | 3_Ifln3         | 0.775331125 | -0.26123 | 0.909829 | 0.970487 | 1.624264 | 0.85875  | 0        | 0        | 1.13134  | 1.037632 |
| ENSMUSG000000074220  | 9_Zfp382        | 27.24001936 | -0.05375 | 0.909757 | 0.970487 | 34.10955 | 24.90376 | 24.16285 | 26.78931 | 19.23278 | 34.24186 |
| ENSMUSG000000085870  | 1_Gm12829       | 0.775331125 | -0.26123 | 0.909829 | 0.970487 | 1.624264 | 0.85875  | 0        | 0        | 1.13134  | 1.037632 |
| ENSMUSG000000032396  | 17_Dis3l        | 636.0968071 | -0.03004 | 0.90992  | 0.970533 | 591.2322 | 571.0689 | 766.3077 | 600.2791 | 701.4309 | 586.2621 |
| ENSMUSG000000022900  | 14_lldr1        | 1990.714316 | -0.03063 | 0.910071 | 0.970558 | 1743.648 | 1778.472 | 2514.087 | 1897.08  | 2086.191 | 1924.807 |
| ENSMUSG000000048424  | 15_Ranbp3l      | 3.235967361 | -0.15592 | 0.910051 | 0.970558 | 2.436397 | 7.728752 | 0        | 3.968787 | 1.13134  | 4.150528 |
| ENSMUSG000000057337  | 13_Chs3         | 14.91006897 | 0.072441 | 0.91009  | 0.970558 | 21.92757 | 11.16375 | 10.35551 | 20.83613 | 15.83876 | 9.338689 |
| ENSMUSG000000020524  | 16_Gria1        | 108.4955691 | 0.04333  | 0.910354 | 0.970718 | 94.20733 | 139.9763 | 86.29591 | 111.126  | 80.32515 | 139.0427 |
| ENSMUSG000000021322  | 7_Aoah          | 30.26532455 | 0.06178  | 0.910386 | 0.970718 | 46.29153 | 24.90376 | 17.25918 | 31.7503  | 39.5969  | 21.79027 |
| ENSMUSG000000091388  | 1_Gm17576       | 1.132190155 | -0.23523 | 0.910305 | 0.970718 | 0.812132 | 1.7175   | 0        | 0        | 0        | 3.112896 |
| ENSMUSG000000021338  | 17_Lrrc16a      | 974.8109675 | 0.032427 | 0.910484 | 0.970768 | 842.1811 | 912.8515 | 1136.805 | 814.5936 | 1186.776 | 955.6591 |
| ENSMUSG000000024519  | 5_Cplx4         | 31.25909579 | 0.07425  | 0.910531 | 0.970768 | 44.66727 | 35.20876 | 16.10857 | 49.60984 | 30.54618 | 11.41395 |
| ENSMUSG000000105204  | 1_Gm43738       | 2.806710724 | 0.229263 | 0.910583 | 0.970772 | 0        | 7.728752 | 0        | 4.960984 | 0        | 4.150528 |
| ENSMUSG000000020224  | 14_Lph          | 1847.646476 | 0.026927 | 0.910965 | 0.971017 | 1813.491 | 1602.428 | 2075.704 | 1711.54  | 1902.914 | 1979.802 |
| ENSMUSG000000029189  | 10_Sel1l3       | 969.3479422 | 0.026405 | 0.911022 | 0.971017 | 919.3336 | 953.2127 | 1009.087 | 882.063  | 939.0123 | 1113.379 |
| ENSMUSG000000039699  | 13_Batf2        | 603.9333751 | 0.070534 | 0.910933 | 0.971017 | 535.1951 | 467.1601 | 765.1571 | 142.8763 | 195.278  | 659.934  |
| ENSMUSG000000047108  | 4_Dnajb7        | 4.265311451 | 0.11359  | 0.911007 | 0.971017 | 6.497057 | 3.435001 | 2.301224 | 6.945378 | 2.26268  | 4.150528 |
| ENSMUSG000000047749  | 2_Zc3hav1l      | 126.2333329 | -0.03994 | 0.911056 | 0.971017 | 121.0077 | 143.4113 | 119.6637 | 166.6891 | 89.37587 | 17.2524  |
| ENSMUSG000000004872  | 15_Pax3         | 28.14707652 | 0.065548 | 0.911352 | 0.971176 | 26.80036 | 39.50251 | 16.10857 | 41.67227 | 14.70742 | 30.09133 |
| ENSMUSG000000034391  | 10_Fbxo13       | 1.02030113  | 0.215285 | 0.911319 | 0.971176 | 0.812132 | 0.85875  | 1.150612 | 0        | 2.26268  | 1.037632 |
| ENSMUSG000000054901  | 5_Arhgef35      | 5.699357857 | 0.094409 | 0.911291 | 0.971176 | 5.684925 | 5.152501 | 5.753061 | 8.929771 | 4.52536  | 4.150528 |
| ENSMUSG000000030638  | 13_Sh3gl3       | 28.660384   |          |          |          |          |          |          |          |          |          |

|                      |                 |             |           |          |          |          |          |          |          |          |          |
|----------------------|-----------------|-------------|-----------|----------|----------|----------|----------|----------|----------|----------|----------|
| ENSMUSG00000057130   | 11_Txnl4a       | 490.3393985 | -0.03022  | 0.914266 | 0.972607 | 494.5885 | 456.8551 | 535.0346 | 378.027  | 519.2851 | 558.2461 |
| ENSMUSG000000097129  | 1_4930507D05Rik | 2.635343508 | -0.13487  | 0.91429  | 0.972607 | 1.624264 | 4.293751 | 2.301224 | 0.992197 | 4.52536  | 2.075264 |
| ENSMUSG000000097471  | 7_5830432E09Rik | 6.852830456 | 0.086728  | 0.914281 | 0.972607 | 8.933454 | 5.152501 | 5.753061 | 6.945378 | 10.18206 | 4.150528 |
| ENSMUSG000000019731  | 13_Slc5c3e1     | 1721.438302 | 0.024743  | 0.914488 | 0.972697 | 1772.885 | 1608.439 | 1738.575 | 1520.046 | 1890.469 | 1798.216 |
| ENSMUSG000000097547  | 7_B230110C06Rik | 0.744370902 | -0.29119  | 0.914676 | 0.972845 | 2.436397 | 0        | 0        | 0.992197 | 0        | 1.037632 |
| ENSMUSG000000001657  | 7_Hoxc8         | 0.790870473 | -0.2859   | 0.915462 | 0.973074 | 0        | 2.576251 | 0        | 0        | 1.13134  | 1.037632 |
| ENSMUSG0000000012705 | 16_Retn         | 1.124420481 | -0.22077  | 0.91582  | 0.973074 | 1.624264 | 0.85875  | 1.150612 | 0        | 0        | 3.112896 |
| ENSMUSG000000021928  | 8_Ebpl          | 162.2642341 | 0.033543  | 0.915662 | 0.973074 | 152.6808 | 184.6313 | 143.8265 | 201.416  | 131.2355 | 159.7953 |
| ENSMUSG000000022257  | 3_Lapmt4b       | 1685.202837 | -0.02713  | 0.915638 | 0.973074 | 1677.053 | 1839.443 | 1586.694 | 1949.667 | 1396.074 | 1662.287 |
| ENSMUSG000000025347  | 3_Mettl7b       | 0.663363442 | 0.355649  | 0.915789 | 0.973074 | 0        | 1.7175   | 0        | 0        | 0        | 2.26268  |
| ENSMUSG000000026480  | 12_Ncf2         | 222.3447153 | -0.04089  | 0.915537 | 0.973074 | 277.7492 | 192.36   | 205.9596 | 151.8061 | 311.1185 | 195.0748 |
| ENSMUSG000000026532  | 7_Spta1         | 12.31237098 | 0.063132  | 0.915514 | 0.973074 | 12.18198 | 14.59875 | 9.204897 | 12.89856 | 13.57608 | 11.41395 |
| ENSMUSG000000027187  | 10_Cat          | 1200.188552 | 0.029126  | 0.91496  | 0.973074 | 1059.02  | 1253.775 | 1251.866 | 1441.662 | 979.7405 | 1215.067 |
| ENSMUSG000000028164  | 15_Manba        | 394.3818242 | -0.02496  | 0.915698 | 0.973074 | 410.1267 | 425.0814 | 357.8404 | 395.8865 | 377.8676 | 399.4883 |
| ENSMUSG000000035431  | 4_Sstr1         | 1.124420481 | -0.22077  | 0.91582  | 0.973074 | 1.624264 | 0.85875  | 1.150612 | 0        | 0        | 3.112896 |
| ENSMUSG000000037279  | 13_Ovol2        | 172.6711589 | -0.03522  | 0.915126 | 0.973074 | 170.5478 | 157.1513 | 196.7547 | 123.0324 | 181.0144 | 207.5264 |
| ENSMUSG000000040935  | 12_Padi6        | 0.663363442 | 0.355649  | 0.915789 | 0.973074 | 0        | 1.7175   | 0        | 0        | 0        | 2.26268  |
| ENSMUSG000000051401  | 6_Kctd16        | 1.109078265 | -0.22101  | 0.915792 | 0.973074 | 2.436397 | 0        | 1.150612 | 0.992197 | 0        | 2.075264 |
| ENSMUSG000000056758  | 14_Hmga2        | 20.61462927 | -0.06506  | 0.915709 | 0.973074 | 17.86691 | 18.8925  | 26.46408 | 9.921968 | 33.9402  | 16.60211 |
| ENSMUSG000000067276  | 5_Capn6         | 257.845077  | -0.04262  | 0.915176 | 0.973074 | 271.2521 | 303.1388 | 210.562  | 360.1674 | 154.9936 | 246.9564 |
| ENSMUSG000000085980  | 1_Gm12408       | 0.663363442 | 0.355649  | 0.915789 | 0.973074 | 0        | 1.7175   | 0        | 0        | 0        | 2.26268  |
| ENSMUSG000000091415  | 4_Ak9           | 1.155853626 | -0.19564  | 0.915147 | 0.973074 | 0.812132 | 1.7175   | 1.150612 | 0.992197 | 2.26268  | 0        |
| ENSMUSG000000095550  | 2_Gm21671       | 0.663363442 | 0.355649  | 0.915789 | 0.973074 | 0        | 1.7175   | 0        | 0        | 0        | 2.26268  |
| ENSMUSG000000105888  | 1_BC037156      | 1.140038487 | -0.19493  | 0.915499 | 0.973074 | 1.624264 | 0.85875  | 1.150612 | 0        | 1.13134  | 2.075264 |
| ENSMUSG000000039048  | 14_Foxred1      | 802.231036  | 0.029217  | 0.91614  | 0.973285 | 808.0715 | 734.2314 | 839.9468 | 626.0762 | 934.4869 | 870.5733 |
| ENSMUSG000000047747  | 9_Rnf150        | 222.1914368 | -0.03877  | 0.916158 | 0.973285 | 220.9    | 253.3313 | 201.3571 | 315.5186 | 170.8324 | 171.2093 |
| ENSMUSG000000047909  | 11_Ankrk16      | 697.5826858 | -0.02292  | 0.916165 | 0.973285 | 717.9248 | 727.3614 | 663.9032 | 698.5066 | 661.834  | 715.9661 |
| ENSMUSG000000049281  | 15_Scn3b        | 11.83155259 | 0.072276  | 0.916279 | 0.973354 | 18.67904 | 7.728752 | 8.054285 | 15.87515 | 11.3134  | 9.336889 |
| ENSMUSG000000038370  | 6_Pcpd41        | 76.95242259 | -0.04606  | 0.916461 | 0.973443 | 73.0919  | 111.6375 | 99.47632 | 65.48499 | 64.48639 | 97.53741 |
| ENSMUSG000000046387  | 5_Pcdhb17       | 182.8063601 | 0.031167  | 0.916449 | 0.973443 | 172.9842 | 202.6651 | 166.8388 | 225.2287 | 165.1757 | 163.9459 |
| ENSMUSG000000064181  | 5_Rab3ip        | 451.6206429 | 0.025355  | 0.916524 | 0.973459 | 446.6727 | 468.0189 | 428.0277 | 400.8475 | 464.9808 | 501.1763 |
| ENSMUSG000000018217  | 12_Pmp22        | 1414.723555 | -0.02783  | 0.916994 | 0.973681 | 1393.619 | 1577.524 | 1313.999 | 1621.25  | 1131.34  | 1450.61  |
| ENSMUSG000000036450  | 4_Hif1an        | 2083.388537 | -0.02379  | 0.917064 | 0.973681 | 2071.749 | 2030.086 | 2199.97  | 1820.681 | 2092.979 | 2284.866 |
| ENSMUSG000000037973  | 6_Ccdc129       | 10.84062876 | -0.069    | 0.916964 | 0.973681 | 6.497057 | 12.0225  | 14.95796 | 10.91416 | 11.3134  | 9.336889 |
| ENSMUSG000000062074  | 6_Wisp3         | 5.382624007 | 0.091401  | 0.916947 | 0.973681 | 6.497057 | 3.435001 | 5.753061 | 5.953181 | 3.94002  | 7.263424 |
| ENSMUSG000000074807  | 2_Gm10762       | 14.23623201 | 0.081117  | 0.917076 | 0.973681 | 13.80625 | 12.88125 | 14.95796 | 30.7581  | 6.788041 | 6.225792 |
| ENSMUSG000000097915  | 1_A330009N23Rik | 9.038083423 | -0.07865  | 0.917034 | 0.973681 | 11.36985 | 9.446252 | 6.903673 | 3.968787 | 9.050721 | 13.84922 |
| ENSMUSG000000099104  | 1_Gm17087       | 1.012728589 | 0.201916  | 0.916848 | 0.973681 | 0.812132 | 0.85875  | 1.150612 | 0.992197 | 2.26268  | 0        |
| ENSMUSG000000030849  | 17_Fgfr2        | 3196.288201 | -0.02149  | 0.917182 | 0.973742 | 3159.194 | 3211.726 | 3289.6   | 3314.93  | 2960.717 | 3241.563 |
| ENSMUSG000000090084  | 7_Srxp          | 455.6579199 | -0.02995  | 0.917248 | 0.97376  | 444.2363 | 530.7076 | 406.1661 | 519.9111 | 359.7662 | 473.1602 |
| ENSMUSG000000044387  | 5_2410080102Rik | 0.647745436 | 0.292663  | 0.917396 | 0.973762 | 0        | 1.7175   | 0        | 0        | 1.13134  | 1.037632 |
| ENSMUSG000000051729  | 11_Gm5087       | 0.647745436 | 0.292663  | 0.917396 | 0.973762 | 0        | 1.7175   | 0        | 0        | 1.13134  | 1.037632 |
| ENSMUSG0000001050501 | 1_5330426L24Rik | 0.647745436 | 0.292663  | 0.917396 | 0.973762 | 0        | 1.7175   | 0        | 0        | 1.13134  | 1.037632 |
| ENSMUSG000000024413  | 13_Npc1         | 1602.73361  | -0.0244   | 0.917497 | 0.973765 | 1460.214 | 1654.812 | 1733.972 | 1454.561 | 1775.073 | 1537.771 |
| ENSMUSG000000074121  | 2_Ntf5          | 68.71048759 | -0.03489  | 0.917482 | 0.973765 | 56.84925 | 73.85252 | 78.24162 | 68.46158 | 62.22371 | 72.63424 |
| ENSMUSG000000022978  | 11_Mis18a       | 217.7287746 | -0.028576 | 0.917741 | 0.973869 | 233.8941 | 204.3826 | 208.2608 | 236.1428 | 242.1068 | 181.5856 |
| ENSMUSG000000032380  | 8_Dapk2         | 136.1777116 | 0.035102  | 0.917734 | 0.973869 | 142.1231 | 96.18002 | 165.6881 | 152.7983 | 135.7608 | 124.5158 |
| ENSMUSG000000048012  | 18_Zfp473       | 23.40626925 | -0.06669  | 0.917664 | 0.973869 | 25.1761  | 14.59875 | 32.21714 | 10.91416 | 18.10144 | 39.43002 |
| ENSMUSG000000020961  | 14_Ston2        | 772.2445127 | -0.03026  | 0.918238 | 0.974136 | 759.3436 | 753.1239 | 828.4407 | 572.4976 | 948.063  | 771.9983 |
| ENSMUSG000000026563  | 13_Tada1        | 509.0402534 | 0.024539  | 0.918198 | 0.974136 | 518.1403 | 443.9739 | 552.2938 | 512.9658 | 533.9925 | 492.8752 |
| ENSMUSG000000026566  | 15_Mpzl1        | 591.3926094 | -0.02562  | 0.918114 | 0.974136 | 587.1716 | 632.8989 | 569.553  | 494.114  | 635.8131 | 628.805  |
| ENSMUSG000000028528  | 16_Dnajc6       | 320.7701526 | 0.033256  | 0.918159 | 0.974136 | 326.4771 | 307.4326 | 317.5689 | 414.7383 | 227.3994 | 331.0046 |
| ENSMUSG000000036151  | 15_Tm6sf2       | 9.241339275 | -0.08845  | 0.918096 | 0.974136 | 9.745586 | 12.88125 | 5.753061 | 1.984394 | 14.20742 | 10.37632 |
| ENSMUSG000000018543  | 8_170001P01Rik  | 2.231433326 | -0.15032  | 0.918396 | 0.974141 | 3.248529 | 2.576251 | 1.150612 | 0        | 2.76268  | 0.150528 |
| ENSMUSG000000031101  | 6_Sash3         | 70.49215527 | -0.06081  | 0.918438 | 0.974141 | 113.6985 | 42.07876 | 59.83183 | 41.67227 | 121.0534 | 44.61818 |
| ENSMUSG0000000086187 | 1_Gm12860       | 2.073825035 | 0.141436  | 0.918423 | 0.974141 | 0.812132 | 1.7175   | 3.451836 | 0.992197 | 3.94002  | 2.075264 |
| ENSMUSG000000105891  | 4_A230001M10Rik | 1.686005782 | 0.187369  | 0.9183   | 0.974141 | 2.436397 | 0        | 2.301224 | 1.984394 | 3.94002  | 0        |
| ENSMUSG000000026134  | 11_Prim2        | 352.3109689 | 0.028461  | 0.91868  | 0.974346 | 375.2051 | 282.5288 | 388.9069 | 327.4249 | 400.494  | 339.3057 |
| ENSMUSG000000005374  | 13_Tbl2         | 647.4956854 | -0.02391  | 0.918787 | 0.9744   | 631.0267 | 681.8477 | 645.4934 | 582.4195 | 719.5323 | 624.6545 |
| ENSMUSG000000024528  | 7_Srfbp1        | 197.3818585 | -0.02392  | 0.918878 | 0.9744   | 193.2875 | 179.4788 | 225.52   | 167.6813 | 227.3994 | 190.9243 |
| ENSMUSG000000047635  | 6_2810006K23Rik | 199.8834541 | -0.03989  | 0.91886  | 0.9744   | 220.9    | 171.75   | 200.2065 | 265.9087 | 165.1757 | 175.3598 |
| ENSMUSG000000018604  | 18_Tbx3         | 19.83906045 | 0.063524  | 0.919444 | 0.974406 | 15.43051 | 30.05626 | 12.65673 | 31.7503  | 13.57608 | 15.56448 |
| ENSMUSG000000021306  | 10_Gpr137b      | 722.0860404 | -0.02276  | 0.919169 | 0.974406 | 726.0462 | 729.9377 | 727.1869 | 673.7016 | 790.8067 | 684.8372 |
| ENSMUSG000000021678  | 8_Fzn1          | 870.9617429 | 0.029736  | 0.919206 | 0.974406 | 859.2358 | 786.6152 | 940.0501 | 698.5066 | 1114.37  | 826.992  |
| ENSMUSG000000024164  | 15_C3           | 2372.885676 | 0.054916  | 0.919243 | 0.974406 | 2475.379 | 1720.935 | 2786.783 | 198.7743 | 217.636  | 2117.807 |
| ENSMUSG000000034088  | 15_Hdlbp        | 14086.52543 | 0.024983  | 0.919628 | 0.974406 | 13729.91 | 13209.3  | 14954.51 | 11793.25 | 16135.17 | 14697.02 |
| ENSMUSG000000037613  | 15_Tnfrsf23     | 252.1151925 | 0.040705  | 0.919169 | 0.974406 | 239.579  | 203.5238 | 302.611  | 189.5096 | 382.393  | 195.0748 |
| ENSMUSG000000038811  | 13_Gngt2        | 56.05839574 | -0.06039  | 0.919448 | 0.974406 | 69.03124 | 40.36126 | 62.13305 | 20.83613 | 97.29525 | 46.69344 |
| ENSMUSG000000038949  | 8_Cnst          | 1229.866759 | 0.022136  | 0.919654 | 0.974406 | 1202.768 | 1154.16  | 1304.794 | 1293.825 | 1149.442 | 1274.212 |
| ENSMUSG000000039081  | 9_Zfp503        | 190.7019946 | -0.04551  | 0.919467 | 0.974406 | 181.1055 | 203.5238 | 196.7547 | 310.5576 | 114.2654 | 138.0051 |
| ENSMUSG000000044170  | 4_Olfrl1384     | 1.451068002 | -0.22933  | 0.919591 | 0.974406 | 2.436397 | 0        | 2.301224 | 3.968787 | 0        | 2.075264 |
| ENSMUSG000000044881  | 6_Coa4          | 254.8051889 | -0.02519  | 0.918952 | 0.974406 | 237.9547 | 255.0488 | 278.4481 | 268.8853 | 247.7635 | 240.7306 |
| ENSMUSG000000057123  | 14_Gja5         | 27.02114491 | 0.048925  | 0.919157 | 0.974406 | 17.86691 | 30.28151 | 31.06653 | 21.82833 | 32.2835  | 32.13659 |
| ENSMUSG000000058216  | 12_BC021614     | 7.297132484 | -0.11243  | 0.919687 | 0.974406 | 10.55772 | 5.152501 | 6.903673 | 0.992197 | 18.10144 | 2.075264 |
| ENSMUSG000000061132  | 13_Blnk         | 909.654377  | -0.02372  | 0.919634 | 0.974406 | 894.9697 | 868.1965 | 988.3758 | 794.7496 | 968.4271 | 943.2075 |
| ENSMUSG000000063821  | 5_Dupd1         | 1.86609211  | 0.220783  | 0.919291 | 0.974406 | 0        | 5.       |          |          |          |          |

|                      |                  |              |           |          |          |          |          |          |          |          |          |
|----------------------|------------------|--------------|-----------|----------|----------|----------|----------|----------|----------|----------|----------|
| ENSMUSG00000042179   | 5_Pnliprp1       | 2.234357707  | -0.13729  | 0.922602 | 0.975889 | 0.812132 | 1.7175   | 4.602448 | 0.992197 | 1.13134  | 4.150528 |
| ENSMUSG00000060284   | 6_Sp7            | 11.45574965  | 0.069346  | 0.922687 | 0.975889 | 12.18198 | 15.4575  | 5.753061 | 10.91416 | 6.788041 | 17.63975 |
| ENSMUSG000000086596  | 1_Susd5          | 8.525323468  | 0.067044  | 0.922691 | 0.975889 | 8.121322 | 7.728752 | 9.204897 | 10.91416 | 7.919381 | 7.263424 |
| ENSMUSG000000103115  | 1_Gm37584        | 13.57076427  | 0.061533  | 0.922415 | 0.975889 | 10.55772 | 18.8925  | 10.35551 | 13.89076 | 9.050721 | 18.67738 |
| ENSMUSG000000029564  | 12_4930519G04Rik | 0.624357755  | 0.274867  | 0.92295  | 0.975987 | 0.812132 | 0.85875  | 0        | 0        | 0        | 2.075264 |
| ENSMUSG000000055937  | 1_Krt28          | 0.624357755  | 0.274867  | 0.92295  | 0.975987 | 0.812132 | 0.85875  | 0        | 0        | 0        | 2.075264 |
| ENSMUSG000000063623  | 2_C230062116Rik  | 1.282489865  | 0.195621  | 0.922972 | 0.975987 | 2.436397 | 0        | 1.150612 | 2.97659  | 1.13134  | 0        |
| ENSMUSG000000069132  | 3_Nxph2          | 0.609015539  | 0.275765  | 0.923046 | 0.976014 | 1.624264 | 0        | 0        | 0.992197 | 0        | 1.037632 |
| ENSMUSG000000071562  | 5_Stfa1          | 5.102182953  | -0.1213   | 0.923318 | 0.97625  | 0        | 6.870002 | 9.204897 | 7.937575 | 4.52536  | 2.075264 |
| ENSMUSG000000011382  | 6_Dhdh           | 194.4768087  | 0.034619  | 0.923552 | 0.976445 | 194.0996 | 208.6763 | 173.7424 | 273.8463 | 138.0235 | 178.4727 |
| ENSMUSG000000068079  | 5_Tcf15          | 1.512791314  | -0.14622  | 0.923852 | 0.976711 | 1.624264 | 0.85875  | 2.301224 | 0.992197 | 2.26268  | 1.037632 |
| ENSMUSG000000000791  | 8_Il12rb1        | 16.44316037  | 0.060121  | 0.924091 | 0.976736 | 13.80625 | 17.175   | 17.25918 | 6.945378 | 23.75814 | 19.71501 |
| ENSMUSG000000013653  | 2_1810065E05Rik  | 0.640172894  | 0.269482  | 0.924074 | 0.976736 | 0        | 1.7175   | 0        | 0.992197 | 1.13134  | 0        |
| ENSMUSG000000014349  | 7_Ube2z          | 4199.489323  | 0.020625  | 0.924207 | 0.976736 | 4050.103 | 4055.019 | 4403.393 | 3855.677 | 4552.513 | 4280.232 |
| ENSMUSG000000022225  | 6_Cma1           | 65.83199726  | 0.033093  | 0.92431  | 0.976736 | 74.71616 | 59.25377 | 60.98244 | 59.53181 | 80.32515 | 60.18266 |
| ENSMUSG000000048485  | 12_Zbtb8b        | 643.4605605  | 0.026635  | 0.92436  | 0.976736 | 549.0014 | 621.7352 | 742.1448 | 531.8175 | 722.9263 | 693.1382 |
| ENSMUSG000000062704  | 3_9430002A10Rik  | 2.328244095  | 0.140287  | 0.924366 | 0.976736 | 3.248529 | 0        | 3.451836 | 3.968787 | 2.26268  | 1.037632 |
| ENSMUSG000000078621  | 1_Hbb-bh2        | 0.736798361  | -0.30885  | 0.924361 | 0.976736 | 2.436397 | 0        | 0        | 1.984394 | 0        | 0        |
| ENSMUSG000000095959  | 1_Gm10845        | 0.736798361  | -0.30885  | 0.924361 | 0.976736 | 2.436397 | 0        | 0        | 1.984394 | 0        | 0        |
| ENSMUSG000000097544  | 1_Gm26750        | 0.736798361  | -0.30885  | 0.924361 | 0.976736 | 2.436397 | 0        | 0        | 1.984394 | 0        | 0        |
| ENSMUSG000000097838  | 1_C530050E15Rik  | 0.736798361  | -0.30885  | 0.924361 | 0.976736 | 2.436397 | 0        | 0        | 1.984394 | 0        | 0        |
| ENSMUSG000000026675  | 12_Hsd17b7       | 965.5467409  | 0.026614  | 0.924514 | 0.976754 | 1022.474 | 792.6265 | 1055.111 | 1130.112 | 988.7913 | 804.1649 |
| ENSMUSG000000028656  | 14_Cap1          | 10678.13238  | 0.023626  | 0.924501 | 0.976754 | 10656.8  | 9901.39  | 11213.87 | 8956.561 | 12410.8  | 10929.38 |
| ENSMUSG000000009703  | 6_Gm28285        | 28.20664967  | -0.05421  | 0.92453  | 0.976754 | 21.92757 | 27.48001 | 36.81959 | 15.87515 | 46.38494 | 20.75264 |
| ENSMUSG000000046971  | 7_Pla2g4f        | 62.94277448  | 0.046645  | 0.924652 | 0.976778 | 56.03712 | 54.96001 | 74.78979 | 29.7659  | 90.50721 | 71.59681 |
| ENSMUSG000000062296  | 8_Trnk1          | 55.17483993  | -0.03628  | 0.924615 | 0.976778 | 69.03124 | 52.38376 | 46.02448 | 64.49279 | 44.12226 | 54.9945  |
| ENSMUSG000000070527  | 3_Mkrr3          | 30.64220596  | -0.04134  | 0.924752 | 0.976833 | 30.86102 | 33.49126 | 28.7653  | 32.74249 | 36.20288 | 21.79027 |
| ENSMUSG000000037010  | 7_Apin           | 45.64102908  | -0.03854  | 0.924975 | 0.976964 | 51.16433 | 32.63251 | 55.22938 | 52.58643 | 40.72824 | 41.50528 |
| ENSMUSG0000000038175 | 9_MyIip          | 1716.953566  | 0.019781  | 0.924963 | 0.976964 | 1622.64  | 1702.902 | 1702.352 | 1814.728 | 1676.646 | 1694.453 |
| ENSMUSG000000030745  | 9_Il21r          | 39.81565031  | 0.048901  | 0.925321 | 0.977245 | 58.47352 | 30.91501 | 27.61469 | 27.78151 | 58.82969 | 35.27949 |
| ENSMUSG000000032089  | 16_Il10ra        | 283.15246    | 0.048547  | 0.925339 | 0.977245 | 402.8176 | 188.0663 | 243.9298 | 139.8998 | 462.7181 | 261.4833 |
| ENSMUSG000000029196  | 9_Tada2b         | 557.4092802  | 0.021732  | 0.925686 | 0.977509 | 533.5708 | 517.8264 | 608.6738 | 596.3103 | 558.882  | 529.1924 |
| ENSMUSG0000000097908 | 7_4933404O12Rik  | 137.1468112  | 0.025237  | 0.925658 | 0.977509 | 125.8805 | 138.2588 | 143.8265 | 128.9856 | 144.8115 | 141.118  |
| ENSMUSG000000028456  | 17_Unc13b        | 853.2371698  | -0.02006  | 0.925774 | 0.97755  | 808.8836 | 906.8402 | 861.8085 | 822.5312 | 851.8991 | 867.4604 |
| ENSMUSG000000048458  | 8_Fam212b        | 201.28865303 | 0.027318  | 0.925904 | 0.977635 | 178.6691 | 207.8176 | 211.7126 | 160.7359 | 219.48   | 229.3167 |
| ENSMUSG000000020310  | 8_Madcam1        | 3.824963262  | -0.11163  | 0.925973 | 0.977655 | 1.624264 | 3.435001 | 6.903673 | 0.992197 | 7.919381 | 2.075264 |
| ENSMUSG000000049583  | 14_Grm5          | 1.425536244  | -0.16063  | 0.926095 | 0.977732 | 0.812132 | 2.576251 | 1.150612 | 2.97659  | 0        | 1.037632 |
| ENSMUSG000000027350  | 8_Chgb           | 20.10931245  | 0.065737  | 0.926163 | 0.977774 | 23.55183 | 21.46876 | 13.80735 | 31.7503  | 24.89948 | 5.18816  |
| ENSMUSG000000052658  | 5_341840601      | 5.341840601  | -0.08829  | 0.9262   | 0.97774  | 8.933454 | 5.152501 | 2.301224 | 3.968787 | 3.39402  | 8.301057 |
| ENSMUSG000000022521  | 10_Crebbp        | 1654.446335  | 0.020839  | 0.926299 | 0.977793 | 1487.826 | 1618.744 | 1821.419 | 1719.477 | 1694.747 | 1584.464 |
| ENSMUSG000000024218  | 12_Taf11         | 476.1512719  | 0.022308  | 0.926353 | 0.977798 | 430.4301 | 470.5951 | 516.6248 | 443.512  | 521.5478 | 474.1979 |
| ENSMUSG000000030137  | 8_Tuba8          | 54.83059404  | 0.053089  | 0.926417 | 0.977814 | 46.29153 | 54.10126 | 60.98244 | 19.84394 | 92.76989 | 54.9945  |
| ENSMUSG000000023828  | 2_Slc22a3        | 2.050634487  | 0.123514  | 0.926919 | 0.978126 | 0.812132 | 1.7175   | 3.451836 | 1.984394 | 2.26268  | 2.075264 |
| ENSMUSG000000032494  | 12_Tdgl1         | 2.454150403  | 0.123567  | 0.926939 | 0.978126 | 0.812132 | 1.7175   | 4.602448 | 0.992197 | 4.52536  | 2.075264 |
| ENSMUSG000000033752  | 7_Mnd1           | 119.5810578  | 0.032093  | 0.92701  | 0.978126 | 122.632  | 101.3325 | 131.1698 | 152.7983 | 87.11319 | 122.4406 |
| ENSMUSG000000043505  | 8_Gimap5         | 24.67614737  | -0.04941  | 0.926953 | 0.978126 | 37.35808 | 21.46876 | 16.10857 | 17.85954 | 28.2835  | 26.97483 |
| ENSMUSG000000053117  | 10_E330013P04Rik | 60.120832    | -0.04123  | 0.926997 | 0.978126 | 63.34631 | 67.84127 | 51.77754 | 91.28211 | 41.85958 | 40.61818 |
| ENSMUSG000000062017  | 14_Abca14        | 1.59090238   | 0.155792  | 0.927031 | 0.978126 | 0.812132 | 2.576251 | 1.150612 | 3.968787 | 0        | 1.037632 |
| ENSMUSG000000079639  | 4_Rhox4a         | 4.438466043  | 0.112355  | 0.927057 | 0.978126 | 2.436397 | 6.870002 | 3.451836 | 5.953181 | 7.919381 | 0        |
| ENSMUSG000000021396  | 4_Nxn12          | 3.243697219  | -0.114455 | 0.927157 | 0.97818  | 5.684925 | 4.293751 | 0        | 2.97659  | 3.39402  | 3.112896 |
| ENSMUSG000000021234  | 9_Fam161b        | 90.15653411  | 0.031493  | 0.92743  | 0.978312 | 73.0919  | 93.60377 | 101.2539 | 102.1963 | 70.14309 | 100.6503 |
| ENSMUSG000000063611  | 4_Gm10134        | 11.27075942  | -0.06151  | 0.927424 | 0.978312 | 14.61838 | 12.88125 | 6.903673 | 13.90636 | 6.788041 | 14.52685 |
| ENSMUSG000000098274  | 7_Rpl24          | 7910.373212  | -0.02277  | 0.927421 | 0.978312 | 7996.253 | 7590.493 | 8331.582 | 6373.872 | 8472.606 | 8697.432 |
| ENSMUSG000000030763  | 7_Lcm1l          | 487.8412089  | 0.021839  | 0.927736 | 0.978483 | 518.1403 | 470.5951 | 463.6967 | 543.7239 | 440.0913 | 490.8    |
| ENSMUSG000000037124  | 6_Trim58         | 4.428471679  | -0.09174  | 0.927985 | 0.978483 | 4.060661 | 1.7175   | 8.054285 | 3.968787 | 5.656701 | 3.112896 |
| ENSMUSG000000048503  | 12_Tmem136       | 124.4143642  | 0.040297  | 0.92785  | 0.978483 | 136.4382 | 148.5638 | 82.84407 | 190.5018 | 91.63855 | 96.99978 |
| ENSMUSG000000053580  | 15_Tanc2         | 1011.029078  | 0.024593  | 0.927833 | 0.978483 | 955.8796 | 1018.478 | 1033.25  | 1201.55  | 797.5948 | 1059.422 |
| ENSMUSG000000062826  | 6_Ces2f          | 1694.275842  | 0.026205  | 0.927968 | 0.978483 | 1611.27  | 1584.394 | 1840.979 | 1319.622 | 2132.576 | 1676.813 |
| ENSMUSG000000083780  | 8_Gm12728        | 5.615595078  | -0.09041  | 0.9278   | 0.978483 | 5.684925 | 6.011252 | 5.753061 | 11.90636 | 2.26268  | 2.075264 |
| ENSMUSG000000085470  | 1_1700012C14Rik  | 0.616588081  | 0.309509  | 0.927866 | 0.978483 | 1.624264 | 0        | 0        | 0        | 0        | 2.075264 |
| ENSMUSG0000000096210 | 1_H110           | 4069.604029  | -0.02297  | 0.927936 | 0.978483 | 4229.584 | 4163.221 | 3913.232 | 4130.515 | 3289.937 | 4691.135 |
| ENSMUSG000000017778  | 14_Cox7c         | 1430.60035   | 0.02291   | 0.928302 | 0.978491 | 1416.359 | 1348.238 | 1493.495 | 1733.368 | 1291.99  | 1300.153 |
| ENSMUSG000000022505  | 8_Emp2           | 12660.8553   | -0.023    | 0.928379 | 0.978491 | 12297.31 | 11874.8  | 14113.41 | 10289.08 | 14107.81 | 13282.73 |
| ENSMUSG000000024096  | 16_Ralbp1        | 6321.090724  | -0.02472  | 0.928315 | 0.978491 | 5701.98  | 5755.344 | 7668.83  | 5445.176 | 7301.669 | 6053.545 |
| ENSMUSG000000024304  | 14_Cdh2          | 208.7916225  | 0.040142  | 0.928172 | 0.978491 | 204.6573 | 261.0601 | 151.8808 | 327.4249 | 132.3668 | 175.3598 |
| ENSMUSG000000031870  | 16_Pgr           | 6.310726436  | -0.08258  | 0.928388 | 0.978491 | 10.55772 | 4.293751 | 4.602448 | 9.921968 | 2.26268  | 6.225792 |
| ENSMUSG000000038884  | 14_A230050P20Rik | 620.2087502  | -0.02995  | 0.928169 | 0.978491 | 559.5591 | 658.6614 | 661.602  | 412.7539 | 774.968  | 653.7082 |
| ENSMUSG000000041215  | 15_Yeats2        | 910.4177606  | 0.022749  | 0.928434 | 0.978491 | 877.1028 | 870.7727 | 961.9117 | 755.0618 | 979.7405 | 1017.917 |
| ENSMUSG000000049608  | 8_Gpr55          | 7.639024782  | -0.07351  | 0.928205 | 0.978491 | 12.18198 | 4.293751 | 6.903673 | 5.953181 | 11.3134  | 5.18816  |
| ENSMUSG000000051486  | 5_Pcdhb11        | 40.38949249  | 0.049725  | 0.92809  | 0.978491 | 48.72793 | 43.79626 | 26.46408 | 68.46158 | 23.75814 | 31.12896 |
| ENSMUSG000000027131  | 3_Emc4           | 1084.188937  | 0.020548  | 0.928608 | 0.978548 | 1037.905 | 1005.597 | 1186.281 | 1129.12  | 1144.916 | 1001.315 |
| ENSMUSG000000027793  | 6_Ccna1          | 10.97134054  | -0.0612   | 0.928655 | 0.978548 | 9.745586 | 11.16375 | 12.65673 | 5.953181 | 16.9701  | 9.338689 |
| ENSMUSG000000038242  | 12_Aox4          | 12.07350577  | -0.05995  | 0.928607 | 0.978548 | 16.24264 | 10.305   | 10.35551 | 16.86735 | 12.44474 | 6.225792 |
| ENSMUSG000000045515  | 3_Pou3f3         | 306.2934033  | -0.03919  | 0.928756 | 0.978548 | 366.2716 | 352.0876 | 212.8632 | 450.4574 | 182.1458 | 273.9349 |
| ENSMUSG000000075419  | 4_Dlk1           | 242.168689   | 0.024951  | 0.928686 | 0.978548 | 235.5183 | 239.5913 | 245.0804 | 197.4472 | 250.0262 | 285.3488 |
| ENSMUSG0000000097372 | 13_Anxa9         | 4.3041       |           |          |          |          |          |          |          |          |          |

|                     |                 |             |          |          |          |          |          |          |          |          |          |
|---------------------|-----------------|-------------|----------|----------|----------|----------|----------|----------|----------|----------|----------|
| ENSMUSG00000074238  | 6_Ap1ar         | 2196.420416 | 0.019493 | 0.930975 | 0.979339 | 2192.757 | 1999.171 | 2353.002 | 2017.136 | 2343.005 | 2273.452 |
| ENSMUSG00000090394  | 8_4930523C07Rik | 420.5632918 | 0.029632 | 0.931199 | 0.979339 | 467.7881 | 437.9626 | 342.8824 | 565.5522 | 306.5932 | 402.6012 |
| ENSMUSG00000097824  | 1_Gm26593       | 6.77434616  | 0.075713 | 0.931139 | 0.979339 | 10.55772 | 3.435001 | 5.753061 | 4.960984 | 4.52536  | 1.141395 |
| ENSMUSG00000022012  | 8_Enox1         | 16.27394411 | -0.04768 | 0.931328 | 0.979348 | 16.24264 | 20.61001 | 12.65673 | 19.84394 | 15.83876 | 12.45158 |
| ENSMUSG000000228071 | 26_28681833     | 26.28681833 | 0.079515 | 0.931362 | 0.979348 | 50.3522  | 11.16375 | 14.95796 | 2.97659  | 42.90902 | 35.27949 |
| ENSMUSG00000031119  | 4_Gpc4          | 556.4969686 | -0.02303 | 0.931294 | 0.979348 | 573.3653 | 601.9839 | 507.4199 | 635.9982 | 453.6674 | 566.5471 |
| ENSMUSG00000020182  | 16_Ddc          | 11.57676029 | -0.07    | 0.93143  | 0.979368 | 11.36985 | 20.61001 | 3.451836 | 14.88295 | 5.656701 | 13.48922 |
| ENSMUSG00000019969  | 13_Psen1        | 4108.829253 | -0.02594 | 0.931605 | 0.979448 | 3954.272 | 3836.896 | 4646.172 | 2964.684 | 4991.473 | 4259.48  |
| ENSMUSG000000097201 | 1_Gm26700       | 2.942502797 | -0.13918 | 0.931592 | 0.979448 | 4.872793 | 4.293751 | 0        | 0        | 2.26268  | 6.225792 |
| ENSMUSG00000050377  | 7_Il31ra        | 4.930188732 | 0.098385 | 0.93171  | 0.979508 | 5.684925 | 5.152501 | 3.451836 | 5.953181 | 0        | 9.338689 |
| ENSMUSG00000010796  | 11_Asz1         | 0.933046061 | 0.216928 | 0.931909 | 0.979665 | 0        | 2.576251 | 0        | 1.984394 | 0        | 1.037632 |
| ENSMUSG00000022820  | 3_Ndufb4        | 869.7305552 | -0.02192 | 0.932183 | 0.979785 | 831.6234 | 916.2865 | 881.3689 | 1034.861 | 750.0785 | 804.1649 |
| ENSMUSG00000049511  | 5_Hlrb1b        | 17.1593226  | 0.069981 | 0.93222  | 0.979785 | 12.99411 | 25.76251 | 11.50612 | 33.73469 | 3.39402  | 15.56448 |
| ENSMUSG00000060985  | 15_Tdrd5        | 2.278602952 | -0.15565 | 0.932159 | 0.979785 | 0        | 6.011252 | 1.150612 | 1.984394 | 4.52536  | 0        |
| ENSMUSG00000070493  | 3_Chchd2        | 2234.601055 | -0.01997 | 0.932178 | 0.979785 | 2145.653 | 2169.203 | 2435.846 | 2523.157 | 2039.806 | 2093.942 |
| ENSMUSG00000021194  | 5_Chga          | 6.185584954 | -0.08788 | 0.932466 | 0.979845 | 4.060661 | 13.74    | 1.150612 | 4.960984 | 9.050721 | 4.150528 |
| ENSMUSG00000030553  | 2_Pgpep1l       | 2.190756485 | -0.12823 | 0.932473 | 0.979845 | 1.624264 | 5.152501 | 0        | 0.992197 | 2.26268  | 3.112896 |
| ENSMUSG00000038540  | 14_Tm3c         | 109.5509636 | -0.03664 | 0.932451 | 0.979845 | 109.6378 | 142.5525 | 80.54285 | 145.8529 | 65.61773 | 113.1019 |
| ENSMUSG00000069273  | 2_Hist1h3e      | 1.132268813 | -0.17709 | 0.932385 | 0.979845 | 2.436397 | 0        | 1.150612 | 0        | 1.13134  | 2.075264 |
| ENSMUSG00000032226  | 5_Gcnt3         | 5.550261001 | 0.091266 | 0.932686 | 0.979965 | 8.121322 | 3.435001 | 4.602448 | 12.89856 | 1.13134  | 3.112896 |
| ENSMUSG00000092083  | 4_Kcnb2         | 16.02181686 | -0.05861 | 0.932657 | 0.979965 | 14.61838 | 24.04501 | 10.35551 | 25.79712 | 6.788041 | 14.52685 |
| ENSMUSG00000097346  | 1_Gm26619       | 9.366623575 | 0.090049 | 0.932742 | 0.979972 | 11.36985 | 7.728752 | 8.054285 | 0        | 12.44474 | 16.60211 |
| ENSMUSG00000022992  | 16_Kansl2       | 966.1877533 | 0.018862 | 0.93281  | 0.979992 | 917.7094 | 950.6365 | 1011.388 | 954.4933 | 1061.197 | 901.7023 |
| ENSMUSG00000028150  | 14_Rorc         | 337.1931372 | 0.023808 | 0.93297  | 0.980056 | 340.2834 | 338.3476 | 324.4726 | 274.8385 | 328.0886 | 417.1281 |
| ENSMUSG00000037428  | 14_Vglf         | 7.141412239 | 0.096977 | 0.932953 | 0.980056 | 2.436397 | 3.435001 | 14.95796 | 0.992197 | 15.83876 | 5.18816  |
| ENSMUSG000000332611 | 9_1700102P08Rik | 5.348162285 | -0.07982 | 0.933093 | 0.980106 | 4.060661 | 3.435001 | 9.204897 | 7.937575 | 2.26268  | 5.18816  |
| ENSMUSG000000079633 | 3_Rhox4d        | 0.948191144 | 0.257034 | 0.933115 | 0.980106 | 0        | 2.576251 | 0        | 0        | 0        | 3.112896 |
| ENSMUSG00000097887  | 1_Gm26542       | 0.989538041 | 0.162122 | 0.93331  | 0.980259 | 0.812132 | 0.85875  | 1.150612 | 1.984394 | 1.13134  | 0        |
| ENSMUSG00000024500  | 18_Ppp2r2b      | 69.23818259 | 0.039427 | 0.933617 | 0.980477 | 66.59484 | 87.59252 | 50.62693 | 109.1416 | 47.51628 | 53.95687 |
| ENSMUSG00000097189  | 1_Gm26594       | 2.182986811 | -0.12284 | 0.933581 | 0.980477 | 2.436397 | 4.293751 | 0        | 0.992197 | 2.26268  | 3.112896 |
| ENSMUSG00000022805  | 16_Maats1       | 2.242206039 | -0.11295 | 0.933987 | 0.980815 | 1.624264 | 0.85875  | 4.602448 | 0.992197 | 2.26268  | 3.112896 |
| ENSMUSG00000029499  | 11_Pxmp2        | 32.11977549 | 0.03605  | 0.934101 | 0.980883 | 28.42463 | 41.22001 | 25.31347 | 29.7659  | 31.67752 | 36.31712 |
| ENSMUSG00000026123  | 11_Plekhh2      | 4557.83307  | -0.01902 | 0.934482 | 0.98123  | 4465.103 | 4426.857 | 4871.692 | 3974.74  | 5075.192 | 4533.414 |
| ENSMUSG00000085973  | 1_Gm1474r2      | 0.981768366 | 0.176618 | 0.934656 | 0.981361 | 1.624264 | 0        | 1.150612 | 1.984394 | 1.13134  | 0        |
| ENSMUSG00000048895  | 13_Cdk5f1       | 15.551629   | -0.0462  | 0.934753 | 0.981412 | 16.24264 | 20.61001 | 10.35551 | 16.86735 | 14.70742 | 14.52685 |
| ENSMUSG00000085354  | 1_Gm2044        | 2.027522597 | 0.12429  | 0.935008 | 0.981628 | 2.436397 | 0        | 3.451836 | 2.97659  | 2.26268  | 1.037632 |
| ENSMUSG00000027331  | 15_Knstrn       | 464.3613055 | 0.023697 | 0.935162 | 0.981738 | 502.7098 | 365.8276 | 513.173  | 399.8553 | 540.7806 | 463.8215 |
| ENSMUSG000000106864 | 3_Glf3c2        | 2016.54589  | -0.01685 | 0.935429 | 0.981966 | 1936.123 | 1980.278 | 2168.904 | 1989.355 | 2025.099 | 1999.517 |
| ENSMUSG00000050751  | 14_Pgbd5        | 6.863142076 | -0.06424 | 0.93551  | 0.982    | 8.933454 | 5.152501 | 6.903673 | 3.968787 | 7.919381 | 8.301057 |
| ENSMUSG00000008085  | 18_Car4         | 10.71710806 | -0.05028 | 0.935876 | 0.982017 | 11.36985 | 12.0225  | 9.204897 | 9.921968 | 12.44474 | 9.338689 |
| ENSMUSG00000017861  | 11_Mybl2        | 226.3981115 | -0.05009 | 0.936402 | 0.982017 | 254.1974 | 164.0213 | 272.6951 | 51.59423 | 345.0587 | 270.822  |
| ENSMUSG00000021090  | 15_Lrrc9        | 1.409996896 | -0.13844 | 0.936252 | 0.982017 | 2.436397 | 0.85875  | 1.150612 | 2.97659  | 0        | 1.037632 |
| ENSMUSG00000022249  | 13_Ttcd2l       | 1.440681328 | -0.13935 | 0.935862 | 0.982017 | 0.812132 | 2.576251 | 1.150612 | 0.992197 | 0        | 3.112896 |
| ENSMUSG000000207016 | 17_Zfp385b      | 26.38656136 | 0.046032 | 0.935841 | 0.982017 | 33.29742 | 28.33876 | 16.10857 | 42.66446 | 19.23278 | 18.67738 |
| ENSMUSG00000033740  | 17_St18         | 4.322197696 | 0.087393 | 0.935709 | 0.982017 | 5.684925 | 3.435001 | 3.451836 | 8.929771 | 3.39402  | 1.037632 |
| ENSMUSG00000033764  | 12_Cdkn1c       | 287.2260063 | -0.0387  | 0.935993 | 0.982017 | 251.761  | 327.1838 | 294.5567 | 467.3247 | 133.4981 | 249.0317 |
| ENSMUSG00000052310  | 9_Slc39a1       | 3497.079249 | 0.019363 | 0.936494 | 0.982017 | 3300.505 | 3224.607 | 3895.973 | 3208.764 | 4008.338 | 3344.283 |
| ENSMUSG00000061577  | 11_Adgrg5       | 78.95115399 | -0.04502 | 0.935976 | 0.982017 | 114.5106 | 53.24251 | 72.48856 | 41.67227 | 135.7608 | 56.03213 |
| ENSMUSG00000066406  | 14_Akap13       | 4417.655249 | -0.01794 | 0.935822 | 0.982017 | 4383.077 | 4206.159 | 4746.275 | 3923.146 | 4646.414 | 4600.861 |
| ENSMUSG00000068893  | 5_Spr2a2        | 47.26115453 | -0.07129 | 0.93628  | 0.982017 | 69.03124 | 16.31625 | 59.83183 | 10.91416 | 110.8713 | 16.60211 |
| ENSMUSG00000087617  | 1_Gm14268       | 0.609212672 | 0.227381 | 0.936513 | 0.982017 | 0.812132 | 0.85875  | 0        | 1.984394 | 0        | 0        |
| ENSMUSG00000090164  | 8_BC035044      | 9.236747387 | 0.056466 | 0.936138 | 0.982017 | 12.18198 | 6.870002 | 8.054285 | 11.90636 | 10.18206 | 6.225792 |
| ENSMUSG00000091695  | 1_Gm17669       | 0.609212672 | 0.227381 | 0.936513 | 0.982017 | 0.812132 | 0.85875  | 0        | 1.984394 | 0        | 0        |
| ENSMUSG00000091698  | 8_Gm6526        | 0.609212672 | 0.227381 | 0.936513 | 0.982017 | 0.812132 | 0.85875  | 0        | 1.984394 | 0        | 0        |
| ENSMUSG00000096971  | 1_4930556M19Rik | 80.45289767 | 0.026928 | 0.936356 | 0.982017 | 83.64961 | 80.72252 | 74.78979 | 98.22748 | 63.35505 | 81.97293 |
| ENSMUSG00000097868  | 1_A330069E16Rik | 9.085427795 | 0.059924 | 0.935894 | 0.982017 | 10.55772 | 10.305   | 5.753061 | 14.88295 | 6.788041 | 6.225792 |
| ENSMUSG00000097930  | 1_C330002G04Rik | 1.575560164 | 0.154598 | 0.935825 | 0.982017 | 1.624264 | 1.7175   | 1.150612 | 4.960984 | 0        | 0        |
| ENSMUSG00000099032  | 2_Tcf24         | 6.84568144  | 0.087384 | 0.936298 | 0.982017 | 8.121322 | 9.446252 | 2.301224 | 16.86735 | 2.26268  | 2.075264 |
| ENSMUSG000000105361 | 1_Yam1          | 37373.38822 | -0.04007 | 0.936233 | 0.982017 | 39908.99 | 37995.4  | 57772.53 | 13409.54 | 42196.72 | 54957.14 |
| ENSMUSG000000006457 | 3_Actn3         | 13.20283239 | -0.06262 | 0.936638 | 0.982097 | 14.61838 | 18.8925  | 6.903673 | 19.84394 | 3.39402  | 15.56448 |
| ENSMUSG000000019891 | 13_Dcbid1       | 187.7473099 | 0.022409 | 0.936798 | 0.982161 | 177.0448 | 168.315  | 214.0139 | 216.2989 | 176.4891 | 174.3222 |
| ENSMUSG00000097514  | 1_Gm17619       | 0.751943444 | -0.25706 | 0.936763 | 0.982161 | 2.436397 | 0        | 0        | 0        | 0        | 2.075264 |
| ENSMUSG00000005628  | 8_75932653      | 86.75932653 | 0.024581 | 0.937376 | 0.98234  | 72.27976 | 92.74502 | 93.19958 | 83.34453 | 93.90123 | 85.08583 |
| ENSMUSG00000015806  | 12_Qdpr         | 715.6340057 | -0.01925 | 0.937255 | 0.98234  | 714.6763 | 747.1127 | 699.5722 | 793.7575 | 603.0043 | 735.6811 |
| ENSMUSG00000023000  | 4_Dhh           | 9.667077509 | 0.060713 | 0.937407 | 0.98234  | 12.99411 | 9.446252 | 5.753061 | 3.968787 | 11.3134  | 14.52685 |
| ENSMUSG00000025812  | 17_Pard3        | 4482.519863 | -0.0172  | 0.937039 | 0.98234  | 4293.743 | 4256.825 | 4977.548 | 4226.758 | 4581.927 | 4558.318 |
| ENSMUSG00000040231  | 14_Syngdr4      | 4.502731301 | -0.09595 | 0.937177 | 0.98234  | 2.436397 | 6.870002 | 4.602448 | 0        | 7.919381 | 5.18816  |
| ENSMUSG00000044201  | 9_Cdc25c        | 158.2541583 | -0.02276 | 0.937461 | 0.98234  | 185.9783 | 141.6938 | 150.7302 | 176.611  | 148.2056 | 146.3061 |
| ENSMUSG00000049719  | 14_Prss46       | 1.796569874 | 0.154434 | 0.937421 | 0.98234  | 0.812132 | 0.85875  | 3.451836 | 0        | 5.656701 | 0        |
| ENSMUSG00000060512  | 7_061004J01Rik  | 78.92062914 | 0.029059 | 0.937176 | 0.98234  | 74.71616 | 64.40627 | 95.50081 | 59.53181 | 85.98185 | 93.38689 |
| ENSMUSG000000103927 | 1_Gm9932        | 0.624554888 | 0.222665 | 0.937511 | 0.98234  | 0        | 1.7175   | 0        | 0.992197 | 0        | 1.037632 |
| ENSMUSG000000104824 | 1_Gm21663       | 0.624554888 | 0.222665 | 0.937511 | 0.98234  | 0        | 1.7175   | 0        | 0.992197 | 0        | 1.037632 |
| ENSMUSG000000108504 | 1_RP23-307M24   | 0.624554888 | 0.222665 | 0.937511 | 0.98234  | 0        | 1.7175   | 0        | 0.992197 | 0        | 1.037632 |
| ENSMUSG00000015291  | 10_Gdi1         | 2979.989714 | -0.01687 | 0.937895 | 0.982384 | 2896.875 | 3058.868 | 3036.465 | 2677.939 | 3026.335 | 3183.455 |
| ENSMUSG00000019838  | 10_Slc16a10     | 114.4113859 | -0.03284 | 0.937657 | 0.982384 | 115.3228 | 147.705  | 83.99468 | 158.7515 | 72.96113 | 103.7632 |
| ENSMUSG00000021062  | 15_Rab15        | 1698.04108  | -0.02884 | 0.93783  | 0.982384 | 1717.66  | 1548.327 | 1878.95  | 990.2124 | 226.113  | 1846.985 |

|                      |                  |              |           |          |          |          |          |          |          |          |          |
|----------------------|------------------|--------------|-----------|----------|----------|----------|----------|----------|----------|----------|----------|
| ENSMUSG00000031155   | 14_Pim2          | 86.45836838  | 0.023356  | 0.940011 | 0.983046 | 83.64961 | 77.28752 | 96.65142 | 84.33673 | 80.32515 | 96.49978 |
| ENSMUSG00000051678   | 4_Podhb6         | 10.67230263  | 0.06487   | 0.939999 | 0.983046 | 10.55772 | 17.175   | 3.451836 | 13.89076 | 3.39402  | 15.56448 |
| ENSMUSG000000091996  | 7_BC049352       | 4.686629268  | 0.071328  | 0.939997 | 0.983046 | 4.872793 | 4.293751 | 4.602448 | 7.93755  | 2.26268  | 1.50528  |
| ENSMUSG000000021940  | 9_Ptpn20         | 0.601442998  | 0.256836  | 0.940428 | 0.983098 | 1.624264 | 0        | 0        | 1.984394 | 0        | 0        |
| ENSMUSG000000047841  | 8_BC051628       | 1.068204291  | -0.153    | 0.940442 | 0.983098 | 1.624264 | 1.7175   | 0        | 0.992197 | 0        | 2.075264 |
| ENSMUSG000000059974  | 10_Ntm           | 55.84126591  | -0.03611  | 0.940505 | 0.983098 | 69.03124 | 66.98252 | 33.36775 | 79.37575 | 39.5969  | 46.69344 |
| ENSMUSG000000074254  | 4_Cyp2a4         | 0.601442998  | 0.256836  | 0.940428 | 0.983098 | 1.624264 | 0        | 0        | 1.984394 | 0        | 0        |
| ENSMUSG000000076433  | 4_BC100451       | 12.94420159  | 0.047816  | 0.94029  | 0.983098 | 12.18198 | 15.4575  | 10.35551 | 8.929771 | 20.36412 | 10.37632 |
| ENSMUSG000000094081  | 2_Gm20826        | 2.206374491  | -0.11328  | 0.940393 | 0.983098 | 1.624264 | 5.152501 | 0        | 0.992197 | 3.39402  | 2.075264 |
| ENSMUSG000000094613  | 2_A630076J17Rik  | 0.632127429  | 0.253812  | 0.940474 | 0.983098 | 0        | 1.7175   | 0        | 0        | 0        | 2.075264 |
| ENSMUSG000000097515  | 2_1700040D17Rik  | 2.113572483  | -0.12279  | 0.940387 | 0.983098 | 5.684925 | 0.85875  | 0        | 3.968787 | 1.13134  | 1.037632 |
| ENSMUSG000000097986  | 1_Gm26953        | 0.601442998  | 0.256836  | 0.940428 | 0.983098 | 1.624264 | 0        | 0        | 1.984394 | 0        | 0        |
| ENSMUSG000000032068  | 14_Plet1         | 33268.29055  | -0.0228   | 0.940615 | 0.983137 | 33135.8  | 31175.21 | 36282.25 | 24584.65 | 43011.29 | 31420.54 |
| ENSMUSG000000032807  | 5_Alox12b        | 56.18466695  | 0.046365  | 0.940641 | 0.983137 | 56.03712 | 56.67751 | 52.92816 | 15.87515 | 99.55793 | 56.03213 |
| ENSMUSG000000039202  | 12_Abhd2         | 2888.379665  | 0.016305  | 0.940931 | 0.983388 | 2788.05  | 2897.423 | 2930.609 | 2711.674 | 3242.421 | 2760.101 |
| ENSMUSG000000025647  | 16_Shisa5        | 6773.304305  | 0.025617  | 0.941099 | 0.983413 | 6139.719 | 5896.179 | 8103.761 | 4549.222 | 8762.229 | 7188.715 |
| ENSMUSG000000028104  | 14_Polr3gl       | 253.6719569  | 0.021017  | 0.941051 | 0.983413 | 247.7003 | 273.0826 | 234.7249 | 310.5576 | 218.3486 | 237.6177 |
| ENSMUSG000000033061  | 15_Resp18        | 1.053059208  | -0.17793  | 0.94114  | 0.983413 | 1.624264 | 1.7175   | 0        | 2.97659  | 0        | 0        |
| ENSMUSG000000035692  | 6_Isg15          | 10083.31914  | 0.045229  | 0.941152 | 0.983413 | 8773.464 | 8222.533 | 12779.85 | 2442.789 | 16543.59 | 11737.69 |
| ENSMUSG000000050627  | 13_Gpd11         | 2998.685041  | 0.015874  | 0.941353 | 0.983571 | 2808.353 | 2890.553 | 3248.178 | 3178.999 | 2897.362 | 2968.665 |
| ENSMUSG000000045877  | 2_4933415A04Rik  | 36.46831068  | -0.03152  | 0.941535 | 0.983672 | 32.48529 | 30.05626 | 48.32571 | 29.7659  | 41.85958 | 36.31712 |
| ENSMUSG000000079559  | 3_Gm684          | 48.59614936  | 0.029388  | 0.941548 | 0.983672 | 52.78859 | 56.67751 | 34.51836 | 47.62545 | 41.85958 | 58.1074  |
| ENSMUSG000000061288  | 13_Taok3         | 2832.567138  | 0.021536  | 0.941666 | 0.983744 | 2611.817 | 2527.302 | 3295.353 | 2226.49  | 3466.426 | 2868.015 |
| ENSMUSG000000033377  | 14_Palmd         | 727.3733521  | 0.019643  | 0.941748 | 0.983778 | 644.0208 | 798.6377 | 724.8856 | 859.2424 | 613.1863 | 724.2672 |
| ENSMUSG000000095493  | 1_A630023A22Rik  | 2.803318418  | 0.105344  | 0.941886 | 0.98387  | 2.436397 | 0        | 5.753061 | 0.992197 | 4.525673 | 3.112896 |
| ENSMUSG000000020657  | 15_Dnajc27       | 339.1627008  | 0.019946  | 0.942155 | 0.984013 | 376.0172 | 313.4438 | 321.0208 | 400.8475 | 288.4917 | 335.1552 |
| ENSMUSG000000034813  | 16_Grip1         | 175.1387857  | -0.02196  | 0.942115 | 0.984013 | 170.5478 | 151.9988 | 207.1102 | 143.8685 | 195.7218 | 181.5856 |
| ENSMUSG000000097239  | 7_Gm27029        | 57.9693407   | 0.039584  | 0.94217  | 0.984013 | 73.0919  | 77.28752 | 20.71102 | 70.44597 | 55.43567 | 50.84397 |
| ENSMUSG0000000070814 | 14_6330408A02Rik | 278.6483378  | -0.01714  | 0.942314 | 0.984112 | 280.1856 | 290.2576 | 270.3938 | 274.8385 | 263.6022 | 292.6122 |
| ENSMUSG000000004268  | 11_Emg1          | 1107.155855  | -0.02174  | 0.942391 | 0.984124 | 1079.324 | 1010.749 | 1256.468 | 815.5858 | 1338.375 | 1142.433 |
| ENSMUSG000000040018  | 9_Cox15          | 990.4579988  | -0.01727  | 0.942425 | 0.984124 | 929.8913 | 934.3202 | 1125.299 | 900.9147 | 1063.46  | 988.8634 |
| ENSMUSG000000097360  | 7_9430065F17Rik  | 0.989065118  | -0.158134 | 0.94266  | 0.984318 | 0.812132 | 0.85875  | 1.150612 | 0        | 0        | 3.112896 |
| ENSMUSG0000000021266 | 16_Wars          | 1806.865789  | -0.02989  | 0.943058 | 0.984321 | 1625.076 | 1779.33  | 2072.252 | 971.3607 | 2691.458 | 1701.717 |
| ENSMUSG000000022229  | 2_Atp12a         | 7.603526646  | -0.05649  | 0.94287  | 0.984321 | 6.497057 | 4.293751 | 12.65673 | 5.953181 | 7.919381 | 8.301057 |
| ENSMUSG000000030616  | 14_Sytl2         | 295.4584341  | 0.036751  | 0.942885 | 0.984321 | 260.6944 | 454.2789 | 159.9351 | 436.5666 | 169.701  | 291.5746 |
| ENSMUSG000000030894  | 4_Tpp1           | 2426.312229  | -0.01588  | 0.943011 | 0.984321 | 2421.778 | 2457.743 | 2439.298 | 2126.278 | 2597.557 | 2515.22  |
| ENSMUSG0000000442200 | 3_Cdr14          | 1.297753423  | 0.141451  | 0.942993 | 0.984321 | 0        | 2.576251 | 1.150612 | 1.984394 | 0        | 2.075264 |
| ENSMUSG000000050350  | 7_Gpr18          | 11.2039654   | 0.055912  | 0.942929 | 0.984321 | 18.67904 | 6.011252 | 8.054285 | 6.945378 | 19.23278 | 8.301057 |
| ENSMUSG000000079051  | 4_Gm14025        | 1.7822768    | -0.11174  | 0.942894 | 0.984321 | 2.436397 | 0.85875  | 2.301224 | 1.984394 | 0        | 3.112896 |
| ENSMUSG000000104763  | 1_9830132P13Rik  | 3.508613202  | -0.08211  | 0.942778 | 0.984321 | 5.684925 | 1.7175   | 3.451836 | 5.953181 | 1.13134  | 3.112896 |
| ENSMUSG000000039901  | 9_9130011E15Rik  | 648.488438   | -0.01519  | 0.943124 | 0.984338 | 657.8271 | 636.3339 | 661.602  | 655.8421 | 650.5206 | 628.805  |
| ENSMUSG000000006169  | 19_Cllnt1        | 6635.887423  | 0.016315  | 0.94329  | 0.984408 | 6207.126 | 6108.29  | 7480.129 | 6471.108 | 7156.857 | 6391.814 |
| ENSMUSG000000042622  | 13_Maff          | 441.0386264  | 0.026147  | 0.943266 | 0.984408 | 407.6904 | 443.1151 | 460.2448 | 262.9322 | 518.1538 | 554.0955 |
| ENSMUSG000000022000  | 10_Zc3h13        | 1279.284438  | -0.01547  | 0.943655 | 0.984448 | 1198.707 | 1249.482 | 1410.65  | 1237.269 | 1290.859 | 1288.739 |
| ENSMUSG000000024253  | 8_Dync2i1        | 288.4301255  | -0.01784  | 0.943752 | 0.984448 | 263.1308 | 300.5626 | 307.2134 | 271.8619 | 256.2589 | 318.553  |
| ENSMUSG000000026700  | 4_Tnfrsf4        | 3.143164077  | 0.100068  | 0.943547 | 0.984448 | 0        | 3.435001 | 5.753061 | 2.97659  | 5.656701 | 3.107632 |
| ENSMUSG000000037263  | 13_Aldh3b1       | 5.782835566  | -0.06453  | 0.943719 | 0.984448 | 2.436397 | 5.152501 | 10.35551 | 6.945378 | 5.656701 | 4.150528 |
| ENSMUSG000000039376  | 13_Sympo2        | 38.95870421  | -0.02999  | 0.943458 | 0.984448 | 37.35808 | 39.50251 | 41.42204 | 40.68007 | 42.02082 | 48.76871 |
| ENSMUSG000000049971  | 17_Glt1d1        | 0.806488479  | -0.22537  | 0.943804 | 0.984448 | 0        | 2.576251 | 0        | 0        | 2.26268  | 0        |
| ENSMUSG000000057375  | 13_Yip1f         | 848.4748304  | -0.02002  | 0.943606 | 0.984448 | 855.9873 | 800.3552 | 906.6823 | 635.9982 | 967.2958 | 924.5302 |
| ENSMUSG000000066894  | 14_Vsig10        | 2517.7112584 | -0.01618  | 0.943604 | 0.984448 | 2339.753 | 2430.263 | 2825.903 | 2305.865 | 2552.303 | 2652.188 |
| ENSMUSG000000096322  | 1_Gm3898         | 0.806488479  | -0.22537  | 0.943804 | 0.984448 | 0        | 2.576251 | 0        | 0        | 2.26268  | 0        |
| ENSMUSG000000073650  | 8_Catlp          | 3.634598168  | -0.07358  | 0.943971 | 0.984562 | 4.872793 | 1.7175   | 4.602448 | 2.97659  | 4.52536  | 3.112896 |
| ENSMUSG000000099906  | 1_Gm28653        | 1.233964692  | 0.203105  | 0.943981 | 0.984562 | 0        | 3.435001 | 0        | 3.968787 | 0        | 0        |
| ENSMUSG000000006800  | 13_Sulf2         | 389.4157053  | -0.02355  | 0.944142 | 0.984678 | 358.1503 | 370.9801 | 448.7387 | 258.9634 | 451.4047 | 448.2571 |
| ENSMUSG000000074259  | 10_Gramd2        | 477.9427676  | 0.020072  | 0.944397 | 0.984893 | 446.6727 | 476.6064 | 500.5163 | 363.144  | 557.7507 | 522.9666 |
| ENSMUSG000000005540  | 9_Fcer2a         | 2.190480695  | -0.13172  | 0.944496 | 0.984895 | 0.812132 | 6.011252 | 0        | 0        | 1.13134  | 5.18816  |
| ENSMUSG000000023915  | 4_Tnfrsf21       | 1991.651433  | 0.01958   | 0.944498 | 0.984895 | 1811.867 | 1939.917 | 2182.711 | 1547.827 | 2374.683 | 2092.904 |
| ENSMUSG000000078776  | 9_9530053A07Rik  | 1.535981862  | -0.11753  | 0.944663 | 0.985015 | 1.624264 | 0.85875  | 2.301224 | 0        | 3.39402  | 1.037632 |
| ENSMUSG000000000197  | 7_Nalcn          | 81.65520117  | 0.034482  | 0.949449 | 0.985057 | 76.34042 | 97.89753 | 67.88611 | 149.8217 | 42.99392 | 54.9945  |
| ENSMUSG0000000000317 | 11_Bclb6         | 48.21143881  | 0.021285  | 0.957425 | 0.985057 | 44.66727 | 54.10126 | 44.87387 | 53.57863 | 33.9402  | 58.1074  |
| ENSMUSG000000000869  | 12_Il4           | 5.994769365  | 0.064207  | 0.947312 | 0.985057 | 6.497057 | 4.293751 | 6.903673 | 12.89856 | 2.26268  | 3.112896 |
| ENSMUSG0000000001366 | 14_Fbxo9         | 1183.069734  | -0.01265  | 0.951529 | 0.985057 | 1156.476 | 1163.607 | 1244.962 | 1175.753 | 1153.967 | 1203.653 |
| ENSMUSG0000000001656 | 3_Hoxc11         | 0.380325369  | 0.179161  | 0.963621 | 0.985057 | 0        | 0        | 1.150612 | 0        | 1.13134  | 0        |
| ENSMUSG0000000003032 | 8_Klf4           | 17657.27118  | 0.012504  | 0.961185 | 0.985057 | 15925.91 | 16136.92 | 20681.1  | 20041.38 | 17346.84 | 15812.48 |
| ENSMUSG000000003518  | 13_Dusp3         | 797.7514558  | 0.010814  | 0.964768 | 0.985057 | 789.3925 | 838.999  | 755.9522 | 890.9927 | 681.0667 | 830.1057 |
| ENSMUSG0000000003779 | 15_Klf20a        | 766.4819959  | 0.0141    | 0.963627 | 0.985057 | 795.8895 | 663.8139 | 828.4407 | 558.6068 | 934.4869 | 817.6541 |
| ENSMUSG0000000004612 | 9_Nkg7           | 34.41137025  | -0.03841  | 0.95944  | 0.985057 | 69.03124 | 11.16375 | 24.16285 | 14.88295 | 50.9103  | 36.31712 |
| ENSMUSG0000000004891 | 16_Nes           | 554.9432368  | -0.0131   | 0.953214 | 0.985057 | 528.698  | 561.6226 | 582.2097 | 552.6536 | 581.5088 | 522.9666 |
| ENSMUSG0000000005667 | 8_Mthfd2         | 231.4871301  | 0.023523  | 0.951208 | 0.985057 | 230.6455 | 178.62   | 279.5987 | 178.5954 | 332.614  | 188.849  |
| ENSMUSG0000000005672 | 12_Klt           | 4466.226917  | 0.012624  | 0.956121 | 0.985057 | 4142.686 | 4262.836 | 4934.975 | 4128.531 | 4422.408 | 4905.924 |
| ENSMUSG0000000005882 | 18_Uqccl1        | 586.9577424  | -0.01247  | 0.958954 | 0.985057 | 631.8388 | 542.7301 | 593.7158 | 534.7941 | 657.3086 | 561.3589 |
| ENSMUSG0000000005886 | 14_Ncoa2         | 2739.216346  | -0.01297  | 0.952226 | 0.985057 | 2681.66  | 2549.629 | 3023.809 | 2797.003 | 2642.81  | 2740.386 |
| ENSMUSG0000000006058 | 10_Snf8          | 940.3960094  | -0.0148   | 0.960941 | 0.985057 | 899.8425 | 895.6765 | 1040.153 | 672.7094 | 1097.4   | 1036.594 |
| ENSMUSG0000000006269 | 7_Atp6v1b1       | 1.099440304  | -0.0959   | 0.962569 | 0.985057 | 1.624264 | 1.7175   | 0        | 0.992197 | 2.26268  | 0        |
| ENSMUSG0000000006418 | 17_Rnf114        | 5806.743413  | -0.02333  | 0.950337 | 0.985057 | 54       |          |          |          |          |          |

|                    |                  |             |           |          |            |          |          |          |          |          |          |
|--------------------|------------------|-------------|-----------|----------|------------|----------|----------|----------|----------|----------|----------|
| ENSMUSG00000021598 | 8_Med10          | 503.1443766 | 0.015564  | 0.949687 | 0.985057   | 505.1462 | 461.1489 | 535.0346 | 449.4652 | 567.9327 | 500.1387 |
| ENSMUSG00000021697 | 12_Depdc1b       | 43.22133458 | -0.01965  | 0.962759 | 0.985057   | 44.66727 | 30.91501 | 55.22938 | 35.71909 | 42.99092 | 49.80634 |
| ENSMUSG00000021944 | 15_Gata4         | 0.323912047 | 0.17916   | 0.964979 | 0.985057   | 0.812132 | 0        | 0        | 0        | 1.13134  | 0        |
| ENSMUSG00000021962 | 8_Dcp1a          | 1577.356384 | 0.01037   | 0.964526 | 0.985057   | 1562.542 | 1500.237 | 1652.279 | 1379.154 | 1750.183 | 1619.744 |
| ENSMUSG00000021983 | 15_Atp8a2        | 33.29857814 | 0.019953  | 0.960576 | 0.985057   | 29.23676 | 37.78501 | 32.21714 | 34.72689 | 30.54618 | 25.97949 |
| ENSMUSG00000022149 | 17_C9            | 0.380325369 | 0.179161  | 0.963621 | 0.985057   | 0        | 0        | 1.150612 | 0        | 1.13134  | 0        |
| ENSMUSG00000022325 | 14_Pop1          | 207.3858122 | -0.02235  | 0.946392 | 0.985057   | 194.0996 | 209.5351 | 223.2187 | 153.7905 | 273.7843 | 189.8967 |
| ENSMUSG00000022496 | 5_Tnfrsf17       | 2.366115031 | 0.058937  | 0.964592 | 0.985057   | 4.872793 | 0.85875  | 1.150612 | 2.97659  | 2.26268  | 2.075264 |
| ENSMUSG00000022582 | 4_Ly6g           | 2.566512351 | -0.0748   | 0.953753 | 0.985057   | 0.812132 | 2.576251 | 4.602448 | 2.97659  | 3.39402  | 1.037632 |
| ENSMUSG00000022659 | 13_Gcsam         | 3.723757737 | 0.071595  | 0.959012 | 0.985057   | 3.248529 | 0.85875  | 6.903673 | 7.937575 | 3.39402  | 0        |
| ENSMUSG00000022683 | 13_Pla2g10       | 0.308294041 | 0.17916   | 0.964979 | 0.985057   | 0.812132 | 0        | 0        | 0        | 1.037632 | 0        |
| ENSMUSG00000022753 | 15_Tmem30c       | 0.925473519 | 0.202298  | 0.947555 | 0.985057   | 0        | 2.576251 | 0        | 2.97659  | 0        | 0        |
| ENSMUSG00000022868 | 5_Ahsg           | 0.316063715 | 0.17916   | 0.964979 | 0.985057   | 0        | 0.85875  | 0        | 0        | 1.037632 | 0        |
| ENSMUSG00000023169 | 14_Slc38a1       | 563.6051877 | -0.02103  | 0.958159 | 0.985057   | 595.2929 | 739.3839 | 368.1959 | 756.054  | 403.8884 | 518.816  |
| ENSMUSG00000024074 | 17_Crim1         | 5575.683852 | -0.01304  | 0.95384  | 0.985057   | 4906.09  | 5688.361 | 6208.703 | 5636.67  | 5484.737 | 5529.541 |
| ENSMUSG00000024512 | 3_Dynap          | 129.278332  | 0.041449  | 0.955392 | 0.985057   | 122.632  | 99.61503 | 159.9351 | 61.5162  | 299.8051 | 32.16659 |
| ENSMUSG00000024517 | 16_Grp           | 0.357134821 | 0.17916   | 0.964379 | 0.985057   | 0        | 0        | 1.150612 | 0.992197 | 0        | 0        |
| ENSMUSG00000024617 | 16_Camk2a        | 24.9736743  | -0.03279  | 0.957494 | 0.985057   | 22.7397  | 33.49126 | 19.56041 | 30.7581  | 9.050721 | 34.24186 |
| ENSMUSG00000024653 | 2_Scgb1a1        | 0.316063715 | 0.17916   | 0.964979 | 0.985057   | 0        | 0.85875  | 0        | 0        | 1.037632 | 0        |
| ENSMUSG00000024732 | 7_Ccdc86         | 271.4237596 | -0.02089  | 0.957966 | 0.985057   | 271.2521 | 267.9301 | 280.7494 | 157.7593 | 391.4437 | 259.408  |
| ENSMUSG00000025243 | 14_Slc6a20b      | 23.60368194 | 0.027356  | 0.95669  | 0.985057   | 25.98823 | 18.8925  | 25.31347 | 17.85954 | 20.36412 | 37.20423 |
| ENSMUSG00000025337 | 10_Sbds          | 1876.552543 | 0.014009  | 0.948726 | 0.985057   | 1867.904 | 1726.947 | 2007.818 | 1976.456 | 1900.651 | 139.5539 |
| ENSMUSG00000025723 | 12_Nmb           | 15.66671859 | -0.02937  | 0.957785 | 0.985057   | 19.49117 | 12.88125 | 14.95796 | 11.90636 | 18.10144 | 16.60211 |
| ENSMUSG00000026180 | 8_Cxcr2          | 34.08906825 | -0.03986  | 0.96146  | 0.985057   | 64.97057 | 12.0225  | 26.46408 | 22.82053 | 67.88041 | 10.37632 |
| ENSMUSG00000026192 | 13_Atlc          | 1299.712159 | -0.01634  | 0.945155 | 0.985057   | 1292.102 | 1235.742 | 1393.391 | 1150.948 | 1488.479 | 1257.61  |
| ENSMUSG00000026274 | 11_Pask          | 382.1420959 | 0.020428  | 0.948318 | 0.985057   | 359.7746 | 349.5113 | 429.1783 | 277.8151 | 410.6765 | 465.8968 |
| ENSMUSG00000026312 | 17_Cdh7          | 2.626278162 | 0.071676  | 0.963007 | 0.985057   | 1.624264 | 6.011252 | 0        | 5.953181 | 1.13134  | 1.037632 |
| ENSMUSG00000026414 | 13_Tnni2         | 108.3379952 | 0.018211  | 0.957587 | 0.985057   | 106.3893 | 97.03878 | 119.6637 | 81.36014 | 108.6086 | 136.9674 |
| ENSMUSG00000026618 | 11_lars2         | 2034.638468 | 0.013255  | 0.951173 | 0.985057   | 2066.064 | 1994.877 | 2014.722 | 1861.361 | 226.1995 | 2054.511 |
| ENSMUSG00000026815 | 14_Gfl1b         | 0.316063715 | 0.17916   | 0.964979 | 0.985057   | 0        | 0.85875  | 0        | 0        | 1.037632 | 0        |
| ENSMUSG00000027067 | 16_Ssrp1         | 3711.694163 | -0.0209   | 0.945143 | 0.985057   | 3821.082 | 3305.33  | 4089.275 | 2694.807 | 4566.089 | 3793.583 |
| ENSMUSG00000027075 | 16_Slc43a1       | 61.13234377 | 0.023486  | 0.958801 | 0.985057   | 56.03712 | 87.59252 | 37.9702  | 56.55522 | 49.77896 | 78.86004 |
| ENSMUSG00000027202 | 12_Slc12a1       | 0.688816542 | 0.118289  | 0.961204 | 0.985057   | 0        | 0.85875  | 1.150612 | 0.992197 | 1.13134  | 0        |
| ENSMUSG00000027261 | 2_Hao1           | 1.62400668  | 0.109014  | 0.954024 | 0.985057   | 2.436397 | 0        | 2.301224 | 3.968787 | 0        | 1.037632 |
| ENSMUSG00000027301 | 7_Oxt            | 0.380325369 | 0.179161  | 0.963621 | 0.985057   | 0        | 0        | 1.150612 | 0        | 1.13134  | 0        |
| ENSMUSG00000027309 | 18_4930402H24Rik | 541.6141549 | 0.012878  | 0.958938 | 0.985057   | 547.3771 | 578.7977 | 491.3114 | 612.1854 | 476.2942 | 543.7192 |
| ENSMUSG00000027339 | 15_Rassf2        | 357.2096617 | -0.01421  | 0.957321 | 0.985057   | 393.072  | 393.3076 | 289.9543 | 355.2065 | 349.5841 | 362.1336 |
| ENSMUSG00000027380 | 10_Acoxl         | 0.308491173 | 0.17916   | 0.964979 | 0.985057   | 0        | 0.85875  | 0        | 0.992197 | 0        | 0        |
| ENSMUSG00000027478 | 15_Dnmt3b        | 68.20160008 | 0.021225  | 0.94755  | 0.985057   | 71.46763 | 59.25377 | 72.48856 | 65.48499 | 67.88041 | 72.63424 |
| ENSMUSG00000027547 | 17_Sall4         | 0.688816542 | 0.118289  | 0.961204 | 0.985057   | 0        | 0.85875  | 1.150612 | 0.992197 | 1.13134  | 0        |
| ENSMUSG00000027580 | 17_Heiz2         | 4147.342438 | 0.033805  | 0.948113 | 0.985057   | 3683.832 | 3378.323 | 5234.134 | 1561.718 | 6553.851 | 4472.194 |
| ENSMUSG00000027611 | 12_Procr         | 516.9641834 | -0.0219   | 0.95276  | 0.985057   | 465.3517 | 481.7589 | 615.5775 | 337.3469 | 716.1383 | 485.6118 |
| ENSMUSG00000027857 | 10_Tshb          | 0.300721499 | 0.17916   | 0.964979 | 0.985057   | 0.812132 | 0        | 0        | 0.992197 | 0        | 0        |
| ENSMUSG00000027951 | 16_Adar          | 5270.12471  | 0.018427  | 0.964508 | 0.985057   | 4673.821 | 4607.195 | 6428.47  | 2797.995 | 7111.604 | 6001.664 |
| ENSMUSG00000028004 | 12_Npy2r         | 0.300721499 | 0.17916   | 0.964979 | 0.985057   | 0.812132 | 0        | 0        | 0.992197 | 0        | 0        |
| ENSMUSG00000028184 | 12_Adgrl2        | 2288.616083 | -0.01343  | 0.947413 | 0.985057   | 2317.013 | 2247.349 | 2333.441 | 2172.911 | 2341.874 | 2319.108 |
| ENSMUSG00000028186 | 14_Uox           | 0.308491173 | 0.17916   | 0.964979 | 0.985057   | 0        | 0.85875  | 0        | 0.992197 | 0        | 0        |
| ENSMUSG00000028573 | 18_Fggy          | 130.0395429 | -0.02089  | 0.950748 | 0.985057   | 103.9529 | 165.7388 | 123.1155 | 107.1573 | 139.1548 | 141.118  |
| ENSMUSG00000028653 | 16_Trit1         | 411.9124401 | 0.014054  | 0.958543 | 0.985057   | 400.3812 | 409.6239 | 419.9734 | 506.0204 | 373.3422 | 362.1336 |
| ENSMUSG00000028741 | 13_Mrt4          | 500.2778212 | -0.02087  | 0.954718 | 0.985057   | 542.5043 | 415.6351 | 553.4444 | 310.5576 | 648.2579 | 531.2676 |
| ENSMUSG00000028894 | 18_Hmp5b         | 606.1206415 | 0.015329  | 0.951067 | 0.985057   | 605.0385 | 609.7127 | 593.7158 | 506.0204 | 667.4907 | 654.7458 |
| ENSMUSG00000028948 | 16_Nol9          | 676.7873088 | -0.01473  | 0.955074 | 0.985057   | 664.3241 | 611.4302 | 765.1571 | 573.4898 | 762.5232 | 683.7995 |
| ENSMUSG00000029015 | 9_Slc26a5        | 0.323912047 | 0.17916   | 0.964979 | 0.985057   | 0.812132 | 0        | 0        | 0        | 1.13134  | 0        |
| ENSMUSG00000029235 | 14_Pdcl2         | 0.323912047 | 0.17916   | 0.964979 | 0.985057   | 0.812132 | 0        | 0        | 0        | 1.13134  | 0        |
| ENSMUSG00000029236 | 4_Nmu            | 5.199928974 | 0.0423319 | 0.963199 | 0.985057   | 8.121322 | 2.576251 | 4.602448 | 4.960984 | 6.788041 | 4.150528 |
| ENSMUSG00000029427 | 11_Zcchc8        | 713.4232468 | 0.014691  | 0.946854 | 0.985057   | 658.6392 | 712.7627 | 758.2534 | 700.491  | 736.5024 | 713.8909 |
| ENSMUSG00000029762 | 6_Akrl1b8        | 554.97487   | -0.03327  | 0.953863 | 0.985057   | 568.4925 | 482.6176 | 632.8367 | 221.2599 | 1077.036 | 347.8067 |
| ENSMUSG00000029924 | 12_Slc37a3       | 1467.478924 | -0.01043  | 0.961877 | 0.985057   | 1435.85  | 1410.927 | 1571.736 | 1361.294 | 1557.855 | 1467.212 |
| ENSMUSG00000030047 | 14_Arhgap25      | 273.073217  | -0.02146  | 0.952514 | 0.985057   | 271.2521 | 266.2126 | 287.653  | 174.6266 | 369.9482 | 268.7467 |
| ENSMUSG00000030048 | 5_Gkn3           | 3.354431435 | 0.08513   | 0.959386 | 0.985057   | 4.872793 | 2.576251 | 2.301224 | 0        | 0        | 10.37632 |
| ENSMUSG00000030054 | 4_Gp9            | 0.316063715 | 0.17916   | 0.964979 | 0.985057   | 0        | 0.85875  | 0        | 0        | 1.037632 | 0        |
| ENSMUSG00000030075 | 10_Cntr3         | 16.55176005 | 0.041654  | 0.947168 | 0.985057   | 15.43051 | 19.75126 | 13.80735 | 27.78151 | 9.050721 | 13.48922 |
| ENSMUSG00000030209 | 14_Grin2b        | 13.15997166 | -0.03668  | 0.961275 | 0.985057   | 14.61838 | 20.61001 | 4.602448 | 18.85174 | 6.788041 | 13.48922 |
| ENSMUSG00000030301 | 17_Ccdc91        | 1180.354374 | 0.012782  | 0.955445 | 0.985057   | 1155.664 | 1059.698 | 1310.547 | 1233.301 | 1135.865 | 1187.051 |
| ENSMUSG00000030472 | 9_Ceacam18       | 0.308491173 | 0.17916   | 0.964979 | 0.985057   | 0        | 0.85875  | 0        | 0.992197 | 0        | 0        |
| ENSMUSG00000030680 | 5_Pagrla         | 64.67912286 | 0.075127  | 0.963591 | 0.985057   | 64.97057 | 51.52501 | 72.48856 | 0        | 73.53711 | 125.5535 |
| ENSMUSG00000030724 | 7_Cd19           | 3.322985482 | -0.07935  | 0.957831 | 0.985057   | 8.121322 | 0.85875  | 1.150612 | 0        | 6.656701 | 1.150612 |
| ENSMUSG00000030732 | 12_Chrd12        | 0.308491173 | 0.17916   | 0.964979 | 0.985057   | 0        | 0.85875  | 0        | 0.992197 | 0        | 0        |
| ENSMUSG00000030738 | 11_Elflc3        | 7320.778366 | -0.01549  | 0.945957 | 0.985057   | 7221.479 | 6889.753 | 7969.139 | 6563.382 | 8076.637 | 7204.279 |
| ENSMUSG00000030769 | 15_Slc5a11       | 0.331681721 | 0.17916   | 0.964979 | 0.985057   | 0        | 0.85875  | 0        | 0        | 1.13134  | 0        |
| ENSMUSG00000030854 | 15_Ptpn5         | 1.739297591 | 0.149131  | 0.947802 | 0.985057   | 4.872793 | 0        | 0        | 0        | 4.52536  | 1.037632 |
| ENSMUSG00000031027 | 15_Stk33         | 6.774858899 | 0.051221  | 0.949107 | 0.985057   | 6.497057 | 7.728752 | 5.753061 | 7.937575 | 3.39402  | 9.338689 |
| ENSMUSG00000031170 | 14_Slc38a5       | 0.331681721 | 0.17916   | 0.964979 | 0.985057   | 0        | 0.85875  | 0        | 0        | 1.13134  | 0        |
| ENSMUSG00000031577 | 9_Tiit2          | 293.0839908 | -0.01414  | 0.953147 | 0.985057   | 282.622  | 303.9976 | 296.8579 | 273.8463 | 317.9066 | 283.2736 |
| ENSMUSG00000032086 | 12_Bace1         | 914.0965694 | -0.01578  | 0.958936 | 0.985057   | 851.1145 | 1046.817 | 859.5072 | 1107.292 | 665.228  | 954.6215 |
| ENSMUSG00000032110 | 4_Acrv1          | 0.308491173 | 0.17916   | 0.964979 | 0.985057   | 0        | 0.85875  | 0        | 0.992197 | 0        | 0        |
| ENSMUSG00000032271 | 13_Nnmt          | 32.25926797 | -0.02846  | 0.954018 | 0.985057   | 46.29153 | 29.19751 | 21.86163 | 32.74249 | 39.5969  | 23.86554 |
| ENSMUSG00000032366 | 15_Tpm1          | 2378.319603 | 0.022443  | 0.947292 | 0.985057   | 2312.952 | 2733.402 | 2033.132 | 3090.693 | 1616.685 | 2483.054 |
| ENSMUSG00000032719 | 4_Sbspon         | 65.8993104  | 0.032067  | 0.956755 | 0.985057</ |          |          |          |          |          |          |

|                    |                  |             |          |          |          |          |          |          |          |          |          |
|--------------------|------------------|-------------|----------|----------|----------|----------|----------|----------|----------|----------|----------|
| ENSMUSG00000037736 | 18_Limch1        | 242.9816365 | 0.029951 | 0.94931  | 0.985057 | 239.579  | 285.1051 | 196.7547 | 369.0972 | 113.134  | 254.2199 |
| ENSMUSG00000037742 | 14_Eef1a1        | 135614.9002 | 0.013688 | 0.951761 | 0.985057 | 138620.4 | 130371.2 | 135923   | 117688.4 | 145311.6 | 145774.9 |
| ENSMUSG00000037982 | 15_Gm9725        | 0.308294041 | 0.17916  | 0.964979 | 0.985057 | 0.812132 | 0        | 0        | 0        | 0        | 1.037632 |
| ENSMUSG00000038002 | 8_Cramp1l        | 1079.889057 | -0.01119 | 0.961258 | 0.985057 | 1066.33  | 1050.252 | 1135.654 | 948.5402 | 1176.594 | 1101.965 |
| ENSMUSG00000038145 | 16_Snrk          | 3518.840194 | -0.01367 | 0.950241 | 0.985057 | 3218.48  | 3499.407 | 3889.069 | 3366.524 | 3615.763 | 3523.798 |
| ENSMUSG00000038257 | 8_Glra3          | 0.357134821 | 0.17916  | 0.964379 | 0.985057 | 0        | 0        | 1.150612 | 0.992197 | 0        | 0        |
| ENSMUSG00000038393 | 14_Txnip         | 15154.02931 | -0.0143  | 0.949379 | 0.985057 | 13755.89 | 15034.14 | 16897.89 | 15263.96 | 14046.72 | 15925.58 |
| ENSMUSG00000038503 | 14_Mesdc2        | 1244.232853 | -0.01311 | 0.953291 | 0.985057 | 1294.539 | 1196.239 | 1258.77  | 1107.292 | 1289.728 | 1318.83  |
| ENSMUSG00000038624 | 11_Nepn          | 0.323912047 | 0.17916  | 0.964979 | 0.985057 | 0.812132 | 0        | 0        | 0        | 1.13134  | 0        |
| ENSMUSG00000038630 | 22.00058549      | 0.028174    | 0.957799 | 0.985057 | 22.7397  | 27.48001 | 14.95796 | 29.7659  | 21.49546 | 15.56448 | 0        |
| ENSMUSG00000039055 | 4_Eme1           | 78.1121463  | -0.02956 | 0.955926 | 0.985057 | 89.33454 | 64.40627 | 82.84407 | 28.77371 | 112.0027 | 91.31162 |
| ENSMUSG00000039330 | 4_Tsga10ip       | 0.308294041 | 0.17916  | 0.964979 | 0.985057 | 0.812132 | 0        | 0        | 0        | 0        | 1.037632 |
| ENSMUSG00000039509 | 7_Nup133         | 704.7066299 | 0.012089 | 0.964819 | 0.985057 | 644.8329 | 672.4014 | 788.1693 | 576.4663 | 830.4036 | 715.9661 |
| ENSMUSG00000039543 | 15_Cfap70        | 6.100373293 | -0.06454 | 0.947461 | 0.985057 | 5.684925 | 1.7175   | 11.50612 | 4.960984 | 3.39402  | 9.338689 |
| ENSMUSG00000039838 | 11_Slc45a1       | 0.323912047 | 0.17916  | 0.964979 | 0.985057 | 0.812132 | 0        | 0        | 0        | 1.13134  | 0        |
| ENSMUSG00000039840 | 7_Epg5           | 895.0464693 | -0.01575 | 0.946067 | 0.985057 | 879.5391 | 863.044  | 957.3093 | 783.8355 | 953.7197 | 932.8312 |
| ENSMUSG00000040314 | 1_Ctsg           | 0.364707362 | 0.17916  | 0.964127 | 0.985057 | 0        | 0        | 1.150612 | 0        | 0        | 1.037632 |
| ENSMUSG00000040345 | 9_Arhgap9        | 48.25332216 | 0.043372 | 0.944872 | 0.985057 | 68.2191  | 39.50251 | 34.51836 | 16.86735 | 83.71917 | 46.69344 |
| ENSMUSG00000040583 | 8_Cyp2b13        | 0.300721499 | 0.17916  | 0.964979 | 0.985057 | 0.812132 | 0        | 0        | 0.992197 | 0        | 0        |
| ENSMUSG00000040724 | 5_Kcna2          | 205.6649133 | -0.02842 | 0.955571 | 0.985057 | 203.8452 | 283.3876 | 135.7722 | 336.3547 | 108.6086 | 166.0211 |
| ENSMUSG00000041062 | 6_Msln1          | 0.308491173 | 0.17916  | 0.964979 | 0.985057 | 0        | 0.85875  | 0        | 0.992197 | 0        | 0        |
| ENSMUSG00000041453 | 12_Rpl21         | 10303.94248 | 0.012796 | 0.958739 | 0.985057 | 10639.74 | 9932.305 | 10202.48 | 8431.689 | 11176.51 | 11440.93 |
| ENSMUSG00000041468 | 7_Gpr12          | 0.300721499 | 0.17916  | 0.964979 | 0.985057 | 0.812132 | 0        | 0        | 0.992197 | 0        | 0        |
| ENSMUSG00000041538 | 15_H2-Ob         | 6.978350726 | 0.055339 | 0.949018 | 0.985057 | 9.745586 | 6.011252 | 4.602448 | 5.953181 | 12.44474 | 3.112896 |
| ENSMUSG00000041681 | 2_Iapp           | 0.958577818 | 0.12383  | 0.960978 | 0.985057 | 1.624264 | 0        | 1.150612 | 2.97659  | 0        | 0        |
| ENSMUSG00000041754 | 5_Trem3          | 4.811912589 | 0.070215 | 0.955565 | 0.985057 | 10.55772 | 0        | 3.451836 | 4.960984 | 6.788041 | 3.112896 |
| ENSMUSG00000041926 | 15_Rnpep         | 4107.890149 | 0.06696  | 0.962219 | 0.985057 | 3626.17  | 3787.947 | 4838.324 | 2698.775 | 5455.322 | 4240.802 |
| ENSMUSG00000041945 | 12_Mfsd9         | 117.7184427 | 0.019316 | 0.949726 | 0.985057 | 112.0742 | 105.6263 | 133.471  | 136.9232 | 116.528  | 101.6879 |
| ENSMUSG00000042118 | 7_Bhmt2          | 6.228821173 | -0.07552 | 0.94887  | 0.985057 | 5.684925 | 1.16375  | 2.301224 | 9.921968 | 0        | 8.301057 |
| ENSMUSG00000042331 | 13_Specc1        | 2853.435056 | 0.016112 | 0.94671  | 0.985057 | 2731.201 | 2655.256 | 3126.213 | 2594.595 | 3285.412 | 2727.935 |
| ENSMUSG00000042345 | 14_Ubash3a       | 2.047710106 | 0.091953 | 0.950701 | 0.985057 | 3.248529 | 2.576251 | 0        | 0.992197 | 3.39402  | 2.075264 |
| ENSMUSG00000042406 | 7_Atf4           | 4139.705273 | 0.015014 | 0.95276  | 0.985057 | 3918.538 | 3778.501 | 4657.678 | 3659.222 | 4826.297 | 3997.996 |
| ENSMUSG00000042414 | 7_Prdm14         | 0.323912047 | 0.17916  | 0.964979 | 0.985057 | 0.812132 | 0        | 0        | 0        | 1.13134  | 0        |
| ENSMUSG00000042448 | 5_Hoxd1          | 0.357134821 | 0.17916  | 0.964379 | 0.985057 | 0        | 0        | 1.150612 | 0.992197 | 0        | 0        |
| ENSMUSG00000043219 | 9_Hoxa6          | 0.323912047 | 0.17916  | 0.964979 | 0.985057 | 0.812132 | 0        | 0        | 0        | 1.13134  | 0        |
| ENSMUSG00000043333 | 12_Rhbd12        | 309.5367217 | 0.013374 | 0.958495 | 0.985057 | 296.4282 | 298.8451 | 329.0751 | 268.8853 | 349.5841 | 314.4025 |
| ENSMUSG00000043644 | 4_O61009L18Rik   | 12.37210058 | 0.044365 | 0.950021 | 0.985057 | 17.05478 | 14.59875 | 4.602448 | 8.929771 | 12.44474 | 16.60211 |
| ENSMUSG00000043727 | 5_F830045P16Rik  | 0.300721499 | 0.17916  | 0.964979 | 0.985057 | 0.812132 | 0        | 0        | 0.992197 | 0        | 0        |
| ENSMUSG00000044222 | 3_Defb13         | 0.308294041 | 0.17916  | 0.964979 | 0.985057 | 0.812132 | 0        | 0        | 0        | 0        | 1.037632 |
| ENSMUSG00000044378 | 12_Slc15a5       | 0.308491173 | 0.17916  | 0.964979 | 0.985057 | 0        | 0.85875  | 0        | 0.992197 | 0        | 0        |
| ENSMUSG00000044505 | 5_Lingo4         | 3.871452277 | -0.04772 | 0.96224  | 0.985057 | 4.060661 | 4.293751 | 3.451836 | 5.953181 | 3.39402  | 2.075264 |
| ENSMUSG00000044576 | 6_Gareml         | 0.696389083 | 0.13903  | 0.954337 | 0.985057 | 0        | 0.85875  | 1.150612 | 0        | 1.13134  | 1.037632 |
| ENSMUSG00000044707 | 7_Ccnj1          | 197.4113232 | -0.015   | 0.961208 | 0.985057 | 173.7963 | 180.3375 | 241.6285 | 164.7047 | 195.7218 | 228.2791 |
| ENSMUSG00000044719 | 4_E230025N22Rik  | 3.103031866 | -0.06082 | 0.960299 | 0.985057 | 4.872793 | 3.435001 | 1.150612 | 5.953181 | 1.13134  | 2.075264 |
| ENSMUSG00000044854 | 7_170056E22Rik   | 5.452046641 | 0.042231 | 0.961091 | 0.985057 | 4.872793 | 7.728752 | 3.451836 | 6.945378 | 4.52536  | 5.18816  |
| ENSMUSG00000044864 | 16_Ankrd50       | 2519.187281 | 0.019007 | 0.945398 | 0.985057 | 2277.219 | 2325.496 | 2905.296 | 2088.574 | 3024.072 | 2494.467 |
| ENSMUSG00000044903 | 14_Psg22         | 0.300721499 | 0.17916  | 0.964979 | 0.985057 | 0.812132 | 0        | 0        | 0.992197 | 0        | 0        |
| ENSMUSG00000045091 | 4_Aqp12          | 0.308294041 | 0.17916  | 0.964979 | 0.985057 | 0.812132 | 0        | 0        | 0        | 0        | 1.037632 |
| ENSMUSG00000045232 | 4_Rln3           | 0.323912047 | 0.17916  | 0.964979 | 0.985057 | 0.812132 | 0        | 0        | 0        | 1.13134  | 0        |
| ENSMUSG00000045275 | 15_Lca5f1        | 29.37957023 | 0.025468 | 0.959669 | 0.985057 | 28.42463 | 29.19751 | 29.91591 | 45.64105 | 19.23278 | 23.86554 |
| ENSMUSG00000045930 | 2_Clec14a        | 195.9477329 | 0.027088 | 0.946764 | 0.985057 | 211.1544 | 187.2075 | 184.0979 | 305.5966 | 140.2862 | 147.3438 |
| ENSMUSG00000046005 | 3_D830044D21Rik  | 0.357134821 | 0.17916  | 0.964379 | 0.985057 | 0        | 0        | 1.150612 | 0.992197 | 0        | 0        |
| ENSMUSG00000046561 | 9_Arsj           | 50.92700452 | -0.02645 | 0.959751 | 0.985057 | 53.60072 | 73.85252 | 26.46408 | 72.43037 | 41.85958 | 37.35475 |
| ENSMUSG00000047021 | 14_Ccdc108       | 0.300721499 | 0.17916  | 0.964979 | 0.985057 | 0.812132 | 0        | 0        | 0.992197 | 0        | 0        |
| ENSMUSG00000047786 | 12_Lix1          | 44.00024714 | 0.027066 | 0.959046 | 0.985057 | 34.92168 | 66.98252 | 28.7653  | 60.52401 | 27.15216 | 45.65581 |
| ENSMUSG00000048480 | 5_Cxcr1          | 0.331681721 | 0.17916  | 0.964979 | 0.985057 | 0        | 0.85875  | 0        | 0        | 1.13134  | 0        |
| ENSMUSG00000048502 | 14_Duxbl1        | 16.73278686 | 0.216649 | 0.952855 | 0.985057 | 0        | 32.63251 | 13.80735 | 0        | 0        | 53.95687 |
| ENSMUSG00000049130 | 5_Csar1          | 39.50930097 | 0.028741 | 0.962338 | 0.985057 | 58.47352 | 27.48001 | 31.06653 | 22.82053 | 71.27443 | 25.9408  |
| ENSMUSG00000049327 | 17_Setd8         | 3742.680651 | -0.01389 | 0.950163 | 0.985057 | 3514.096 | 3559.52  | 4208.939 | 3726.691 | 3880.497 | 3566.341 |
| ENSMUSG00000049548 | 8_Krt82          | 0.380325369 | 0.17916  | 0.963621 | 0.985057 | 0        | 0        | 1.150612 | 0        | 1.13134  | 0        |
| ENSMUSG00000049555 | 10_Tmie          | 302.9655983 | -0.02192 | 0.952679 | 0.985057 | 276.1249 | 311.7263 | 327.9245 | 180.5798 | 341.6647 | 379.7733 |
| ENSMUSG00000050270 | 12_Tmem220       | 63.16940899 | -0.02003 | 0.956368 | 0.985057 | 66.59484 | 67.84127 | 56.37999 | 75.40696 | 46.38494 | 66.04845 |
| ENSMUSG00000050304 | 3_Slc25a2        | 2.803712682 | 0.087995 | 0.946241 | 0.985057 | 0.812132 | 1.7175   | 5.753061 | 2.97659  | 4.52536  | 1.037632 |
| ENSMUSG00000050423 | 10_Ppp1r3g       | 1.766934585 | -0.11684 | 0.948133 | 0.985057 | 3.248529 | 0        | 2.301224 | 2.97659  | 0        | 2.075264 |
| ENSMUSG00000050440 | 8_Hamp           | 0.331681721 | 0.17916  | 0.964979 | 0.985057 | 0        | 0.85875  | 0        | 0        | 1.13134  | 0        |
| ENSMUSG00000050553 | 3_Gk2            | 0.316063715 | 0.17916  | 0.964979 | 0.985057 | 0        | 0.85875  | 0        | 0        | 0        | 1.037632 |
| ENSMUSG00000050963 | 6_Kcns2          | 0.331681721 | 0.17916  | 0.964979 | 0.985057 | 0        | 0.85875  | 0        | 0        | 1.13134  | 0        |
| ENSMUSG00000051041 | 7_Olfml1         | 226.5181779 | -0.01751 | 0.958139 | 0.985057 | 228.2091 | 243.8851 | 211.7126 | 288.7293 | 157.2563 | 229.3167 |
| ENSMUSG00000051599 | 4_Pcdhb2         | 8.296859691 | 0.045749 | 0.962302 | 0.985057 | 6.497057 | 11.16375 | 6.903673 | 17.85954 | 1.13134  | 6.225792 |
| ENSMUSG00000052479 | 5_A330008L17Rik  | 0.331681721 | 0.17916  | 0.964979 | 0.985057 | 0        | 0.85875  | 0        | 0        | 1.13134  | 0        |
| ENSMUSG00000052852 | 7_Reep1          | 142.5435993 | -0.02849 | 0.954169 | 0.985057 | 161.6143 | 187.2075 | 82.84407 | 220.2677 | 87.11319 | 116.2148 |
| ENSMUSG00000053185 | 2_Gm9898         | 0.357134821 | 0.17916  | 0.964379 | 0.985057 | 0        | 0        | 1.150612 | 0.992197 | 0        | 0        |
| ENSMUSG00000053395 | 15_Cacng8        | 0.300721499 | 0.17916  | 0.964979 | 0.985057 | 0.812132 | 0        | 0        | 0.992197 | 0        | 0        |
| ENSMUSG00000053550 | 13_Shisa7        | 4.08119757  | 0.072578 | 0.959709 | 0.985057 | 8.121322 | 2.576251 | 1.150612 | 0        | 2.26268  | 10.37632 |
| ENSMUSG00000053684 | 8_BC048403       | 147.1387314 | 0.012829 | 0.96222  | 0.985057 | 137.2503 | 157.1513 | 144.9771 | 133.9466 | 153.2623 | 155.6448 |
| ENSMUSG00000053769 | 5_Lysmd1         | 202.7932271 | 0.020823 | 0.96121  | 0.985057 | 136.4382 | 176.9025 | 291.1049 | 134.9388 | 225.668  | 251.107  |
| ENSMUSG00000053783 | 5_1700116K19Rik  | 0.331681721 | 0.17916  | 0.964979 | 0.985057 | 0        | 0.85875  | 0        | 0        | 0        | 1.13134  |
| ENSMUSG00000053830 | 3_Gm9923         | 78.80423232 | -0.04181 | 0.94694  | 0.985057 | 64.97057 | 70.41752 | 104.7057 | 140.8919 | 69.01175 | 22.82791 |
| ENSMUSG00000054423 | 13_Cadps         | 36.33287718 | -0.04043 | 0.948489 | 0.985057 | 34.10955 | 60.11252 | 16.10857 | 56.55522 | 28.2835  | 22.82791 |
| ENSMUSG00000054885 | 11_4930578G10Rik | 0.98926225  | 0.125862 | 0.953401 | 0.985057 | 0        | 1.717    |          |          |          |          |

|                    |                 |             |          |          |          |          |          |          |          |          |          |
|--------------------|-----------------|-------------|----------|----------|----------|----------|----------|----------|----------|----------|----------|
| ENSMUSG00000067341 | 5_H2-Eb2        | 0.300721499 | 0.17916  | 0.964979 | 0.985057 | 0.812132 | 0        | 0        | 0.992197 | 0        | 0        |
| ENSMUSG00000067545 | 2_Olfir1419     | 0.331681721 | 0.17916  | 0.964979 | 0.985057 | 0        | 0.85875  | 0        | 0        | 1.13134  | 0        |
| 1146.688927        | 4_Col8a1        | -0.02199    | 0.962254 | 0.985057 | 1303.472 | 1307.877 | 854.9048 | 1857.392 | 614.3177 | 942.1699 | 0        |
| ENSMUSG00000068407 | 2_Rnase12       | 0.323912047 | 0.17916  | 0.964979 | 0.985057 | 0.812132 | 0        | 0        | 0        | 1.13134  | 0        |
| ENSMUSG00000068457 | 14_Ulyt         | 0.308294041 | 0.17916  | 0.964979 | 0.985057 | 0.812132 | 0        | 0        | 0        | 0        | 1.037632 |
| ENSMUSG00000069378 | 13_Prdm6        | 26.03592195 | 0.038103 | 0.946402 | 0.985057 | 29.23676 | 24.90376 | 23.01224 | 38.69568 | 11.3134  | 29.0537  |
| ENSMUSG00000069707 | 1_Taar4         | 0.300721499 | 0.17916  | 0.964979 | 0.985057 | 0.812132 | 0        | 0        | 0.992197 | 0        | 0        |
| ENSMUSG00000069713 | 2_4933406P04Rik | 10.2701236  | 0.044581 | 0.949512 | 0.985057 | 7.30919  | 9.446252 | 13.80735 | 15.87515 | 7.919381 | 7.263424 |
| ENSMUSG00000069721 | 2_Krtap3-2      | 0.331681721 | 0.17916  | 0.964979 | 0.985057 | 0        | 0.85875  | 0        | 0        | 1.13134  | 0        |
| ENSMUSG00000070311 | 2_Olfrr894      | 0.364707362 | 0.17916  | 0.964127 | 0.985057 | 0        | 0        | 1.150612 | 0        | 0        | 1.037632 |
| ENSMUSG00000070691 | 10_Runx3        | 50.5741787  | -0.03225 | 0.95862  | 0.985057 | 73.0919  | 31.77376 | 48.32571 | 17.85954 | 82.58783 | 49.80634 |
| ENSMUSG00000070979 | 5_Actl7a        | 0.308294041 | 0.17916  | 0.964979 | 0.985057 | 0.812132 | 0        | 0        | 0        | 0        | 1.037632 |
| ENSMUSG00000071138 | 4_Tex24         | 0.364707362 | 0.17916  | 0.964127 | 0.985057 | 0        | 0        | 1.150612 | 0        | 0        | 1.037632 |
| ENSMUSG00000071229 | 3_Timm8a2       | 0.364707362 | 0.17916  | 0.964127 | 0.985057 | 0        | 0        | 1.150612 | 0        | 0        | 1.037632 |
| ENSMUSG00000071573 | 13_Rnls         | 90.22195781 | -0.0232  | 0.946686 | 0.985057 | 73.90403 | 108.2025 | 90.89836 | 109.1416 | 80.32515 | 78.86004 |
| ENSMUSG00000071771 | 4_Rhox4b        | 62.06118379 | 0.019573 | 0.952523 | 0.985057 | 67.40697 | 57.53626 | 59.83183 | 57.54742 | 66.74907 | 63.29556 |
| ENSMUSG00000071856 | 10_Mcc          | 416.0637763 | 0.016419 | 0.954761 | 0.985057 | 388.1992 | 404.4714 | 448.7387 | 511.9736 | 414.0705 | 328.9294 |
| ENSMUSG00000071860 | 1_2900055J20Rik | 0.364707362 | 0.17916  | 0.964127 | 0.985057 | 0        | 0        | 1.150612 | 0        | 0        | 1.037632 |
| ENSMUSG00000072769 | 6_Gm10419       | 12.39756555 | -0.04907 | 0.952286 | 0.985057 | 15.43051 | 15.4575  | 6.903673 | 24.80492 | 4.52536  | 7.263424 |
| ENSMUSG00000072945 | 3_538248491     | 0.052521    | 0.962724 | 0.985057 | 3.248529 | 2.576251 | 4.602448 | 2.97659  | 6.788041 | 1.037632 | 0        |
| ENSMUSG00000074030 | 2_Excoc8        | 541.8082194 | -0.01773 | 0.947955 | 0.985057 | 530.3223 | 515.2501 | 590.264  | 657.8265 | 481.9509 | 475.2355 |
| ENSMUSG00000074228 | 2_Gm10845       | 0.357134821 | 0.17916  | 0.964379 | 0.985057 | 0        | 0        | 1.150612 | 0.992197 | 0        | 0        |
| ENSMUSG00000074268 | 4_Amy2a5        | 0.331681721 | 0.17916  | 0.964979 | 0.985057 | 0        | 0.85875  | 0        | 0        | 1.13134  | 0        |
| ENSMUSG00000074635 | 2_3110070M22Rik | 13.15043474 | 0.029435 | 0.962547 | 0.985057 | 17.86691 | 12.88125 | 8.054285 | 9.921968 | 13.57608 | 16.60211 |
| ENSMUSG00000074678 | 1_Derfb25       | 0.300721499 | 0.17916  | 0.964979 | 0.985057 | 0.812132 | 0        | 0        | 0.992197 | 0        | 0        |
| ENSMUSG00000074771 | 10_Ankef1       | 2.325438189 | 0.083379 | 0.953709 | 0.985057 | 3.248529 | 3.435001 | 0        | 3.968787 | 2.26268  | 1.037632 |
| ENSMUSG00000075025 | 10_Gm10804      | 2.011431668 | 0.09765  | 0.957438 | 0.985057 | 2.436397 | 0        | 3.451836 | 0.992197 | 0        | 5.18816  |
| ENSMUSG00000075277 | 4_Haglr         | 0.364707362 | 0.17916  | 0.964127 | 0.985057 | 0        | 0        | 1.150612 | 0        | 0        | 1.037632 |
| ENSMUSG00000075316 | 11_Scn9a        | 0.958577818 | 0.12383  | 0.960978 | 0.985057 | 1.624264 | 0        | 1.150612 | 2.97659  | 0        | 0        |
| ENSMUSG00000075588 | 6_Hoxb2         | 0.323912047 | 0.17916  | 0.964979 | 0.985057 | 0.812132 | 0        | 0        | 0        | 1.13134  | 0        |
| ENSMUSG00000076434 | 9_Wfdc3         | 7.244019026 | -0.04899 | 0.954025 | 0.985057 | 10.55772 | 3.435001 | 8.054285 | 5.953181 | 11.3134  | 4.150528 |
| ENSMUSG00000078117 | 2_Gm16485       | 1.72698923  | 0.080693 | 0.961005 | 0.985057 | 0.812132 | 0.85875  | 3.451836 | 2.97659  | 2.26268  | 0        |
| ENSMUSG00000078179 | 1_Rnf148        | 0.380325369 | 0.179161 | 0.963621 | 0.985057 | 0        | 0        | 1.150612 | 0        | 0        | 1.037632 |
| ENSMUSG00000078202 | 3_Nrarp         | 1102.831779 | 0.014515 | 0.960653 | 0.985057 | 1035.469 | 851.0215 | 1406.048 | 1150.948 | 1123.421 | 1050.084 |
| ENSMUSG00000078252 | 1_Krtap17-1     | 0.380325369 | 0.179161 | 0.963621 | 0.985057 | 0        | 0        | 1.150612 | 0        | 0        | 1.037632 |
| ENSMUSG00000078554 | 2_Fam229a       | 0.308294041 | 0.17916  | 0.964979 | 0.985057 | 0.812132 | 0        | 0        | 0        | 0        | 1.037632 |
| ENSMUSG00000078780 | 7_Gm5150        | 23.44531149 | -0.05209 | 0.946744 | 0.985057 | 42.23087 | 8.587502 | 20.71102 | 34.72689 | 27.15216 | 7.263424 |
| ENSMUSG00000078808 | 4_Vmn1f58       | 0.316063715 | 0.17916  | 0.964979 | 0.985057 | 0        | 0.85875  | 0        | 0        | 0        | 1.037632 |
| ENSMUSG00000078926 | 8_Cdc20b        | 0.380325369 | 0.179161 | 0.963621 | 0.985057 | 0        | 0        | 1.150612 | 0        | 0        | 1.037632 |
| ENSMUSG00000079012 | 11_Serpina3m    | 193.290864  | -0.04631 | 0.953912 | 0.985057 | 276.9371 | 127.9538 | 184.0979 | 20.83613 | 388.0497 | 161.8706 |
| ENSMUSG00000079013 | 2_Serpina3j     | 0.308294041 | 0.17916  | 0.964979 | 0.985057 | 0.812132 | 0        | 0        | 0        | 0        | 1.037632 |
| ENSMUSG00000079017 | 3_lfi2712a      | 8596.968734 | -0.03221 | 0.945982 | 0.985057 | 7641.352 | 6292.063 | 12144.71 | 4066.023 | 11840.61 | 9597.059 |
| ENSMUSG00000079164 | 8_Tlr5          | 566.4390282 | -0.01665 | 0.956999 | 0.985057 | 564.4319 | 467.1601 | 677.7105 | 476.2545 | 702.5622 | 510.515  |
| ENSMUSG00000079247 | 2_Gm13691       | 0.357134821 | 0.17916  | 0.964379 | 0.985057 | 0        | 0        | 1.150612 | 0.992197 | 0        | 0        |
| ENSMUSG00000079550 | 9_Mpp4          | 46.71027189 | 0.042636 | 0.94861  | 0.985057 | 59.28565 | 60.11252 | 18.40979 | 77.39135 | 46.38494 | 18.67738 |
| ENSMUSG00000079606 | 1_Gm595         | 0.308491173 | 0.17916  | 0.964979 | 0.985057 | 0        | 0.85875  | 0        | 0.992197 | 0        | 0        |
| ENSMUSG00000079620 | 13_Muc4         | 89950.22136 | -0.01548 | 0.960665 | 0.985057 | 88120.4  | 86220.24 | 96957.48 | 62122.43 | 113404.4 | 92876.37 |
| ENSMUSG00000079644 | 1_Gm1110        | 0.364707362 | 0.17916  | 0.964127 | 0.985057 | 0        | 0        | 1.150612 | 0        | 0        | 1.037632 |
| ENSMUSG00000084897 | 1_Gm14226       | 1.813512813 | -0.07714 | 0.956429 | 0.985057 | 2.436397 | 0.85875  | 2.301224 | 1.984394 | 2.26268  | 1.037632 |
| ENSMUSG00000085020 | 1_2310081O03Rik | 0.300721499 | 0.17916  | 0.964979 | 0.985057 | 0.812132 | 0        | 0        | 0.992197 | 0        | 0        |
| ENSMUSG00000085035 | 1_Gm12031       | 2.193759524 | -0.08335 | 0.949237 | 0.985057 | 0.812132 | 2.576251 | 3.451836 | 1.984394 | 2.26268  | 2.075264 |
| ENSMUSG00000085126 | 1_Gm12589       | 0.331681721 | 0.17916  | 0.964979 | 0.985057 | 0        | 0.85875  | 0        | 0        | 0        | 1.13134  |
| ENSMUSG00000085222 | 1_Gm13974       | 0.357134821 | 0.17916  | 0.964379 | 0.985057 | 0        | 0        | 1.150612 | 0.992197 | 0        | 0        |
| ENSMUSG00000085261 | 1_Gm13814       | 1.789849342 | -0.10451 | 0.948576 | 0.985057 | 2.436397 | 0.85875  | 2.301224 | 0.992197 | 0        | 4.150528 |
| ENSMUSG00000085515 | 1_C630028M04Rik | 0.323912047 | 0.17916  | 0.964979 | 0.985057 | 0.812132 | 0        | 0        | 0        | 0        | 1.13134  |
| ENSMUSG00000085562 | 7_2610028E06Rik | 0.688816542 | 0.118289 | 0.961204 | 0.985057 | 0        | 0.85875  | 1.150612 | 0.992197 | 1.13134  | 0        |
| ENSMUSG00000085750 | 1_Gm14009       | 0.364707362 | 0.17916  | 0.964127 | 0.985057 | 0        | 0        | 1.150612 | 0        | 0        | 1.037632 |
| ENSMUSG00000085868 | 1_Gm13632       | 0.308294041 | 0.17916  | 0.964979 | 0.985057 | 0.812132 | 0        | 0        | 0        | 0        | 1.037632 |
| ENSMUSG00000086042 | 1_Gm12670       | 0.308294041 | 0.17916  | 0.964979 | 0.985057 | 0.812132 | 0        | 0        | 0        | 0        | 1.037632 |
| ENSMUSG00000086095 | 1_Gm15328       | 0.300721499 | 0.17916  | 0.964979 | 0.985057 | 0.812132 | 0        | 0        | 0.992197 | 0        | 0        |
| ENSMUSG00000086138 | 7_4930471C06Rik | 0.316063715 | 0.17916  | 0.964979 | 0.985057 | 0        | 0.85875  | 0        | 0        | 0        | 1.037632 |
| ENSMUSG00000086283 | 7_2810433D01Rik | 33.00634564 | -0.02208 | 0.963503 | 0.985057 | 34.10955 | 44.65501 | 20.71102 | 28.77371 | 28.2835  | 41.50528 |
| ENSMUSG00000086523 | 1_Gm13499       | 0.364707362 | 0.17916  | 0.964127 | 0.985057 | 0        | 0        | 1.150612 | 0        | 0        | 1.037632 |
| ENSMUSG00000086540 | 1_Scm1l         | 0.308491173 | 0.17916  | 0.964979 | 0.985057 | 0        | 0.85875  | 0        | 0.992197 | 0        | 0        |
| ENSMUSG00000086658 | 1_Gm14260       | 0.323912047 | 0.17916  | 0.964979 | 0.985057 | 0.812132 | 0        | 0        | 0        | 0        | 1.13134  |
| ENSMUSG00000086885 | 1_Gm13846       | 0.364707362 | 0.17916  | 0.964127 | 0.985057 | 0        | 0        | 1.150612 | 0        | 0        | 1.037632 |
| ENSMUSG00000086940 | 1_Gm12746       | 0.331681721 | 0.17916  | 0.964979 | 0.985057 | 0        | 0.85875  | 0        | 0        | 0        | 1.13134  |
| ENSMUSG00000087147 | 1_Gm14228       | 0.364707362 | 0.17916  | 0.964127 | 0.985057 | 0        | 0        | 1.150612 | 0        | 0        | 1.037632 |
| ENSMUSG00000087246 | 1_Gm13346       | 0.308491173 | 0.17916  | 0.964979 | 0.985057 | 0        | 0.85875  | 0        | 0.992197 | 0        | 0        |
| ENSMUSG00000087378 | 1_Gm12414       | 0.380325369 | 0.179161 | 0.963621 | 0.985057 | 0        | 0        | 1.150612 | 0        | 0        | 1.13134  |
| ENSMUSG00000087662 | 1_Gm11373       | 0.364707362 | 0.17916  | 0.964127 | 0.985057 | 0        | 0        | 1.150612 | 0        | 0        | 1.037632 |
| ENSMUSG00000089815 | 7_Gm5083        | 0.308491173 | 0.17916  | 0.964979 | 0.985057 | 0        | 0.85875  | 0        | 0.992197 | 0        | 0        |
| ENSMUSG00000090173 | 8_Fbxw10        | 38.18473656 | -0.02519 | 0.94711  | 0.985057 | 35.73382 | 42.93751 | 36.81959 | 37.70348 | 39.5969  | 36.31712 |
| ENSMUSG0000009017  | 1_Fam71a        | 0.323912047 | 0.17916  | 0.964979 | 0.985057 | 0.812132 | 0        | 0        | 0        | 0        | 1.13134  |
| ENSMUSG00000090911 | 1_Gm17334       | 57.11801708 | 0.021925 | 0.964578 | 0.985057 | 52.78859 | 61.83002 | 55.22938 | 26.78931 | 84.85051 | 61.22029 |
| ENSMUSG00000090915 | 1_Olfir102      | 0.308491173 | 0.17916  | 0.964979 | 0.985057 | 0        | 0.85875  | 0        | 0.992197 | 0        | 0        |
| ENSMUSG00000090915 | 2_Gm9844        | 1.877774467 | -0.11685 | 0.94775  | 0.985057 | 2.436397 | 0        | 3.451836 | 1.984394 | 3.39402  | 0        |
| ENSMUSG00000090938 | 1_Gm20732       | 4.013824997 | 0.053666 | 0.96215  | 0.985057 | 3.248529 | 5.152501 | 3.451836 | 8.929771 | 2.26268  | 1.037632 |
| ENSMUSG00000090945 | 2_Scgb2b7       | 0.308491173 | 0.17916  | 0.964979 | 0.985057 | 0        | 0.85875  | 0        | 0.992197 | 0        | 0        |
| ENSMUSG00000090945 | 1_Gm13698       | 0.357134821 | 0.17916  | 0.964379 | 0.985057 | 0        | 0        | 1.150612 | 0.992197 | 0        | 0        |
| ENSMUSG00000090945 | 1_Gm13693       | 0.357134821 | 0.17916  | 0.964379 | 0.985057 | 0        | 0        | 1.150612 | 0.992197 | 0        | 0        |
| ENSMUSG00000090945 | 1_Cyp2d34       | 0.331681721 | 0.17916  | 0.964979 | 0.985057 | 0        | 0.85875  | 0        | 0        | 0        | 1.13134  |
| ENSMUSG00000090945 | 1_Topaz1        | 0.364707362 | 0.17916  | 0.964127 | 0.985057 | 0        | 0        | 1.15     |          |          |          |

|                     |                 |             |          |          |          |          |          |          |          |          |          |
|---------------------|-----------------|-------------|----------|----------|----------|----------|----------|----------|----------|----------|----------|
| ENSMUSG00000097502  | 1_4930528D03Rik | 0.323912047 | 0.17916  | 0.964979 | 0.985057 | 0.812132 | 0        | 0        | 0        | 1.13134  | 0        |
| ENSMUSG00000097505  | 1_Gm26540       | 0.783179457 | -0.15659 | 0.961146 | 0.985057 | 2.436397 | 0        | 0        | 0        | 2.26268  | 0        |
| 1_Gm26660           | 6.688549675     | 0.049059    | 0.958142 | 0.985057 | 5.684925 | 9.446252 | 4.602448 | 13.89076 | 3.39402  | 3.112896 |          |
| ENSMUSG00000097602  | 1_4930519P11Rik | 0.364707362 | 0.17916  | 0.964127 | 0.985057 | 0        | 0        | 1.150612 | 0        | 0        | 1.037632 |
| 1_Gm26507           | 0.308491173     | 0.17916     | 0.964979 | 0.985057 | 0        | 0.85875  | 0        | 0.992197 | 0        | 0        |          |
| ENSMUSG00000097677  | 1_Gm26611       | 0.300721499 | 0.17916  | 0.964979 | 0.985057 | 0.812132 | 0        | 0        | 0.992197 | 0        | 0        |
| ENSMUSG00000097697  | 1_4833412C05Rik | 1.836821835 | -0.10575 | 0.946778 | 0.985057 | 0        | 3.435001 | 2.301224 | 1.984394 | 2.26268  | 1.037632 |
| ENSMUSG00000097723  | 1_Gm26848       | 169.7270487 | 0.018698 | 0.945278 | 0.985057 | 161.6143 | 186.3488 | 157.6339 | 160.7359 | 191.1965 | 160.833  |
| ENSMUSG00000097734  | 1_B930082K07Rik | 3.91942587  | -0.06265 | 0.951139 | 0.985057 | 4.872793 | 2.576251 | 4.602448 | 2.97659  | 2.26268  | 6.225792 |
| ENSMUSG00000097801  | 1_Gm26777       | 0.300721499 | 0.17916  | 0.964979 | 0.985057 | 0.812132 | 0        | 0        | 0.992197 | 0        | 0        |
| ENSMUSG00000097867  | 1_Lppos         | 56.00204808 | 0.020184 | 0.958025 | 0.985057 | 51.16433 | 62.68877 | 52.92816 | 44.64886 | 50.9103  | 73.67188 |
| ENSMUSG00000098061  | 1_Gm26945       | 0.357134821 | 0.17916  | 0.964379 | 0.985057 | 0        | 0        | 1.150612 | 0.992197 | 0        | 0        |
| ENSMUSG00000098773  | 1_Gm27179       | 0.380325369 | 0.179161 | 0.963621 | 0.985057 | 0        | 0        | 1.150612 | 0        | 1.13134  | 0        |
| ENSMUSG00000099349  | 6_170047G03Rik  | 0.323912047 | 0.17916  | 0.964979 | 0.985057 | 0.812132 | 0        | 0        | 0        | 1.13134  | 0        |
| ENSMUSG00000099608  | 1_4933411E06Rik | 0.316063715 | 0.17916  | 0.964979 | 0.985057 | 0        | 0.85875  | 0        | 0        | 0        | 1.037632 |
| ENSMUSG00000099630  | 1_1700096J18Rik | 0.364707362 | 0.17916  | 0.964127 | 0.985057 | 0        | 0        | 1.150612 | 0        | 0        | 1.037632 |
| ENSMUSG00000099950  | 1_9130227L01Rik | 0.308491173 | 0.17916  | 0.964979 | 0.985057 | 0        | 0.85875  | 0        | 0.992197 | 0        | 0        |
| ENSMUSG00000100175  | 6_170025M24Rik  | 0.323912047 | 0.17916  | 0.964979 | 0.985057 | 0.812132 | 0        | 0        | 0        | 1.13134  | 0        |
| ENSMUSG00000100546  | 1_Gm29483       | 0.357134821 | 0.17916  | 0.964379 | 0.985057 | 0        | 0        | 1.150612 | 0.992197 | 0        | 0        |
| ENSMUSG00000100625  | 6_1700016G22Rik | 0.323912047 | 0.17916  | 0.964979 | 0.985057 | 0.812132 | 0        | 0        | 0        | 1.13134  | 0        |
| ENSMUSG00000100798  | 1_Gm19589       | 0.308294041 | 0.17916  | 0.964979 | 0.985057 | 0.812132 | 0        | 0        | 0        | 0        | 1.037632 |
| ENSMUSG00000100987  | 1_Gm1627        | 0.357134821 | 0.17916  | 0.964379 | 0.985057 | 0        | 0        | 1.150612 | 0.992197 | 0        | 0        |
| ENSMUSG00000101356  | 1_Gm28876       | 0.316063715 | 0.17916  | 0.964979 | 0.985057 | 0        | 0.85875  | 0        | 0        | 0        | 1.037632 |
| ENSMUSG00000101517  | 6_4732465J04Rik | 1.369587619 | 0.107223 | 0.950842 | 0.985057 | 0        | 1.7175   | 2.301224 | 0.992197 | 1.13134  | 2.075264 |
| ENSMUSG00000101731  | 1_3830432H09Rik | 0.357134821 | 0.17916  | 0.964379 | 0.985057 | 0        | 0        | 1.150612 | 0.992197 | 0        | 0        |
| ENSMUSG00000102343  | 1_Gm37381       | 0.300721499 | 0.17916  | 0.964979 | 0.985057 | 0.812132 | 0        | 0        | 0        | 0.992197 | 0        |
| ENSMUSG00000103144  | 1_Pcdhga1       | 67.7162219  | -0.02636 | 0.961317 | 0.985057 | 58.47352 | 100.4738 | 46.02448 | 106.1651 | 33.9402  | 61.22029 |
| ENSMUSG00000103517  | 1_Gm37432       | 0.380325369 | 0.179161 | 0.963621 | 0.985057 | 0        | 0        | 1.150612 | 0        | 1.13134  | 0        |
| ENSMUSG00000103711  | 1_Tsdt1         | 26.98555294 | 0.027018 | 0.957019 | 0.985057 | 22.7397  | 30.91501 | 26.46408 | 15.87515 | 13.67752 | 34.24186 |
| ENSMUSG00000103827  | 1_Gm32950       | 0.323912047 | 0.17916  | 0.964979 | 0.985057 | 0.812132 | 0        | 0        | 0        | 1.13134  | 0        |
| ENSMUSG00000103912  | 1_Gm33819       | 0.308491173 | 0.17916  | 0.964979 | 0.985057 | 0        | 0.85875  | 0        | 0.992197 | 0        | 0        |
| ENSMUSG00000104701  | 1_Gm42555       | 0.300721499 | 0.17916  | 0.964979 | 0.985057 | 0.812132 | 0        | 0        | 0.992197 | 0        | 0        |
| ENSMUSG00000105006  | 1_Gm9484        | 7.952034786 | 0.036919 | 0.960708 | 0.985057 | 5.684925 | 12.0225  | 5.753061 | 7.937575 | 9.050721 | 7.263424 |
| ENSMUSG00000105570  | 1_Gm42682       | 0.300721499 | 0.17916  | 0.964979 | 0.985057 | 0.812132 | 0        | 0        | 0.992197 | 0        | 0        |
| ENSMUSG00000105734  | 1_4930558C23Rik | 1.62400668  | 0.109014 | 0.954024 | 0.985057 | 2.436397 | 0        | 2.301224 | 3.968787 | 0        | 1.037632 |
| ENSMUSG00000105912  | 1_Gm10440       | 0.308294041 | 0.17916  | 0.964979 | 0.985057 | 0.812132 | 0        | 0        | 0        | 0        | 1.037632 |
| ENSMUSG00000107044  | 1_Gm43086       | 0.316063715 | 0.17916  | 0.964979 | 0.985057 | 0        | 0.85875  | 0        | 0        | 0        | 1.037632 |
| ENSMUSG00000107244  | 1_Gm43699       | 0.357134821 | 0.17916  | 0.964379 | 0.985057 | 0        | 0        | 1.150612 | 0.992197 | 0        | 0        |
| ENSMUSG00000107895  | 1_RP23-47ZD18   | 0.316063715 | 0.17916  | 0.964979 | 0.985057 | 0        | 0.85875  | 0        | 0        | 0        | 1.037632 |
| ENSMUSG00000107961  | 1_RP23-20K24    | 0.688619409 | 0.164135 | 0.94618  | 0.985057 | 0.812132 | 0        | 1.150612 | 0        | 1.13134  | 1.037632 |
| ENSMUSG00000108713  | 1_RP23-223O9    | 1.068480082 | -0.12233 | 0.953425 | 0.985057 | 2.436397 | 0.85875  | 0        | 1.984394 | 1.13134  | 0        |
| ENSMUSG00000090202  | 1_4930503B20Rik | 0.714269641 | -0.14464 | 0.965212 | 0.985194 | 0        | 0        | 2.301224 | 1.984394 | 0        | 0        |
| ENSMUSG00000095979  | 8_Gm8246        | 0.714269641 | -0.14464 | 0.965212 | 0.985194 | 0        | 0        | 2.301224 | 1.984394 | 0        | 0        |
| ENSMUSG00000048484  | 4_Gm7461        | 2.209180398 | -0.05706 | 0.965264 | 0.985196 | 1.624264 | 1.7175   | 3.451836 | 0.992197 | 3.39402  | 2.075264 |
| ENSMUSG00000021258  | 9_Ccnk          | 673.6732216 | -0.01018 | 0.965487 | 0.98529  | 635.0874 | 636.3339 | 757.1028 | 653.8577 | 718.401  | 641.2566 |
| ENSMUSG00000049690  | 5_Nckap5        | 58.93469148 | -0.01557 | 0.965469 | 0.98529  | 64.15844 | 66.12377 | 47.1751  | 66.47719 | 58.82969 | 50.84397 |
| ENSMUSG00000062961  | 6_Ccdc177       | 4.40192004  | 0.04735  | 0.965504 | 0.98529  | 2.436397 | 6.011252 | 4.602448 | 8.929771 | 3.39402  | 1.037632 |
| ENSMUSG00000046637  | 2_Ttc34         | 1.715831253 | 0.080486 | 0.965663 | 0.985401 | 0.060661 | 0.85875  | 0        | 2.26268  | 3.112896 |          |
| ENSMUSG00000079015  | 2_Serpina1c     | 1.431003551 | 0.120015 | 0.966032 | 0.985728 | 0.060661 | 0        | 0        | 0        | 4.52536  | 0        |
| ENSMUSG00000052212  | 6_Cd177         | 10.8312244  | -0.03647 | 0.966106 | 0.985753 | 20.3033  | 7.728752 | 4.602448 | 3.968787 | 16.9701  | 11.41395 |
| ENSMUSG00000002007  | 5_SrpK3         | 12.56289153 | 0.032296 | 0.966313 | 0.985914 | 6.497057 | 21.46876 | 9.204897 | 5.953181 | 13.57608 | 18.67738 |
| ENSMUSG000000021102 | 3_Glrx5         | 378.2335807 | 0.011947 | 0.966515 | 0.985917 | 384.1385 | 346.9351 | 399.2624 | 473.2779 | 333.7453 | 332.0423 |
| ENSMUSG000000021694 | 18_Errc8        | 240.5542577 | 0.010441 | 0.966525 | 0.985917 | 229.0213 | 233.5801 | 256.5865 | 224.2365 | 260.2082 | 239.693  |
| ENSMUSG000000029608 | 10_Rph3a        | 11.6901577  | 0.028469 | 0.966458 | 0.985917 | 13.80625 | 13.74    | 6.903673 | 16.86735 | 11.3134  | 7.263424 |
| ENSMUSG000000041341 | 9_Atg2b         | 1280.045838 | 0.010757 | 0.966371 | 0.985917 | 1229.568 | 1271.809 | 1324.355 | 1042.799 | 1462.823 | 1348.921 |
| ENSMUSG000000073535 | 5_Gm5532        | 8.067349401 | 0.038276 | 0.966564 | 0.985917 | 13.80625 | 4.293751 | 5.753061 | 15.87515 | 4.52536  | 4.150528 |
| ENSMUSG000000086007 | 1_1700057H21Rik | 0.665428861 | 0.102223 | 0.966633 | 0.985937 | 0.812132 | 0        | 1.150612 | 0.992197 | 0        | 1.037632 |
| ENSMUSG000000017300 | 9_Tnnc2         | 318.8266155 | -0.02121 | 0.966898 | 0.986147 | 202.2209 | 488.6289 | 272.6951 | 286.7449 | 170.8324 | 491.8376 |
| ENSMUSG000000026875 | 14_Tra1f        | 113.3436877 | -0.02064 | 0.966987 | 0.986147 | 157.5536 | 83.29877 | 101.2539 | 68.46158 | 184.4084 | 85.0853  |
| ENSMUSG000000046679 | 16_C87346       | 357.2573011 | 0.009757 | 0.966952 | 0.986147 | 342.7198 | 335.7713 | 390.0575 | 358.1831 | 348.4528 | 368.3594 |
| ENSMUSG000000084823 | 2_Gm17216       | 1.710718395 | -0.06834 | 0.967438 | 0.986556 | 3.248529 | 0.85875  | 1.150612 | 3.968787 | 0        | 1.037632 |
| ENSMUSG000000024334 | 8_H2-Oa         | 3.126489978 | 0.04517  | 0.967521 | 0.986559 | 4.000661 | 1.7175   | 3.451836 | 1.984394 | 3.39402  | 4.150528 |
| ENSMUSG000000005124 | 9_Wisp1         | 287.3255905 | 0.017362 | 0.967977 | 0.986779 | 302.9253 | 316.8788 | 237.0261 | 456.4105 | 173.095  | 237.6177 |
| ENSMUSG000000030008 | 9_Pradc1        | 153.2163941 | -0.01403 | 0.967893 | 0.986779 | 149.4323 | 133.1063 | 179.4955 | 106.1651 | 167.4383 | 183.6609 |
| ENSMUSG000000037386 | 15_Rhm2         | 20.3167263  | 0.022932 | 0.967844 | 0.986779 | 28.42463 | 18.03375 | 13.80735 | 27.78151 | 20.36412 | 13.82921 |
| ENSMUSG000000038567 | 5_Cyp24a1       | 1793.80364  | 0.01207  | 0.968053 | 0.986779 | 1796.436 | 1881.522 | 1681.044 | 1957.604 | 1280.677 | 2165.538 |
| ENSMUSG000000045671 | 17_Spred2       | 931.0208847 | 0.009381 | 0.968004 | 0.986779 | 827.5627 | 918.004  | 1039.003 | 983.267  | 893.7587 | 924.5302 |
| ENSMUSG000000057092 | 12_Fxyd3        | 5991.823124 | 0.013059 | 0.967945 | 0.986779 | 5615.082 | 5325.969 | 6953.149 | 4238.665 | 7678.405 | 6139.669 |
| ENSMUSG000000092392 | 1_Gm20546       | 3.149137171 | -0.04545 | 0.967774 | 0.986779 | 4.060661 | 4.293751 | 1.150612 | 2.97659  | 2.26268  | 4.150528 |
| ENSMUSG000000025202 | 7_Scd3          | 29.24168607 | -0.01898 | 0.968118 | 0.986795 | 29.23676 | 33.49126 | 25.31347 | 18.85174 | 38.46556 | 30.09133 |
| ENSMUSG000000023216 | 13_Epb42        | 1.479765673 | -0.06707 | 0.968356 | 0.986986 | 1.624264 | 1.7175   | 1.150612 | 0.992197 | 0        | 3.39402  |
| ENSMUSG000000020483 | 14_Dynll2       | 4436.996157 | 0.009304 | 0.968478 | 0.98706  | 4384.702 | 4523.896 | 4359.669 | 5074.095 | 3825.061 | 4454.554 |
| ENSMUSG000000001027 | 7_Scn4a         | 299.4104648 | 0.015736 | 0.969097 | 0.987215 | 298.8646 | 279.0938 | 315.2677 | 157.7593 | 368.8169 | 376.6604 |
| ENSMUSG000000024910 | 4_Ctsw          | 27.23965316 | 0.02652  | 0.969114 | 0.987215 | 35.73382 | 16.31625 | 28.7653  | 9.921968 | 50.9103  | 21.79027 |
| ENSMUSG000000026479 | 13_Lamc2        | 3521.105203 | -0.01704 | 0.969256 | 0.987215 | 3183.558 | 3060.586 | 4381.531 | 2040.949 | 5652.175 | 2807.832 |
| ENSMUSG000000028957 | 12_Per3         | 3186.614012 | -0.00988 | 0.969314 | 0.987215 | 3189.243 | 3093.218 | 3810.211 | 2872.41  | 2783.097 | 3871.405 |
| ENSMUSG000000030200 | 13_Bcl2l14      | 53.42027398 | 0.015278 | 0.96931  | 0.987215 | 47.9158  | 39.50251 | 72.48856 | 53.57863 | 52.04164 | 54.9945  |
| ENSMUSG000000033214 | 9_Slitrlk5      | 14.15615882 | 0.028437 | 0.969443 | 0.987215 | 14.61838 | 13.74    | 13.80735 | 23.81272 | 13.3134  | 15.56448 |
| ENSMUSG000000034987 | 3_Hrh2          | 8.966373678 | 0.036706 | 0.968971 | 0.987215 | 13.80625 | 3.435001 | 9.204897 | 3.968787 | 19.23278 | 4.150528 |
| ENSMUSG000000037300 | 17_Ttc13        | 919.710543  | 0.008262 |          |          |          |          |          |          |          |          |

|                      |                  |              |          |          |          |          |          |          |          |          |          |
|----------------------|------------------|--------------|----------|----------|----------|----------|----------|----------|----------|----------|----------|
| ENSMUSG00000035183   | 14_Slc2d4a5      | 889.5225538  | 0.017949 | 0.971187 | 0.988002 | 831.6234 | 1228.872 | 591.4146 | 1425.787 | 448.0107 | 811.4283 |
| ENSMUSG00000022445   | 6_Cyp2d26        | 1.754758281  | 0.06447  | 0.971344 | 0.988058 | 1.624264 | 3.435001 | 0        | 0        | 3.39402  | 2.075624 |
| 267.8887964          | 14_Rangfr        | 0.010257     | 0.971399 | 0.988058 | 269.6279 | 234.4388 | 296.8579 | 217.2911 | 297.5424 | 291.5746 |          |
| ENSMUSG000000066537  | 4_Vmn2r57        | 3.015650095  | 0.048524 | 0.971357 | 0.988058 | 4.872793 | 1.7175   | 2.301224 | 2.97659  | 0        | 6.225792 |
| ENSMUSG000000086526  | 2_Gm12762        | 1.053523904  | 0.069119 | 0.971441 | 0.988058 | 0        | 0.85875  | 2.301224 | 0.992197 | 1.13134  | 1.037632 |
| ENSMUSG000000031165  | 6_Was            | 52.44912848  | -0.02388 | 0.971551 | 0.98812  | 87.71028 | 32.63251 | 37.9702  | 19.84394 | 95.03257 | 41.50528 |
| ENSMUSG000000035592  | 2_Krt33a         | 4.22771991   | -0.03607 | 0.971709 | 0.988179 | 5.684925 | 2.576251 | 4.602448 | 2.97659  | 2.26268  | 7.263424 |
| ENSMUSG000000036568  | 6_Gltscr11       | 731.8137913  | 0.008055 | 0.971676 | 0.988179 | 680.5668 | 742.8189 | 766.3077 | 776.8901 | 672.016  | 752.2832 |
| ENSMUSG000000022094  | 15_Slc39a14      | 373.8084313  | -0.00968 | 0.971917 | 0.988341 | 421.4966 | 344.3588 | 358.991  | 357.1909 | 441.2226 | 319.5907 |
| ENSMUSG000000023755  | 9_Rheb1          | 70.57668569  | 0.014433 | 0.972097 | 0.988373 | 75.52829 | 48.09001 | 87.44652 | 76.39915 | 50.9103  | 85.08583 |
| ENSMUSG000000039252  | 11_Lgi2          | 1262.137608  | -0.00958 | 0.972085 | 0.988373 | 1219.823 | 1358.543 | 1220.799 | 1523.022 | 1002.367 | 1248.271 |
| ENSMUSG000000042251  | 12_Pm20d1        | 656.5506852  | -0.00826 | 0.972034 | 0.988373 | 598.5414 | 698.1639 | 678.8611 | 658.8187 | 596.2162 | 708.7027 |
| ENSMUSG000000096965  | 7_330005D01Rik   | 2.150898789  | 0.057646 | 0.972177 | 0.988403 | 0.812132 | 4.293751 | 1.150612 | 0.992197 | 5.656701 | 0        |
| ENSMUSG000000019775  | 17_Rgs17         | 5.690769038  | 0.034127 | 0.972351 | 0.988425 | 5.684925 | 7.728752 | 3.451836 | 9.921968 | 1.13134  | 6.225792 |
| ENSMUSG000000024371  | 14_C2            | 1234.470258  | 0.011189 | 0.972397 | 0.988425 | 1103.688 | 1412.644 | 1172.474 | 850.3127 | 1424.357 | 1443.346 |
| ENSMUSG000000028451  | 12_1700022111Rik | 3.882492554  | 0.041434 | 0.972268 | 0.988425 | 1.624264 | 0.85875  | 9.204897 | 3.968787 | 4.52536  | 3.112896 |
| ENSMUSG000000031987  | 5_Egln1          | 1451.581893  | 0.007764 | 0.972377 | 0.988425 | 1376.564 | 1481.344 | 1485.44  | 1558.741 | 1297.647 | 1509.755 |
| ENSMUSG000000027194  | 16_Tct17         | 1047.854664  | -0.00724 | 0.972577 | 0.988558 | 1029.784 | 1011.608 | 1110.341 | 1061.651 | 1046.49  | 1027.256 |
| ENSMUSG000000022893  | 14_Adamts1       | 1220.924497  | -0.01055 | 0.972727 | 0.98866  | 1329.46  | 1264.939 | 1081.575 | 1537.905 | 1216.191 | 895.4765 |
| ENSMUSG000000028085  | 12_Gatb          | 296.1889542  | -0.00982 | 0.972811 | 0.988694 | 295.6161 | 302.2801 | 293.4061 | 237.135  | 365.4229 | 283.2736 |
| ENSMUSG000000021767  | 16_Katfb         | 1319.893119  | 0.007464 | 0.973018 | 0.988732 | 1308.345 | 1400.622 | 1240.36  | 1360.302 | 1216.191 | 1393.54  |
| ENSMUSG000000033396  | 13_Spg11         | 1231.274189  | -0.008   | 0.972907 | 0.988732 | 1150.791 | 1272.668 | 1280.631 | 1064.627 | 1302.172 | 1316.755 |
| ENSMUSG000000081984  | 3_Dnajb3         | 11.40321978  | 0.027023 | 0.972989 | 0.988732 | 12.18198 | 6.870002 | 14.95796 | 18.85174 | 12.44474 | 3.112896 |
| ENSMUSG000000097944  | 1_A130014A01Rik  | 43.97218234  | 0.015154 | 0.973046 | 0.988732 | 48.72793 | 52.38376 | 29.91591 | 57.54742 | 31.67752 | 43.58055 |
| ENSMUSG000000034783  | 7_Cd207          | 3.350353636  | -0.0436  | 0.973126 | 0.988762 | 0.812132 | 2.576251 | 6.903673 | 1.984394 | 6.788041 | 1.037632 |
| ENSMUSG000000026078  | 10_Pdc3          | 1169.922154  | -0.00815 | 0.973295 | 0.988884 | 1163.785 | 1105.212 | 1250.715 | 990.2124 | 1285.202 | 1224.406 |
| ENSMUSG000000031948  | 13_Kars          | 2377.408313  | 0.012022 | 0.973481 | 0.98898  | 2229.303 | 2158.898 | 2714.294 | 1483.334 | 1900.379 | 2488.242 |
| ENSMUSG000000056486  | 17_Chn1          | 166.01982    | -0.01343 | 0.973489 | 0.98898  | 177.0448 | 200.0888 | 123.1155 | 207.3691 | 100.6893 | 187.8114 |
| ENSMUSG0000000046101 | 16_Mcmodc2       | 2.461336907  | 0.043763 | 0.973558 | 0.989    | 4.060661 | 0.85875  | 2.301224 | 1.984394 | 4.52536  | 1.037632 |
| ENSMUSG000000022768  | 15_Ccdc116       | 57.99650085  | -0.01809 | 0.973711 | 0.989006 | 69.84337 | 60.11252 | 44.87387 | 22.82053 | 61.09237 | 89.23636 |
| ENSMUSG000000034235  | 16_Usp54         | 2793.083771  | -0.00703 | 0.973695 | 0.989006 | 2839.214 | 2681.877 | 2879.982 | 2418.976 | 2932.434 | 3006.02  |
| ENSMUSG000000036602  | 13_Alc1          | 14.91145975  | 0.023935 | 0.973714 | 0.989006 | 18.67904 | 8.587502 | 17.25918 | 25.79712 | 5.656701 | 13.48922 |
| ENSMUSG0000000004359 | 16_Spic          | 5.134611226  | 0.037103 | 0.973843 | 0.989034 | 12.18198 | 1.7175   | 1.150612 | 3.968787 | 4.52536  | 7.263424 |
| ENSMUSG000000048070  | 4_Pirt           | 1.749251159  | -0.04617 | 0.97383  | 0.989034 | 2.436397 | 1.7175   | 1.150612 | 1.984394 | 1.13134  | 2.075624 |
| ENSMUSG0000000102748 | 11_Pcdhgb2       | 87.80619642  | 0.015335 | 0.97389  | 0.989034 | 95.8316  | 107.3438 | 58.68122 | 100.2119 | 47.51628 | 117.2524 |
| ENSMUSG000000036972  | 14_Zic4          | 128.5310934  | -0.01963 | 0.973957 | 0.989052 | 111.2621 | 218.1226 | 58.68122 | 210.3457 | 69.01175 | 103.7632 |
| ENSMUSG0000000105376 | 4_Gm42487        | 0.721842183  | -0.09019 | 0.974073 | 0.98912  | 0        | 0        | 2.301224 | 0.992197 | 0        | 1.037632 |
| ENSMUSG000000032009  | 7_Sesn3          | 679.0315701  | -0.00795 | 0.974165 | 0.989162 | 683.0032 | 753.1239 | 606.3726 | 736.21   | 607.5296 | 687.9501 |
| ENSMUSG000000024019  | 17_Cmtr1         | 3024.081484  | -0.01177 | 0.974512 | 0.989464 | 2886.318 | 2798.667 | 3424.222 | 1782.978 | 3924.619 | 3927.686 |
| ENSMUSG000000036863  | 11_Syde2         | 167.9873509  | -0.01192 | 0.974614 | 0.989469 | 181.9176 | 173.4675 | 150.7302 | 236.1428 | 113.134  | 152.5319 |
| ENSMUSG000000041984  | 2_Rptn           | 0.673198535  | 0.077103 | 0.974791 | 0.989469 | 0        | 0.85875  | 1.150612 | 0.992197 | 0        | 1.037632 |
| ENSMUSG000000059325  | 14_Hopx          | 8908.83055   | 0.007166 | 0.974815 | 0.989469 | 8499.775 | 8657.92  | 9502.905 | 10057.9  | 8187.508 | 8546.975 |
| ENSMUSG0000000061388 | 11_Csn1s2b       | 0.673198535  | 0.077103 | 0.974791 | 0.989469 | 0        | 0.85875  | 1.150612 | 0.992197 | 0        | 1.037632 |
| ENSMUSG000000091381  | 2_Vmn2r83        | 0.673198535  | 0.077103 | 0.974791 | 0.989469 | 0        | 0.85875  | 1.150612 | 0.992197 | 0        | 1.037632 |
| ENSMUSG000000097463  | 1_4930448E22Rik  | 0.673198535  | 0.077103 | 0.974791 | 0.989469 | 0        | 0.85875  | 1.150612 | 0.992197 | 0        | 1.037632 |
| ENSMUSG000000029134  | 14_Plb1          | 18.3971239   | 0.020191 | 0.974906 | 0.989511 | 27.61249 | 15.4575  | 11.50612 | 10.91416 | 15.83876 | 29.0537  |
| ENSMUSG000000061100  | 3_Retnla         | 94.44181297  | -0.01652 | 0.975102 | 0.989609 | 125.0684 | 105.6263 | 54.07877 | 132.9544 | 44.12226 | 104.8008 |
| ENSMUSG0000000085833 | 2_Gm13003        | 13.2424226   | -0.01951 | 0.975082 | 0.989609 | 12.99411 | 12.0225  | 14.95796 | 6.945378 | 16.9701  | 15.56448 |
| ENSMUSG000000025092  | 6_Hspa12a        | 101.1424483  | -0.01399 | 0.975171 | 0.989629 | 100.7044 | 123.66   | 80.54285 | 151.8061 | 58.82969 | 91.31162 |
| ENSMUSG000000020218  | 11_Wif1          | 187.0397129  | -0.01677 | 0.975327 | 0.989737 | 192.4753 | 249.8963 | 121.9649 | 315.5186 | 82.58783 | 159.7953 |
| ENSMUSG000000032015  | 15_Pou2f3        | 146.035917   | -0.00906 | 0.975438 | 0.989799 | 124.2562 | 151.14   | 164.5375 | 150.8139 | 126.7101 | 158.7577 |
| ENSMUSG000000087358  | 8_4930453H23Rik  | 0.680771077  | 0.085469 | 0.975641 | 0.989904 | 0        | 0.85875  | 1.150612 | 0        | 0        | 2.075624 |
| ENSMUSG000000099446  | 1_2310005E17Rik  | 0.680771077  | 0.085469 | 0.975641 | 0.989904 | 0        | 0.85875  | 1.150612 | 0        | 0        | 2.075624 |
| ENSMUSG000000032278  | 11_Pagr5         | 4104.9898645 | -0.0071  | 0.975864 | 0.989978 | 3866.561 | 3885.845 | 4593.244 | 3653.269 | 4197.272 | 4433.802 |
| ENSMUSG000000038782  | 5_1700028J19Rik  | 6.067124488  | -0.02891 | 0.975785 | 0.989978 | 7.30919  | 8.587502 | 2.301224 | 1.984394 | 7.919381 | 8.301057 |
| ENSMUSG0000000104266 | 1_Gm37748        | 1.695376179  | -0.06894 | 0.975827 | 0.989978 | 4.060661 | 0        | 1.150612 | 4.960984 | 0        | 0        |
| ENSMUSG000000026435  | 15_Slc45a3       | 83.86558688  | 0.010554 | 0.976181 | 0.990025 | 76.34042 | 79.00502 | 95.50081 | 62.5084  | 87.11319 | 102.7256 |
| ENSMUSG000000029916  | 11_Agk           | 261.0334174  | -0.00736 | 0.976287 | 0.990307 | 254.1974 | 241.3088 | 289.9543 | 253.0102 | 257.9455 | 269.7843 |
| ENSMUSG000000021311  | 8_Mtr            | 378.1262147  | 0.006747 | 0.976571 | 0.990494 | 350.029  | 387.2096 | 394.66   | 386.9568 | 371.0796 | 378.7357 |
| ENSMUSG000000097494  | 7_4933406C10Rik  | 29.56390126  | -0.01355 | 0.976531 | 0.990494 | 32.48529 | 33.49126 | 23.01224 | 38.69568 | 23.75814 | 25.9408  |
| ENSMUSG0000000000028 | 14_Cdc45         | 271.5580788  | -0.01034 | 0.976888 | 0.990685 | 290.7433 | 244.7438 | 281.9    | 173.6344 | 352.9781 | 285.3488 |
| ENSMUSG000000021939  | 7_Ctbs           | 18228.8292   | -0.0083  | 0.976917 | 0.990685 | 18955.17 | 16914.8  | 18973.59 | 13836.18 | 22579.29 | 18113.94 |
| ENSMUSG000000036872  | 16_Abcc12        | 17.52432255  | -0.01546 | 0.976958 | 0.990685 | 18.67904 | 18.03375 | 16.10857 | 14.88295 | 13.57608 | 23.86554 |
| ENSMUSG000000045689  | 3_Pcdhnb4        | 11.182731    | -0.01892 | 0.976932 | 0.990685 | 13.80625 | 12.88125 | 6.903673 | 13.89076 | 11.3134  | 8.301057 |
| ENSMUSG000000021496  | 12_Pcbd2         | 271.0682181  | 0.008161 | 0.977154 | 0.990733 | 279.3735 | 274.8001 | 256.5865 | 228.2053 | 252.2888 | 335.1552 |
| ENSMUSG000000027940  | 18_Tpm3          | 2497.598632  | 0.007707 | 0.977067 | 0.990733 | 2406.348 | 2260.231 | 2806.343 | 2243.357 | 3034.254 | 2235.059 |
| ENSMUSG0000000057346 | 11_Apo9a         | 4698.855838  | 0.015311 | 0.977139 | 0.990733 | 4044.418 | 4020.669 | 5956.719 | 1586.523 | 6982.631 | 5602.176 |
| ENSMUSG000000058126  | 6_Tpm3-rs7       | 5244.508815  | -0.00813 | 0.97734  | 0.990871 | 4945.885 | 4759.194 | 6072.931 | 4129.523 | 6317.403 | 5242.117 |
| ENSMUSG000000020864  | 13_Ankrd40       | 1245.485815  | 0.005978 | 0.977631 | 0.991065 | 1190.586 | 1258.928 | 1279.481 | 1288.864 | 1165.28  | 1289.777 |
| ENSMUSG000000044667  | 12_Lppr4         | 60.62031382  | 0.016048 | 0.977607 | 0.991065 | 44.66727 | 93.60377 | 42.57265 | 103.1885 | 35.07154 | 44.61818 |
| ENSMUSG000000029707  | 6_Fscn3          | 0.729414725  | -0.09208 | 0.977756 | 0.99109  | 0        | 0        | 2.301224 | 0        | 0        | 2.075624 |
| ENSMUSG000000064288  | 4_Hist1h4k       | 0.729414725  | -0.09208 | 0.977756 | 0.99109  | 0        | 0        | 2.301224 | 0        | 0        | 2.075624 |
| ENSMUSG000000051728  | 5_4930563D23Rik  | 2.40702882   | -0.03835 | 0.977949 | 0.991235 | 1.624264 | 3.435001 | 2.301224 | 3.968787 | 0        | 3.112896 |
| ENSMUSG000000001804  | 9_Dsg4           | 2.122003986  | -0.03576 | 0.978069 | 0.991267 | 2.436397 | 1.7175   | 2.301224 | 2.97659  | 2.26268  | 1.037632 |
| ENSMUSG000000028689  | 14_Ccdc163       | 119.6228743  | -0.00958 | 0.978129 | 0.991267 | 102.3287 | 114.2138 | 143.8265 | 90.28991 | 117.6594 | 149.419  |
| ENSMUSG0             |                  |              |          |          |          |          |          |          |          |          |          |

|                     |                  |              |          |          |          |          |          |          |          |          |          |
|---------------------|------------------|--------------|----------|----------|----------|----------|----------|----------|----------|----------|----------|
| ENSMUSG00000021108  | 17_Prkch         | 1958.774657  | -0.00547 | 0.981993 | 0.992557 | 2005.154 | 1793.929 | 2088.361 | 1727.415 | 2238.922 | 1898.867 |
| ENSMUSG00000022226  | 5_Mcpt2          | 3.373730761  | 0.03072  | 0.981961 | 0.992557 | 4.872793 | 1.1715   | 3.451836 | 7.937575 | 1.26268  | 0        |
| ENSMUSG00000028452  | 7_Vcp            | 9870.375796  | 0.00535  | 0.981651 | 0.992557 | 9670.058 | 9478.885 | 10407.29 | 8575.557 | 21093.92 | 9996.547 |
| ENSMUSG00000029434  | 12_Vps33a        | 1380.401067  | -0.00539 | 0.981635 | 0.992557 | 1347.327 | 1388.599 | 1412.952 | 1179.722 | 1461.691 | 1492.115 |
| ENSMUSG00000031450  | 7_Grk1           | 137.1280597  | -0.01831 | 0.981388 | 0.992557 | 216.0272 | 145.9875 | 51.77754 | 240.1116 | 147.0742 | 21.79027 |
| ENSMUSG00000038119  | 14_Cdon          | 1671.547411  | -0.00694 | 0.981747 | 0.992557 | 1651.065 | 1855.759 | 1519.959 | 2021.105 | 1206.009 | 1775.388 |
| ENSMUSG00000039013  | 16_SiglecF       | 2.397193727  | 0.029891 | 0.981146 | 0.992557 | 1.624264 | 4.293751 | 1.150612 | 2.97659  | 2.26268  | 2.075264 |
| ENSMUSG00000044792  | 6_Isca1          | 1098.135183  | -0.00491 | 0.981345 | 0.992557 | 1106.936 | 1120.669 | 1072.37  | 1152.933 | 1057.803 | 1078.1   |
| ENSMUSG00000045381  | 5_Olfrr433       | 2.160733882  | -0.03102 | 0.98173  | 0.992557 | 0.812132 | 3.435001 | 2.301224 | 1.984394 | 3.39402  | 1.037632 |
| ENSMUSG00000049313  | 8_Sori1          | 12309.89781  | 0.005438 | 0.98195  | 0.992557 | 11449.44 | 12060.29 | 13350.55 | 10472.64 | 13267.16 | 0        |
| ENSMUSG00000049866  | 12_Arl4c         | 462.3134331  | -0.00639 | 0.981546 | 0.992557 | 524.6374 | 361.5338 | 503.9681 | 457.4027 | 485.3449 | 440.9936 |
| ENSMUSG00000050621  | 6_Rps27r1        | 923.3286135  | 0.005763 | 0.981706 | 0.992557 | 967.2494 | 942.049  | 854.9048 | 819.5546 | 867.7379 | 1088.476 |
| ENSMUSG00000053687  | 14_Dpep2         | 55.08349986  | 0.012984 | 0.981423 | 0.992557 | 76.34042 | 42.93751 | 44.87387 | 28.77371 | 95.03257 | 42.54291 |
| ENSMUSG00000056201  | 6_Cf1f           | 3187.150758  | -0.00795 | 0.981535 | 0.992557 | 3493.793 | 2796.091 | 3297.654 | 2186.802 | 4360.185 | 2988.38  |
| ENSMUSG00000063446  | 4_Lppr1          | 4.464771152  | -0.02327 | 0.981728 | 0.992557 | 4.060661 | 6.011252 | 3.451836 | 6.945378 | 1.13134  | 5.18816  |
| ENSMUSG00000075267  | 9_Dfnb59         | 0.65785632   | 0.065523 | 0.981431 | 0.992557 | 0.812132 | 0        | 1.150612 | 1.984394 | 0        | 0        |
| ENSMUSG00000095930  | 1_Nim1k          | 38.81857361  | 0.009804 | 0.98187  | 0.992557 | 45.4794  | 43.79626 | 26.46408 | 46.63325 | 37.33422 | 33.20423 |
| ENSMUSG00000100932  | 1_Gm29459        | 0.65785632   | 0.065523 | 0.981431 | 0.992557 | 0.812132 | 0        | 1.150612 | 1.984394 | 0        | 0        |
| ENSMUSG00000100992  | 1_Gm23925        | 5.347655104  | -0.02799 | 0.981992 | 0.992557 | 3.248529 | 9.446252 | 3.451836 | 0        | 4.52536  | 11.41395 |
| ENSMUSG00000103170  | 1_Gm37170        | 5.631554807  | -0.02203 | 0.981635 | 0.992557 | 6.497057 | 2.576251 | 8.054285 | 8.929771 | 5.656701 | 2.075264 |
| ENSMUSG00000107352  | 1_Gm43660        | 43.00422729  | -0.00964 | 0.981429 | 0.992557 | 38.17021 | 53.24251 | 37.9702  | 53.57863 | 41.85958 | 33.20423 |
| ENSMUSG00000050854  | 9_Tmem125        | 346.4528019  | 0.008835 | 0.982162 | 0.992678 | 298.6768 | 279.9526 | 456.793  | 220.2677 | 453.6674 | 368.3594 |
| ENSMUSG00000096727  | 2_Psmb9          | 2318.487154  | -0.01051 | 0.982364 | 0.992831 | 2122.101 | 1883.239 | 2975.483 | 1046.768 | 3507.154 | 2376.177 |
| ENSMUSG000000002741 | 9_Ykt6           | 3407.675743  | -0.00559 | 0.982483 | 0.992893 | 3354.106 | 3155.048 | 3733.736 | 2866.457 | 3966.478 | 3370.229 |
| ENSMUSG00000038302  | 14_Lace1         | 323.9293258  | -0.00523 | 0.992525 | 0.992893 | 318.3558 | 322.8901 | 332.5269 | 332.5269 | 291.8857 | 345.5315 |
| ENSMUSG00000028701  | 4_Lurap1         | 128.3130231  | -0.00883 | 0.98281  | 0.993131 | 115.3228 | 171.75   | 98.95264 | 179.5876 | 48.26569 | 105.8385 |
| ENSMUSG00000097098  | 7_9330111N05Rik  | 9.759260174  | -0.0146  | 0.982942 | 0.993214 | 13.80625 | 8.587502 | 6.903673 | 11.90636 | 9.050721 | 8.301057 |
| ENSMUSG00000024338  | 14_Psmb8         | 5278.023715  | -0.01133 | 0.983072 | 0.993222 | 5101.002 | 4364.169 | 6425.018 | 1781.985 | 8253.126 | 5730.842 |
| ENSMUSG00000074199  | 7_Krtadp         | 13.20354501  | -0.01811 | 0.983056 | 0.993222 | 12.99411 | 5.152501 | 21.86163 | 16.86735 | 19.2378  | 3.112896 |
| ENSMUSG00000074445  | 4_Spr2a3         | 29.20313862  | -0.02162 | 0.9831   | 0.993222 | 43.04301 | 12.88125 | 32.21714 | 2.97659  | 75.79979 | 8.301057 |
| ENSMUSG00000032446  | 14_Eomes         | 17.71258733  | 0.016469 | 0.983494 | 0.993463 | 36.54595 | 6.870002 | 9.204897 | 22.82053 | 21.49545 | 9.338689 |
| ENSMUSG00000035910  | 15_Dcdc2a        | 60.95895193  | 0.012662 | 0.983494 | 0.993463 | 54.41286 | 98.75628 | 28.7653  | 101.2041 | 32.80886 | 49.80634 |
| ENSMUSG00000038213  | 7_Tapbl1         | 1210.852639  | -0.00931 | 0.983511 | 0.993463 | 1111.809 | 1063.133 | 1469.332 | 570.5132 | 1762.628 | 1287.701 |
| ENSMUSG00000055305  | 15_Zfp93         | 151.847109   | 0.005952 | 0.983538 | 0.993463 | 155.9294 | 168.315  | 130.0192 | 140.8919 | 143.6802 | 172.2469 |
| ENSMUSG00000061666  | 6_Gdpl1          | 182.3147037  | -0.00692 | 0.983712 | 0.993544 | 185.9783 | 186.3992 | 244.0804 | 168.5697 | 132.8169 | 0        |
| ENSMUSG00000096950  | 2_Gm9530         | 18.06201565  | 0.011247 | 0.983718 | 0.993544 | 25.98823 | 12.88125 | 14.95796 | 17.85954 | 16.9701  | 19.71501 |
| ENSMUSG00000086478  | 1_Gm14102        | 1.030136224  | 0.043531 | 0.983832 | 0.993608 | 0.812132 | 0        | 2.301224 | 0.992197 | 0        | 2.075264 |
| ENSMUSG00000066366  | 14_Serpina1a     | 3.157568674  | 0.023761 | 0.983915 | 0.993642 | 0.812132 | 5.152501 | 3.451836 | 1.984394 | 3.39402  | 4.150528 |
| ENSMUSG00000032939  | 13_Nup93         | 1218.414841  | 0.006115 | 0.984094 | 0.993773 | 1184.901 | 1123.245 | 1339.312 | 890.0005 | 1534.097 | 1238.933 |
| ENSMUSG00000032827  | 15_Ppp19a        | 381.068885   | -0.00949 | 0.984198 | 0.993797 | 407.6904 | 489.4876 | 249.6828 | 606.2323 | 212.6919 | 320.6283 |
| ENSMUSG00000060548  | 12_Tnfrsf19      | 338.6505354  | 0.008877 | 0.984218 | 0.993797 | 344.344  | 450.8439 | 217.4657 | 509.9892 | 222.874  | 286.3865 |
| ENSMUSG00000032094  | 7_Cd3d           | 9.946760284  | -0.01857 | 0.984399 | 0.993829 | 13.80625 | 6.870002 | 9.204897 | 1.984394 | 22.6268  | 5.18816  |
| ENSMUSG00000049811  | 15_Fam161a       | 56.25723862  | -0.00883 | 0.984397 | 0.993829 | 69.84337 | 53.24251 | 46.02448 | 76.39915 | 58.82699 | 33.20423 |
| ENSMUSG00000066771  | 9_Gm14685        | 6.859673067  | 0.019223 | 0.98437  | 0.993829 | 4.872793 | 8.587502 | 6.903673 | 0.992197 | 13.57608 | 6.225792 |
| ENSMUSG00000024654  | 8_Asrg1f         | 190.8038986  | -0.00687 | 0.984628 | 0.99401  | 189.2268 | 194.9363 | 189.851  | 237.135  | 119.9221 | 121.7522 |
| ENSMUSG000000002458 | 13_Rgs19         | 183.3609396  | 0.005623 | 0.984812 | 0.994109 | 196.536  | 186.3488 | 165.6881 | 146.8451 | 213.8233 | 190.9243 |
| ENSMUSG00000041879  | 13_Ipo9          | 1881.938085  | -0.00465 | 0.984826 | 0.994109 | 1822.425 | 1879.804 | 1952.589 | 1582.554 | 2157.466 | 1896.791 |
| ENSMUSG00000051590  | 15_Ubl4a         | 1347.439005  | 0.003963 | 0.984957 | 0.994141 | 1322.963 | 1294.137 | 1419.855 | 1318.63  | 1403.993 | 1325.056 |
| ENSMUSG00000074452  | 12_Pate2         | 3.063016853  | 0.024476 | 0.984958 | 0.994141 | 0.812132 | 6.011252 | 2.301224 | 5.953181 | 2.26268  | 1.037632 |
| ENSMUSG00000024841  | 7_Elflad         | 791.9773012  | 0.004569 | 0.985115 | 0.994249 | 804.0109 | 707.6102 | 860.6579 | 720.3349 | 890.3647 | 768.8854 |
| ENSMUSG00000053603  | 4_4930442H3Rik   | 1.726139269  | -0.0313  | 0.985174 | 0.994259 | 4.060661 | 0        | 1.150612 | 2.97659  | 1.13134  | 1.037632 |
| ENSMUSG00000049044  | 16_Rapgef4       | 232.3699771  | 0.006205 | 0.985364 | 0.9944   | 220.9    | 261.9188 | 212.8632 | 316.5108 | 190.0651 | 191.9619 |
| ENSMUSG00000079566  | 1_Spin2d         | 6.315714961  | 0.019029 | 0.985429 | 0.994415 | 2.436397 | 1.1715   | 14.95796 | 7.937575 | 5.656701 | 5.18816  |
| ENSMUSG00000050504  | 6_Cstb           | 3646.026441  | -0.00505 | 0.985629 | 0.994427 | 3672.462 | 3378.323 | 3906.328 | 2839.667 | 4464.268 | 3615.11  |
| ENSMUSG00000029217  | 16_Tec           | 131.8276566  | 0.005099 | 0.985689 | 0.994427 | 120.1956 | 150.2813 | 124.2661 | 141.8841 | 126.7101 | 127.8827 |
| ENSMUSG00000031015  | 7_Swap70         | 555.4073904  | -0.00467 | 0.985654 | 0.994427 | 560.3712 | 566.7751 | 541.9383 | 652.8655 | 461.5868 | 548.9074 |
| ENSMUSG00000033429  | 10_Mcee          | 301.6575532  | -0.0055  | 0.985607 | 0.994427 | 313.483  | 291.9751 | 301.4604 | 341.3157 | 217.2173 | 344.4938 |
| ENSMUSG00000034525  | 6_Ice1           | 1550.249807  | 0.003784 | 0.985571 | 0.994427 | 1500.82  | 1562.925 | 1580.941 | 1457.537 | 1594.058 | 1605.217 |
| ENSMUSG00000050967  | 5_Creg2          | 71.10453858  | -0.01199 | 0.985783 | 0.99447  | 57.66138 | 121.9425 | 34.51836 | 133.9466 | 33.9402  | 44.61818 |
| ENSMUSG00000020264  | 5_Slc36a2        | 17.86458584  | -0.01104 | 0.986044 | 0.994515 | 16.24264 | 25.76251 | 11.50612 | 9.921968 | 27.15216 | 16.60211 |
| ENSMUSG00000025481  | 11_Urah          | 4567.544818  | -0.00646 | 0.986276 | 0.994515 | 4041.17  | 3979.449 | 5712.789 | 3280.203 | 6586.662 | 3804.997 |
| ENSMUSG00000028411  | 15_Aptx          | 689.5642017  | 0.004108 | 0.986294 | 0.994515 | 695.9973 | 620.8764 | 749.0485 | 622.1074 | 736.5024 | 712.8532 |
| ENSMUSG00000033578  | 7_Tmem35         | 39.34133882  | -0.00818 | 0.986319 | 0.994515 | 46.29153 | 42.07876 | 29.91591 | 56.55522 | 24.88948 | 36.31712 |
| ENSMUSG00000038327  | 8_Serpinb9f      | 1.798359503  | 0.032223 | 0.986039 | 0.994515 | 0.812132 | 0        | 4.602448 | 0        | 2.26268  | 3.112896 |
| ENSMUSG00000039067  | 4_Psmf2          | 2242.652378  | -0.00445 | 0.986189 | 0.994515 | 2243.109 | 2024.933 | 2470.364 | 1921.885 | 2626.972 | 2168.651 |
| ENSMUSG00000044968  | 16_Napepld       | 134.553499   | 0.007532 | 0.986105 | 0.994515 | 112.8864 | 183.7725 | 105.8563 | 193.4784 | 121.0534 | 90.27399 |
| ENSMUSG00000046321  | 8_Hs3st2         | 1.415228228  | -0.00497 | 0.985974 | 0.994515 | 0.812132 | 3.435001 | 0        | 0        | 1.13134  | 3.112896 |
| ENSMUSG00000052794  | 13_1700030K09Rik | 227.4679837  | 0.005732 | 0.985881 | 0.994515 | 236.3305 | 218.9813 | 225.52   | 157.7593 | 264.7336 | 261.4833 |
| ENSMUSG00000079033  | 9_Mef2b          | 4.606058518  | 0.016837 | 0.986377 | 0.994515 | 6.497057 | 2.576251 | 4.602448 | 1.984394 | 6.788041 | 5.18816  |
| ENSMUSG00000095040  | 2_1700011J03Rik  | 1.78321442   | 0.028594 | 0.986364 | 0.994515 | 0.812132 | 0        | 4.602448 | 1.984394 | 2.26268  | 1.037632 |
| ENSMUSG00000051855  | 15_Mest          | 479.3523712  | -0.00616 | 0.98655  | 0.994539 | 510.019  | 558.1876 | 372.7983 | 657.8265 | 339.402  | 437.8807 |
| ENSMUSG00000069581  | 11_Tspear        | 16.285020506 | 0.010397 | 0.986547 | 0.994539 | 12.99411 | 20.61001 | 14.95796 | 7.937575 | 21.49546 | 19.71501 |
| ENSMUSG000000107503 | 1_RP23-214M22    | 3.601761432  | 0.021493 | 0.98653  | 0.994539 | 2.436397 | 2.576251 | 5.753061 | 0        | 5.656701 | 5.18816  |
| ENSMUSG00000034617  | 6_Mtrr           | 315.8683813  | -0.00404 | 0.986625 | 0.994564 | 309.4224 | 315.1613 | 324.4726 | 296.6668 | 299.8051 | 349.682  |
| ENSMUSG00000037148  | 7_Arhgap10       | 1647.106876  | 0.003895 | 0.986687 | 0.994576 | 1540.615 | 1560.349 | 1834.076 | 1494.248 | 1680.04  | 1773.313 |

|                      |                  |             |          |          |          |          |          |          |          |          |          |
|----------------------|------------------|-------------|----------|----------|----------|----------|----------|----------|----------|----------|----------|
| ENSMUSG00000032750   | 13_Gab3          | 11.68236524 | -0.01156 | 0.989298 | 0.995504 | 12.18198 | 17.175   | 5.753061 | 22.82053 | 9.050721 | 3.112896 |
| ENSMUSG00000064037   | 13_Gpn1          | 520.7380795 | 0.003961 | 0.989406 | 0.995504 | 537.6315 | 513.5326 | 508.5706 | 390.9255 | 653.9146 | 519.8537 |
| ENSMUSG00000064141   | 14_Zfp69         | 32.96202772 | 0.005661 | 0.989403 | 0.995504 | 38.17021 | 32.63251 | 27.61469 | 25.79712 | 36.20288 | 37.35475 |
| ENSMUSG00000070687   | 11_Hlrlr1        | 2.16053675  | -0.01745 | 0.989331 | 0.995504 | 1.624264 | 2.576251 | 2.301224 | 0.992197 | 3.39402  | 2.075264 |
| ENSMUSG00000097045   | 1_Gm26641        | 2.477073387 | 0.018418 | 0.989471 | 0.995519 | 1.624264 | 3.435001 | 2.301224 | 2.97659  | 4.52536  | 0        |
| ENSMUSG00000028901   | 13_Gmeb1         | 540.2309508 | -0.00335 | 0.989597 | 0.995595 | 524.6374 | 503.2276 | 594.8665 | 453.4339 | 588.2969 | 576.9234 |
| ENSMUSG00000000439   | 9_Mknn2          | 1114.935848 | -0.0027  | 0.989934 | 0.995834 | 1108.56  | 1099.2   | 1140.257 | 1048.752 | 1098.531 | 1194.315 |
| ENSMUSG000000051495  | 7_Irf2bp2        | 813.2099409 | 0.002911 | 0.988896 | 0.995834 | 799.9502 | 819.2477 | 818.0852 | 905.8757 | 806.6455 | 729.4553 |
| ENSMUSG000000046408  | 13_1700067K01Rik | 1.037905898 | 0.026033 | 0.990327 | 0.996107 | 0        | 0.85875  | 2.301224 | 0.992197 | 0        | 2.075264 |
| ENSMUSG000000071552  | 4_Tigt1          | 8.659790609 | -0.00998 | 0.990357 | 0.996107 | 11.36985 | 4.293751 | 10.35551 | 3.968787 | 14.70742 | 7.263424 |
| ENSMUSG000000090121  | 10_Abhd12b       | 1.037905898 | 0.026033 | 0.990327 | 0.996107 | 0        | 0.85875  | 2.301224 | 0.992197 | 0        | 2.075264 |
| ENSMUSG000000019808  | 8_Adat2          | 96.96000777 | -0.00386 | 0.990645 | 0.996272 | 77.15256 | 107.3438 | 107.0069 | 85.32893 | 93.90123 | 111.0266 |
| ENSMUSG000000054728  | 16_Phactr1       | 230.9249844 | 0.003184 | 0.990666 | 0.996272 | 235.5183 | 228.4276 | 227.8212 | 213.3223 | 276.047  | 204.4135 |
| ENSMUSG000000060923  | 5_Acyp2          | 58.66376263 | -0.00468 | 0.99067  | 0.996272 | 51.97646 | 63.54752 | 60.98244 | 81.36014 | 46.38494 | 47.73108 |
| ENSMUSG000000032649  | 14_Colgal2       | 475.5371659 | 0.004849 | 0.990892 | 0.996344 | 492.1521 | 599.4077 | 332.5269 | 646.9123 | 273.7843 | 508.4397 |
| ENSMUSG000000062157  | 6_Iflnr1         | 712.3427925 | -0.00359 | 0.990855 | 0.996344 | 725.234  | 638.9102 | 775.5126 | 499.075  | 827.0096 | 808.3154 |
| ENSMUSG000000071322  | 12_Tcp10a        | 1.384070874 | -0.02628 | 0.990792 | 0.996344 | 2.436397 | 1.7175   | 0        | 0        | 4.150528 |          |
| ENSMUSG000000028364  | 15_Tnc           | 2042.501529 | 0.004553 | 0.991014 | 0.996417 | 2078.246 | 1707.195 | 2332.291 | 1259.098 | 3110.054 | 1768.125 |
| ENSMUSG000000071716  | 4_Apol7e         | 12.21902103 | -0.00943 | 0.991067 | 0.996442 | 11.36985 | 12.88125 | 12.65673 | 24.80492 | 2.26268  | 9.338689 |
| ENSMUSG000000046523  | 4_Kctd4          | 43.44405909 | 0.008114 | 0.991325 | 0.996556 | 47.10367 | 57.53626 | 25.31347 | 95.25089 | 14.70742 | 20.75264 |
| ENSMUSG000000050747  | 14_Trim15        | 25.5337603  | -0.00726 | 0.991353 | 0.996556 | 32.48529 | 15.4575  | 28.7653  | 7.937575 | 38.46556 | 30.09133 |
| ENSMUSG000000062093  | 4_Gm10110        | 23.8631447  | -0.00638 | 0.991265 | 0.996556 | 35.73382 | 19.75126 | 16.10857 | 24.80492 | 13.57608 | 33.20423 |
| ENSMUSG00000004730   | 14_Adgre1        | 226.1783273 | -0.00373 | 0.991475 | 0.996628 | 309.4224 | 188.925  | 180.6461 | 254.0024 | 234.1874 | 189.8867 |
| ENSMUSG000000067614  | 4_Krt86          | 1.7644749   | 0.019792 | 0.991563 | 0.996667 | 0.060661 | 0        | 1.150612 | 0        | 2.26268  | 3.112896 |
| ENSMUSG000000029255  | 8_Gmnr           | 2.811011766 | -0.01363 | 0.991913 | 0.996787 | 1.624264 | 3.435001 | 3.451836 | 4.960984 | 3.39402  | 0        |
| ENSMUSG000000031257  | 11_S100a14       | 3.42939537  | -0.01249 | 0.991933 | 0.996787 | 3.248529 | 2.576251 | 4.602448 | 4.960984 | 0        | 5.18816  |
| ENSMUSG000000042306  | 16_Unc80         | 13523.03359 | 0.002593 | 0.991784 | 0.996787 | 13362.82 | 12393.48 | 14769.26 | 9730.474 | 16350.13 | 14532.04 |
| ENSMUSG000000055567  | 8_Cd300lb        | 80.76321389 | 0.006509 | 0.991858 | 0.996787 | 117.7592 | 82.44002 | 41.42204 | 152.7983 | 36.20288 | 53.95687 |
| ENSMUSG000000063193  | 6_Adgrf2         | 36.37247735 | 0.0067   | 0.991739 | 0.996787 | 50.3522  | 24.90376 | 33.36775 | 21.82833 | 70.14309 | 17.63975 |
| ENSMUSG000000057899  | 5_Trp53cor1      | 48.32107528 | -0.00388 | 0.992018 | 0.996822 | 53.60072 | 38.64376 | 52.92816 | 47.62545 | 57.69835 | 39.43002 |
| ENSMUSG000000085912  | 1_Gm16617        | 5.18376542  | 0.007504 | 0.992497 | 0.997209 | 9.745586 | 4.293751 | 11.50612 | 3.968787 | 10.18206 | 11.41395 |
| ENSMUSG000000097633  | 9_Nudt13         | 5.407809622 | 0.009322 | 0.992503 | 0.997209 | 7.30919  | 4.293751 | 4.602448 | 9.921968 | 1.13134  | 5.18816  |
| ENSMUSG0000000021809 | 13_Sh2d4b        | 363.5195136 | 0.002593 | 0.992659 | 0.997315 | 370.3323 | 328.0426 | 391.2081 | 286.7449 | 408.4138 | 396.3754 |
| ENSMUSG000000032680  | 11_6820408C15Rik | 6.756019687 | -0.00774 | 0.992855 | 0.997427 | 8.933454 | 7.728752 | 3.451836 | 2.97659  | 10.18206 | 7.263424 |
| ENSMUSG000000037833  | 13_Sh2d4b        | 6.864187615 | -0.00749 | 0.99287  | 0.997427 | 9.745586 | 5.152501 | 5.753061 | 10.91416 | 3.39402  | 6.225792 |
| ENSMUSG000000026806  | 15_Ddx31         | 328.1664161 | 0.002335 | 0.993236 | 0.997453 | 305.3617 | 309.1501 | 369.3465 | 286.7449 | 389.181  | 309.2144 |
| ENSMUSG000000029195  | 10_Klb           | 5.274727366 | 0.008084 | 0.993274 | 0.997453 | 1.624264 | 5.152501 | 9.204897 | 5.953181 | 4.52536  | 5.18816  |
| ENSMUSG000000029372  | 7_Pbpb           | 69.21226874 | -0.00577 | 0.993186 | 0.997453 | 84.46175 | 46.37251 | 77.09101 | 49.60984 | 138.0235 | 19.71501 |
| ENSMUSG000000031755  | 5_Bbs2           | 387.0092143 | -0.00193 | 0.993297 | 0.997453 | 367.0837 | 403.6126 | 391.2081 | 379.0192 | 373.3422 | 407.7894 |
| ENSMUSG000000048410  | 16_Zfp407        | 511.3628331 | 0.0021   | 0.993149 | 0.997453 | 524.6374 | 462.0076 | 546.5408 | 548.6848 | 532.8612 | 453.4452 |
| ENSMUSG000000090369  | 3_4933411K16Rik  | 4.613946666 | -0.00809 | 0.993041 | 0.997453 | 3.248529 | 6.011252 | 4.602448 | 2.97659  | 5.565701 | 5.18816  |
| ENSMUSG000000090622  | 1_A930033H14Rik  | 38.53879333 | 0.003398 | 0.993238 | 0.997453 | 37.35808 | 36.92626 | 41.42204 | 47.62545 | 30.54618 | 37.35475 |
| ENSMUSG000000098207  | 1_Arl14          | 1.379698503 | -0.01728 | 0.993182 | 0.997453 | 0.812132 | 0        | 3.451836 | 2.97659  | 0        | 1.037632 |
| ENSMUSG000000037573  | 5_Tob1           | 443.483826  | 0.002322 | 0.993606 | 0.997613 | 432.0543 | 449.9851 | 447.5881 | 567.5366 | 389.181  | 374.5852 |
| ENSMUSG000000055333  | 14_Fat2          | 3086.44059  | 0.003247 | 0.993598 | 0.997613 | 2791.298 | 2863.073 | 3594.512 | 1673.836 | 4314.931 | 3280.993 |
| ENSMUSG000000101903  | 1_Gm29291        | 3.40628348  | -0.01081 | 0.993605 | 0.997613 | 4.872793 | 0.85875  | 4.602448 | 5.953181 | 0        | 4.150528 |
| ENSMUSG000000030770  | 14_Parva         | 4401.462607 | 0.001628 | 0.993784 | 0.997654 | 4337.598 | 4513.591 | 4345.862 | 4682.177 | 4073.956 | 4455.592 |
| ENSMUSG000000032324  | 10_Span3         | 1136.796968 | 0.002389 | 0.993764 | 0.997654 | 1123.991 | 1342.227 | 941.2007 | 1411.896 | 912.9915 | 1088.476 |
| ENSMUSG000000087028  | 7_Gm13387        | 5.089375437 | 0.008124 | 0.993797 | 0.997654 | 4.872793 | 3.435001 | 6.903673 | 0.992197 | 10.18206 | 4.150528 |
| ENSMUSG000000097305  | 1_Gm17276        | 9.905963194 | -0.0052  | 0.994013 | 0.99782  | 7.30919  | 7.728752 | 14.95796 | 7.937575 | 9.050721 | 12.45158 |
| ENSMUSG000000049107  | 13_Nlf3          | 442.7754405 | 0.001645 | 0.994199 | 0.997907 | 432.8665 | 434.5276 | 460.2448 | 414.7383 | 464.9808 | 449.2947 |
| ENSMUSG000000097495  | 1_Gm26651        | 0.745032731 | -0.00213 | 0.994181 | 0.997907 | 0        | 0        | 2.301224 | 0        | 1.13134  | 1.037632 |
| ENSMUSG000000025545  | 9_Clybl          | 108.4281531 | 0.002496 | 0.994588 | 0.998021 | 110.45   | 120.225  | 94.35019 | 136.9232 | 72.40577 | 116.2148 |
| ENSMUSG000000026672  | 11_Optn          | 734.9461208 | -0.00155 | 0.994524 | 0.998021 | 734.1675 | 775.4515 | 696.1203 | 672.7094 | 747.8158 | 743.4122 |
| ENSMUSG000000028785  | 12_Hpca          | 5.723093034 | 0.007427 | 0.994714 | 0.998021 | 12.18198 | 2.576251 | 2.301224 | 9.921968 | 1.13134  | 6.225792 |
| ENSMUSG000000032303  | 6_Chna3          | 2.319931067 | 0.010491 | 0.994617 | 0.998021 | 0.060661 | 1.7175   | 1.150612 | 5.953181 | 0        | 1.037632 |
| ENSMUSG000000074305  | 9_Peak1          | 667.2321147 | 0.002025 | 0.994433 | 0.998021 | 674.8818 | 759.1352 | 566.1012 | 821.539  | 574.7208 | 607.0148 |
| ENSMUSG000000099877  | 6_Plnc           | 1.1253581   | -0.01655 | 0.994698 | 0.998021 | 0        | 0        | 3.451836 | 0        | 2.26268  | 1.037632 |
| ENSMUSG000000102439  | 2_Flg            | 2.019012436 | -0.0111  | 0.994383 | 0.998021 | 0.060661 | 0.85875  | 1.150612 | 3.968787 | 0        | 2.075264 |
| ENSMUSG000000108255  | 1_RP23-446E21    | 3.769043898 | 0.007414 | 0.994672 | 0.998021 | 1.624264 | 5.152501 | 4.602448 | 5.953181 | 1.13134  | 4.150528 |
| ENSMUSG000000040046  | 13_Tph1          | 6.11923587  | 0.006205 | 0.994966 | 0.998224 | 4.872793 | 4.293751 | 9.204897 | 0.992197 | 9.050721 | 8.301057 |
| ENSMUSG000000022991  | 4_Lalba          | 1.692759179 | -0.01119 | 0.995017 | 0.998225 | 1.624264 | 3.435001 | 0        | 1.984394 | 0        | 3.112896 |
| ENSMUSG000000036986  | 16_Pml           | 2200.265892 | 0.002845 | 0.995095 | 0.998252 | 1992.972 | 1933.407 | 2668.269 | 982.2748 | 3207.349 | 2417.683 |
| ENSMUSG000000007338  | 9_Mrlp49         | 841.6569299 | -0.00138 | 0.995474 | 0.998362 | 877.9149 | 811.519  | 836.495  | 713.3895 | 939.0123 | 871.6109 |
| ENSMUSG0000000303287 | 15_Irf2          | 3684.182007 | -0.00171 | 0.995505 | 0.998362 | 3307.002 | 3458.187 | 4294.084 | 2728.541 | 4467.662 | 3849.615 |
| ENSMUSG000000030762  | 11_Aqp8          | 2.525519903 | -0.00714 | 0.995448 | 0.998362 | 2.436397 | 1.7175   | 3.451836 | 1.984394 | 4.52536  | 1.037632 |
| ENSMUSG0000000041849 | 7_Card6          | 288.6259293 | -0.00141 | 0.995302 | 0.998362 | 268.0036 | 293.6926 | 304.9122 | 302.62   | 277.1783 | 285.3488 |
| ENSMUSG000000052387  | 15_Trpm3         | 3953.405965 | -0.00139 | 0.995334 | 0.998362 | 4090.71  | 4207.017 | 3568.048 | 4358.721 | 3446.062 | 4049.873 |
| ENSMUSG000000056043  | 5_Rgs9bbp        | 68.1215334  | 0.004796 | 0.995396 | 0.998362 | 95.8316  | 88.45127 | 19.56041 | 128.9856 | 64.48639 | 11.41395 |
| ENSMUSG000000020706  | 13_Ftj3          | 1439.728892 | -0.00172 | 0.995662 | 0.998368 | 1492.699 | 1250.34  | 1578.64  | 1033.869 | 1813.538 | 1469.287 |
| ENSMUSG000000044005  | 13_Gls2          | 21.18206322 | -0.00317 | 0.995579 | 0.998368 | 25.98823 | 14.59875 | 23.01224 | 11.90636 | 21.49546 | 30.09133 |
| ENSMUSG000000055137  | 6_Sugt           | 30.8182012  | -0.00335 | 0.995627 | 0.998368 | 31.67315 | 44.65501 | 16.10857 | 48.61764 | 15.83766 | 28.01607 |
| ENSMUSG000000028344  | 12_Invs          | 209.4631544 | 0.001675 | 0.995813 | 0.998469 | 198.1603 | 224.1338 | 205.9596 | 267.8931 | 157.2563 | 203.3759 |
| ENSMUSG000000005483  | 9_Dnajb1         | 3796.490449 | -0.00156 | 0.996032 | 0.998611 | 3598.558 | 3590.435 | 4206.638 | 2624.361 | 4601.16  | 4157.792 |
| ENSMUSG000000025557  | 9_Slc15a1        | 70.45871535 | 0.001774 | 0.996054 | 0.998611 | 56.03712 | 66.98252 | 68.59713 | 66.47719 | 130.32   |          |

|                     |                  |             |          |          |          |          |          |          |          |          |          |
|---------------------|------------------|-------------|----------|----------|----------|----------|----------|----------|----------|----------|----------|
| ENSMUSG00000048578  | 11_Mlec          | 8092.425878 | 0.000536 | 0.998187 | 0.9991   | 7995.441 | 7638.583 | 8638.796 | 6947.362 | 8965.87  | 8368.503 |
| ENSMUSG00000022464  | 13_Slc38a4       | 42.90383226 | -0.00096 | 0.99848  | 0.999283 | 29.23676 | 66.12377 | 33.36775 | 52.58643 | 29.41484 | 46.69344 |
| ENSMUSG000000086593 | 2_Gm16548        | 2.312358525 | 0.003535 | 0.998437 | 0.999283 | 4.060661 | 1.7175   | 1.150612 | 6.945378 | 0        | 0        |
| ENSMUSG000000022885 | 15_Stfgal1       | 930.1547807 | -0.00038 | 0.998646 | 0.999398 | 847.866  | 951.4952 | 991.8276 | 917.7821 | 902.8094 | 969.1483 |
| ENSMUSG000000002847 | 6_Pla1a          | 127.7211674 | -0.00069 | 0.998746 | 0.999448 | 153.493  | 79.00502 | 150.7302 | 98.22748 | 182.1458 | 102.7256 |
| ENSMUSG000000019876 | 15_Pkib          | 24.865773   | -0.00062 | 0.999006 | 0.999515 | 27.61249 | 24.04501 | 23.01224 | 34.72689 | 16.9701  | 22.82791 |
| ENSMUSG000000024391 | 7_Apom           | 2.86489264  | 0.001809 | 0.998963 | 0.999515 | 0        | 5.152501 | 3.451836 | 1.984394 | 4.52536  | 2.075264 |
| ENSMUSG000000028431 | 11_lkbkap        | 809.8036996 | -0.00029 | 0.998916 | 0.999515 | 823.502  | 833.8465 | 772.0607 | 823.5234 | 834.929  | 770.9806 |
| ENSMUSG000000032952 | 11_Ap4b1         | 694.019741  | -0.00021 | 0.999265 | 0.999515 | 674.8818 | 641.4864 | 766.3077 | 699.4988 | 674.2787 | 707.6651 |
| ENSMUSG000000036766 | 12_Dner          | 43.67563382 | -0.00048 | 0.999101 | 0.999515 | 38.98234 | 54.10126 | 37.9702  | 49.60984 | 30.54618 | 50.84397 |
| ENSMUSG000000048924 | 13_Ccdc125       | 35.60672521 | -0.00047 | 0.999031 | 0.999515 | 34.92168 | 35.20876 | 36.81959 | 38.69568 | 31.67752 | 36.31712 |
| ENSMUSG000000051335 | 5_Gfod1          | 320.4886712 | -0.00026 | 0.999208 | 0.999515 | 304.5496 | 293.6926 | 363.5934 | 278.8073 | 345.0587 | 337.2304 |
| ENSMUSG000000056820 | 6_Tsnax          | 1612.686486 | 0.000242 | 0.999121 | 0.999515 | 1638.071 | 1622.179 | 1577.489 | 1756.188 | 1458.297 | 1623.894 |
| ENSMUSG000000073117 | 2_Gm7347         | 1.140976106 | 0.00285  | 0.999237 | 0.999515 | 0        | 0        | 3.451836 | 0        | 3.39402  | 0        |
| ENSMUSG000000068615 | 4_Gjd2           | 4.708969081 | 0.001123 | 0.999355 | 0.999556 | 9.745586 | 4.293751 | 0        | 10.91416 | 2.26268  | 1.037632 |
| ENSMUSG000000063535 | 6_Zfp773         | 8.981824788 | -0.00046 | 0.999522 | 0.999672 | 5.684925 | 15.4575  | 5.753061 | 11.90636 | 6.788041 | 8.301057 |
| ENSMUSG000000063851 | 12_Rnf183        | 137.2568421 | 0.000182 | 0.999747 | 0.999797 | 112.8864 | 129.6713 | 169.14   | 46.63325 | 237.5814 | 127.6287 |
| ENSMUSG000000096944 | 1_Gm26722        | 5.446035006 | 0.000371 | 0.999721 | 0.999797 | 11.36985 | 2.576251 | 2.301224 | 9.921968 | 3.39402  | 3.112896 |
| ENSMUSG000000037759 | 5_Ptger2         | 21.4726821  | -0.00012 | 0.999816 | 0.999816 | 24.36397 | 17.175   | 23.01224 | 31.7503  | 16.9701  | 15.56448 |
| ENSMUSG000000000889 | 8_Dbh            | 0           | NA       | NA       | NA       | 0        | 0        | 0        | 0        | 0        | 0        |
| ENSMUSG000000003974 | 6_Grm3           | 0           | NA       | NA       | NA       | 0        | 0        | 0        | 0        | 0        | 0        |
| ENSMUSG000000007440 | 10_Pcdha11       | 0           | NA       | NA       | NA       | 0        | 0        | 0        | 0        | 0        | 0        |
| ENSMUSG000000008590 | 4_Htr3b          | 0           | NA       | NA       | NA       | 0        | 0        | 0        | 0        | 0        | 0        |
| ENSMUSG000000008813 | 12_Tppp2         | 0           | NA       | NA       | NA       | 0        | 0        | 0        | 0        | 0        | 0        |
| ENSMUSG000000009487 | 9_Otog           | 0           | NA       | NA       | NA       | 0        | 0        | 0        | 0        | 0        | 0        |
| ENSMUSG000000009596 | 9_Taf7l          | 0           | NA       | NA       | NA       | 0        | 0        | 0        | 0        | 0        | 0        |
| ENSMUSG000000011154 | 16_1700026D08Rik | 0           | NA       | NA       | NA       | 0        | 0        | 0        | 0        | 0        | 0        |
| ENSMUSG000000017211 | 14_Gsdma2        | 0           | NA       | NA       | NA       | 0        | 0        | 0        | 0        | 0        | 0        |
| ENSMUSG000000018634 | 10_Chrh1         | 0           | NA       | NA       | NA       | 0        | 0        | 0        | 0        | 0        | 0        |
| ENSMUSG000000019834 | 15_Slc22a16      | 0           | NA       | NA       | NA       | 0        | 0        | 0        | 0        | 0        | 0        |
| ENSMUSG000000019909 | 3_Fam162b        | 0           | NA       | NA       | NA       | 0        | 0        | 0        | 0        | 0        | 0        |
| ENSMUSG000000020299 | 6_4930524B15Rik  | 0           | NA       | NA       | NA       | 0        | 0        | 0        | 0        | 0        | 0        |
| ENSMUSG000000020327 | 3_Fgf22          | 0           | NA       | NA       | NA       | 0        | 0        | 0        | 0        | 0        | 0        |
| ENSMUSG000000020600 | 13_Slc7a15       | 0           | NA       | NA       | NA       | 0        | 0        | 0        | 0        | 0        | 0        |
| ENSMUSG000000020633 | 13_Dcdc2c        | 0           | NA       | NA       | NA       | 0        | 0        | 0        | 0        | 0        | 0        |
| ENSMUSG000000020686 | 12_Gas2l2        | 0           | NA       | NA       | NA       | 0        | 0        | 0        | 0        | 0        | 0        |
| ENSMUSG000000020703 | 3_5530401A14Rik  | 0           | NA       | NA       | NA       | 0        | 0        | 0        | 0        | 0        | 0        |
| ENSMUSG000000021078 | 4_Tomm20l        | 0           | NA       | NA       | NA       | 0        | 0        | 0        | 0        | 0        | 0        |
| ENSMUSG000000021207 | 8_Akr1c21        | 0           | NA       | NA       | NA       | 0        | 0        | 0        | 0        | 0        | 0        |
| ENSMUSG000000021228 | 14_Aco13         | 0           | NA       | NA       | NA       | 0        | 0        | 0        | 0        | 0        | 0        |
| ENSMUSG000000021492 | 15_F12           | 0           | NA       | NA       | NA       | 0        | 0        | 0        | 0        | 0        | 0        |
| ENSMUSG000000021907 | 12_Msmb          | 0           | NA       | NA       | NA       | 0        | 0        | 0        | 0        | 0        | 0        |
| ENSMUSG000000022097 | 3_Sttpc          | 0           | NA       | NA       | NA       | 0        | 0        | 0        | 0        | 0        | 0        |
| ENSMUSG000000022388 | 14_Ttlil8        | 0           | NA       | NA       | NA       | 0        | 0        | 0        | 0        | 0        | 0        |
| ENSMUSG000000022487 | 14_Glsf1         | 0           | NA       | NA       | NA       | 0        | 0        | 0        | 0        | 0        | 0        |
| ENSMUSG000000022997 | 9_Wnt1           | 0           | NA       | NA       | NA       | 0        | 0        | 0        | 0        | 0        | 0        |
| ENSMUSG000000023093 | 7_Gm7257         | 0           | NA       | NA       | NA       | 0        | 0        | 0        | 0        | 0        | 0        |
| ENSMUSG000000023165 | 13_Ssxb2         | 0           | NA       | NA       | NA       | 0        | 0        | 0        | 0        | 0        | 0        |
| ENSMUSG000000024154 | 10_Gtf2a1l       | 0           | NA       | NA       | NA       | 0        | 0        | 0        | 0        | 0        | 0        |
| ENSMUSG000000024184 | 15_Pdia2         | 0           | NA       | NA       | NA       | 0        | 0        | 0        | 0        | 0        | 0        |
| ENSMUSG000000024681 | 11_Ms4a3         | 0           | NA       | NA       | NA       | 0        | 0        | 0        | 0        | 0        | 0        |
| ENSMUSG000000024979 | 13_Tectb         | 0           | NA       | NA       | NA       | 0        | 0        | 0        | 0        | 0        | 0        |
| ENSMUSG000000025003 | 6_Cyp2c39        | 0           | NA       | NA       | NA       | 0        | 0        | 0        | 0        | 0        | 0        |
| ENSMUSG000000025056 | 4_Nr0b1          | 0           | NA       | NA       | NA       | 0        | 0        | 0        | 0        | 0        | 0        |
| ENSMUSG000000025400 | 10_Tac2          | 0           | NA       | NA       | NA       | 0        | 0        | 0        | 0        | 0        | 0        |
| ENSMUSG000000025527 | 9_Satl1          | 0           | NA       | NA       | NA       | 0        | 0        | 0        | 0        | 0        | 0        |
| ENSMUSG000000026237 | 3_Nmur1          | 0           | NA       | NA       | NA       | 0        | 0        | 0        | 0        | 0        | 0        |
| ENSMUSG000000026246 | 12_Alpl12        | 0           | NA       | NA       | NA       | 0        | 0        | 0        | 0        | 0        | 0        |
| ENSMUSG000000026295 | 12_Spp2          | 0           | NA       | NA       | NA       | 0        | 0        | 0        | 0        | 0        | 0        |
| ENSMUSG000000026514 | 13_Cnlh3         | 0           | NA       | NA       | NA       | 0        | 0        | 0        | 0        | 0        | 0        |
| ENSMUSG000000026572 | 11_Tbx19         | 0           | NA       | NA       | NA       | 0        | 0        | 0        | 0        | 0        | 0        |
| ENSMUSG000000026937 | 12_Lcn5          | 0           | NA       | NA       | NA       | 0        | 0        | 0        | 0        | 0        | 0        |
| ENSMUSG000000026969 | 3_Fam166a        | 17.62864031 | 3.767081 | NA       | NA       | 4.060661 | 0.85875  | 2.301224 | 95.25089 | 2.26268  | 1.037632 |
| ENSMUSG000000027157 | 10_4930430A15Rik | 0           | NA       | NA       | NA       | 0        | 0        | 0        | 0        | 0        | 0        |
| ENSMUSG000000027209 | 17_Fam227b       | 0           | NA       | NA       | NA       | 0        | 0        | 0        | 0        | 0        | 0        |
| ENSMUSG000000027403 | 12_Tgm6          | 0           | NA       | NA       | NA       | 0        | 0        | 0        | 0        | 0        | 0        |
| ENSMUSG000000027409 | 5_1700020A23Rik  | 0           | NA       | NA       | NA       | 0        | 0        | 0        | 0        | 0        | 0        |
| ENSMUSG000000027480 | 12_Sun5          | 0           | NA       | NA       | NA       | 0        | 0        | 0        | 0        | 0        | 0        |
| ENSMUSG000000027513 | 11_Pck1          | 0           | NA       | NA       | NA       | 0        | 0        | 0        | 0        | 0        | 0        |
| ENSMUSG000000027556 | 15_Car1          | 0           | NA       | NA       | NA       | 0        | 0        | 0        | 0        | 0        | 0        |
| ENSMUSG000000027869 | 14_Hsd3b6        | 0           | NA       | NA       | NA       | 0        | 0        | 0        | 0        | 0        | 0        |
| ENSMUSG000000027876 | 4_Reg4           | 0           | NA       | NA       | NA       | 0        | 0        | 0        | 0        | 0        | 0        |
| ENSMUSG000000027927 | 5_Lelp1          | 0           | NA       | NA       | NA       | 0        | 0        | 0        | 0        | 0        | 0        |
| ENSMUSG000000027967 | 8_Neurog2        | 0           | NA       | NA       | NA       | 0        | 0        | 0        | 0        | 0        | 0        |
| ENSMUSG000000028008 | 10_Asic5         | 0           | NA       | NA       | NA       | 0        | 0        | 0        | 0        | 0        | 0        |
| ENSMUSG000000028238 | 6_Atp6v0d2       | 20.29552274 | 2.779794 | NA       | NA       | 2.436397 | 1.7175   | 11.50612 | 0.992197 | 104.0833 | 1.037632 |
| ENSMUSG000000028287 | 4_170009N14Rik   | 0           | NA       | NA       | NA       | 0        | 0        | 0        | 0        | 0        | 0        |
| ENSMUSG000000028492 | 13_Saxo1         | 0           | NA       | NA       | NA       | 0        | 0        | 0        | 0        | 0        | 0        |
| ENSMUSG000000028813 | 2_CK137956       | 0           | NA       | NA       | NA       | 0        | 0        | 0        | 0        | 0        | 0        |
| ENSMUSG000000029044 | 9_4930584F24Rik  | 0           | NA       | NA       | NA       | 0        | 0        | 0        | 0        | 0        | 0        |
| ENSMUSG000000029280 | 13_Smr3a         | 0           | NA       | NA       | NA       | 0        | 0        | 0        | 0        | 0        | 0        |
| ENSMUSG000000029282 | 3_Amtn           | 0           | NA       | NA       | NA       | 0        | 0        | 0        | 0        | 0        | 0        |
| ENSMUSG000000029286 | 12_Enam          | 0           | NA       | NA       | NA       | 0        | 0        | 0        | 0        | 0        | 0        |
| ENSMUSG000000029522 | 12_Pla2g1b       | 0           | NA       | NA       | NA       | 0        | 0        | 0        | 0        | 0        | 0        |
| ENSMUSG000000029844 | 9_Hoxa1          | 0           | NA       | NA       | NA       | 0        | 0        | 0        | 0        | 0        | 0        |
| ENSMUSG000000029866 | 13_Kel           | 0           | NA       | NA       | NA       | 0        | 0        | 0        | 0        | 0        | 0        |
| ENSMUSG000000030001 | 4_Figla          | 0           | NA       | NA       | NA       | 0        | 0        | 0        | 0        | 0        | 0        |
| ENSMUSG000000030278 | 11_Cidec         | 0           | NA       | NA       | NA       | 0        | 0        | 0        | 0        | 0        | 0        |
| ENSMUSG000000030378 | 14_Sult2a8       | 0           | NA       | NA       | NA       | 0        | 0        | 0        | 0        | 0        | 0        |
| ENSMUSG000000030492 | 16_Slc7a9        | 0           | NA       | NA       | NA       | 0        | 0        | 0        | 0        | 0        | 0        |
| ENSMUSG000000030911 | 6_Zp2            | 0           | NA       | NA       | NA       | 0        | 0        | 0        | 0        | 0        | 0        |
| ENSMUSG000000030976 | 2_Tex36          | 0           | NA       | NA       | NA       | 0        | 0        | 0        | 0        | 0        | 0        |
| ENSMUSG000000031354 | 16_Amelx         | 0           | NA       | NA       | NA       | 0        | 0        | 0        | 0        | 0        | 0        |
| ENSMUSG000000031510 | 5_1700128E19Rik  | 0           | NA       | NA       | NA       | 0        | 0        | 0        | 0        | 0        | 0        |
| ENSMUSG000000031518 | 6_Spata4         | 0           | NA       | NA       | NA       | 0        | 0        | 0        | 0        | 0        | 0        |
| ENSMUSG000000031603 | 14_Fgf20         | 0           | NA       | NA       | NA       | 0        | 0        | 0        | 0        | 0        | 0        |
| ENSMUSG000000031620 | 15_1700007B14Rik | 0           | NA       | NA       | NA       | 0        | 0        | 0        | 0        | 0        | 0        |
| ENSMUSG000000031725 | 8_Ces1f          | 0           | NA       | NA       | NA       | 0        | 0        | 0        | 0        | 0        | 0        |
| ENSMUSG000000032864 | 4_Rag2           | 0           | NA       | NA       | NA       | 0        | 0        | 0        | 0        | 0        | 0        |
| ENSMUSG000000032985 | 15_5730522E02Rik | 0           | NA       | NA       | NA       | 0        | 0        | 0        | 0        | 0        | 0        |
| ENSMUSG000000033219 | 8_Gm9758         | 0           | NA       | NA       | NA       | 0        | 0        | 0        | 0        | 0        | 0        |
| ENSMUSG000000033383 | 6_Rtp1           | 0           | NA       | NA       | NA       | 0        | 0        | 0        | 0        | 0        | 0        |
| ENSMUSG000000033794 | 6_Lpcat2b        | 0           | NA       | NA       | NA       | 0        | 0        | 0        | 0        | 0        | 0        |
| ENSMUSG000000033831 | 5_Fgb            | 0           | NA       | NA       | NA       | 0        | 0        | 0        | 0        | 0        | 0        |
| ENSMUSG000000034219 | 15_Sept14        | 0           | NA       | NA       | NA       | 0        | 0        | 0        | 0        | 0        | 0        |
| ENSMUSG000000034677 | 9_Gpr142         | 0           | NA       | NA       | NA       | 0        | 0        | 0        | 0        | 0        | 0        |
| ENSMUSG000000034690 | 12_Nlrp4c        | 0           | NA       | NA       | NA       | 0        | 0        | 0        | 0        | 0        | 0        |

|                    |                  |             |          |    |    |          |          |          |          |          |          |
|--------------------|------------------|-------------|----------|----|----|----------|----------|----------|----------|----------|----------|
| ENSMUSG00000035177 | 7_Nlrp2          | 0           | NA       | NA | NA | 0        | 0        | 0        | 0        | 0        | 0        |
| ENSMUSG00000035560 | 4_Wdr20rt        | 0           | NA       | NA | NA | 0        | 0        | 0        | 0        | 0        | 0        |
| ENSMUSG00000035785 | 5_Cmtm2b         | 0           | NA       | NA | NA | 0        | 0        | 0        | 0        | 0        | 0        |
| ENSMUSG00000036027 | 11_1810046K07Rik | 0           | NA       | NA | NA | 0        | 0        | 0        | 0        | 0        | 0        |
| ENSMUSG00000036744 | 11_Olfr701       | 0           | NA       | NA | NA | 0        | 0        | 0        | 0        | 0        | 0        |
| ENSMUSG00000036855 | 3_Gjd4           | 0           | NA       | NA | NA | 0        | 0        | 0        | 0        | 0        | 0        |
| ENSMUSG00000037140 | 6_Tas2r108       | 0           | NA       | NA | NA | 0        | 0        | 0        | 0        | 0        | 0        |
| ENSMUSG00000037346 | 4_Hrh4           | 0           | NA       | NA | NA | 0        | 0        | 0        | 0        | 0        | 0        |
| ENSMUSG00000037469 | 9_Pap1           | 0           | NA       | NA | NA | 0        | 0        | 0        | 0        | 0        | 0        |
| ENSMUSG00000037578 | 4_Pkd2l1         | 0           | NA       | NA | NA | 0        | 0        | 0        | 0        | 0        | 0        |
| ENSMUSG00000037727 | 6_Avp            | 0           | NA       | NA | NA | 0        | 0        | 0        | 0        | 0        | 0        |
| ENSMUSG00000037797 | 14_Adh4          | 0           | NA       | NA | NA | 0        | 0        | 0        | 0        | 0        | 0        |
| ENSMUSG00000038246 | 6_Fam50b         | 0           | NA       | NA | NA | 0        | 0        | 0        | 0        | 0        | 0        |
| ENSMUSG00000038754 | 4_Elov13         | 0           | NA       | NA | NA | 0        | 0        | 0        | 0        | 0        | 0        |
| ENSMUSG00000039539 | 13_Sgcz          | 0           | NA       | NA | NA | 0        | 0        | 0        | 0        | 0        | 0        |
| ENSMUSG00000039720 | 6_Got1l1         | 0           | NA       | NA | NA | 0        | 0        | 0        | 0        | 0        | 0        |
| ENSMUSG00000039742 | 15_Fam71f1       | 0           | NA       | NA | NA | 0        | 0        | 0        | 0        | 0        | 0        |
| ENSMUSG00000039878 | 12_Slc39a5       | 0           | NA       | NA | NA | 0        | 0        | 0        | 0        | 0        | 0        |
| ENSMUSG00000040086 | 13_Tnni3k        | 0           | NA       | NA | NA | 0        | 0        | 0        | 0        | 0        | 0        |
| ENSMUSG00000040808 | 4_S100g          | 0           | NA       | NA | NA | 0        | 0        | 0        | 0        | 0        | 0        |
| ENSMUSG00000040919 | 13_4930505A04Rik | 0           | NA       | NA | NA | 0        | 0        | 0        | 0        | 0        | 0        |
| ENSMUSG00000041505 | 15_Gm3402        | 0           | NA       | NA | NA | 0        | 0        | 0        | 0        | 0        | 0        |
| ENSMUSG00000041565 | 16_L3mbtl4       | 0           | NA       | NA | NA | 0        | 0        | 0        | 0        | 0        | 0        |
| ENSMUSG00000041583 | 8_Obox6          | 0           | NA       | NA | NA | 0        | 0        | 0        | 0        | 0        | 0        |
| ENSMUSG00000041710 | 4_Trpc5          | 0           | NA       | NA | NA | 0        | 0        | 0        | 0        | 0        | 0        |
| ENSMUSG00000042279 | 13_H1foo         | 0           | NA       | NA | NA | 0        | 0        | 0        | 0        | 0        | 0        |
| ENSMUSG00000042386 | 7_Tex13          | 0           | NA       | NA | NA | 0        | 0        | 0        | 0        | 0        | 0        |
| ENSMUSG00000043383 | 4_Olfr1342       | 0           | NA       | NA | NA | 0        | 0        | 0        | 0        | 0        | 0        |
| ENSMUSG00000044084 | 2_4933402P03Rik  | 0           | NA       | NA | NA | 0        | 0        | 0        | 0        | 0        | 0        |
| ENSMUSG00000044441 | 2_Olfr1442       | 0           | NA       | NA | NA | 0        | 0        | 0        | 0        | 0        | 0        |
| ENSMUSG00000044581 | 7_4932415D10Rik  | 0           | NA       | NA | NA | 0        | 0        | 0        | 0        | 0        | 0        |
| ENSMUSG00000045174 | 10_Amer3         | 0           | NA       | NA | NA | 0        | 0        | 0        | 0        | 0        | 0        |
| ENSMUSG00000045591 | 5_Olig3          | 0           | NA       | NA | NA | 0        | 0        | 0        | 0        | 0        | 0        |
| ENSMUSG00000045693 | 7_Nlrp4e         | 0           | NA       | NA | NA | 0        | 0        | 0        | 0        | 0        | 0        |
| ENSMUSG00000045744 | 10_Bricd5        | 0           | NA       | NA | NA | 0        | 0        | 0        | 0        | 0        | 0        |
| ENSMUSG00000046088 | 8_Gm9805         | 0           | NA       | NA | NA | 0        | 0        | 0        | 0        | 0        | 0        |
| ENSMUSG00000046774 | 16_8030474K03Rik | 0           | NA       | NA | NA | 0        | 0        | 0        | 0        | 0        | 0        |
| ENSMUSG00000047352 | 5_Olfr976        | 0           | NA       | NA | NA | 0        | 0        | 0        | 0        | 0        | 0        |
| ENSMUSG00000047619 | 4_Ddl1           | 0           | NA       | NA | NA | 0        | 0        | 0        | 0        | 0        | 0        |
| ENSMUSG00000048206 | 6_Dnajb8         | 0           | NA       | NA | NA | 0        | 0        | 0        | 0        | 0        | 0        |
| ENSMUSG00000048483 | 5_Zdhhc22        | 0           | NA       | NA | NA | 0        | 0        | 0        | 0        | 0        | 0        |
| ENSMUSG00000048693 | 3_Olfr435        | 0           | NA       | NA | NA | 0        | 0        | 0        | 0        | 0        | 0        |
| ENSMUSG00000049133 | 6_Flg2           | 0           | NA       | NA | NA | 0        | 0        | 0        | 0        | 0        | 0        |
| ENSMUSG00000049152 | 11_Ugt3a2        | 0           | NA       | NA | NA | 0        | 0        | 0        | 0        | 0        | 0        |
| ENSMUSG00000049350 | 6_Zg16           | 0           | NA       | NA | NA | 0        | 0        | 0        | 0        | 0        | 0        |
| ENSMUSG00000049723 | 14_Mmp12         | 351.4781945 | 1.263839 | NA | NA | 311.0466 | 151.9988 | 150.7302 | 104.1807 | 1346.295 | 44.61818 |
| ENSMUSG00000049796 | 4_Crh            | 0           | NA       | NA | NA | 0        | 0        | 0        | 0        | 0        | 0        |
| ENSMUSG00000050114 | 7_Prdx6b         | 0           | NA       | NA | NA | 0        | 0        | 0        | 0        | 0        | 0        |
| ENSMUSG00000050783 | 4_Htr1f          | 0           | NA       | NA | NA | 0        | 0        | 0        | 0        | 0        | 0        |
| ENSMUSG00000050824 | 11_Sstr5         | 0           | NA       | NA | NA | 0        | 0        | 0        | 0        | 0        | 0        |
| ENSMUSG00000050966 | 9_Lin28a         | 0           | NA       | NA | NA | 0        | 0        | 0        | 0        | 0        | 0        |
| ENSMUSG00000050982 | 12_Apol10a       | 0           | NA       | NA | NA | 0        | 0        | 0        | 0        | 0        | 0        |
| ENSMUSG00000051207 | 6_Mrgprd         | 0           | NA       | NA | NA | 0        | 0        | 0        | 0        | 0        | 0        |
| ENSMUSG00000051257 | 3_Trap1a         | 0           | NA       | NA | NA | 0        | 0        | 0        | 0        | 0        | 0        |
| ENSMUSG00000051361 | 7_6030498E09Rik  | 0           | NA       | NA | NA | 0        | 0        | 0        | 0        | 0        | 0        |
| ENSMUSG00000051452 | 8_Gm11437        | 0           | NA       | NA | NA | 0        | 0        | 0        | 0        | 0        | 0        |
| ENSMUSG00000051481 | 5_Krtap31-2      | 0           | NA       | NA | NA | 0        | 0        | 0        | 0        | 0        | 0        |
| ENSMUSG00000051582 | 2_Otud6a         | 0           | NA       | NA | NA | 0        | 0        | 0        | 0        | 0        | 0        |
| ENSMUSG00000051956 | 4_Rnf133         | 0           | NA       | NA | NA | 0        | 0        | 0        | 0        | 0        | 0        |
| ENSMUSG00000051965 | 8_Nanos2         | 0           | NA       | NA | NA | 0        | 0        | 0        | 0        | 0        | 0        |
| ENSMUSG00000051980 | 13_Casr          | 0           | NA       | NA | NA | 0        | 0        | 0        | 0        | 0        | 0        |
| ENSMUSG00000052363 | 7_Zdhhc19        | 0           | NA       | NA | NA | 0        | 0        | 0        | 0        | 0        | 0        |
| ENSMUSG00000052562 | 15_Slc22a30      | 0           | NA       | NA | NA | 0        | 0        | 0        | 0        | 0        | 0        |
| ENSMUSG00000052730 | 6_Gm5111         | 0           | NA       | NA | NA | 0        | 0        | 0        | 0        | 0        | 0        |
| ENSMUSG00000053367 | 15_Gm6792        | 0           | NA       | NA | NA | 0        | 0        | 0        | 0        | 0        | 0        |
| ENSMUSG00000053375 | 7_Atp6v1e2       | 0           | NA       | NA | NA | 0        | 0        | 0        | 0        | 0        | 0        |
| ENSMUSG00000053593 | 10_Fate1         | 0           | NA       | NA | NA | 0        | 0        | 0        | 0        | 0        | 0        |
| ENSMUSG00000053640 | 2_Gm9915         | 0           | NA       | NA | NA | 0        | 0        | 0        | 0        | 0        | 0        |
| ENSMUSG00000054360 | 3_Bsx            | 0           | NA       | NA | NA | 0        | 0        | 0        | 0        | 0        | 0        |
| ENSMUSG00000054450 | 1_Gm9945         | 0           | NA       | NA | NA | 0        | 0        | 0        | 0        | 0        | 0        |
| ENSMUSG00000055198 | 3_Gm12830        | 0           | NA       | NA | NA | 0        | 0        | 0        | 0        | 0        | 0        |
| ENSMUSG00000055385 | 11_Rnf212        | 0           | NA       | NA | NA | 0        | 0        | 0        | 0        | 0        | 0        |
| ENSMUSG00000056316 | 2_Gm9996         | 0           | NA       | NA | NA | 0        | 0        | 0        | 0        | 0        | 0        |
| ENSMUSG00000056399 | 1_Prss34         | 0           | NA       | NA | NA | 0        | 0        | 0        | 0        | 0        | 0        |
| ENSMUSG00000056509 | 10_Gm9999        | 0           | NA       | NA | NA | 0        | 0        | 0        | 0        | 0        | 0        |
| ENSMUSG00000056606 | 2_Gm10000        | 0           | NA       | NA | NA | 0        | 0        | 0        | 0        | 0        | 0        |
| ENSMUSG00000056815 | 1_Gm6812         | 0           | NA       | NA | NA | 0        | 0        | 0        | 0        | 0        | 0        |
| ENSMUSG00000056946 | 2_Olfr512        | 0           | NA       | NA | NA | 0        | 0        | 0        | 0        | 0        | 0        |
| ENSMUSG00000057000 | 12_Nxf3          | 0           | NA       | NA | NA | 0        | 0        | 0        | 0        | 0        | 0        |
| ENSMUSG00000057697 | 2_Vmn1r53        | 0           | NA       | NA | NA | 0        | 0        | 0        | 0        | 0        | 0        |
| ENSMUSG00000057710 | 6_9630041A04Rik  | 0           | NA       | NA | NA | 0        | 0        | 0        | 0        | 0        | 0        |
| ENSMUSG00000058028 | 14_Zscan5b       | 0           | NA       | NA | NA | 0        | 0        | 0        | 0        | 0        | 0        |
| ENSMUSG00000058176 | 2_Gm5407         | 0           | NA       | NA | NA | 0        | 0        | 0        | 0        | 0        | 0        |
| ENSMUSG00000058246 | 6_Gm10037        | 0           | NA       | NA | NA | 0        | 0        | 0        | 0        | 0        | 0        |
| ENSMUSG00000058588 | 5_Vmn1r21        | 0           | NA       | NA | NA | 0        | 0        | 0        | 0        | 0        | 0        |
| ENSMUSG00000058618 | 6_AY761184       | 0           | NA       | NA | NA | 0        | 0        | 0        | 0        | 0        | 0        |
| ENSMUSG00000058925 | 11_1700011I03Rik | 0           | NA       | NA | NA | 0        | 0        | 0        | 0        | 0        | 0        |
| ENSMUSG00000059244 | 6_Gm10062        | 0           | NA       | NA | NA | 0        | 0        | 0        | 0        | 0        | 0        |
| ENSMUSG00000059301 | 5_Gm5434         | 0           | NA       | NA | NA | 0        | 0        | 0        | 0        | 0        | 0        |
| ENSMUSG00000059610 | 4_Olfr222        | 0           | NA       | NA | NA | 0        | 0        | 0        | 0        | 0        | 0        |
| ENSMUSG00000059626 | 13_Rhox3e        | 0           | NA       | NA | NA | 0        | 0        | 0        | 0        | 0        | 0        |
| ENSMUSG00000059690 | 1_1700020N15Rik  | 0           | NA       | NA | NA | 0        | 0        | 0        | 0        | 0        | 0        |
| ENSMUSG00000059887 | 5_Olfr1507       | 0           | NA       | NA | NA | 0        | 0        | 0        | 0        | 0        | 0        |
| ENSMUSG00000059956 | 14_Serpinb12     | 0           | NA       | NA | NA | 0        | 0        | 0        | 0        | 0        | 0        |
| ENSMUSG00000060499 | 7_Rpl10l         | 0           | NA       | NA | NA | 0        | 0        | 0        | 0        | 0        | 0        |
| ENSMUSG00000060678 | 4_Hist1h4c       | 0           | NA       | NA | NA | 0        | 0        | 0        | 0        | 0        | 0        |
| ENSMUSG00000060699 | 1_Vmn1r35        | 0           | NA       | NA | NA | 0        | 0        | 0        | 0        | 0        | 0        |
| ENSMUSG00000060715 | 9_1700019A02Rik  | 0           | NA       | NA | NA | 0        | 0        | 0        | 0        | 0        | 0        |
| ENSMUSG00000061144 | 5_Spink12        | 0           | NA       | NA | NA | 0        | 0        | 0        | 0        | 0        | 0        |
| ENSMUSG00000061561 | 4_Olfr373        | 0           | NA       | NA | NA | 0        | 0        | 0        | 0        | 0        | 0        |
| ENSMUSG00000061584 | 6_Lyg2           | 0           | NA       | NA | NA | 0        | 0        | 0        | 0        | 0        | 0        |
| ENSMUSG00000062046 | 1_5730460C07Rik  | 0           | NA       | NA | NA | 0        | 0        | 0        | 0        | 0        | 0        |
| ENSMUSG00000062456 | 3_Rpl9-ps6       | 2001.673431 | 2.304412 | NA | NA | 602.6021 | 654.3677 | 765.1571 | 8631.12  | 608.661  | 748.1327 |
| ENSMUSG00000062546 | 4_V1ra8          | 0           | NA       | NA | NA | 0        | 0        | 0        | 0        | 0        | 0        |
| ENSMUSG00000062553 | 2_Olfr709-ps1    | 0           | NA       | NA | NA | 0        | 0        | 0        | 0        | 0        | 0        |
| ENSMUSG00000062564 | 12_Tex28         | 0           | NA       | NA | NA | 0        | 0        | 0        | 0        | 0        | 0        |
| ENSMUSG00000063137 | 3_Olfr177        | 0           | NA       | NA | NA | 0        | 0        | 0        | 0        | 0        | 0        |

|                    |                   |             |          |    |    |          |          |          |          |          |          |
|--------------------|-------------------|-------------|----------|----|----|----------|----------|----------|----------|----------|----------|
| ENSMUSG00000063232 | 16_Serpina11      | 0           | NA       | NA | NA | 0        | 0        | 0        | 0        | 0        | 0        |
| ENSMUSG00000063779 | 6_Chil4           | 0           | NA       | NA | NA | 0        | 0        | 0        | 0        | 0        | 0        |
| ENSMUSG00000063932 | 4_Poteg           | 0           | NA       | NA | NA | 0        | 0        | 0        | 0        | 0        | 0        |
| ENSMUSG00000063935 | 3_Zar1            | 0           | NA       | NA | NA | 0        | 0        | 0        | 0        | 0        | 0        |
| ENSMUSG00000064201 | 8_Krt2            | 0           | NA       | NA | NA | 0        | 0        | 0        | 0        | 0        | 0        |
| ENSMUSG00000065968 | 7_Ilfm7           | 0           | NA       | NA | NA | 0        | 0        | 0        | 0        | 0        | 0        |
| ENSMUSG00000066272 | 4_Olfr559         | 0           | NA       | NA | NA | 0        | 0        | 0        | 0        | 0        | 0        |
| ENSMUSG00000066756 | 5_Igfb3           | 0           | NA       | NA | NA | 0        | 0        | 0        | 0        | 0        | 0        |
| ENSMUSG00000066897 | 5_Olfr872         | 0           | NA       | NA | NA | 0        | 0        | 0        | 0        | 0        | 0        |
| ENSMUSG00000067578 | 3_Cbln4           | 0           | NA       | NA | NA | 0        | 0        | 0        | 0        | 0        | 0        |
| ENSMUSG00000067604 | 8_Nms             | 0           | NA       | NA | NA | 0        | 0        | 0        | 0        | 0        | 0        |
| ENSMUSG00000067615 | 3_Krt81           | 0           | NA       | NA | NA | 0        | 0        | 0        | 0        | 0        | 0        |
| ENSMUSG00000068151 | 7_A230006K03Rik   | 0           | NA       | NA | NA | 0        | 0        | 0        | 0        | 0        | 0        |
| ENSMUSG00000068314 | 4_Gm6899          | 0           | NA       | NA | NA | 0        | 0        | 0        | 0        | 0        | 0        |
| ENSMUSG00000068428 | 6_Gmnc            | 0           | NA       | NA | NA | 0        | 0        | 0        | 0        | 0        | 0        |
| ENSMUSG00000068806 | 4_Olfr1259        | 0           | NA       | NA | NA | 0        | 0        | 0        | 0        | 0        | 0        |
| ENSMUSG00000069189 | 4_Zdhhc11         | 0           | NA       | NA | NA | 0        | 0        | 0        | 0        | 0        | 0        |
| ENSMUSG00000069390 | 2_Olfr707         | 0           | NA       | NA | NA | 0        | 0        | 0        | 0        | 0        | 0        |
| ENSMUSG00000069733 | 11_Ube2u          | 0           | NA       | NA | NA | 0        | 0        | 0        | 0        | 0        | 0        |
| ENSMUSG00000070330 | 2_Tmem235         | 0           | NA       | NA | NA | 0        | 0        | 0        | 0        | 0        | 0        |
| ENSMUSG00000070533 | 11_Wfdc8          | 0           | NA       | NA | NA | 0        | 0        | 0        | 0        | 0        | 0        |
| ENSMUSG00000070686 | 10_C87414         | 0           | NA       | NA | NA | 0        | 0        | 0        | 0        | 0        | 0        |
| ENSMUSG00000070902 | 5_Zfp352          | 0           | NA       | NA | NA | 0        | 0        | 0        | 0        | 0        | 0        |
| ENSMUSG00000071033 | 1_Gm10308         | 0           | NA       | NA | NA | 0        | 0        | 0        | 0        | 0        | 0        |
| ENSMUSG00000071767 | 4_Rhox7a          | 0           | NA       | NA | NA | 0        | 0        | 0        | 0        | 0        | 0        |
| ENSMUSG00000071890 | 4_Mroh9           | 0           | NA       | NA | NA | 0        | 0        | 0        | 0        | 0        | 0        |
| ENSMUSG00000072479 | 10_Xlrb5b         | 0           | NA       | NA | NA | 0        | 0        | 0        | 0        | 0        | 0        |
| ENSMUSG00000072613 | 12_1700049E17Rik2 | 0           | NA       | NA | NA | 0        | 0        | 0        | 0        | 0        | 0        |
| ENSMUSG00000072625 | 1_Gdf2            | 0           | NA       | NA | NA | 0        | 0        | 0        | 0        | 0        | 0        |
| ENSMUSG00000072664 | 10_Ugt3a1         | 0           | NA       | NA | NA | 0        | 0        | 0        | 0        | 0        | 0        |
| ENSMUSG00000072693 | 2_Gm10401         | 31.58493194 | 21.85311 | NA | NA | 0        | 0        | 0        | 189.5096 | 0        | 0        |
| ENSMUSG00000072821 | 4_Gm6351          | 0           | NA       | NA | NA | 0        | 0        | 0        | 0        | 0        | 0        |
| ENSMUSG00000072952 | 6_Gm5878          | 0           | NA       | NA | NA | 0        | 0        | 0        | 0        | 0        | 0        |
| ENSMUSG00000073294 | 4_AU022751        | 0           | NA       | NA | NA | 0        | 0        | 0        | 0        | 0        | 0        |
| ENSMUSG00000073551 | 4_Spink13         | 0           | NA       | NA | NA | 0        | 0        | 0        | 0        | 0        | 0        |
| ENSMUSG00000073610 | 3_Gm10549         | 0           | NA       | NA | NA | 0        | 0        | 0        | 0        | 0        | 0        |
| ENSMUSG00000073699 | 3_Gm833           | 0           | NA       | NA | NA | 0        | 0        | 0        | 0        | 0        | 0        |
| ENSMUSG00000073759 | 6_4933407E24Rik   | 0           | NA       | NA | NA | 0        | 0        | 0        | 0        | 0        | 0        |
| ENSMUSG00000073834 | 10_Mup11          | 0           | NA       | NA | NA | 0        | 0        | 0        | 0        | 0        | 0        |
| ENSMUSG00000073899 | 1_Olfr1532-ps1    | 0           | NA       | NA | NA | 0        | 0        | 0        | 0        | 0        | 0        |
| ENSMUSG00000073954 | 3_Olfr594         | 0           | NA       | NA | NA | 0        | 0        | 0        | 0        | 0        | 0        |
| ENSMUSG00000073991 | 4_Cnbd1           | 0           | NA       | NA | NA | 0        | 0        | 0        | 0        | 0        | 0        |
| ENSMUSG00000073998 | 1_Olfr520         | 0           | NA       | NA | NA | 0        | 0        | 0        | 0        | 0        | 0        |
| ENSMUSG00000074003 | 4_Gucy2d          | 0           | NA       | NA | NA | 0        | 0        | 0        | 0        | 0        | 0        |
| ENSMUSG00000074029 | 2_Gm10608         | 0           | NA       | NA | NA | 0        | 0        | 0        | 0        | 0        | 0        |
| ENSMUSG00000074062 | 5_Fbxw16          | 0           | NA       | NA | NA | 0        | 0        | 0        | 0        | 0        | 0        |
| ENSMUSG00000074704 | 9_Rad21l          | 0           | NA       | NA | NA | 0        | 0        | 0        | 0        | 0        | 0        |
| ENSMUSG00000074812 | 10_Spdye4c        | 0           | NA       | NA | NA | 0        | 0        | 0        | 0        | 0        | 0        |
| ENSMUSG00000074872 | 2_Ctnx2           | 0           | NA       | NA | NA | 0        | 0        | 0        | 0        | 0        | 0        |
| ENSMUSG00000074991 | 4_Gabrr3          | 0           | NA       | NA | NA | 0        | 0        | 0        | 0        | 0        | 0        |
| ENSMUSG00000074997 | 3_Pln1rt1         | 0           | NA       | NA | NA | 0        | 0        | 0        | 0        | 0        | 0        |
| ENSMUSG00000075045 | 4_Gm4981          | 0           | NA       | NA | NA | 0        | 0        | 0        | 0        | 0        | 0        |
| ENSMUSG00000075081 | 4_Olfr1247        | 0           | NA       | NA | NA | 0        | 0        | 0        | 0        | 0        | 0        |
| ENSMUSG00000075212 | 3_Olfr154         | 0           | NA       | NA | NA | 0        | 0        | 0        | 0        | 0        | 0        |
| ENSMUSG00000075215 | 1_Olfr1000        | 0           | NA       | NA | NA | 0        | 0        | 0        | 0        | 0        | 0        |
| ENSMUSG00000075249 | 12_Fsfp2          | 0           | NA       | NA | NA | 0        | 0        | 0        | 0        | 0        | 0        |
| ENSMUSG00000075370 | 10_Igll1          | 0           | NA       | NA | NA | 0        | 0        | 0        | 0        | 0        | 0        |
| ENSMUSG00000075480 | 1_Gm10840         | 0           | NA       | NA | NA | 0        | 0        | 0        | 0        | 0        | 0        |
| ENSMUSG00000075517 | 3_Cyp2d37-ps      | 0           | NA       | NA | NA | 0        | 0        | 0        | 0        | 0        | 0        |
| ENSMUSG00000078126 | 3_Rpl23a-ps3      | 1603.847709 | 2.918179 | NA | NA | 324.8529 | 447.4089 | 352.0873 | 7780.807 | 374.4736 | 343.4562 |
| ENSMUSG00000078127 | 2_Fam170b         | 0           | NA       | NA | NA | 0        | 0        | 0        | 0        | 0        | 0        |
| ENSMUSG00000078129 | 1_Actl10          | 0           | NA       | NA | NA | 0        | 0        | 0        | 0        | 0        | 0        |
| ENSMUSG00000078173 | 3_Lenep           | 23.13209537 | -5.0802  | NA | NA | 0        | 134.8238 | 0        | 3.968787 | 0        | 0        |
| ENSMUSG00000078508 | 1_Gm13128         | 0           | NA       | NA | NA | 0        | 0        | 0        | 0        | 0        | 0        |
| ENSMUSG00000078626 | 2_Gm12790         | 0           | NA       | NA | NA | 0        | 0        | 0        | 0        | 0        | 0        |
| ENSMUSG00000078650 | 2_G6pc            | 0           | NA       | NA | NA | 0        | 0        | 0        | 0        | 0        | 0        |
| ENSMUSG00000078683 | 9_Mup1            | 0           | NA       | NA | NA | 0        | 0        | 0        | 0        | 0        | 0        |
| ENSMUSG00000078688 | 11_Mup2           | 0           | NA       | NA | NA | 0        | 0        | 0        | 0        | 0        | 0        |
| ENSMUSG00000078799 | 5_Sult2a5         | 0           | NA       | NA | NA | 0        | 0        | 0        | 0        | 0        | 0        |
| ENSMUSG00000078889 | 11_Gm14288        | 0           | NA       | NA | NA | 0        | 0        | 0        | 0        | 0        | 0        |
| ENSMUSG00000078958 | 9_Atp6ap1l        | 0           | NA       | NA | NA | 0        | 0        | 0        | 0        | 0        | 0        |
| ENSMUSG00000078962 | 4_4932414J04Rik   | 0           | NA       | NA | NA | 0        | 0        | 0        | 0        | 0        | 0        |
| ENSMUSG00000078972 | 1_Gm15557         | 0           | NA       | NA | NA | 0        | 0        | 0        | 0        | 0        | 0        |
| ENSMUSG00000078984 | 1_Gm11027         | 0           | NA       | NA | NA | 0        | 0        | 0        | 0        | 0        | 0        |
| ENSMUSG00000079034 | 2_Gm8300          | 0           | NA       | NA | NA | 0        | 0        | 0        | 0        | 0        | 0        |
| ENSMUSG00000079277 | 9_Hoxd3           | 0           | NA       | NA | NA | 0        | 0        | 0        | 0        | 0        | 0        |
| ENSMUSG00000079378 | 8_Gm8279          | 0           | NA       | NA | NA | 0        | 0        | 0        | 0        | 0        | 0        |
| ENSMUSG00000079389 | 10_Gm3149         | 0           | NA       | NA | NA | 0        | 0        | 0        | 0        | 0        | 0        |
| ENSMUSG00000079407 | 9_1700110I01Rik   | 0           | NA       | NA | NA | 0        | 0        | 0        | 0        | 0        | 0        |
| ENSMUSG00000079460 | 11_4933403O08Rik  | 0           | NA       | NA | NA | 0        | 0        | 0        | 0        | 0        | 0        |
| ENSMUSG00000079564 | 2_Gm11149         | 0           | NA       | NA | NA | 0        | 0        | 0        | 0        | 0        | 0        |
| ENSMUSG00000079604 | 9_Gm13219         | 0           | NA       | NA | NA | 0        | 0        | 0        | 0        | 0        | 0        |
| ENSMUSG00000079626 | 2_Rhox7b          | 0           | NA       | NA | NA | 0        | 0        | 0        | 0        | 0        | 0        |
| ENSMUSG00000079630 | 2_Rhox4f          | 0           | NA       | NA | NA | 0        | 0        | 0        | 0        | 0        | 0        |
| ENSMUSG00000079636 | 11_Rhox3c         | 0           | NA       | NA | NA | 0        | 0        | 0        | 0        | 0        | 0        |
| ENSMUSG00000081362 | 3_Cyp2j7          | 0           | NA       | NA | NA | 0        | 0        | 0        | 0        | 0        | 0        |
| ENSMUSG00000083193 | 1_4930595D18Rik   | 0           | NA       | NA | NA | 0        | 0        | 0        | 0        | 0        | 0        |
| ENSMUSG00000084346 | 4_Cyp4a30b        | 0           | NA       | NA | NA | 0        | 0        | 0        | 0        | 0        | 0        |
| ENSMUSG00000084754 | 1_Gm12532         | 0           | NA       | NA | NA | 0        | 0        | 0        | 0        | 0        | 0        |
| ENSMUSG00000084772 | 1_Gm15473         | 0           | NA       | NA | NA | 0        | 0        | 0        | 0        | 0        | 0        |
| ENSMUSG00000084773 | 1_Gm12159         | 0           | NA       | NA | NA | 0        | 0        | 0        | 0        | 0        | 0        |
| ENSMUSG00000084805 | 1_Gm12273         | 0           | NA       | NA | NA | 0        | 0        | 0        | 0        | 0        | 0        |
| ENSMUSG00000084909 | 1_4930528G23Rik   | 0           | NA       | NA | NA | 0        | 0        | 0        | 0        | 0        | 0        |
| ENSMUSG00000084921 | 1_Gm13838         | 0           | NA       | NA | NA | 0        | 0        | 0        | 0        | 0        | 0        |
| ENSMUSG00000084923 | 1_Gm15611         | 0           | NA       | NA | NA | 0        | 0        | 0        | 0        | 0        | 0        |
| ENSMUSG00000084954 | 1_Gm16351         | 0           | NA       | NA | NA | 0        | 0        | 0        | 0        | 0        | 0        |
| ENSMUSG00000084966 | 1_2810471M01Rik   | 0           | NA       | NA | NA | 0        | 0        | 0        | 0        | 0        | 0        |
| ENSMUSG00000085000 | 1_Gm14553         | 0           | NA       | NA | NA | 0        | 0        | 0        | 0        | 0        | 0        |
| ENSMUSG00000085046 | 1_Gm11467         | 0           | NA       | NA | NA | 0        | 0        | 0        | 0        | 0        | 0        |
| ENSMUSG00000085074 | 1_Gm11494         | 0           | NA       | NA | NA | 0        | 0        | 0        | 0        | 0        | 0        |
| ENSMUSG00000085113 | 1_B130011K05Rik   | 0           | NA       | NA | NA | 0        | 0        | 0        | 0        | 0        | 0        |
| ENSMUSG00000085158 | 1_Gm14264         | 0           | NA       | NA | NA | 0        | 0        | 0        | 0        | 0        | 0        |
| ENSMUSG00000085188 | 1_Gm11368         | 0           | NA       | NA | NA | 0        | 0        | 0        | 0        | 0        | 0        |
| ENSMUSG00000085275 | 1_Gm14487         | 0           | NA       | NA | NA | 0        | 0        | 0        | 0        | 0        | 0        |
| ENSMUSG00000085325 | 7_Gm14974         | 0           | NA       | NA | NA | 0        | 0        | 0        | 0        | 0        | 0        |
| ENSMUSG00000085402 | 1_Gm12111         | 0           | NA       | NA | NA | 0        | 0        | 0        | 0        | 0        | 0        |
| ENSMUSG00000085489 | 7_Gm3669          | 0           | NA       | NA | NA | 0        | 0        | 0        | 0        | 0        | 0        |

|                    |                  |             |          |    |    |          |          |          |         |          |          |
|--------------------|------------------|-------------|----------|----|----|----------|----------|----------|---------|----------|----------|
| ENSMUSG00000085640 | 1_Gm14064        | 0 NA        | NA       | NA | 0  | 0        | 0        | 0        | 0       | 0        |          |
| ENSMUSG00000085656 | 1_Gm13180        | 0 NA        | NA       | NA | 0  | 0        | 0        | 0        | 0       | 0        |          |
| ENSMUSG00000085677 | 7_4930594C21Rik  | 0 NA        | NA       | NA | 0  | 0        | 0        | 0        | 0       | 0        |          |
| ENSMUSG00000085682 | 1_Gm14267        | 0 NA        | NA       | NA | 0  | 0        | 0        | 0        | 0       | 0        |          |
| ENSMUSG00000085740 | 1_4930505K14Rik  | 0 NA        | NA       | NA | 0  | 0        | 0        | 0        | 0       | 0        |          |
| ENSMUSG00000085757 | 7_1700019B21Rik  | 0 NA        | NA       | NA | 0  | 0        | 0        | 0        | 0       | 0        |          |
| ENSMUSG00000085798 | 1_Gm2018         | 0 NA        | NA       | NA | 0  | 0        | 0        | 0        | 0       | 0        |          |
| ENSMUSG00000085844 | 1_Gm11690        | 0 NA        | NA       | NA | 0  | 0        | 0        | 0        | 0       | 0        |          |
| ENSMUSG00000085896 | 2_5330429C05Rik  | 0 NA        | NA       | NA | 0  | 0        | 0        | 0        | 0       | 0        |          |
| ENSMUSG00000086177 | 1_Gm14616        | 0 NA        | NA       | NA | 0  | 0        | 0        | 0        | 0       | 0        |          |
| ENSMUSG00000086179 | 1_Gm14317        | 0 NA        | NA       | NA | 0  | 0        | 0        | 0        | 0       | 0        |          |
| ENSMUSG00000086425 | 7_F730016J06Rik  | 0 NA        | NA       | NA | 0  | 0        | 0        | 0        | 0       | 0        |          |
| ENSMUSG00000086441 | 1_Gm15046        | 0 NA        | NA       | NA | 0  | 0        | 0        | 0        | 0       | 0        |          |
| ENSMUSG00000086485 | 2_Gm15458        | 0 NA        | NA       | NA | 0  | 0        | 0        | 0        | 0       | 0        |          |
| ENSMUSG00000086653 | 1_9130015L21Rik  | 0 NA        | NA       | NA | 0  | 0        | 0        | 0        | 0       | 0        |          |
| ENSMUSG00000087032 | 1_Gm13874        | 0 NA        | NA       | NA | 0  | 0        | 0        | 0        | 0       | 0        |          |
| ENSMUSG00000087040 | 1_Gm14033        | 0 NA        | NA       | NA | 0  | 0        | 0        | 0        | 0       | 0        |          |
| ENSMUSG00000087116 | 1_Gm12324        | 0 NA        | NA       | NA | 0  | 0        | 0        | 0        | 0       | 0        |          |
| ENSMUSG00000087124 | 1_Gm13839        | 0 NA        | NA       | NA | 0  | 0        | 0        | 0        | 0       | 0        |          |
| ENSMUSG00000087211 | 7_Lhx1os         | 0 NA        | NA       | NA | 0  | 0        | 0        | 0        | 0       | 0        |          |
| ENSMUSG00000087238 | 1_Gm12865        | 0 NA        | NA       | NA | 0  | 0        | 0        | 0        | 0       | 0        |          |
| ENSMUSG00000087279 | 10_4930544D05Rik | 0 NA        | NA       | NA | 0  | 0        | 0        | 0        | 0       | 0        |          |
| ENSMUSG00000087388 | 1_Gm12128        | 0 NA        | NA       | NA | 0  | 0        | 0        | 0        | 0       | 0        |          |
| ENSMUSG00000087407 | 1_Gm11431        | 0 NA        | NA       | NA | 0  | 0        | 0        | 0        | 0       | 0        |          |
| ENSMUSG00000087450 | 1_Gm13994        | 0 NA        | NA       | NA | 0  | 0        | 0        | 0        | 0       | 0        |          |
| ENSMUSG00000087491 | 7_Gm14552        | 0 NA        | NA       | NA | 0  | 0        | 0        | 0        | 0       | 0        |          |
| ENSMUSG00000087585 | 1_Gm14100        | 0 NA        | NA       | NA | 0  | 0        | 0        | 0        | 0       | 0        |          |
| ENSMUSG00000087587 | 1_Gm15245        | 0 NA        | NA       | NA | 0  | 0        | 0        | 0        | 0       | 0        |          |
| ENSMUSG00000087602 | 1_Gm12753        | 0 NA        | NA       | NA | 0  | 0        | 0        | 0        | 0       | 0        |          |
| ENSMUSG00000087637 | 1_Gm11986        | 0 NA        | NA       | NA | 0  | 0        | 0        | 0        | 0       | 0        |          |
| ENSMUSG00000090104 | 1_Slmapos2       | 0 NA        | NA       | NA | 0  | 0        | 0        | 0        | 0       | 0        |          |
| ENSMUSG00000090317 | 1_Gm17324        | 0 NA        | NA       | NA | 0  | 0        | 0        | 0        | 0       | 0        |          |
| ENSMUSG00000090472 | 8_Gm3047         | 0 NA        | NA       | NA | 0  | 0        | 0        | 0        | 0       | 0        |          |
| ENSMUSG00000090625 | 1_Gm20721        | 707.9881882 | 2.513755 | NA | NA | 170.5478 | 254.1901 | 208.2608 | 3337.75 | 101.8206 | 175.3598 |
| ENSMUSG00000090634 | 1_Gm8126         | 0 NA        | NA       | NA | NA | 0        | 0        | 0        | 0       | 0        | 0        |
| ENSMUSG00000090827 | 8_Gm8297         | 0 NA        | NA       | NA | NA | 0        | 0        | 0        | 0       | 0        | 0        |
| ENSMUSG00000090894 | 2_Olfr110        | 0 NA        | NA       | NA | NA | 0        | 0        | 0        | 0       | 0        | 0        |
| ENSMUSG00000091055 | 2_Siglec15       | 0 NA        | NA       | NA | NA | 0        | 0        | 0        | 0       | 0        | 0        |
| ENSMUSG00000091110 | 1_Gm2832         | 0 NA        | NA       | NA | NA | 0        | 0        | 0        | 0       | 0        | 0        |
| ENSMUSG00000091140 | 1_Gm17124        | 0 NA        | NA       | NA | NA | 0        | 0        | 0        | 0       | 0        | 0        |
| ENSMUSG00000091400 | 1_Gm6356         | 0 NA        | NA       | NA | NA | 0        | 0        | 0        | 0       | 0        | 0        |
| ENSMUSG00000091430 | 1_Platr19        | 0 NA        | NA       | NA | NA | 0        | 0        | 0        | 0       | 0        | 0        |
| ENSMUSG00000091541 | 1_Vmn1r9         | 0 NA        | NA       | NA | NA | 0        | 0        | 0        | 0       | 0        | 0        |
| ENSMUSG00000091561 | 2_Gm6665         | 0 NA        | NA       | NA | NA | 0        | 0        | 0        | 0       | 0        | 0        |
| ENSMUSG00000091614 | 1_Gm17657        | 0 NA        | NA       | NA | NA | 0        | 0        | 0        | 0       | 0        | 0        |
| ENSMUSG00000091722 | 1_Siah3          | 0 NA        | NA       | NA | NA | 0        | 0        | 0        | 0       | 0        | 0        |
| ENSMUSG00000091740 | 2_Gm7929         | 0 NA        | NA       | NA | NA | 0        | 0        | 0        | 0       | 0        | 0        |
| ENSMUSG00000091779 | 8_Gm21293        | 0 NA        | NA       | NA | NA | 0        | 0        | 0        | 0       | 0        | 0        |
| ENSMUSG00000091945 | 1_Vmn2r114       | 0 NA        | NA       | NA | NA | 0        | 0        | 0        | 0       | 0        | 0        |
| ENSMUSG00000092074 | 1_Dynl11a        | 316.9531054 | 4.502572 | NA | NA | 8.121322 | 30.91501 | 41.42204 | 1716.5  | 74.66845 | 30.09133 |
| ENSMUSG00000092080 | 1_Vmn2r16        | 0 NA        | NA       | NA | NA | 0        | 0        | 0        | 0       | 0        | 0        |
| ENSMUSG00000092152 | 1_Gm17026        | 0 NA        | NA       | NA | NA | 0        | 0        | 0        | 0       | 0        | 0        |
| ENSMUSG00000092219 | 1_Gm20443        | 0 NA        | NA       | NA | NA | 0        | 0        | 0        | 0       | 0        | 0        |
| ENSMUSG00000092276 | 2_1700116B05Rik  | 0 NA        | NA       | NA | NA | 0        | 0        | 0        | 0       | 0        | 0        |
| ENSMUSG00000092310 | 2_Gm20509        | 0 NA        | NA       | NA | NA | 0        | 0        | 0        | 0       | 0        | 0        |
| ENSMUSG00000093376 | 1_Vmn1r23        | 0 NA        | NA       | NA | NA | 0        | 0        | 0        | 0       | 0        | 0        |
| ENSMUSG00000093482 | 8_Gm20619        | 0 NA        | NA       | NA | NA | 0        | 0        | 0        | 0       | 0        | 0        |
| ENSMUSG00000093550 | 7_Higd1c         | 0 NA        | NA       | NA | NA | 0        | 0        | 0        | 0       | 0        | 0        |
| ENSMUSG00000093817 | 7_Gm2101         | 0 NA        | NA       | NA | NA | 0        | 0        | 0        | 0       | 0        | 0        |
| ENSMUSG00000093833 | 1_Gm7970         | 0 NA        | NA       | NA | NA | 0        | 0        | 0        | 0       | 0        | 0        |
| ENSMUSG00000093844 | 1_Gm16381        | 0 NA        | NA       | NA | NA | 0        | 0        | 0        | 0       | 0        | 0        |
| ENSMUSG00000093857 | 1_Gm21645        | 0 NA        | NA       | NA | NA | 0        | 0        | 0        | 0       | 0        | 0        |
| ENSMUSG00000093926 | 1_Gm17027        | 0 NA        | NA       | NA | NA | 0        | 0        | 0        | 0       | 0        | 0        |
| ENSMUSG00000093931 | 2_Amy2a3         | 0 NA        | NA       | NA | NA | 0        | 0        | 0        | 0       | 0        | 0        |
| ENSMUSG00000093962 | 7_Gm11756        | 0 NA        | NA       | NA | NA | 0        | 0        | 0        | 0       | 0        | 0        |
| ENSMUSG00000094025 | 7_Gm8879         | 0 NA        | NA       | NA | NA | 0        | 0        | 0        | 0       | 0        | 0        |
| ENSMUSG00000094105 | 7_Gm8922         | 0 NA        | NA       | NA | NA | 0        | 0        | 0        | 0       | 0        | 0        |
| ENSMUSG00000094113 | 7_5430401F13Rik  | 0 NA        | NA       | NA | NA | 0        | 0        | 0        | 0       | 0        | 0        |
| ENSMUSG00000094133 | 1_Olfr1431       | 0 NA        | NA       | NA | NA | 0        | 0        | 0        | 0       | 0        | 0        |
| ENSMUSG00000094144 | 8_Gm21312        | 0 NA        | NA       | NA | NA | 0        | 0        | 0        | 0       | 0        | 0        |
| ENSMUSG00000094155 | 1_Gm21699        | 0 NA        | NA       | NA | NA | 0        | 0        | 0        | 0       | 0        | 0        |
| ENSMUSG00000094157 | 7_Gm7995         | 0 NA        | NA       | NA | NA | 0        | 0        | 0        | 0       | 0        | 0        |
| ENSMUSG00000094205 | 7_Gm8926         | 0 NA        | NA       | NA | NA | 0        | 0        | 0        | 0       | 0        | 0        |
| ENSMUSG00000094258 | 7_Gm8159         | 0 NA        | NA       | NA | NA | 0        | 0        | 0        | 0       | 0        | 0        |
| ENSMUSG00000094379 | 1_Vmn1r202       | 0 NA        | NA       | NA | NA | 0        | 0        | 0        | 0       | 0        | 0        |
| ENSMUSG00000094385 | 1_Vmn1r123       | 0 NA        | NA       | NA | NA | 0        | 0        | 0        | 0       | 0        | 0        |
| ENSMUSG00000094620 | 1_Cldn34c3       | 0 NA        | NA       | NA | NA | 0        | 0        | 0        | 0       | 0        | 0        |
| ENSMUSG00000094638 | 1_Gm21972        | 0 NA        | NA       | NA | NA | 0        | 0        | 0        | 0       | 0        | 0        |
| ENSMUSG00000094648 | 1_Gm13287        | 0 NA        | NA       | NA | NA | 0        | 0        | 0        | 0       | 0        | 0        |
| ENSMUSG00000094706 | 7_Gm10338        | 0 NA        | NA       | NA | NA | 0        | 0        | 0        | 0       | 0        | 0        |
| ENSMUSG00000094804 | 1_Gm21977        | 0 NA        | NA       | NA | NA | 0        | 0        | 0        | 0       | 0        | 0        |
| ENSMUSG00000094811 | 7_Gm21103        | 0 NA        | NA       | NA | NA | 0        | 0        | 0        | 0       | 0        | 0        |
| ENSMUSG00000094817 | 8_Cphx3          | 0 NA        | NA       | NA | NA | 0        | 0        | 0        | 0       | 0        | 0        |
| ENSMUSG00000094841 | 1_Gm10610        | 0 NA        | NA       | NA | NA | 0        | 0        | 0        | 0       | 0        | 0        |
| ENSMUSG00000094904 | 1_Gm14476        | 0 NA        | NA       | NA | NA | 0        | 0        | 0        | 0       | 0        | 0        |
| ENSMUSG00000094918 | 3_Gm8765         | 0 NA        | NA       | NA | NA | 0        | 0        | 0        | 0       | 0        | 0        |
| ENSMUSG00000094931 | 1_Vmn1r160       | 0 NA        | NA       | NA | NA | 0        | 0        | 0        | 0       | 0        | 0        |
| ENSMUSG00000094978 | 2_Scgb1b20       | 0 NA        | NA       | NA | NA | 0        | 0        | 0        | 0       | 0        | 0        |
| ENSMUSG00000094991 | 2_Gm21718        | 0 NA        | NA       | NA | NA | 0        | 0        | 0        | 0       | 0        | 0        |
| ENSMUSG00000095022 | 8_Gm20765        | 0 NA        | NA       | NA | NA | 0        | 0        | 0        | 0       | 0        | 0        |
| ENSMUSG00000095113 | 1_Gm3633         | 0 NA        | NA       | NA | NA | 0        | 0        | 0        | 0       | 0        | 0        |
| ENSMUSG00000095143 | 5_Hsd3b4         | 0 NA        | NA       | NA | NA | 0        | 0        | 0        | 0       | 0        | 0        |
| ENSMUSG00000095257 | 1_Scgb1b3        | 0 NA        | NA       | NA | NA | 0        | 0        | 0        | 0       | 0        | 0        |
| ENSMUSG00000095300 | 1_Gm906          | 0 NA        | NA       | NA | NA | 0        | 0        | 0        | 0       | 0        | 0        |
| ENSMUSG00000095318 | 1_Gm8024         | 0 NA        | NA       | NA | NA | 0        | 0        | 0        | 0       | 0        | 0        |
| ENSMUSG00000095368 | 7_Gm3012         | 0 NA        | NA       | NA | NA | 0        | 0        | 0        | 0       | 0        | 0        |
| ENSMUSG00000095371 | 1_Gm9611         | 0 NA        | NA       | NA | NA | 0        | 0        | 0        | 0       | 0        | 0        |
| ENSMUSG00000095388 | 7_Gm10681        | 0 NA        | NA       | NA | NA | 0        | 0        | 0        | 0       | 0        | 0        |
| ENSMUSG00000095445 | 1_Gm14475        | 0 NA        | NA       | NA | NA | 0        | 0        | 0        | 0       | 0        | 0        |
| ENSMUSG00000095466 | 7_Gm3015         | 0 NA        | NA       | NA | NA | 0        | 0        | 0        | 0       | 0        | 0        |
| ENSMUSG00000095503 | 4_Gm3147         | 0 NA        | NA       | NA | NA | 0        | 0        | 0        | 0       | 0        | 0        |
| ENSMUSG00000095533 | 7_Gm10413        | 0 NA        | NA       | NA | NA | 0        | 0        | 0        | 0       | 0        | 0        |
| ENSMUSG00000095538 | 1_Gm21983        | 0 NA        | NA       | NA | NA | 0        | 0        | 0        | 0       | 0        | 0        |
| ENSMUSG00000095540 | 1_Esp4           | 0 NA        | NA       | NA | NA | 0        | 0        | 0        | 0       | 0        | 0        |
| ENSMUSG00000095551 | 1_Gm7980         | 0 NA        | NA       | NA | NA | 0        | 0        | 0        | 0       | 0        | 0        |
| ENSMUSG00000095557 | 7_Gm3415         | 0 NA        | NA       | NA | NA | 0        | 0        | 0        | 0       | 0        | 0        |
| ENSMUSG00000095655 | 1_Gm14479        | 0 NA        | NA       | NA | NA | 0        | 0        | 0        | 0       | 0        | 0        |

|                     |                 |             |          |    |    |          |          |          |          |          |          |
|---------------------|-----------------|-------------|----------|----|----|----------|----------|----------|----------|----------|----------|
| ENSMUSG00000095663  | 1_Gm2310        | 0           | NA       | NA | NA | 0        | 0        | 0        | 0        | 0        | 0        |
| ENSMUSG00000095717  | 1_Gm2056        | 0           | NA       | NA | NA | 0        | 0        | 0        | 0        | 0        | 0        |
| ENSMUSG00000095741  | 3_Rhox2f        | 0           | NA       | NA | NA | 0        | 0        | 0        | 0        | 0        | 0        |
| ENSMUSG00000095743  | 1_Gm17654       | 0           | NA       | NA | NA | 0        | 0        | 0        | 0        | 0        | 0        |
| ENSMUSG00000095829  | 8_Speer1        | 0           | NA       | NA | NA | 0        | 0        | 0        | 0        | 0        | 0        |
| ENSMUSG00000095912  | 1_Gm3317        | 0           | NA       | NA | NA | 0        | 0        | 0        | 0        | 0        | 0        |
| ENSMUSG00000095941  | 1_Gm21964       | 0           | NA       | NA | NA | 0        | 0        | 0        | 0        | 0        | 0        |
| ENSMUSG00000096042  | 1_Vmn2r125      | 0           | NA       | NA | NA | 0        | 0        | 0        | 0        | 0        | 0        |
| ENSMUSG00000096066  | 4_Gm10424       | 0           | NA       | NA | NA | 0        | 0        | 0        | 0        | 0        | 0        |
| ENSMUSG00000096097  | 1_Gm14477       | 0           | NA       | NA | NA | 0        | 0        | 0        | 0        | 0        | 0        |
| ENSMUSG00000096228  | 1_Olfr5         | 0           | NA       | NA | NA | 0        | 0        | 0        | 0        | 0        | 0        |
| ENSMUSG00000096327  | 1_Gm21980       | 0           | NA       | NA | NA | 0        | 0        | 0        | 0        | 0        | 0        |
| ENSMUSG00000096486  | 1_Gm5426        | 0           | NA       | NA | NA | 0        | 0        | 0        | 0        | 0        | 0        |
| ENSMUSG00000096569  | 2_Amy2a2        | 0           | NA       | NA | NA | 0        | 0        | 0        | 0        | 0        | 0        |
| ENSMUSG00000096573  | 2_1700009J07Rik | 0           | NA       | NA | NA | 0        | 0        | 0        | 0        | 0        | 0        |
| ENSMUSG00000096574  | 7_Gm2956        | 0           | NA       | NA | NA | 0        | 0        | 0        | 0        | 0        | 0        |
| ENSMUSG00000096582  | 1_Gm13289       | 0           | NA       | NA | NA | 0        | 0        | 0        | 0        | 0        | 0        |
| ENSMUSG00000096593  | 1_Vmn2r54       | 0           | NA       | NA | NA | 0        | 0        | 0        | 0        | 0        | 0        |
| ENSMUSG00000096607  | 1_7530416G11Rik | 0           | NA       | NA | NA | 0        | 0        | 0        | 0        | 0        | 0        |
| ENSMUSG00000096620  | 1_Gm5169        | 0           | NA       | NA | NA | 0        | 0        | 0        | 0        | 0        | 0        |
| ENSMUSG00000096644  | 1_Magea1        | 0           | NA       | NA | NA | 0        | 0        | 0        | 0        | 0        | 0        |
| ENSMUSG00000096736  | 1_Gm17535       | 0           | NA       | NA | NA | 0        | 0        | 0        | 0        | 0        | 0        |
| ENSMUSG00000096753  | 7_Fam181a       | 0           | NA       | NA | NA | 0        | 0        | 0        | 0        | 0        | 0        |
| ENSMUSG00000096770  | 2_Amy2a4        | 0           | NA       | NA | NA | 0        | 0        | 0        | 0        | 0        | 0        |
| ENSMUSG00000096846  | 7_Gm8890        | 0           | NA       | NA | NA | 0        | 0        | 0        | 0        | 0        | 0        |
| ENSMUSG00000096901  | 7_Gm3029        | 0           | NA       | NA | NA | 0        | 0        | 0        | 0        | 0        | 0        |
| ENSMUSG00000096911  | 7_Gm2165        | 0           | NA       | NA | NA | 0        | 0        | 0        | 0        | 0        | 0        |
| ENSMUSG00000096915  | 1_Gm2964        | 0           | NA       | NA | NA | 0        | 0        | 0        | 0        | 0        | 0        |
| ENSMUSG00000096918  | 1_Gm16863       | 0           | NA       | NA | NA | 0        | 0        | 0        | 0        | 0        | 0        |
| ENSMUSG00000096972  | 7_Gm26883       | 171.3805658 | 5.957949 | NA | NA | 16.24264 | 0        | 0        | 1012.041 | 0        | 0        |
| ENSMUSG00000096978  | 1_Gm26851       | 0           | NA       | NA | NA | 0        | 0        | 0        | 0        | 0        | 0        |
| ENSMUSG00000096999  | 1_Gm26793       | 0           | NA       | NA | NA | 0        | 0        | 0        | 0        | 0        | 0        |
| ENSMUSG00000097005  | 1_4930598A11Rik | 0           | NA       | NA | NA | 0        | 0        | 0        | 0        | 0        | 0        |
| ENSMUSG00000097068  | 1_Gm26760       | 0           | NA       | NA | NA | 0        | 0        | 0        | 0        | 0        | 0        |
| ENSMUSG00000097074  | 1_4833428L15Rik | 0           | NA       | NA | NA | 0        | 0        | 0        | 0        | 0        | 0        |
| ENSMUSG00000097097  | 1_5033426C07Rik | 0           | NA       | NA | NA | 0        | 0        | 0        | 0        | 0        | 0        |
| ENSMUSG00000097147  | 1_Gm26780       | 0           | NA       | NA | NA | 0        | 0        | 0        | 0        | 0        | 0        |
| ENSMUSG00000097185  | 1_Gm26596       | 0           | NA       | NA | NA | 0        | 0        | 0        | 0        | 0        | 0        |
| ENSMUSG00000097222  | 1_1010001N08Rik | 0           | NA       | NA | NA | 0        | 0        | 0        | 0        | 0        | 0        |
| ENSMUSG00000097229  | 1_Platr23       | 0           | NA       | NA | NA | 0        | 0        | 0        | 0        | 0        | 0        |
| ENSMUSG00000097261  | 2_4930532G15Rik | 0           | NA       | NA | NA | 0        | 0        | 0        | 0        | 0        | 0        |
| ENSMUSG00000097265  | 1_Gm26803       | 0           | NA       | NA | NA | 0        | 0        | 0        | 0        | 0        | 0        |
| ENSMUSG00000097285  | 1_Gm26683       | 0           | NA       | NA | NA | 0        | 0        | 0        | 0        | 0        | 0        |
| ENSMUSG00000097356  | 1_Gm26774       | 0           | NA       | NA | NA | 0        | 0        | 0        | 0        | 0        | 0        |
| ENSMUSG00000097367  | 1_Gm26718       | 82.68306792 | 23.18919 | NA | NA | 0        | 0        | 0        | 496.0984 | 0        | 0        |
| ENSMUSG00000097417  | 1_Gm26669       | 548.8059036 | 4.922704 | NA | NA | 26.80036 | 30.05626 | 48.32571 | 2969.645 | 151.5996 | 66.40845 |
| ENSMUSG00000097453  | 1_Gm26894       | 0           | NA       | NA | NA | 0        | 0        | 0        | 0        | 0        | 0        |
| ENSMUSG00000097474  | 1_Gm26584       | 0           | NA       | NA | NA | 0        | 0        | 0        | 0        | 0        | 0        |
| ENSMUSG00000097550  | 7_Gm21304       | 0           | NA       | NA | NA | 0        | 0        | 0        | 0        | 0        | 0        |
| ENSMUSG00000097565  | 1_Gm26965       | 0           | NA       | NA | NA | 0        | 0        | 0        | 0        | 0        | 0        |
| ENSMUSG00000097582  | 1_Gm26527       | 110.7662506 | 10.33976 | NA | NA | 0        | 0        | 0        | 645.9201 | 0        | 18.67738 |
| ENSMUSG00000097609  | 1_Gm26659       | 0           | NA       | NA | NA | 0        | 0        | 0        | 0        | 0        | 0        |
| ENSMUSG00000097627  | 1_4930519A11Rik | 0           | NA       | NA | NA | 0        | 0        | 0        | 0        | 0        | 0        |
| ENSMUSG00000097672  | 1_Gm26609       | 0           | NA       | NA | NA | 0        | 0        | 0        | 0        | 0        | 0        |
| ENSMUSG00000097673  | 1_Gm26608       | 0           | NA       | NA | NA | 0        | 0        | 0        | 0        | 0        | 0        |
| ENSMUSG00000097682  | 1_4930554H23Rik | 0           | NA       | NA | NA | 0        | 0        | 0        | 0        | 0        | 0        |
| ENSMUSG00000097701  | 1_Gm17508       | 0           | NA       | NA | NA | 0        | 0        | 0        | 0        | 0        | 0        |
| ENSMUSG00000097717  | 1_1700066J03Rik | 0           | NA       | NA | NA | 0        | 0        | 0        | 0        | 0        | 0        |
| ENSMUSG00000097774  | 1_Gm26565       | 0           | NA       | NA | NA | 0        | 0        | 0        | 0        | 0        | 0        |
| ENSMUSG00000097809  | 1_Gm26554       | 0           | NA       | NA | NA | 0        | 0        | 0        | 0        | 0        | 0        |
| ENSMUSG00000097812  | 1_Gm26812       | 0           | NA       | NA | NA | 0        | 0        | 0        | 0        | 0        | 0        |
| ENSMUSG00000097870  | 1_Gm26868       | 0           | NA       | NA | NA | 0        | 0        | 0        | 0        | 0        | 0        |
| ENSMUSG00000097881  | 7_Celrr         | 0           | NA       | NA | NA | 0        | 0        | 0        | 0        | 0        | 0        |
| ENSMUSG00000097884  | 1_Gm26543       | 0           | NA       | NA | NA | 0        | 0        | 0        | 0        | 0        | 0        |
| ENSMUSG00000097902  | 1_Gm26531       | 0           | NA       | NA | NA | 0        | 0        | 0        | 0        | 0        | 0        |
| ENSMUSG00000097917  | 1_Gm26839       | 0           | NA       | NA | NA | 0        | 0        | 0        | 0        | 0        | 0        |
| ENSMUSG00000097961  | 1_Gm27000       | 0           | NA       | NA | NA | 0        | 0        | 0        | 0        | 0        | 0        |
| ENSMUSG00000097998  | 1_Gm27019       | 0           | NA       | NA | NA | 0        | 0        | 0        | 0        | 0        | 0        |
| ENSMUSG00000098045  | 1_Gm26979       | 0           | NA       | NA | NA | 0        | 0        | 0        | 0        | 0        | 0        |
| ENSMUSG00000098463  | 1_Cphx2         | 0           | NA       | NA | NA | 0        | 0        | 0        | 0        | 0        | 0        |
| ENSMUSG00000098519  | 1_Gm27166       | 0           | NA       | NA | NA | 0        | 0        | 0        | 0        | 0        | 0        |
| ENSMUSG00000098727  | 1_1700017I07Rik | 0           | NA       | NA | NA | 0        | 0        | 0        | 0        | 0        | 0        |
| ENSMUSG00000098754  | 7_Gm28045       | 0           | NA       | NA | NA | 0        | 0        | 0        | 0        | 0        | 0        |
| ENSMUSG00000098758  | 1_7630403G23Rik | 0           | NA       | NA | NA | 0        | 0        | 0        | 0        | 0        | 0        |
| ENSMUSG000000989102 | 1_Gm11963       | 0           | NA       | NA | NA | 0        | 0        | 0        | 0        | 0        | 0        |
| ENSMUSG00000099269  | 2_Calm5         | 0           | NA       | NA | NA | 0        | 0        | 0        | 0        | 0        | 0        |
| ENSMUSG00000099294  | 1_Gm11214       | 0           | NA       | NA | NA | 0        | 0        | 0        | 0        | 0        | 0        |
| ENSMUSG00000099420  | 1_Gm13279       | 0           | NA       | NA | NA | 0        | 0        | 0        | 0        | 0        | 0        |
| ENSMUSG00000099443  | 1_Gm14478       | 0           | NA       | NA | NA | 0        | 0        | 0        | 0        | 0        | 0        |
| ENSMUSG00000099518  | 1_Gm13275       | 0           | NA       | NA | NA | 0        | 0        | 0        | 0        | 0        | 0        |
| ENSMUSG00000099574  | 1_1700121L03Rik | 0           | NA       | NA | NA | 0        | 0        | 0        | 0        | 0        | 0        |
| ENSMUSG00000099576  | 1_Gm29040       | 0           | NA       | NA | NA | 0        | 0        | 0        | 0        | 0        | 0        |
| ENSMUSG00000099625  | 1_Gm29325       | 0           | NA       | NA | NA | 0        | 0        | 0        | 0        | 0        | 0        |
| ENSMUSG00000099810  | 1_Gm29509       | 0           | NA       | NA | NA | 0        | 0        | 0        | 0        | 0        | 0        |
| ENSMUSG00000099899  | 1_Gm28784       | 0           | NA       | NA | NA | 0        | 0        | 0        | 0        | 0        | 0        |
| ENSMUSG00000099968  | 6_1700029J03Rik | 0           | NA       | NA | NA | 0        | 0        | 0        | 0        | 0        | 0        |
| ENSMUSG00000099983  | 1_1700022E09Rik | 0           | NA       | NA | NA | 0        | 0        | 0        | 0        | 0        | 0        |
| ENSMUSG00000100002  | 1_Gm29642       | 0           | NA       | NA | NA | 0        | 0        | 0        | 0        | 0        | 0        |
| ENSMUSG00000100110  | 1_Gm28783       | 0           | NA       | NA | NA | 0        | 0        | 0        | 0        | 0        | 0        |
| ENSMUSG00000100155  | 1_Gm2109        | 0           | NA       | NA | NA | 0        | 0        | 0        | 0        | 0        | 0        |
| ENSMUSG00000100188  | 1_Gm29561       | 0           | NA       | NA | NA | 0        | 0        | 0        | 0        | 0        | 0        |
| ENSMUSG00000100234  | 1_Gm13277       | 0           | NA       | NA | NA | 0        | 0        | 0        | 0        | 0        | 0        |
| ENSMUSG00000100417  | 1_Gm28578       | 0           | NA       | NA | NA | 0        | 0        | 0        | 0        | 0        | 0        |
| ENSMUSG00000100437  | 1_Gm29152       | 0           | NA       | NA | NA | 0        | 0        | 0        | 0        | 0        | 0        |
| ENSMUSG00000100486  | 6_Gm4131        | 0           | NA       | NA | NA | 0        | 0        | 0        | 0        | 0        | 0        |
| ENSMUSG00000100558  | 1_1700025F24Rik | 0           | NA       | NA | NA | 0        | 0        | 0        | 0        | 0        | 0        |
| ENSMUSG00000100580  | 6_4933436120Rik | 0           | NA       | NA | NA | 0        | 0        | 0        | 0        | 0        | 0        |
| ENSMUSG00000100666  | 1_1700007F19Rik | 0           | NA       | NA | NA | 19       | 0        | 0        | 0        | 0        | 0        |
| ENSMUSG00000100714  | 6_2010308F09Rik | 0           | NA       | NA | NA | 0        | 0        | 0        | 0        | 0        | 0        |
| ENSMUSG00000100837  | 6_1700063D05Rik | 0           | NA       | NA | NA | 0        | 0        | 0        | 0        | 0        | 0        |
| ENSMUSG00000100850  | 1_4930434B07Rik | 0           | NA       | NA | NA | 0        | 0        | 0        | 0        | 0        | 0        |
| ENSMUSG00000100923  | 1_Olfr10        | 0           | NA       | NA | NA | 0        | 0        | 0        | 0        | 0        | 0        |
| ENSMUSG00000100936  | 1_Gm28865       | 0           | NA       | NA | NA | 0        | 0        | 0        | 0        | 0        | 0        |
| ENSMUSG00000101012  | 6_1700008K24Rik | 0           | NA       | NA | NA | 0        | 0        | 0        | 0        | 0        | 0        |
| ENSMUSG00000101067  | 1_Gm29007       | 0           | NA       | NA | NA | 0        | 0        | 0        | 0        | 0        | 0        |
| ENSMUSG00000101086  | 1_Gm28651       | 0           | NA       | NA | NA | 0        | 0        | 0        | 0        | 0        | 0        |
| ENSMUSG00000101112  | 1_Gm29185       | 0           | NA       | NA | NA | 0        | 0        | 0        | 0        | 0        | 0        |

|                    |                 |             |          |    |    |          |          |          |          |          |          |
|--------------------|-----------------|-------------|----------|----|----|----------|----------|----------|----------|----------|----------|
| ENSMUSG00000101163 | 1_Gm13278       | 0           | NA       | NA | NA | 0        | 0        | 0        | 0        | 0        | 0        |
| ENSMUSG00000101265 | 1_Gm29099       | 0           | NA       | NA | NA | 0        | 0        | 0        | 0        | 0        | 0        |
| ENSMUSG00000101514 | 1_Gm5524        | 0           | NA       | NA | NA | 0        | 0        | 0        | 0        | 0        | 0        |
| ENSMUSG00000101540 | 1_Gm28465       | 0           | NA       | NA | NA | 0        | 0        | 0        | 0        | 0        | 0        |
| ENSMUSG00000101559 | 1_Gm28258       | 0           | NA       | NA | NA | 0        | 0        | 0        | 0        | 0        | 0        |
| ENSMUSG00000101588 | 1_Gm28265       | 0           | NA       | NA | NA | 0        | 0        | 0        | 0        | 0        | 0        |
| ENSMUSG00000101643 | 1_Gm28307       | 0           | NA       | NA | NA | 0        | 0        | 0        | 0        | 0        | 0        |
| ENSMUSG00000101677 | 1_Gm29415       | 0           | NA       | NA | NA | 0        | 0        | 0        | 0        | 0        | 0        |
| ENSMUSG00000101750 | 1_Olfr1392      | 0           | NA       | NA | NA | 0        | 0        | 0        | 0        | 0        | 0        |
| ENSMUSG00000101880 | 1_Gm29282       | 0           | NA       | NA | NA | 0        | 0        | 0        | 0        | 0        | 0        |
| ENSMUSG00000102084 | 1_Gm29638       | 0           | NA       | NA | NA | 0        | 0        | 0        | 0        | 0        | 0        |
| ENSMUSG00000102098 | 1_2310016D03Rik | 0           | NA       | NA | NA | 0        | 0        | 0        | 0        | 0        | 0        |
| ENSMUSG00000102144 | 1_4930429P21Rik | 0           | NA       | NA | NA | 0        | 0        | 0        | 0        | 0        | 0        |
| ENSMUSG00000102569 | 1_Gm37041       | 0           | NA       | NA | NA | 0        | 0        | 0        | 0        | 0        | 0        |
| ENSMUSG00000102679 | 1_Gm20557       | 0           | NA       | NA | NA | 0        | 0        | 0        | 0        | 0        | 0        |
| ENSMUSG00000102836 | 1_Gm37013       | 0           | NA       | NA | NA | 0        | 0        | 0        | 0        | 0        | 0        |
| ENSMUSG00000102885 | 1_Gm37280       | 0           | NA       | NA | NA | 0        | 0        | 0        | 0        | 0        | 0        |
| ENSMUSG00000102938 | 1_Gm38112       | 0           | NA       | NA | NA | 0        | 0        | 0        | 0        | 0        | 0        |
| ENSMUSG00000103034 | 1_Gm8797        | 372.7842662 | 3.677378 | NA | NA | 56.84925 | 55.81876 | 49.47632 | 1971.495 | 66.74907 | 36.31712 |
| ENSMUSG00000103092 | 1_Pcdha5        | 0           | NA       | NA | NA | 0        | 0        | 0        | 0        | 0        | 0        |
| ENSMUSG00000103362 | 1_Tdpoz2        | 0           | NA       | NA | NA | 0        | 0        | 0        | 0        | 0        | 0        |
| ENSMUSG00000103594 | 1_A430034D21Rik | 0           | NA       | NA | NA | 0        | 0        | 0        | 0        | 0        | 0        |
| ENSMUSG00000103640 | 1_Gm31406       | 0           | NA       | NA | NA | 0        | 0        | 0        | 0        | 0        | 0        |
| ENSMUSG00000103655 | 1_Gm37202       | 0           | NA       | NA | NA | 0        | 0        | 0        | 0        | 0        | 0        |
| ENSMUSG00000103770 | 1_Pcdha9        | 0           | NA       | NA | NA | 0        | 0        | 0        | 0        | 0        | 0        |
| ENSMUSG00000104000 | 1_Gm38335       | 0           | NA       | NA | NA | 0        | 0        | 0        | 0        | 0        | 0        |
| ENSMUSG00000104275 | 1_Gm37867       | 0           | NA       | NA | NA | 0        | 0        | 0        | 0        | 0        | 0        |
| ENSMUSG00000104401 | 1_Gm20750       | 0           | NA       | NA | NA | 0        | 0        | 0        | 0        | 0        | 0        |
| ENSMUSG00000104448 | 1_Gm37256       | 0           | NA       | NA | NA | 0        | 0        | 0        | 0        | 0        | 0        |
| ENSMUSG00000104607 | 1_Gm43202       | 0           | NA       | NA | NA | 0        | 0        | 0        | 0        | 0        | 0        |
| ENSMUSG00000105219 | 1_Gm43821       | 0           | NA       | NA | NA | 0        | 0        | 0        | 0        | 0        | 0        |
| ENSMUSG00000105337 | 4_Gm43832       | 0           | NA       | NA | NA | 0        | 0        | 0        | 0        | 0        | 0        |
| ENSMUSG00000105443 | 1_Gm43837       | 0           | NA       | NA | NA | 0        | 0        | 0        | 0        | 0        | 0        |
| ENSMUSG00000105475 | 1_4930431L21Rik | 0           | NA       | NA | NA | 0        | 0        | 0        | 0        | 0        | 0        |
| ENSMUSG00000105511 | 1_Gm42703       | 0           | NA       | NA | NA | 0        | 0        | 0        | 0        | 0        | 0        |
| ENSMUSG00000105704 | 1_Gm43055       | 0           | NA       | NA | NA | 0        | 0        | 0        | 0        | 0        | 0        |
| ENSMUSG00000105838 | 1_4930425O10Rik | 0           | NA       | NA | NA | 0        | 0        | 0        | 0        | 0        | 0        |
| ENSMUSG00000105845 | 1_Gm42808       | 0           | NA       | NA | NA | 0        | 0        | 0        | 0        | 0        | 0        |
| ENSMUSG00000106501 | 1_Gm42711       | 0           | NA       | NA | NA | 0        | 0        | 0        | 0        | 0        | 0        |
| ENSMUSG00000106525 | 1_Gm42695       | 0           | NA       | NA | NA | 0        | 0        | 0        | 0        | 0        | 0        |
| ENSMUSG00000106658 | 1_Gm42426       | 0           | NA       | NA | NA | 0        | 0        | 0        | 0        | 0        | 0        |
| ENSMUSG00000106674 | 1_Gm43153       | 0           | NA       | NA | NA | 0        | 0        | 0        | 0        | 0        | 0        |
| ENSMUSG00000106738 | 1_Gm5           | 0           | NA       | NA | NA | 0        | 0        | 0        | 0        | 0        | 0        |
| ENSMUSG00000107192 | 1_Gm19583       | 0           | NA       | NA | NA | 0        | 0        | 0        | 0        | 0        | 0        |
| ENSMUSG00000107422 | 1_RP24-423A5    | 0           | NA       | NA | NA | 0        | 0        | 0        | 0        | 0        | 0        |
| ENSMUSG00000107773 | 1_RP24-174O2    | 0           | NA       | NA | NA | 0        | 0        | 0        | 0        | 0        | 0        |
| ENSMUSG00000107789 | 1_RP24-124B23   | 0           | NA       | NA | NA | 0        | 0        | 0        | 0        | 0        | 0        |
| ENSMUSG00000107815 | 1_RP23-449F12   | 0           | NA       | NA | NA | 0        | 0        | 0        | 0        | 0        | 0        |
| ENSMUSG00000107859 | 1_RP23-381K3    | 0           | NA       | NA | NA | 0        | 0        | 0        | 0        | 0        | 0        |
| ENSMUSG00000107985 | 1_RP23-449F12   | 0           | NA       | NA | NA | 0        | 0        | 0        | 0        | 0        | 0        |
| ENSMUSG00000108085 | 1_RP24-392D22   | 0           | NA       | NA | NA | 0        | 0        | 0        | 0        | 0        | 0        |
| ENSMUSG00000108118 | 1_RP24-475M20   | 0           | NA       | NA | NA | 0        | 0        | 0        | 0        | 0        | 0        |
| ENSMUSG00000108274 | 1_RP24-183K24   | 0           | NA       | NA | NA | 0        | 0        | 0        | 0        | 0        | 0        |
| ENSMUSG00000108315 | 1_RP24-160N8    | 0           | NA       | NA | NA | 0        | 0        | 0        | 0        | 0        | 0        |
| ENSMUSG00000108345 | 1_RP24-136L4    | 0           | NA       | NA | NA | 0        | 0        | 0        | 0        | 0        | 0        |
| ENSMUSG00000108360 | 1_RP23-26A14    | 0           | NA       | NA | NA | 0        | 0        | 0        | 0        | 0        | 0        |
| ENSMUSG00000108532 | 1_RP23-231J2    | 0           | NA       | NA | NA | 0        | 0        | 0        | 0        | 0        | 0        |
| ENSMUSG00000108644 | 1_W11-2587D24   | 0           | NA       | NA | NA | 0        | 0        | 0        | 0        | 0        | 0        |
| ENSMUSG00000108652 | 1_RP23-53N23    | 0           | NA       | NA | NA | 0        | 0        | 0        | 0        | 0        | 0        |
| ENSMUSG00000108657 | 1_RP23-435E16   | 0           | NA       | NA | NA | 0        | 0        | 0        | 0        | 0        | 0        |
| ENSMUSG00000108683 | 1_RP23-370I17   | 0           | NA       | NA | NA | 0        | 0        | 0        | 0        | 0        | 0        |
